# Supplementary material for: Quantitative Phosphoproteomics Reveals SLP-76 Dependent Regulation of PAG and Src Family Kinases in T Cells
Source: PubMed Central journal article supplement (PMC3469622; doi:10.1371/journal.pone.0046725), 2012-10-11

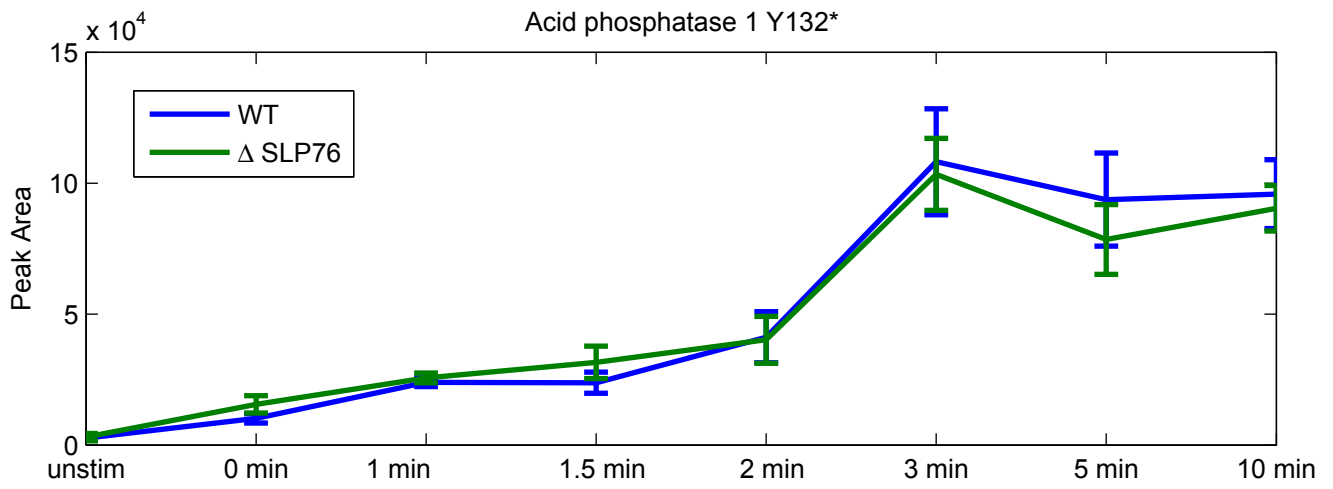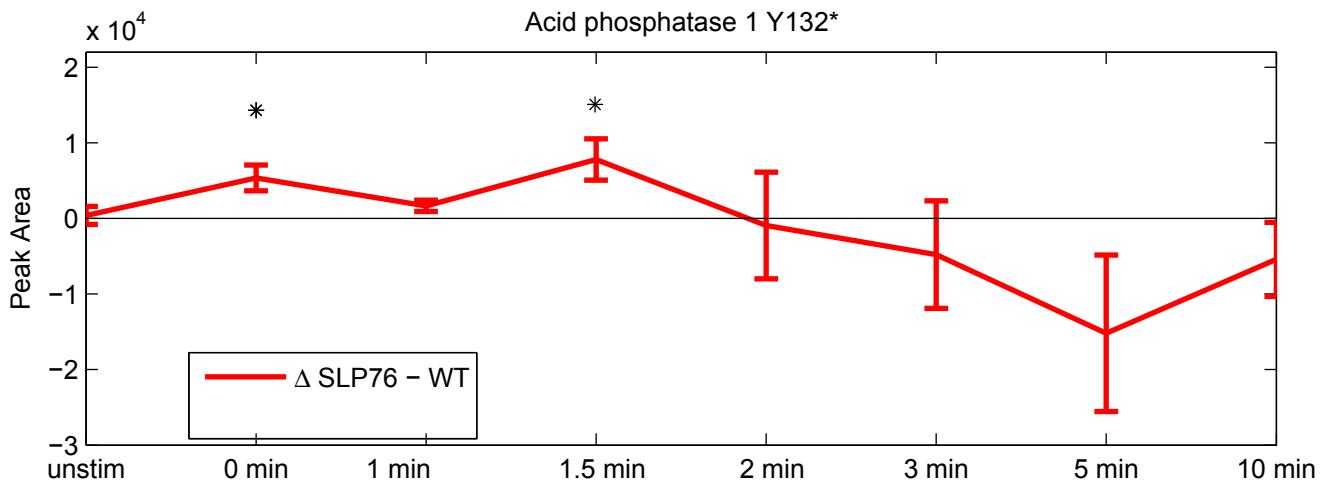

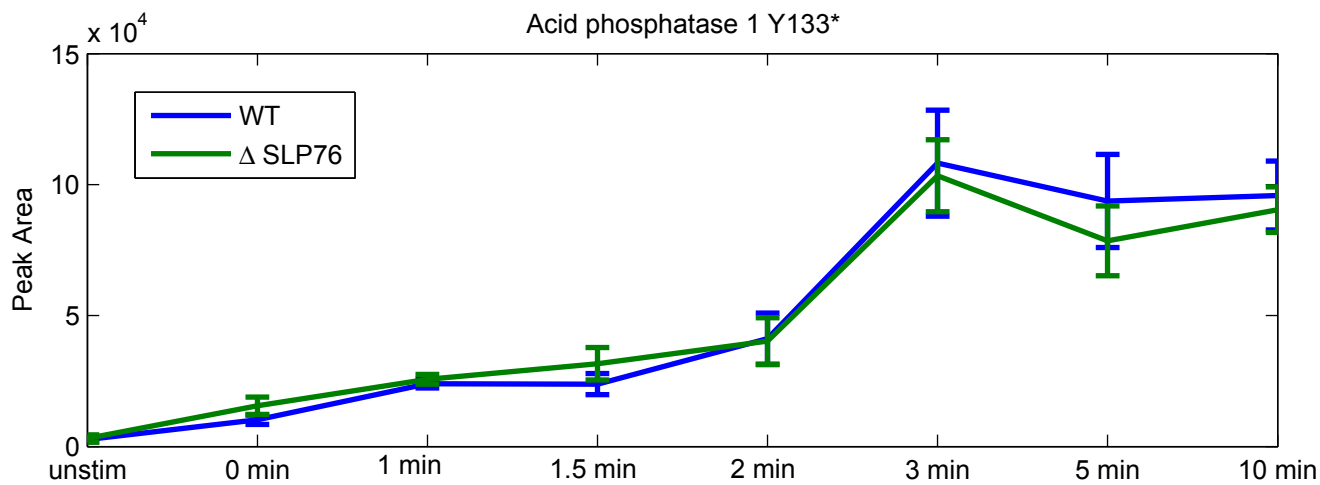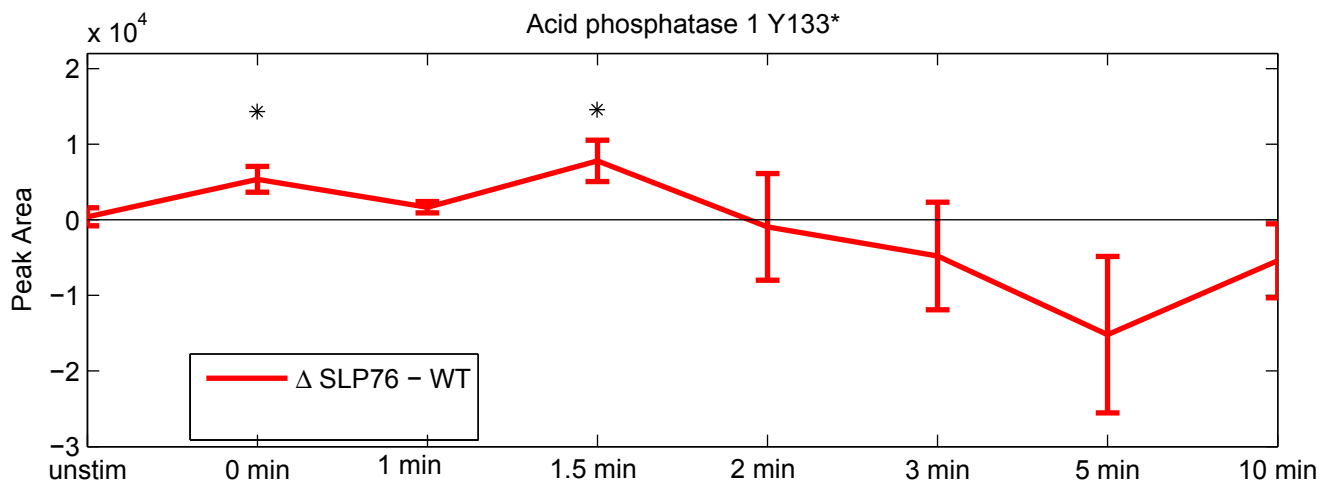

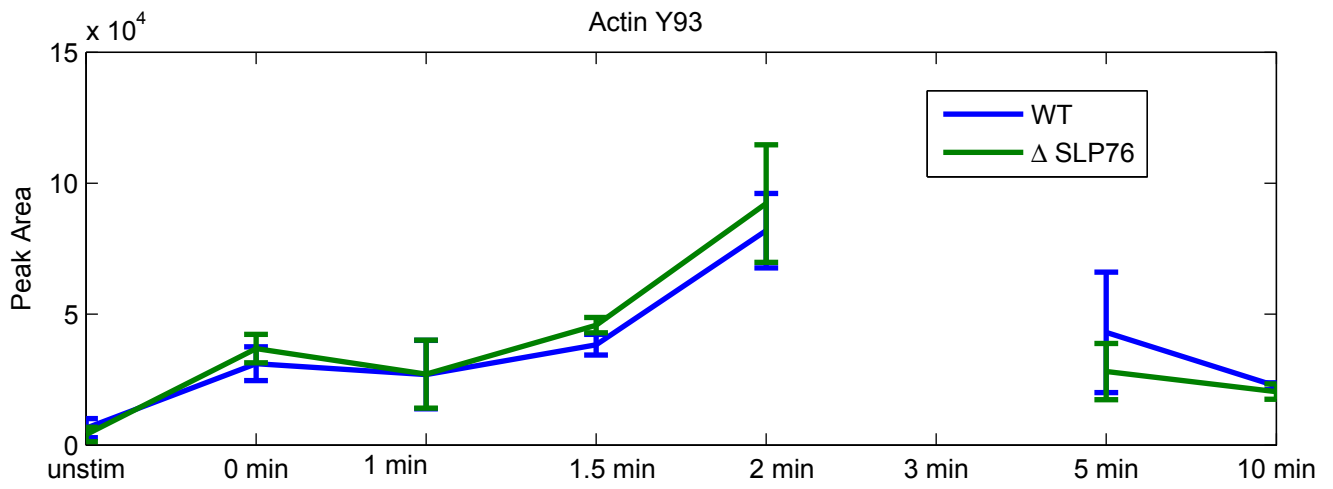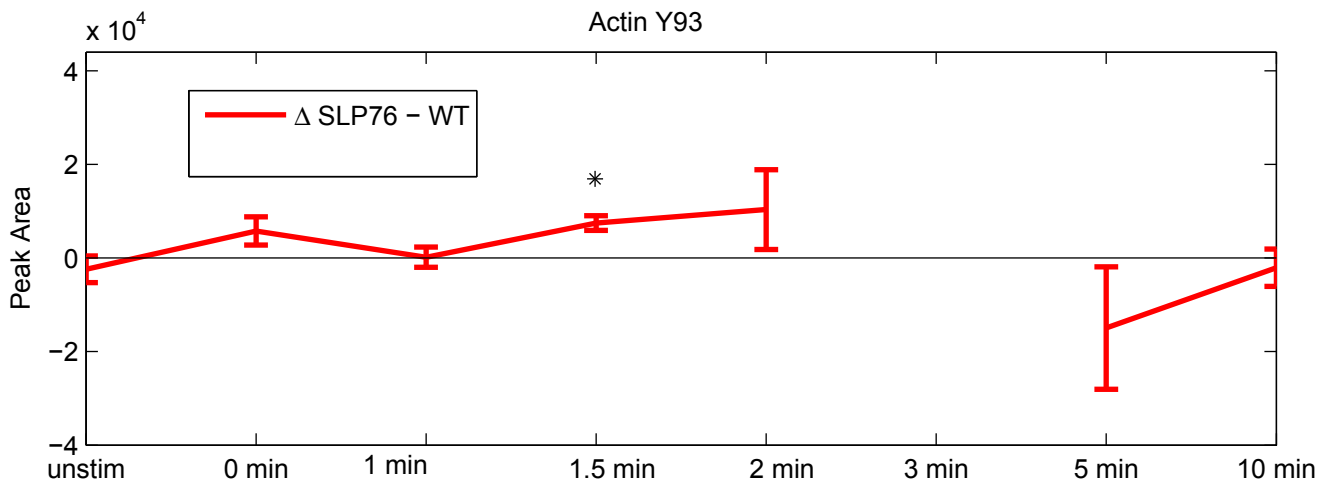

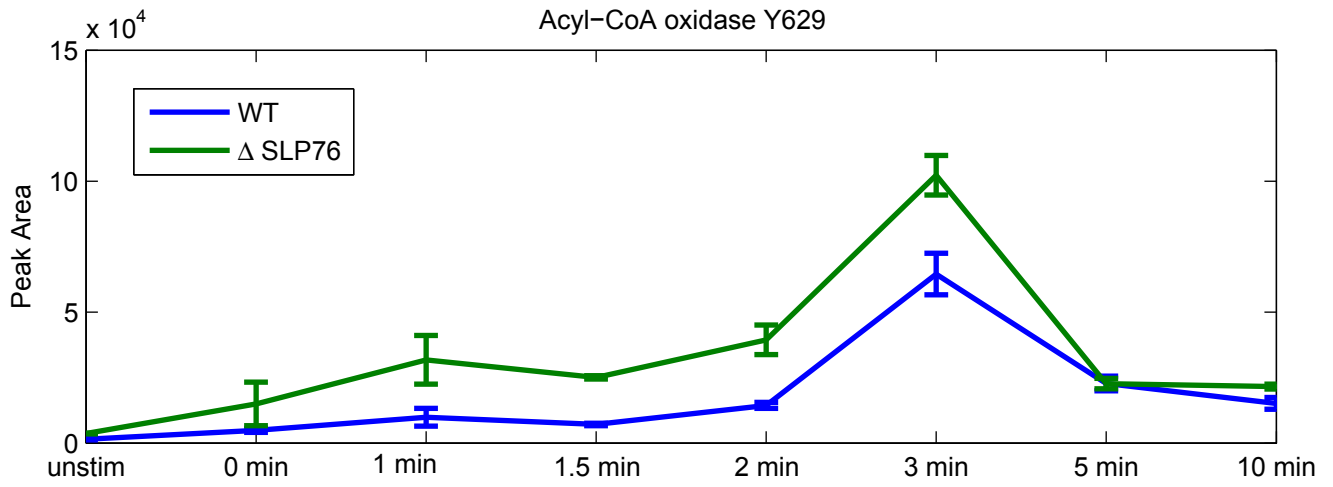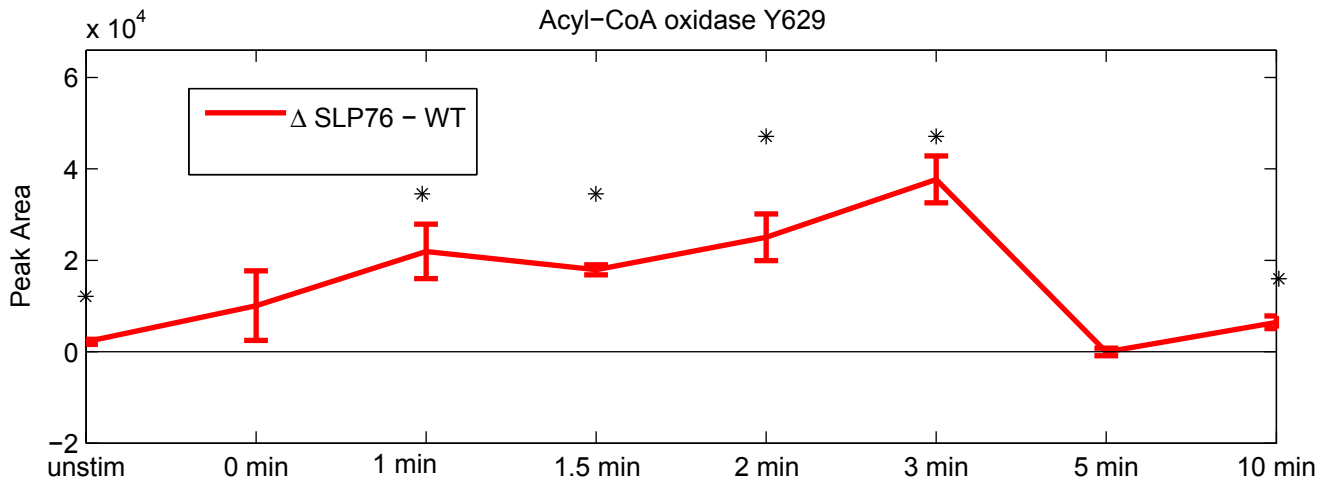

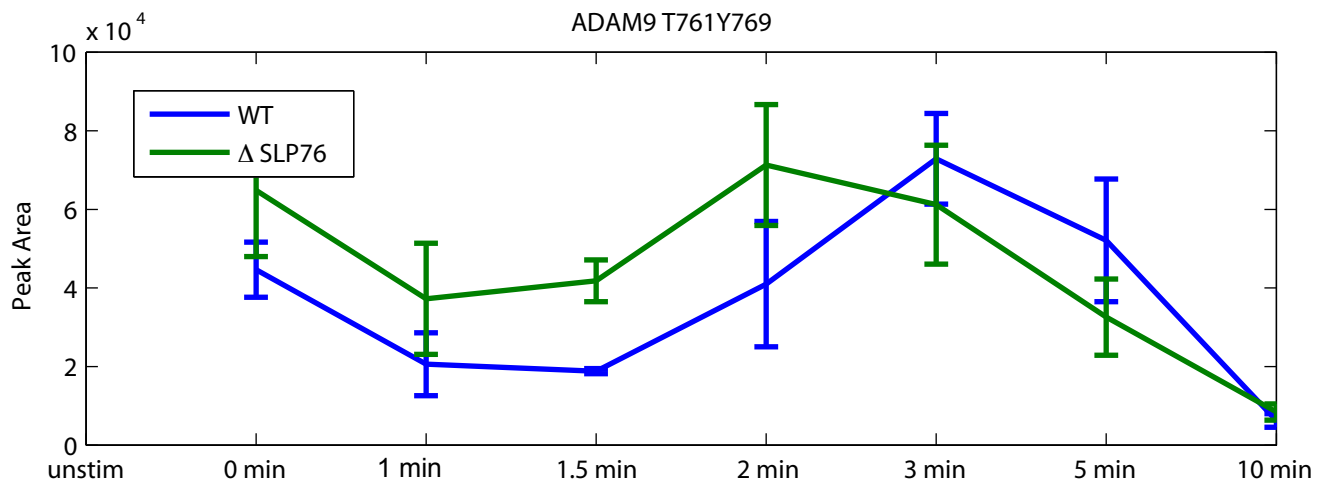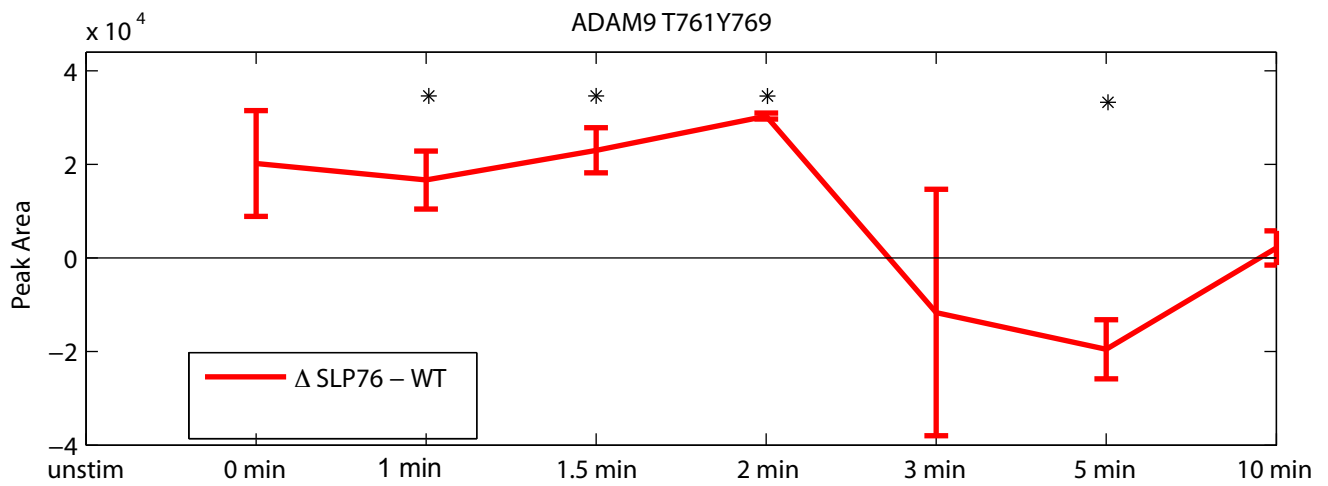

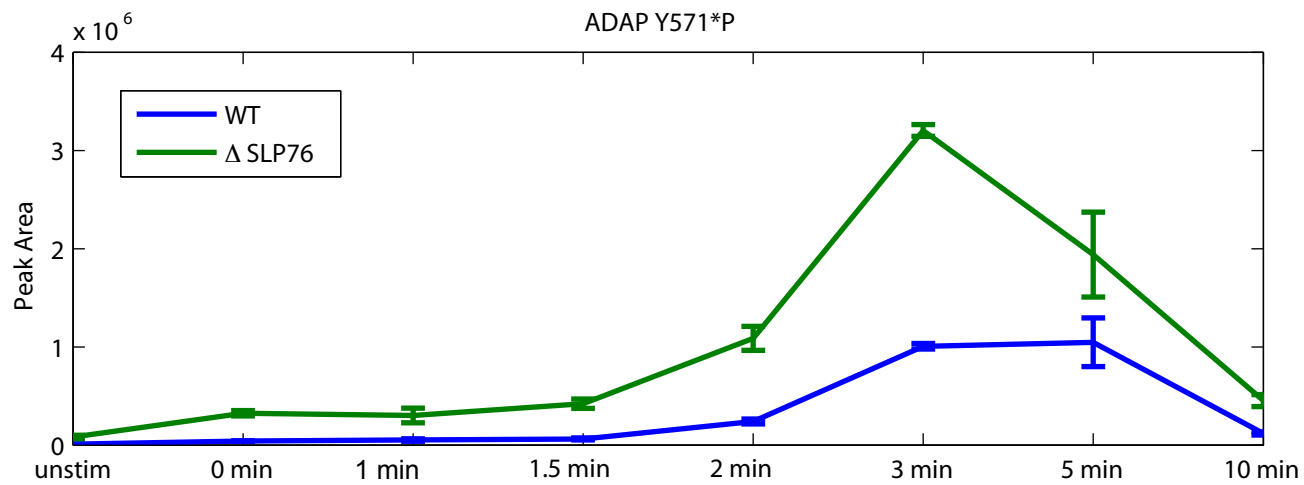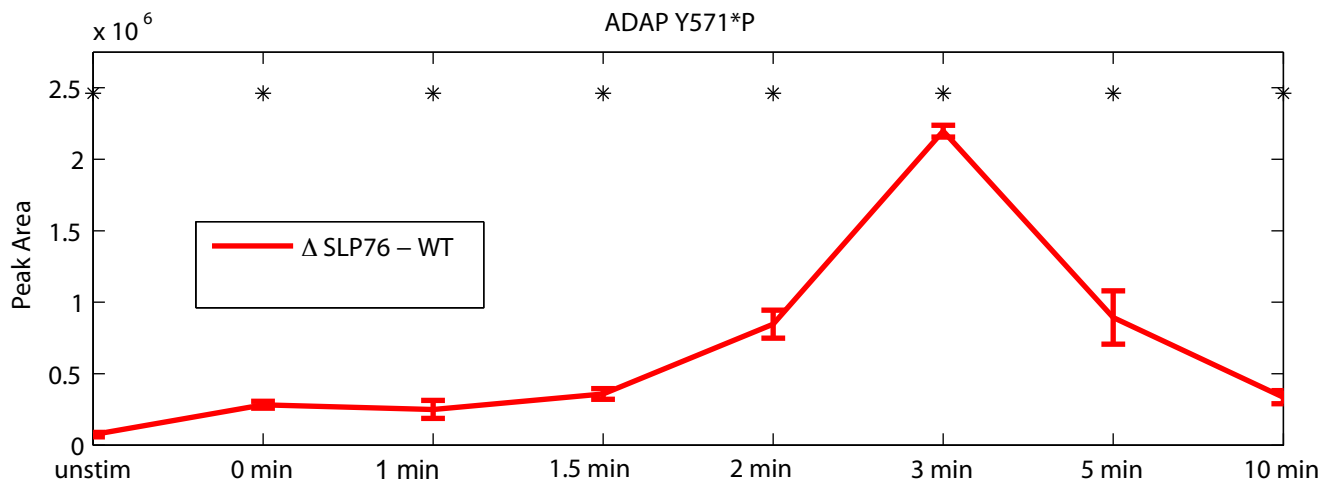

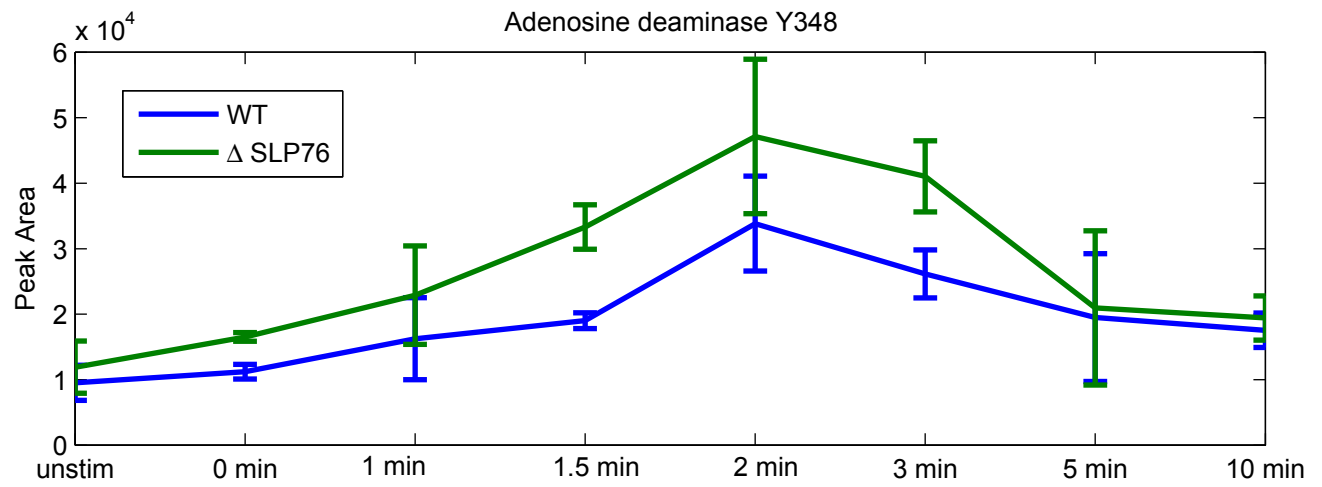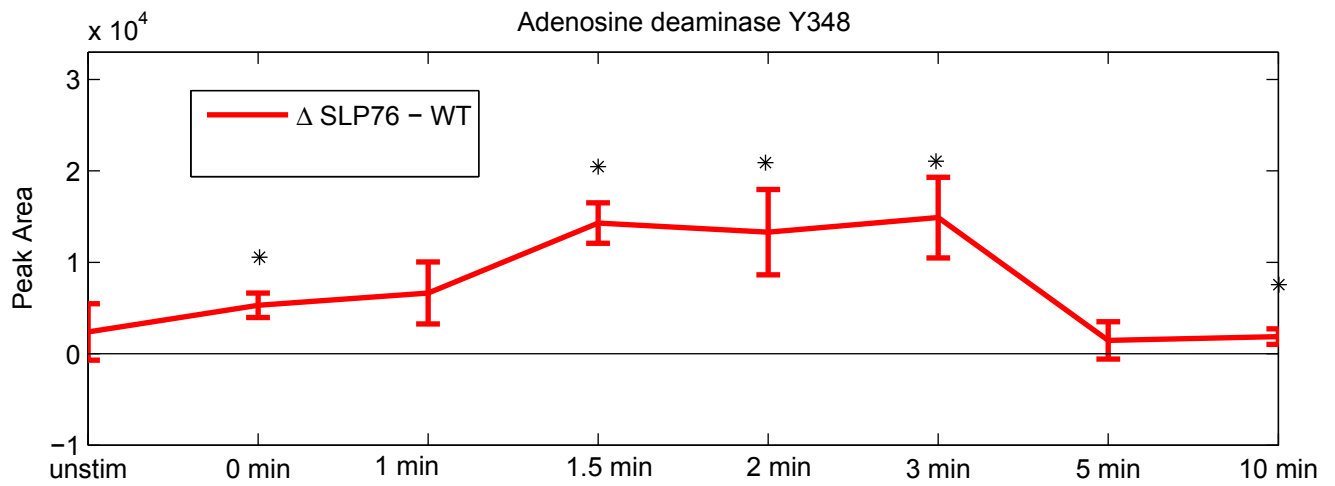

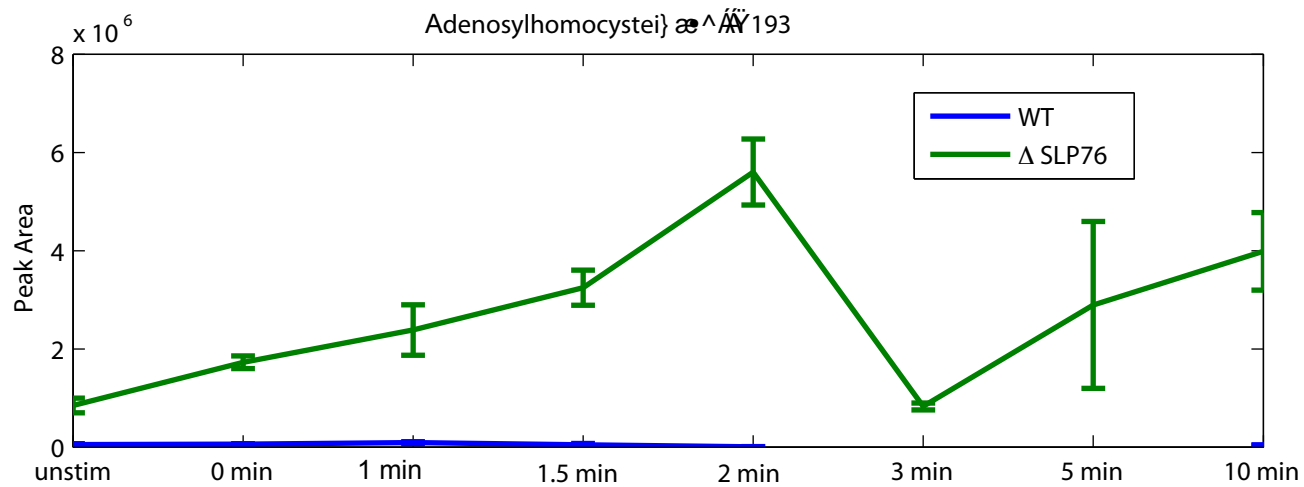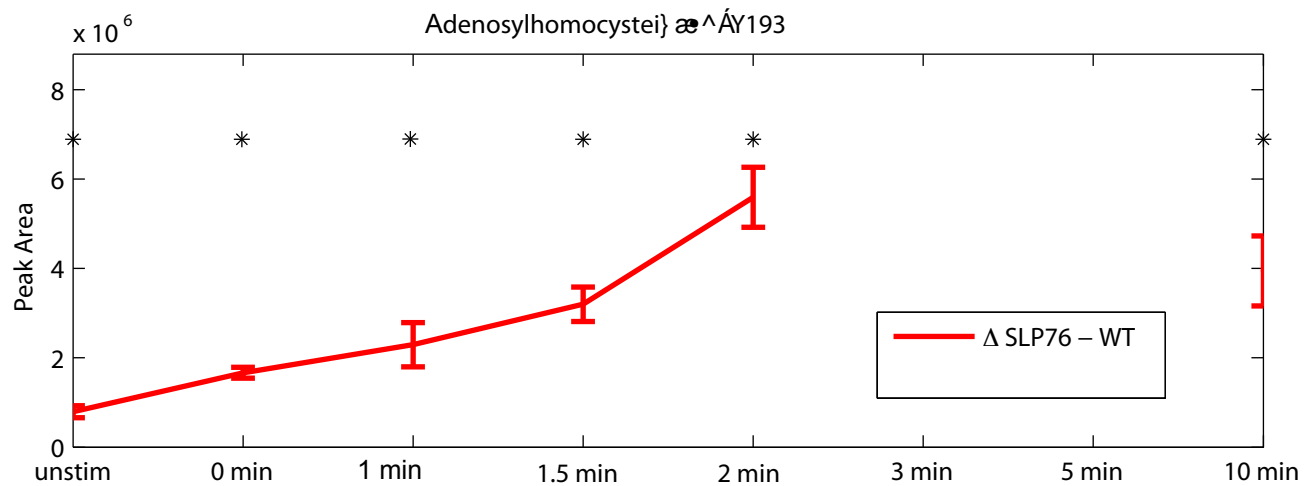



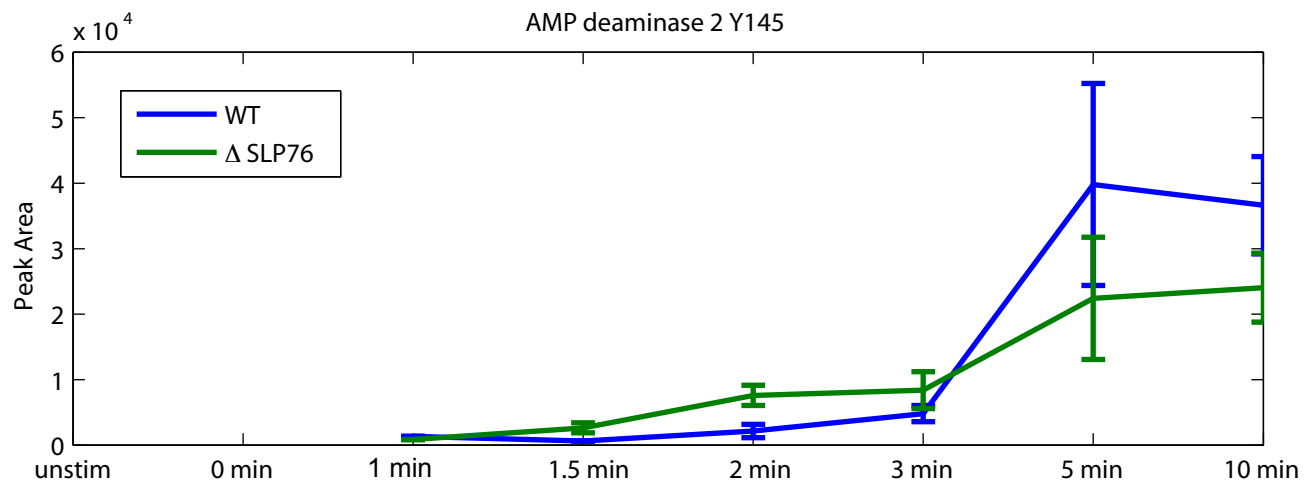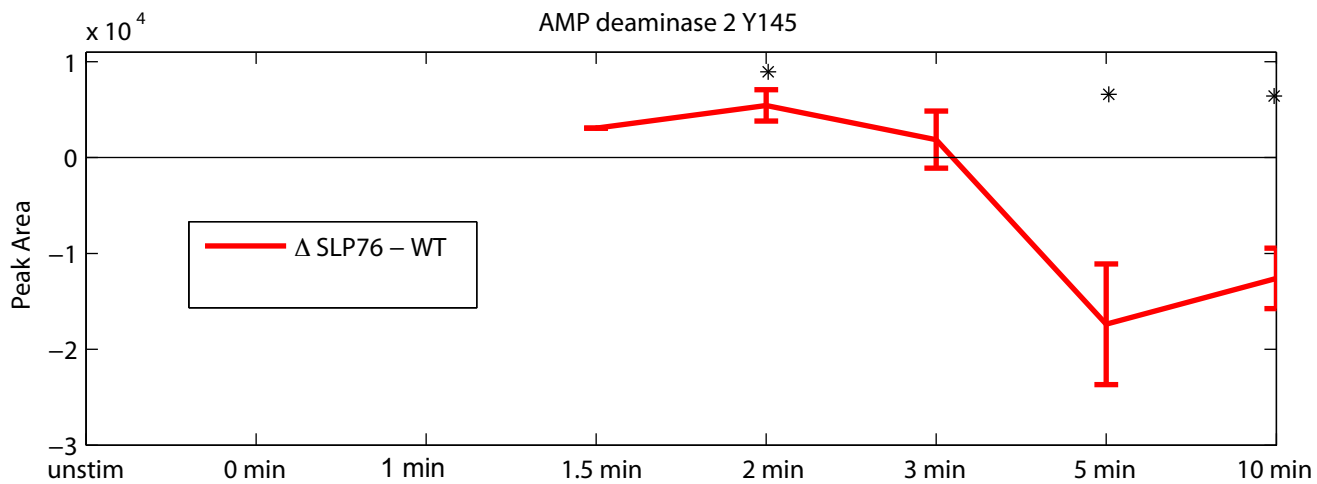

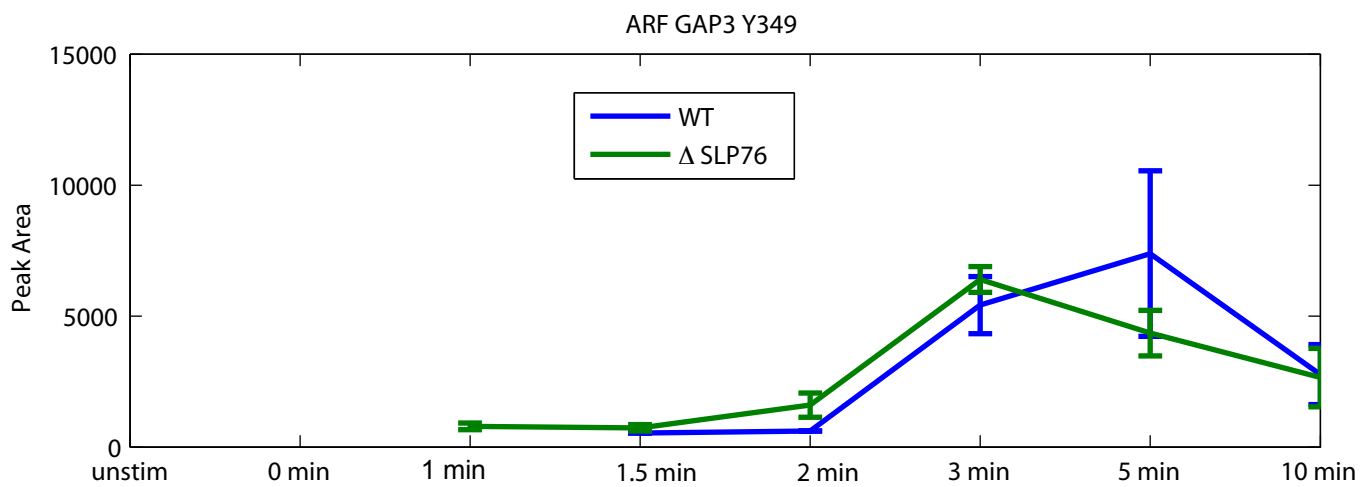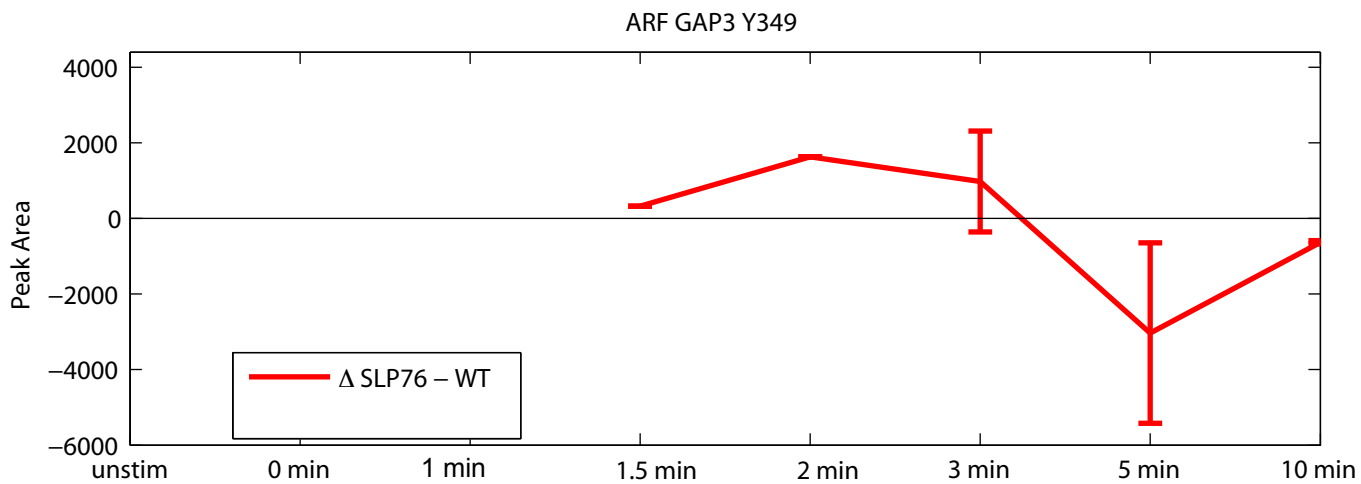

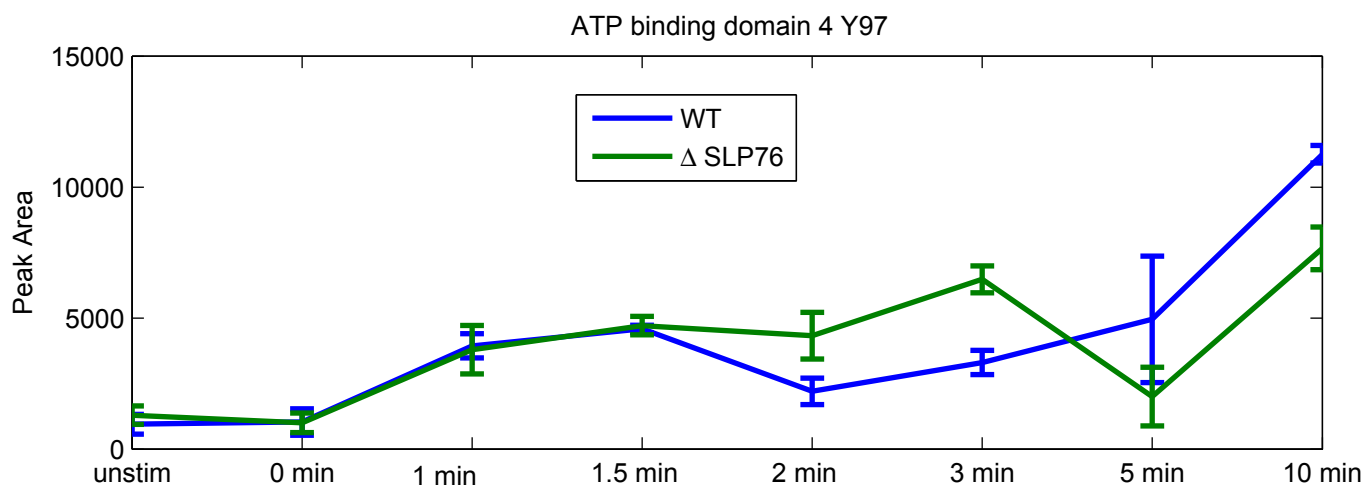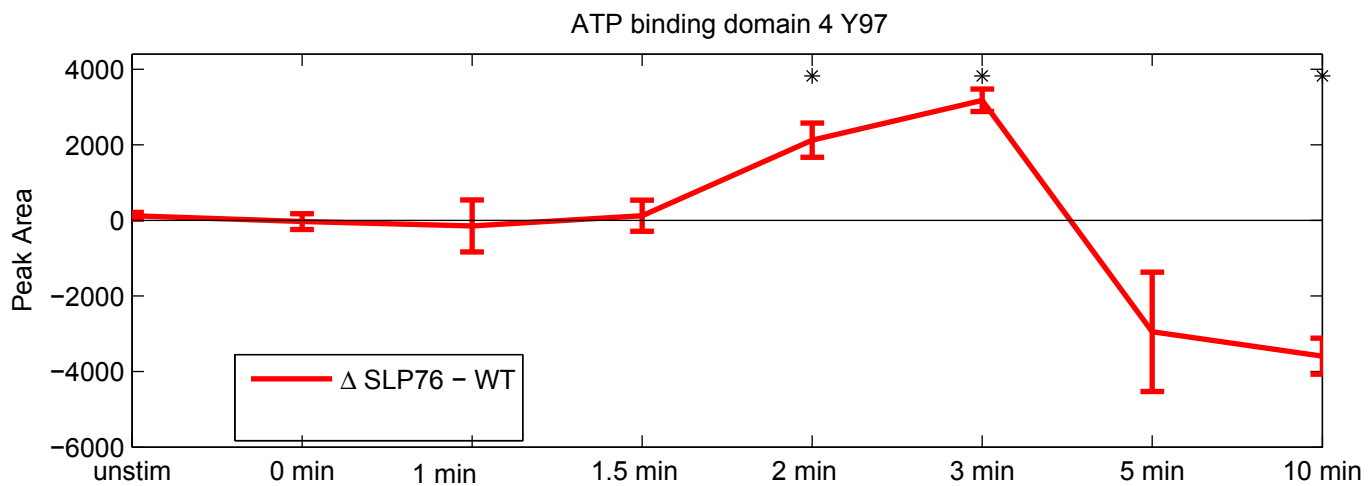

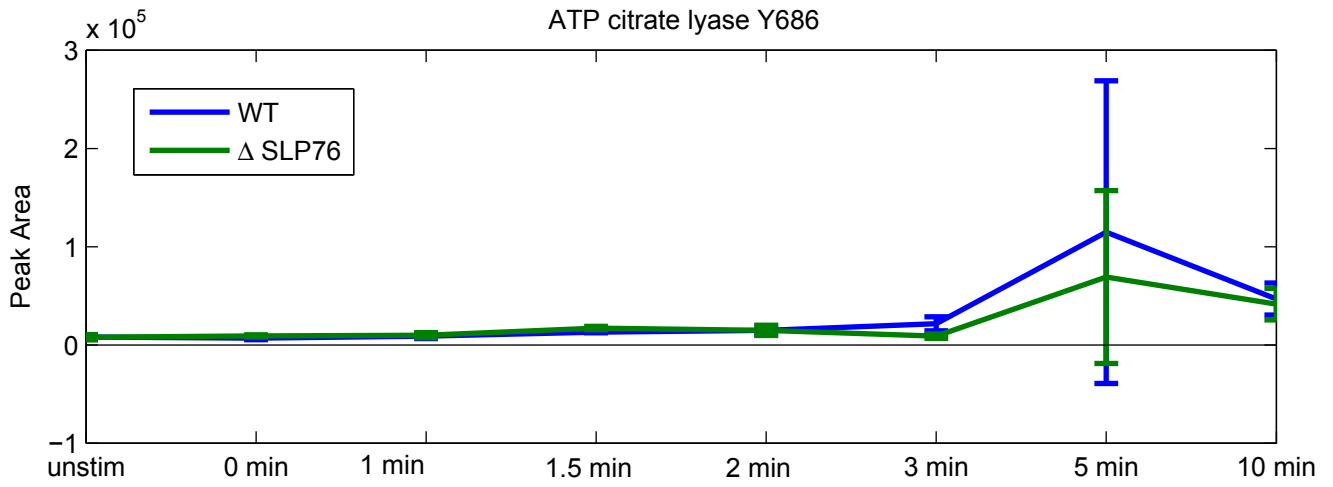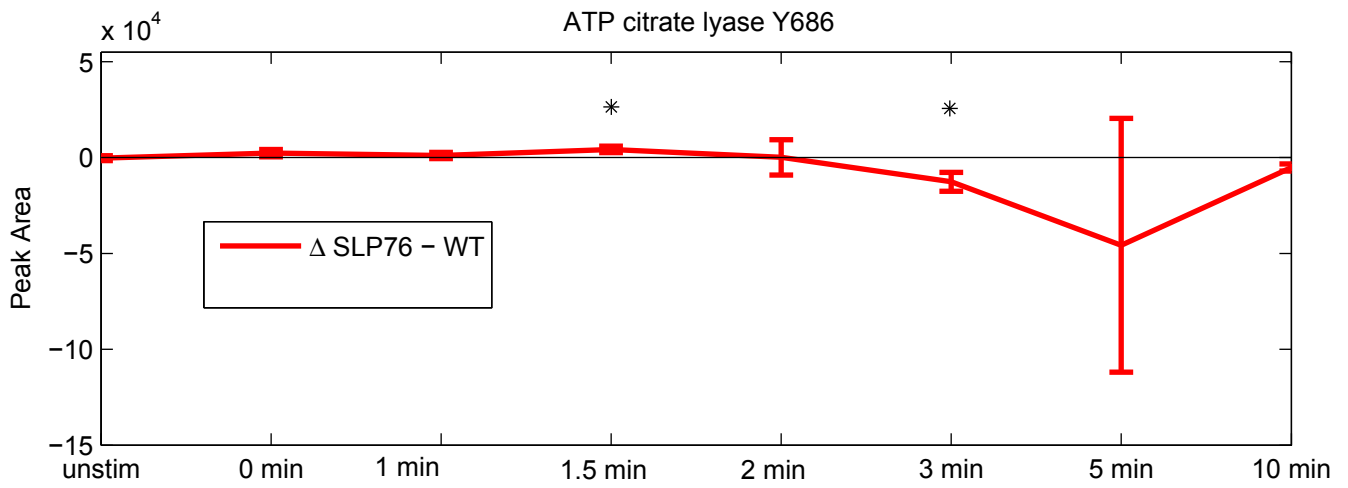

ATP1A1 Y260

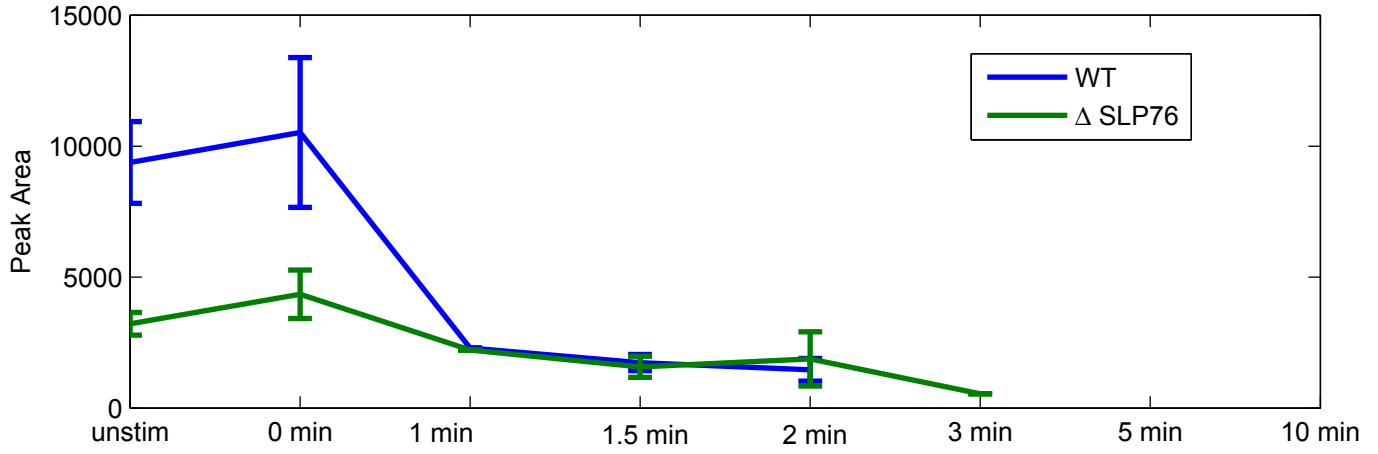

ATP1A1 Y260

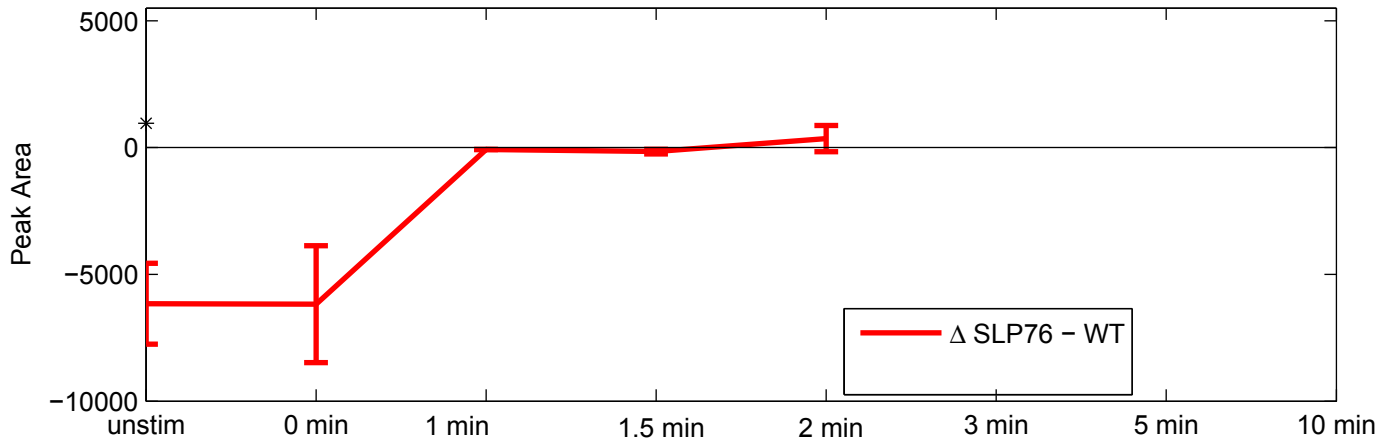

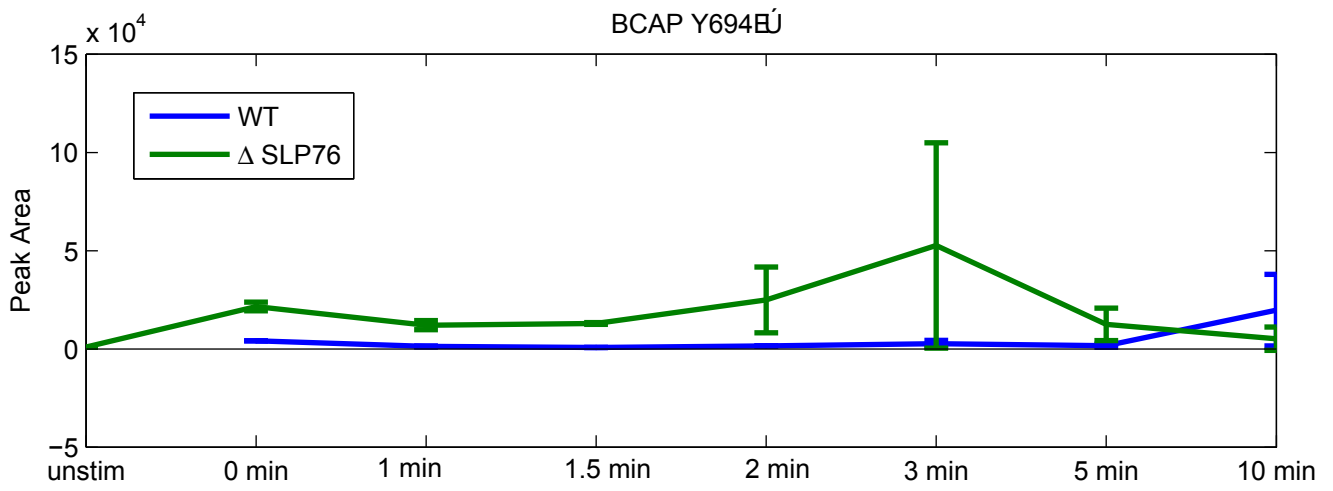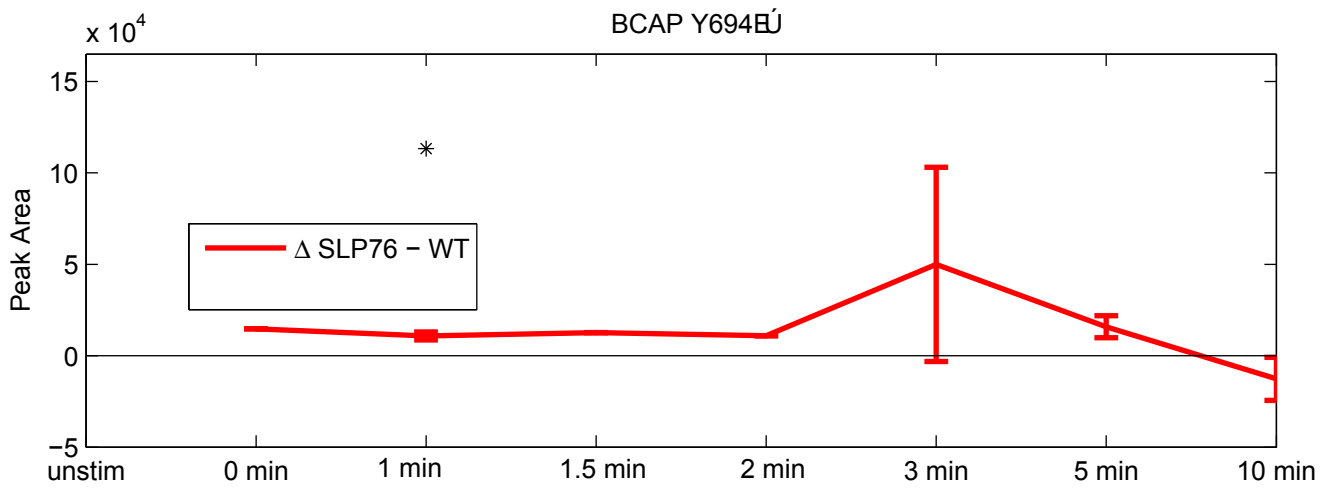

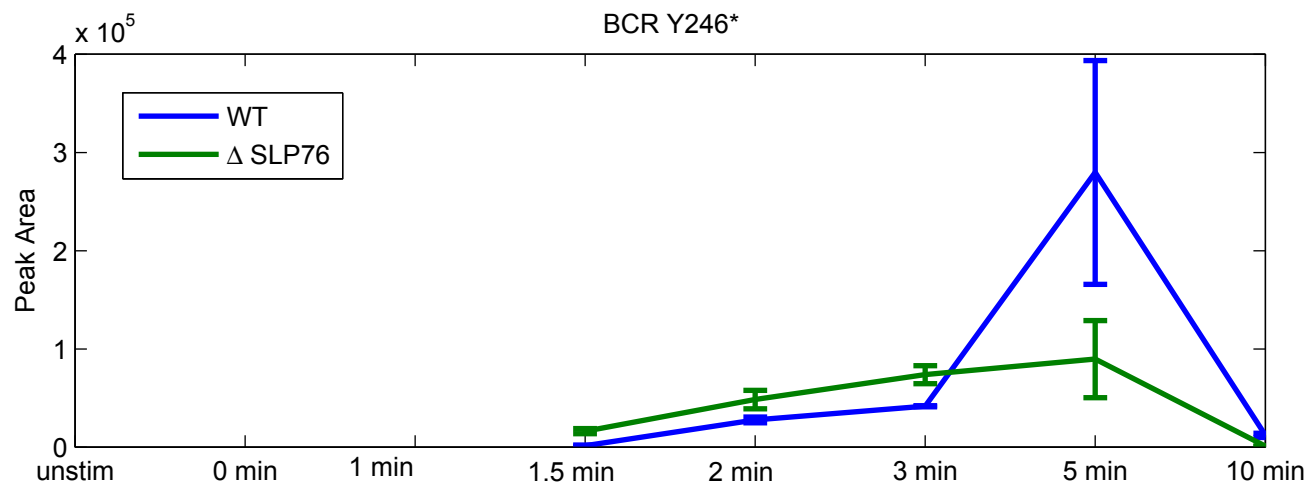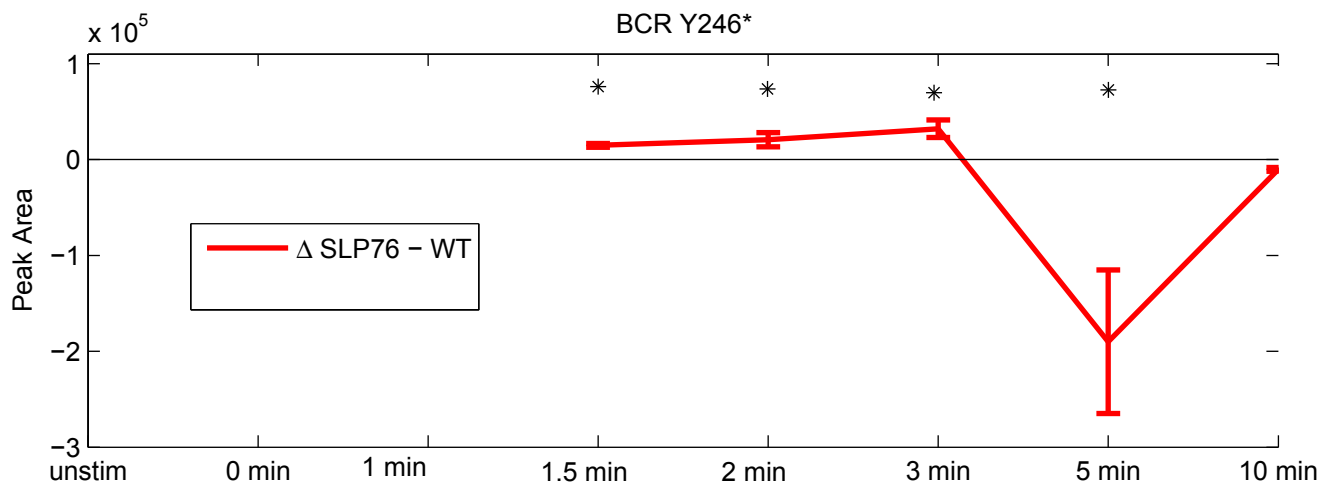

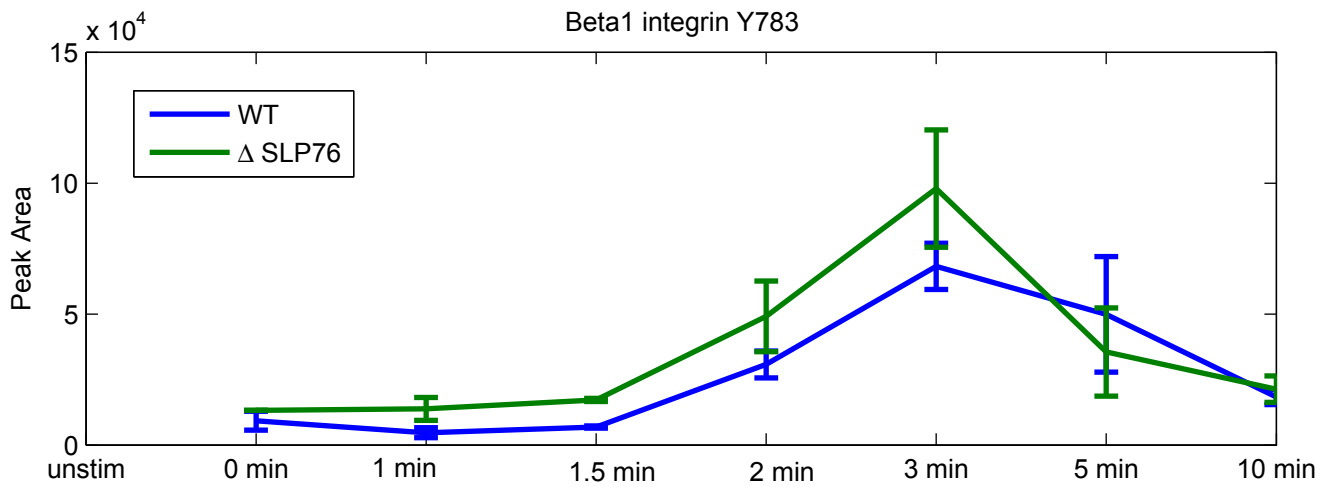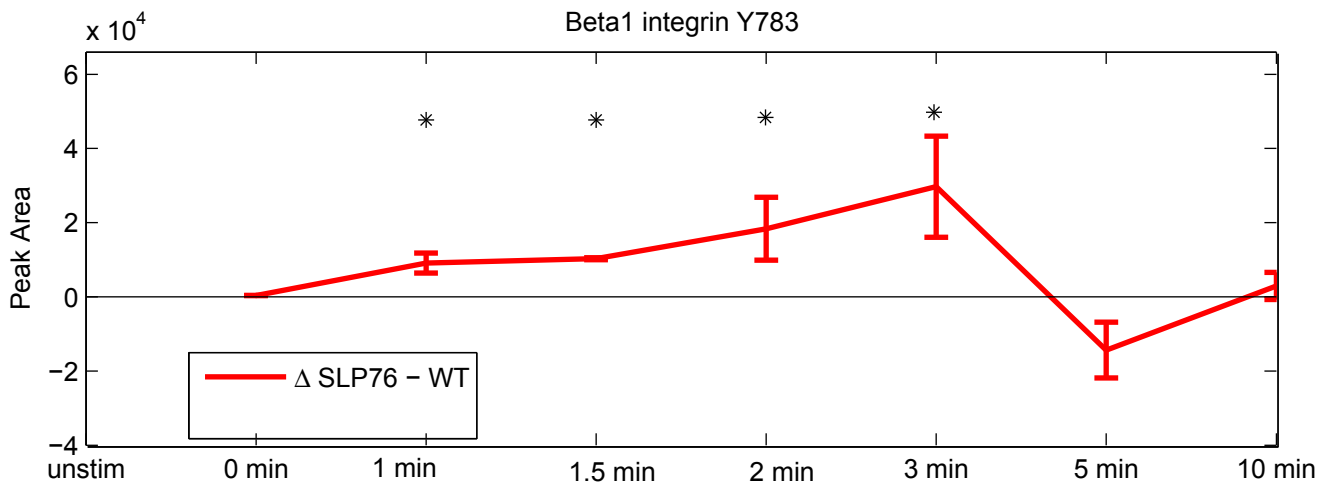



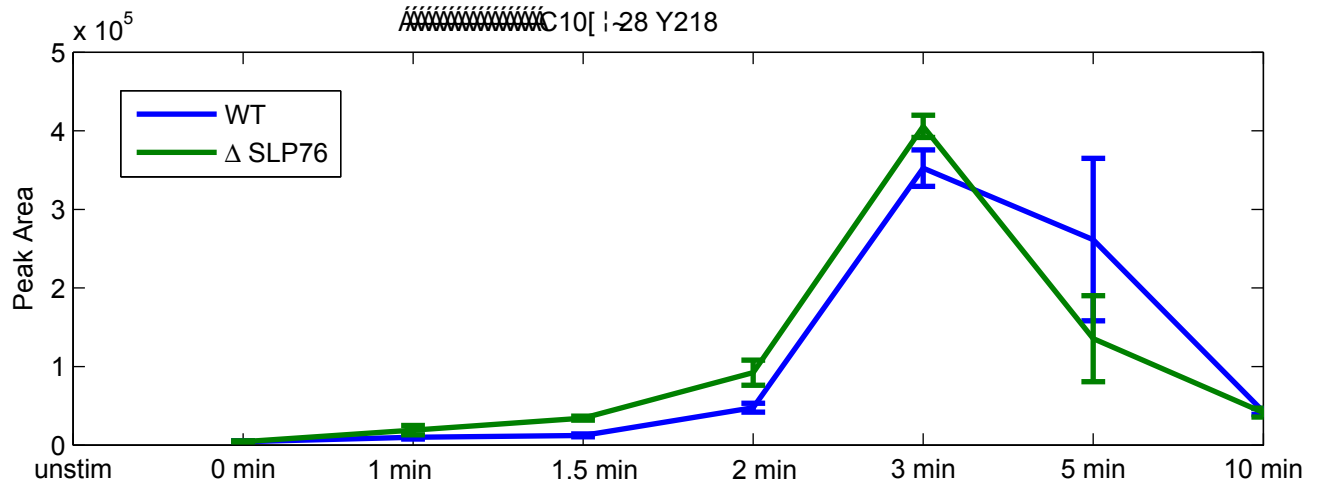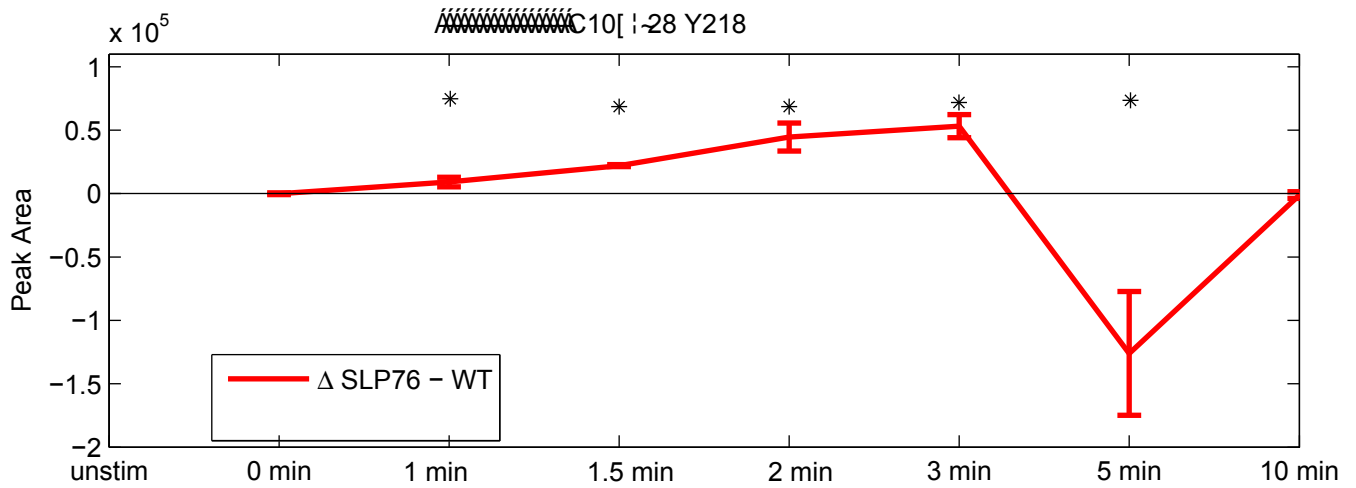

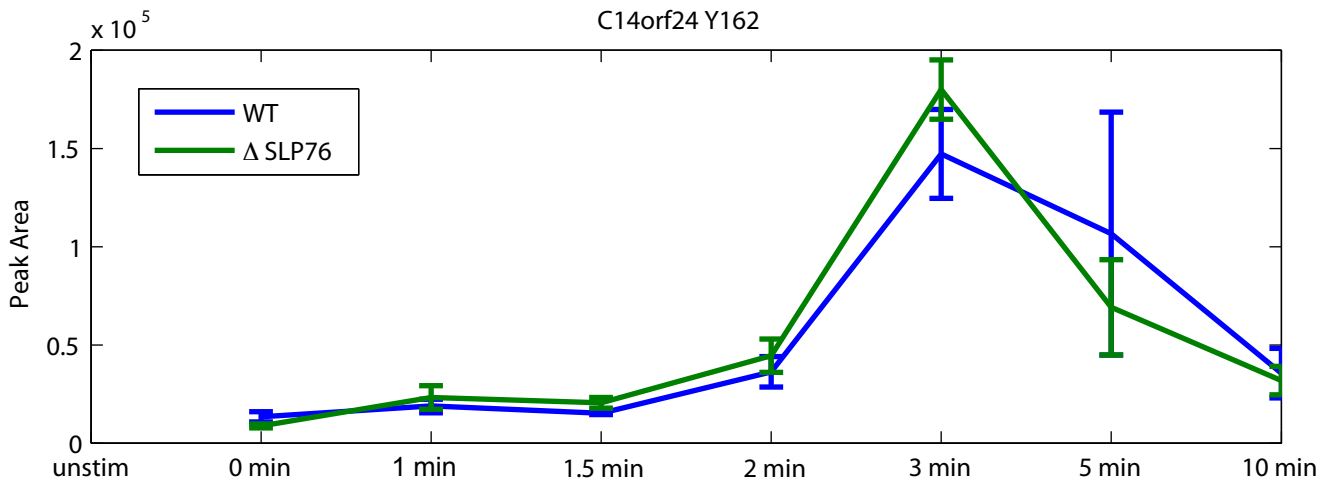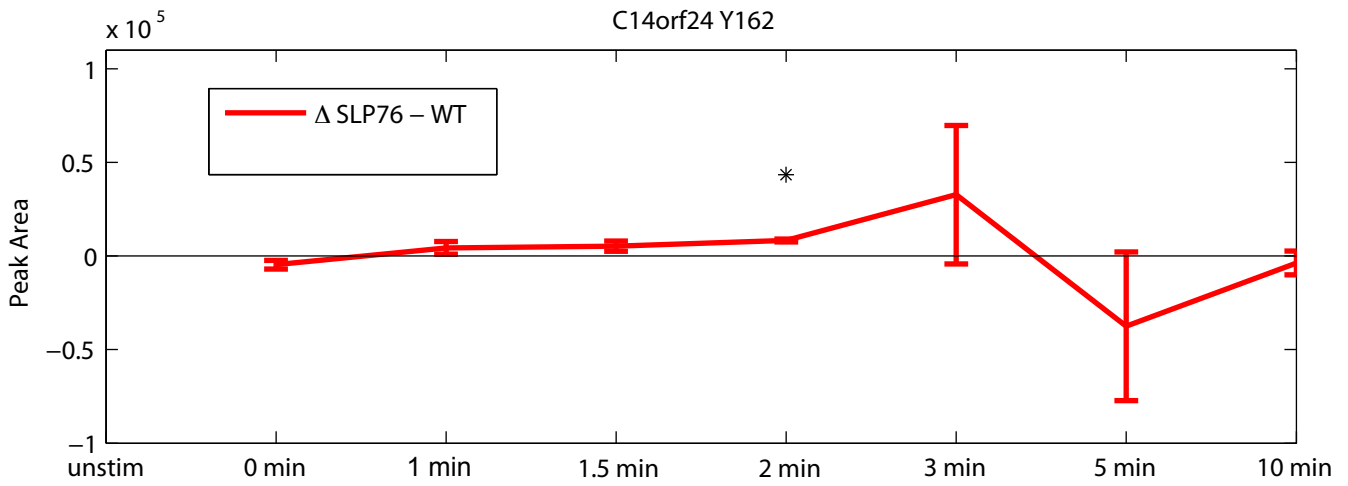

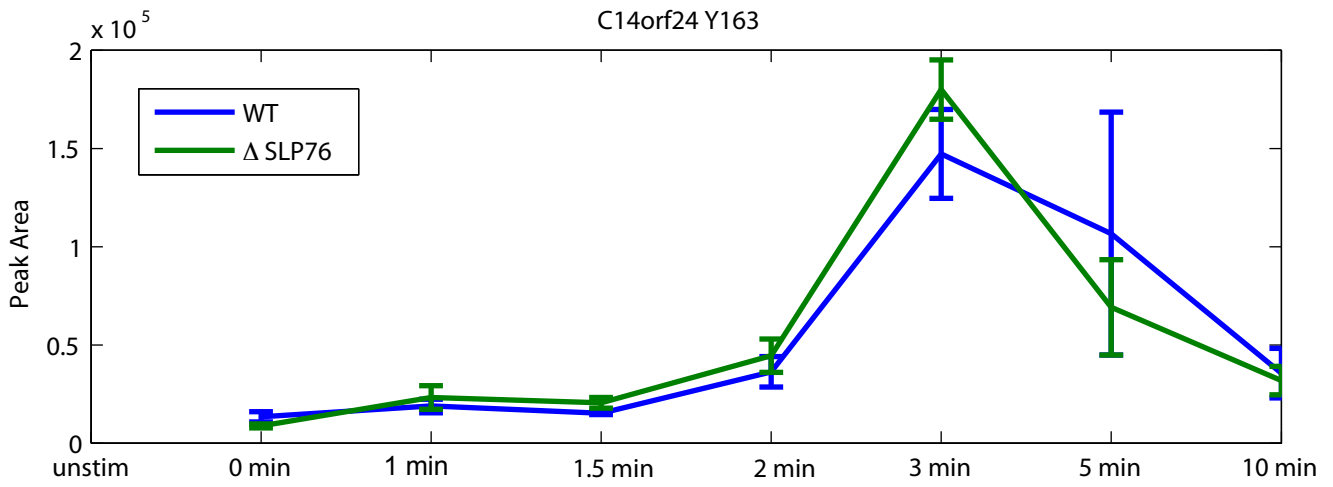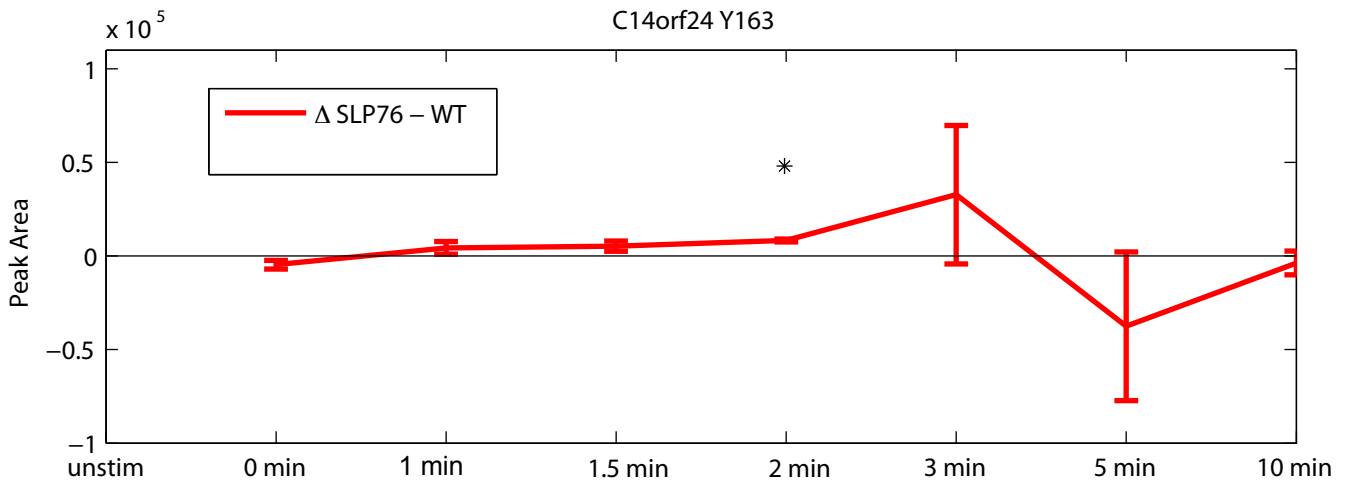

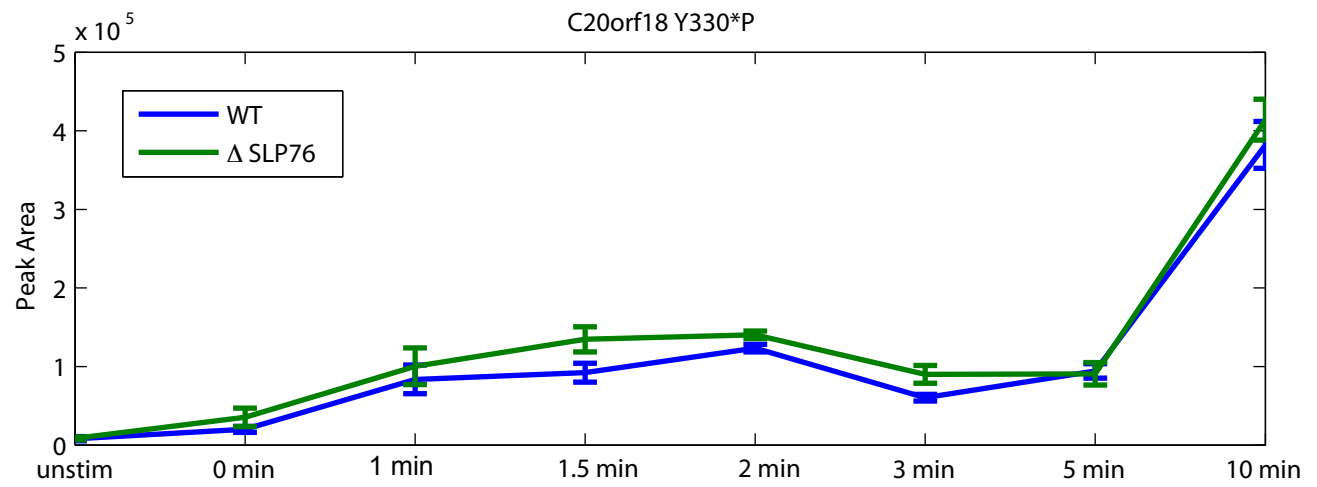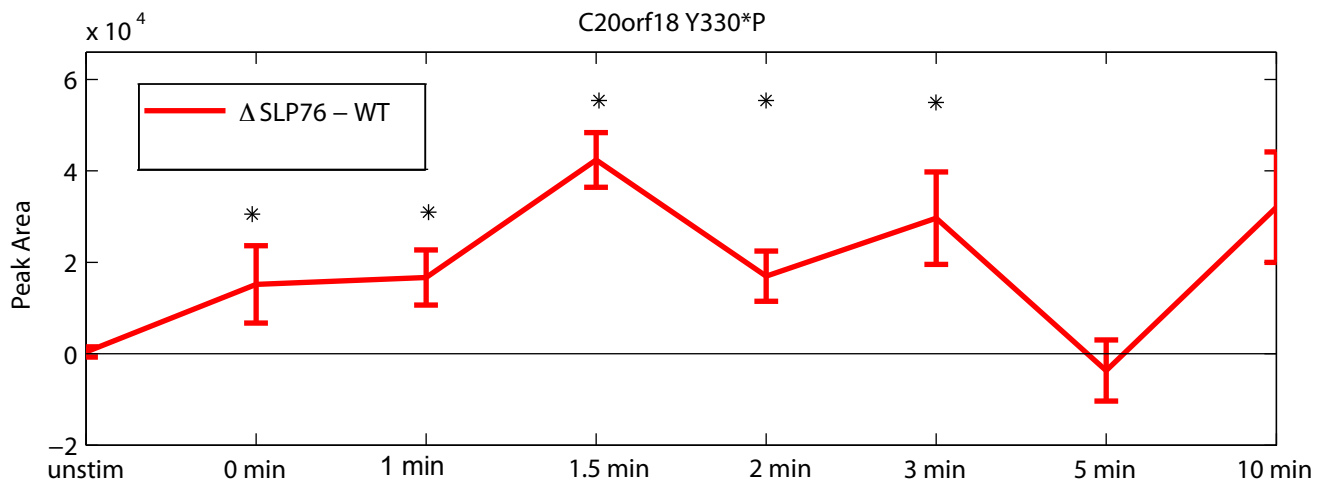

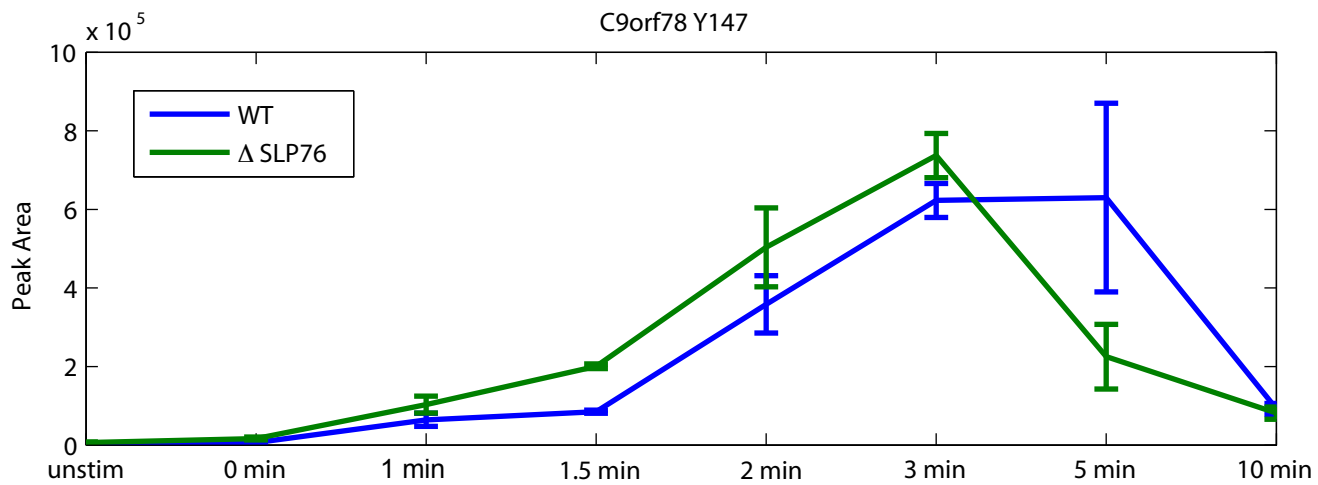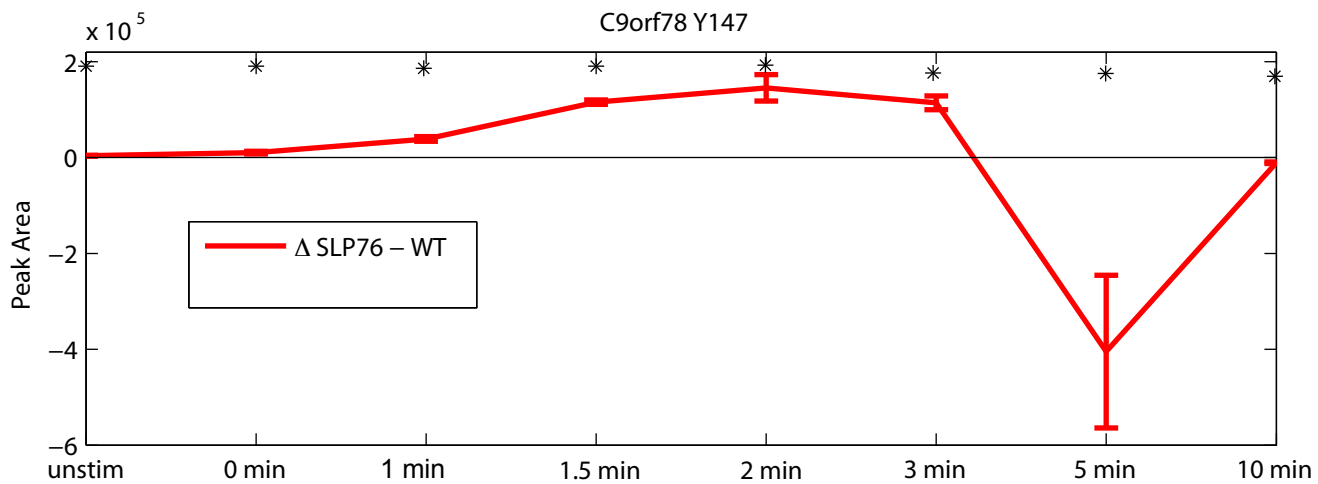

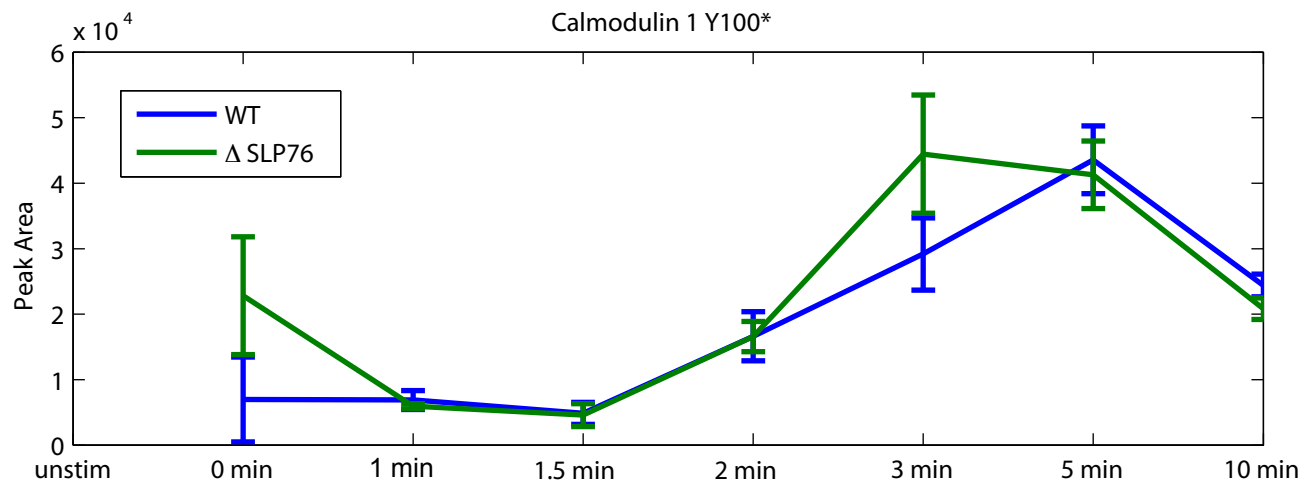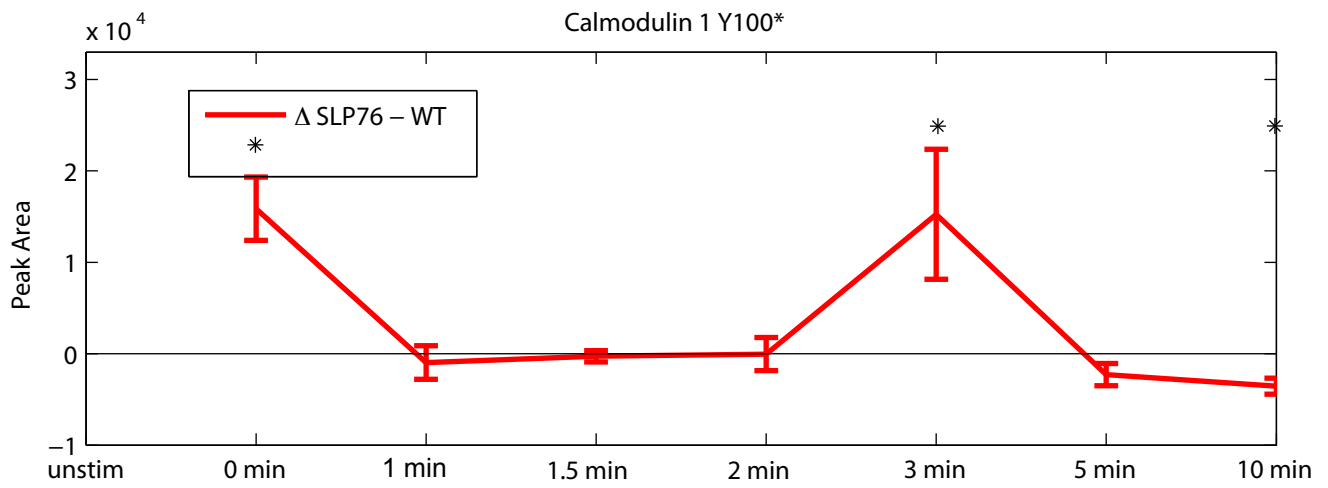

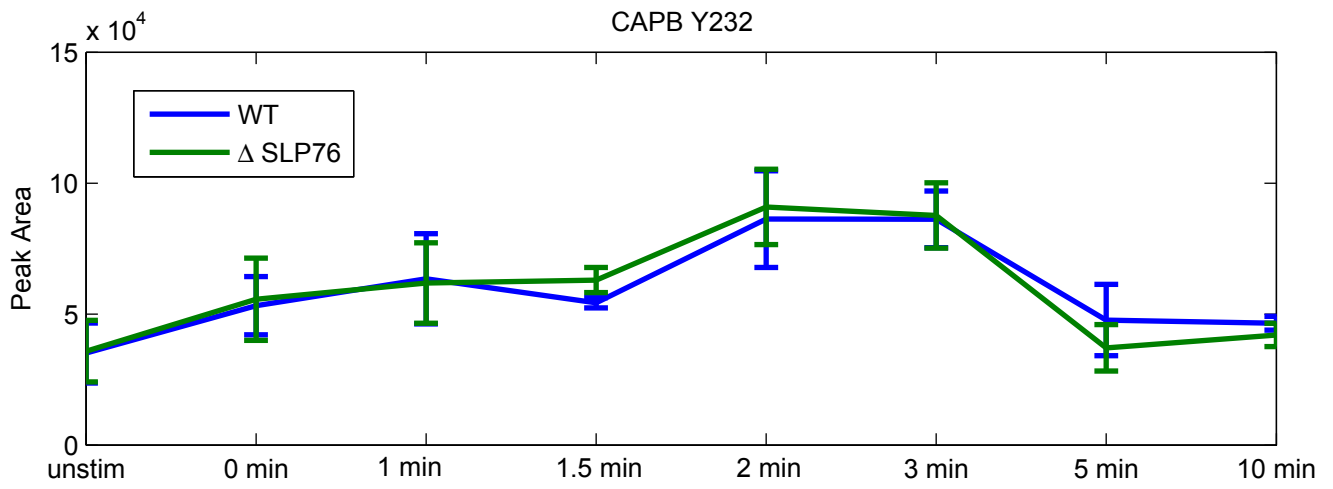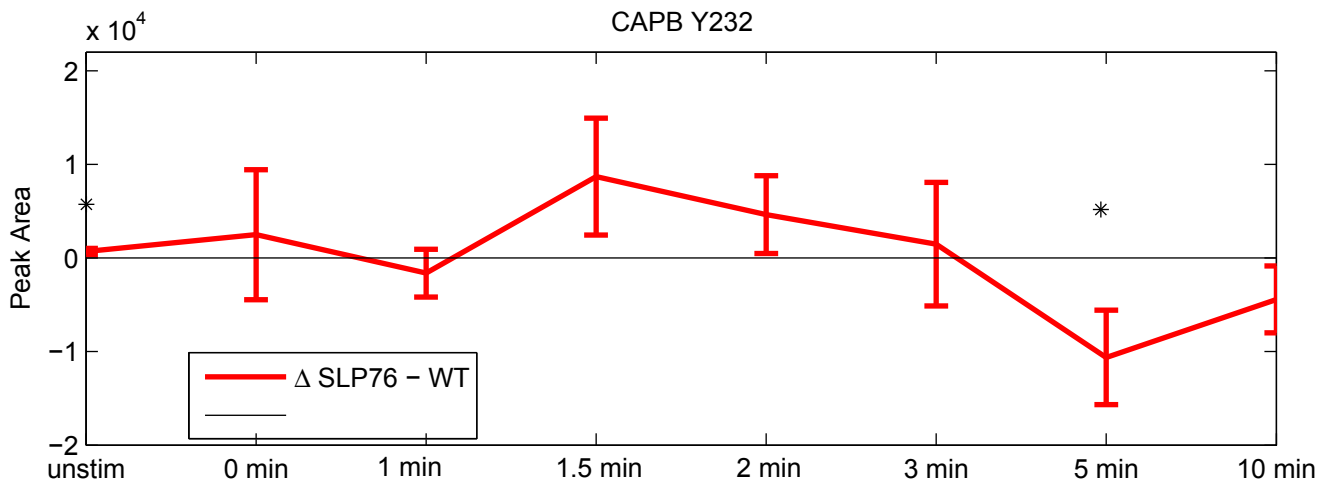

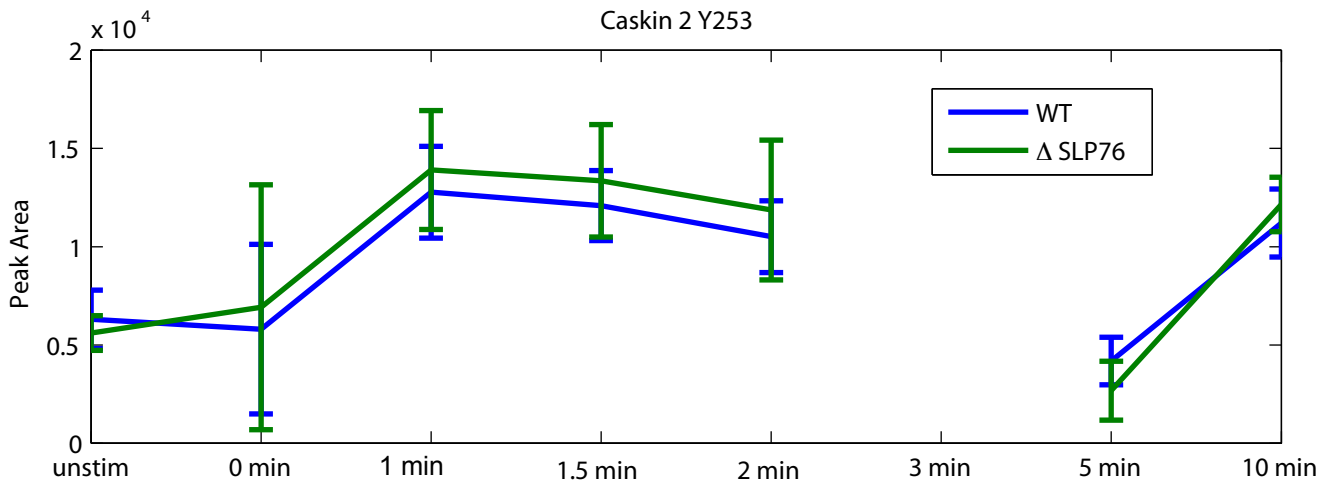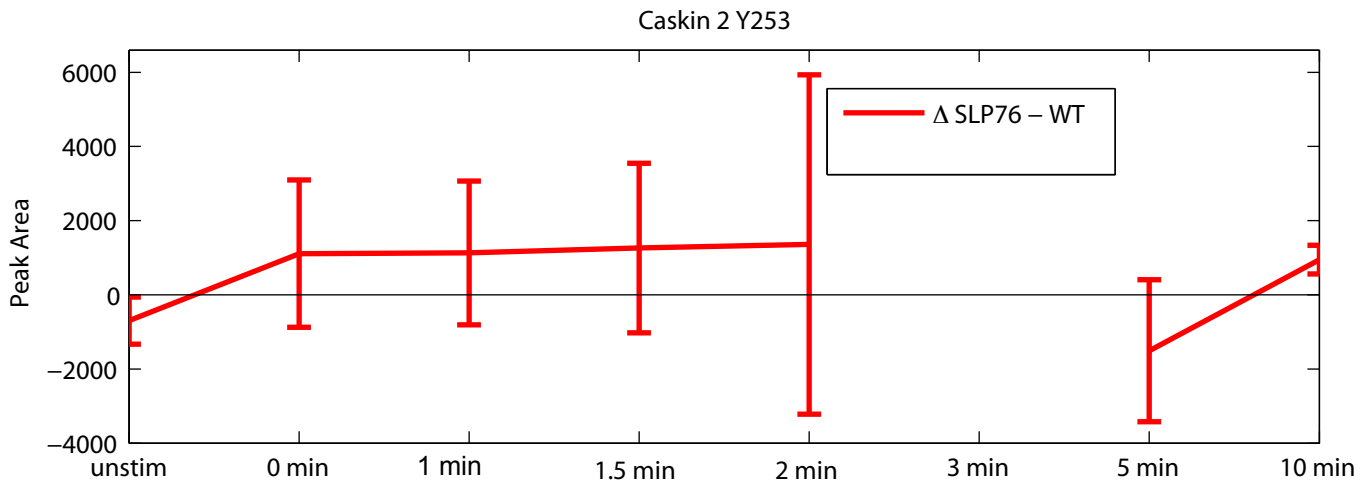



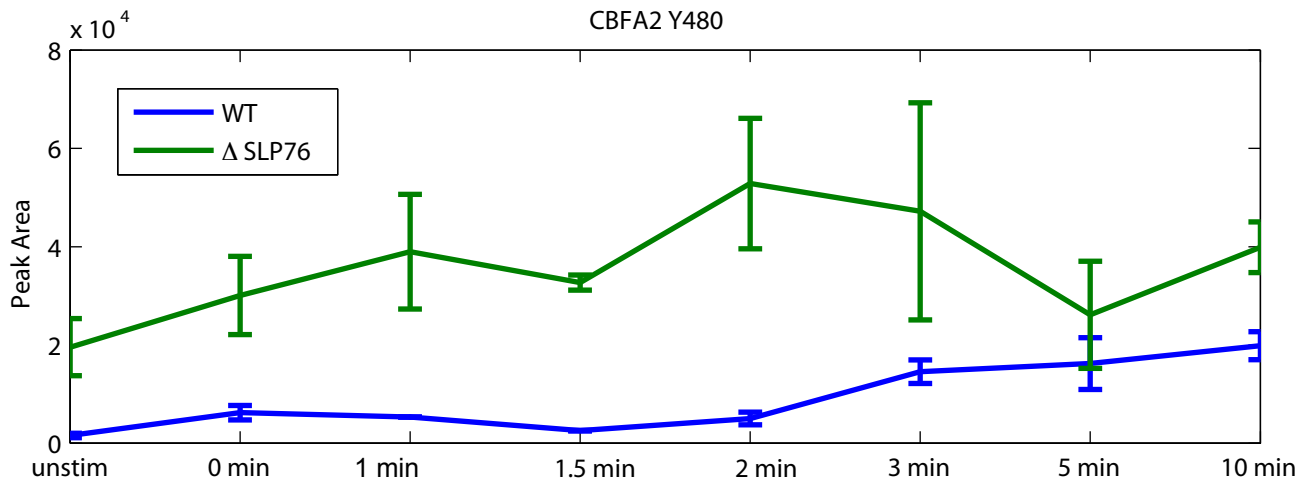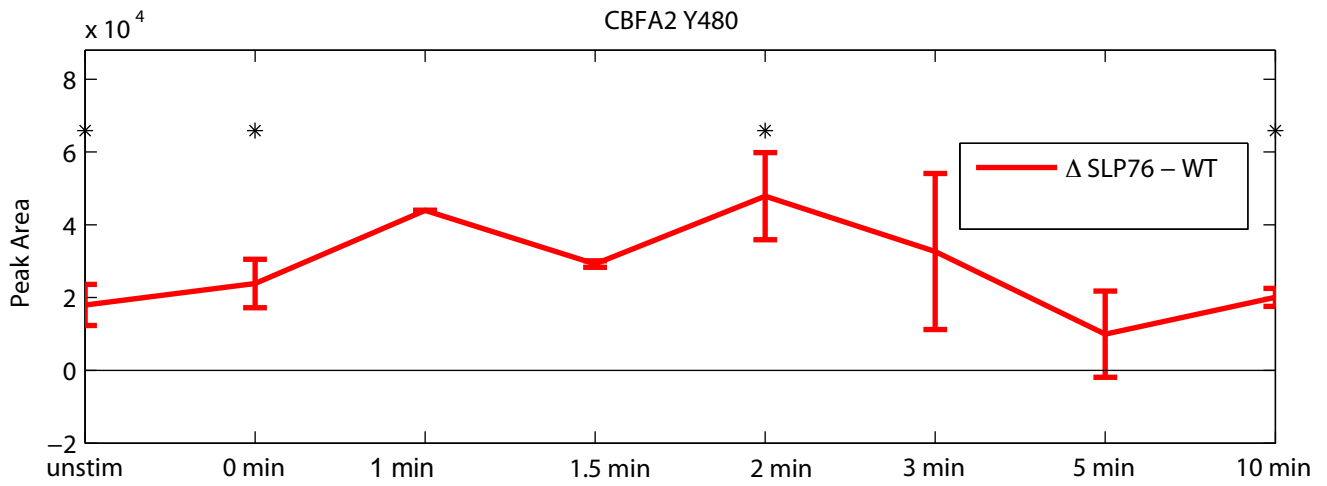

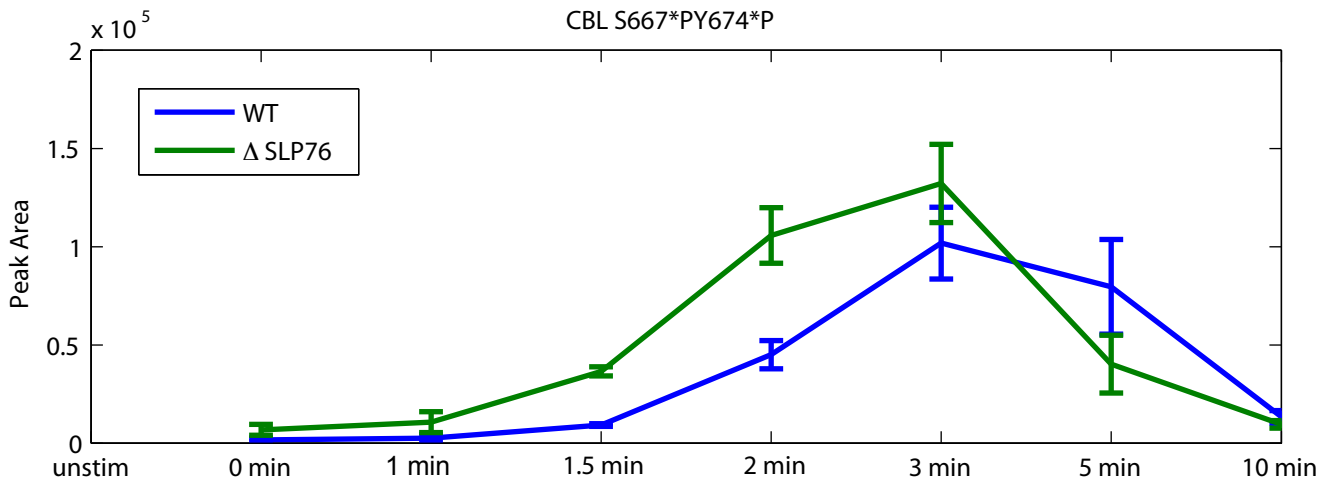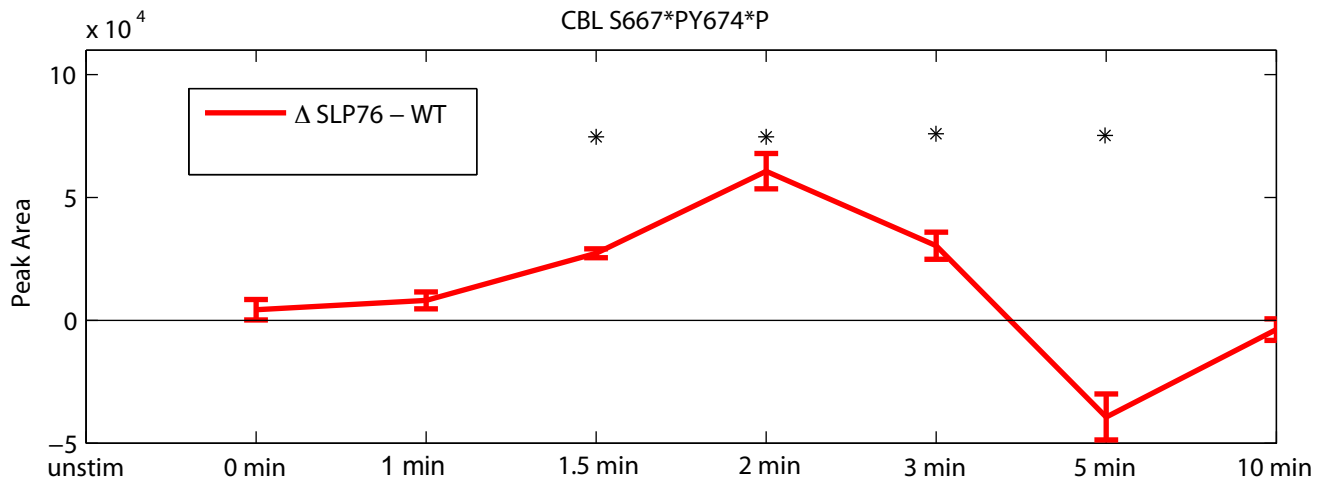

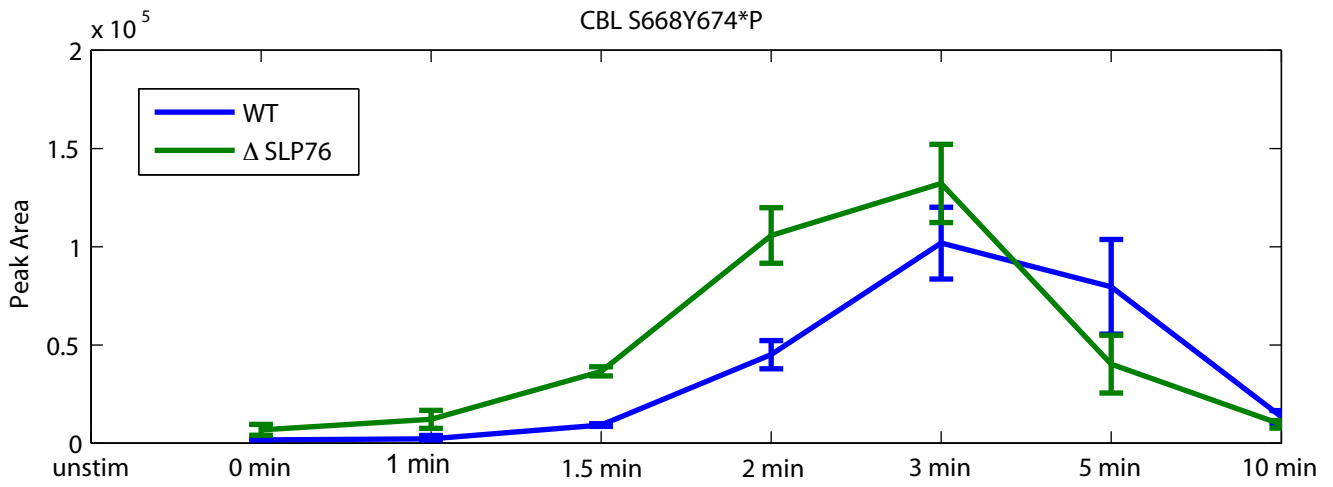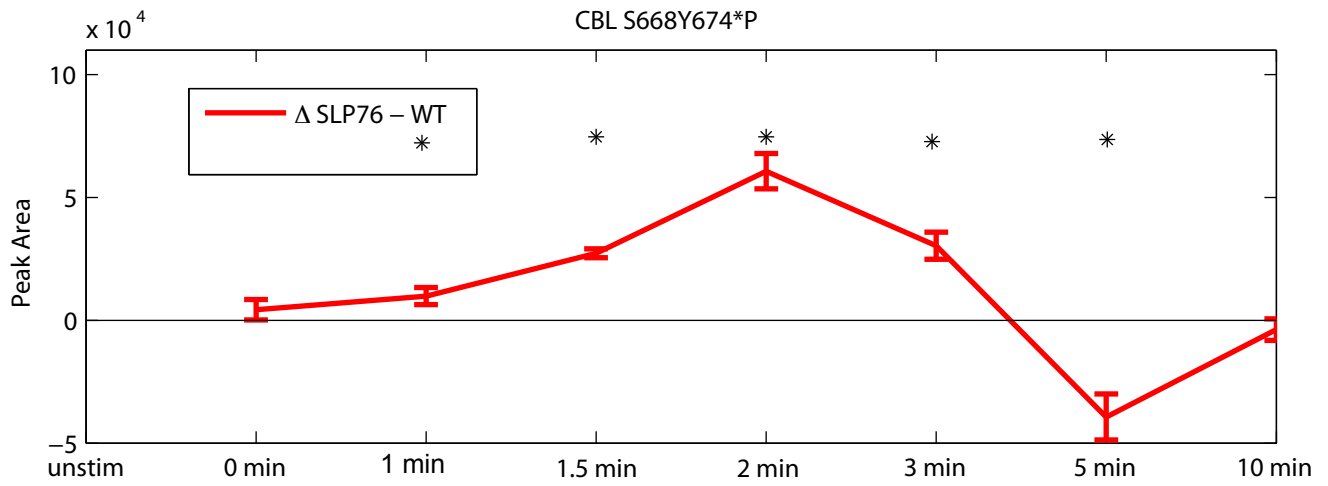

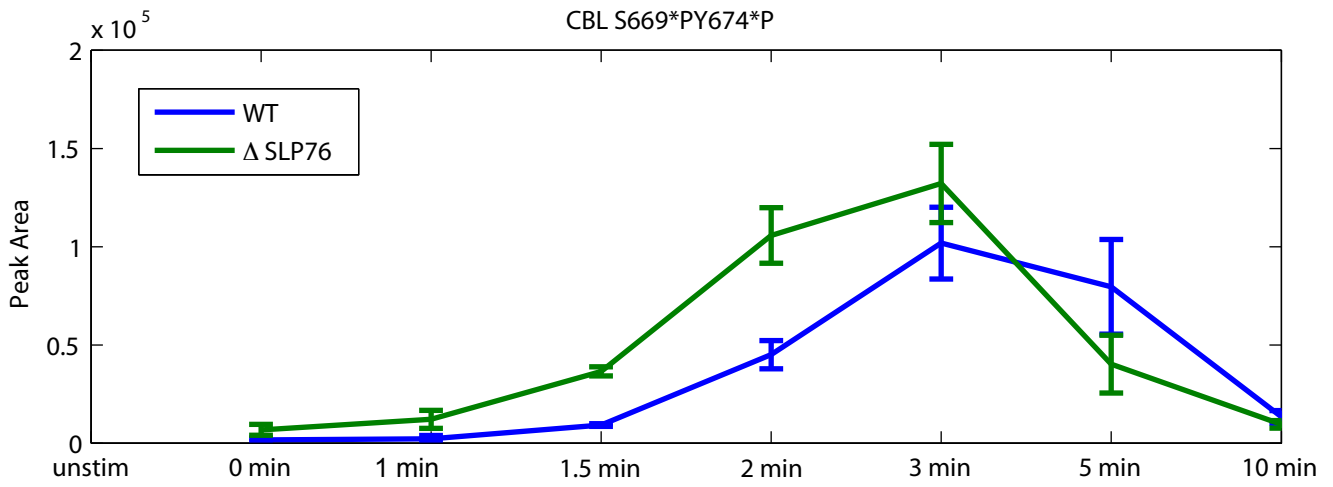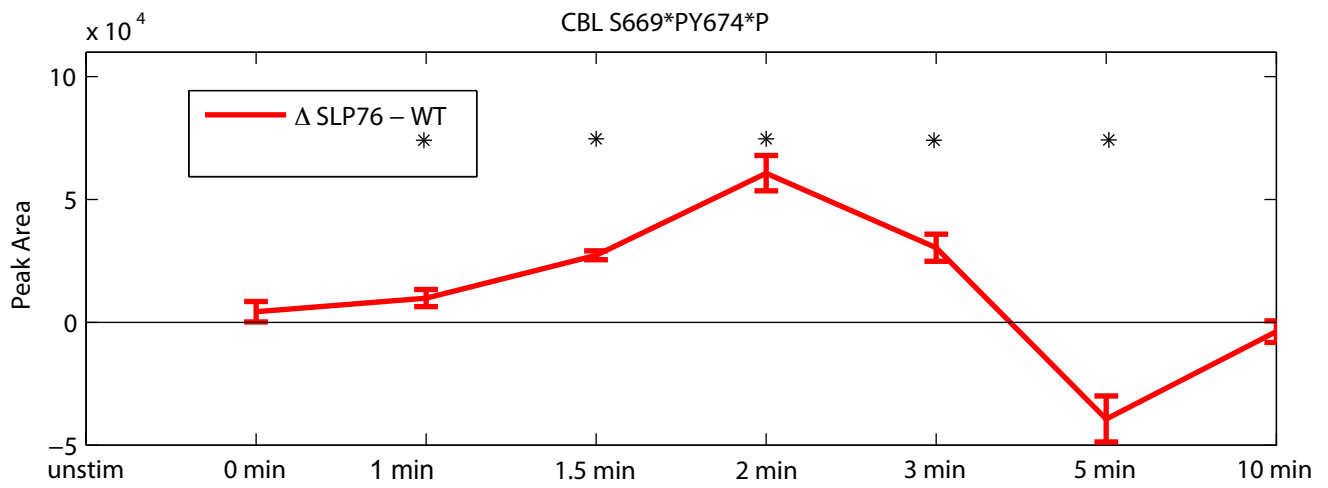

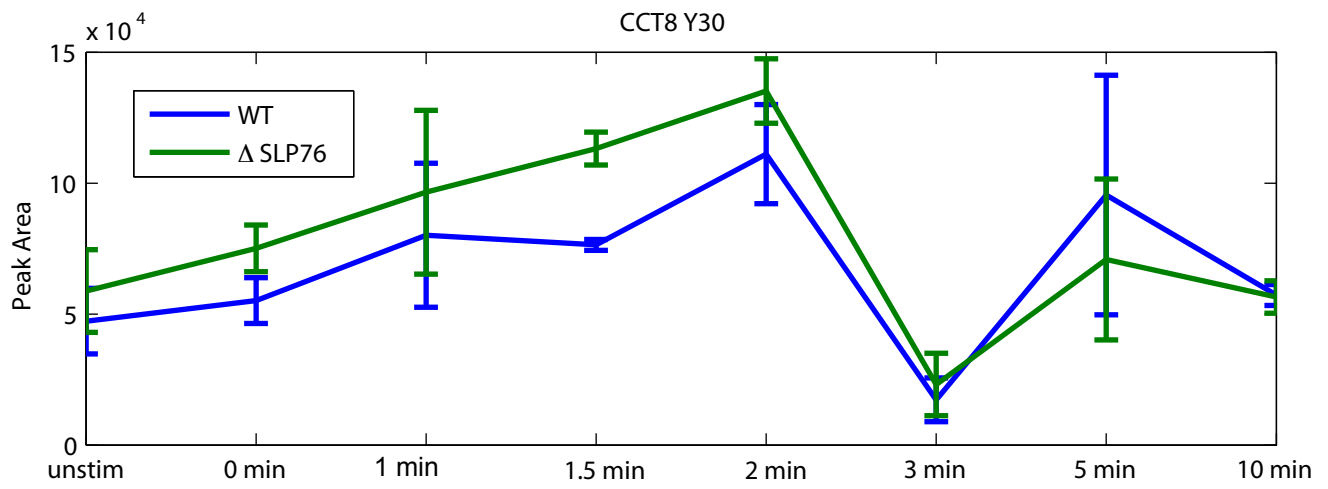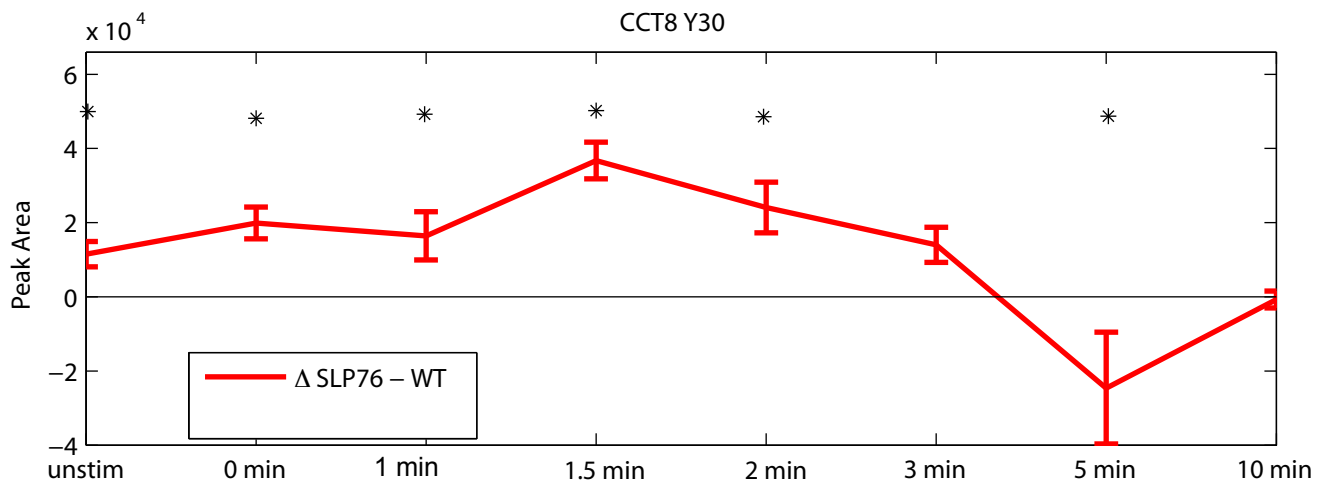

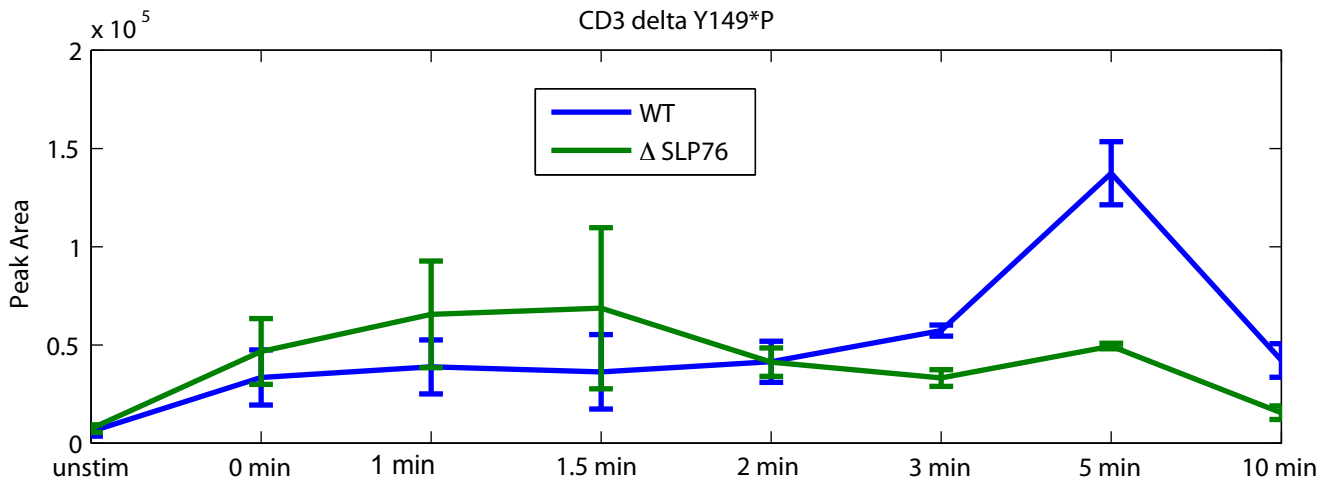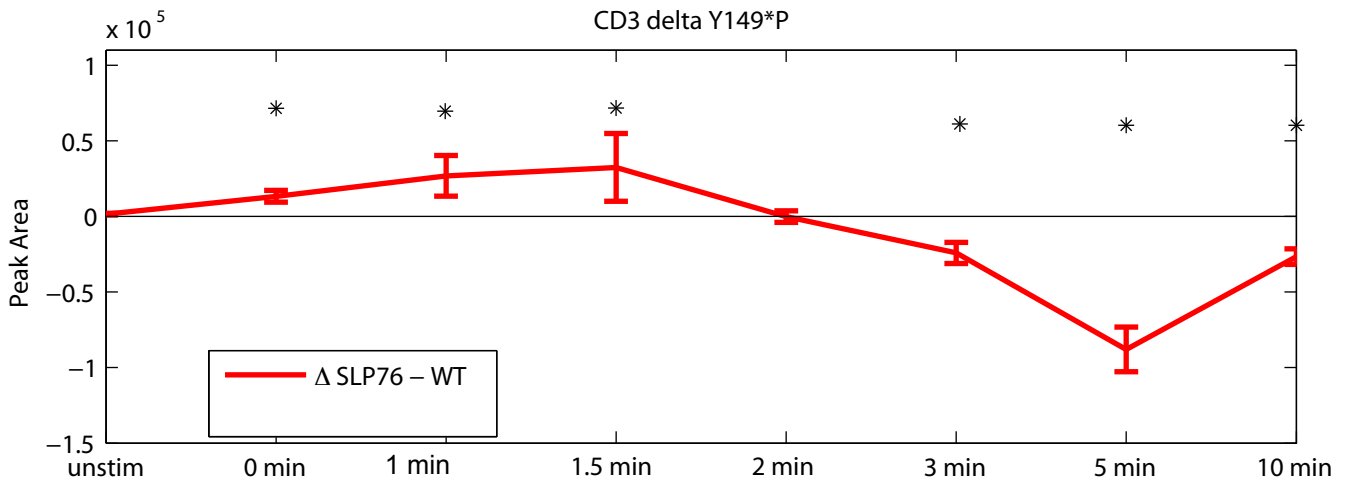

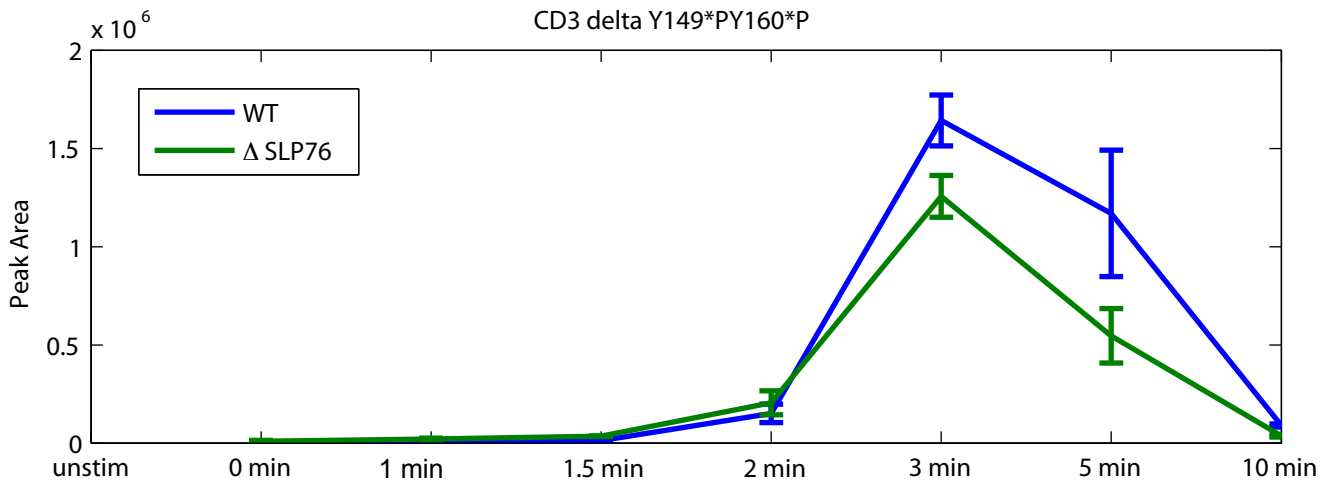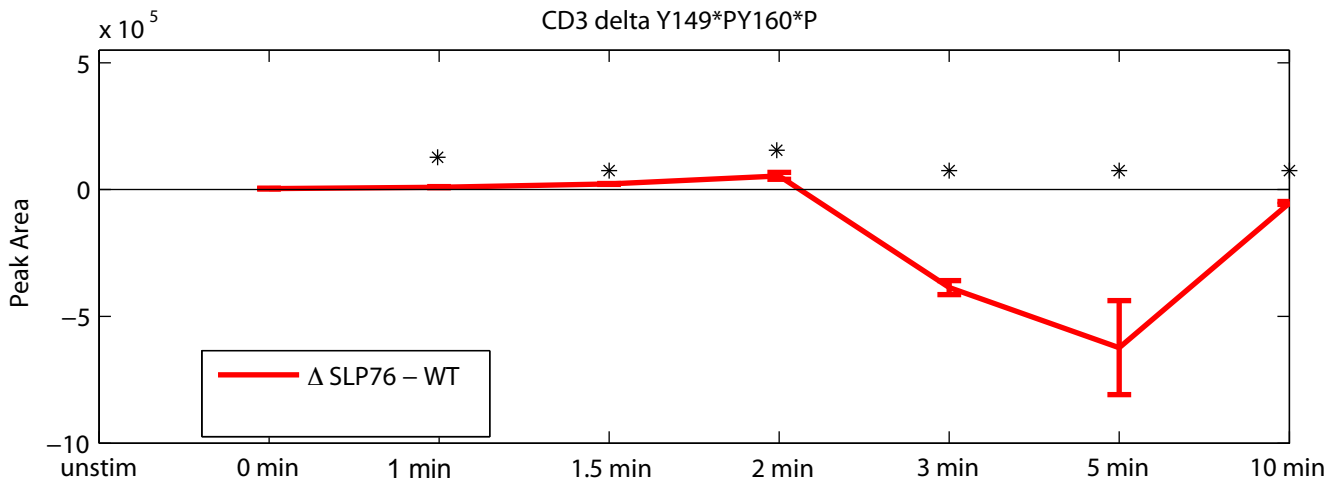

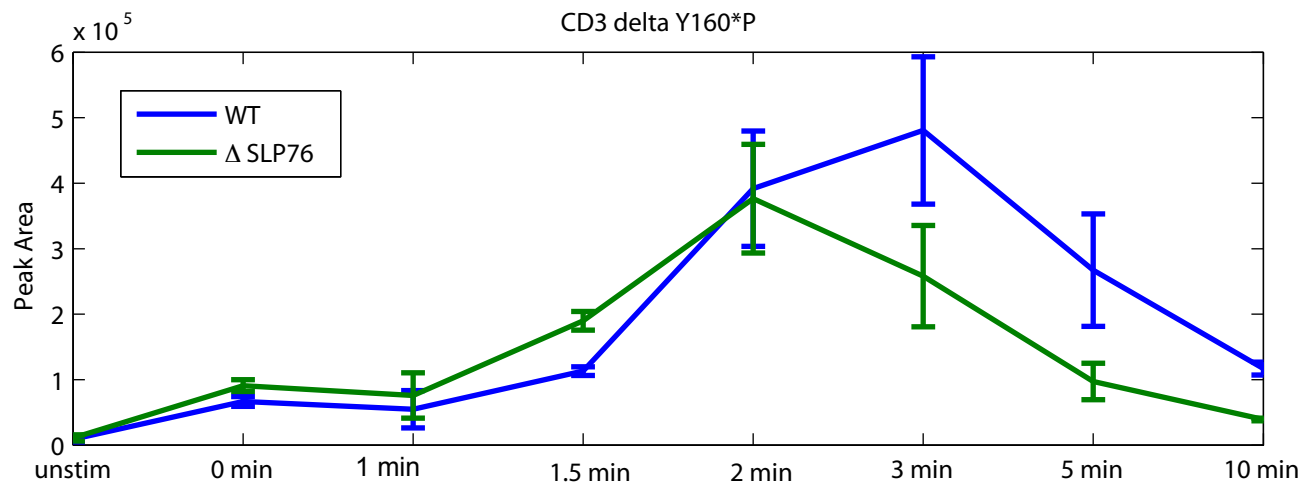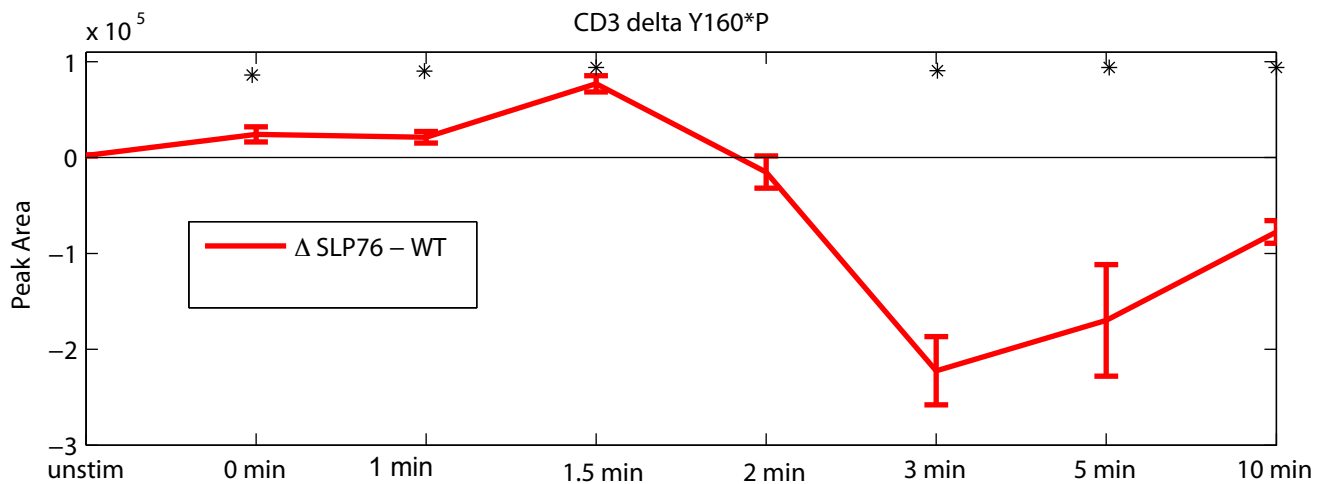



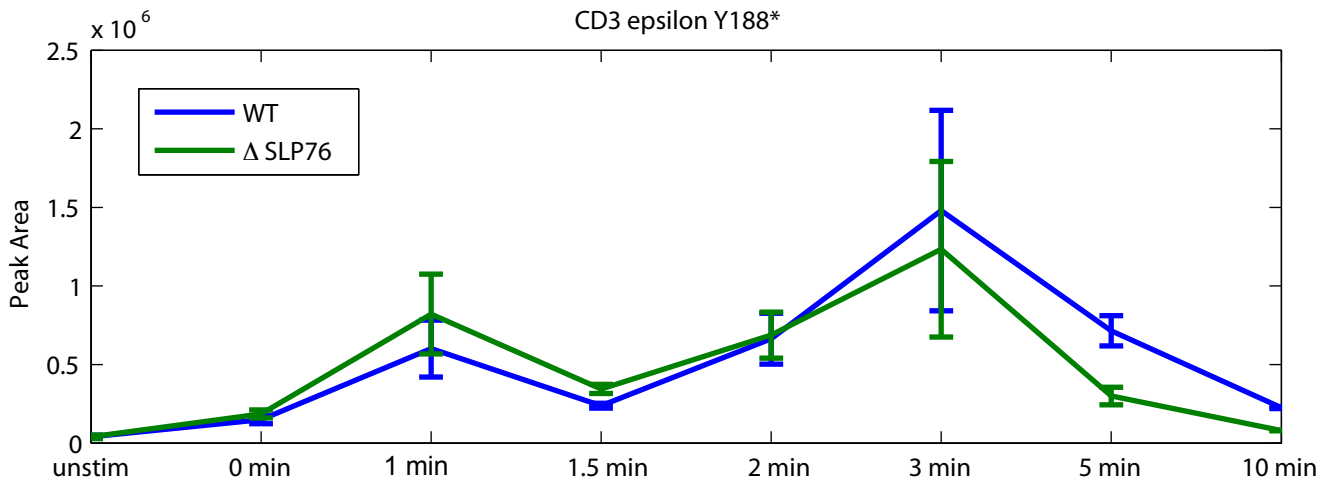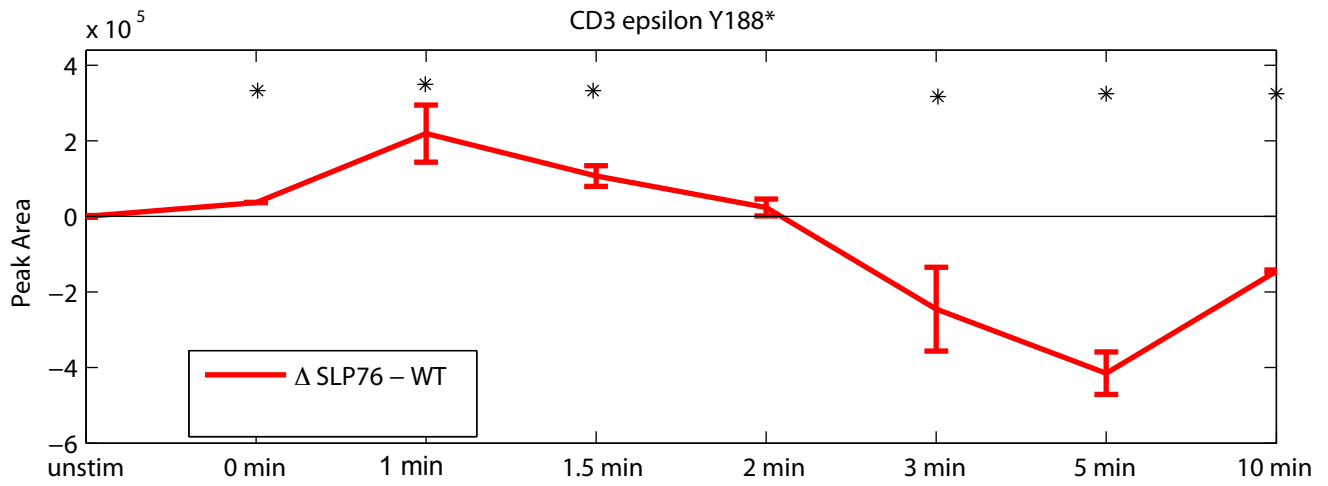

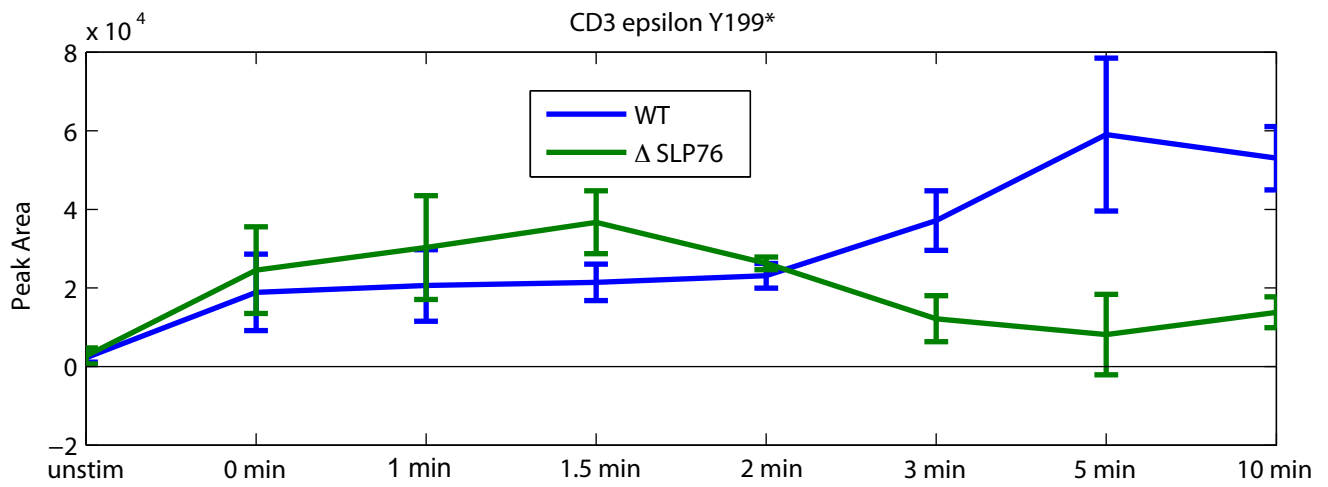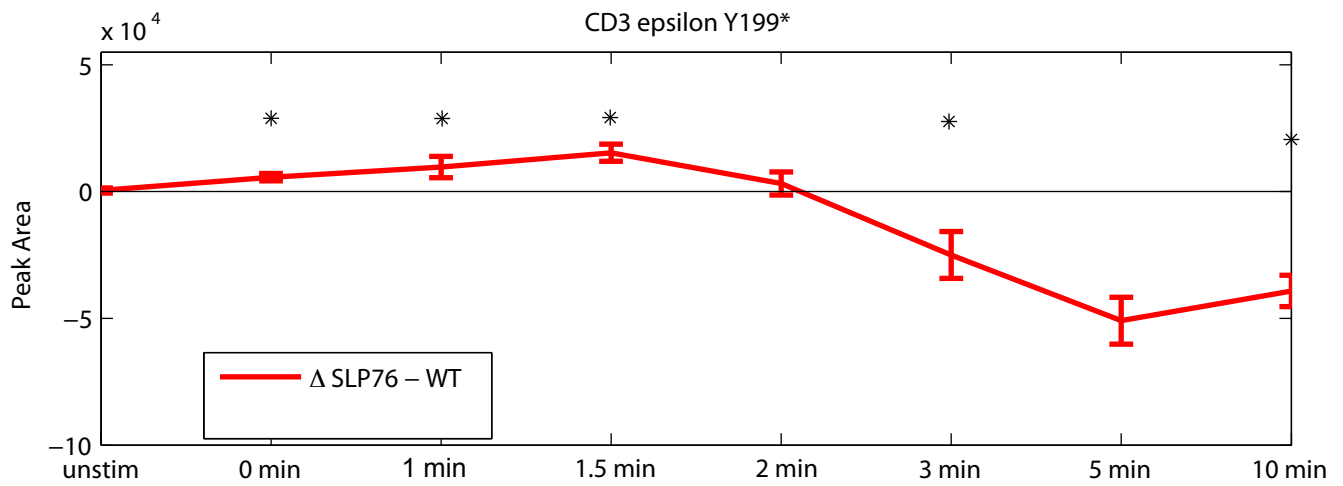

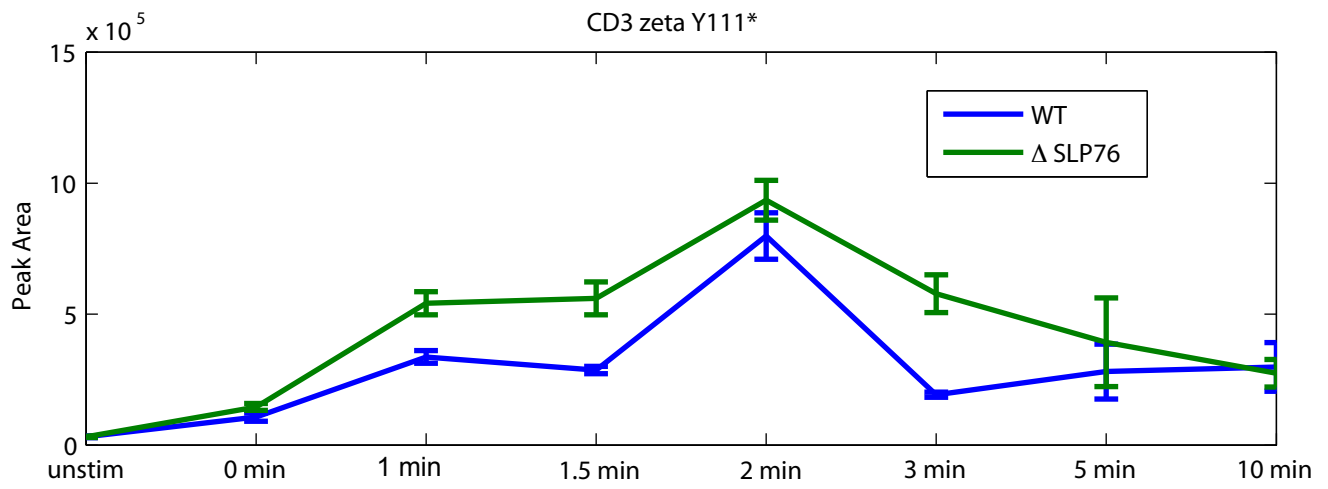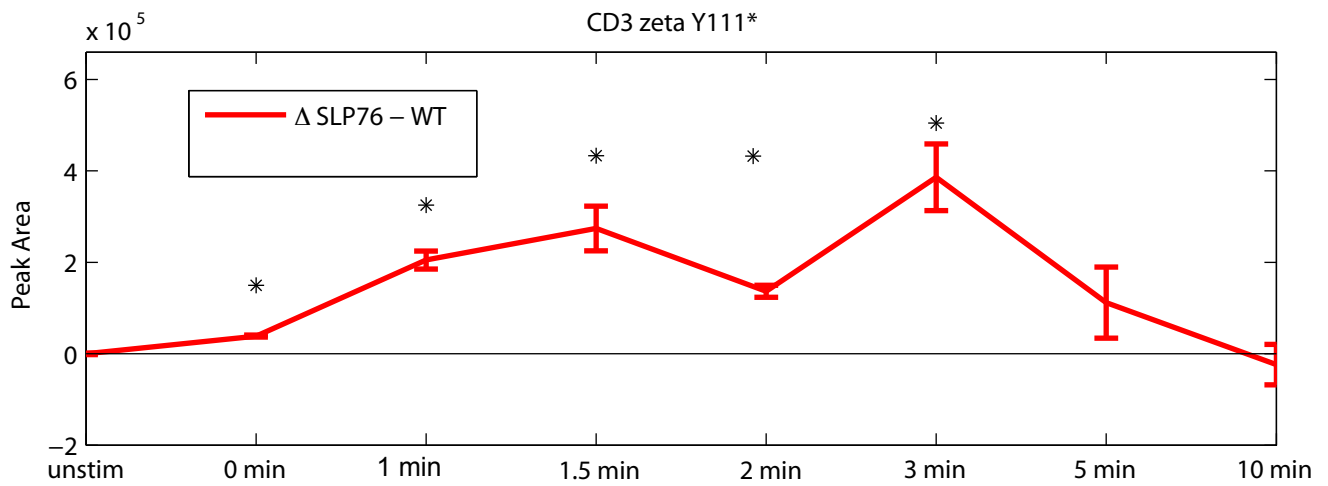

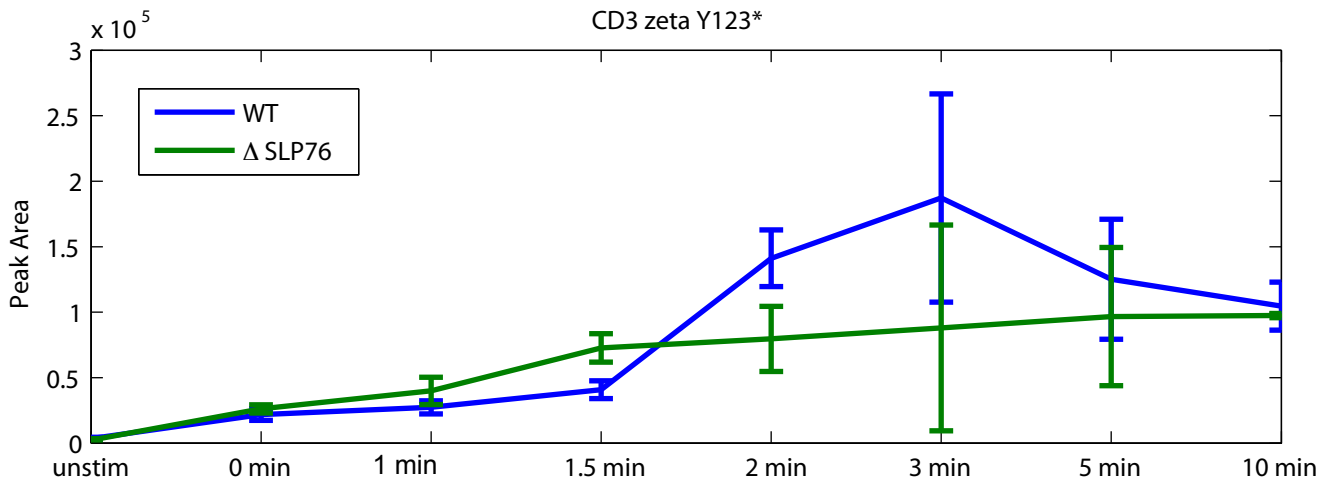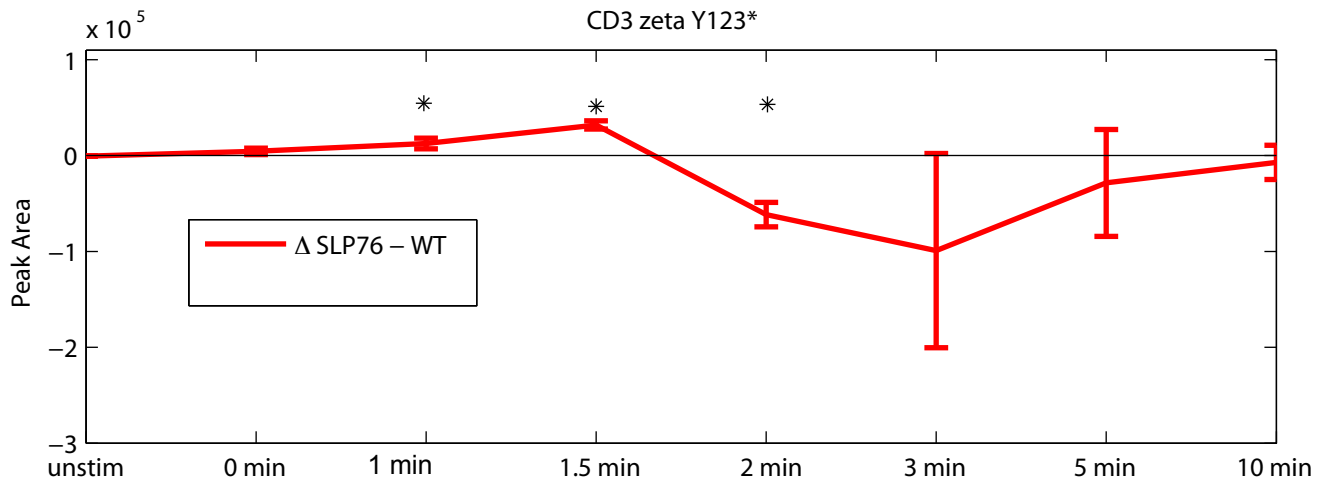

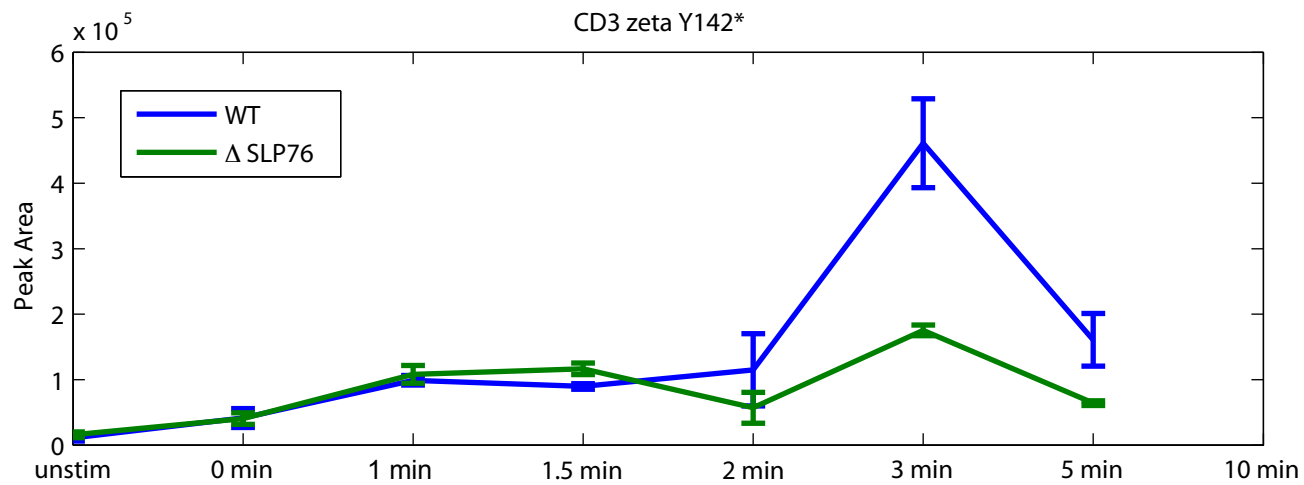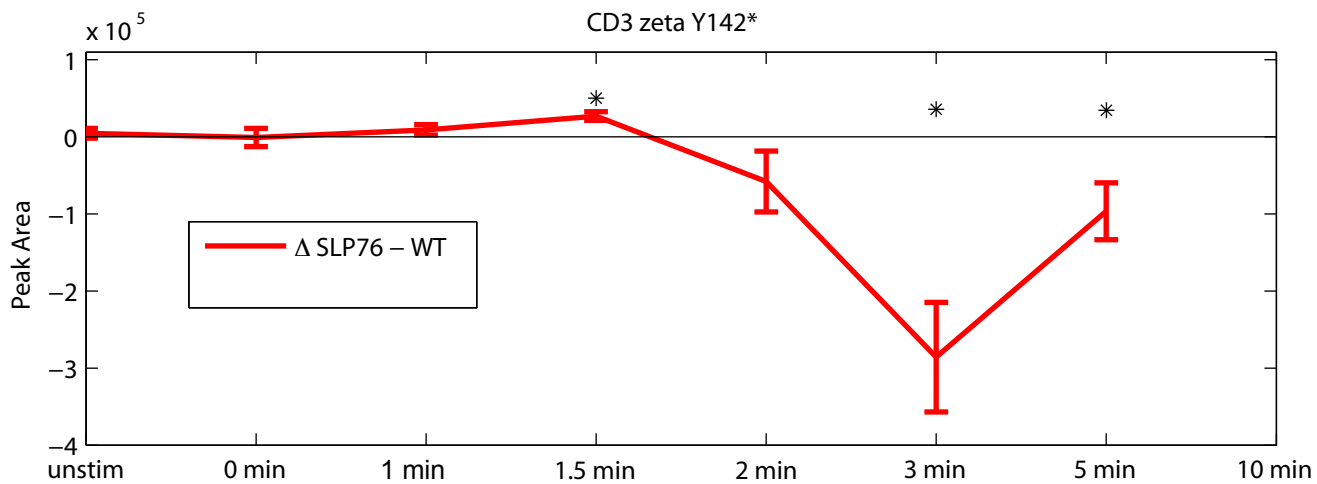

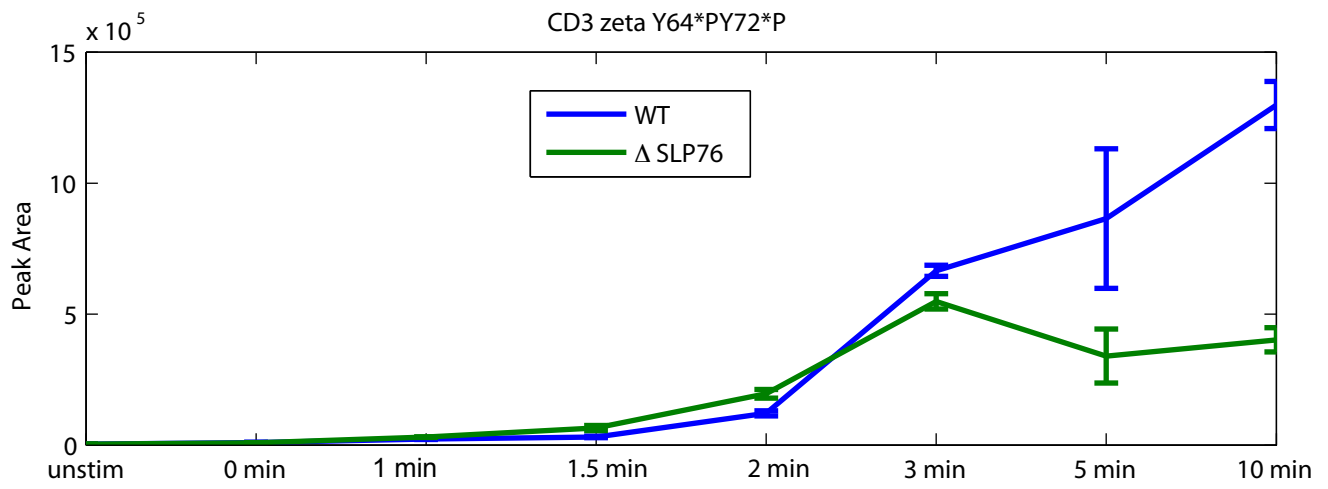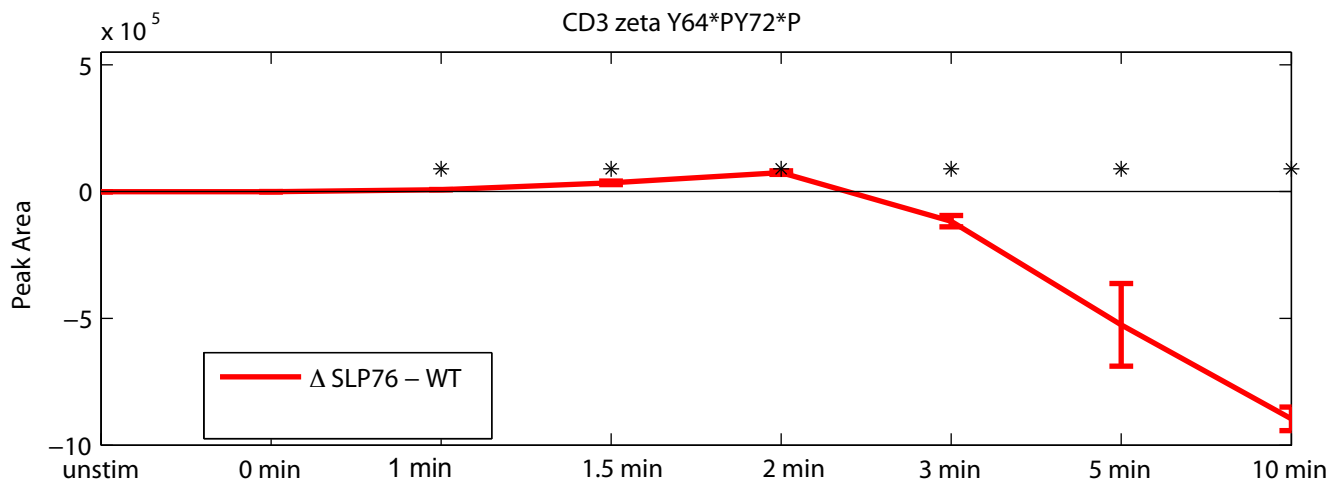

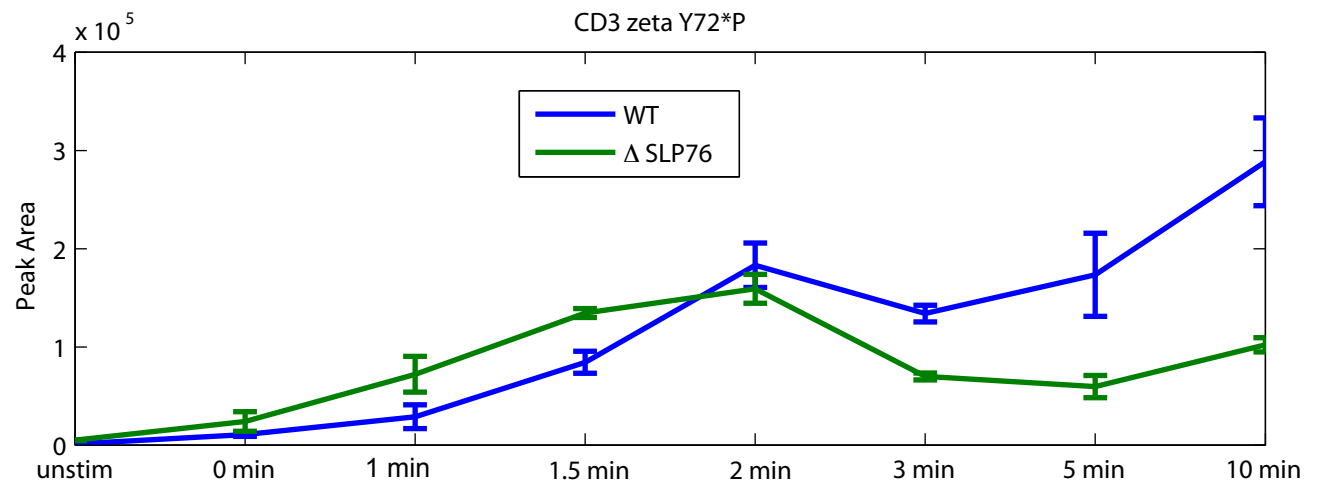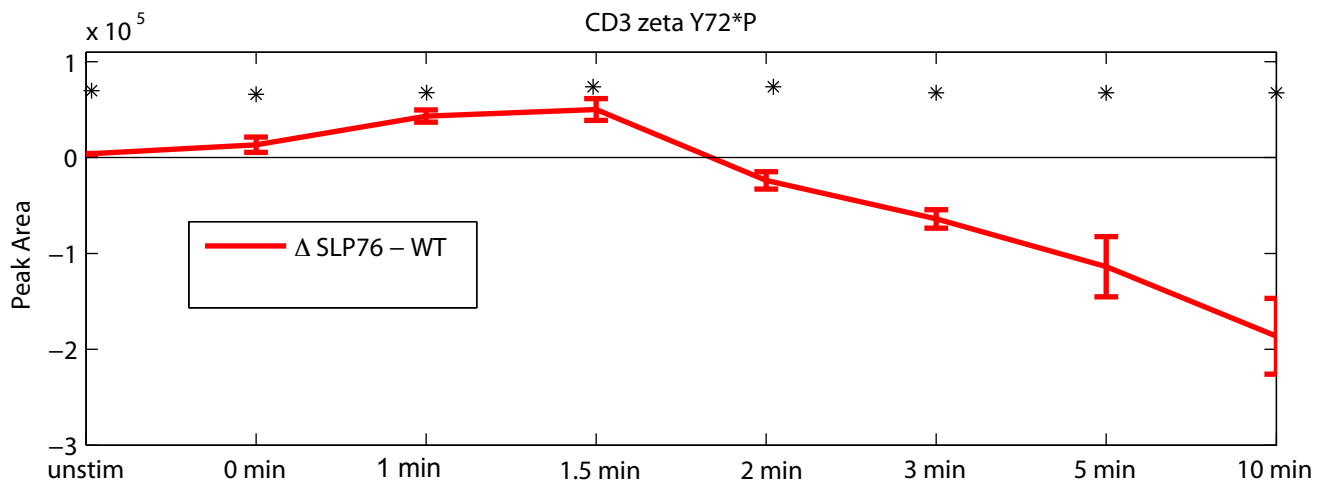

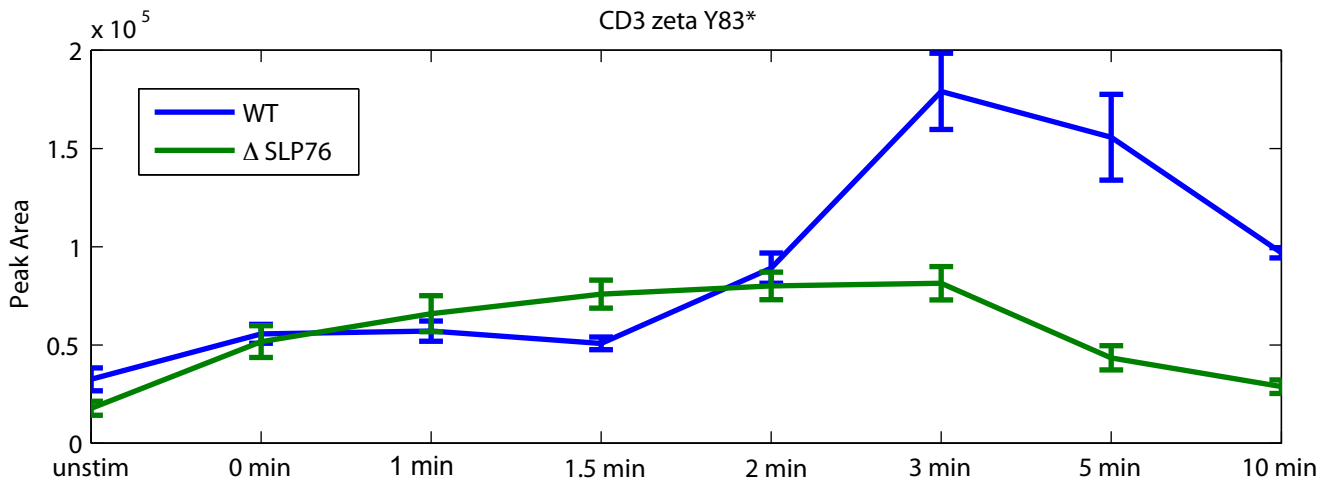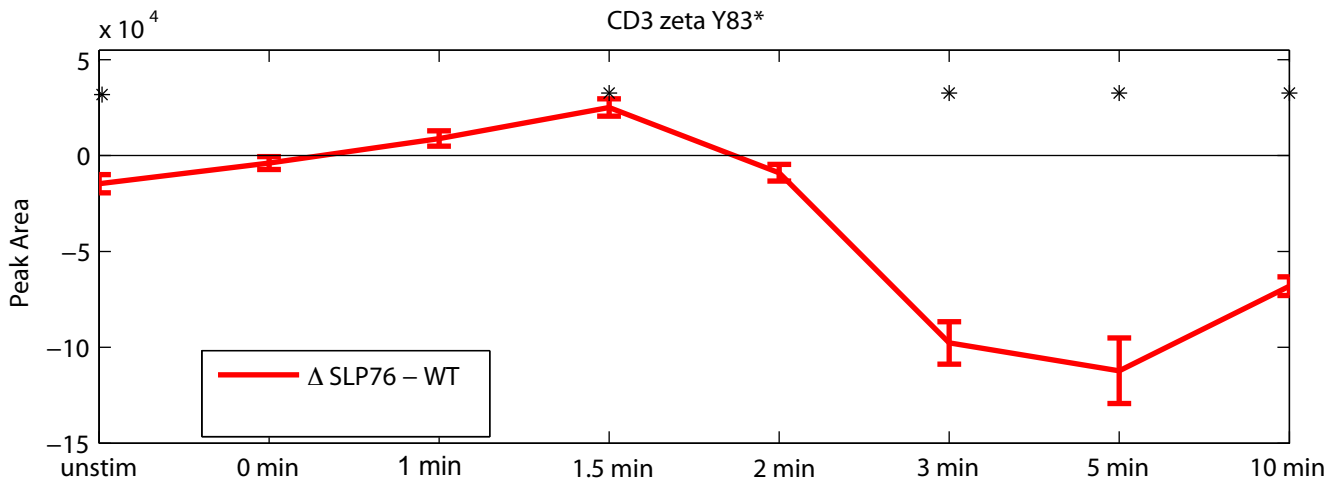



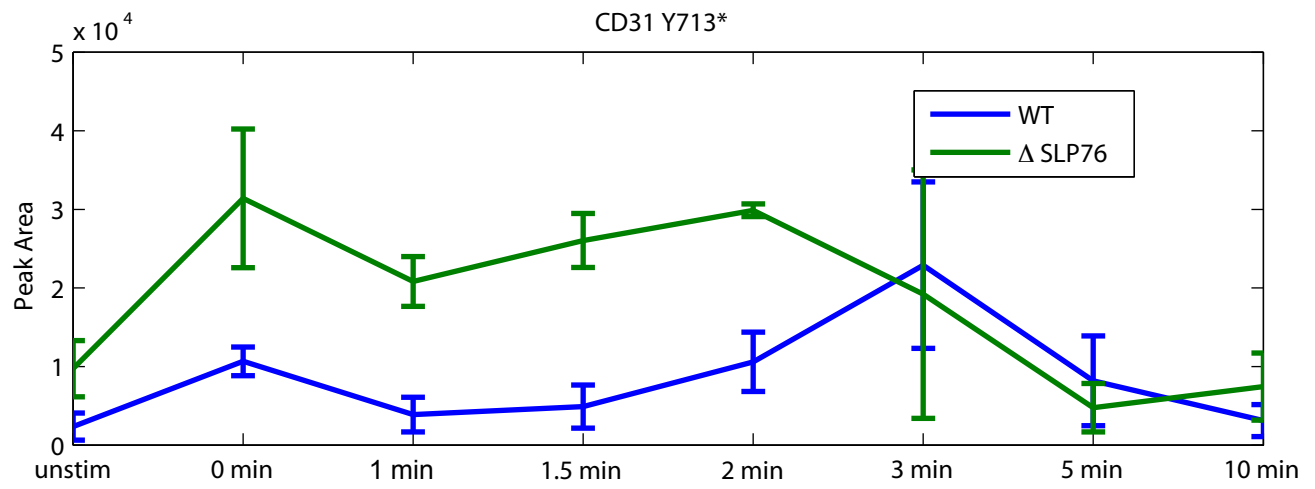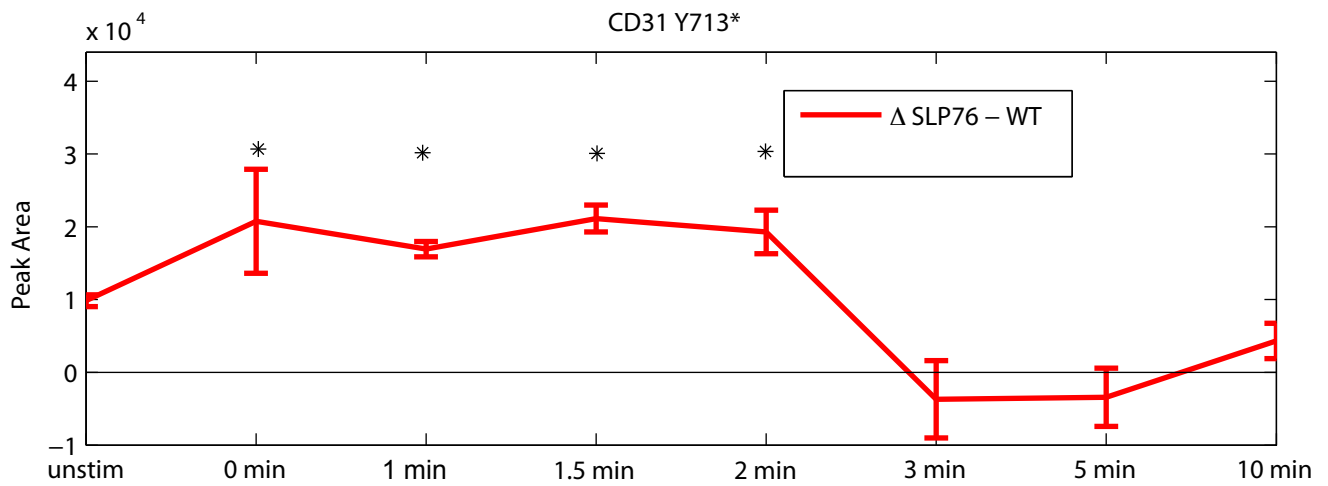

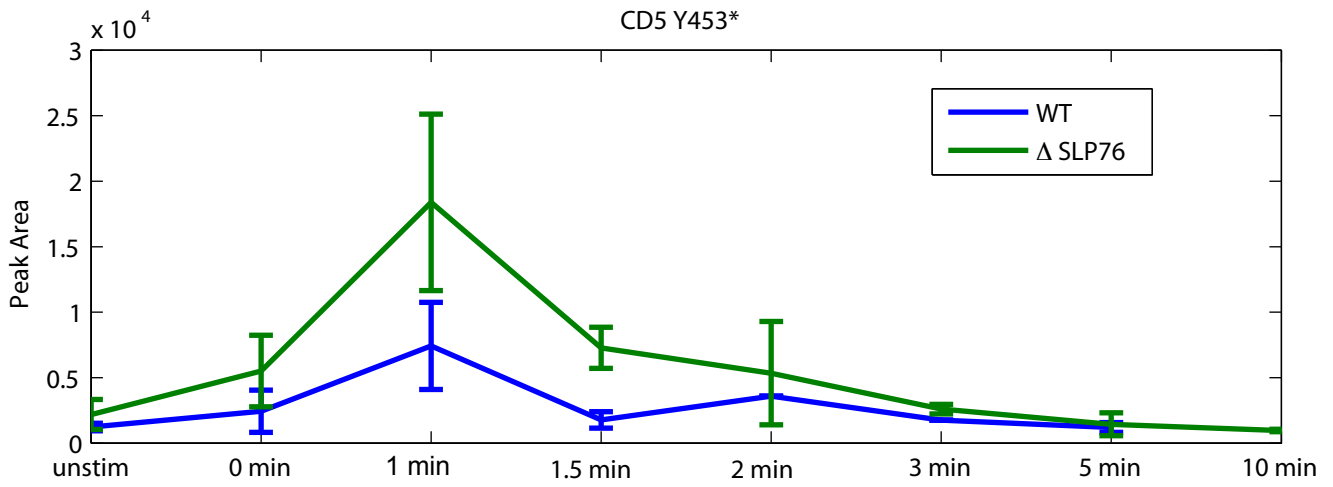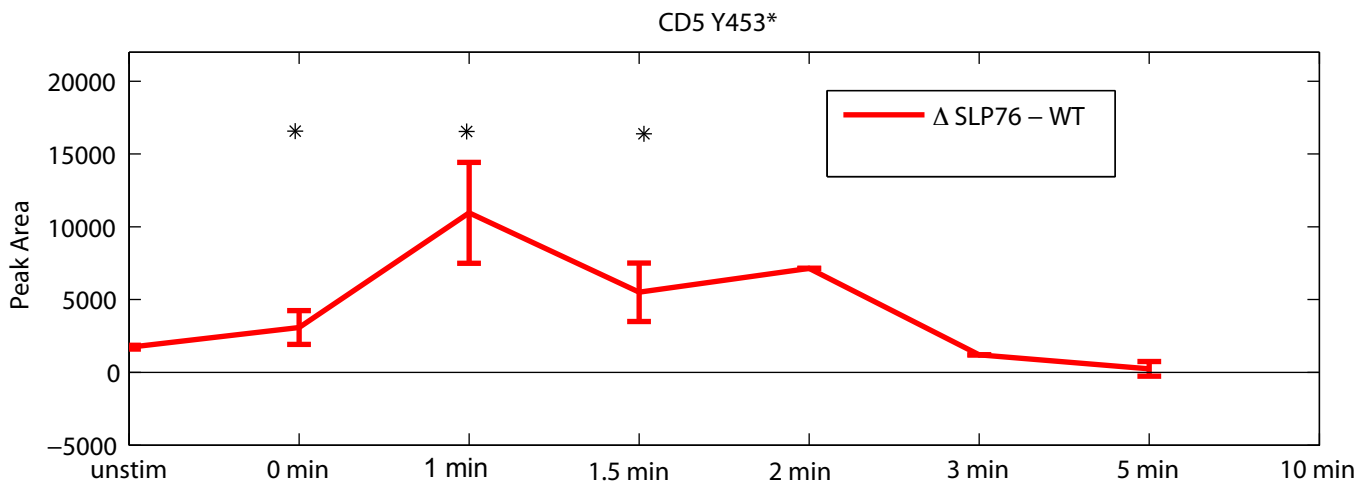

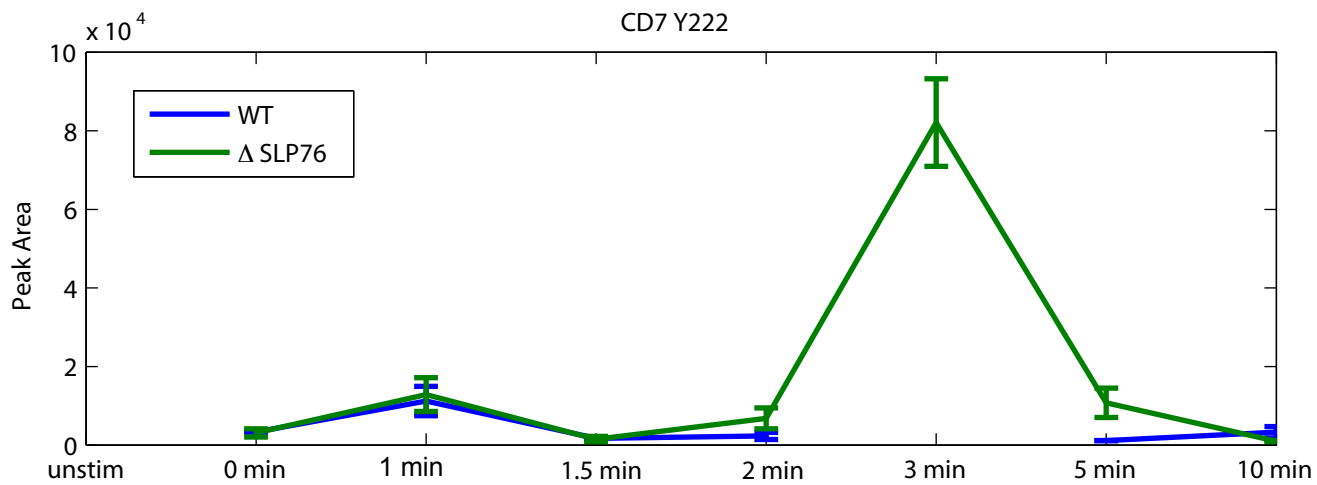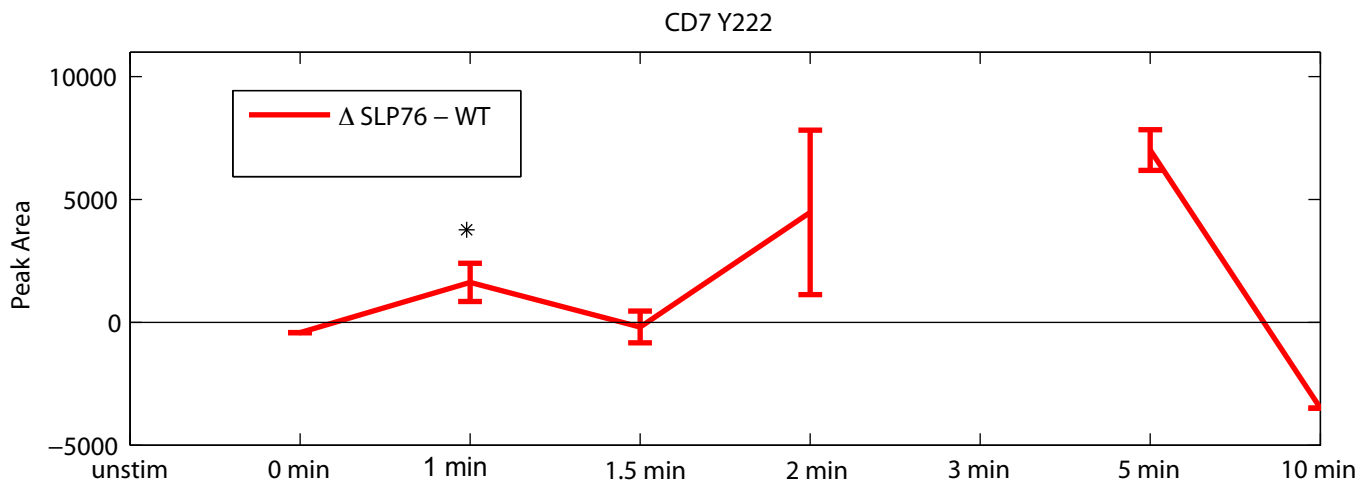

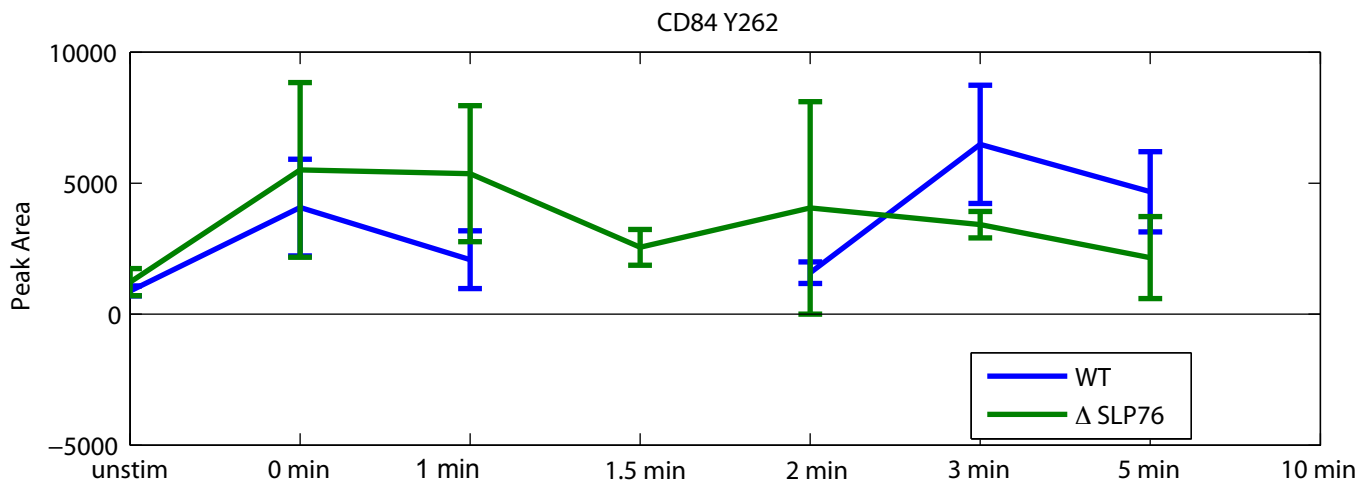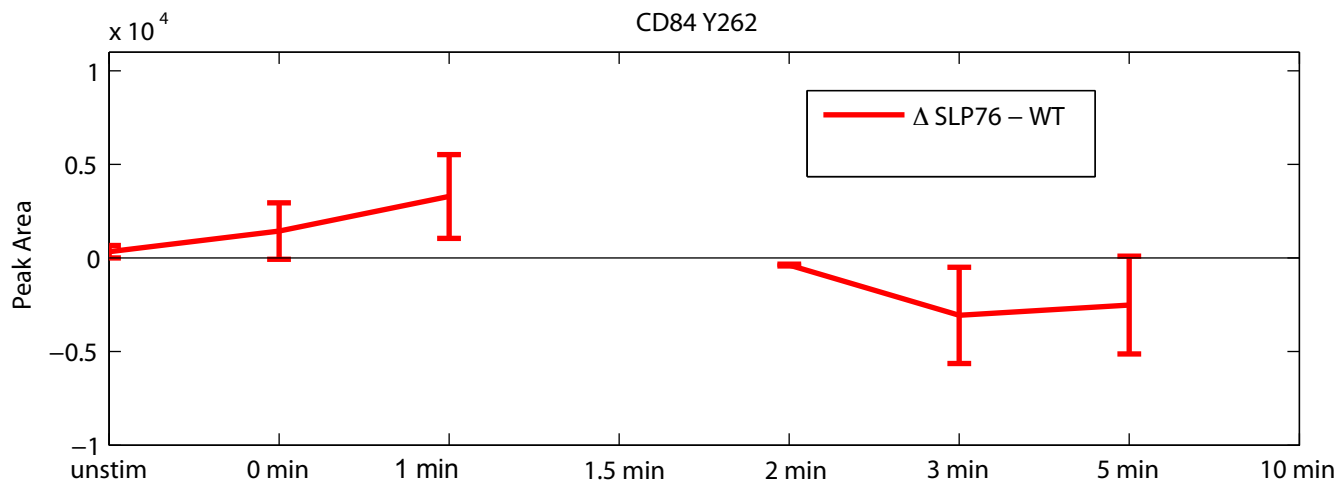

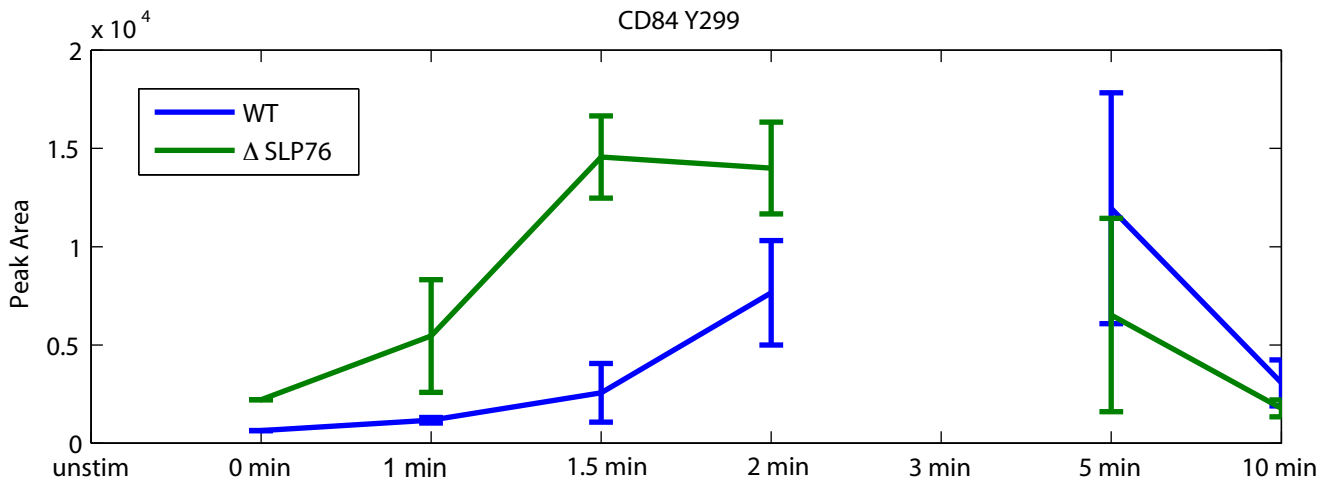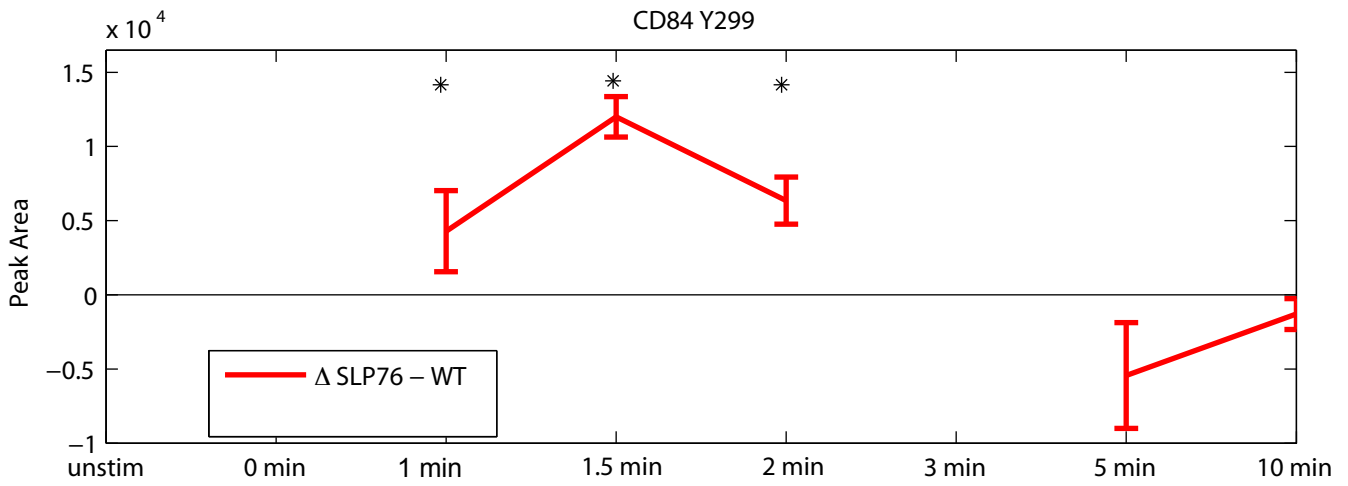

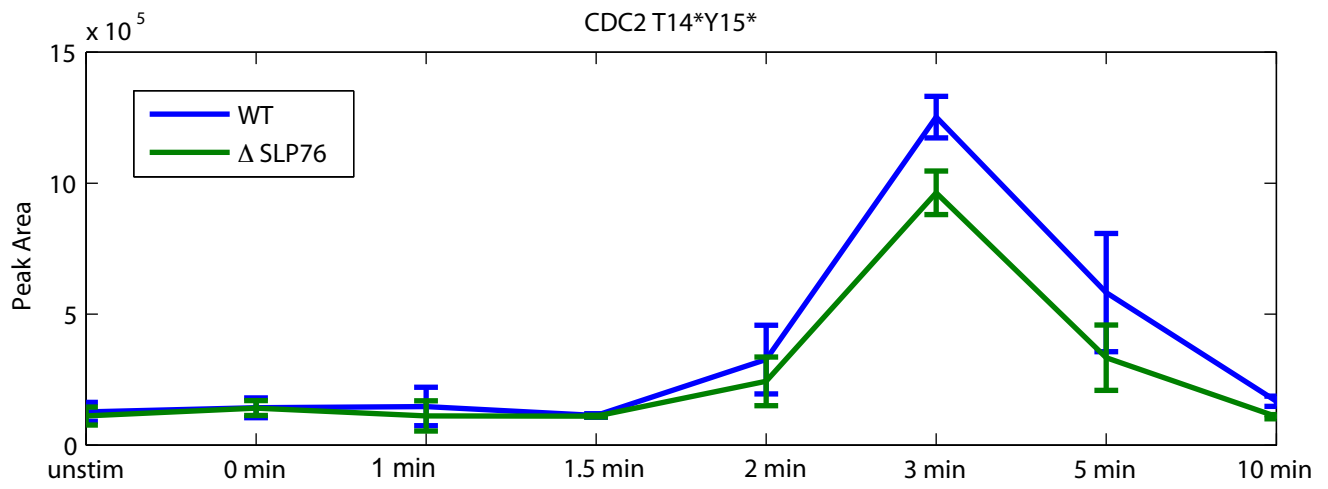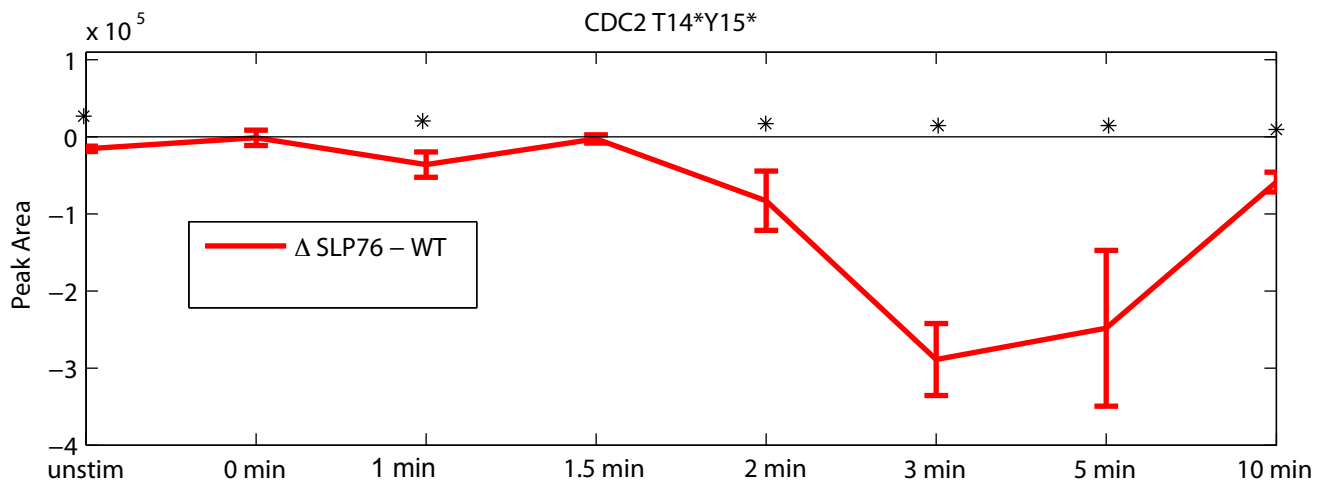

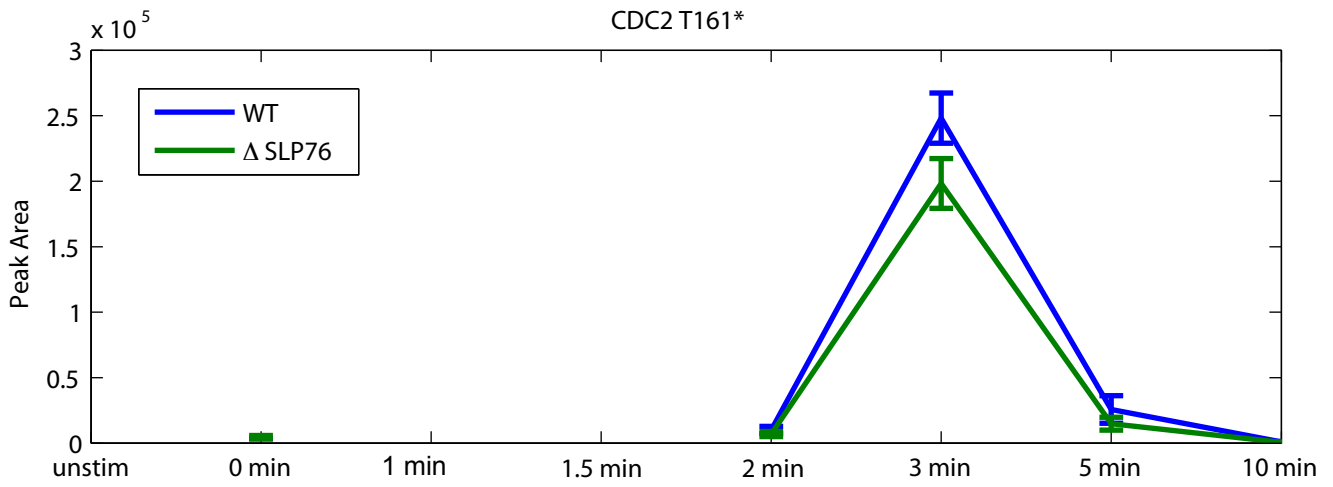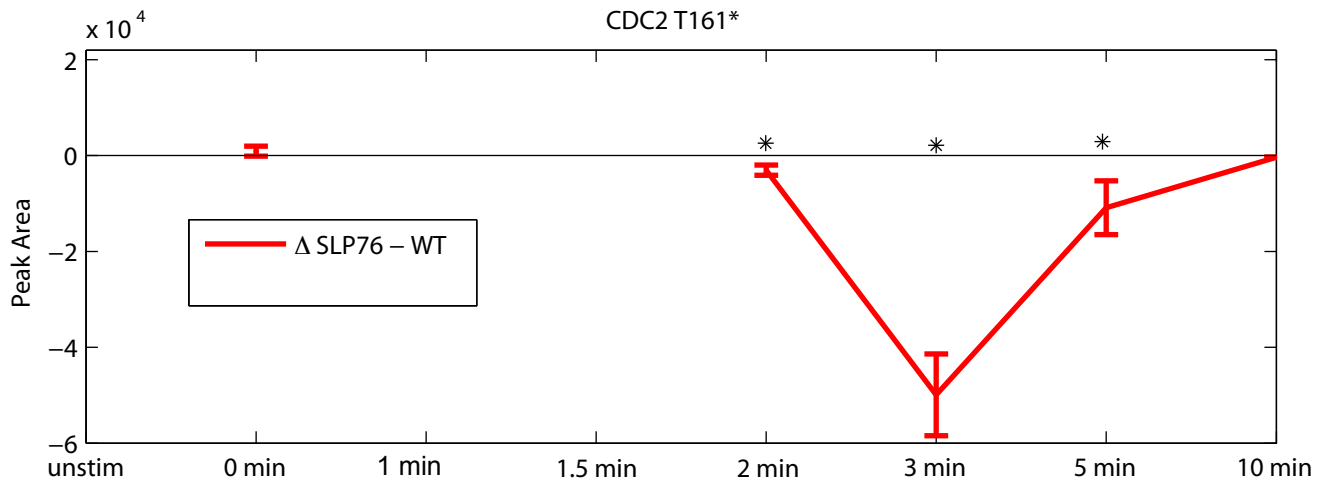

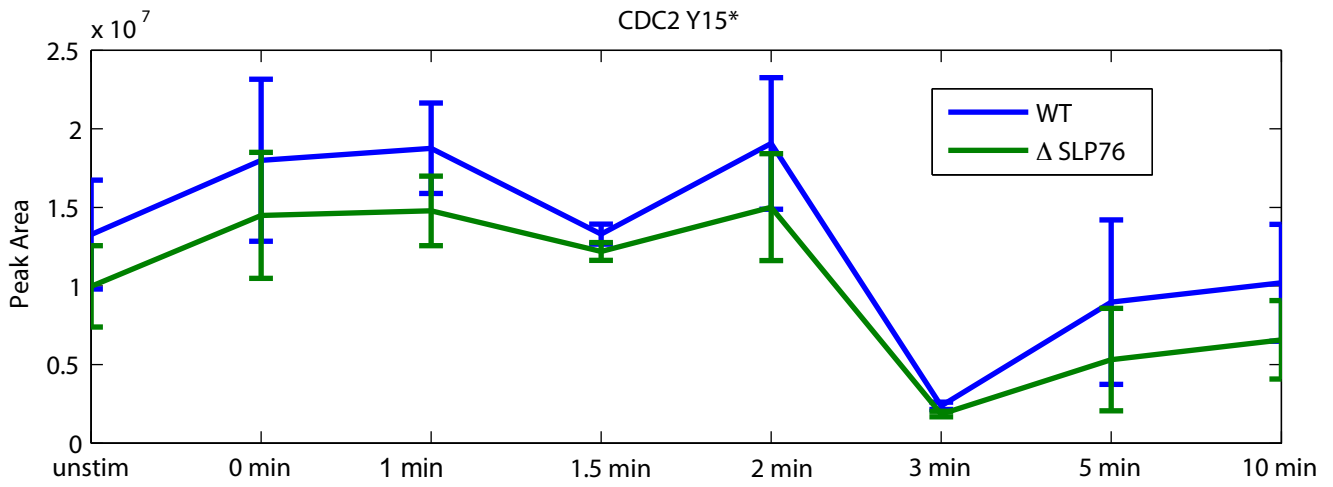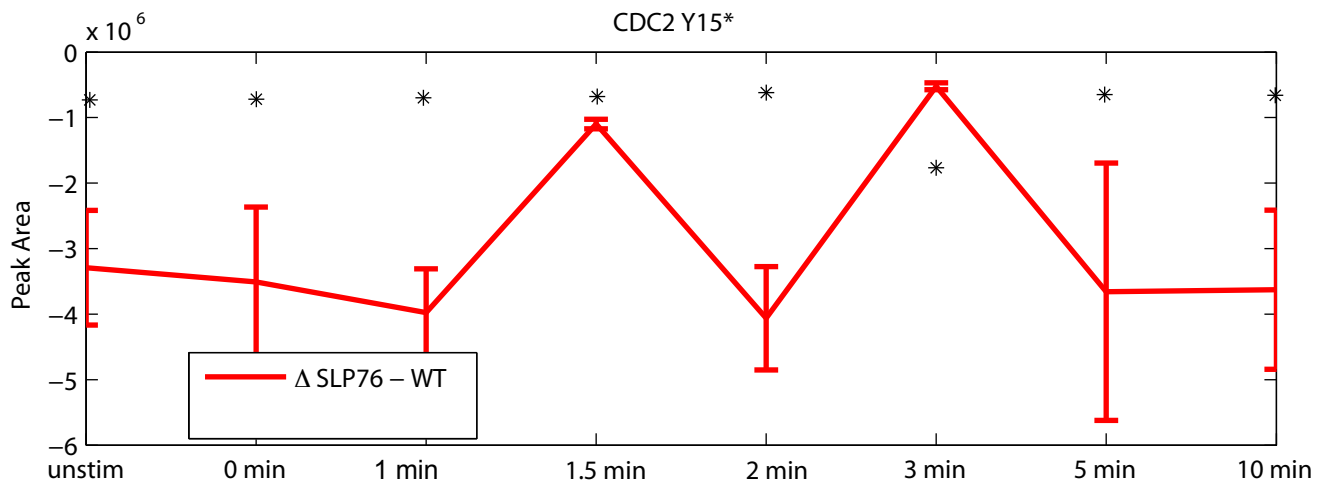



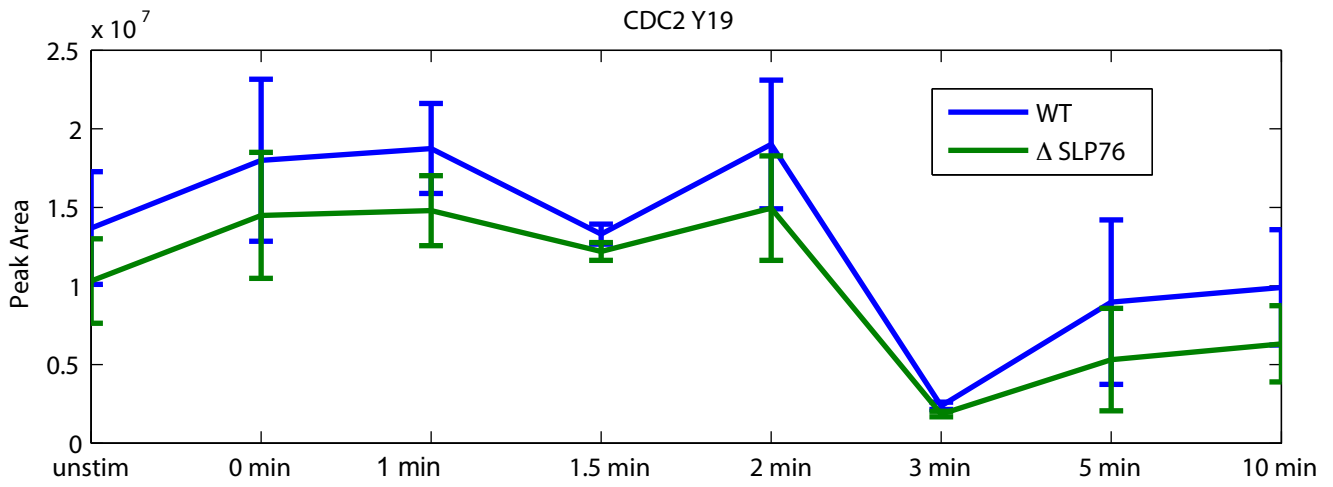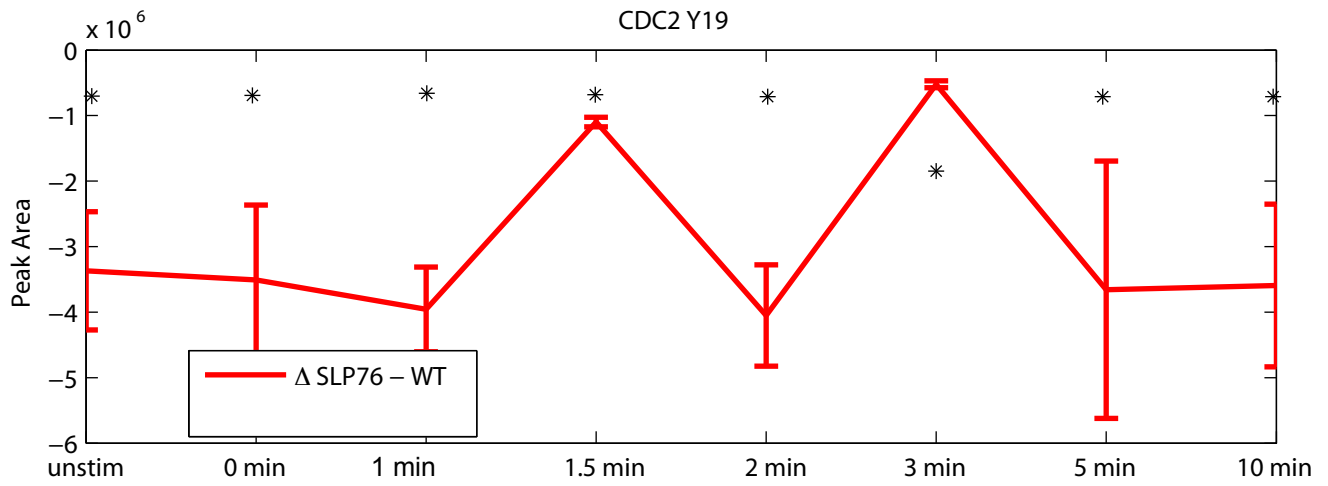

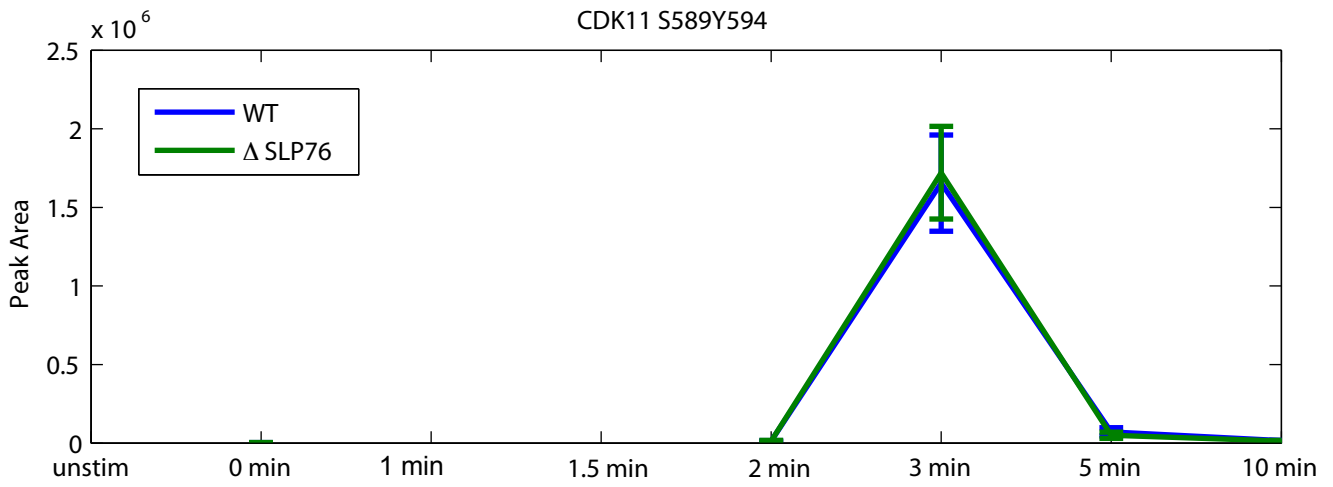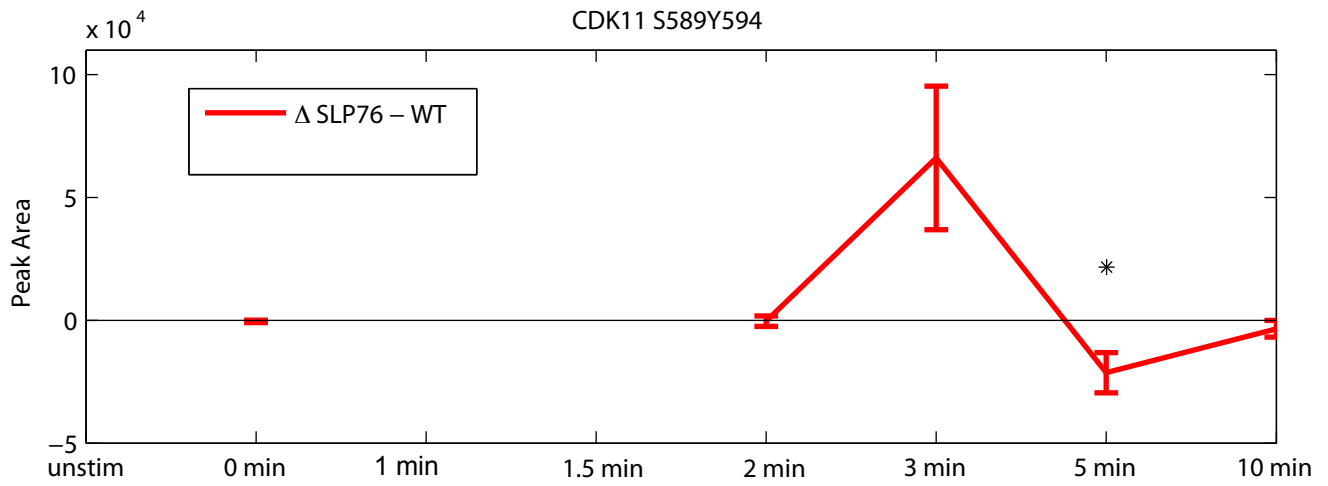

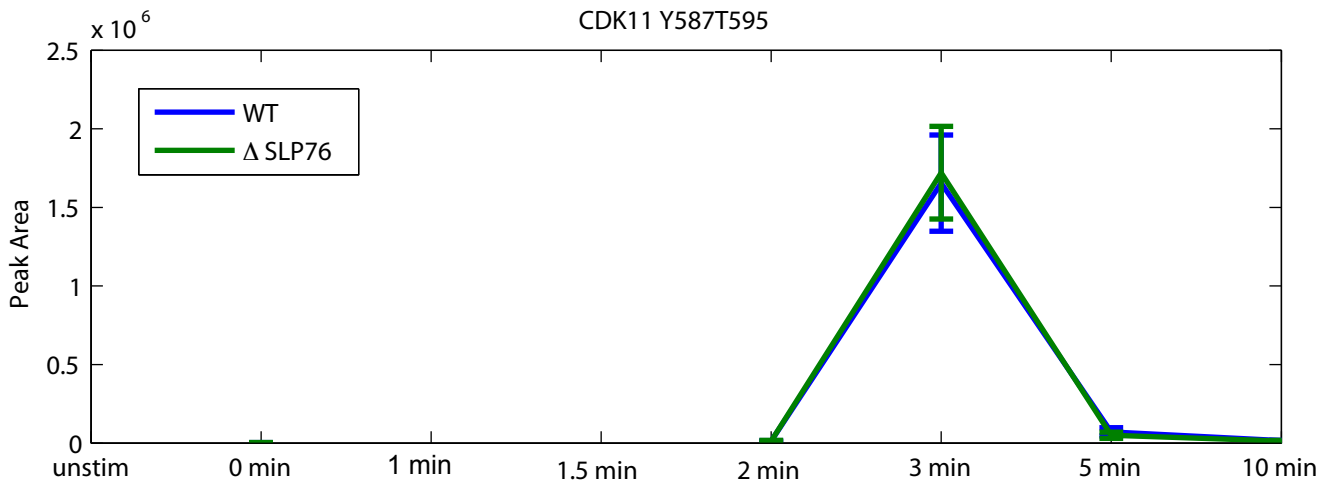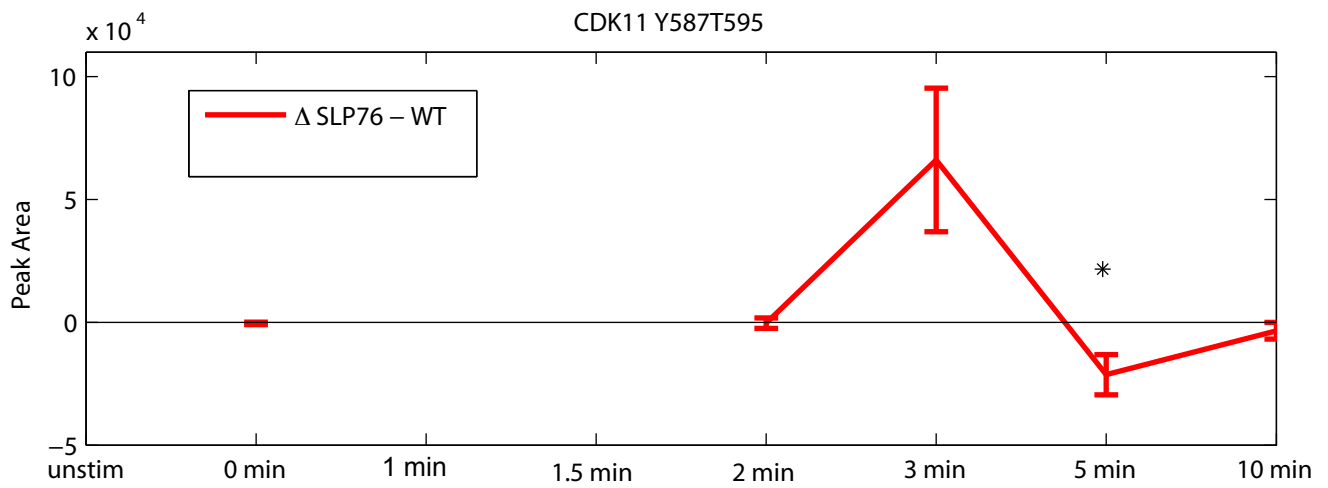

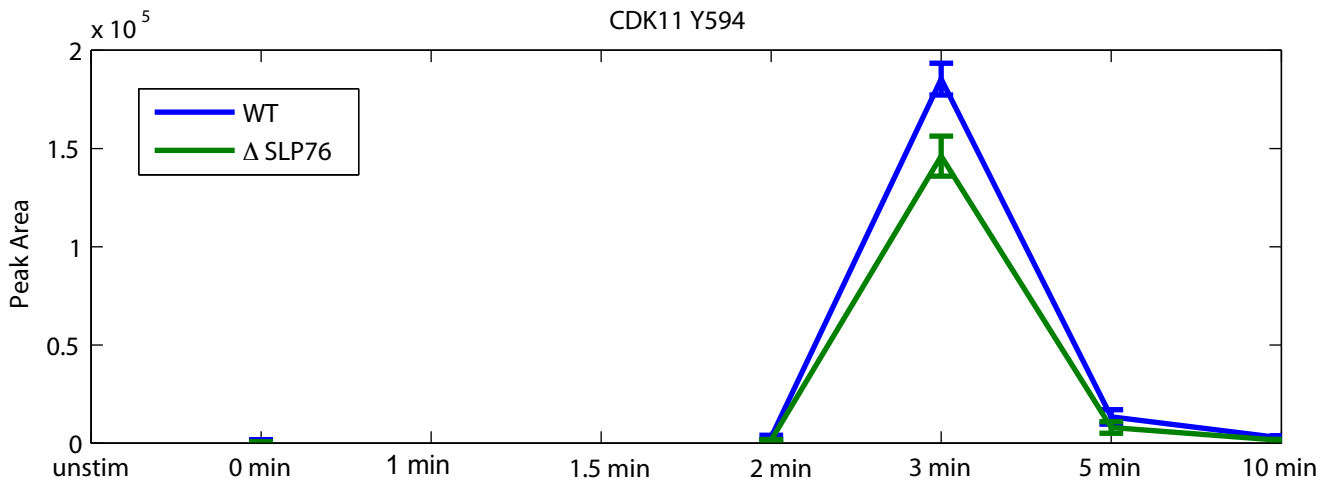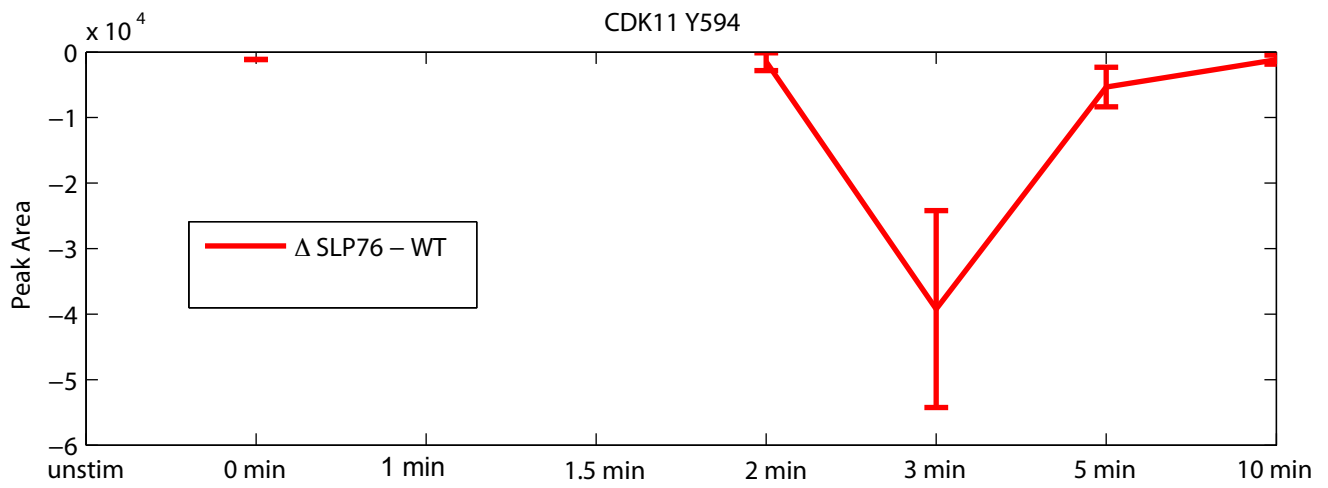

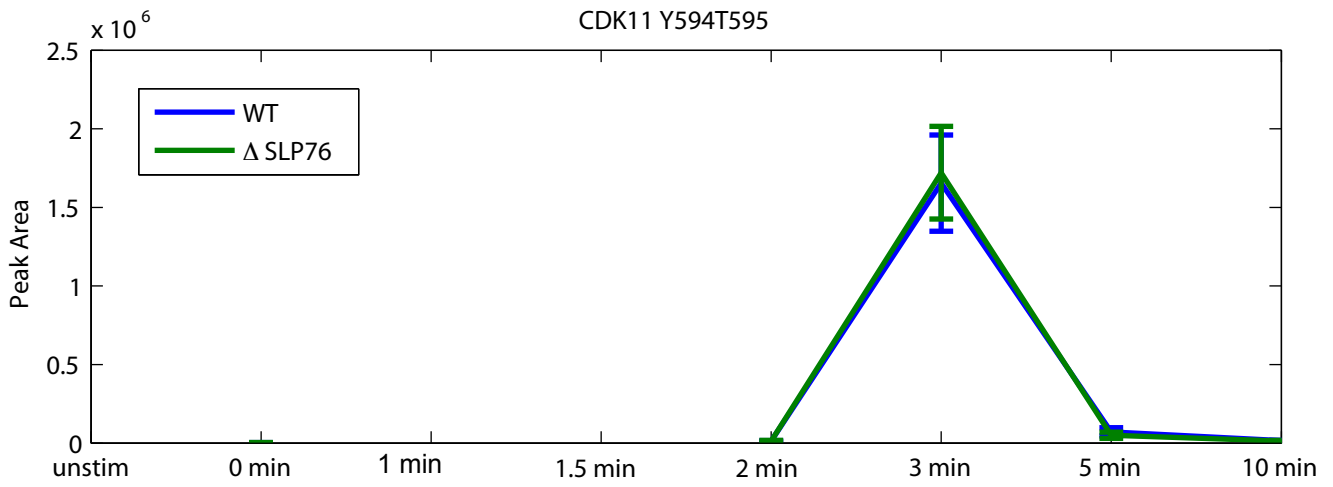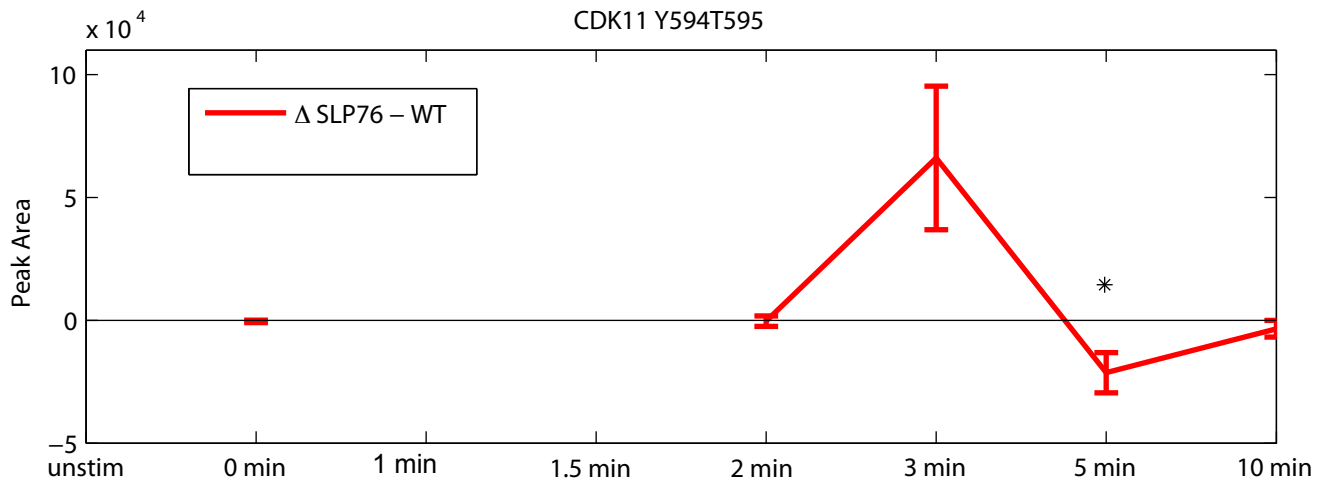

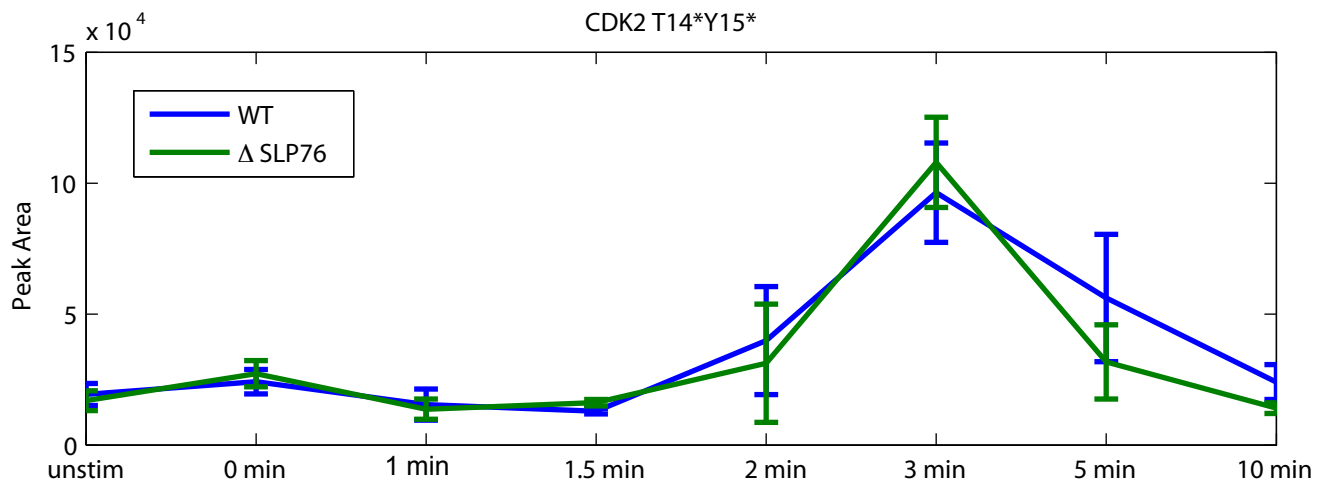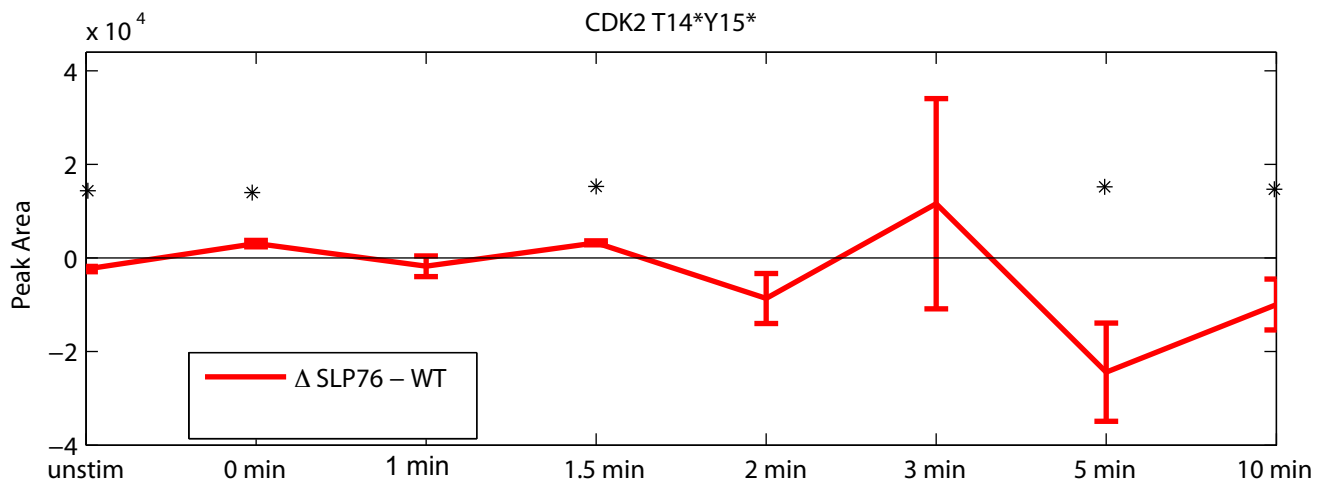

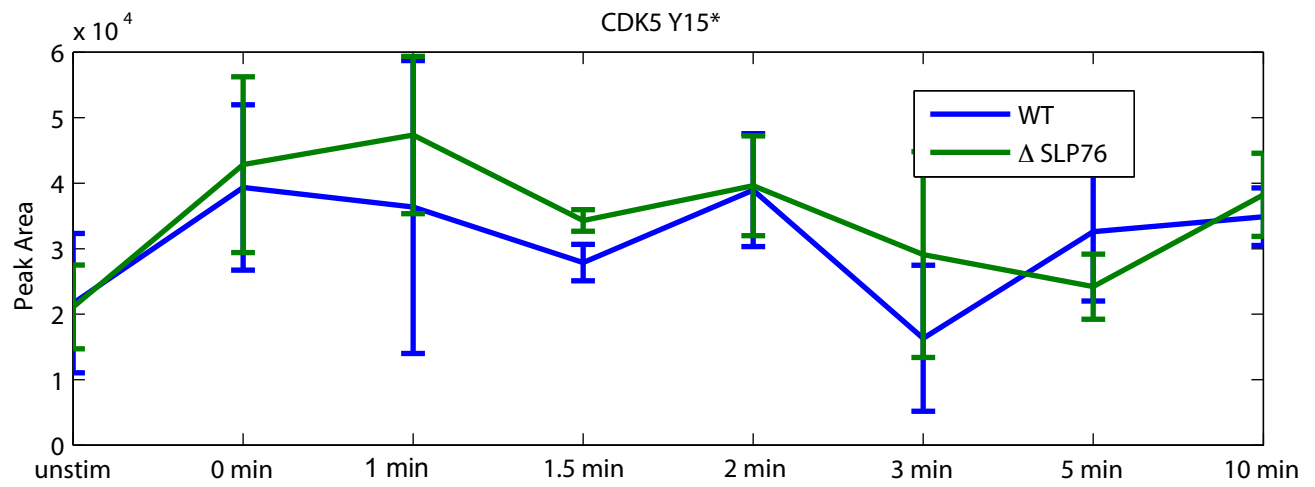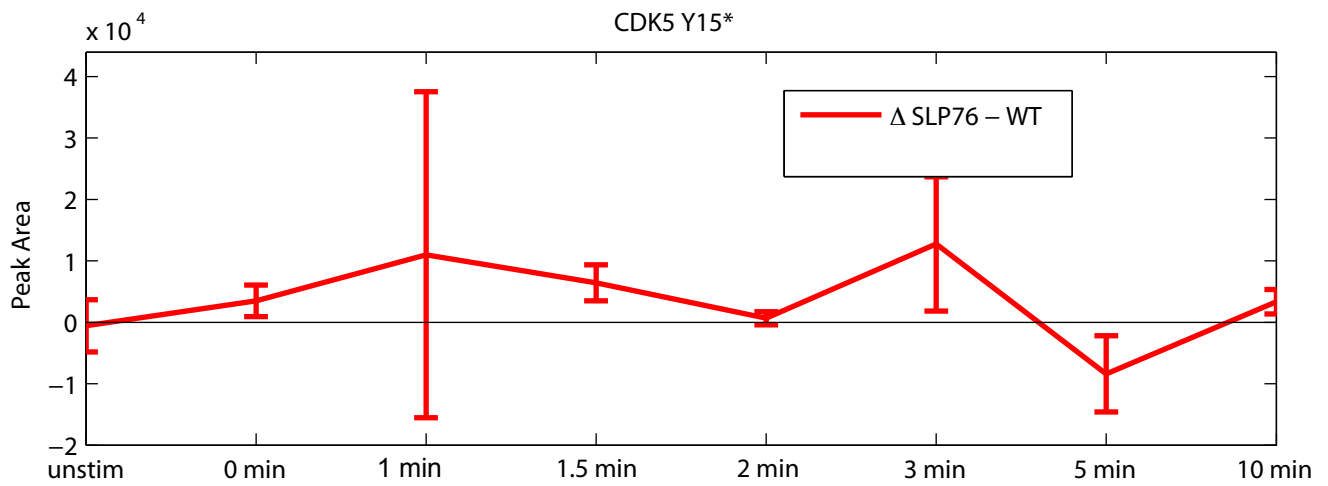

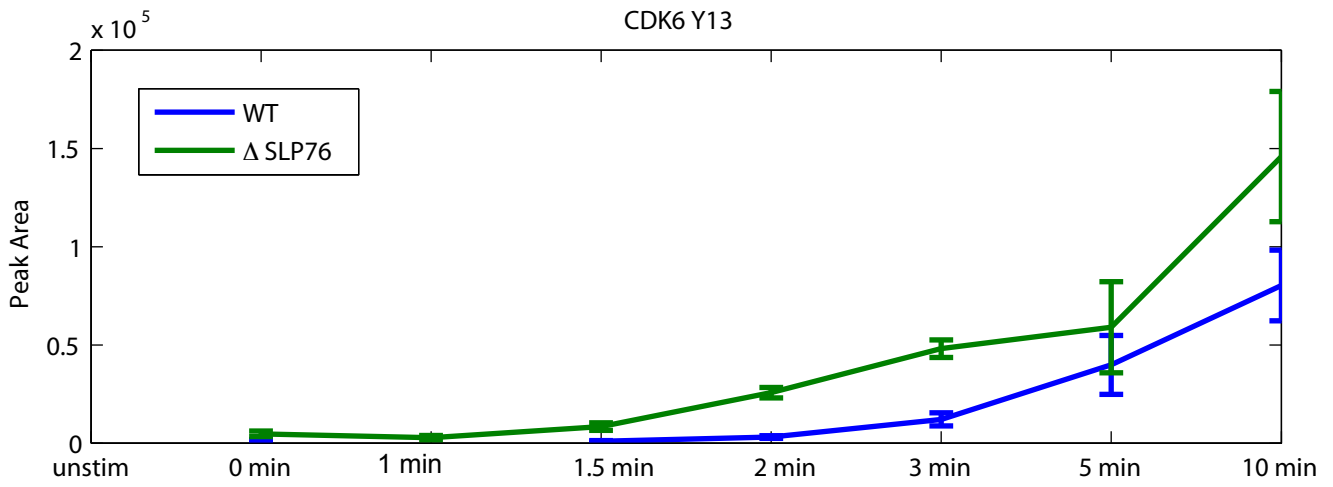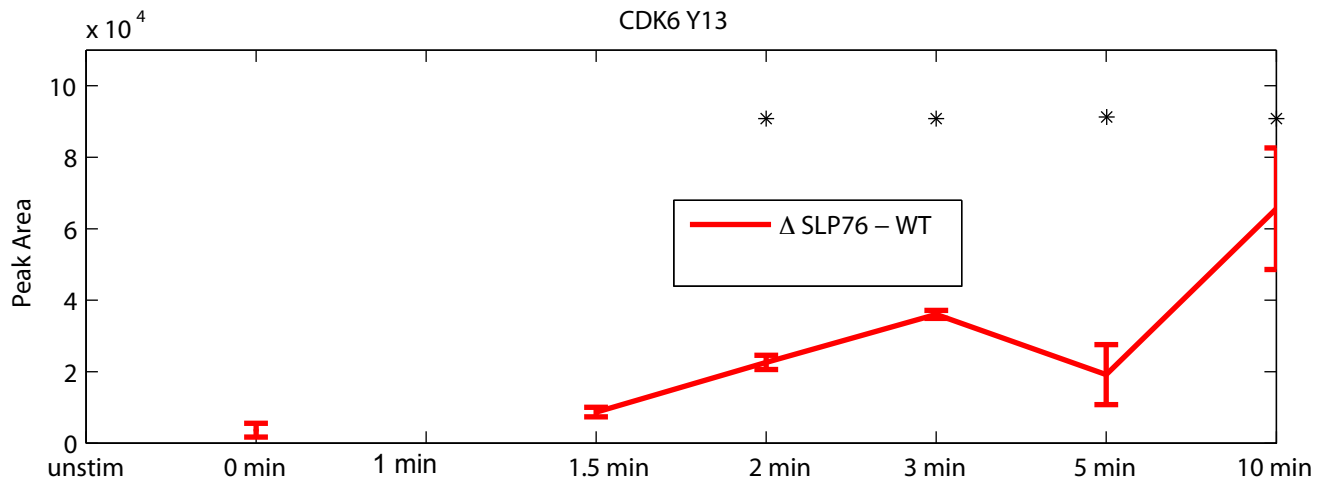



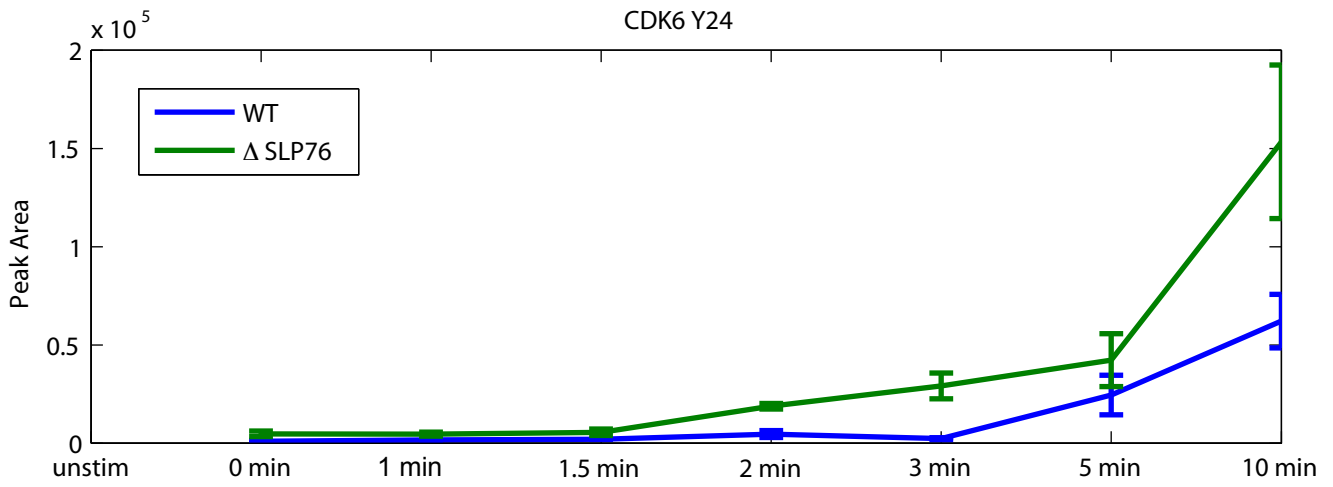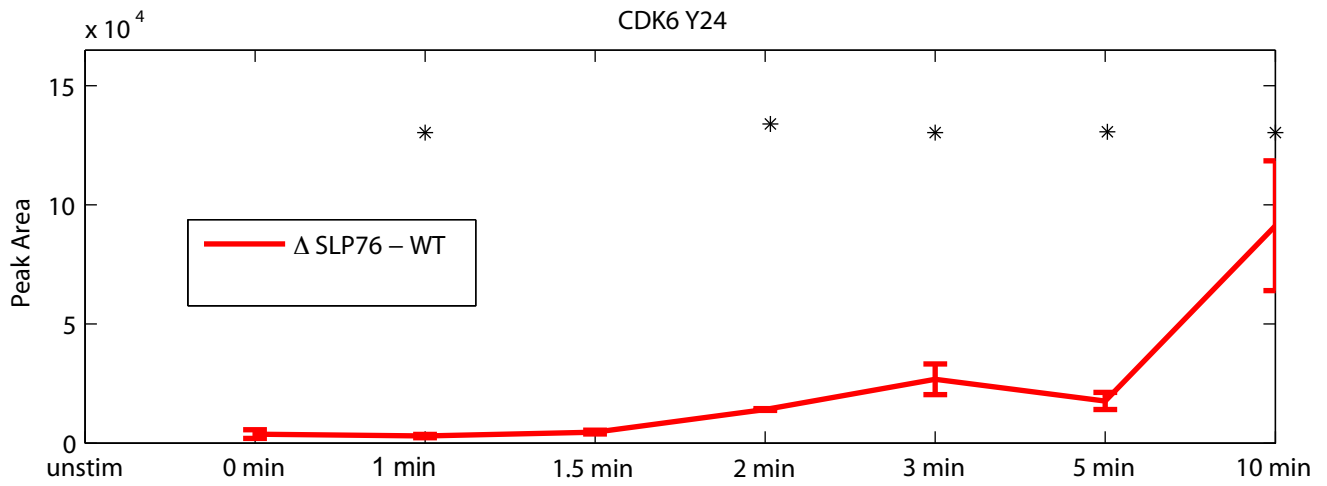

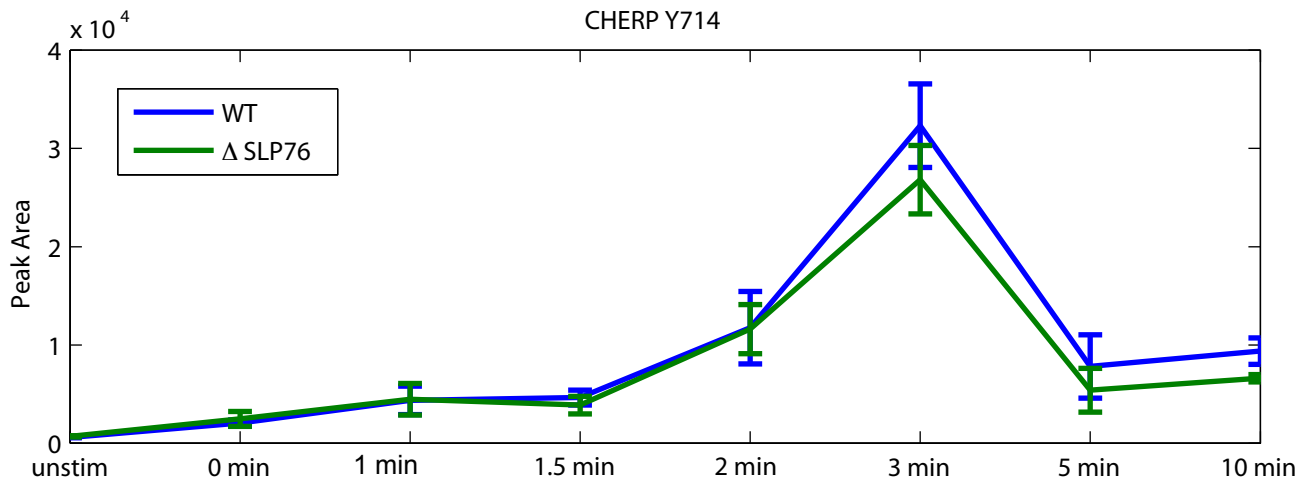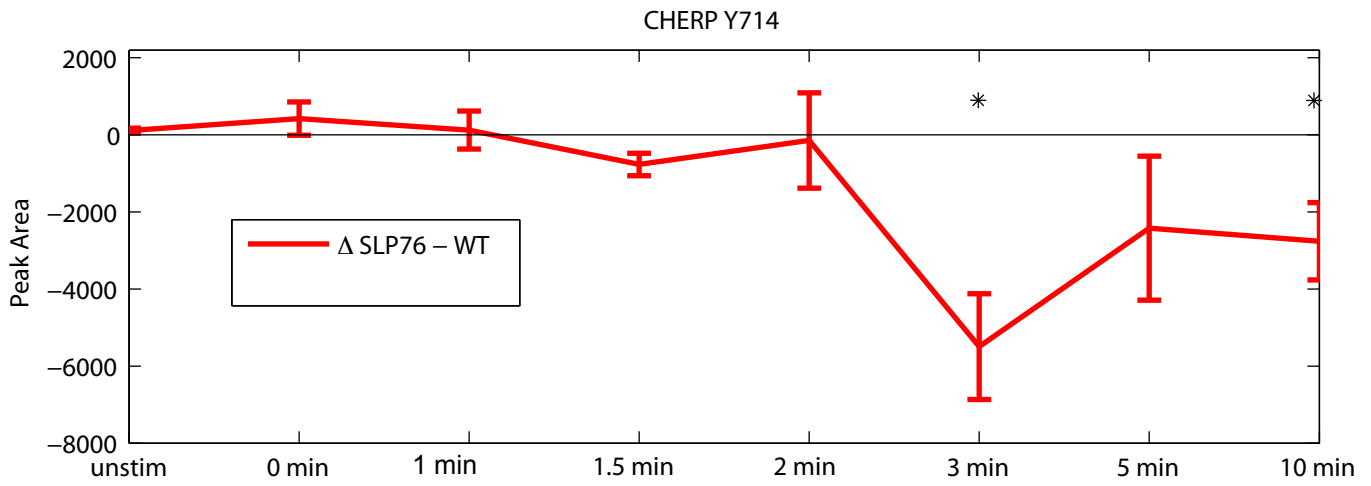

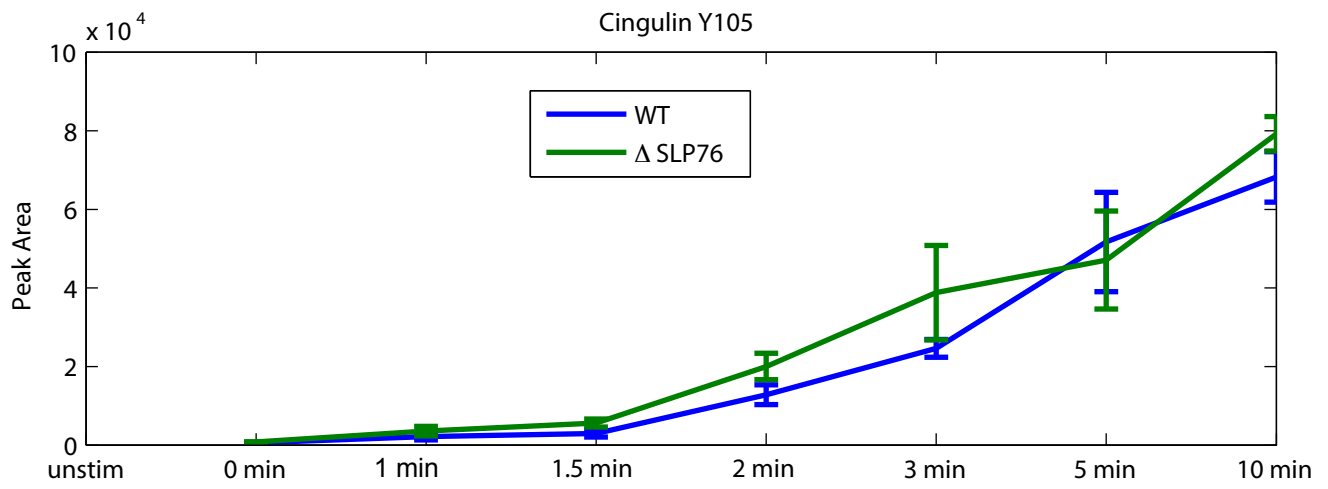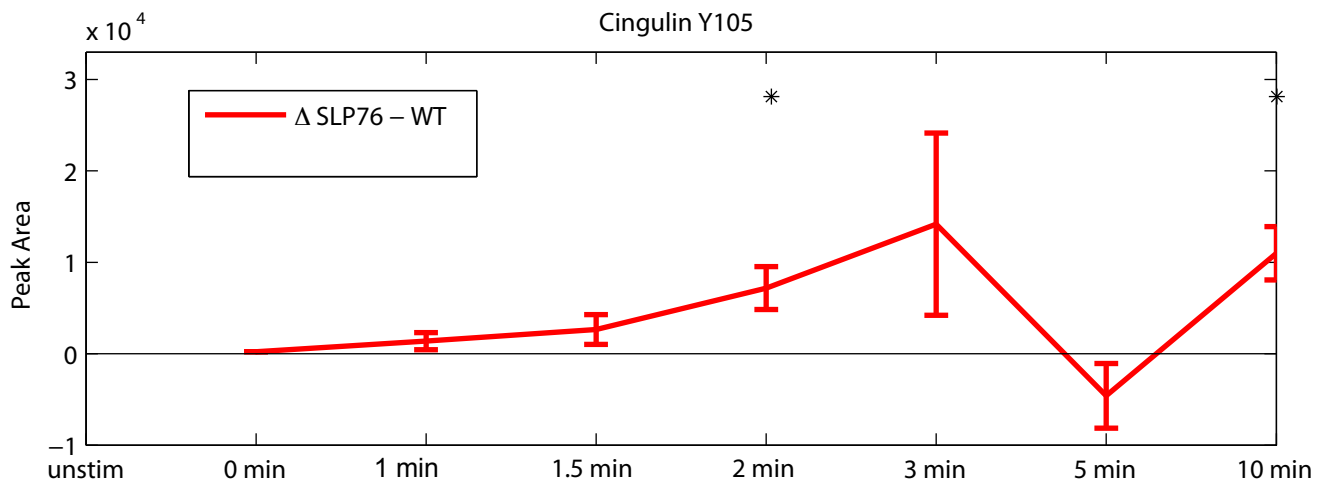

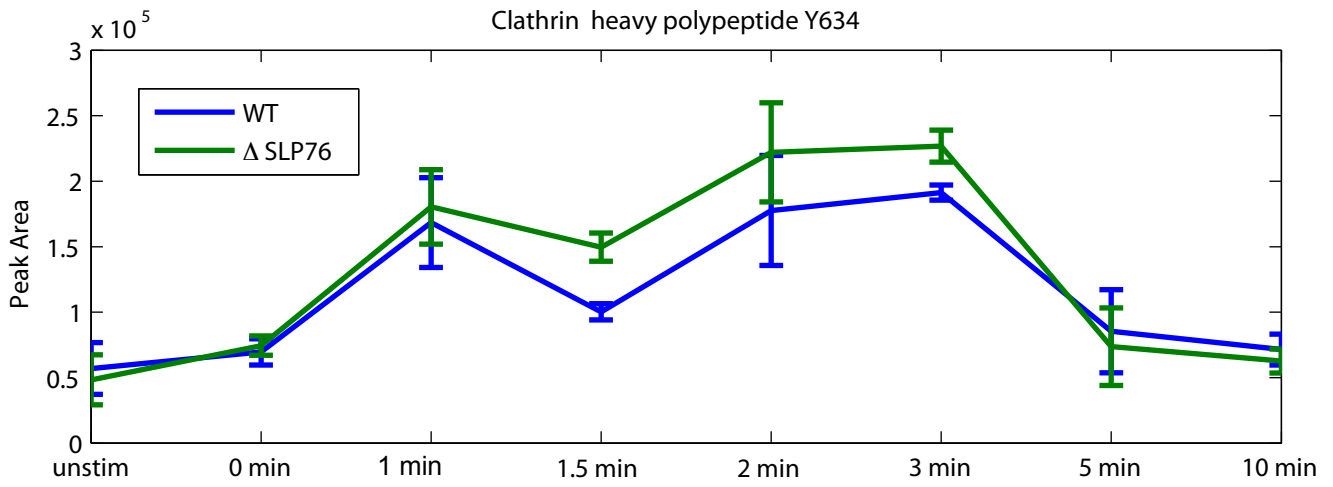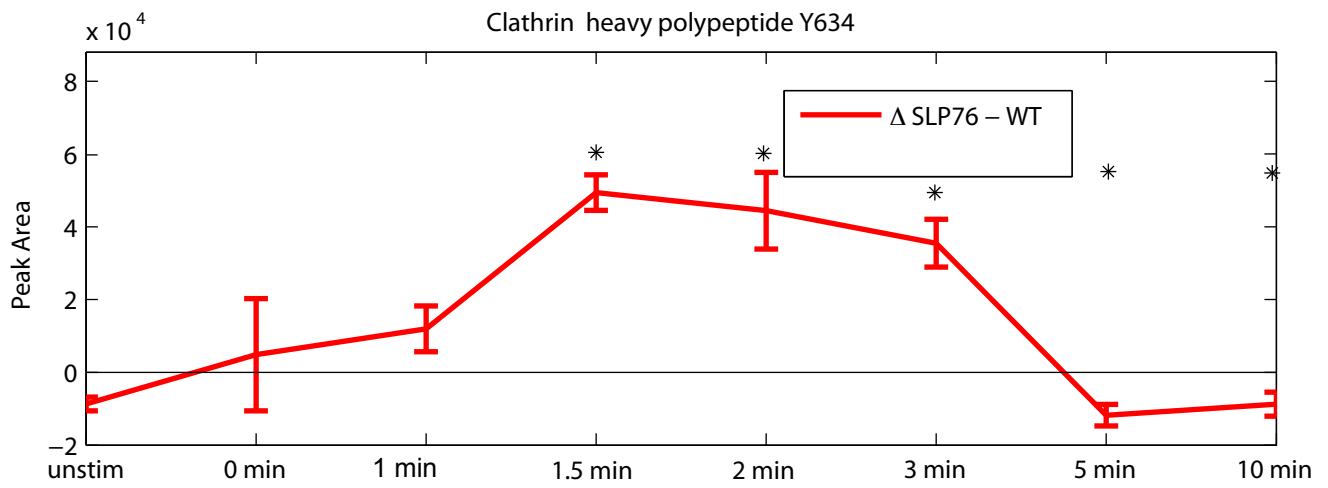

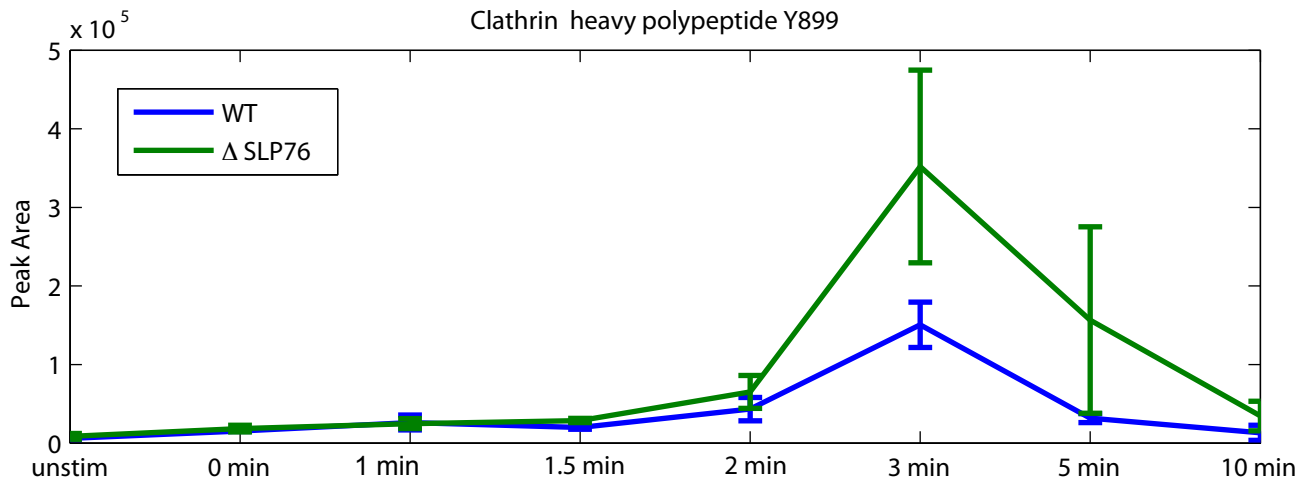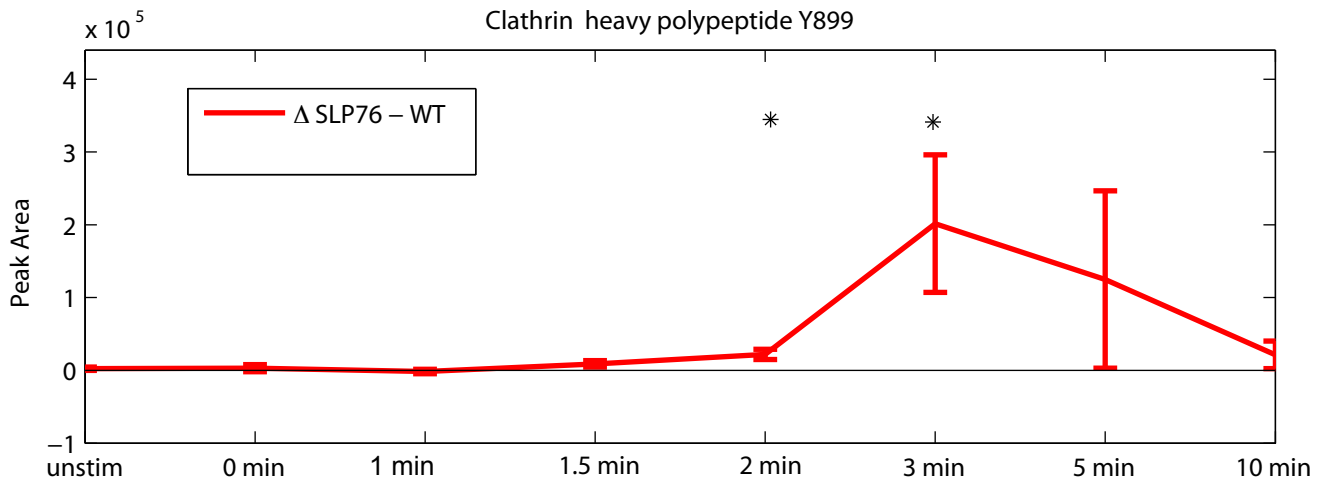

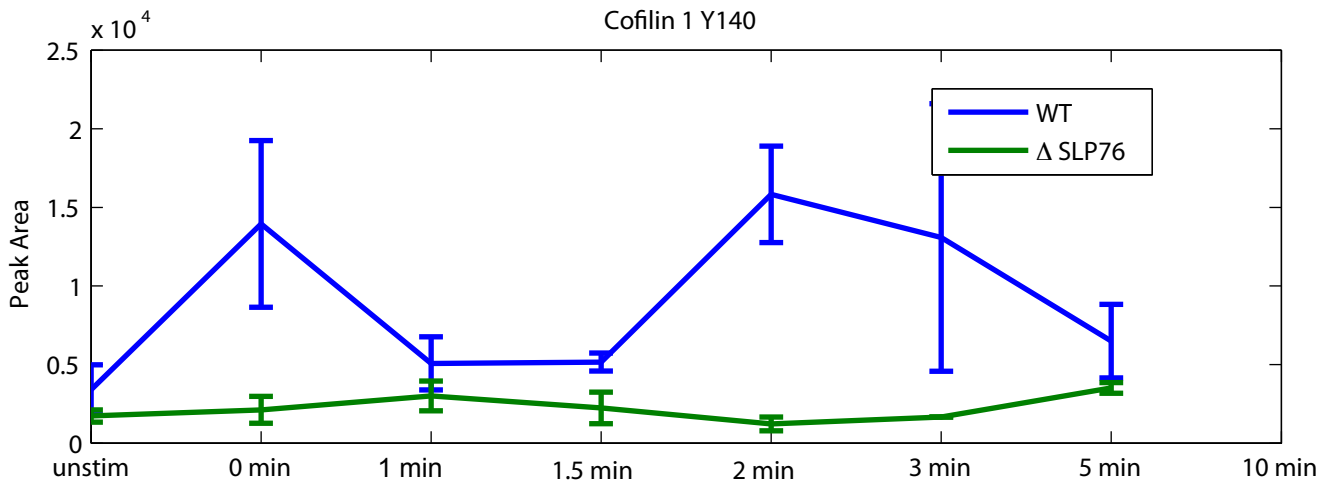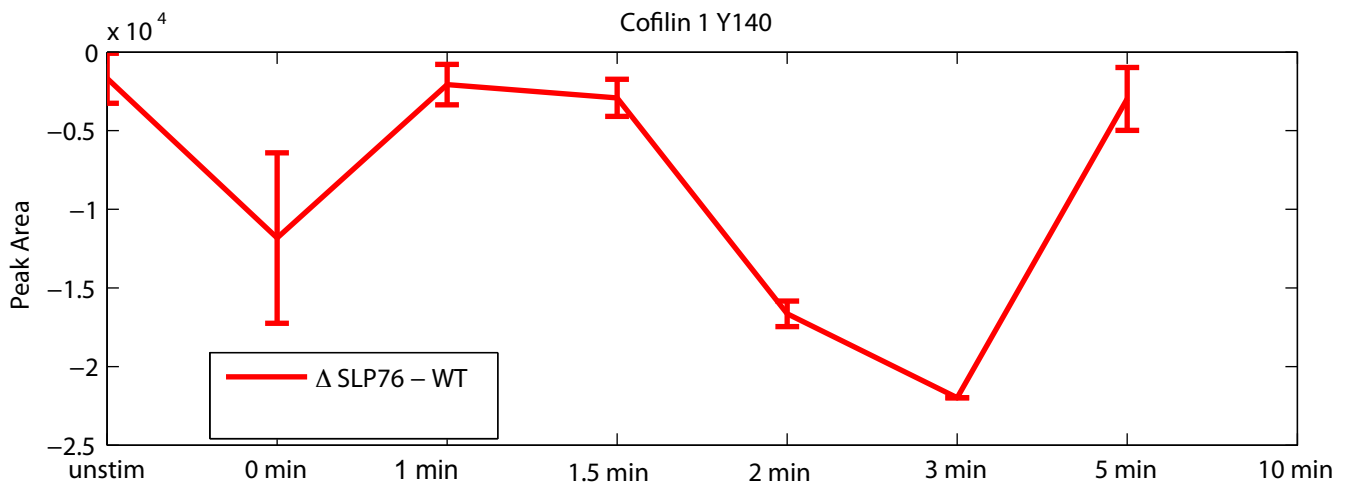

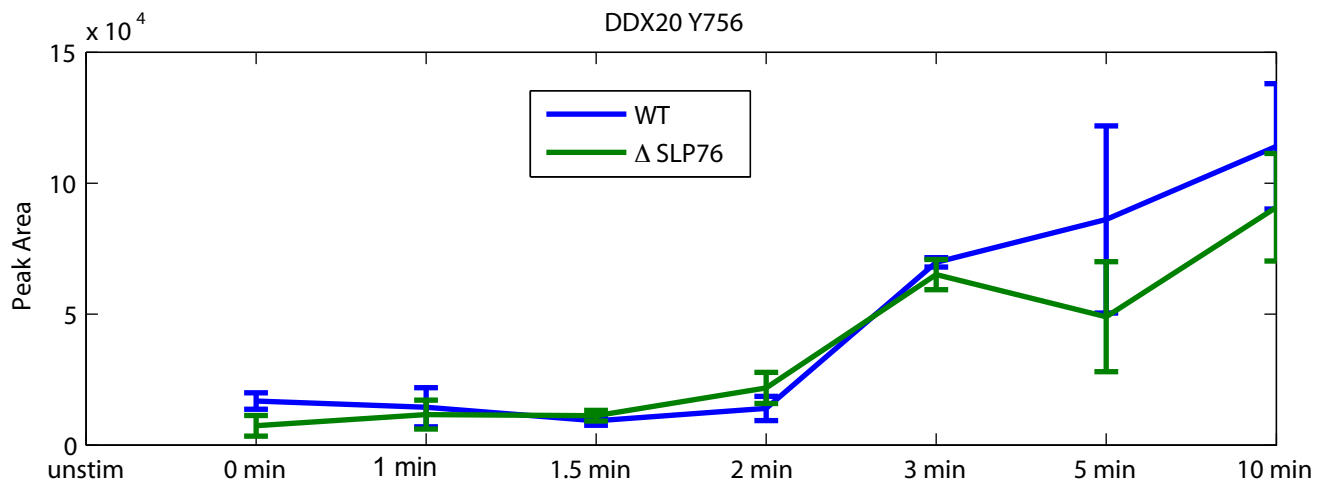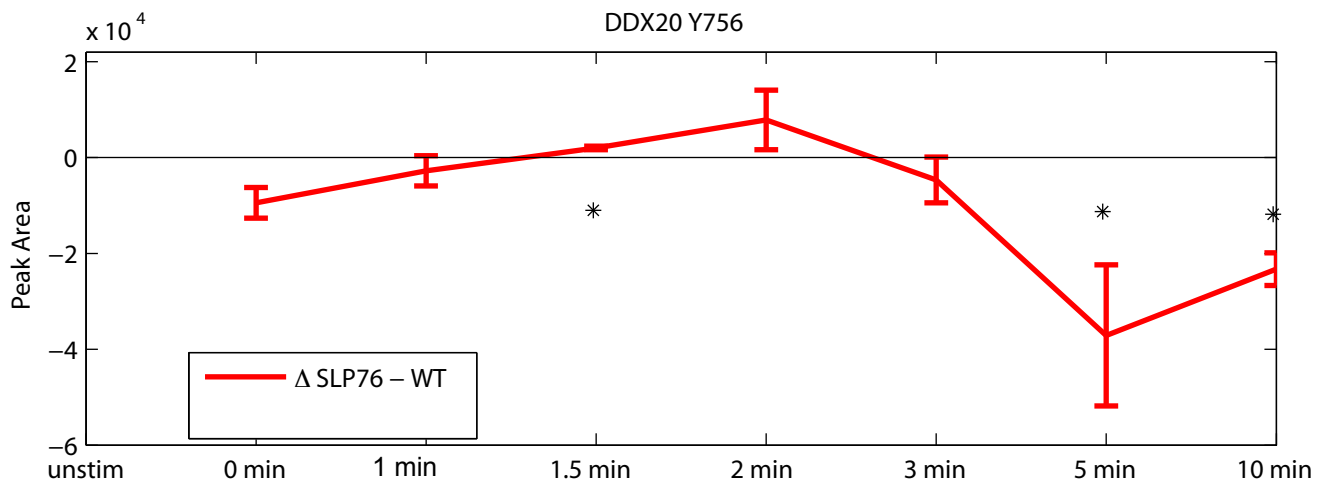

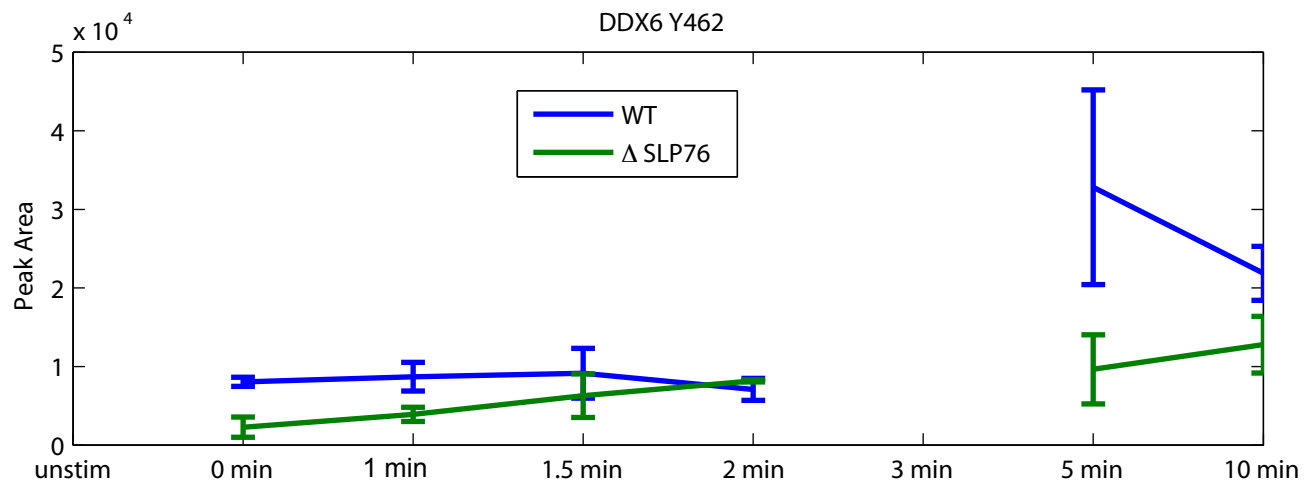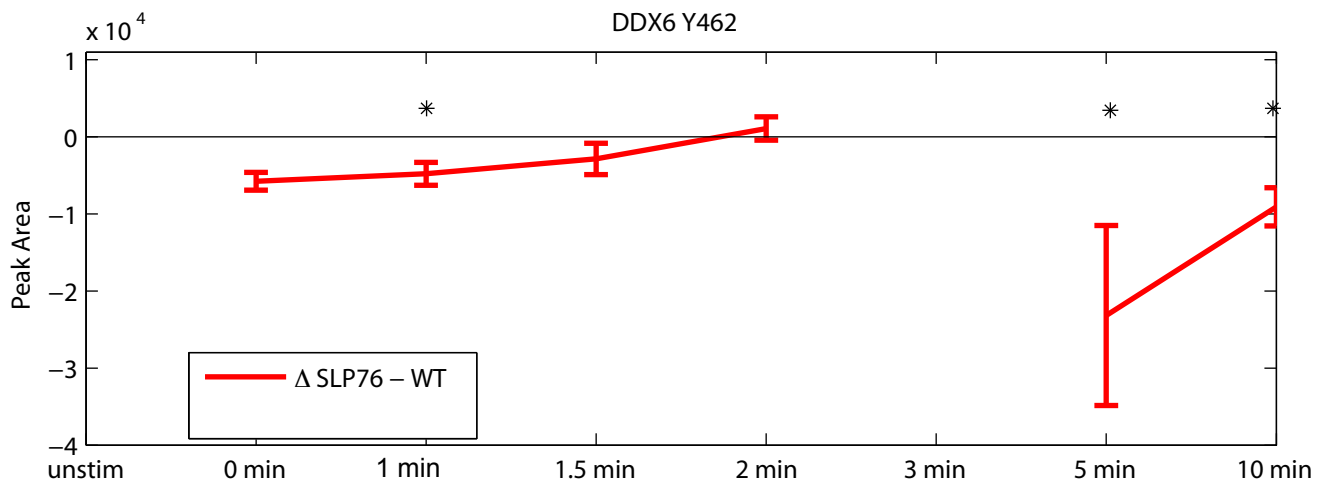



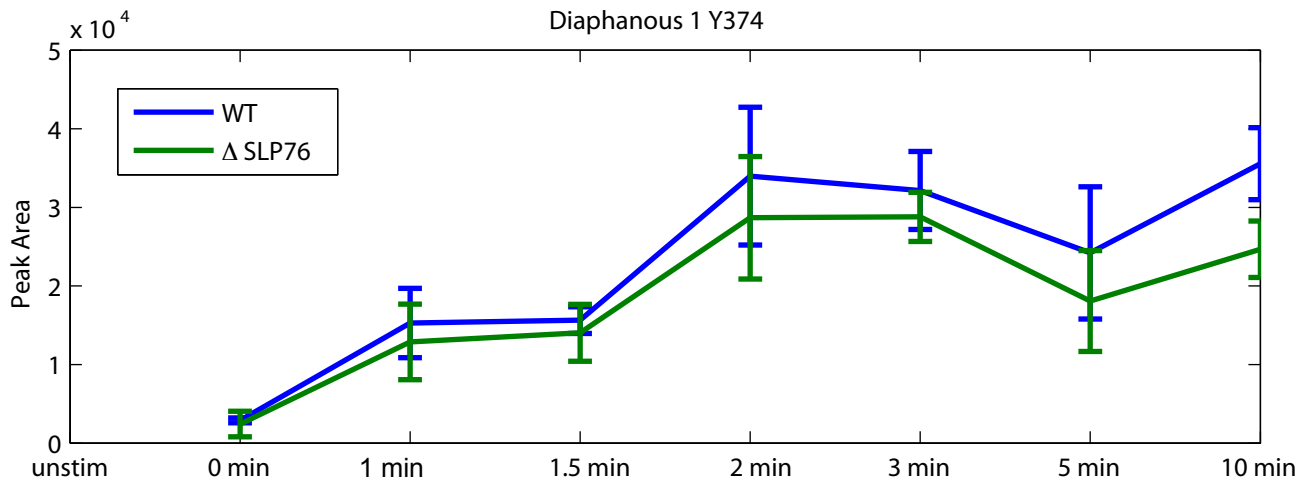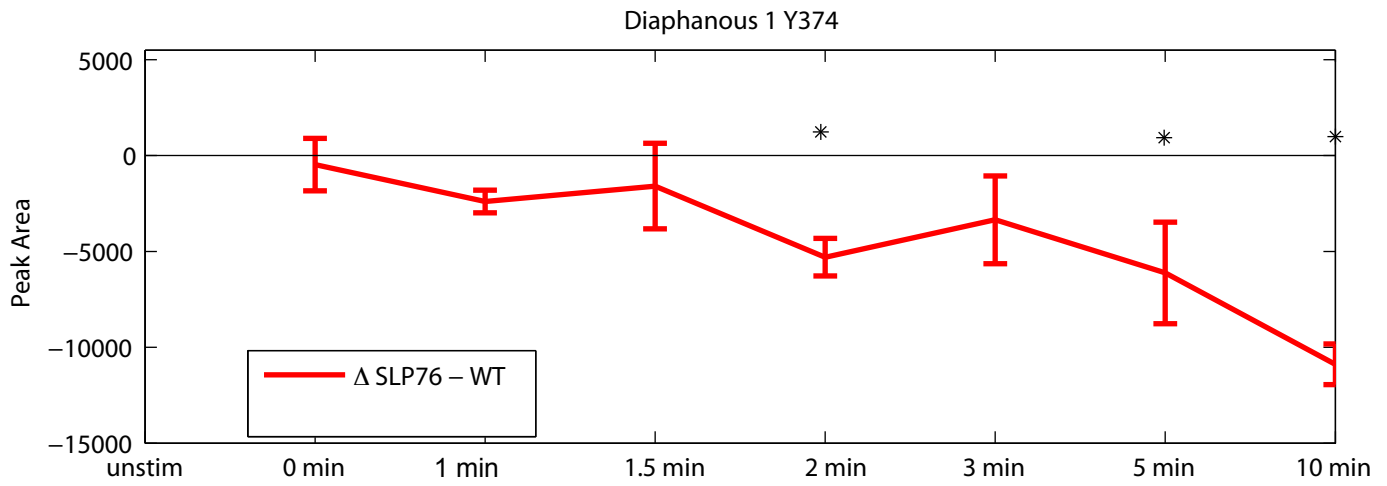

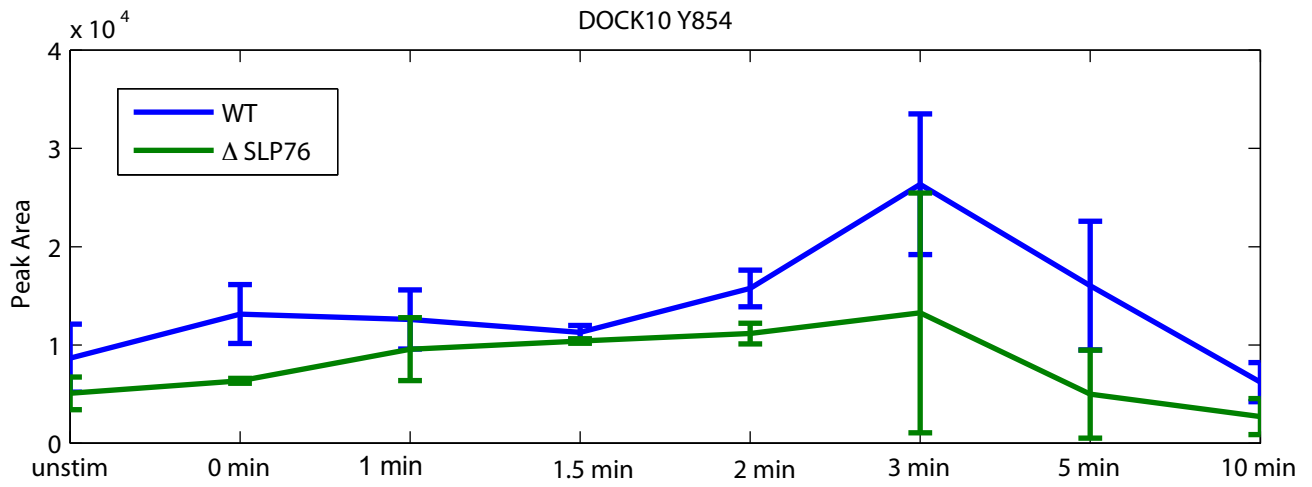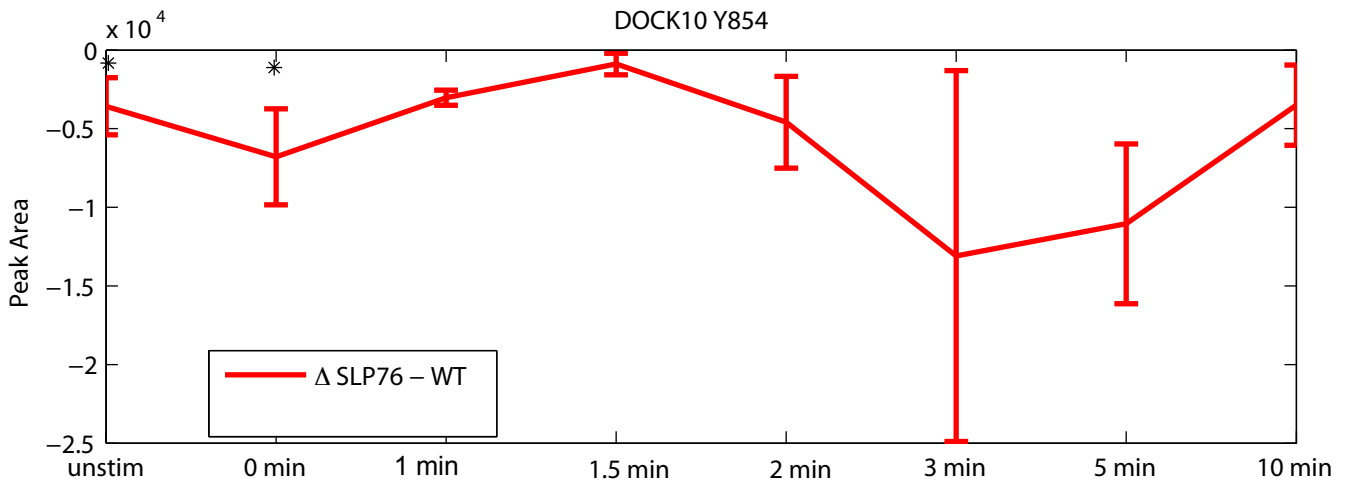

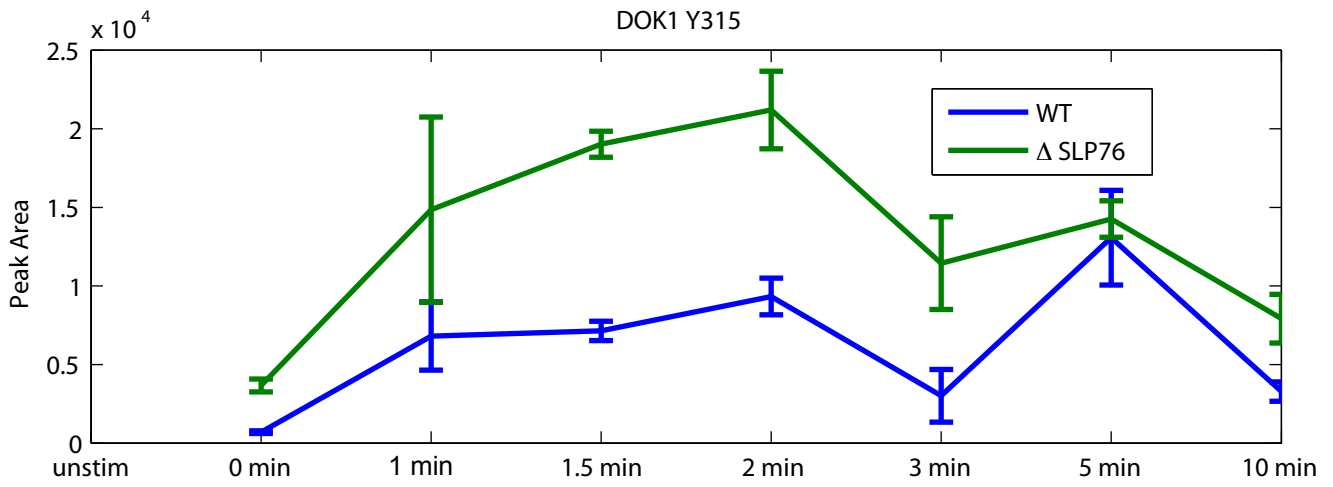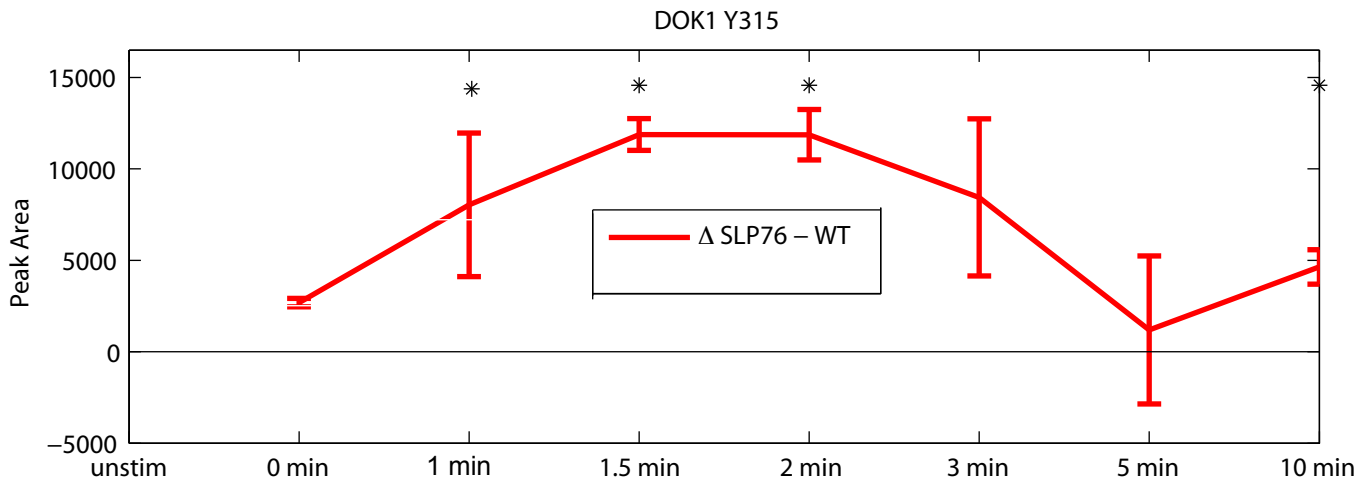

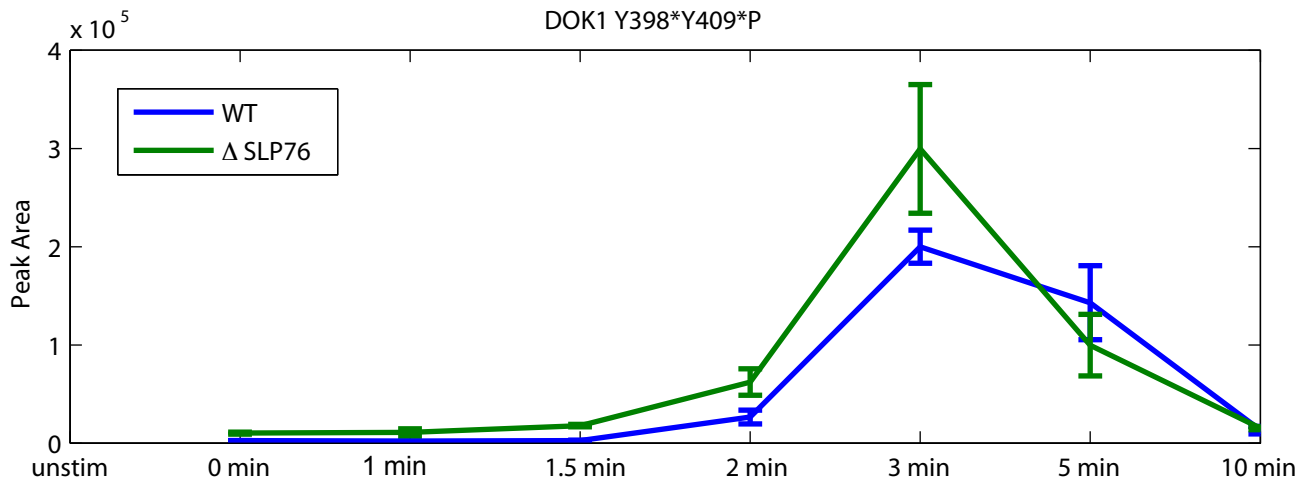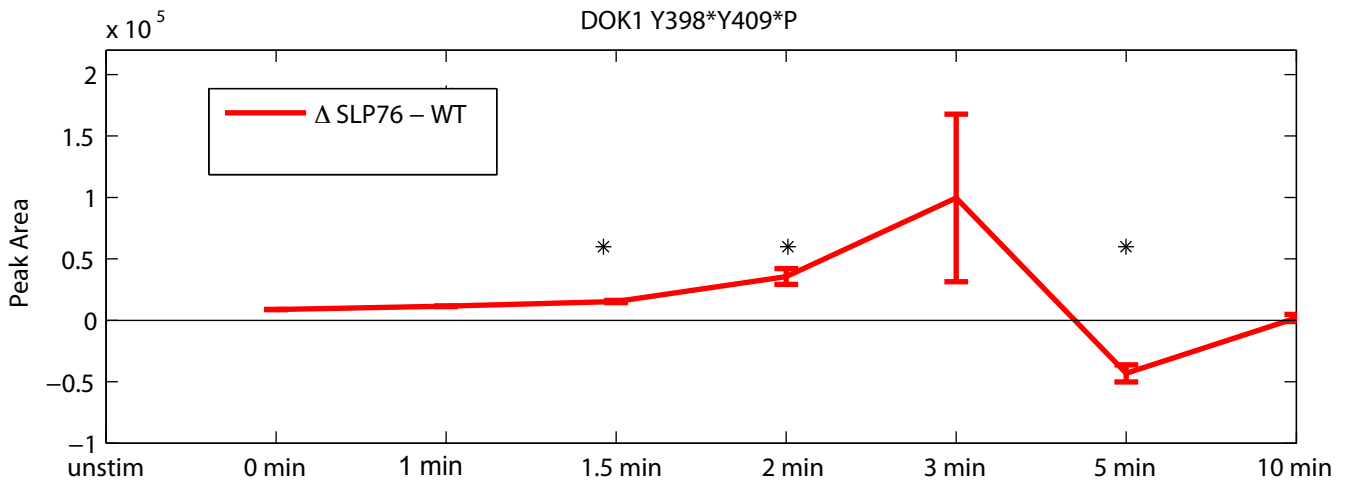

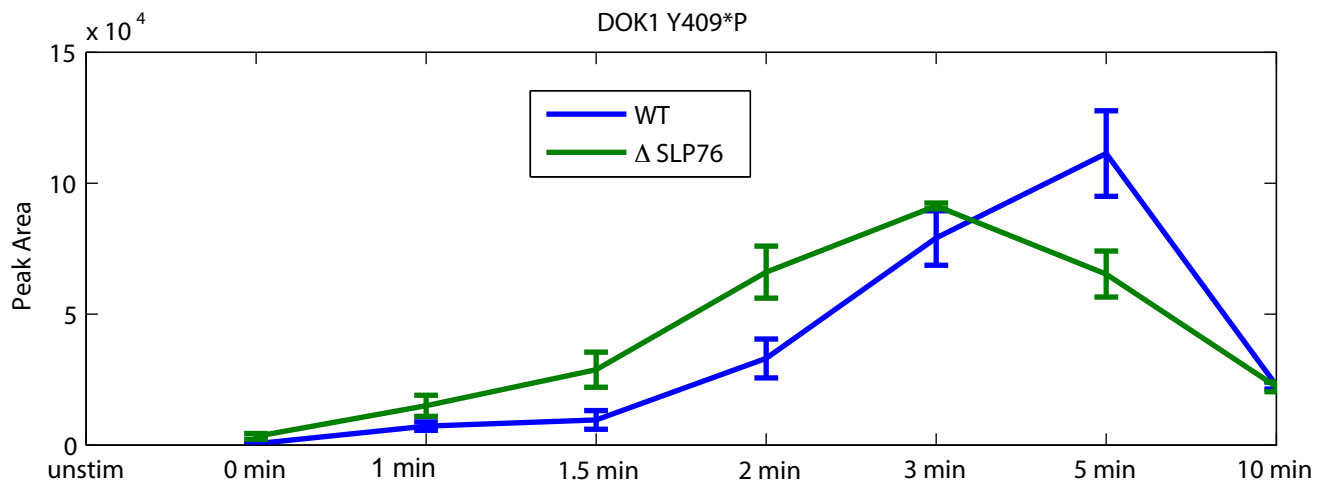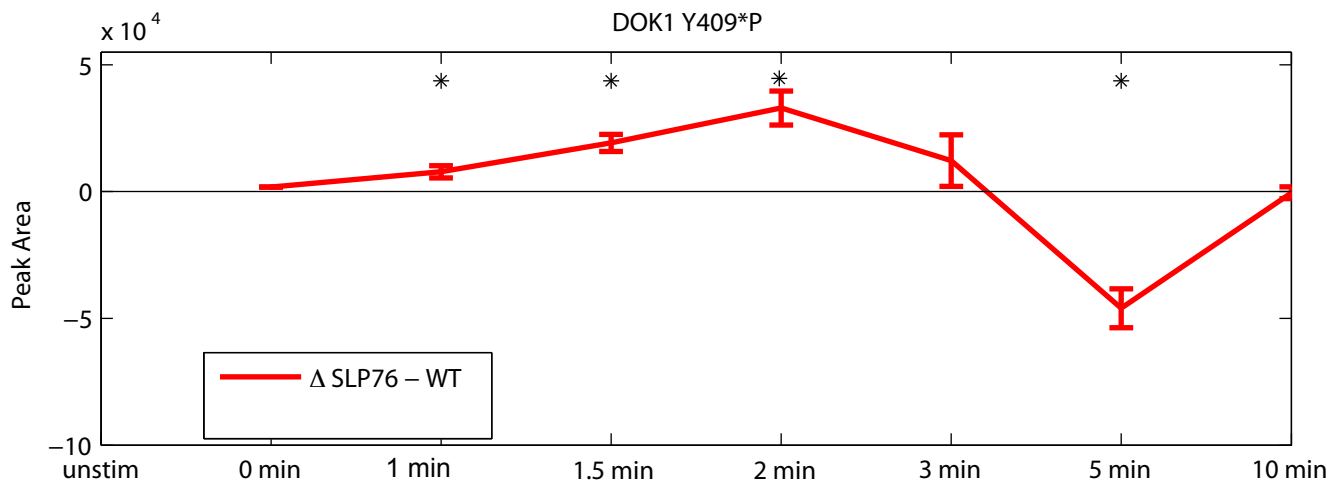

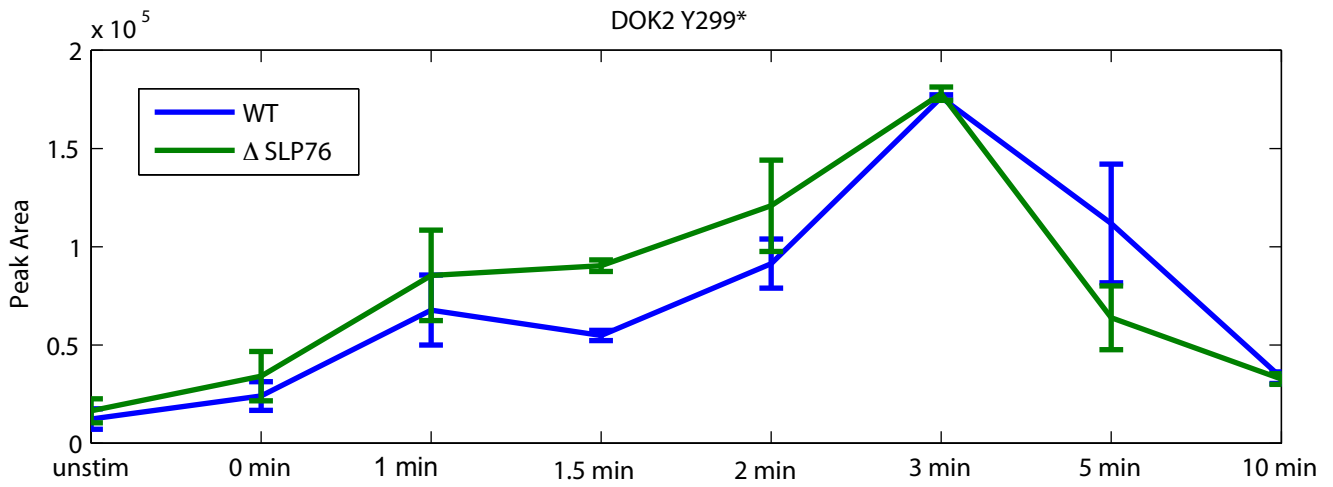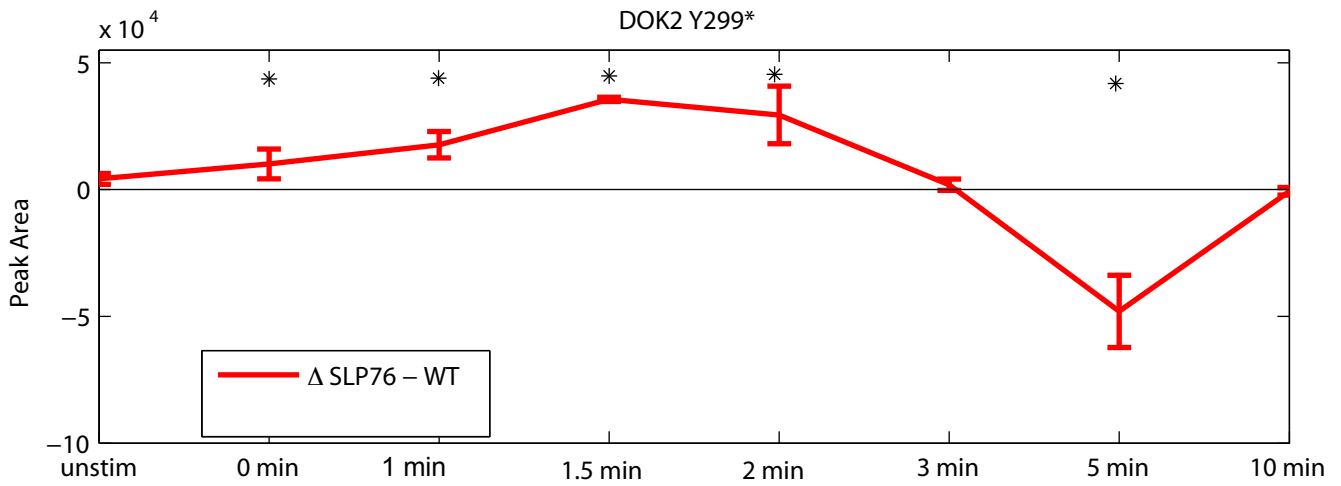

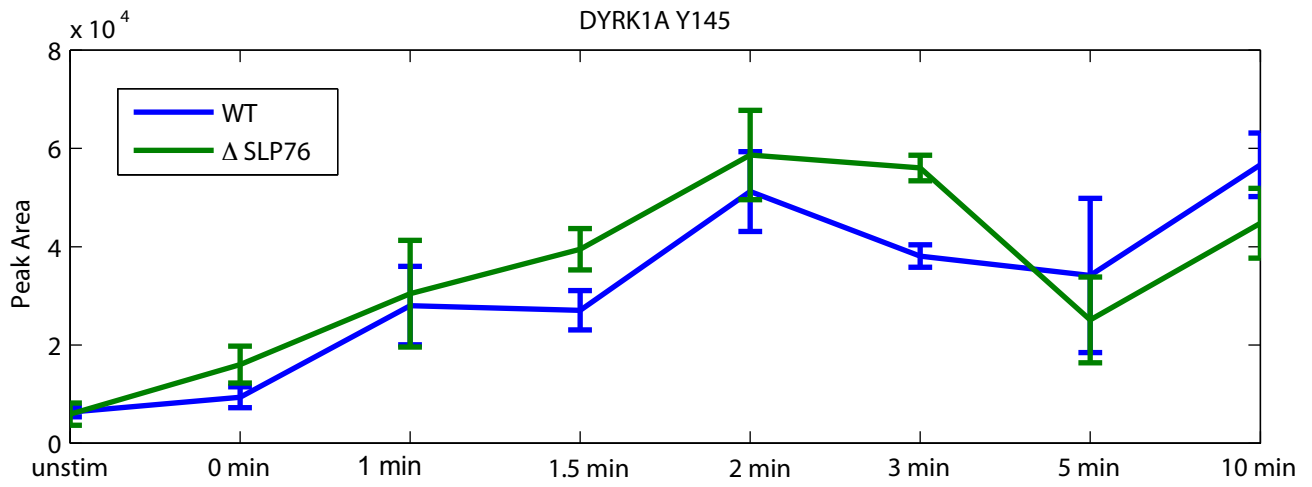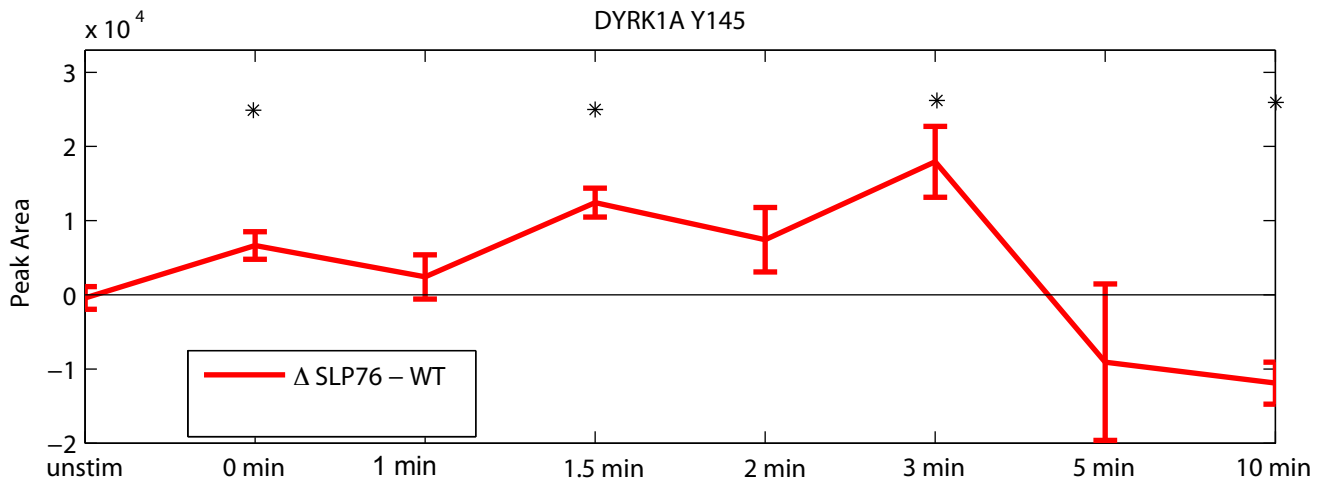

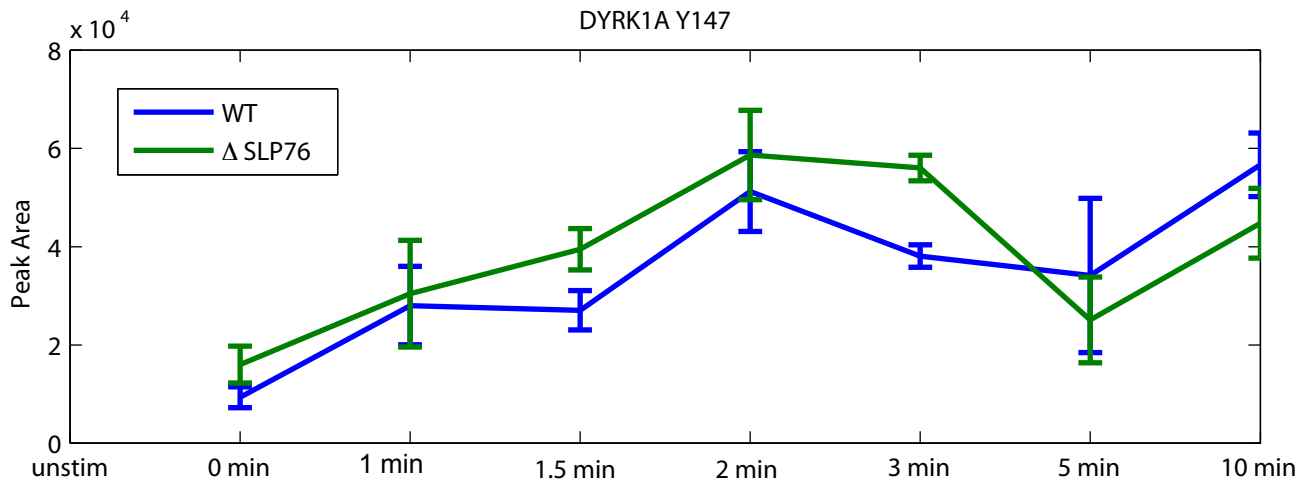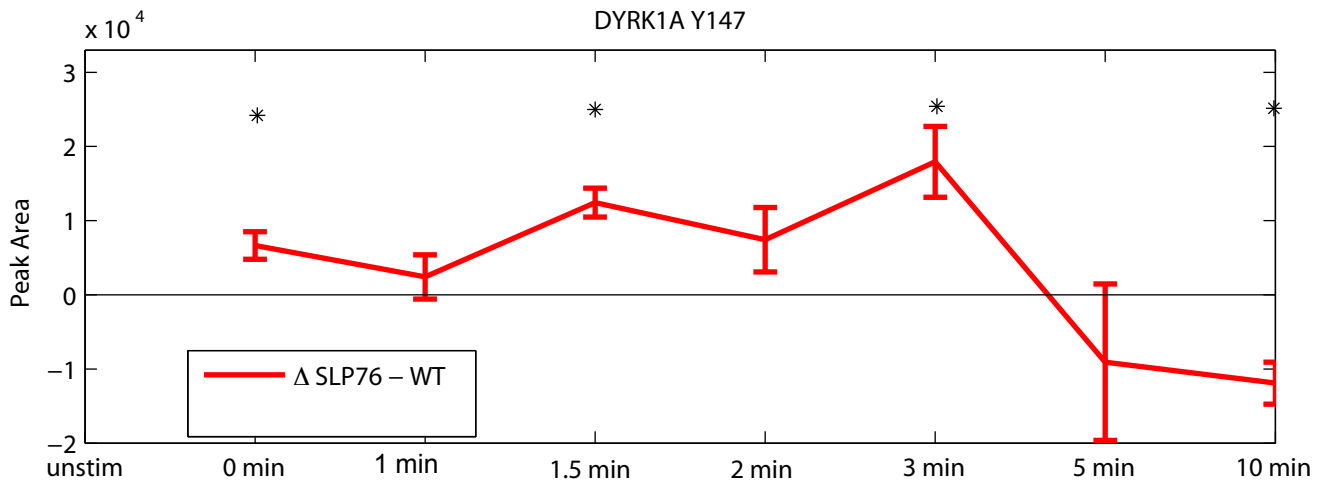



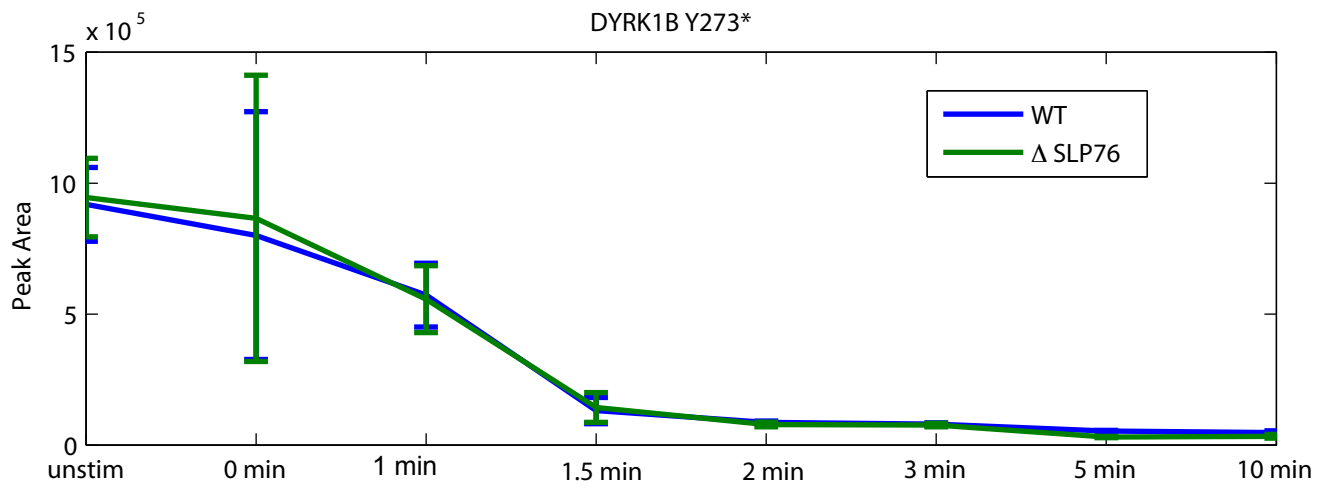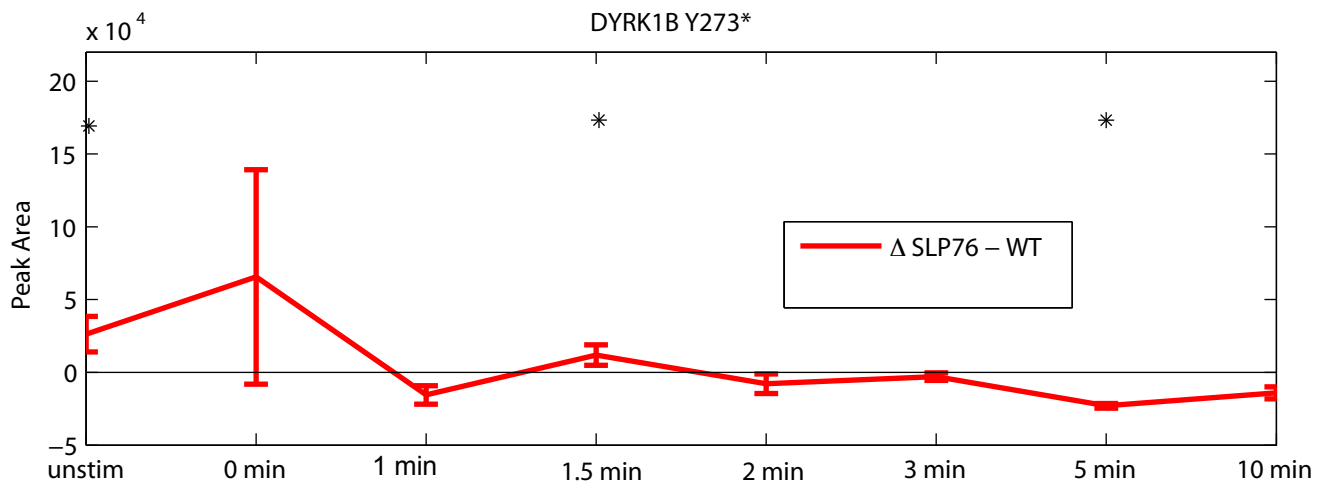

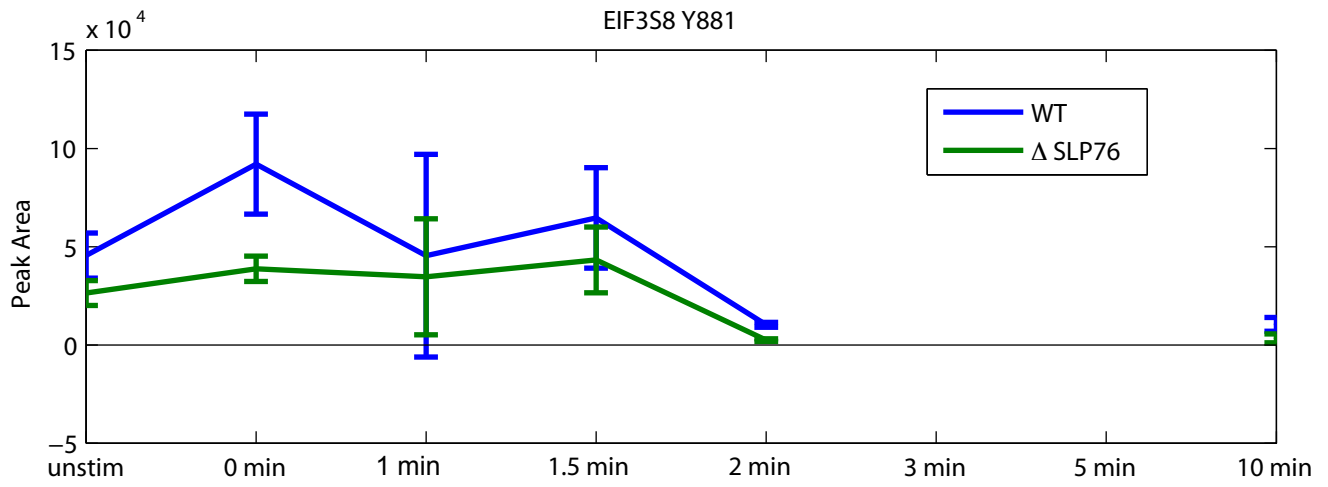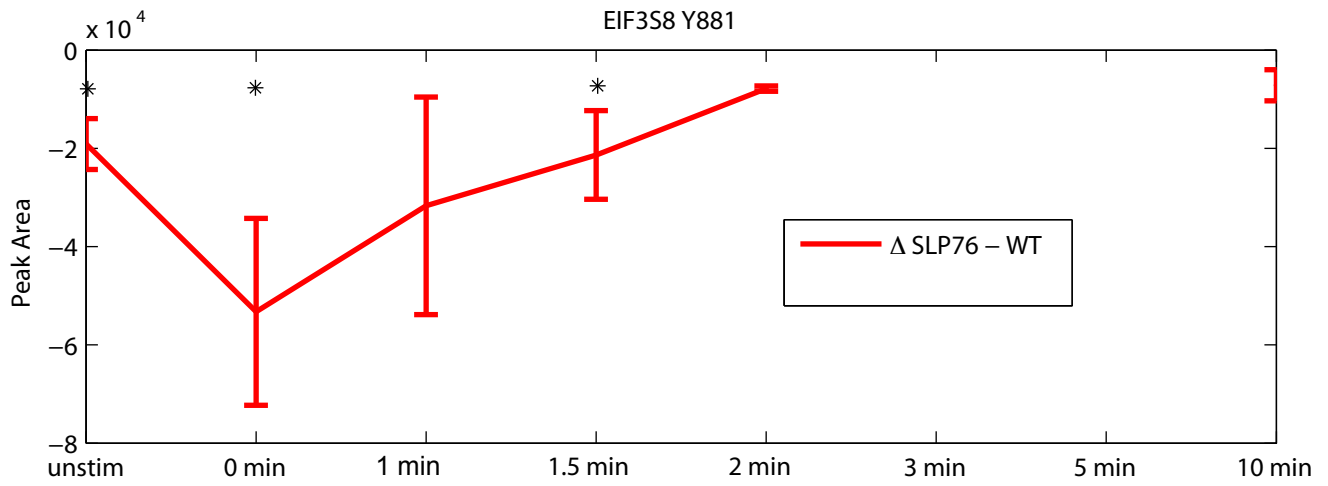

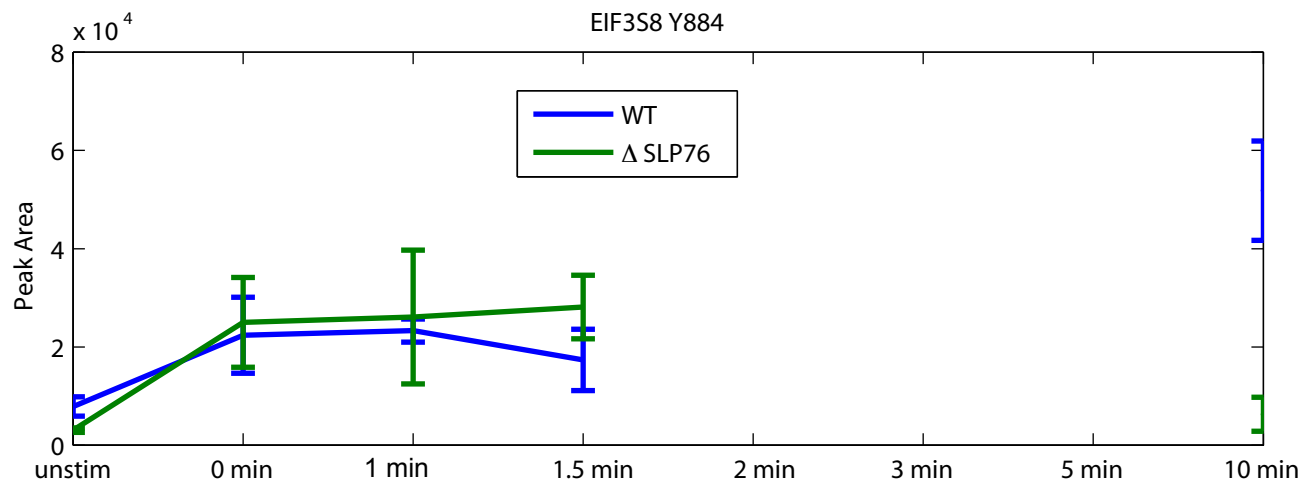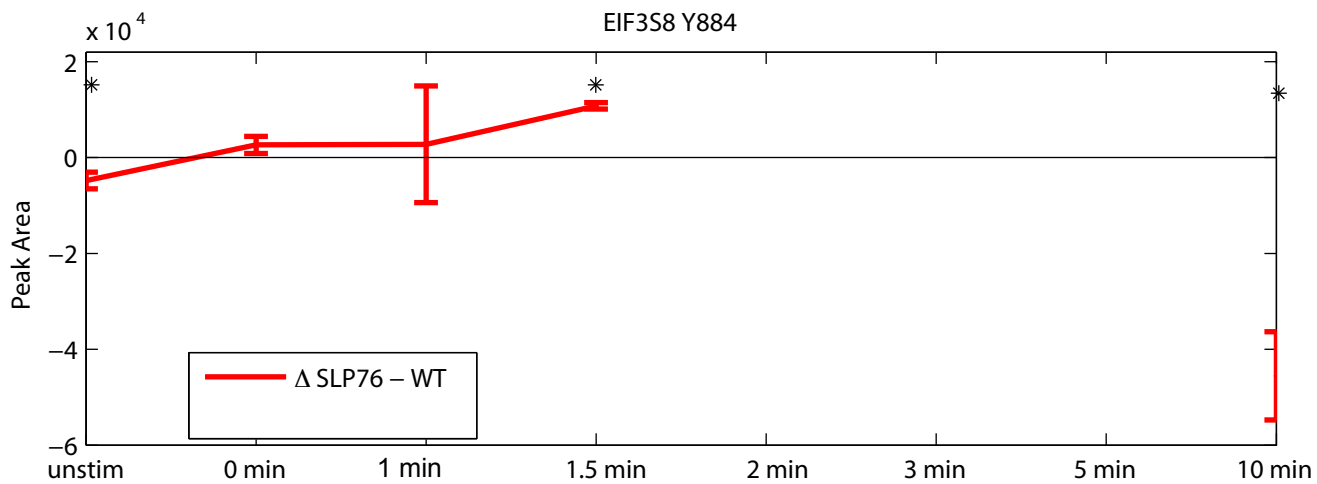

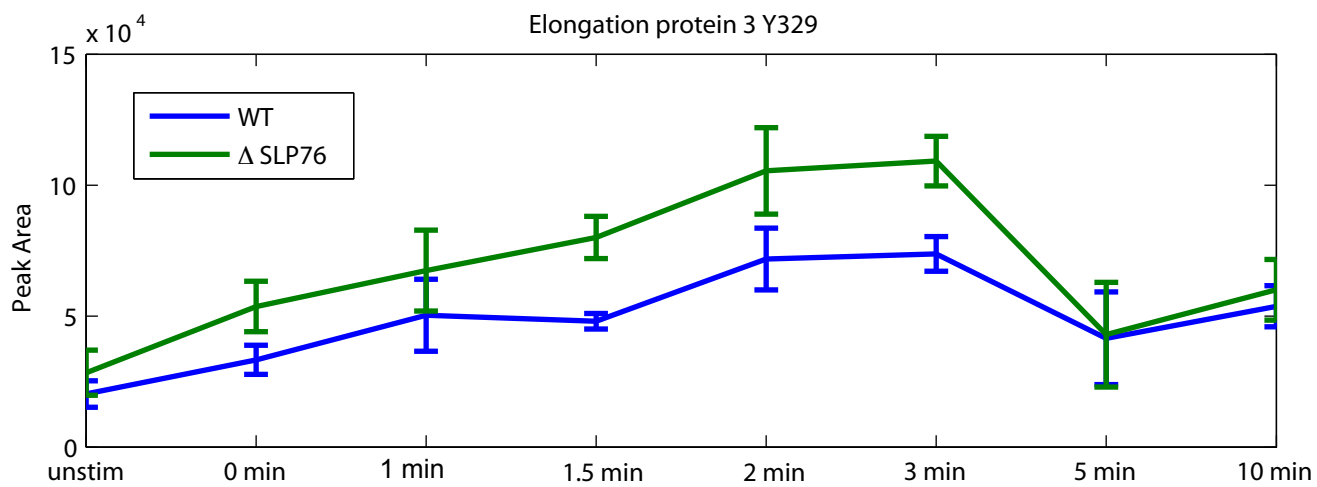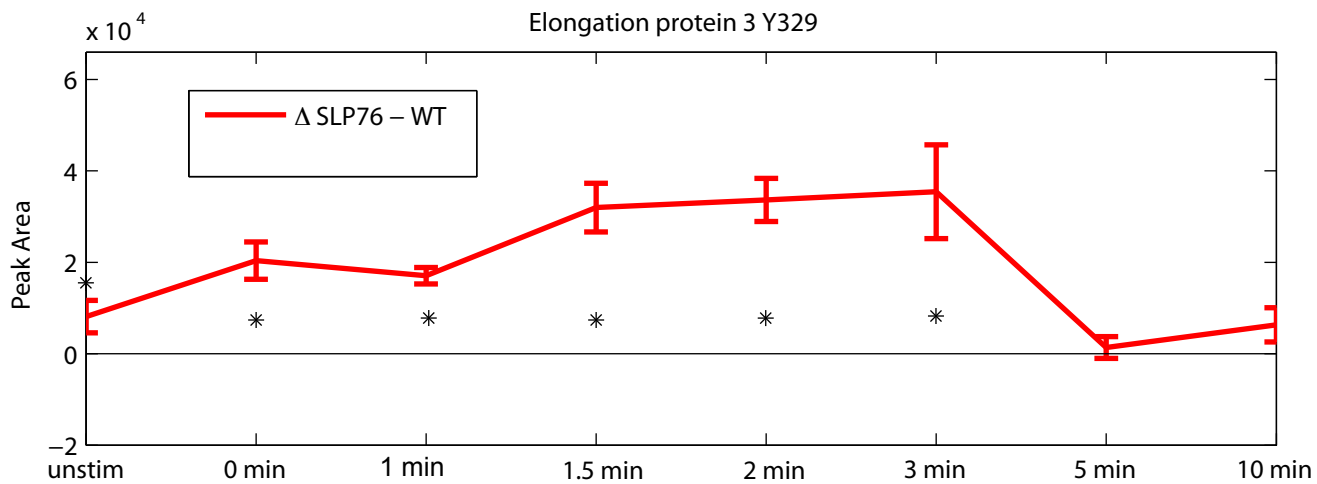

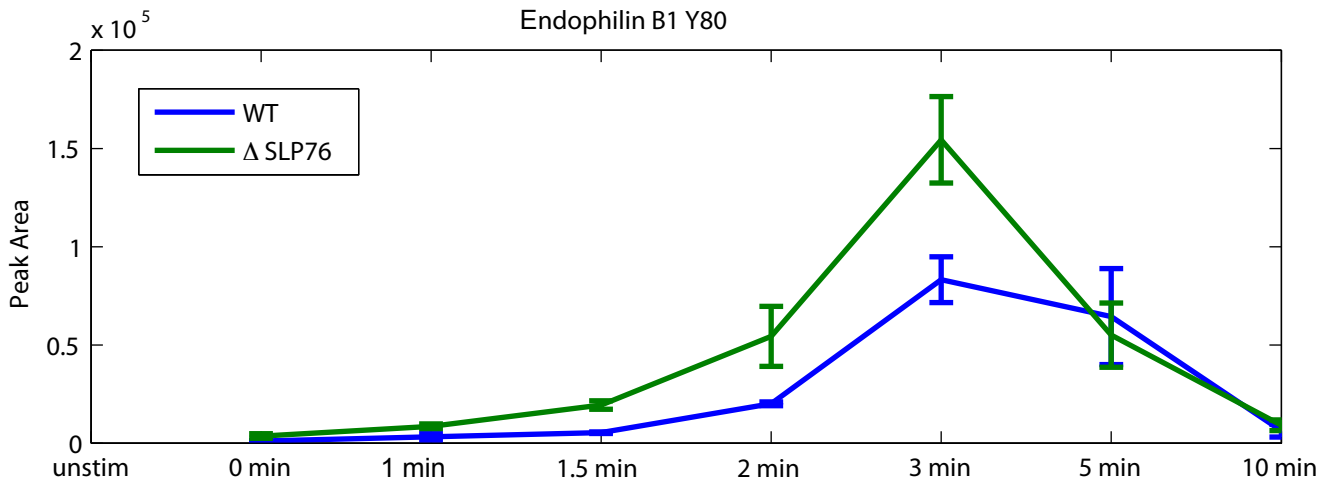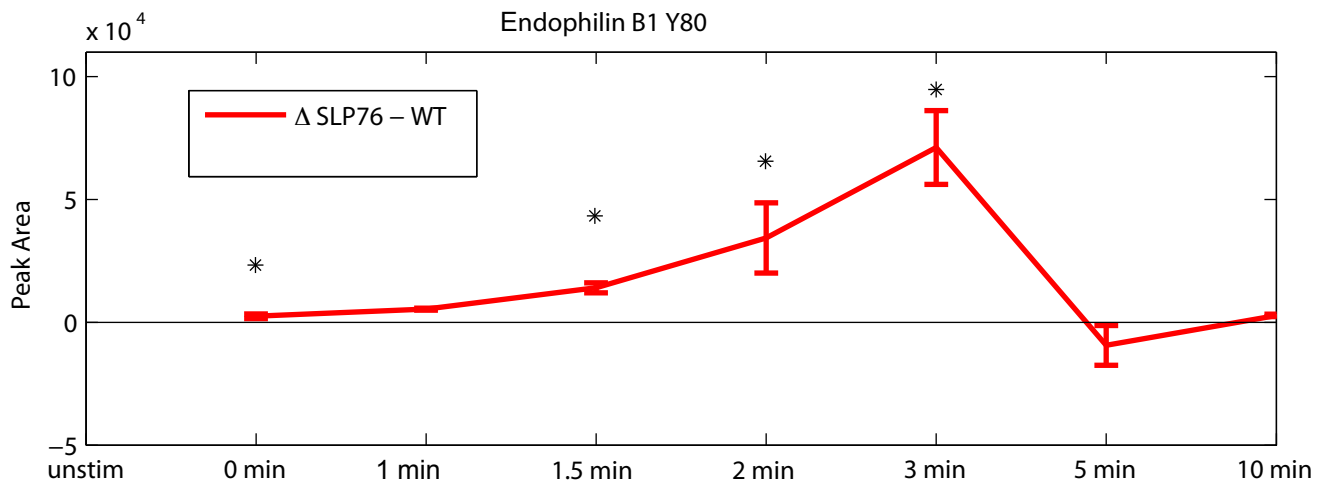

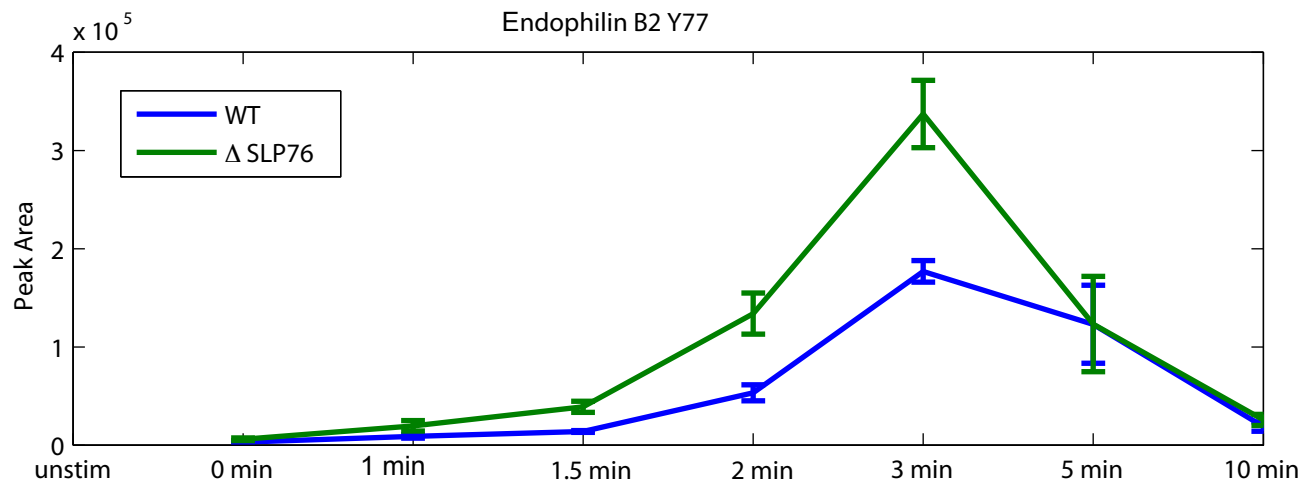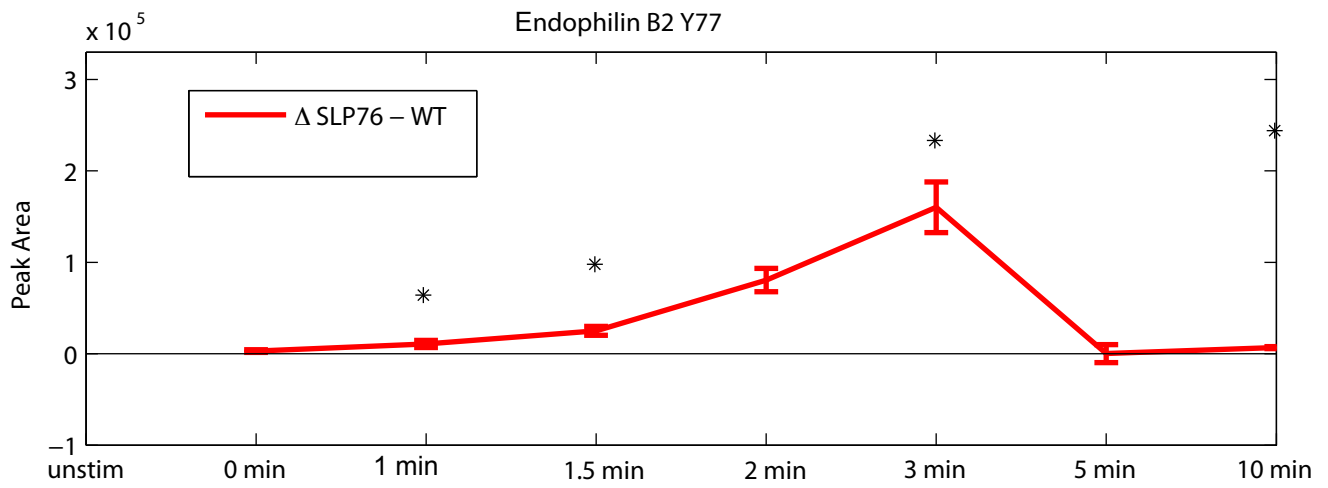

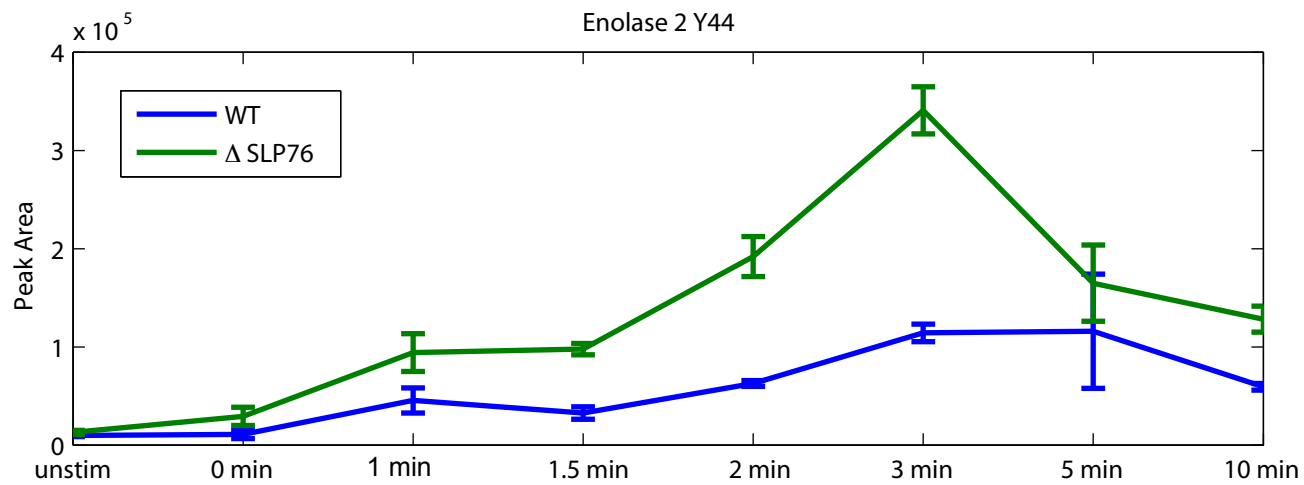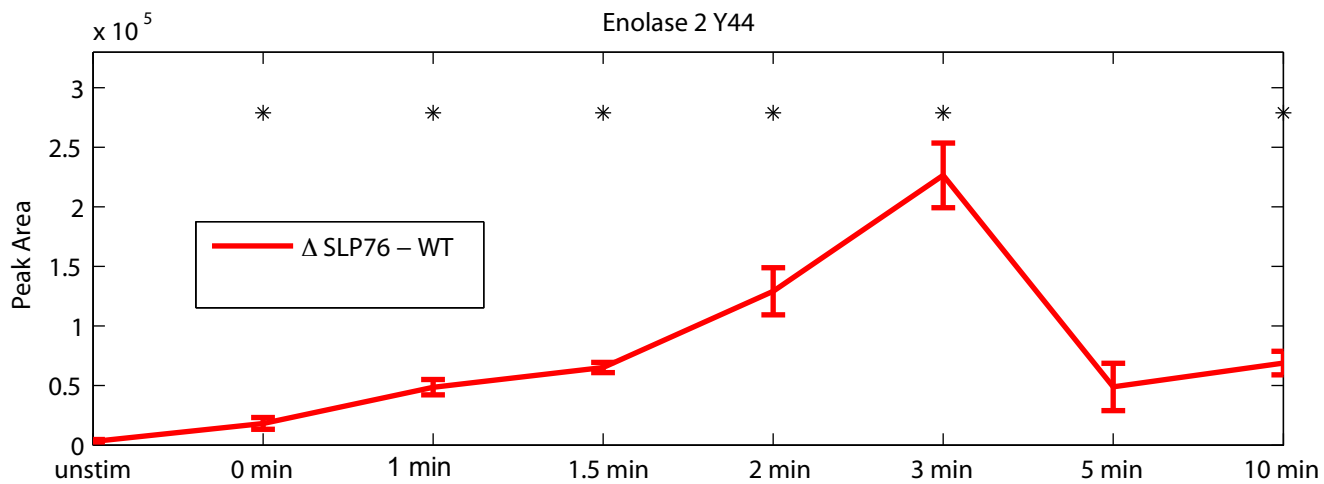

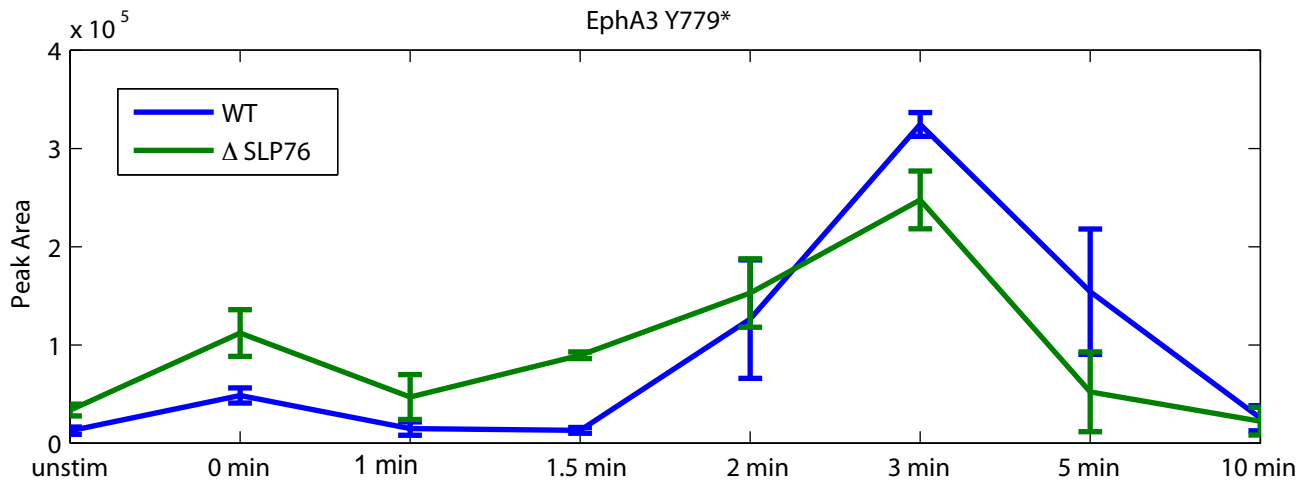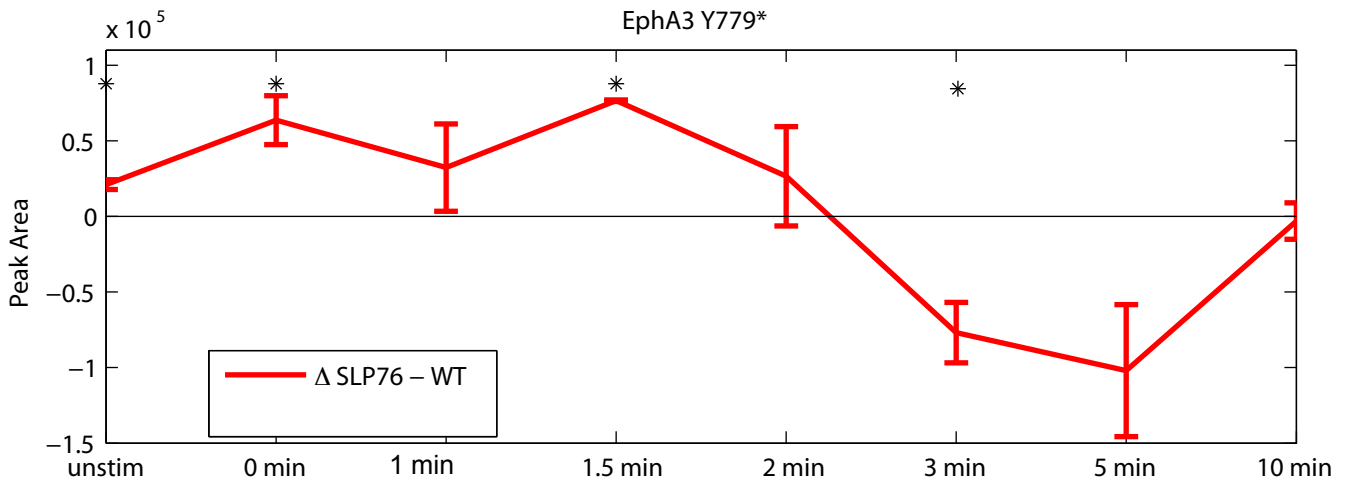



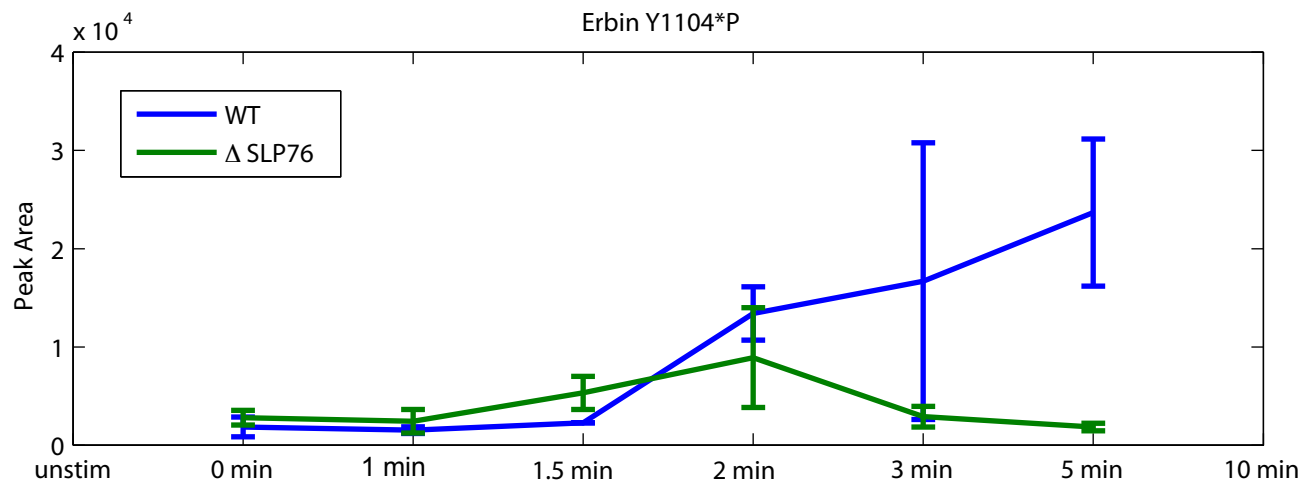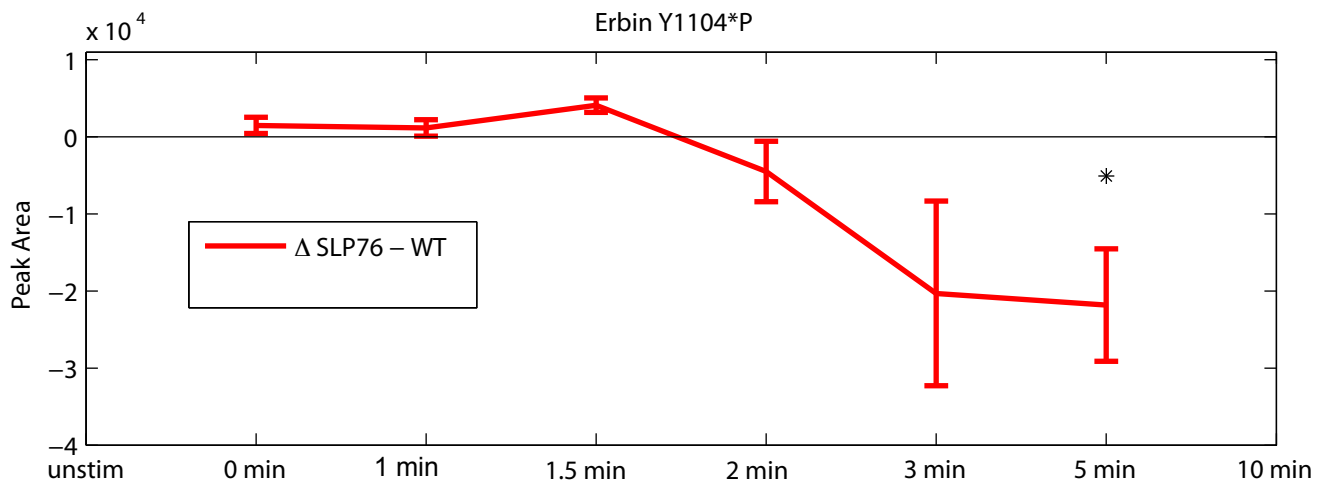

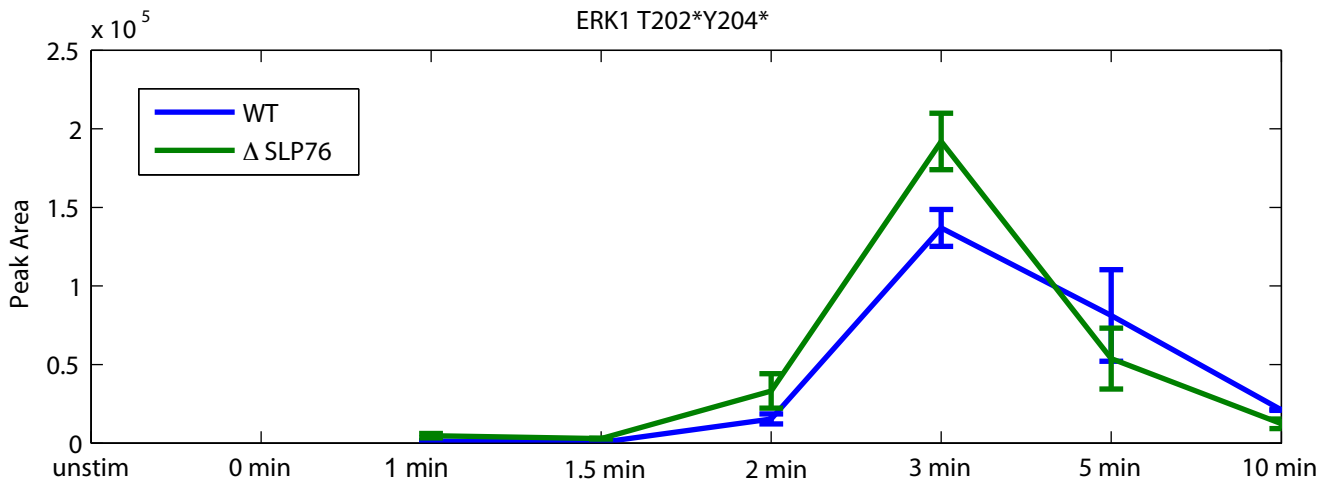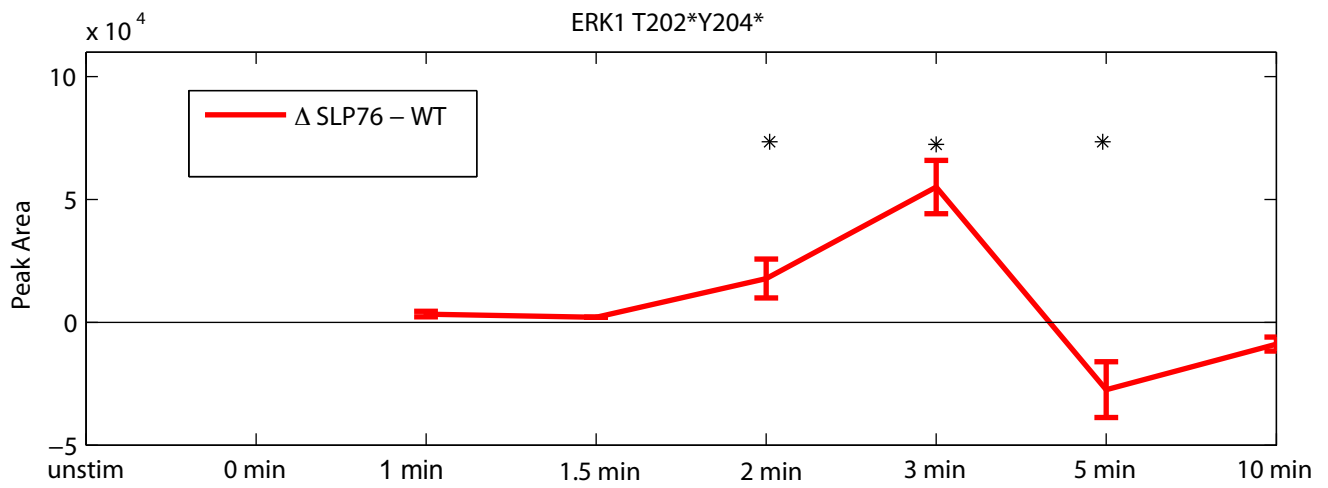

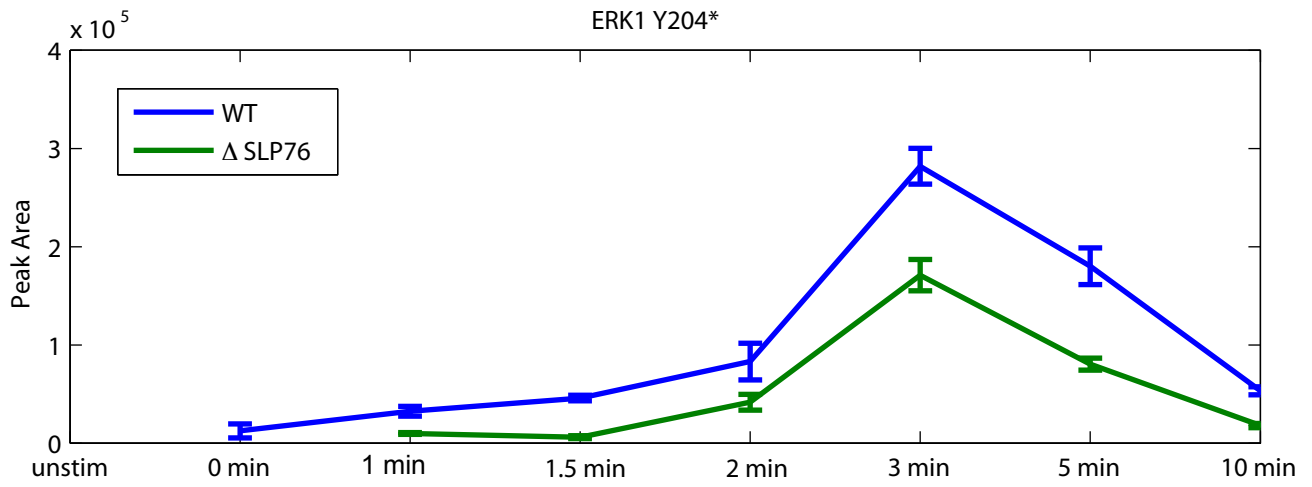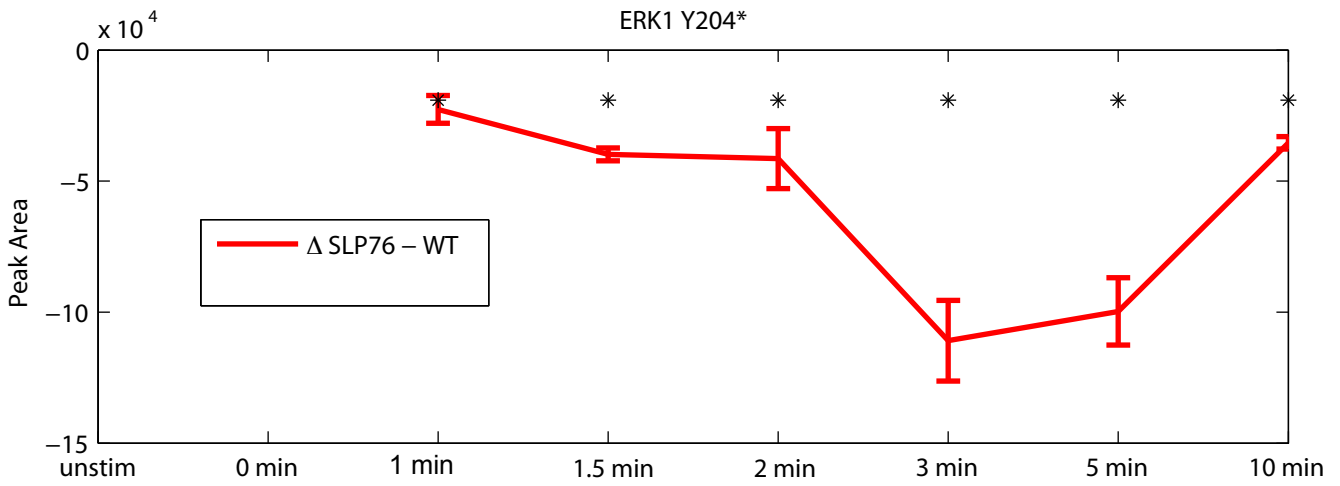

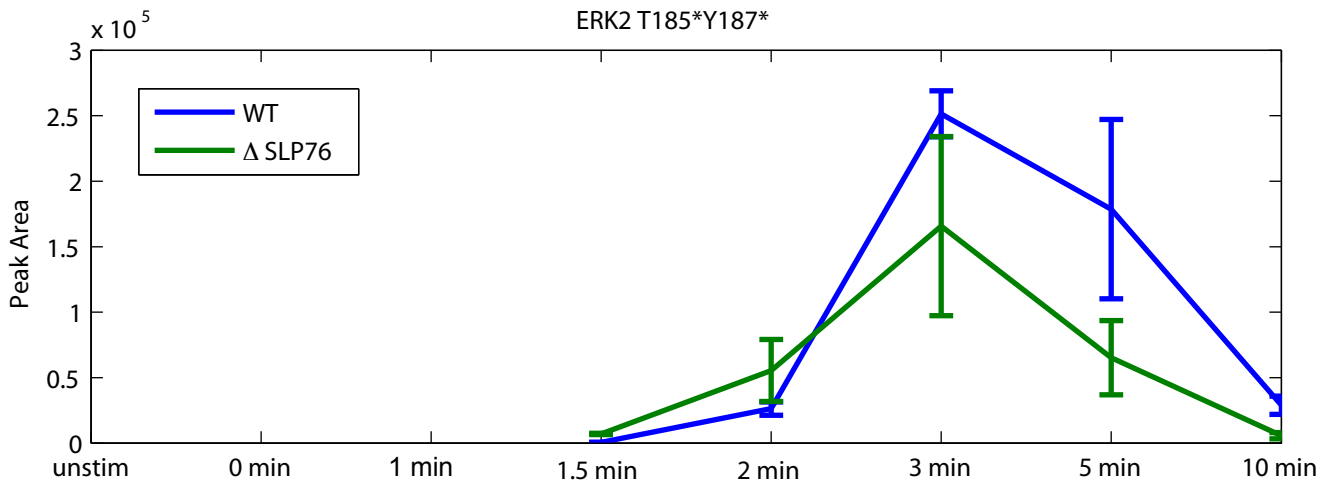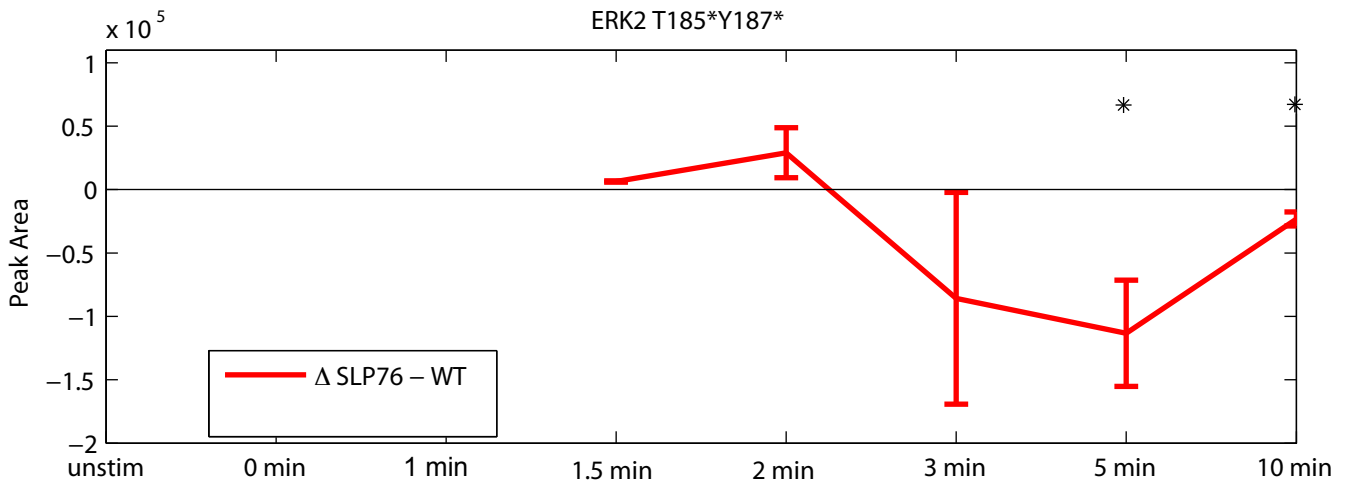

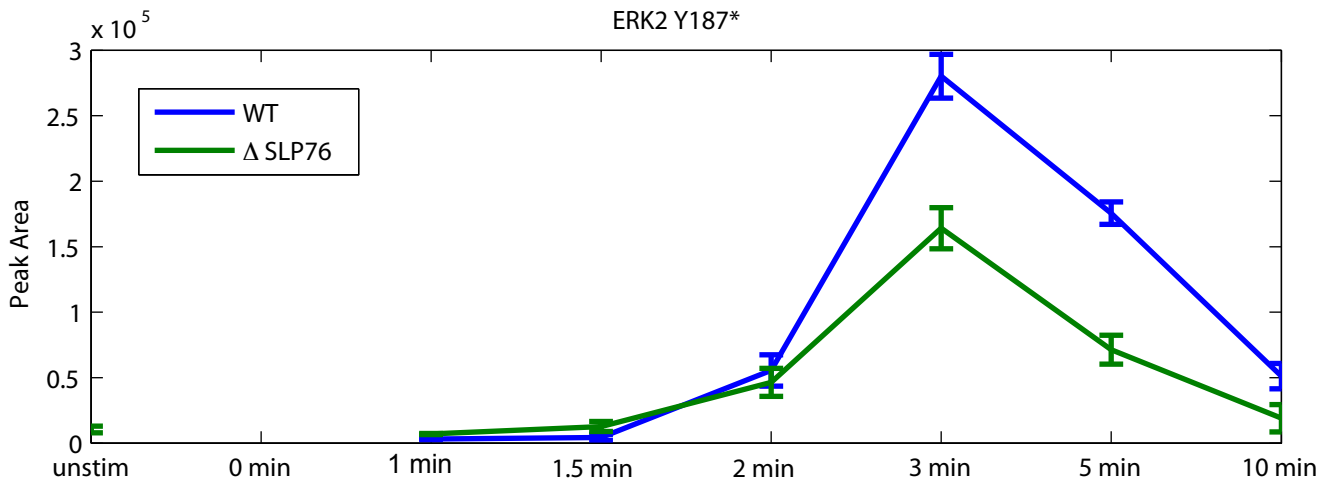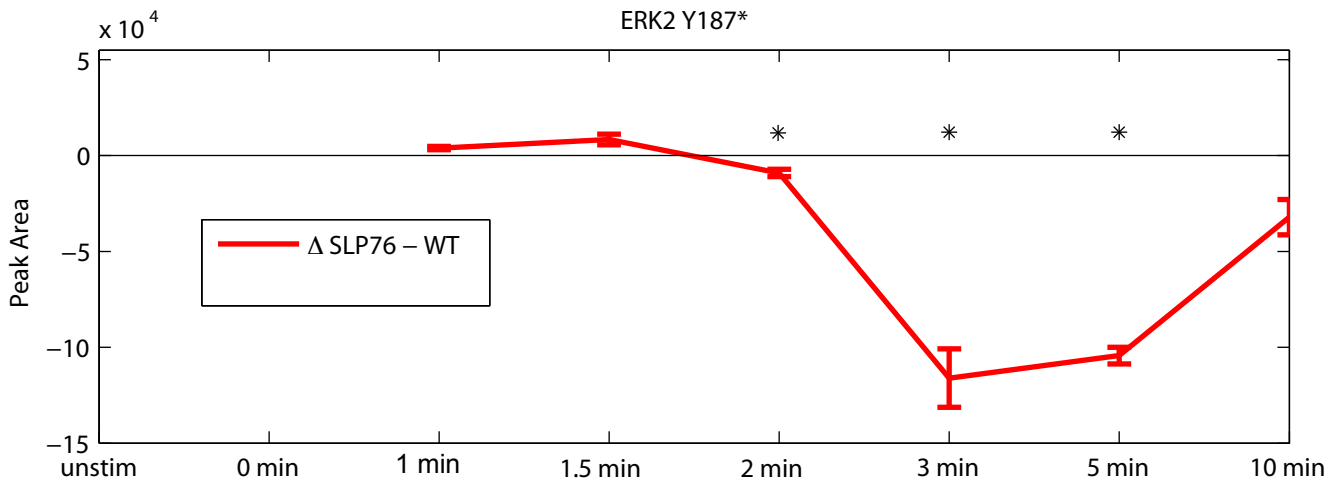

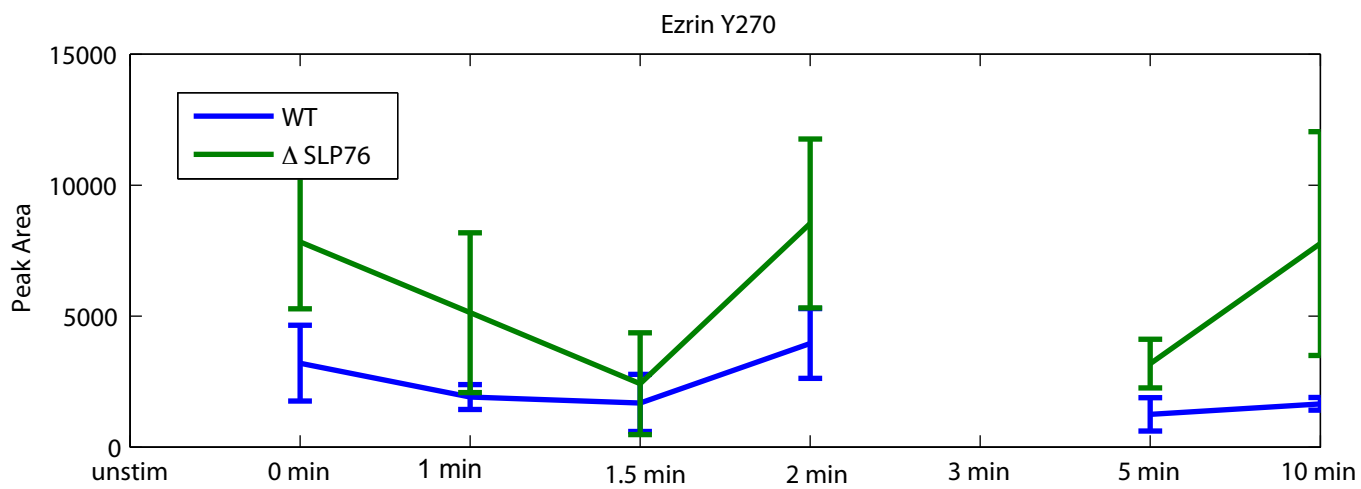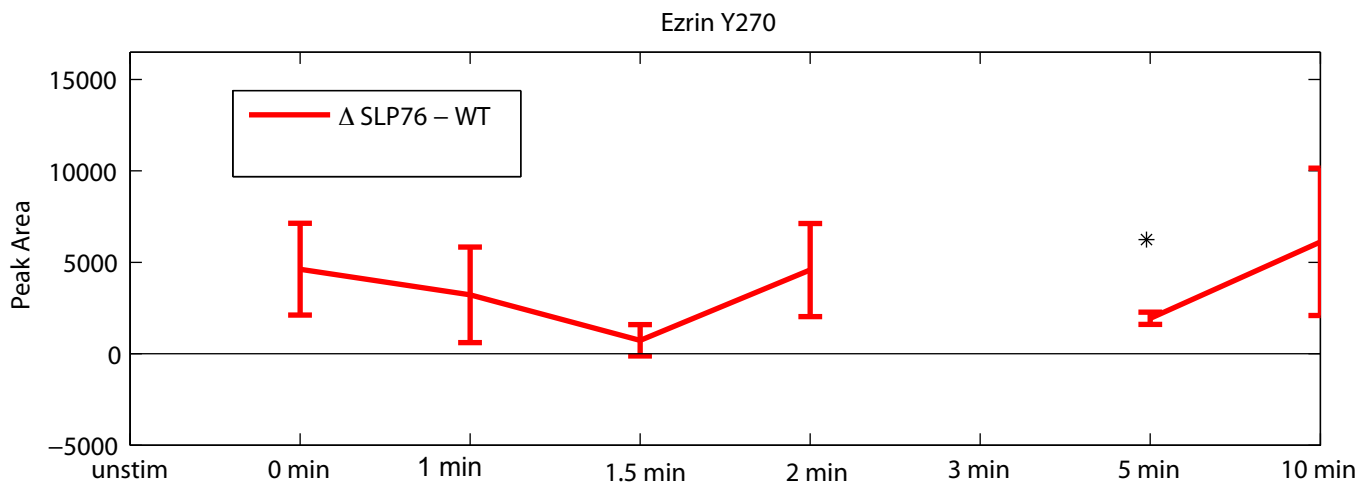

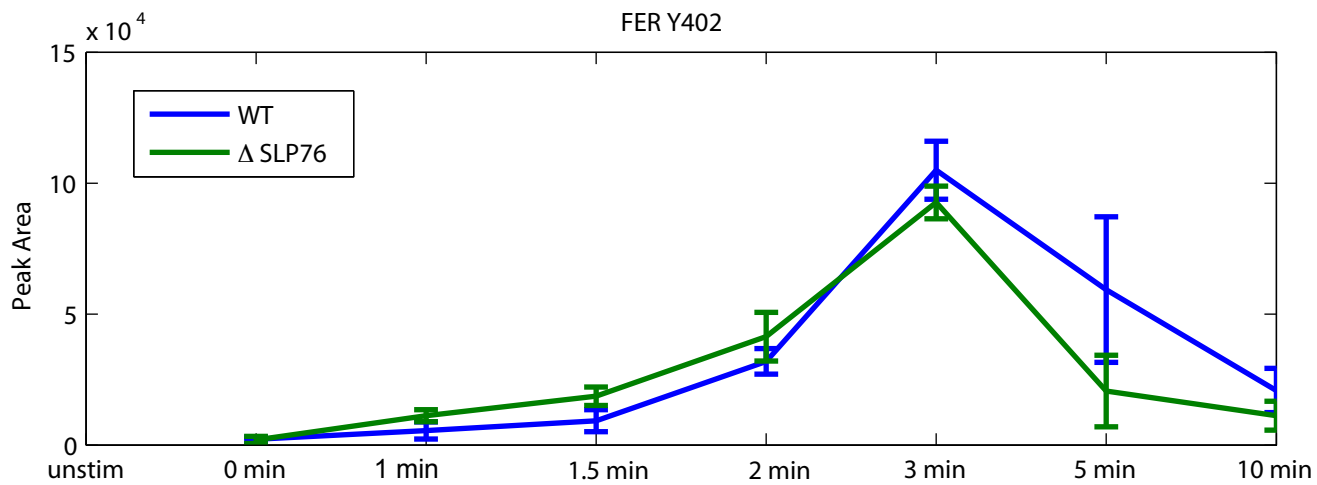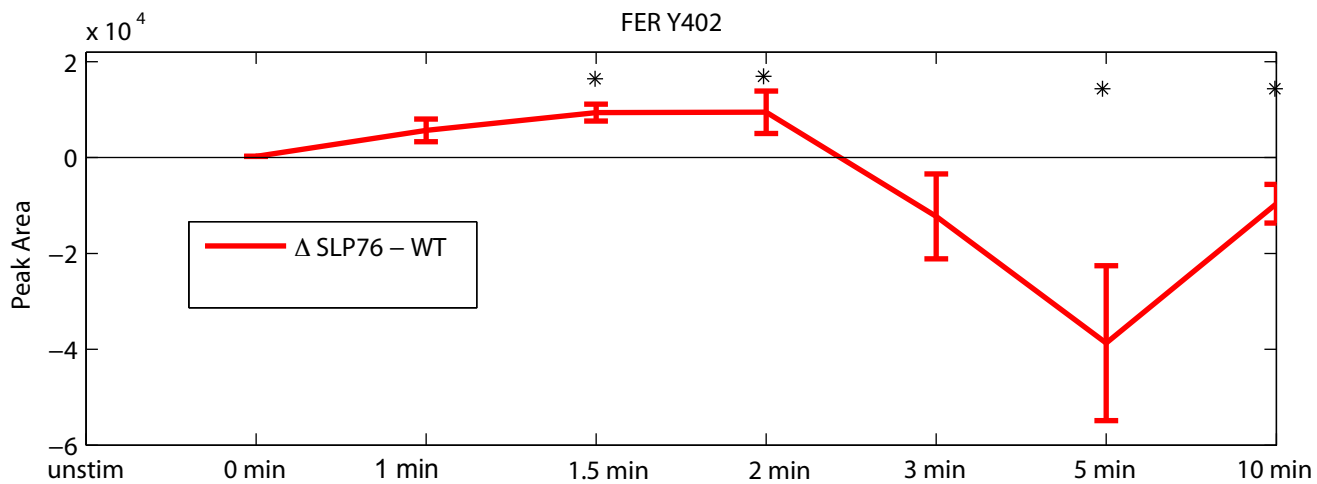

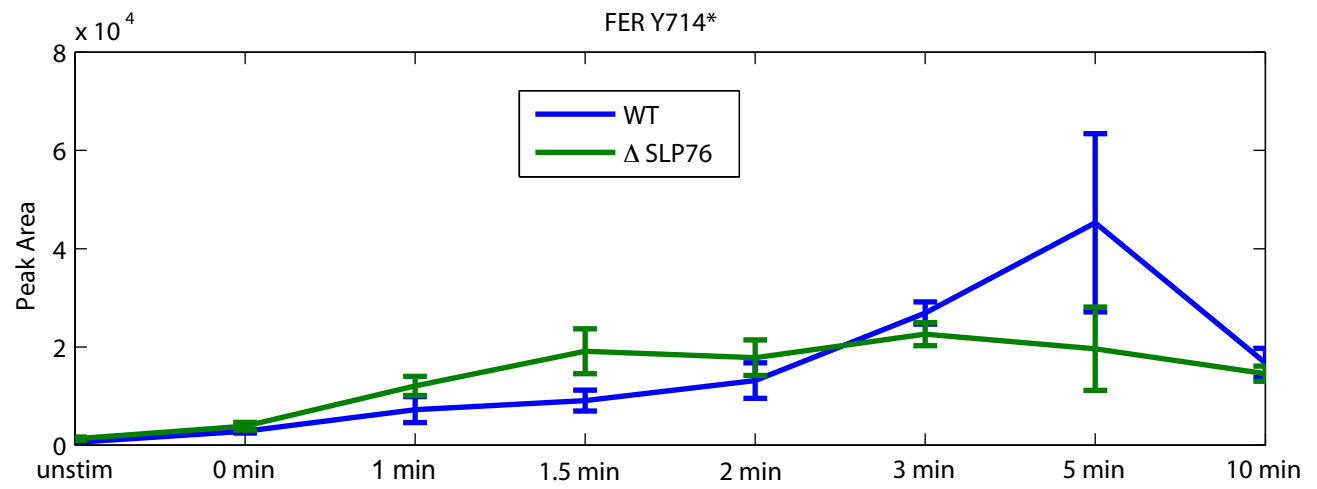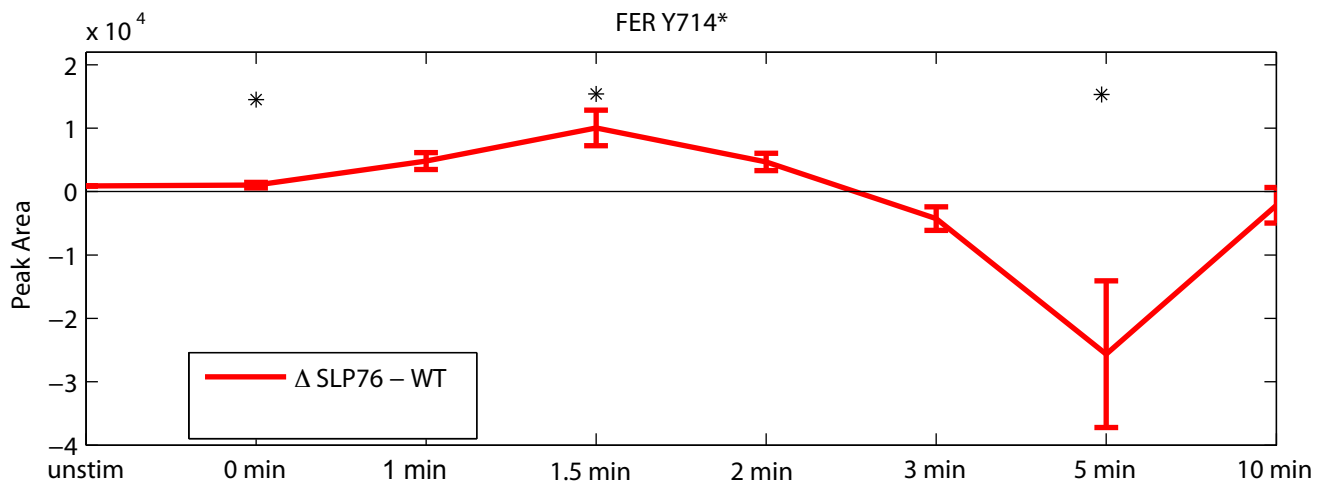



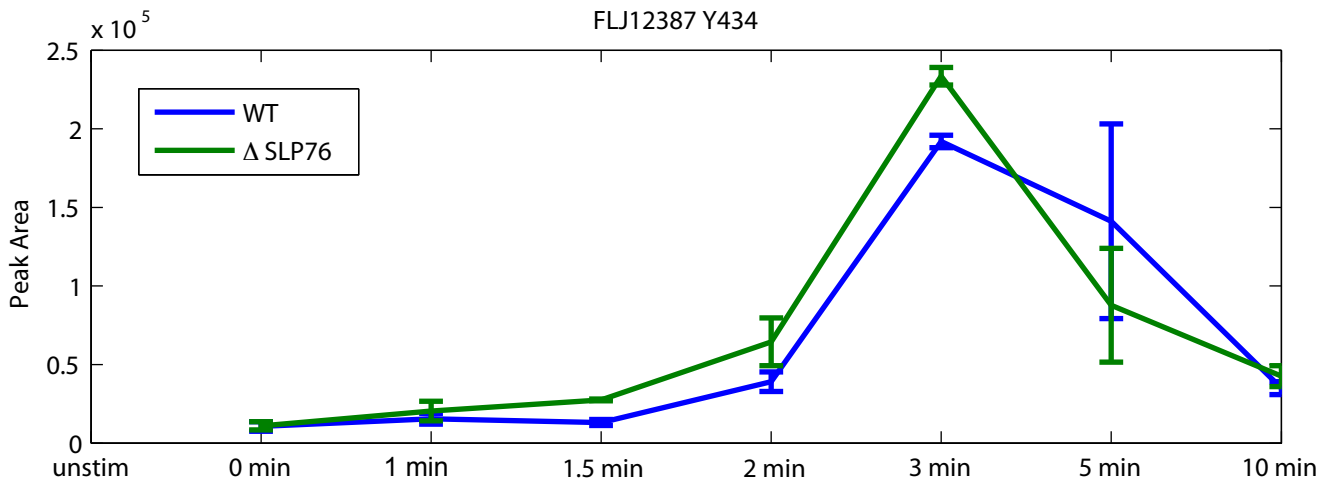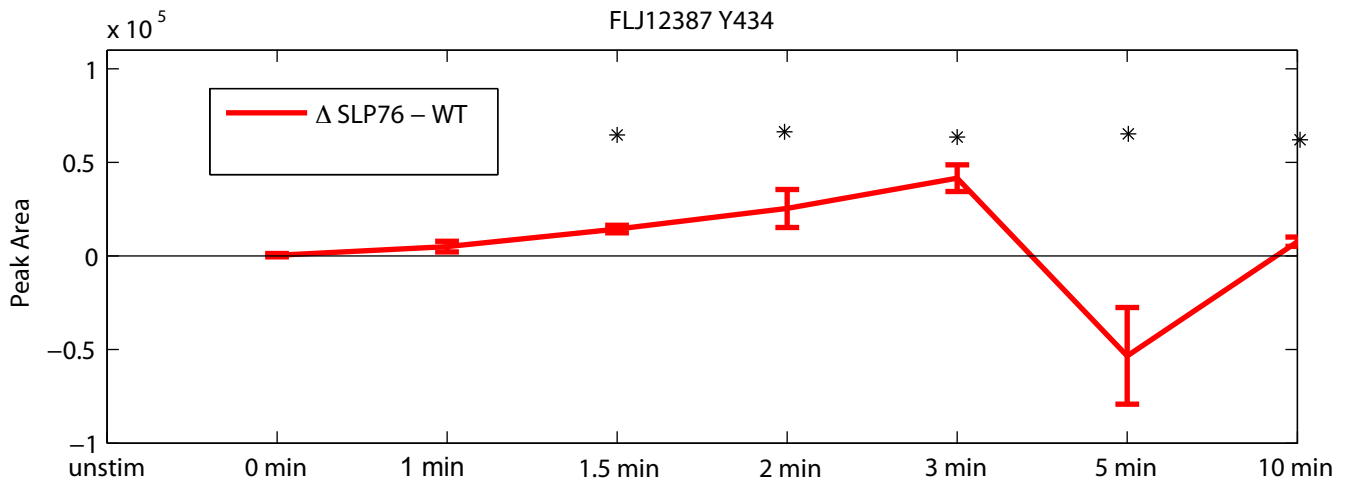

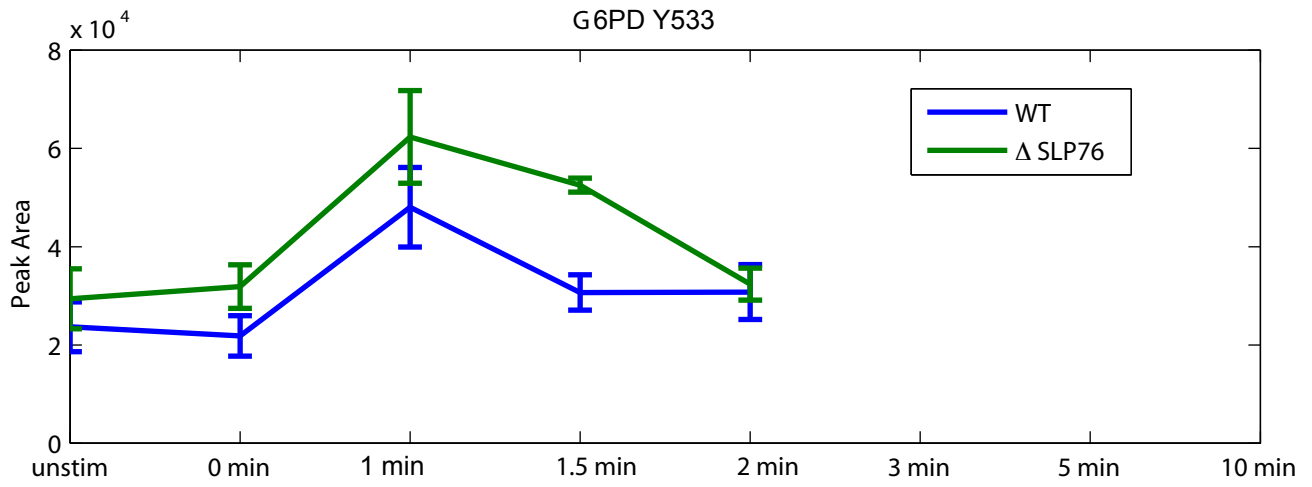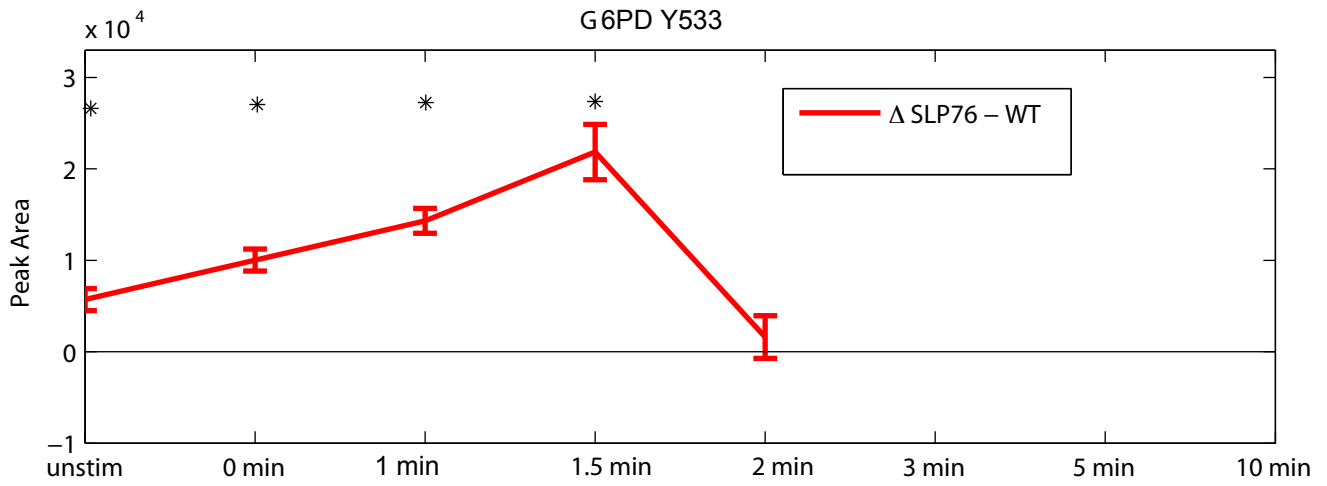

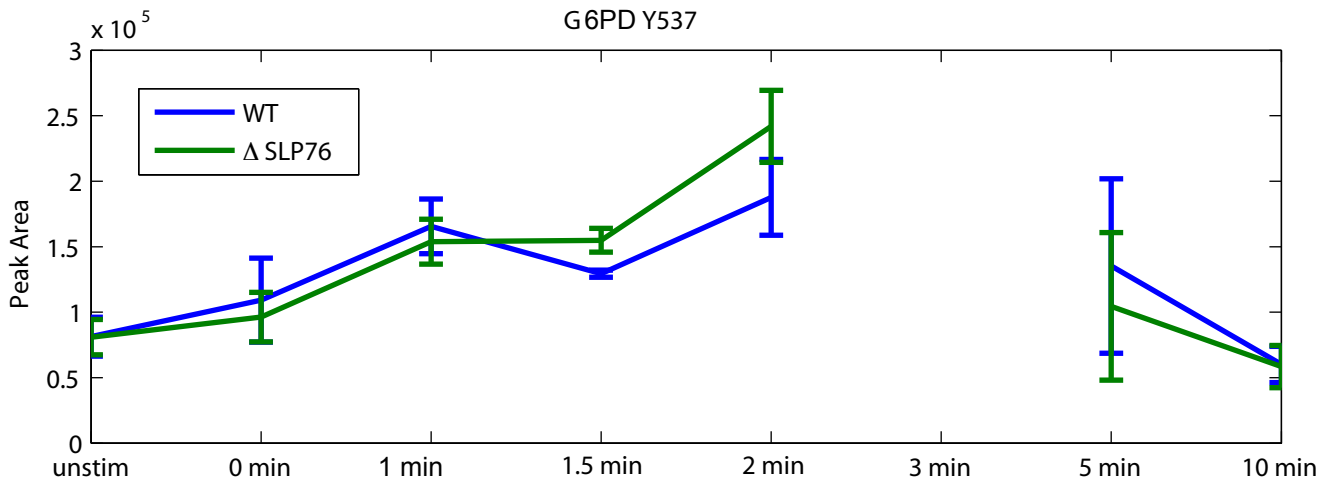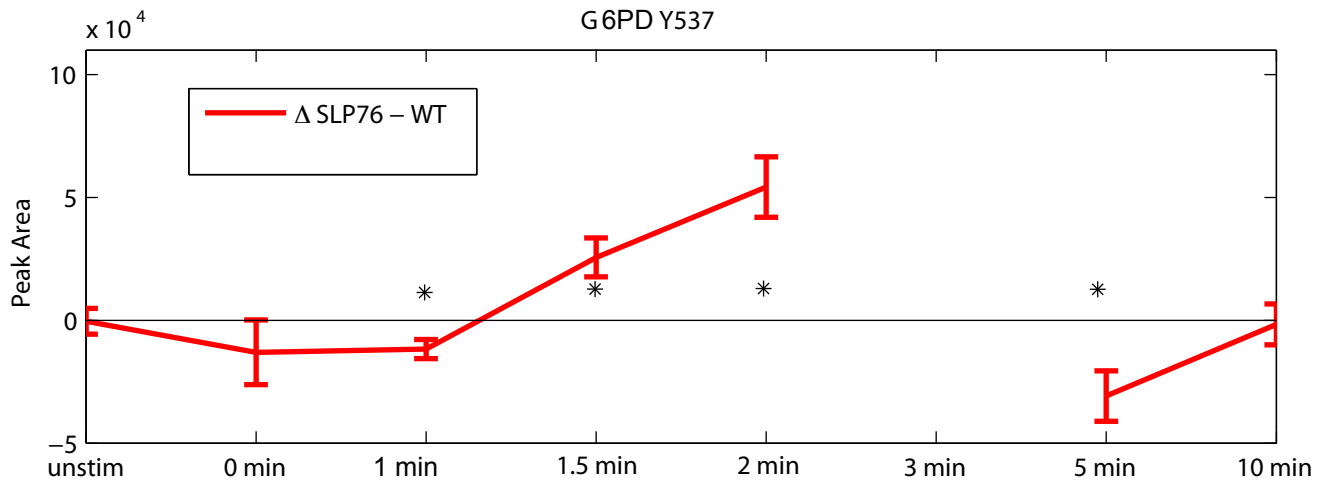

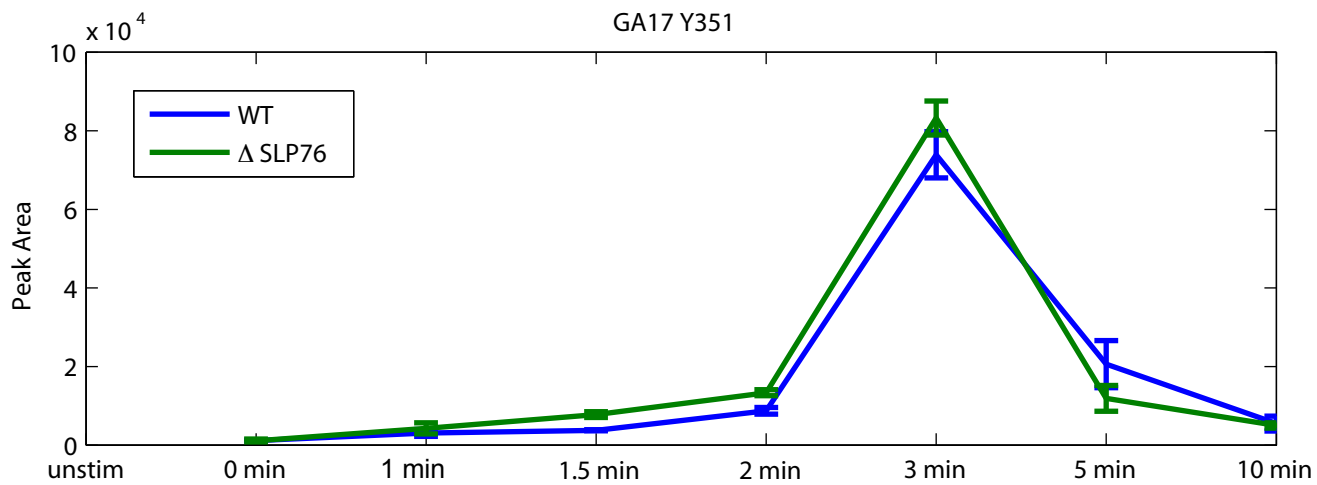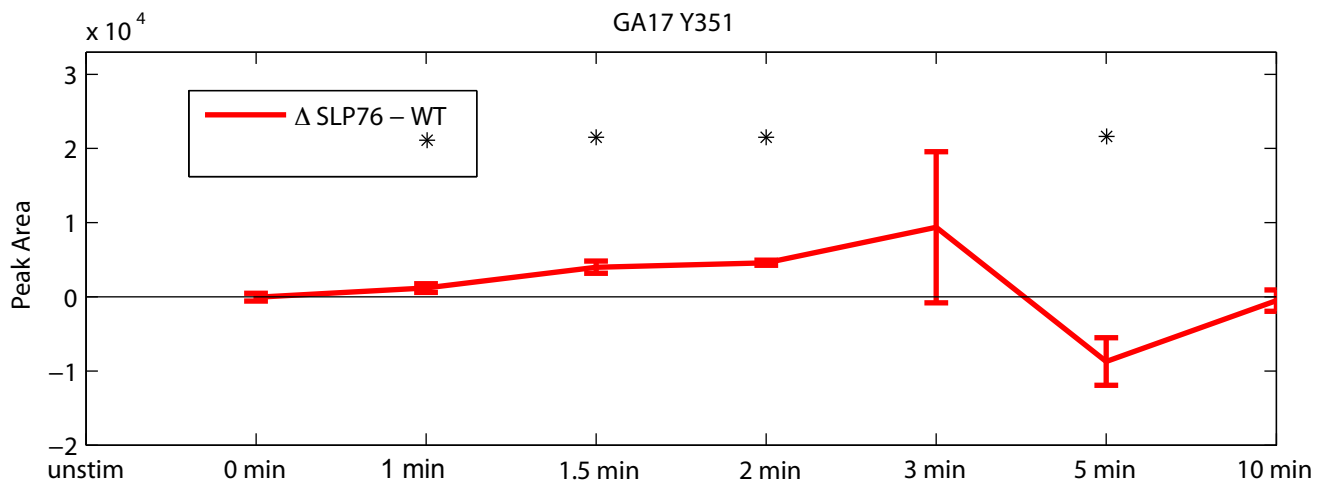

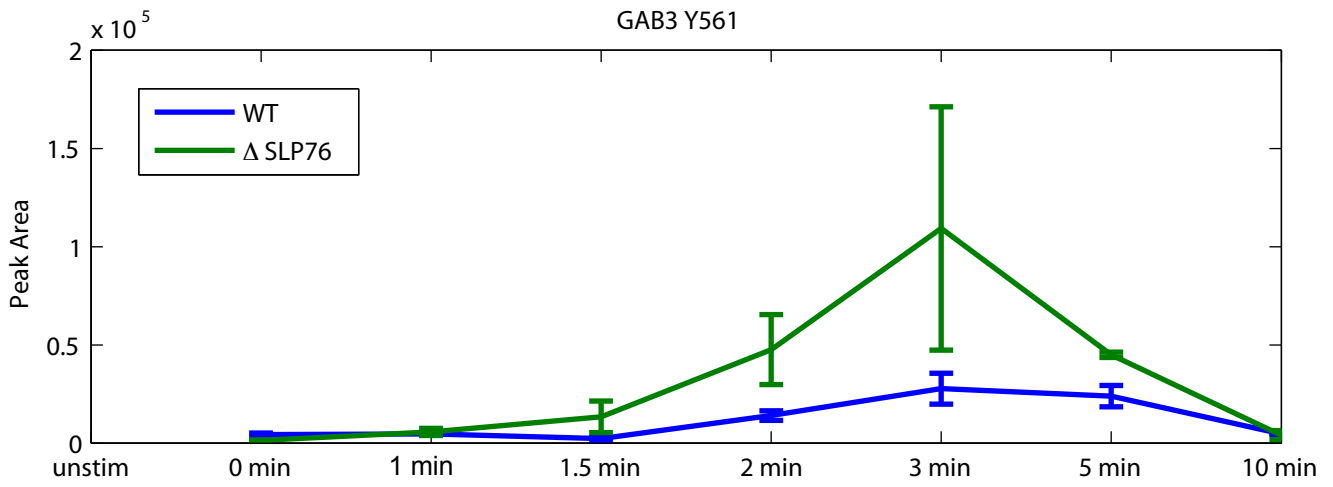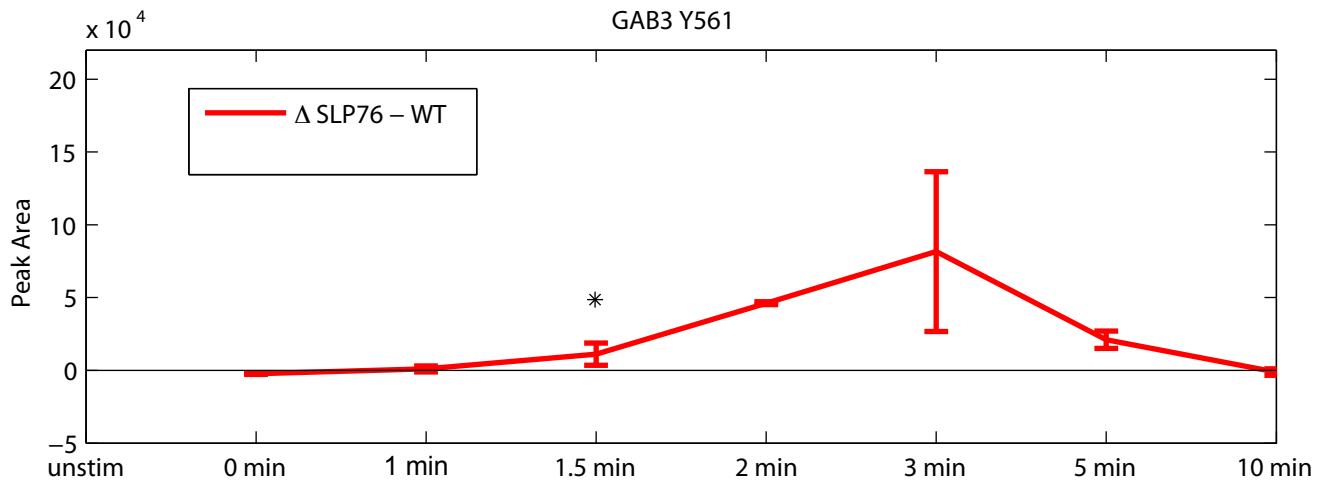

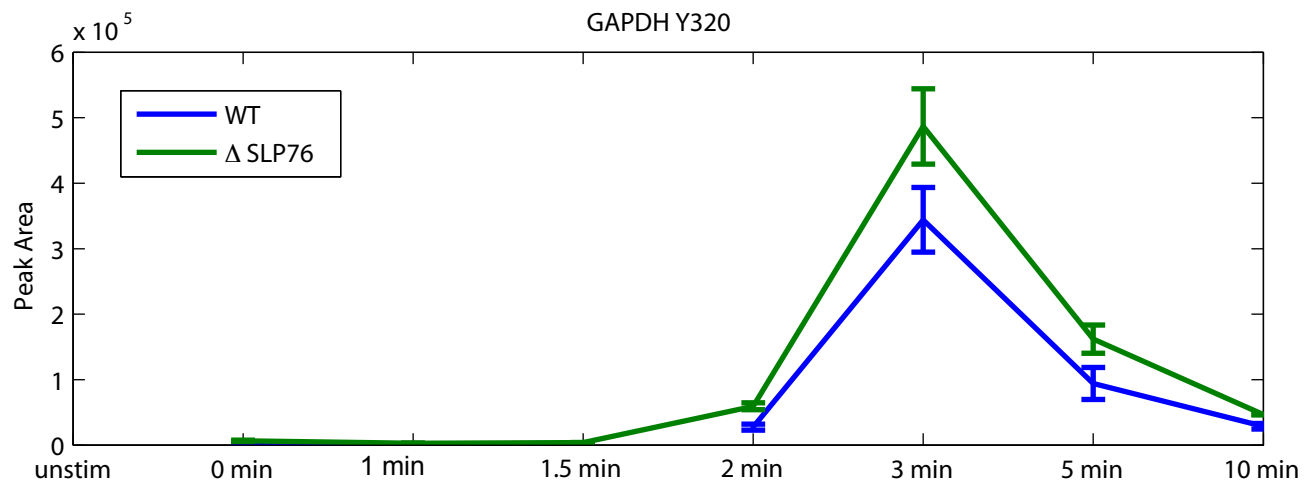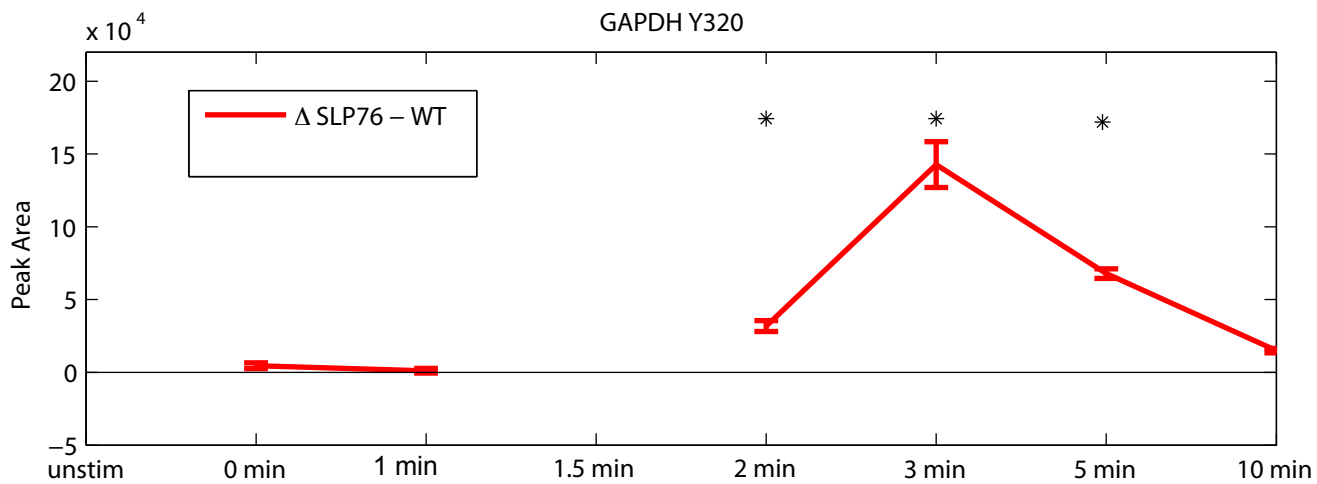

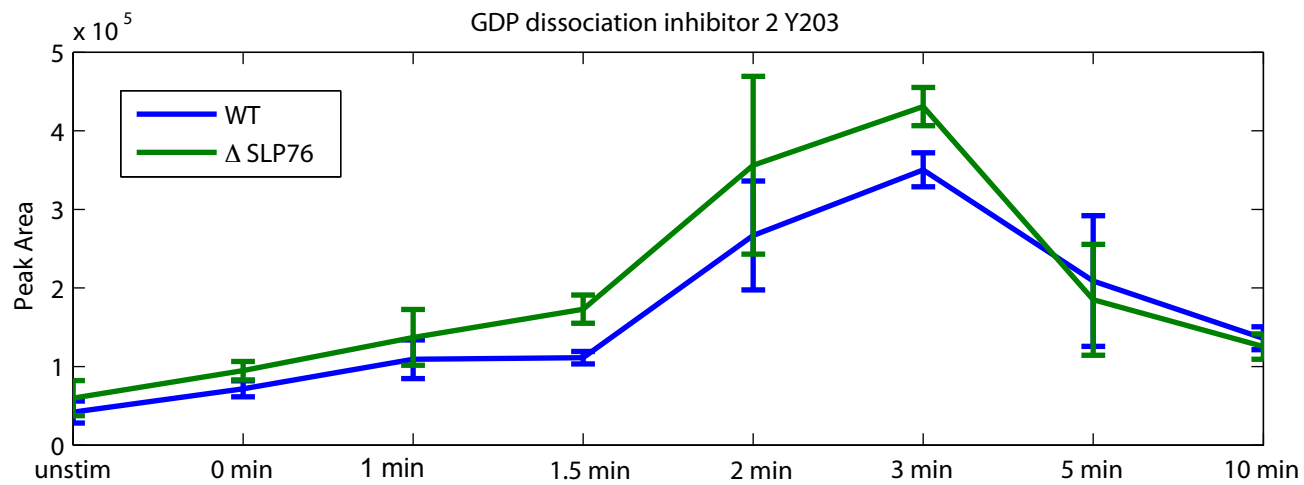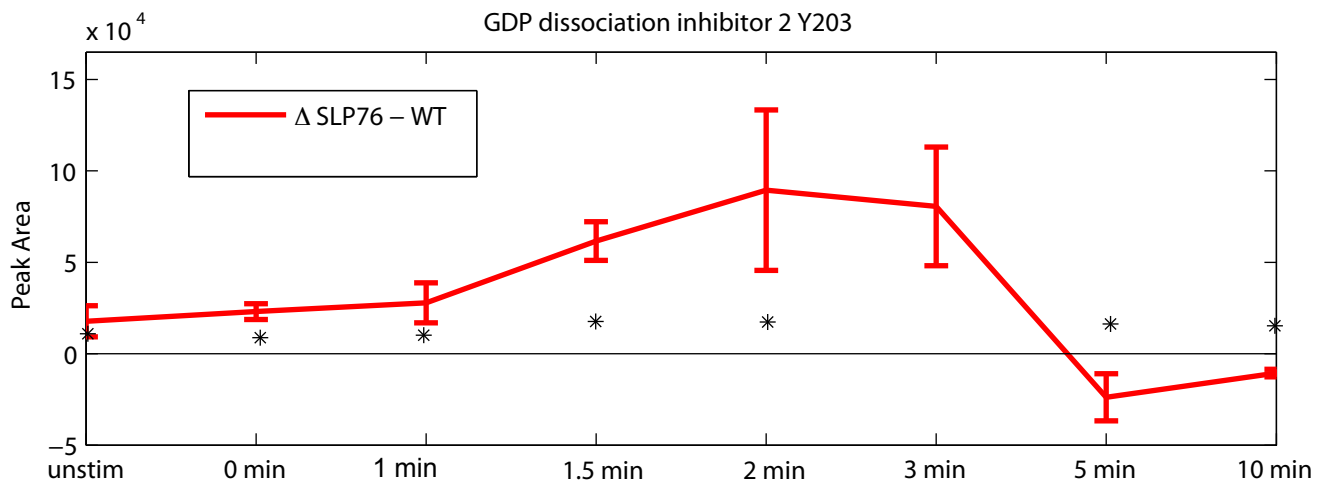

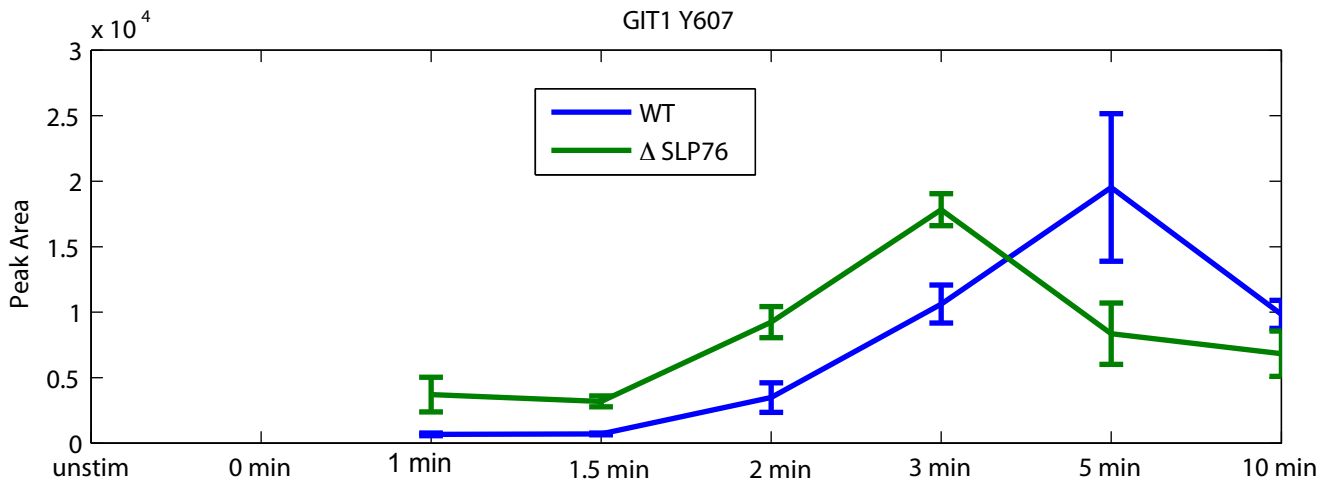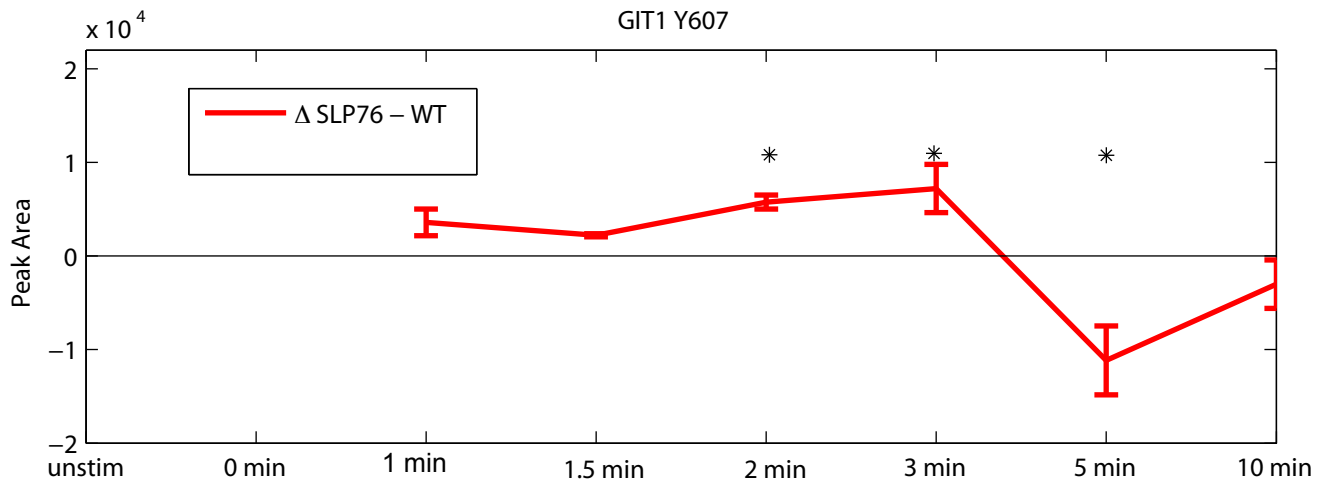



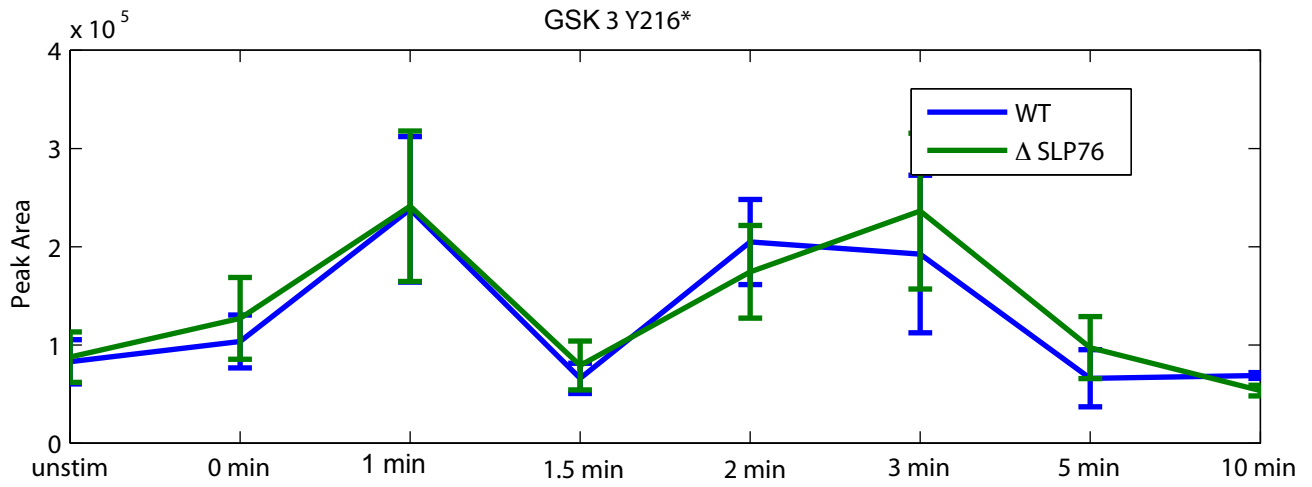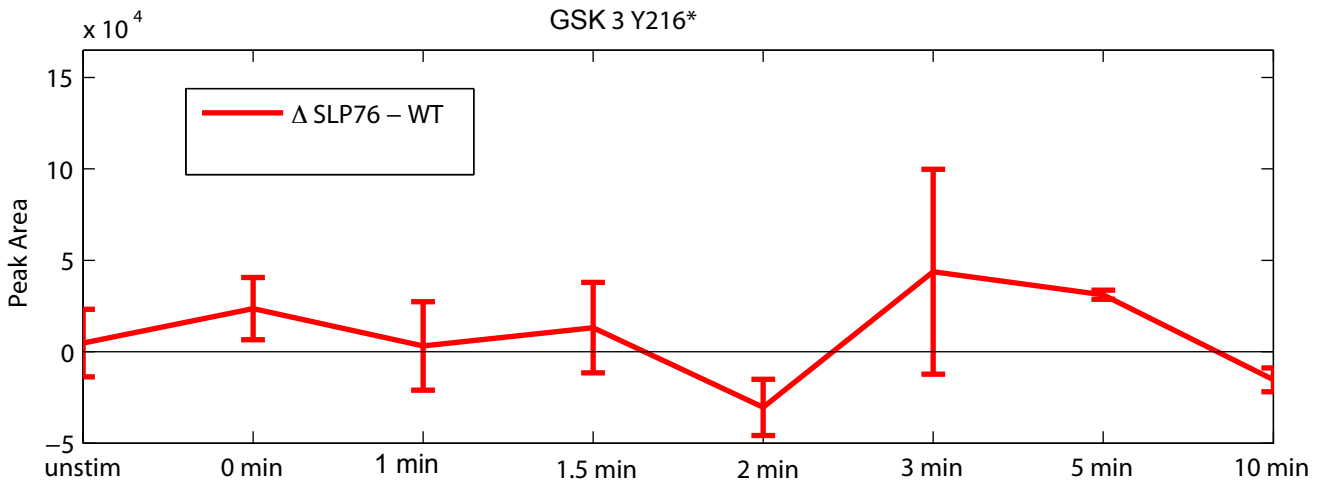

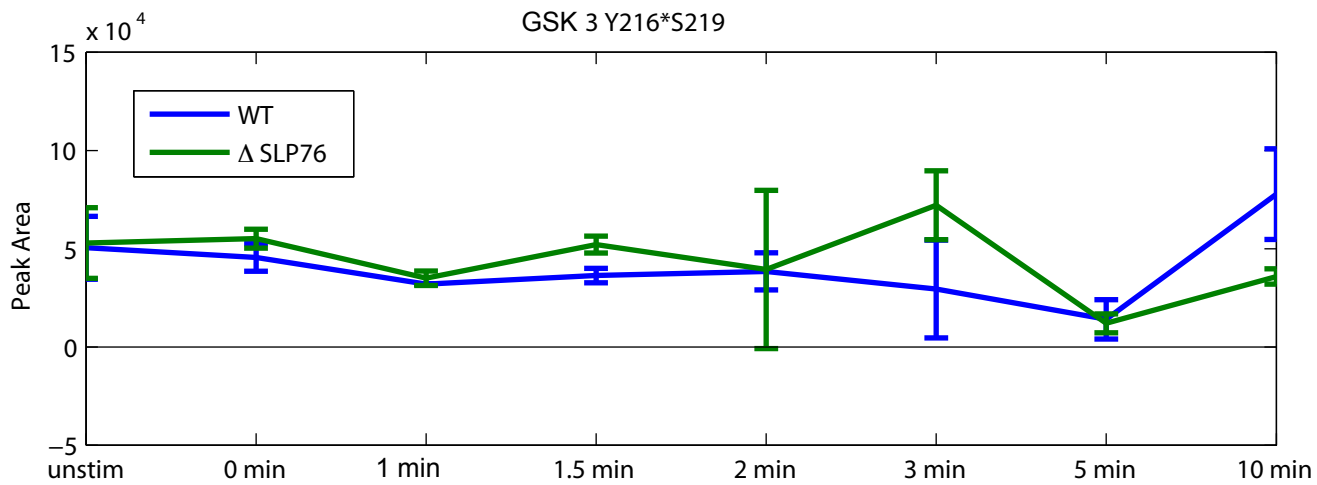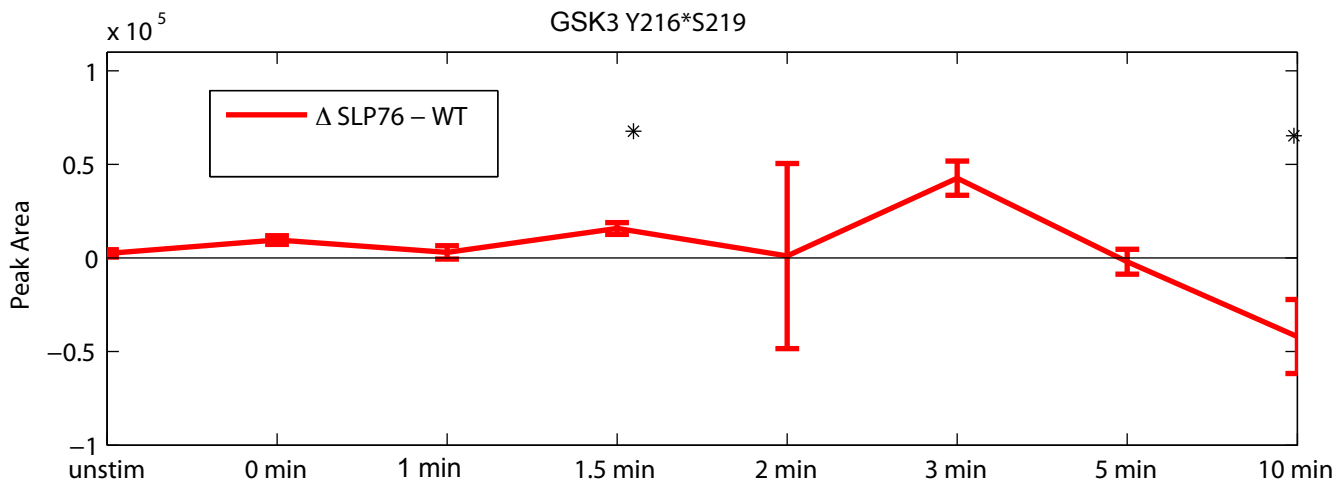

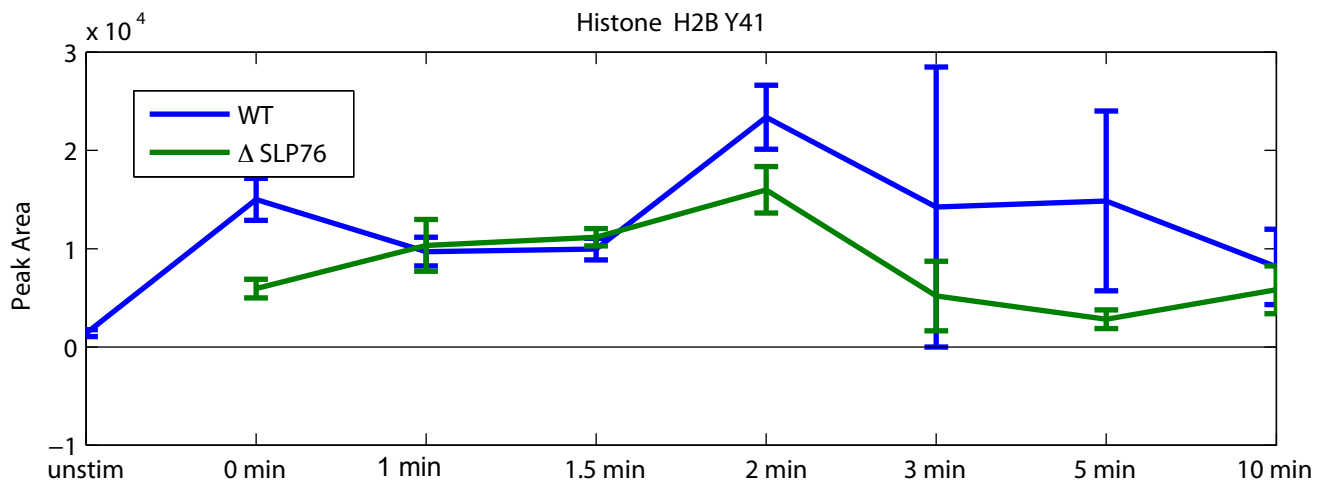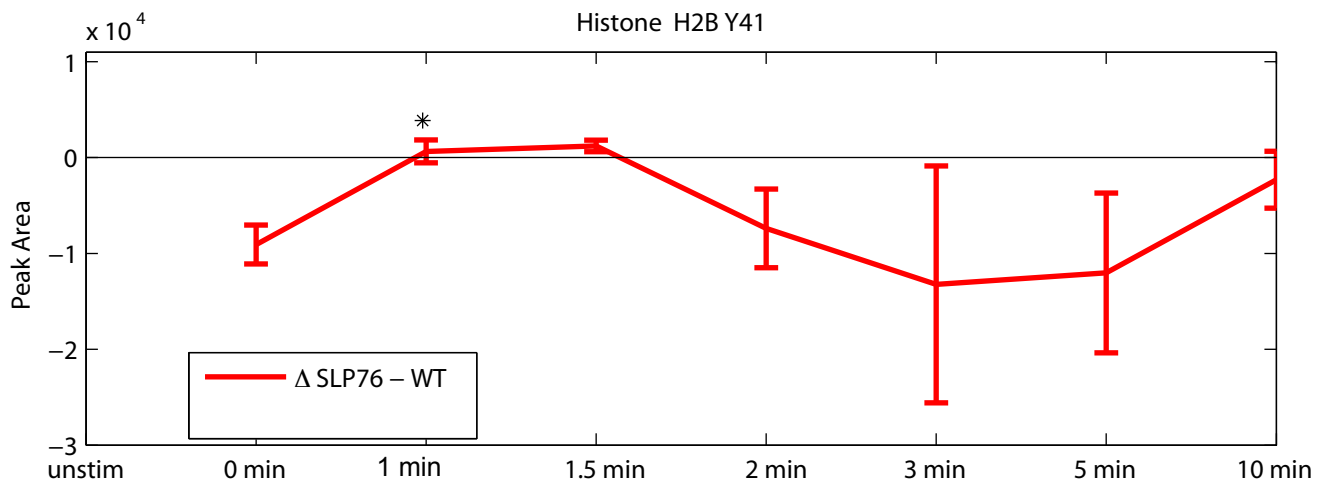

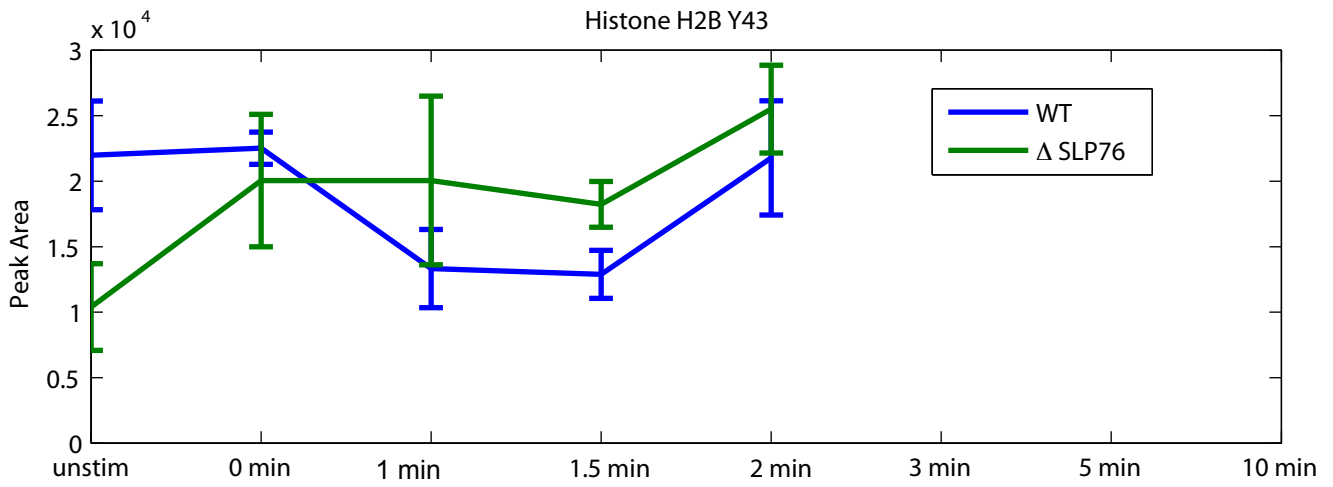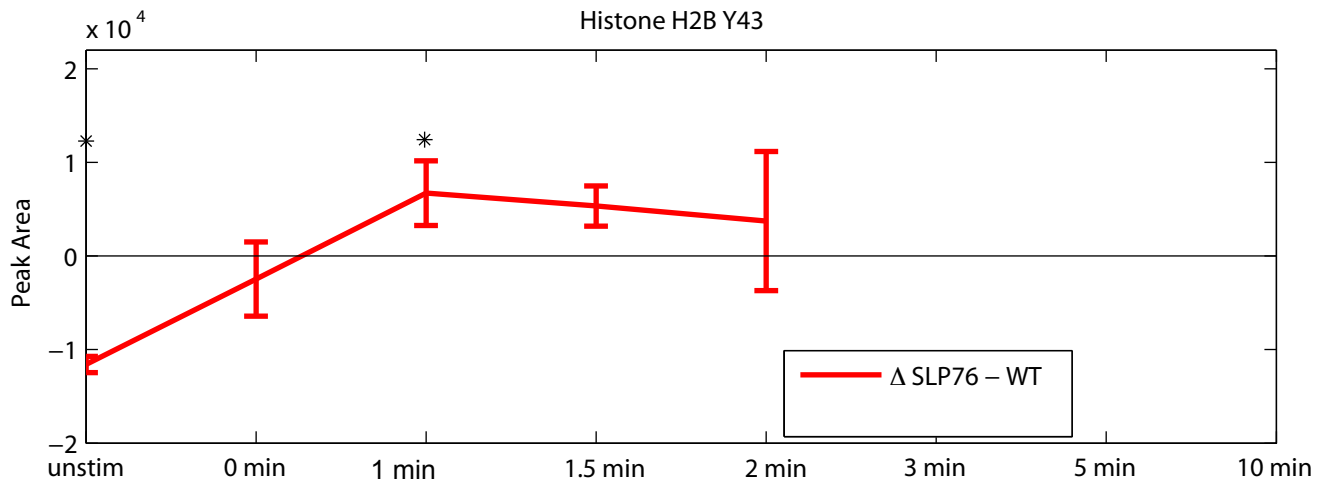

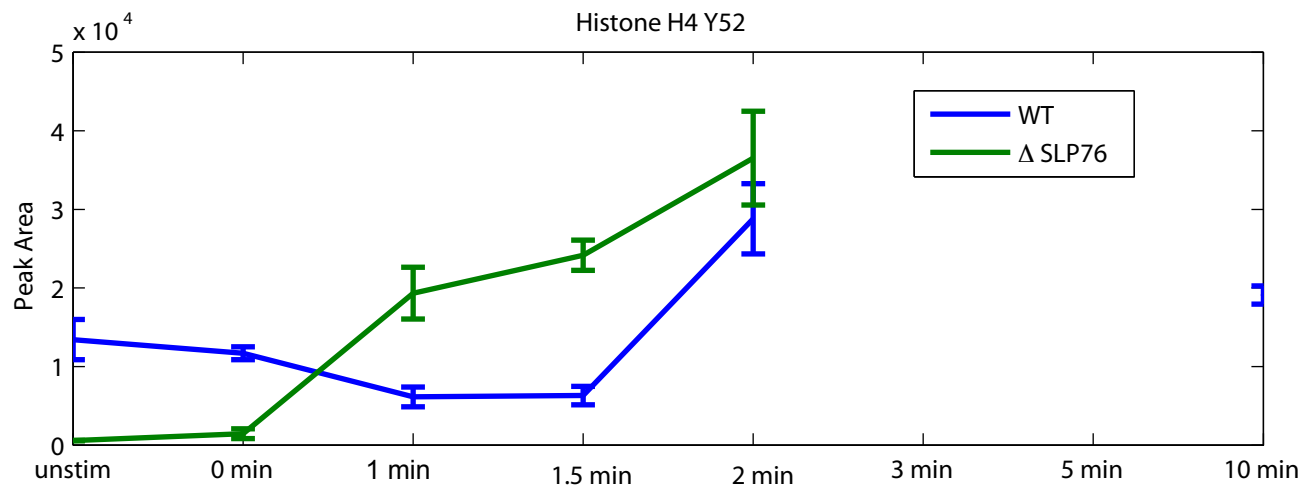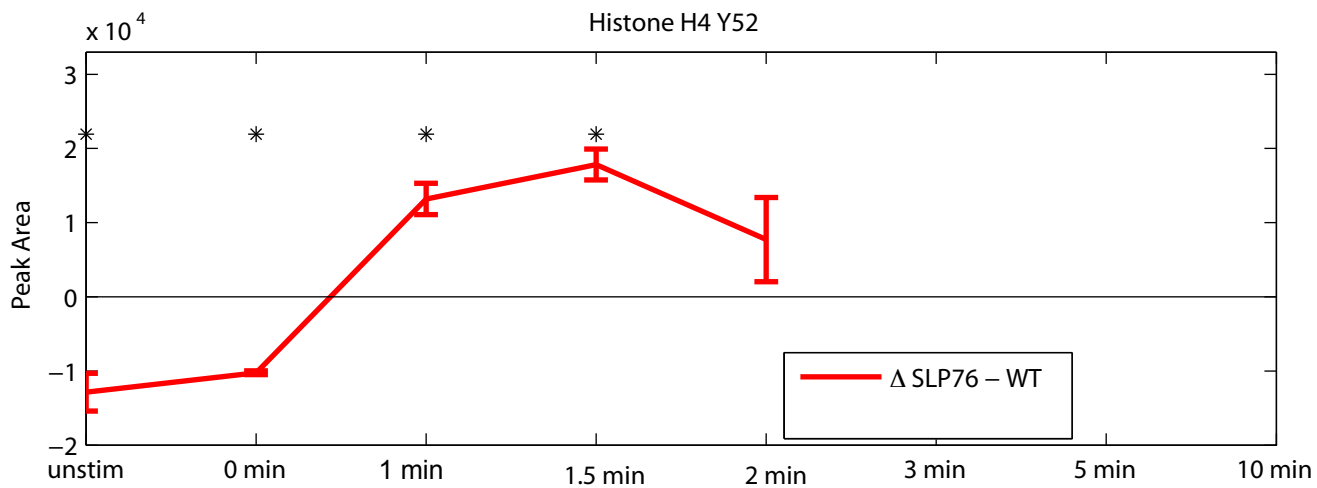

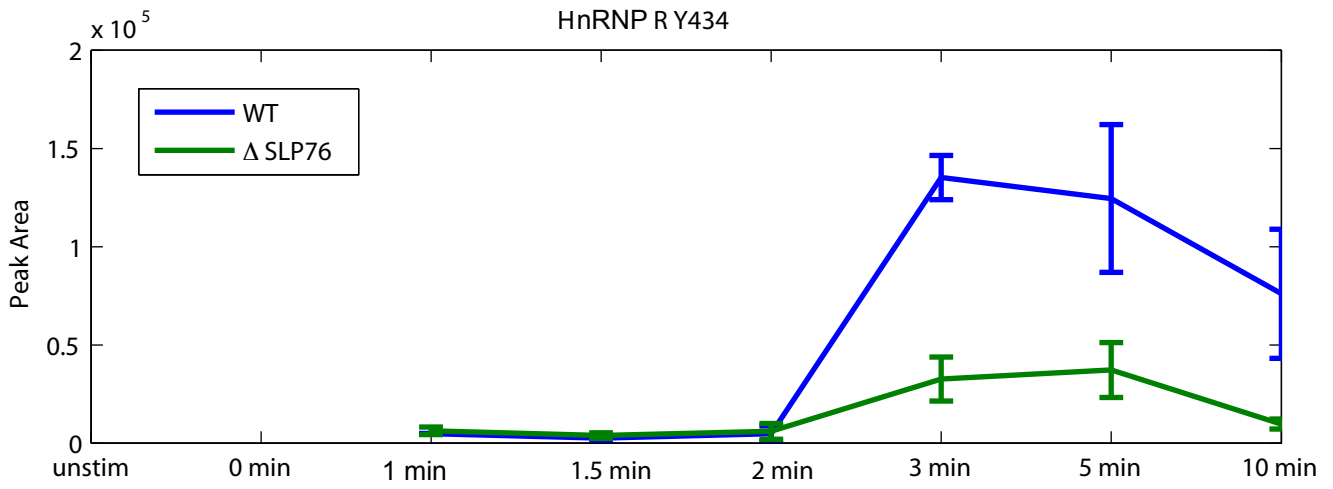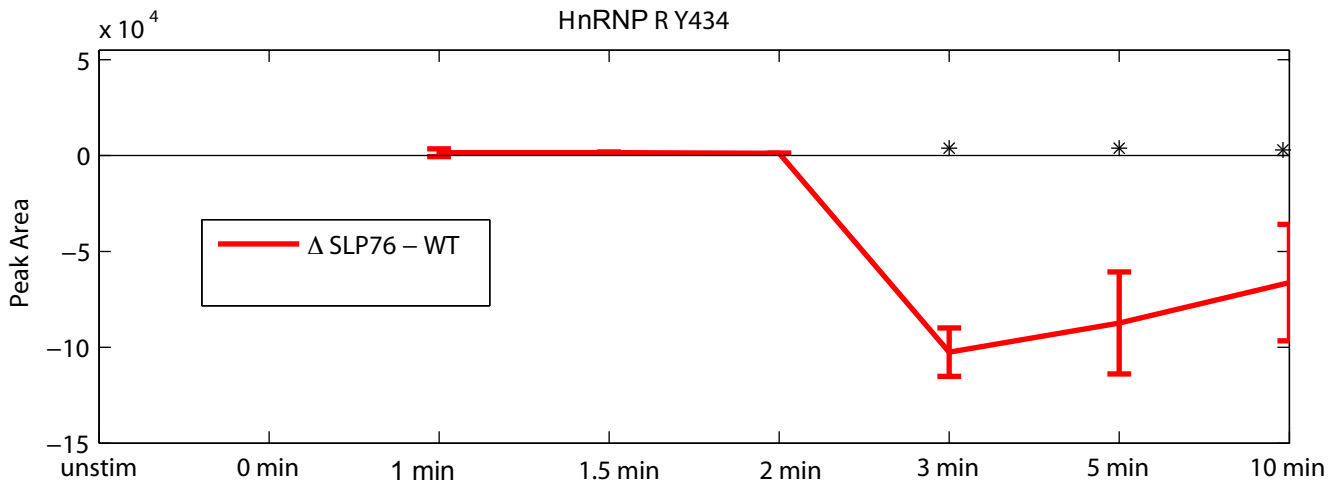

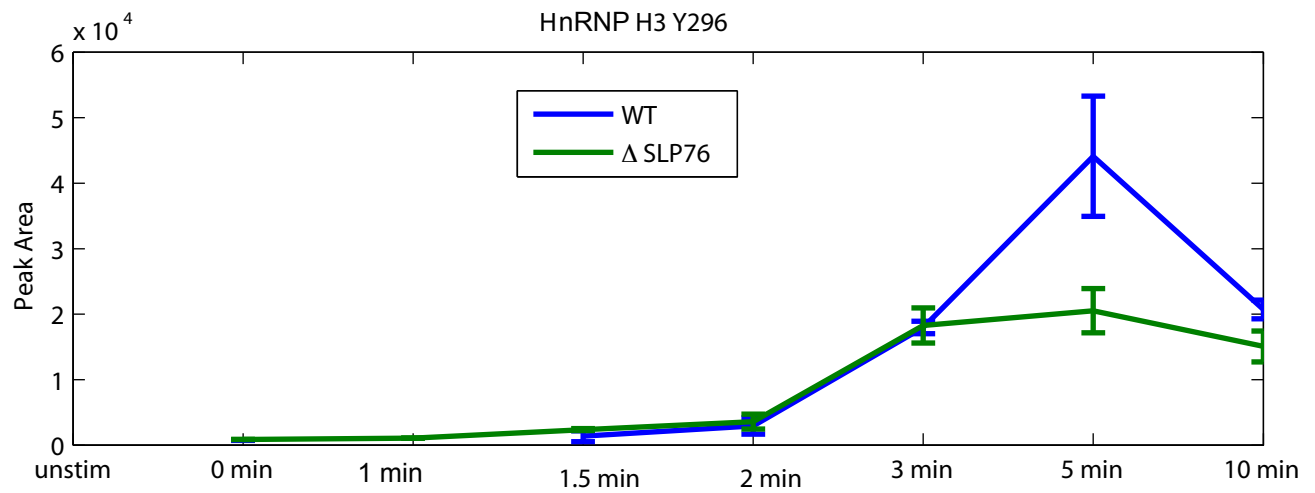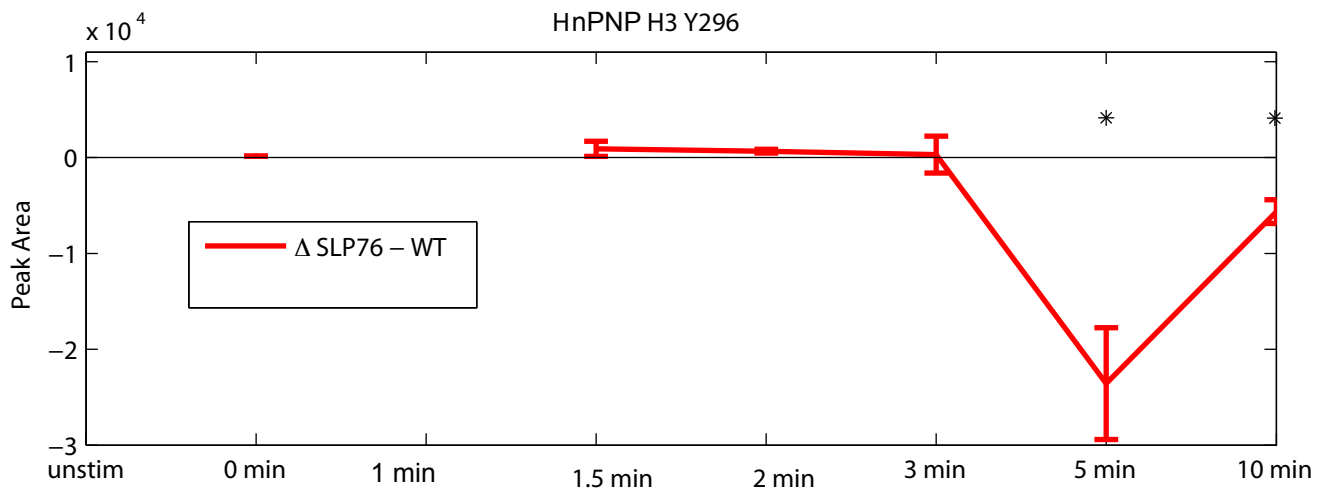

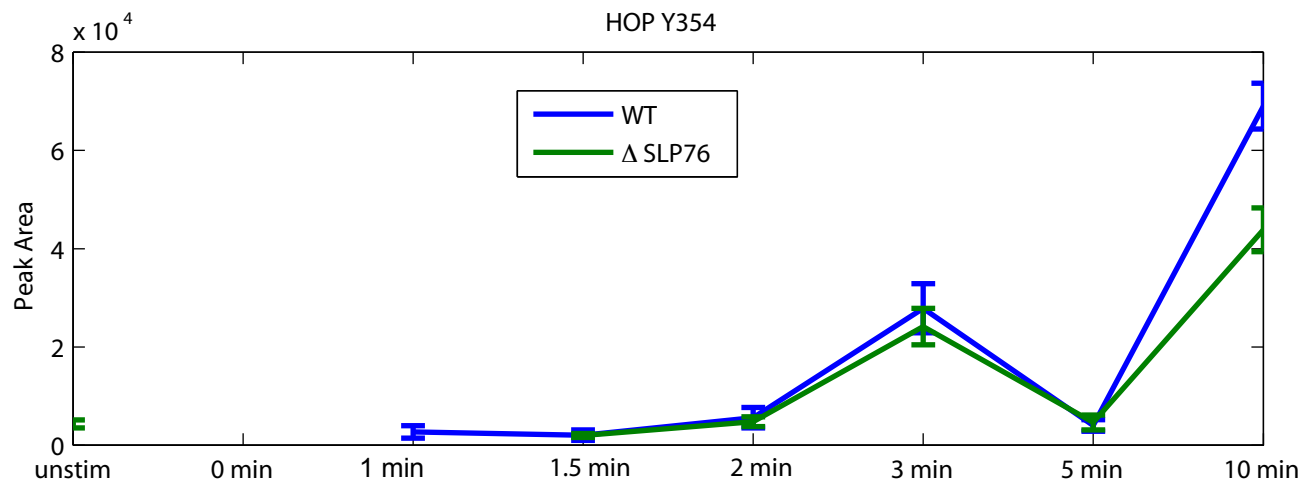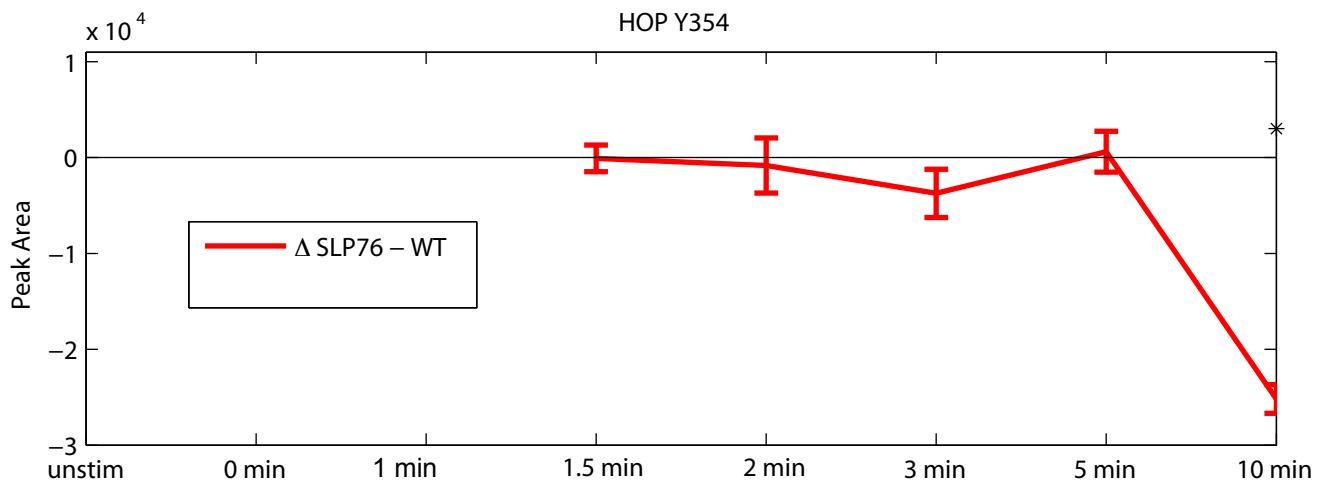



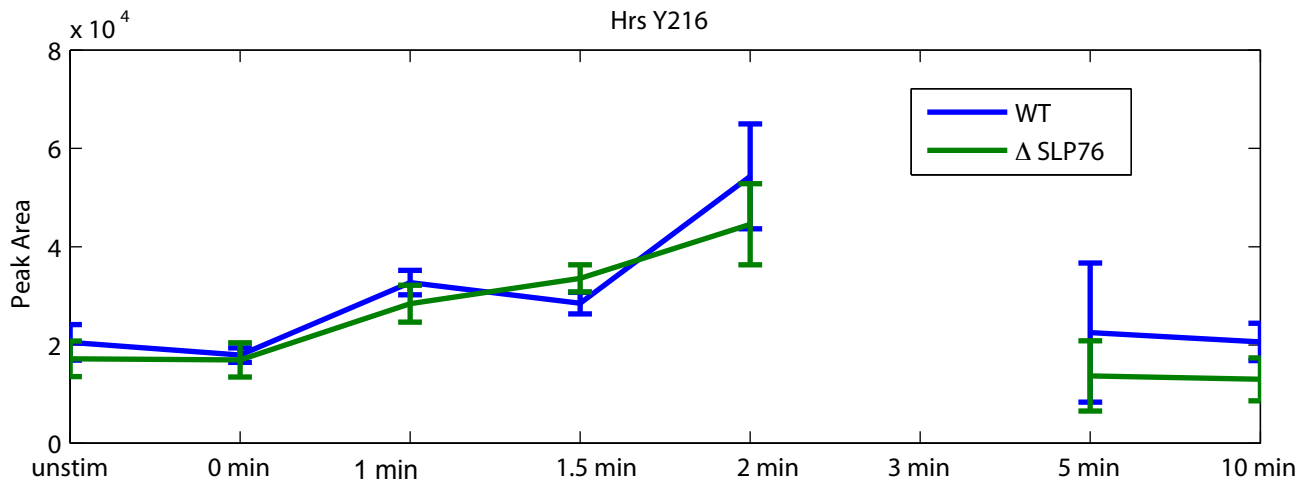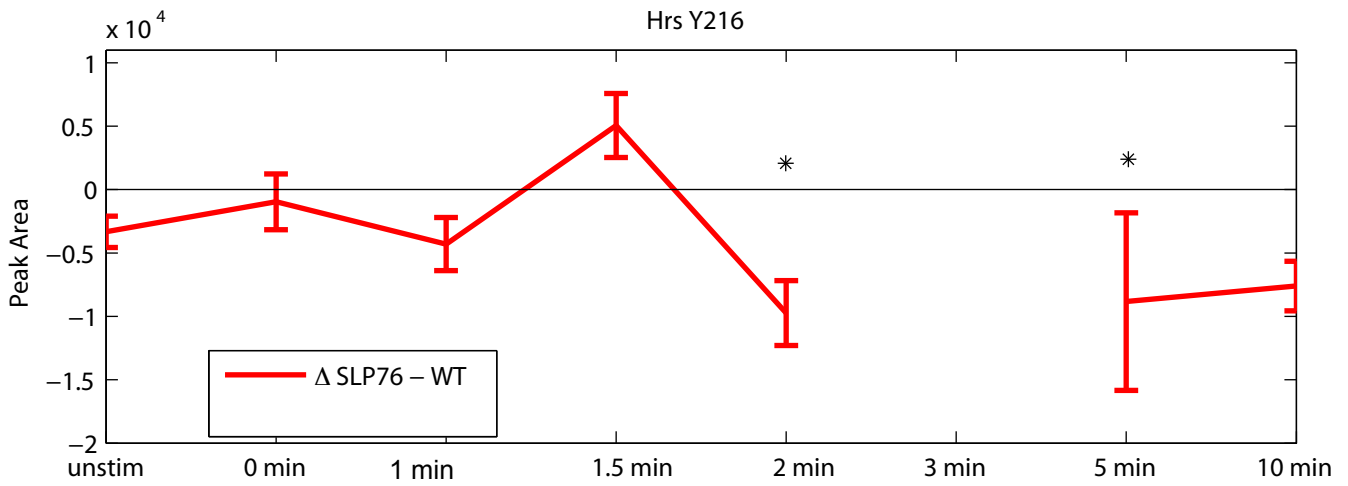

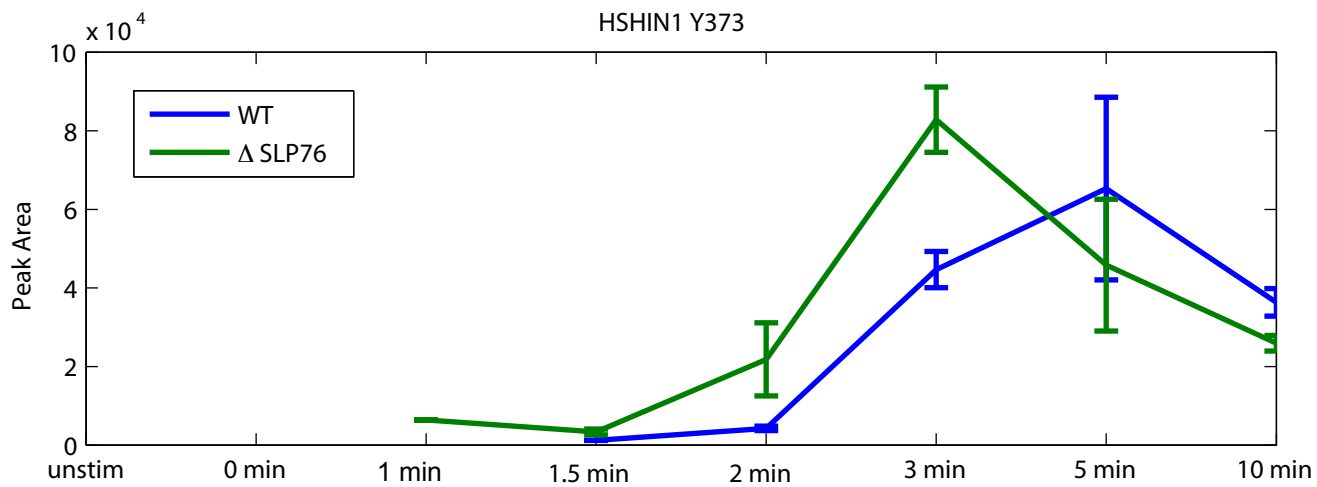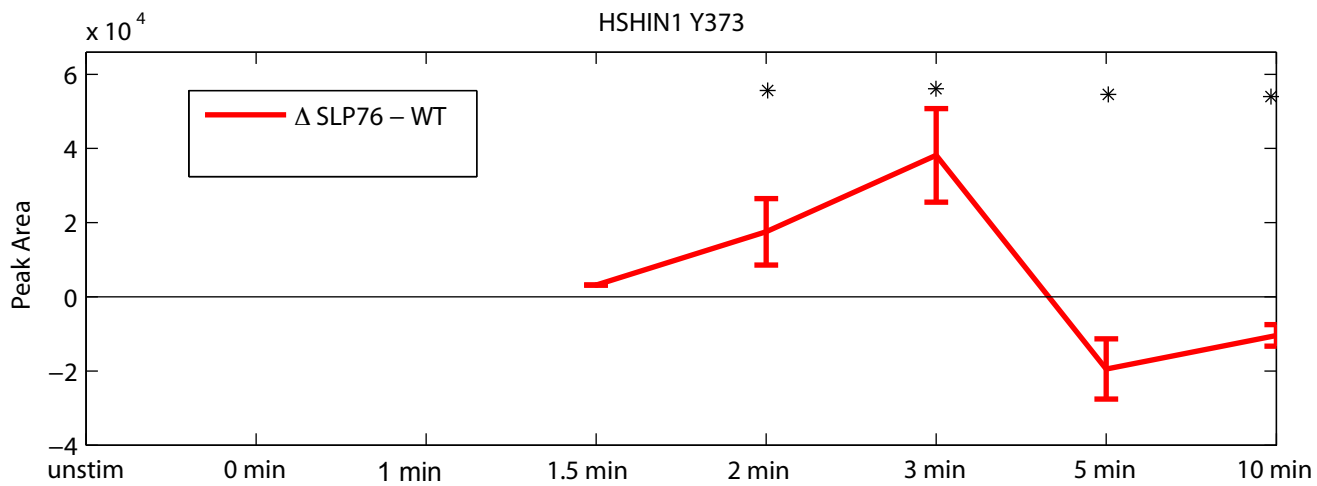

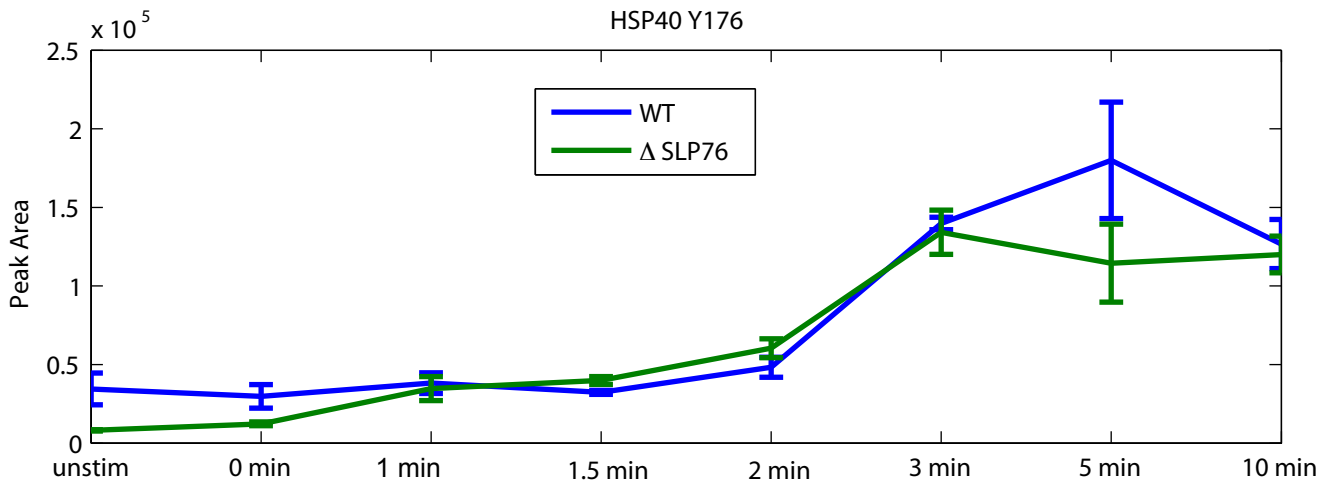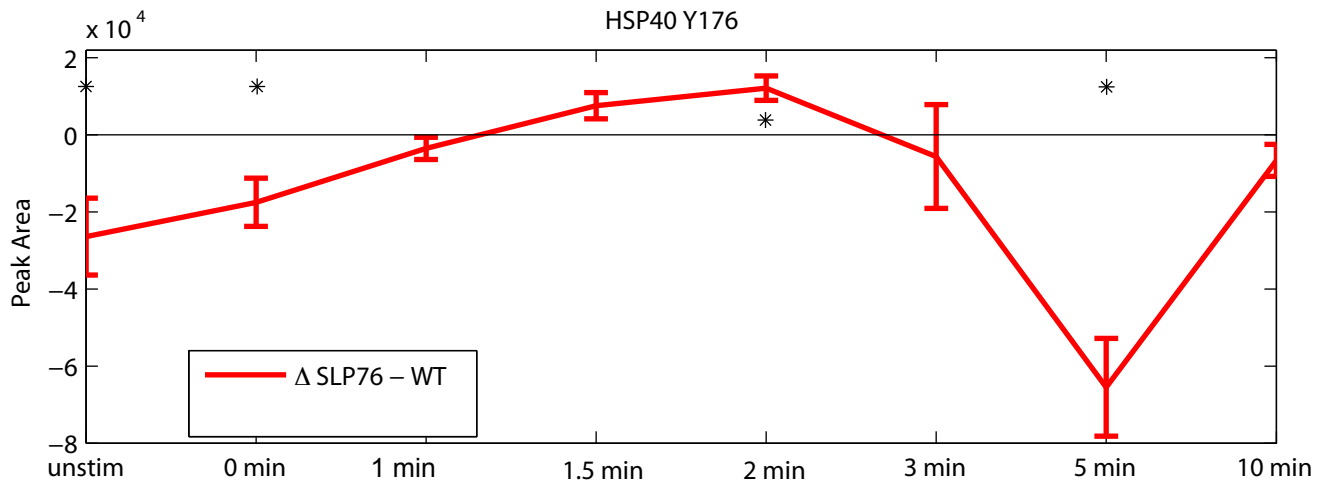

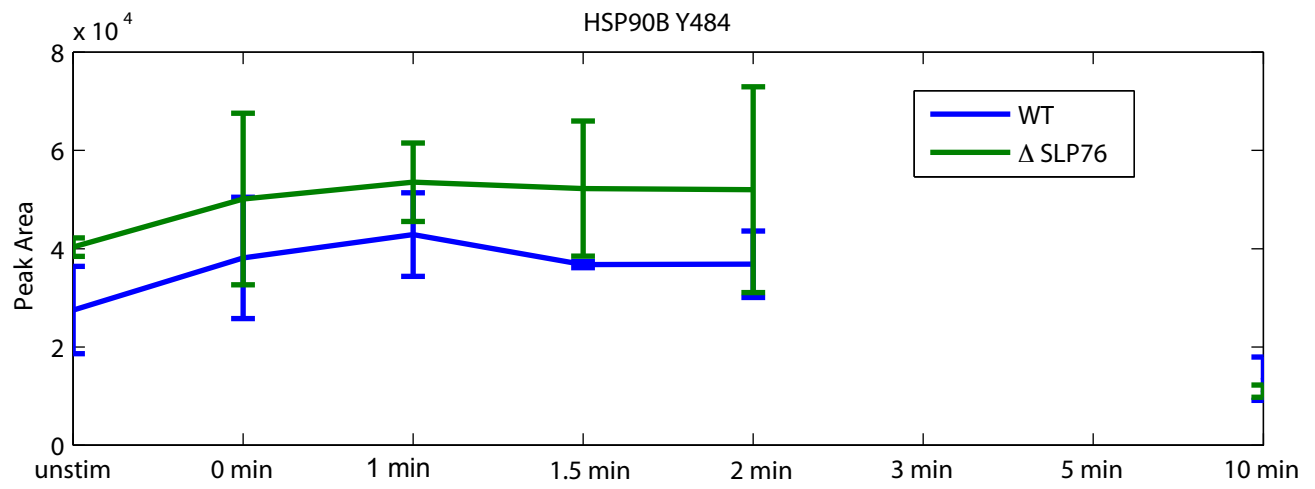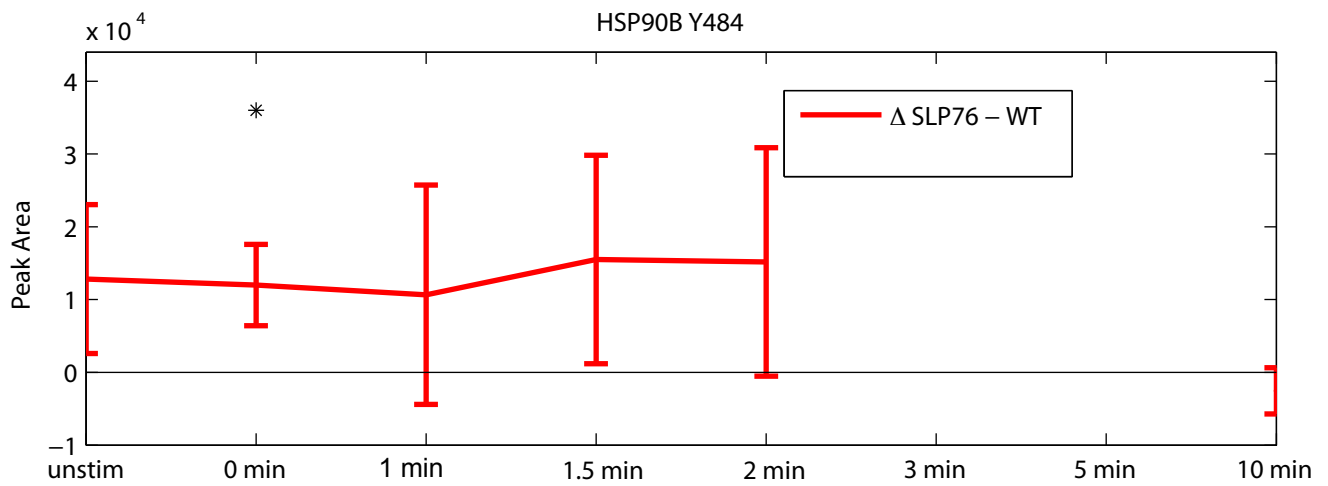

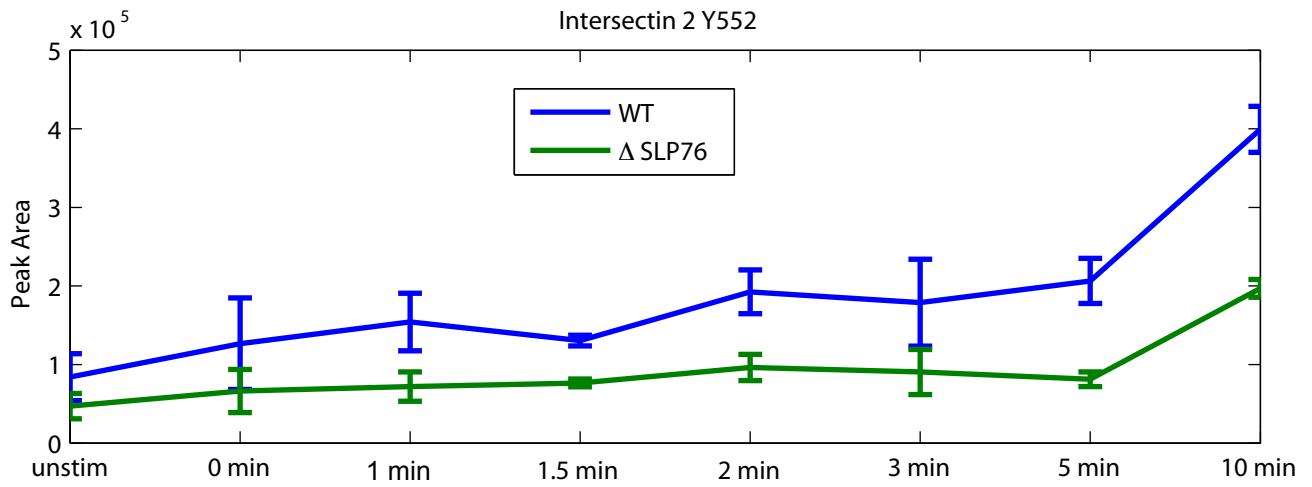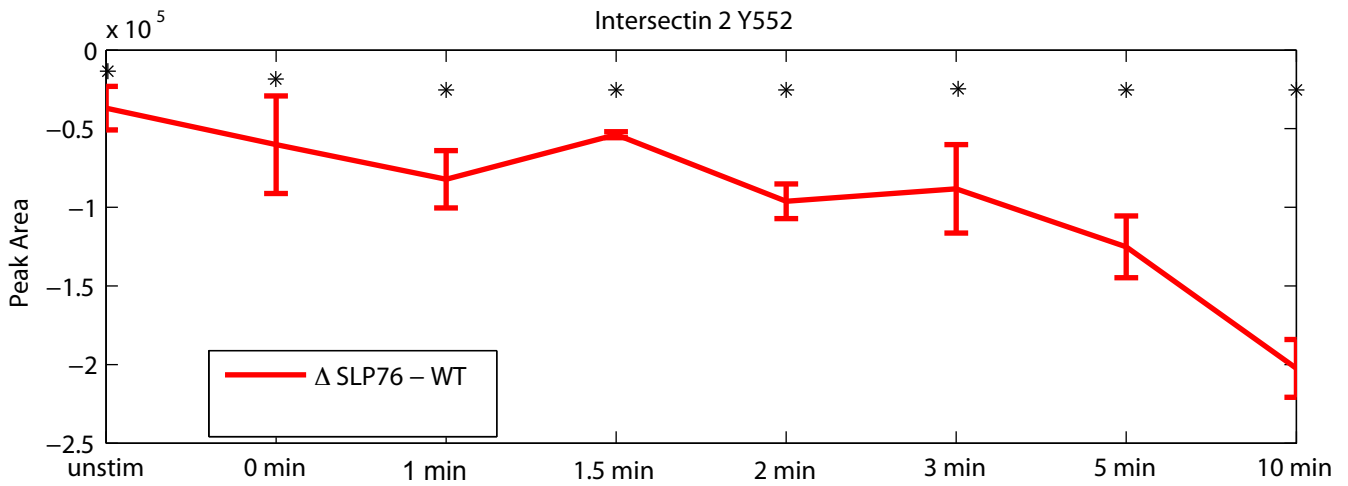

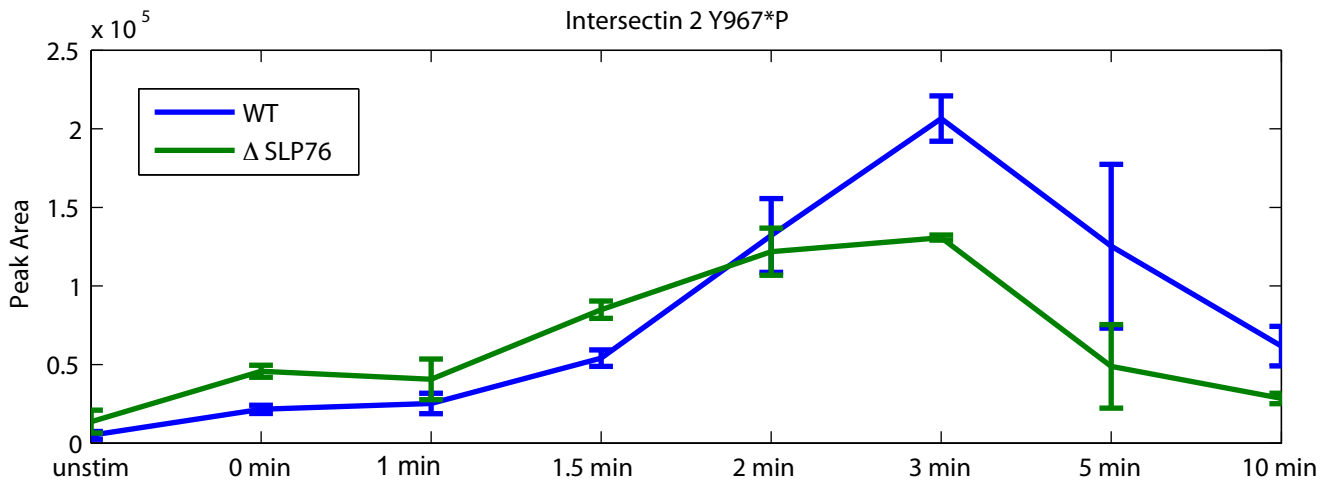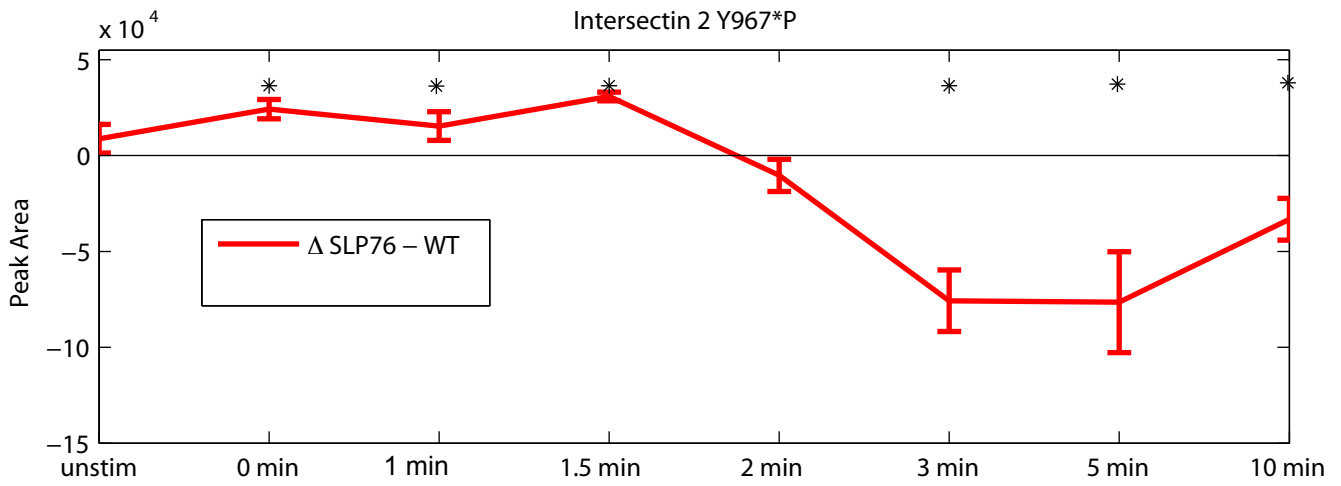

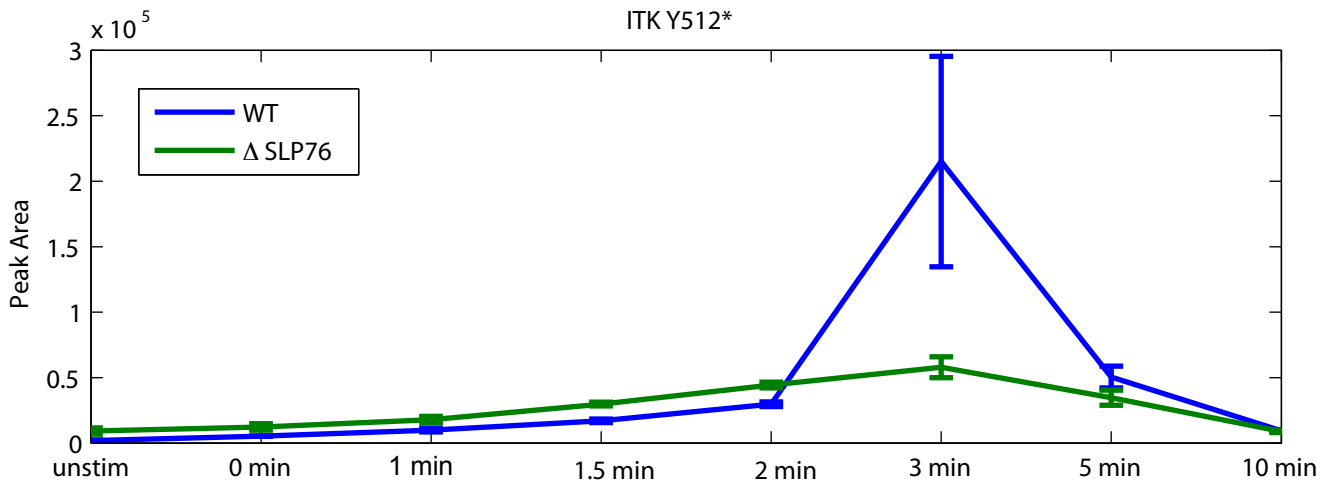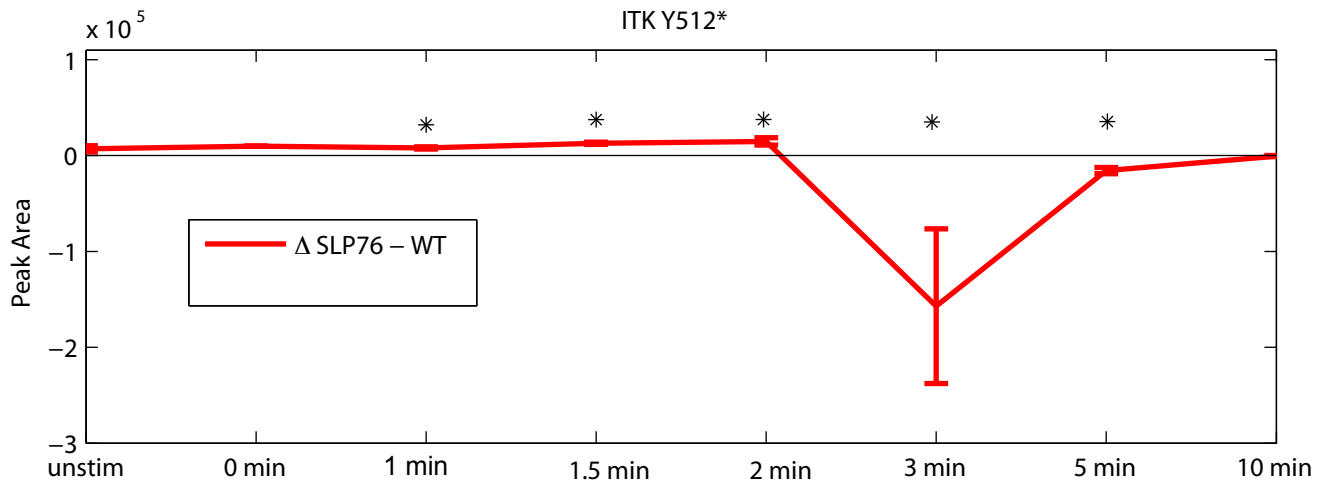

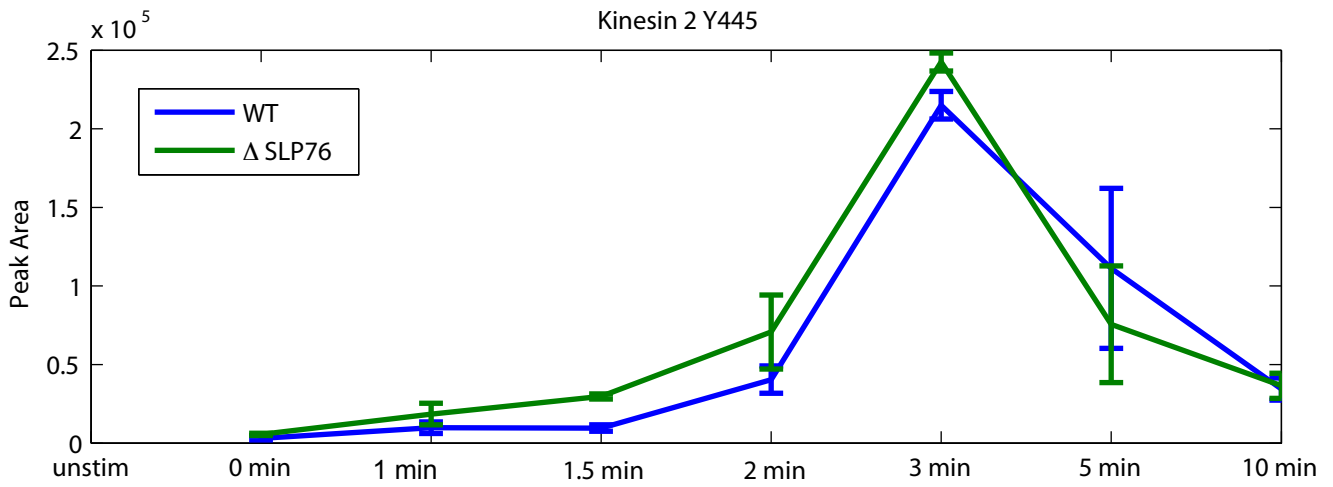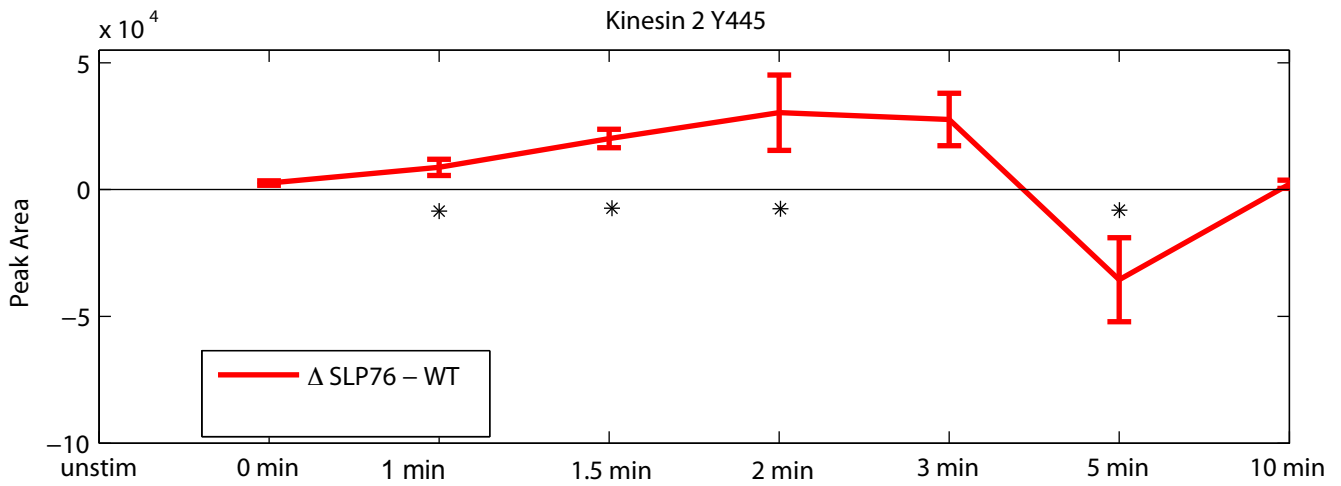



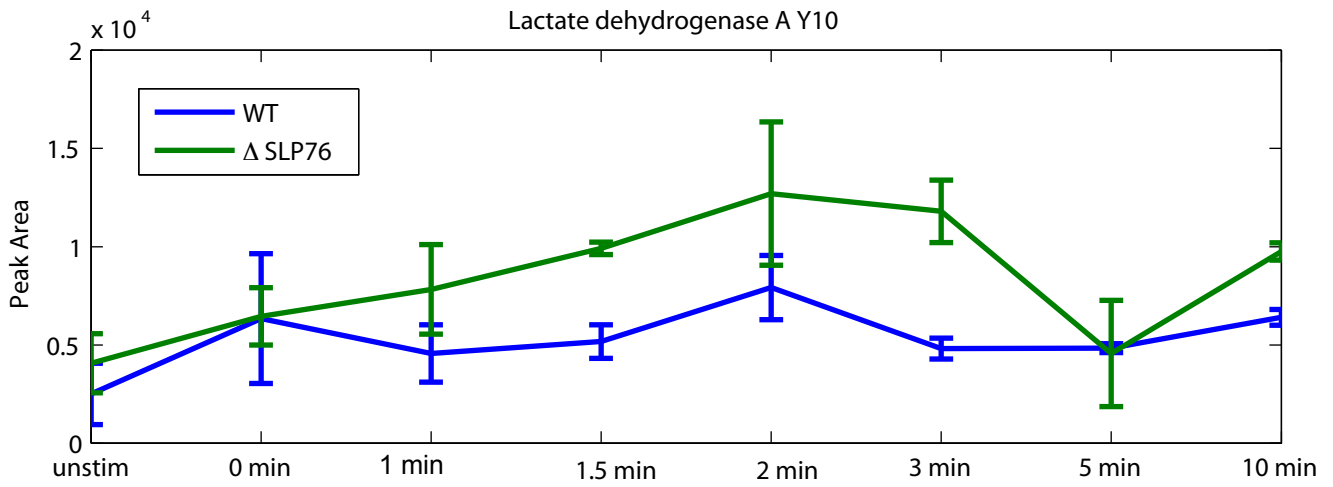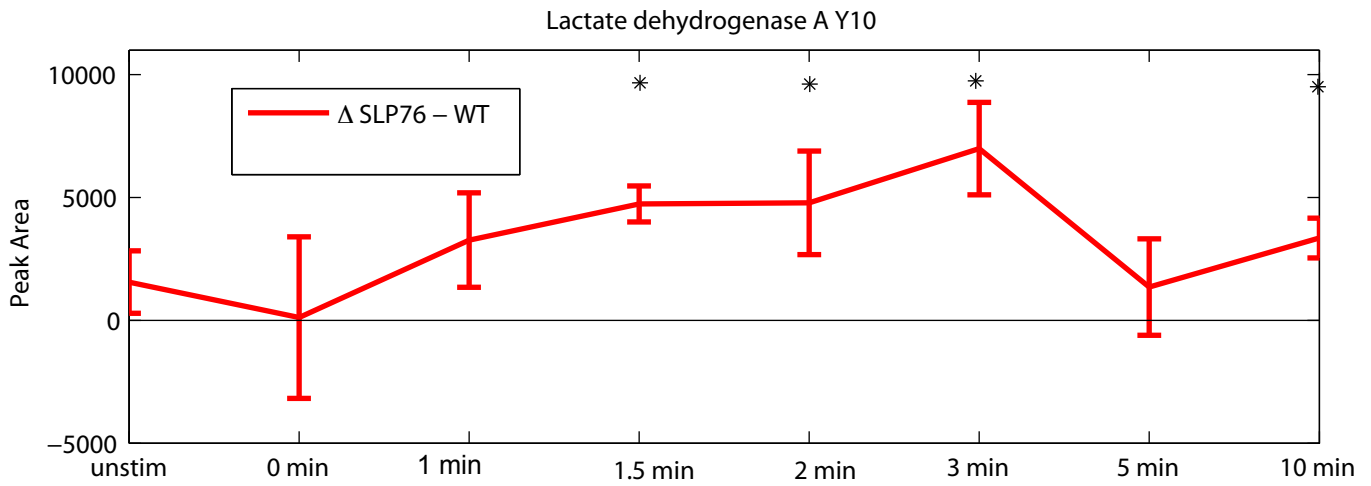

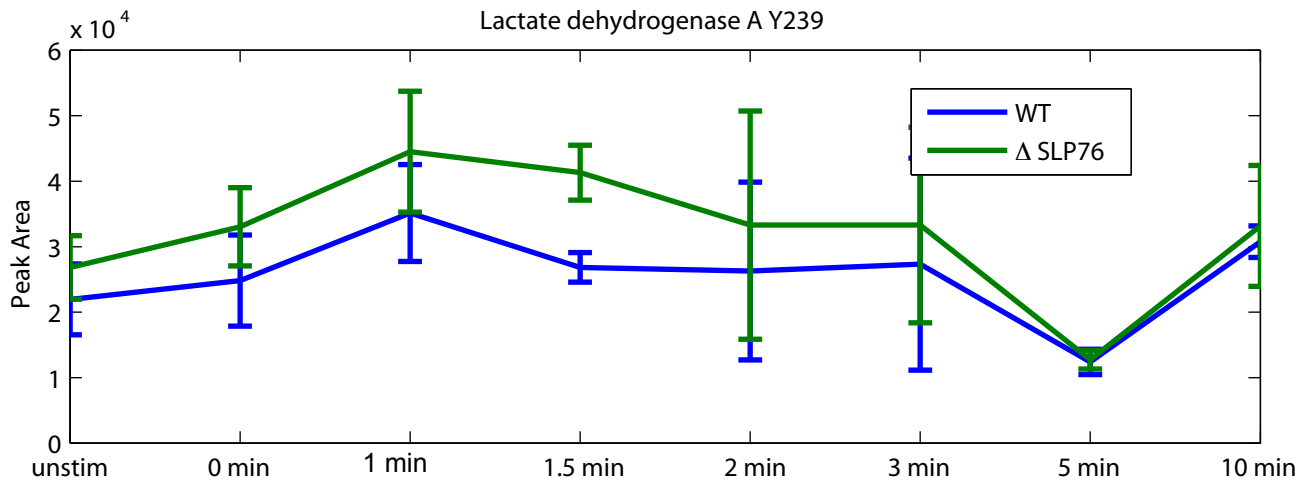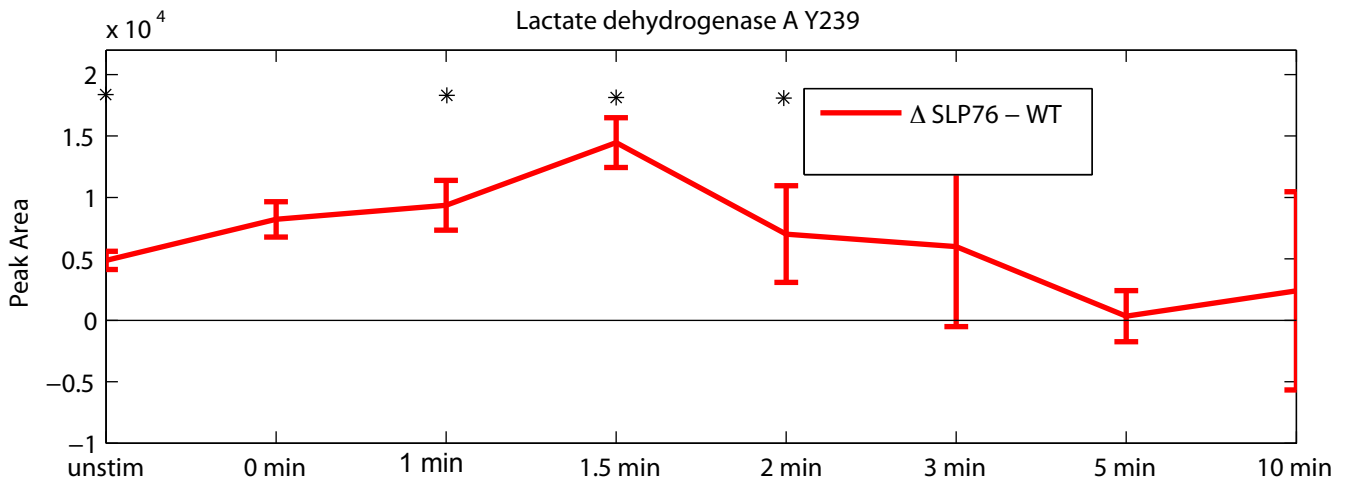

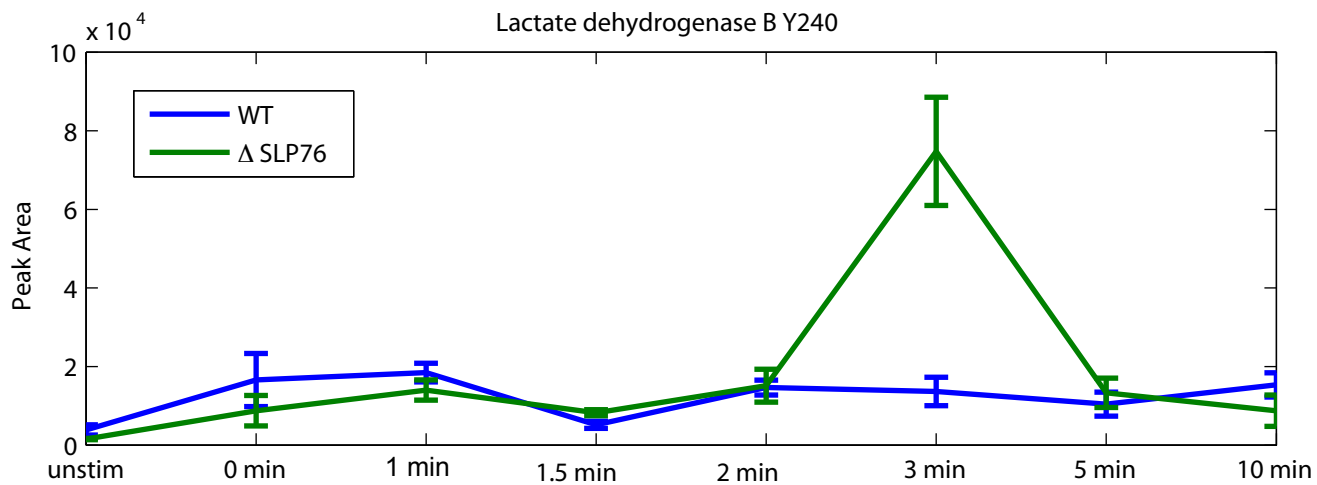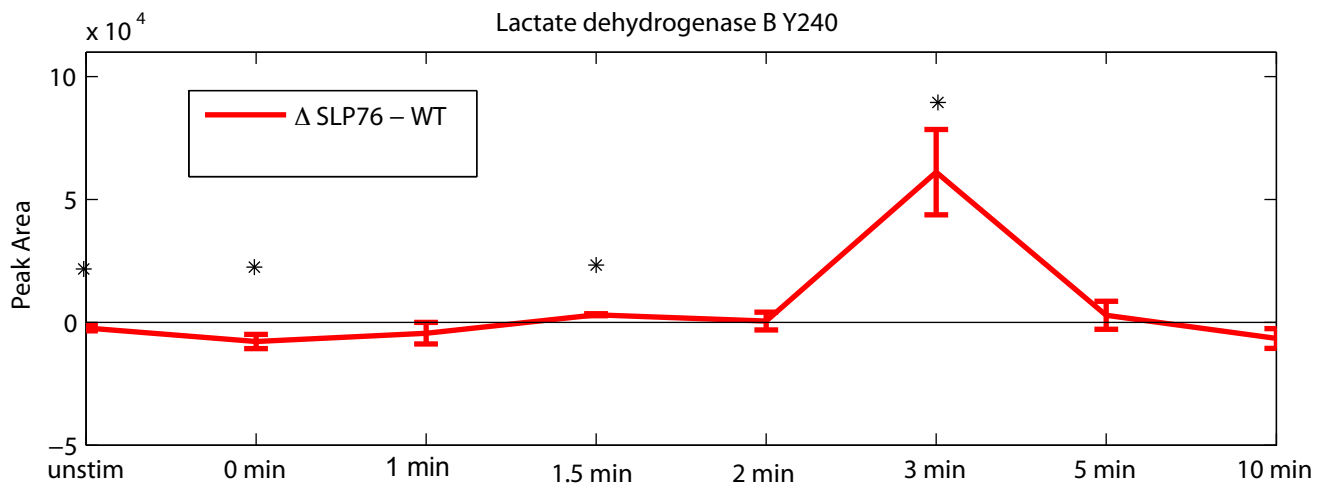

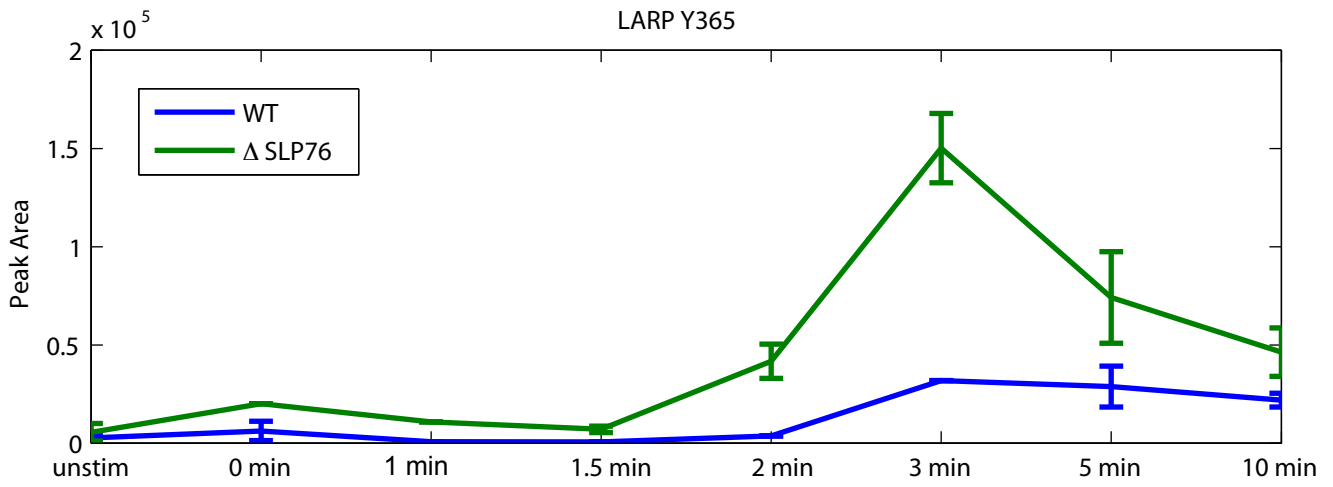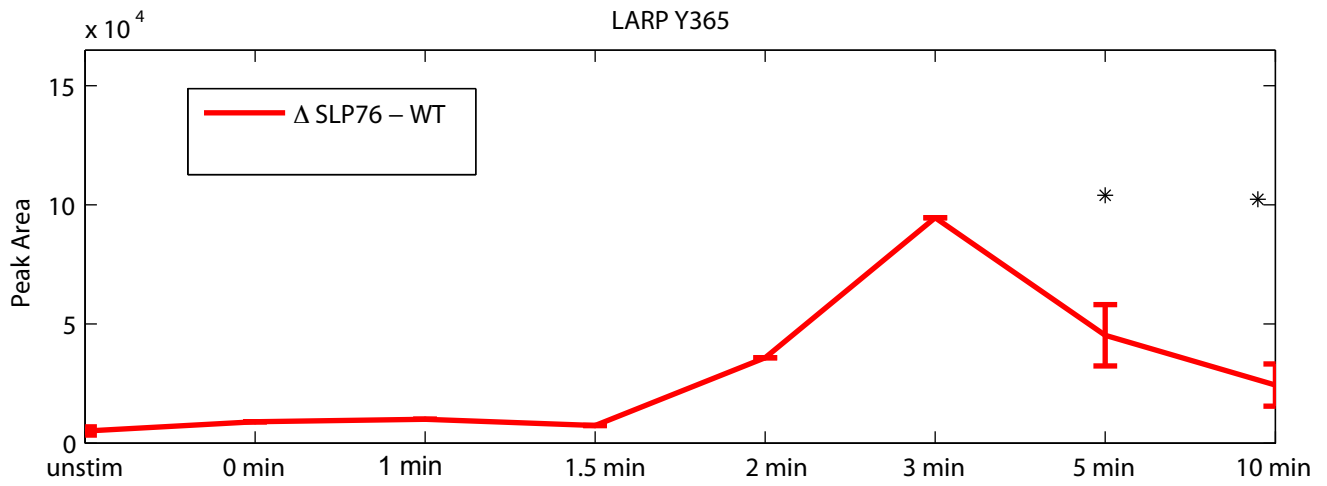

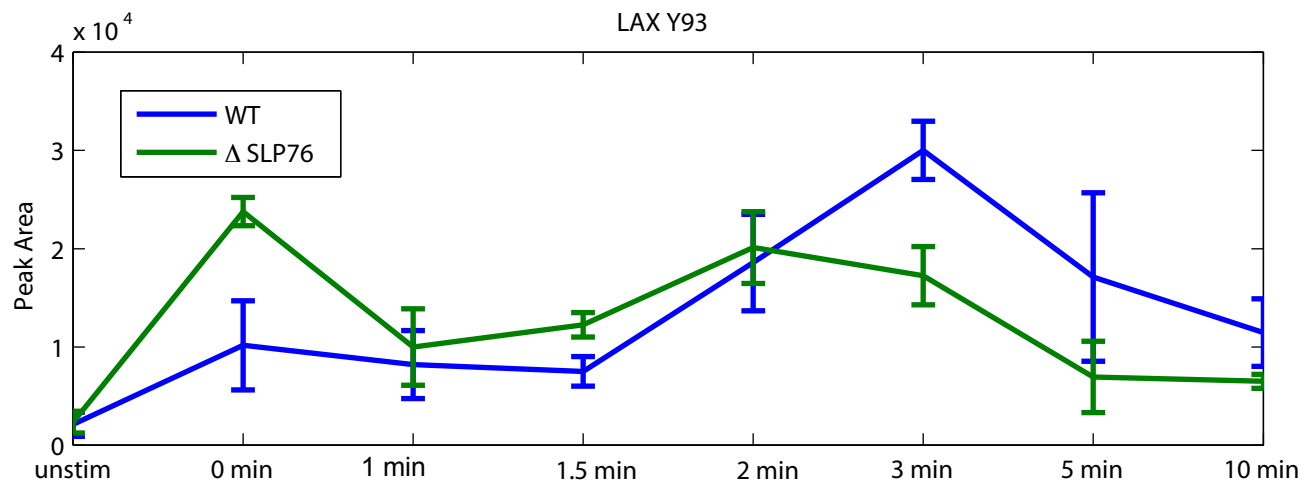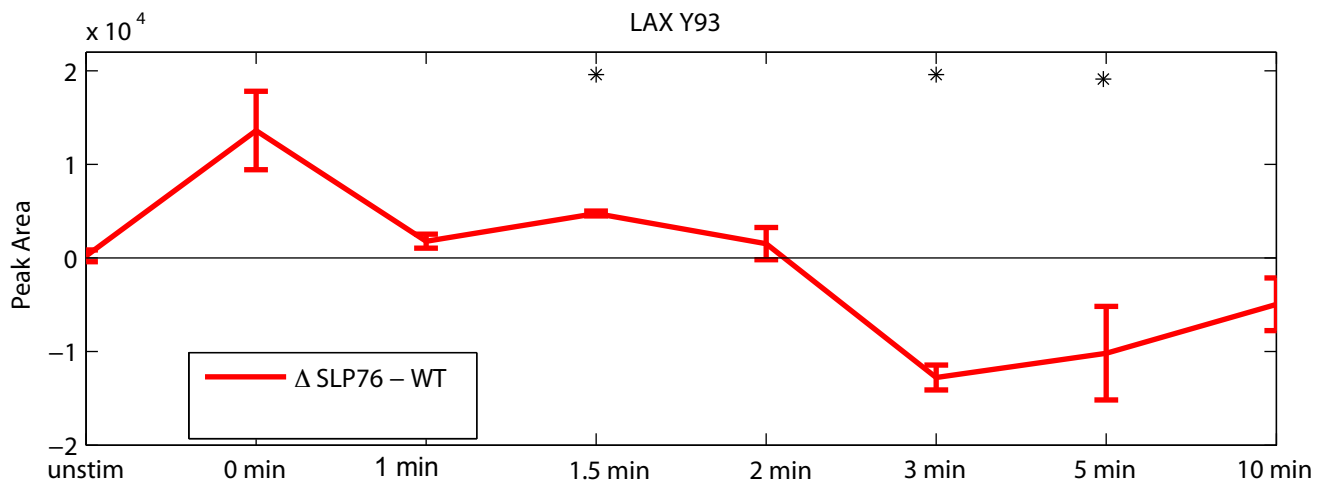

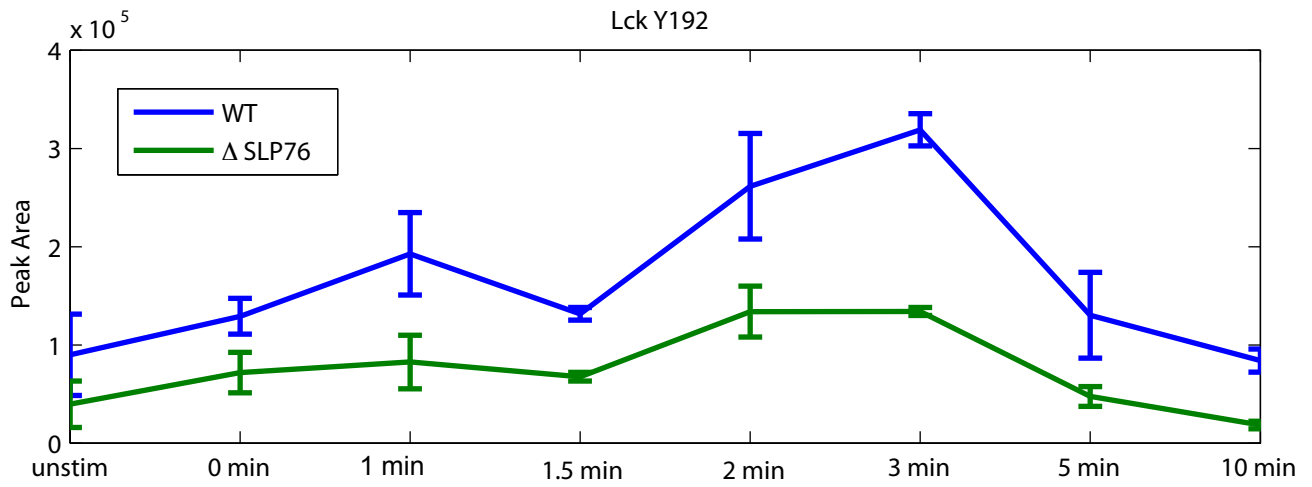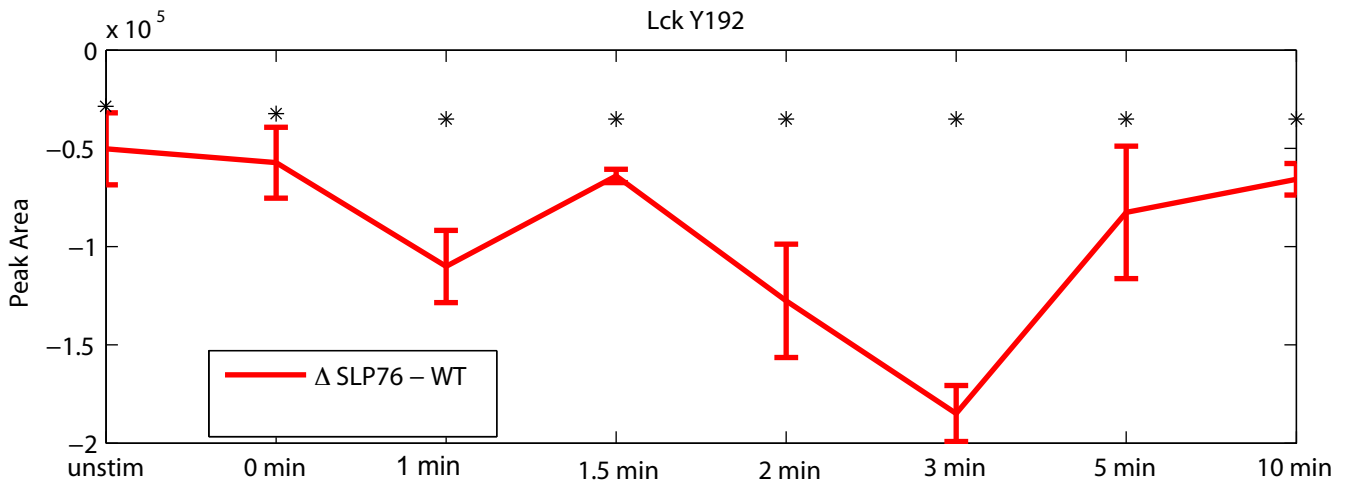

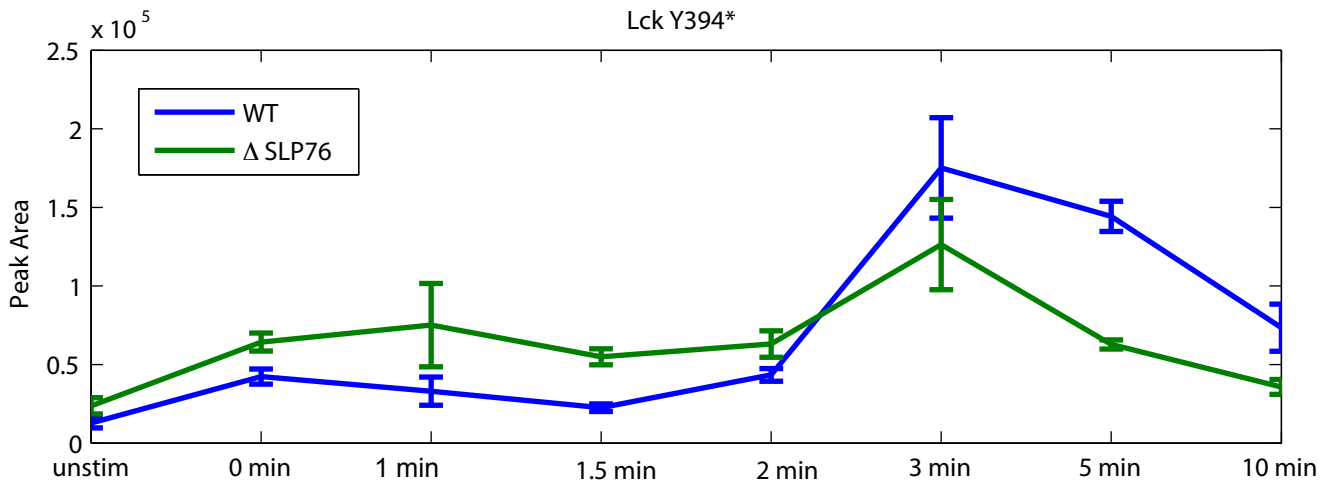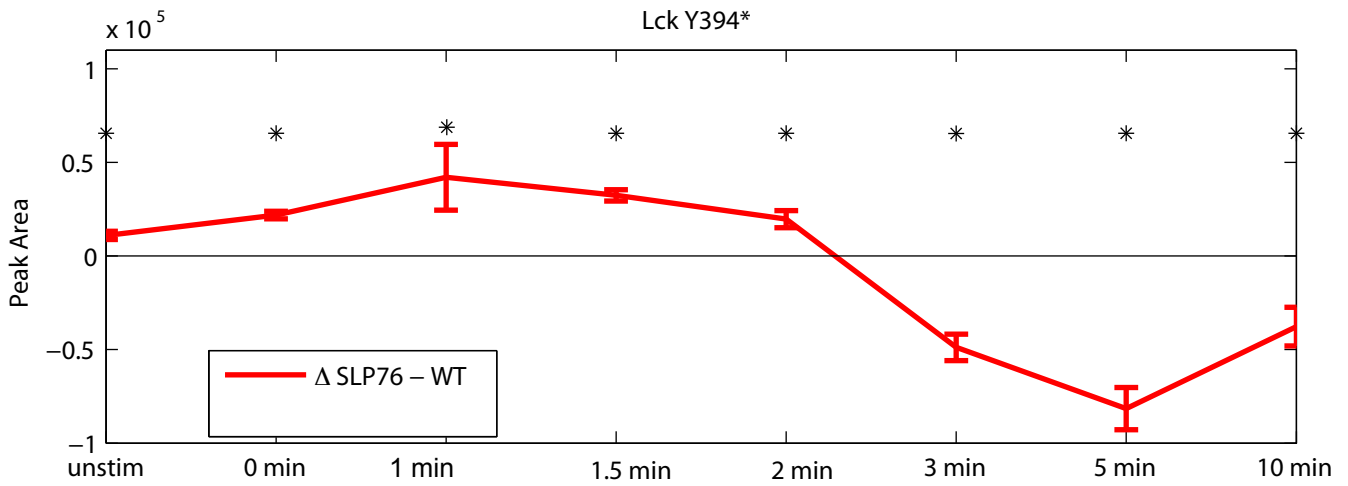

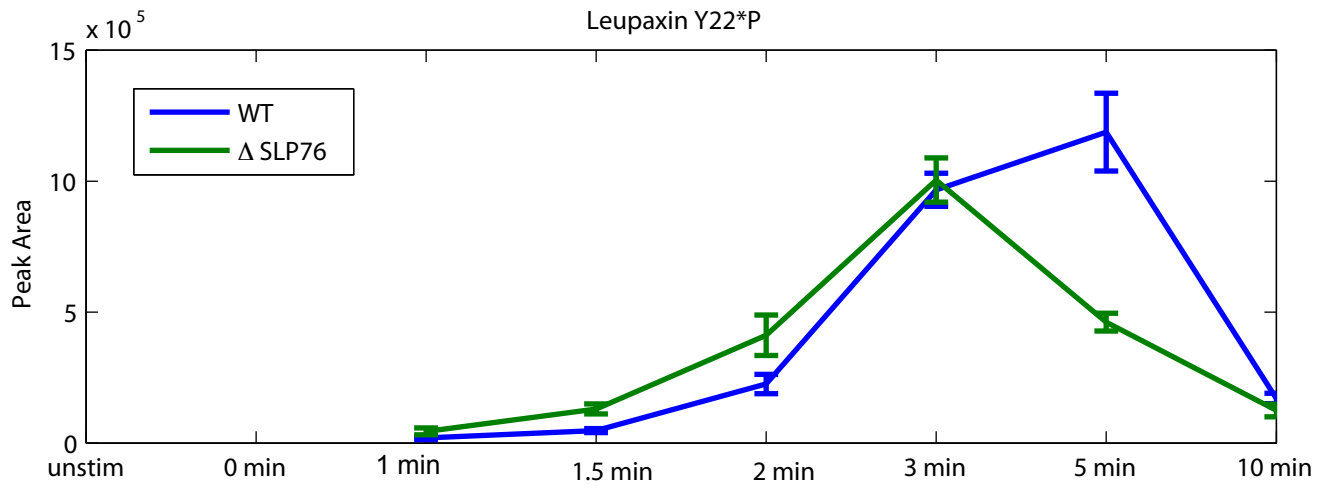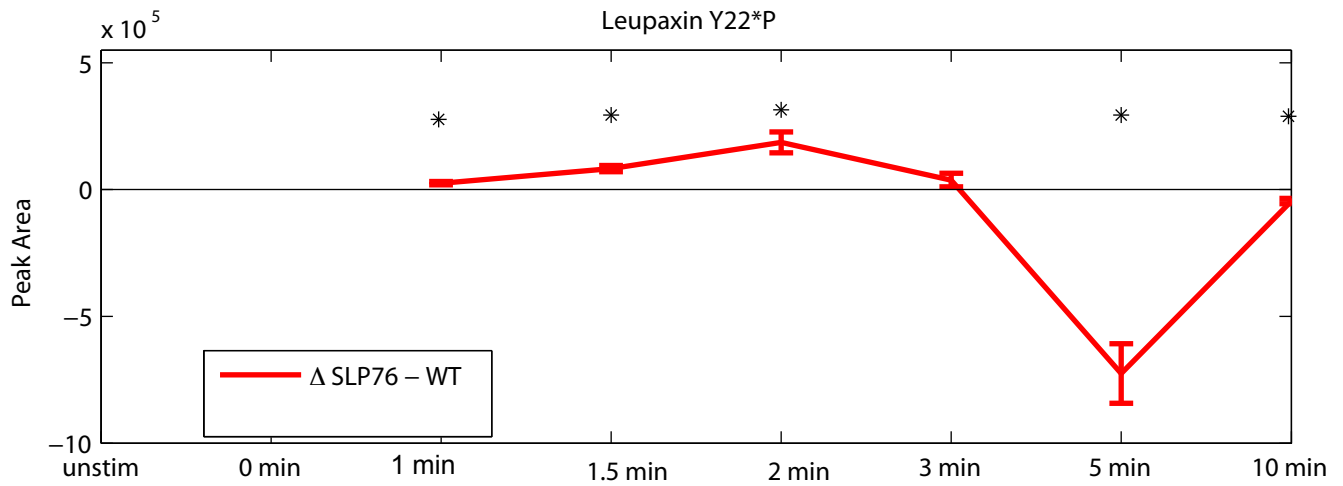



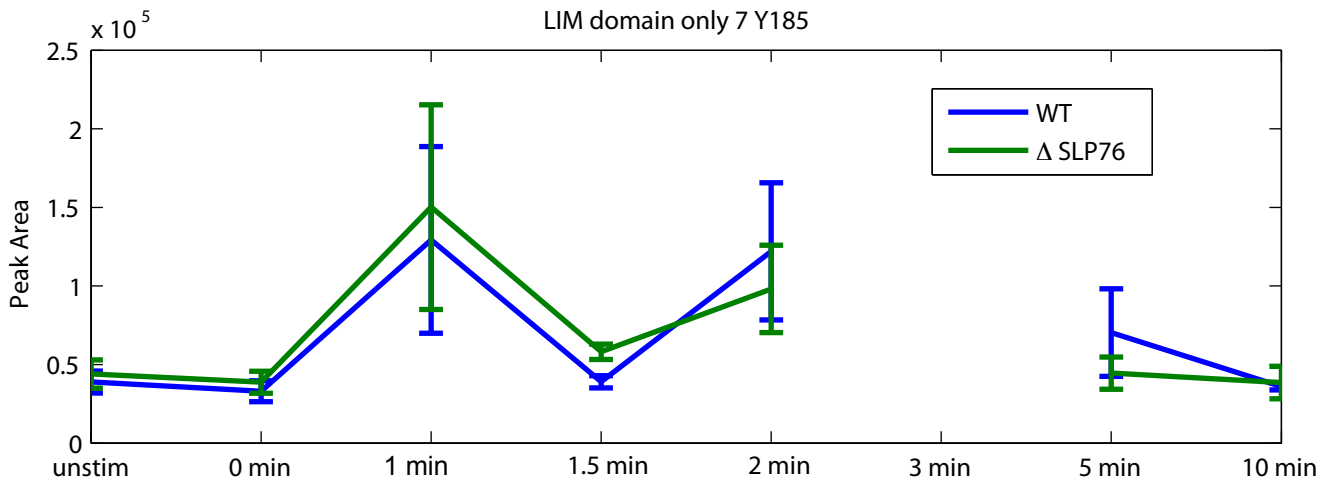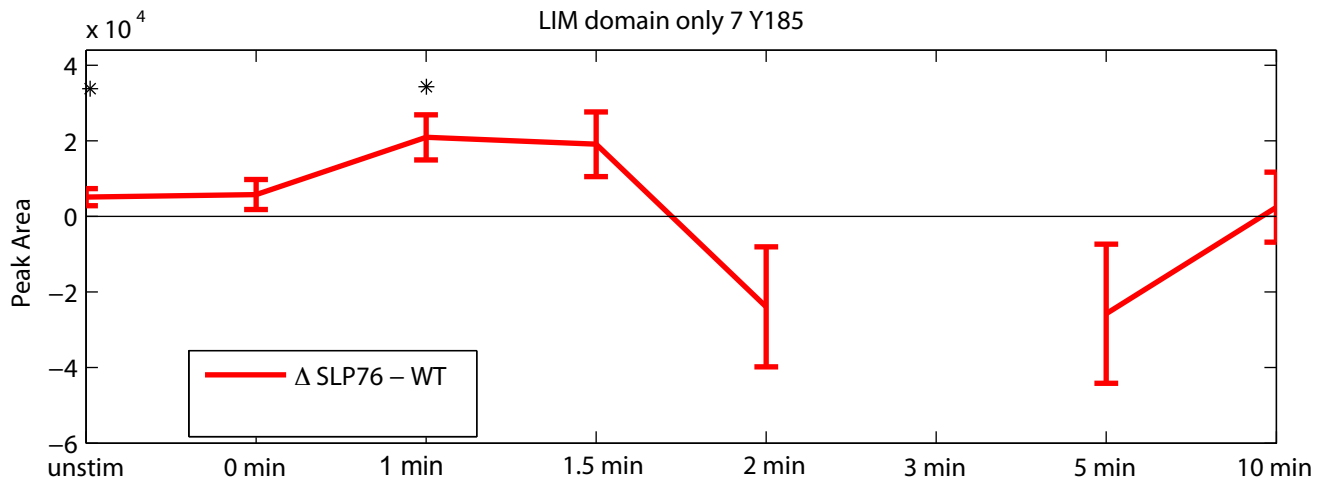

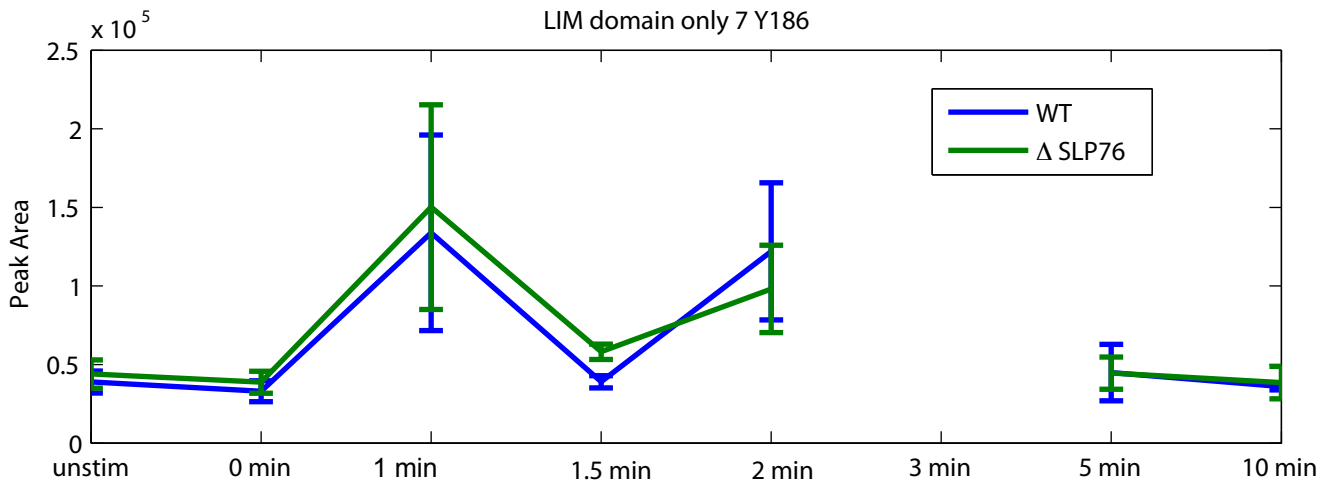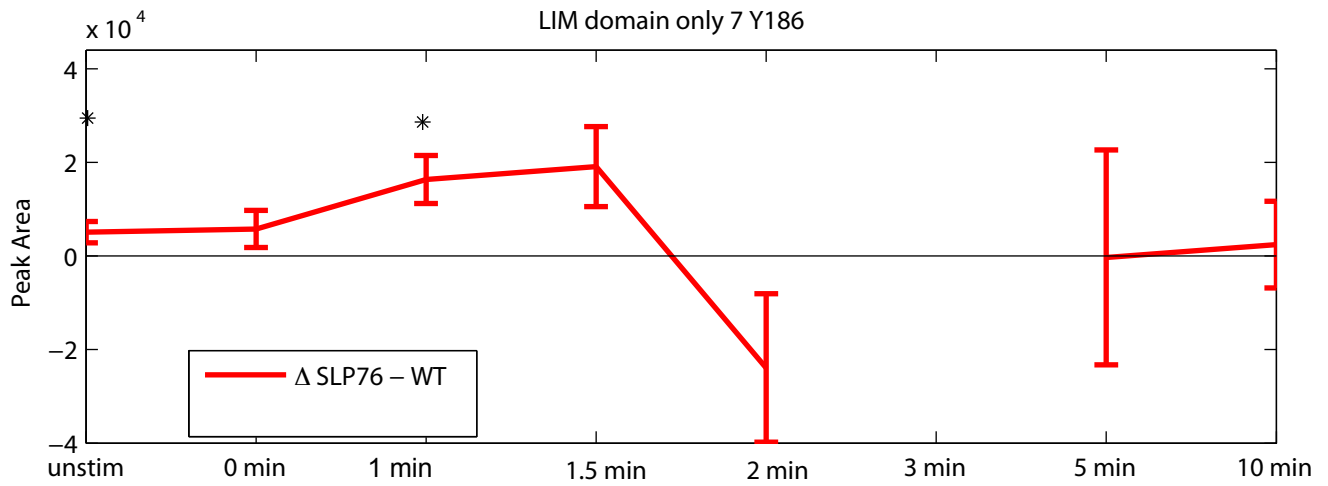

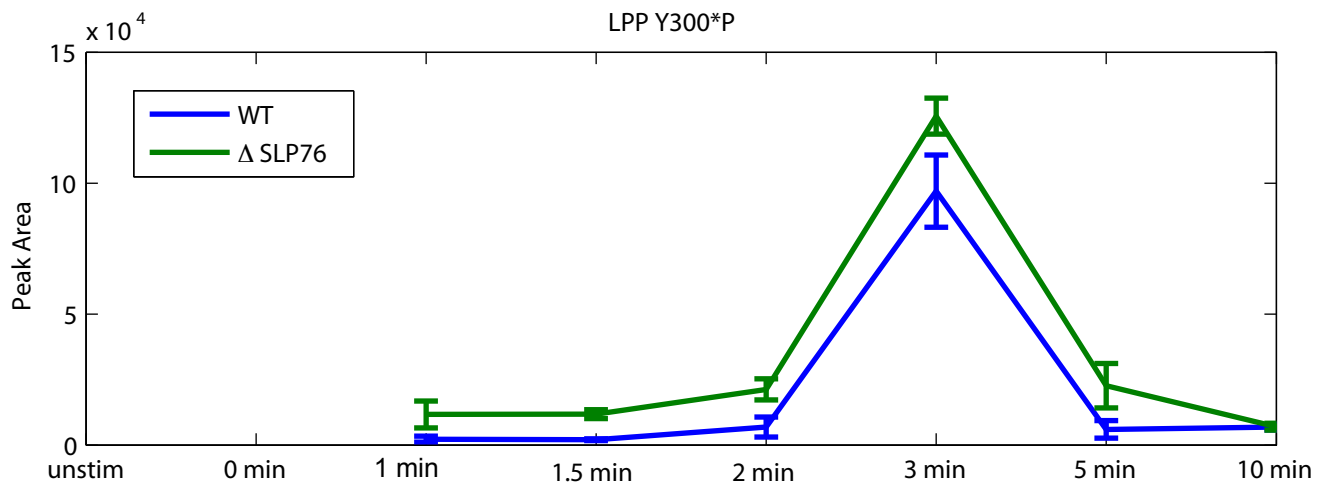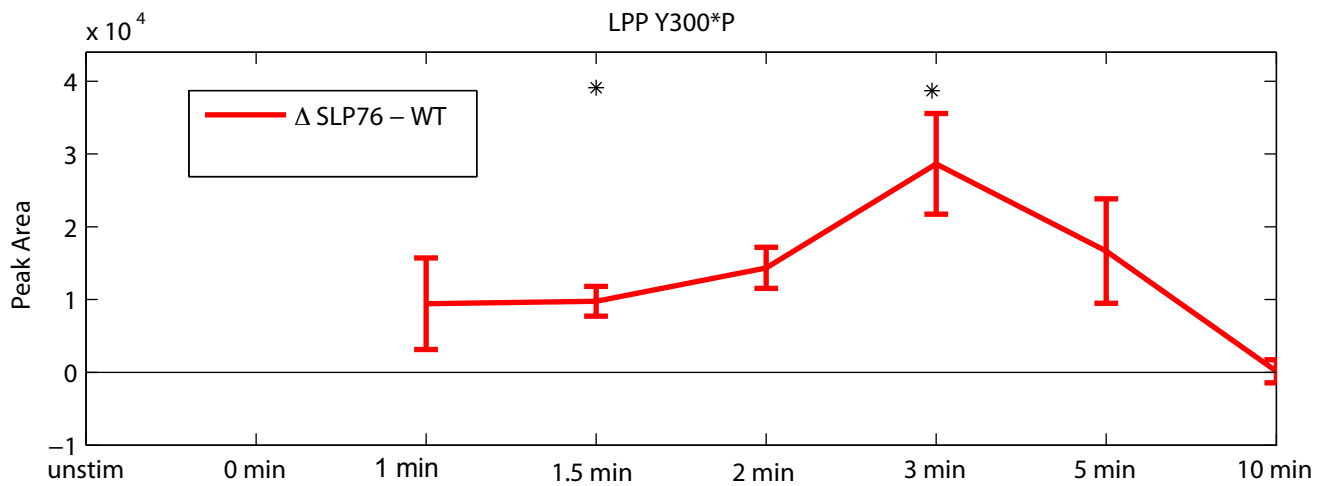

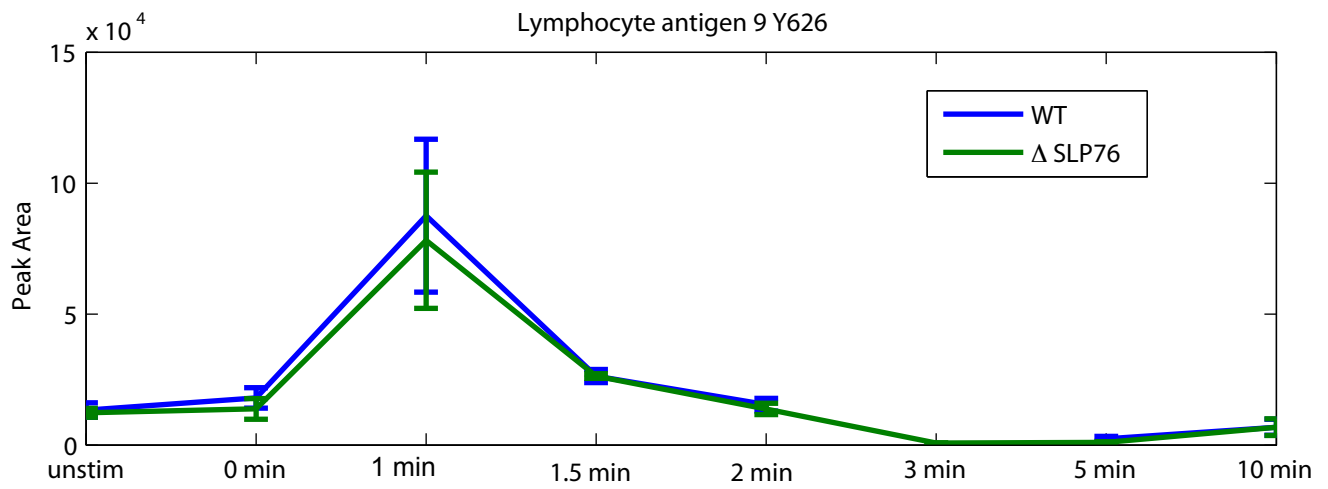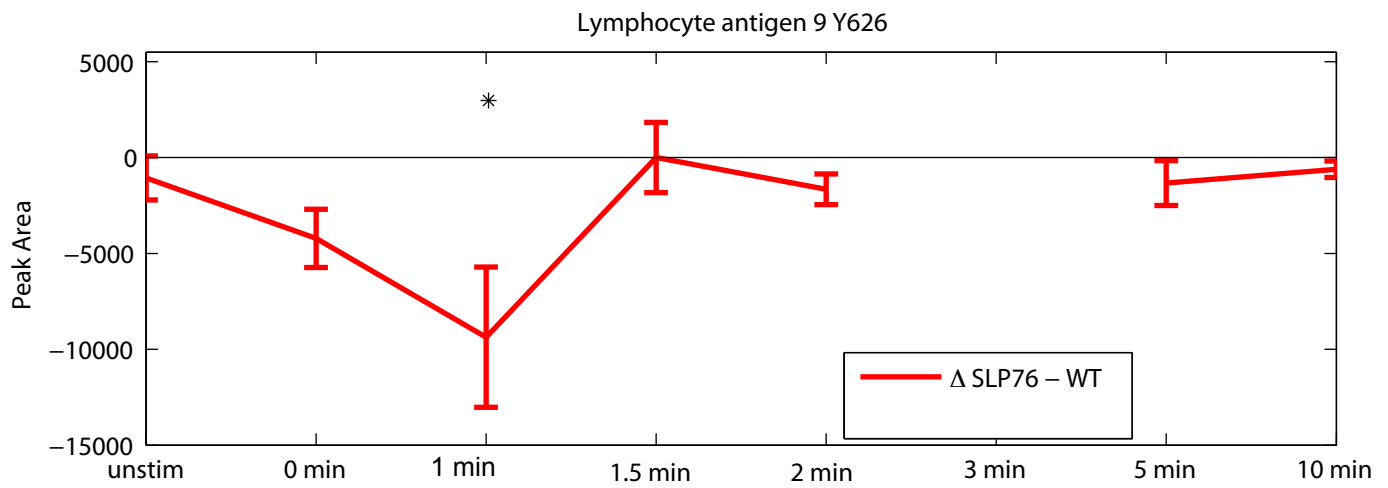

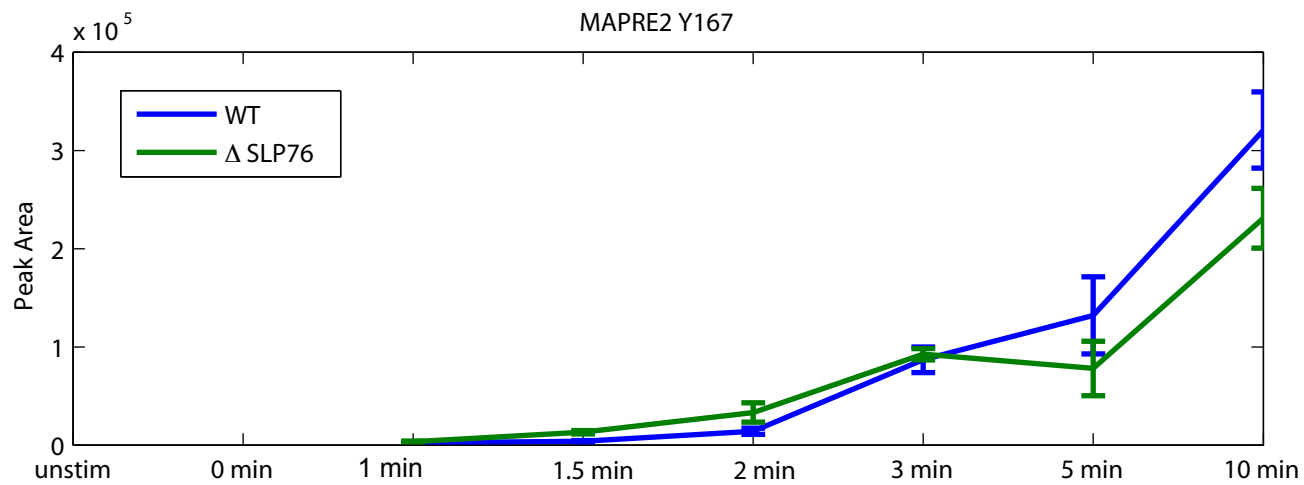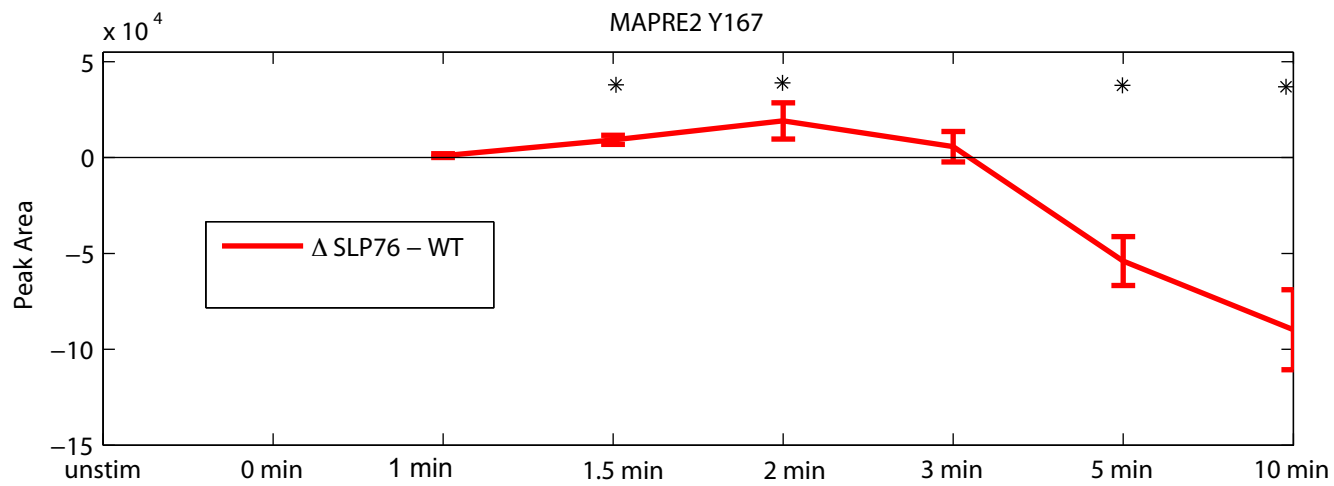

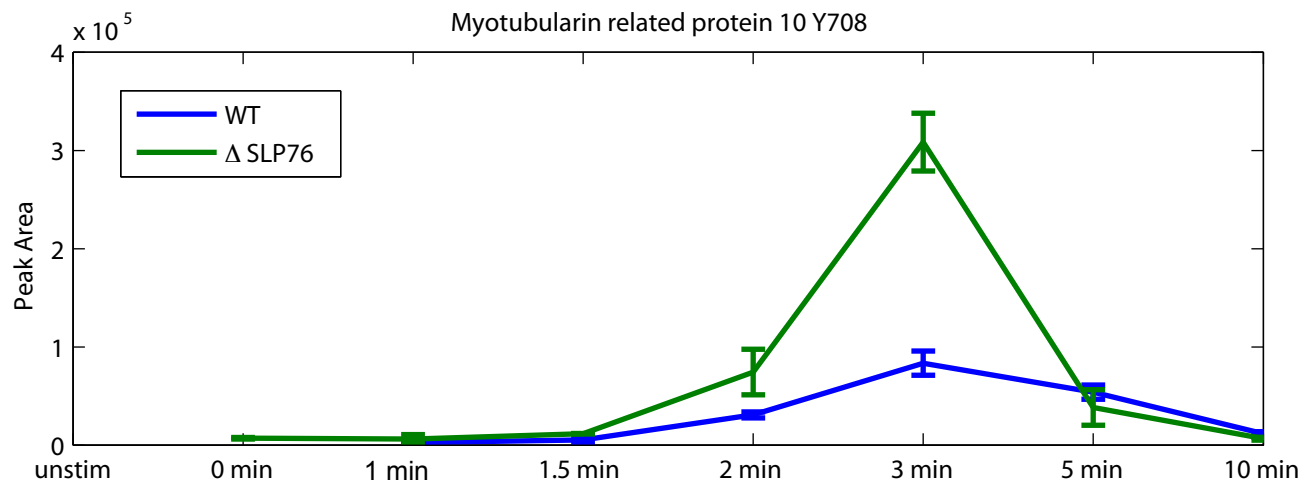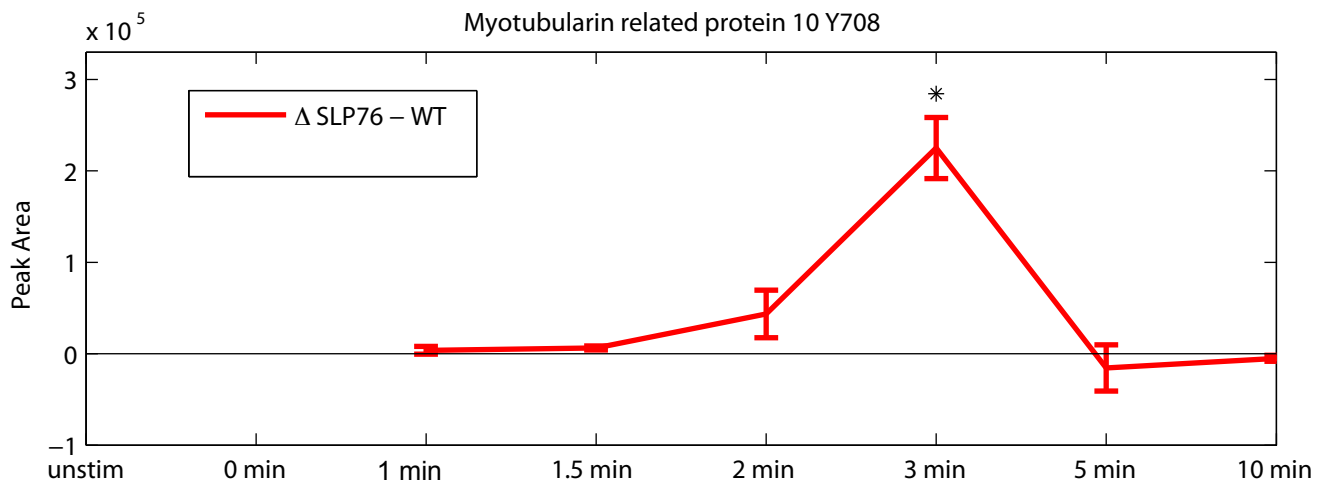

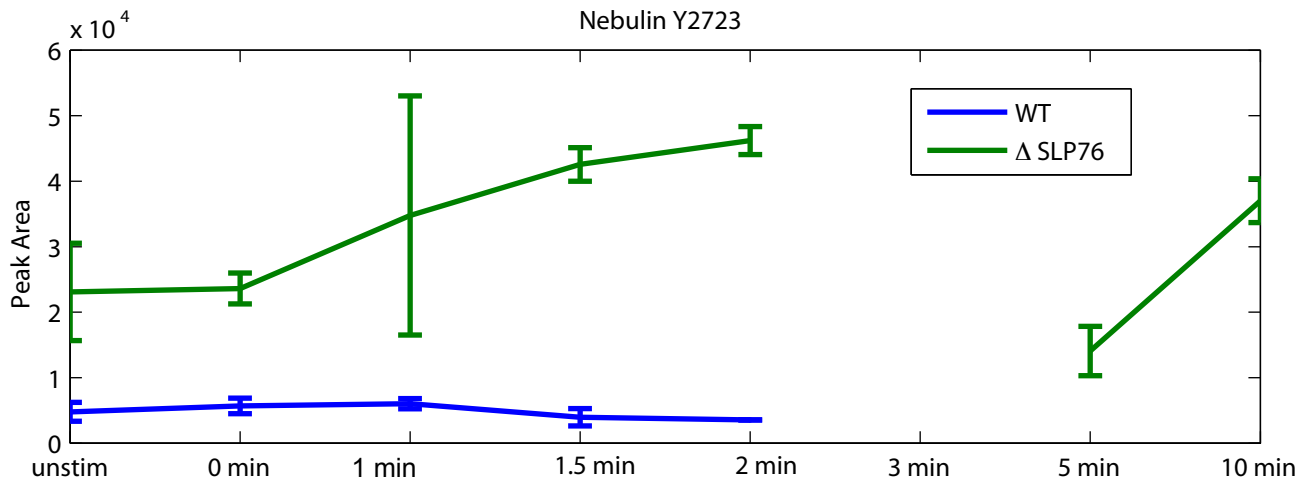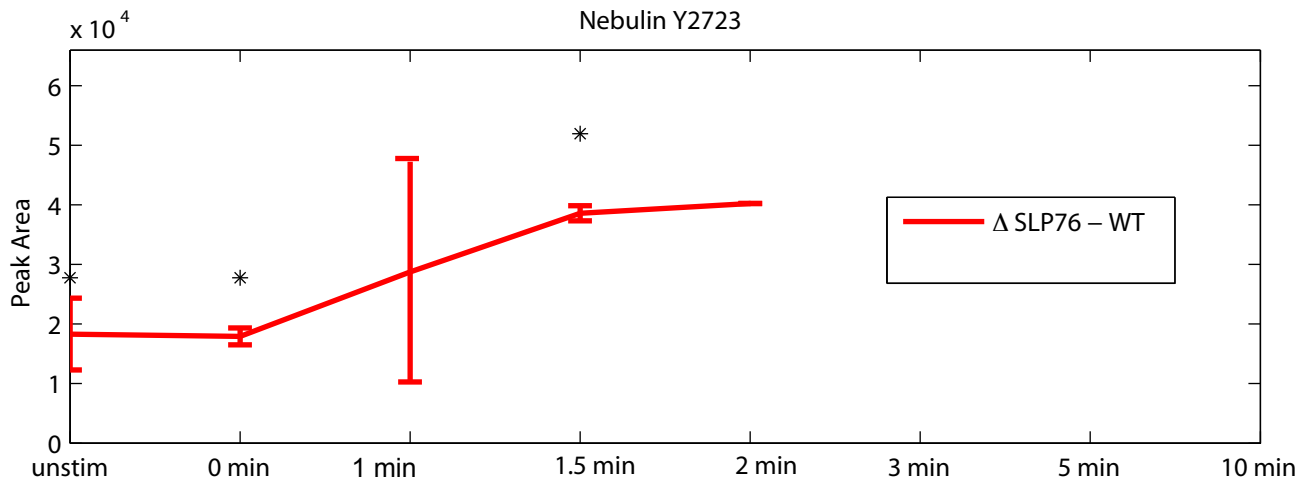

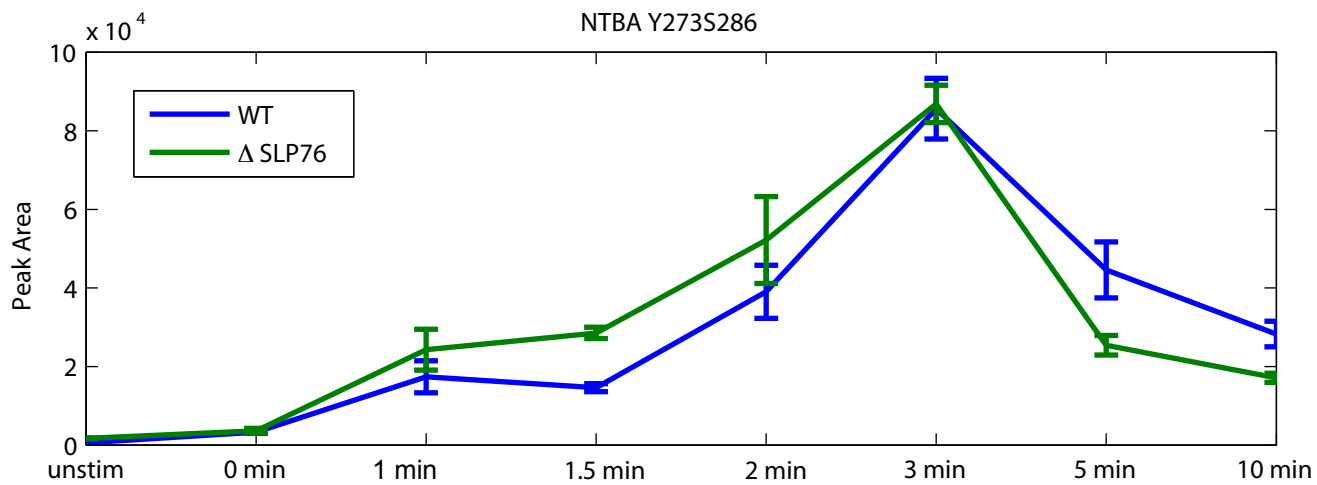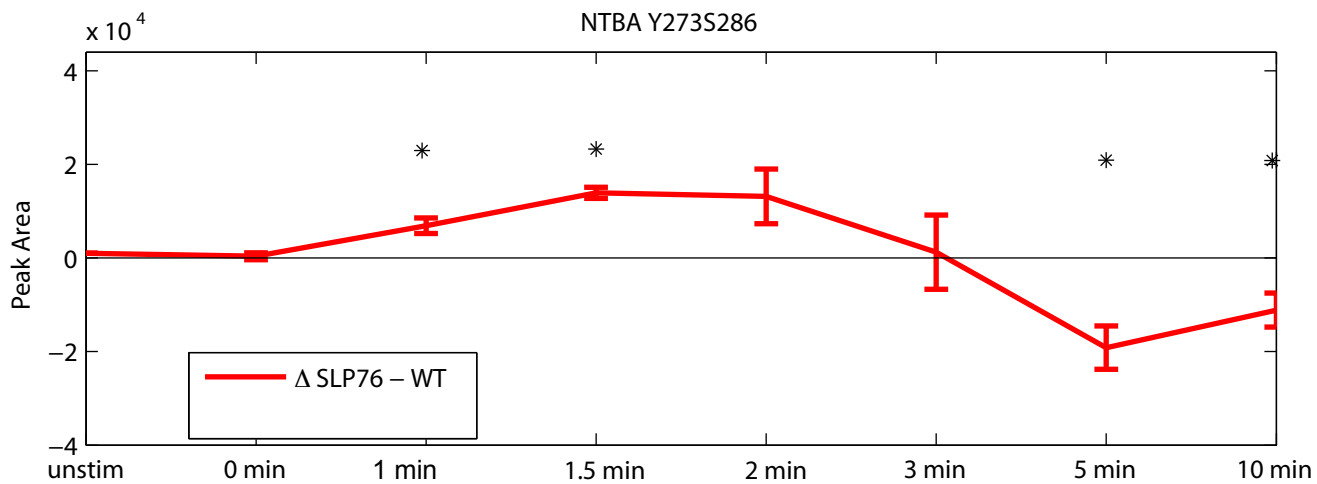



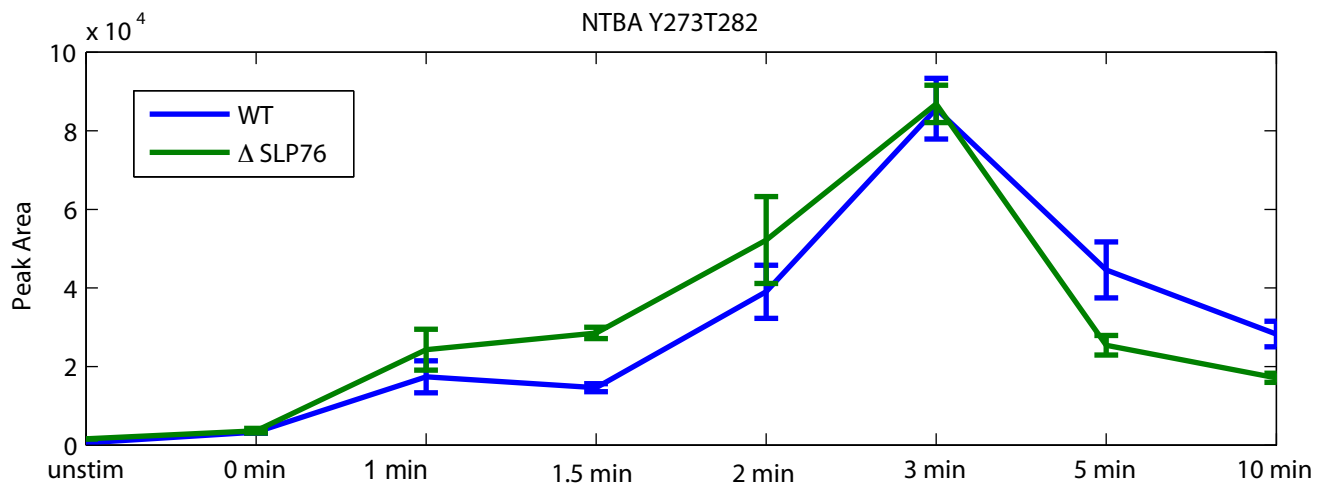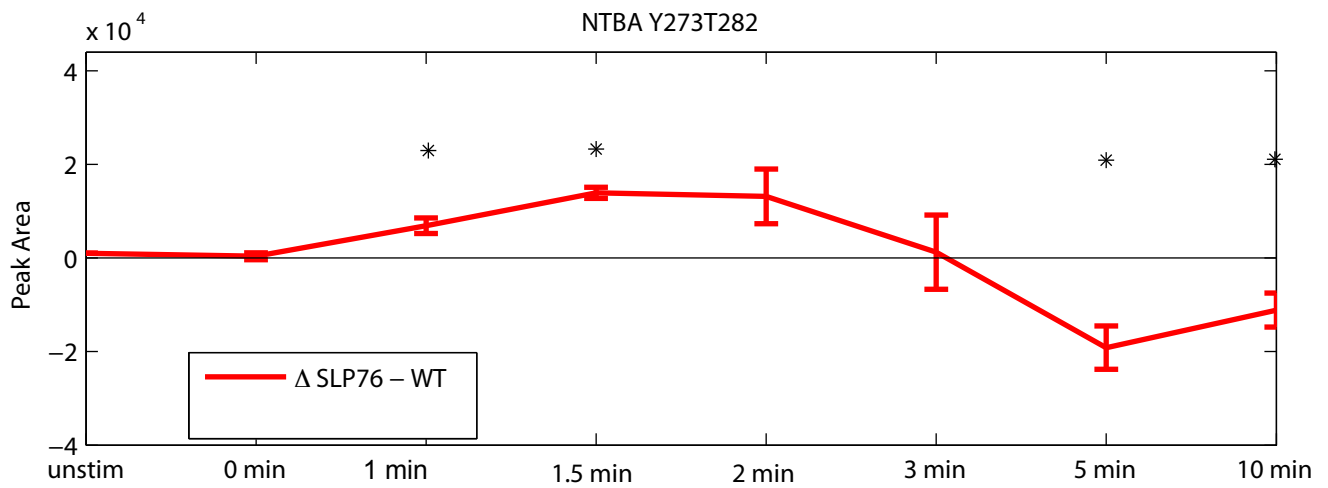

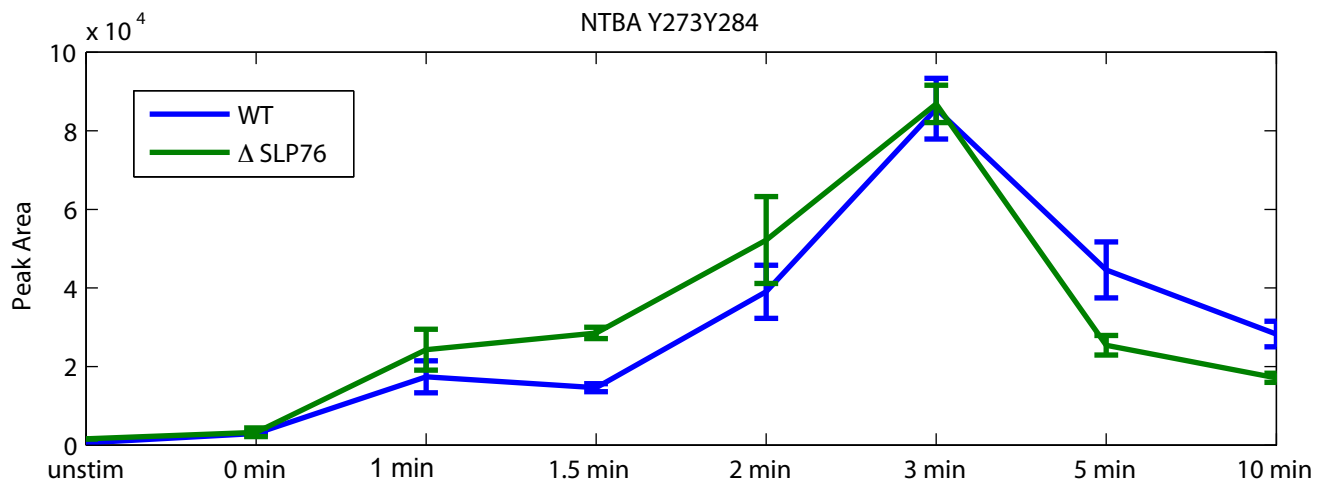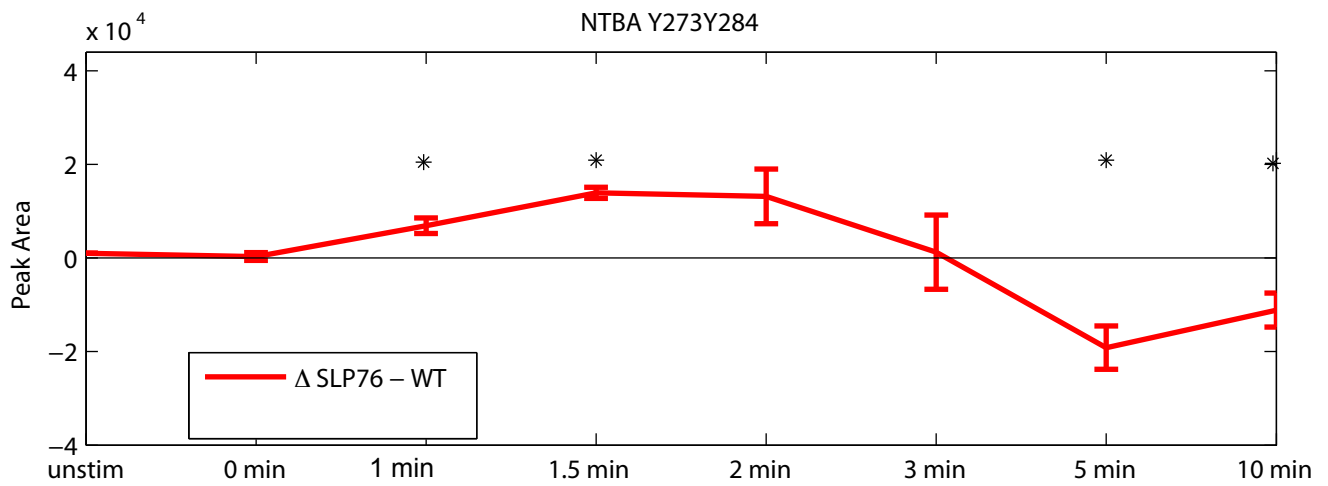

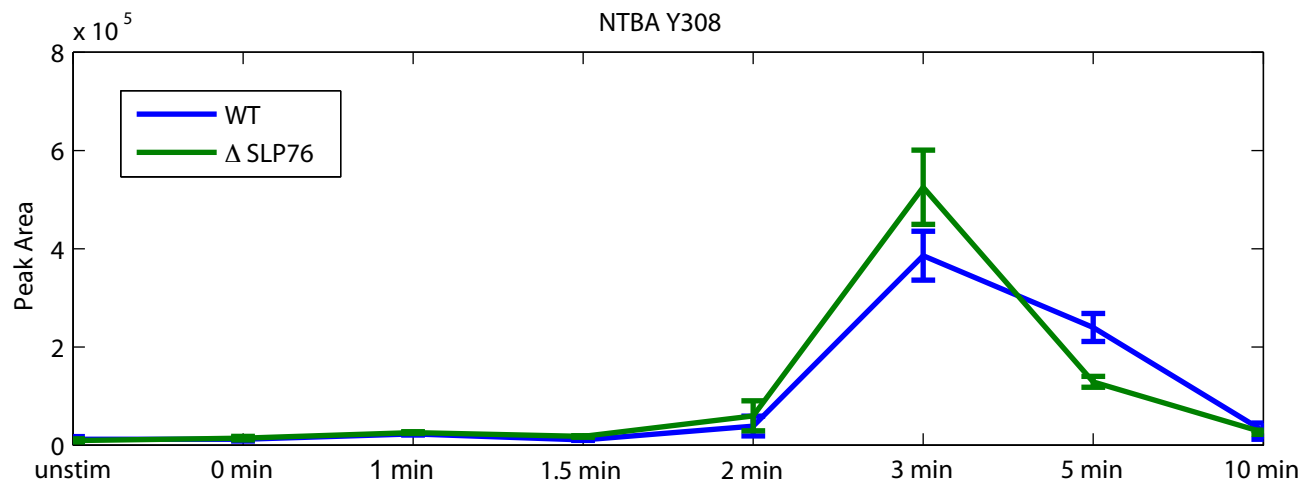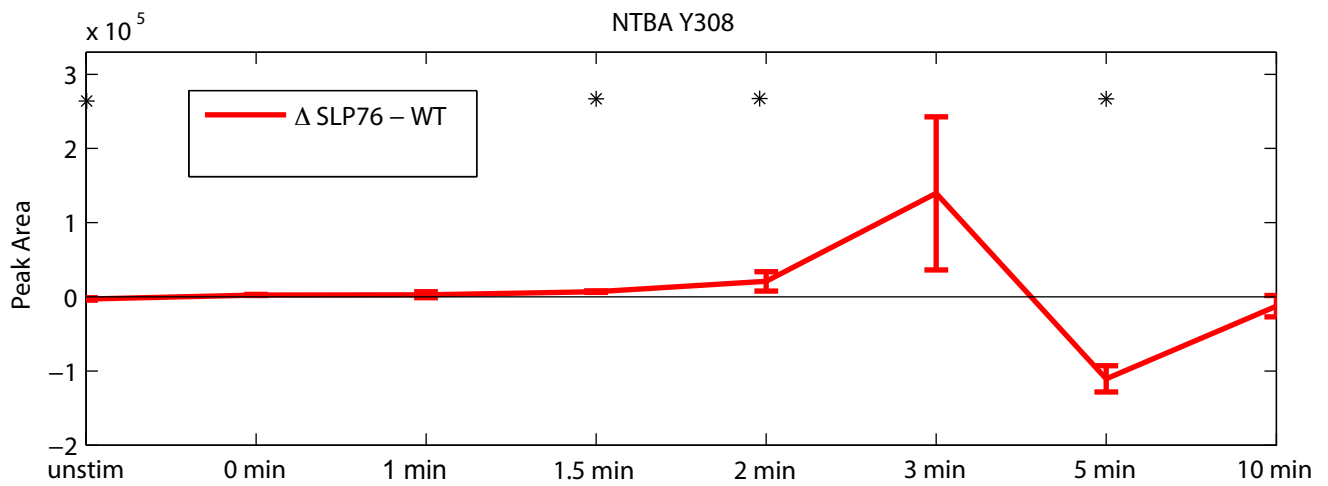

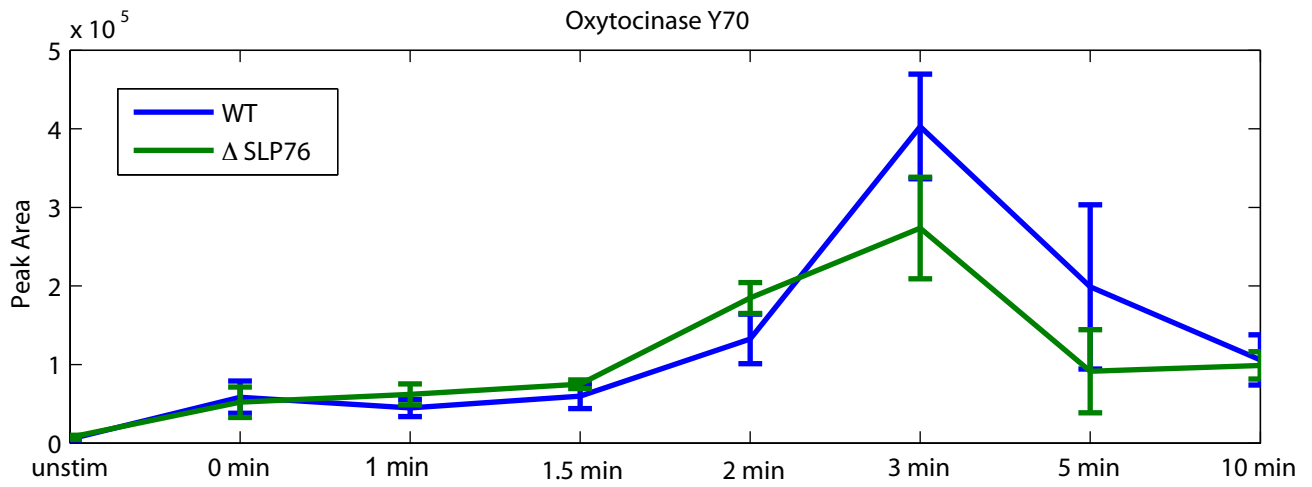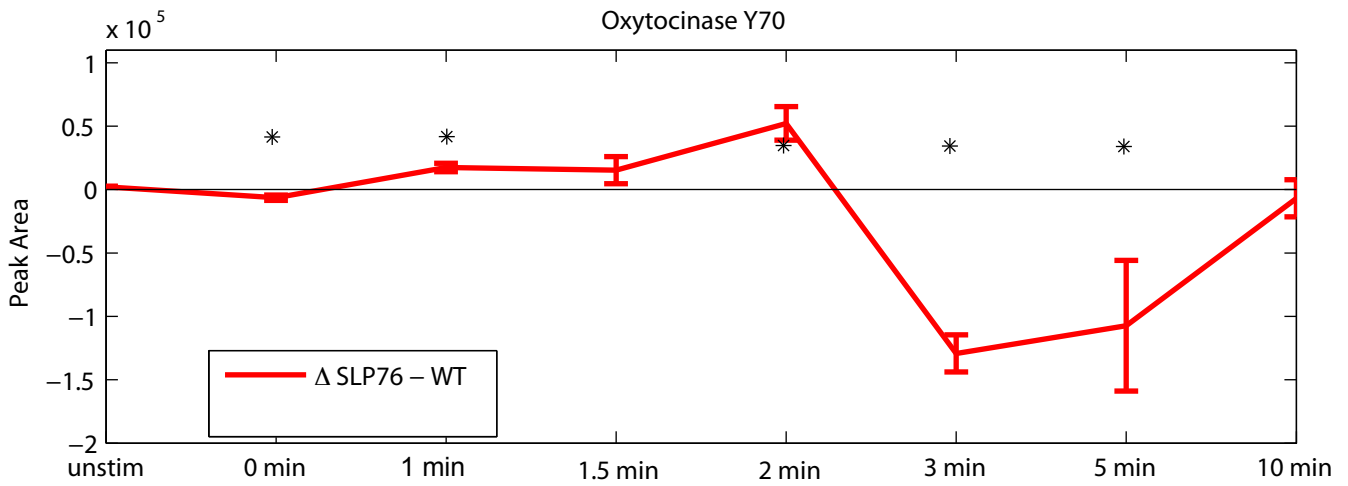

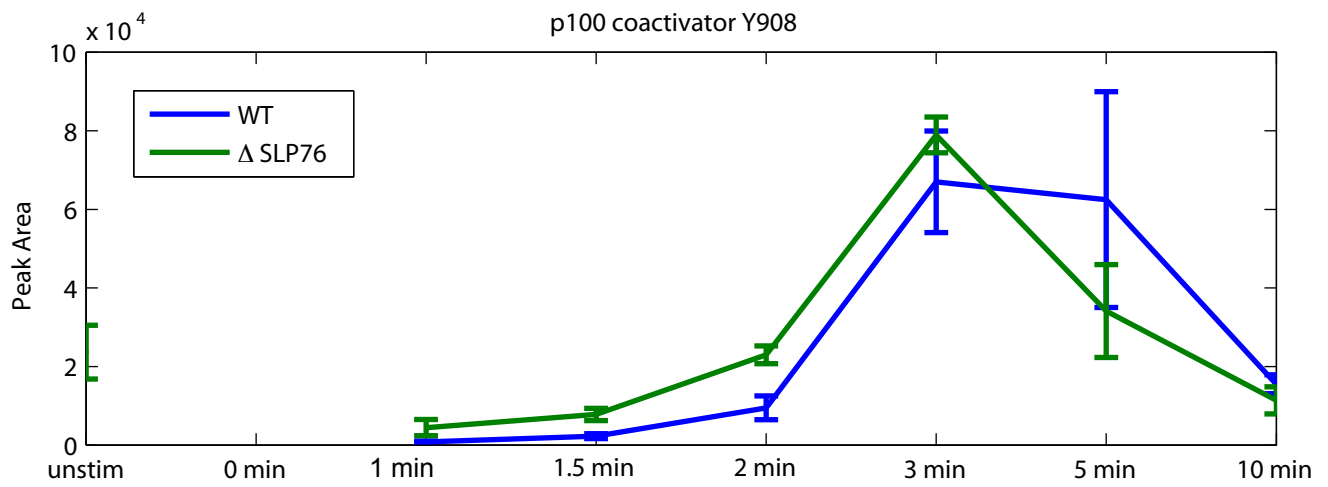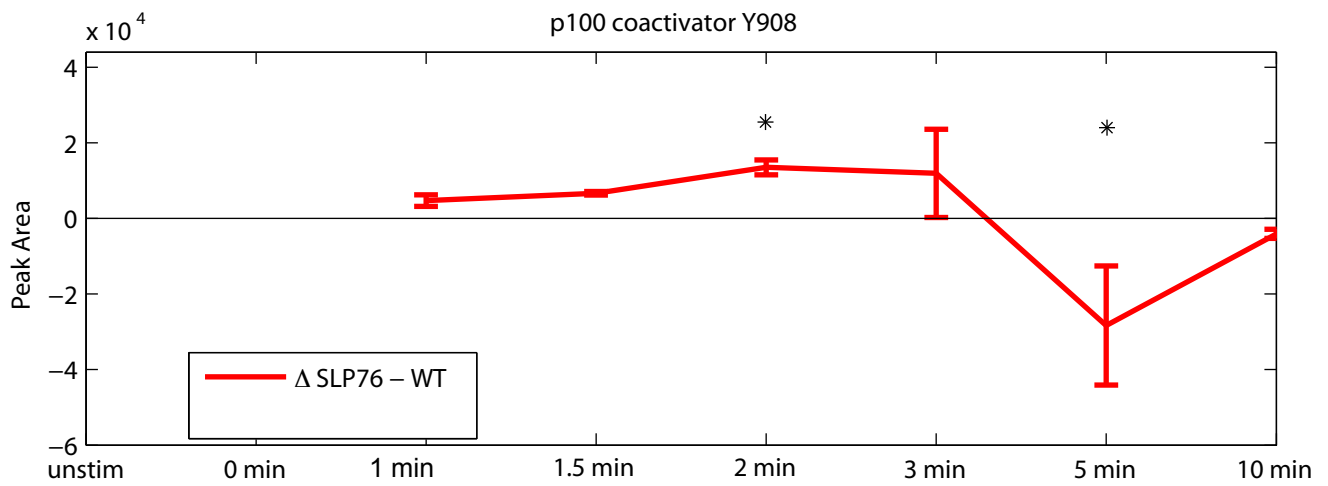

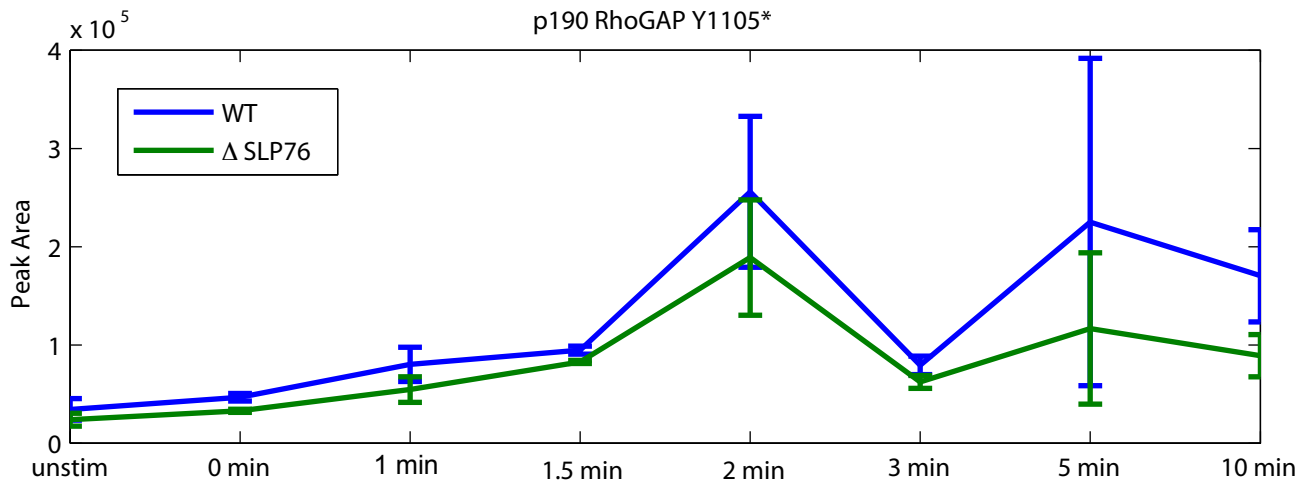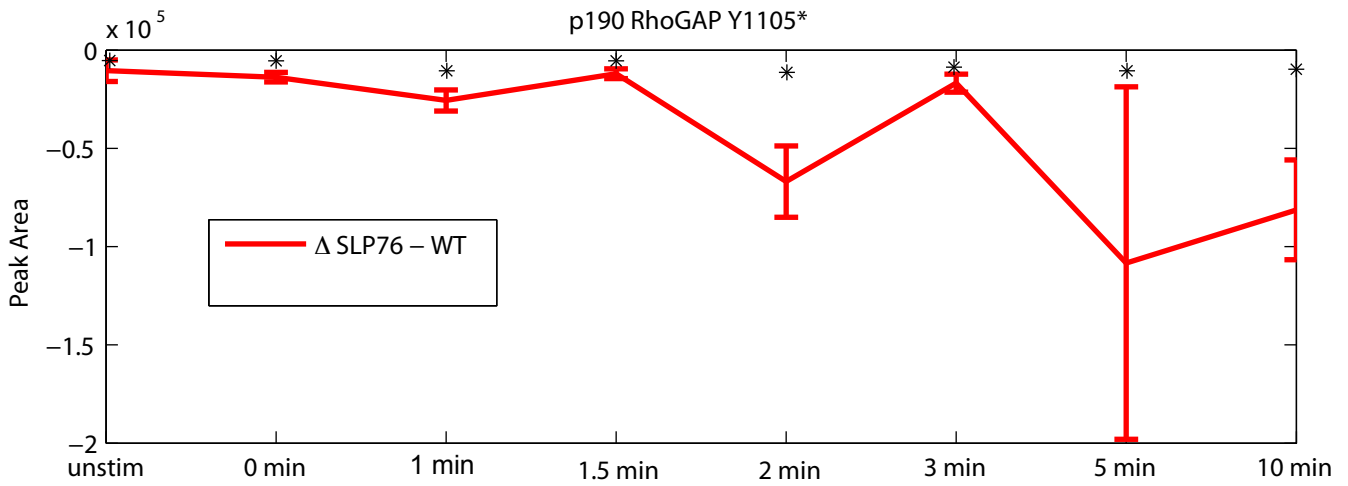

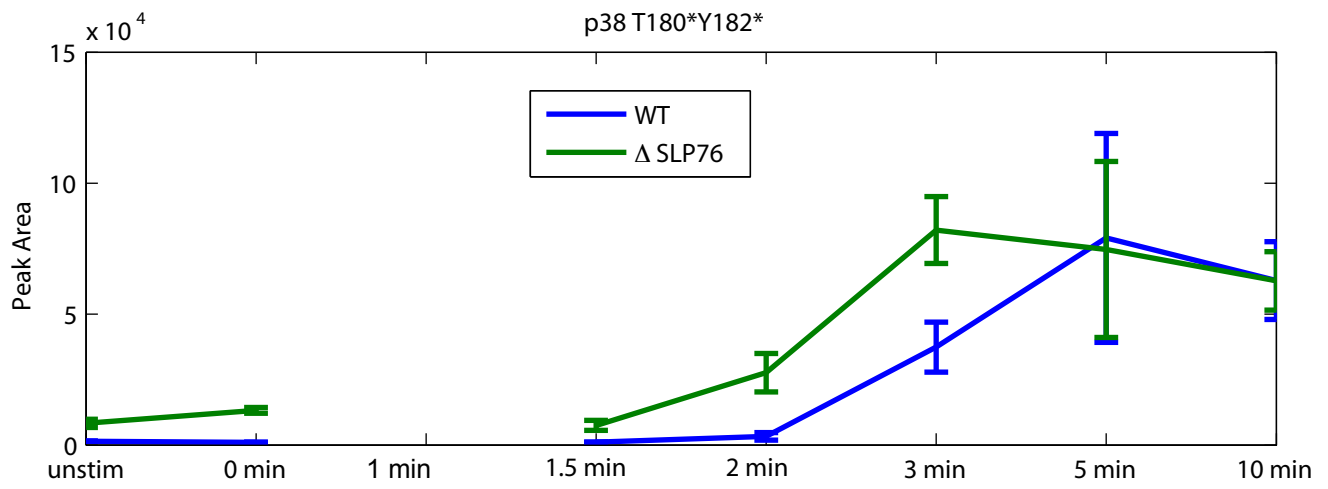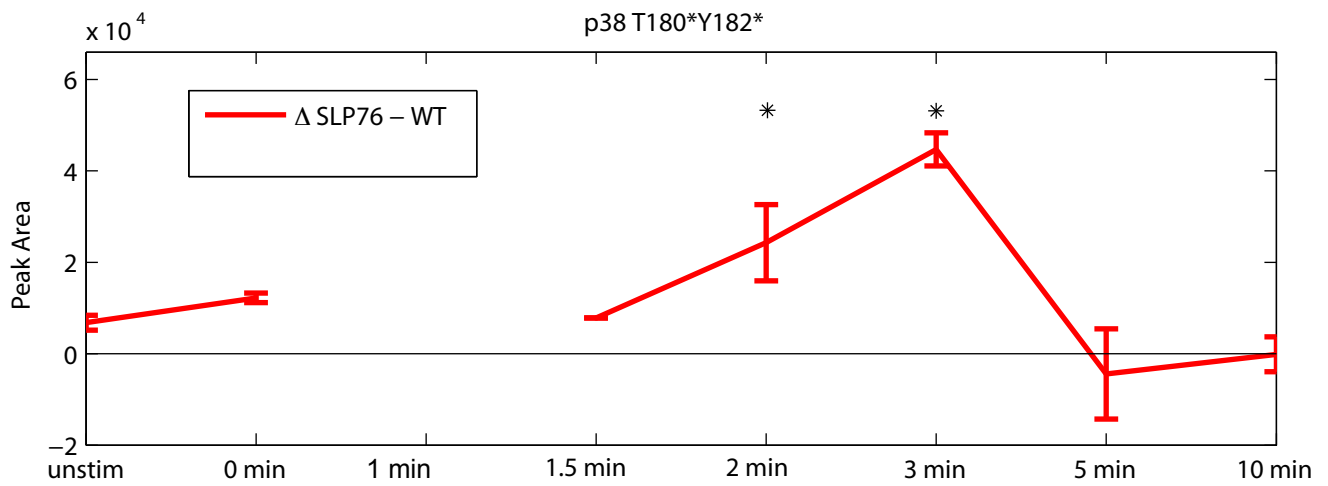

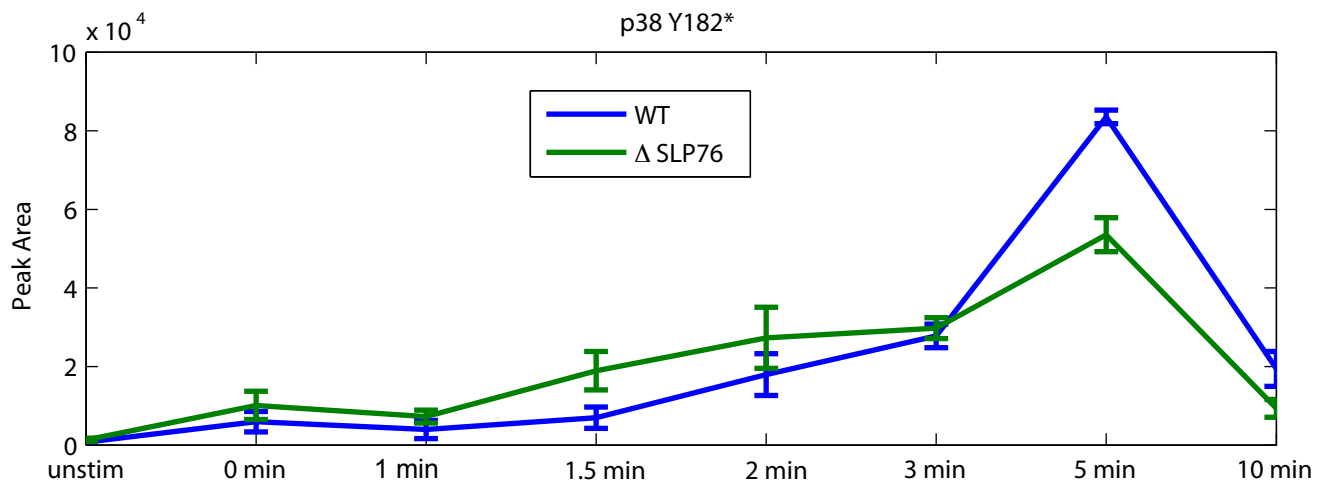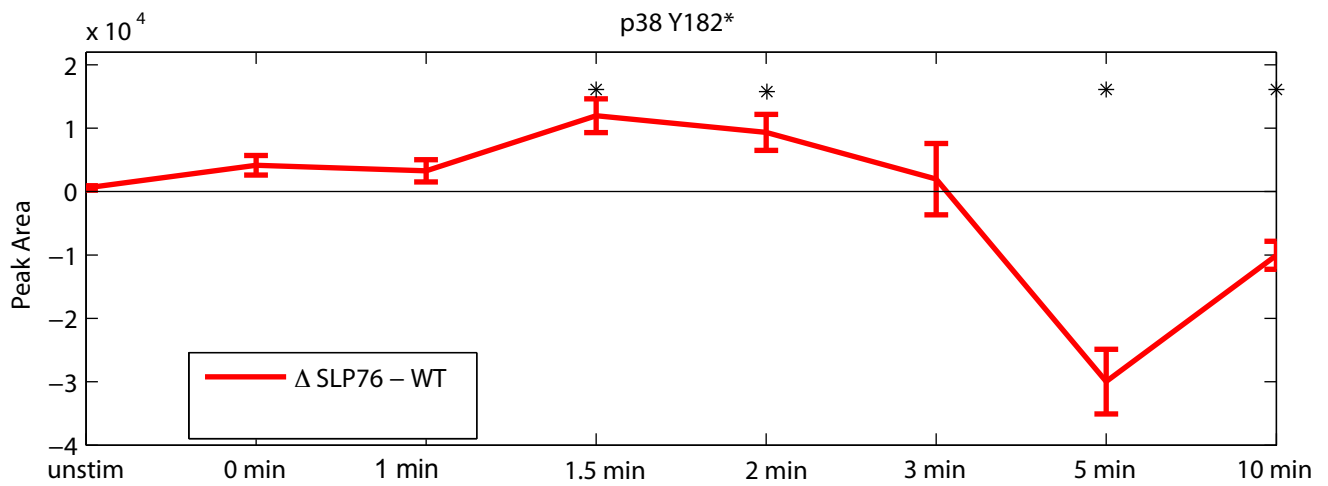



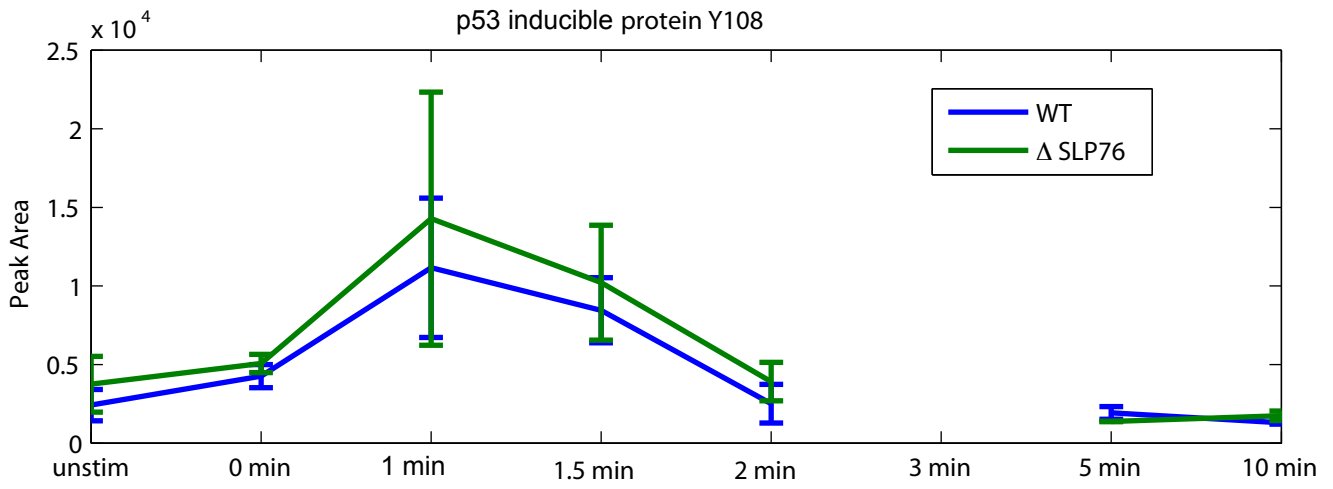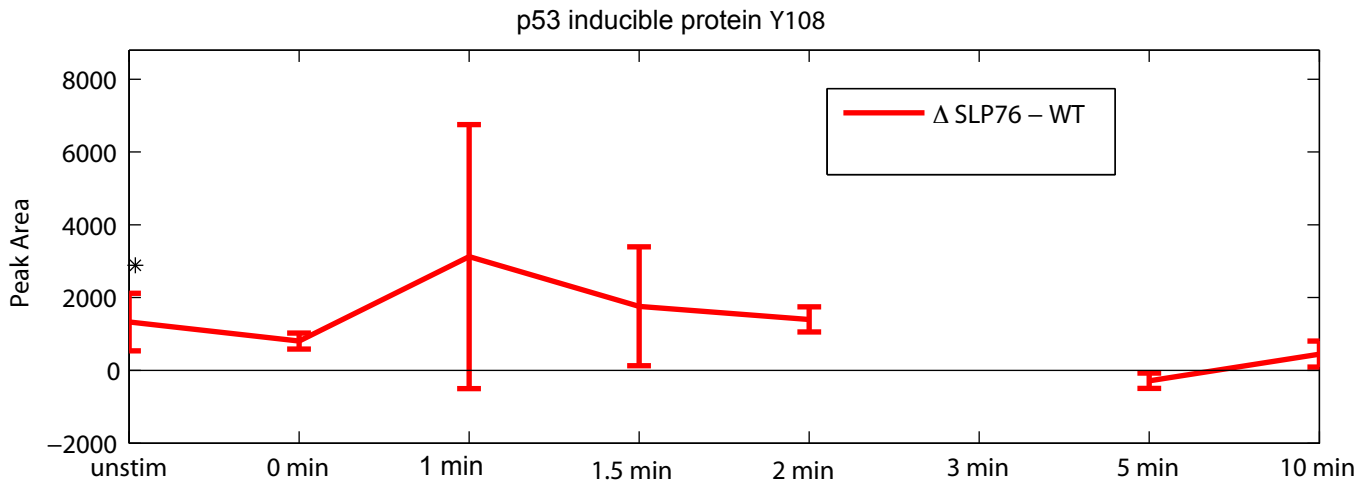

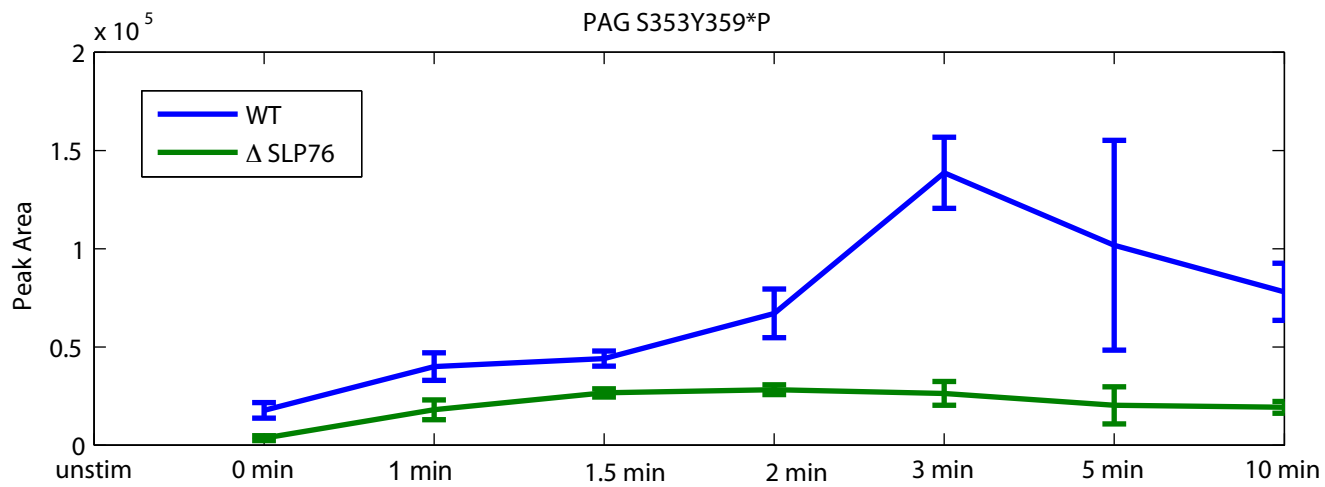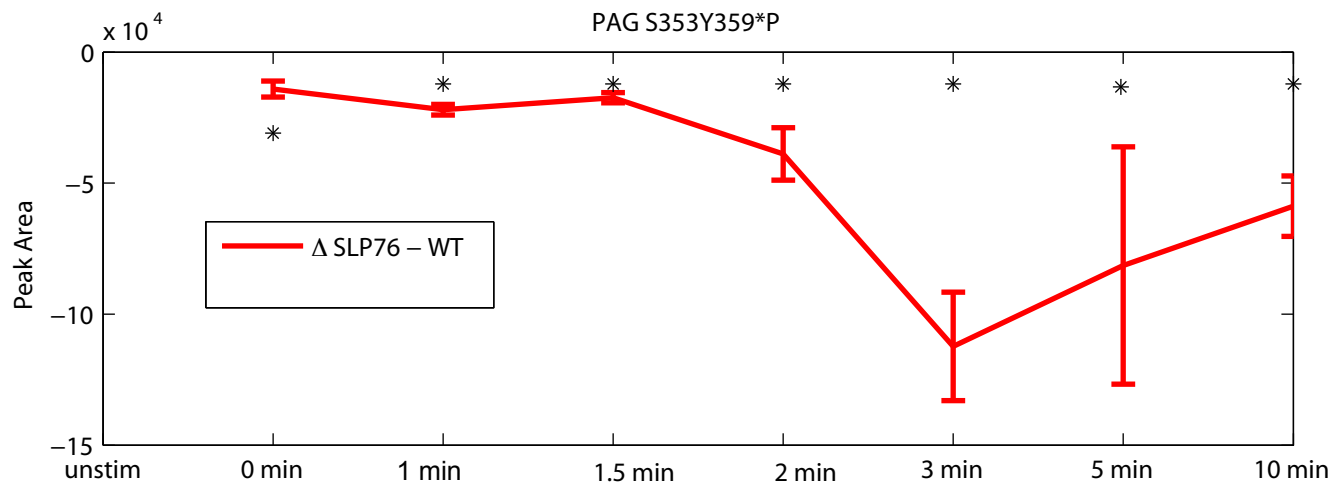

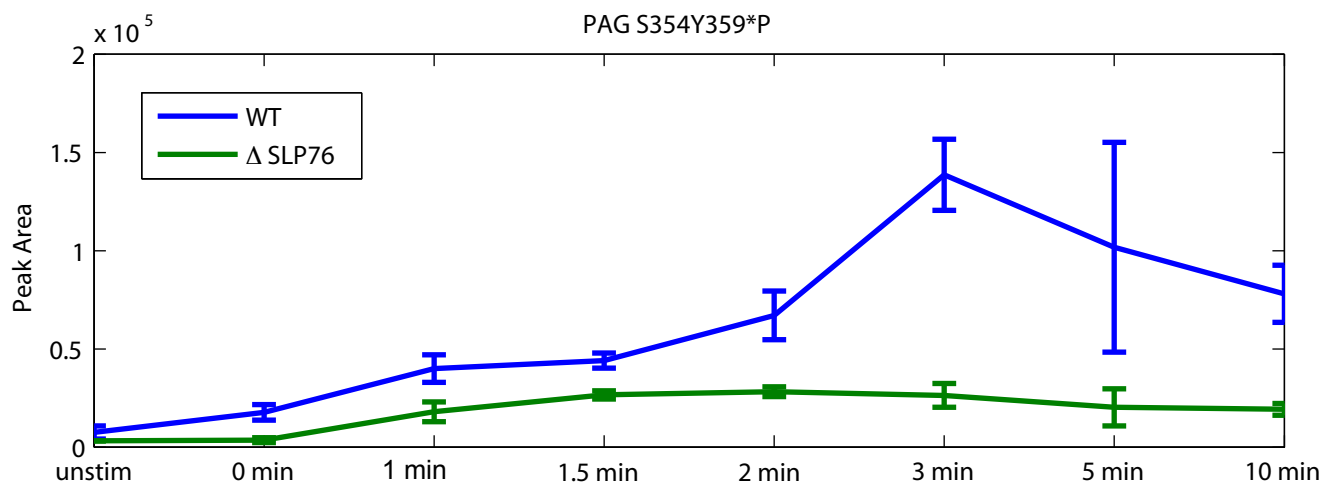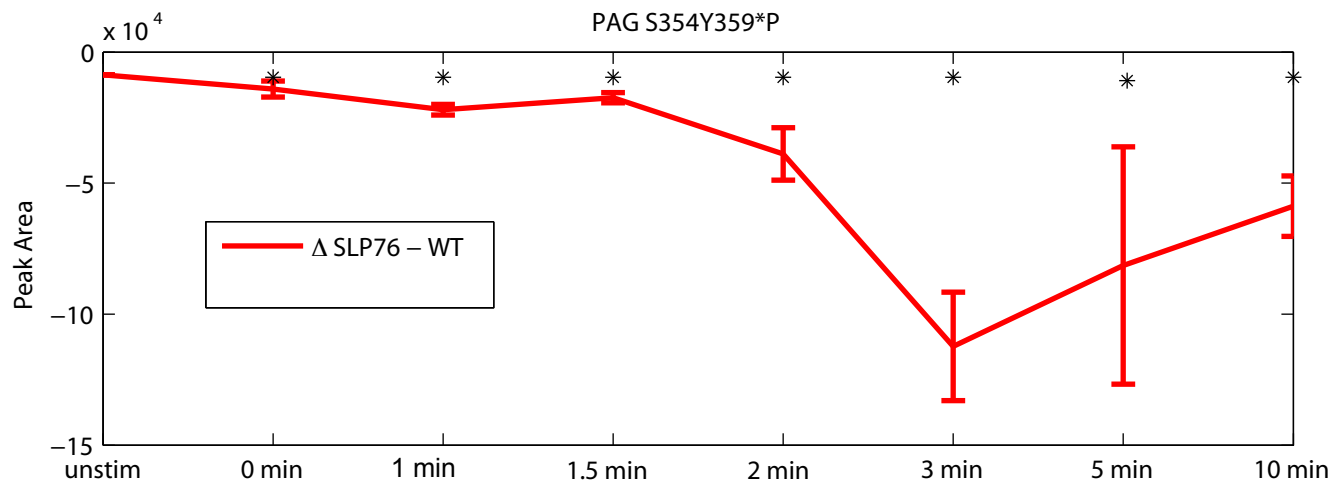

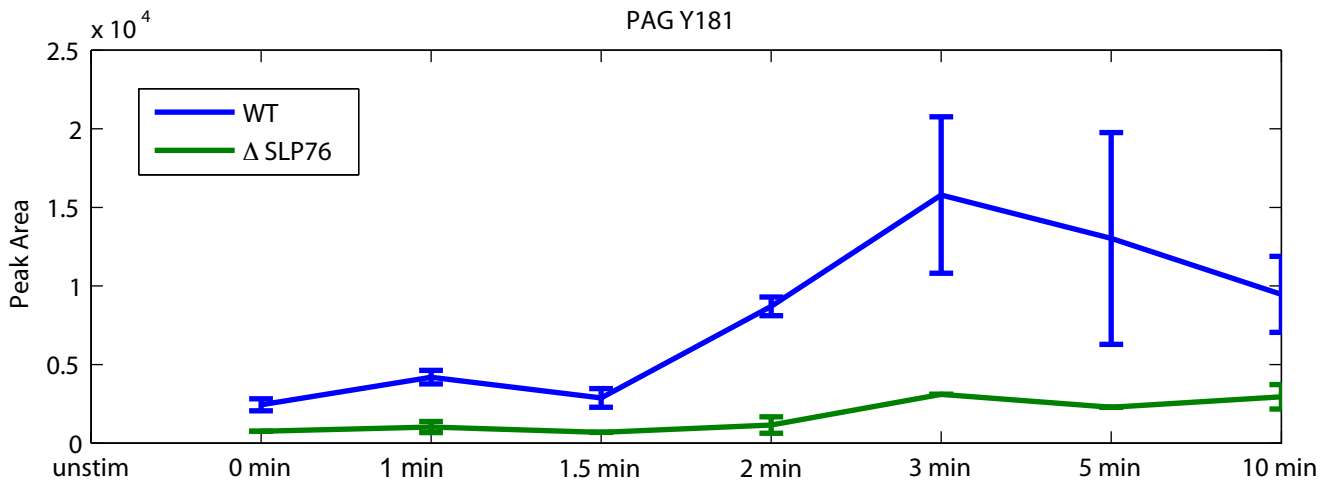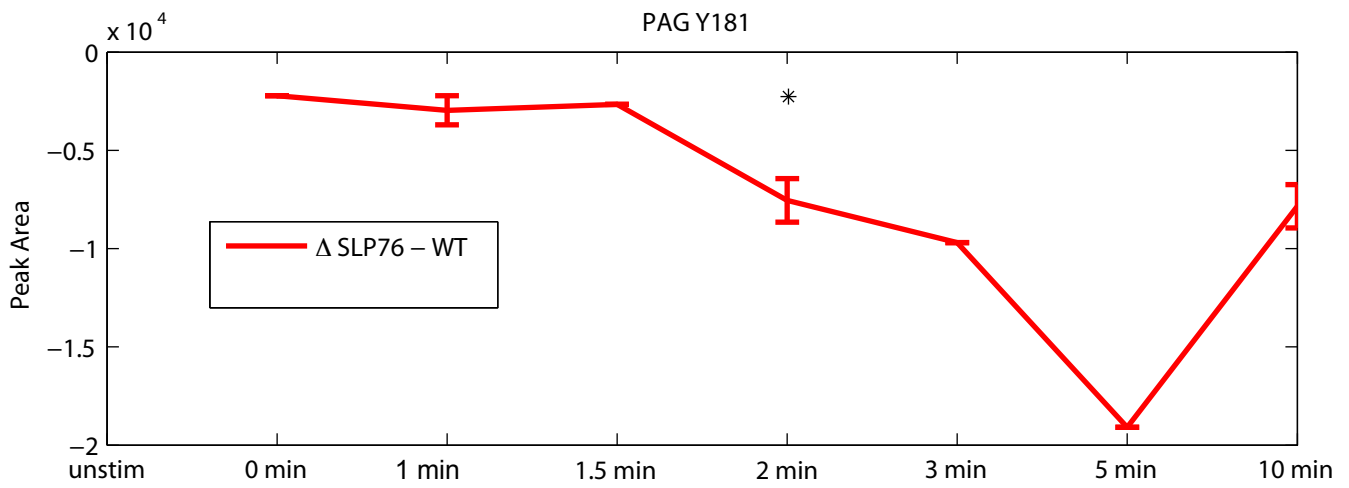

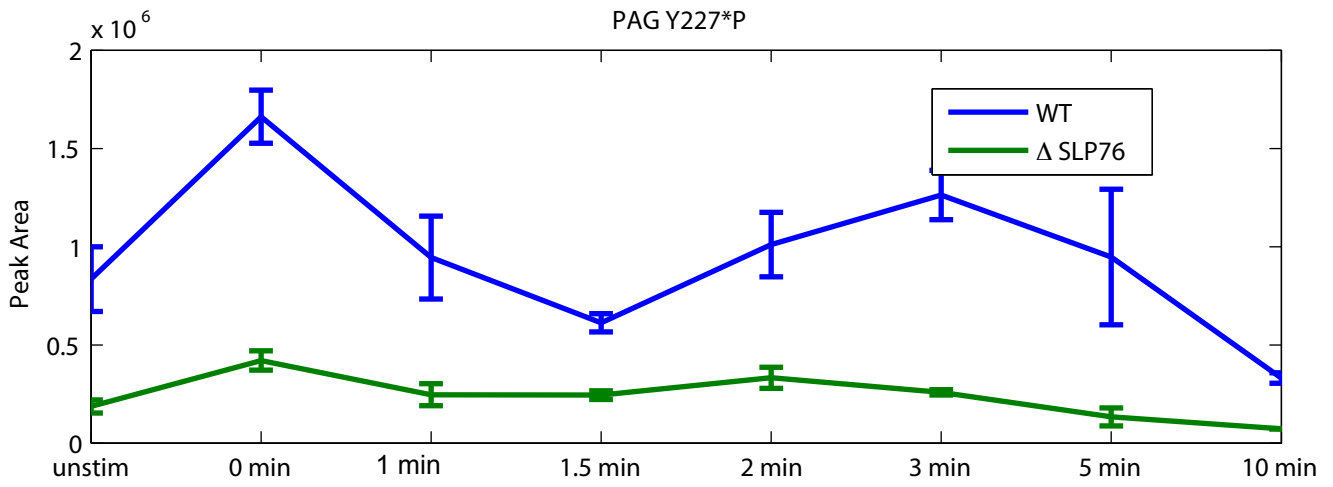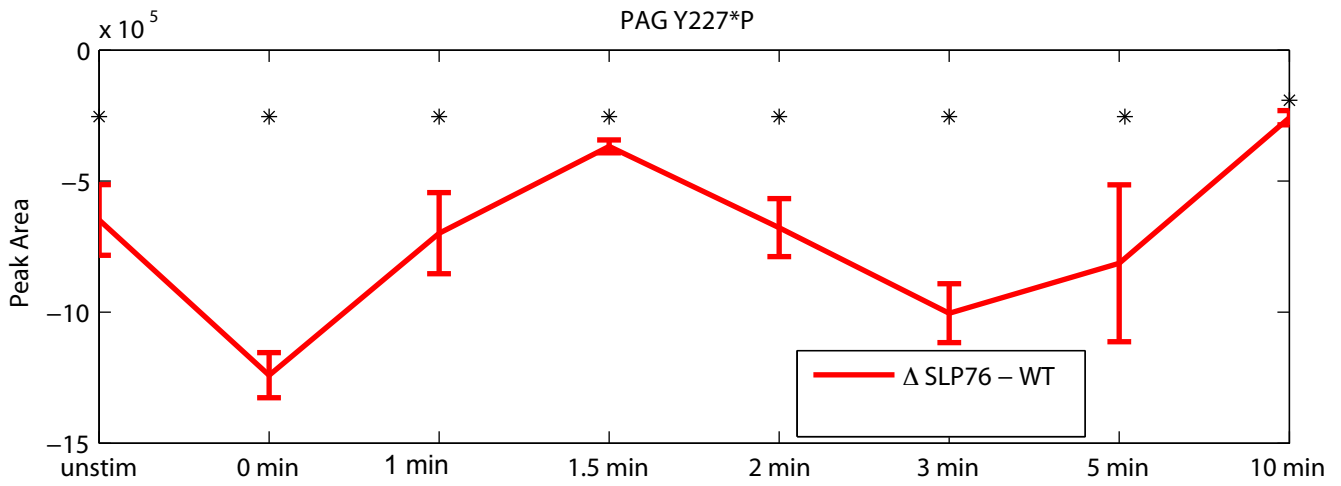

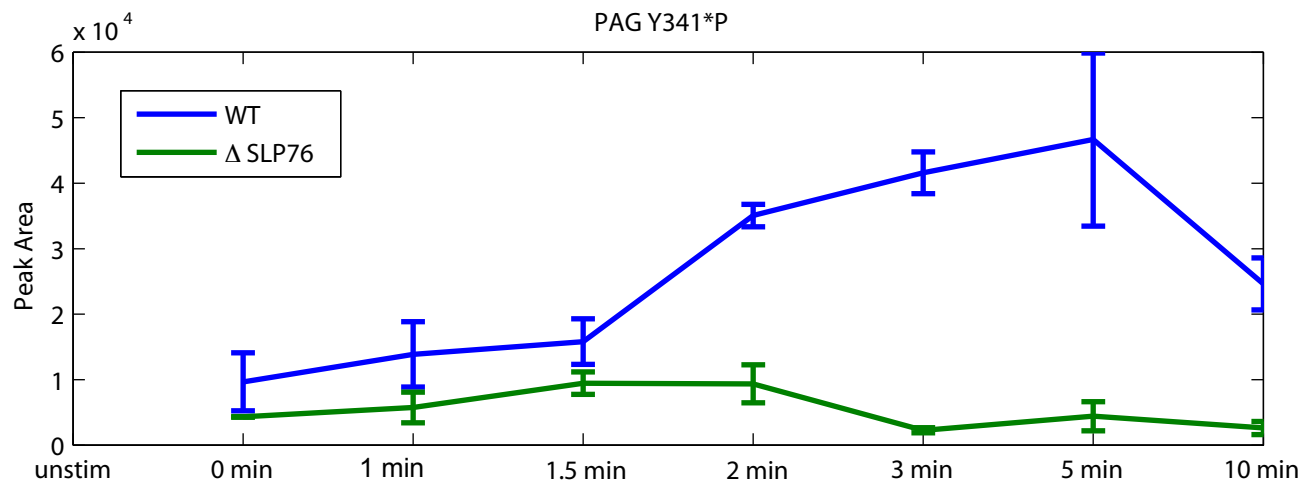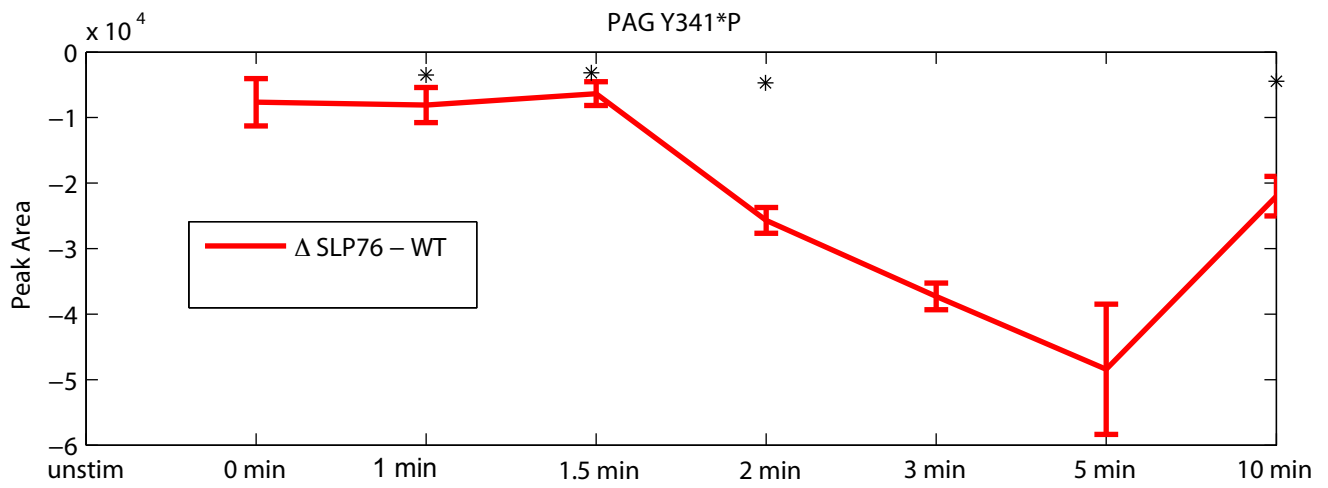

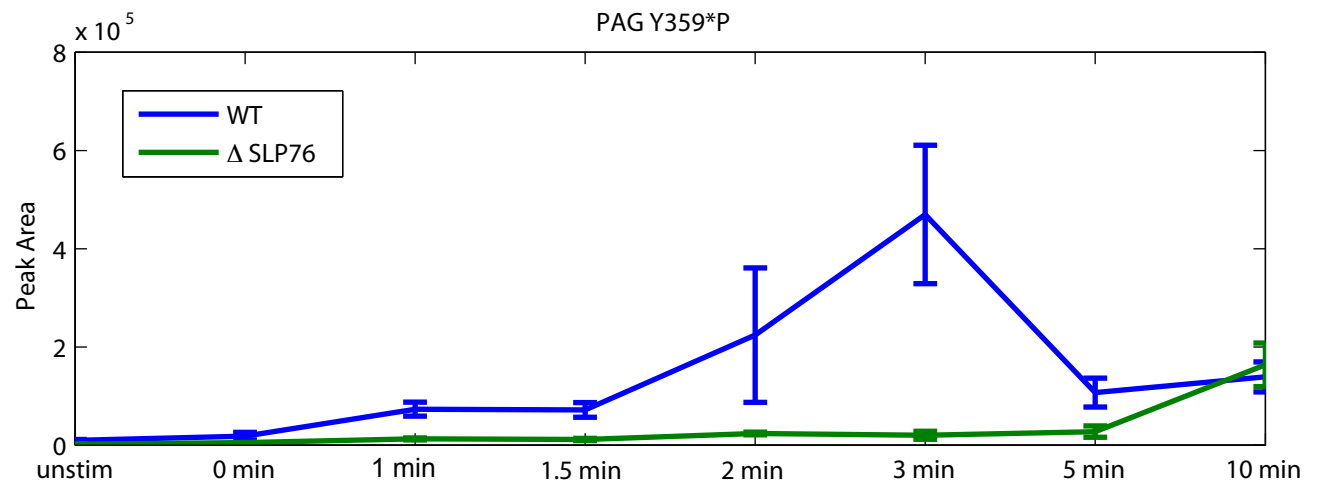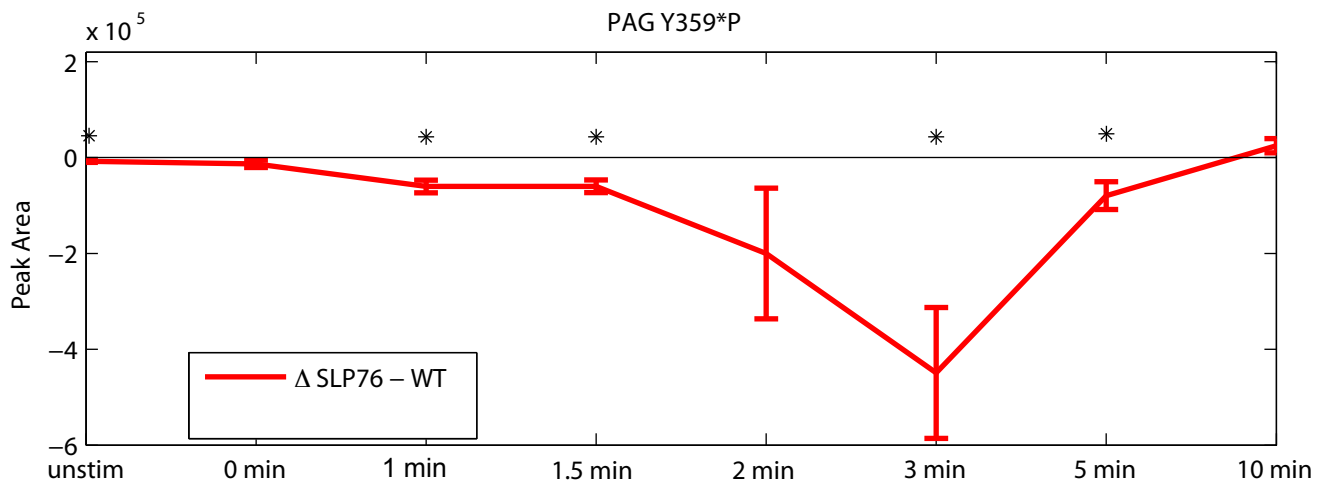

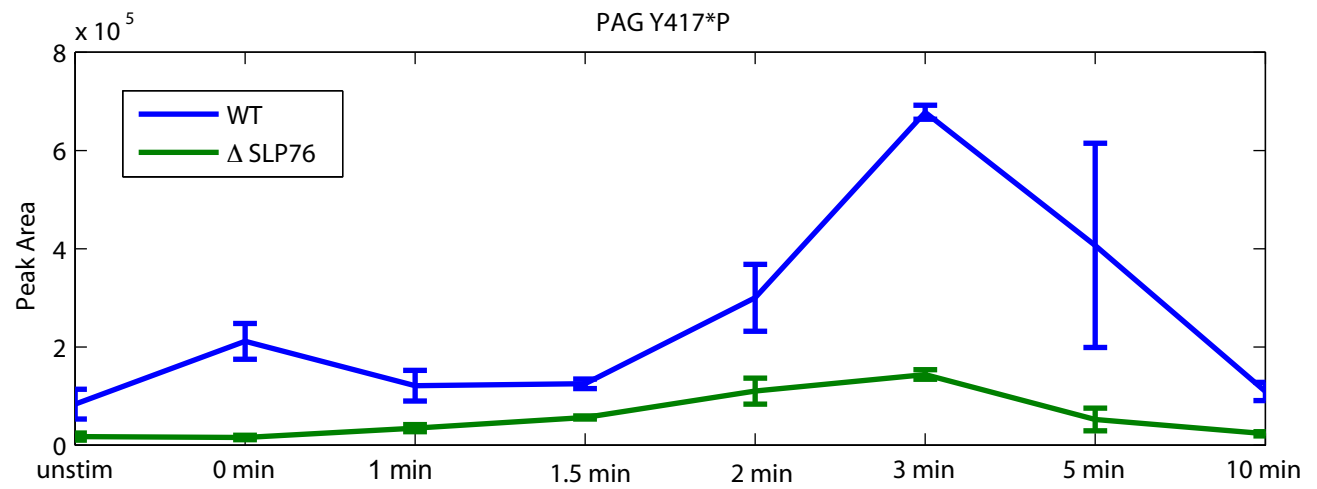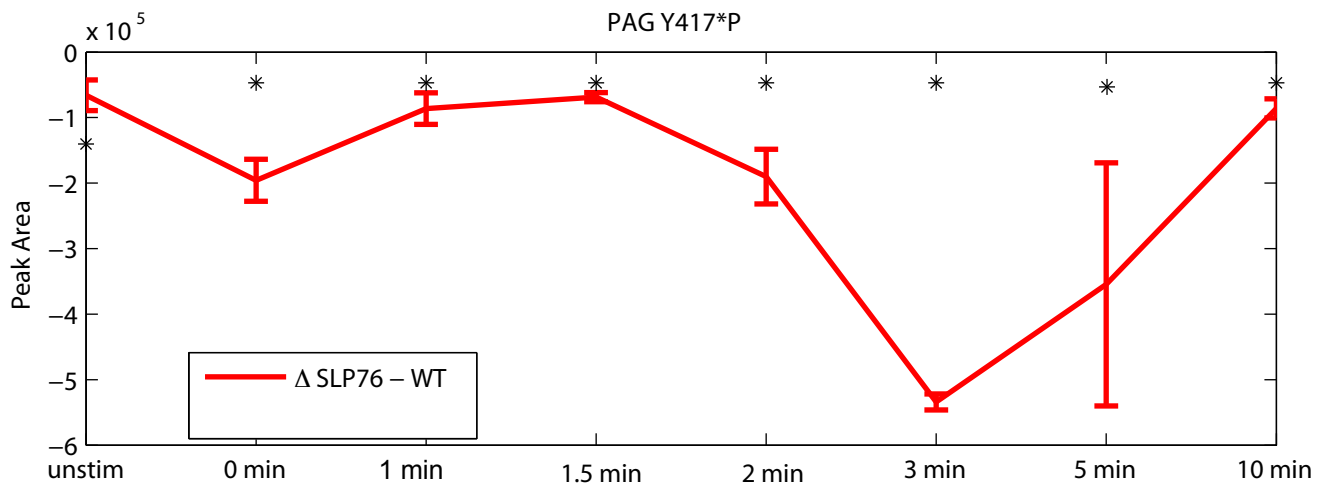



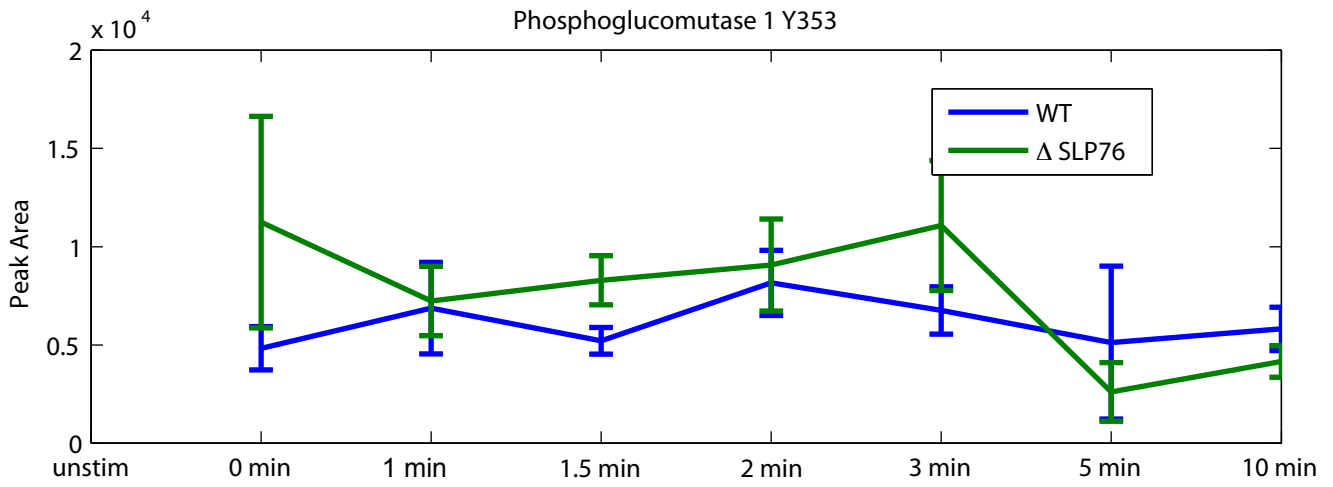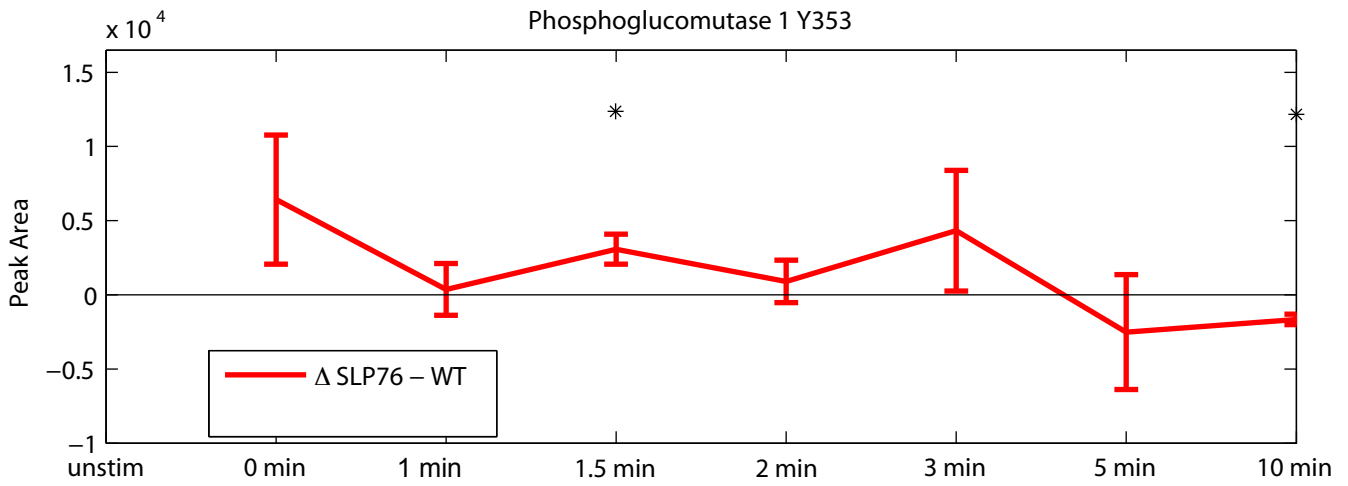

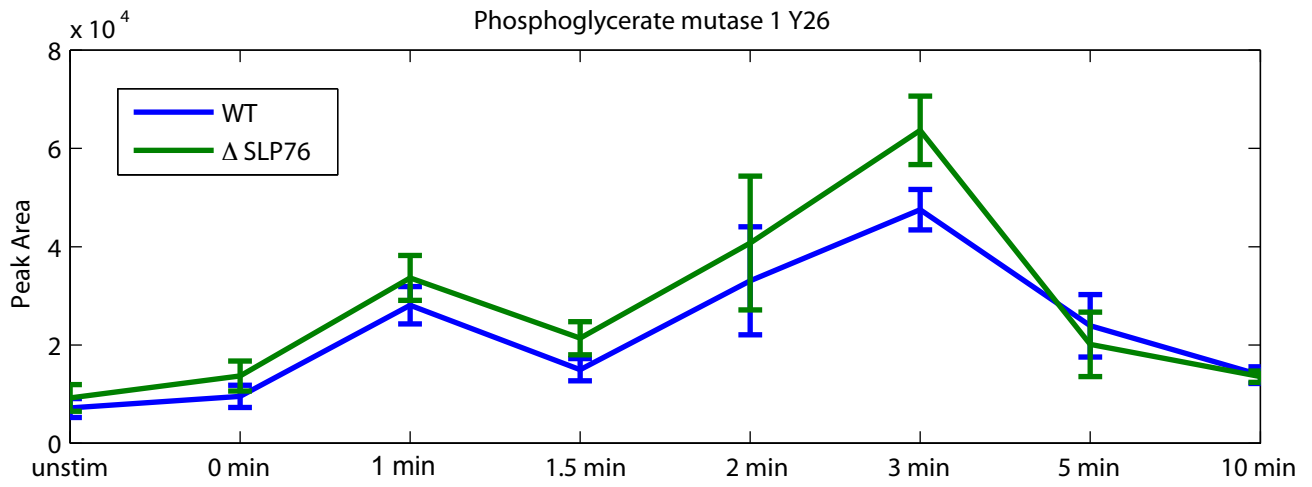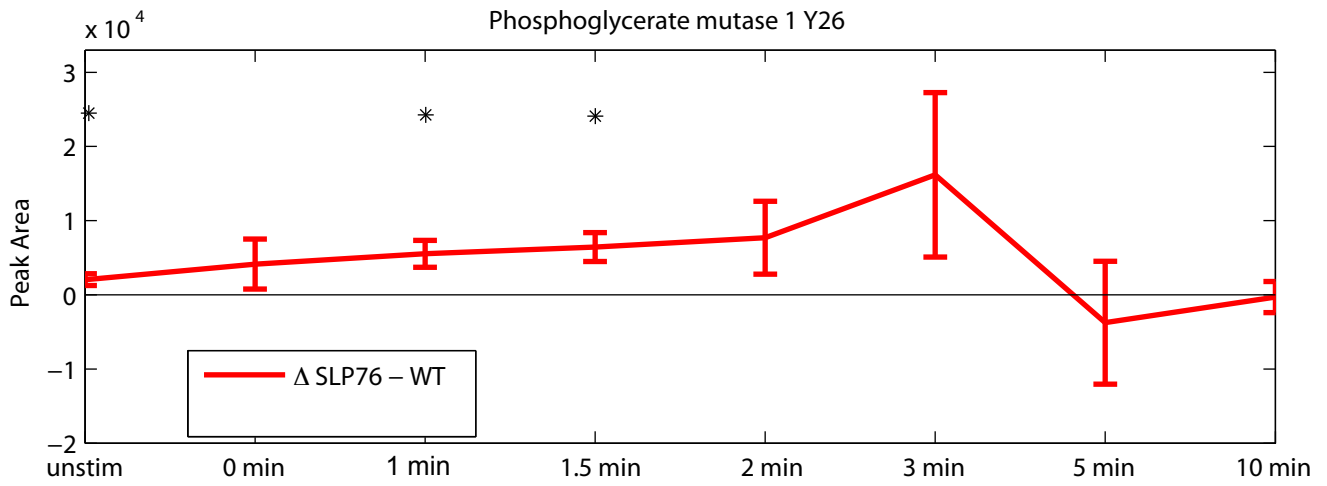

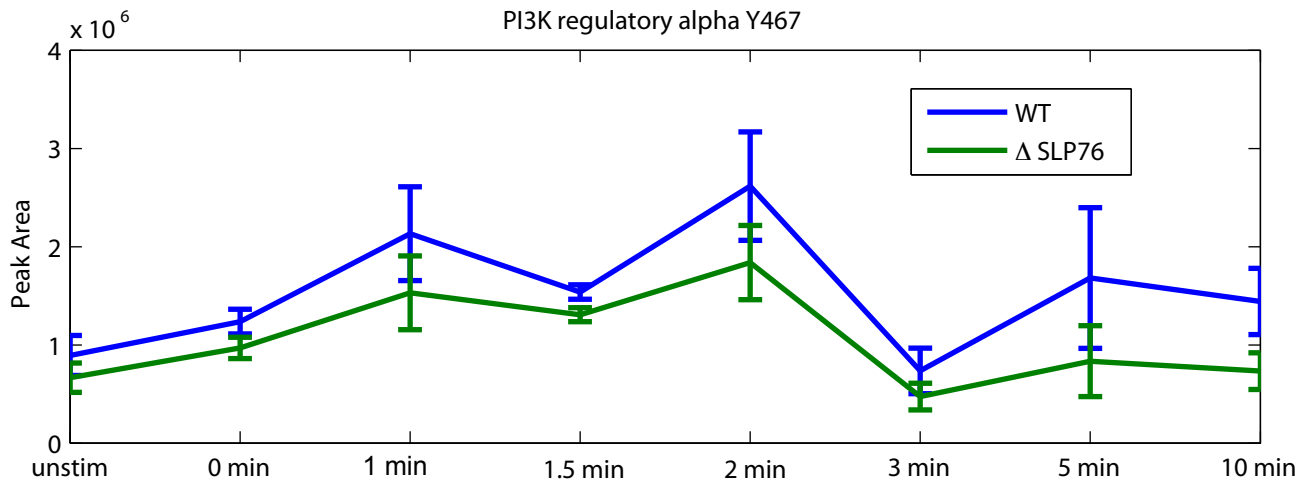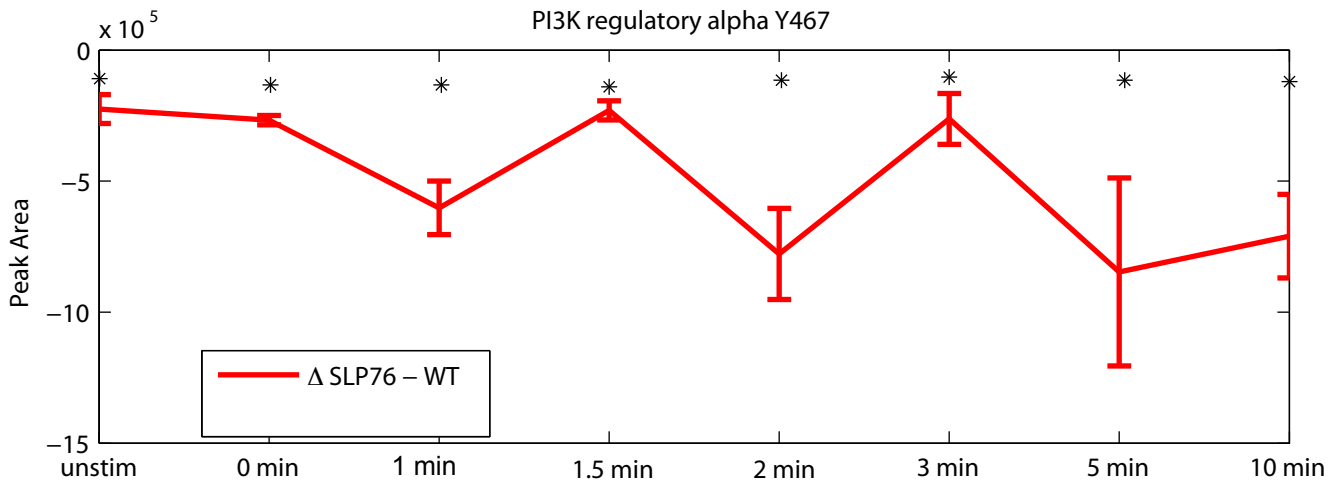

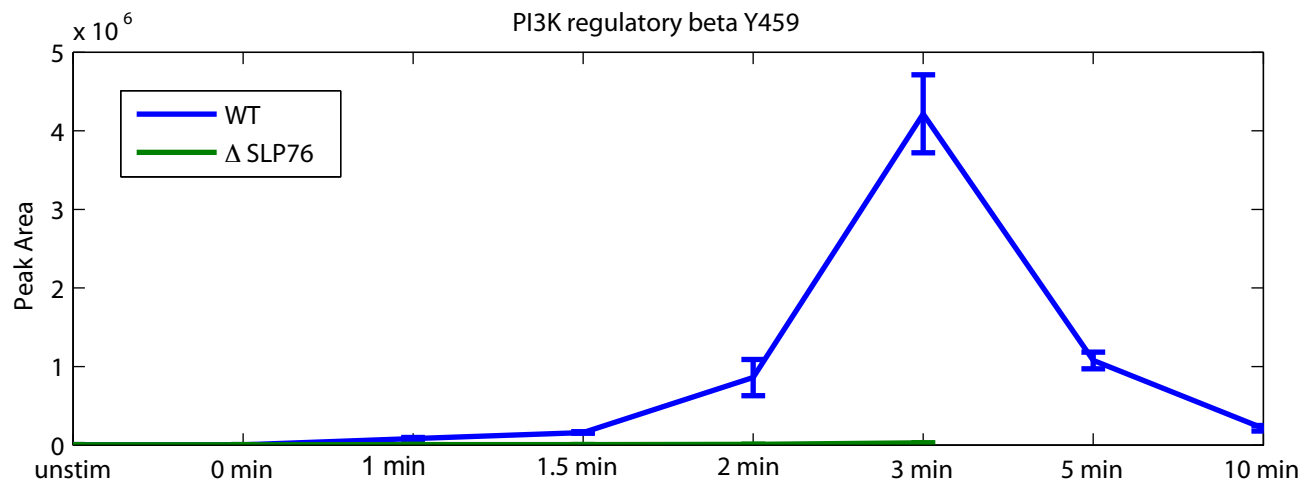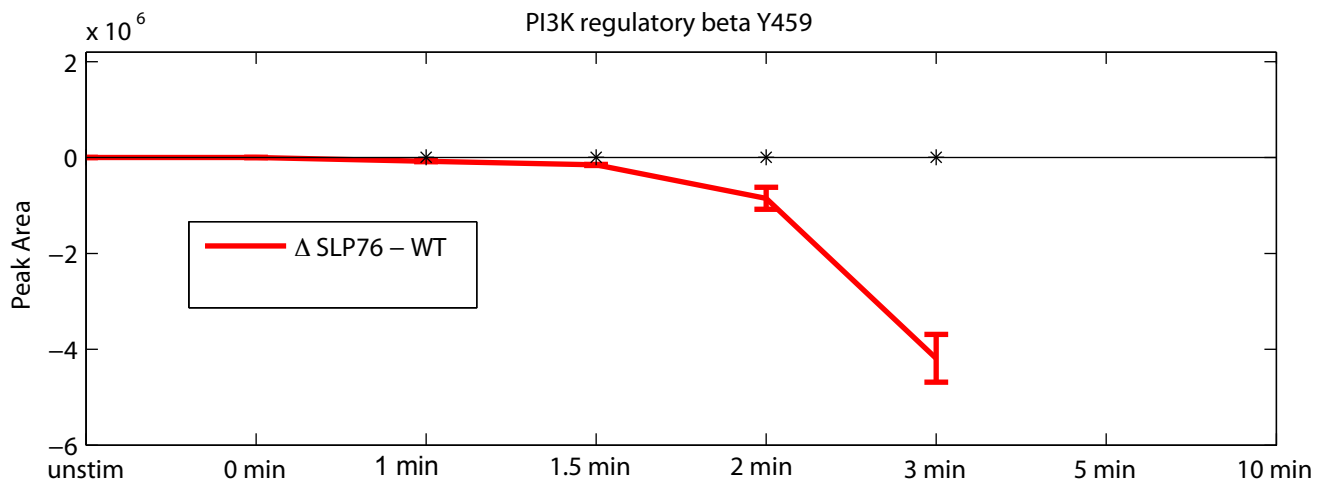

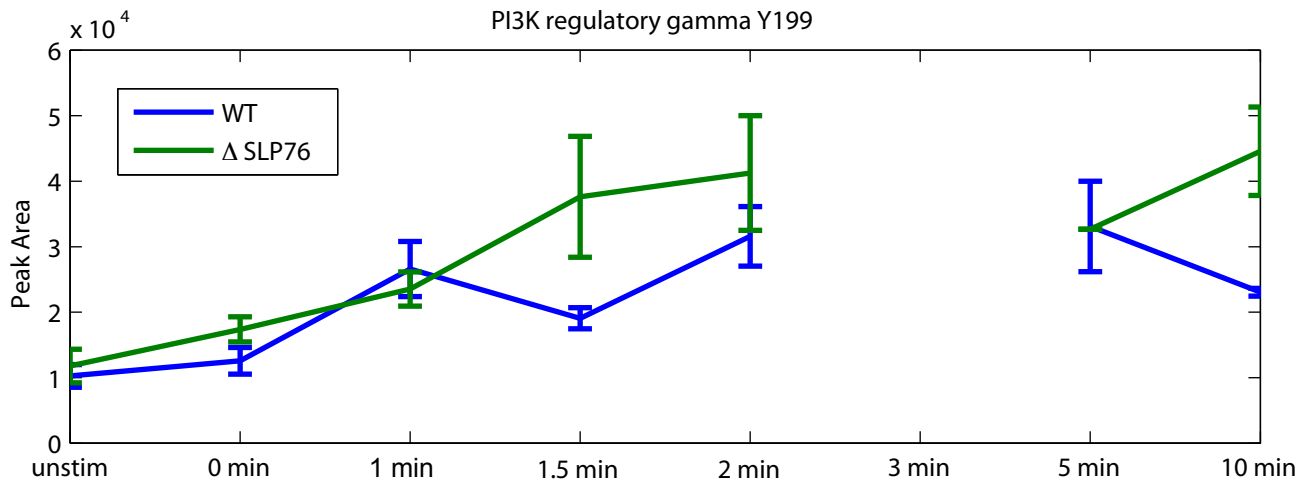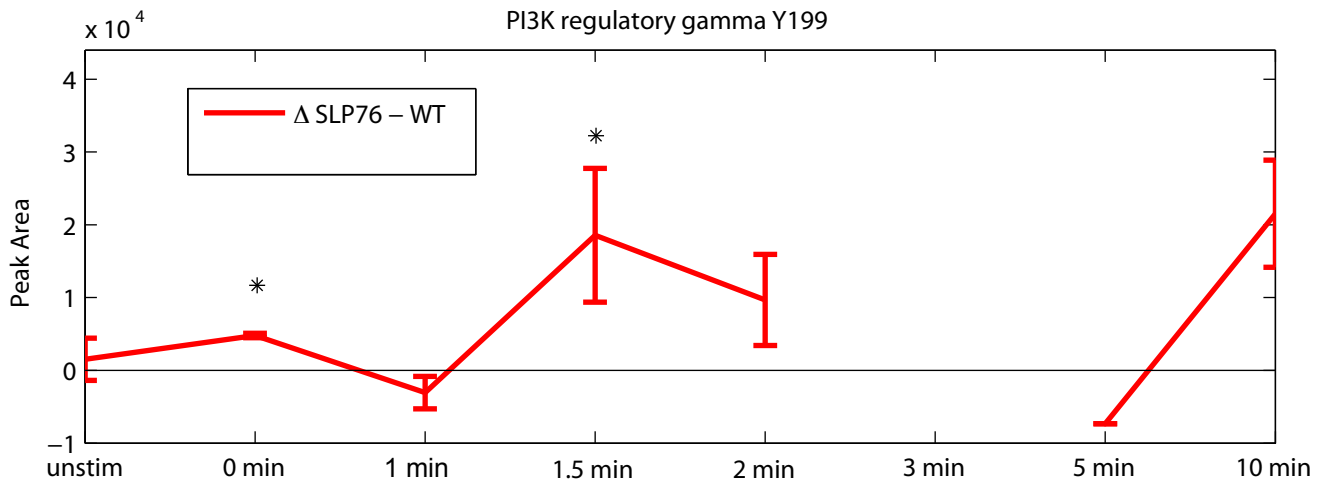

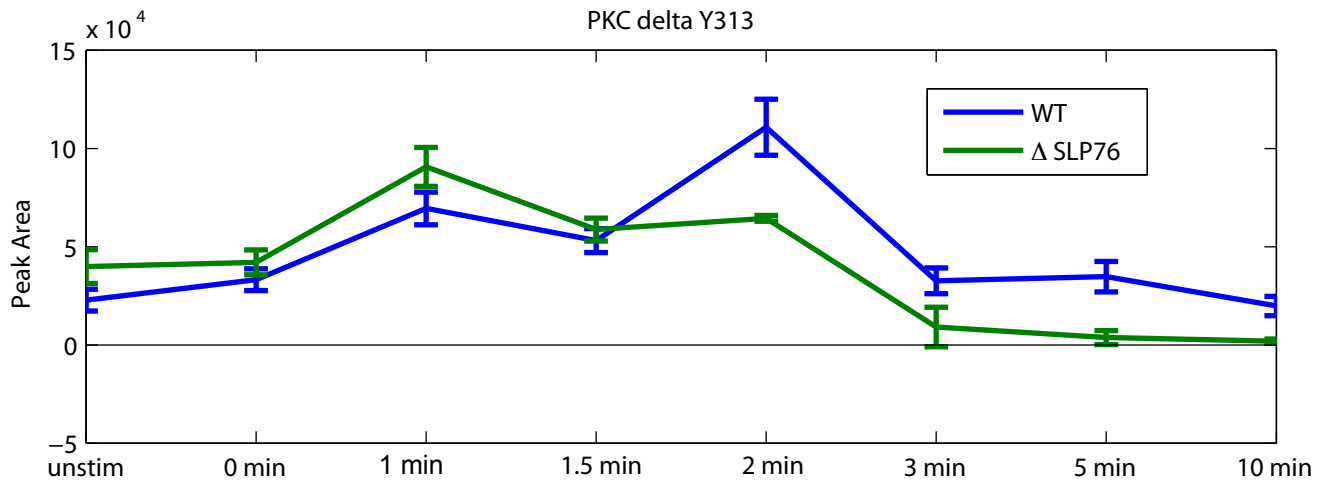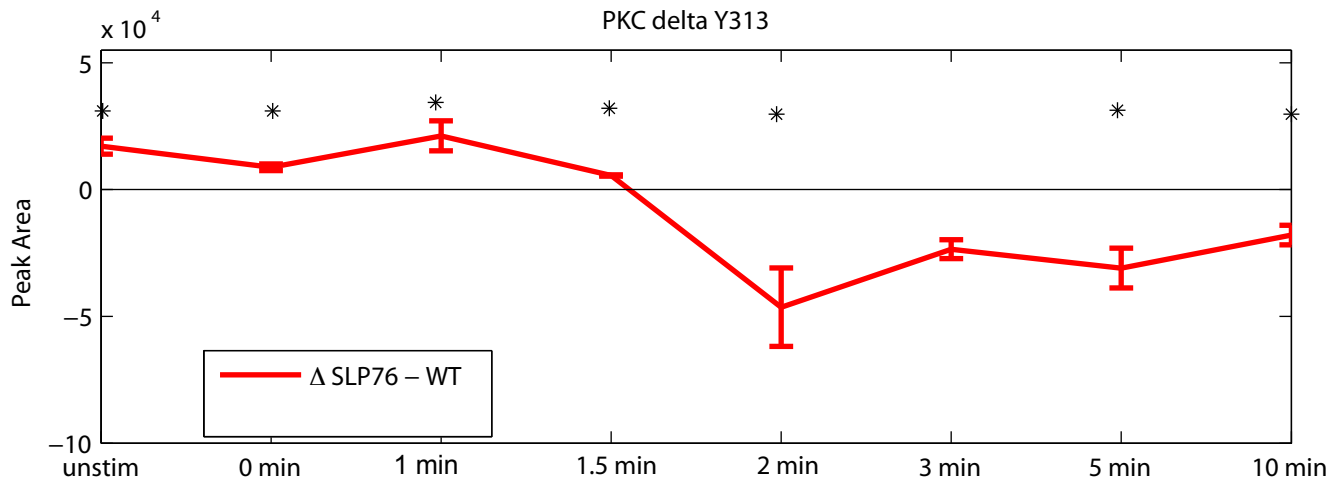

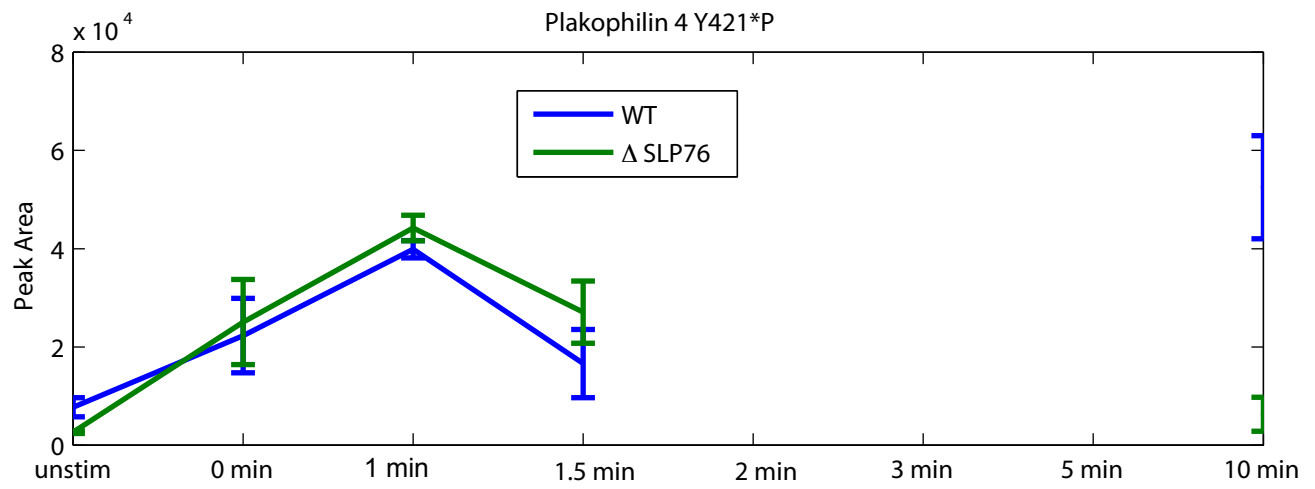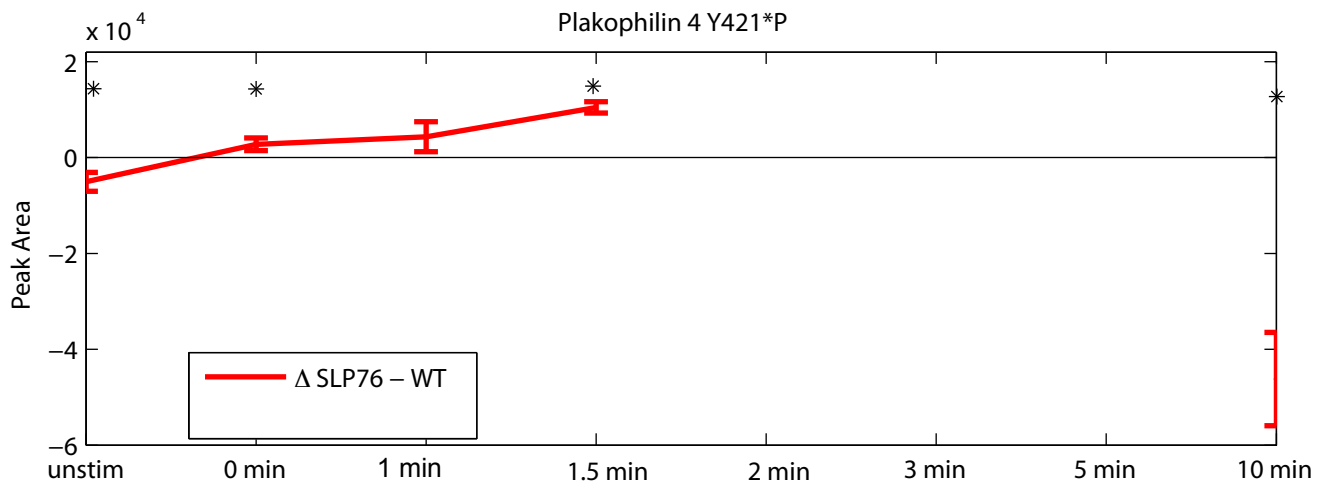

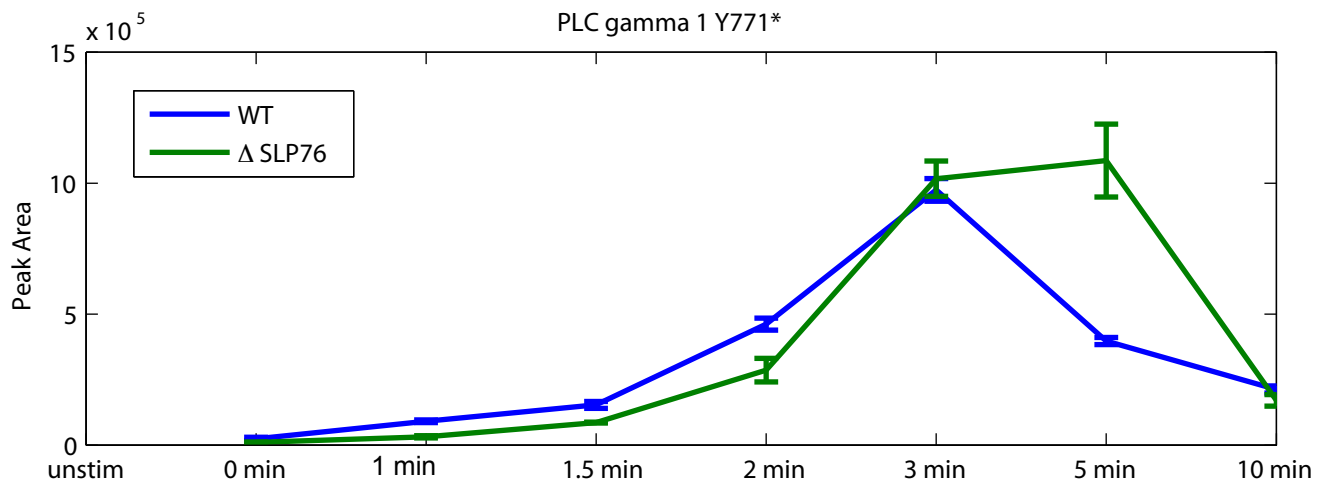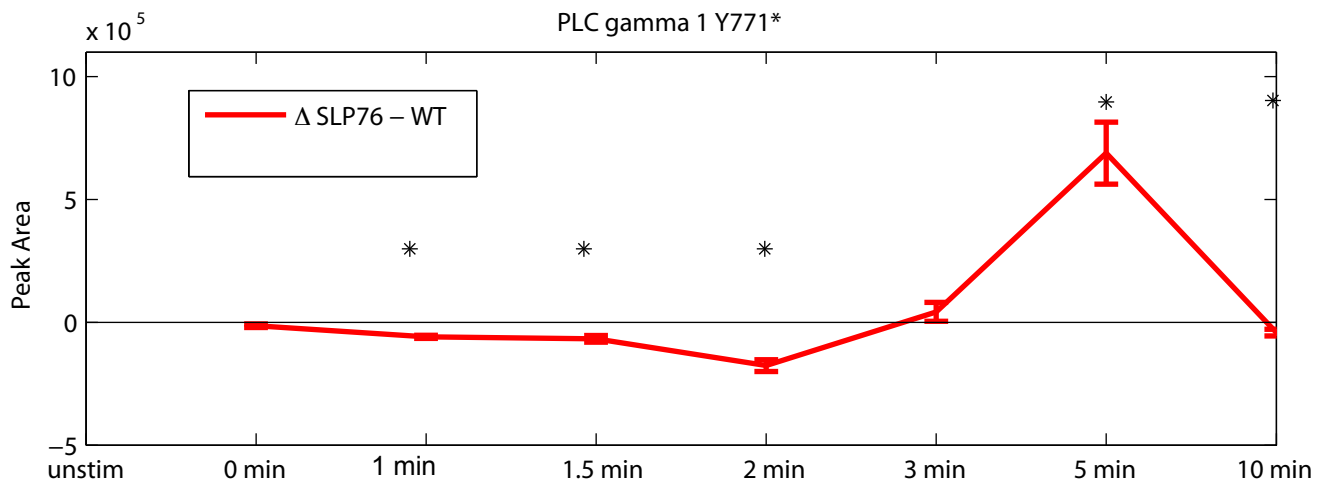



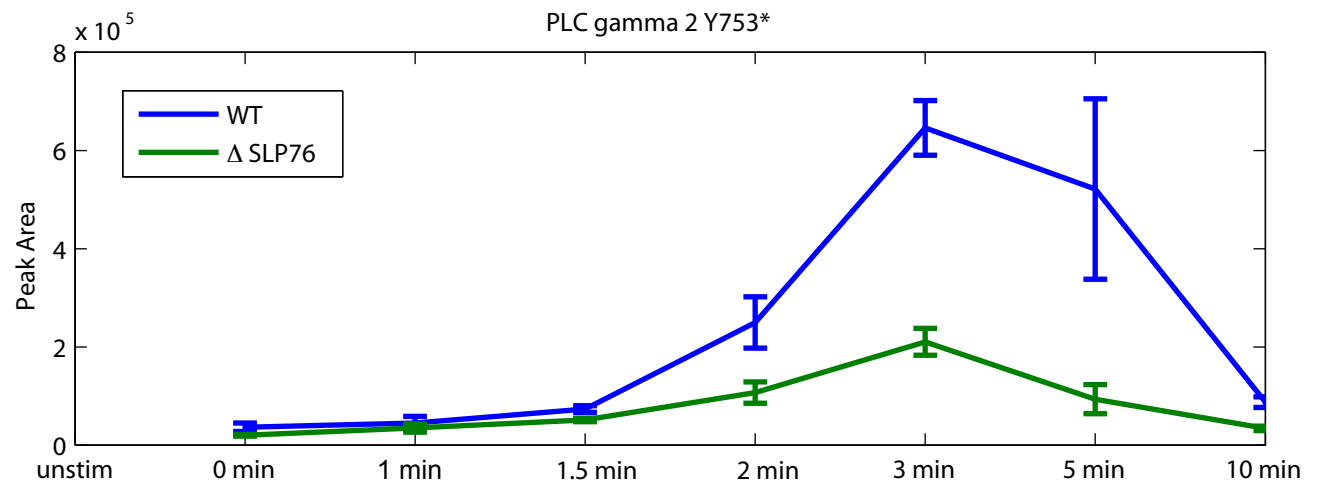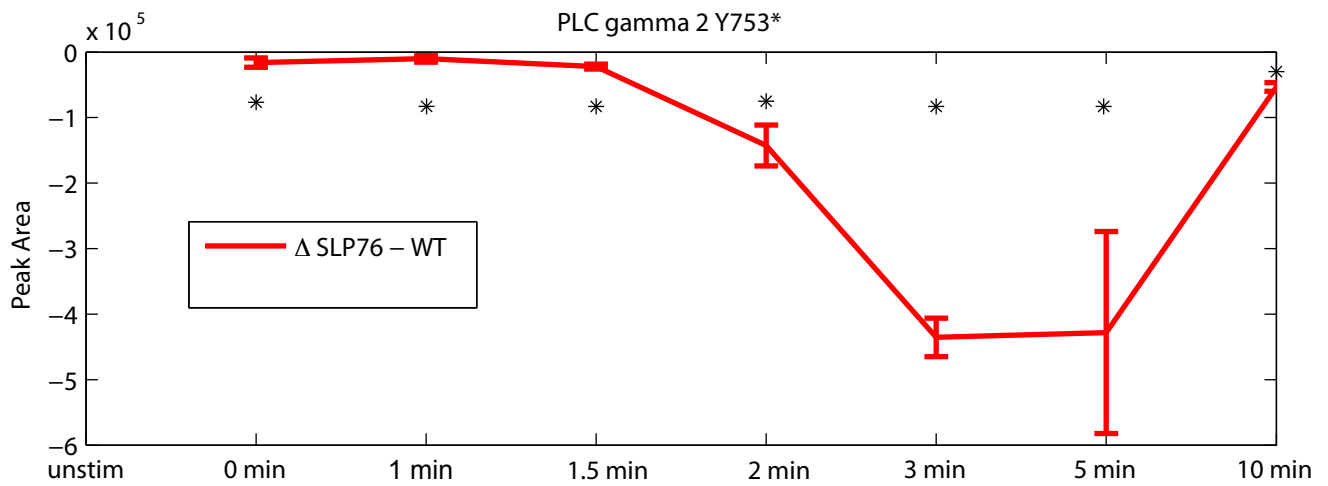

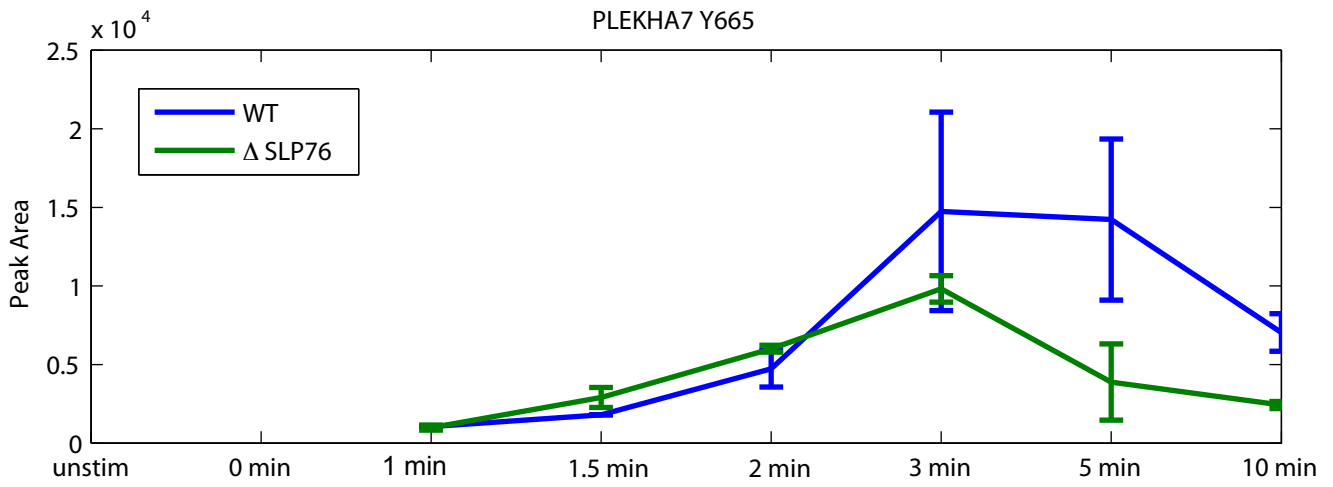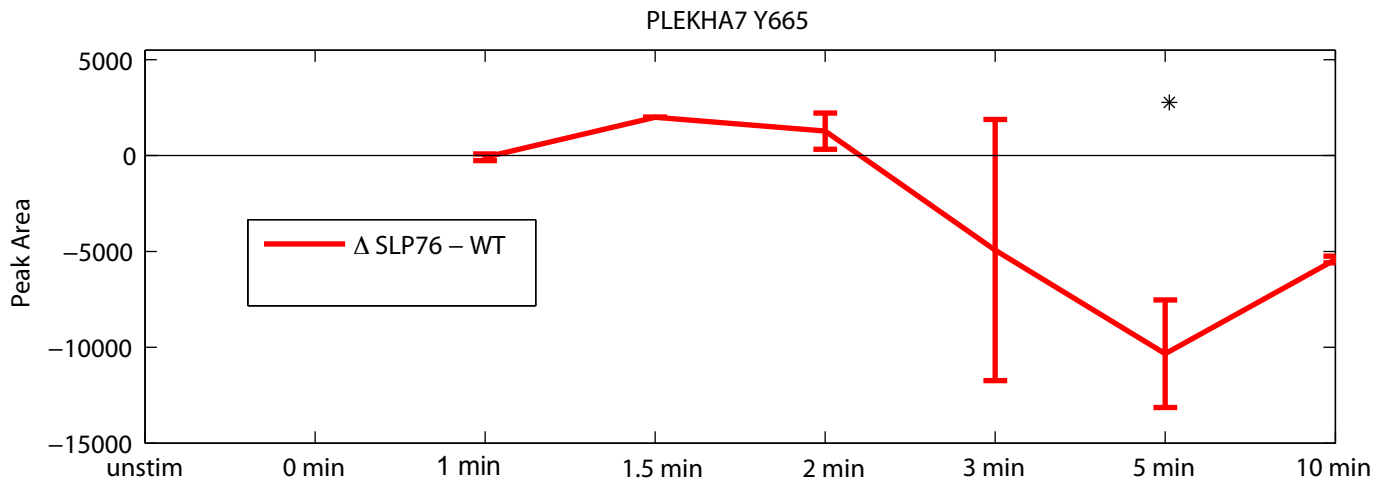

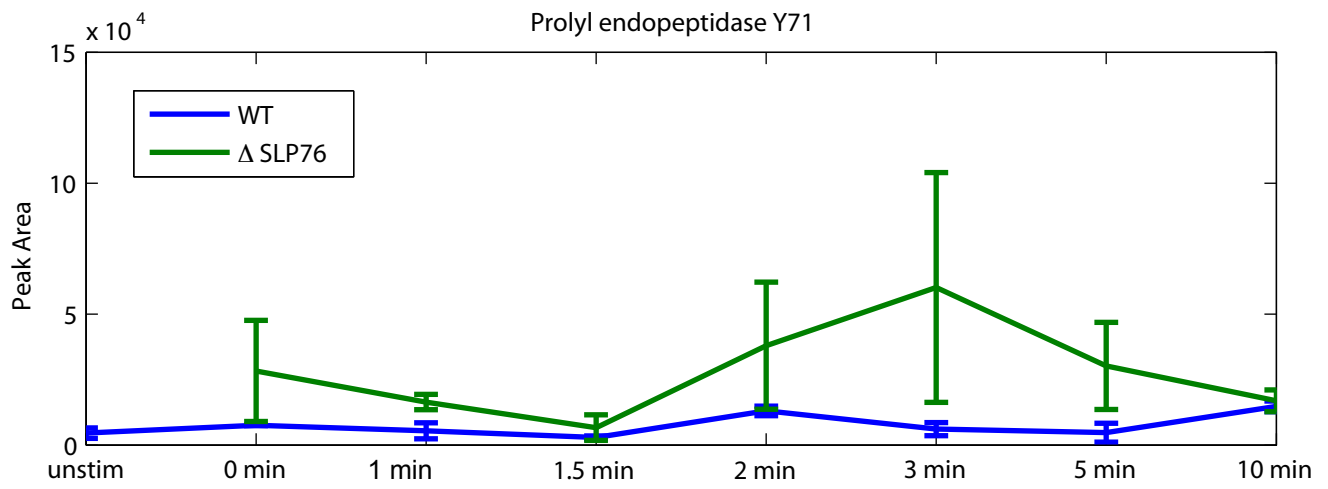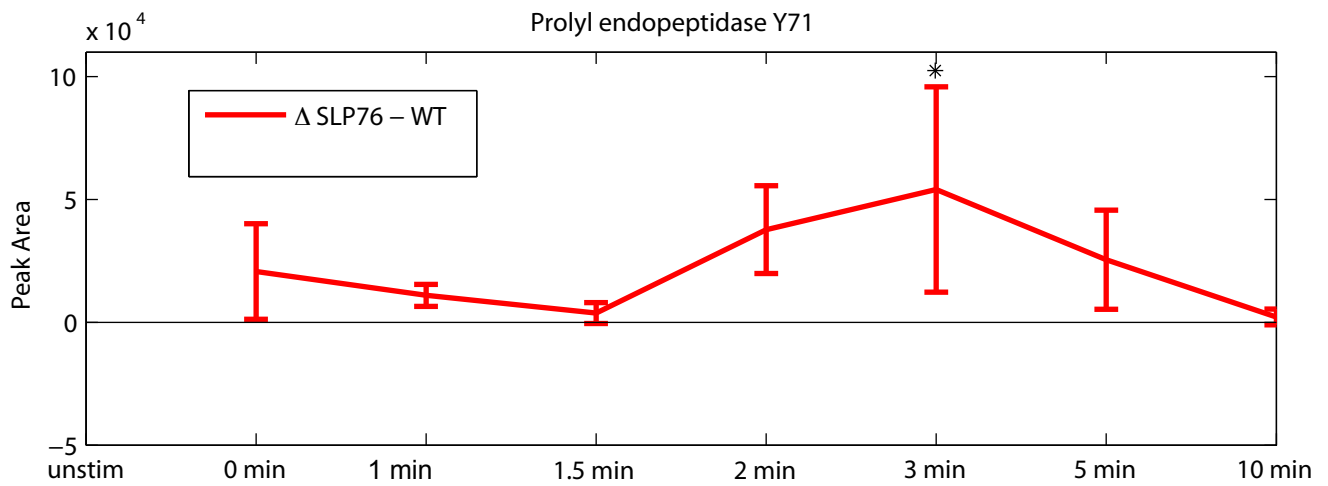

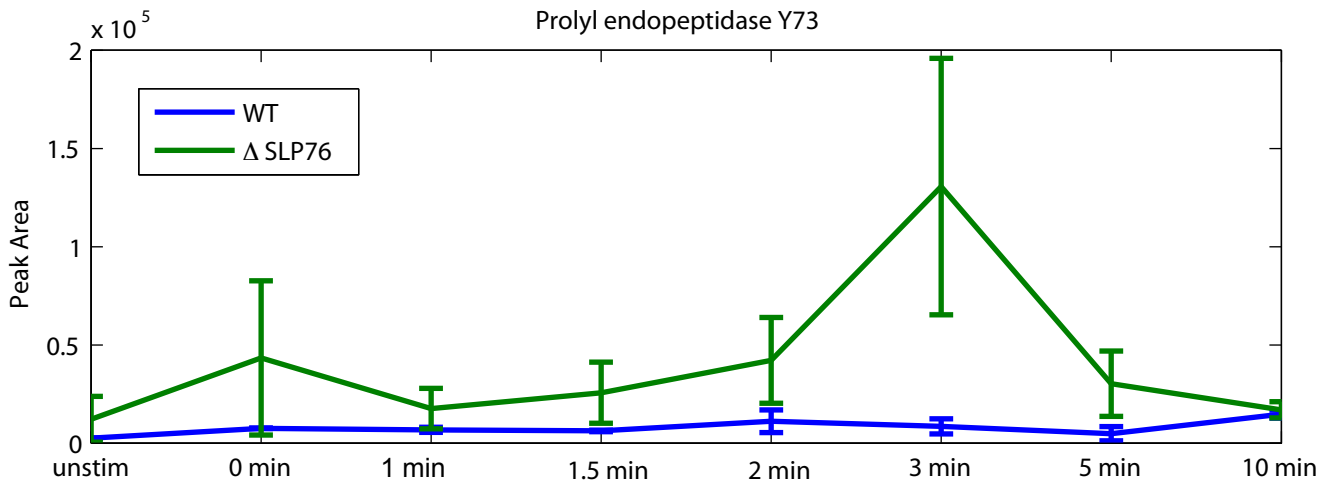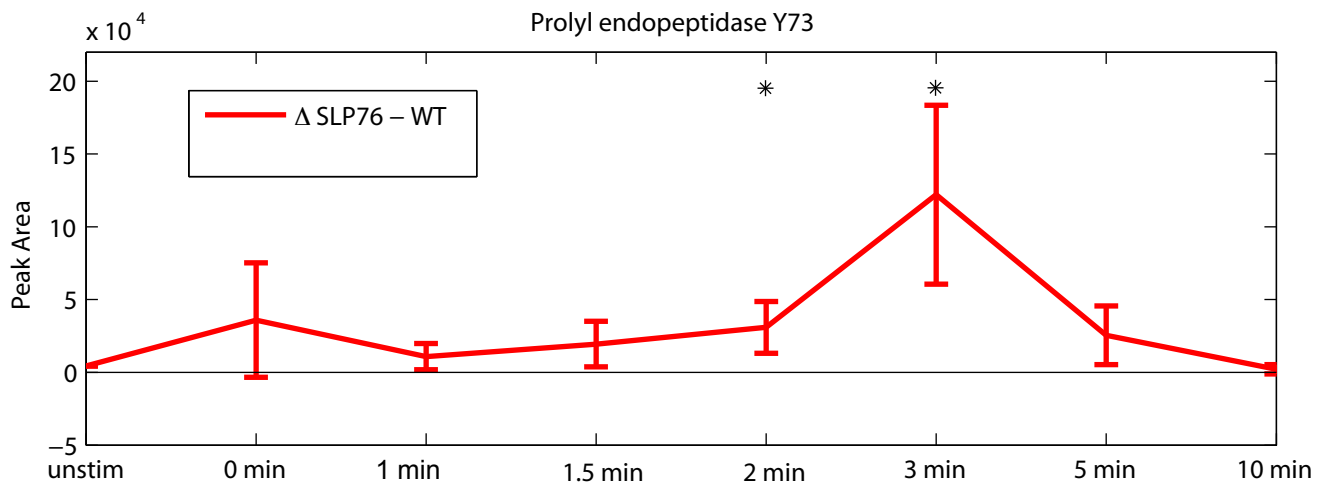

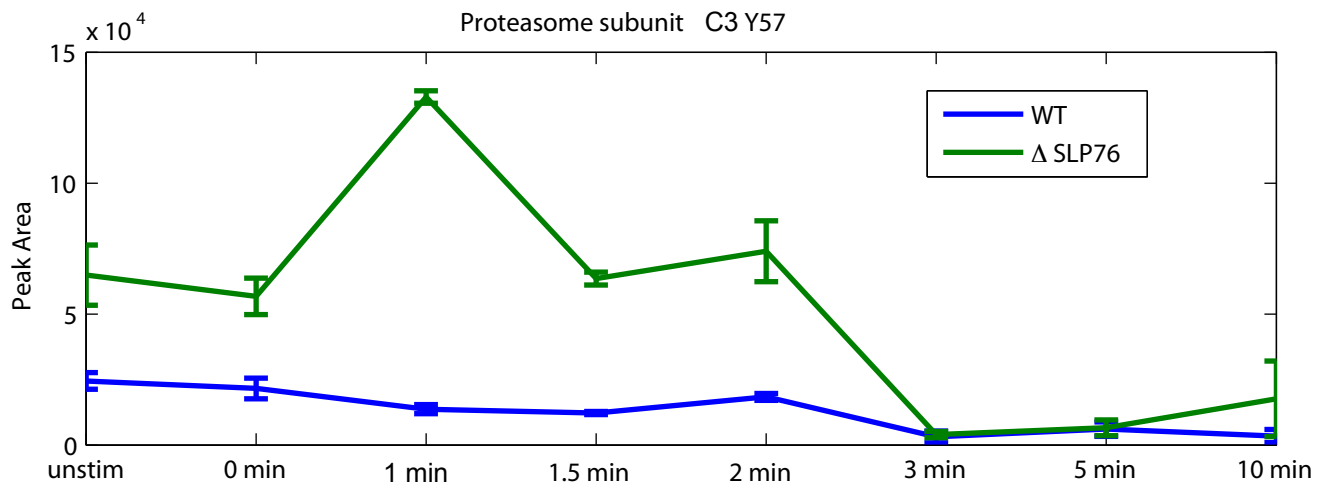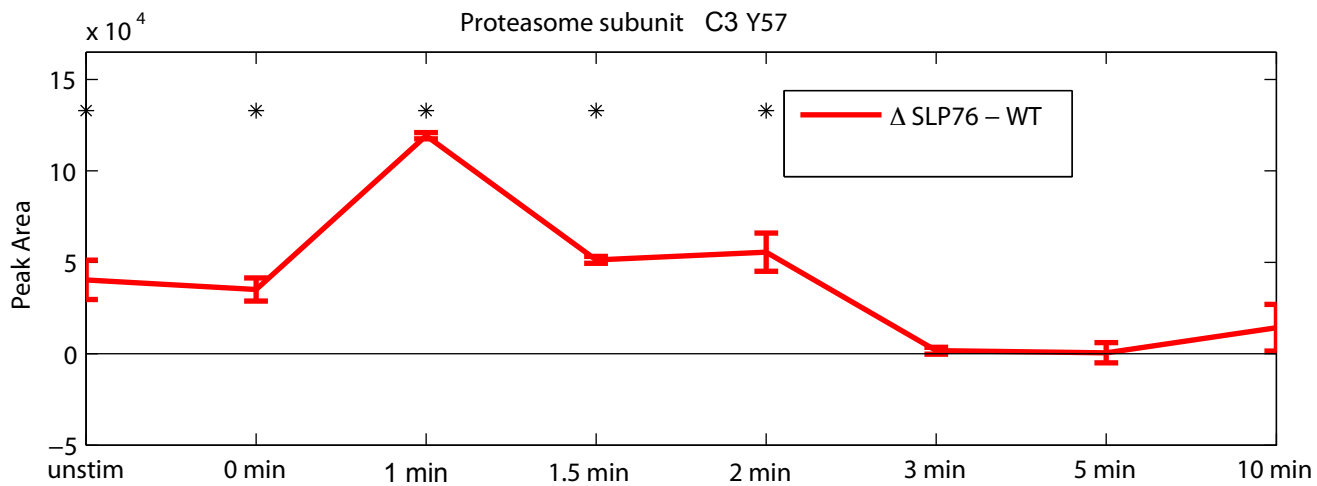

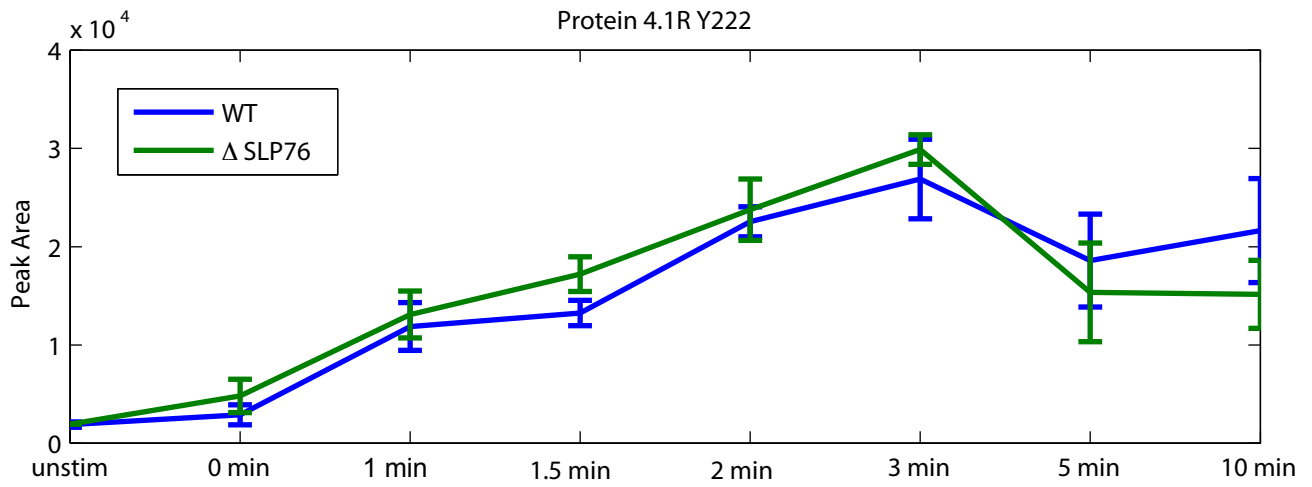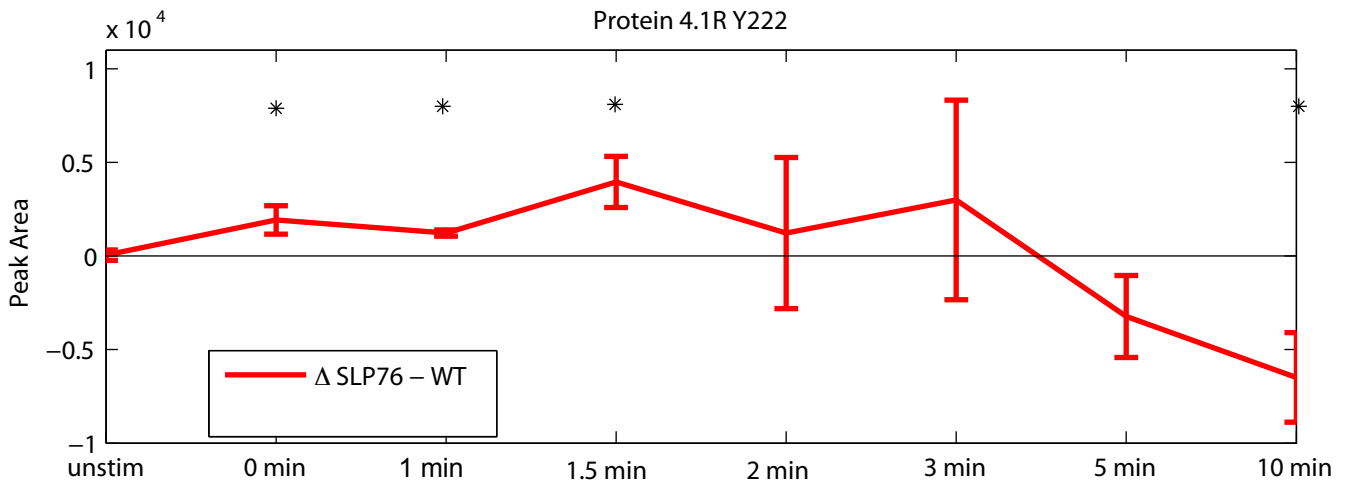

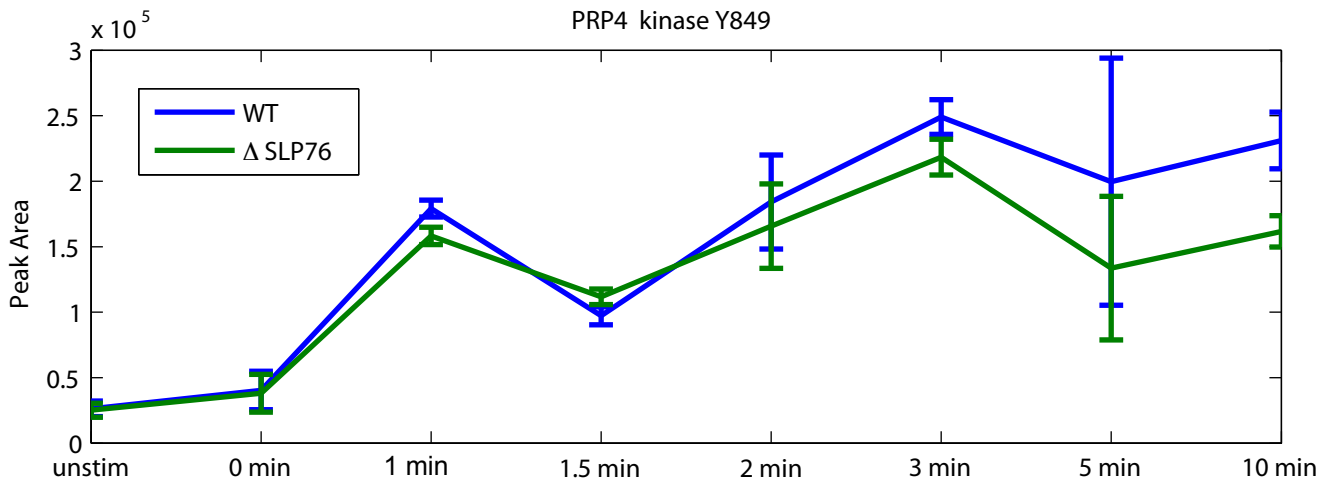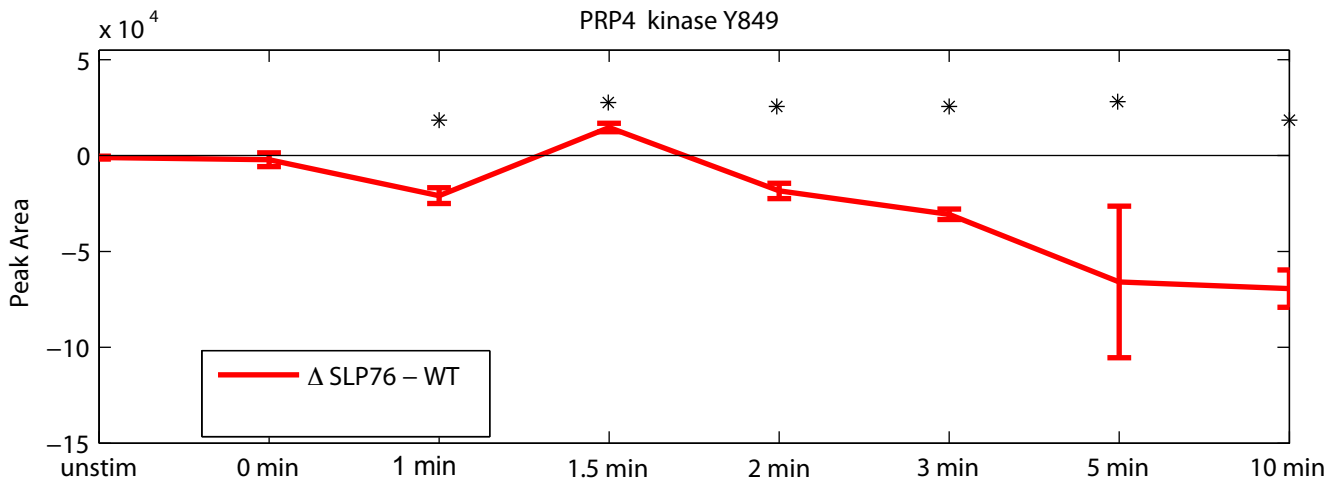

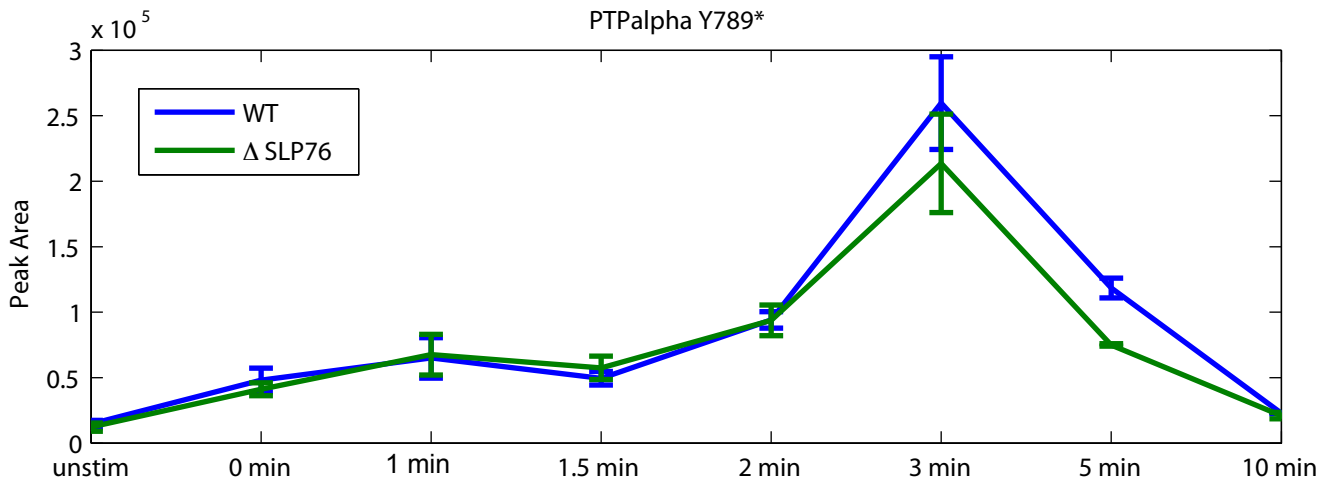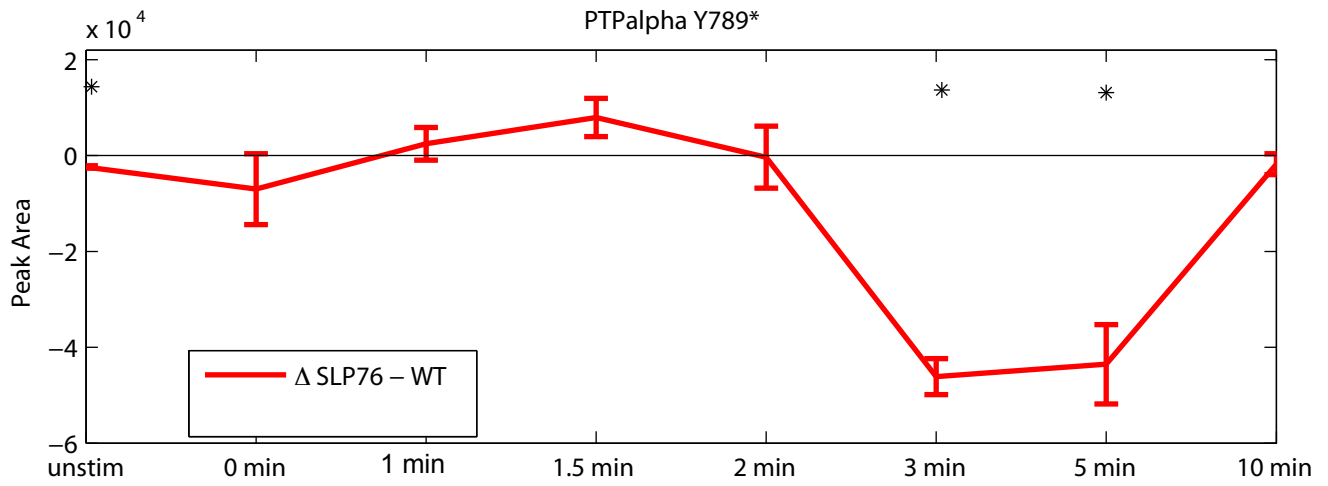



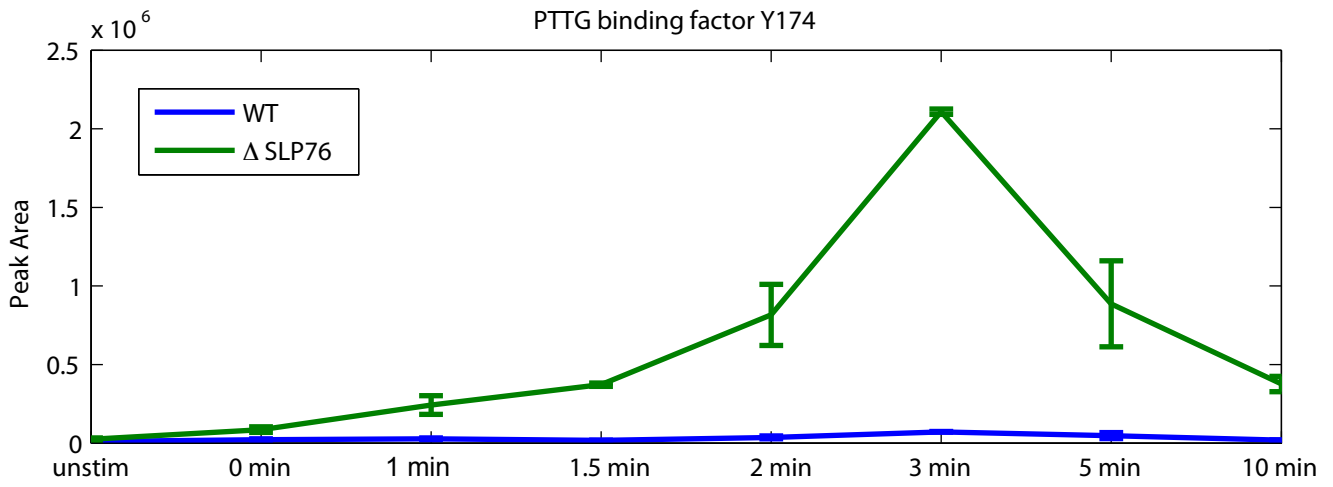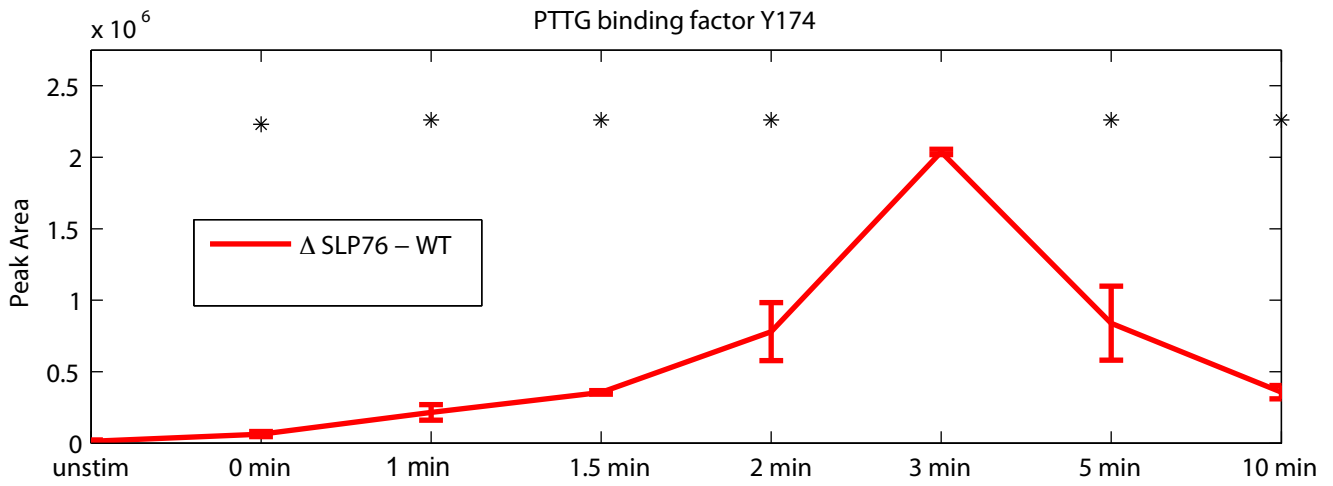

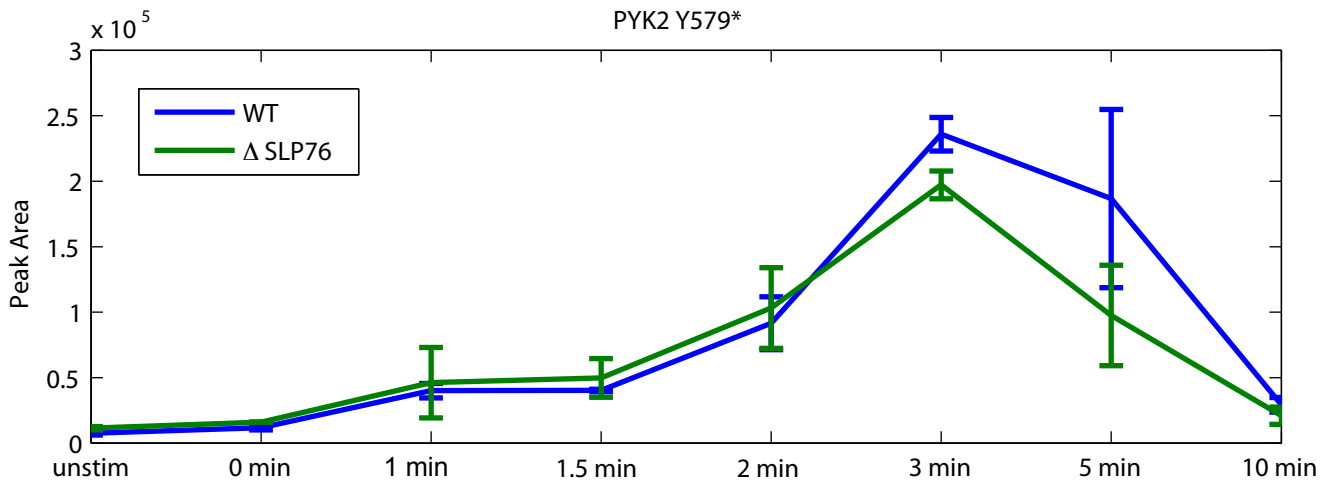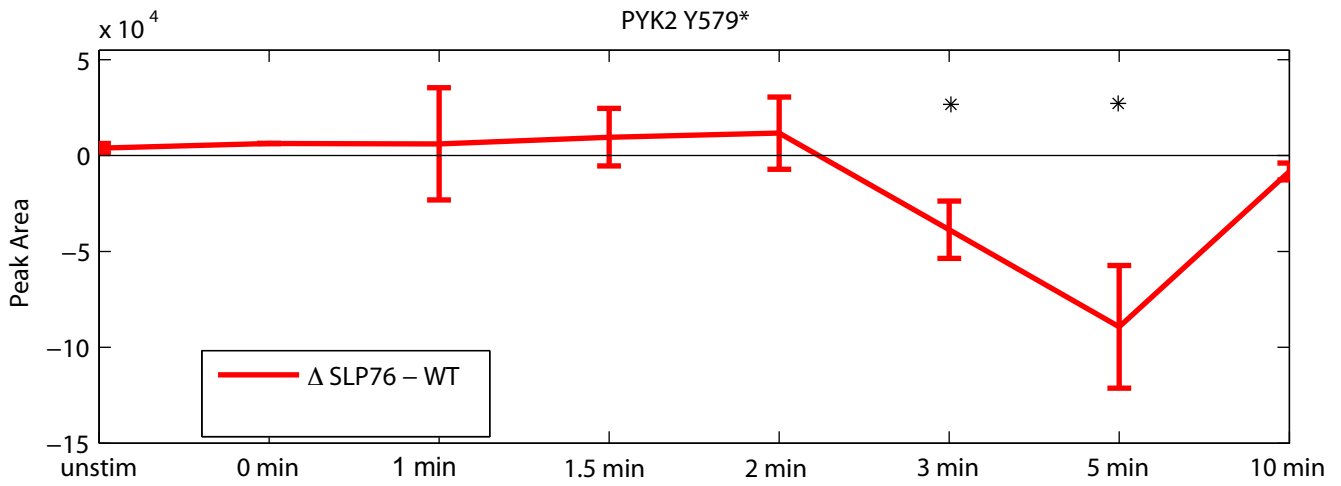

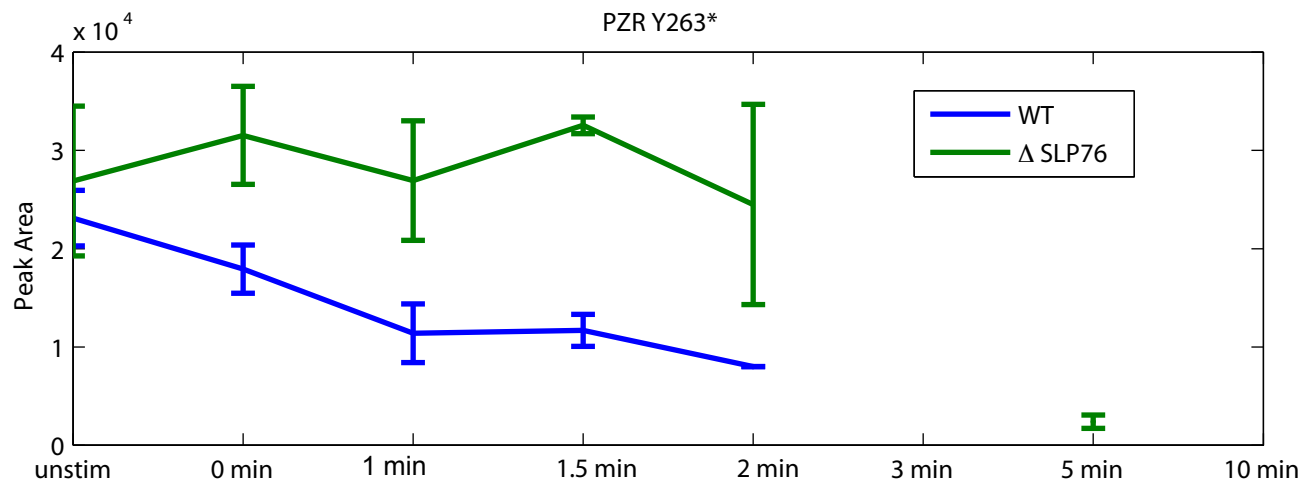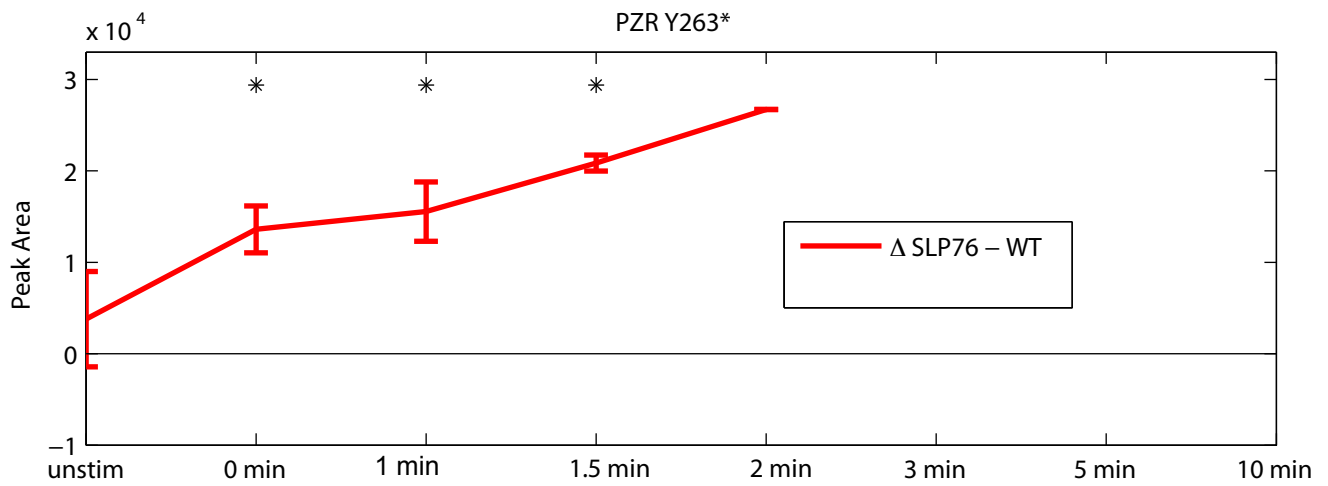

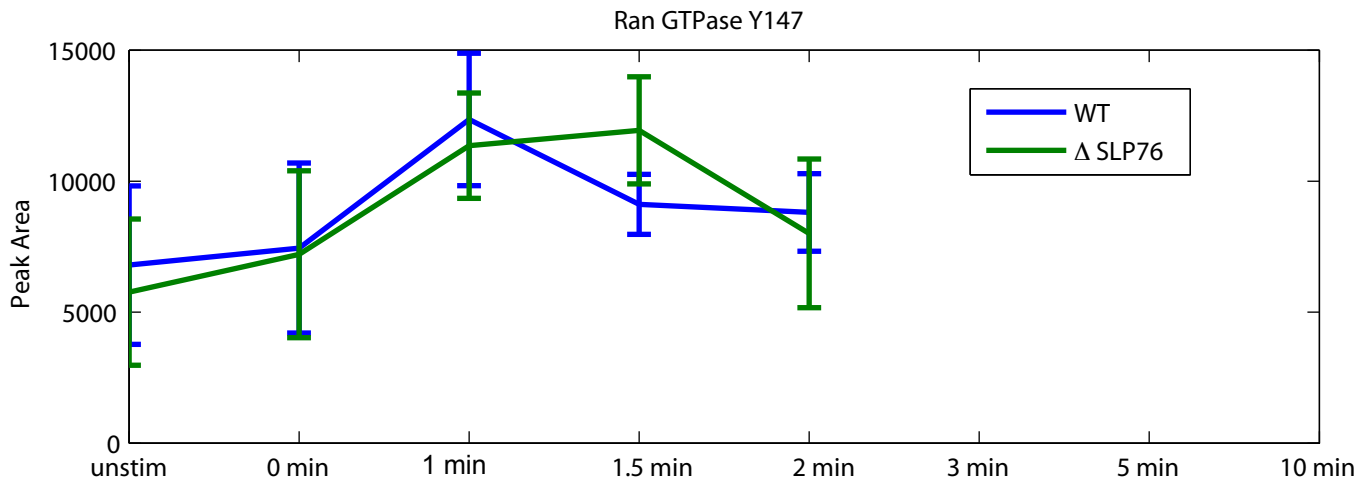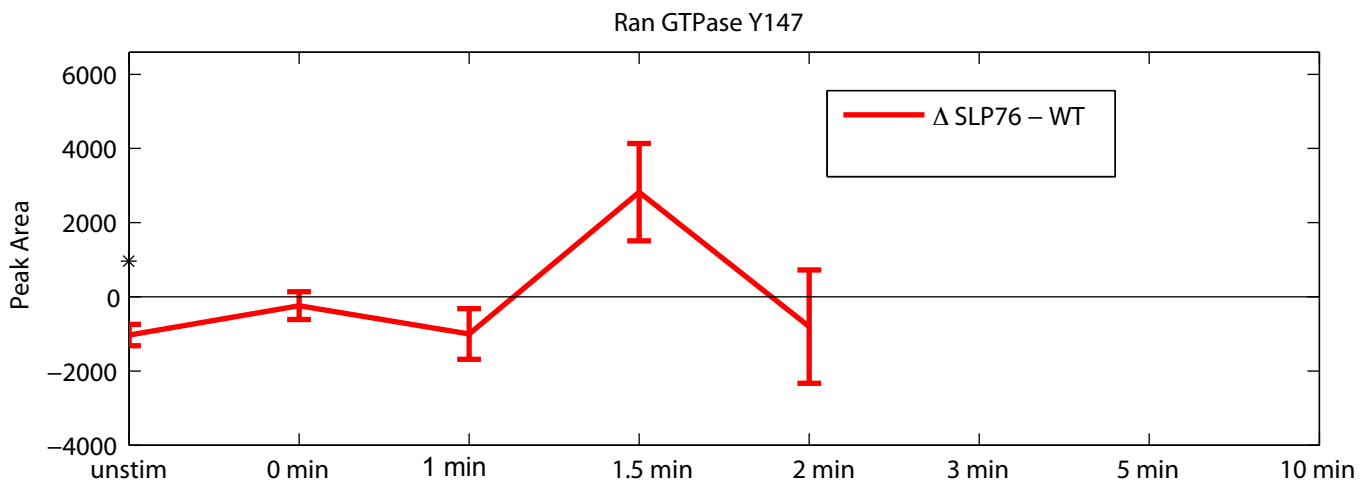

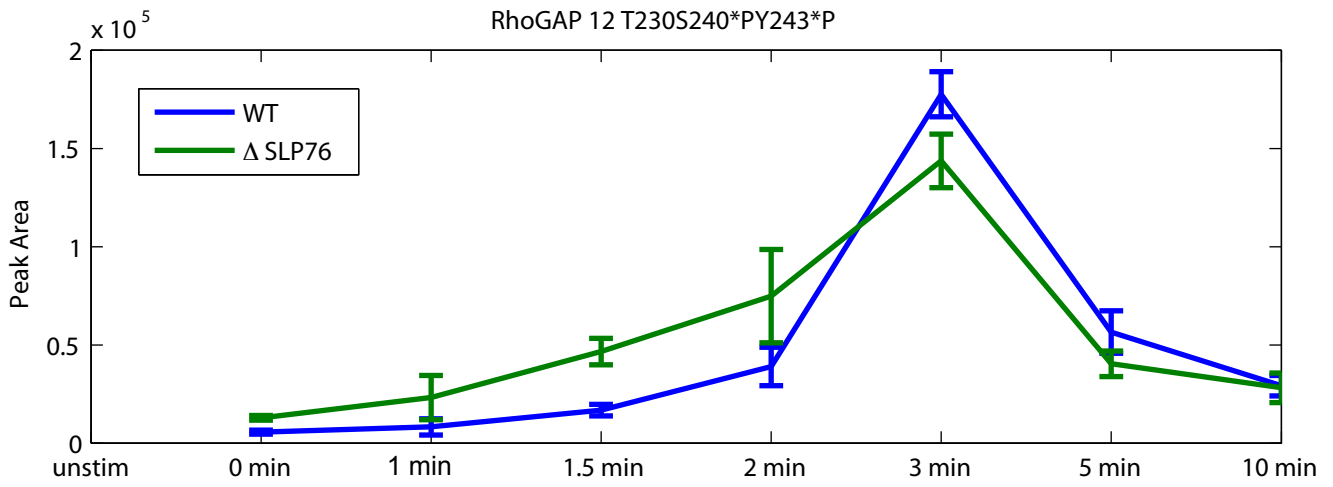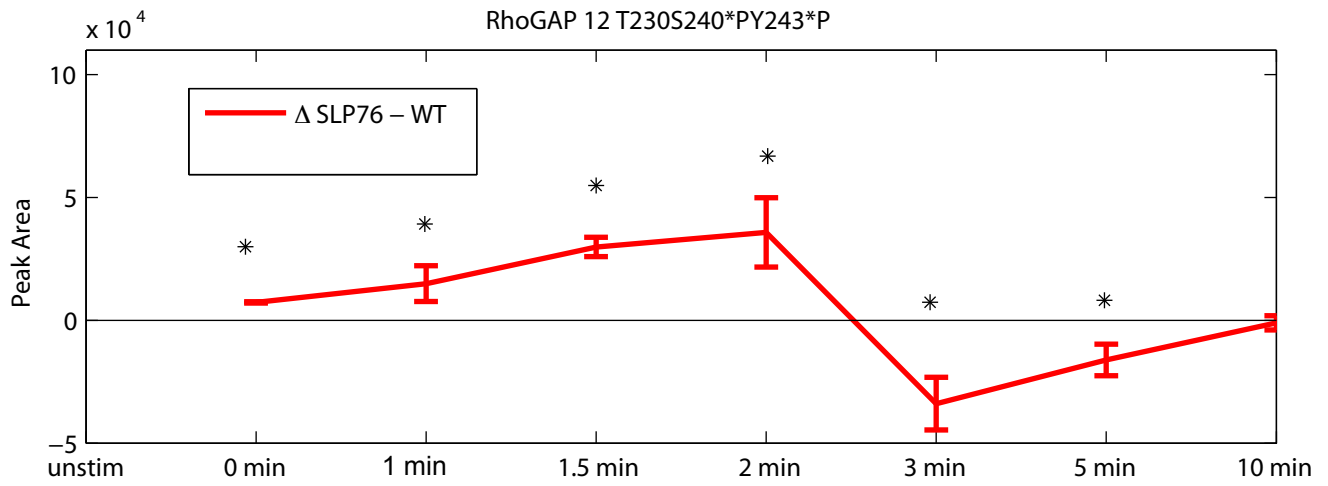

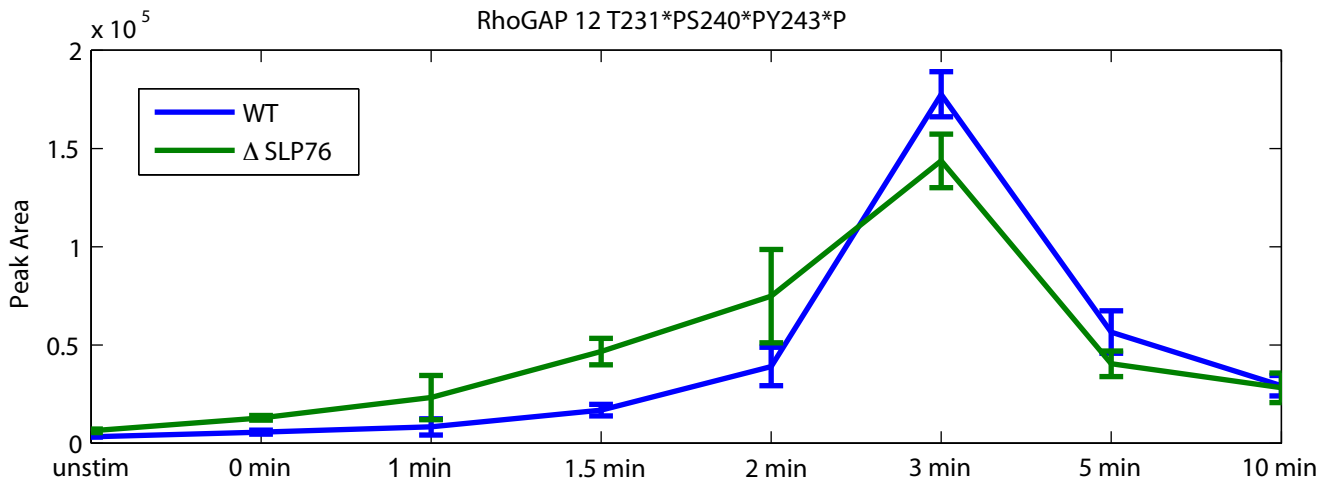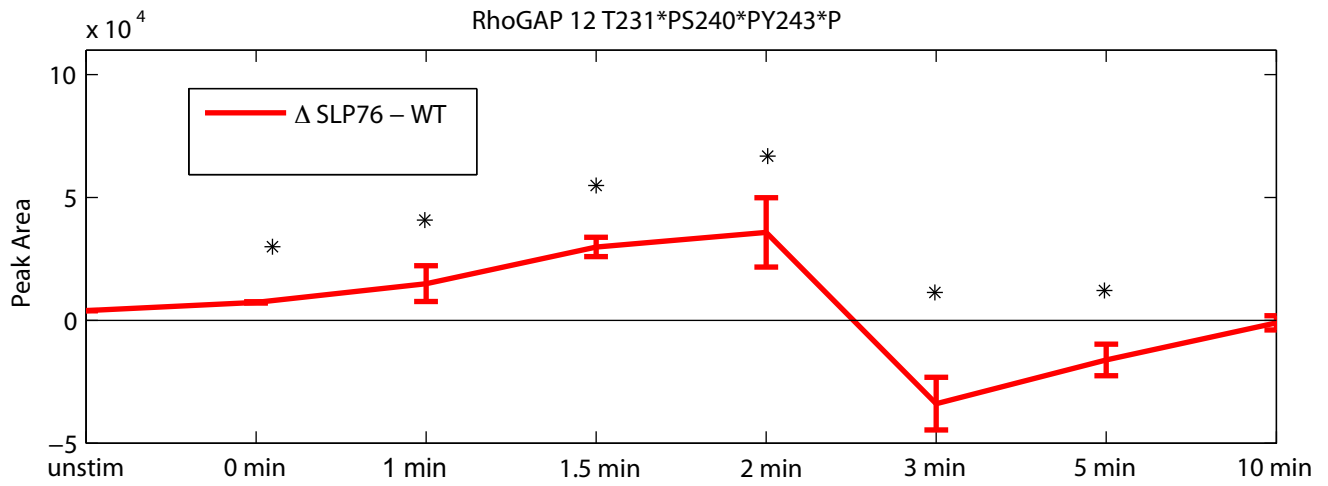

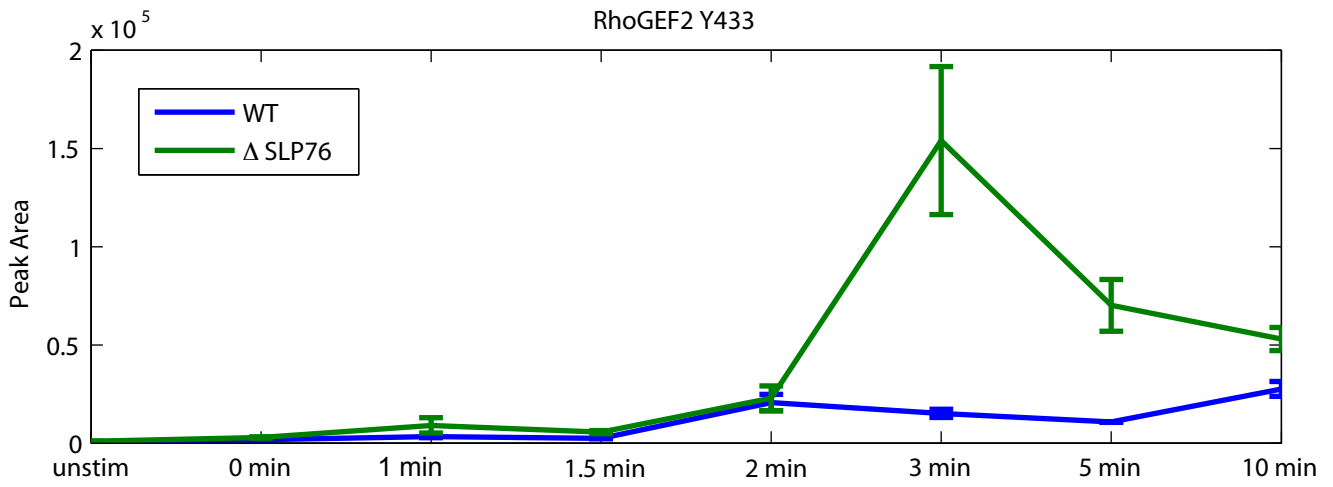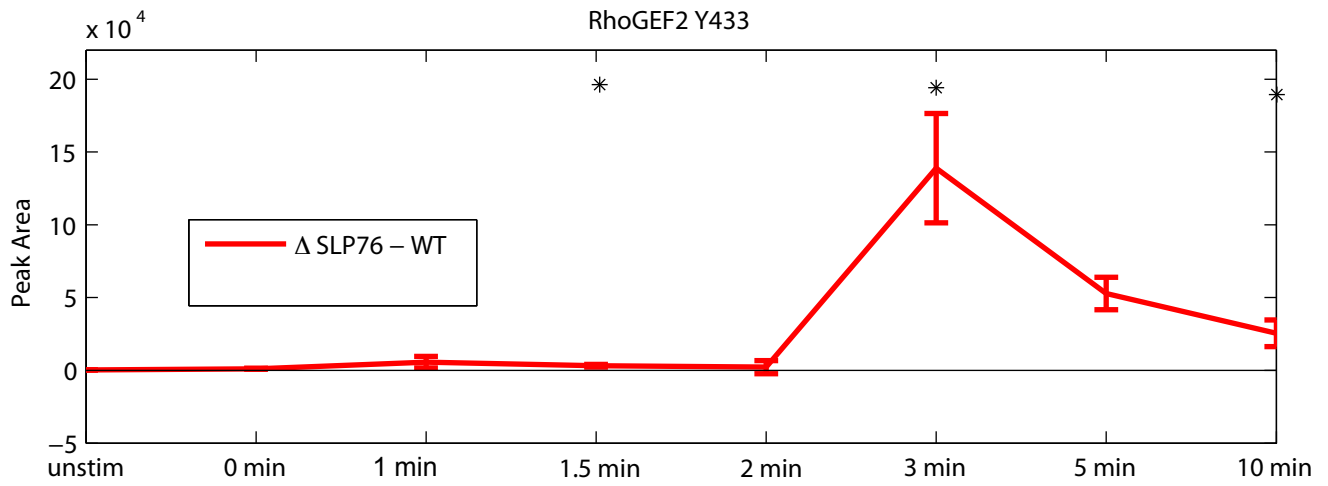

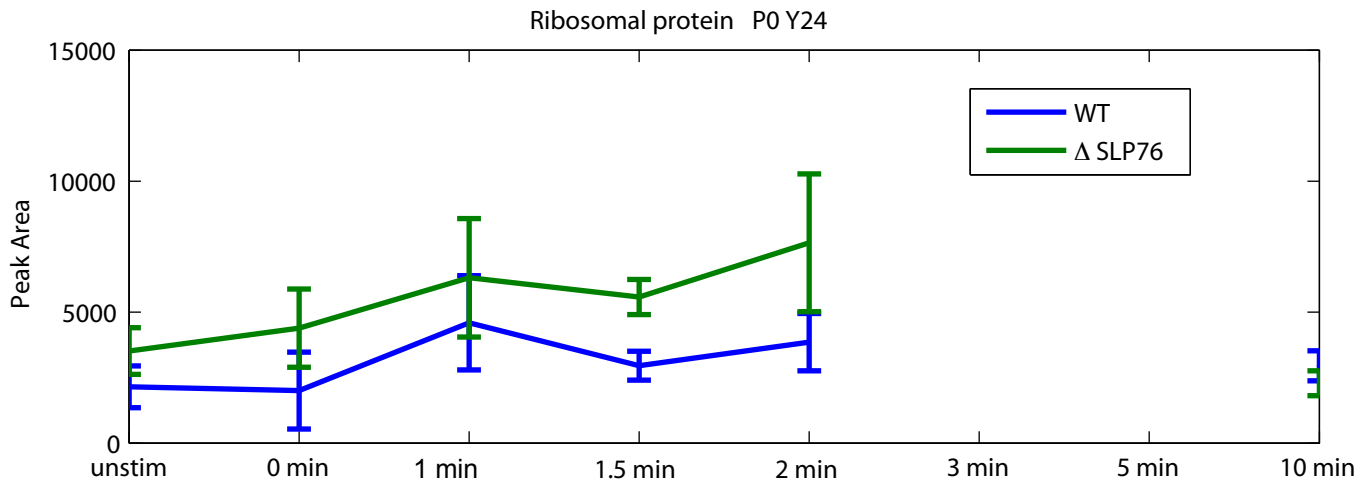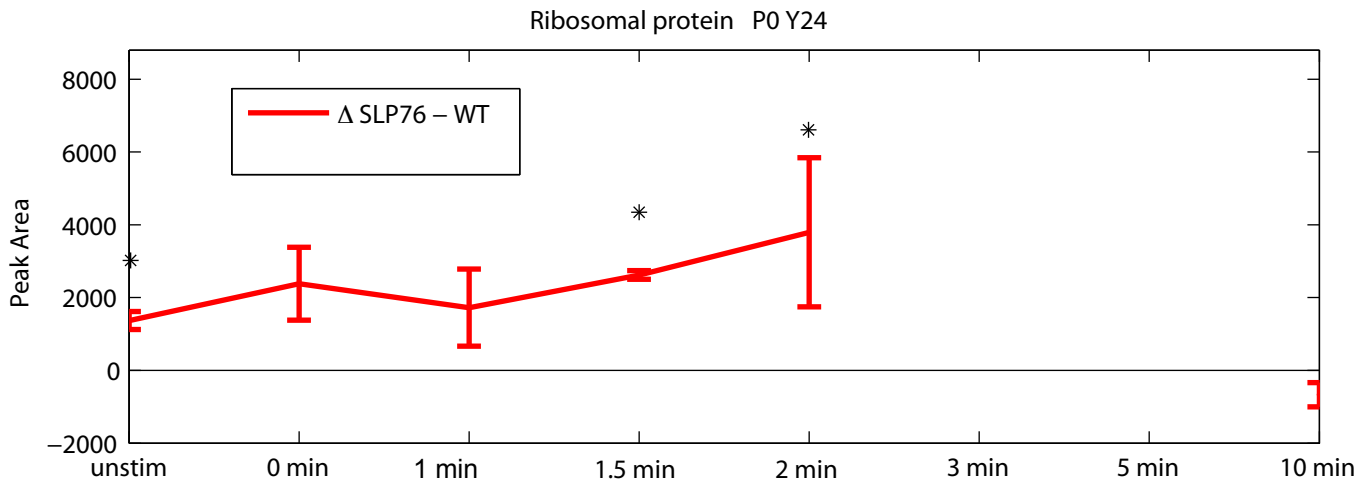



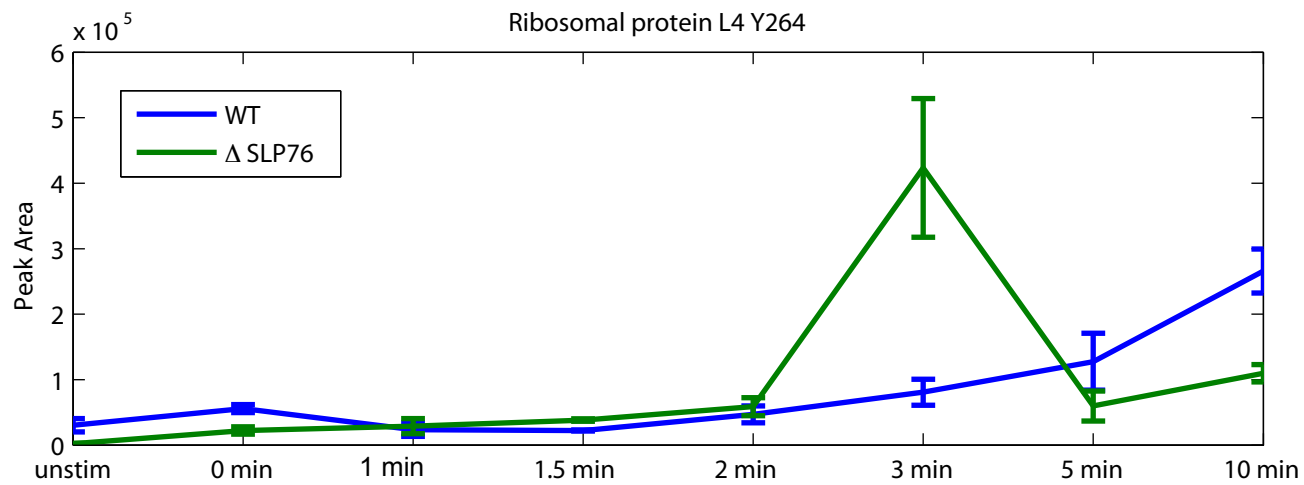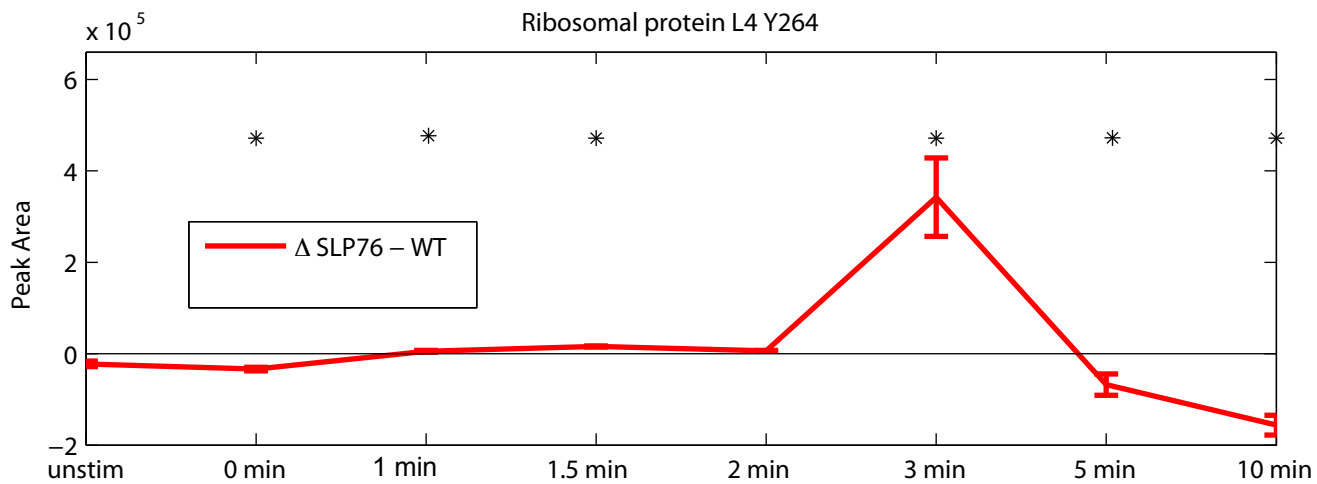

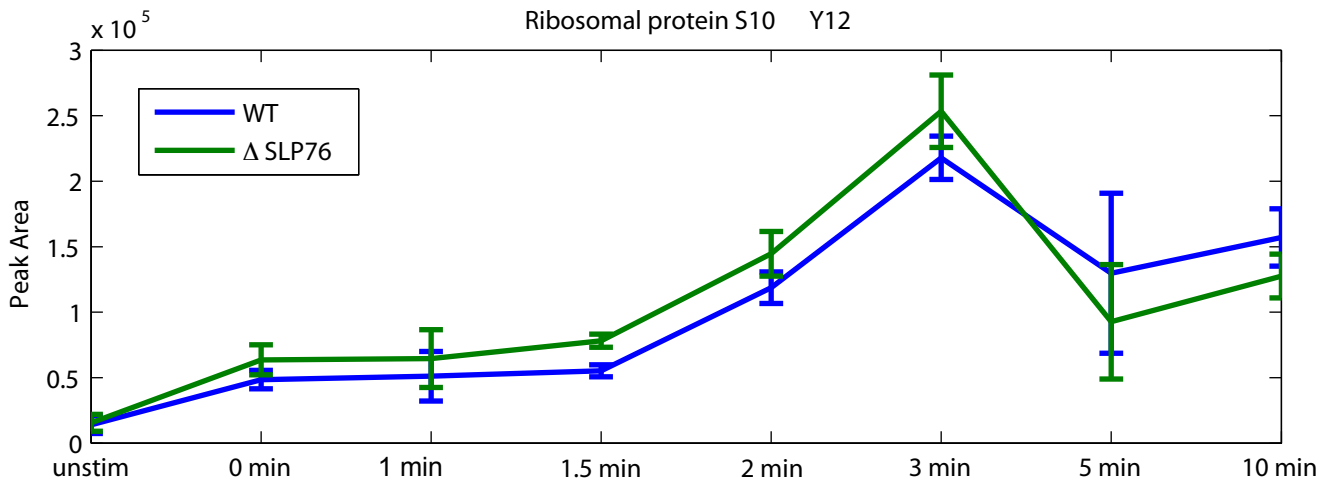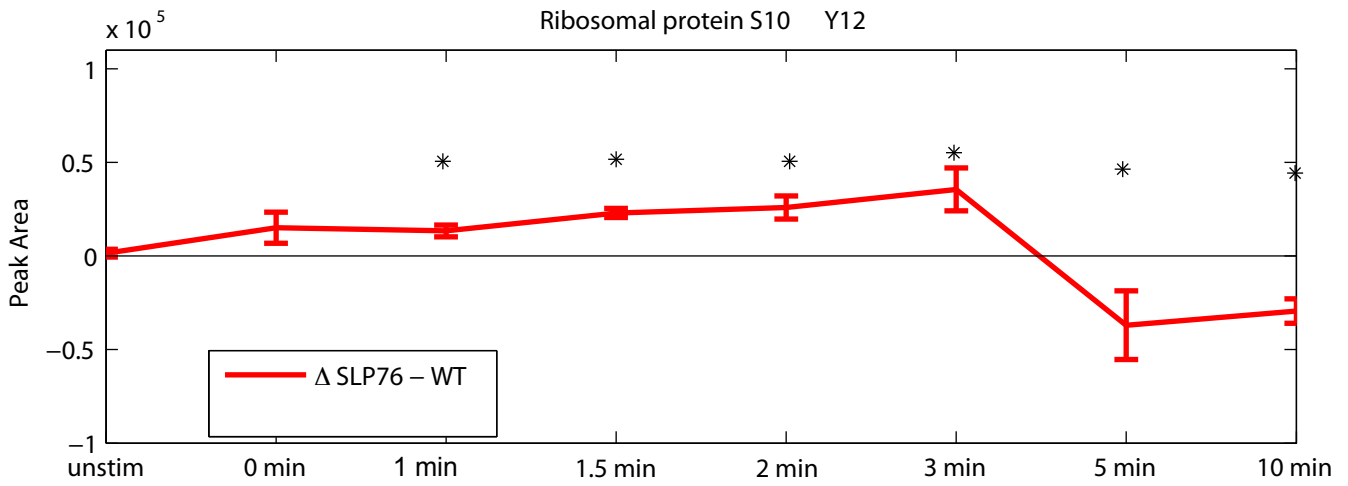

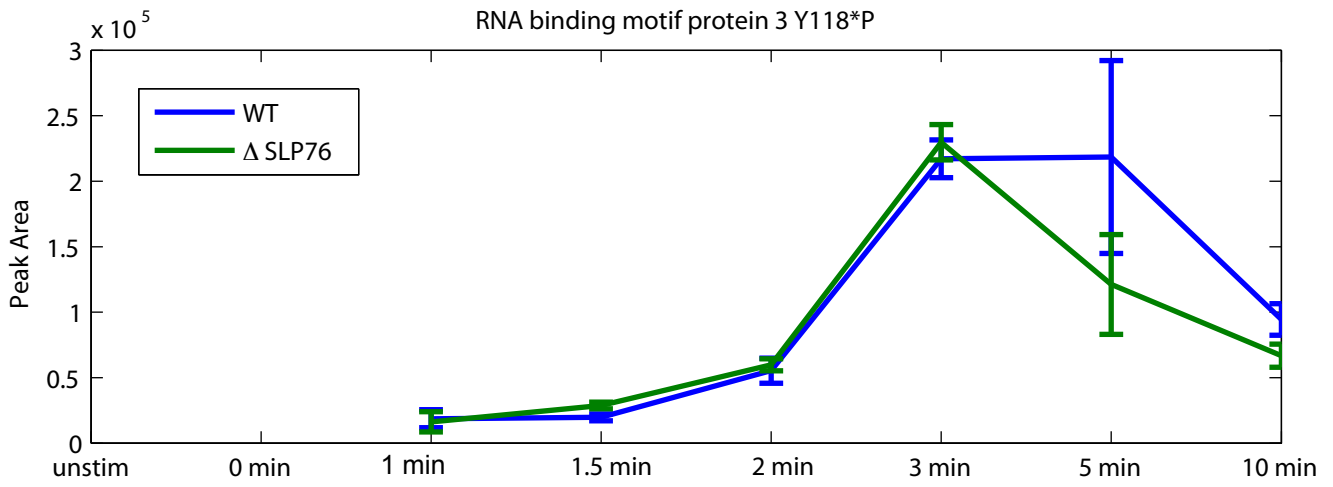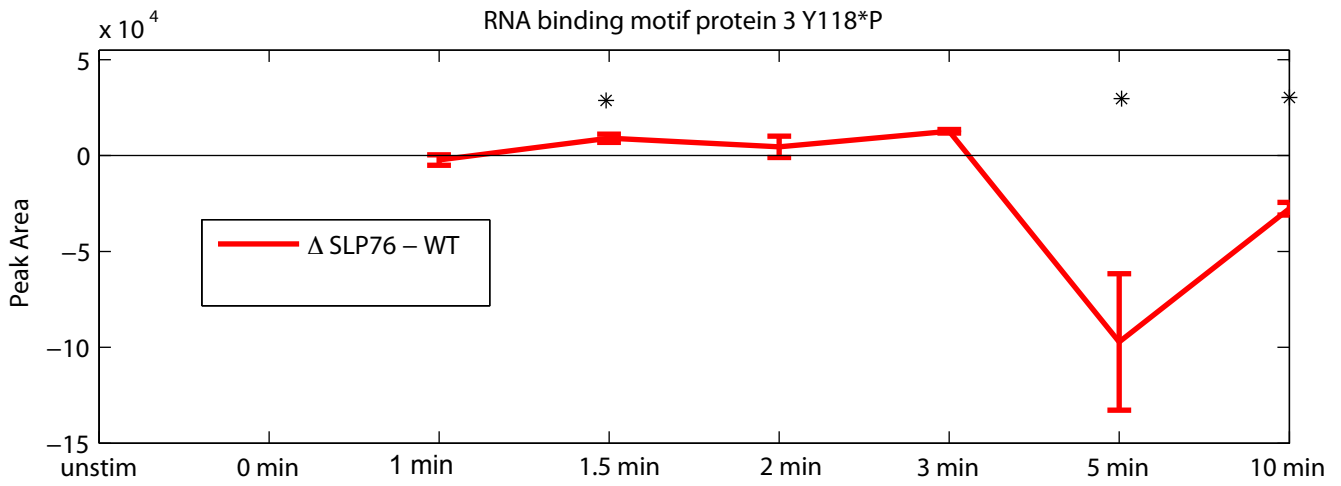

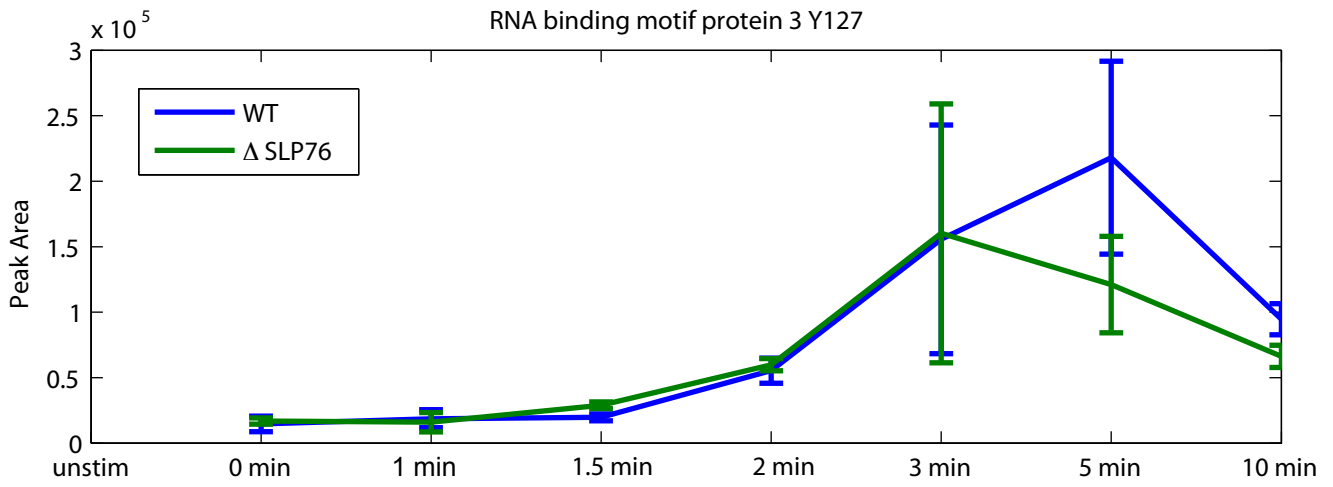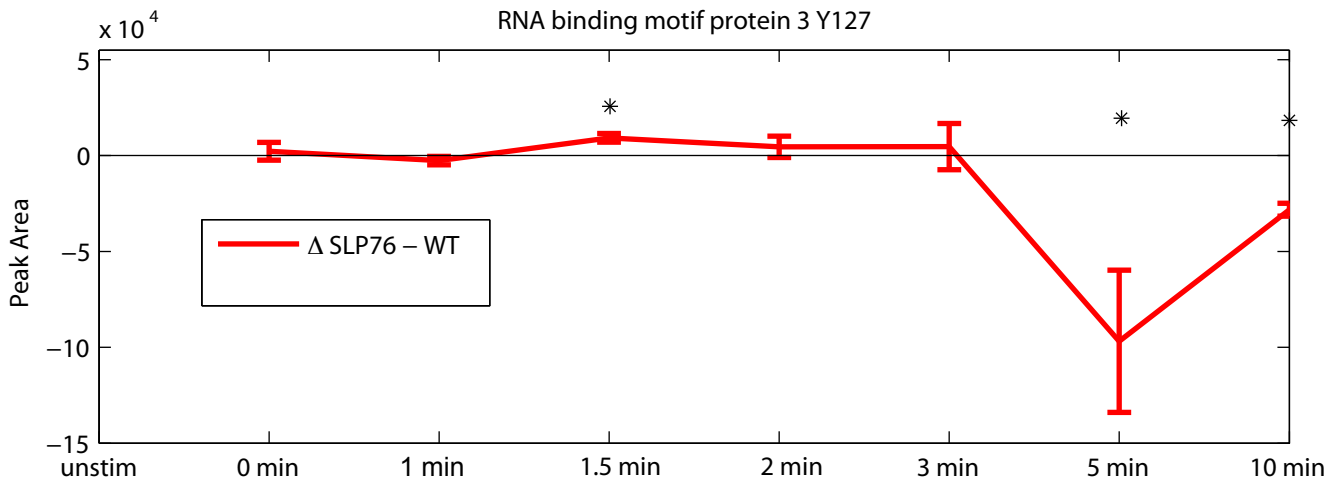

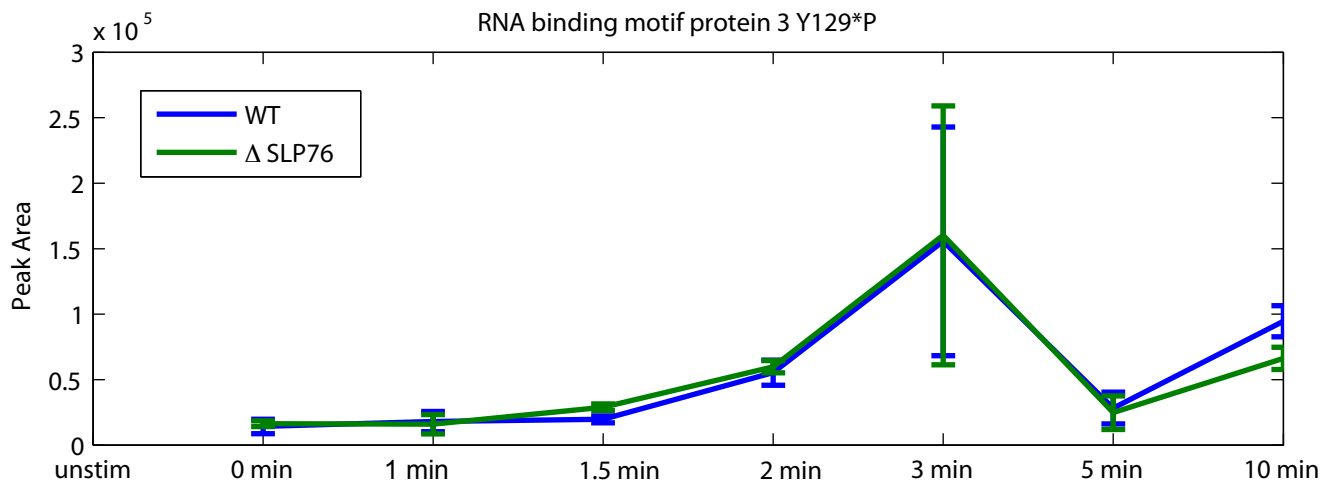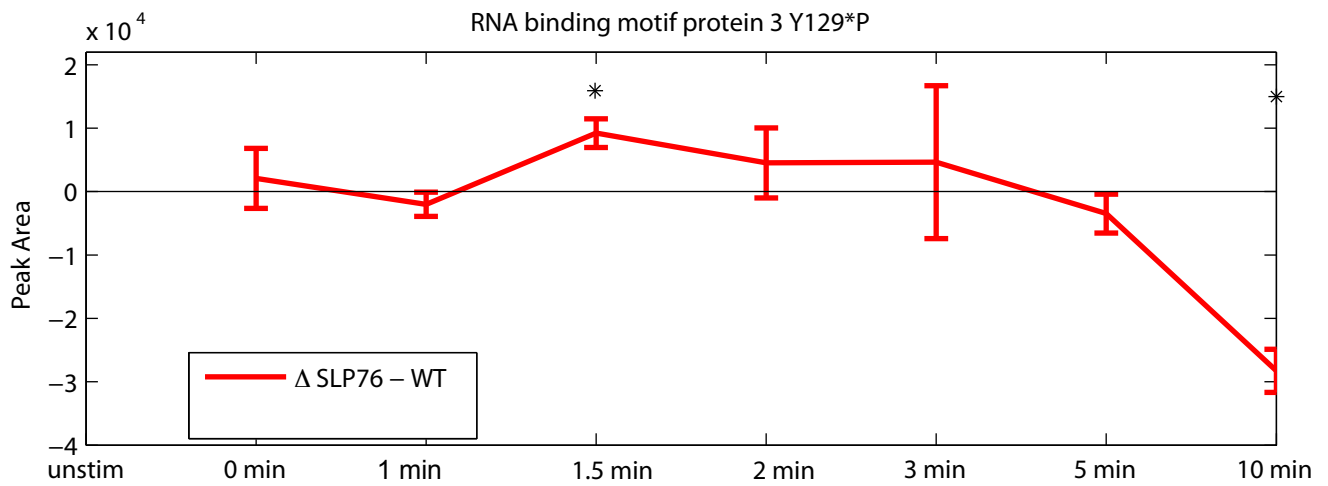

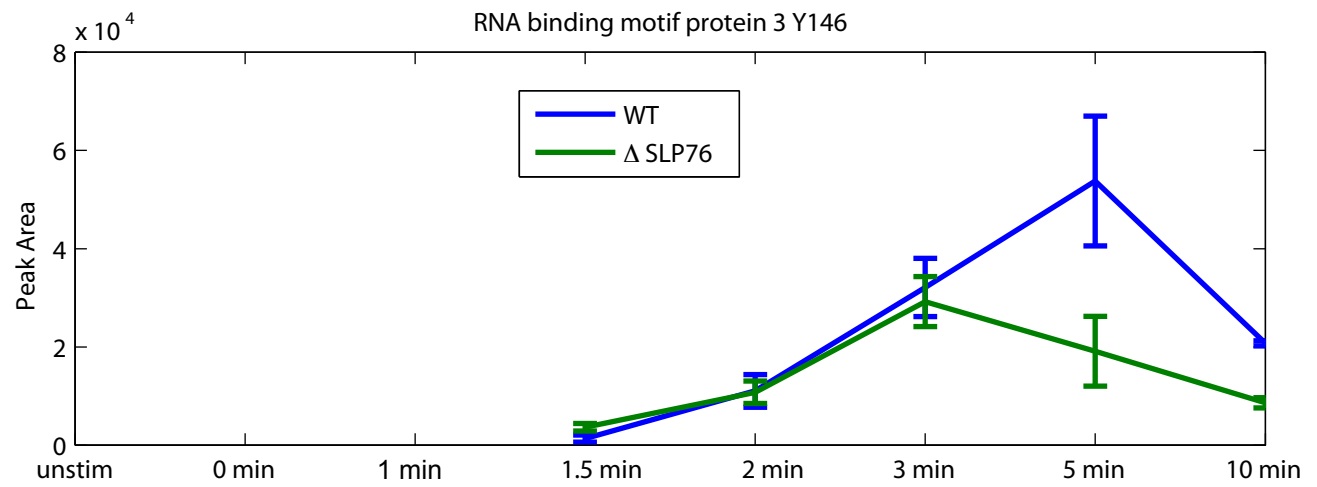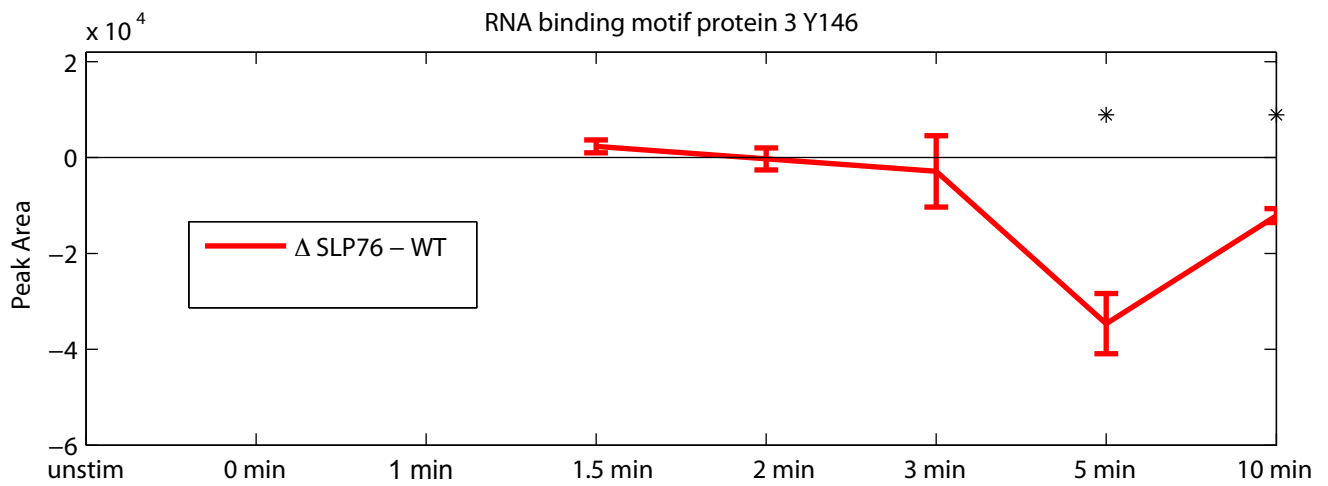

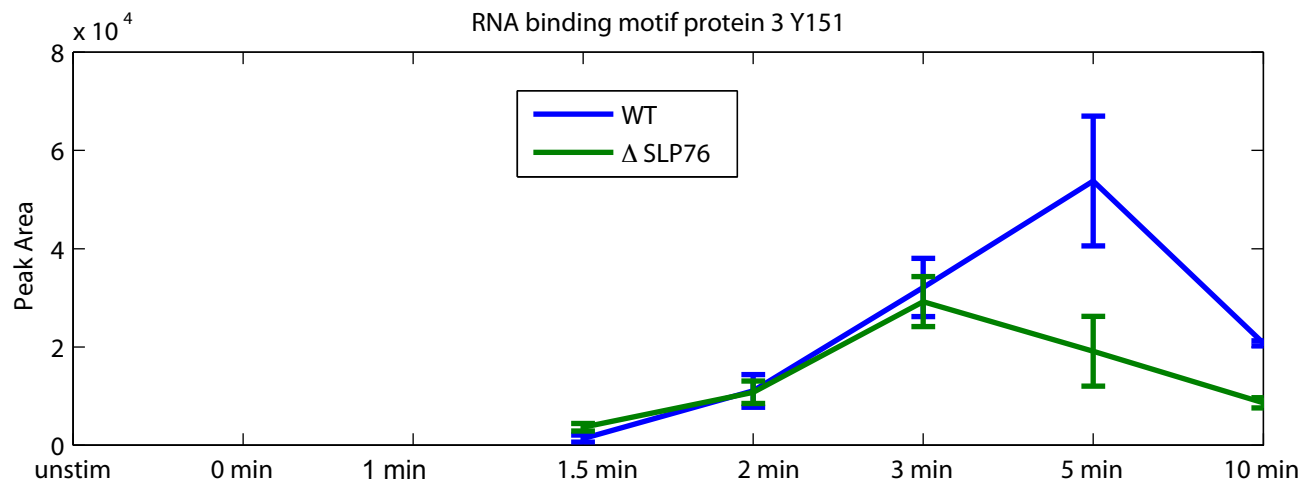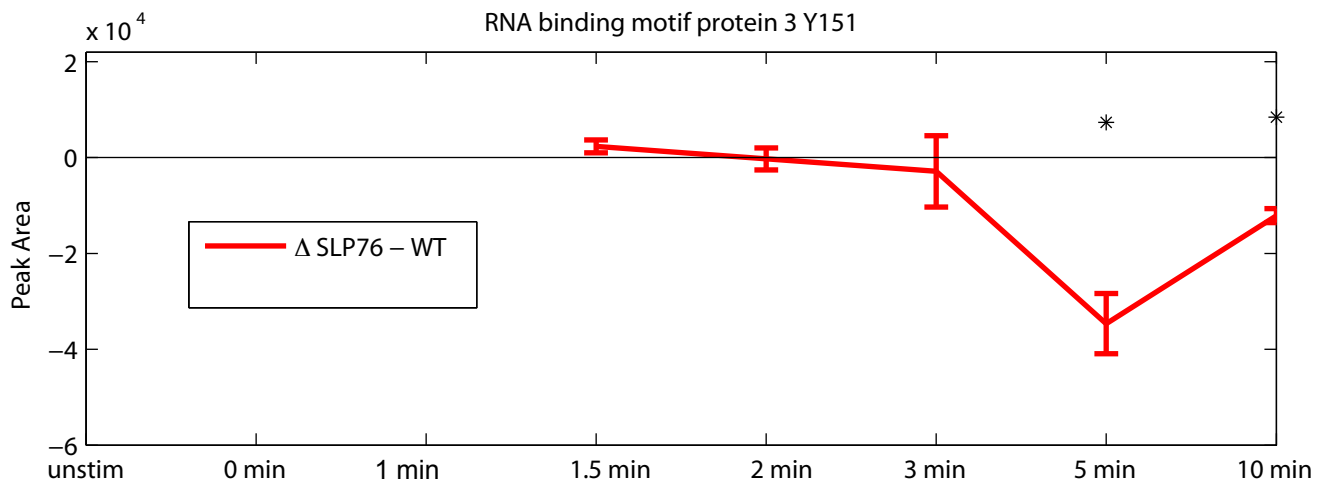

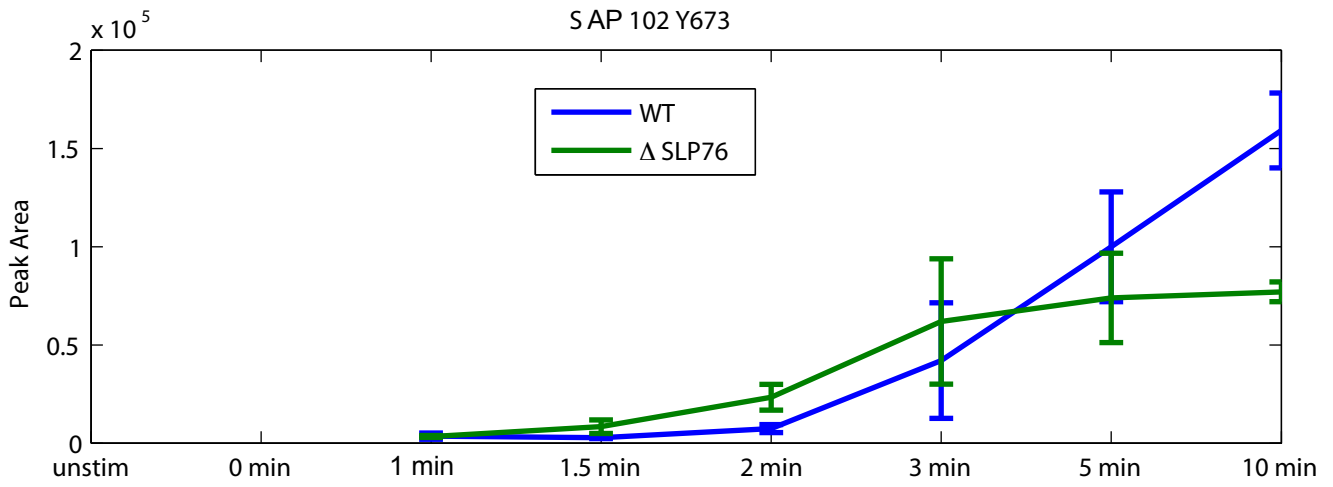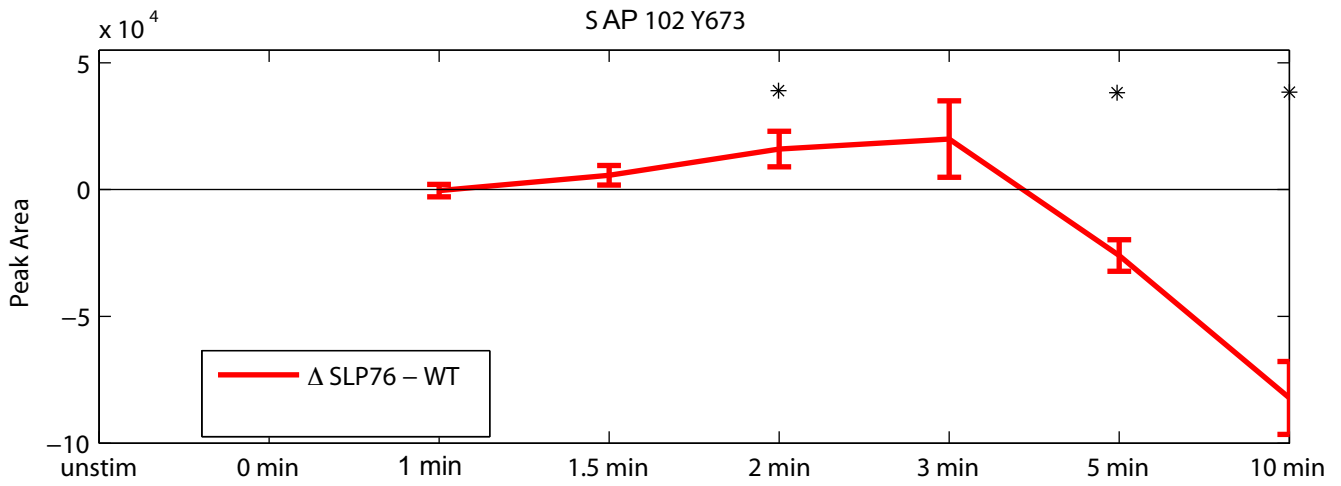



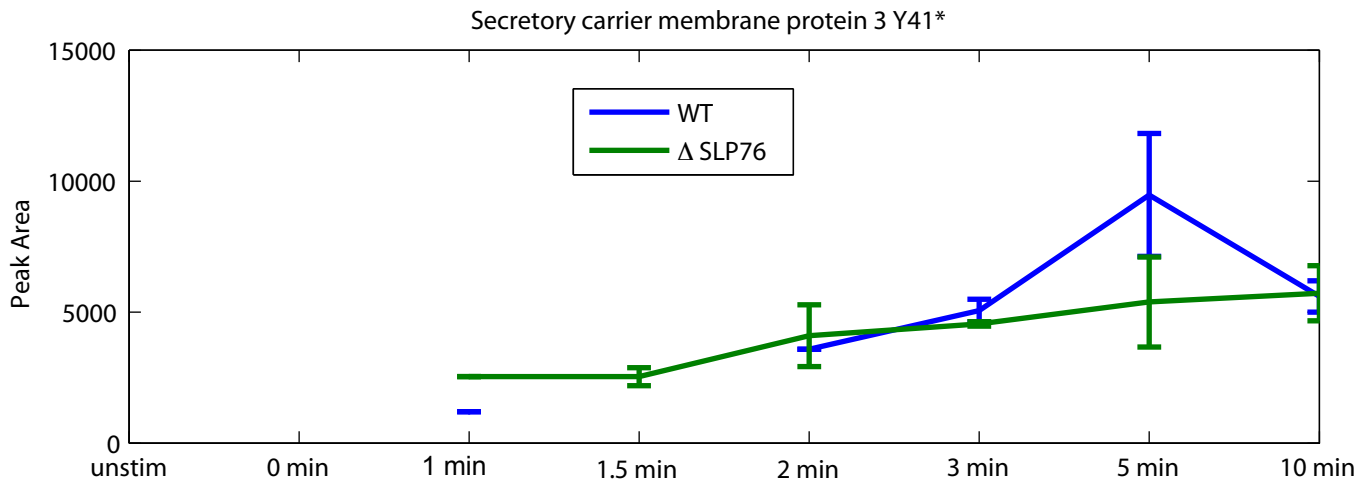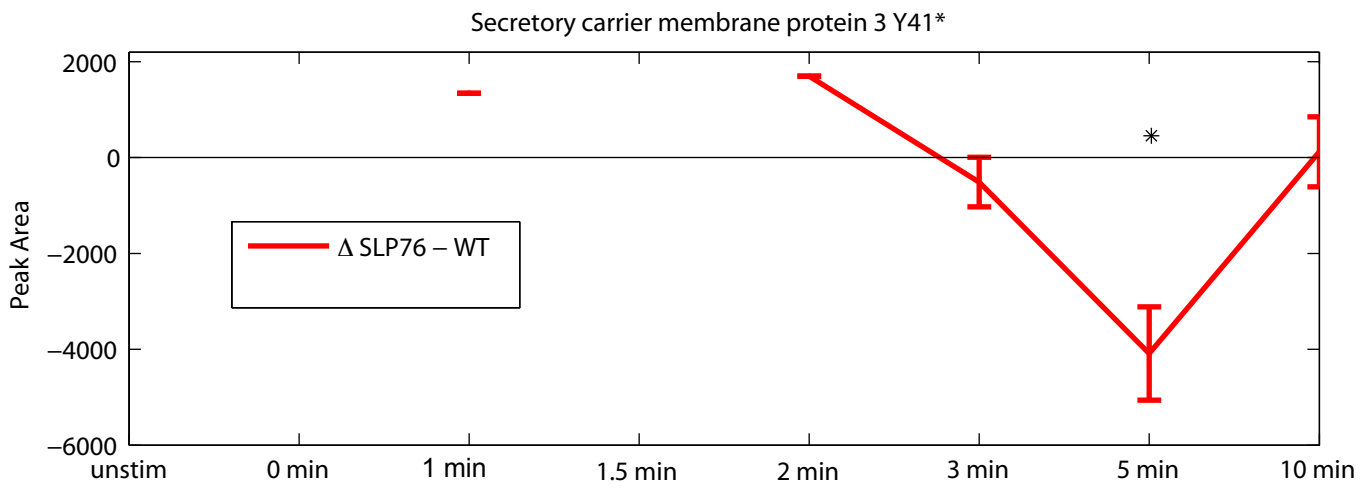

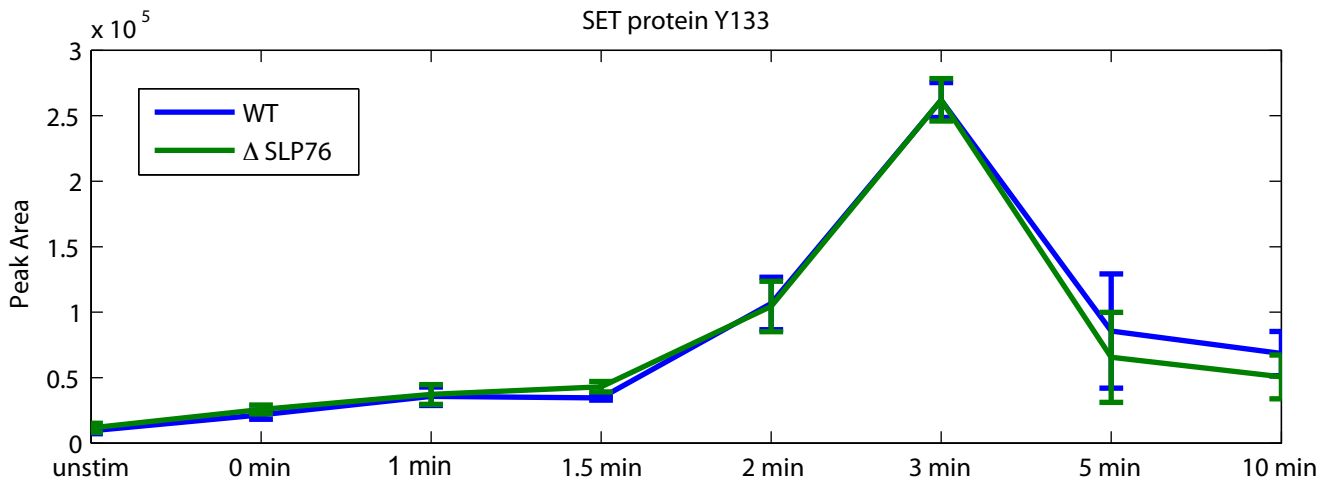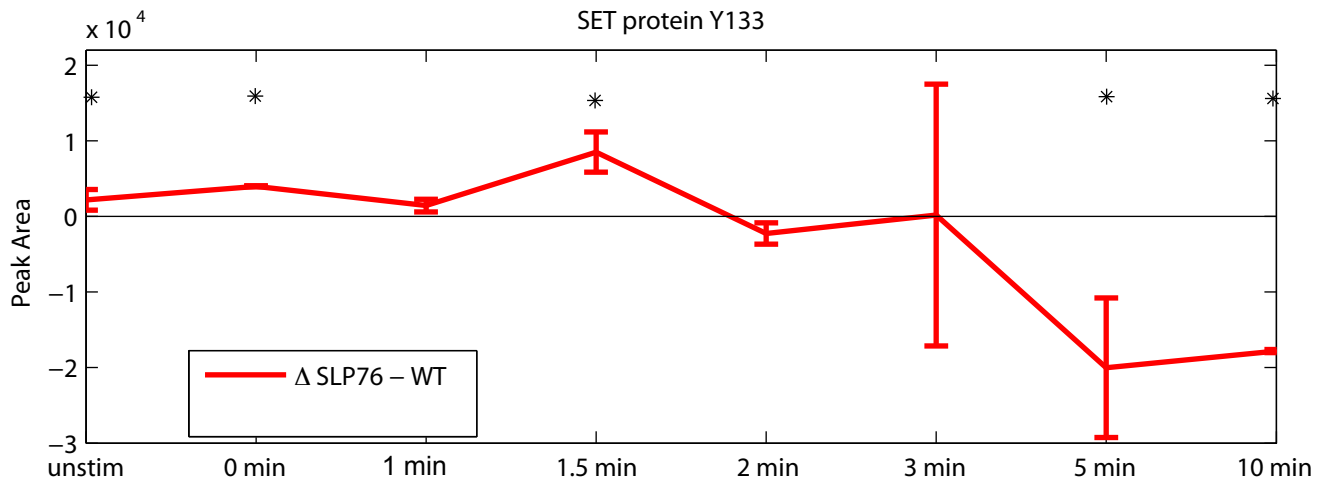

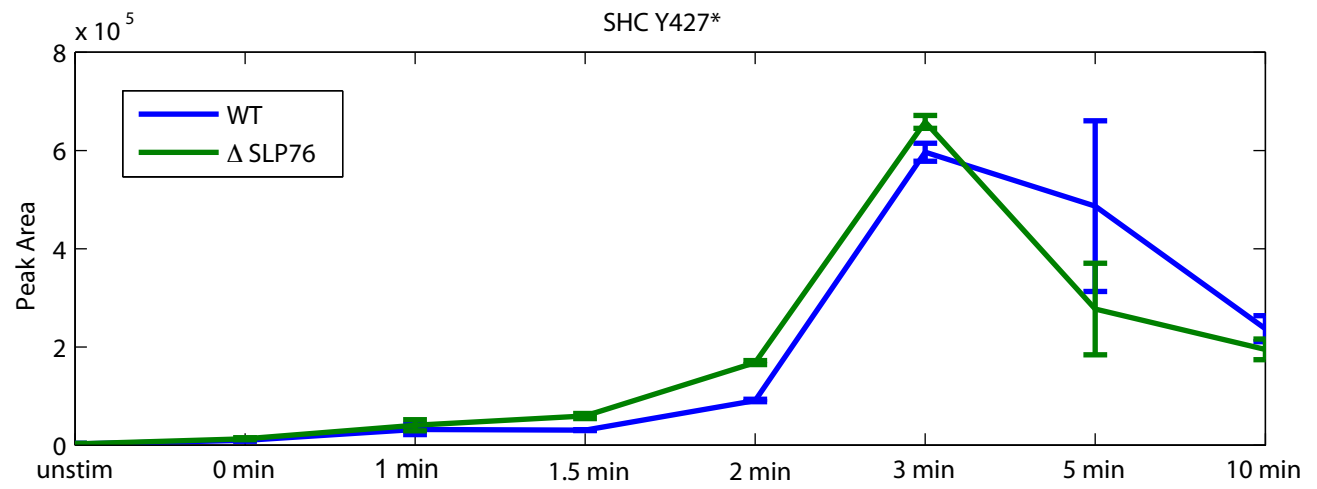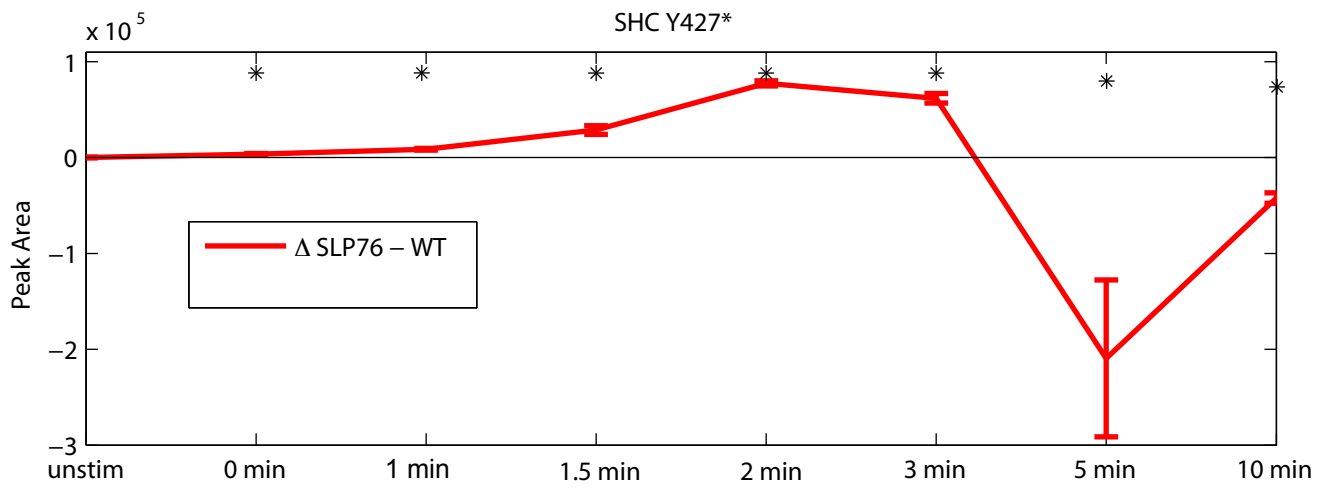

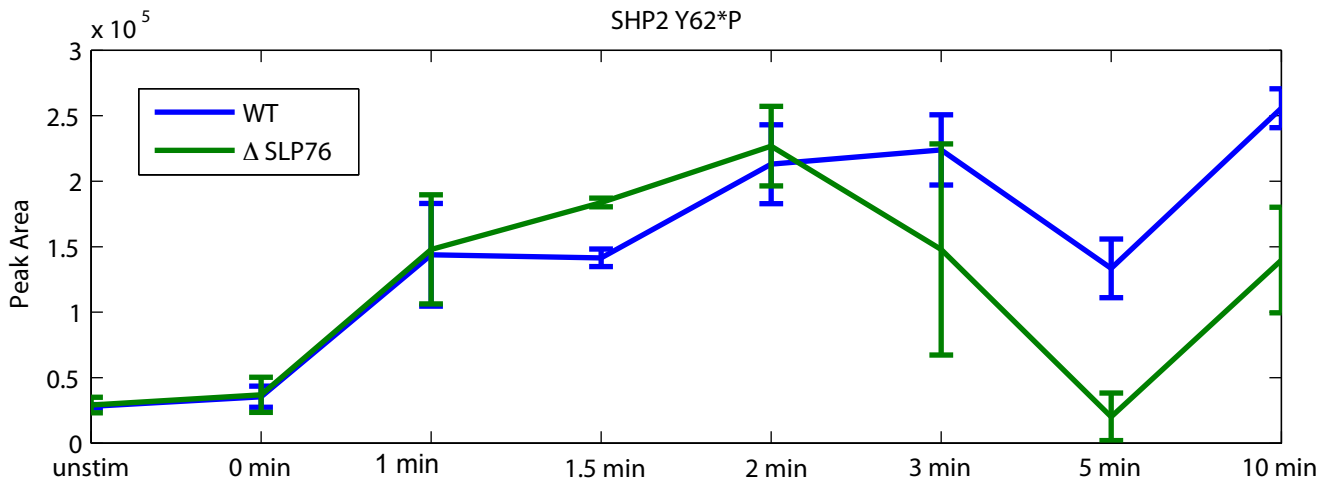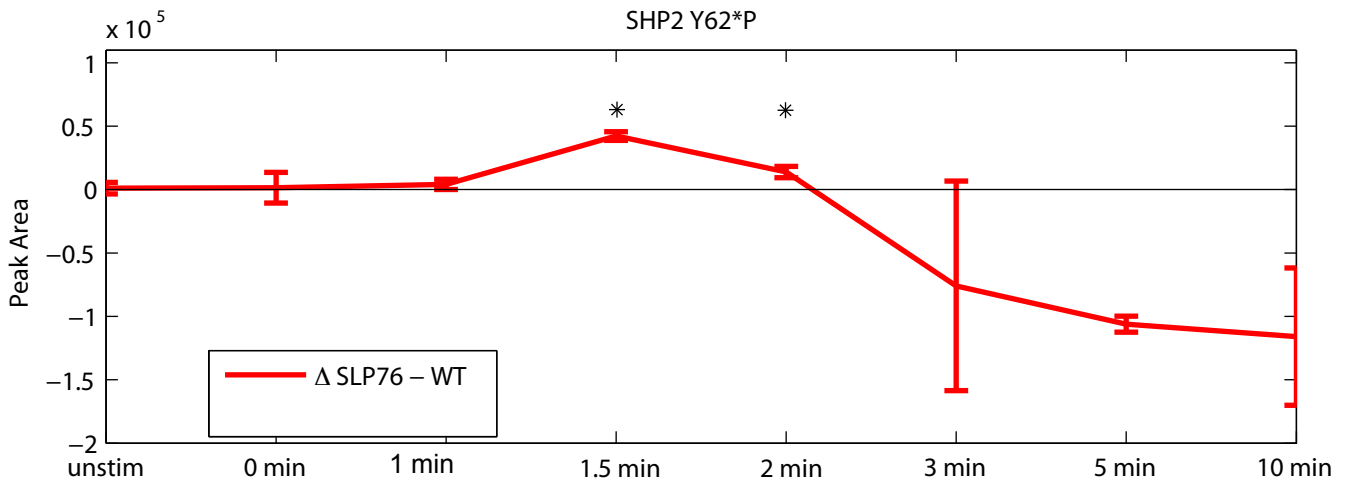

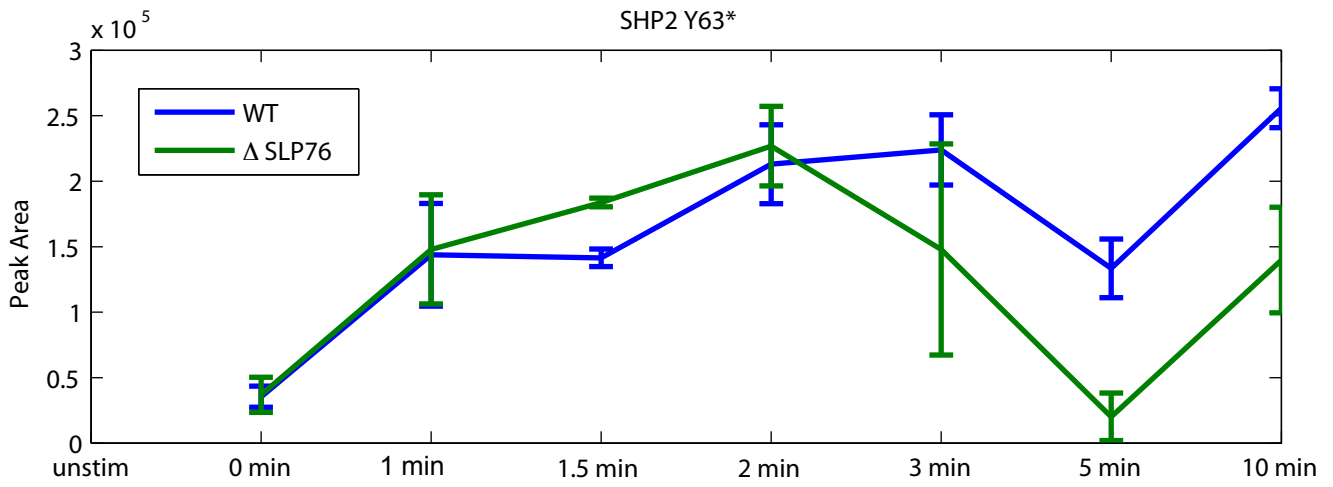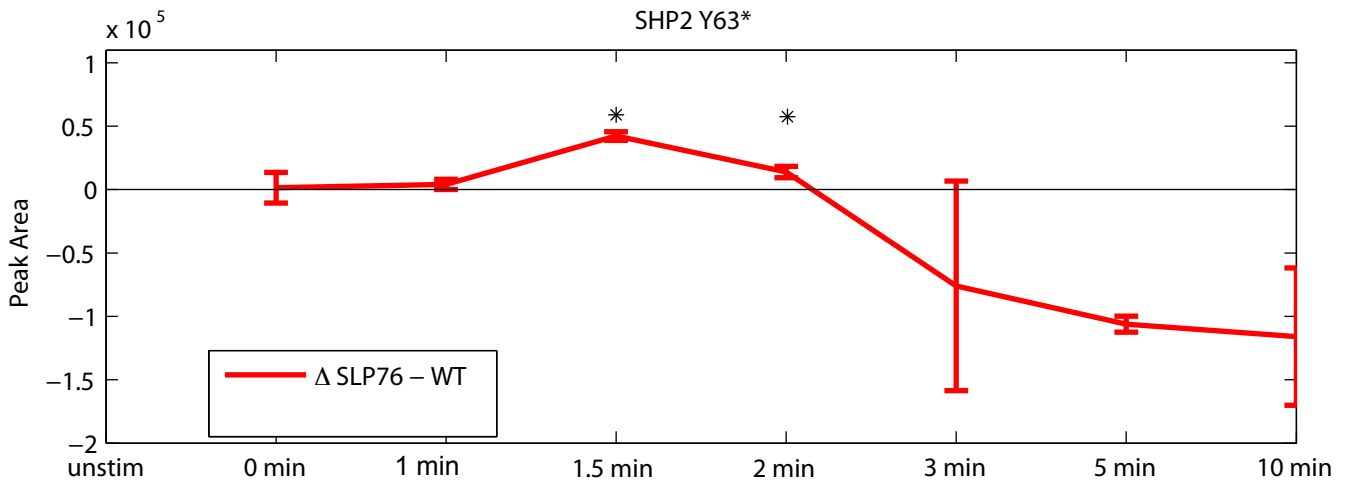

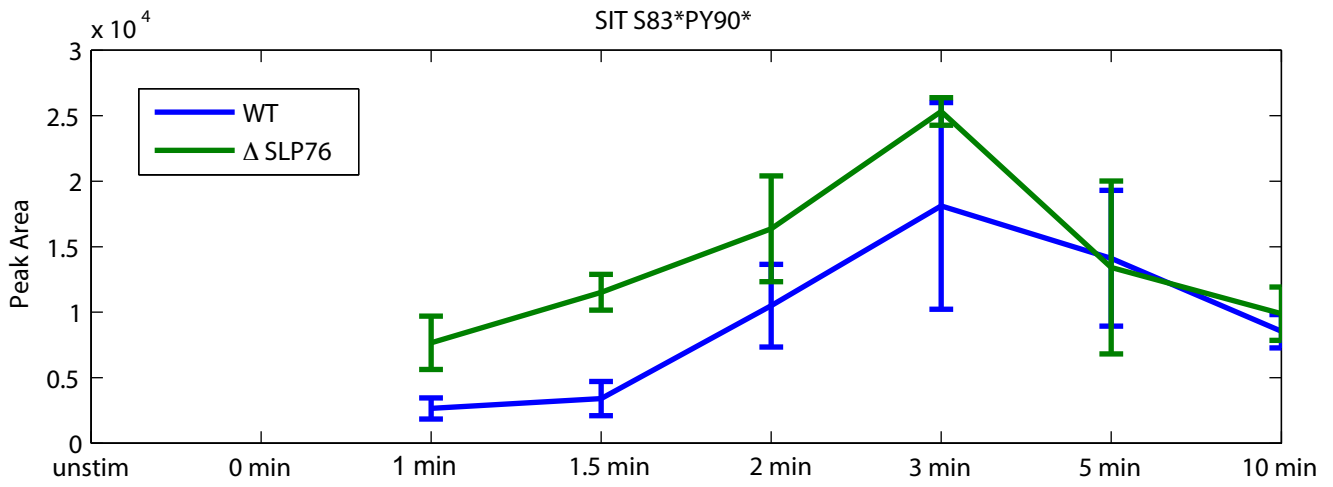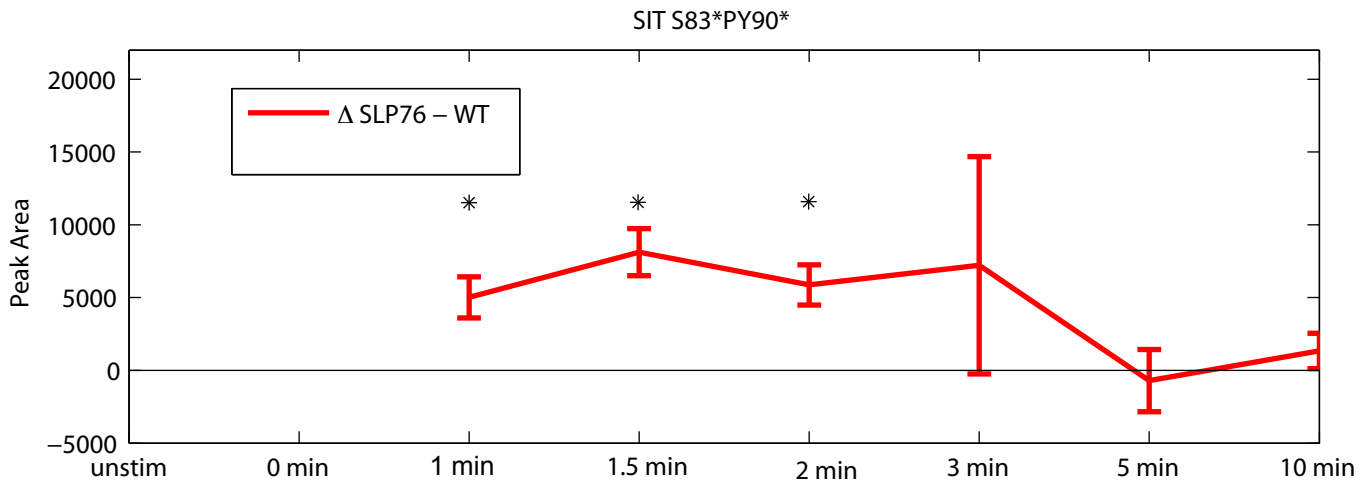

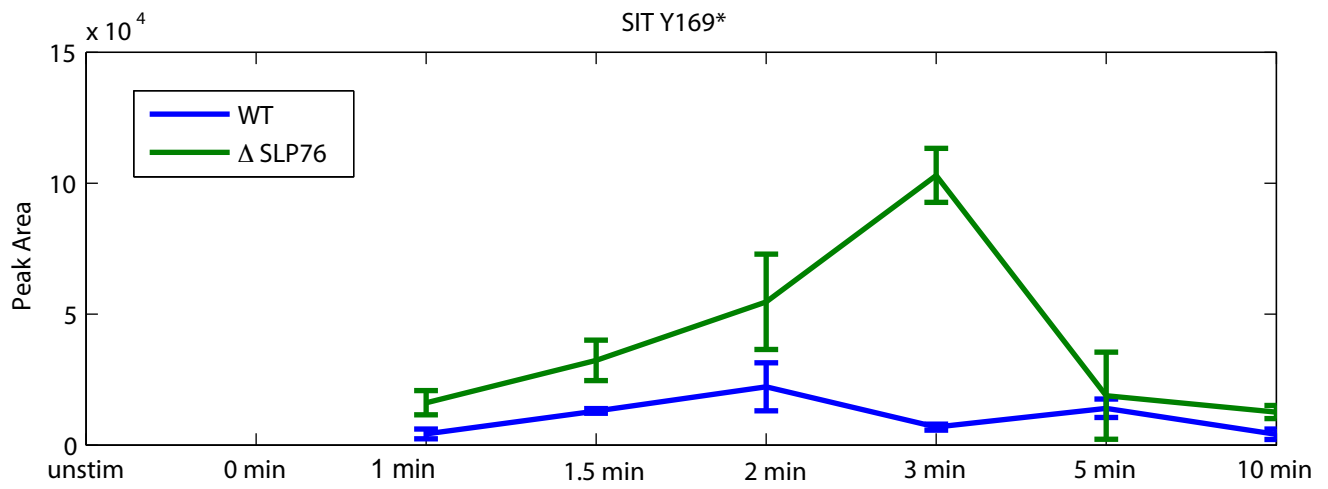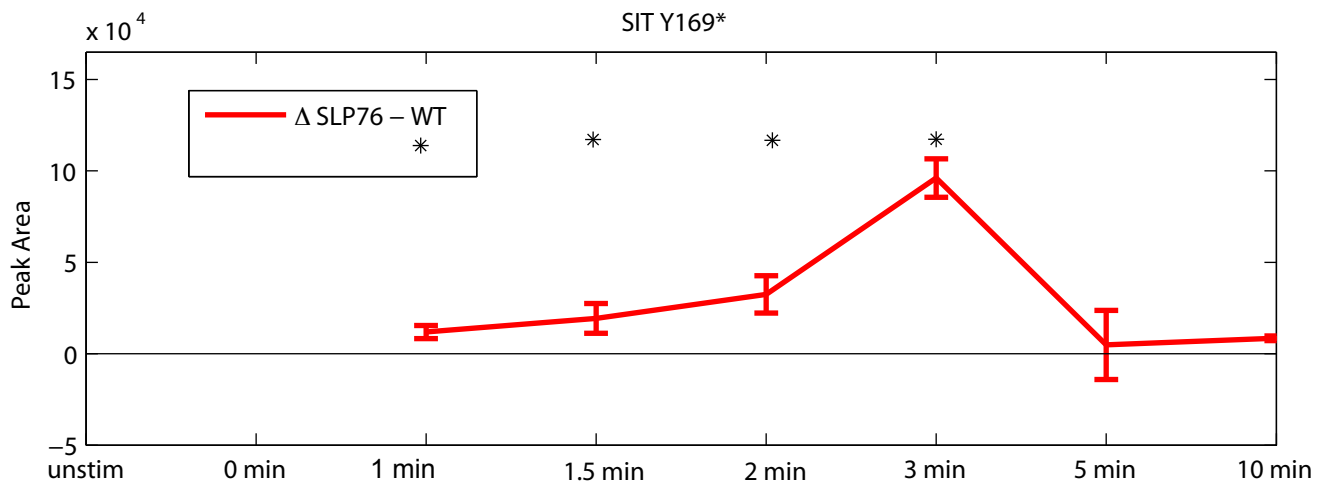

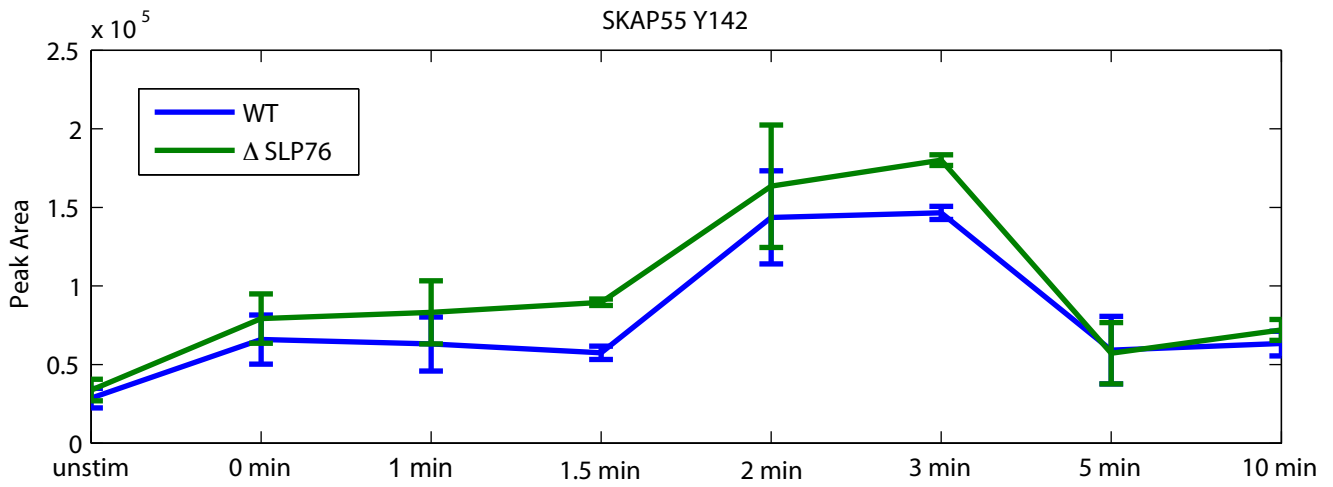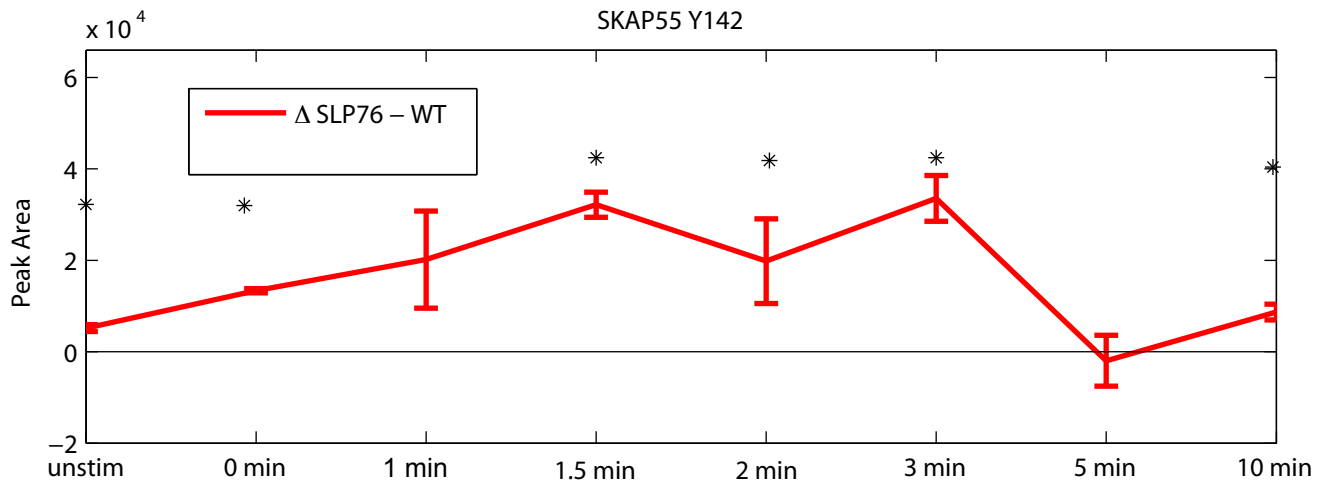



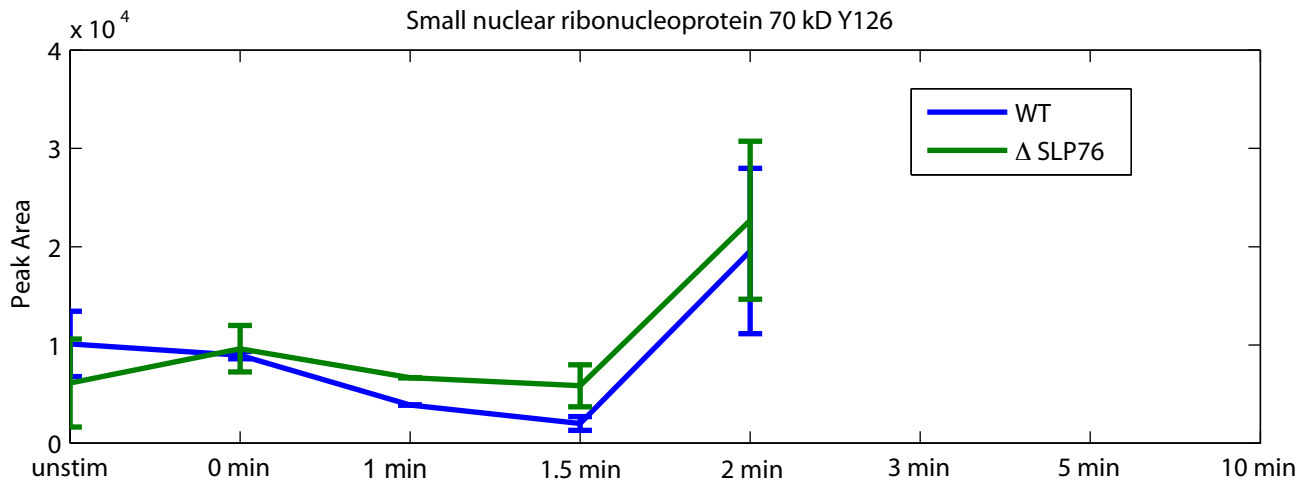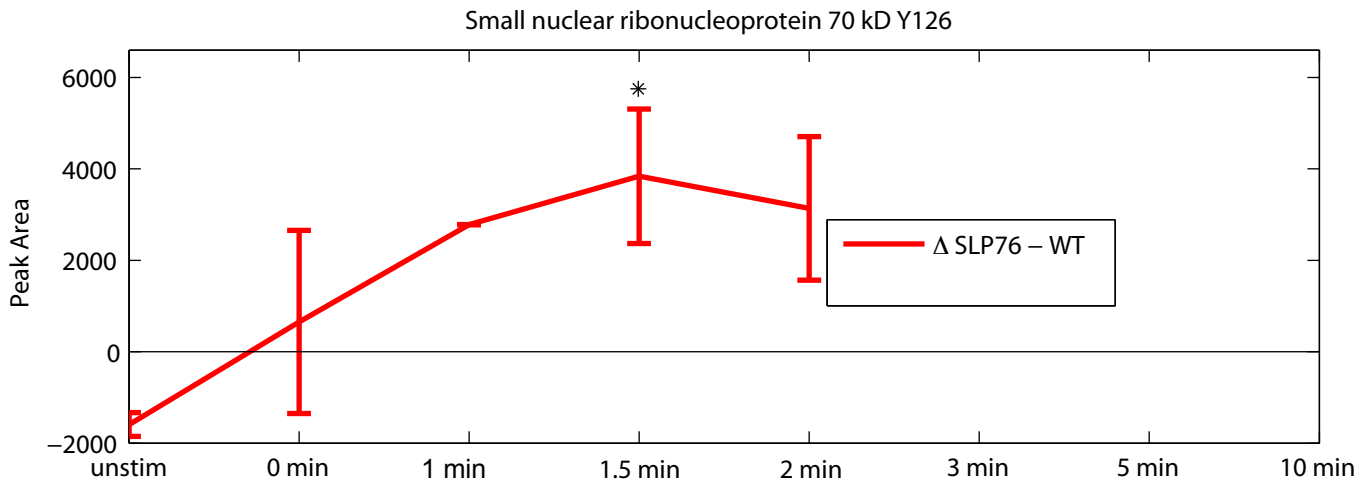

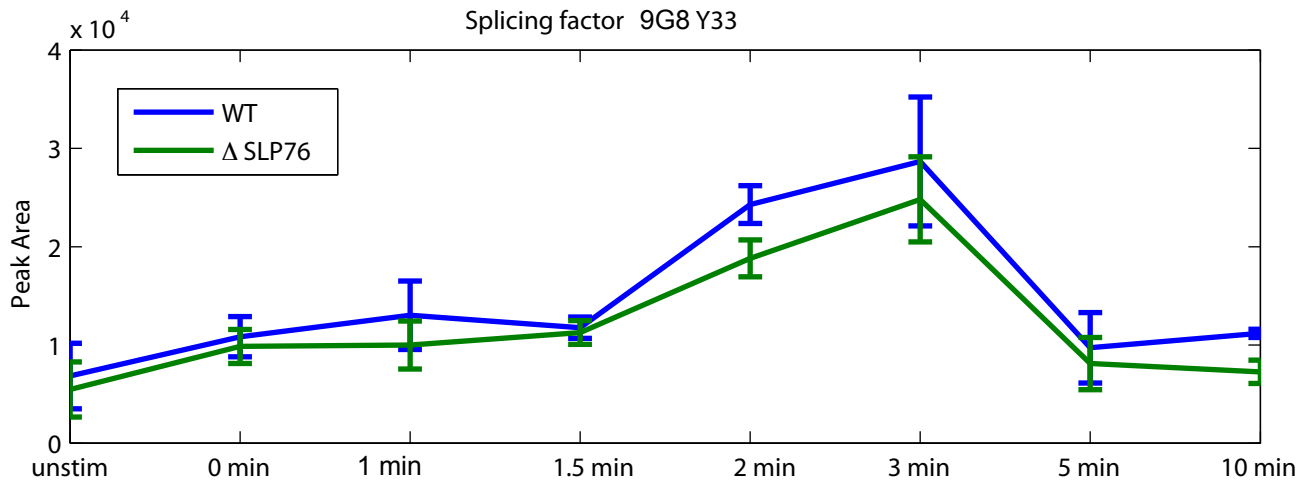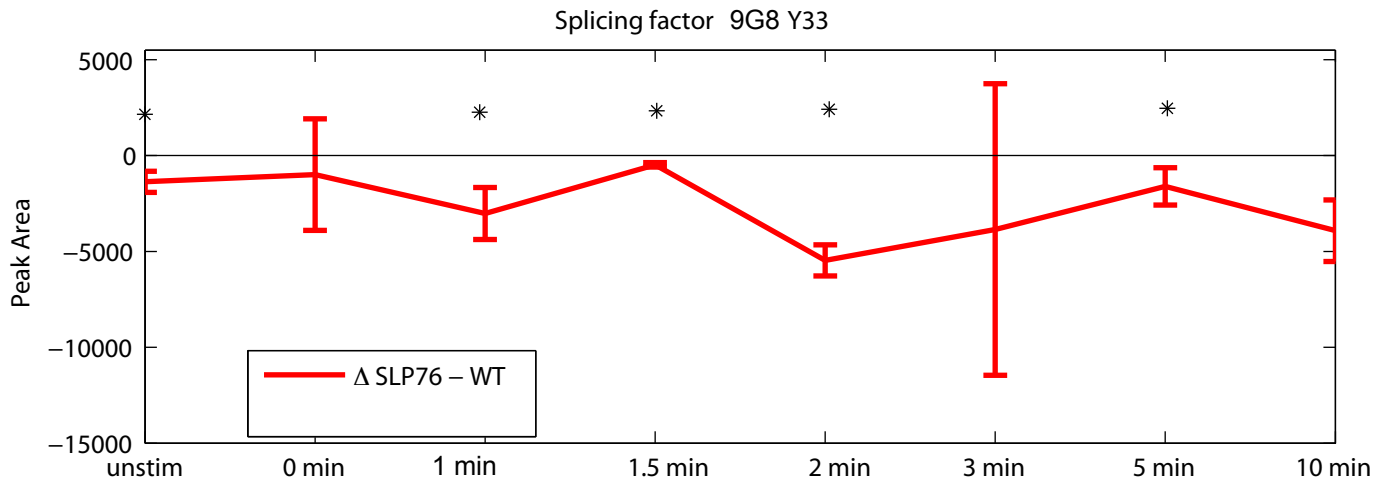

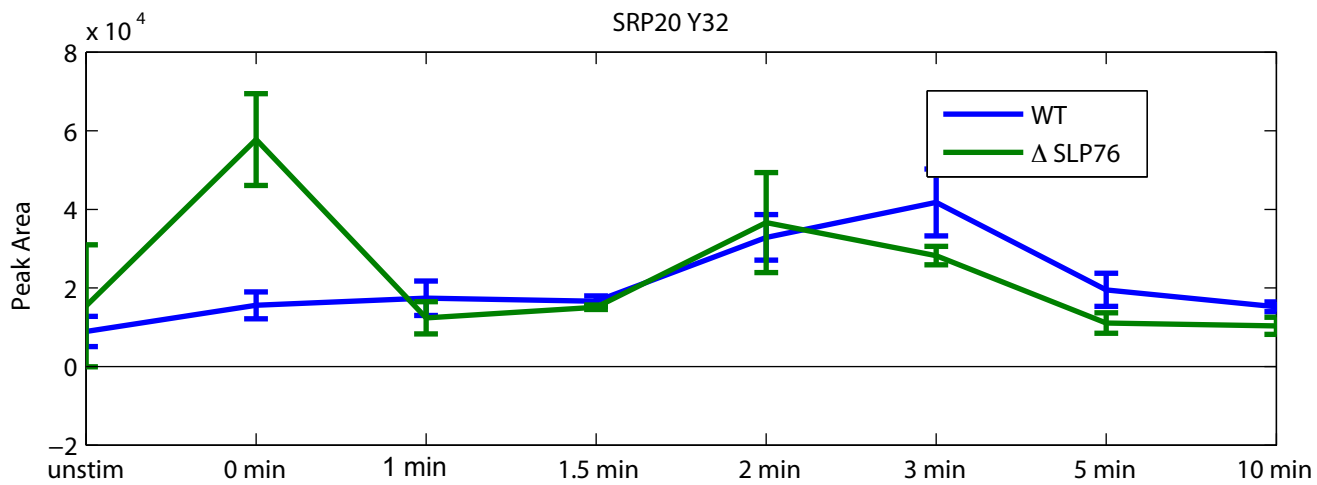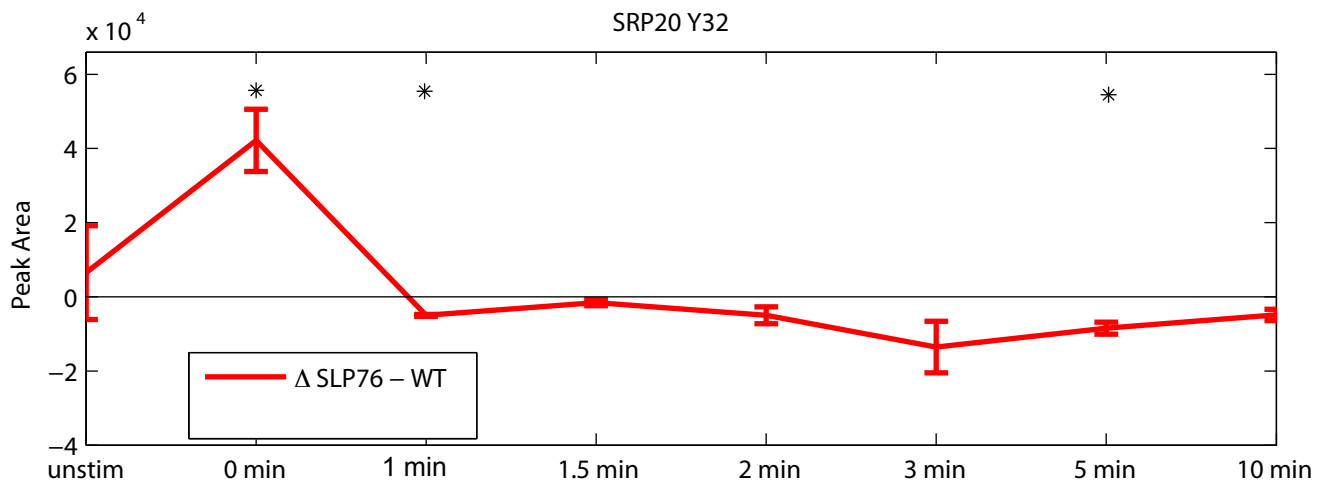

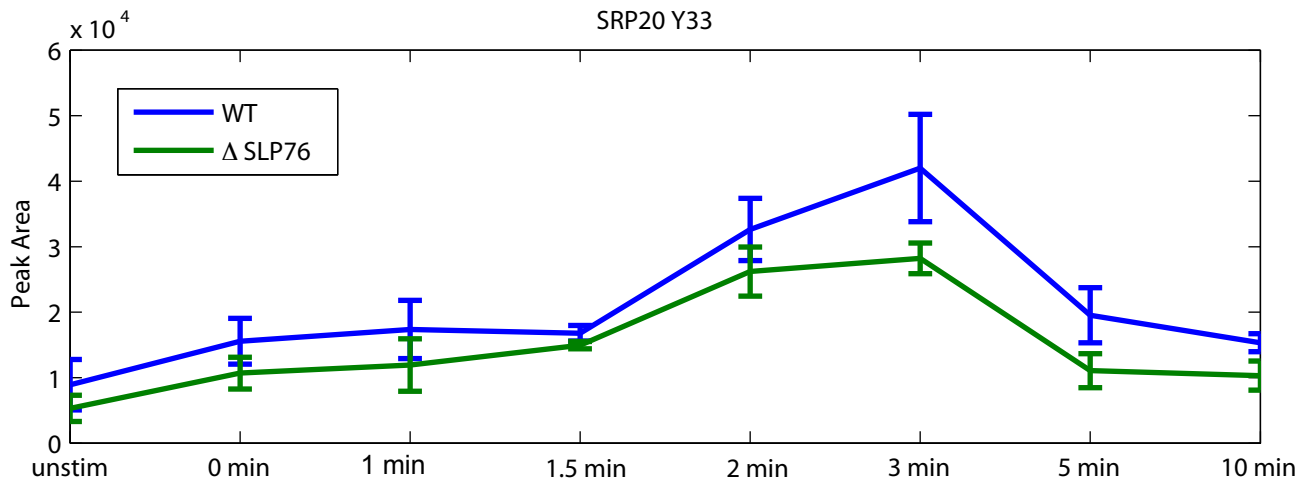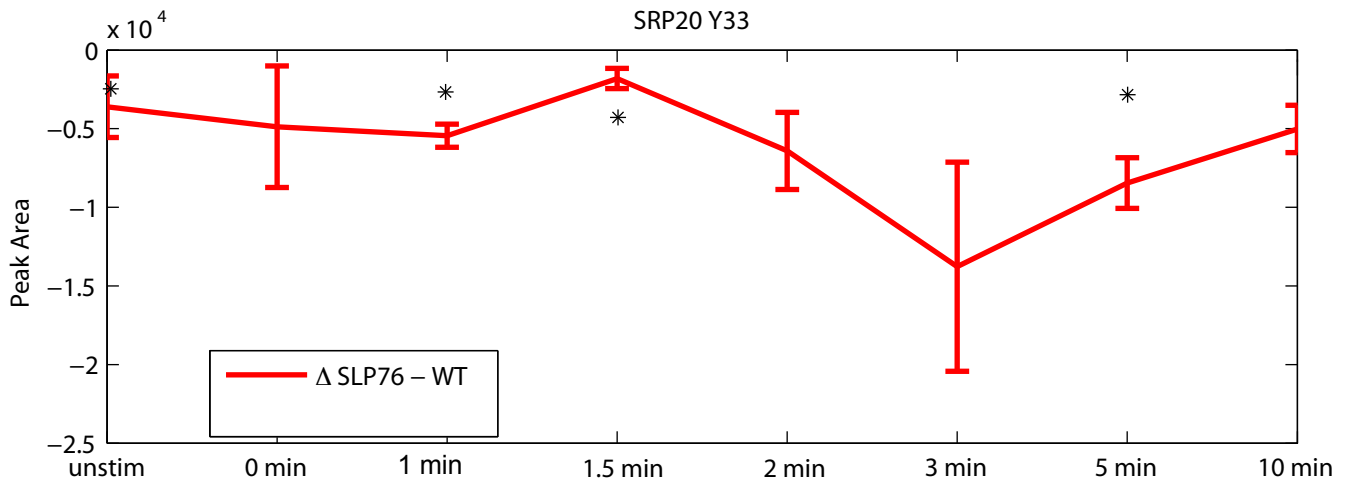

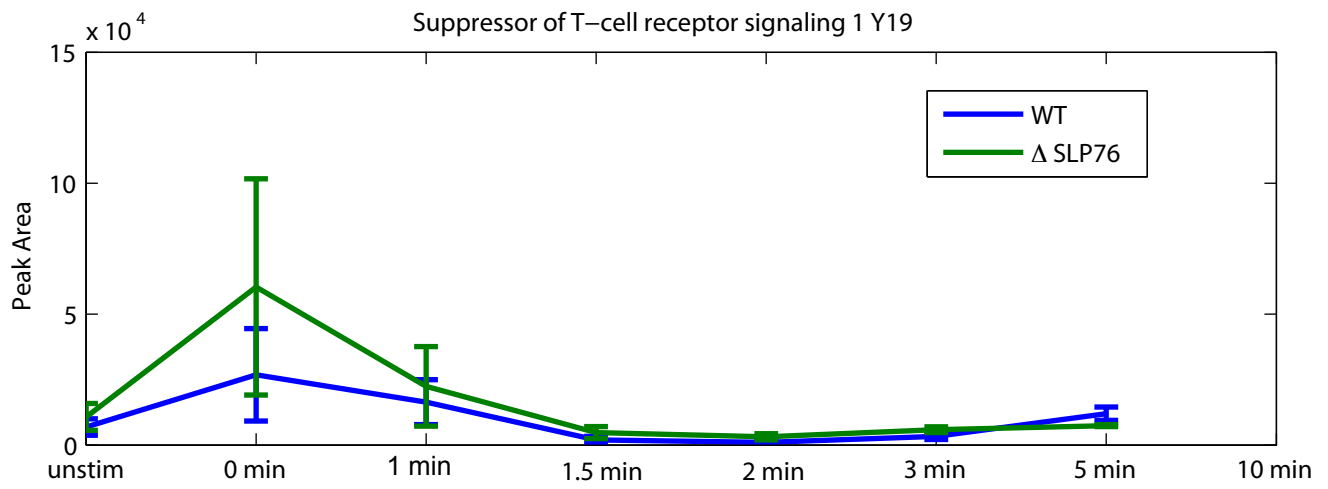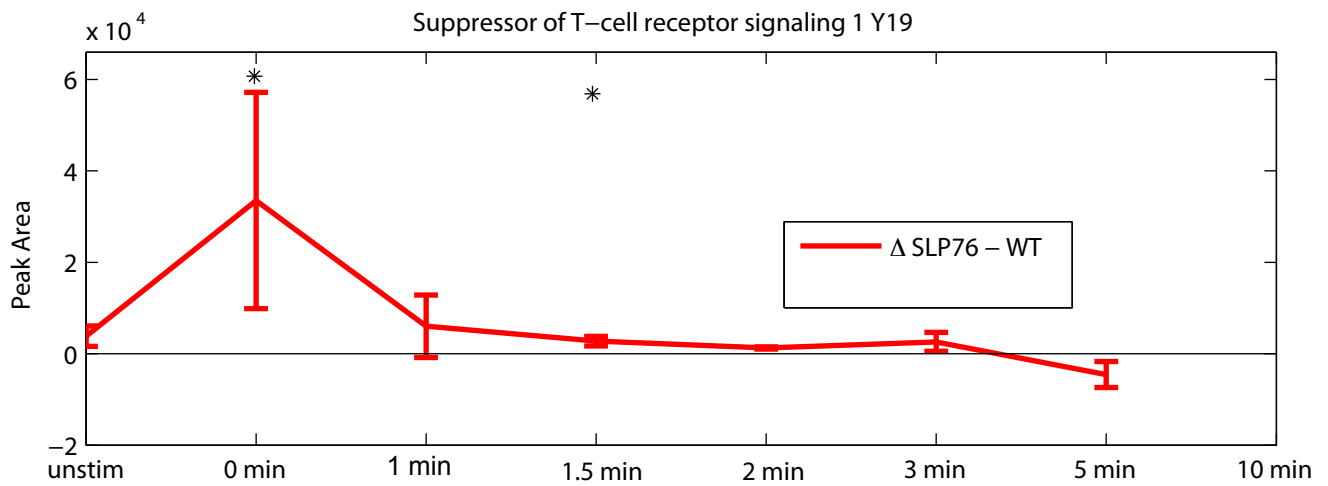

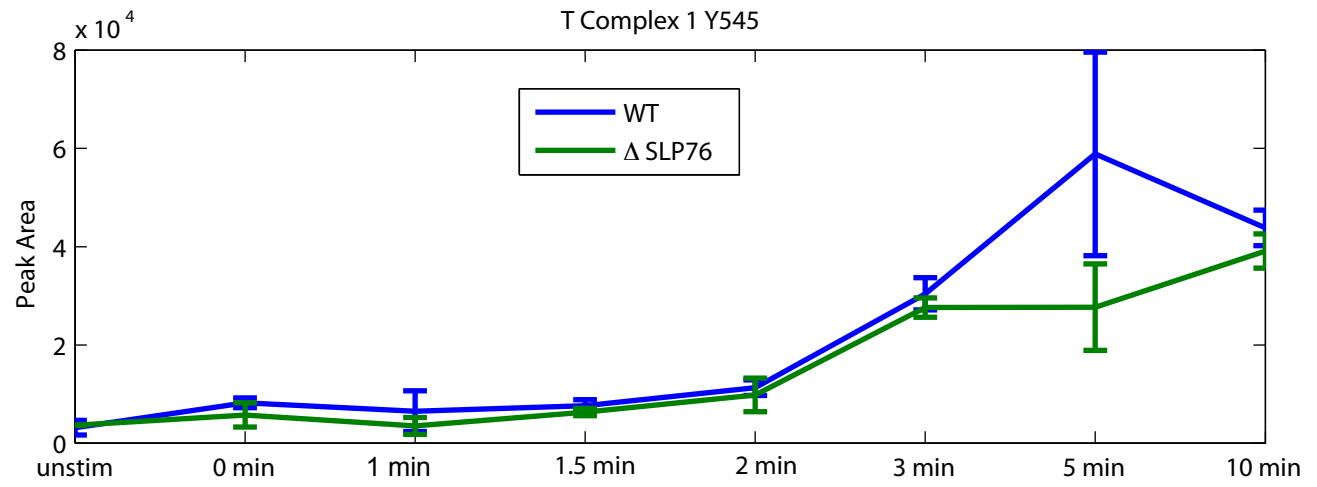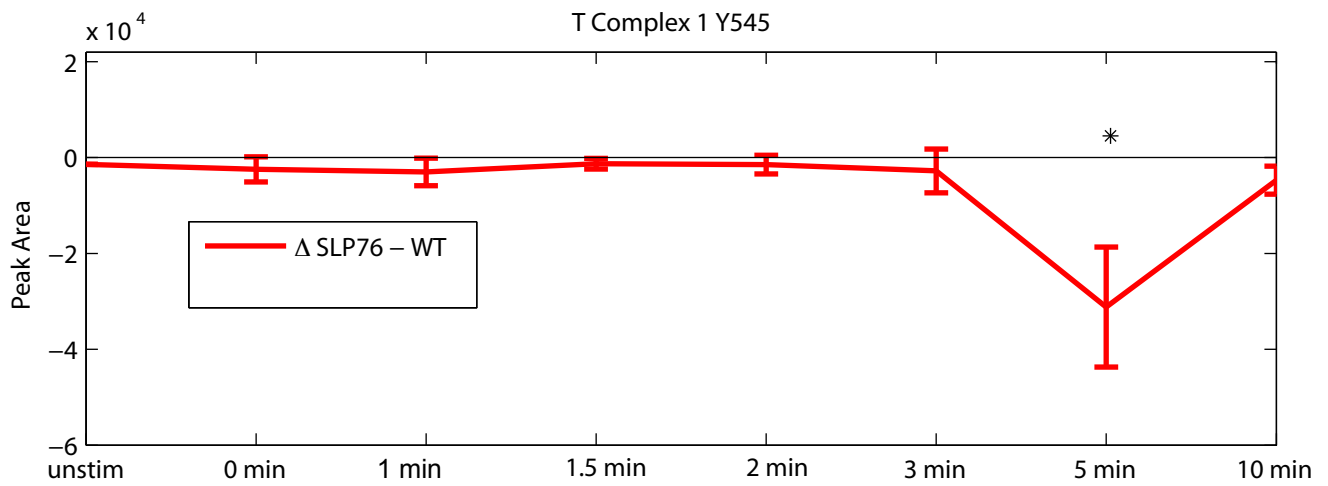

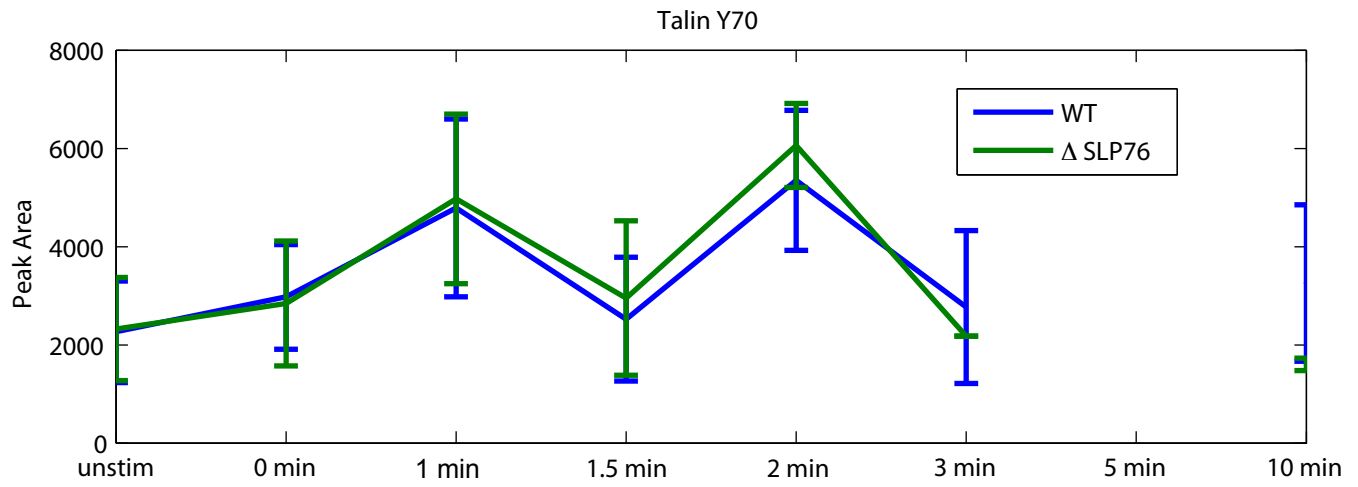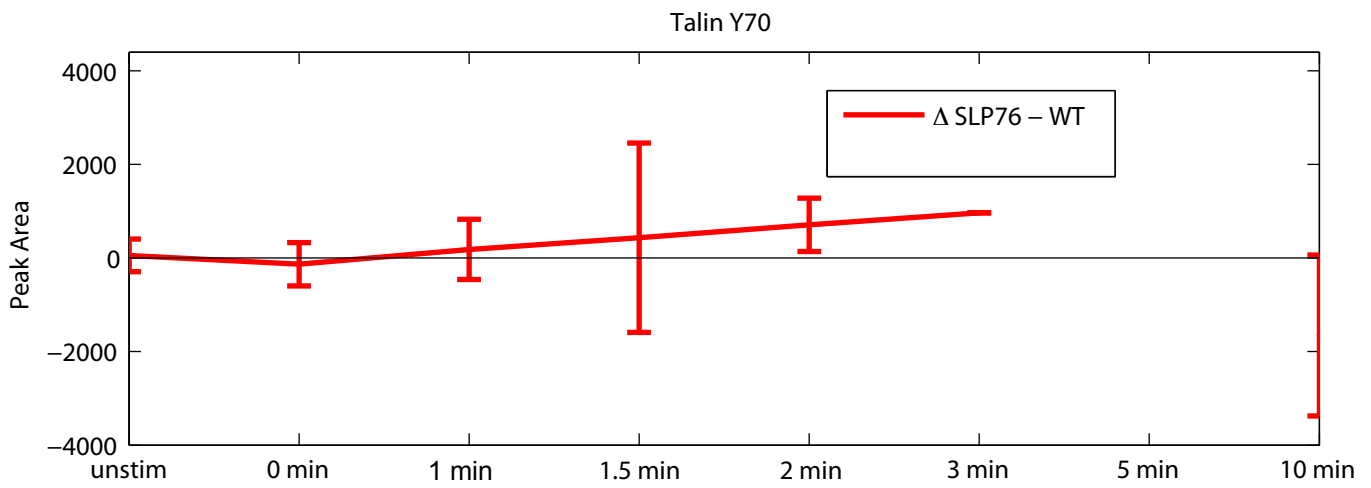

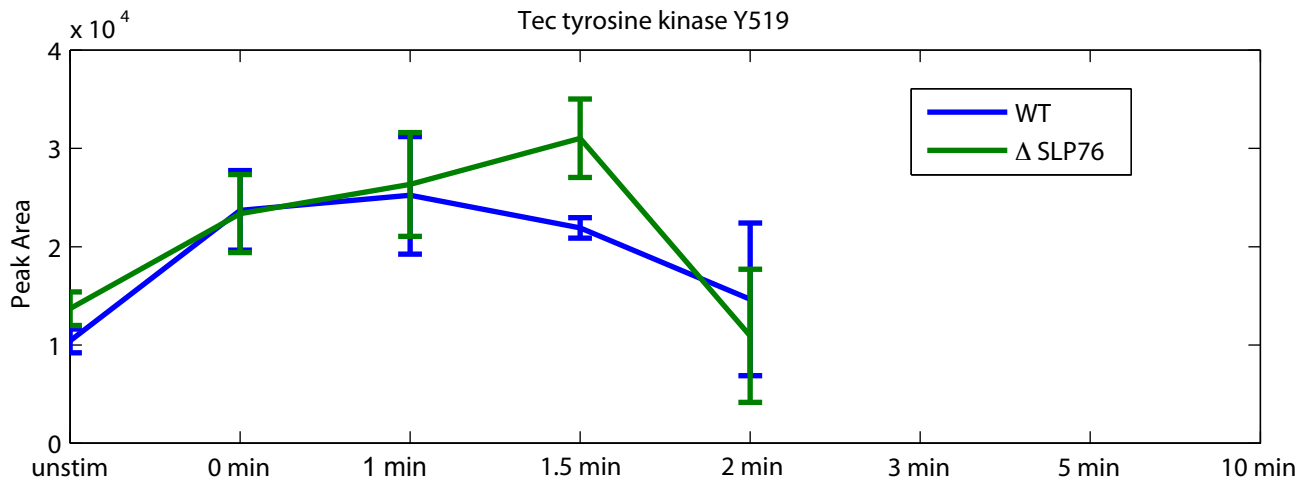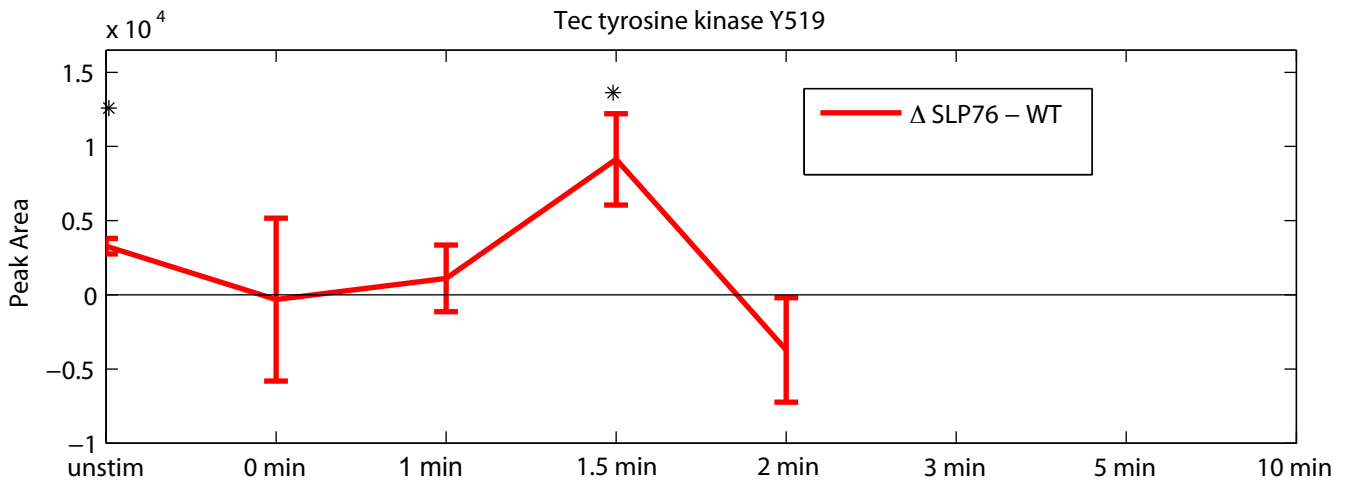



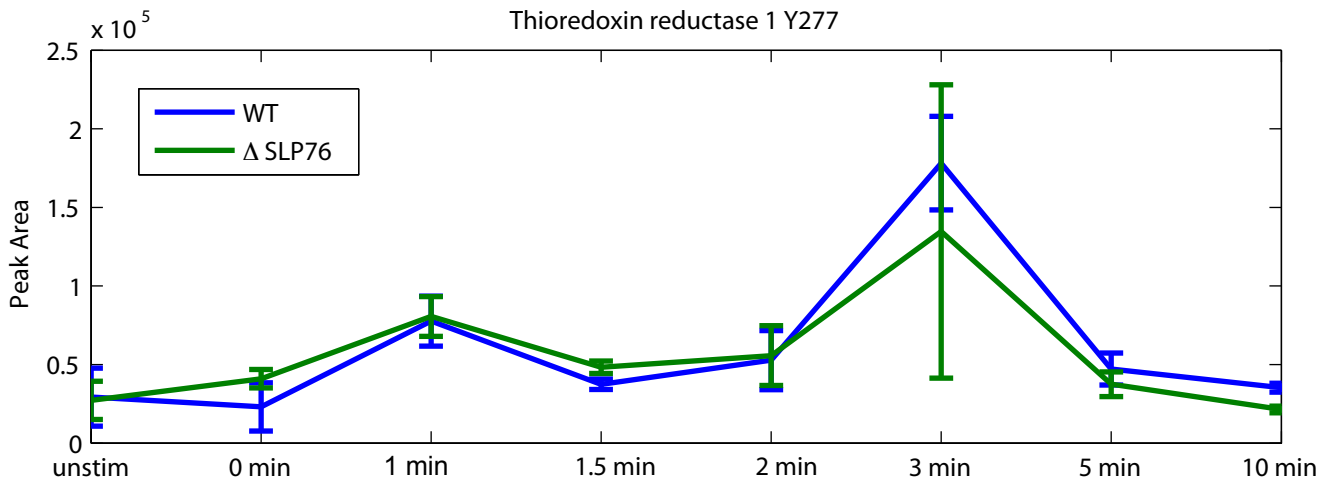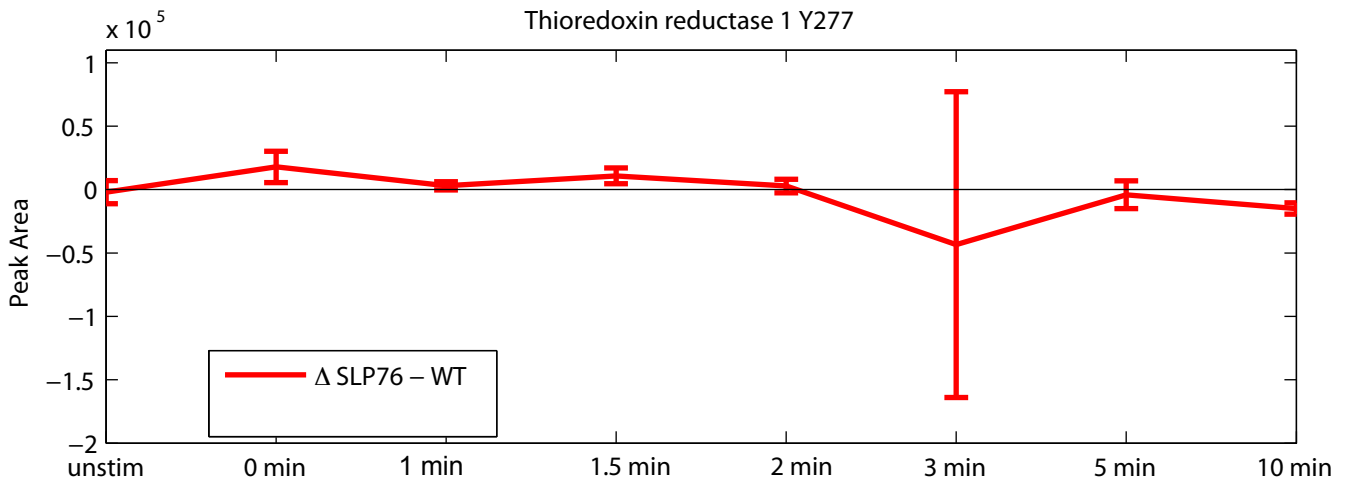

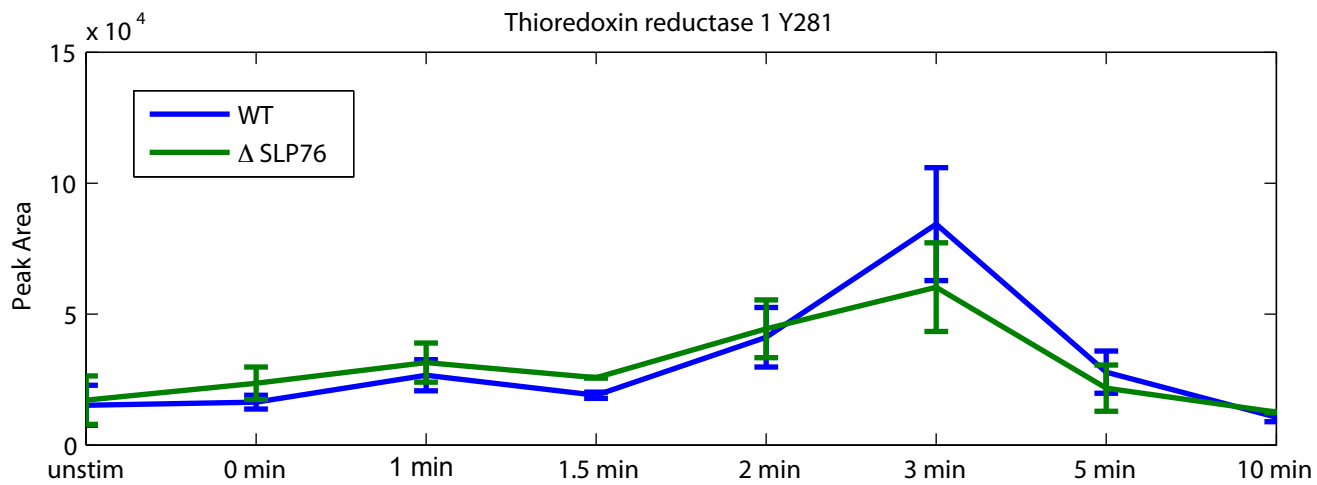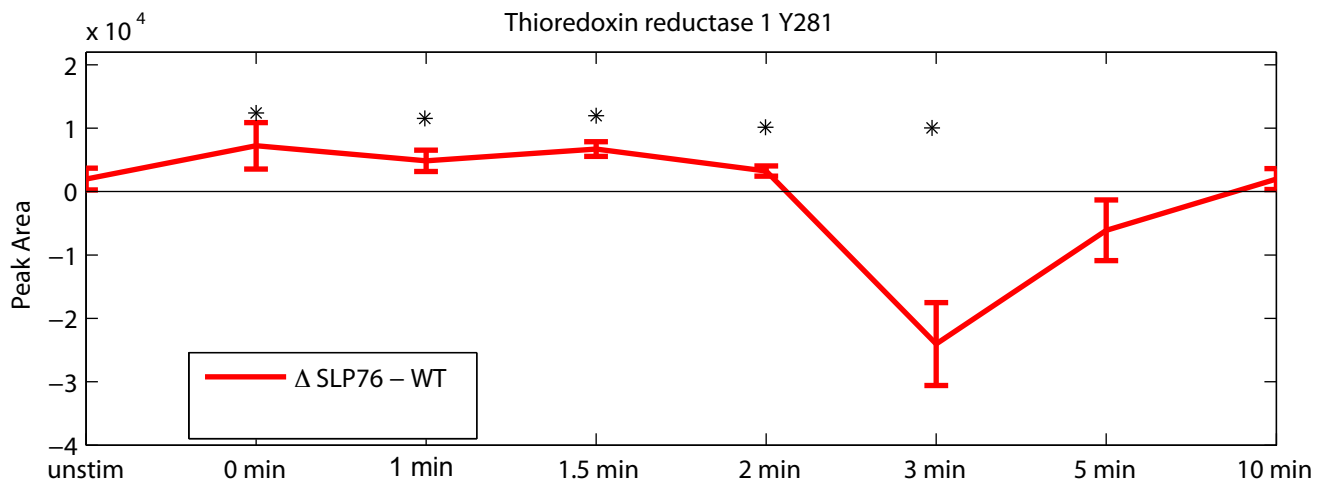

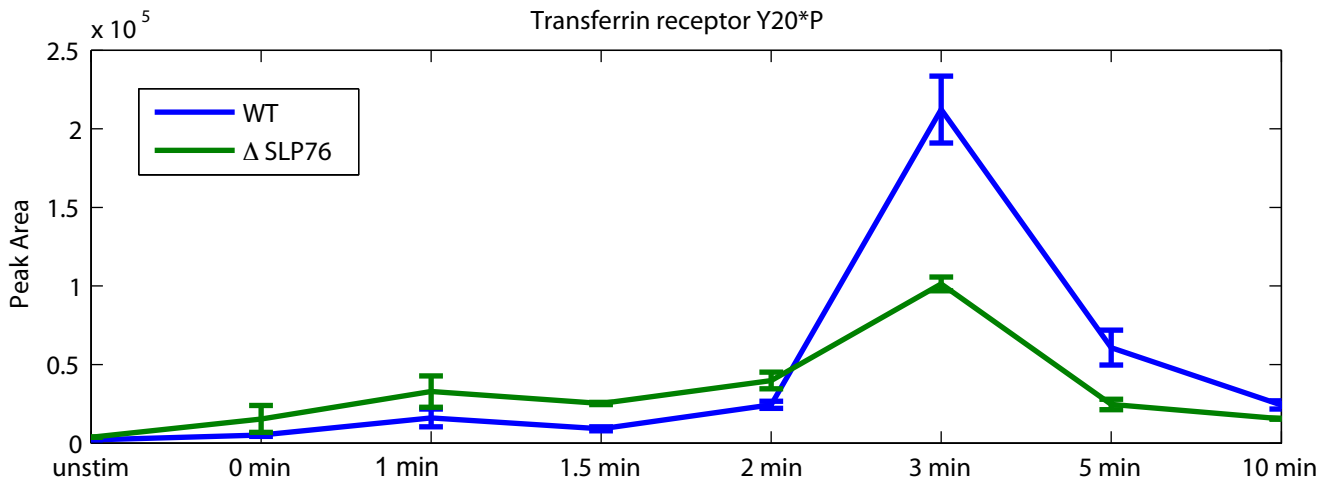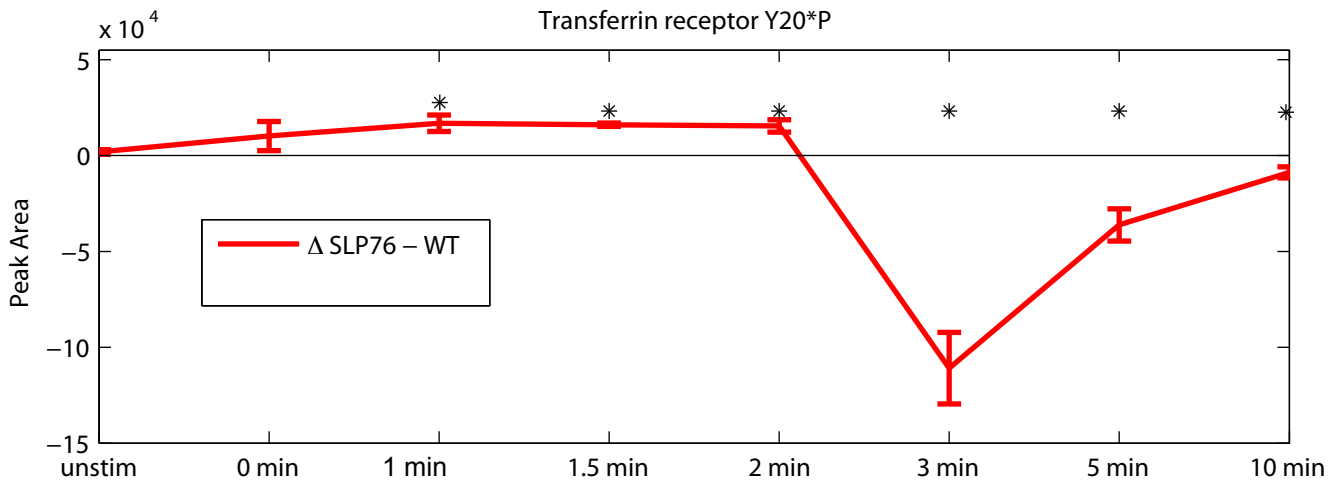

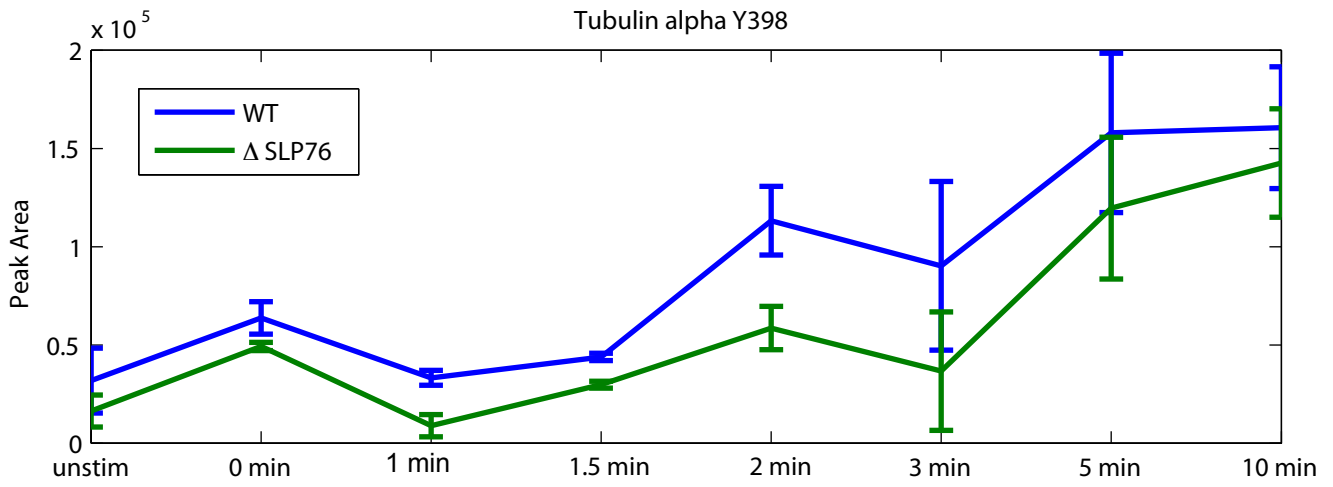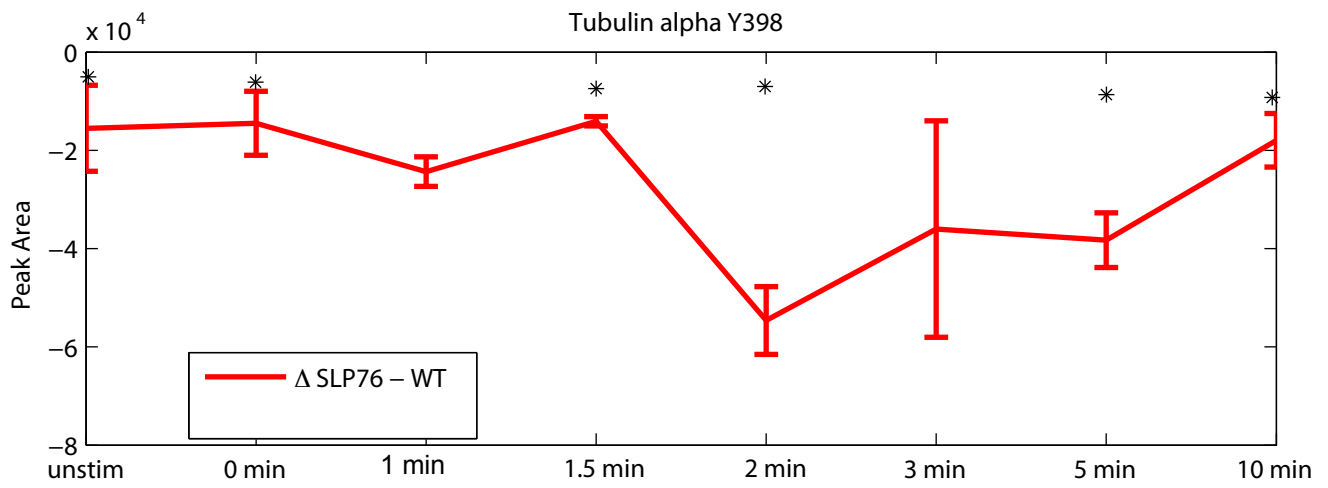

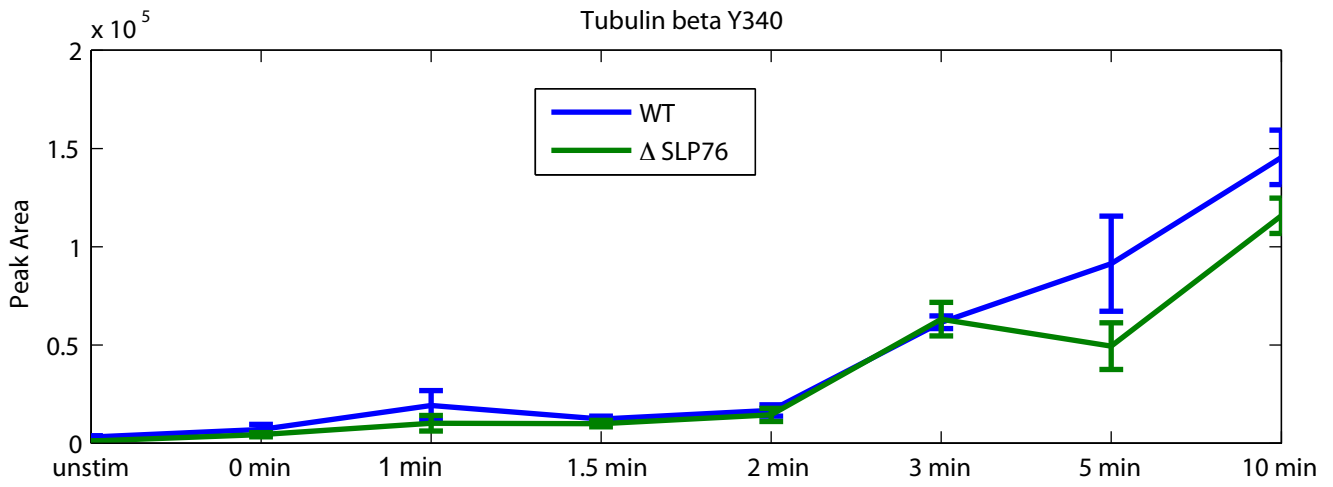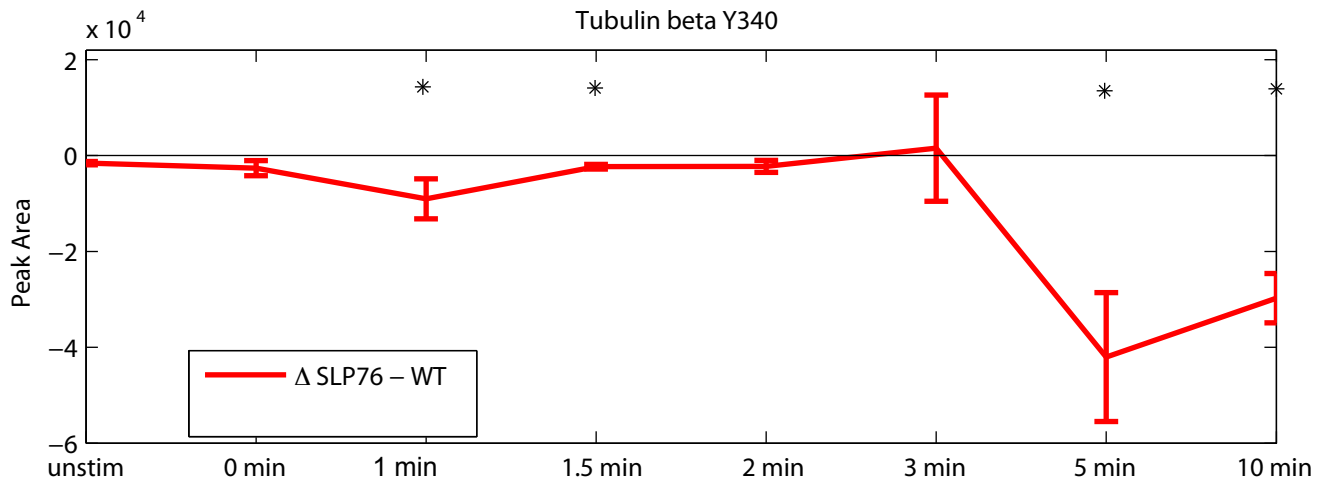

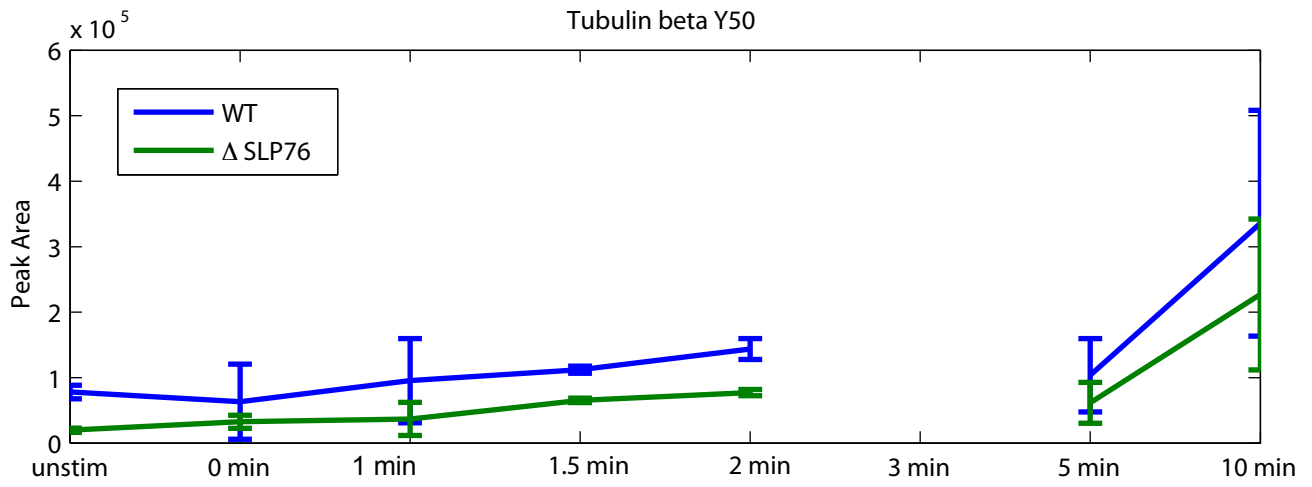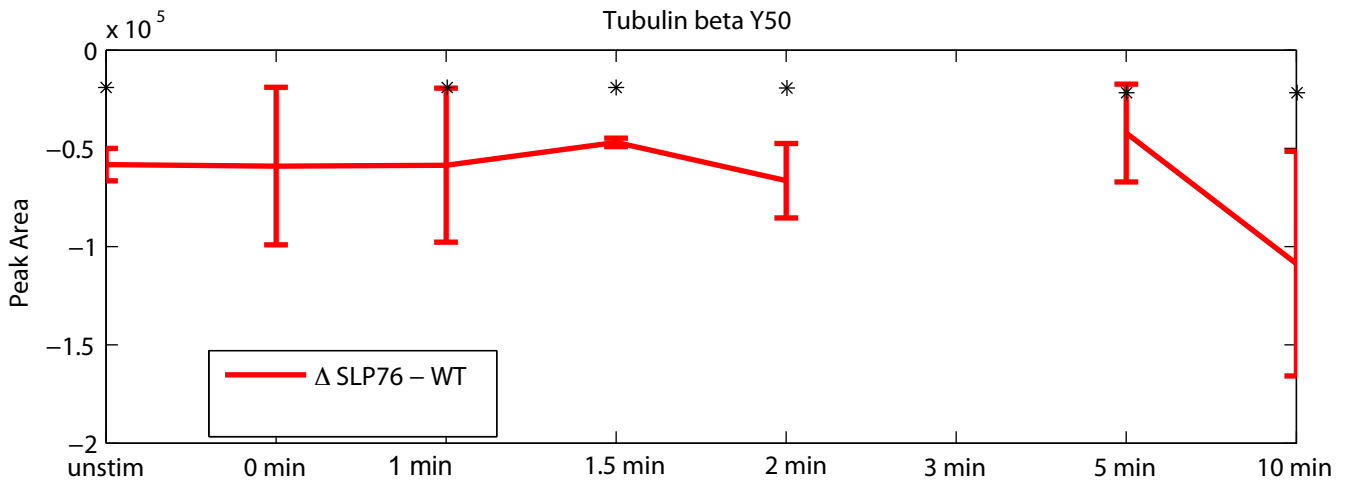

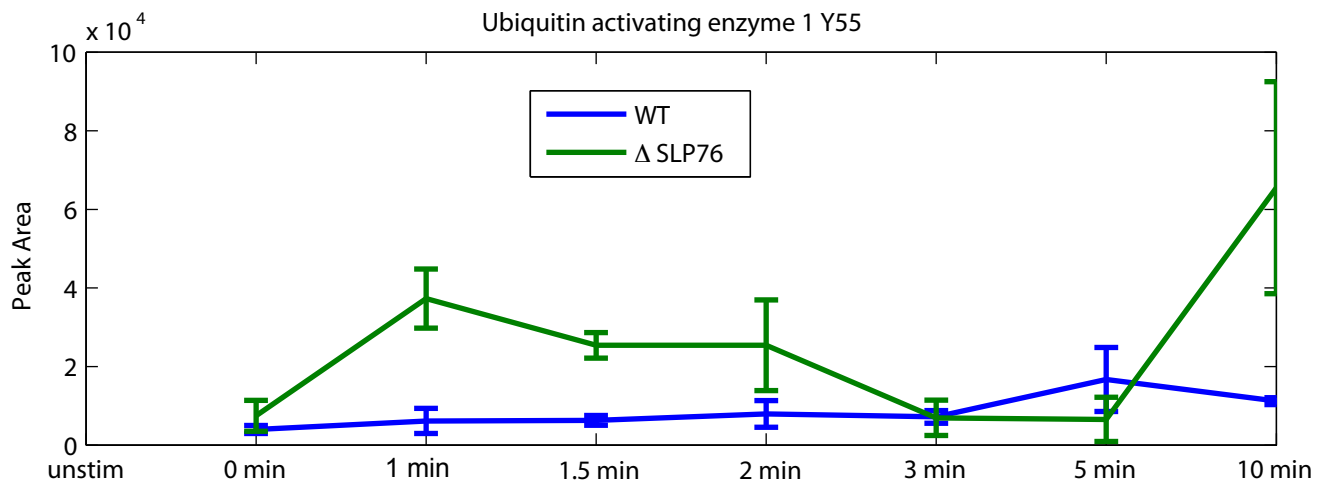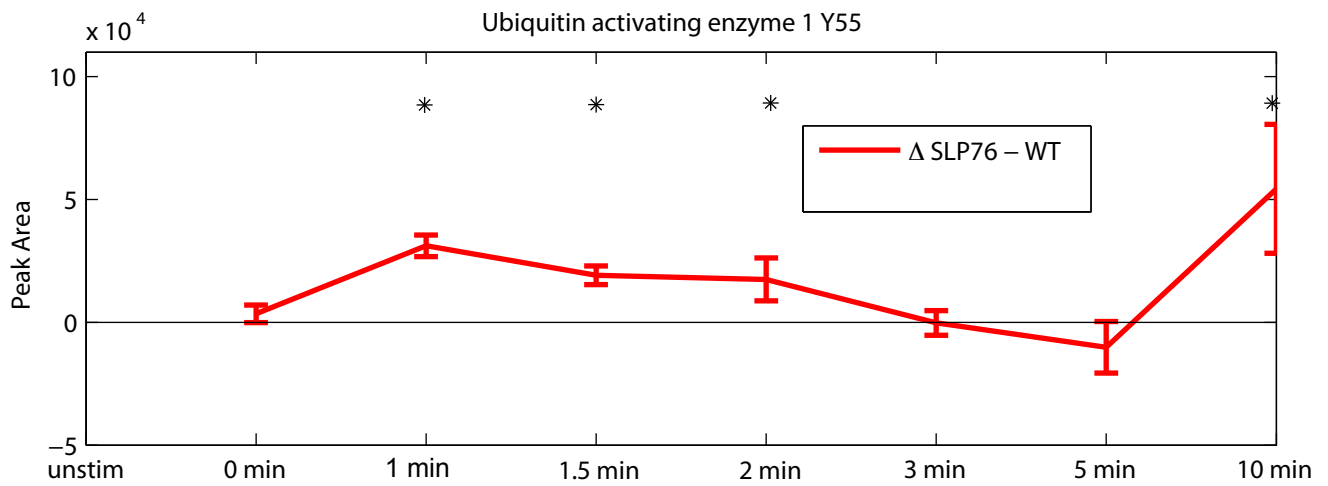

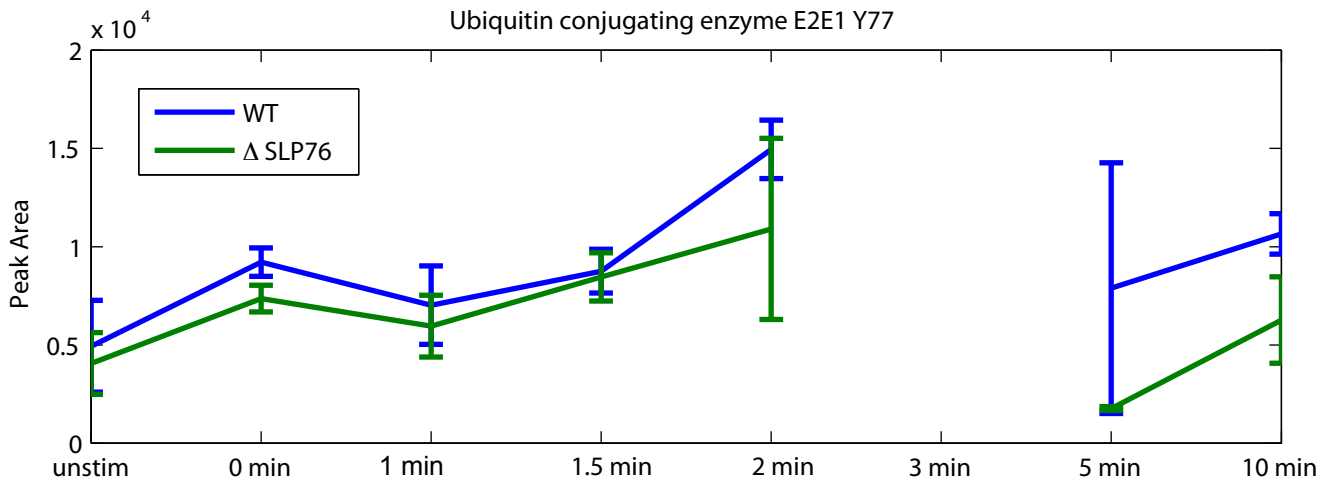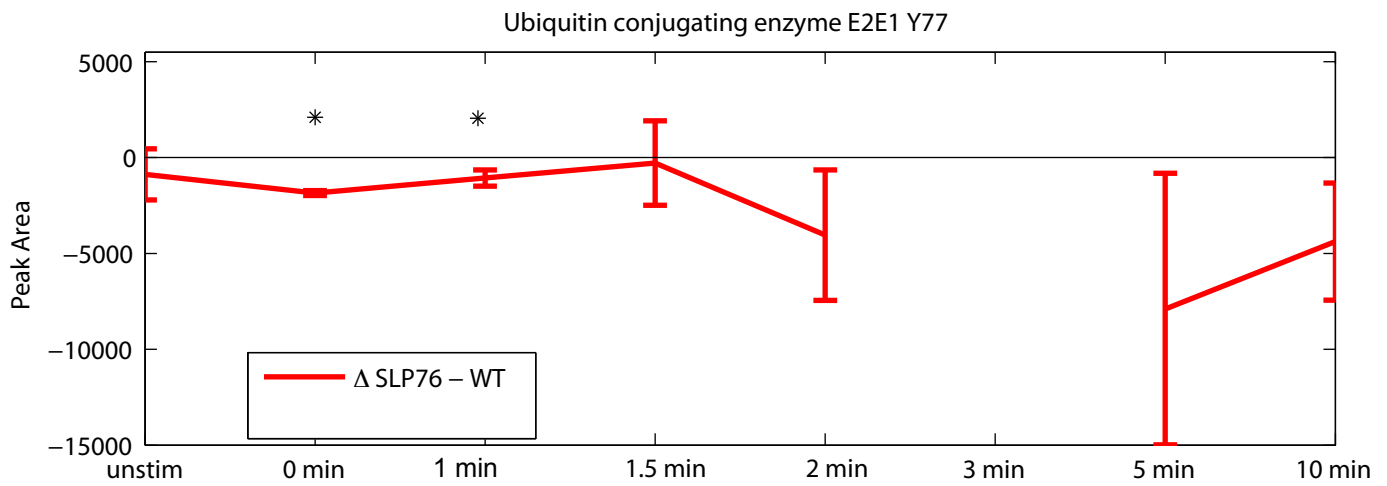



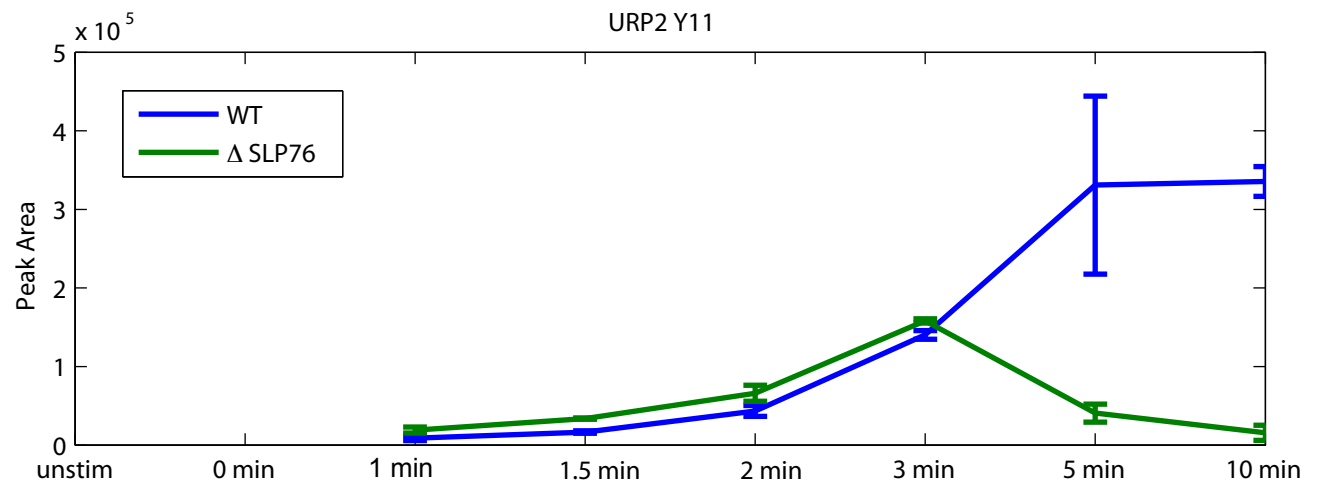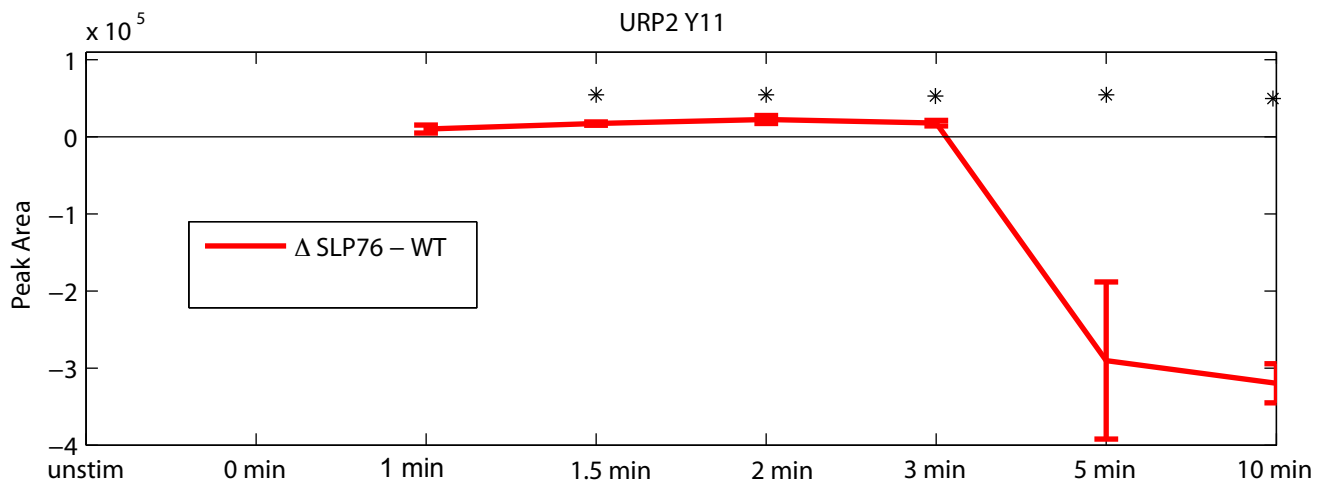

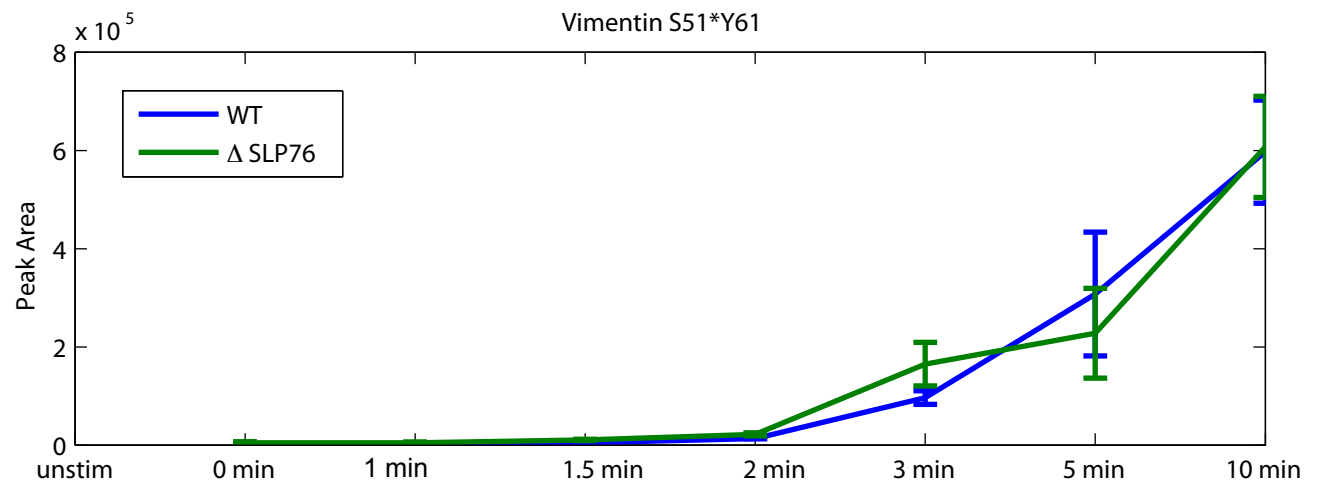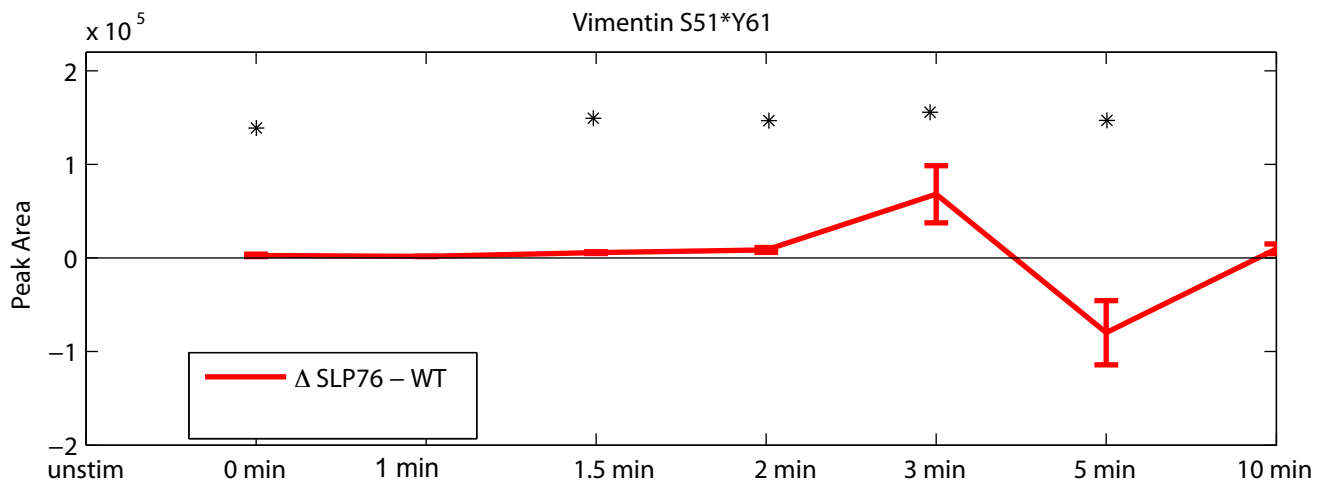

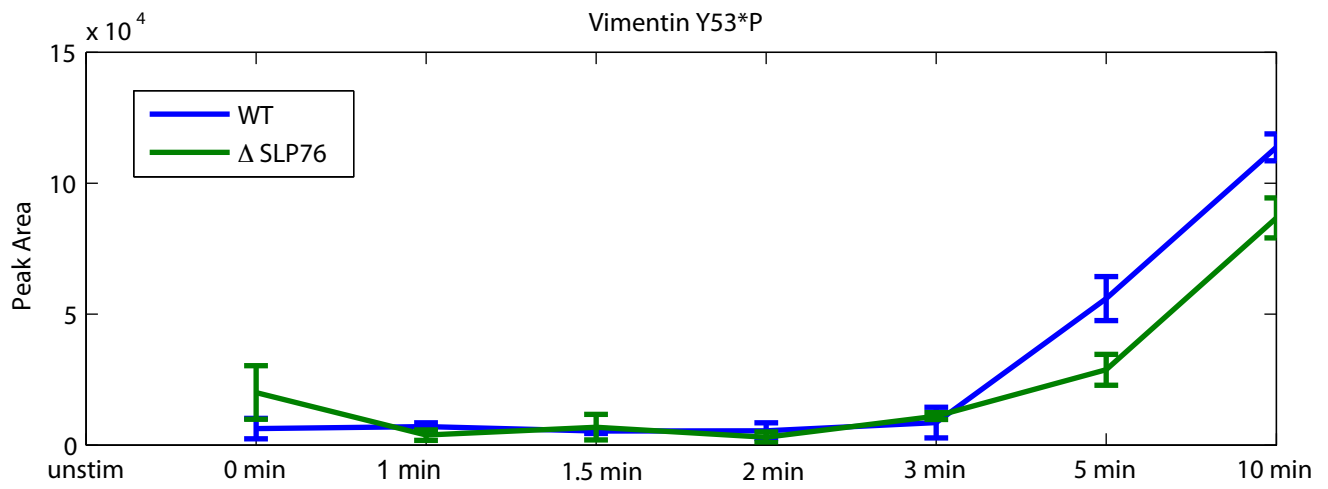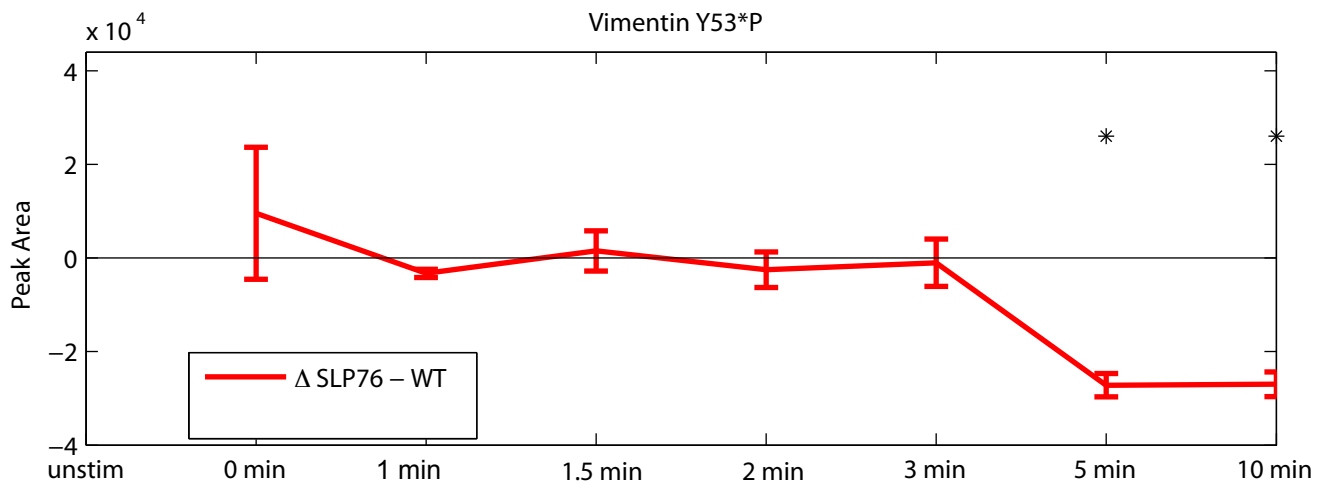

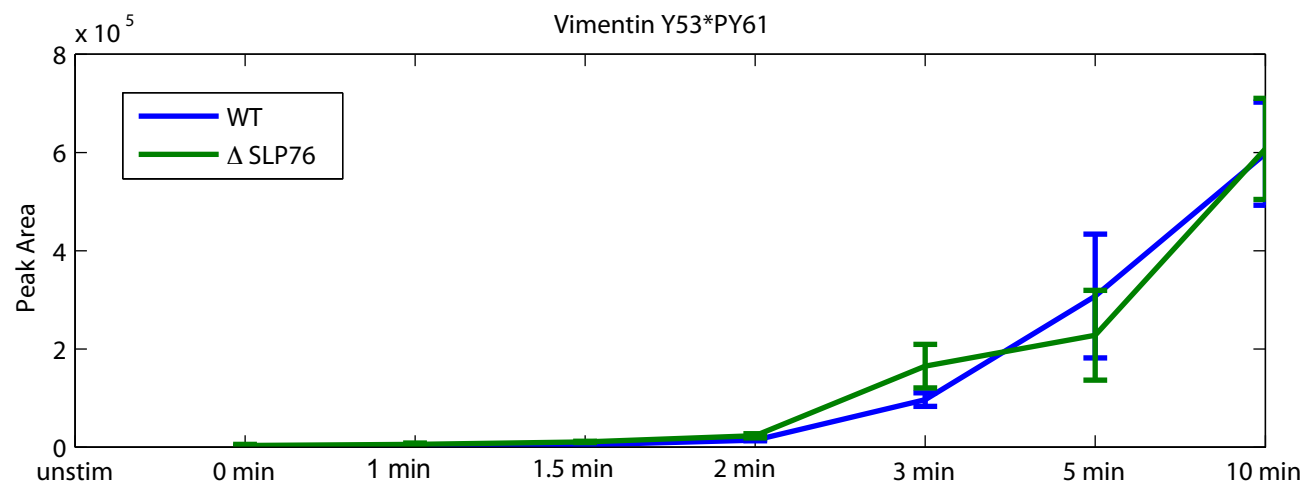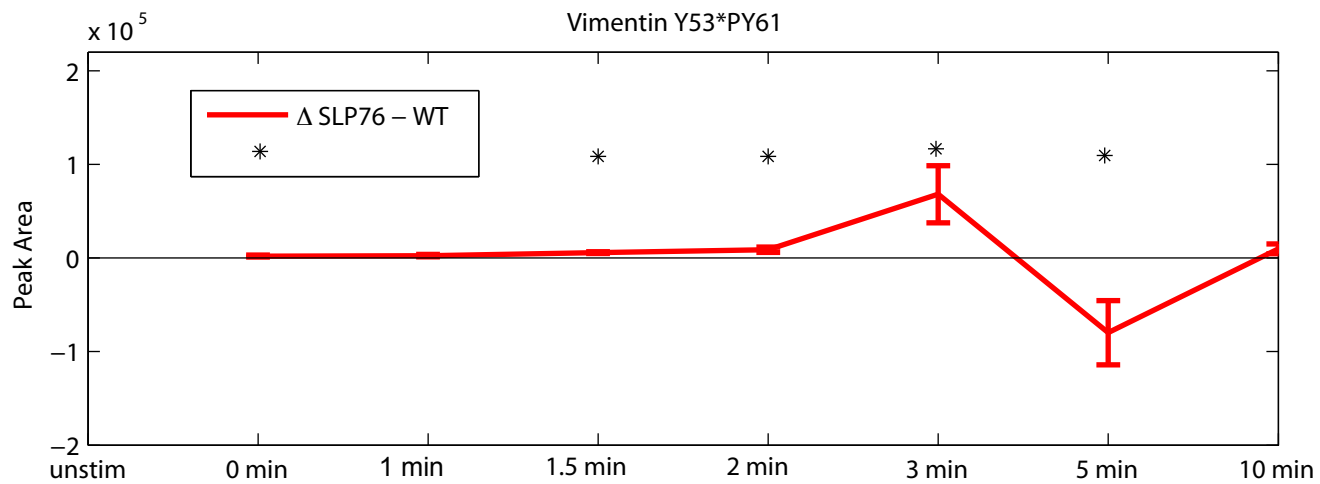

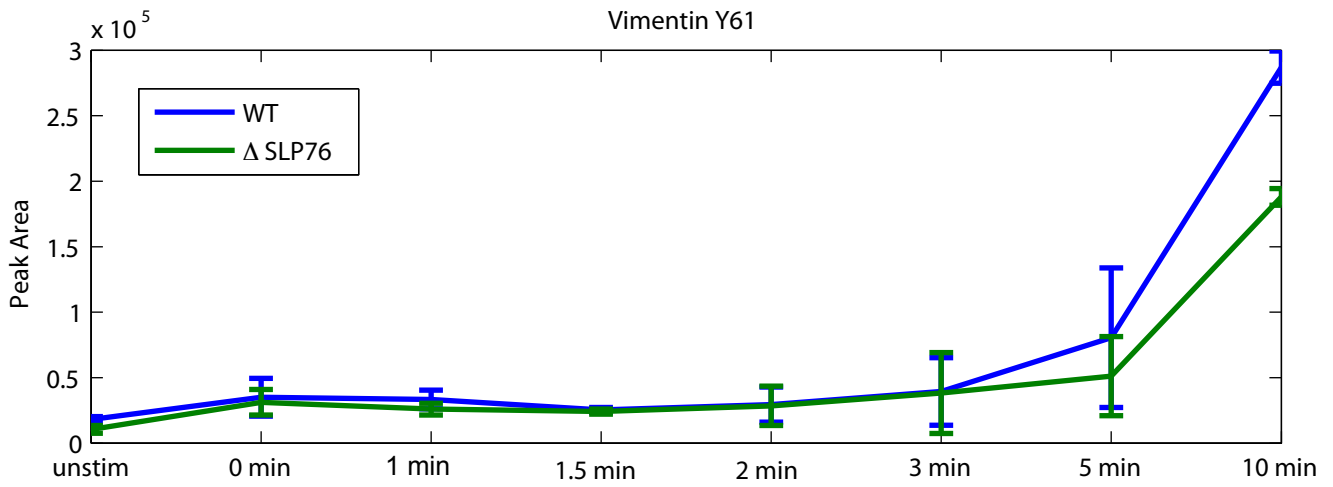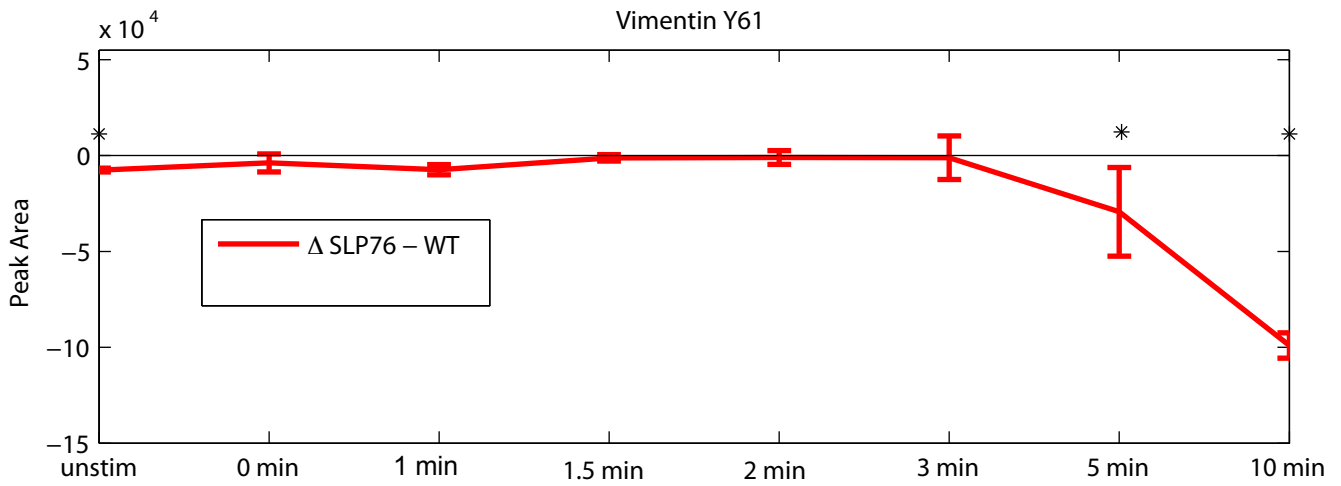

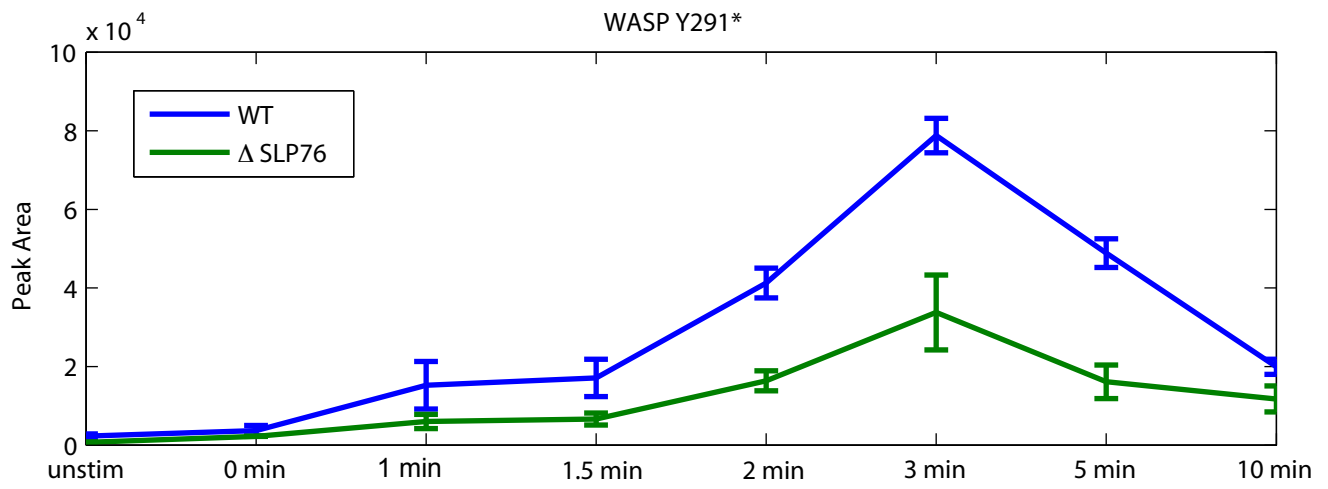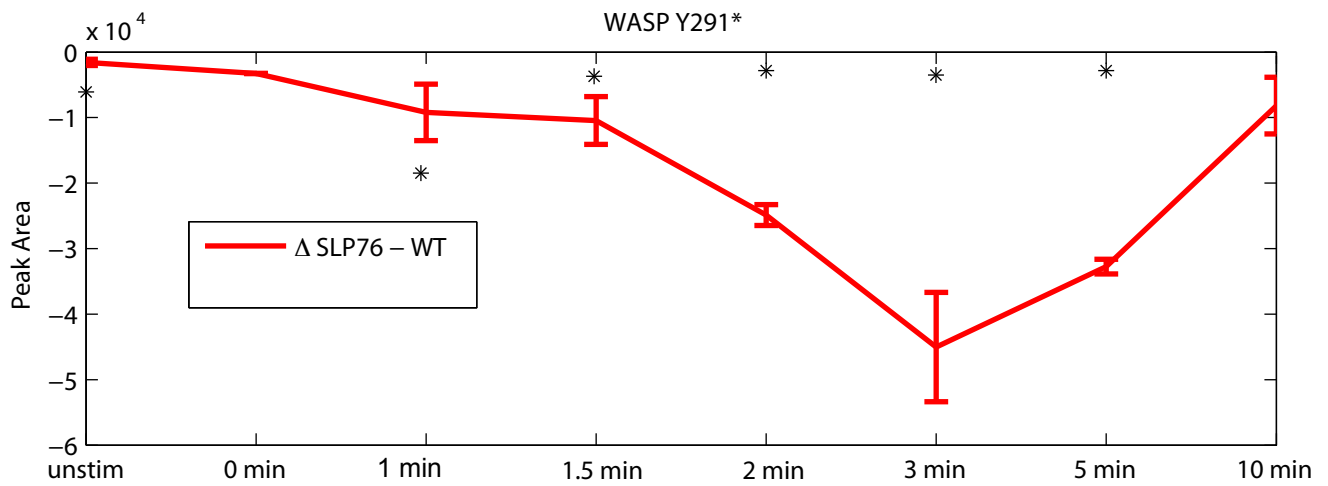

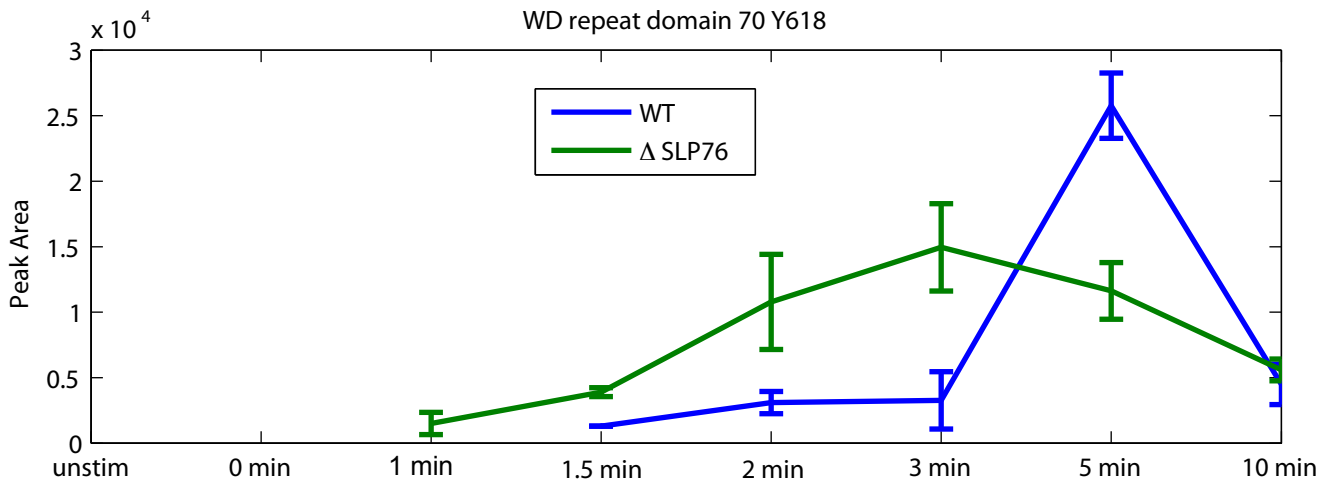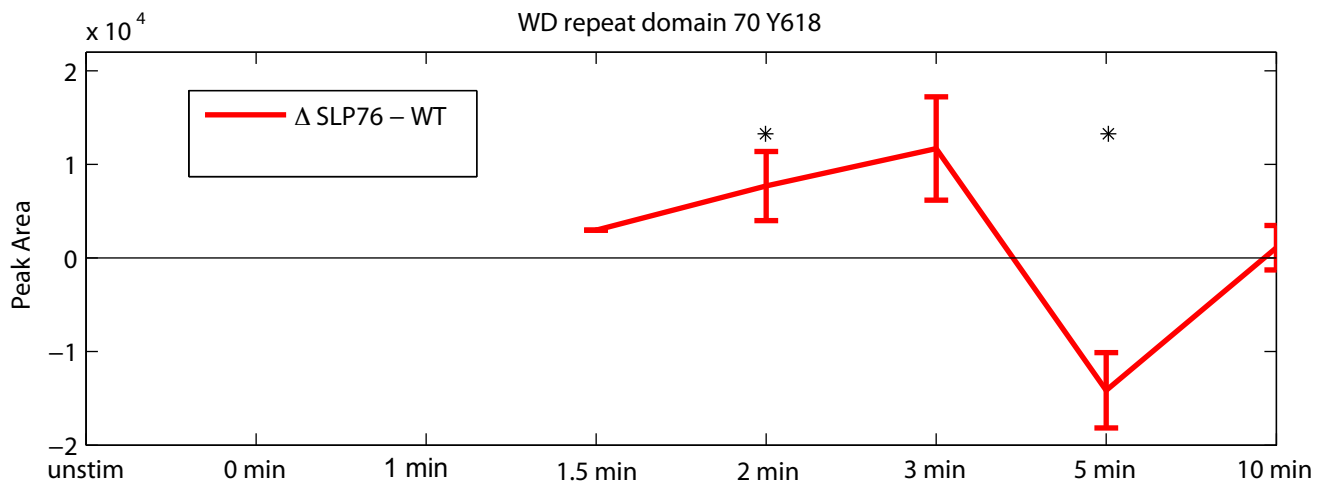

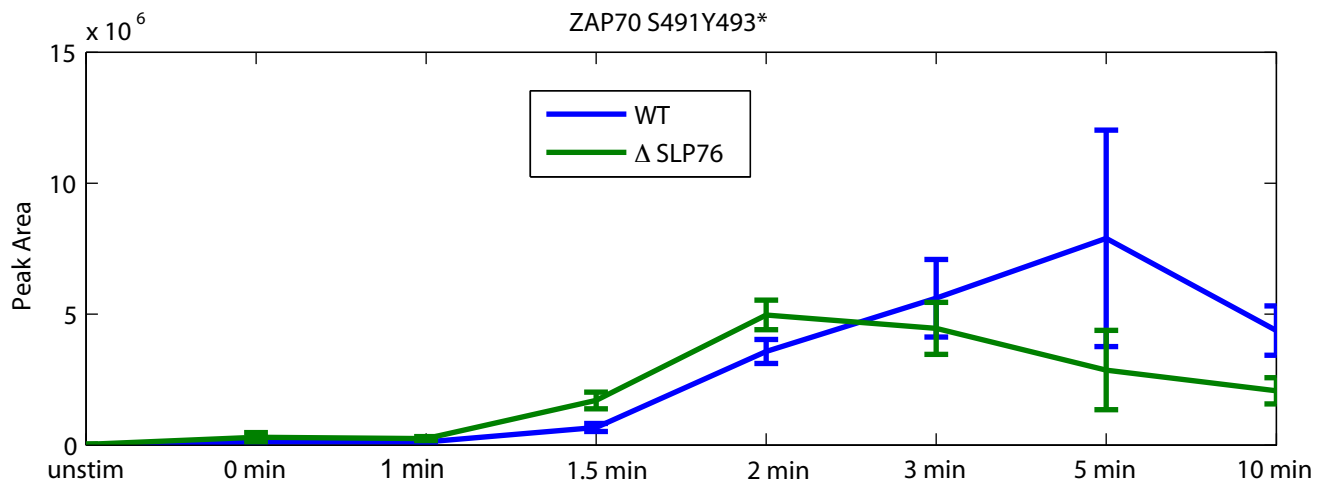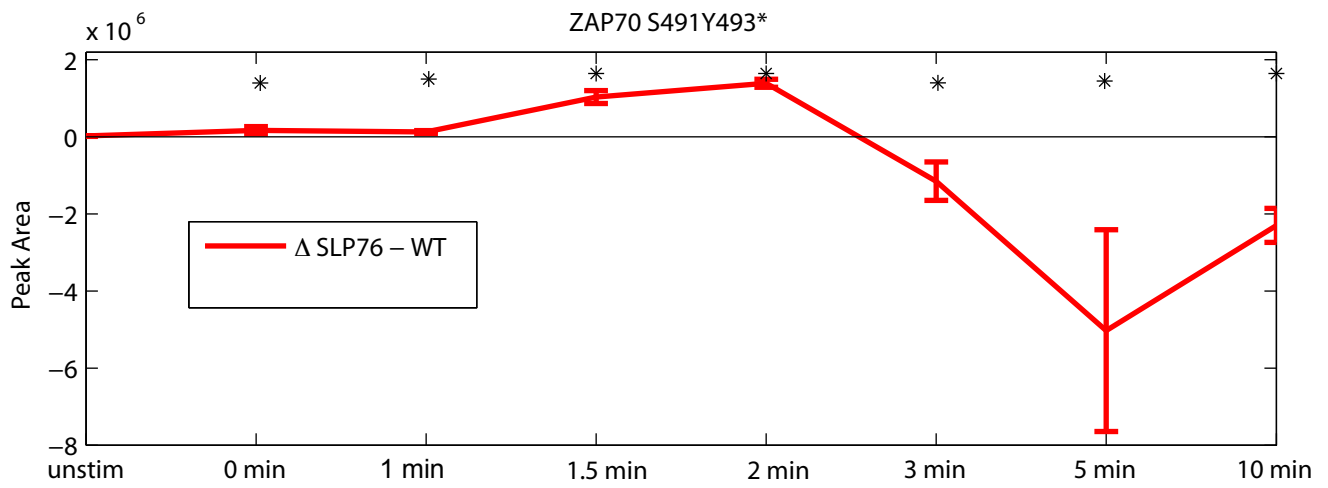



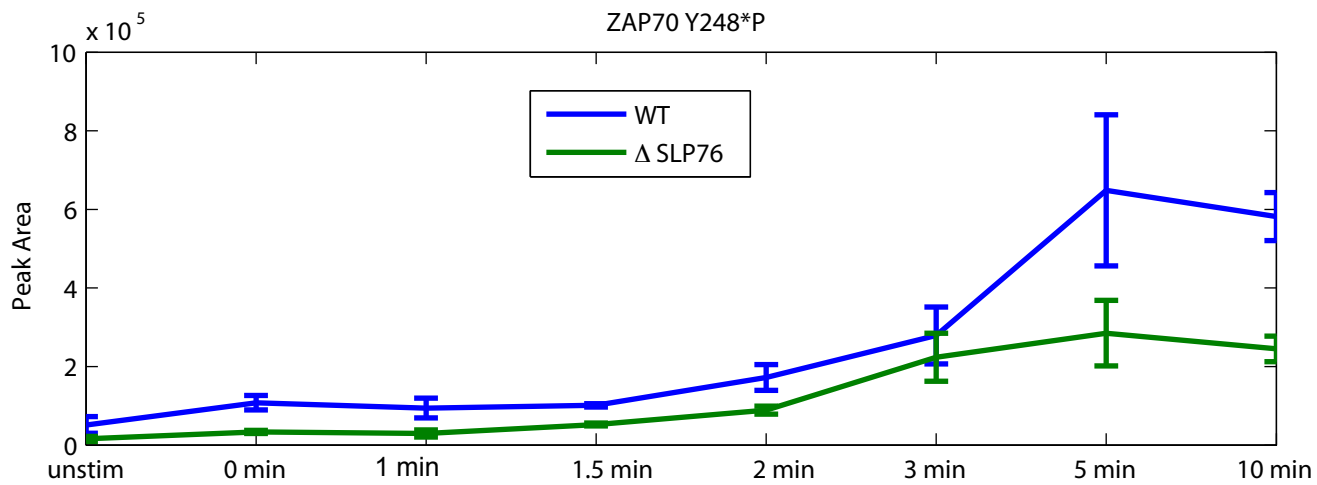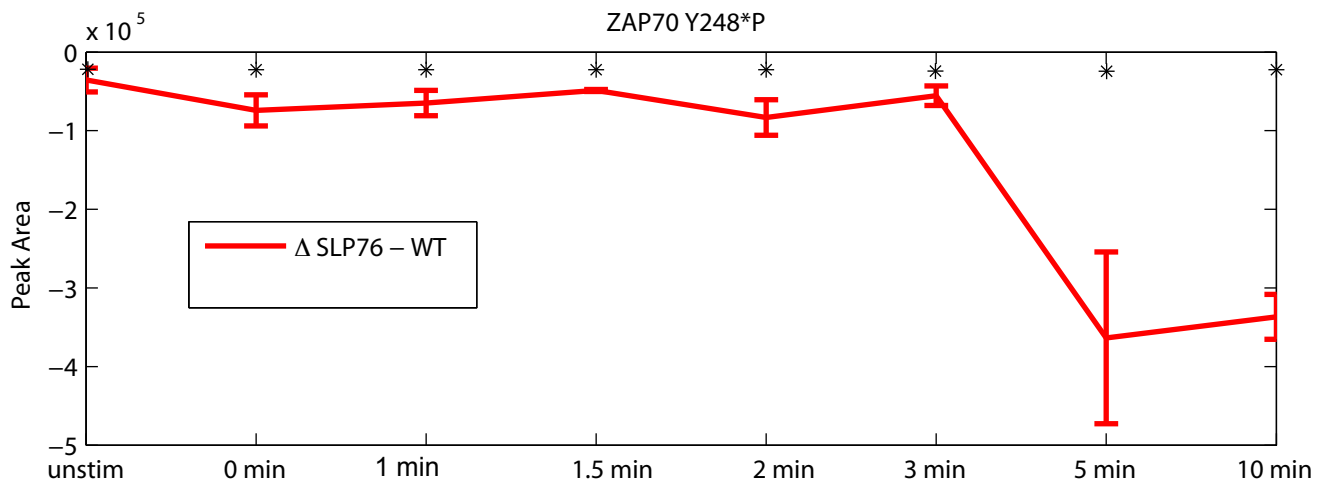

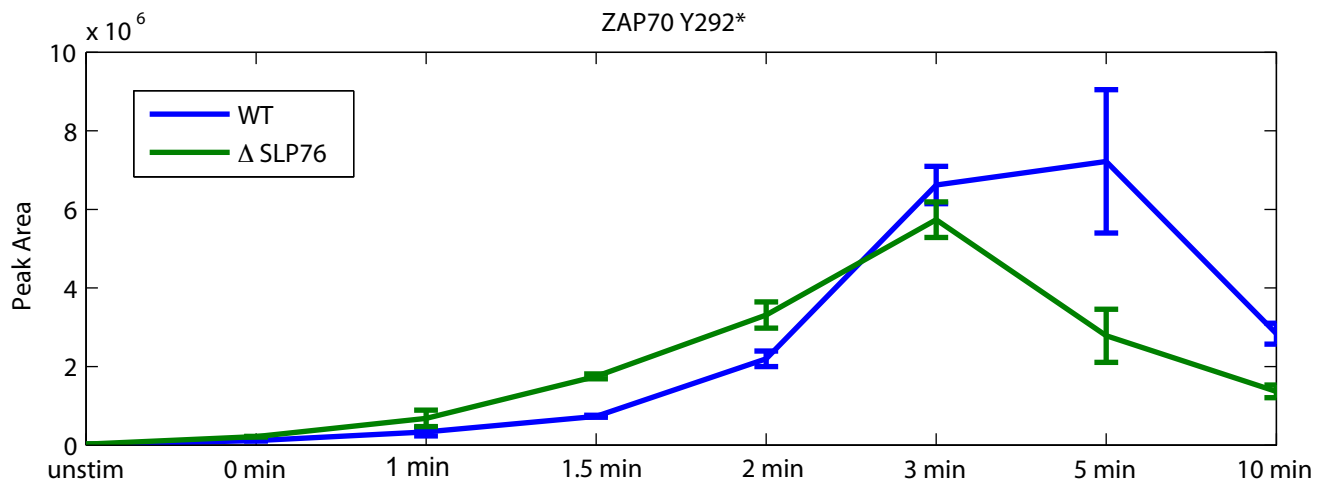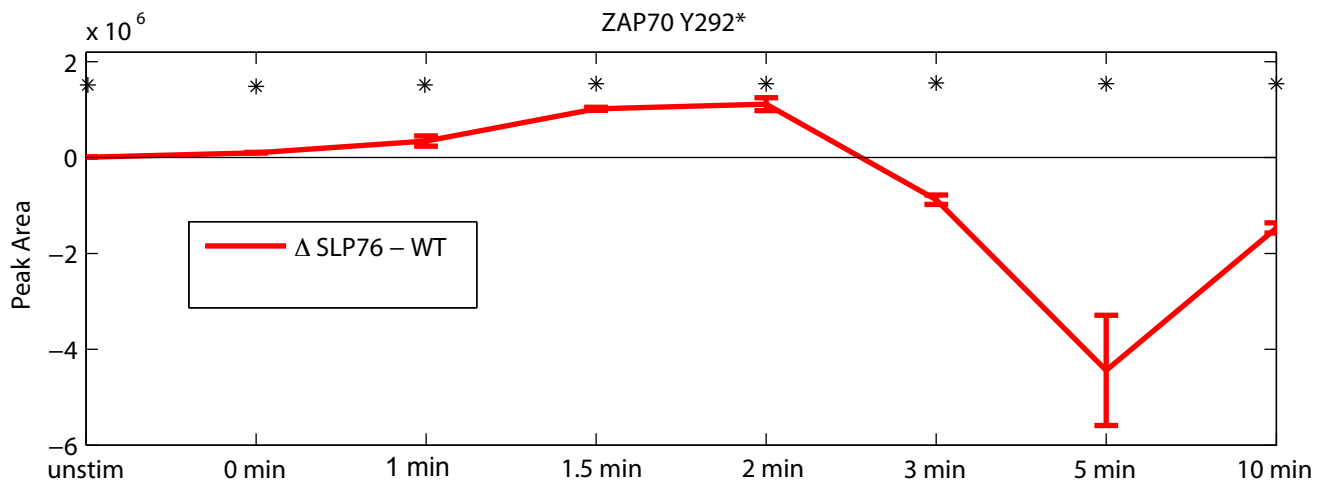

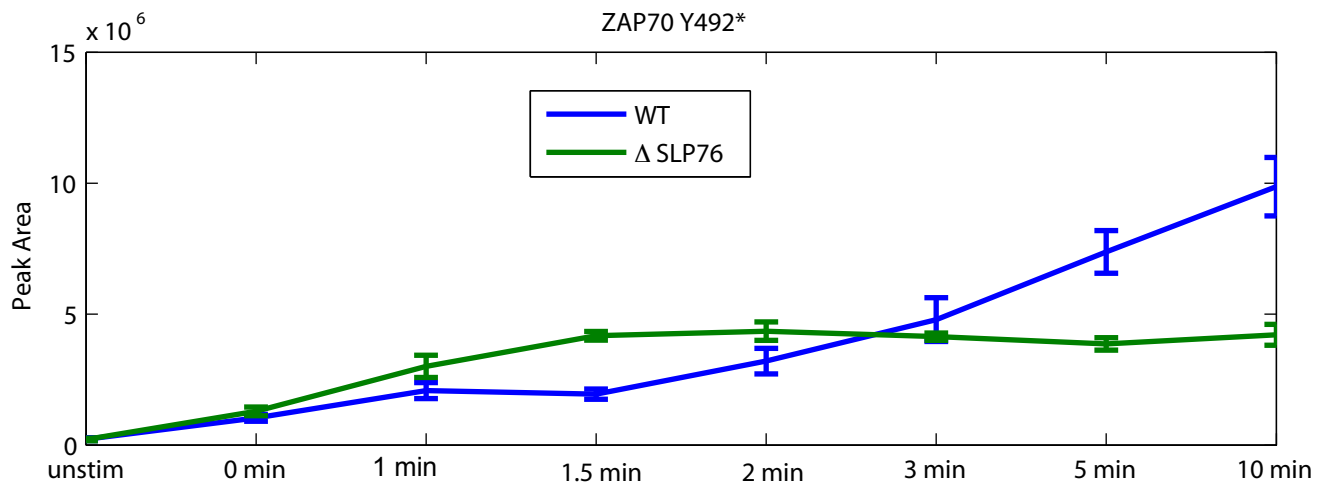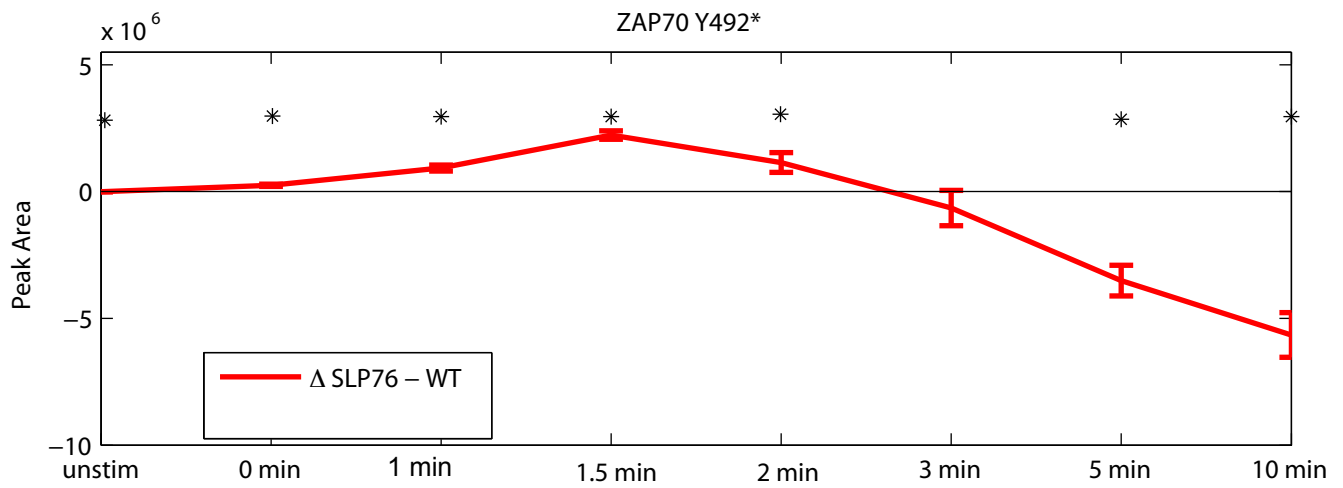

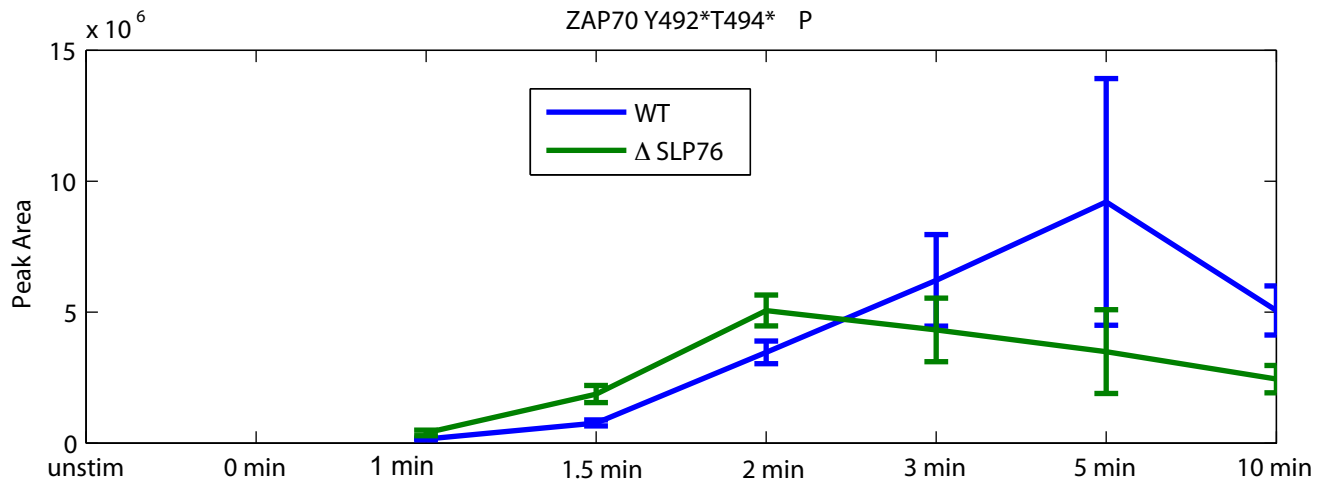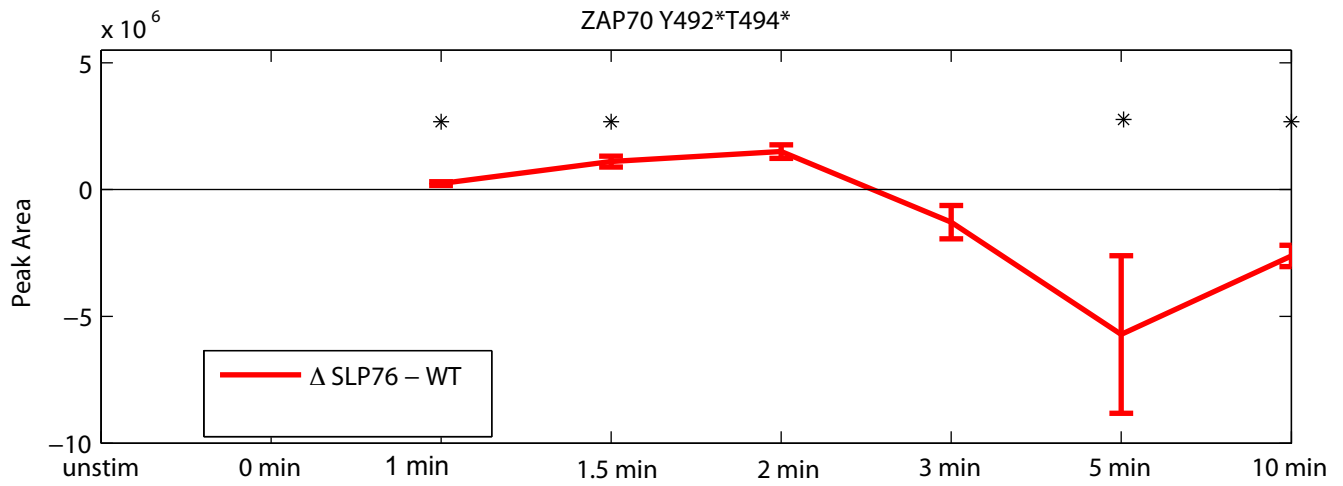

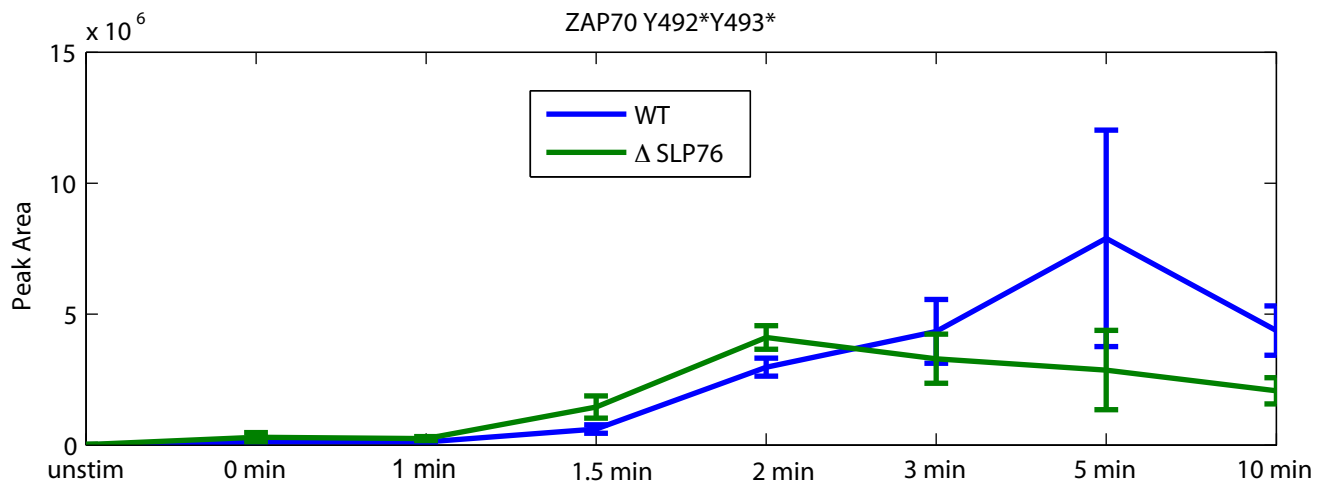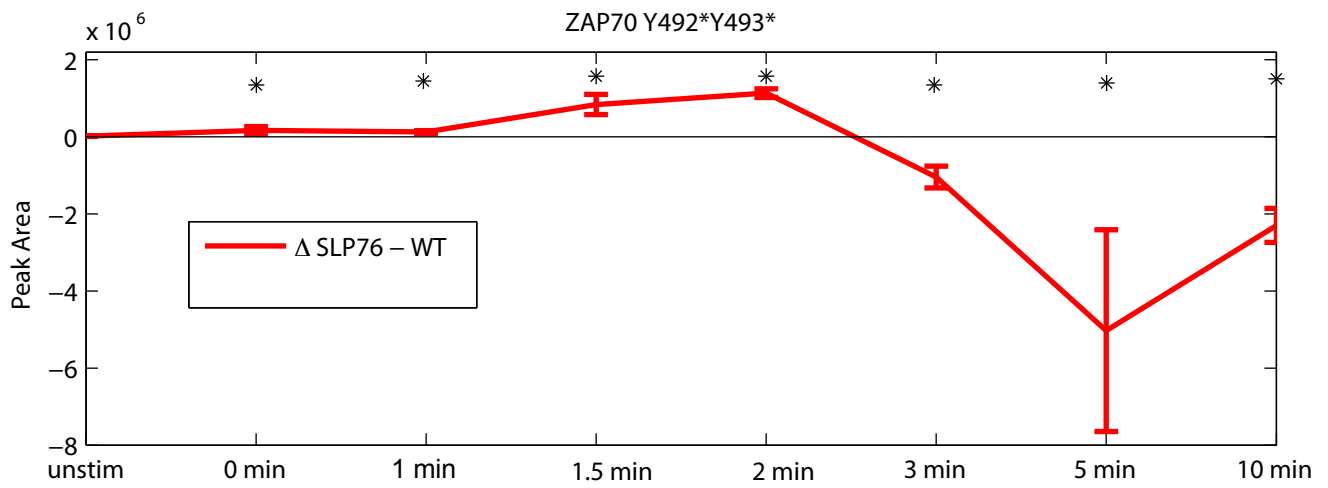

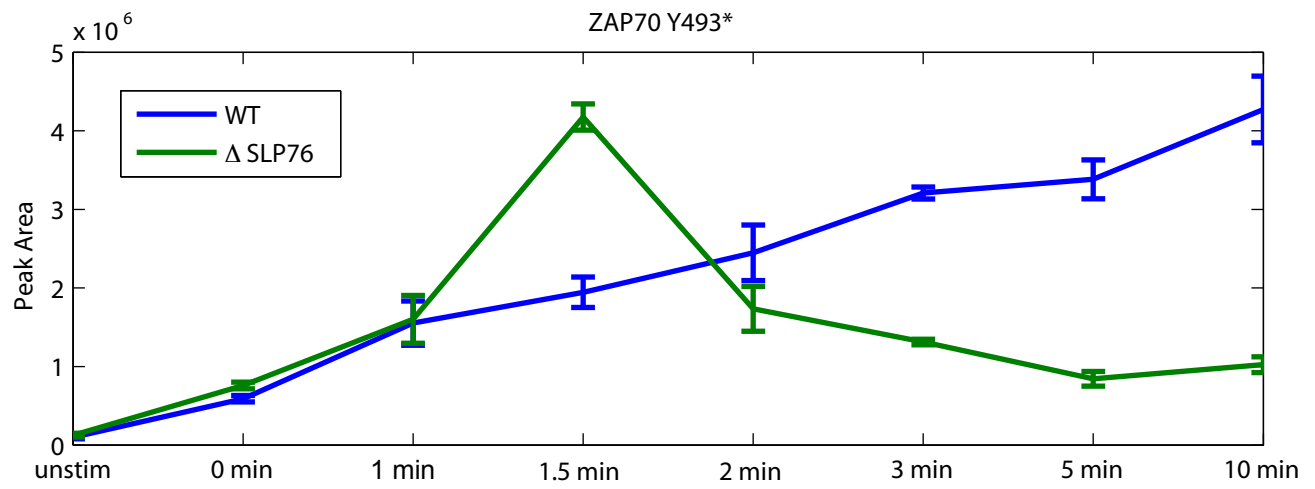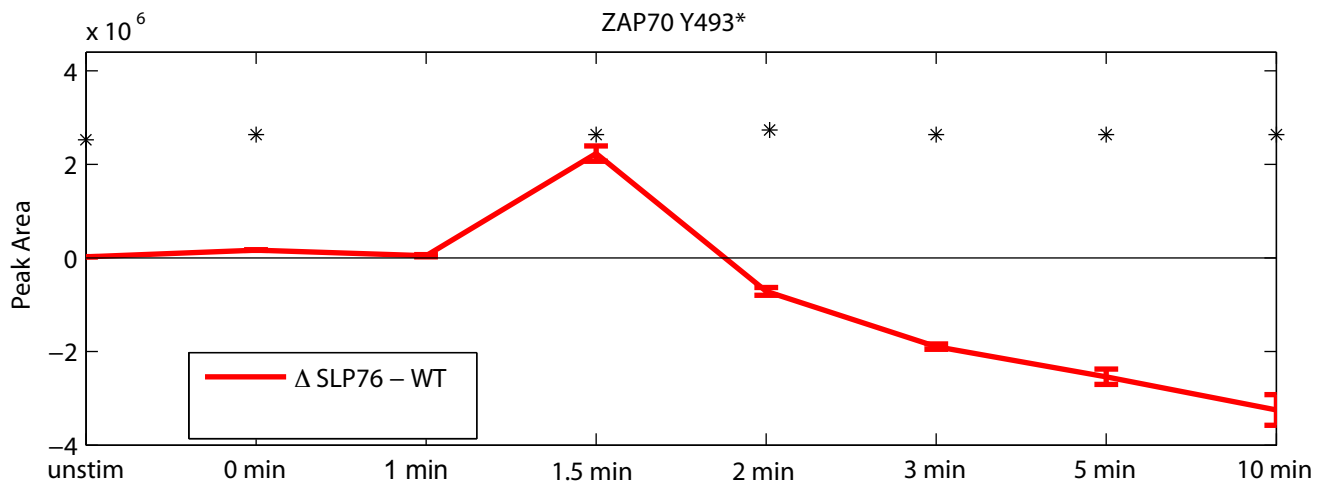

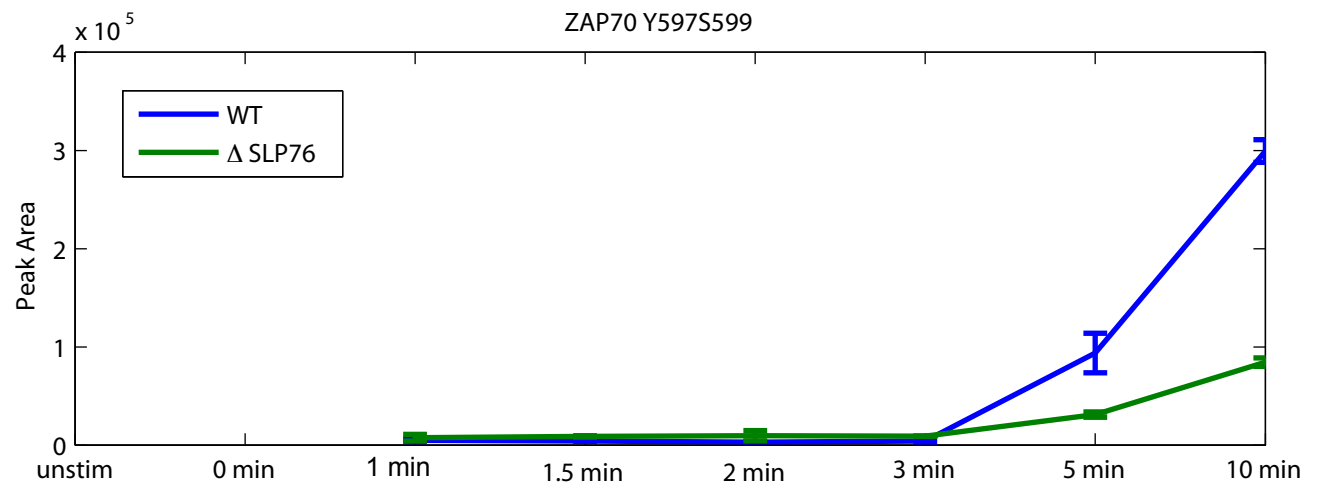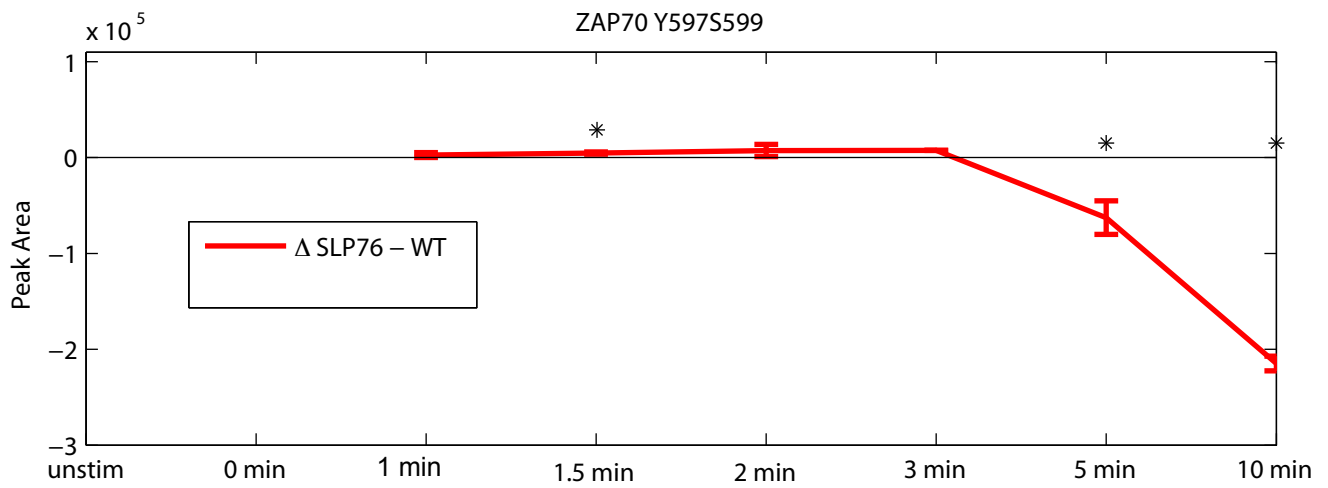

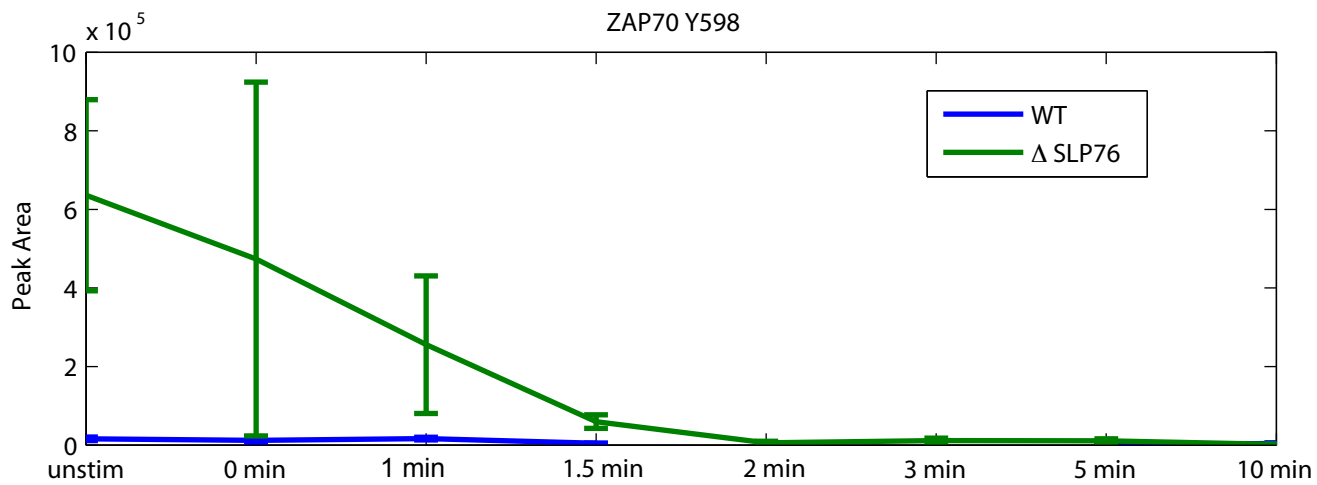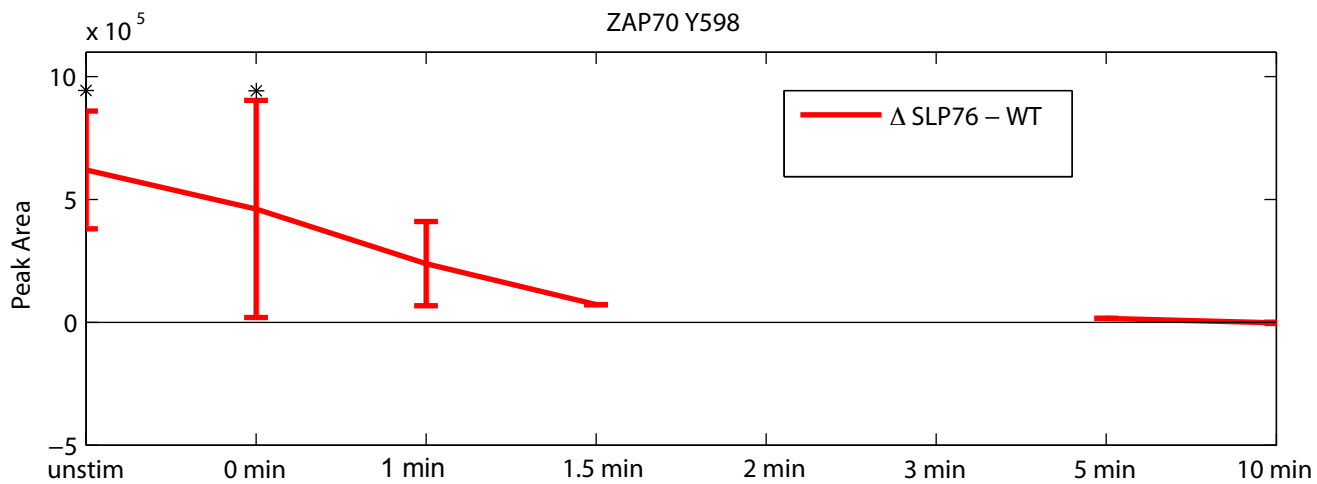



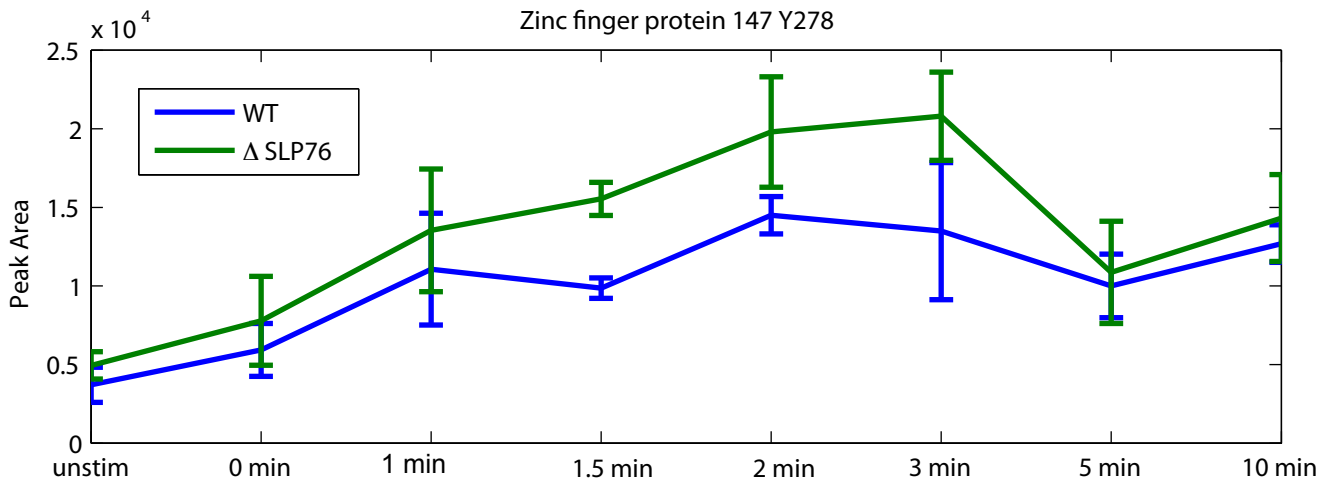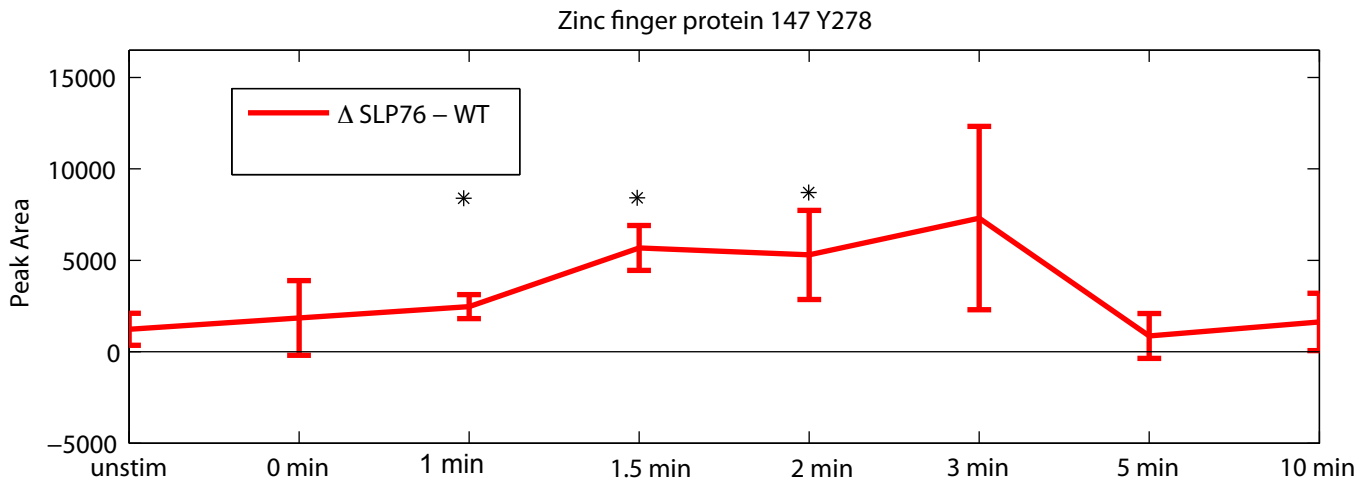

Supplement: pone.0046725.s003.pdf [file pone.0046725.s003.pdf]
