# Supplementary material for: Quantitative Phosphoproteomics Reveals SLP-76 Dependent Regulation of PAG and Src Family Kinases in T Cells
Source: PubMed Central journal article supplement (PMC3469622; doi:10.1371/journal.pone.0046725), 2012-10-11
Supplement: pone.0046725.s002.pdf [file pone.0046725.s002.pdf]

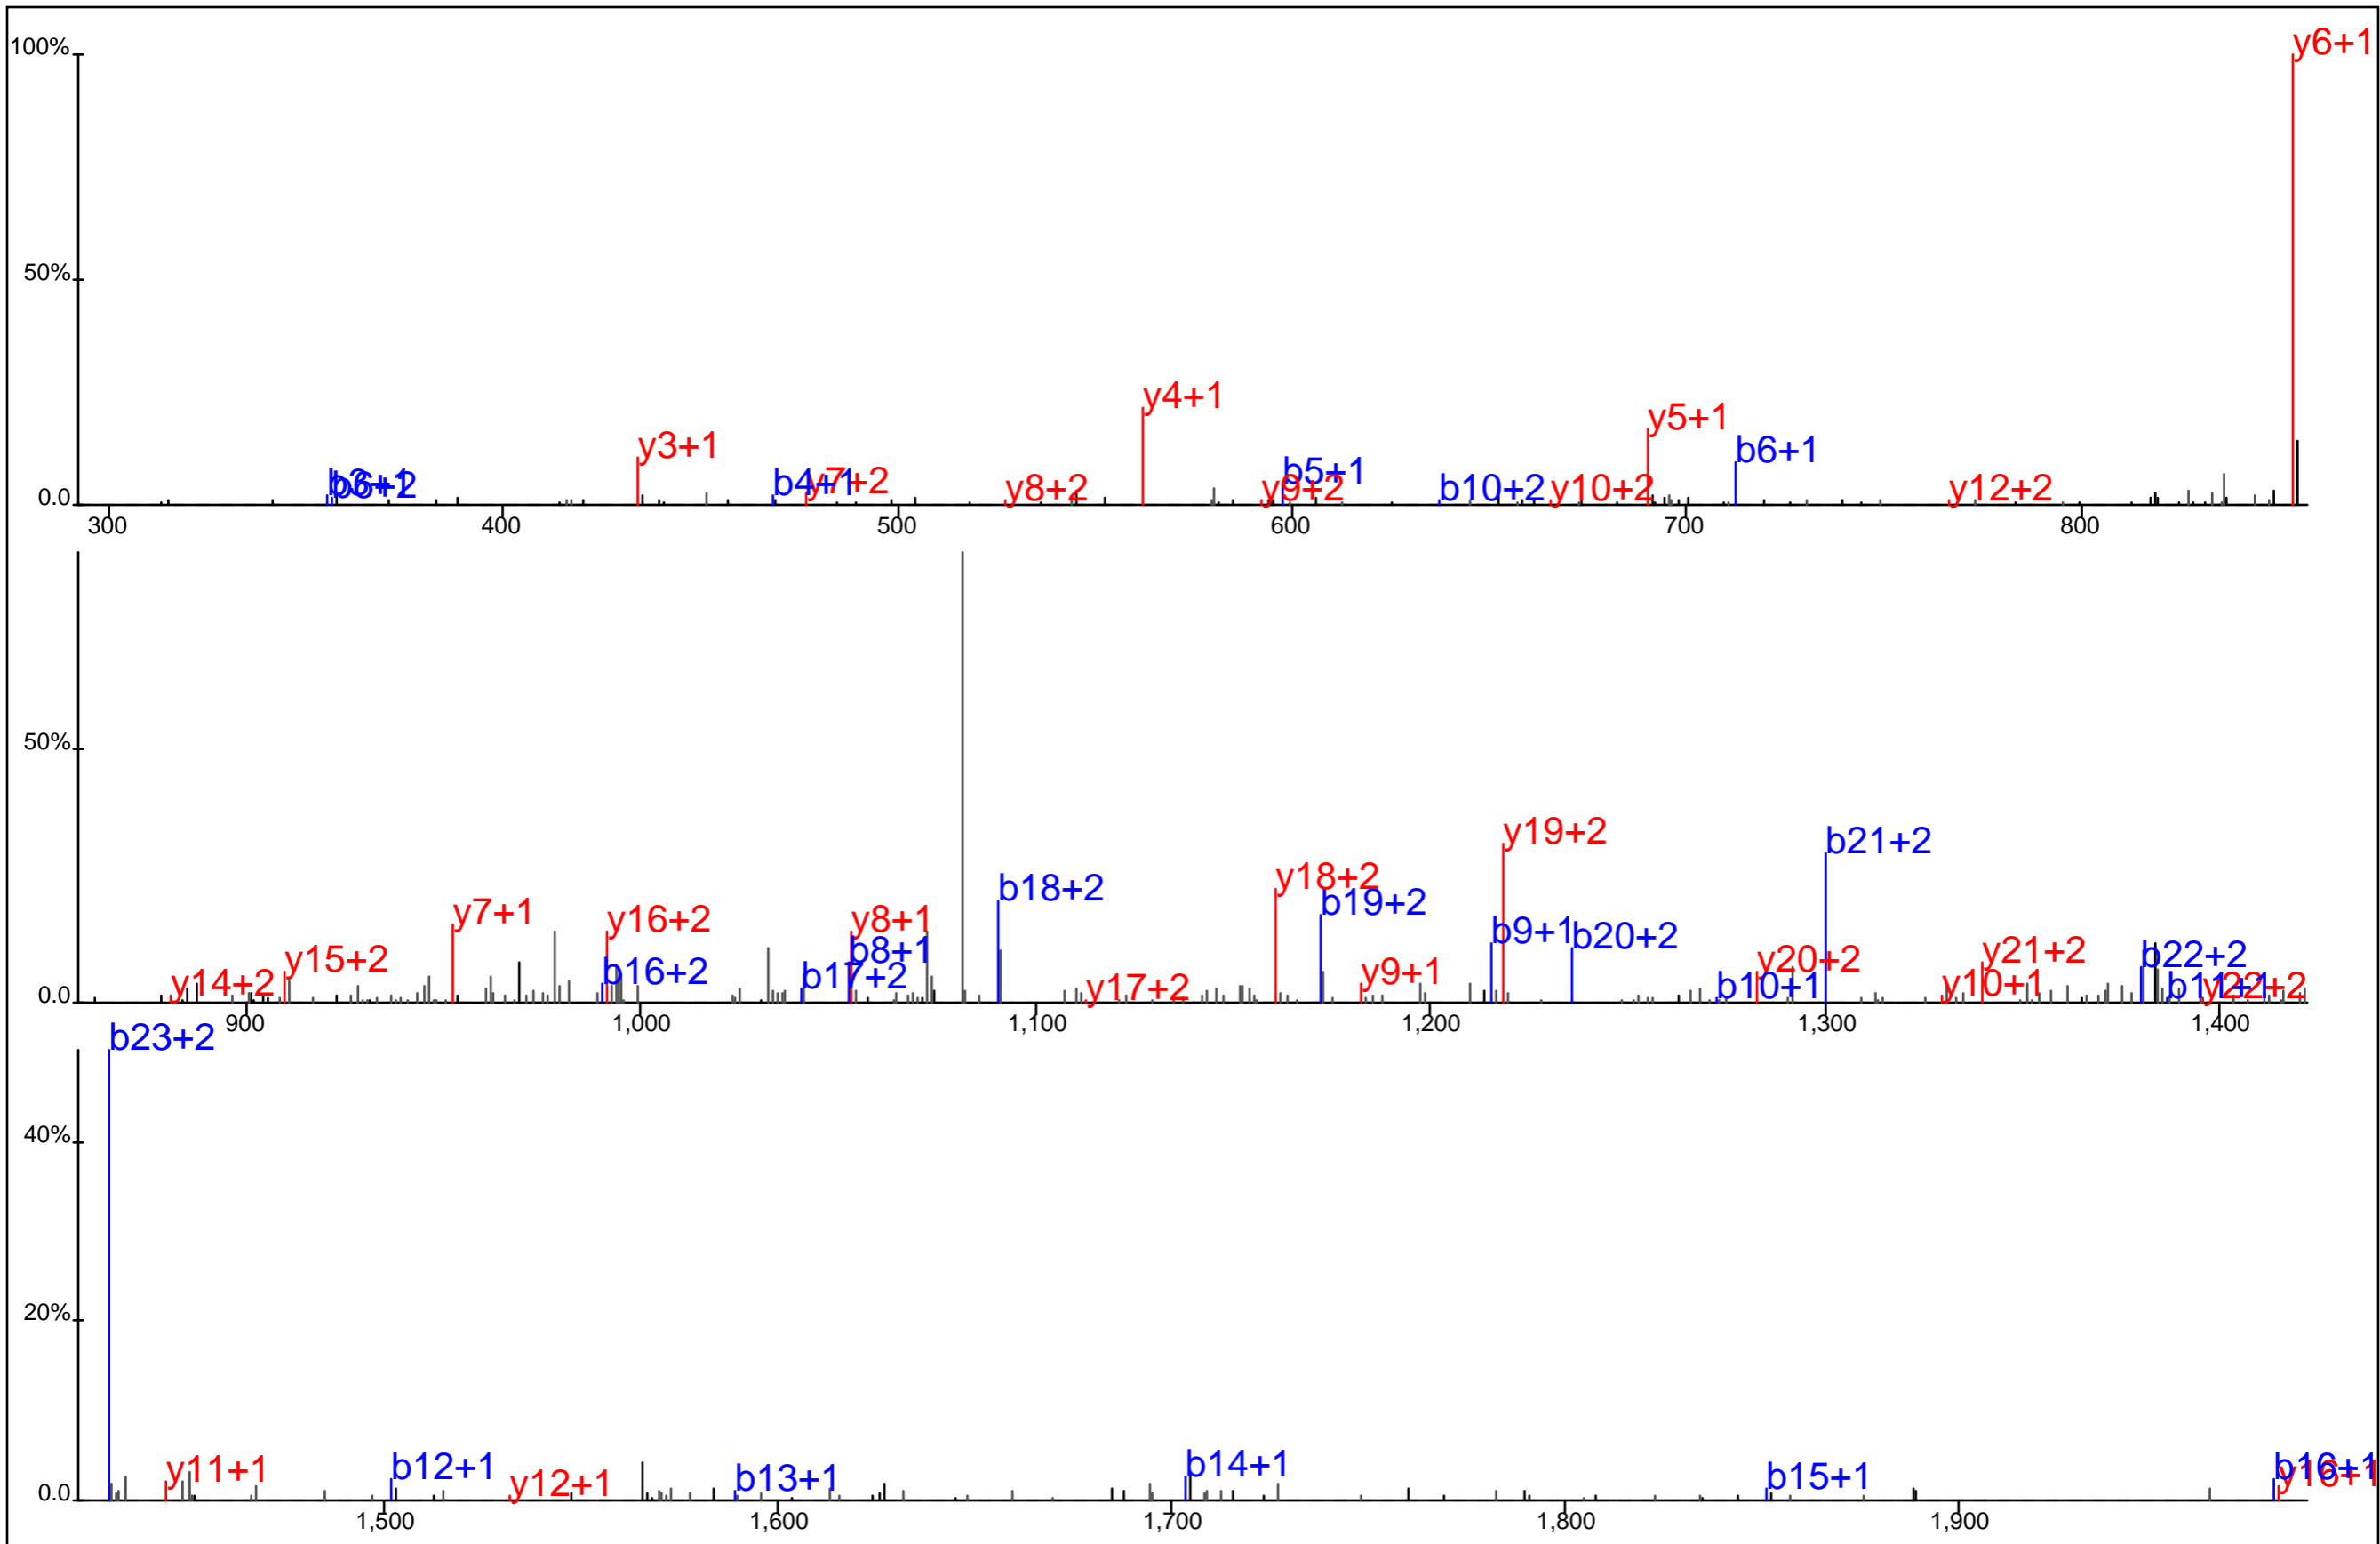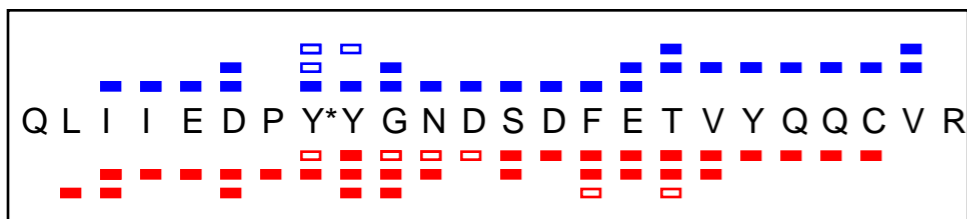

Protein Name: Acid phosphatase 1  
 gi Accession: 4757714  
 Precursor Mass: 1,011.4417+3  
 Delta Mass: 2.786 ppm  
 XCorr: 60.25

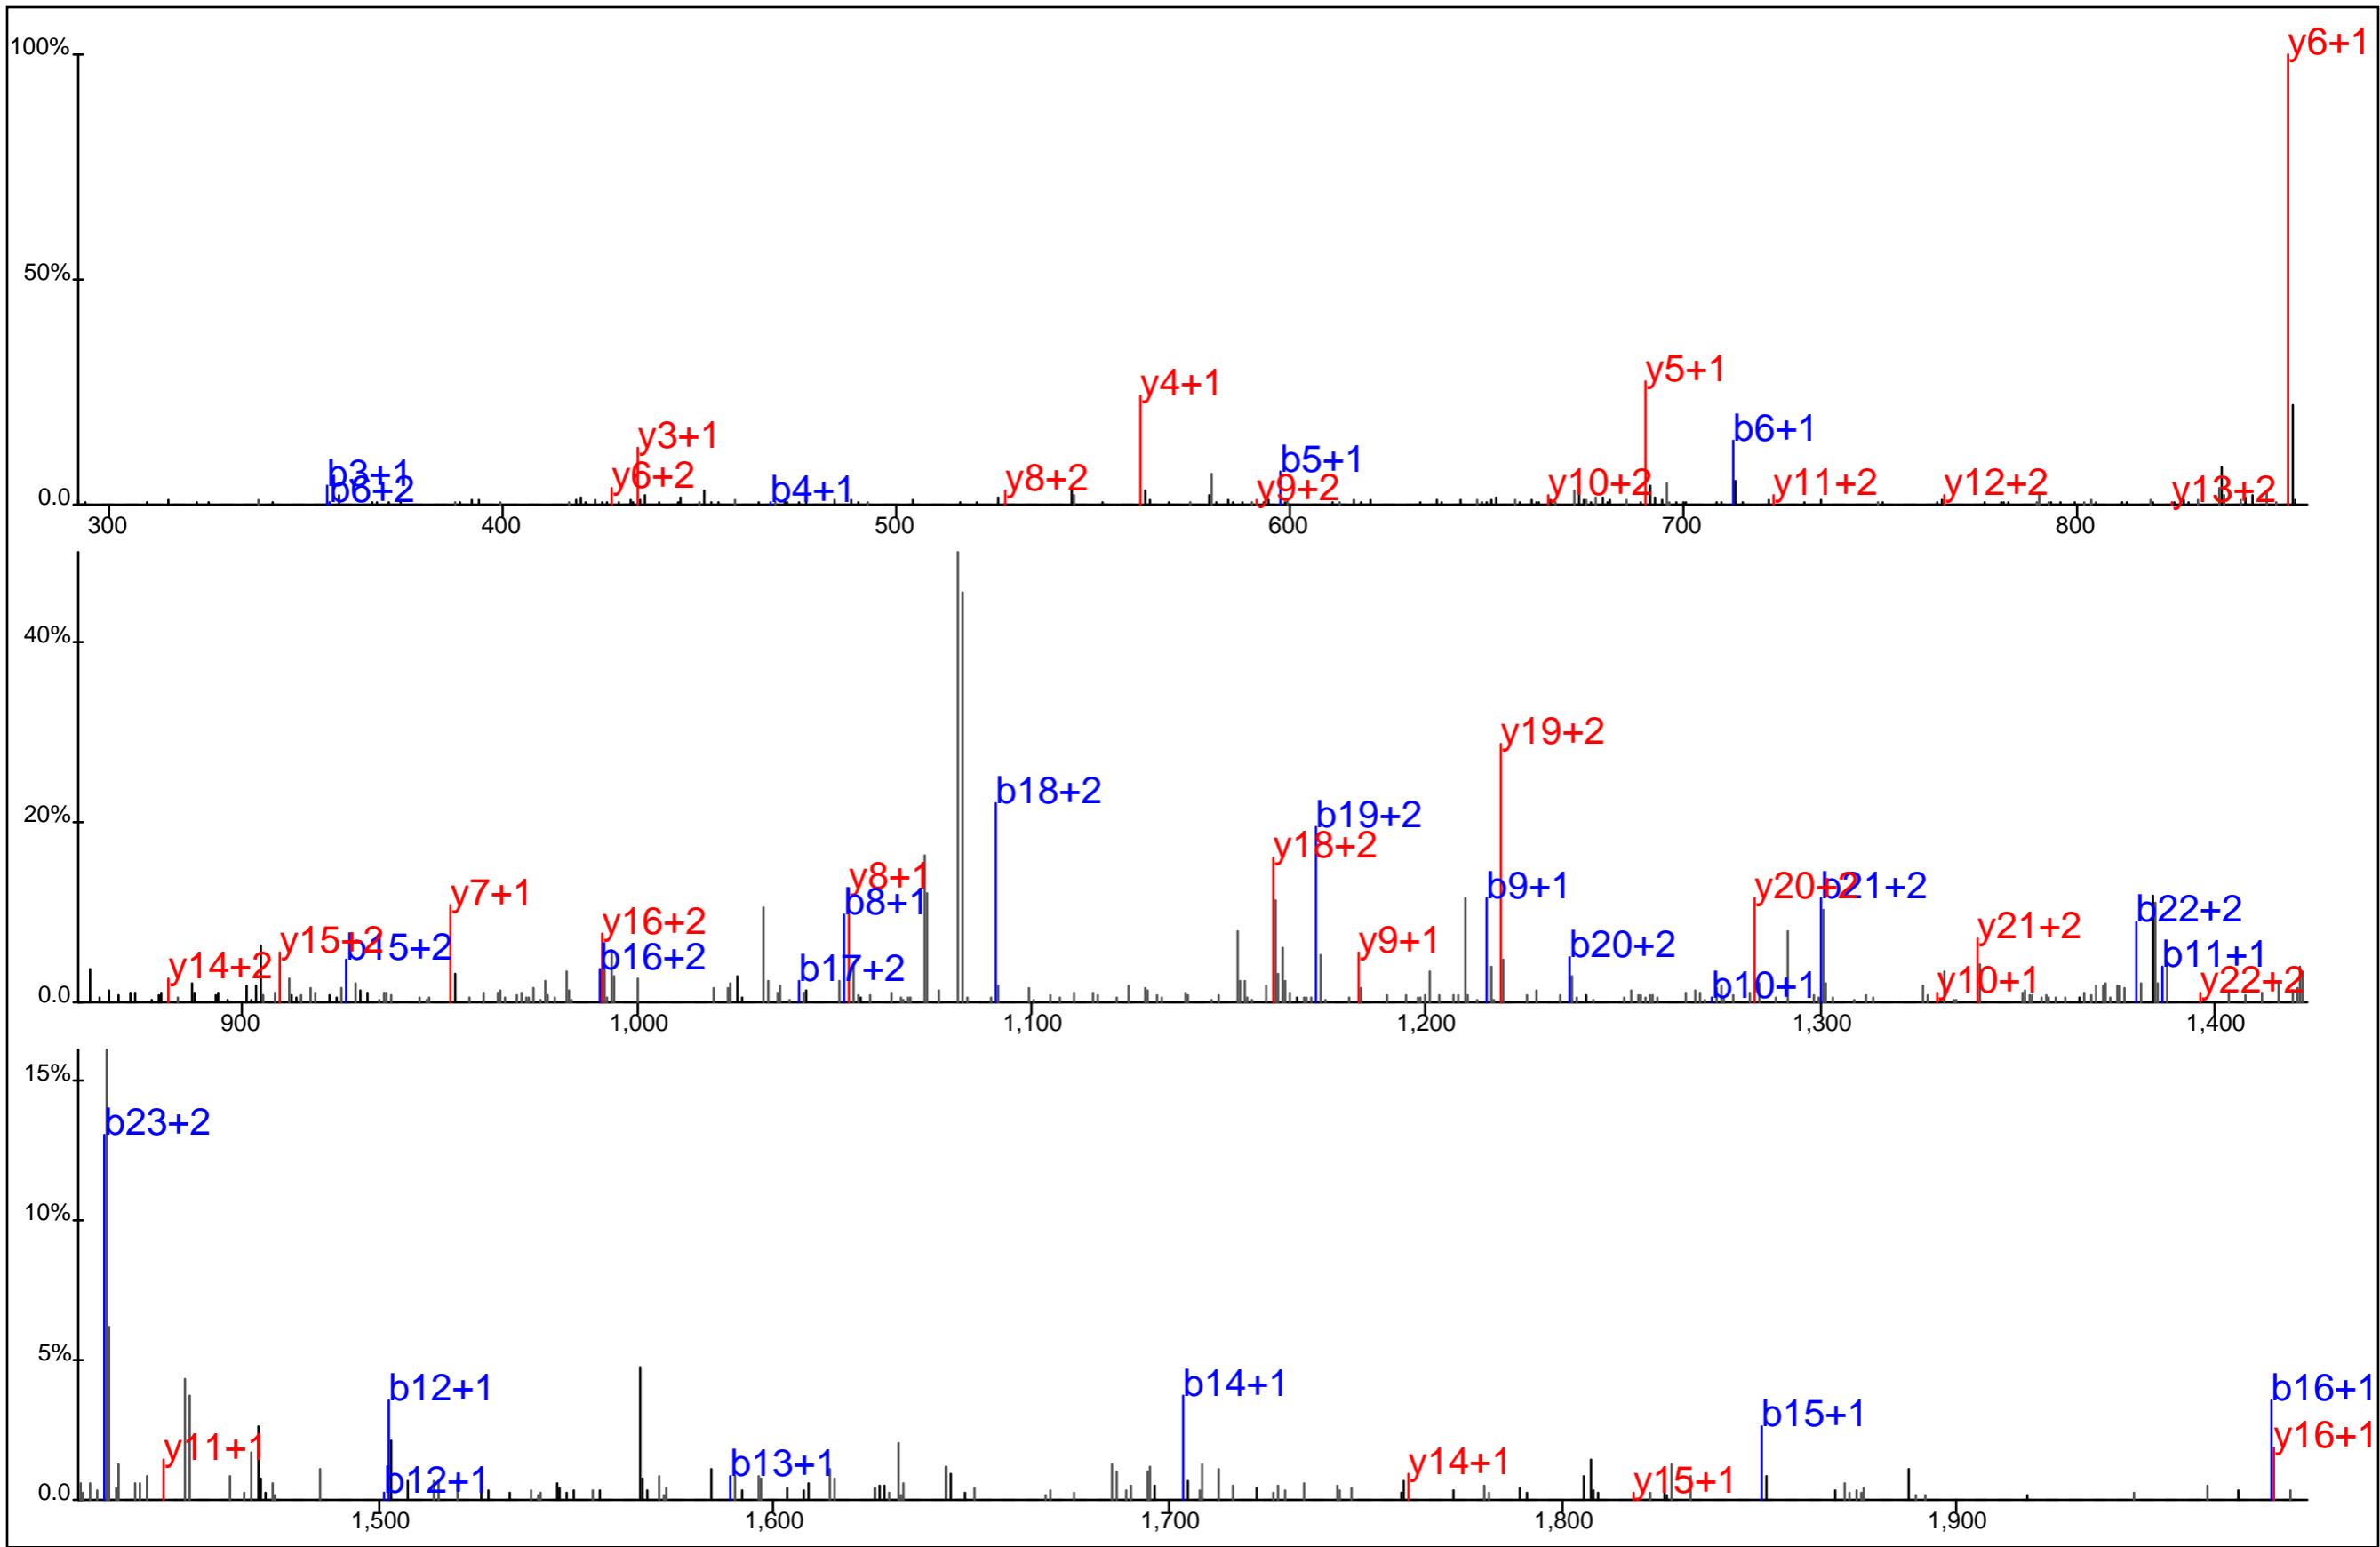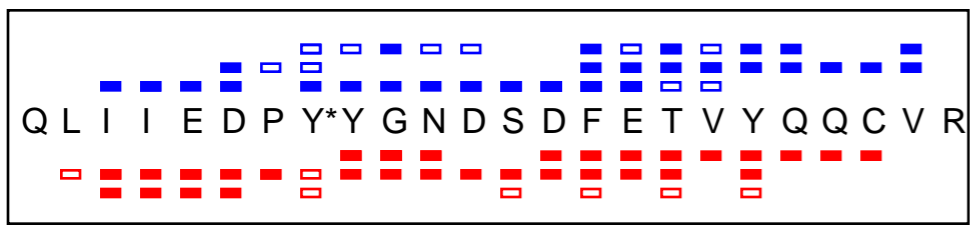

Protein Name: Acid phosphatase 1  
 gi Accession: 4757714  
 Precursor Mass: 1,011.4408+3  
 Delta Mass: 1.938 ppm  
 XCorr: 61.27

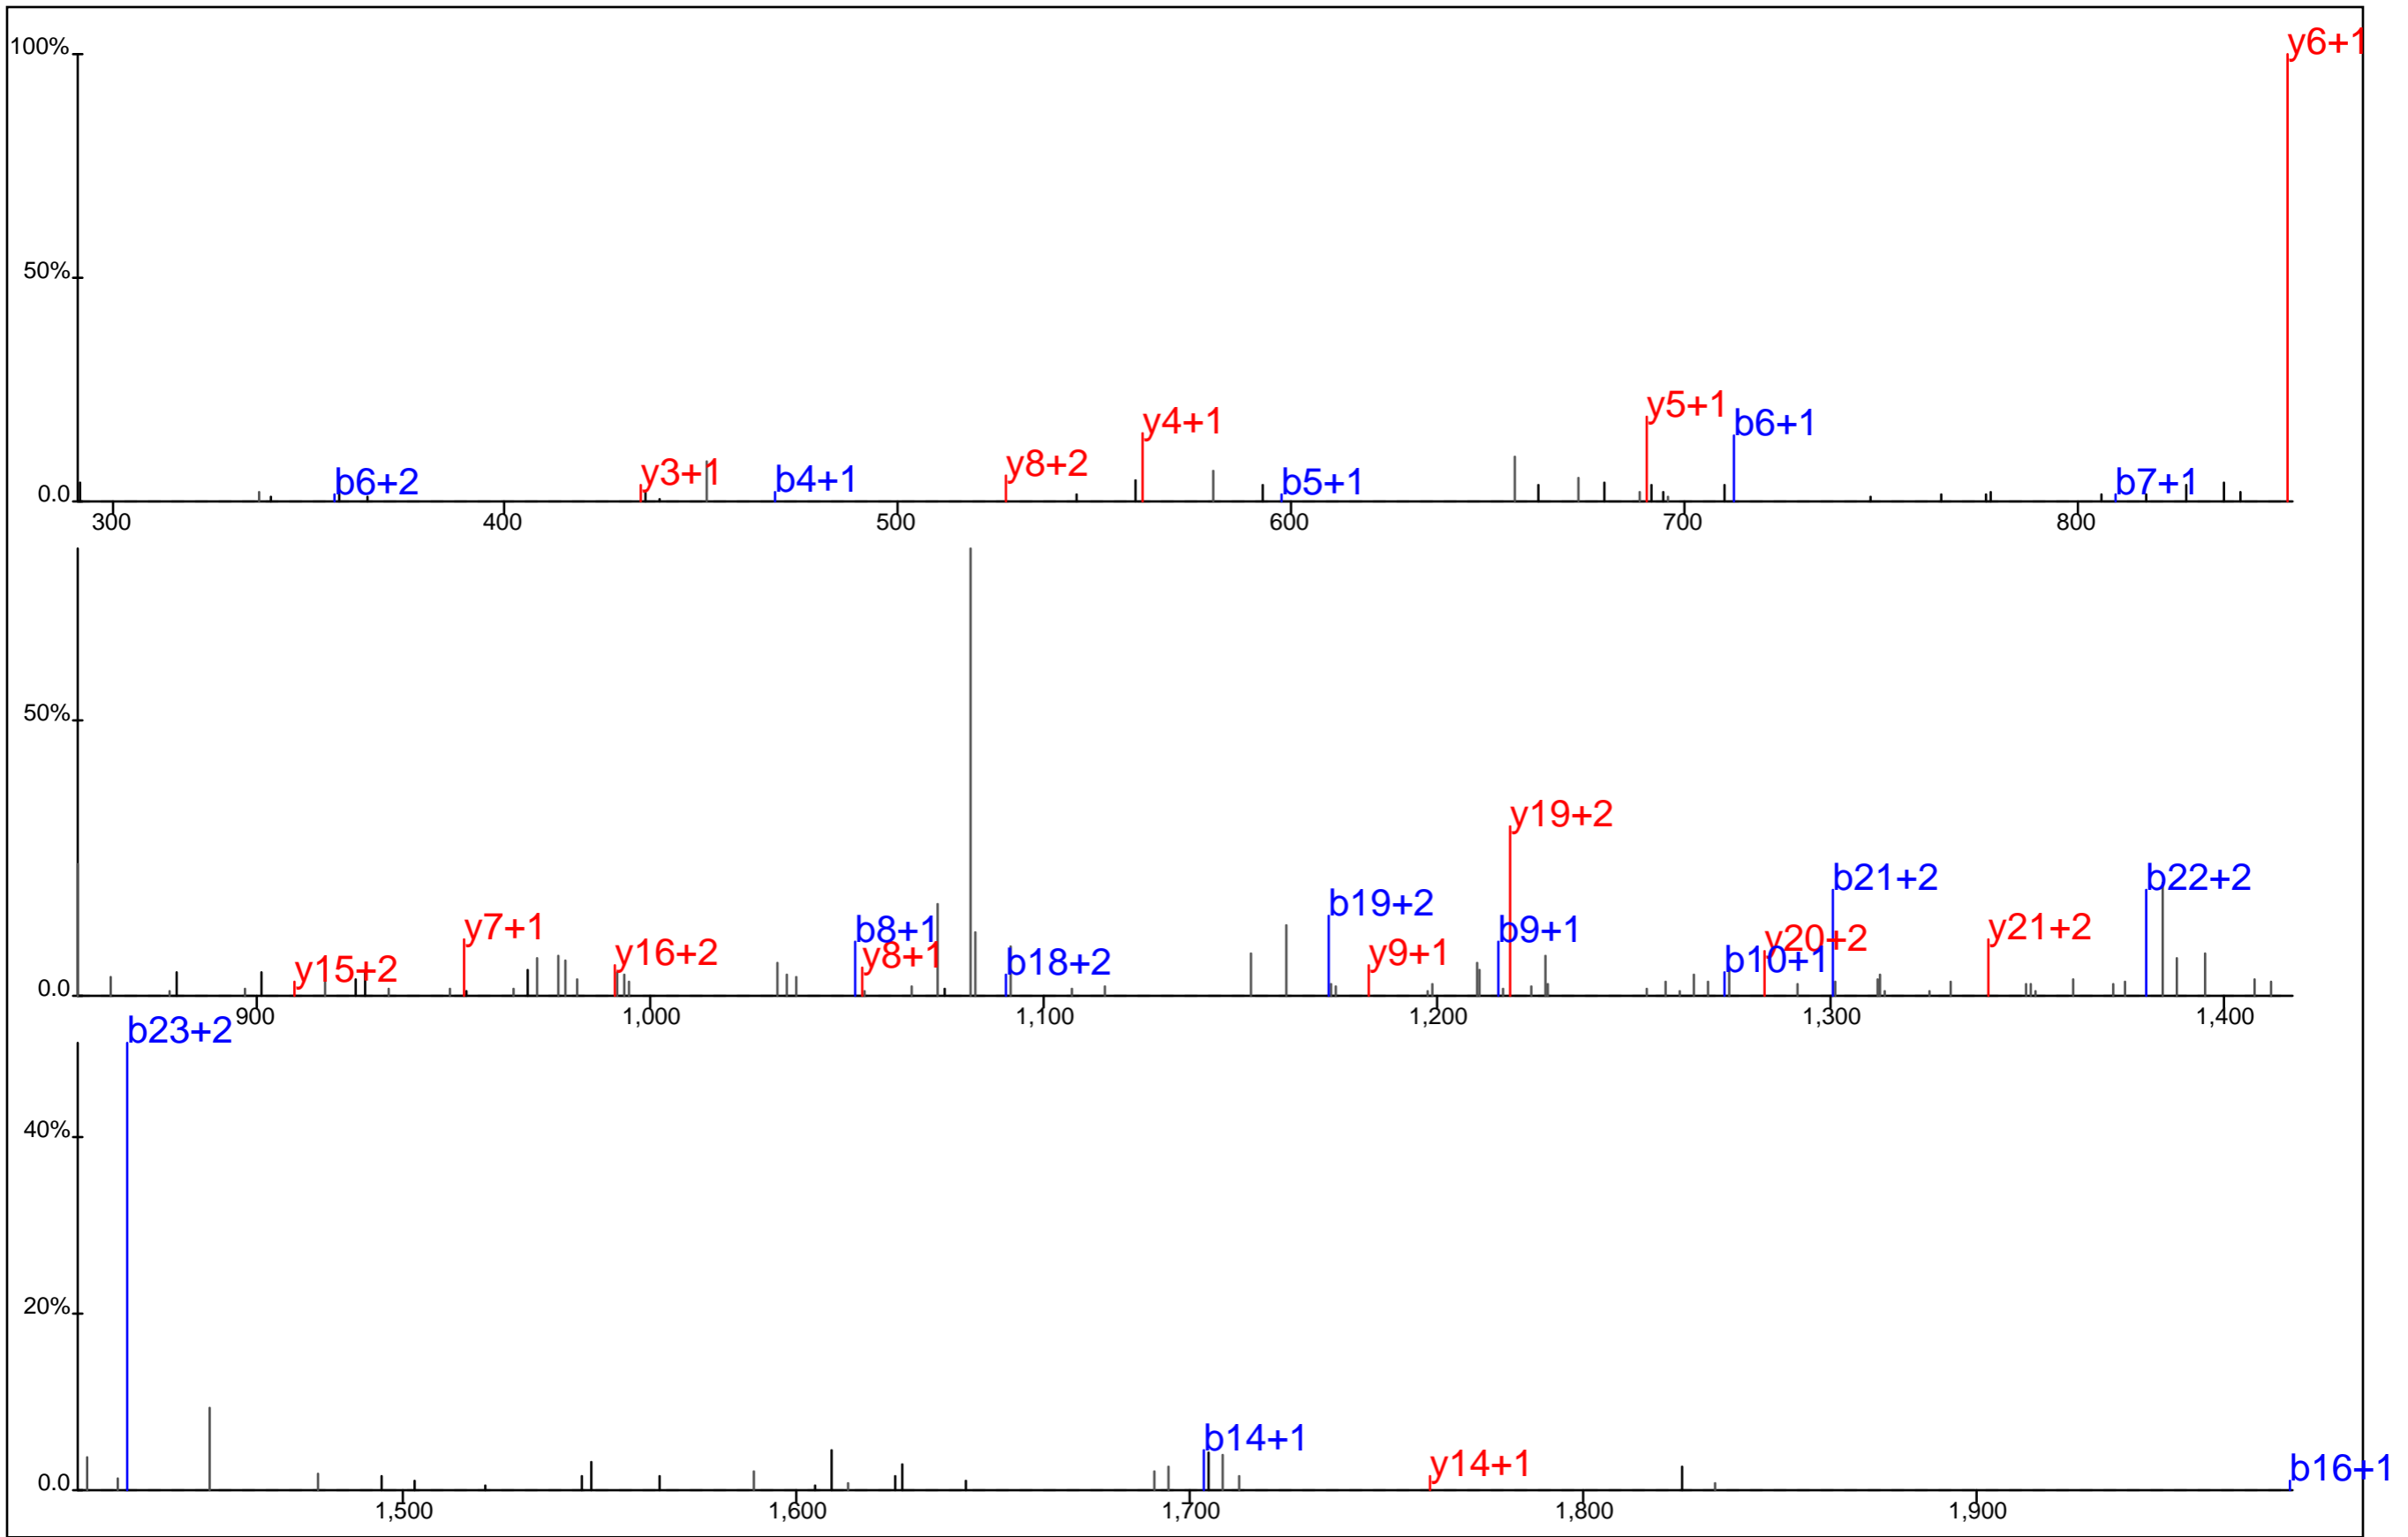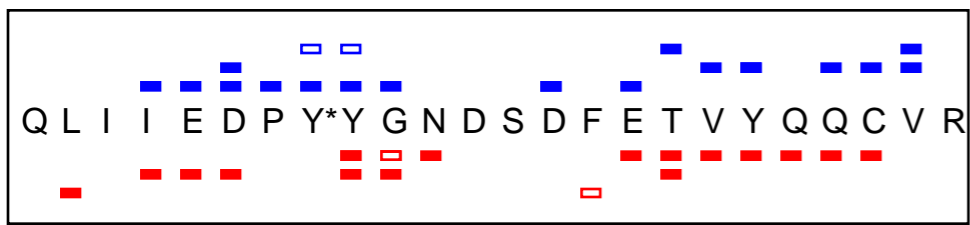

Protein Name: Acid phosphatase 1  
 gi Accession: 4757714  
 Precursor Mass: 1,011.4439+3  
 Delta Mass: 5.018 ppm  
 XCorr: 36.5

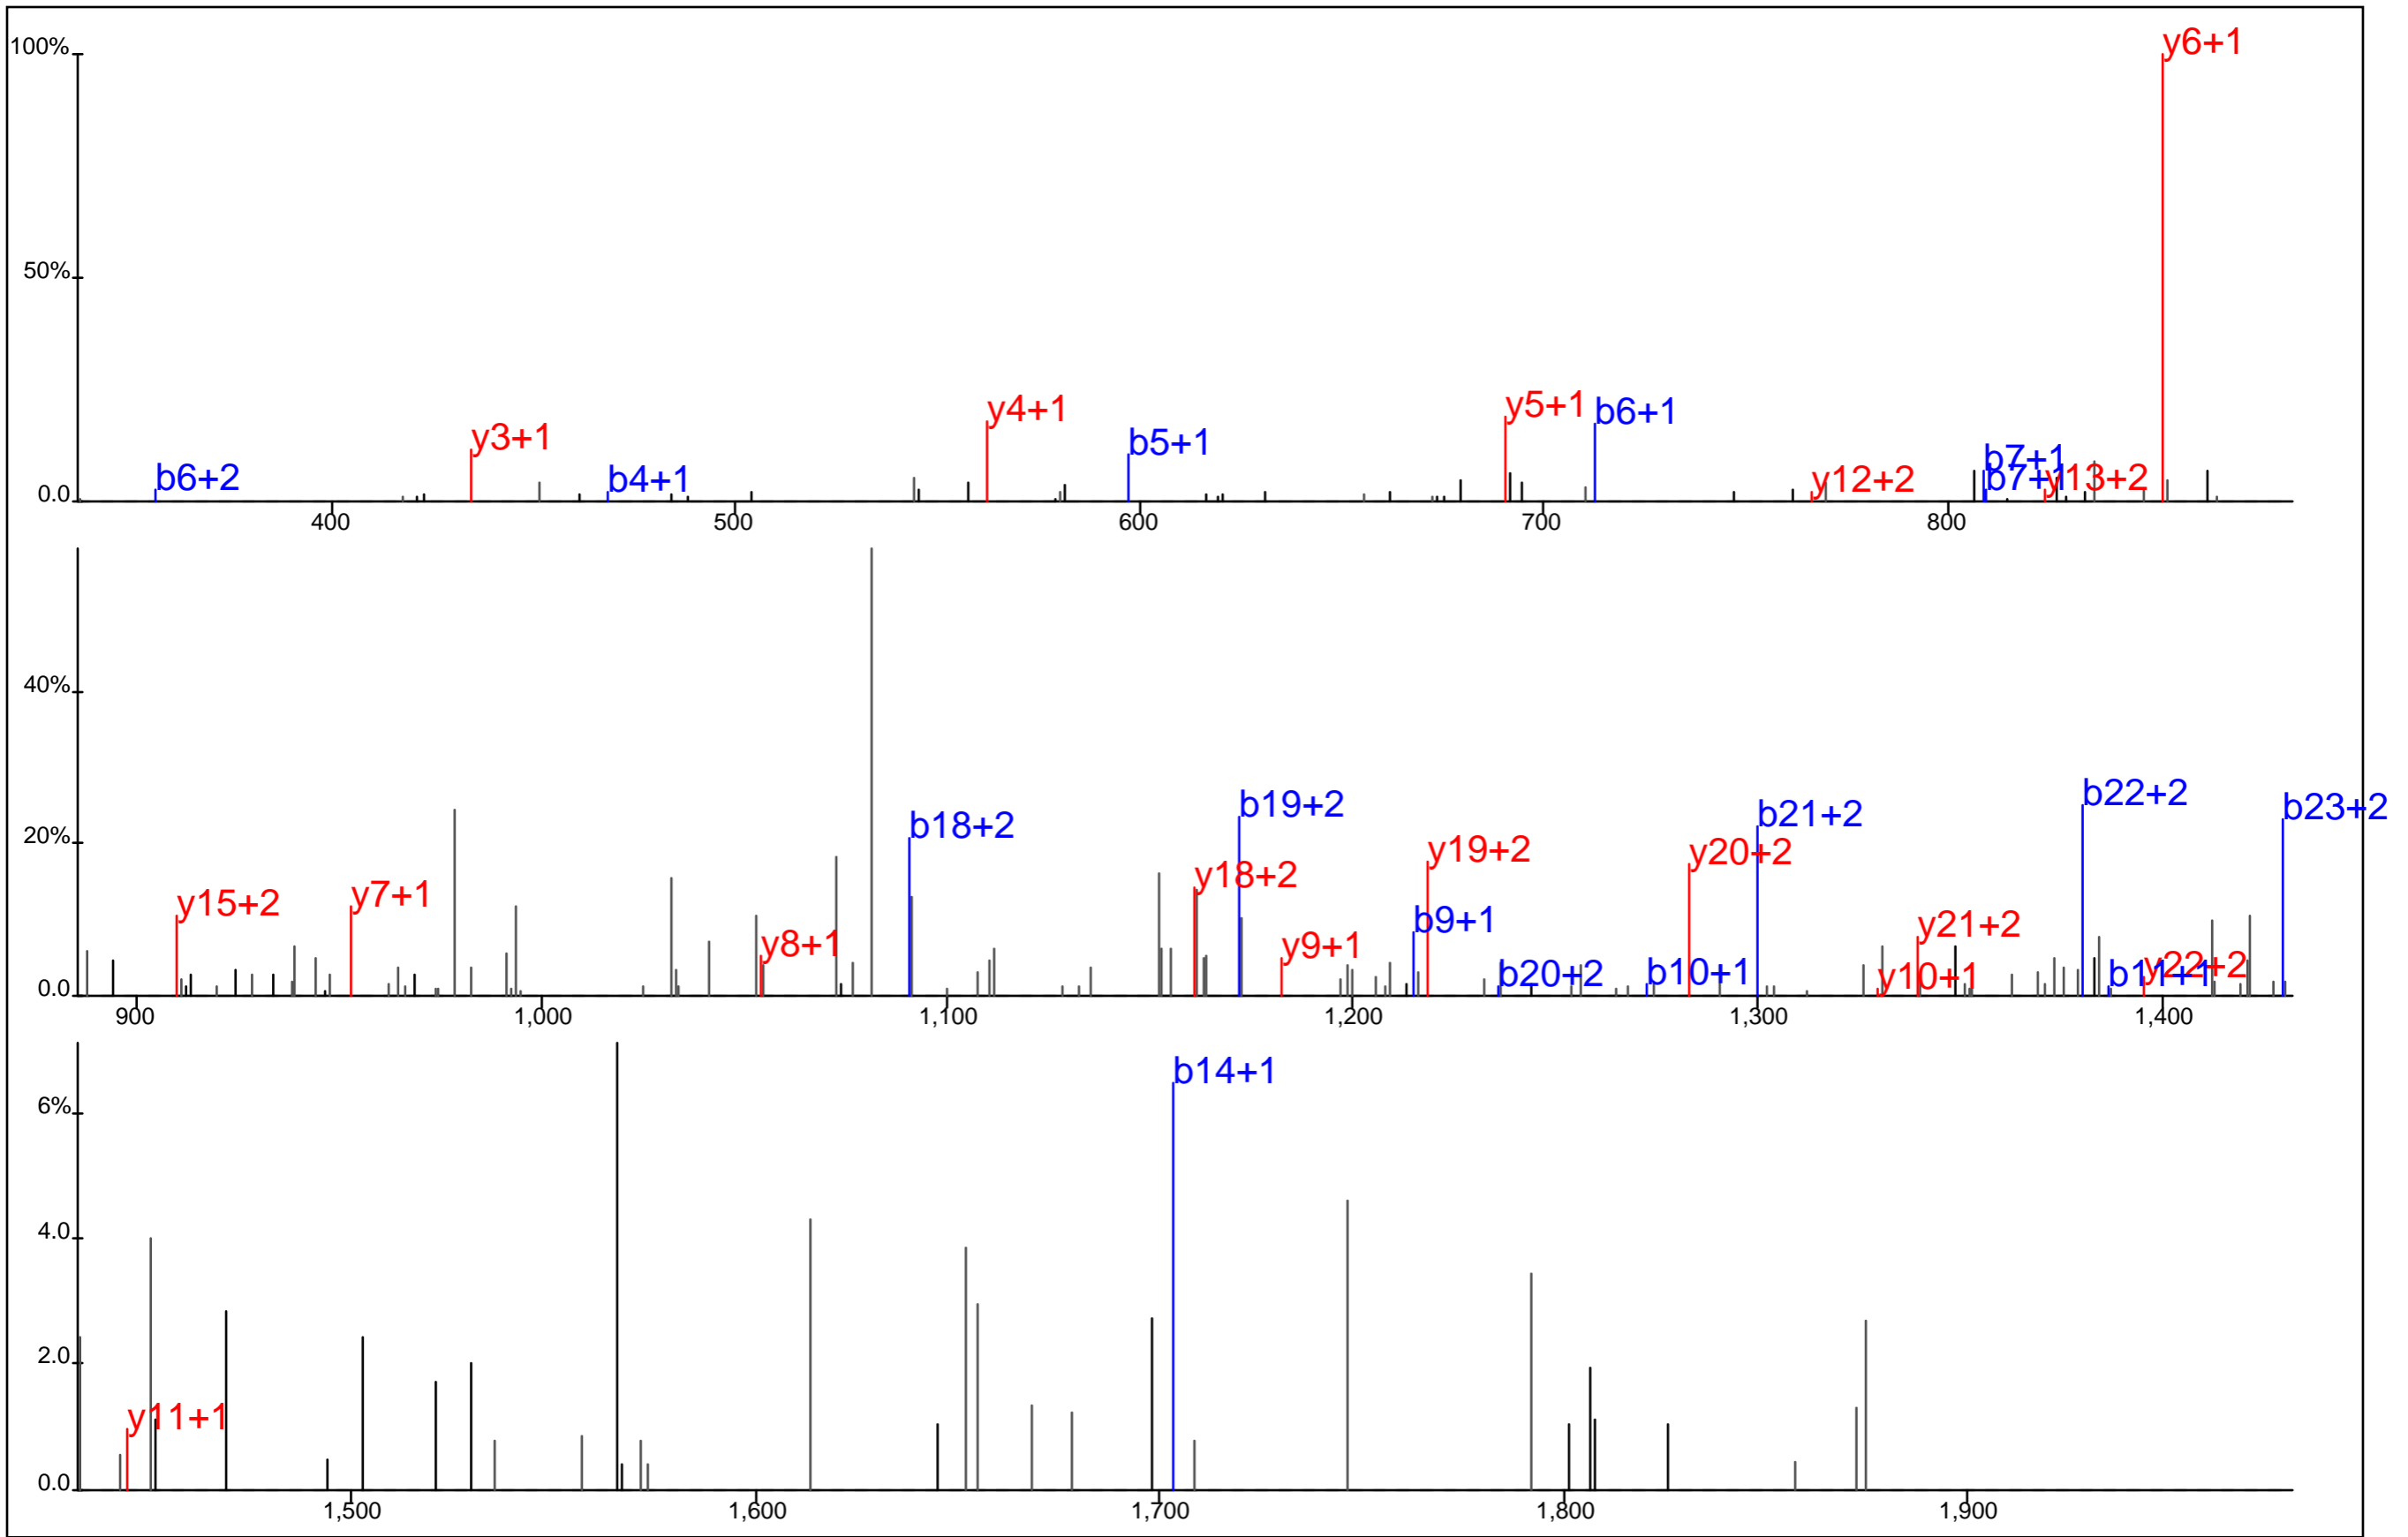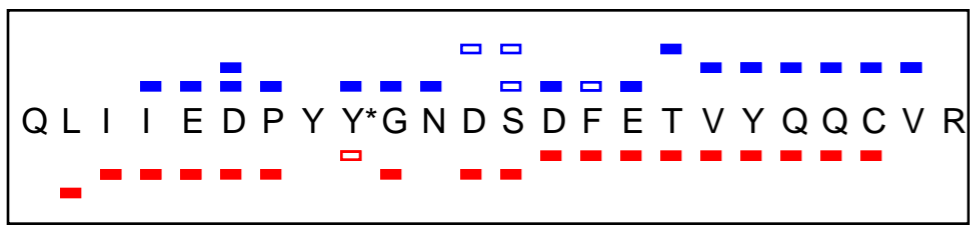

Protein Name: Acid phosphatase 1  
 gi Accession: 4757714  
 Precursor Mass: 1,011.4426+3  
 Delta Mass: 3.752 ppm  
 XCorr: 43.2

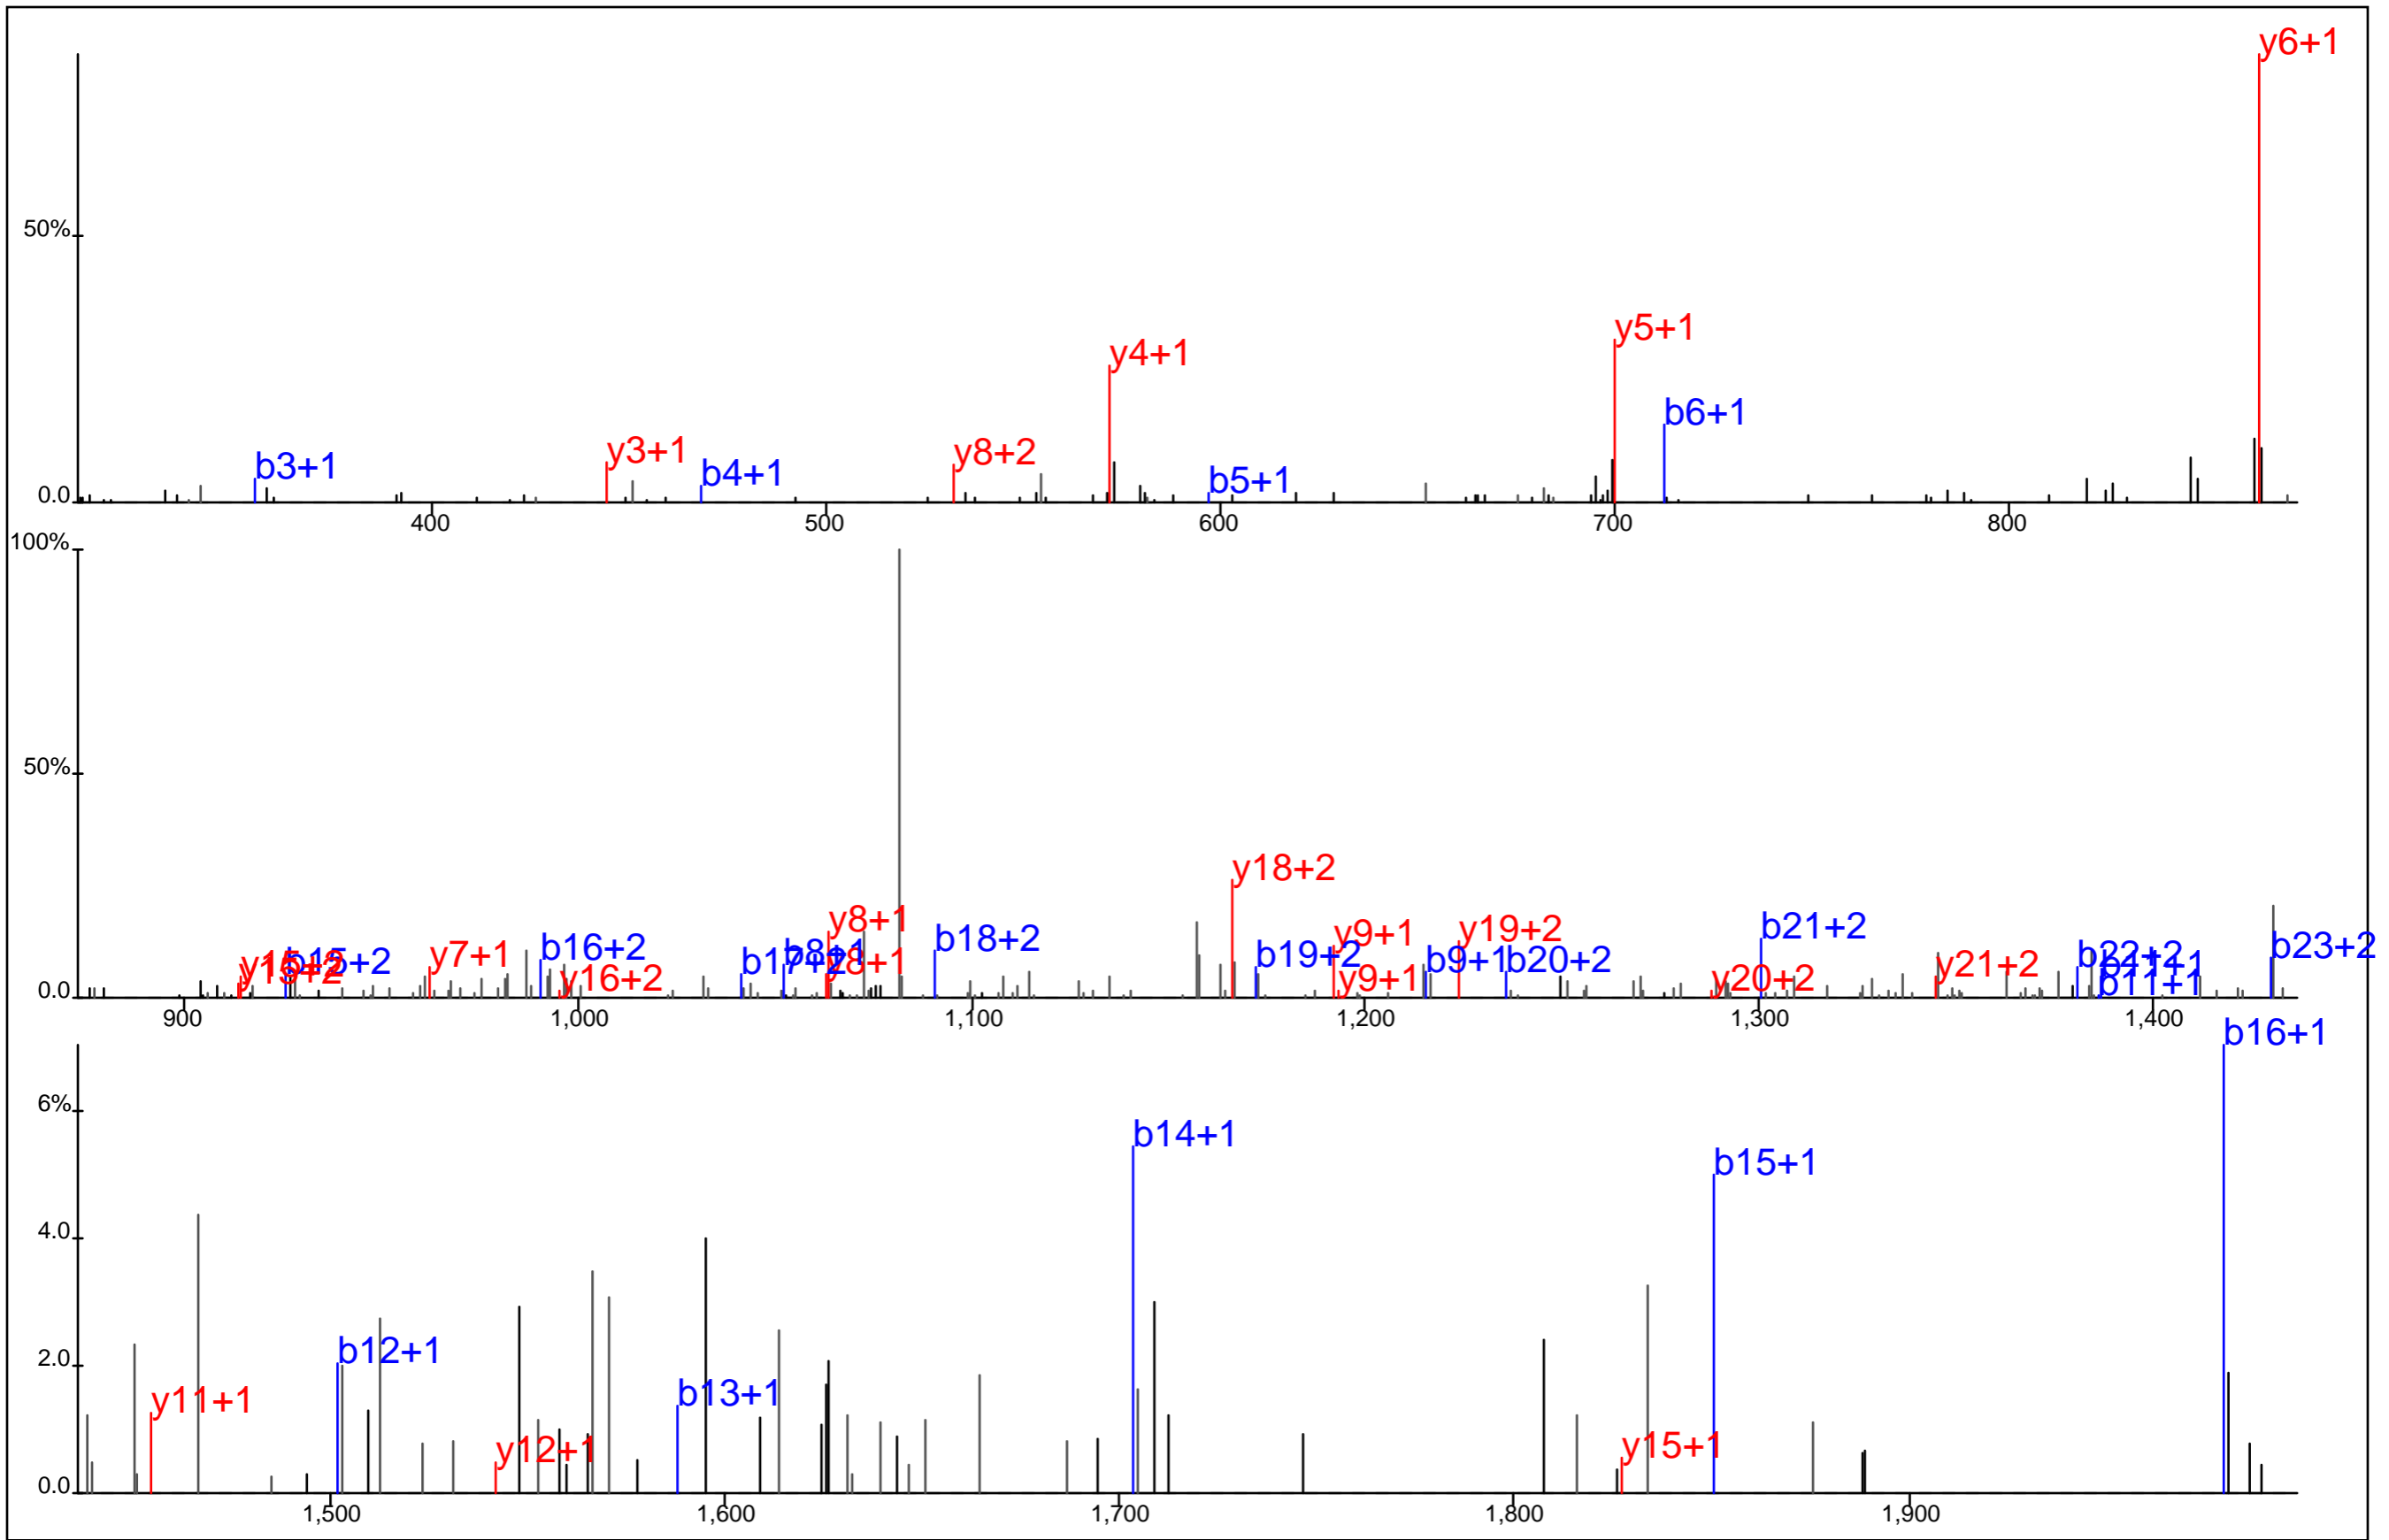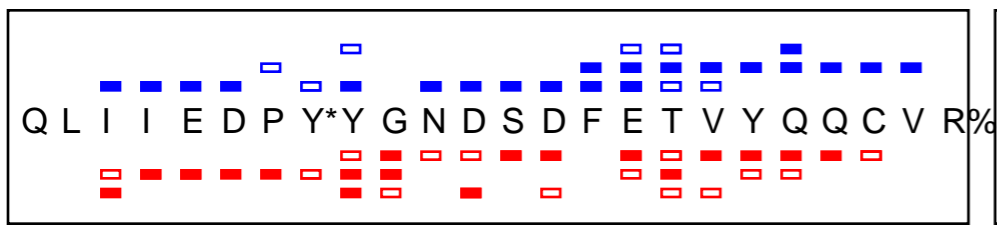

Protein Name: Acid phosphatase 1  
 gi Accession: 4757714  
 Precursor Mass: 1,014.7791+3  
 Delta Mass: 4.069 ppm  
 XCorr: 45.41

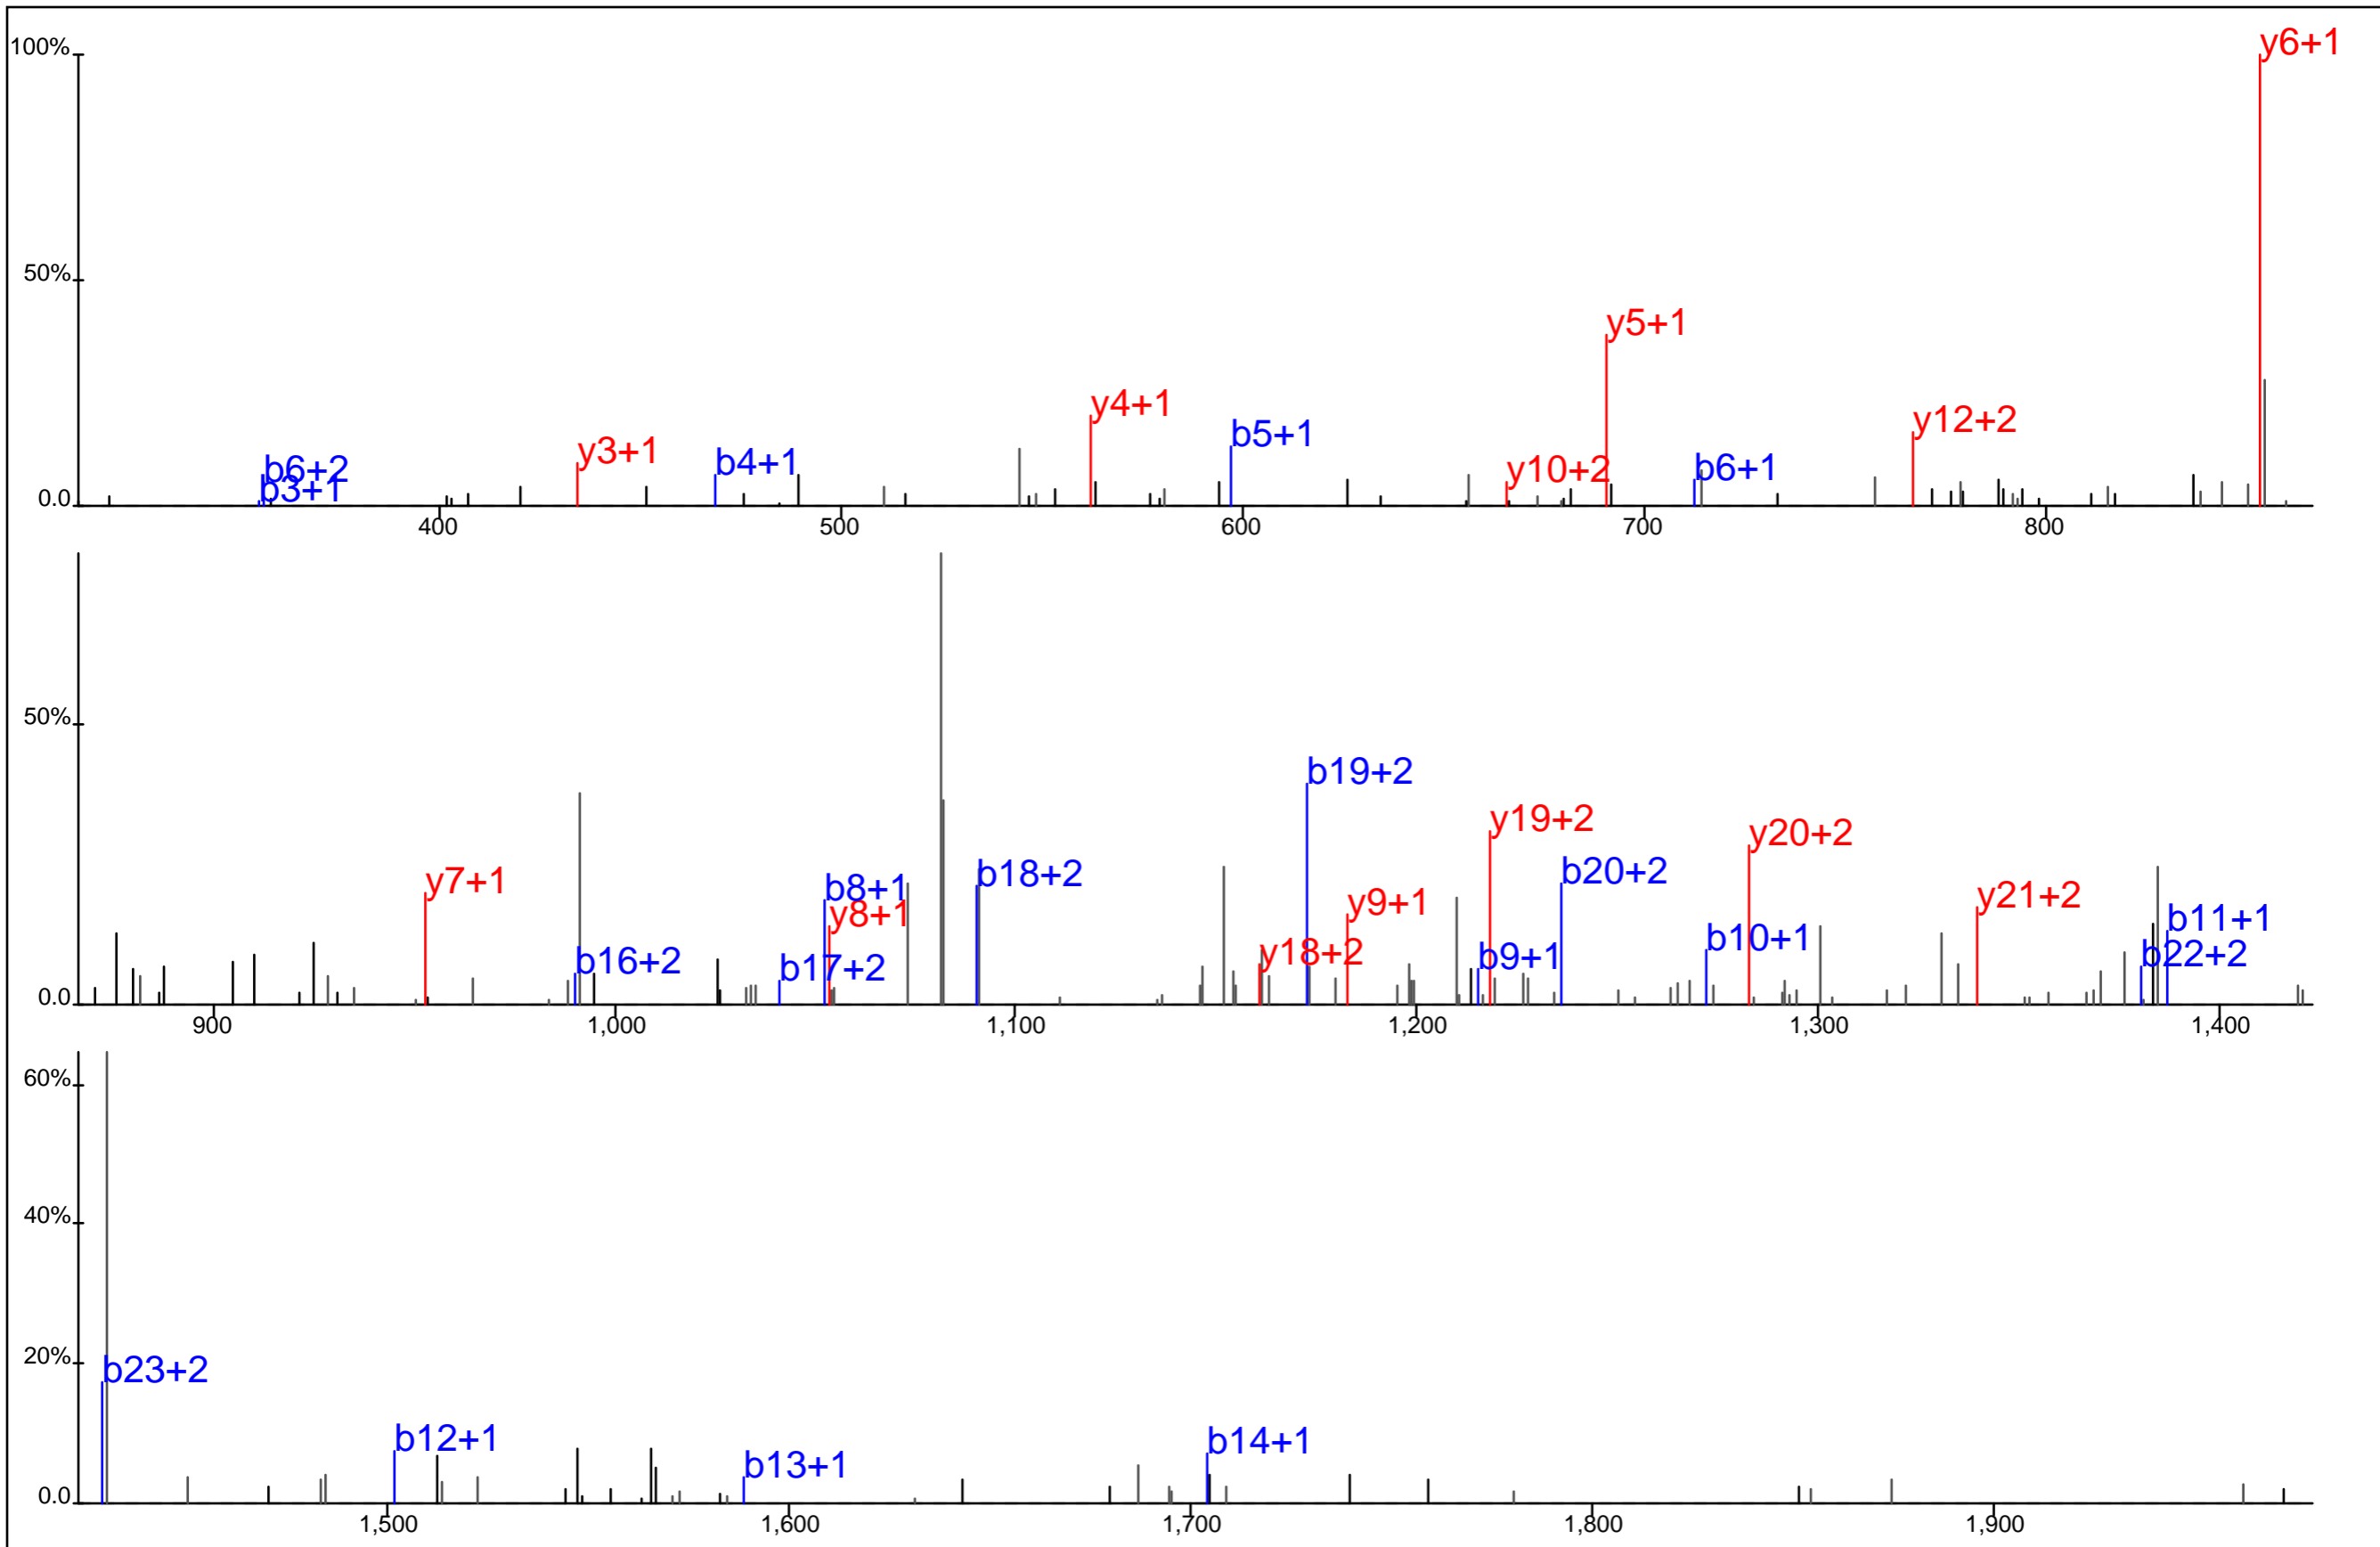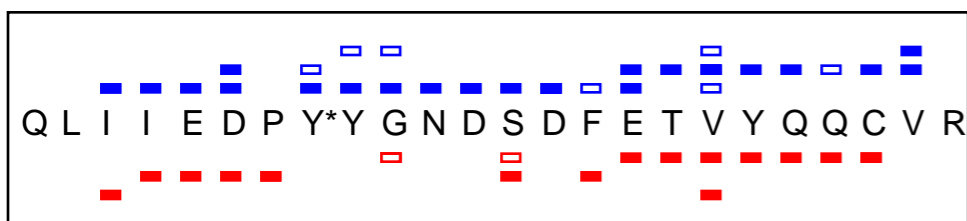

Protein Name: Acid phosphatase 1  
 gi Accession: 4757714  
 Precursor Mass: 1,011.4423+3  
 Delta Mass: 3.449 ppm  
 XCorr: 49.01

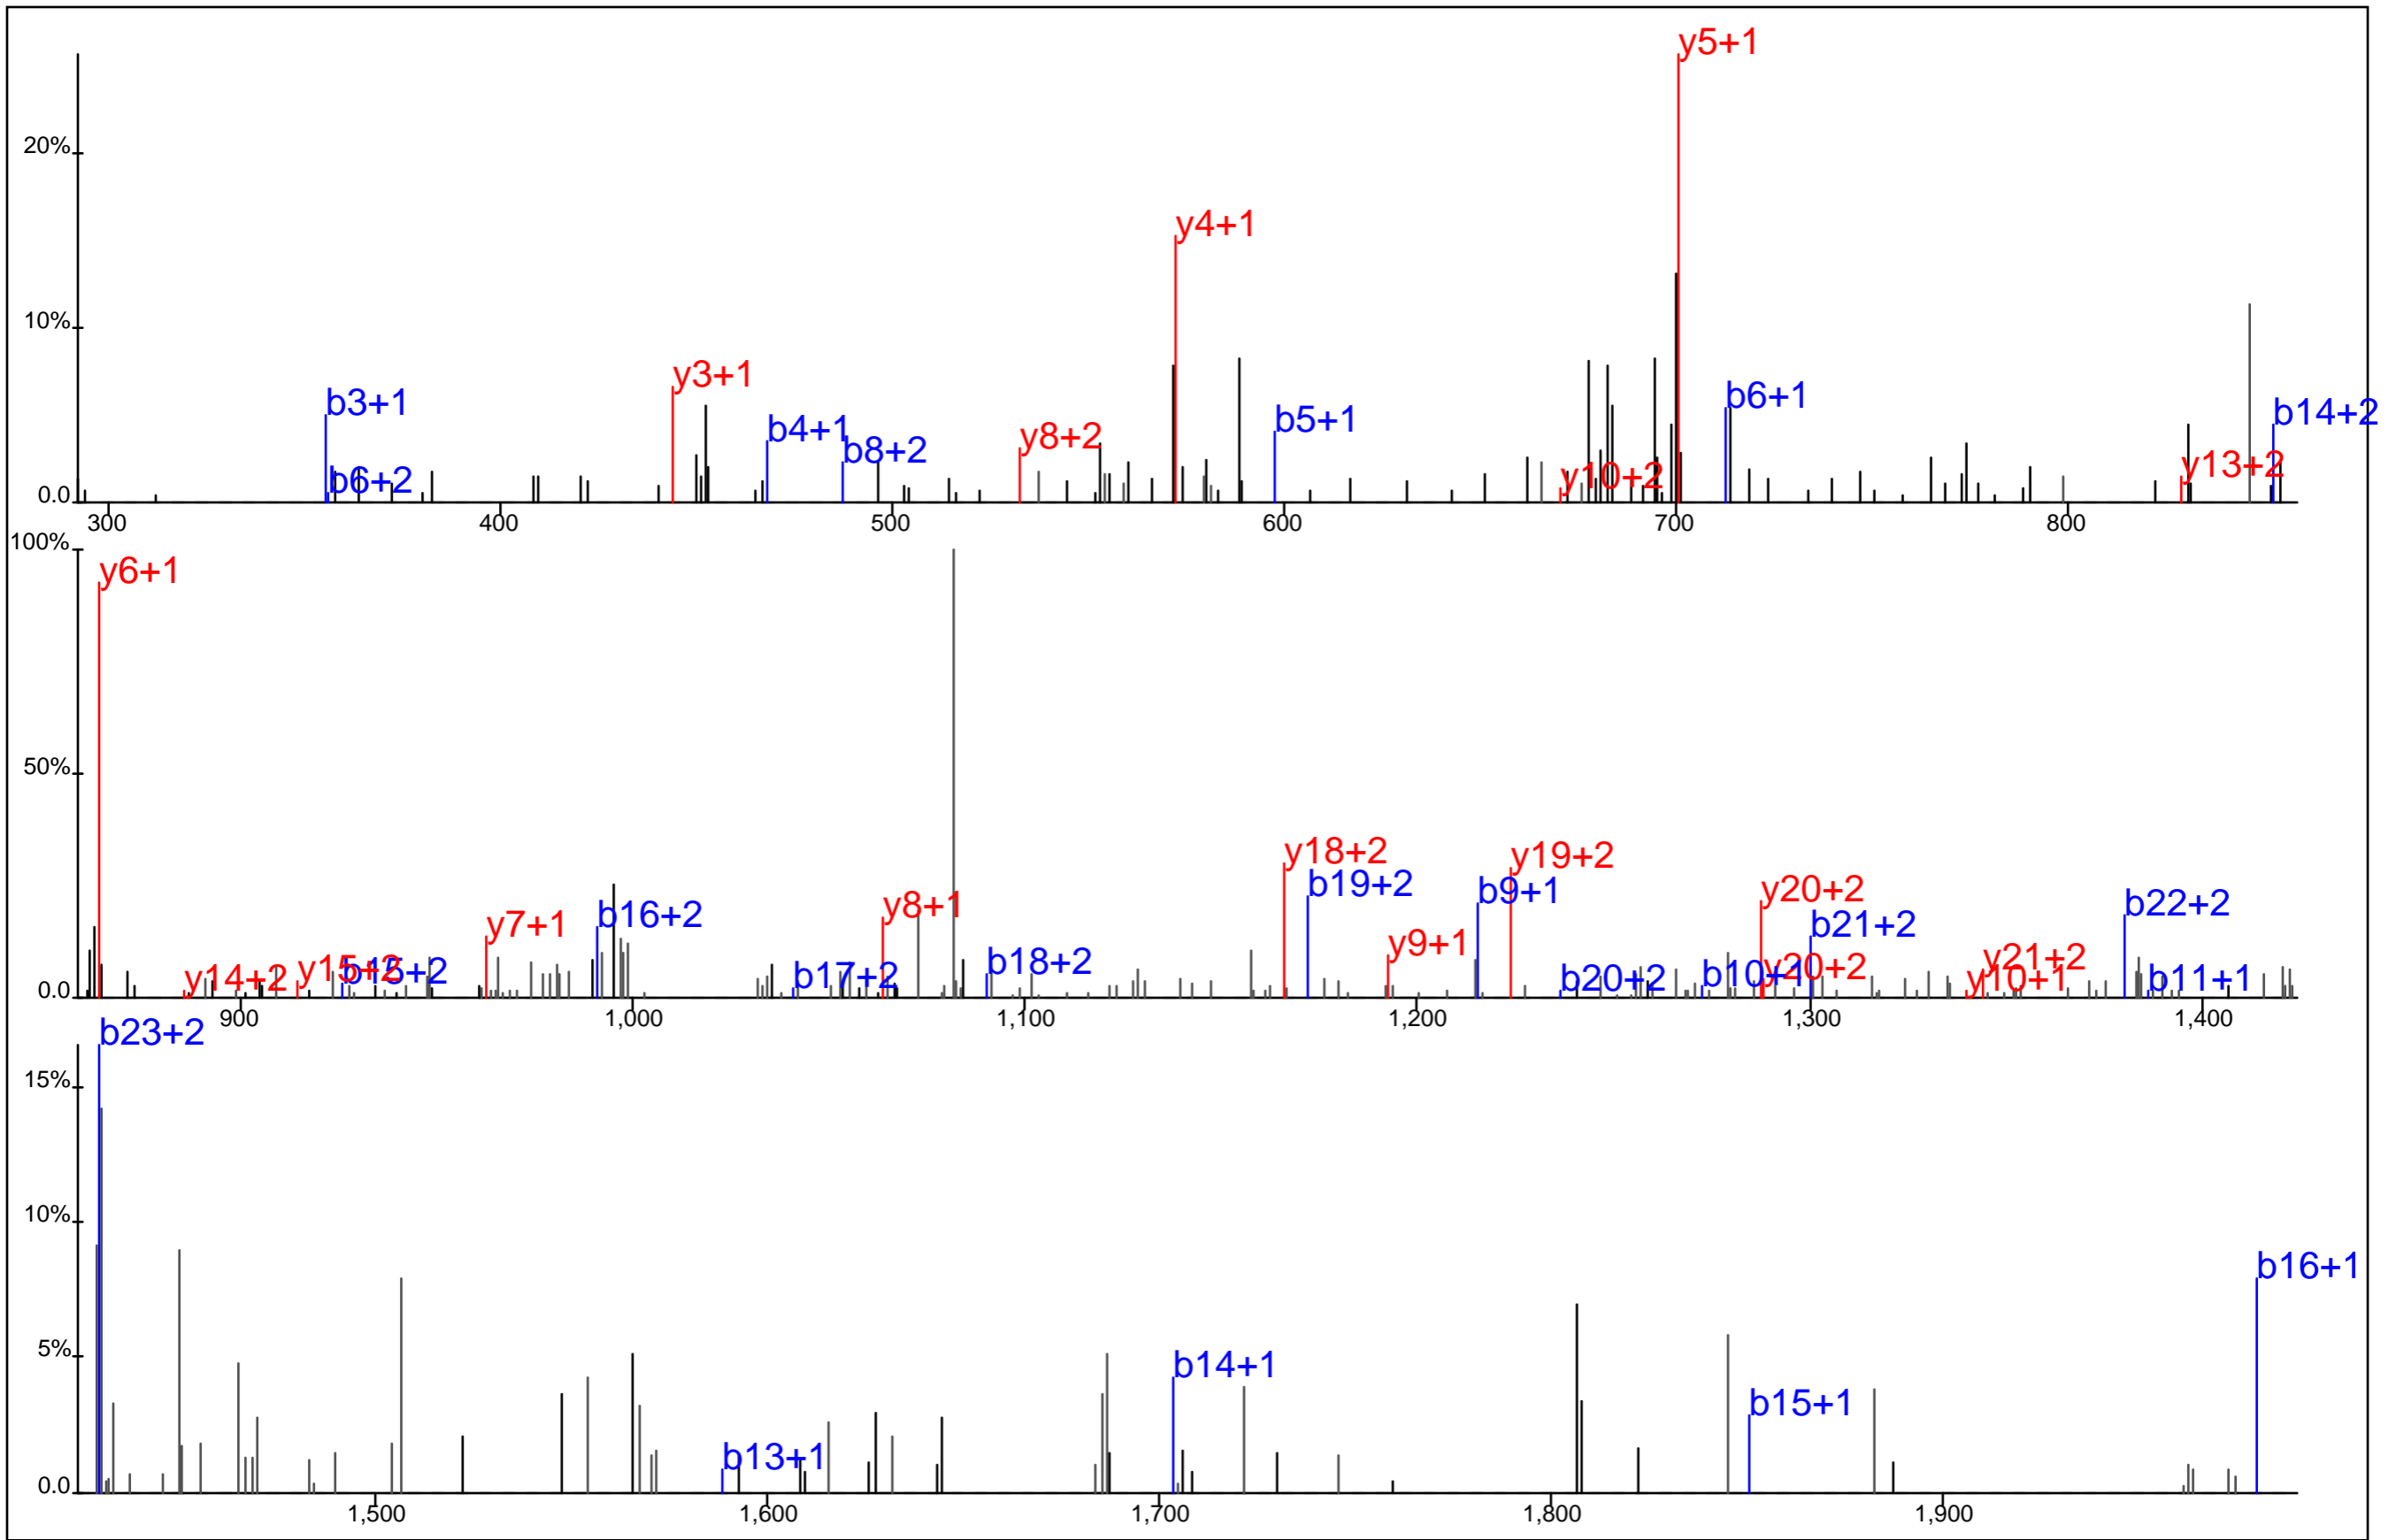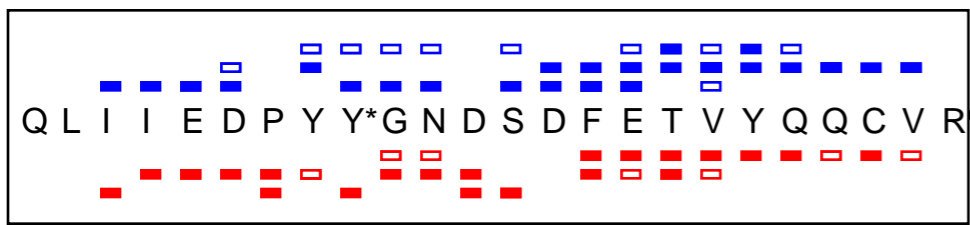

Protein Name: Acid phosphatase 1  
 gi Accession: 4757714  
 Precursor Mass: 1,014.7775+3  
 Delta Mass: 2.566 ppm  
 XCorr: 34.77

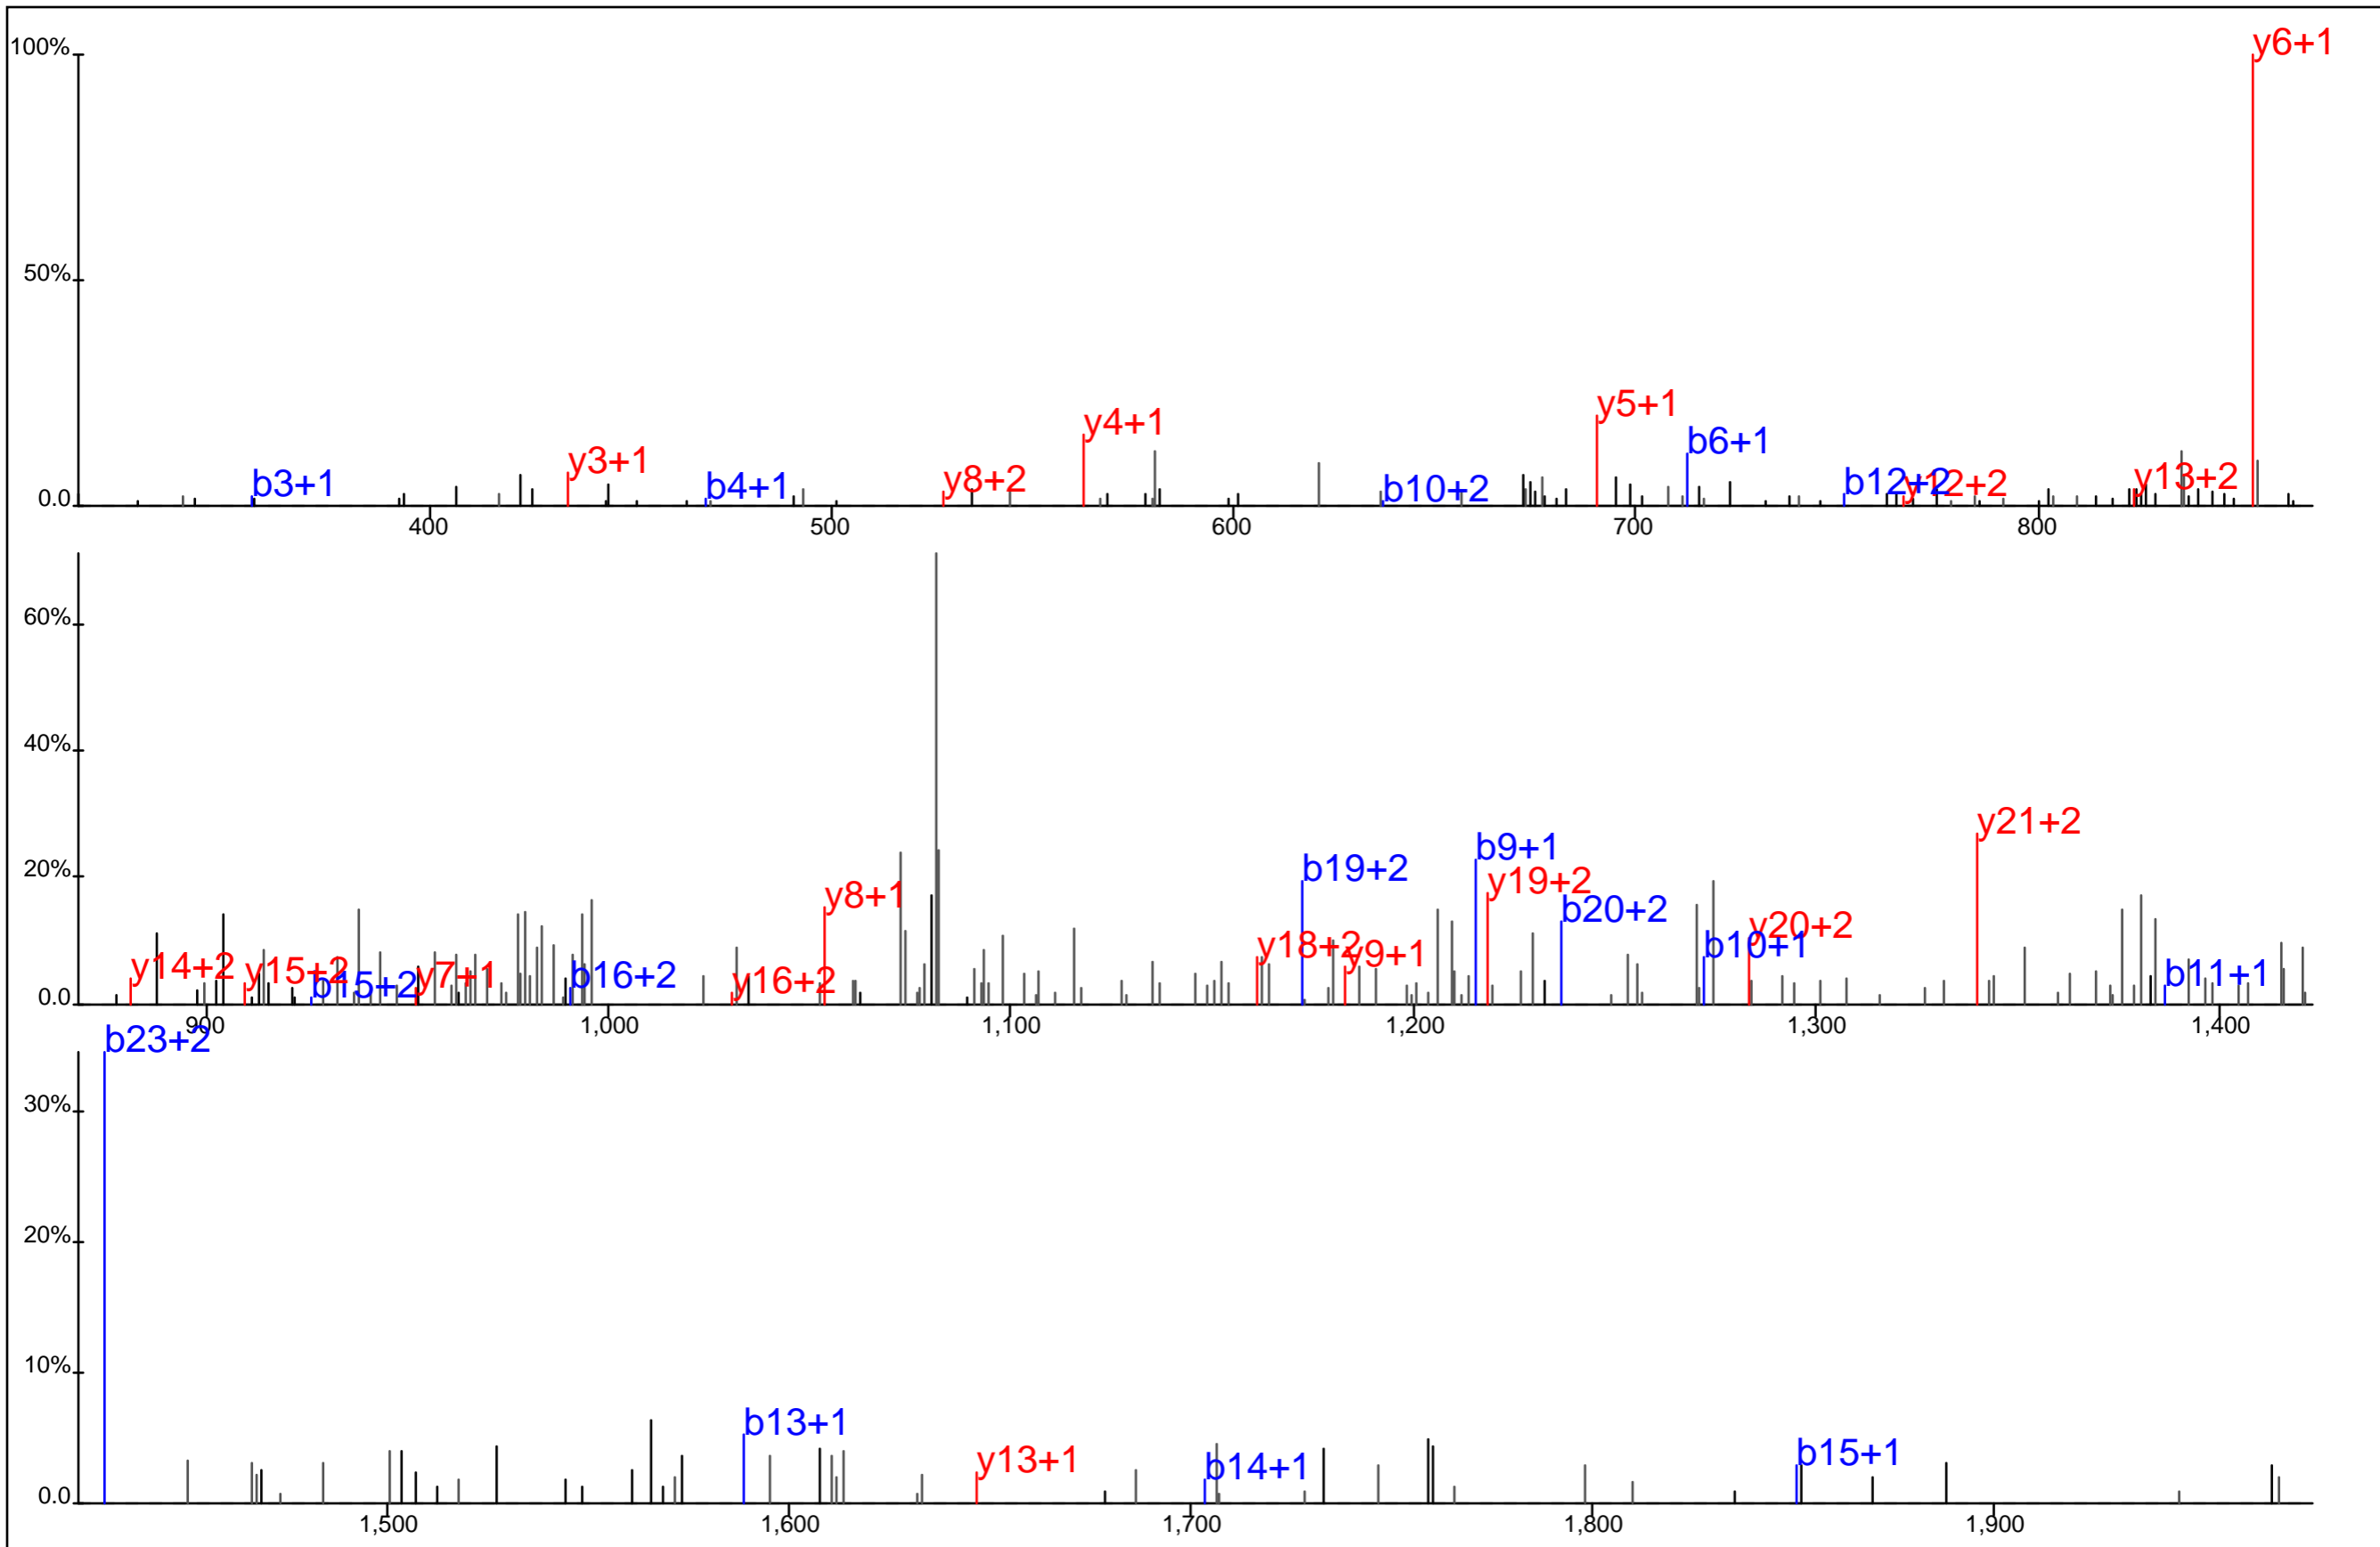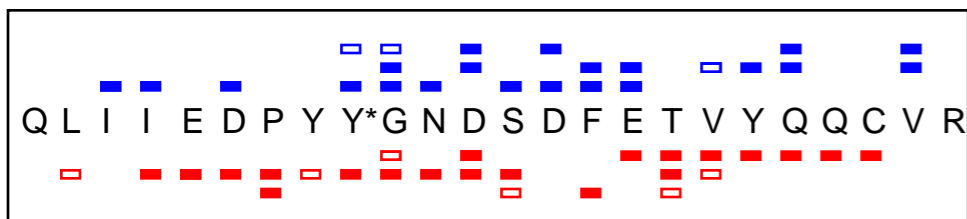

Protein Name: Acid phosphatase 1  
 gi Accession: 4757714  
 Precursor Mass: 1,011.4414+3  
 Delta Mass: 2.545 ppm  
 XCorr: 16.4



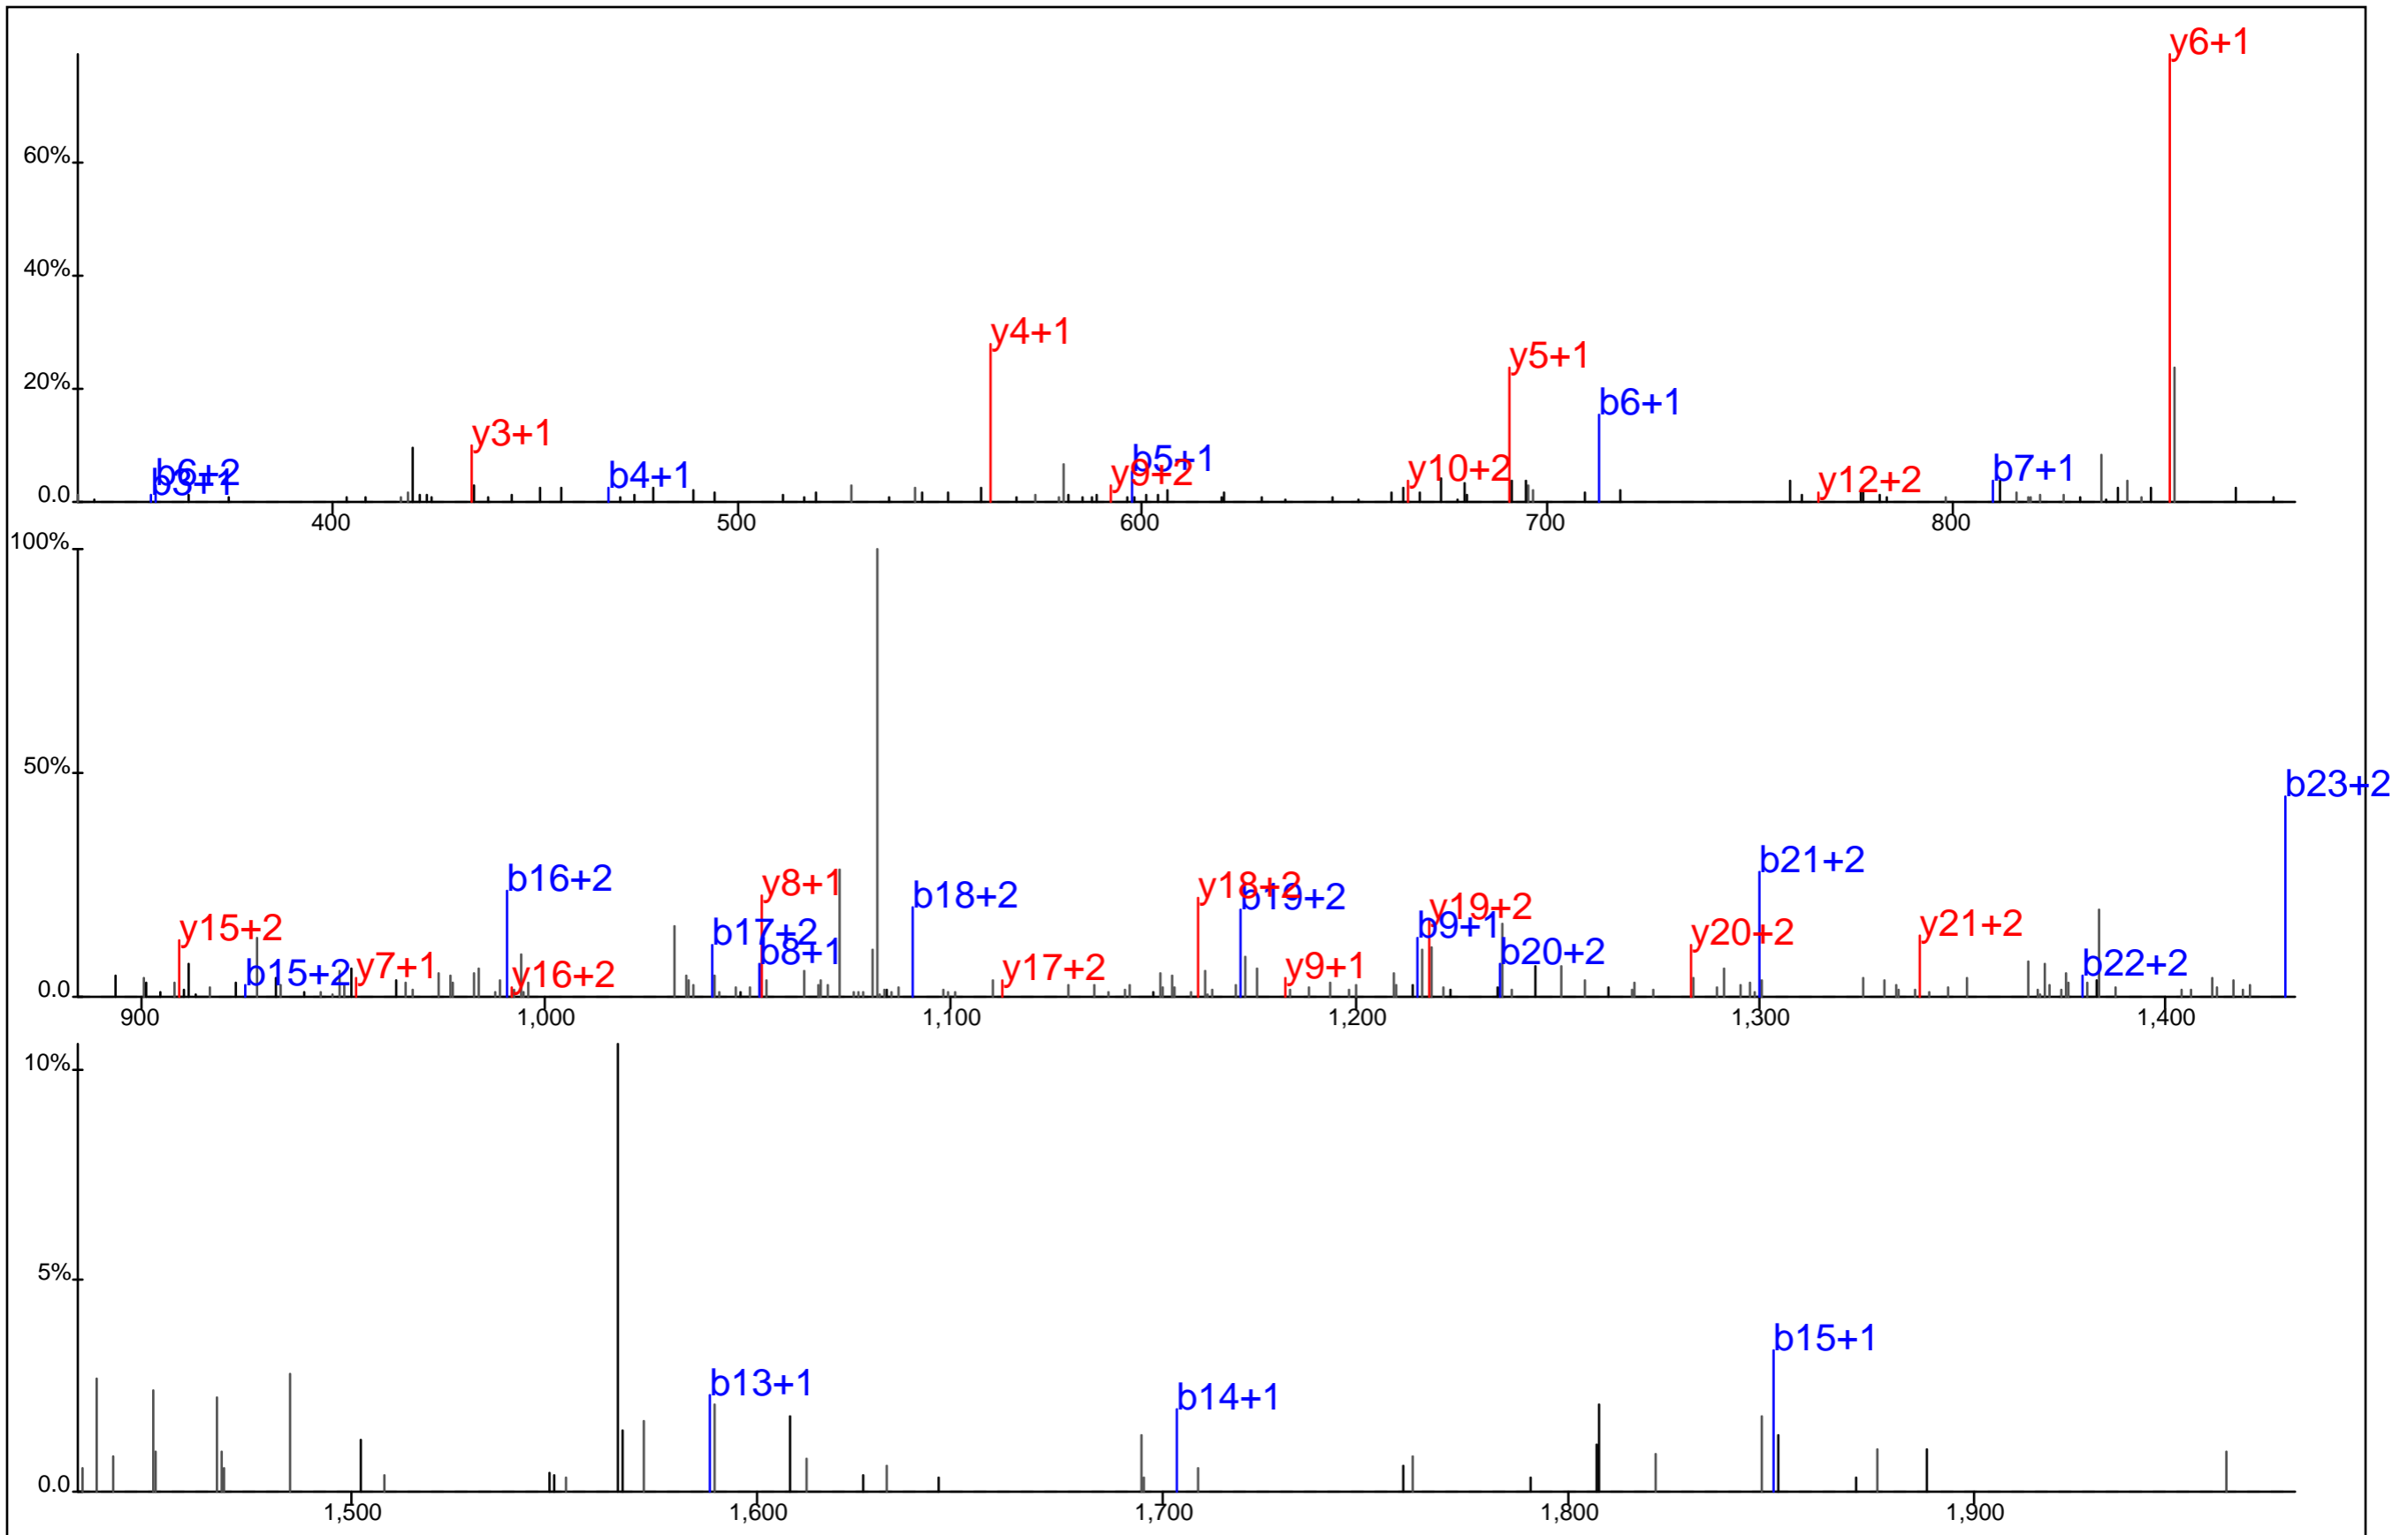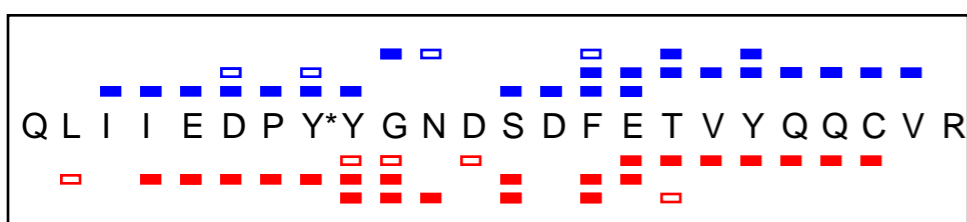

Protein Name: Acid phosphatase 1  
 gi Accession: 4757714  
 Precursor Mass: 1,011.4465+3  
 Delta Mass: 7.617 ppm  
 XCorr: 45.31

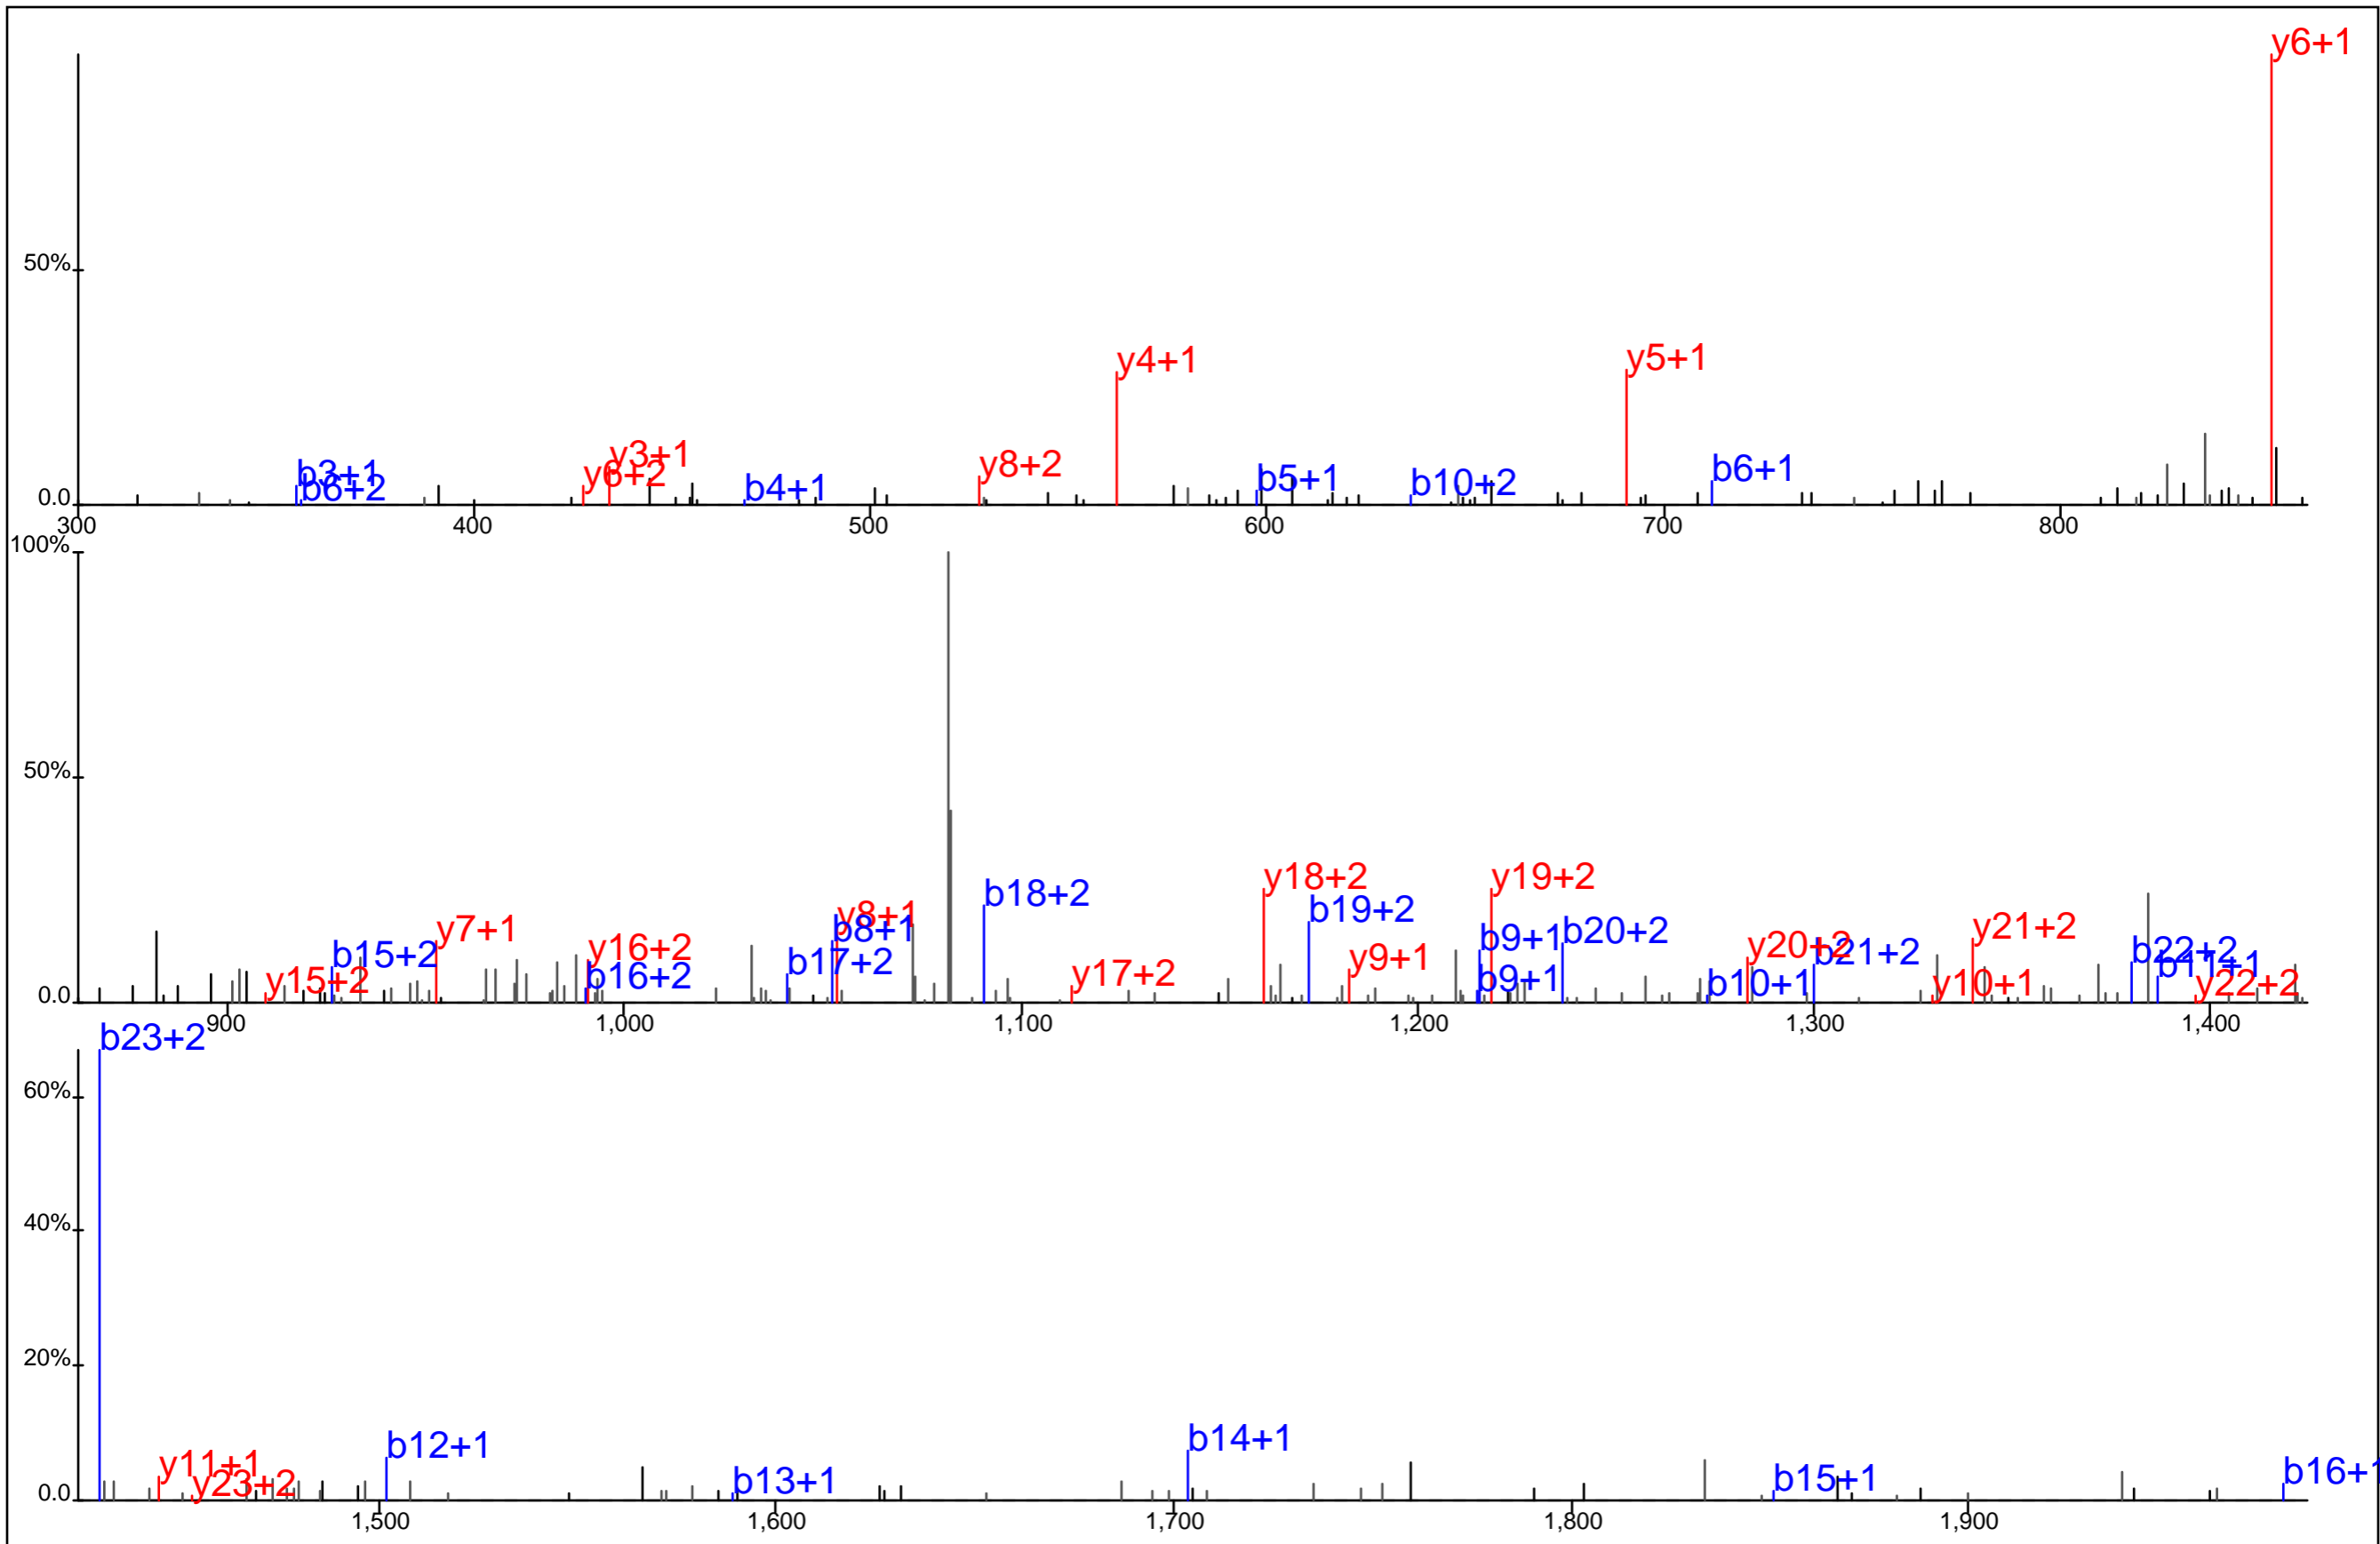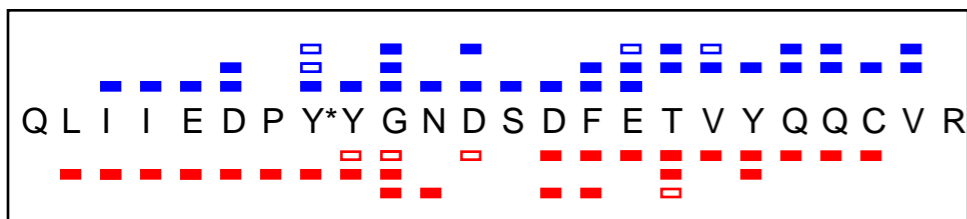

Protein Name: Acid phosphatase 1  
 gi Accession: 4757714  
 Precursor Mass: 1,011.4514+3  
 Delta Mass: 12.386 ppm  
 XCorr: 50.32

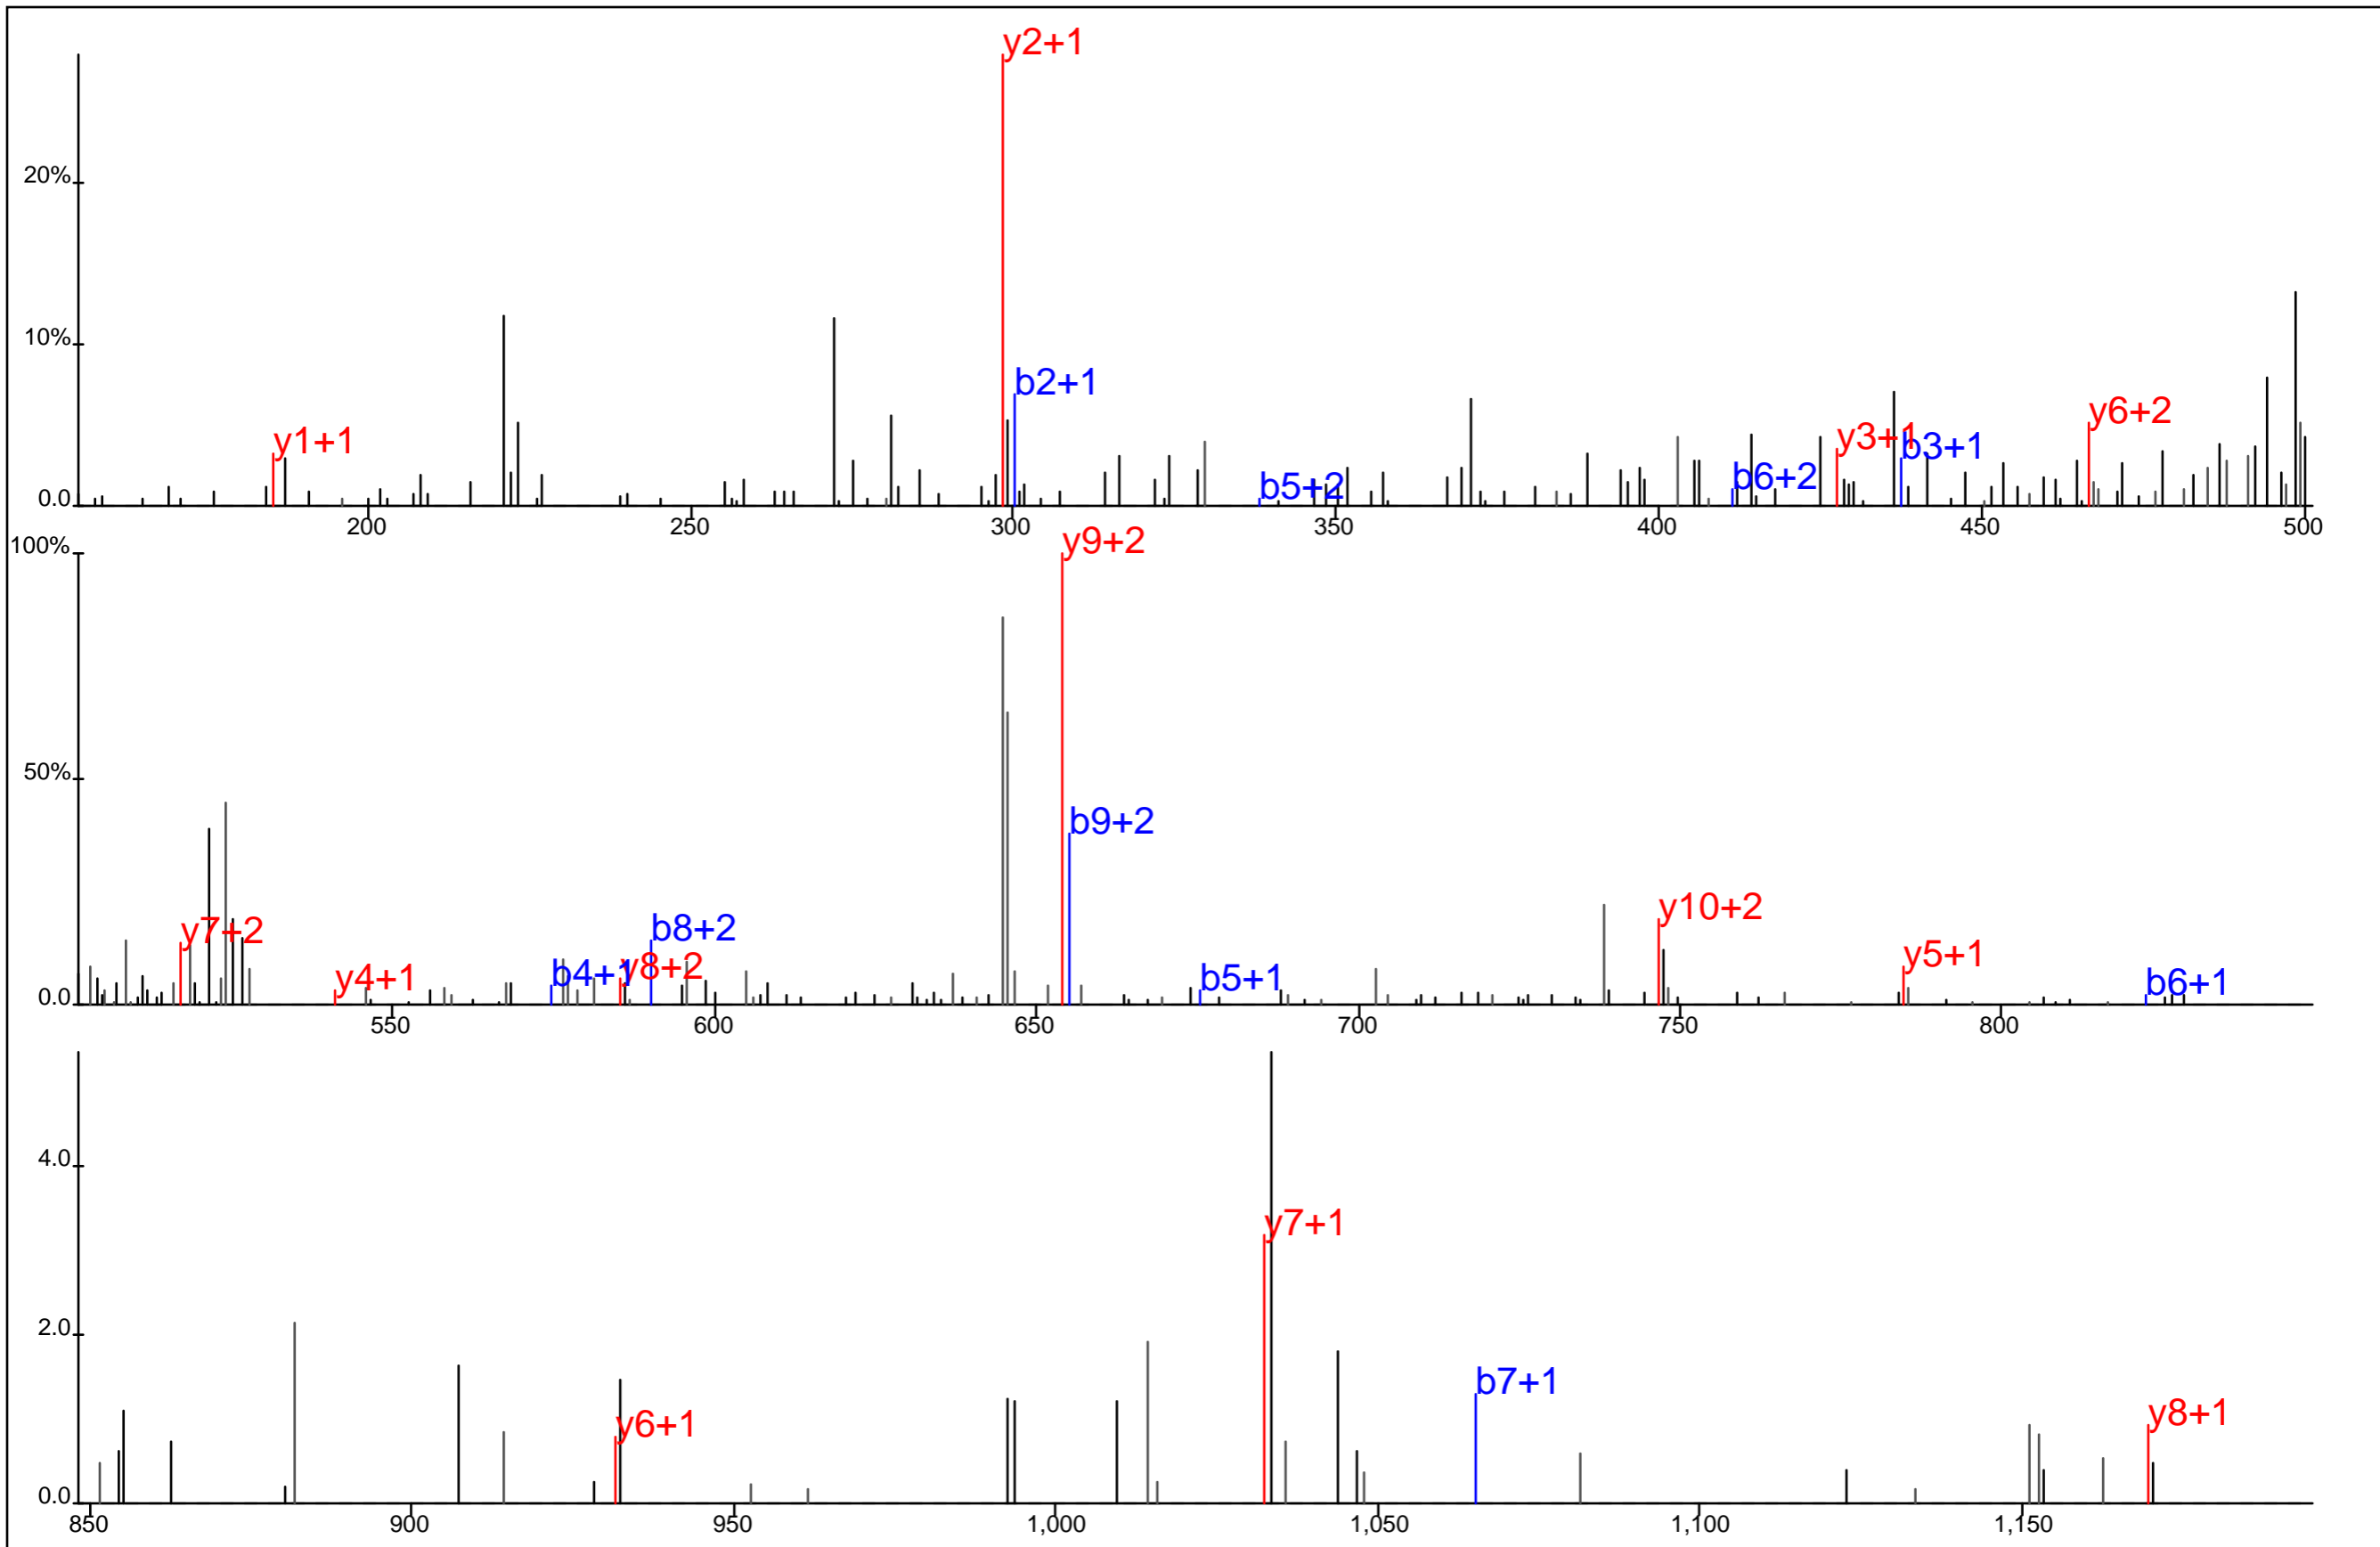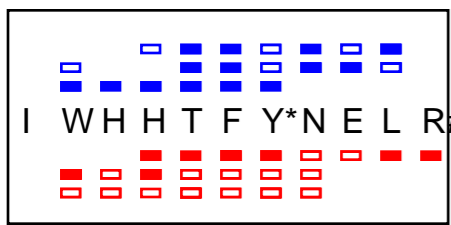

Protein Name: Actin  
 gi Accession: 7245526  
 Precursor Mass: 535.9132+3  
 Delta Mass: 0.816 ppm  
 XCorr: 3.1026

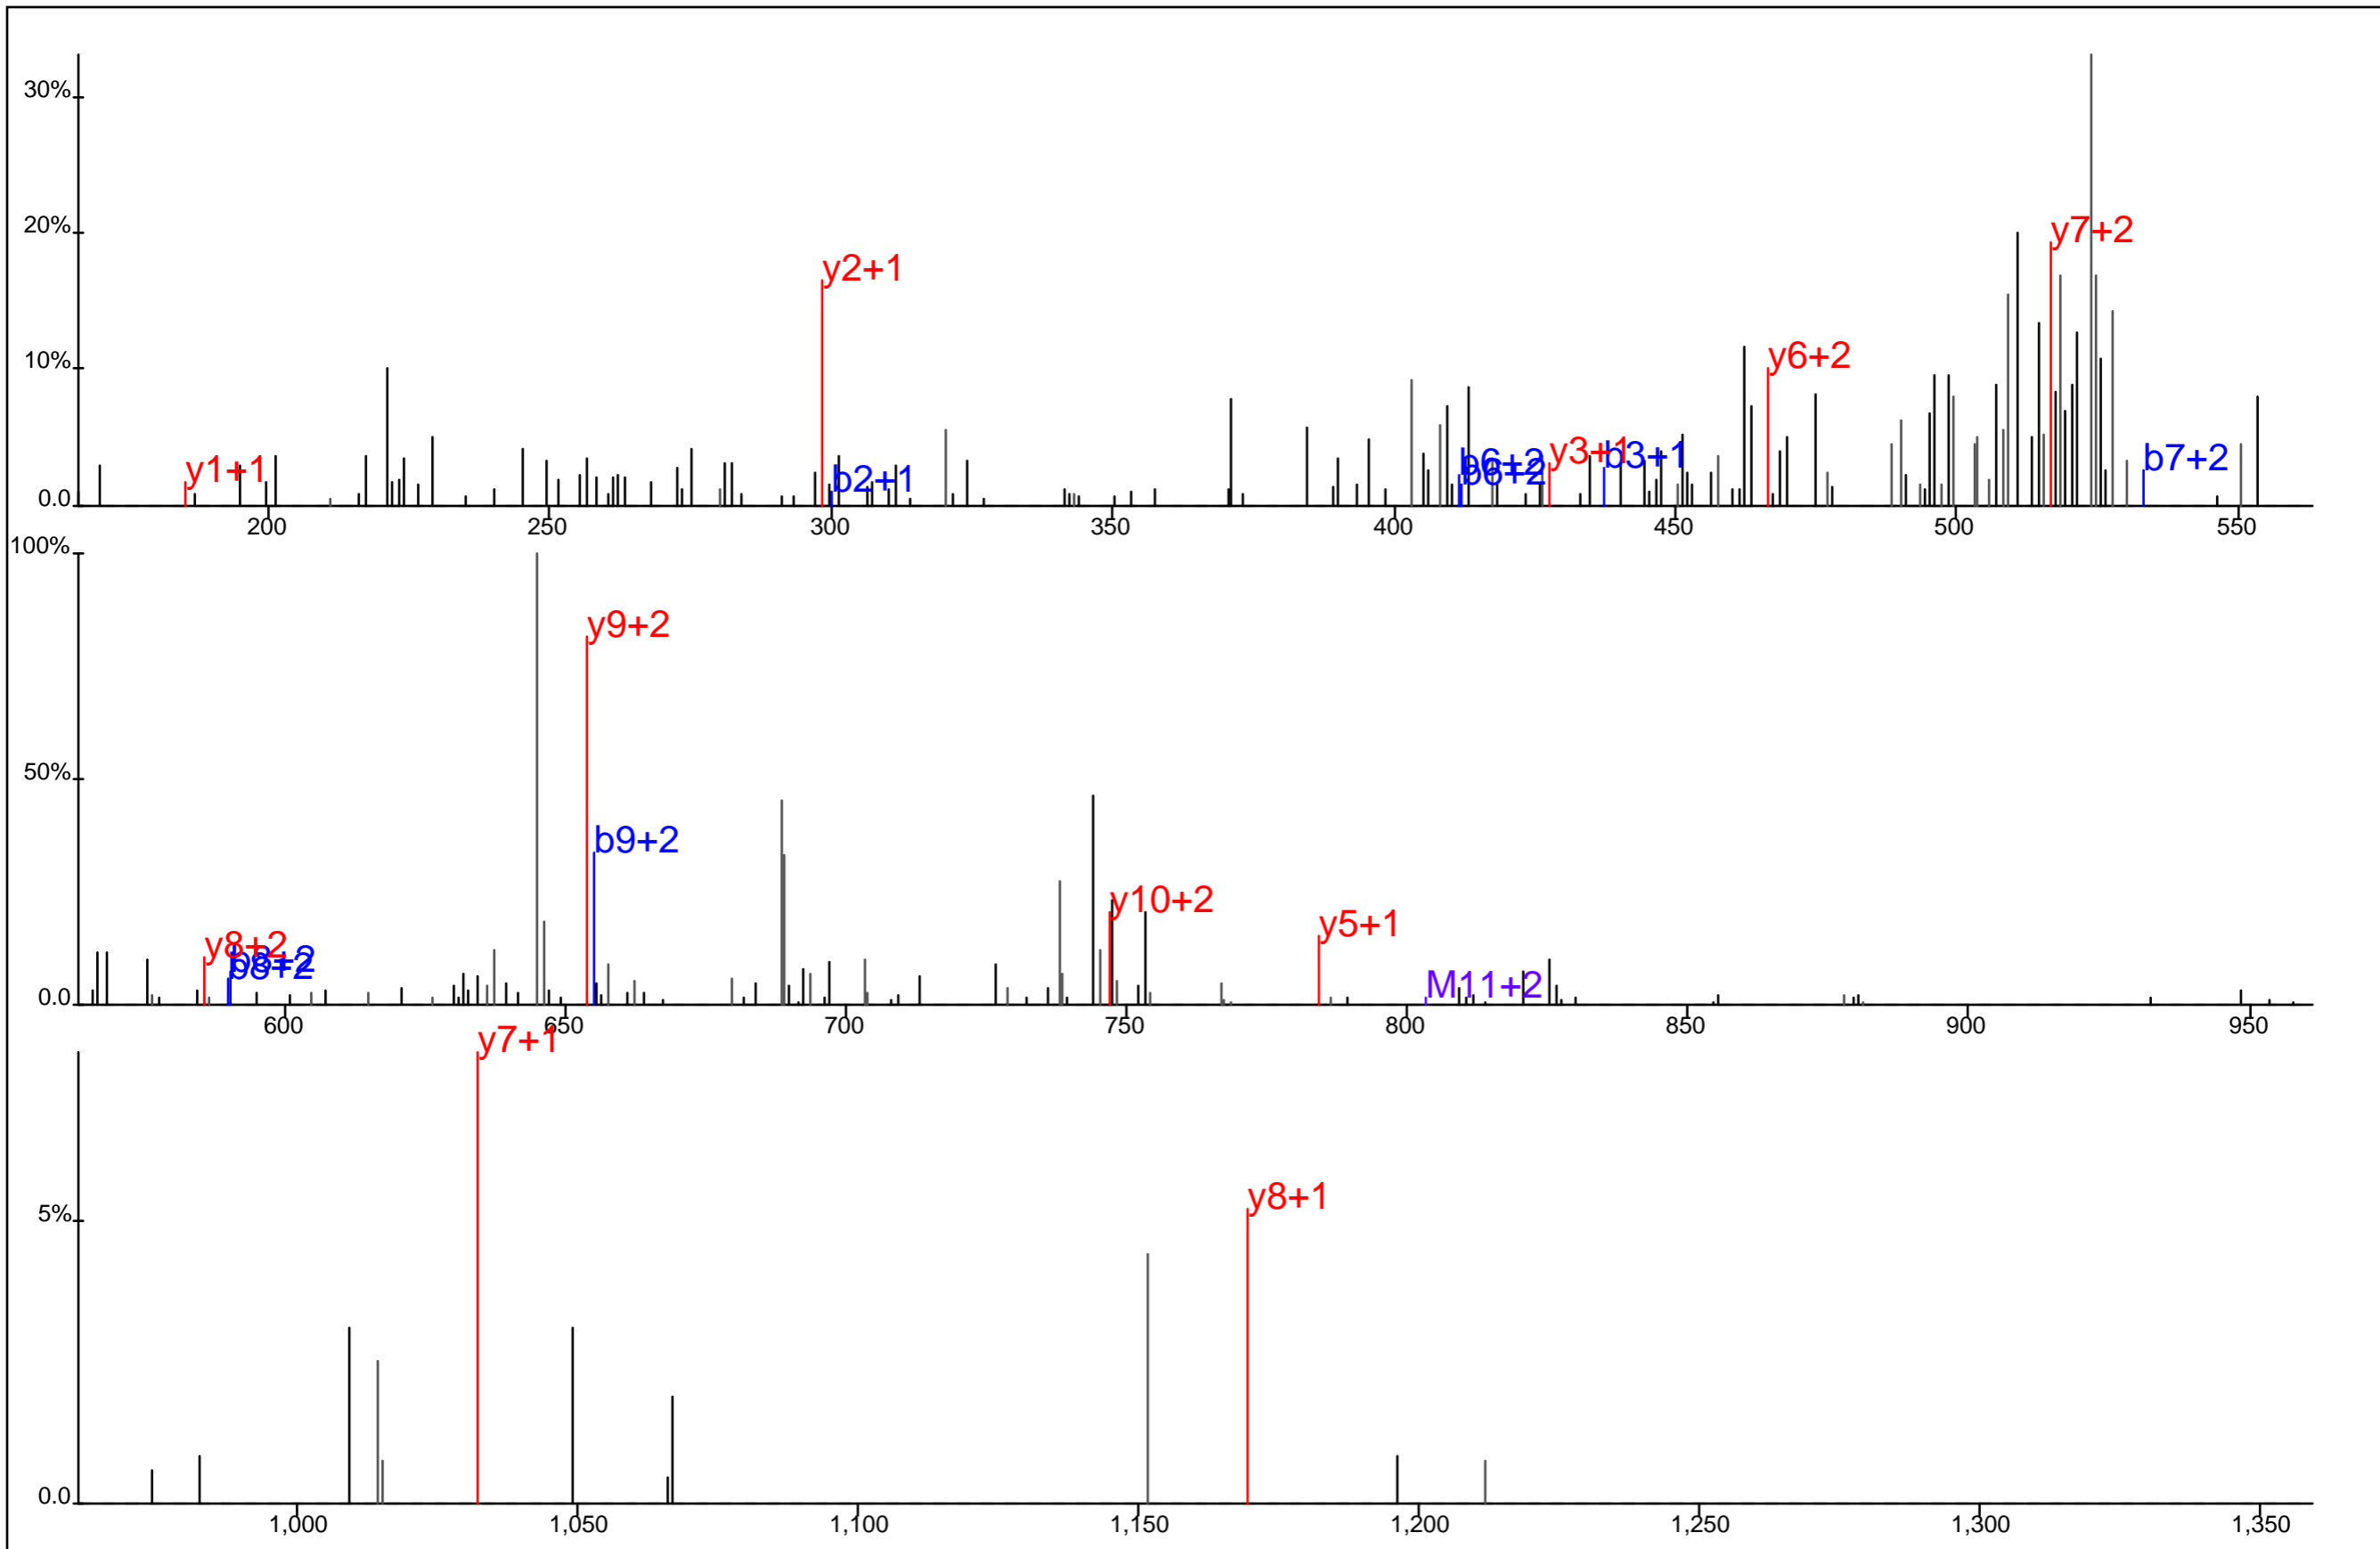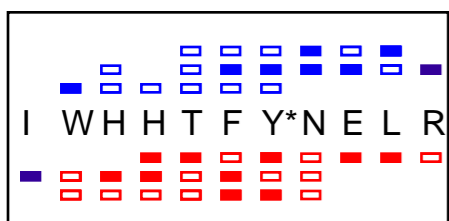

Protein Name: Actin  
 gi Accession: 7245526  
 Precursor Mass: 535.9150+3  
 Delta Mass: 4.245 ppm  
 XCorr: 16.37

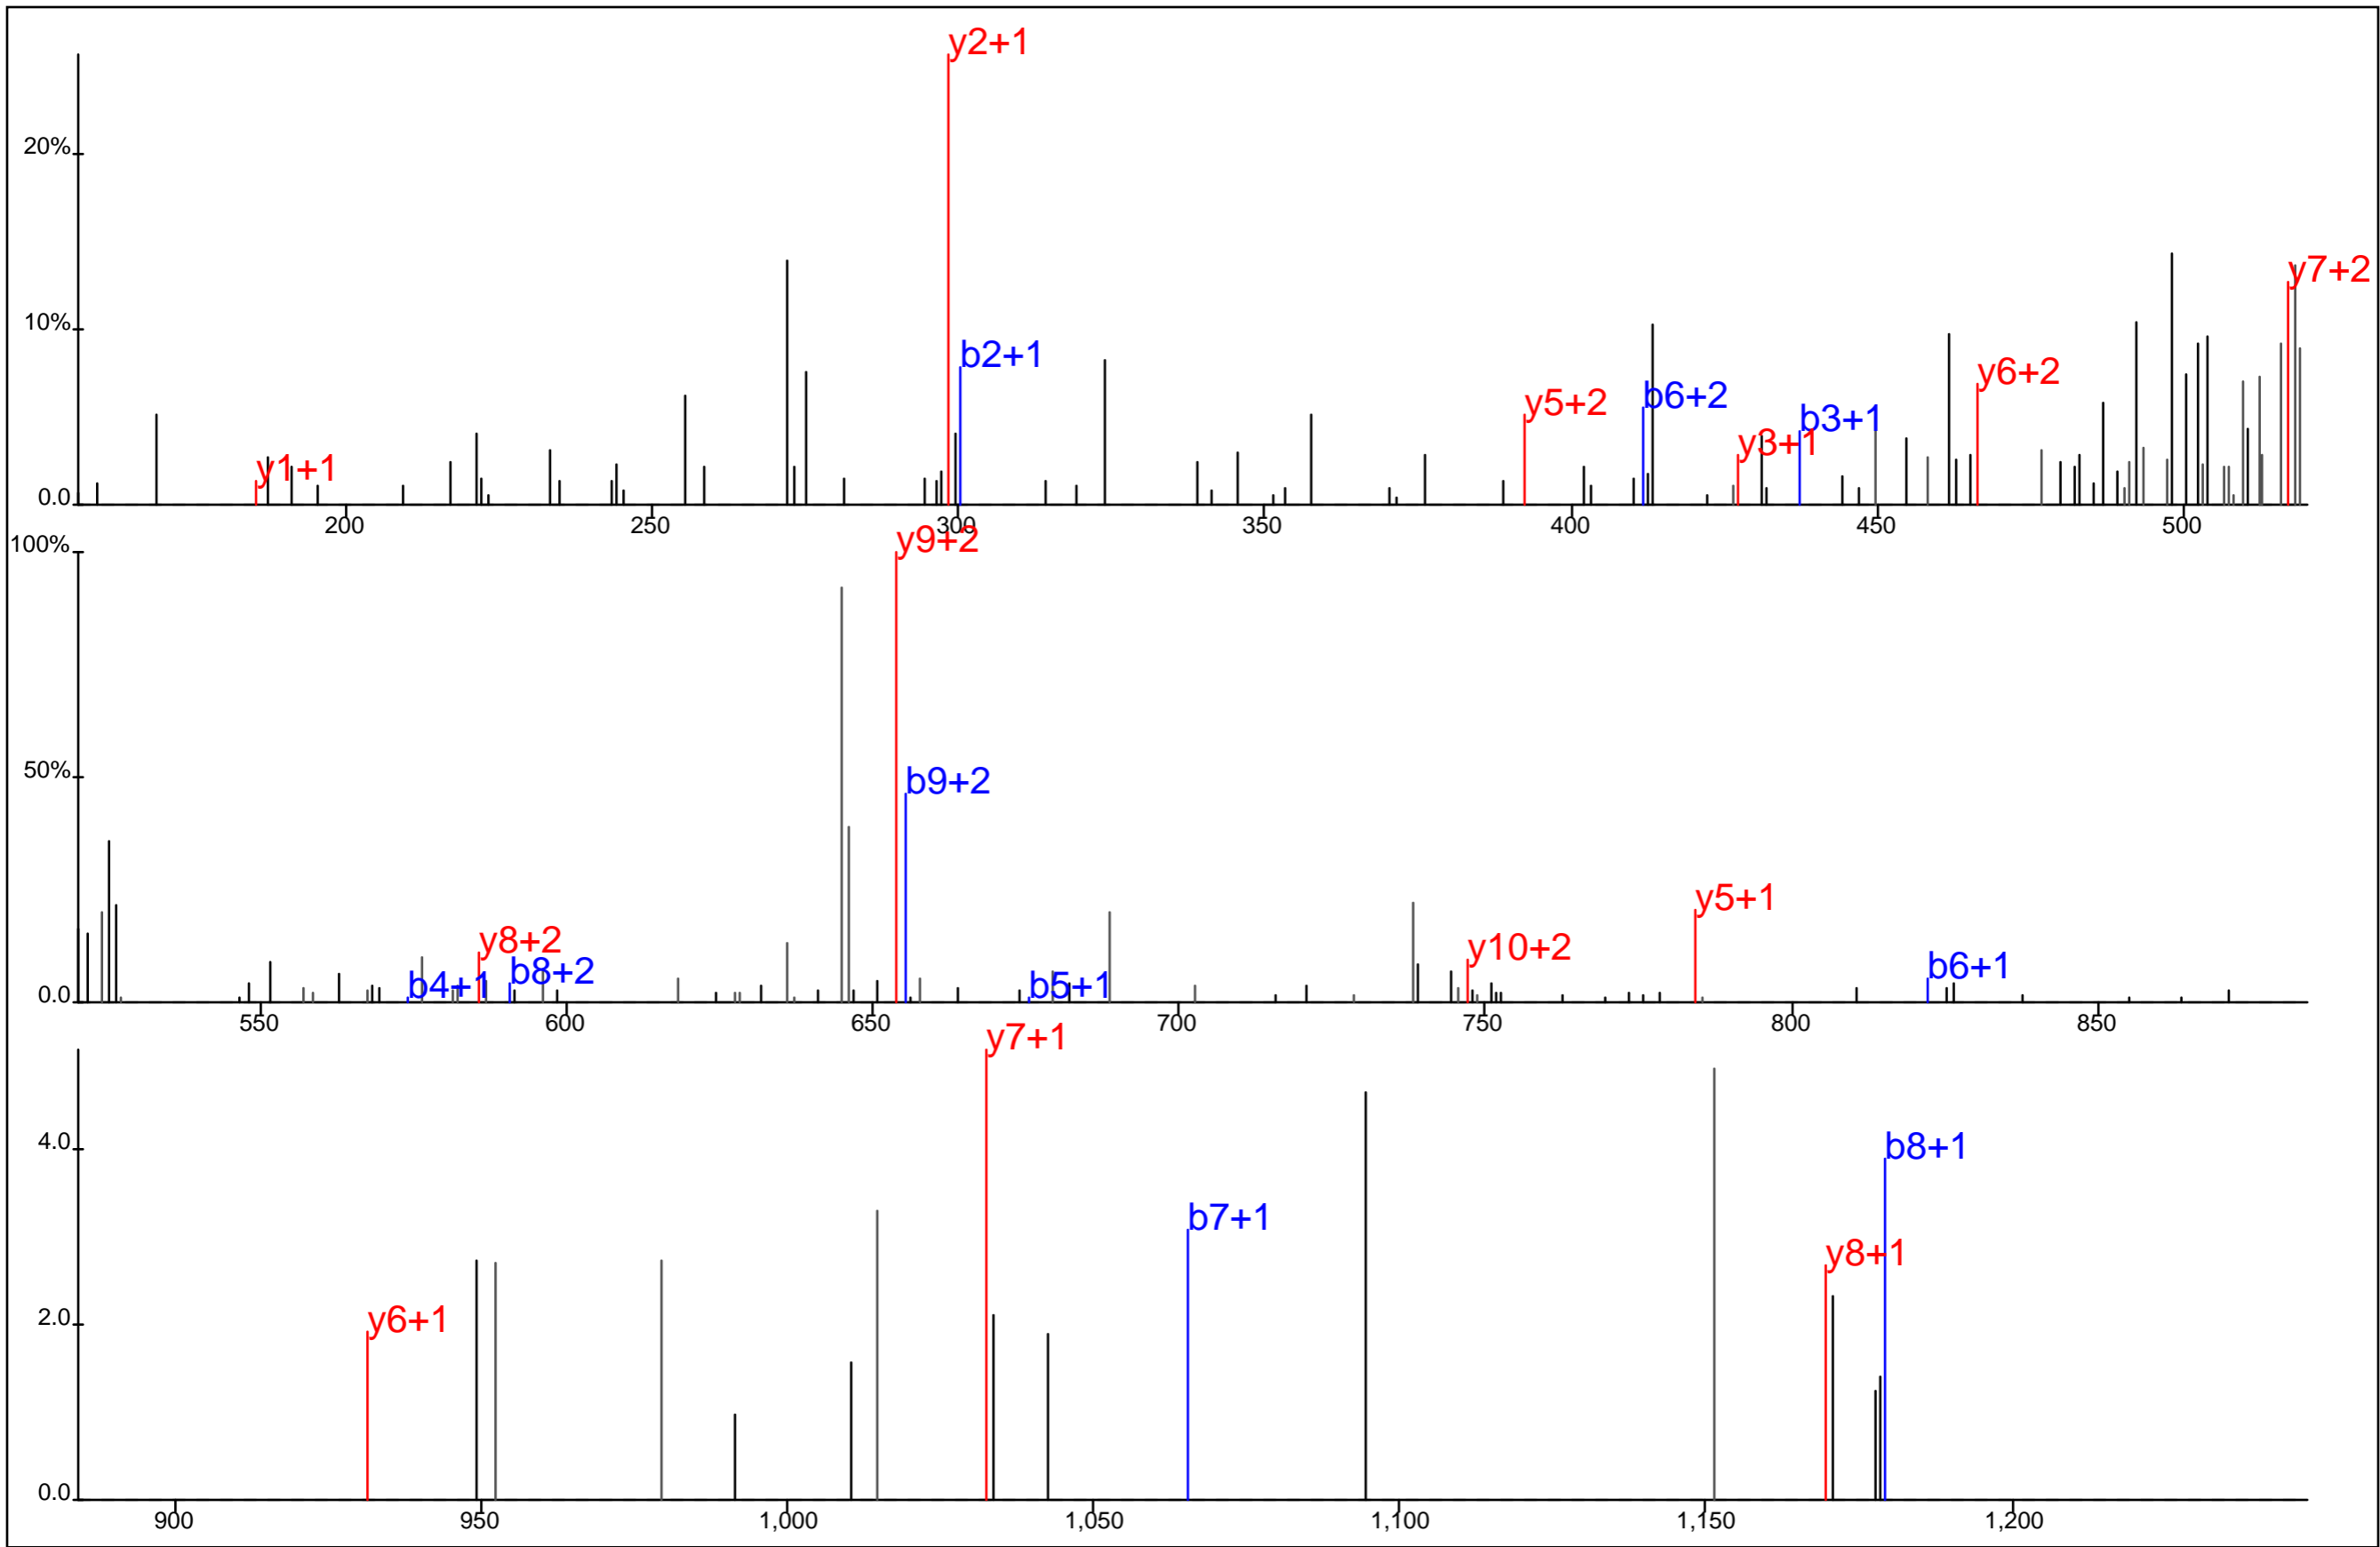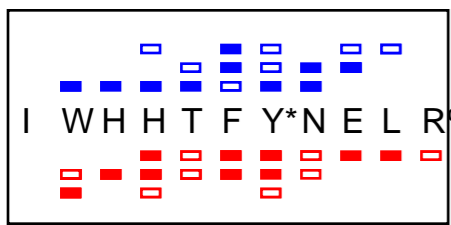

Protein Name: Actin  
 gi Accession: 7245526  
 Precursor Mass: 535.9147+3  
 Delta Mass: 3.679 ppm  
 XCorr: 20.89

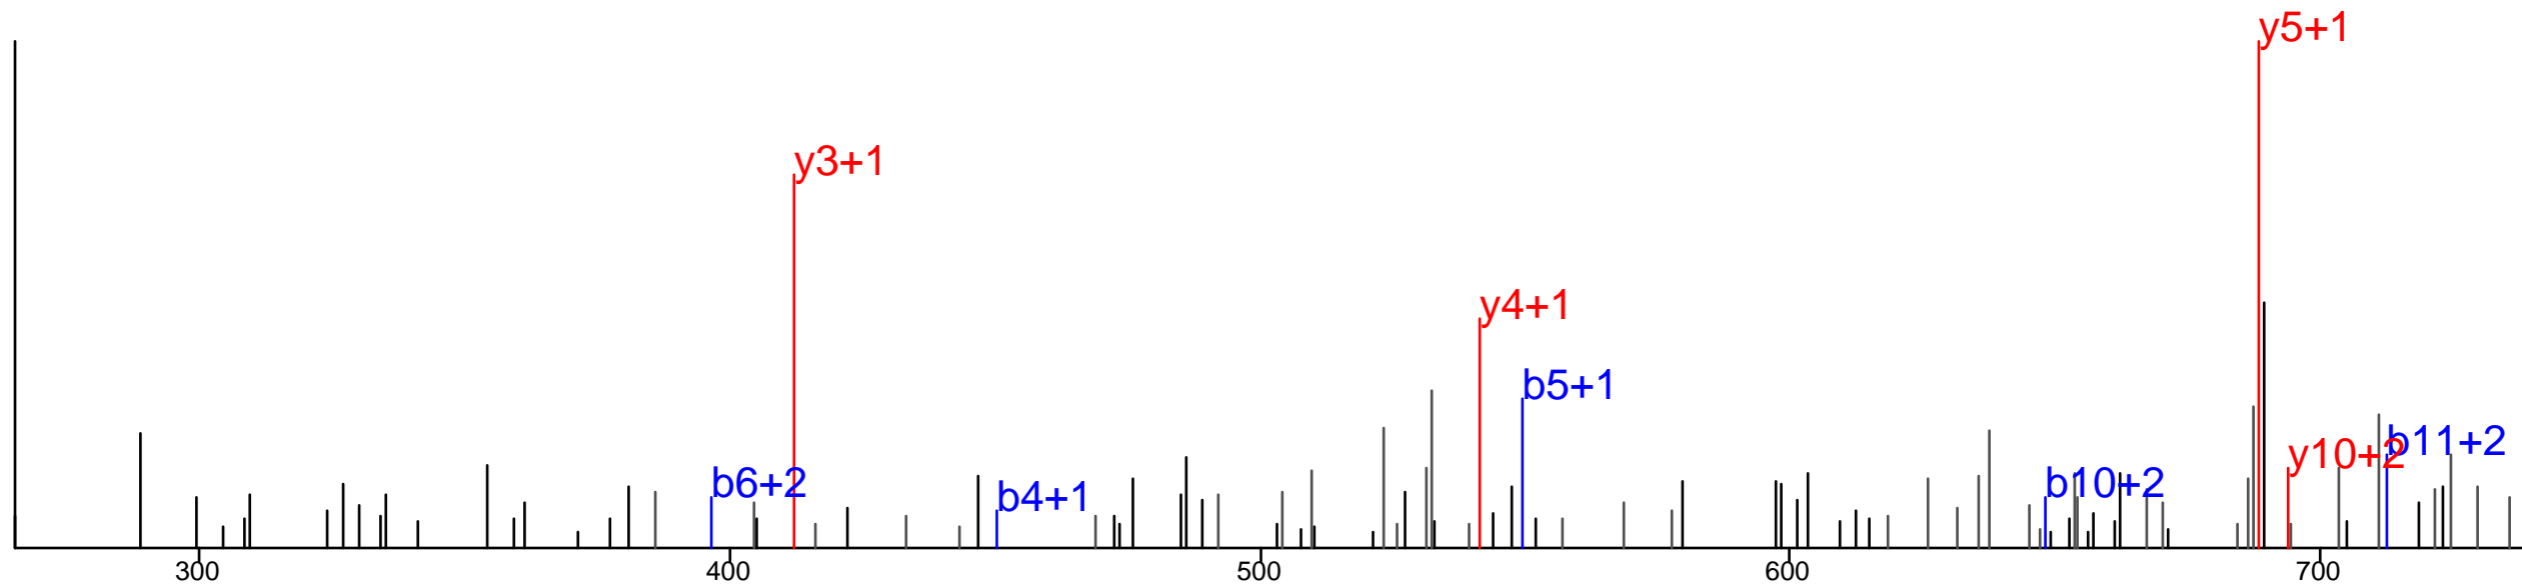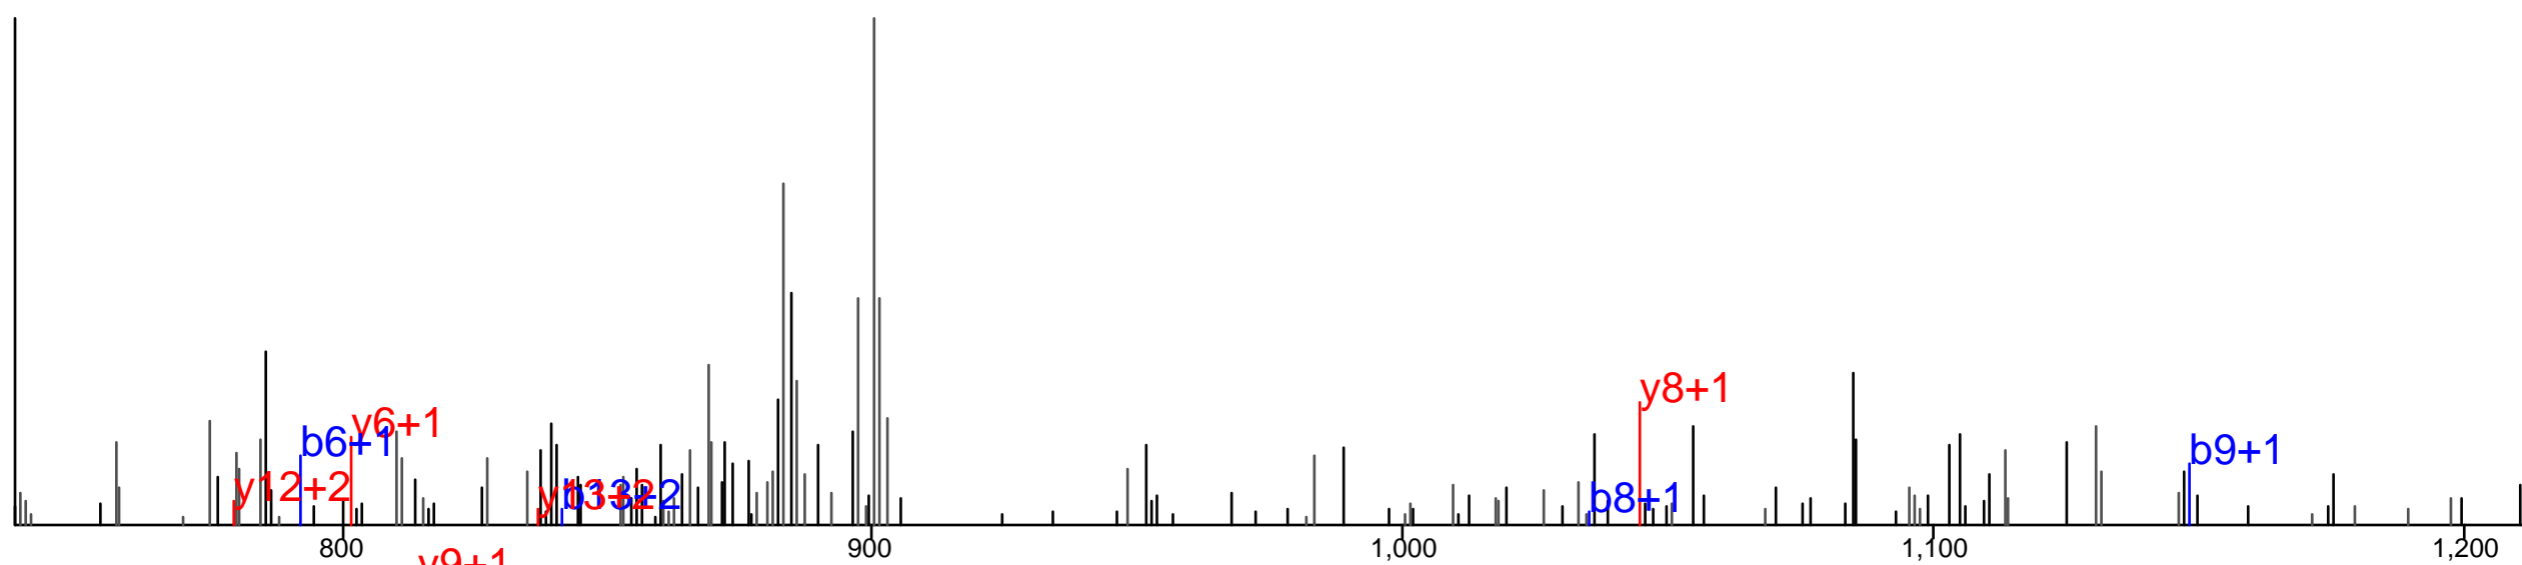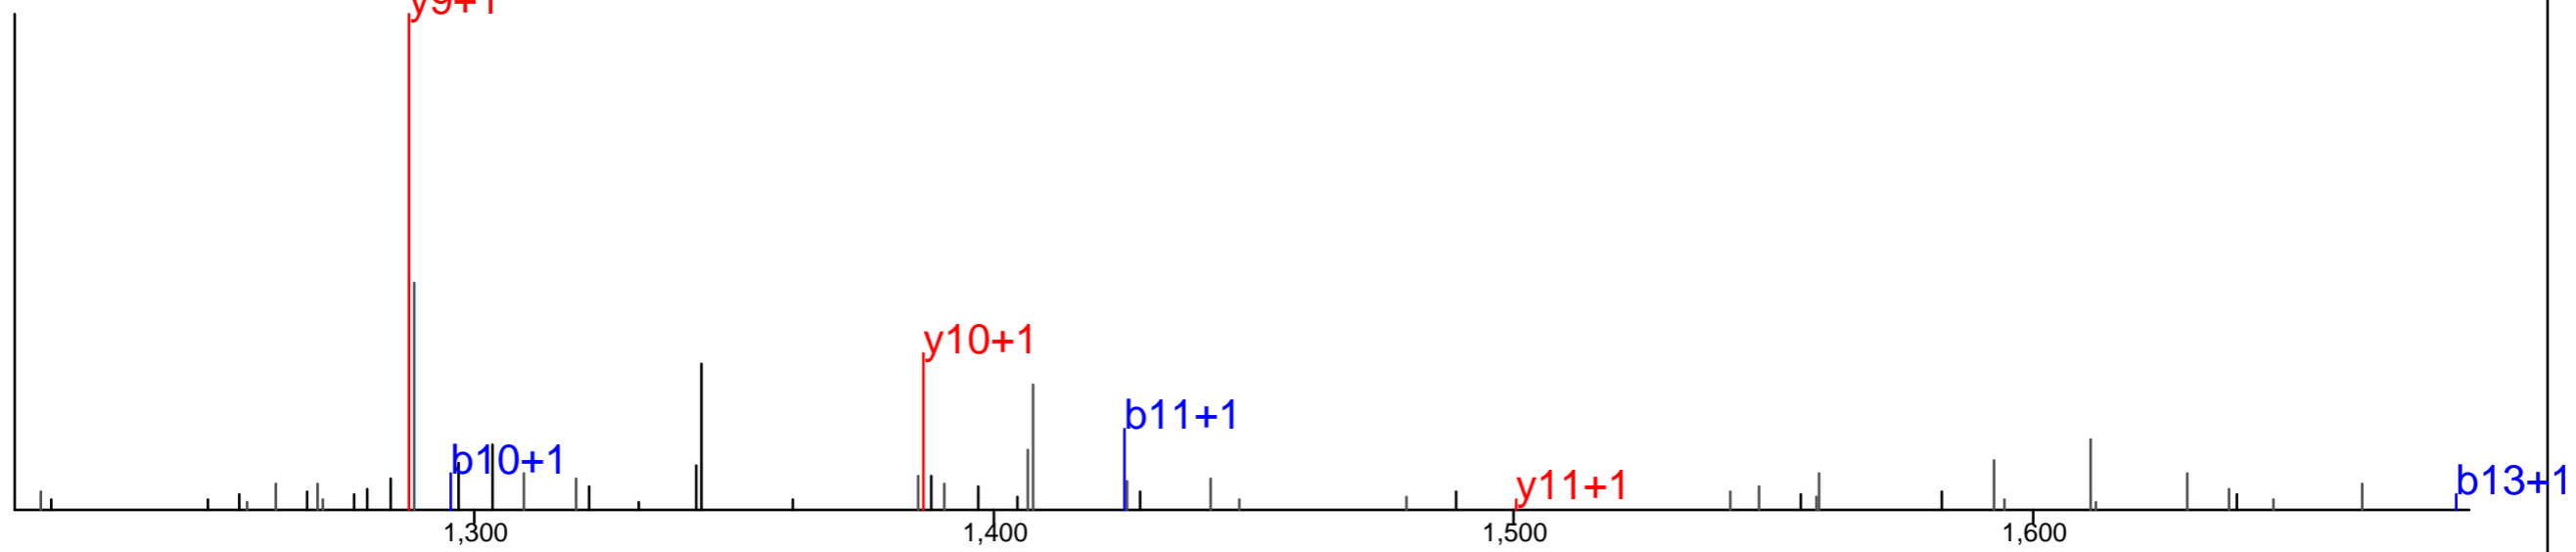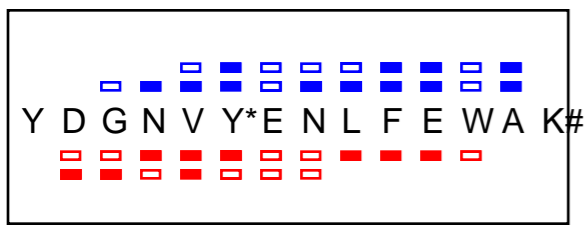

Protein Name: Acyl-CoA oxidase  
 gi Accession: 119609755  
 Precursor Mass: 918.3974+2  
 Delta Mass: 5.877 ppm  
 XCorr: 24.12

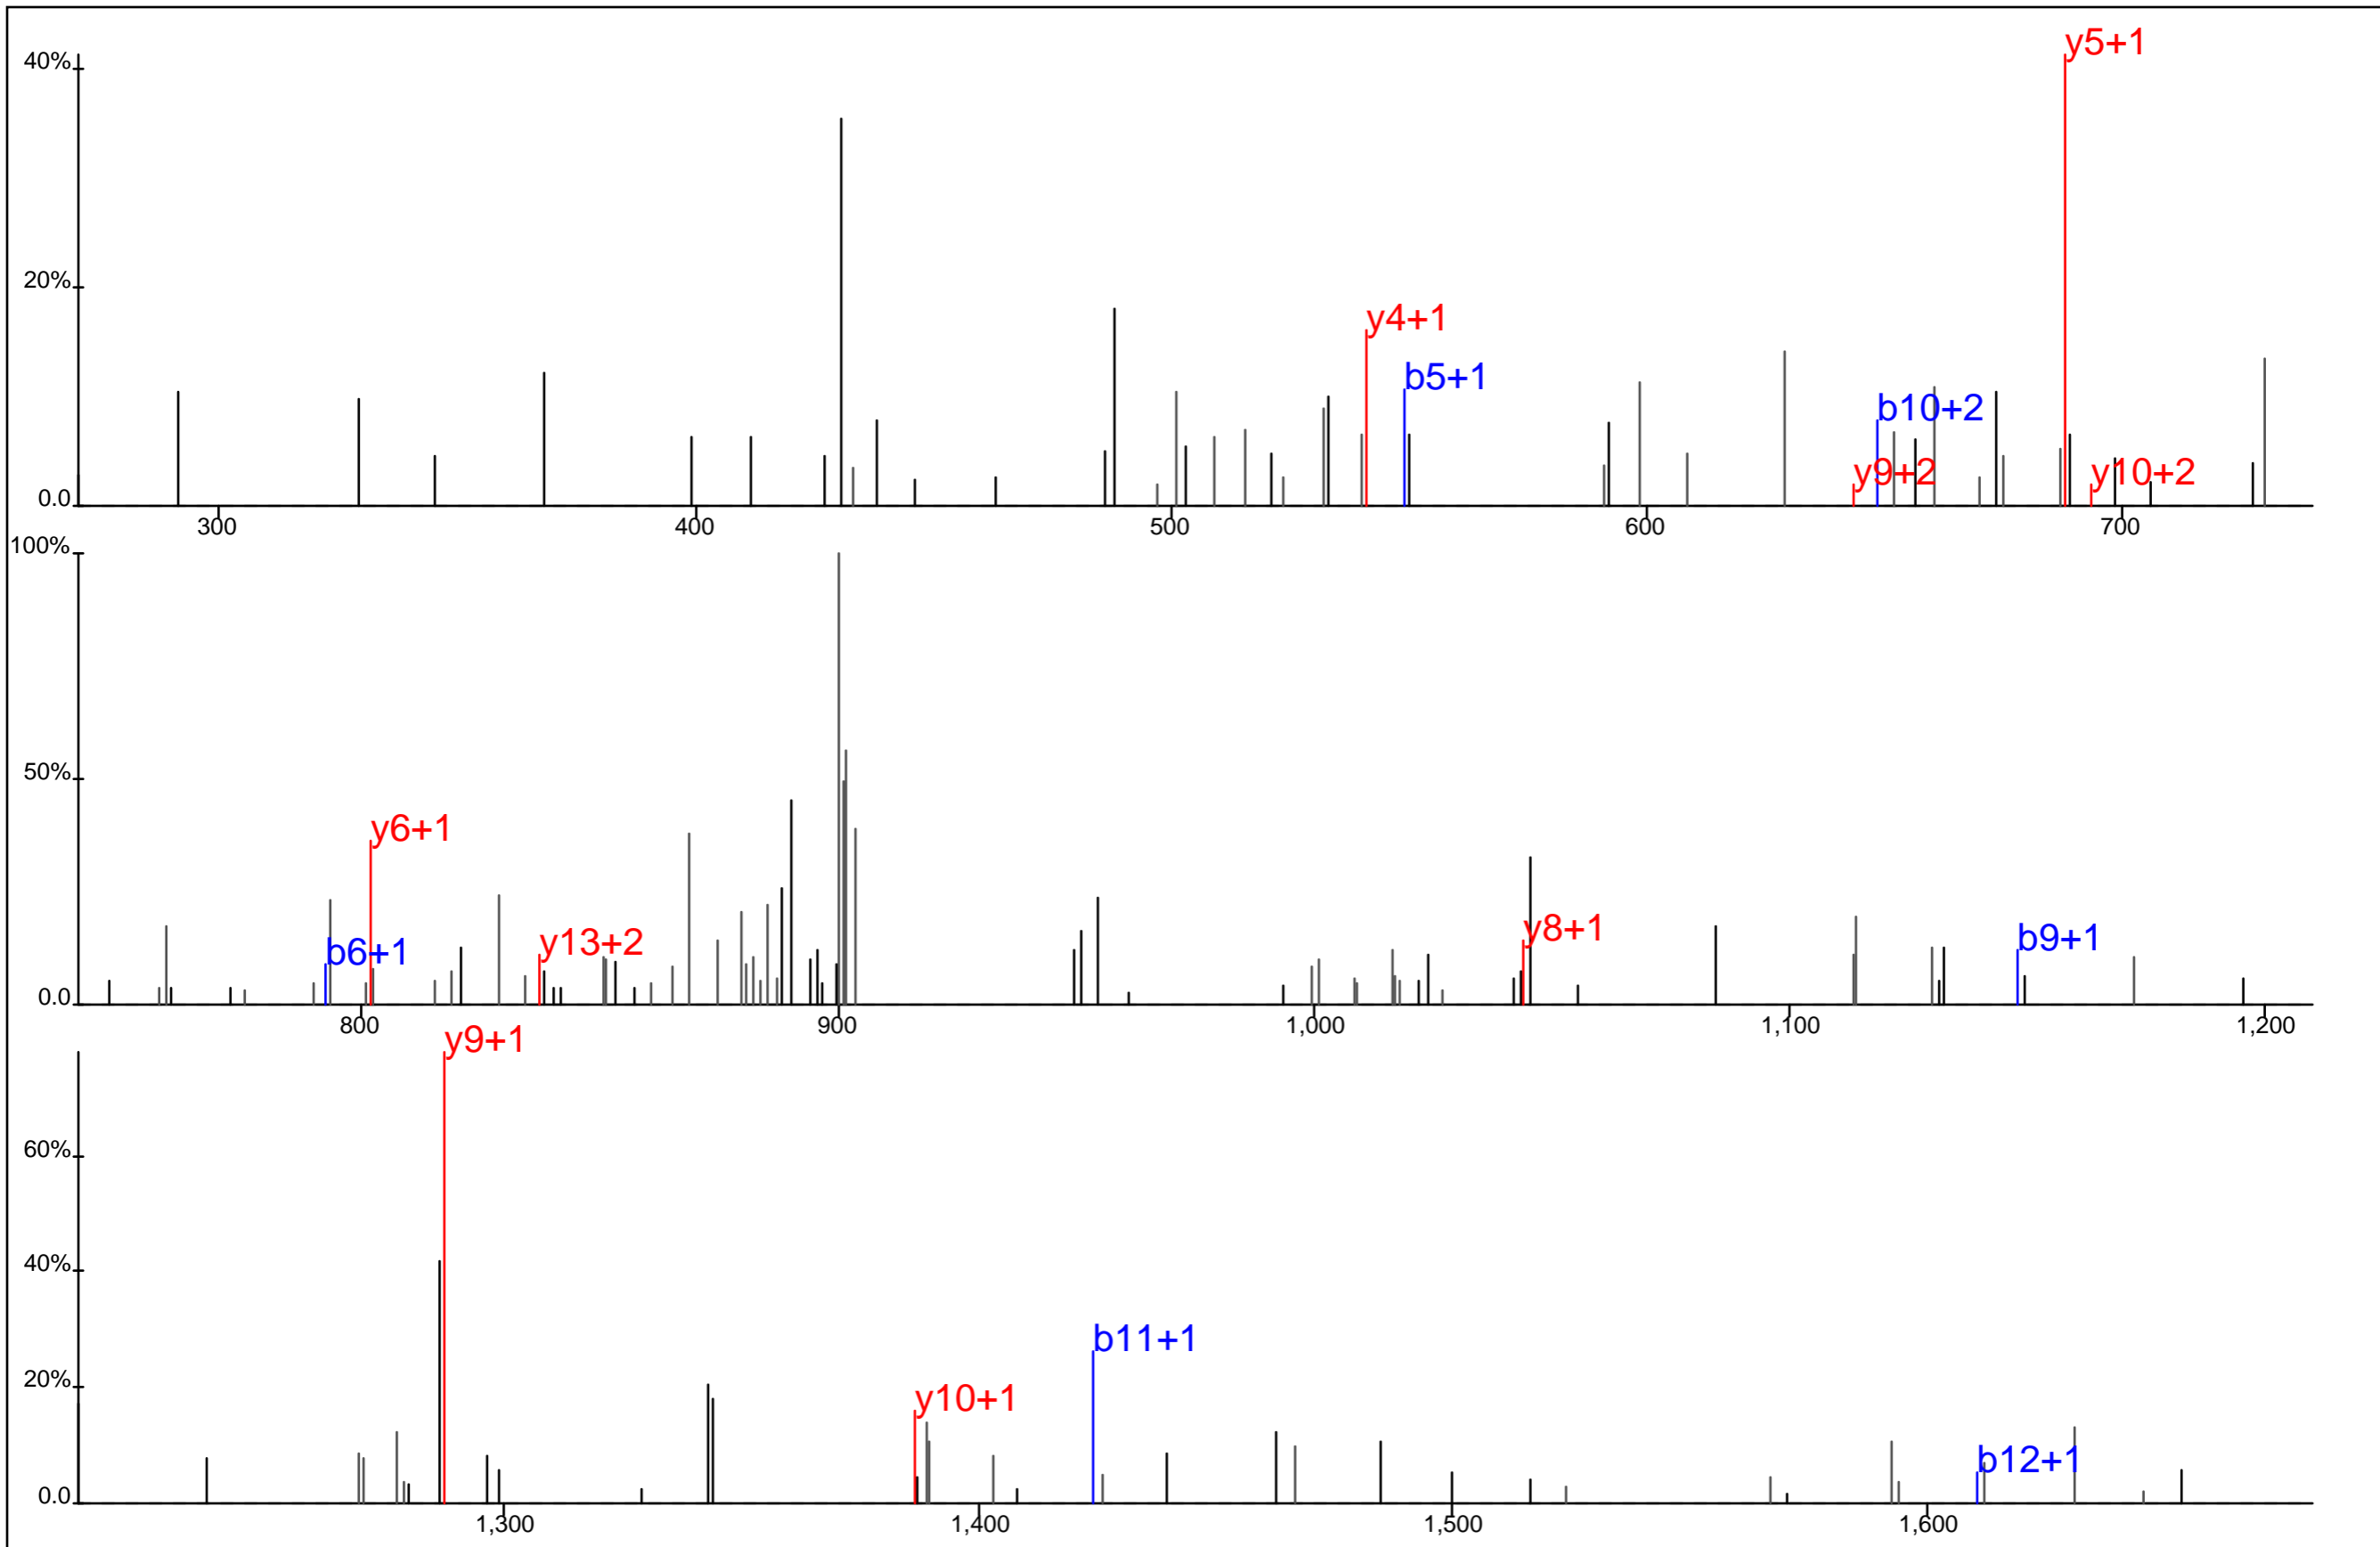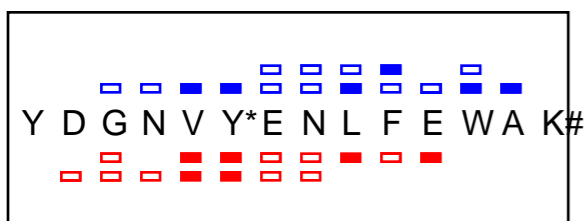

Protein Name: Acyl-CoA oxidase  
 gi Accession: 119609755  
 Precursor Mass: 918.3952+2  
 Delta Mass: 3.485 ppm  
 XCorr: 16.39

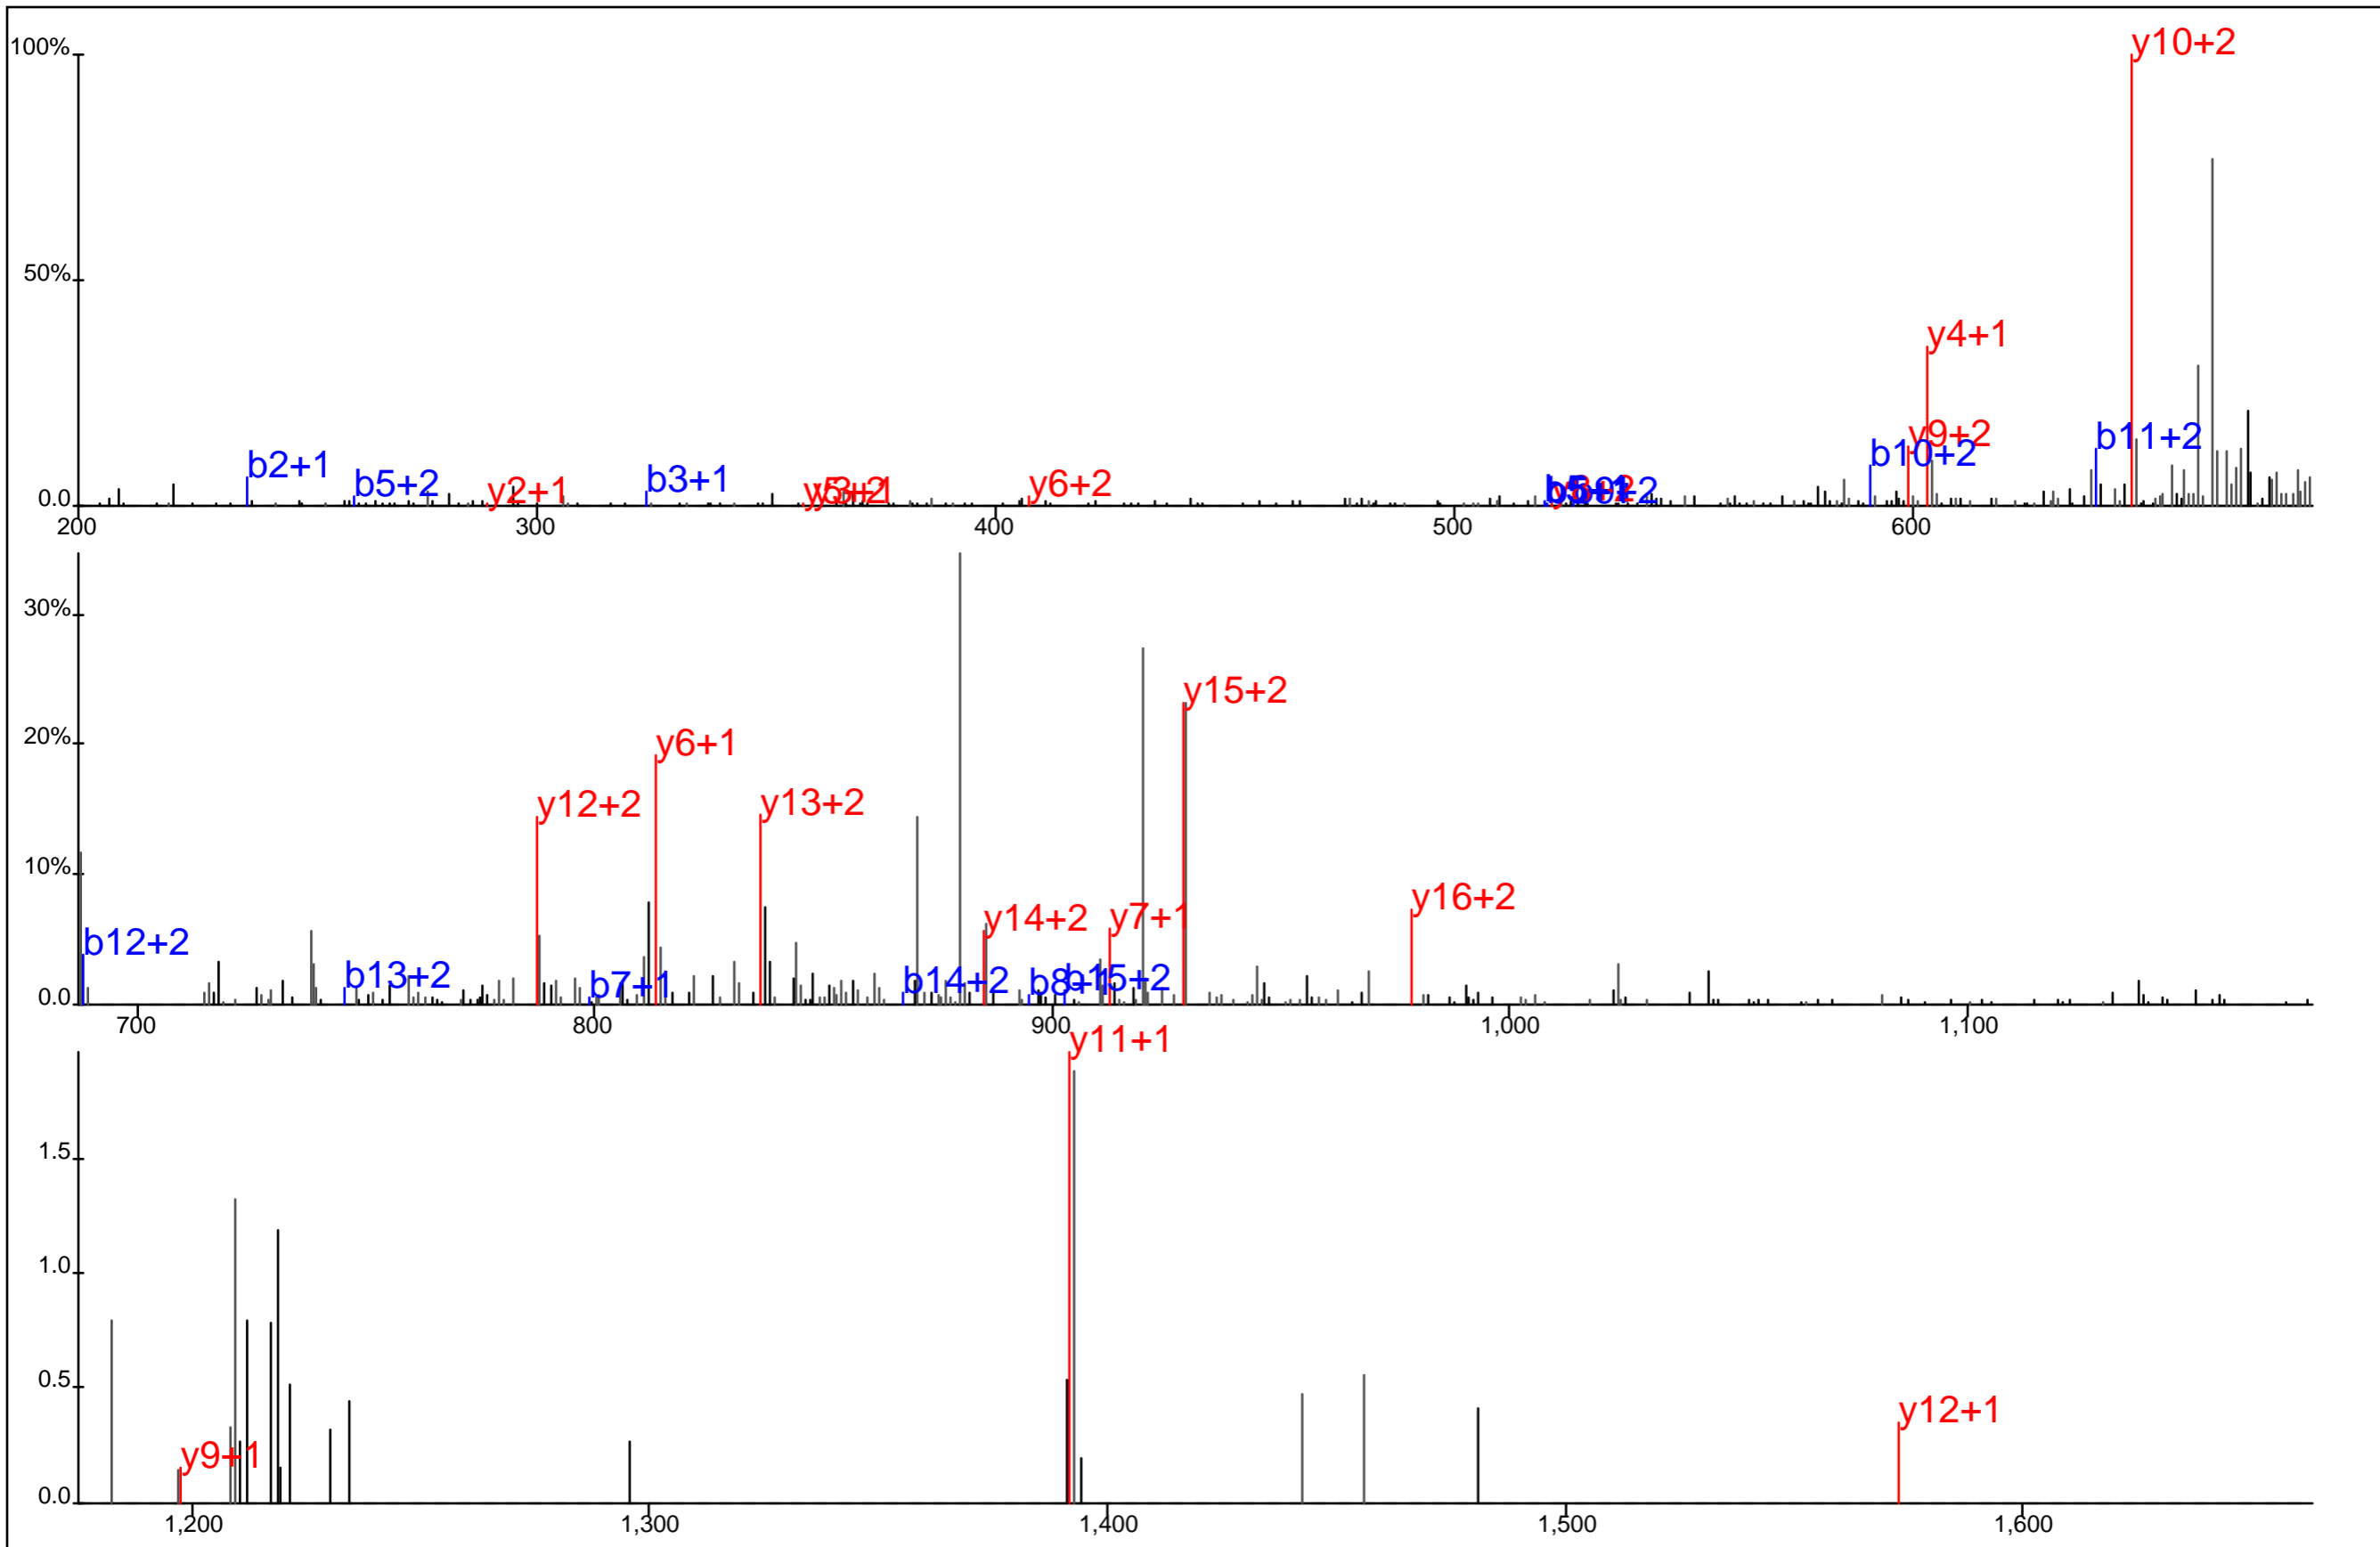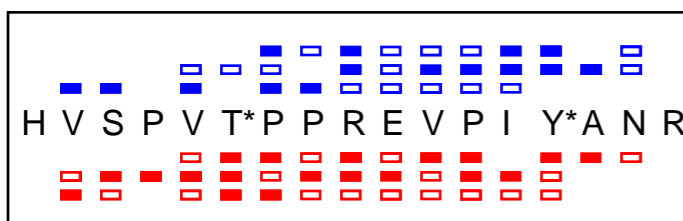

Protein Name: ADAM9  
 gi Accession: 6630618  
 Precursor Mass: 697.9979+3  
 Delta Mass: 0.668 ppm  
 XCorr: 35.29



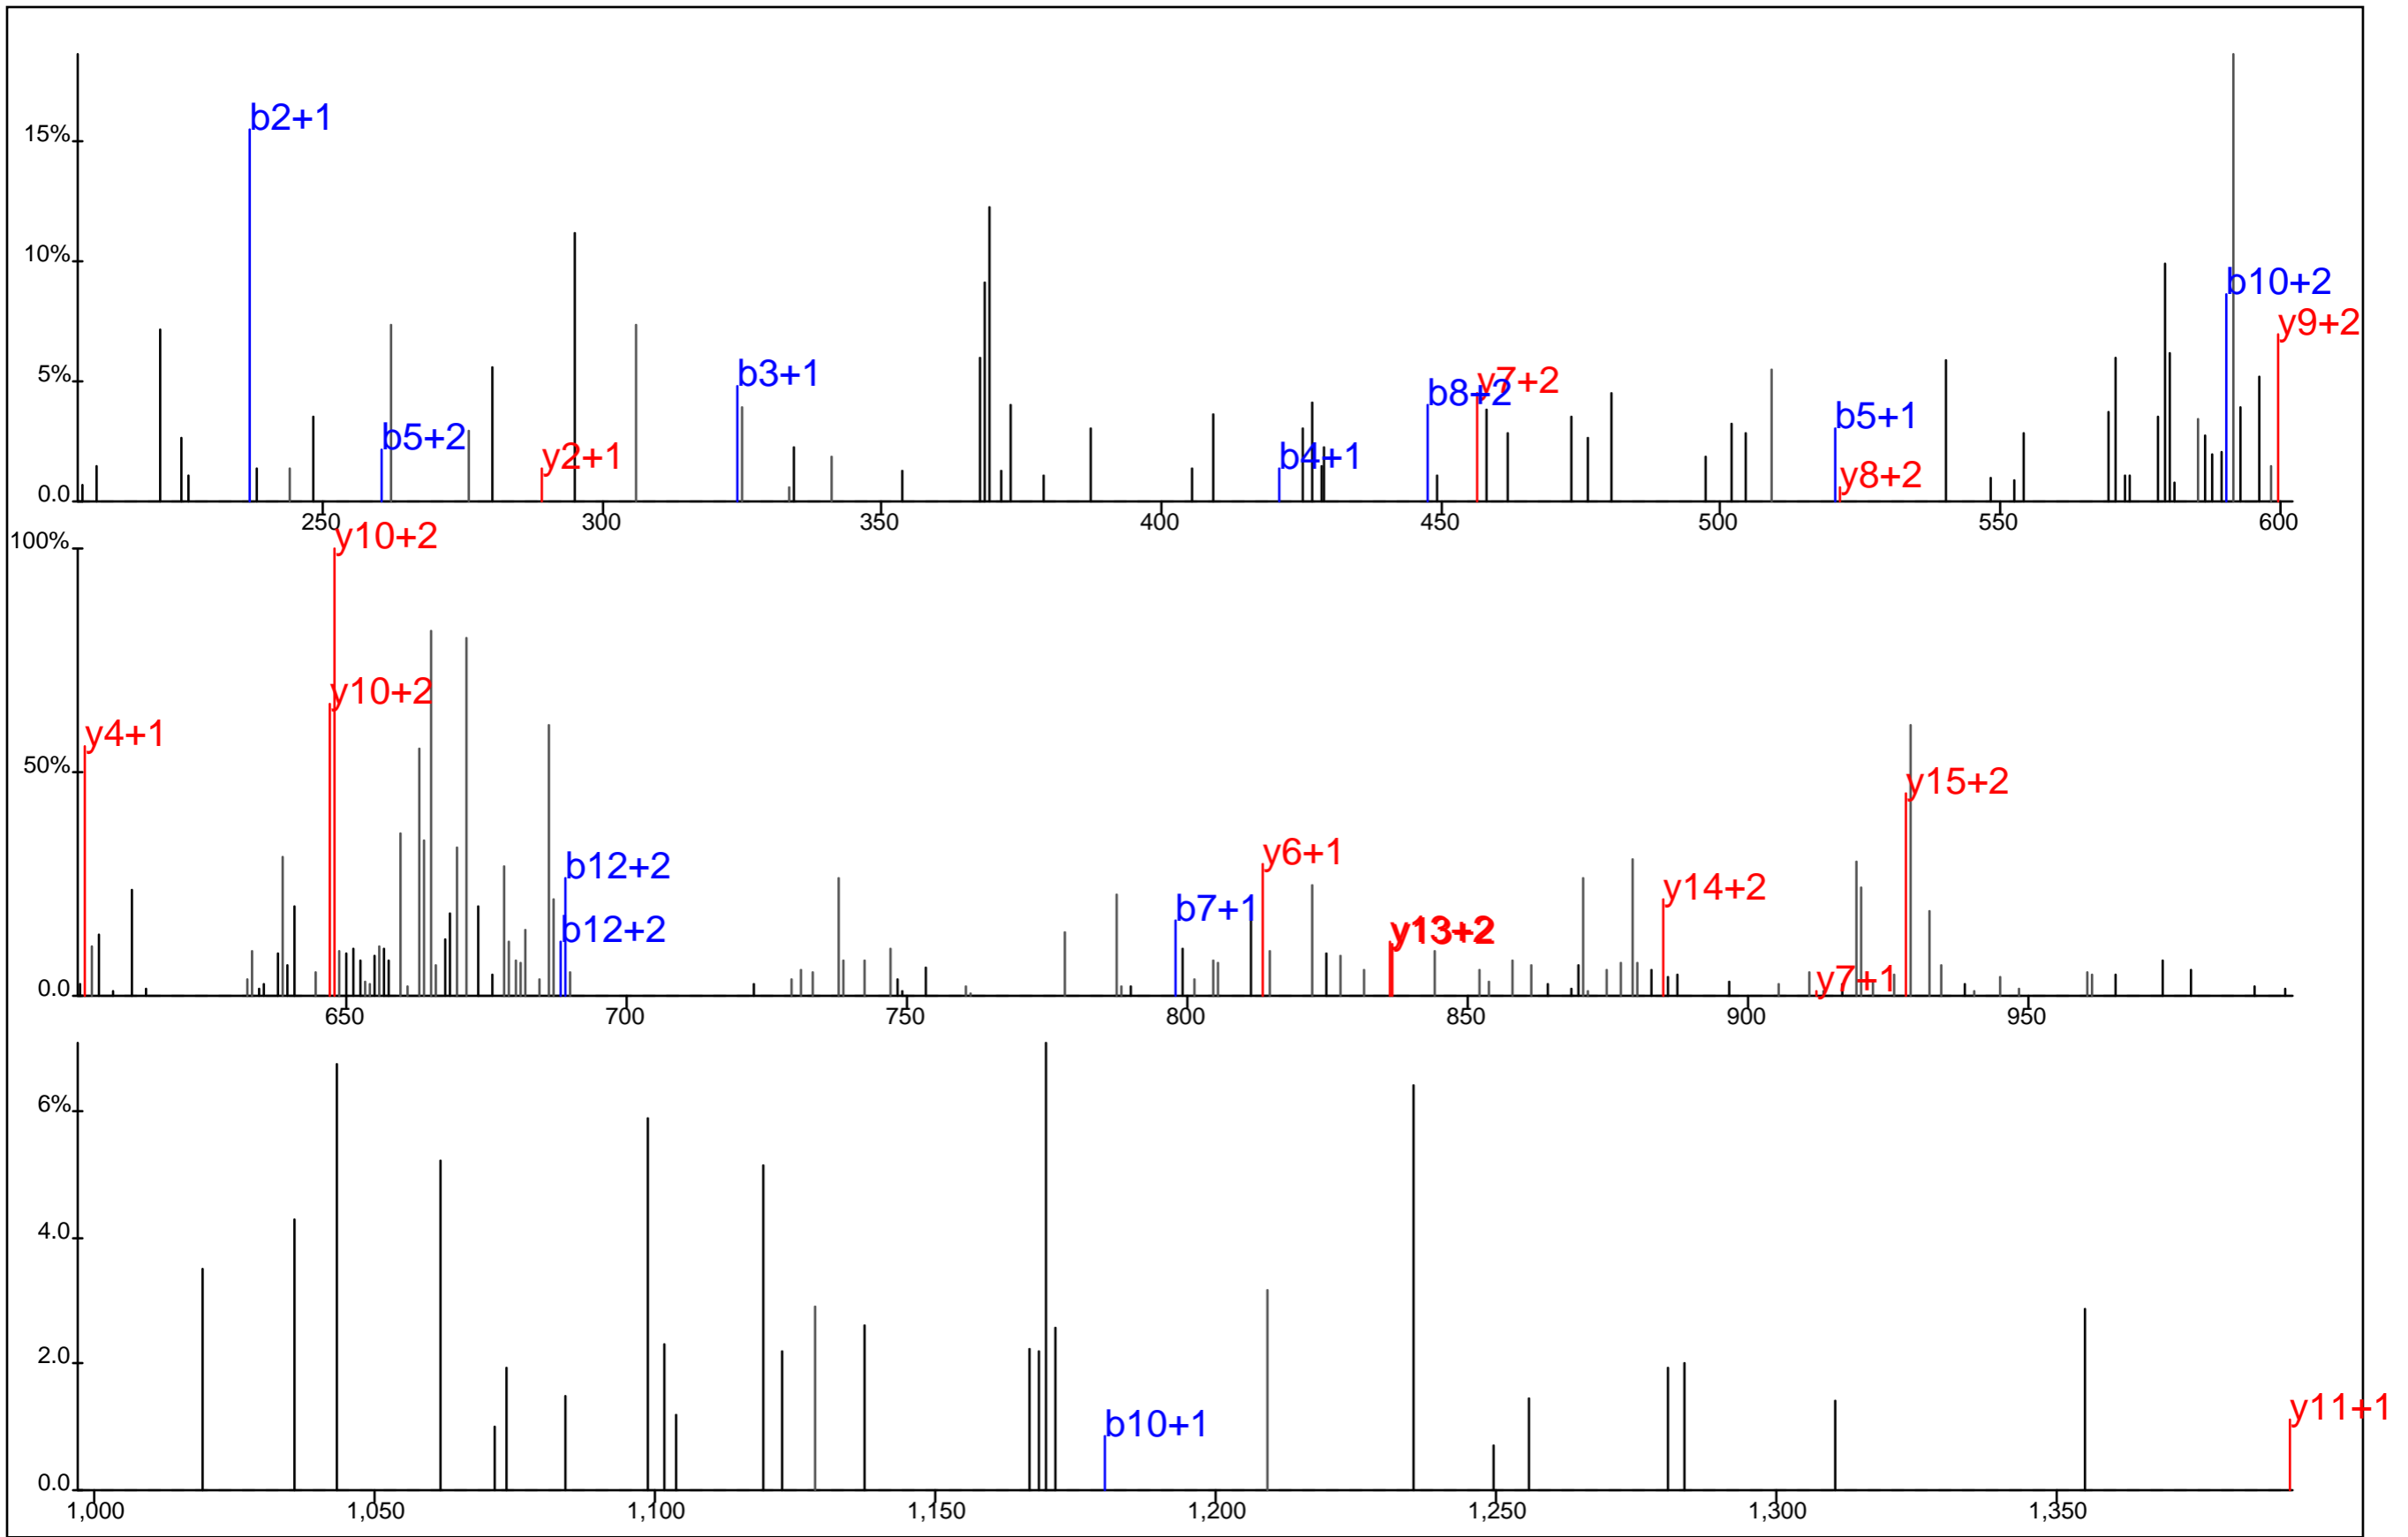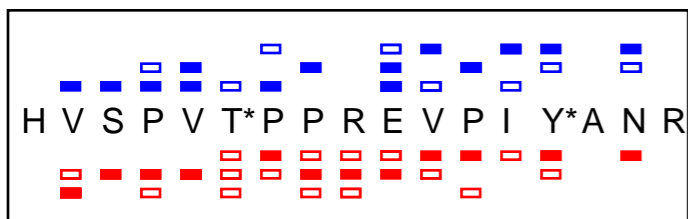

Protein Name: ADAM9  
 gi Accession: 6630618  
 Precursor Mass: 697.9991+3  
 Delta Mass: 2.504 ppm  
 XCorr: 20.77

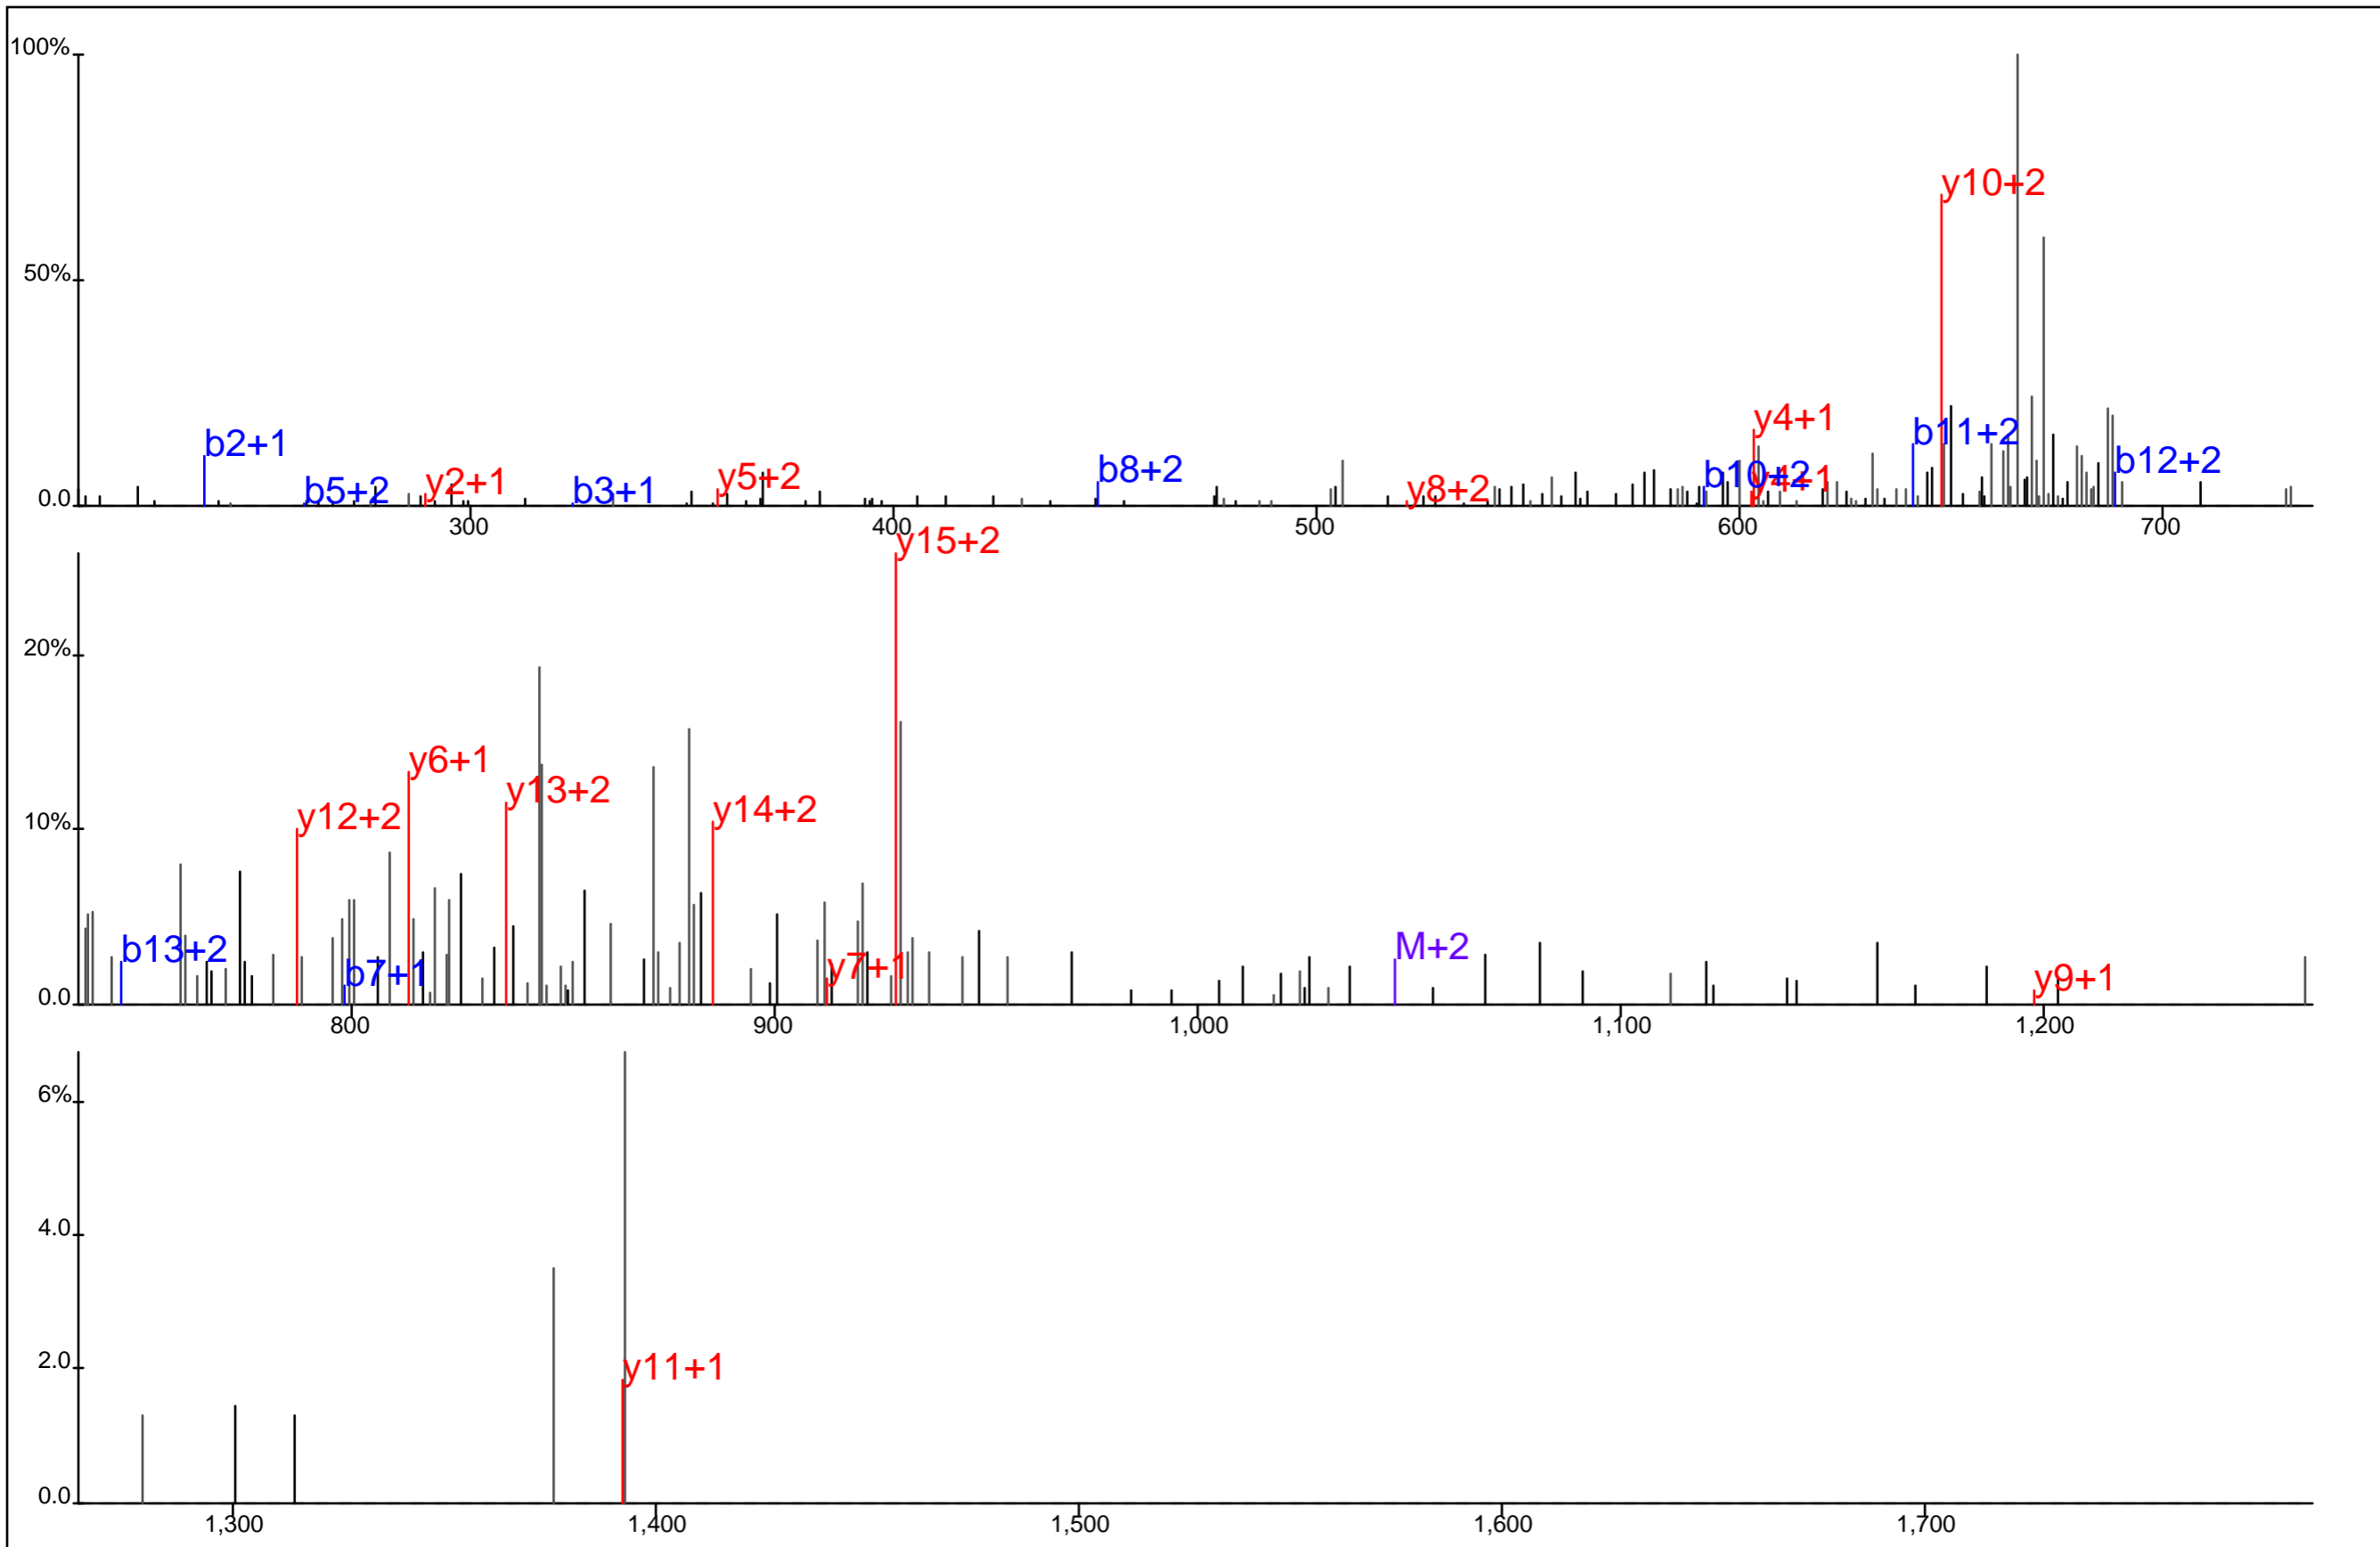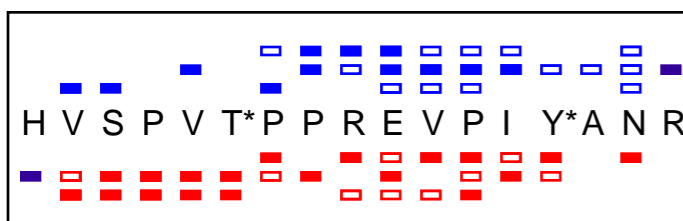

Protein Name: ADAM9  
 gi Accession: 6630618  
 Precursor Mass: 697.9998+3  
 Delta Mass: 3.379 ppm  
 XCorr: 15.08

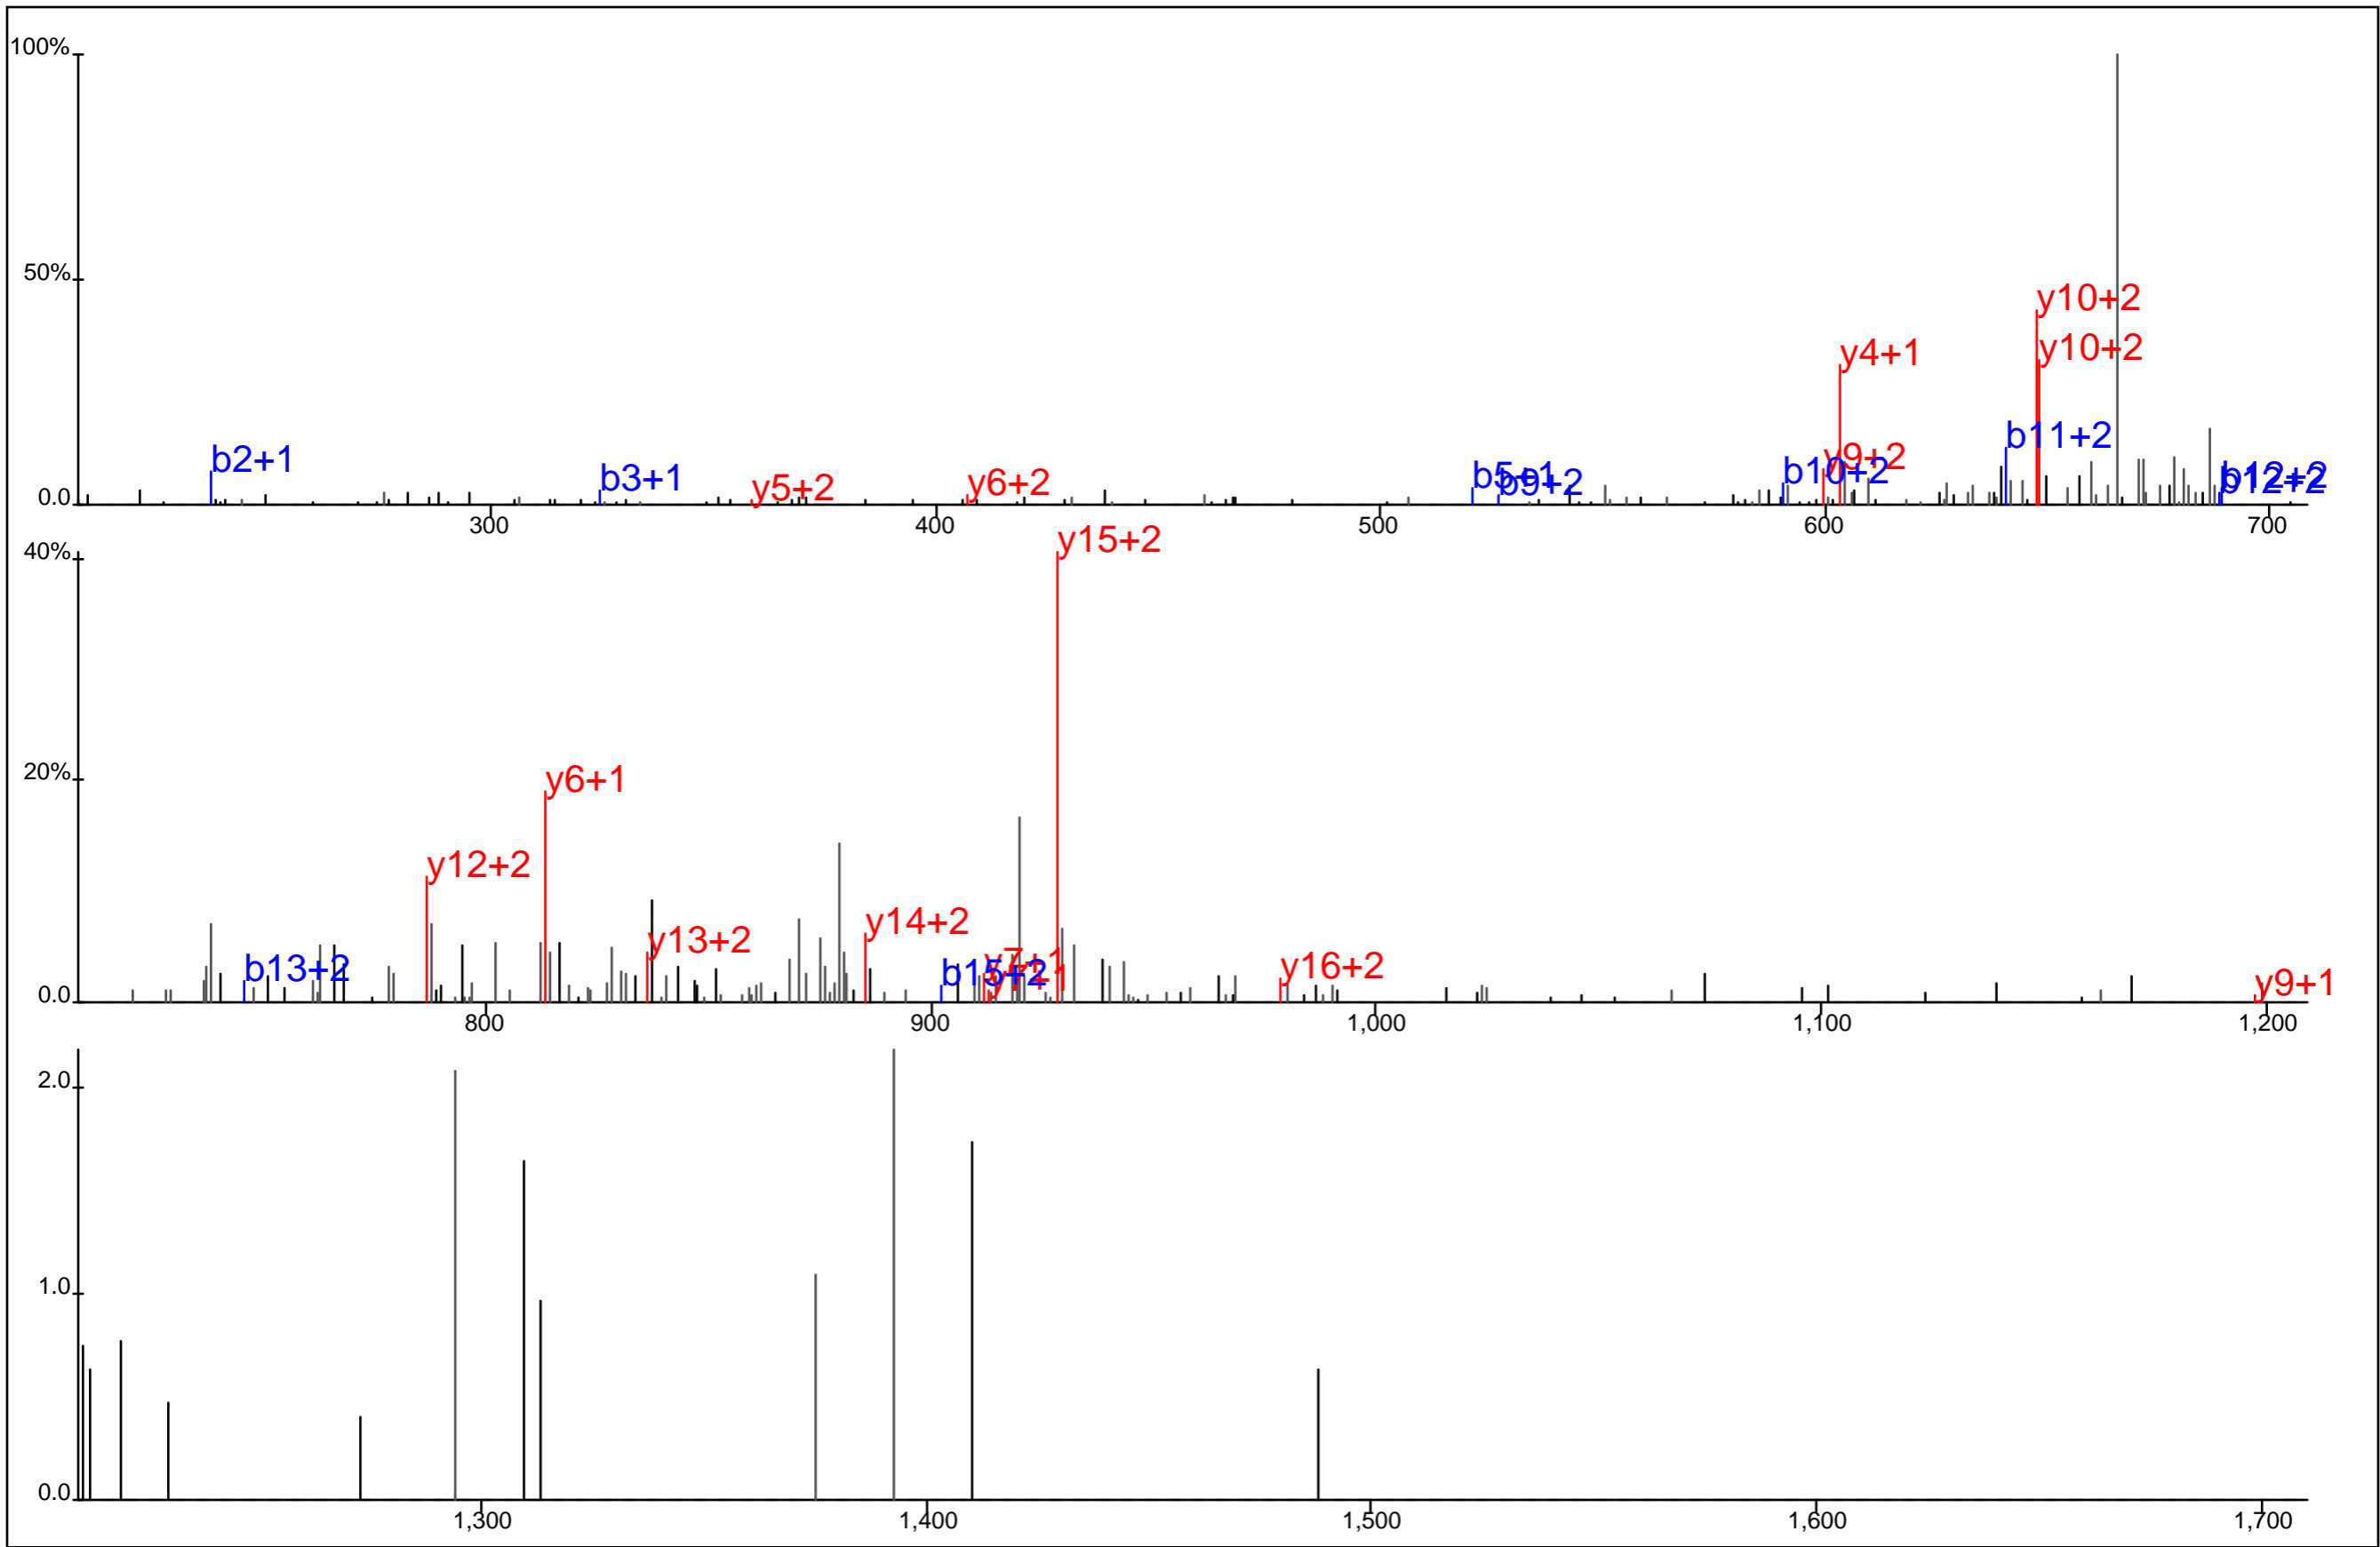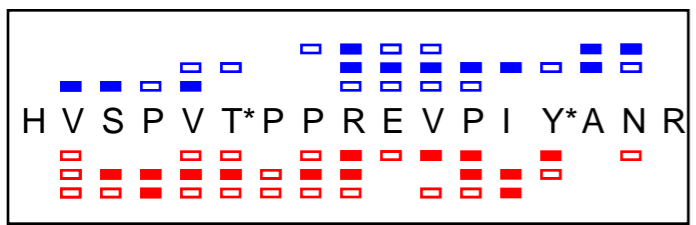

Protein Name: ADAM9  
 gi Accession: 6630618  
 Precursor Mass: 698.0002+3  
 Delta Mass: 4.081 ppm  
 XCorr: 23.88

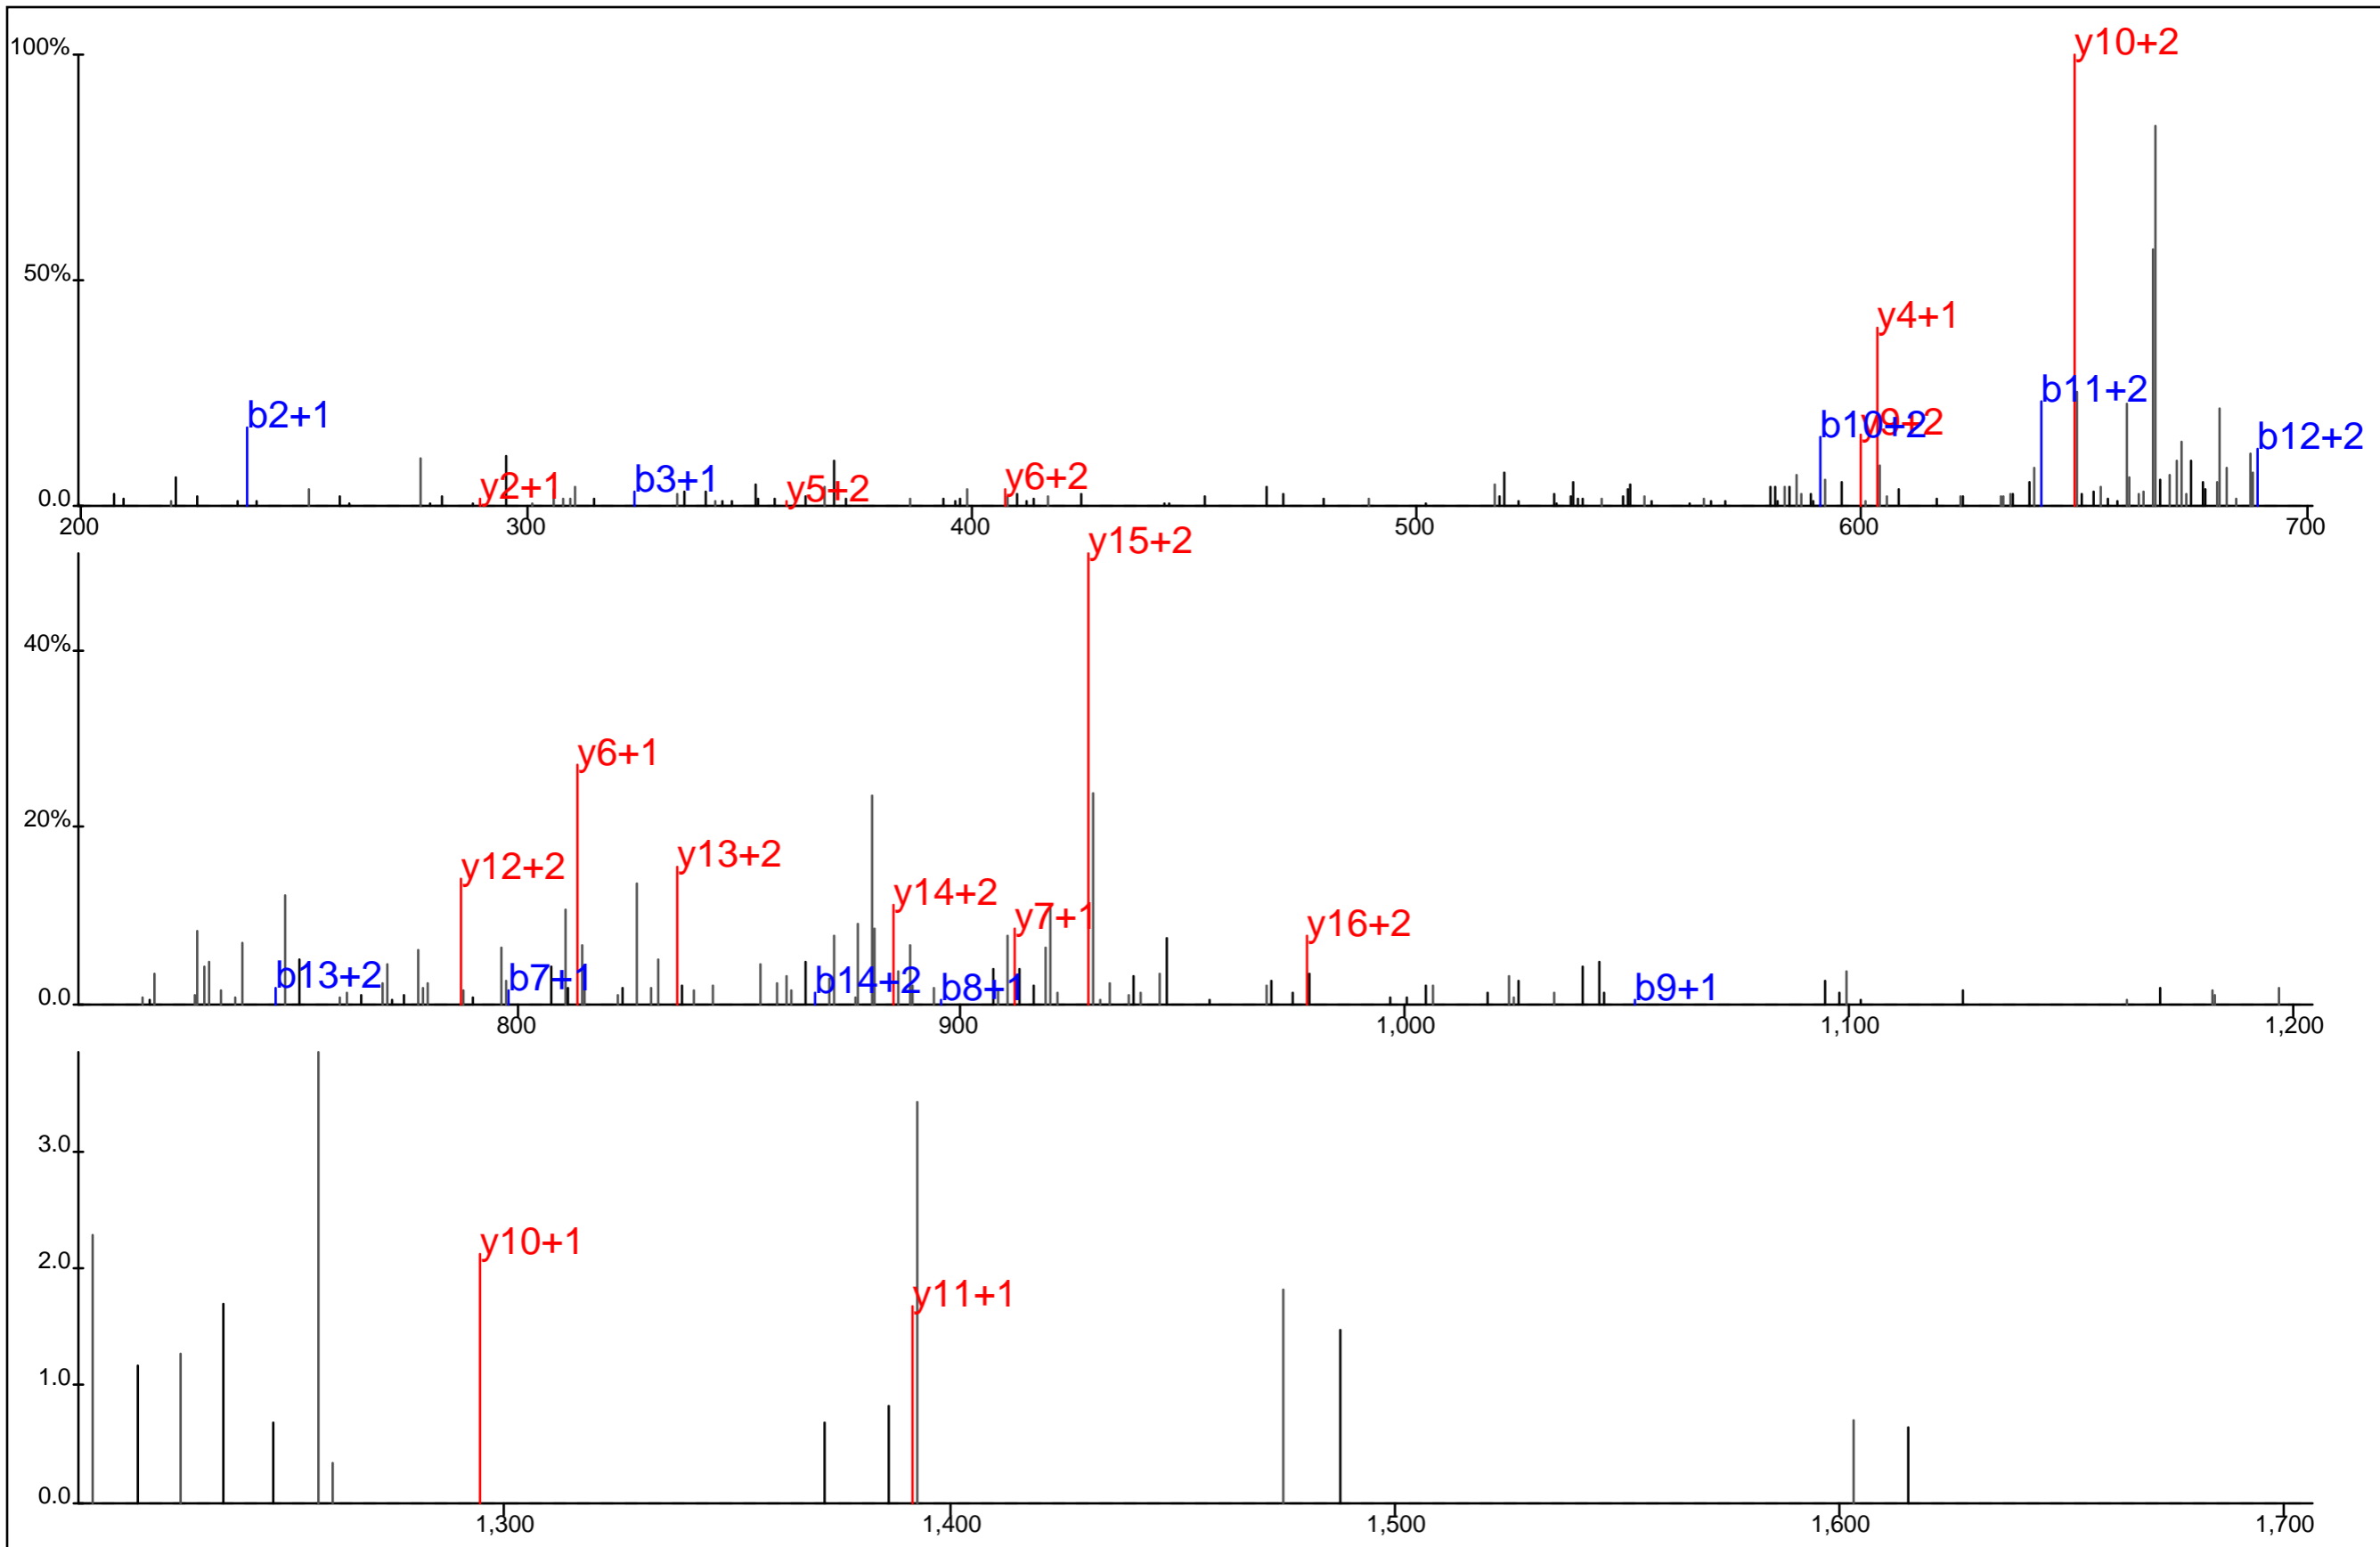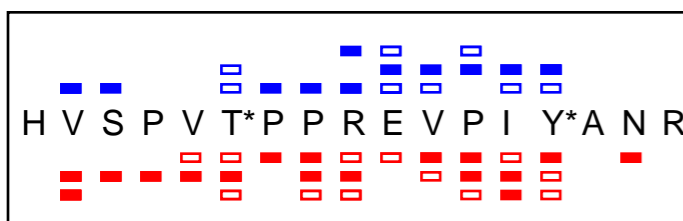

Protein Name: ADAM9  
 gi Accession: 6630618  
 Precursor Mass: 697.9998+3  
 Delta Mass: 3.379 ppm  
 XCorr: 23.34



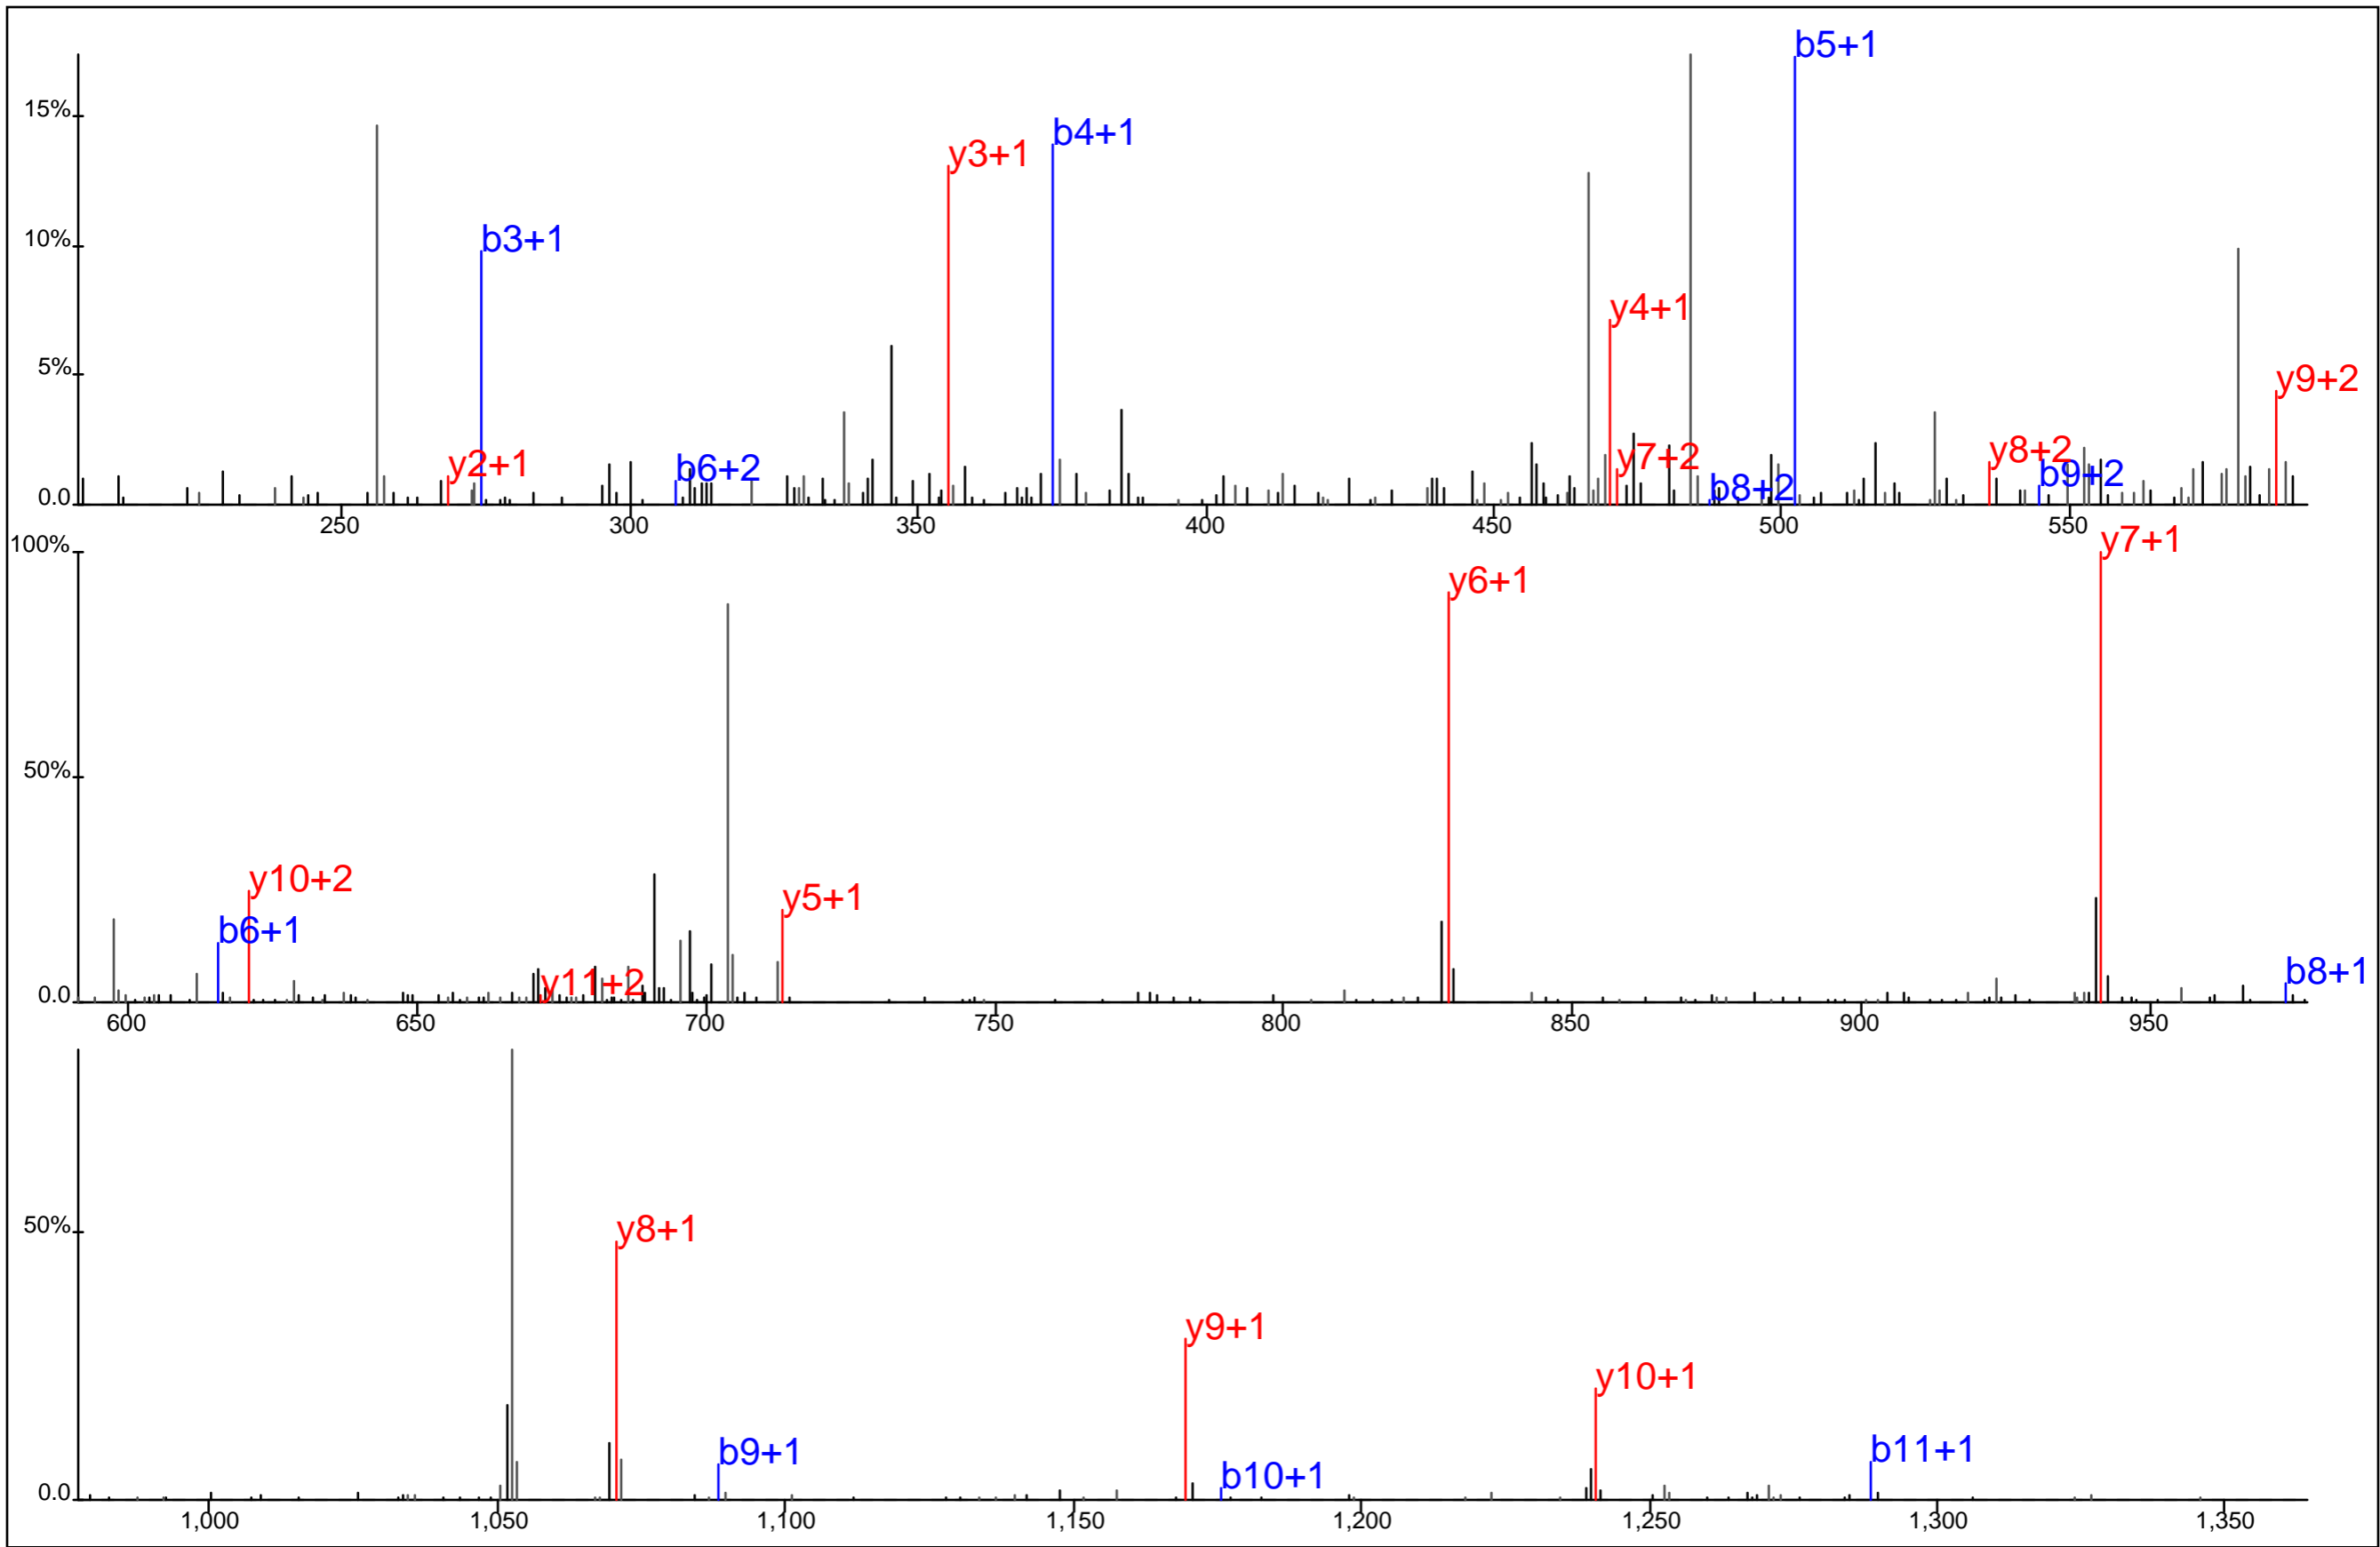

■ ▢ ▣ ▤ ▥ ▦ ▧ ▨  
**T T A V E I D Y\* D S L K#**  
▢ ▣ ▤ ▥ ▦ ▧ ▨ ▩

Protein Name: ADAP  
 gi Accession: 6166197  
 Precursor Mass: 721.8325+2  
 Delta Mass: 2.487 ppm  
 XCorr: 53.32



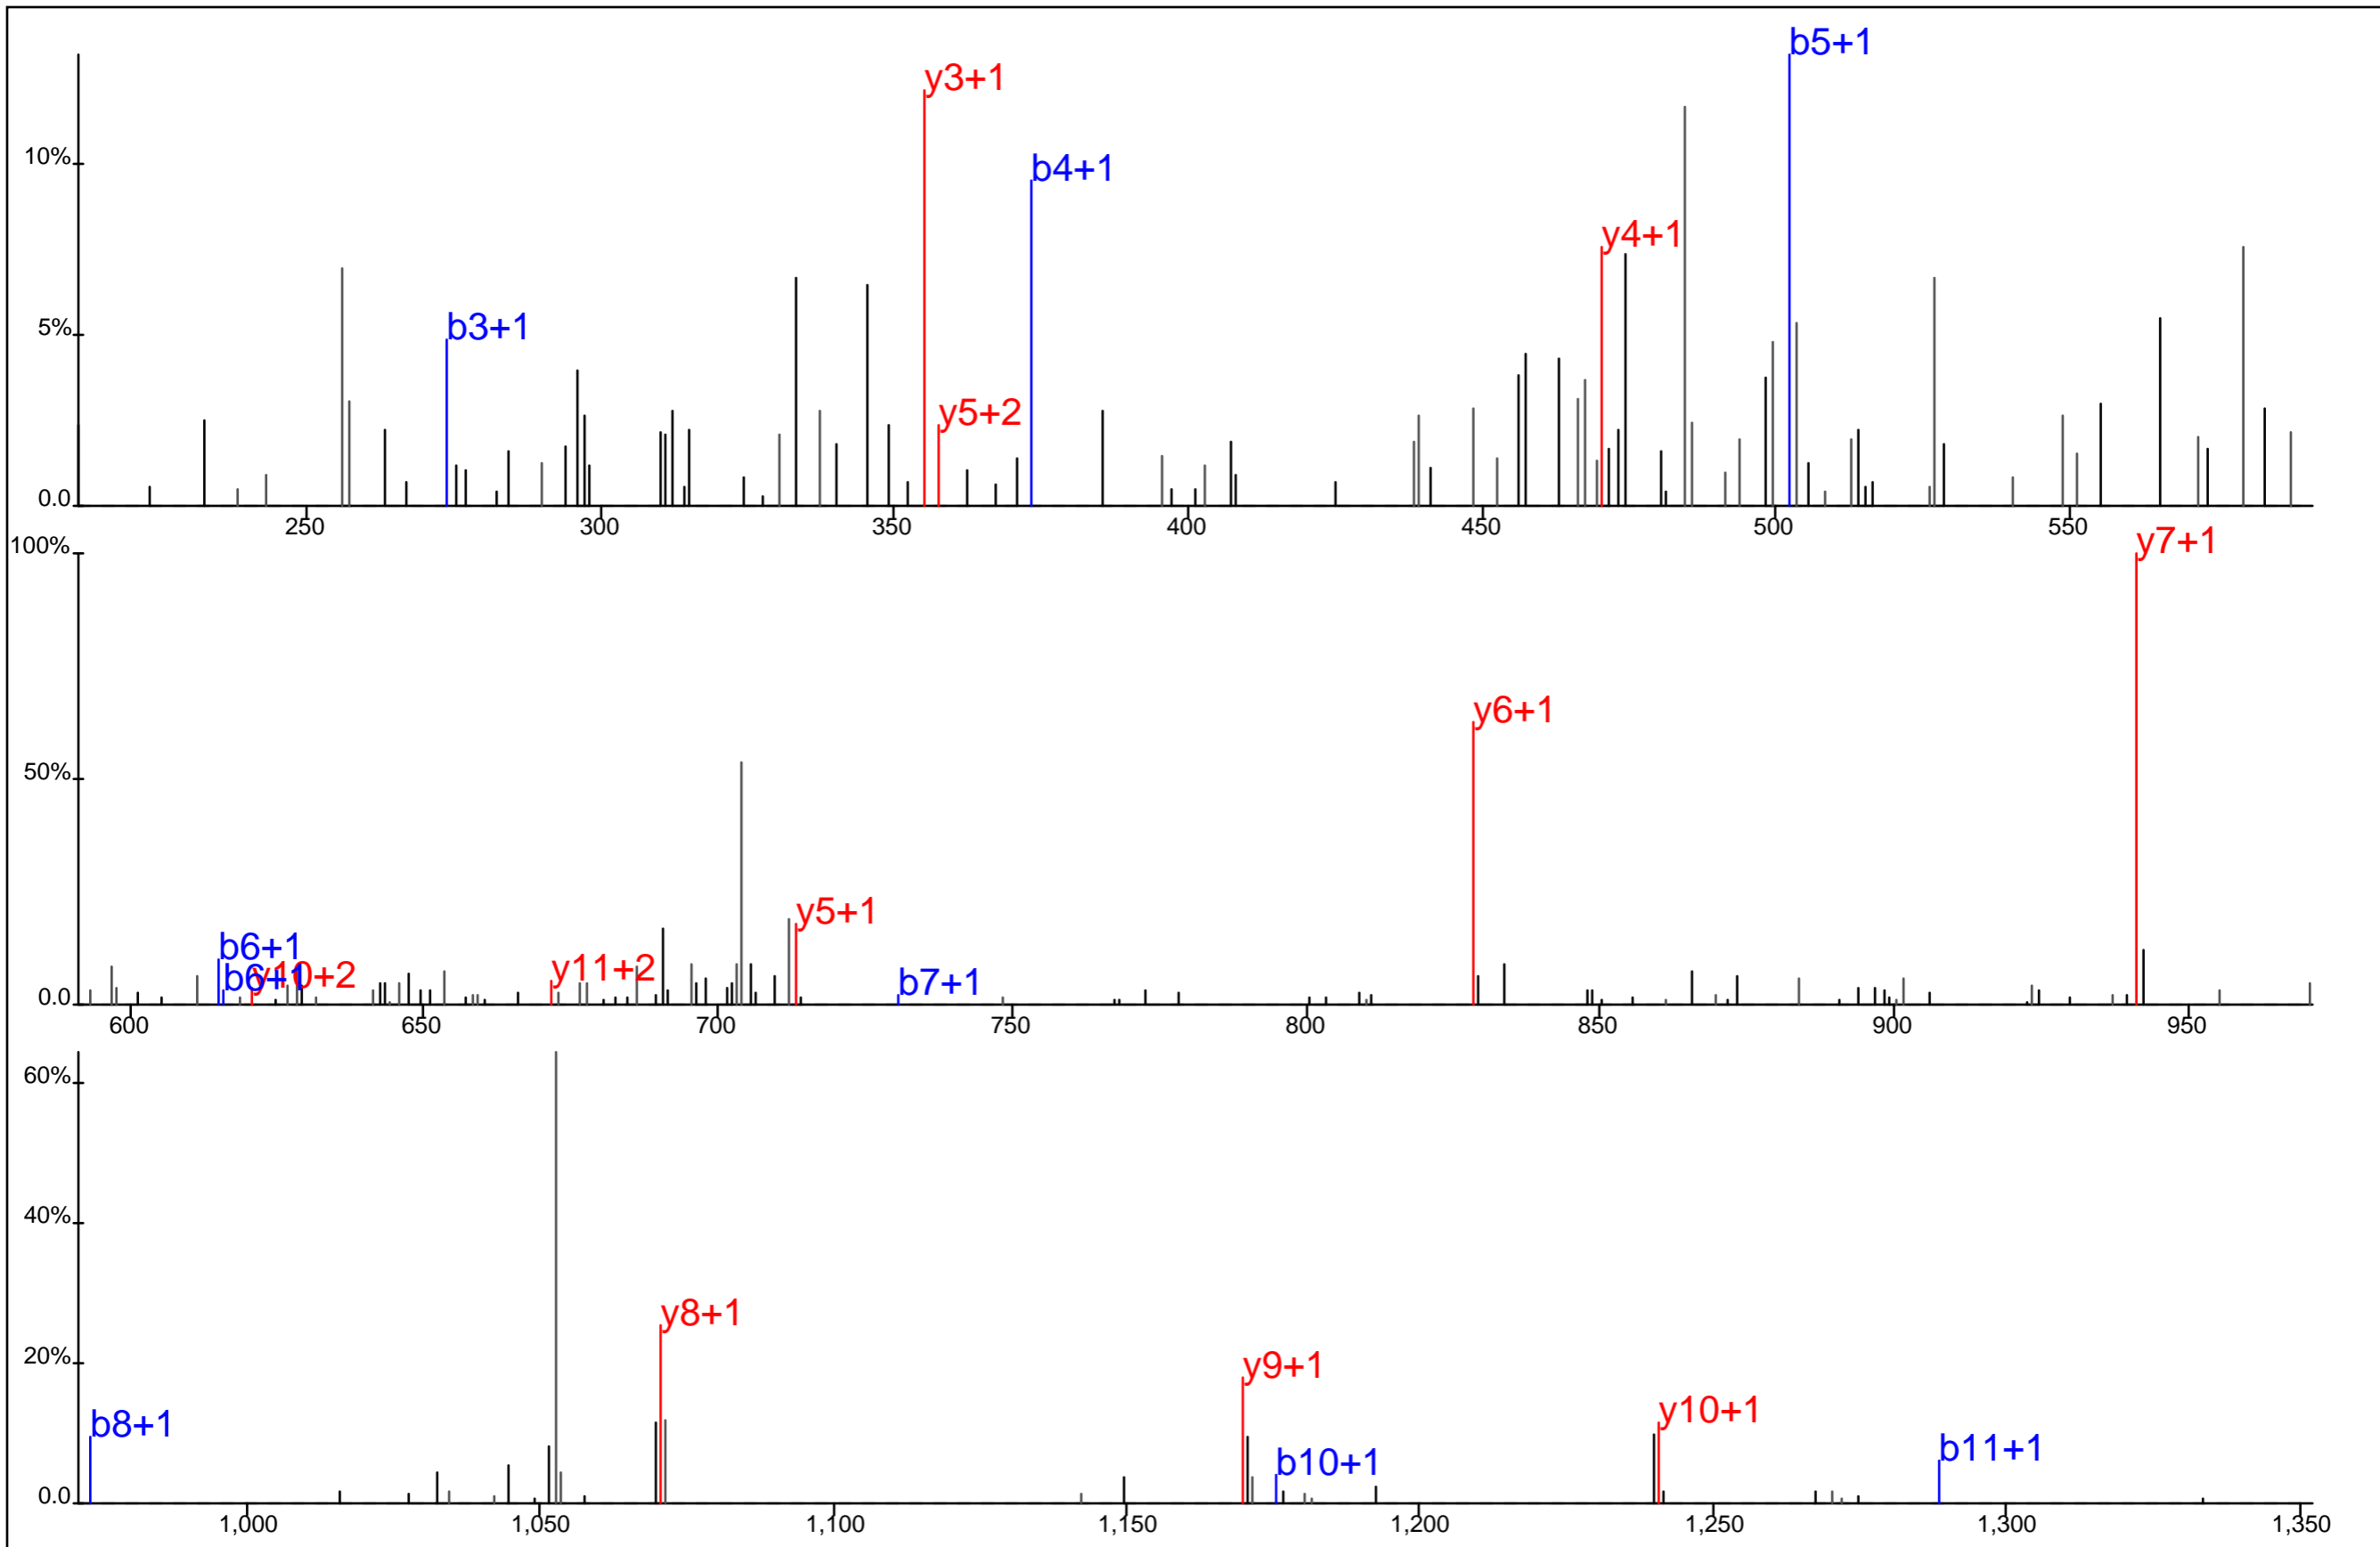

■ ■ ■ ■ ■ ■ ■ ■  
 T T A V E I D Y\* D S L K#  
■ ■ ■ ■ ■ ■ ■ ■

Protein Name: ADAP  
 gi Accession: 6166197  
 Precursor Mass: 721.8324+2  
 Delta Mass: 2.321 ppm  
 XCorr: 60.66



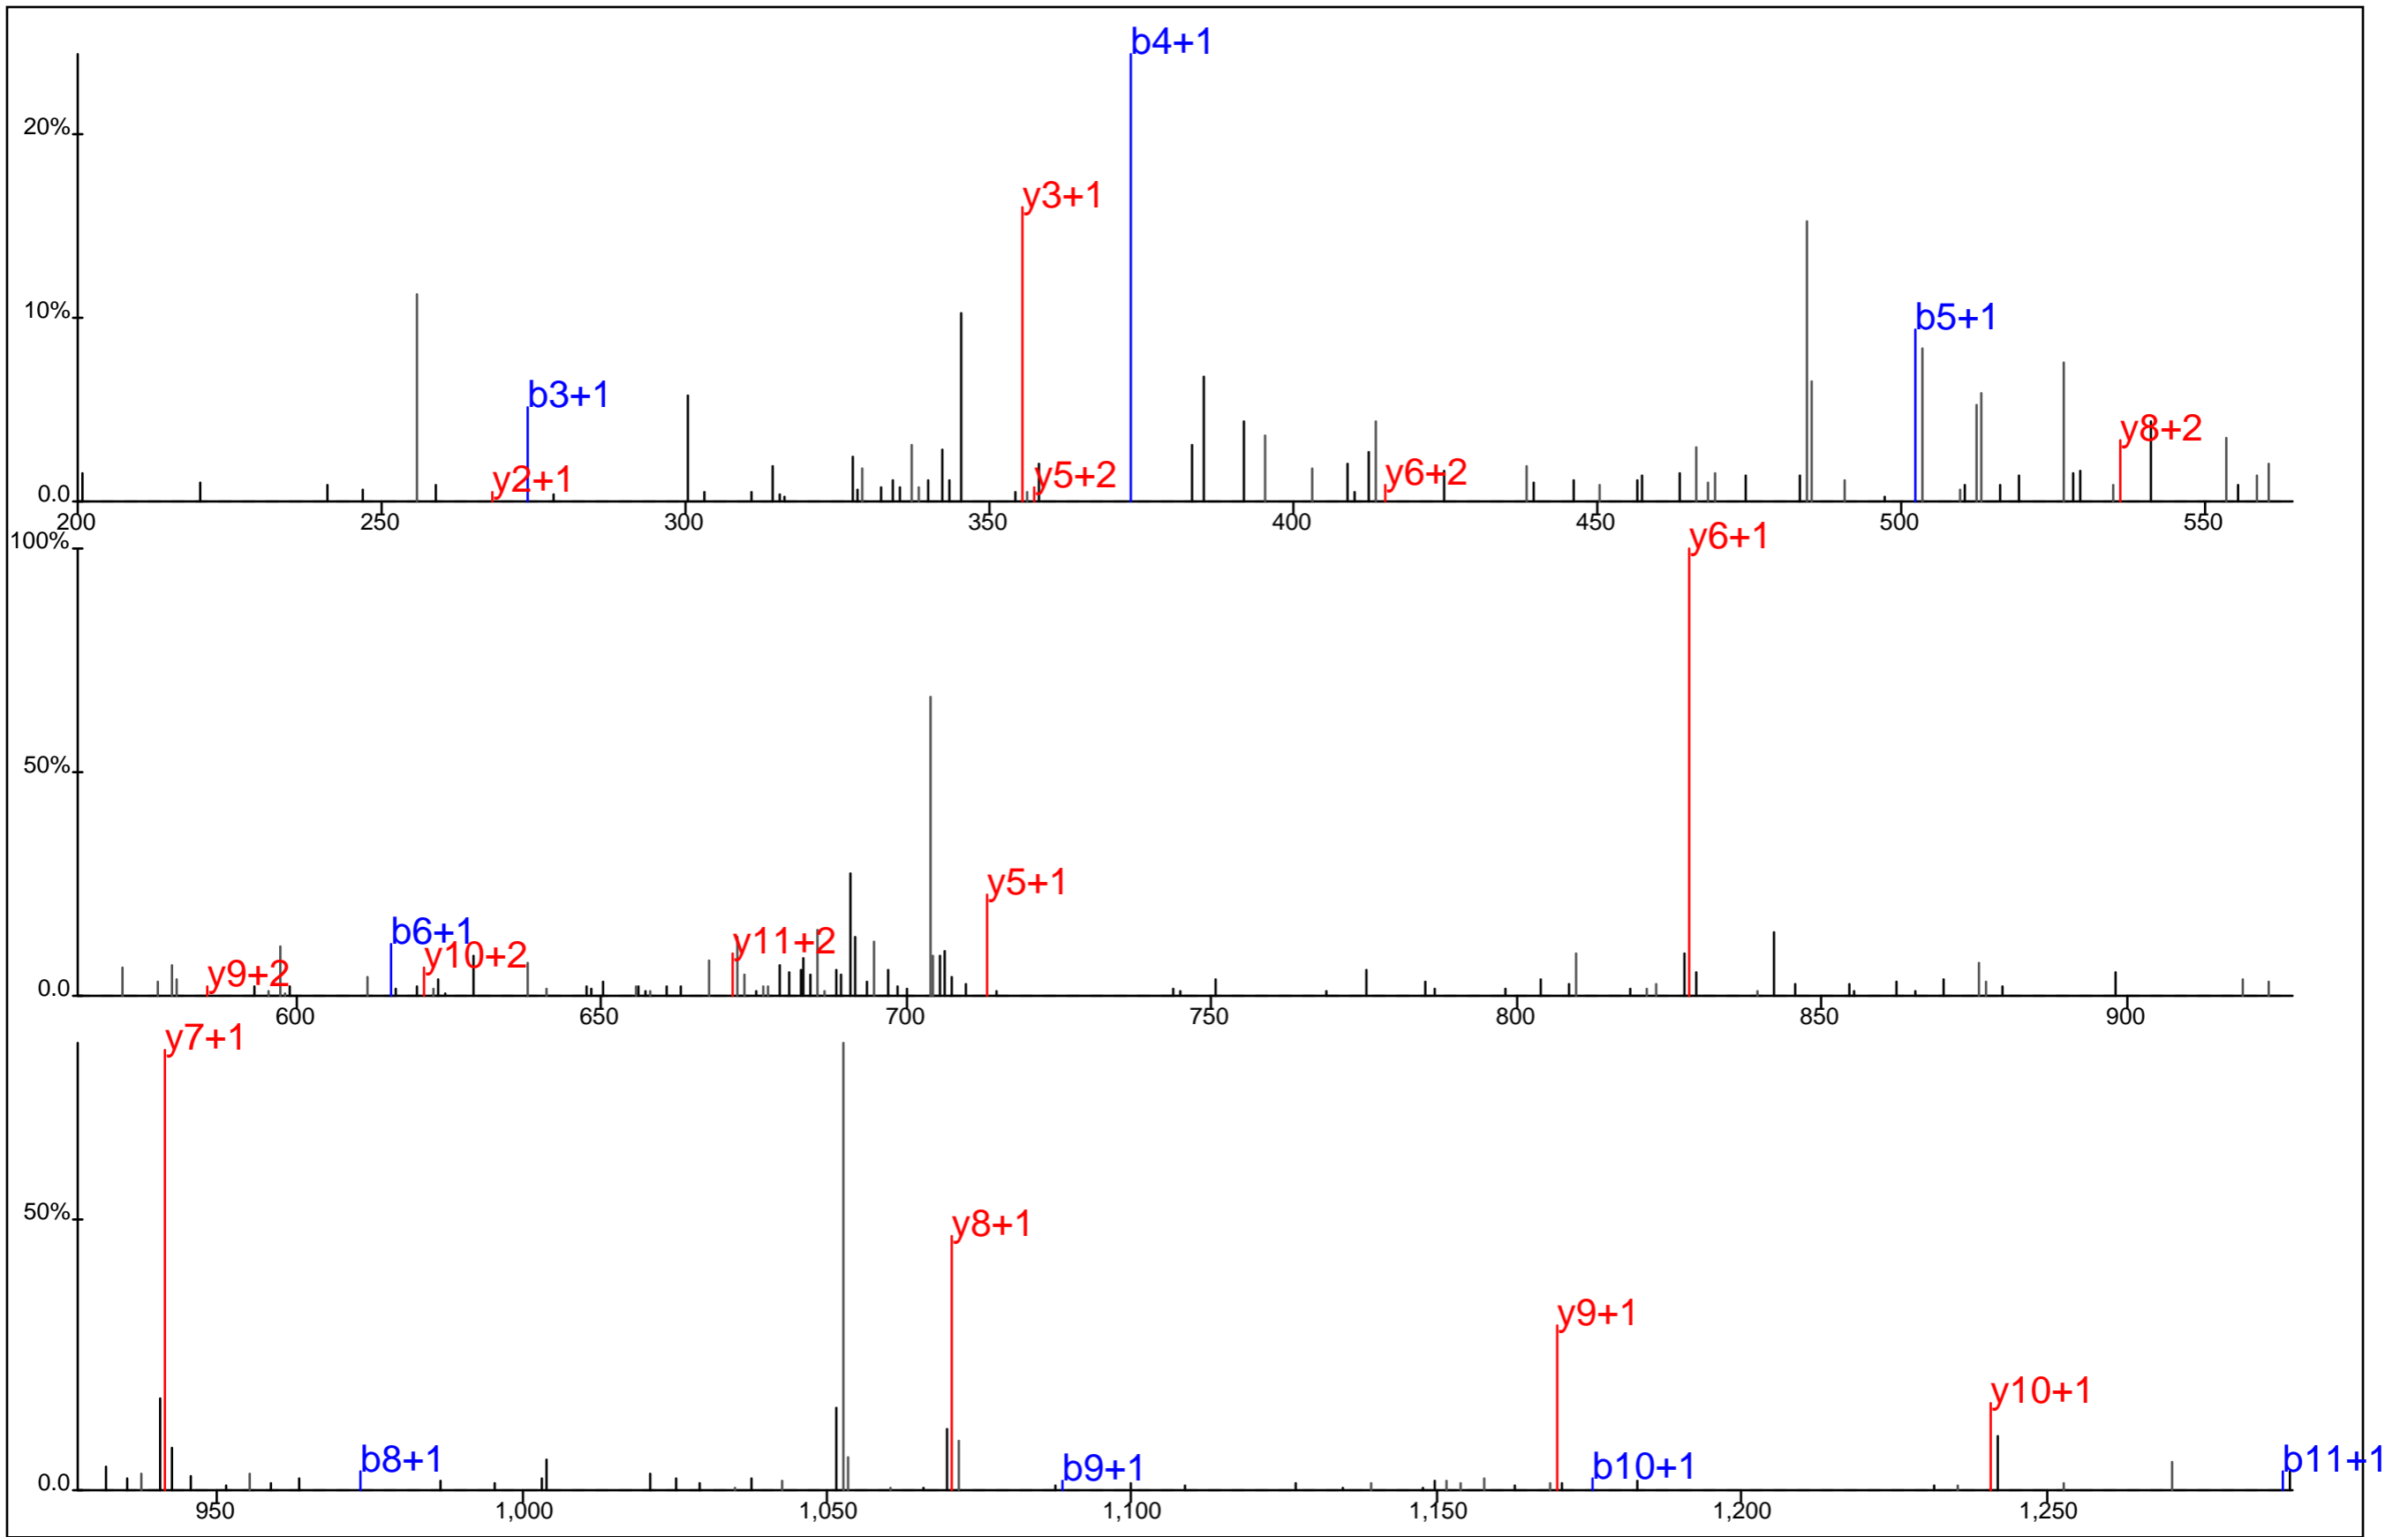

▢ ▢ ▢ ▢ ▢ ▢ ▢ ▢ ▢  
 T T A V E I D Y\* D S L K#  
▢ ▢ ▢ ▢ ▢ ▢ ▢ ▢ ▢

Protein Name: ADAP  
 gi Accession: 6166197  
 Precursor Mass: 721.8333+2  
 Delta Mass: 3.589 ppm  
 XCorr: 49.9

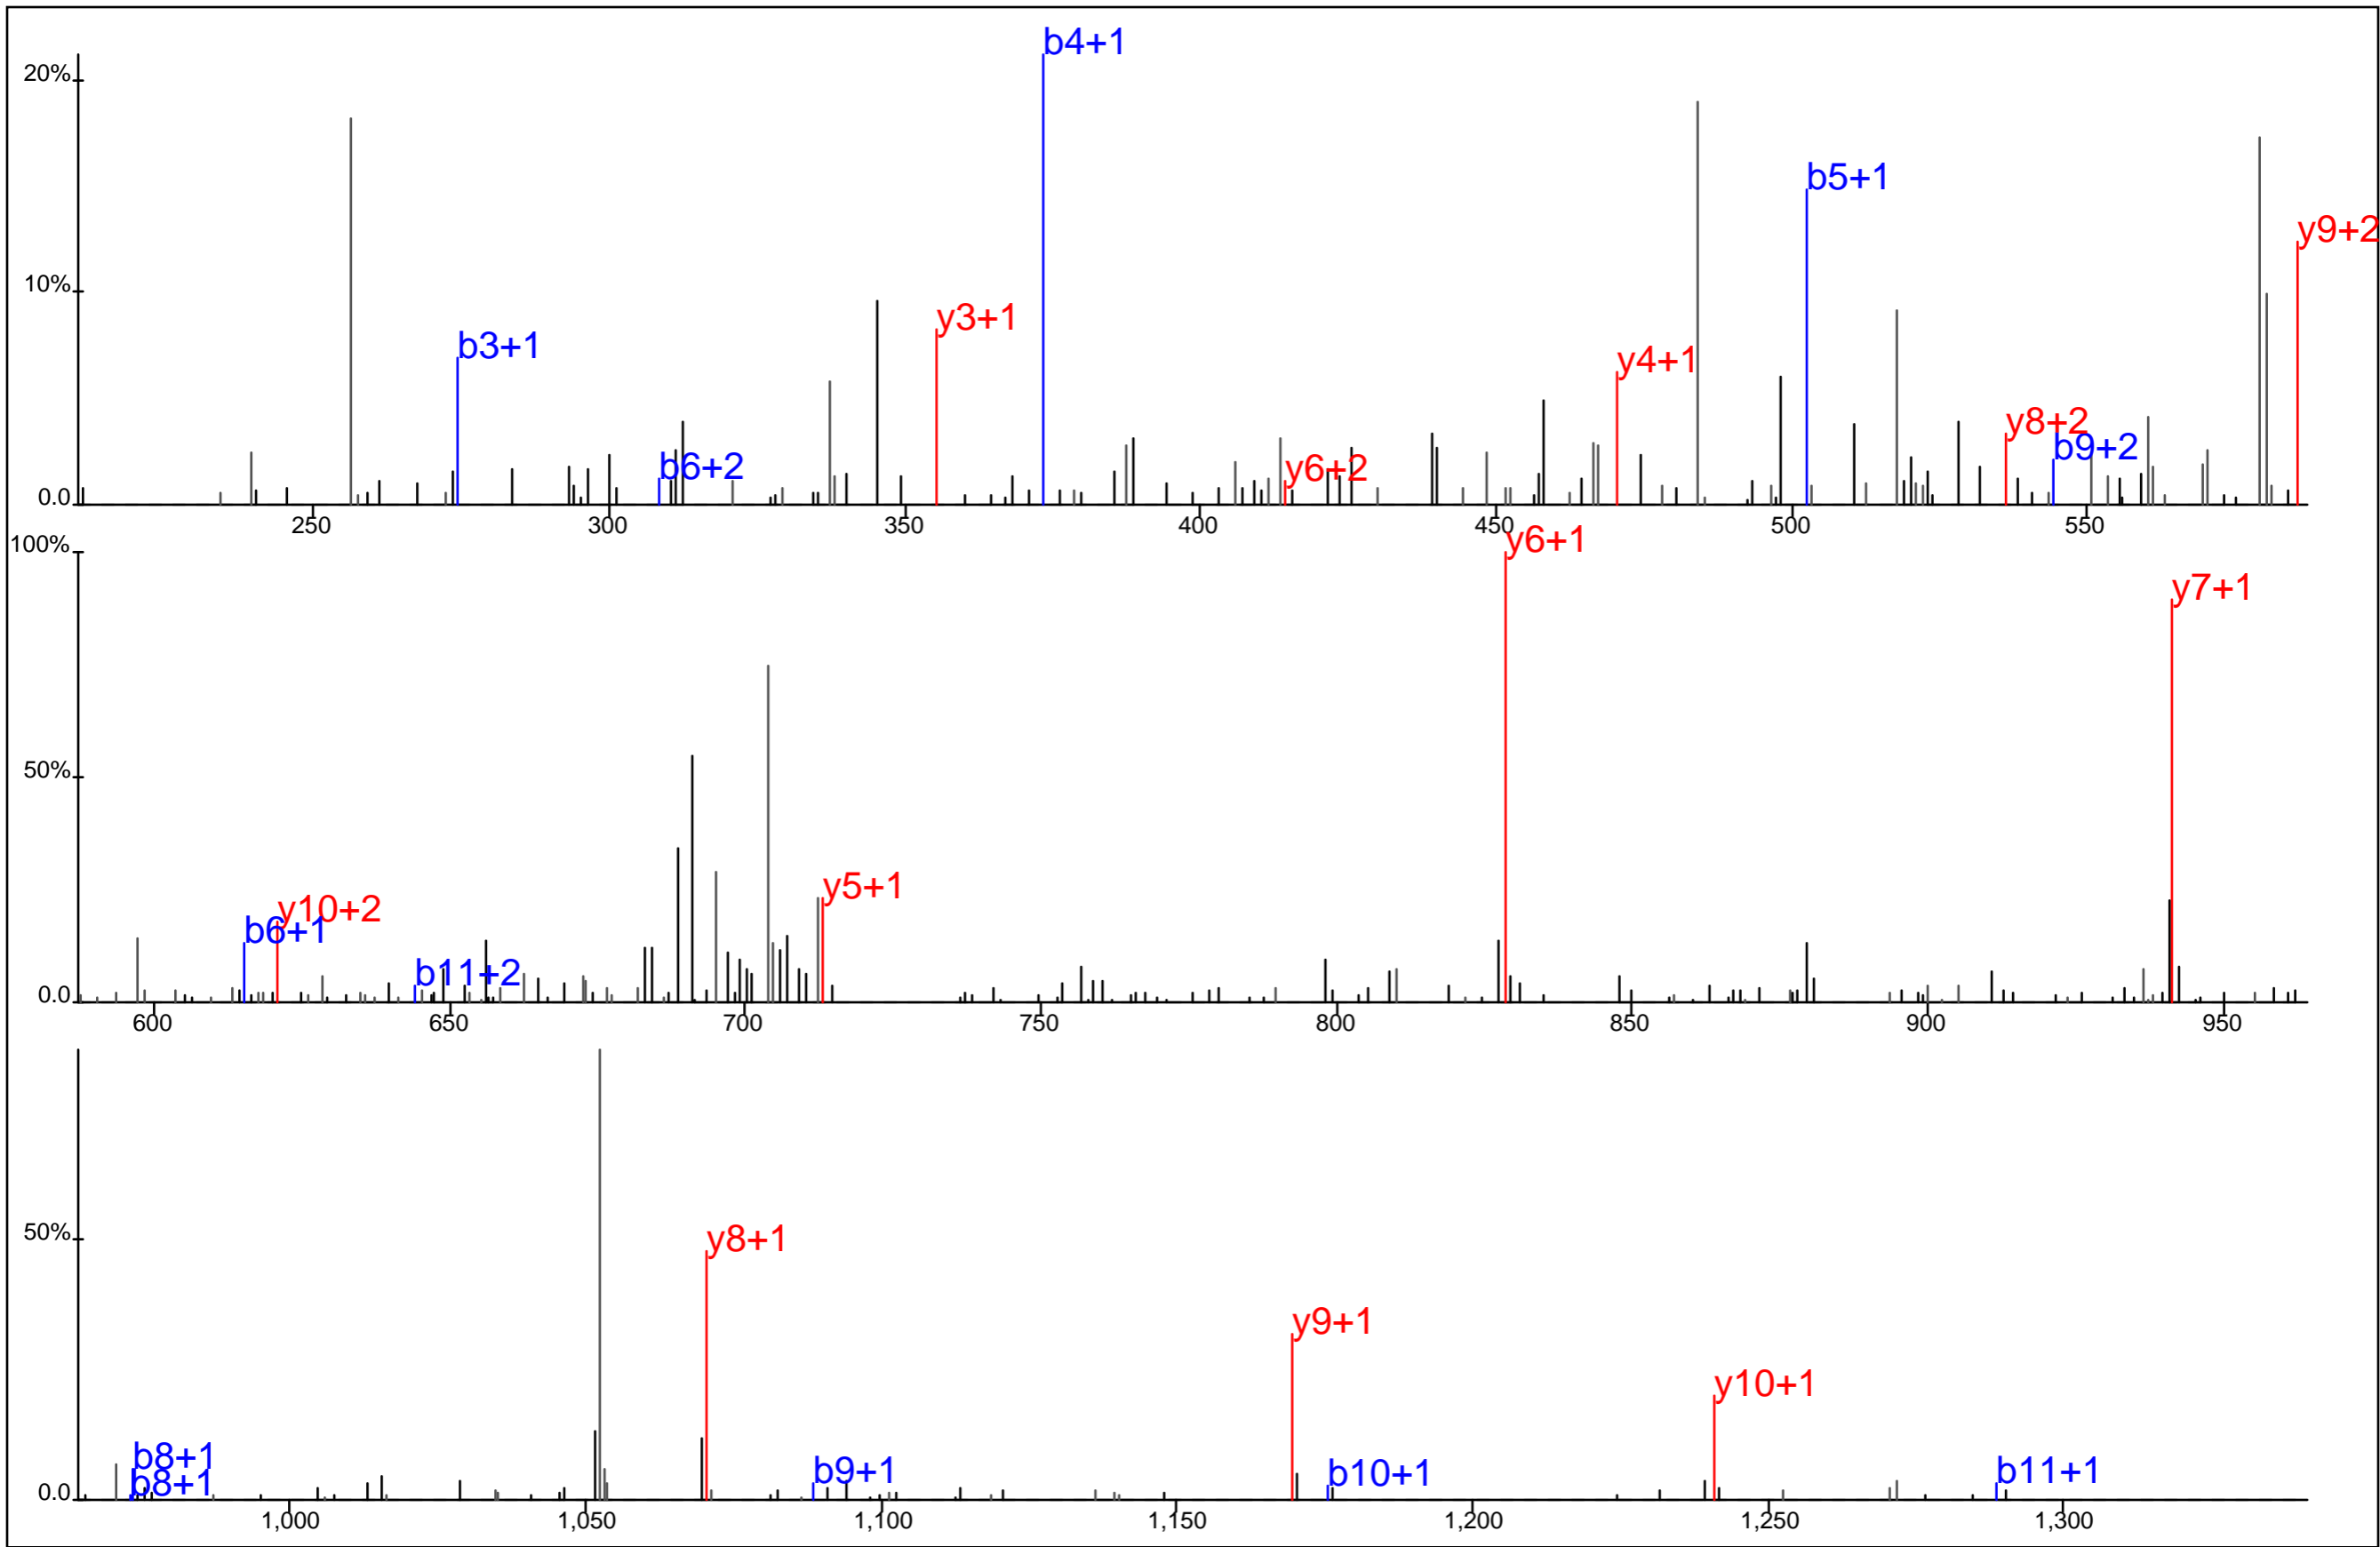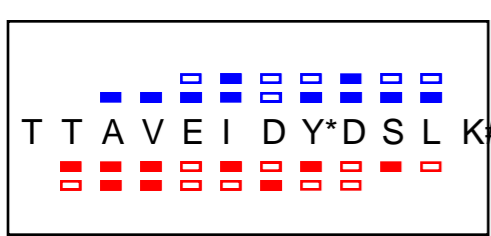

Protein Name: ADAP  
 gi Accession: 6166197  
 Precursor Mass: 721.8328+2  
 Delta Mass: 2.910 ppm  
 XCorr: 61.91

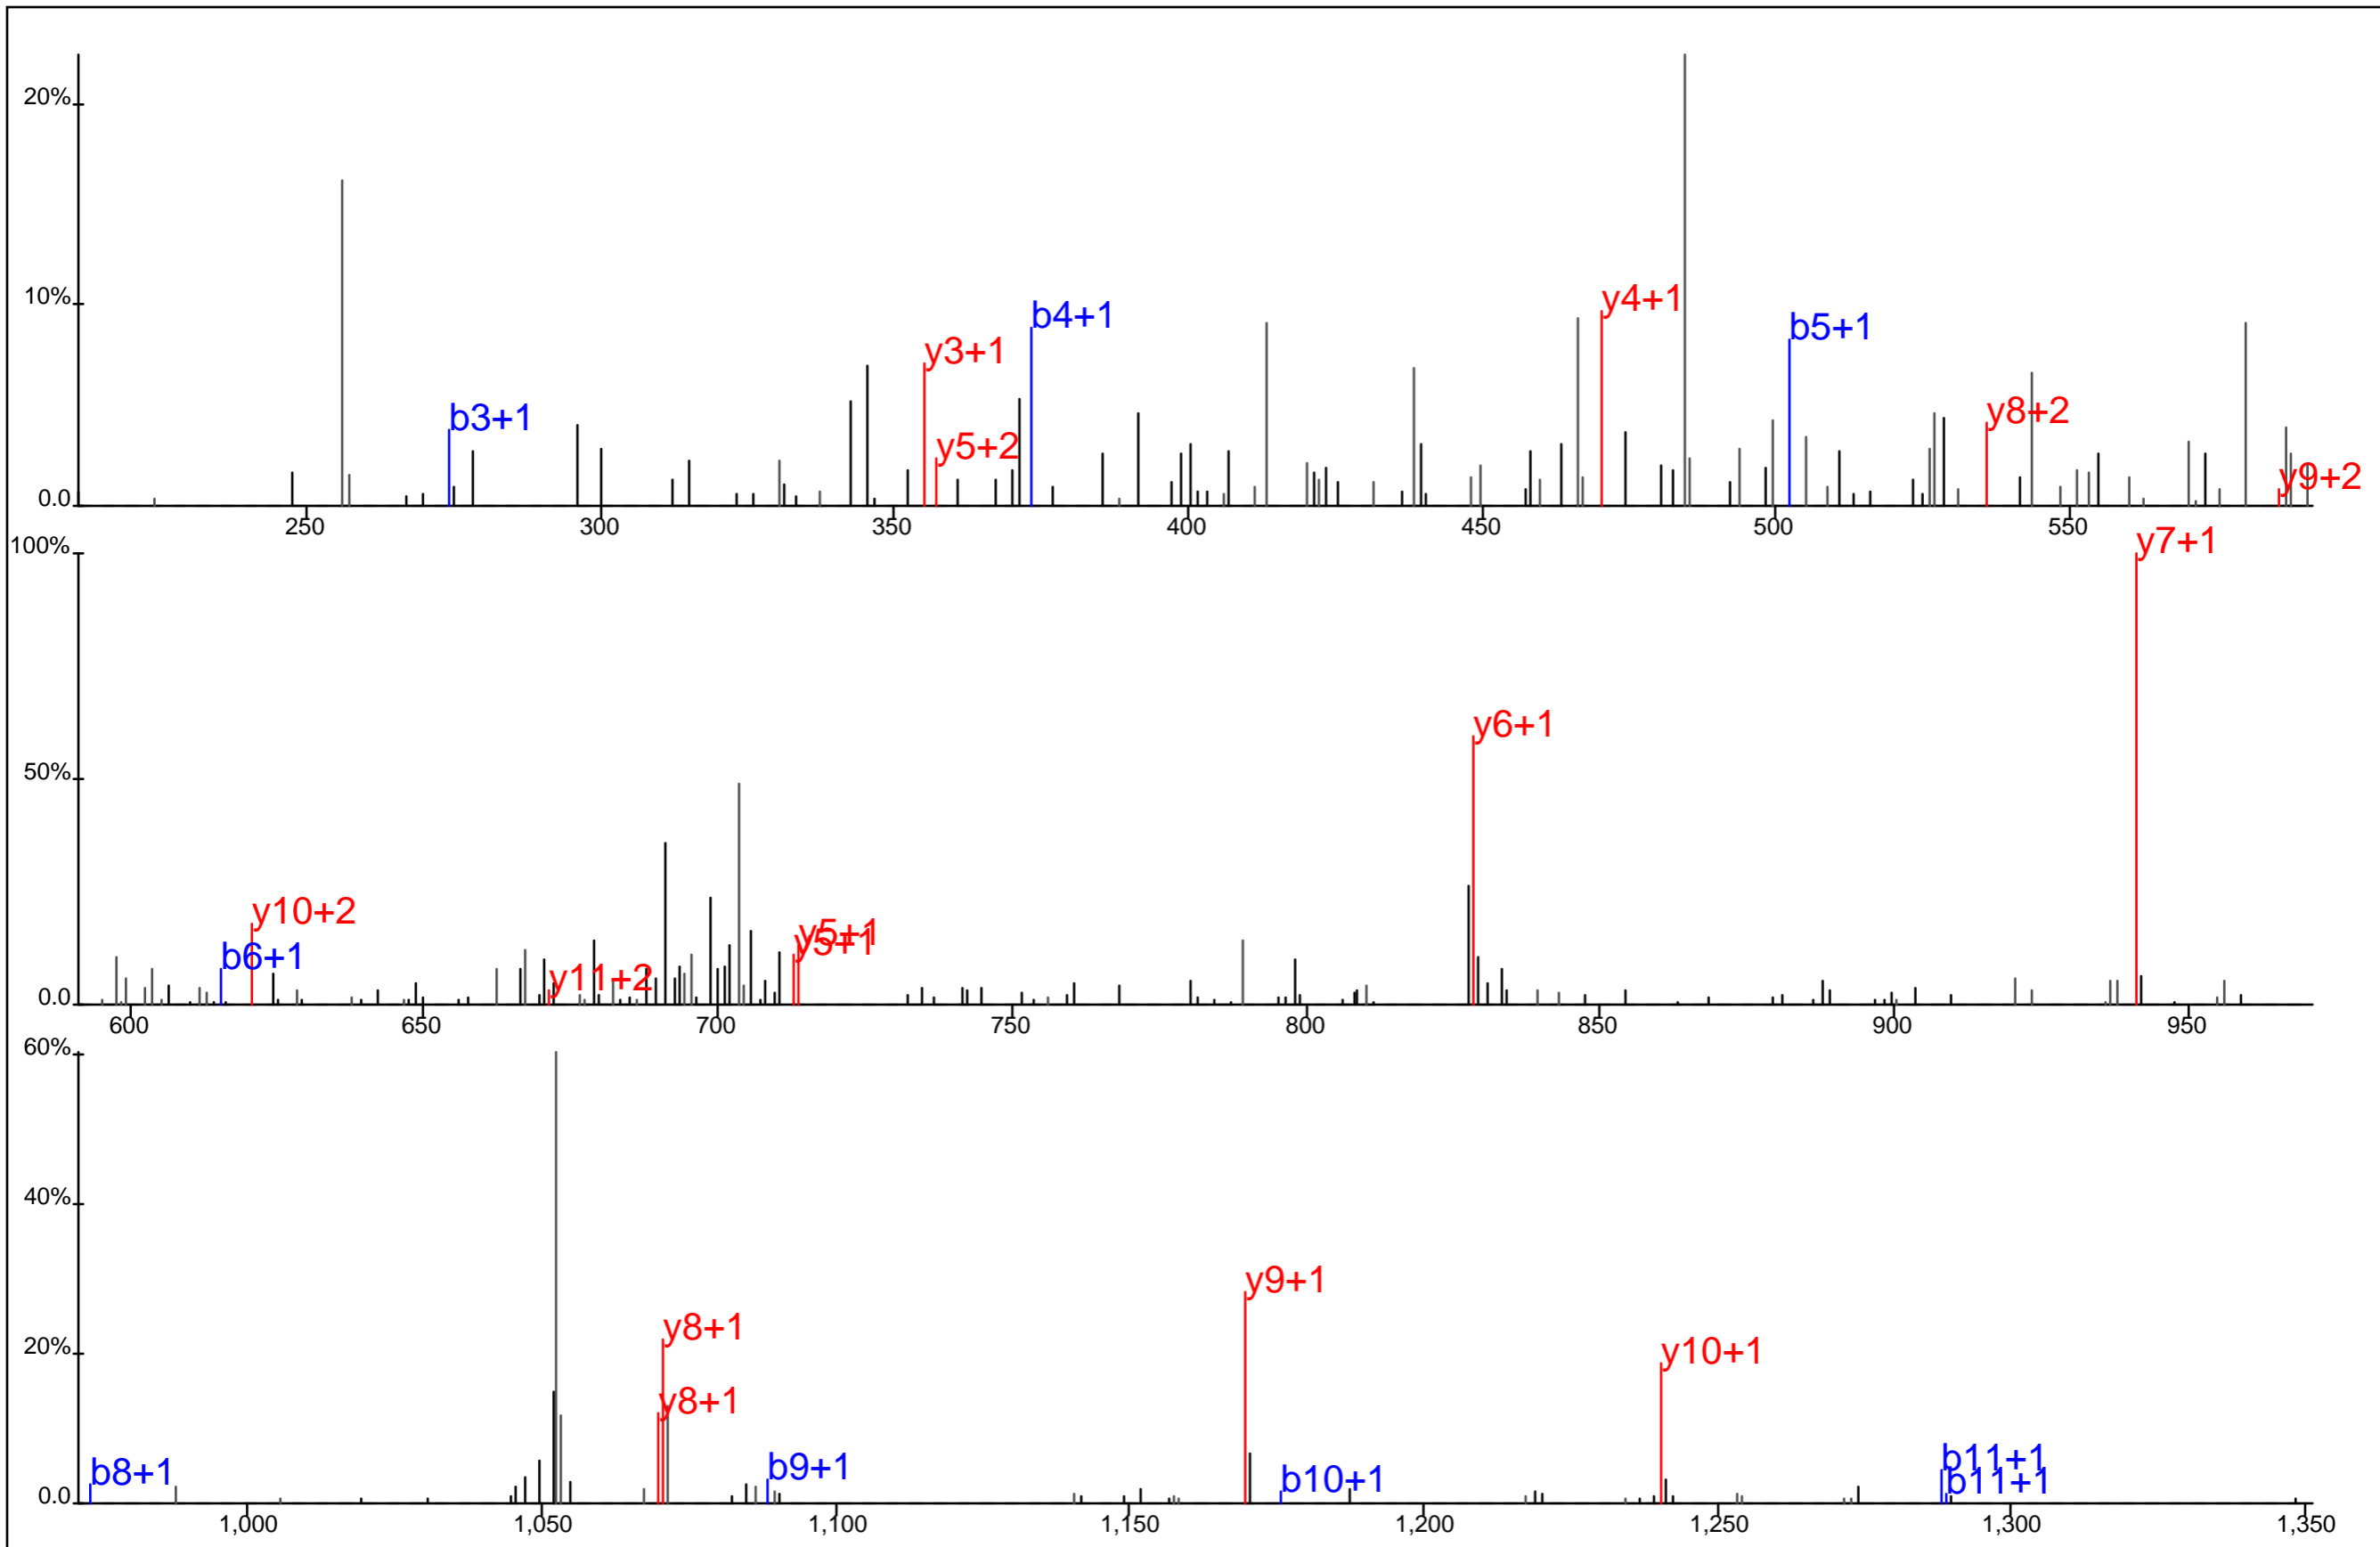

■ ■ ■ ■ ■ ■ ■ ■  
 T T A V E I D Y\* D S L K#  
□ □ □ □ □ □ □ □

Protein Name: ADAP  
 gi Accession: 6166197  
 Precursor Mass: 721.8354+2  
 Delta Mass: 6.466 ppm  
 XCorr: 56.2



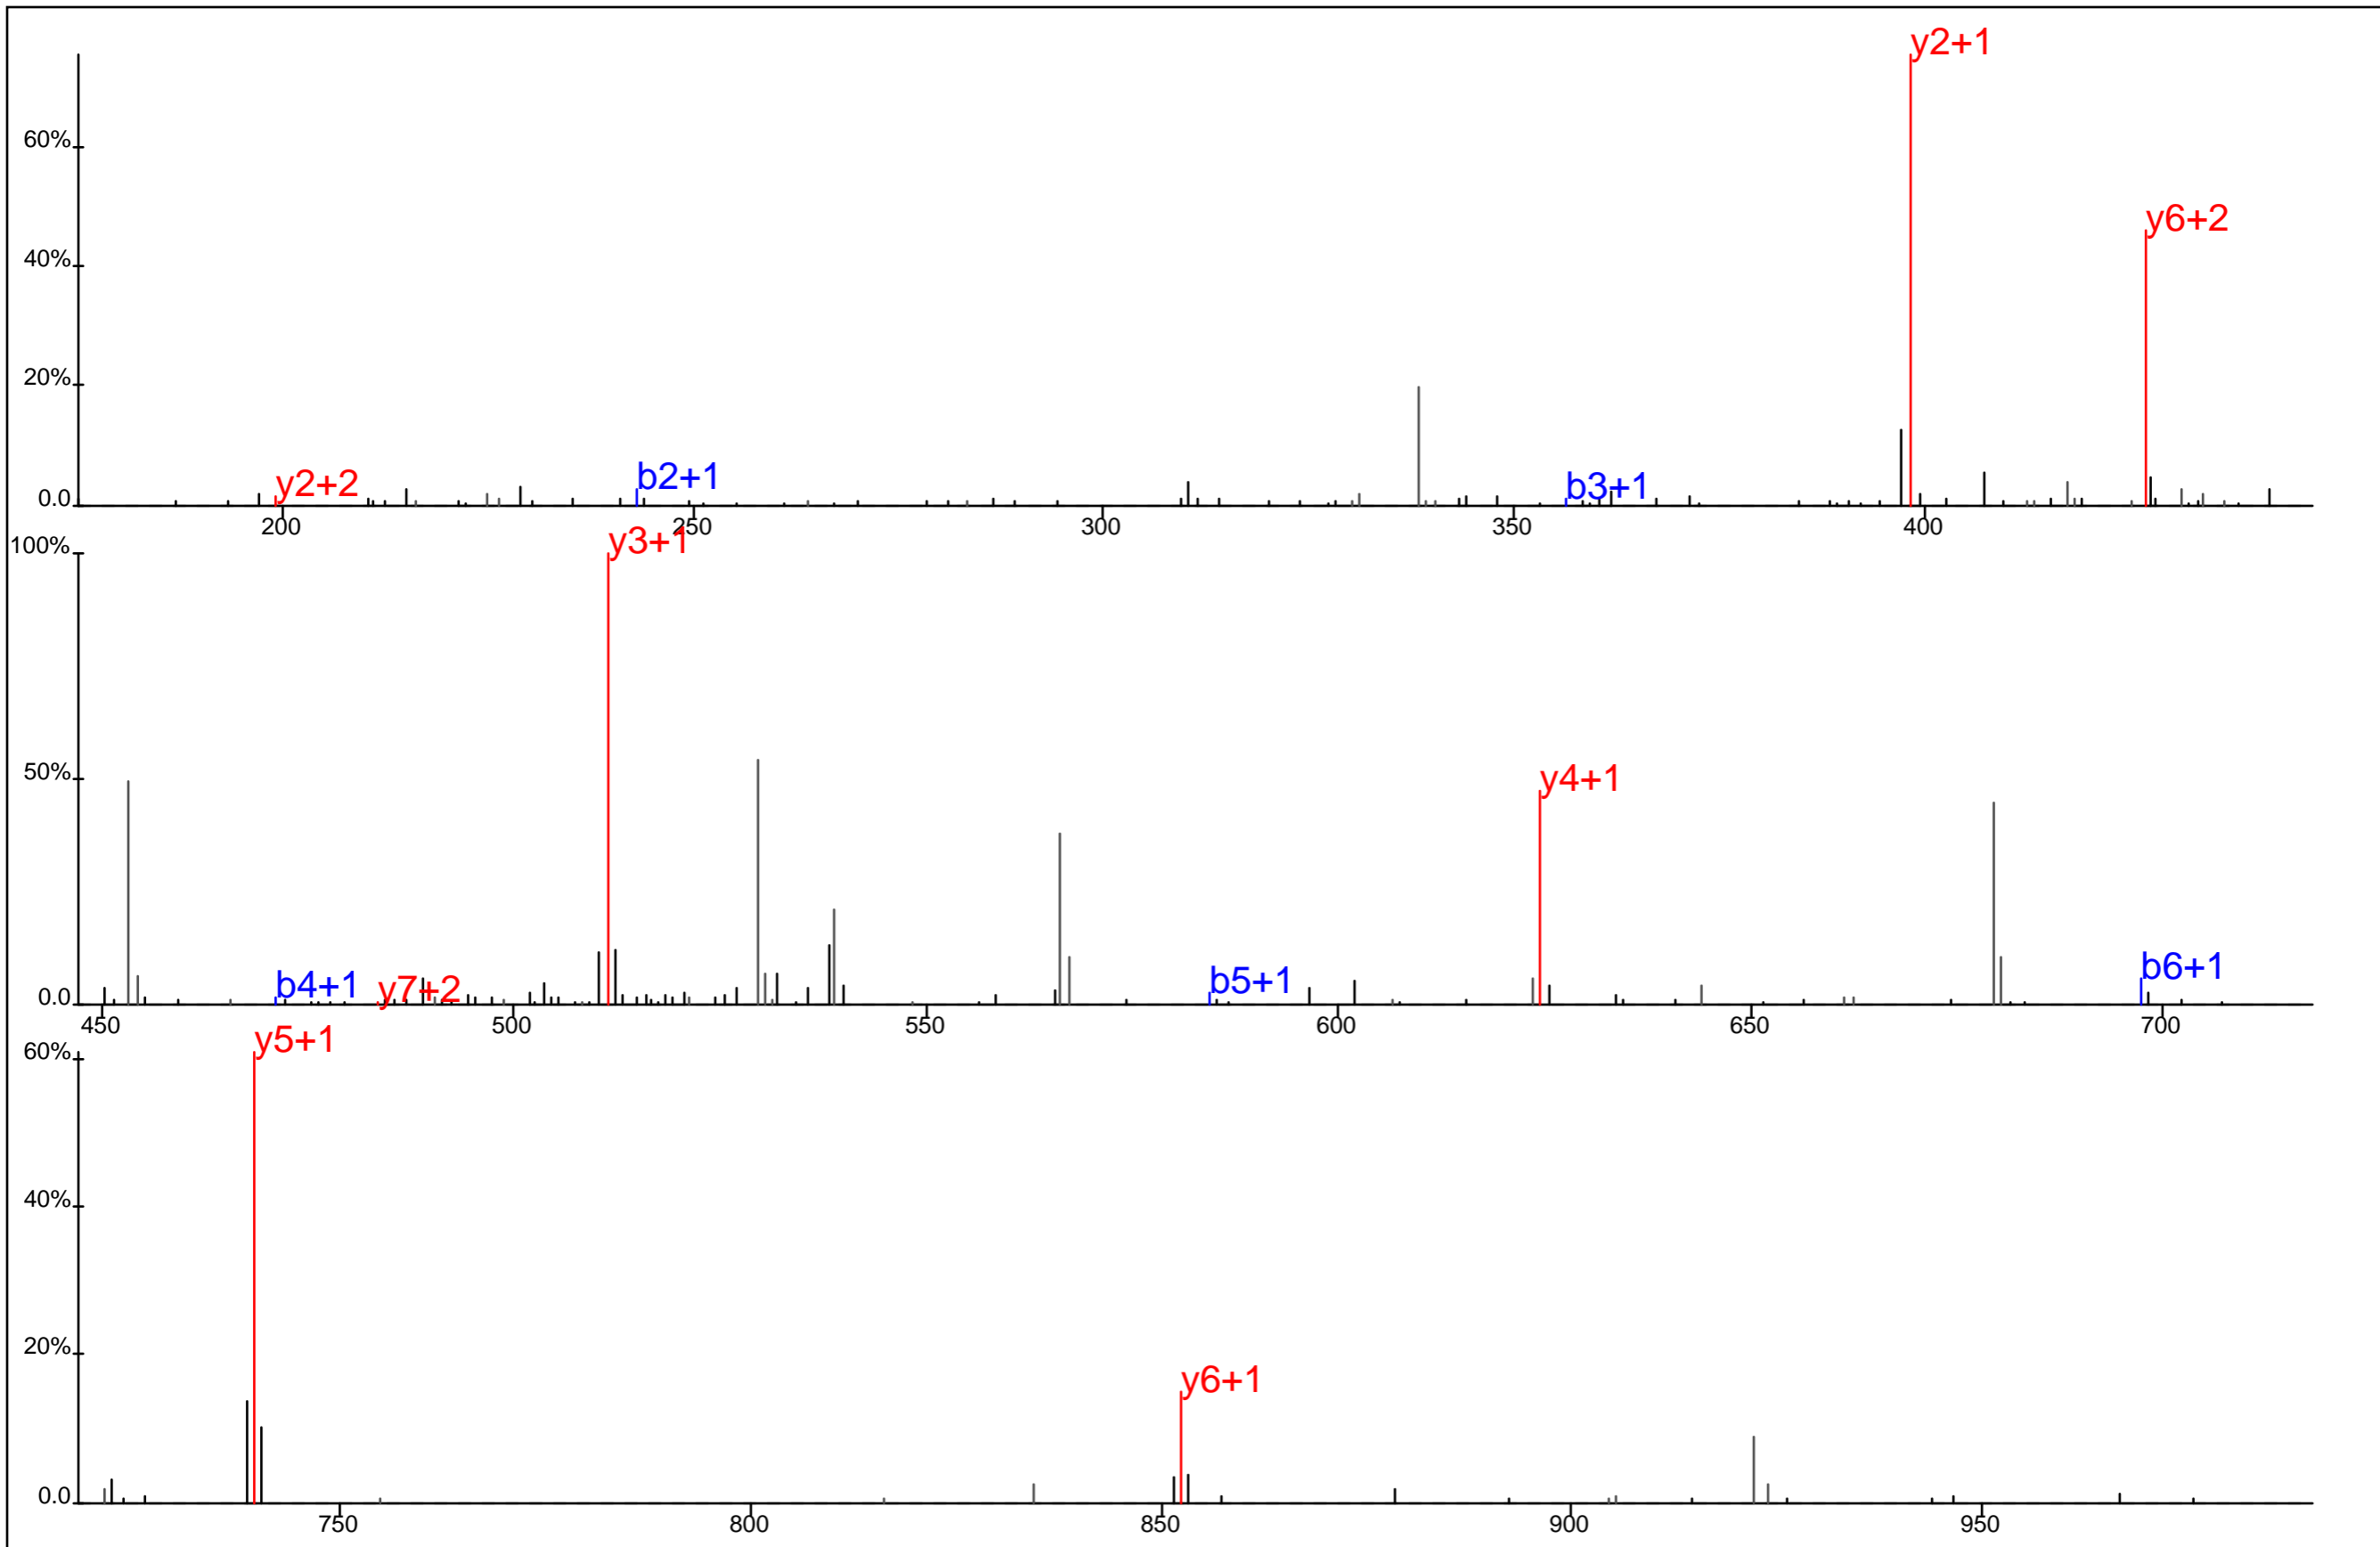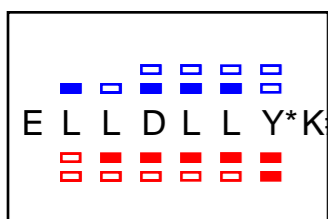

Protein Name: Adenosine deaminase  
 gi Accession: 1197210  
 Precursor Mass: 547.7863+2  
 Delta Mass: 2.684 ppm  
 XCorr: 33.4

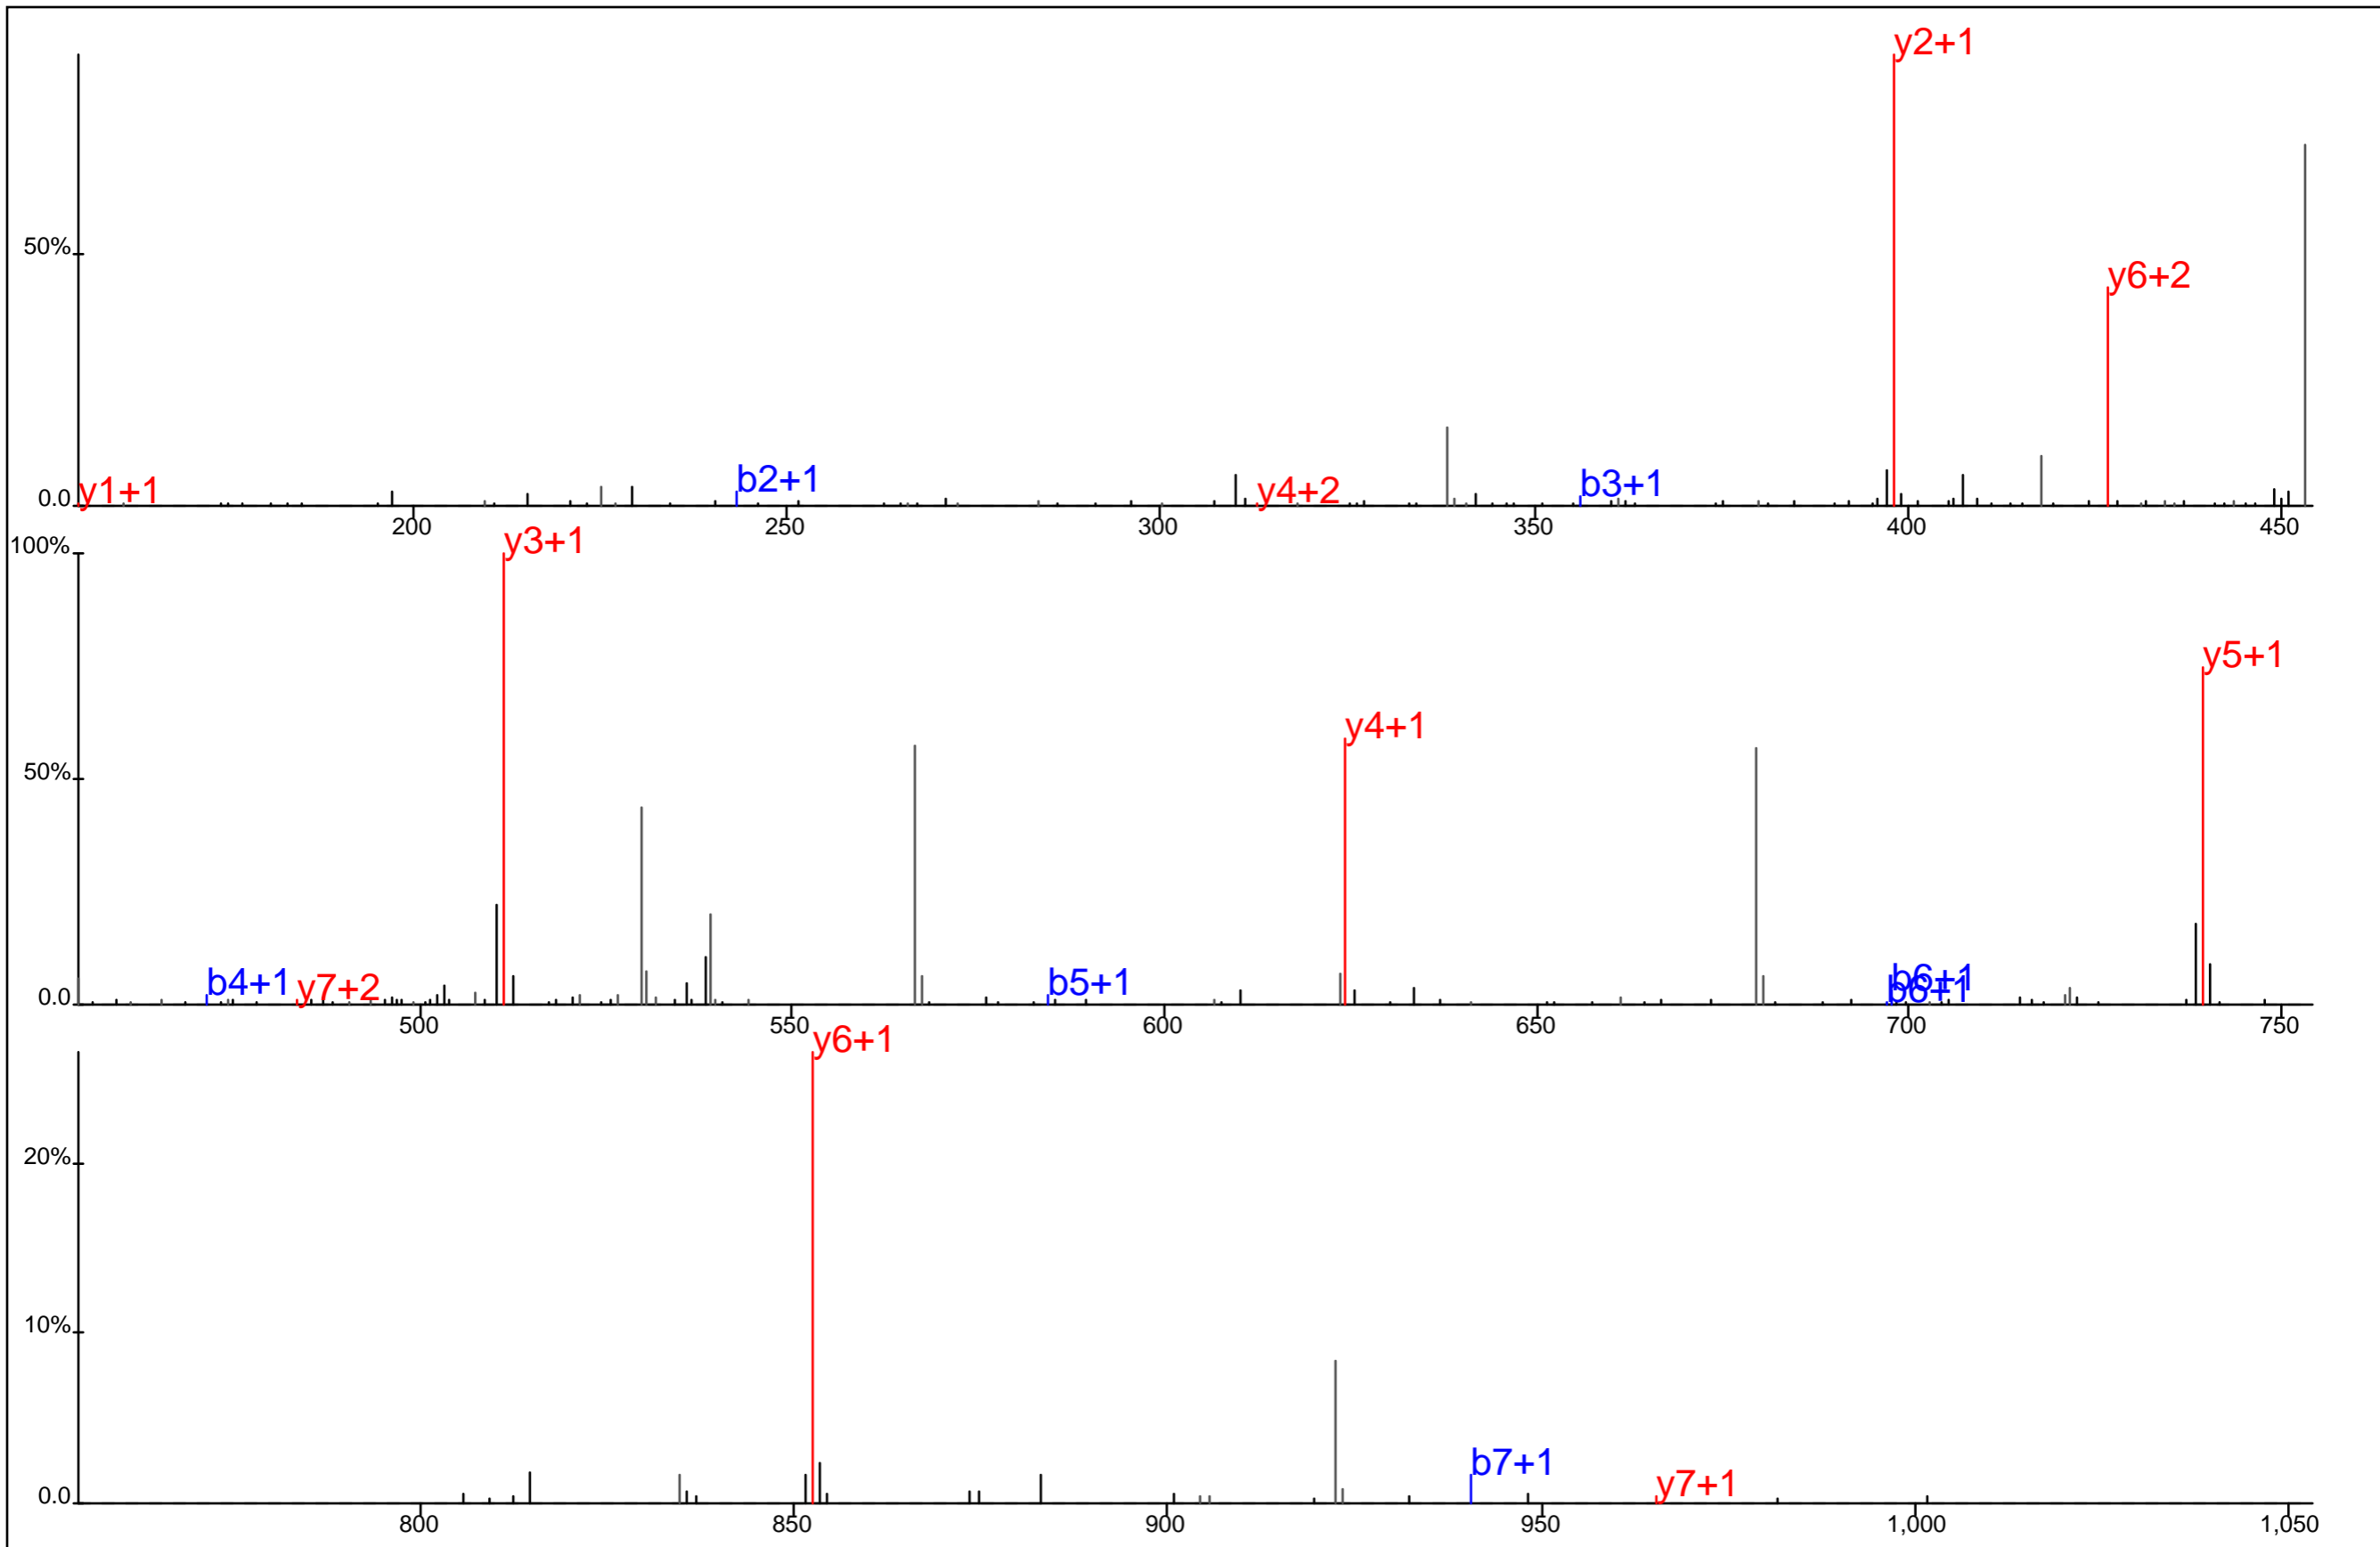

**E L L D L L Y\* K#**

Protein Name: Adenosine deaminase  
 gi Accession: 1197210  
 Precursor Mass: 547.7874+2  
 Delta Mass: 4.575 ppm  
 XCorr: 48.49

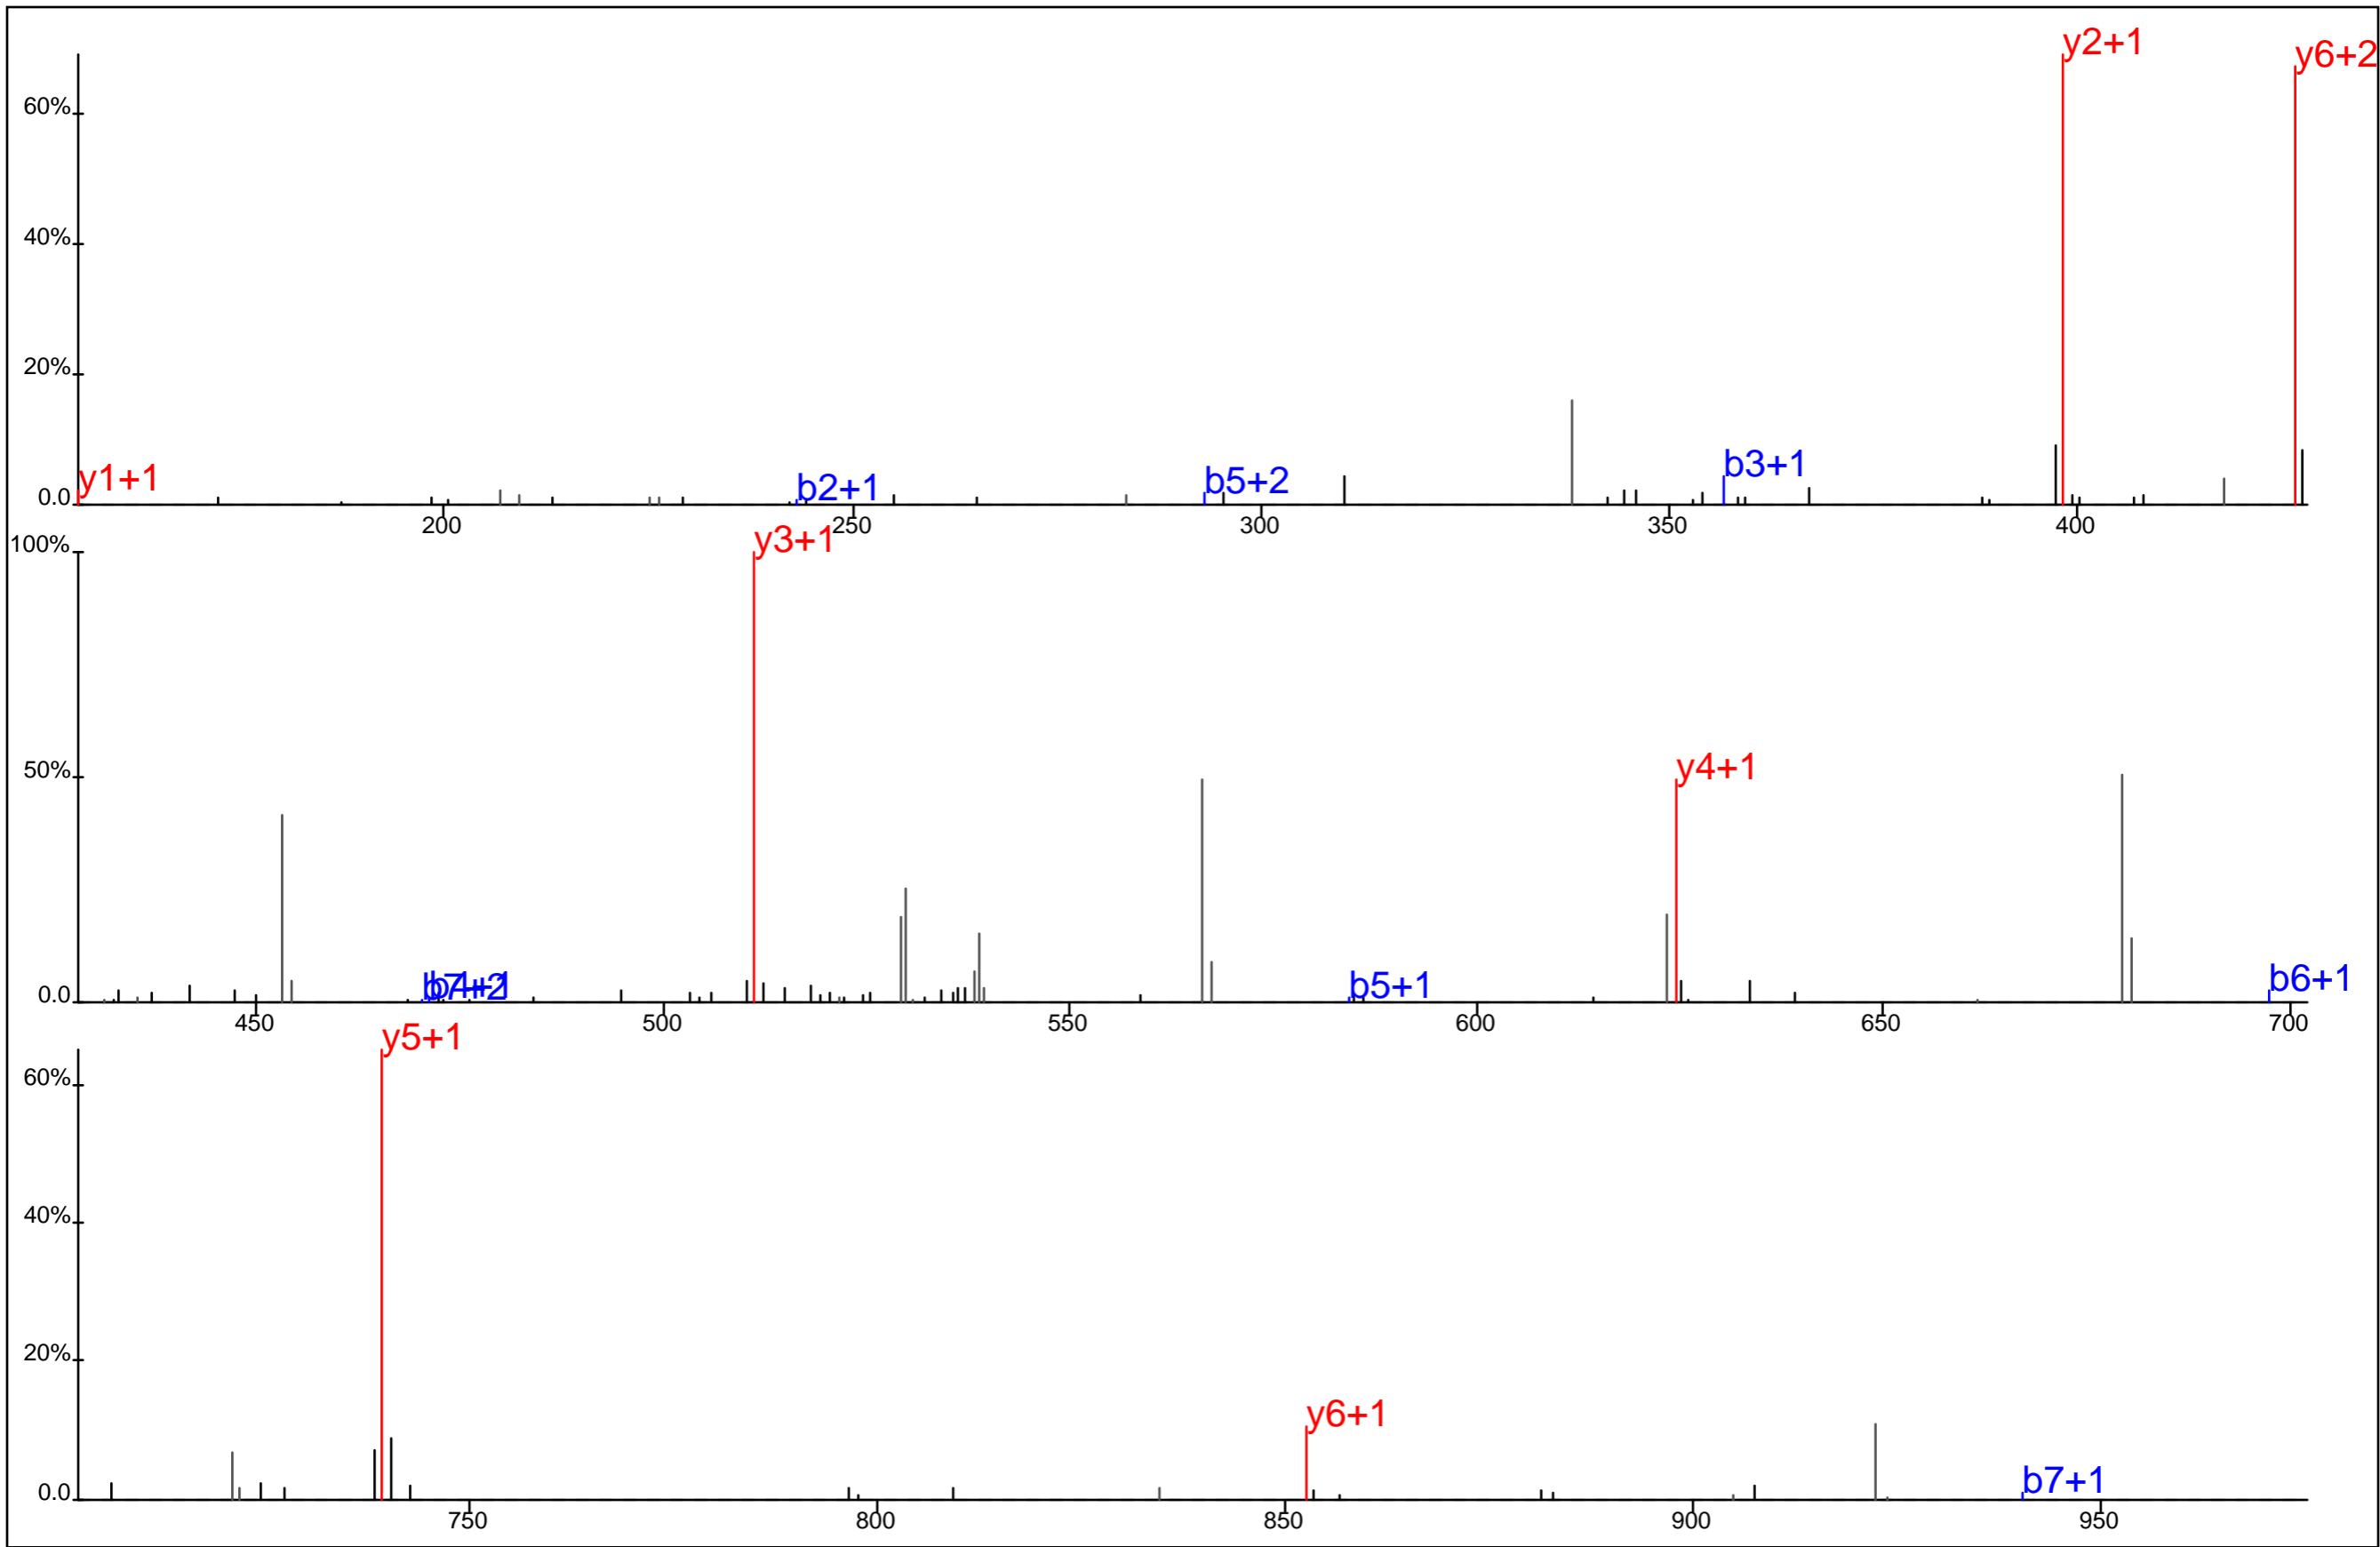

|  |                                                                                                                                                                                  |
|--|----------------------------------------------------------------------------------------------------------------------------------------------------------------------------------|
|  | <p>Protein Name: Adenosine deaminase<br/>         gi Accession: 1197210<br/>         Precursor Mass: 547.7864+2<br/>         Delta Mass: 2.794 ppm<br/>         XCorr: 48.36</p> |
|--|----------------------------------------------------------------------------------------------------------------------------------------------------------------------------------|

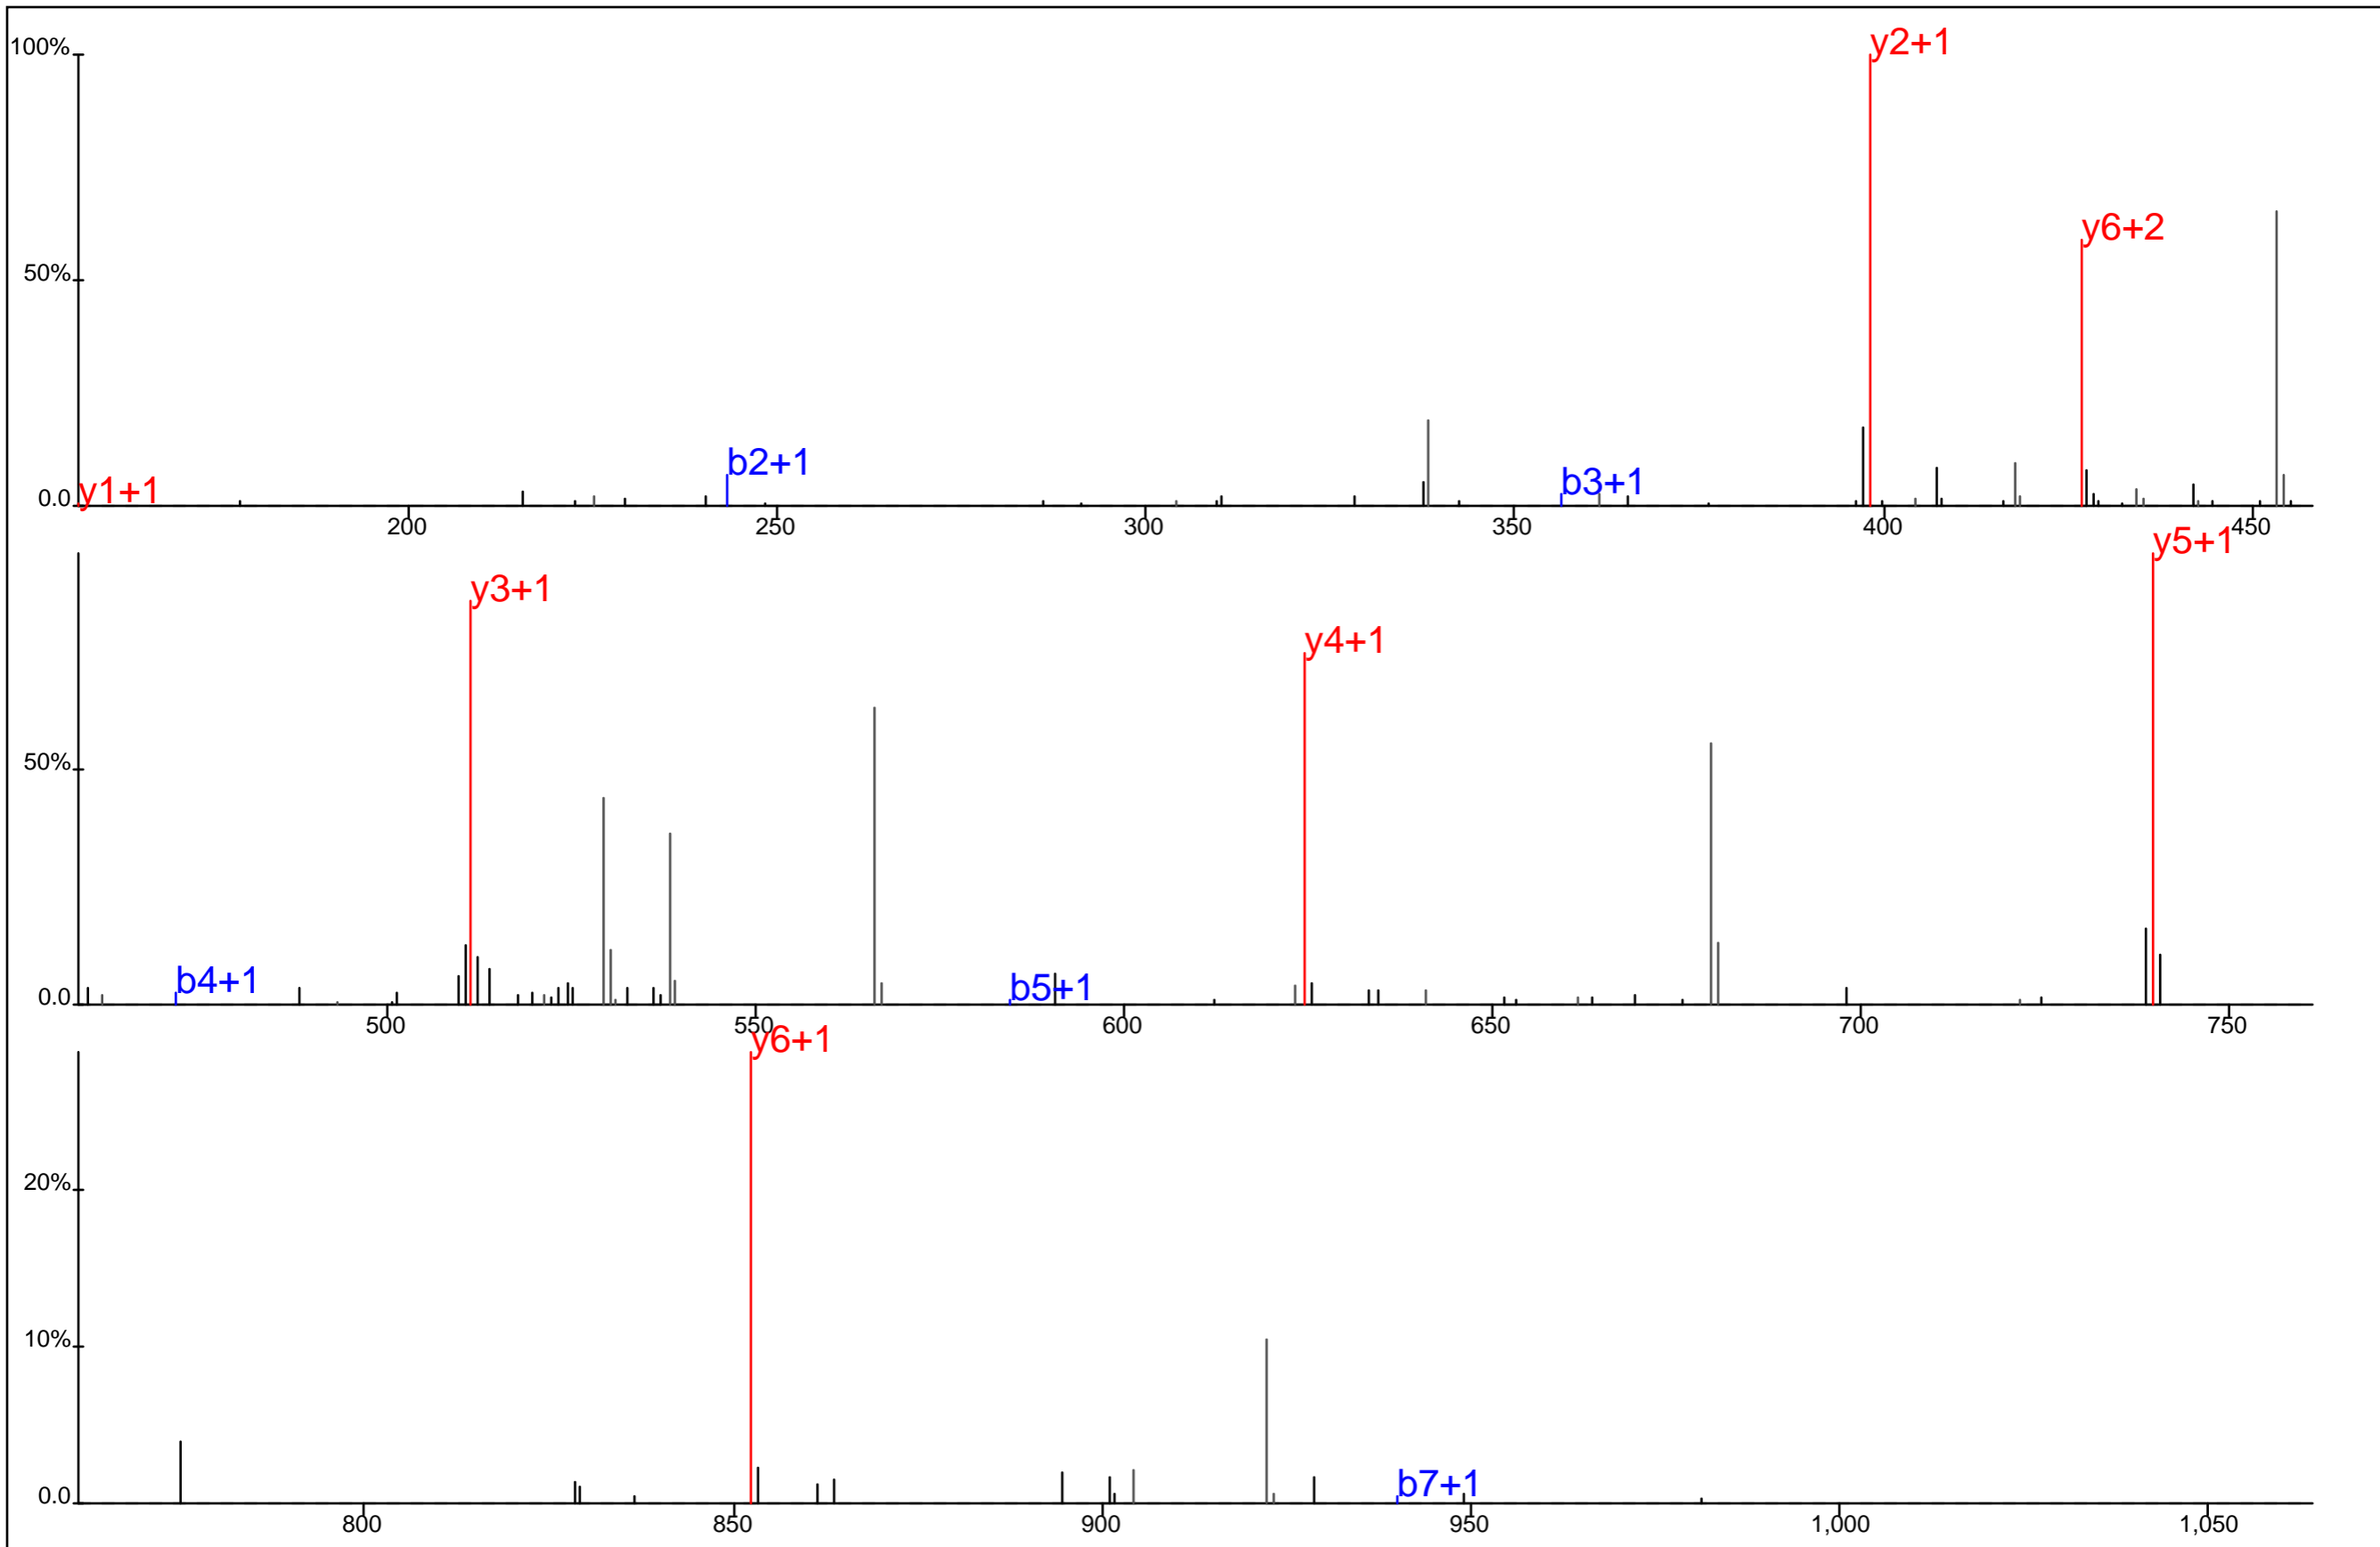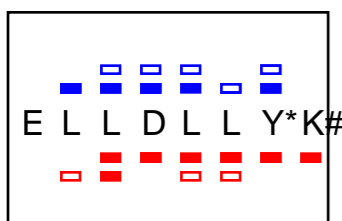

Protein Name: Adenosine deaminase  
 gi Accession: 1197210  
 Precursor Mass: 547.7867+2  
 Delta Mass: 3.351 ppm  
 XCorr: 30.93



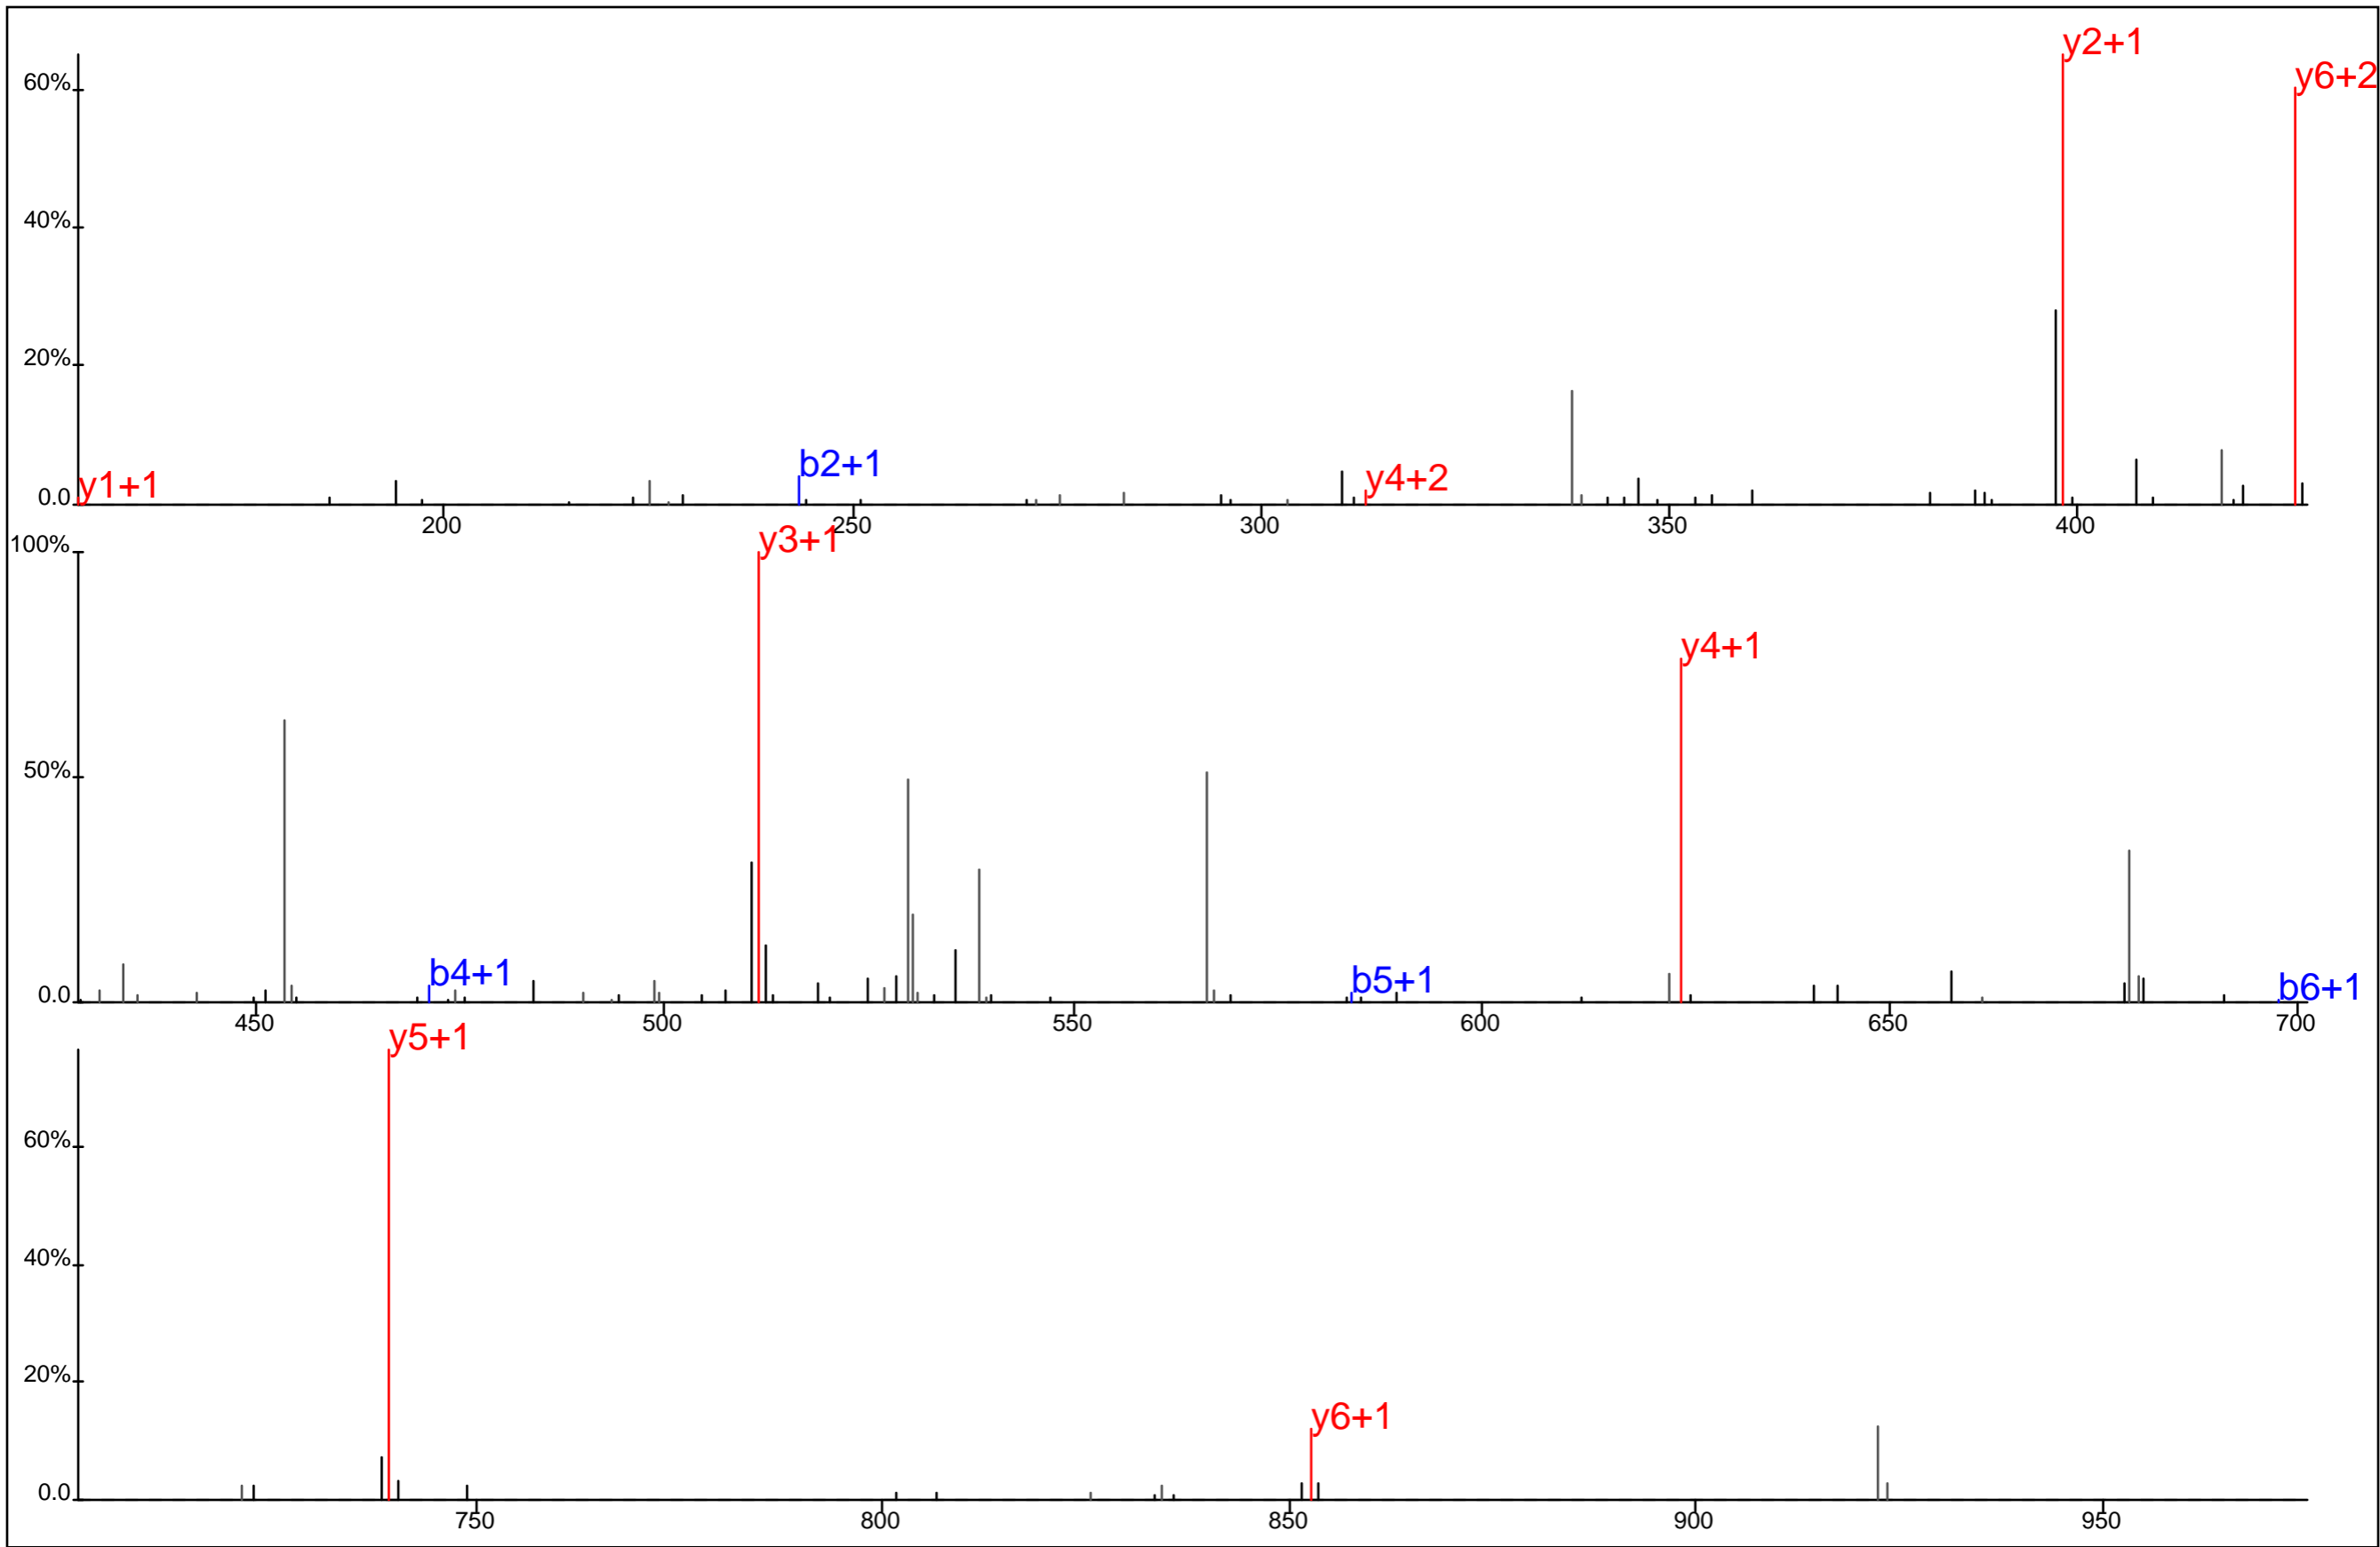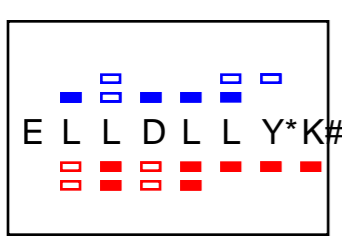

Protein Name: Adenosine deaminase  
 gi Accession: 1197210  
 Precursor Mass: 547.7863+2  
 Delta Mass: 2.565 ppm  
 XCorr: 33.02

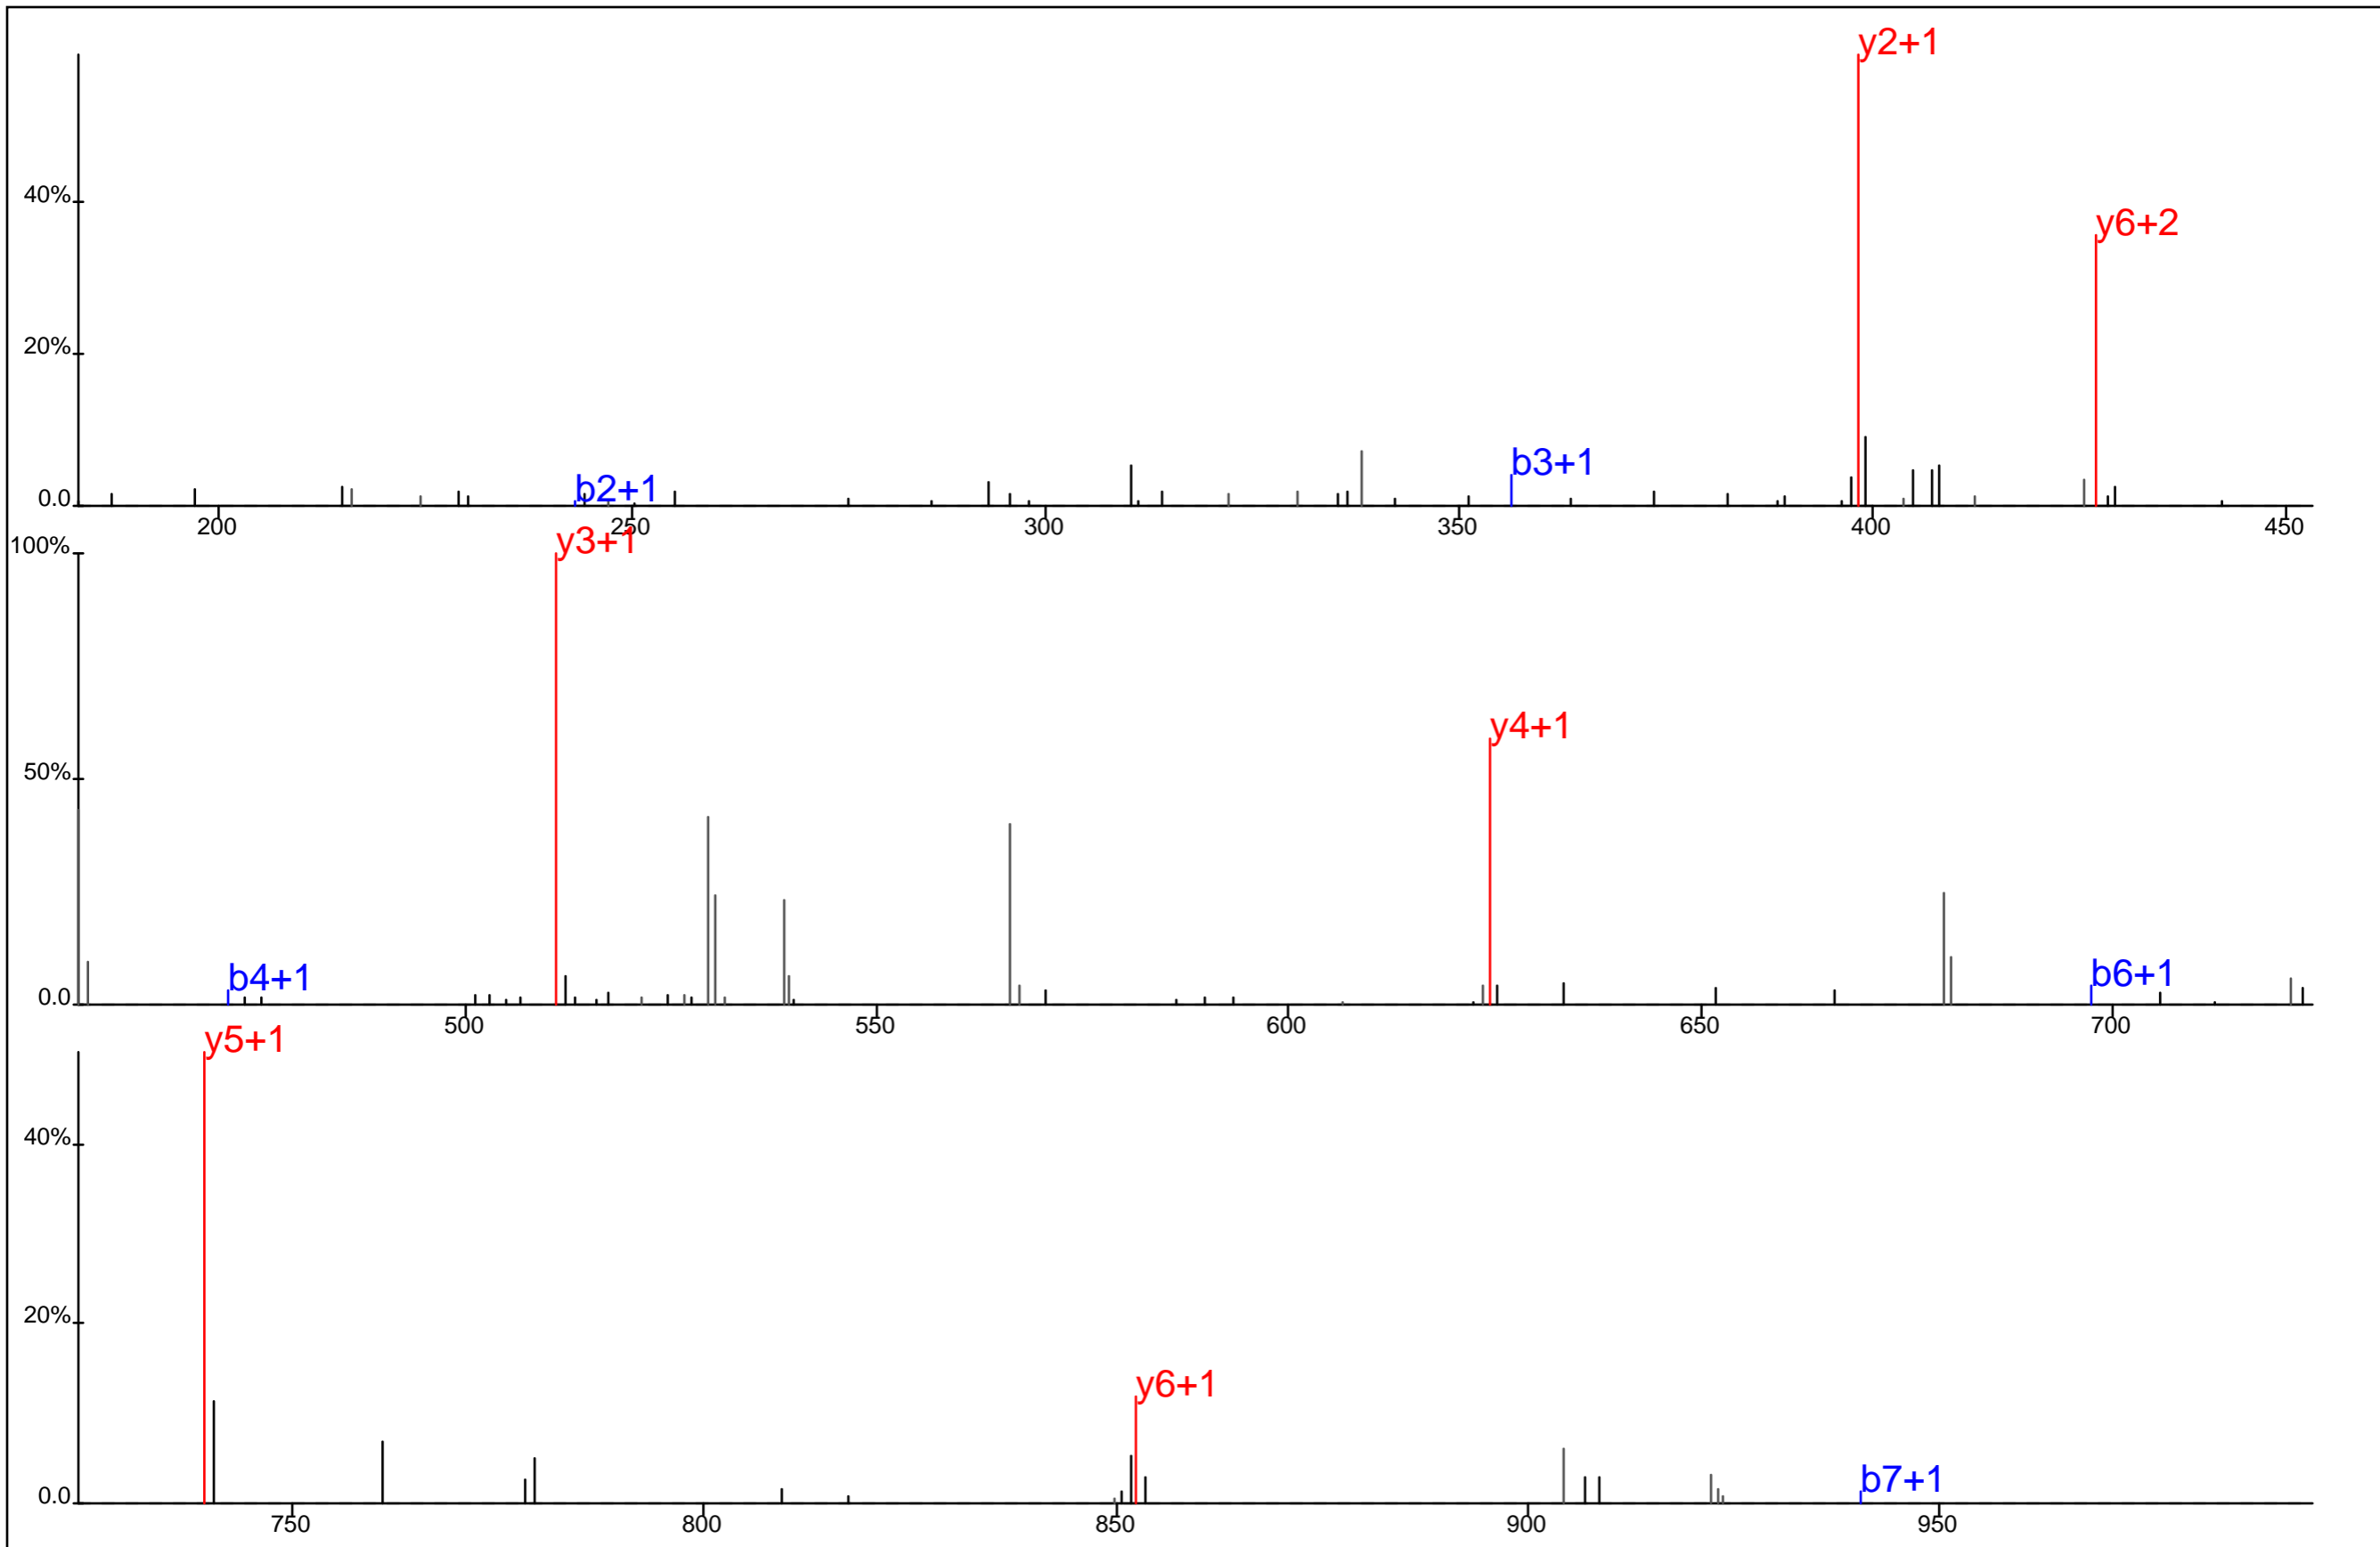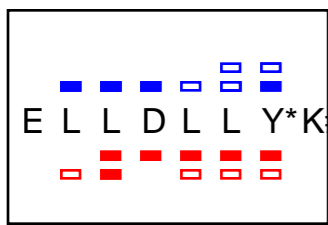

Protein Name: Adenosine deaminase  
 gi Accession: 1197210  
 Precursor Mass: 547.7873+2  
 Delta Mass: 4.466 ppm  
 XCorr: 33.33

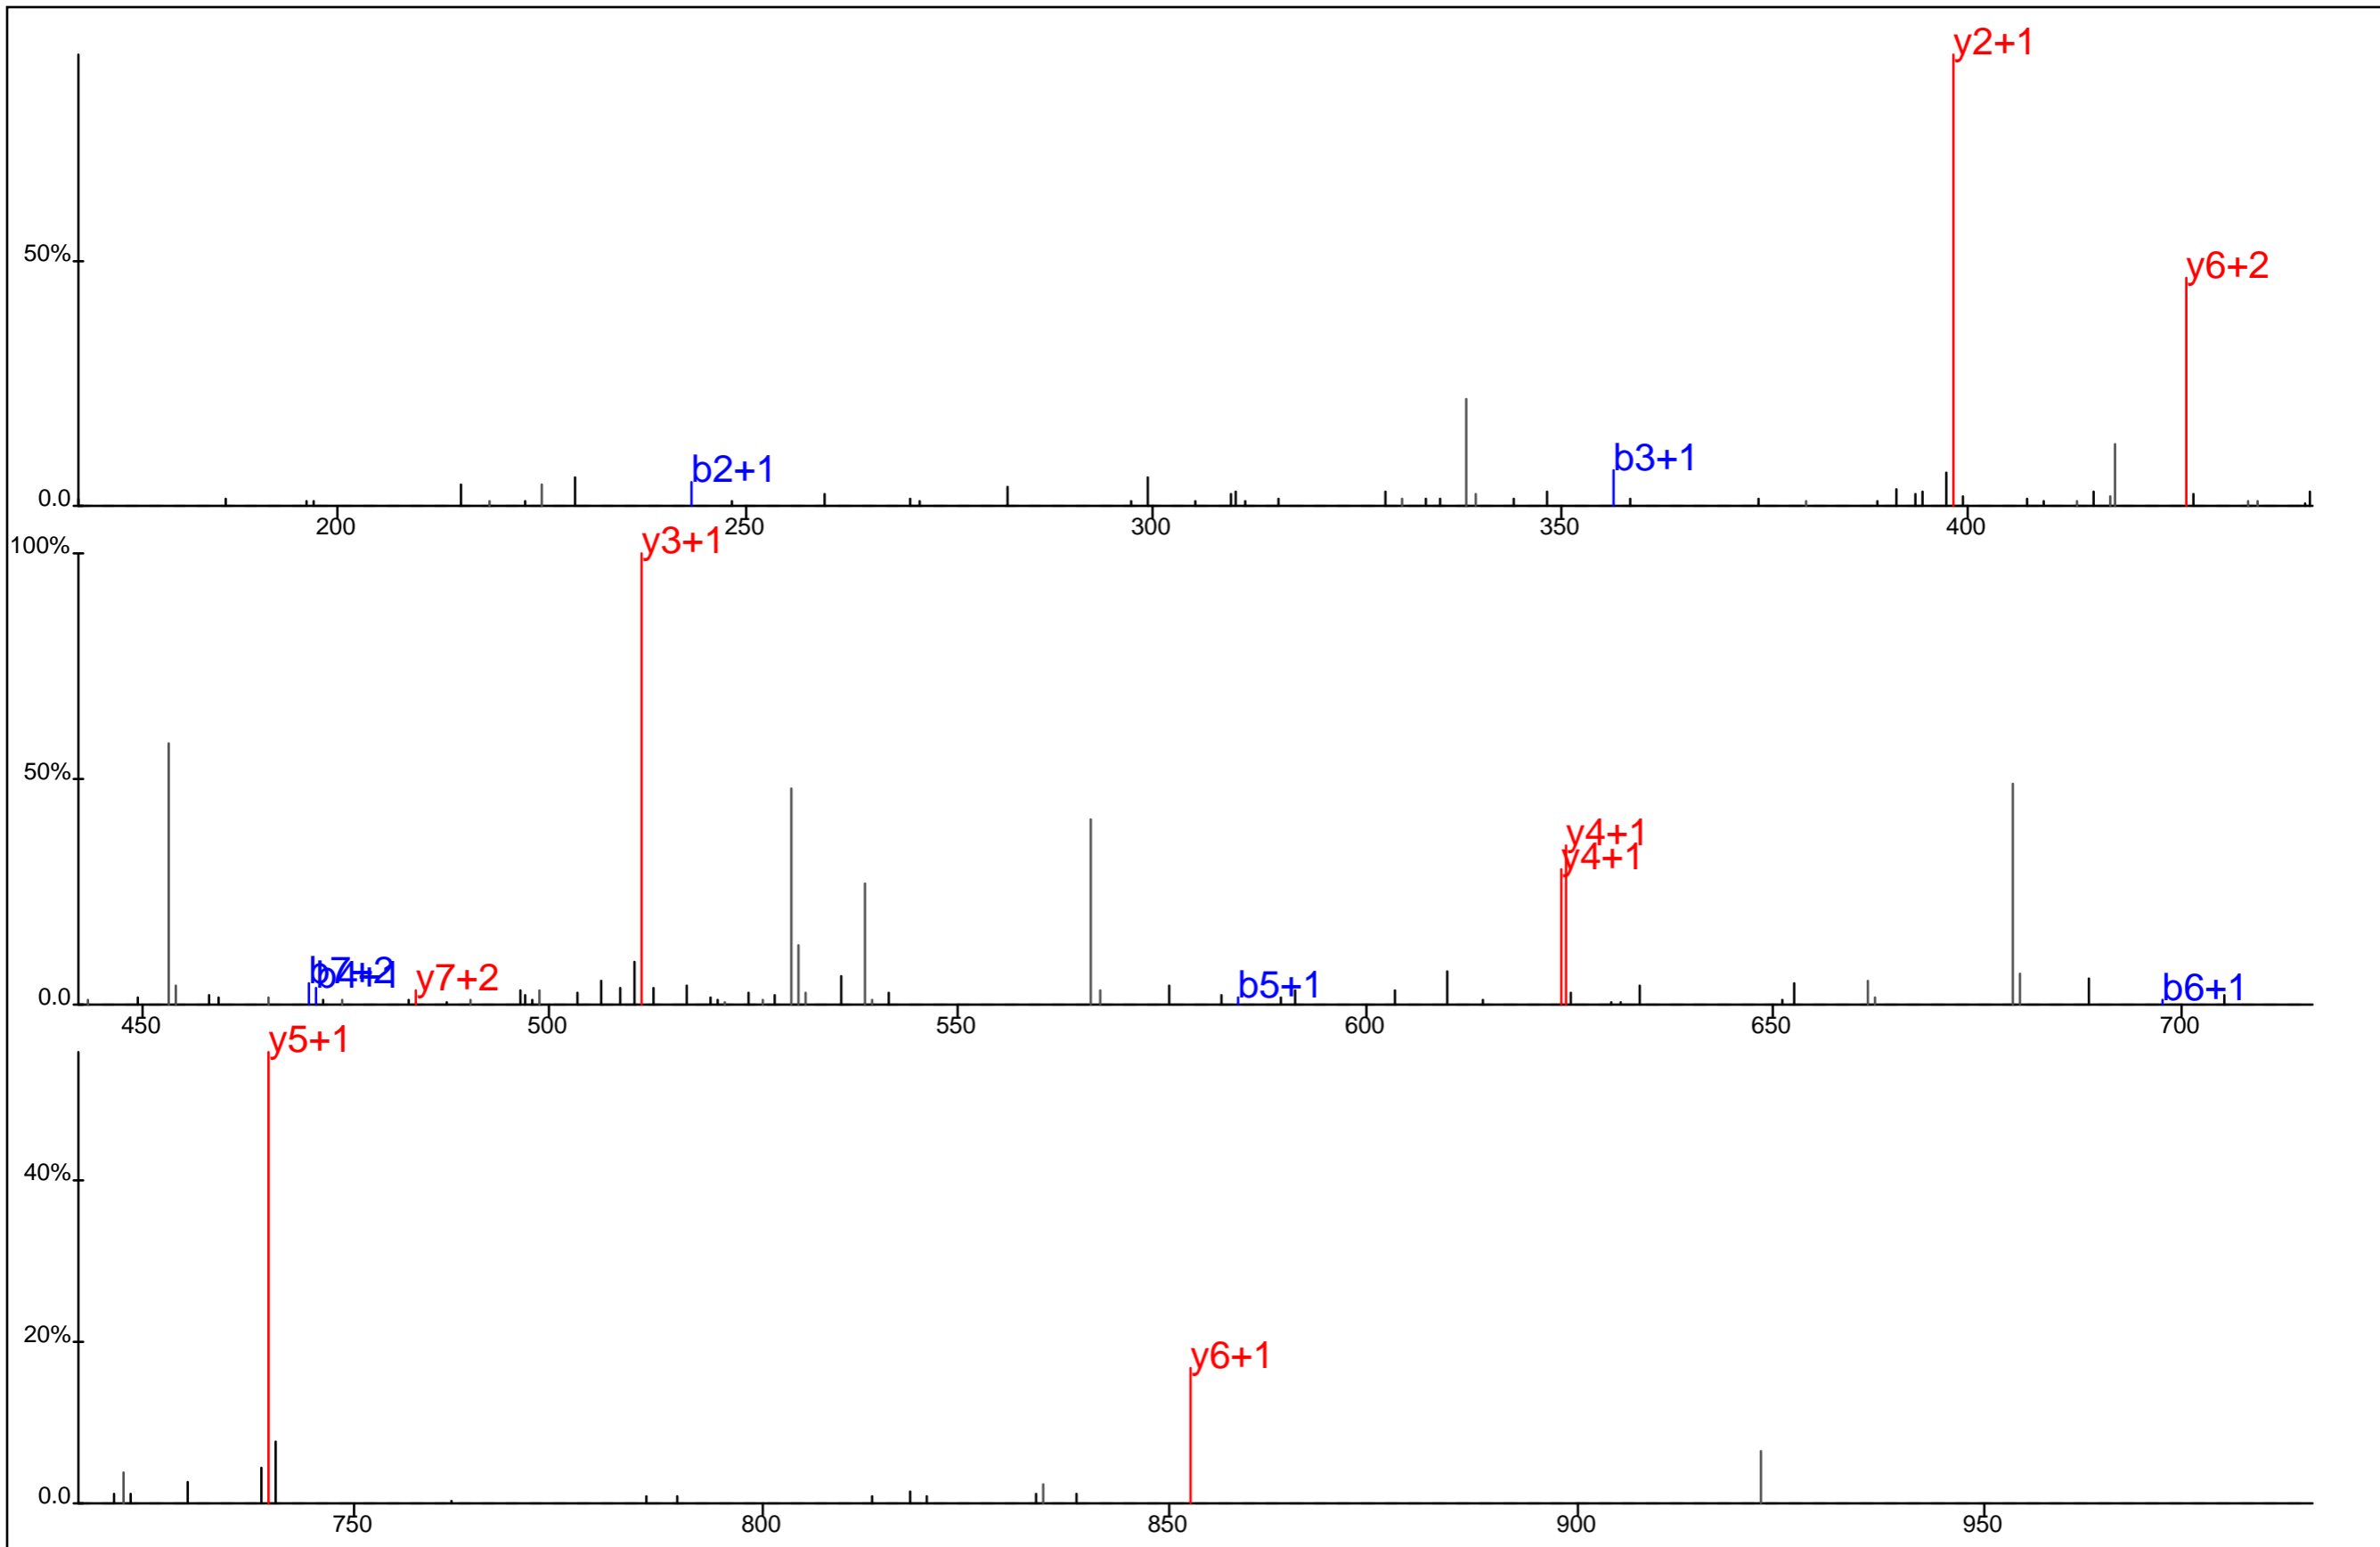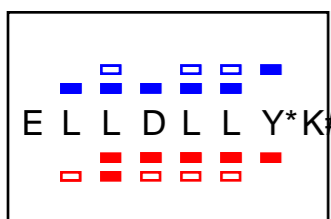

Protein Name: Adenosine deaminase  
 gi Accession: 1197210  
 Precursor Mass: 547.7859+2  
 Delta Mass: 2.008 ppm  
 XCorr: 43.52

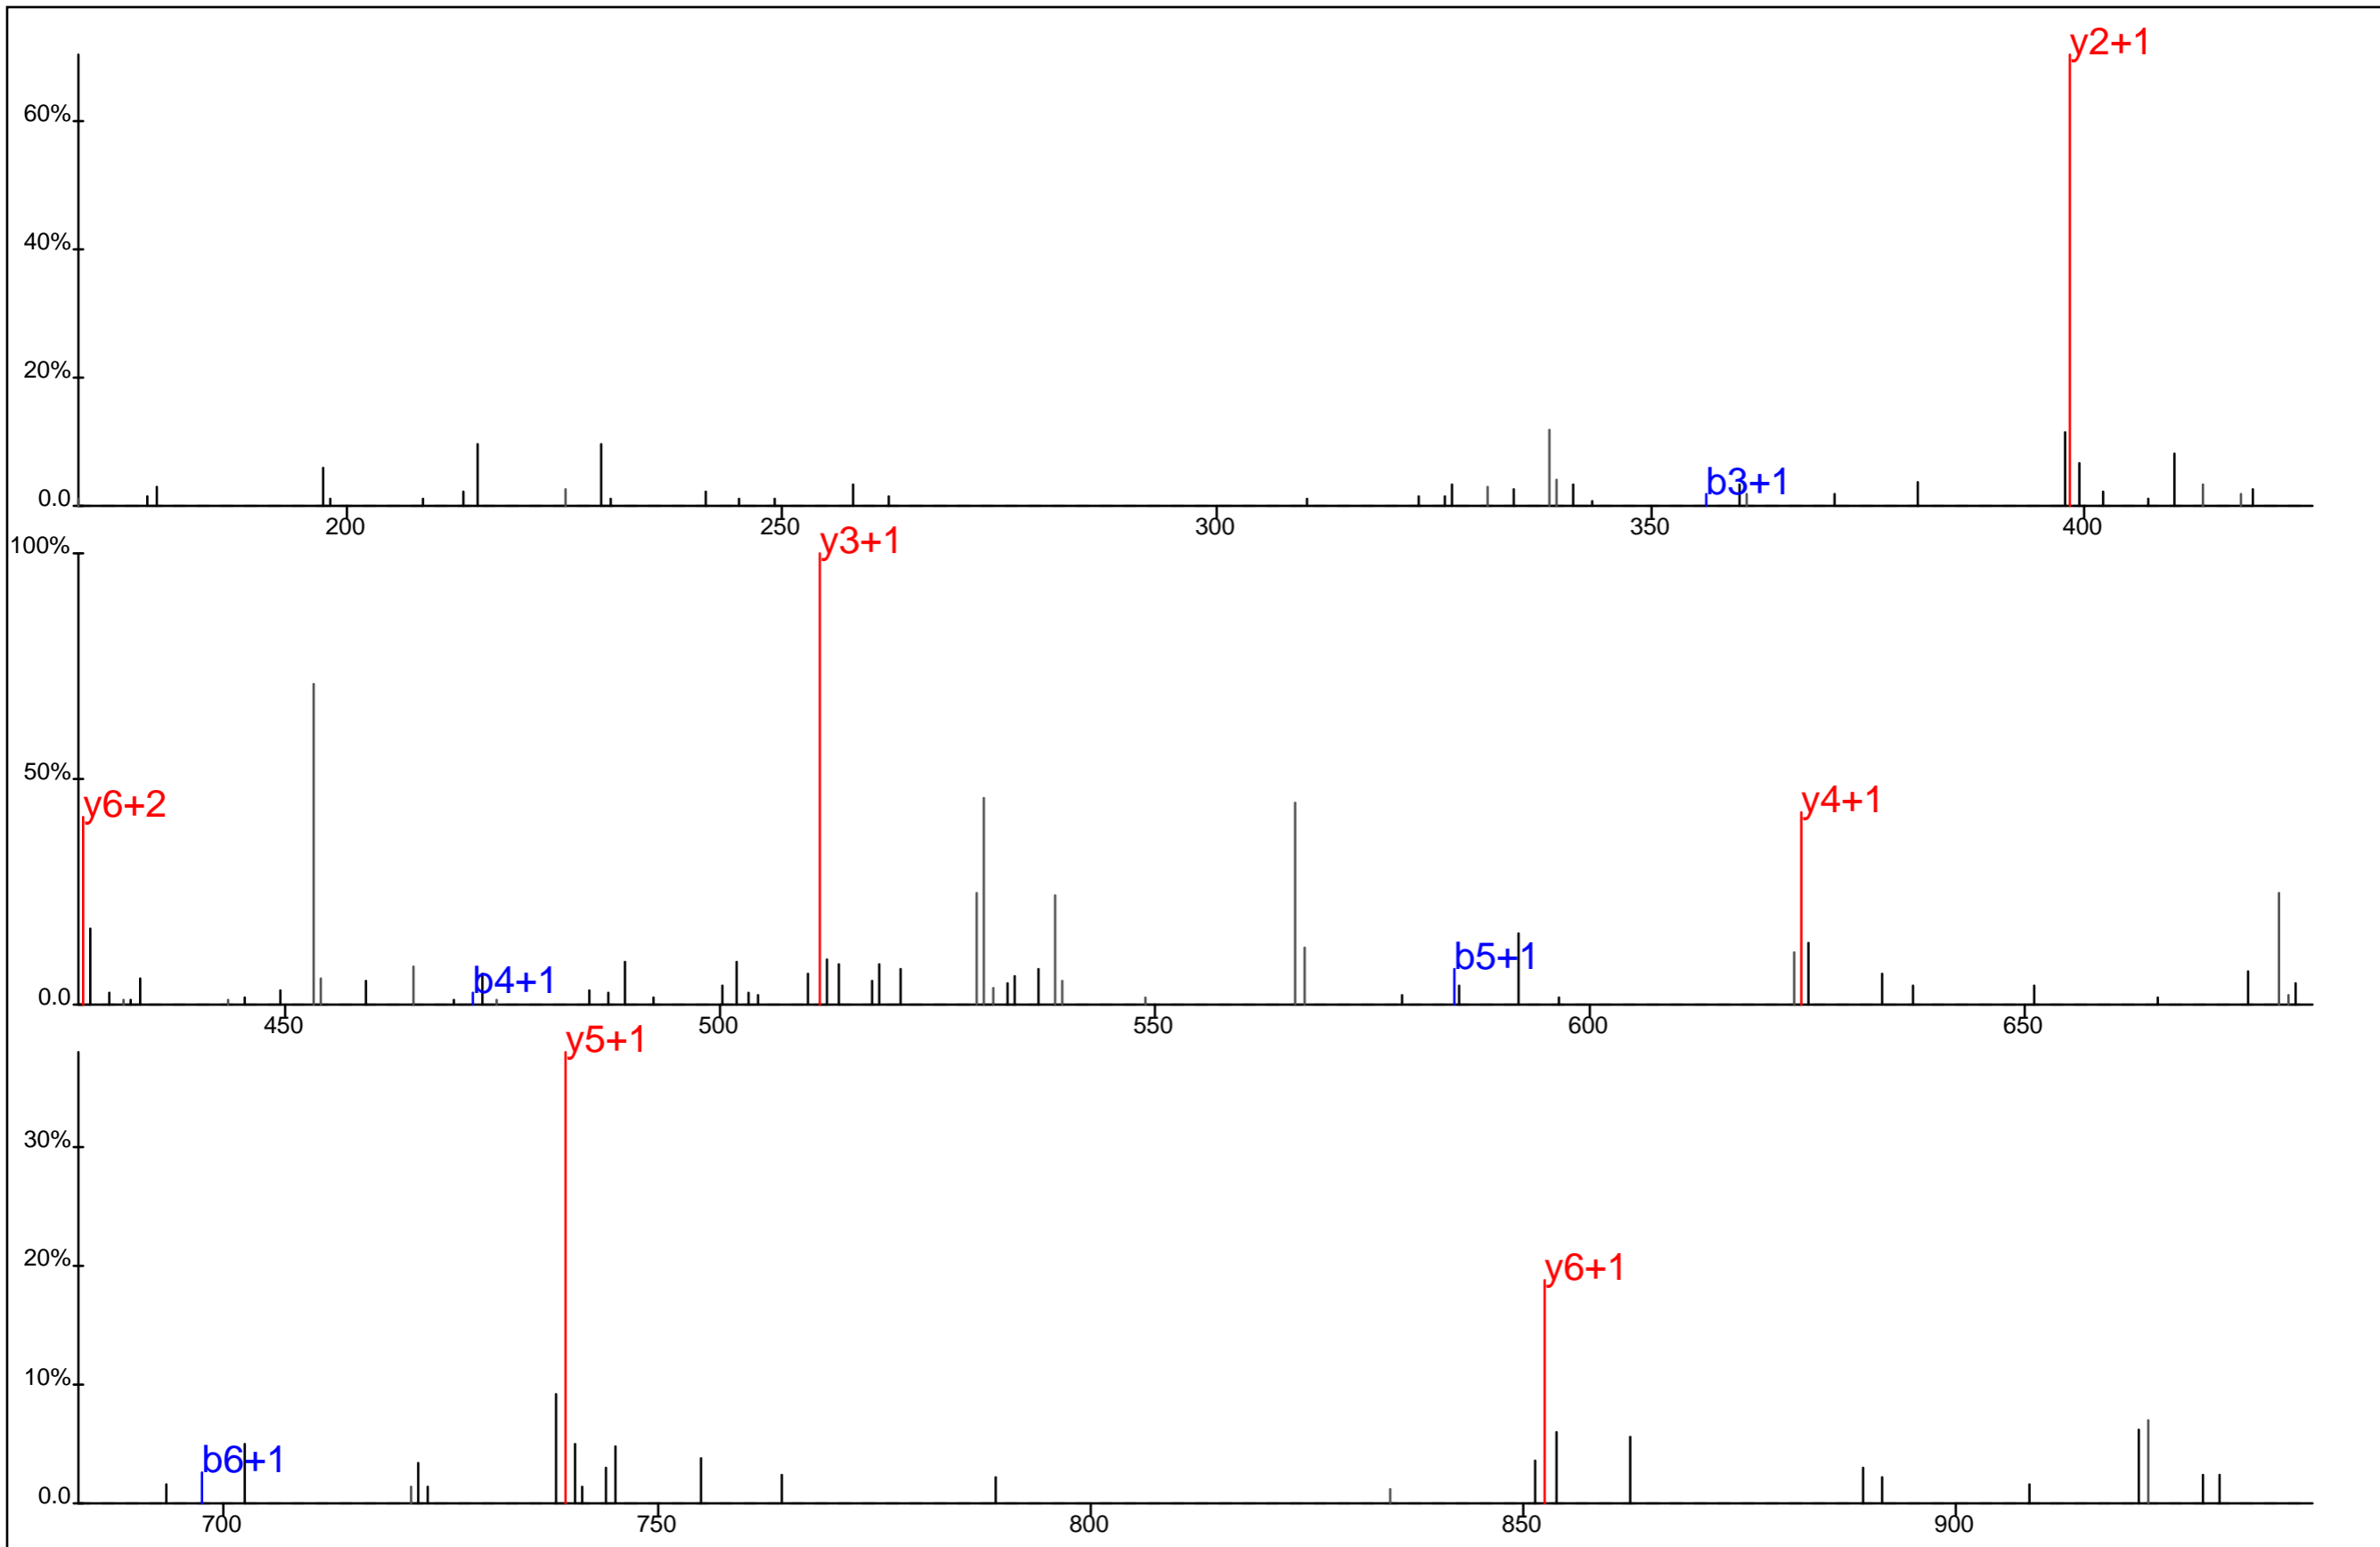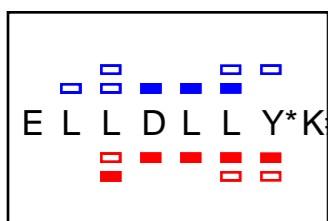

Protein Name: Adenosine deaminase  
 gi Accession: 1197210  
 Precursor Mass: 547.7850+2  
 Delta Mass: 0.227 ppm  
 XCorr: 20.26



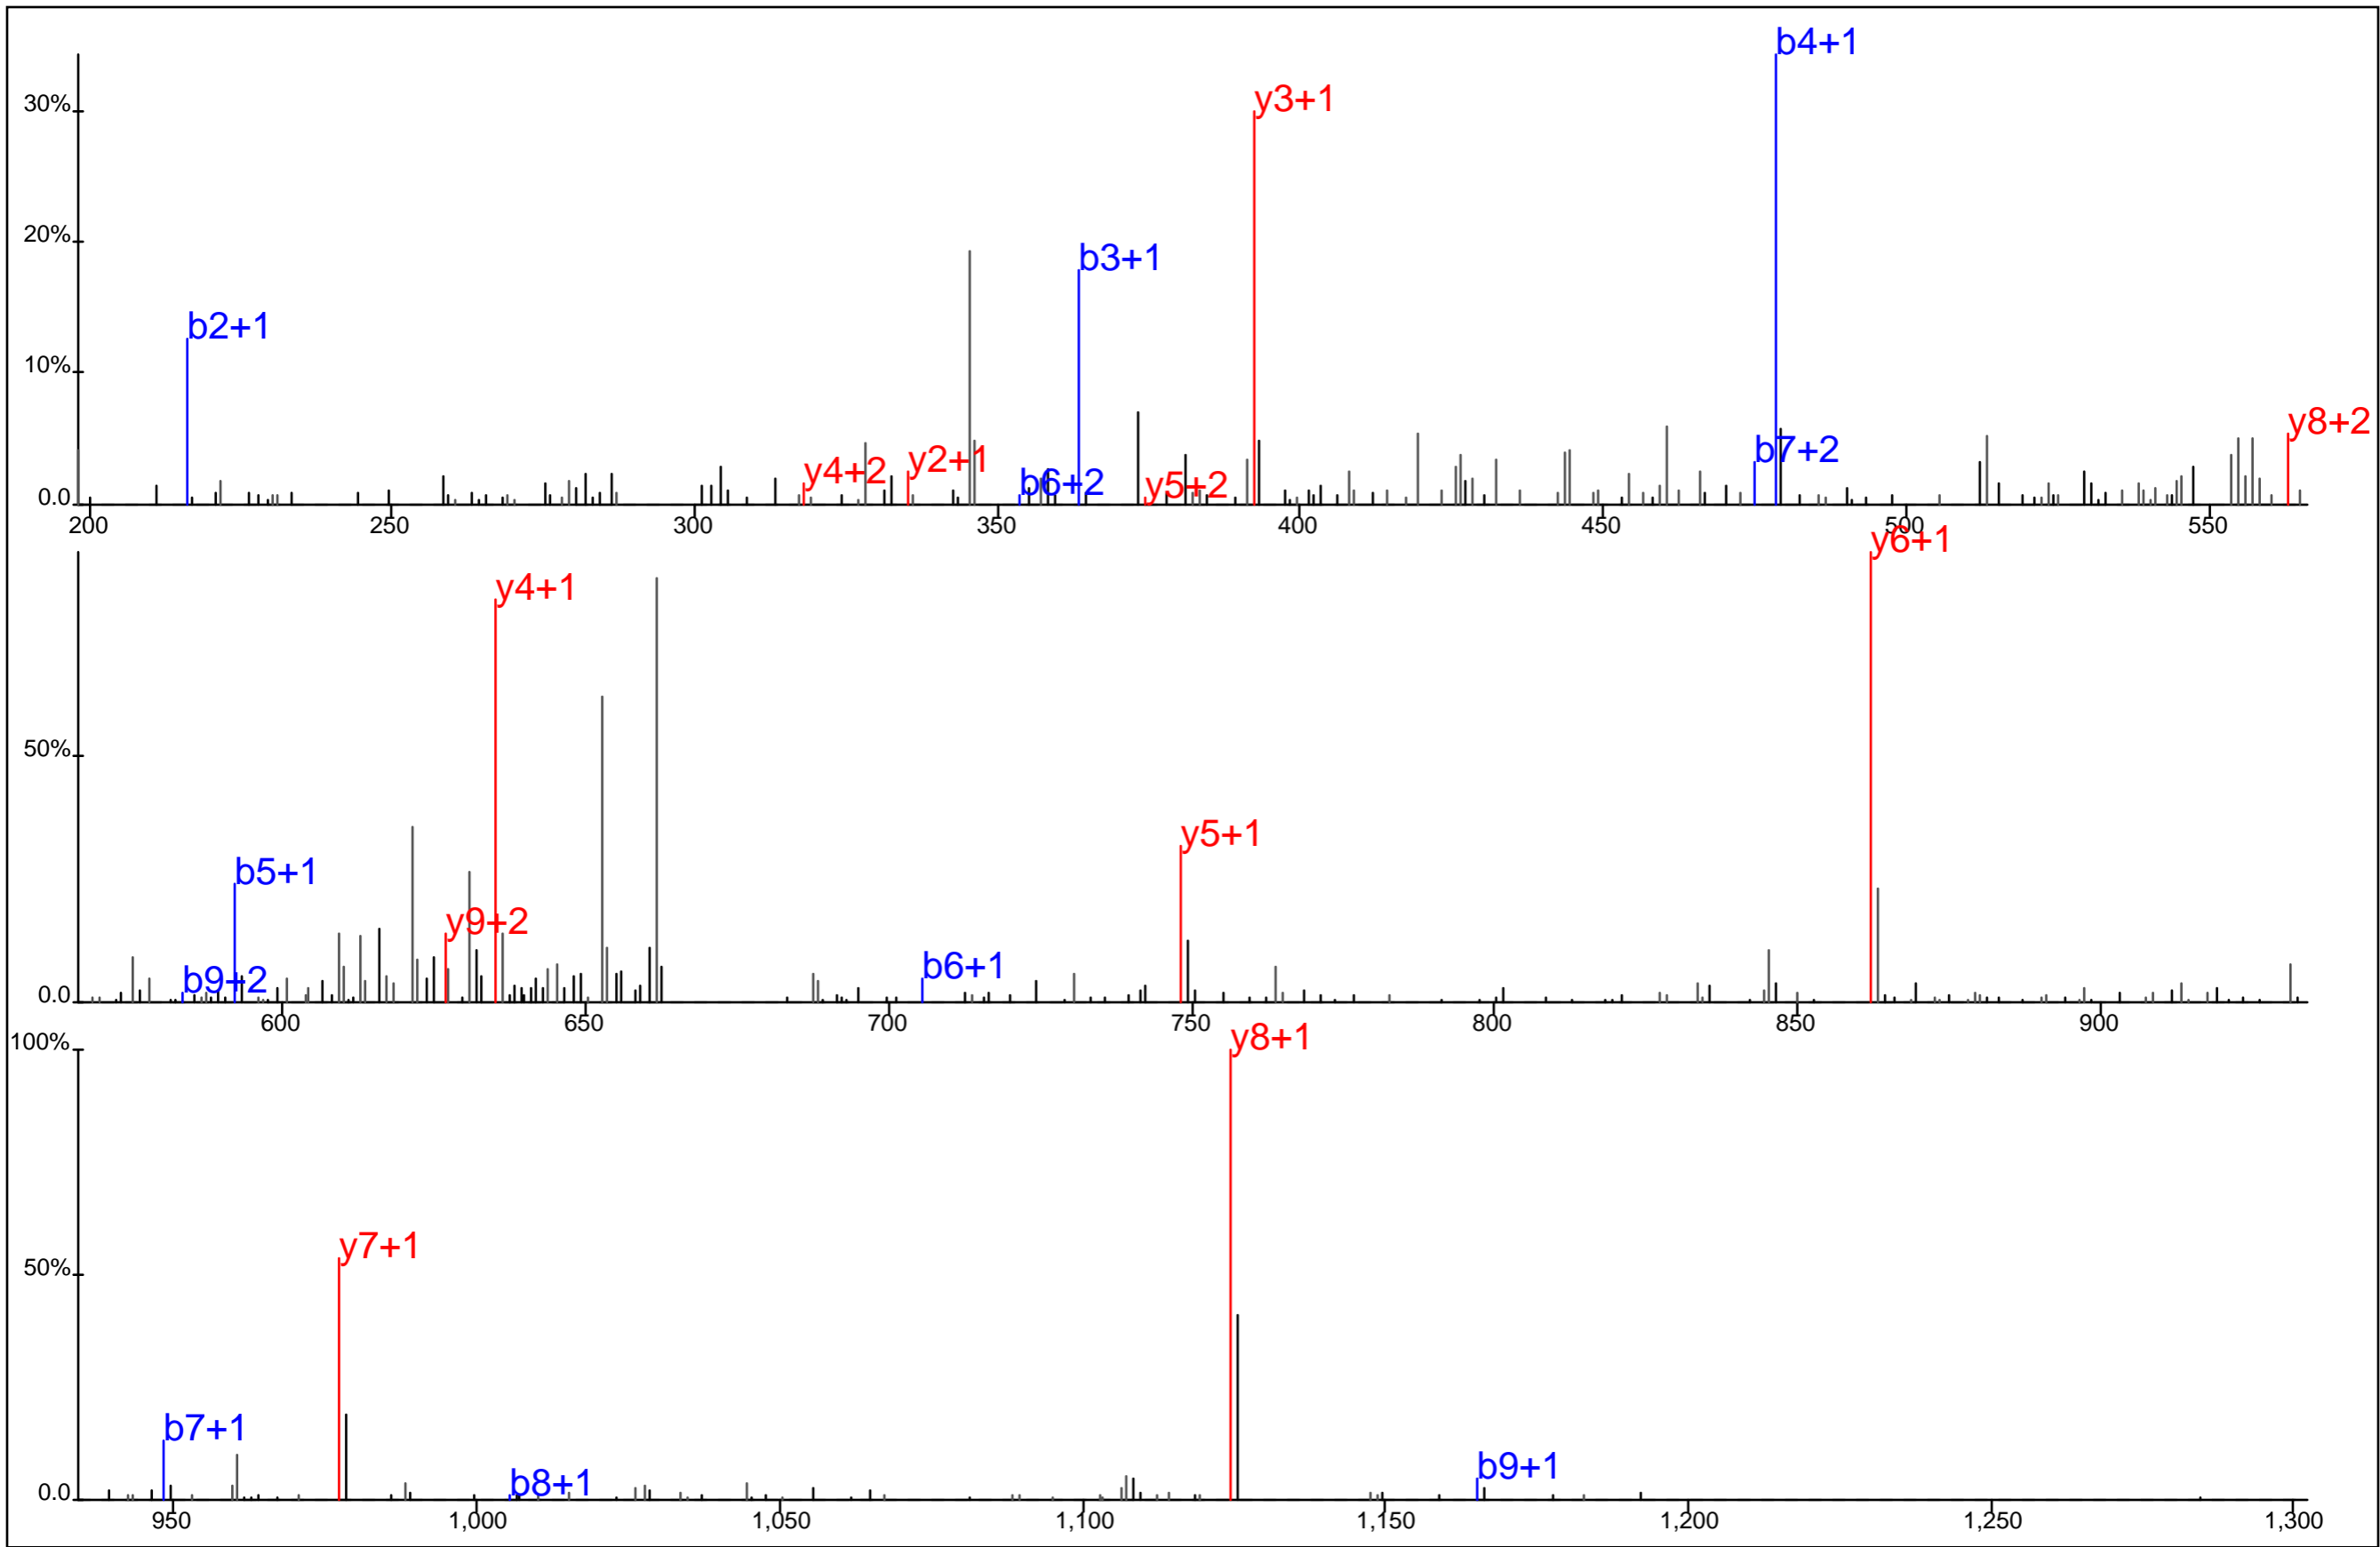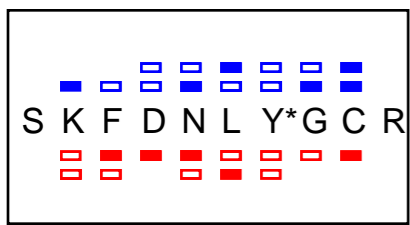

Protein Name: Adenosylhomocysteinase  
 gi Accession: 9951915  
 Precursor Mass: 670.2816+2  
 Delta Mass: 4.321 ppm  
 XCorr: 37.4

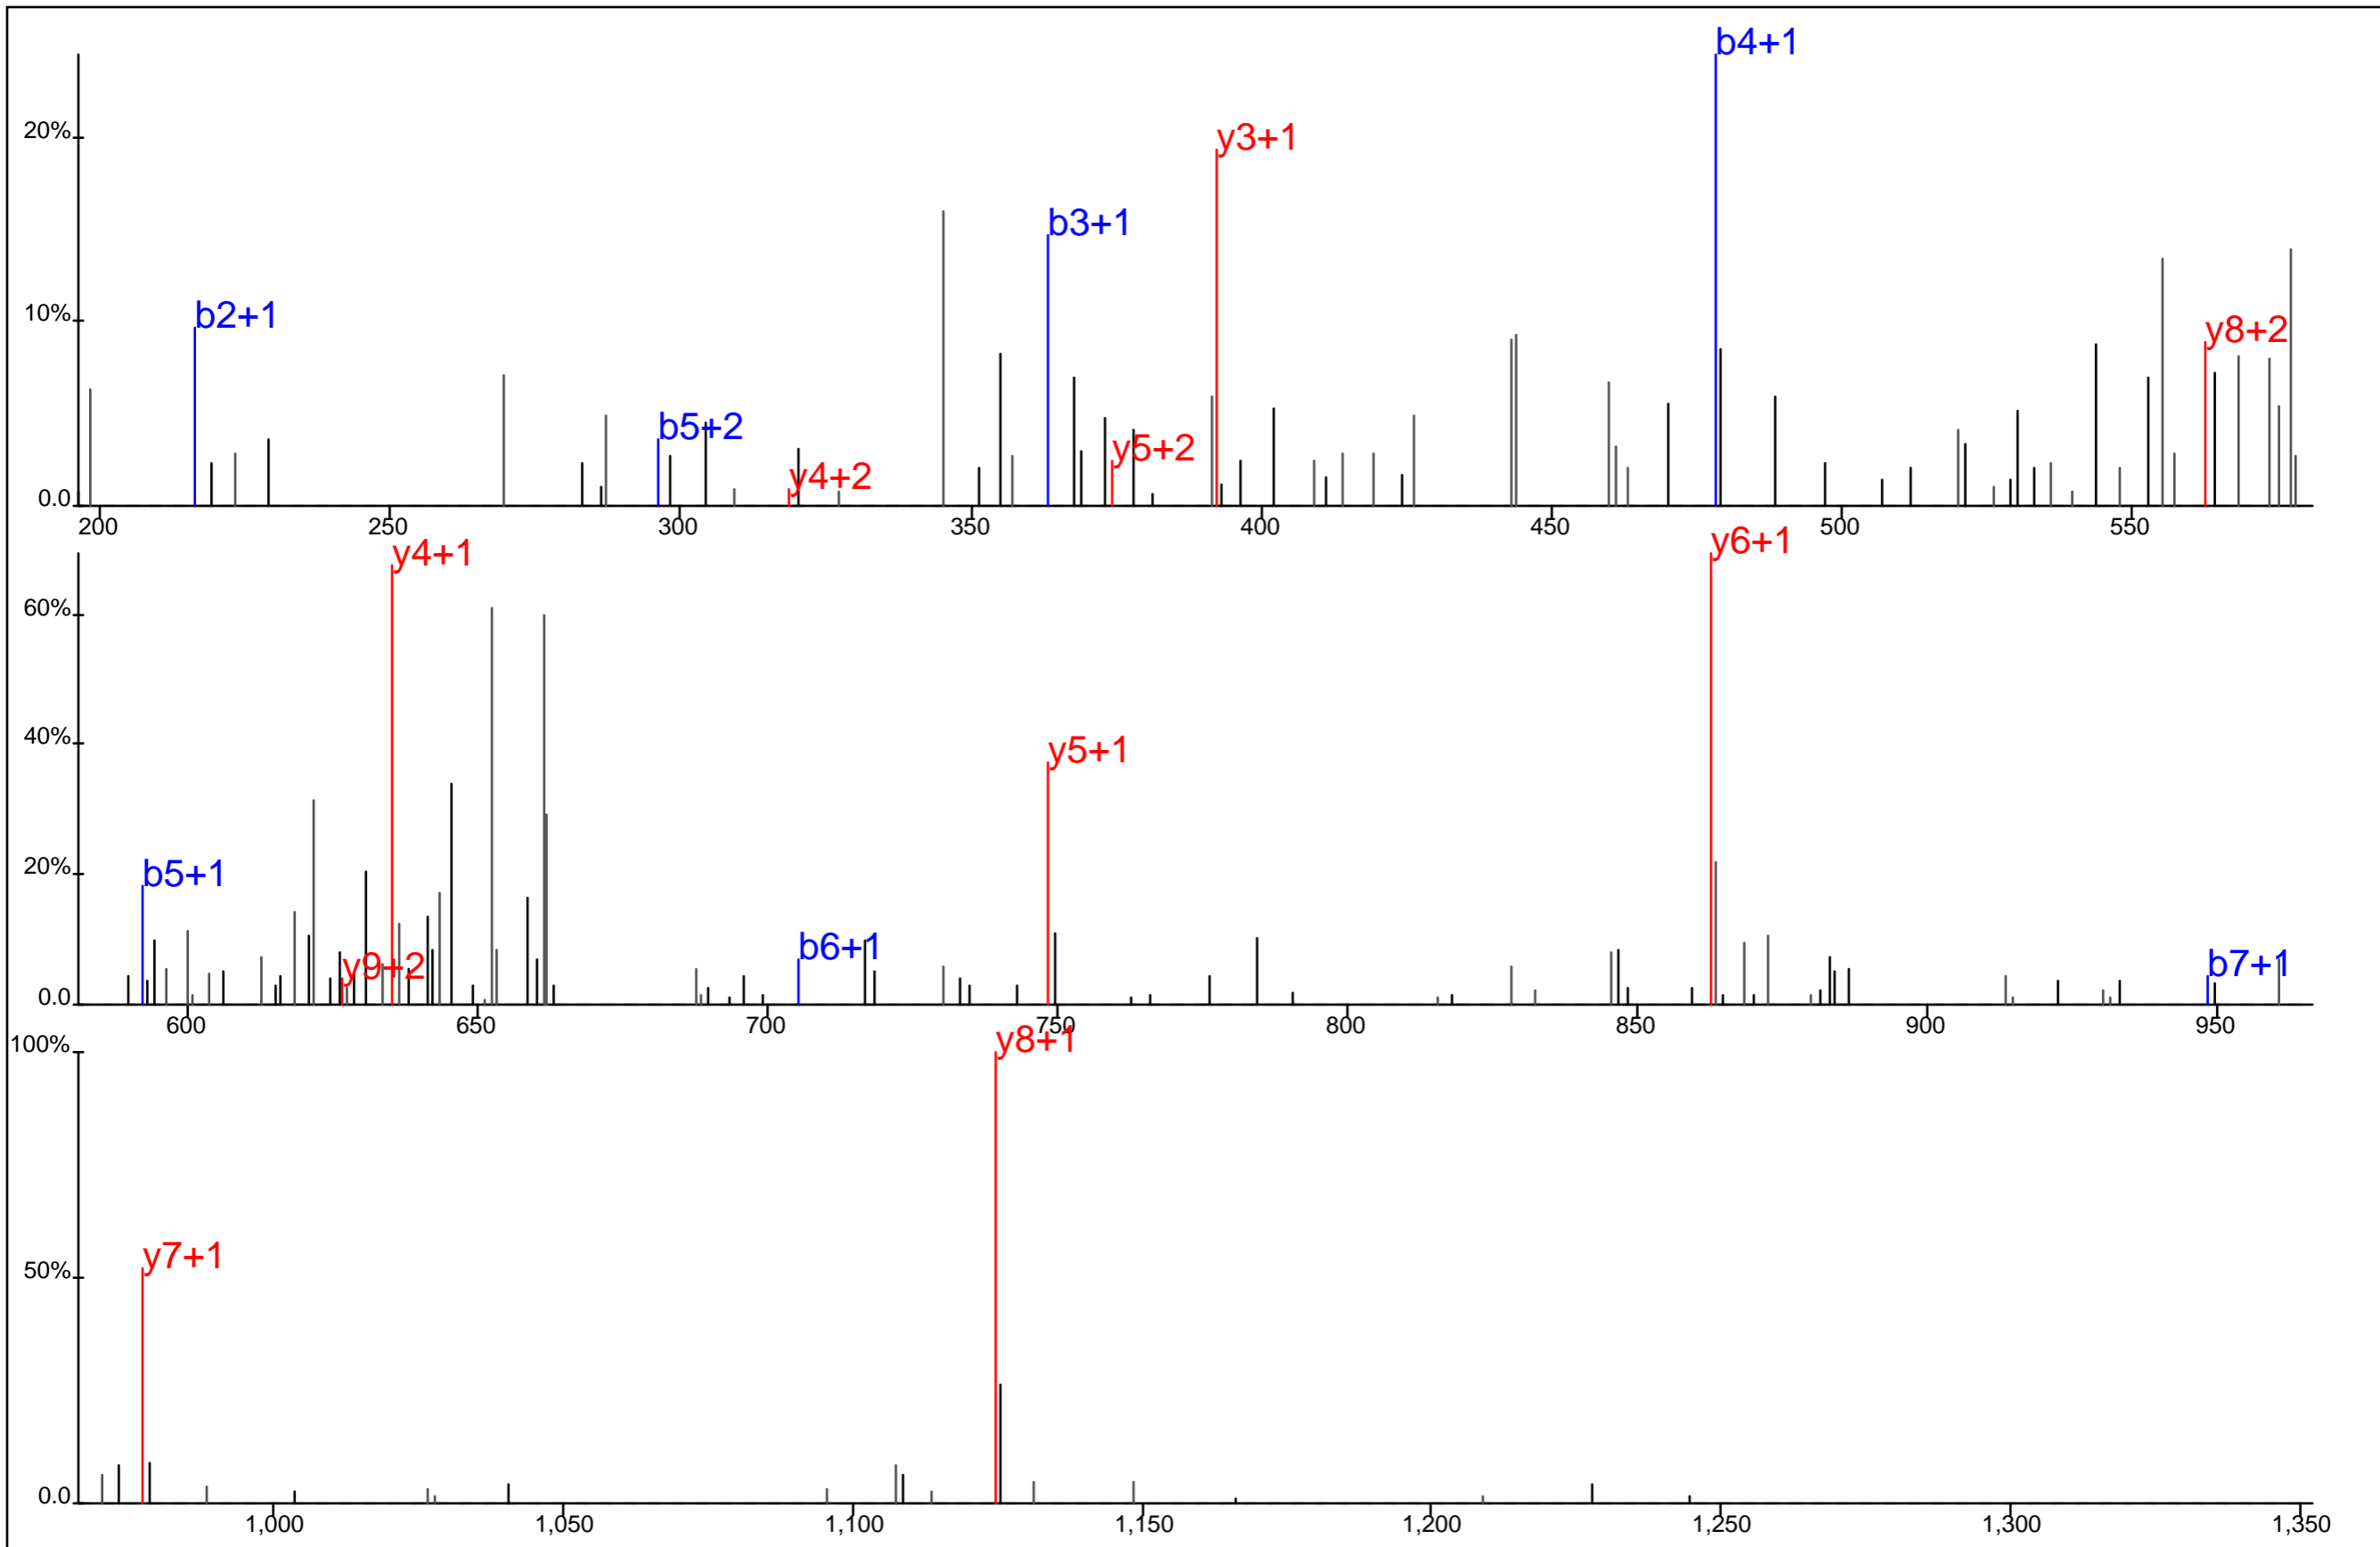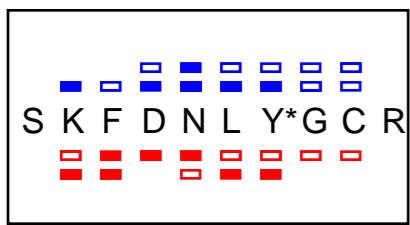

Protein Name: Adenosylhomocysteinase  
 gi Accession: 9951915  
 Precursor Mass: 670.2802+2  
 Delta Mass: 2.231 ppm  
 XCorr: 48.09

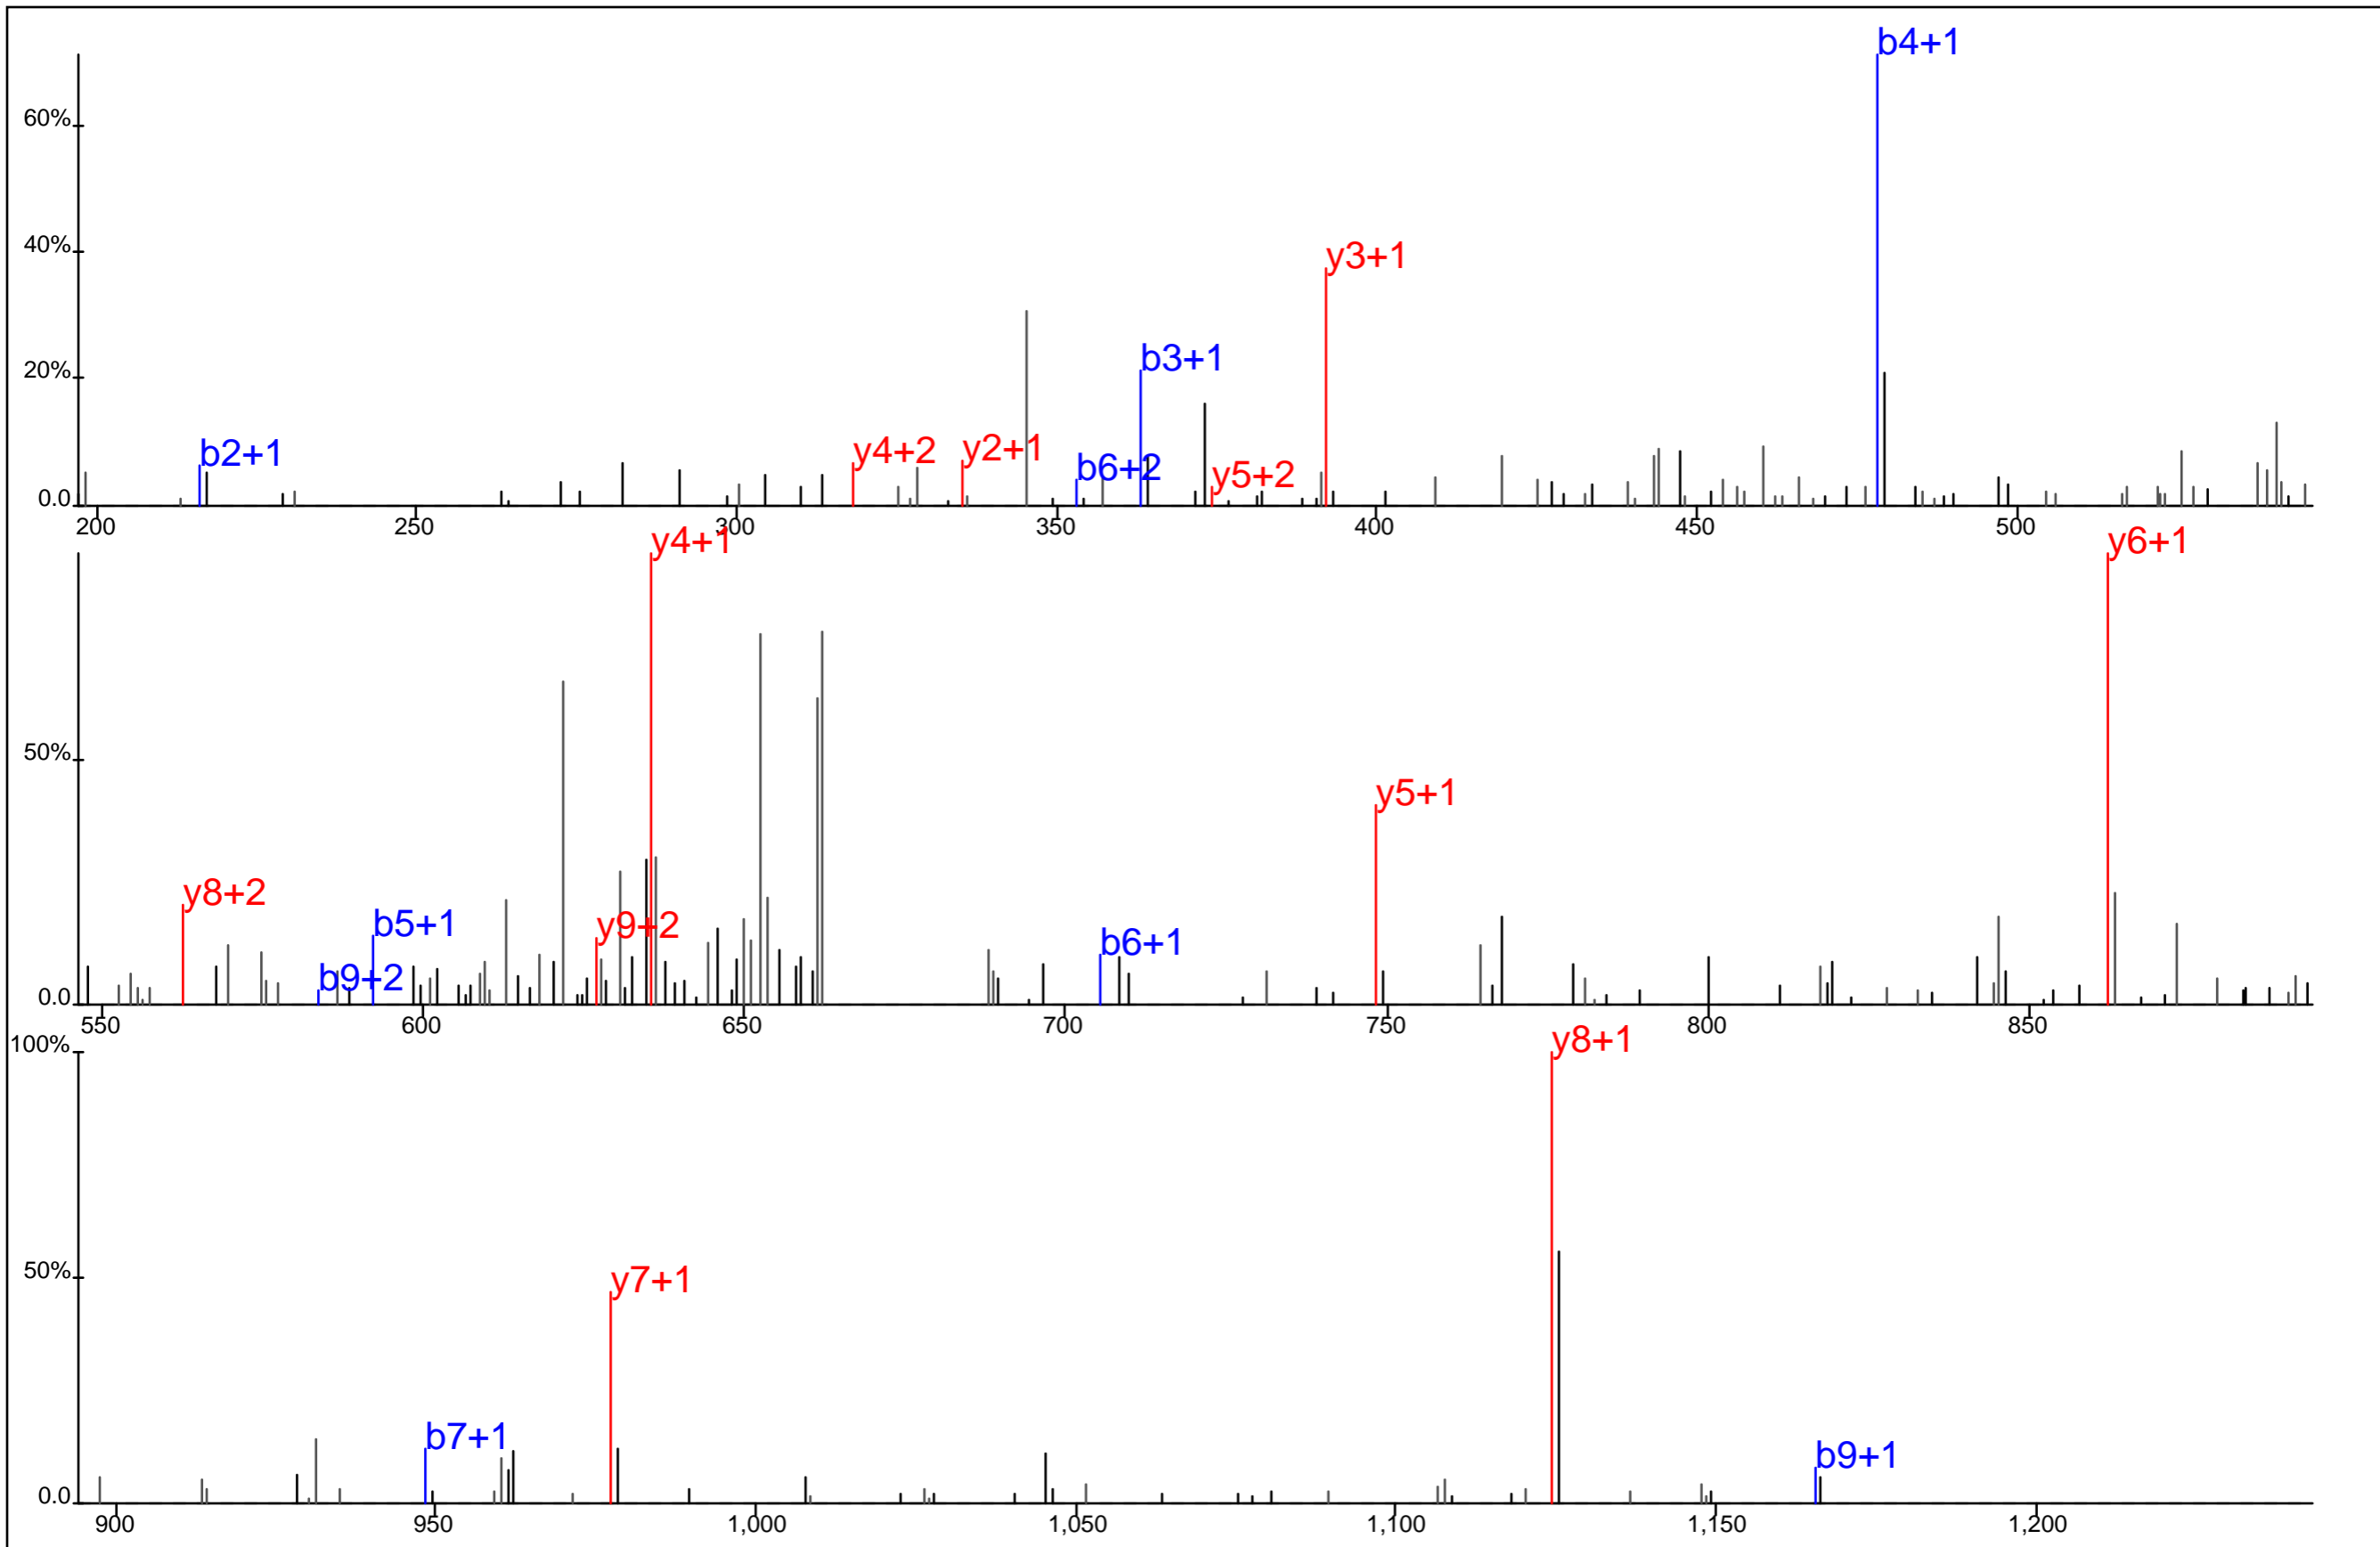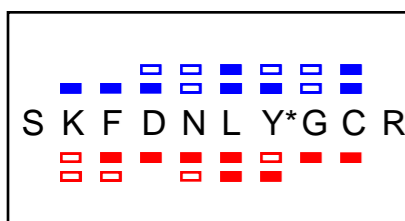

Protein Name: Adenosylhomocysteinase  
 gi Accession: 9951915  
 Precursor Mass: 670.2789+2  
 Delta Mass: 0.402 ppm  
 XCorr: 37.24



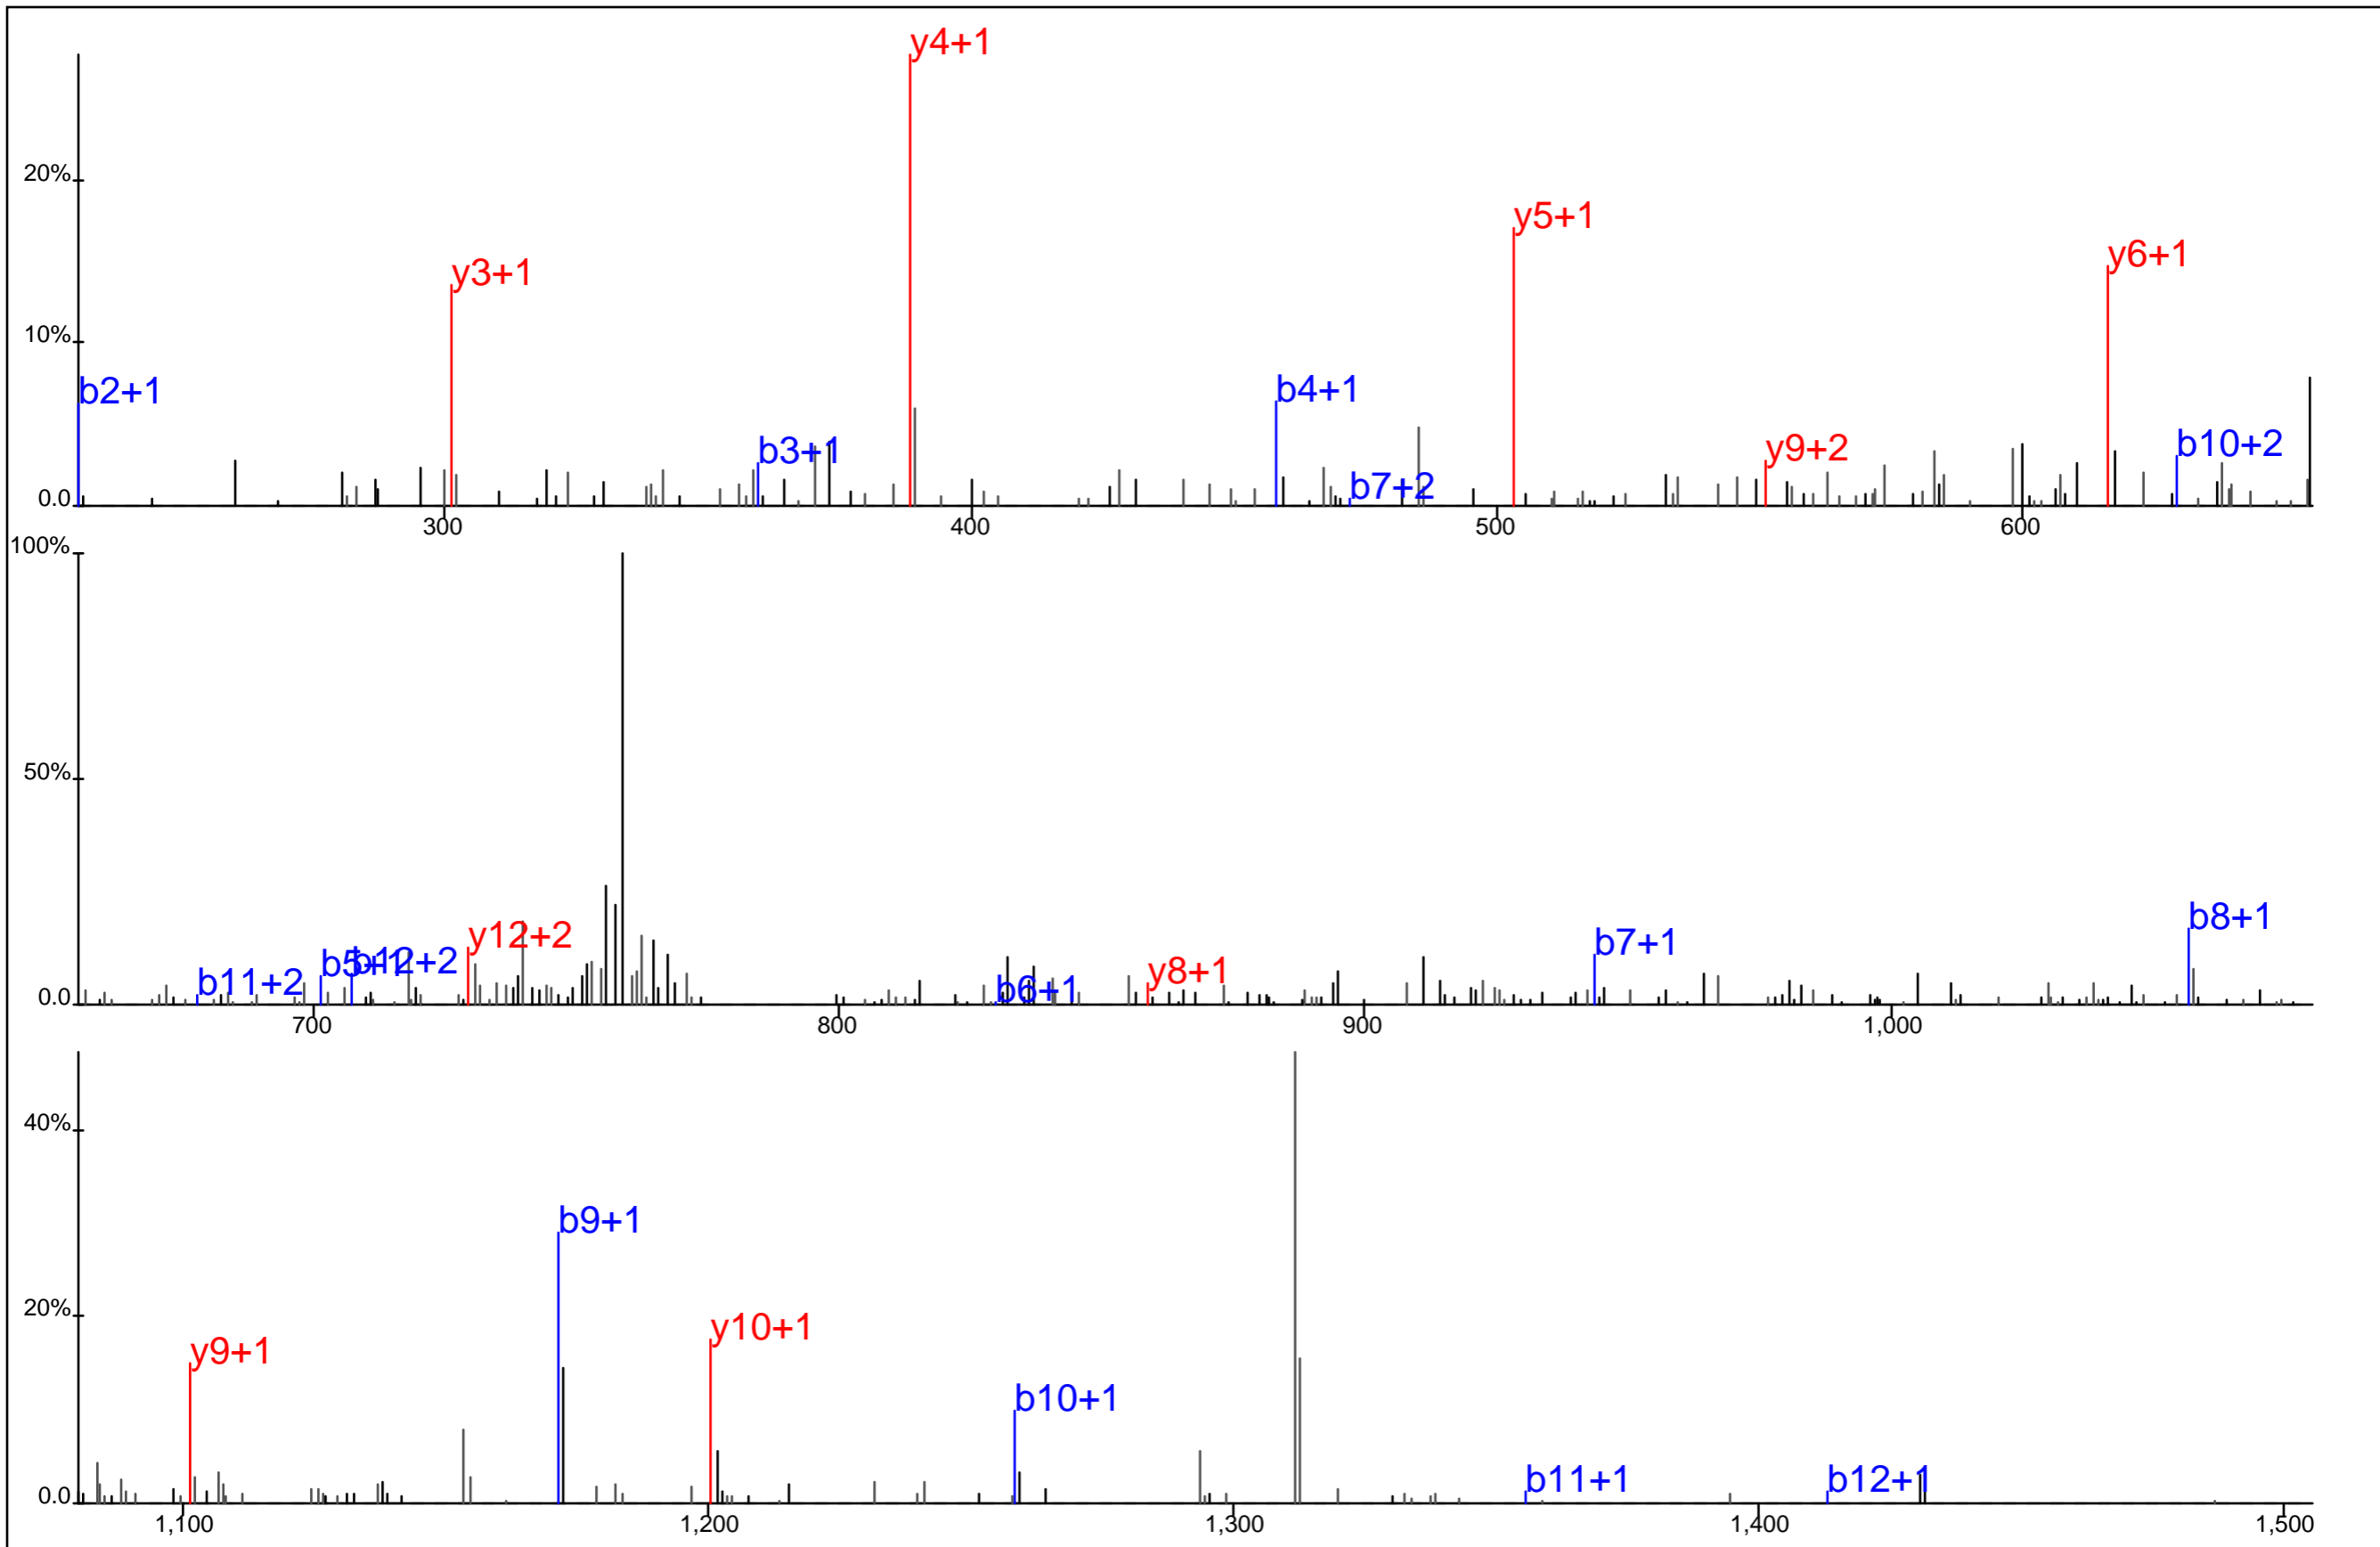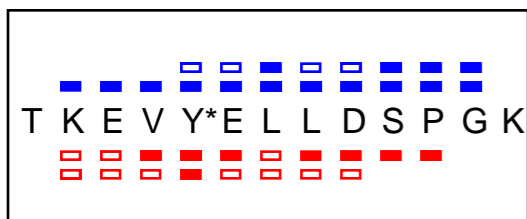

Protein Name: AIR carboxylase  
 gi Accession: 5453539  
 Precursor Mass: 779.8774+2  
 Delta Mass: 4.797 ppm  
 XCorr: 49.03

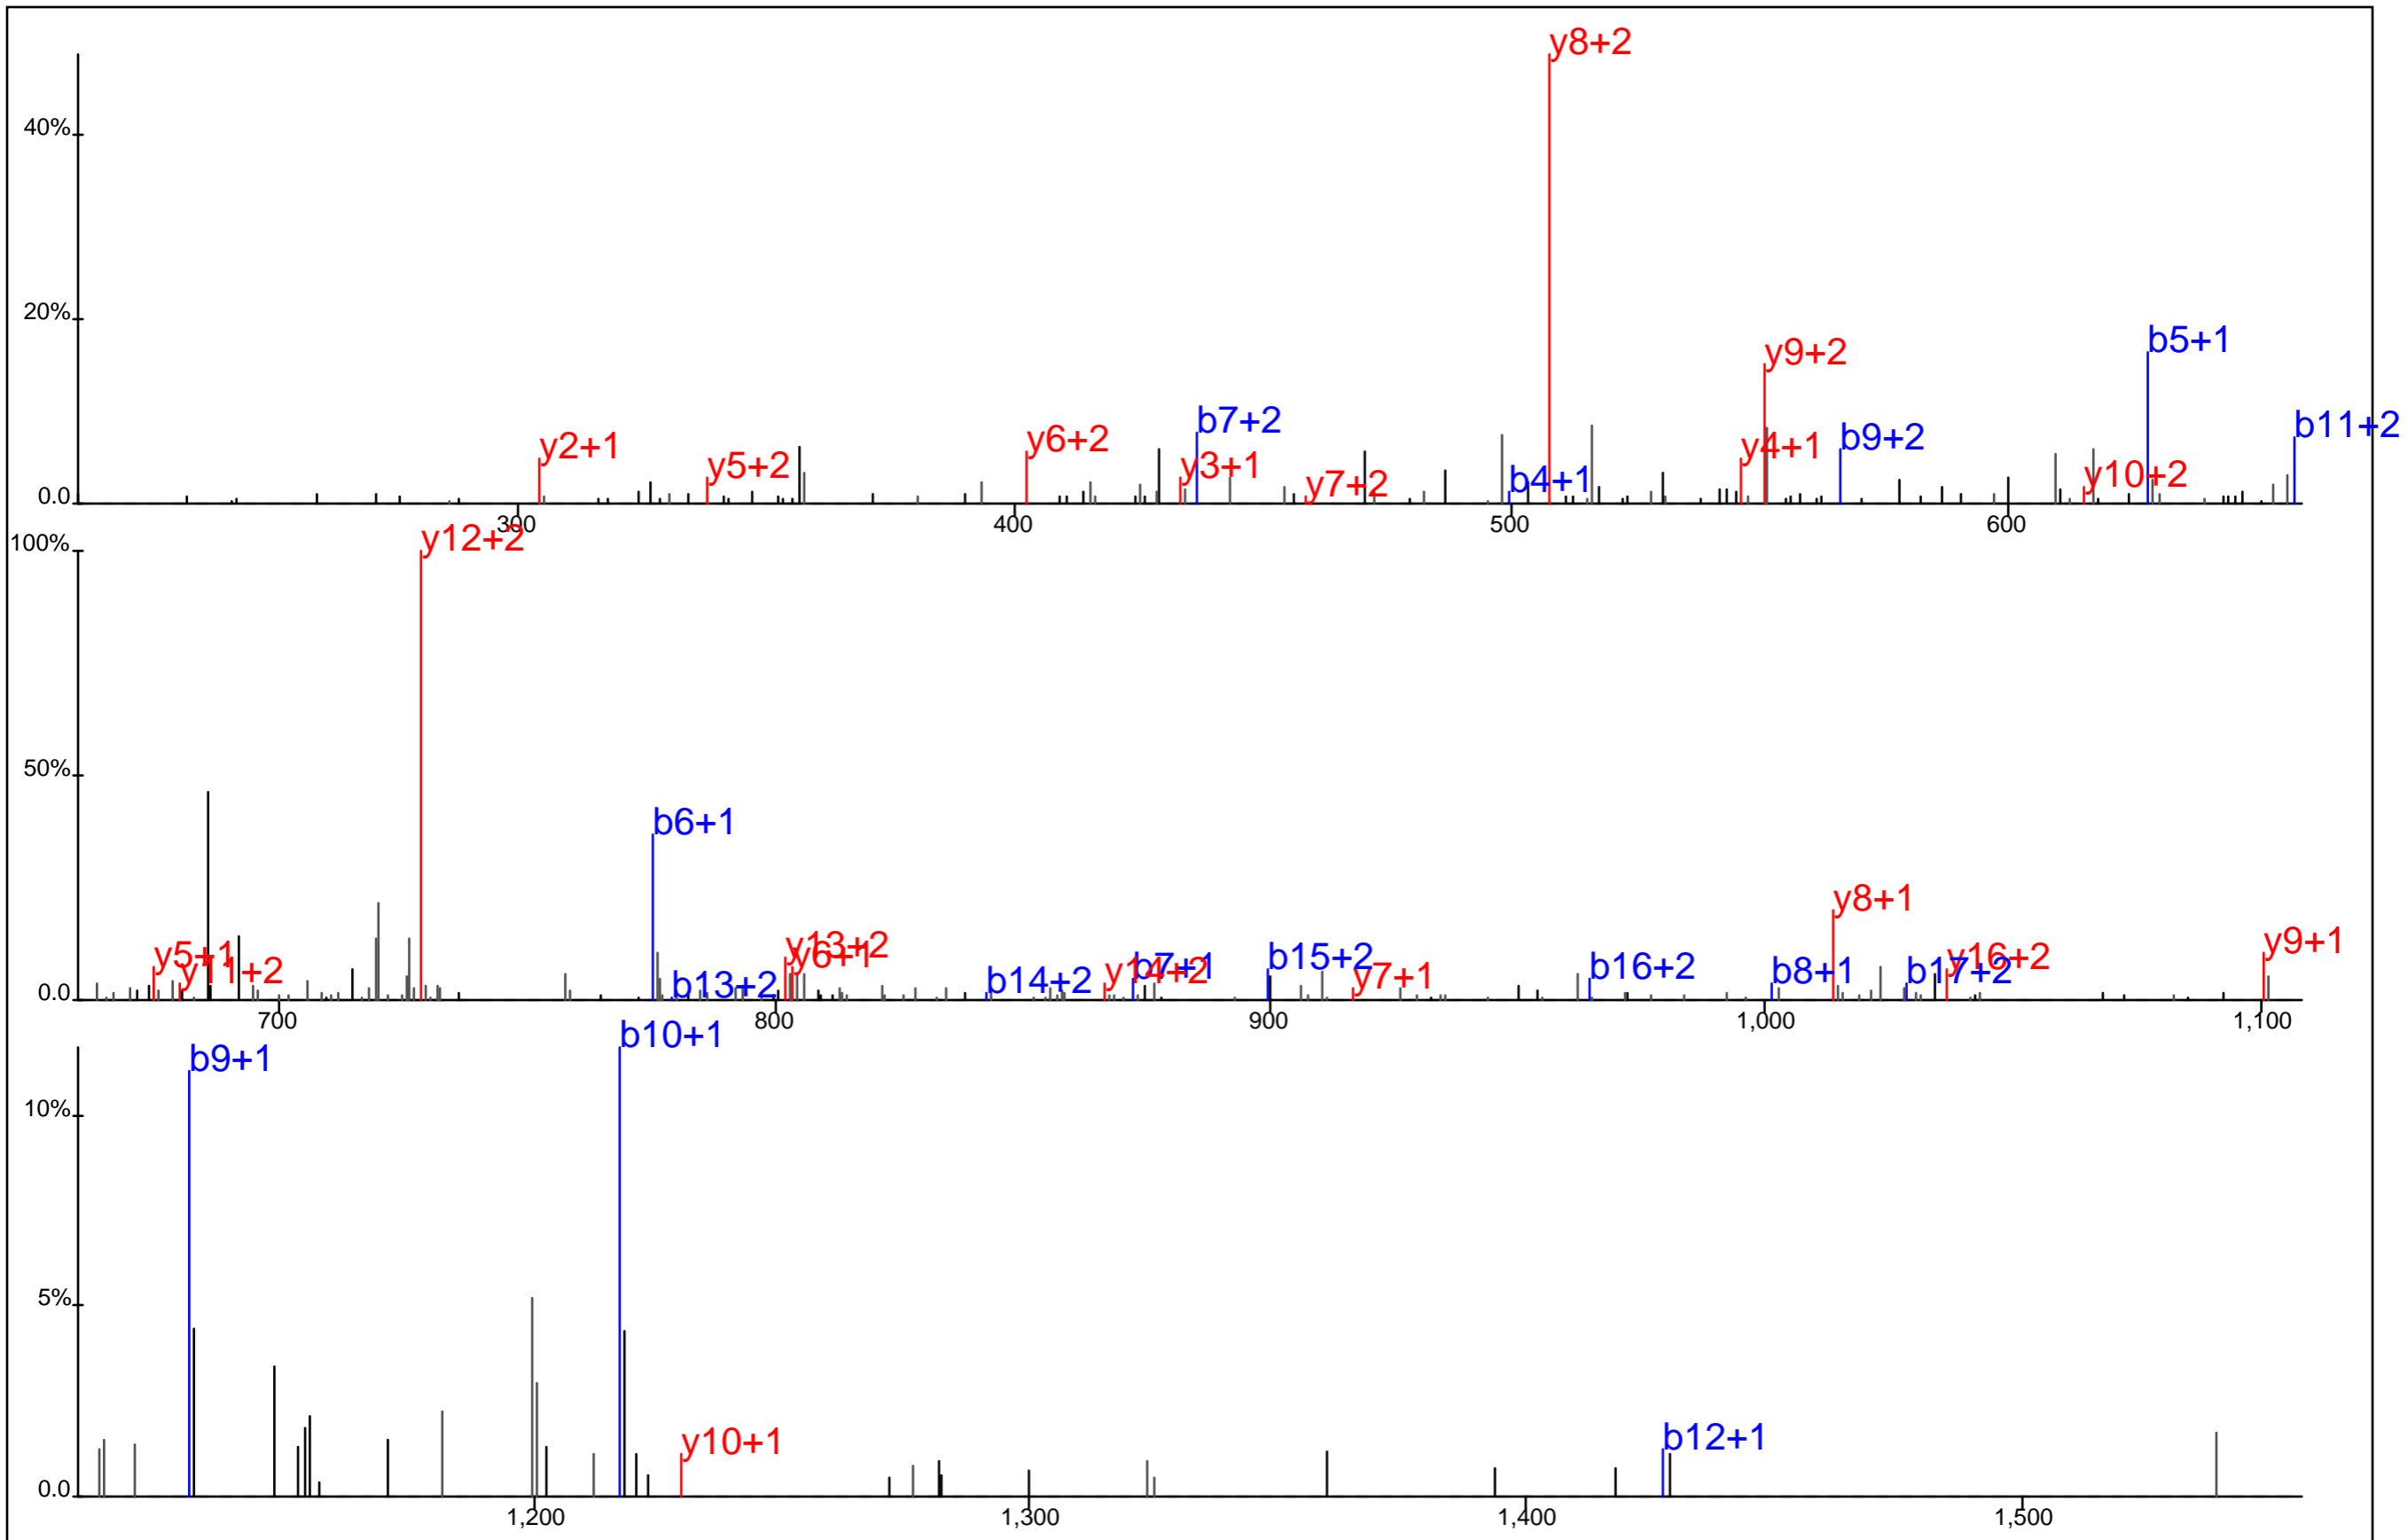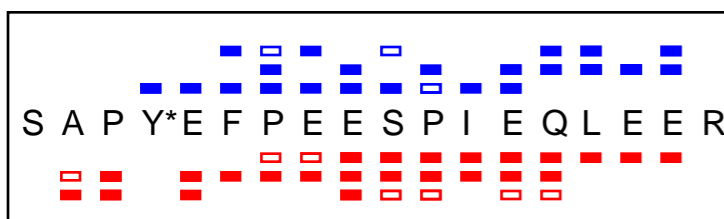

Protein Name: AMP deaminase 2  
 gi Accession: 21264318  
 Precursor Mass: 743.9952+3  
 Delta Mass: 5.510 ppm  
 XCorr: 38.67

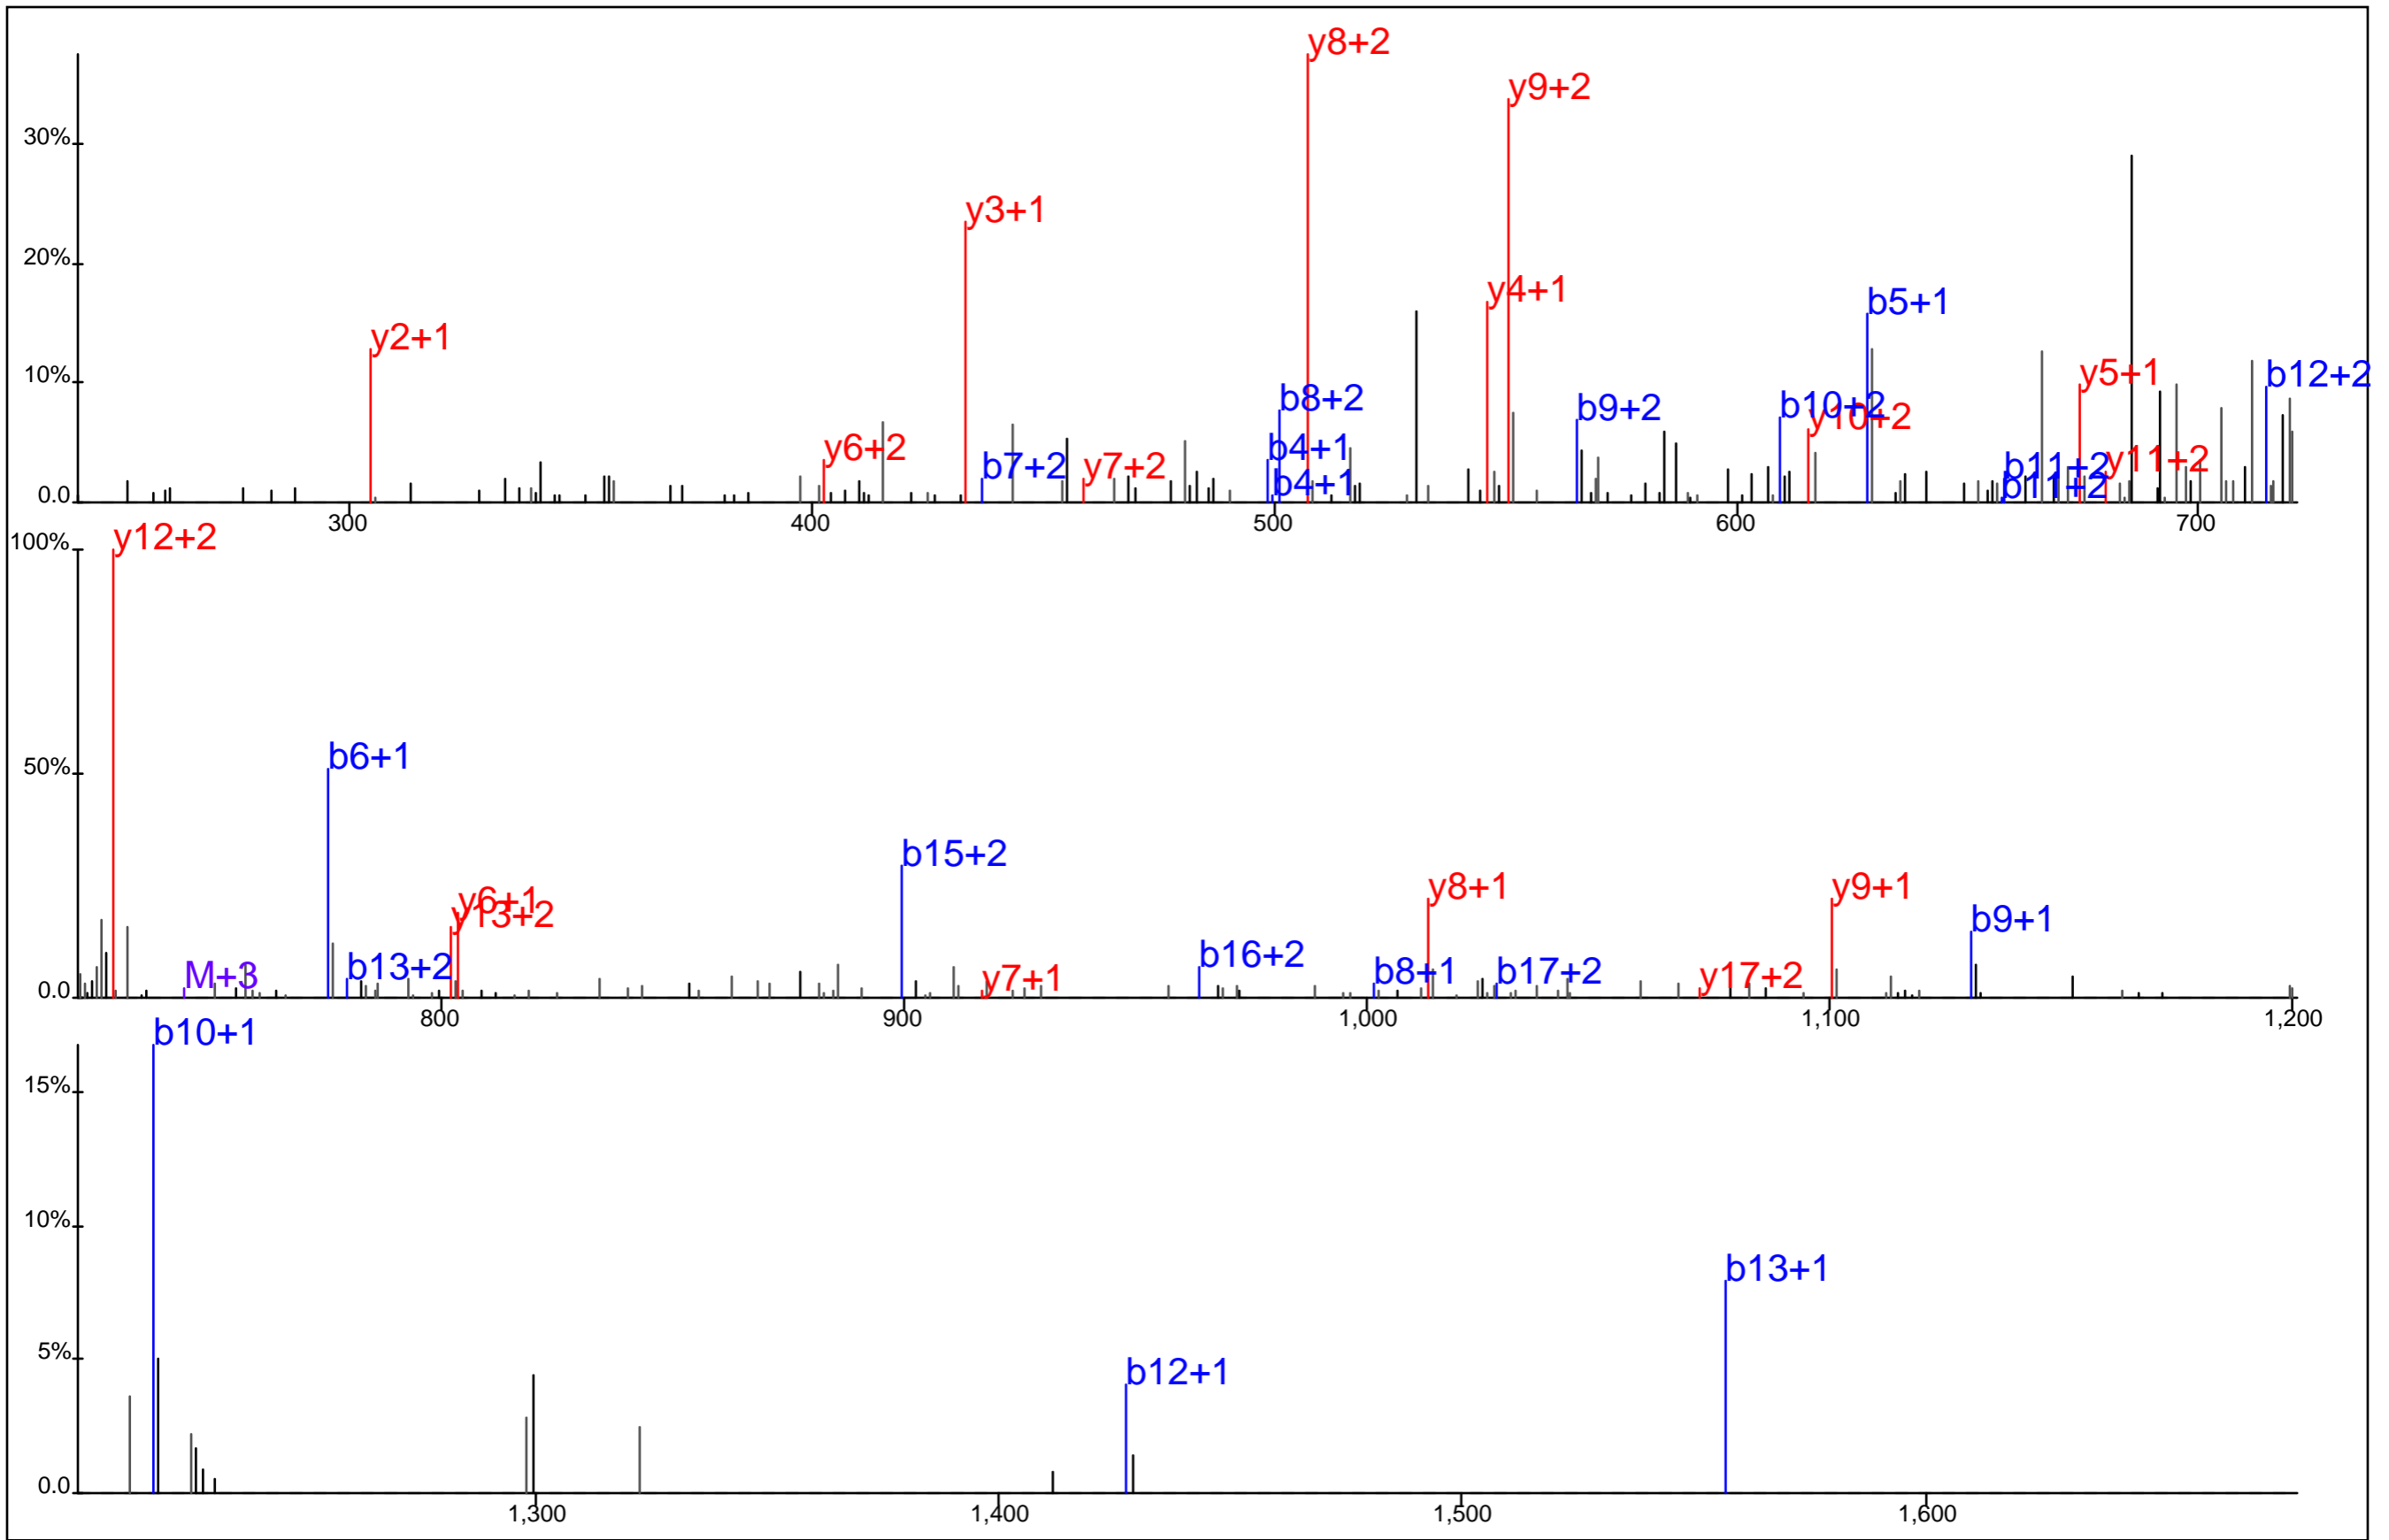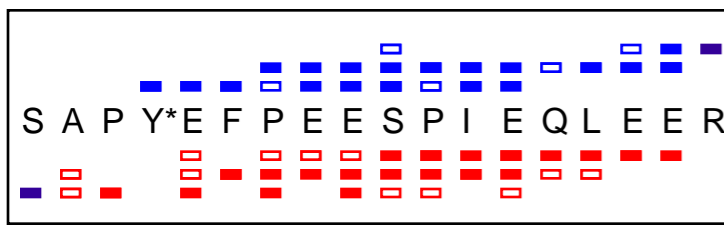

Protein Name: AMP deaminase 2  
 gi Accession: 21264318  
 Precursor Mass: 743.9942+3  
 Delta Mass: 4.197 ppm  
 XCorr: 36.04



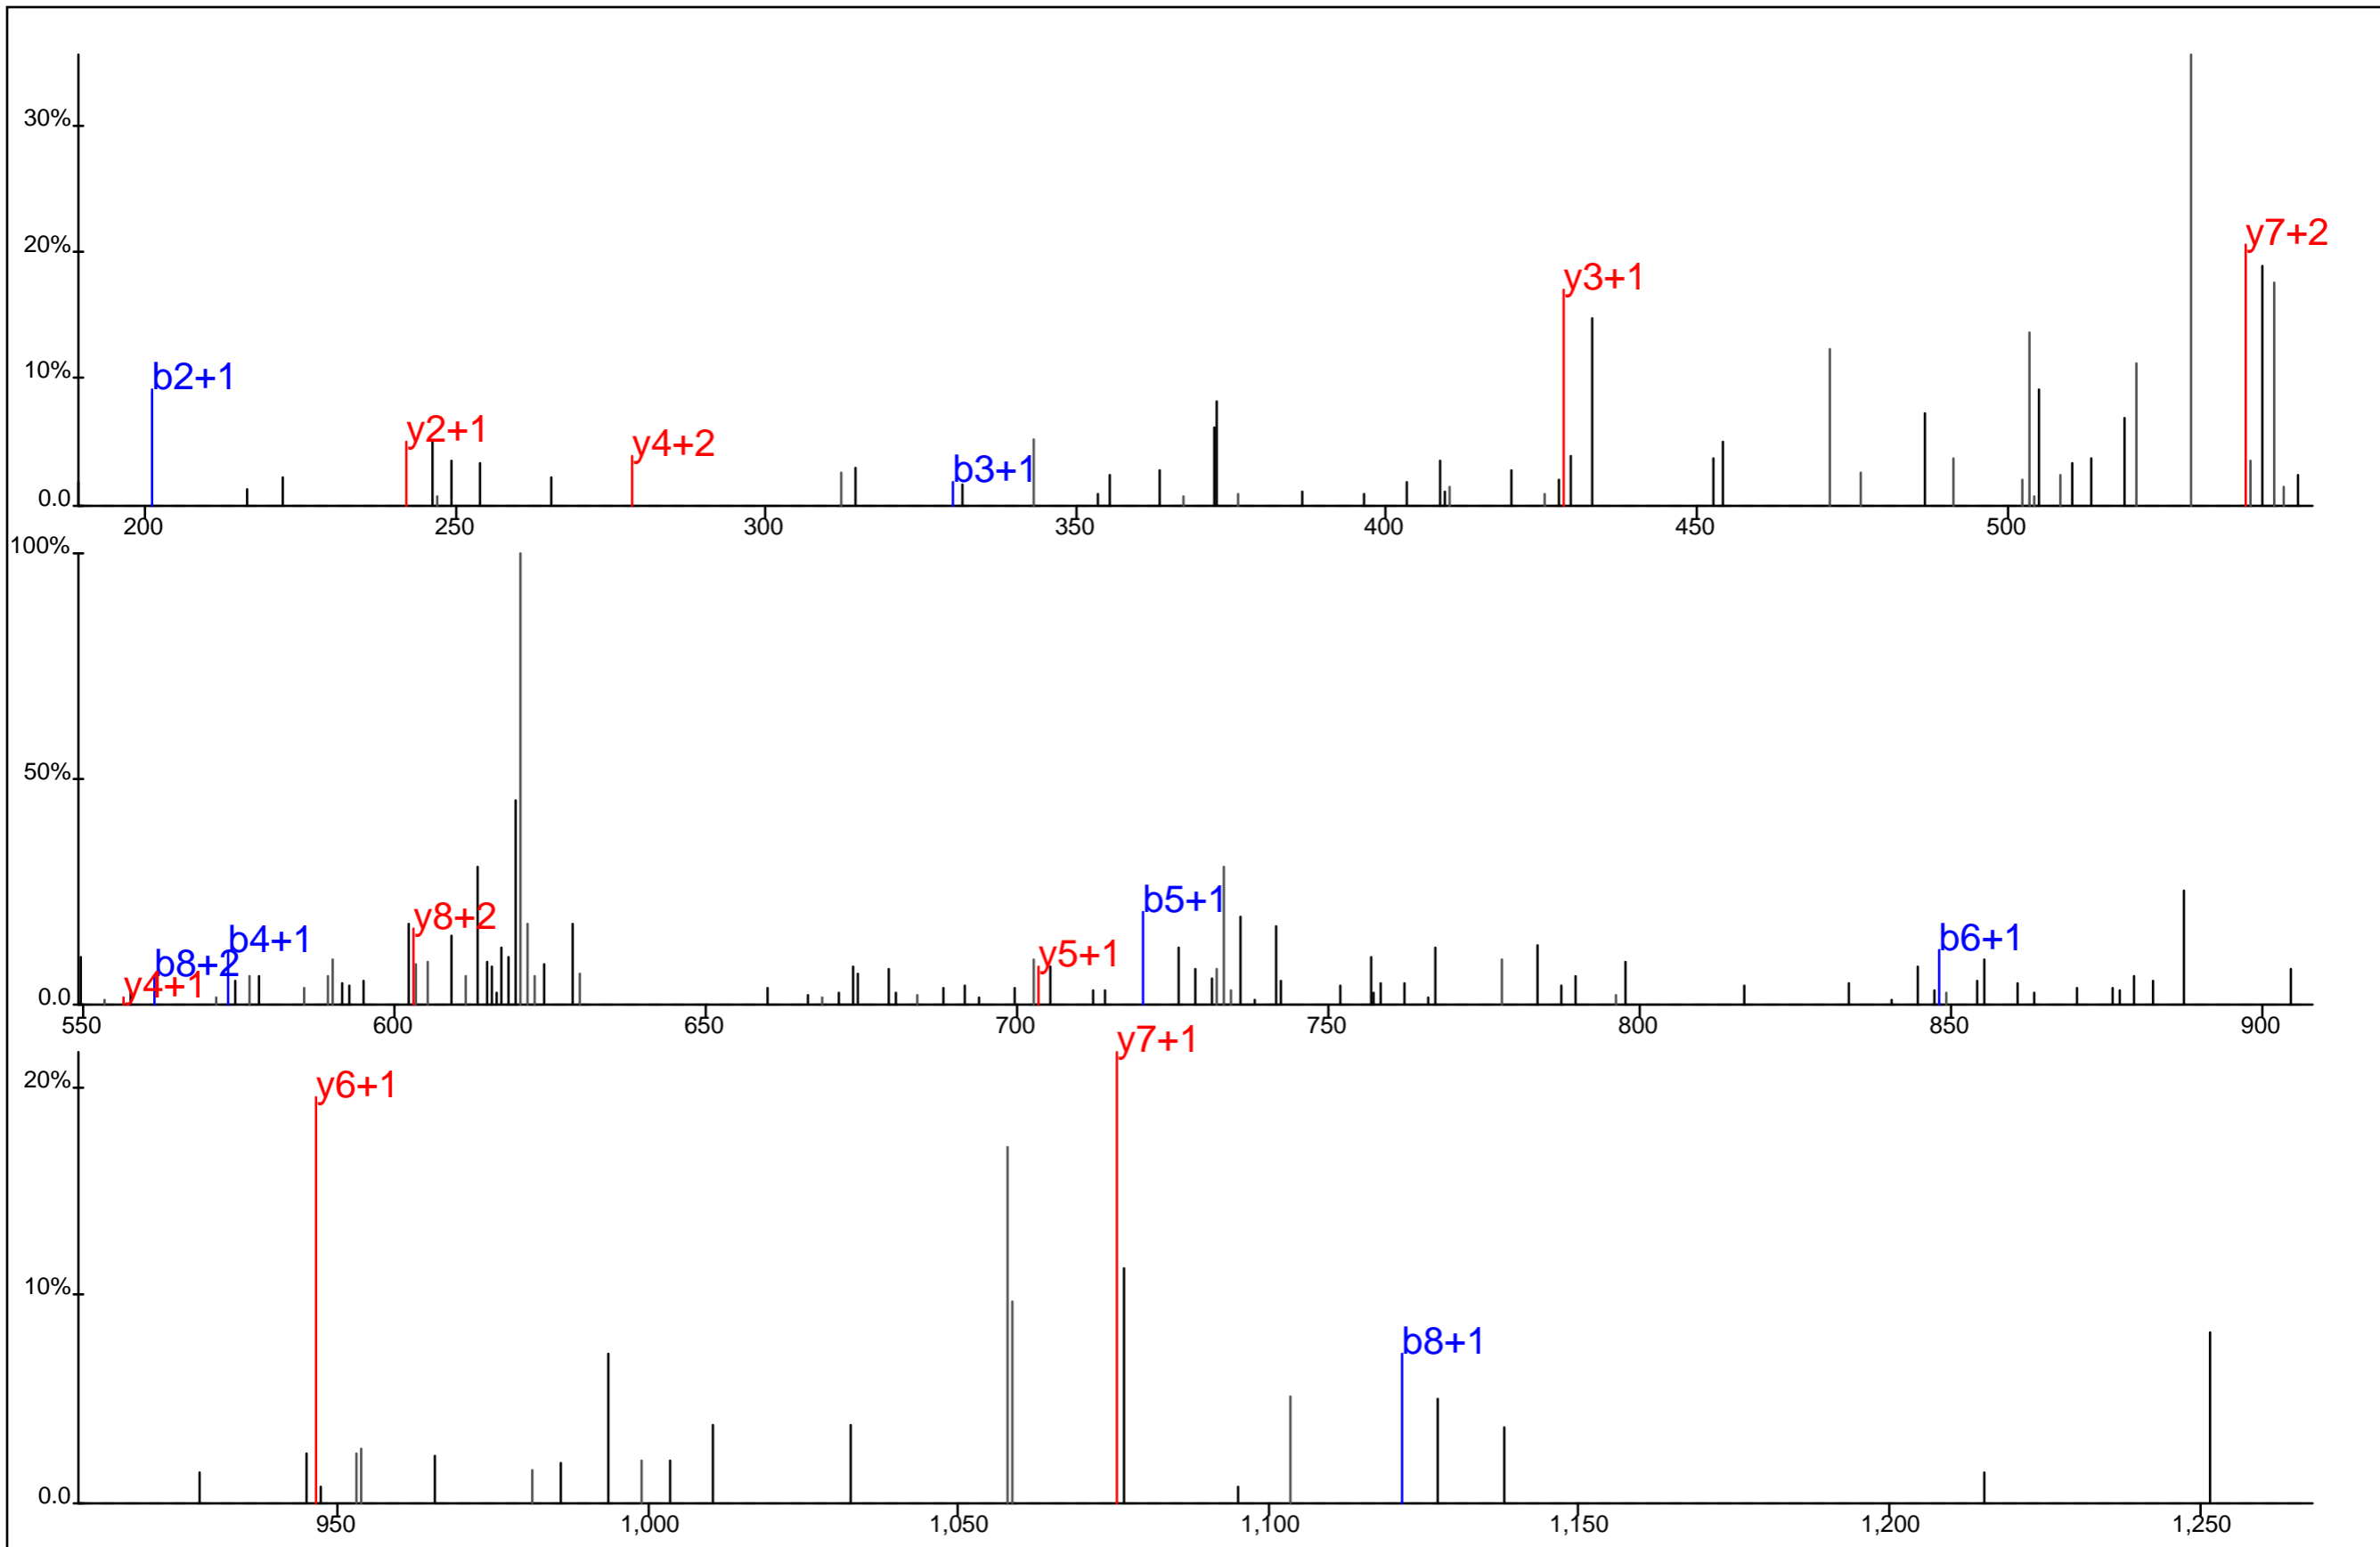

**A E E Y\*F Q W S K#**

Protein Name: Artemis protein  
 gi Accession: 76496497  
 Precursor Mass: 638.2653+2  
 Delta Mass: 4.773 ppm  
 XCorr: 16.66

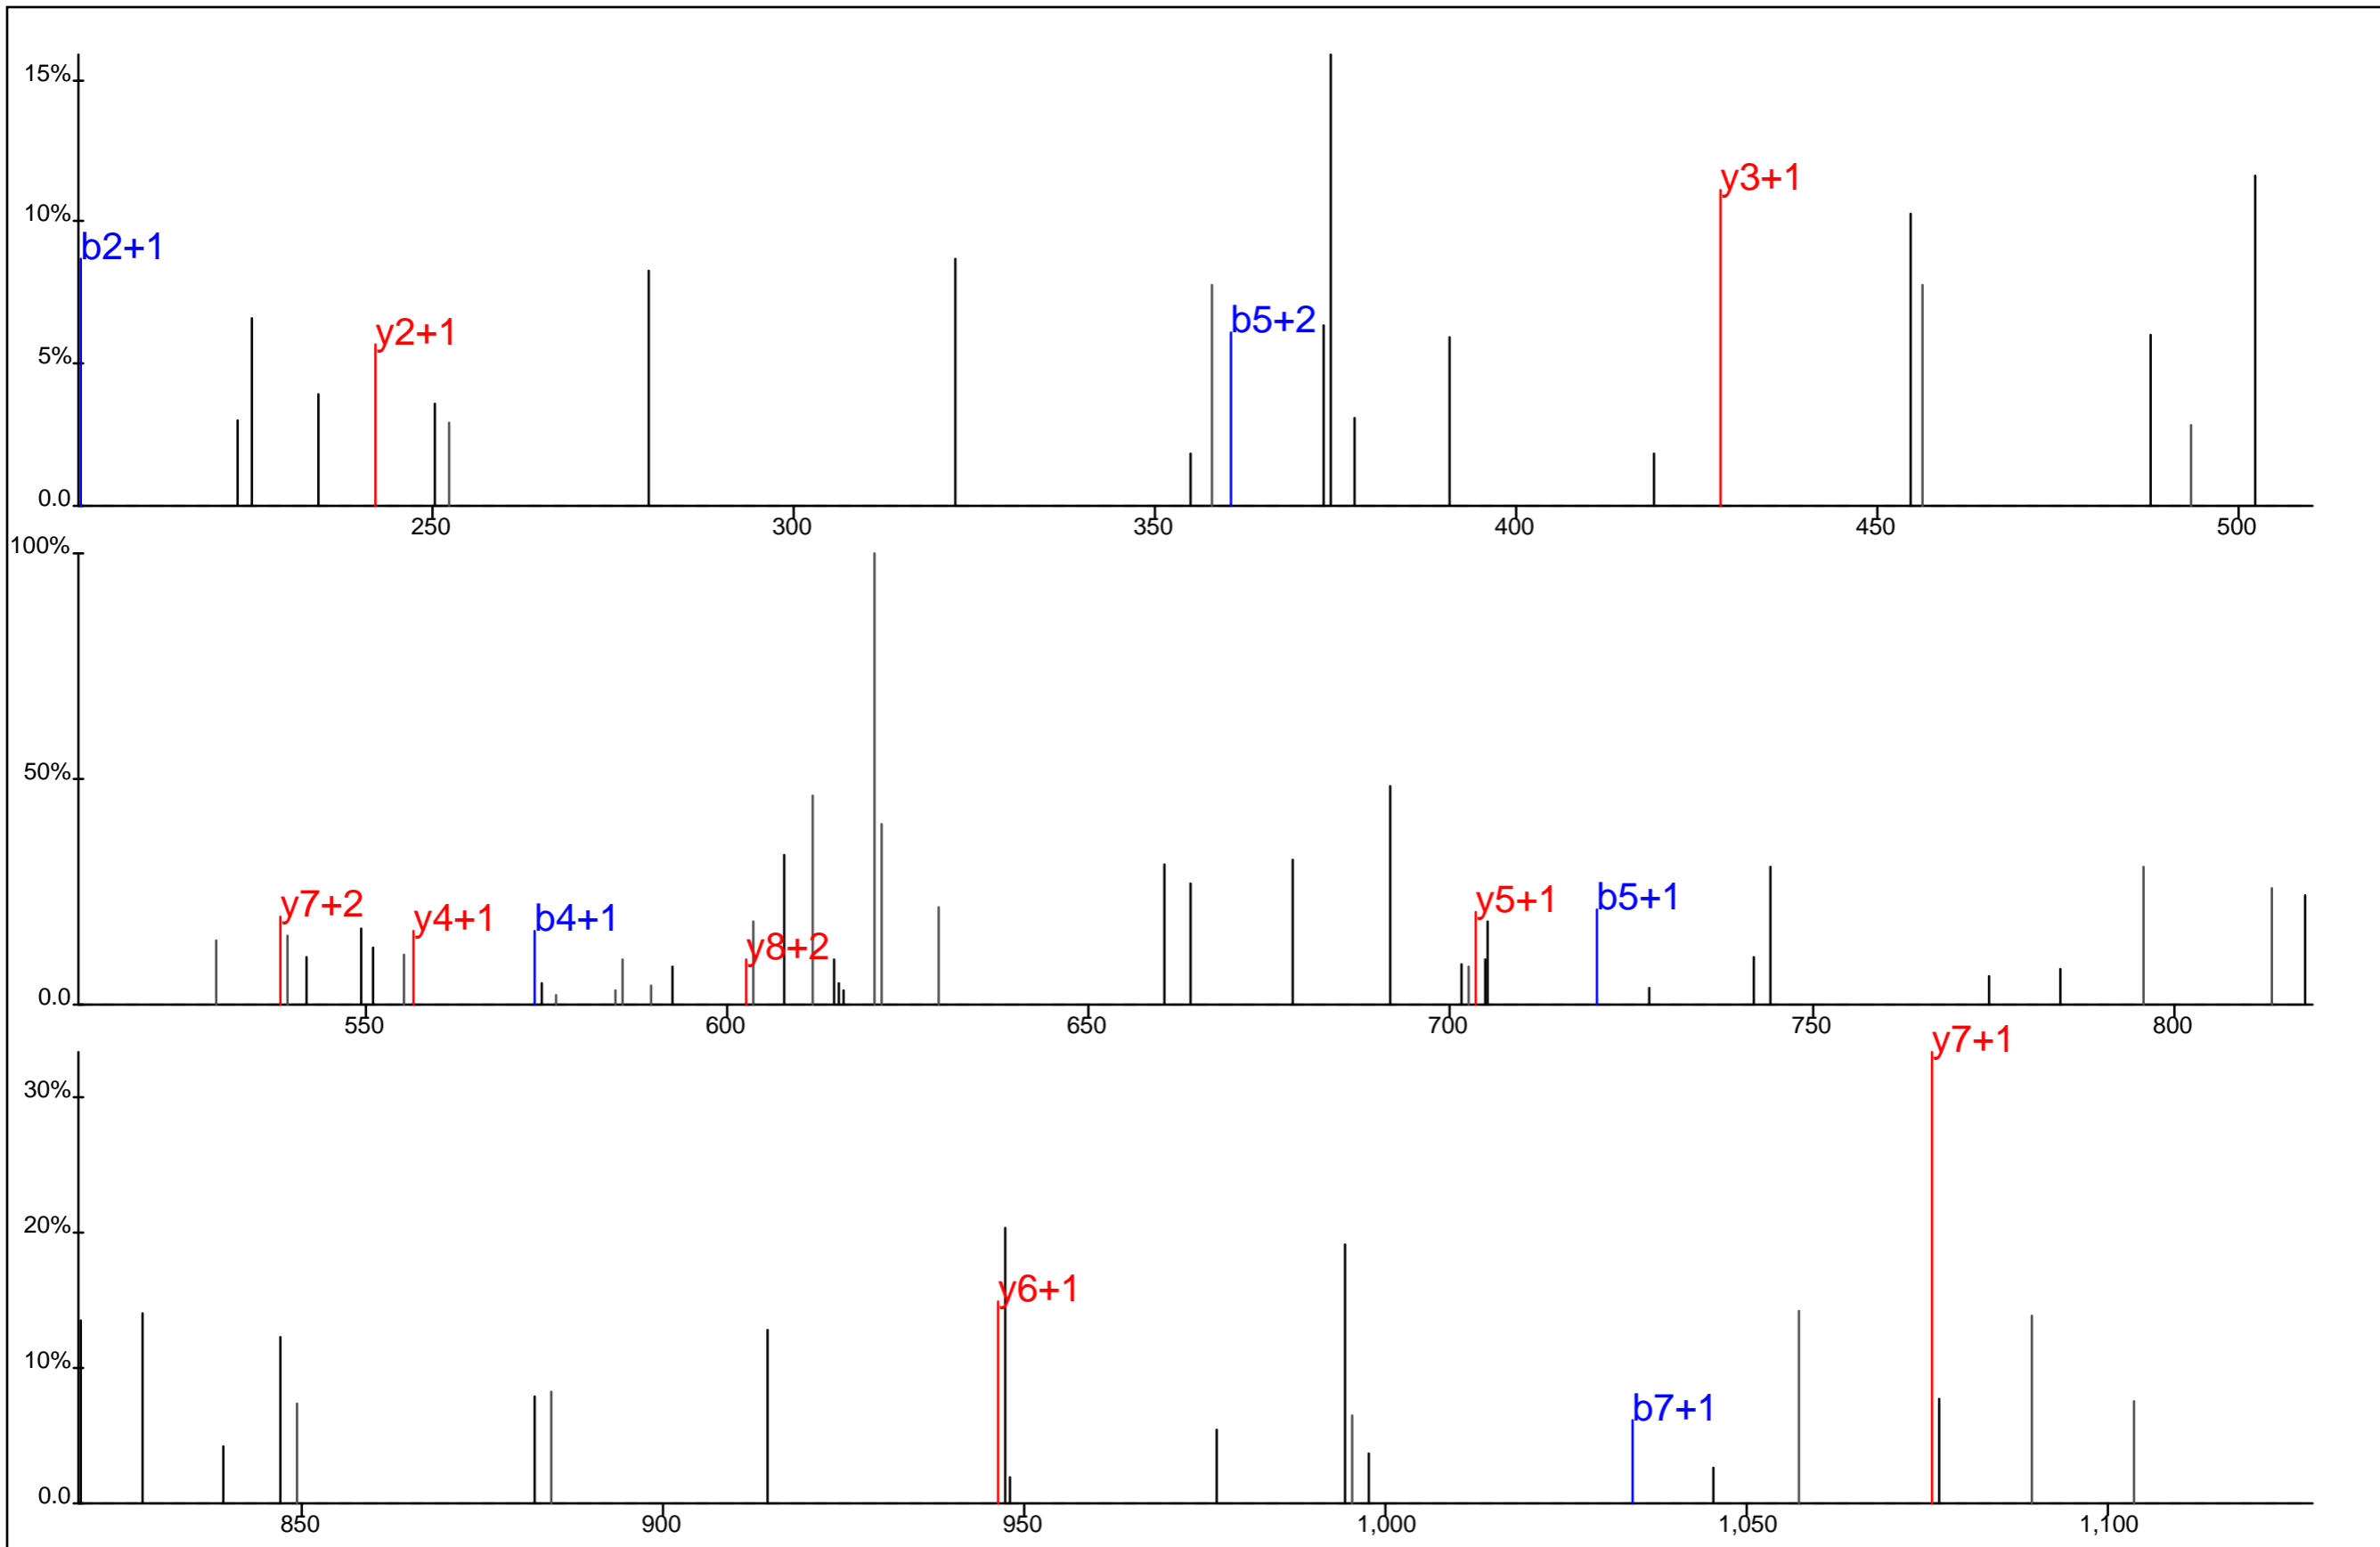

A E E Y\* F Q W S K#

Protein Name: Artemis protein  
 gi Accession: 76496497  
 Precursor Mass: 638.2633+2  
 Delta Mass: 1.613 ppm  
 XCorr: 19.76

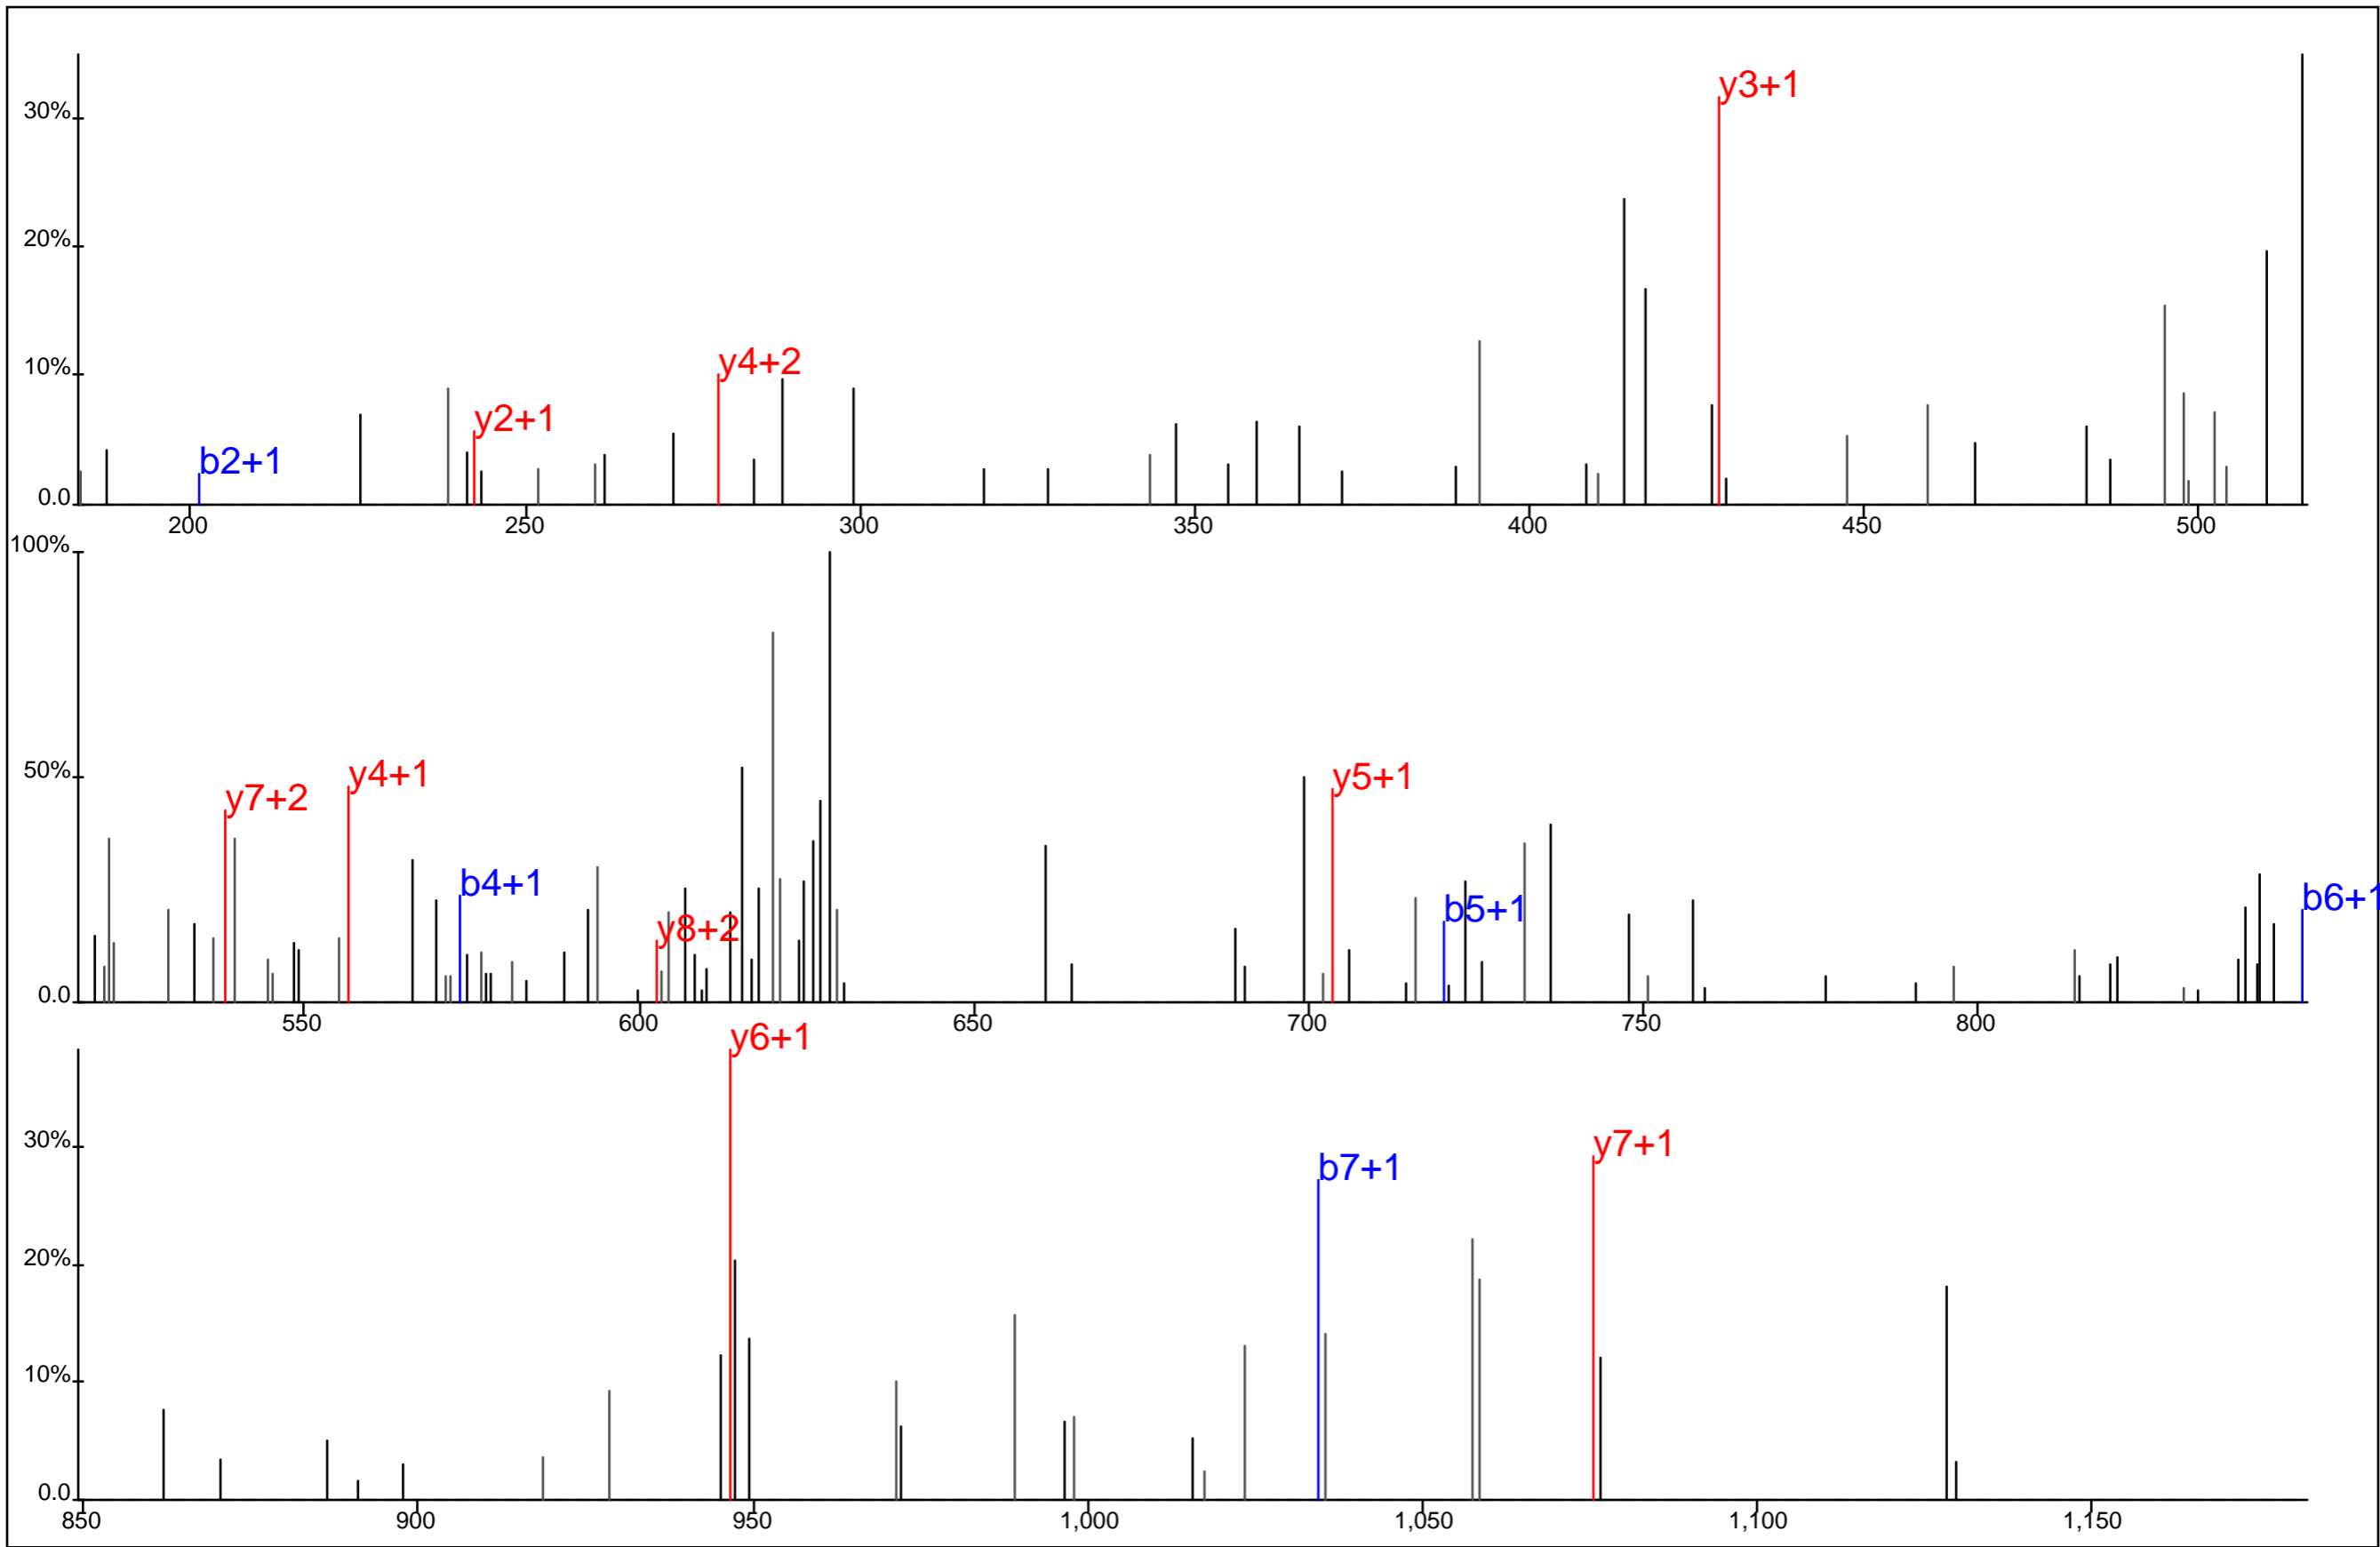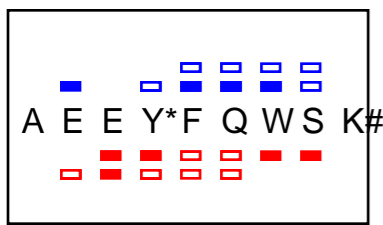

Protein Name: Artemis protein  
 gi Accession: 76496497  
 Precursor Mass: 638.2651+2  
 Delta Mass: 4.491 ppm  
 XCorr: 20.3

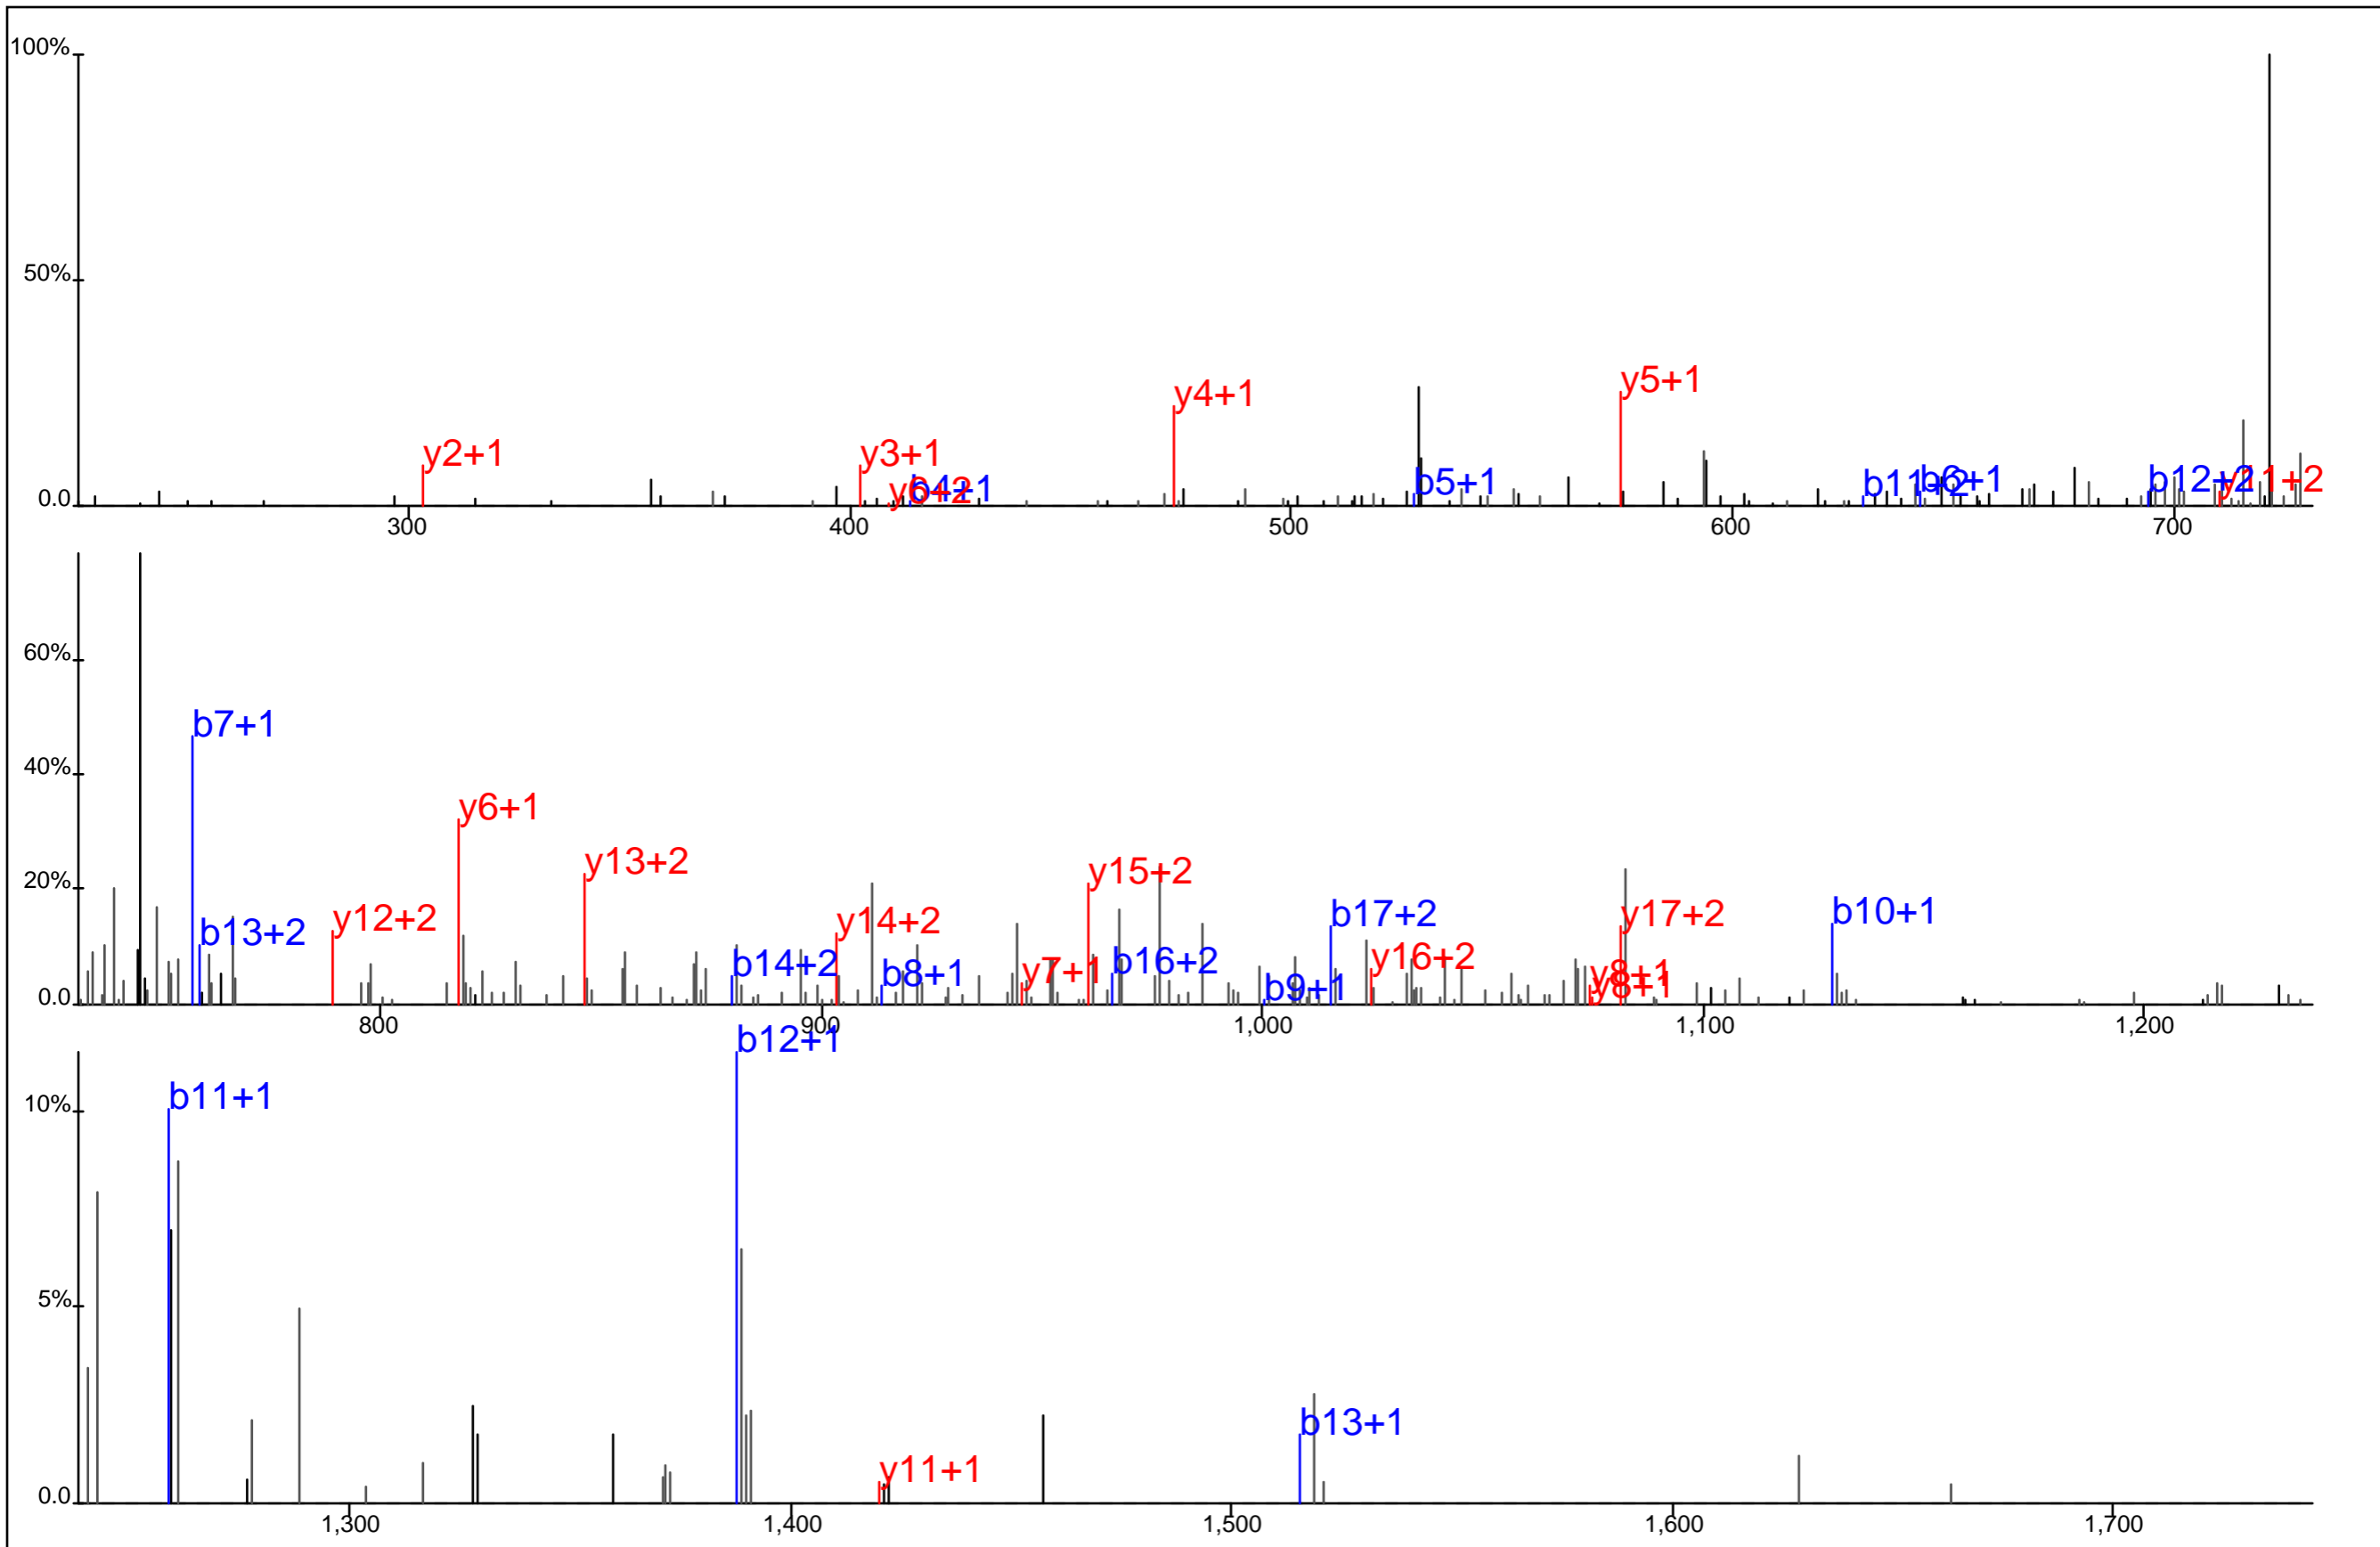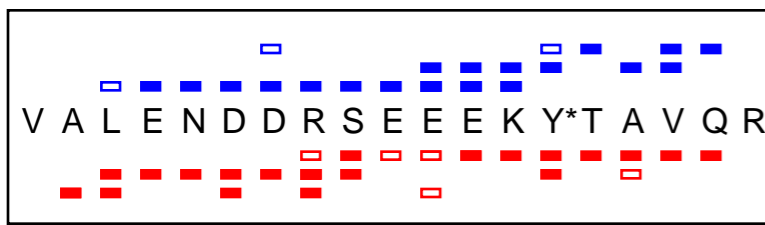

Protein Name: Ataxin 2  
 gi Accession: 52000732  
 Precursor Mass: 778.0243+3  
 Delta Mass: 5.617 ppm  
 XCorr: 21.22



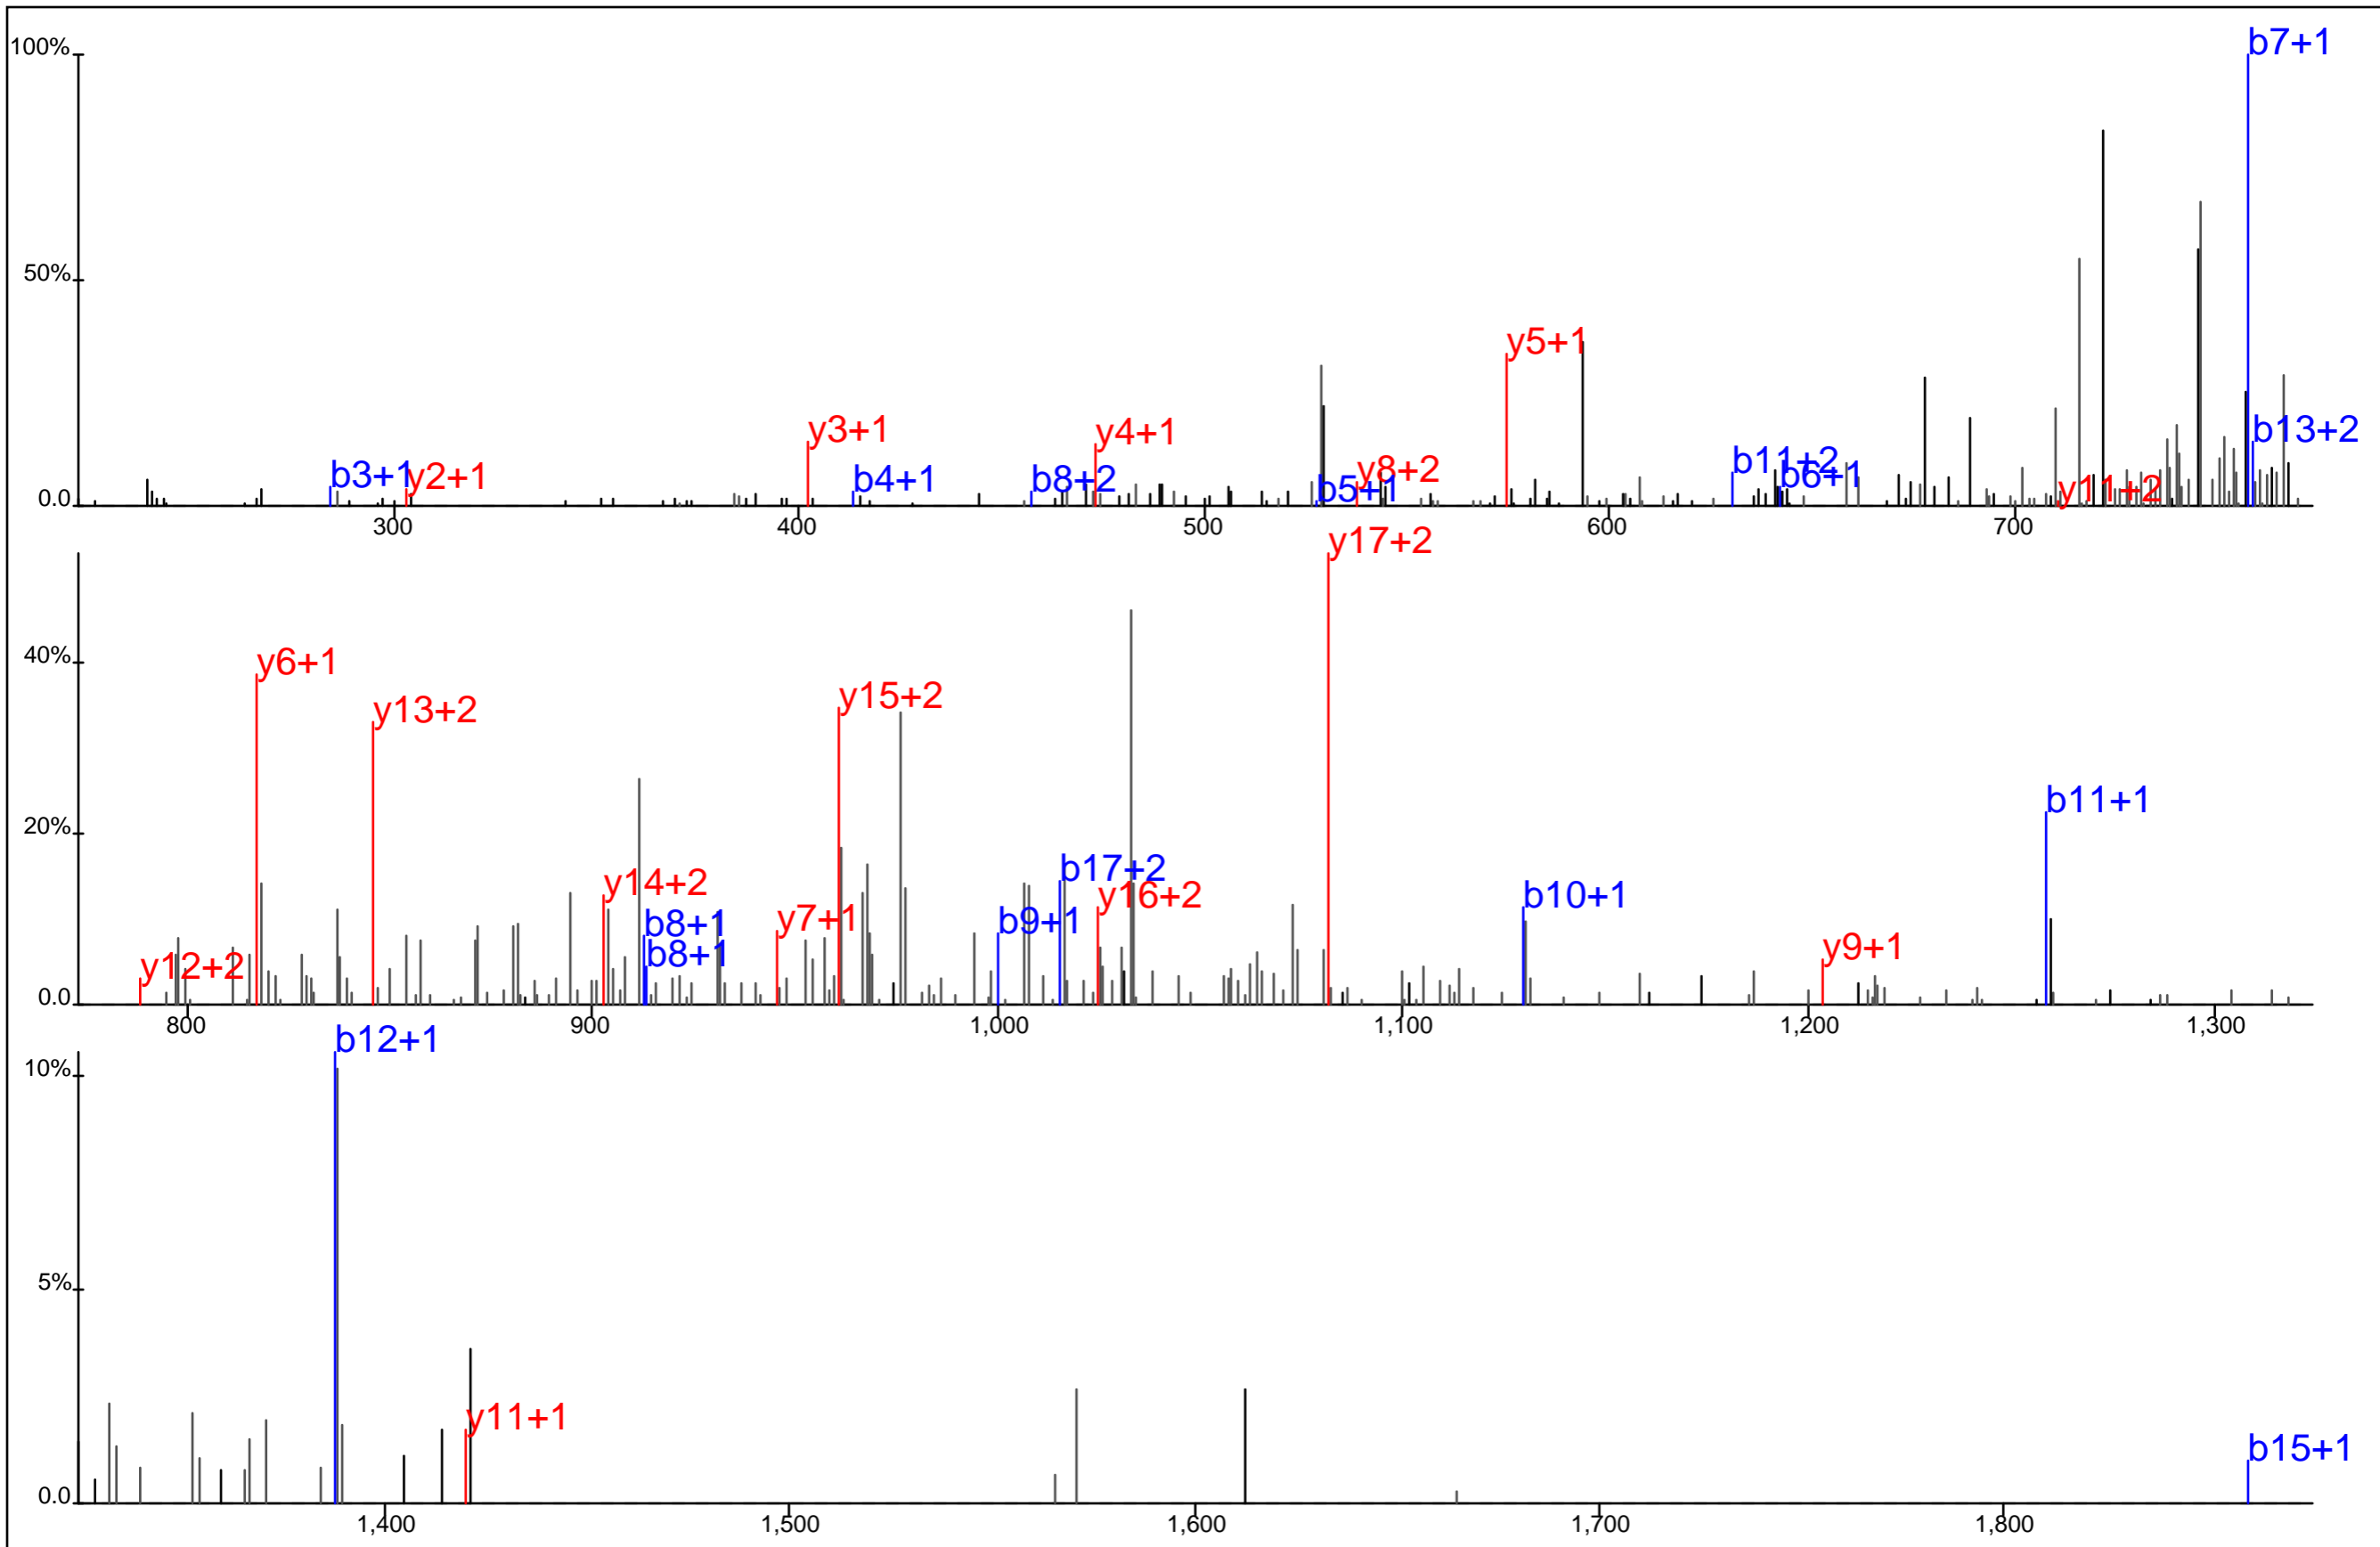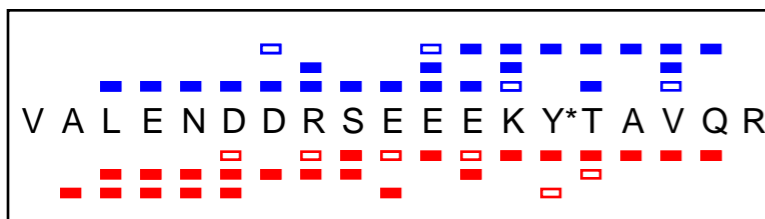

Protein Name: Ataxin 2  
 gi Accession: 52000732  
 Precursor Mass: 778.0253+3  
 Delta Mass: 6.955 ppm  
 XCorr: 33.98

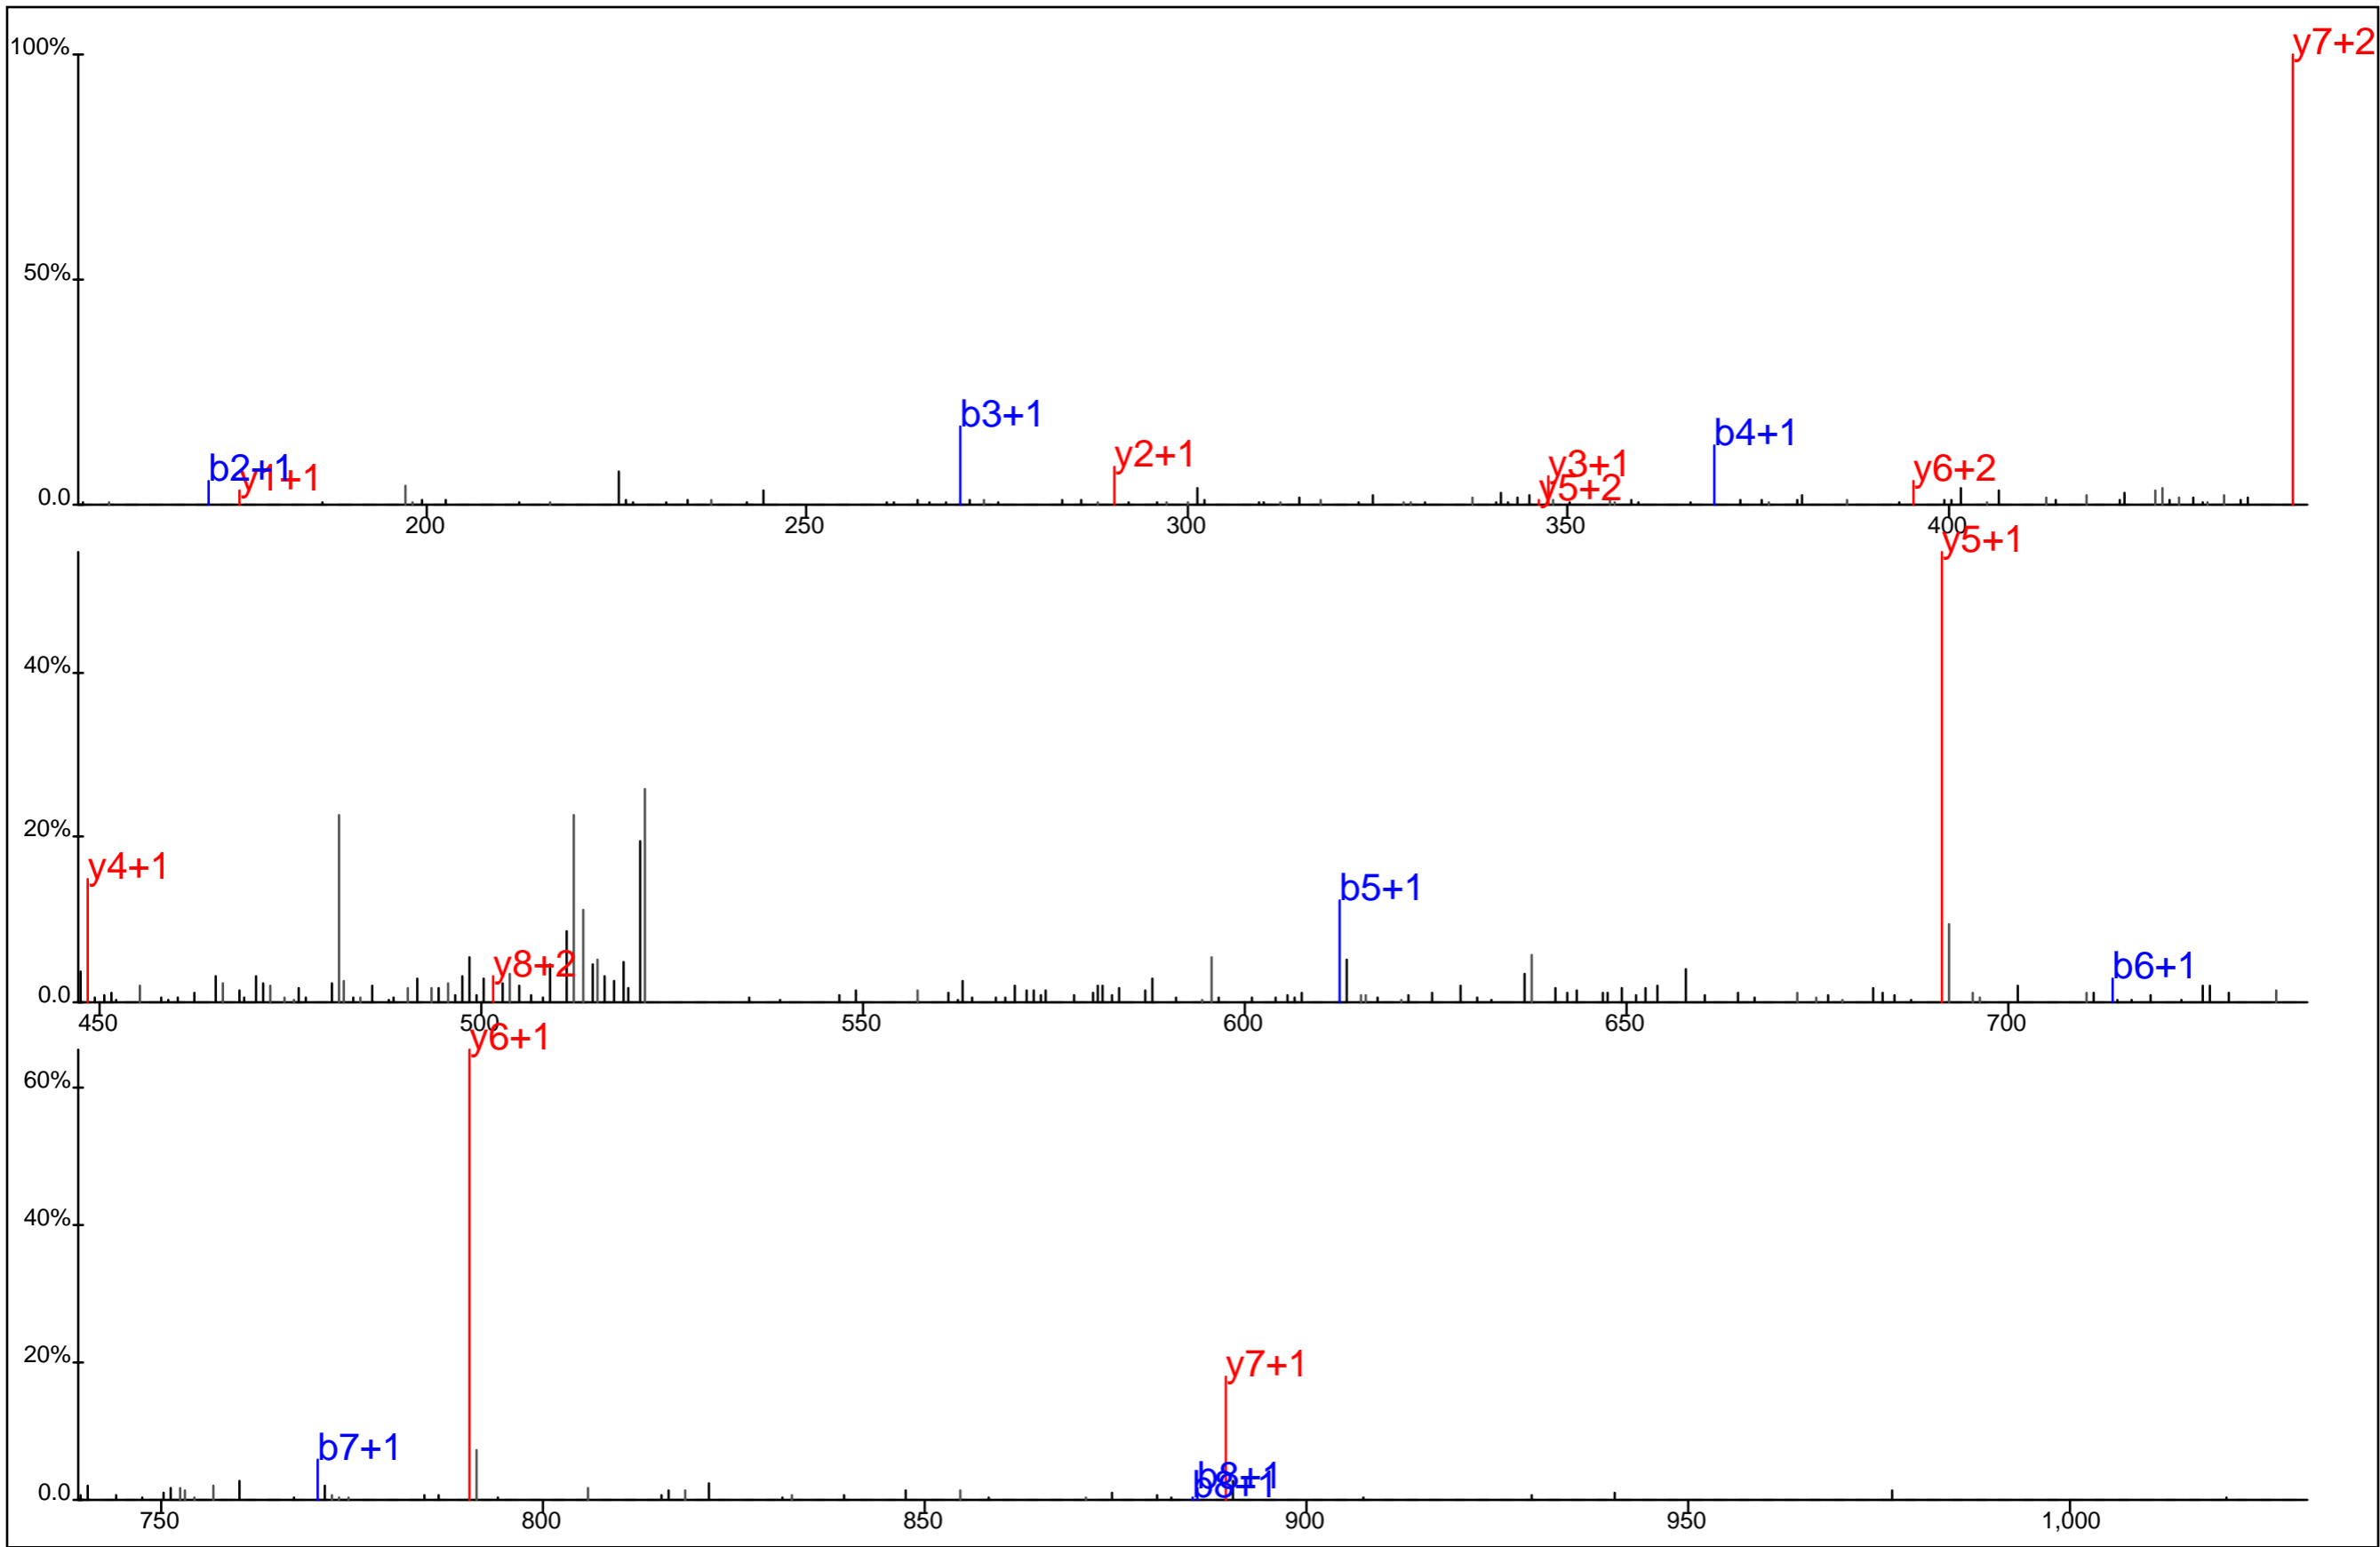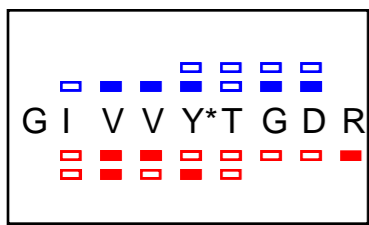

Protein Name: ATP1A1  
 gi Accession: 21361181  
 Precursor Mass: 530.2483+2  
 Delta Mass: 2.122 ppm  
 XCorr: 43.07

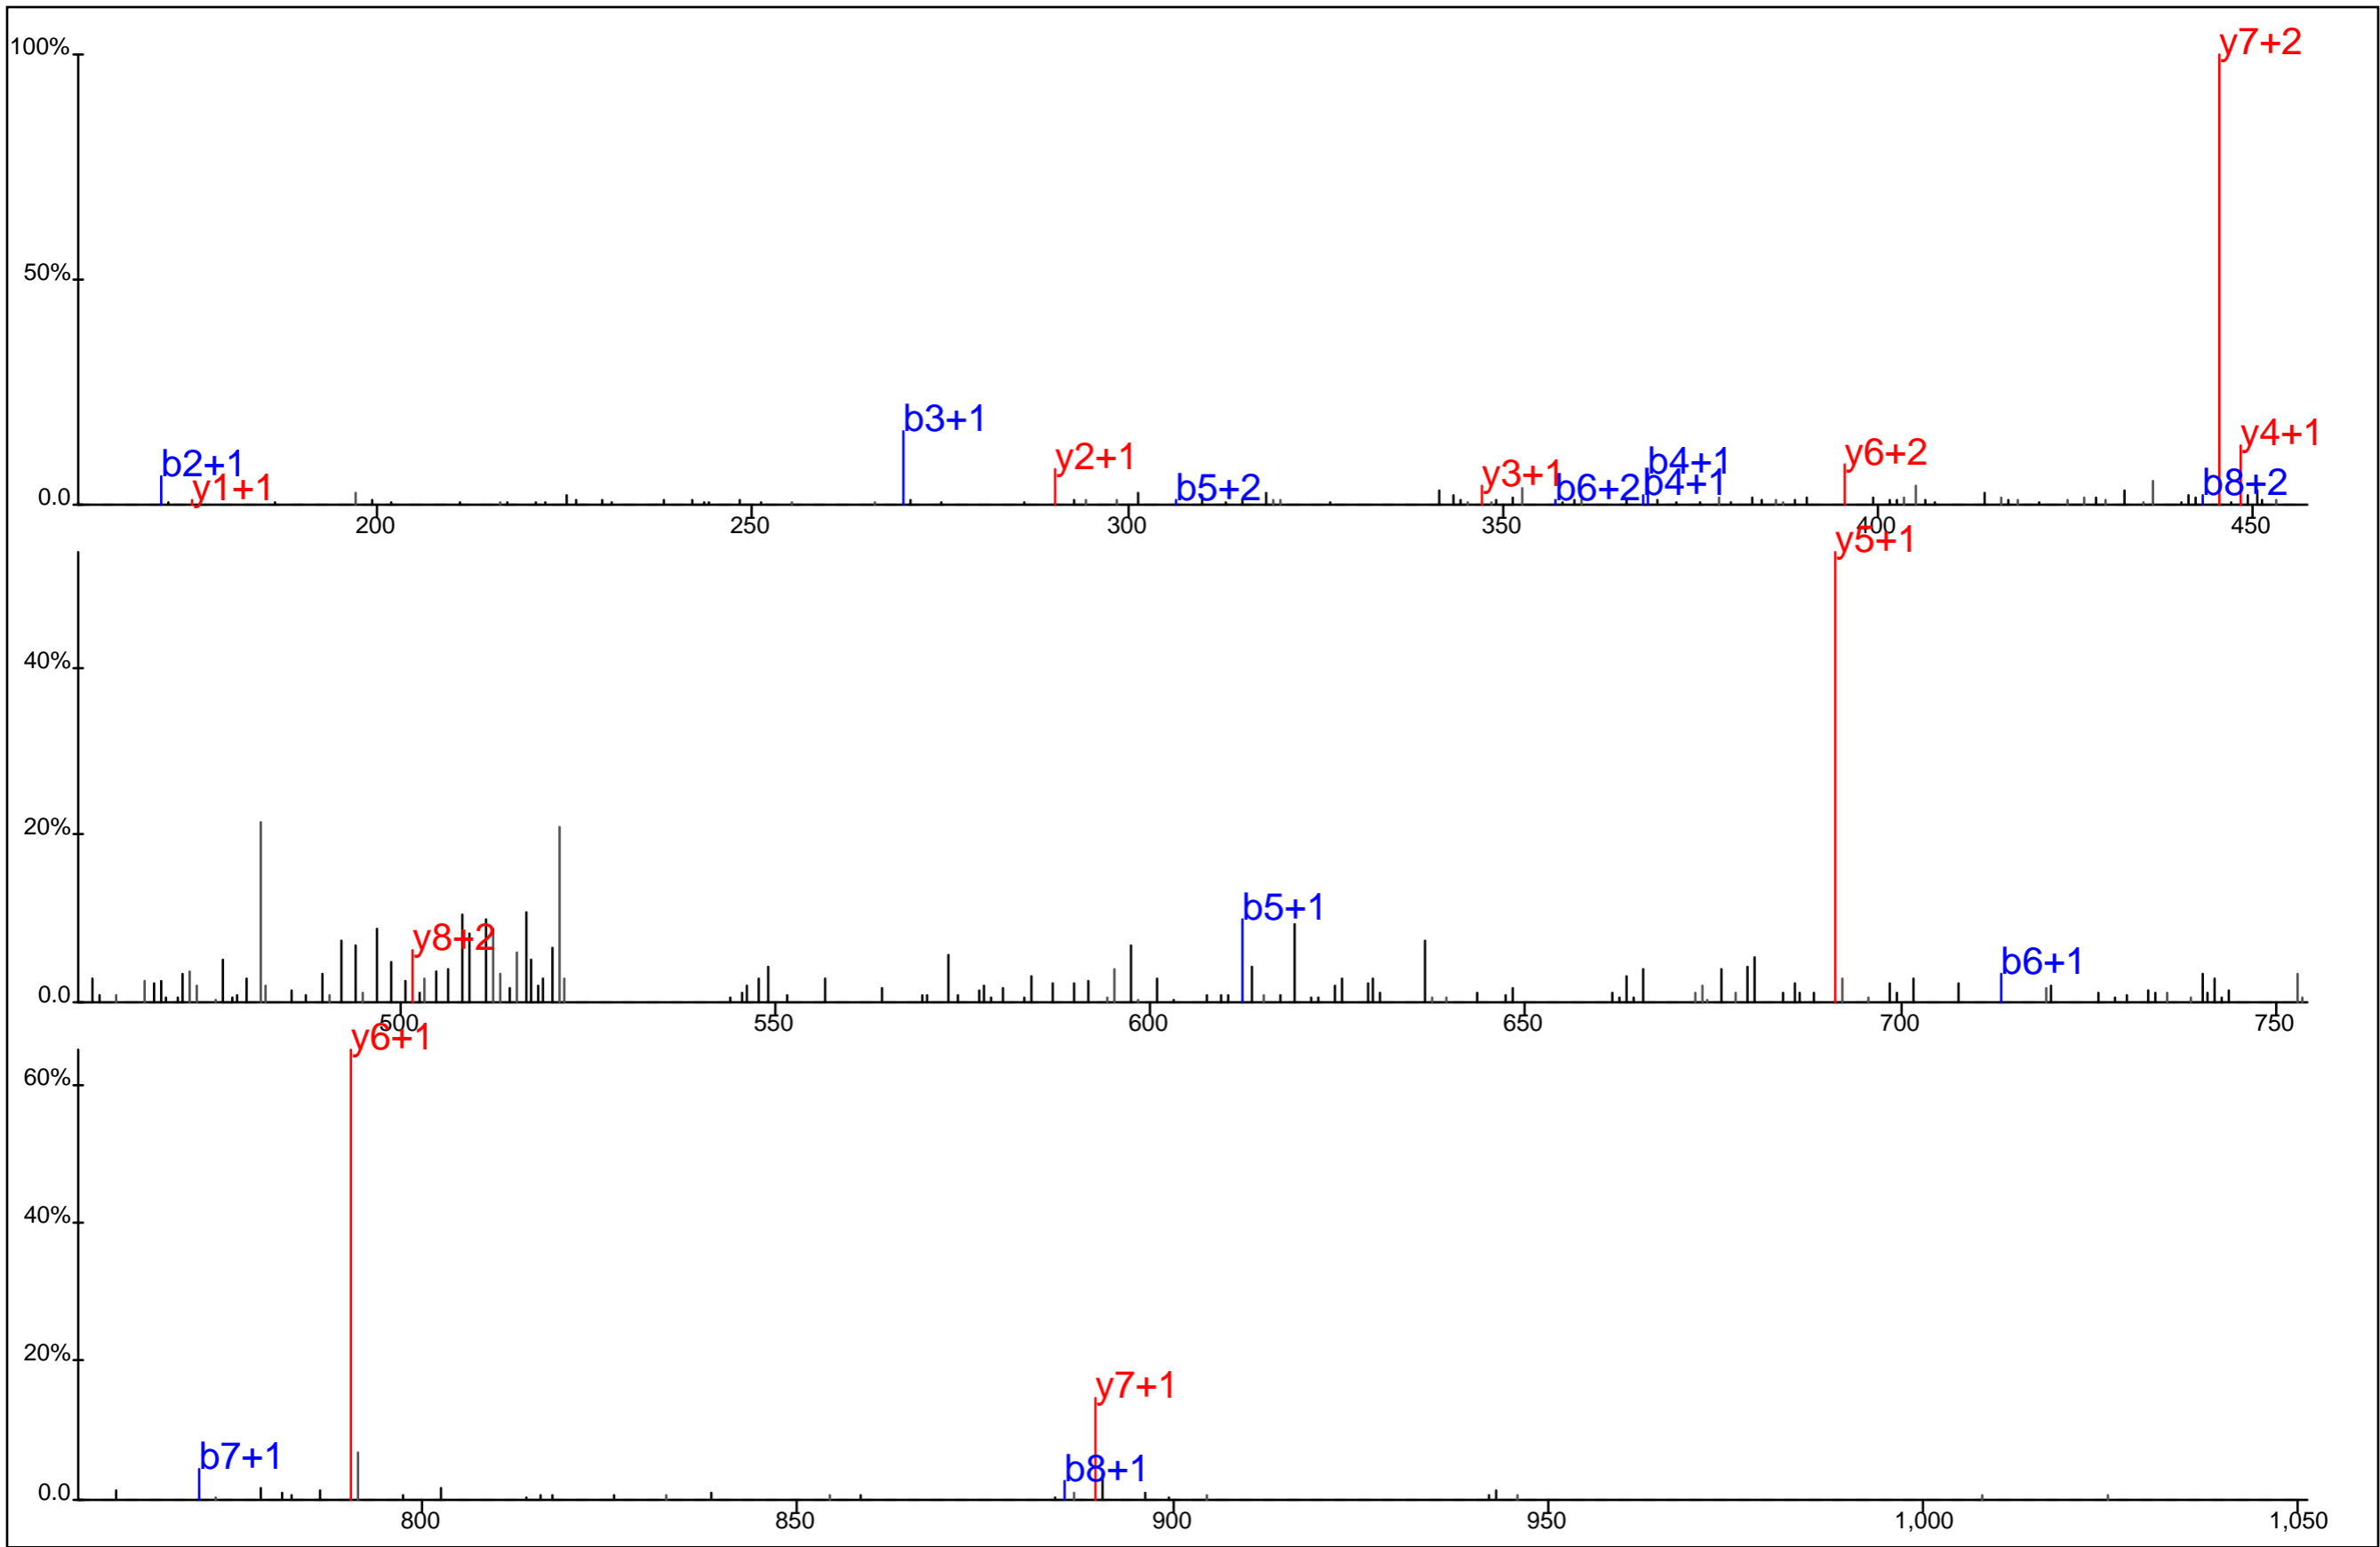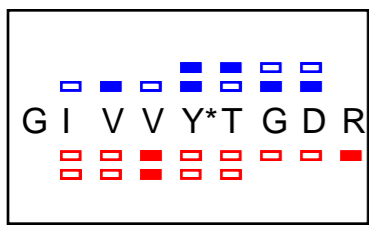

Protein Name: ATP1A1  
 gi Accession: 21361181  
 Precursor Mass: 530.2488+2  
 Delta Mass: 3.037 ppm  
 XCorr: 37.7

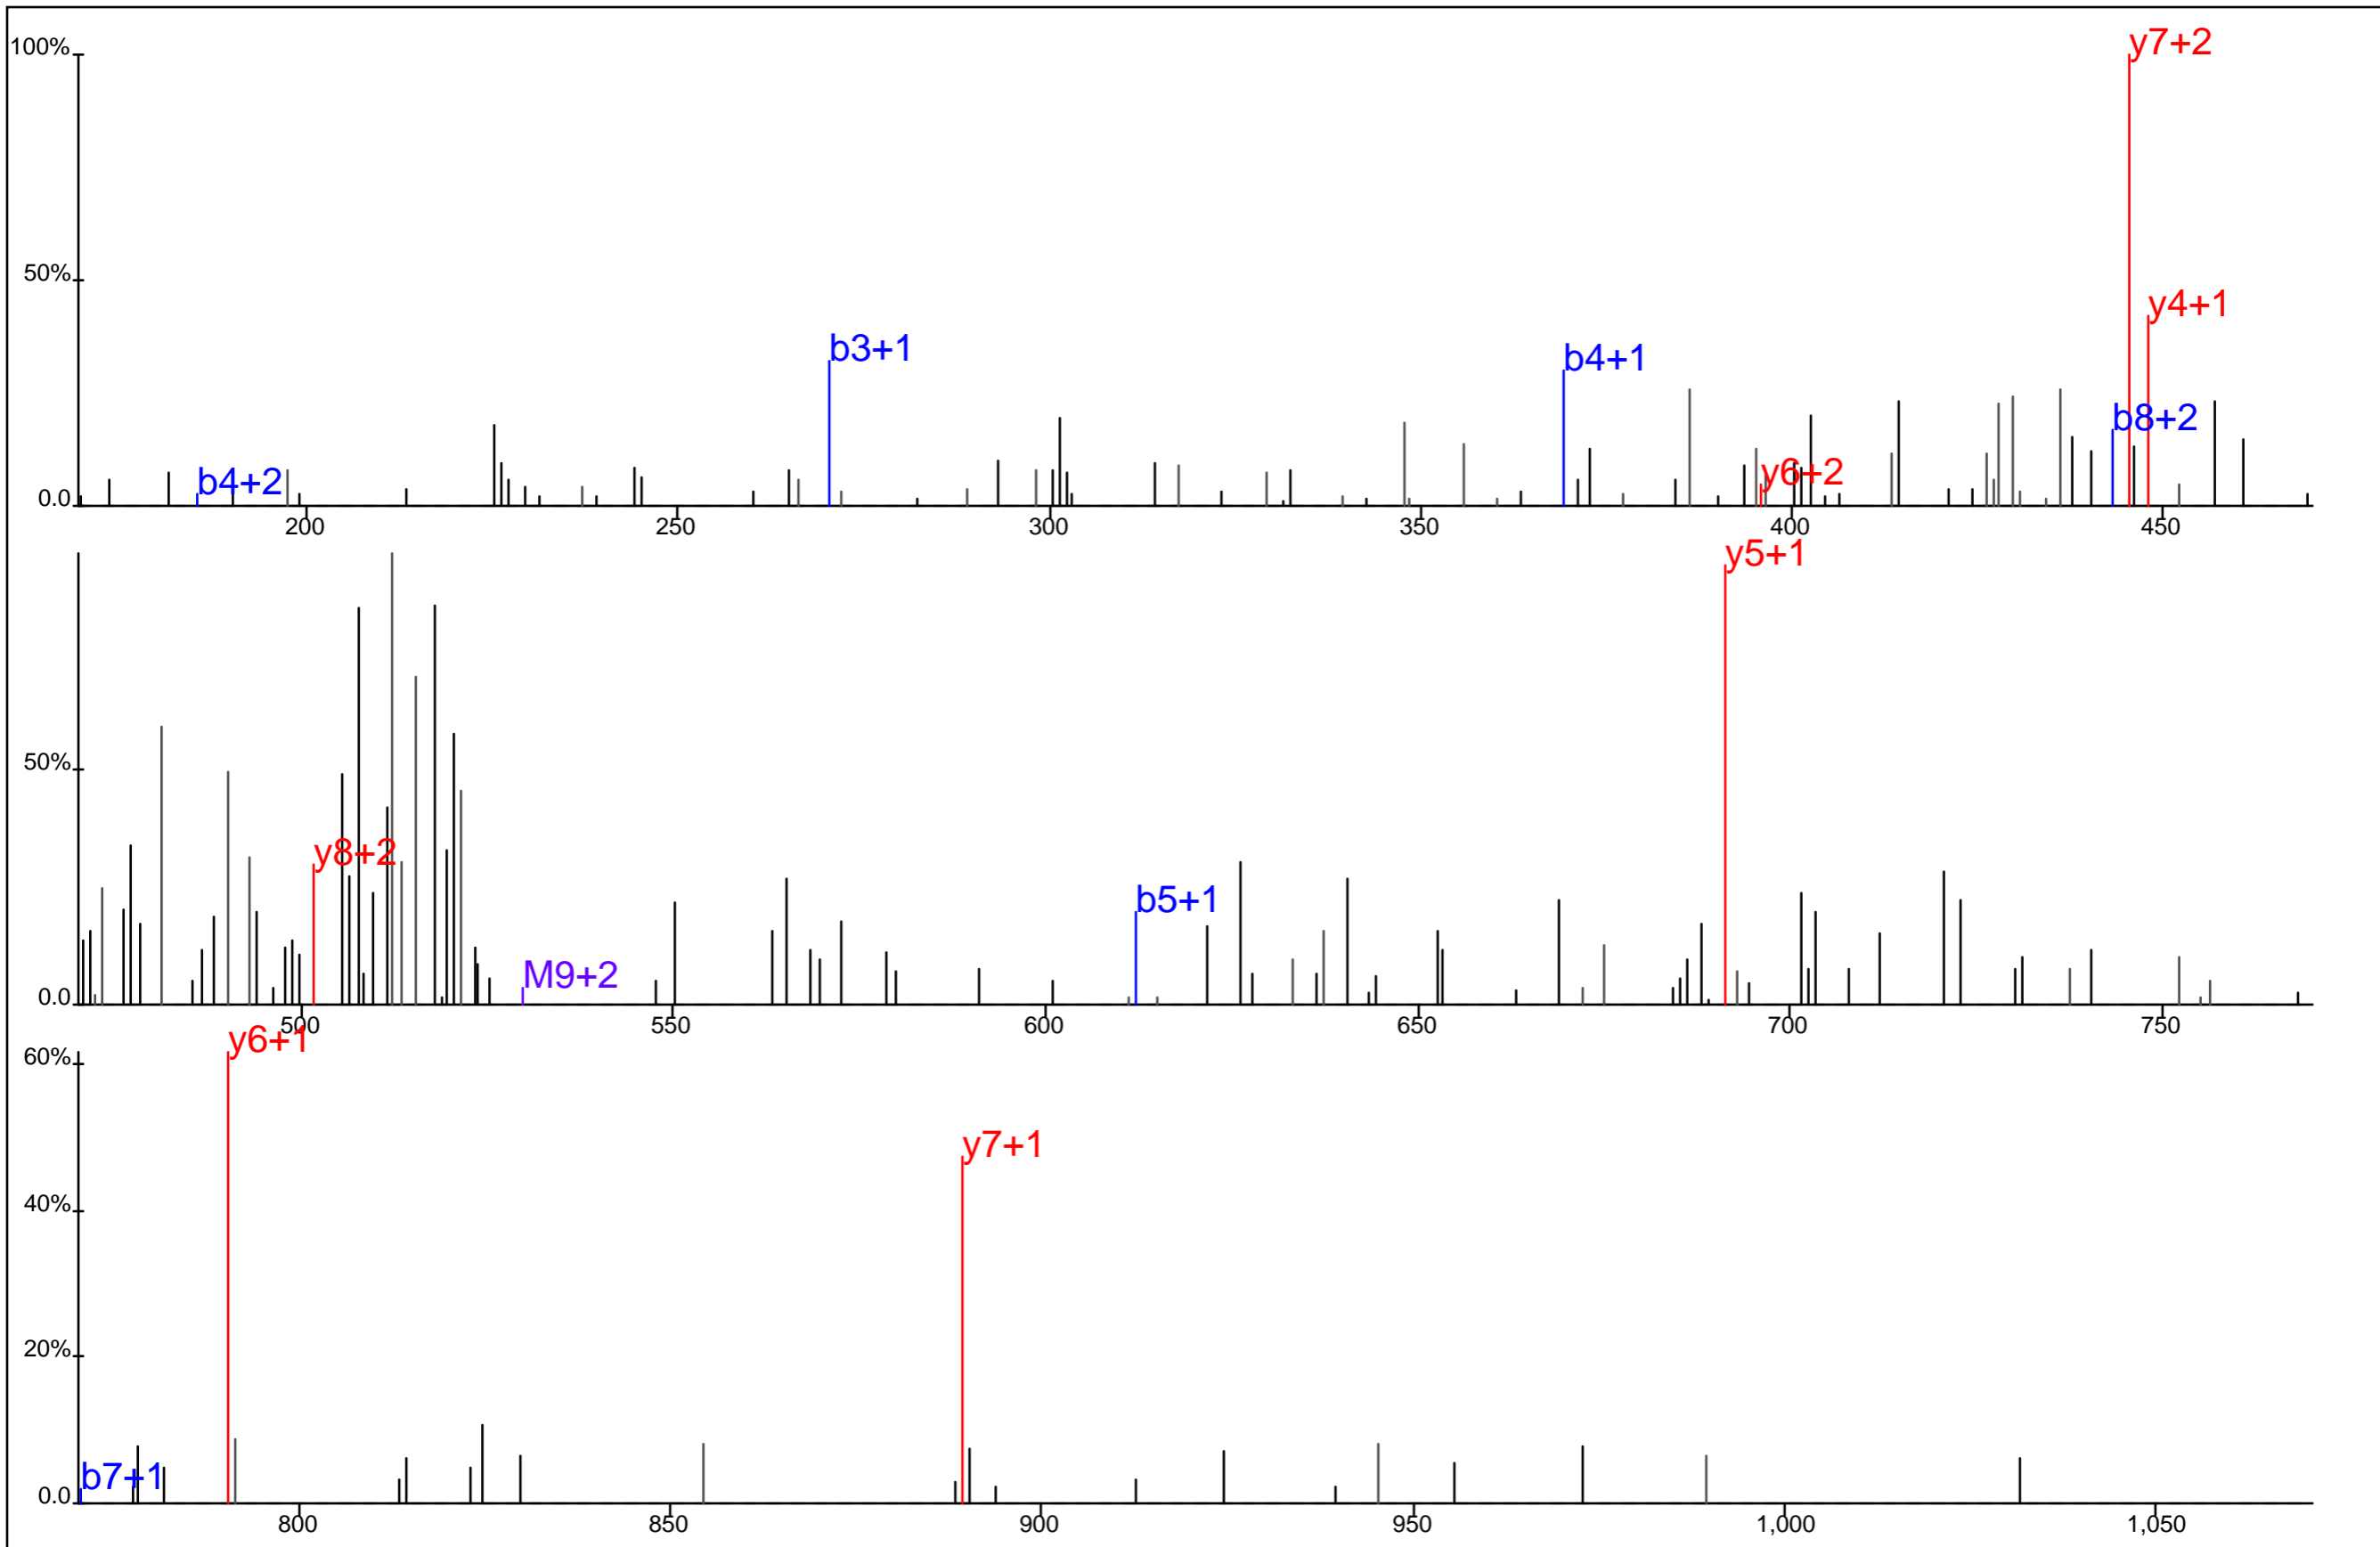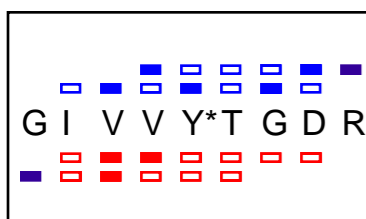

Protein Name: ATP1A1  
 gi Accession: 21361181  
 Precursor Mass: 530.2484+2  
 Delta Mass: 2.348 ppm  
 XCorr: 13.66

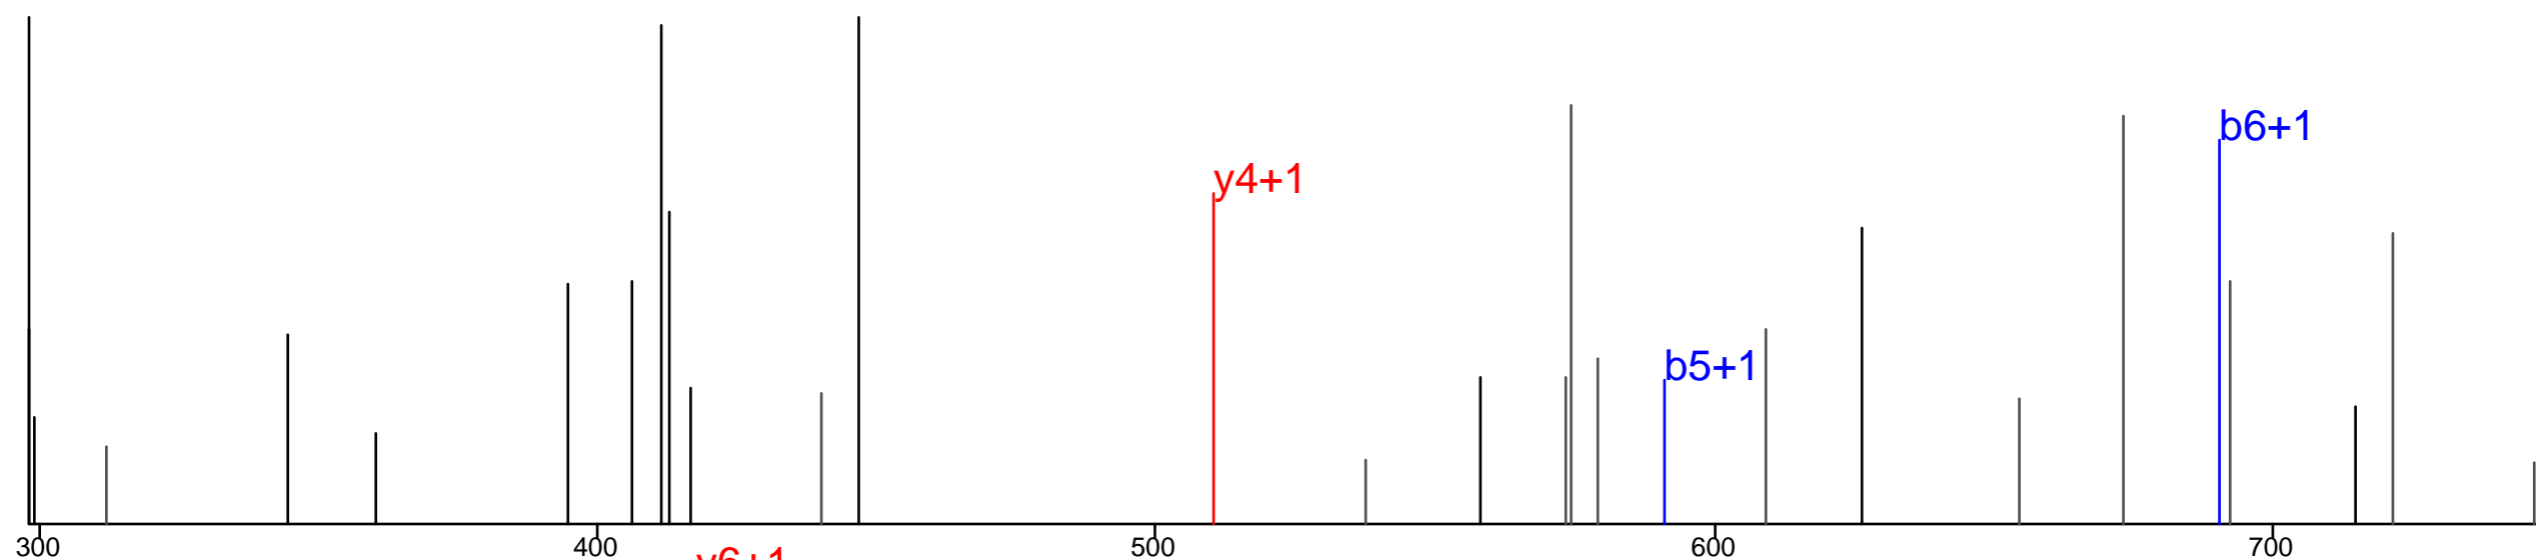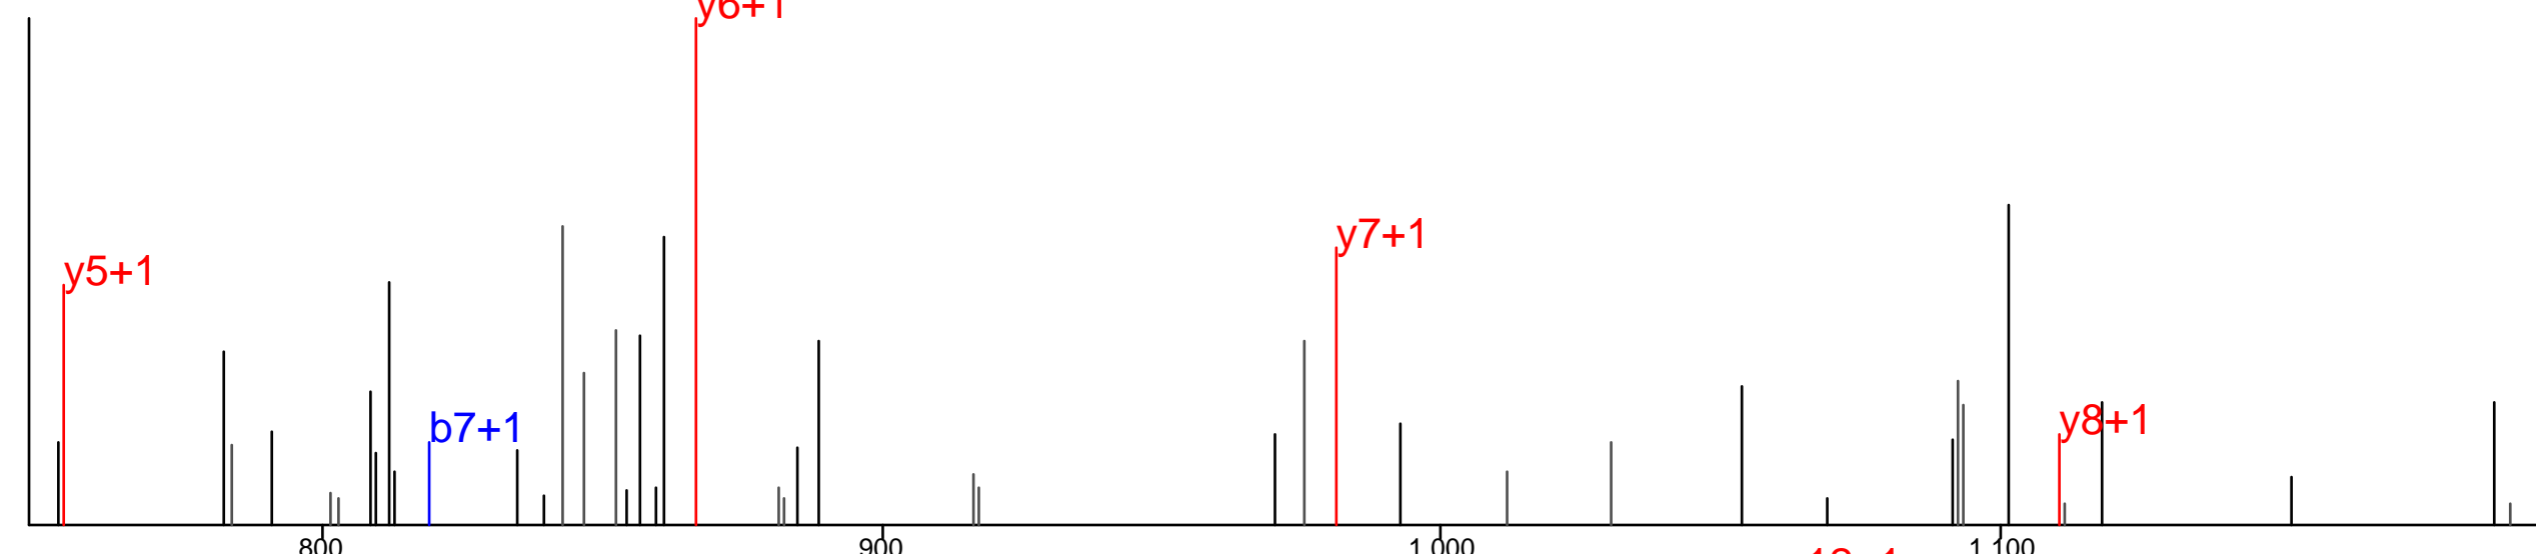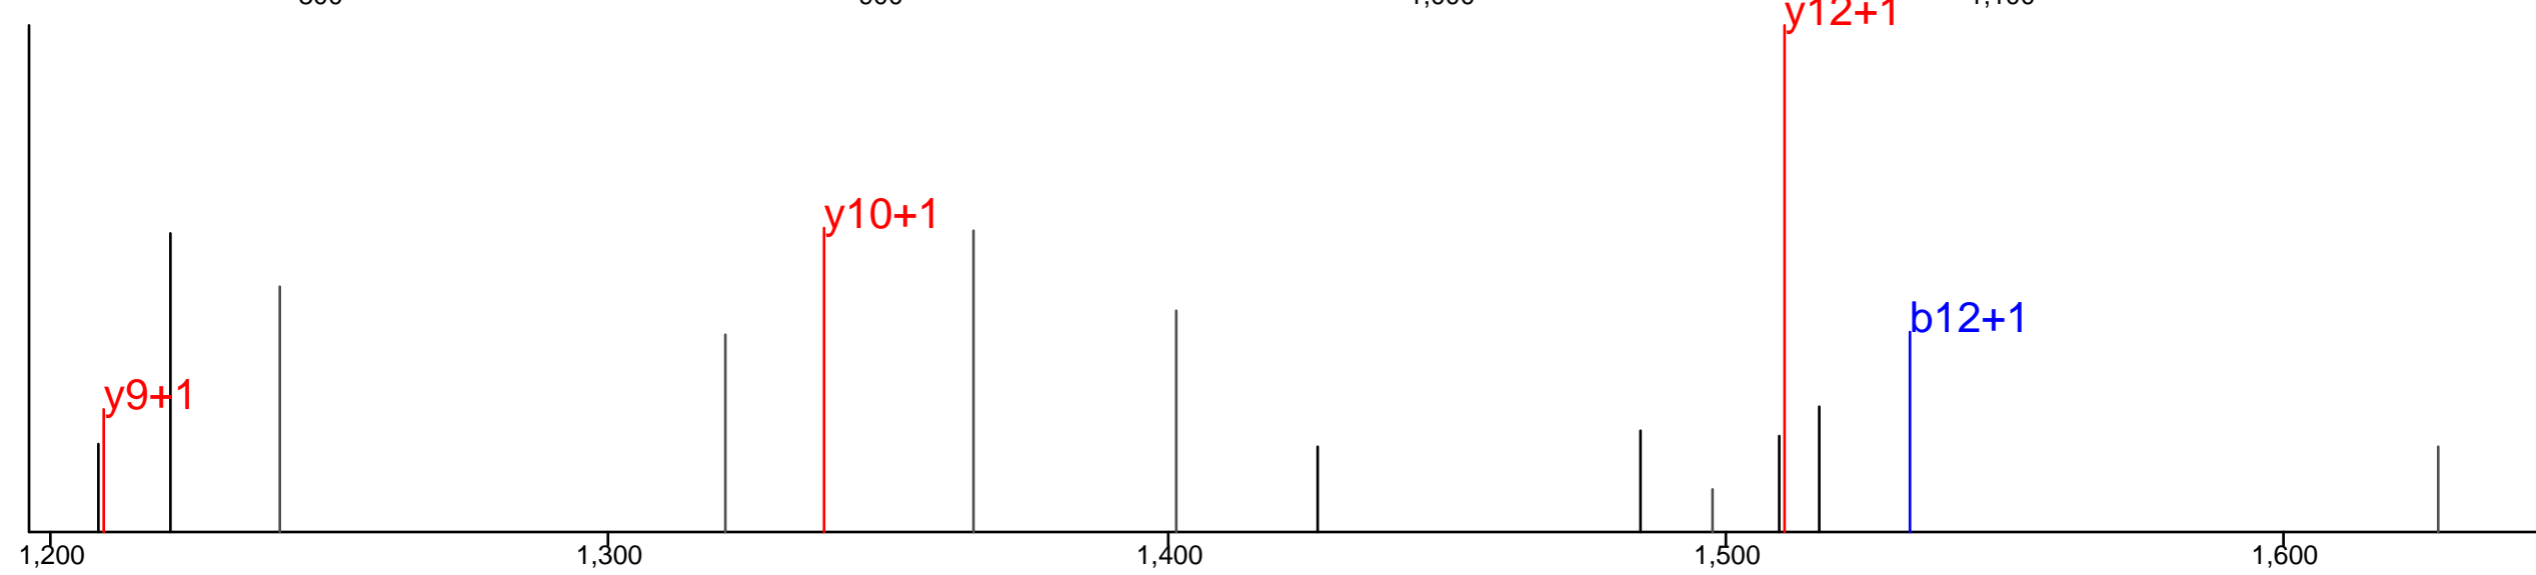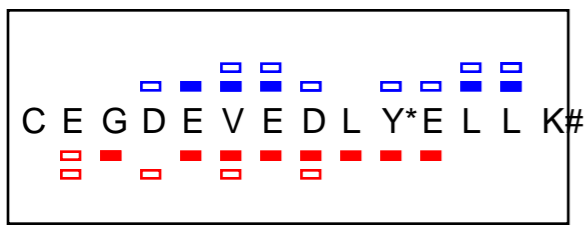

Protein Name: ATP binding domain 4  
 gi Accession: 18087809  
 Precursor Mass: 900.3814+2  
 Delta Mass: 1.071 ppm  
 XCorr: 24.26

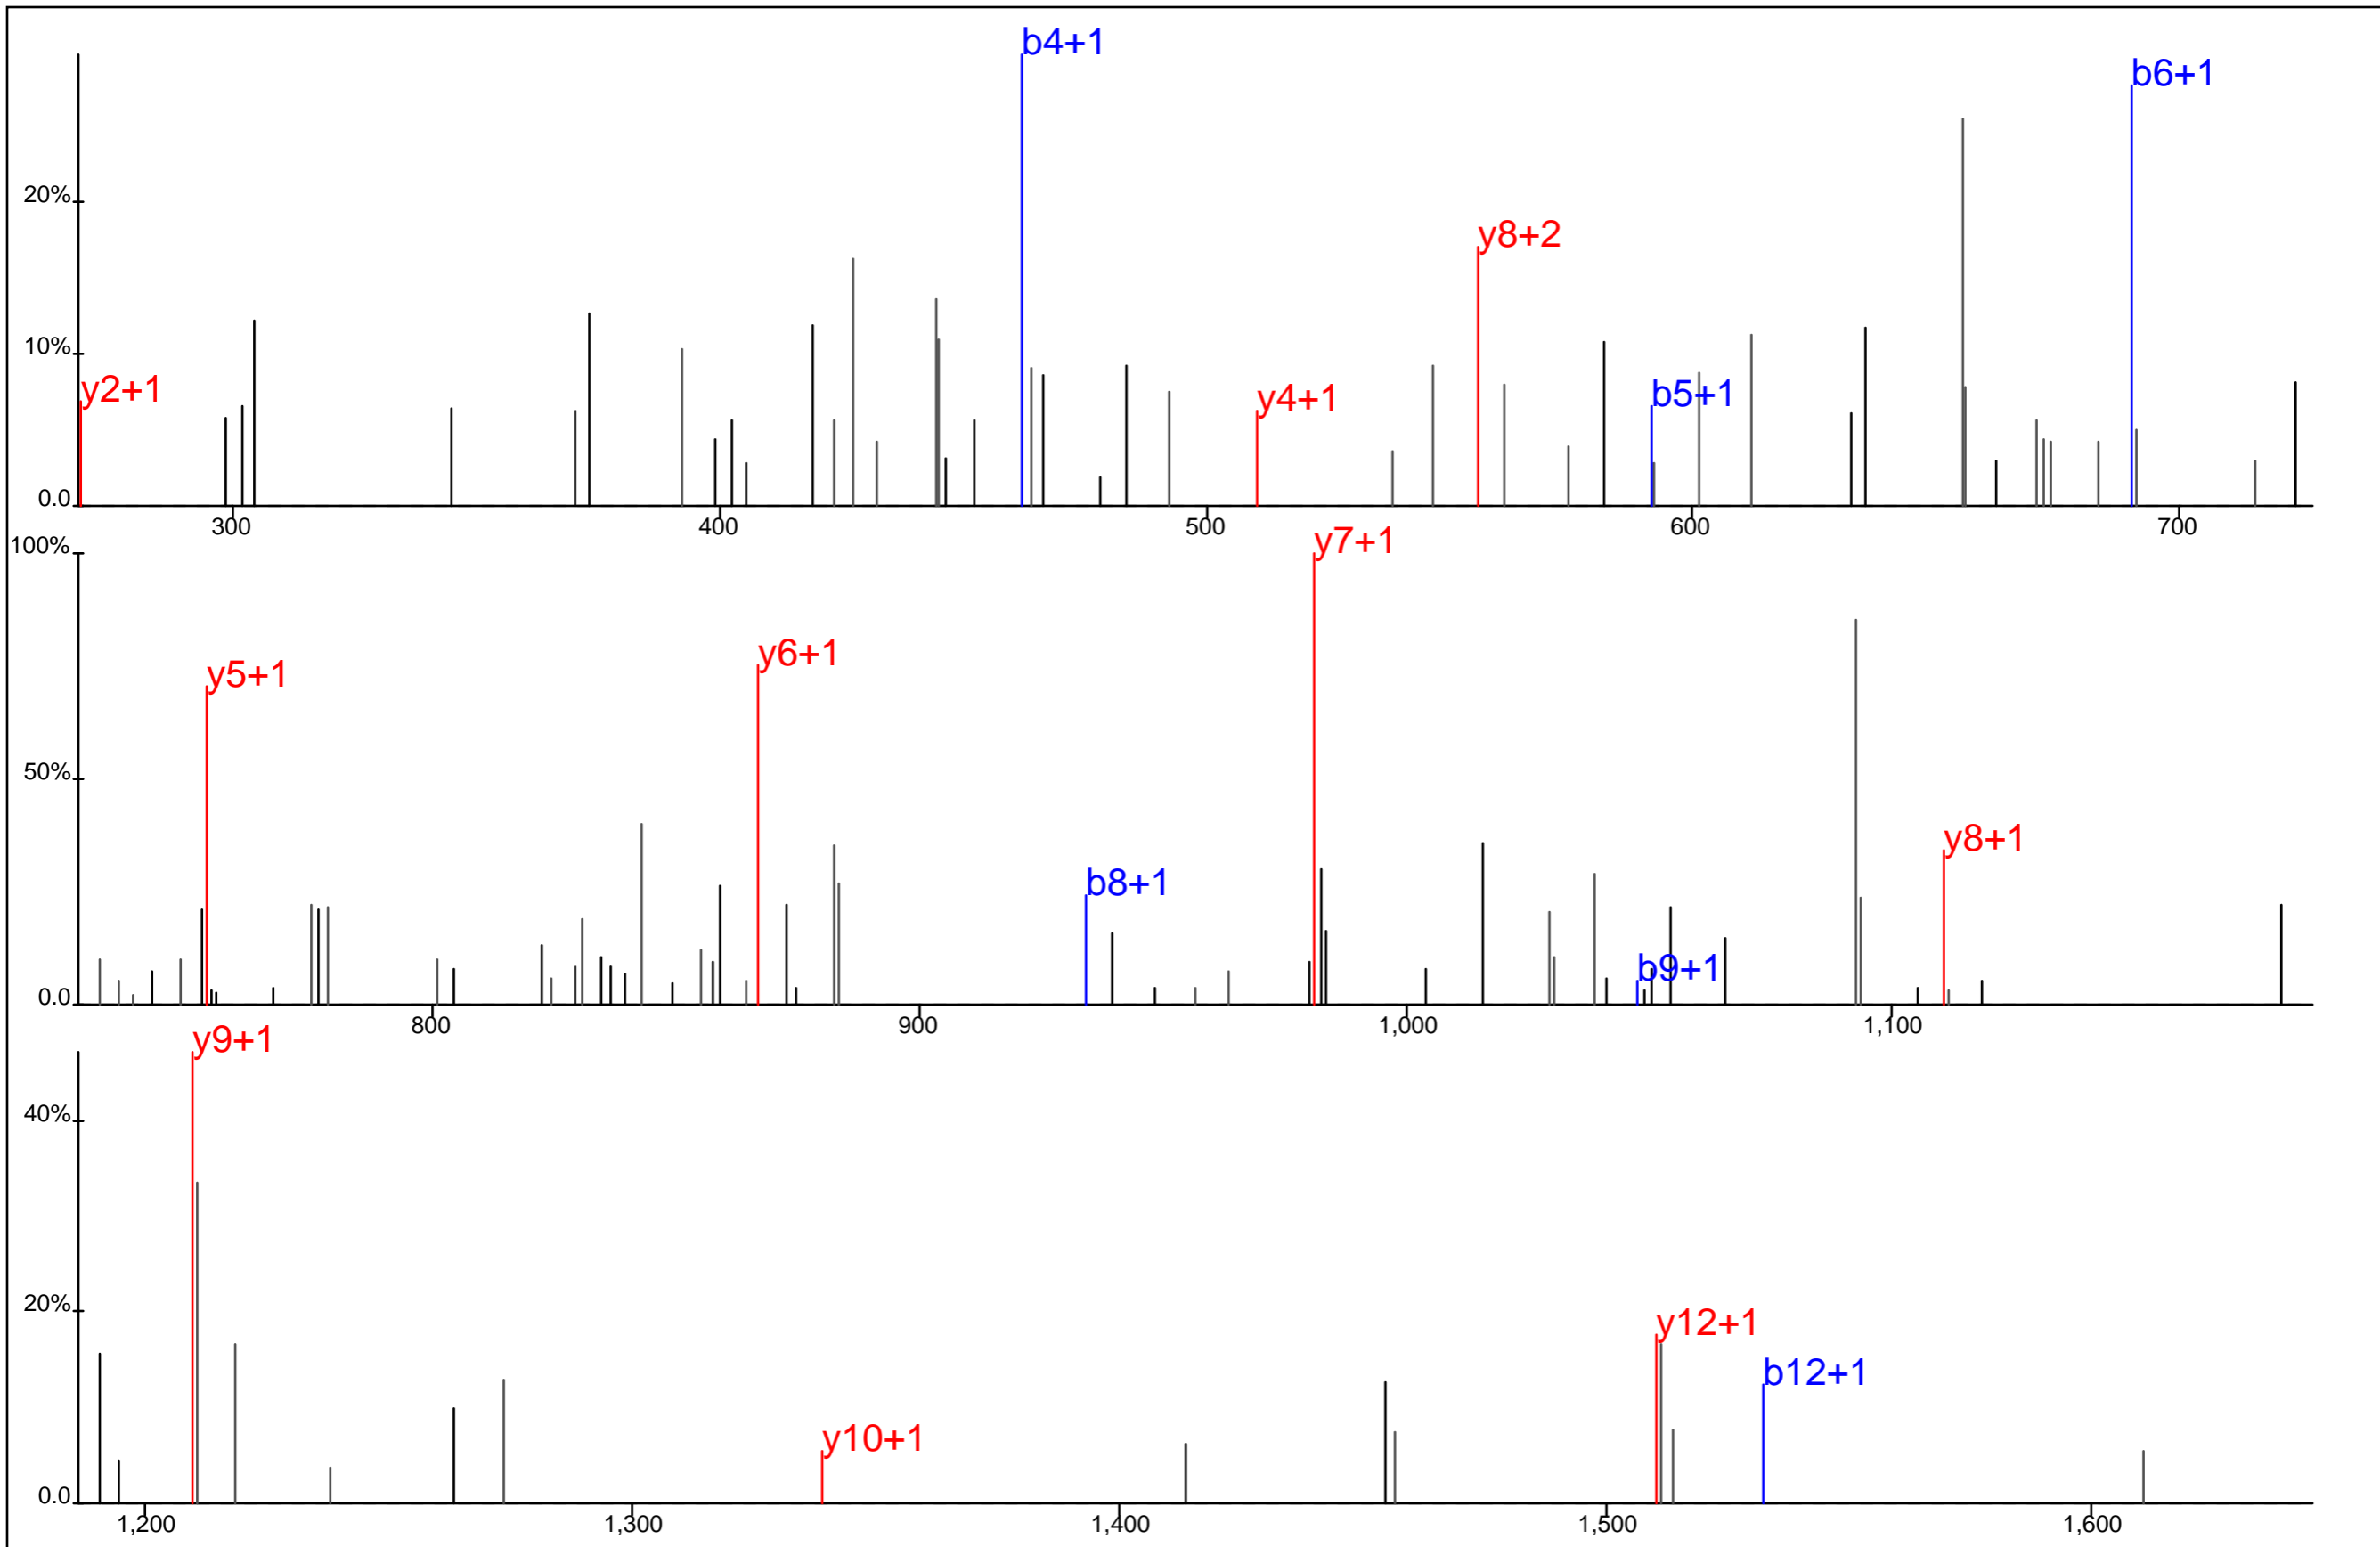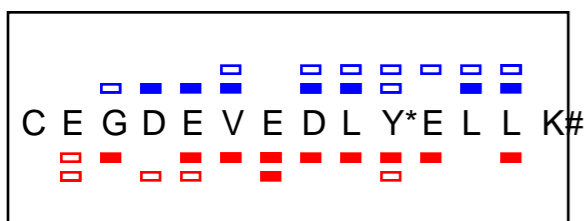

Protein Name: ATP binding domain 4  
 gi Accession: 18087809  
 Precursor Mass: 900.3907+2  
 Delta Mass: 11.384 ppm  
 XCorr: 41.34

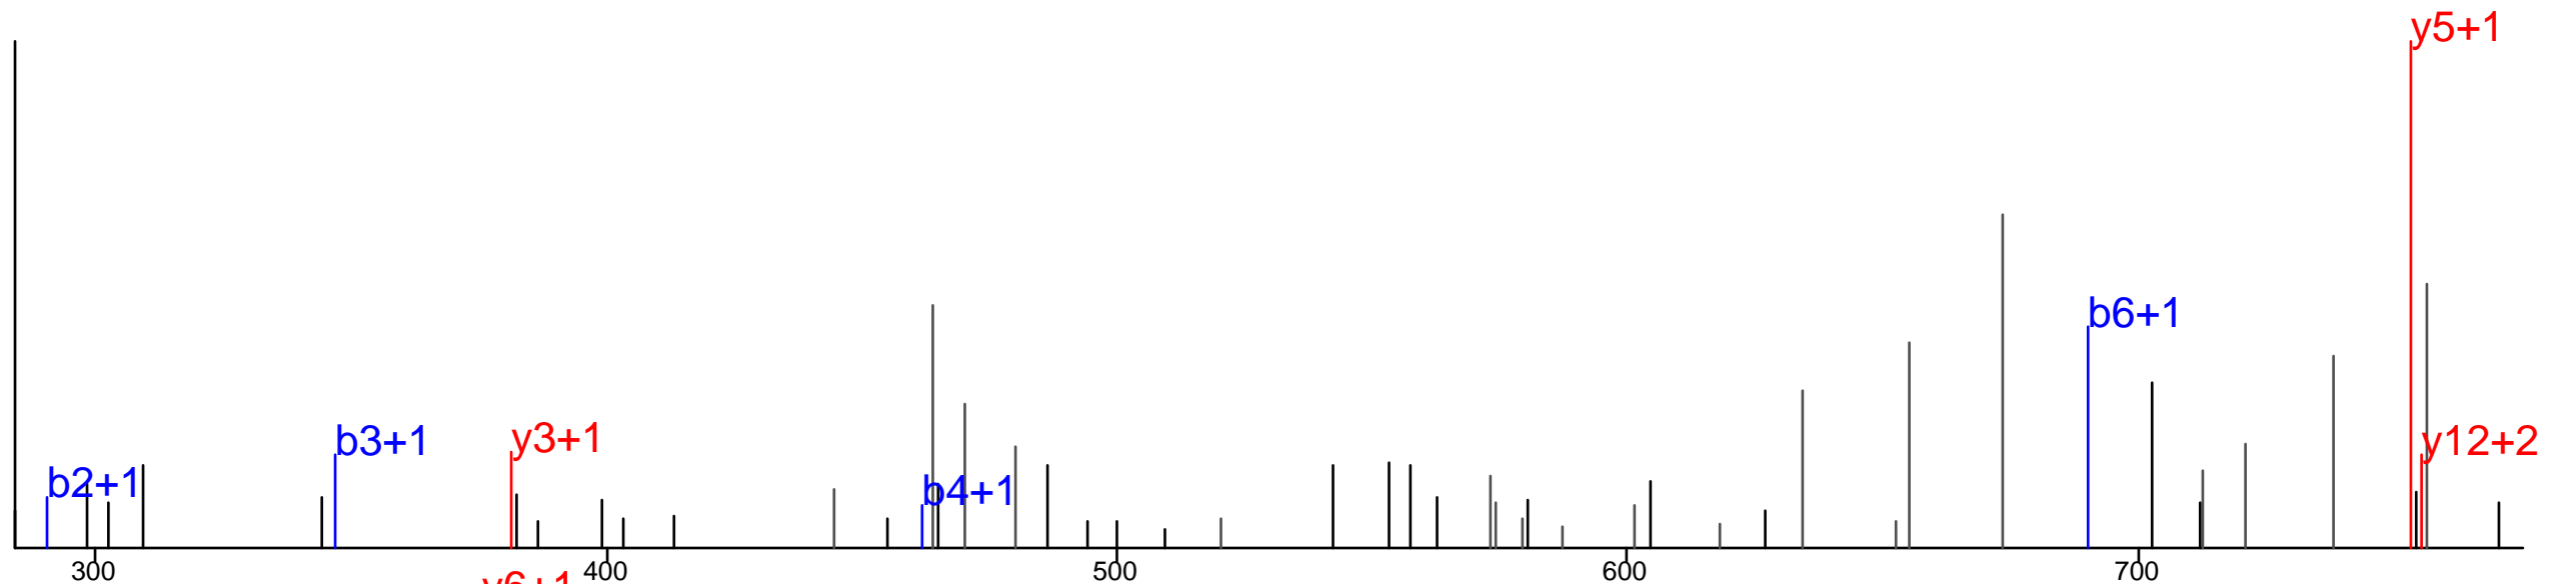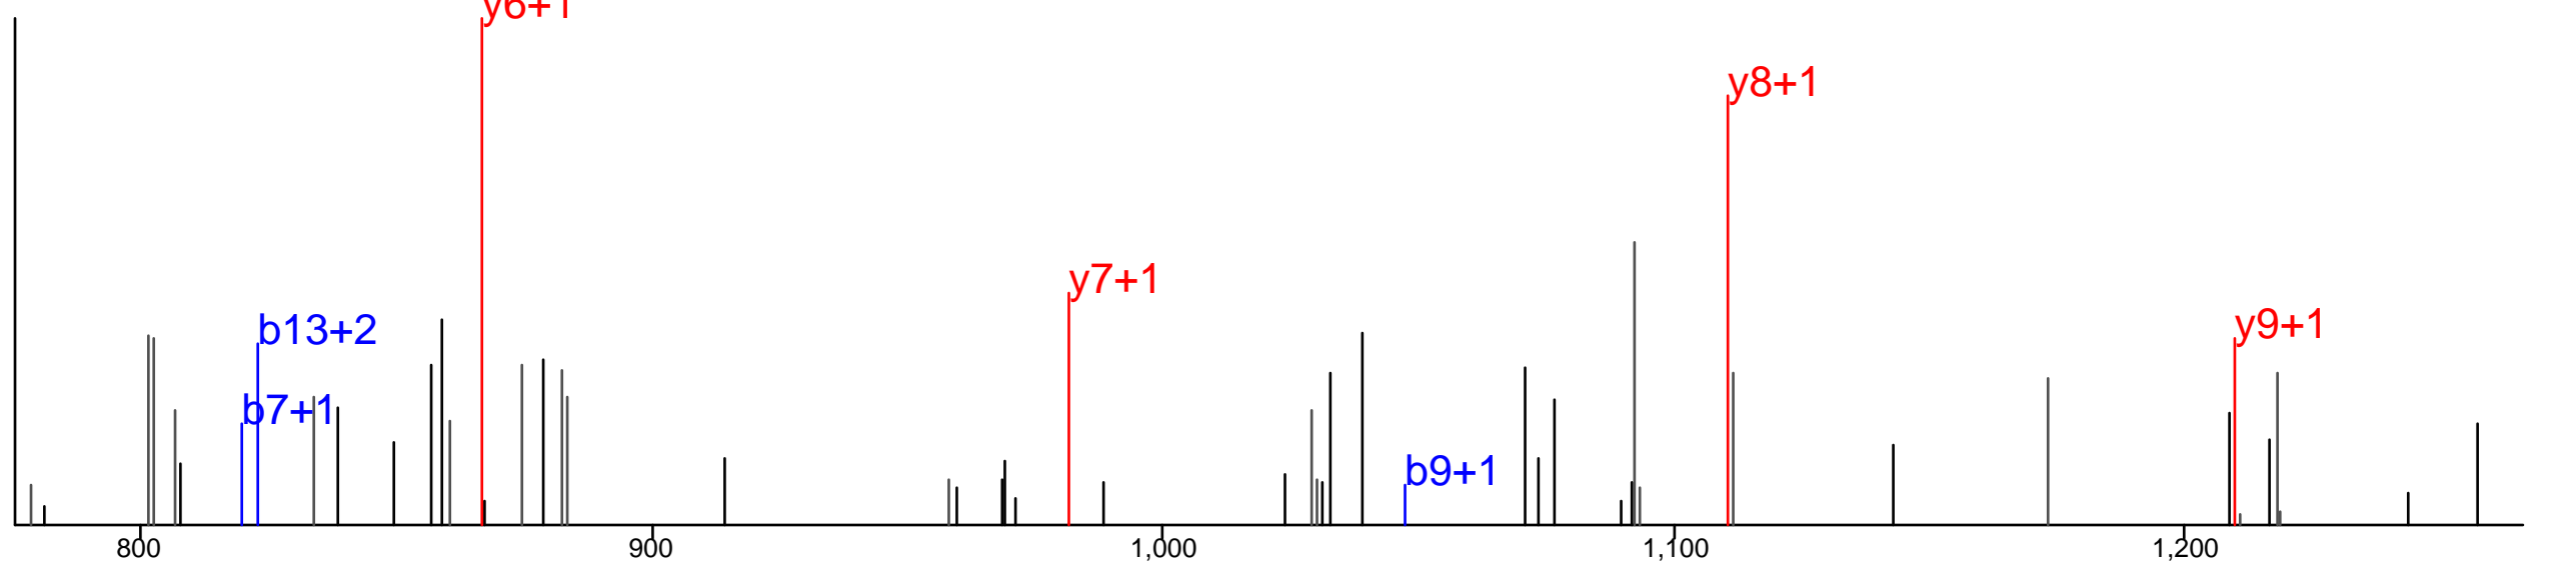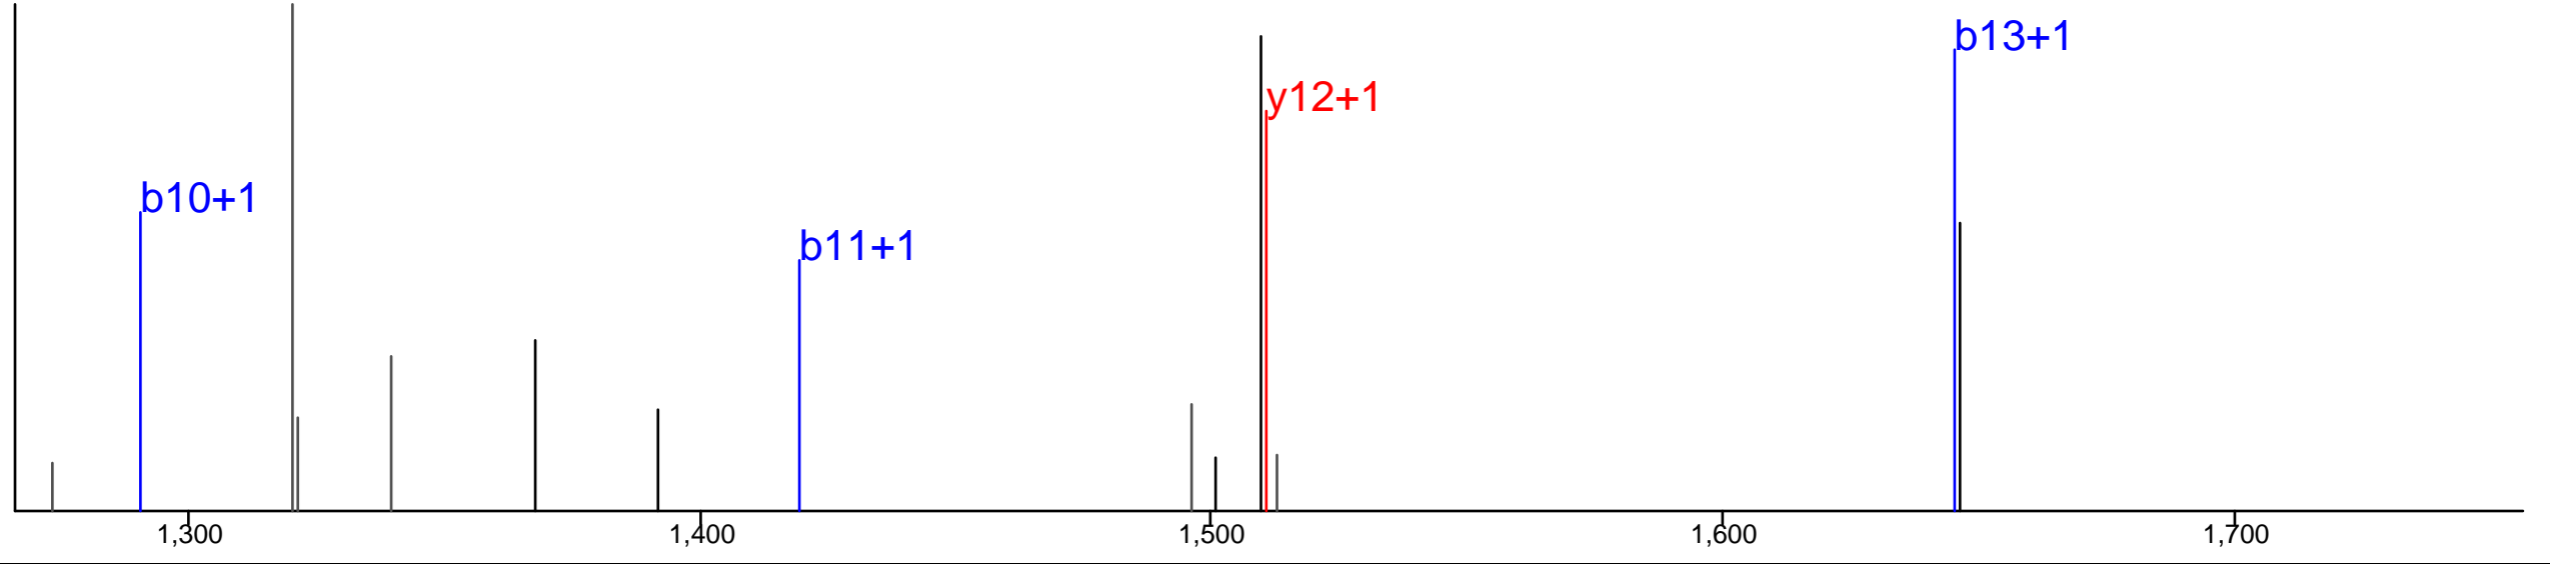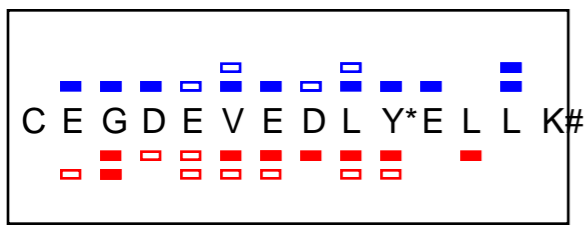

Protein Name: ATP binding domain 4  
 gi Accession: 18087809  
 Precursor Mass: 900.3862+2  
 Delta Mass: 6.428 ppm  
 XCorr: 32.61

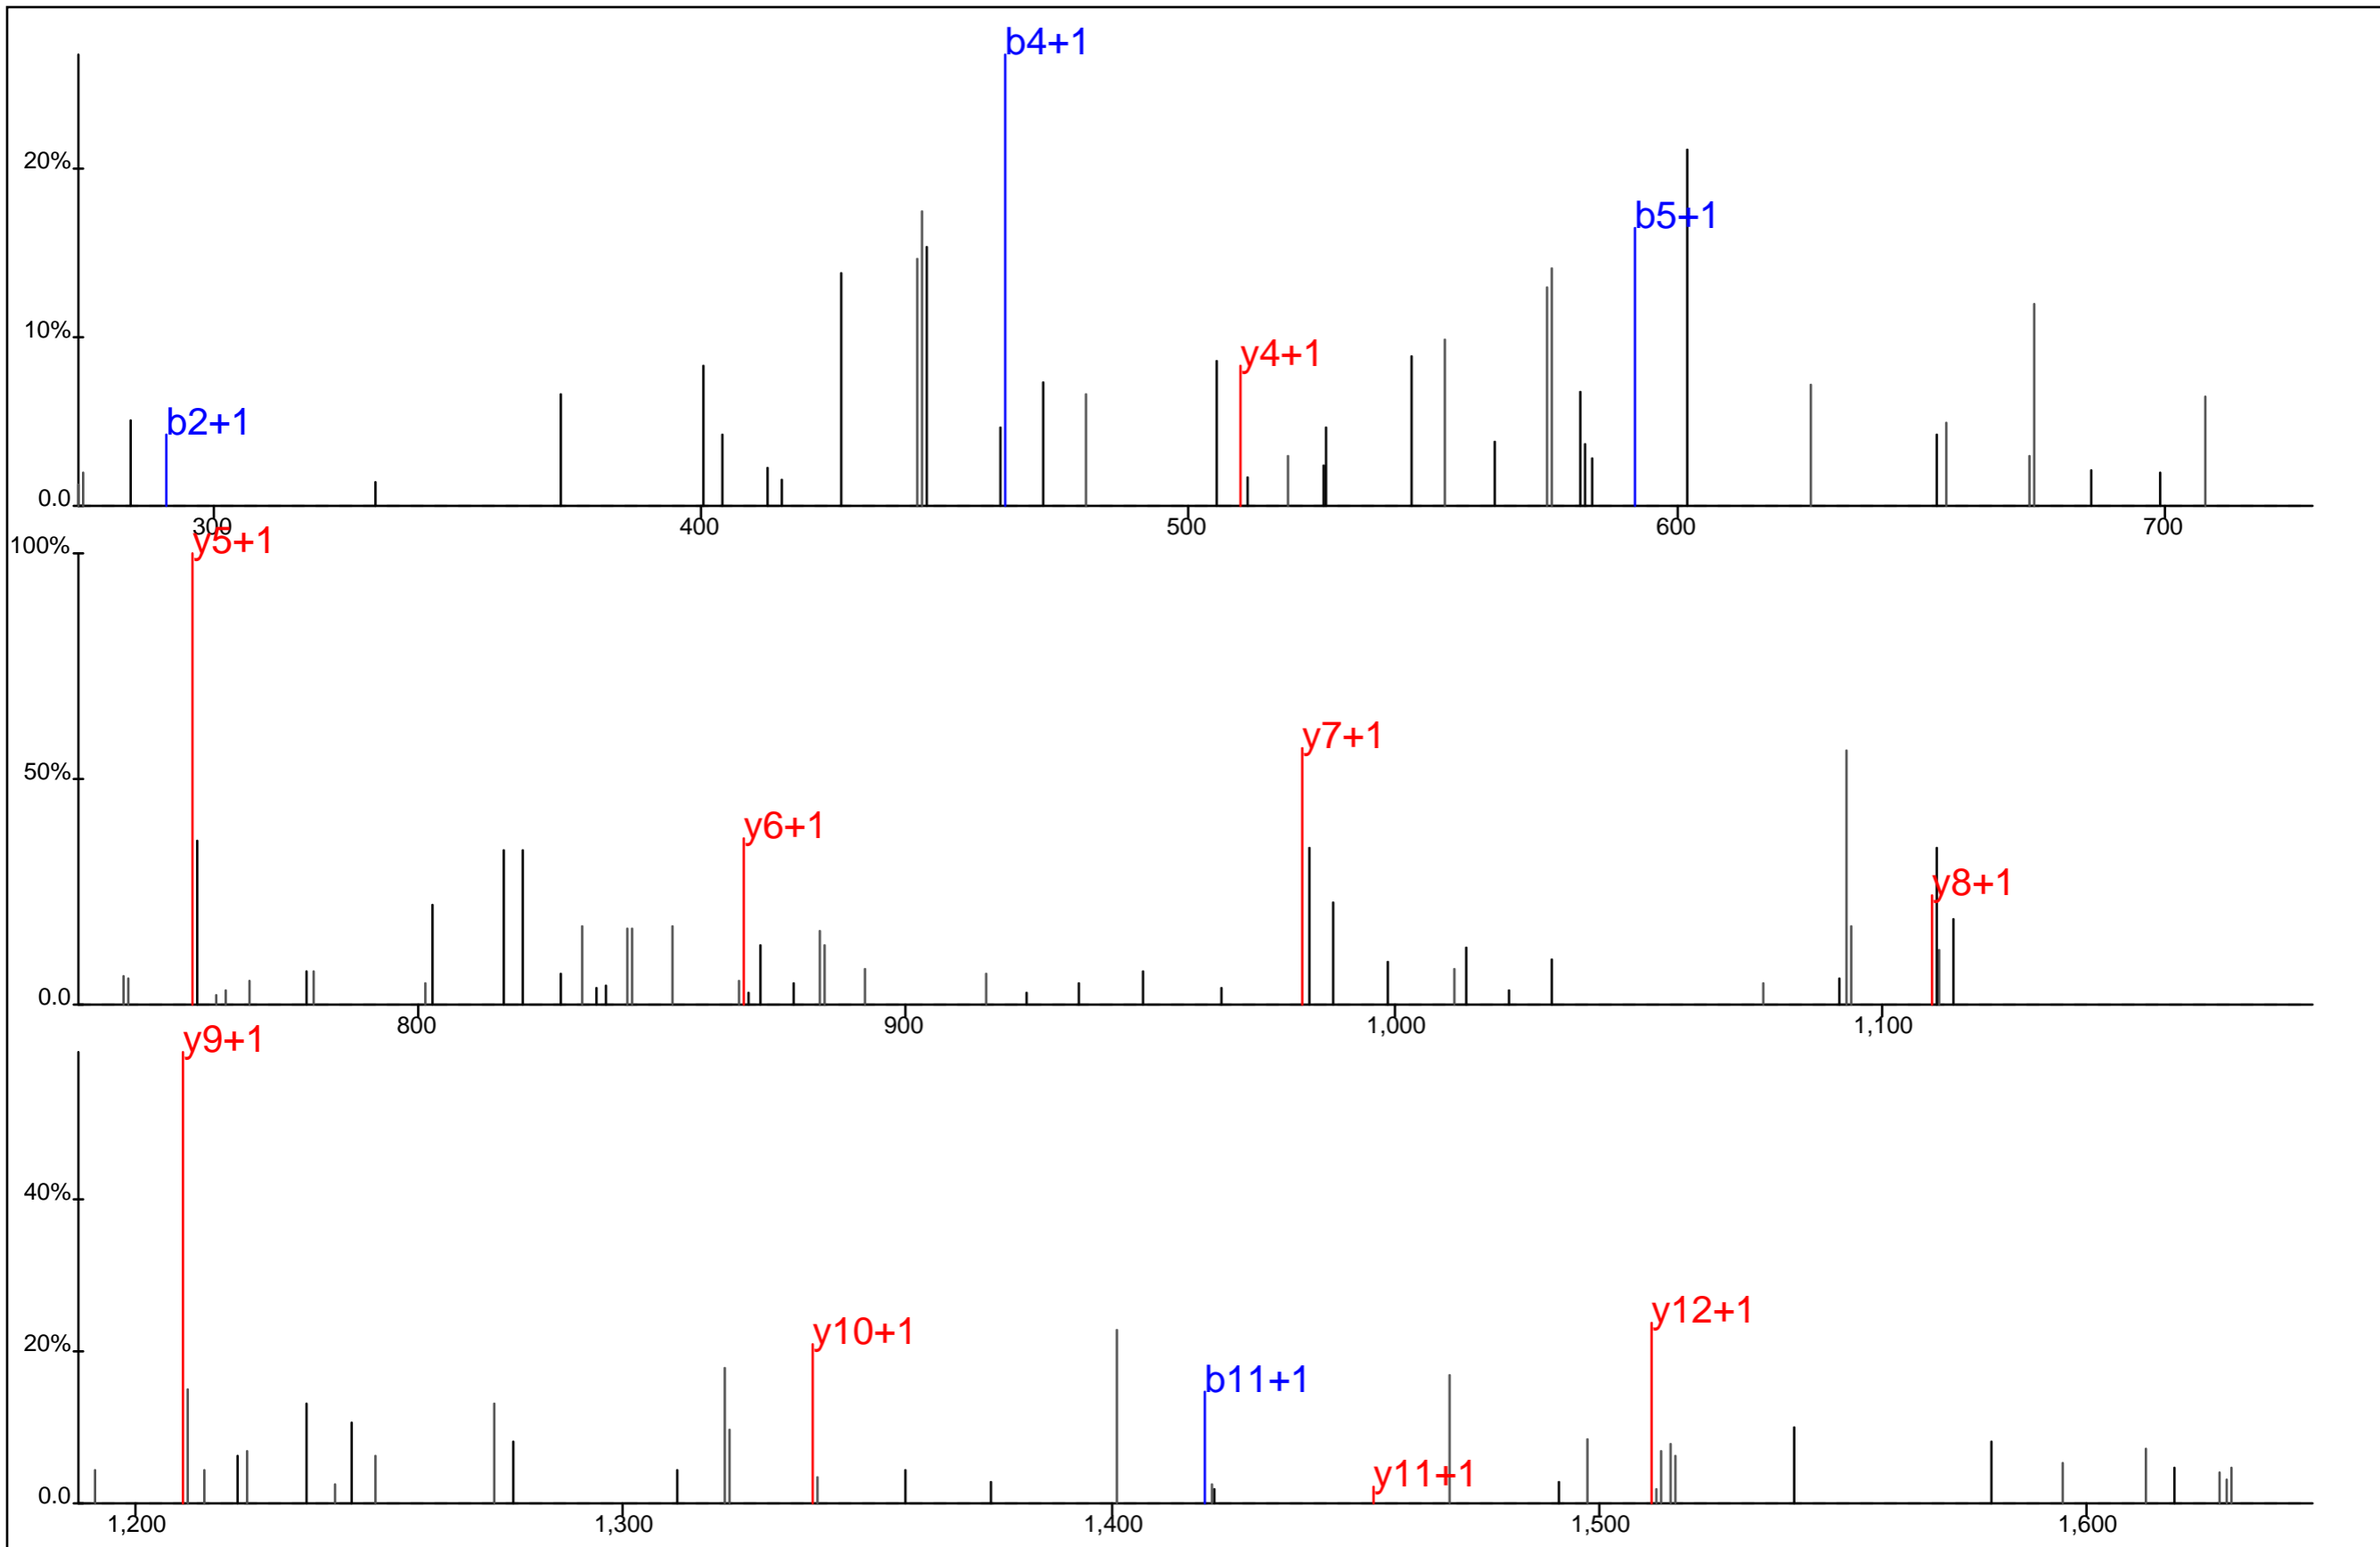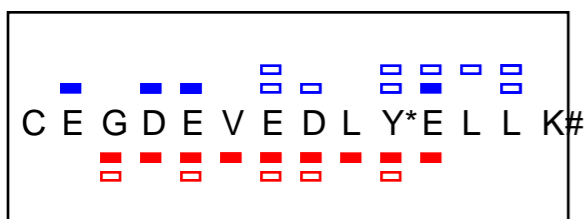

Protein Name: ATP binding domain 4  
 gi Accession: 18087809  
 Precursor Mass: 900.3807+2  
 Delta Mass: 0.327 ppm  
 XCorr: 29.93



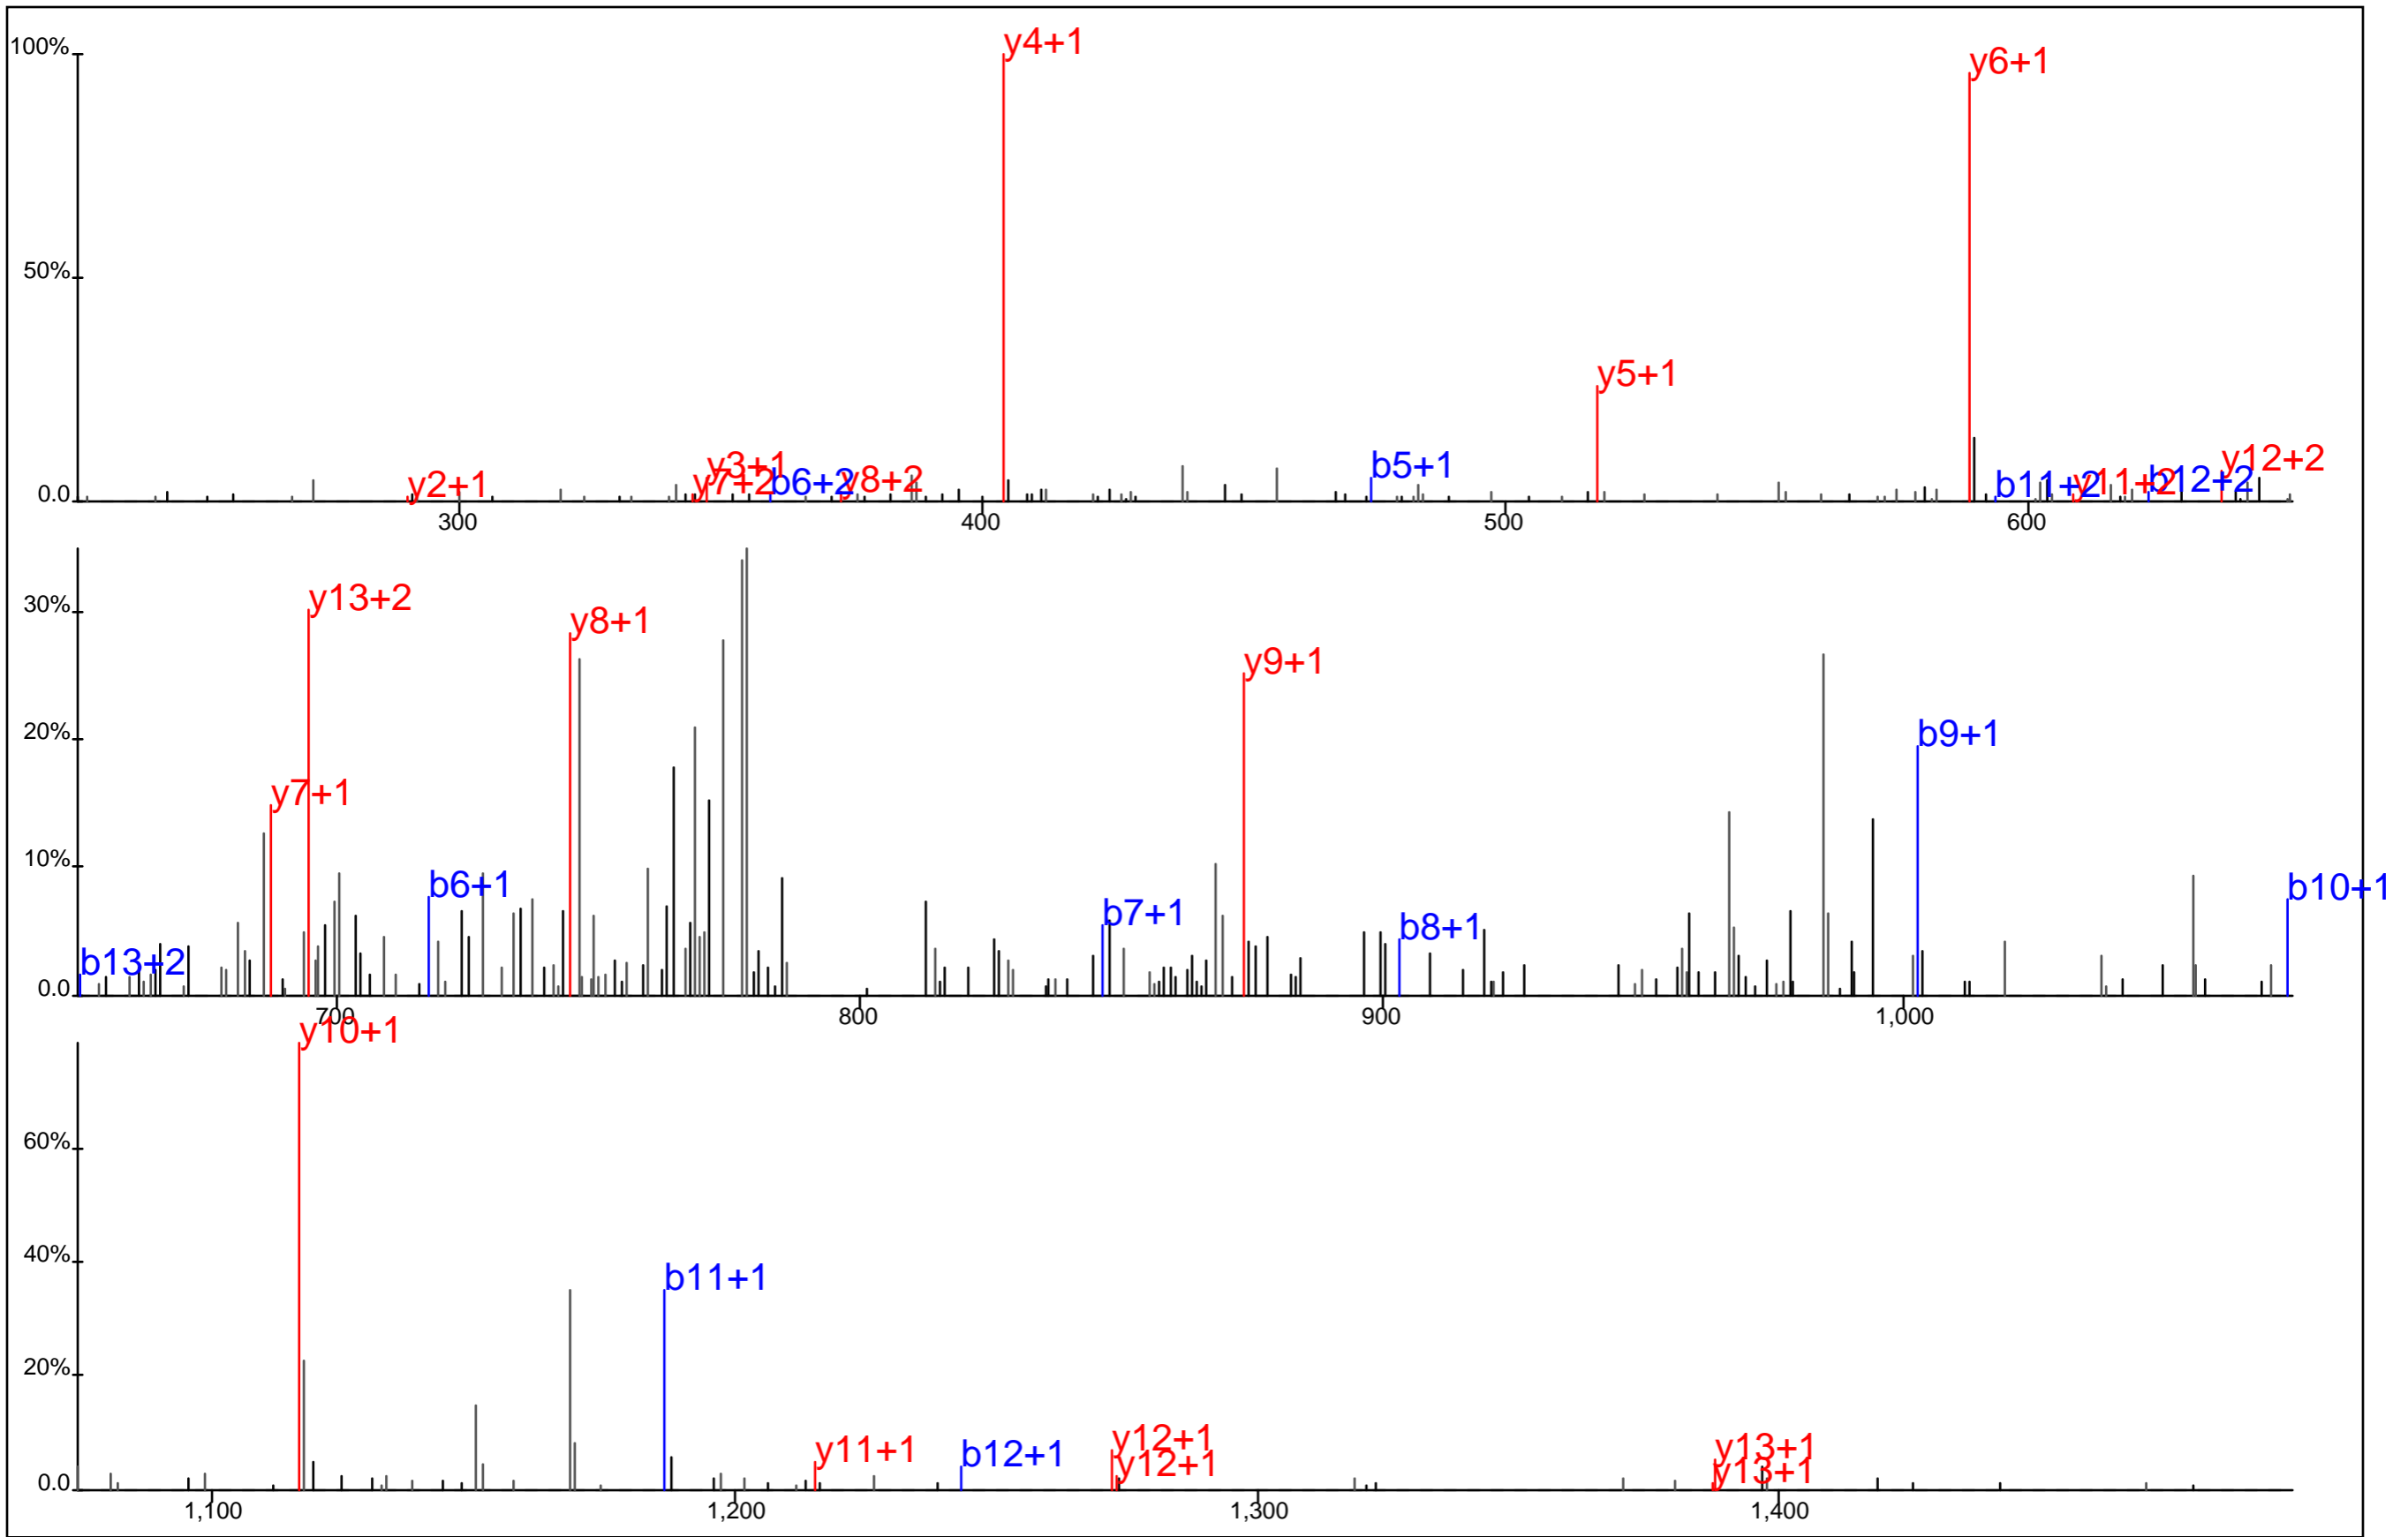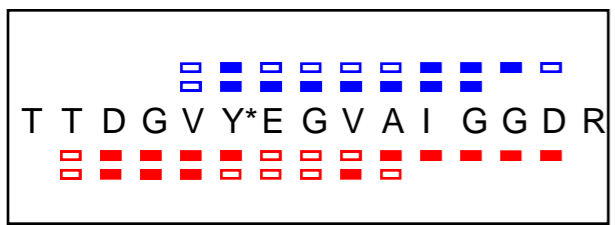

Protein Name: ATP citrate lyase  
 gi Accession: 68533125  
 Precursor Mass: 795.3471+2  
 Delta Mass: 1.647 ppm  
 XCorr: 74.69

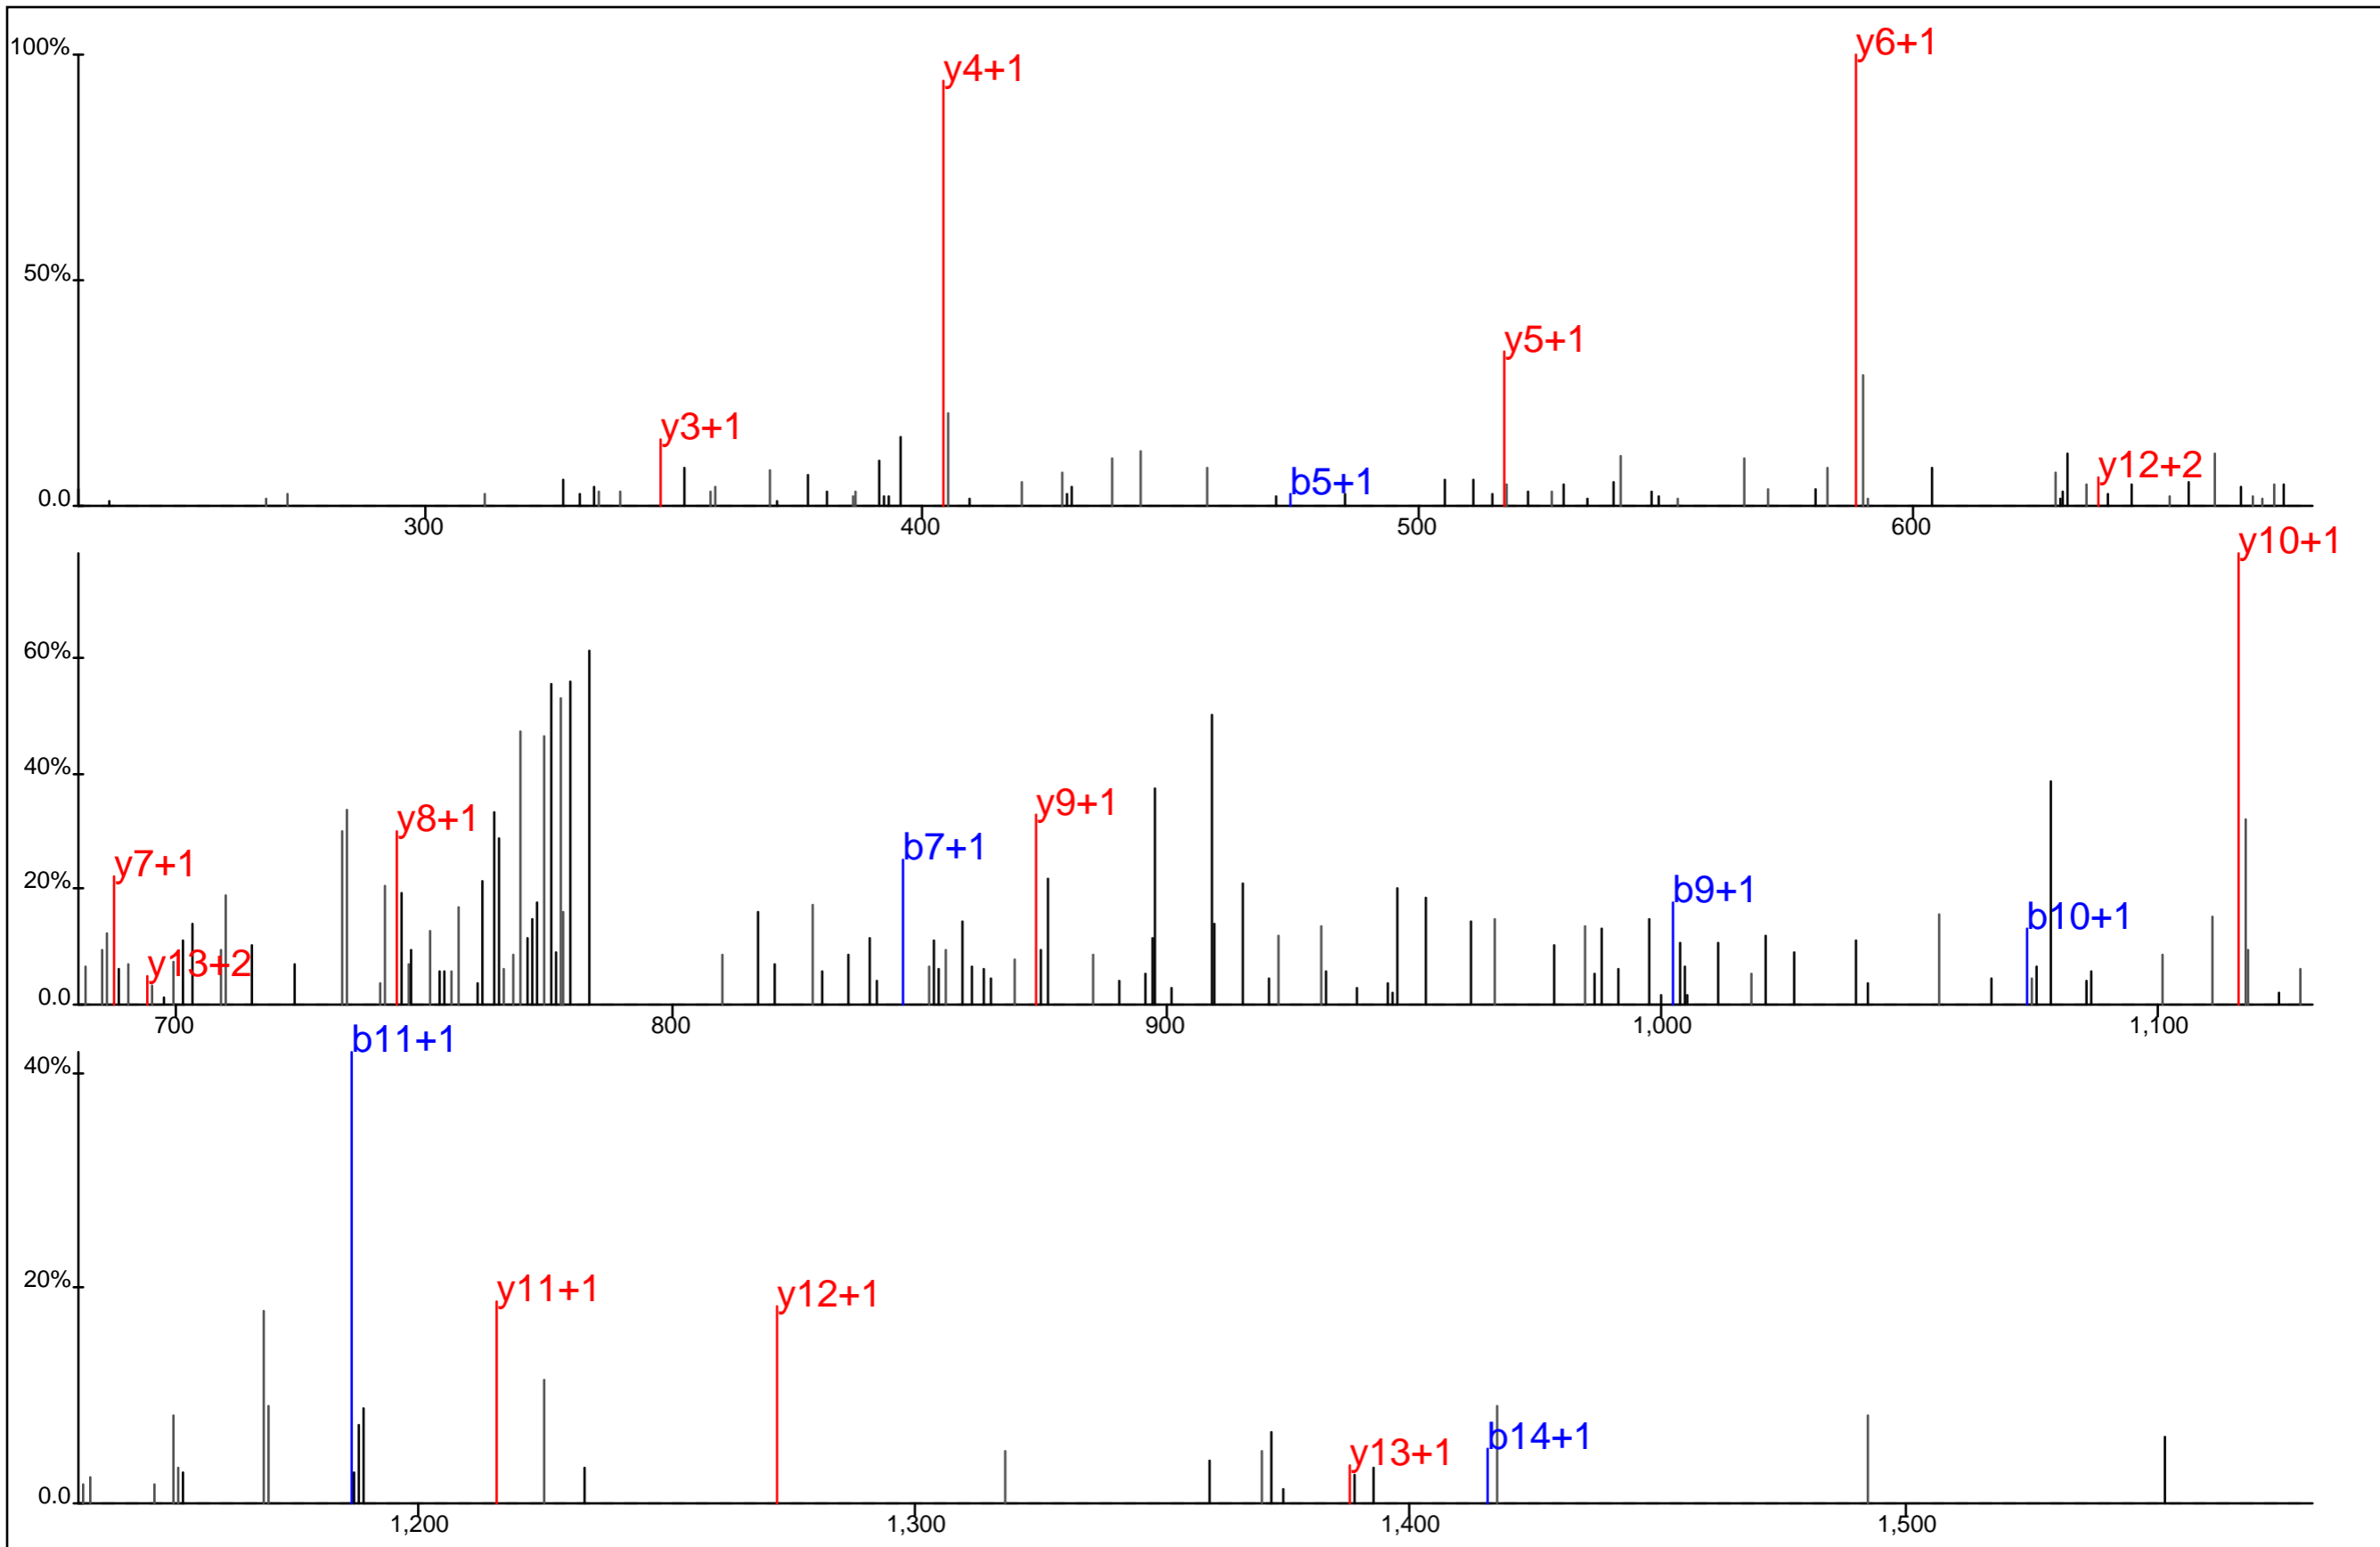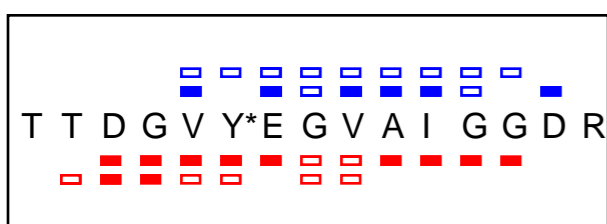

Protein Name: ATP citrate lyase  
 gi Accession: 68533125  
 Precursor Mass: 795.3469+2  
 Delta Mass: 1.339 ppm  
 XCorr: 38.76

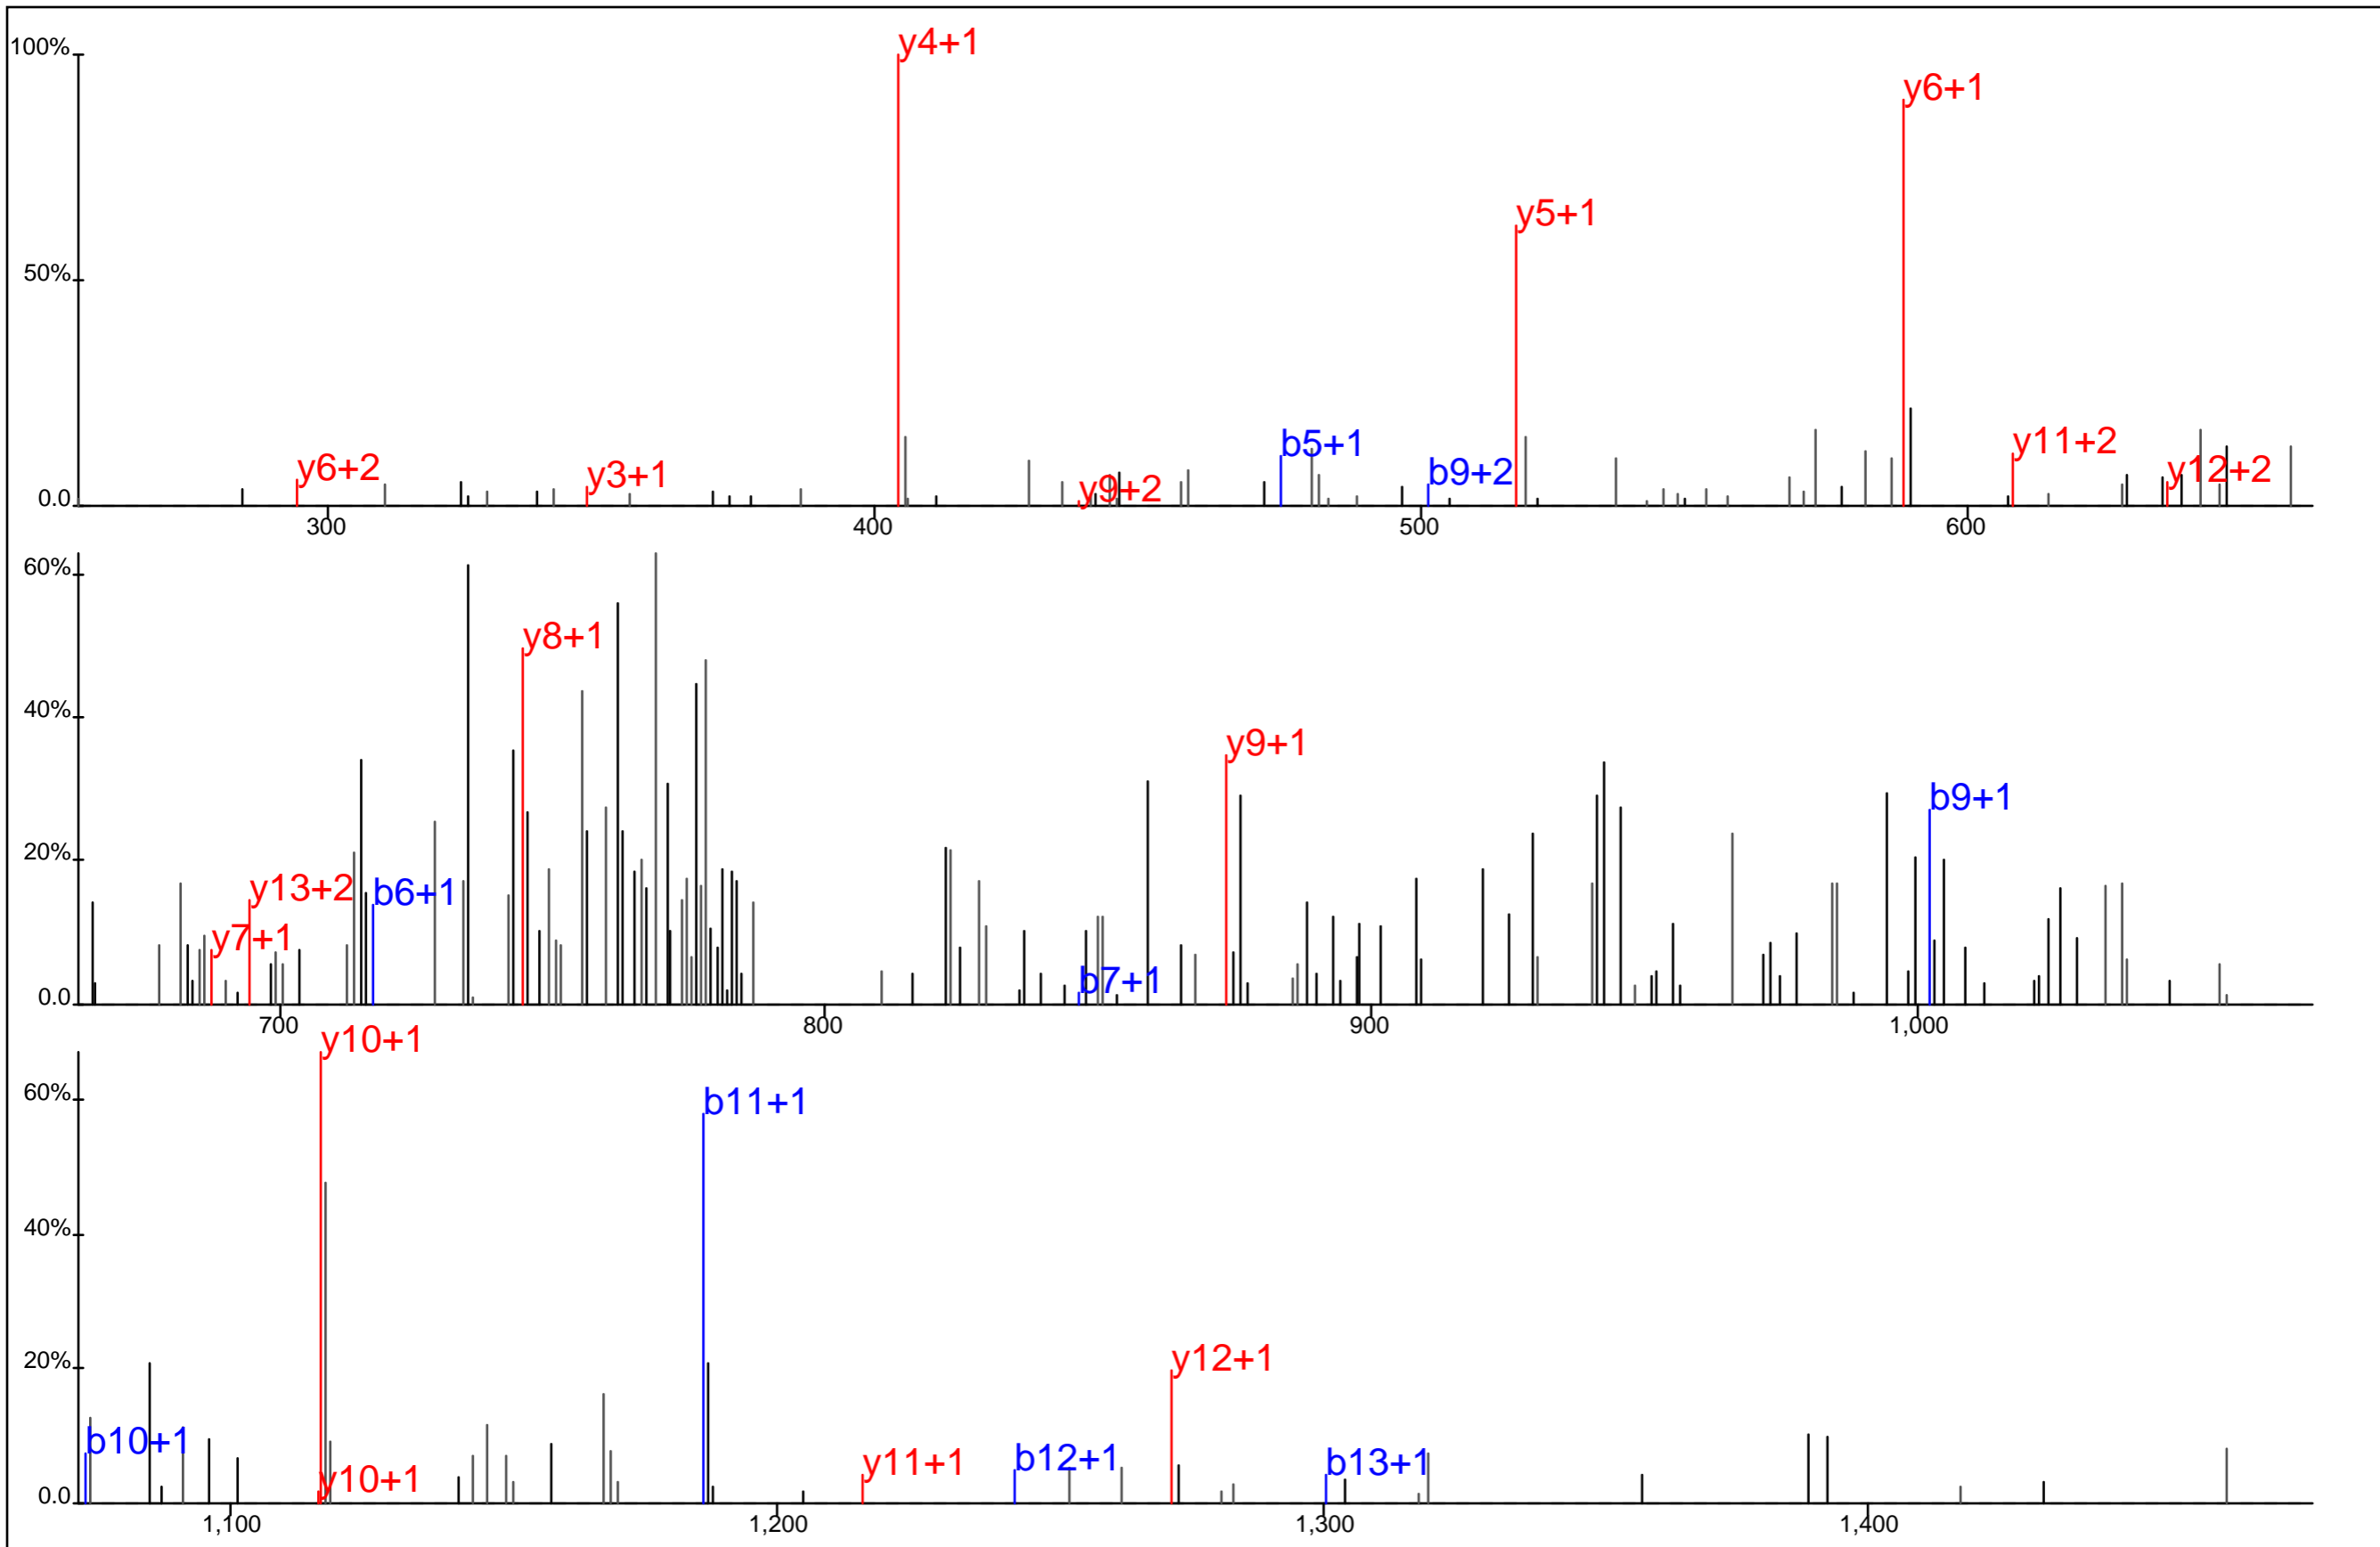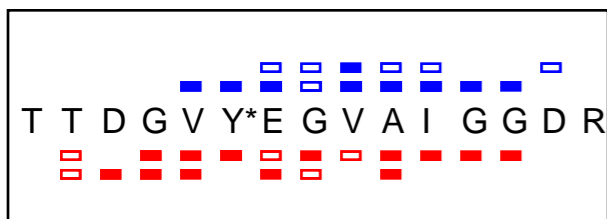

Protein Name: ATP citrate lyase  
 gi Accession: 68533125  
 Precursor Mass: 795.3500+2  
 Delta Mass: 5.333 ppm  
 XCorr: 29.12



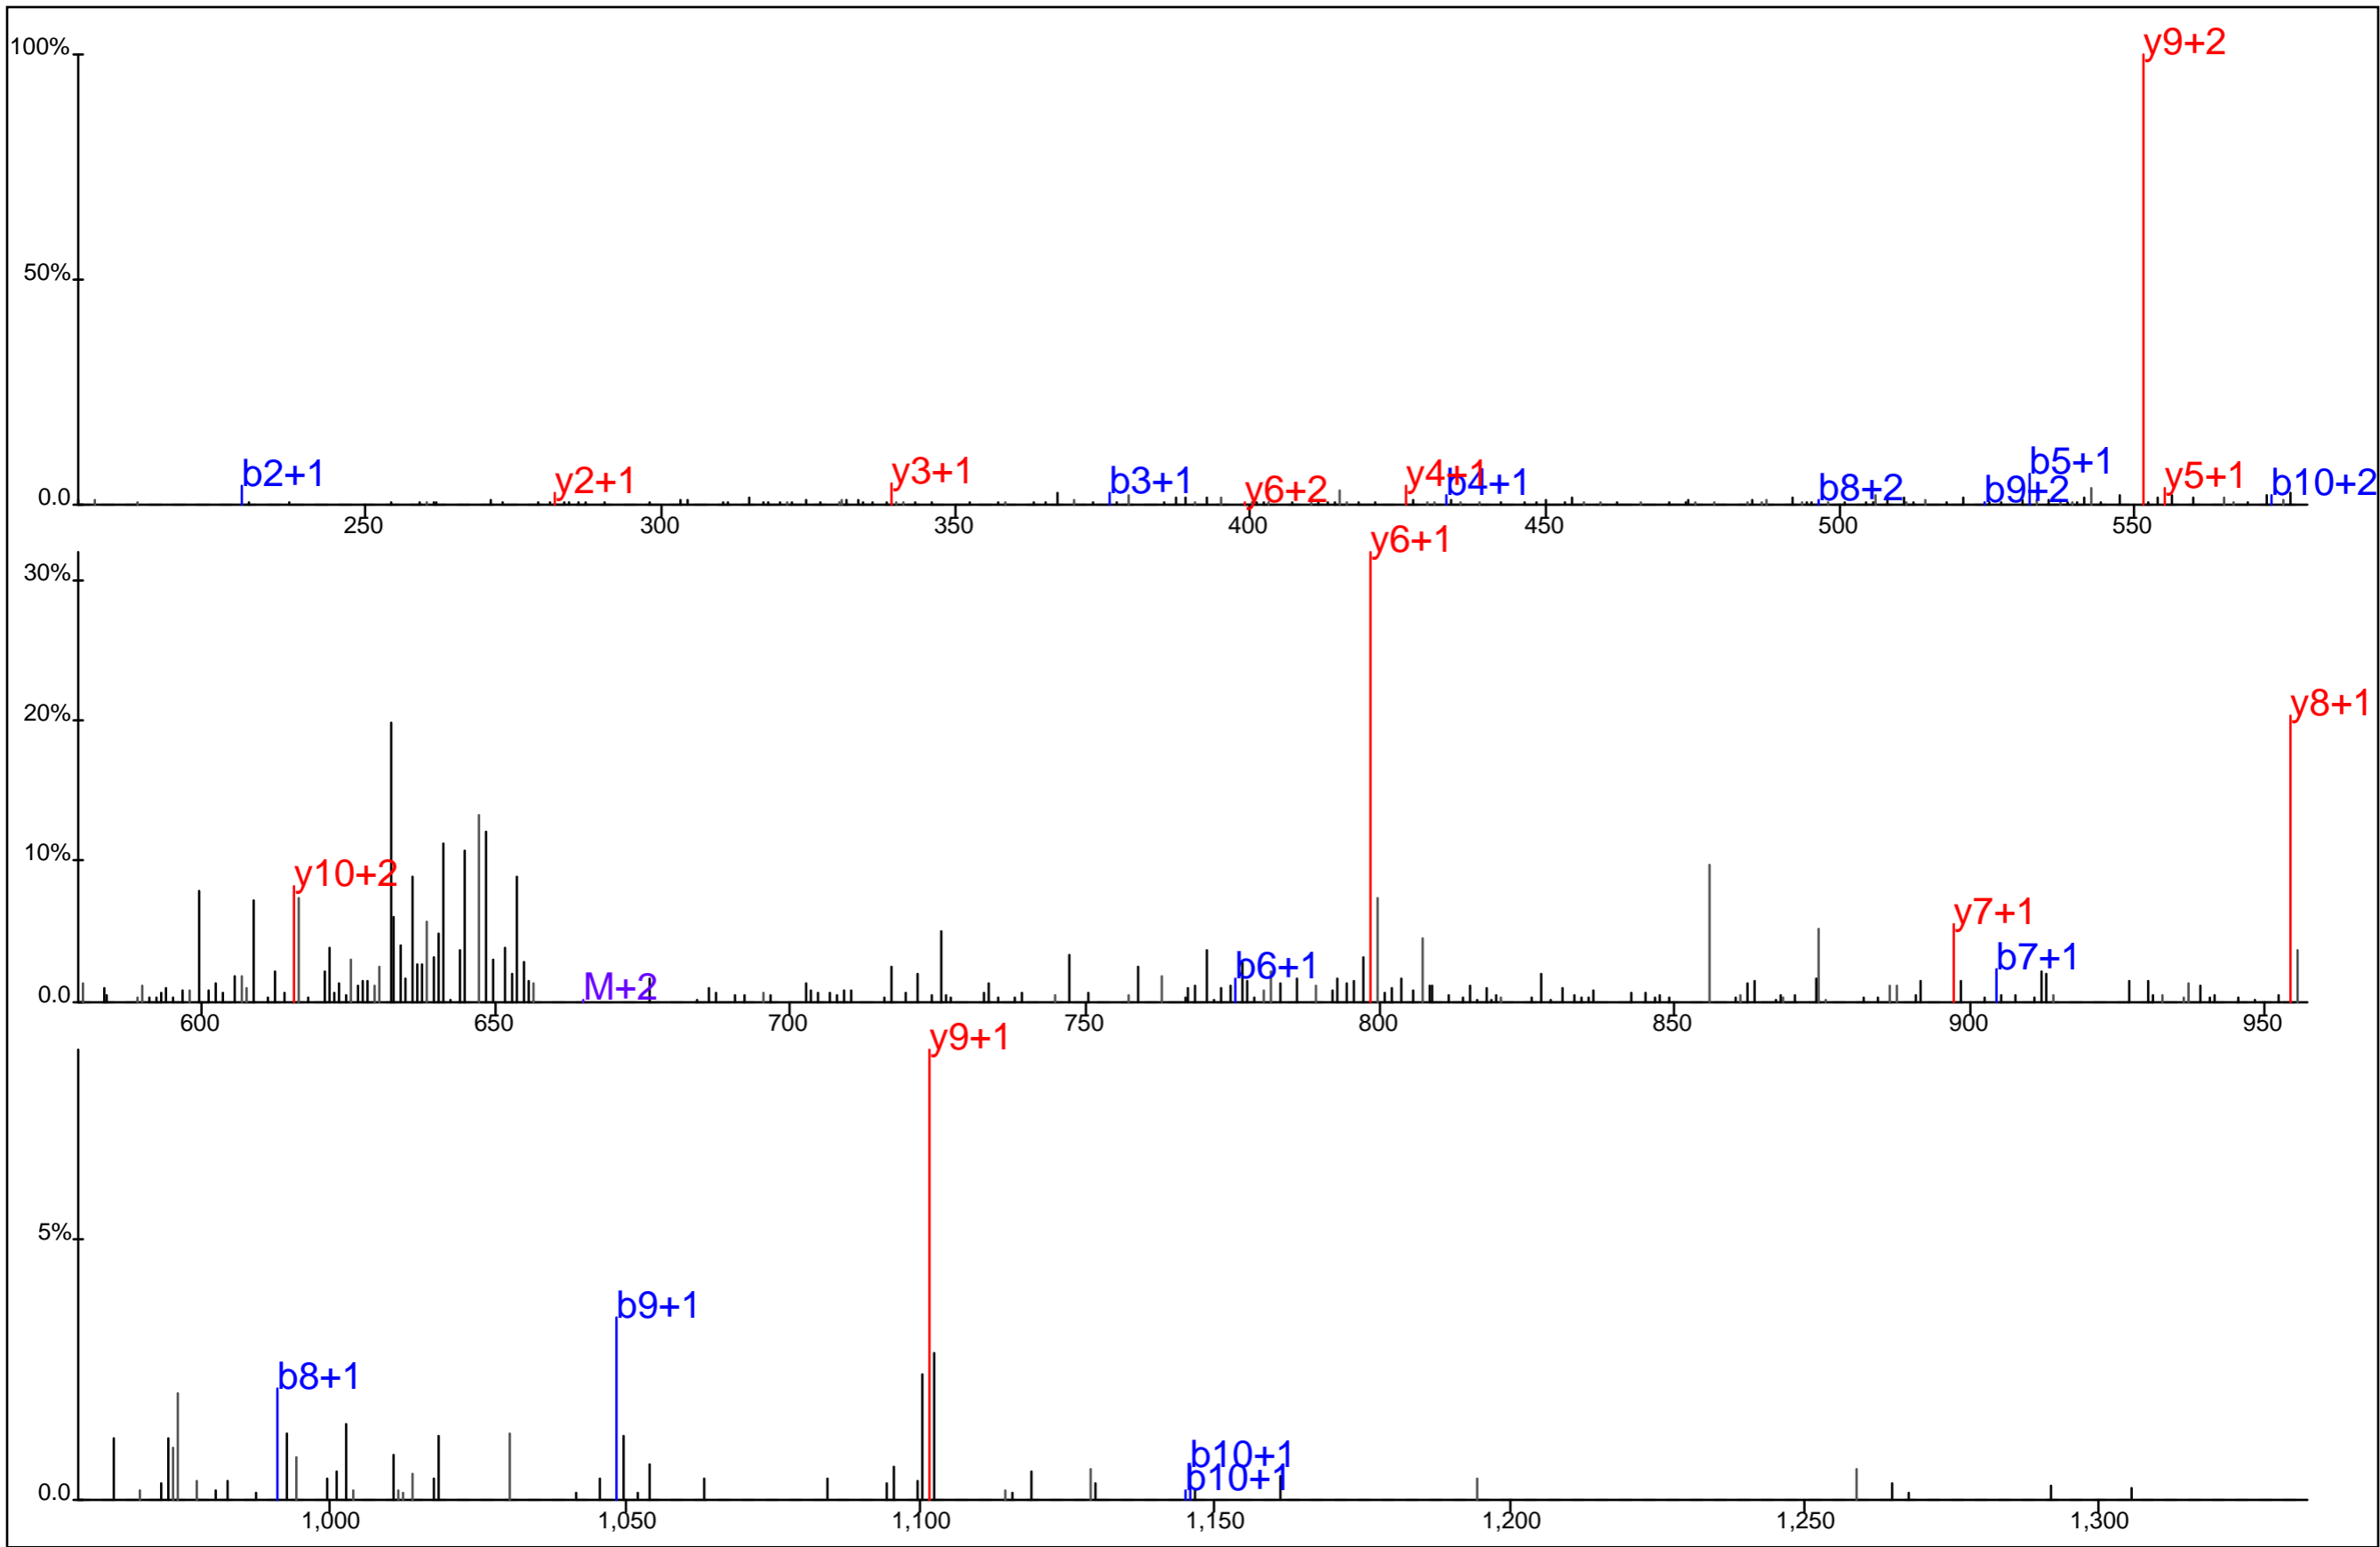

|  |                                                                                                                                                                    |
|--|--------------------------------------------------------------------------------------------------------------------------------------------------------------------|
|  | <p>Protein Name: BCAP<br/>         gi Accession: 28273124<br/>         Precursor Mass: 665.2935+2<br/>         Delta Mass: 3.564 ppm<br/>         XCorr: 43.13</p> |
|--|--------------------------------------------------------------------------------------------------------------------------------------------------------------------|

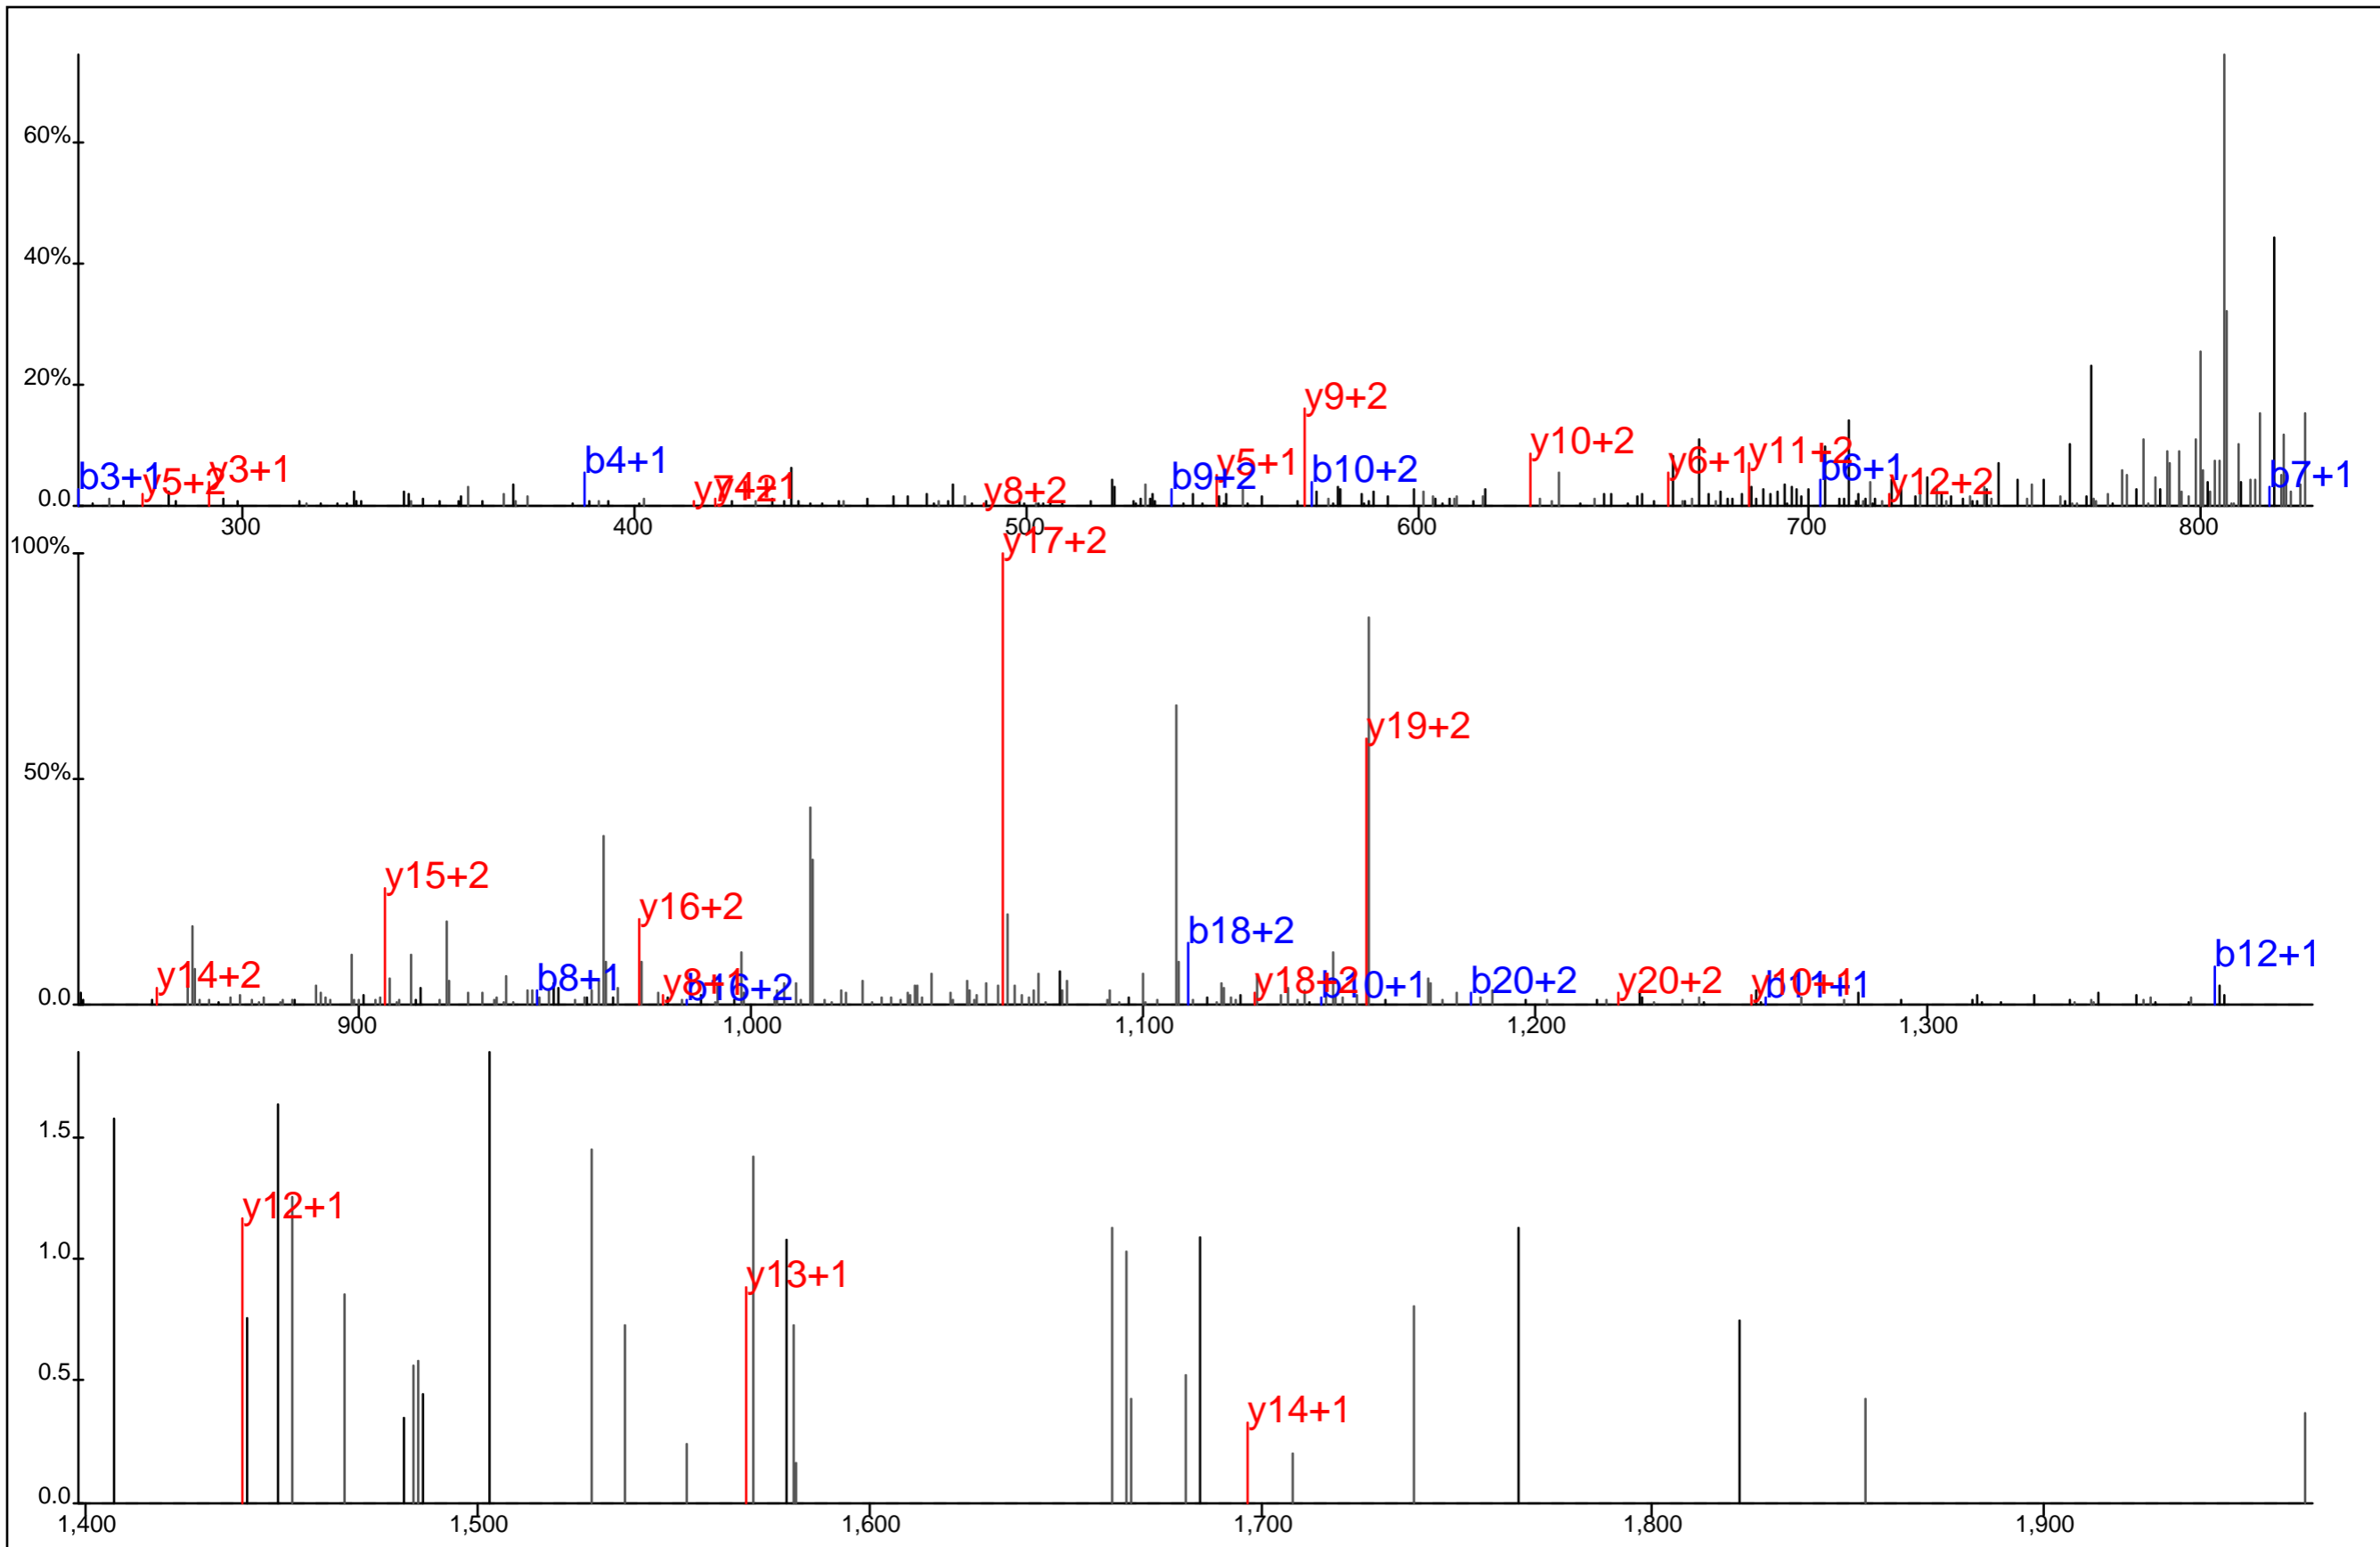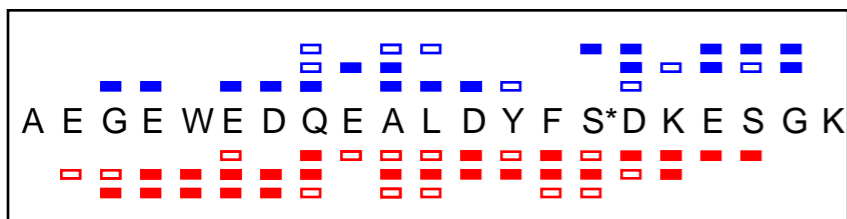

Protein Name: BCLAF1  
 gi Accession: 7661958  
 Precursor Mass: 838.3422+3  
 Delta Mass: 3.724 ppm  
 XCorr: 45.79

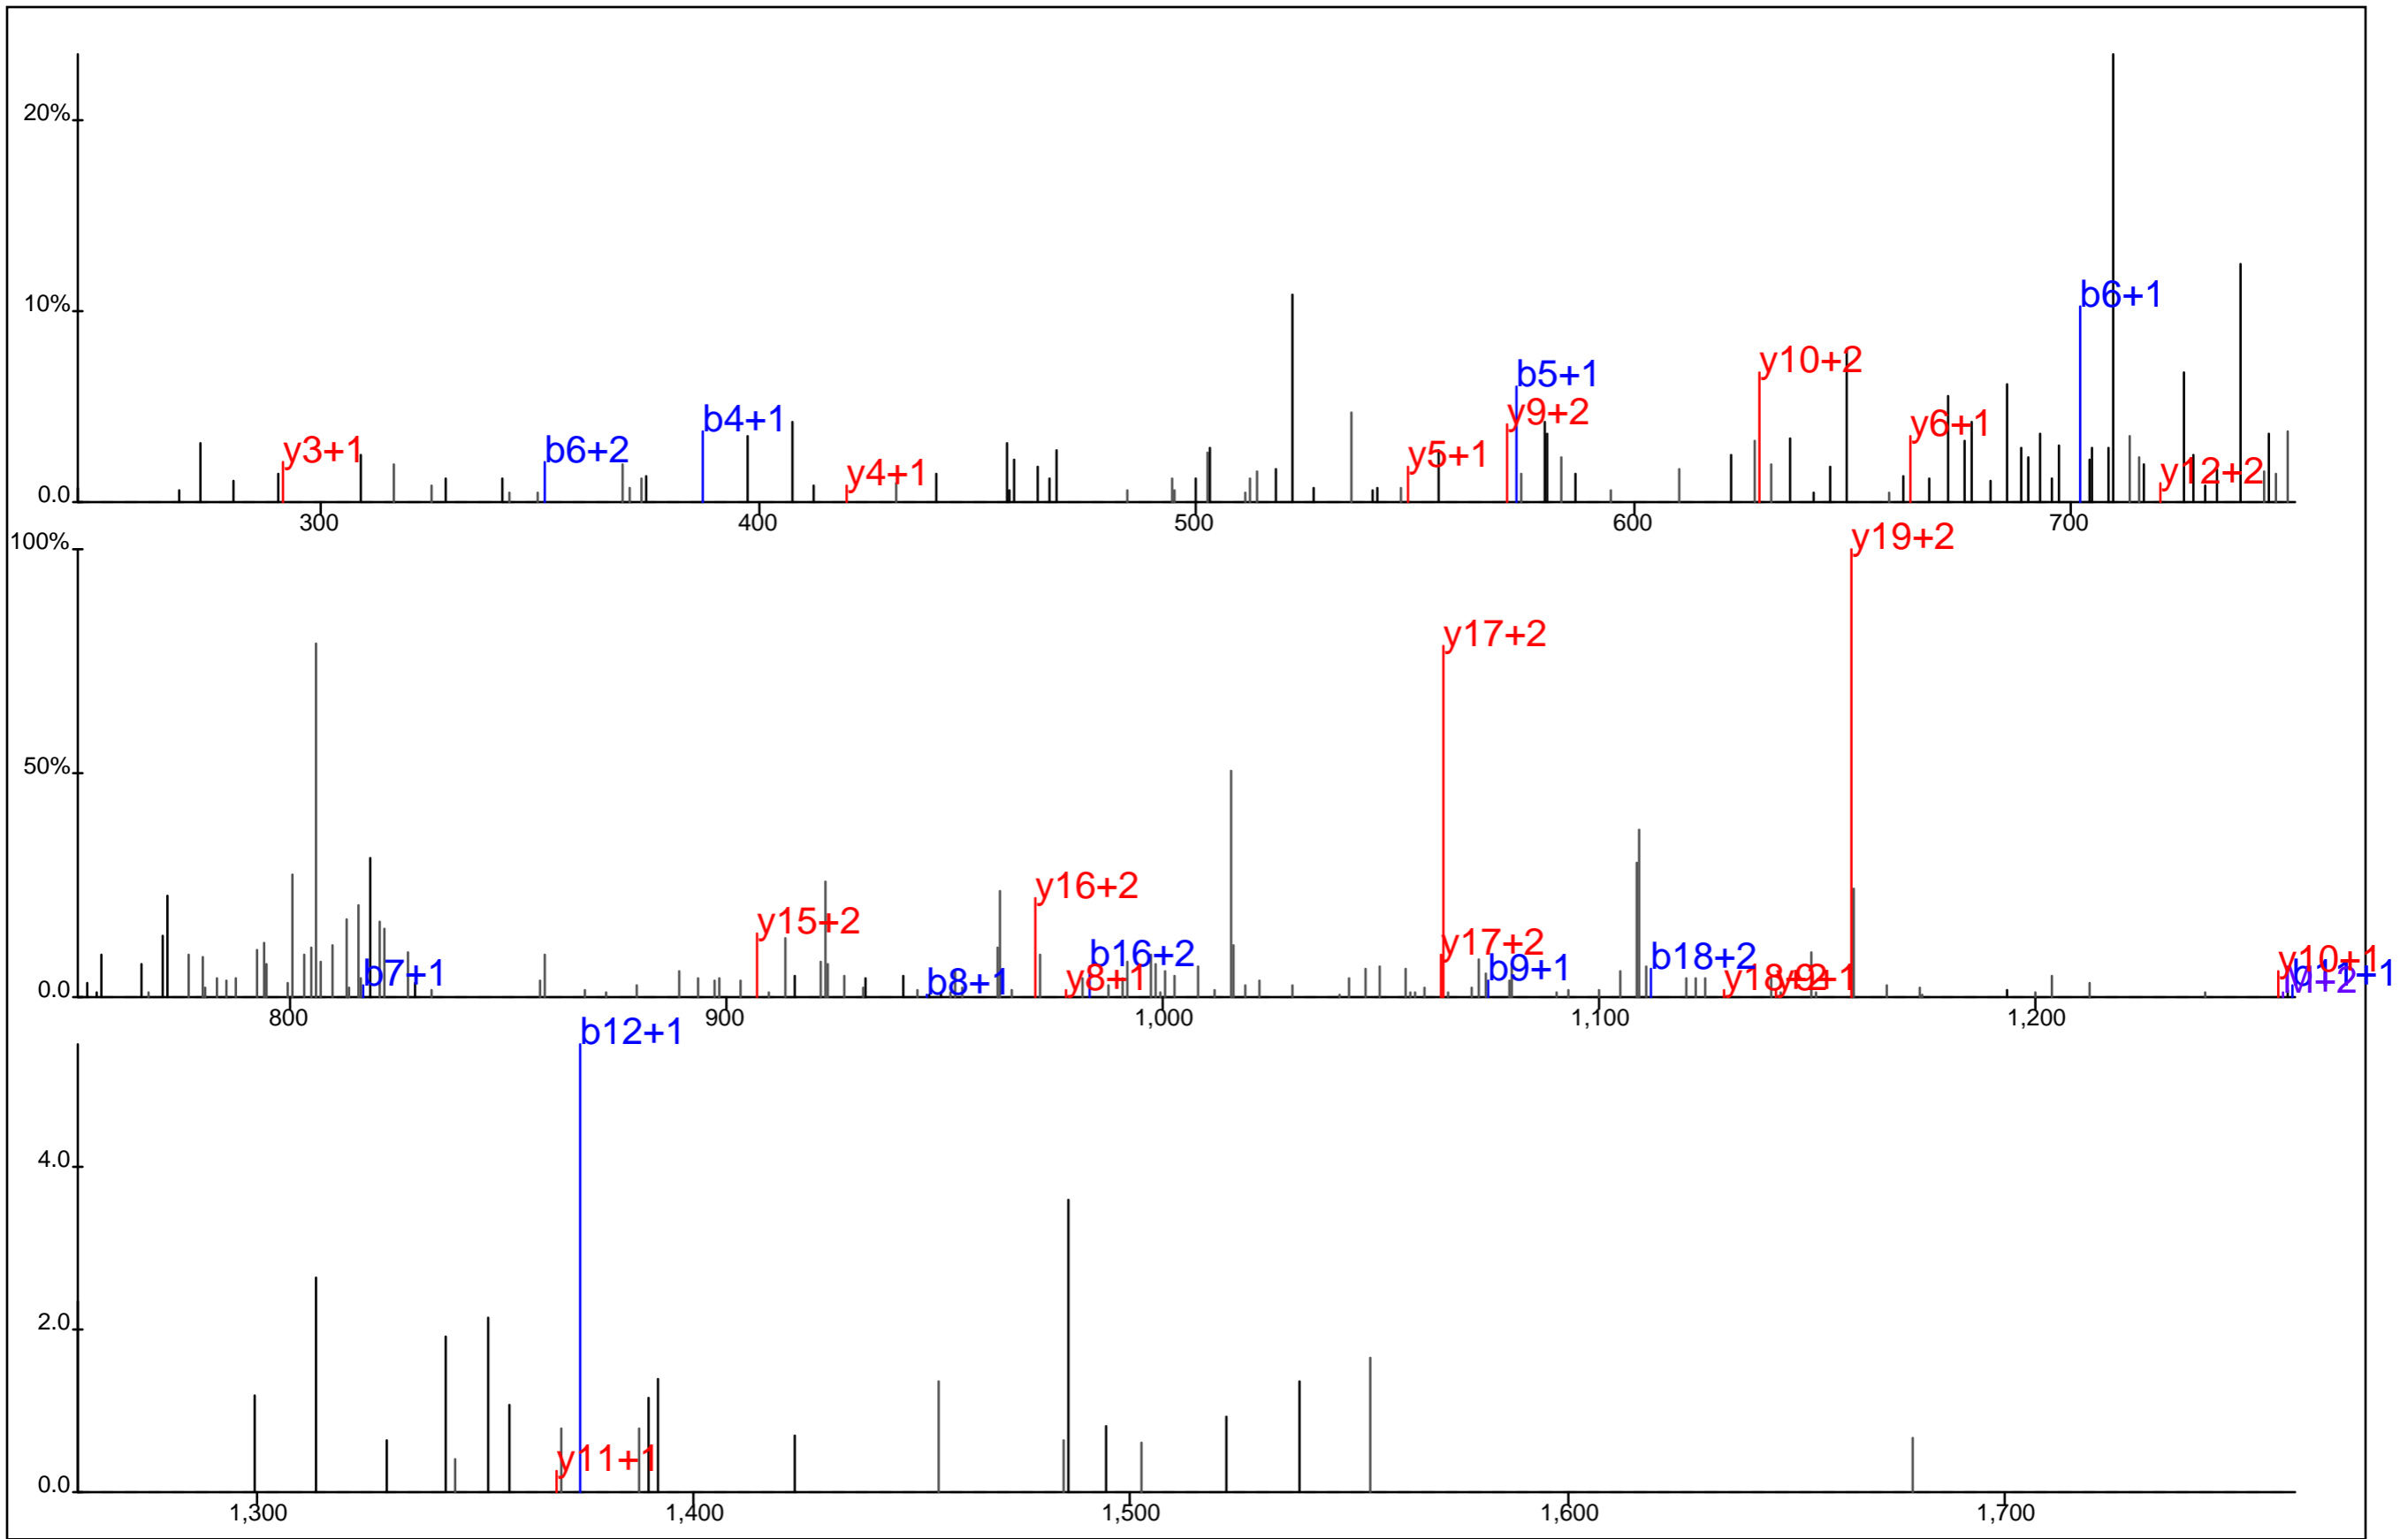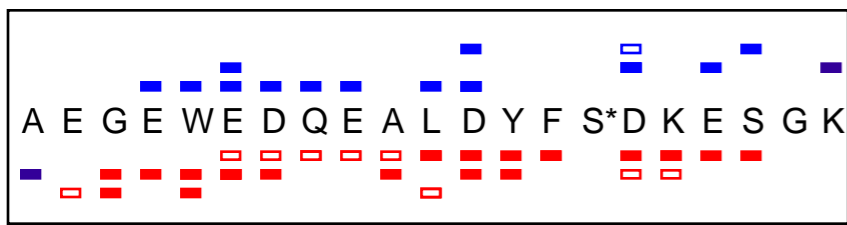

Protein Name: BCLAF1  
 gi Accession: 7661958  
 Precursor Mass: 838.3437+3  
 Delta Mass: 5.470 ppm  
 XCorr: 13.42

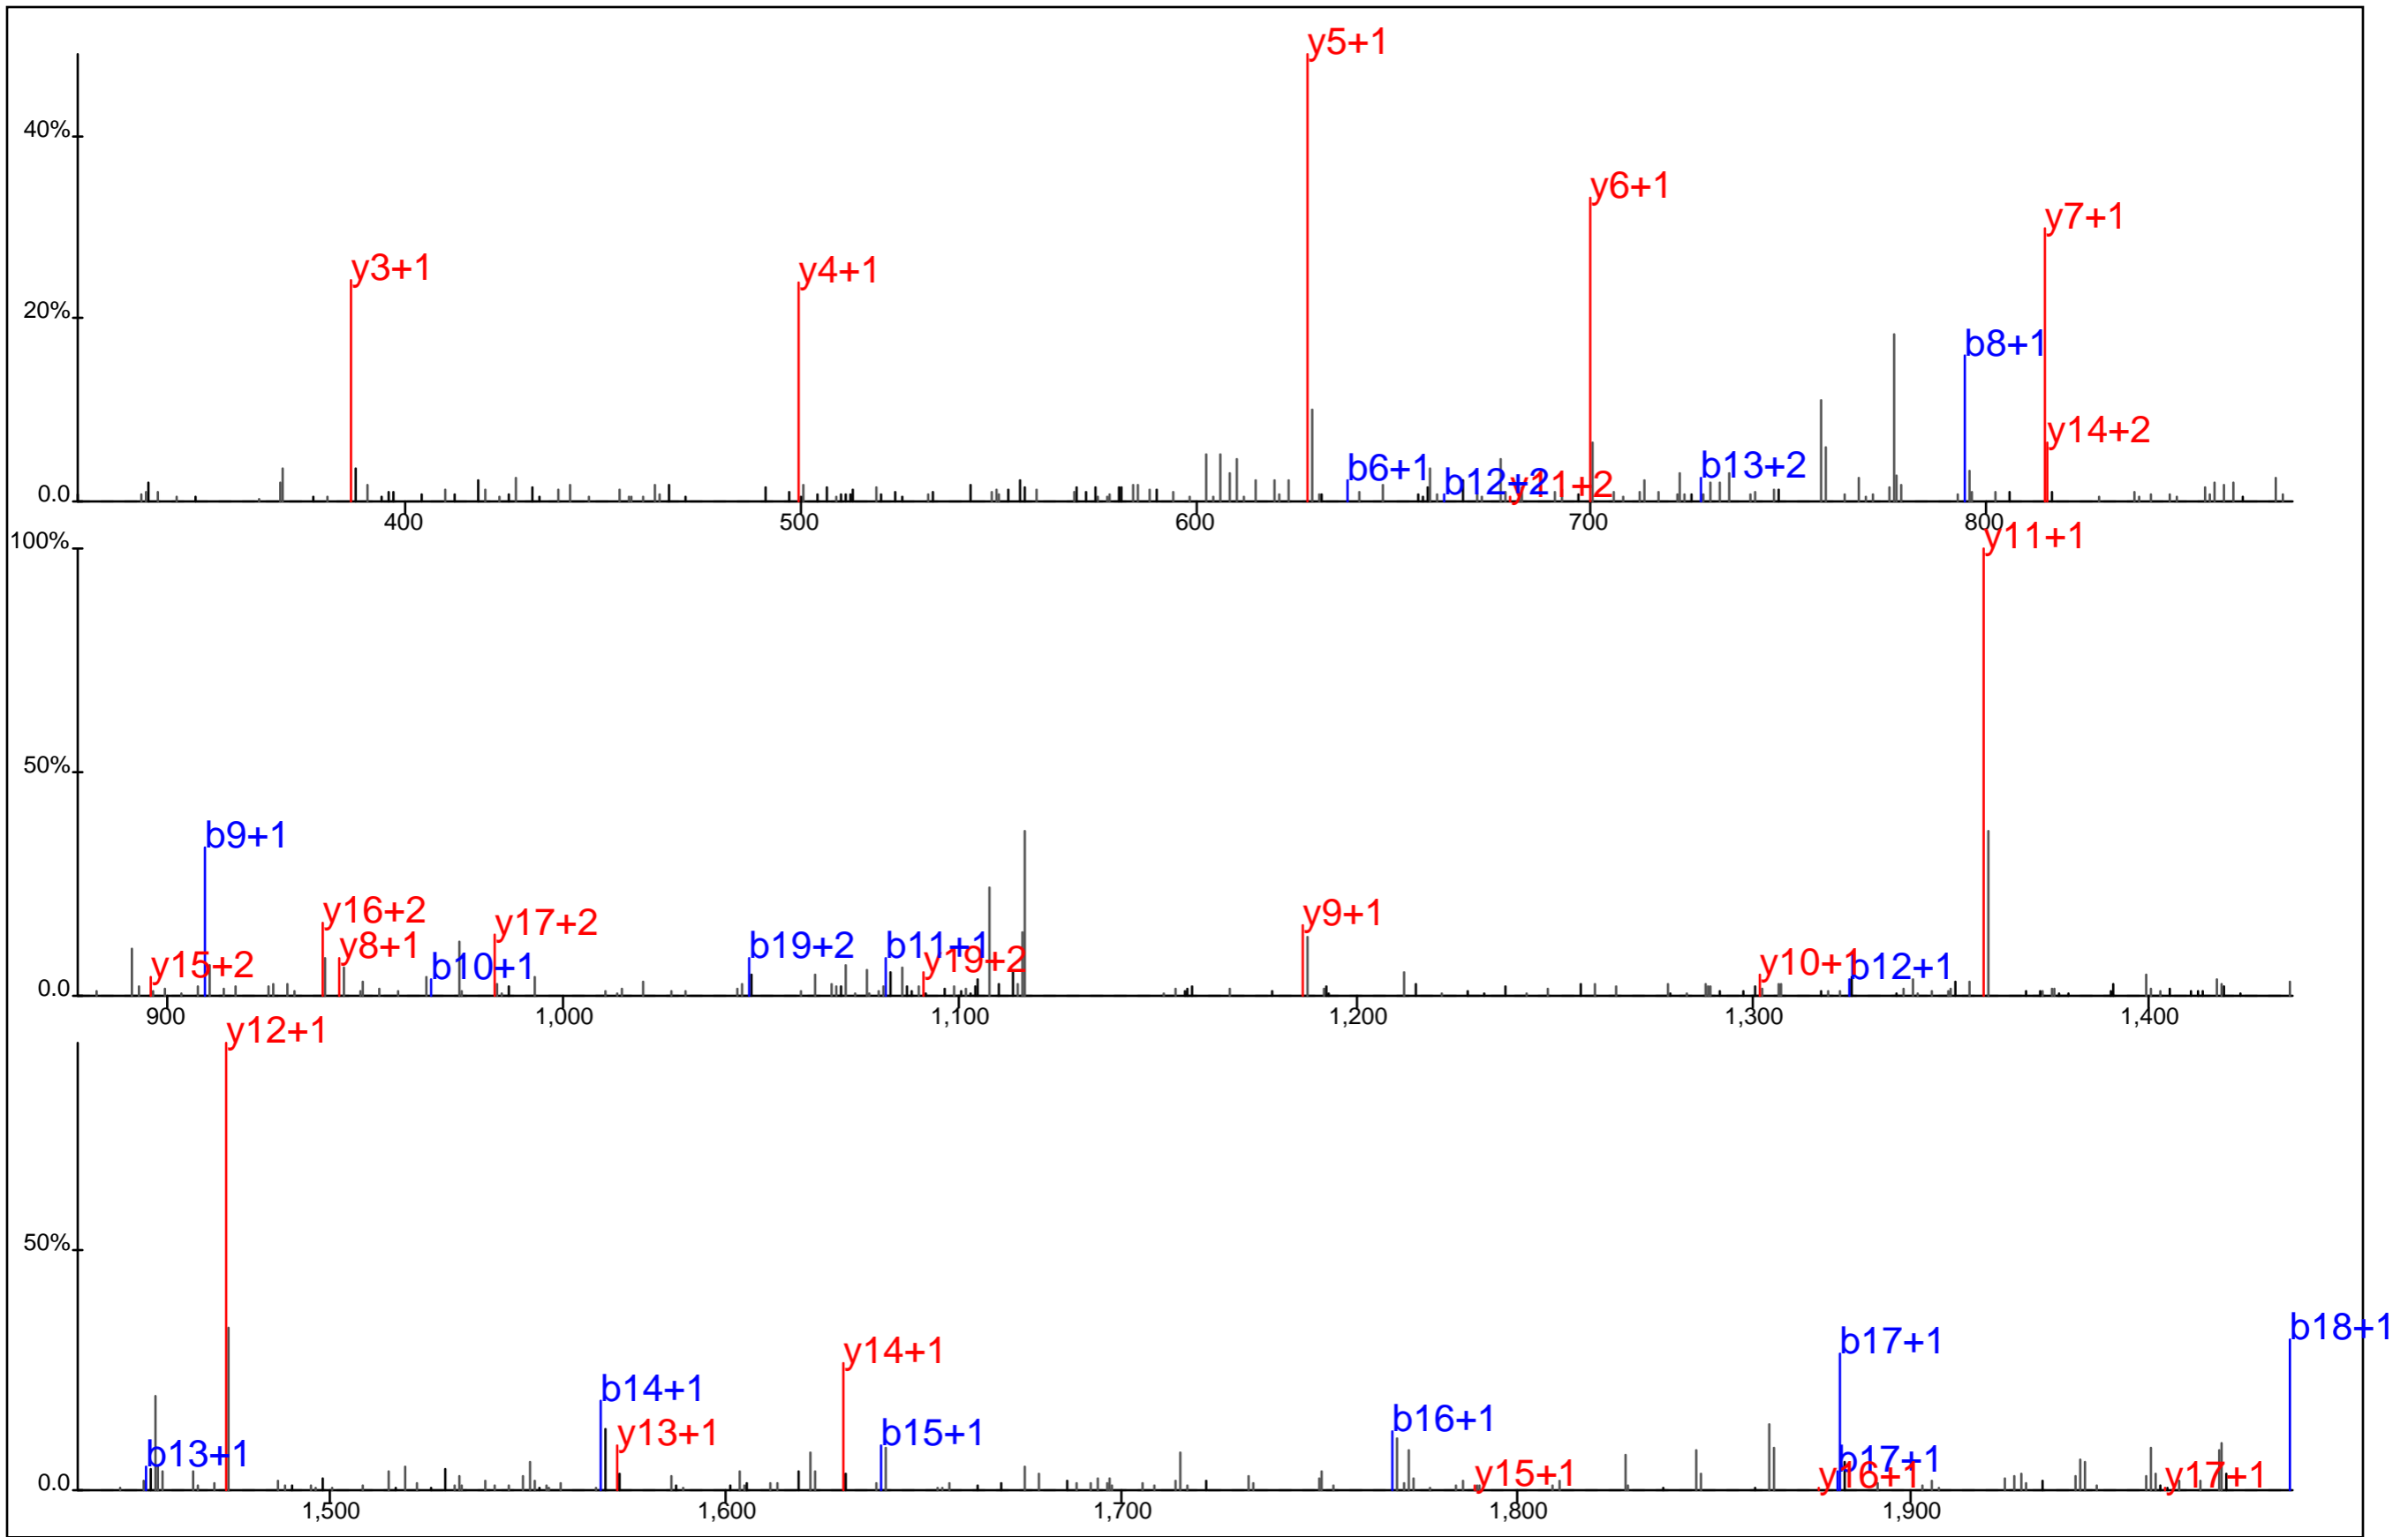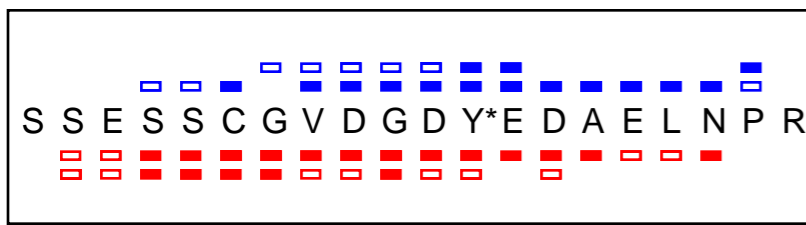

Protein Name: BCR  
 gi Accession: 28629  
 Precursor Mass: 1,133.9270+2  
 Delta Mass: 1.128 ppm  
 XCorr: 75.74





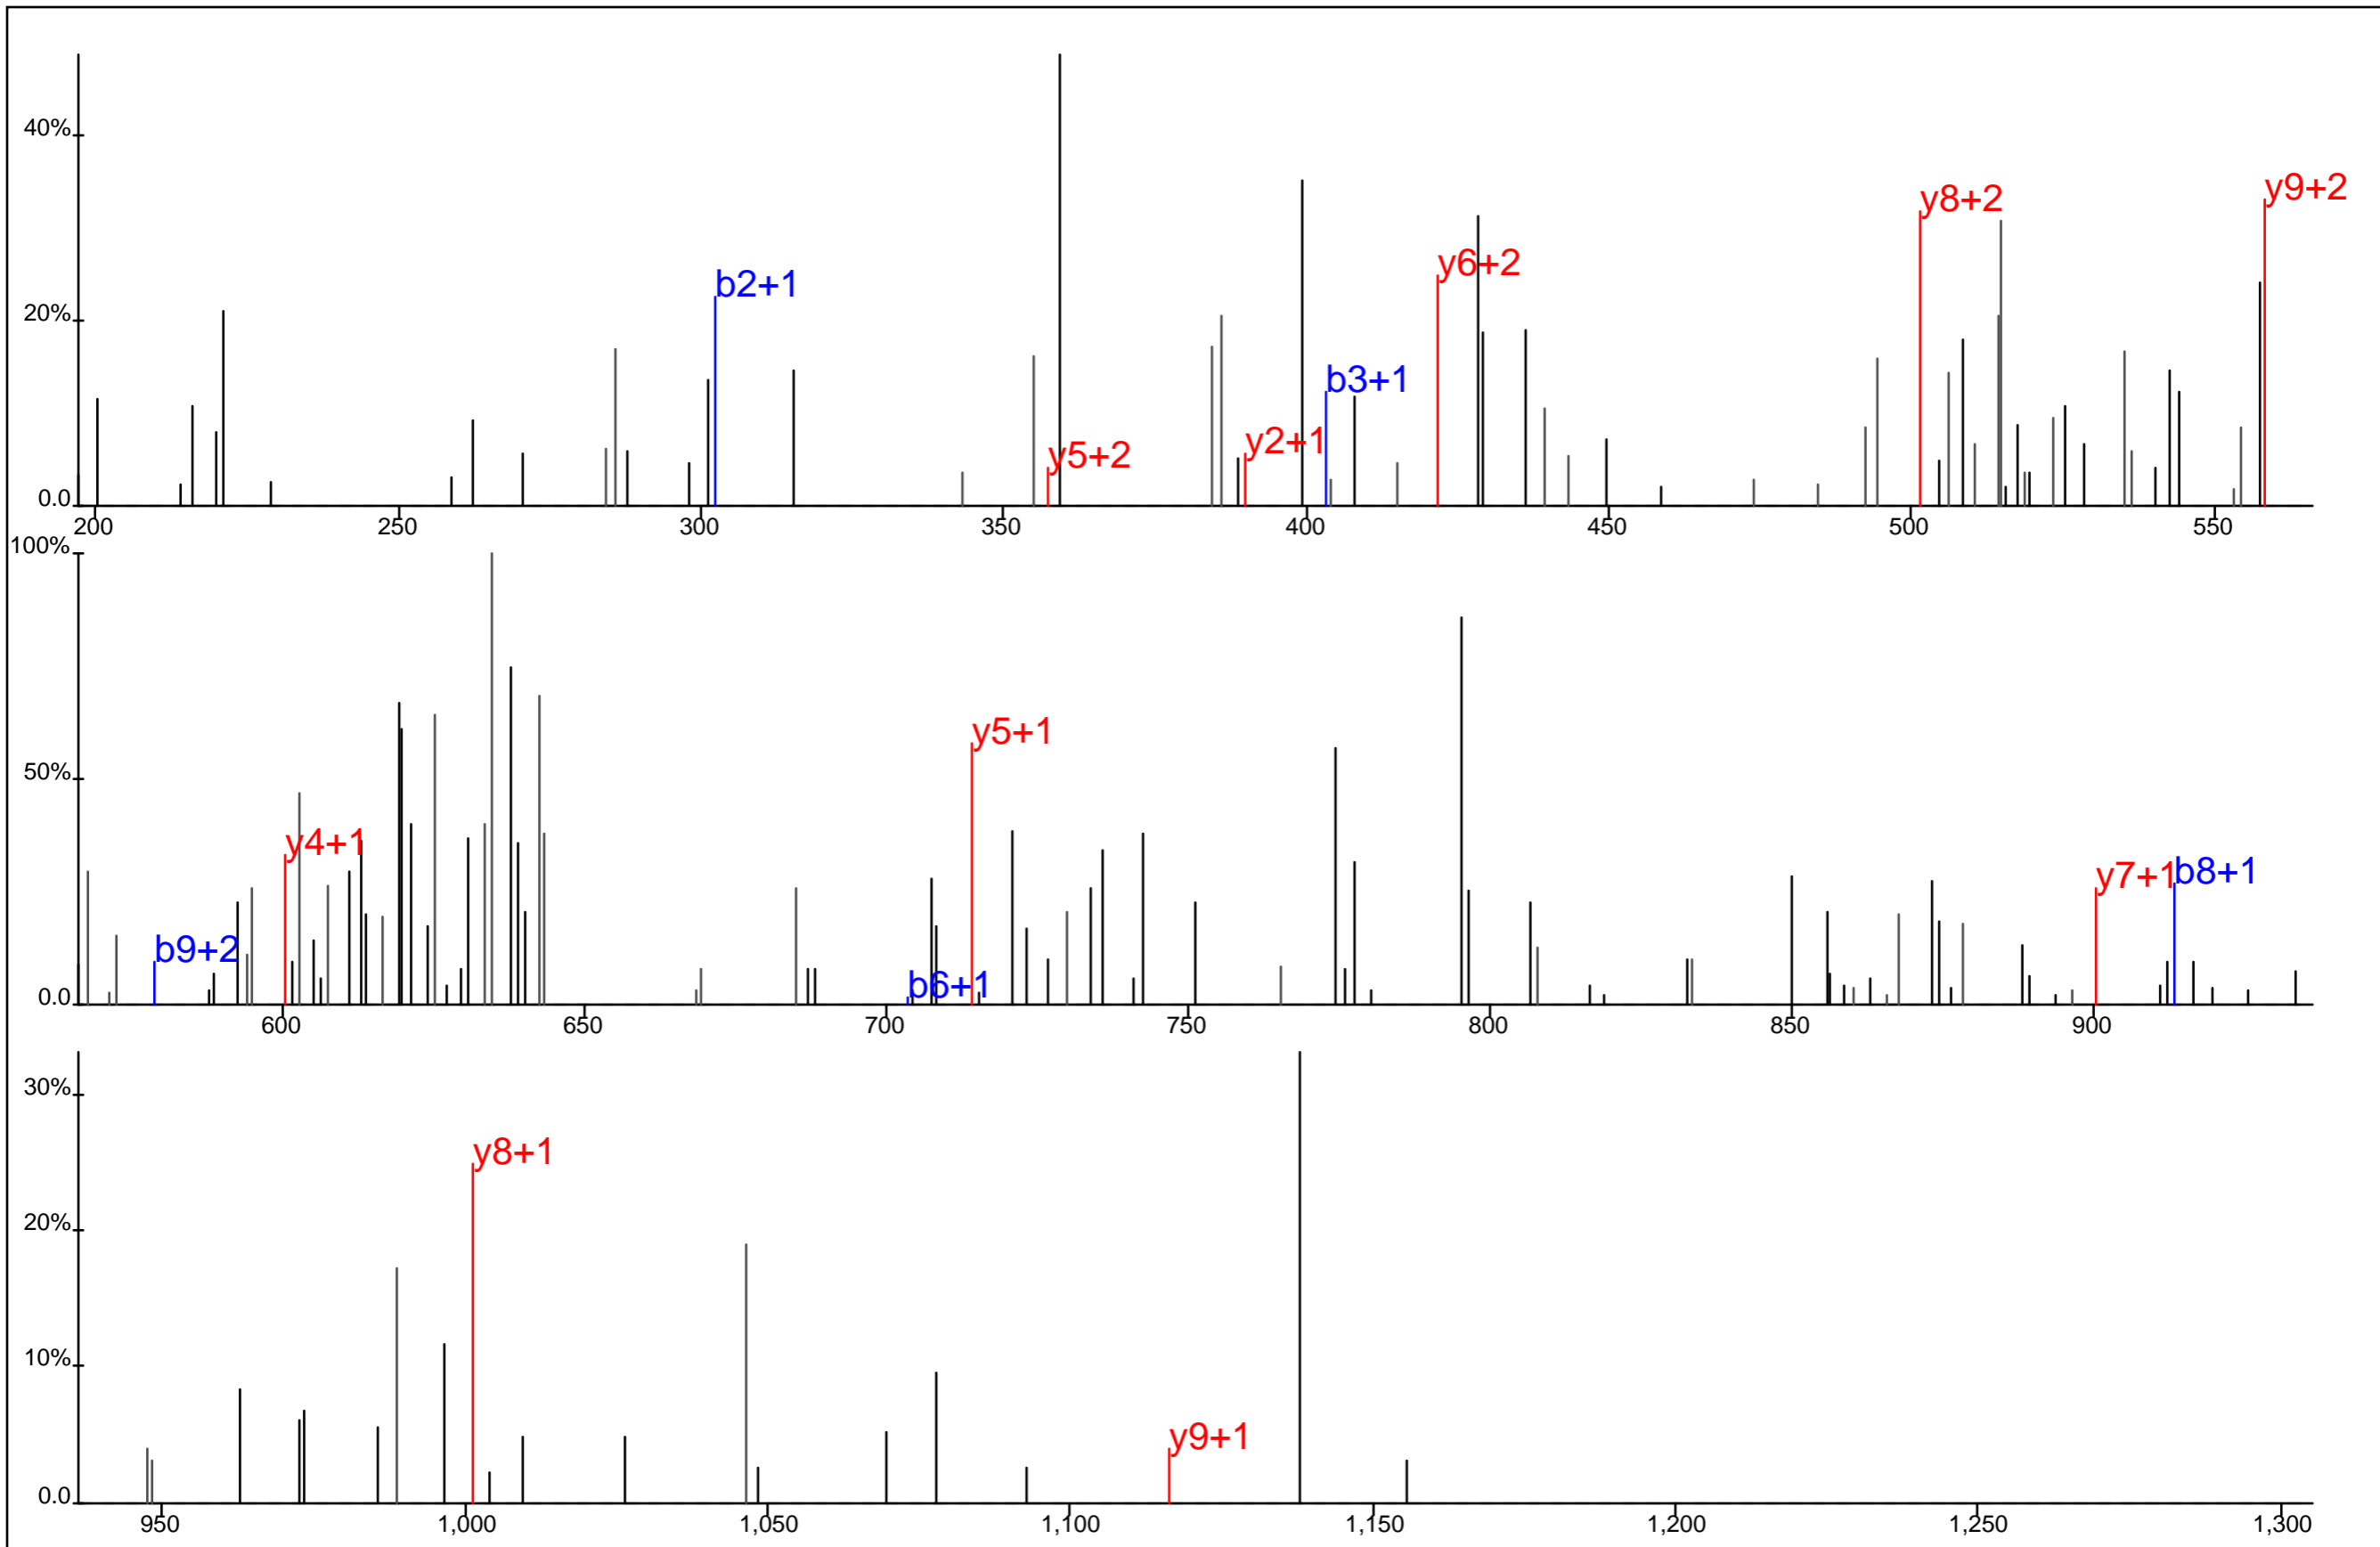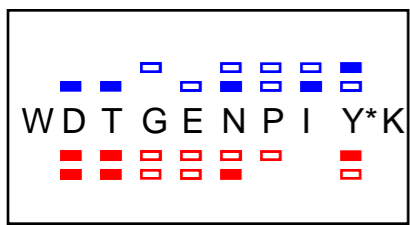

Protein Name: Beta1 integrin  
 gi Accession: 124963  
 Precursor Mass: 651.7760+2  
 Delta Mass: 3.484 ppm  
 XCorr: 12.28

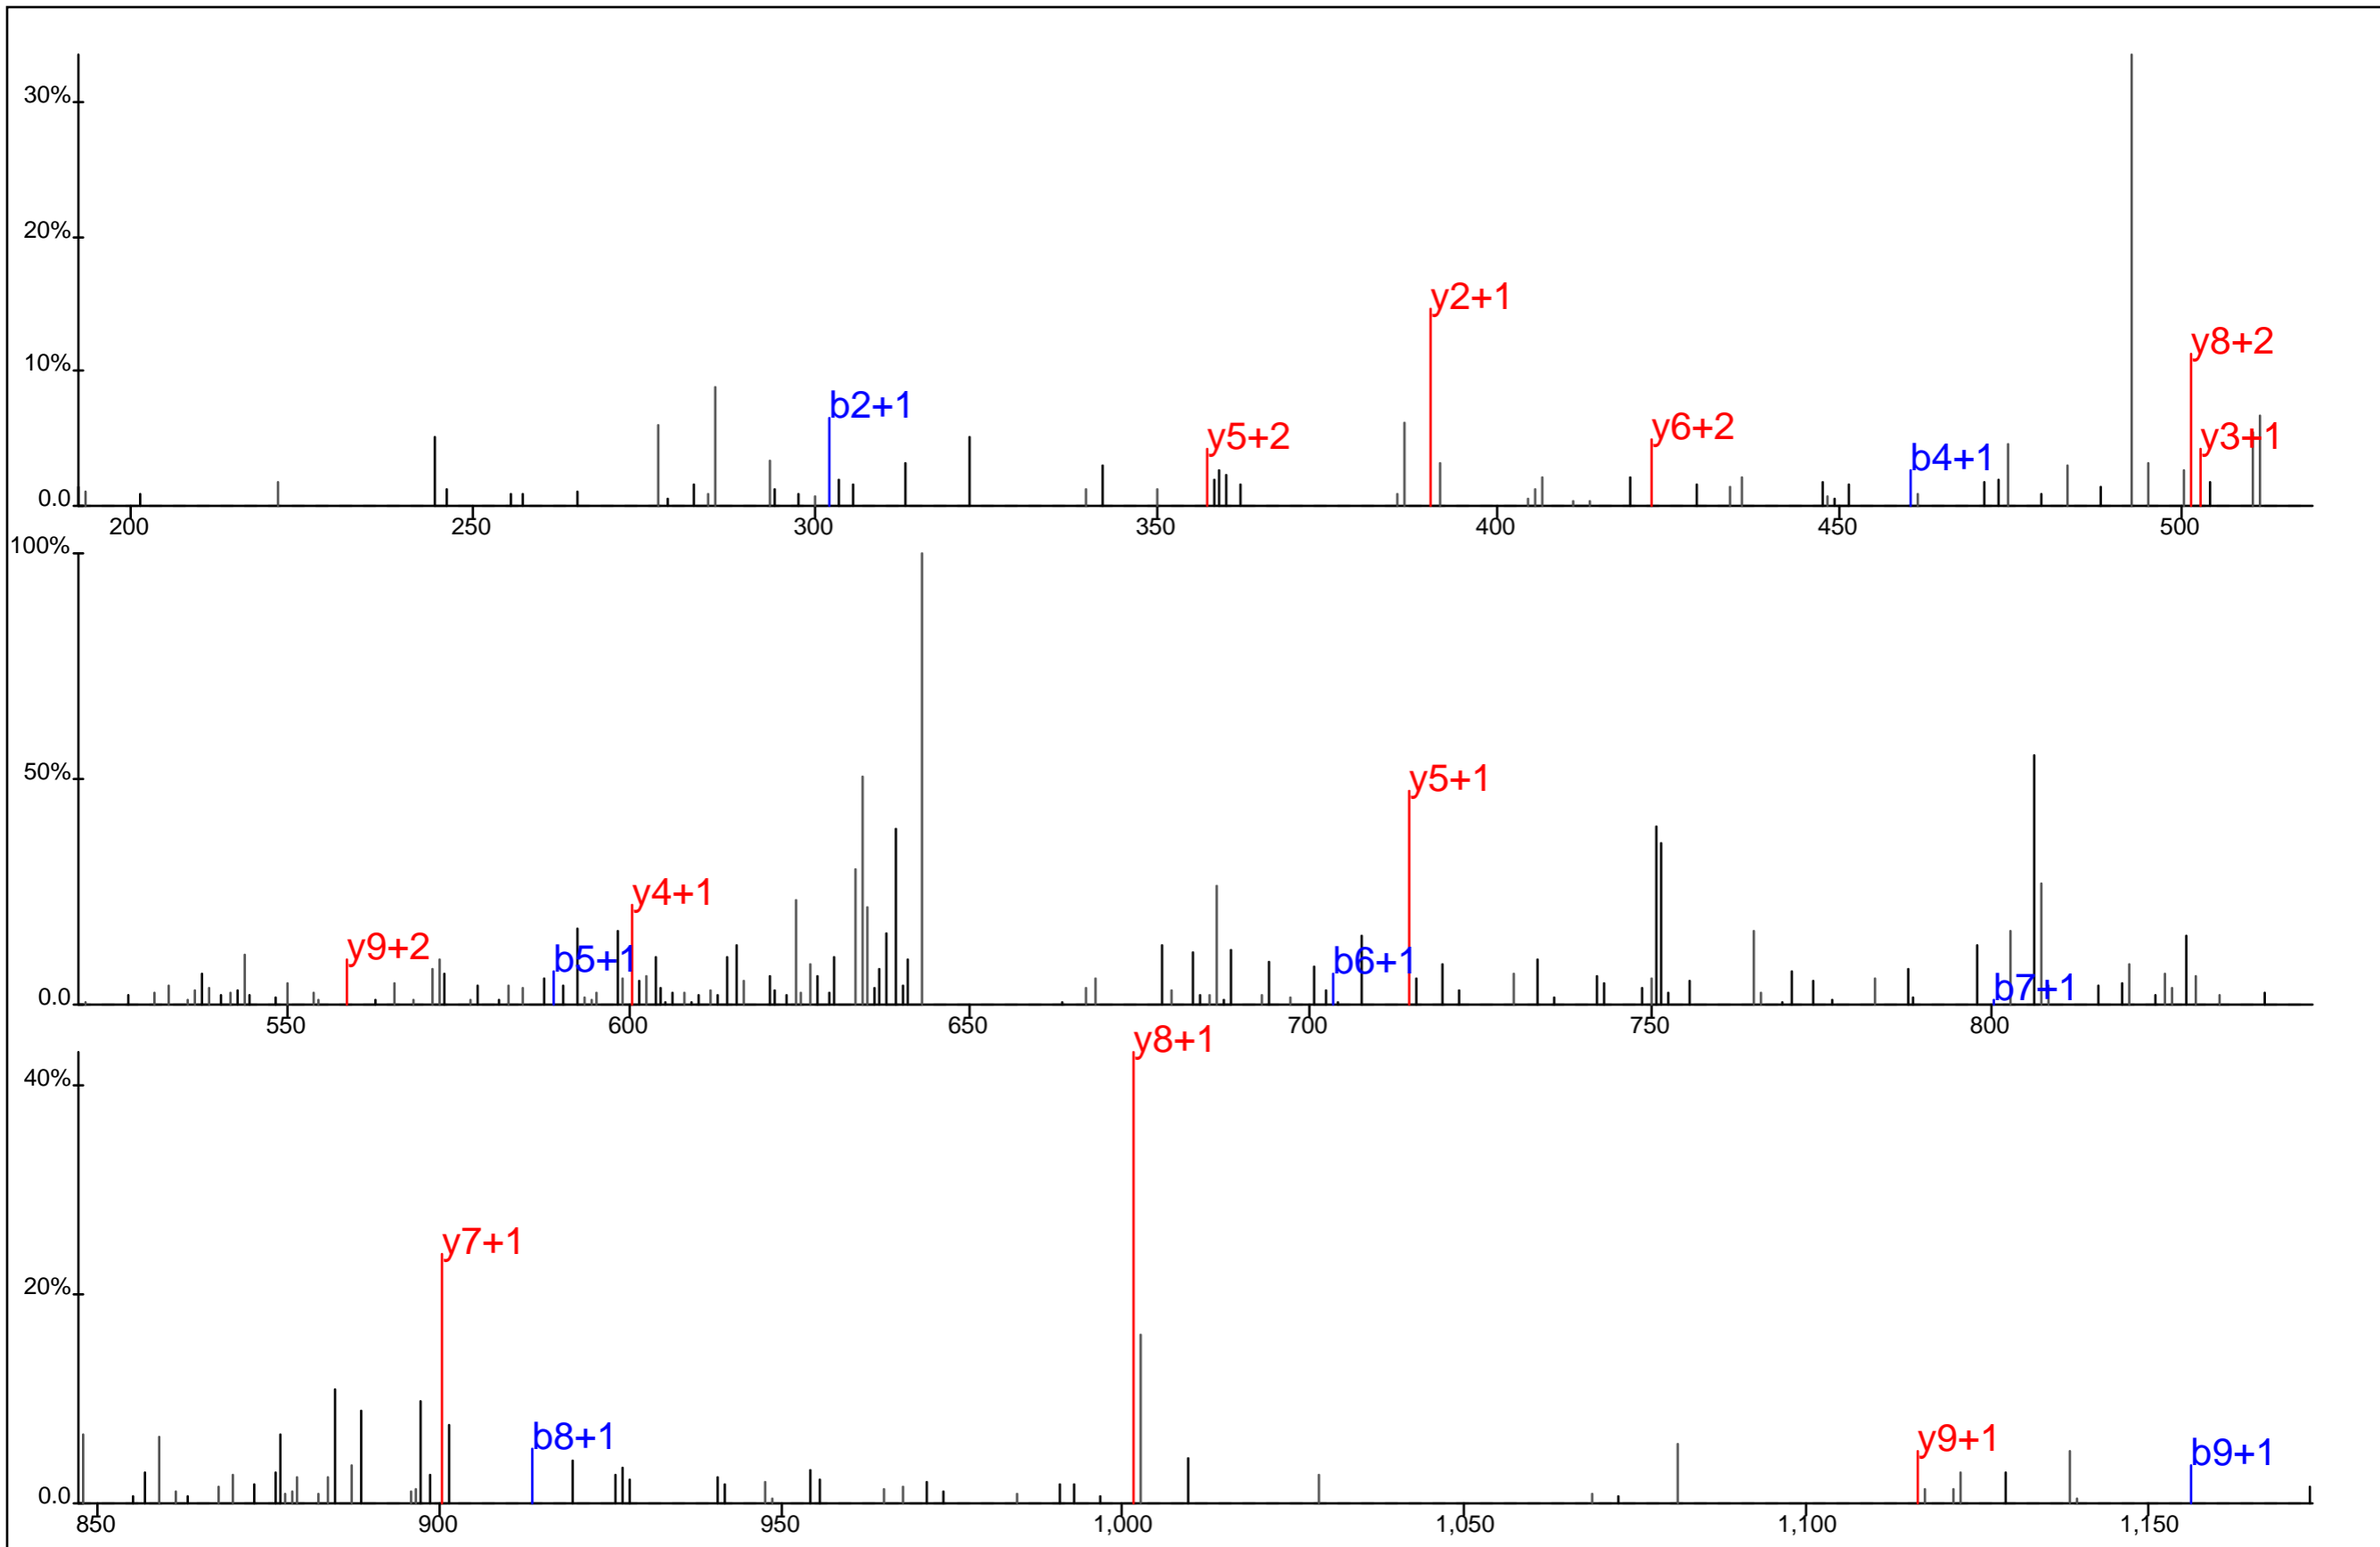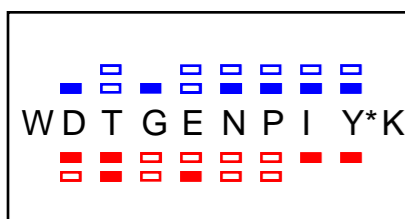

Protein Name: Beta1 integrin  
 gi Accession: 124963  
 Precursor Mass: 651.7756+2  
 Delta Mass: 2.824 ppm  
 XCorr: 33.08

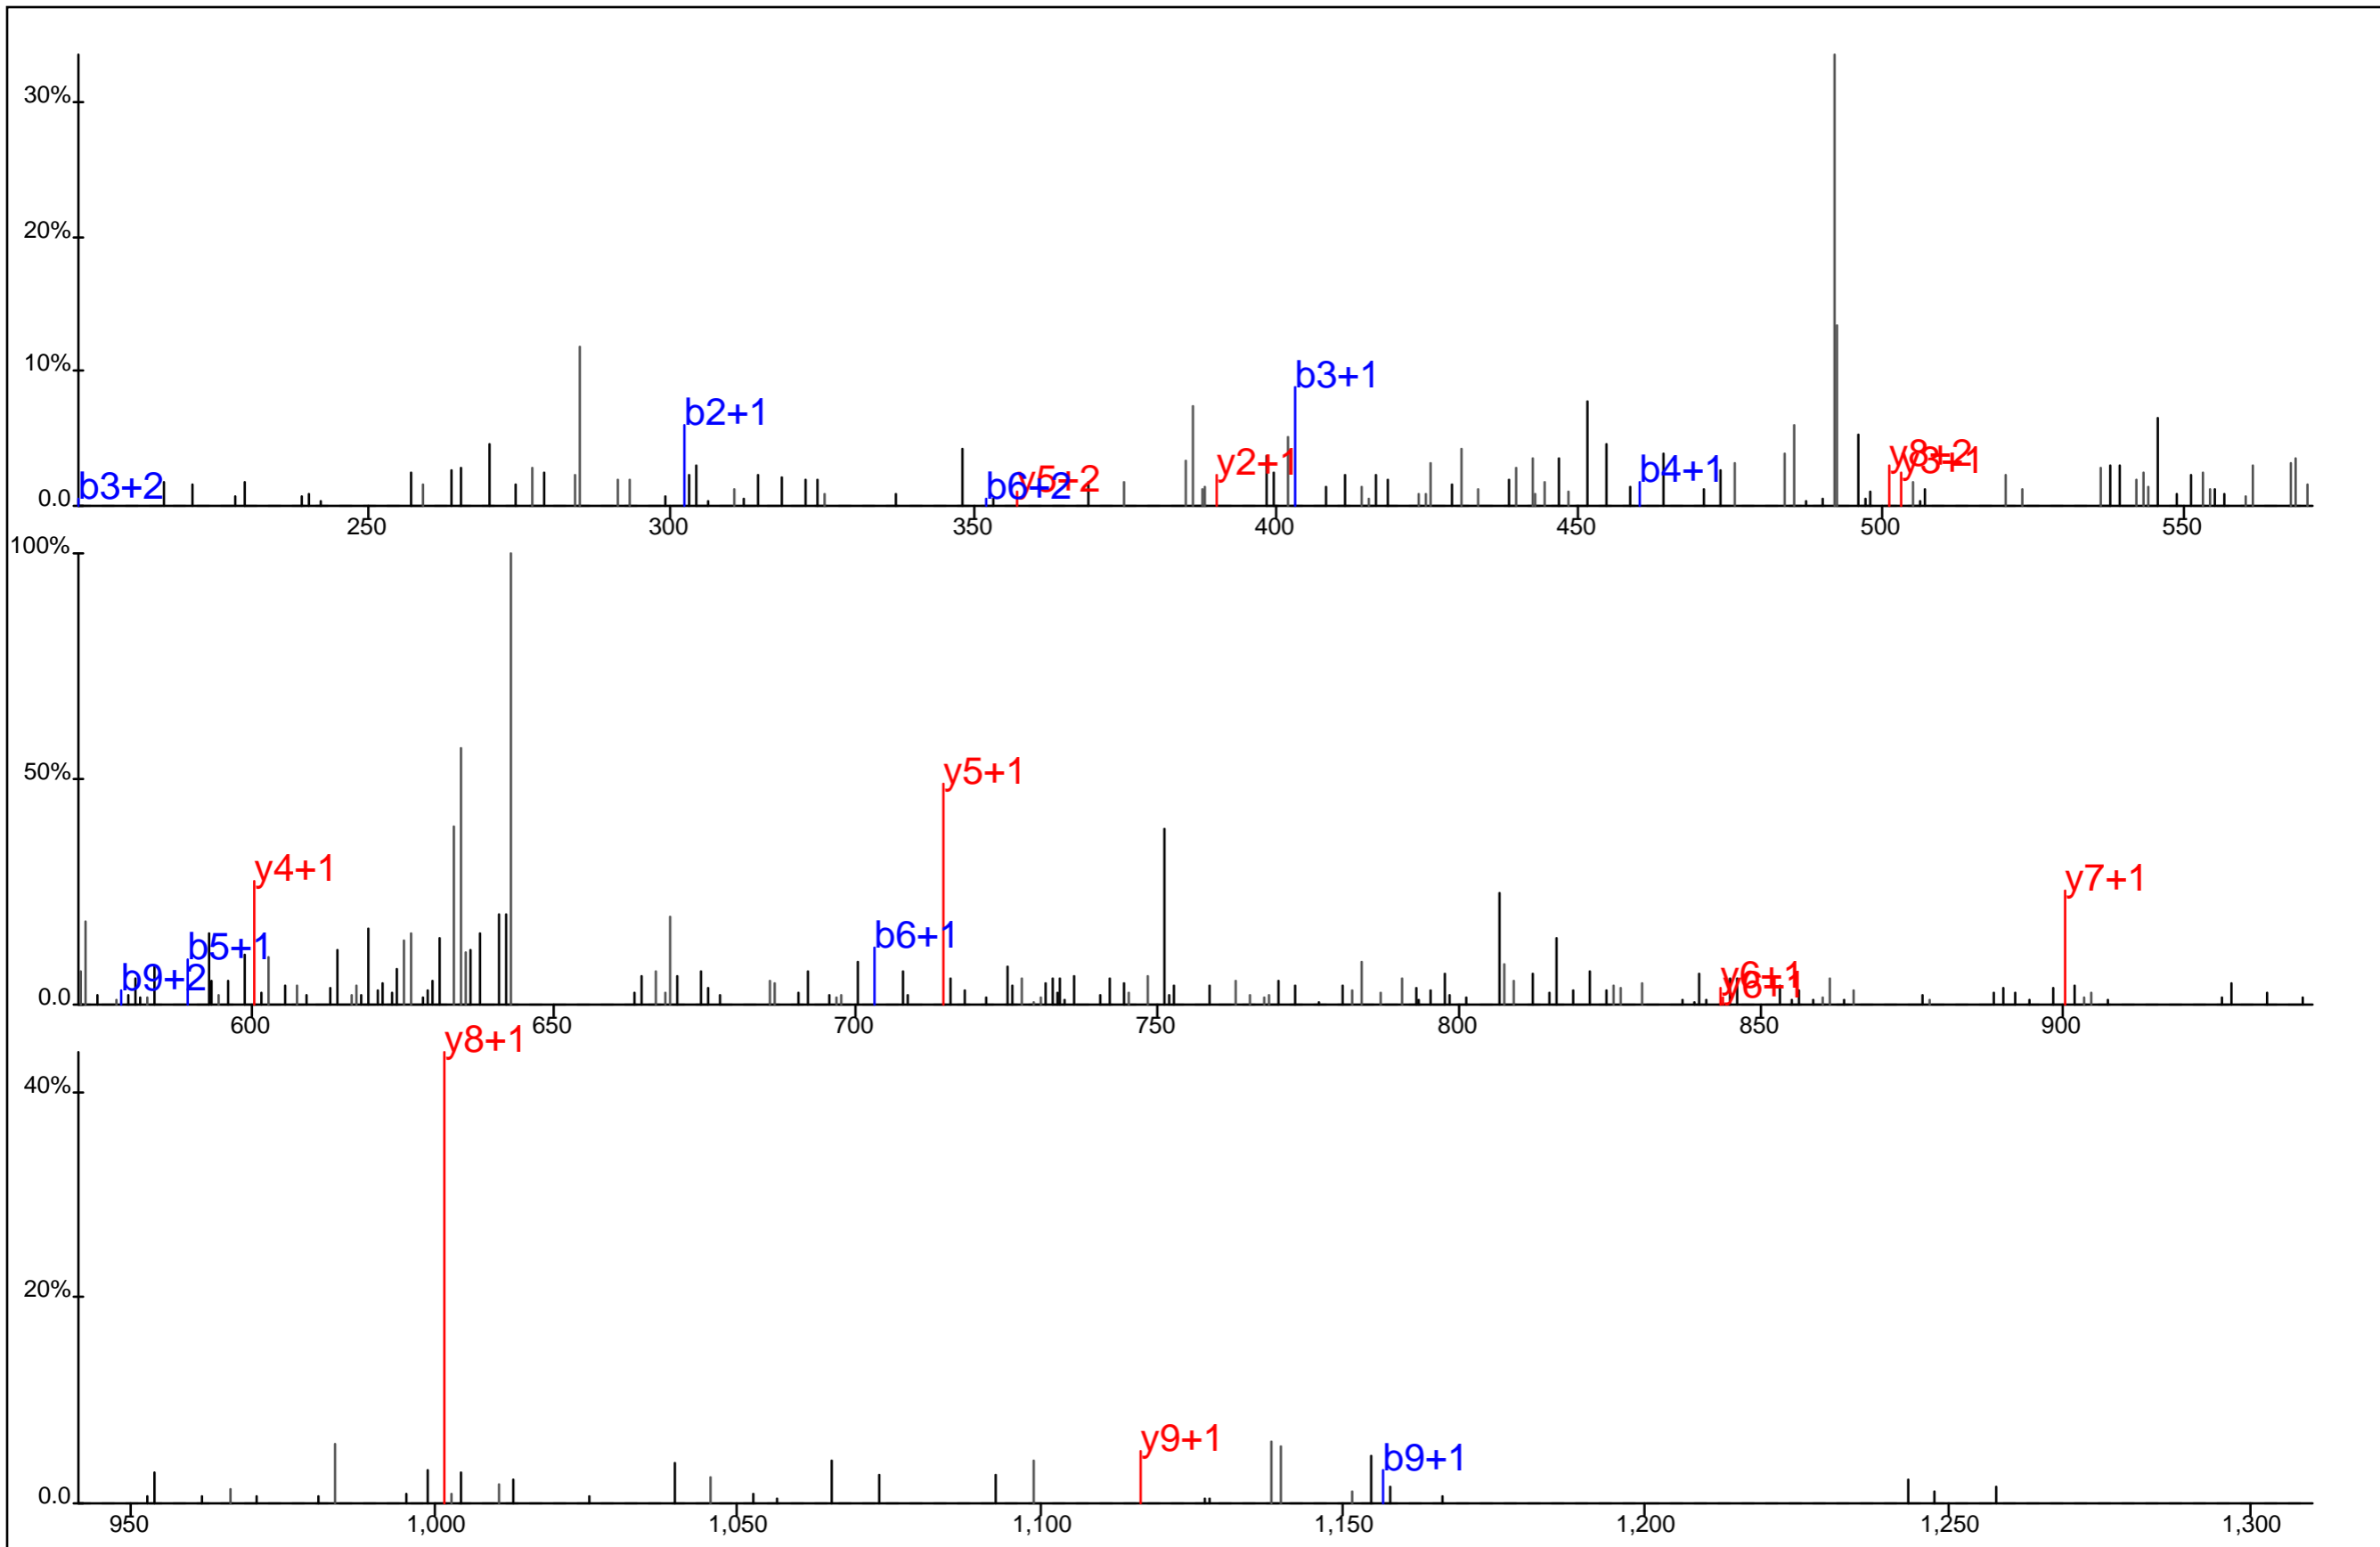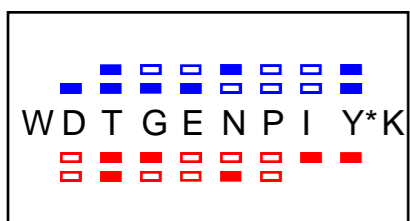

Protein Name: Beta1 integrin  
 gi Accession: 124963  
 Precursor Mass: 651.7782+2  
 Delta Mass: 6.854 ppm  
 XCorr: 21.71

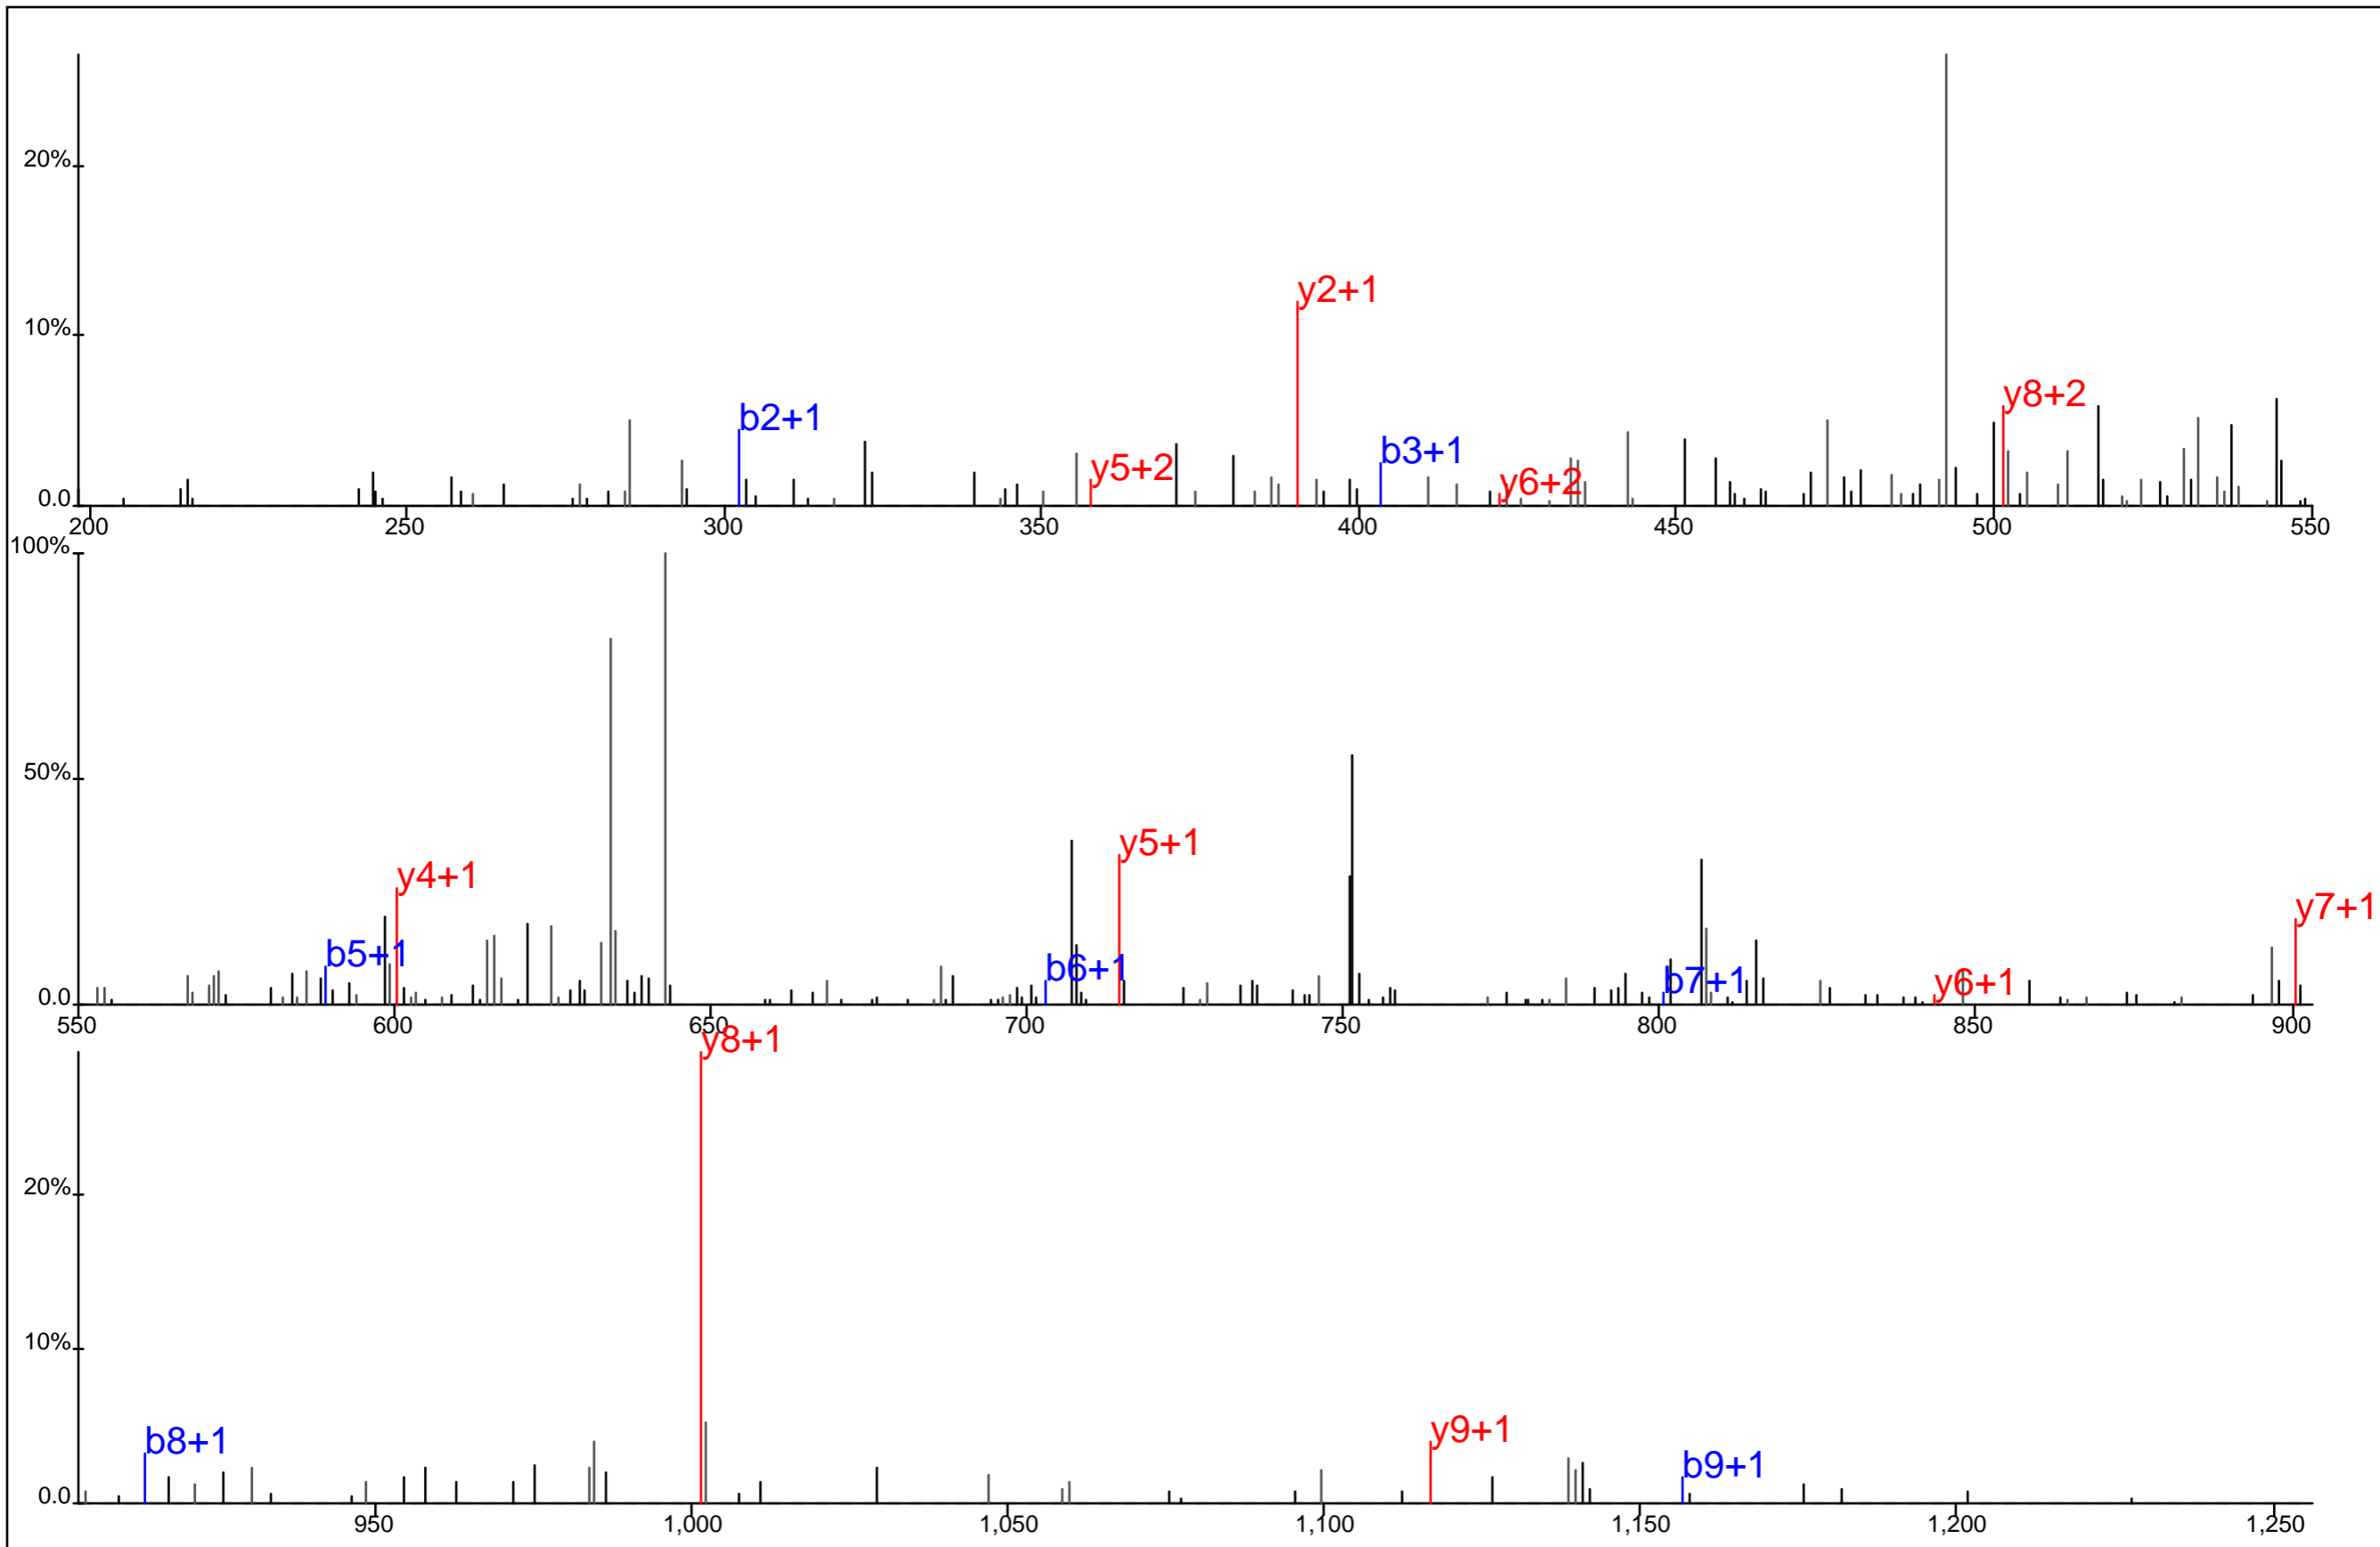

■ ■ □ □ □ □ □ □  
 W D T G E N P I Y\* K  
□ □ □ □ □ □ □ □

Protein Name: Beta1 integrin  
 gi Accession: 124963  
 Precursor Mass: 651.7761+2  
 Delta Mass: 3.576 ppm  
 XCorr: 25.12



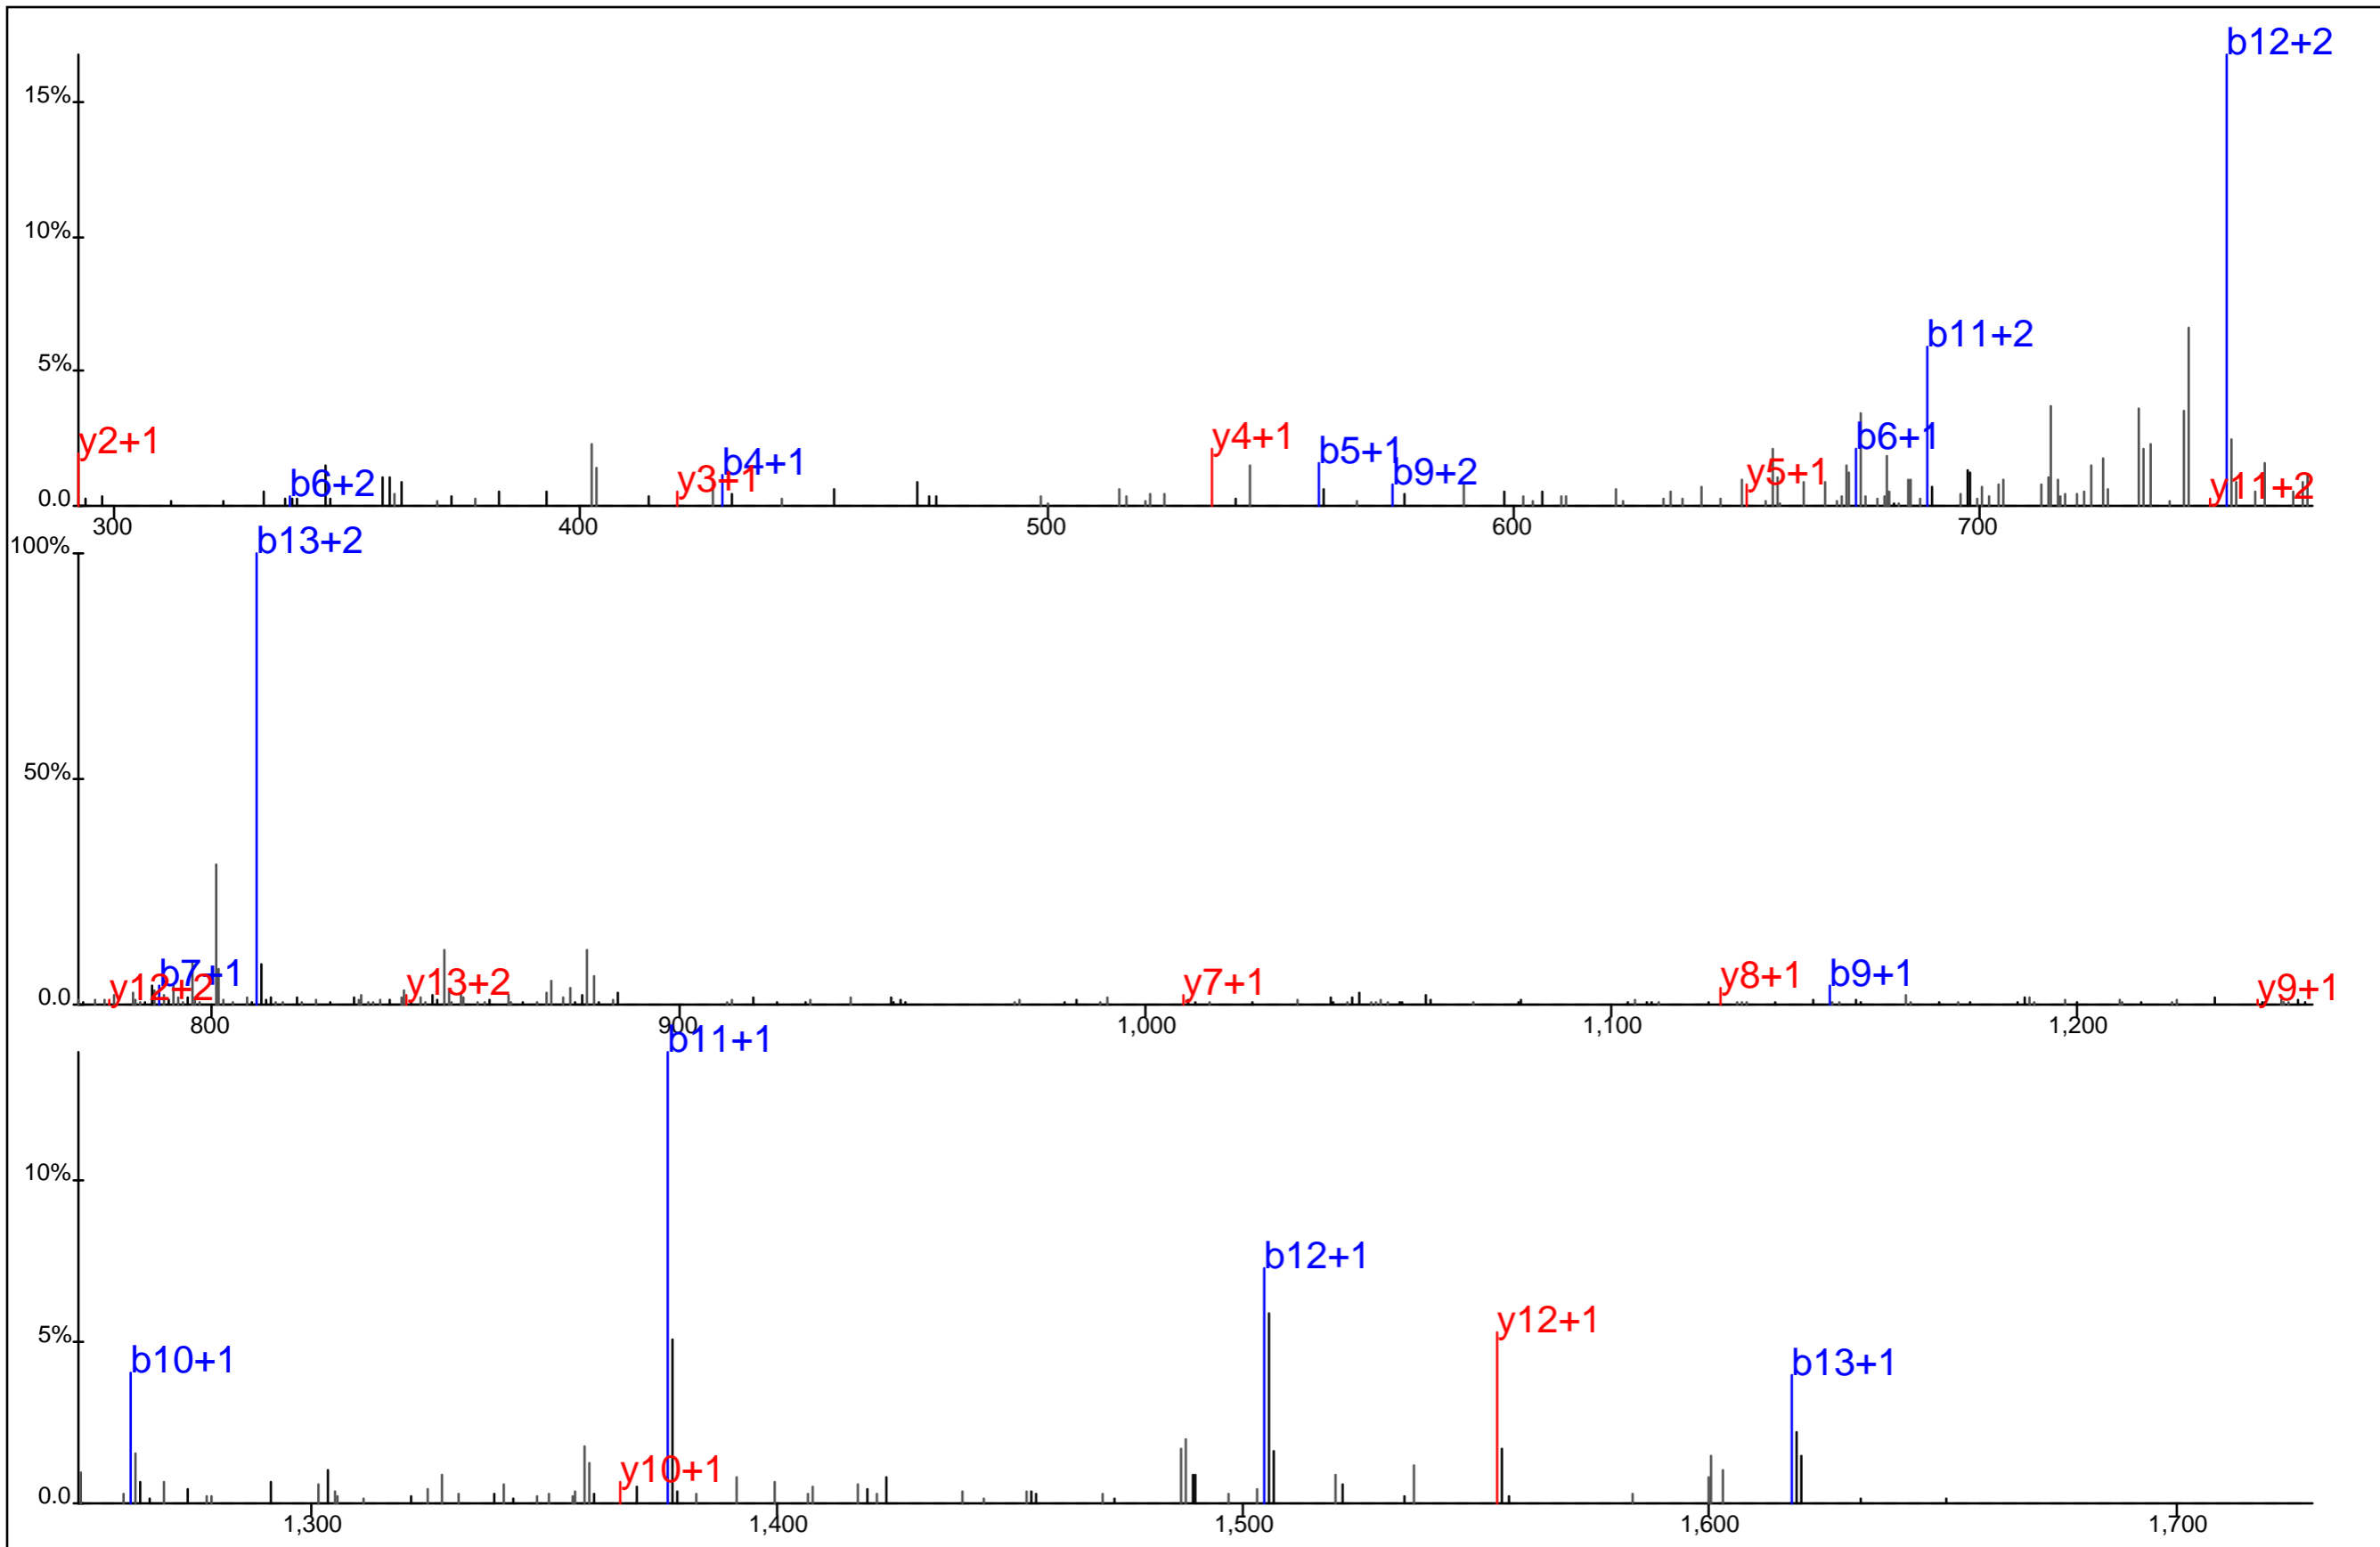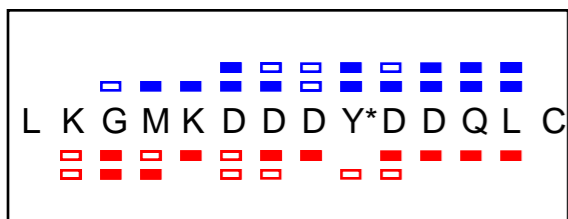

Protein Name: Beta arrestin 2  
 gi Accession: 21757343  
 Precursor Mass: 898.3492+2  
 Delta Mass: 0.190 ppm  
 XCorr: 44.68

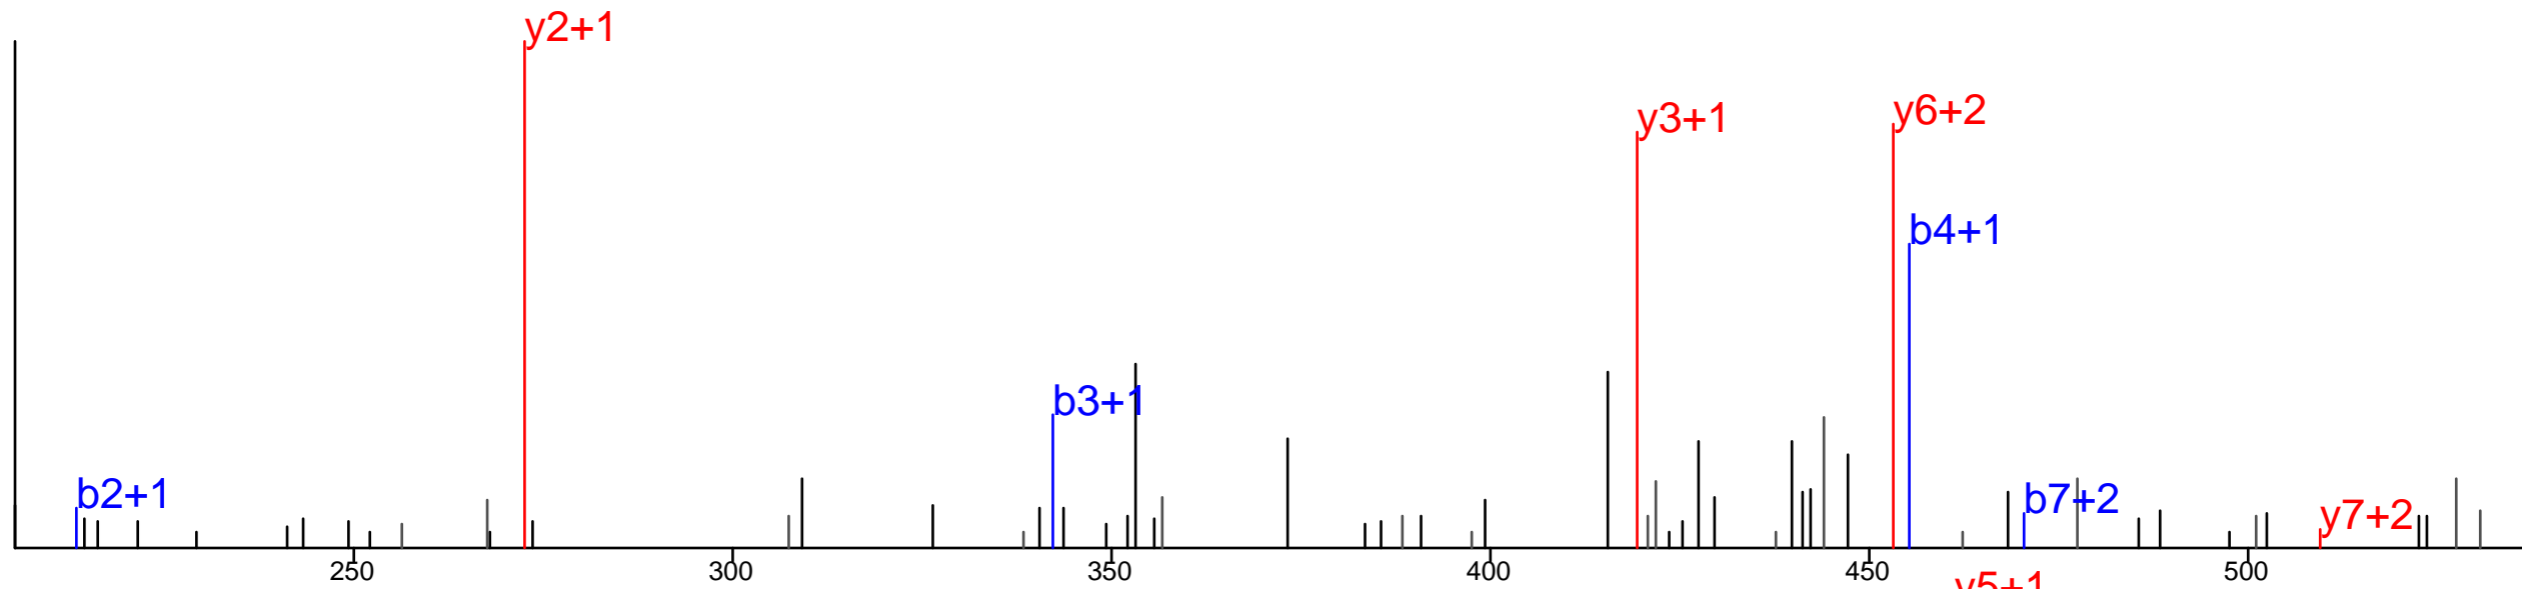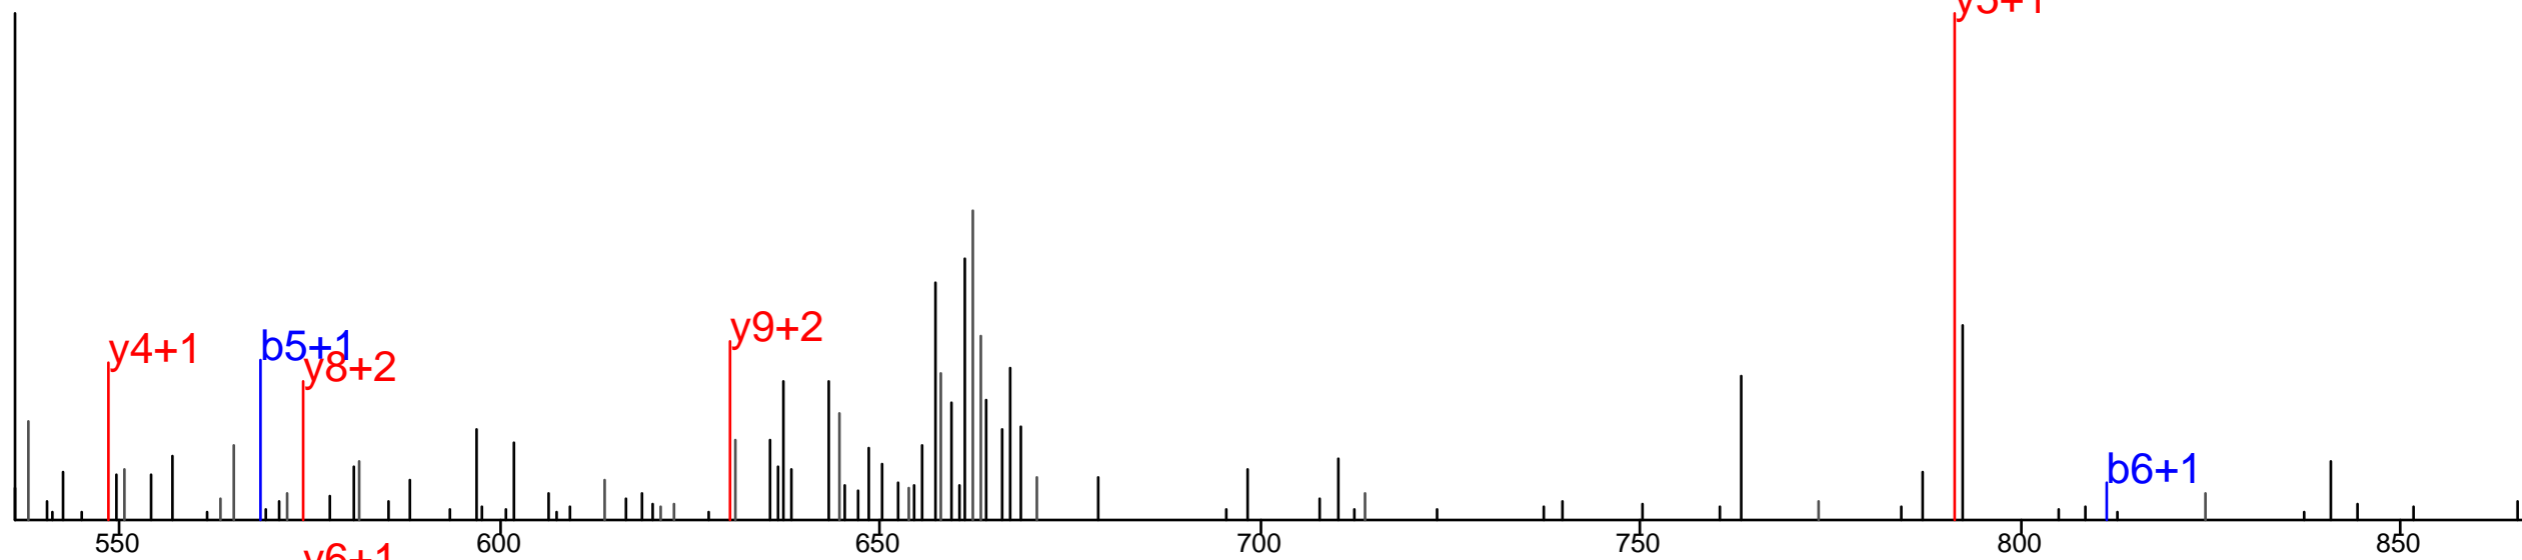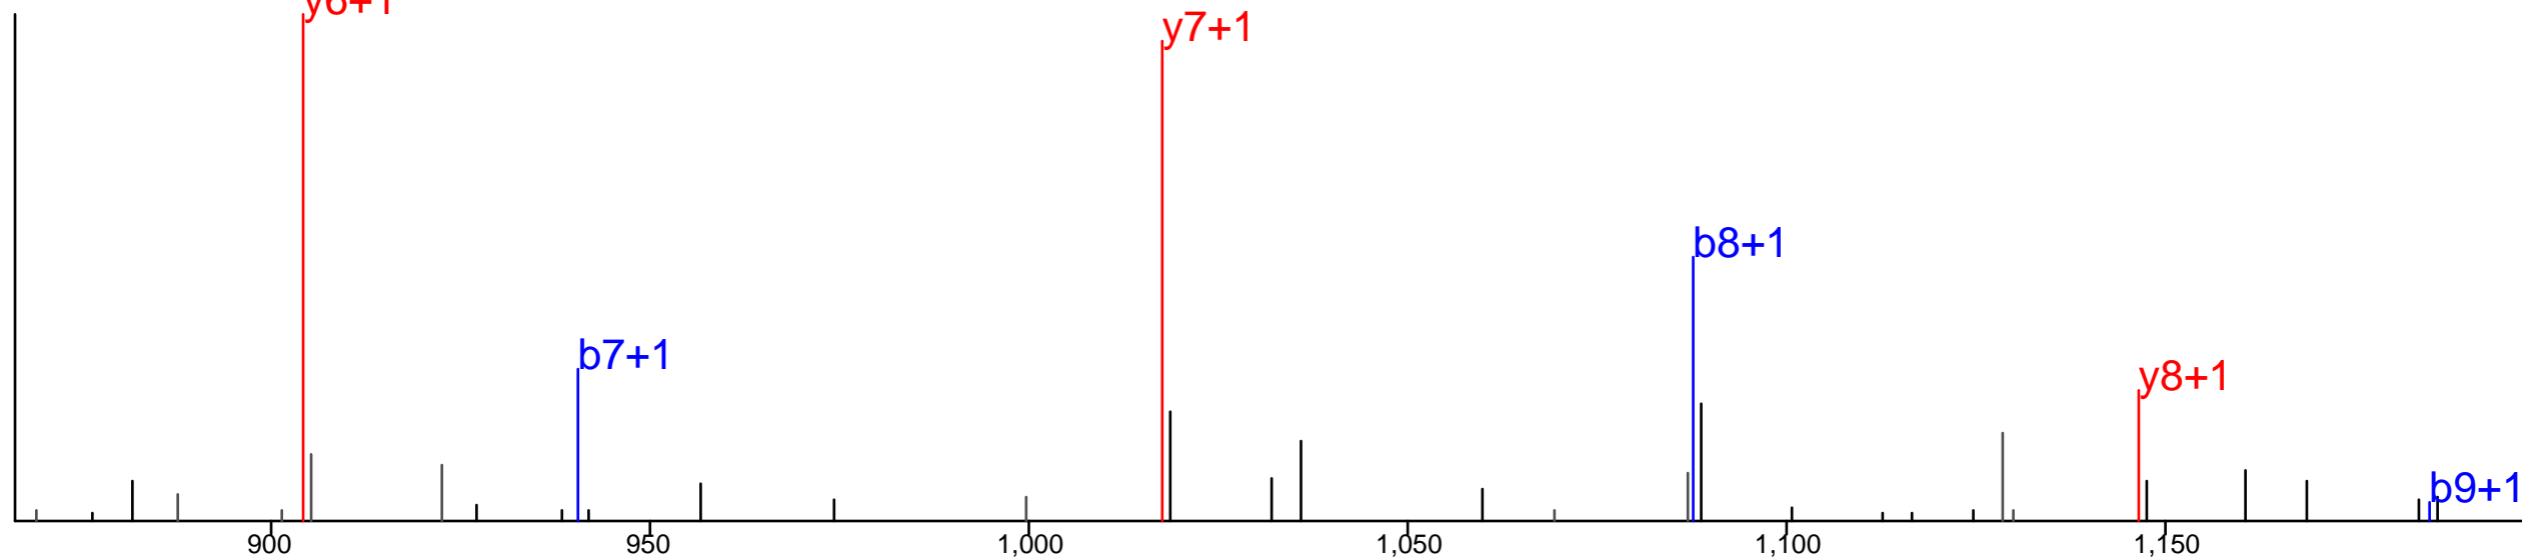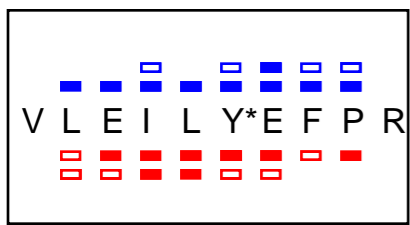

Protein Name: C10orf28  
 gi Accession: 71648680  
 Precursor Mass: 679.8438+2  
 Delta Mass: 3.436 ppm  
 XCorr: 48.18



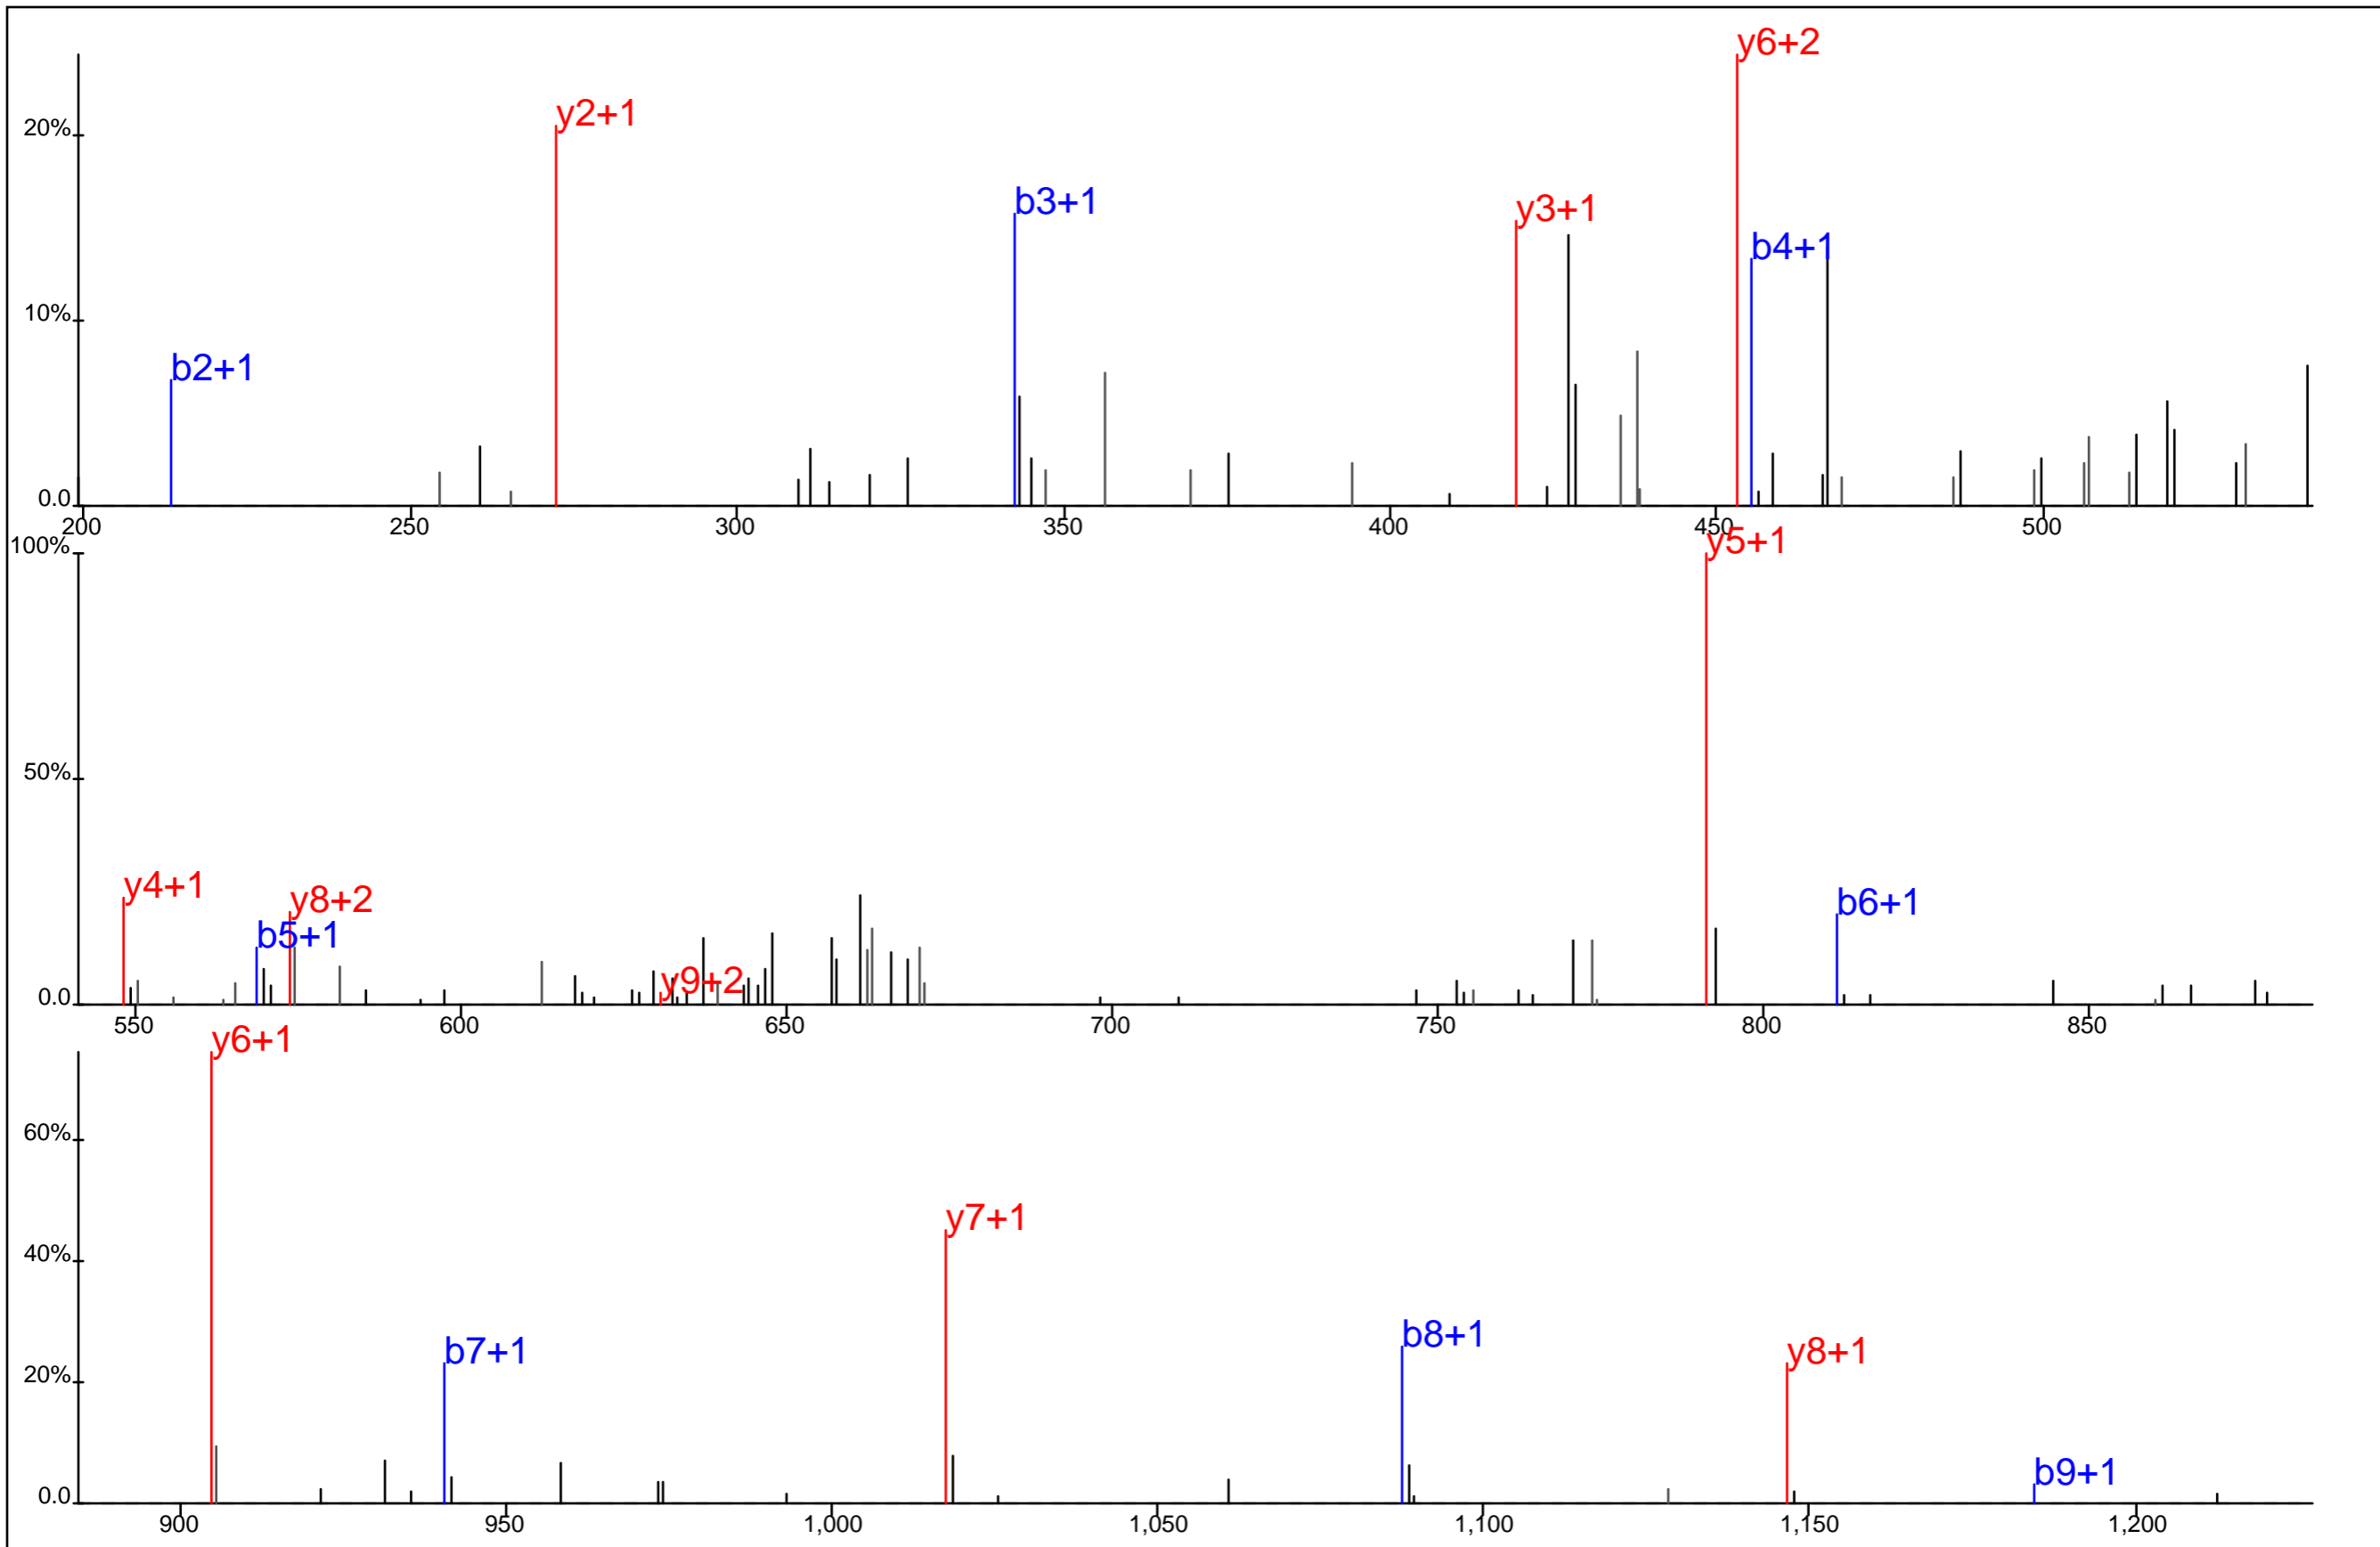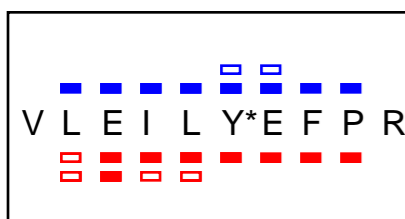

Protein Name: C10orf28  
 gi Accession: 71648680  
 Precursor Mass: 679.8434+2  
 Delta Mass: 2.898 ppm  
 XCorr: 51.75

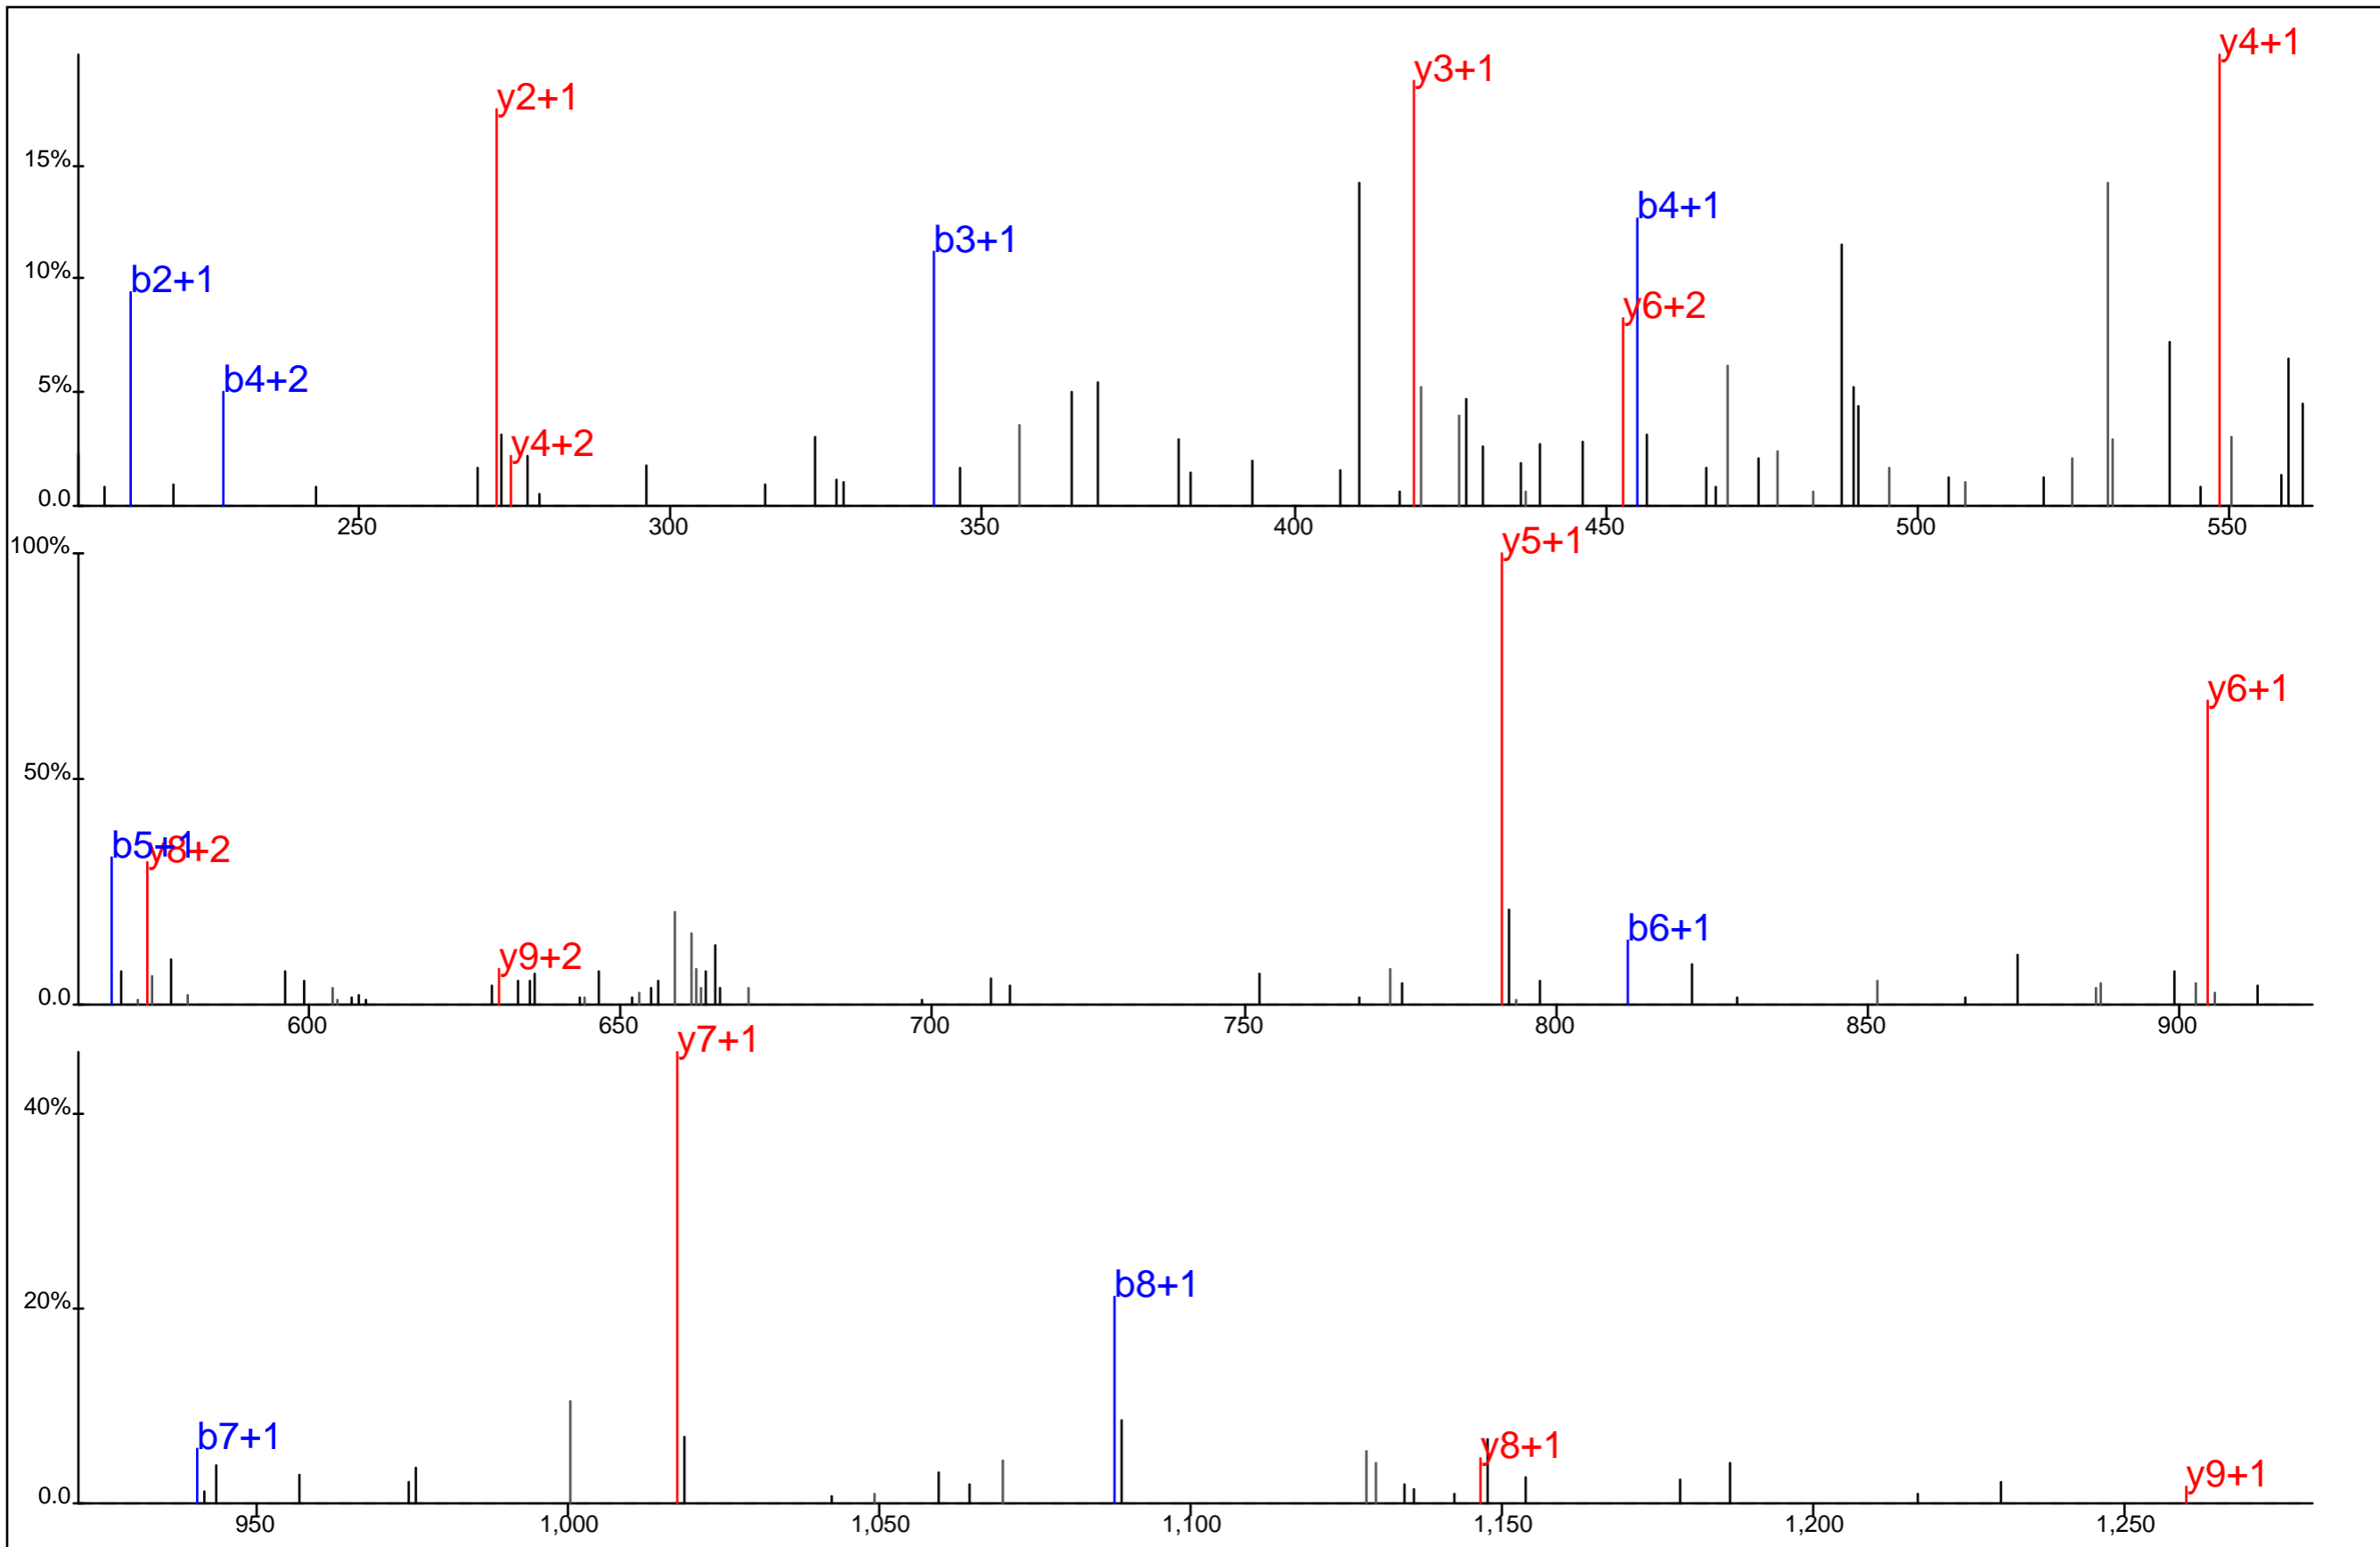

■ ■ ■ ■ ■ ■ ■ ■  
 V L E I L Y\* E F P R  
■ ■ ■ ■ ■ ■ ■ ■

Protein Name: C10orf28  
 gi Accession: 71648680  
 Precursor Mass: 679.8449+2  
 Delta Mass: 5.143 ppm  
 XCorr: 50.7

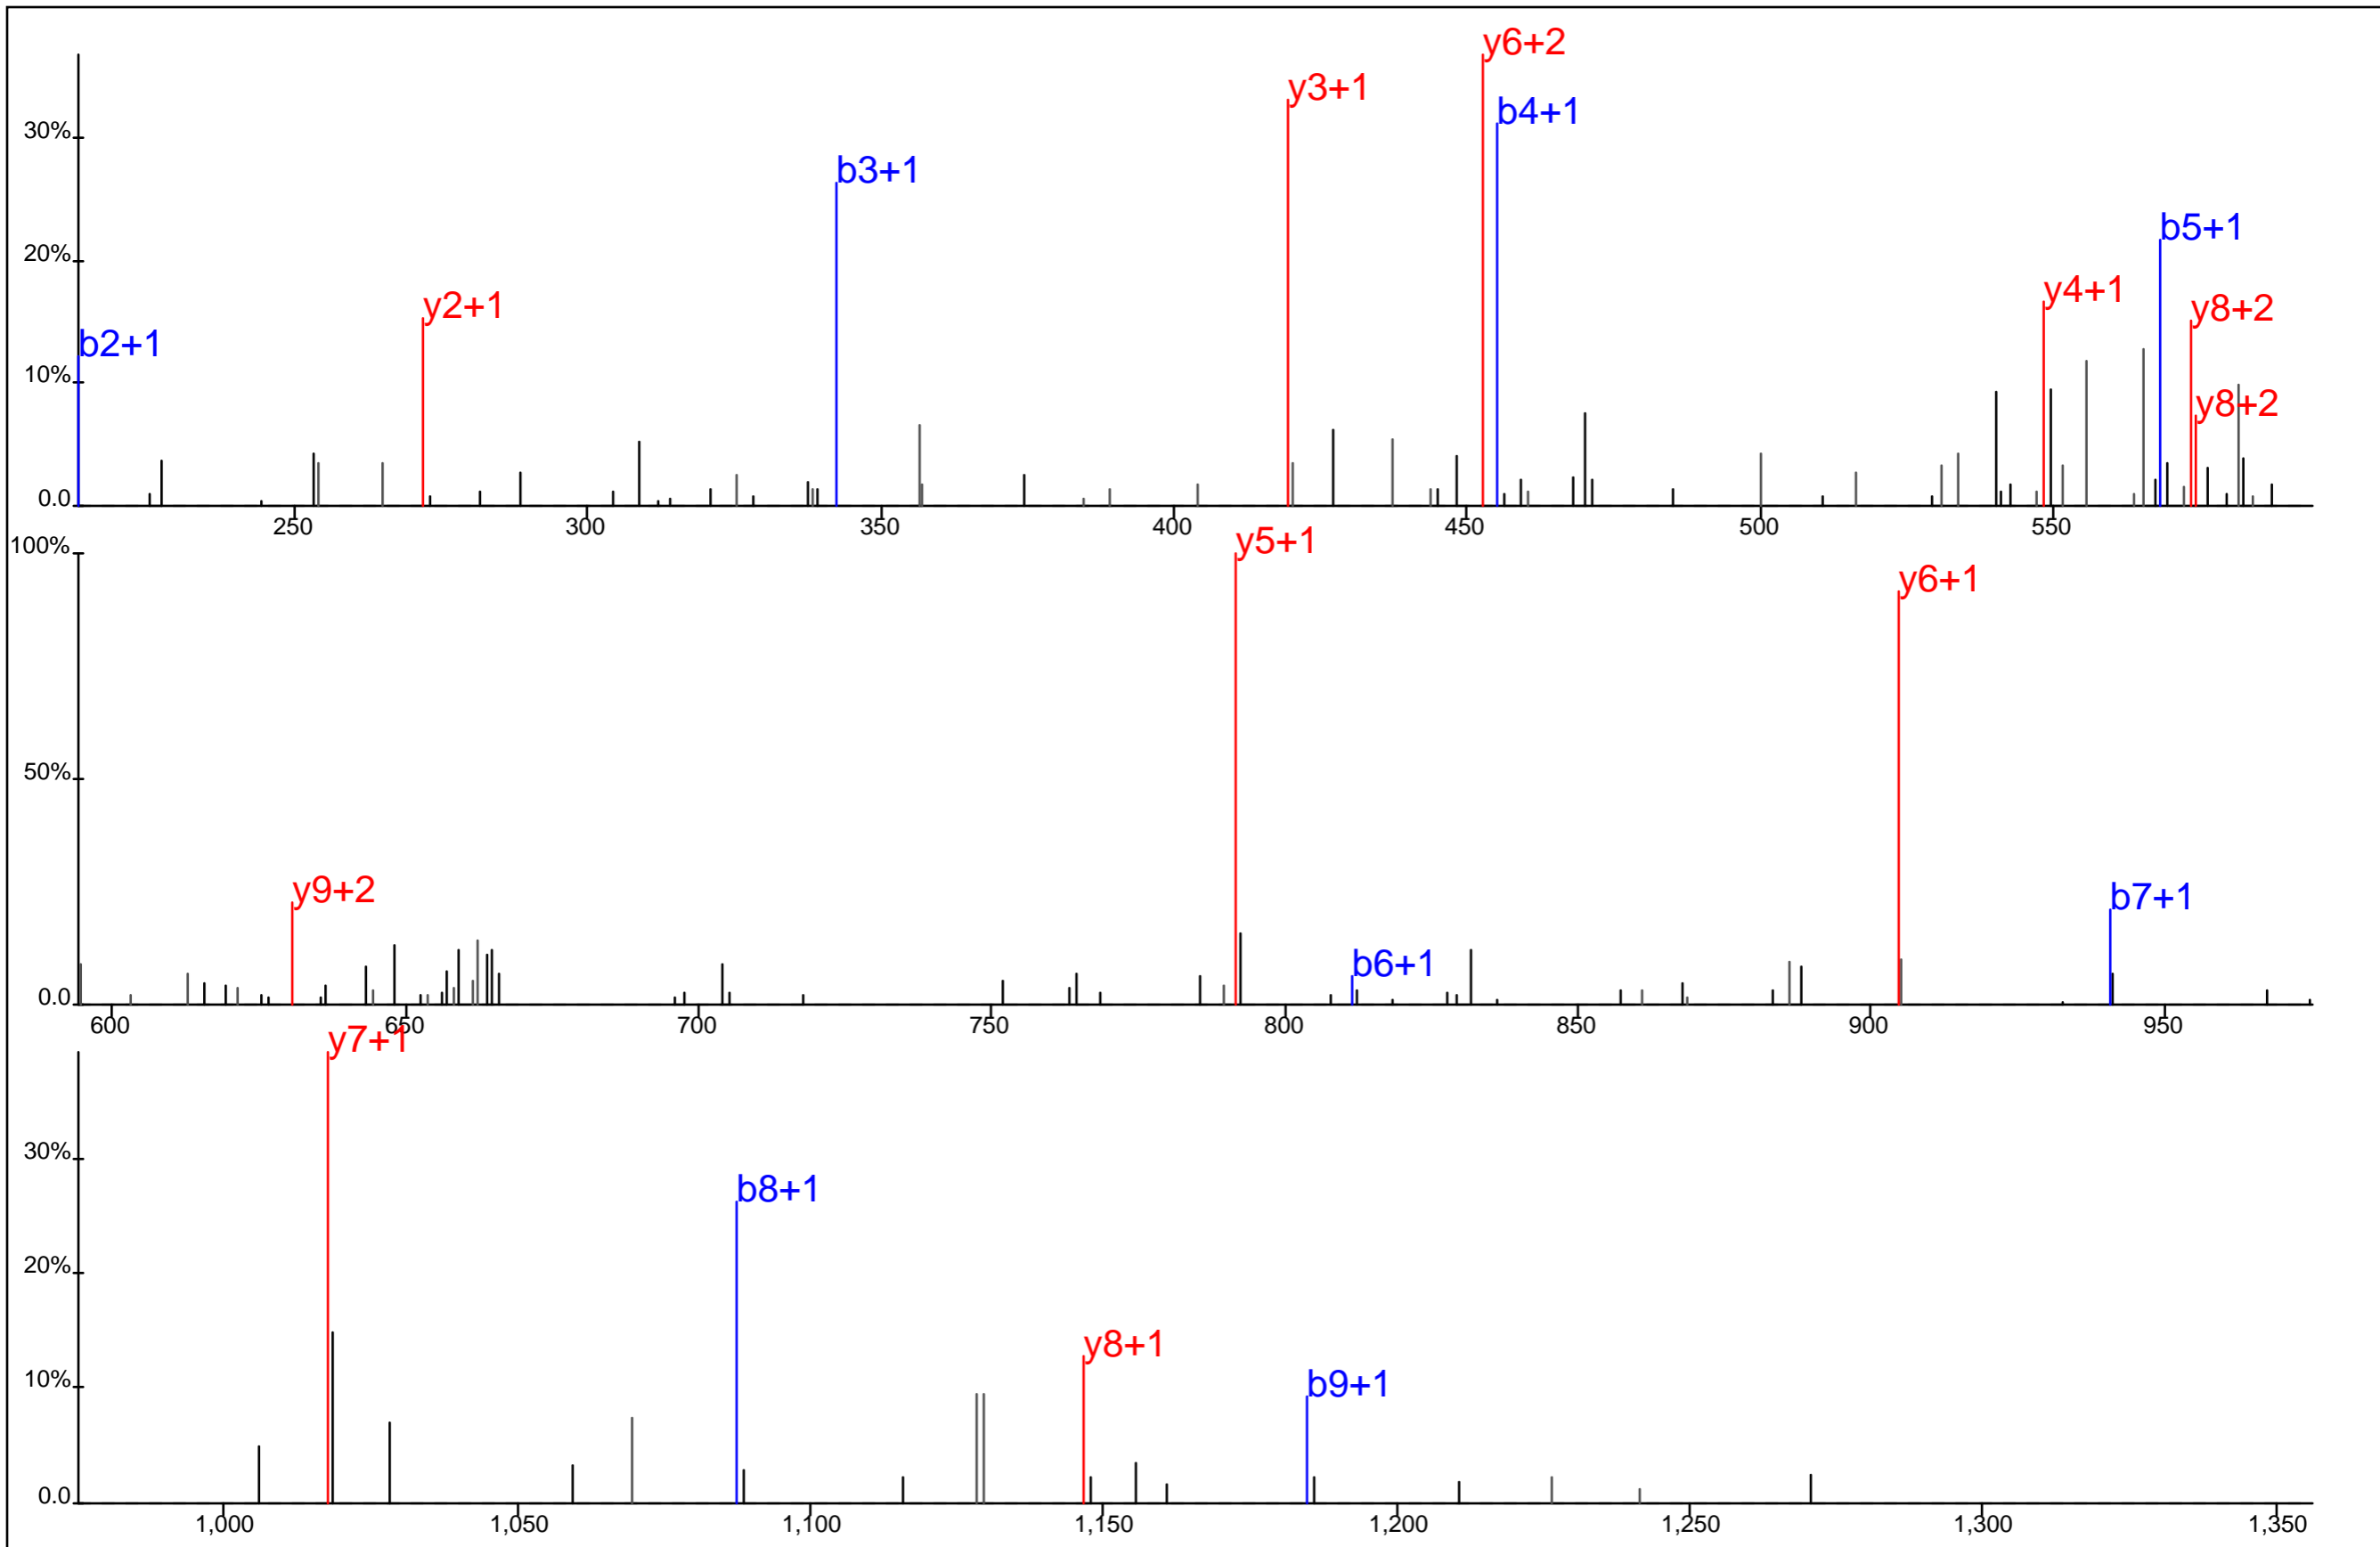

V L E I L Y\* E F P R

Protein Name: C10orf28  
 gi Accession: 71648680  
 Precursor Mass: 679.8450+2  
 Delta Mass: 5.232 ppm  
 XCorr: 50.13

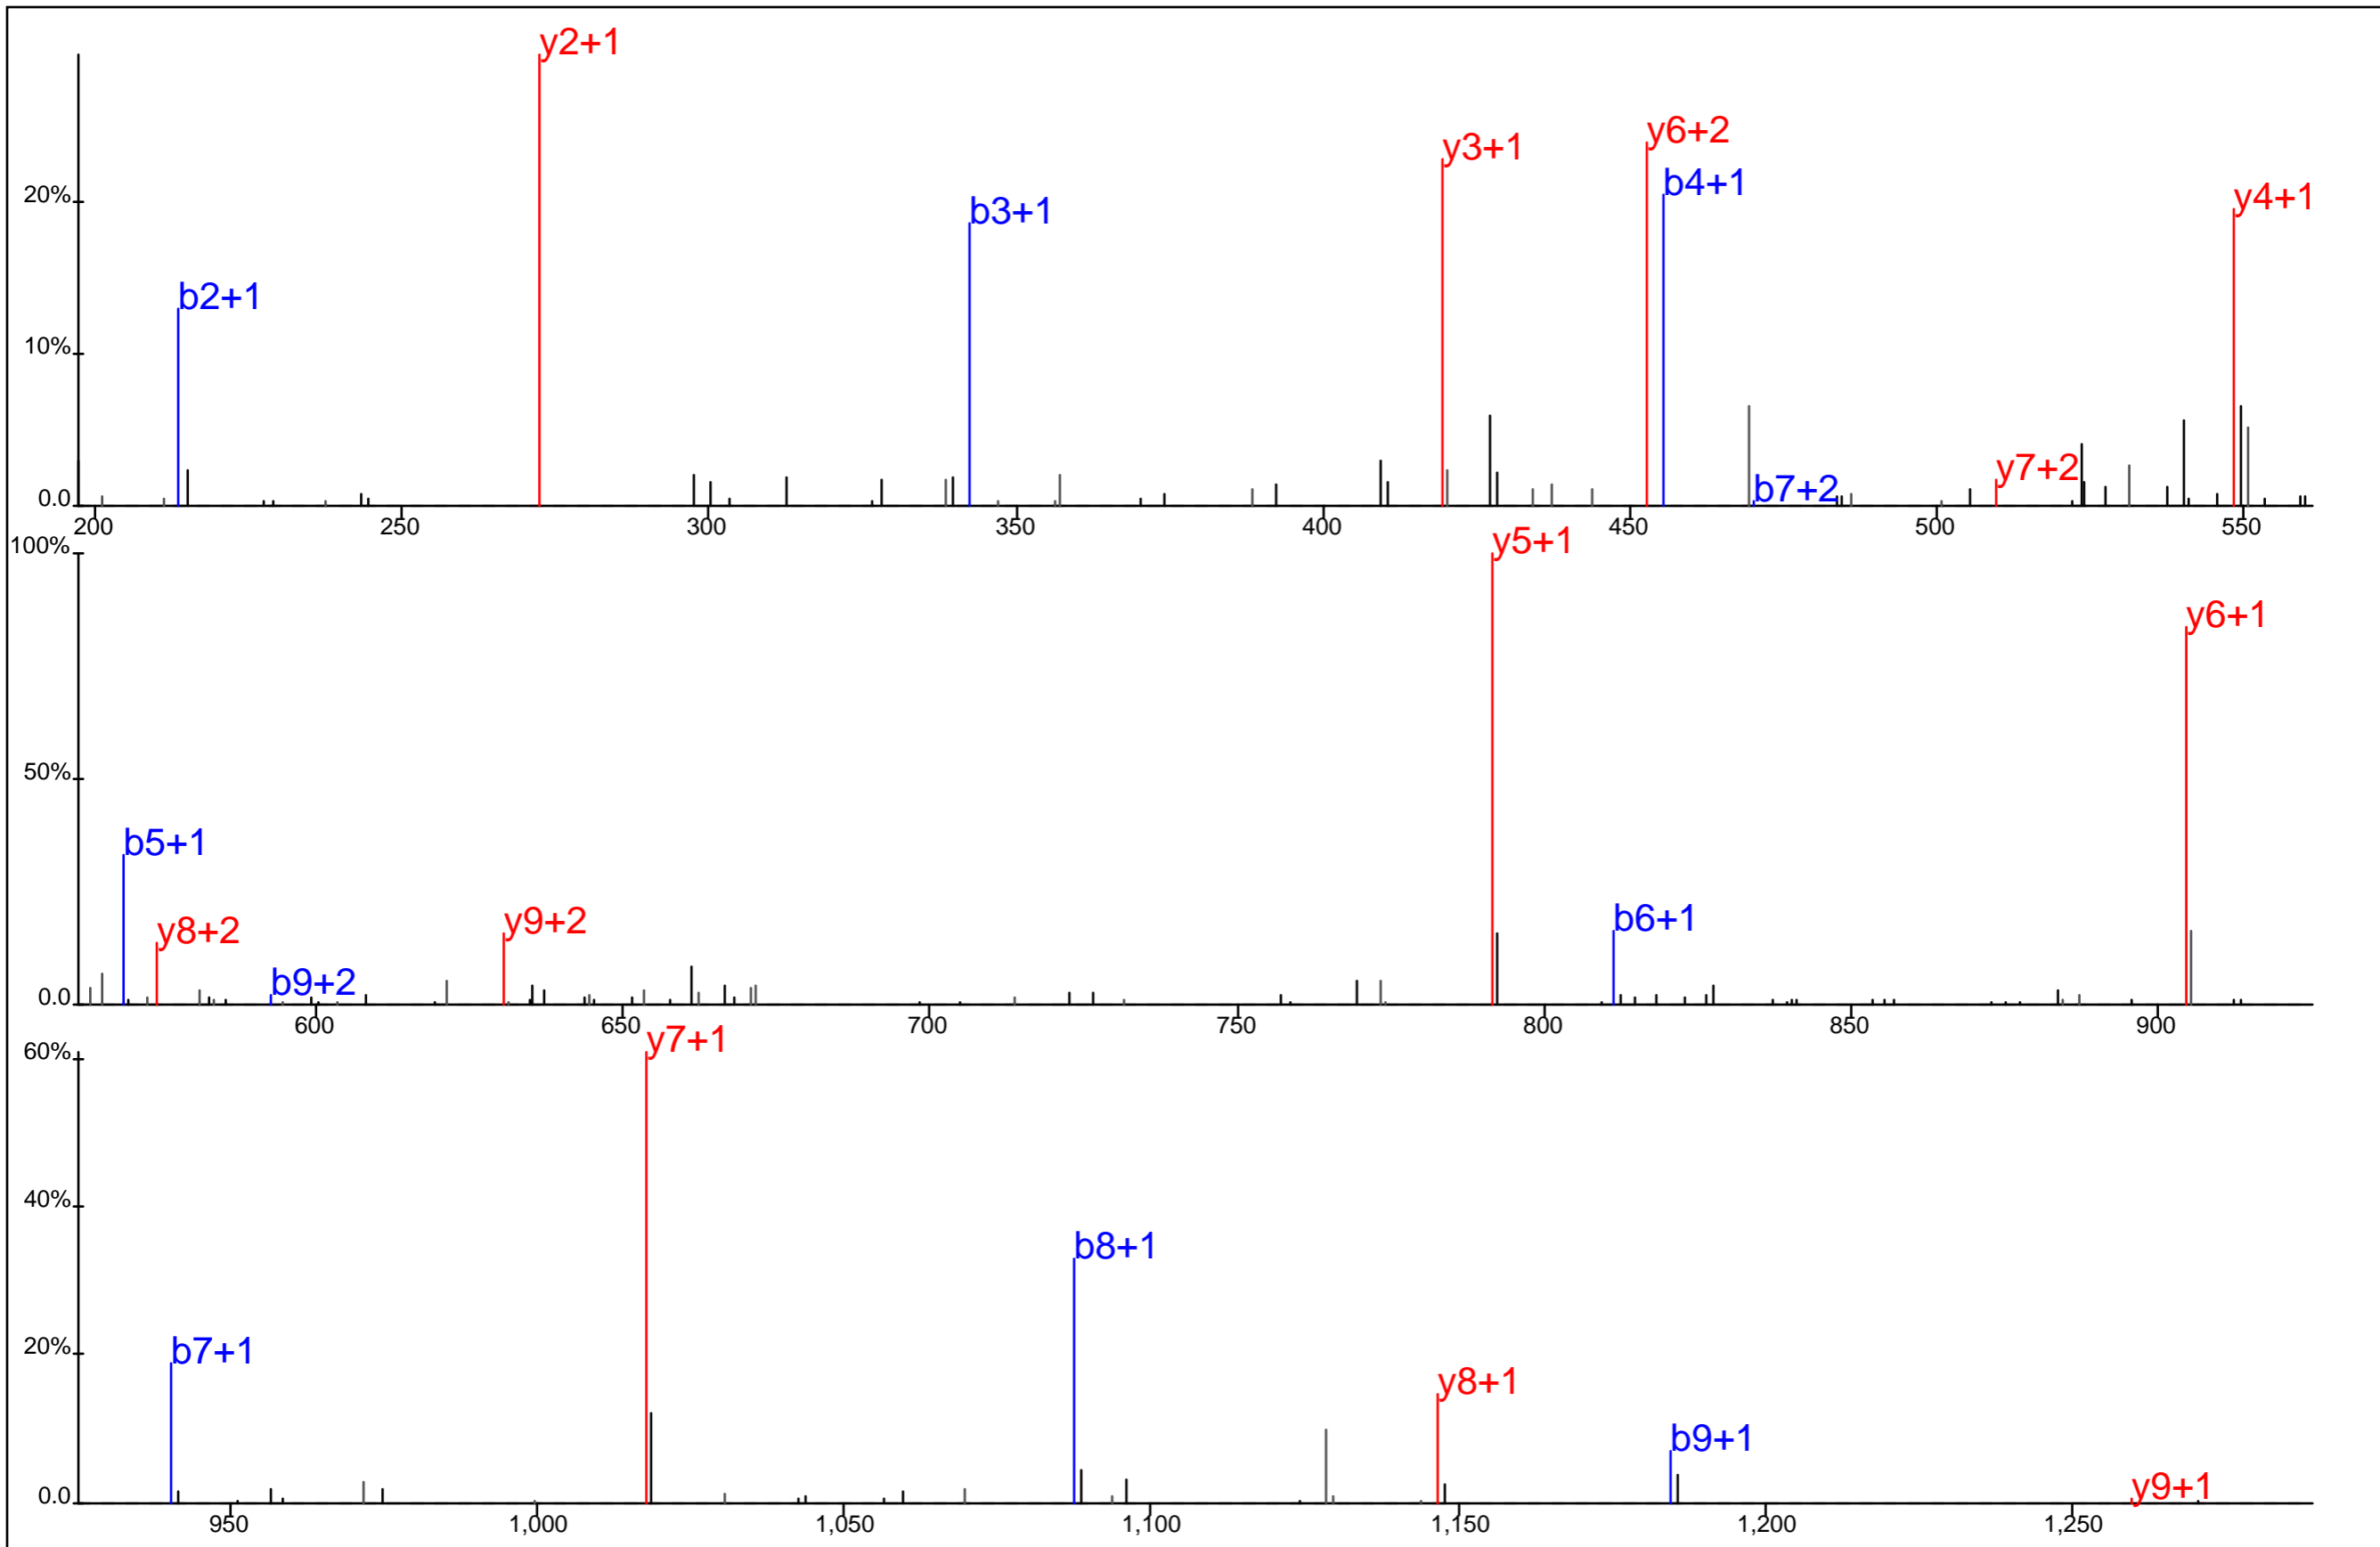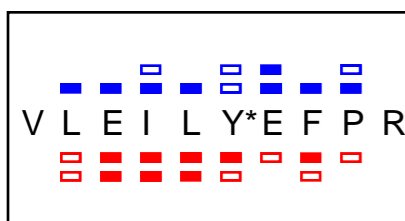

Protein Name: C10orf28  
 gi Accession: 71648680  
 Precursor Mass: 679.8459+2  
 Delta Mass: 6.586 ppm  
 XCorr: 67.43

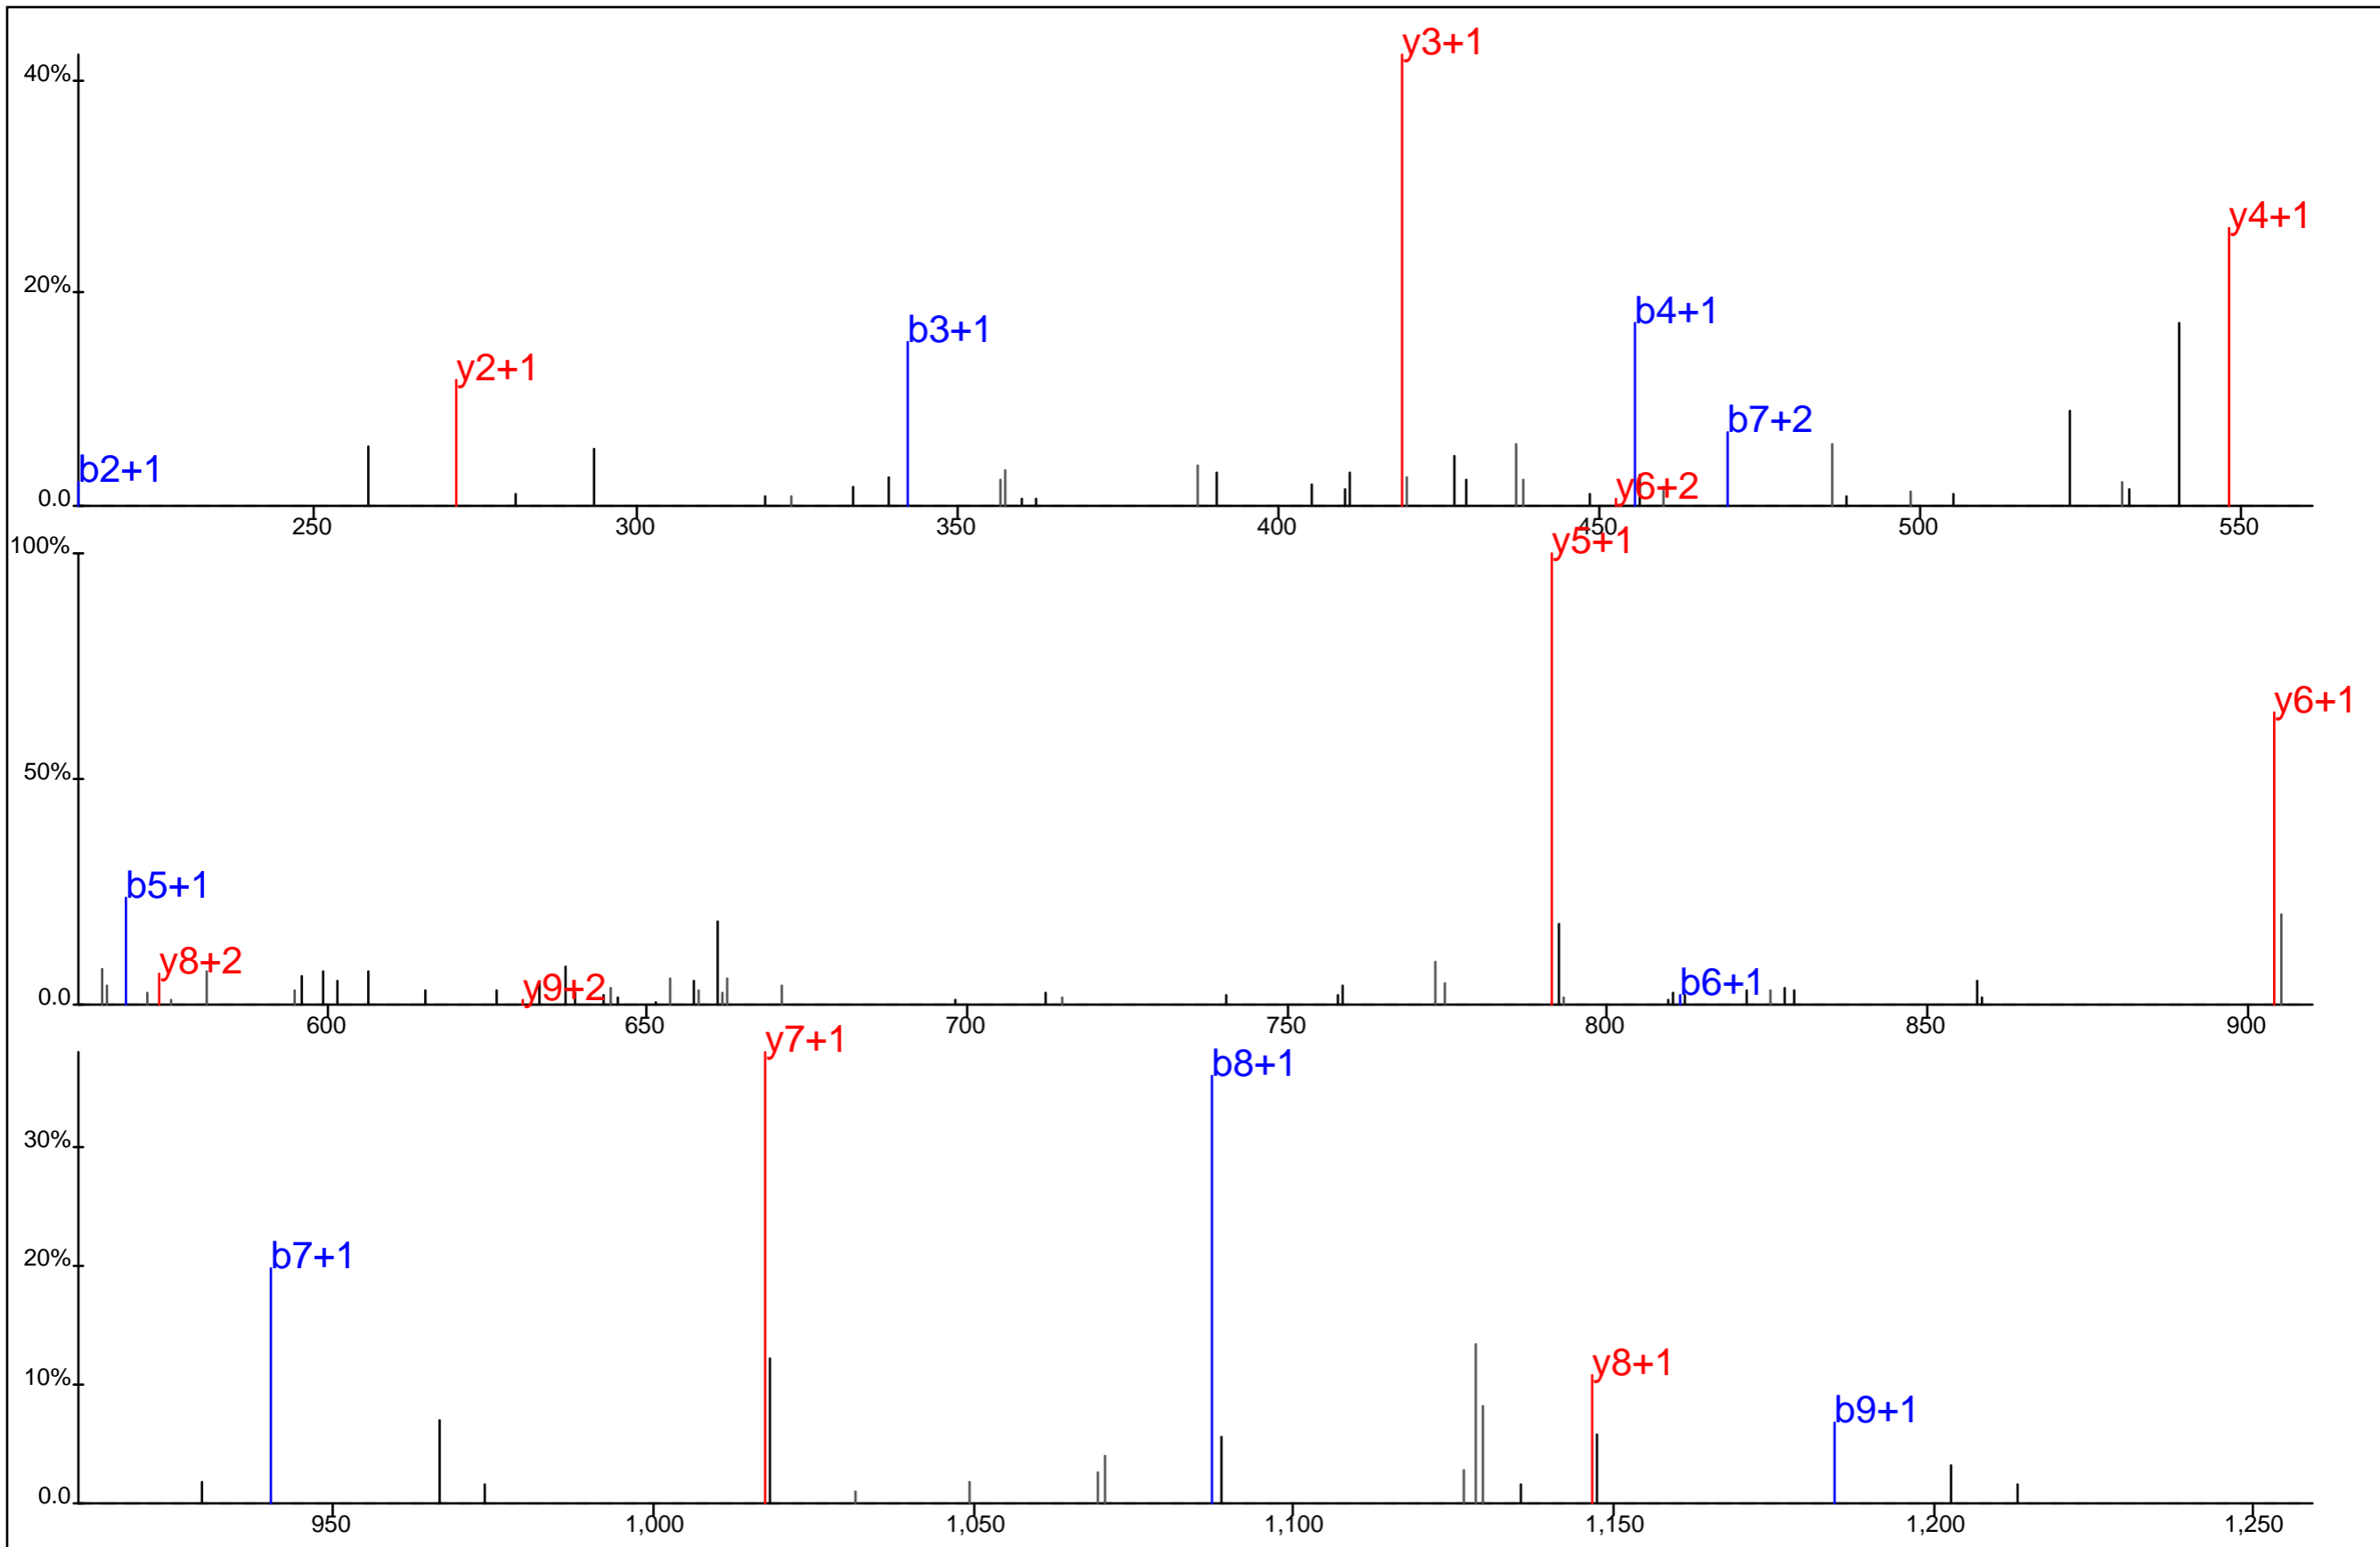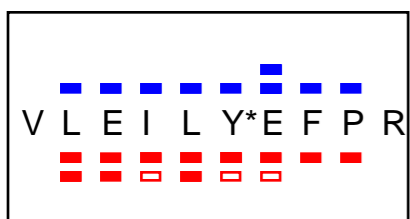

Protein Name: C10orf28  
 gi Accession: 71648680  
 Precursor Mass: 679.8455+2  
 Delta Mass: 6.041 ppm  
 XCorr: 65.71

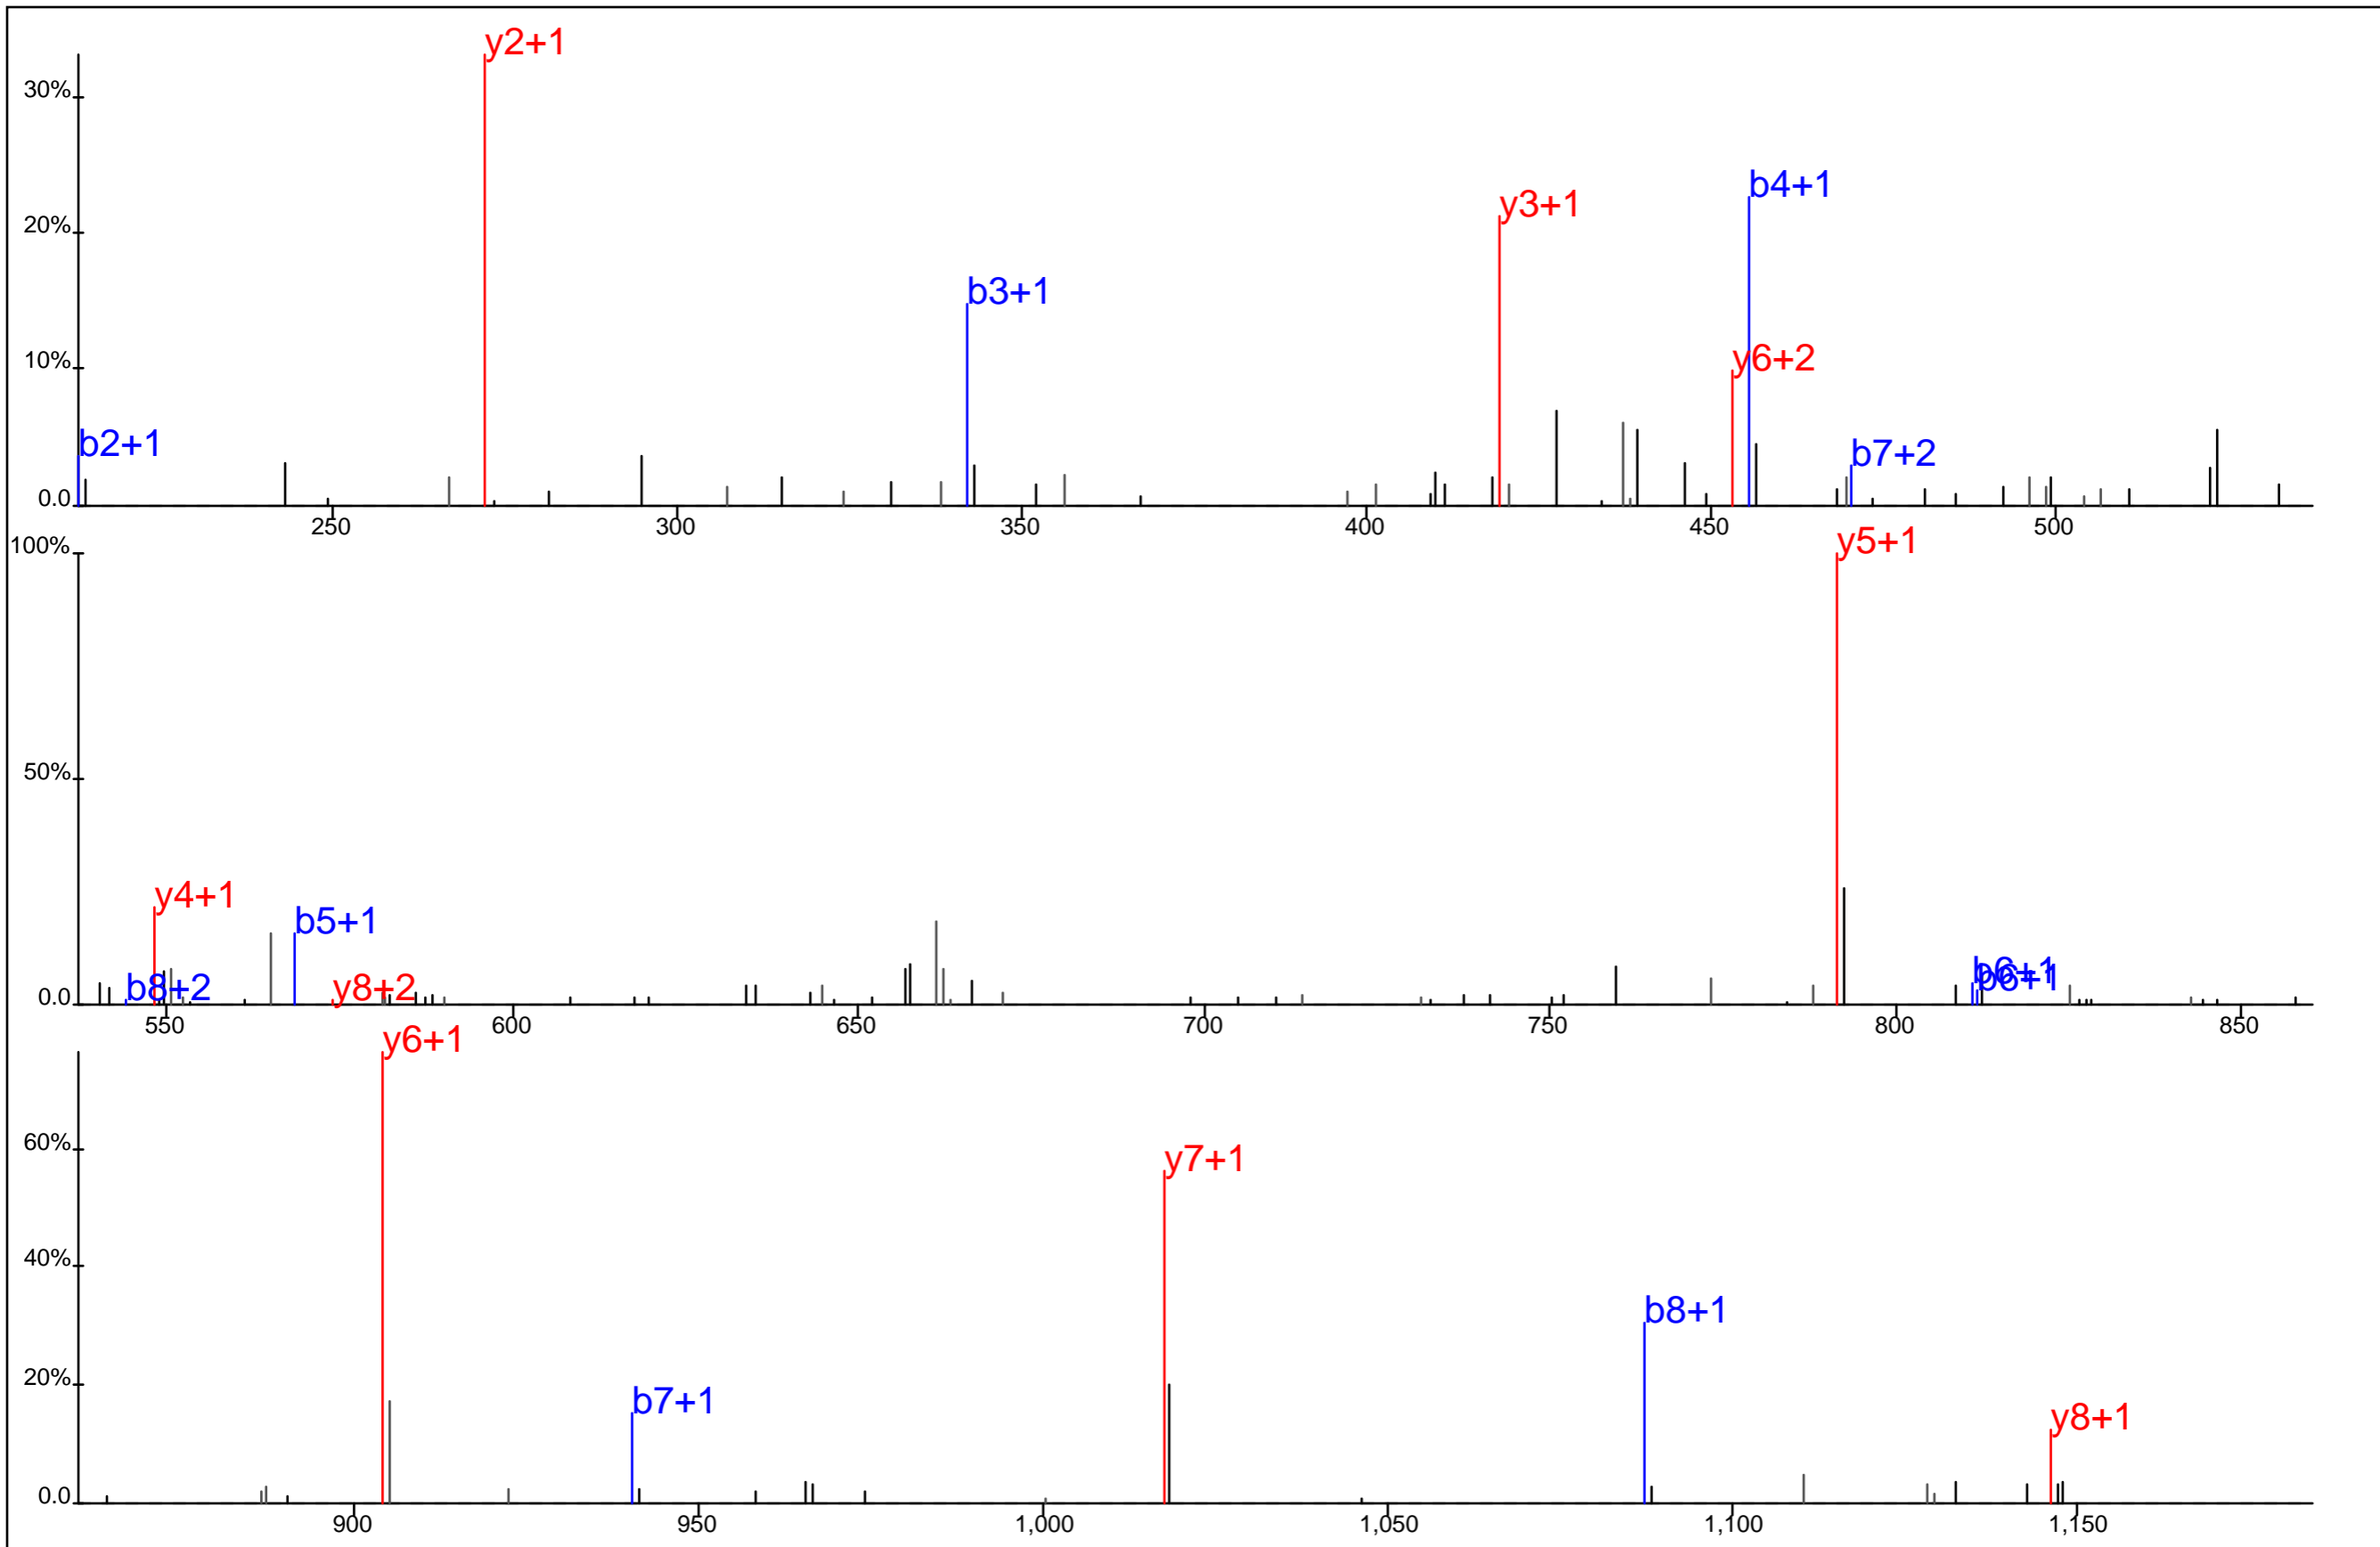

V L E I L Y\* E F P R

Protein Name: C10orf28  
 gi Accession: 71648680  
 Precursor Mass: 679.8445+2  
 Delta Mass: 4.606 ppm  
 XCorr: 59.13

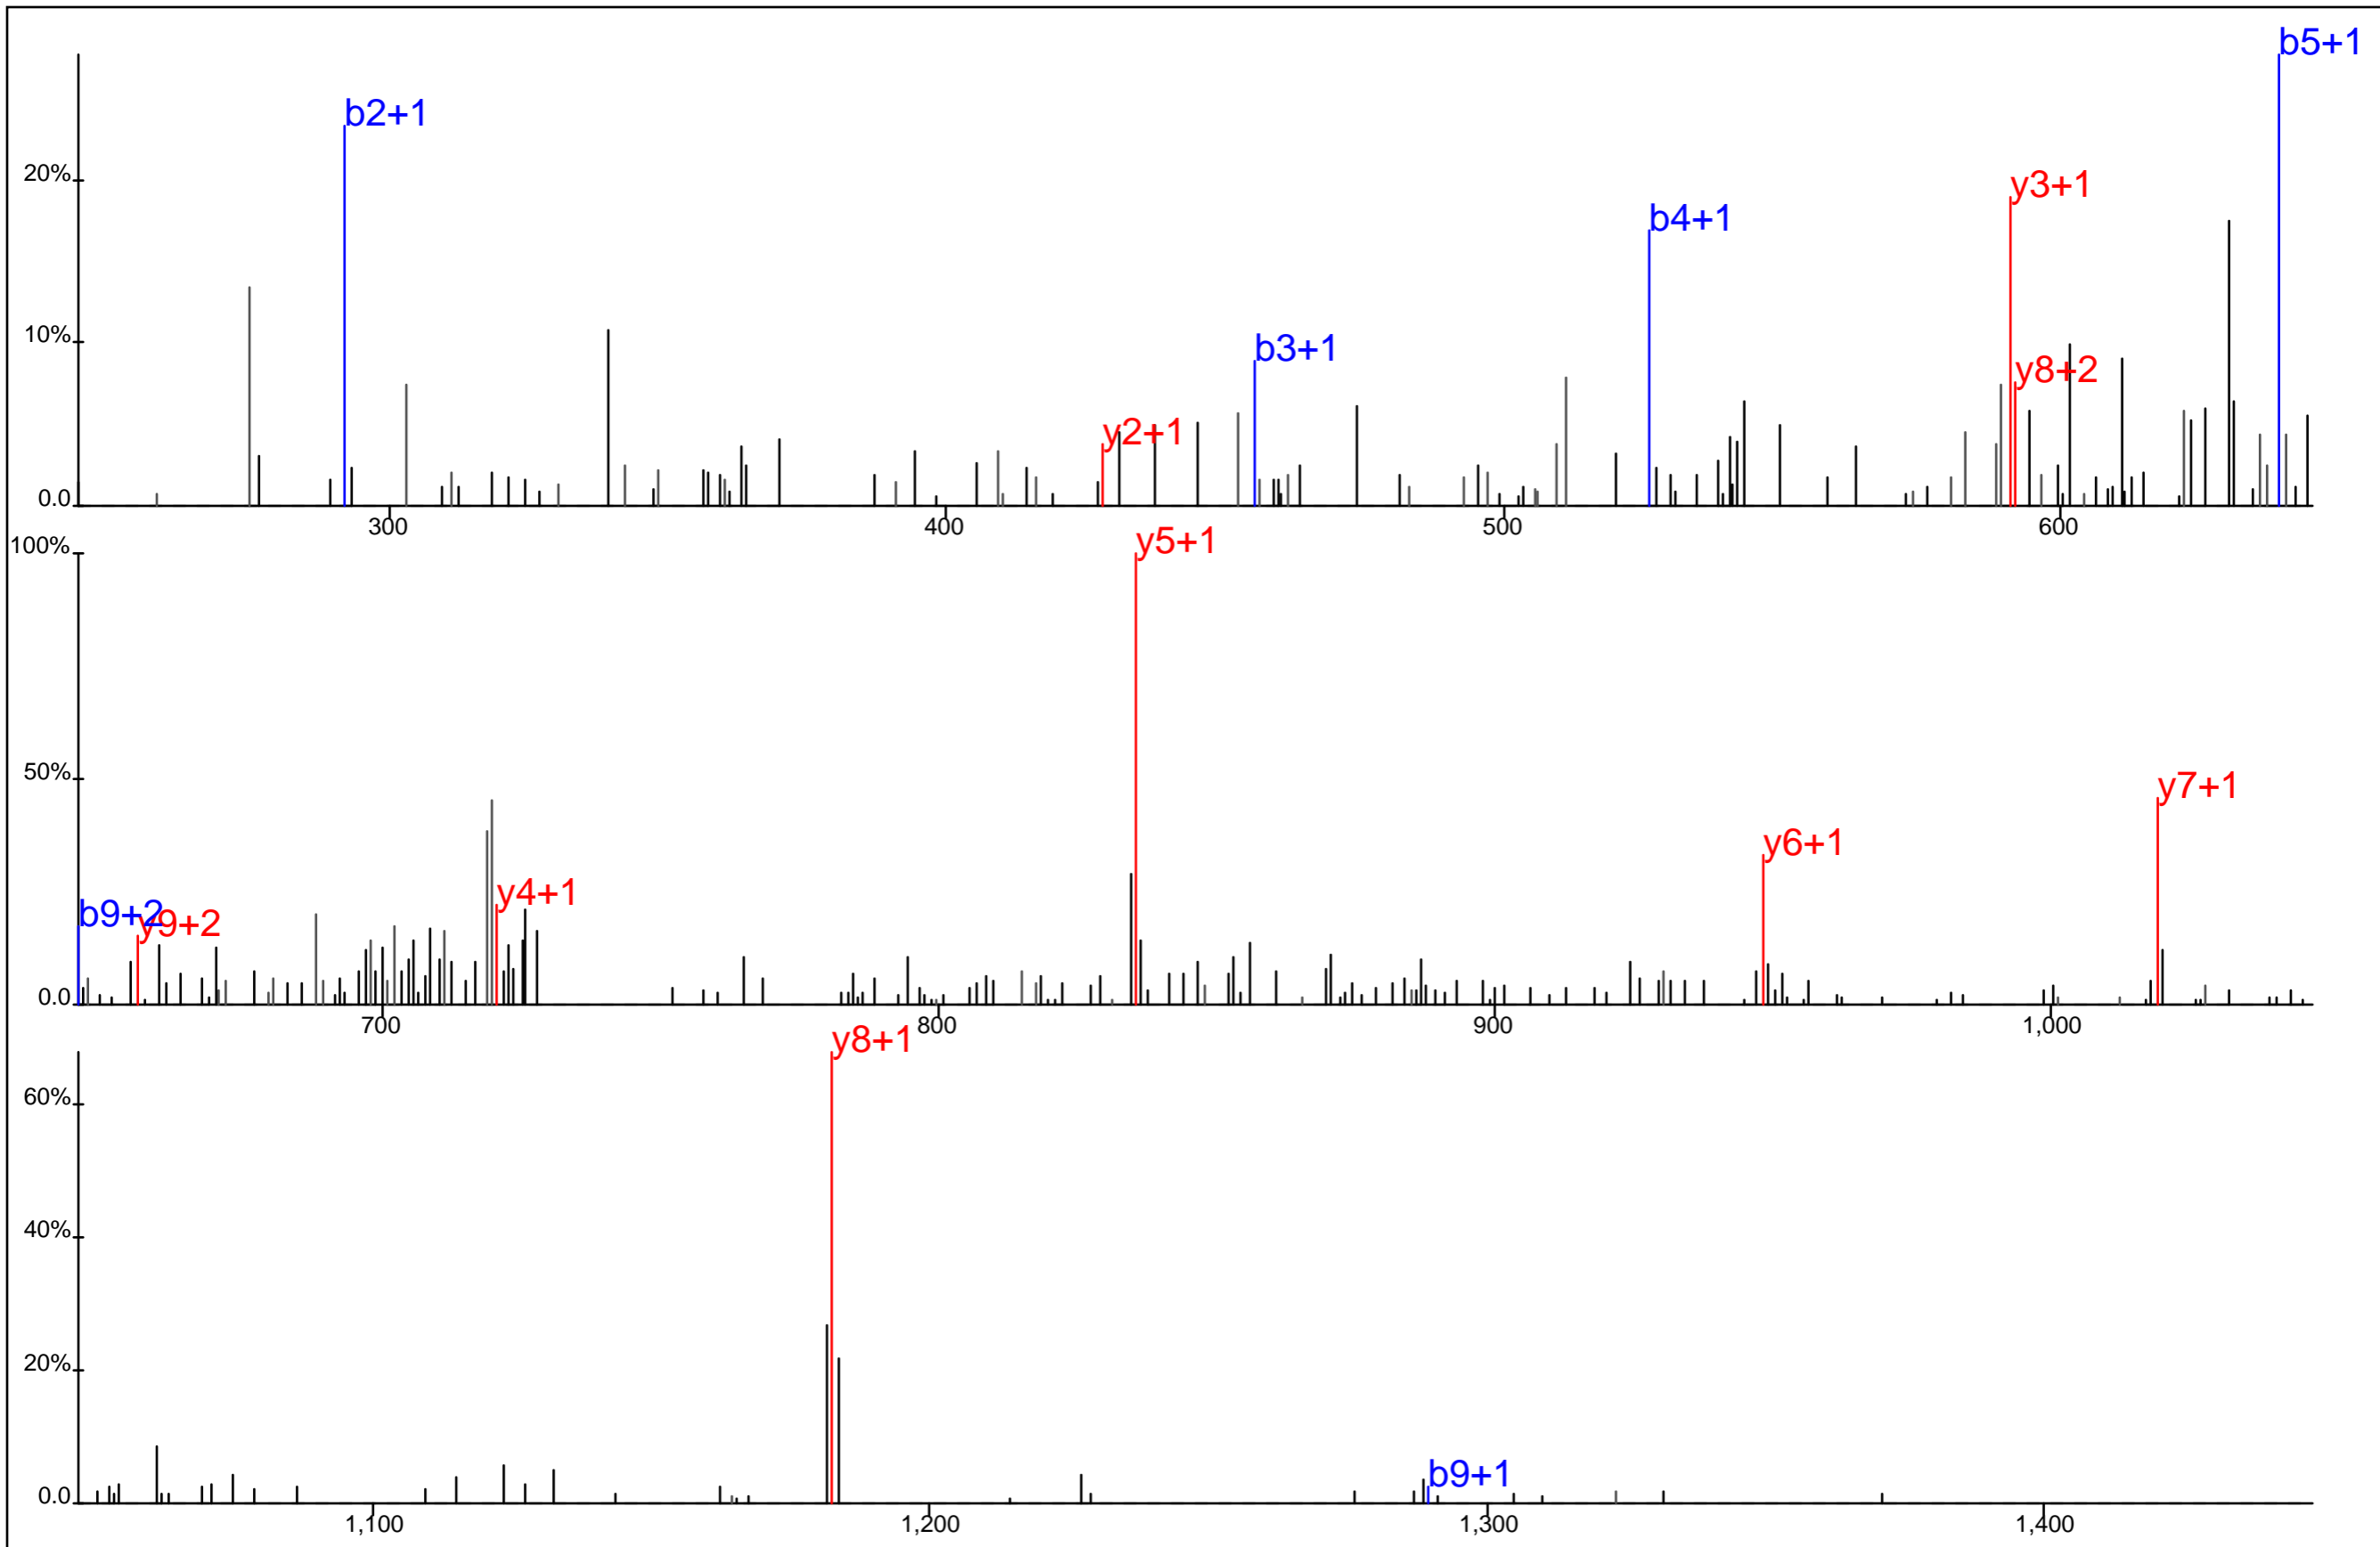

■ ■ ■ ■ ■ ■ ■ ■  
■ ■ ■ ■ ■ ■ ■ ■  
 Y Q Y A I D E Y Y\* R%

Protein Name: C14orf24  
 gi Accession: 118498366  
 Precursor Mass: 737.3041+2  
 Delta Mass: 3.317 ppm  
 XCorr: 26.6

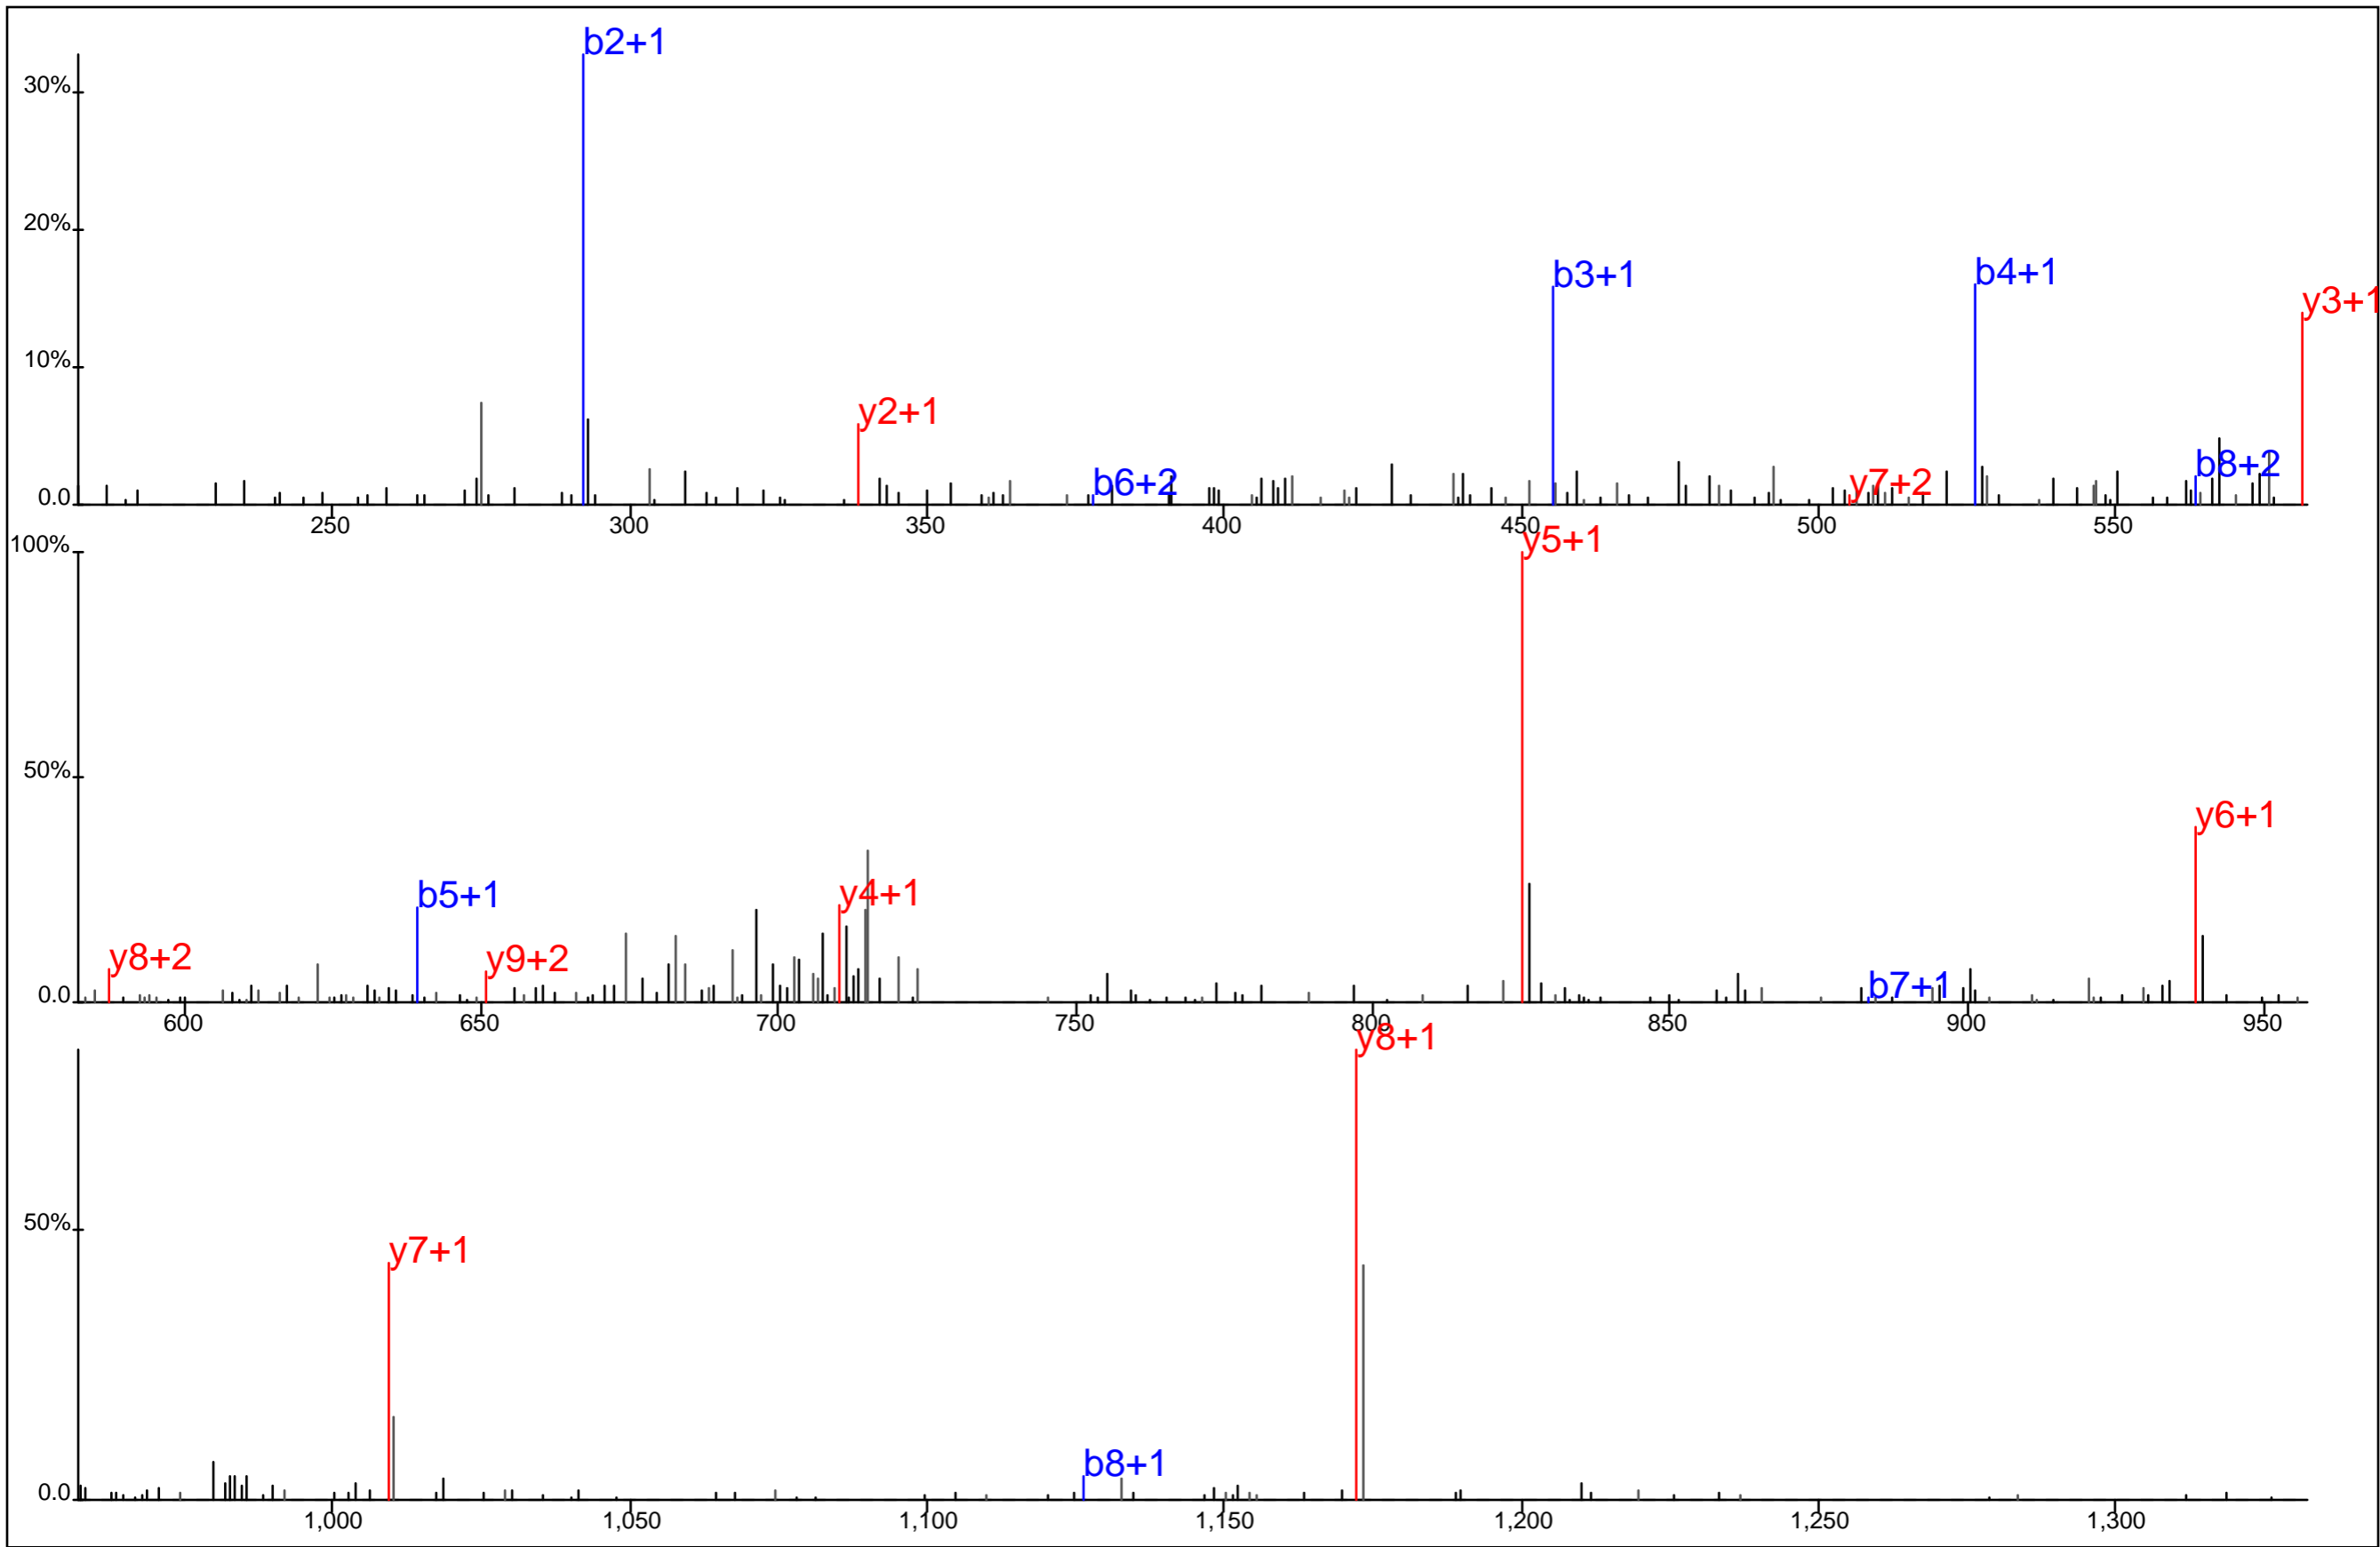

■ ■ ■ ■ ■ ■ ■ ■  
□ □ □ □ □ □ □ □  
**Y Q Y A I D E Y\*Y R**

Protein Name: C14orf24  
 gi Accession: 118498366  
 Precursor Mass: 732.3010+2  
 Delta Mass: 4.734 ppm  
 XCorr: 40.56



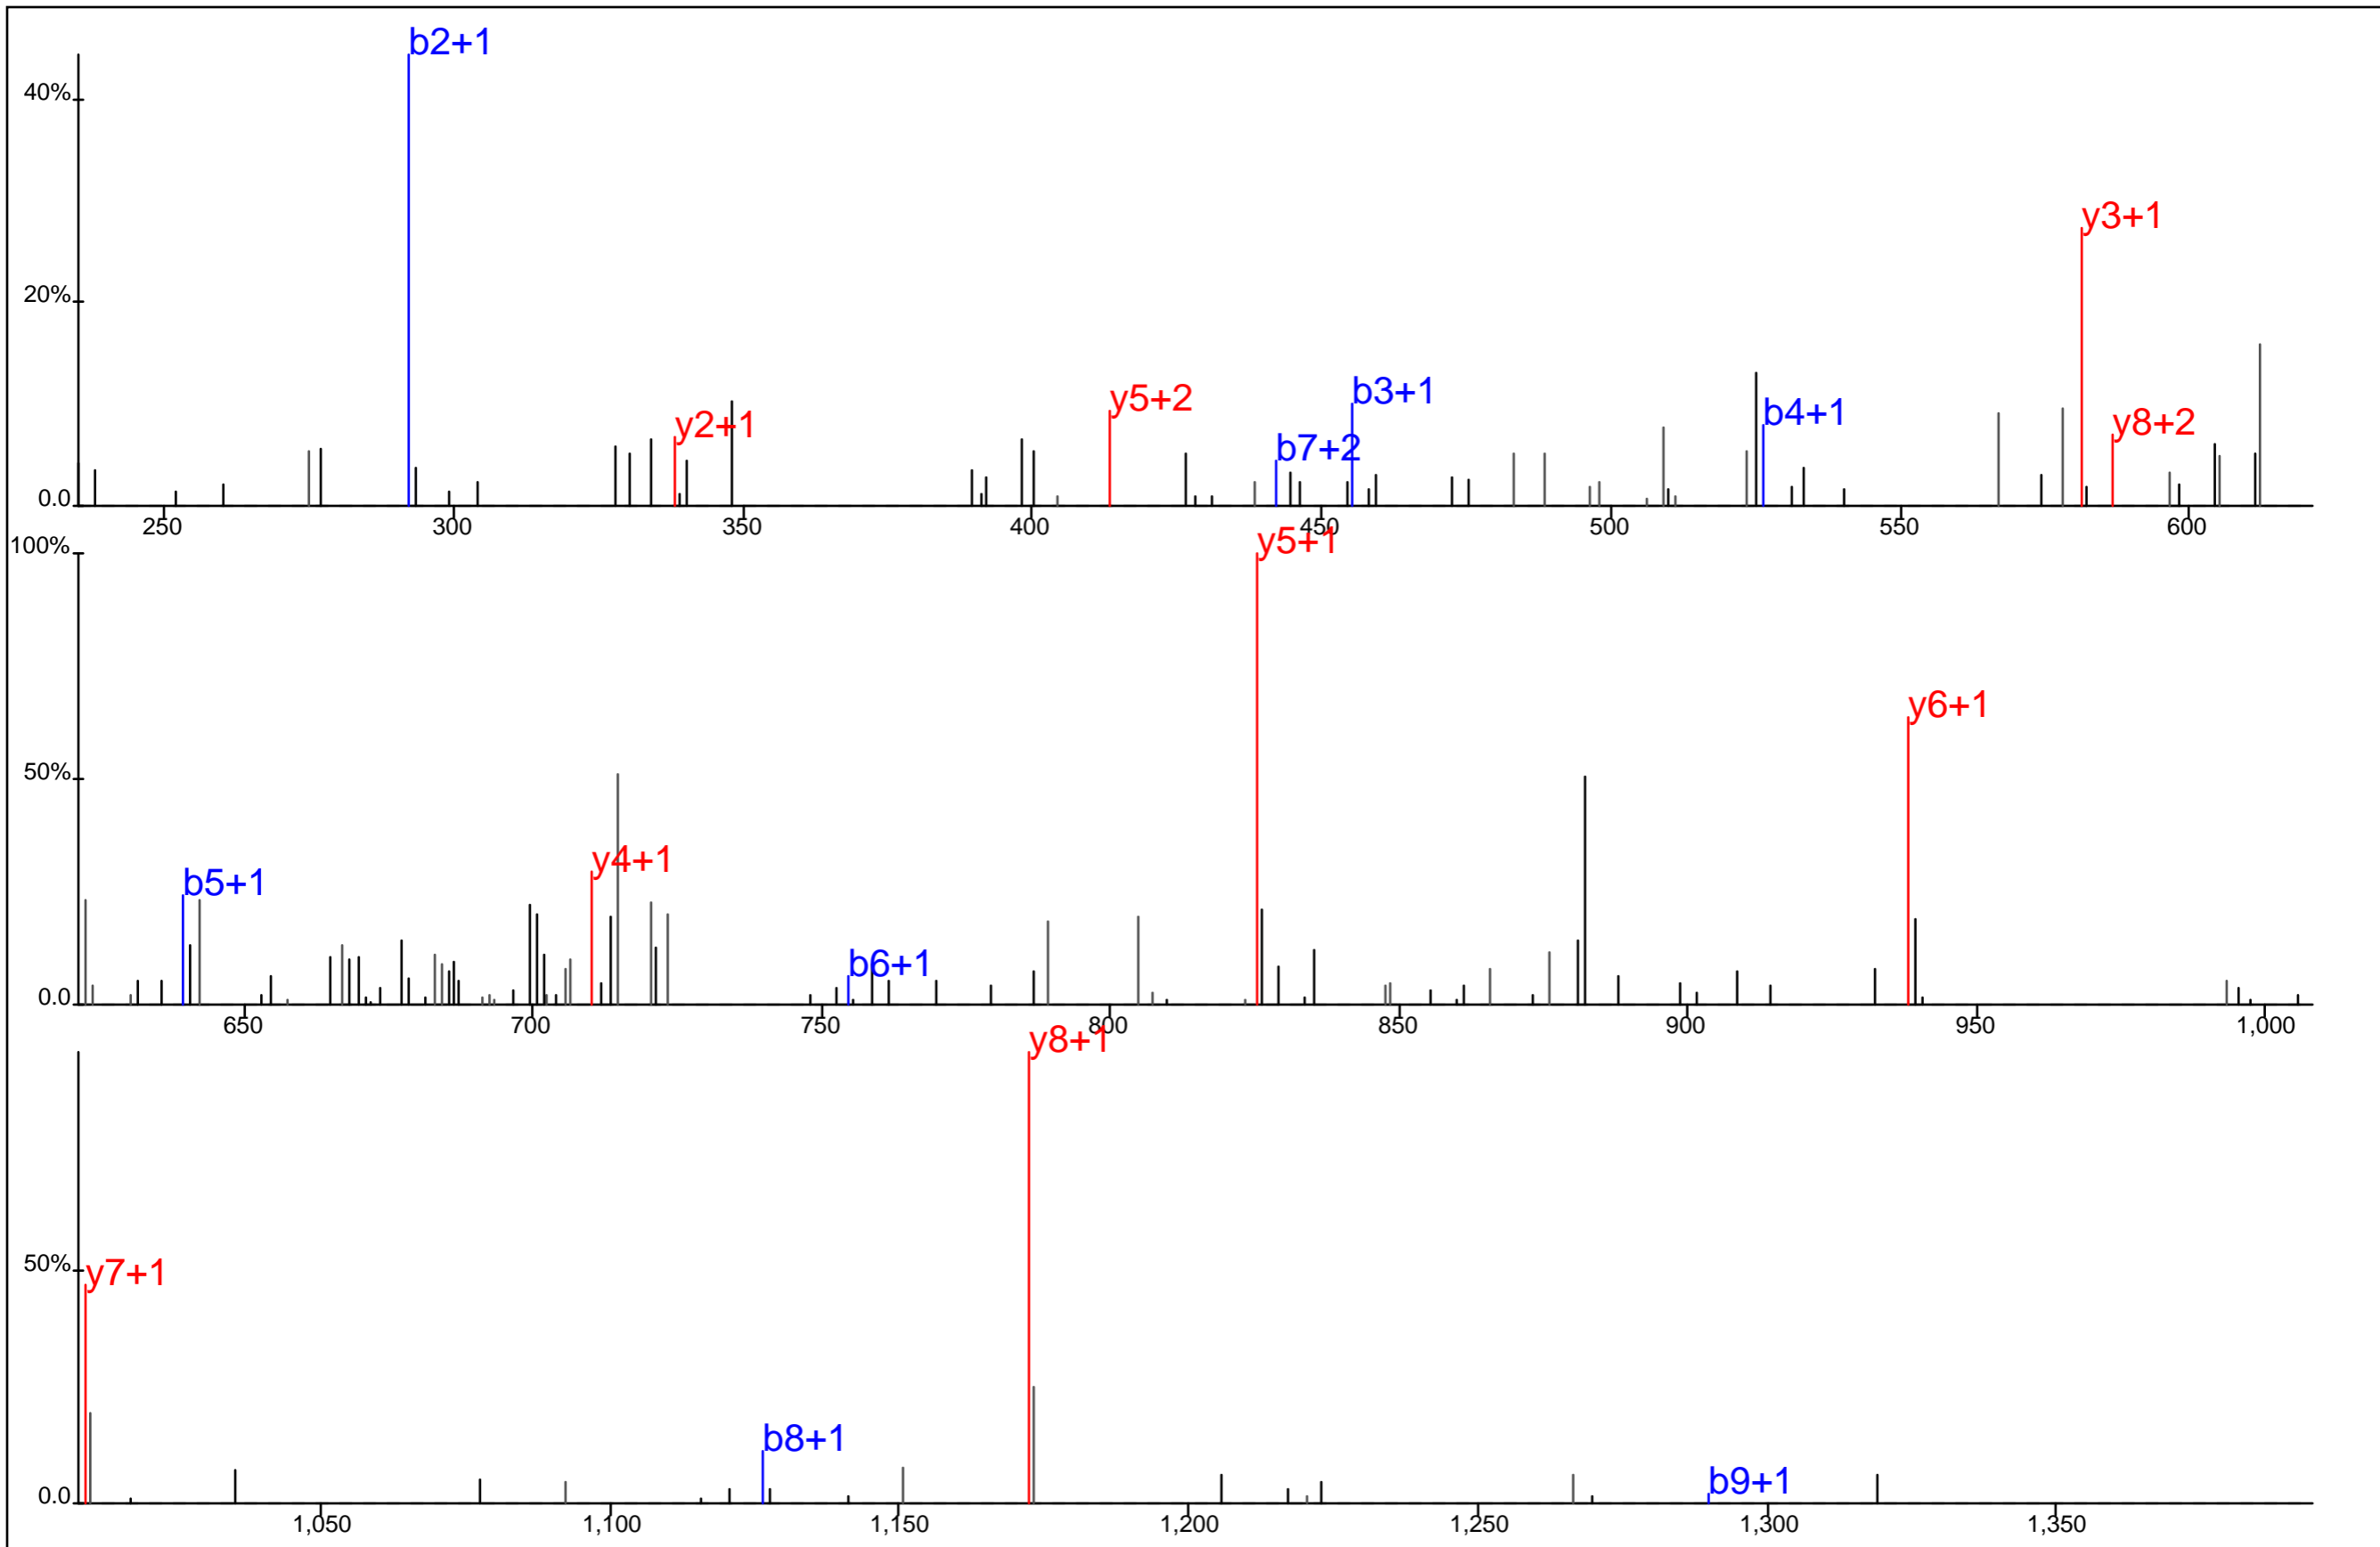

■ ■ ■ ■ ■ ■ ■ ■  
■ ■ ■ ■ ■ ■ ■ ■  
 Y Q Y A I D E Y\*Y R

Protein Name: C14orf24  
 gi Accession: 118498366  
 Precursor Mass: 732.3017+2  
 Delta Mass: 5.656 ppm  
 XCorr: 33.05

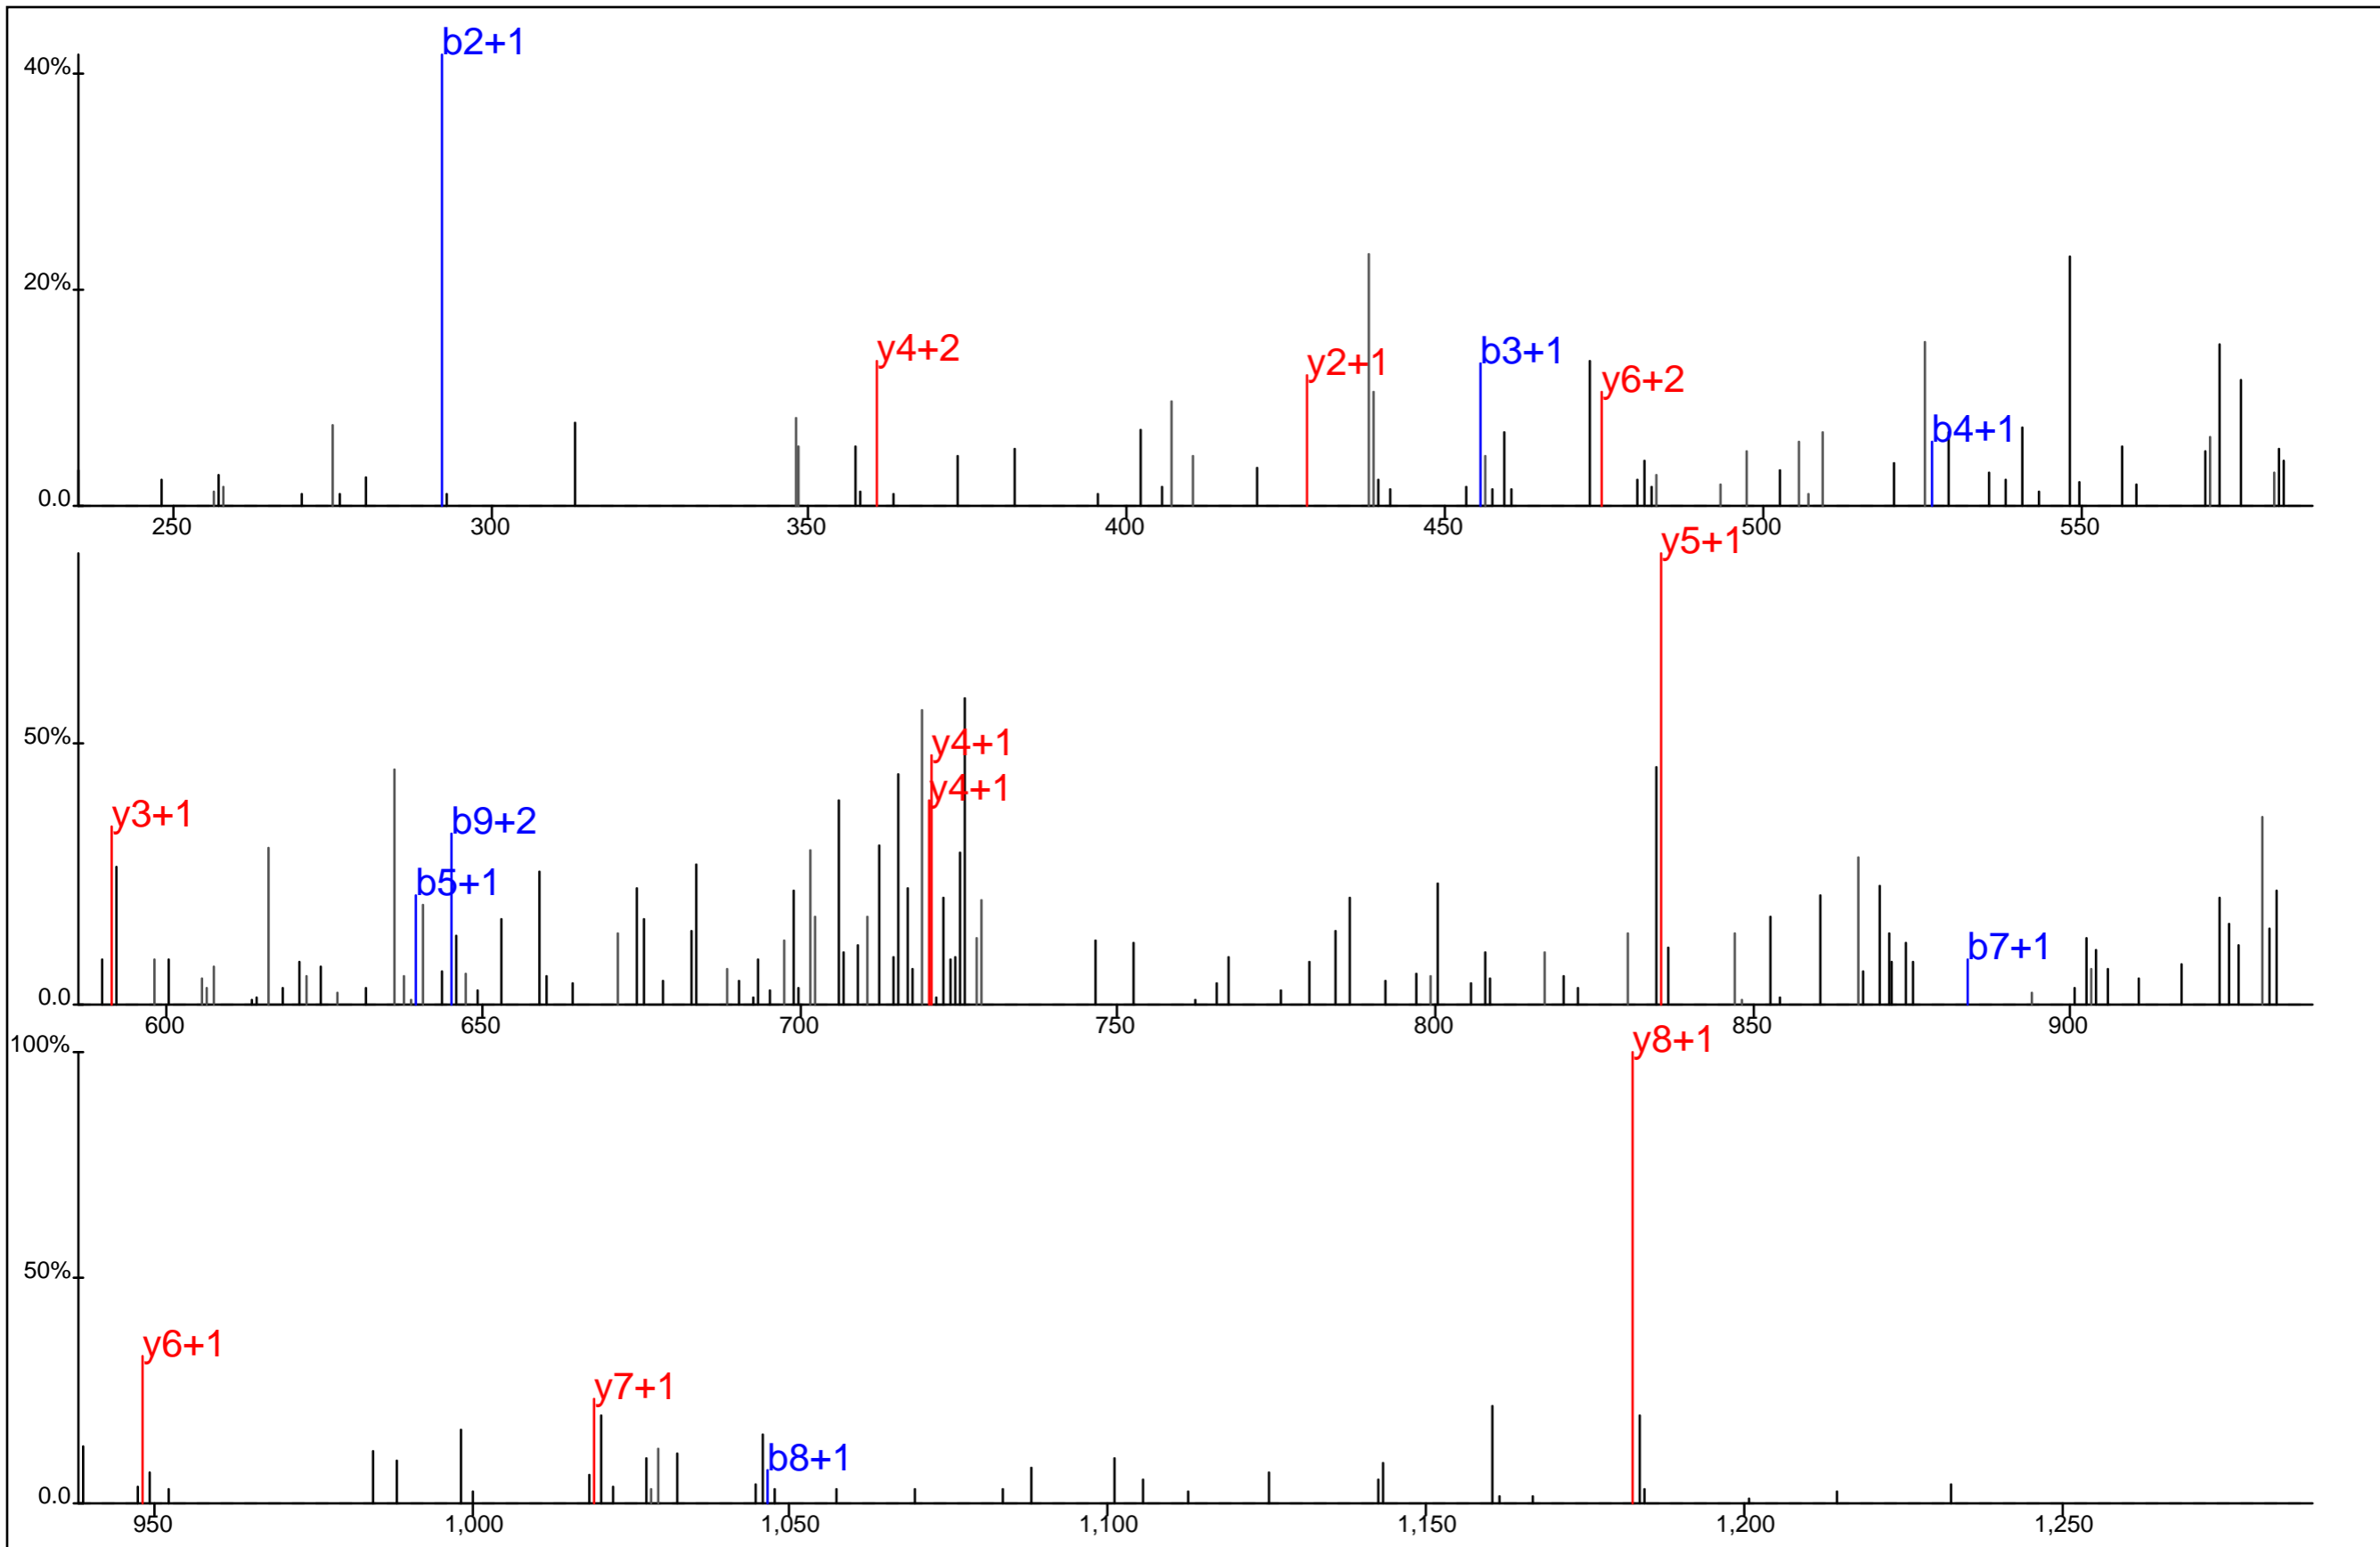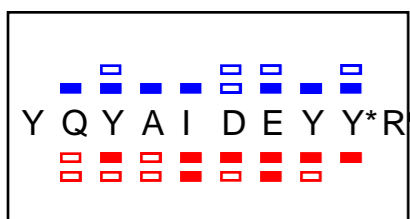

Protein Name: C14orf24  
 gi Accession: 118498366  
 Precursor Mass: 737.3040+2  
 Delta Mass: 3.066 ppm  
 XCorr: 33.54



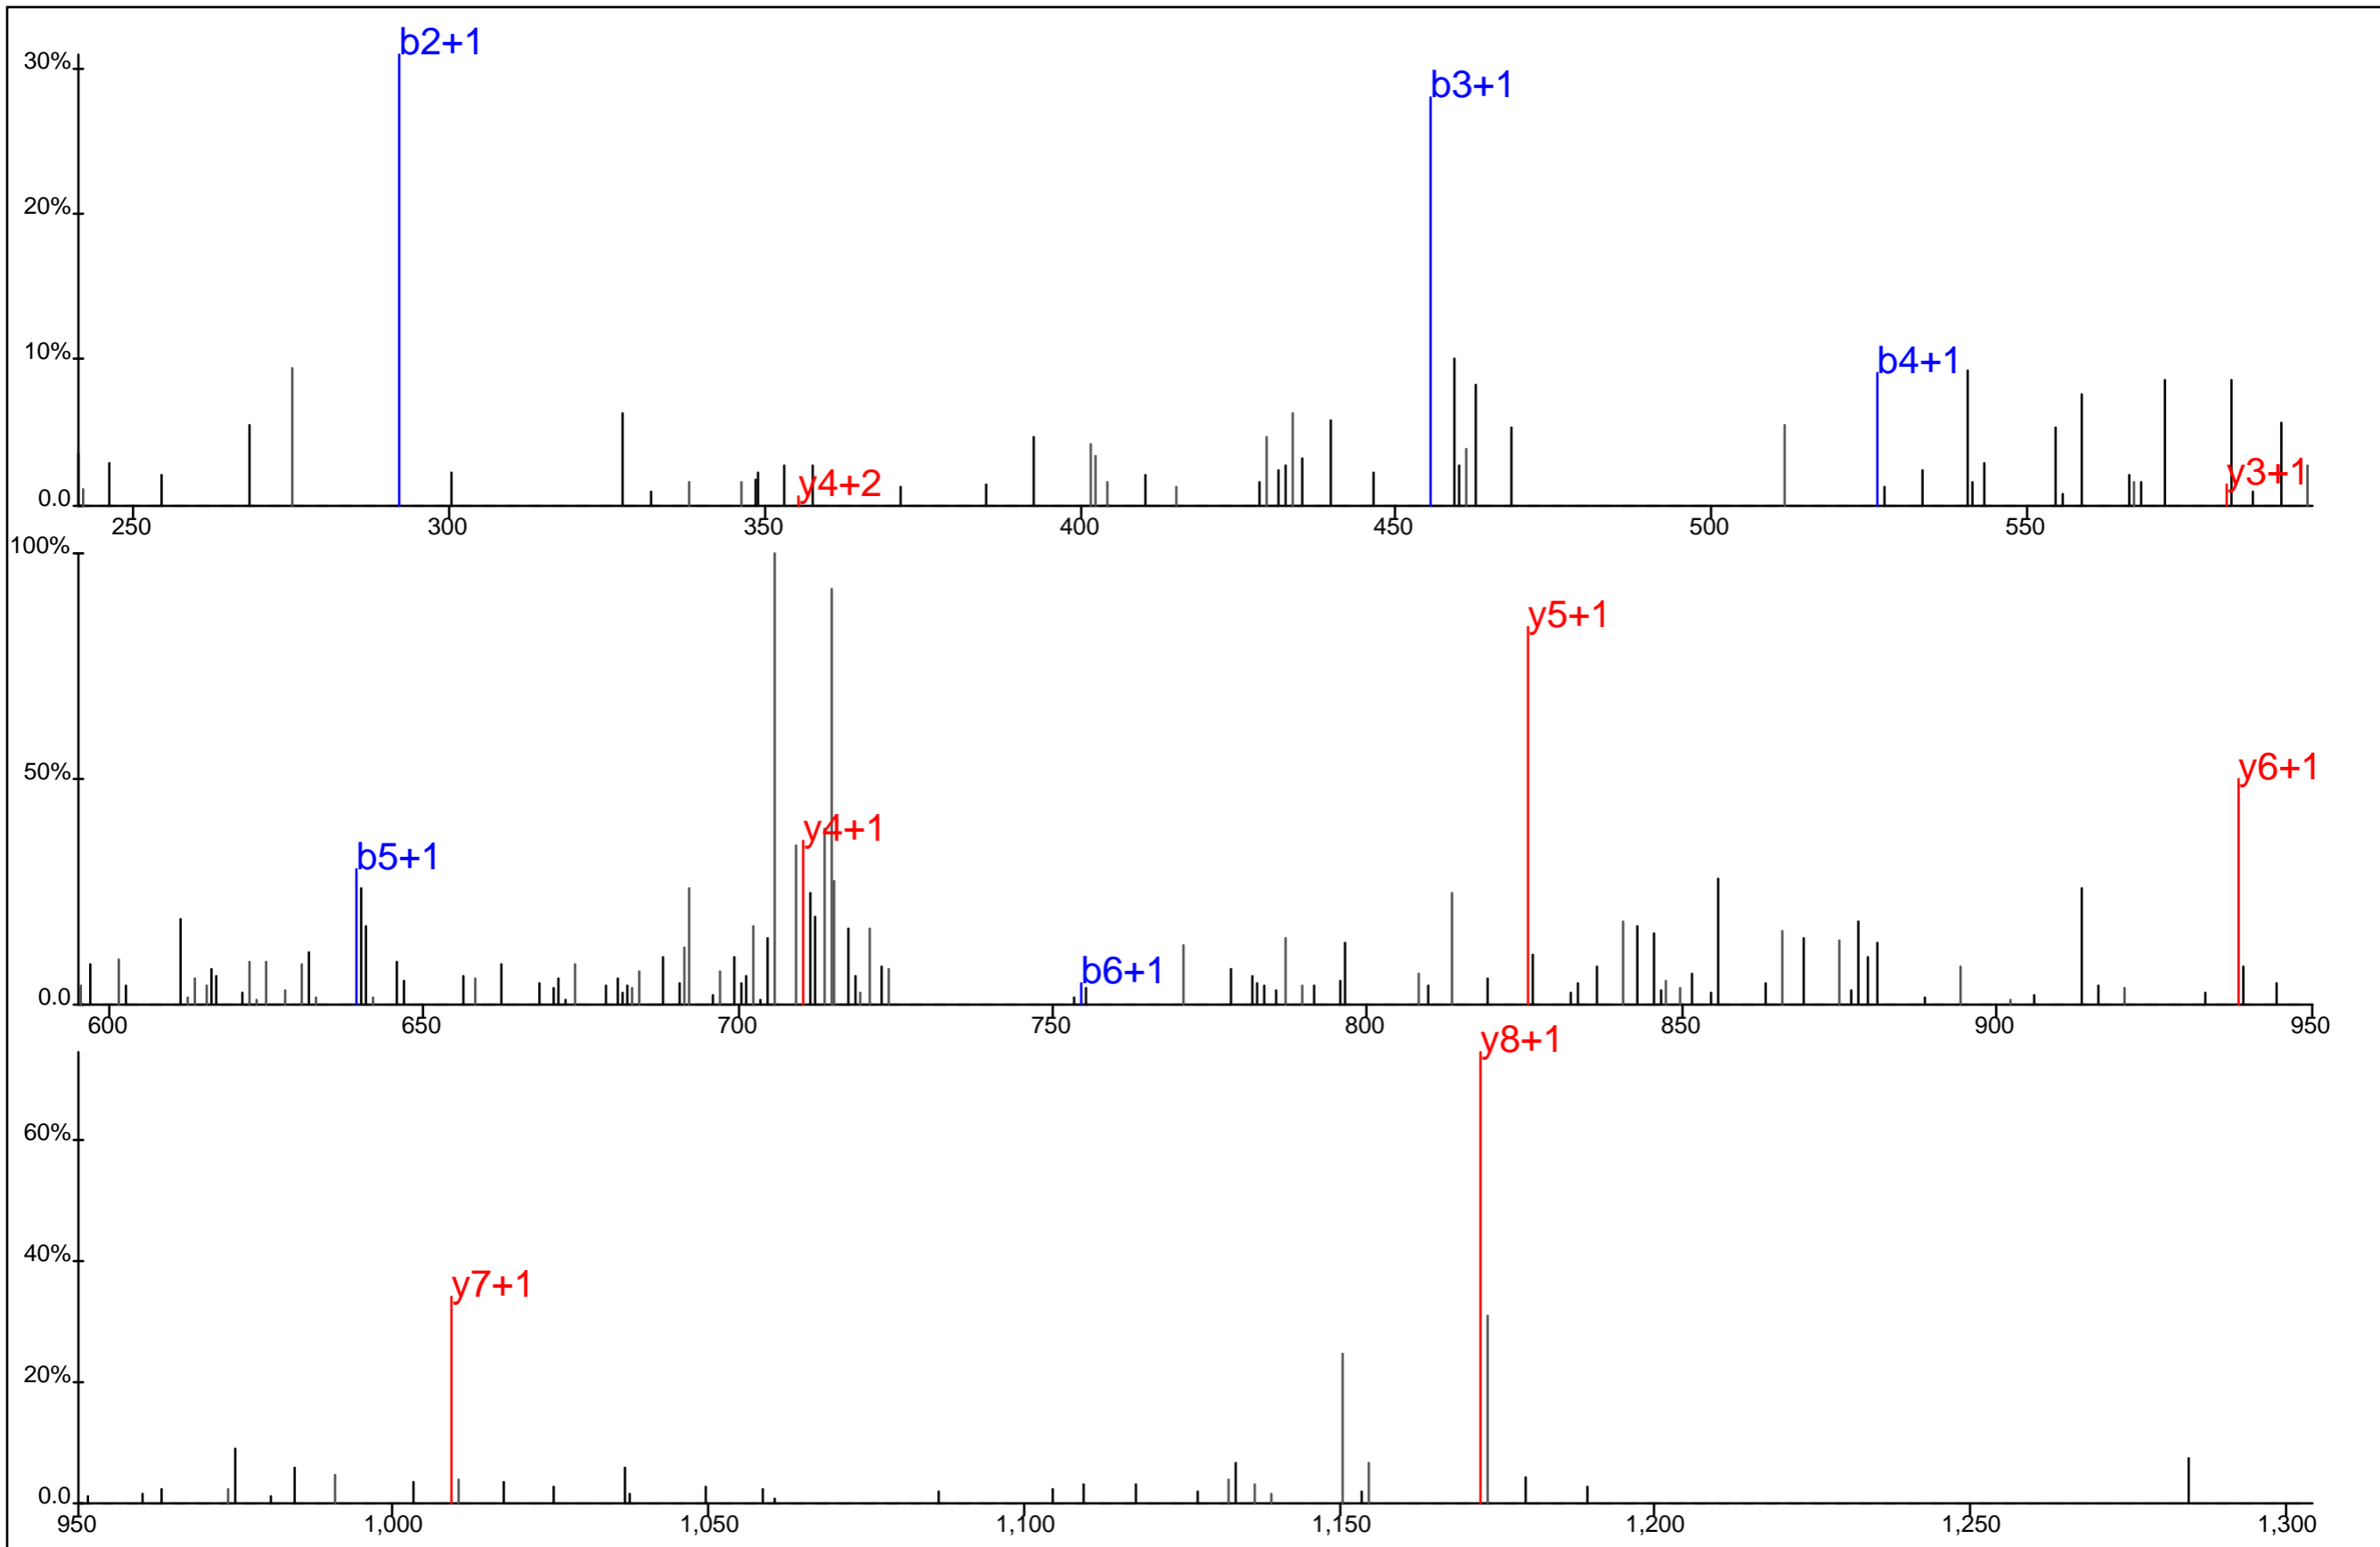

■ ■ ▢ ▢ ■ ▢ ▢ ▢  
 Y Q Y A I D E Y Y\* R  
▢ ▢ ▢ ▢ ▢ ▢ ▢ ▢

Protein Name: C14orf24  
 gi Accession: 118498366  
 Precursor Mass: 732.3000+2  
 Delta Mass: 3.319 ppm  
 XCorr: 21.92

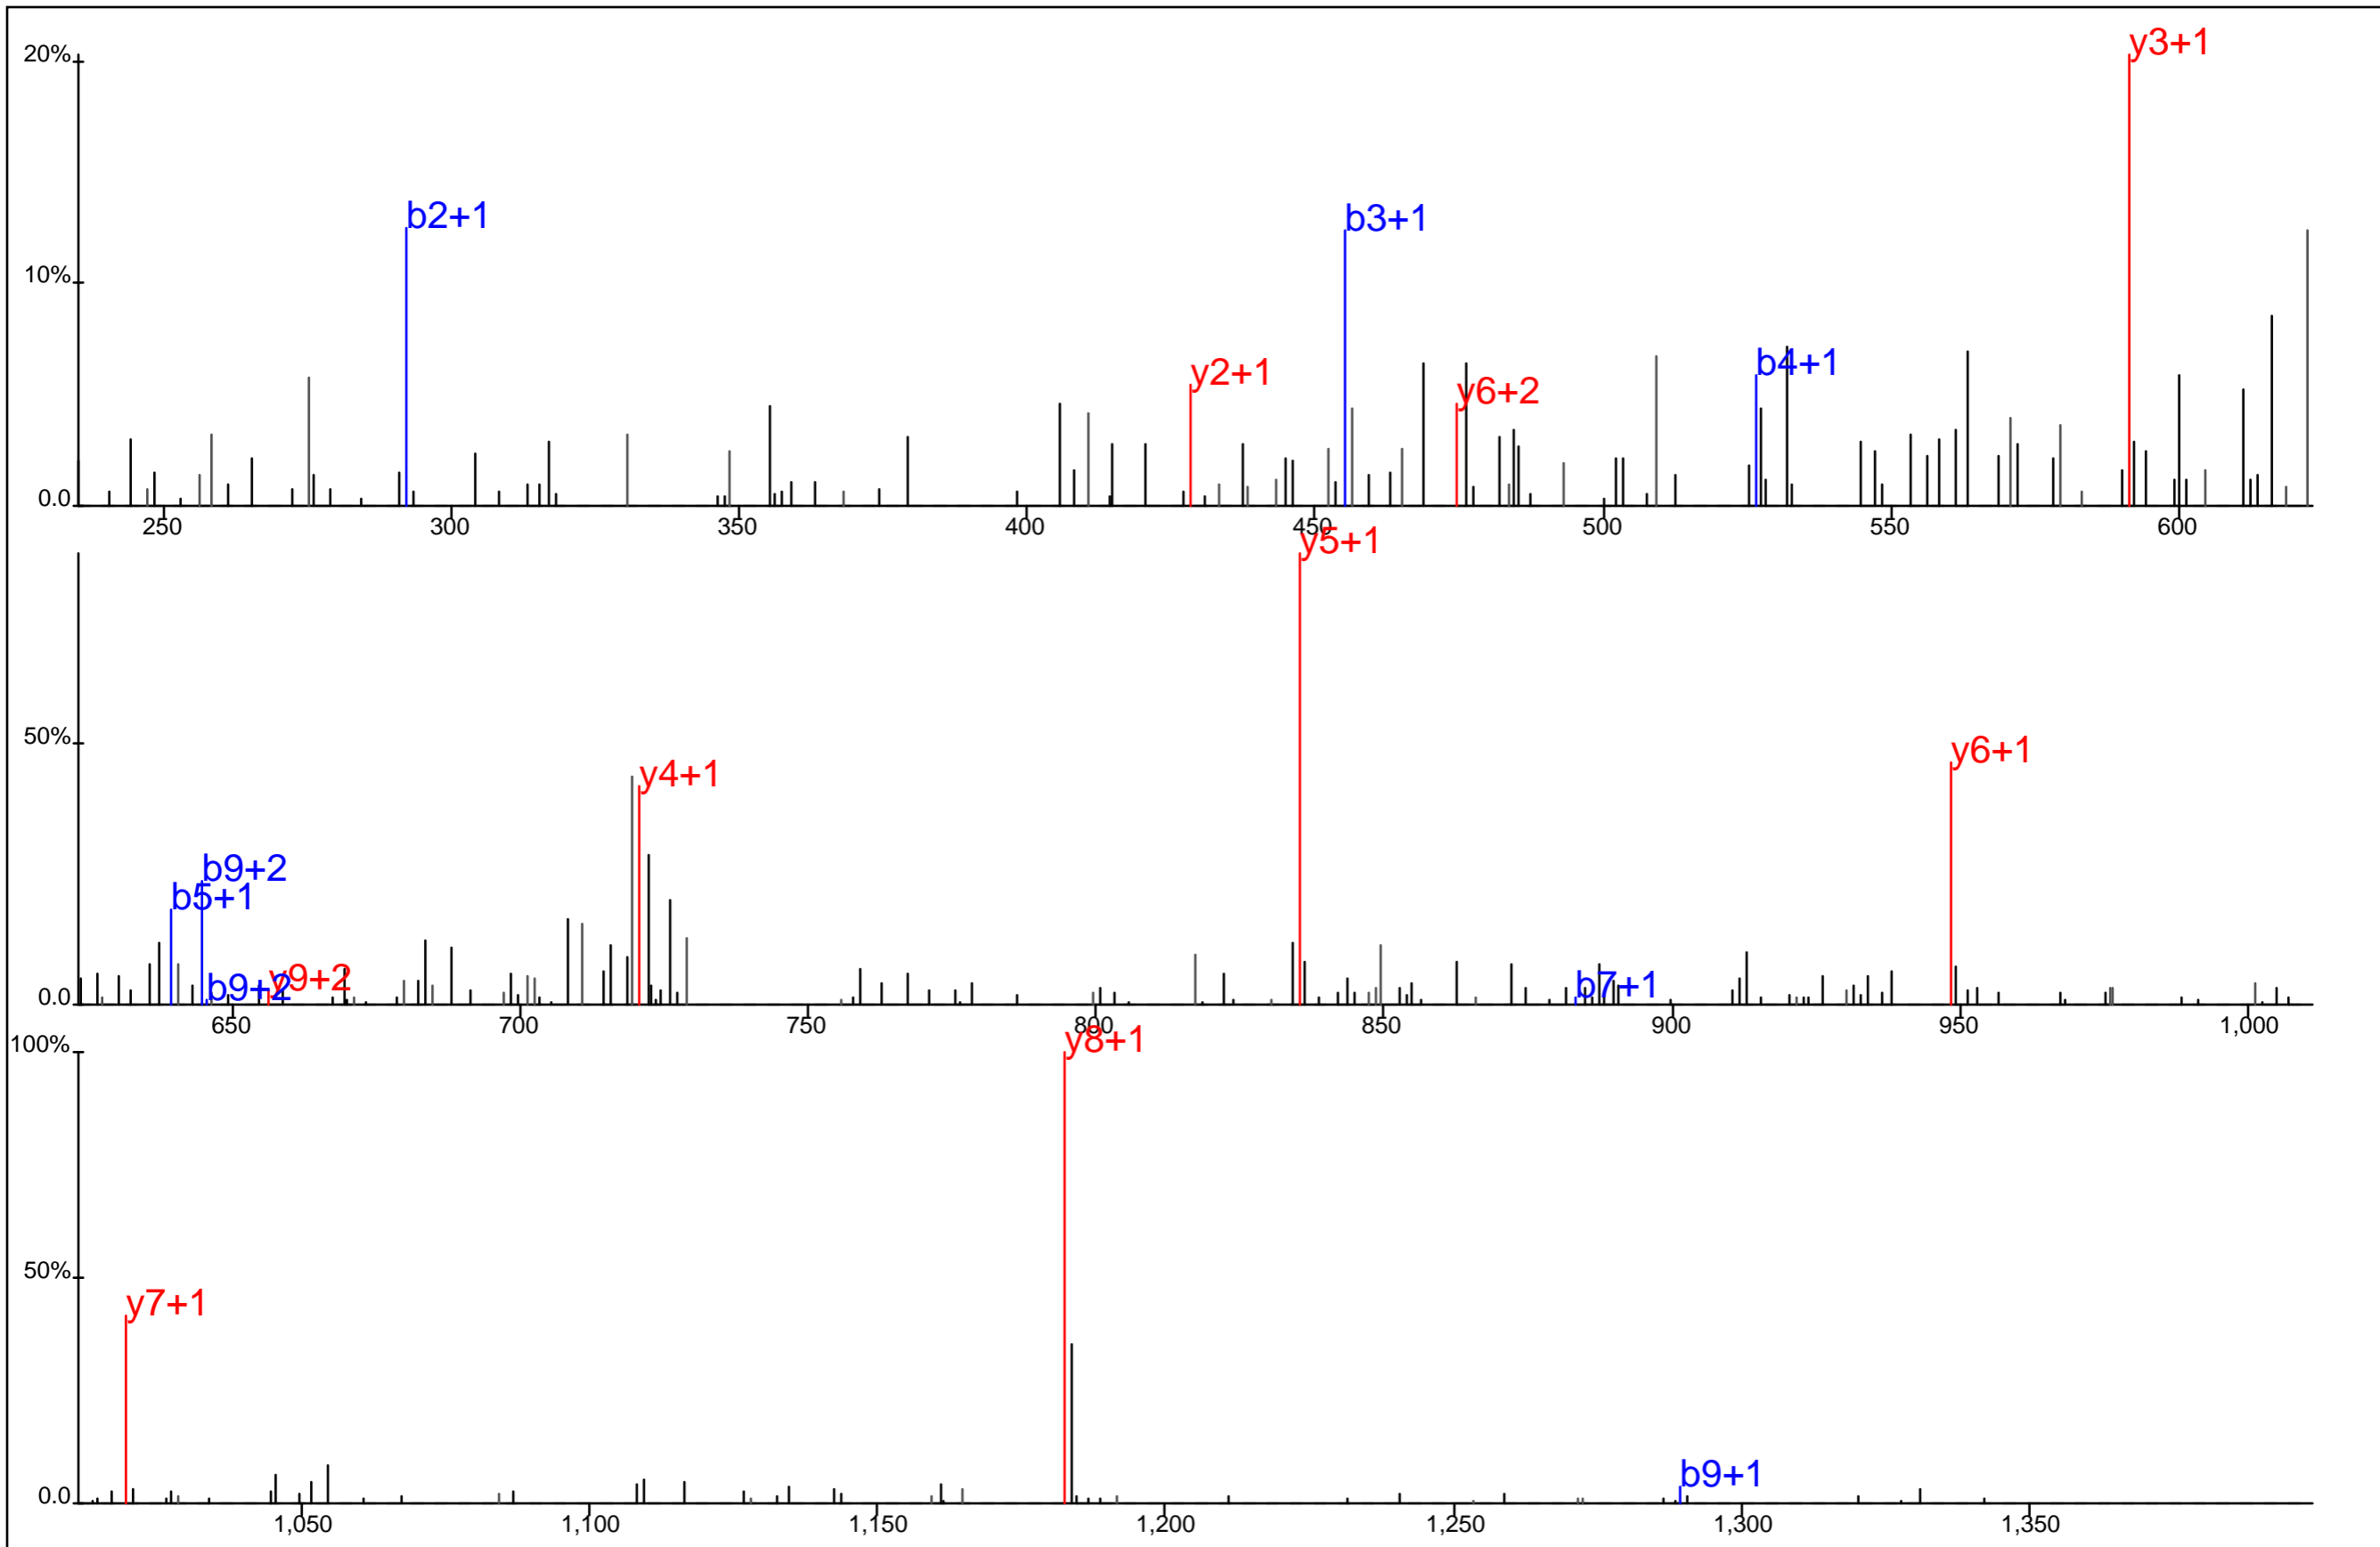

**Y Q Y A I D E Y Y\* R%**

Protein Name: C14orf24  
 gi Accession: 118498366  
 Precursor Mass: 737.3048+2  
 Delta Mass: 4.226 ppm  
 XCorr: 42.32

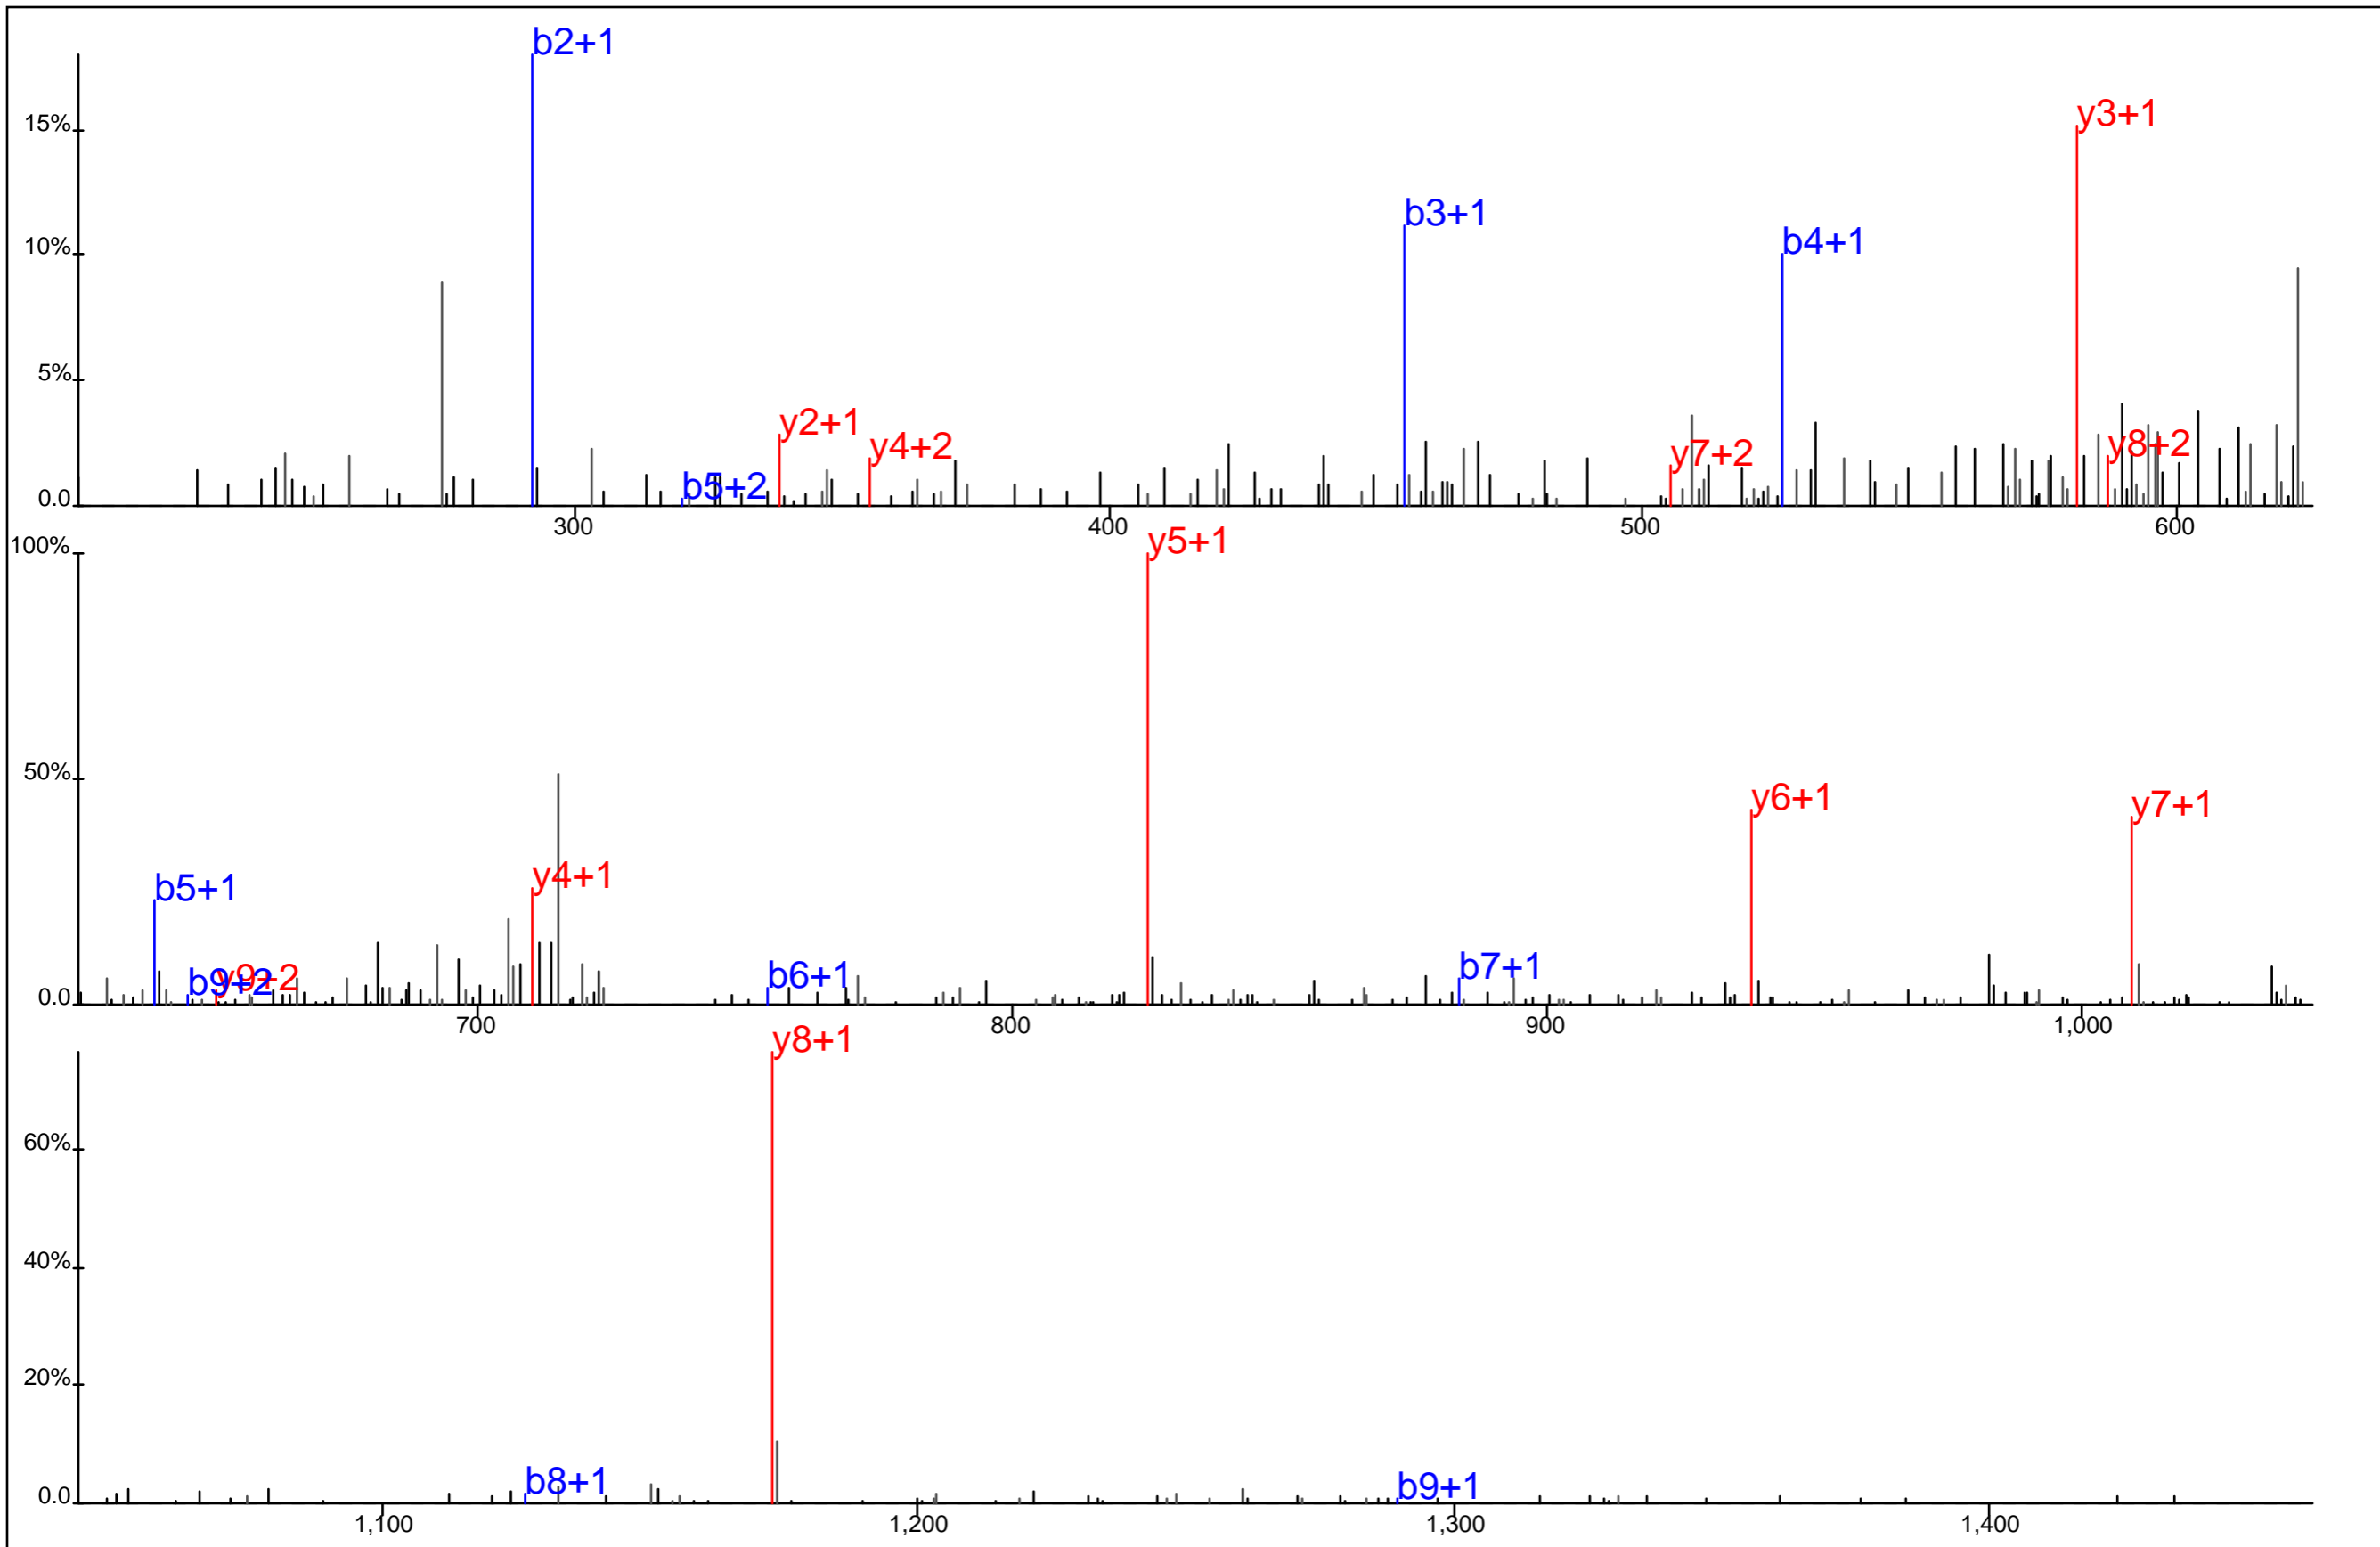

■ ■ □ □ □ □ □ □  
□ □ □ □ □ □ □ □

Y Q Y A I D E Y\*Y R

Protein Name: C14orf24  
 gi Accession: 118498366  
 Precursor Mass: 732.2985+2  
 Delta Mass: 1.317 ppm  
 XCorr: 45.44

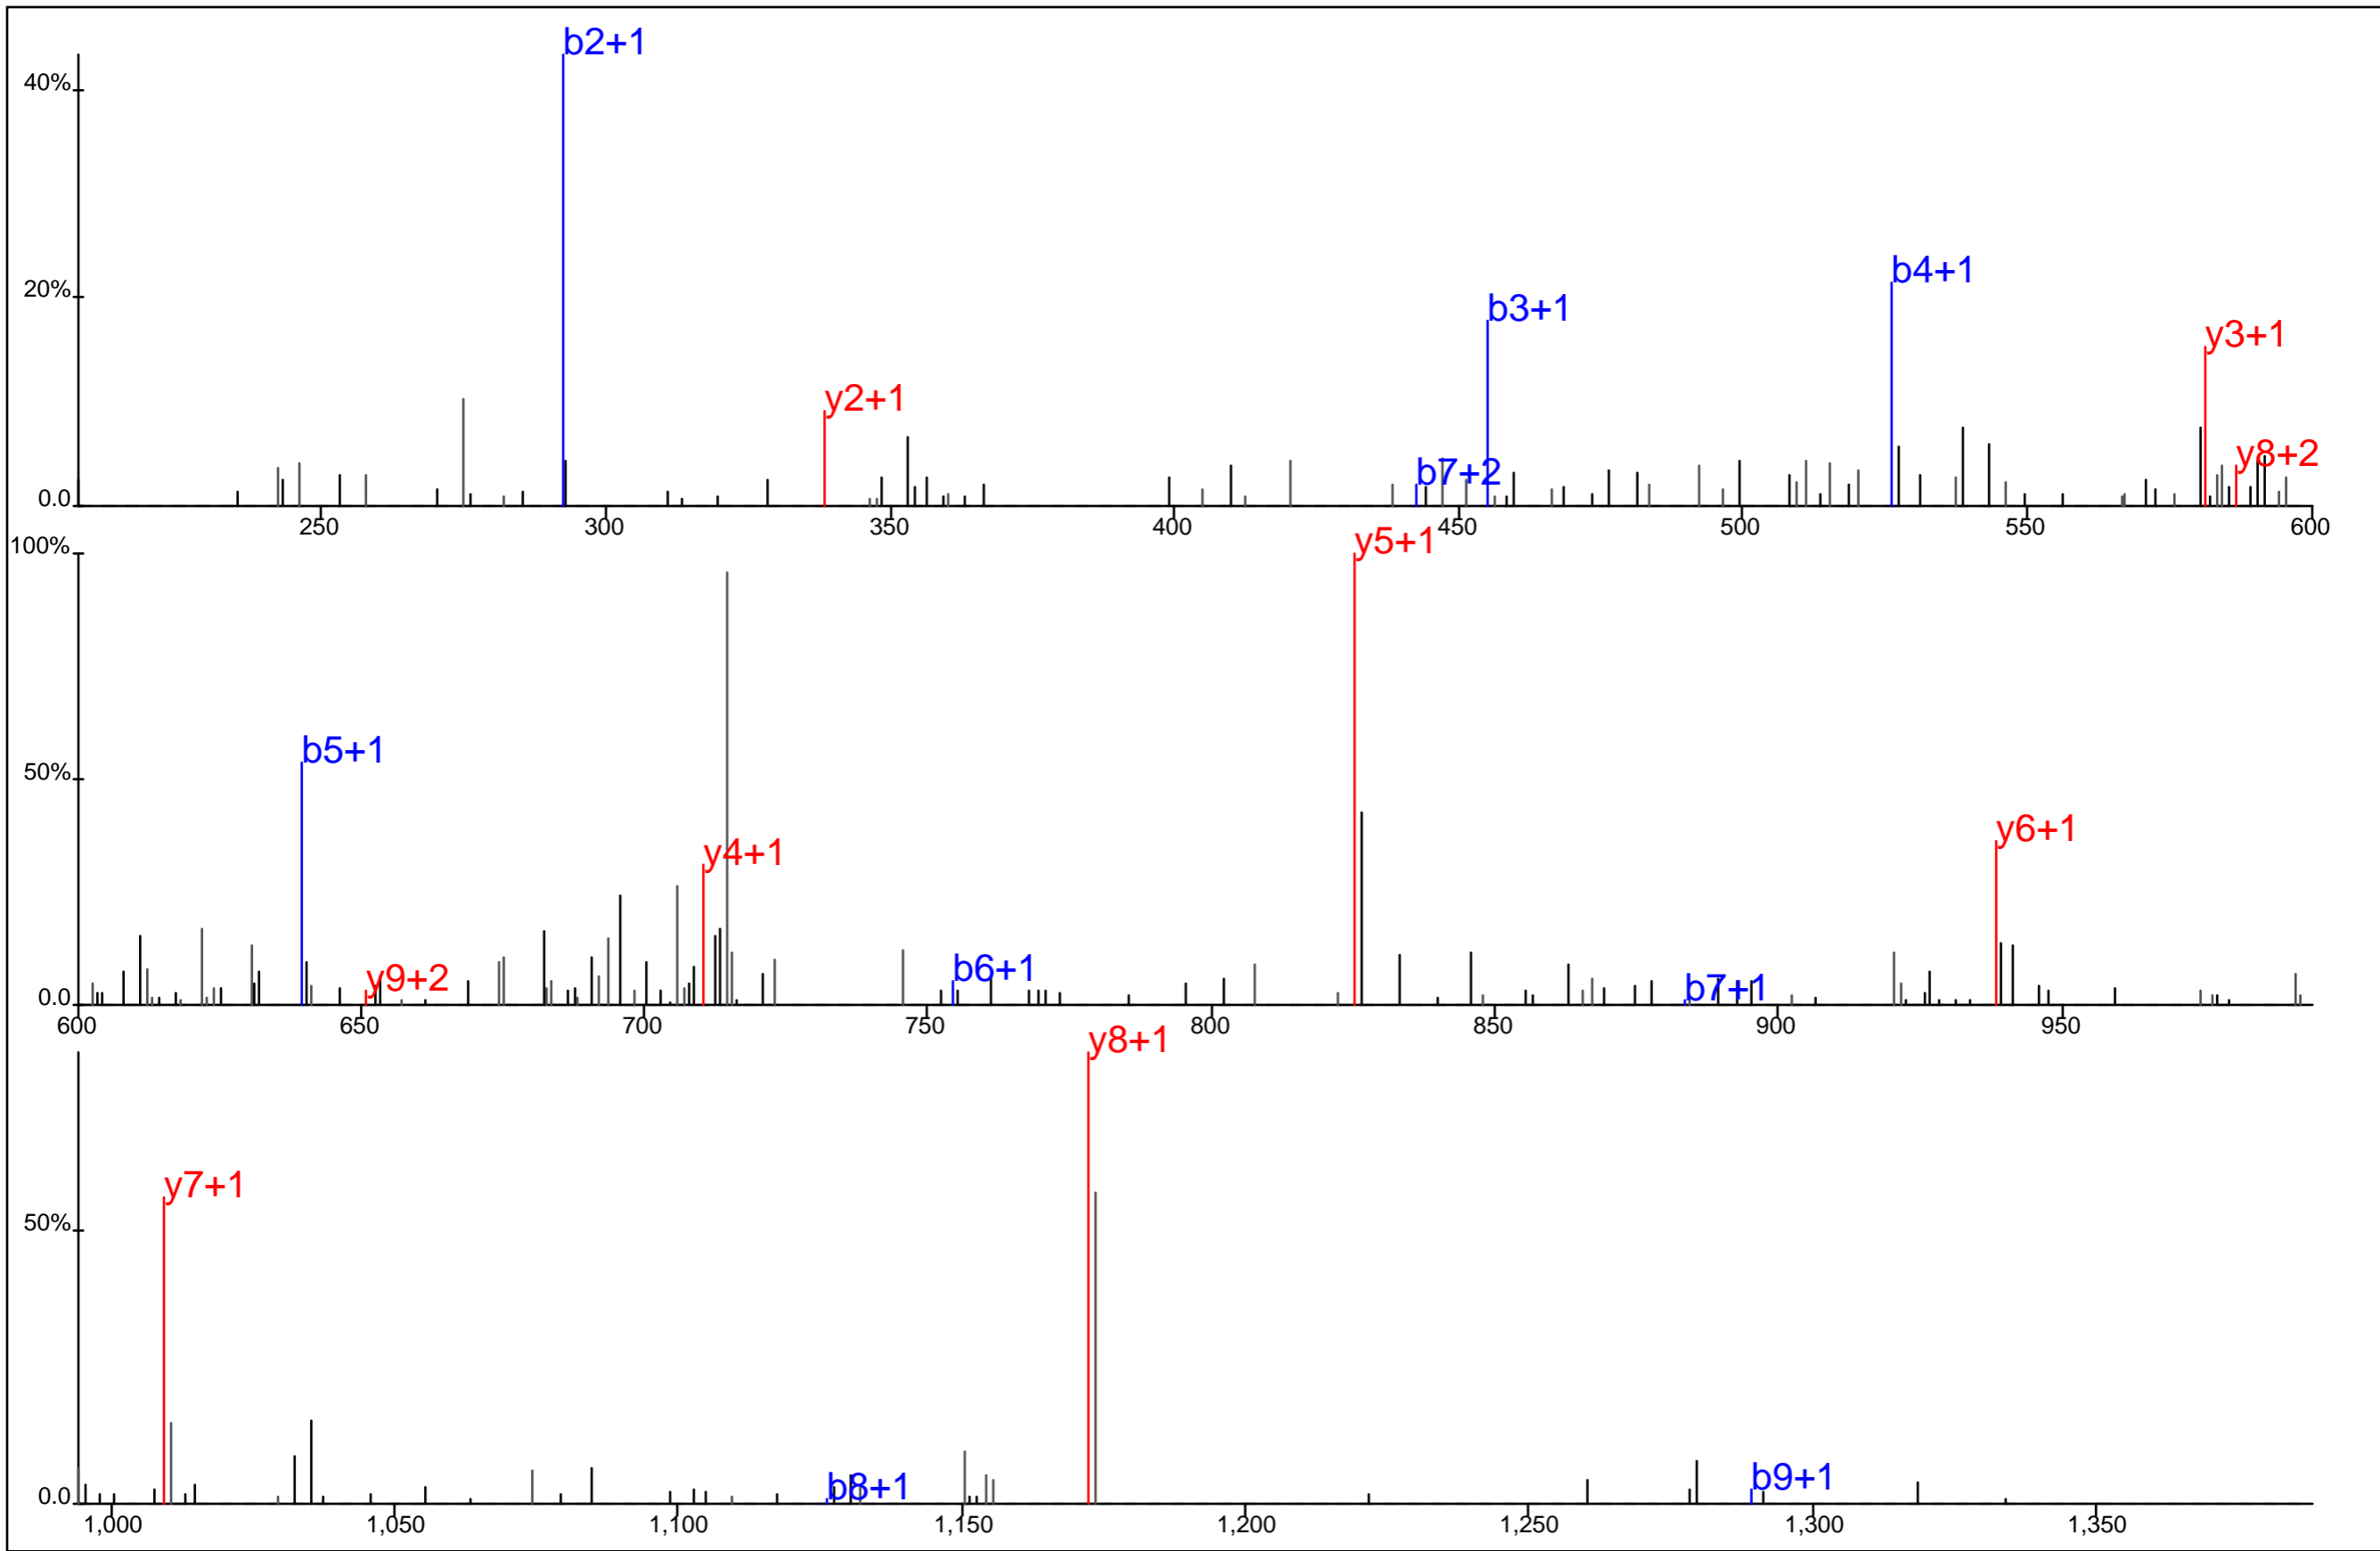

■ ■ ■ ■ ■ ■ ■ ■  
■ ■ ■ ■ ■ ■ ■ ■  
**Y Q Y A I D E Y\*Y R**

Protein Name: C14orf24  
 gi Accession: 118498366  
 Precursor Mass: 732.3011+2  
 Delta Mass: 4.822 ppm  
 XCorr: 40.33

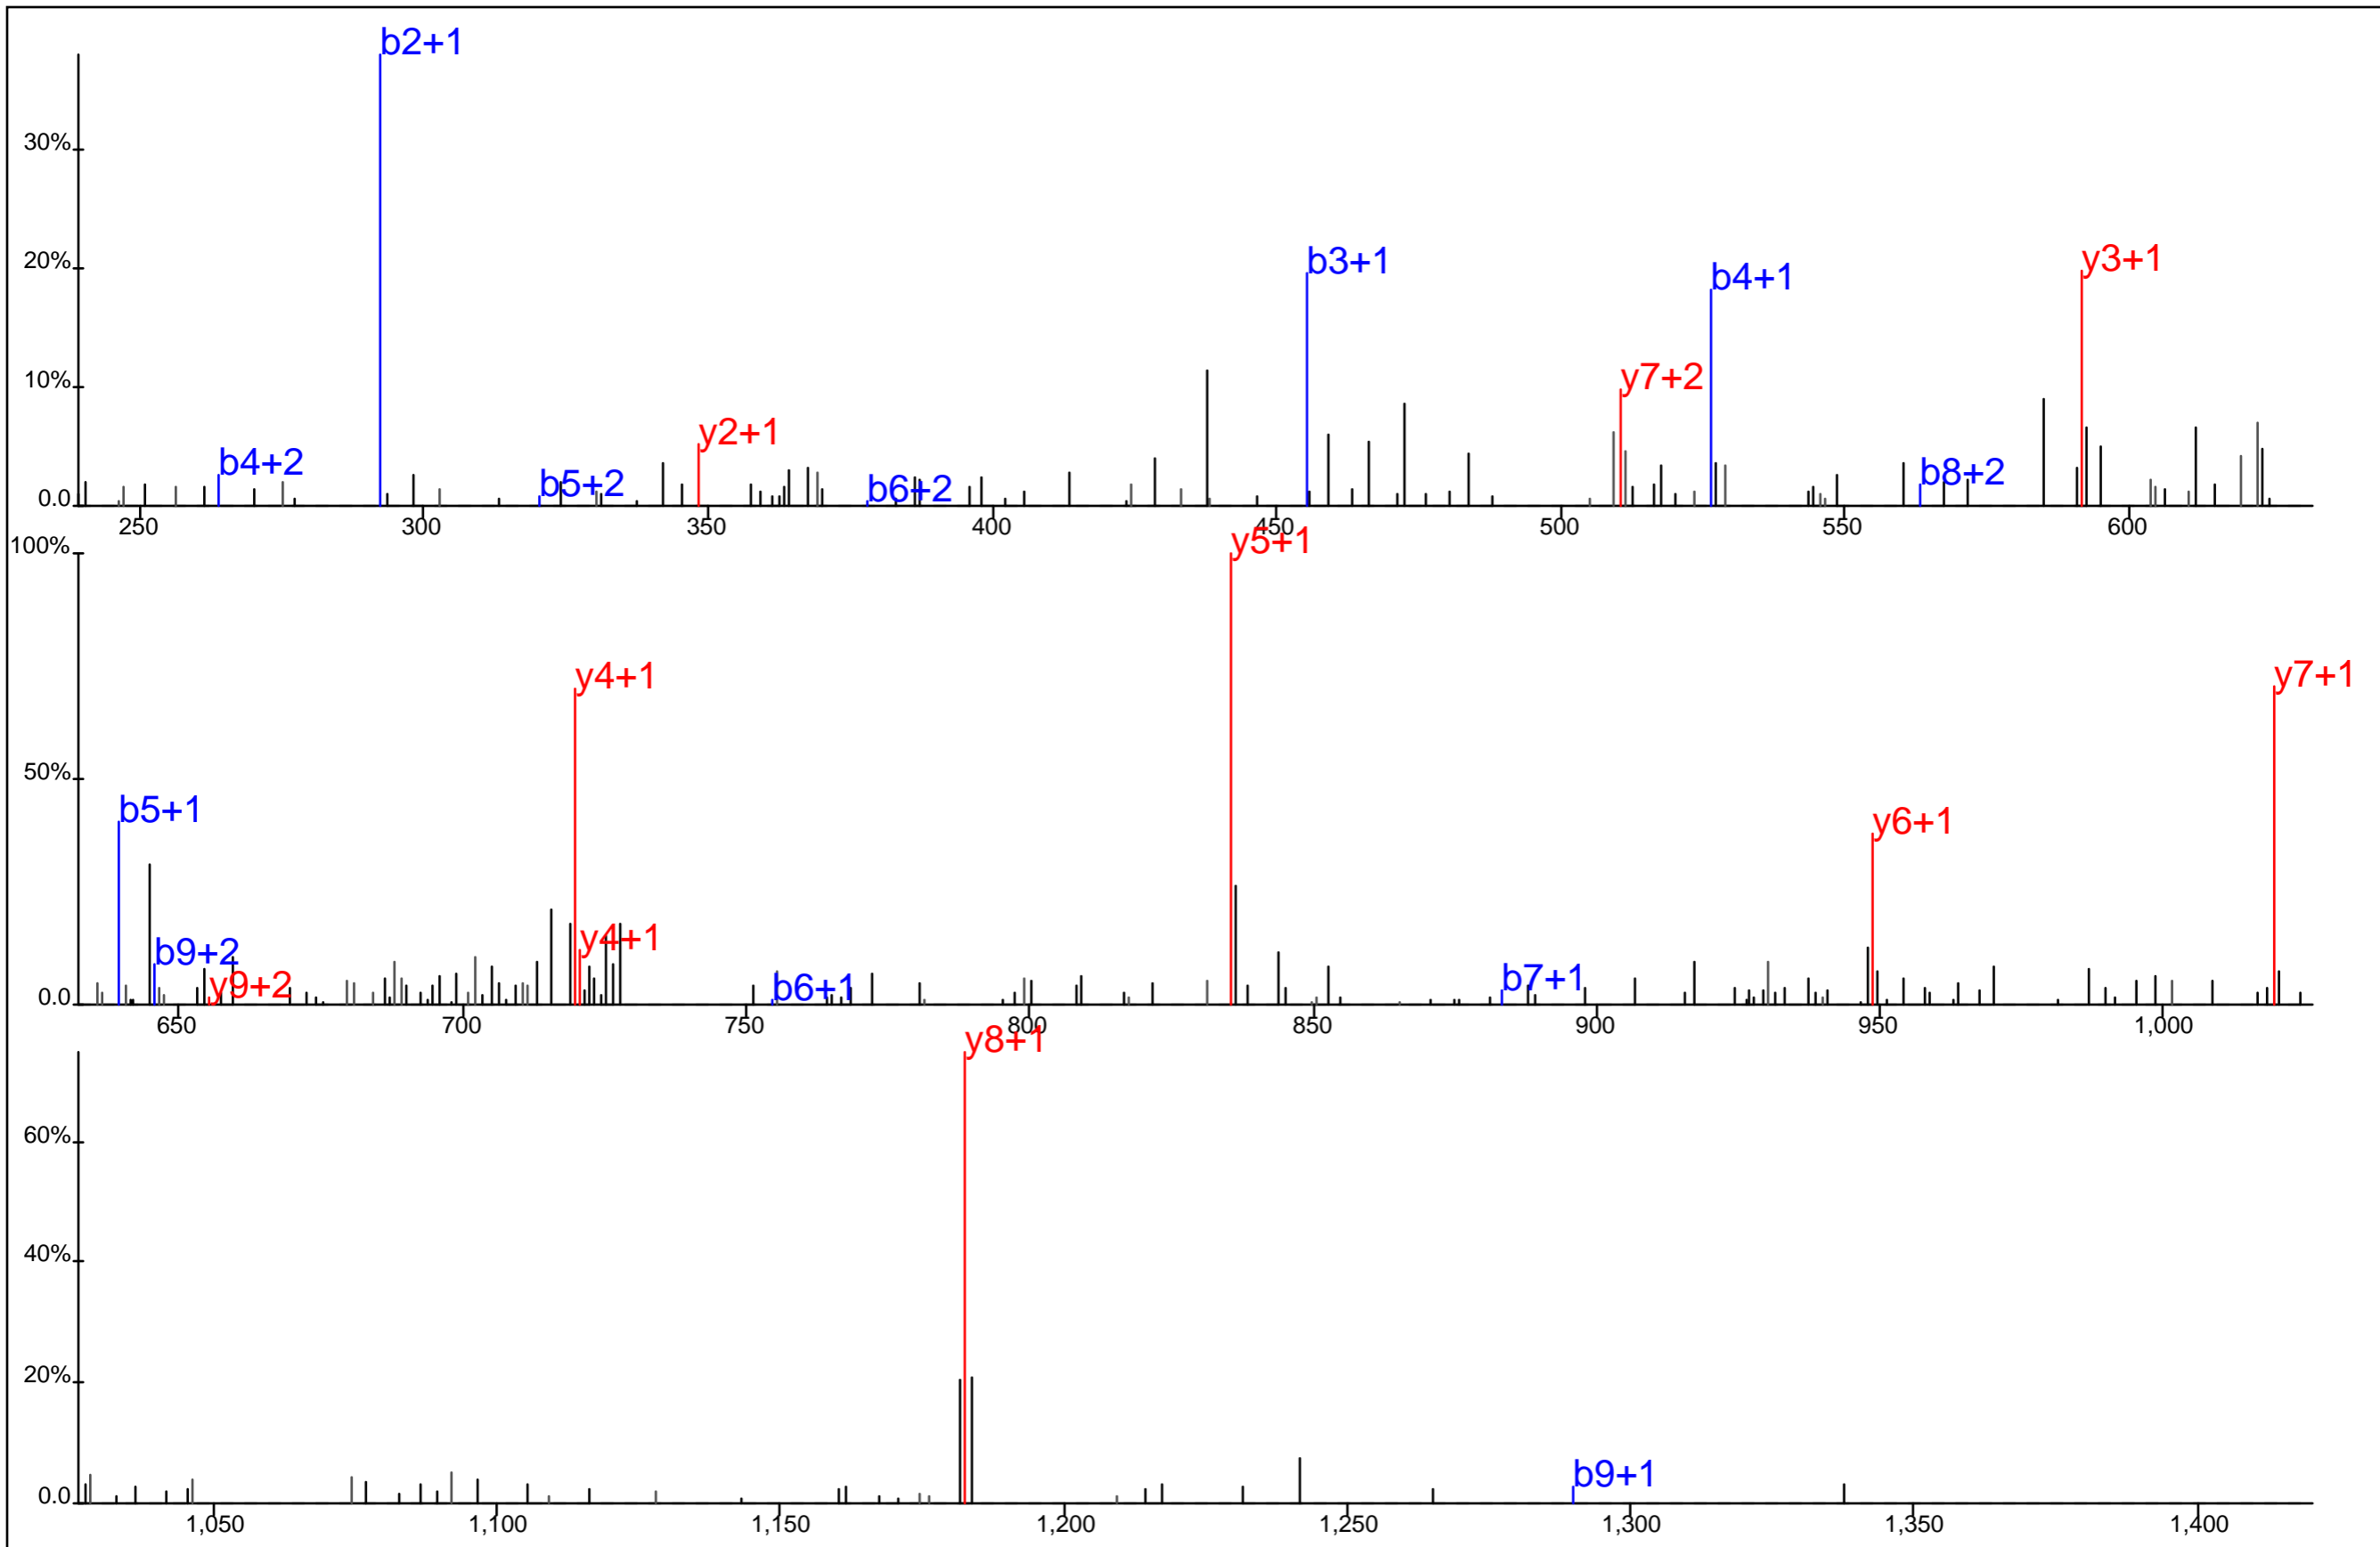

|    |   |   |   |   |   |   |     |
|----|---|---|---|---|---|---|-----|
| ■  | ■ | ■ | ■ | ■ | ■ | ■ | ■   |
| Y  | Q | Y | A | I | D | E | Y*Y |
| R% |   |   |   |   |   |   |     |
| □  | □ | □ | □ | □ | □ | □ | □   |
|    |   |   |   |   |   |   |     |

Protein Name: C14orf24  
 gi Accession: 118498366  
 Precursor Mass: 737.3066+2  
 Delta Mass: 6.710 ppm  
 XCorr: 40.02



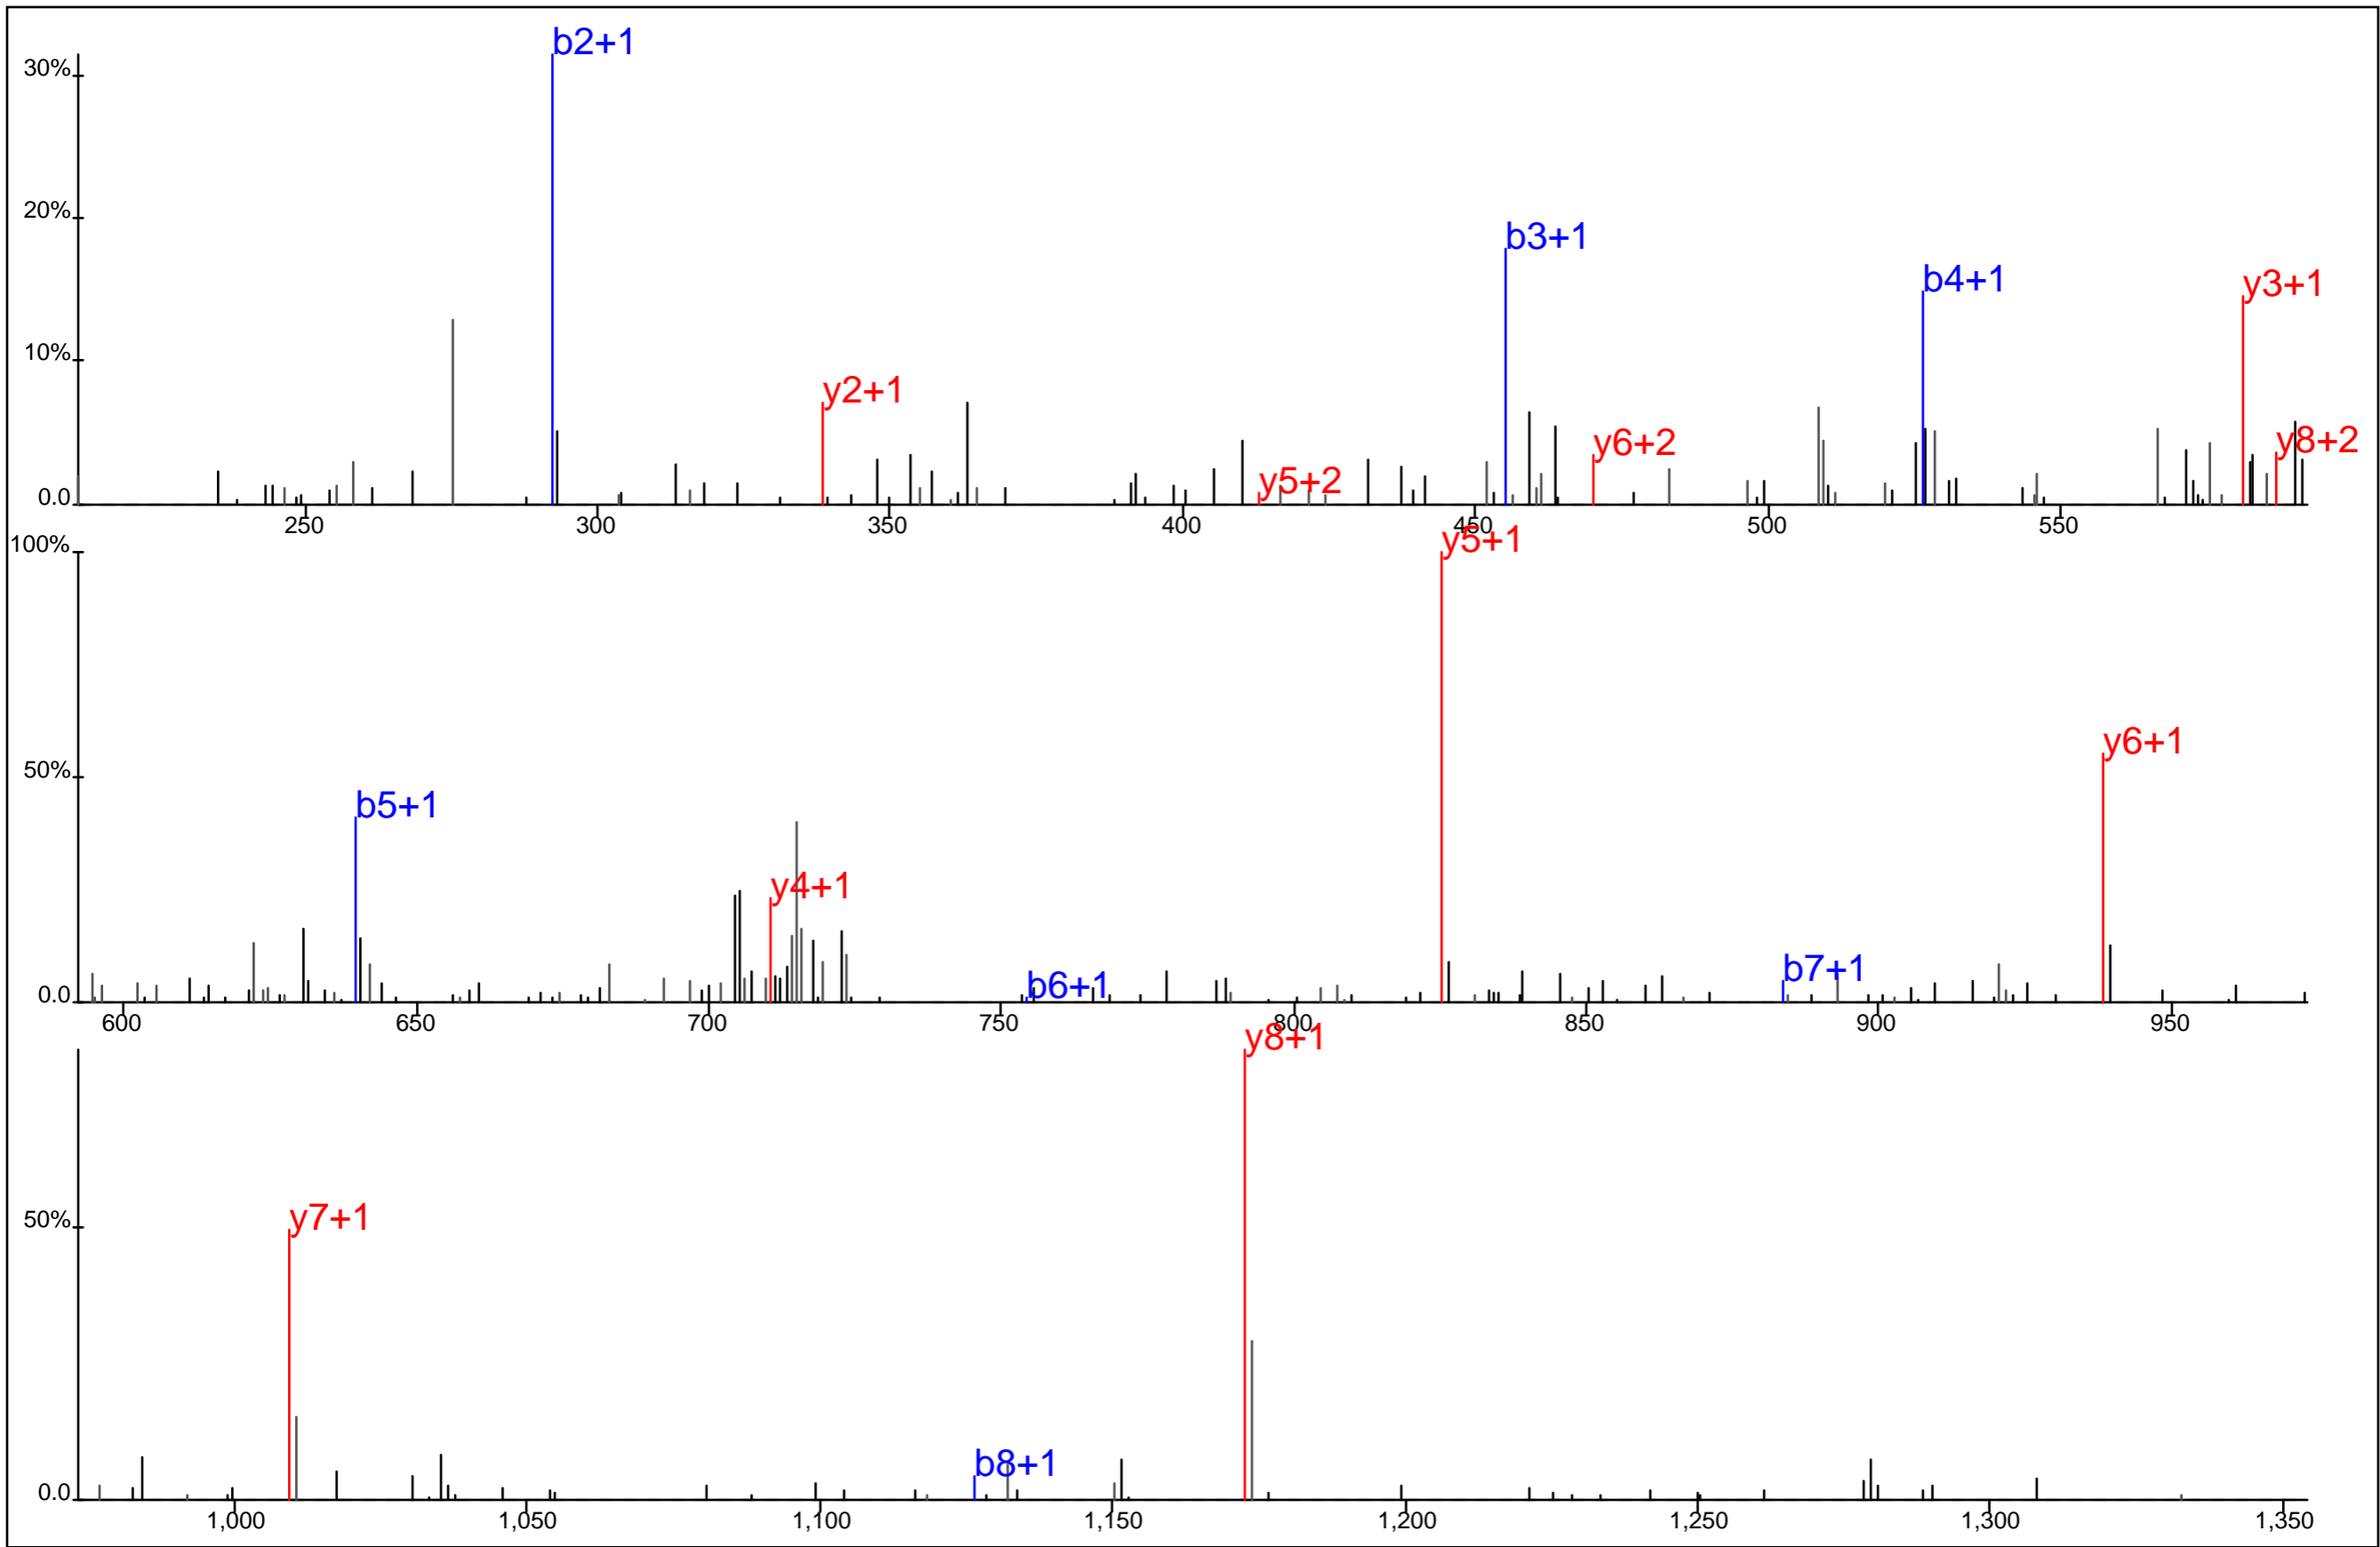

■ ■ ■ ■ ■ ■ ■ ■  
■ ■ ■ ■ ■ ■ ■ ■  
**Y Q Y A I D E Y\*Y R**

Protein Name: C14orf24  
 gi Accession: 118498366  
 Precursor Mass: 732.3017+2  
 Delta Mass: 5.656 ppm  
 XCorr: 31.31

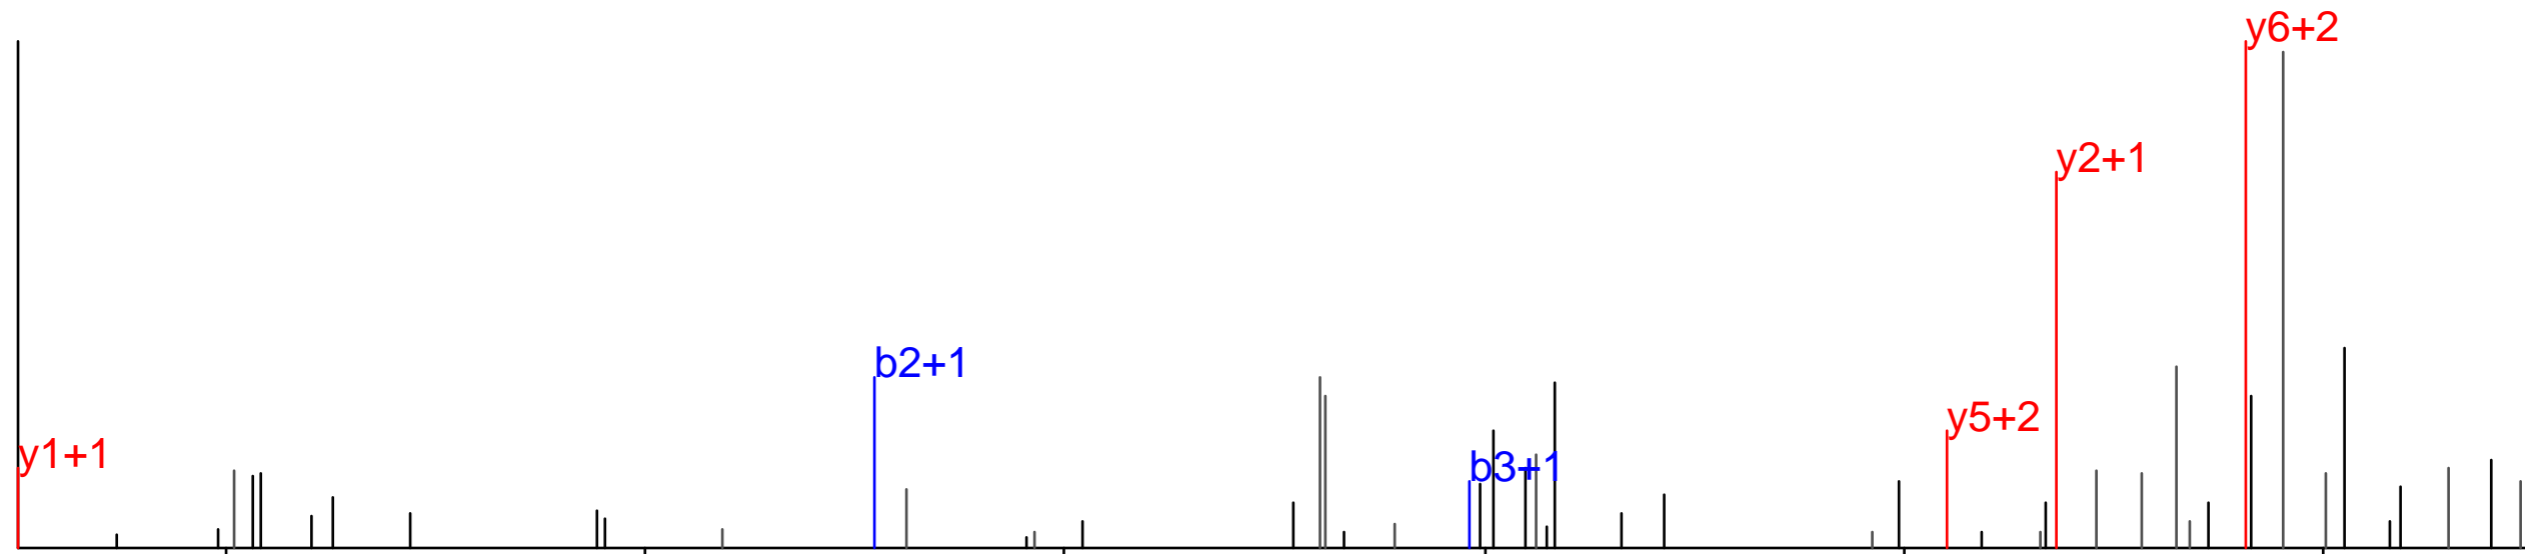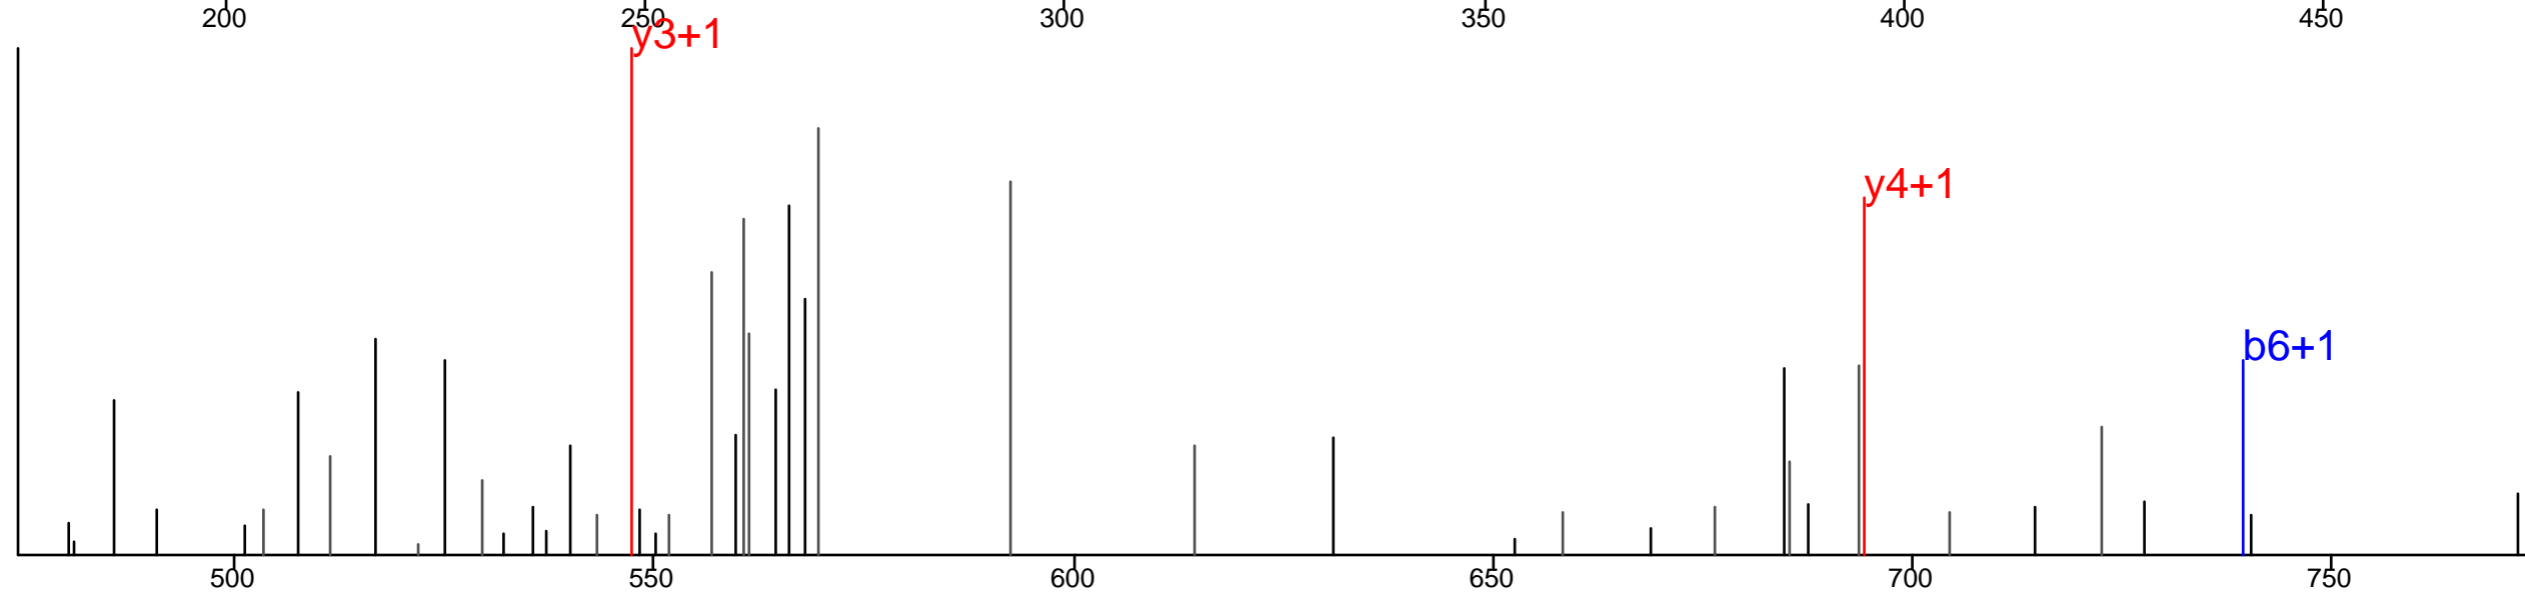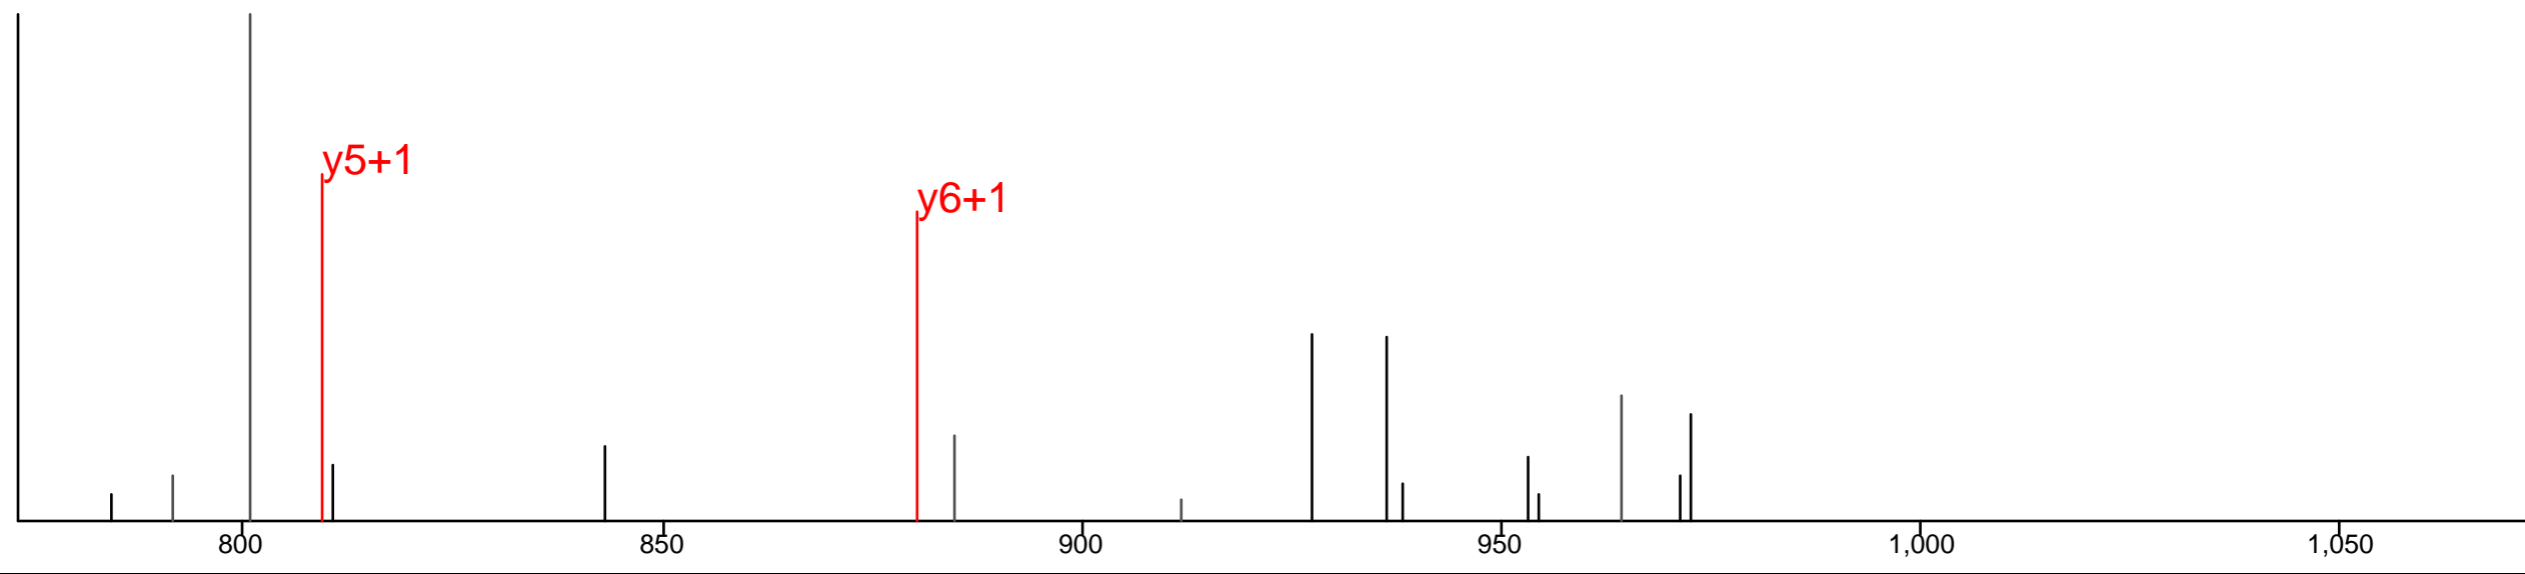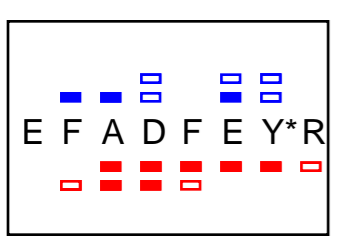

Protein Name: C19orf13  
 gi Accession: 14041999  
 Precursor Mass: 578.7244+2  
 Delta Mass: 5.870 ppm  
 XCorr: 32.84

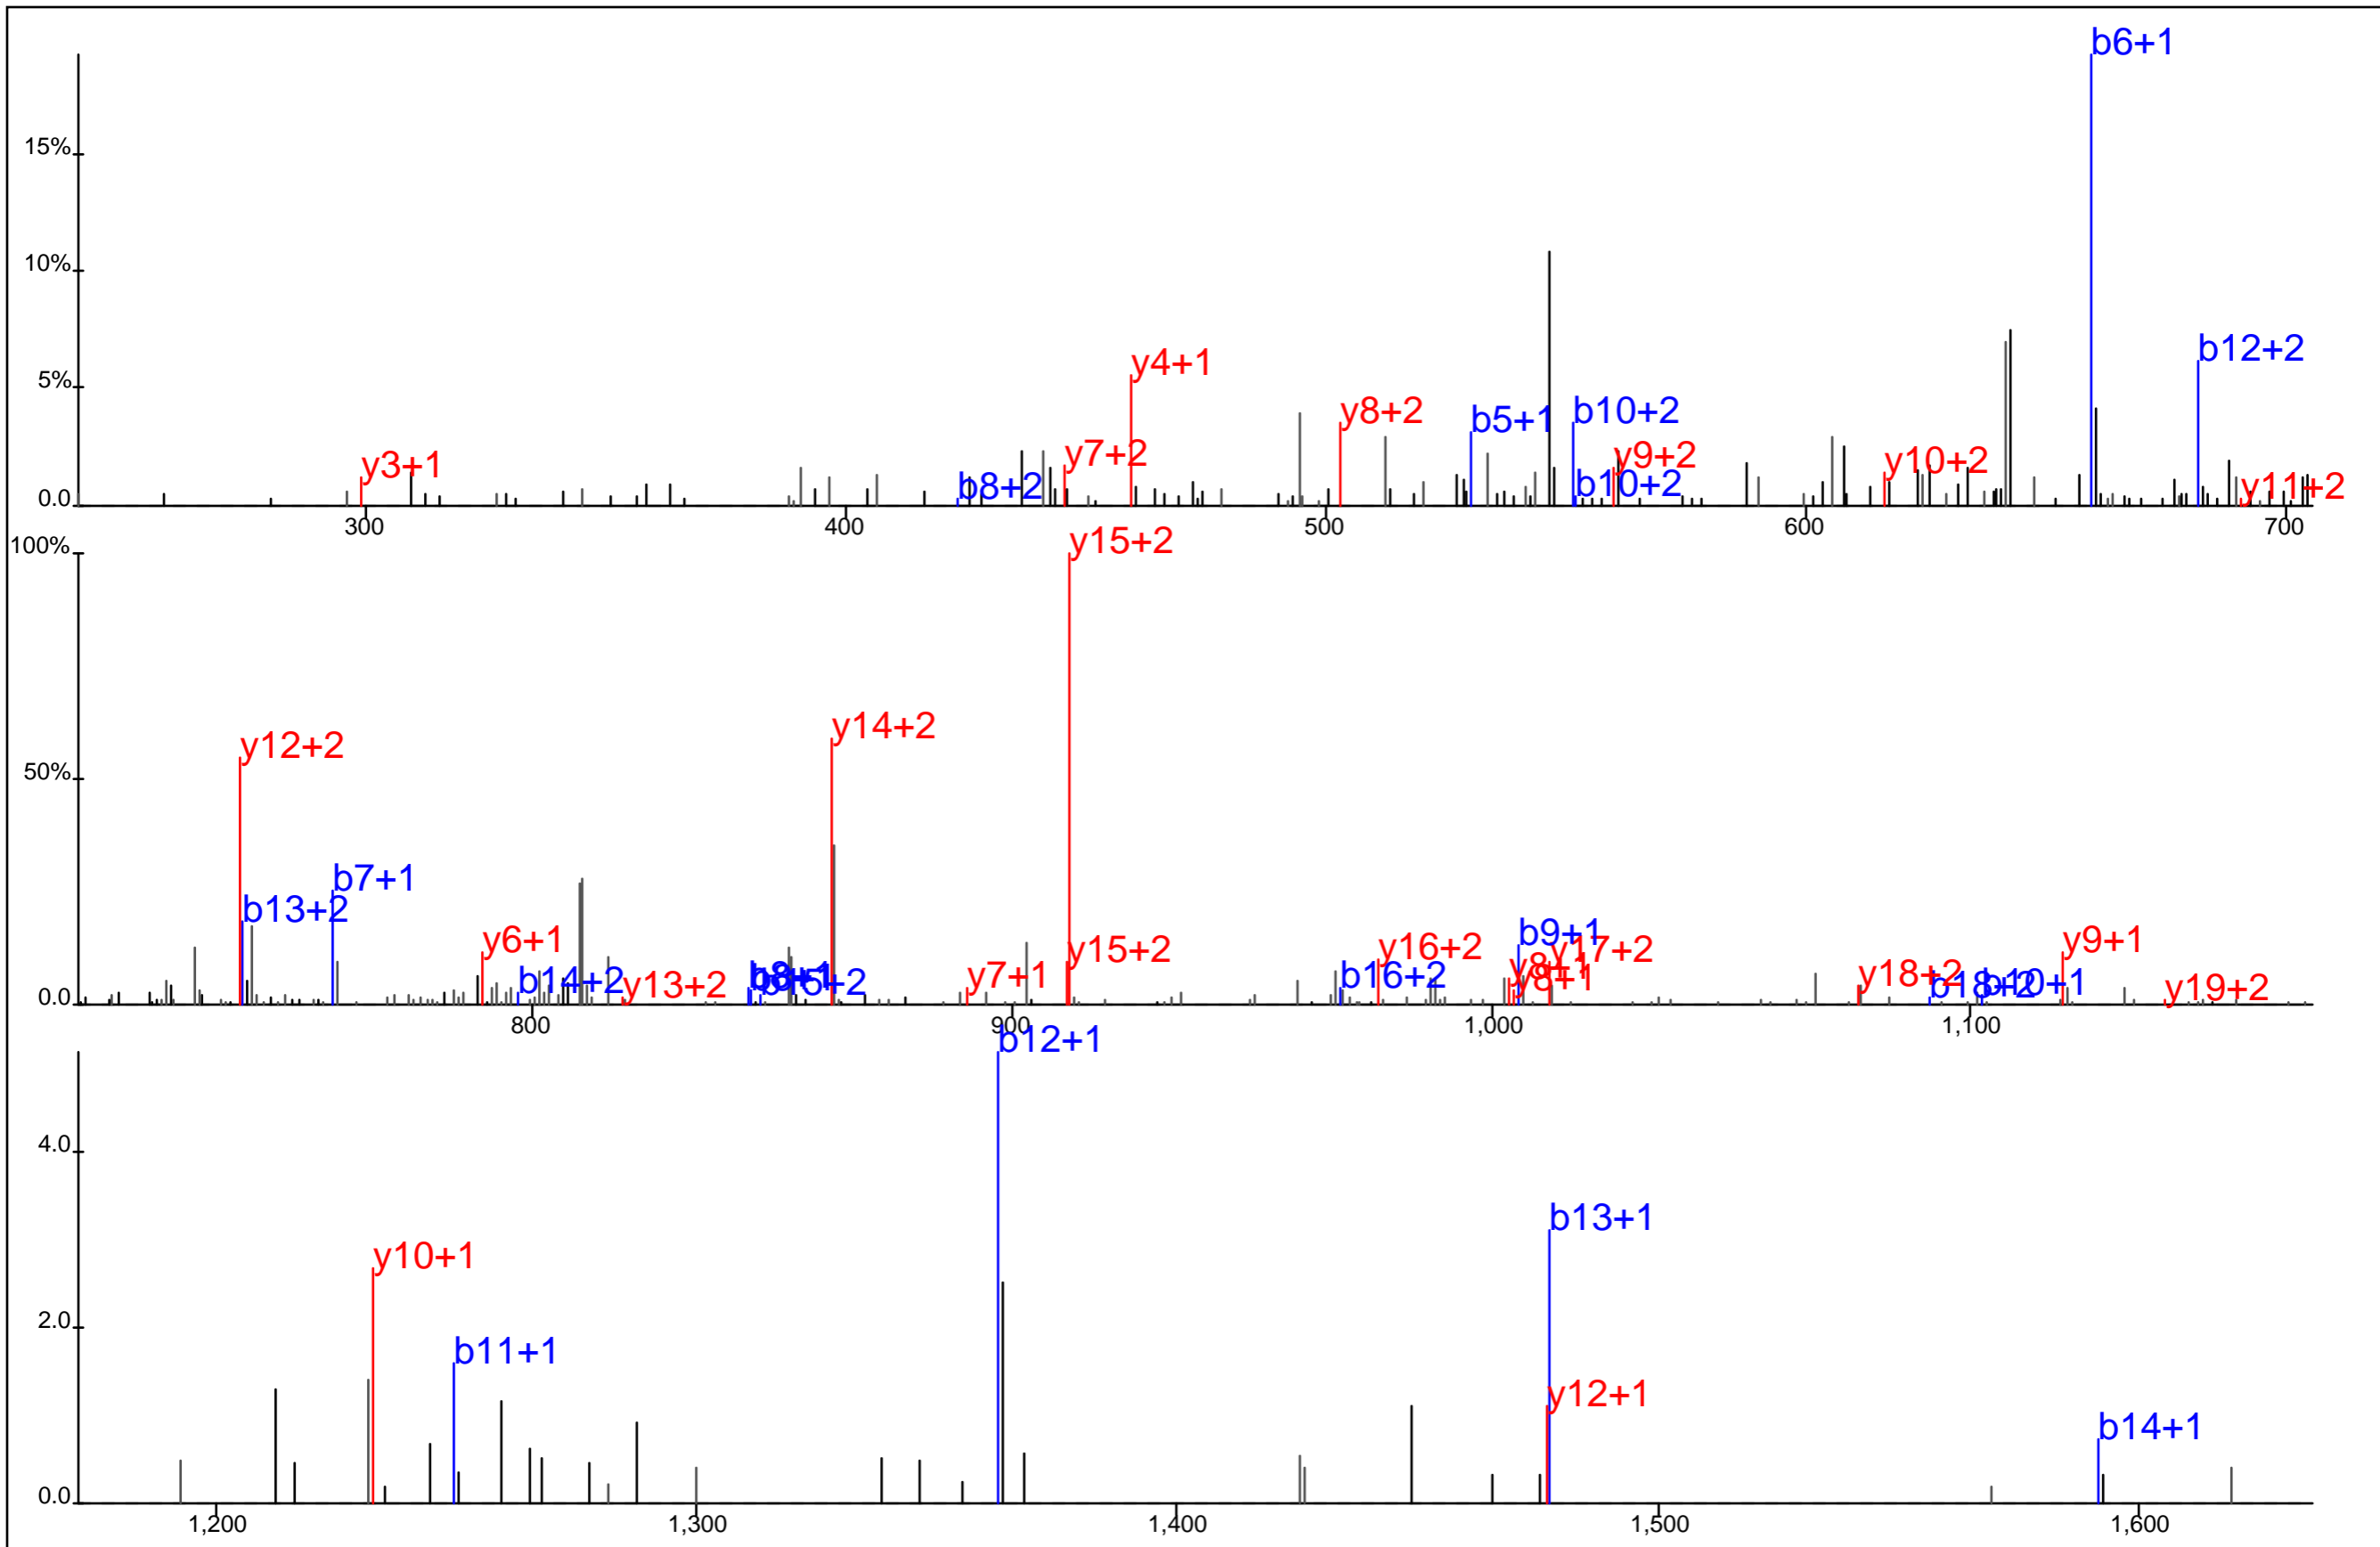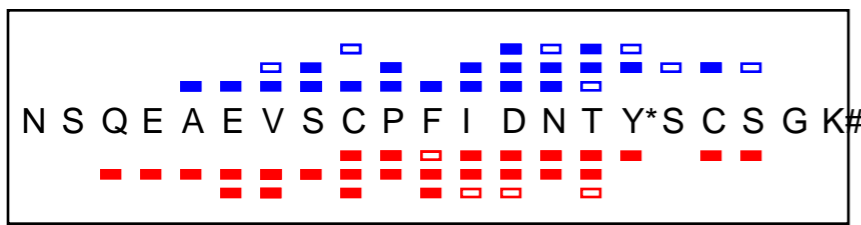

Protein Name: C20orf18  
 gi Accession: 34189561  
 Precursor Mass: 827.6694+3  
 Delta Mass: 4.518 ppm  
 XCorr: 62.99

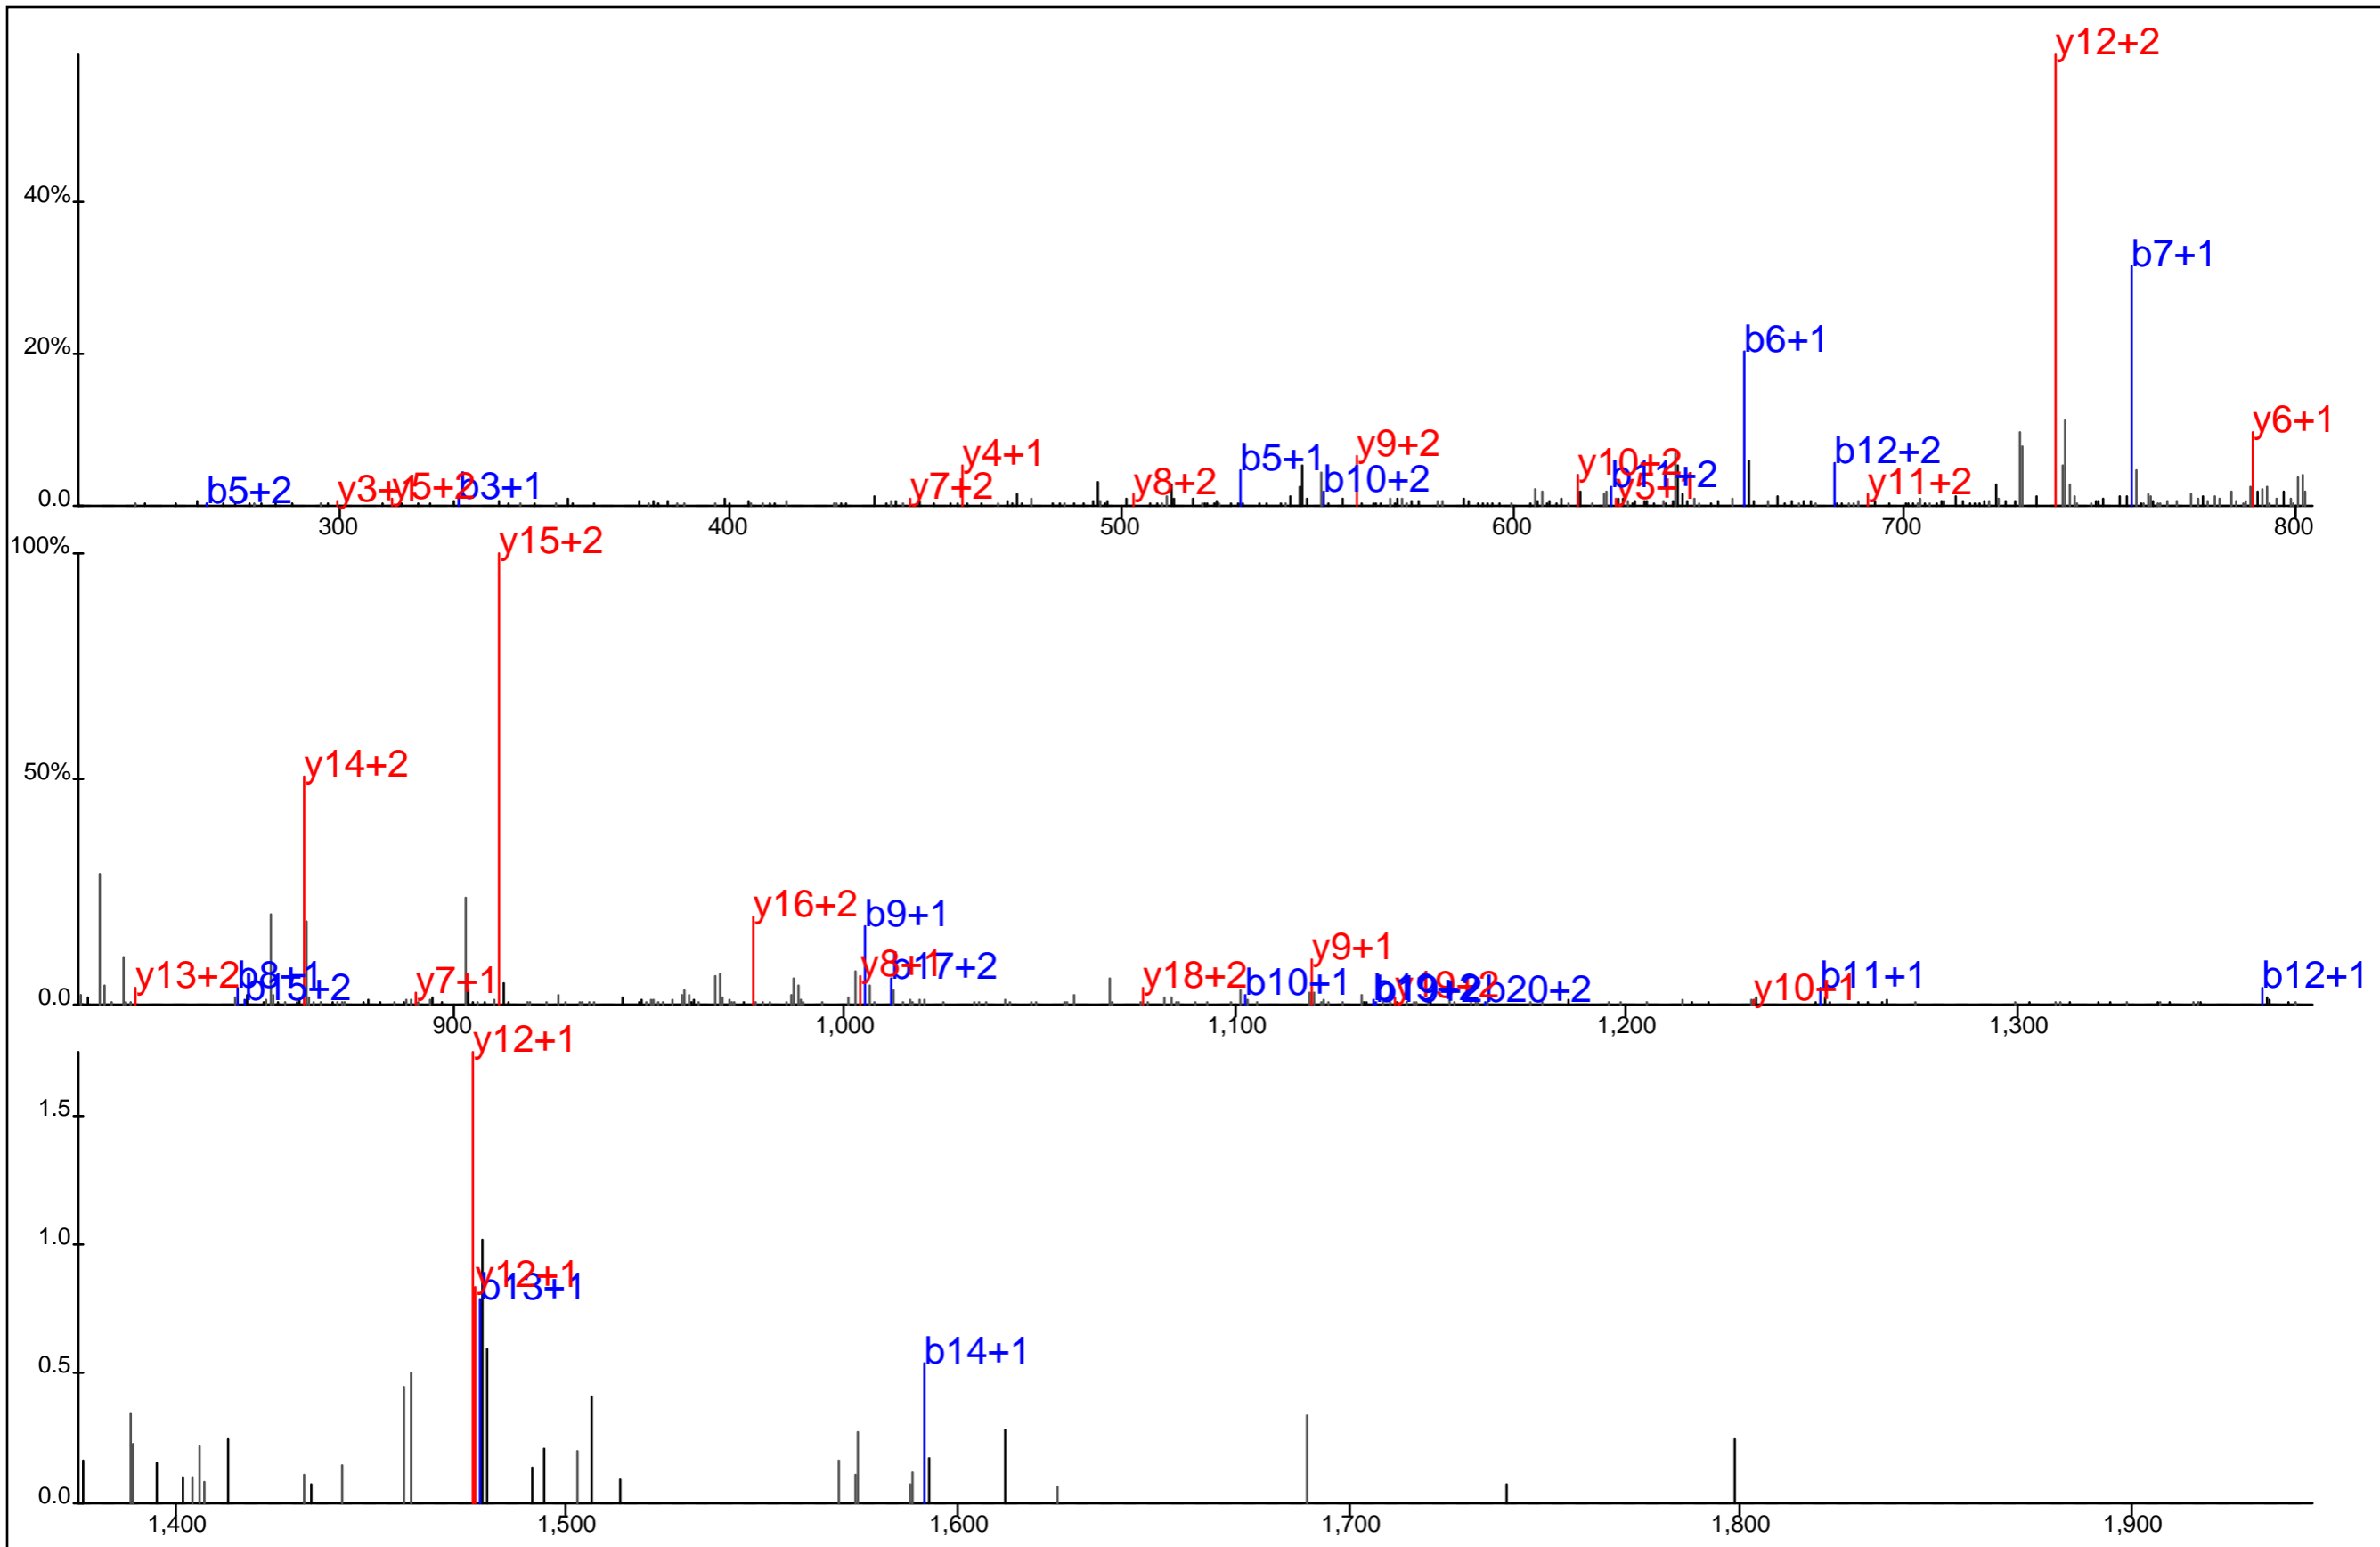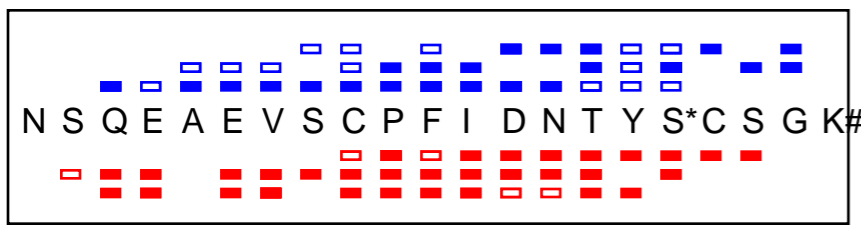

Protein Name: C20orf18  
 gi Accession: 34189561  
 Precursor Mass: 827.6711+3  
 Delta Mass: 6.582 ppm  
 XCorr: 63.66



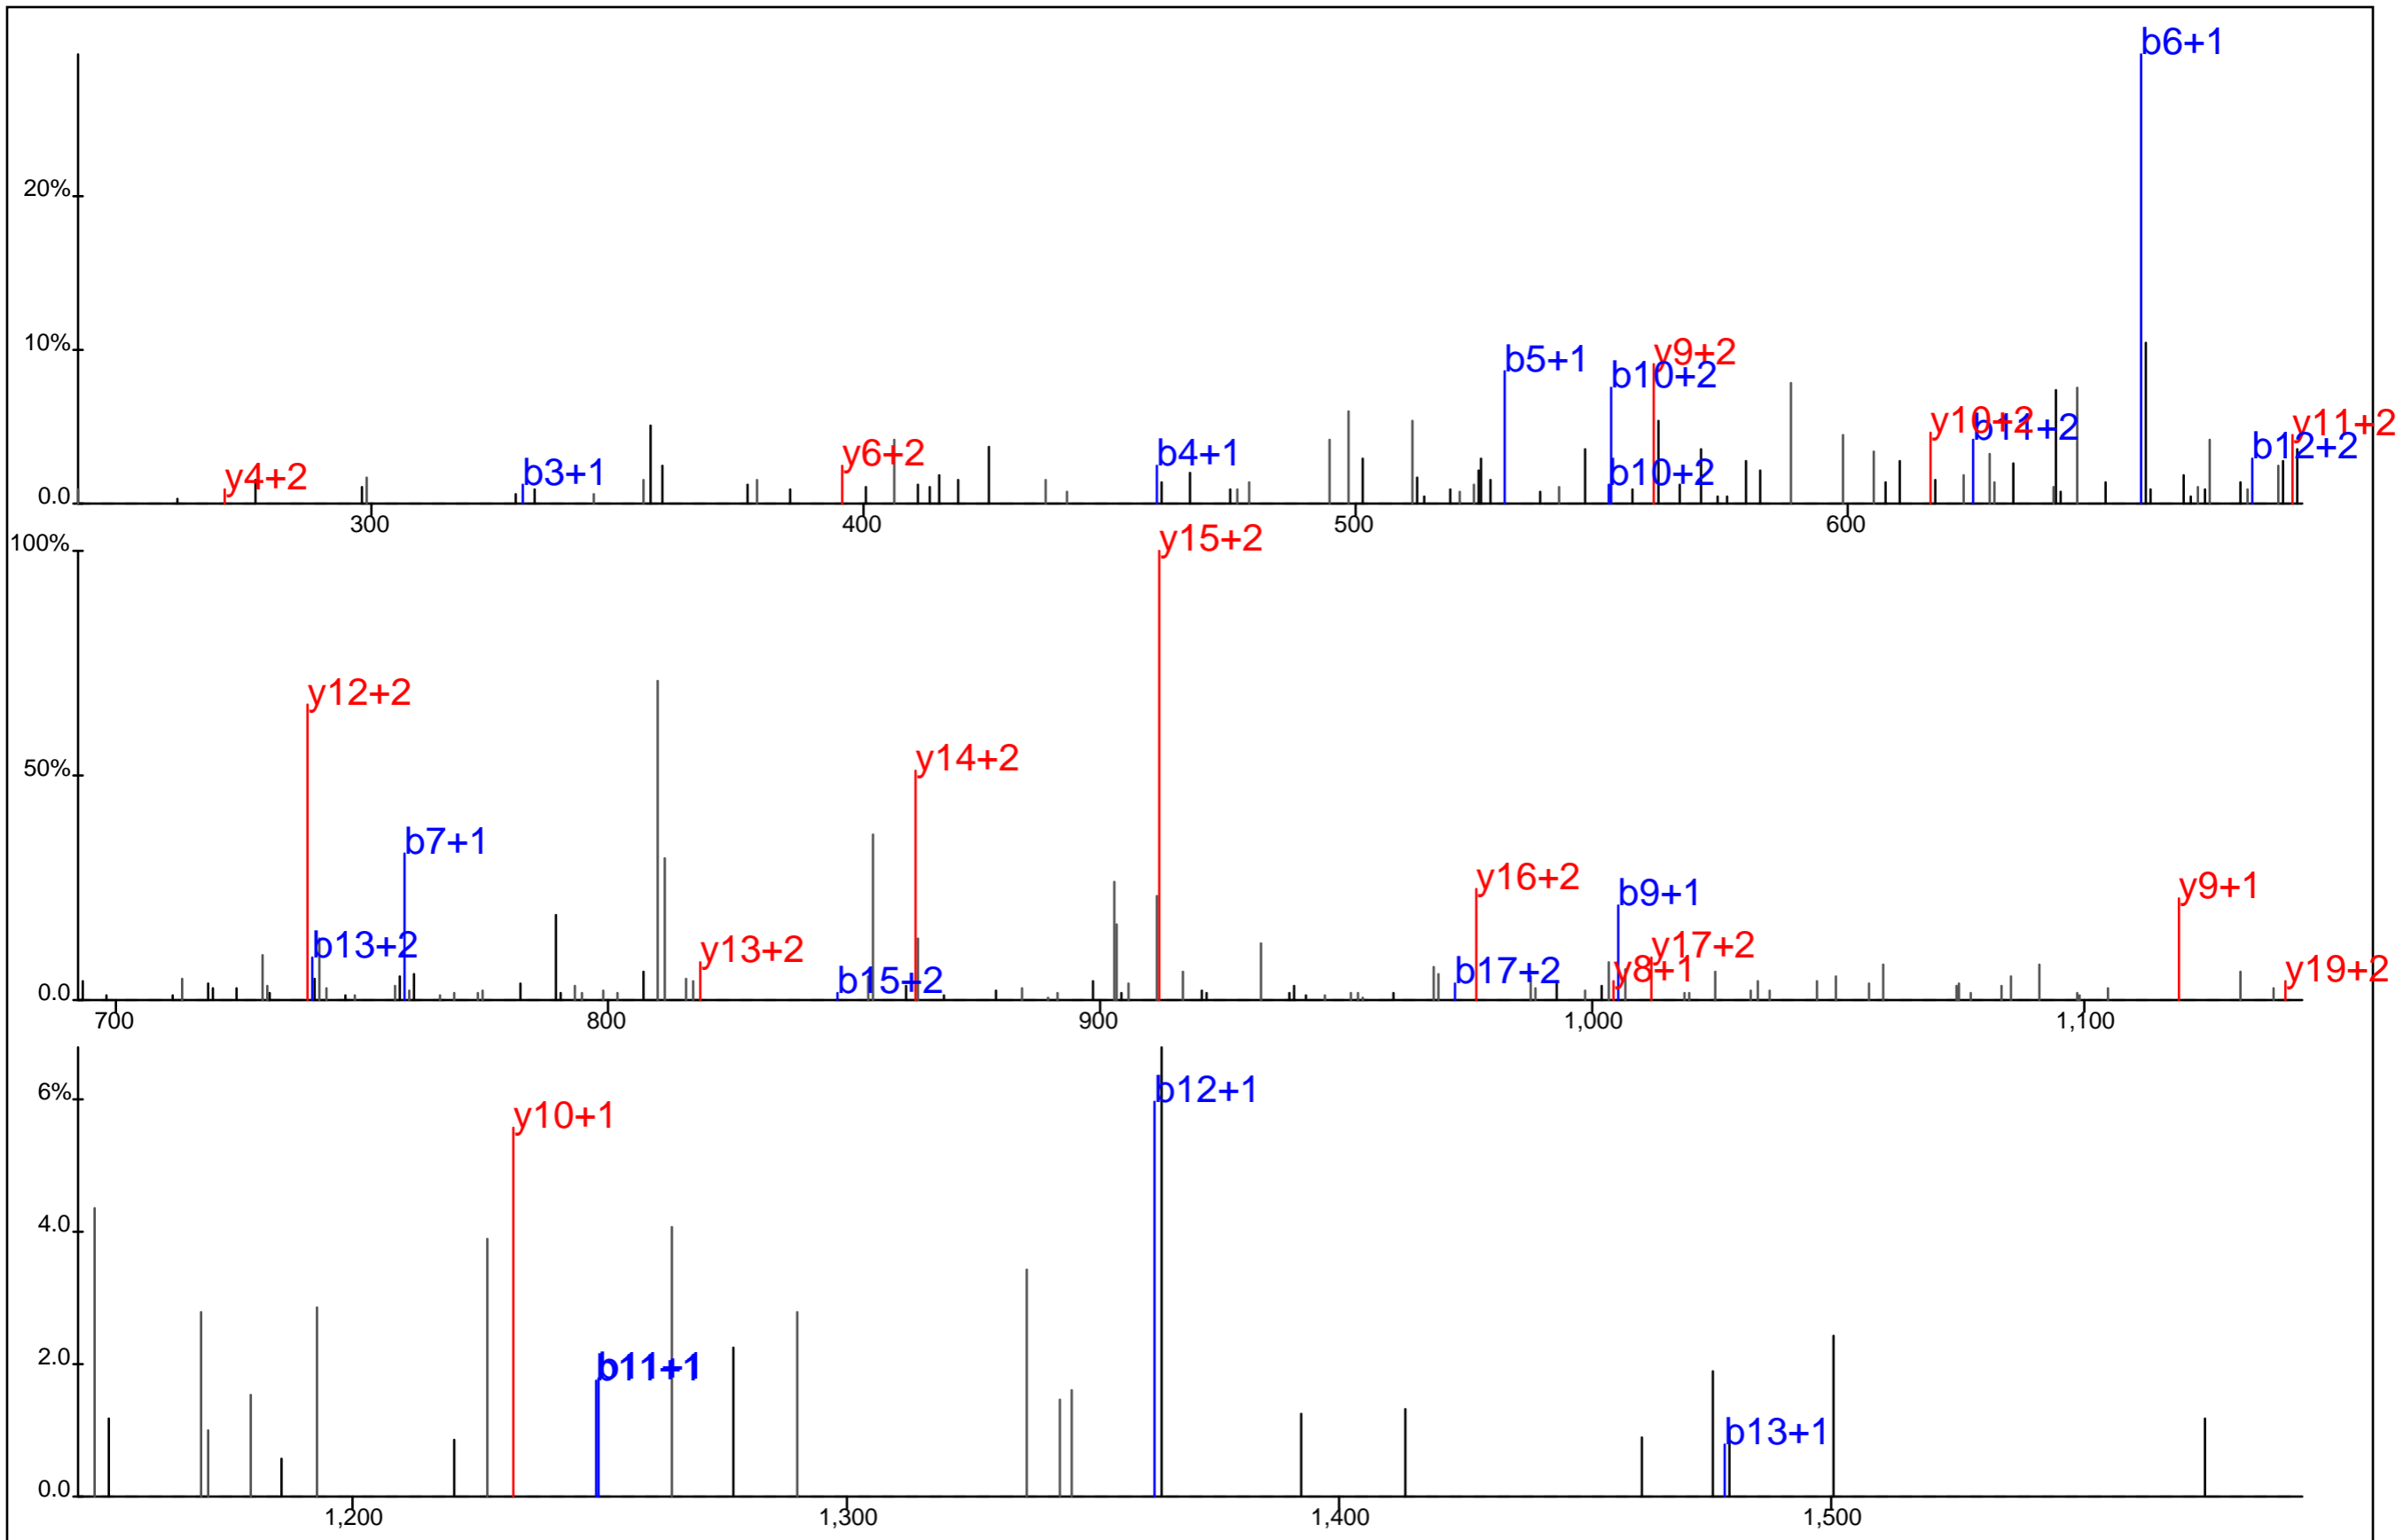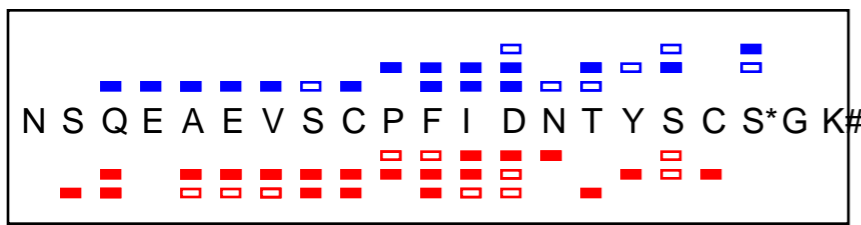

Protein Name: C20orf18  
 gi Accession: 34189561  
 Precursor Mass: 827.6586+3  
 Delta Mass: 8.545 ppm  
 XCorr: 41.81

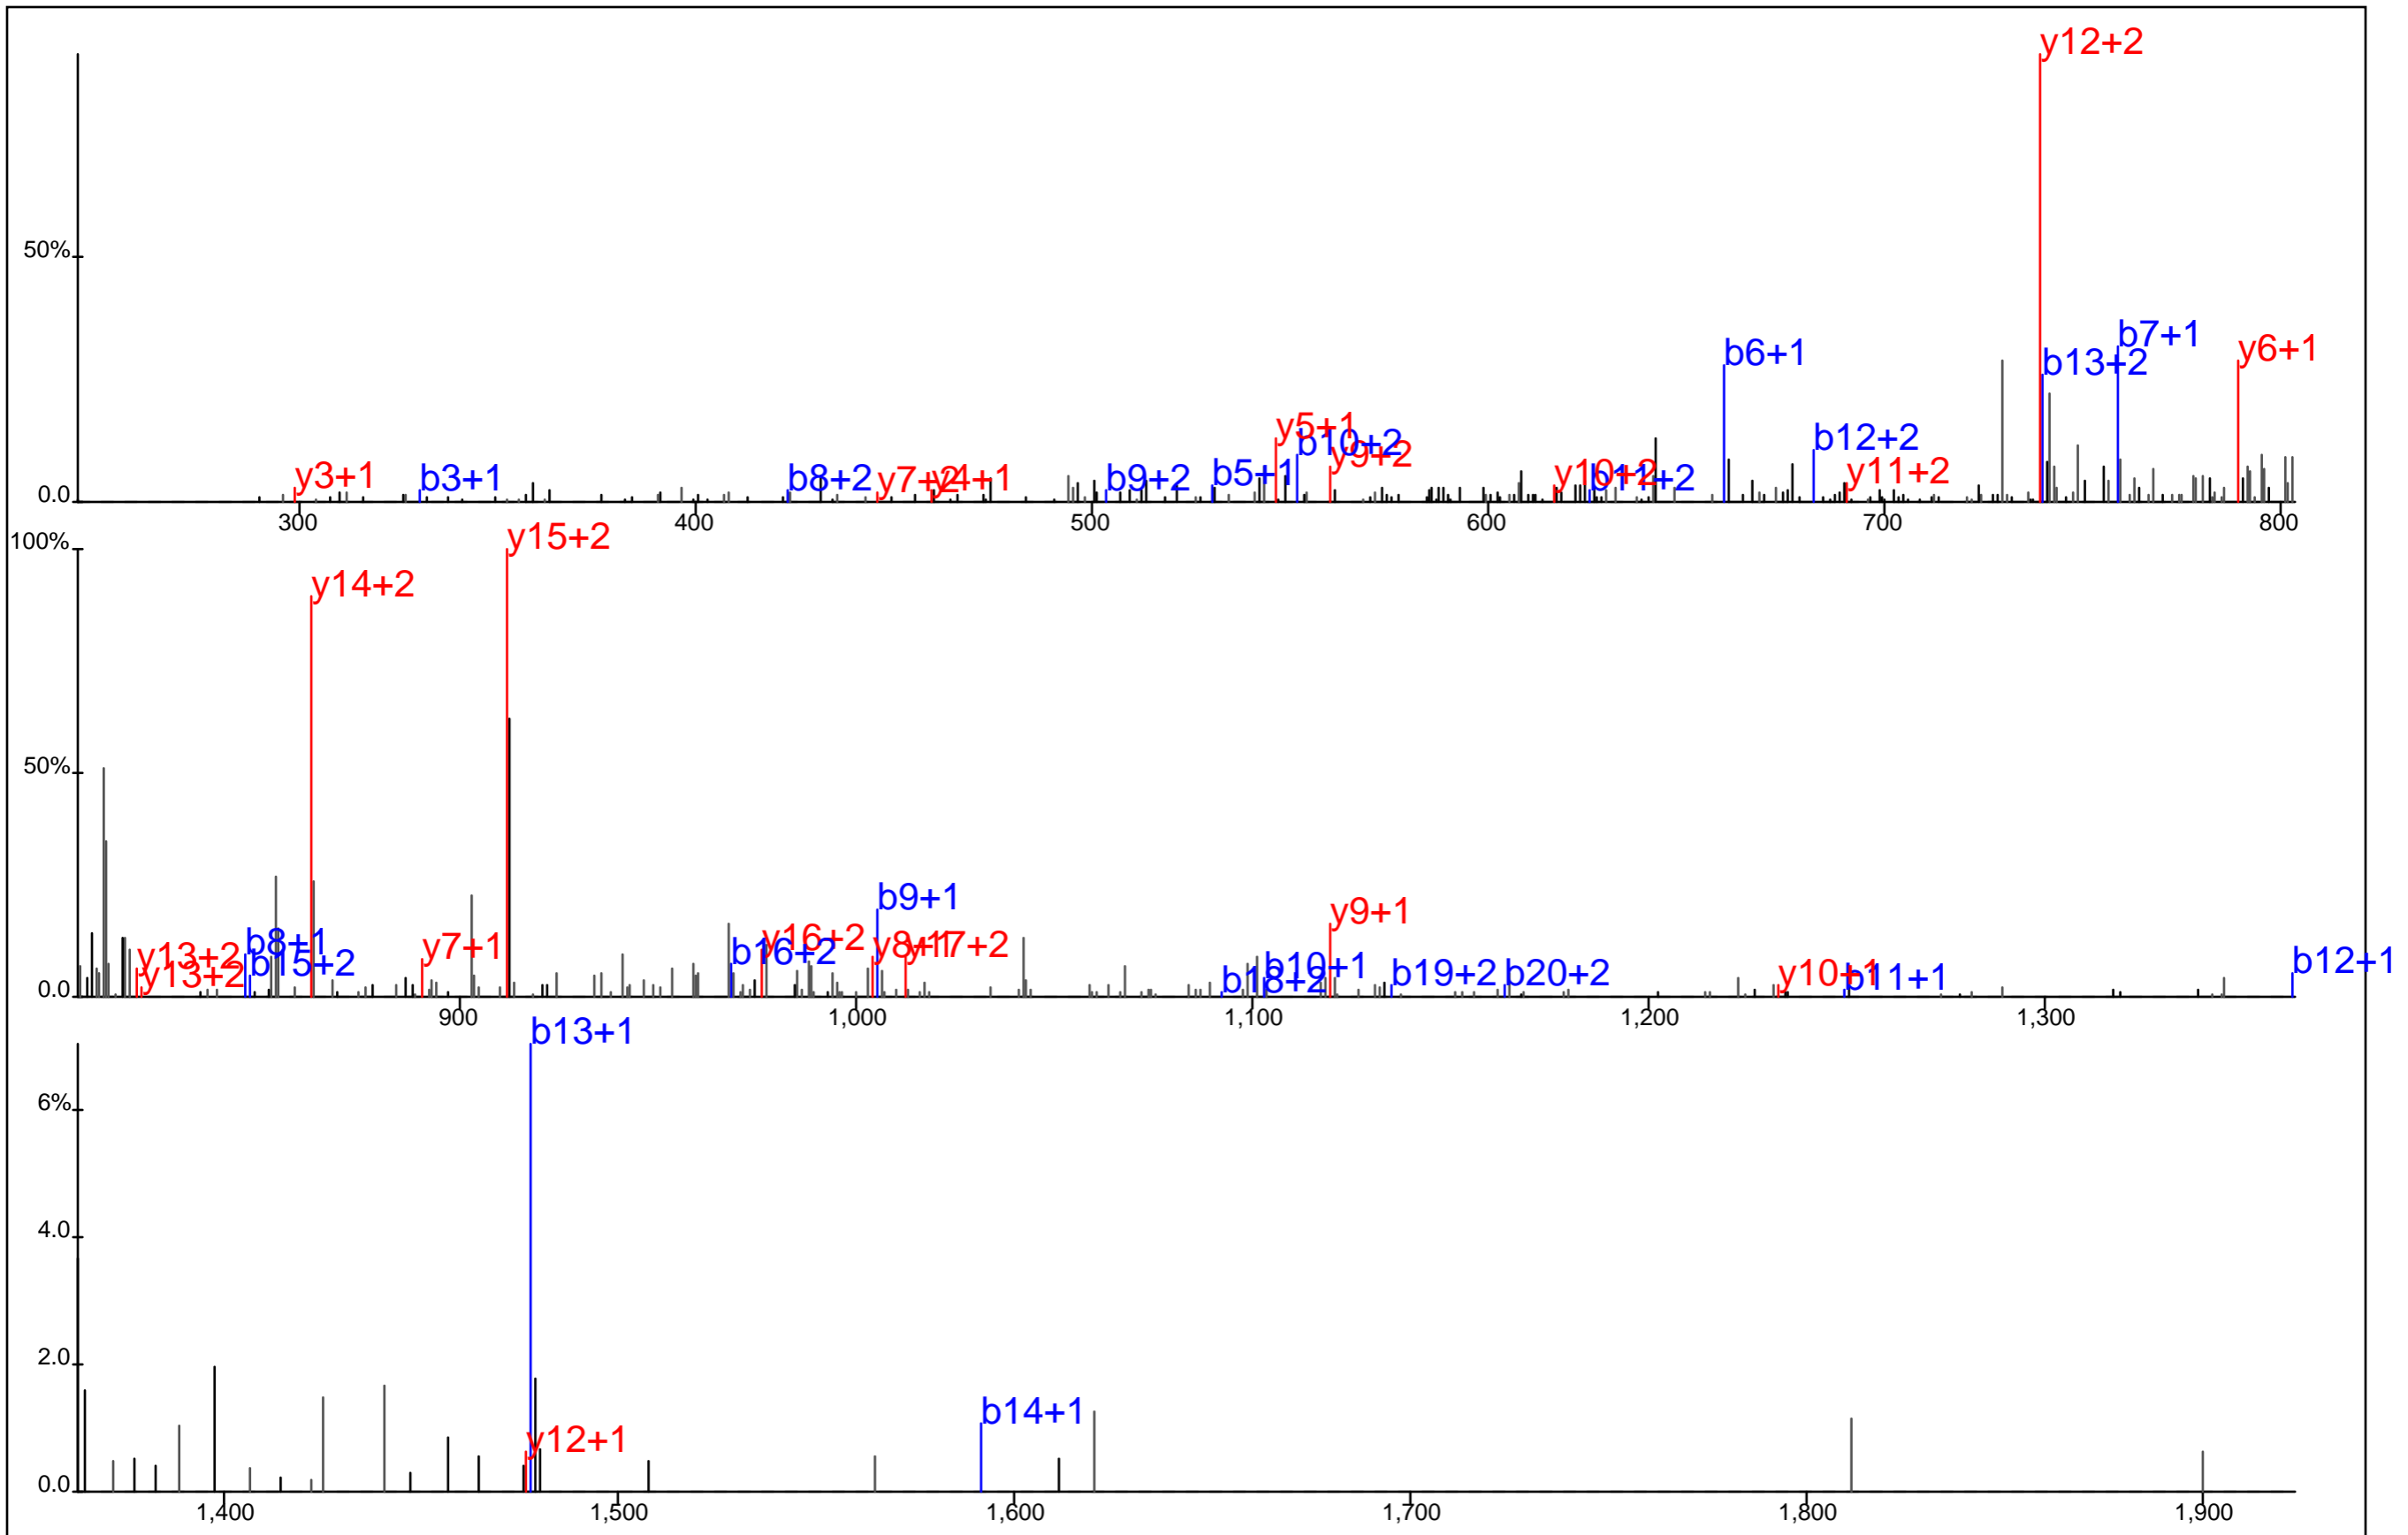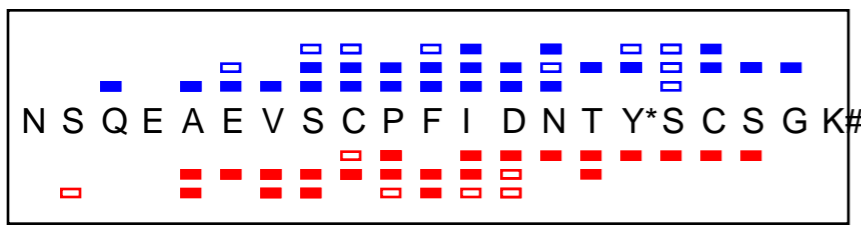

Protein Name: C20orf18  
 gi Accession: 34189561  
 Precursor Mass: 827.6707+3  
 Delta Mass: 6.065 ppm  
 XCorr: 40.0

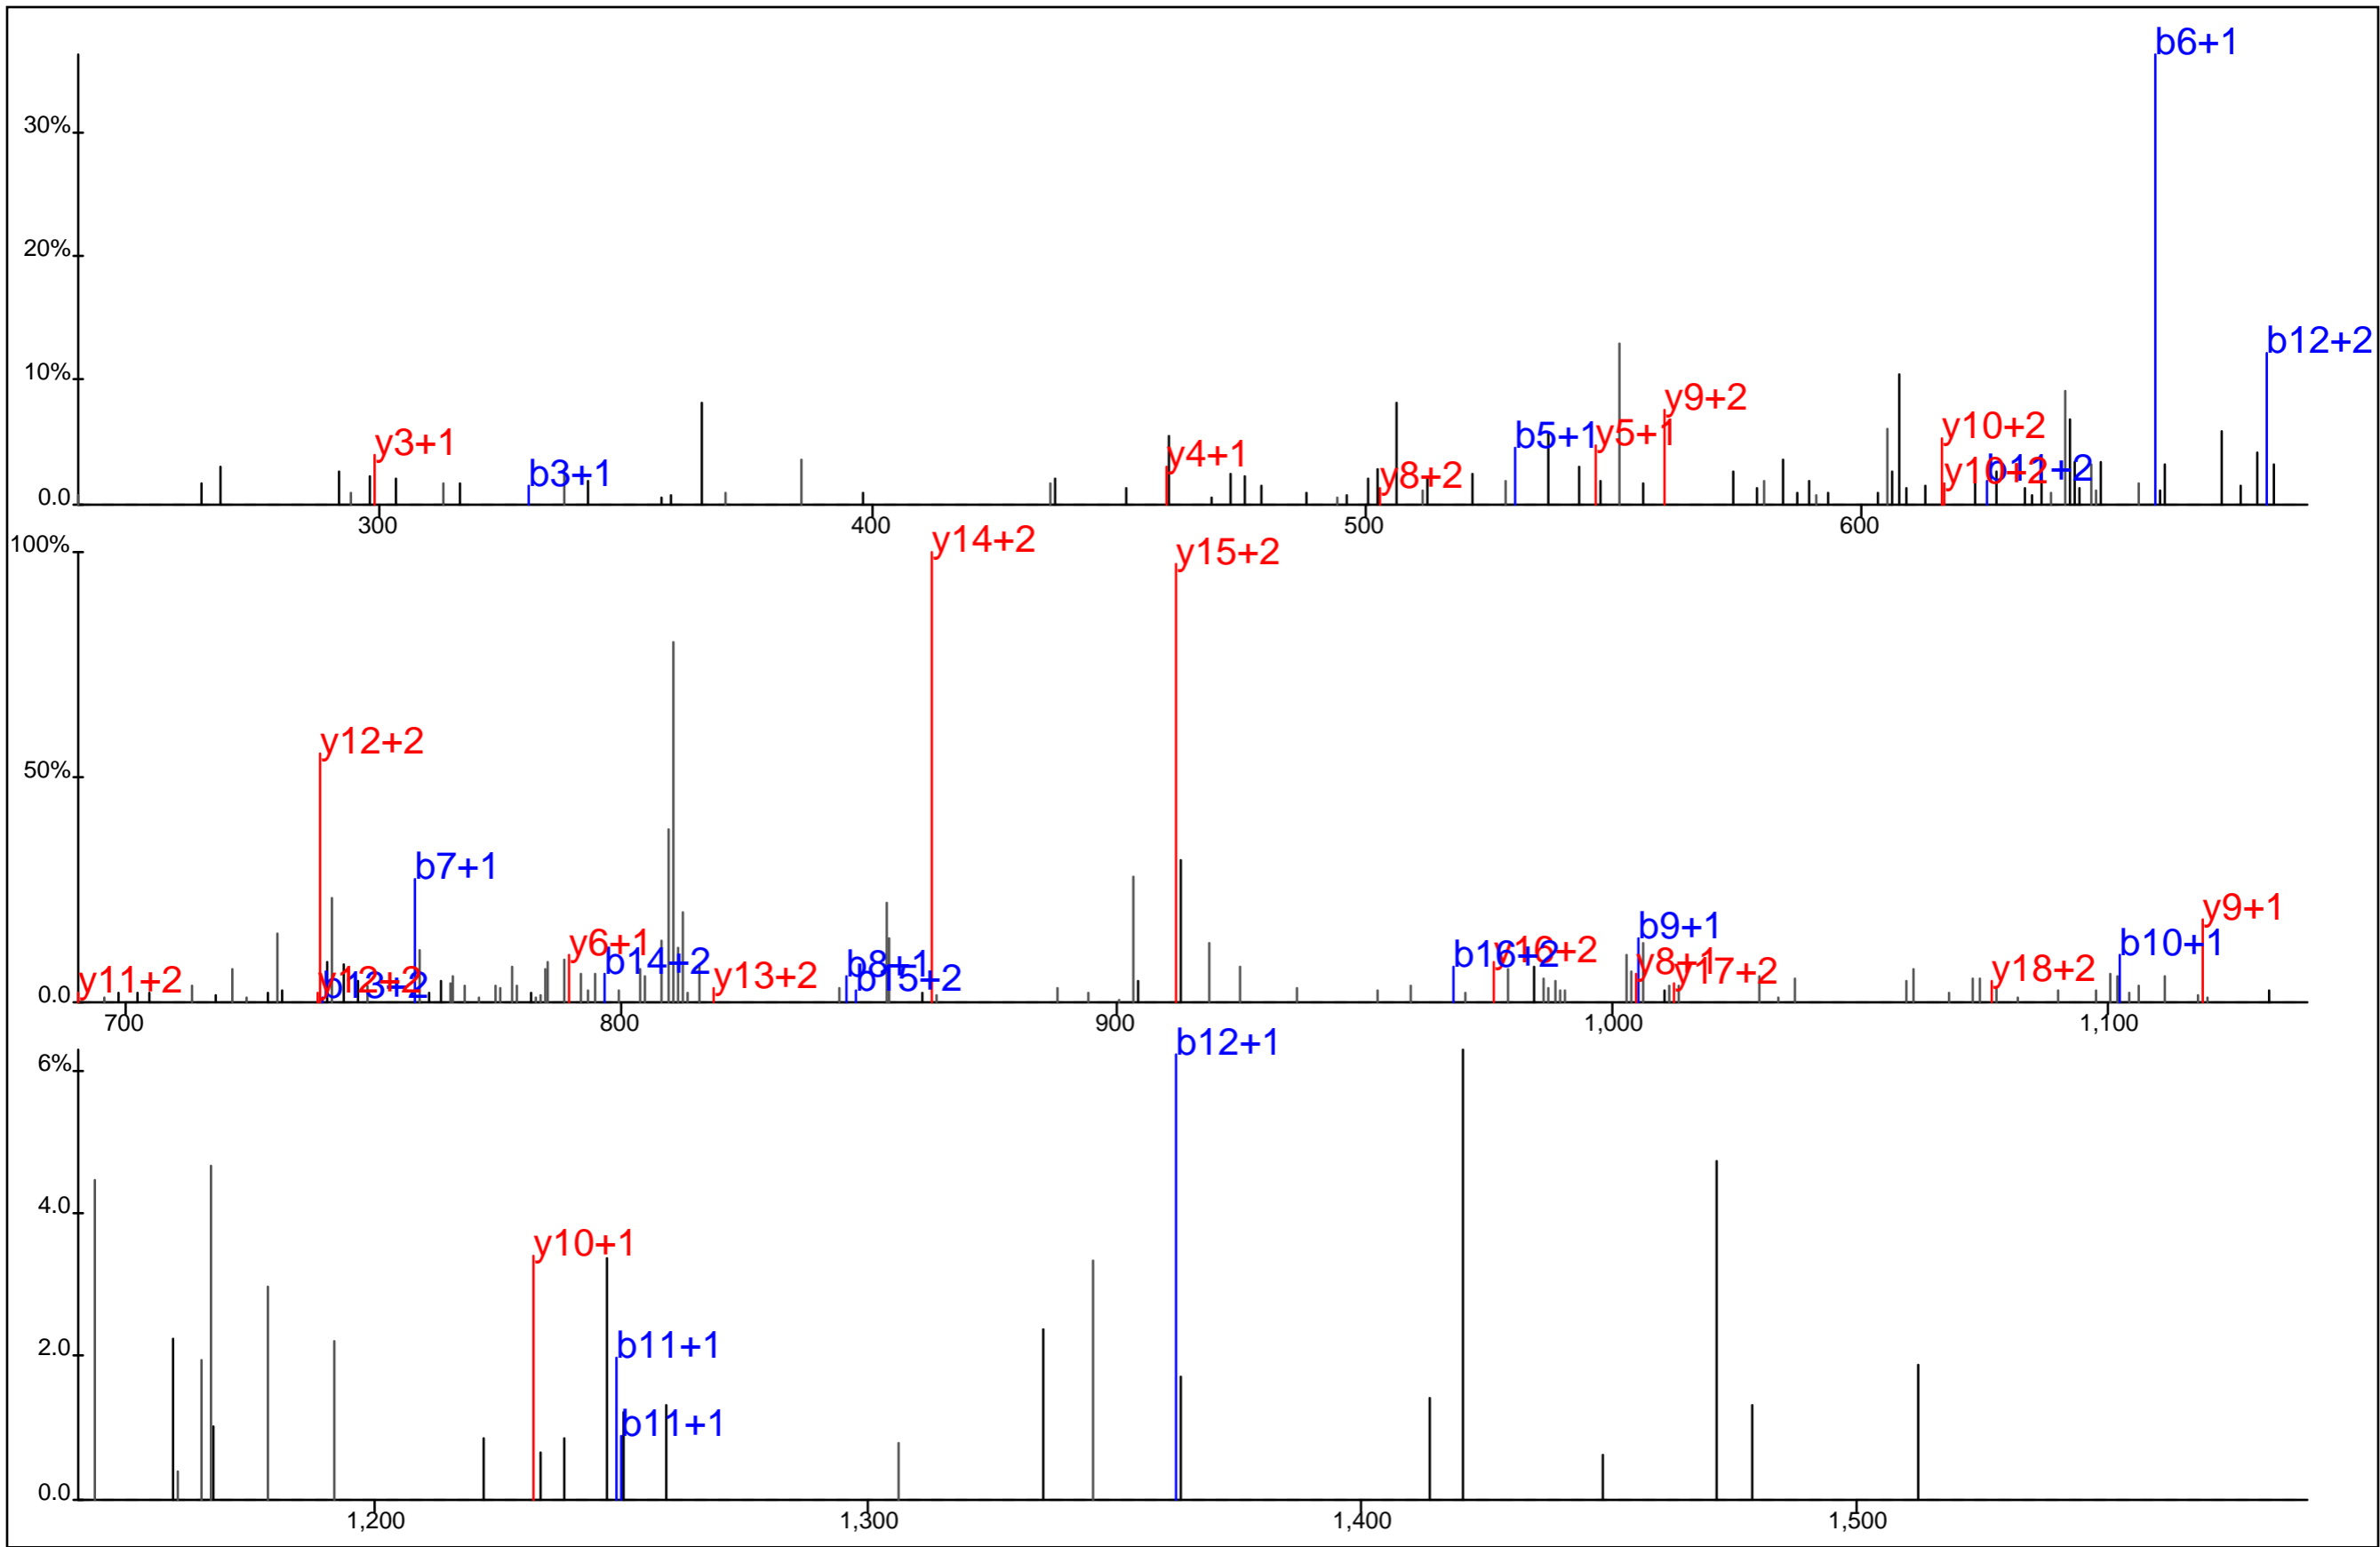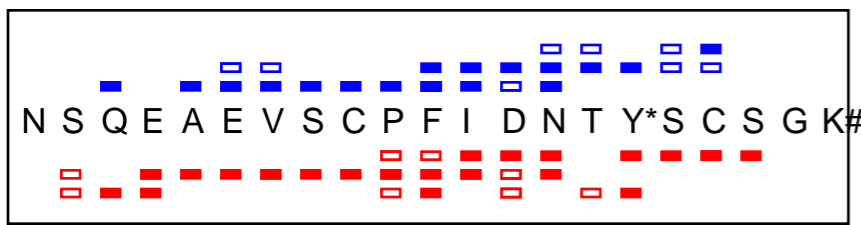

Protein Name: C20orf18  
 gi Accession: 34189561  
 Precursor Mass: 827.6722+3  
 Delta Mass: 7.912 ppm  
 XCorr: 38.62



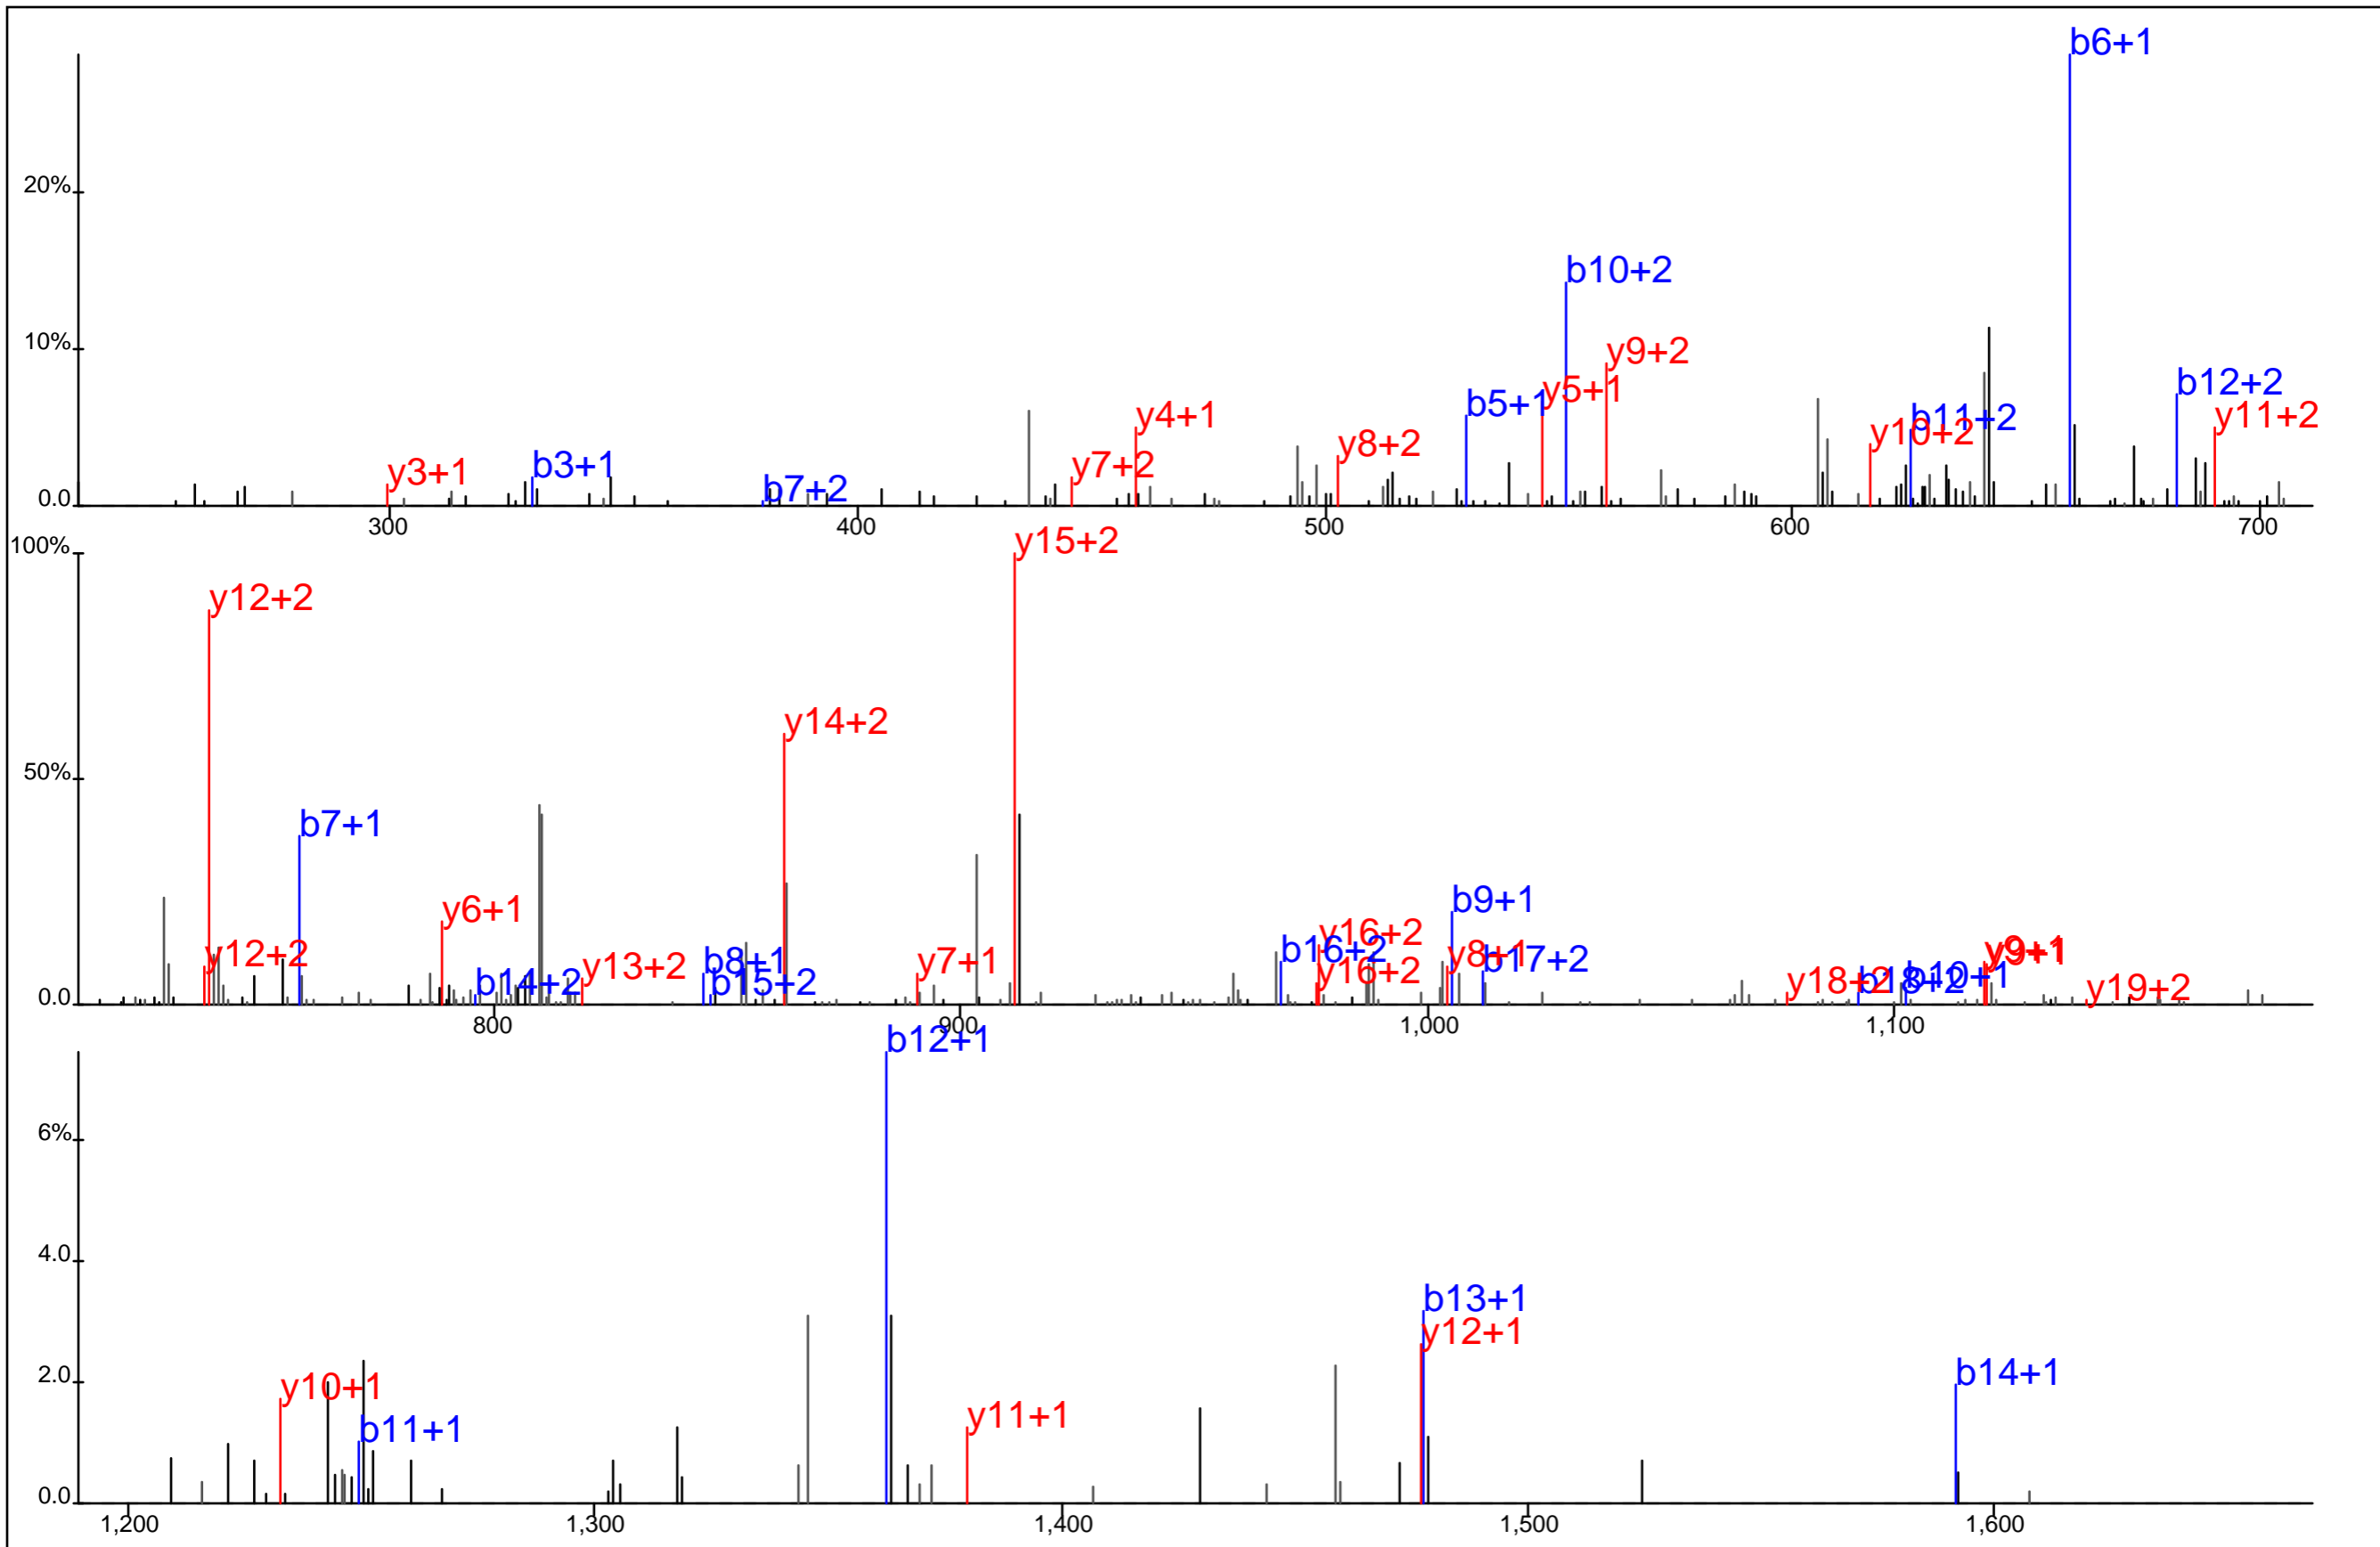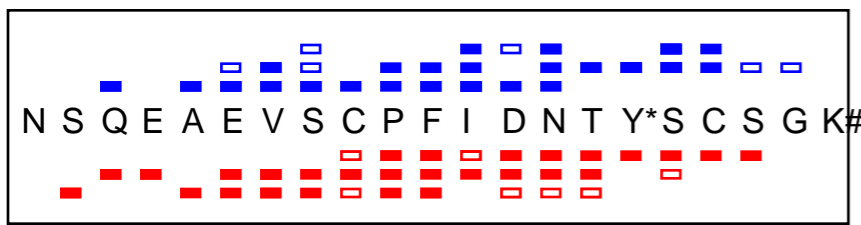

Protein Name: C20orf18  
 gi Accession: 34189561  
 Precursor Mass: 827.6749+3  
 Delta Mass: 11.084 ppm  
 XCorr: 56.08

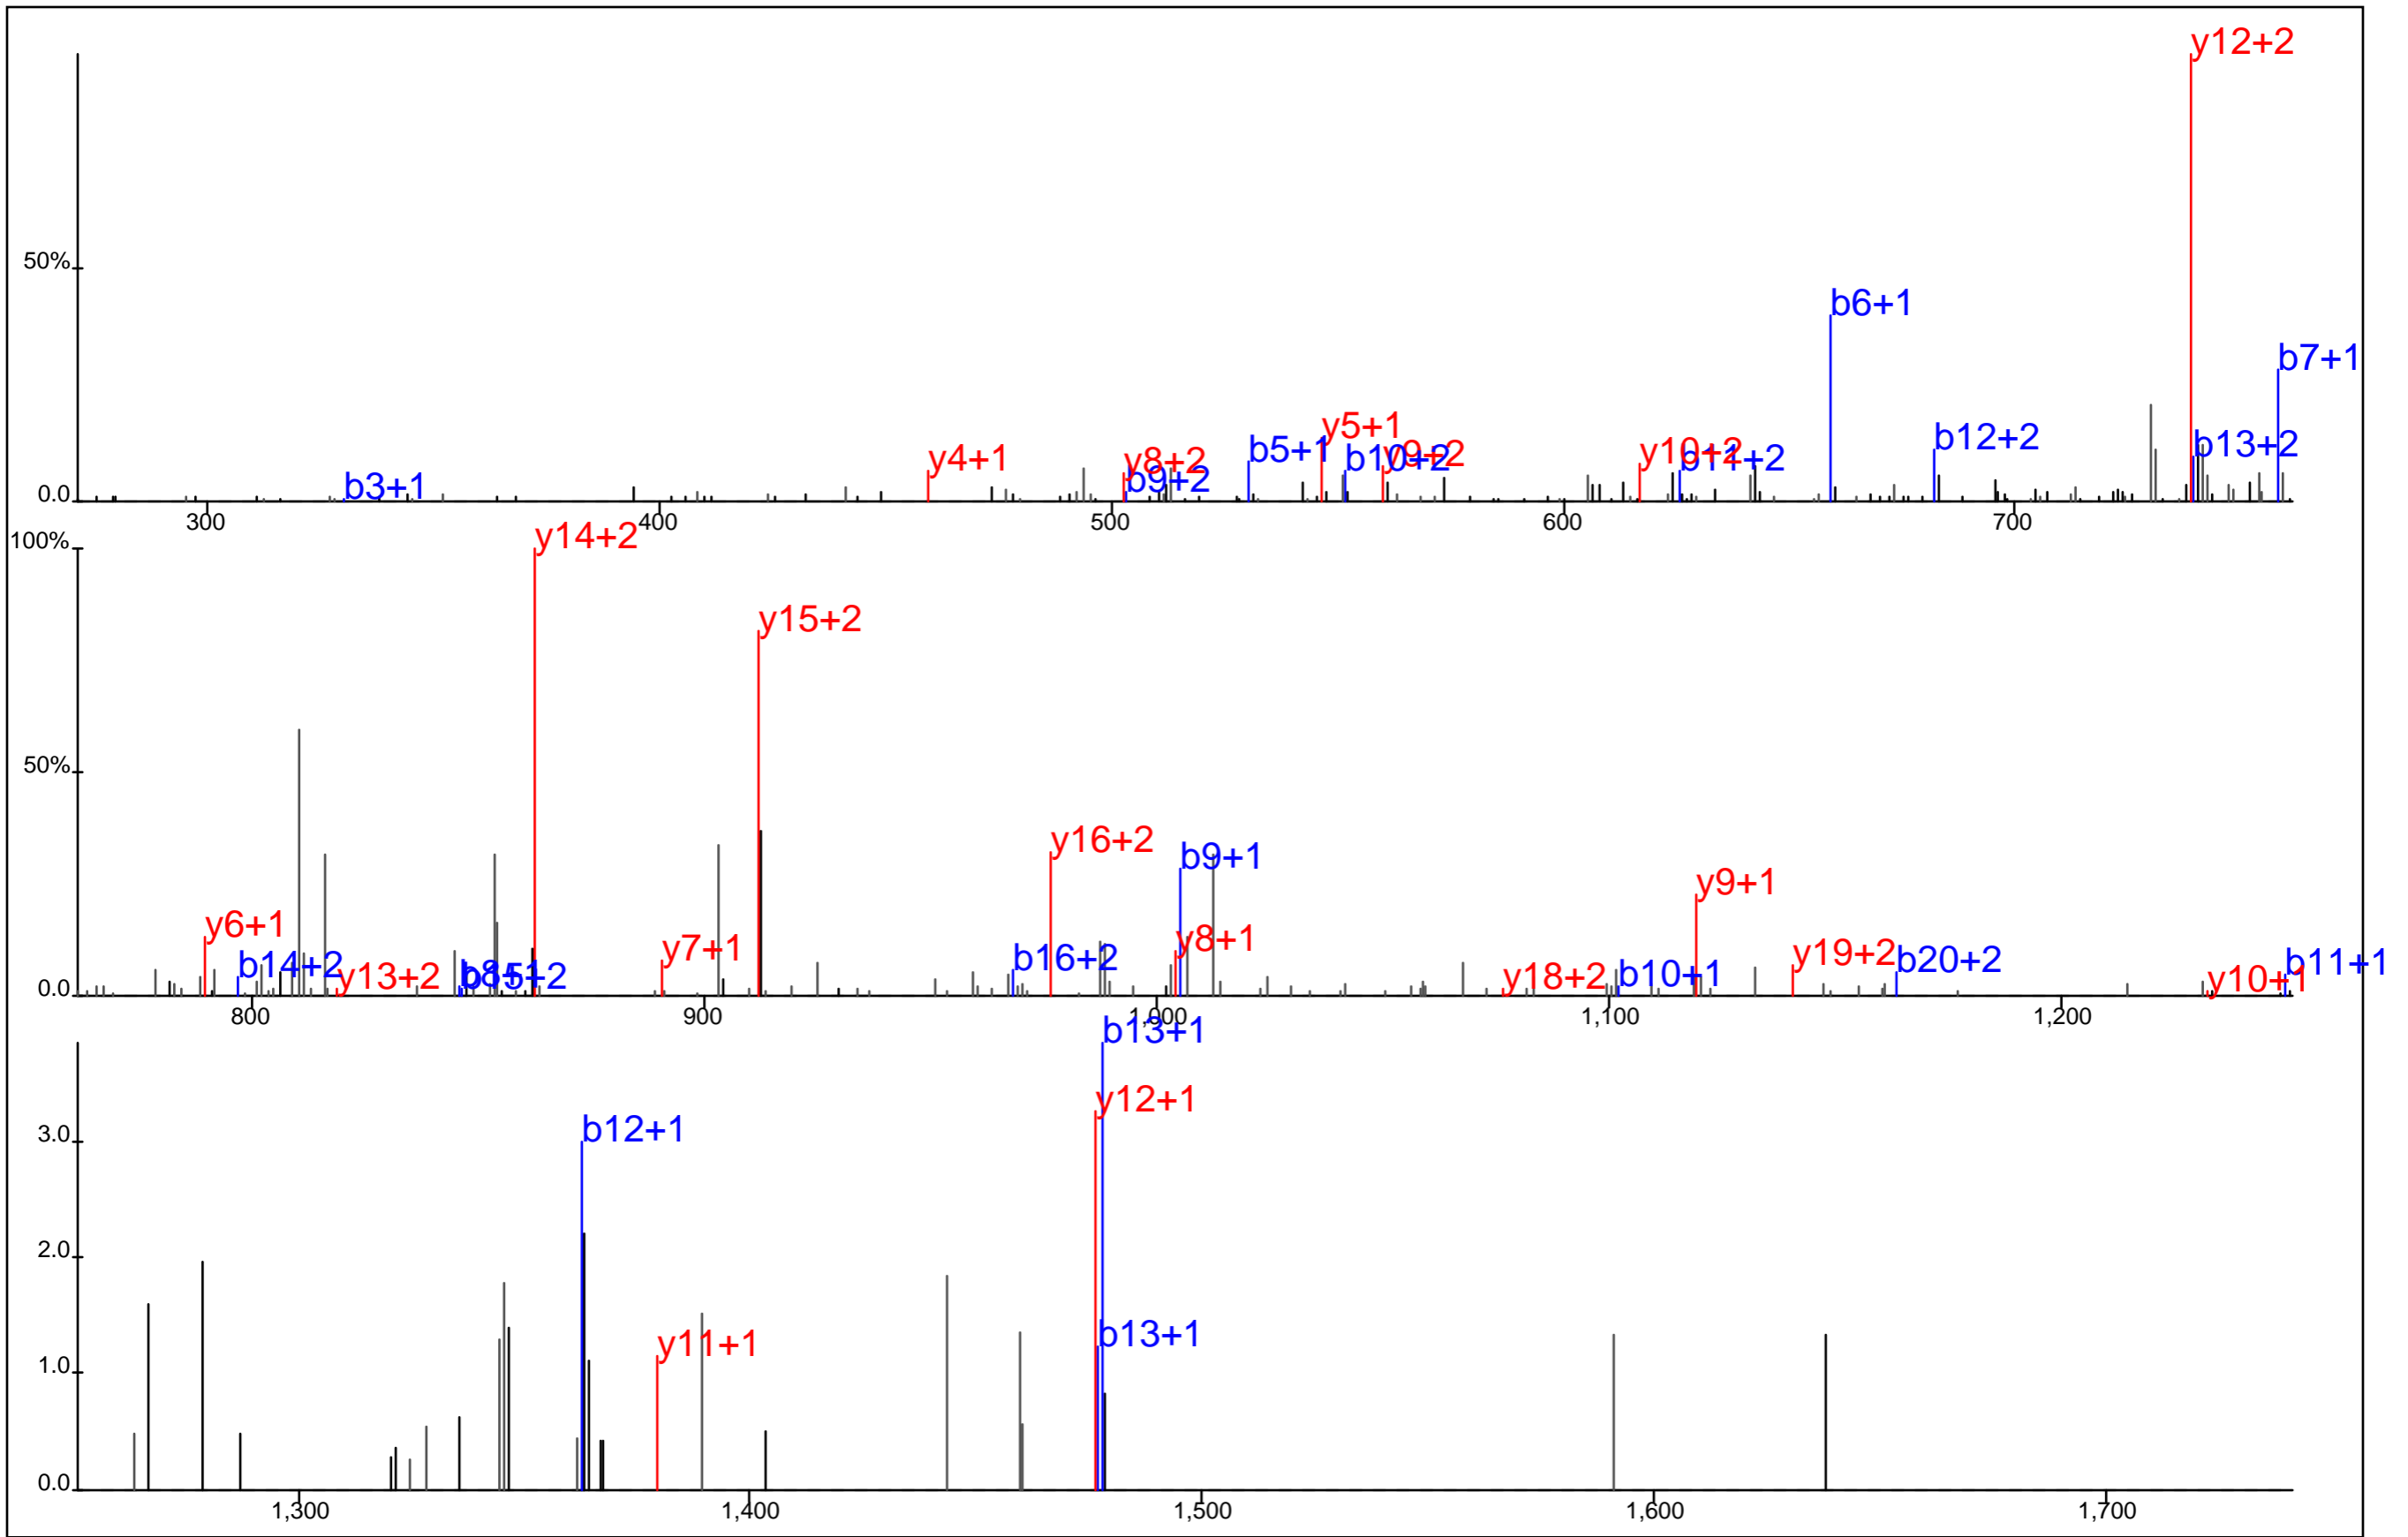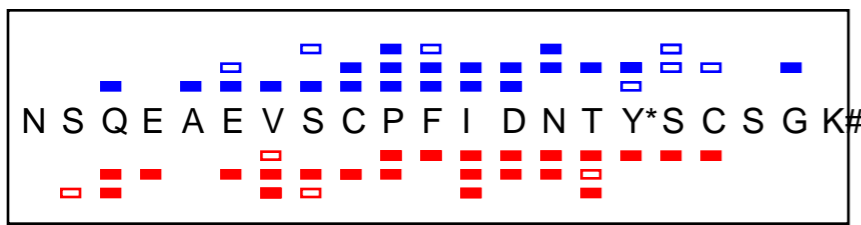

Protein Name: C20orf18  
 gi Accession: 34189561  
 Precursor Mass: 827.6700+3  
 Delta Mass: 5.183 ppm  
 XCorr: 46.05

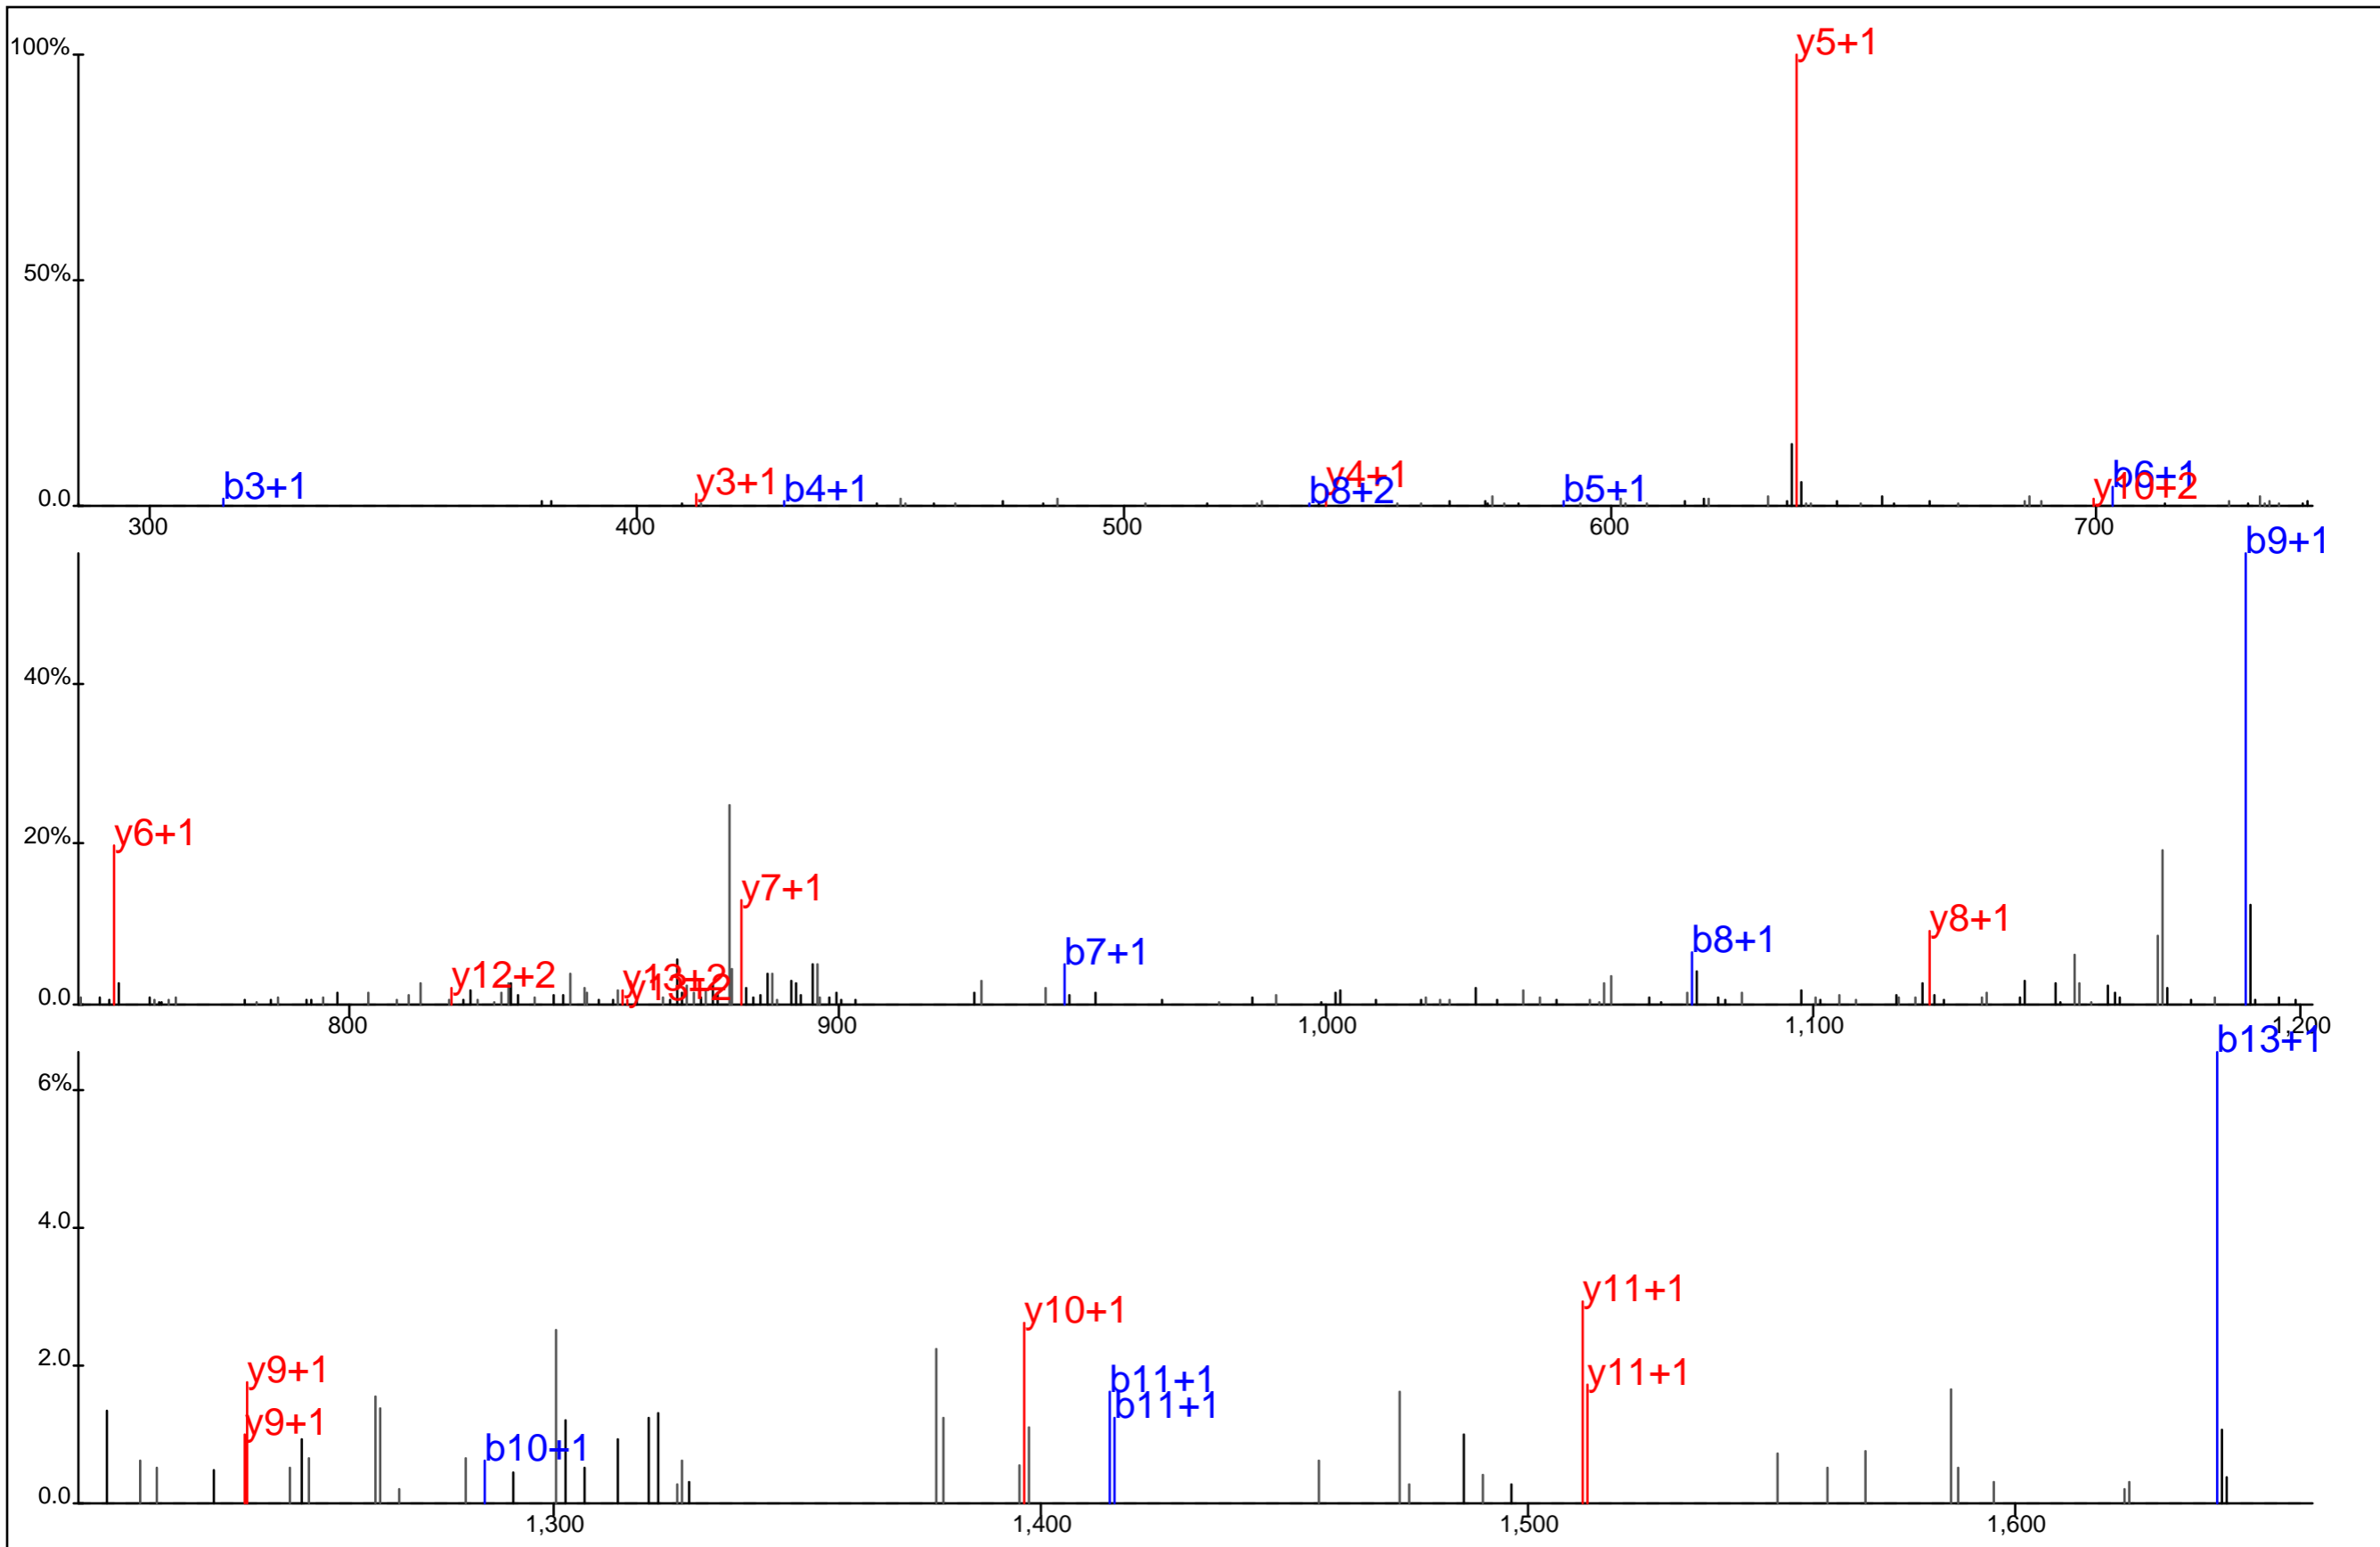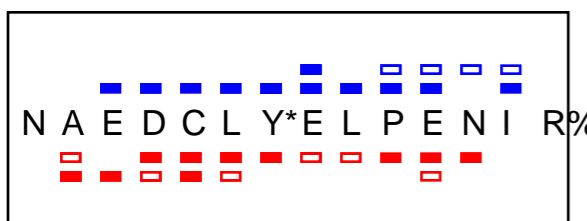

Protein Name: C9orf78  
 gi Accession: 6808233  
 Precursor Mass: 913.3892+2  
 Delta Mass: 0.574 ppm  
 XCorr: 50.94

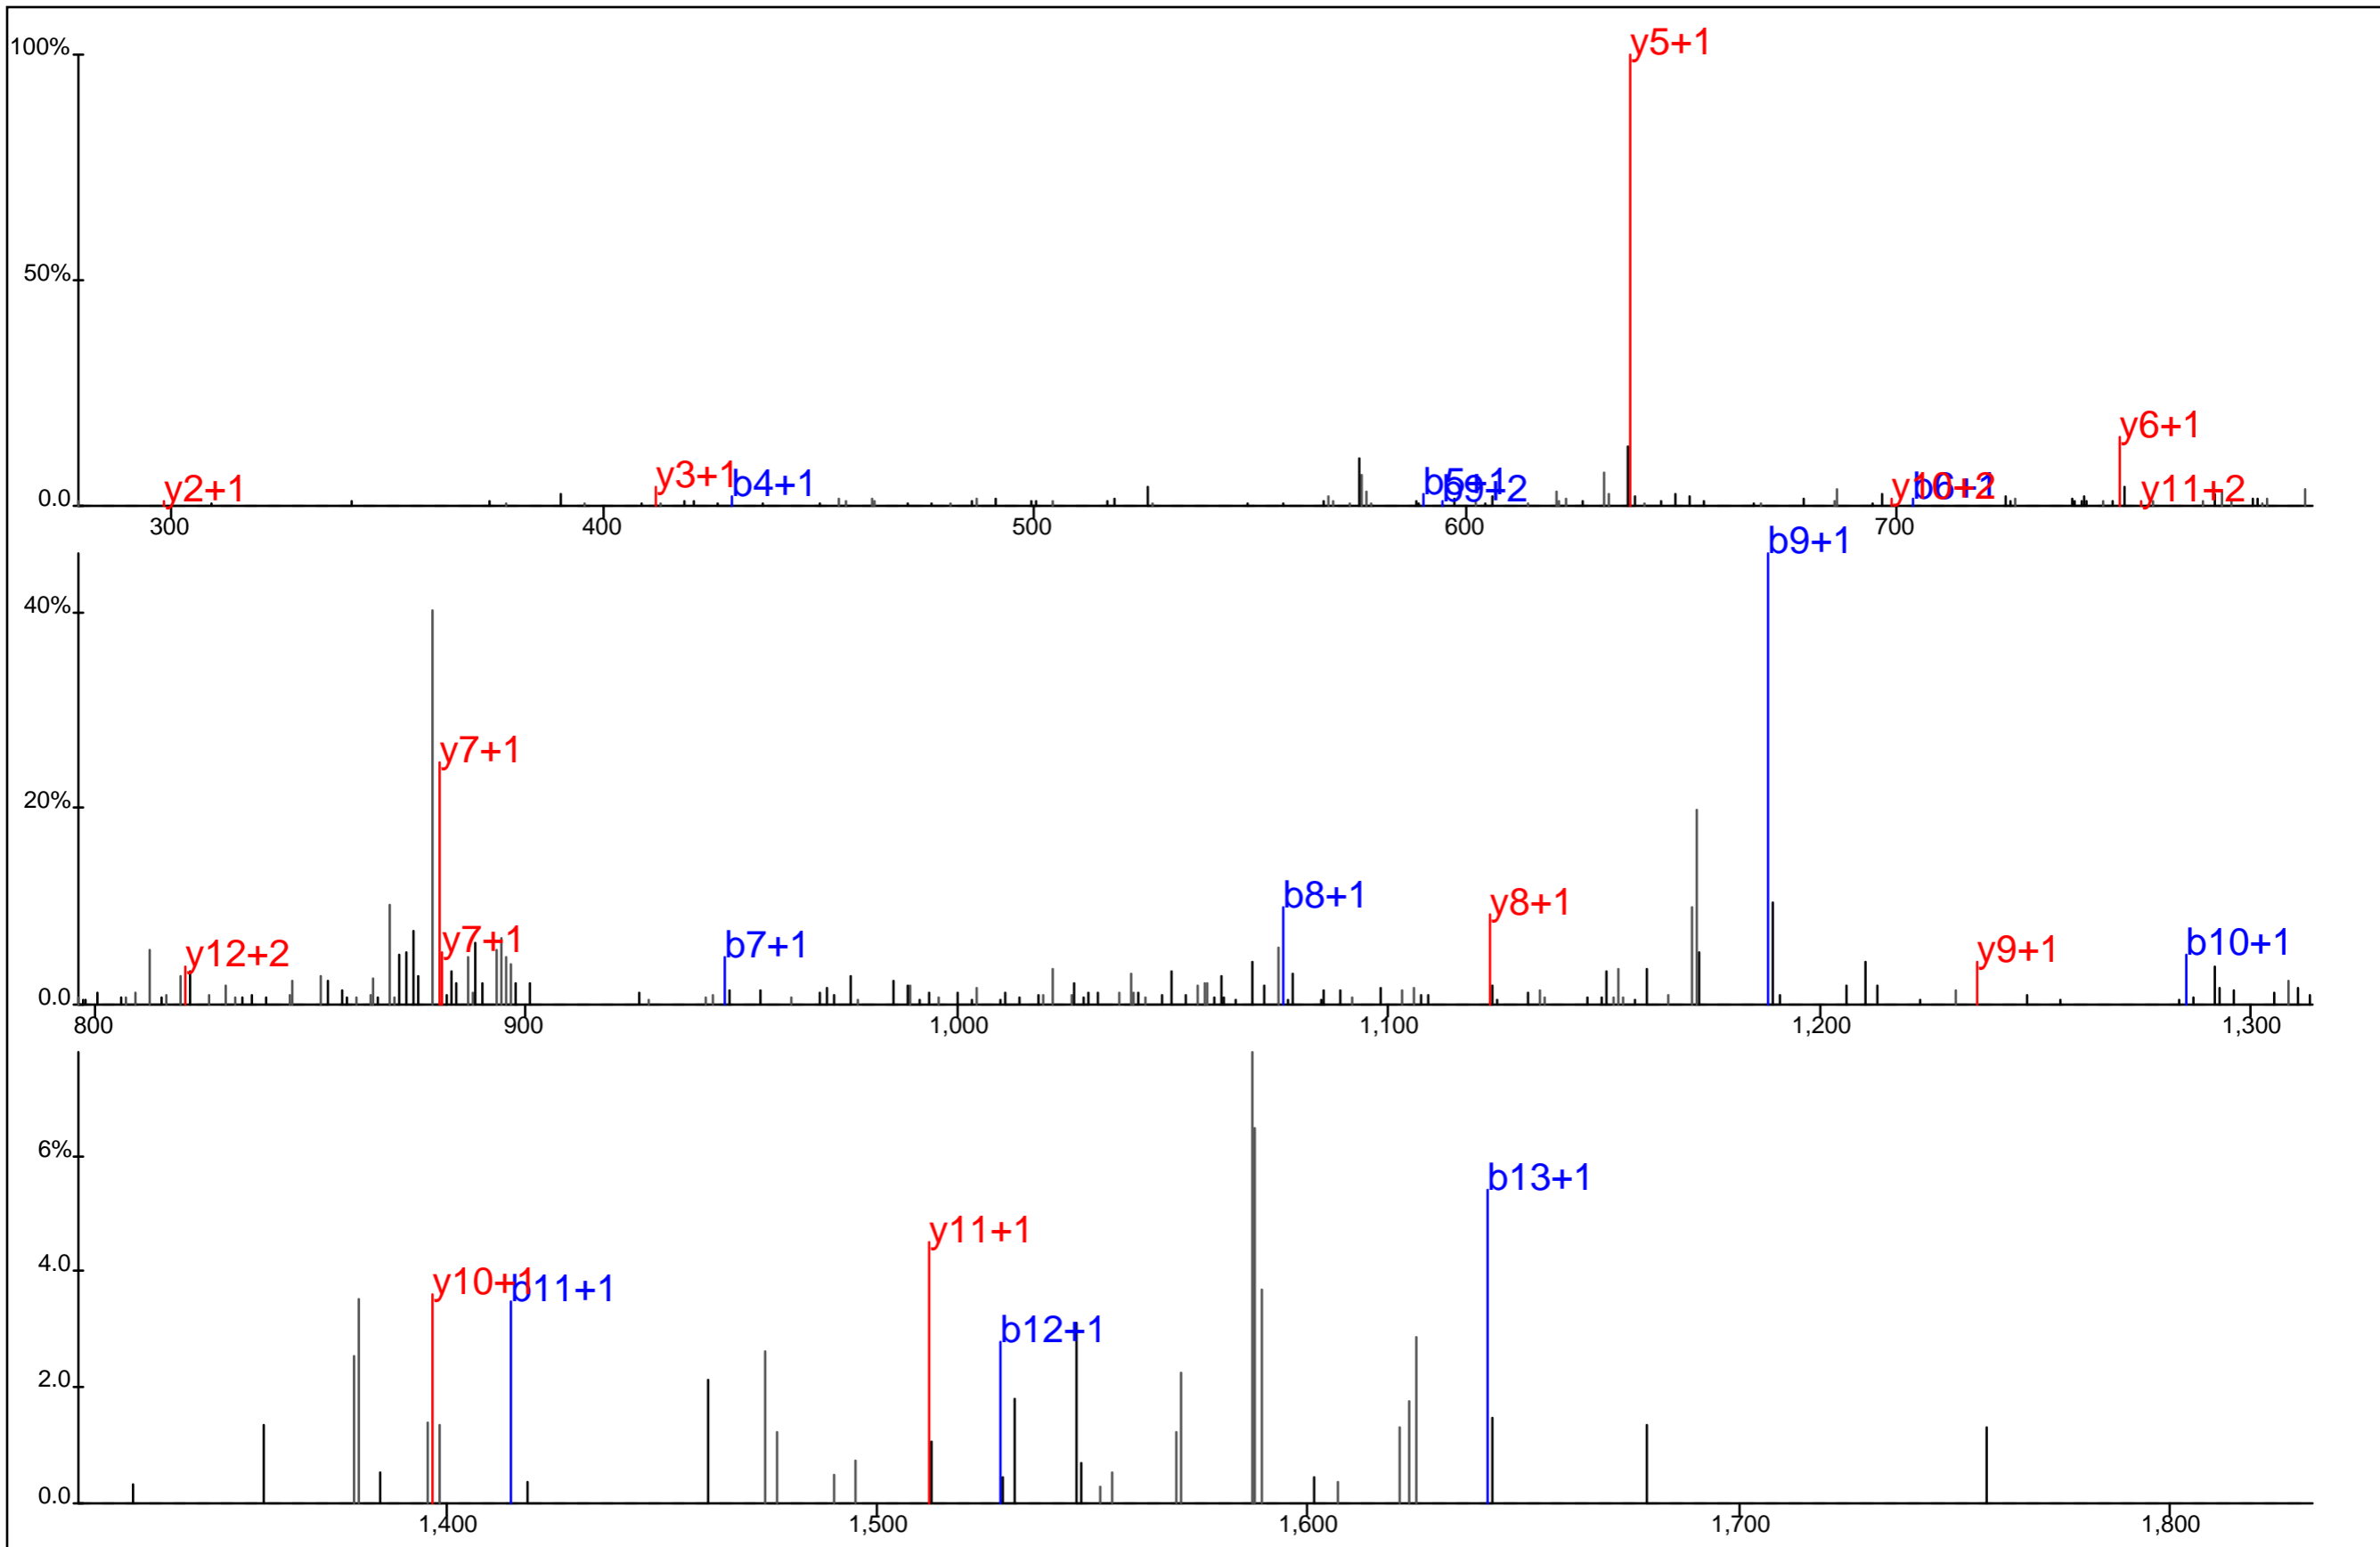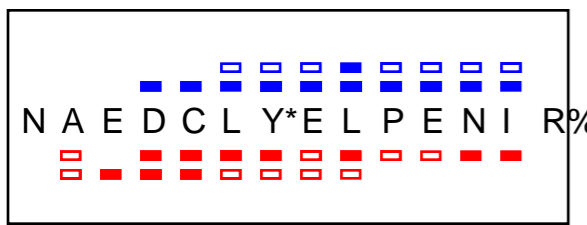

Protein Name: C9orf78  
 gi Accession: 6808233  
 Precursor Mass: 913.3901+2  
 Delta Mass: 1.576 ppm  
 XCorr: 49.44

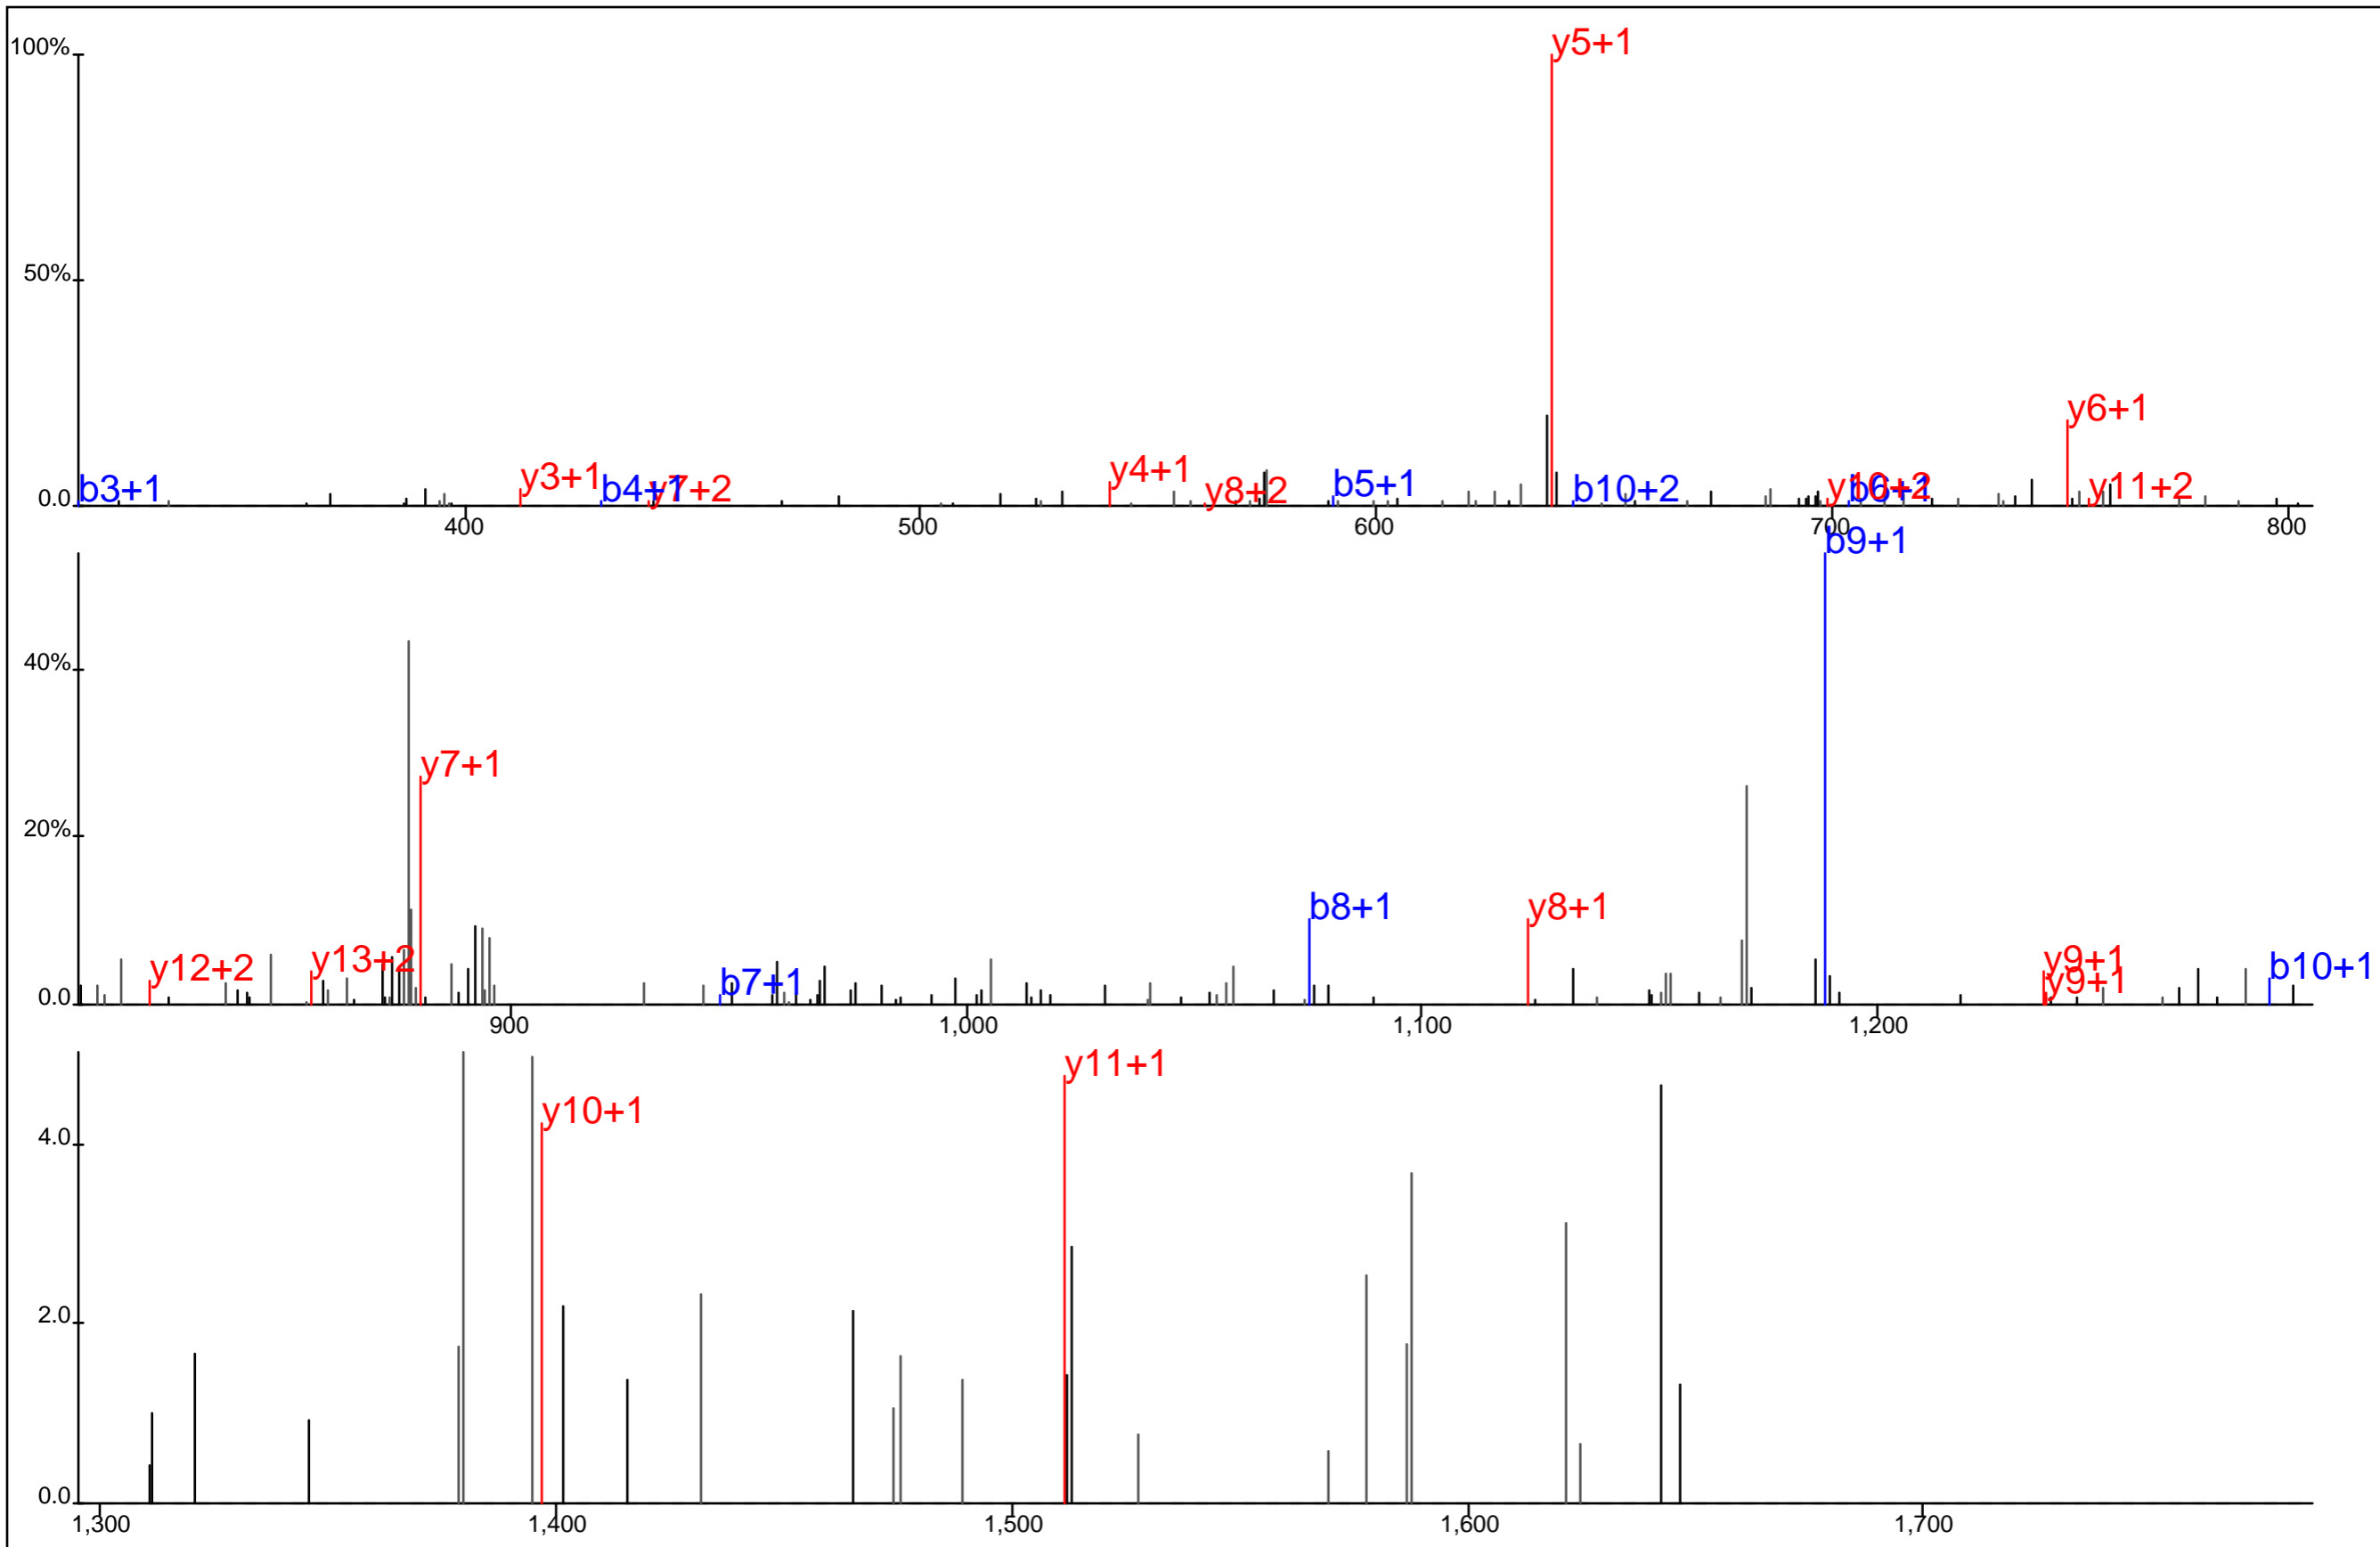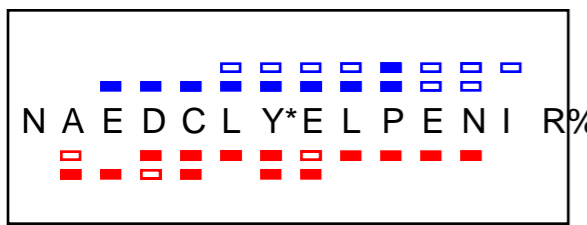

Protein Name: C9orf78  
 gi Accession: 6808233  
 Precursor Mass: 913.3943+2  
 Delta Mass: 6.188 ppm  
 XCorr: 35.71

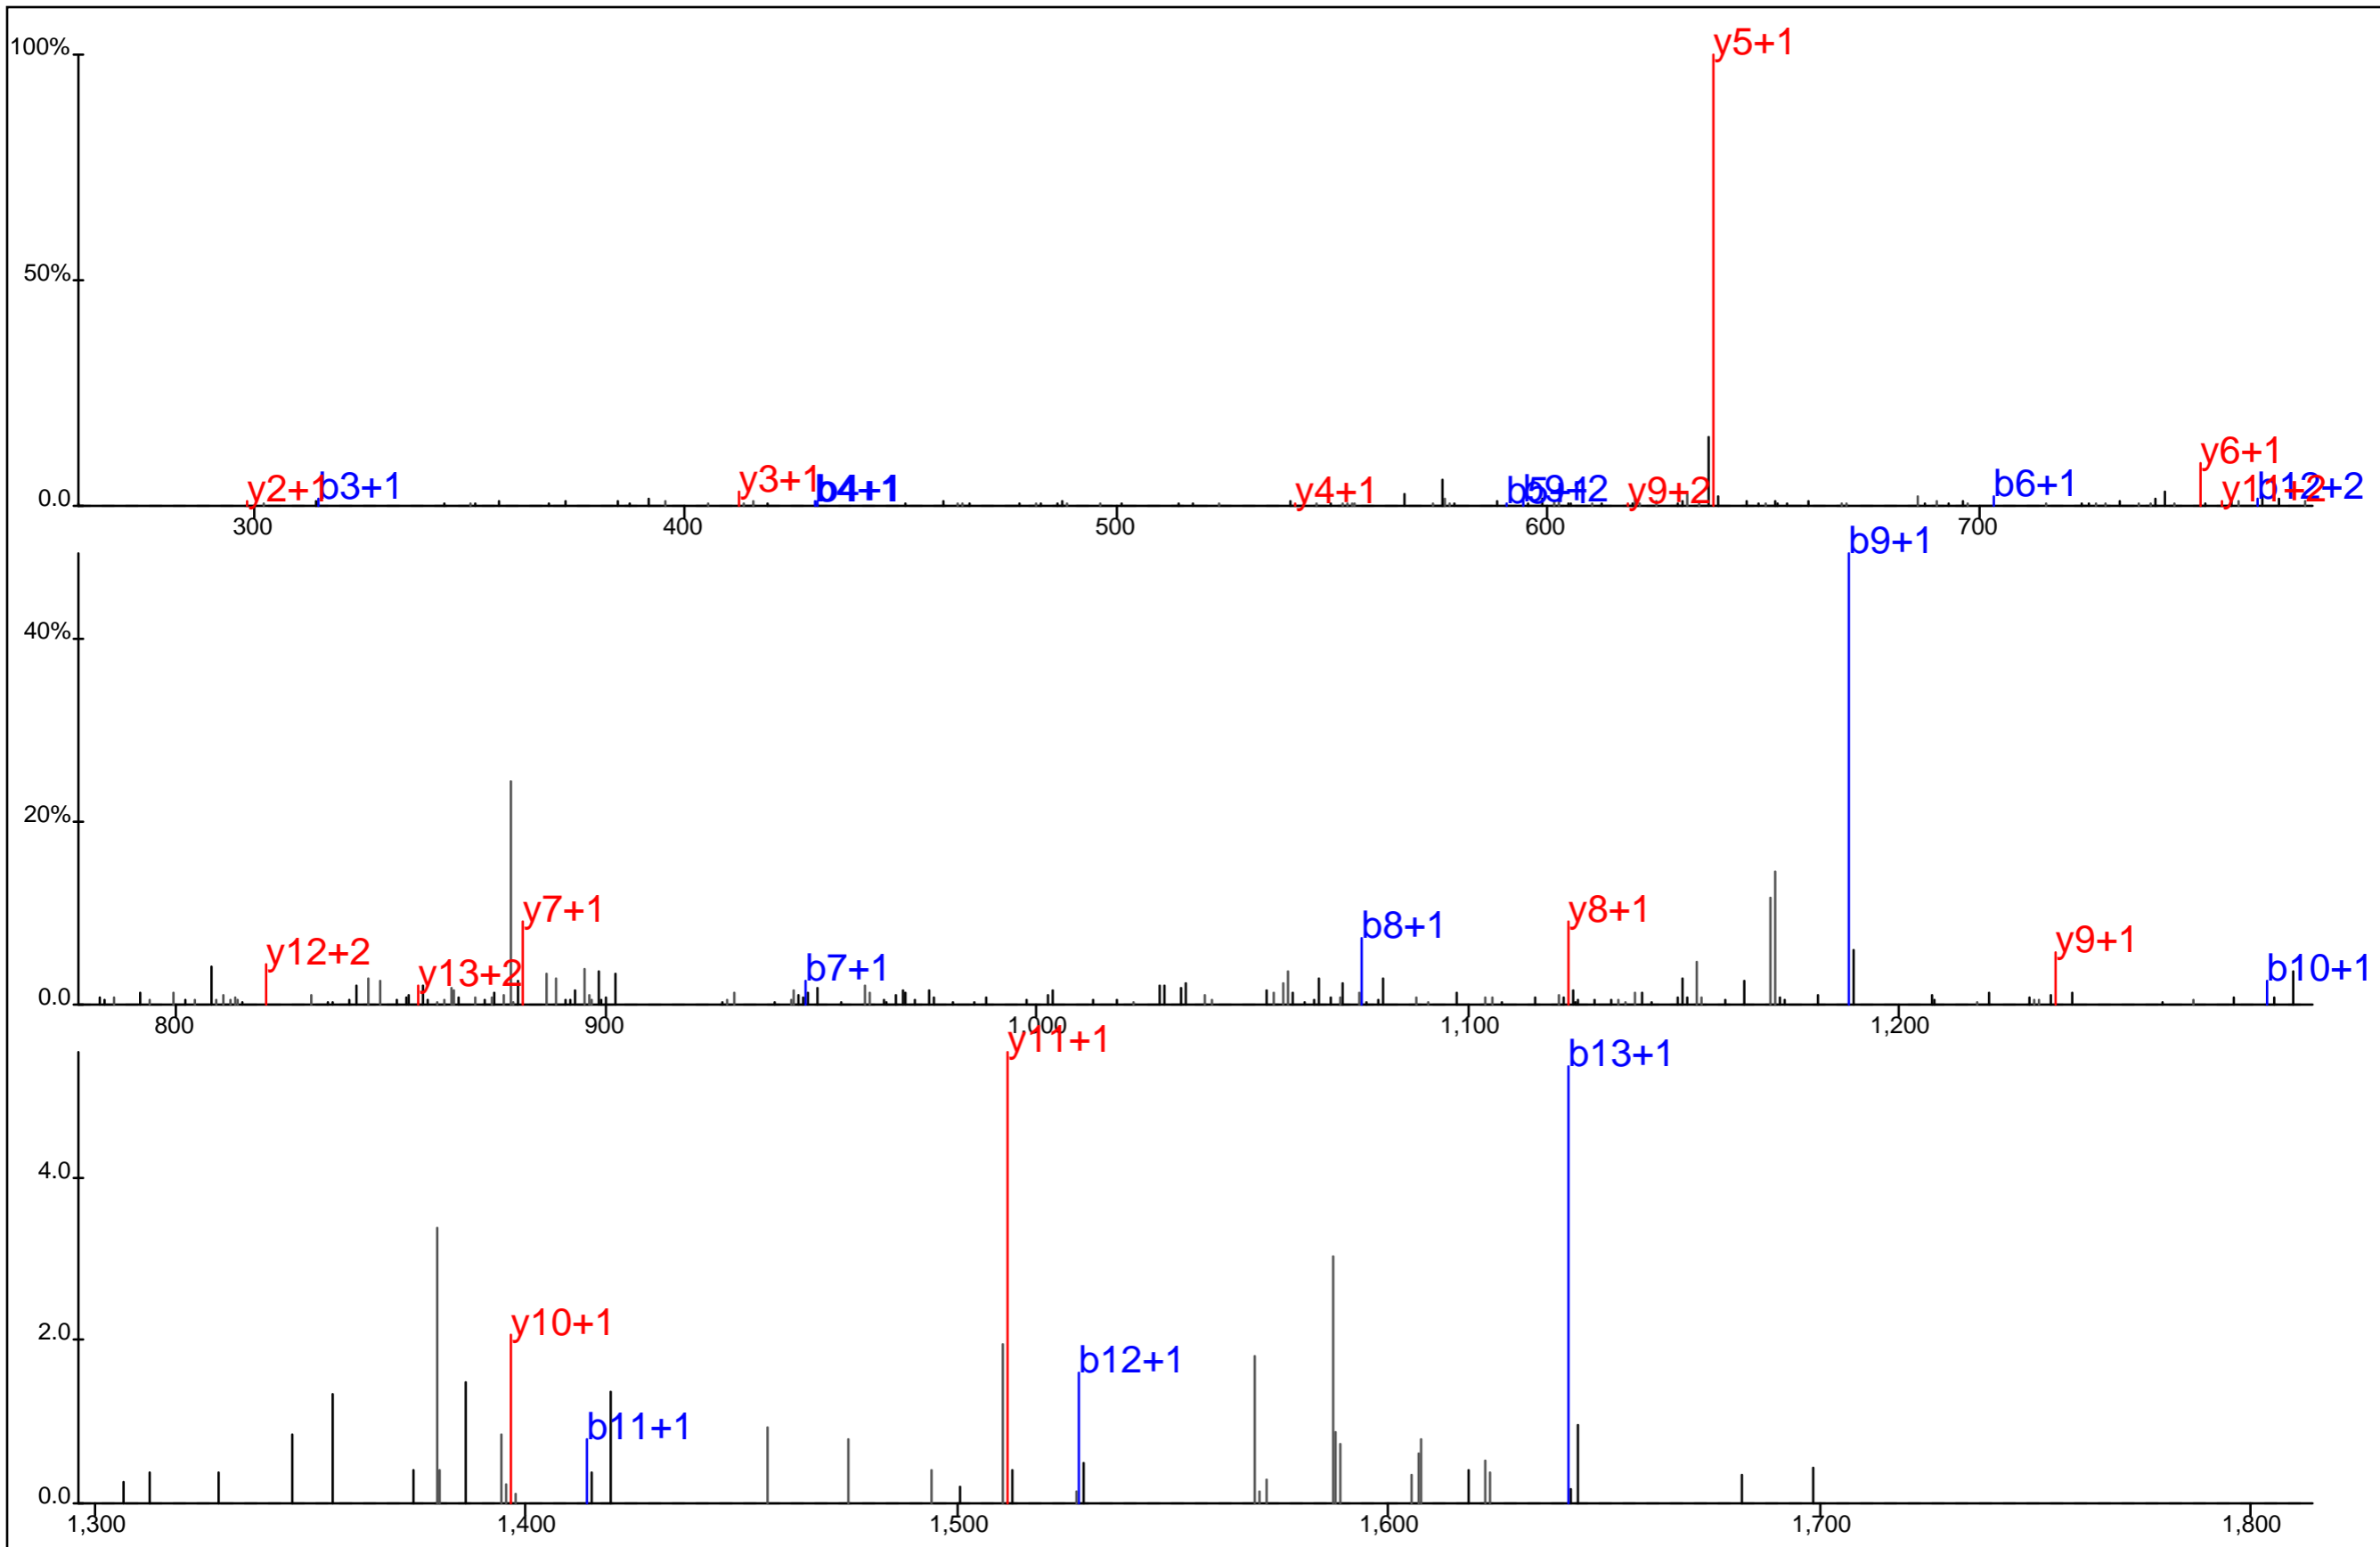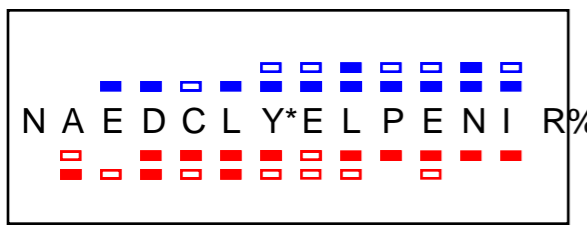

Protein Name: C9orf78  
 gi Accession: 6808233  
 Precursor Mass: 913.3908+2  
 Delta Mass: 2.310 ppm  
 XCorr: 44.52

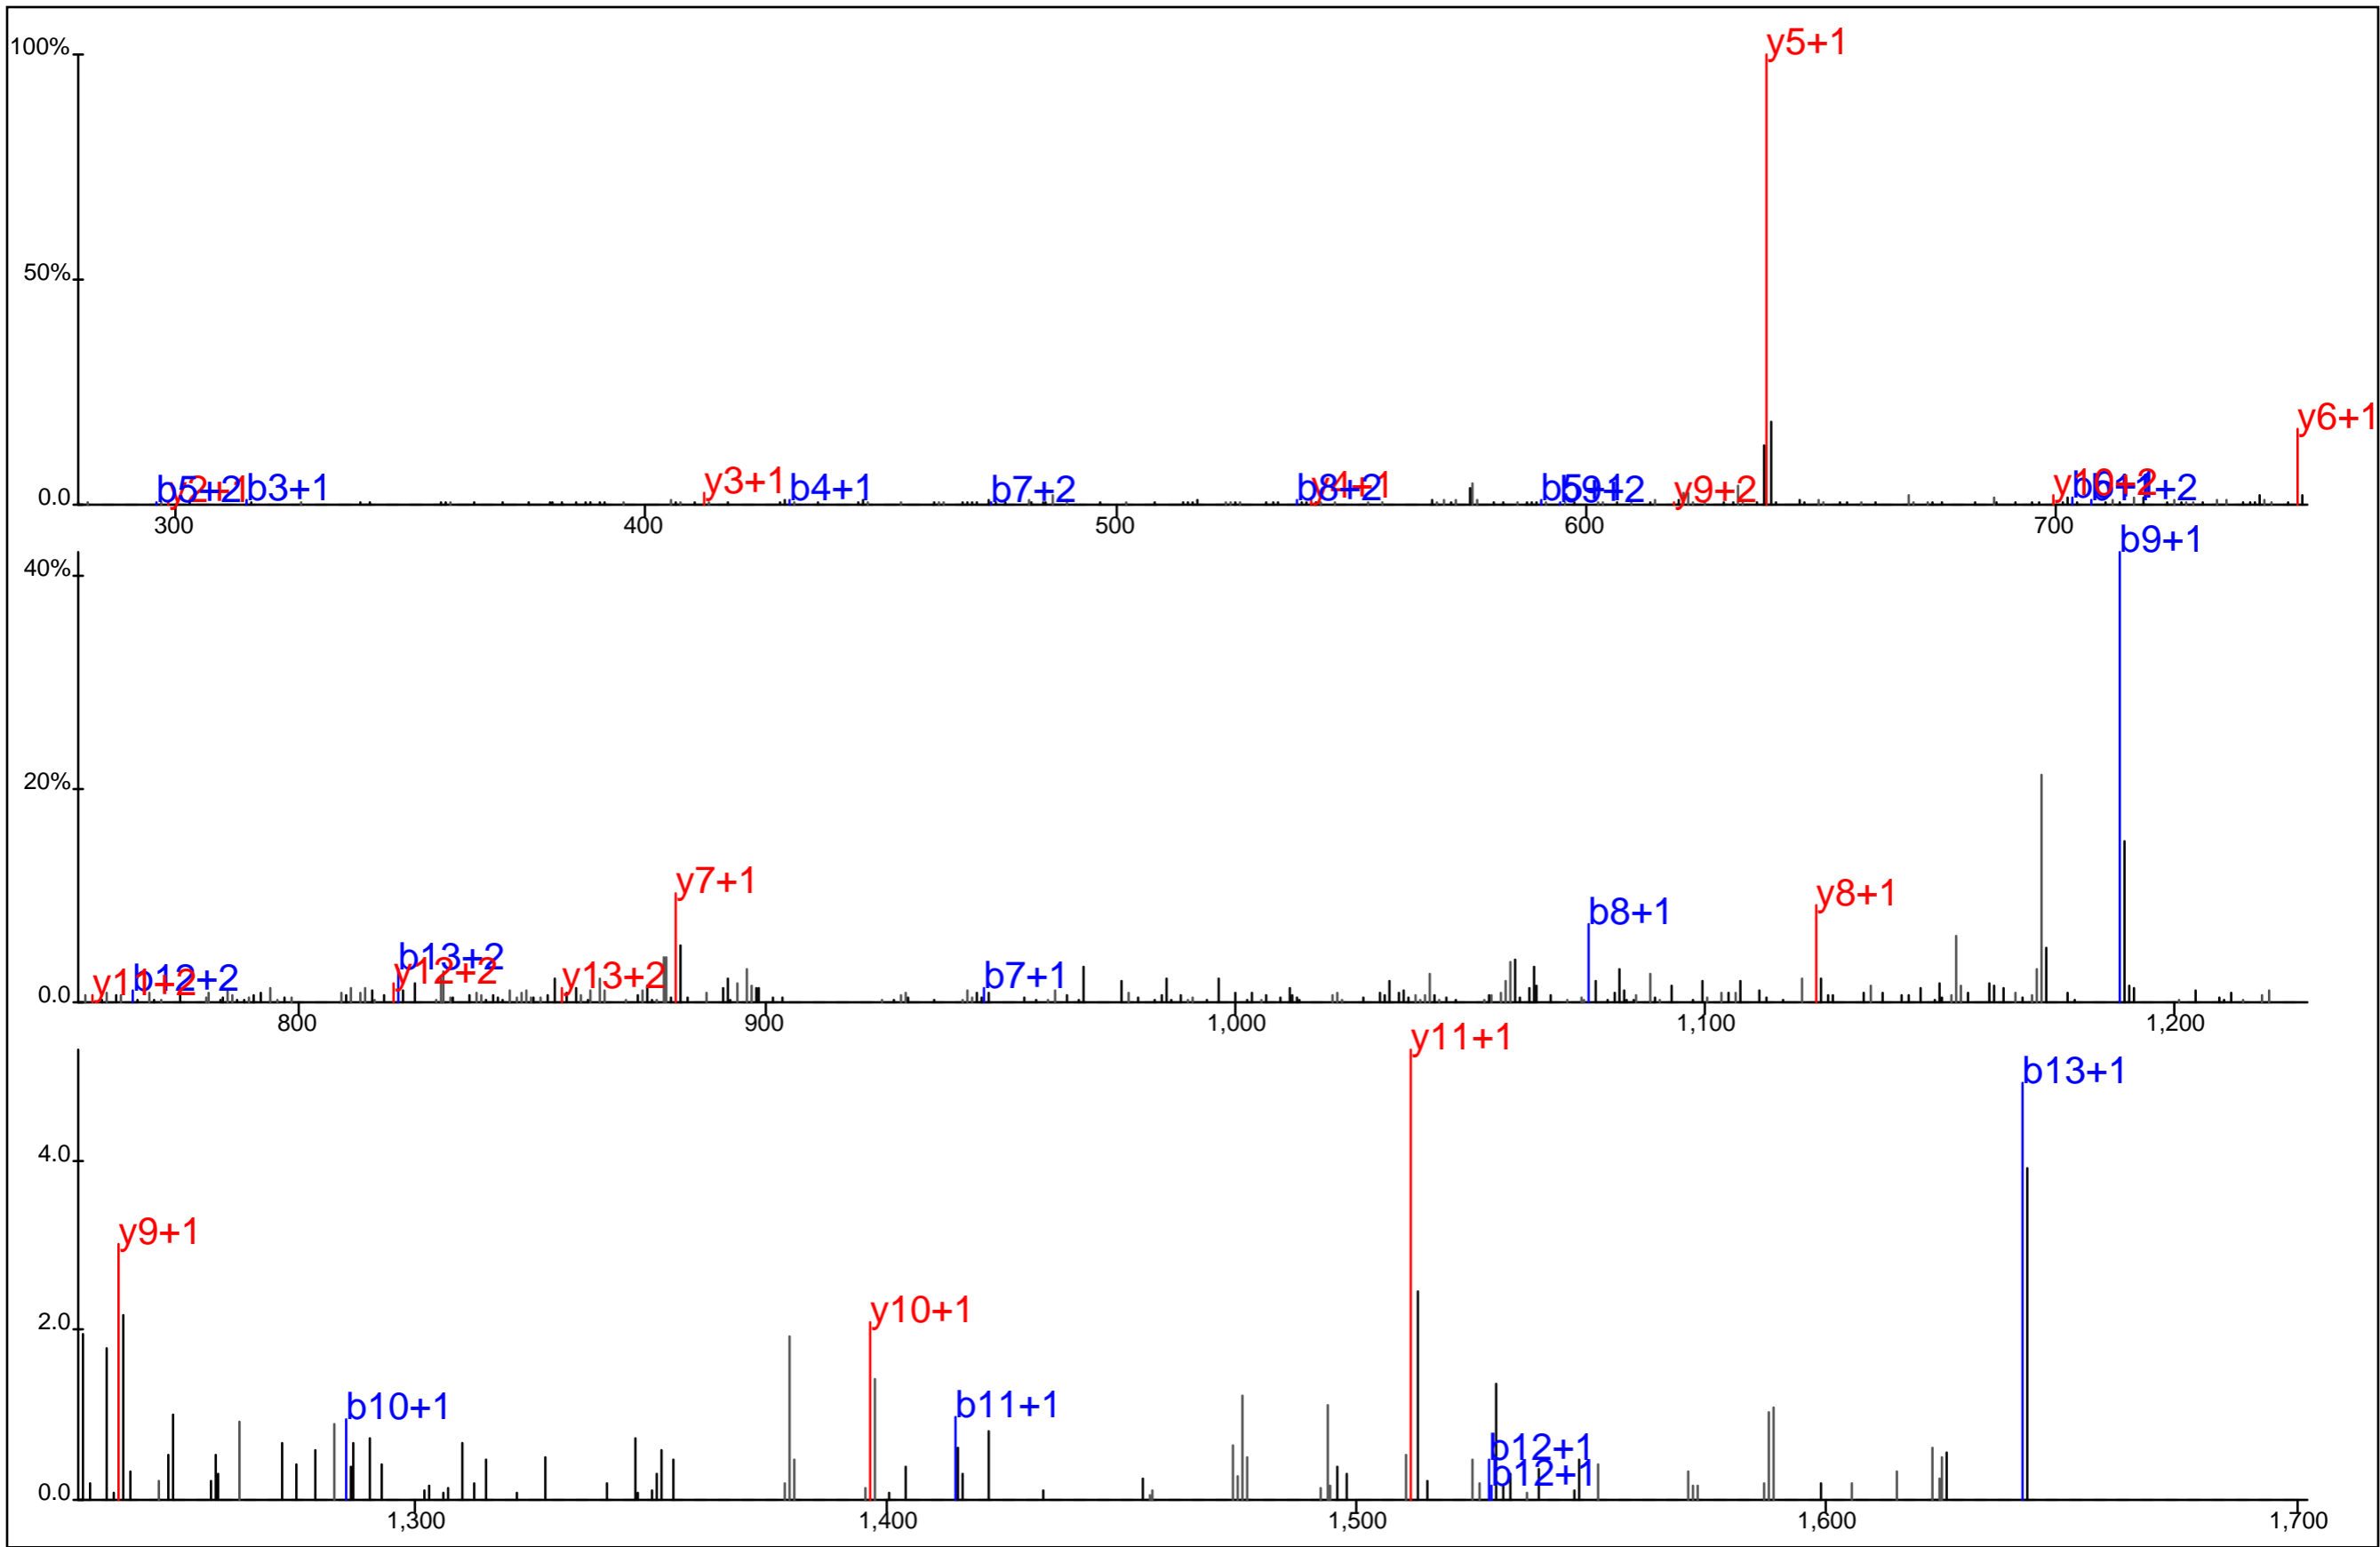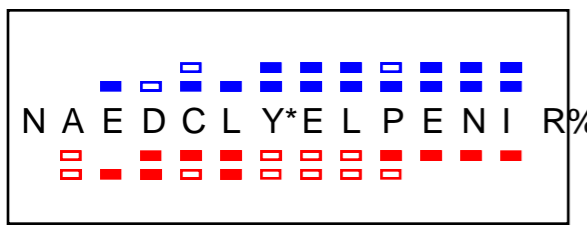

Protein Name: C9orf78  
 gi Accession: 6808233  
 Precursor Mass: 913.3917+2  
 Delta Mass: 3.313 ppm  
 XCorr: 50.53

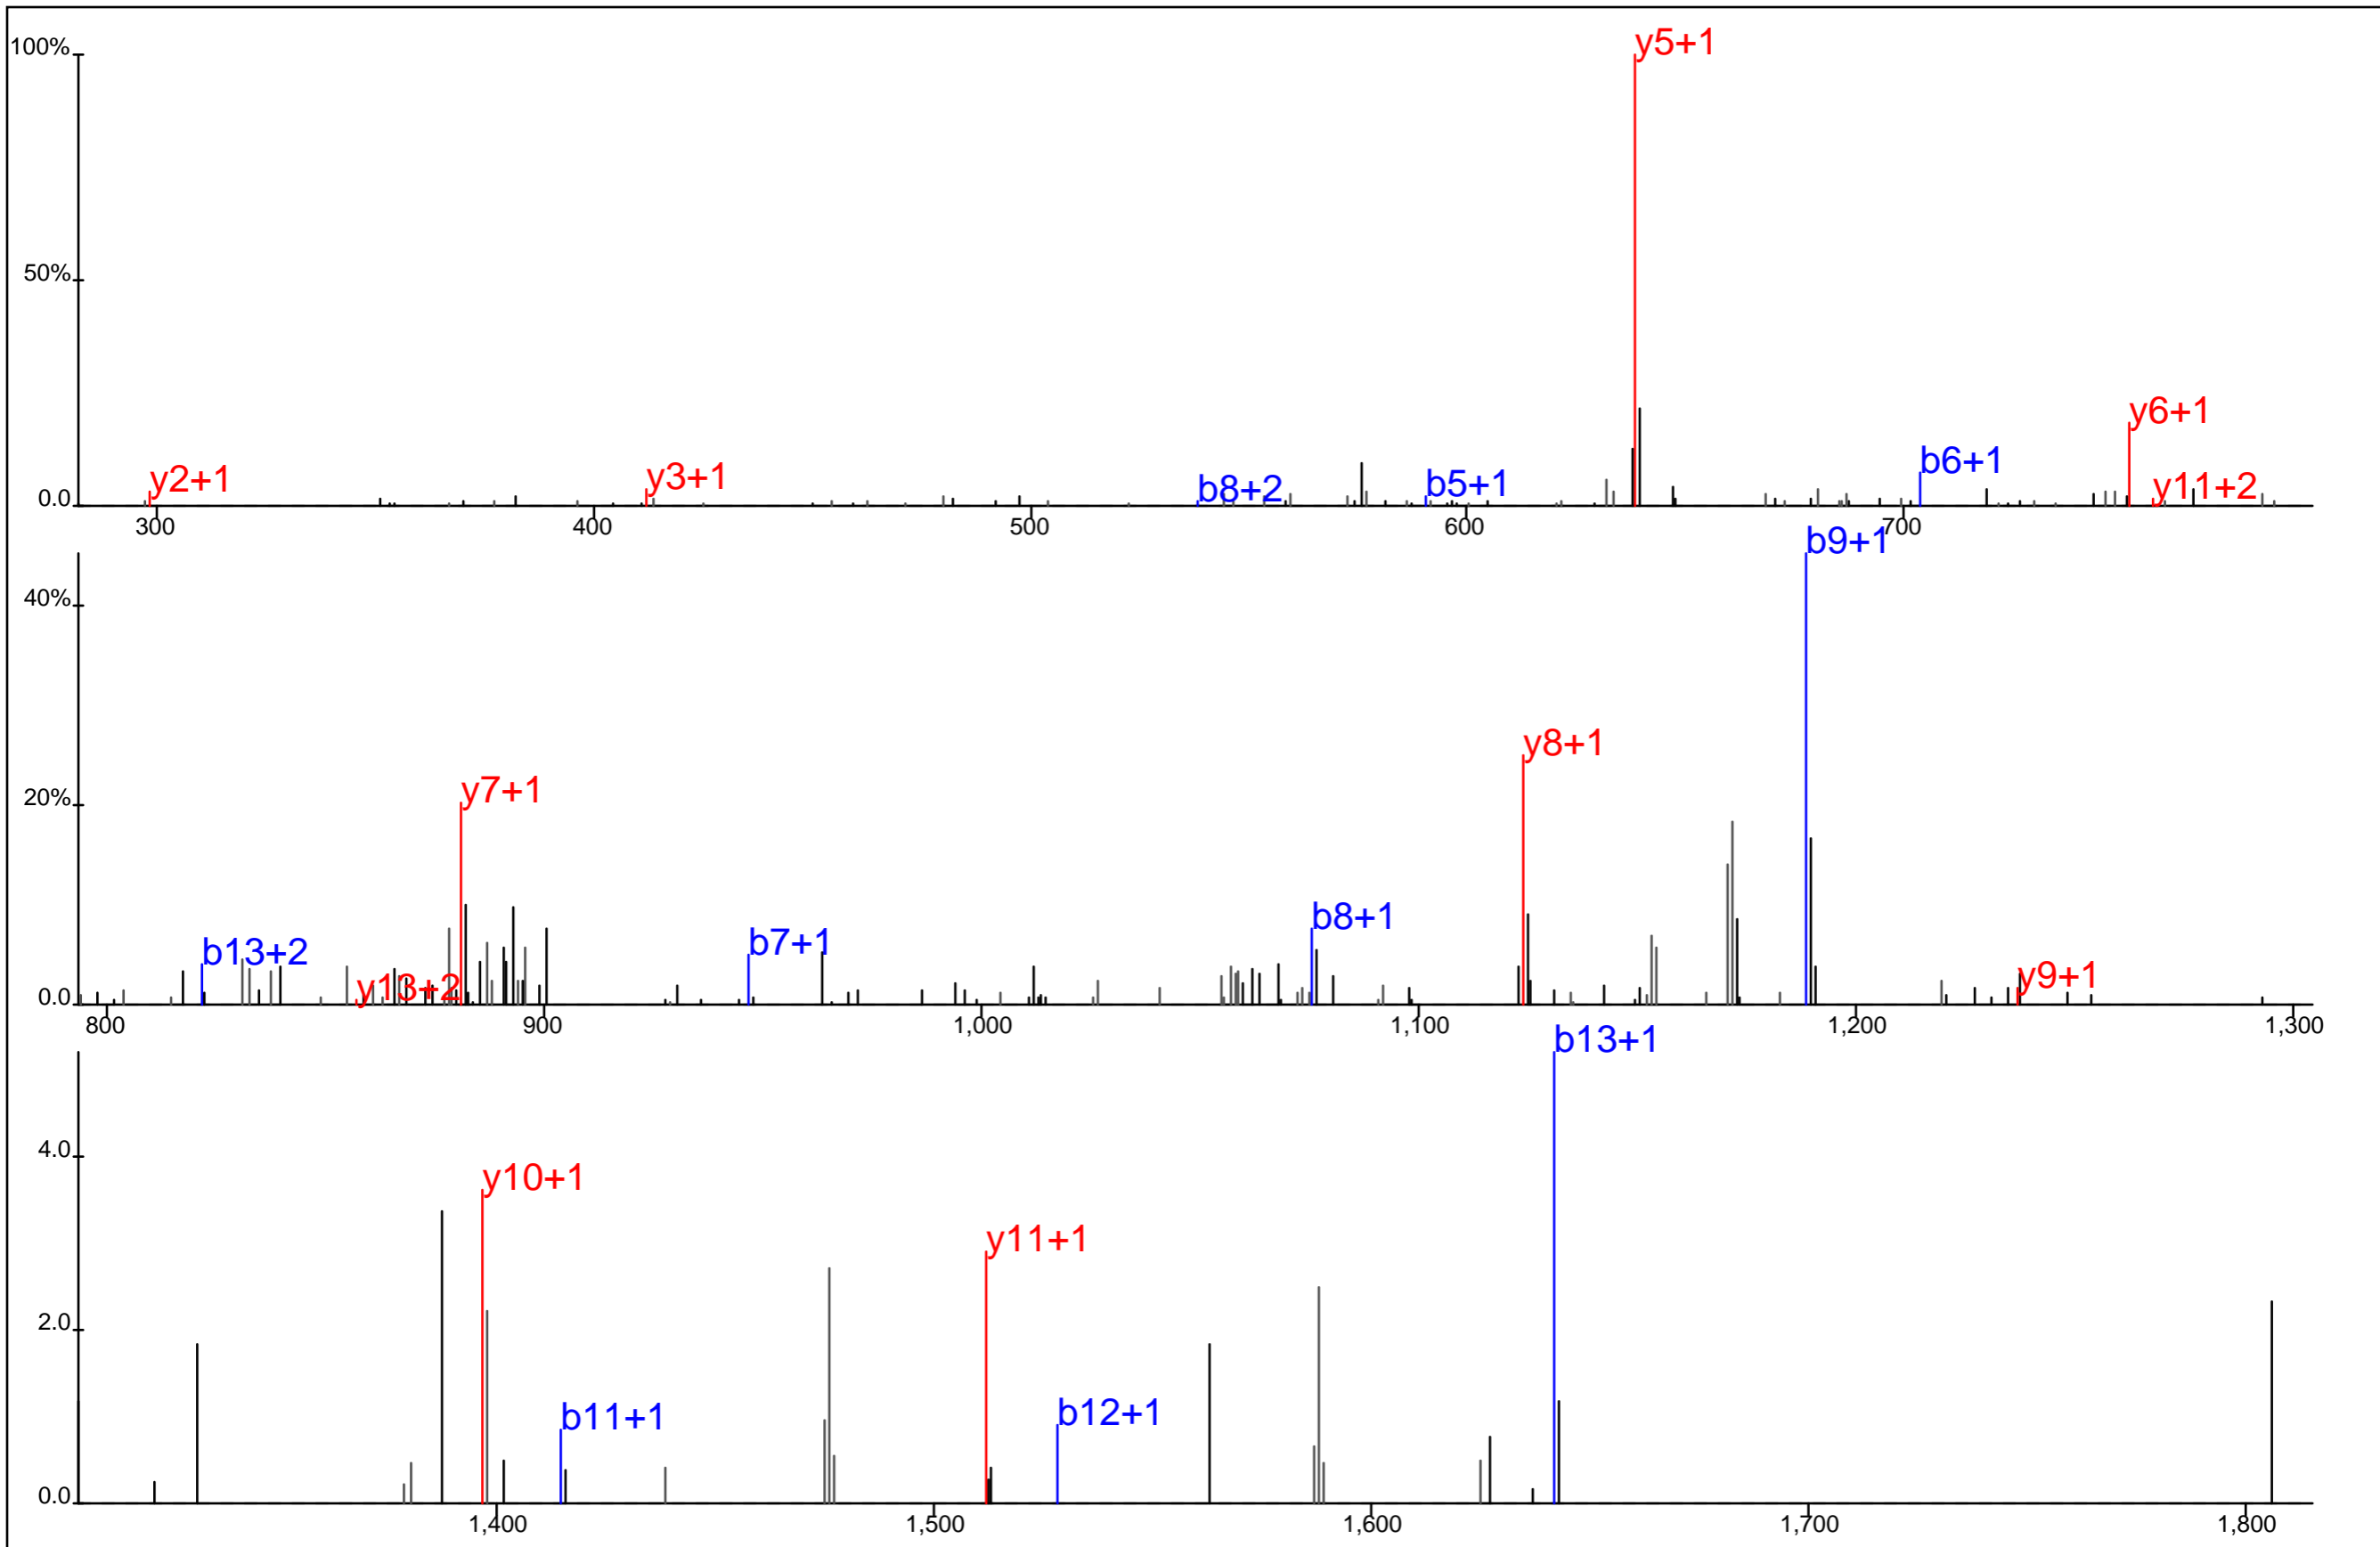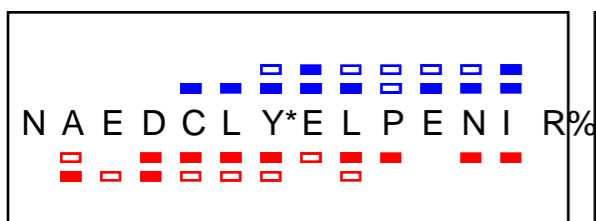

Protein Name: C9orf78  
 gi Accession: 6808233  
 Precursor Mass: 913.3918+2  
 Delta Mass: 3.378 ppm  
 XCorr: 60.38



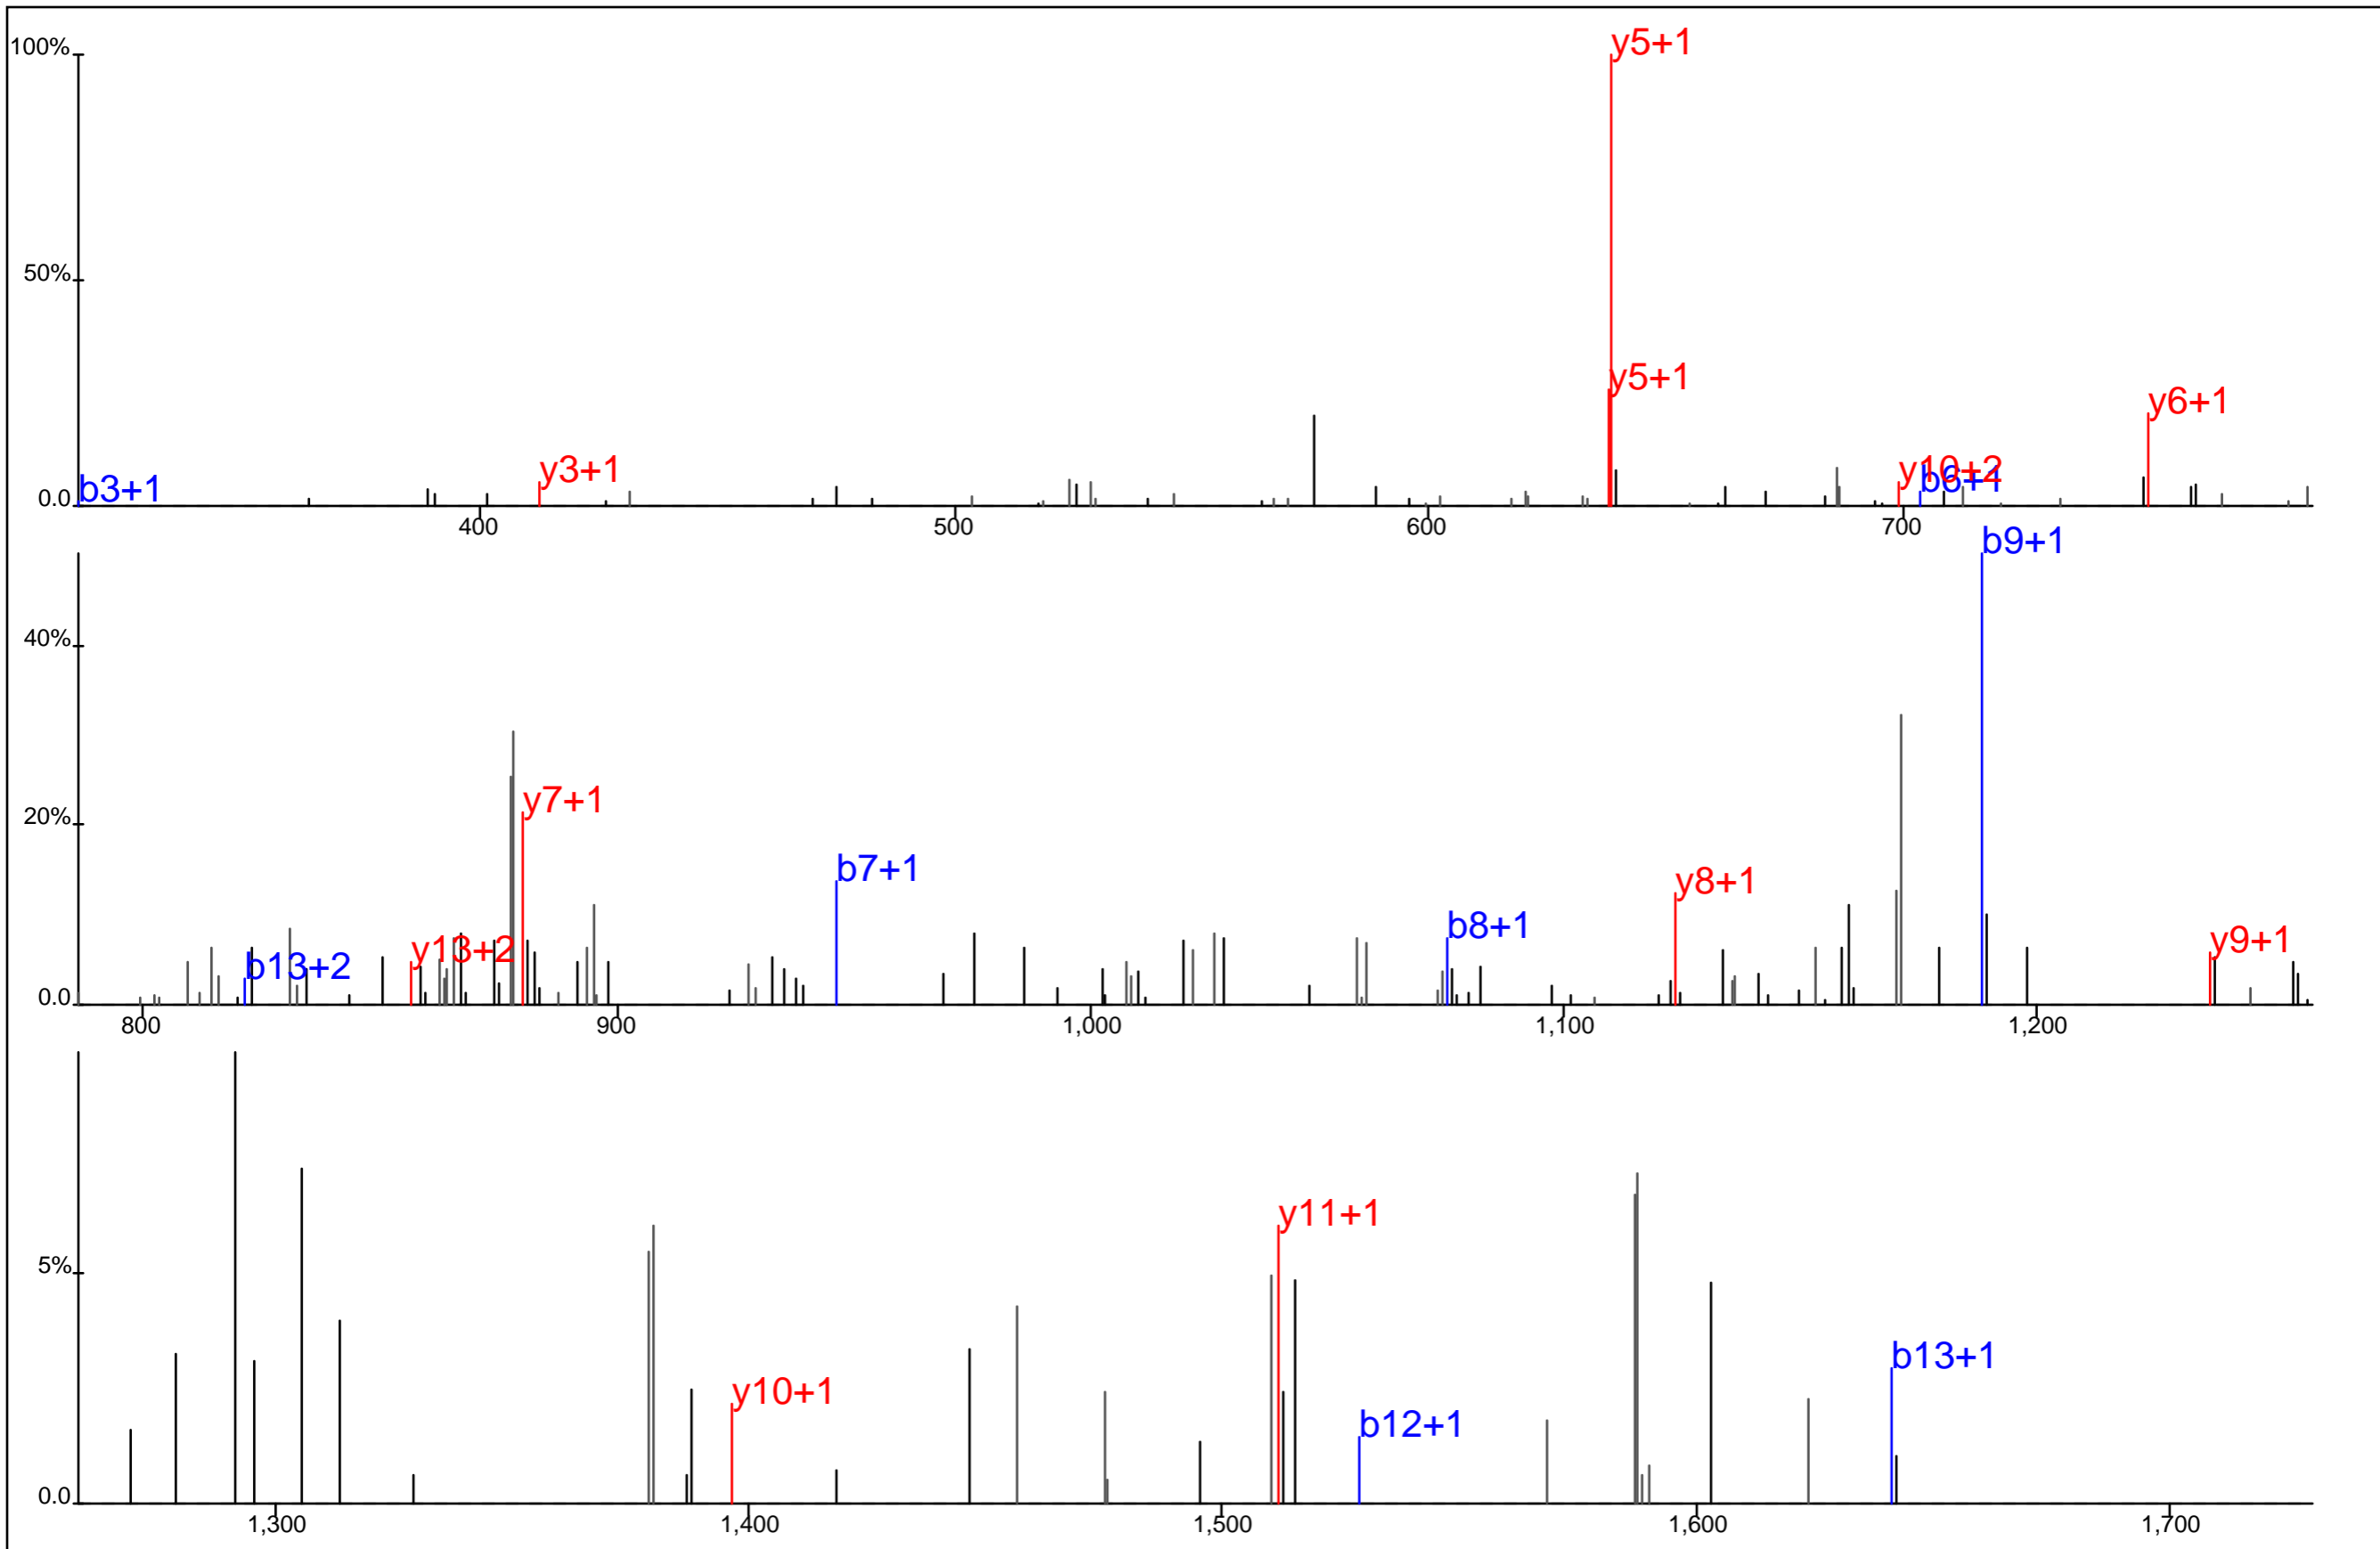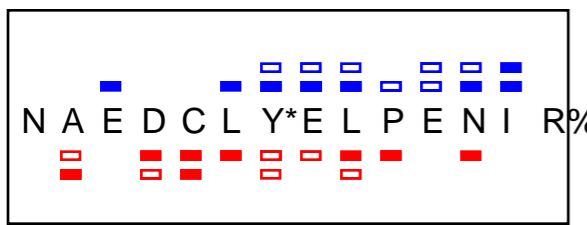

Protein Name: C9orf78  
 gi Accession: 6808233  
 Precursor Mass: 913.3920+2  
 Delta Mass: 3.581 ppm  
 XCorr: 30.04

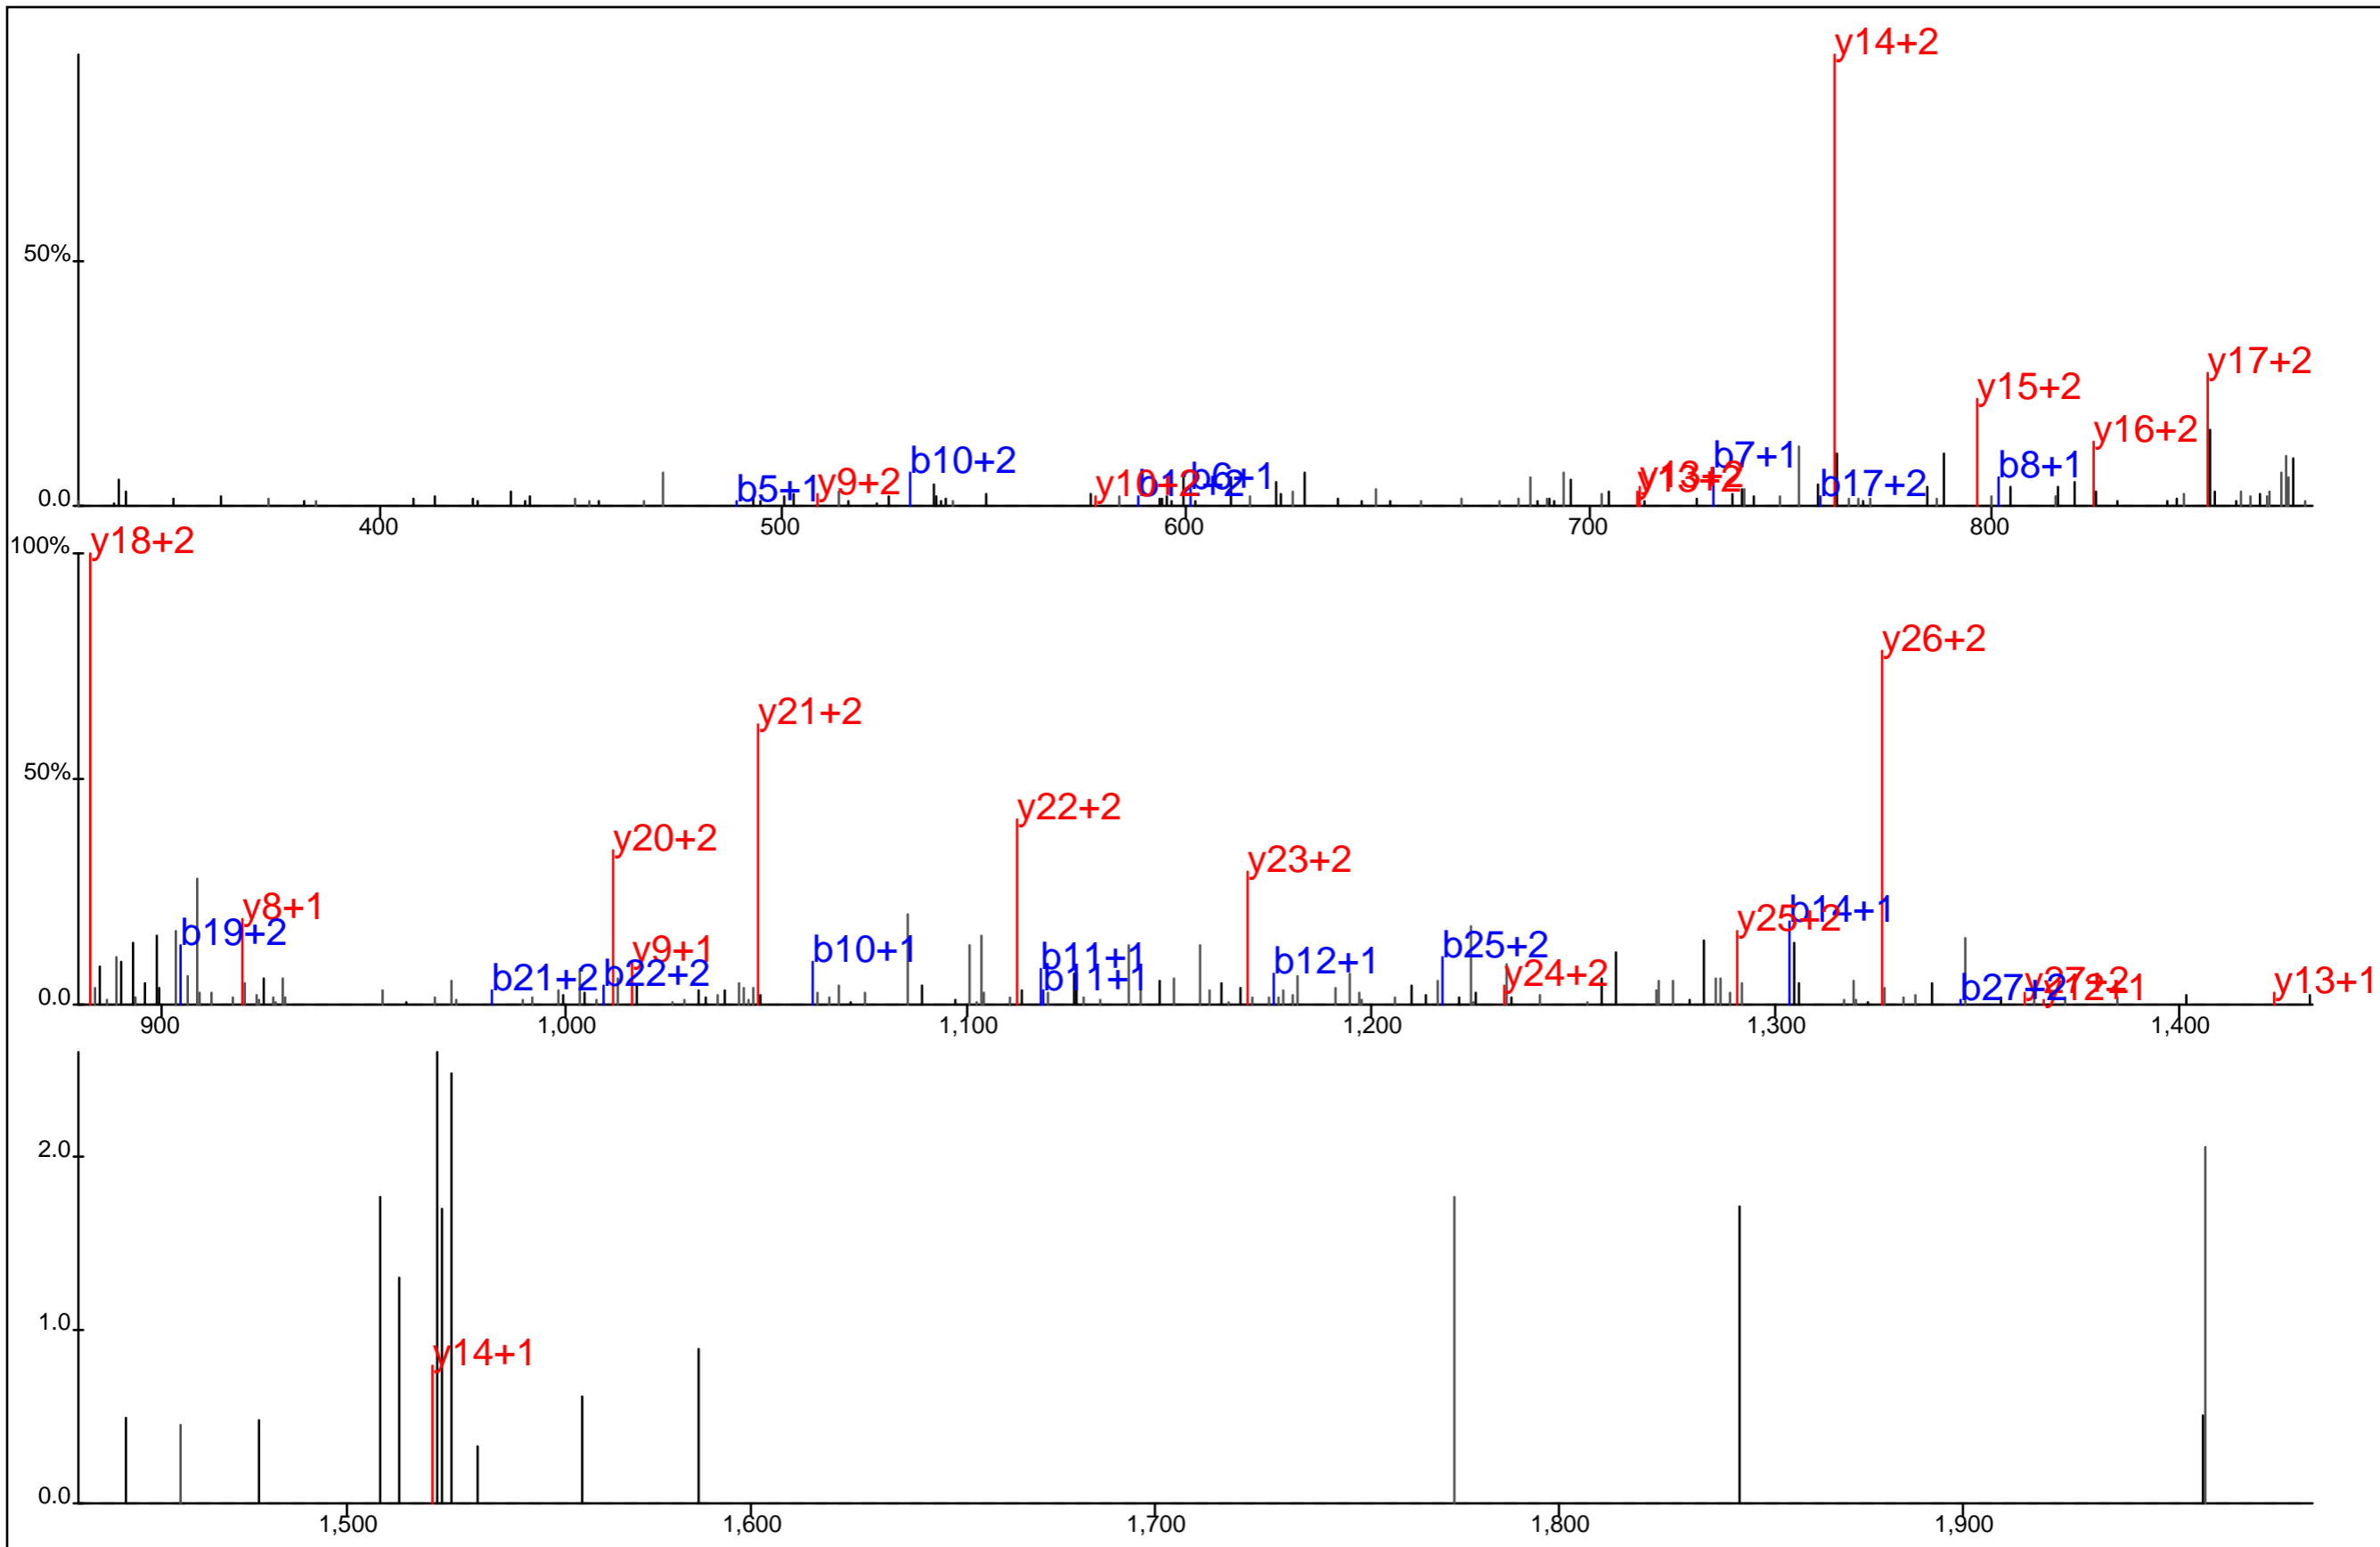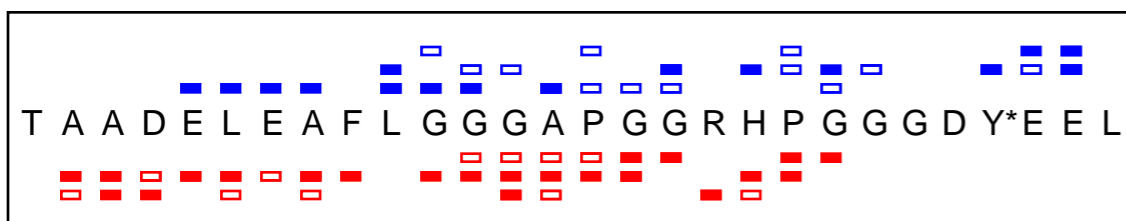

Protein Name: C9orf86  
 gi Accession: 14042363  
 Precursor Mass: 941.7533+3  
 Delta Mass: 6.935 ppm  
 XCorr: 53.19

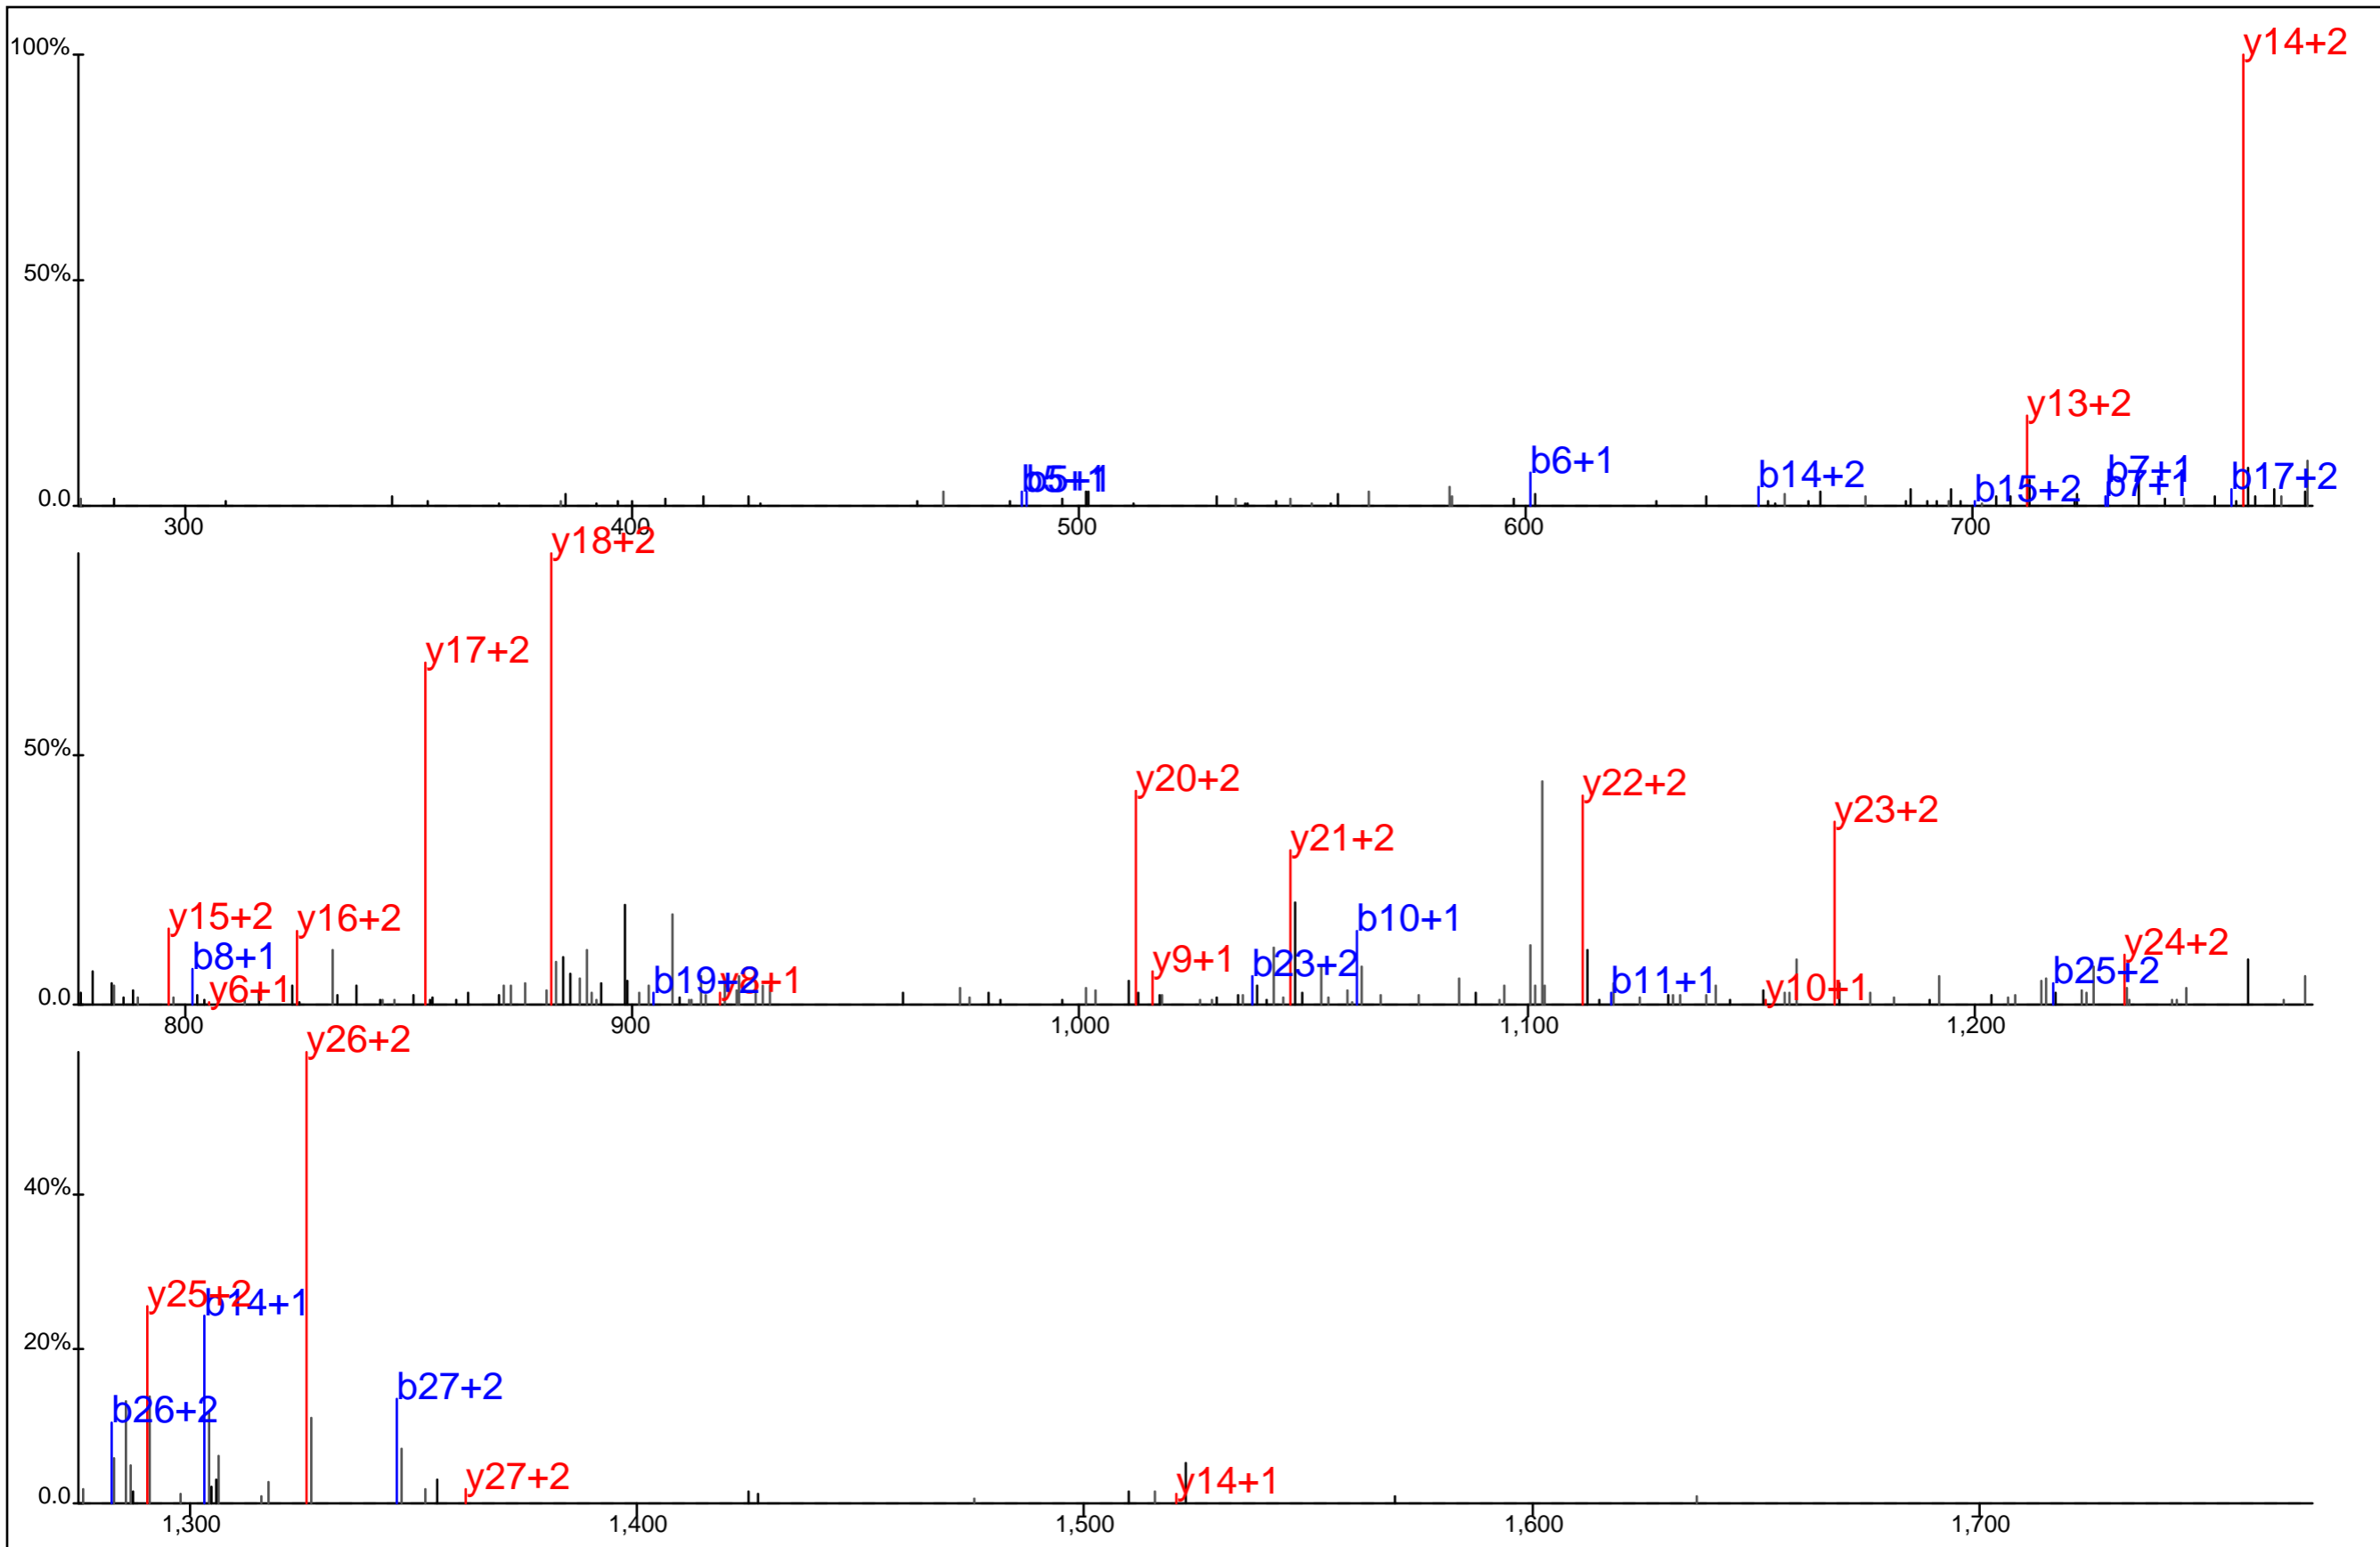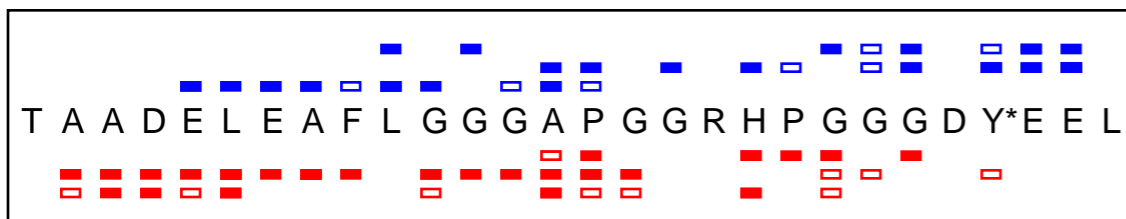

Protein Name: C9orf86  
 gi Accession: 14042363  
 Precursor Mass: 941.7481+3  
 Delta Mass: 1.423 ppm  
 XCorr: 64.15

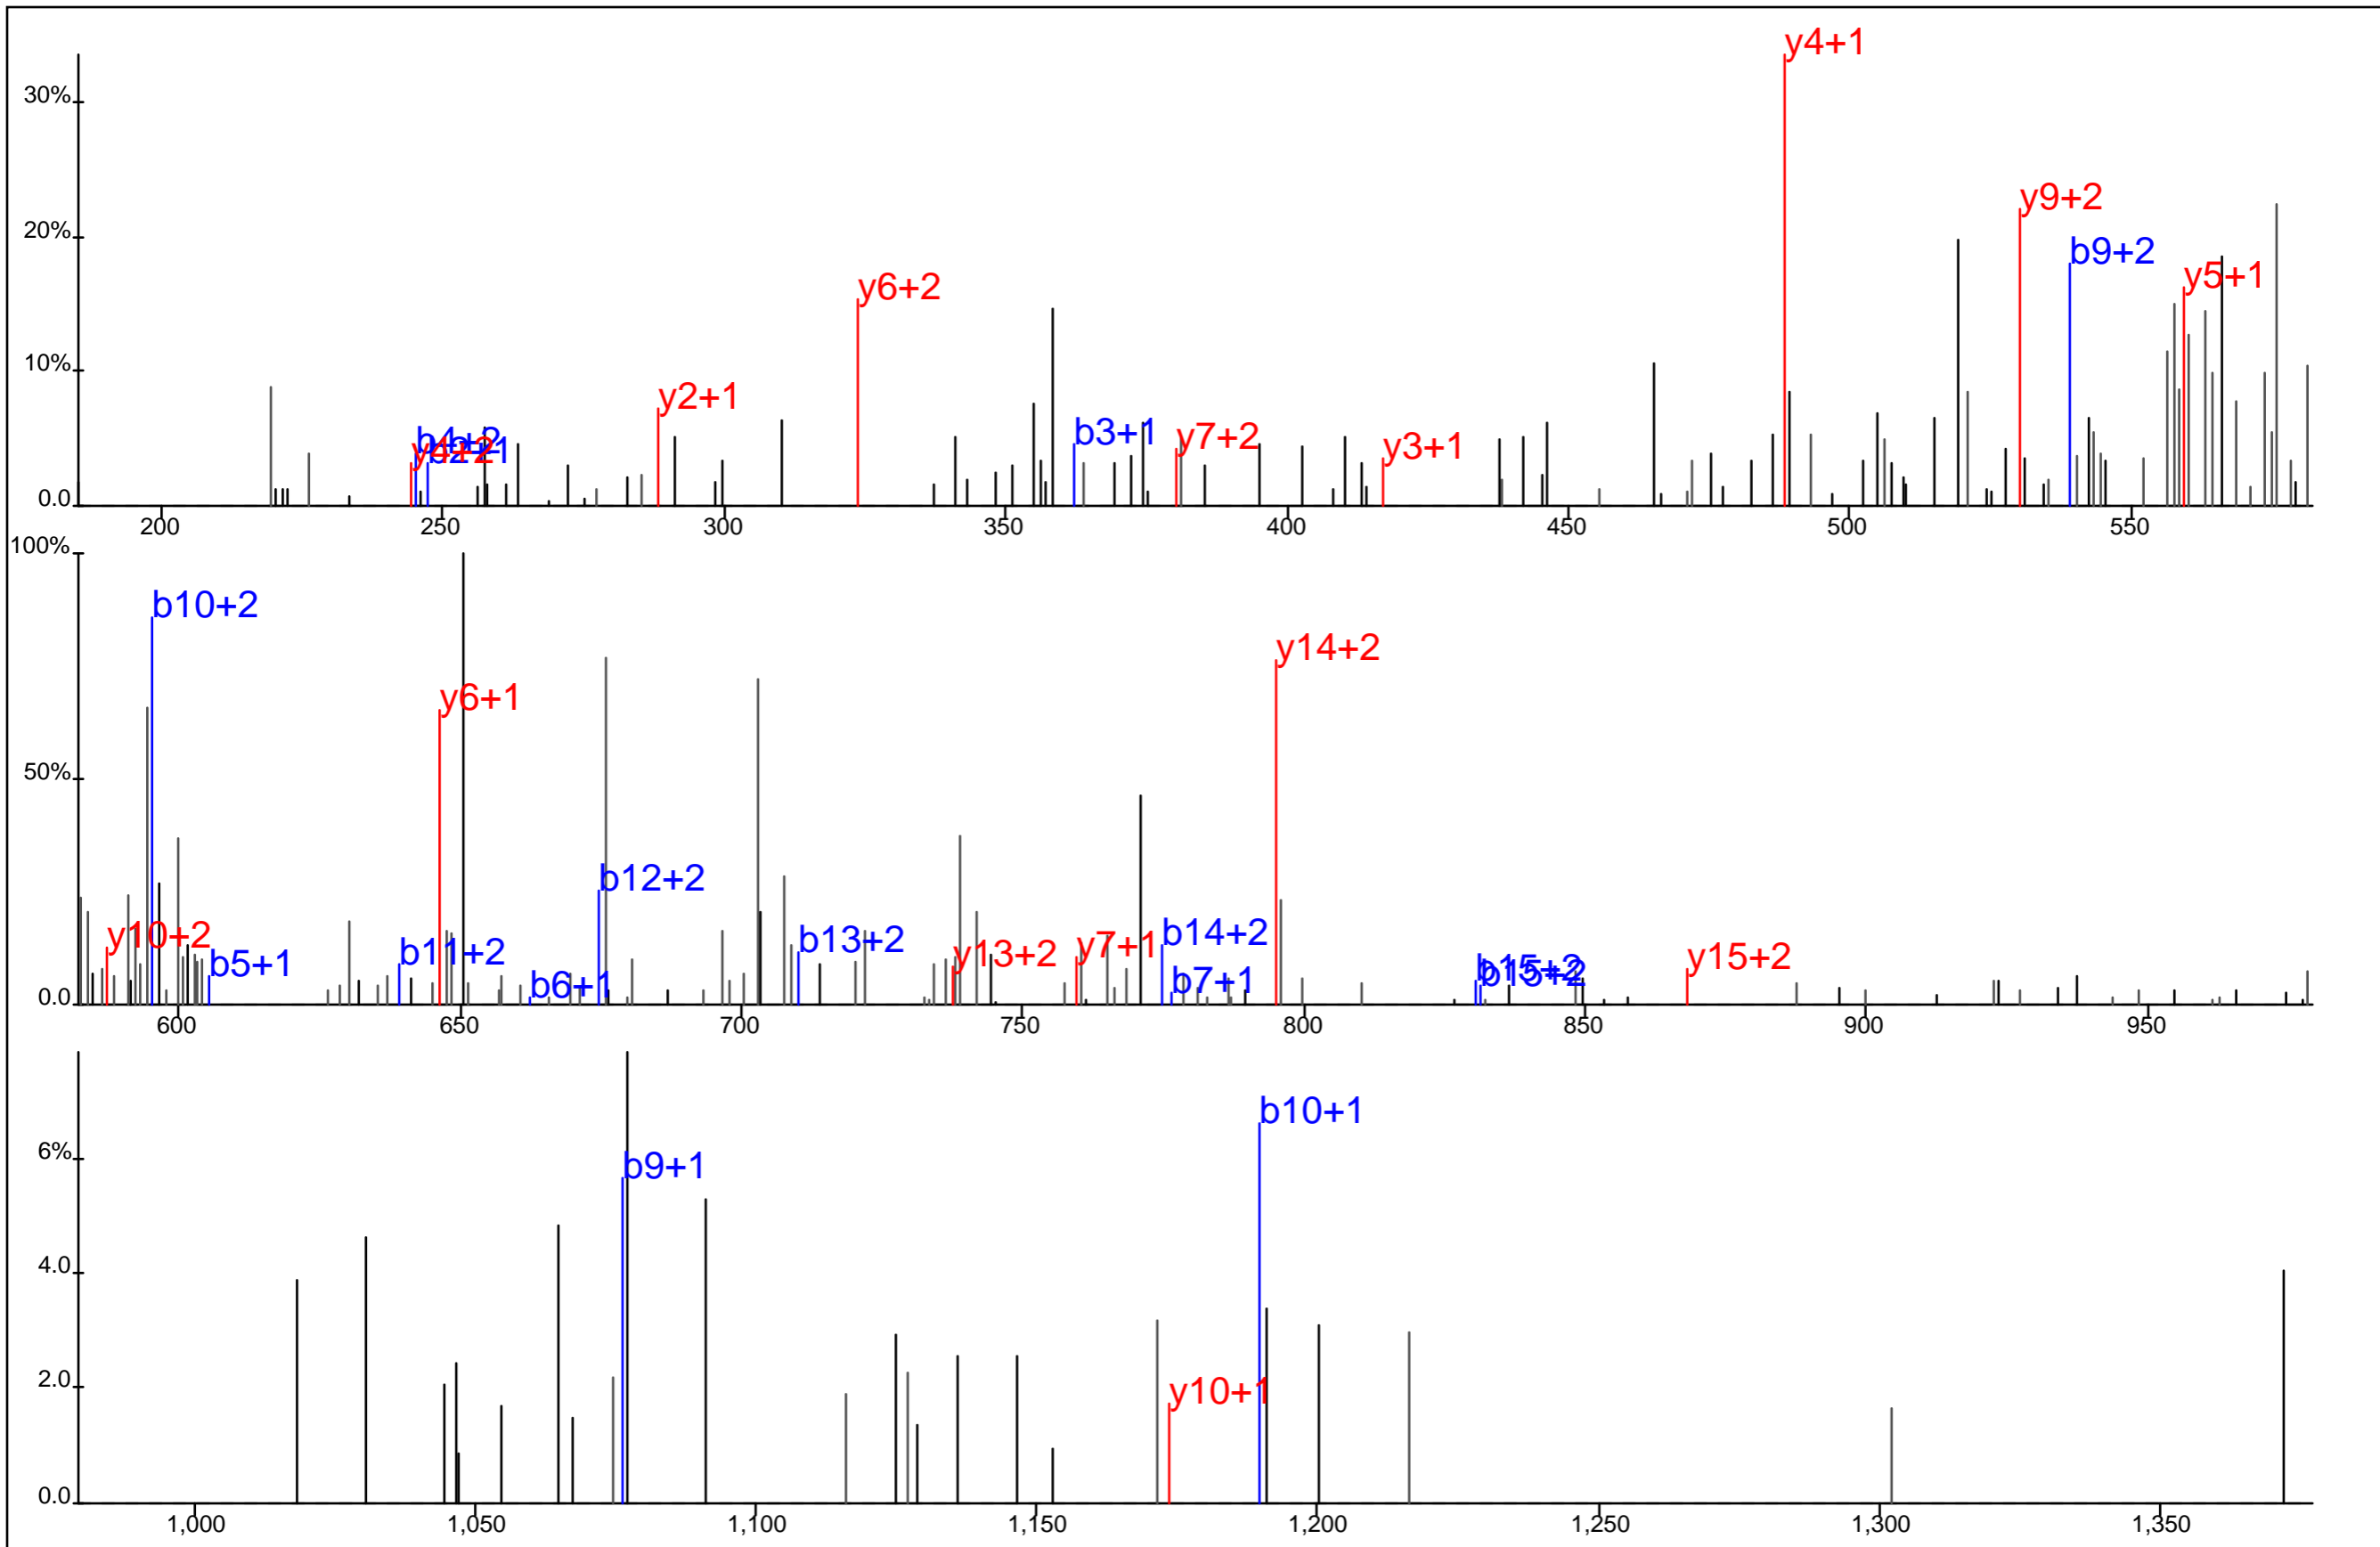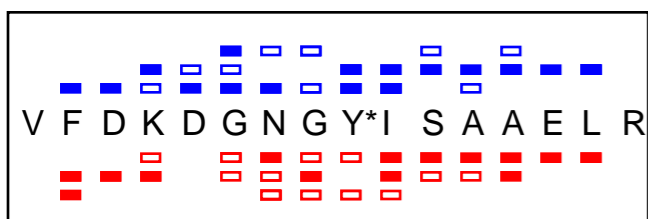

Protein Name: Calmodulin  
 gi Accession: 825635  
 Precursor Mass: 612.2878+3  
 Delta Mass: 6.474 ppm  
 XCorr: 14.15

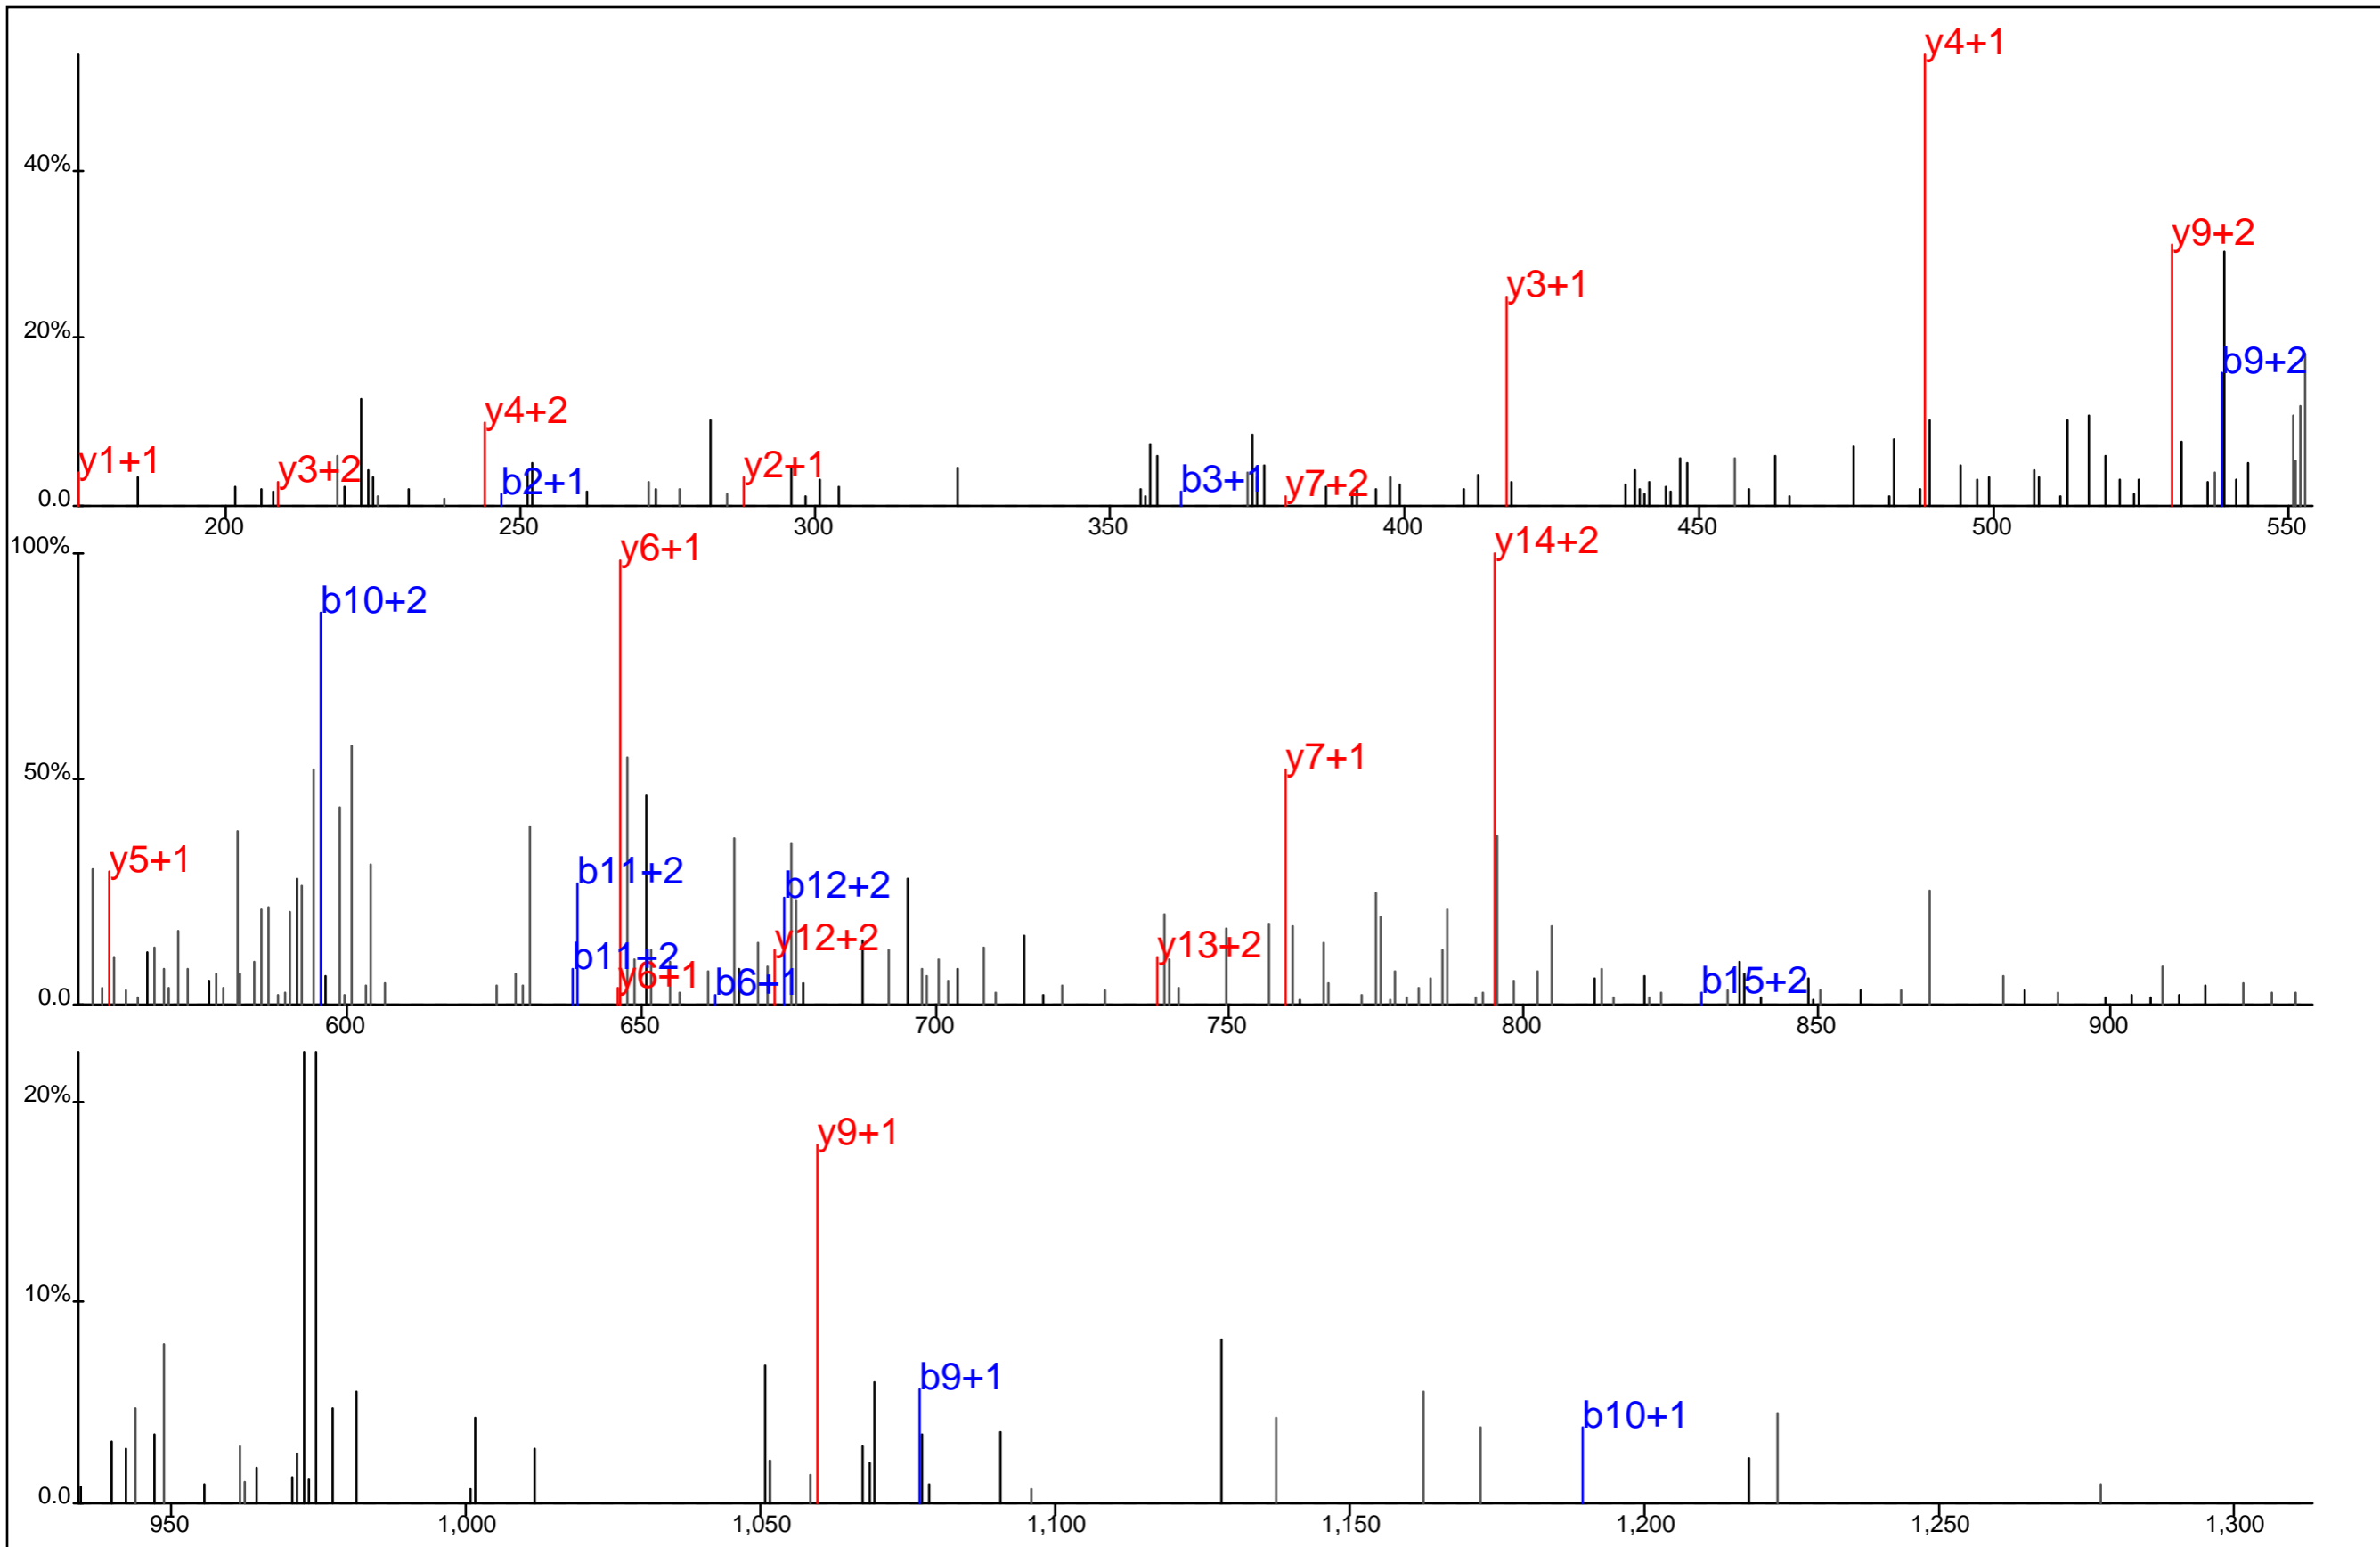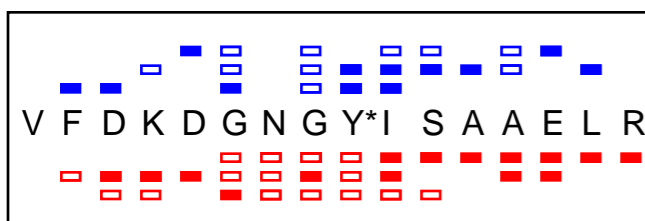

Protein Name: Calmodulin  
 gi Accession: 825635  
 Precursor Mass: 612.2853+3  
 Delta Mass: 2.282 ppm  
 XCorr: 19.11

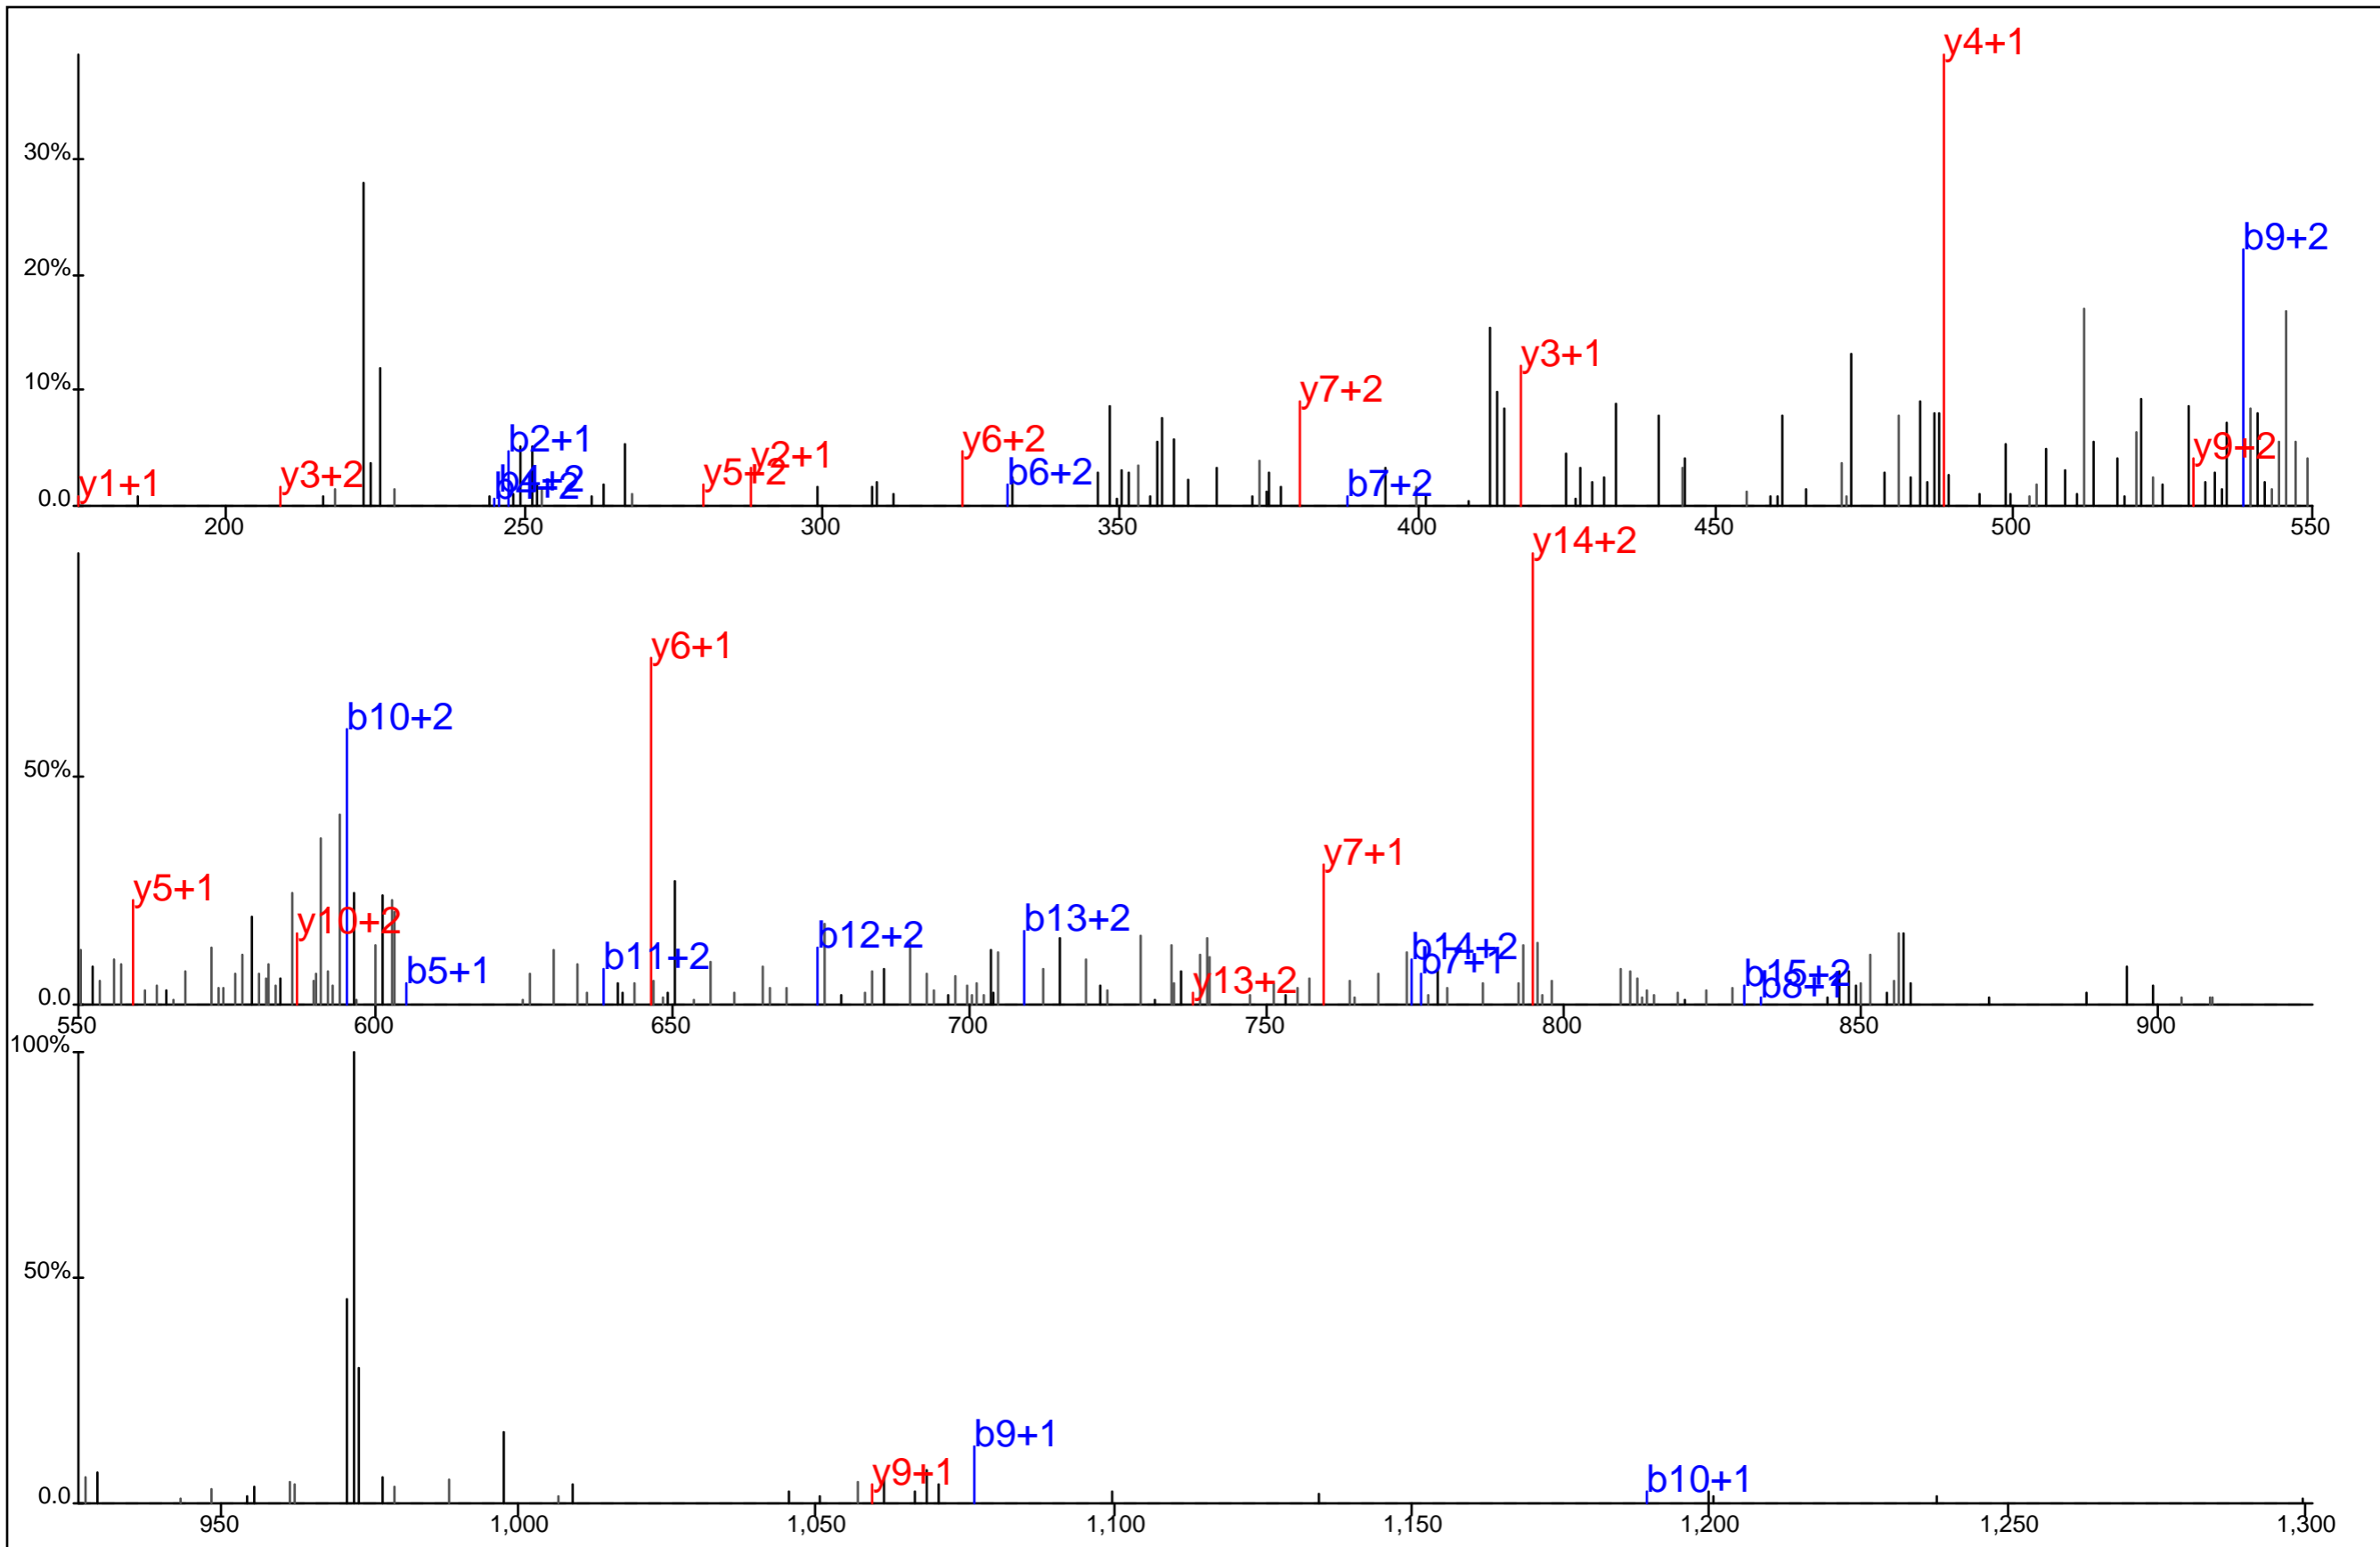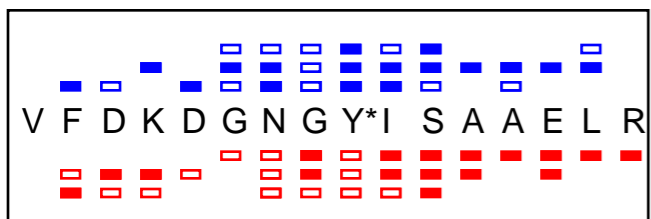

Protein Name: Calmodulin  
 gi Accession: 825635  
 Precursor Mass: 612.2867+3  
 Delta Mass: 4.578 ppm  
 XCorr: 10.82

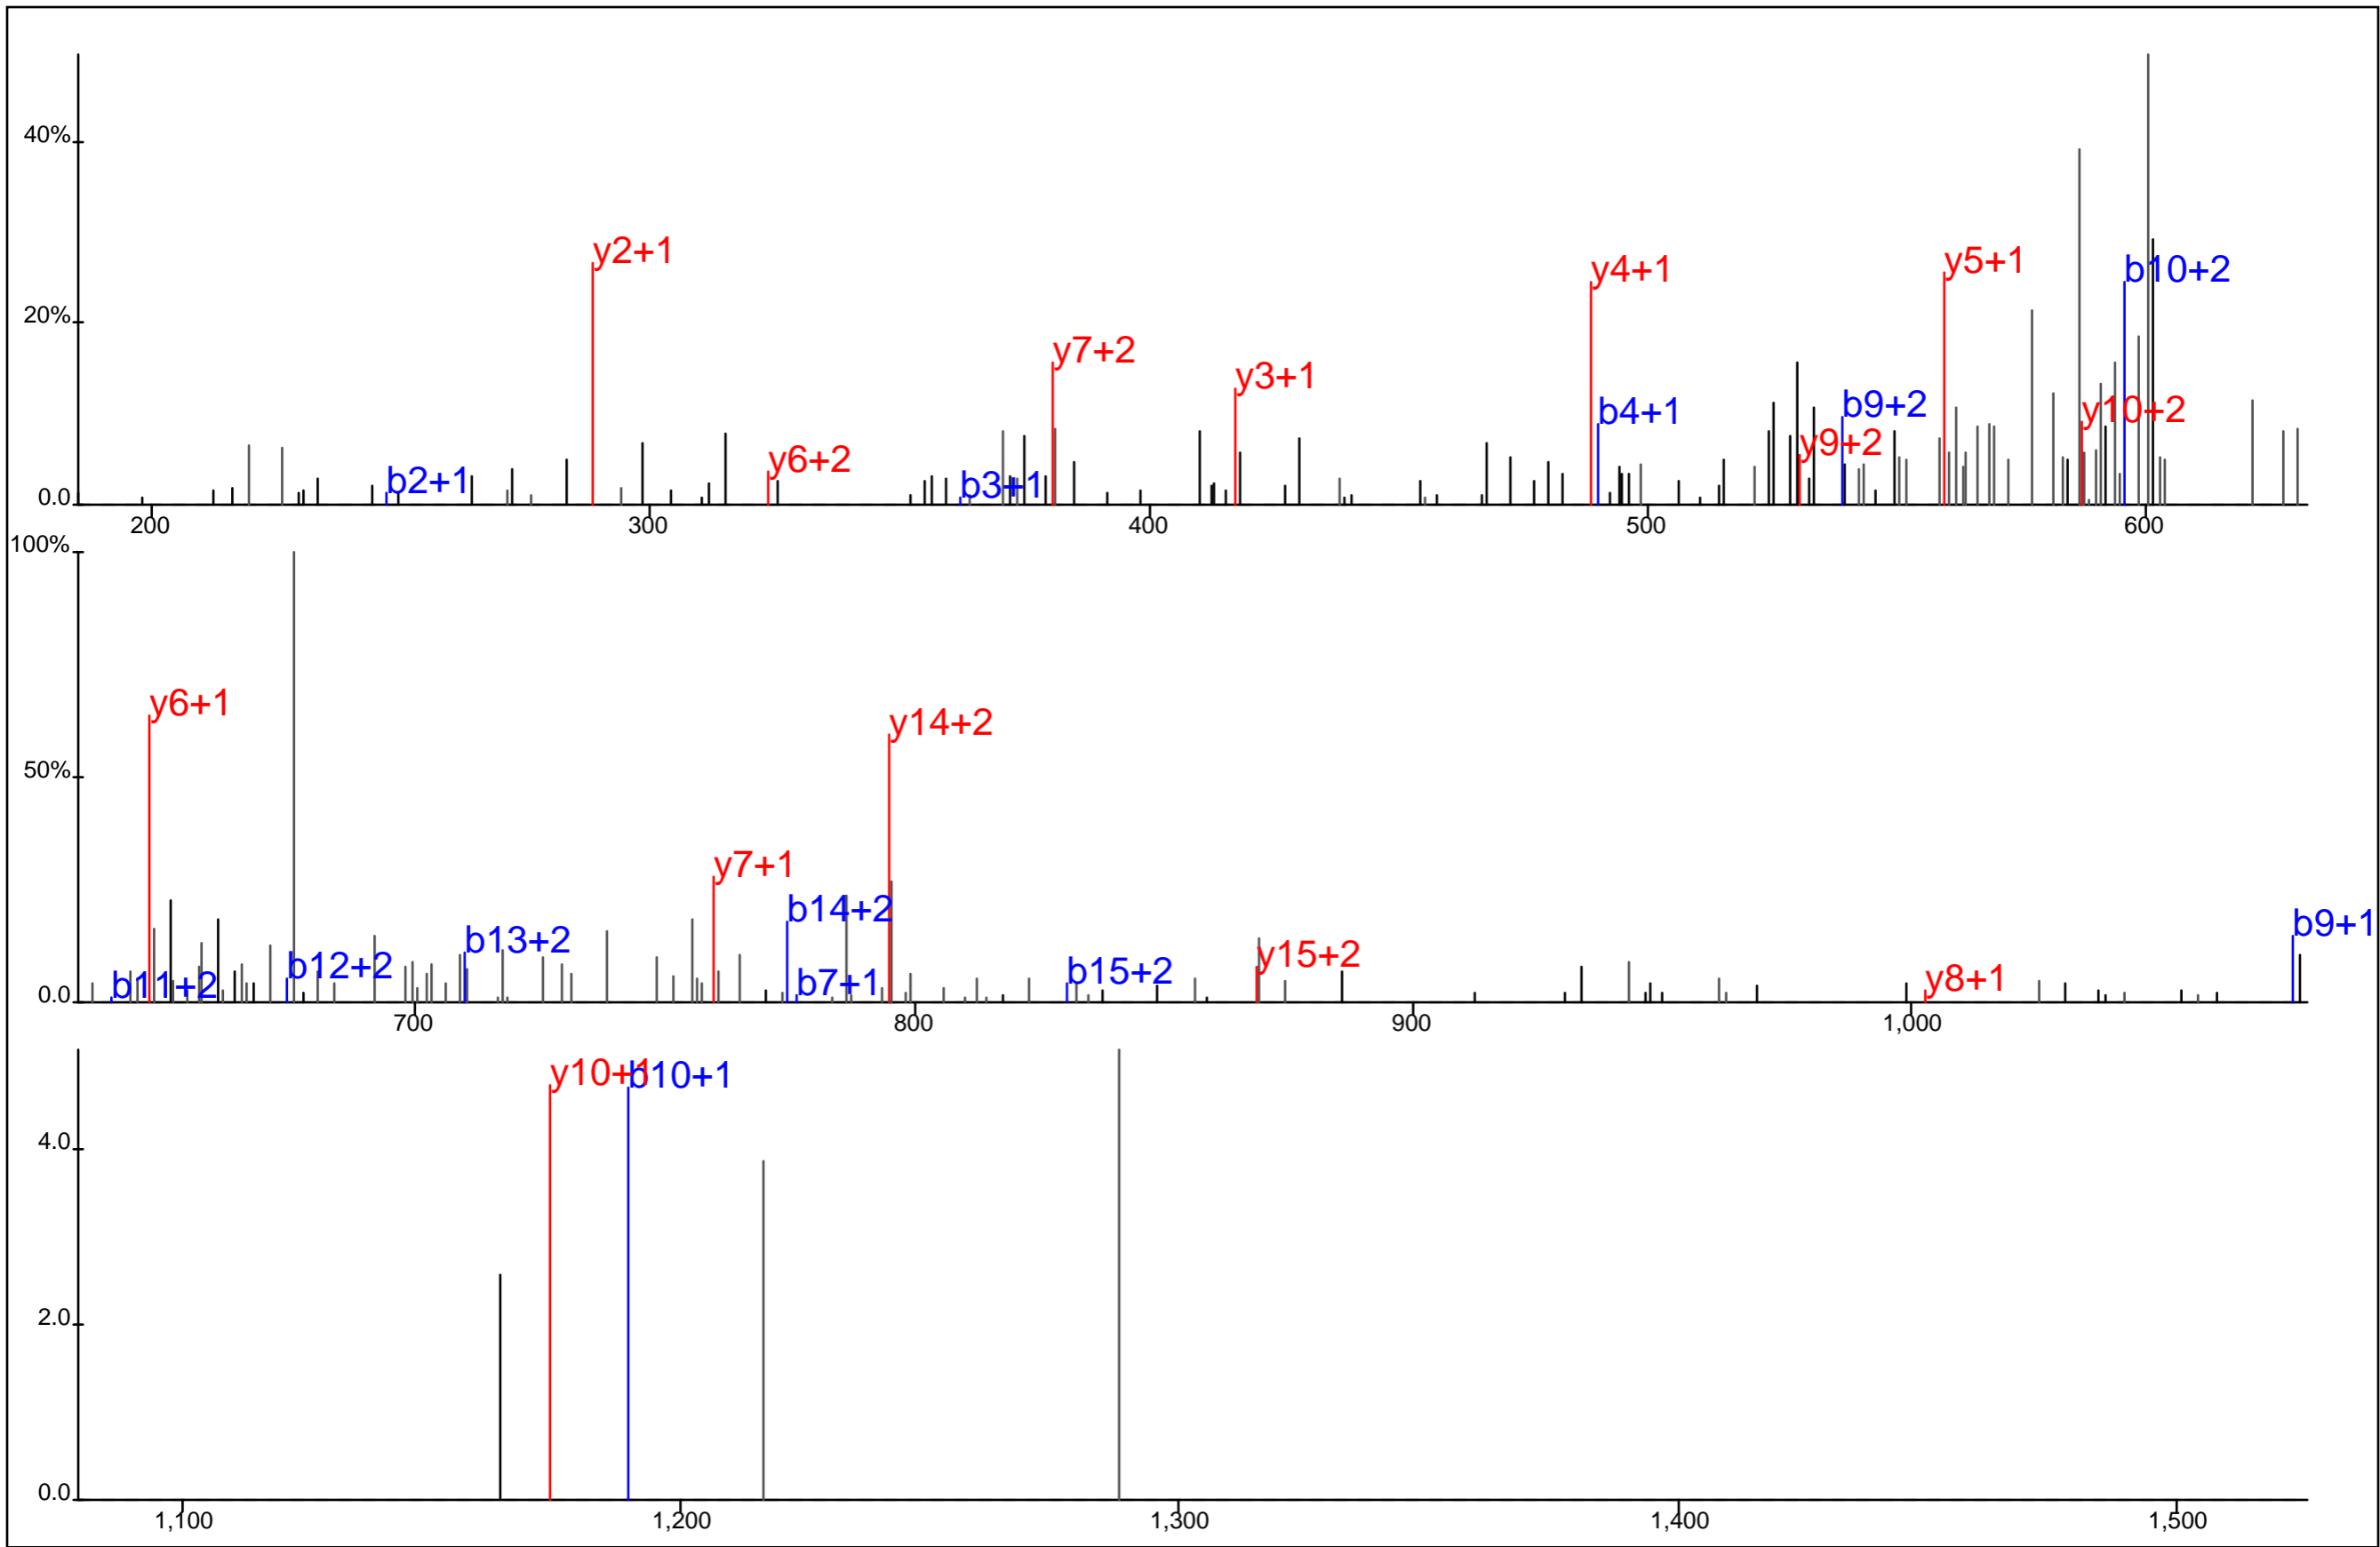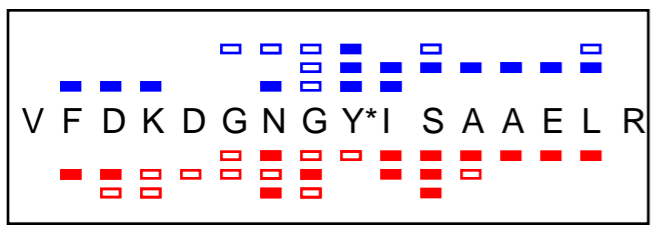

Protein Name: Calmodulin  
 gi Accession: 825635  
 Precursor Mass: 612.2861+3  
 Delta Mass: 3.683 ppm  
 XCorr: 30.78

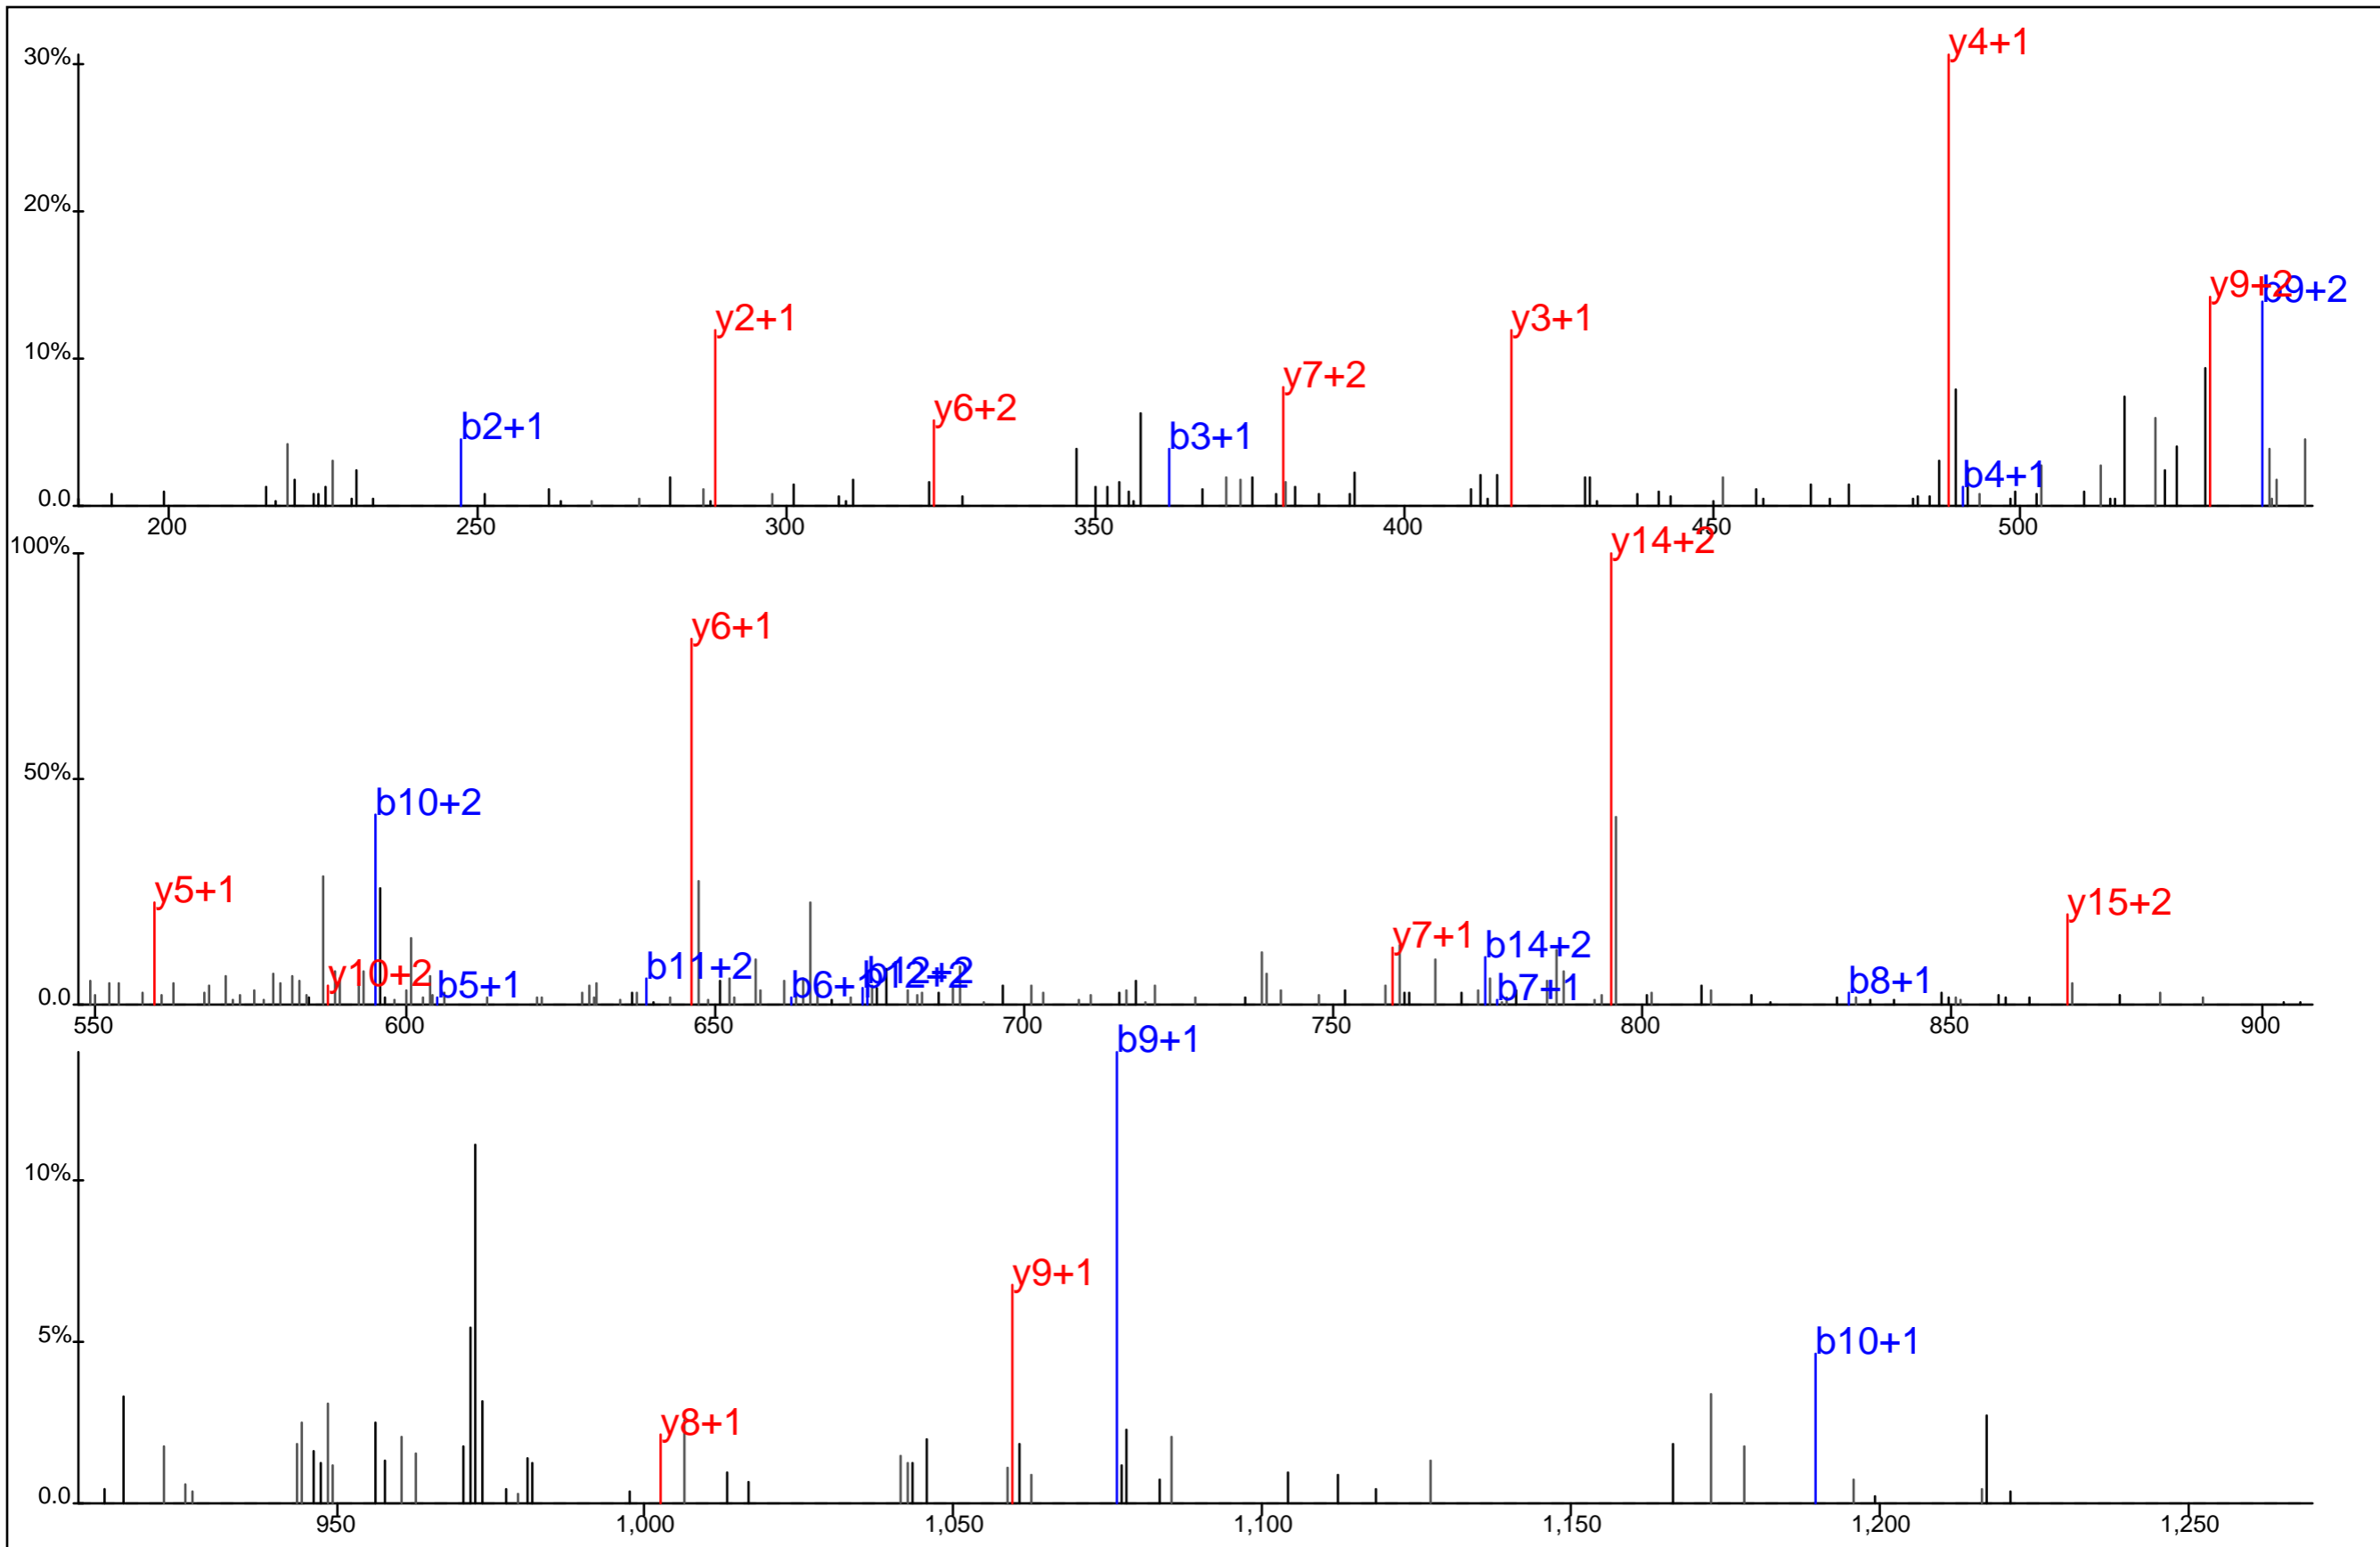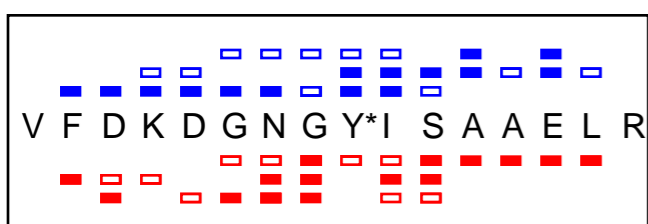

Protein Name: Calmodulin  
 gi Accession: 825635  
 Precursor Mass: 612.2847+3  
 Delta Mass: 1.383 ppm  
 XCorr: 42.07



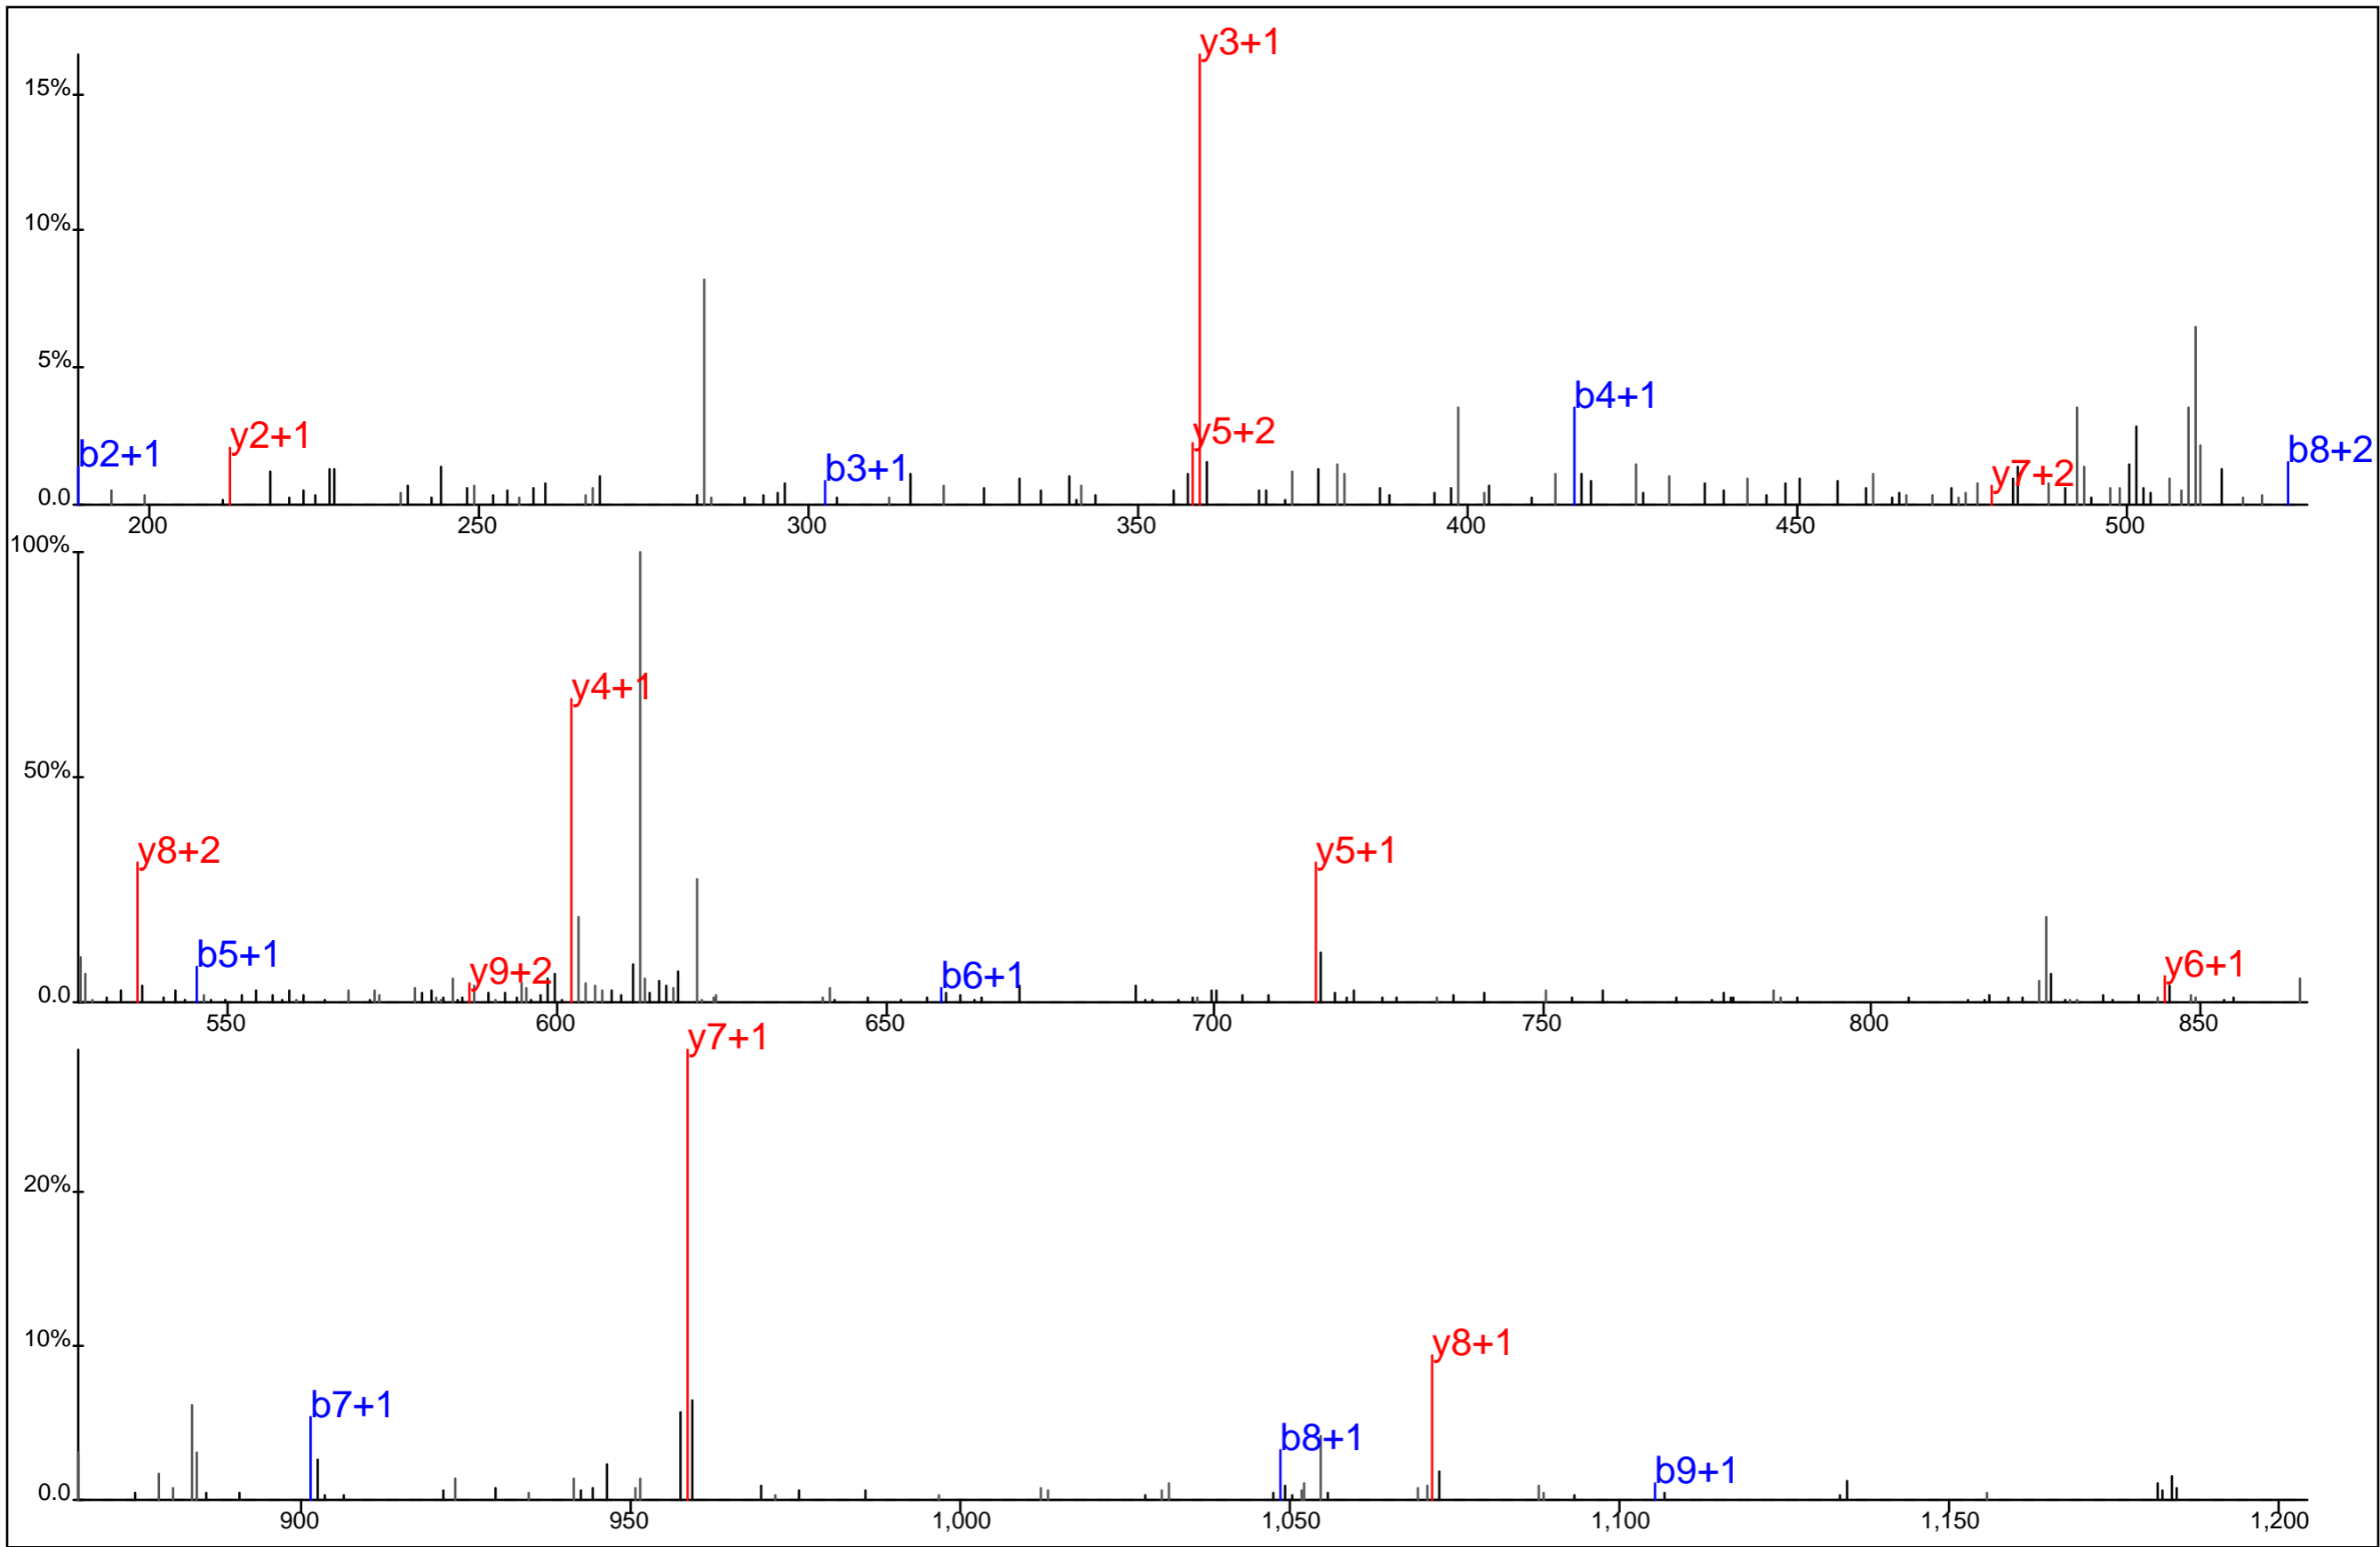

|   |   |   |   |   |   |    |   |    |
|---|---|---|---|---|---|----|---|----|
| ■ | ■ | ■ | ■ | ■ | ■ | ■  | ■ | ■  |
| S | T | L | N | E | I | Y* | F | G  |
| □ | □ | □ | □ | □ | □ | □  | □ | □  |
|   |   |   |   |   |   |    |   | K# |

Protein Name: CAPB  
 gi Accession: 13124696  
 Precursor Mass: 630.2958+2  
 Delta Mass: 3.587 ppm  
 XCorr: 41.61

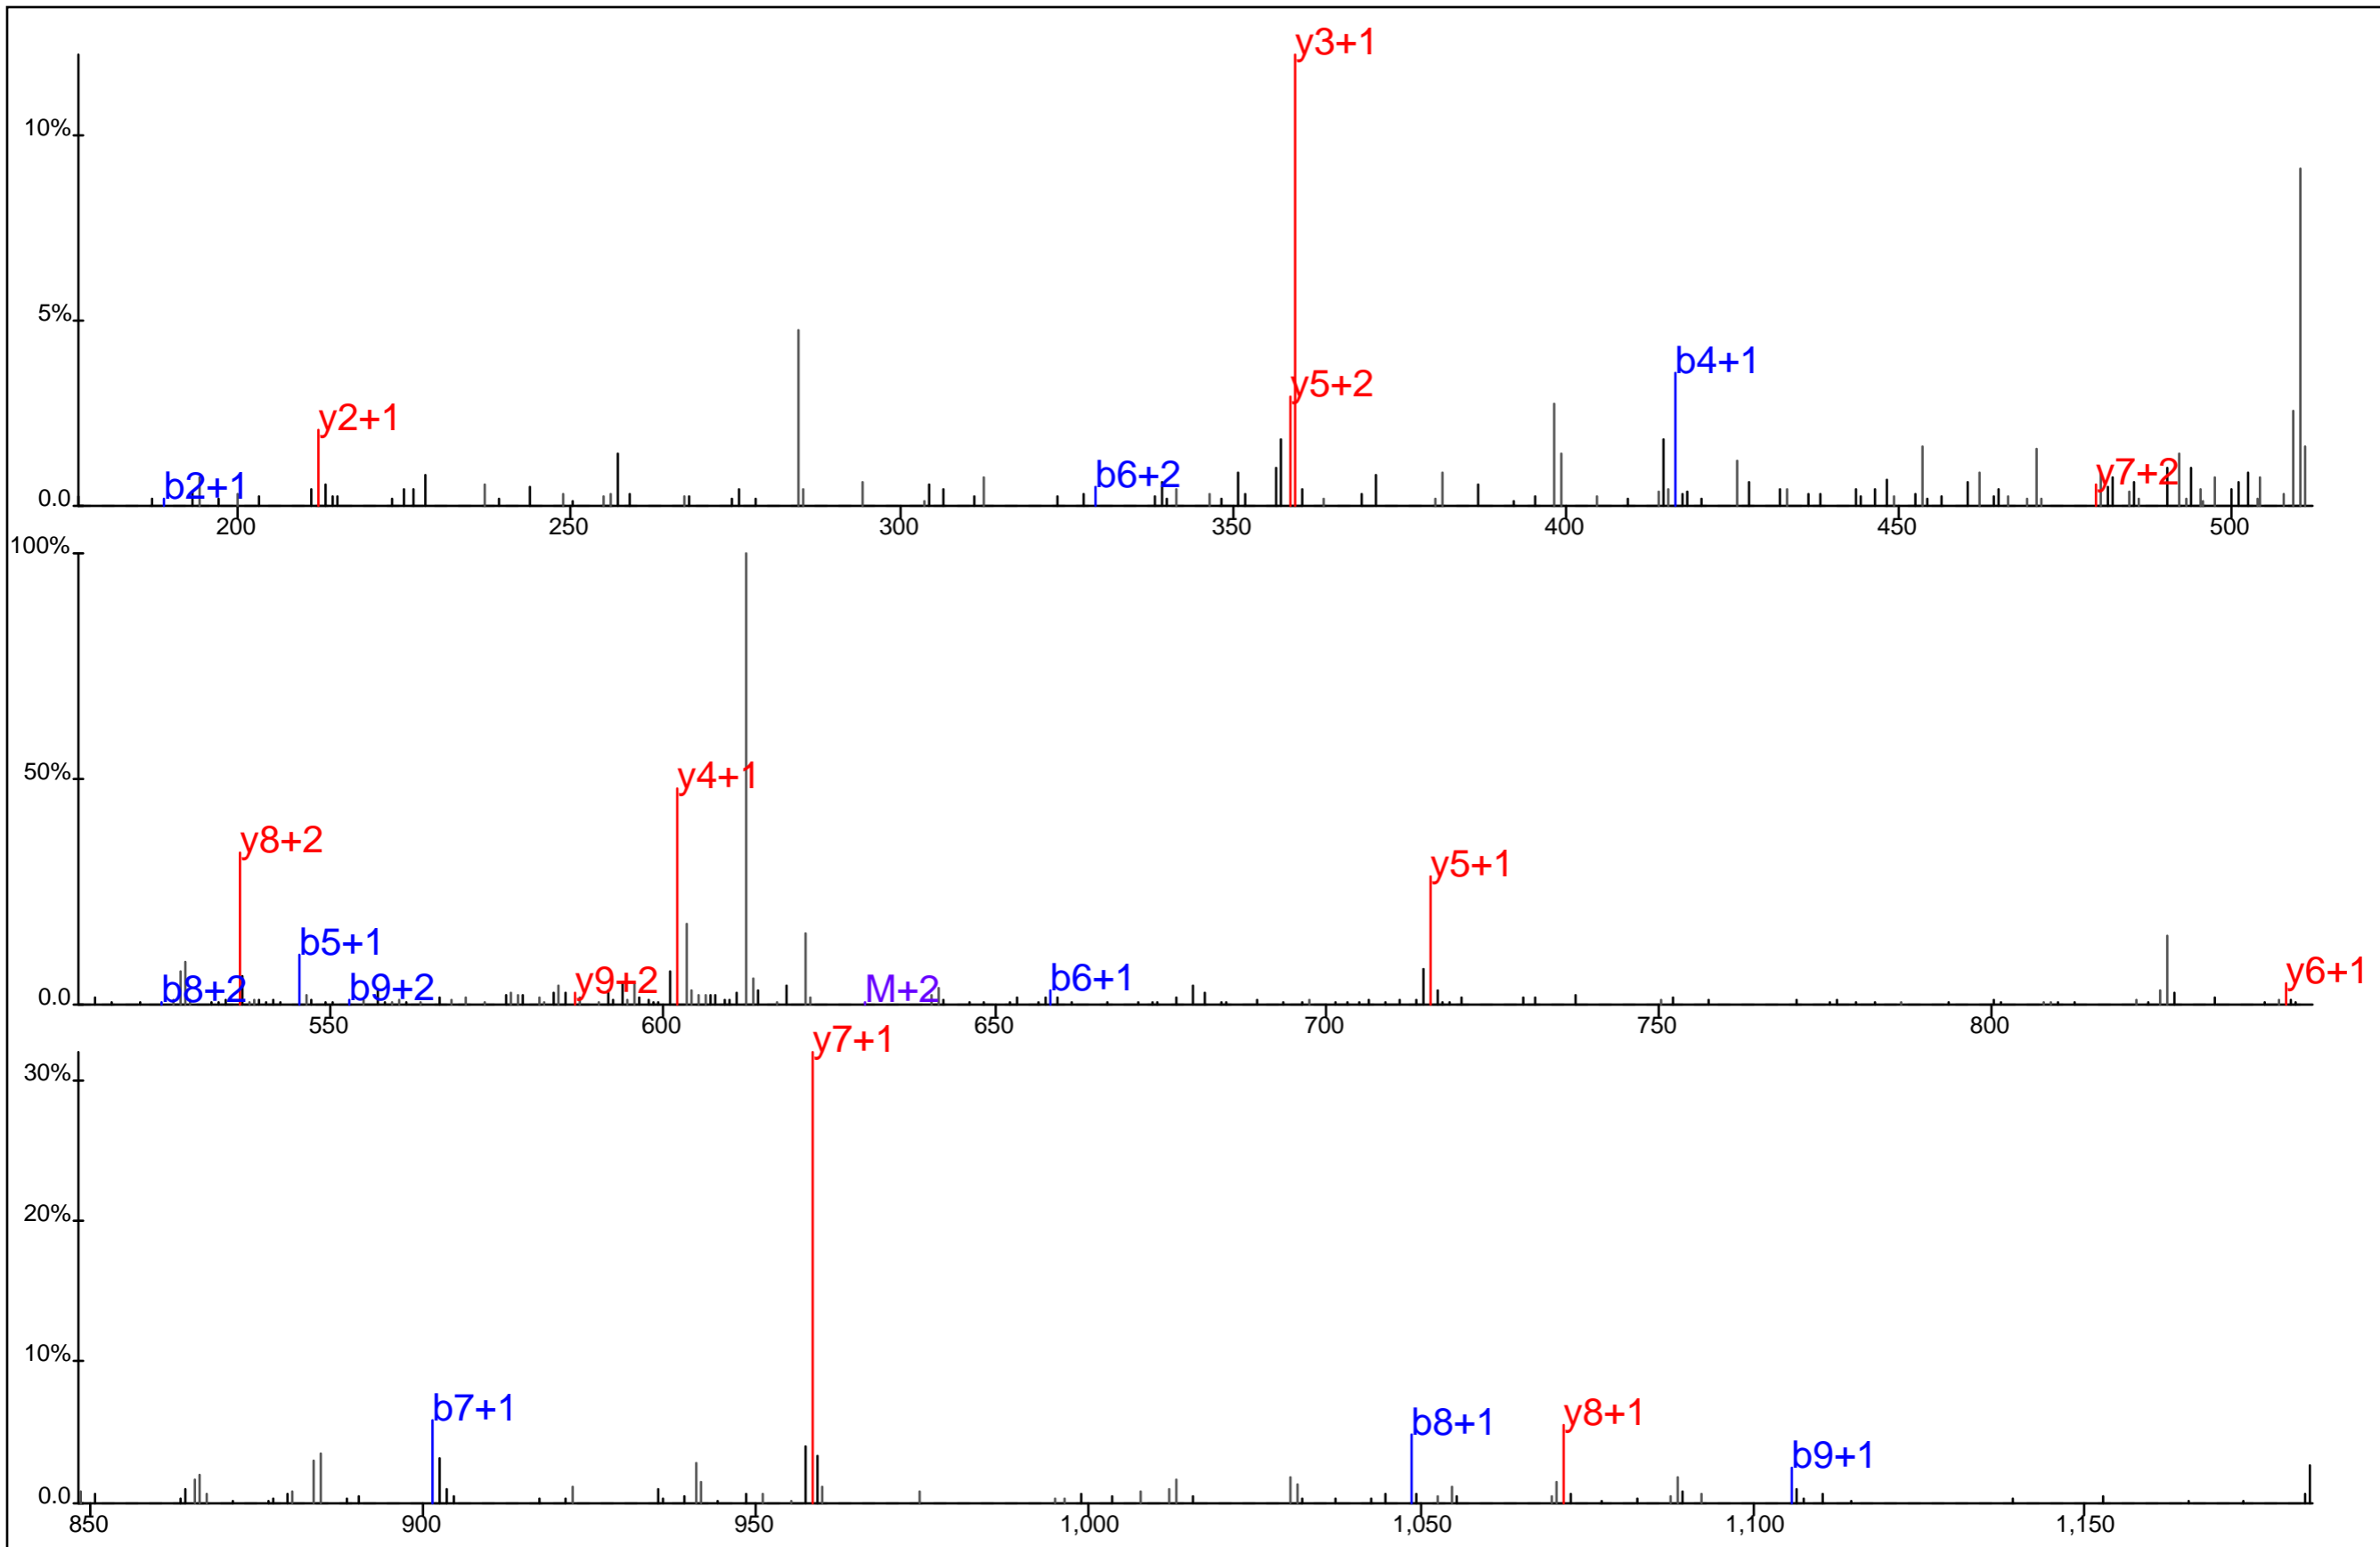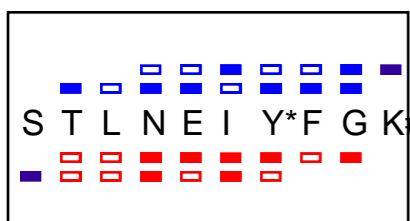

Protein Name: CAPB  
 gi Accession: 13124696  
 Precursor Mass: 630.2954+2  
 Delta Mass: 2.904 ppm  
 XCorr: 56.85

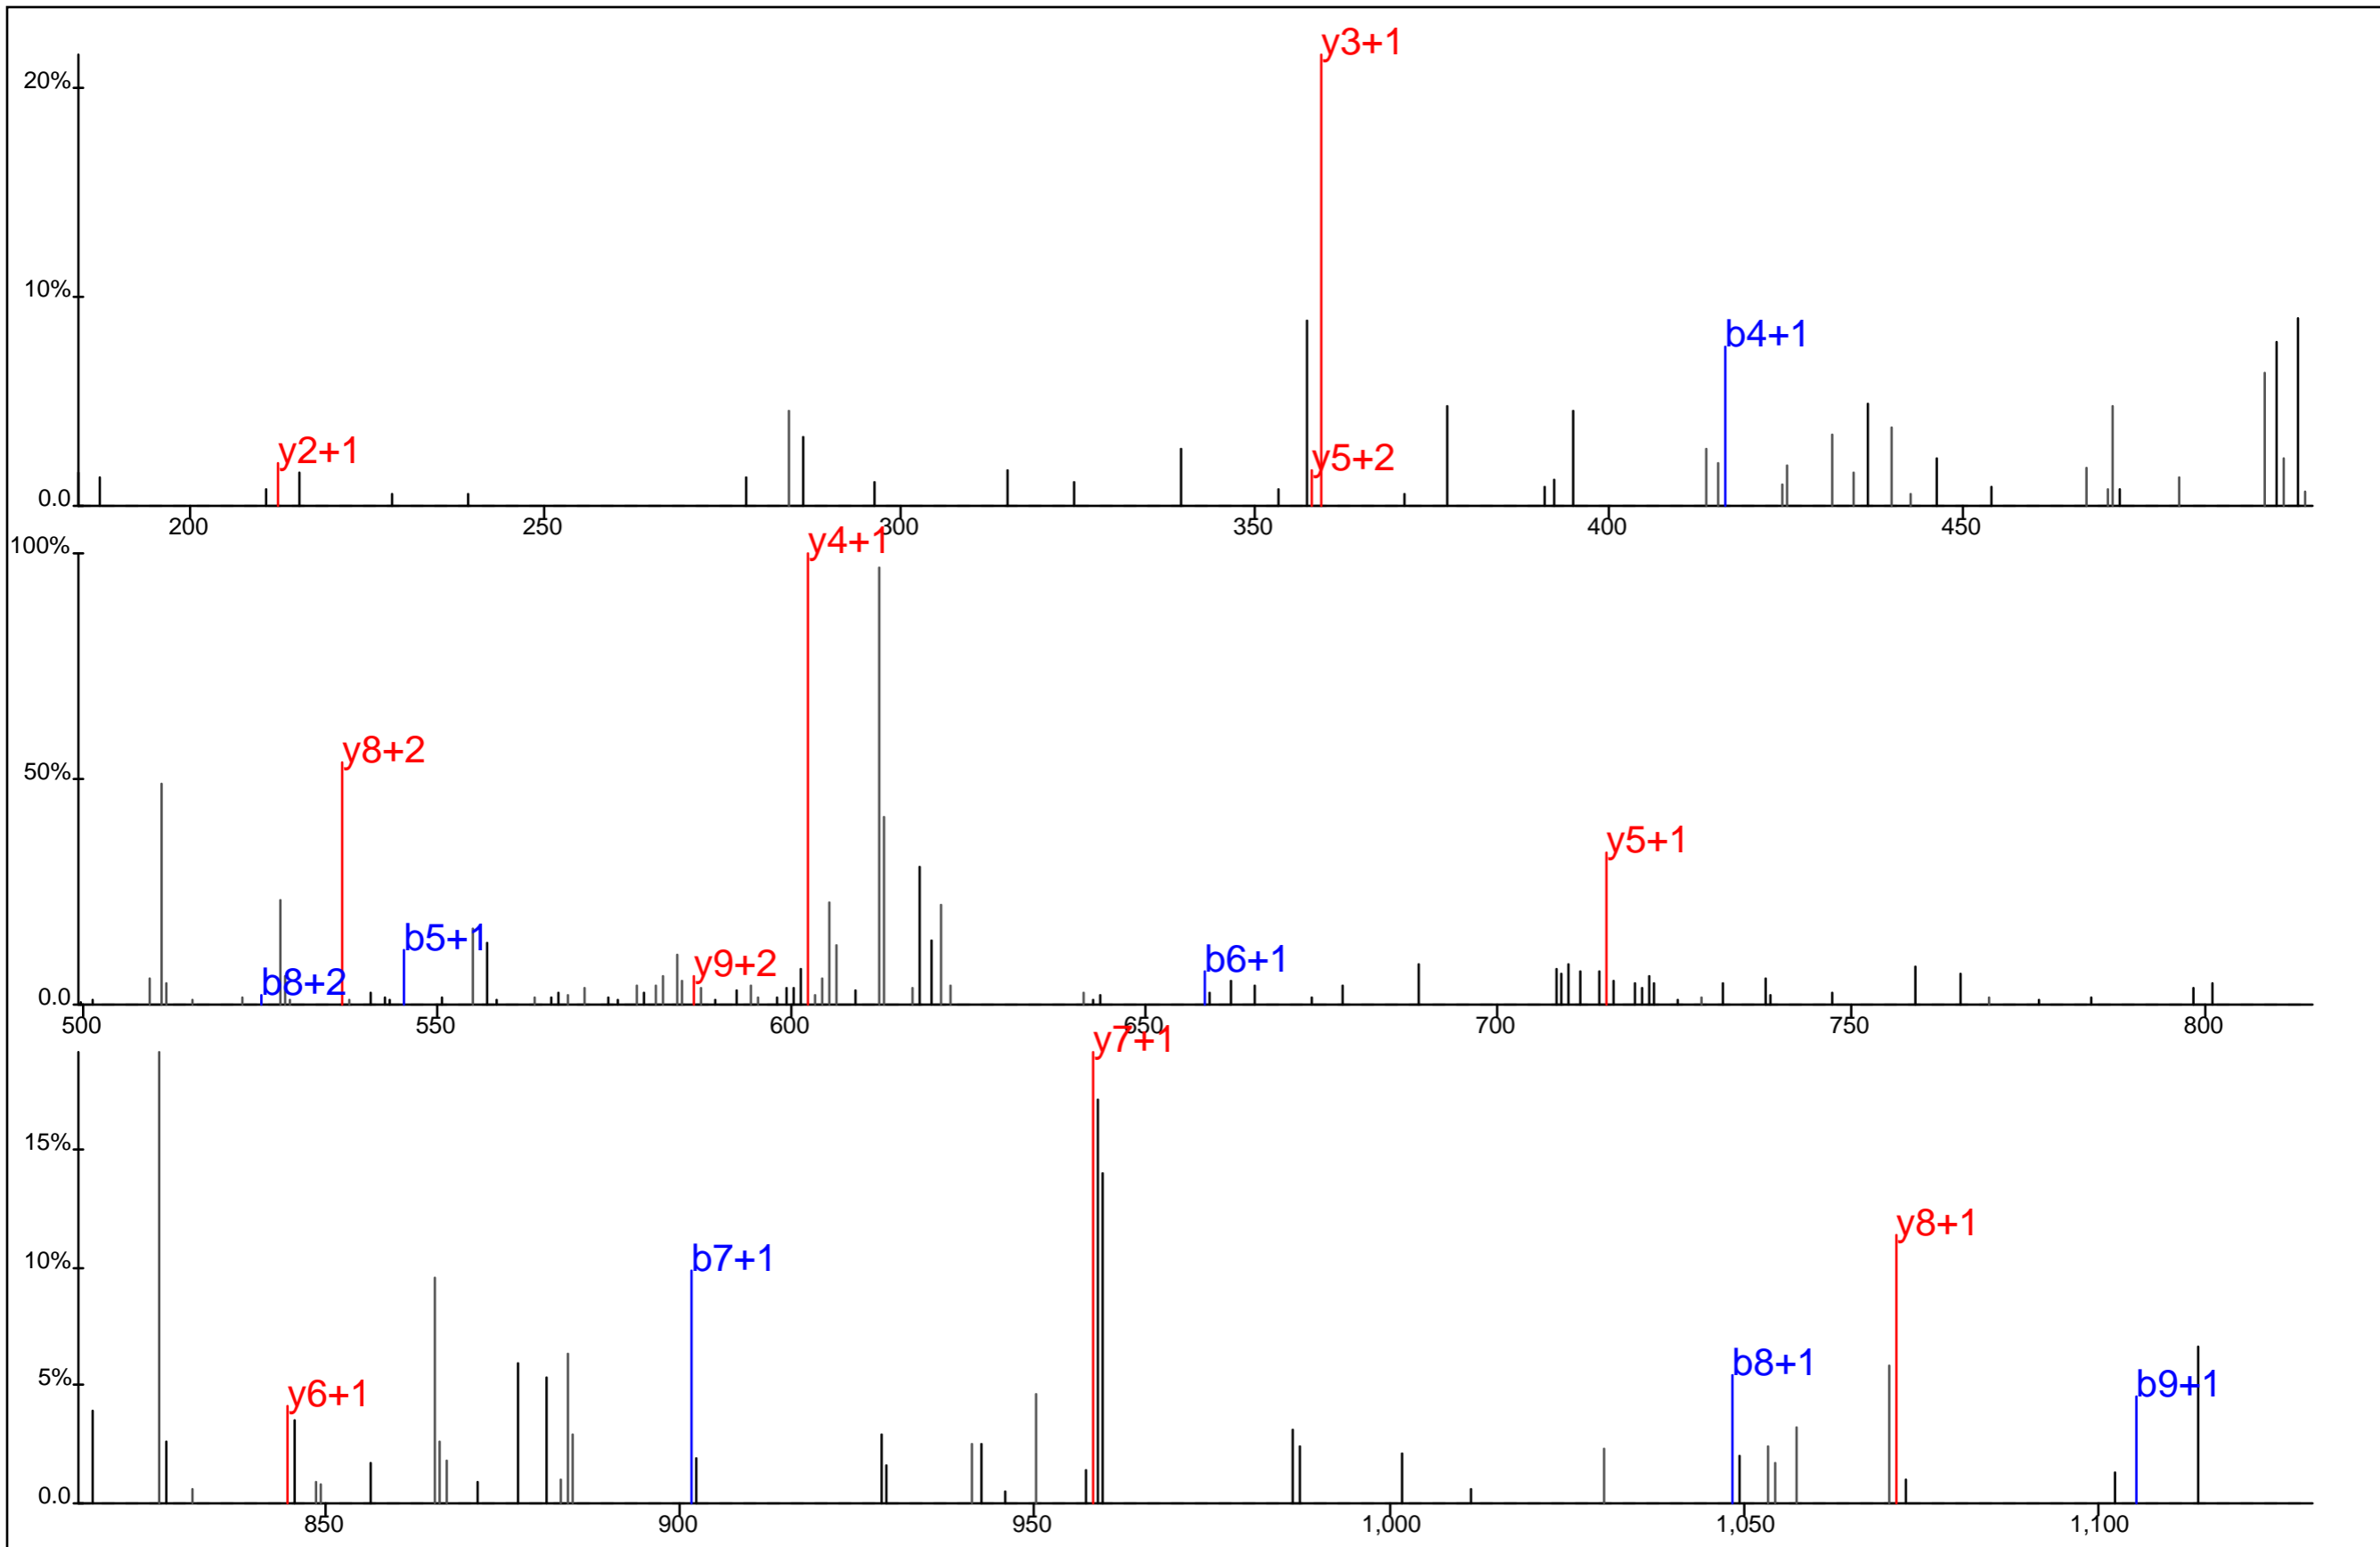

□ □ □ □ □ □ □ □  
 S T L N E I Y\* F G K#  
□ □ □ □ □ □ □ □

Protein Name: CAPB  
 gi Accession: 13124696  
 Precursor Mass: 630.2946+2  
 Delta Mass: 1.650 ppm  
 XCorr: 44.37

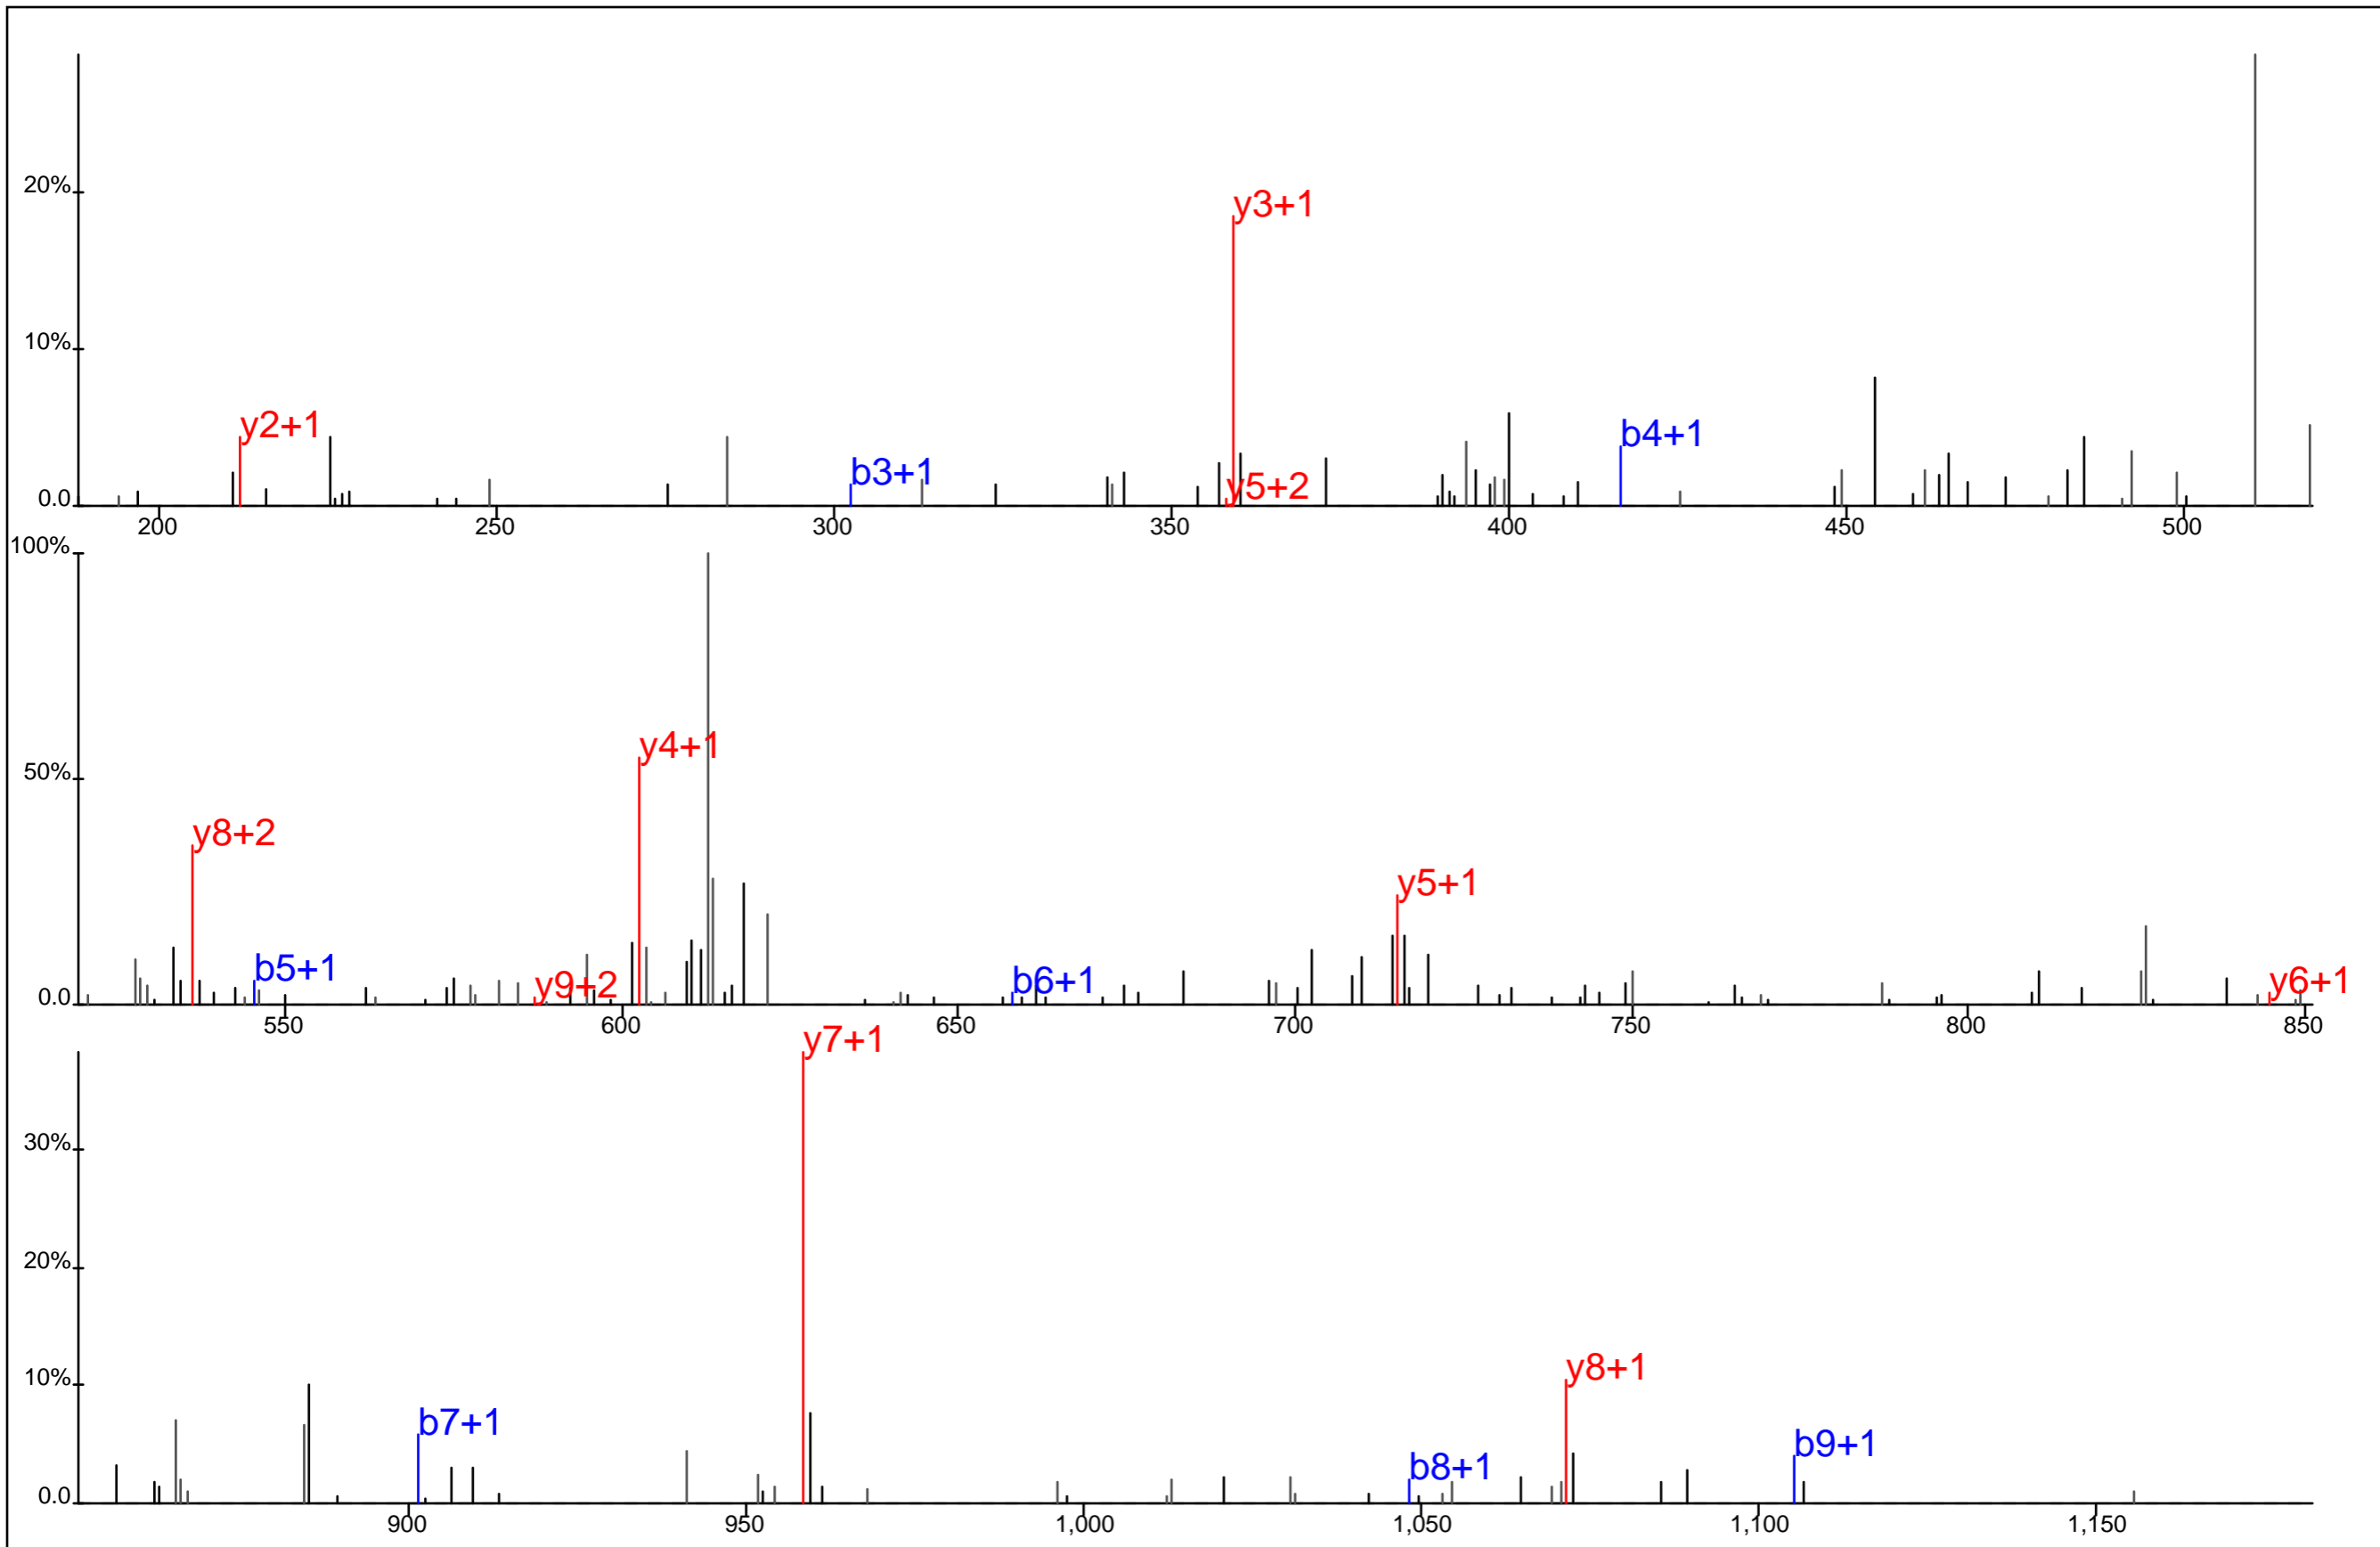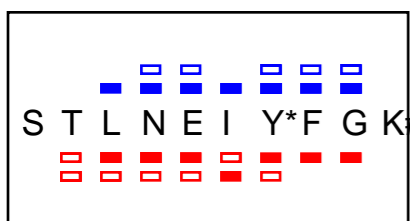

Protein Name: CAPB  
 gi Accession: 13124696  
 Precursor Mass: 630.2961+2  
 Delta Mass: 4.071 ppm  
 XCorr: 30.97

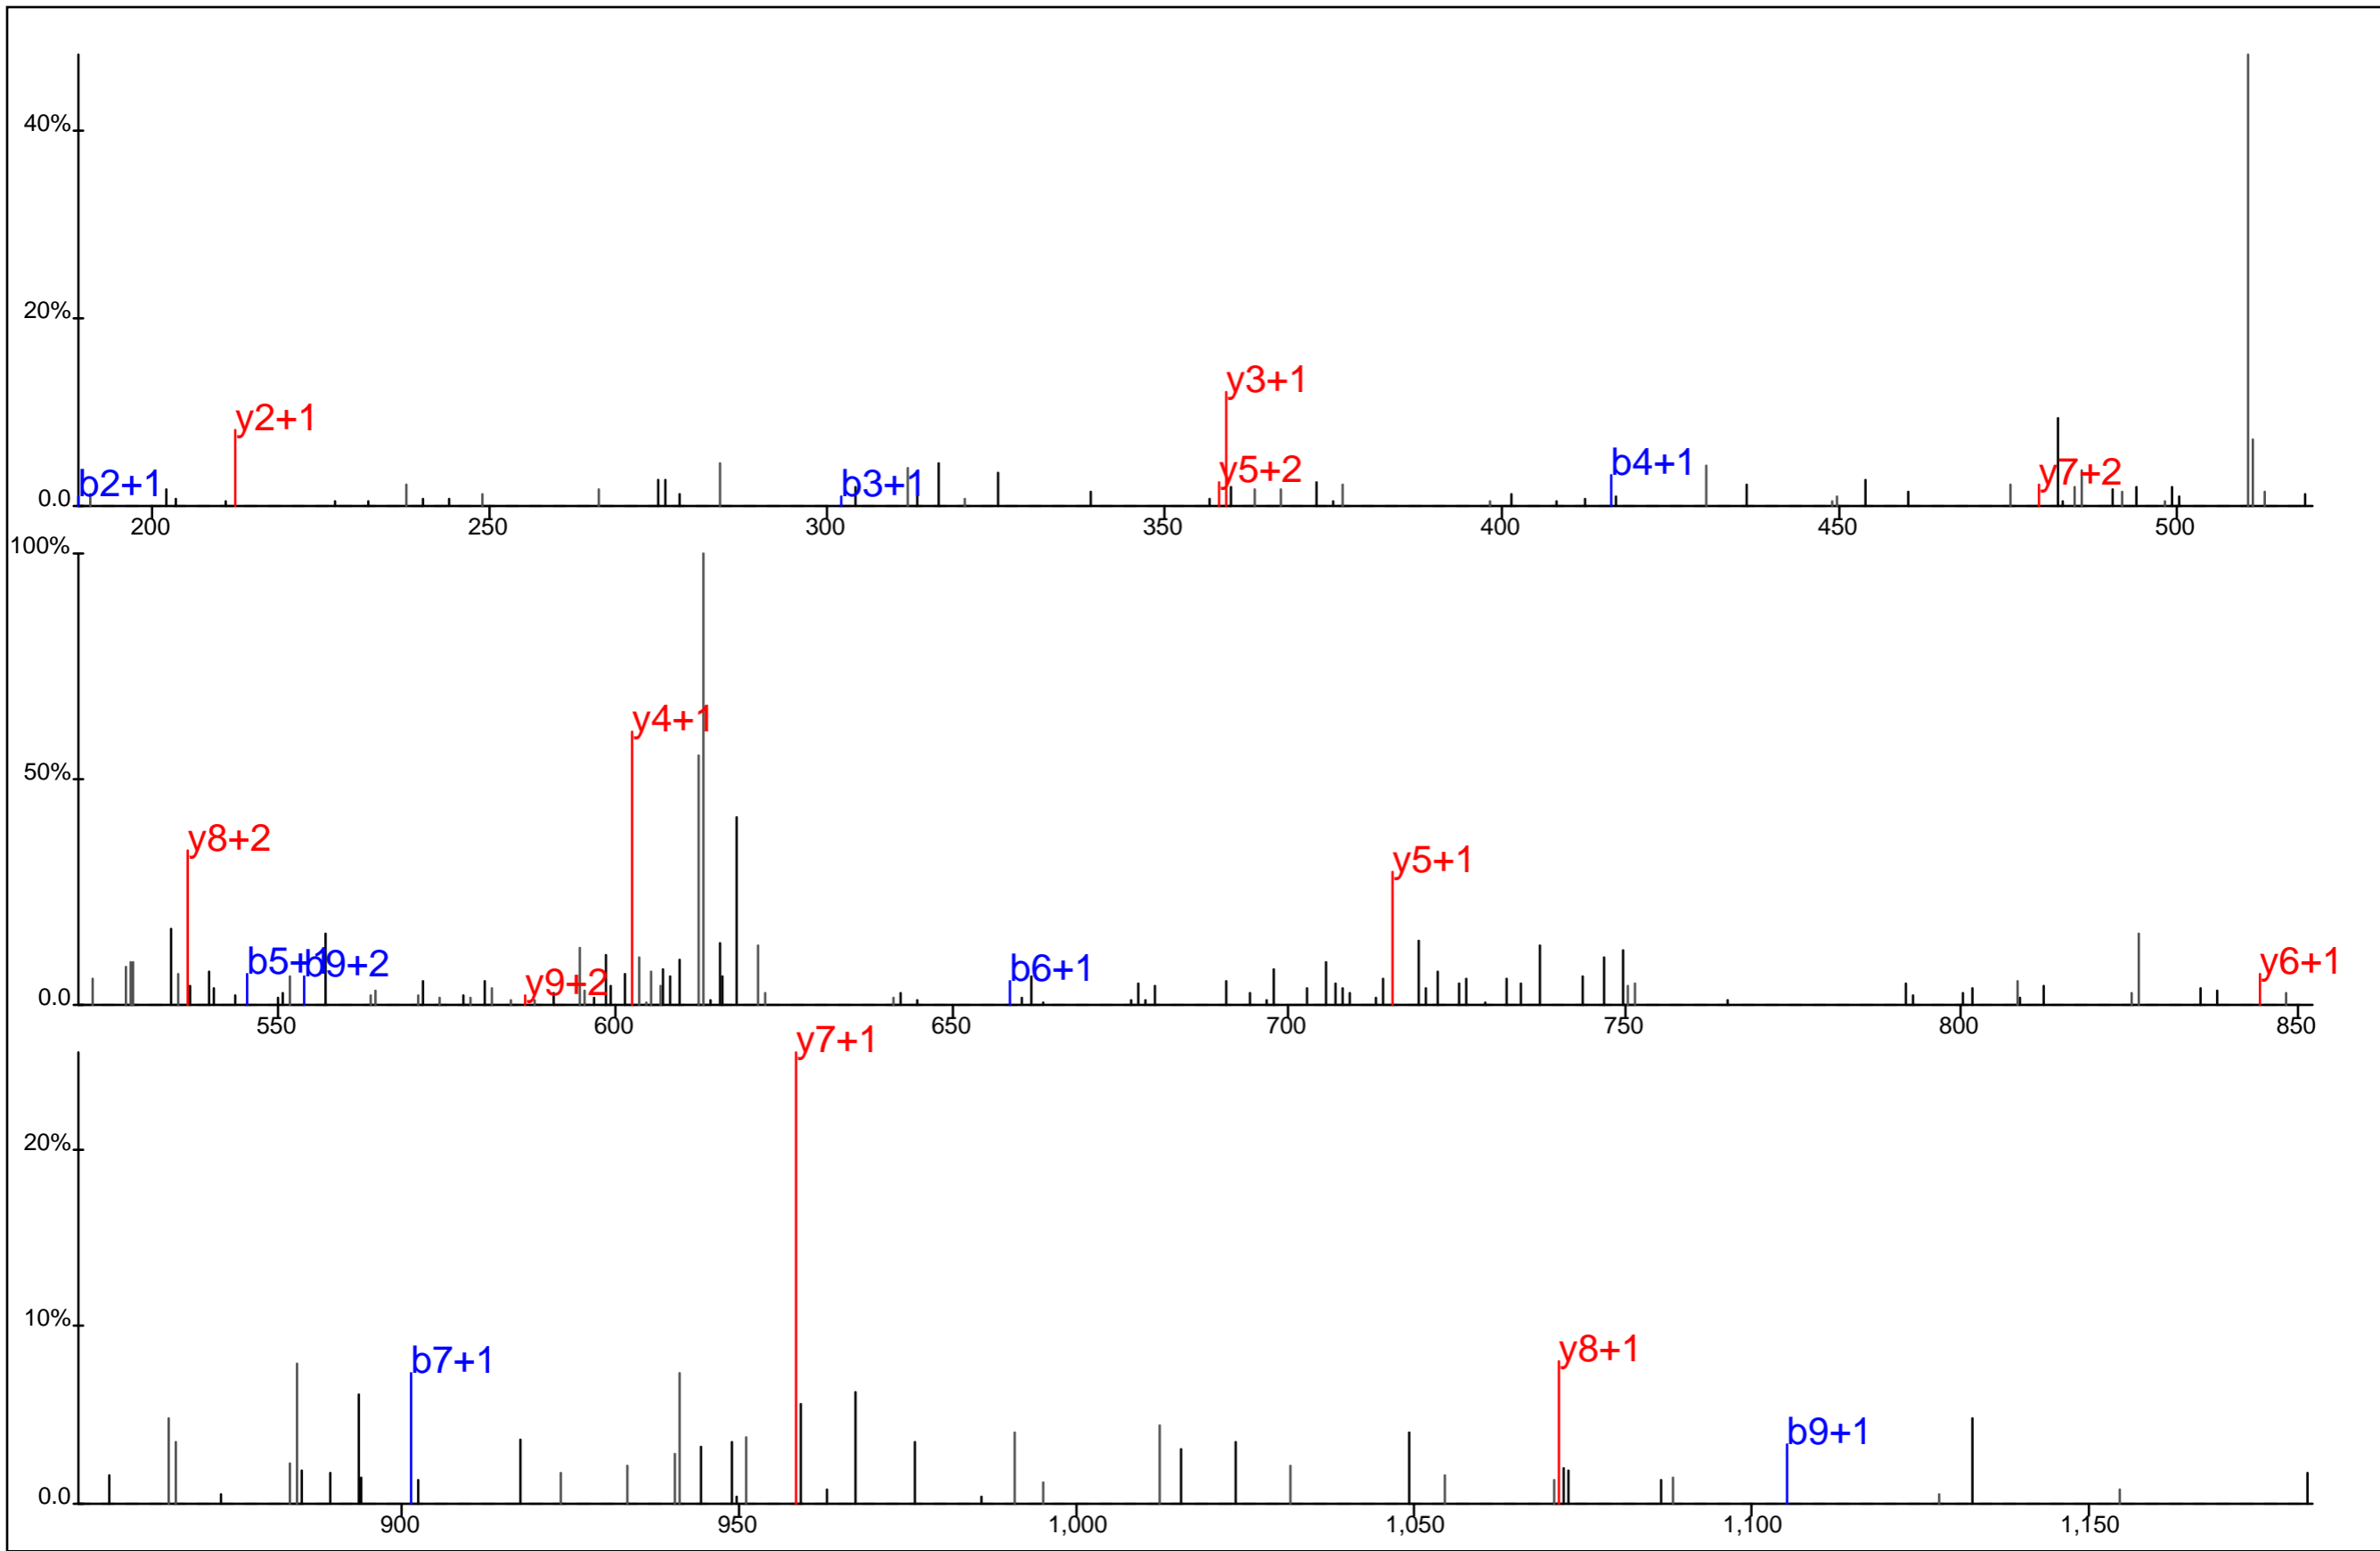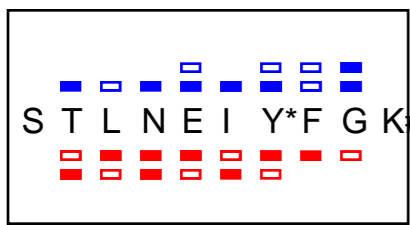

Protein Name: CAPB  
 gi Accession: 13124696  
 Precursor Mass: 630.2975+2  
 Delta Mass: 6.199 ppm  
 XCorr: 38.67

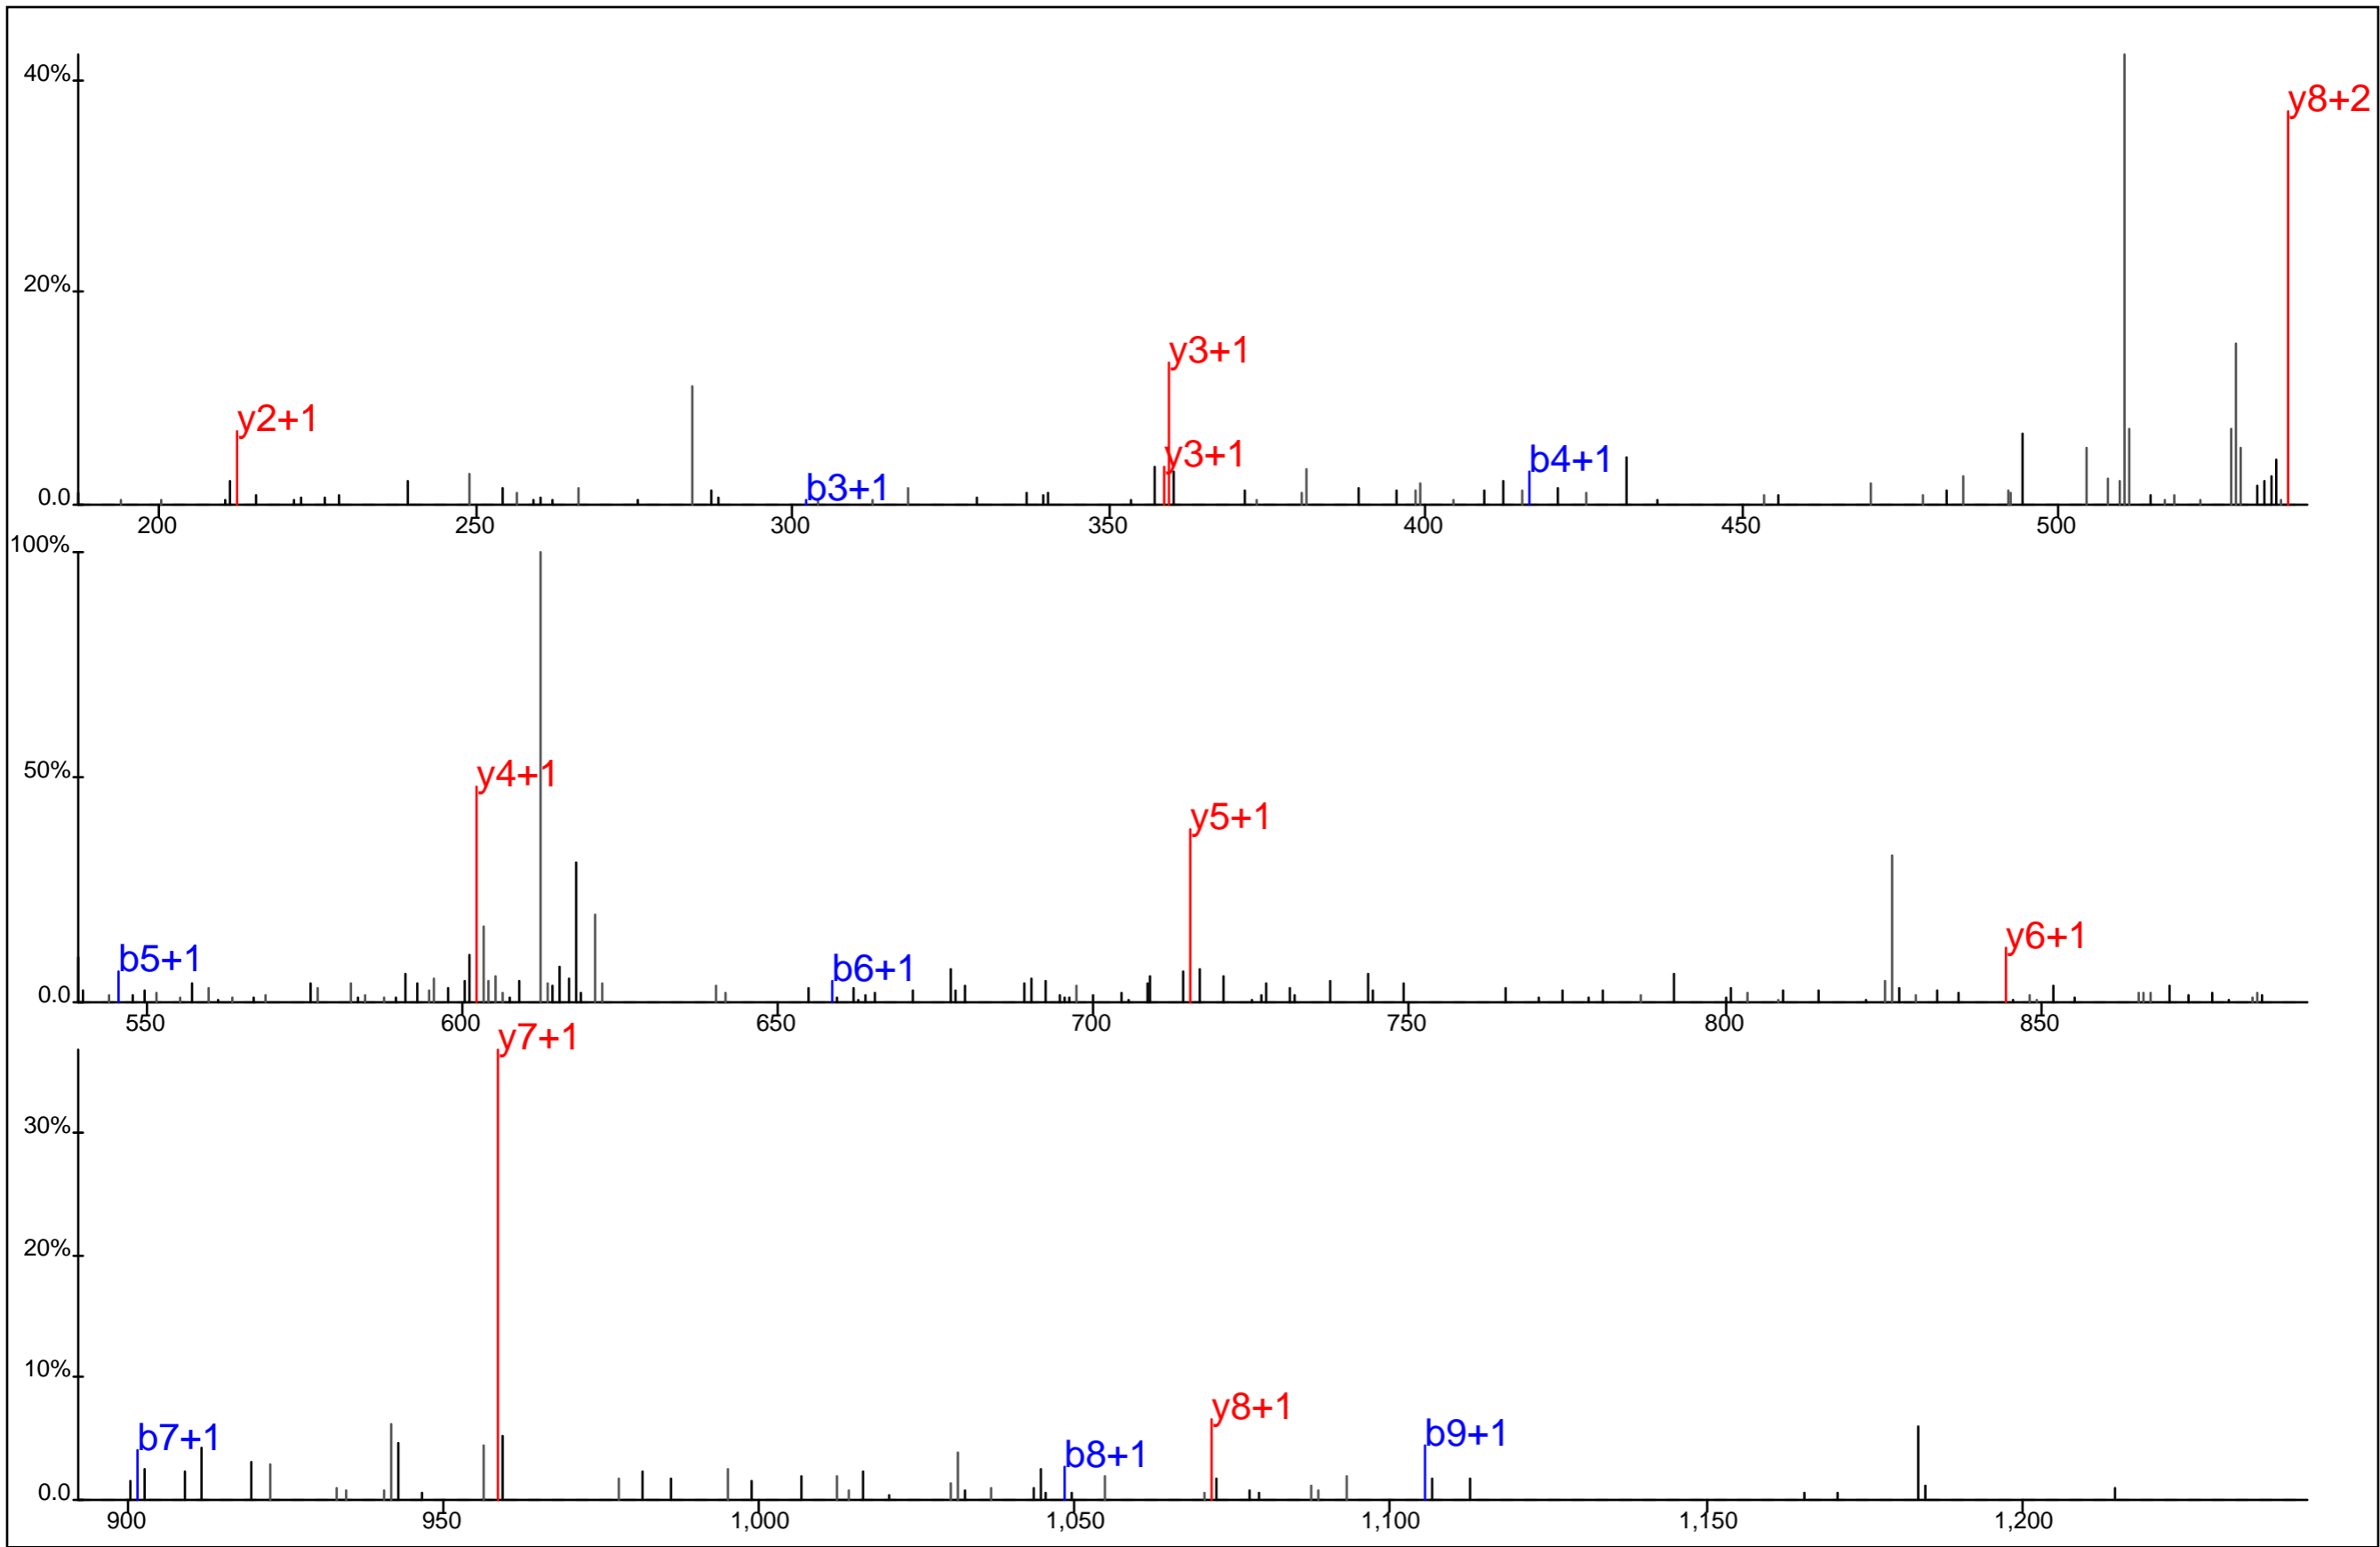

|   |   |   |   |   |   |    |   |   |    |
|---|---|---|---|---|---|----|---|---|----|
| □ | □ | □ | □ | □ | □ | □  | □ |   |    |
| S | T | L | N | E | I | Y* | F | G | K# |
| □ | □ | □ | □ | □ | □ | □  | □ | □ |    |

Protein Name: CAPB  
 gi Accession: 13124696  
 Precursor Mass: 630.2958+2  
 Delta Mass: 3.587 ppm  
 XCorr: 48.74

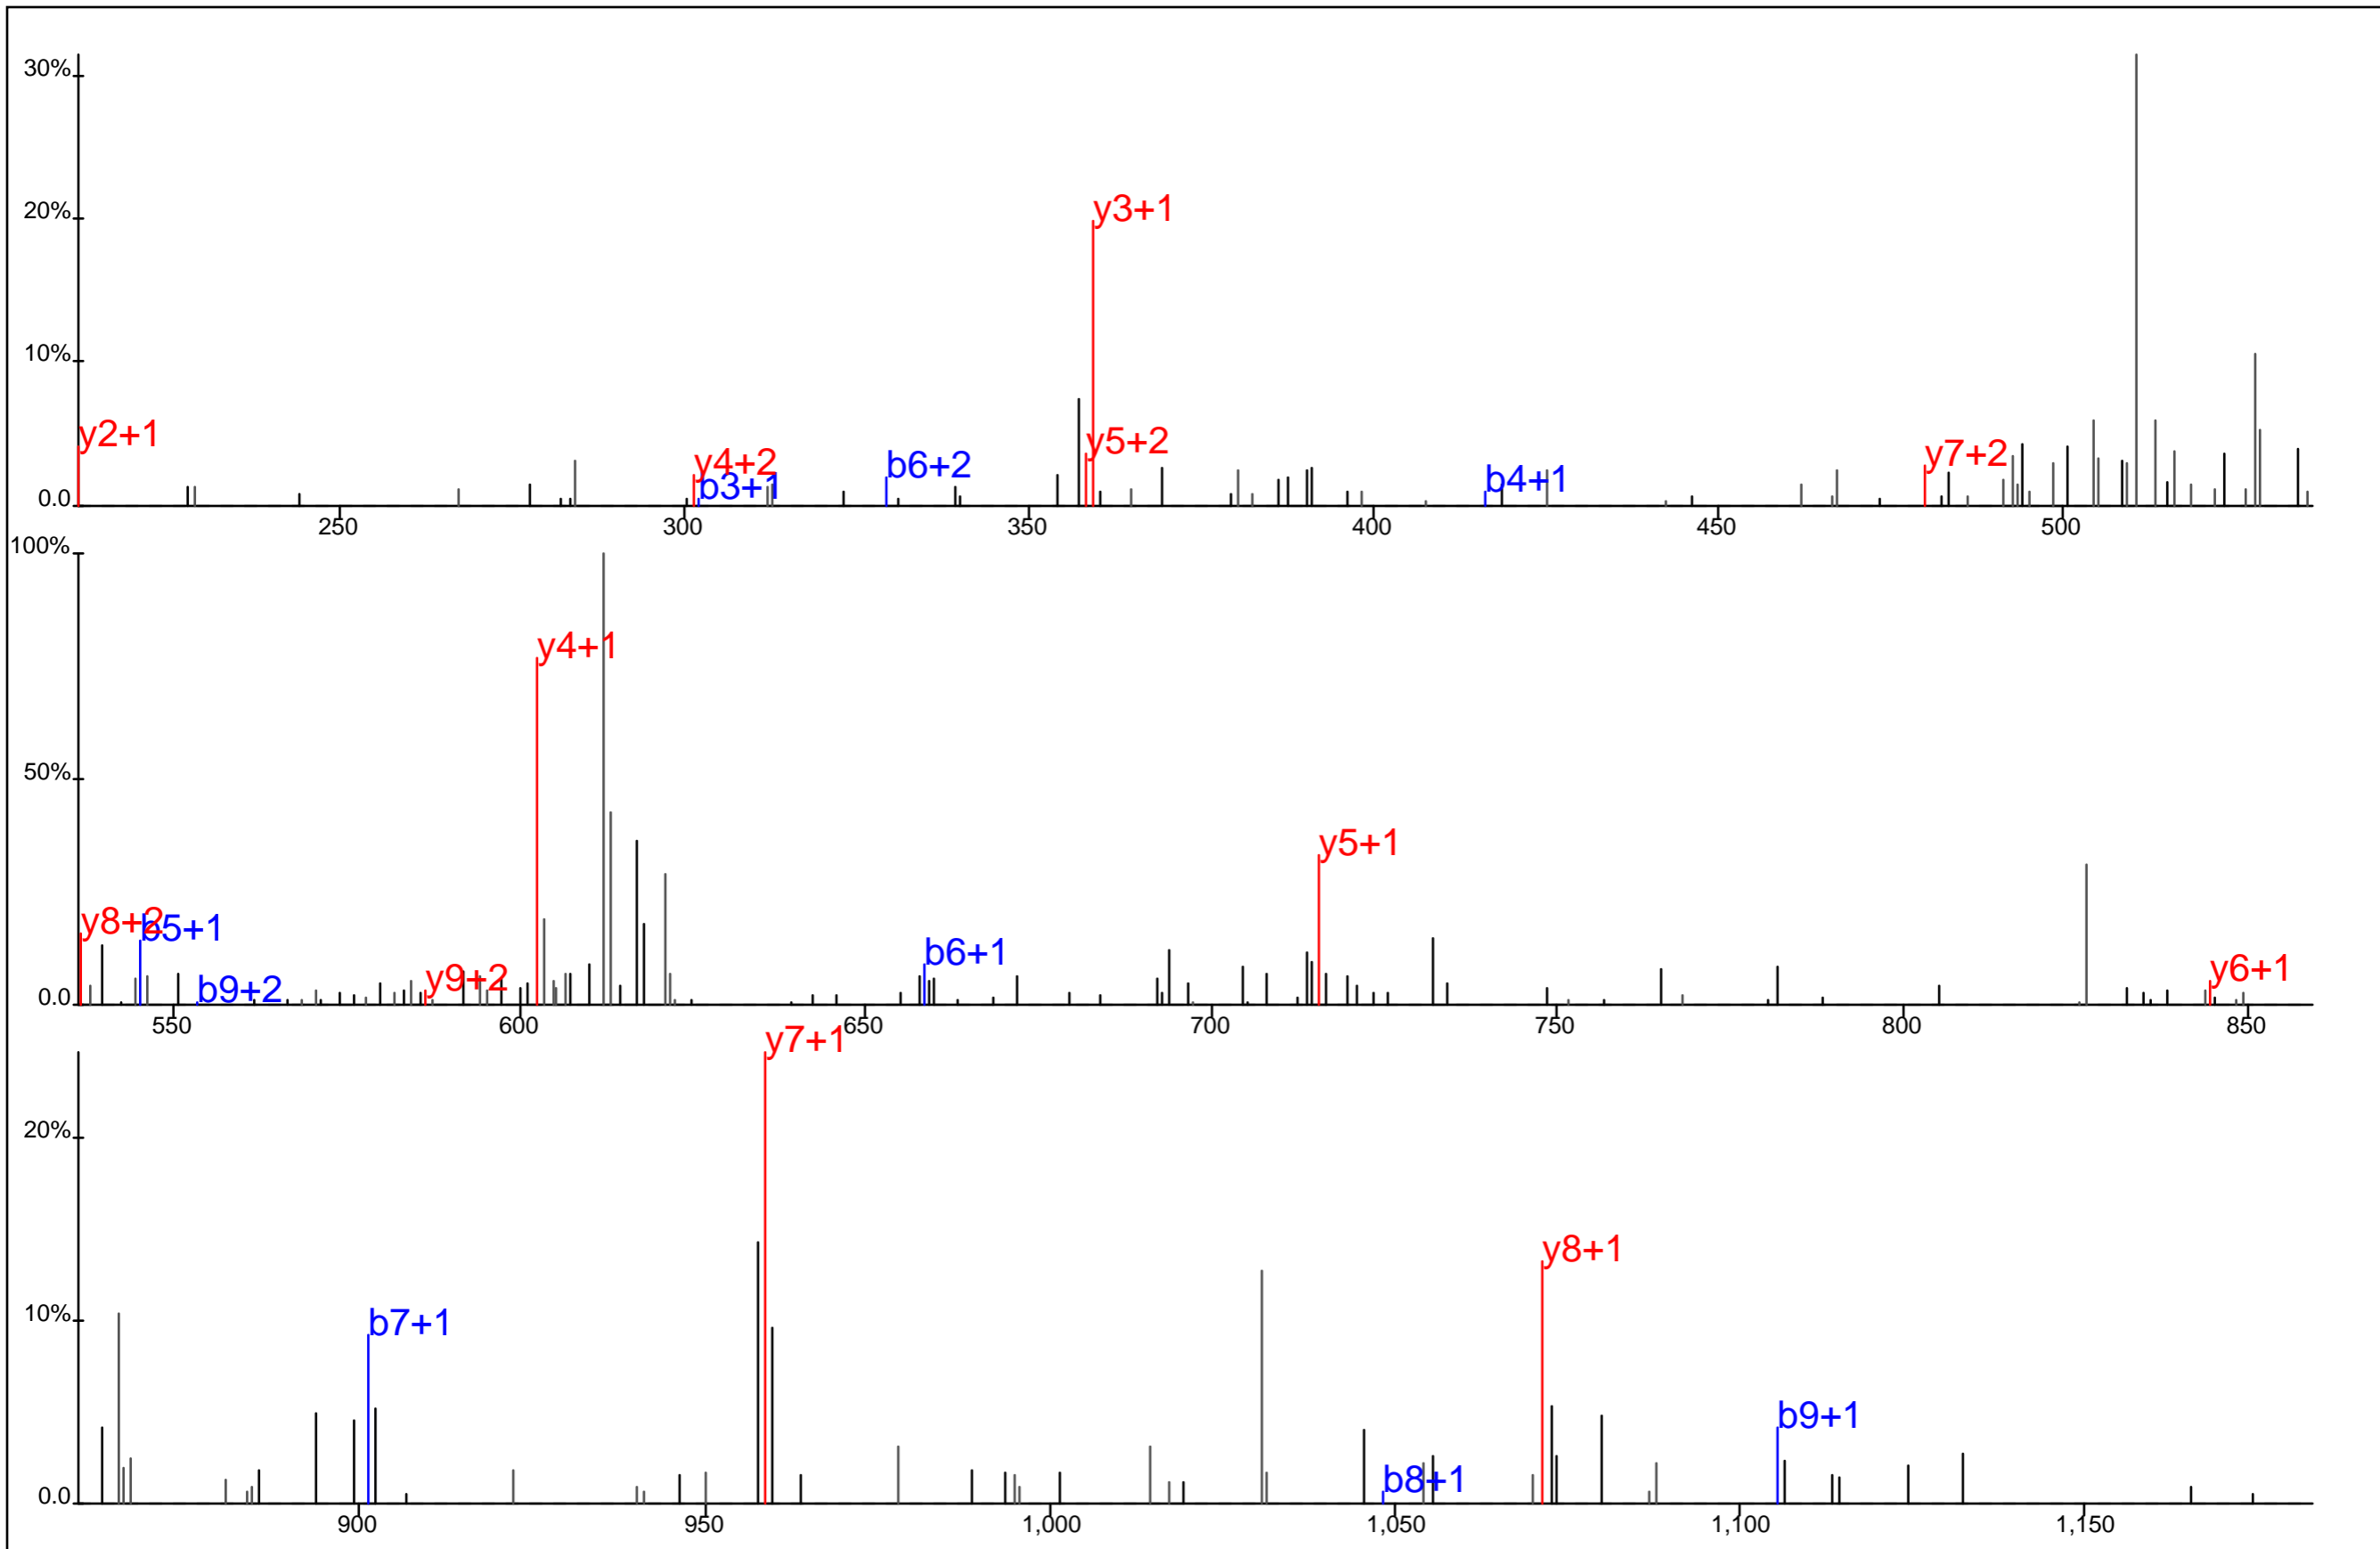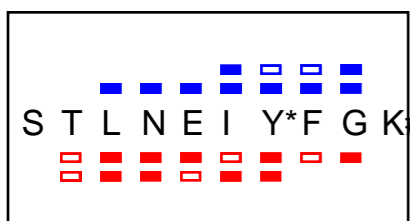

Protein Name: CAPB  
 gi Accession: 13124696  
 Precursor Mass: 630.2967+2  
 Delta Mass: 4.945 ppm  
 XCorr: 45.21

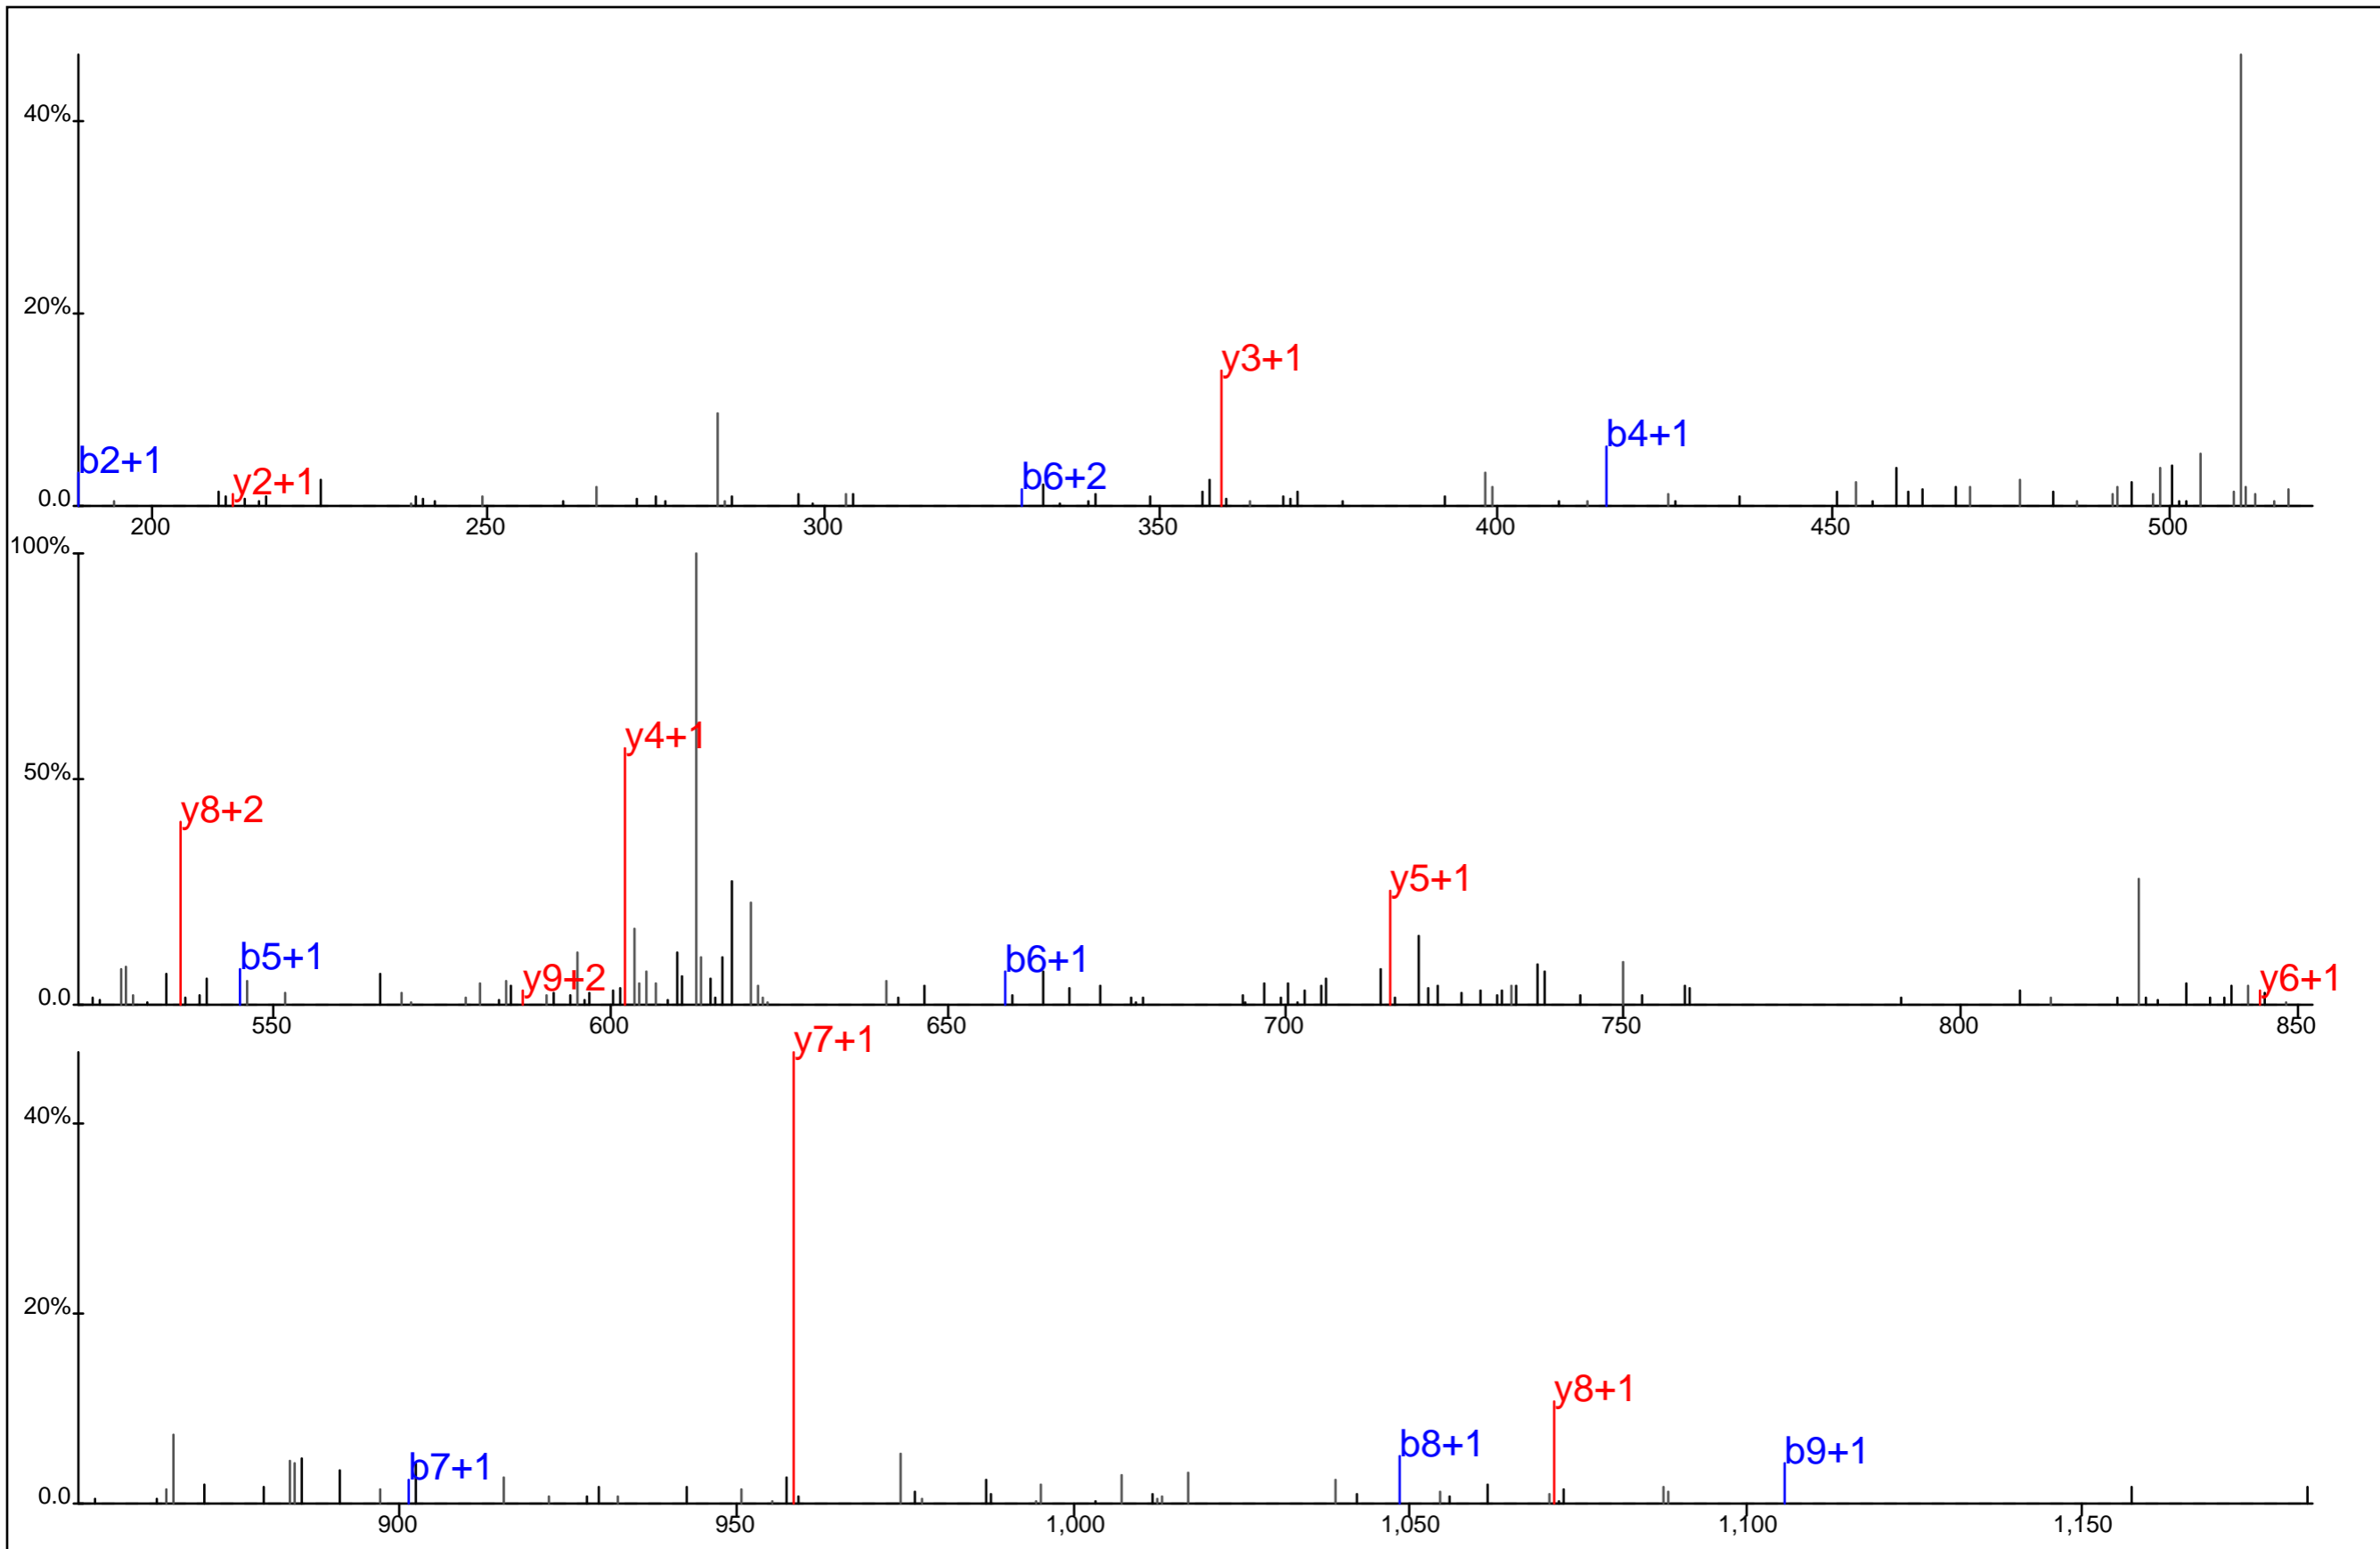

|   |   |   |   |   |   |    |   |   |    |
|---|---|---|---|---|---|----|---|---|----|
| ■ | ▢ | ▣ | ▤ | ▥ | ▦ | ▧  | ▨ |   |    |
| S | T | L | N | E | I | Y* | F | G | K# |
| ▣ | ▤ | ▥ | ▦ | ▧ | ▨ | ▩  | ▪ |   |    |

Protein Name: CAPB  
 gi Accession: 13124696  
 Precursor Mass: 630.3030+2  
 Delta Mass: 14.924 ppm  
 XCorr: 37.41



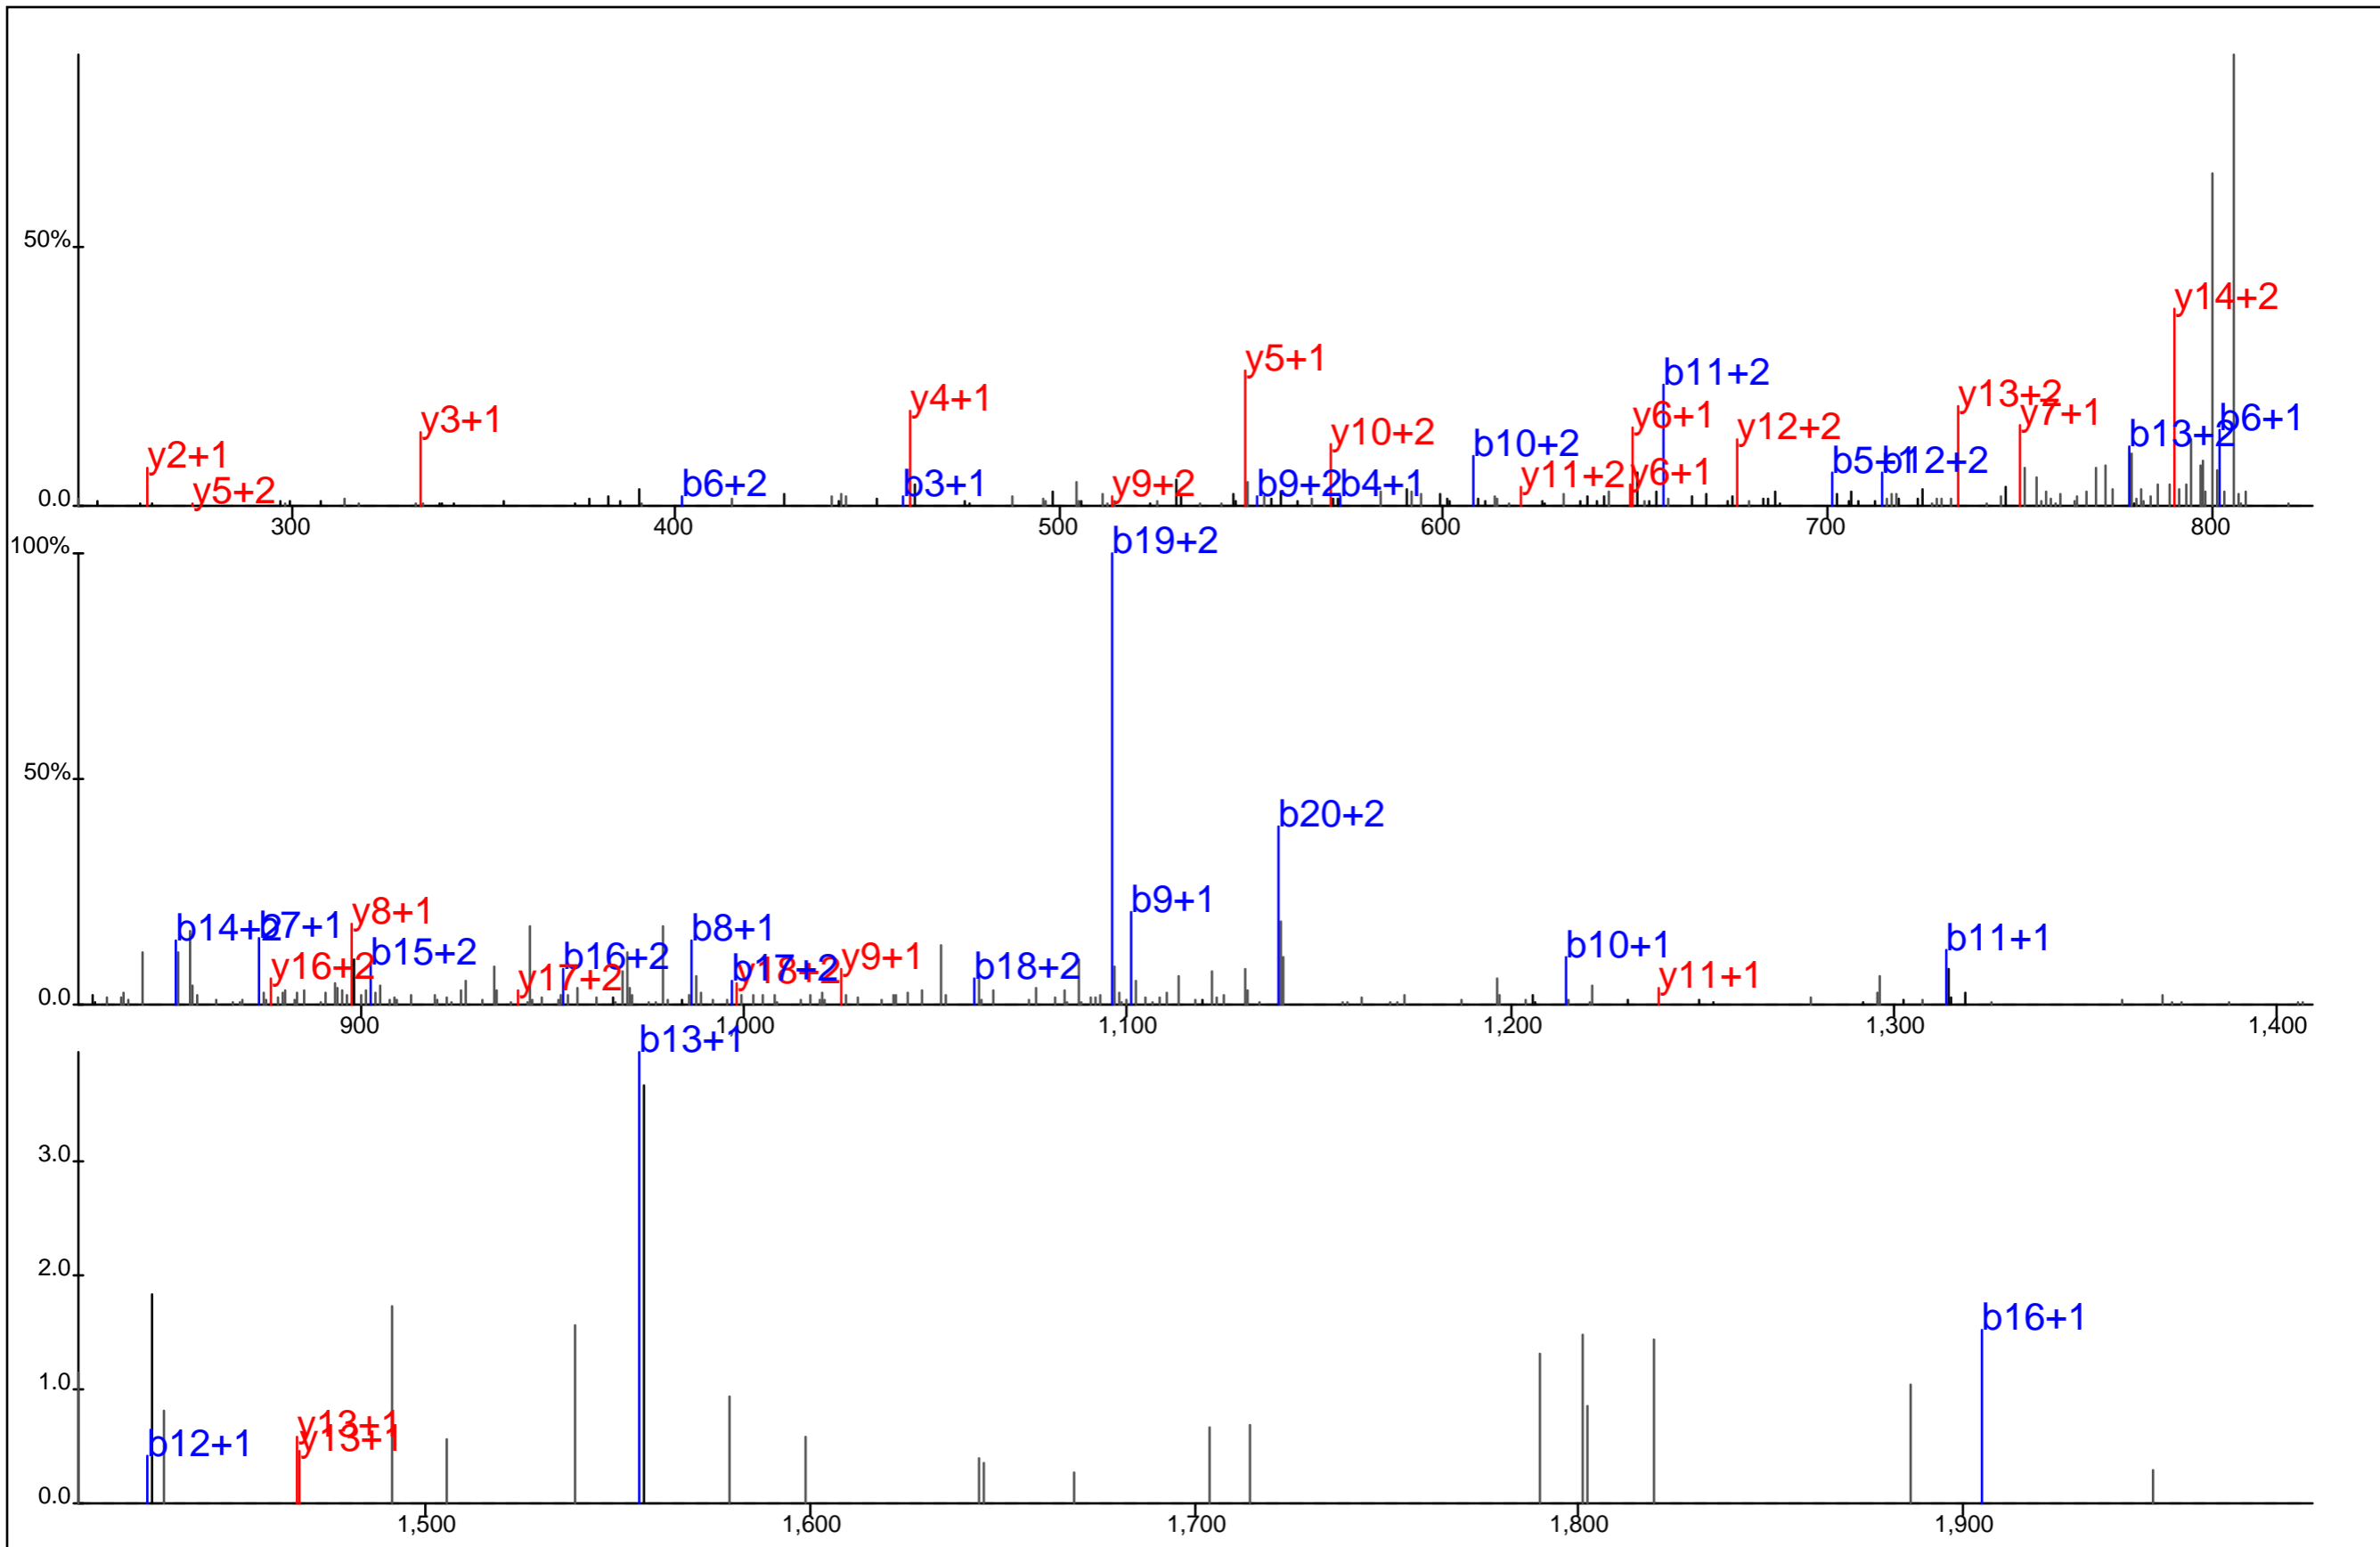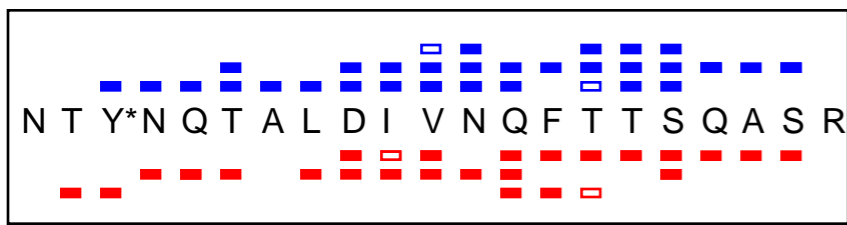

Protein Name: Caskin 2  
 gi Accession: 24638431  
 Precursor Mass: 818.0461+3  
 Delta Mass: 3.947 ppm  
 XCorr: 61.73

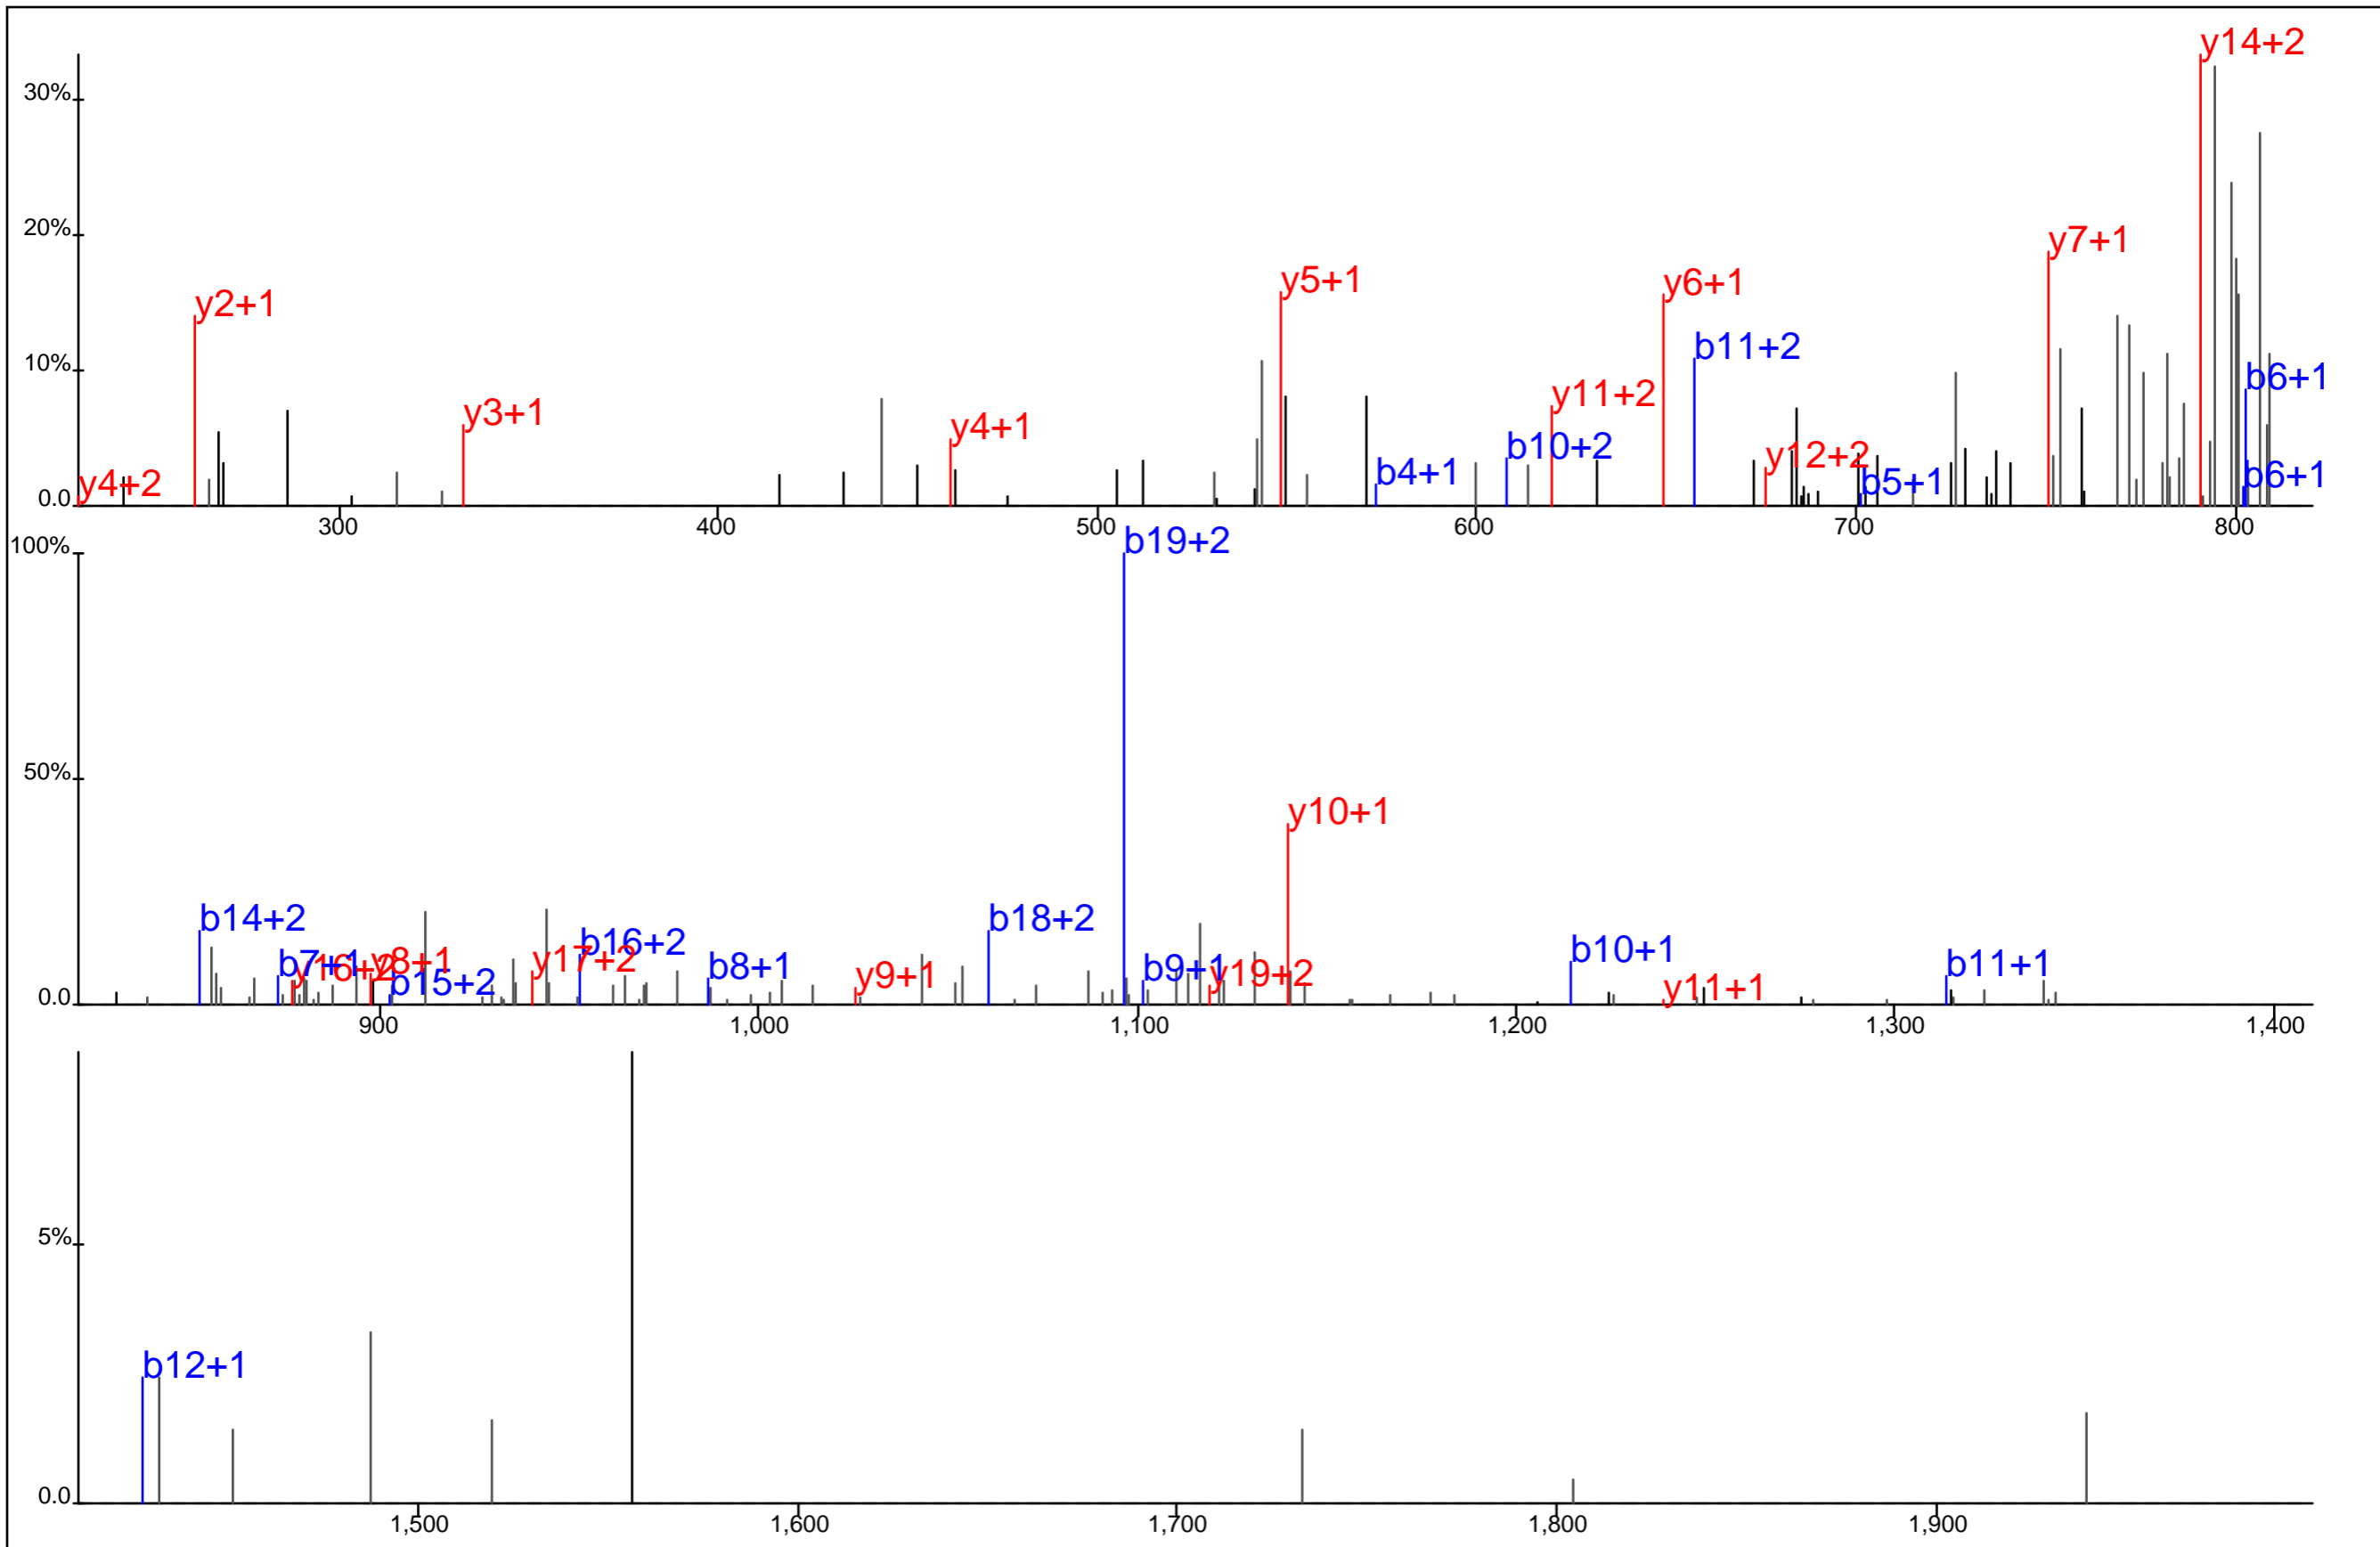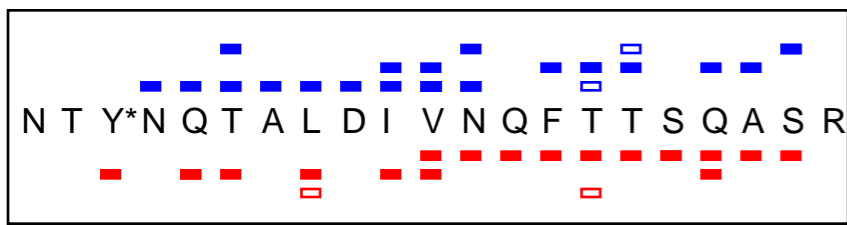

Protein Name: Caskin 2  
 gi Accession: 24638431  
 Precursor Mass: 818.0475+3  
 Delta Mass: 5.741 ppm  
 XCorr: 26.61

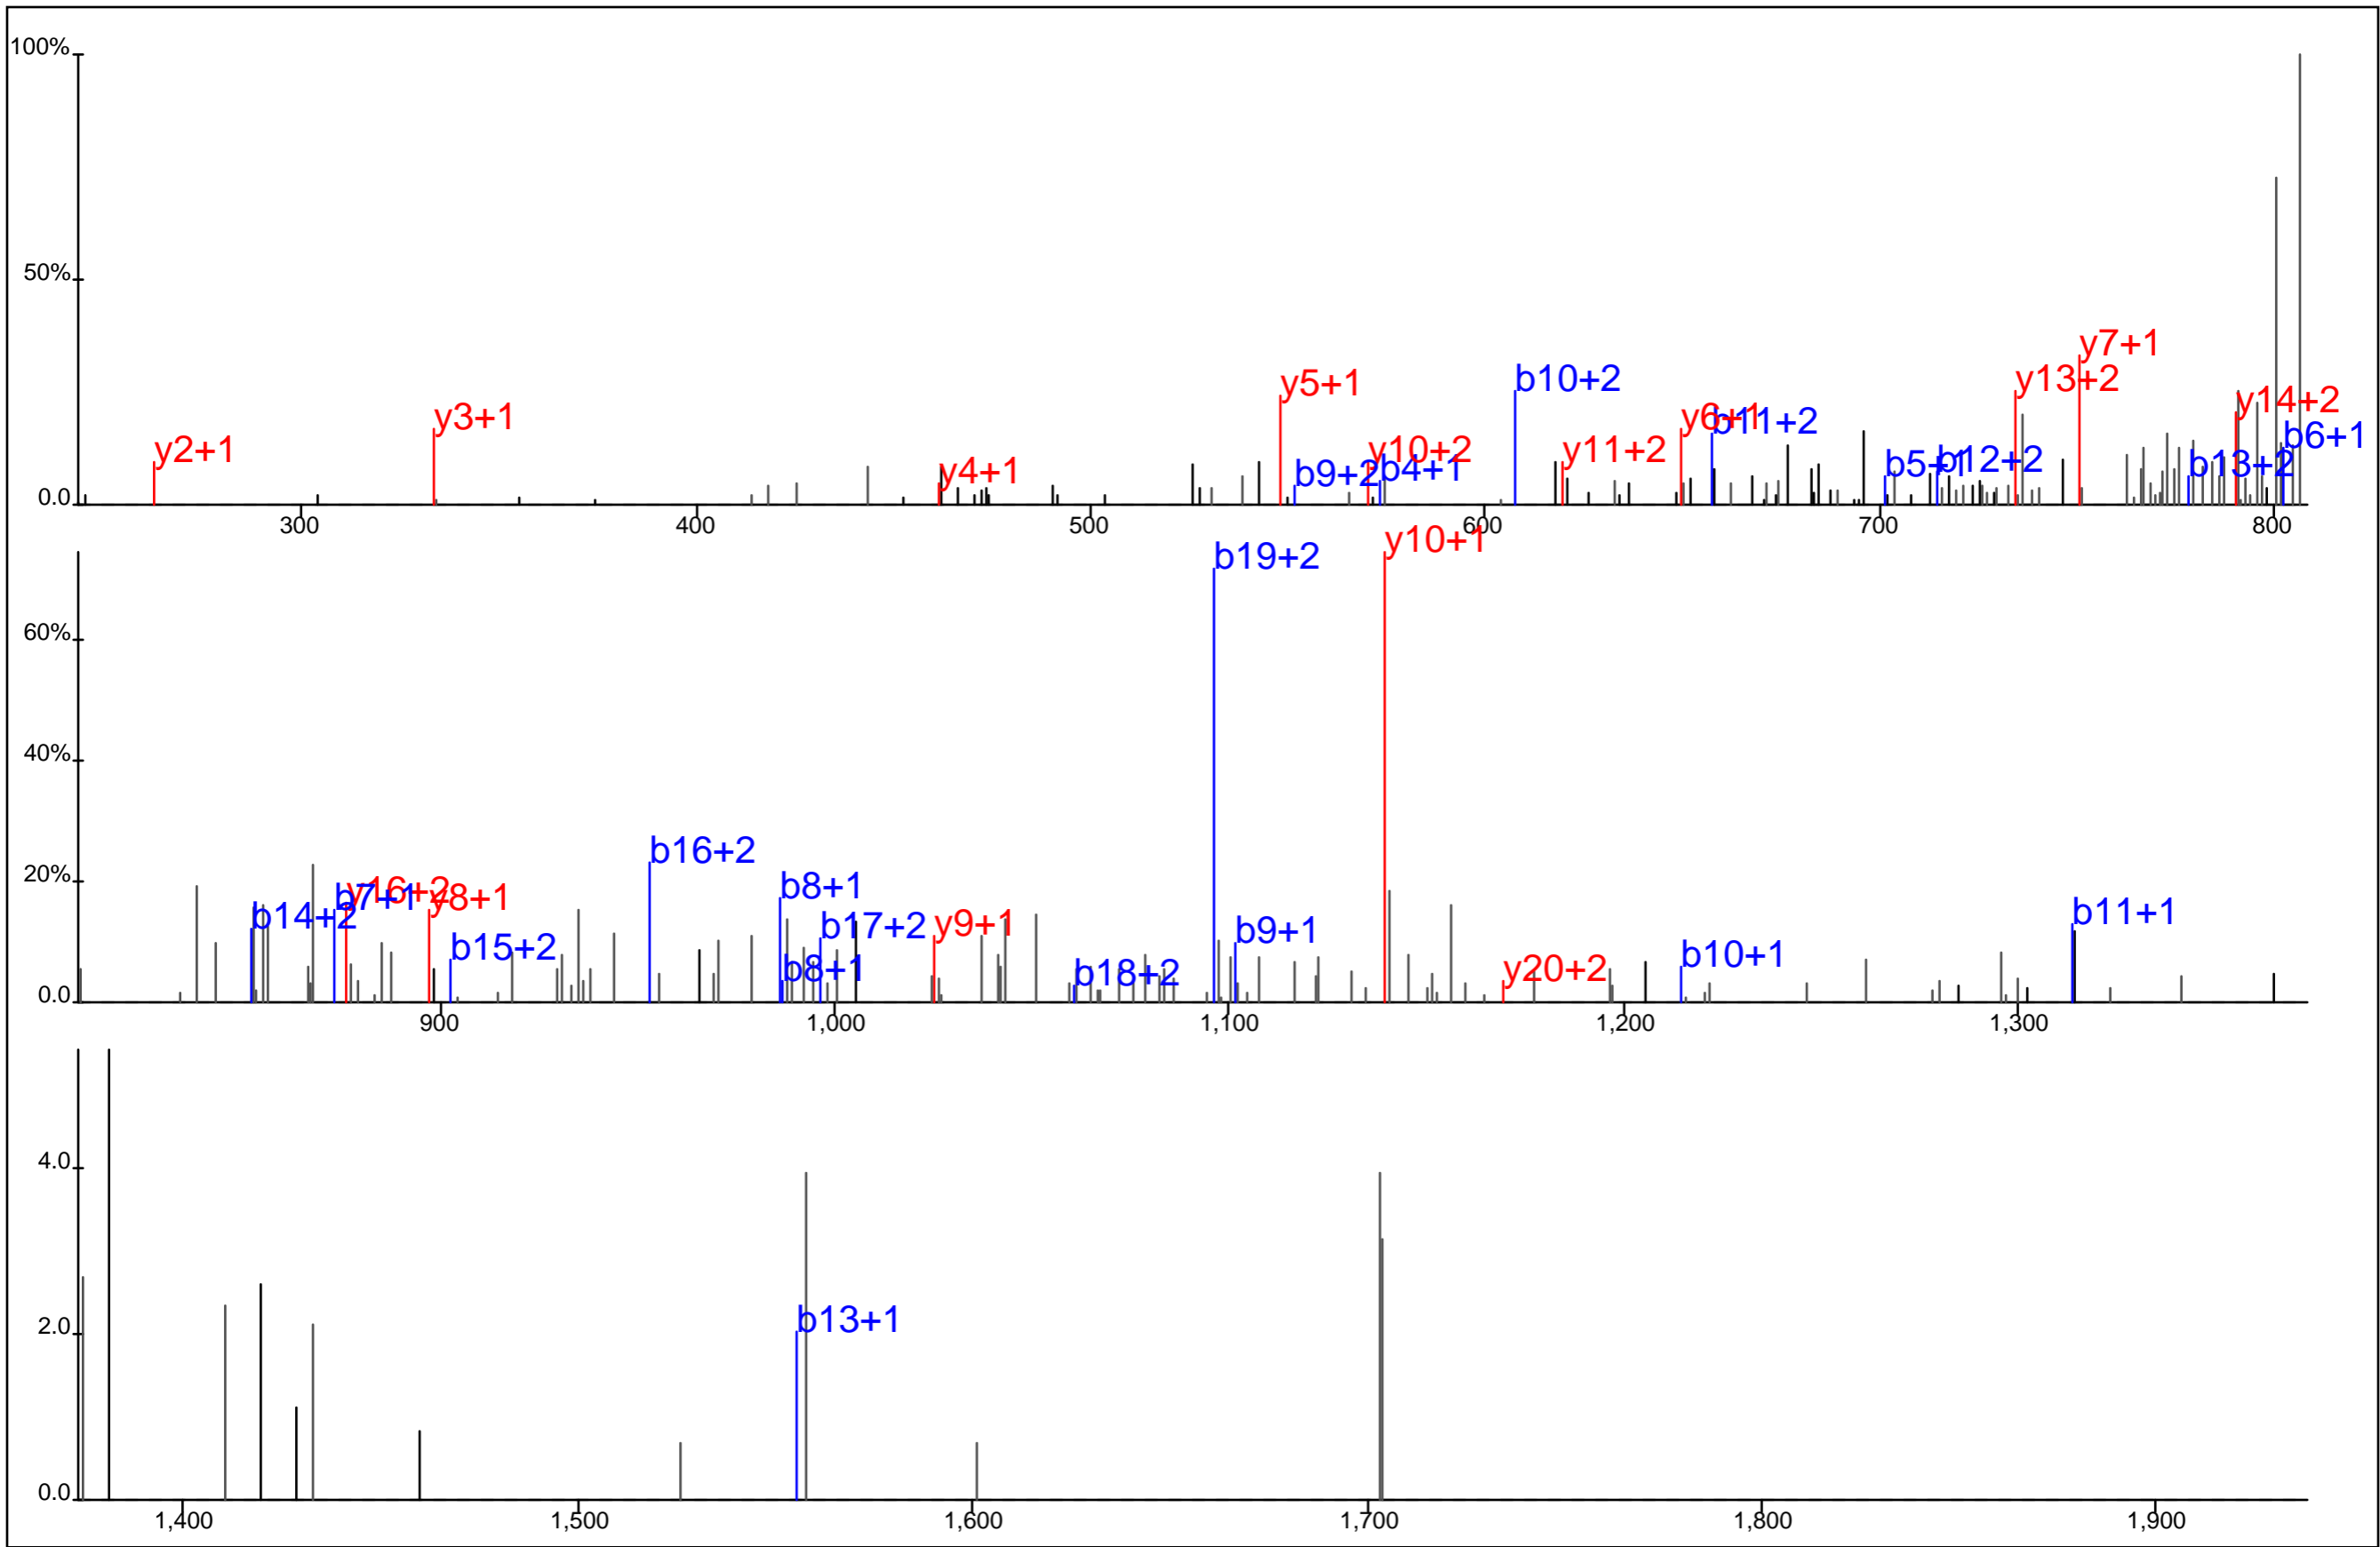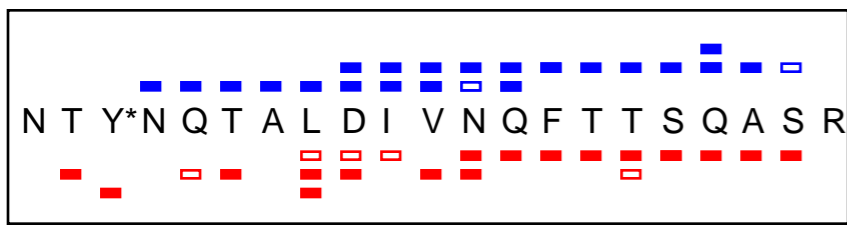

Protein Name: Caskin 2  
 gi Accession: 24638431  
 Precursor Mass: 818.0450+3  
 Delta Mass: 2.679 ppm  
 XCorr: 33.39

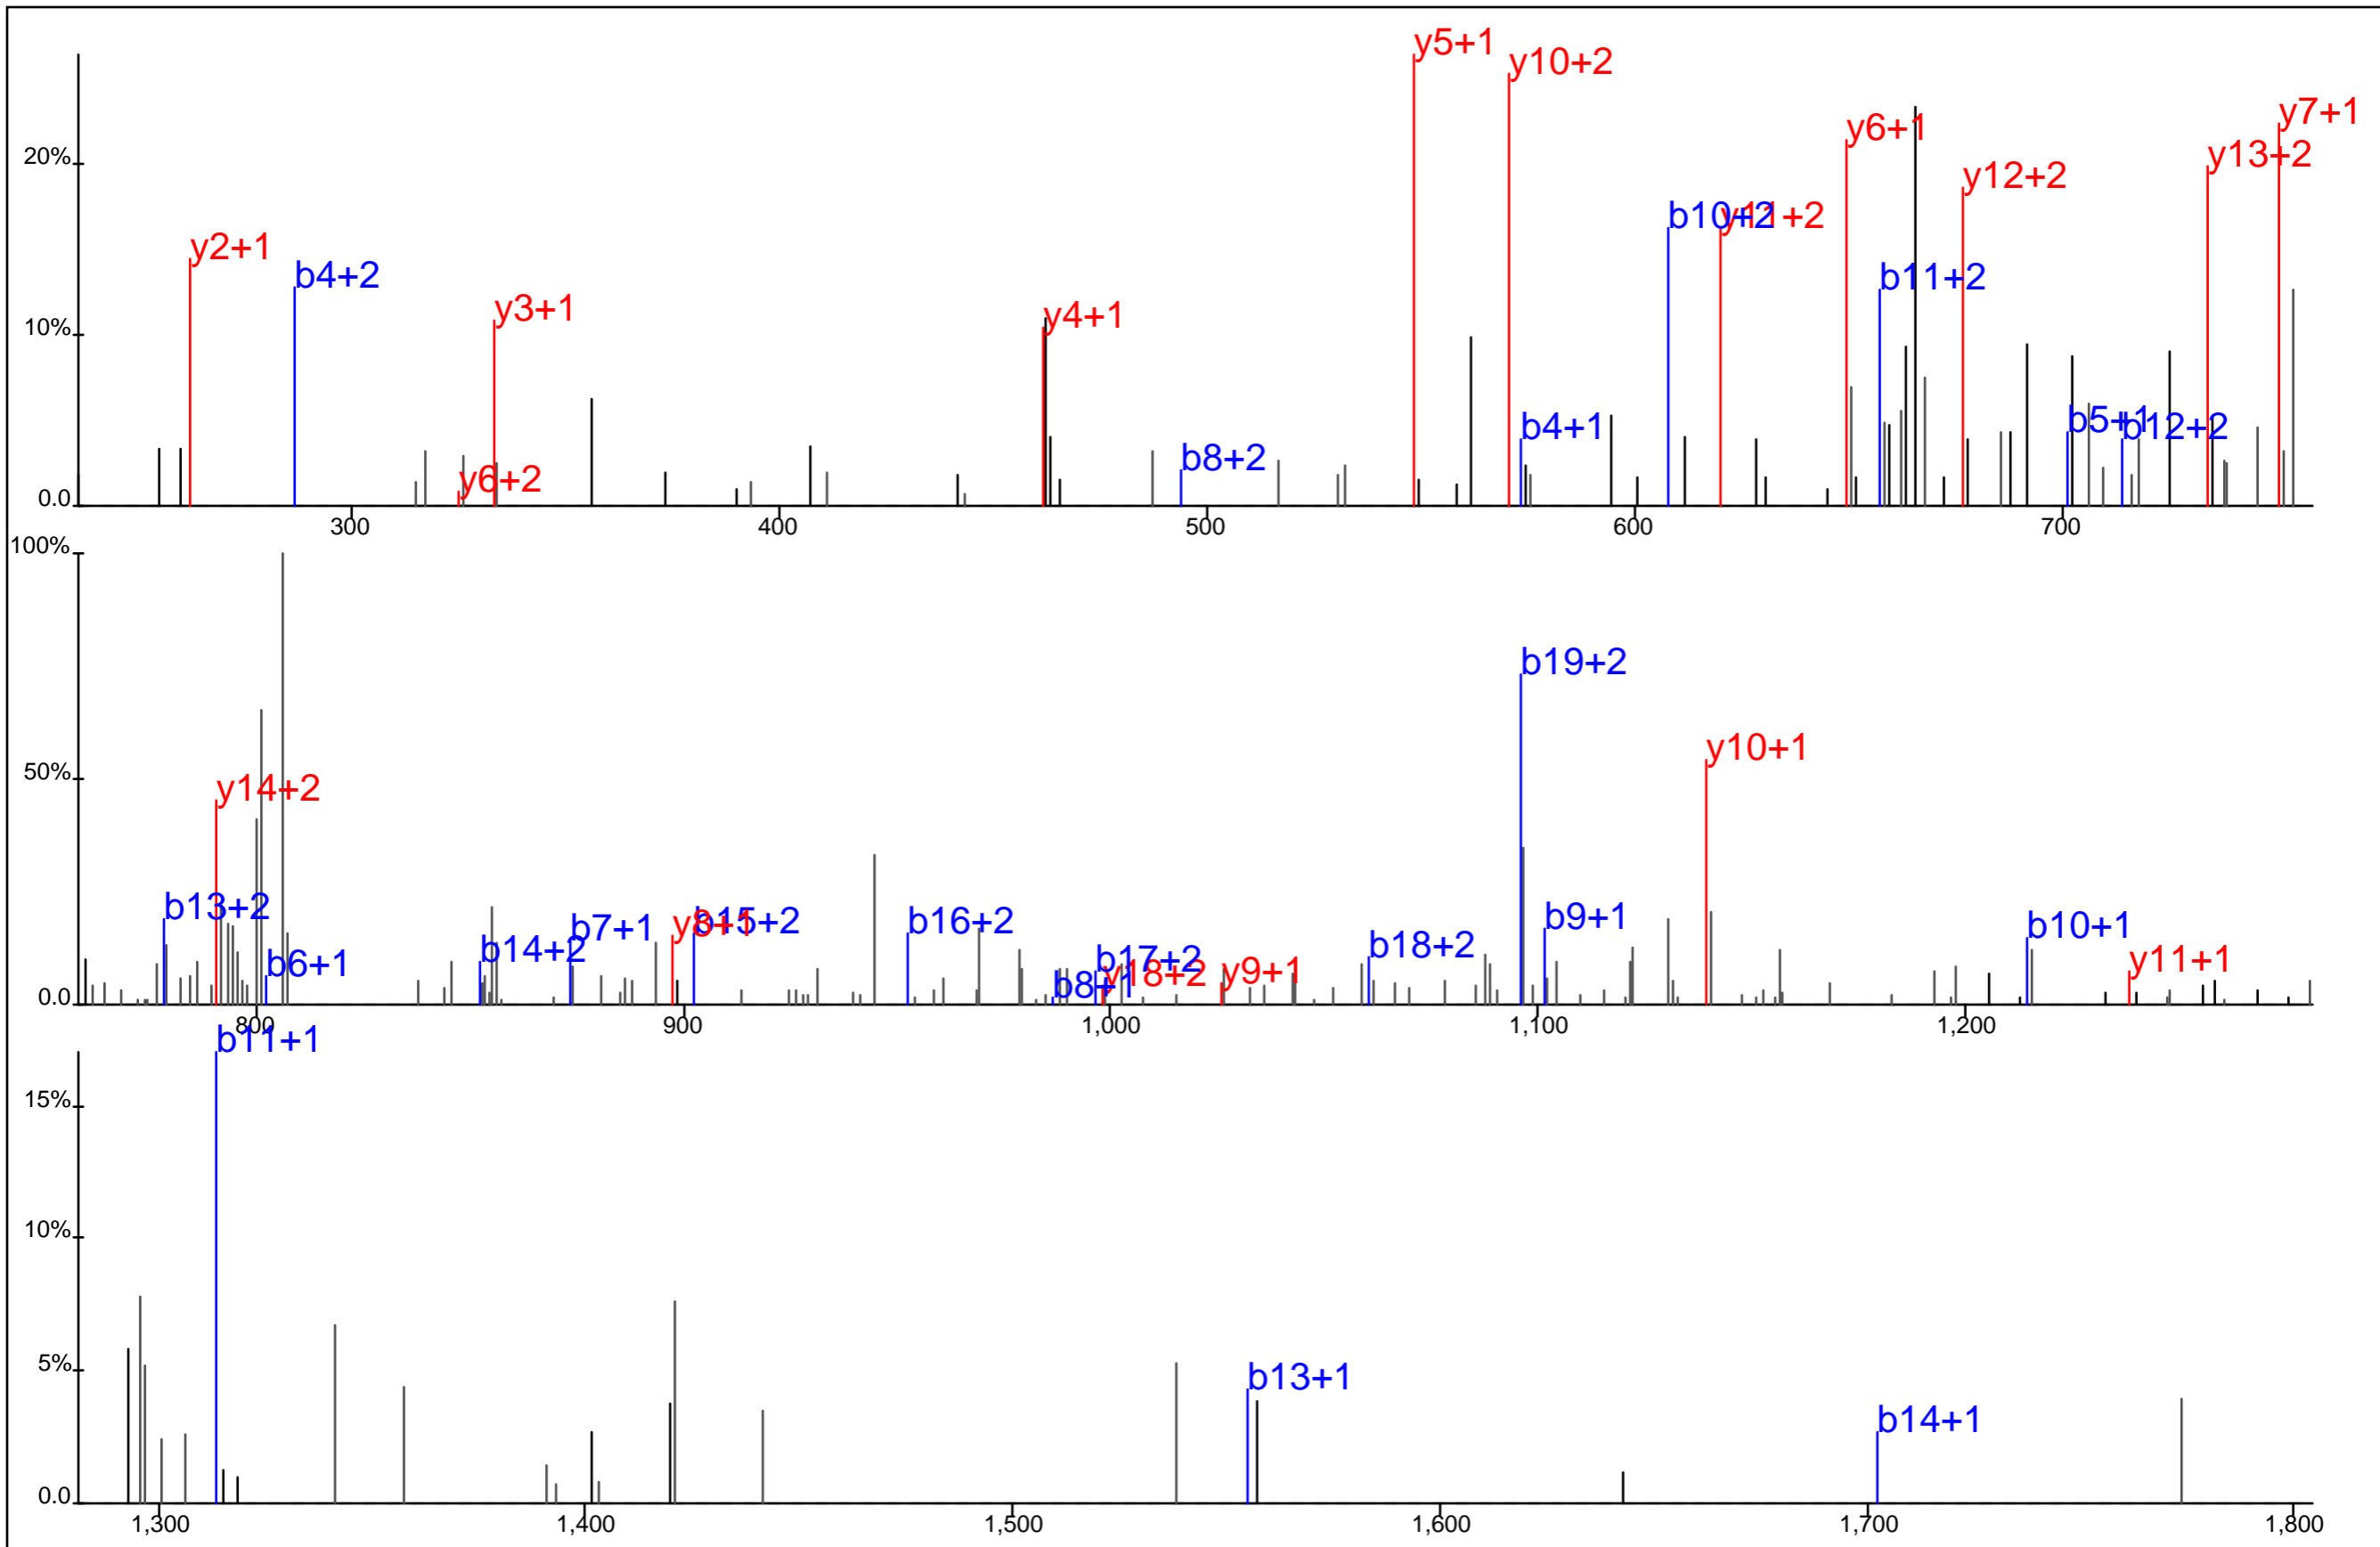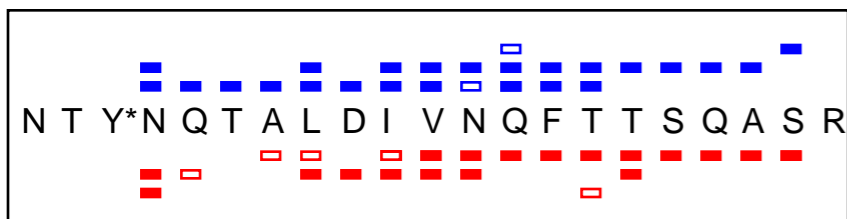

Protein Name: Caskin 2  
 gi Accession: 24638431  
 Precursor Mass: 818.0468+3  
 Delta Mass: 4.844 ppm  
 XCorr: 44.52

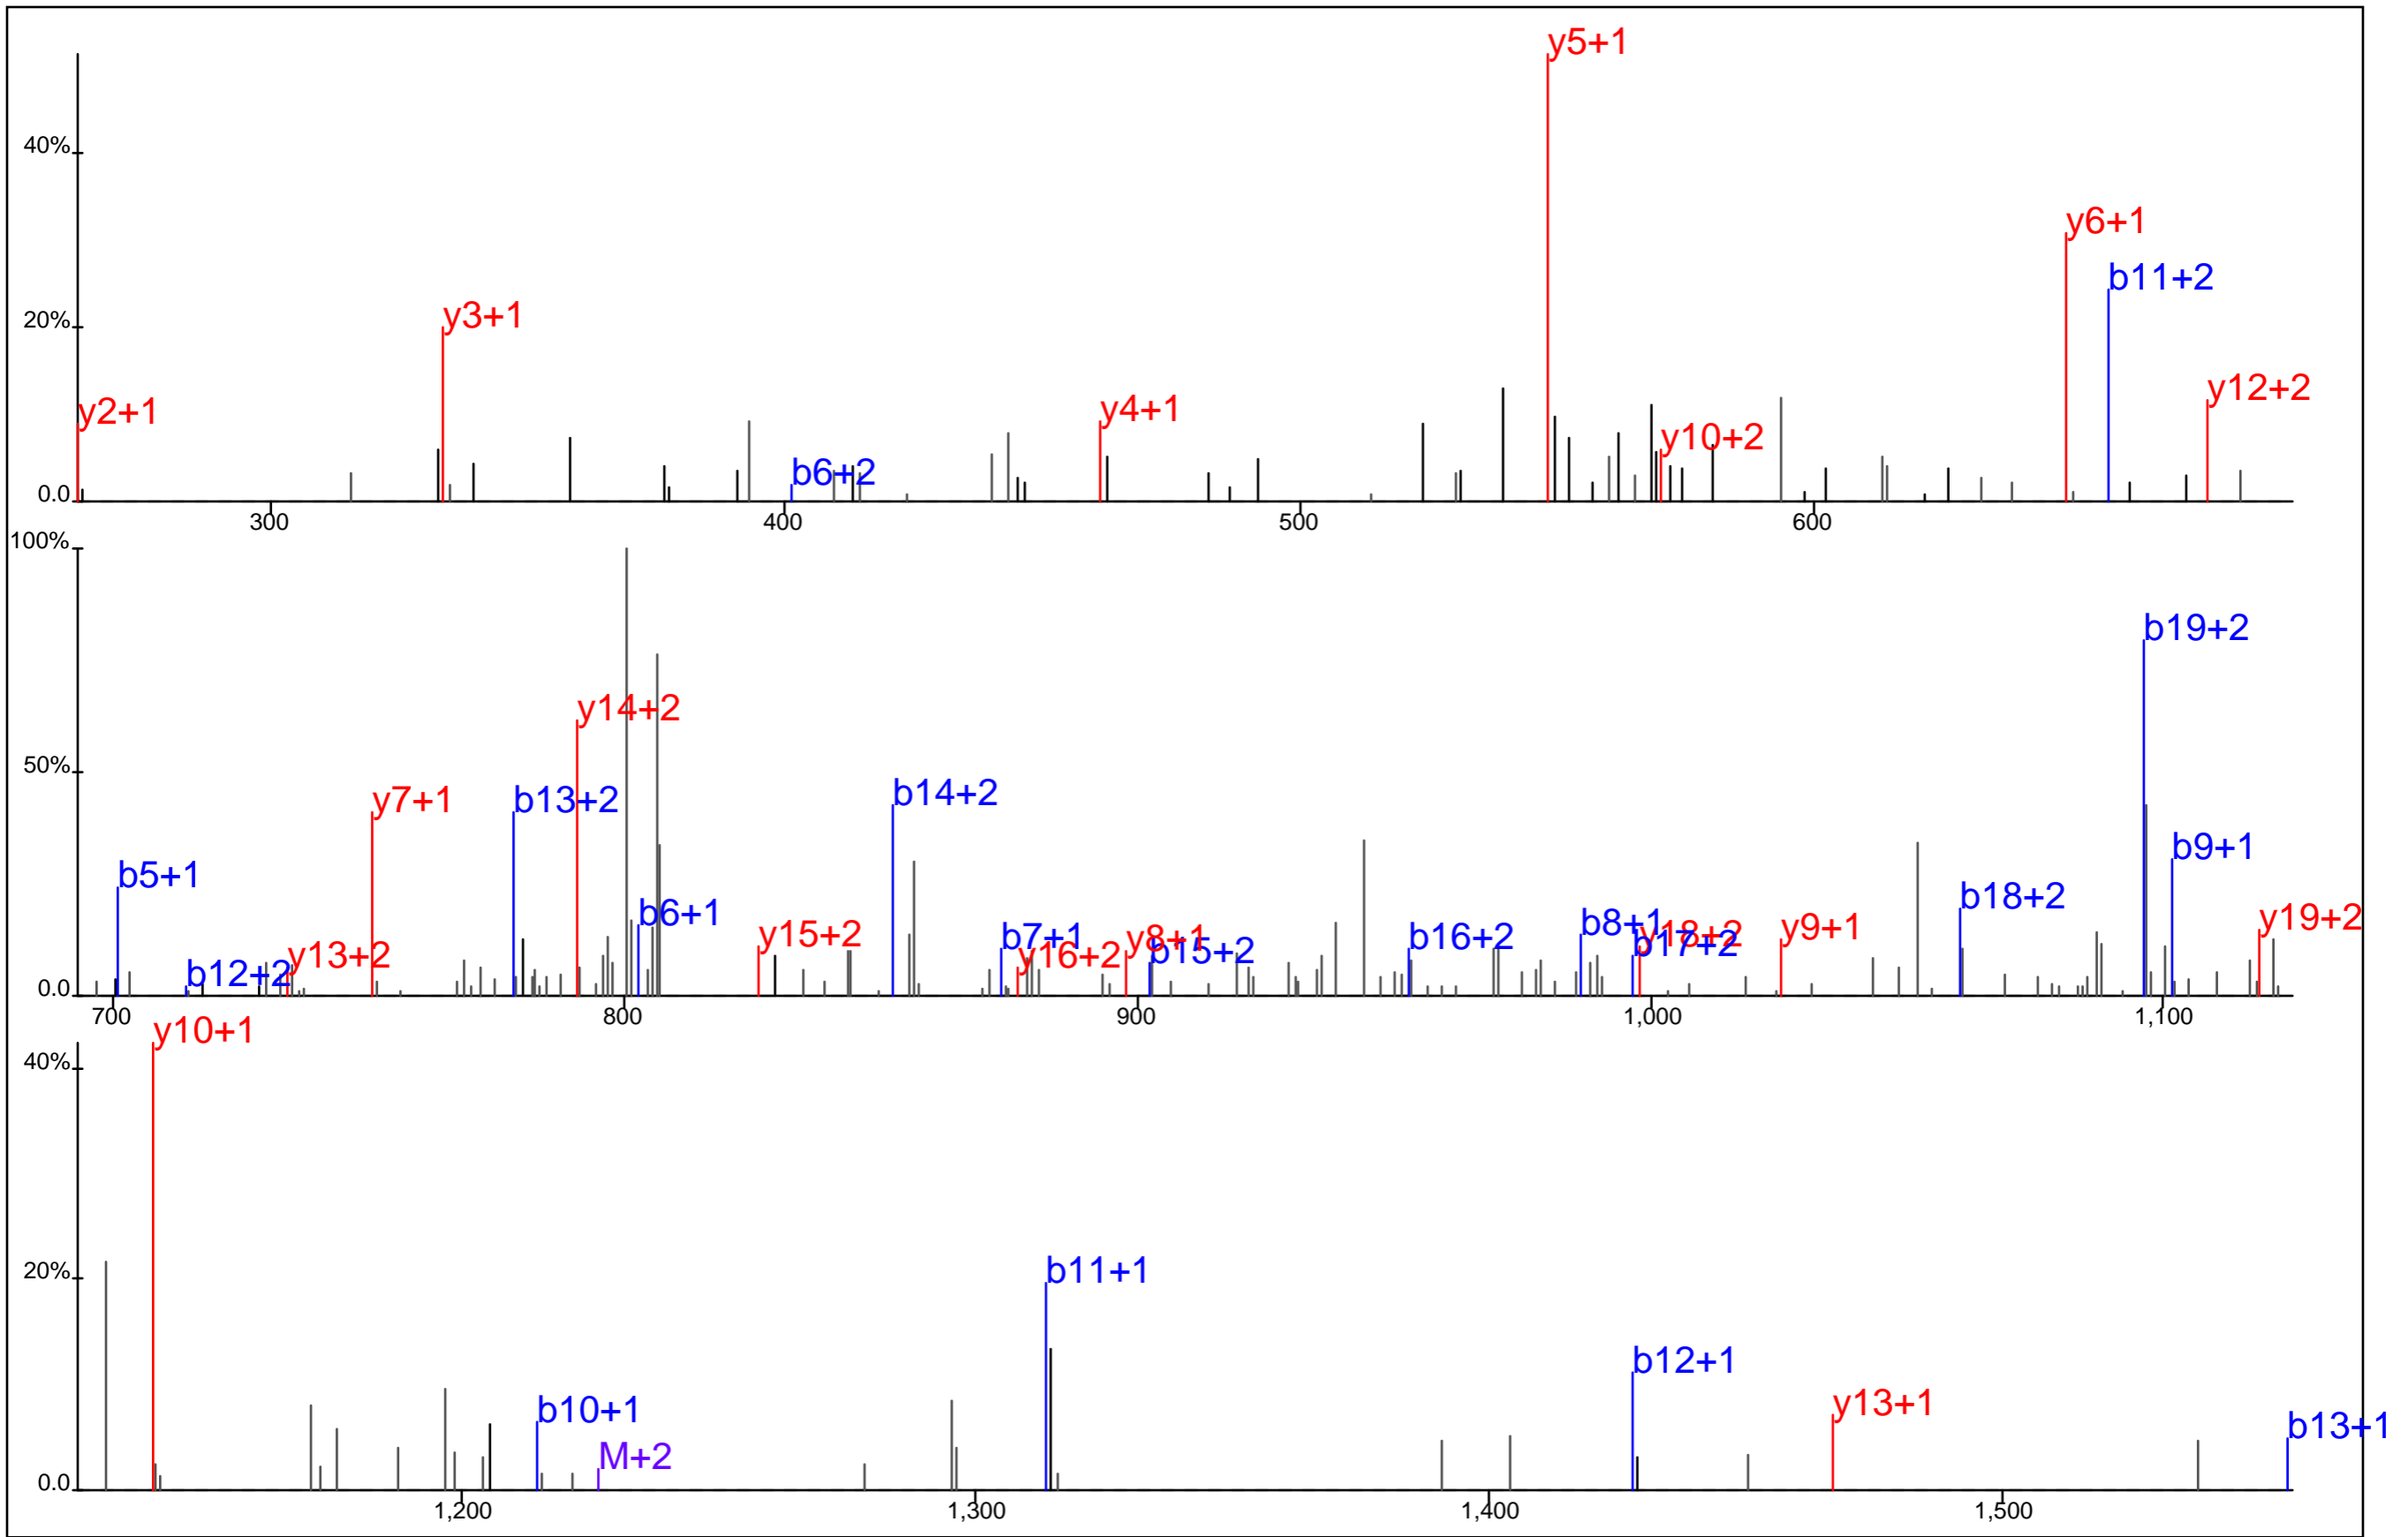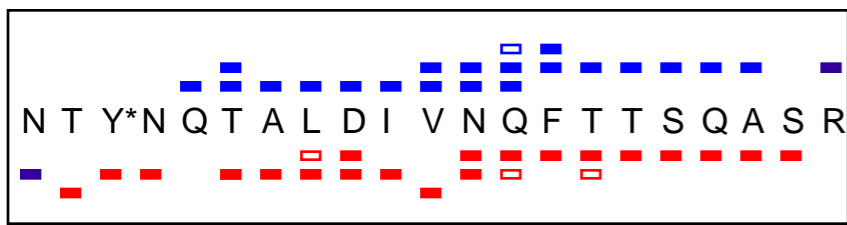

Protein Name: Caskin 2  
 gi Accession: 24638431  
 Precursor Mass: 818.0455+3  
 Delta Mass: 3.201 ppm  
 XCorr: 59.93

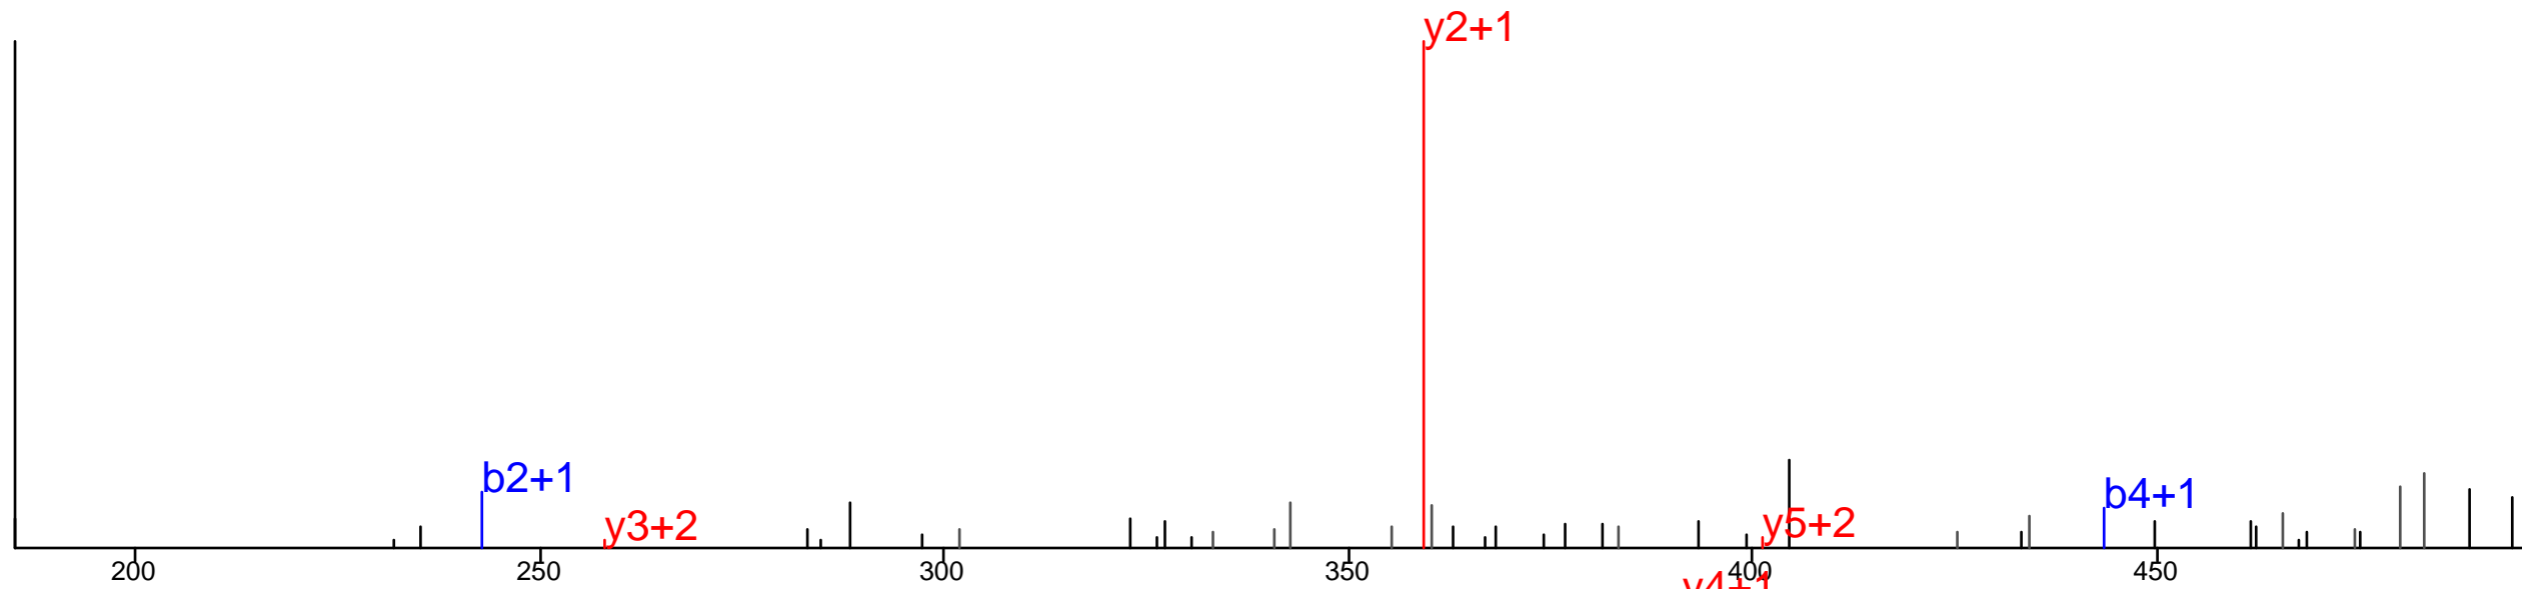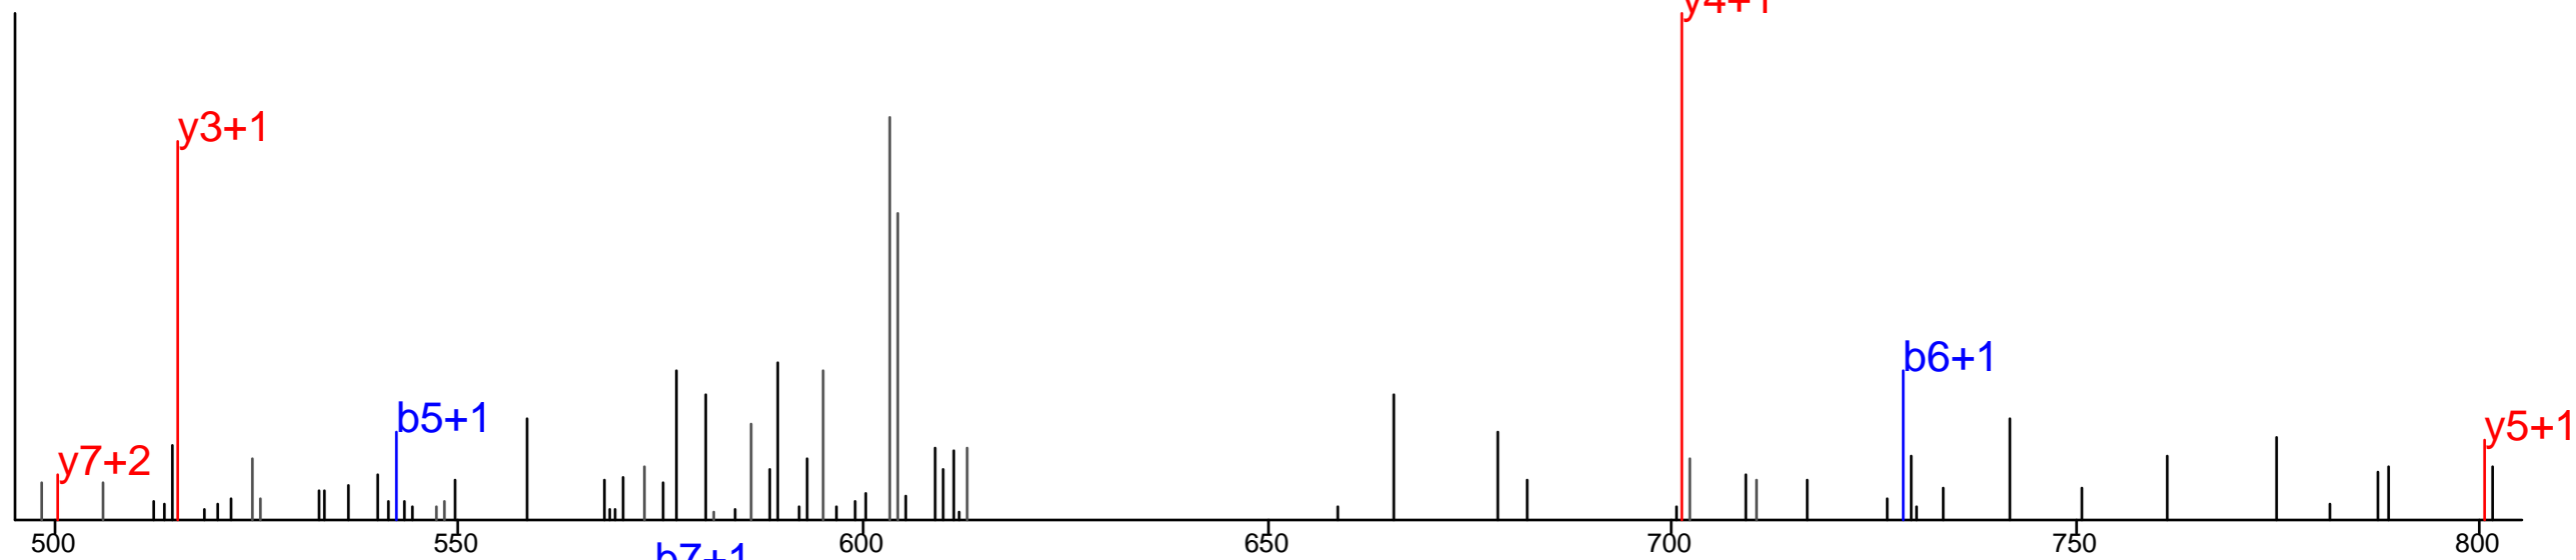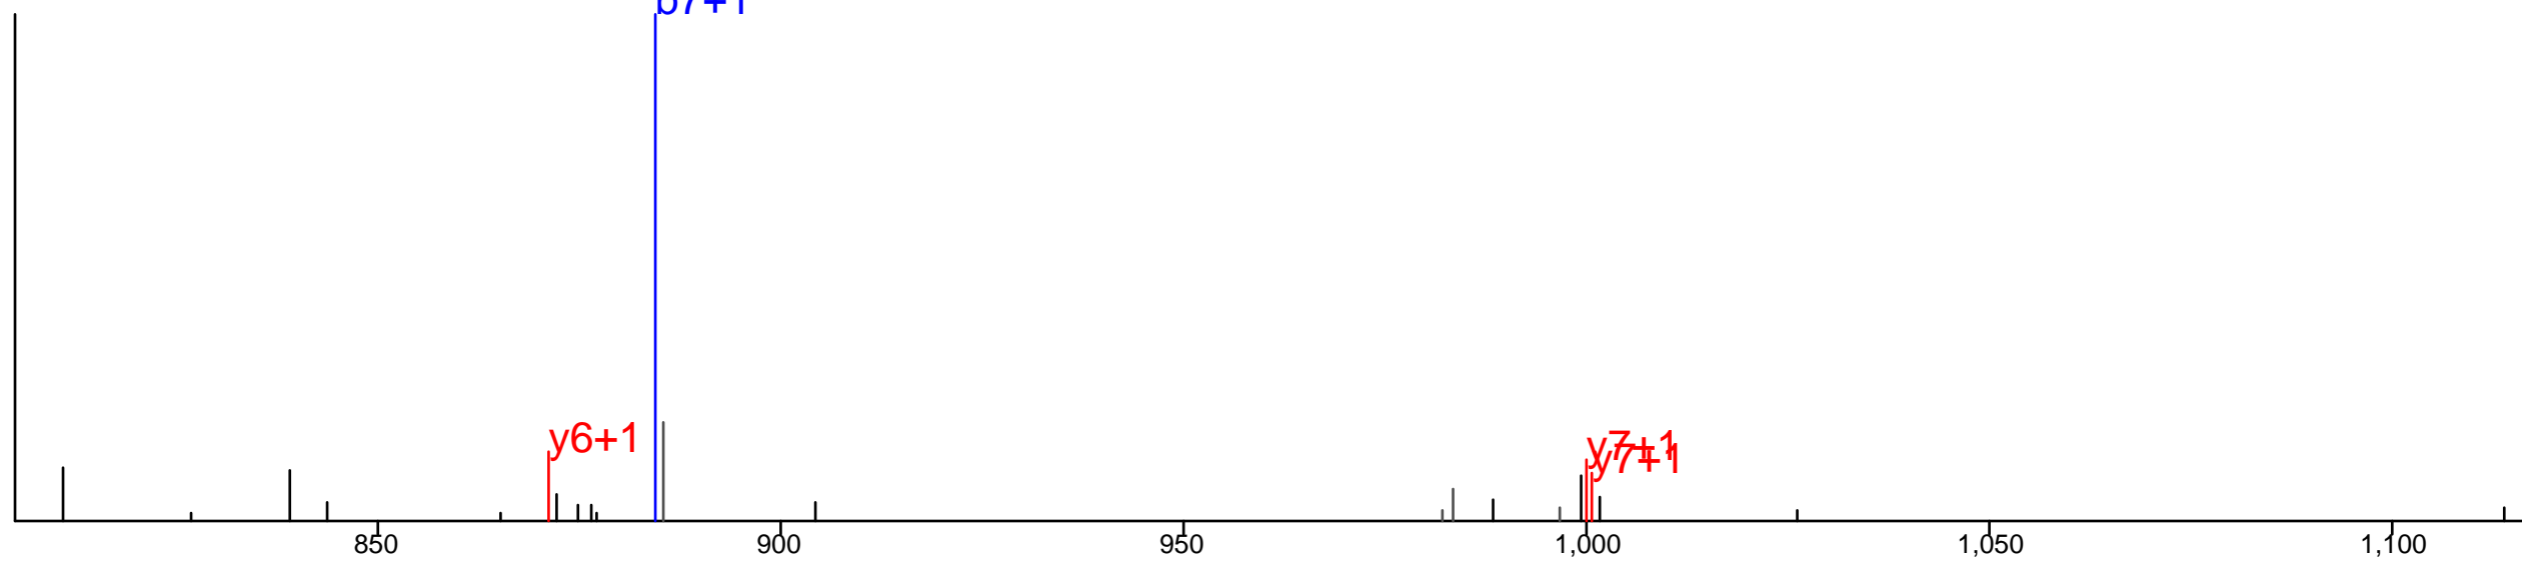

L E E A V W R P Y\*

Protein Name: CBFA2  
 gi Accession: 2506974  
 Precursor Mass: 621.7822+2  
 Delta Mass: 1.302 ppm  
 XCorr: 29.28

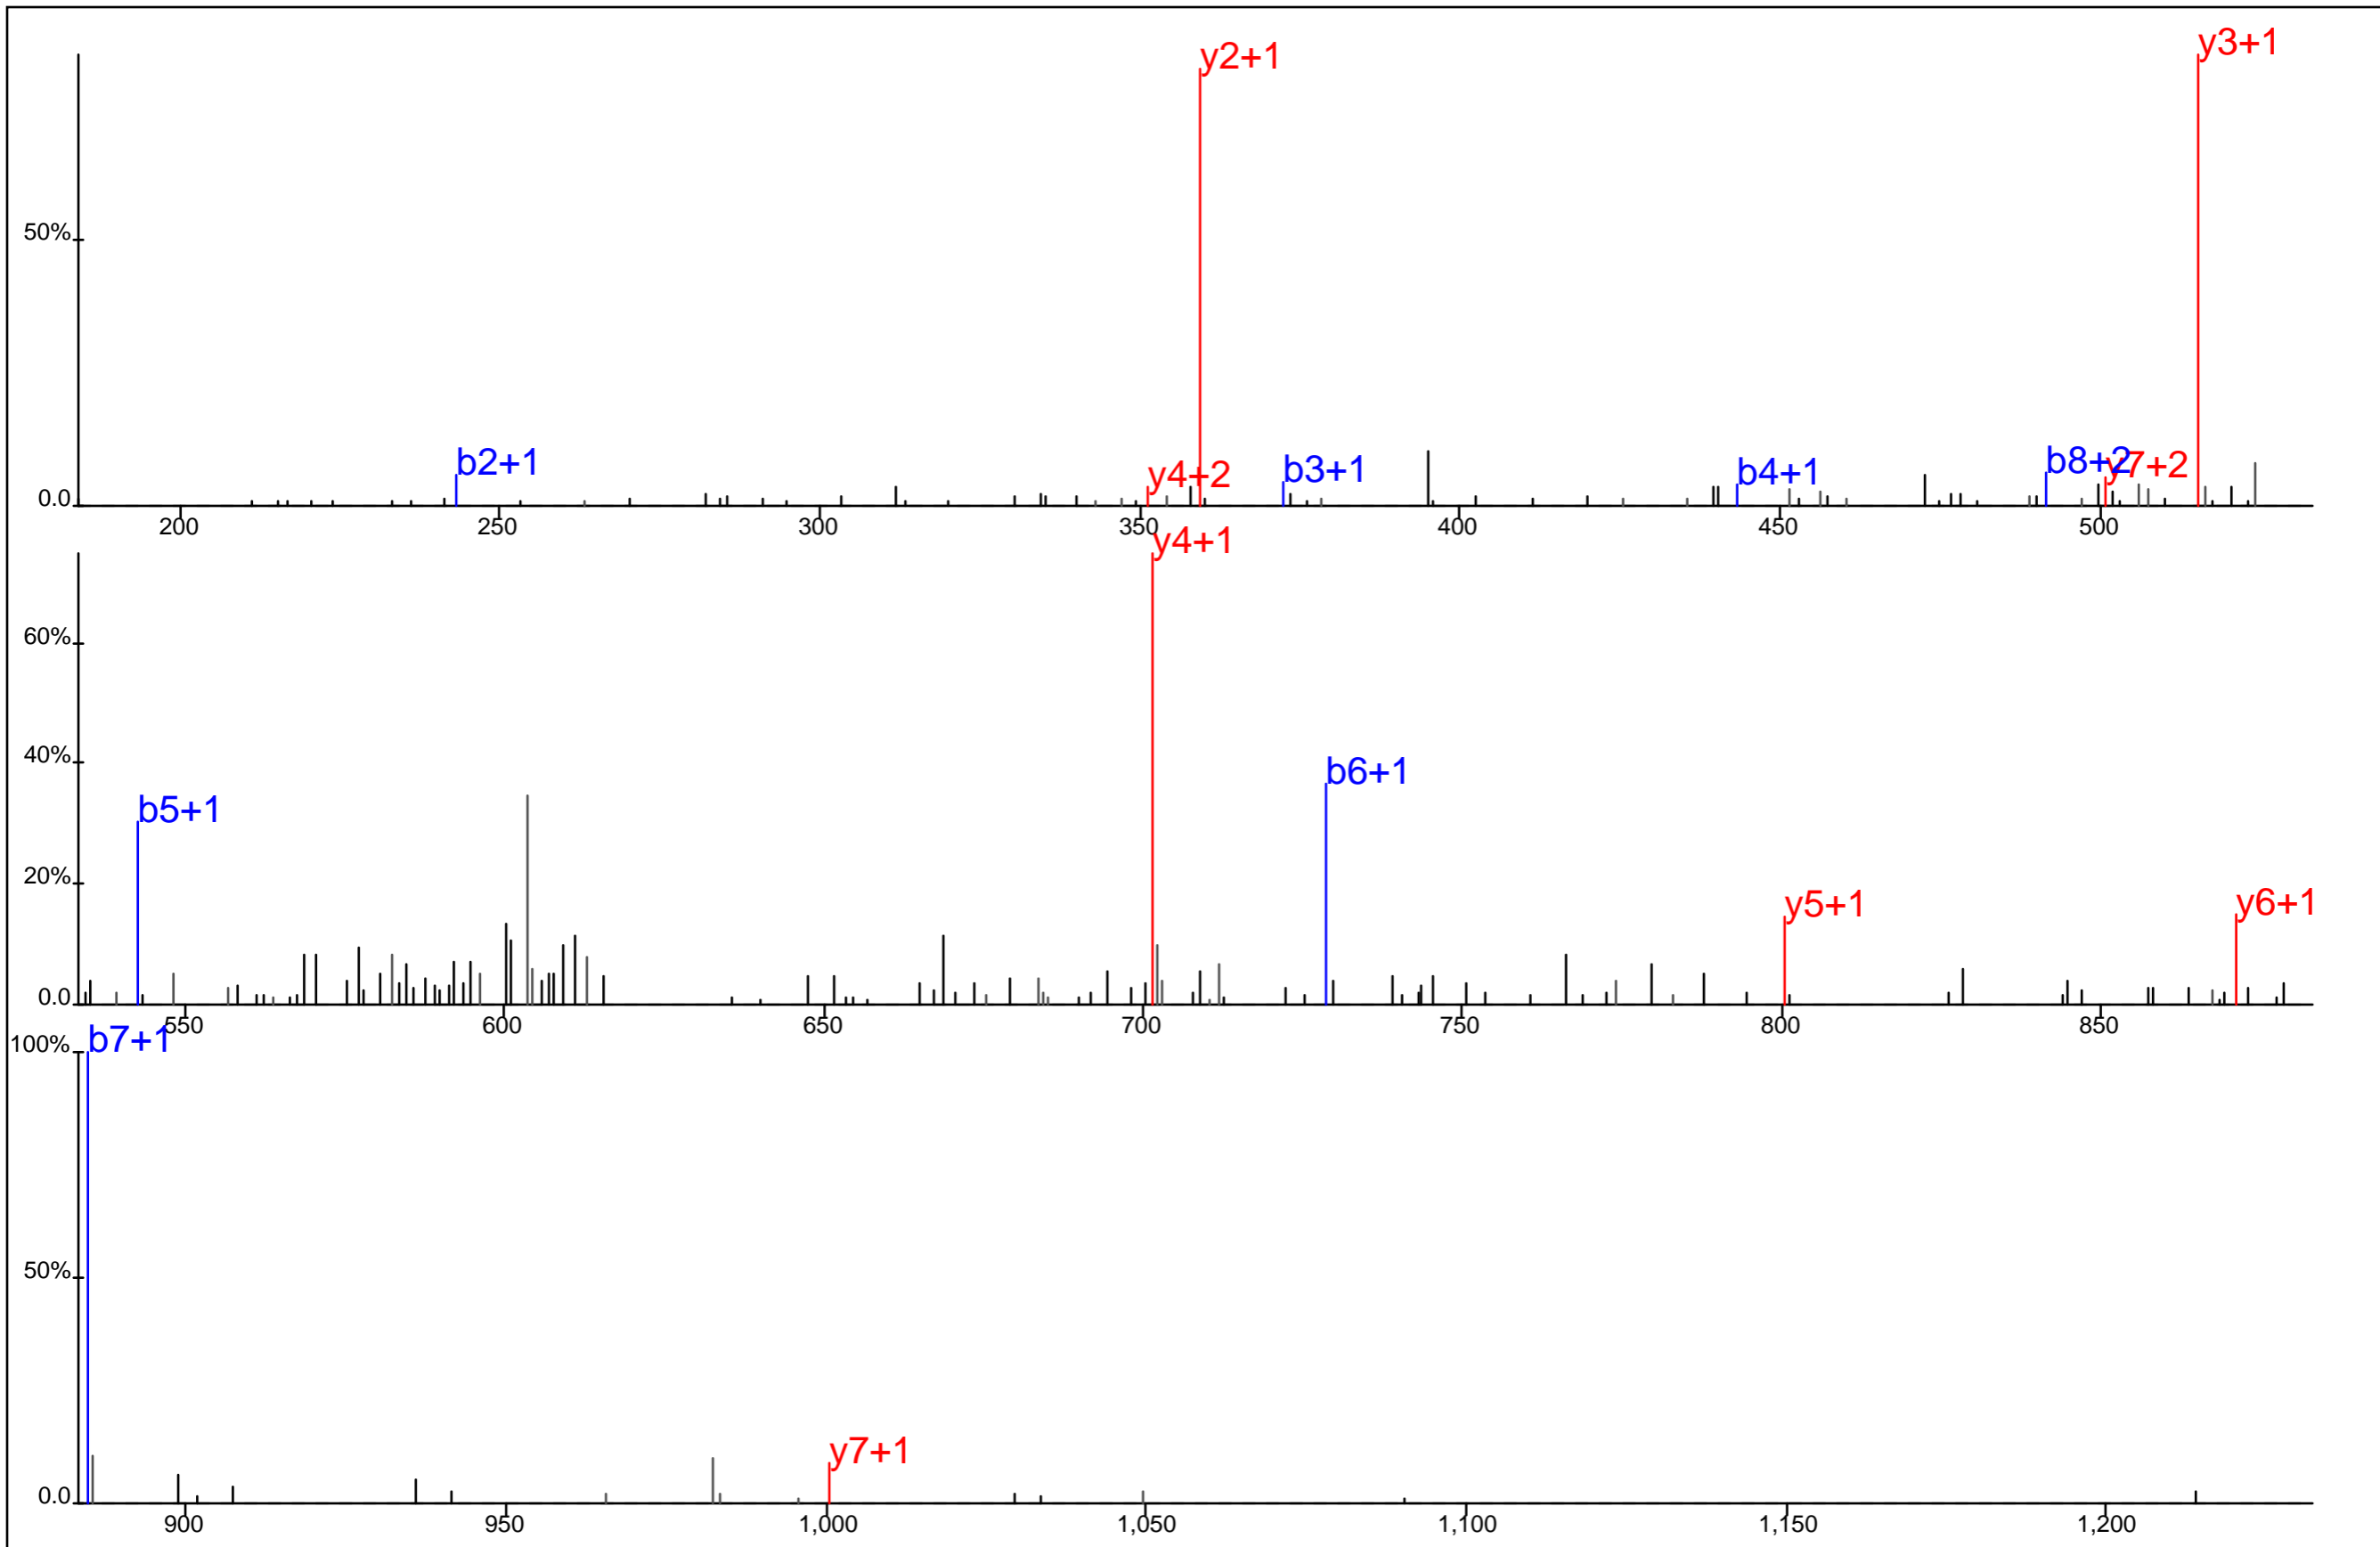

L E E A V W R P Y\*

Protein Name: CBFA2  
 gi Accession: 2506974  
 Precursor Mass: 621.7828+2  
 Delta Mass: 2.389 ppm  
 XCorr: 36.99

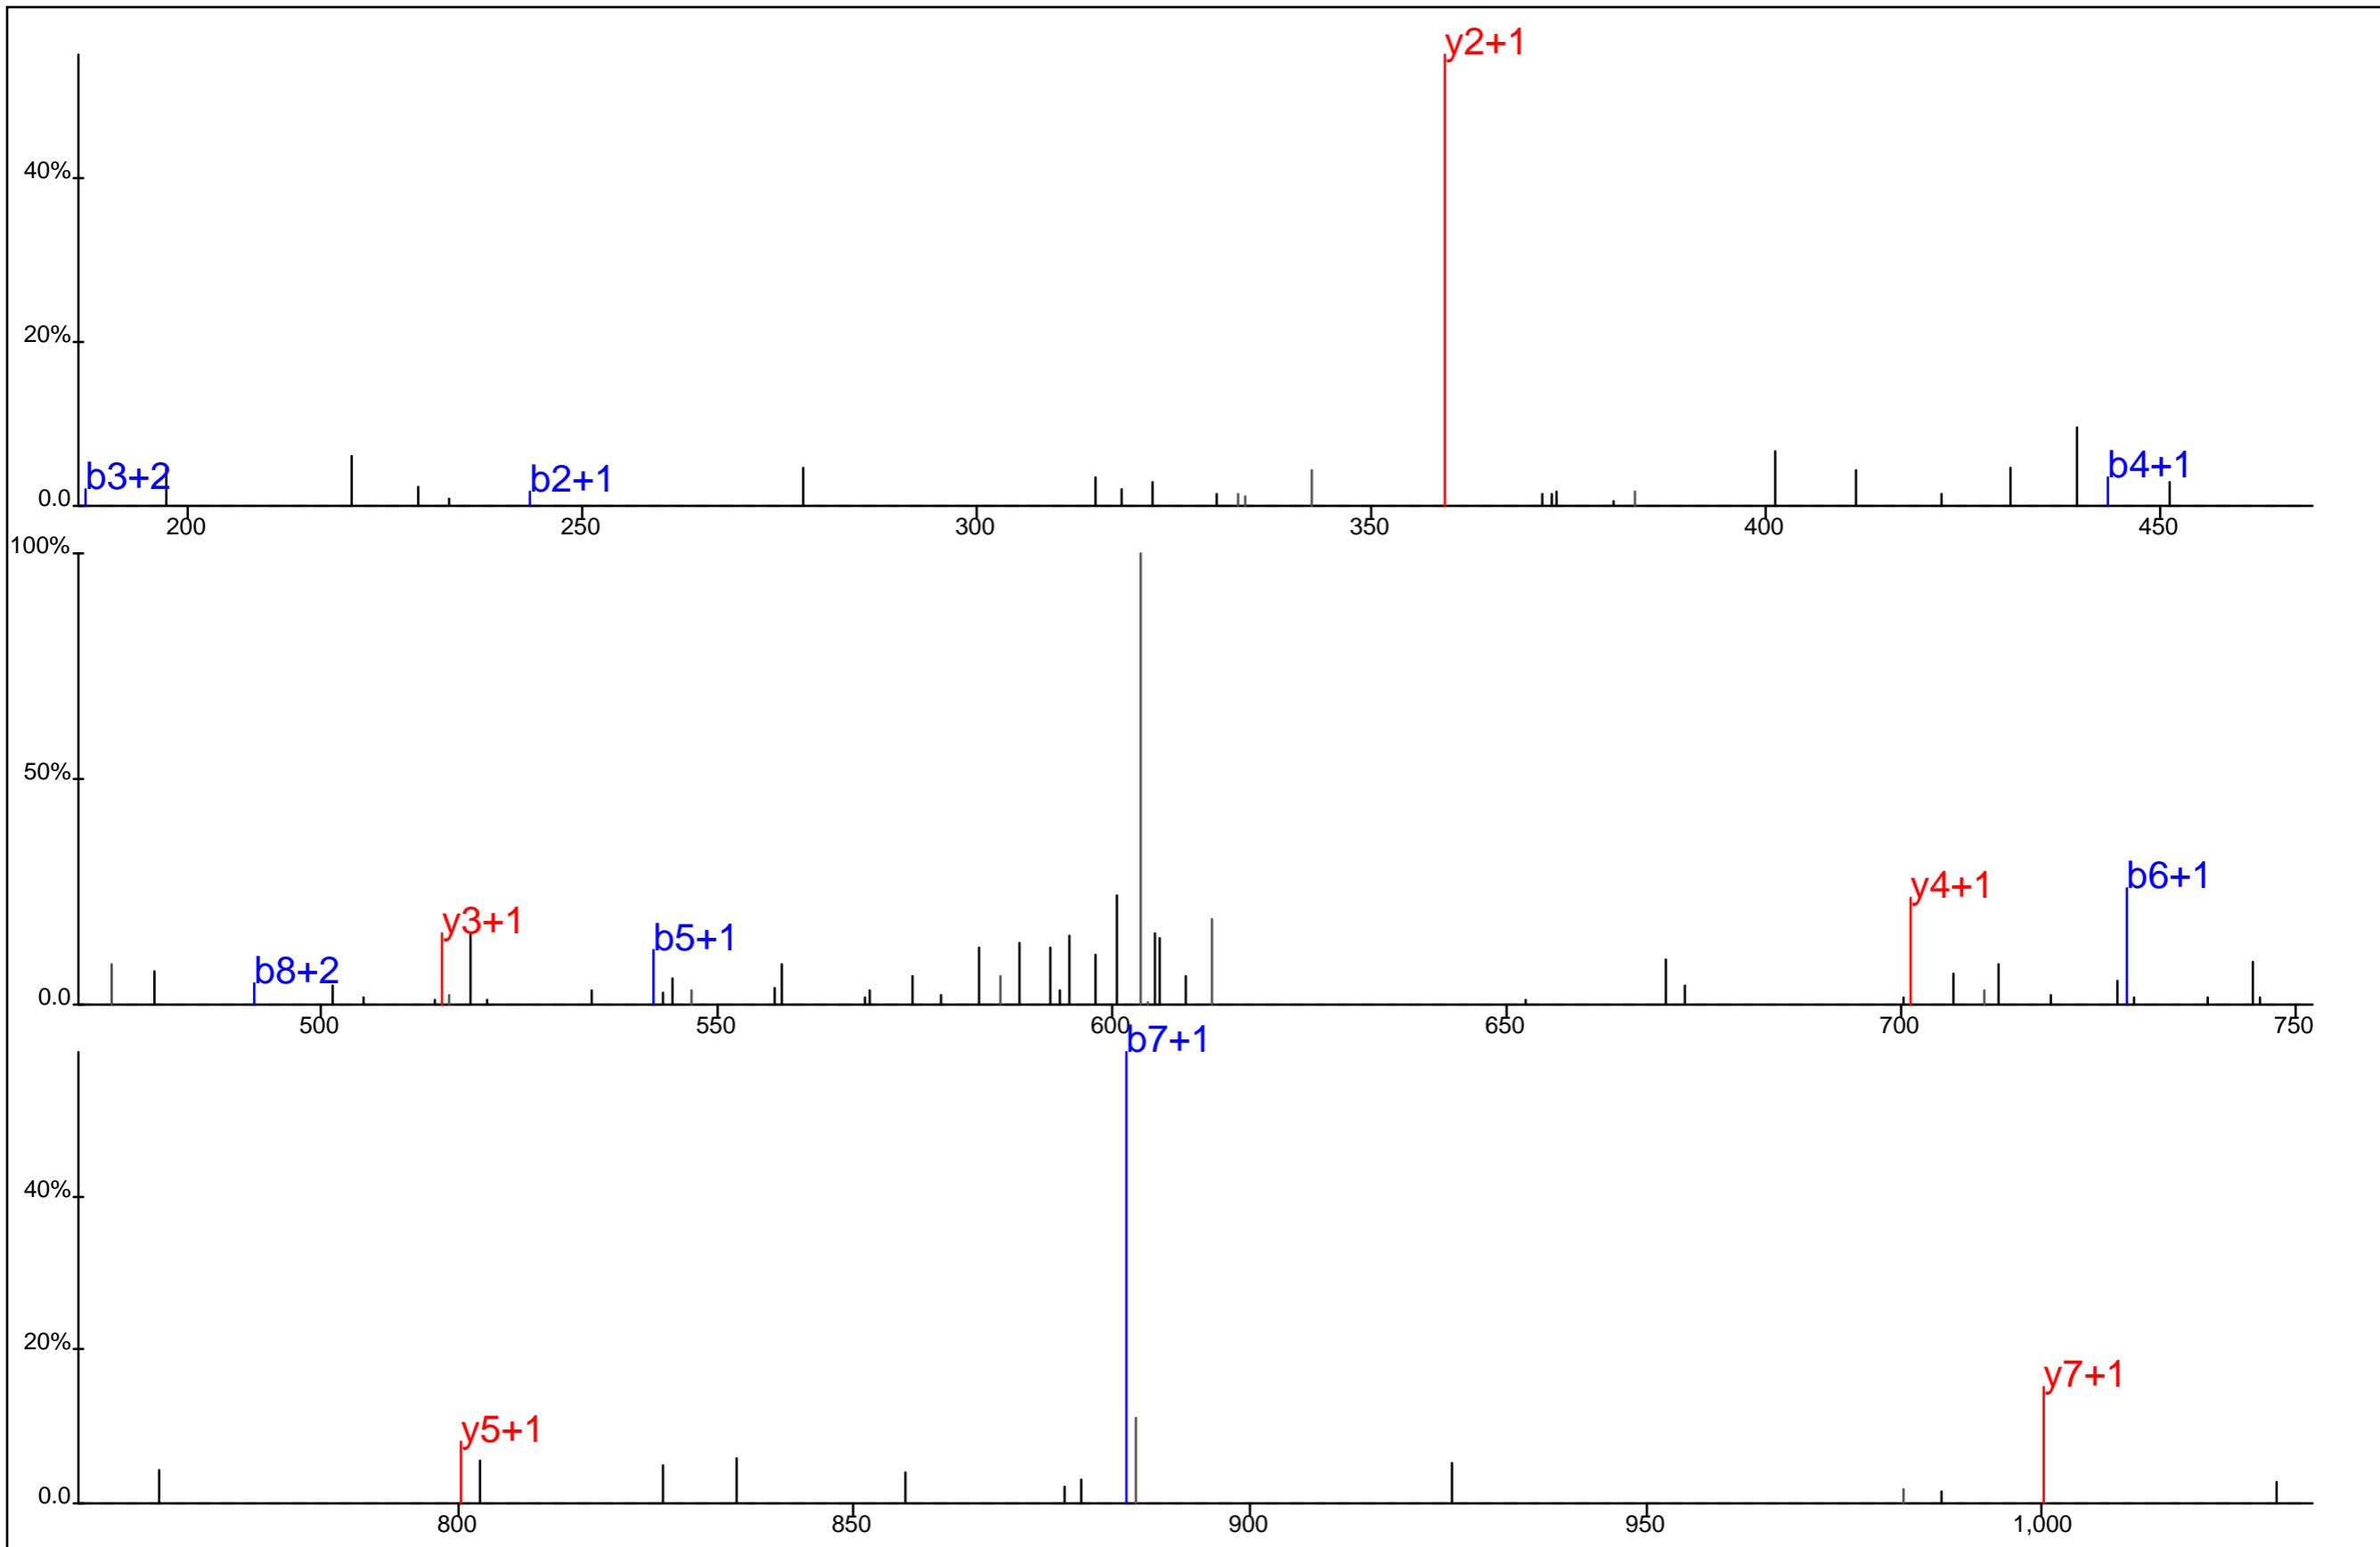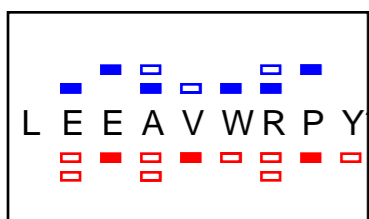

Protein Name: CBFA2  
 gi Accession: 2506974  
 Precursor Mass: 621.7844+2  
 Delta Mass: 4.843 ppm  
 XCorr: 20.3



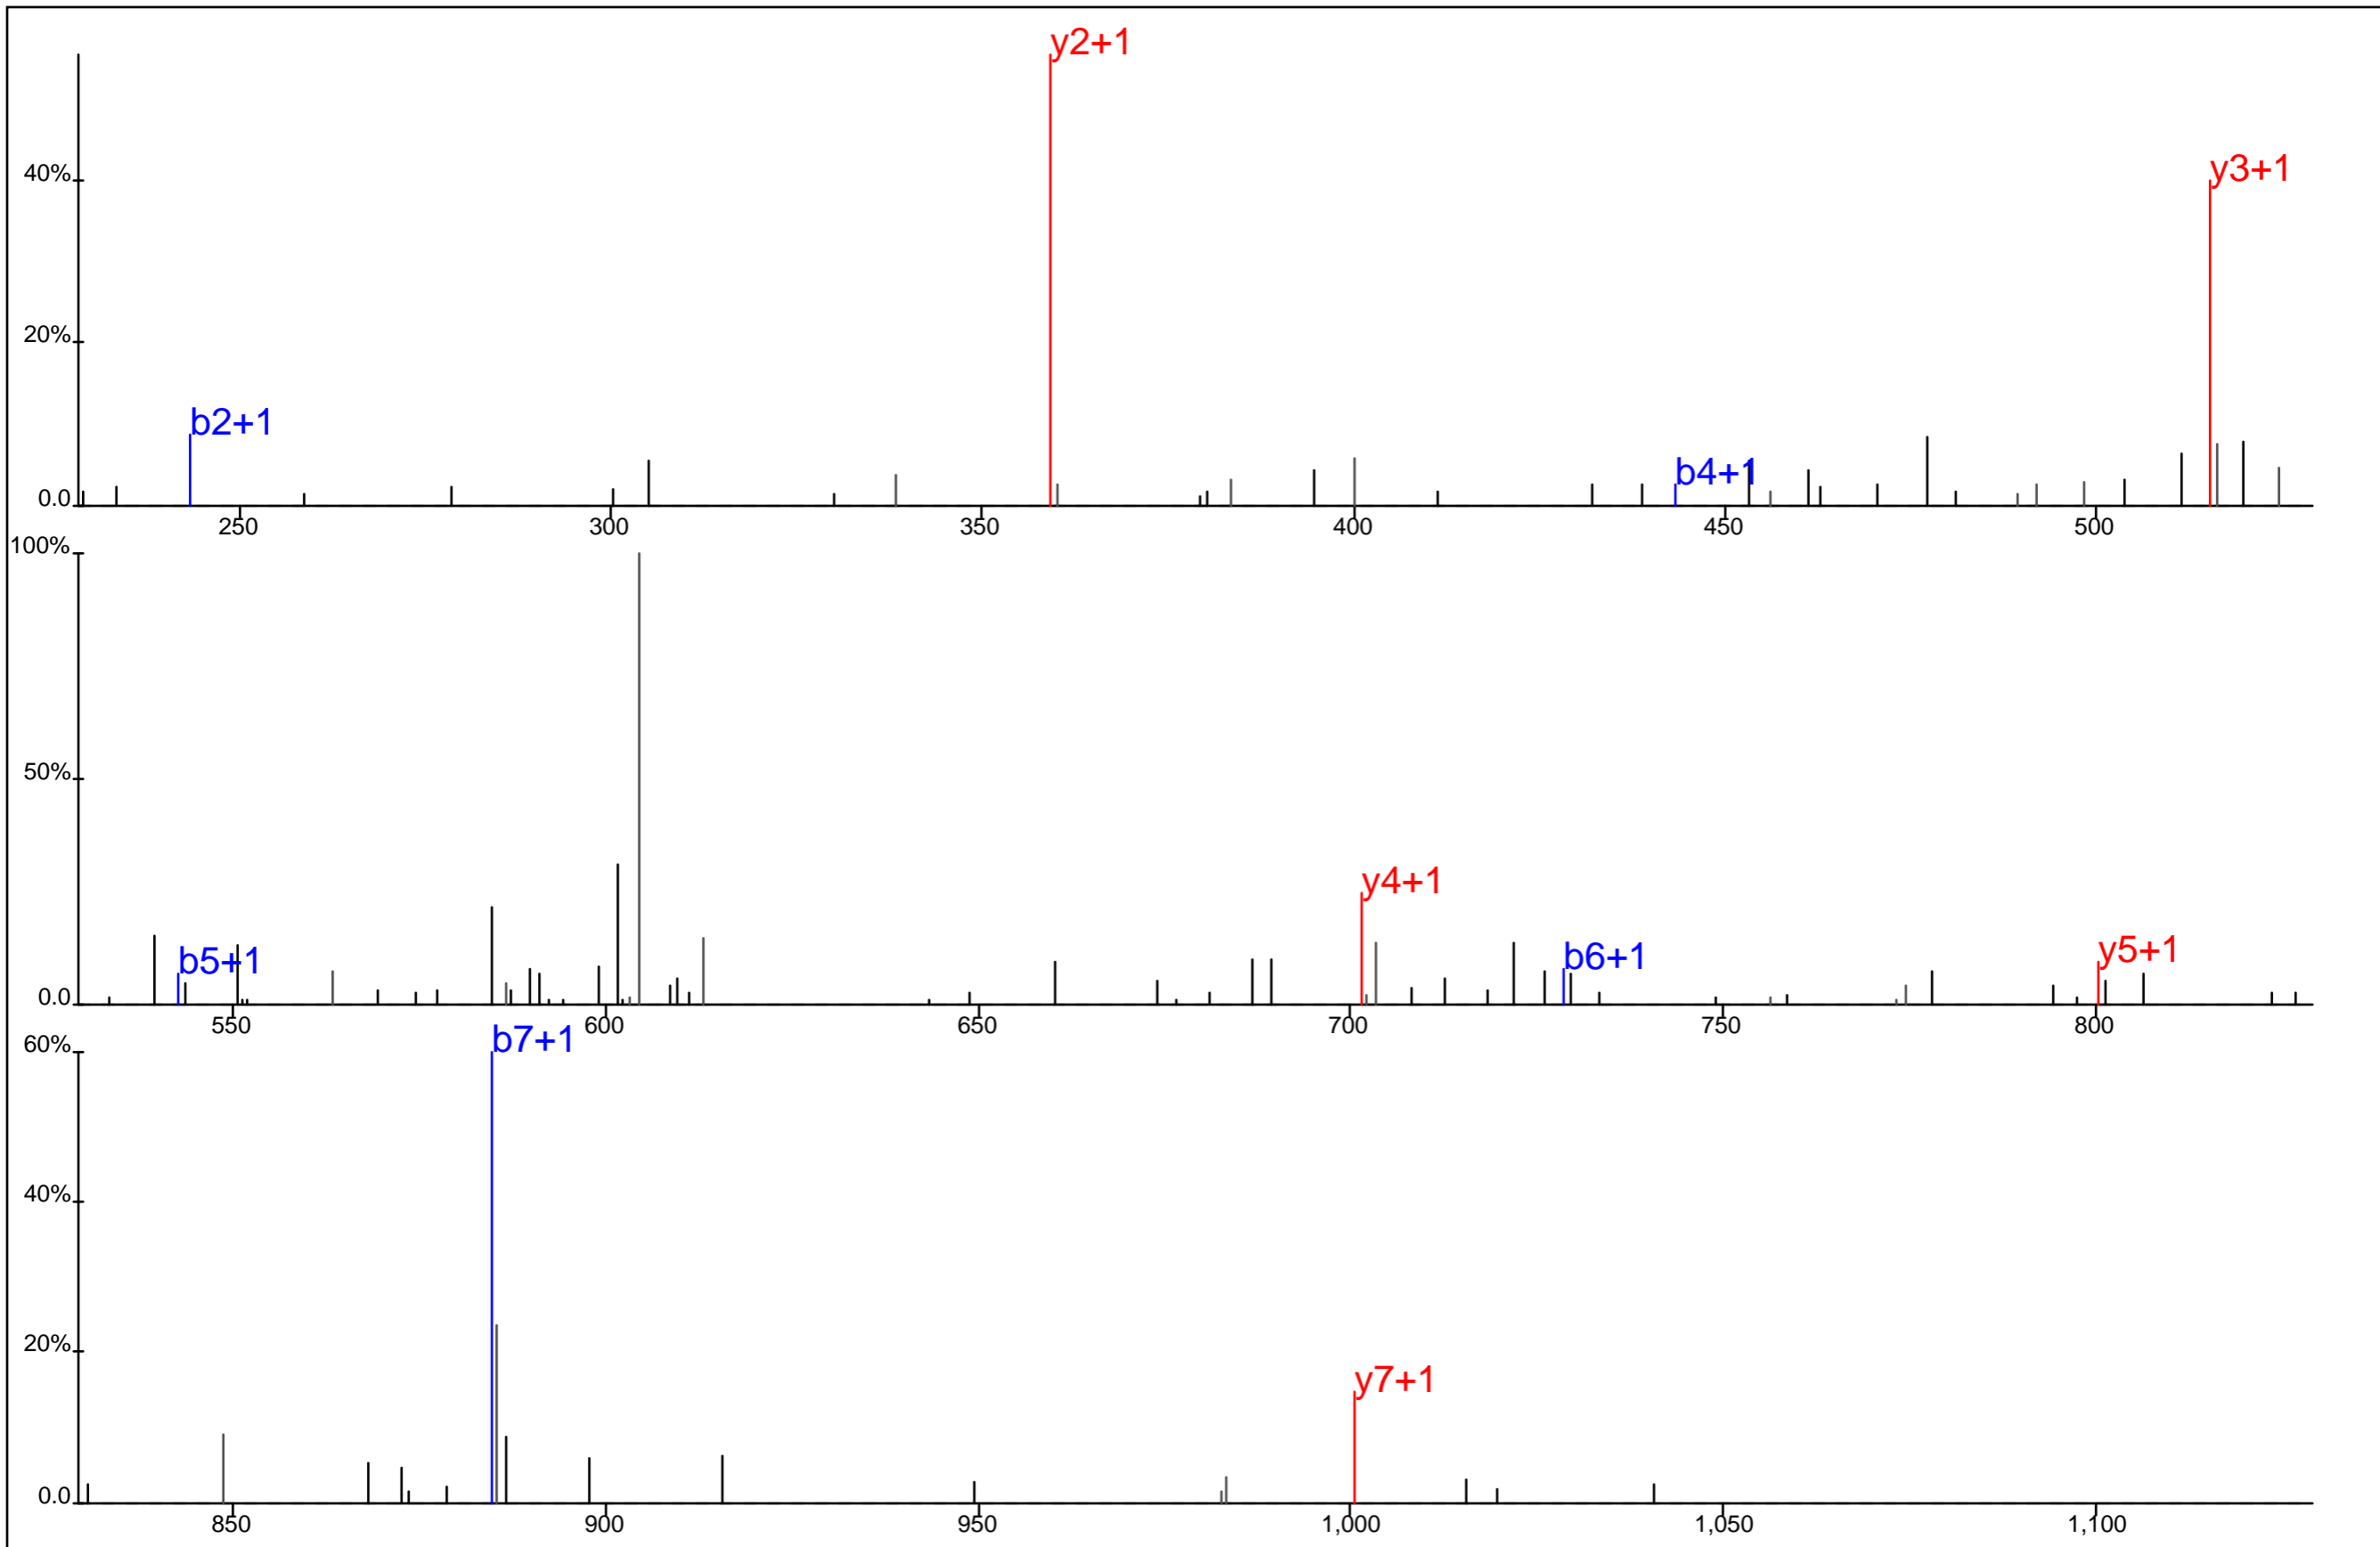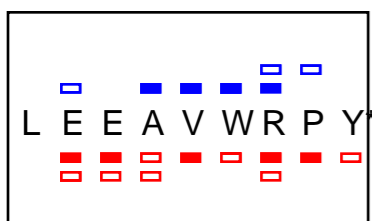

Protein Name: CBFA2  
 gi Accession: 2506974  
 Precursor Mass: 621.7834+2  
 Delta Mass: 3.370 ppm  
 XCorr: 54.44

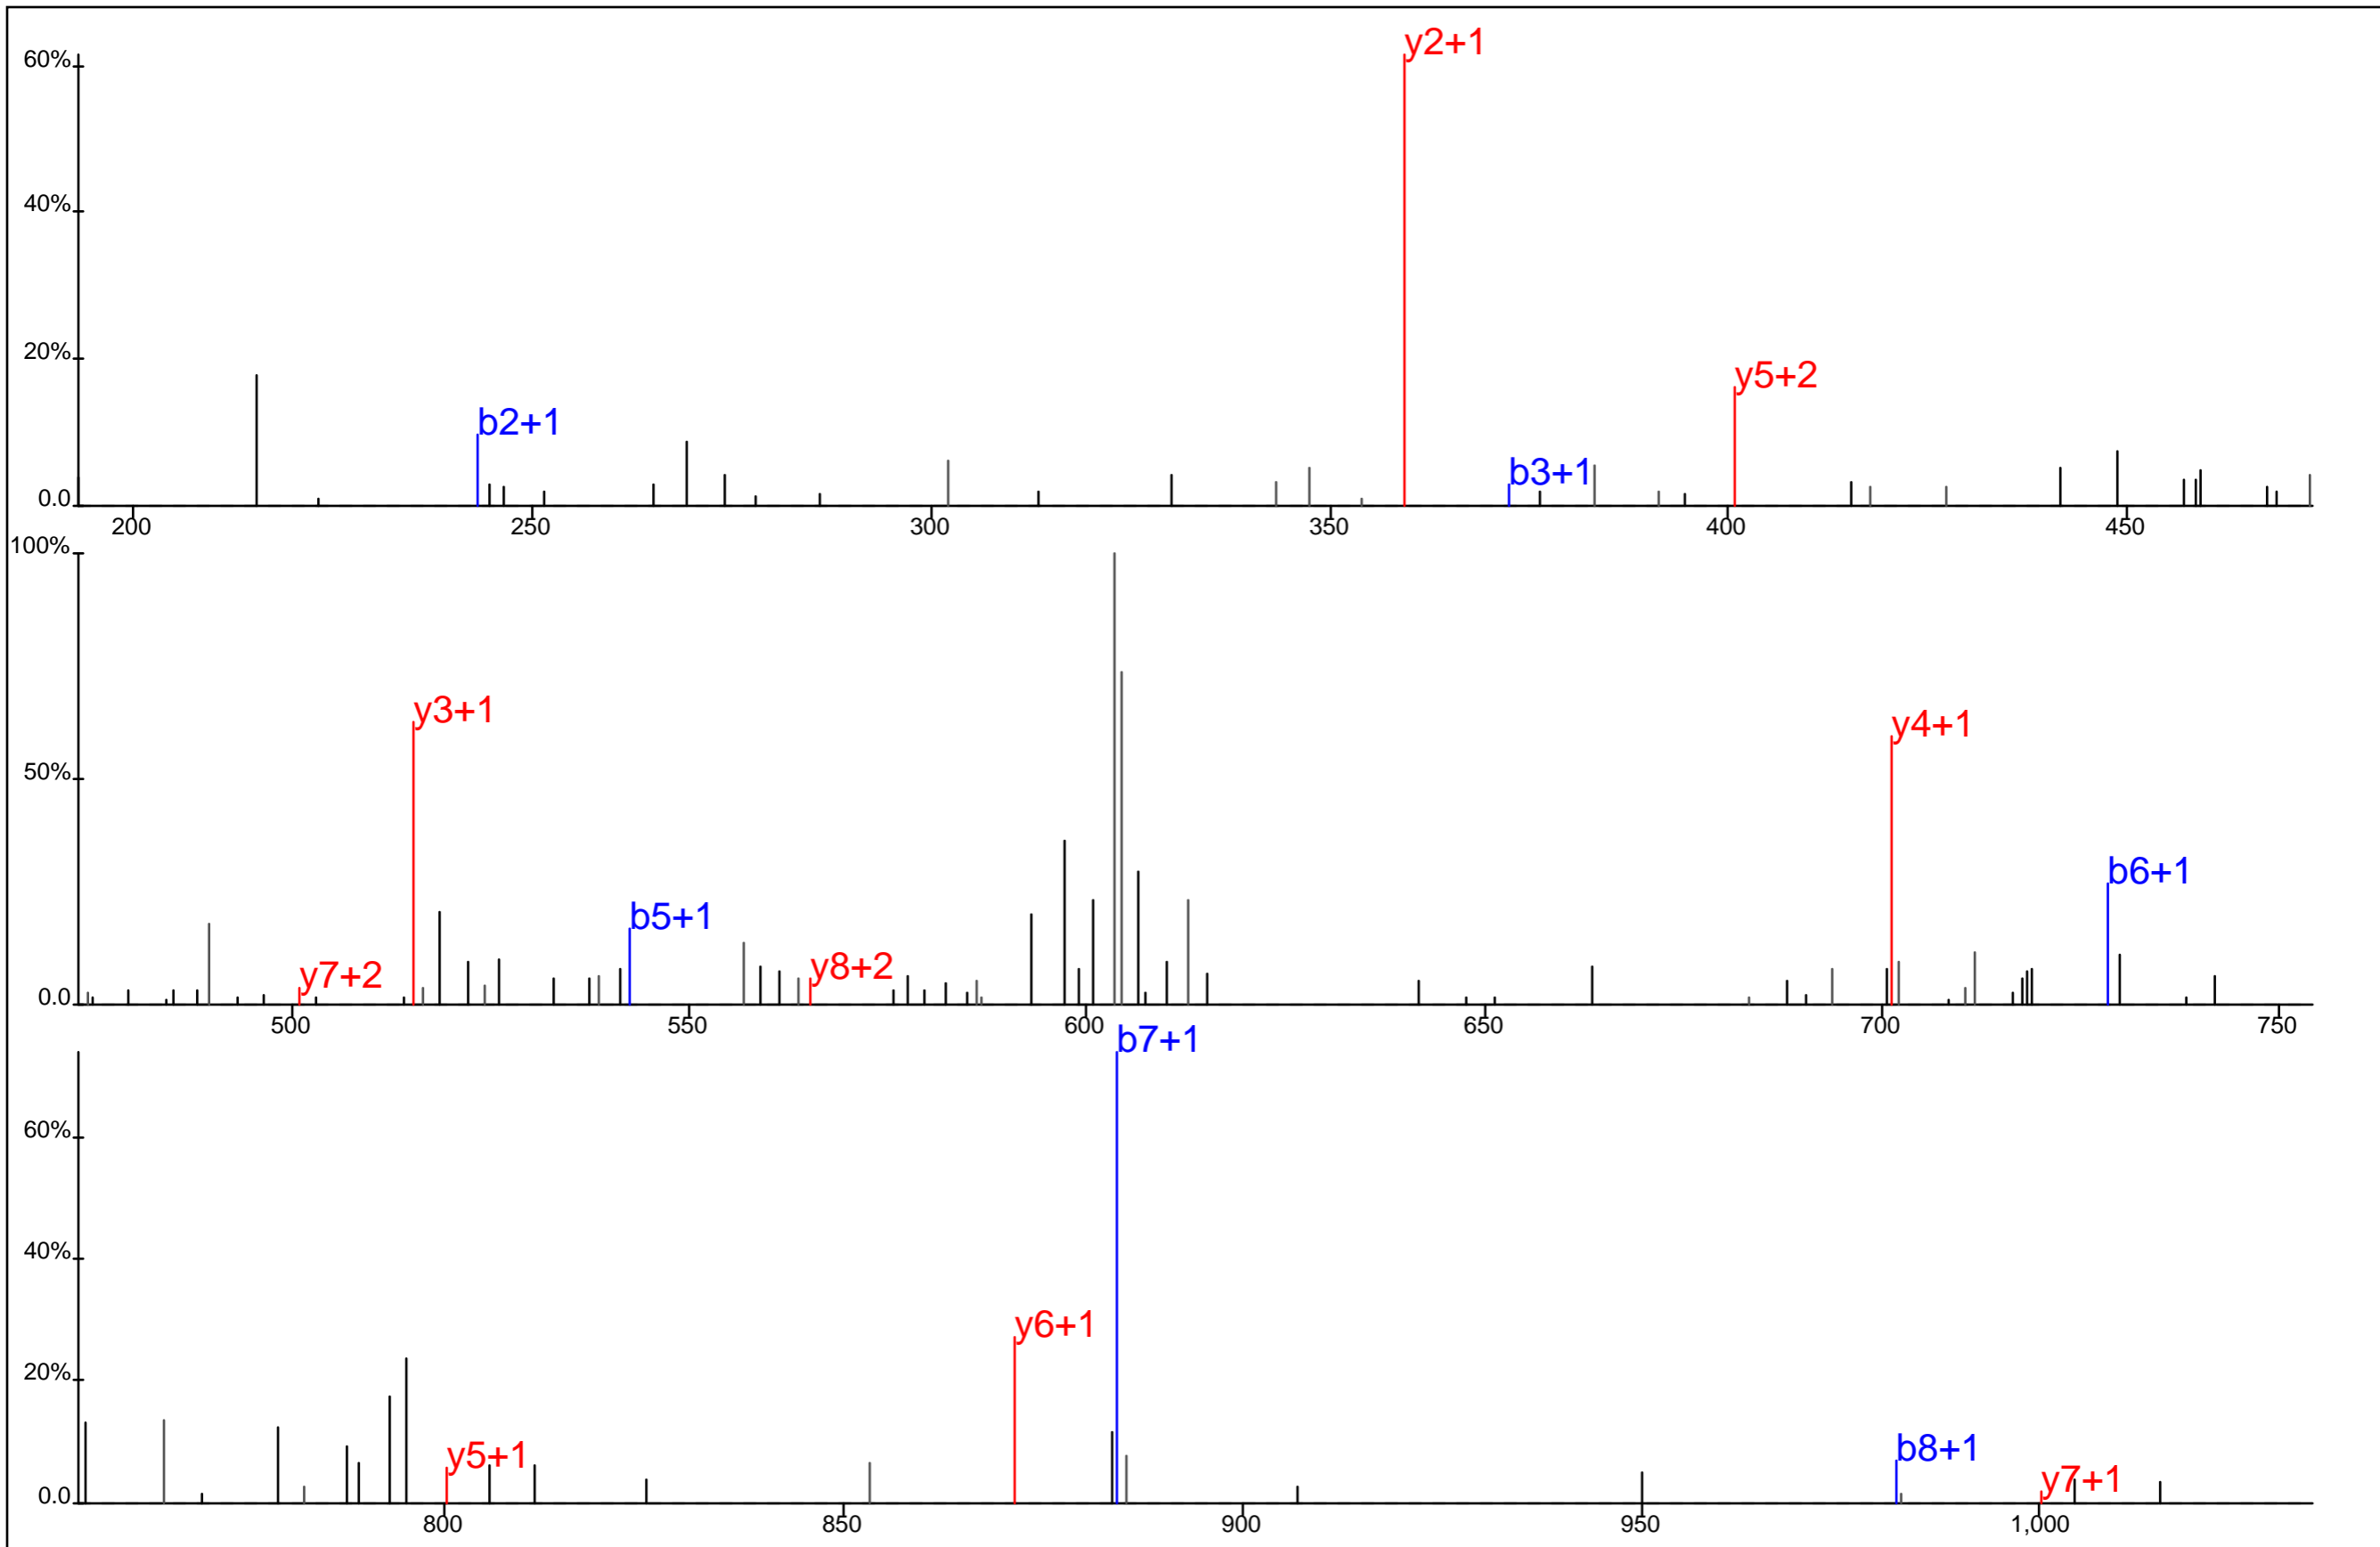

■ ■ ■ ■ ■ ■ ■ ■  
 L E E A V W R P Y\*  
□ □ □ □ □ □ □

Protein Name: CBFA2  
 gi Accession: 2506974  
 Precursor Mass: 621.7847+2  
 Delta Mass: 5.334 ppm  
 XCorr: 26.23

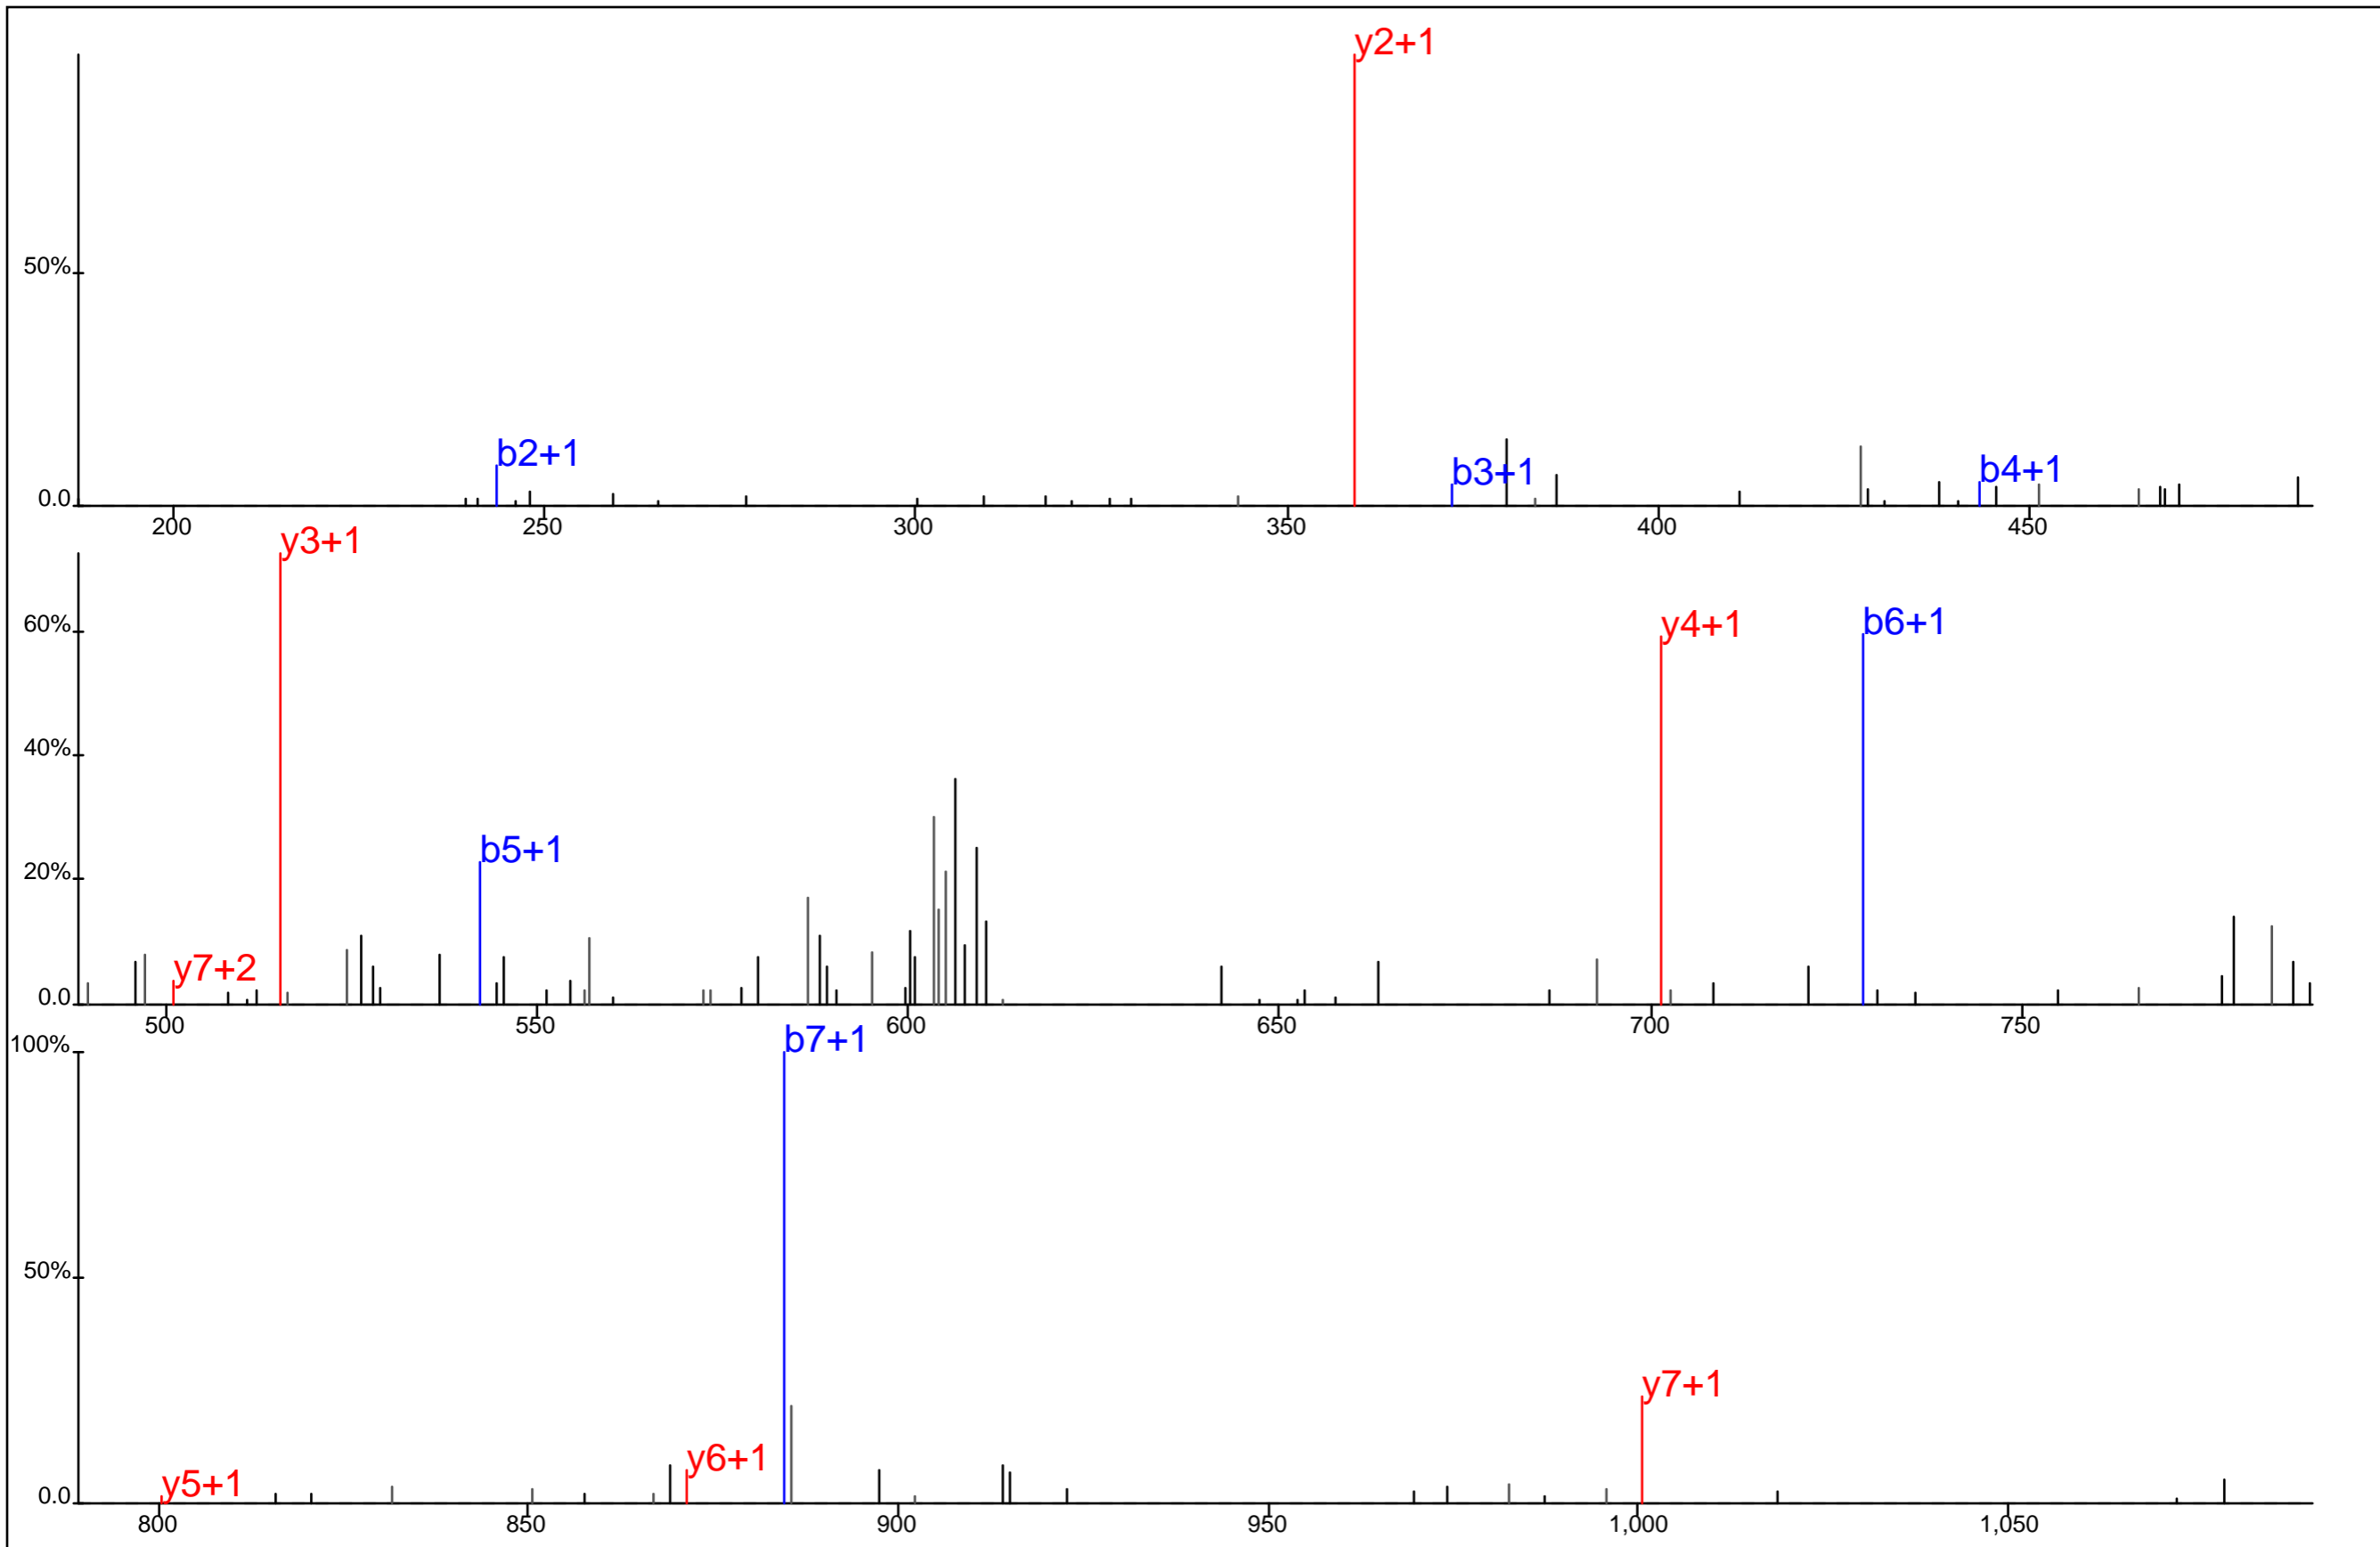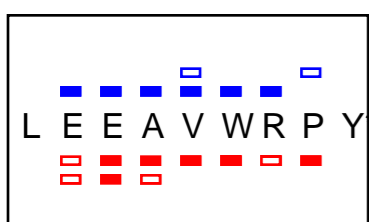

Protein Name: CBFA2  
 gi Accession: 2506974  
 Precursor Mass: 621.7798+2  
 Delta Mass: 2.424 ppm  
 XCorr: 24.74

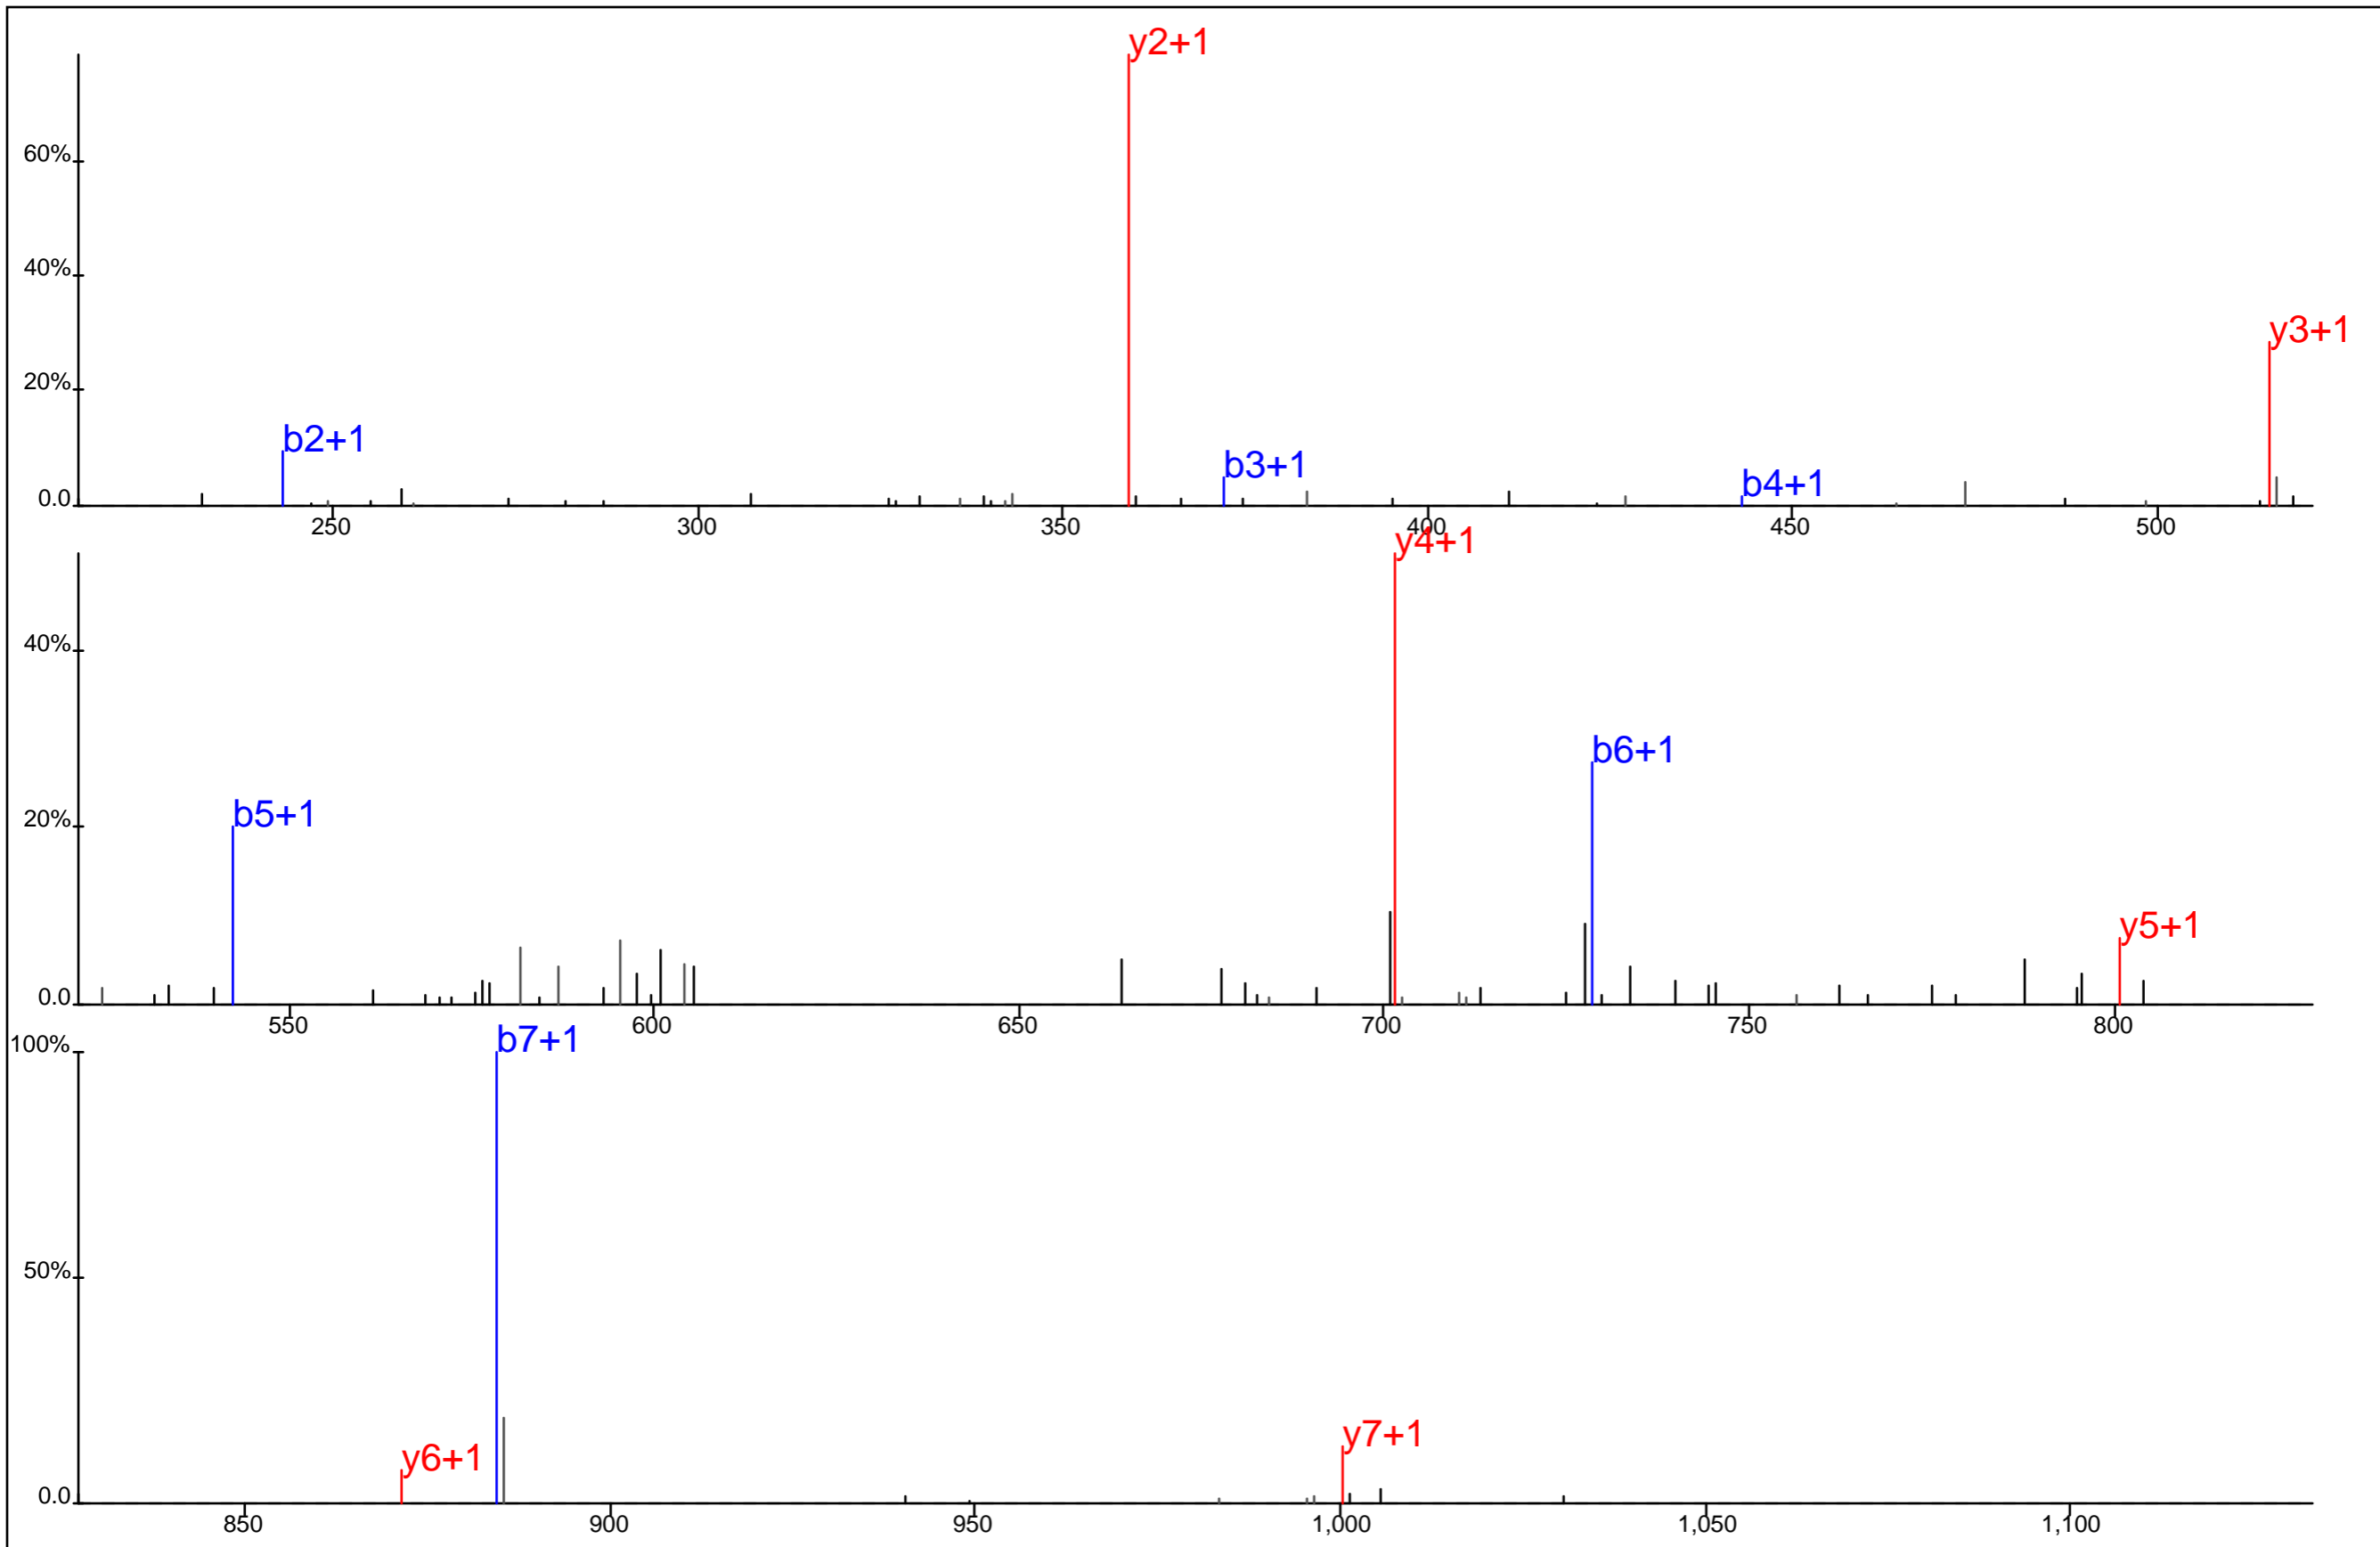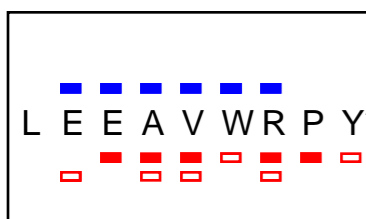

Protein Name: CBFA2  
 gi Accession: 2506974  
 Precursor Mass: 621.7823+2  
 Delta Mass: 1.503 ppm  
 XCorr: 32.75

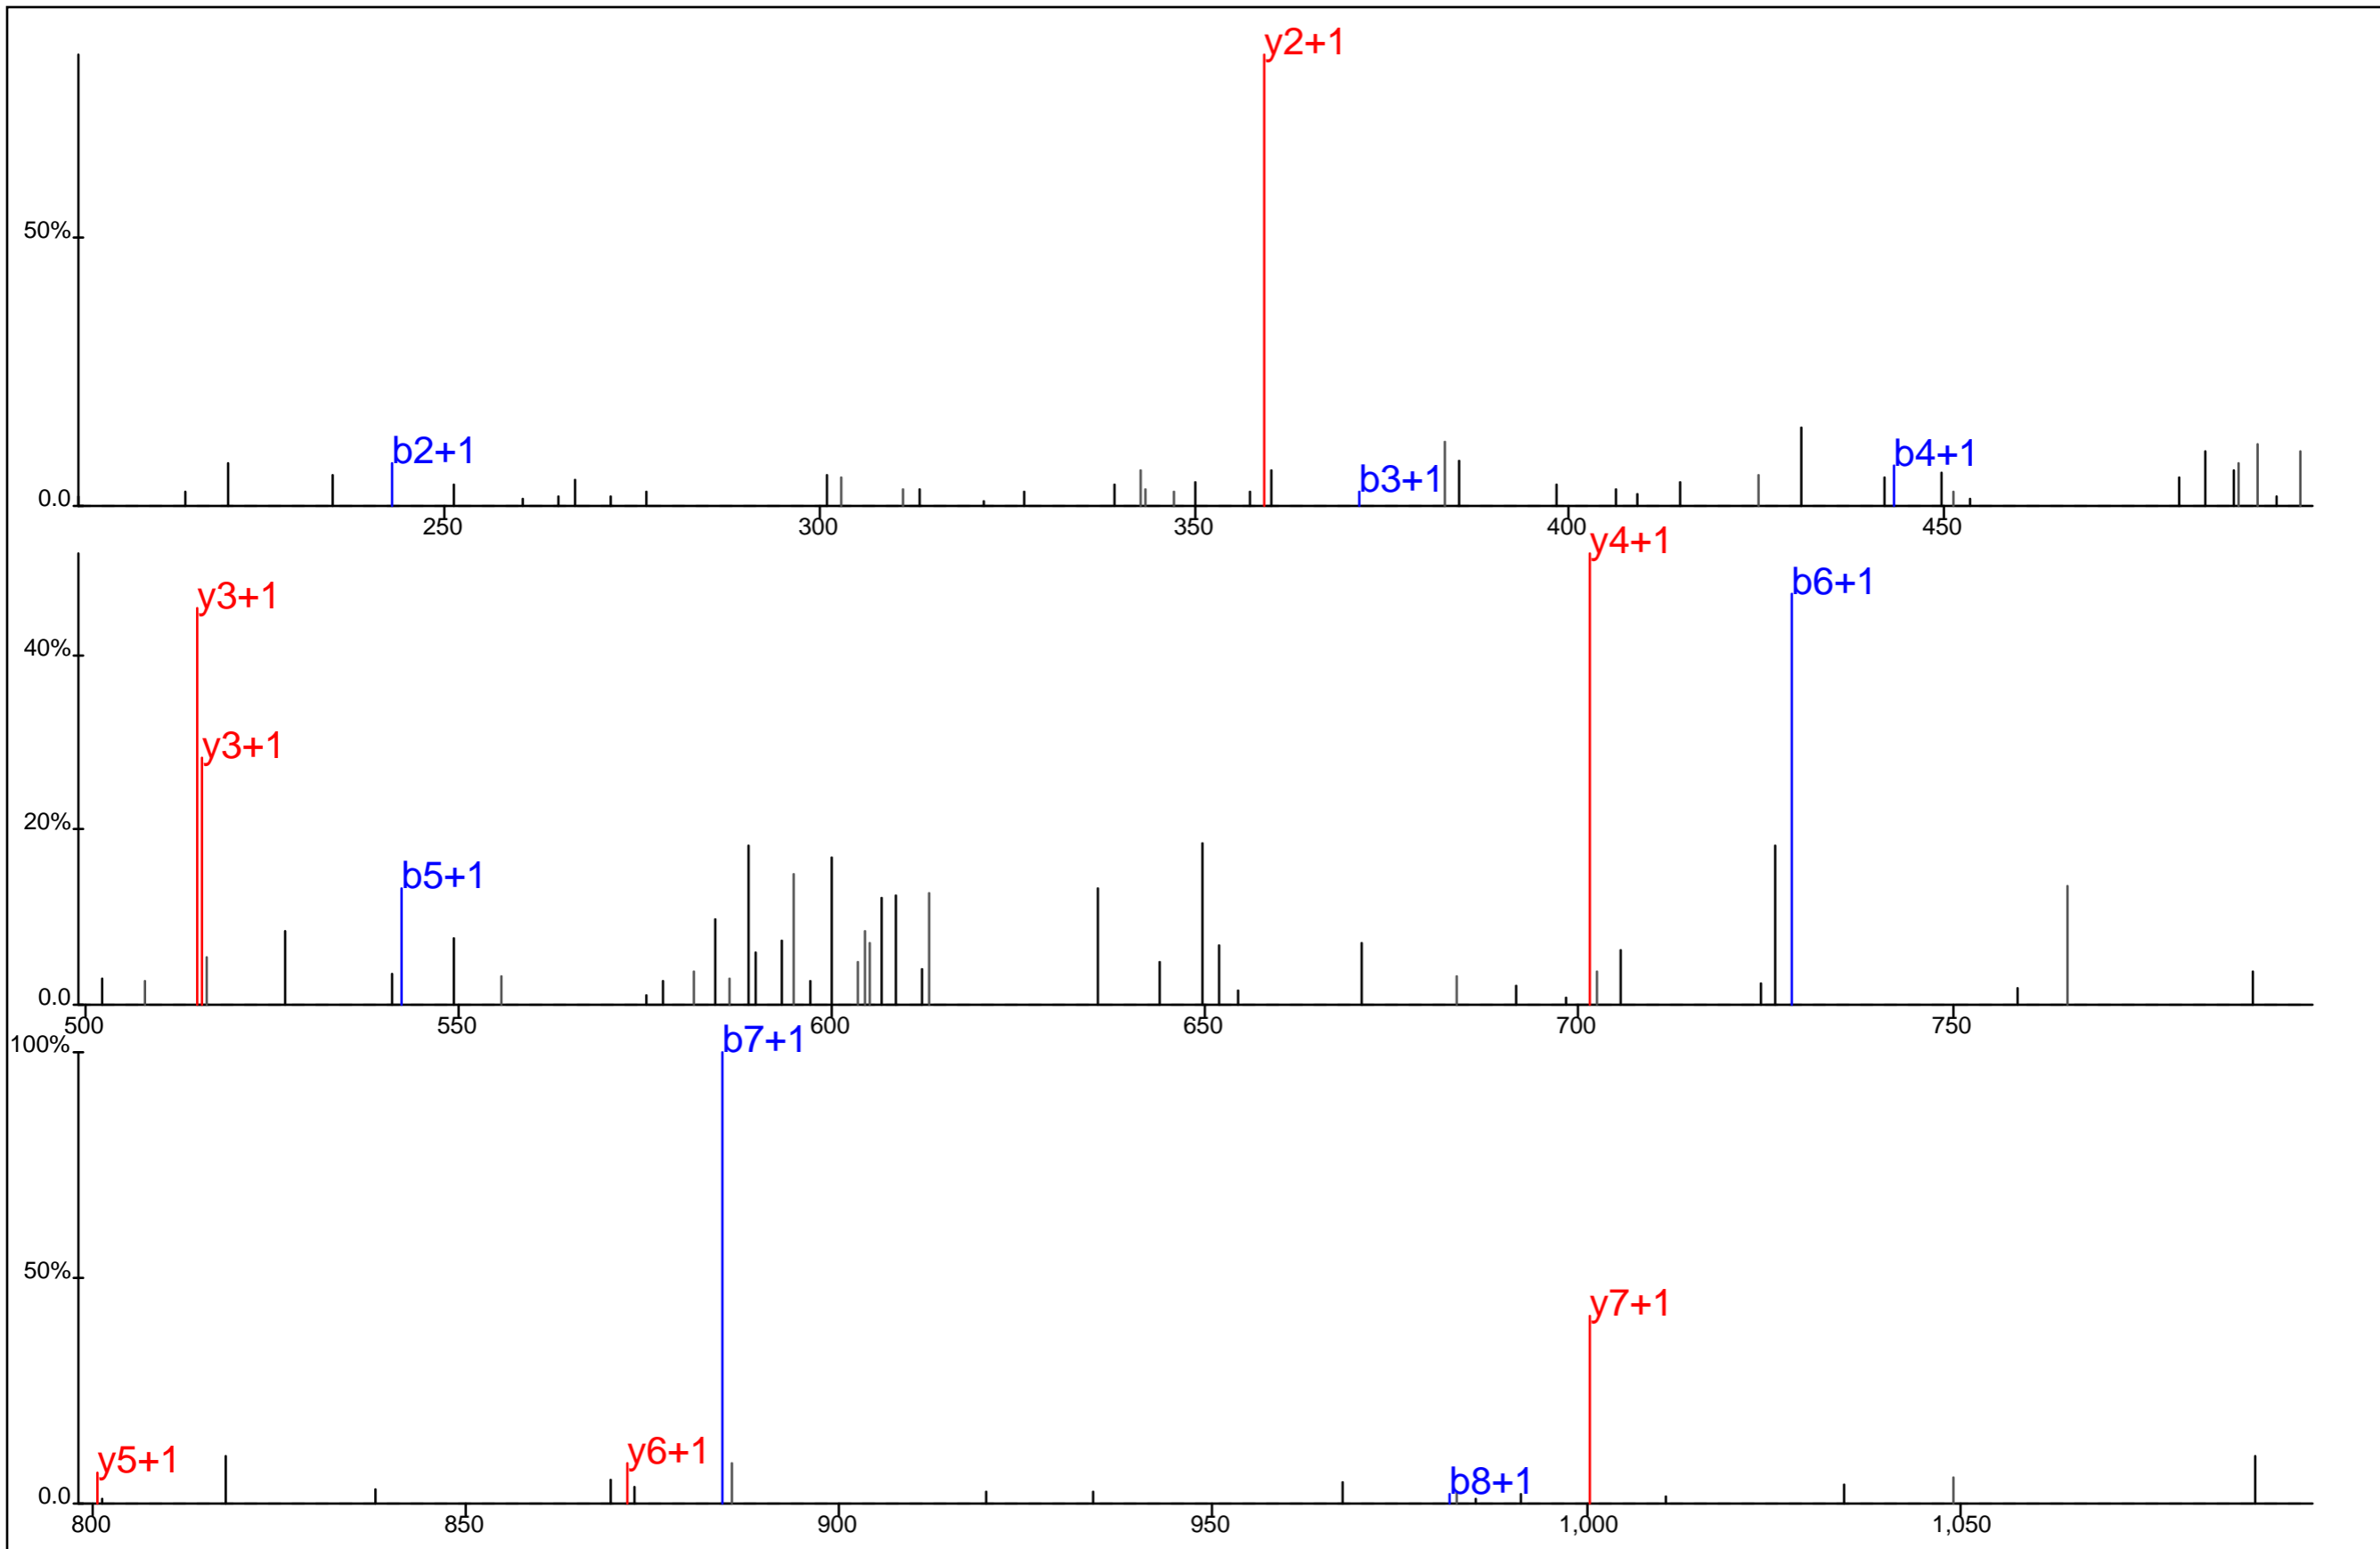

■ ■ ■ ■ ■ ■ ■ ■  
 L E E A V W R P Y\*  
□ □ □ □ □ □ □

Protein Name: CBFA2  
 gi Accession: 2506974  
 Precursor Mass: 621.7841+2  
 Delta Mass: 4.449 ppm  
 XCorr: 24.36

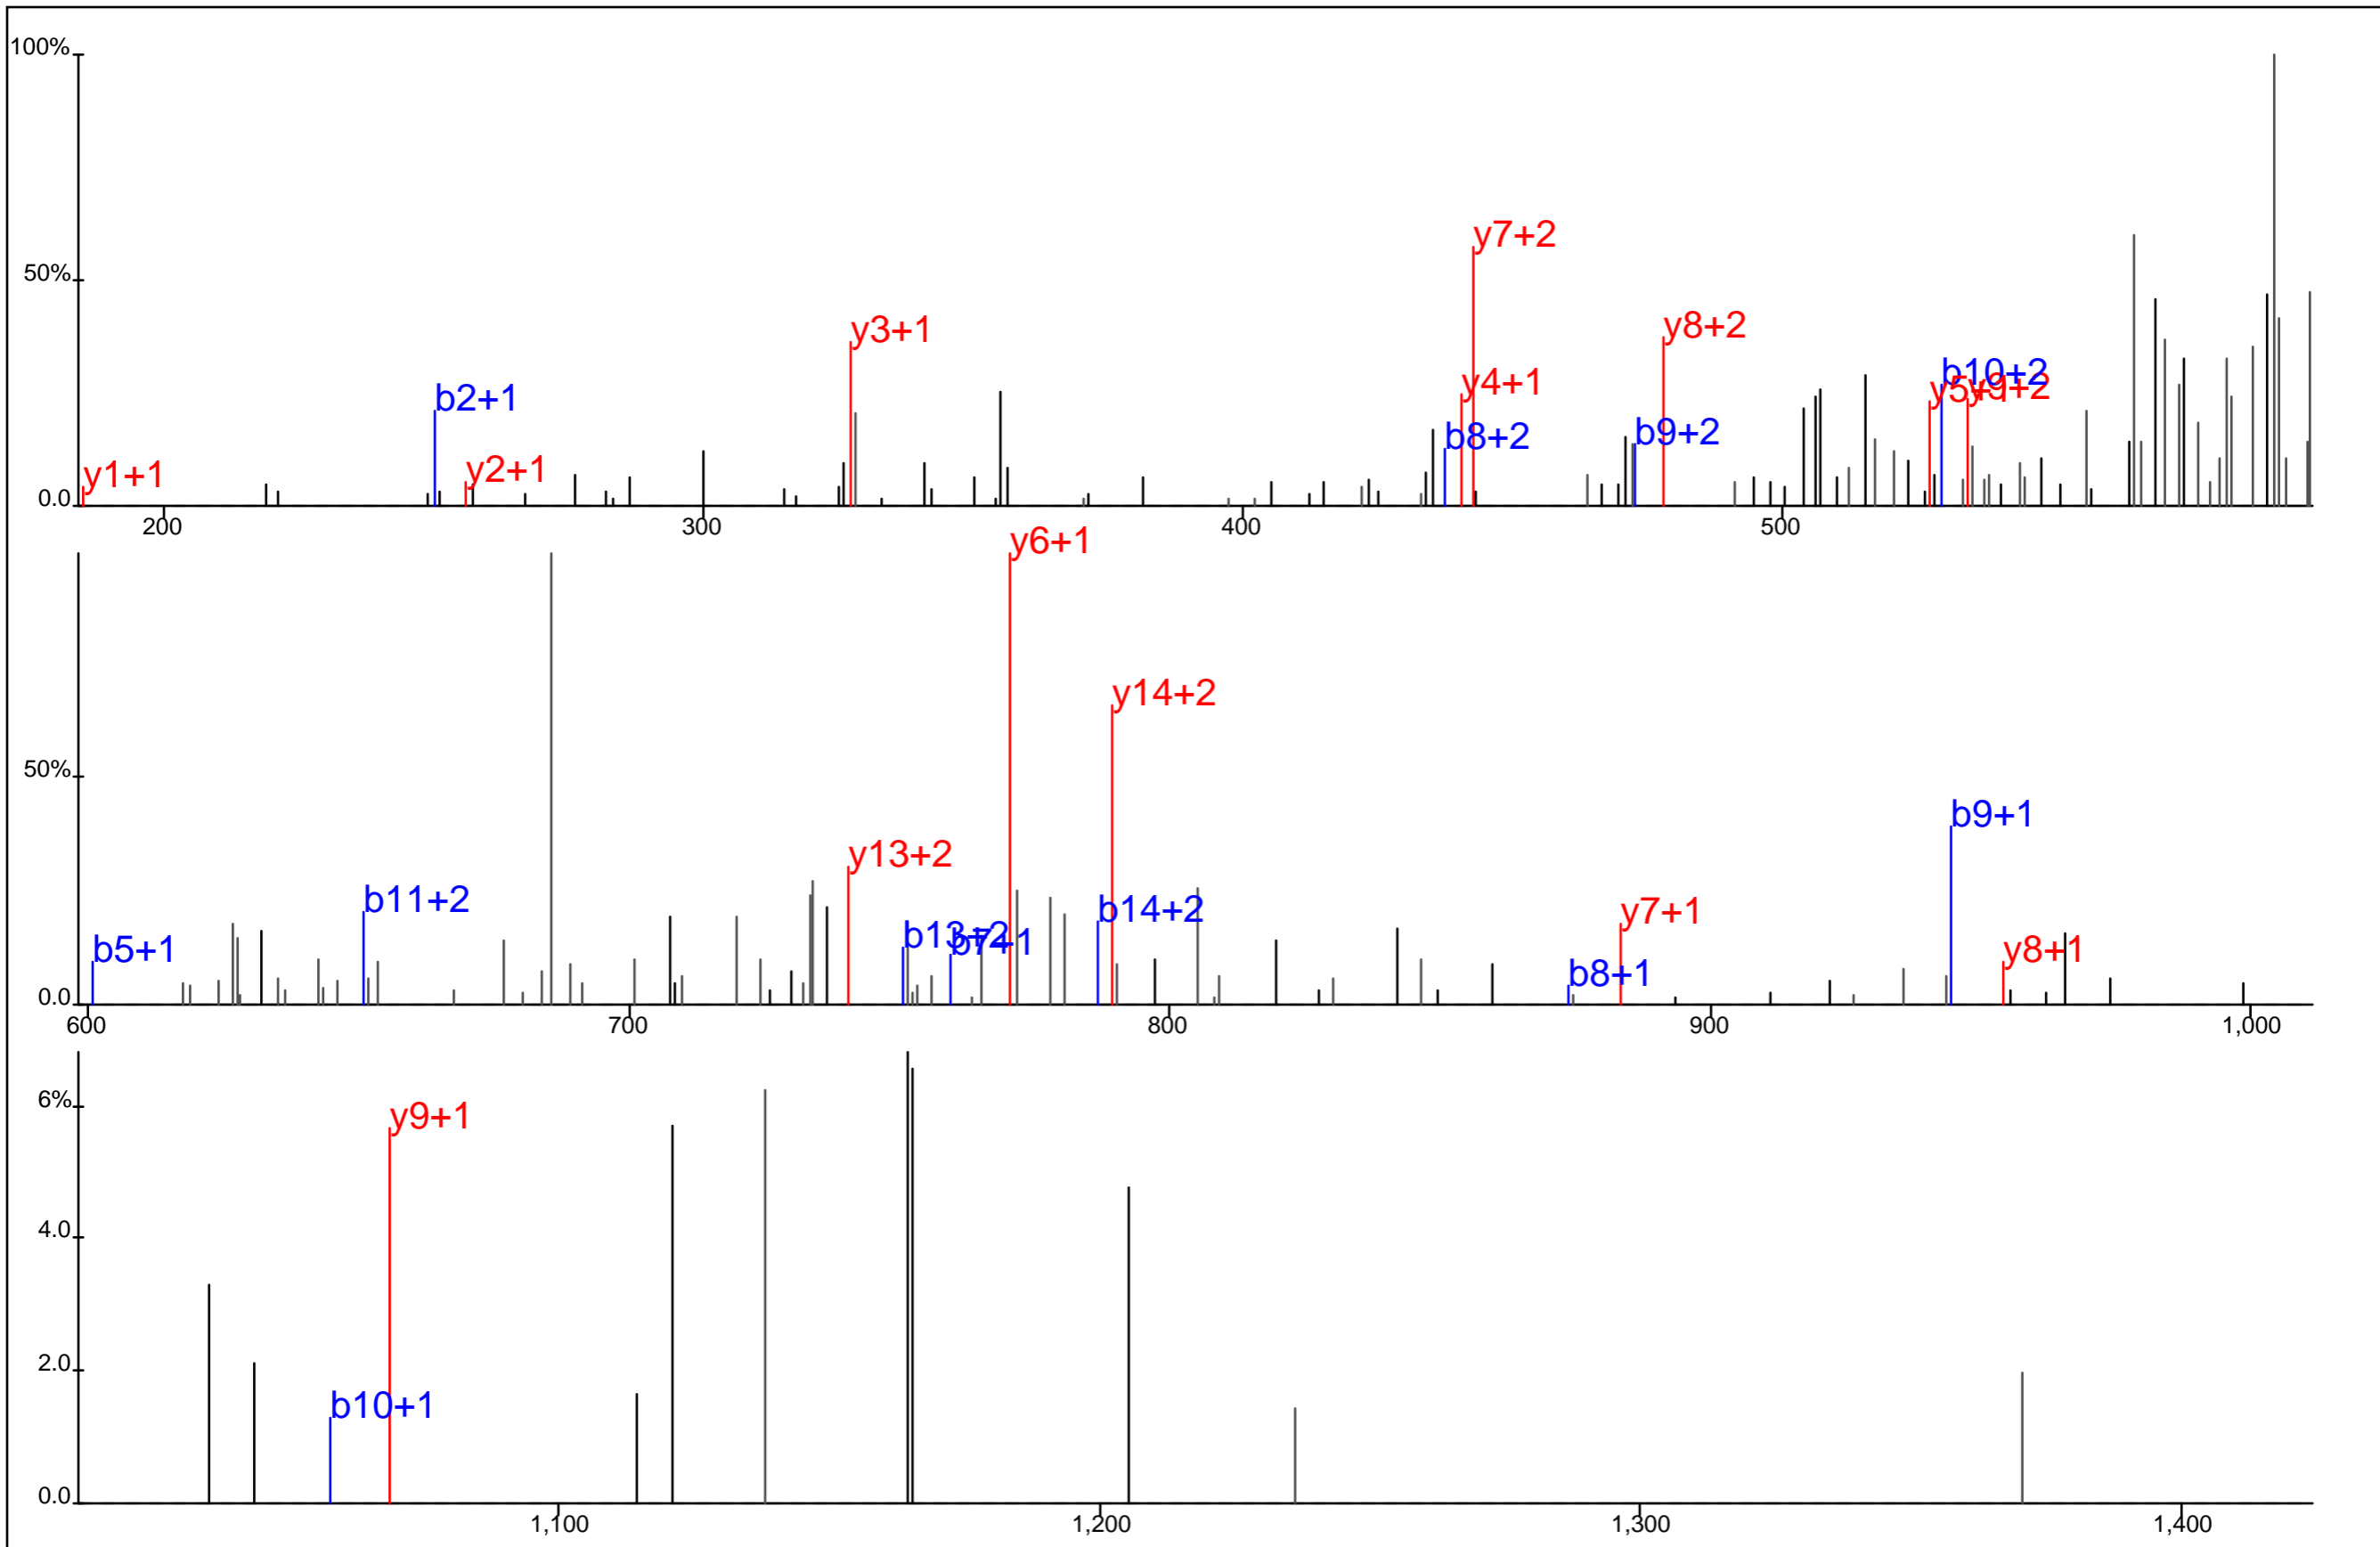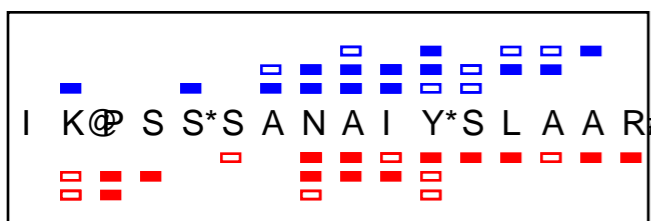

Protein Name: CBL  
 gi Accession: 115855  
 Precursor Mass: 609.6208+3  
 Delta Mass: 4.932 ppm  
 XCorr: 3.1716

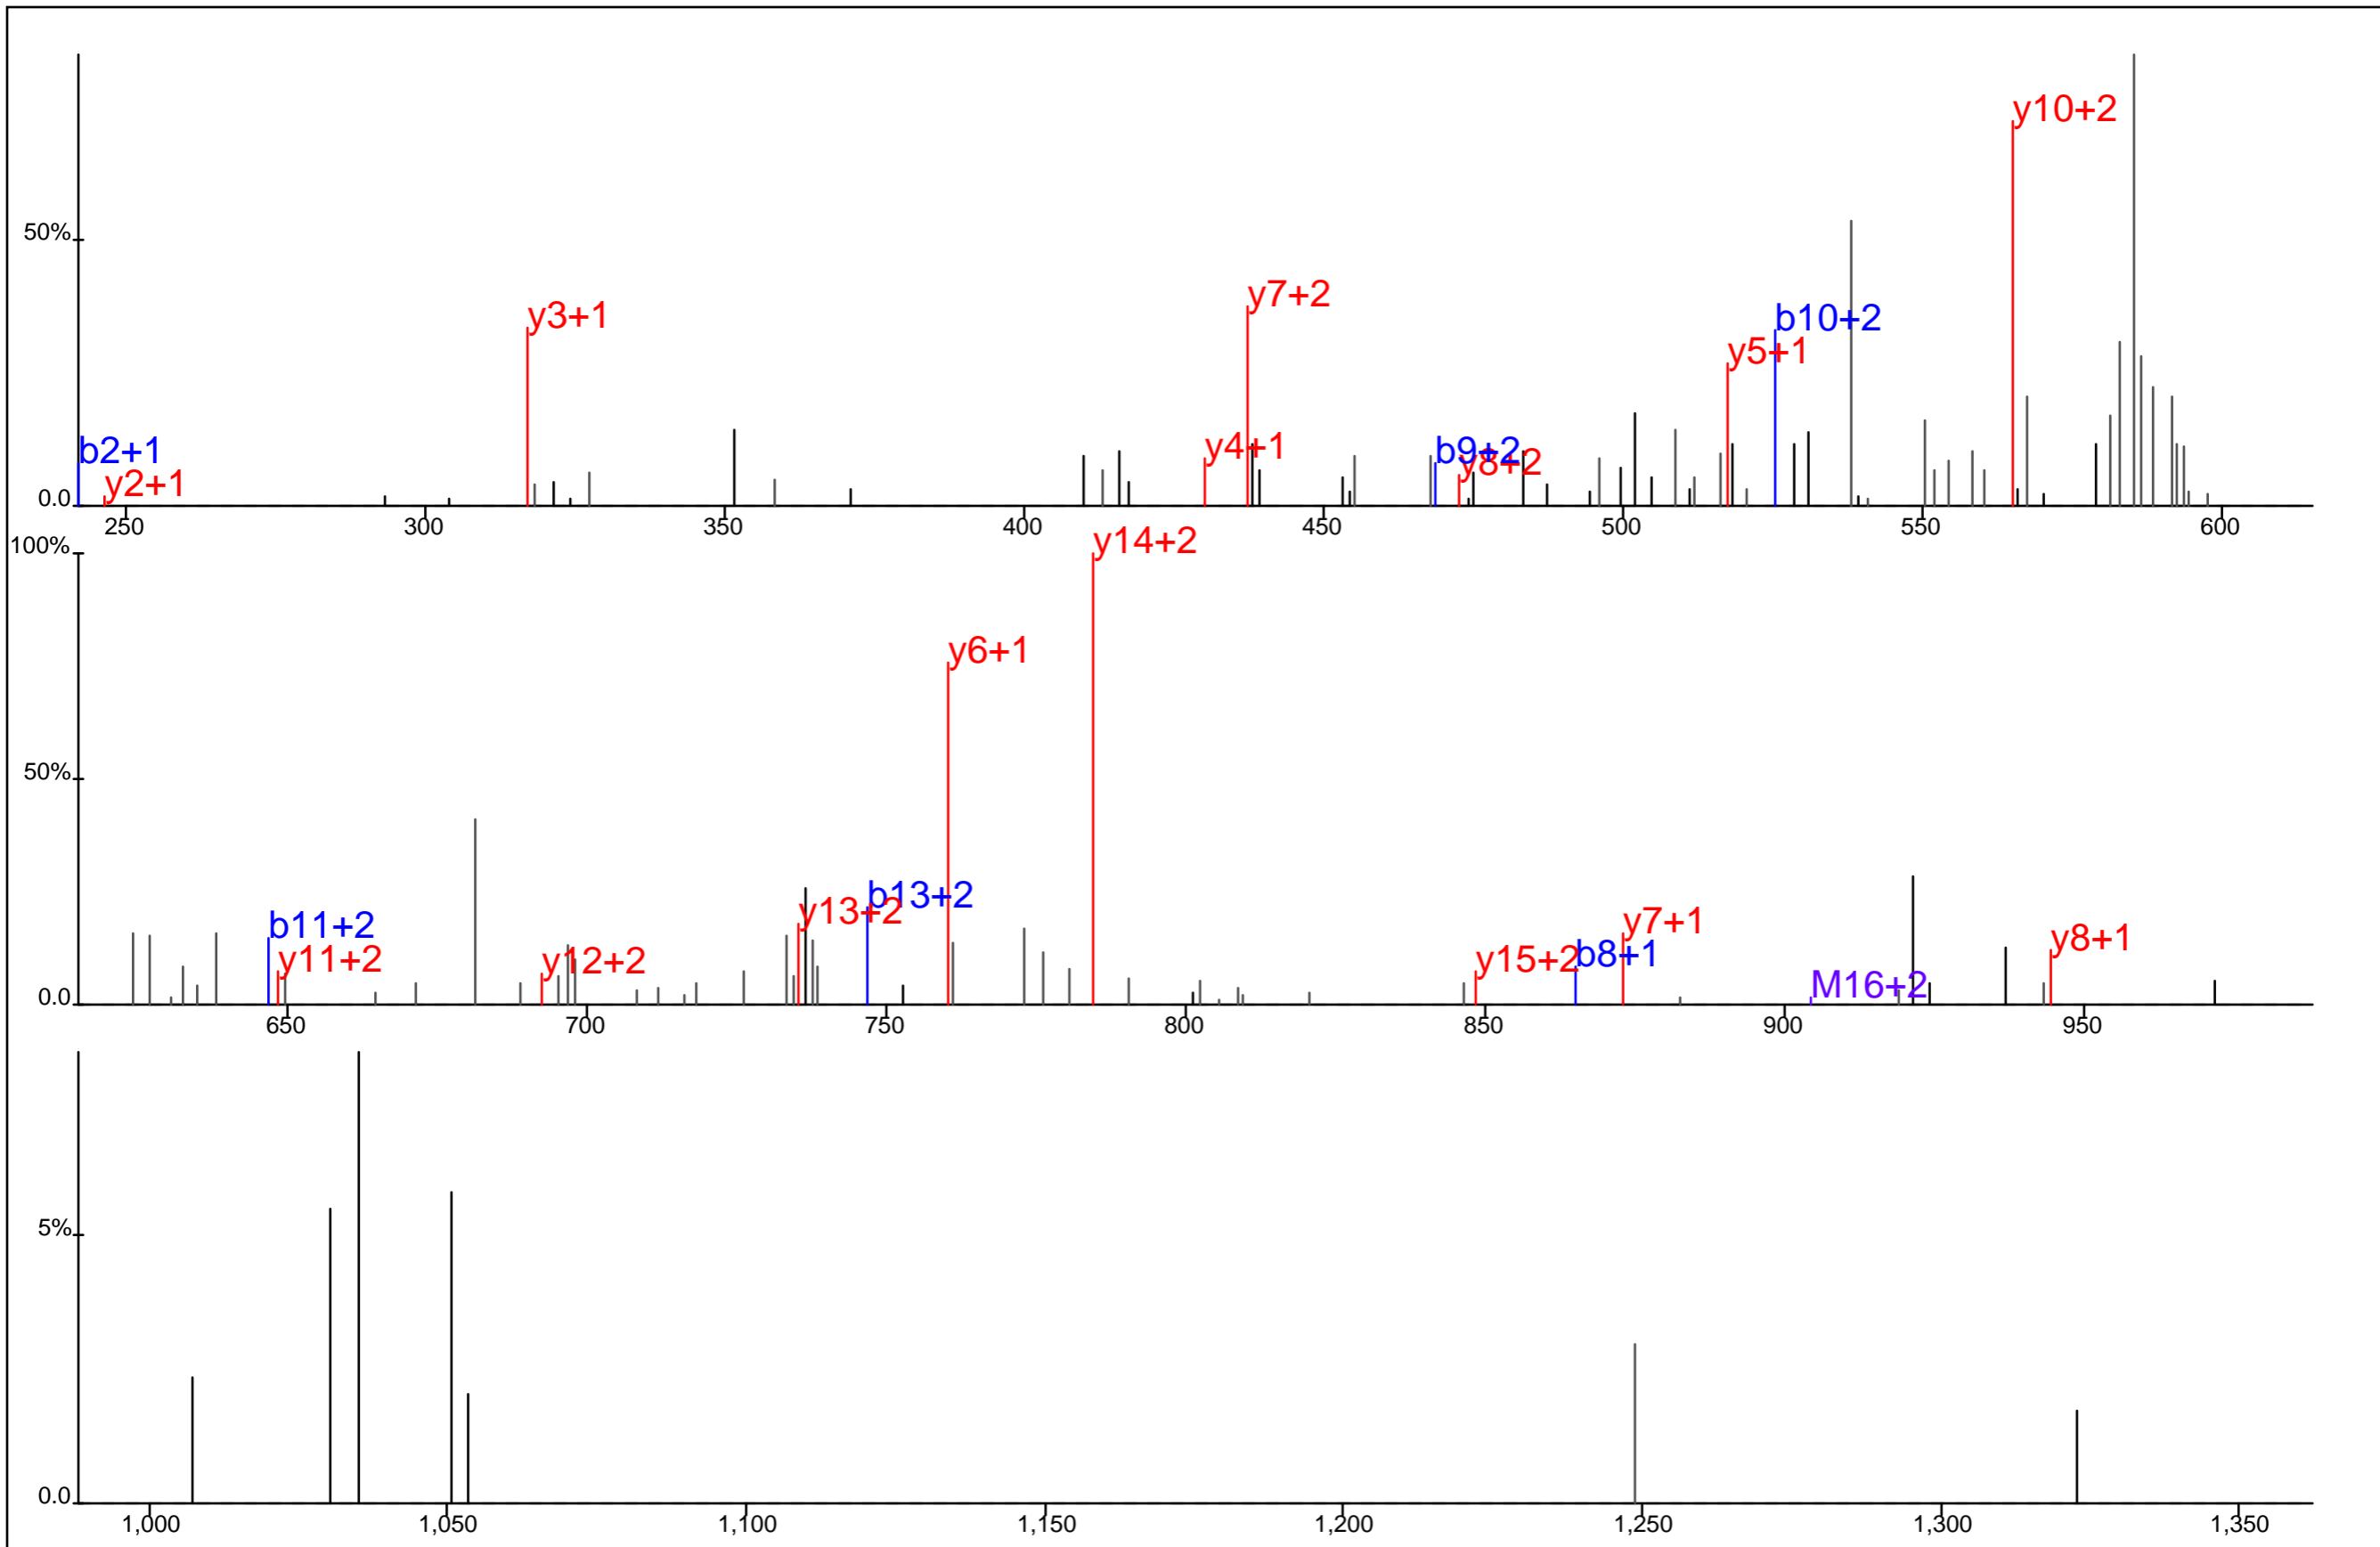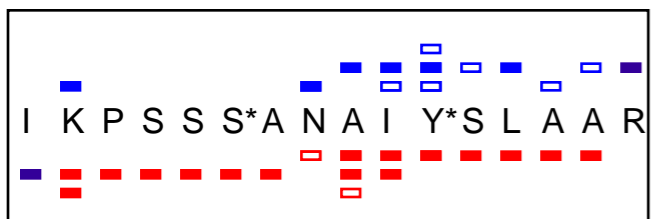

Protein Name: CBL  
 gi Accession: 115855  
 Precursor Mass: 603.6181+3  
 Delta Mass: 2.985 ppm  
 XCorr: 3.0468

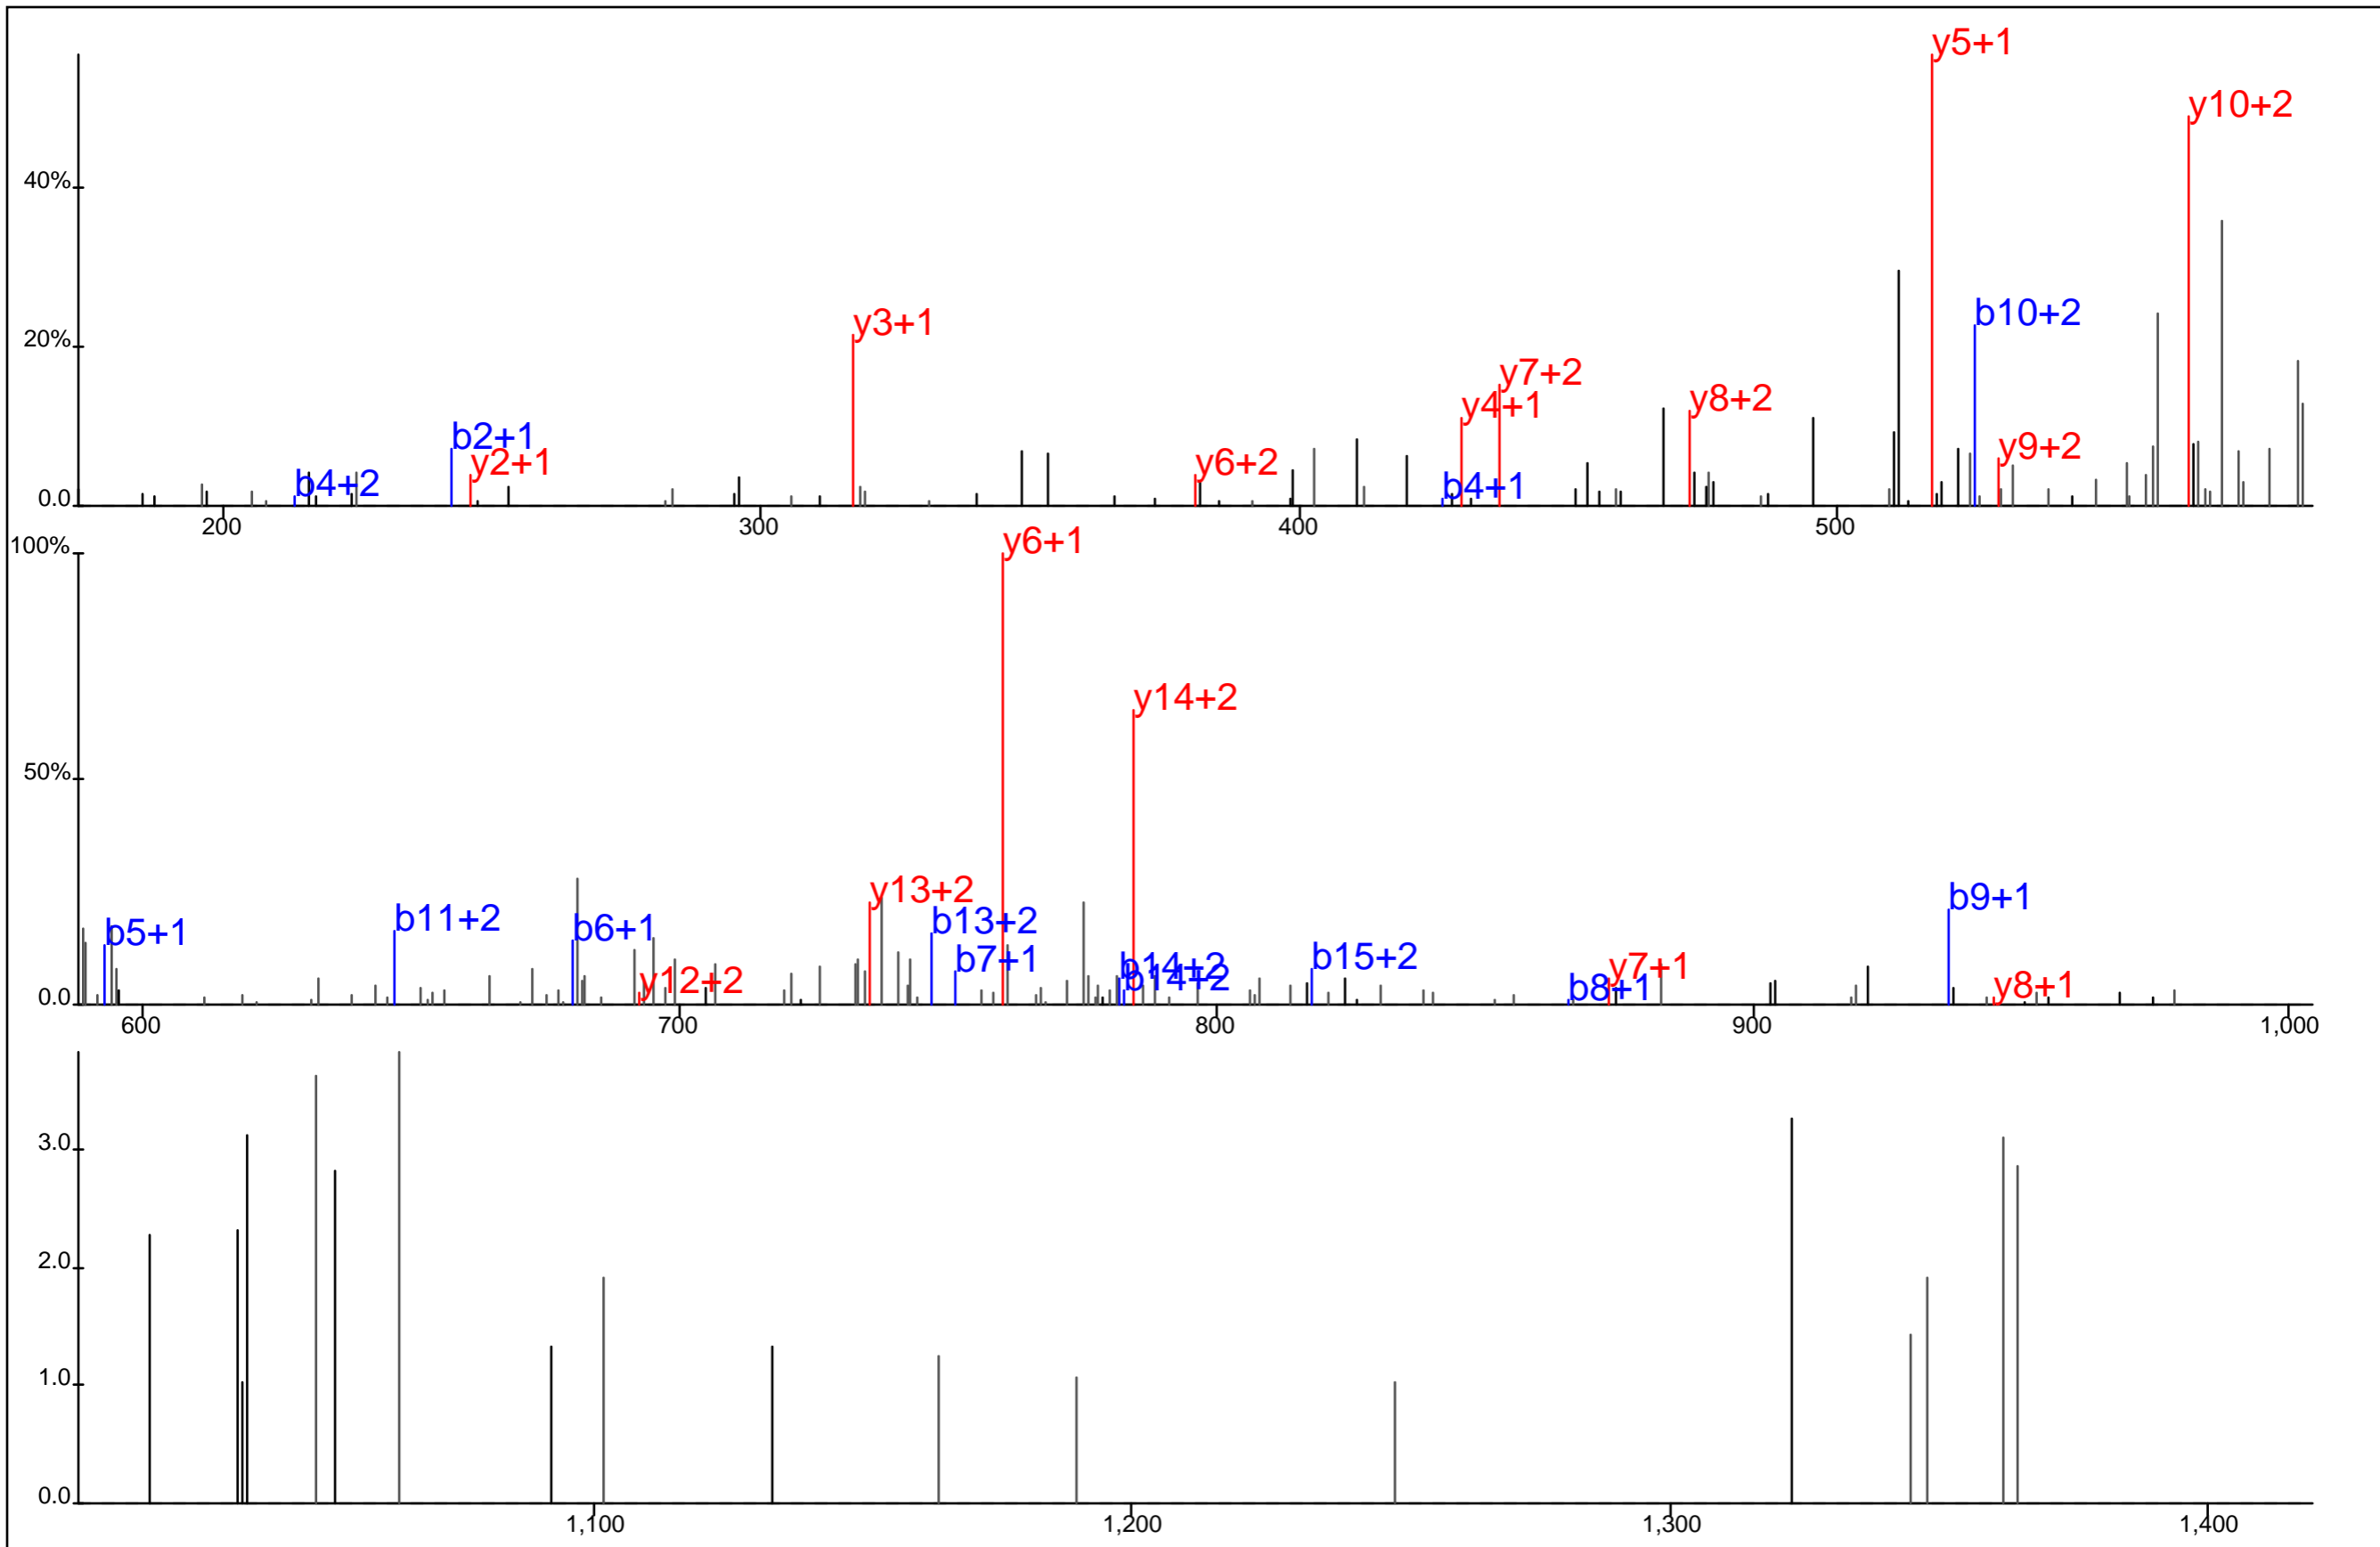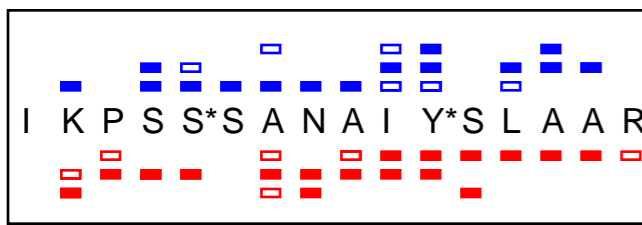

Protein Name: CBL  
 gi Accession: 115855  
 Precursor Mass: 603.6175+3  
 Delta Mass: 1.968 ppm  
 XCorr: 3.6091



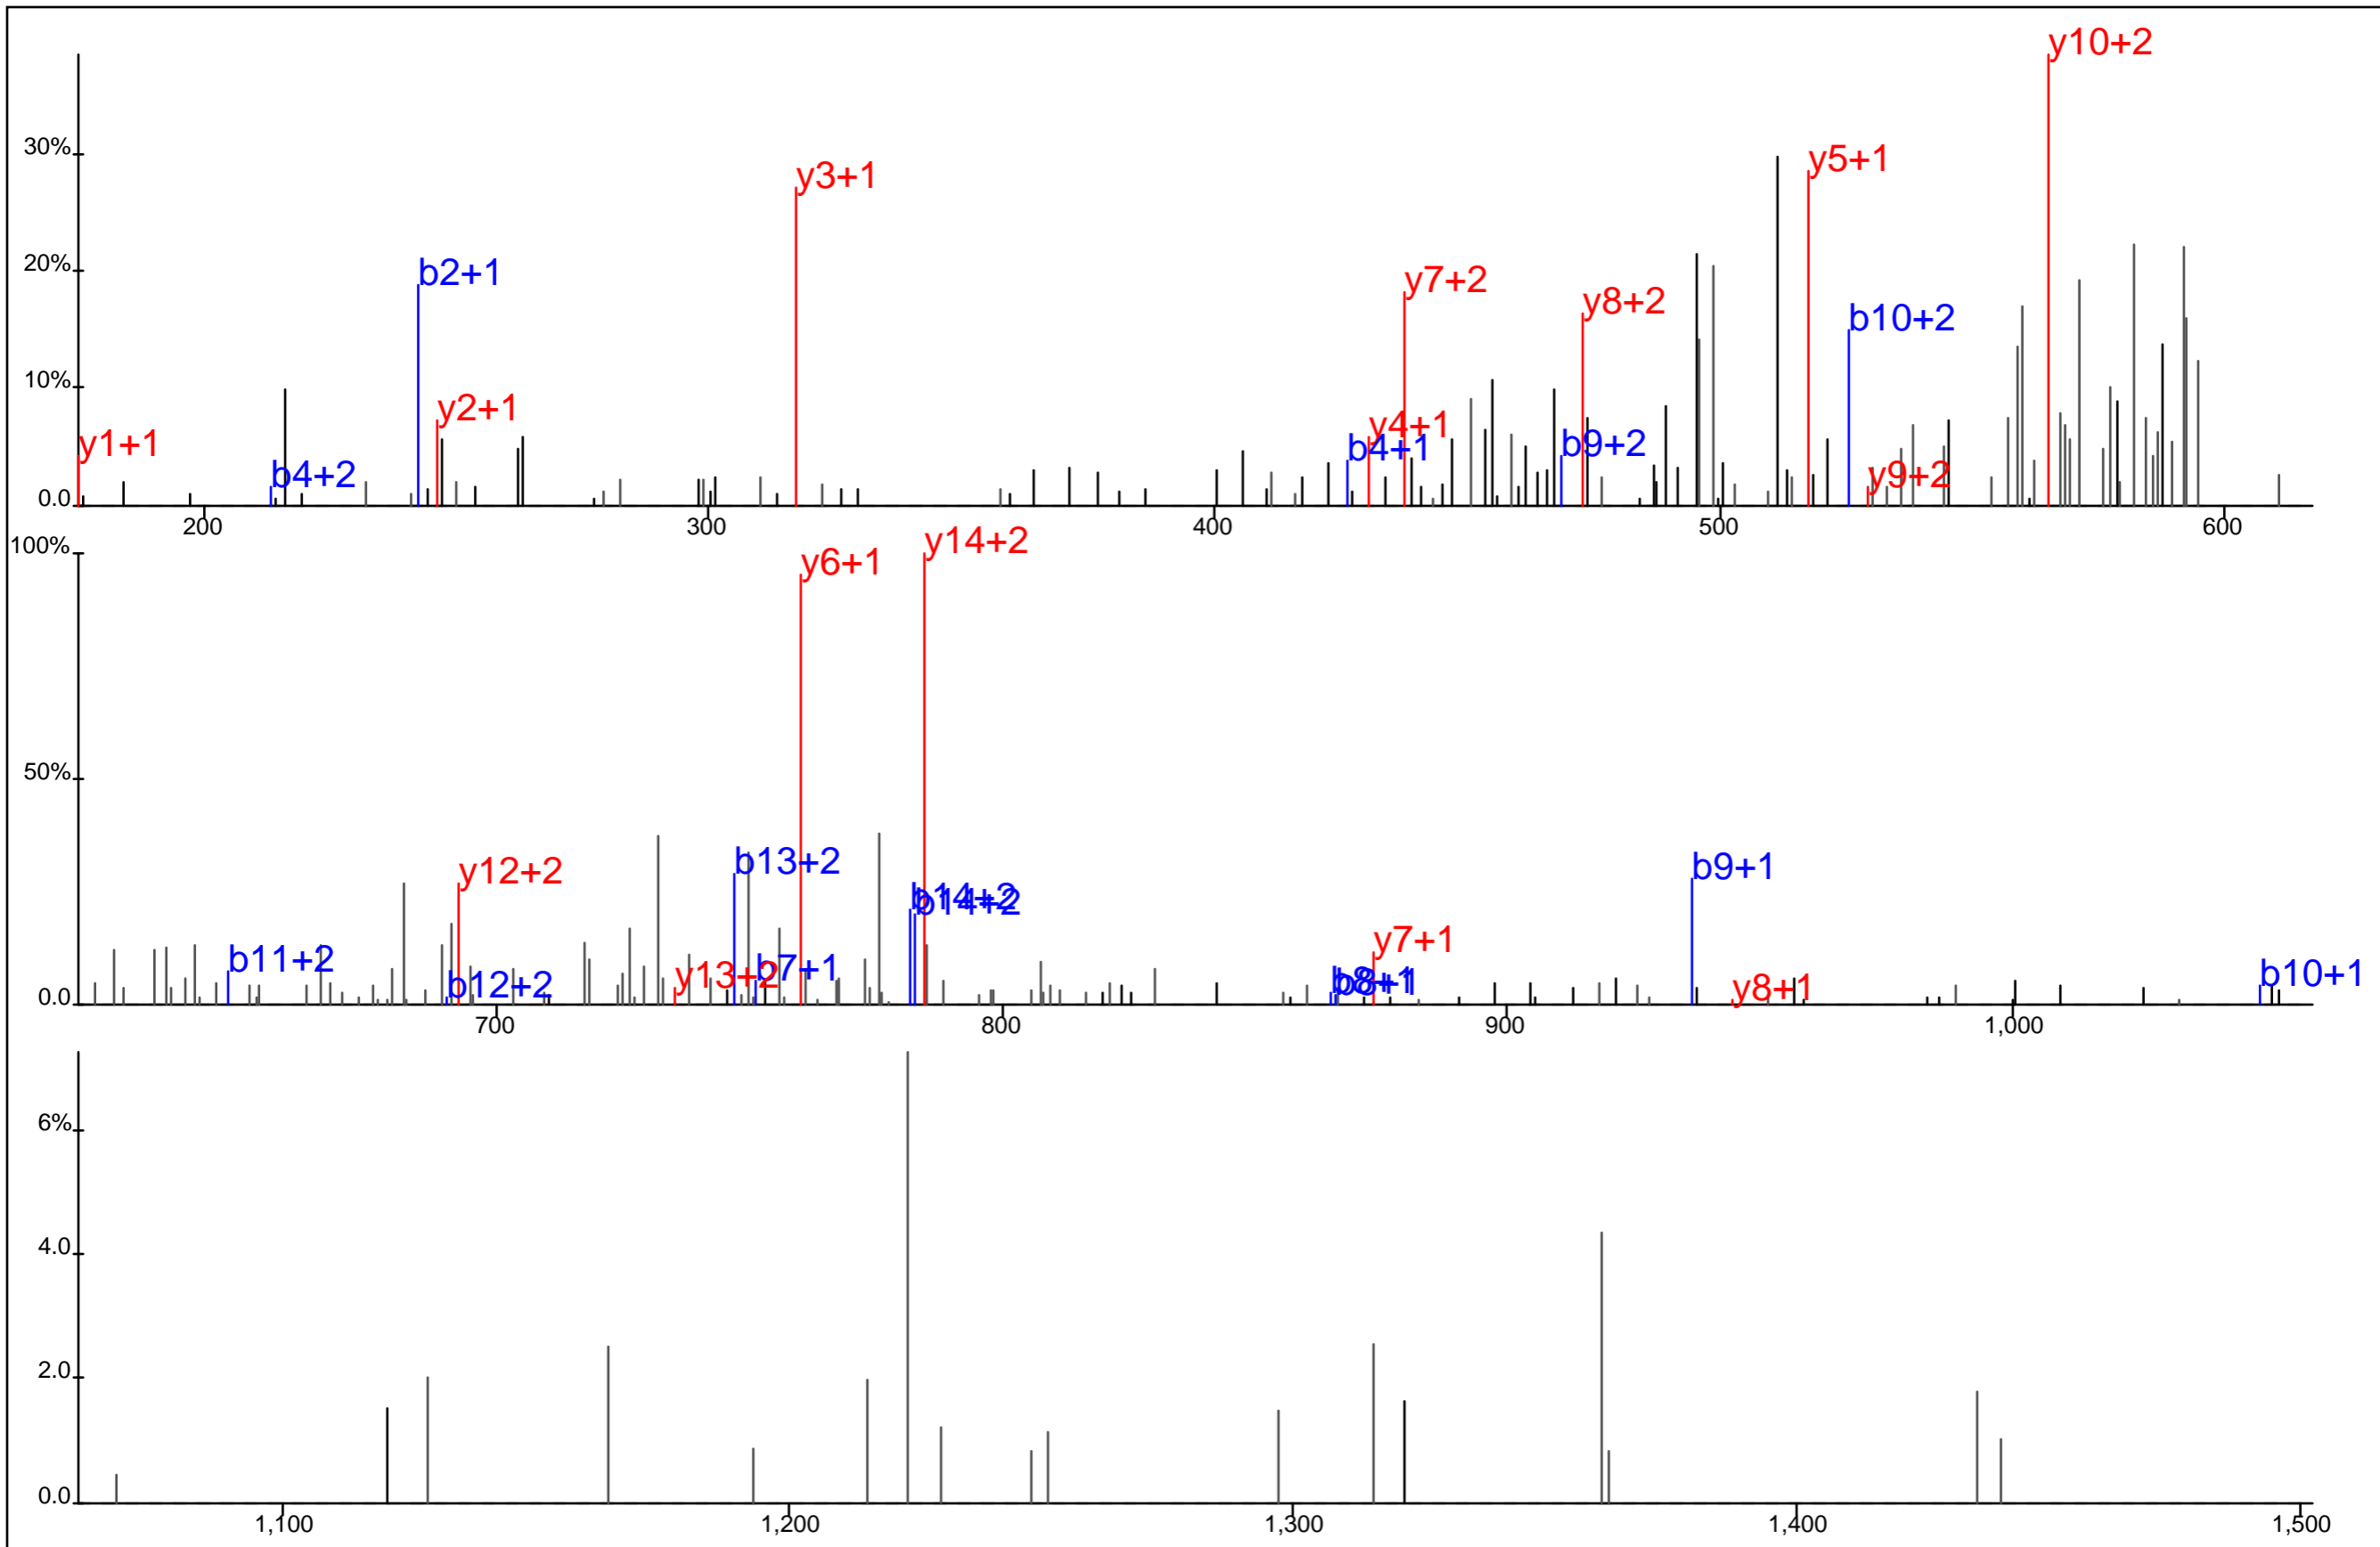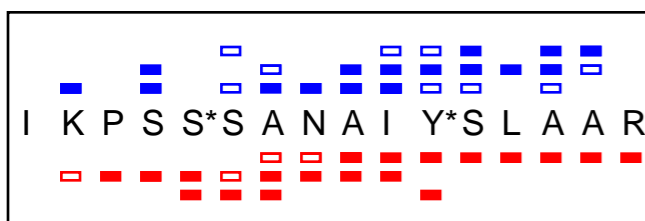

Protein Name: CBL  
 gi Accession: 115855  
 Precursor Mass: 603.6166+3  
 Delta Mass: 0.553 ppm  
 XCorr: 3.0698

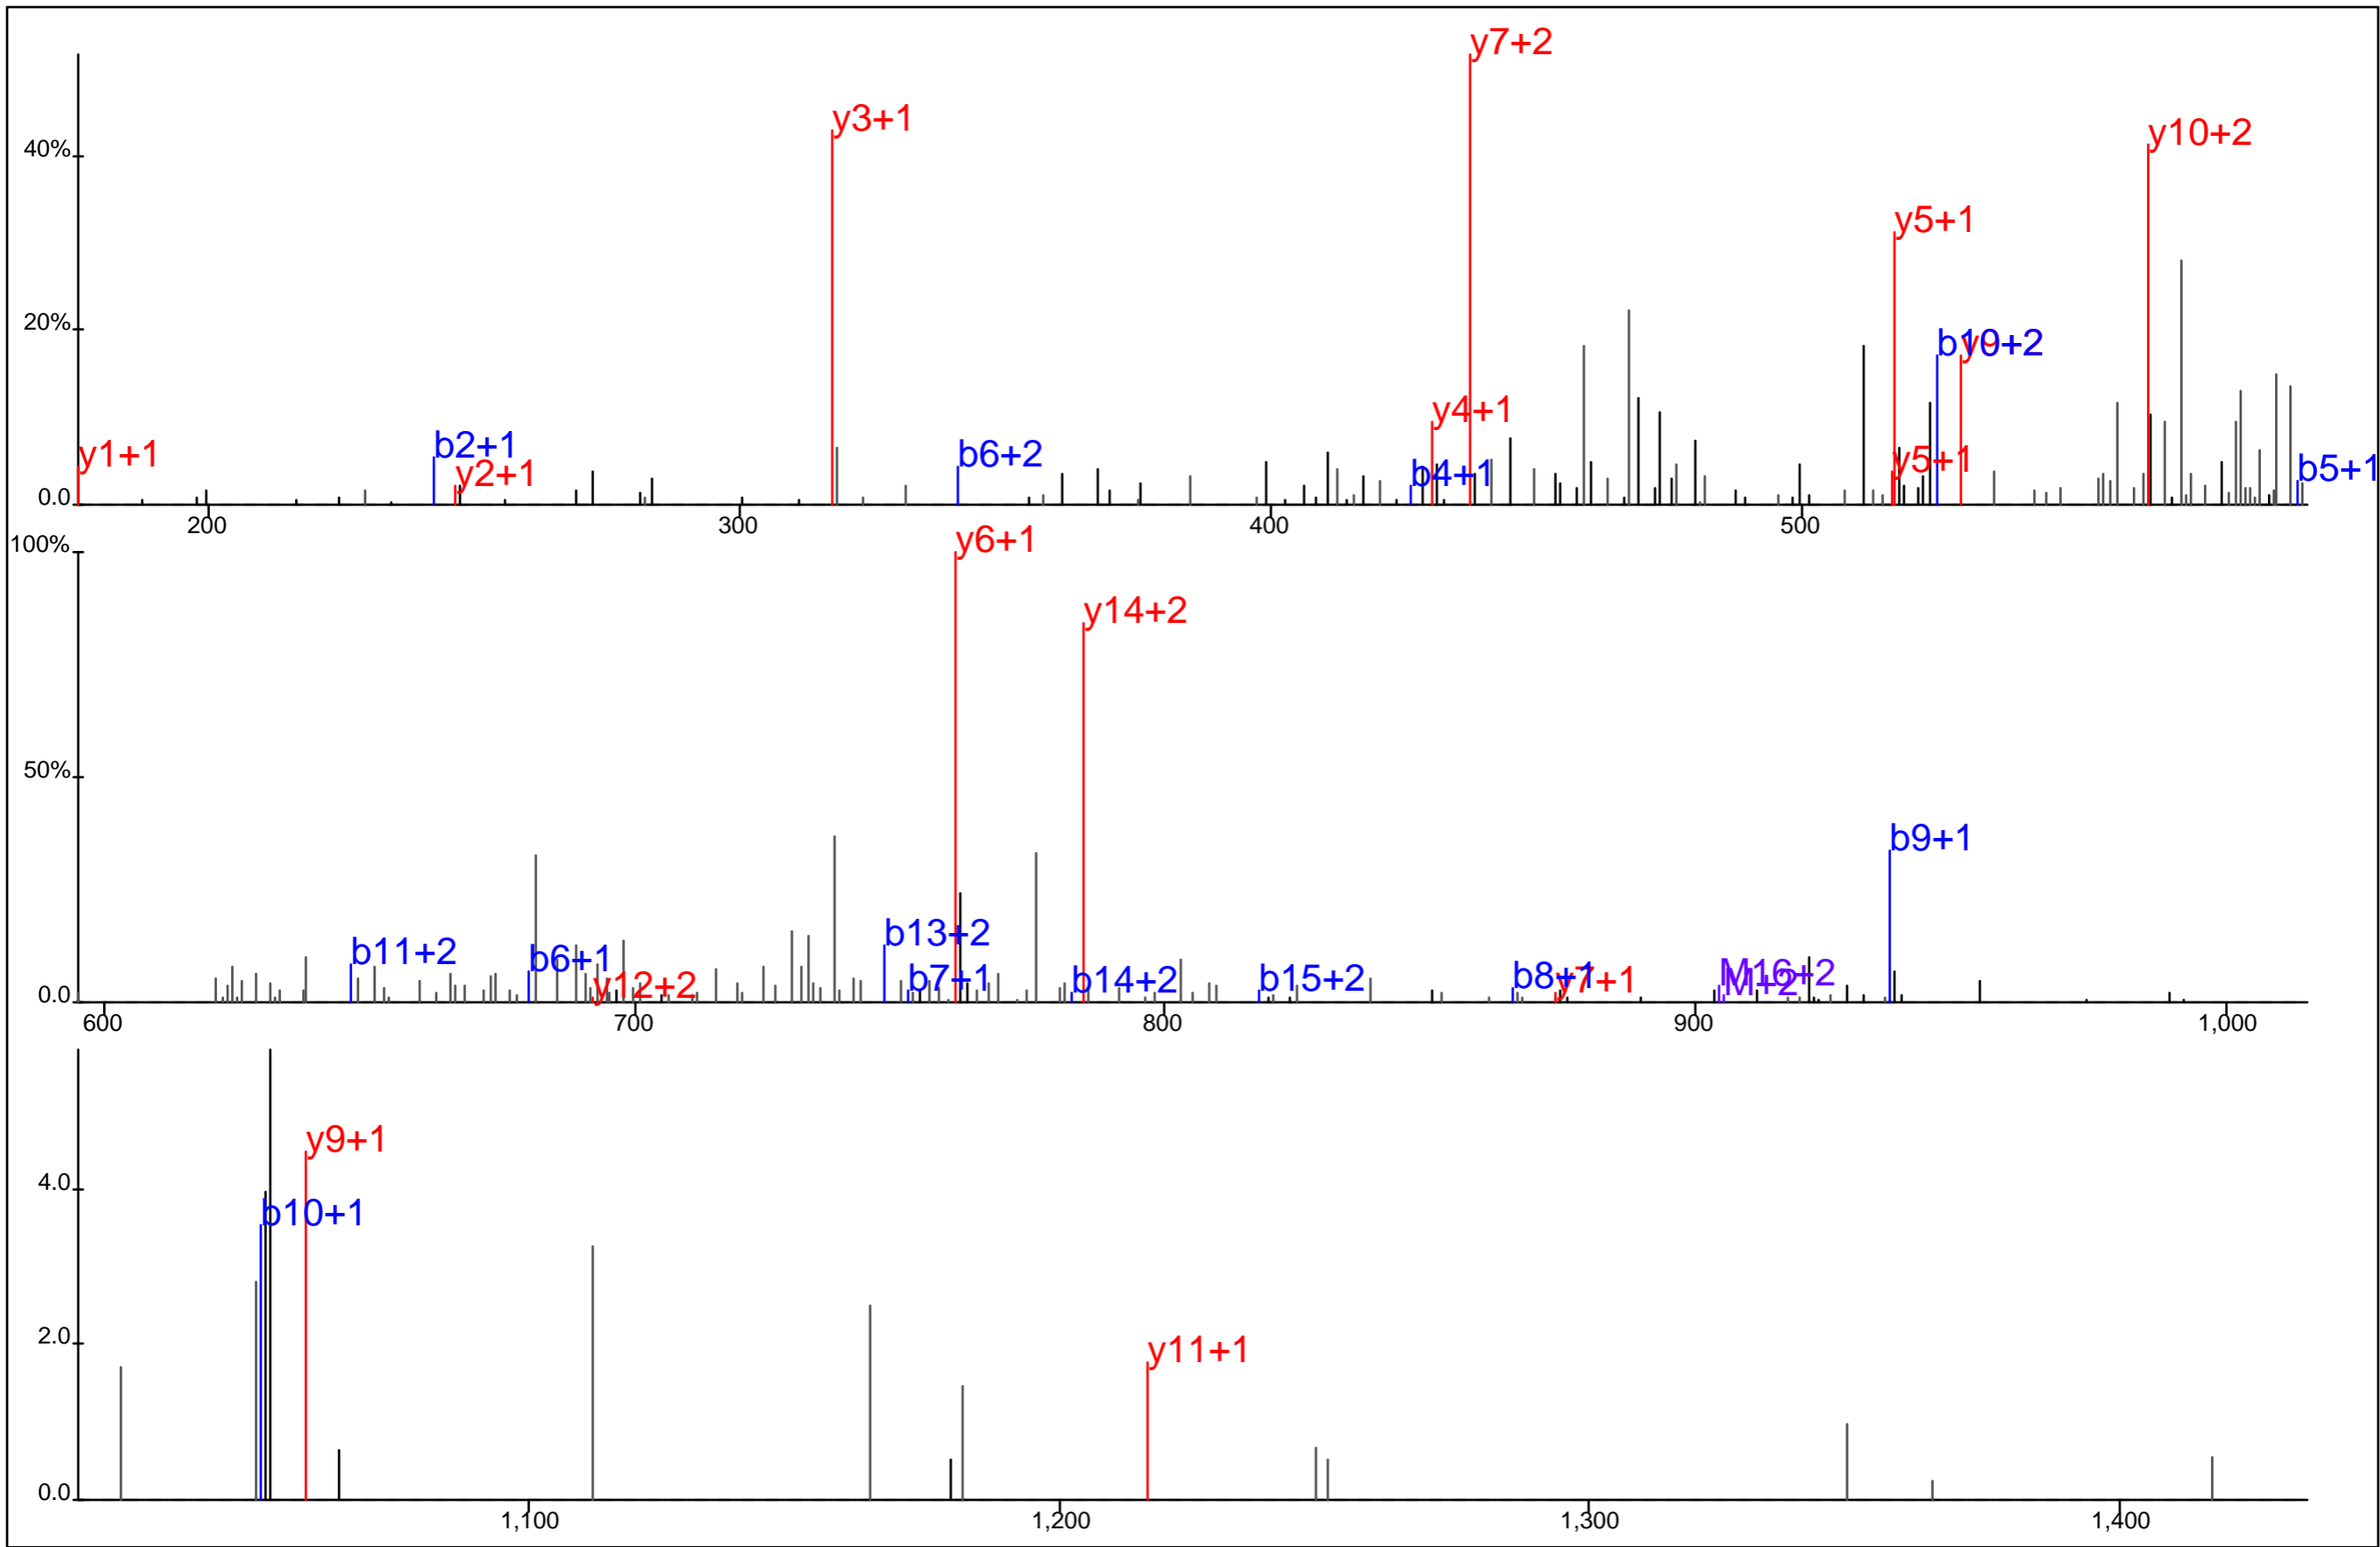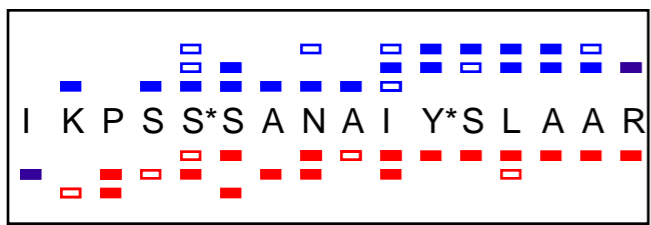

Protein Name: CBL  
 gi Accession: 115855  
 Precursor Mass: 603.6179+3  
 Delta Mass: 2.681 ppm  
 XCorr: 3.7373

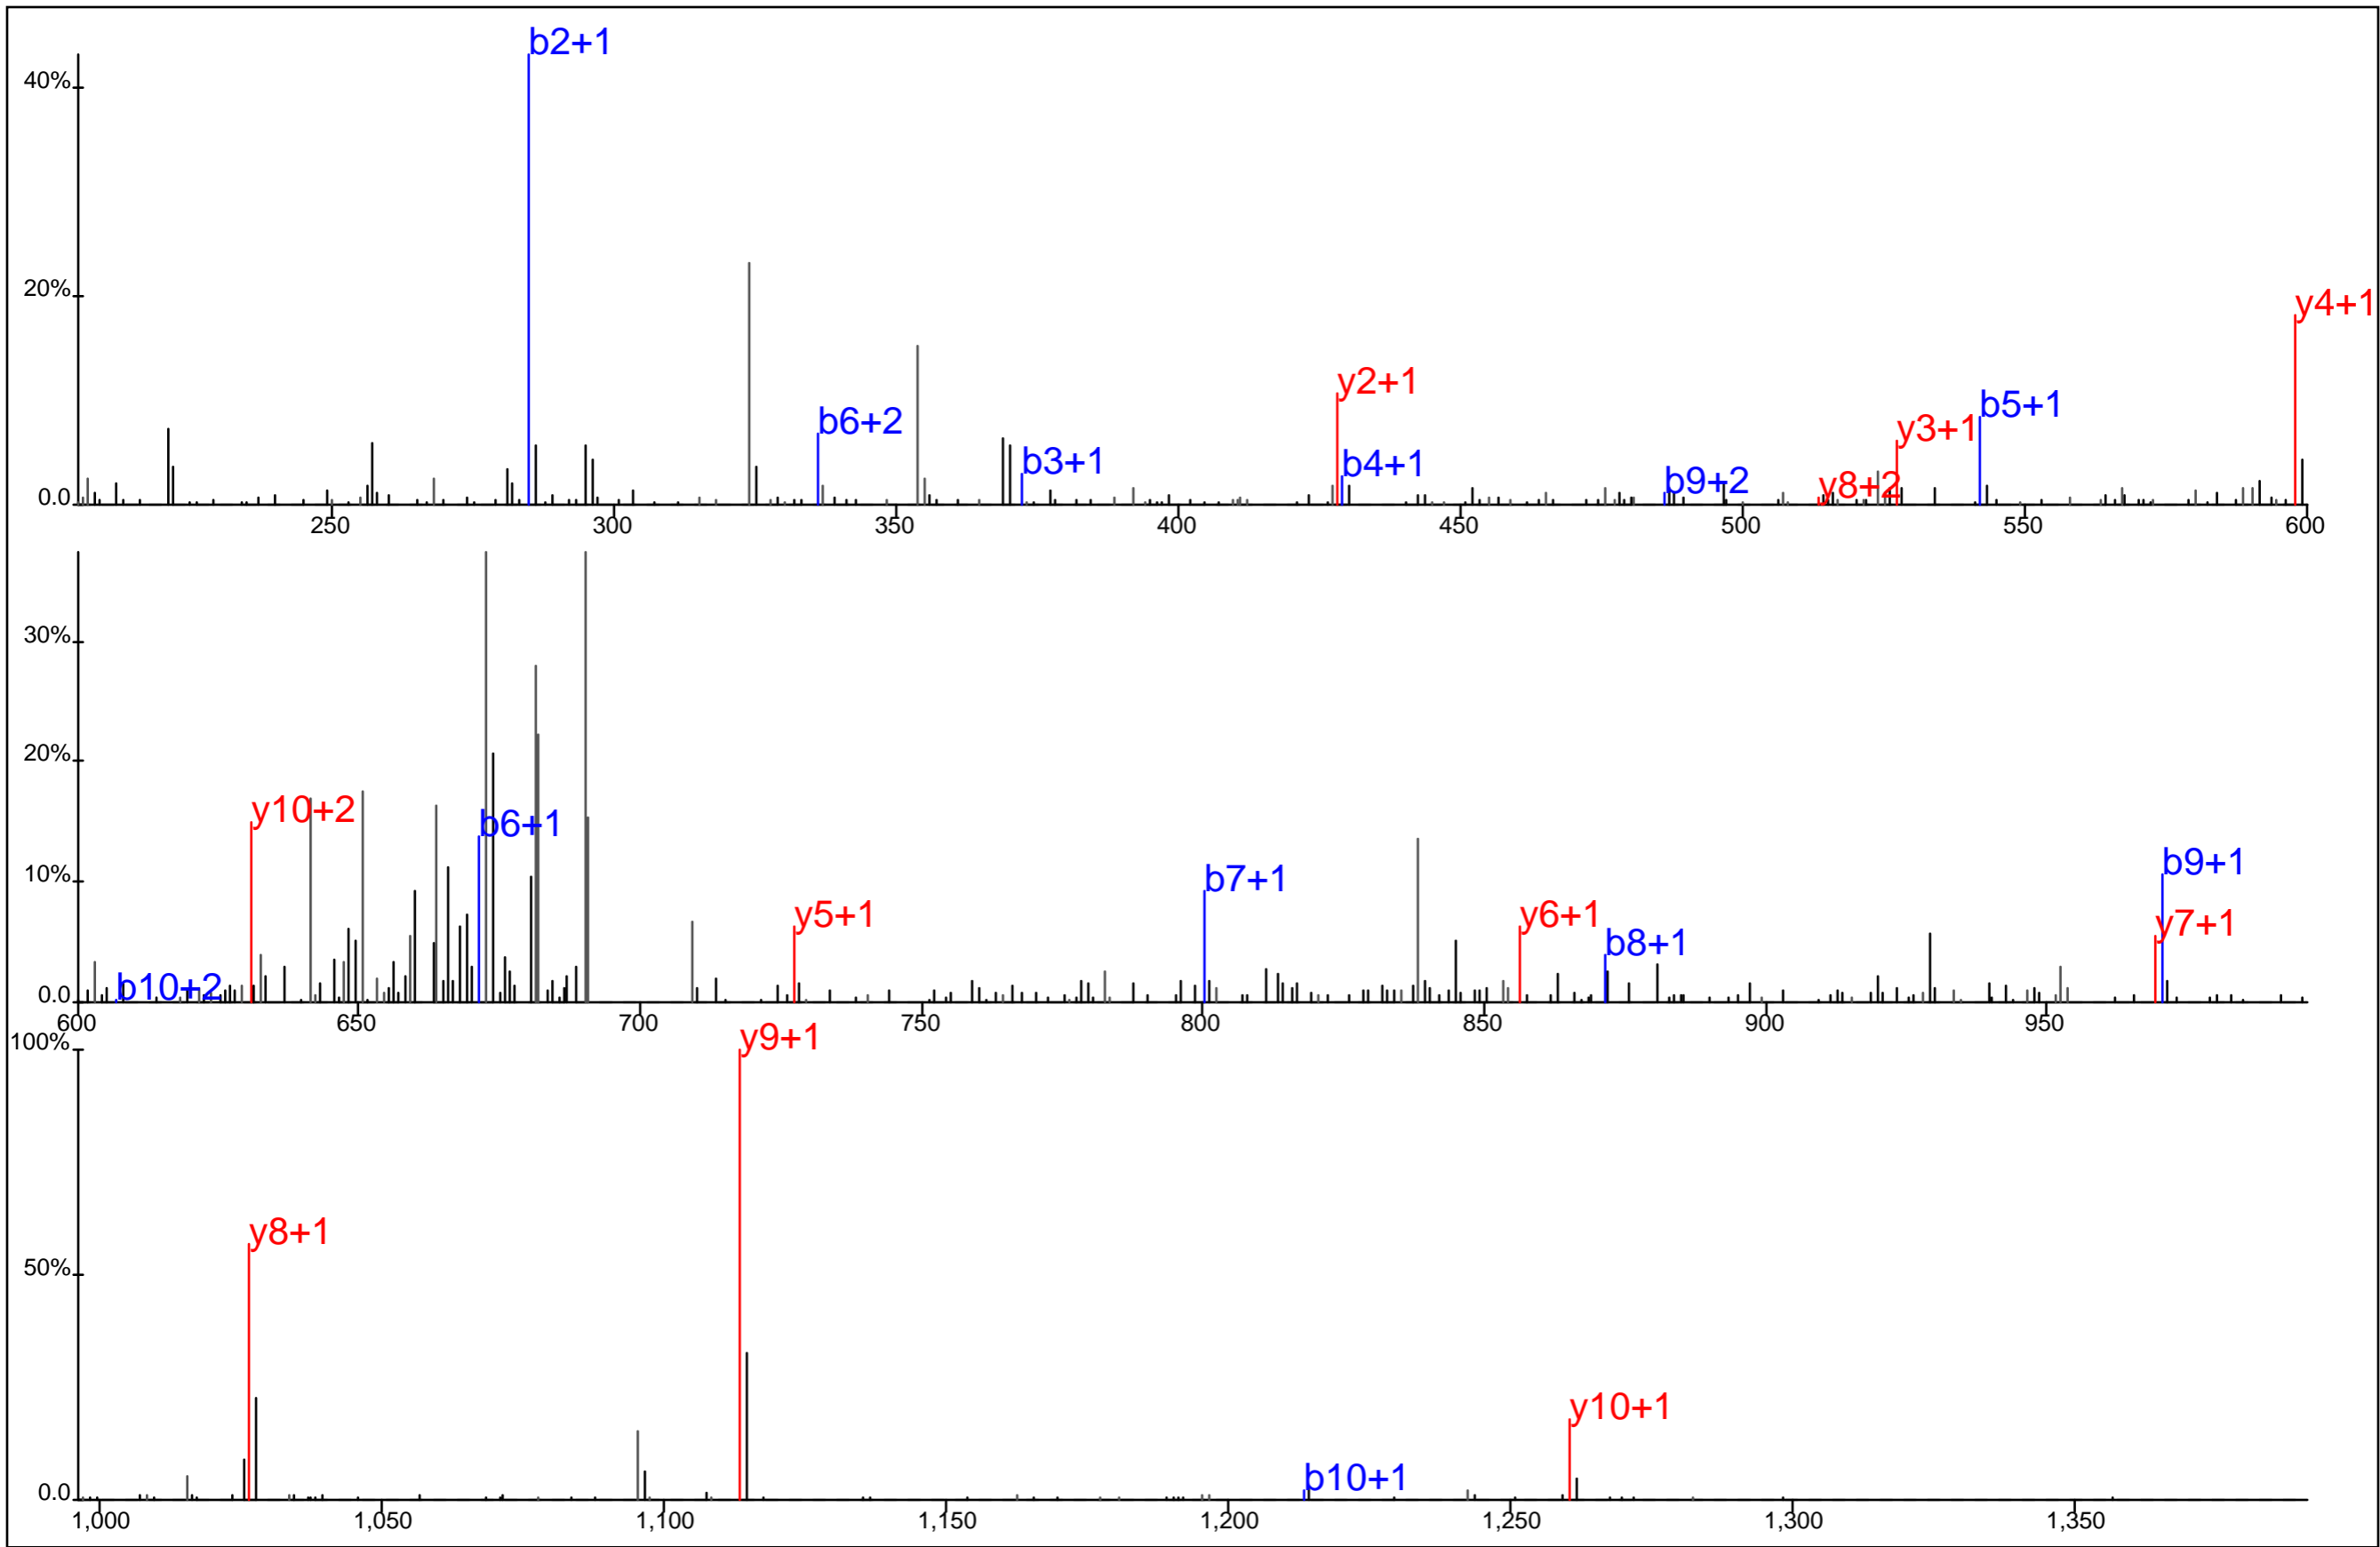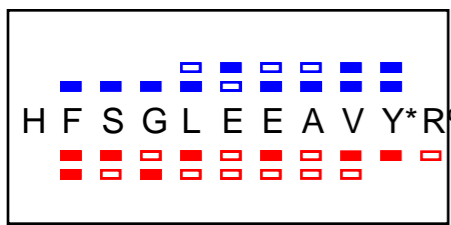

Protein Name: CCT8  
 gi Accession: 48762932  
 Precursor Mass: 699.3123+2  
 Delta Mass: 3.426 ppm  
 XCorr: 60.15

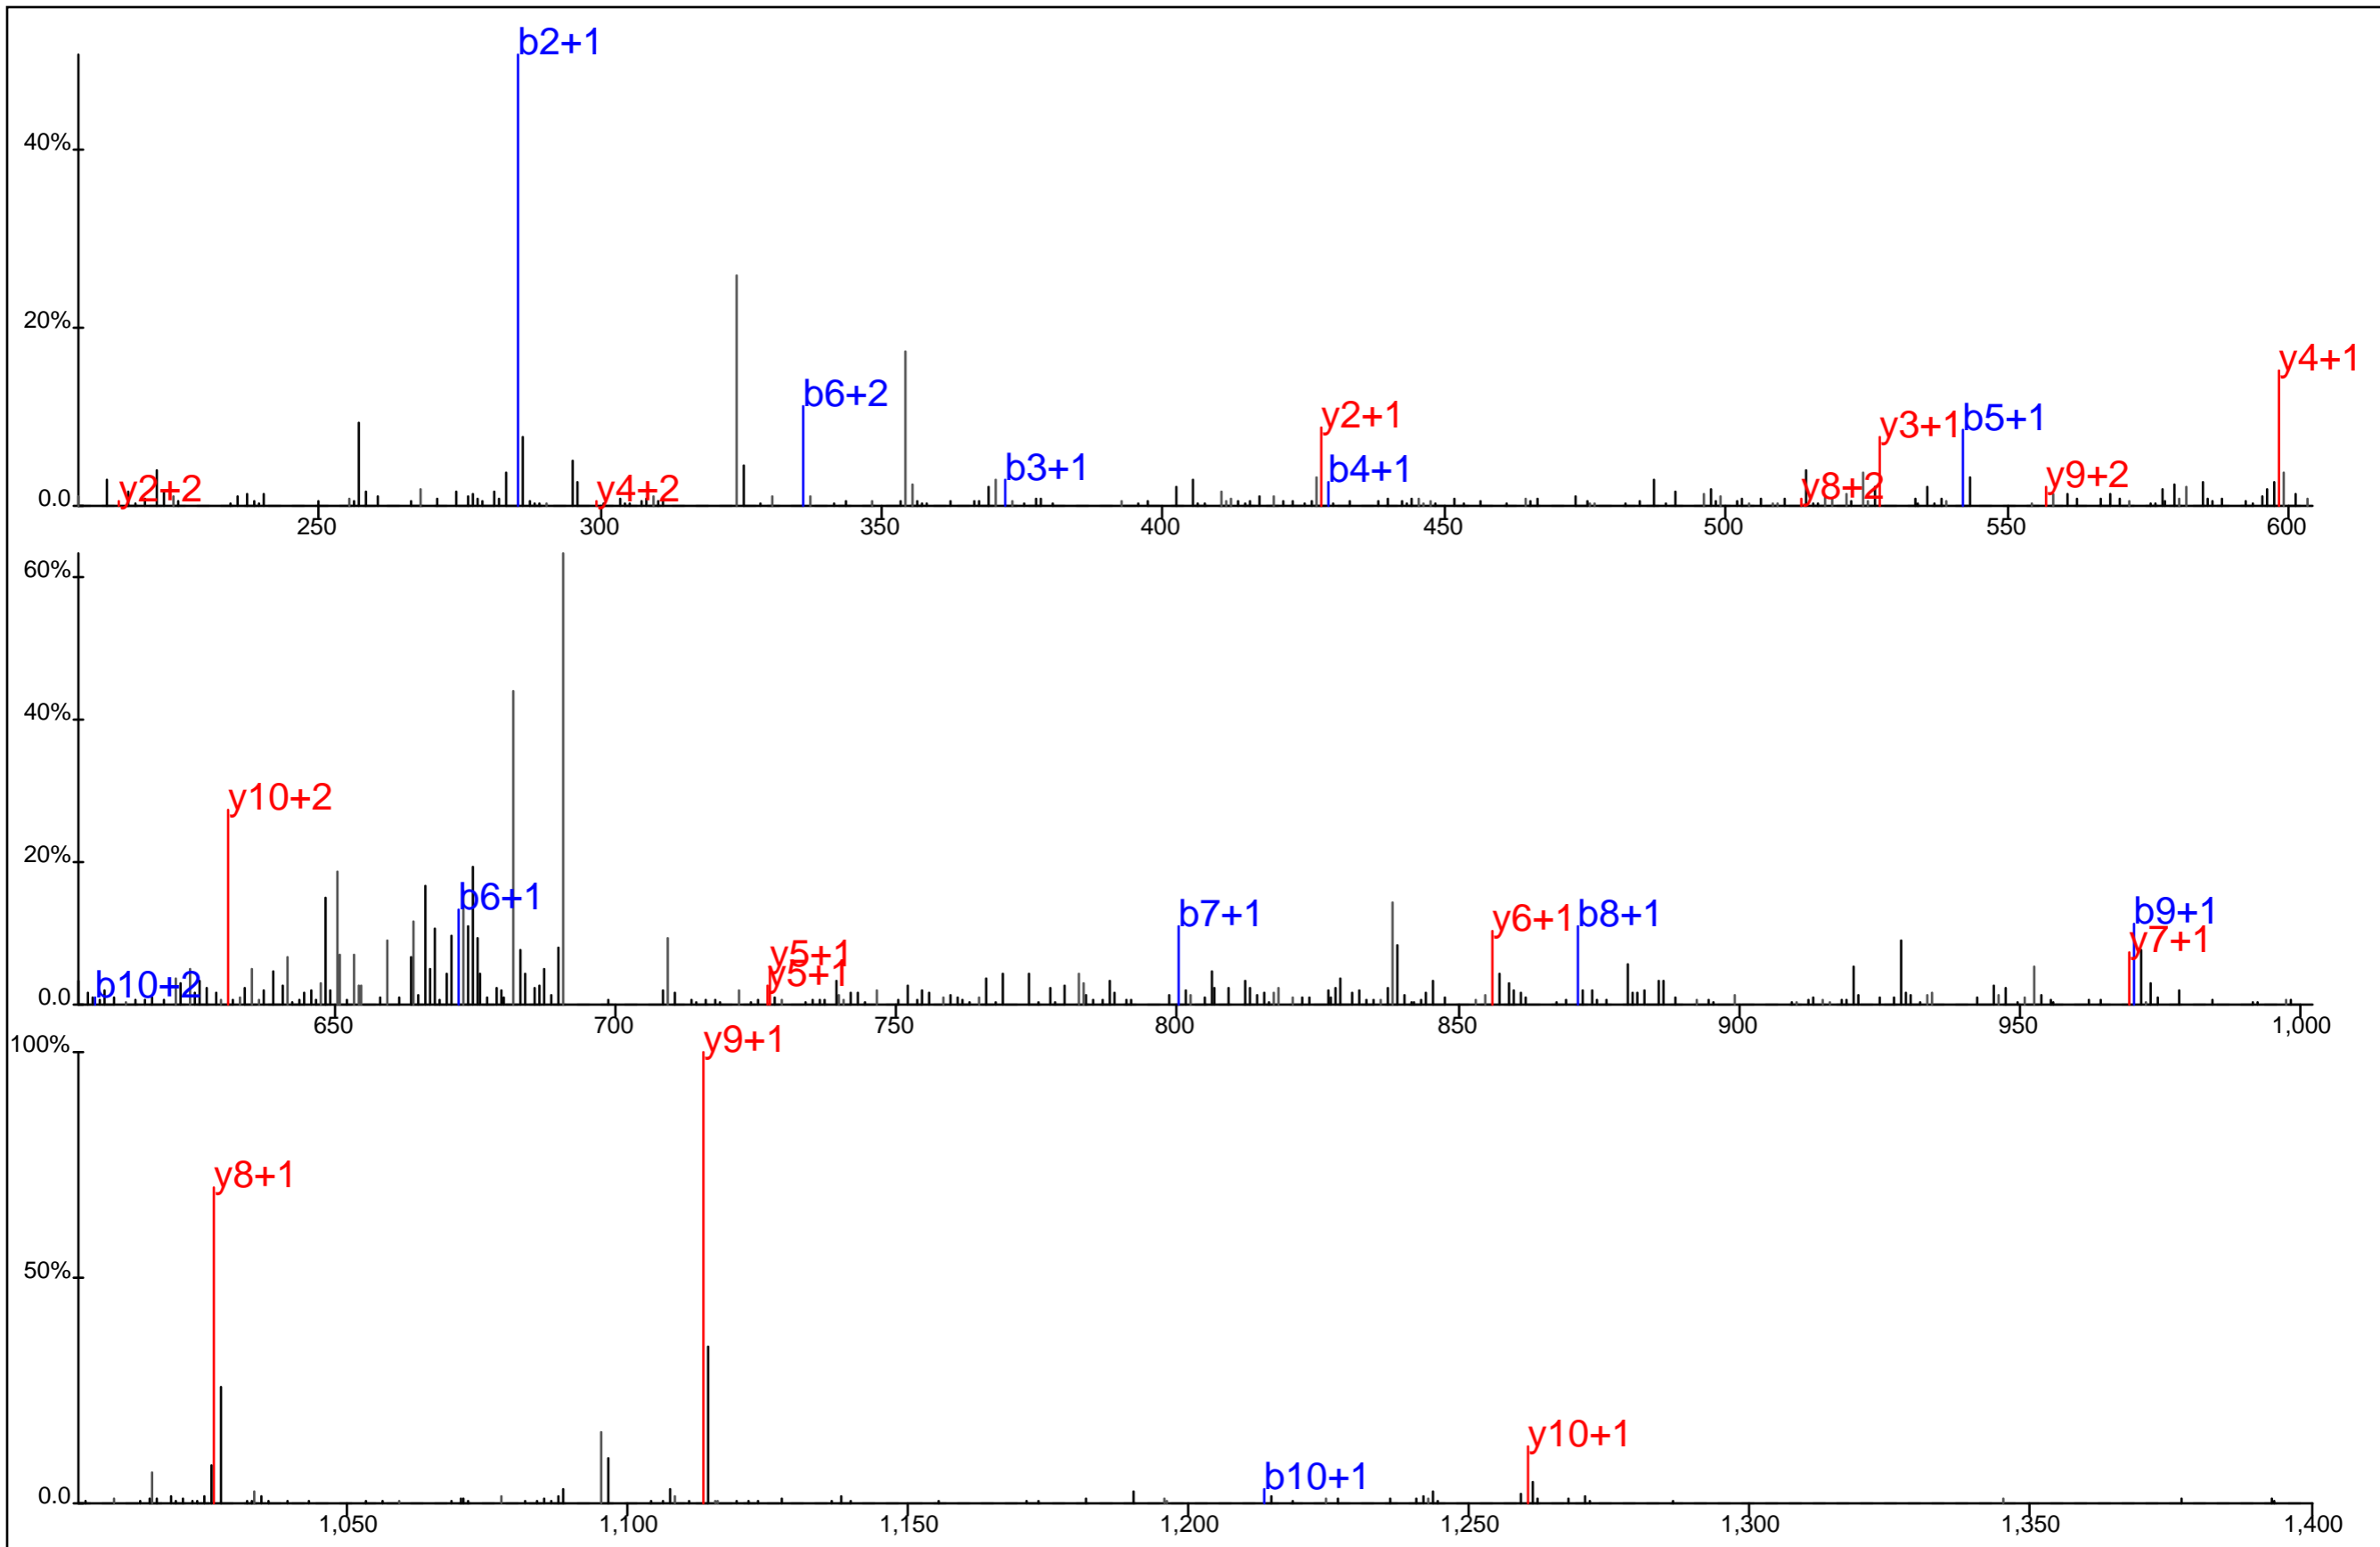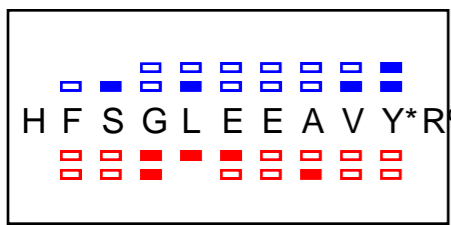

Protein Name: CCT8  
 gi Accession: 48762932  
 Precursor Mass: 699.3113+2  
 Delta Mass: 2.109 ppm  
 XCorr: 54.61

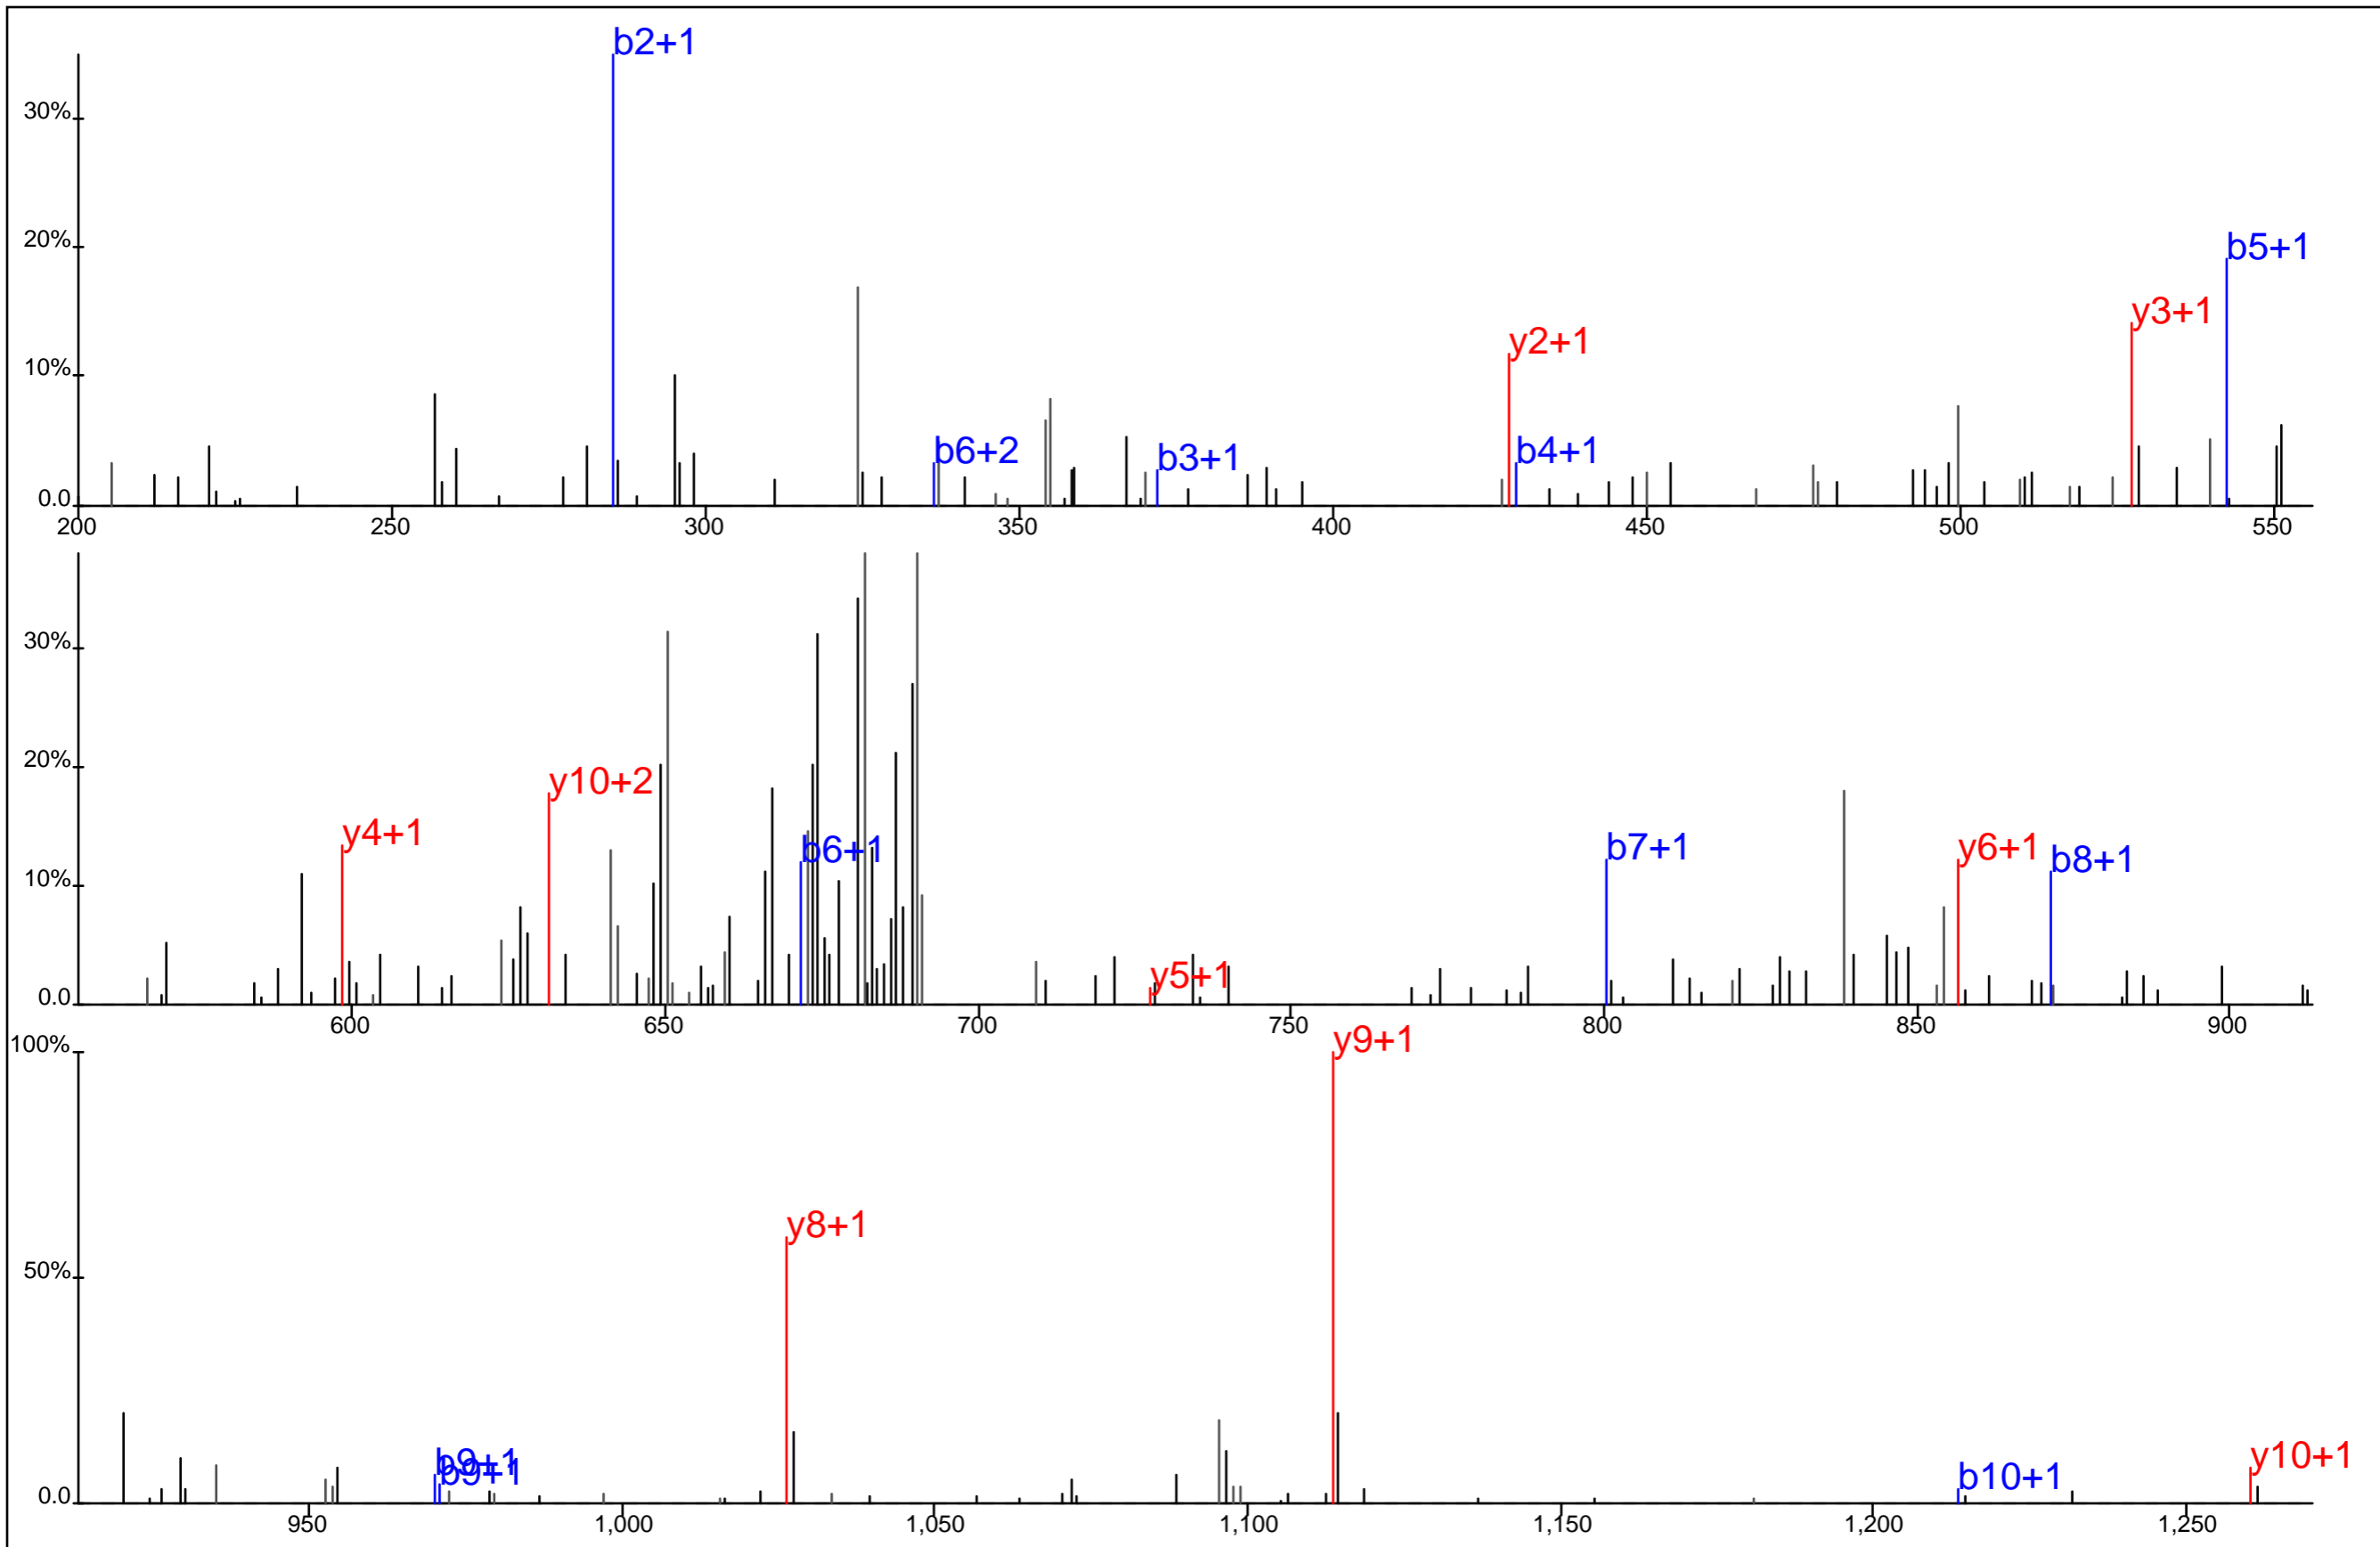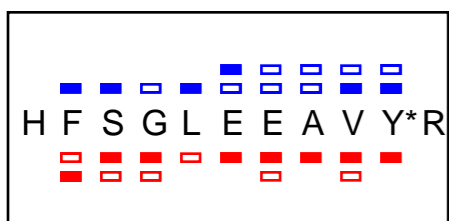

Protein Name: CCT8  
 gi Accession: 48762932  
 Precursor Mass: 699.3124+2  
 Delta Mass: 3.598 ppm  
 XCorr: 38.23

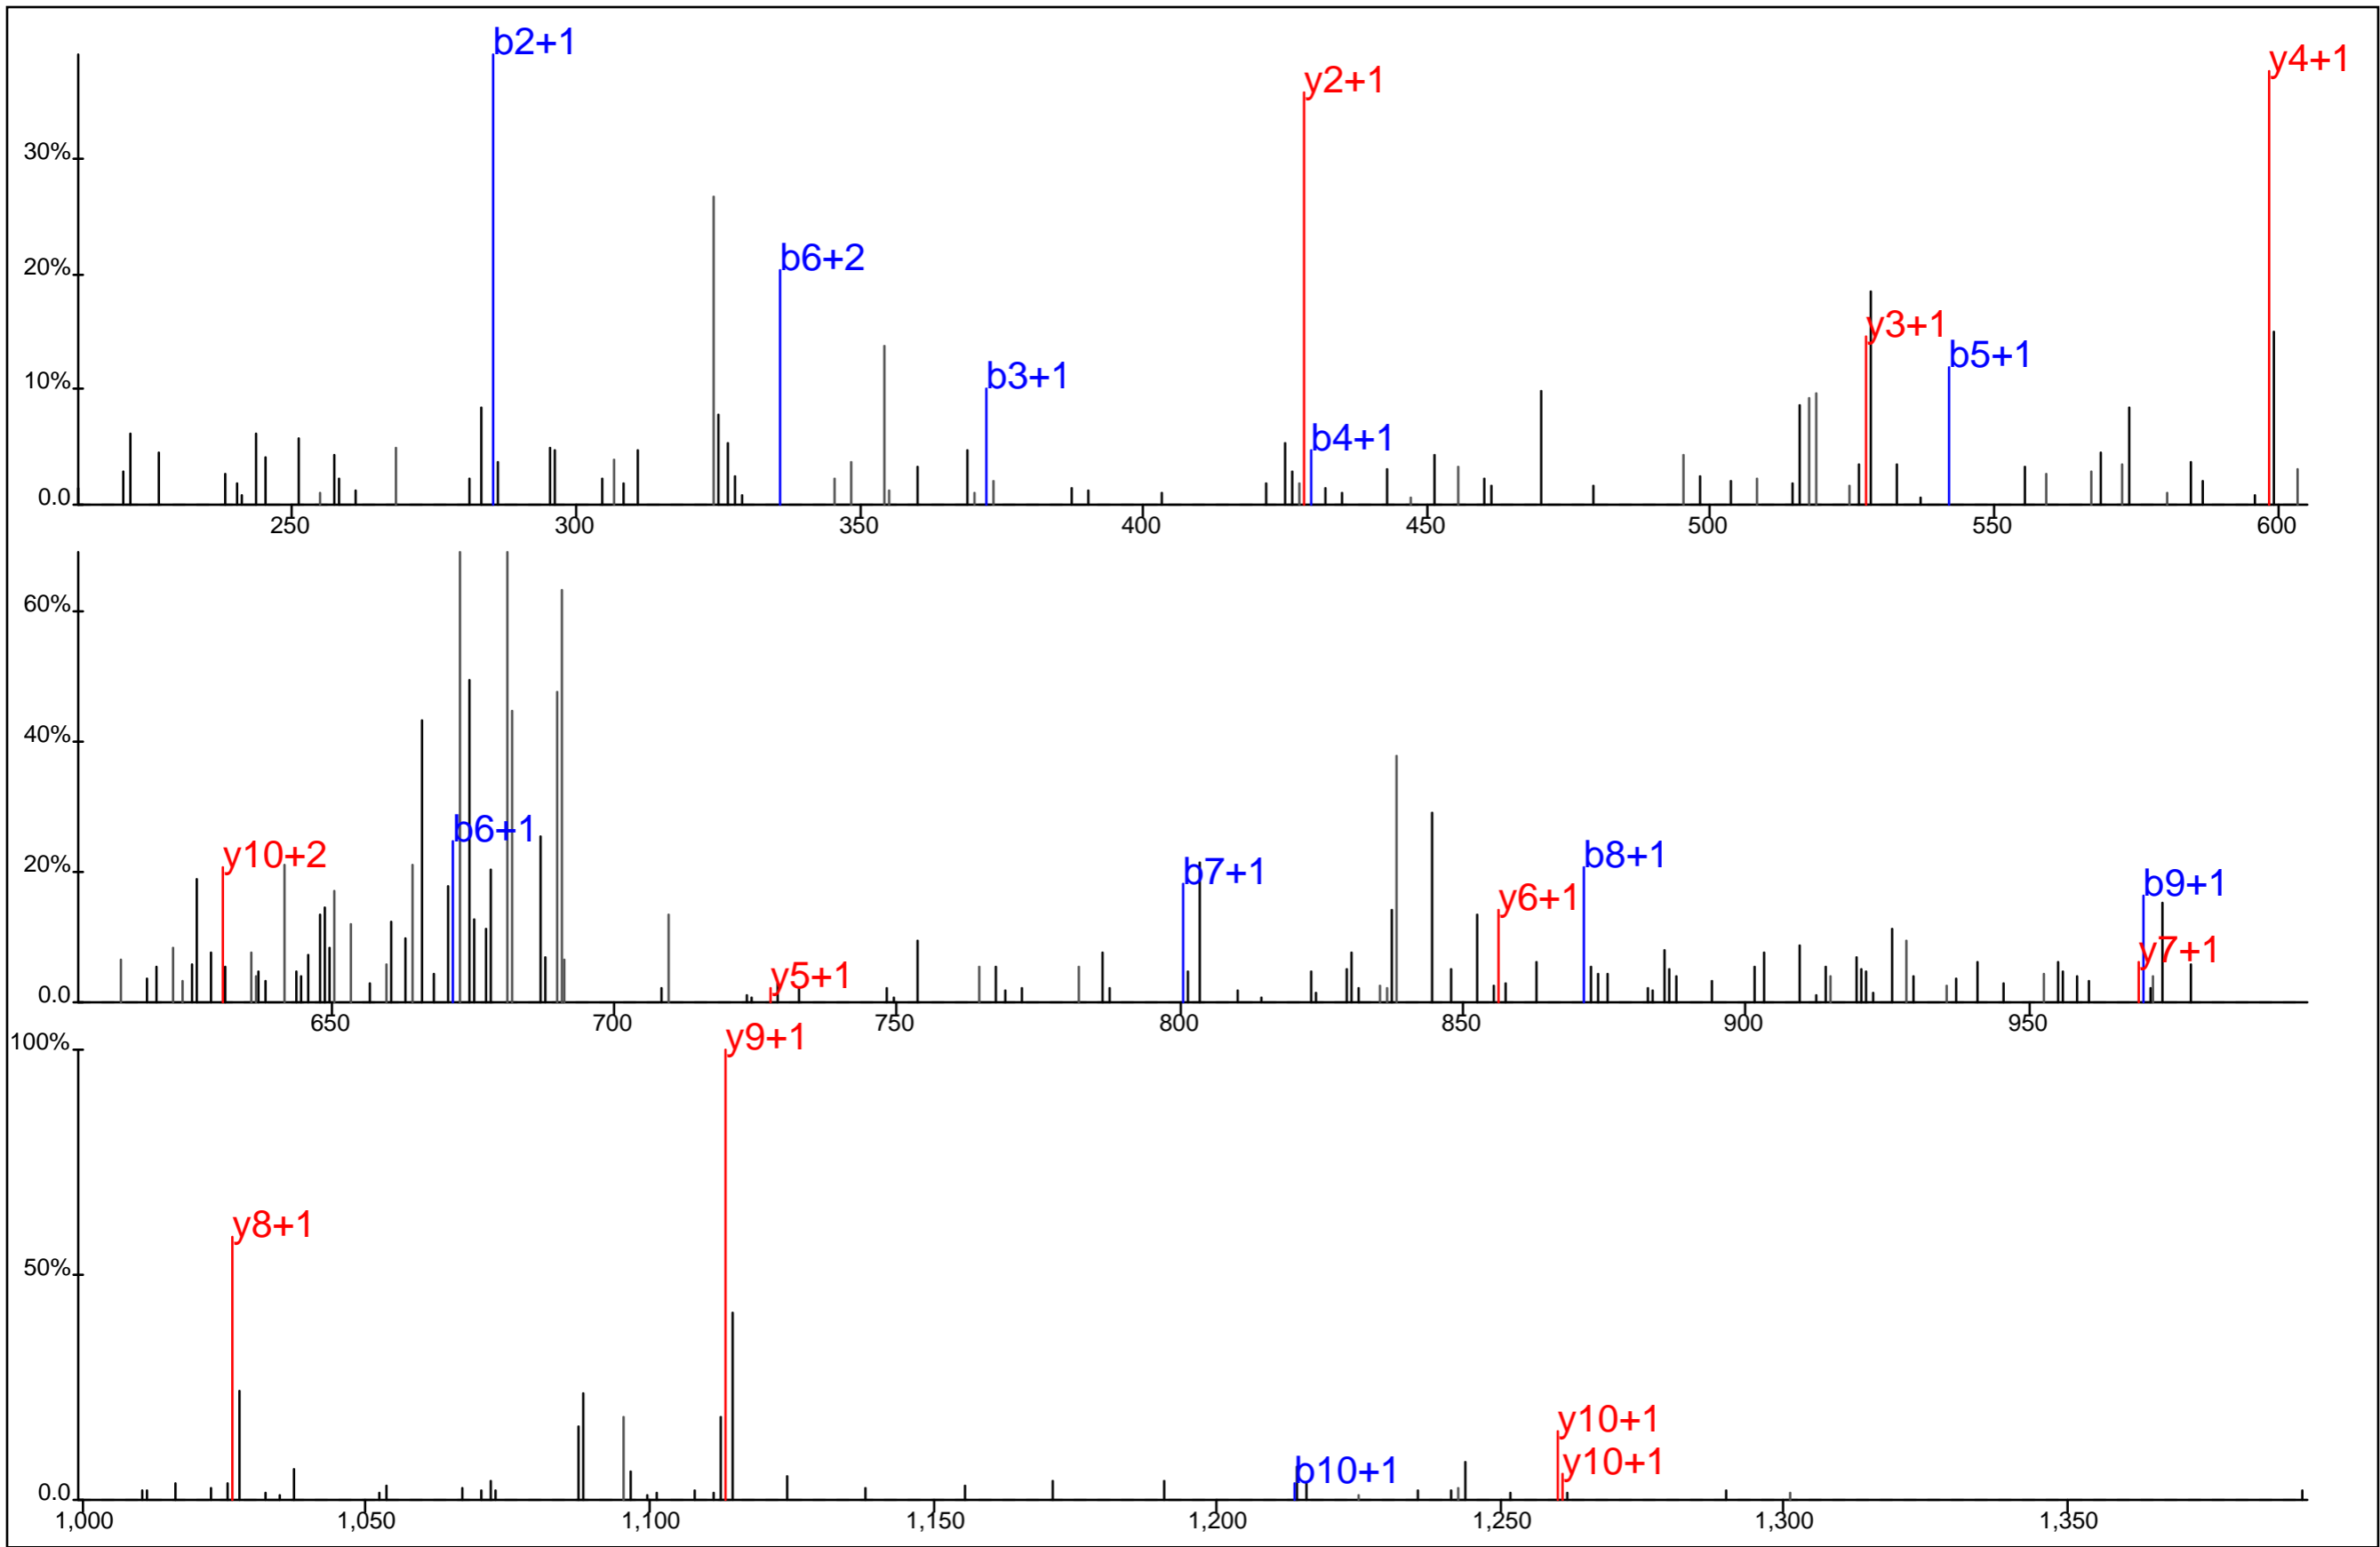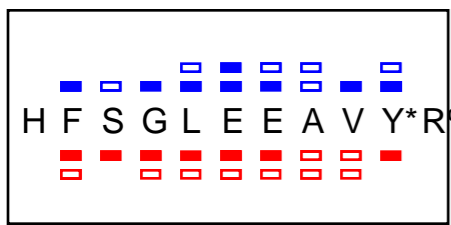

Protein Name: CCT8  
 gi Accession: 48762932  
 Precursor Mass: 699.3121+2  
 Delta Mass: 3.161 ppm  
 XCorr: 29.71

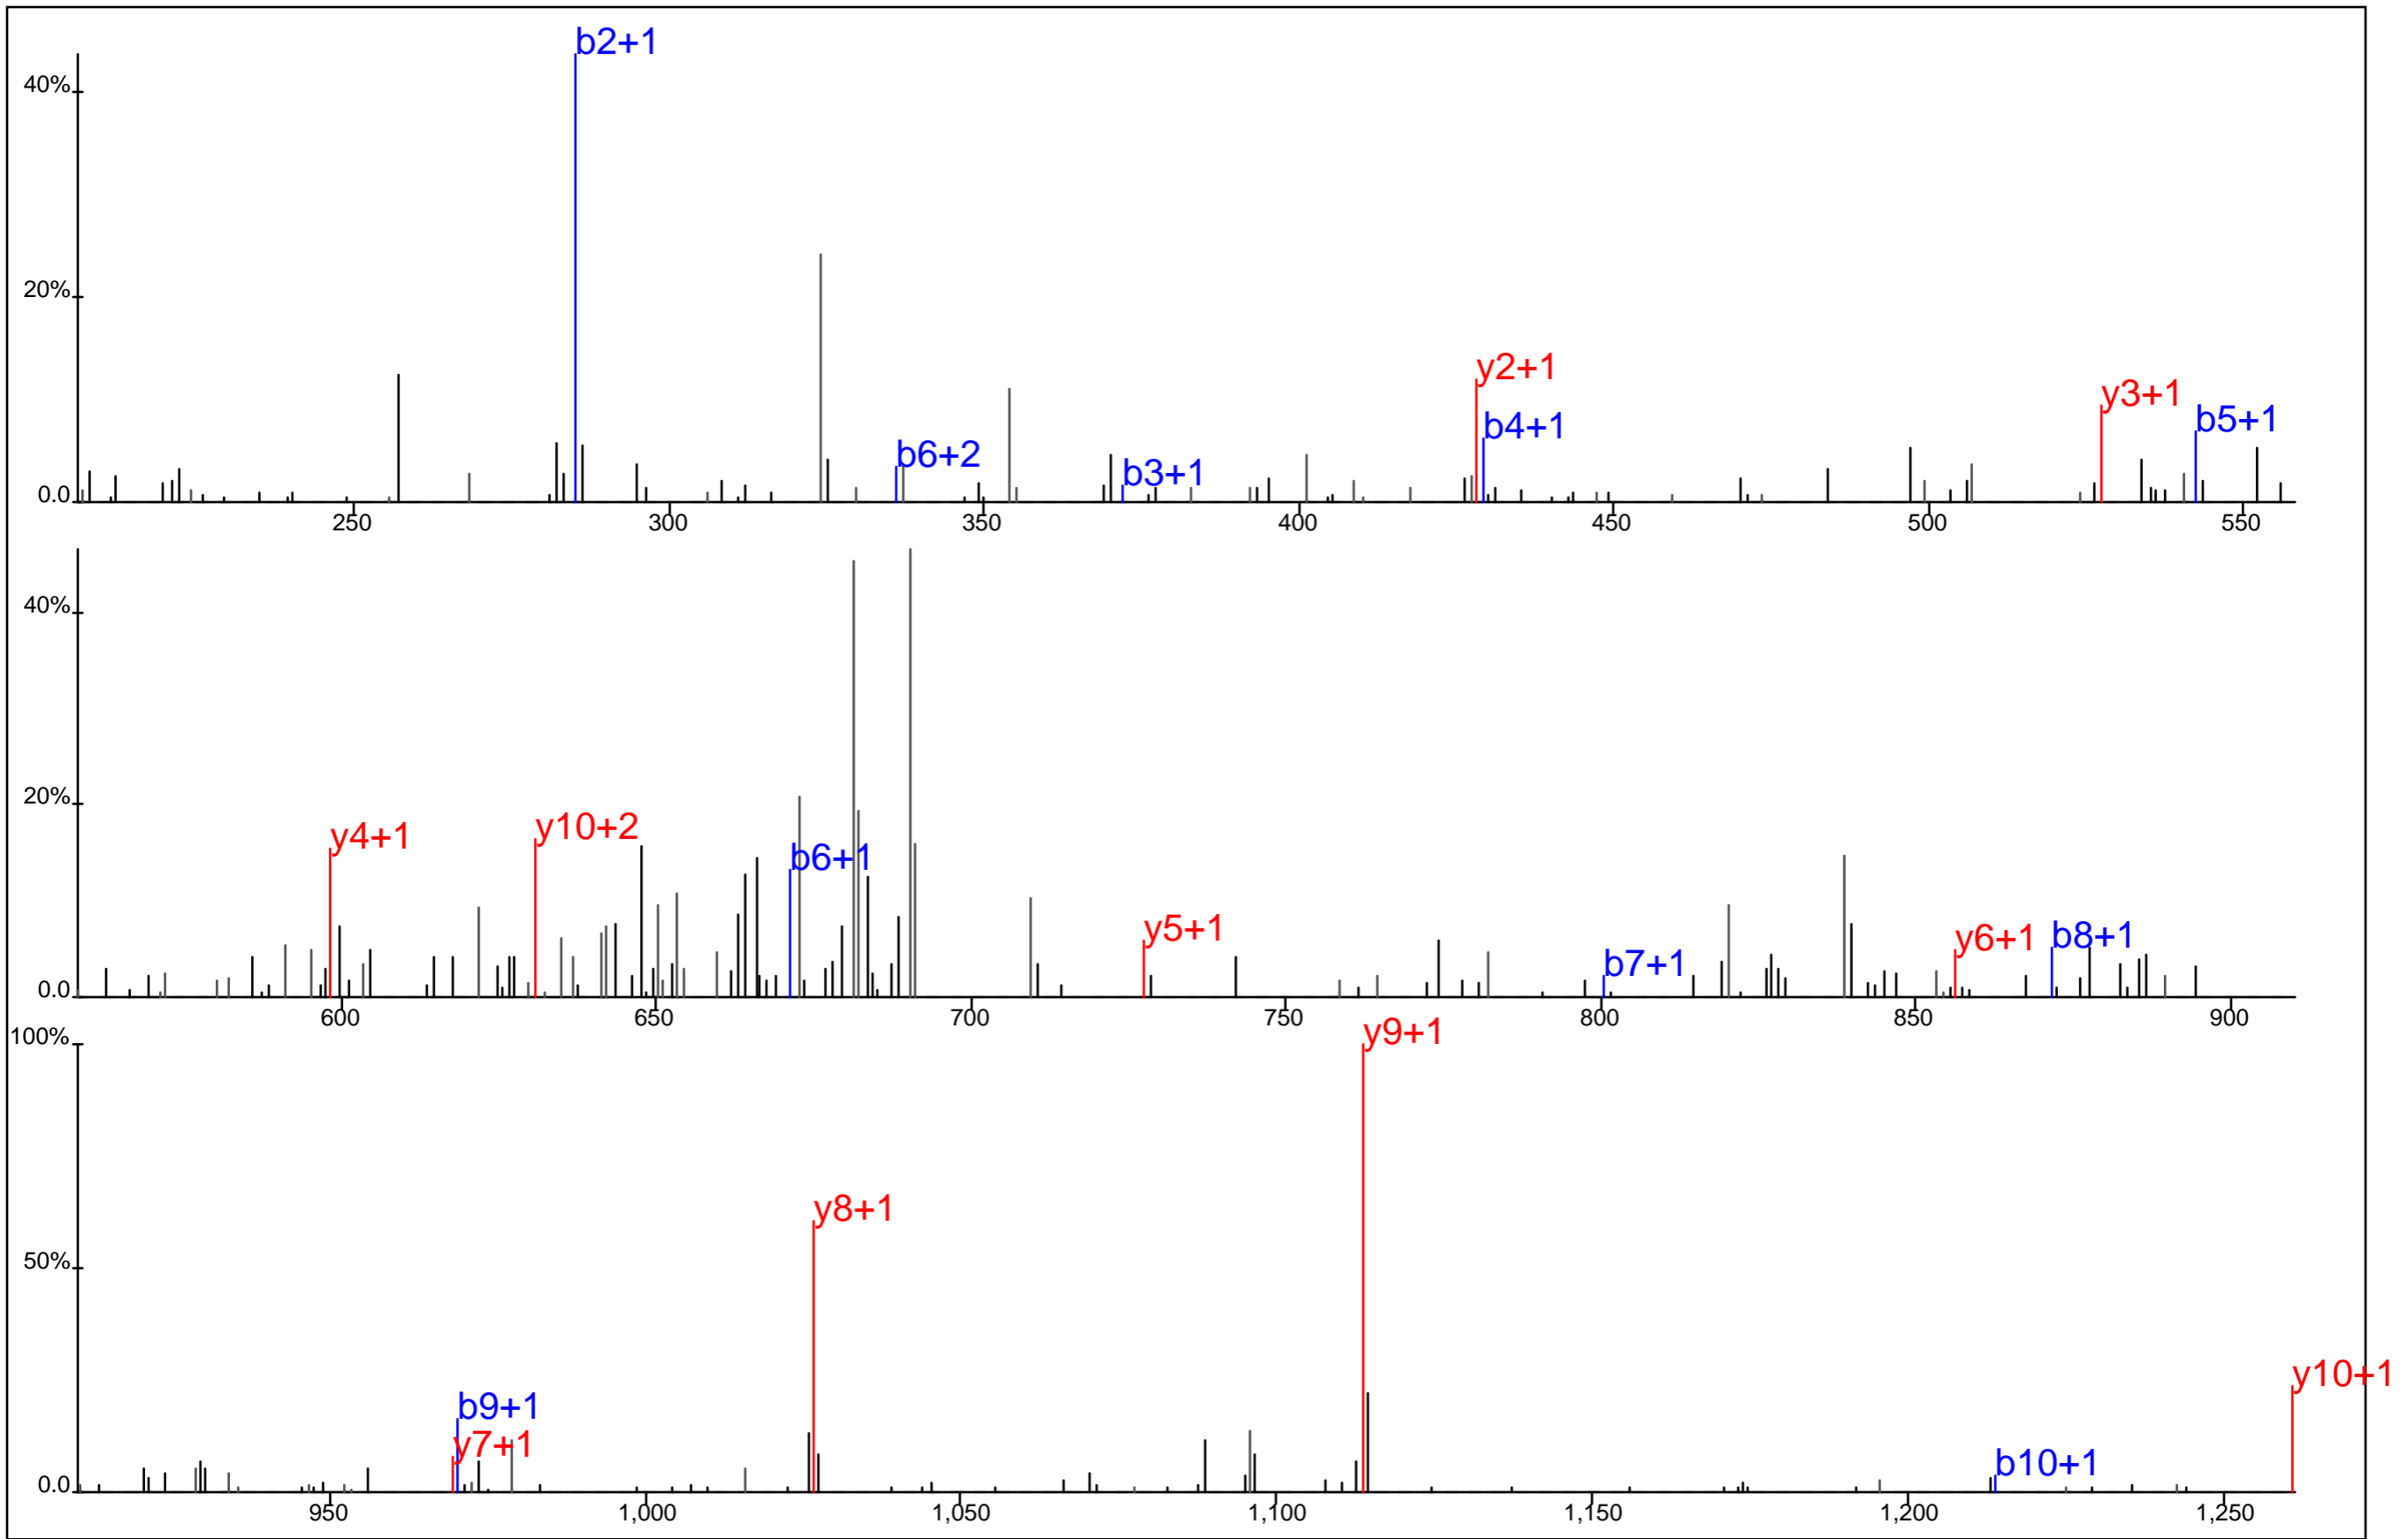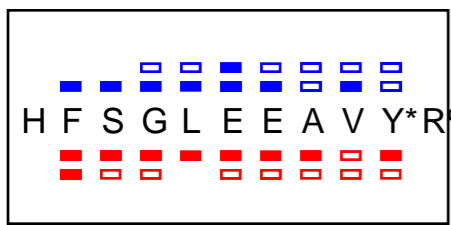

Protein Name: CCT8  
 gi Accession: 48762932  
 Precursor Mass: 699.3116+2  
 Delta Mass: 2.460 ppm  
 XCorr: 51.58

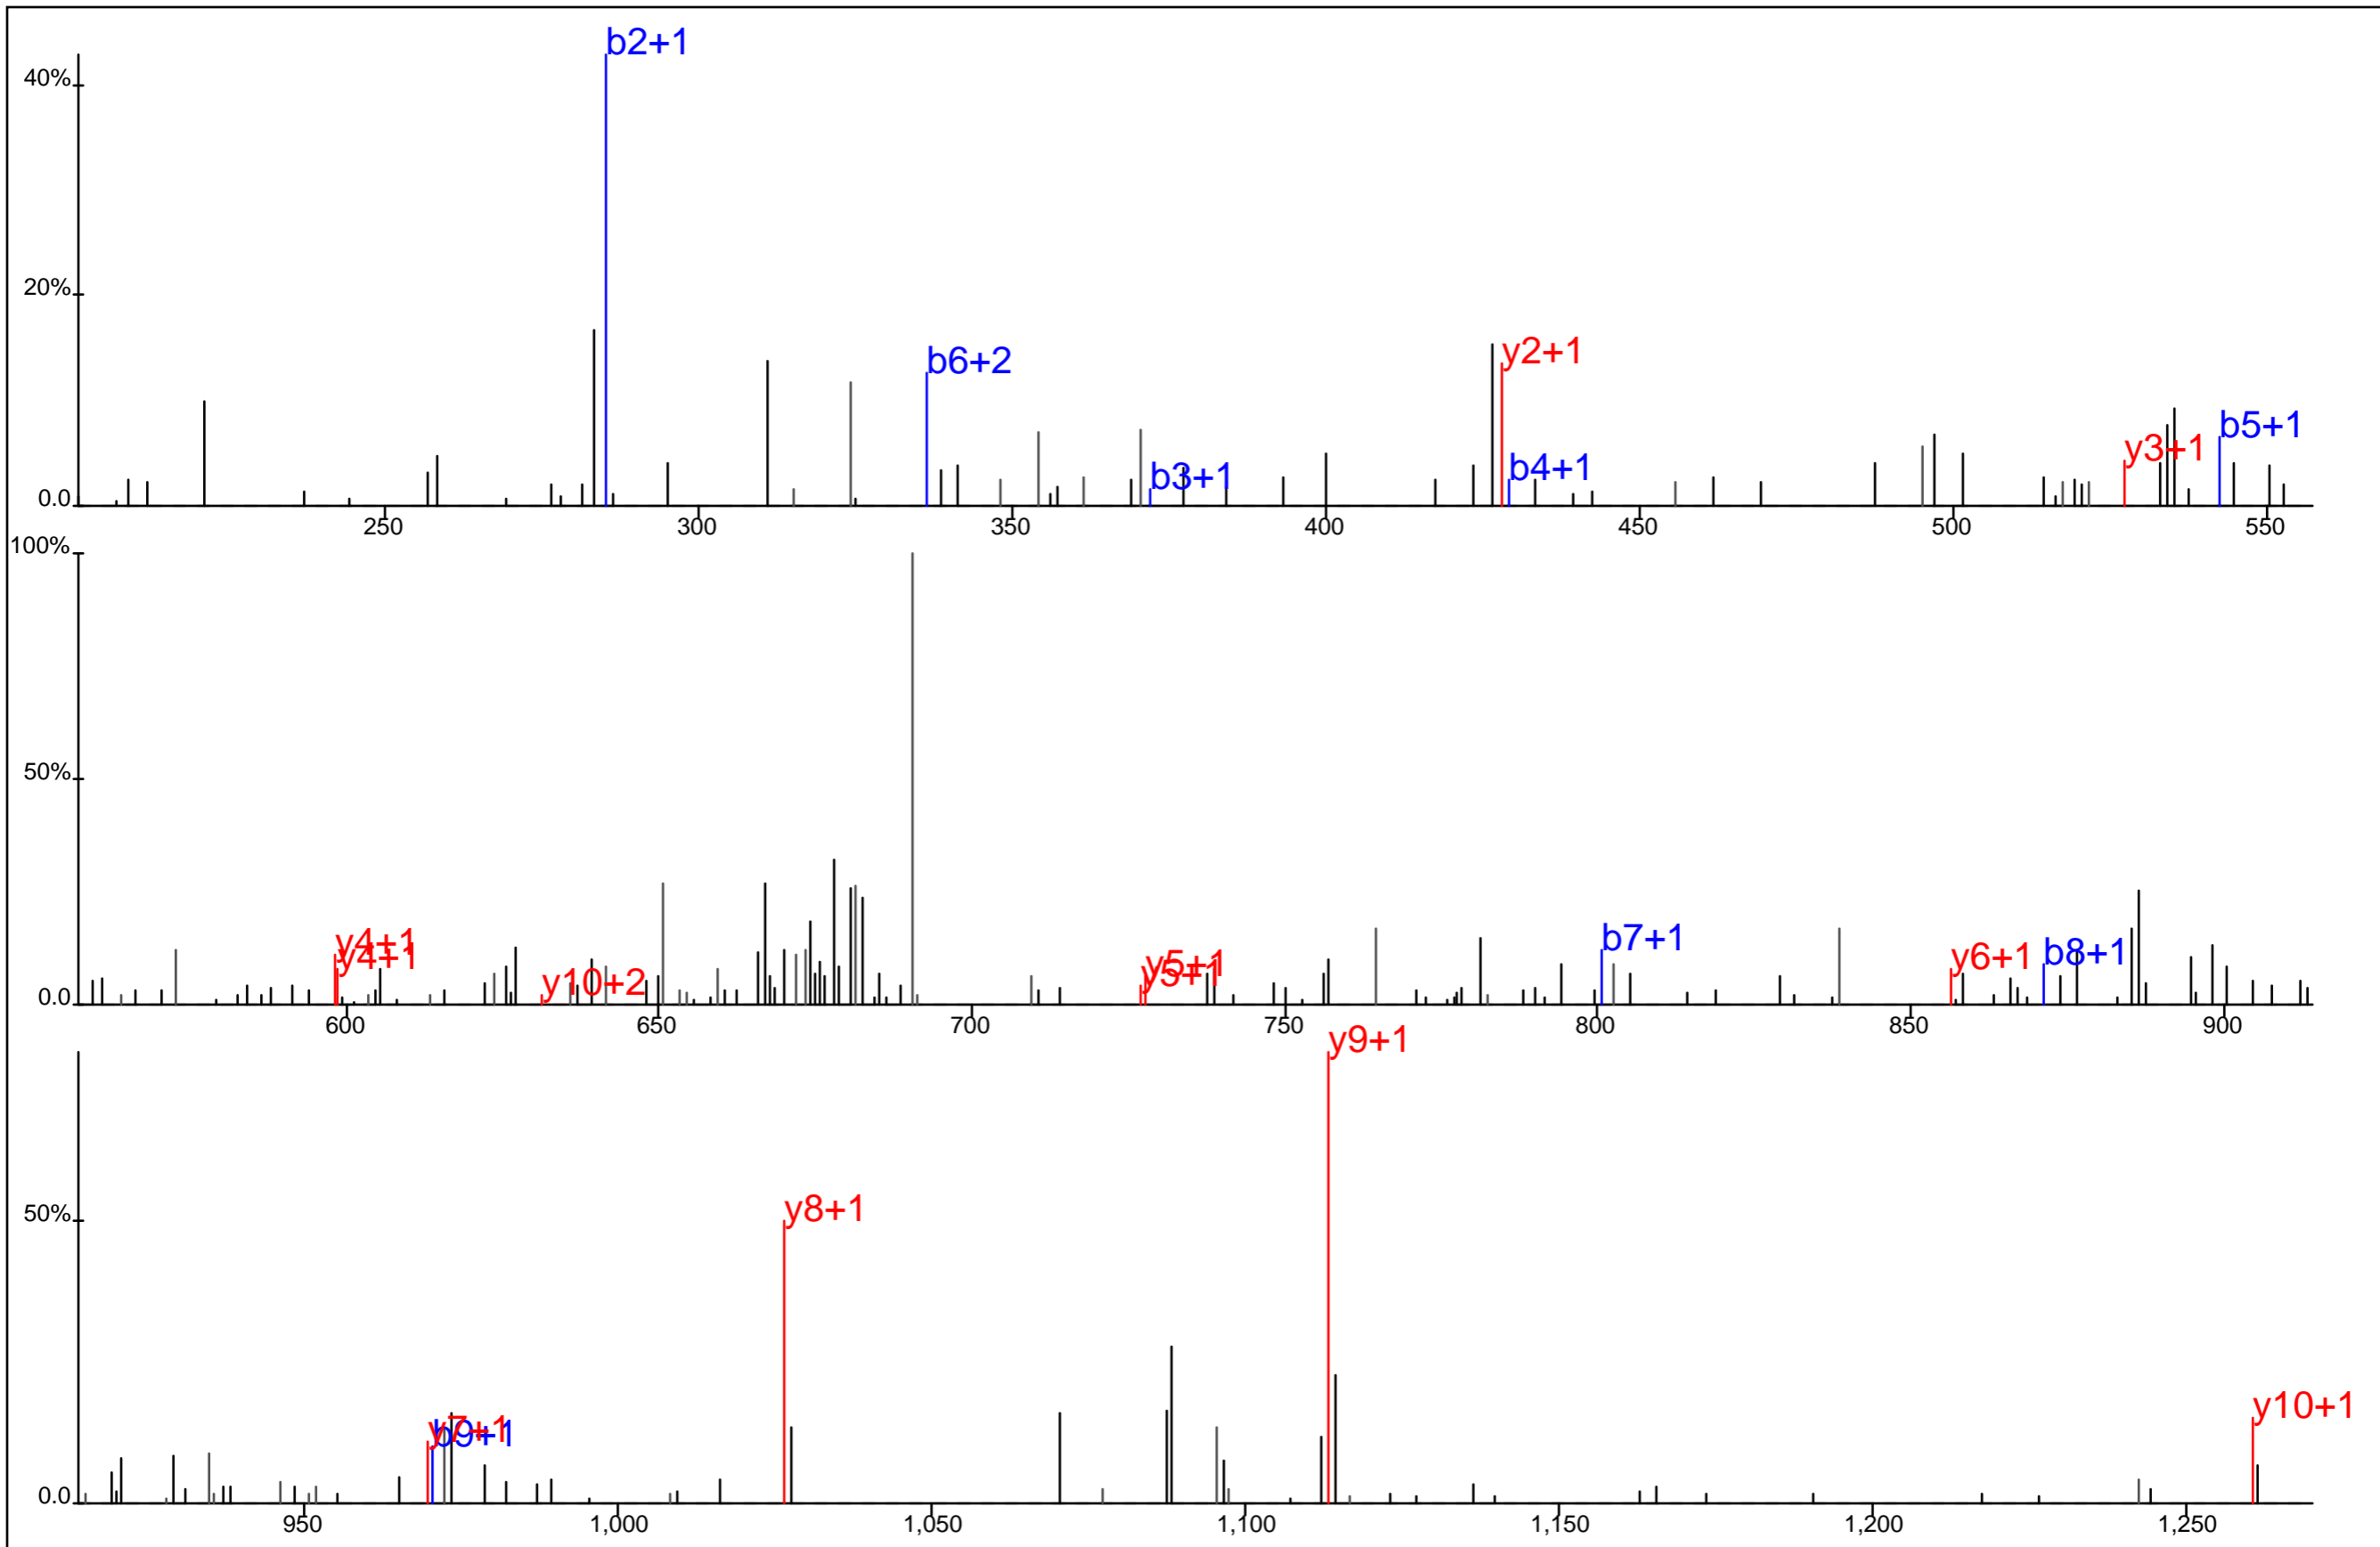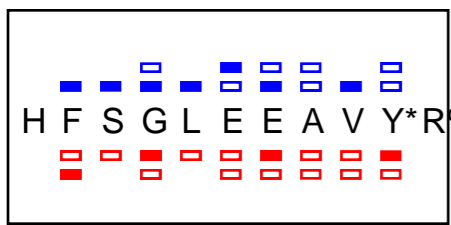

Protein Name: CCT8  
 gi Accession: 48762932  
 Precursor Mass: 699.3122+2  
 Delta Mass: 3.333 ppm  
 XCorr: 20.89



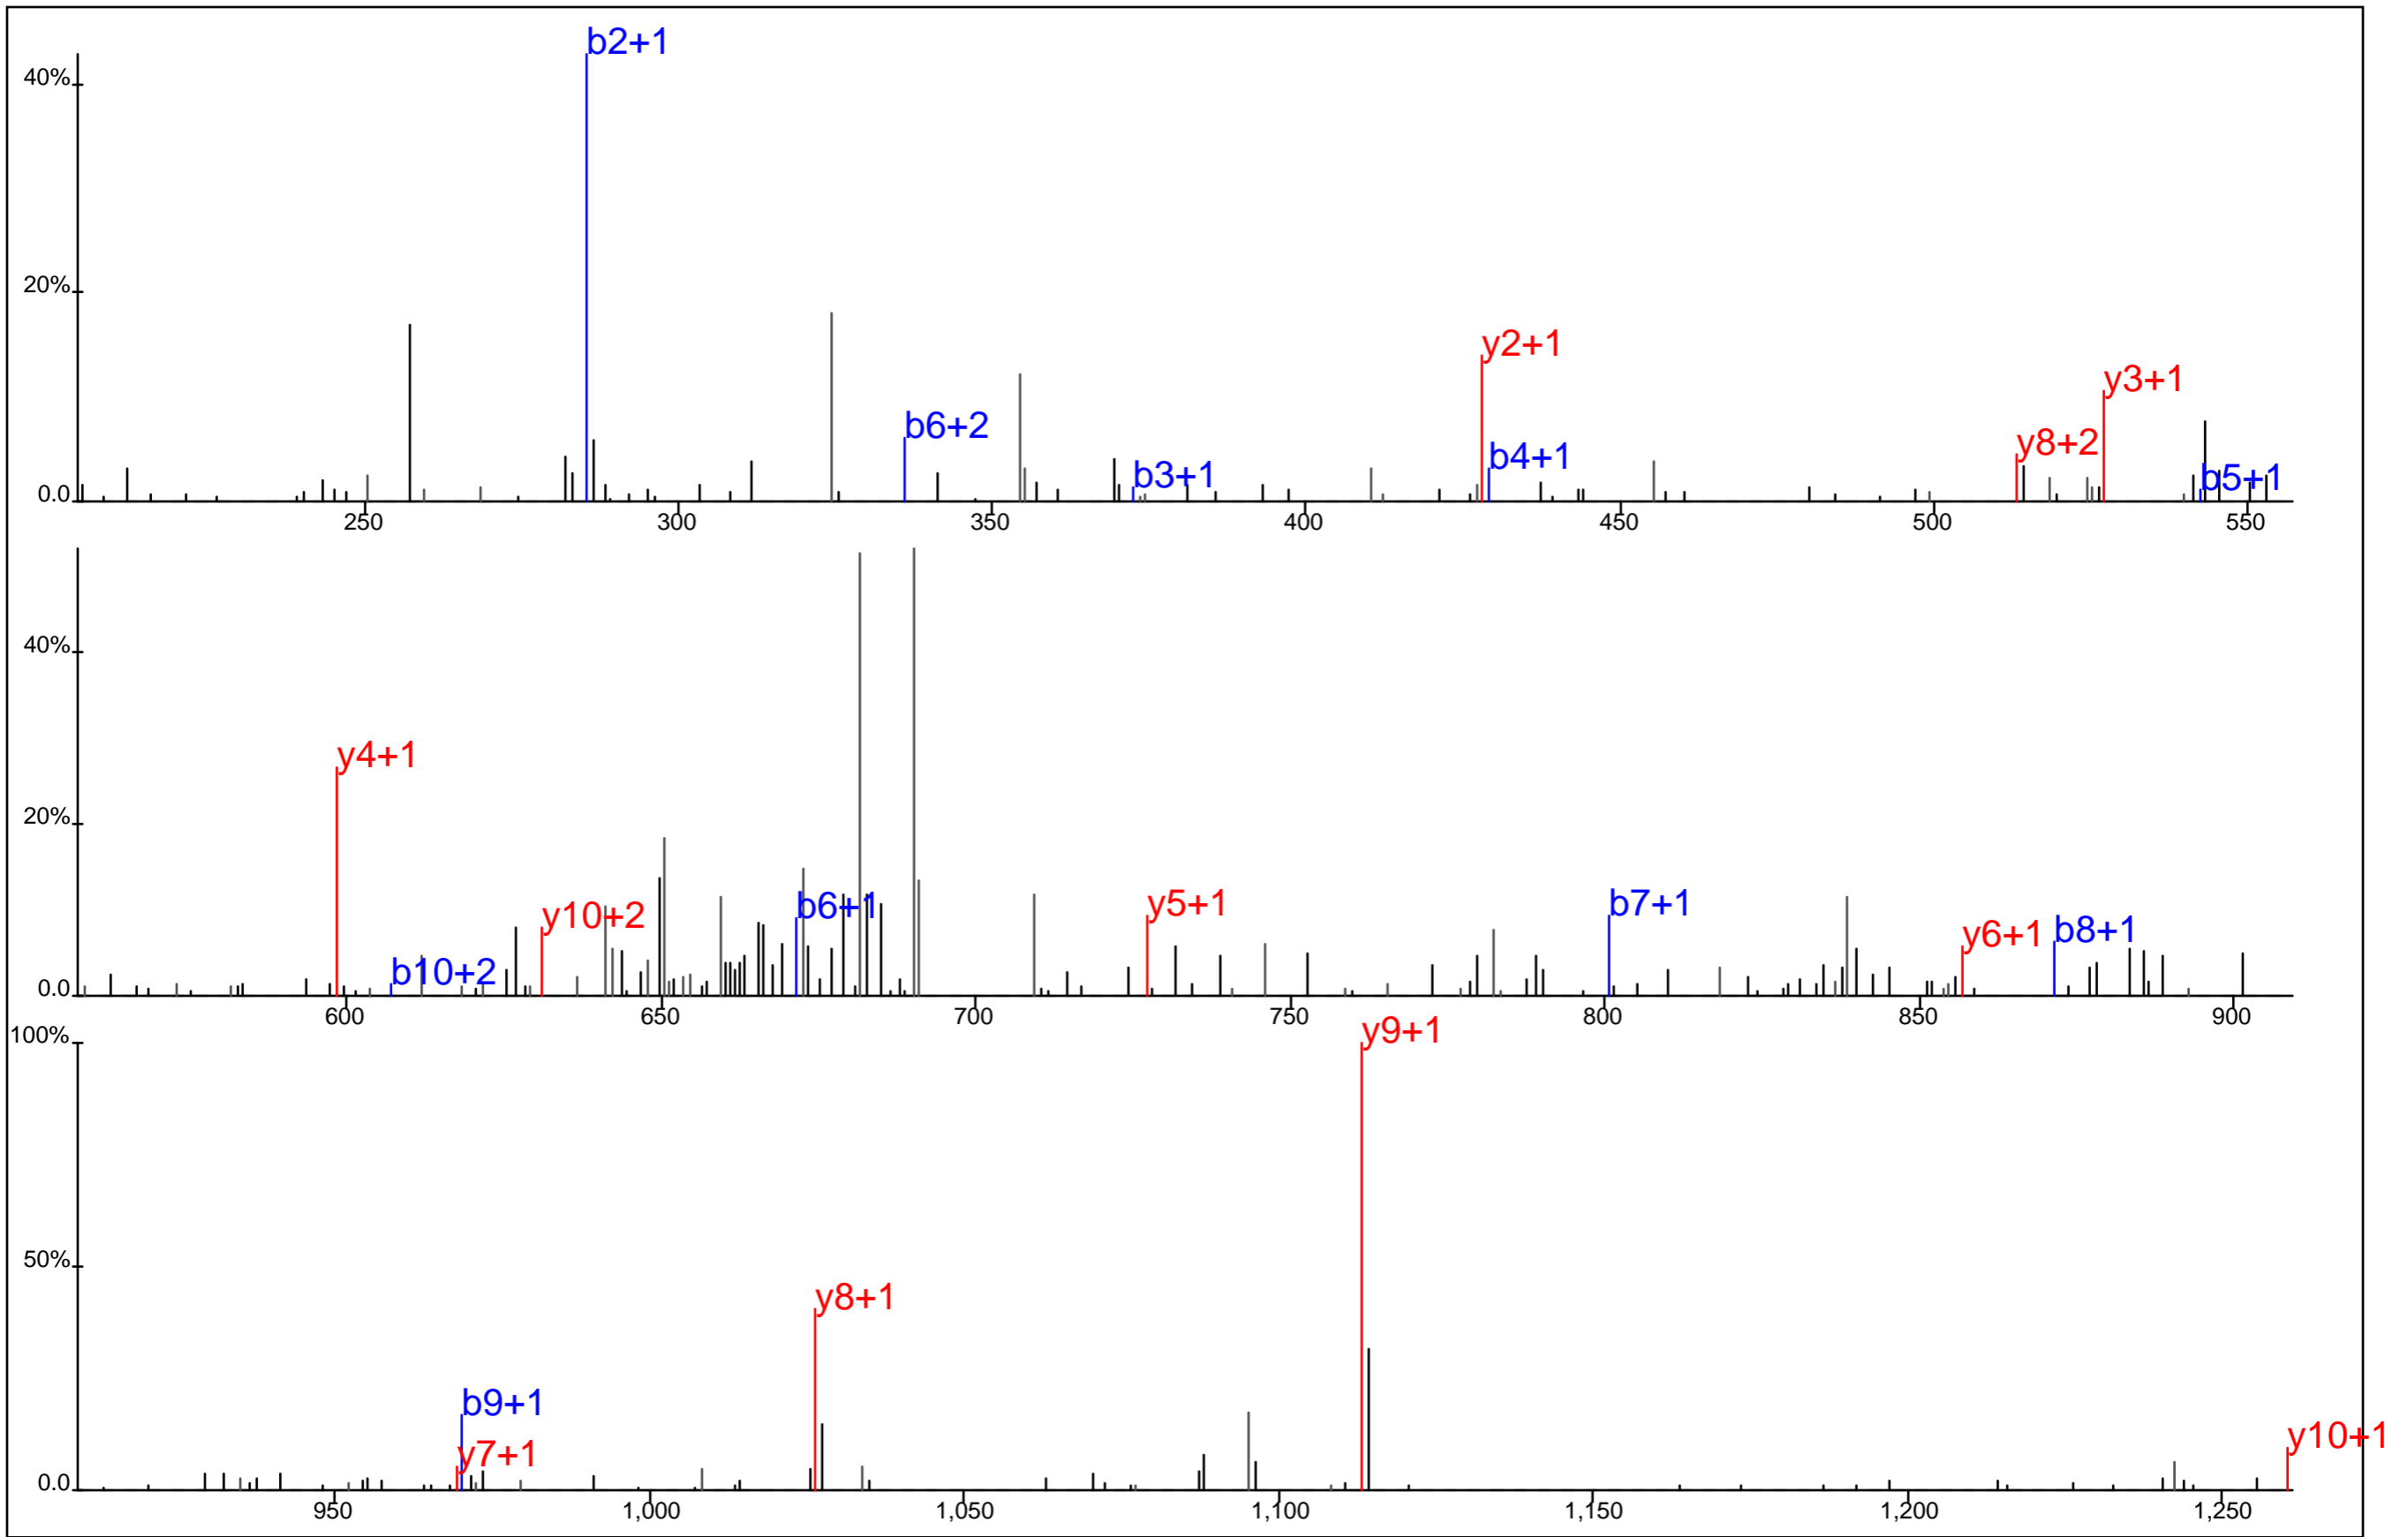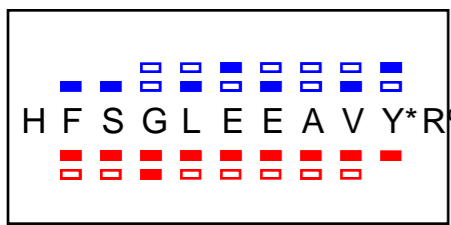

Protein Name: CCT8  
 gi Accession: 48762932  
 Precursor Mass: 699.3110+2  
 Delta Mass: 1.587 ppm  
 XCorr: 63.31

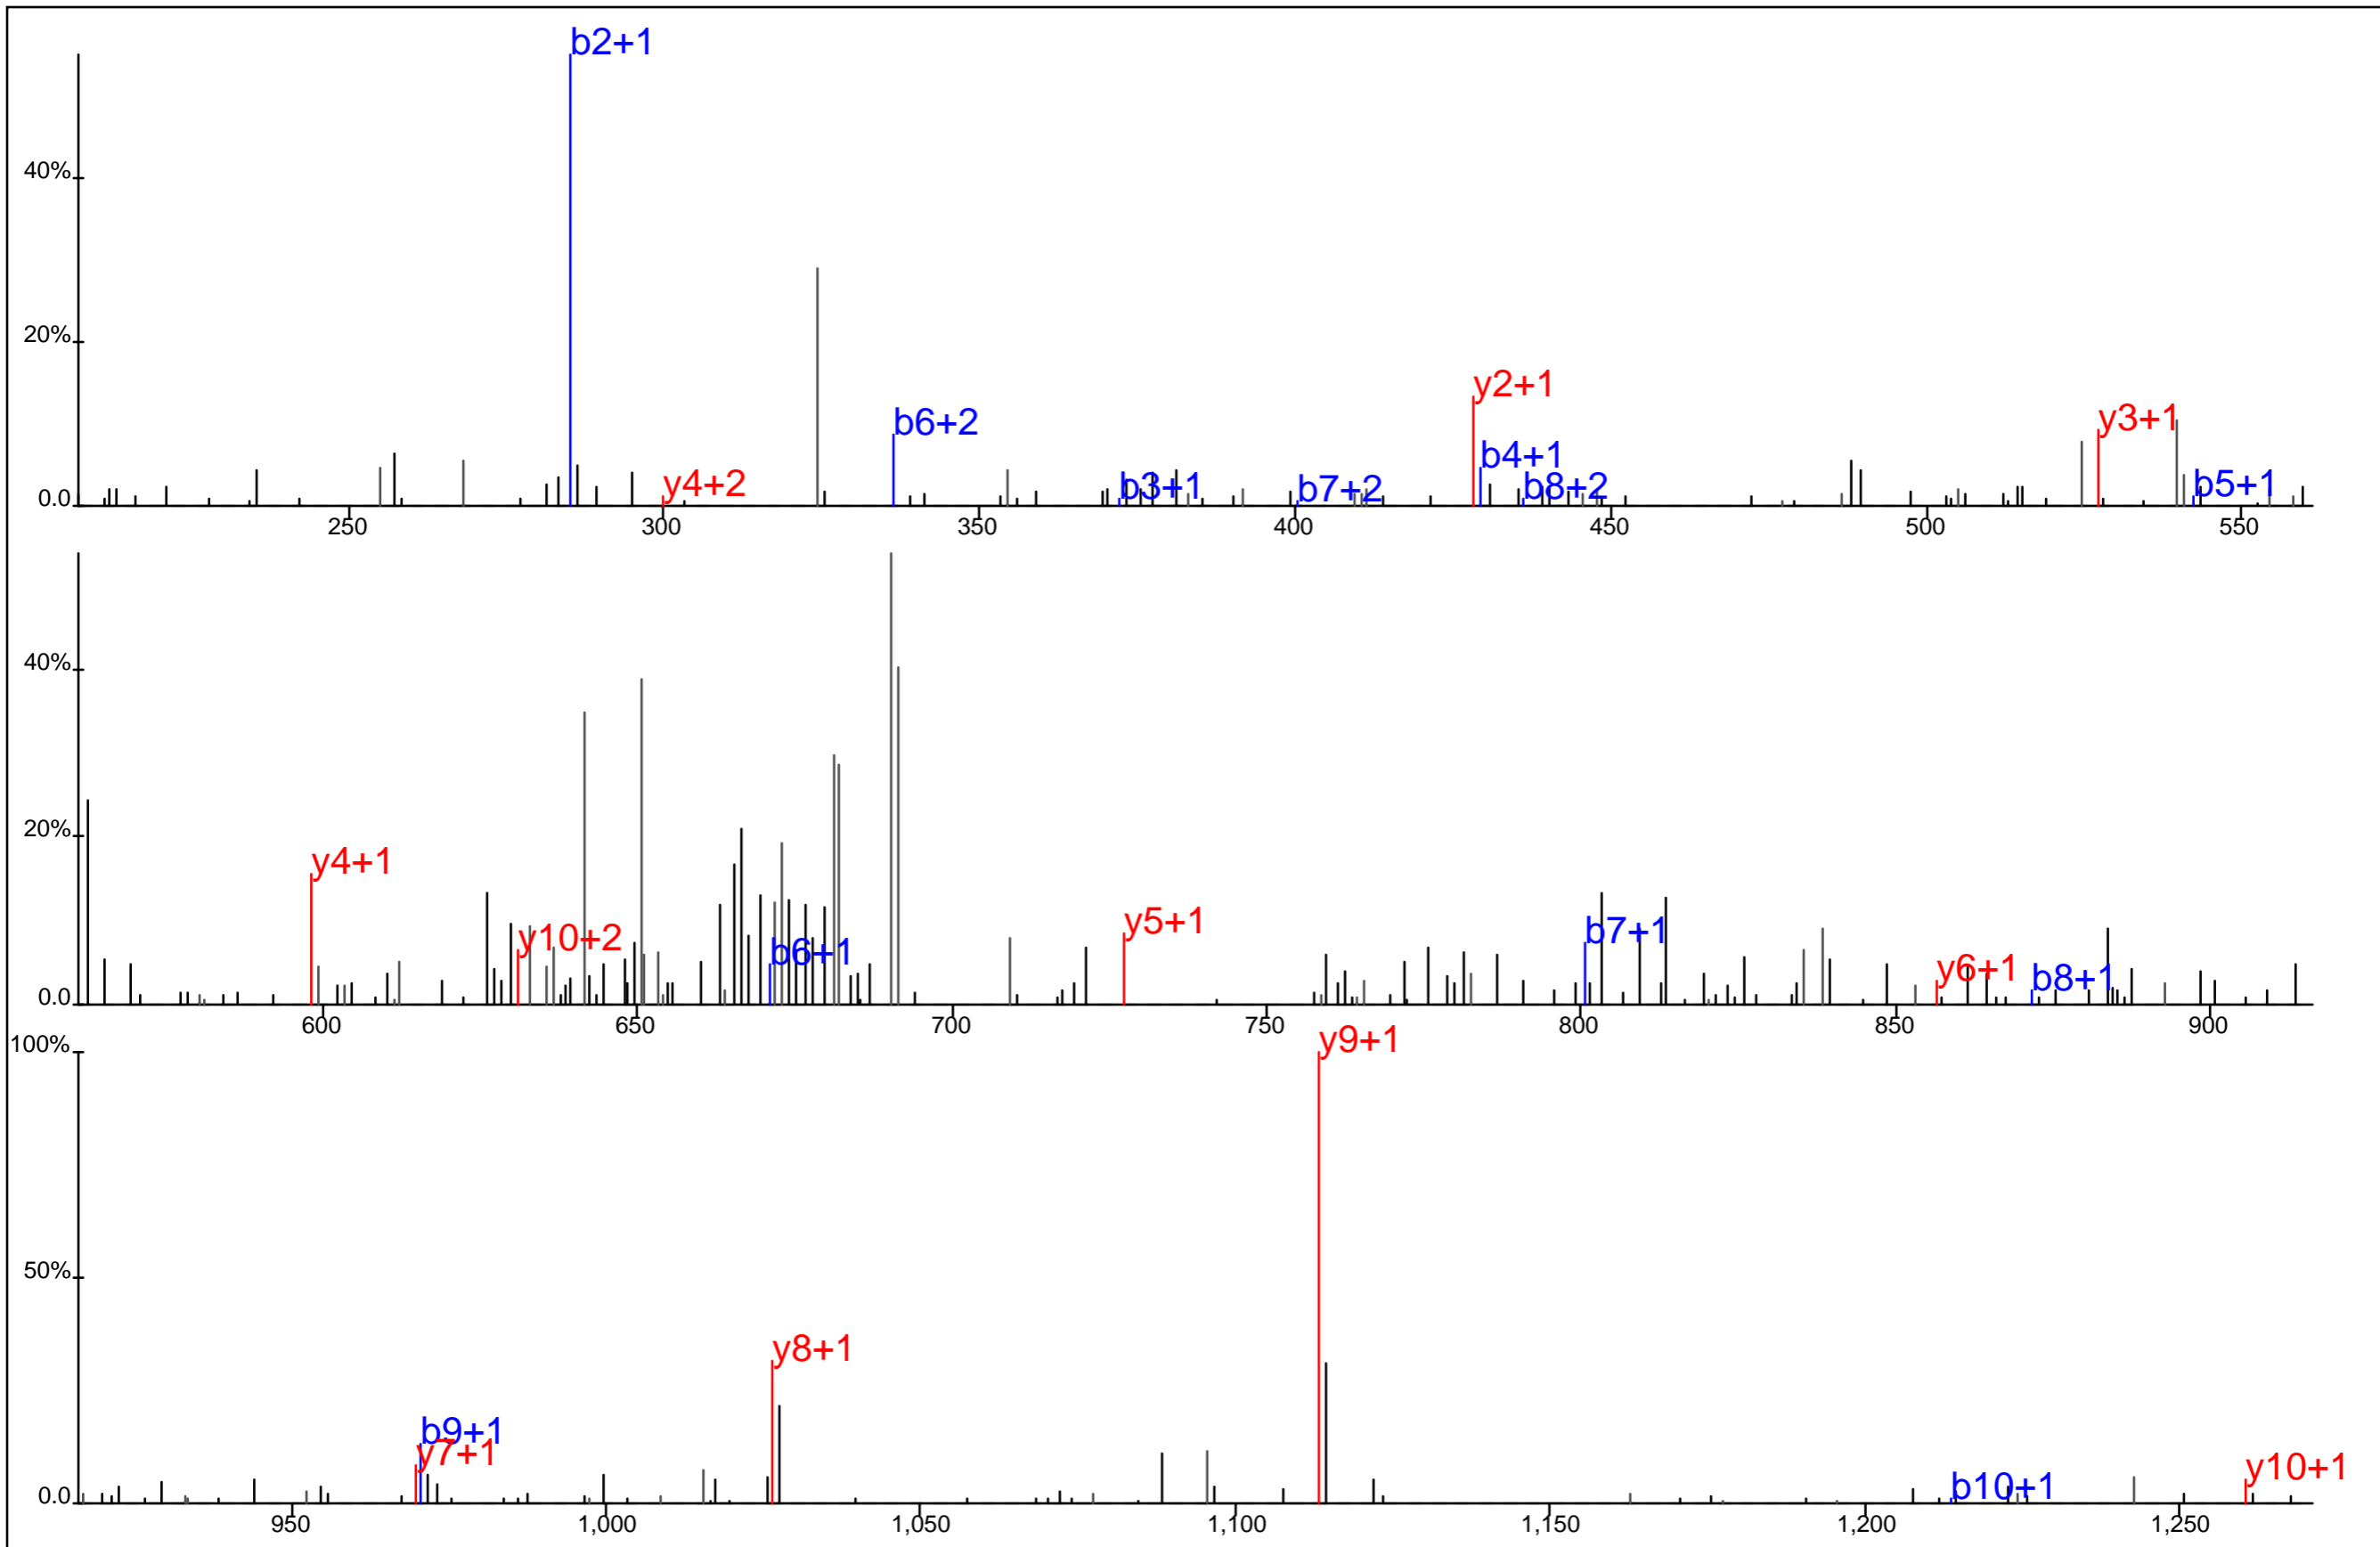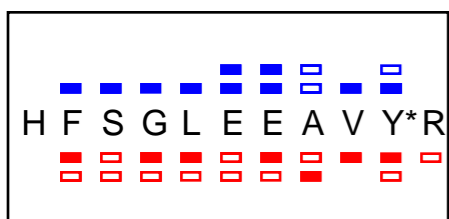

Protein Name: CCT8  
 gi Accession: 48762932  
 Precursor Mass: 699.3132+2  
 Delta Mass: 4.821 ppm  
 XCorr: 41.09

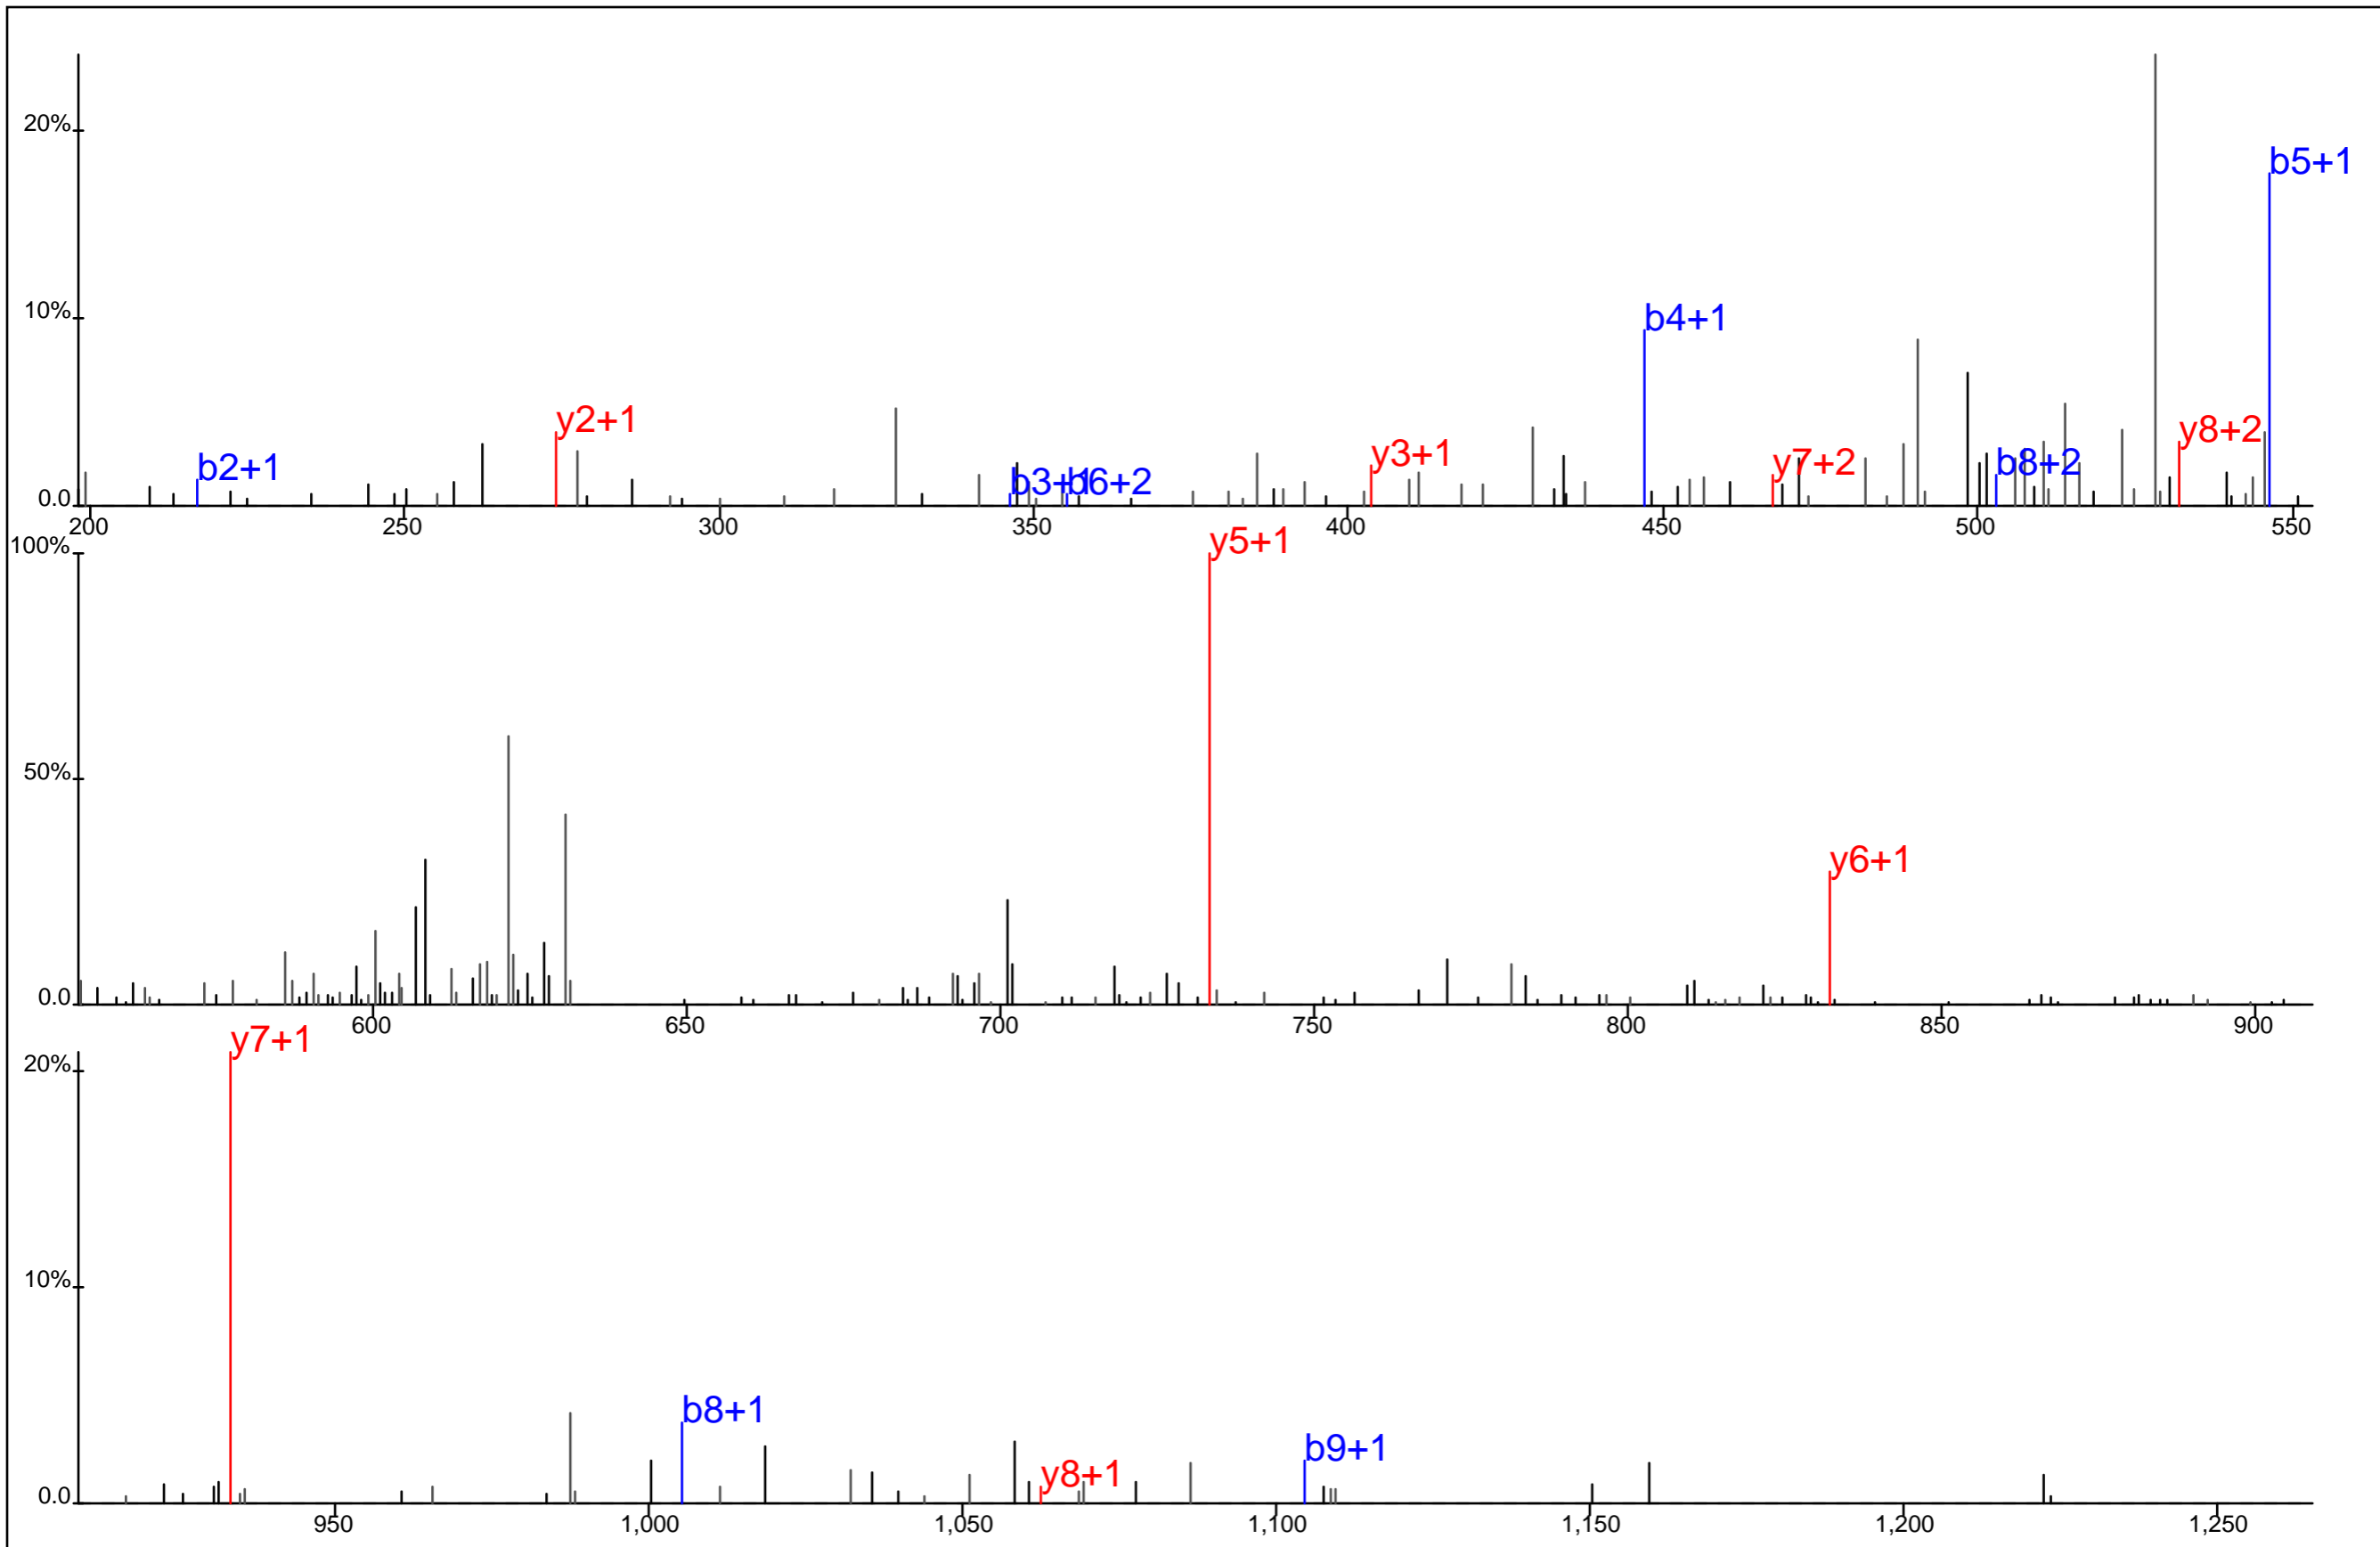

DTETVYS\*EVR

Protein Name: CD31  
 gi Accession: 110347451  
 Precursor Mass: 639.7679+2  
 Delta Mass: 2.775 ppm  
 XCorr: 33.6

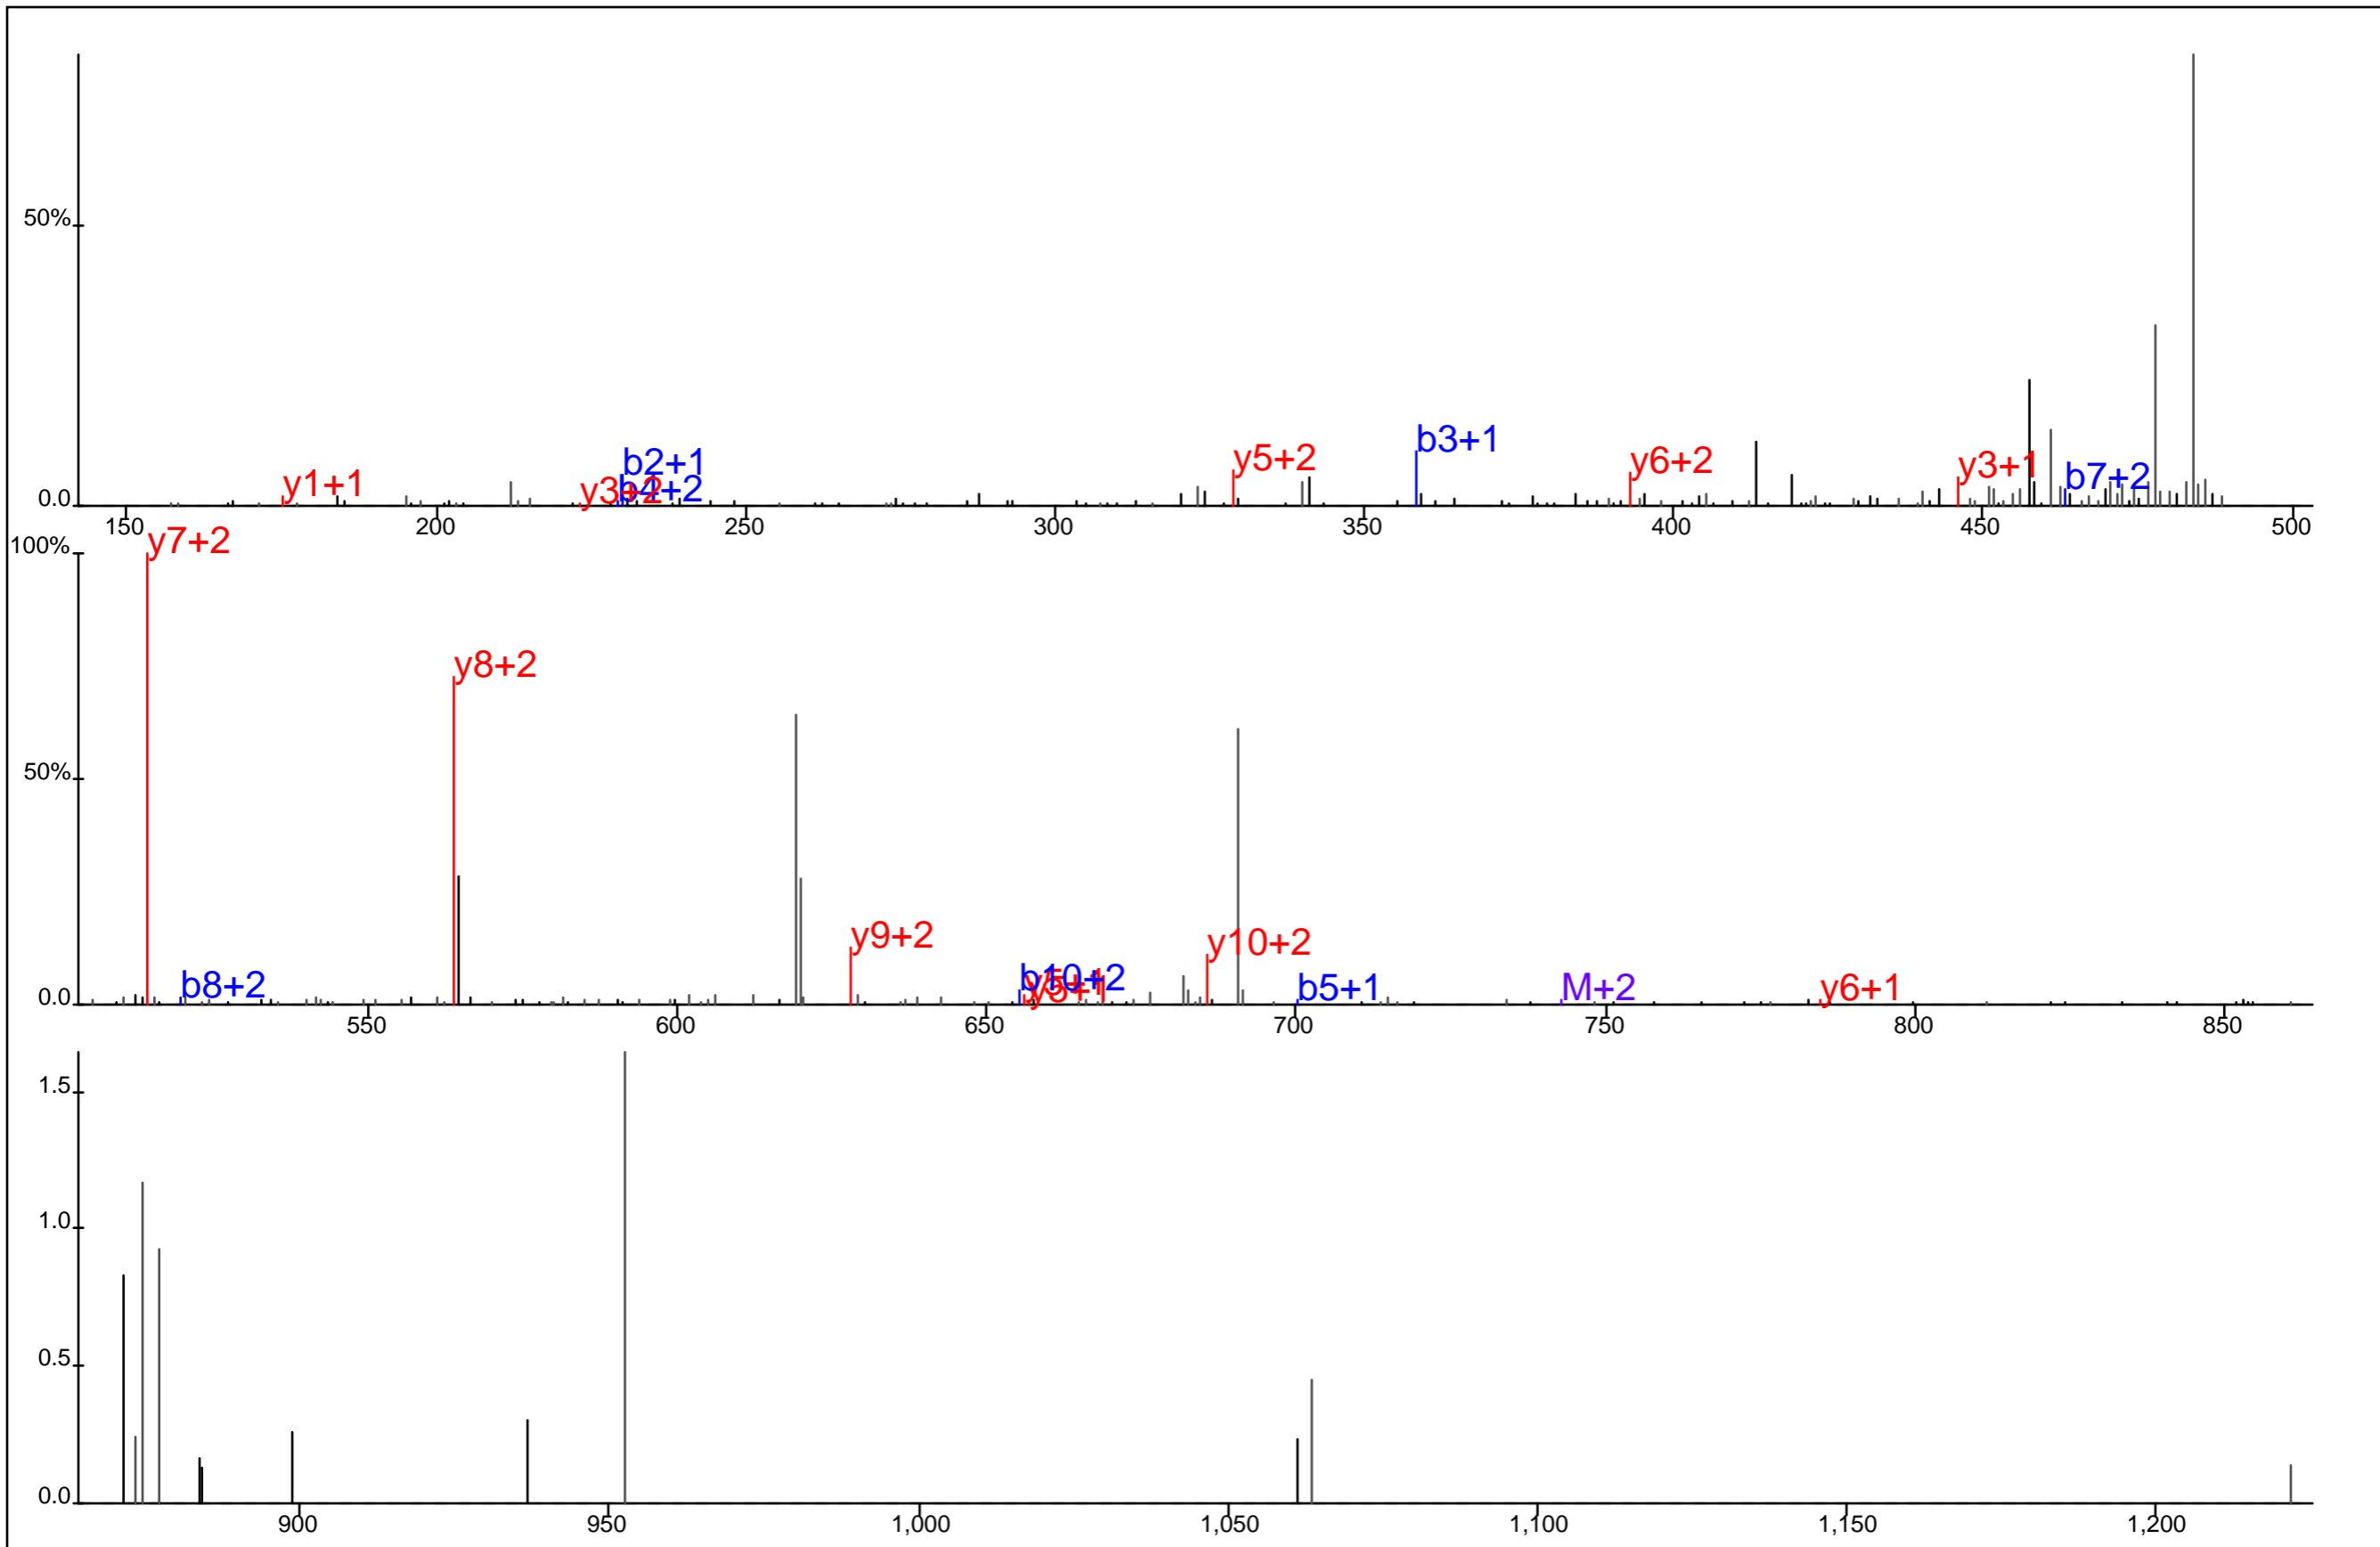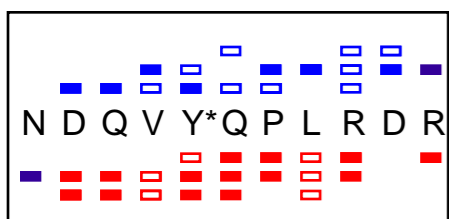

Protein Name: CD3 delta  
 gi Accession: 4502669  
 Precursor Mass: 495.2290+3  
 Delta Mass: 2.391 ppm  
 XCorr: 19.85

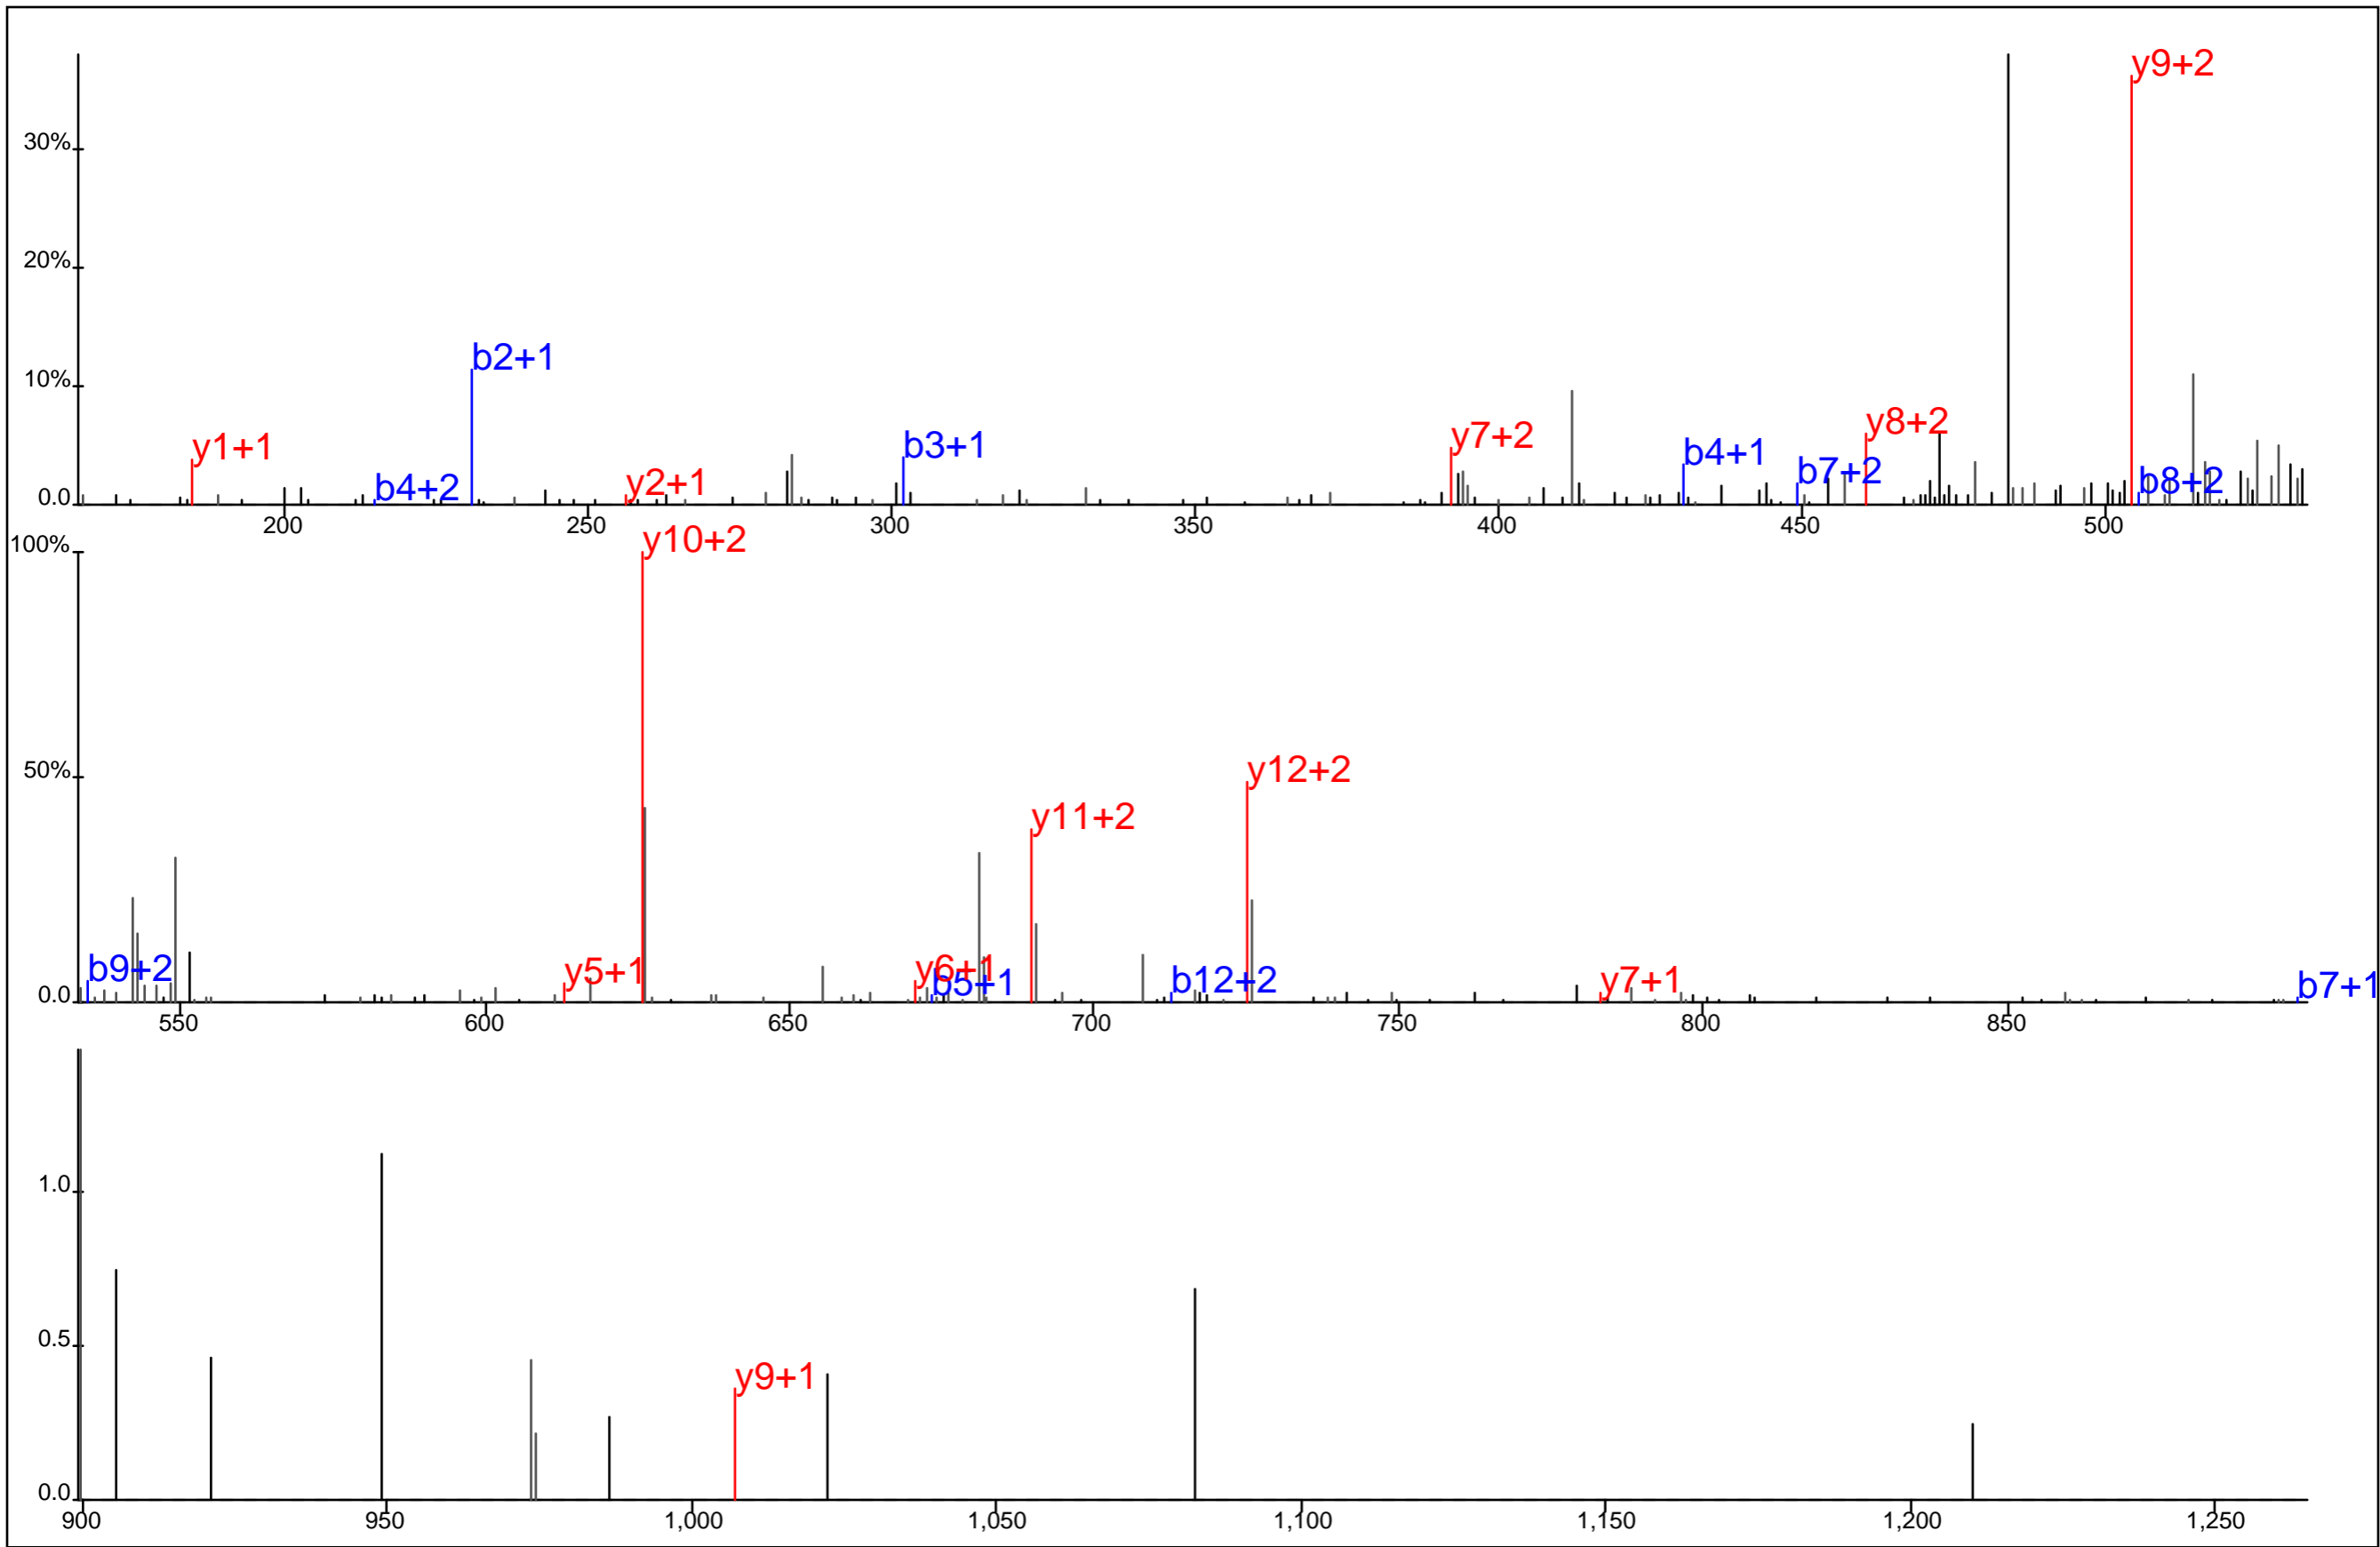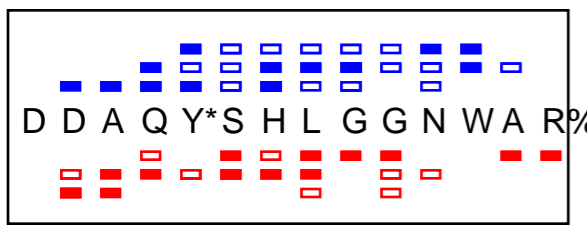

Protein Name: CD3 delta  
 gi Accession: 4502669  
 Precursor Mass: 560.5684+3  
 Delta Mass: 4.155 ppm  
 XCorr: 29.77

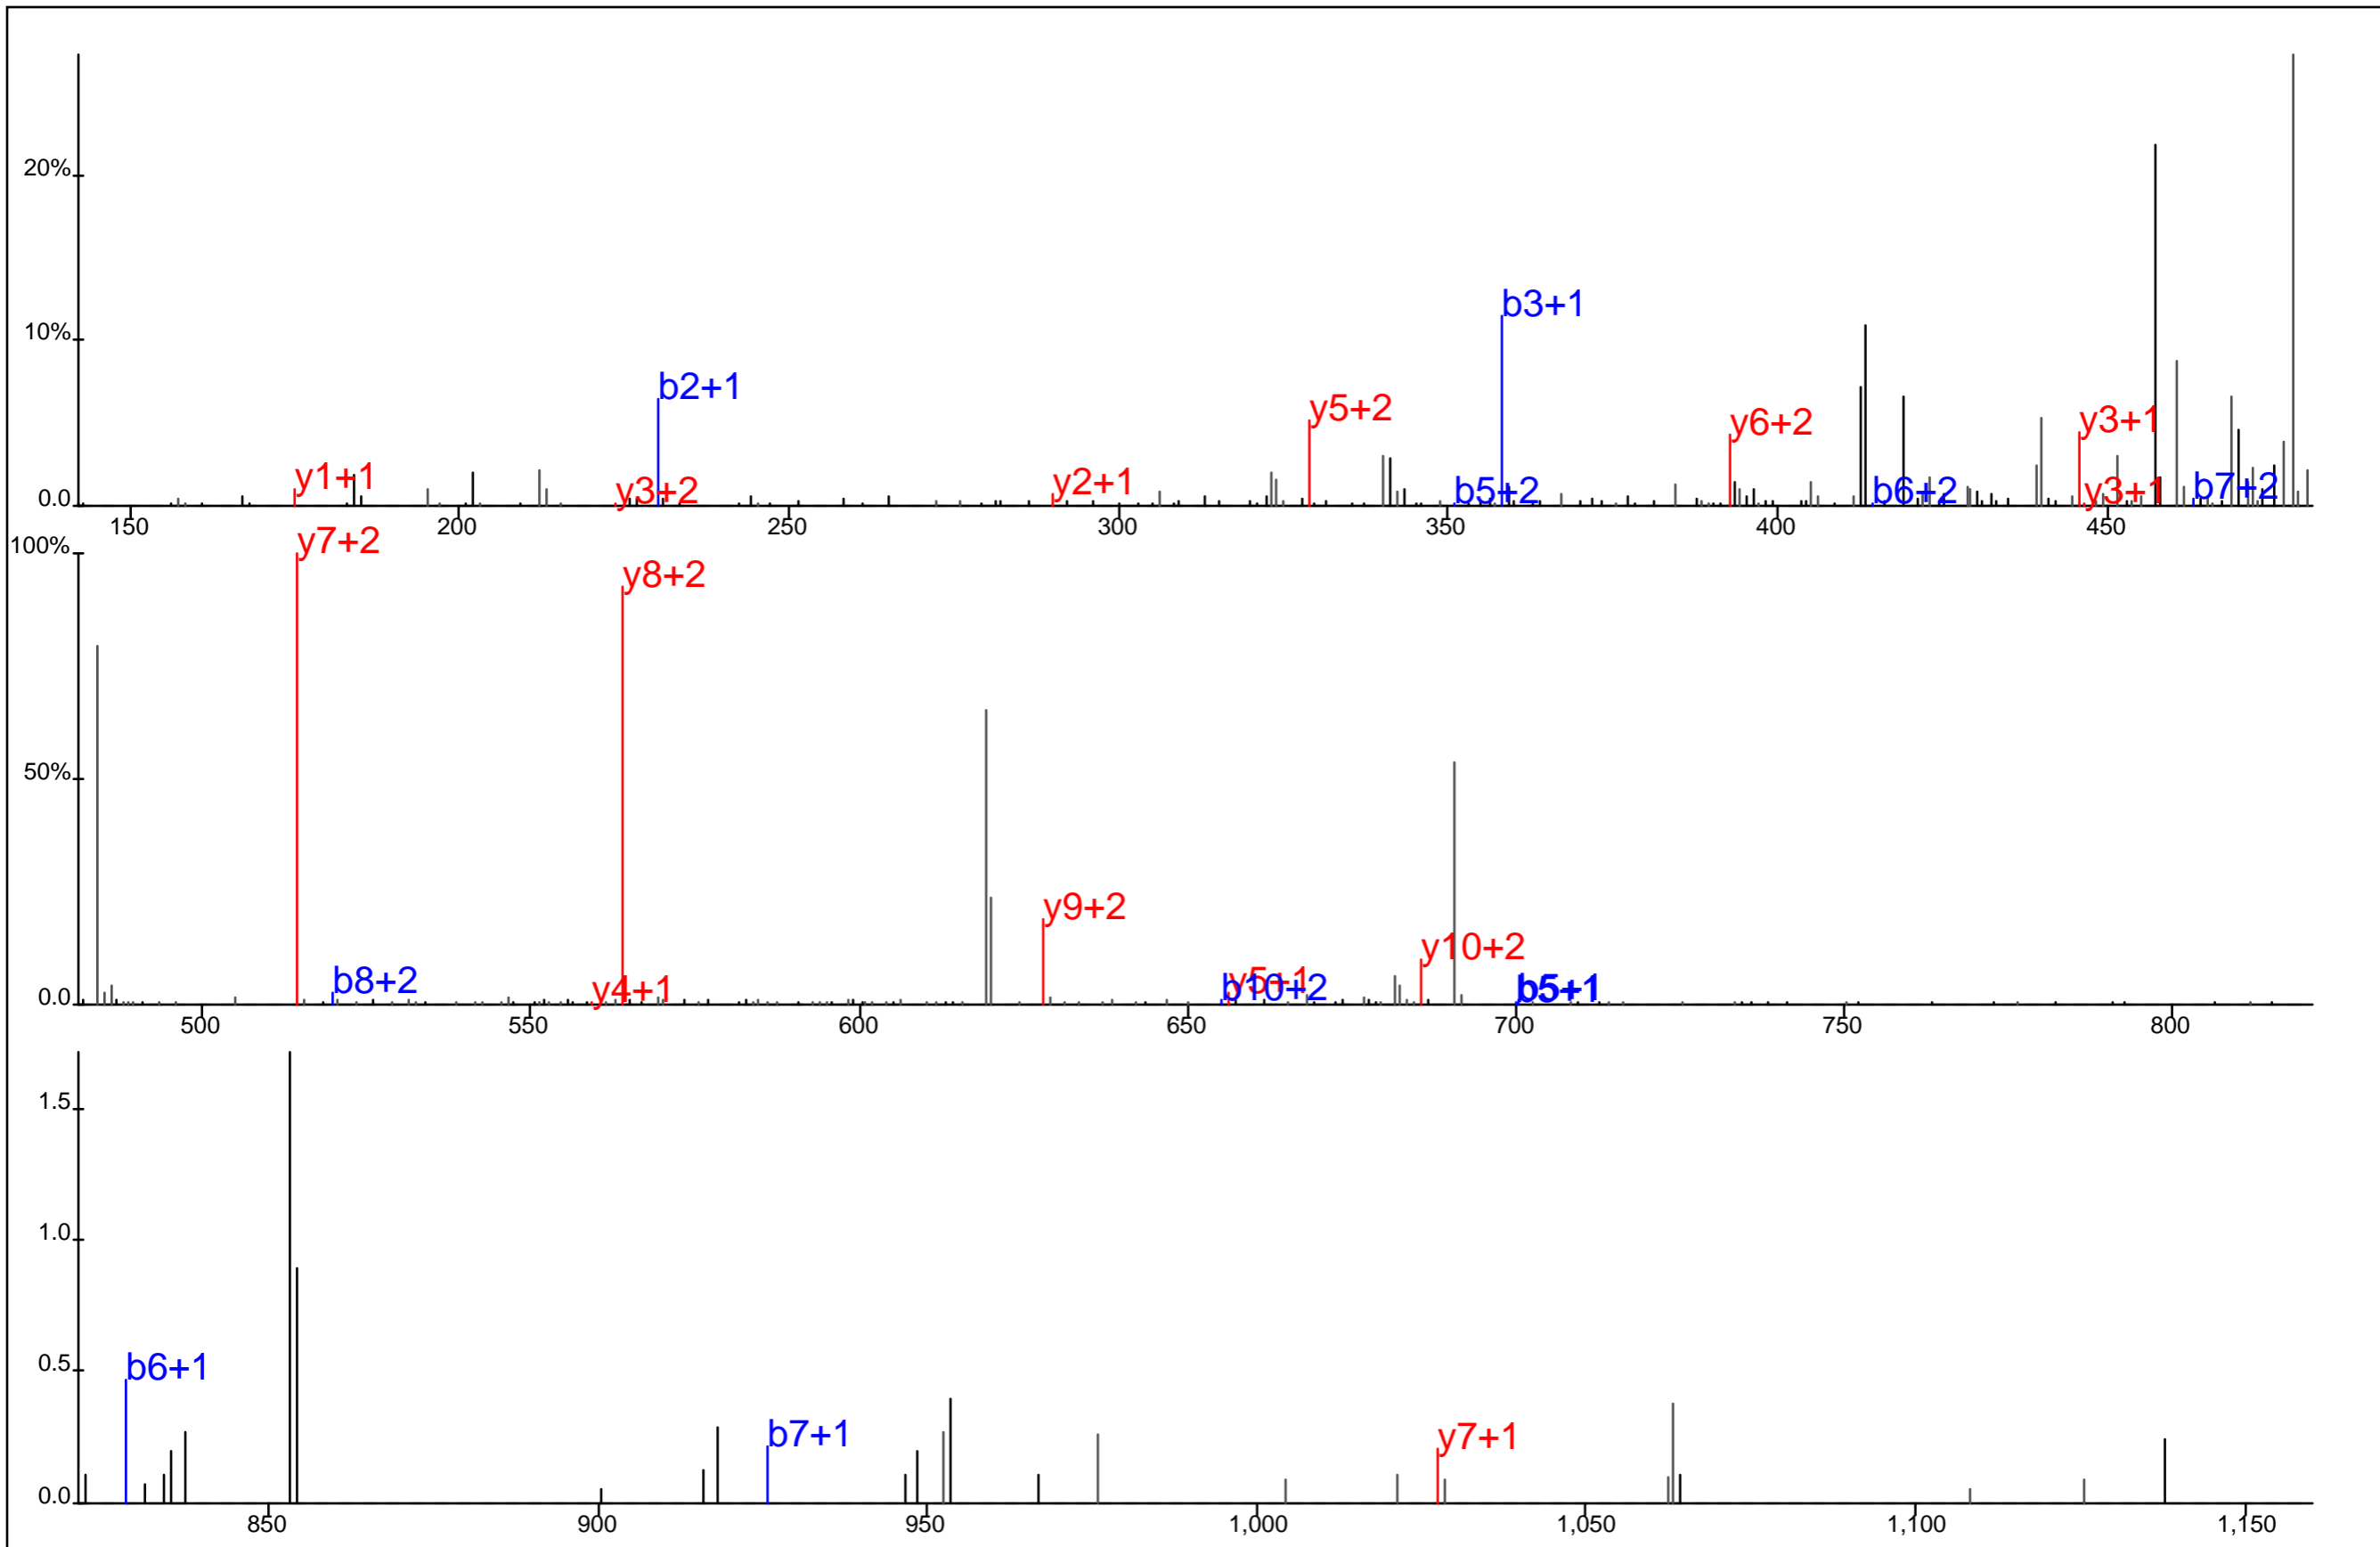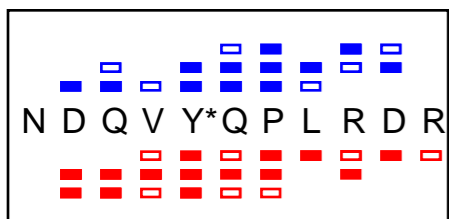

Protein Name: CD3 delta  
 gi Accession: 4502669  
 Precursor Mass: 495.2291+3  
 Delta Mass: 2.573 ppm  
 XCorr: 21.59

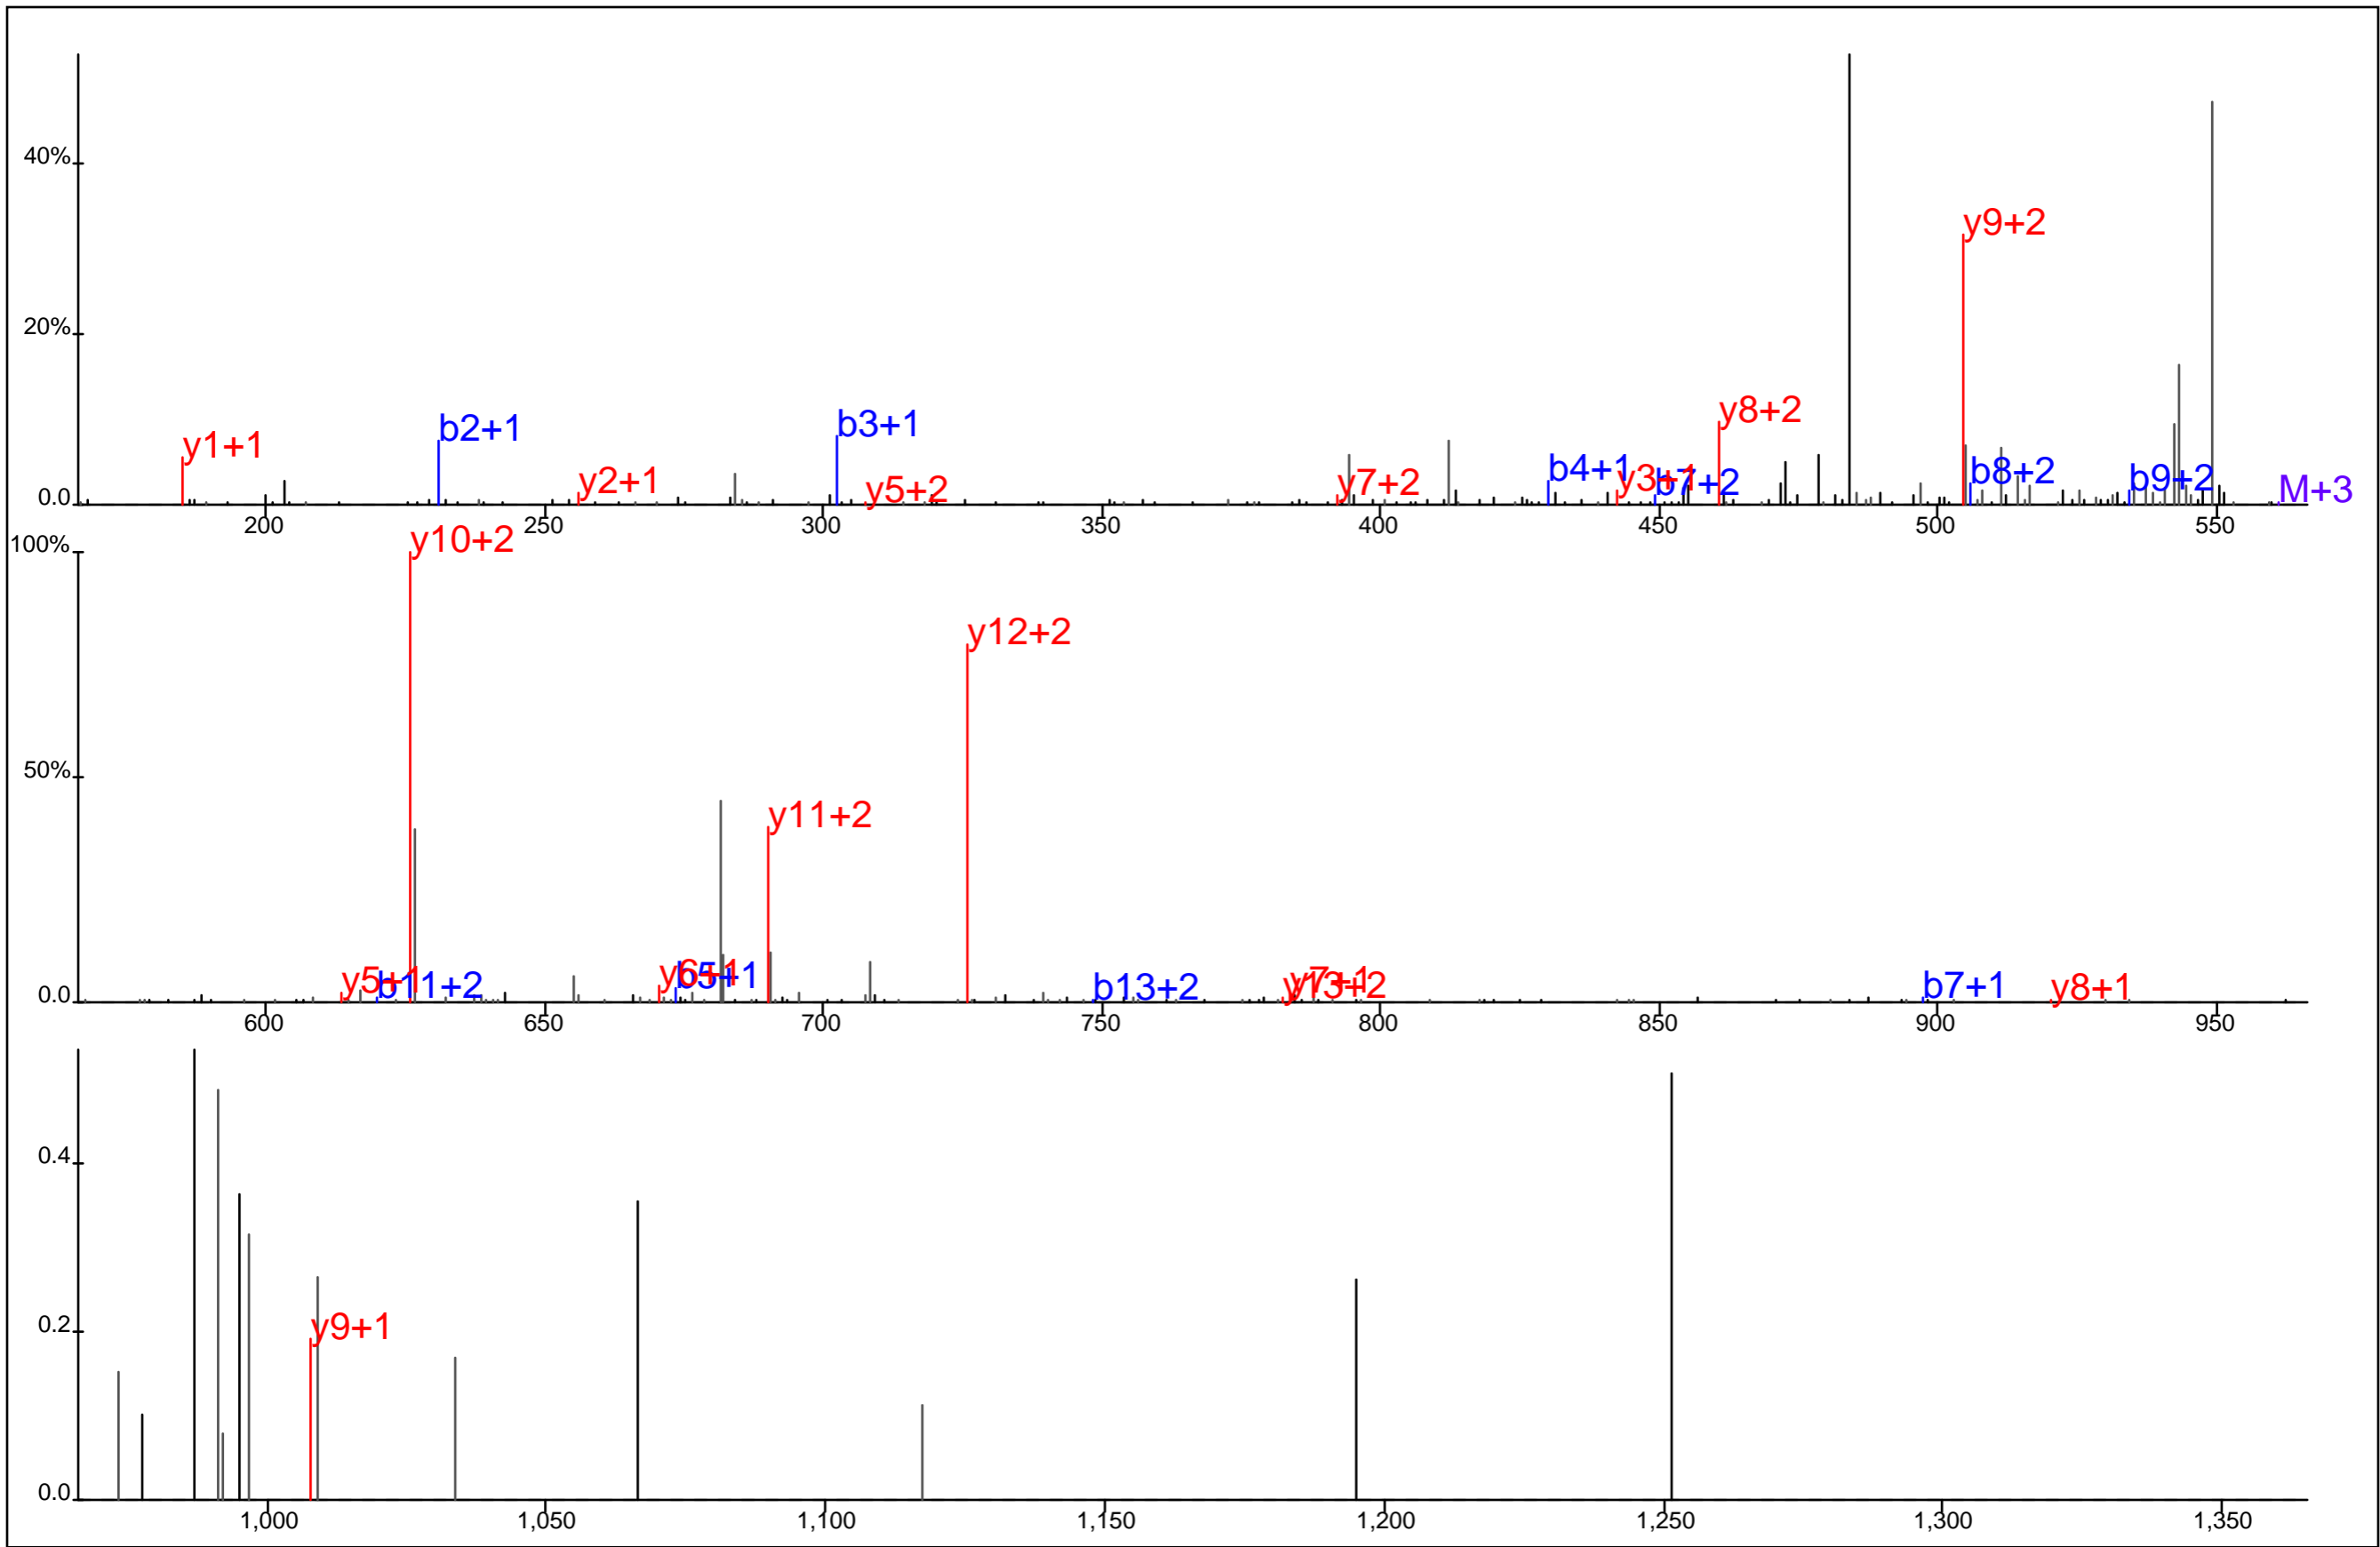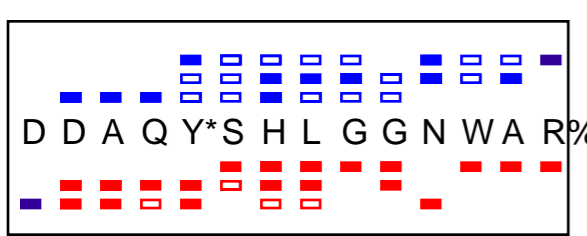

Protein Name: CD3 delta  
 gi Accession: 4502669  
 Precursor Mass: 560.5678+3  
 Delta Mass: 3.065 ppm  
 XCorr: 30.44

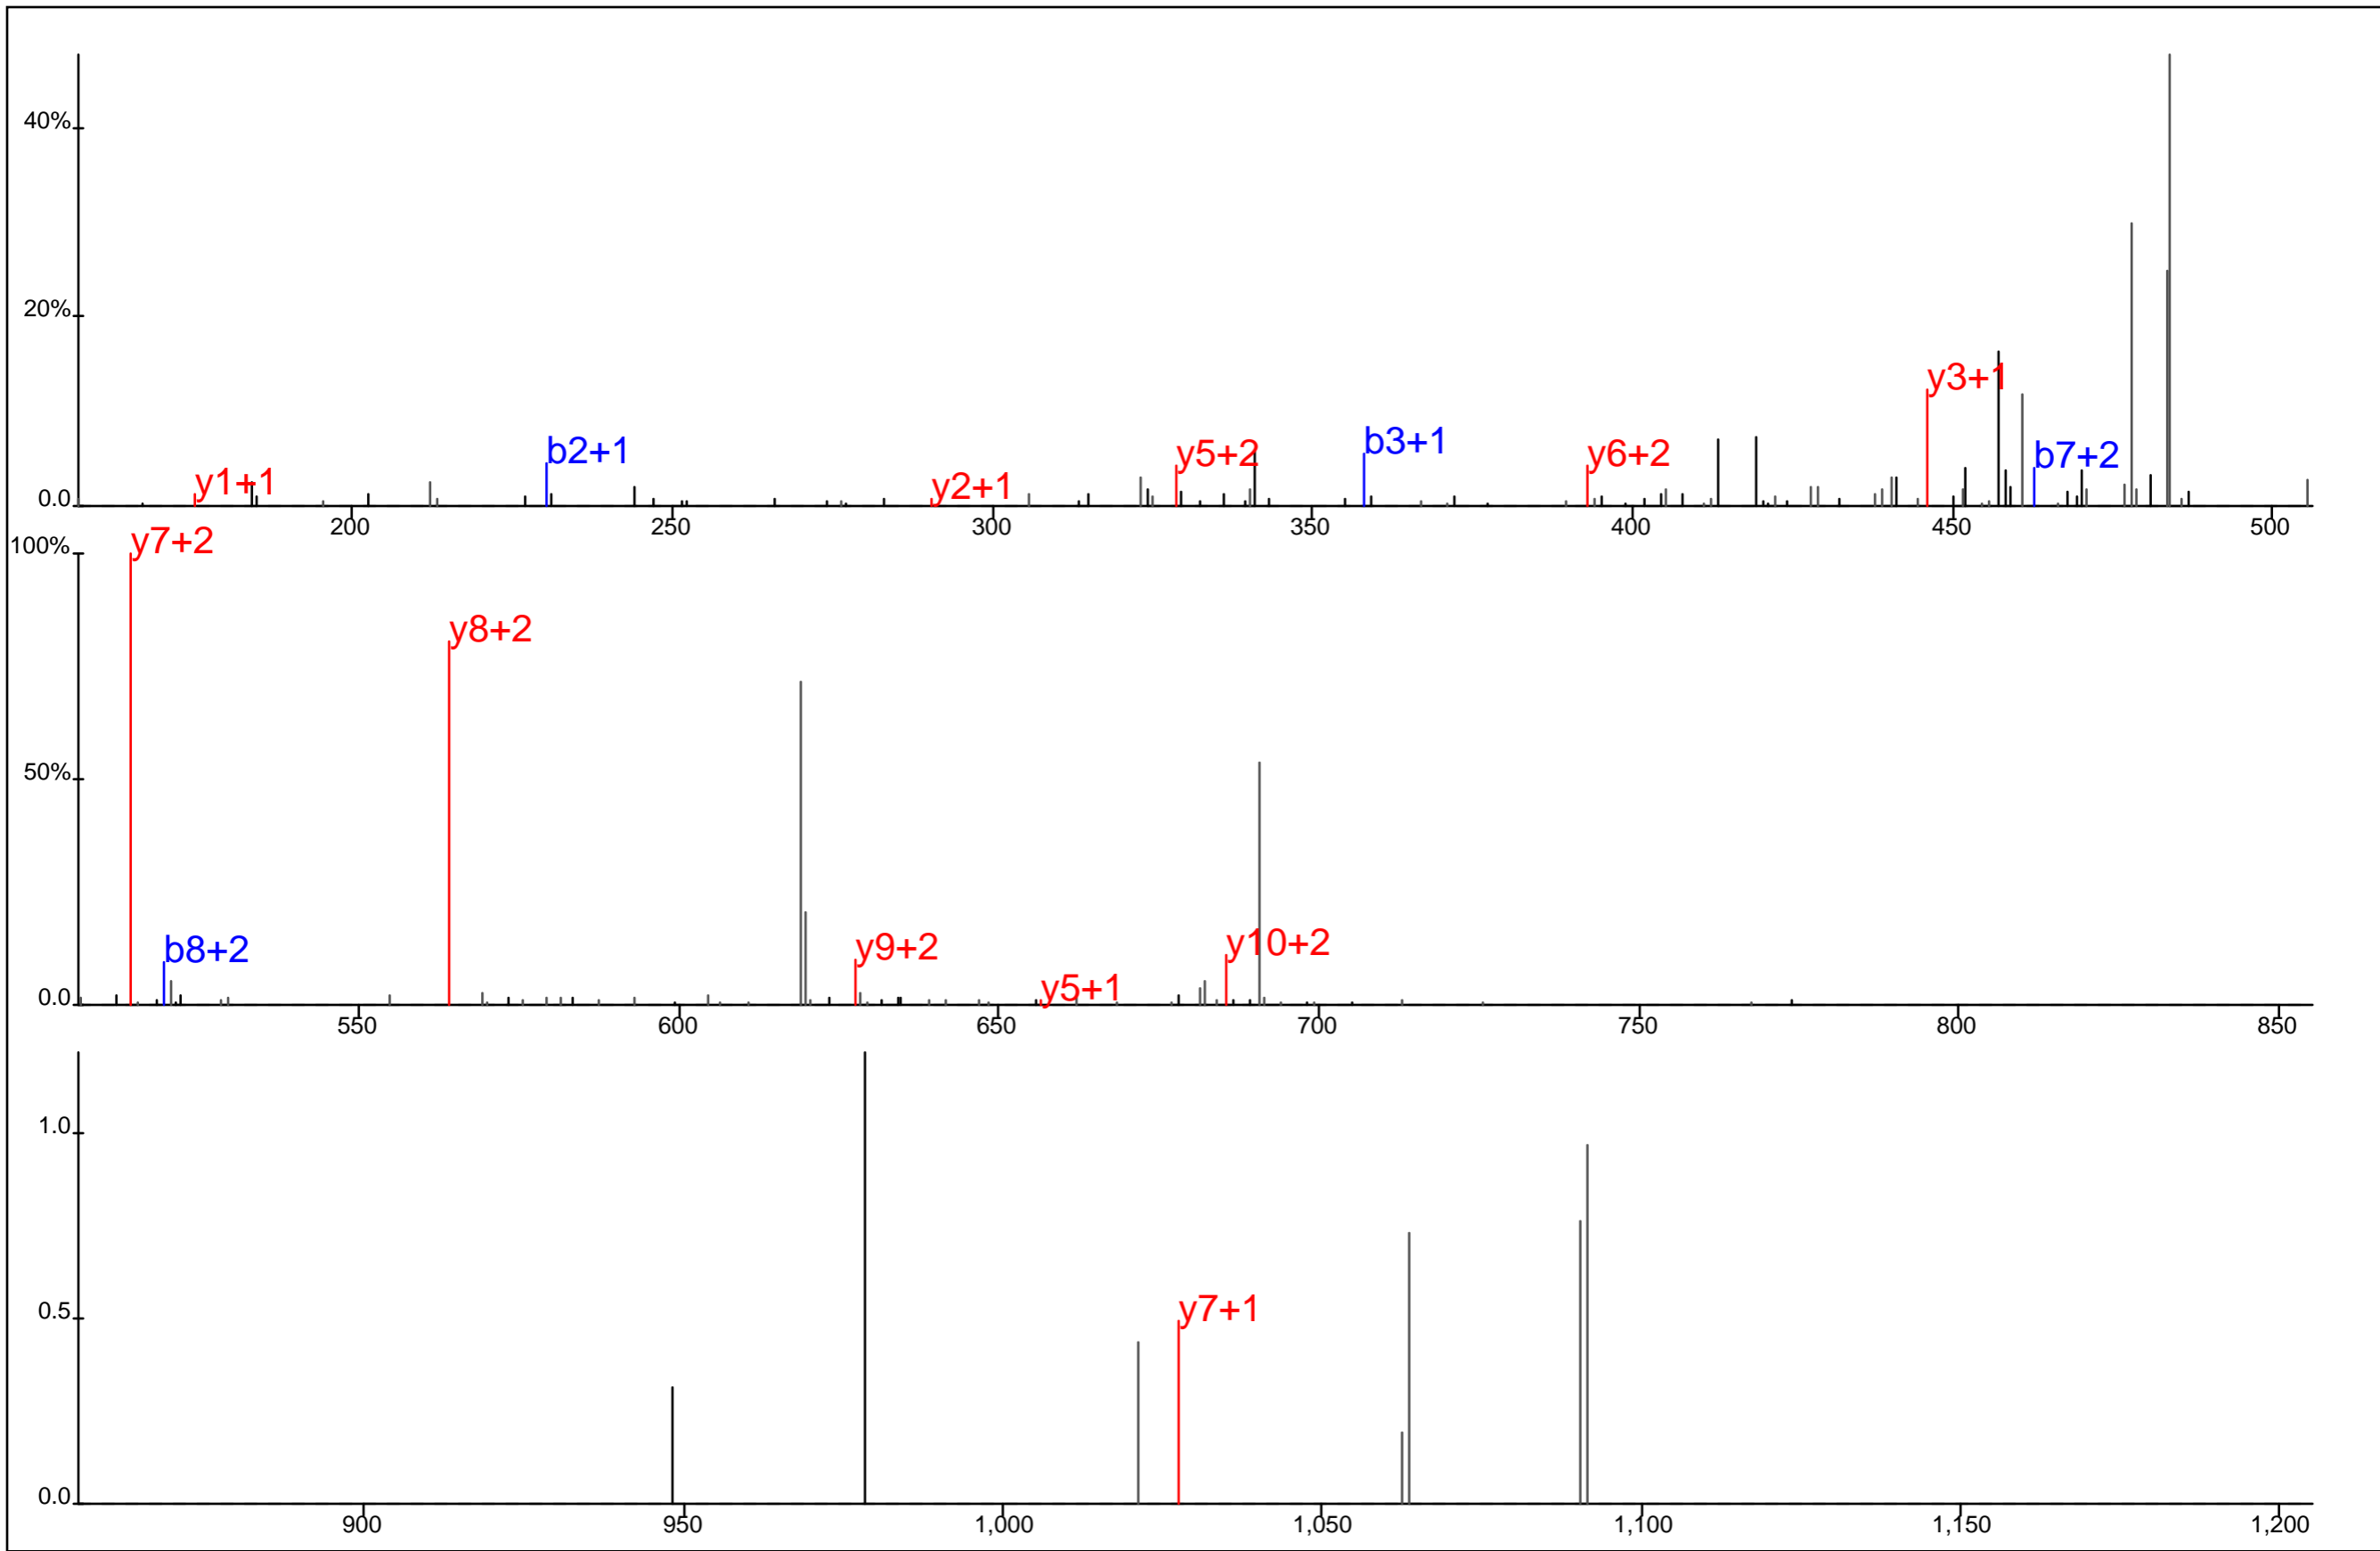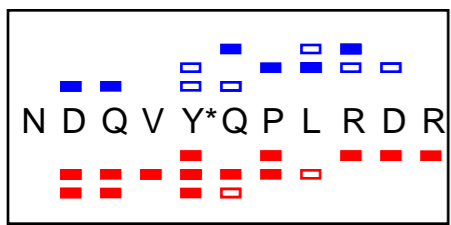

Protein Name: CD3 delta  
 gi Accession: 4502669  
 Precursor Mass: 495.2285+3  
 Delta Mass: 1.467 ppm  
 XCorr: 23.23



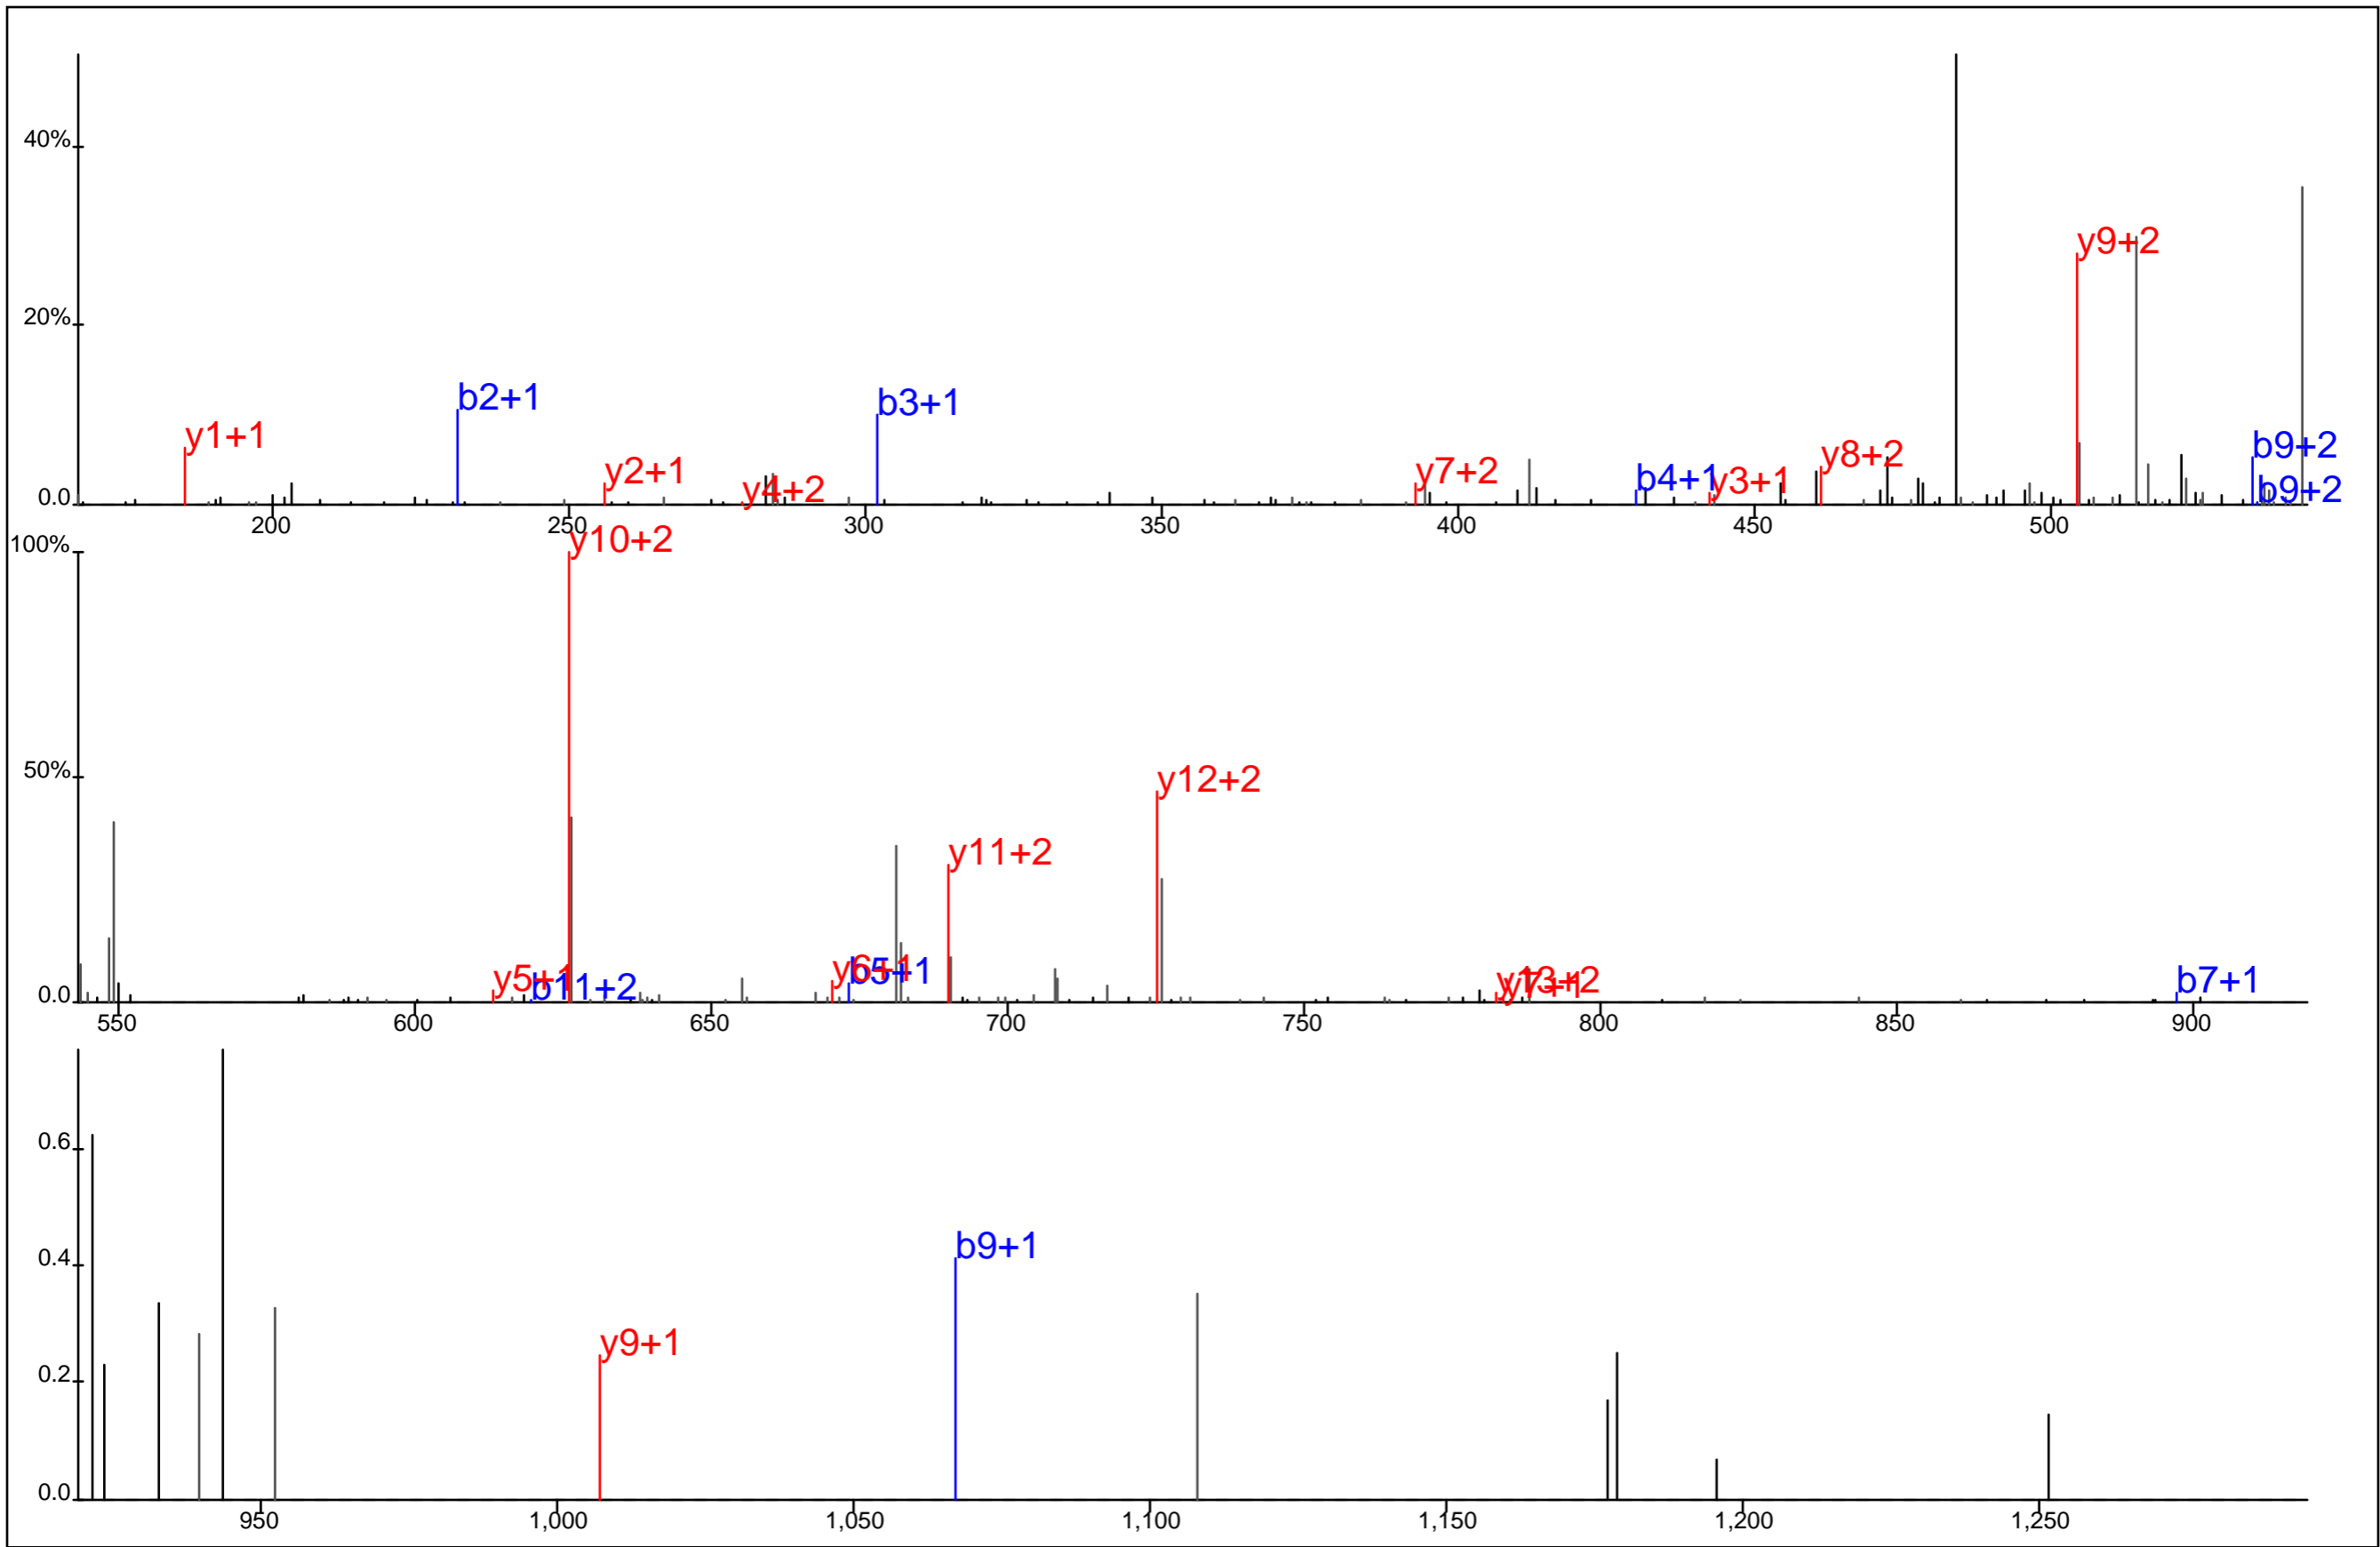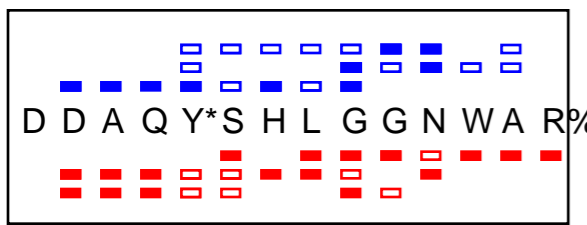

Protein Name: CD3 delta  
 gi Accession: 4502669  
 Precursor Mass: 560.5673+3  
 Delta Mass: 2.083 ppm  
 XCorr: 30.91

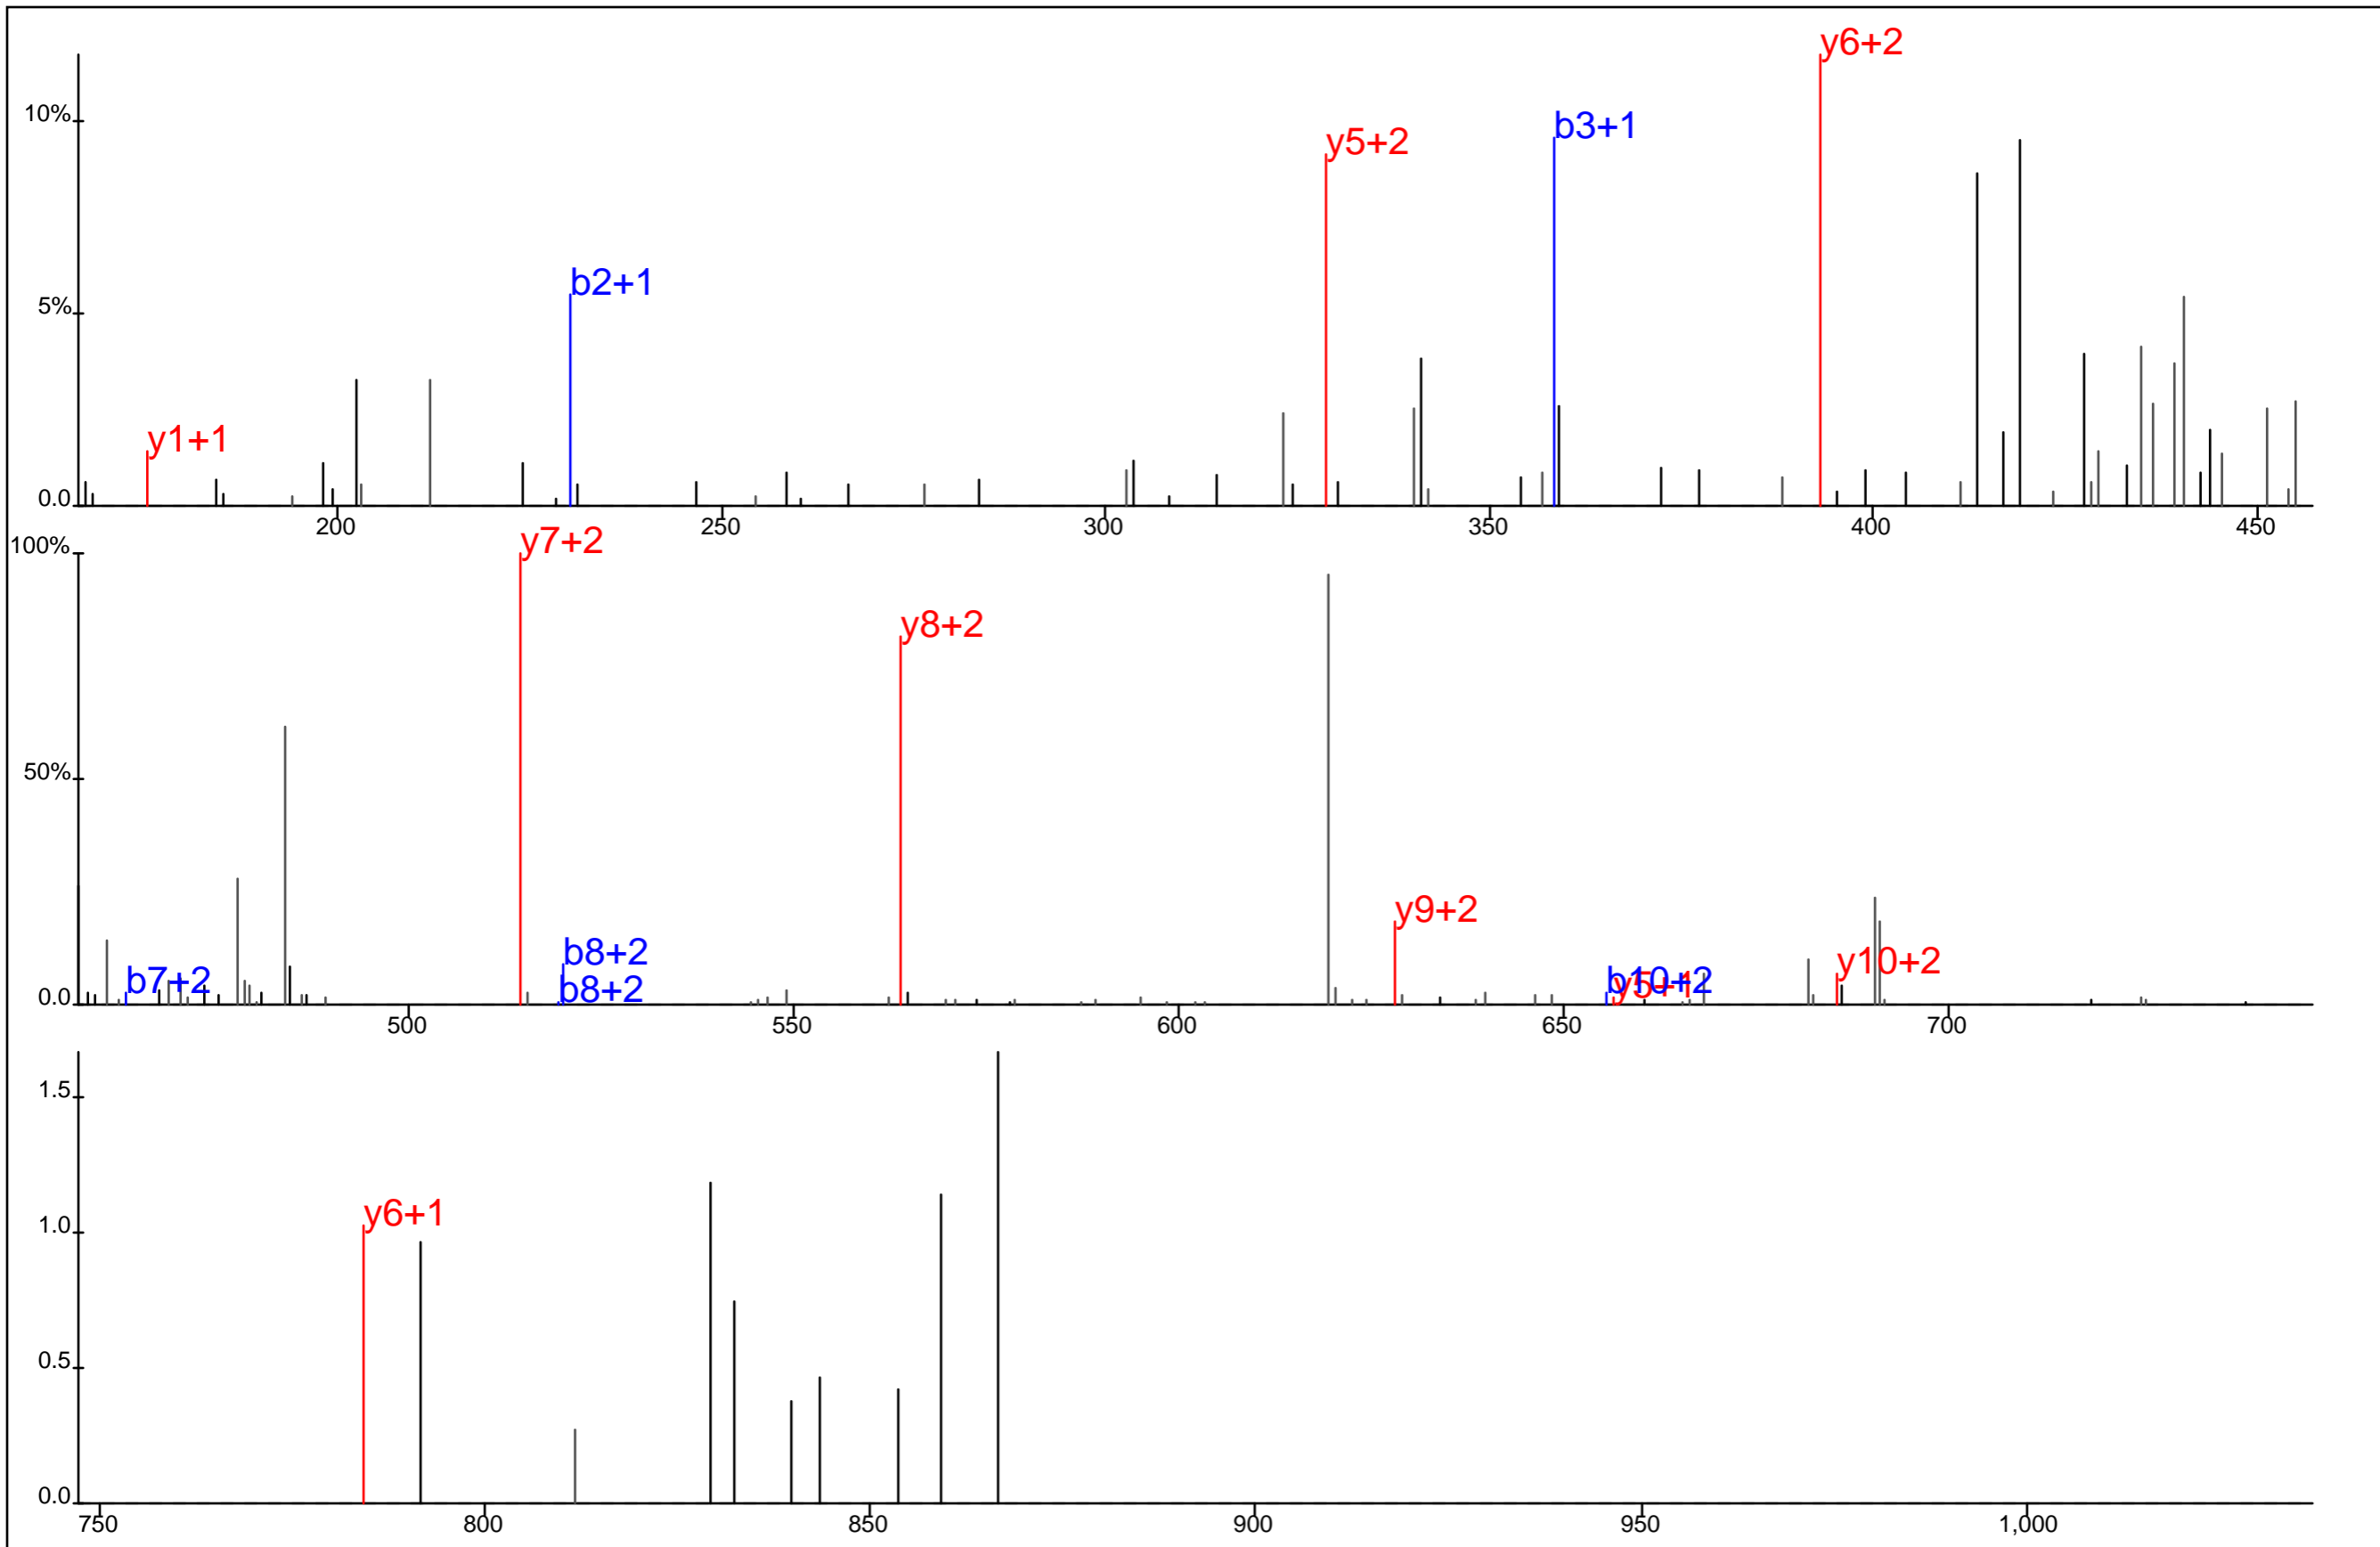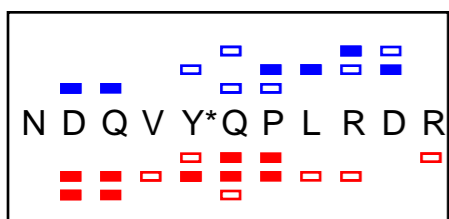

Protein Name: CD3 delta  
 gi Accession: 4502669  
 Precursor Mass: 495.2290+3  
 Delta Mass: 2.391 ppm  
 XCorr: 27.18

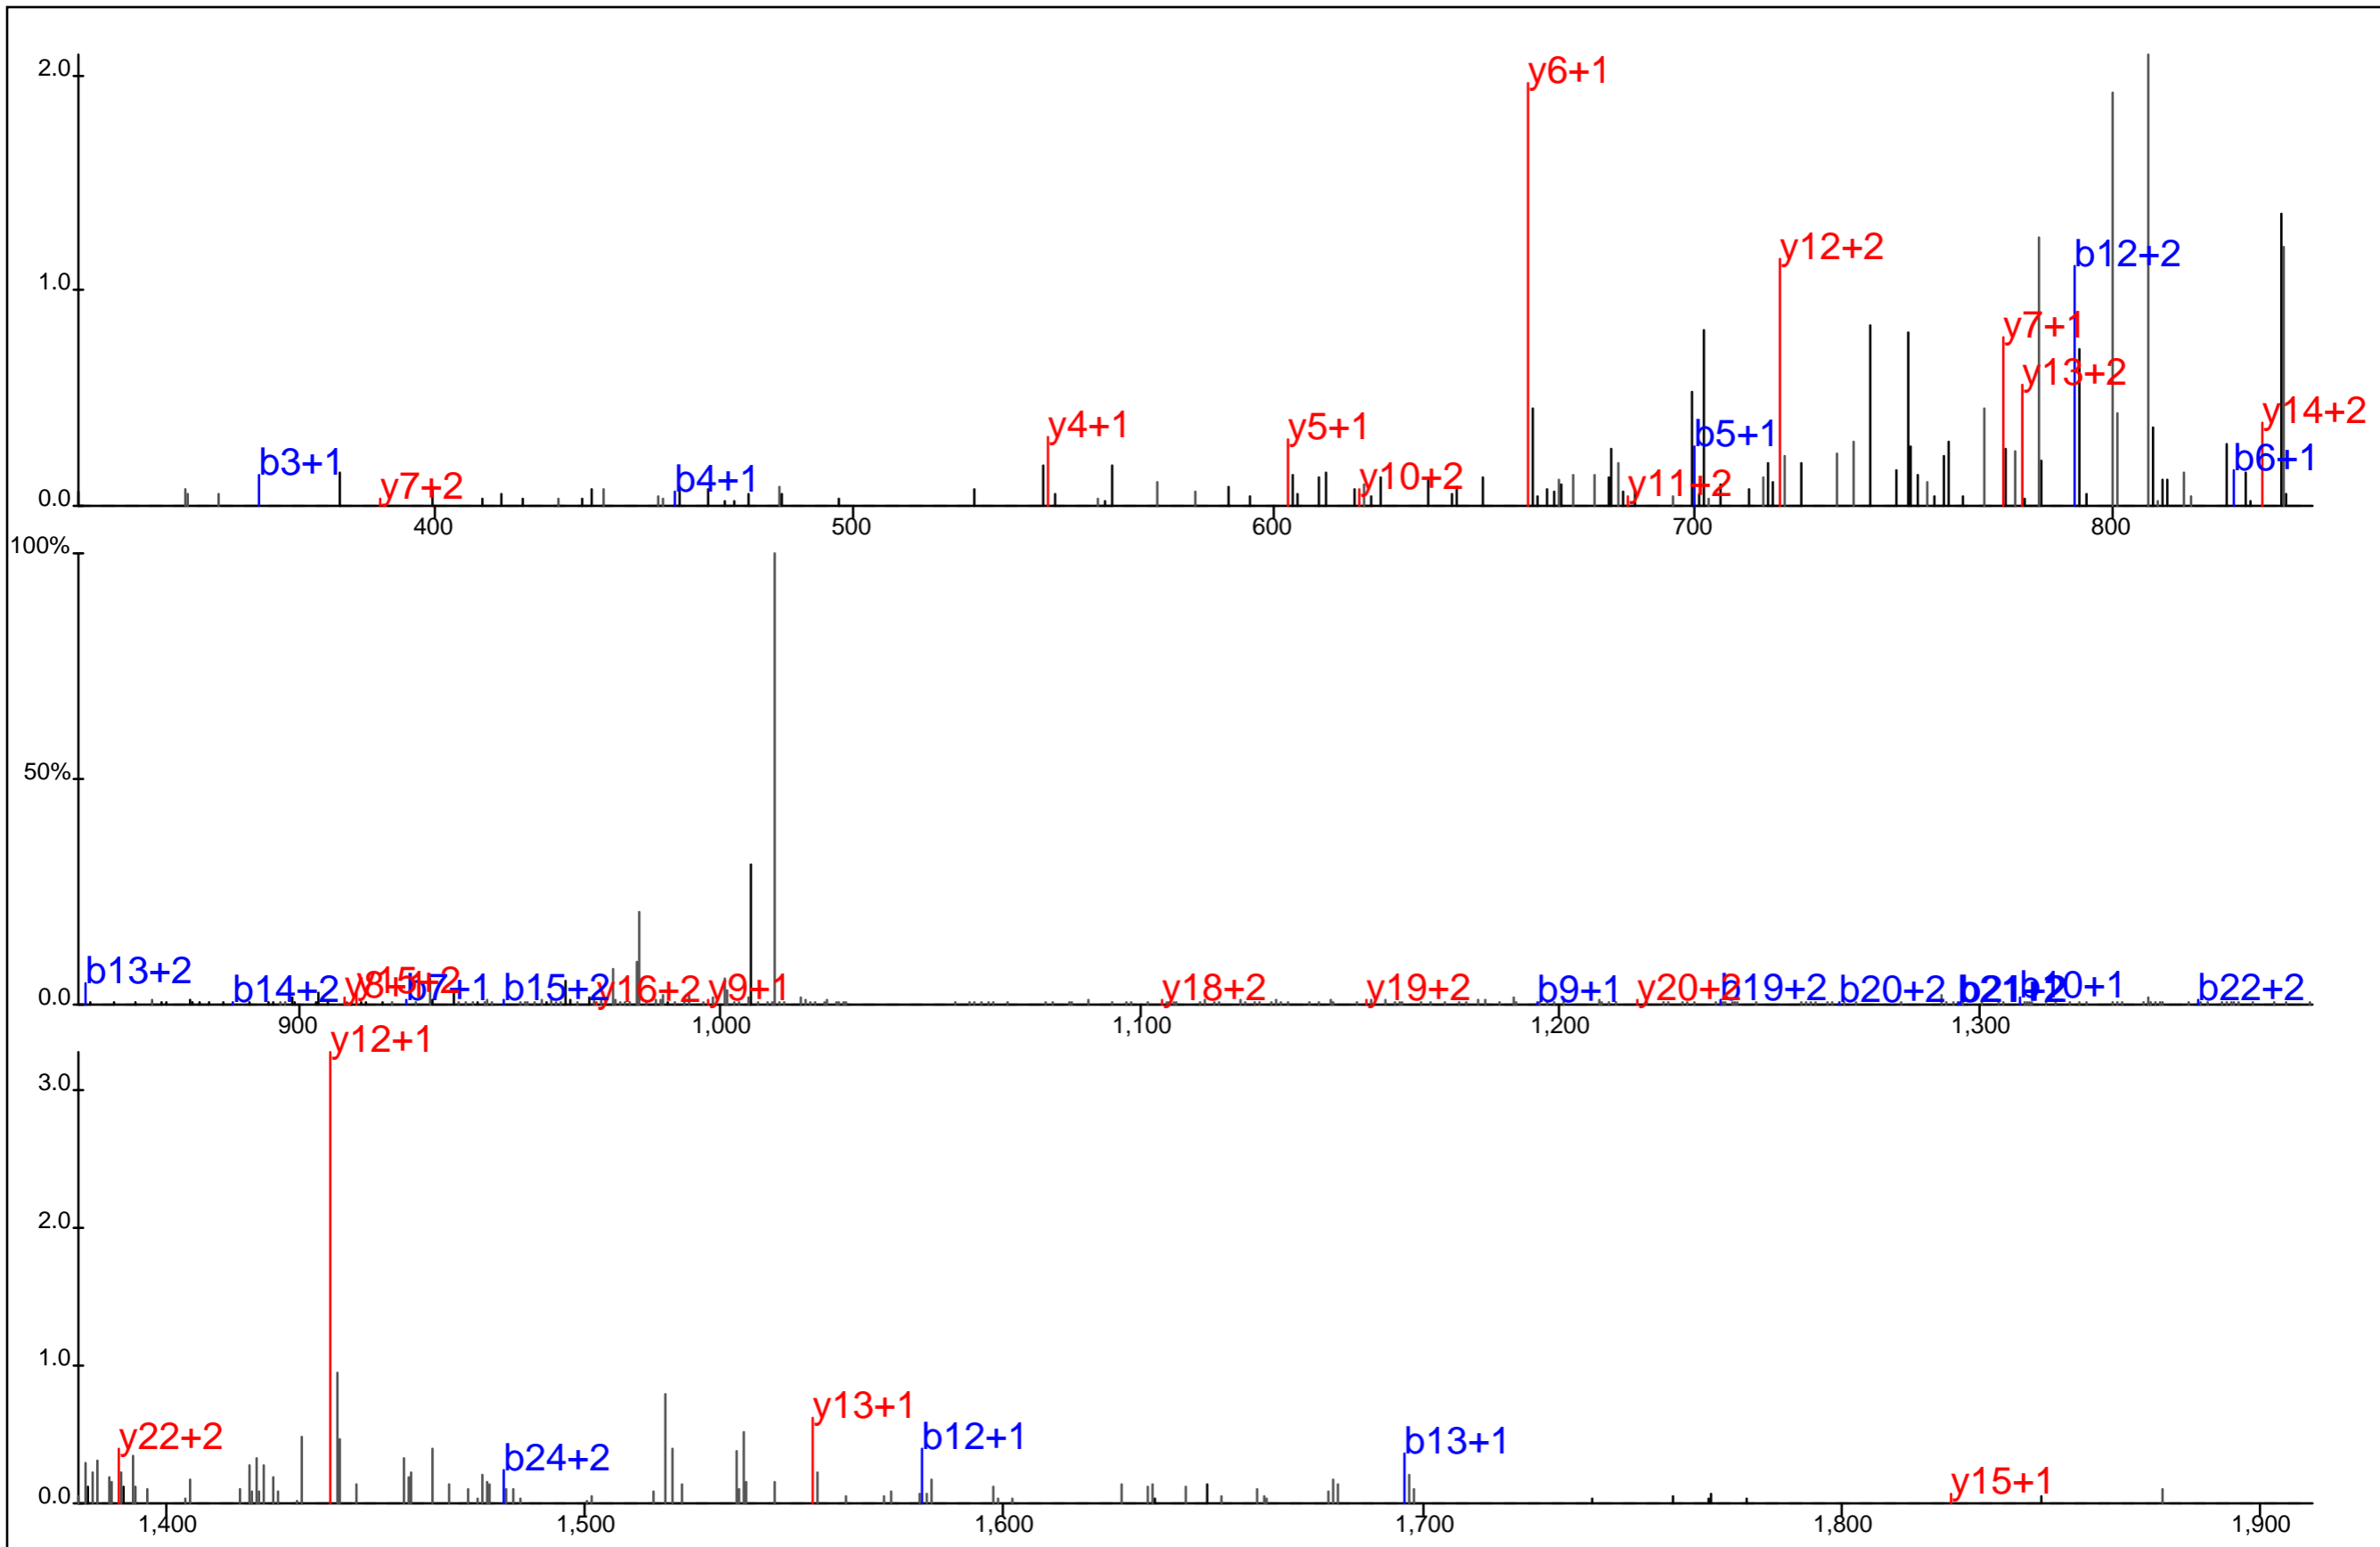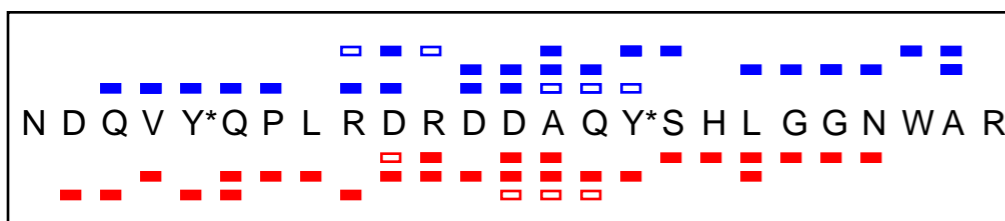

Protein Name: CD3 delta  
 gi Accession: 4502669  
 Precursor Mass: 1,045.4508+3  
 Delta Mass: 3.614 ppm  
 XCorr: 20.08

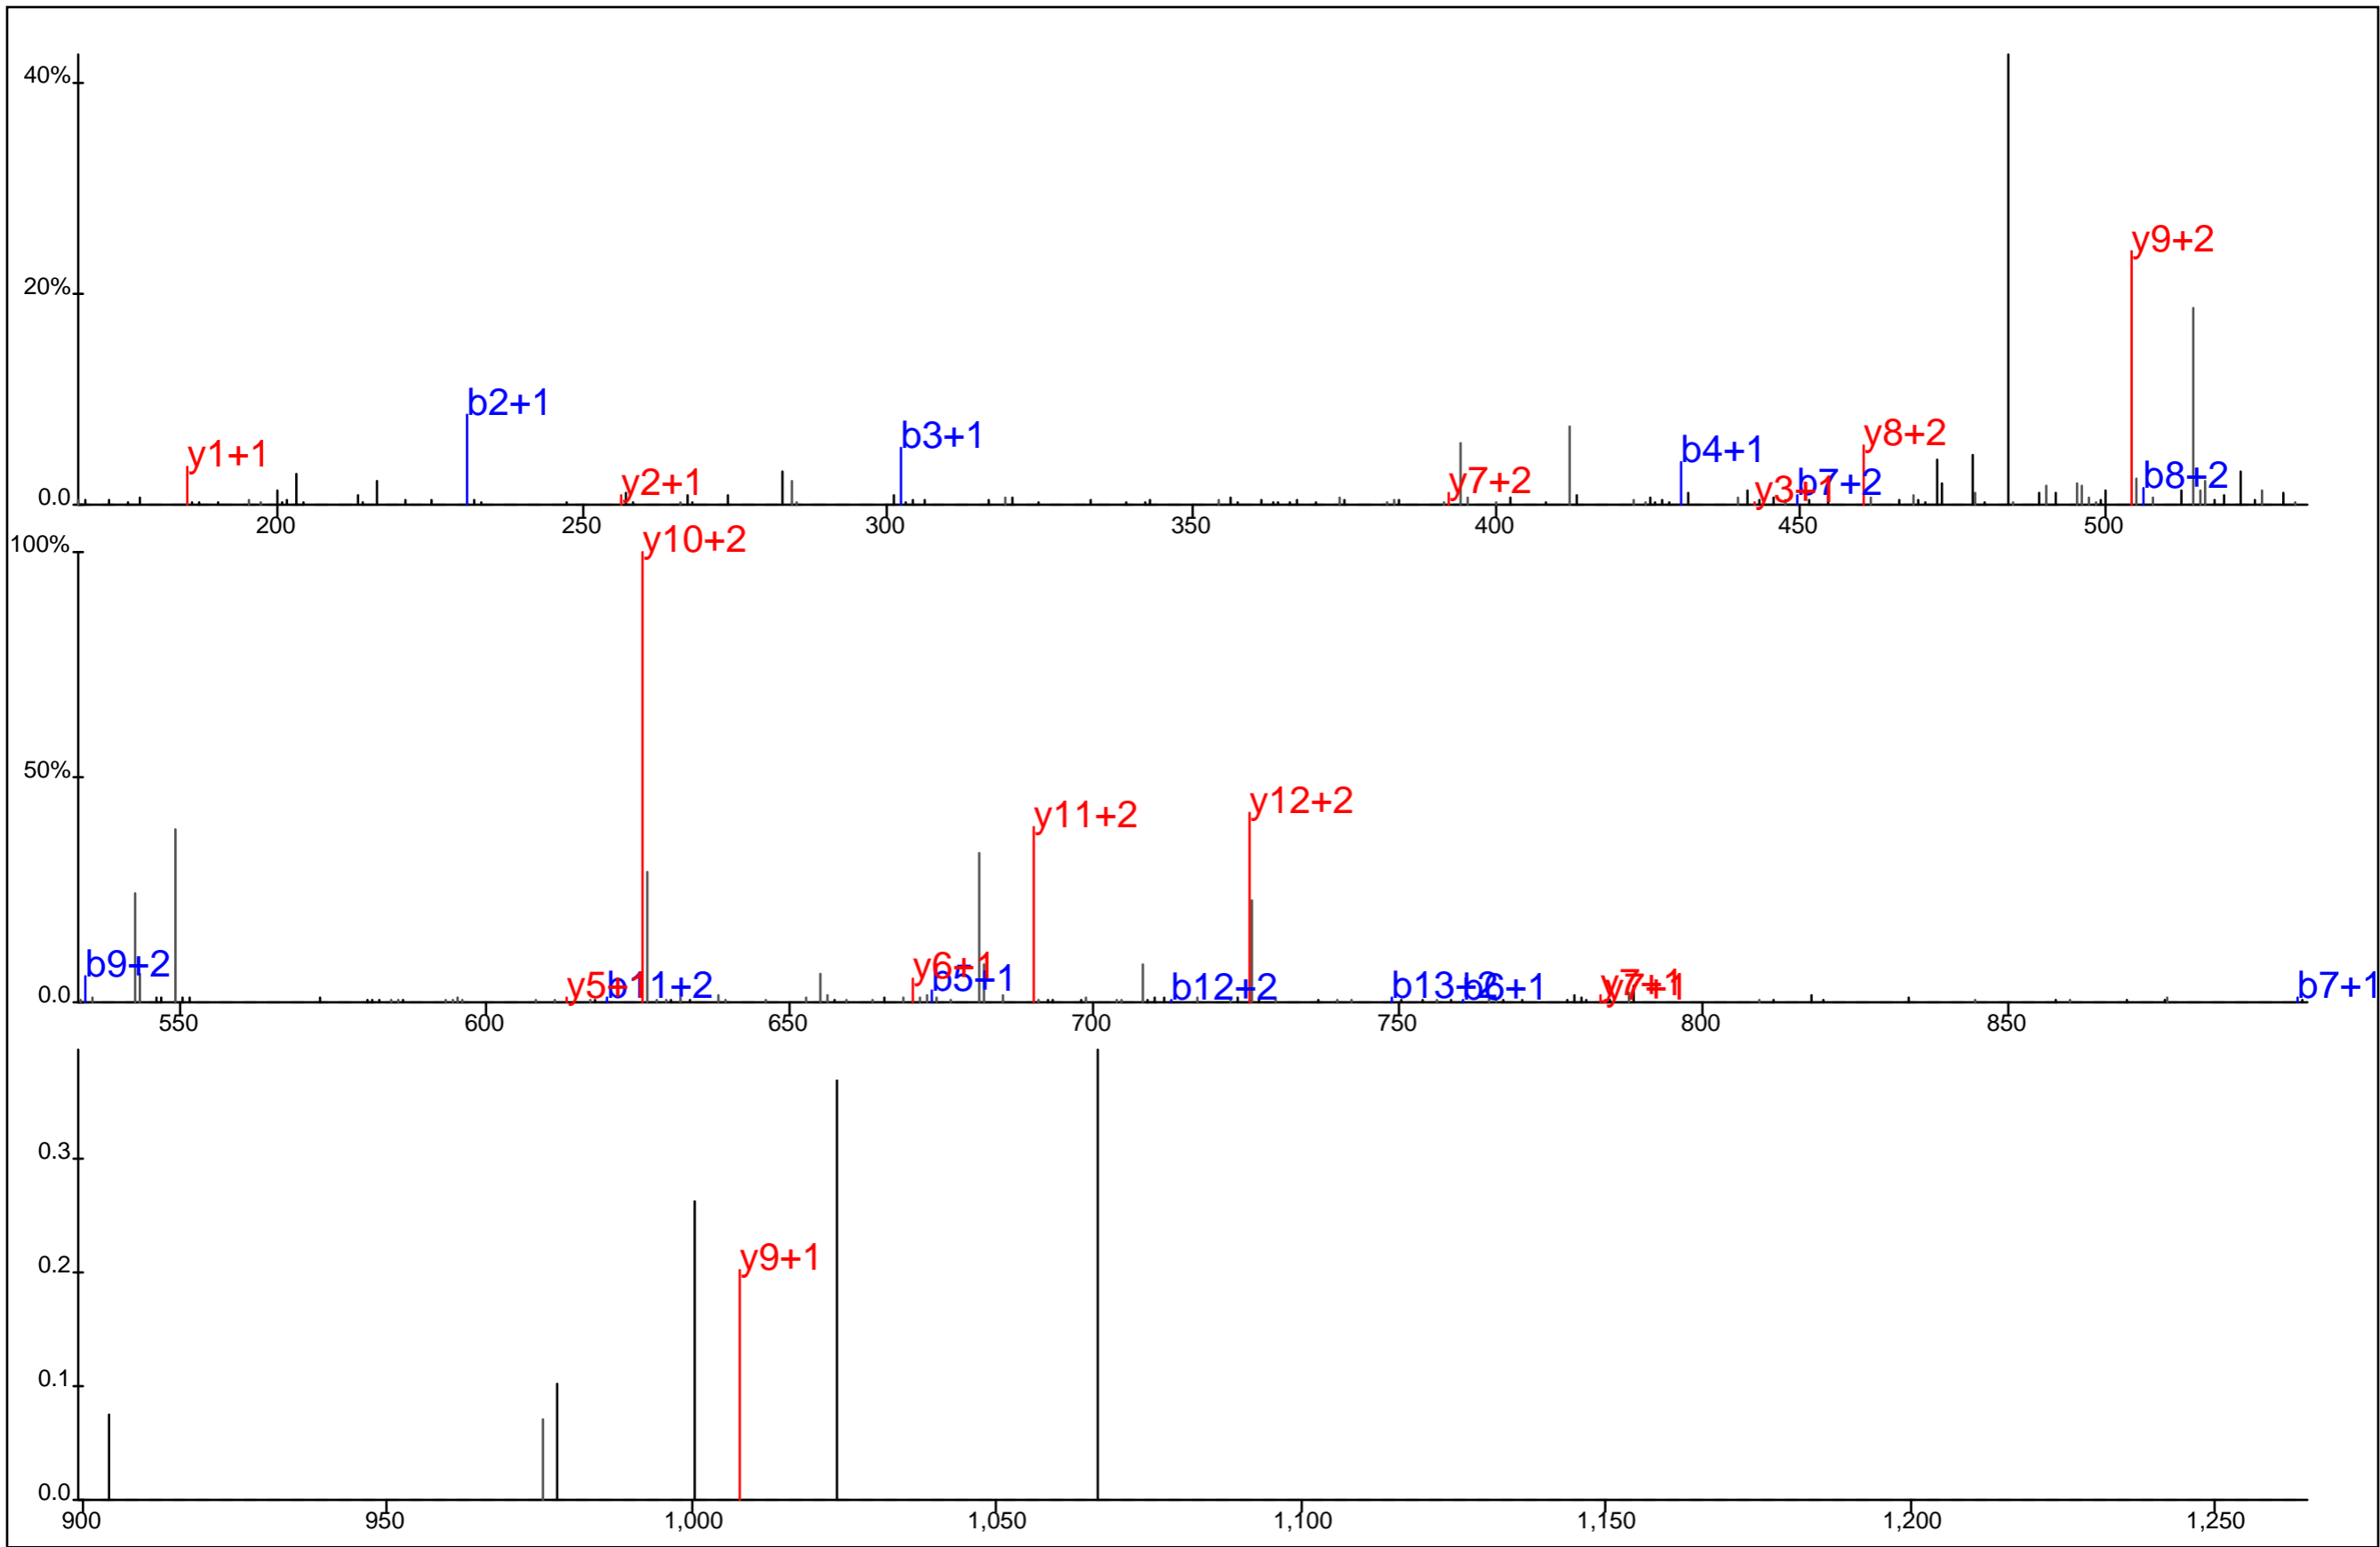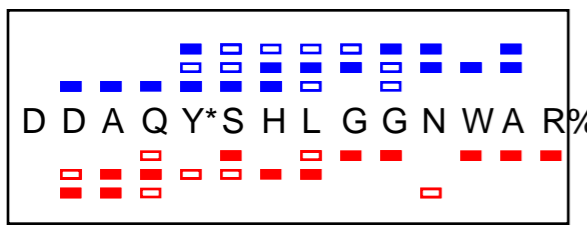

Protein Name: CD3 delta  
 gi Accession: 4502669  
 Precursor Mass: 560.5669+3  
 Delta Mass: 1.428 ppm  
 XCorr: 29.13

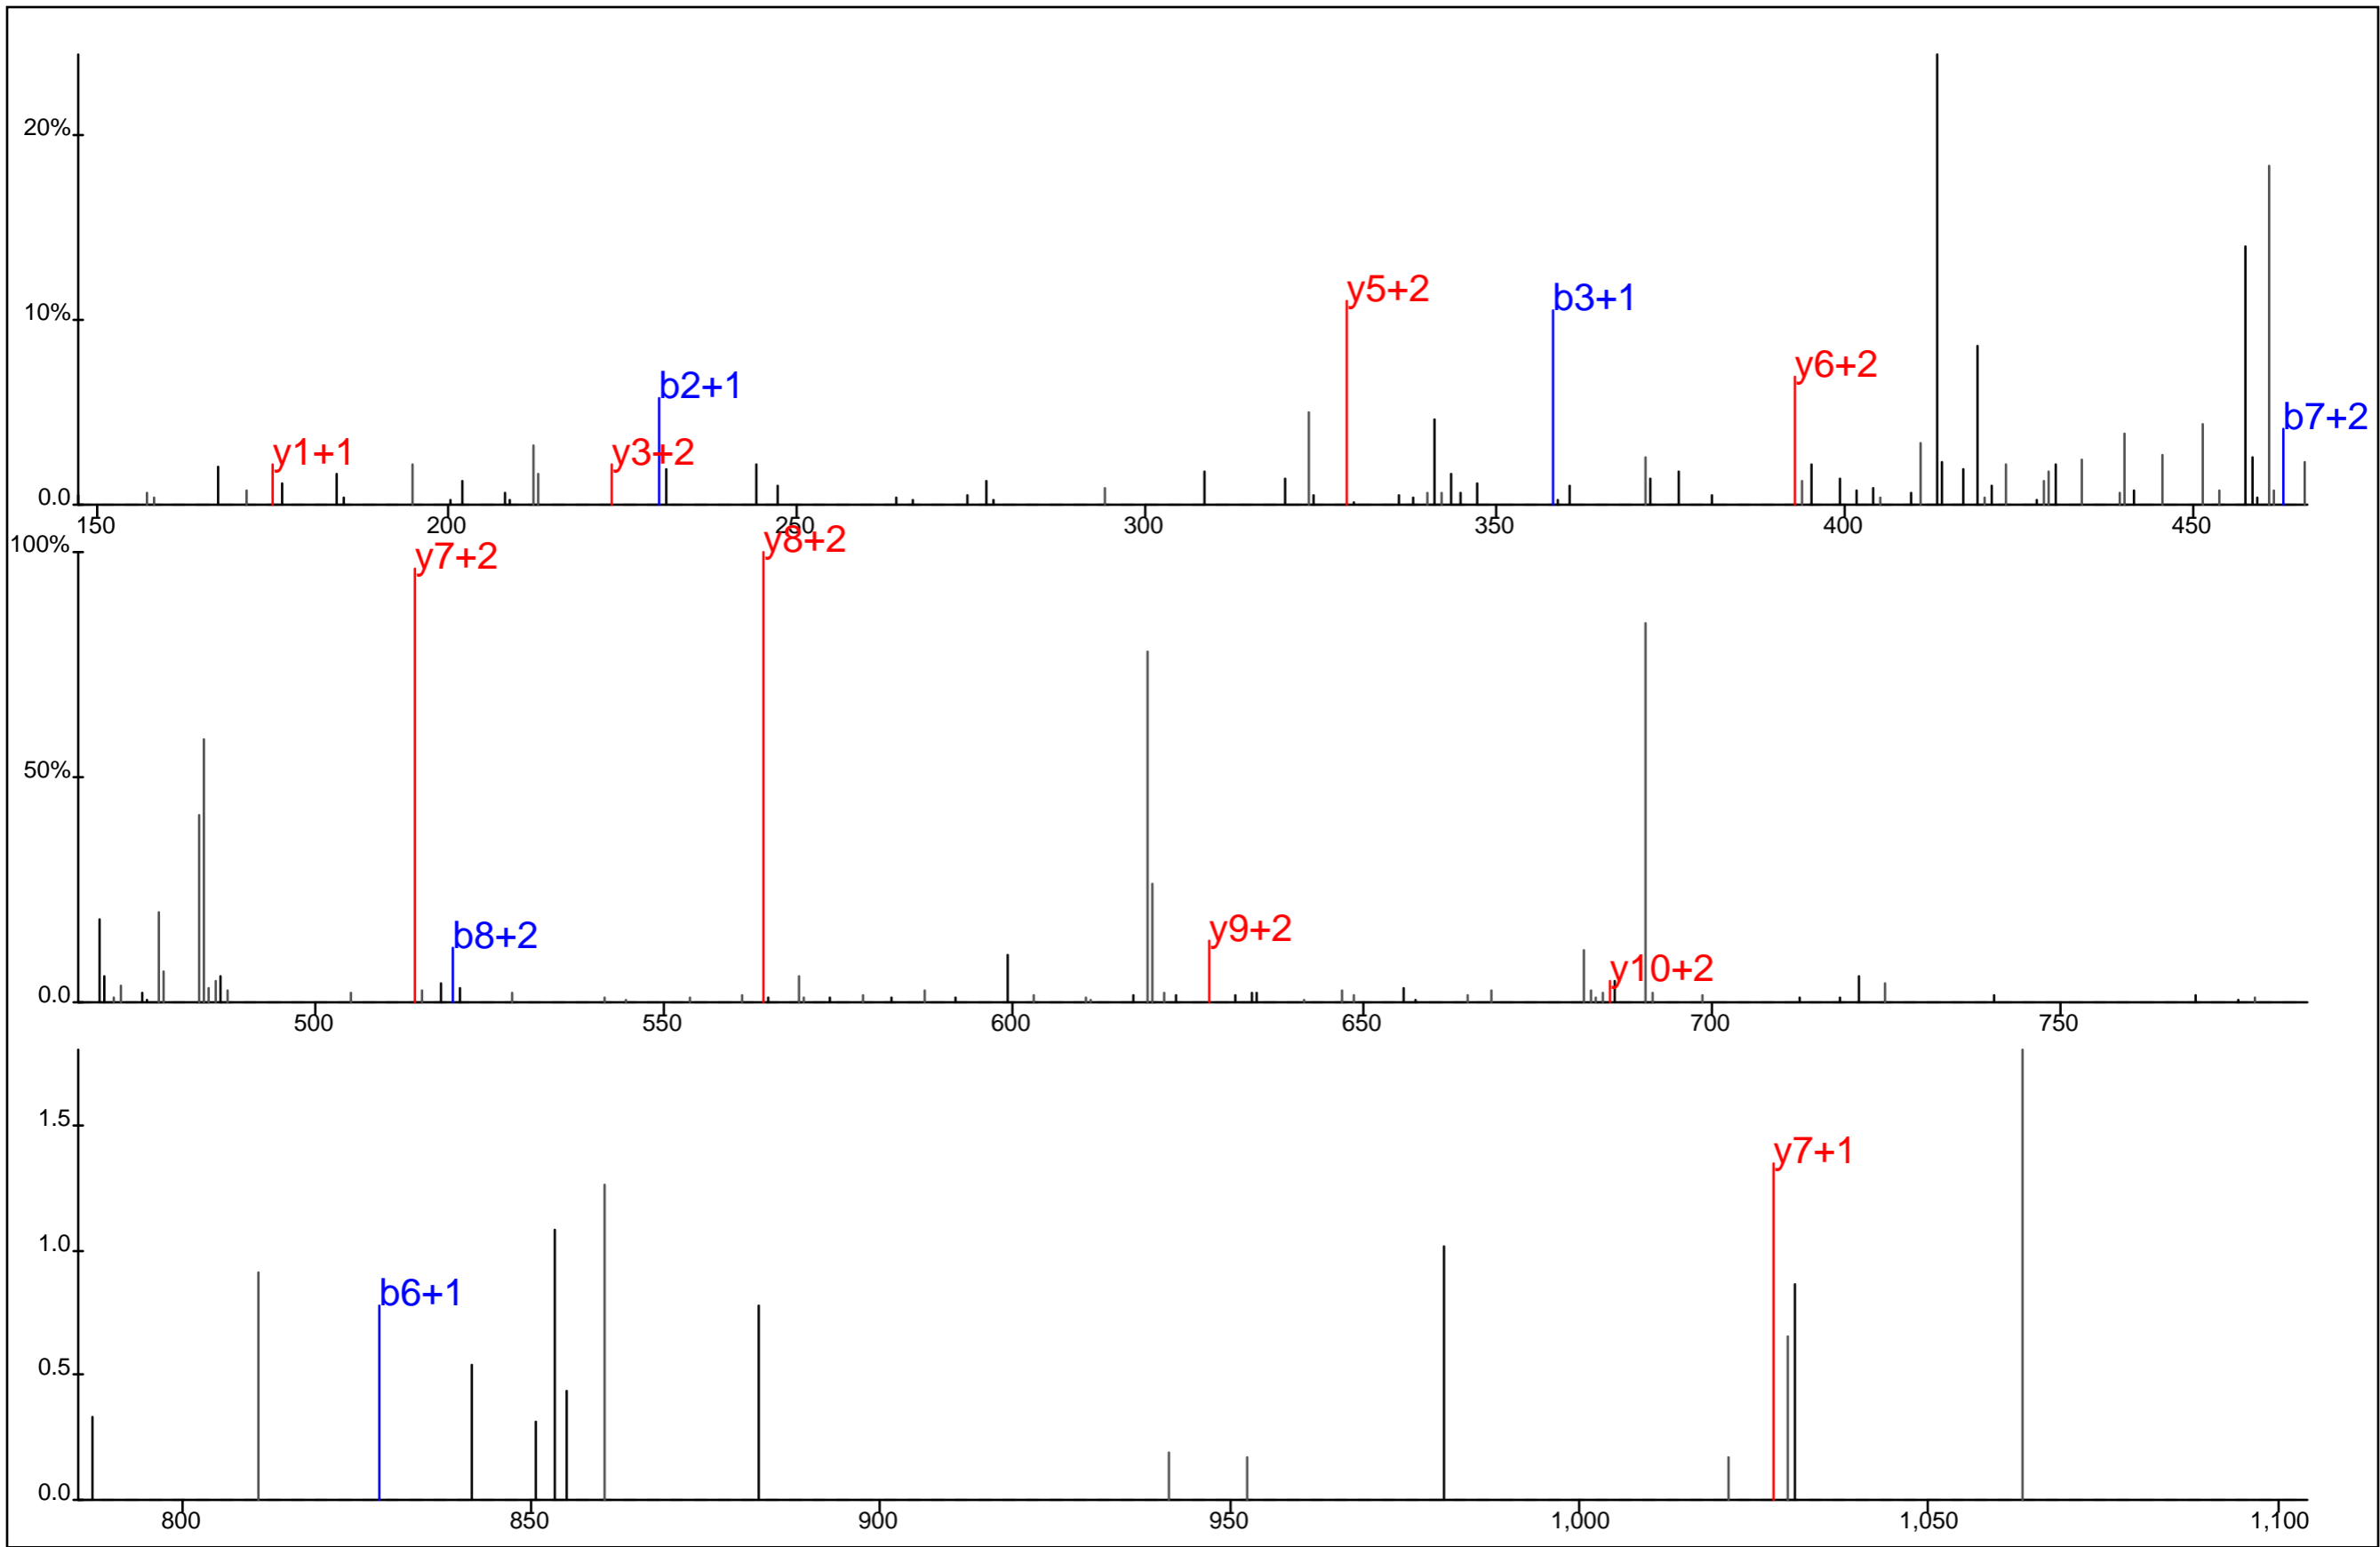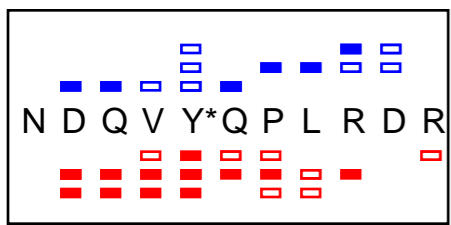

Protein Name: CD3 delta  
 gi Accession: 4502669  
 Precursor Mass: 495.2296+3  
 Delta Mass: 3.564 ppm  
 XCorr: 24.43

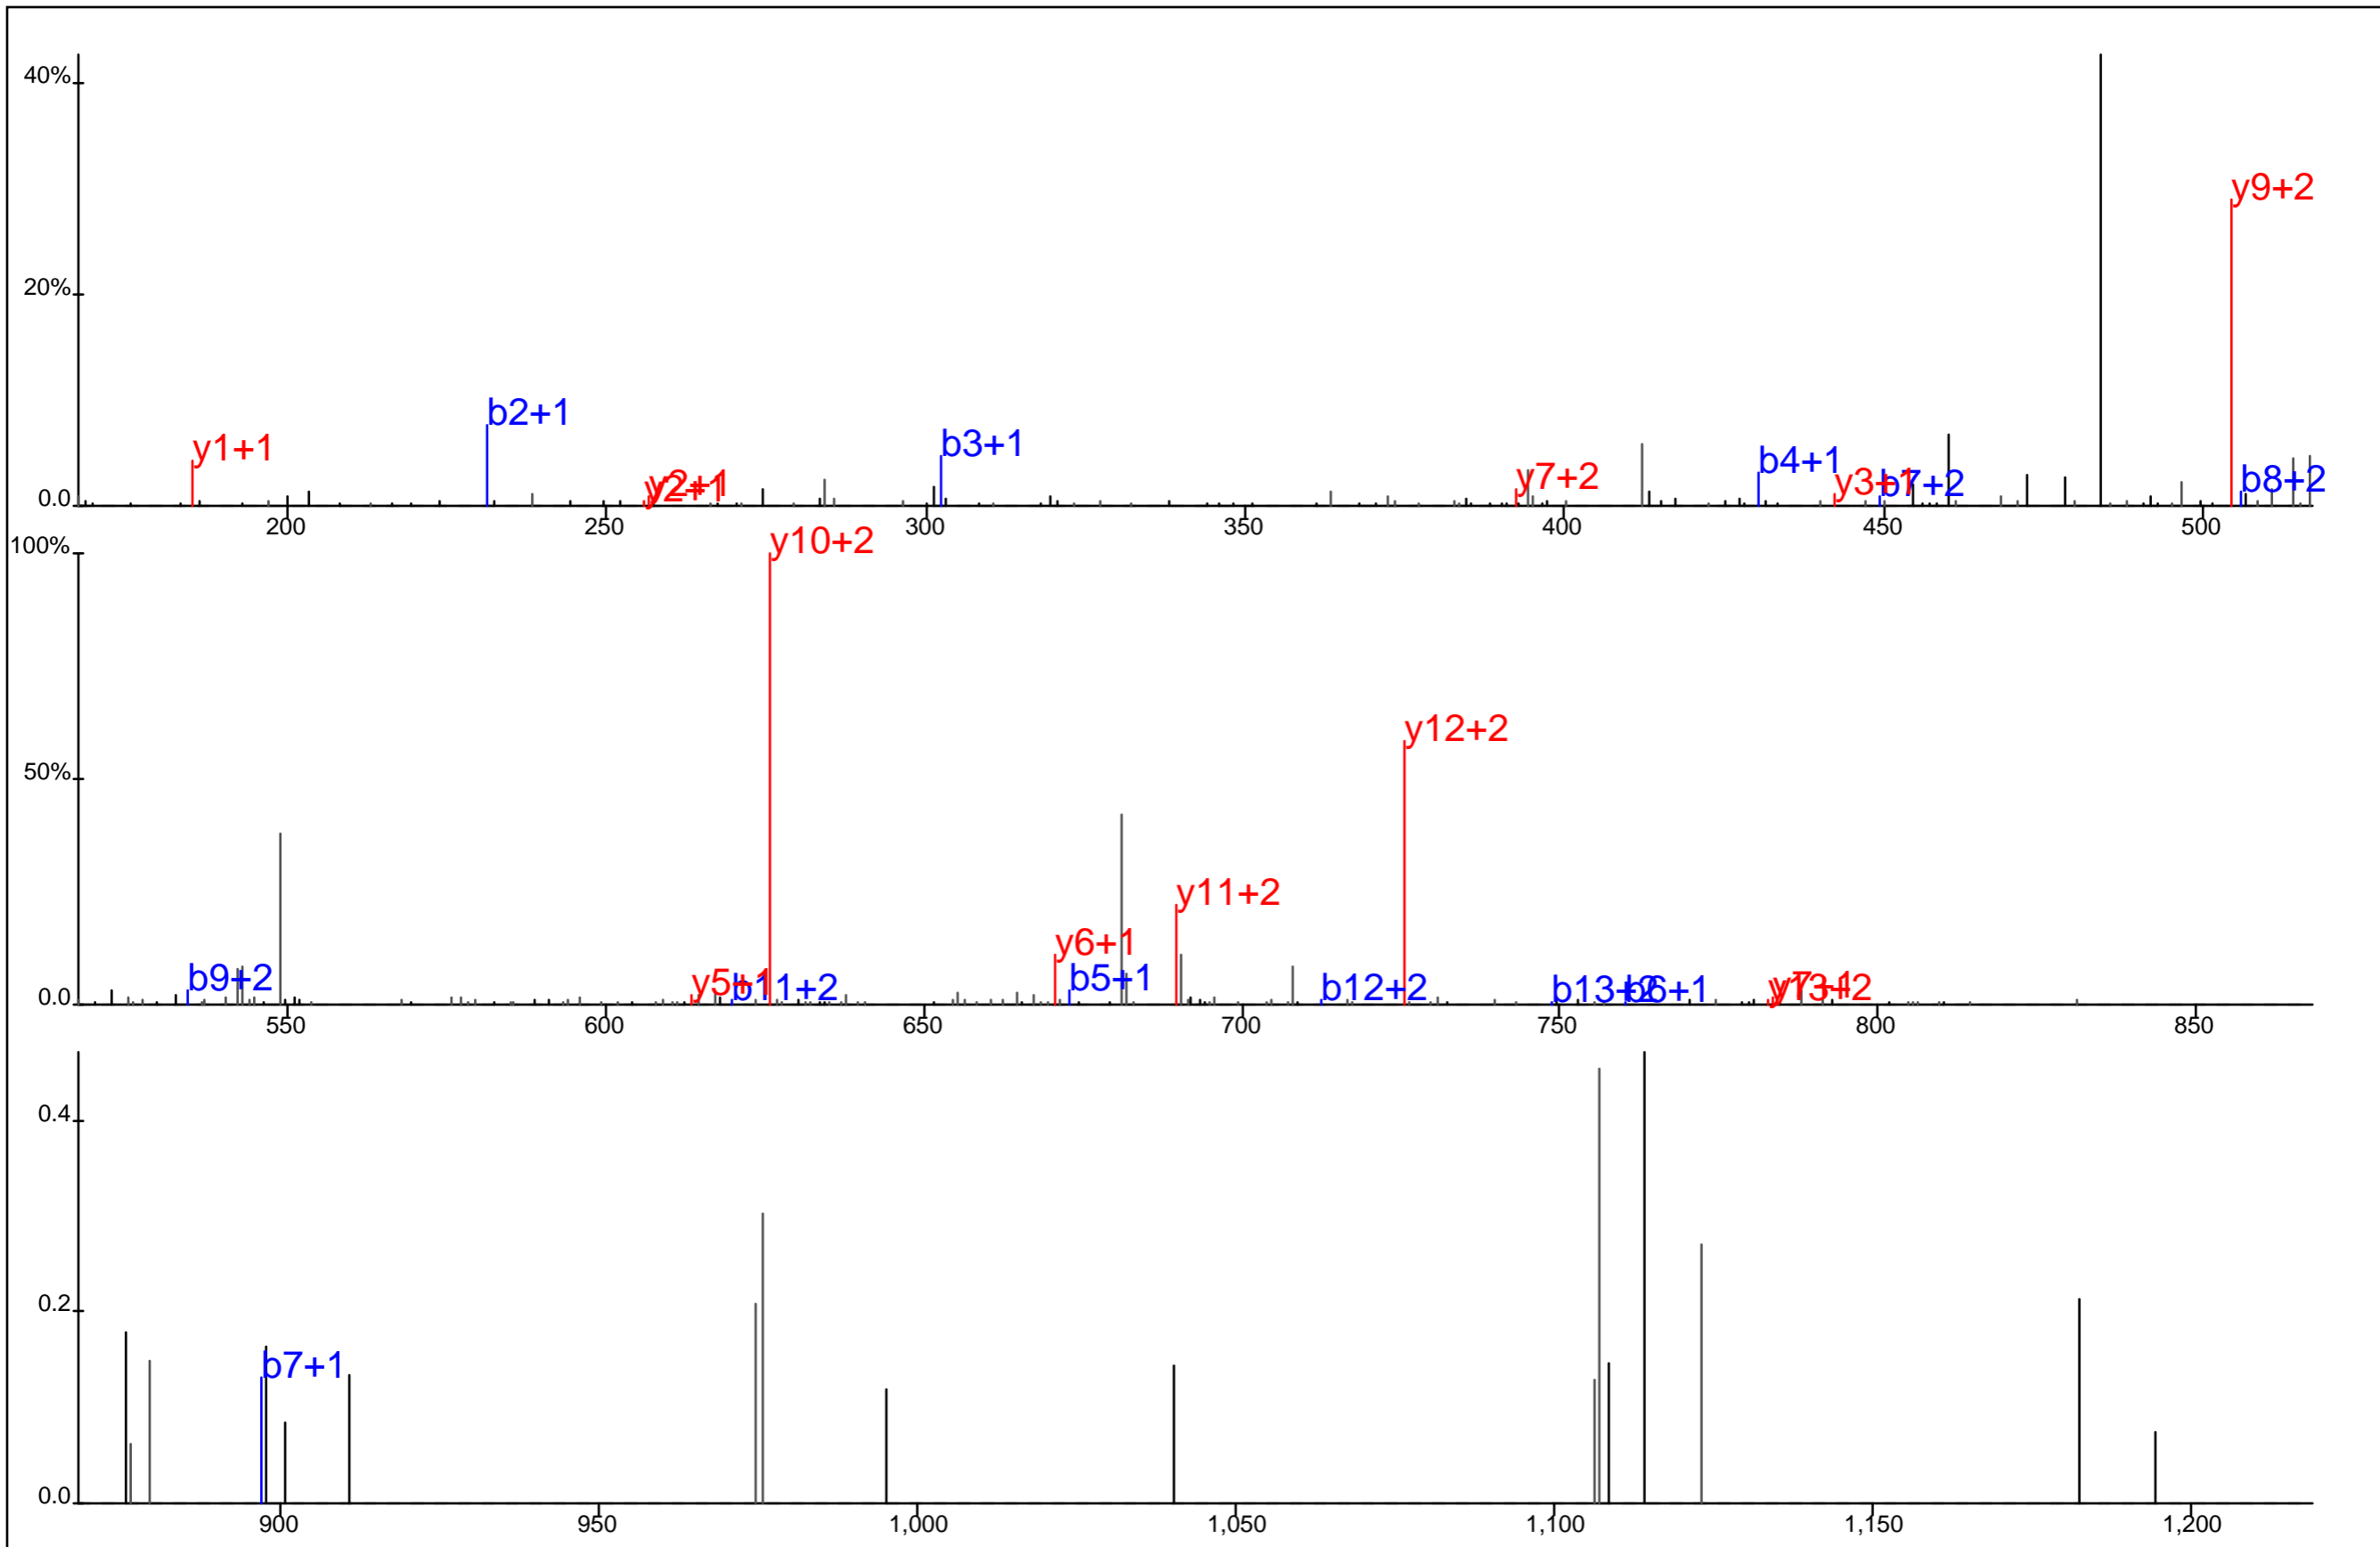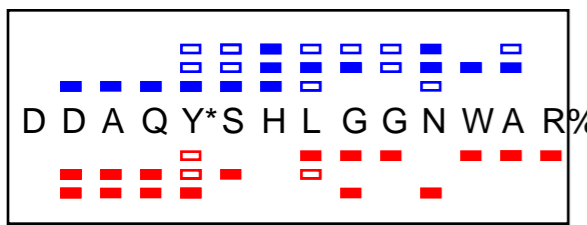

Protein Name: CD3 delta  
 gi Accession: 4502669  
 Precursor Mass: 560.5677+3  
 Delta Mass: 2.844 ppm  
 XCorr: 35.41

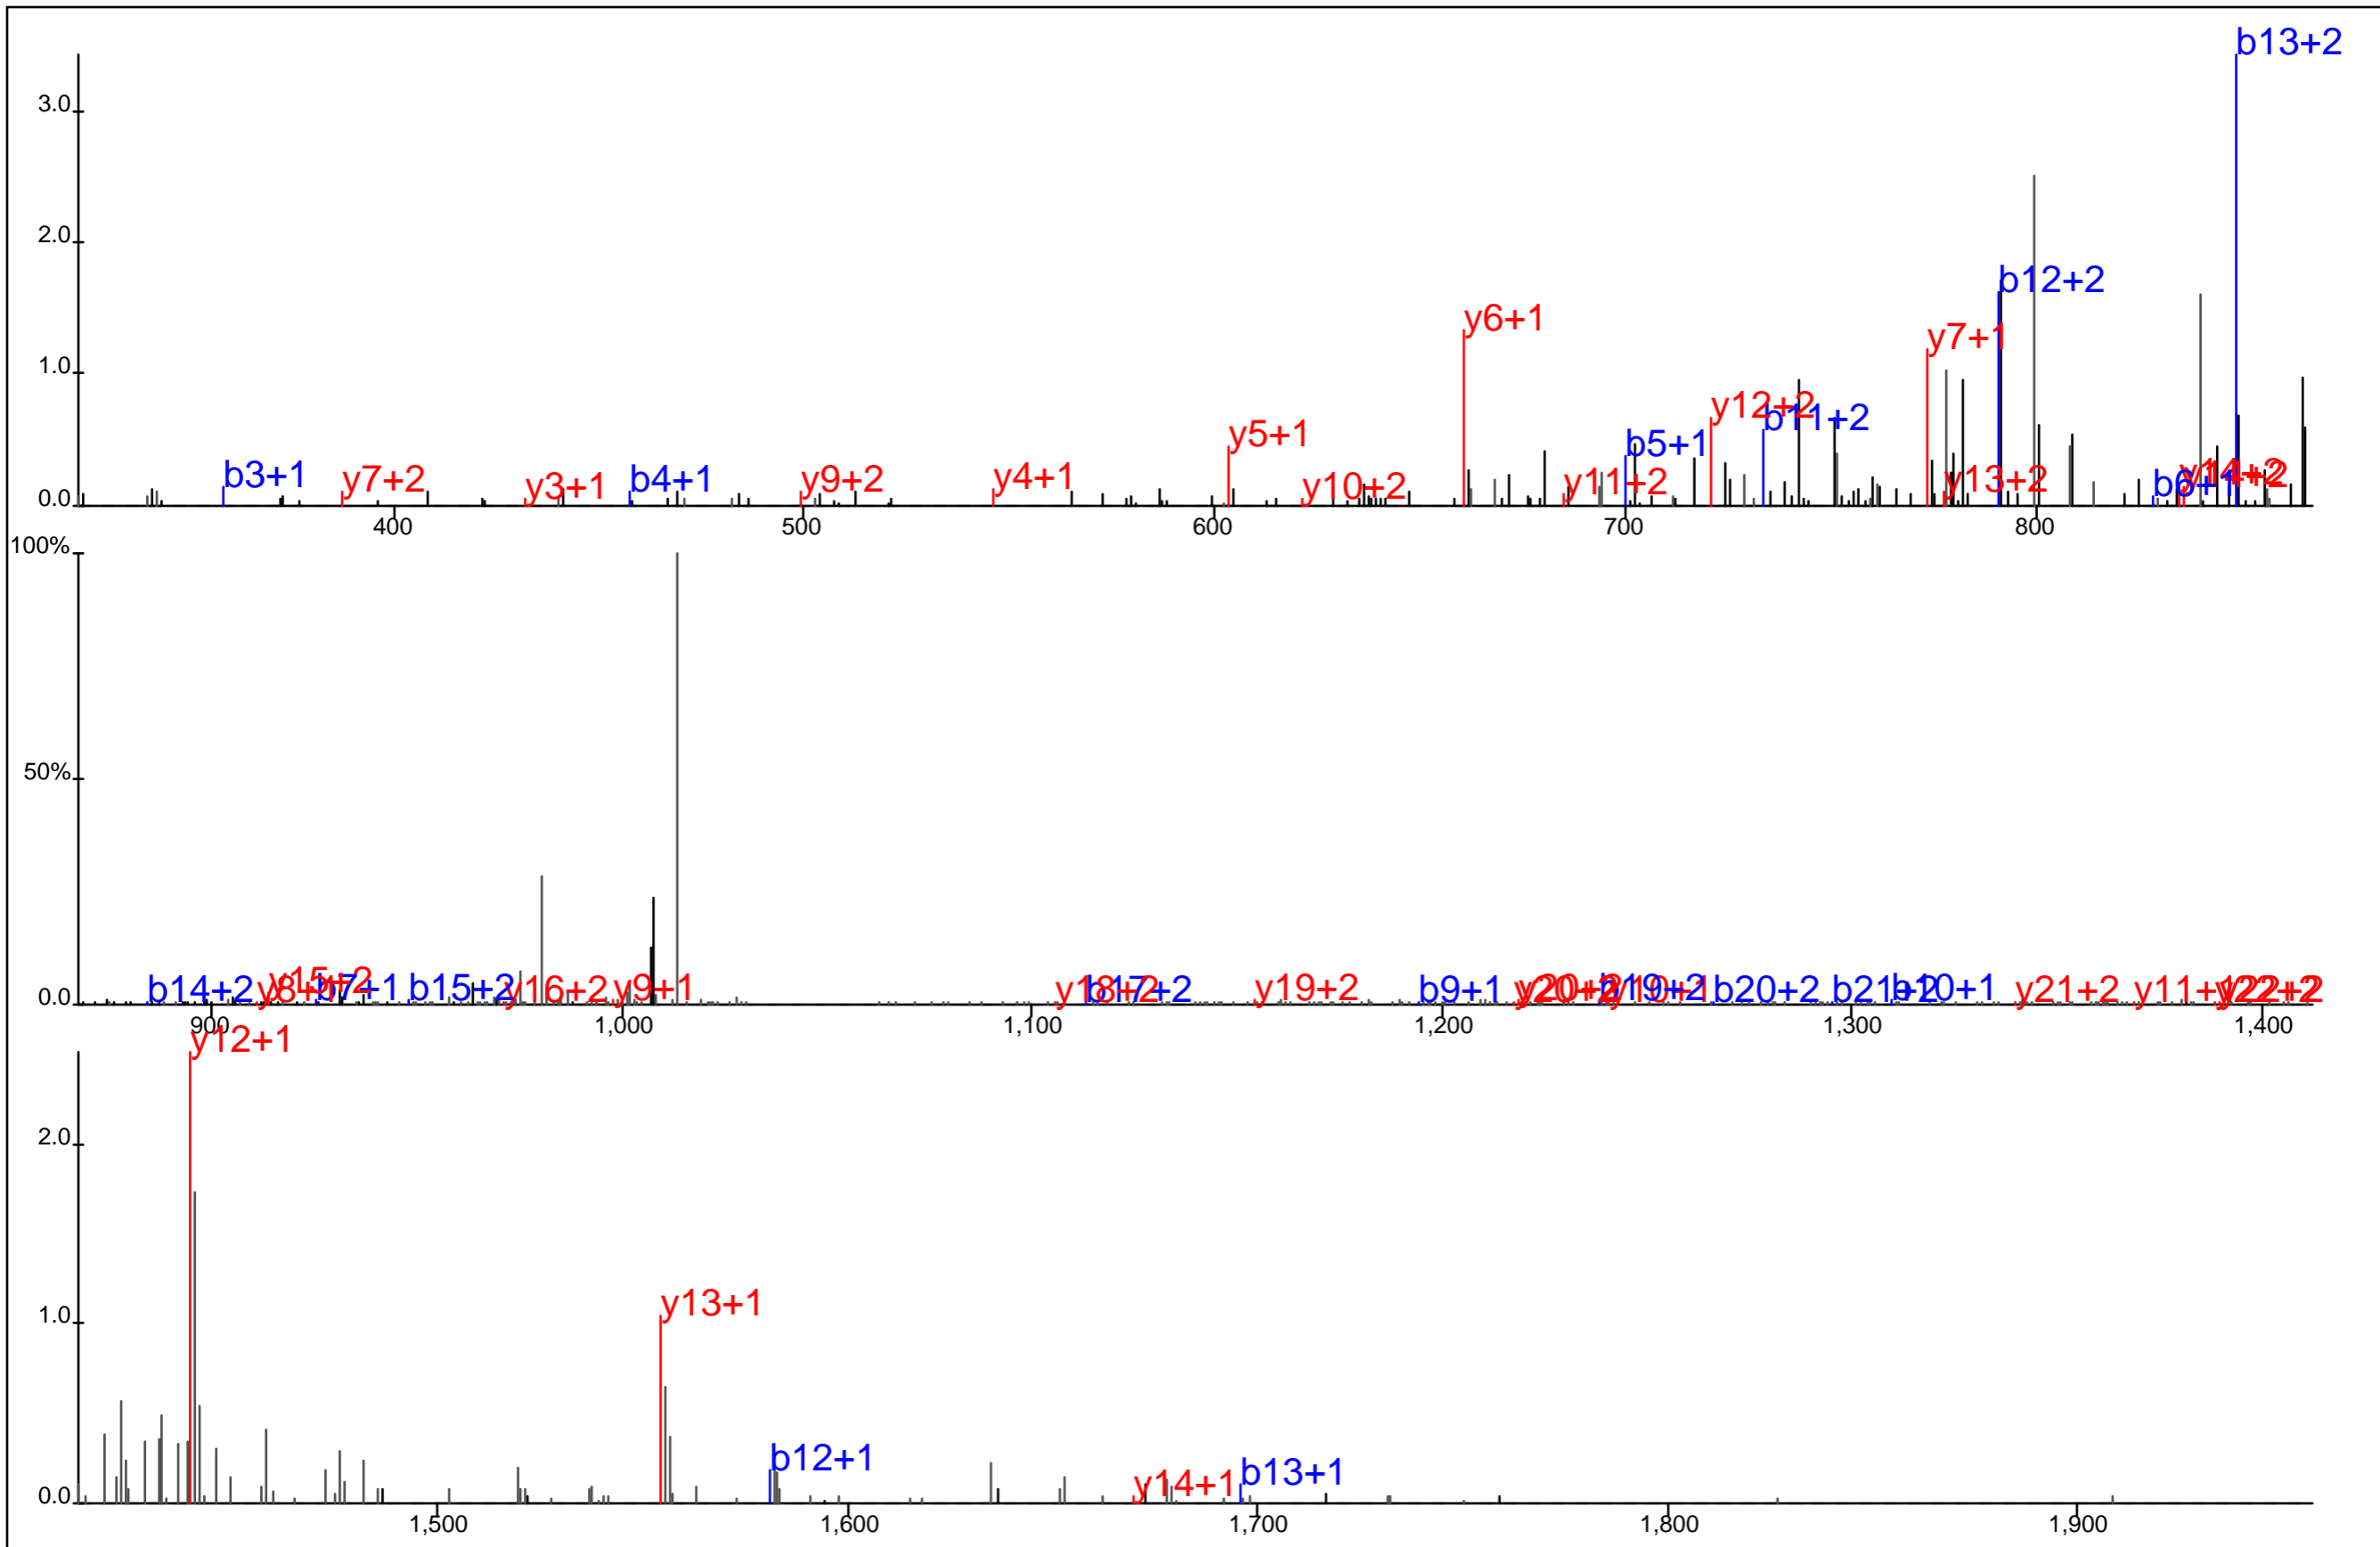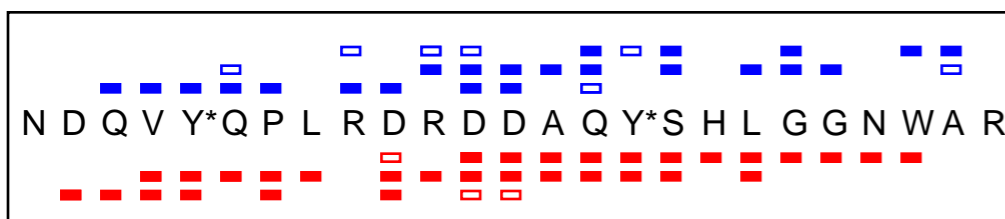

Protein Name: CD3 delta  
 gi Accession: 4502669  
 Precursor Mass: 1,045.4449+3  
 Delta Mass: 1.992 ppm  
 XCorr: 21.36

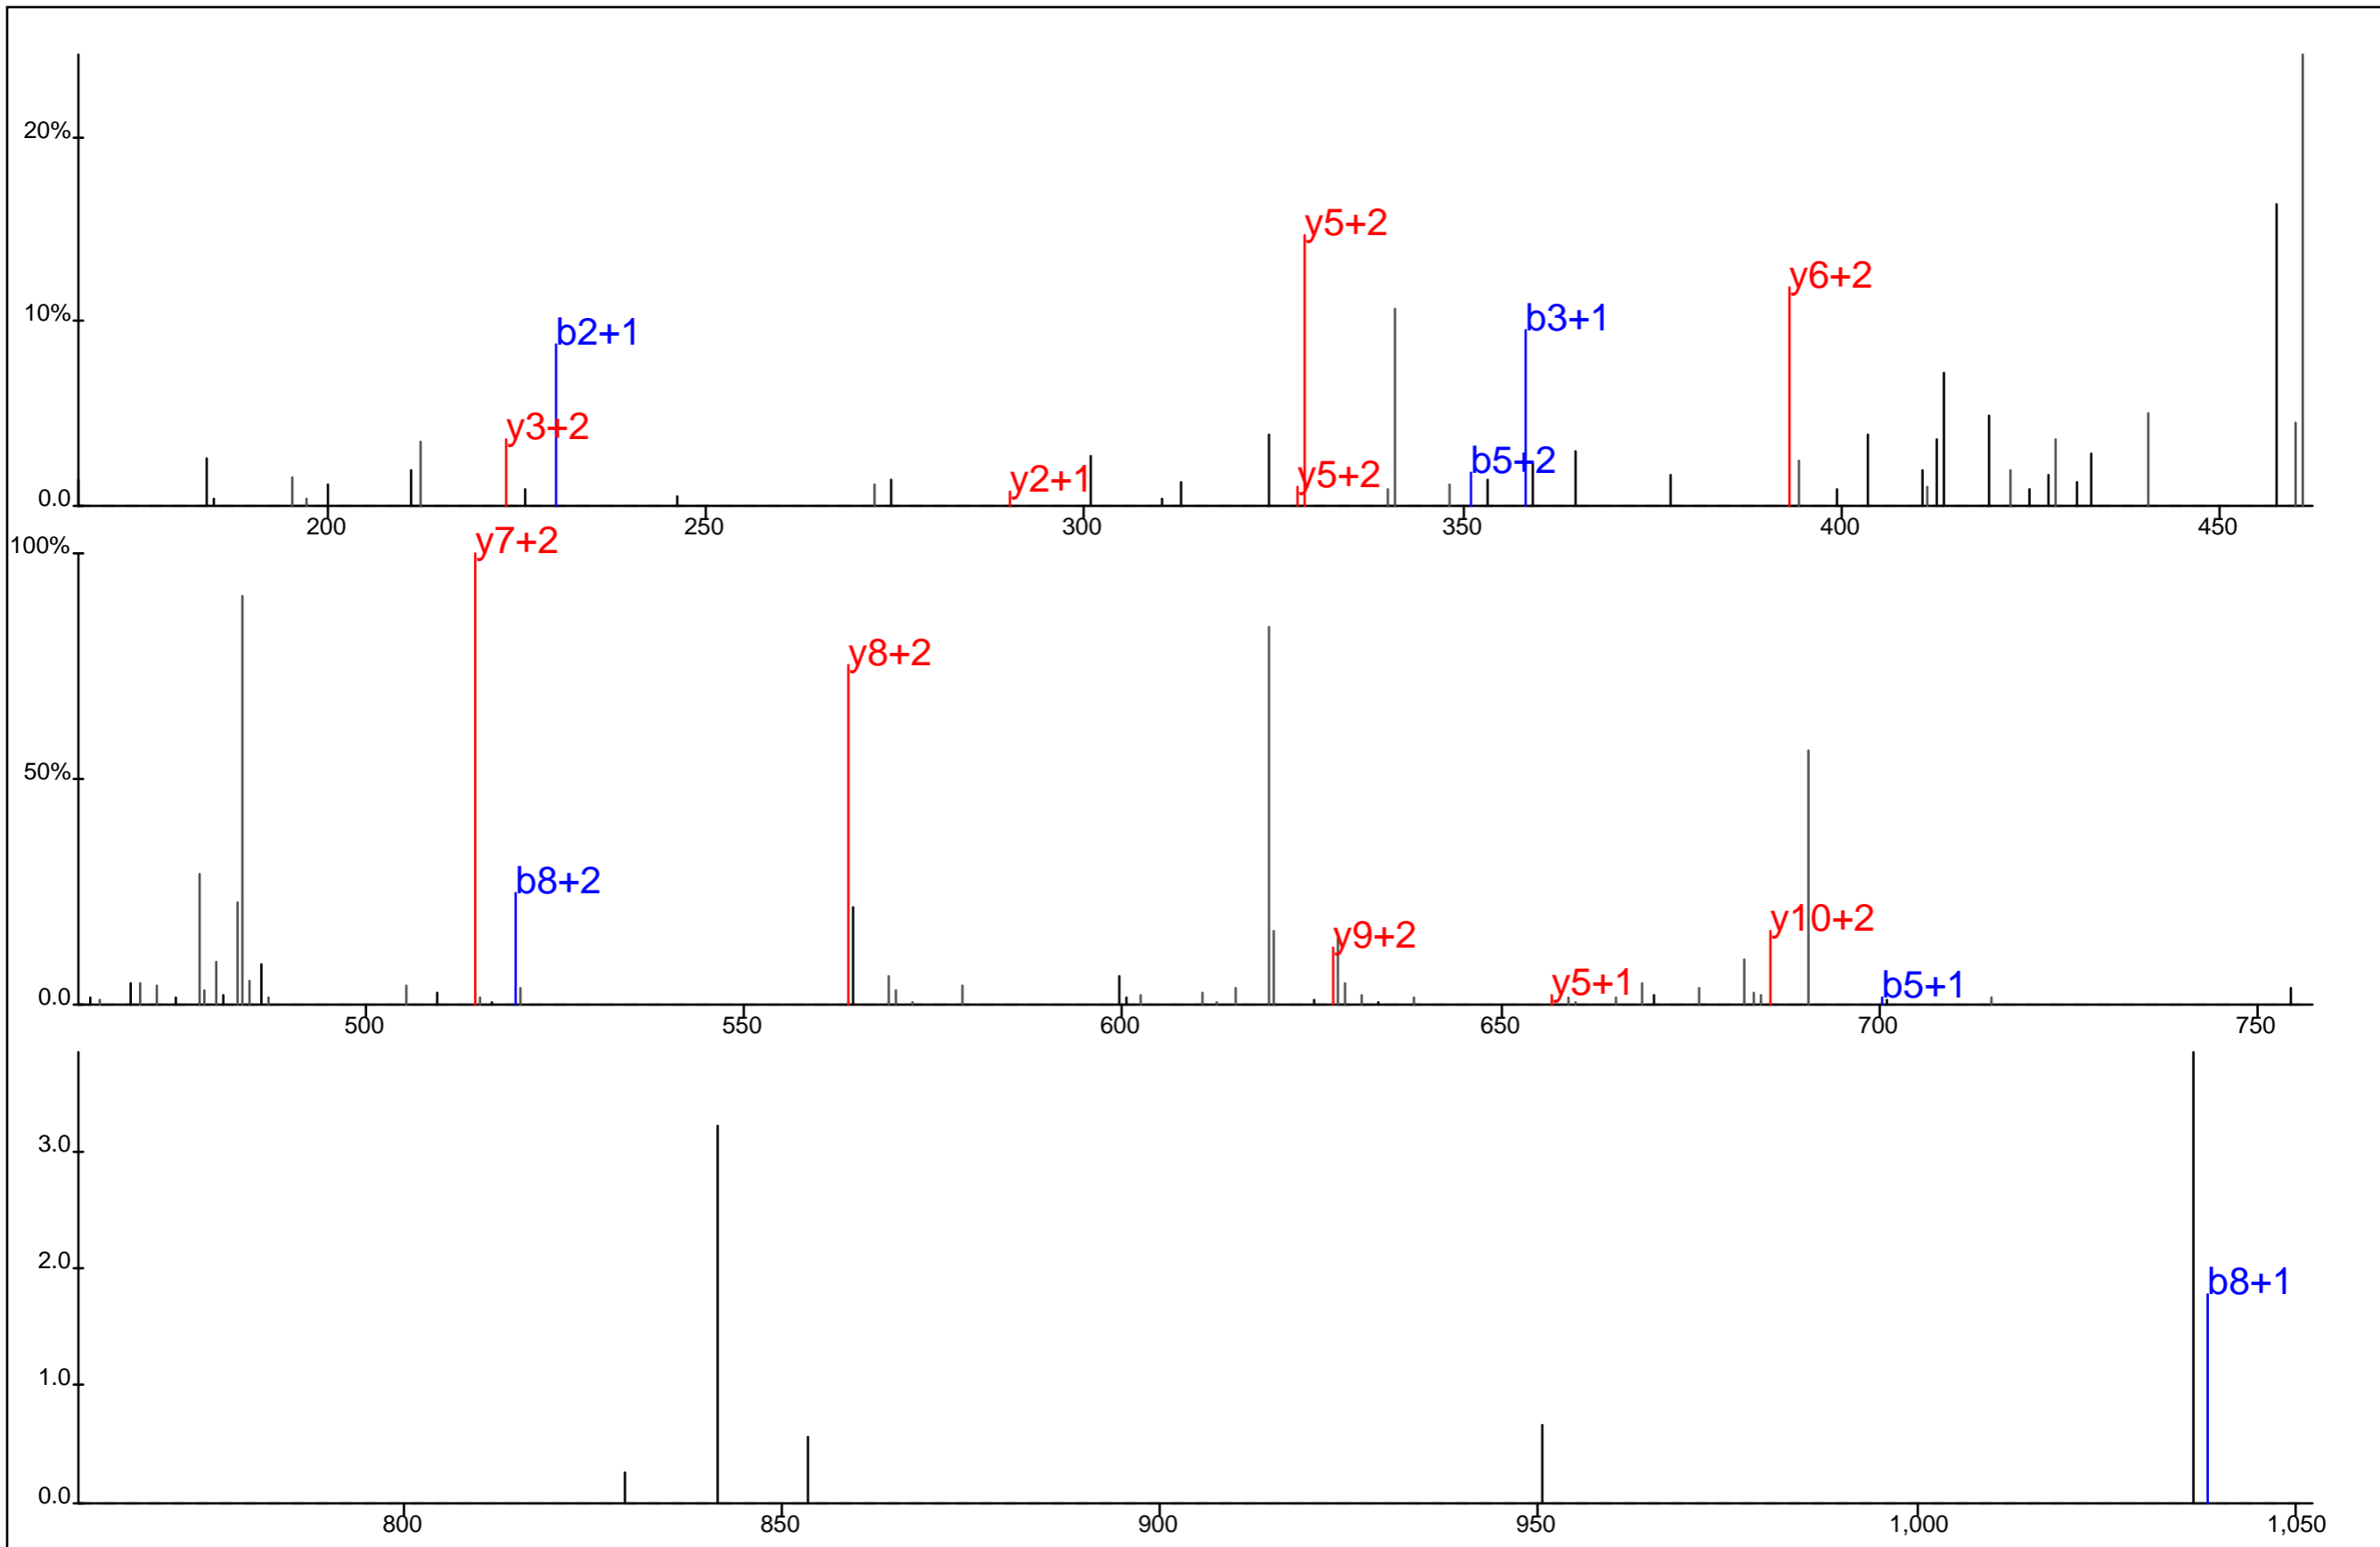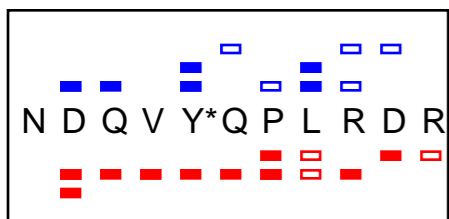

Protein Name: CD3 delta  
 gi Accession: 4502669  
 Precursor Mass: 495.2290+3  
 Delta Mass: 2.331 ppm  
 XCorr: 32.43



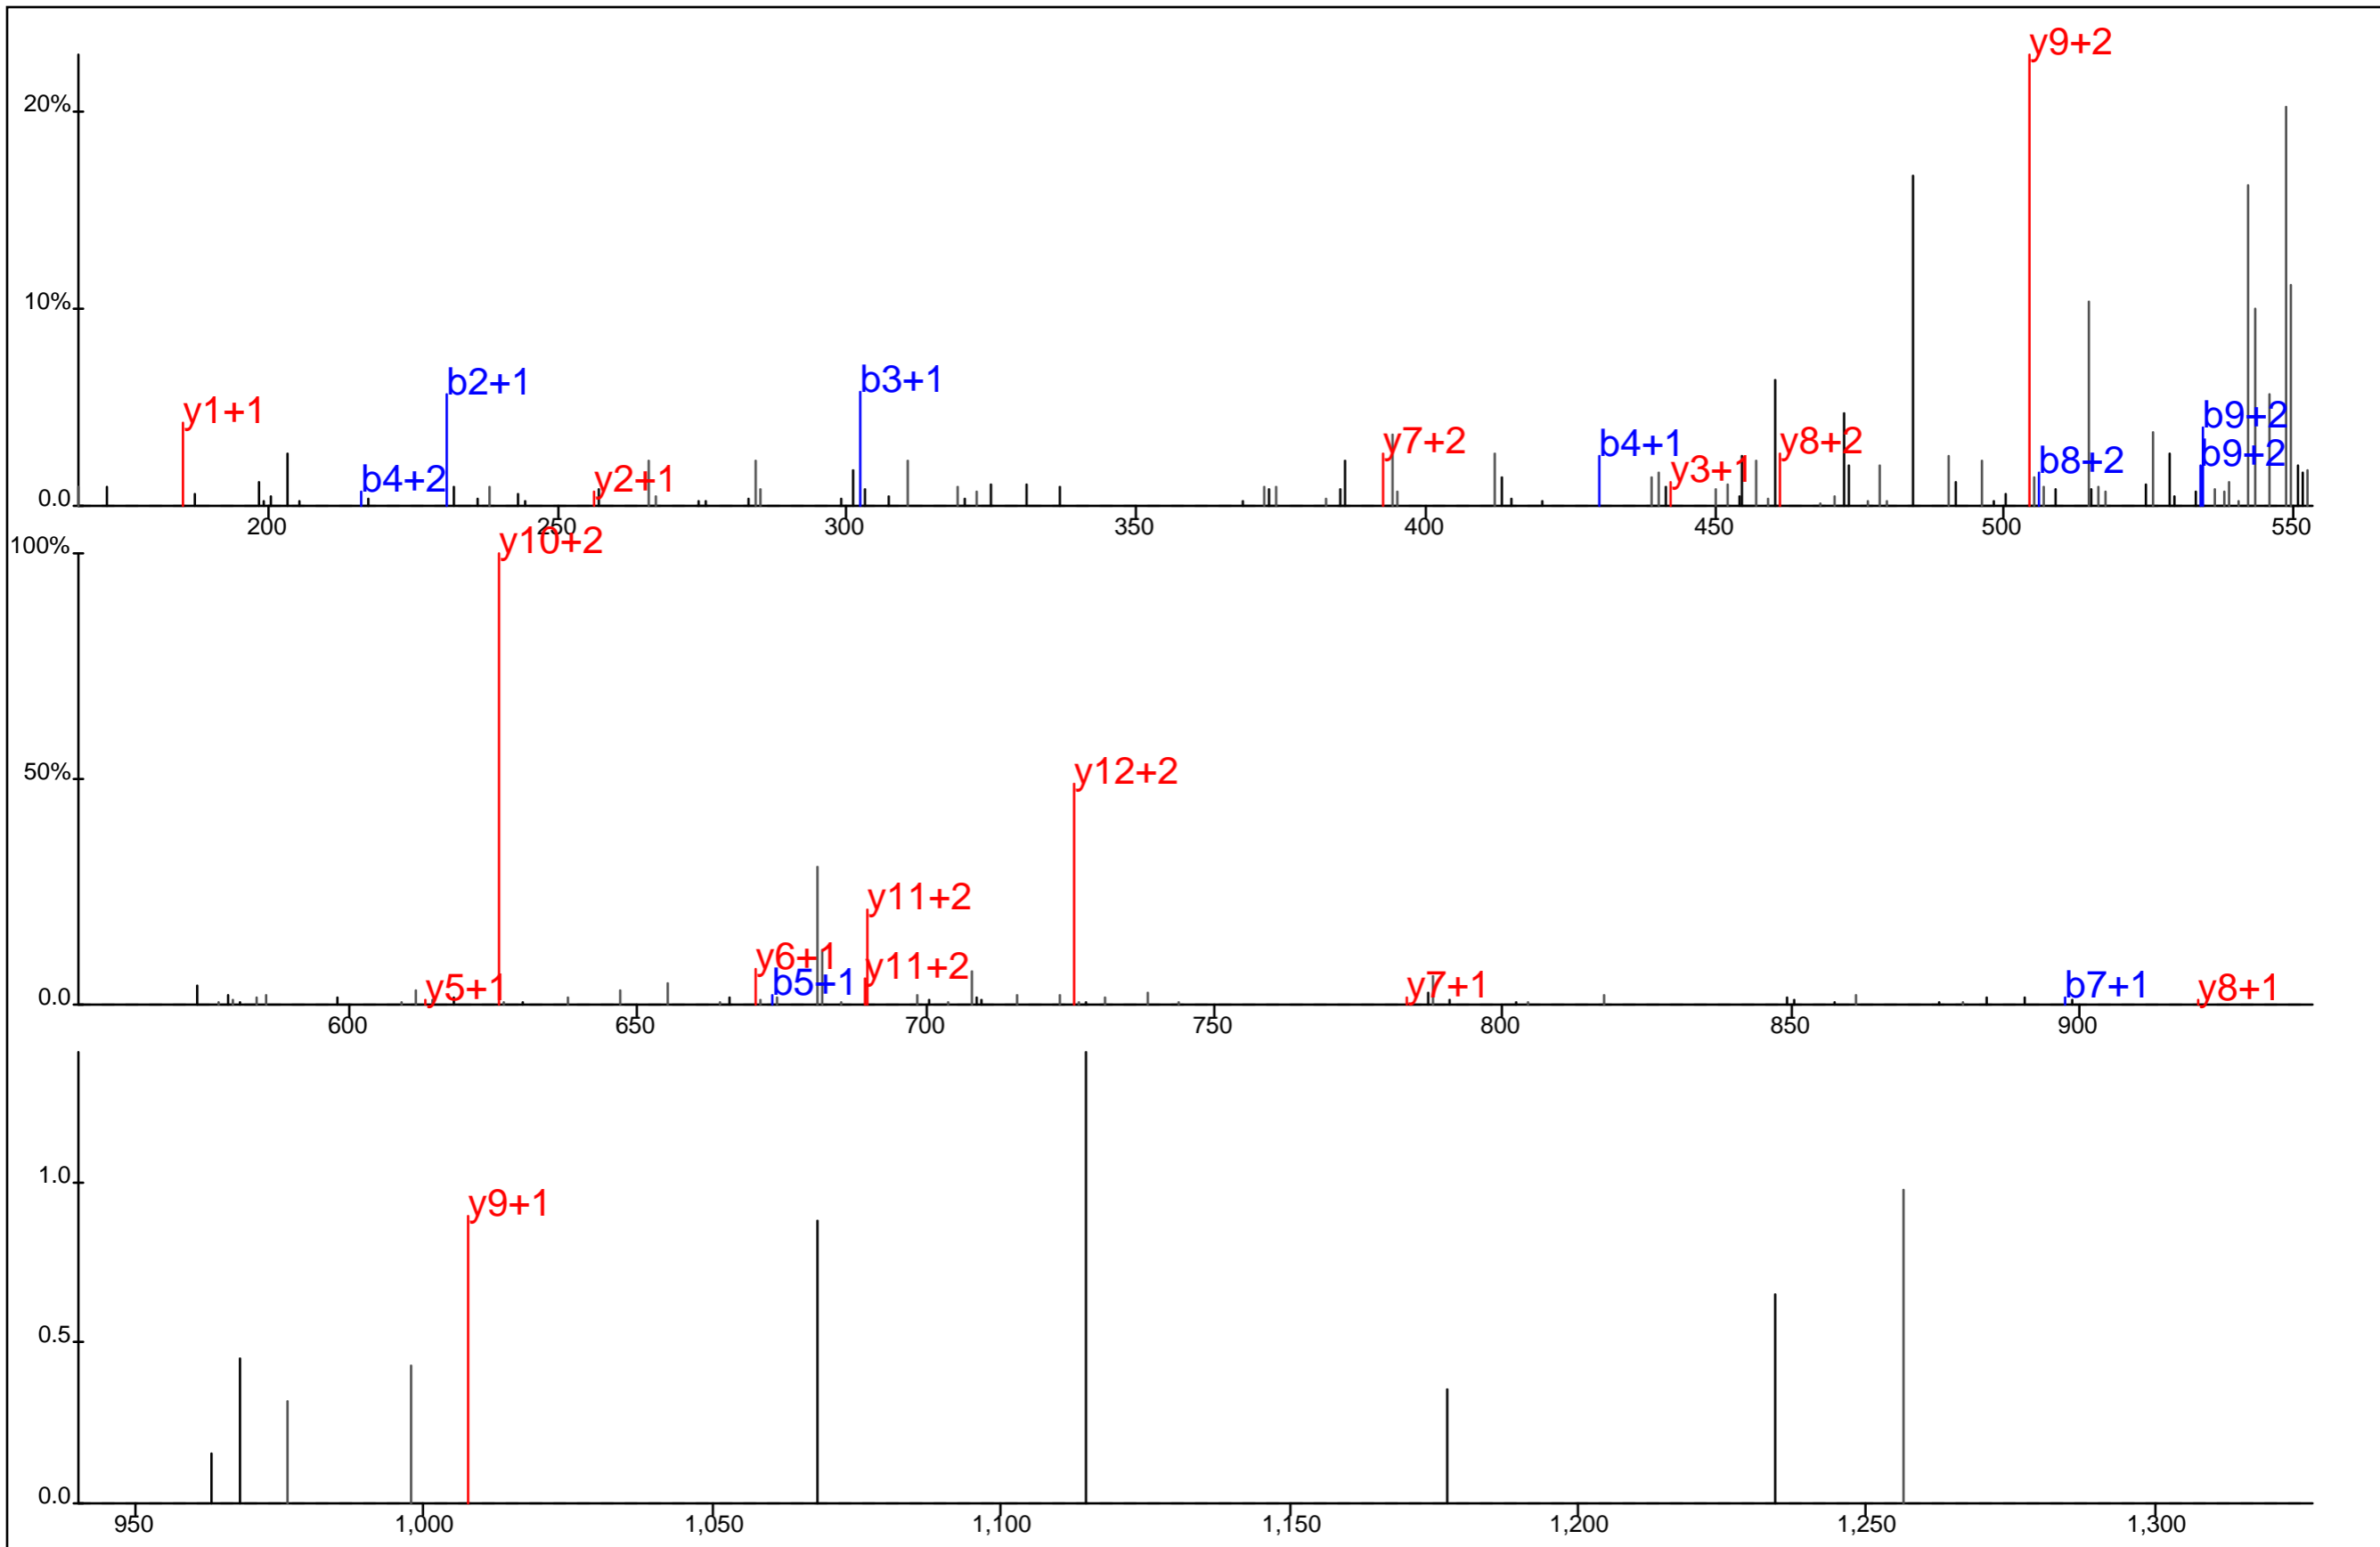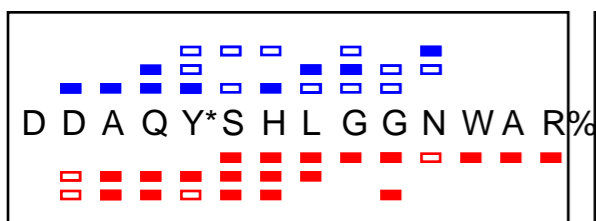

Protein Name: CD3 delta  
 gi Accession: 4502669  
 Precursor Mass: 560.5682+3  
 Delta Mass: 3.719 ppm  
 XCorr: 23.66

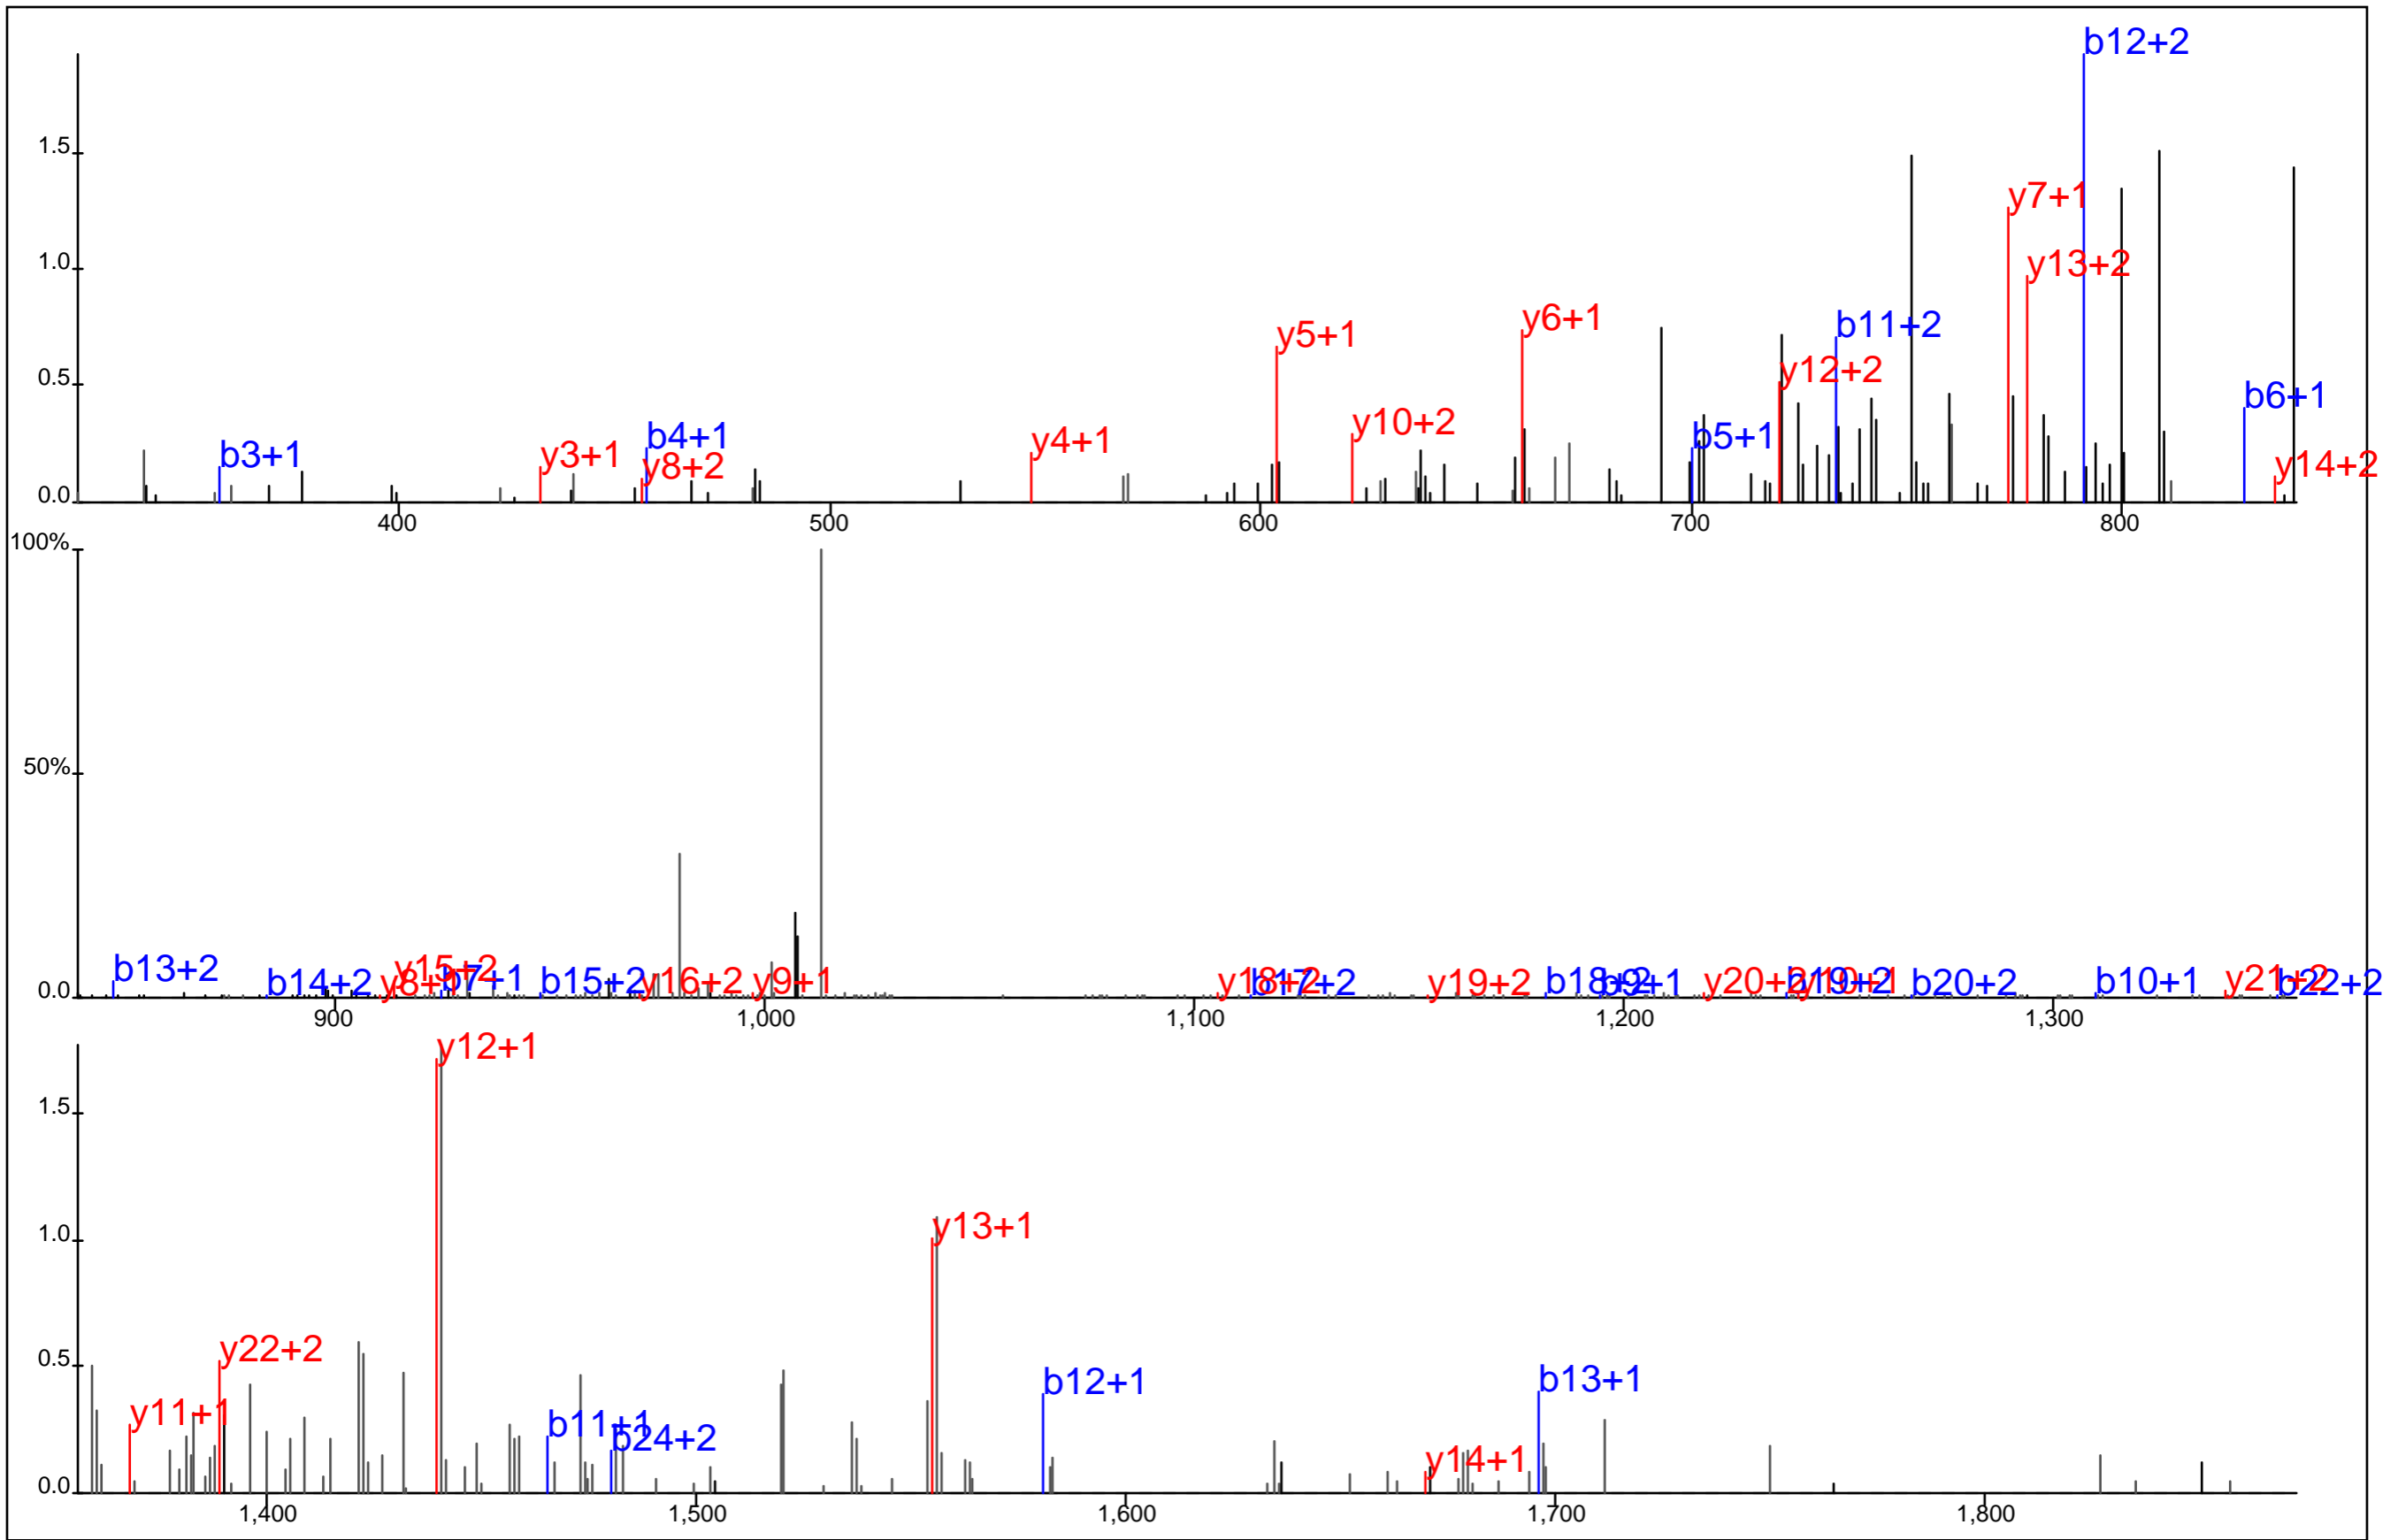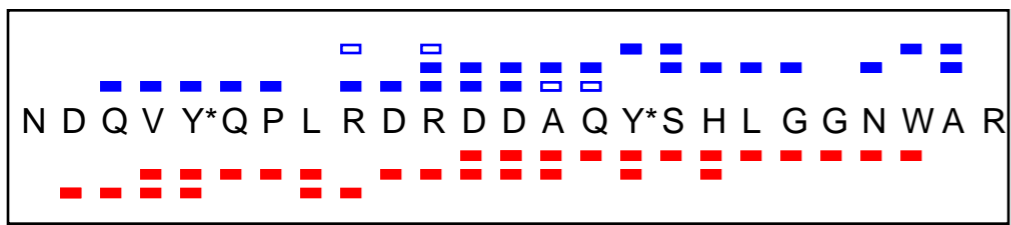

Protein Name: CD3 delta  
 gi Accession: 4502669  
 Precursor Mass: 1,045.4462+3  
 Delta Mass: 0.824 ppm  
 XCorr: 35.88

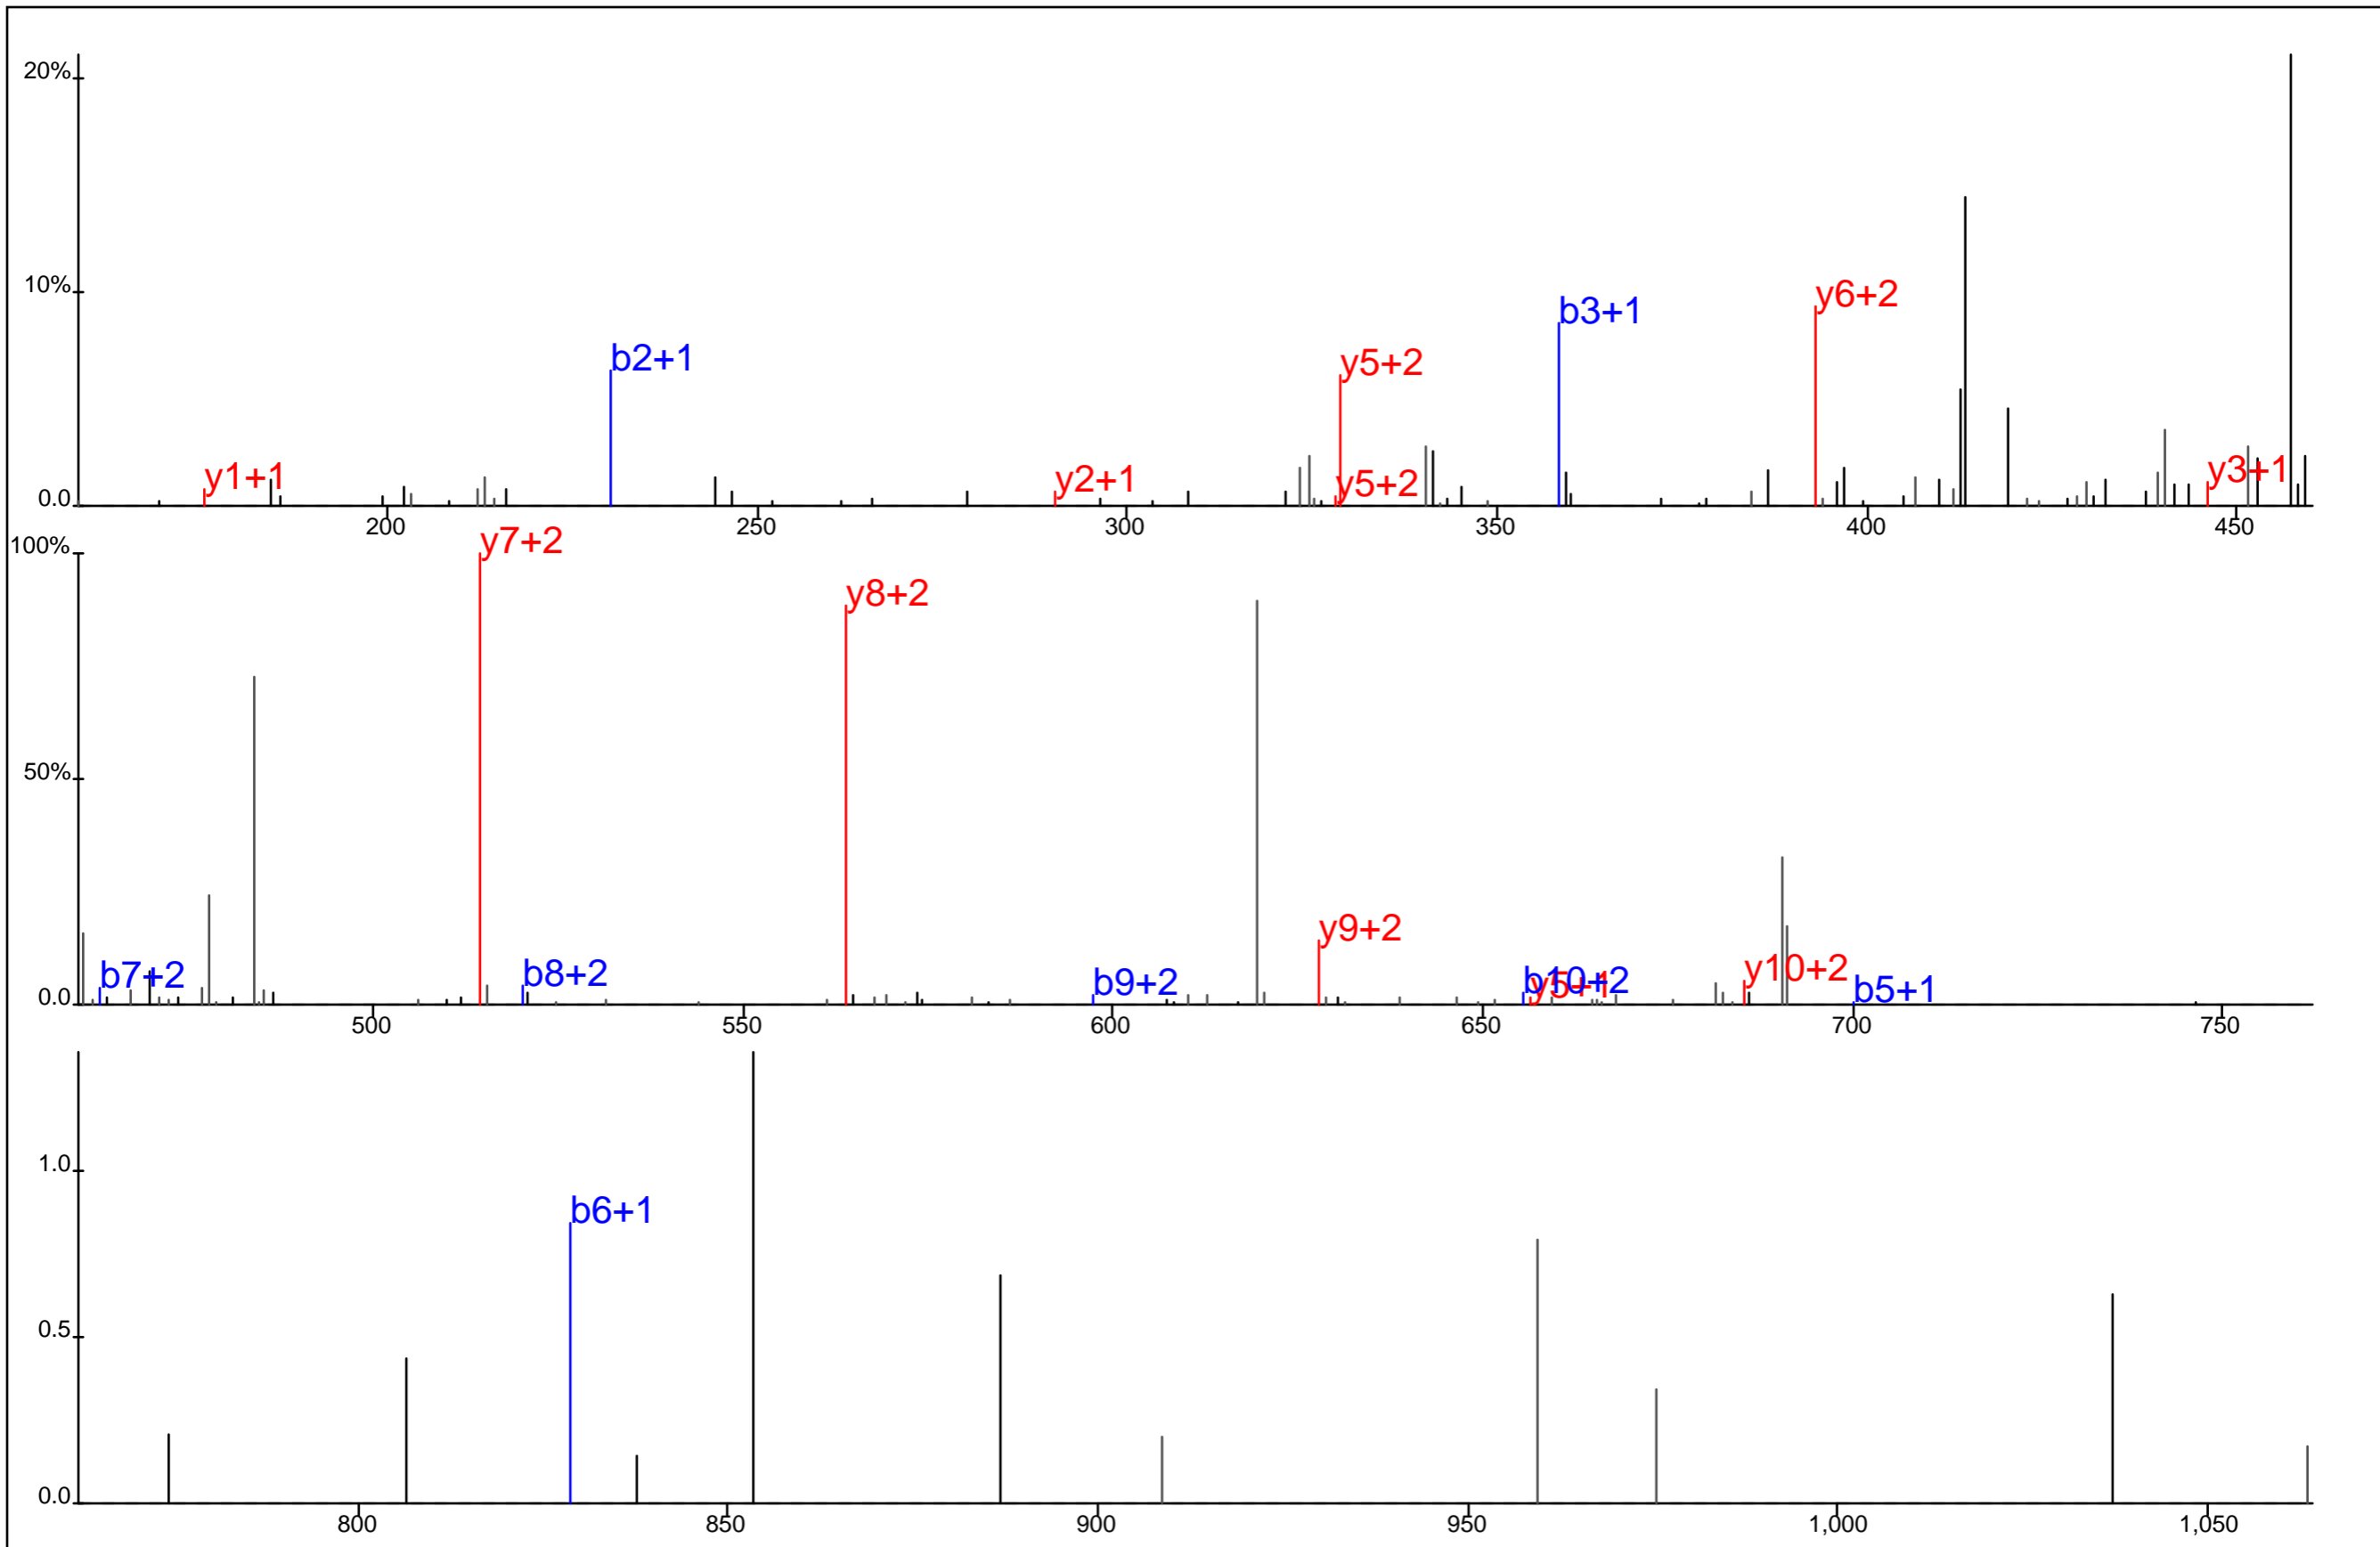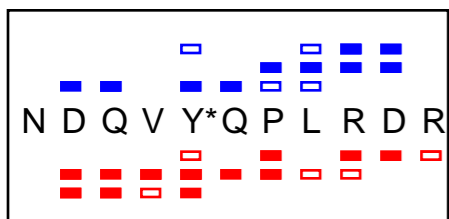

Protein Name: CD3 delta  
 gi Accession: 4502669  
 Precursor Mass: 495.2290+3  
 Delta Mass: 2.391 ppm  
 XCorr: 26.46

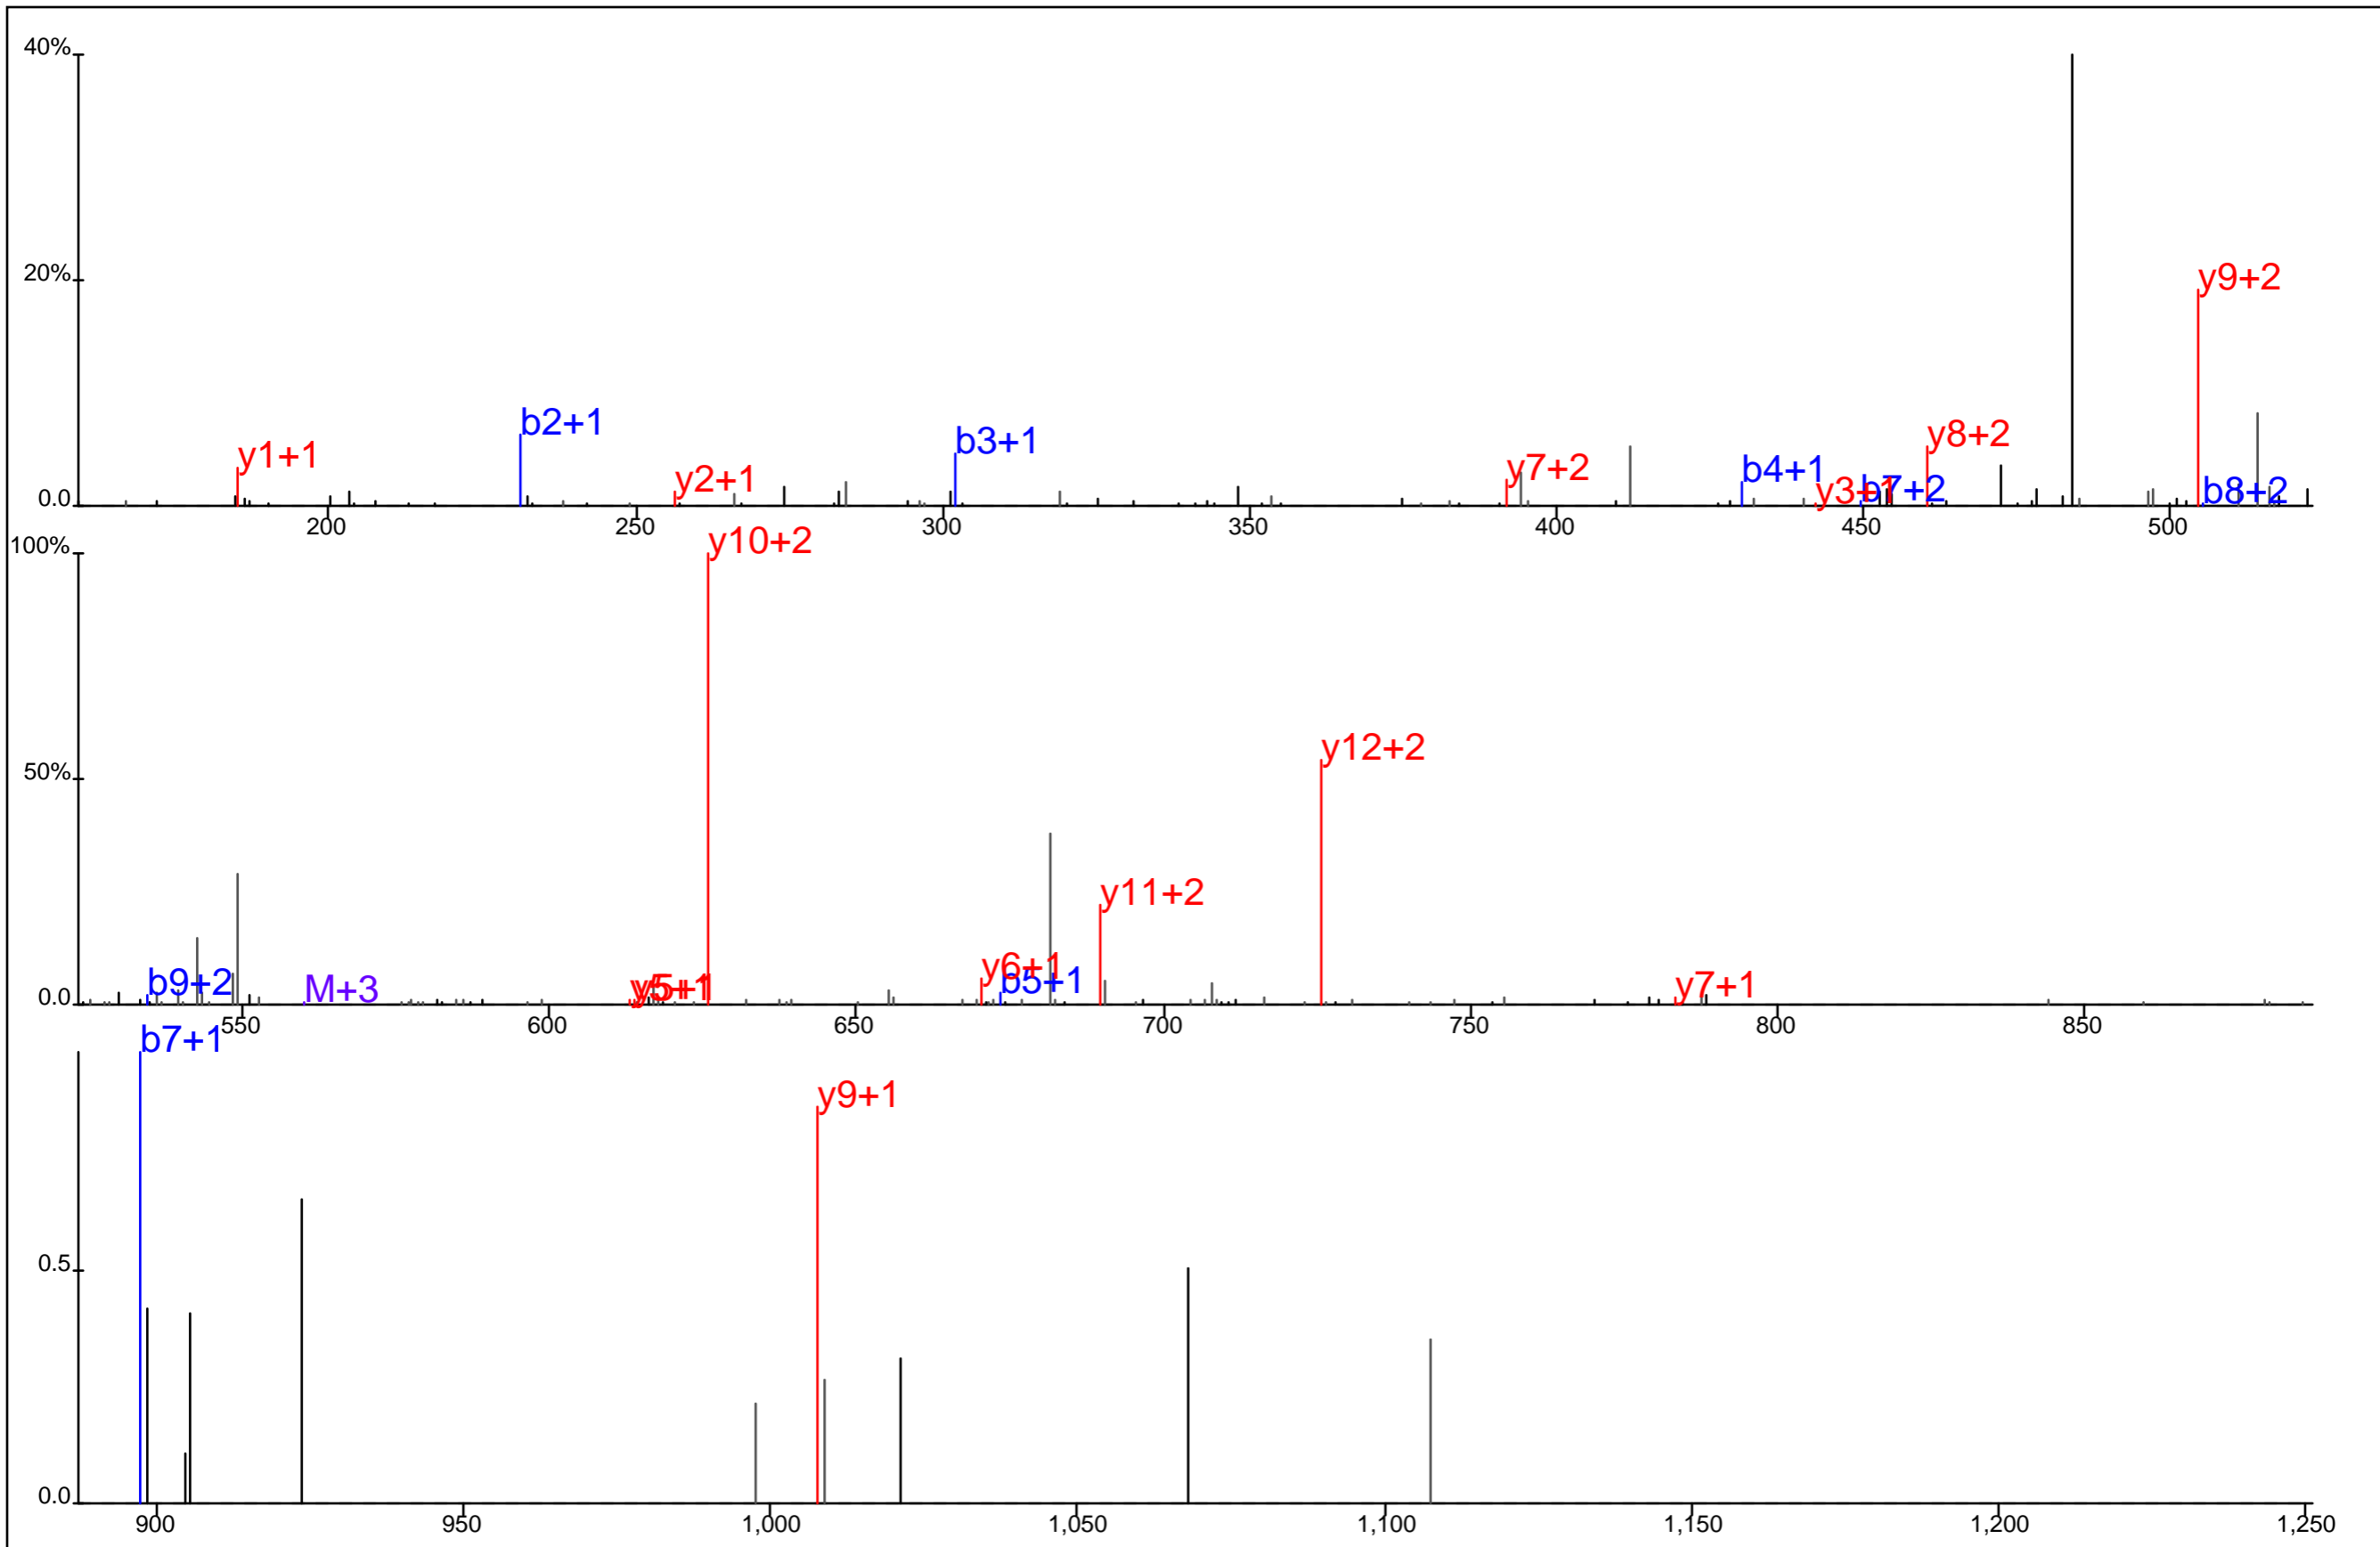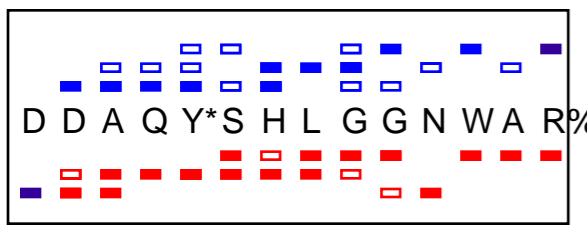

Protein Name: CD3 delta  
 gi Accession: 4502669  
 Precursor Mass: 560.5666+3  
 Delta Mass: 0.879 ppm  
 XCorr: 29.46

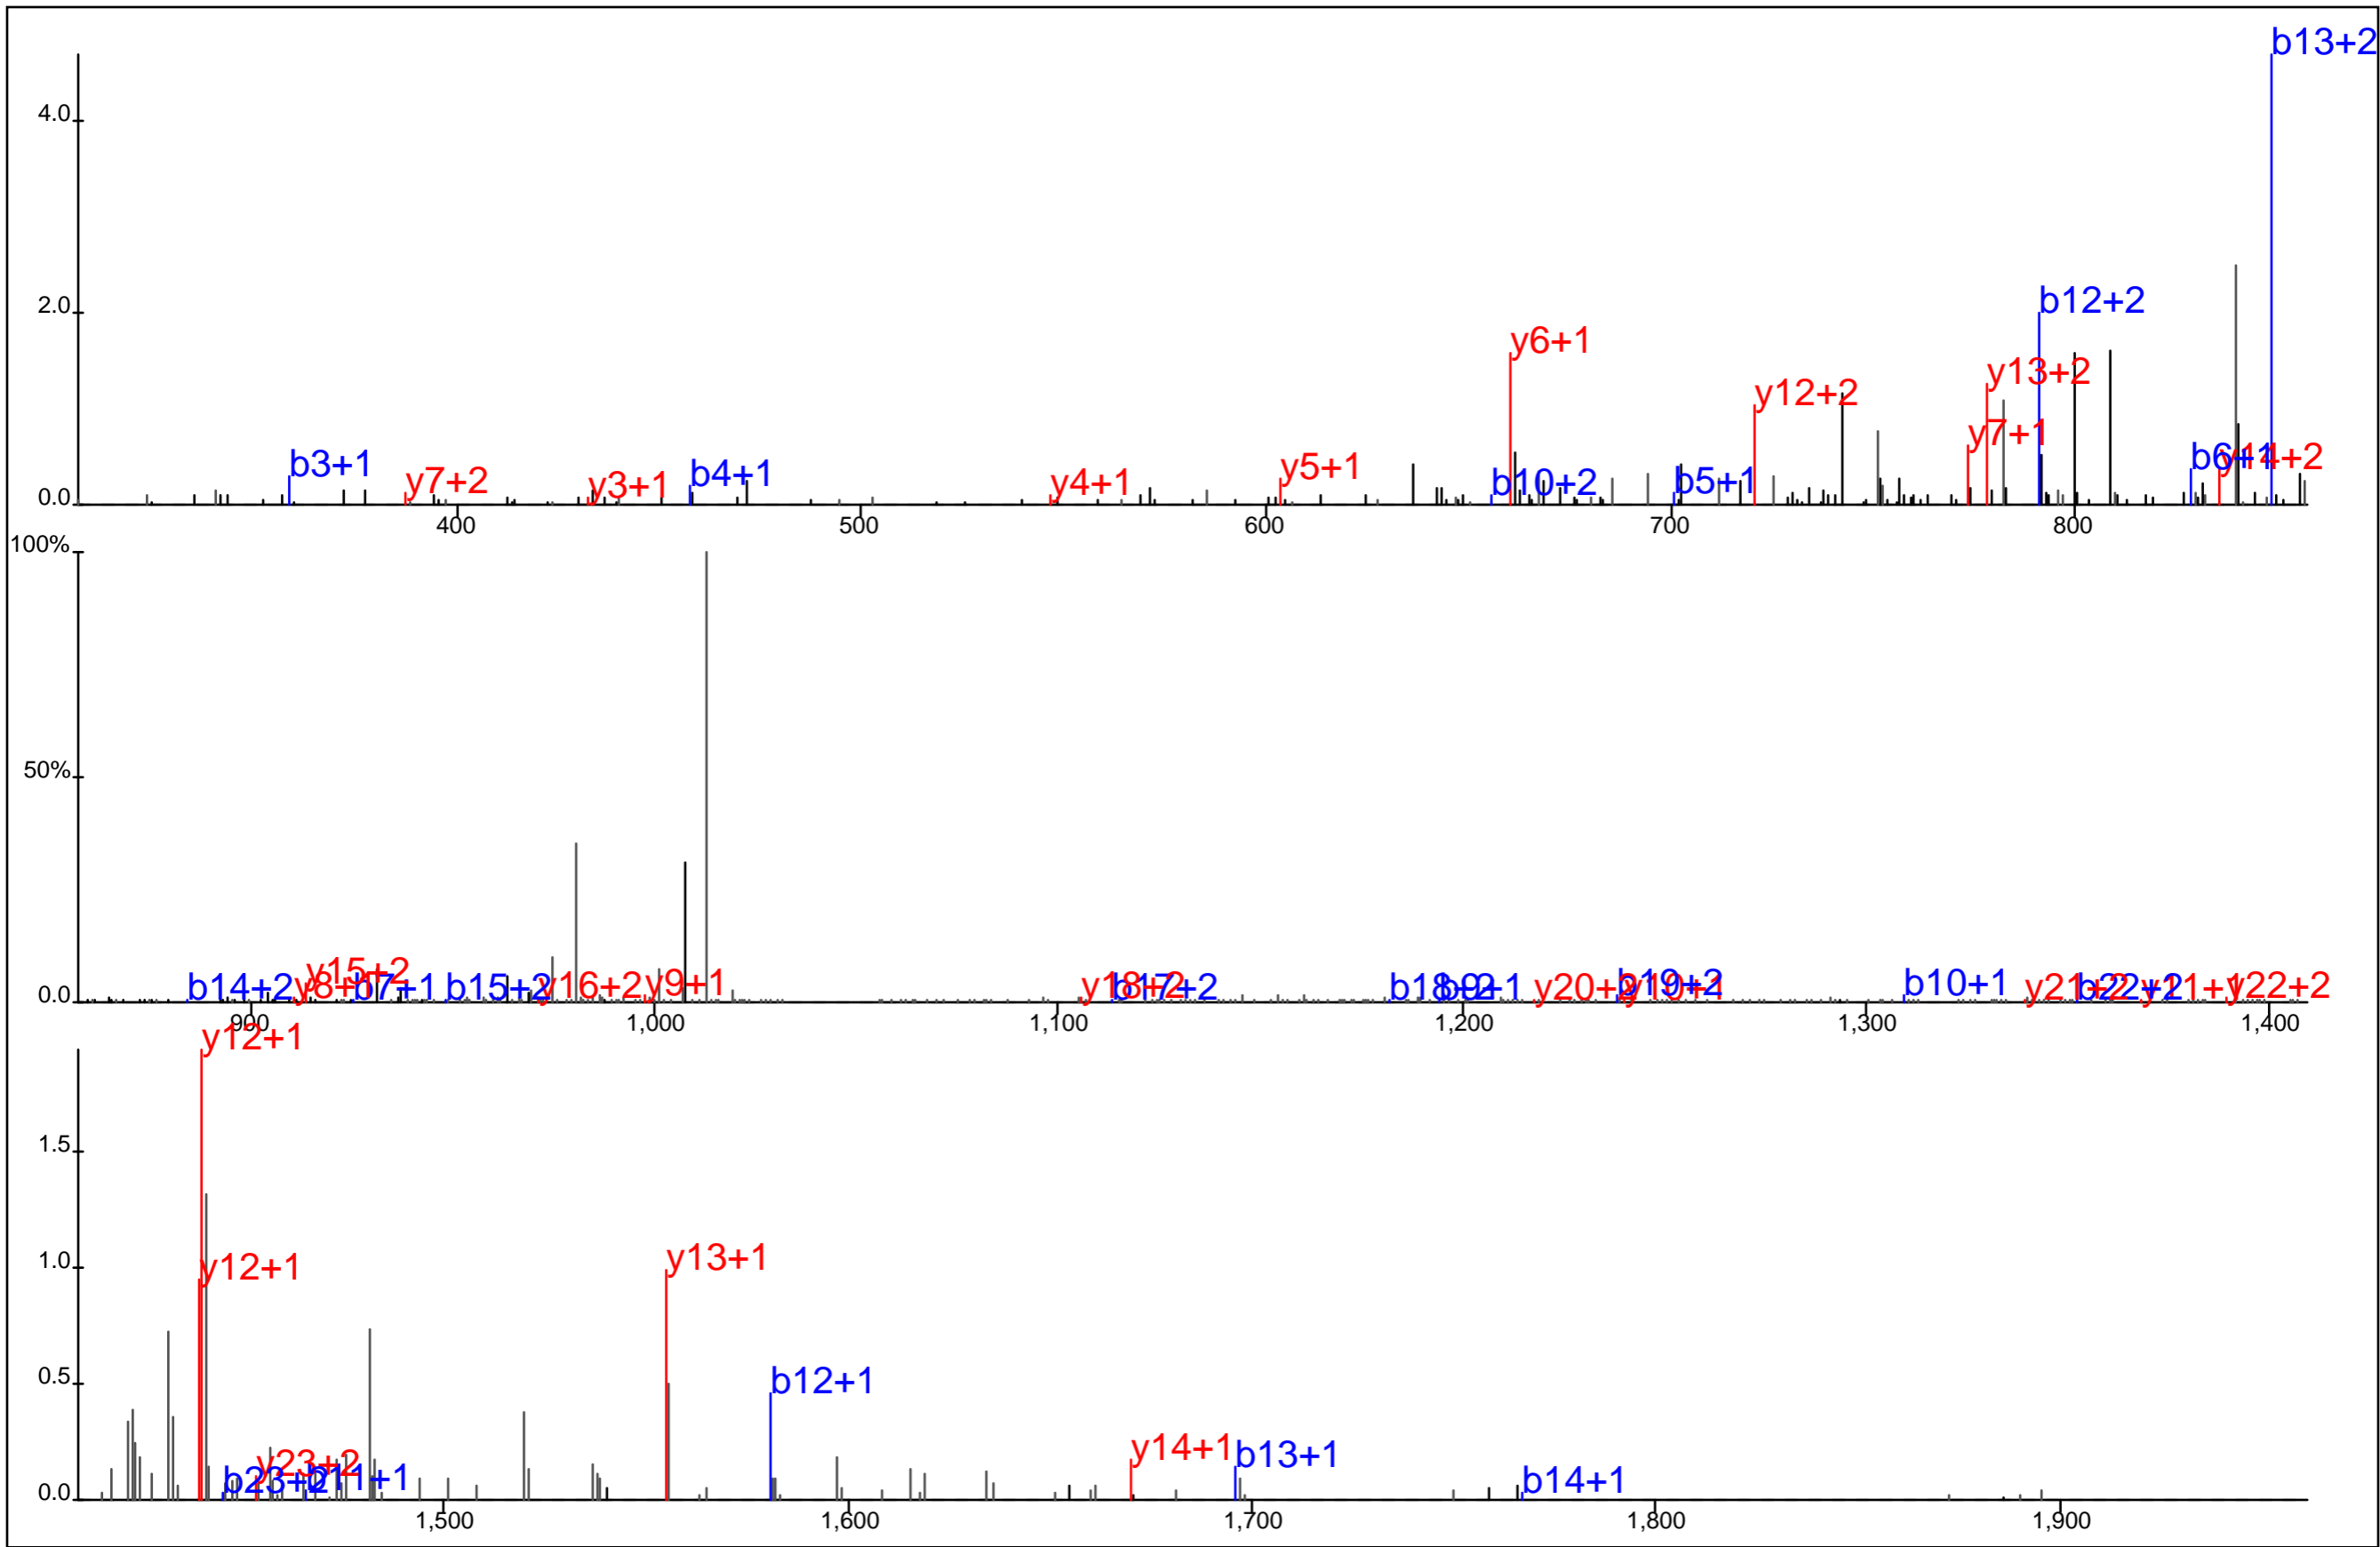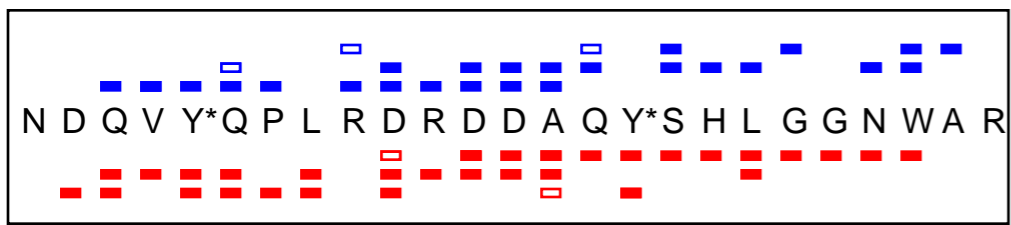

Protein Name: CD3 delta  
 gi Accession: 4502669  
 Precursor Mass: 1,045.4479+3  
 Delta Mass: 0.810 ppm  
 XCorr: 20.66

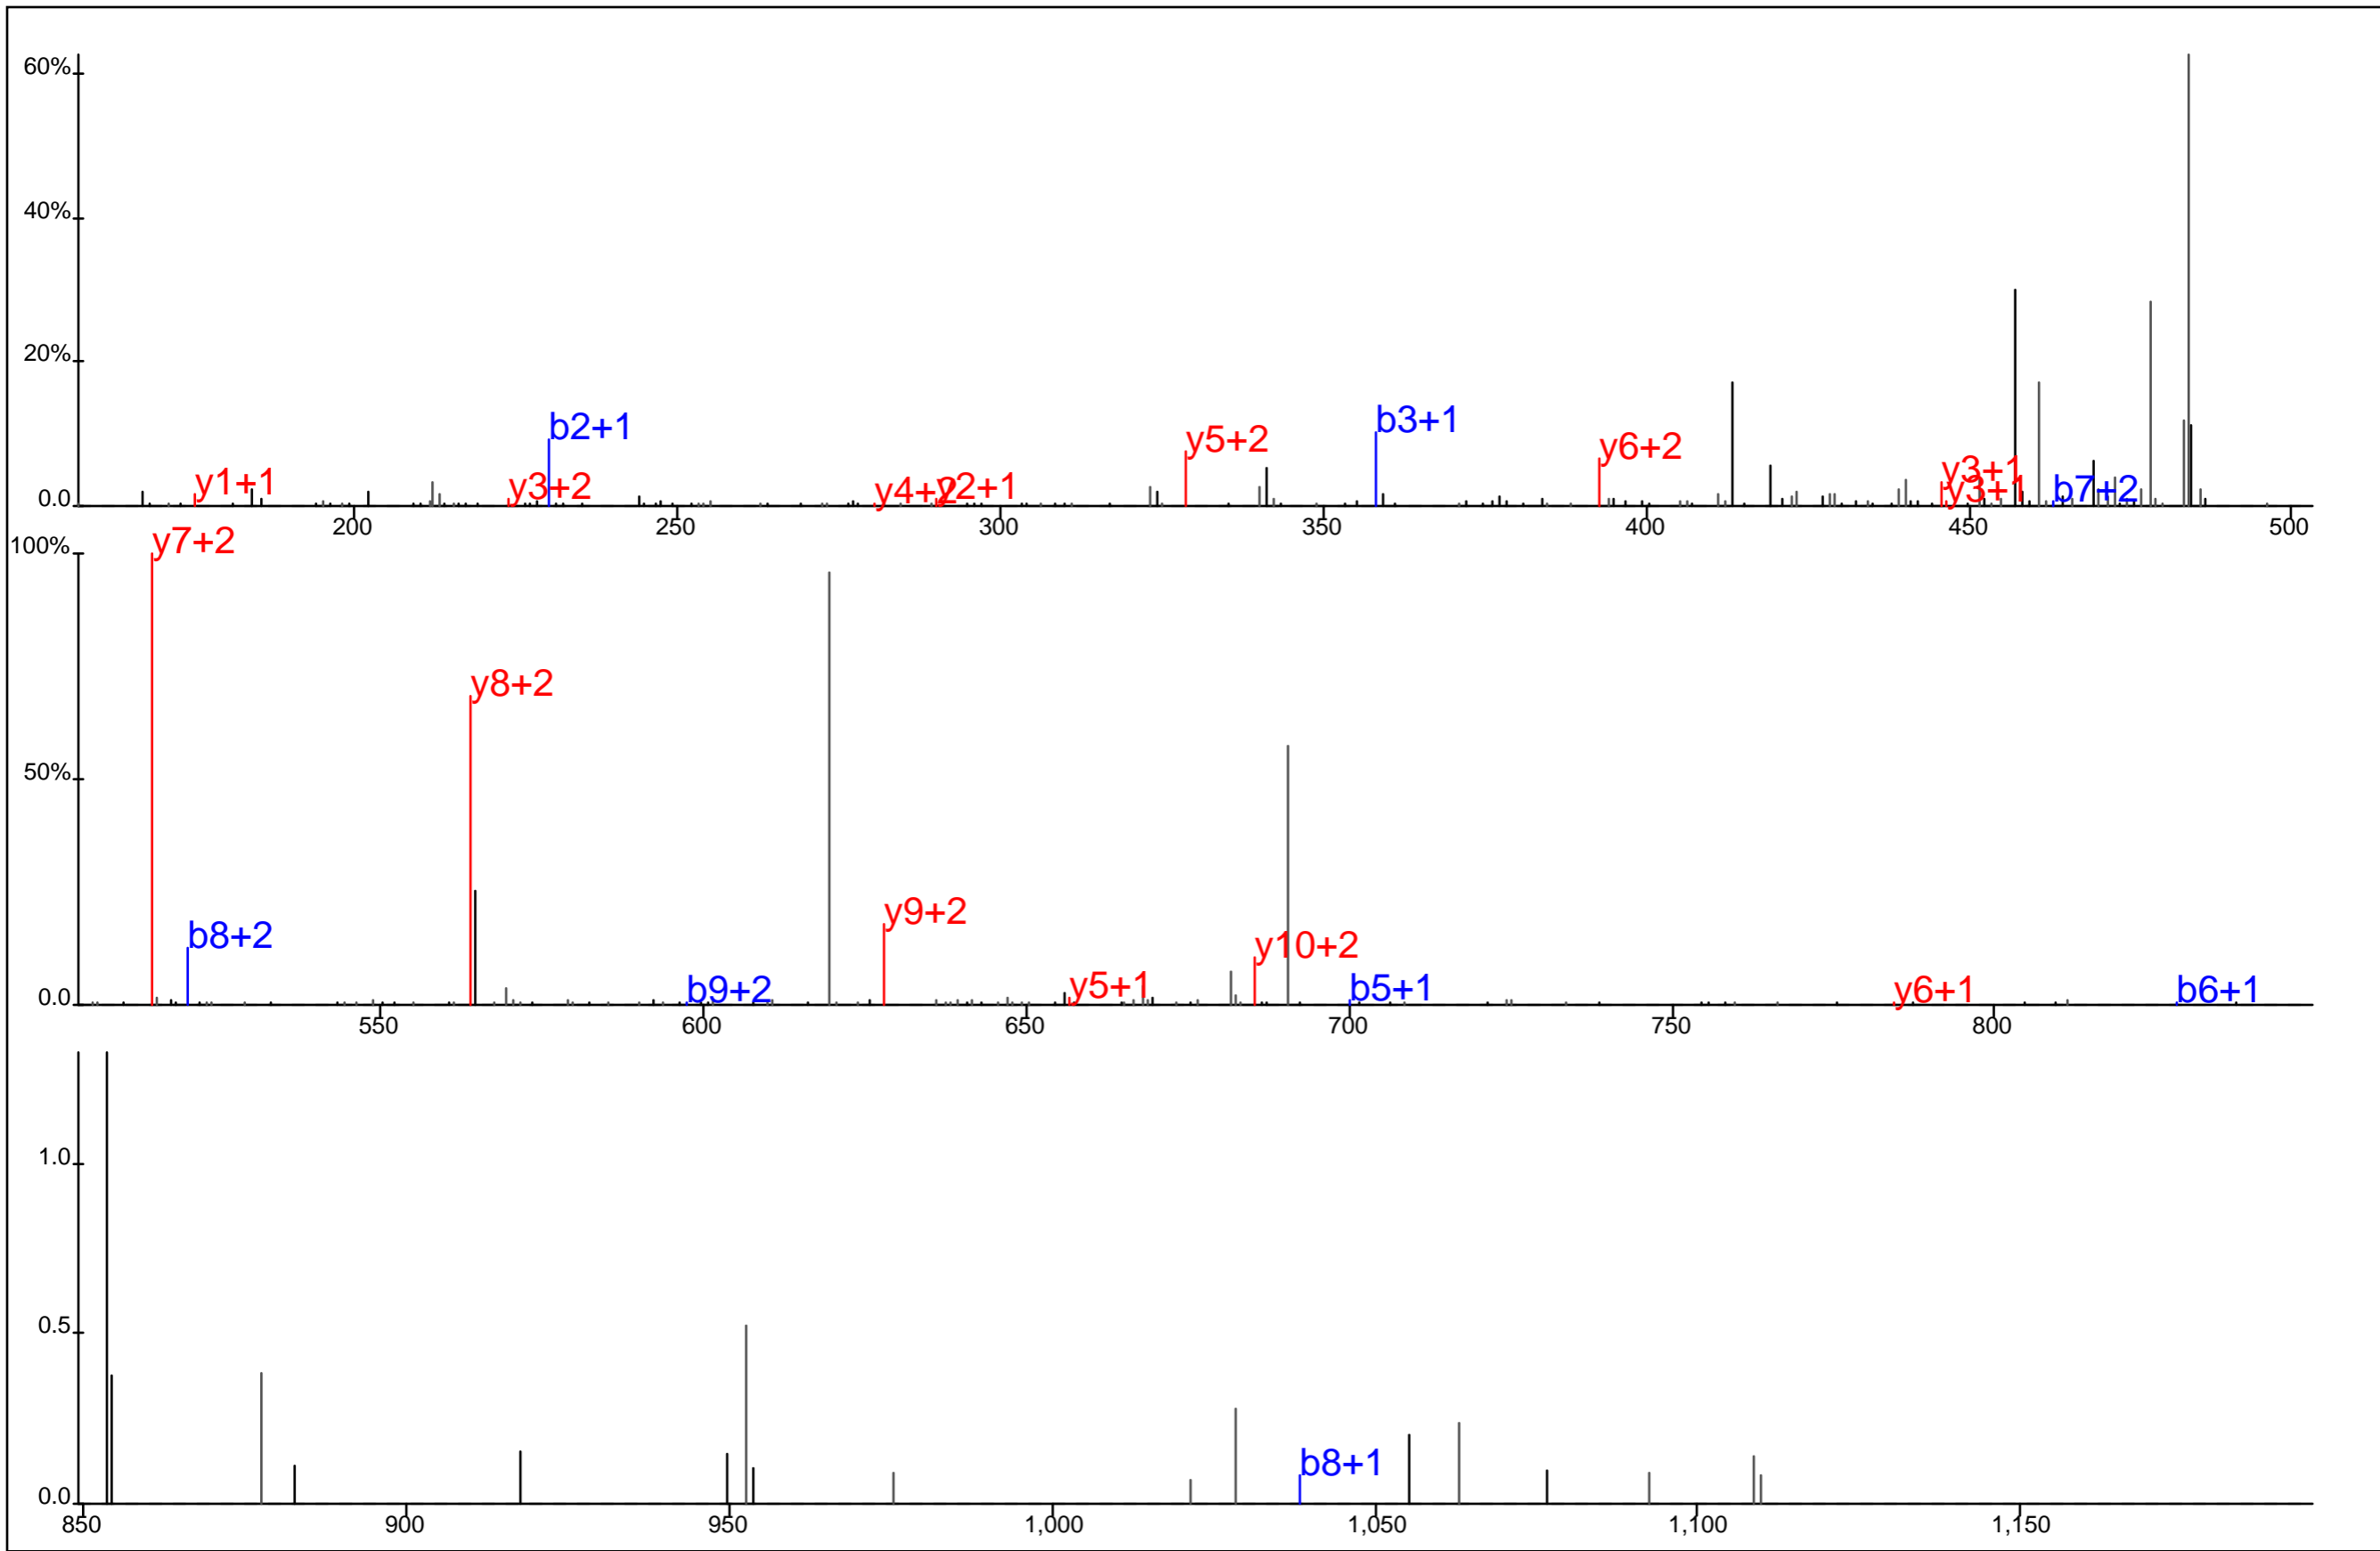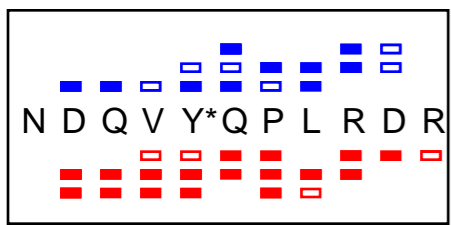

Protein Name: CD3 delta  
 gi Accession: 4502669  
 Precursor Mass: 495.2288+3  
 Delta Mass: 2.021 ppm  
 XCorr: 25.57

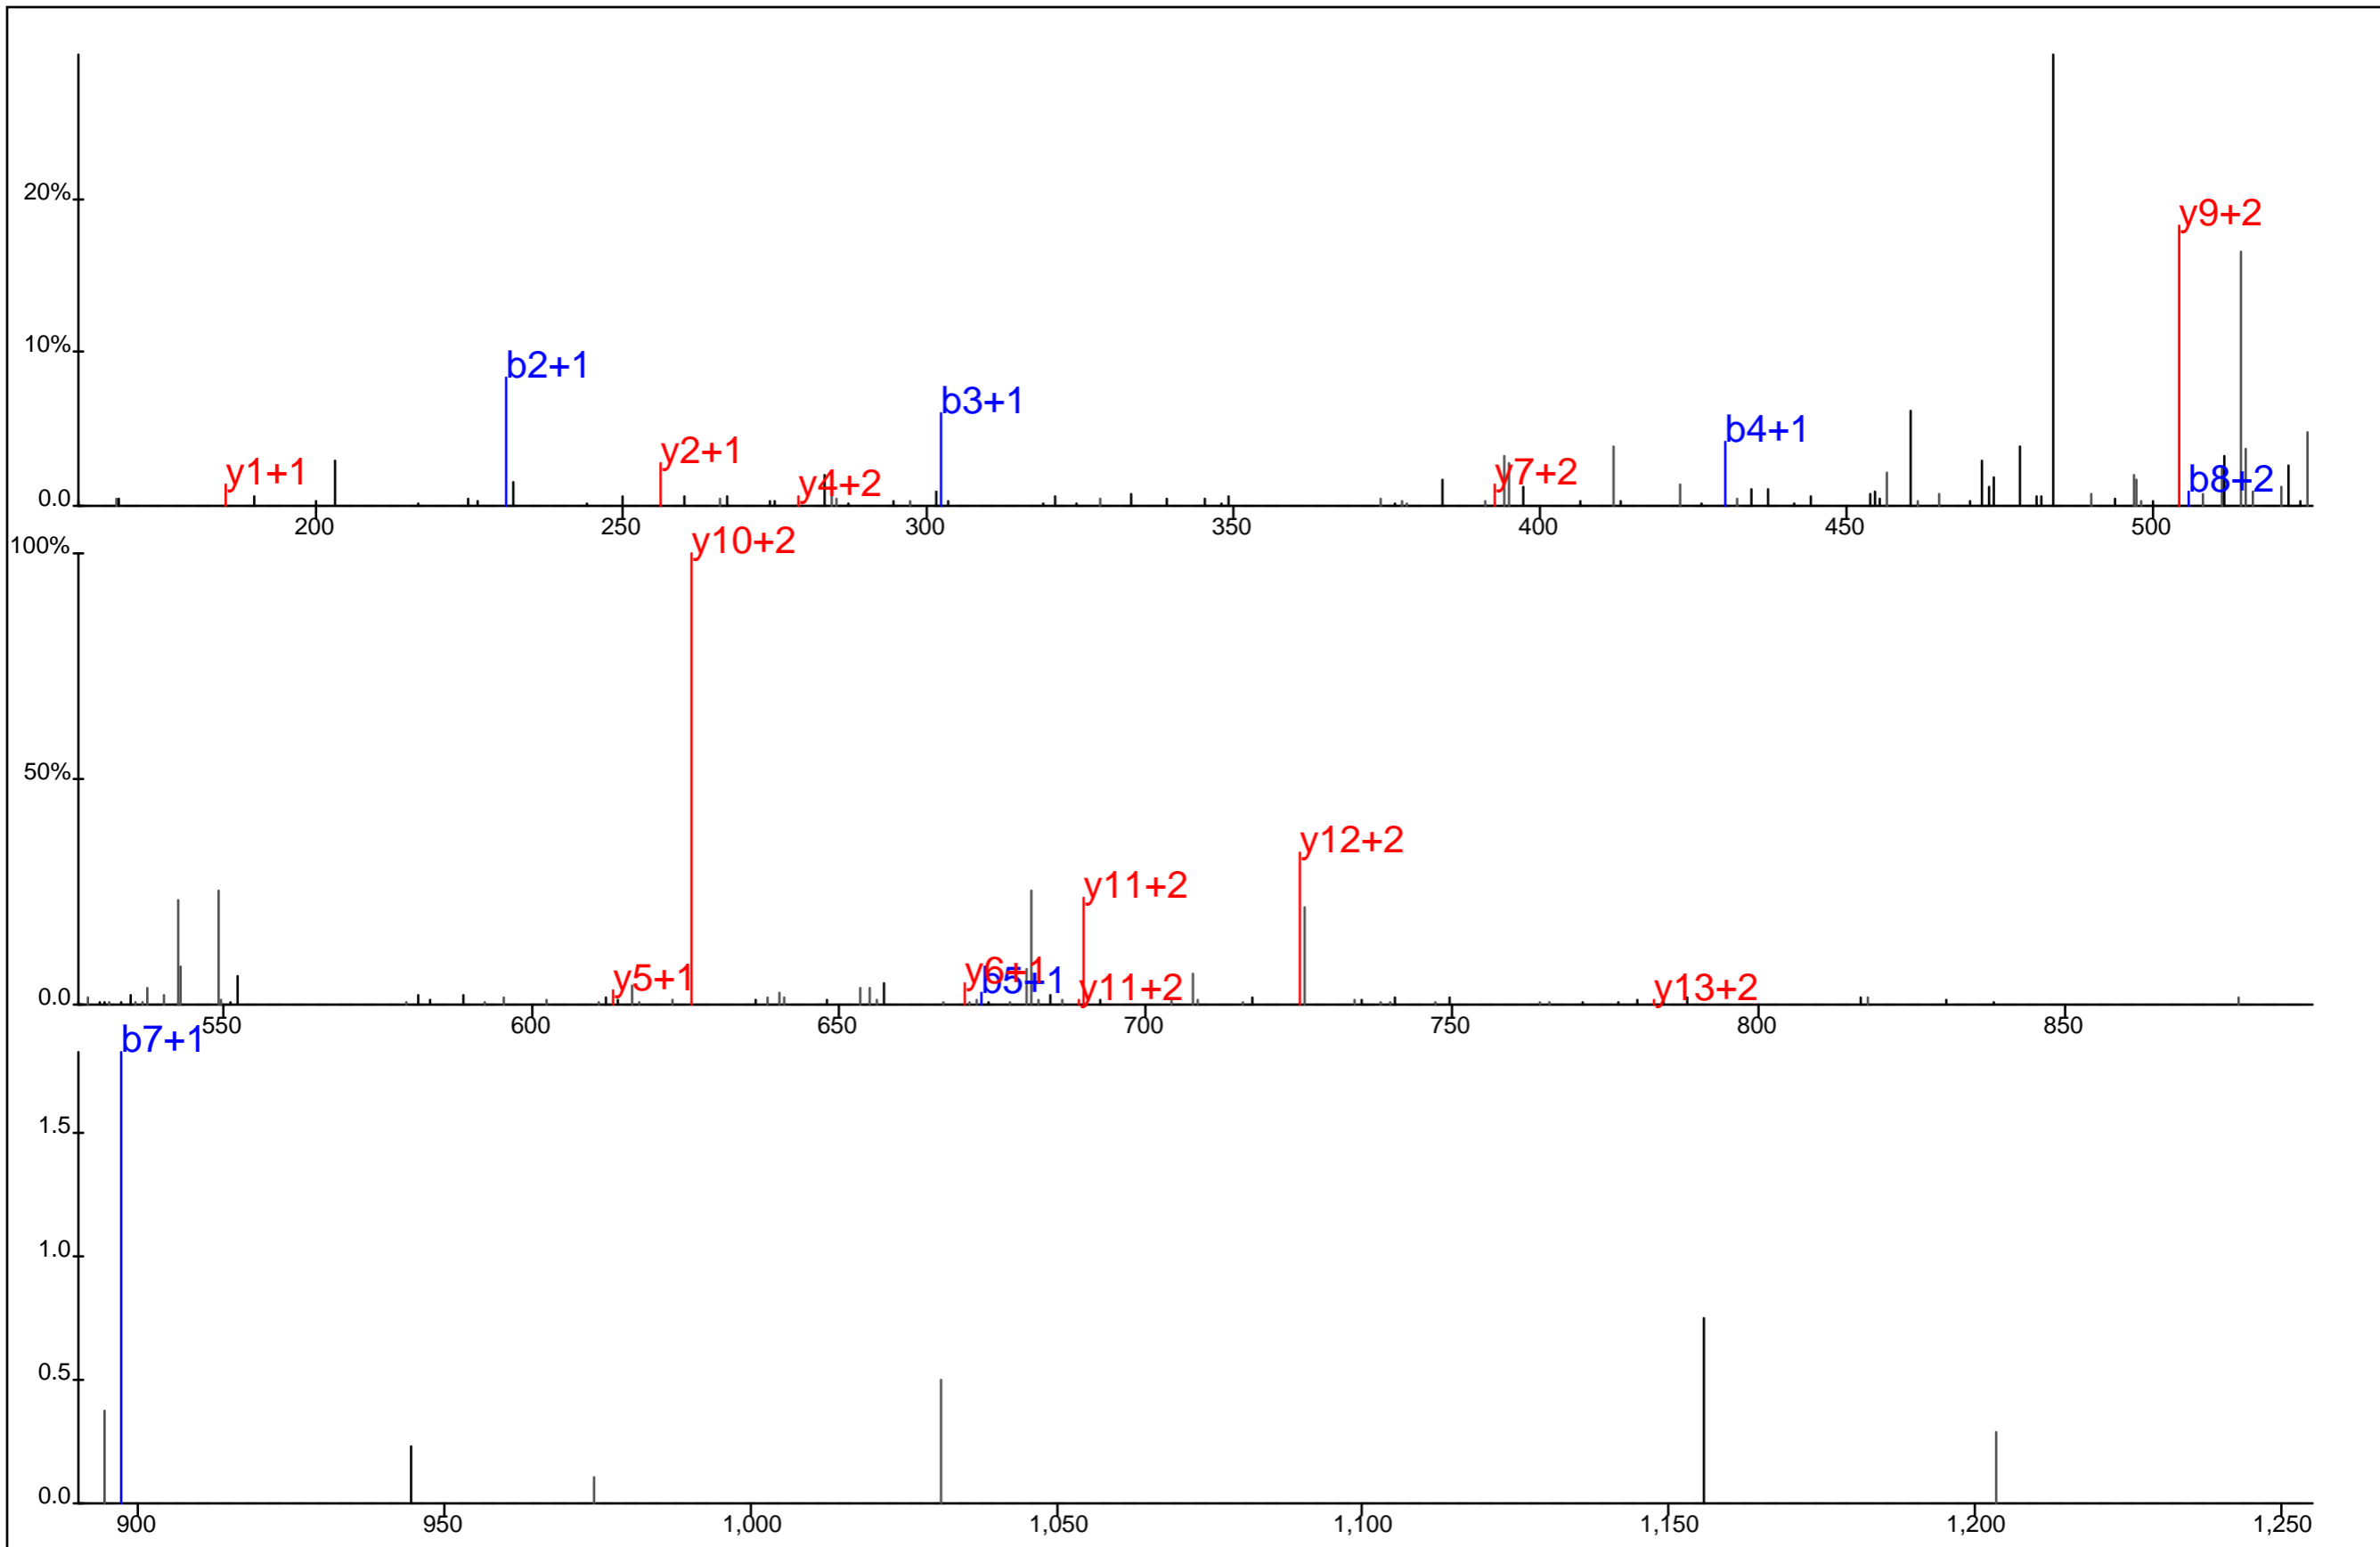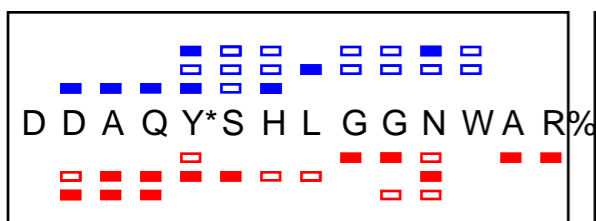

Protein Name: CD3 delta  
 gi Accession: 4502669  
 Precursor Mass: 560.5682+3  
 Delta Mass: 3.719 ppm  
 XCorr: 36.96

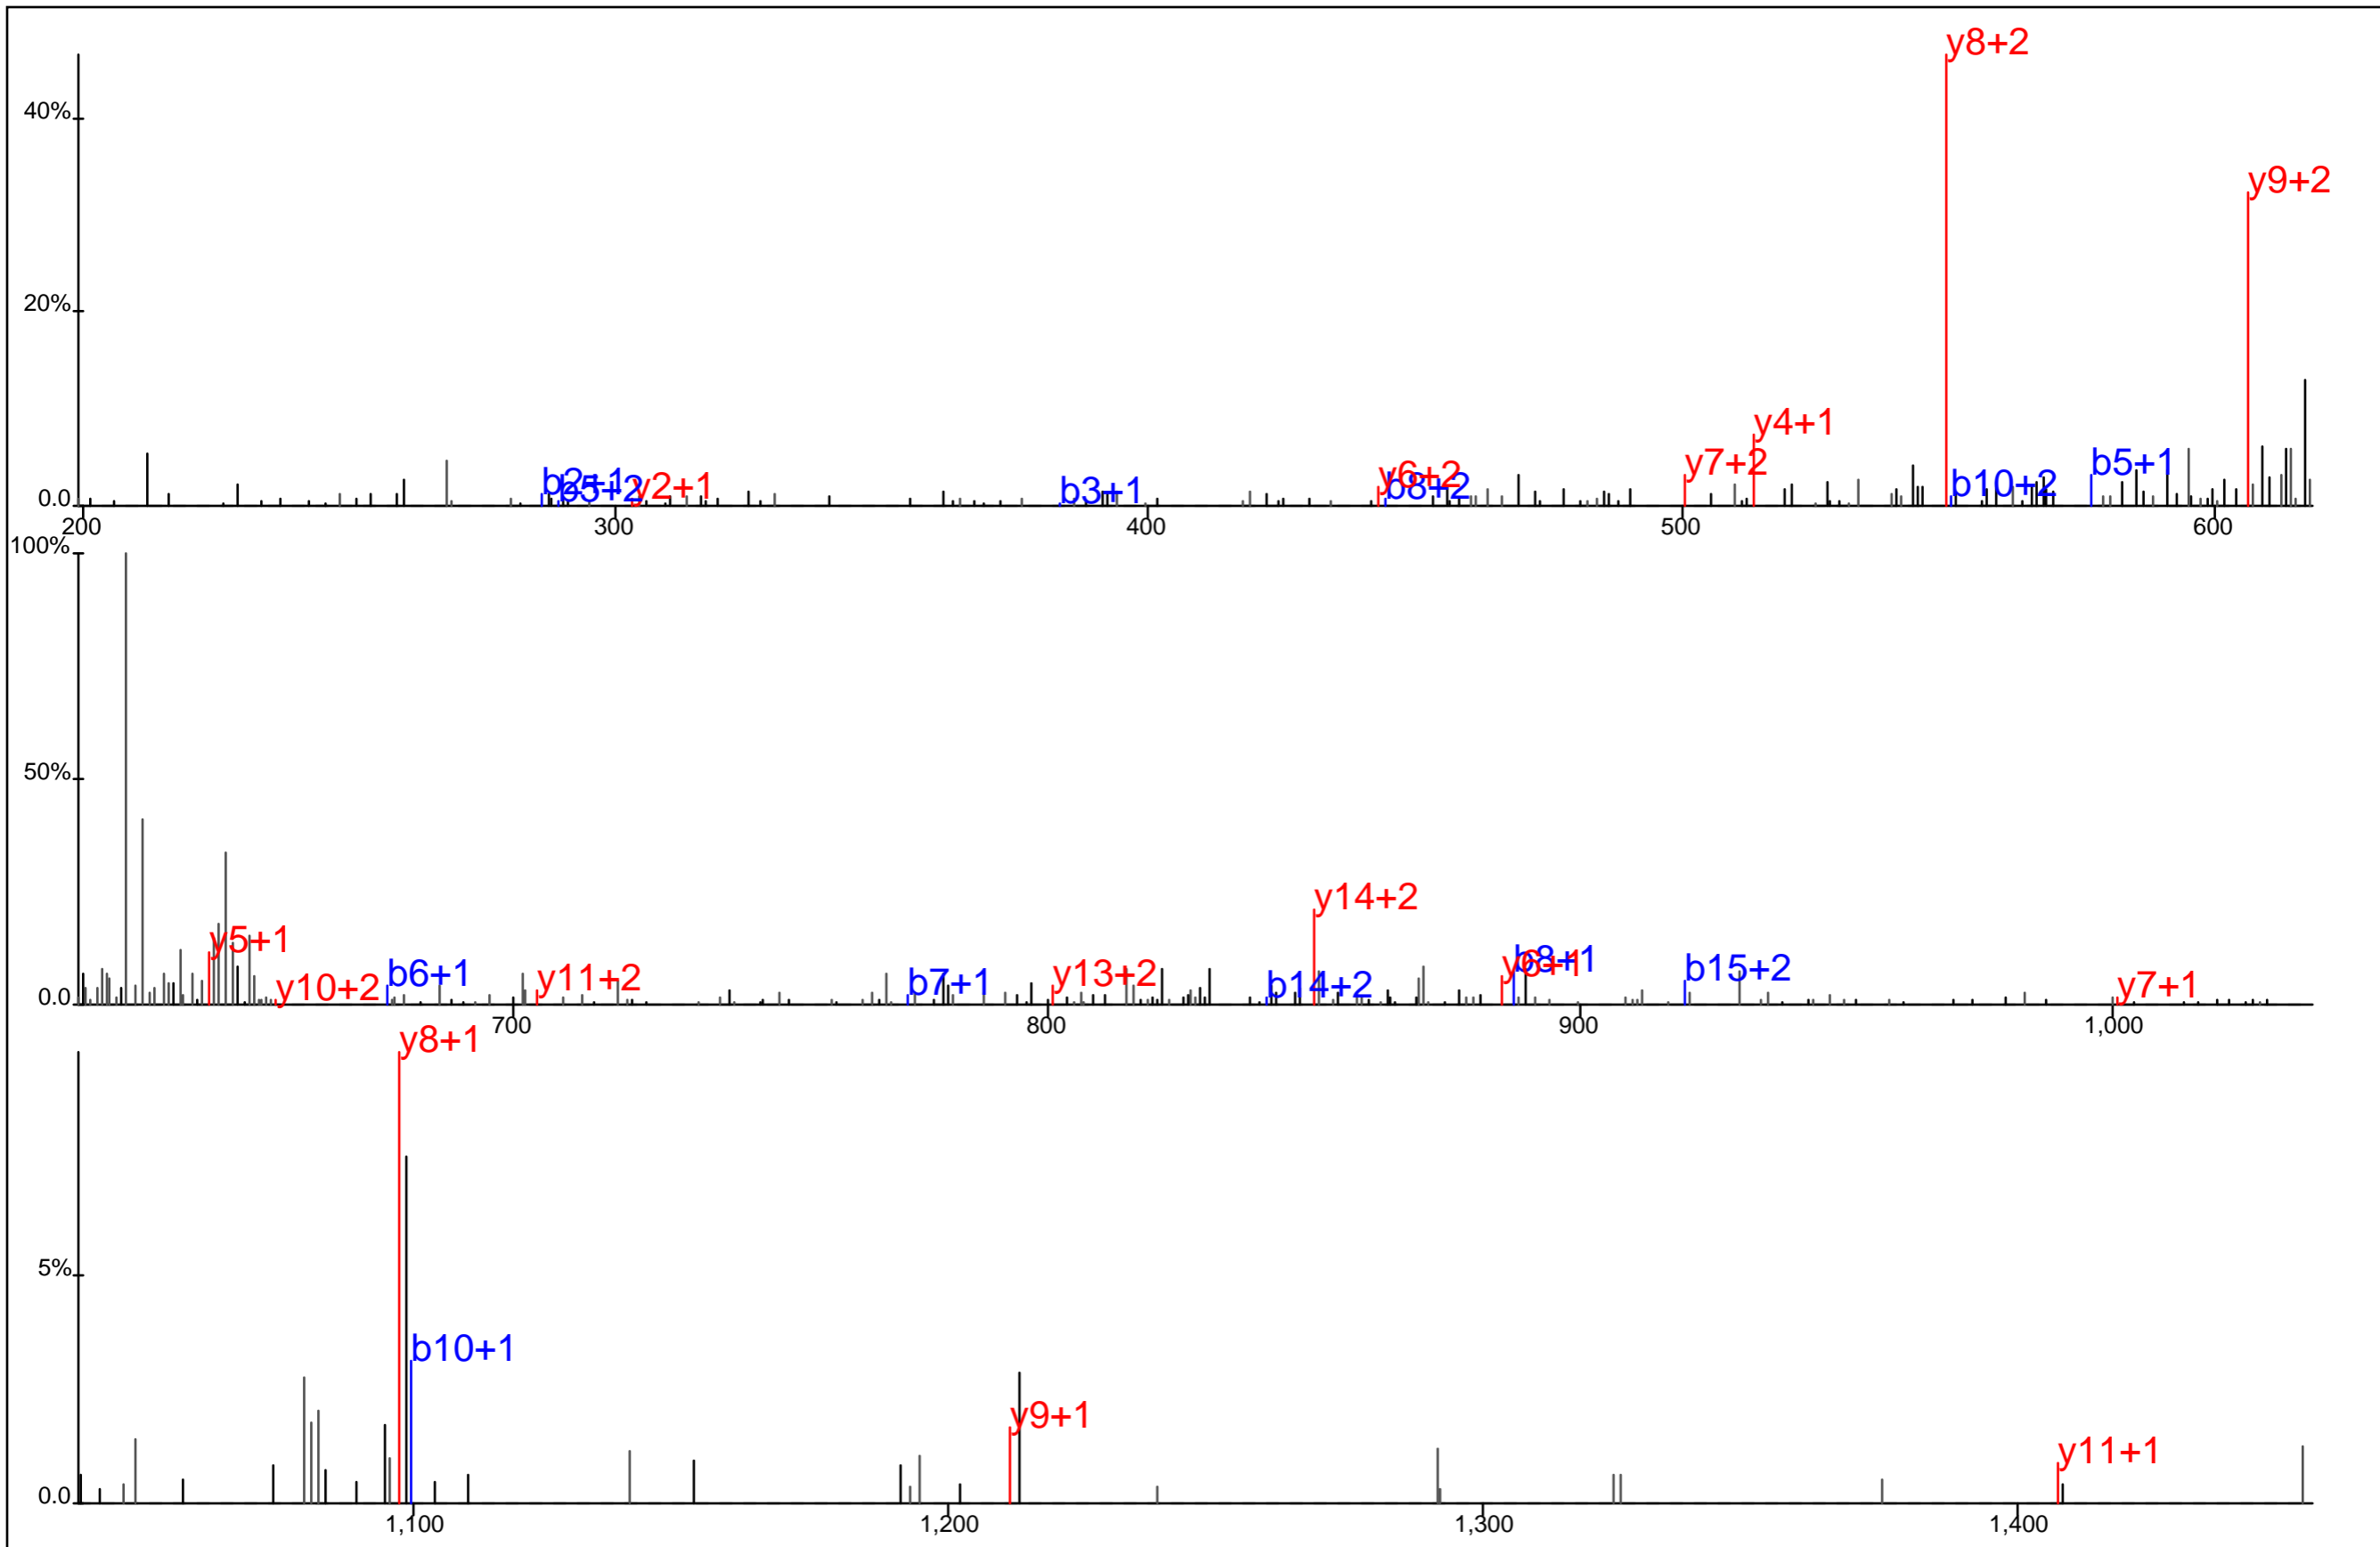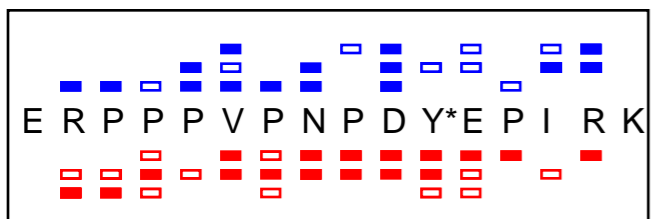

Protein Name: CD3 epsilon  
 gi Accession: 4502671  
 Precursor Mass: 661.9945+3  
 Delta Mass: 0.086 ppm  
 XCorr: 2.5629



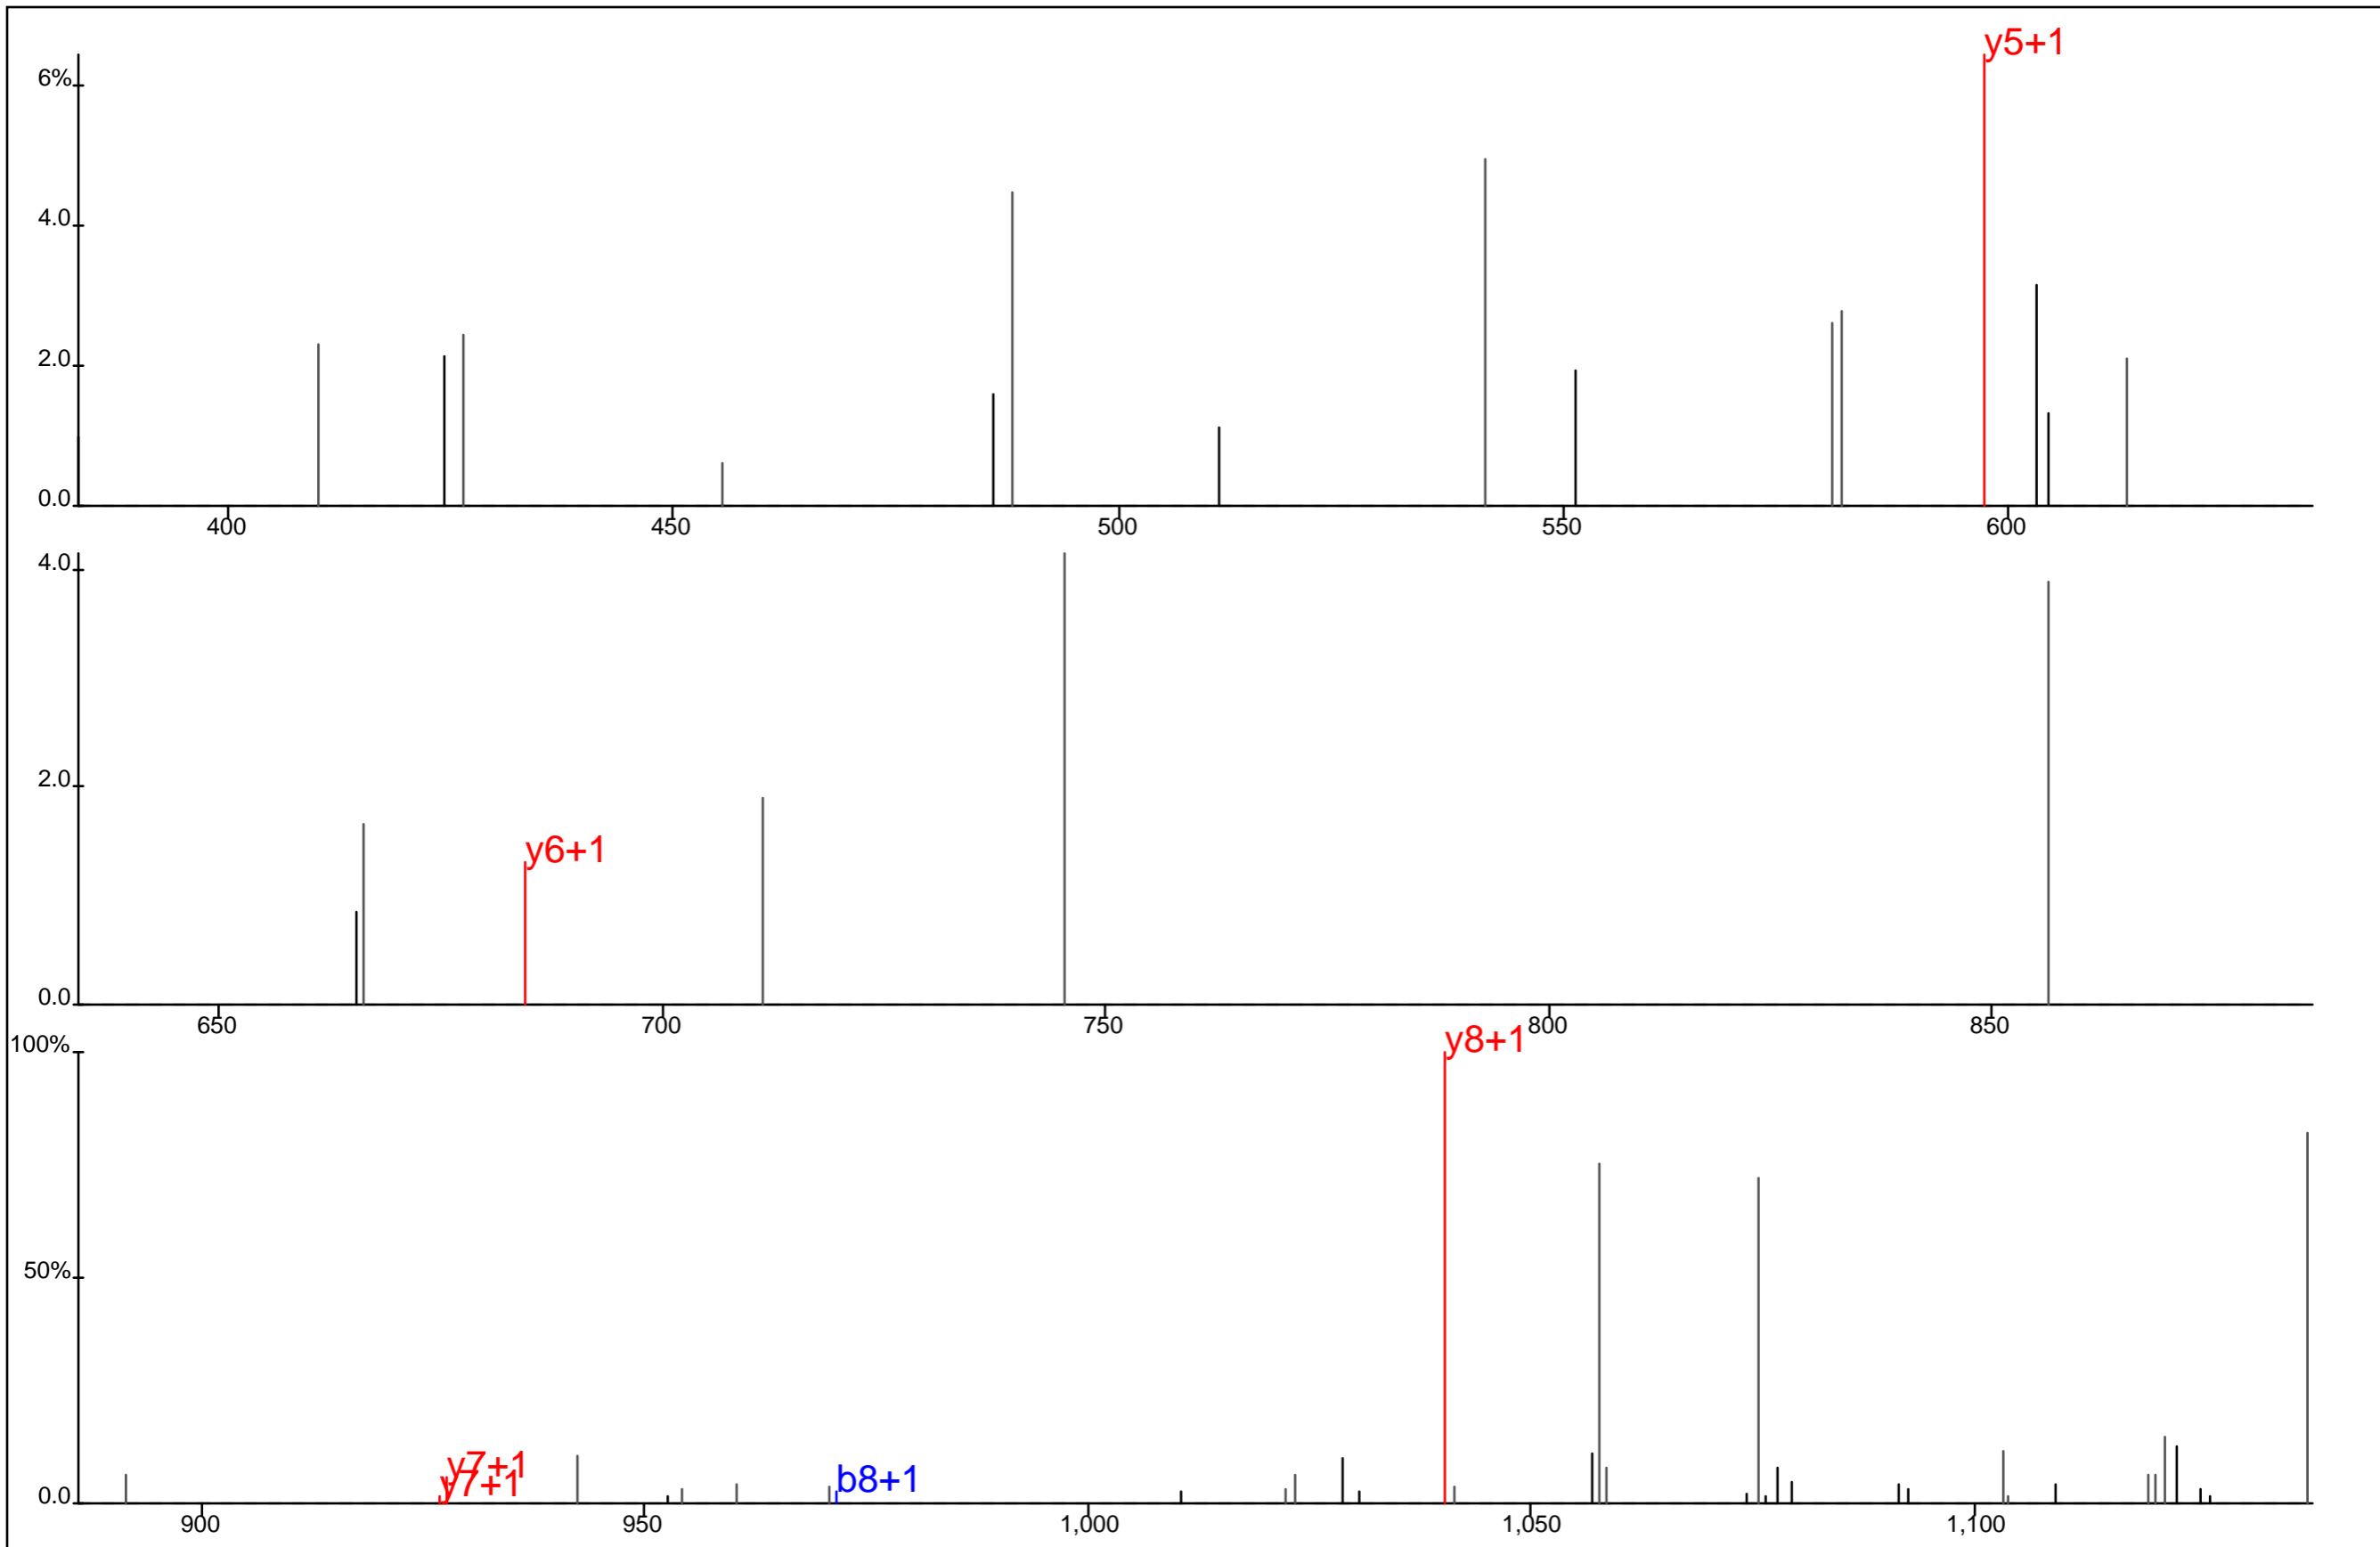

□ □ ■  
 D L Y\* S G L N Q R#  
■ ■ ■ ■ □

Protein Name: CD3 epsilon  
 gi Accession: 4502671  
 Precursor Mass: 1,155.4916+1  
 Delta Mass: 13.302 ppm  
 XCorr: 1.7836

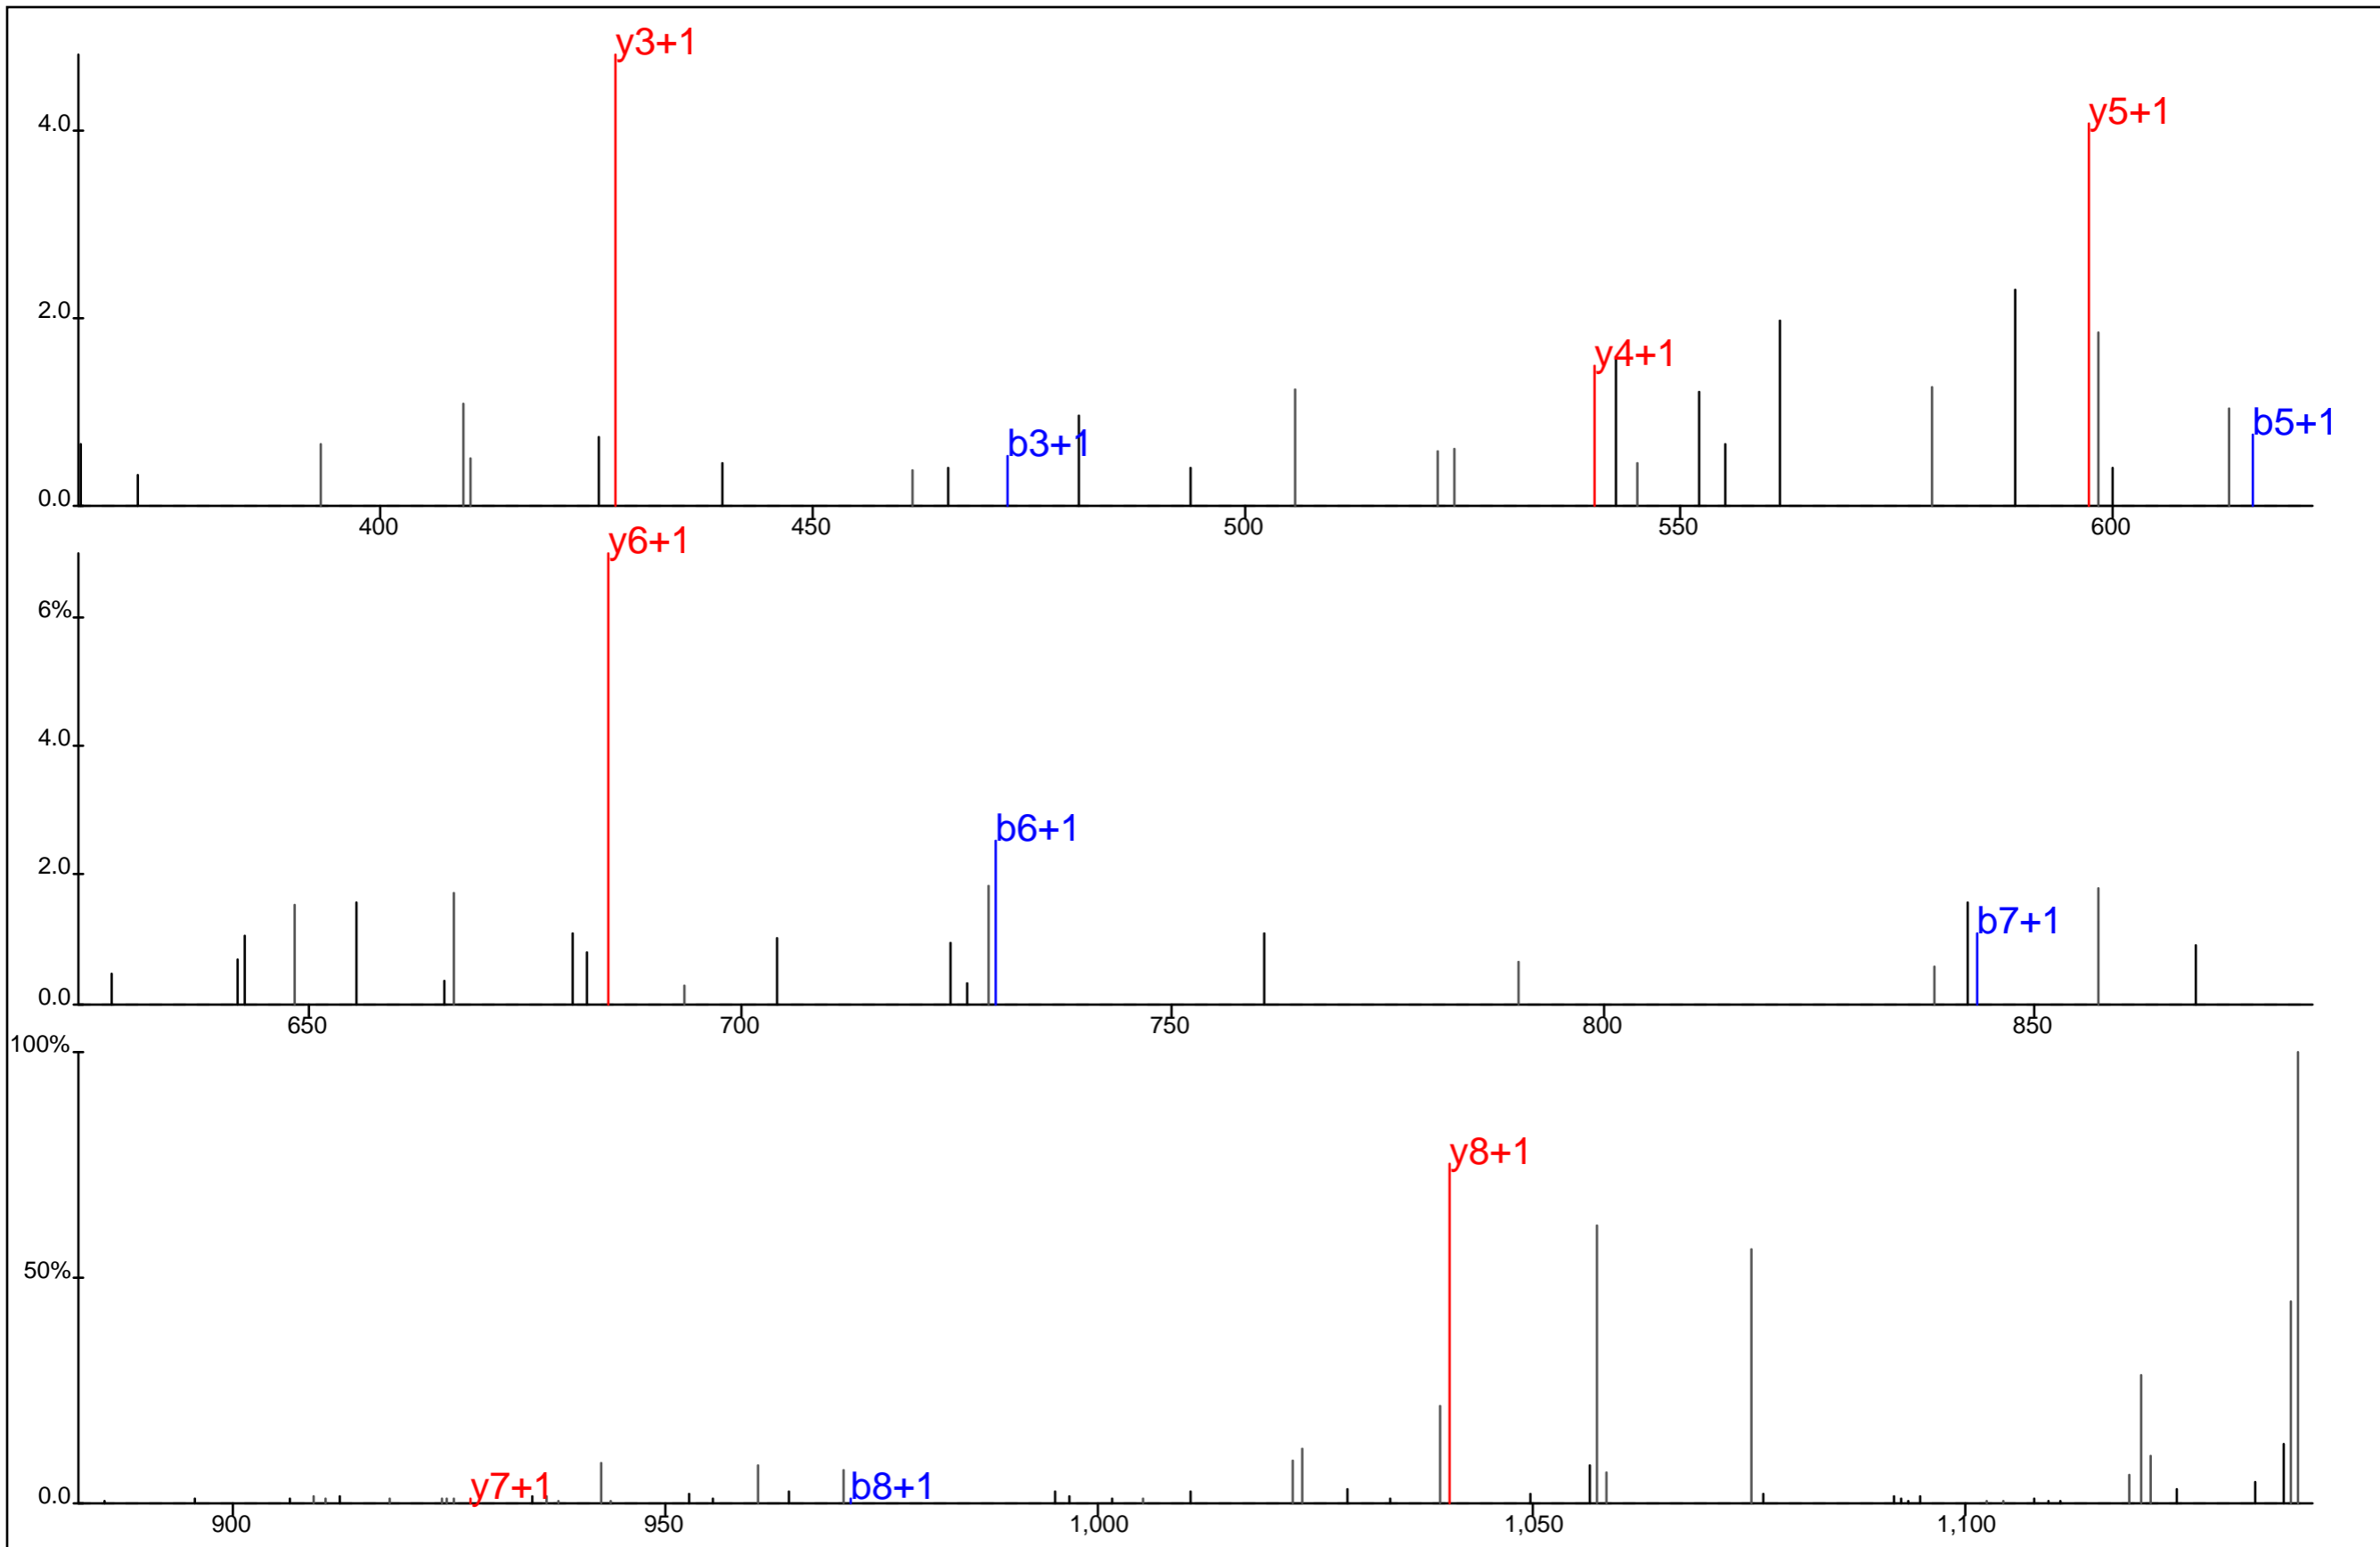

■ ■ ■ ■  
 D L Y\* S G L N Q R%  
■ ■ ■ ■

Protein Name: CD3 epsilon  
 gi Accession: 4502671  
 Precursor Mass: 1,155.5138+1  
 Delta Mass: 5.944 ppm  
 XCorr: 24.3

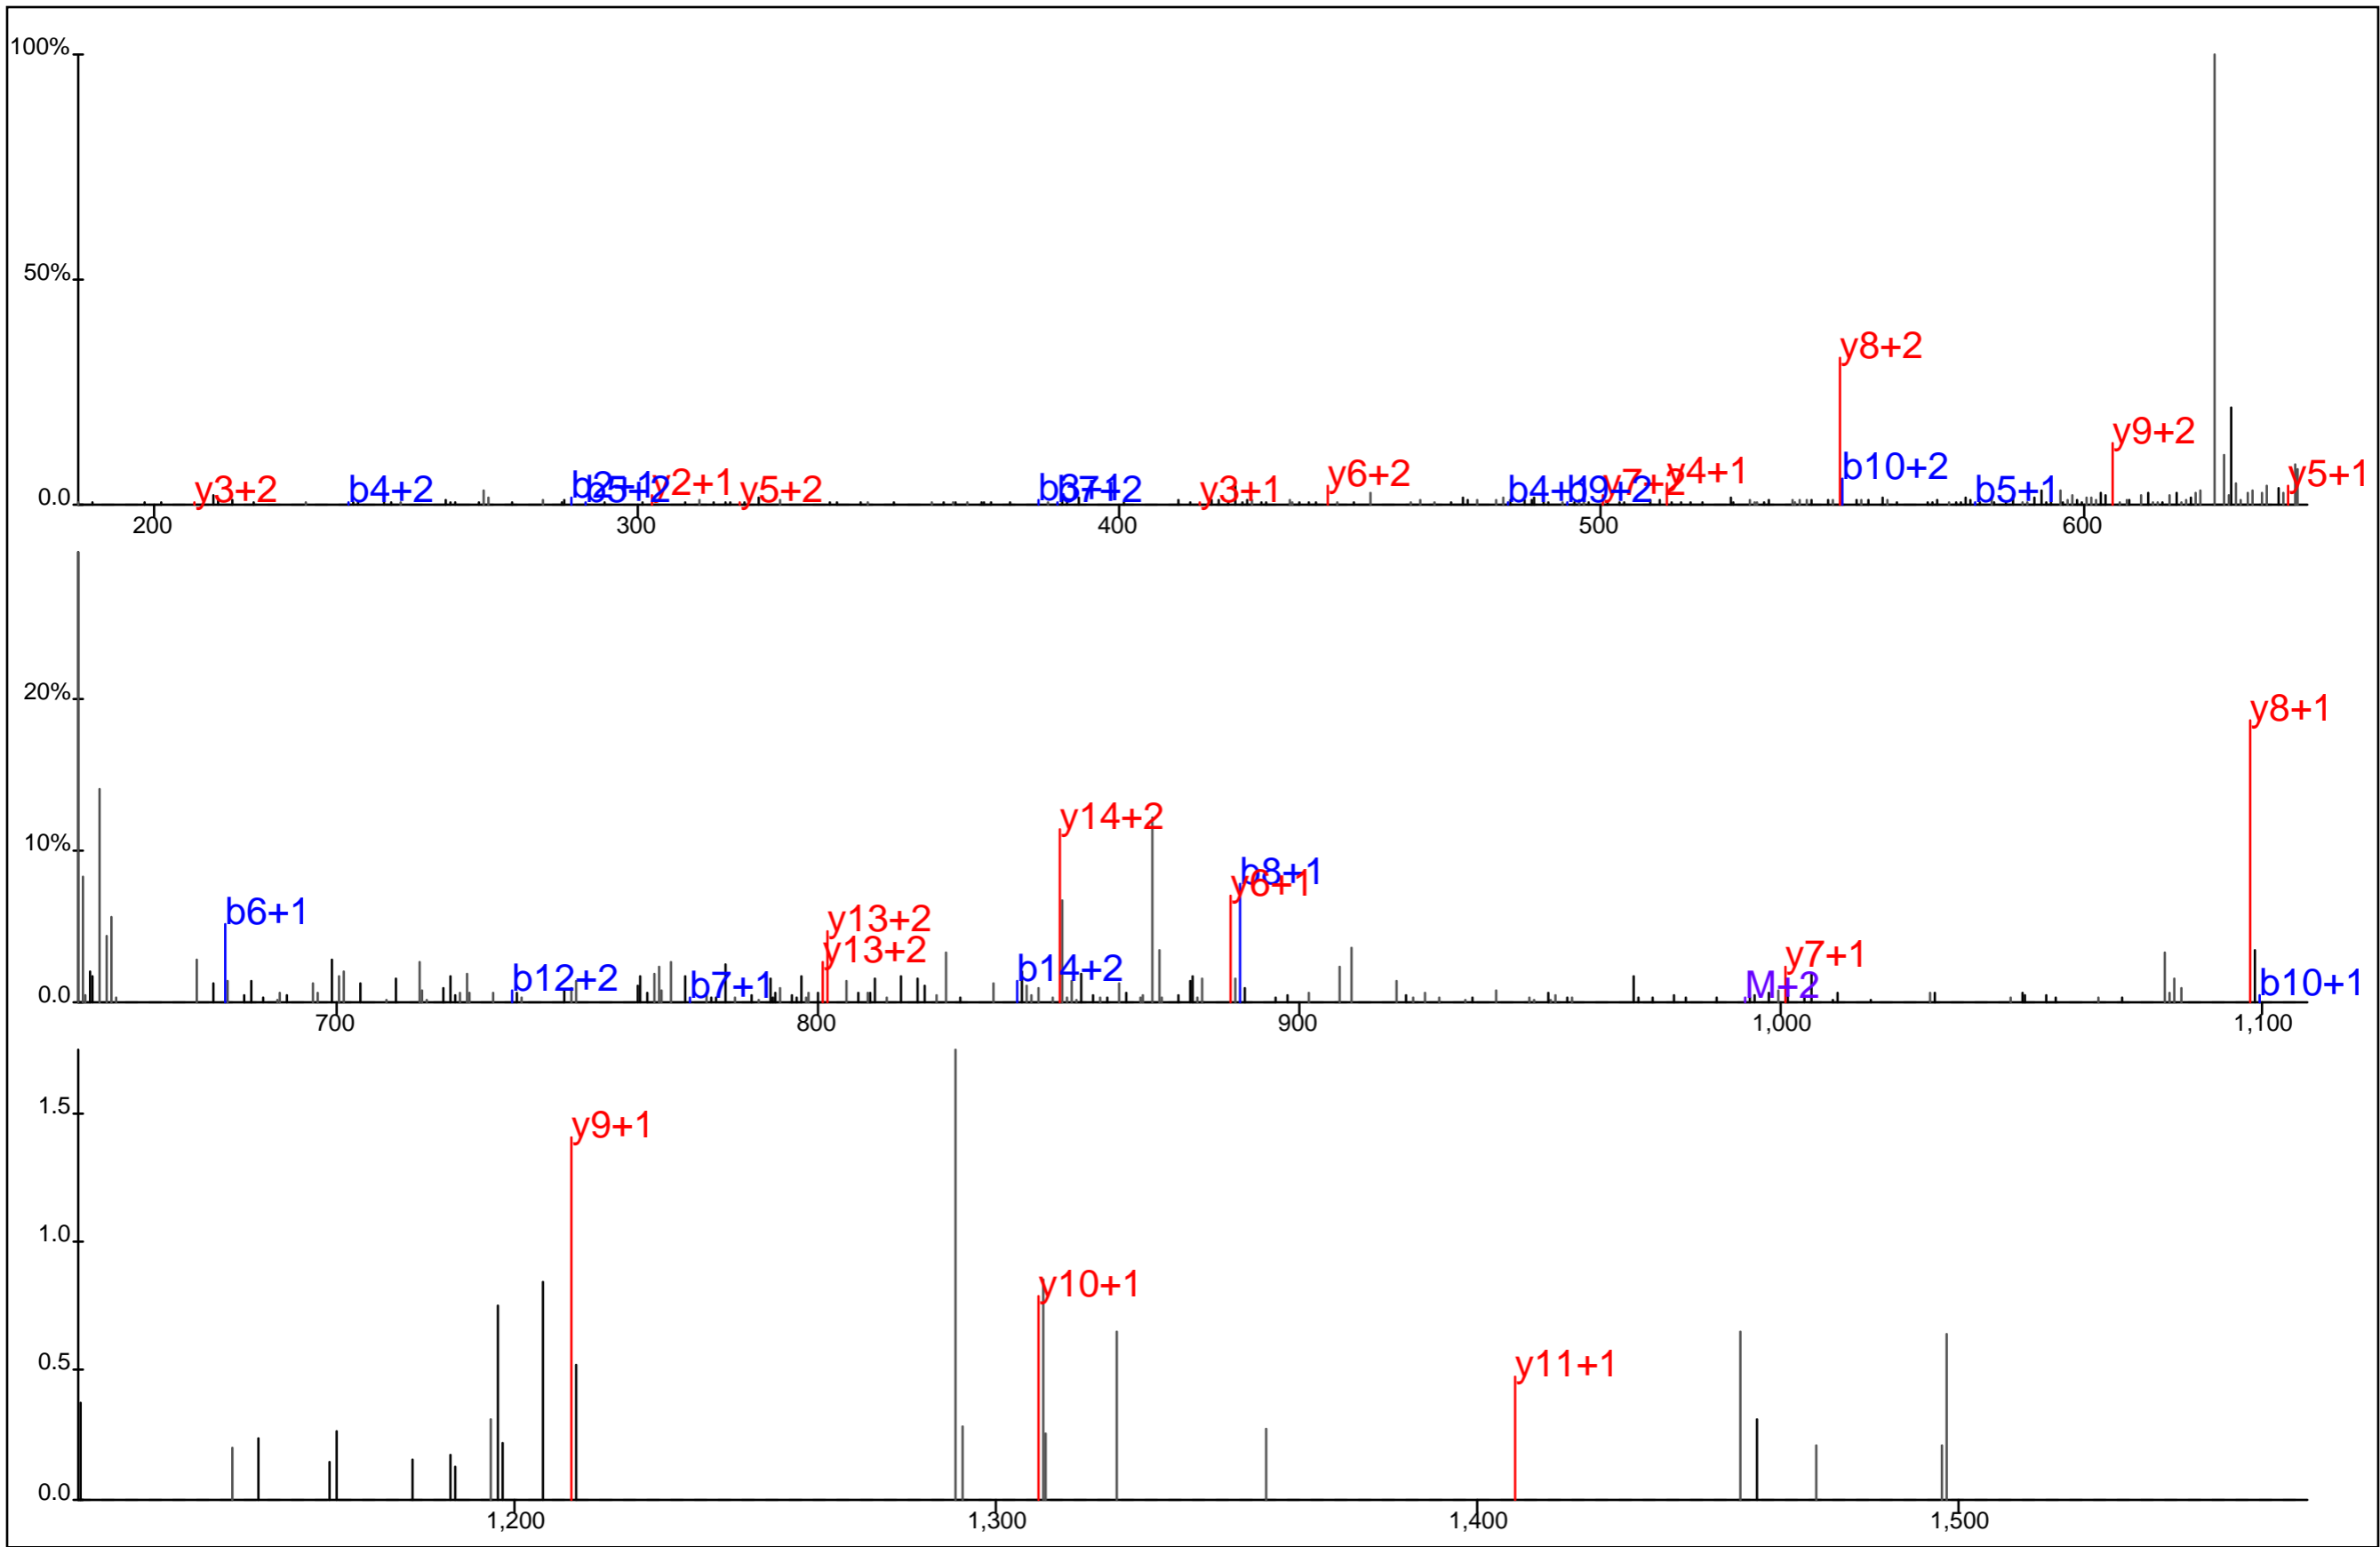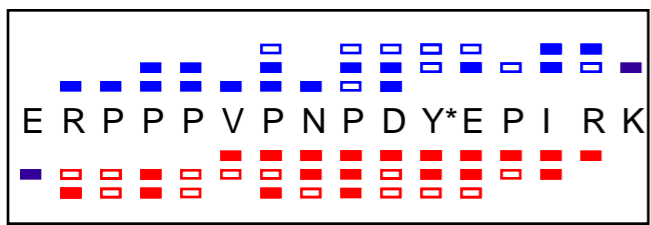

Protein Name: CD3 epsilon  
 gi Accession: 4502671  
 Precursor Mass: 661.9969+3  
 Delta Mass: 3.794 ppm  
 XCorr: 36.43

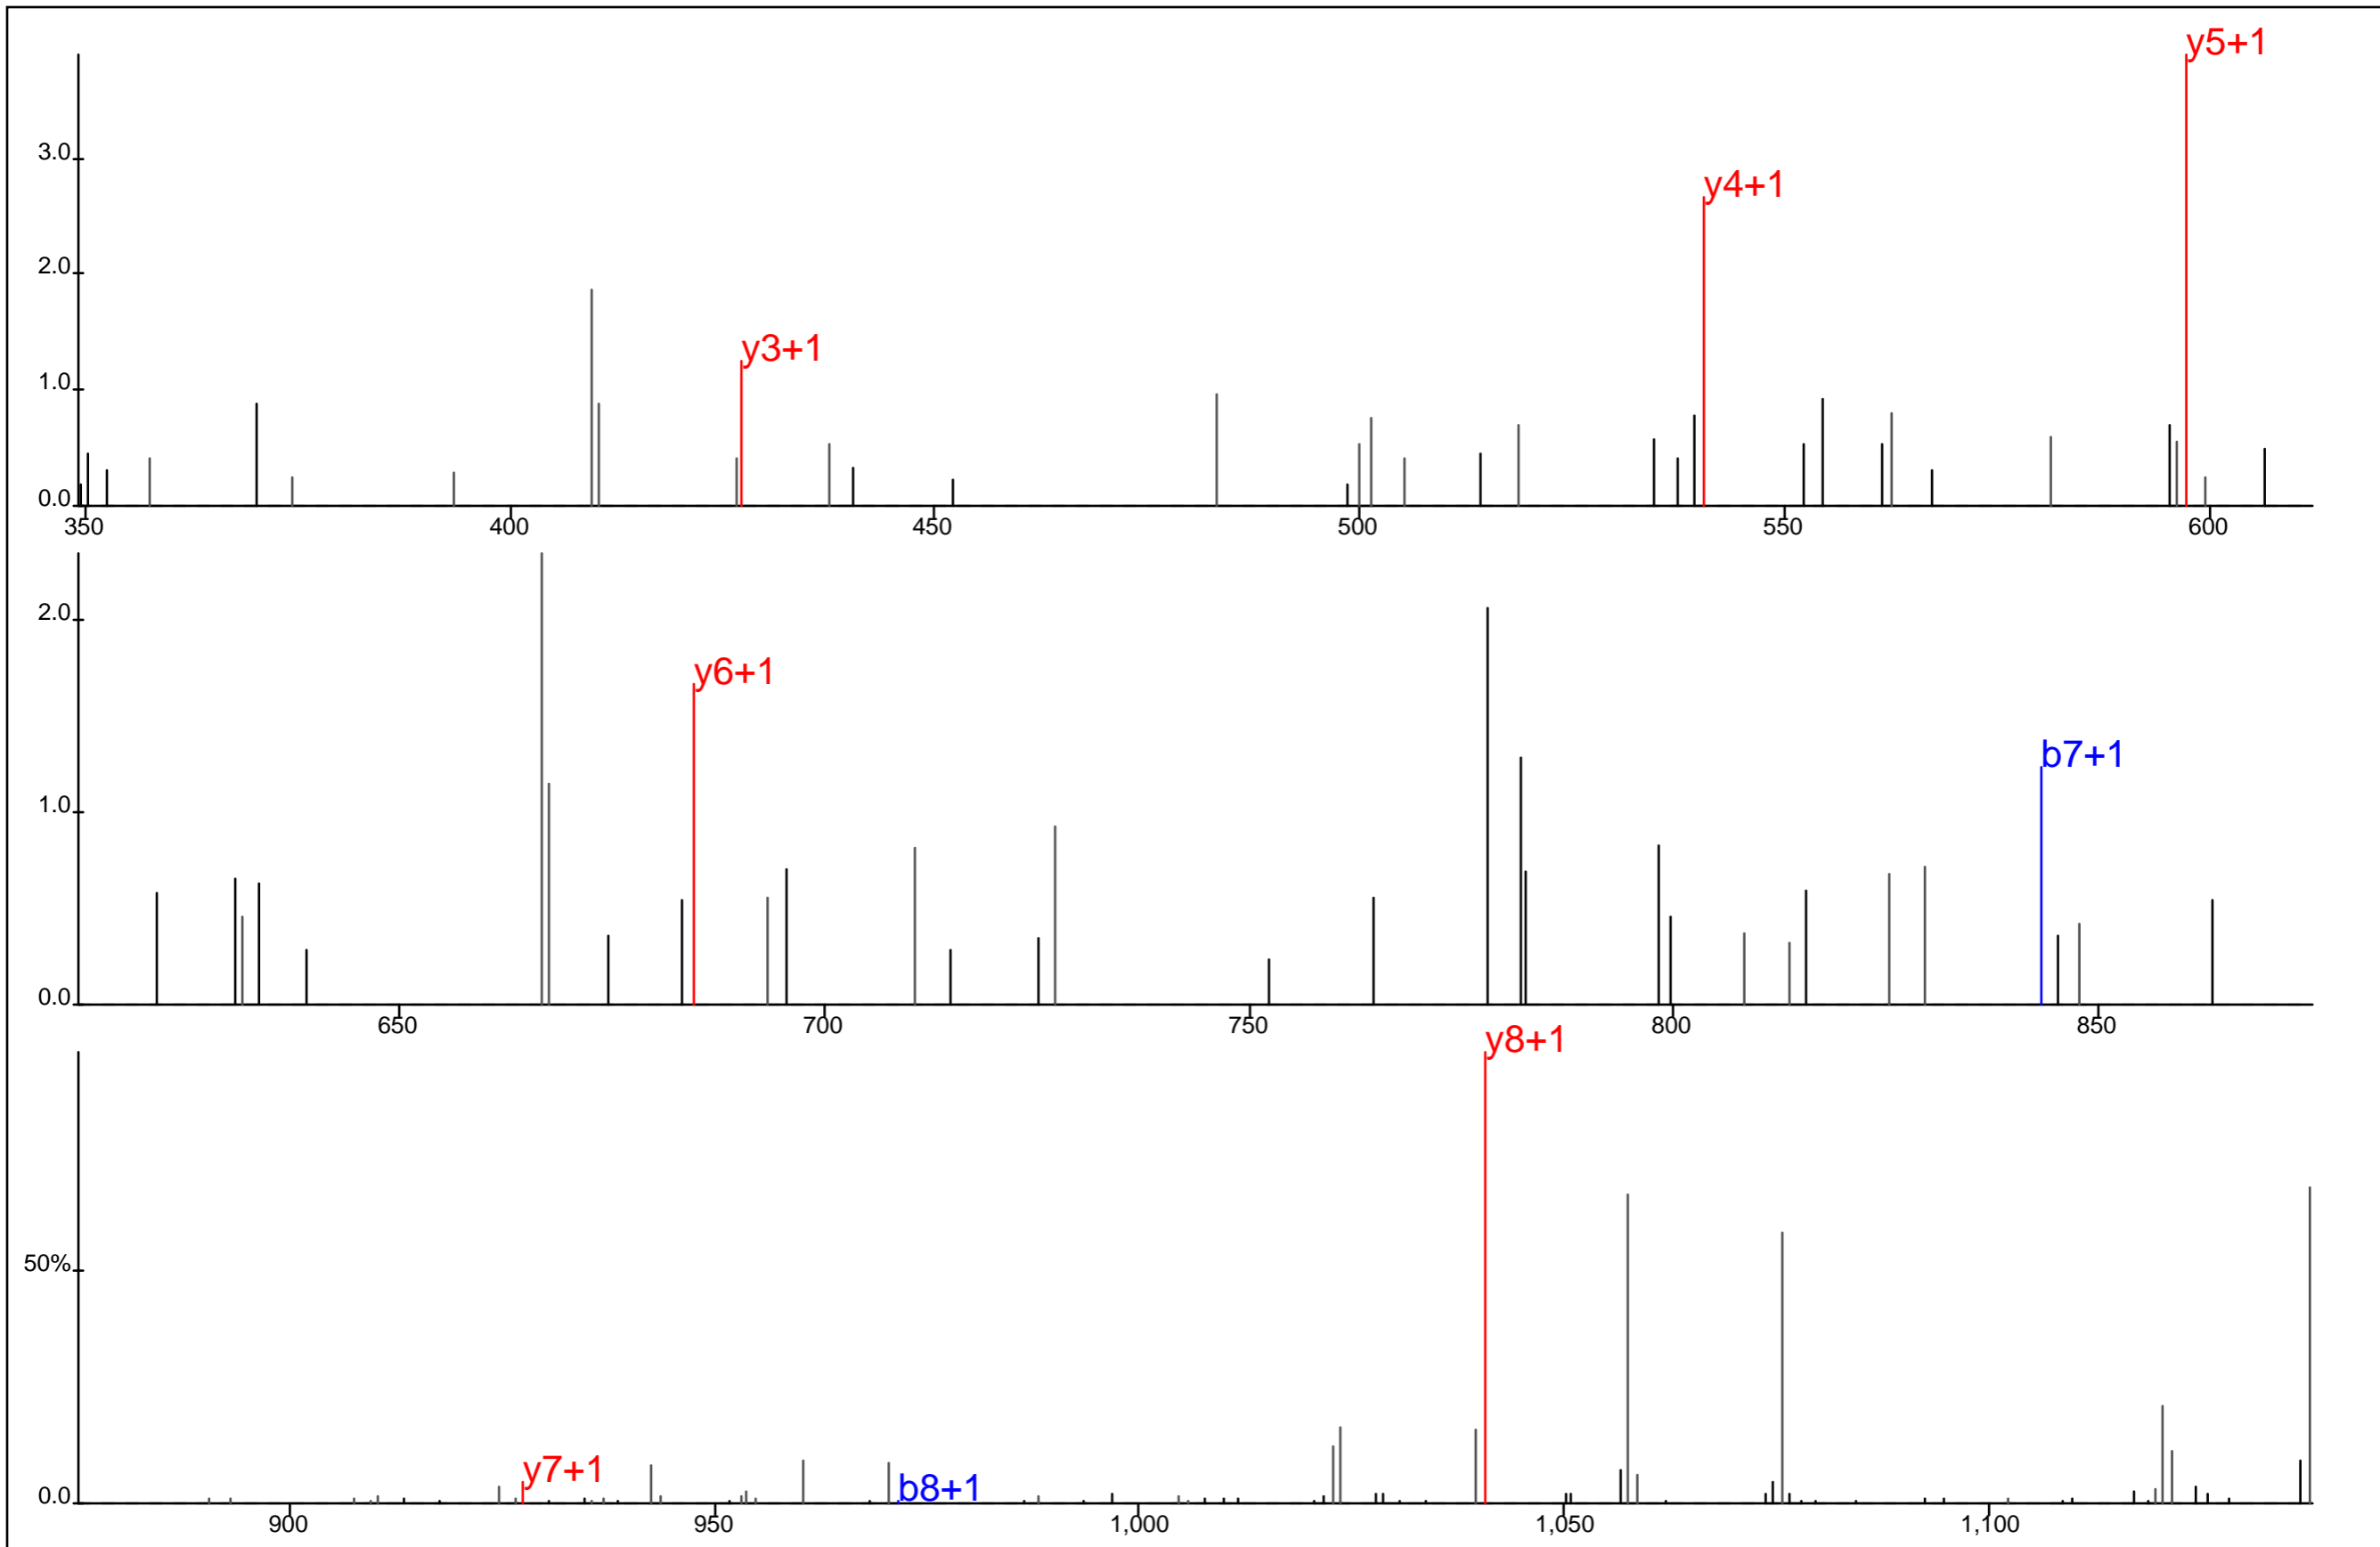

□ □ □ □ ■ □  
 D L Y\* S G L N Q R%  
□ □ □ □ □

Protein Name: CD3 epsilon  
 gi Accession: 4502671  
 Precursor Mass: 1,155.5055+1  
 Delta Mass: 1.239 ppm  
 XCorr: 42.06

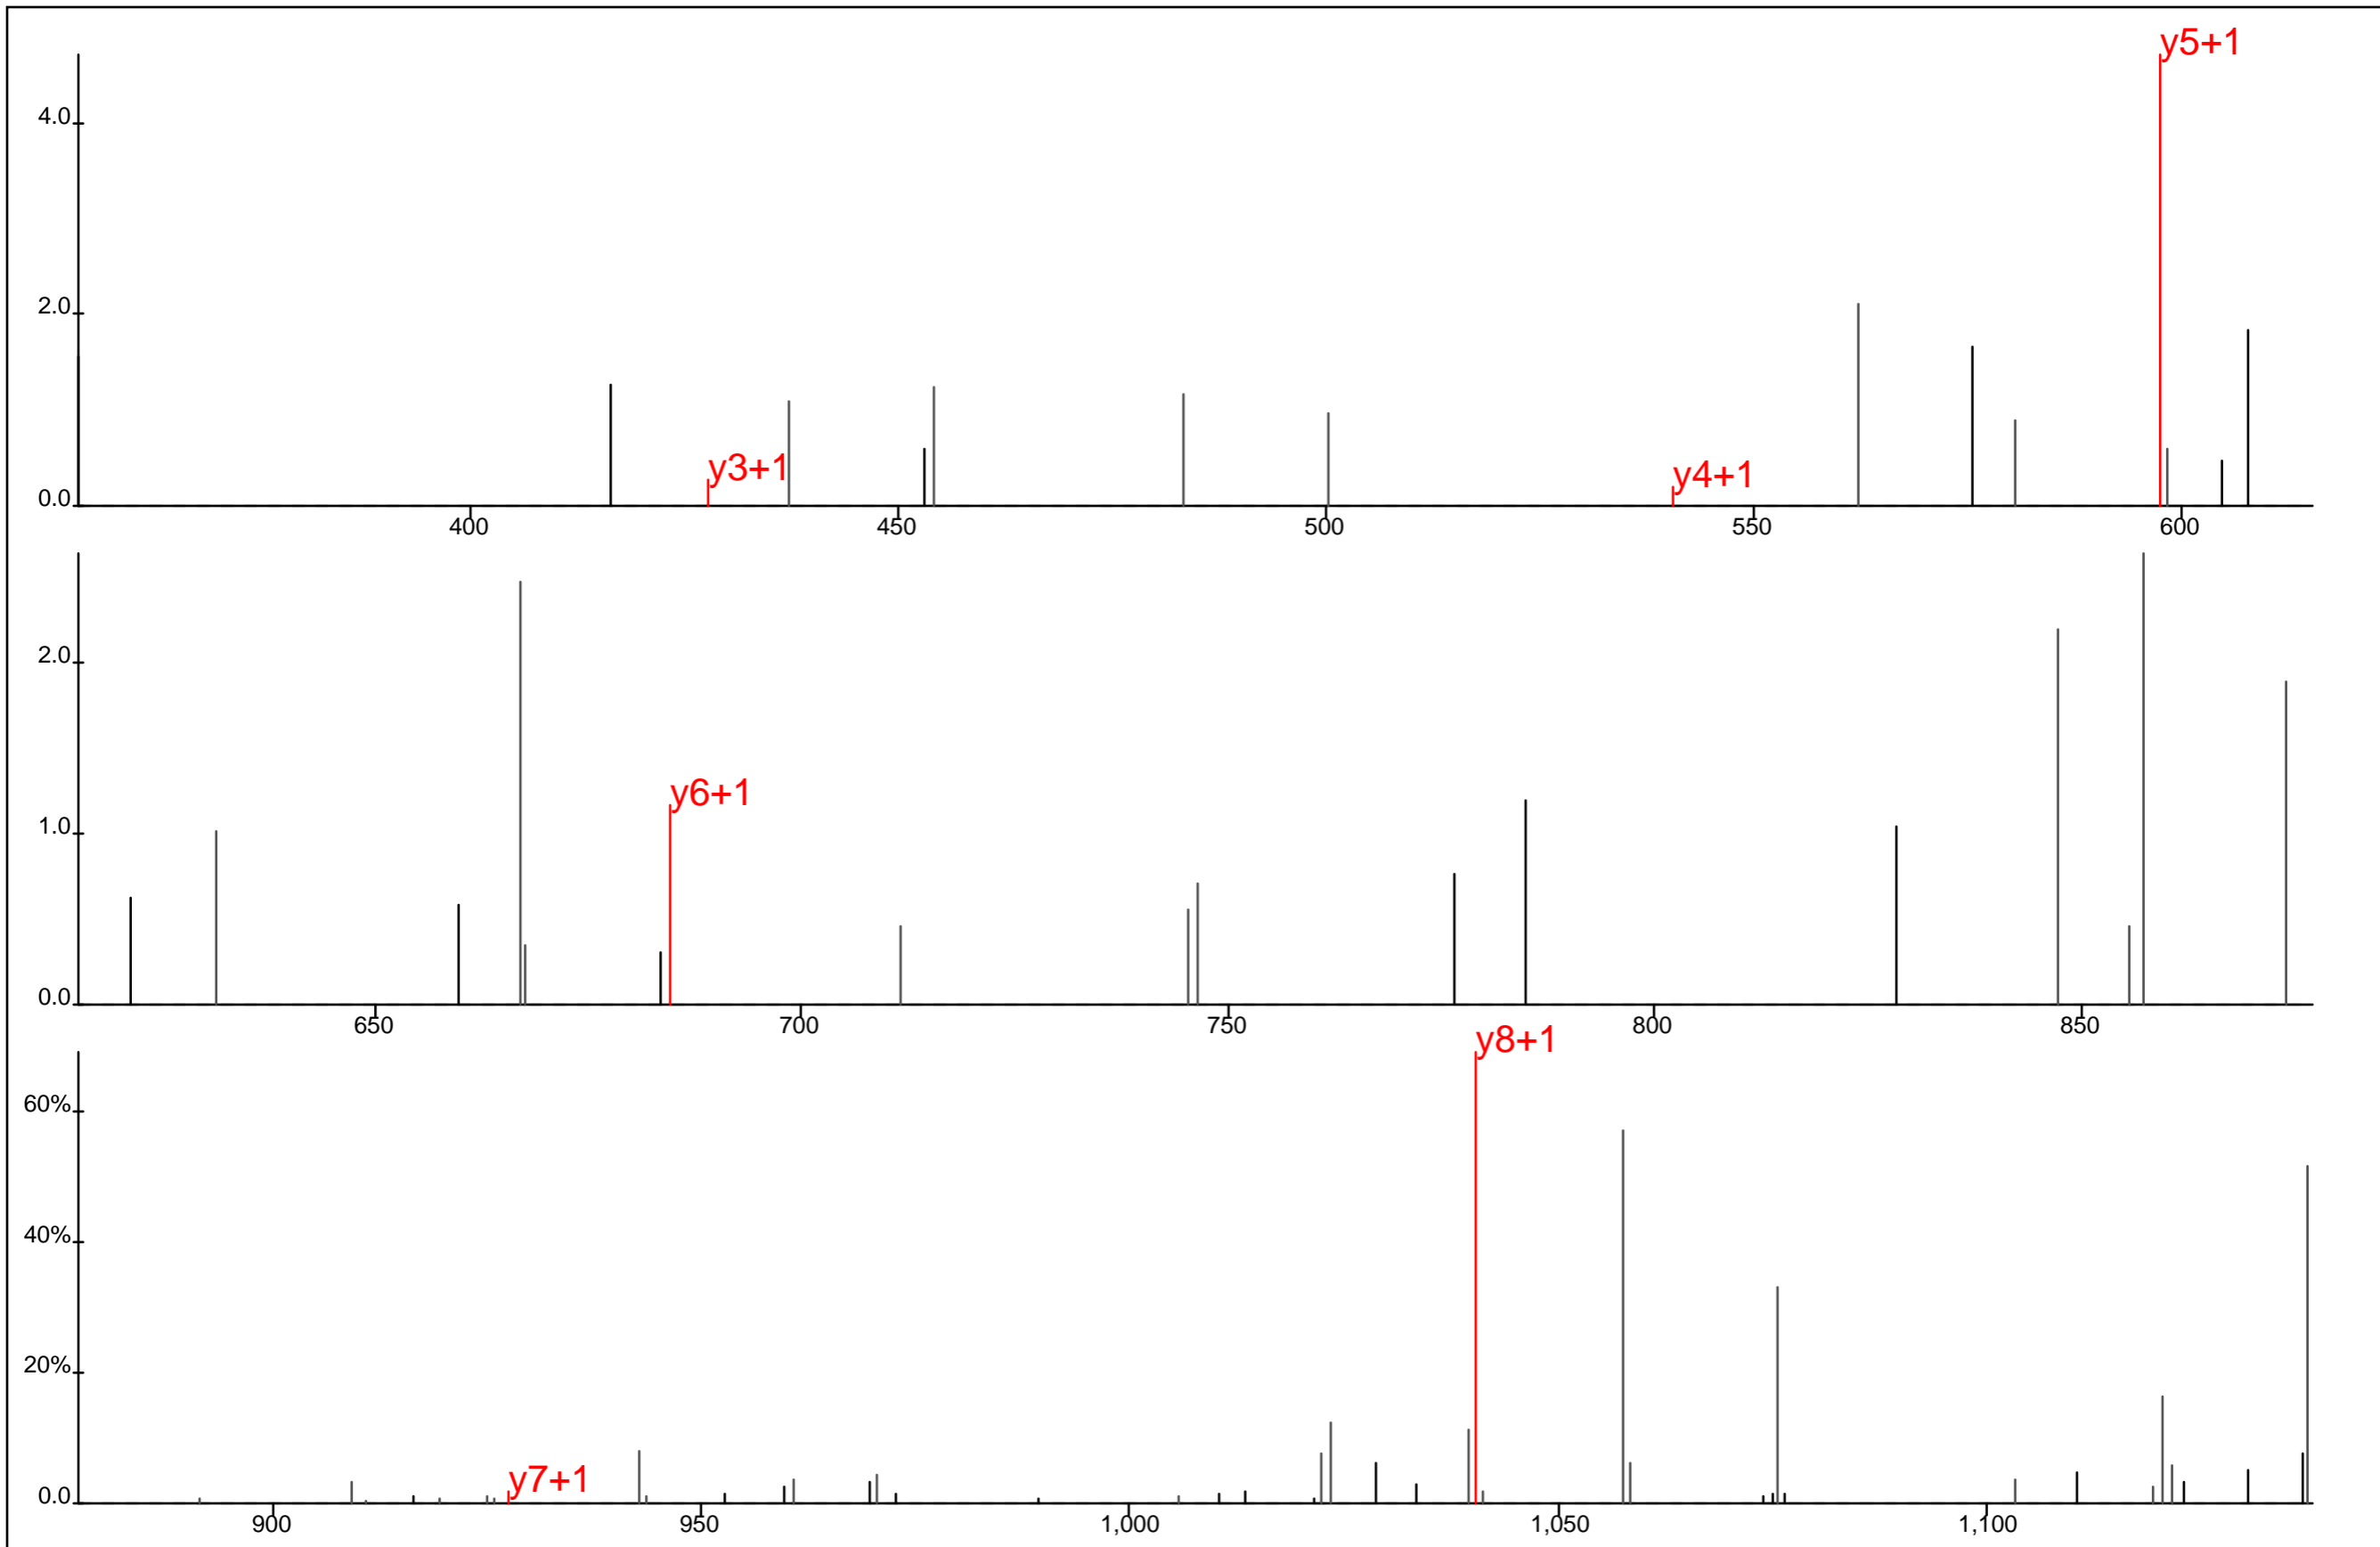

□ □ □ □  
 D L Y\* S G L N Q R%  
■ ■ ■ ■ ■

Protein Name: CD3 epsilon  
 gi Accession: 4502671  
 Precursor Mass: 1,155.5094+1  
 Delta Mass: 2.145 ppm  
 XCorr: 20.08

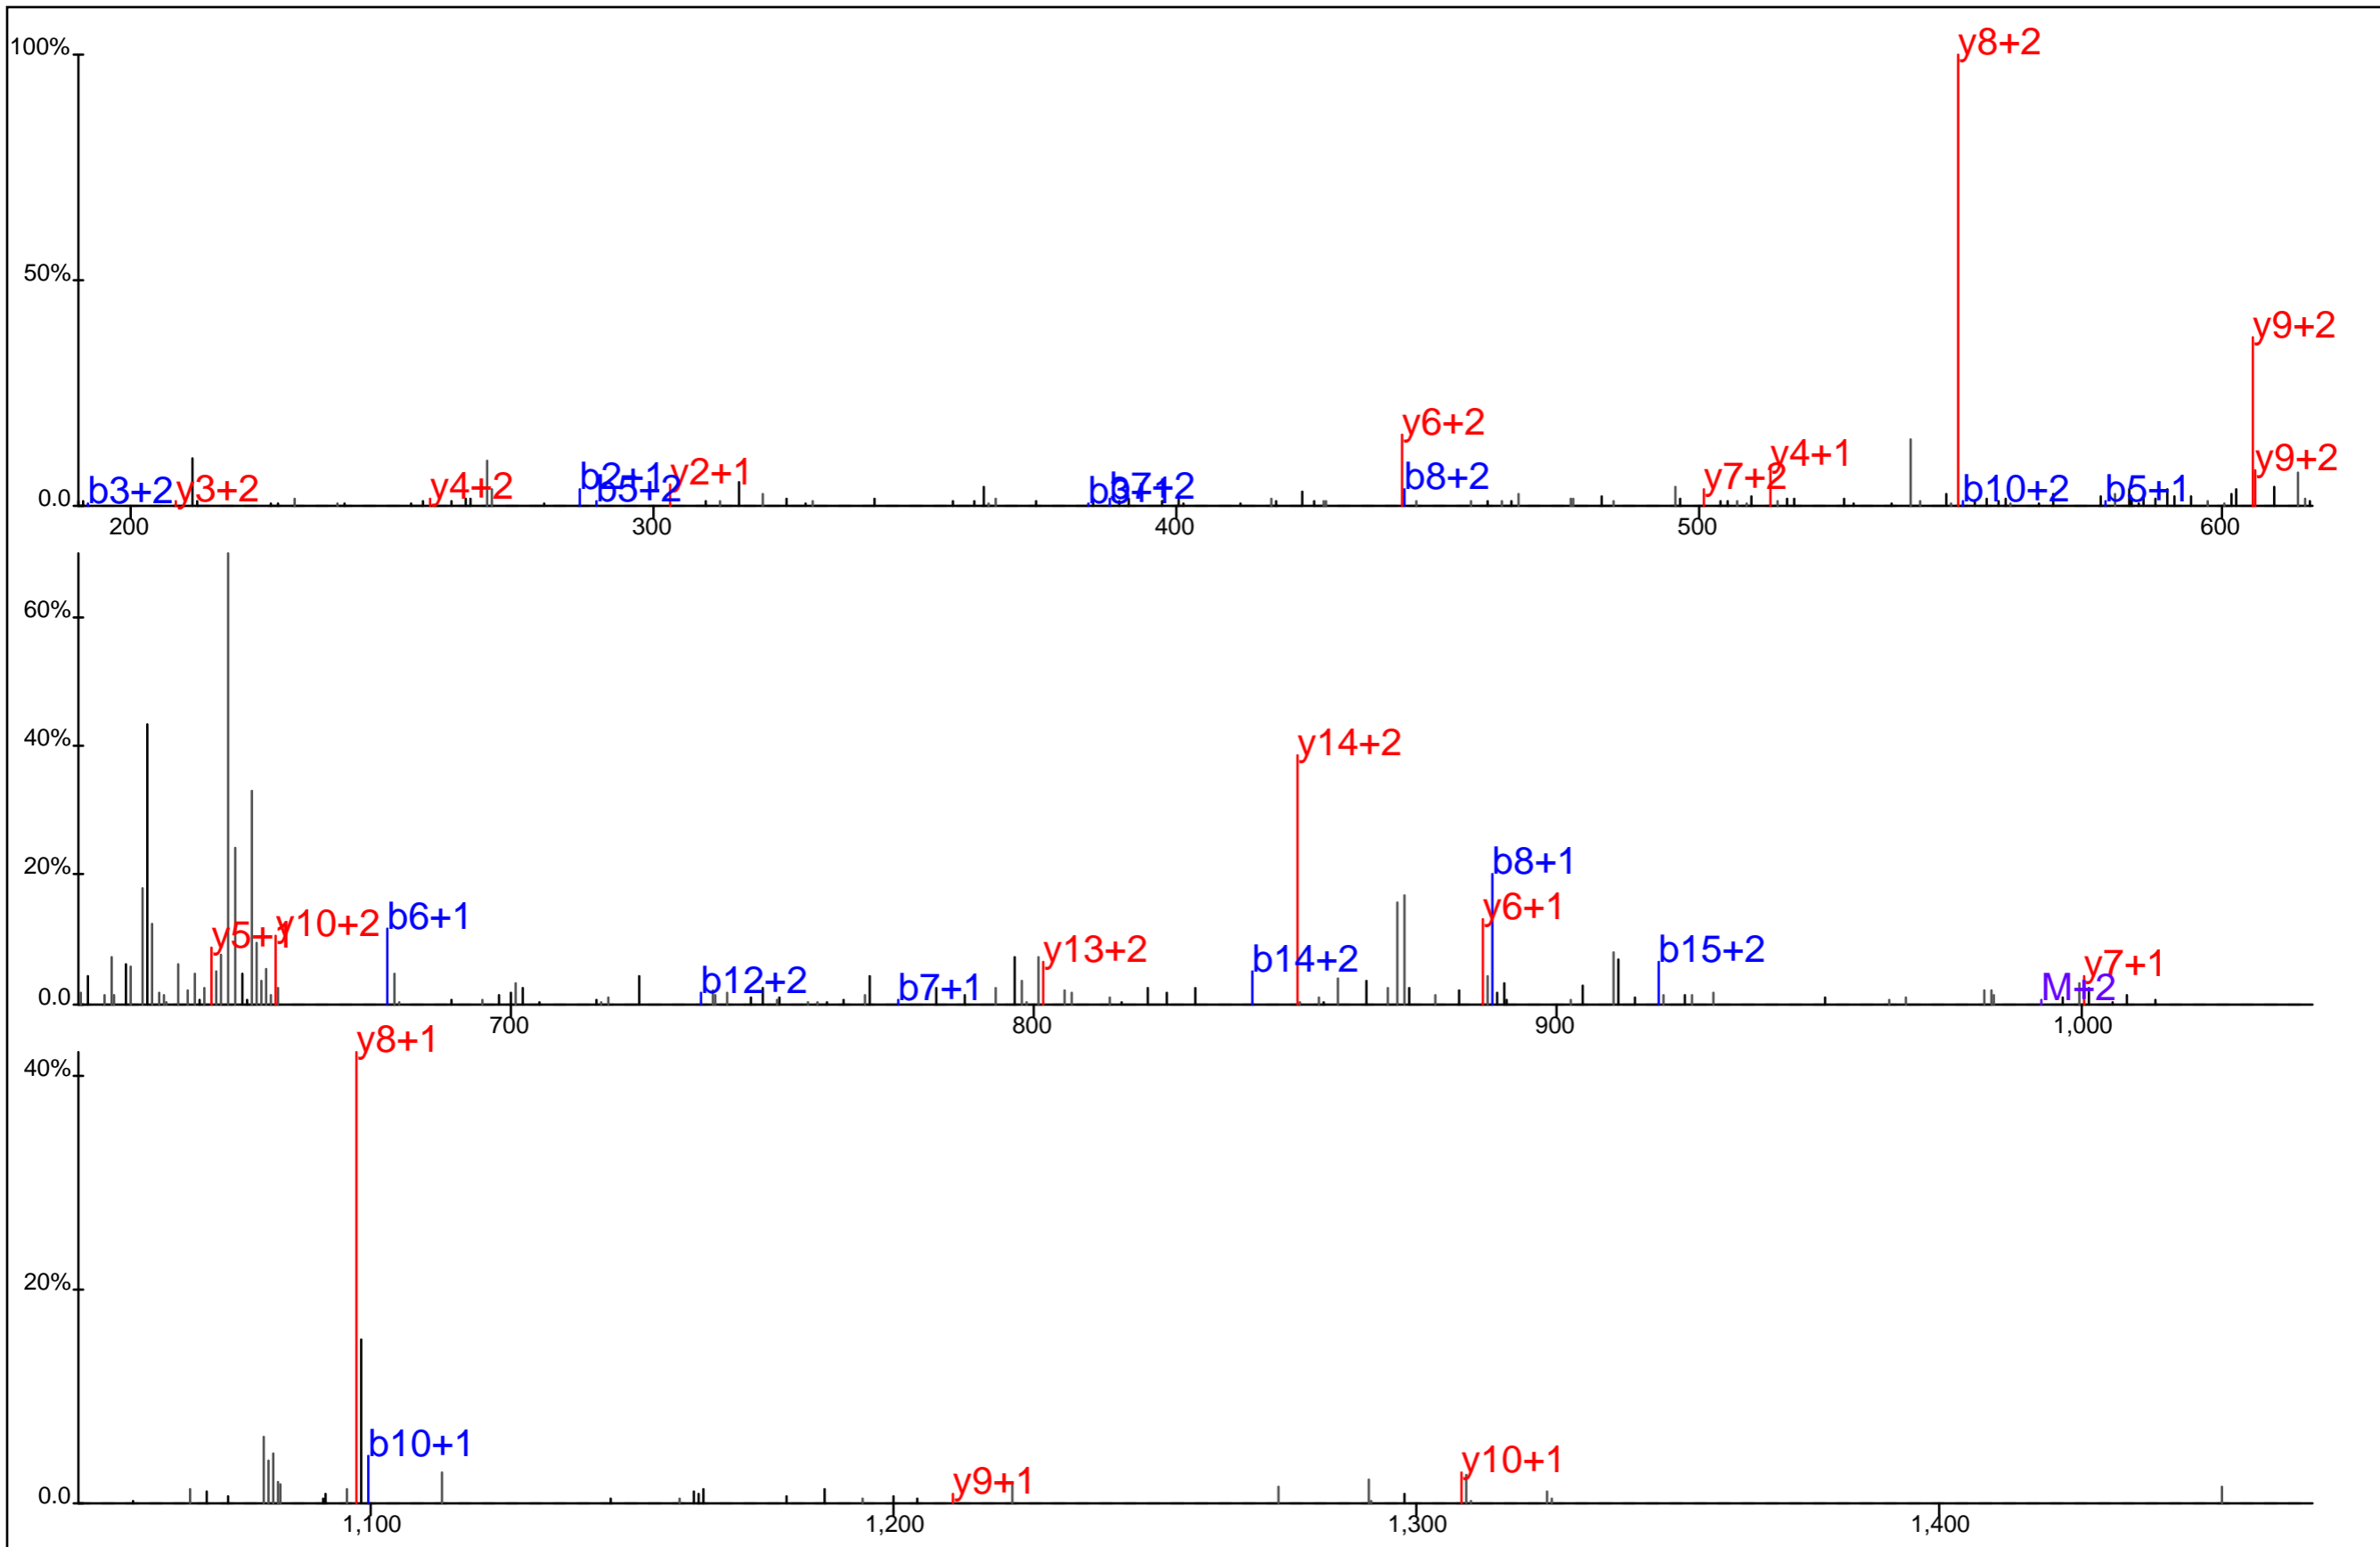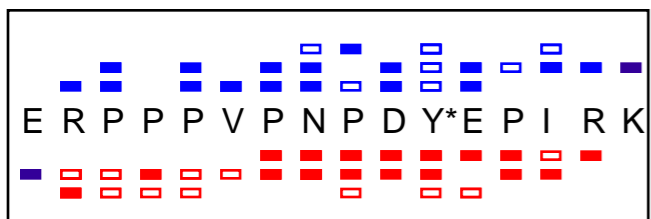

Protein Name: CD3 epsilon  
 gi Accession: 4502671  
 Precursor Mass: 661.9952+3  
 Delta Mass: 1.117 ppm  
 XCorr: 31.59

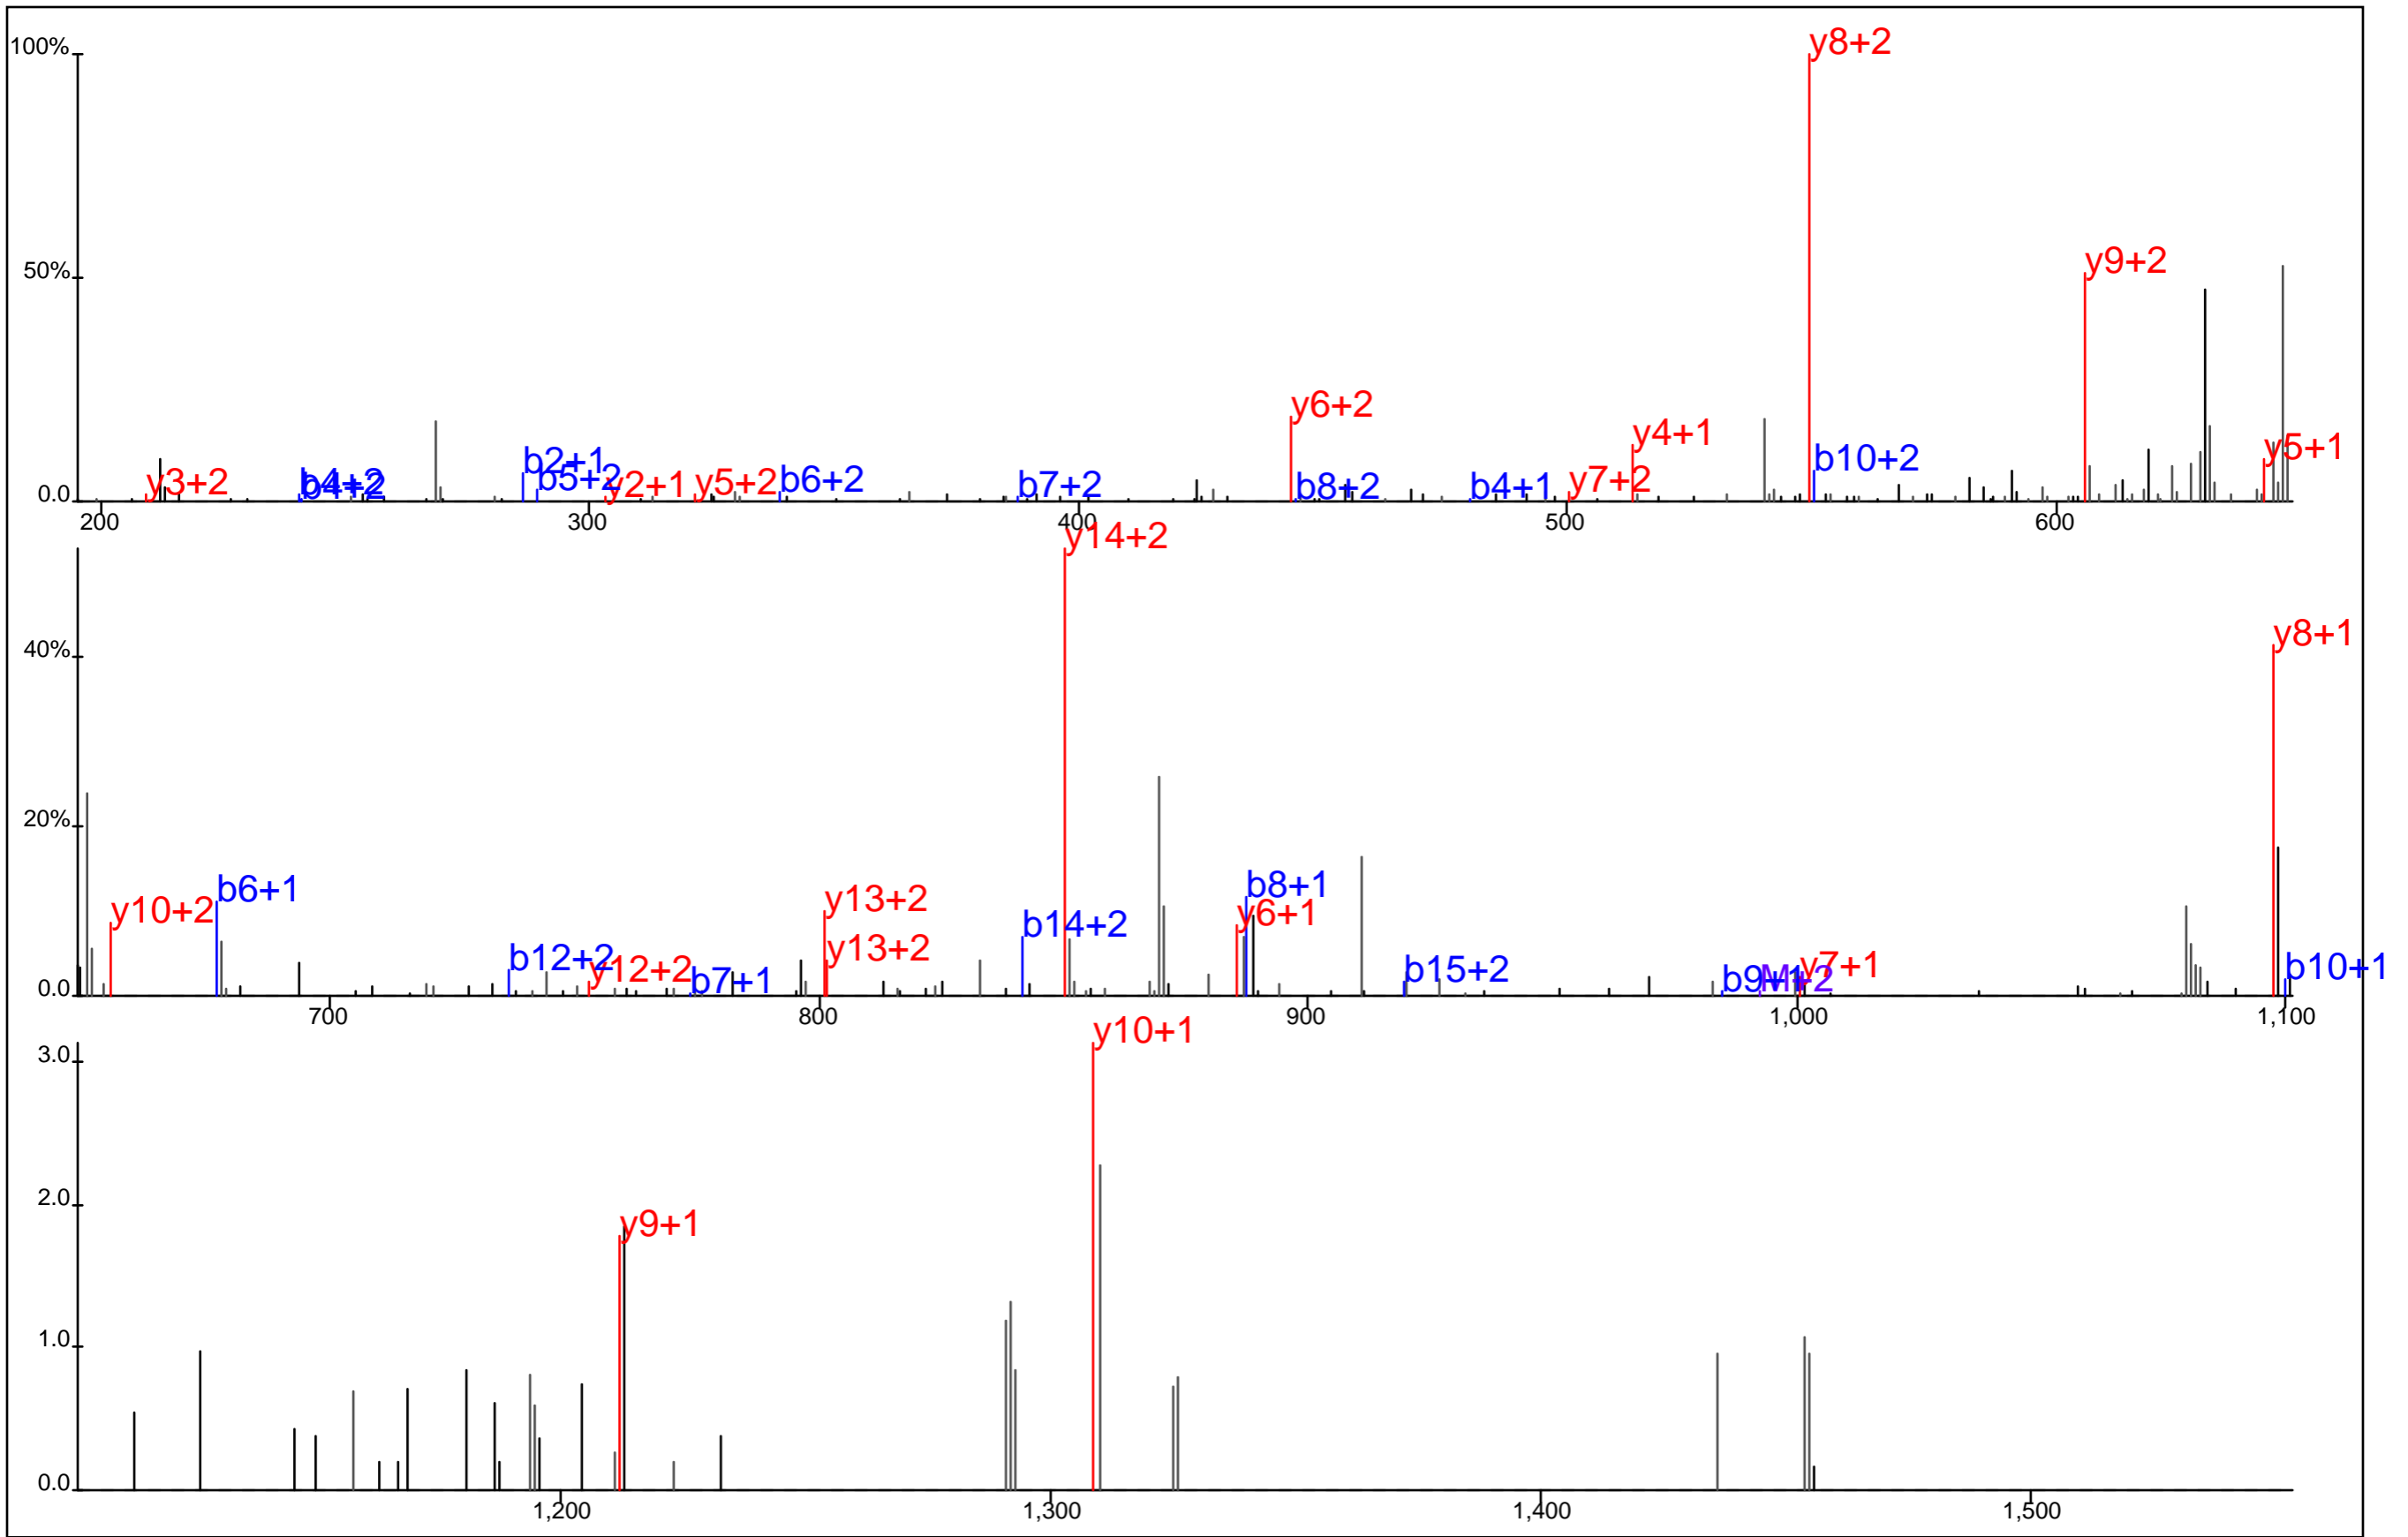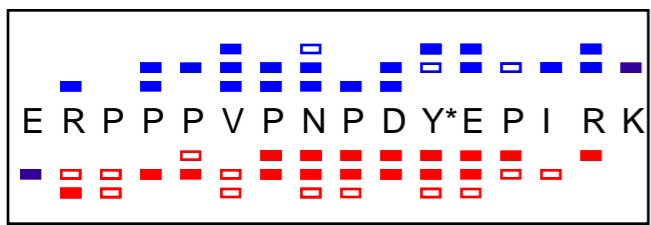

Protein Name: CD3 epsilon  
 gi Accession: 4502671  
 Precursor Mass: 661.9977+3  
 Delta Mass: 4.995 ppm  
 XCorr: 36.38

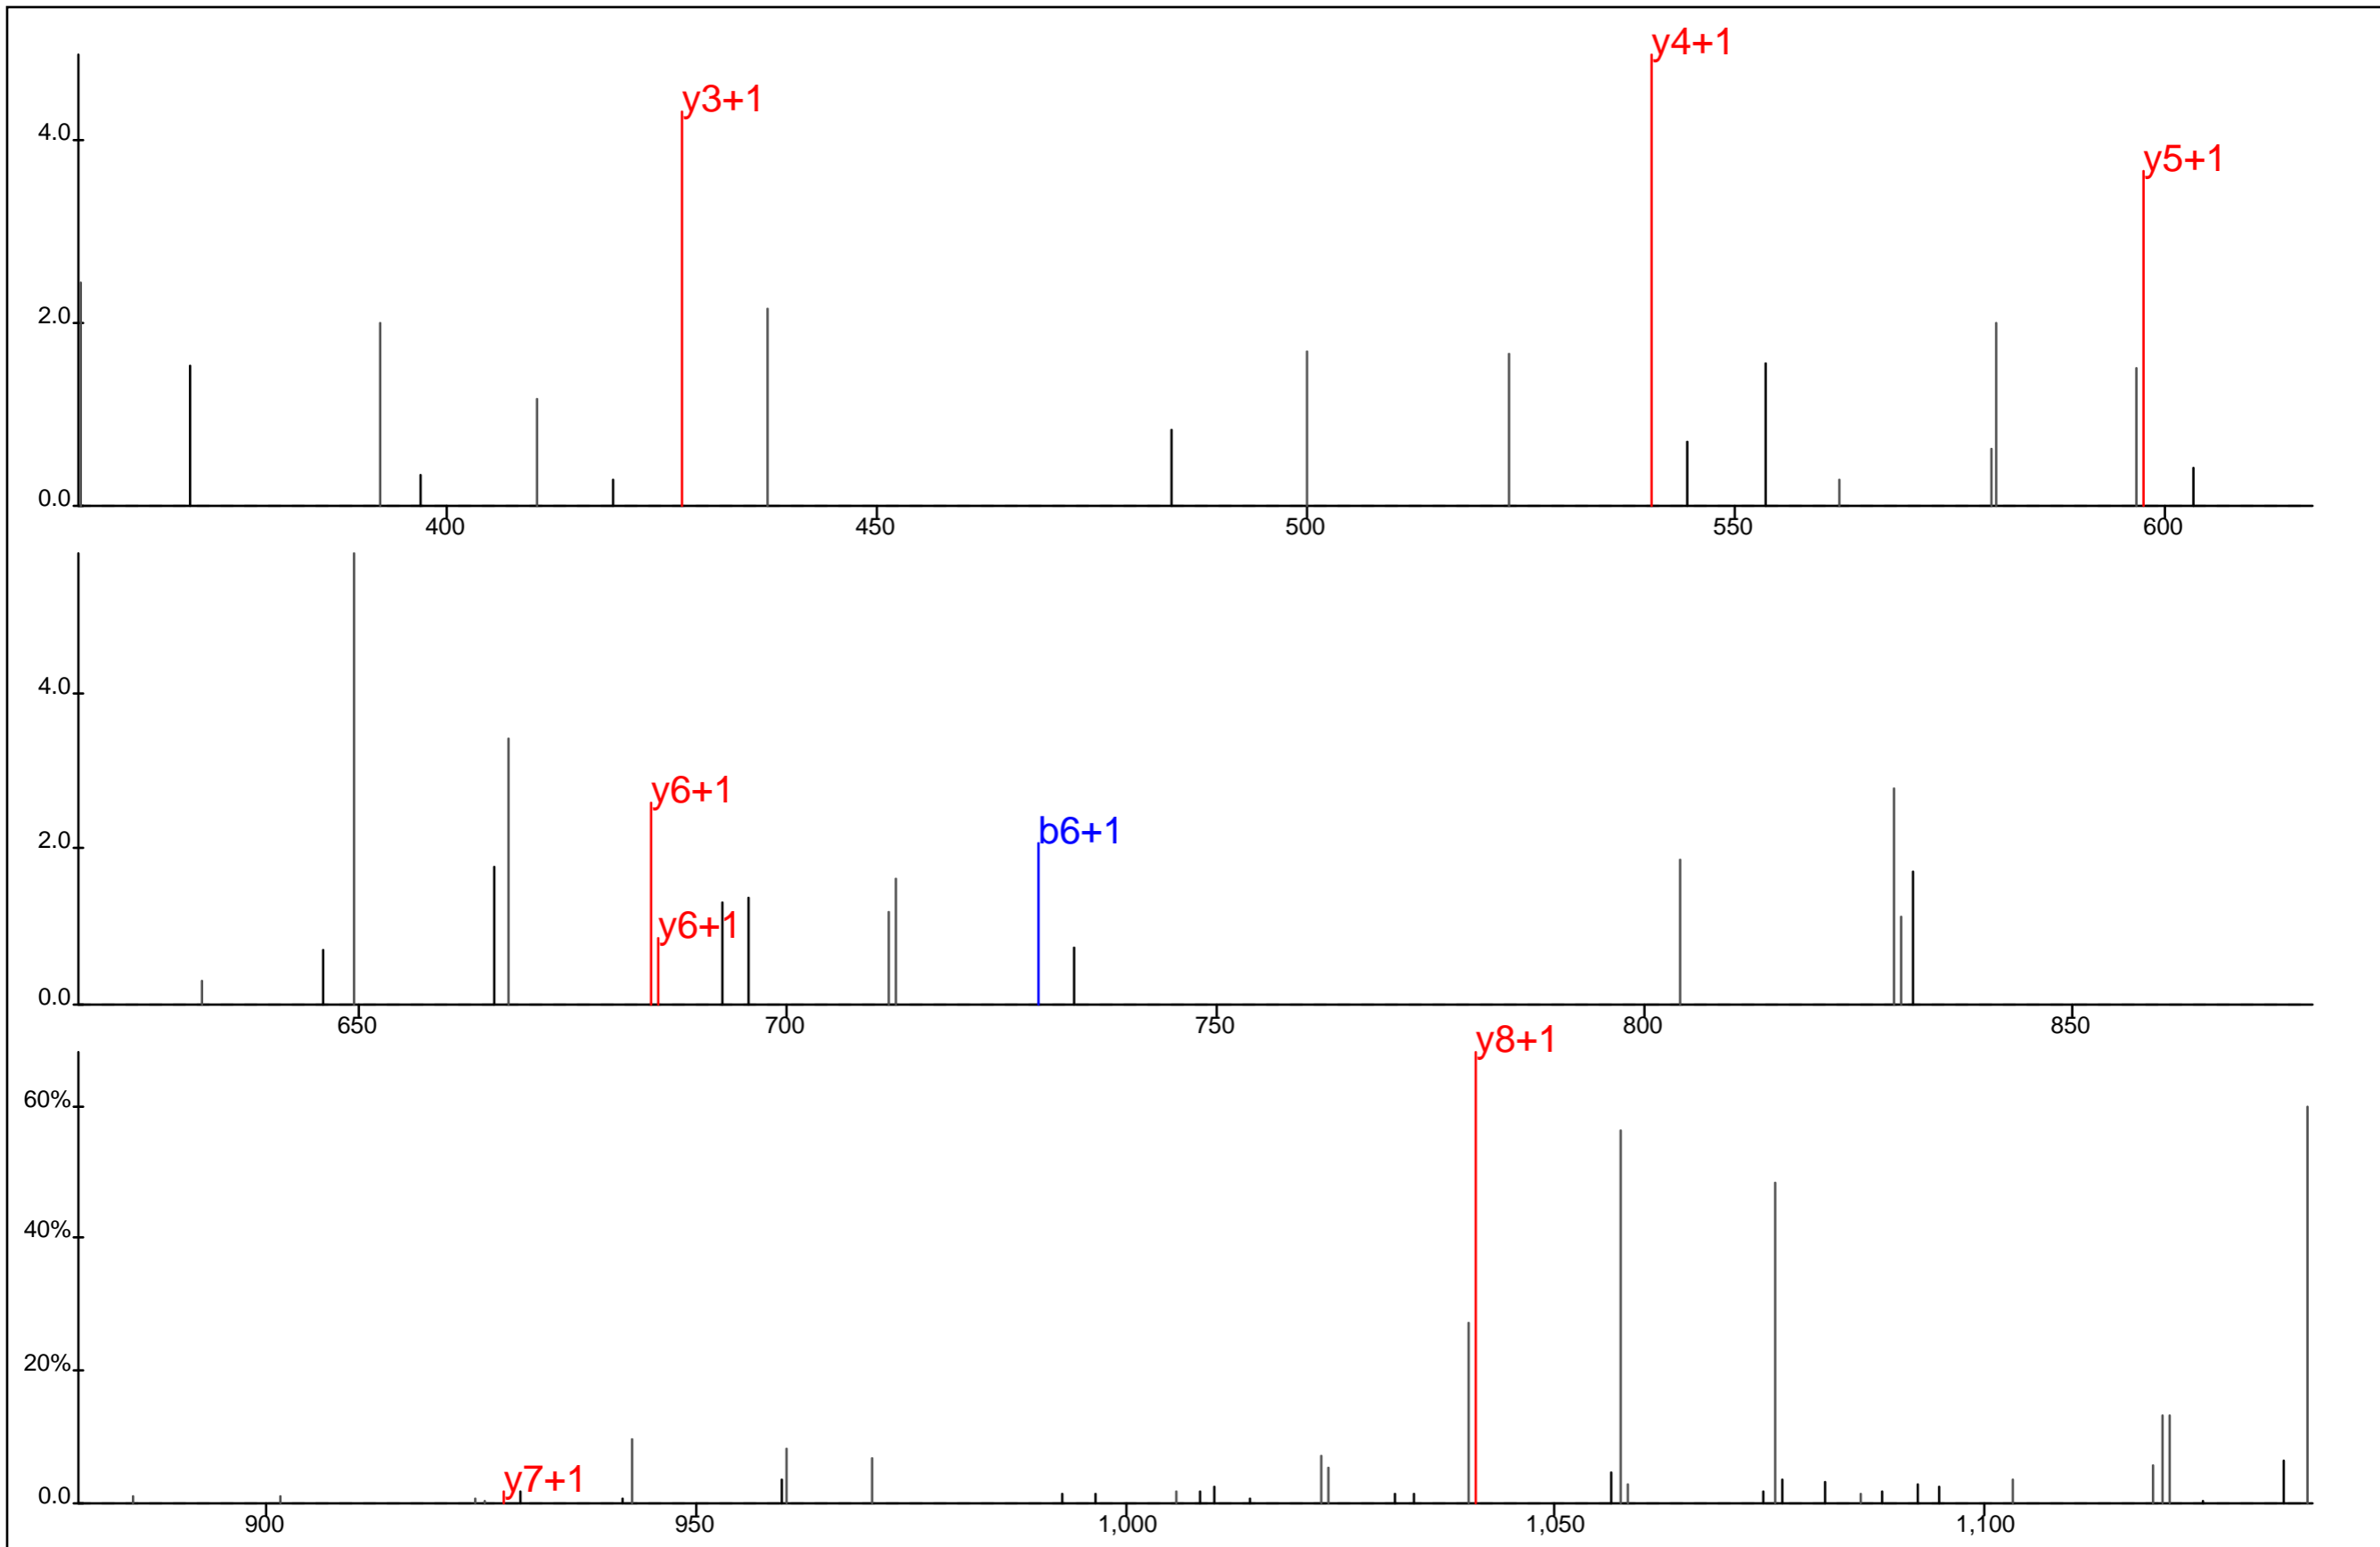

□ ■  
 D L Y\* S G L N Q R%  
■ ■ □ ■ ■

Protein Name: CD3 epsilon  
 gi Accession: 4502671  
 Precursor Mass: 1,155.5034+1  
 Delta Mass: 3.031 ppm  
 XCorr: 39.24



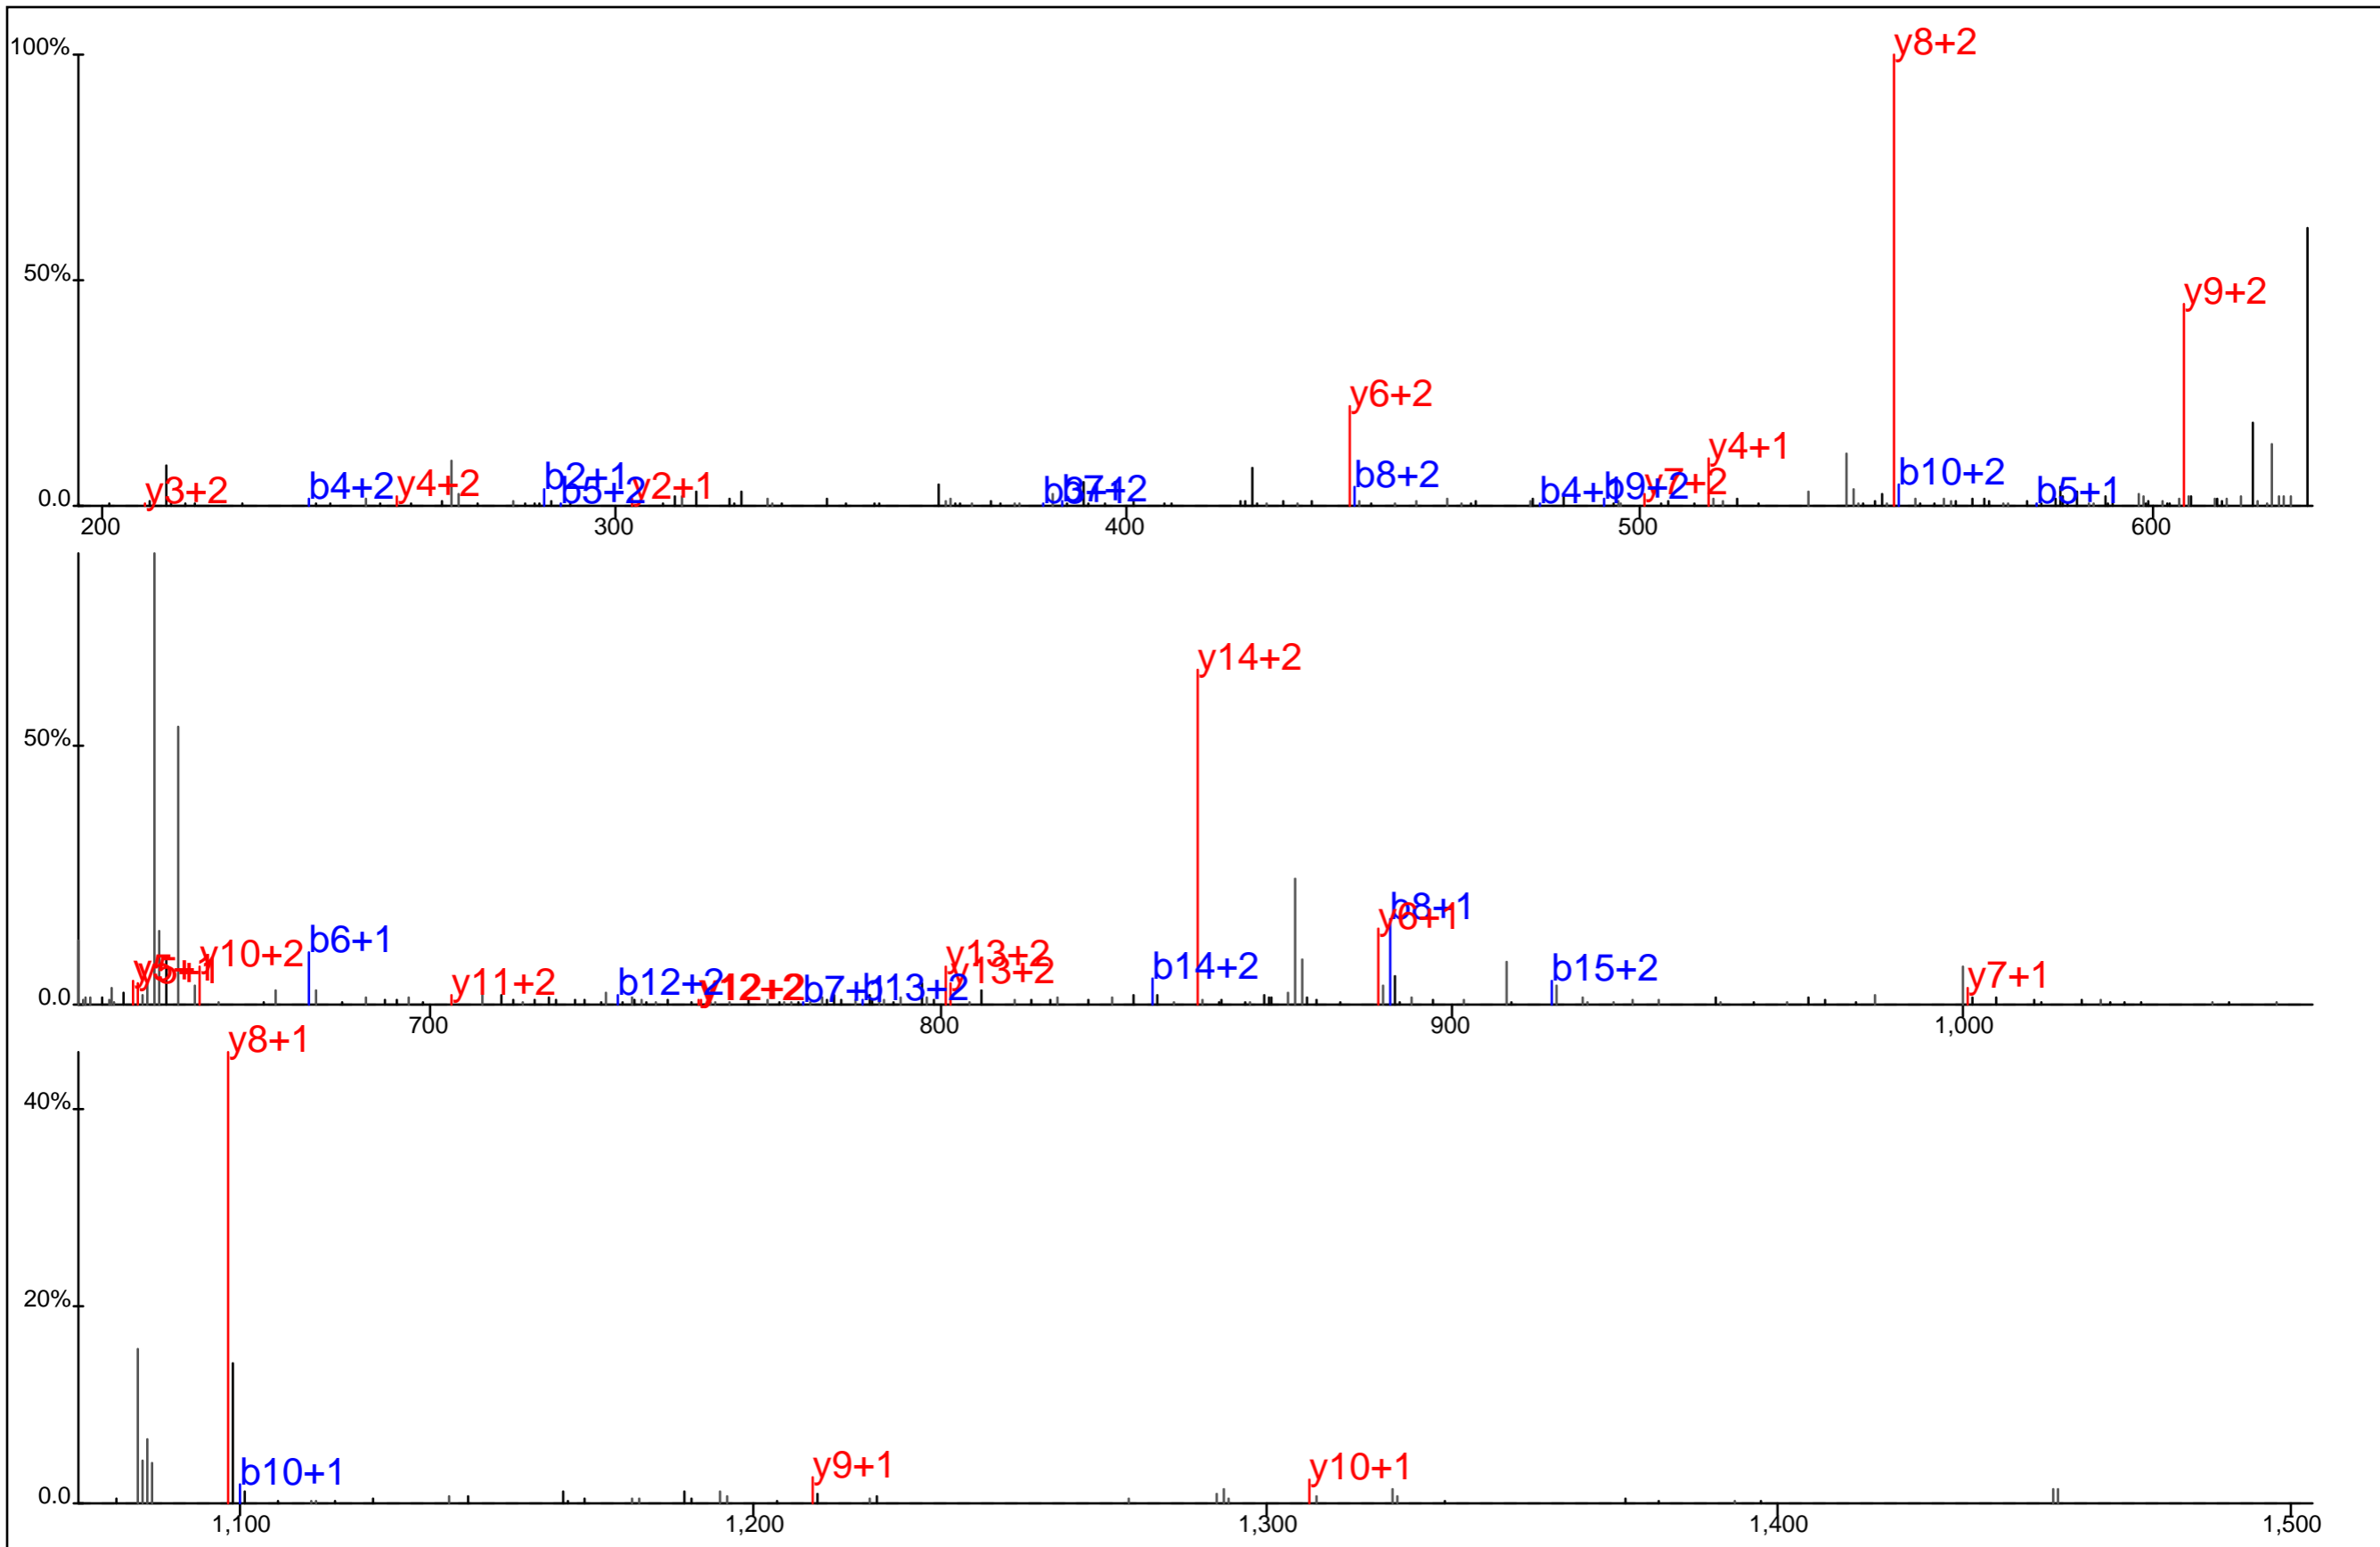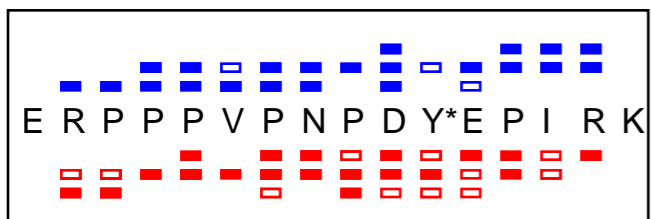

Protein Name: CD3 epsilon  
 gi Accession: 4502671  
 Precursor Mass: 661.9951+3  
 Delta Mass: 0.936 ppm  
 XCorr: 34.66

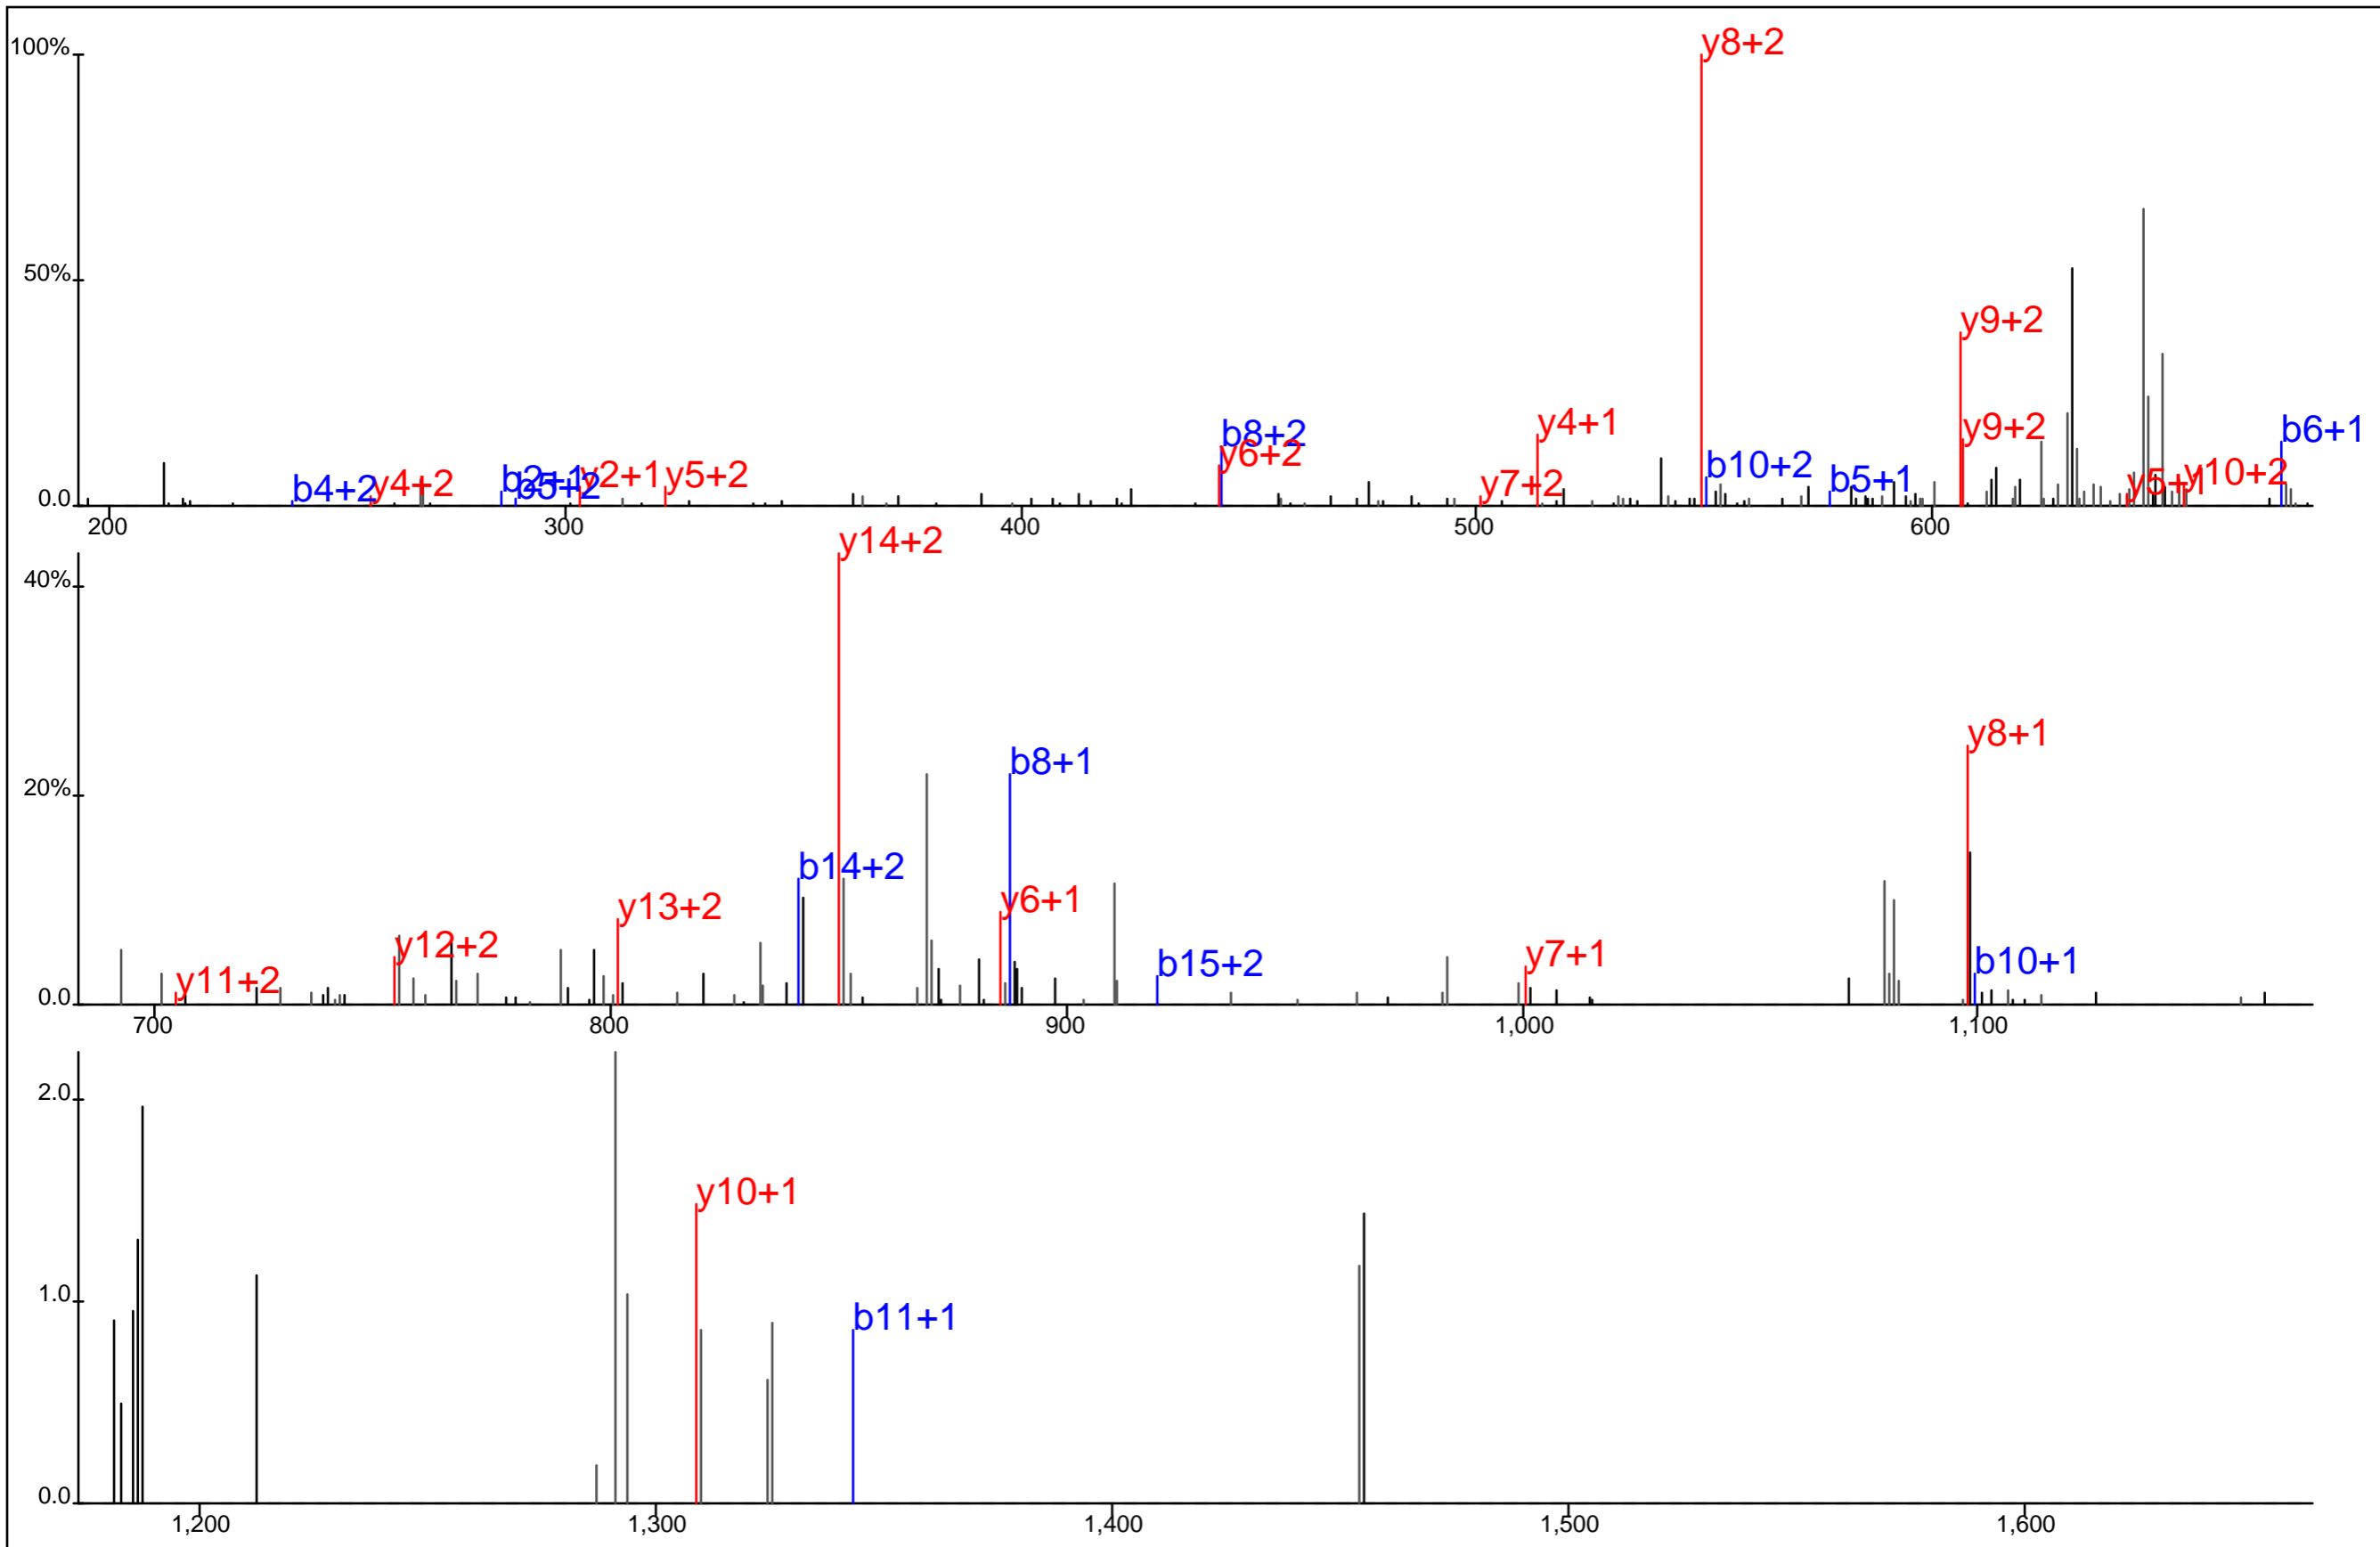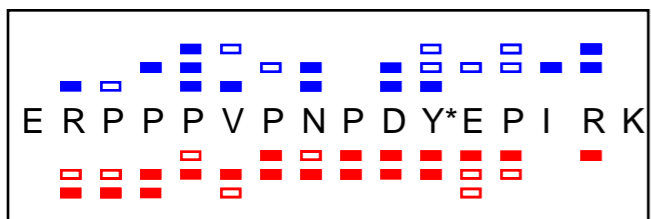

Protein Name: CD3 epsilon  
 gi Accession: 4502671  
 Precursor Mass: 661.9974+3  
 Delta Mass: 4.535 ppm  
 XCorr: 37.51

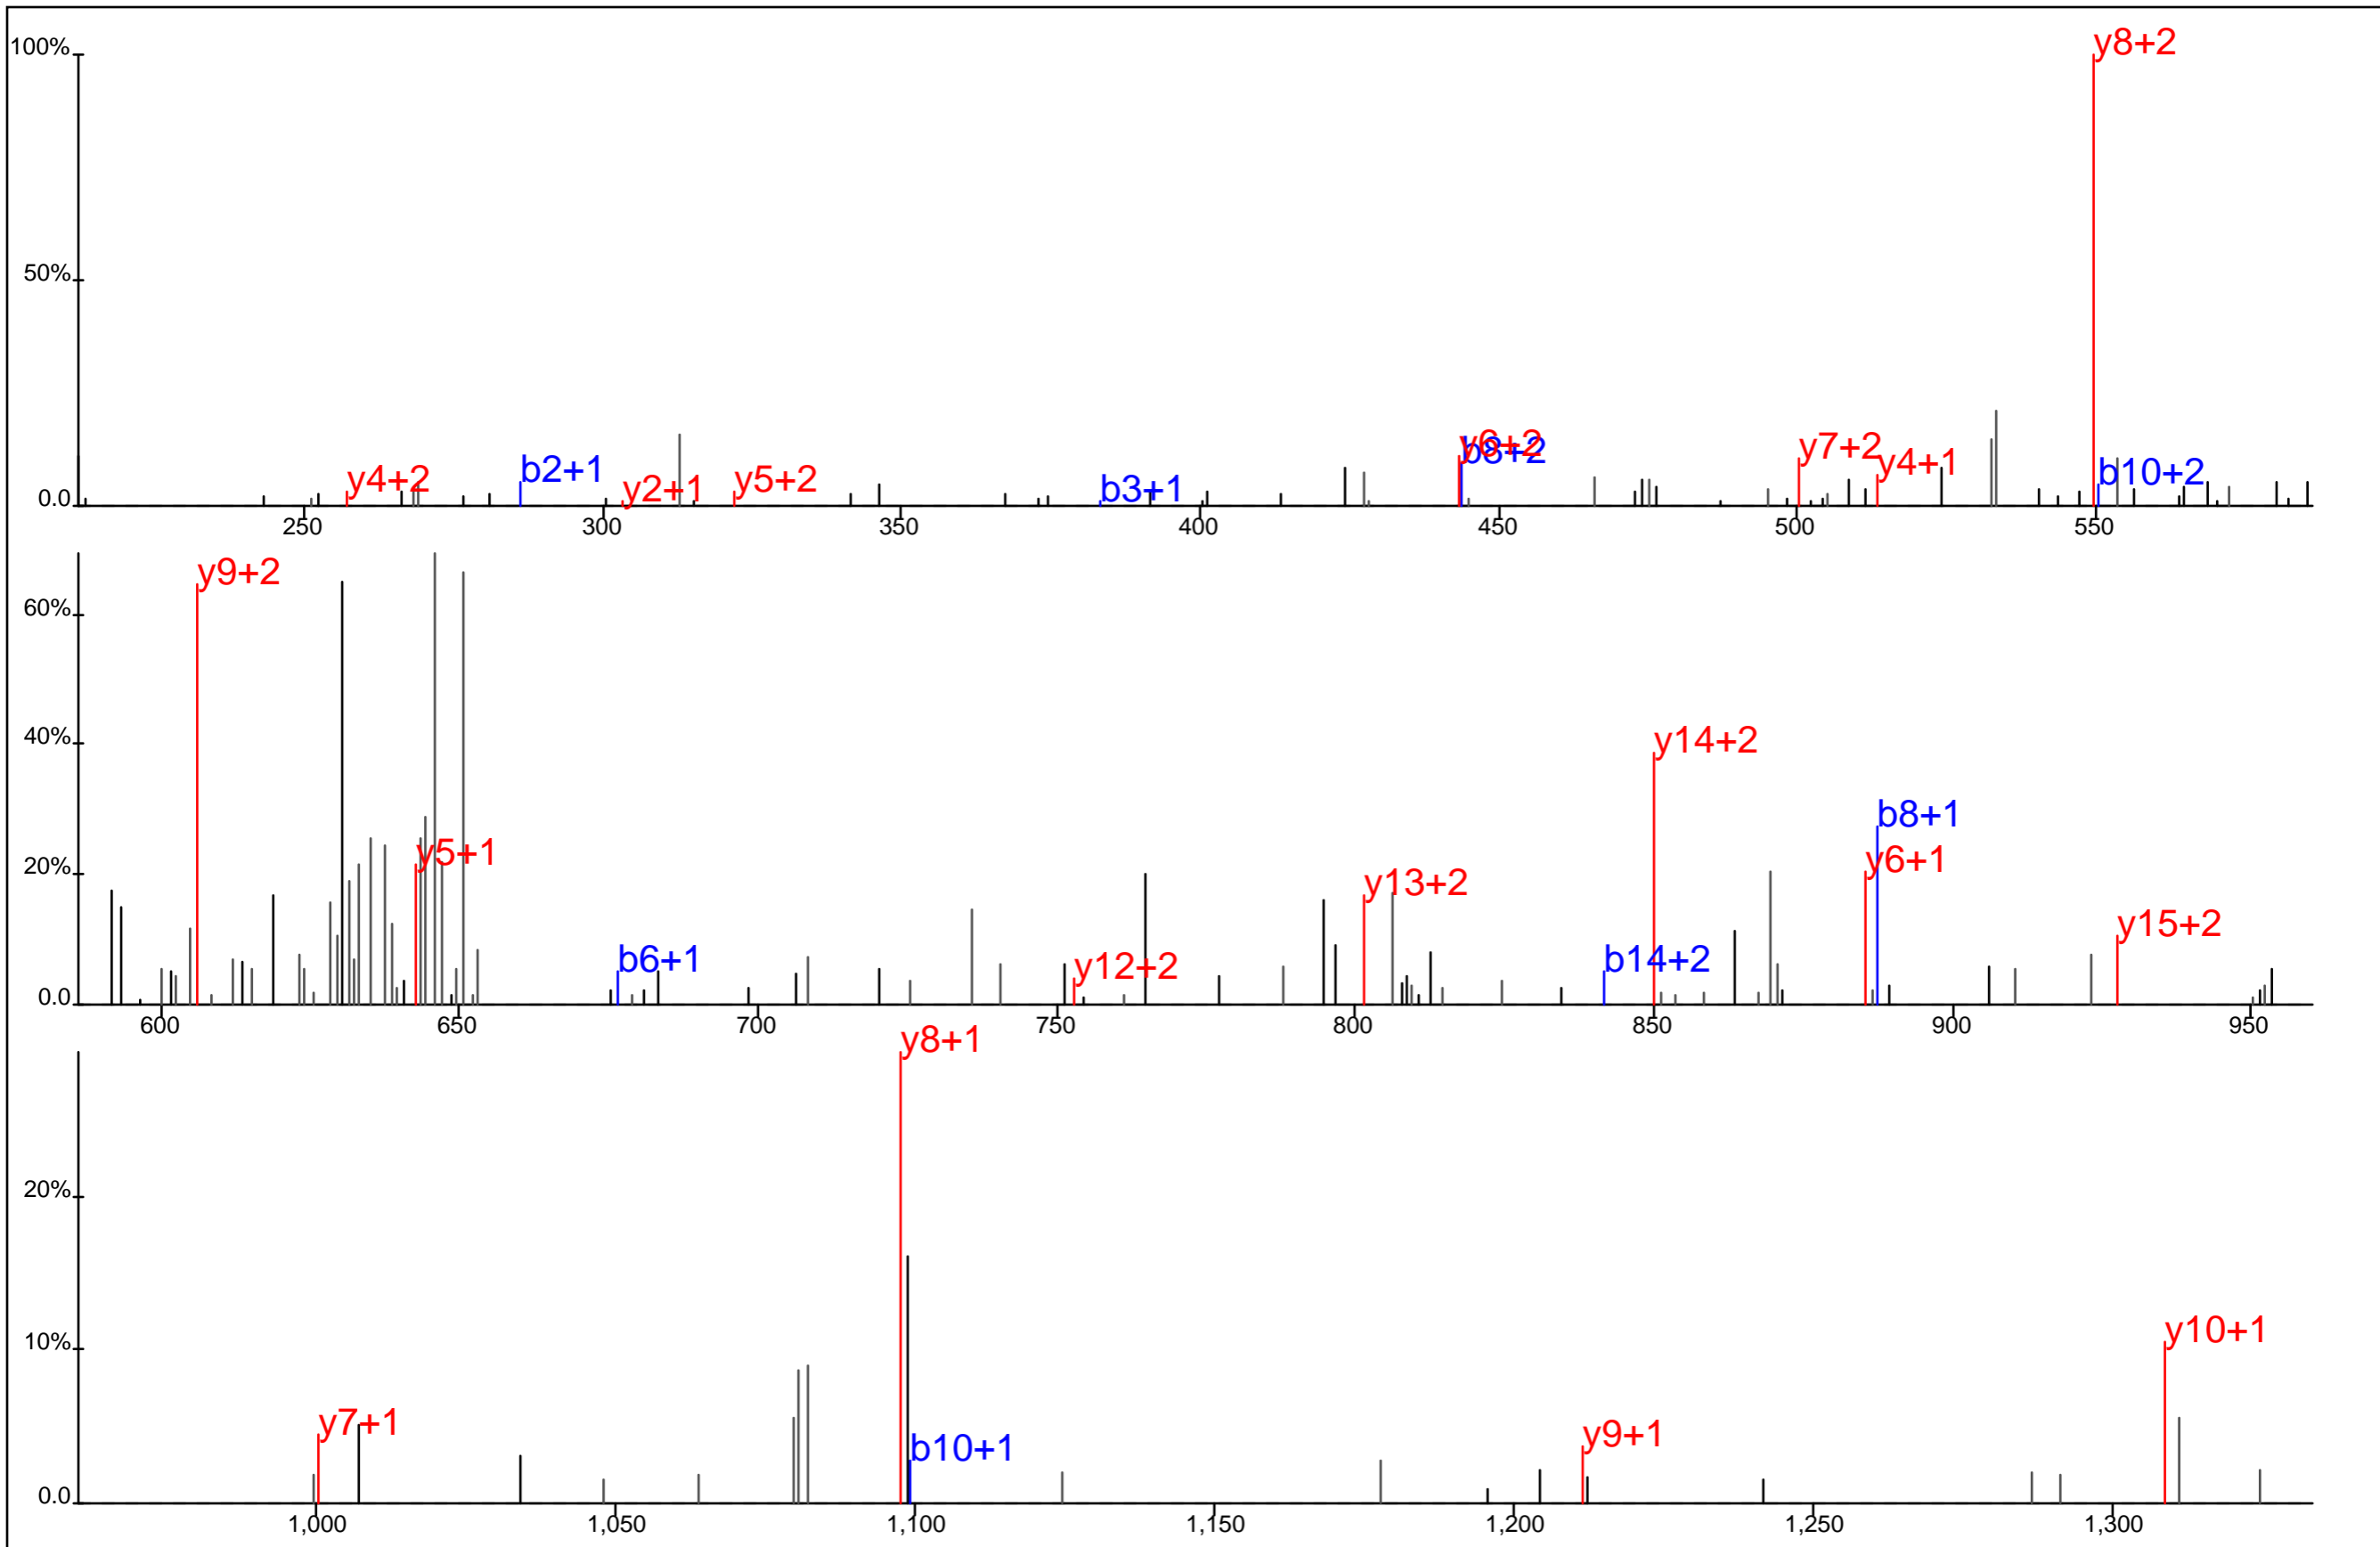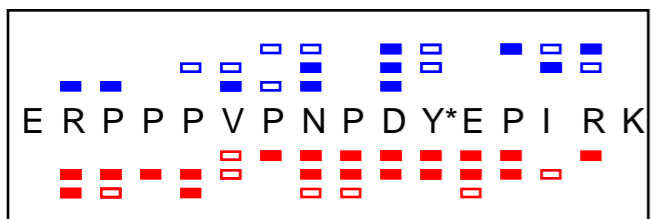

Protein Name: CD3 epsilon  
 gi Accession: 4502671  
 Precursor Mass: 661.9993+3  
 Delta Mass: 7.393 ppm  
 XCorr: 40.15

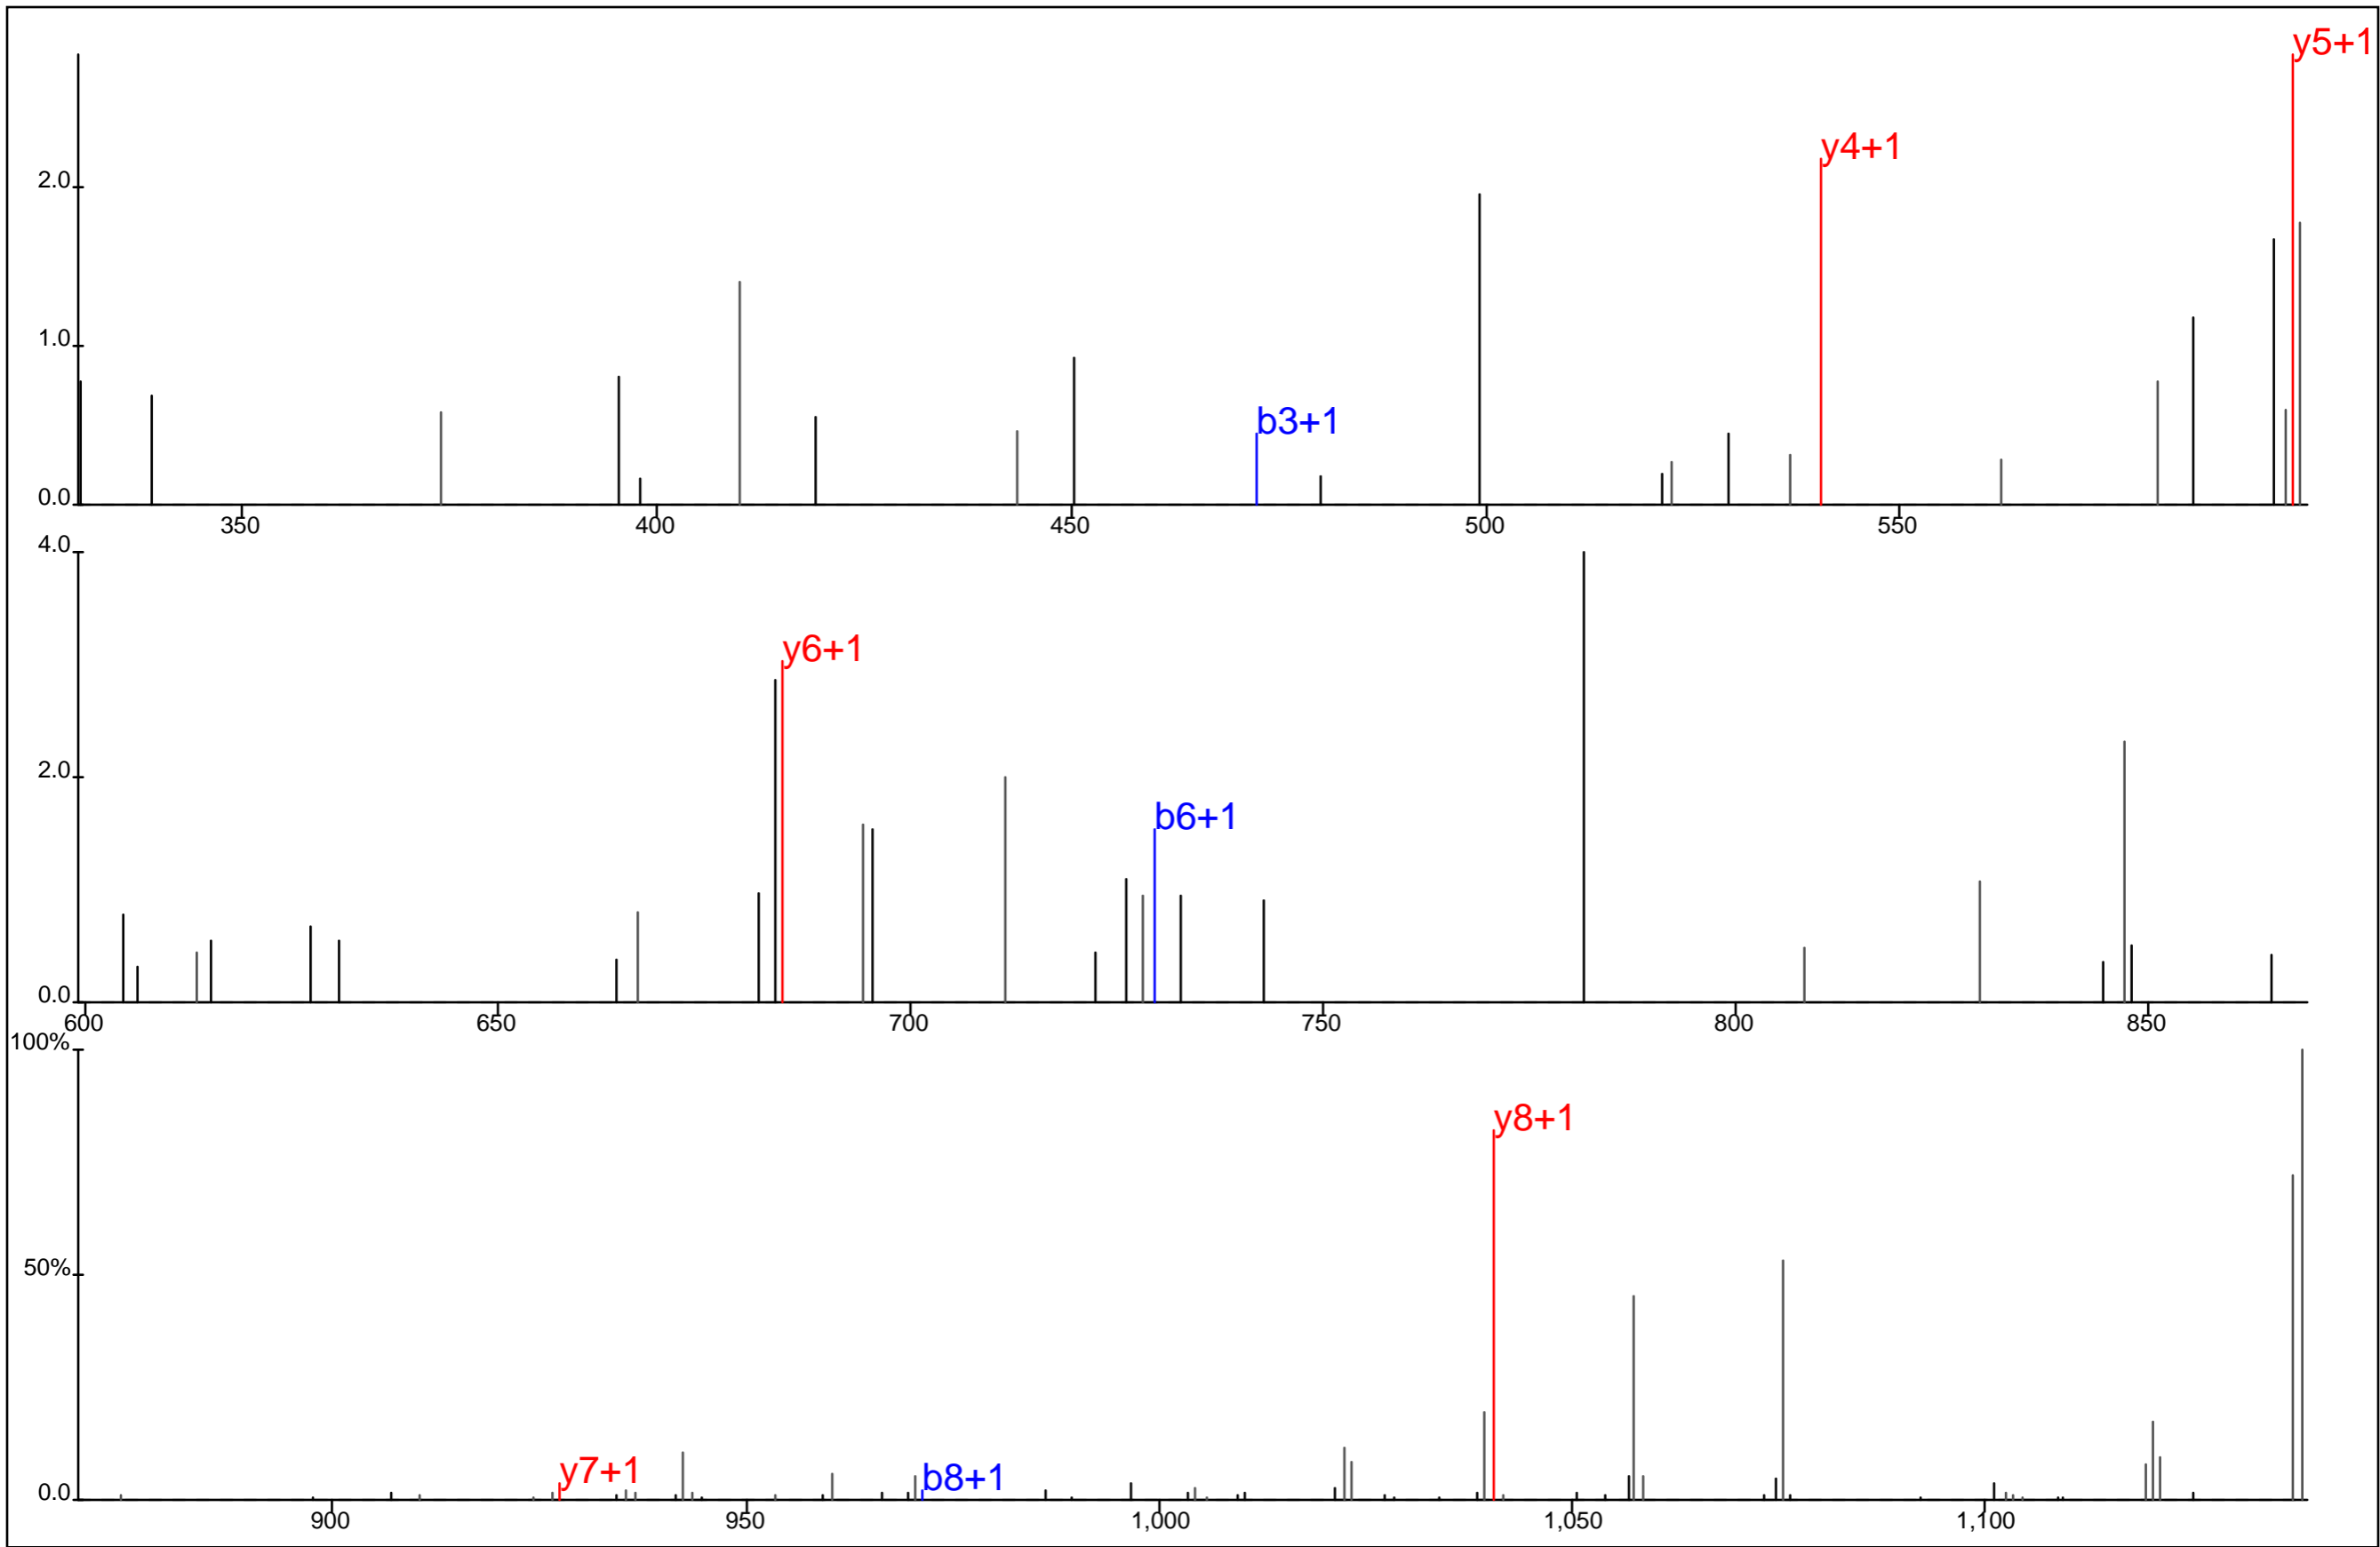

■ □ □ ■ □ □  
 D L Y\* S G L N Q R%  
□ □ □ □ □

Protein Name: CD3 epsilon  
 gi Accession: 4502671  
 Precursor Mass: 1,155.5107+1  
 Delta Mass: 3.304 ppm  
 XCorr: 28.21

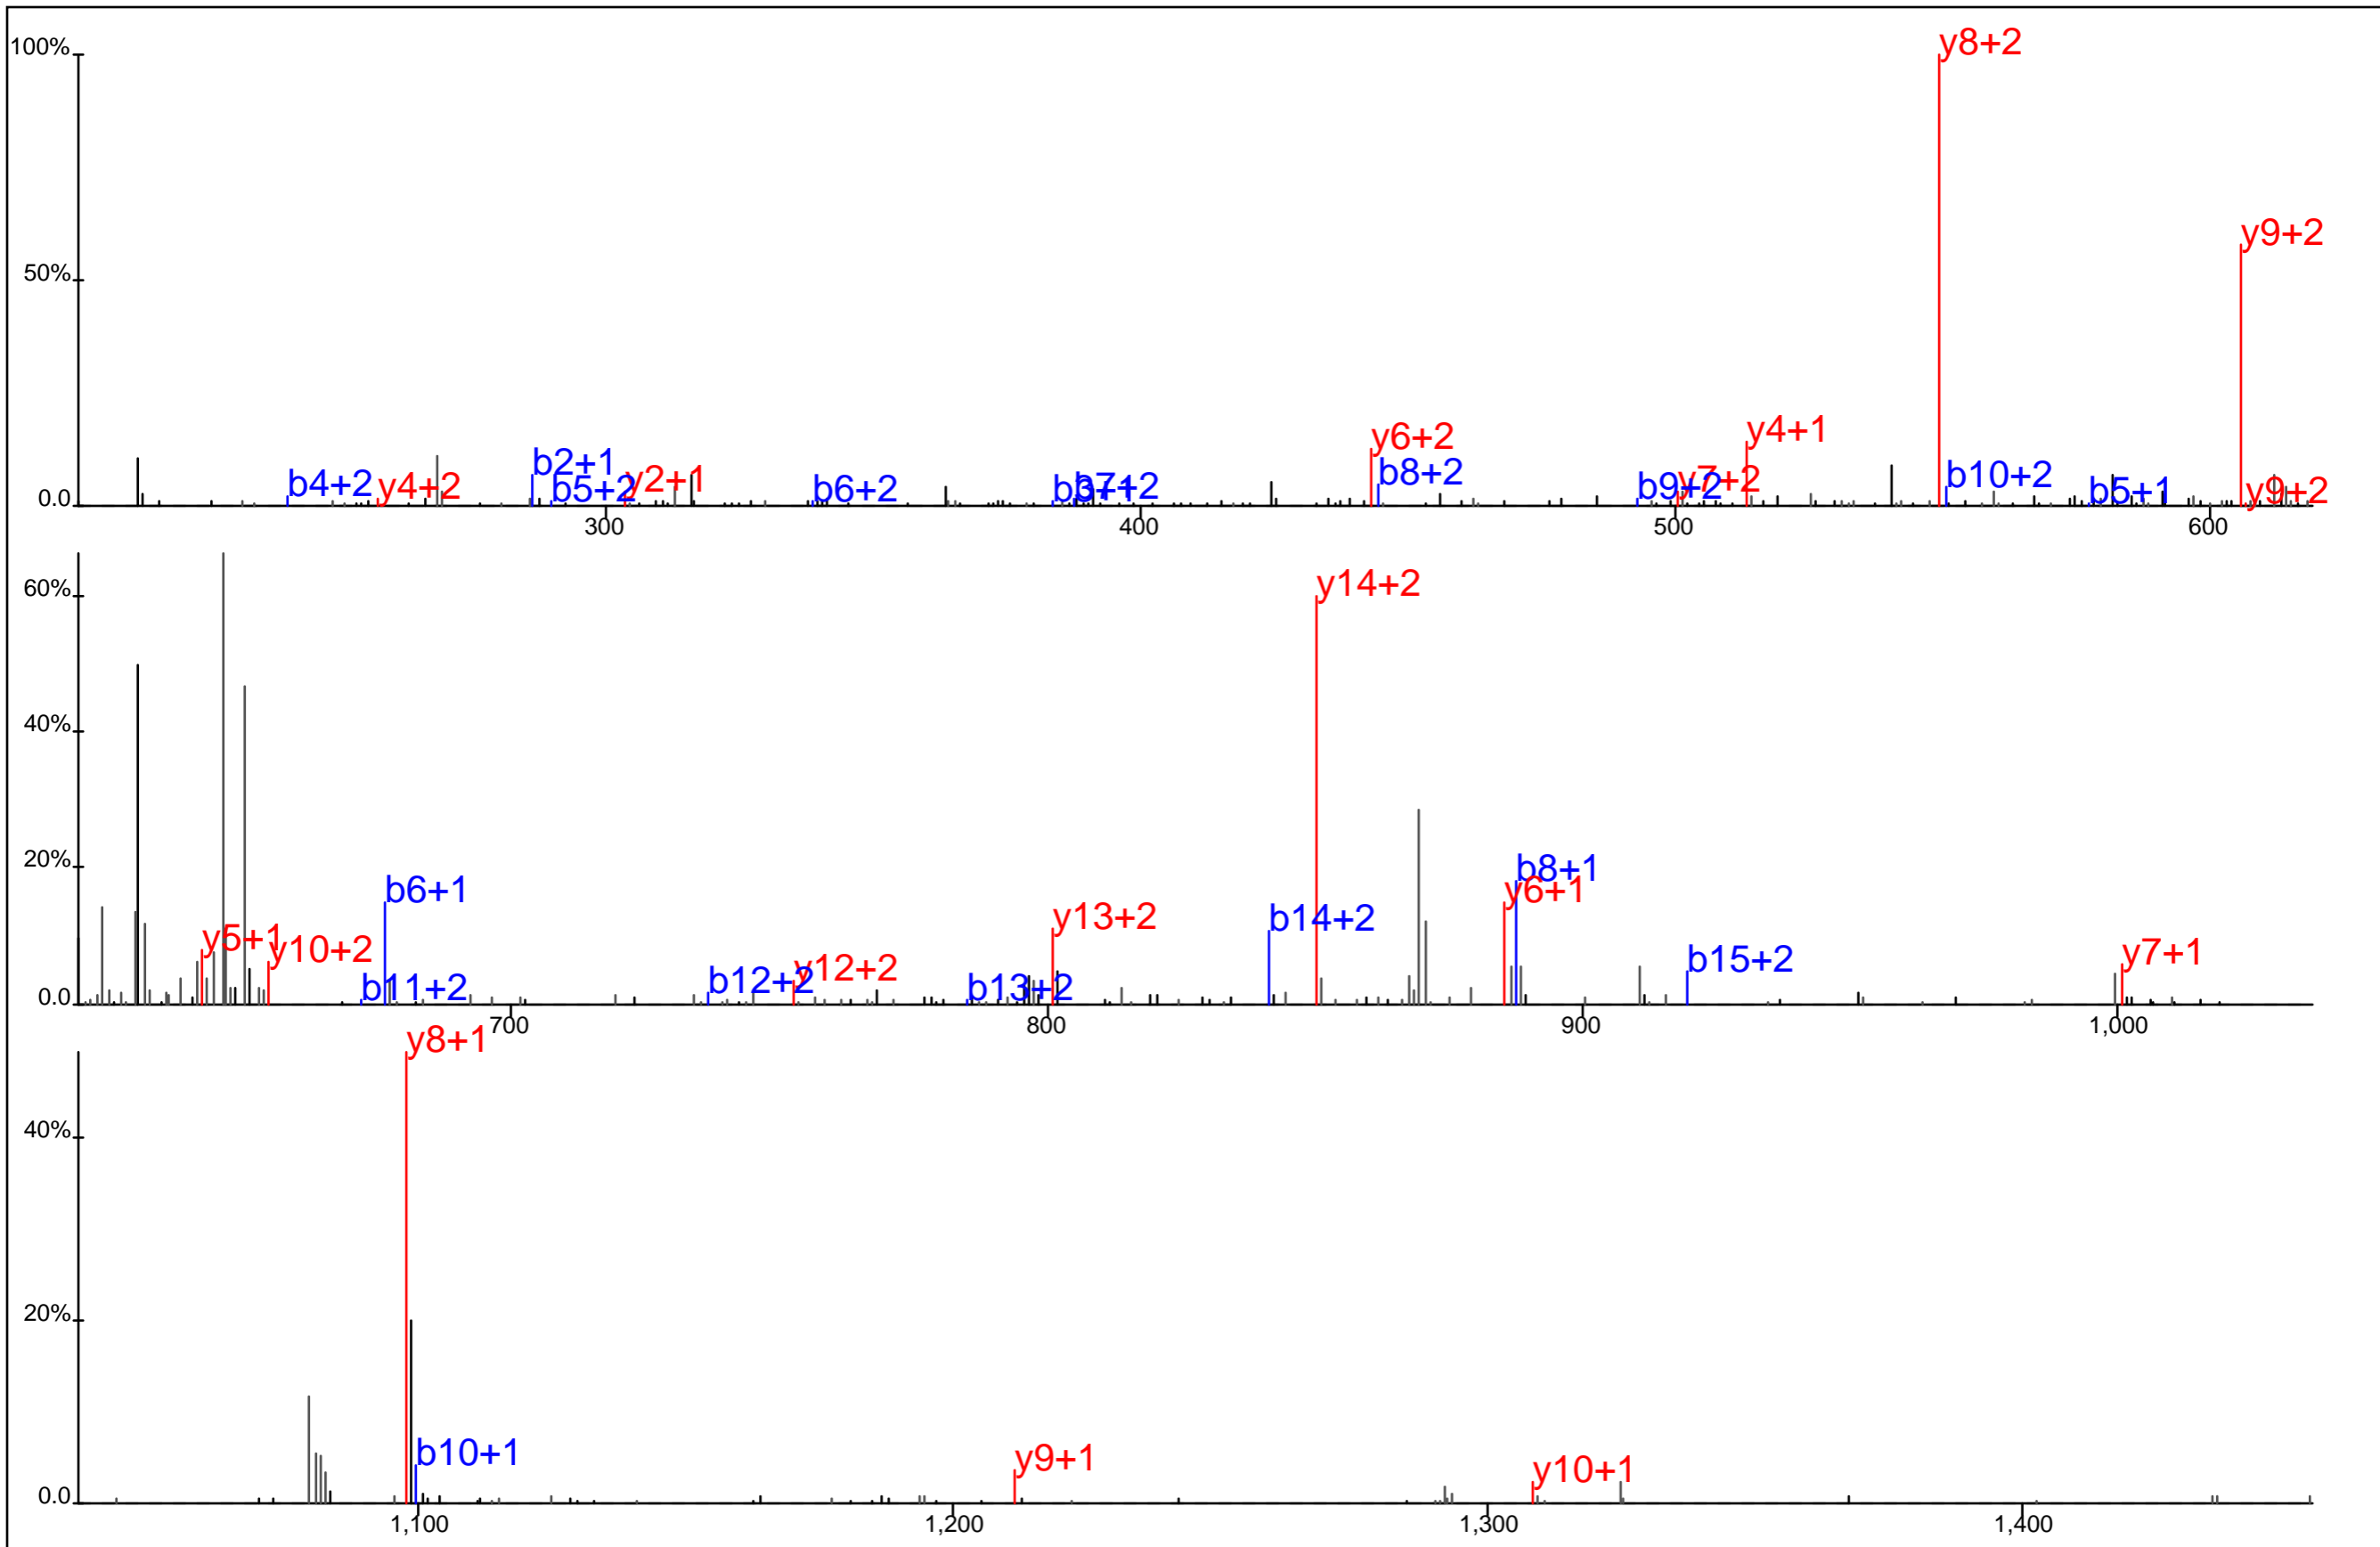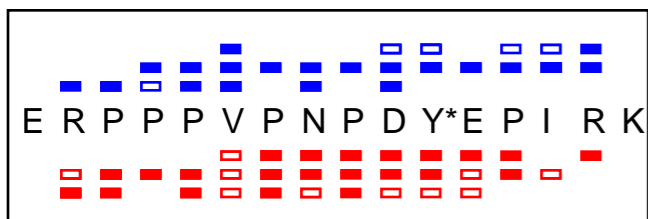

Protein Name: CD3 epsilon  
 gi Accession: 4502671  
 Precursor Mass: 661.9959+3  
 Delta Mass: 2.227 ppm  
 XCorr: 38.54

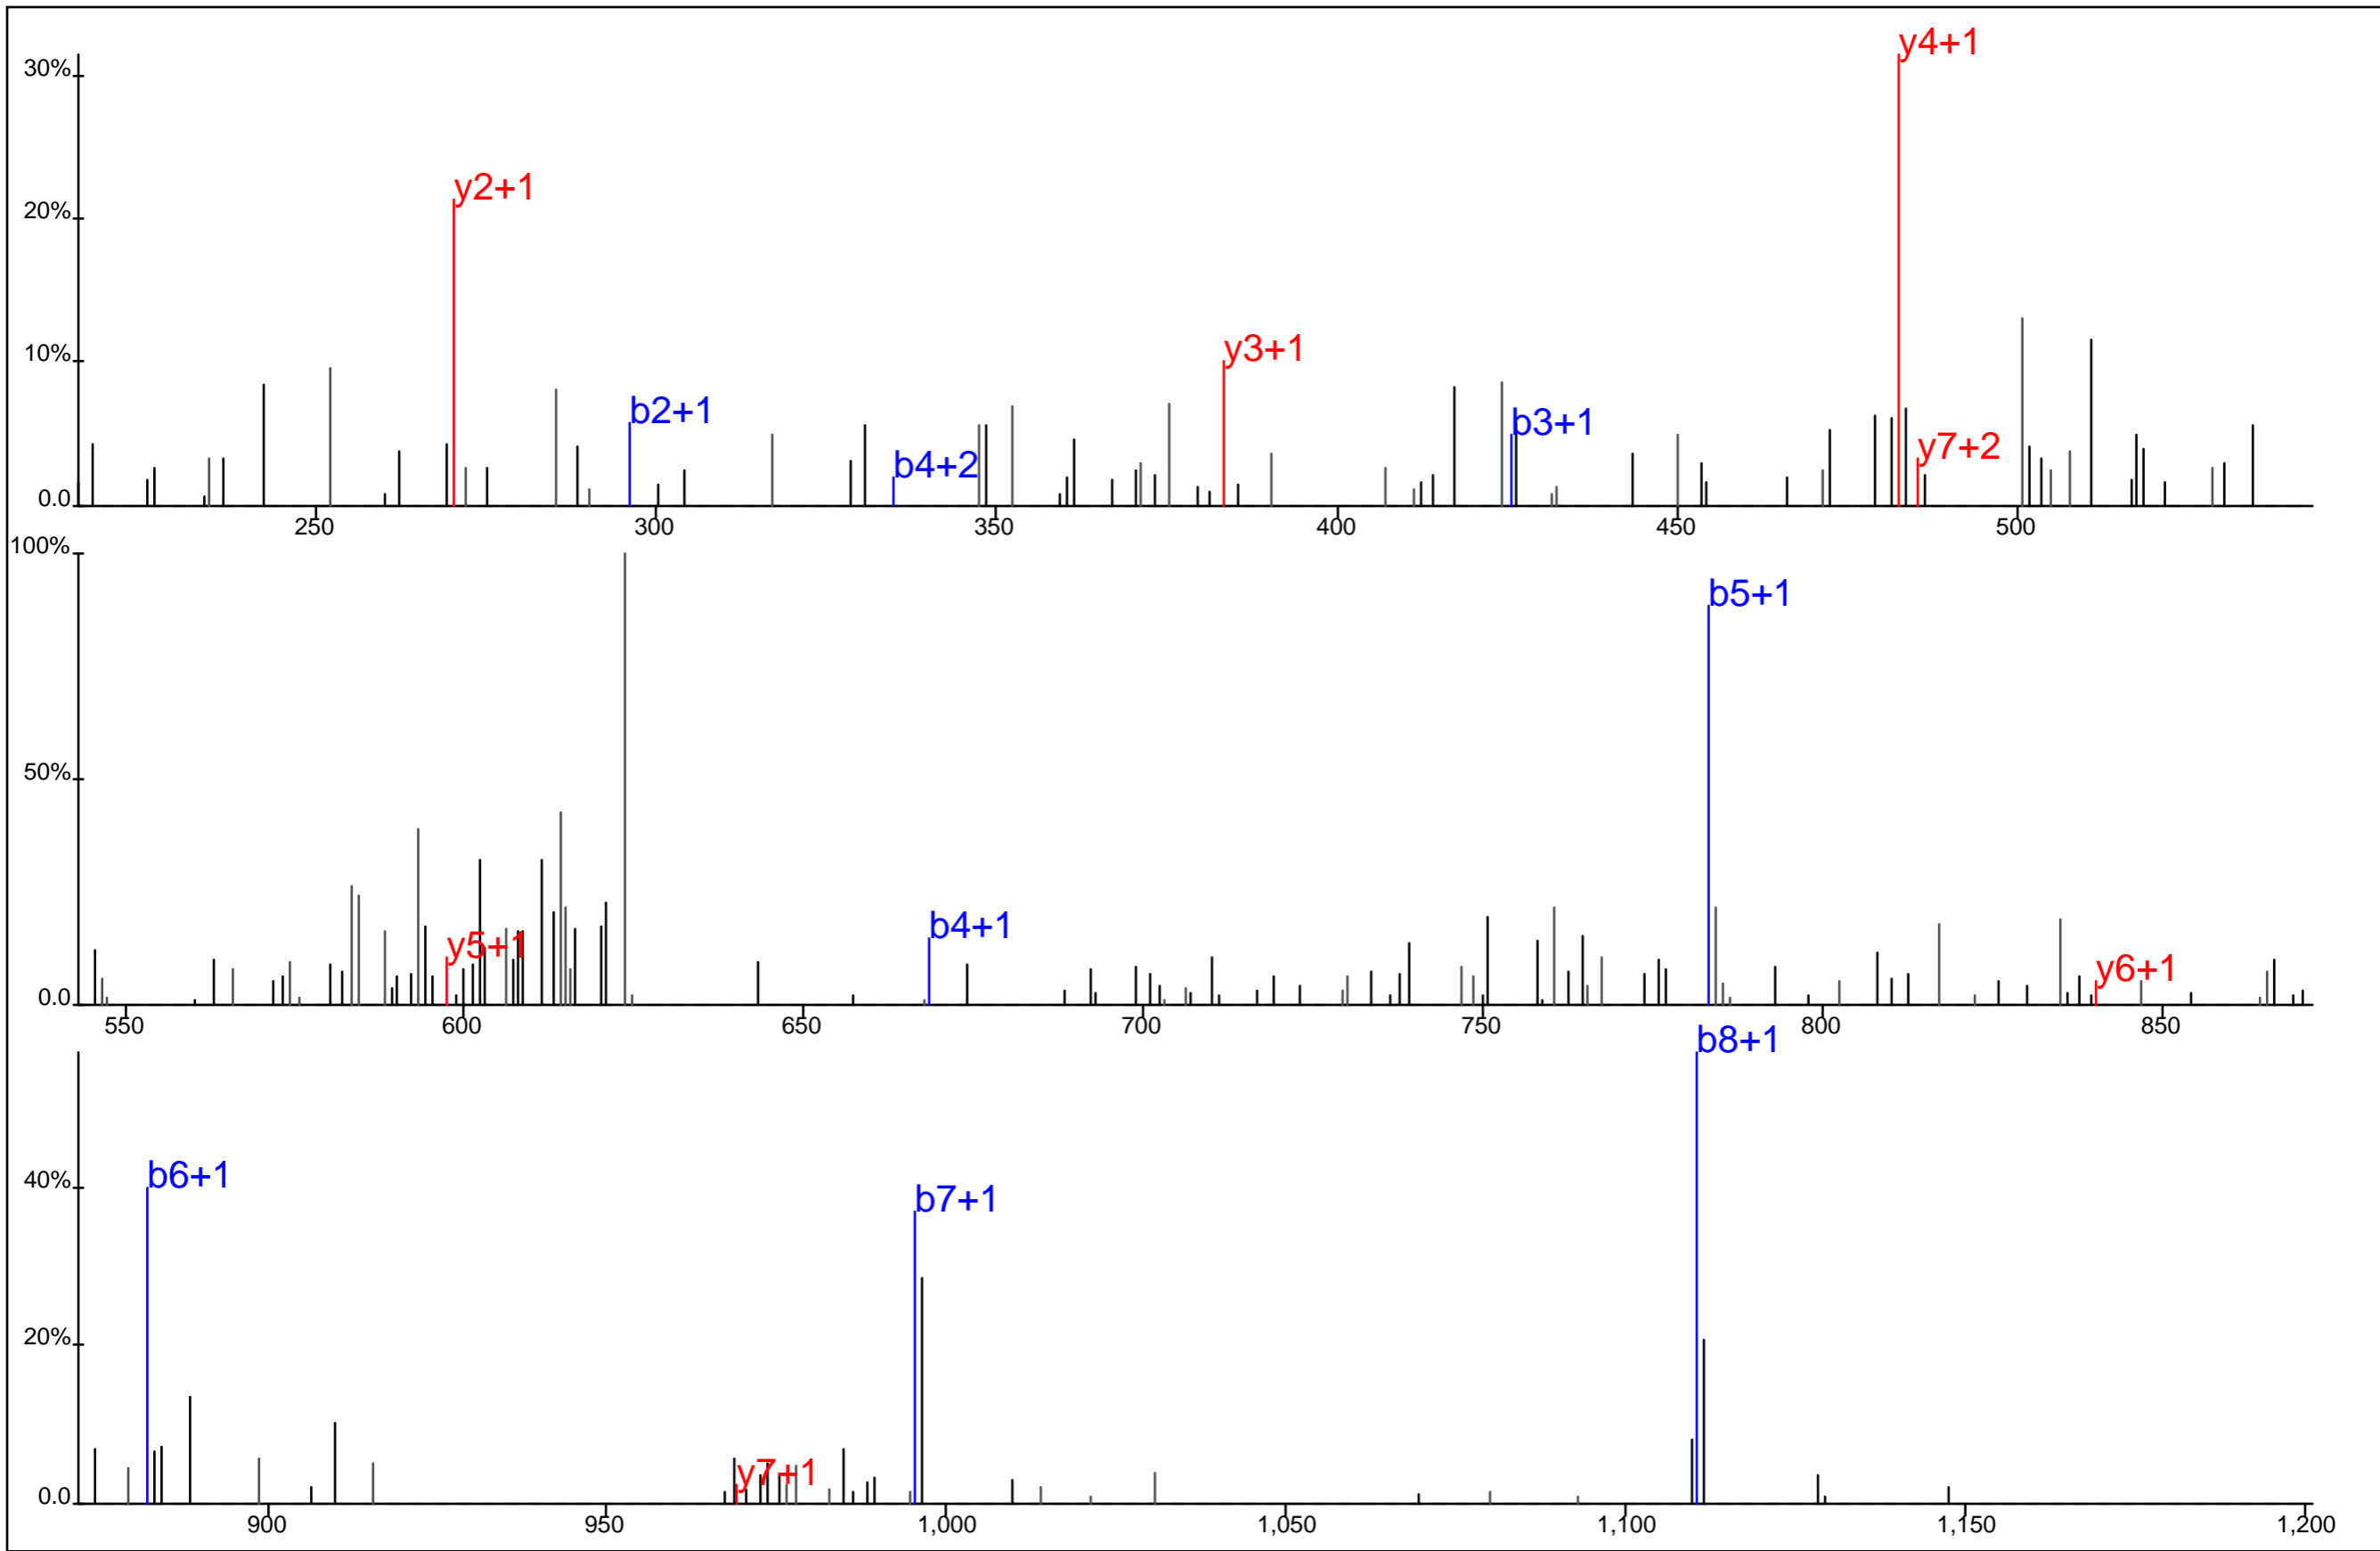

■ ■ ■ ■ ■ ■  
**R#E E Y\*D V L D K@**  
□ □ □ □ □ □

Protein Name: CD3 zeta  
 gi Accession: 37595565  
 Precursor Mass: 632.7835+2  
 Delta Mass: 1.700 ppm  
 XCorr: 2.8817

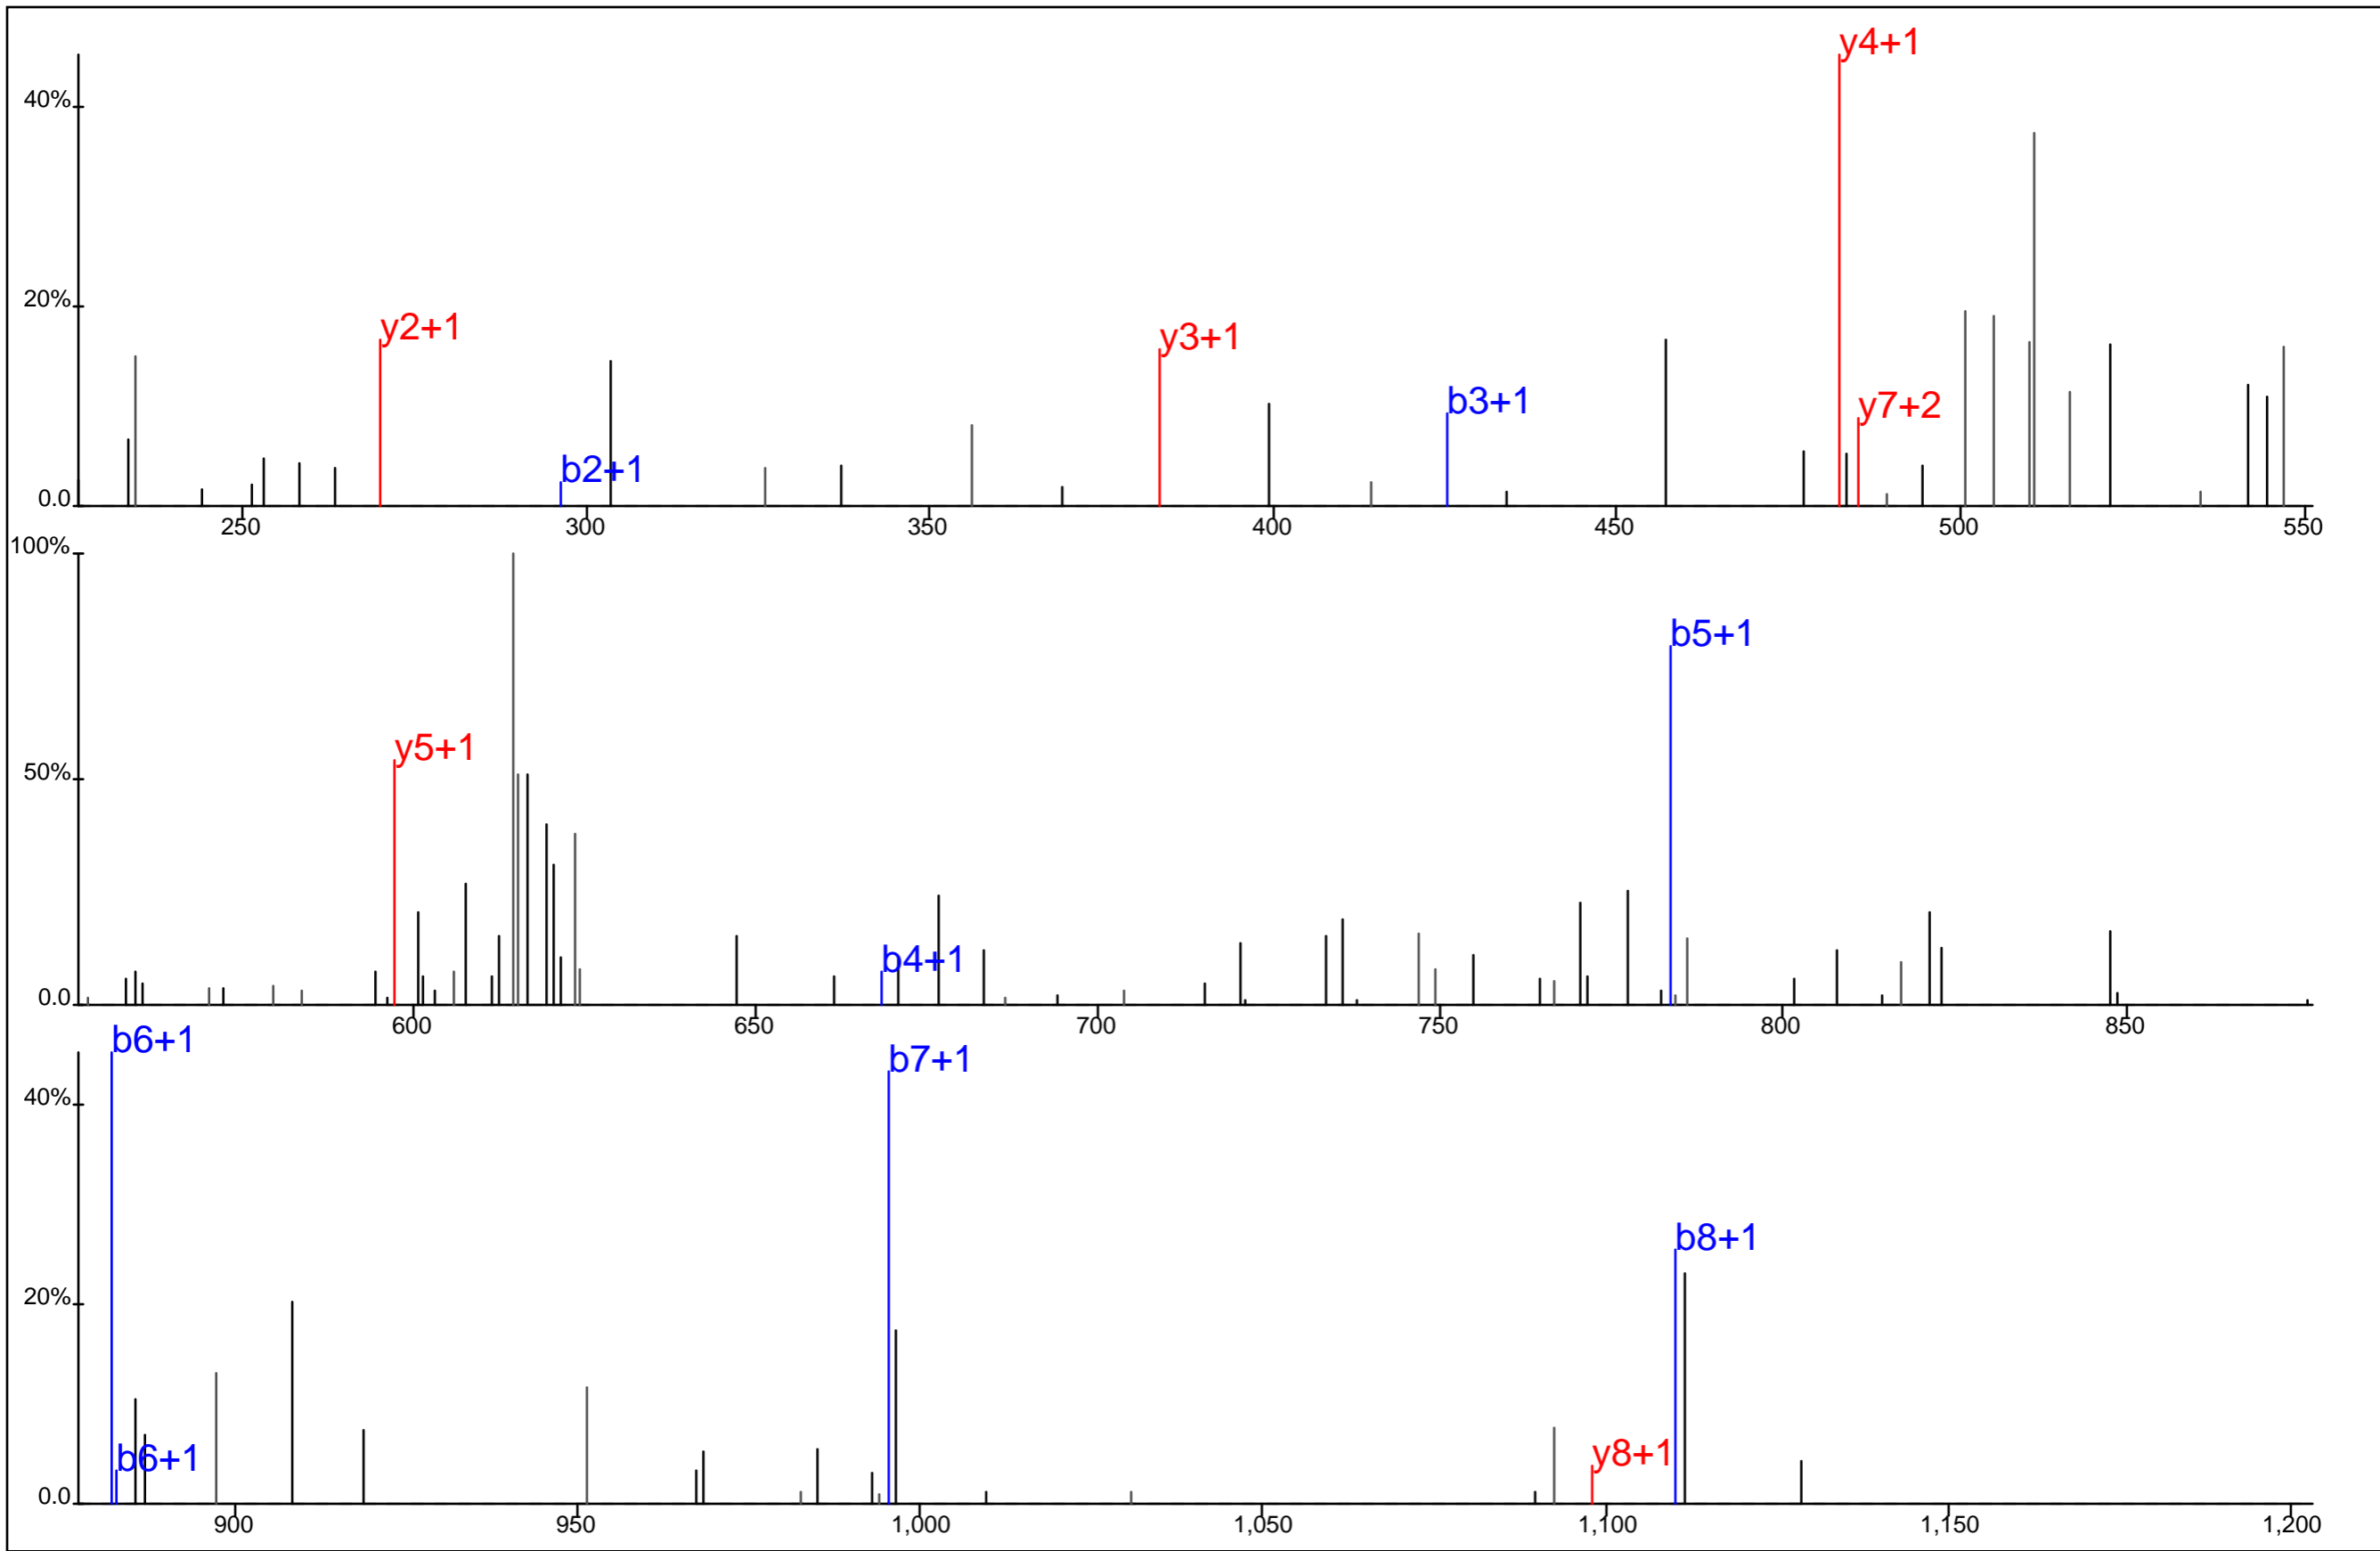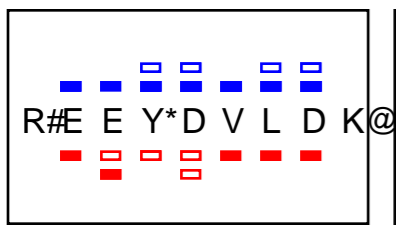

Protein Name: CD3 zeta  
 gi Accession: 37595565  
 Precursor Mass: 632.7896+2  
 Delta Mass: 11.356 ppm  
 XCorr: 2.0799

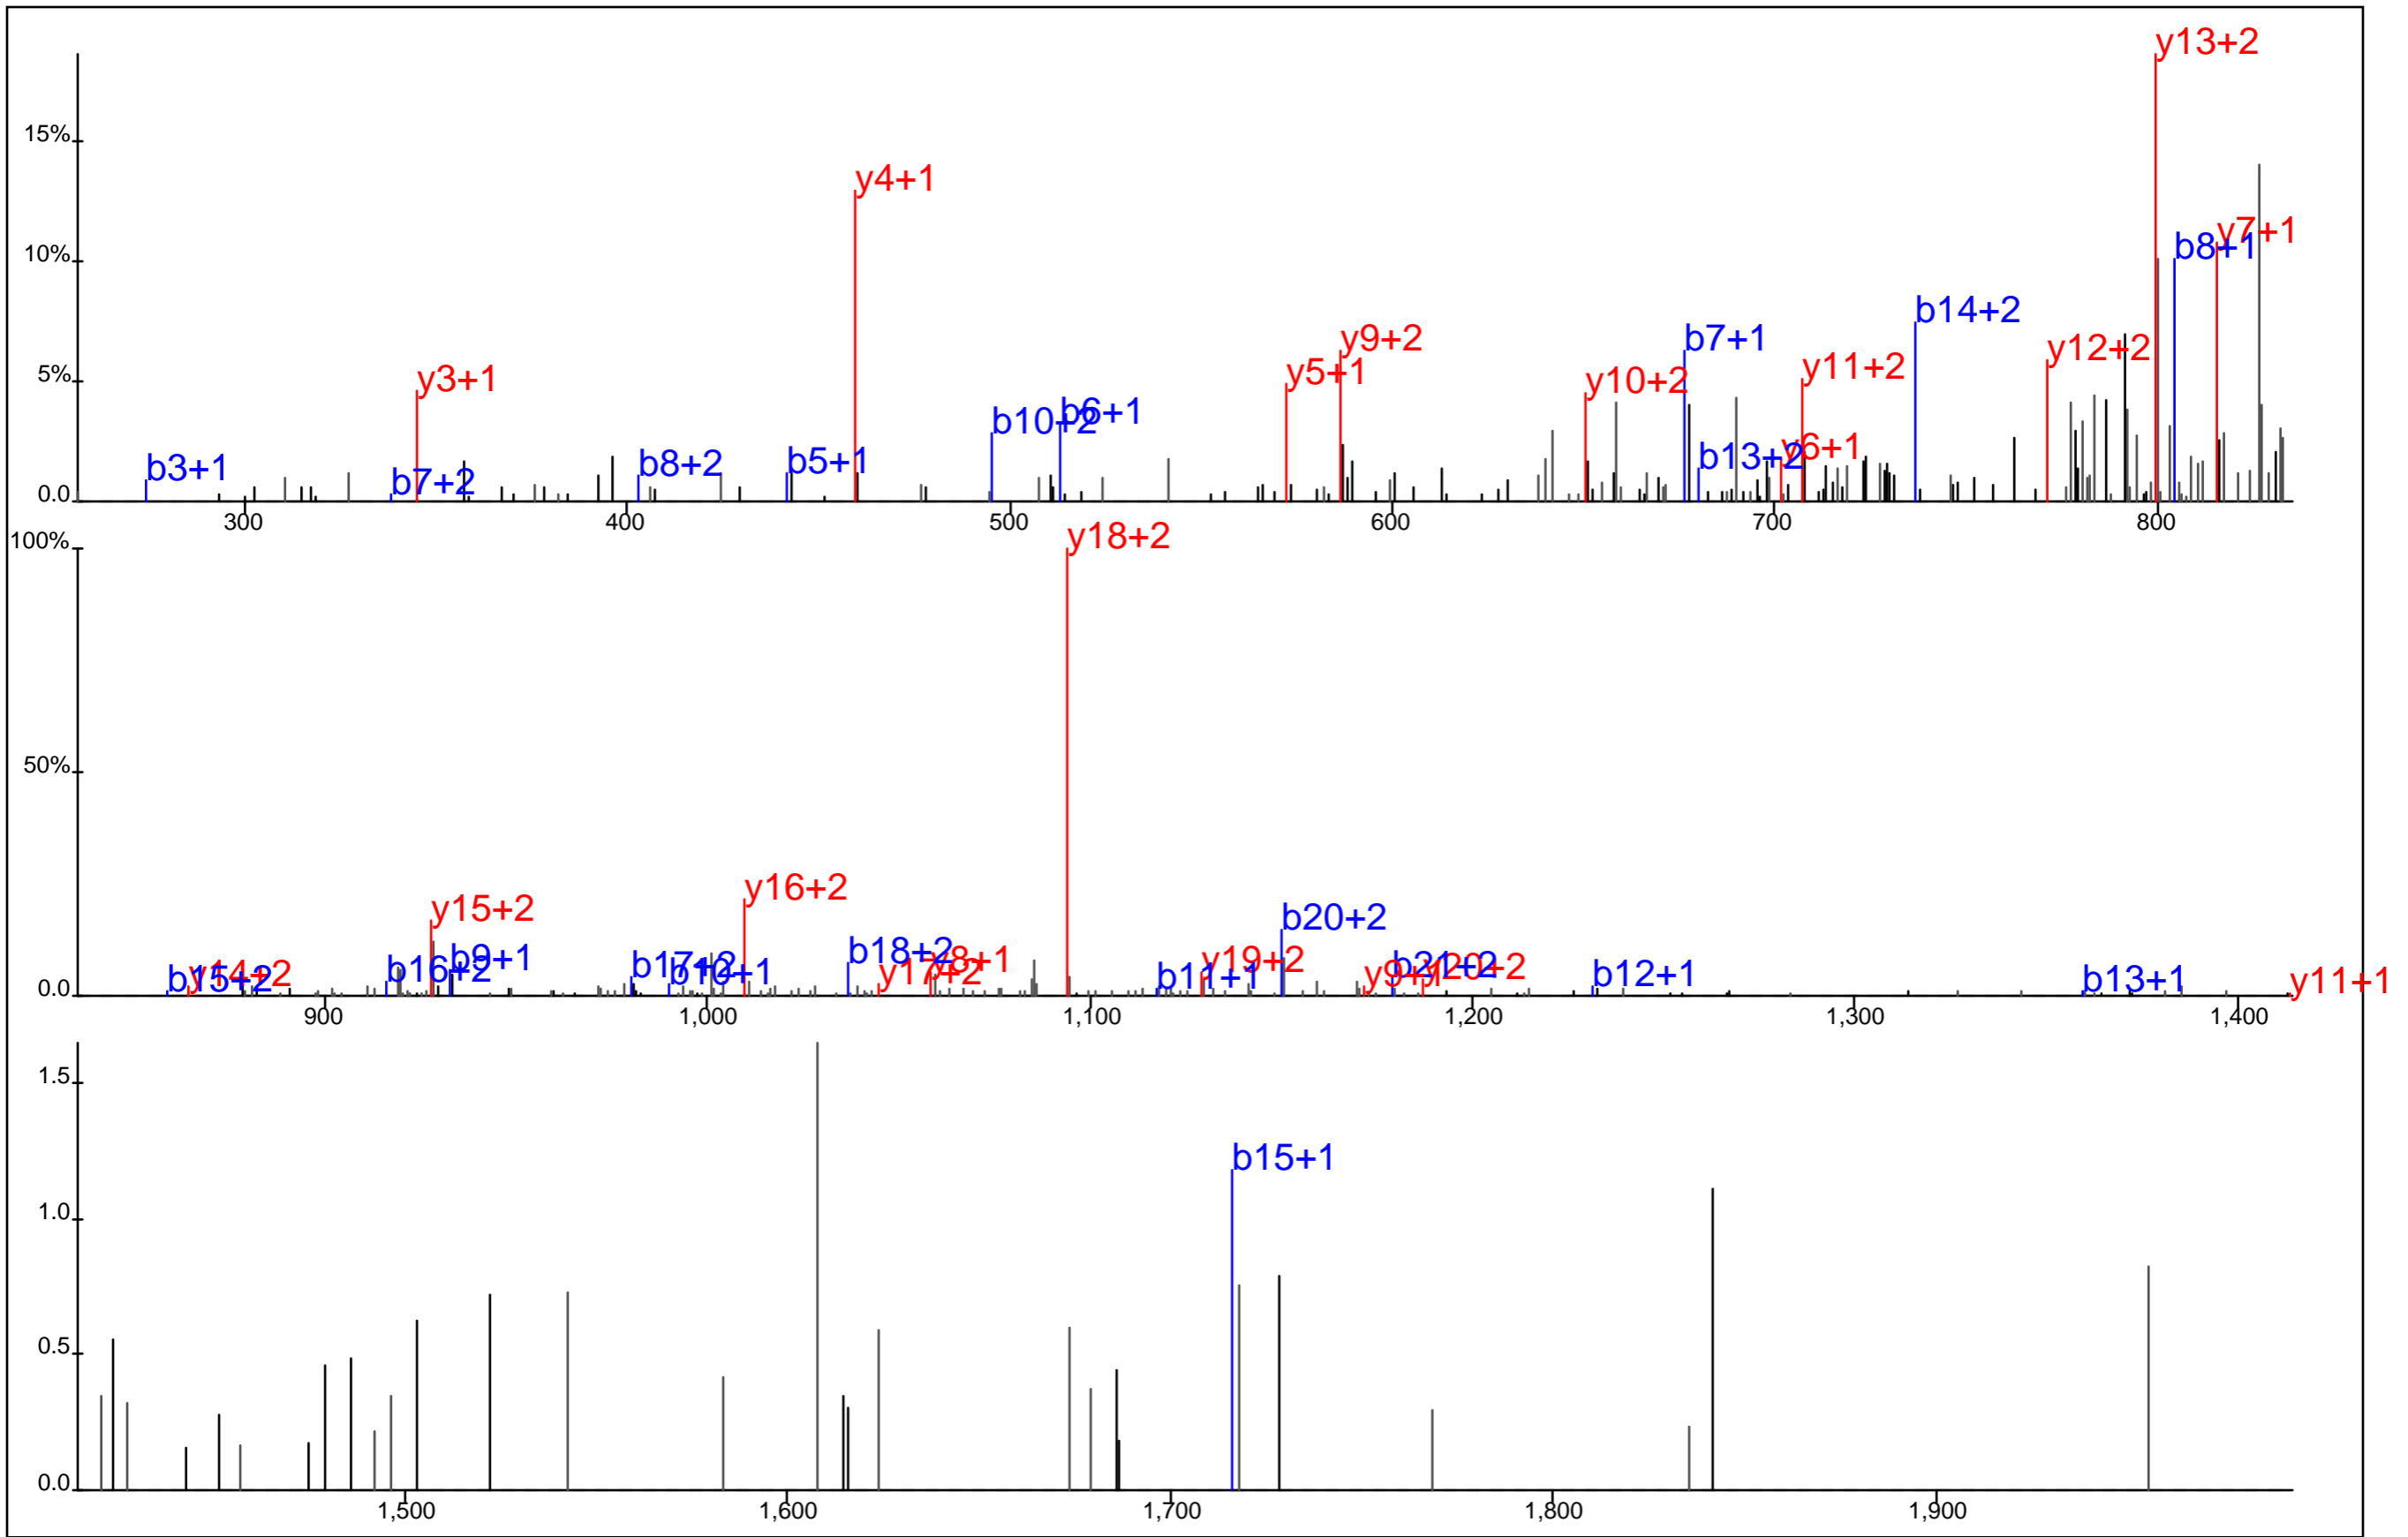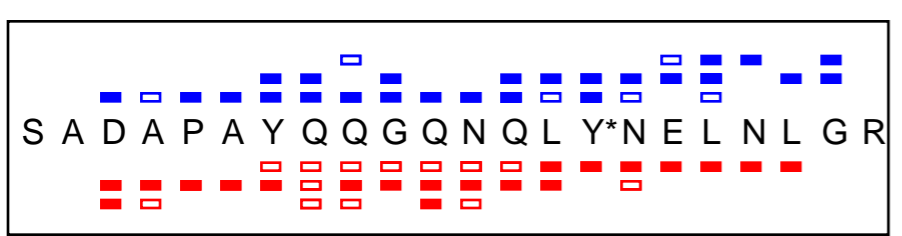

Protein Name: CD3 zeta  
 gi Accession: 37595565  
 Precursor Mass: 844.0528+3  
 Delta Mass: 3.185 ppm  
 XCorr: 56.68



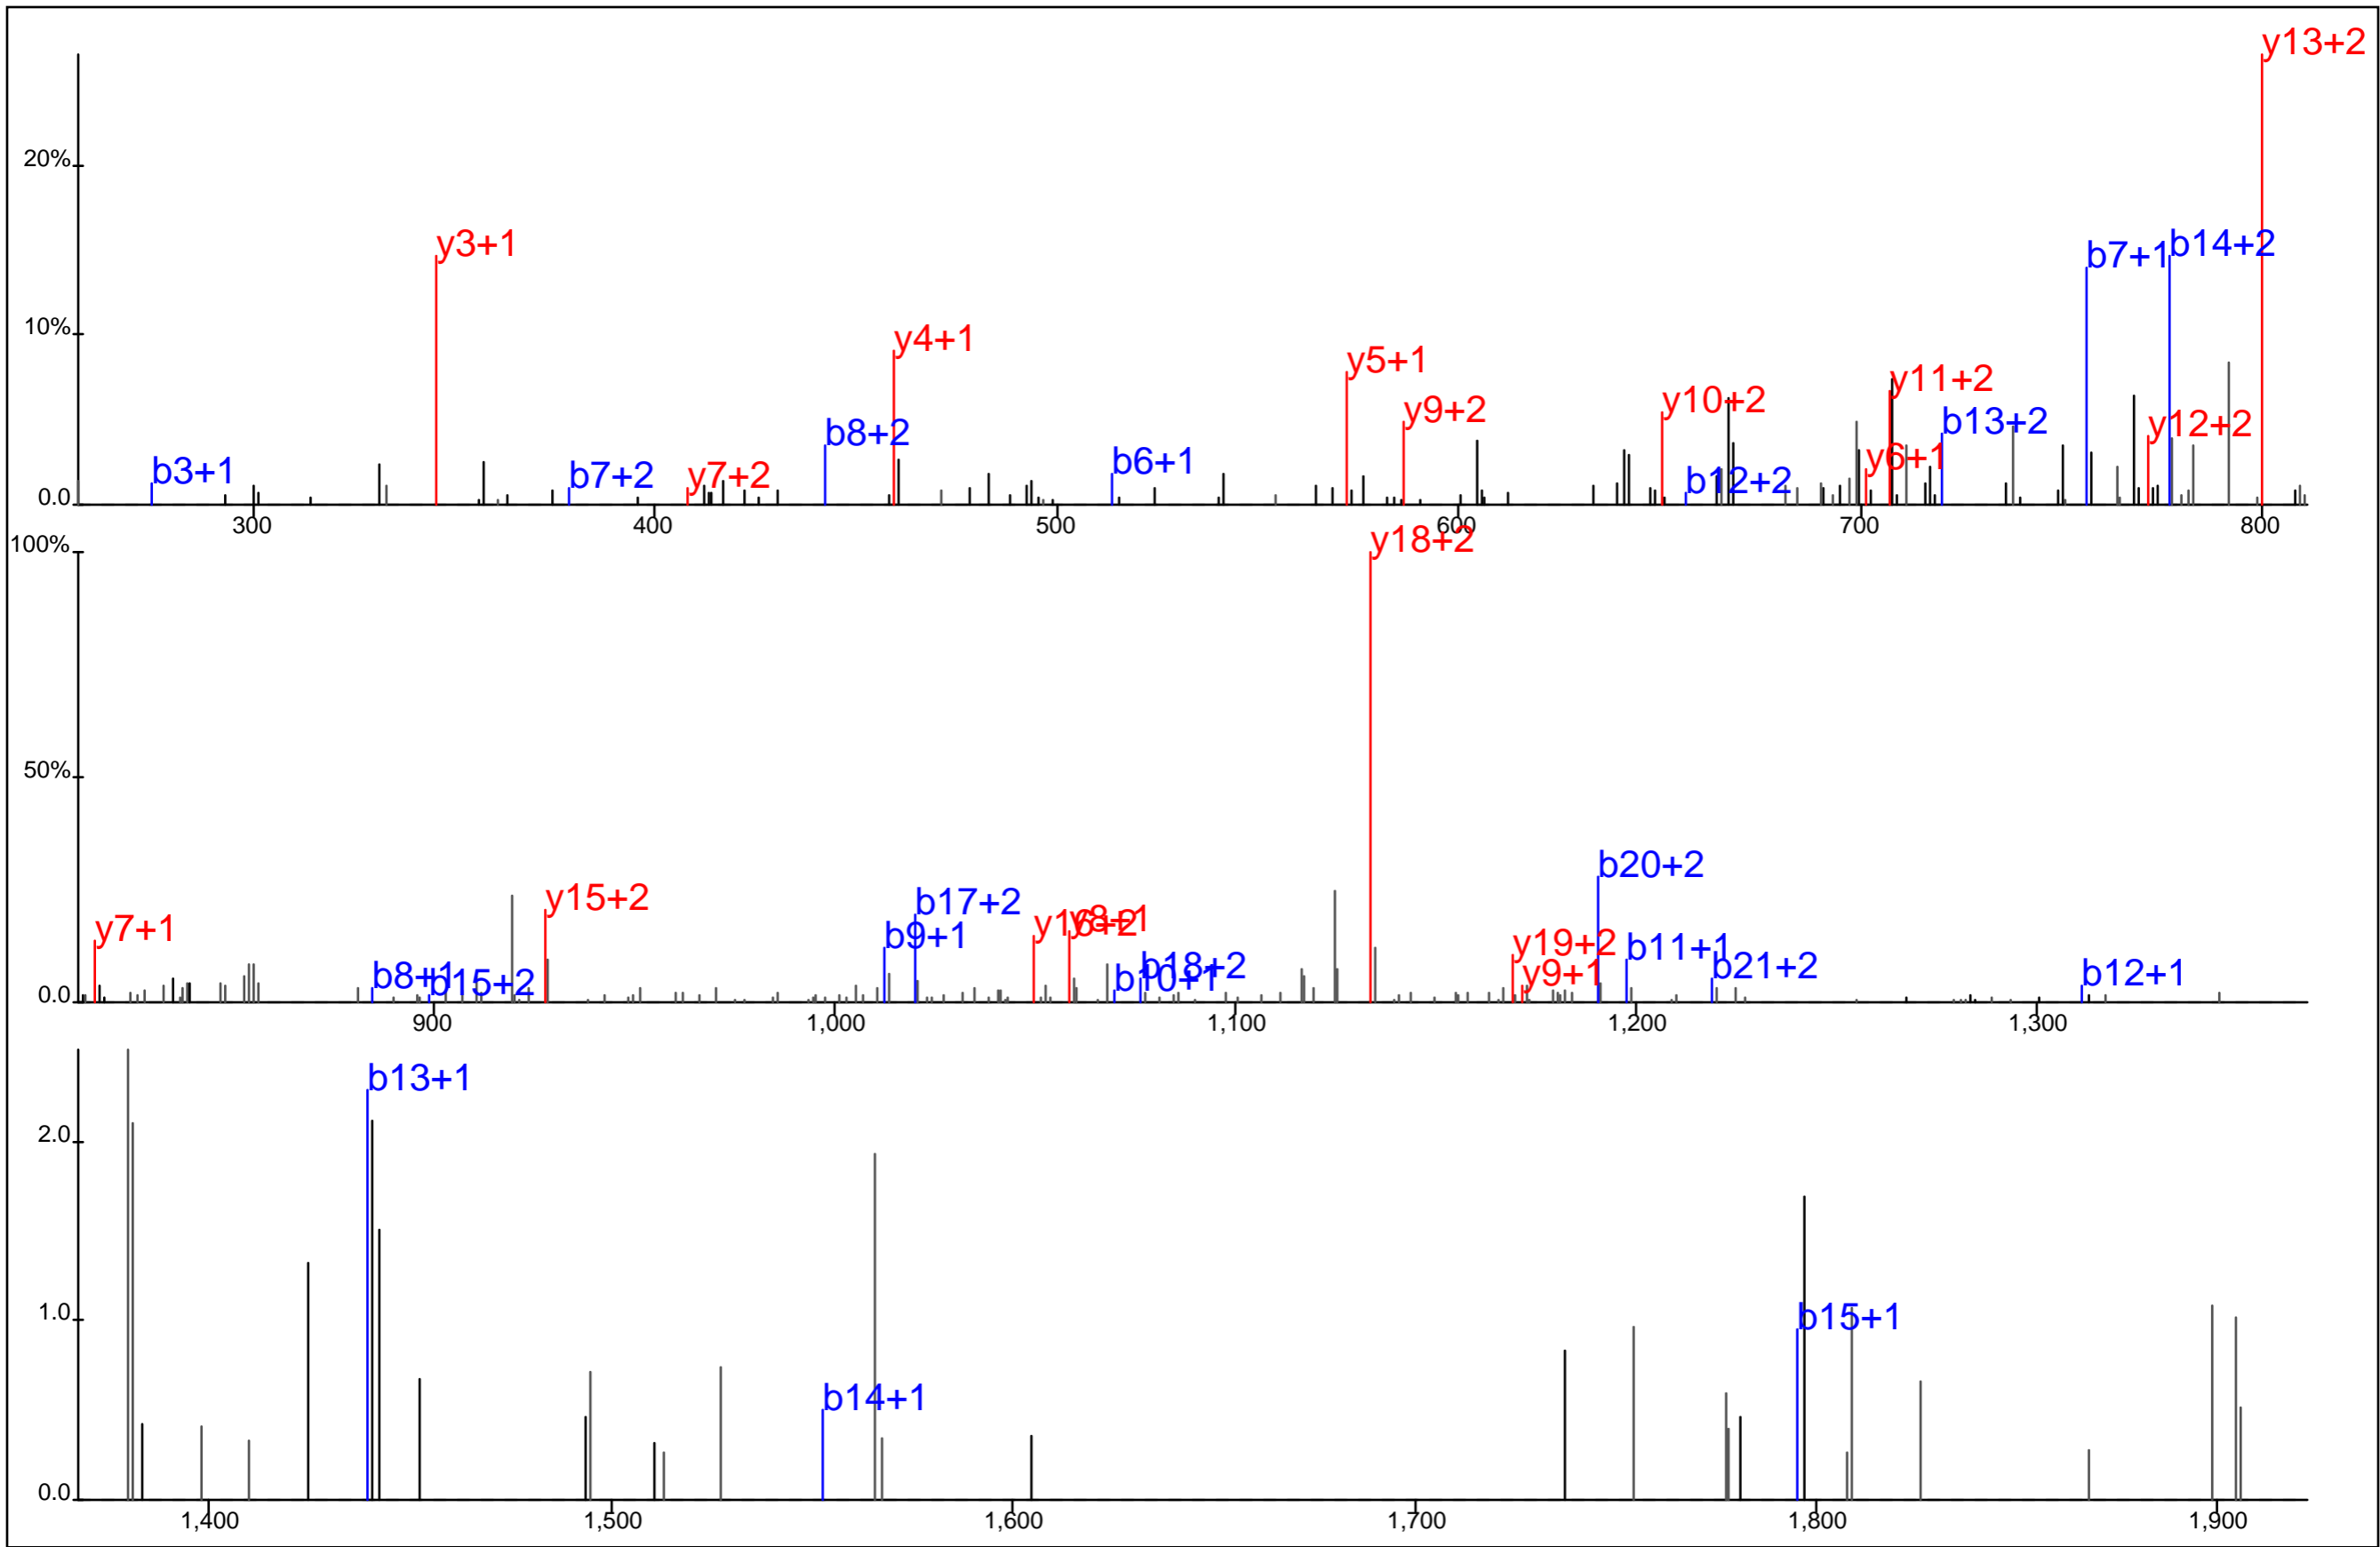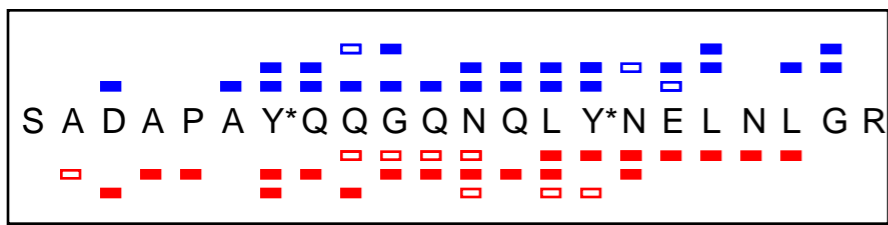

Protein Name: CD3 zeta  
 gi Accession: 37595565  
 Precursor Mass: 870.7092+3  
 Delta Mass: 4.160 ppm  
 XCorr: 50.64

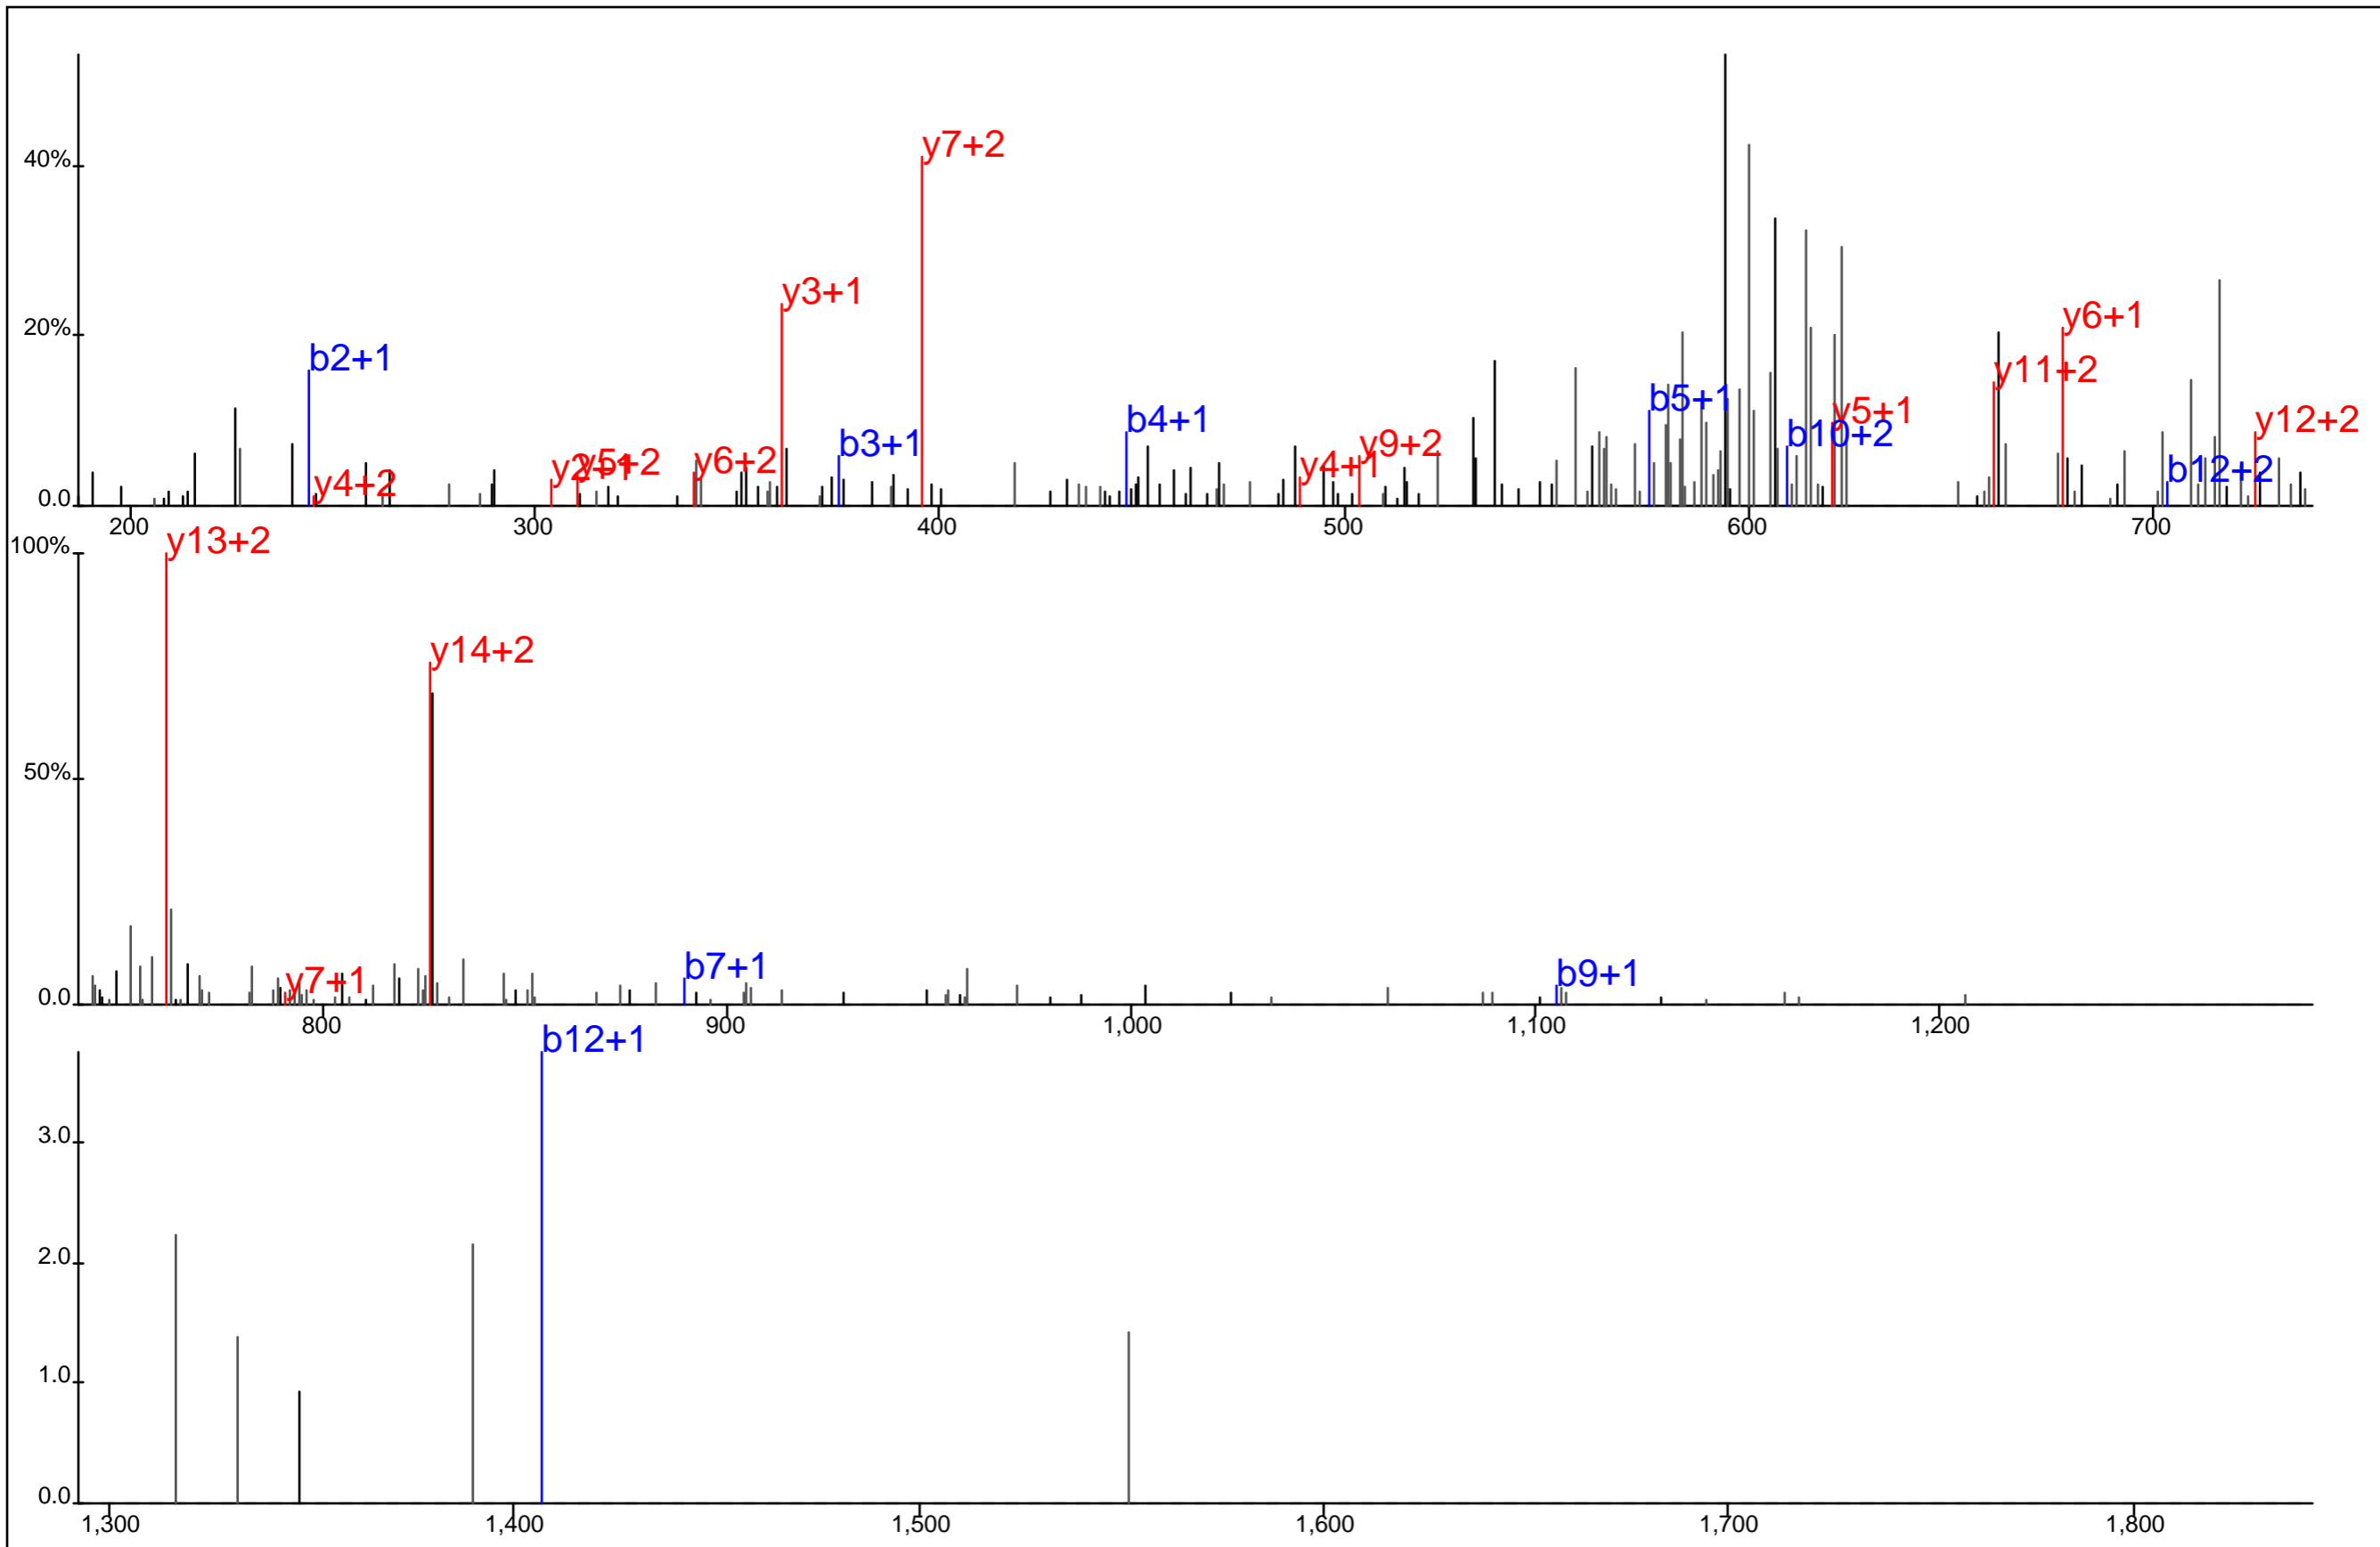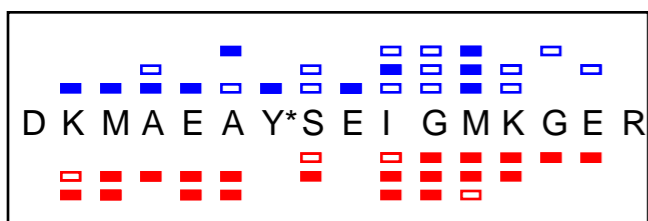

Protein Name: CD3 zeta  
 gi Accession: 37595565  
 Precursor Mass: 632.2758+3  
 Delta Mass: 2.896 ppm  
 XCorr: 17.07

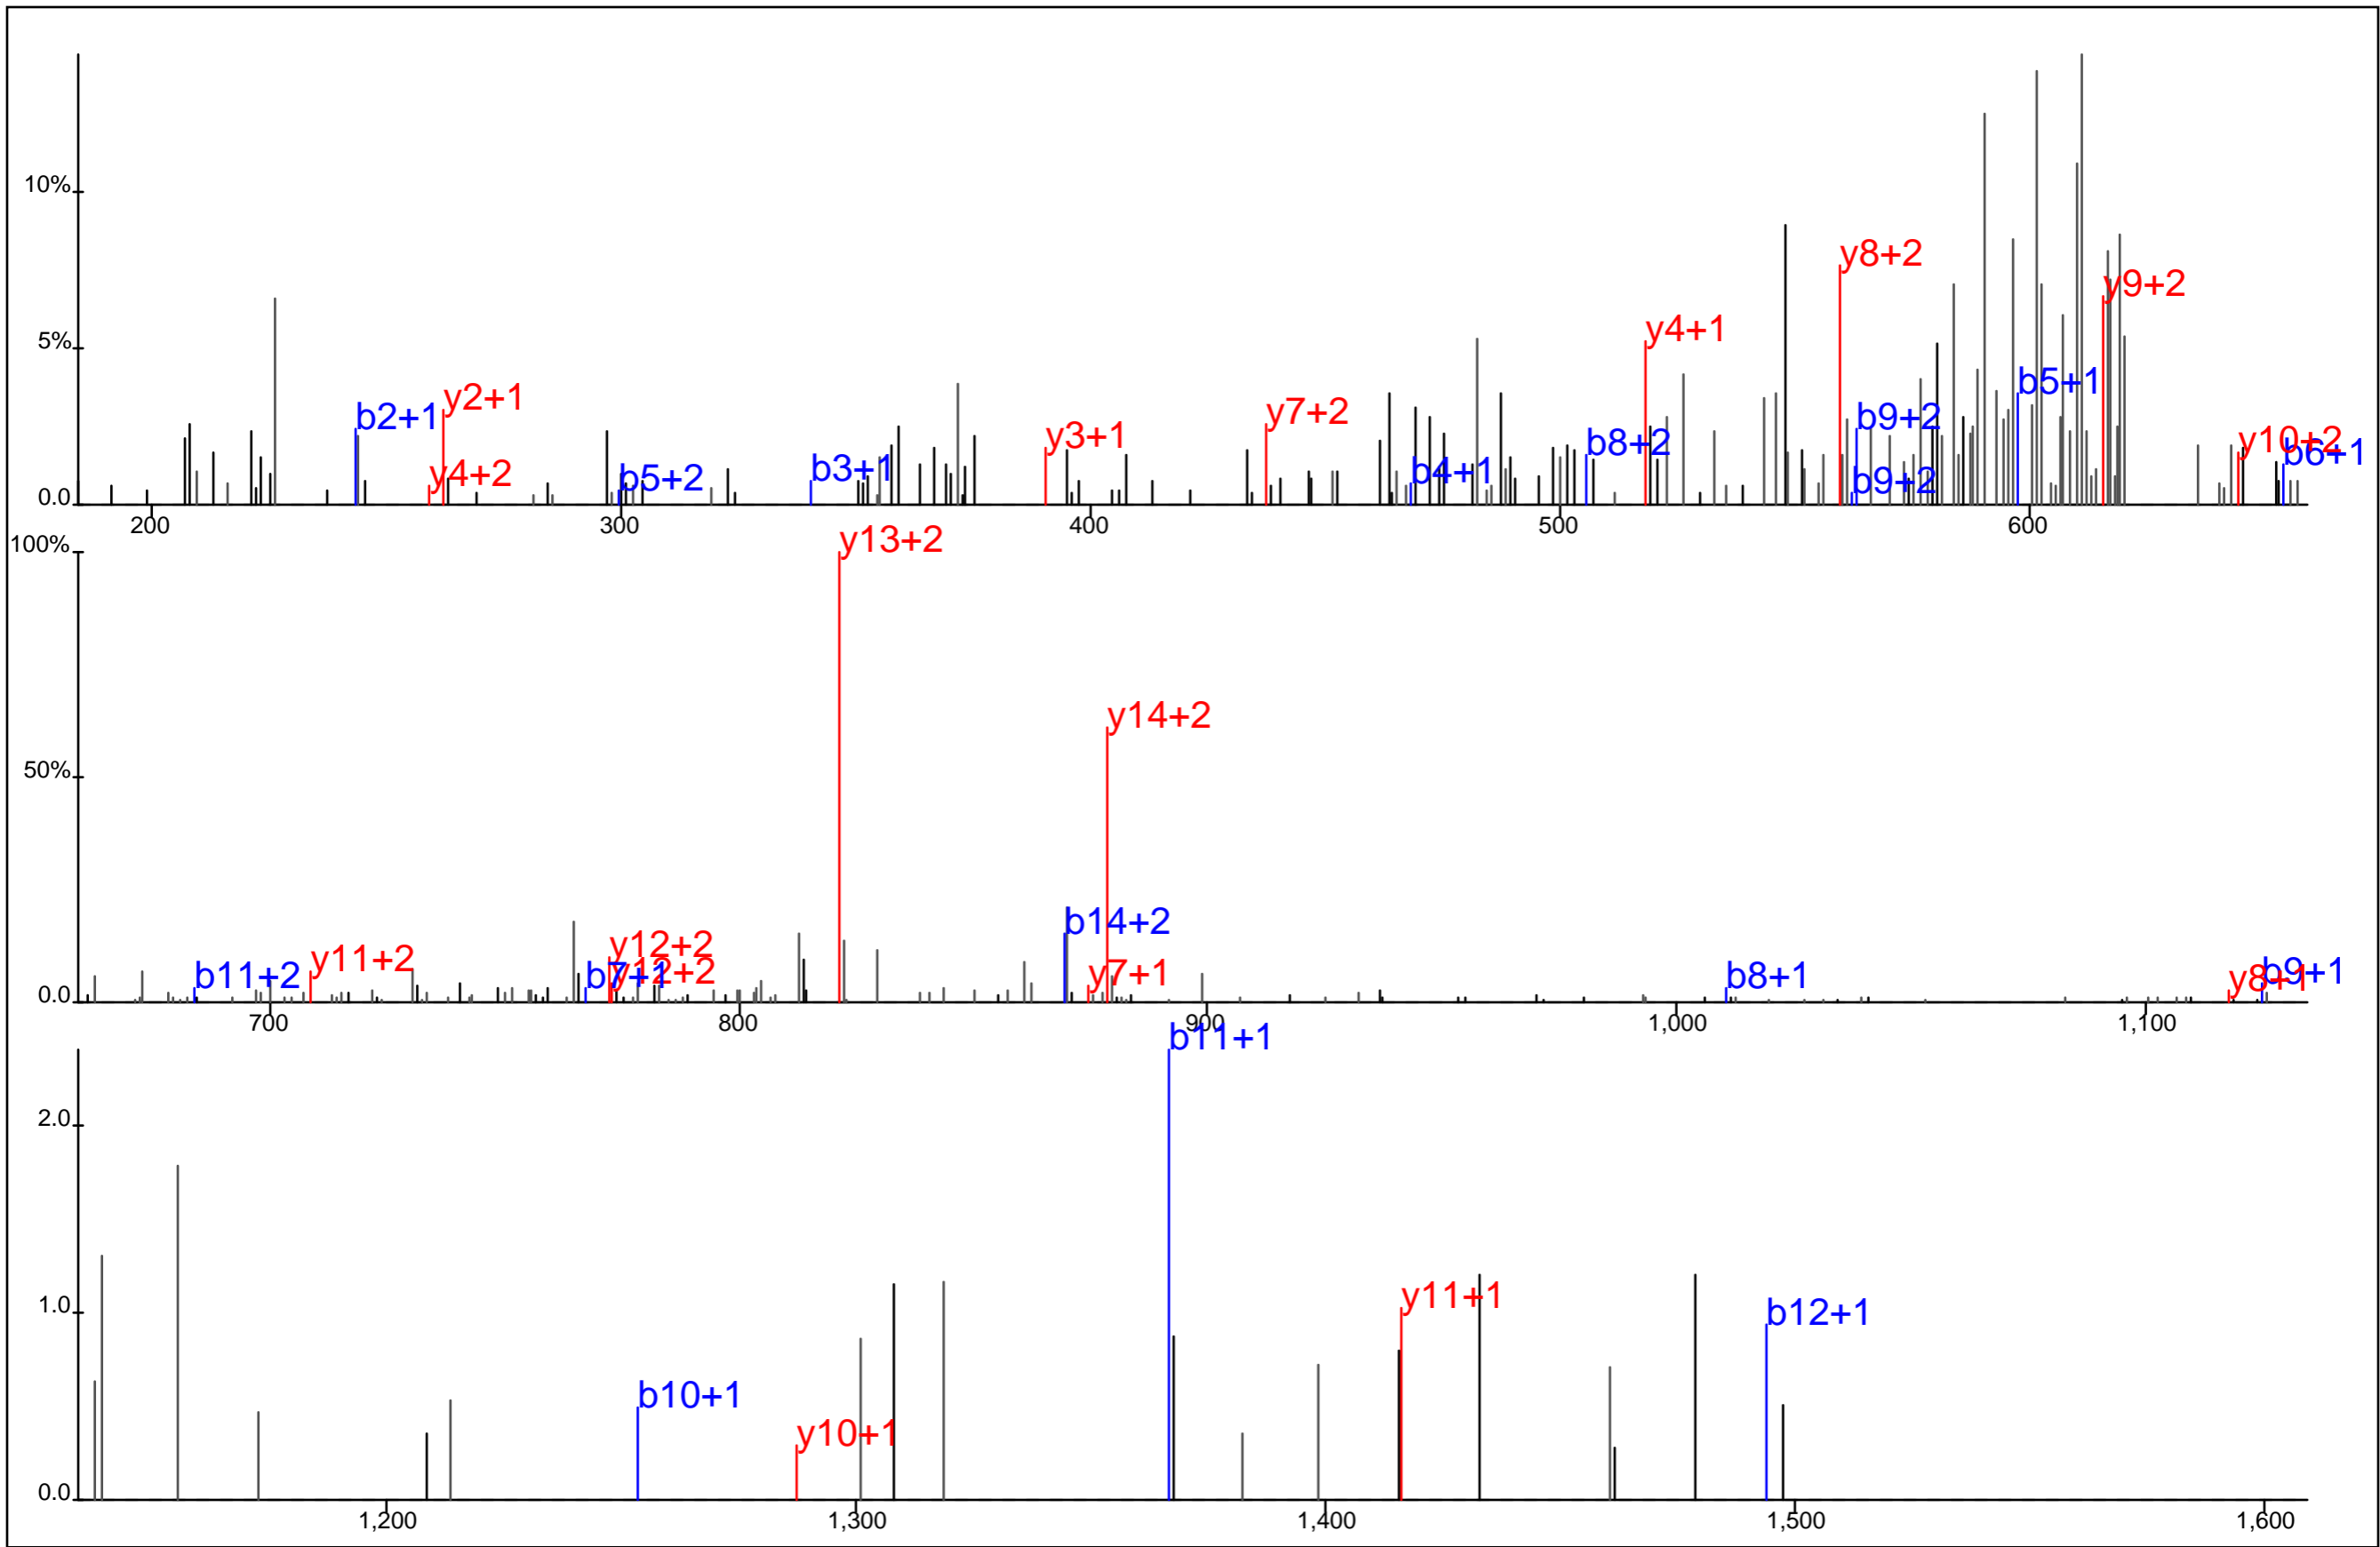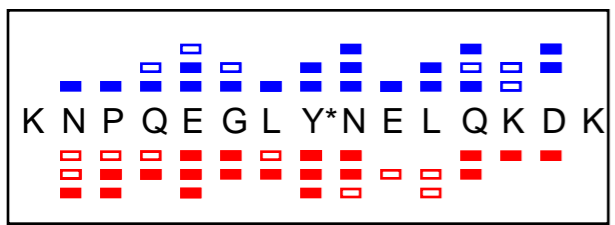

Protein Name: CD3 zeta  
 gi Accession: 37595565  
 Precursor Mass: 628.6352+3  
 Delta Mass: 0.636 ppm  
 XCorr: 29.66

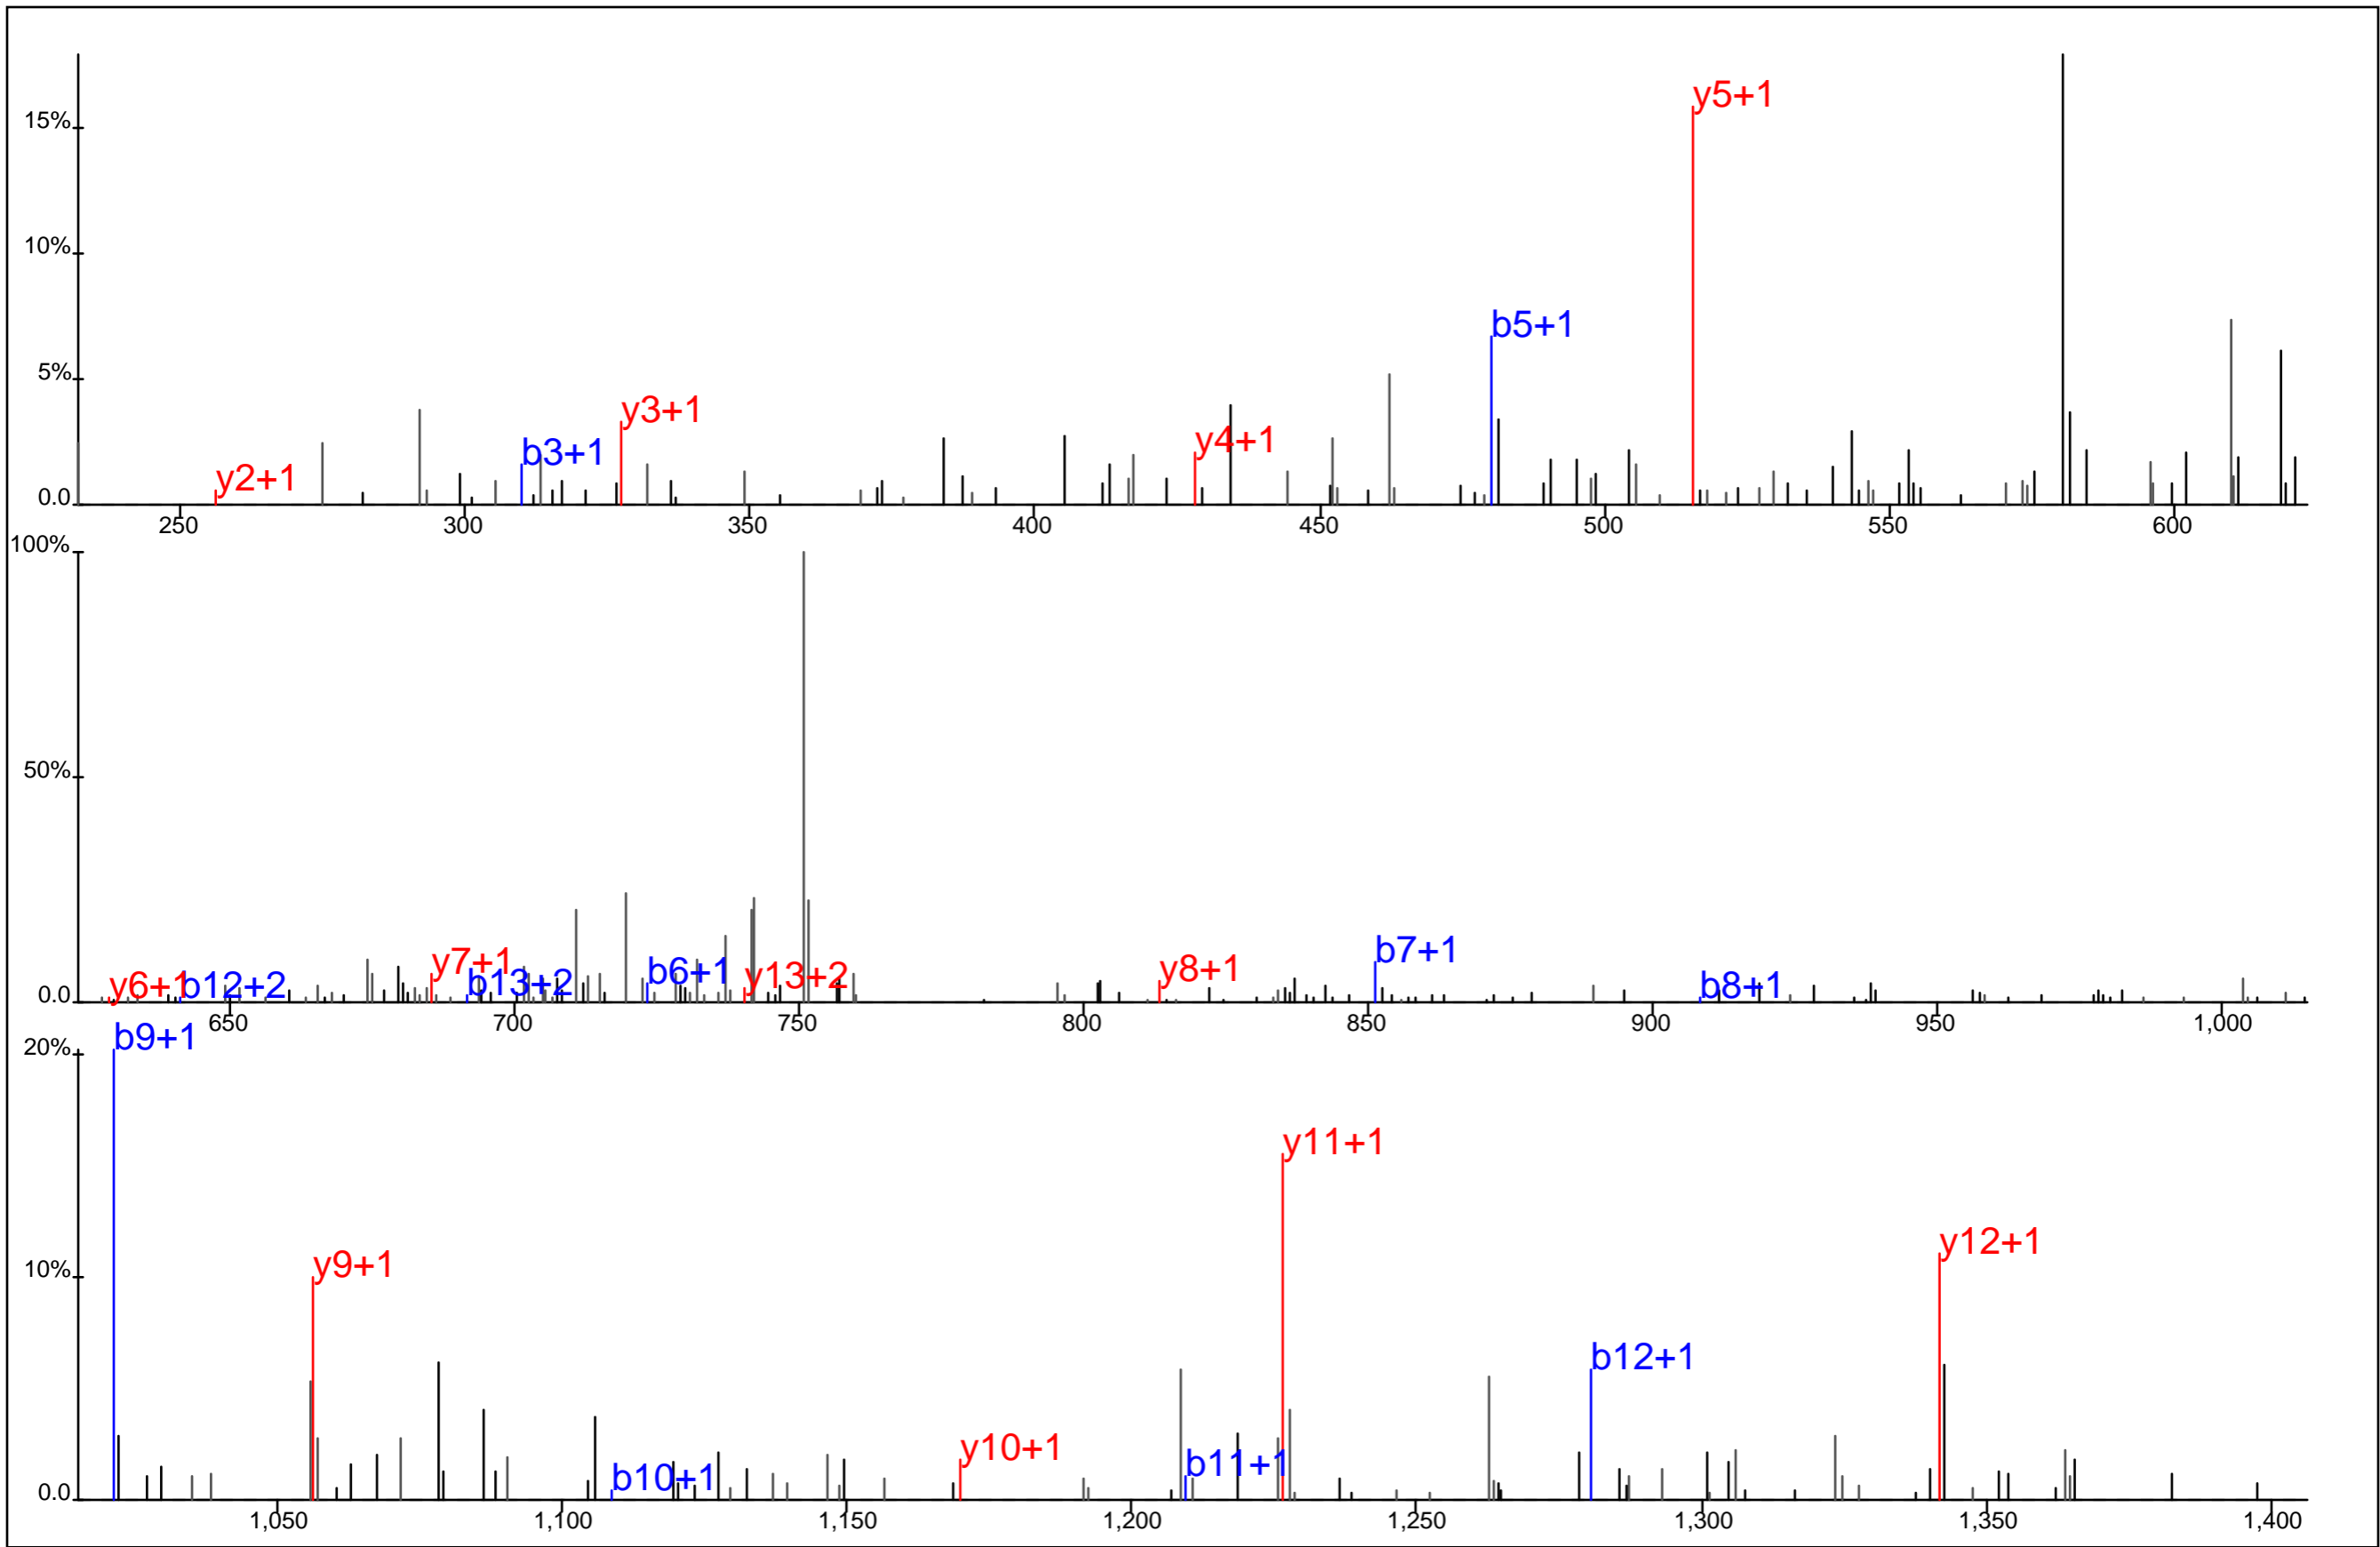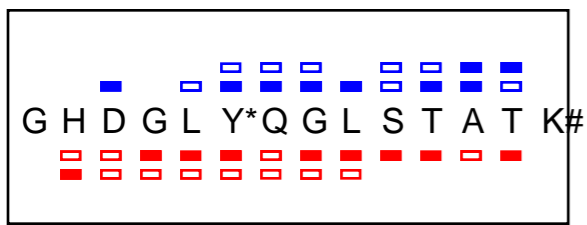

Protein Name: CD3 zeta  
 gi Accession: 37595565  
 Precursor Mass: 768.3516+2  
 Delta Mass: 1.401 ppm  
 XCorr: 29.54

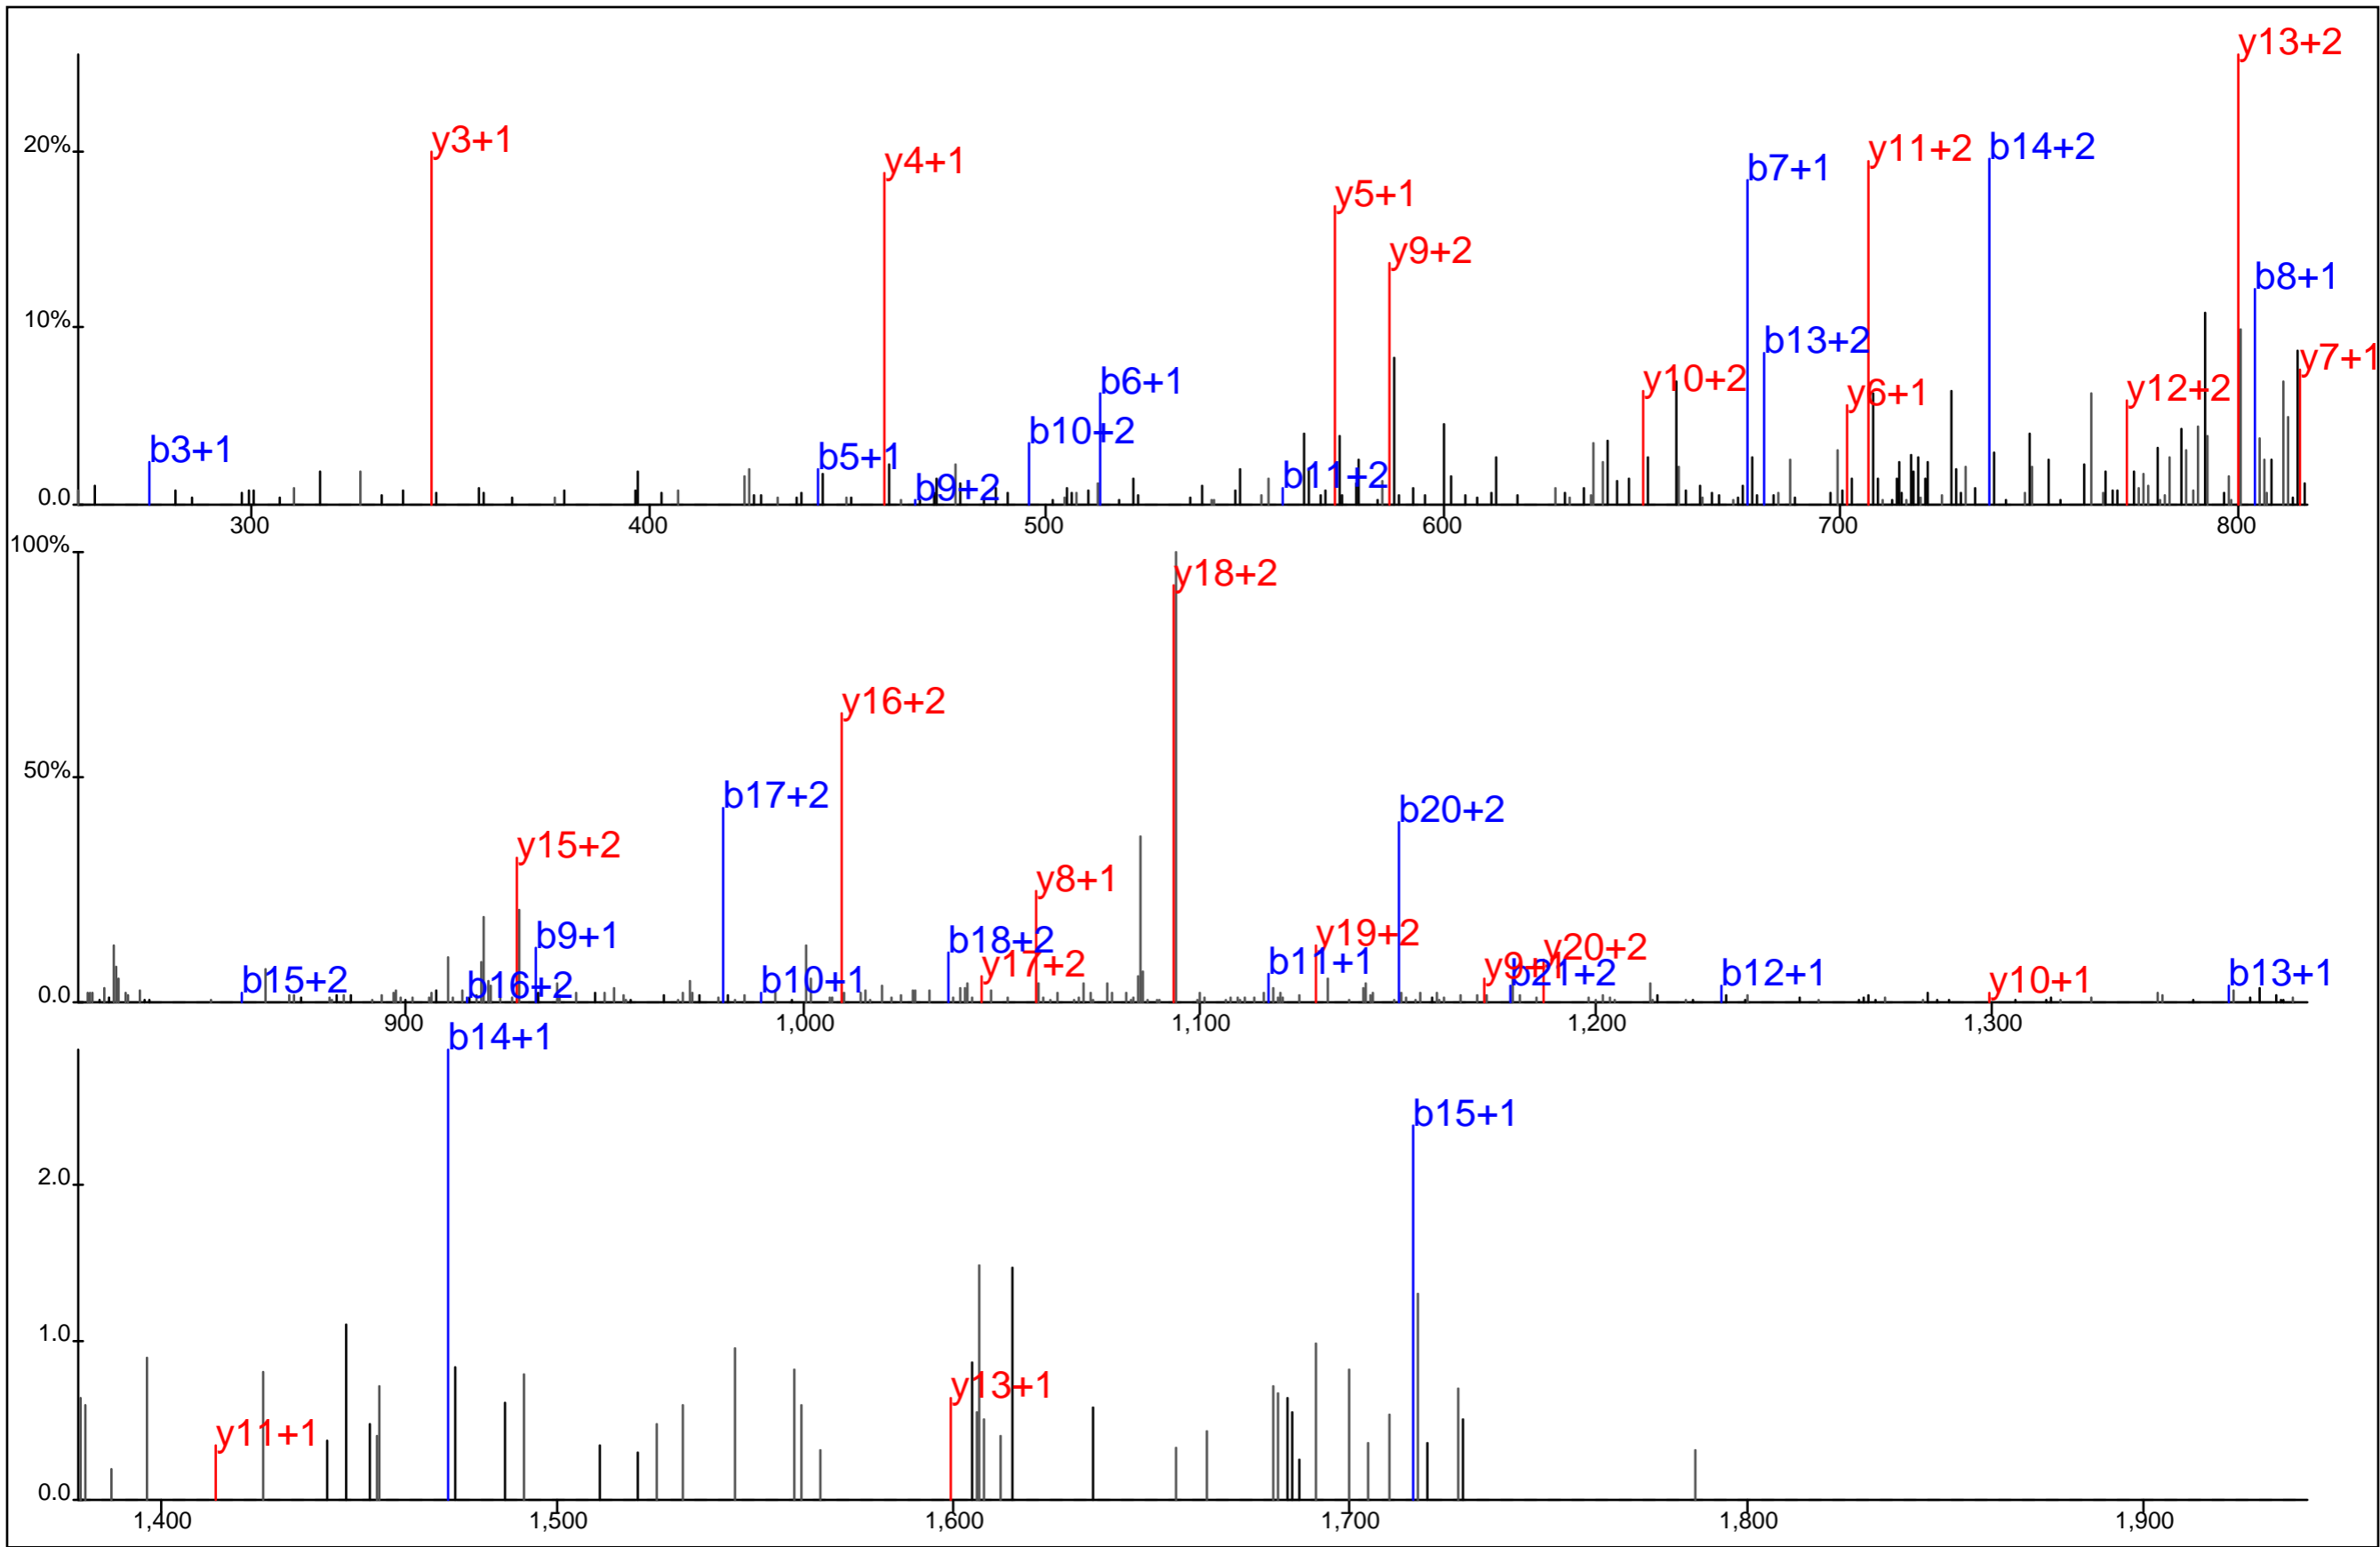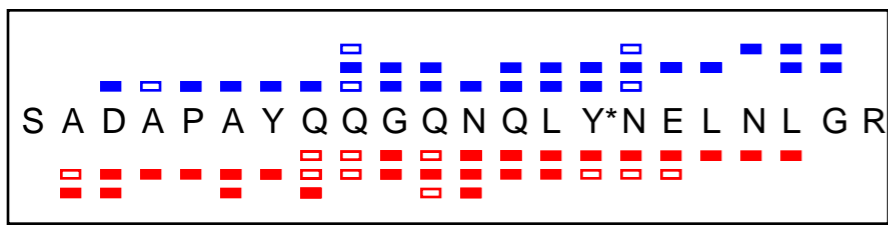

Protein Name: CD3 zeta  
 gi Accession: 37595565  
 Precursor Mass: 844.0548+3  
 Delta Mass: 5.576 ppm  
 XCorr: 63.91

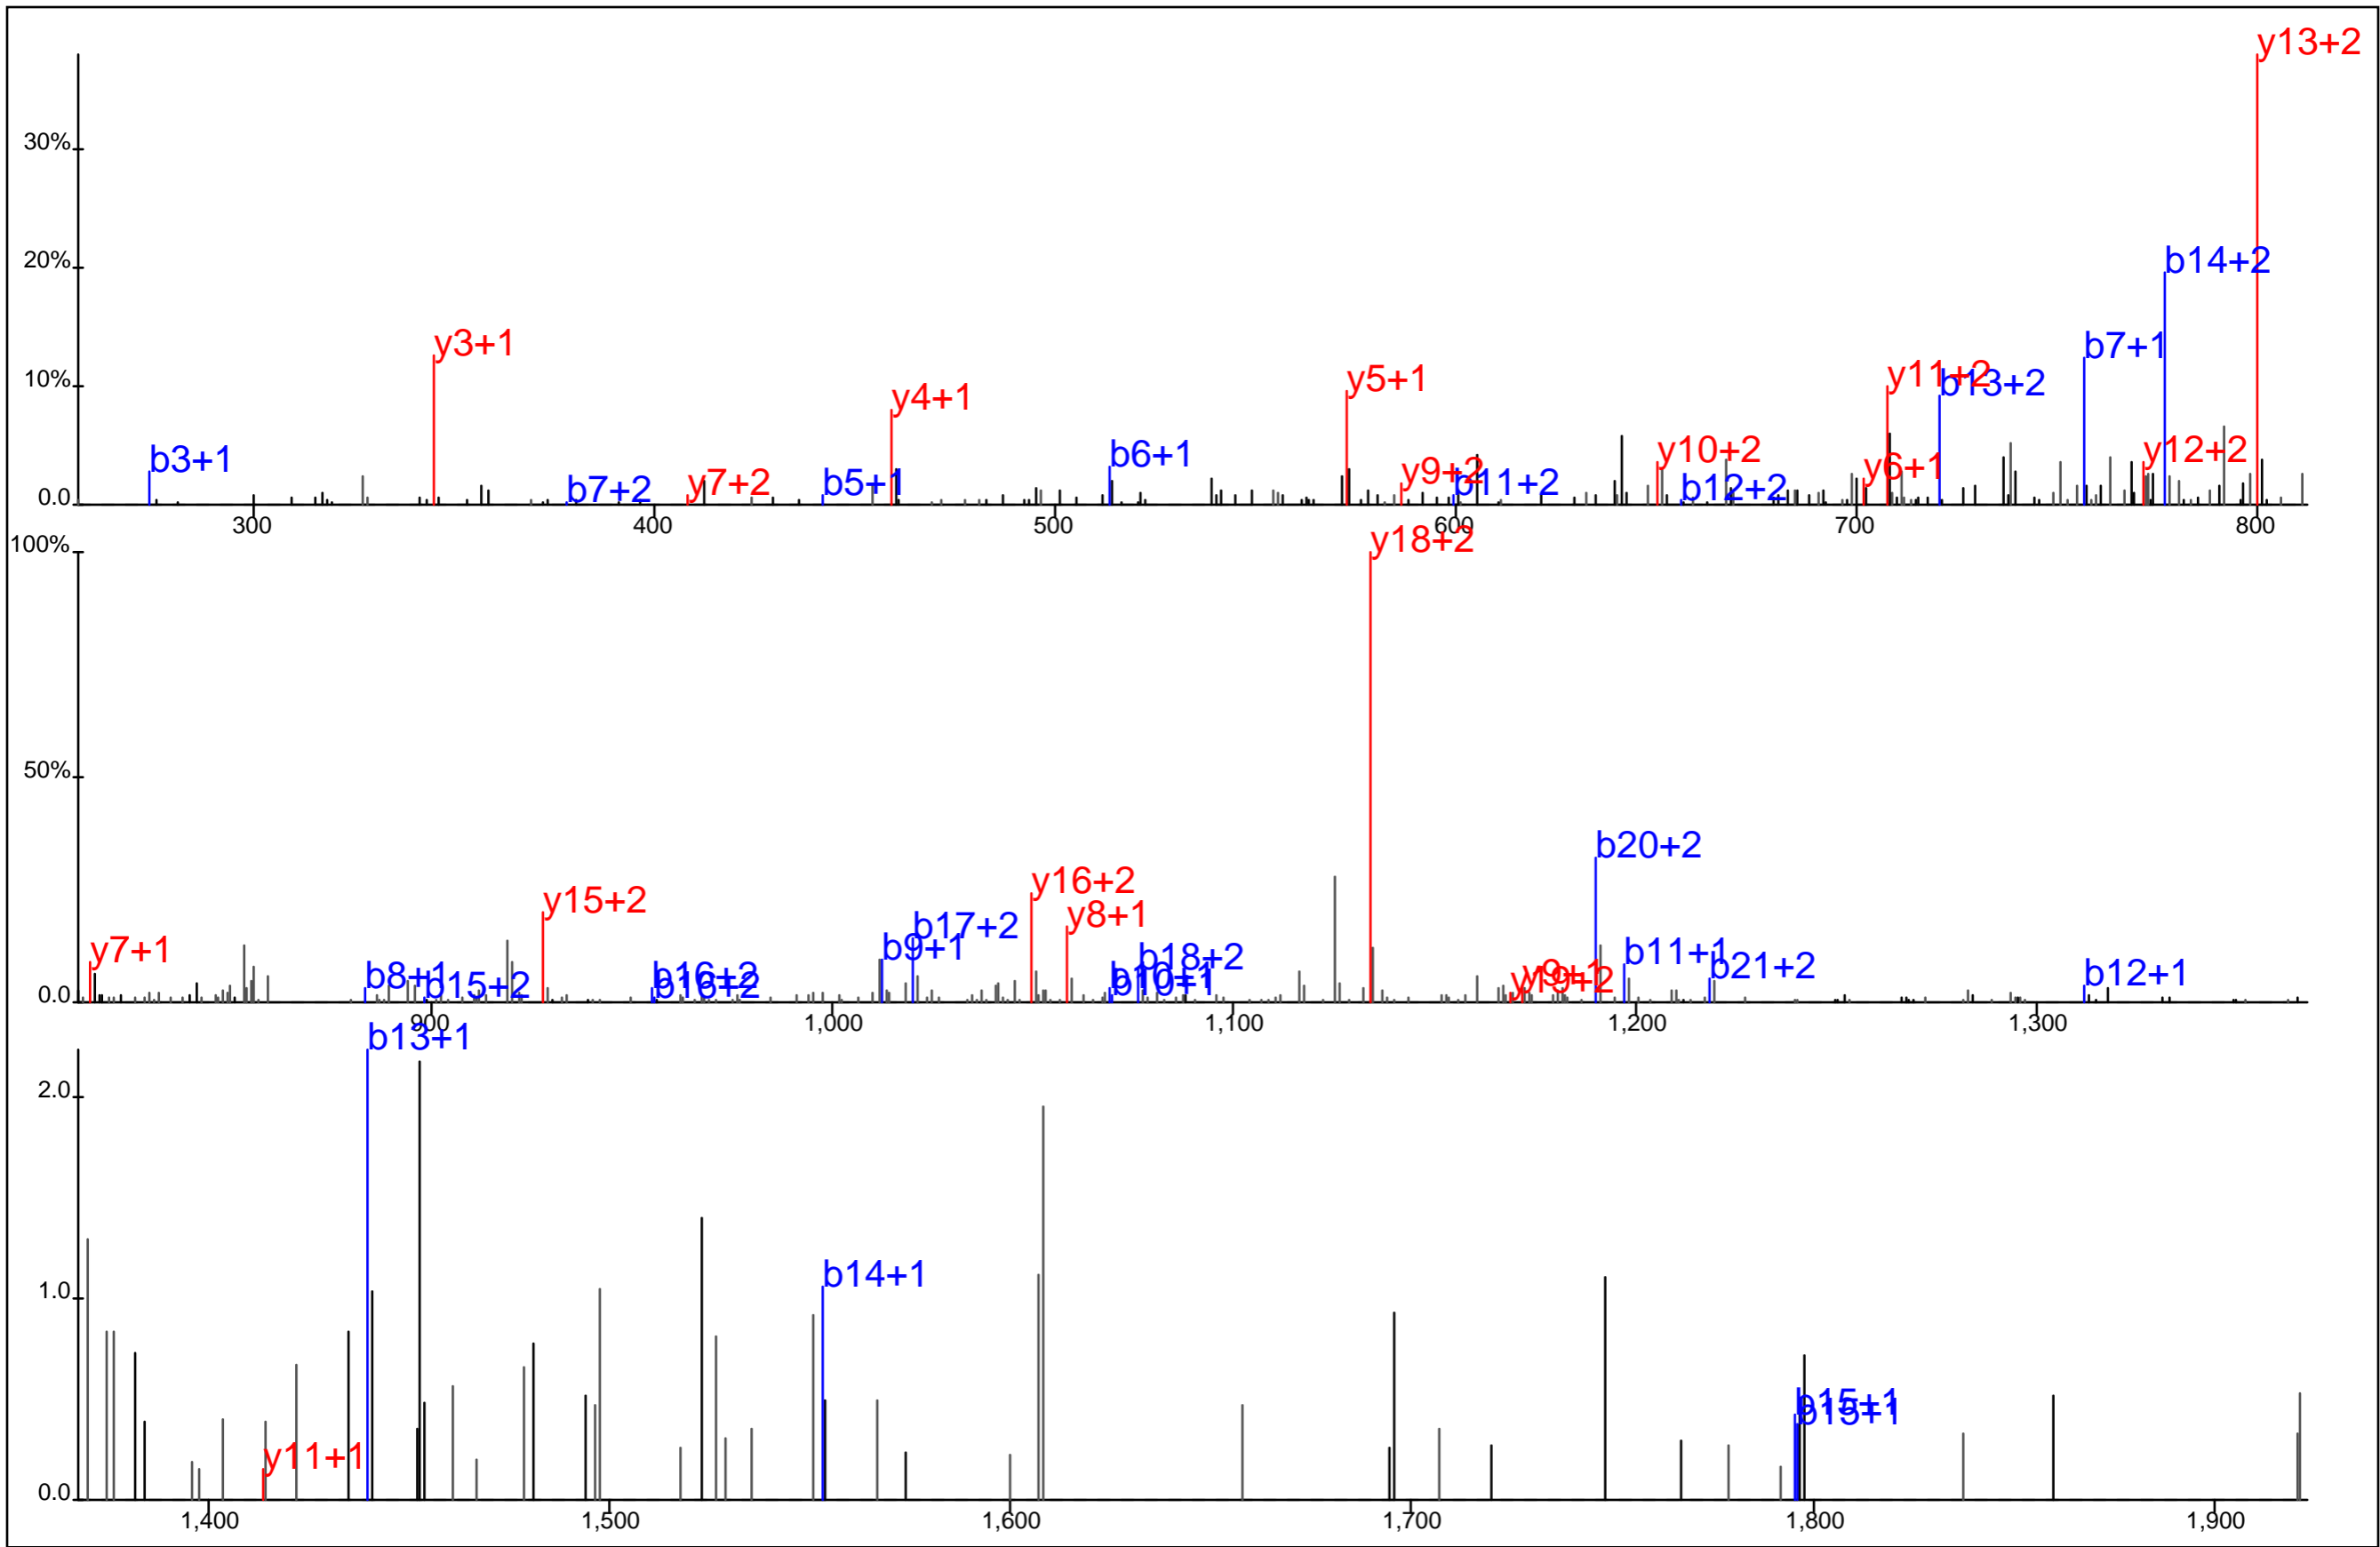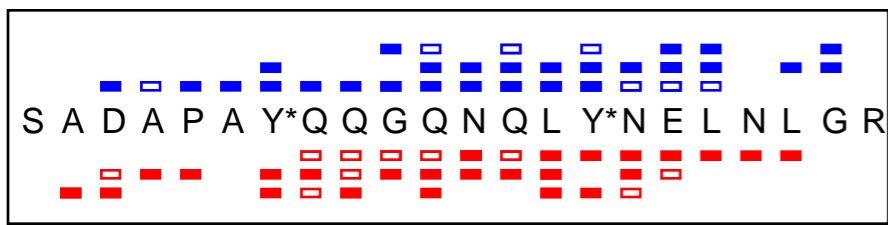

Protein Name: CD3 zeta  
 gi Accession: 37595565  
 Precursor Mass: 870.7111+3  
 Delta Mass: 6.405 ppm  
 XCorr: 53.97

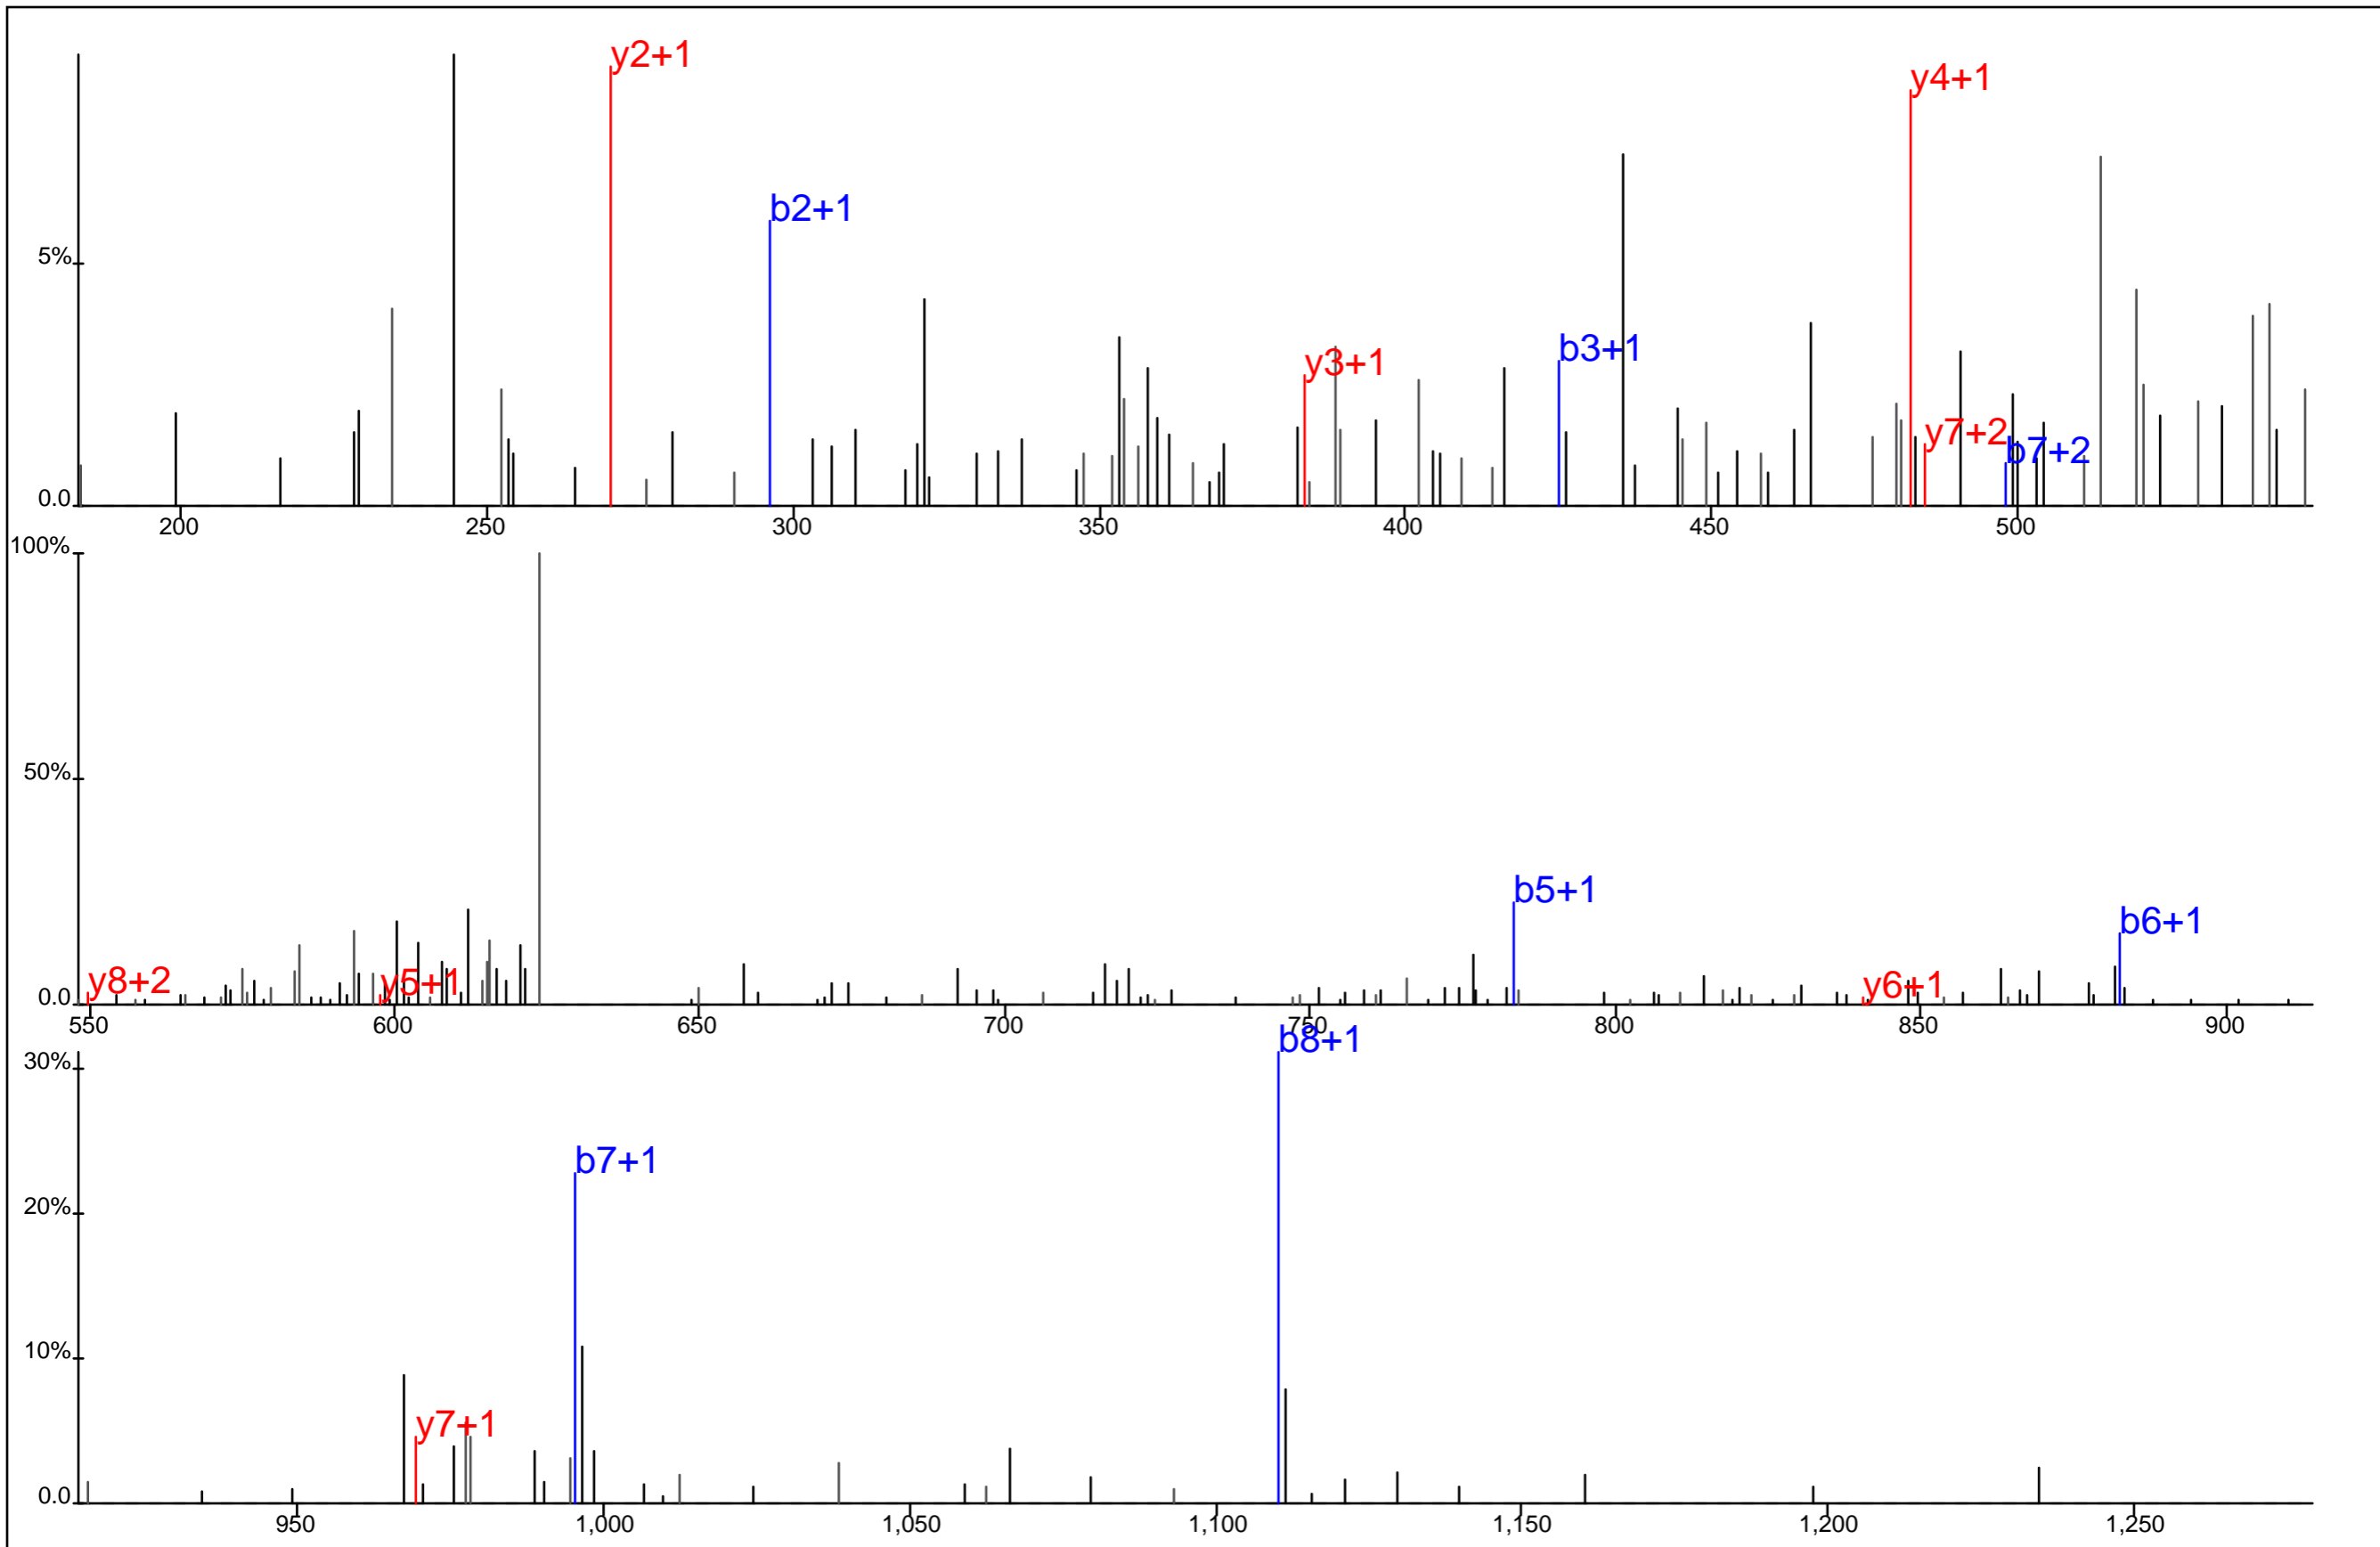

**R** **E** **E** **Y\*** **D** **V** **L** **D** **K**#

Protein Name: CD3 zeta  
 gi Accession: 37595565  
 Precursor Mass: 632.7861+2  
 Delta Mass: 5.771 ppm  
 XCorr: 25.79

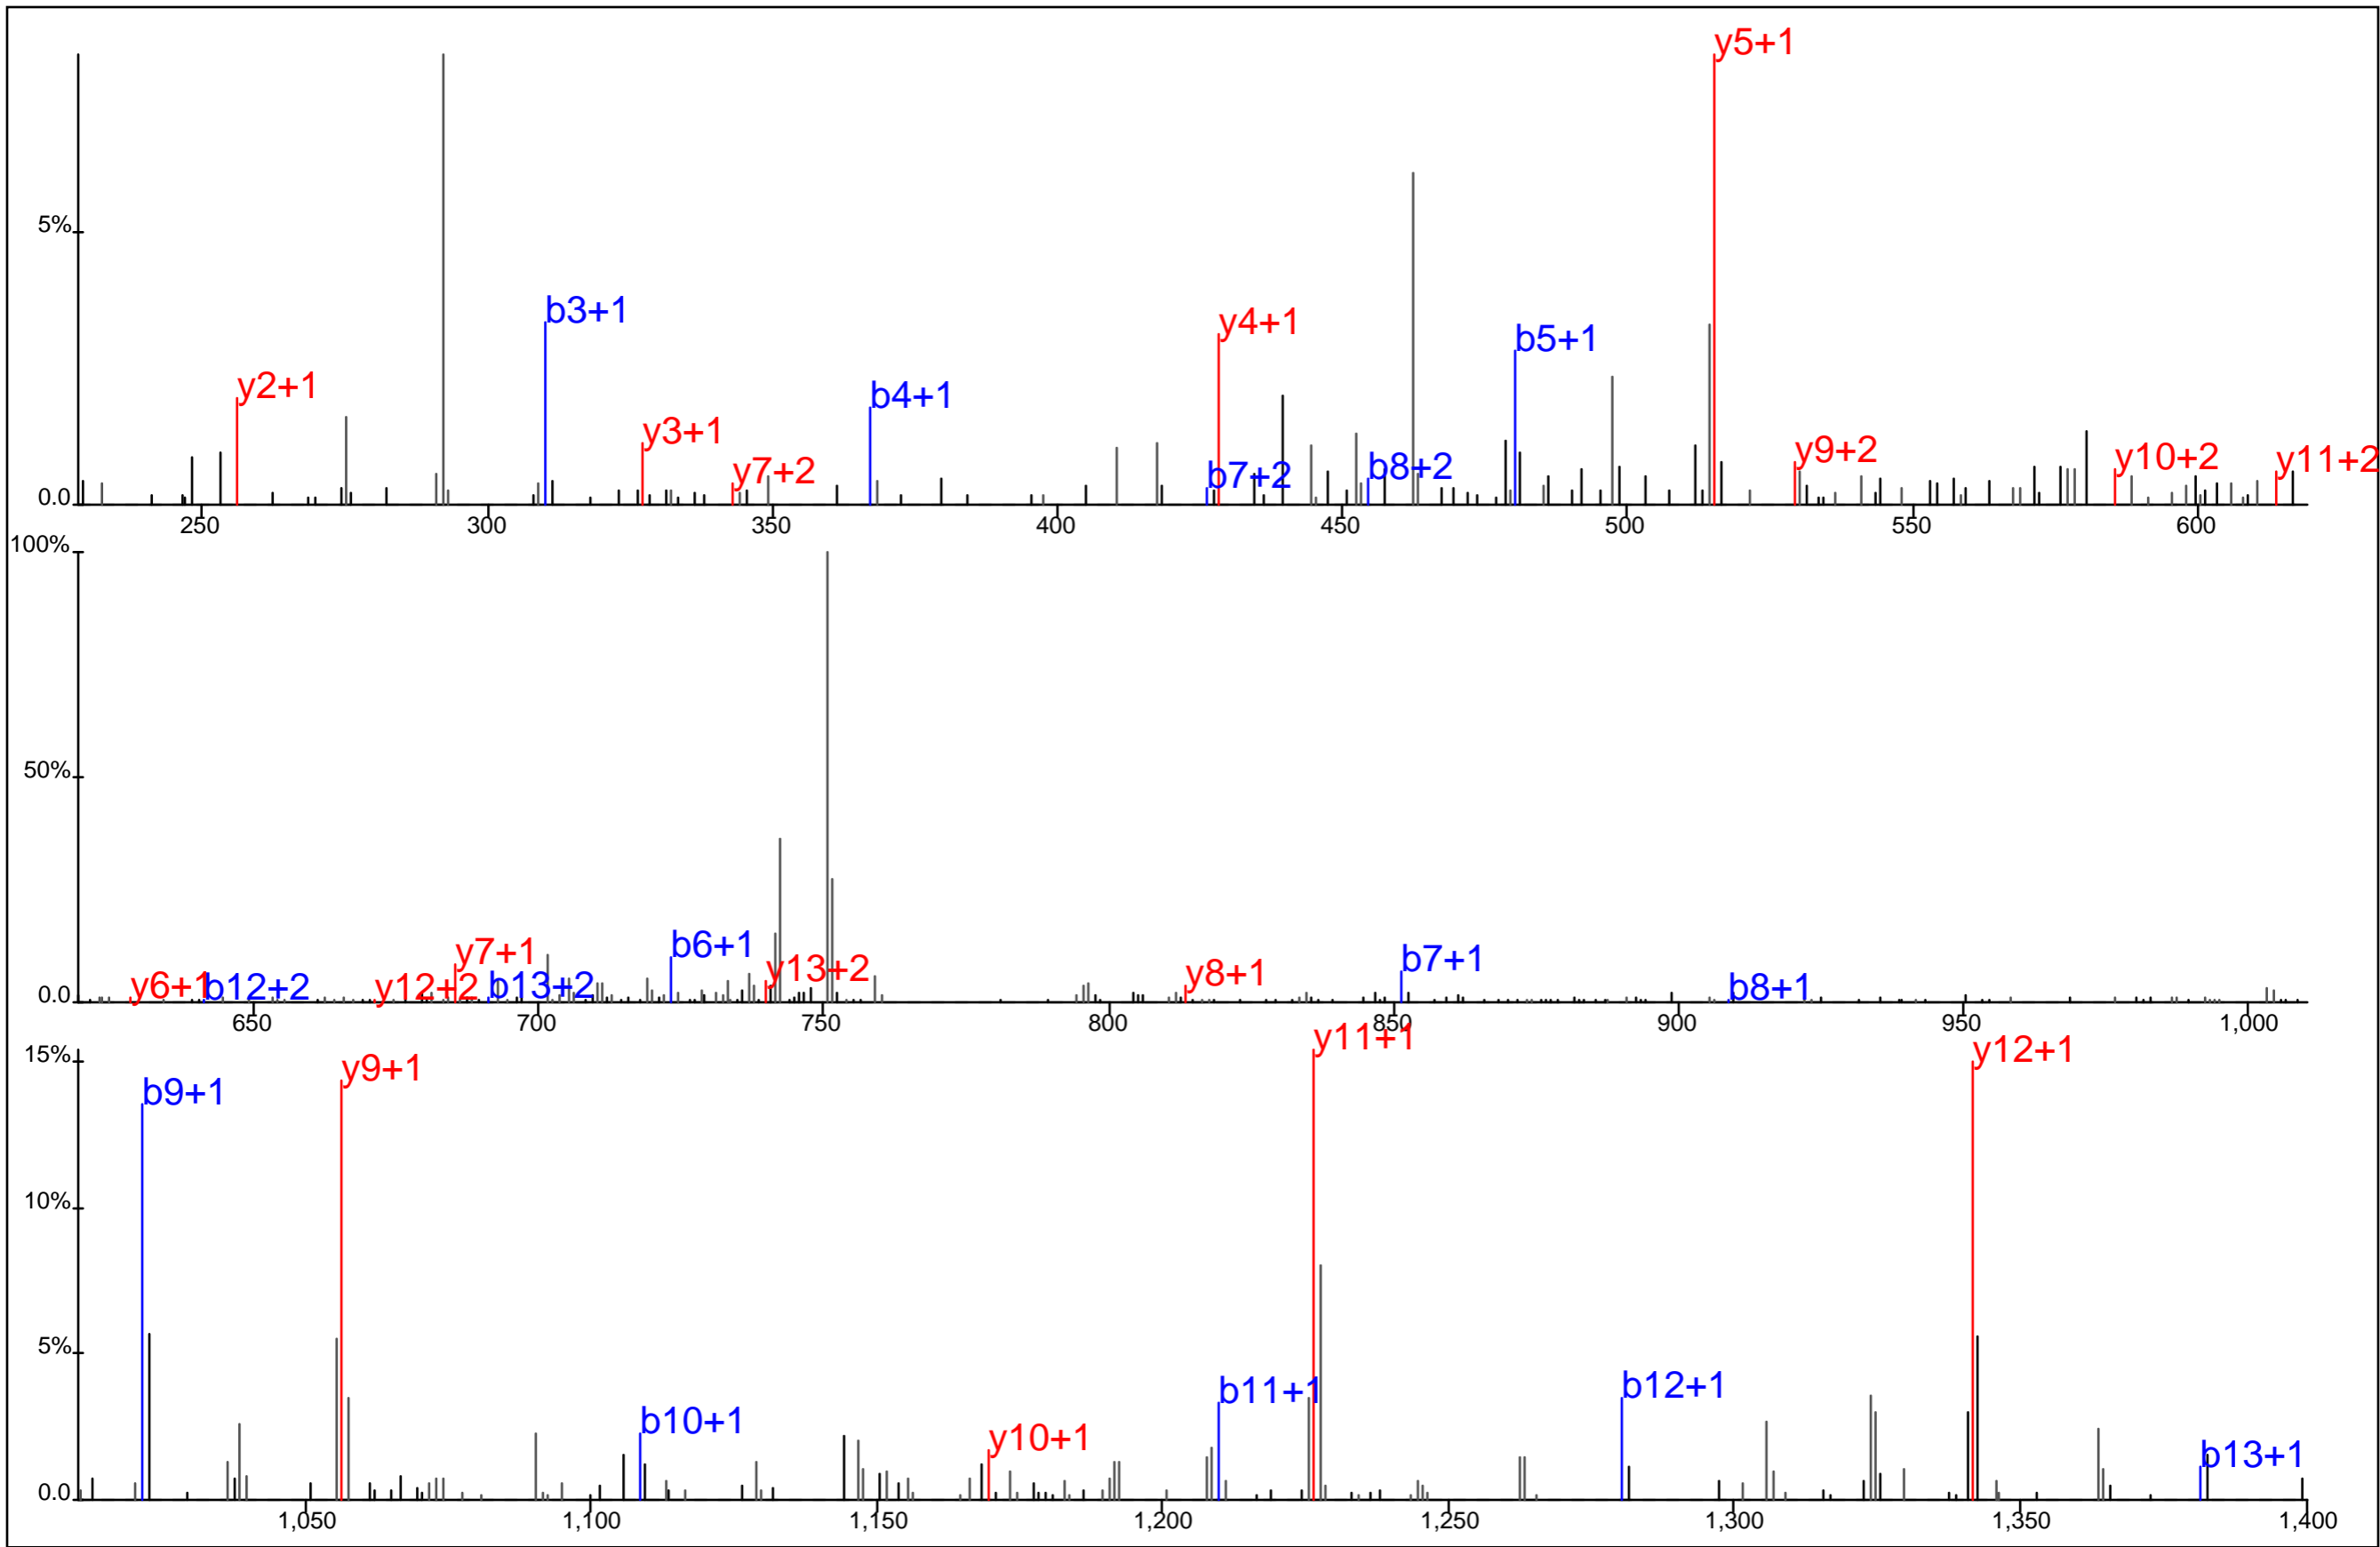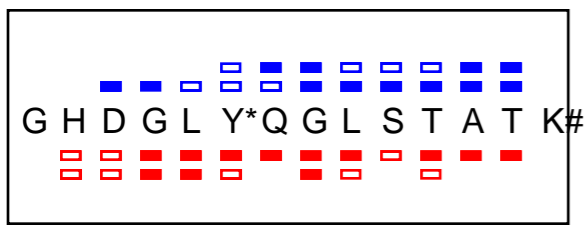

Protein Name: CD3 zeta  
 gi Accession: 37595565  
 Precursor Mass: 768.3546+2  
 Delta Mass: 2.415 ppm  
 XCorr: 54.59



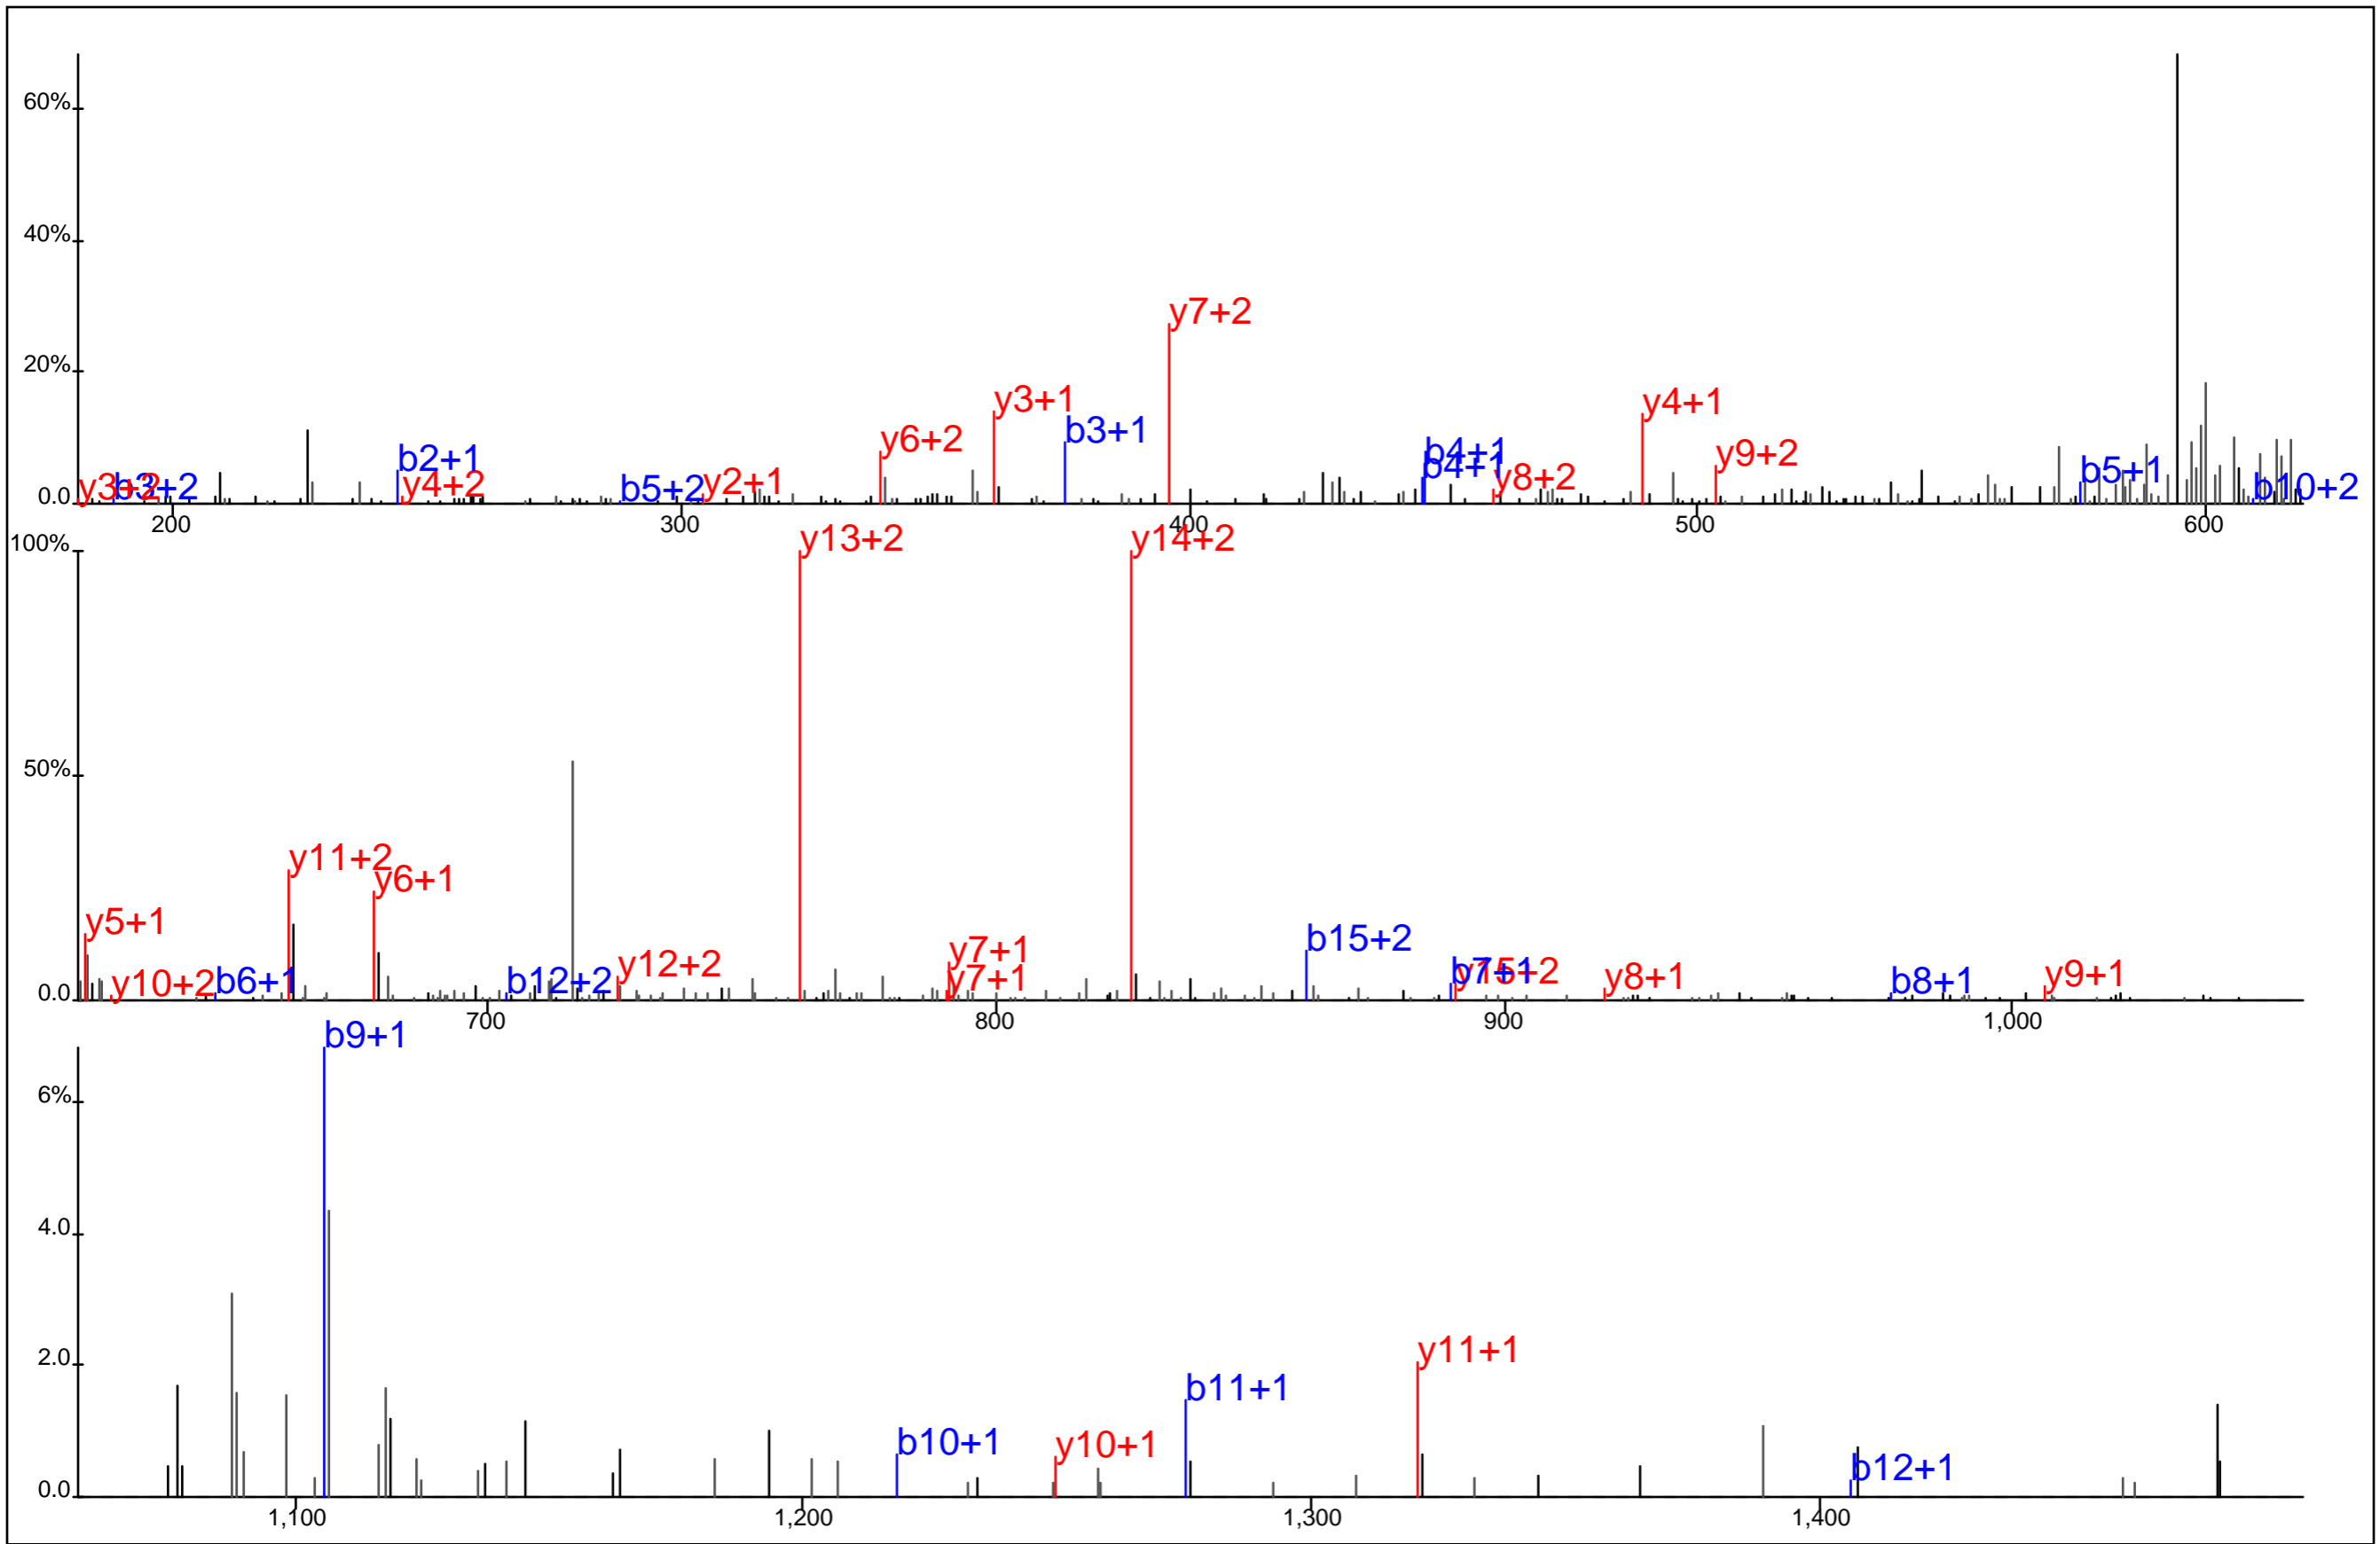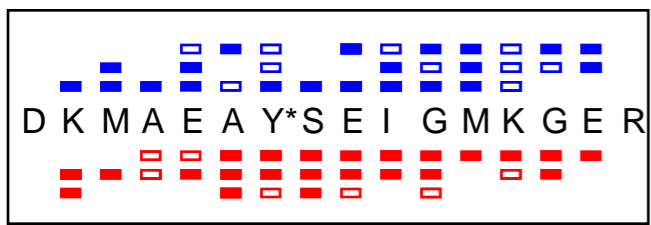

Protein Name: CD3 zeta  
 gi Accession: 37595565  
 Precursor Mass: 632.2749+3  
 Delta Mass: 1.446 ppm  
 XCorr: 51.3

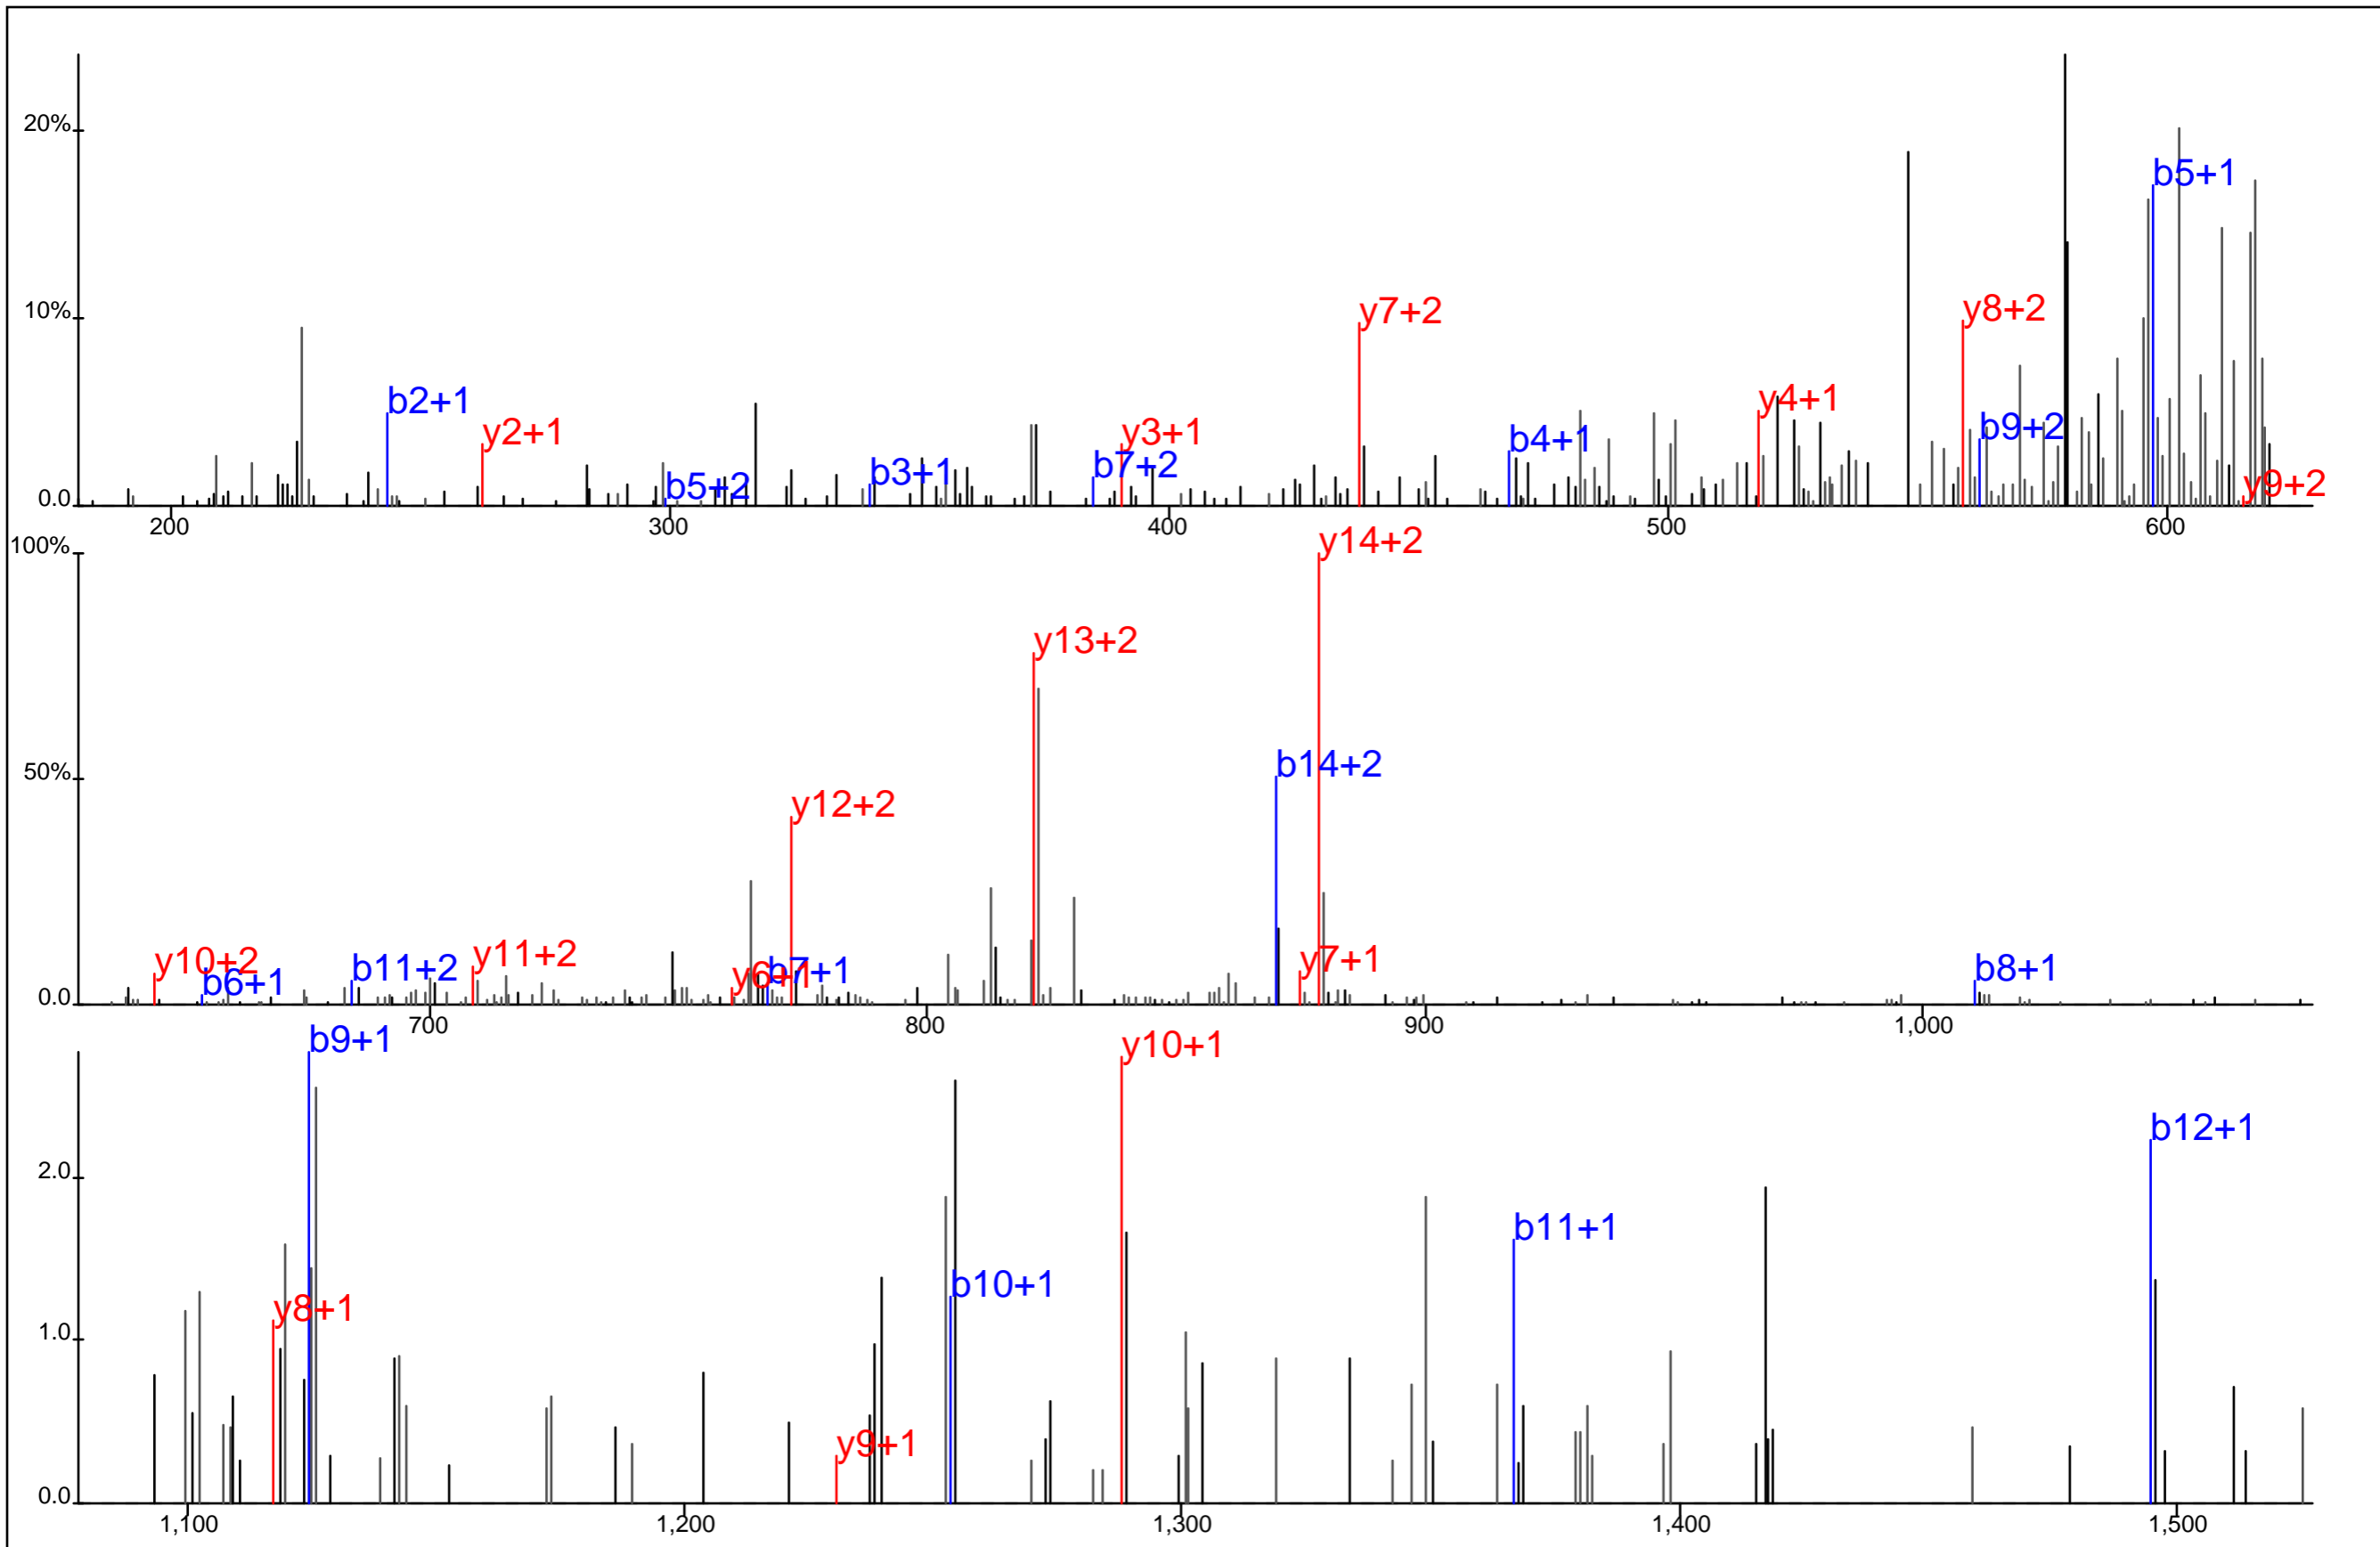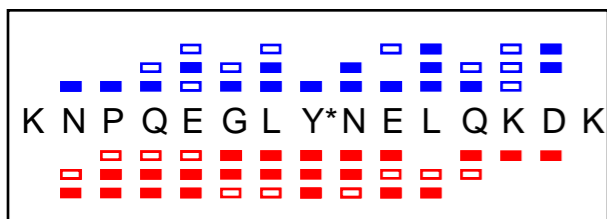

Protein Name: CD3 zeta  
 gi Accession: 37595565  
 Precursor Mass: 628.6361+3  
 Delta Mass: 2.090 ppm  
 XCorr: 38.67

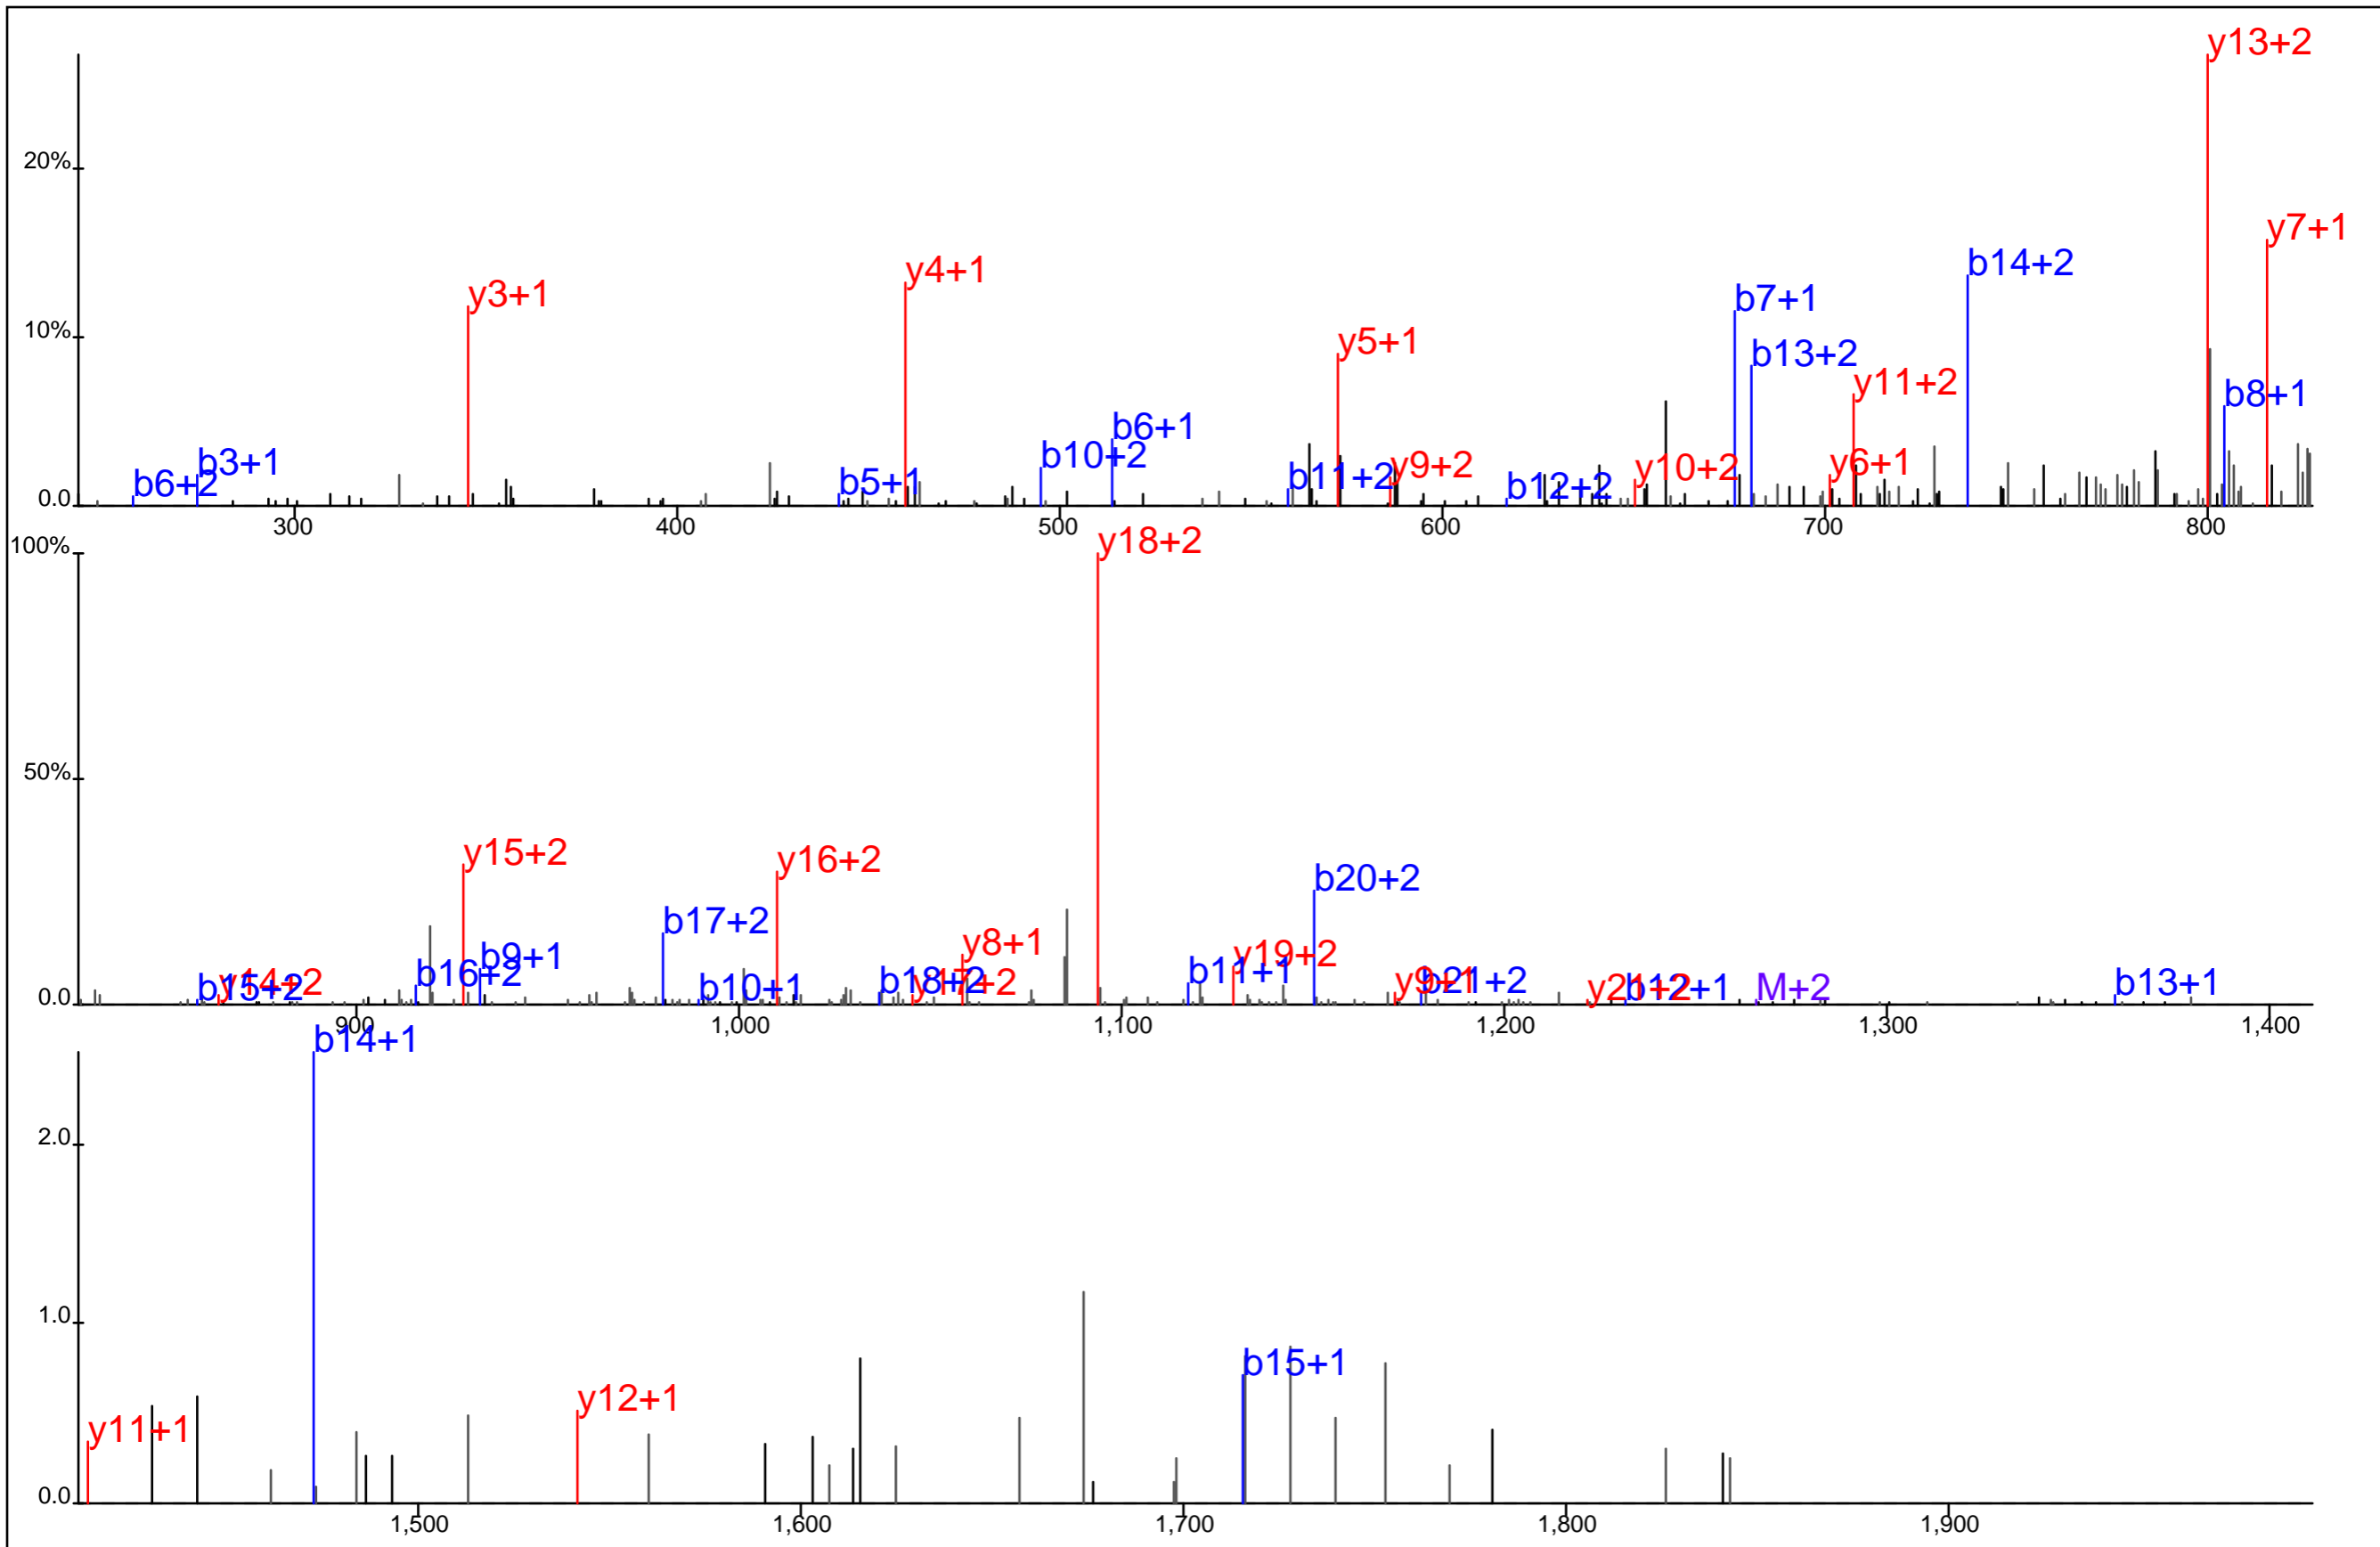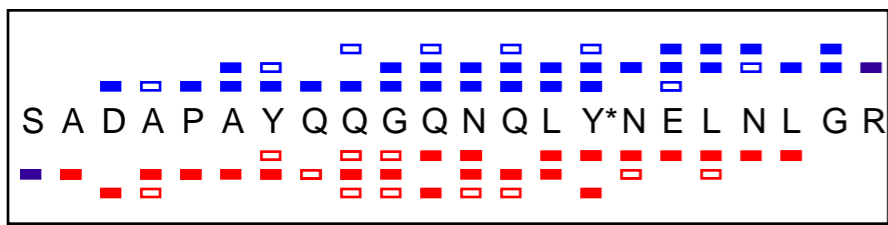

Protein Name: CD3 zeta  
 gi Accession: 37595565  
 Precursor Mass: 844.0522+3  
 Delta Mass: 2.536 ppm  
 XCorr: 55.56

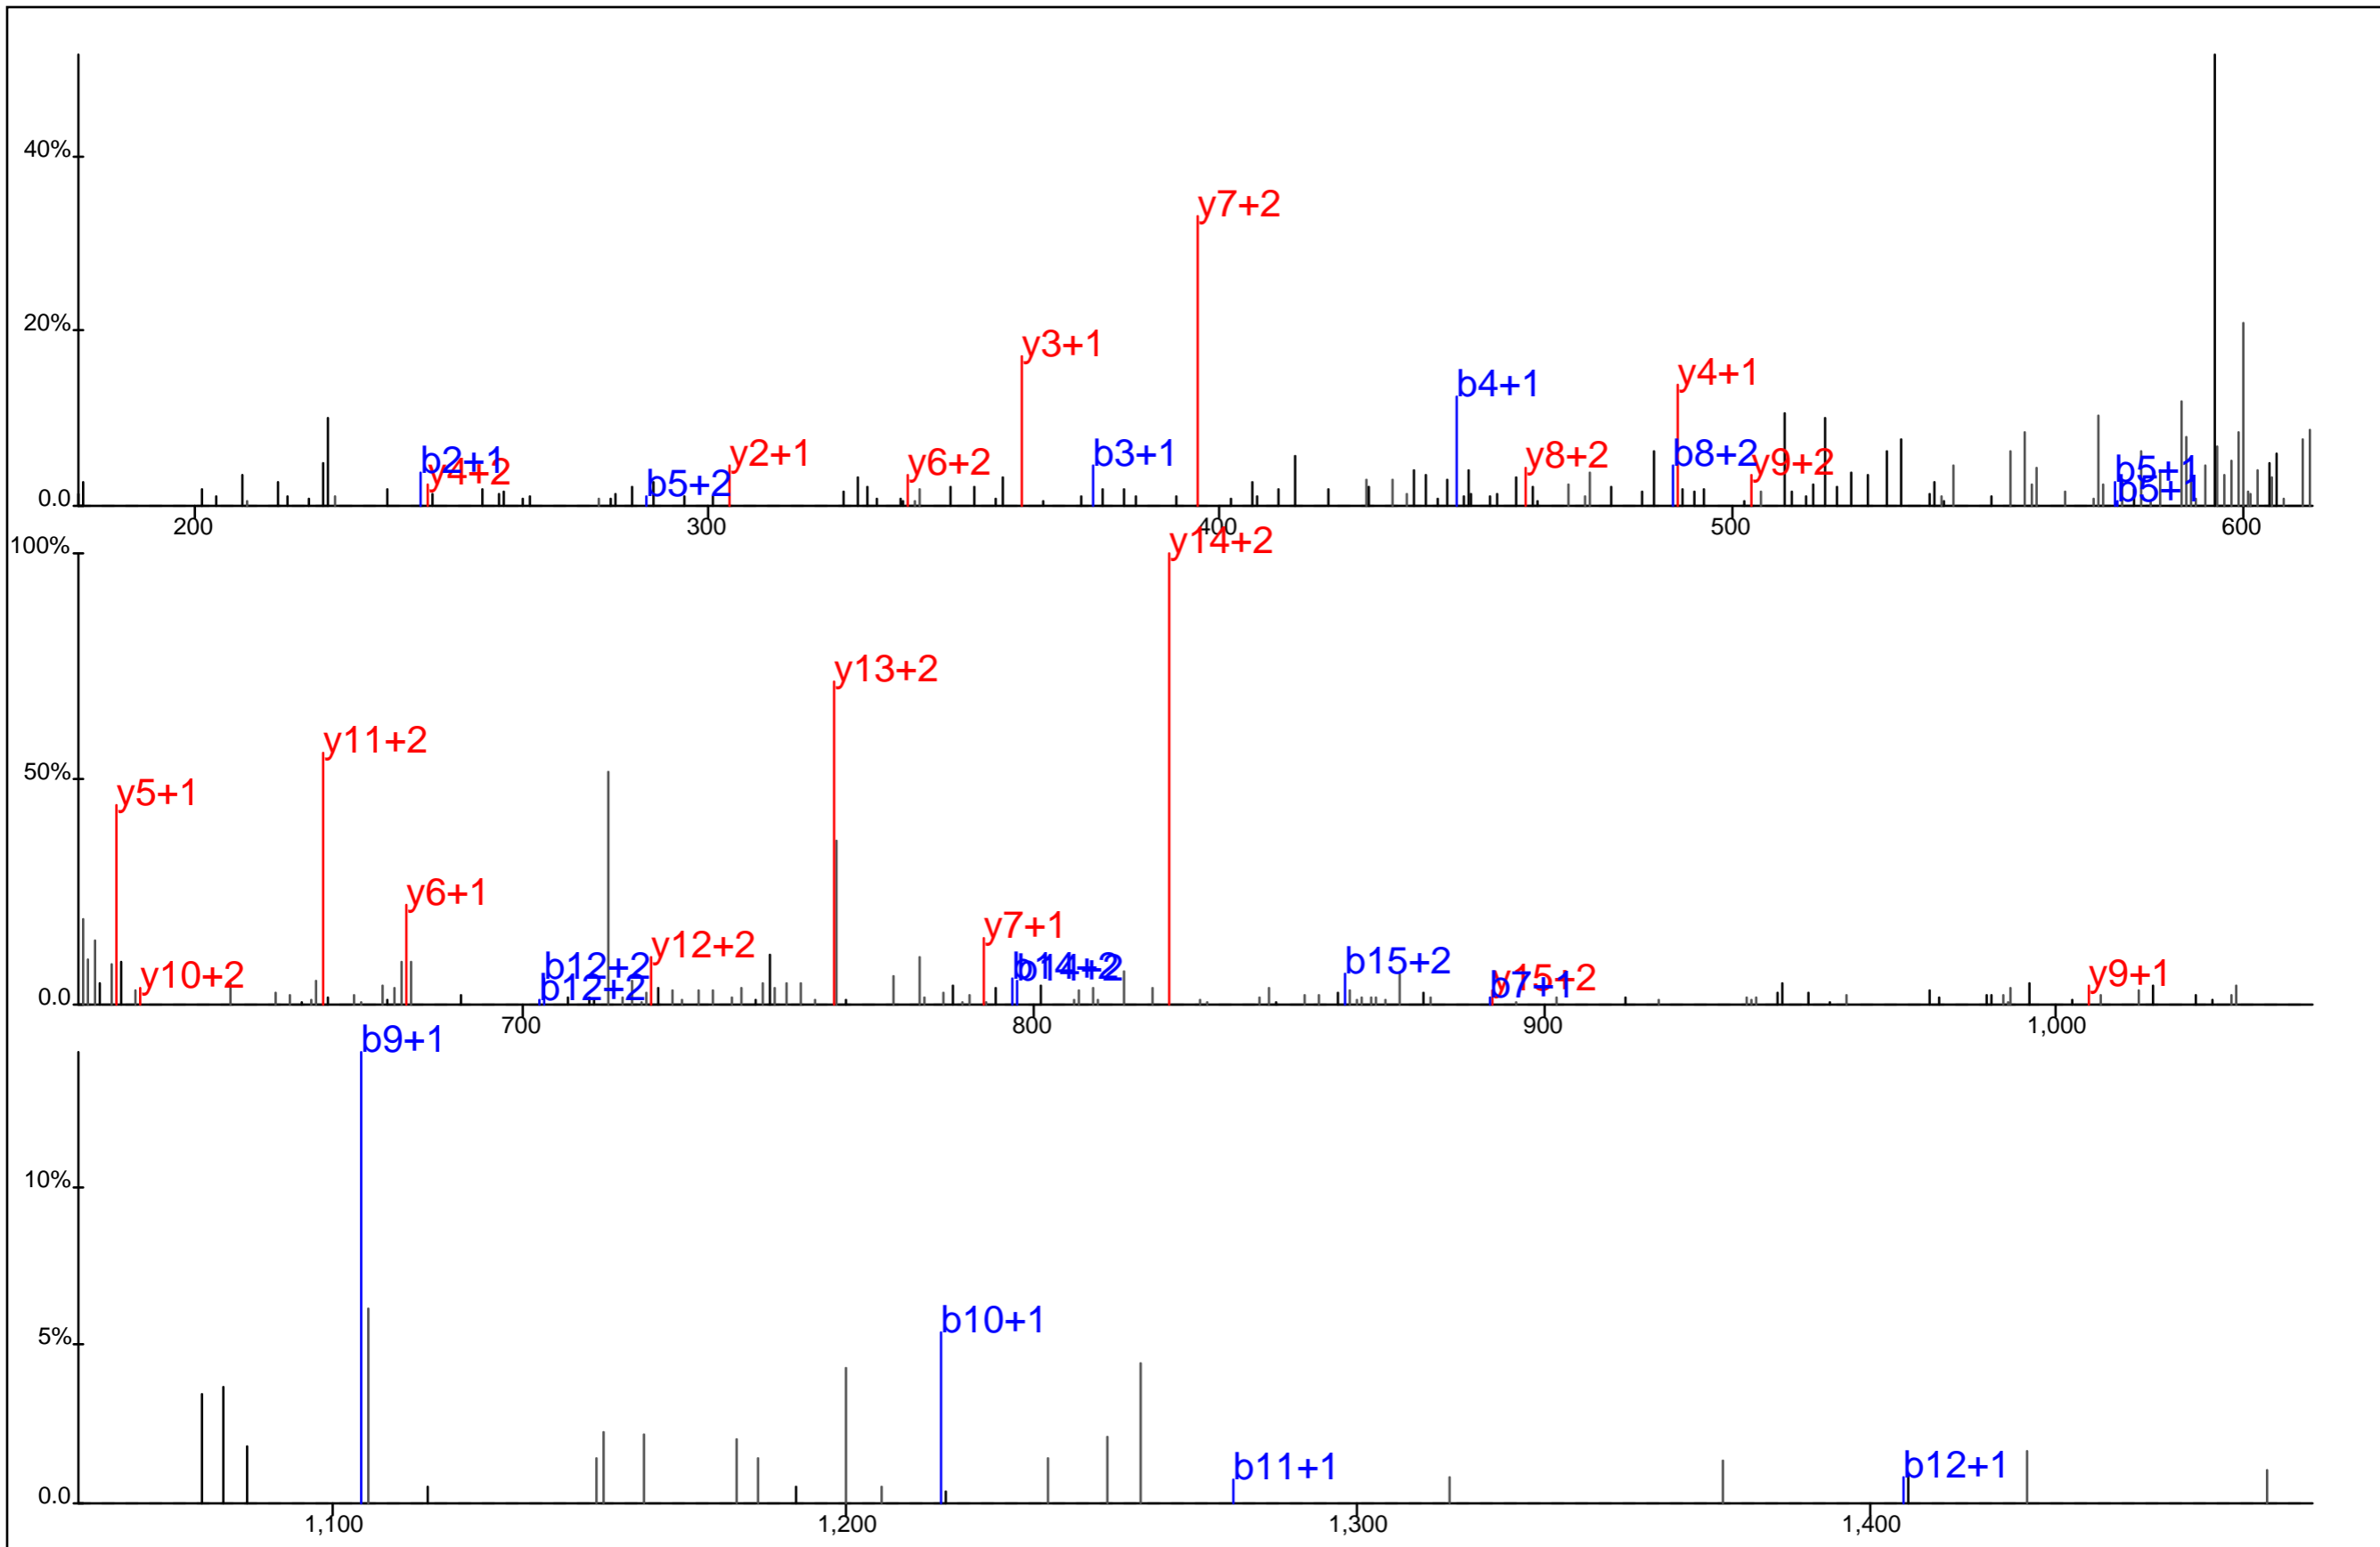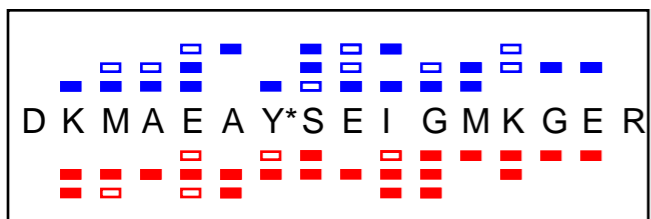

Protein Name: CD3 zeta  
 gi Accession: 37595565  
 Precursor Mass: 632.2767+3  
 Delta Mass: 4.348 ppm  
 XCorr: 43.32

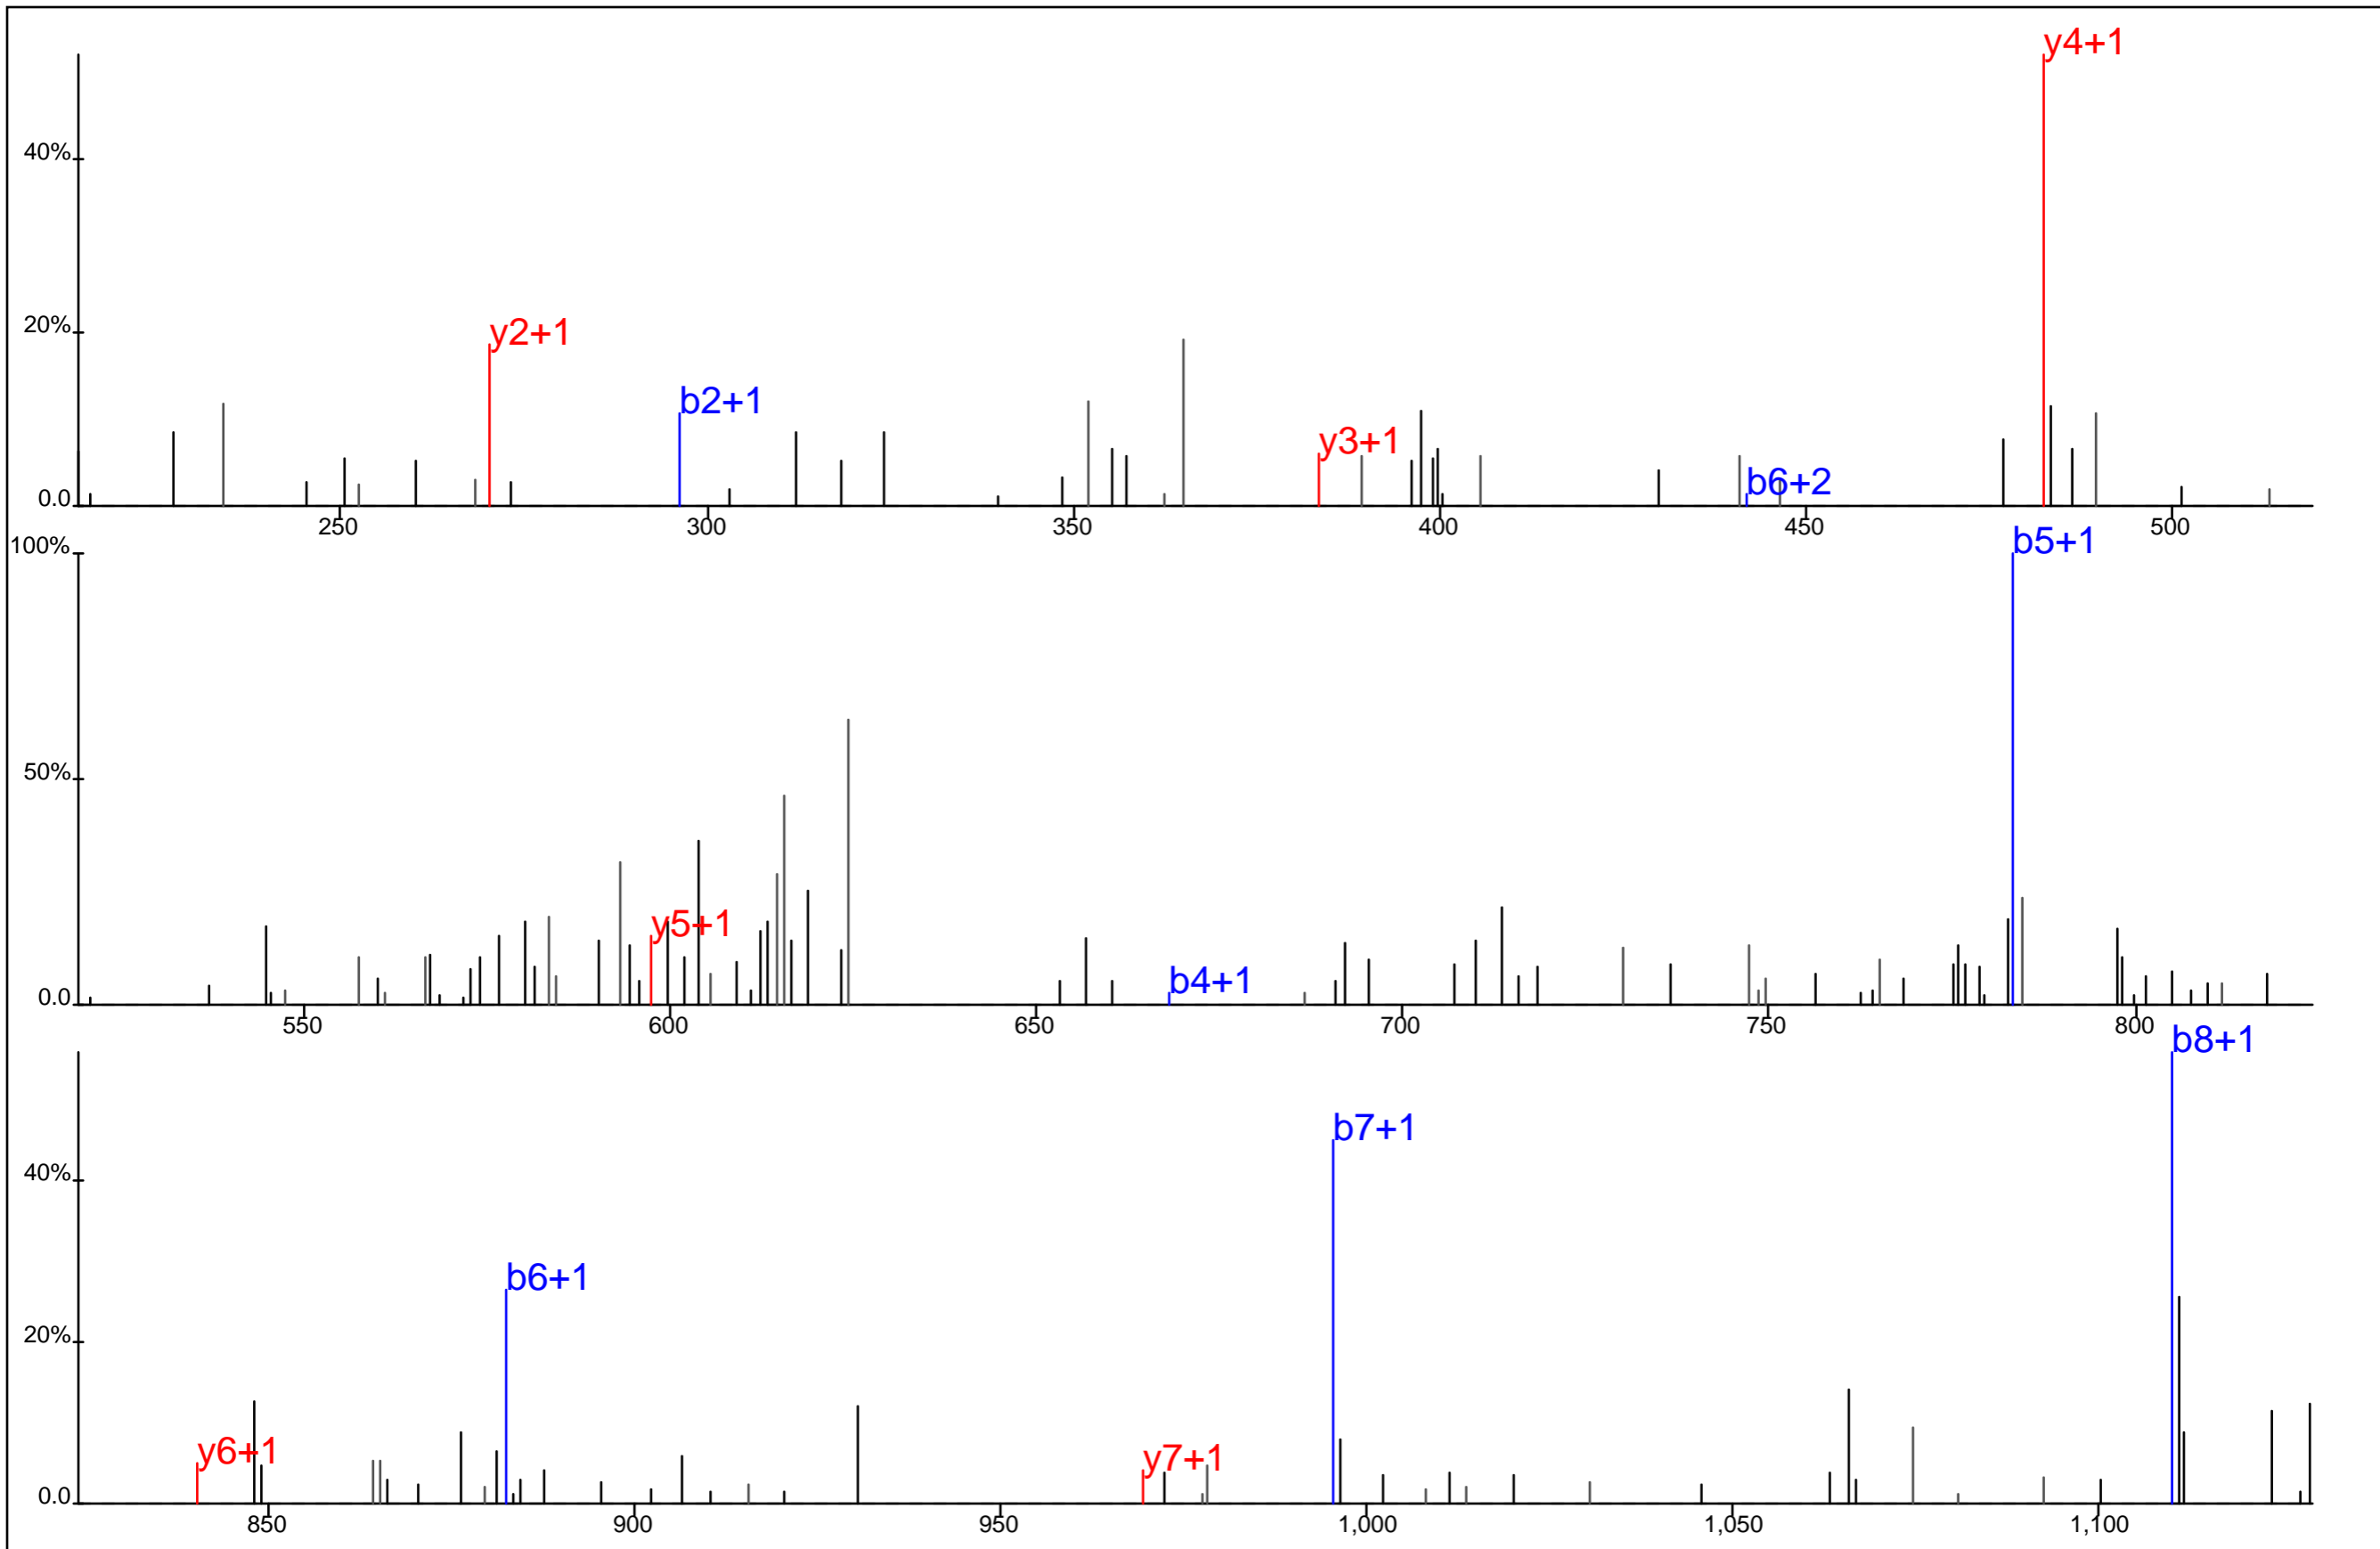

**R** ~~**E**~~ **E** **Y\*** **D** **V** **L** **D** **K**#

Protein Name: CD3 zeta  
 gi Accession: 37595565  
 Precursor Mass: 632.7834+2  
 Delta Mass: 1.620 ppm  
 XCorr: 26.56

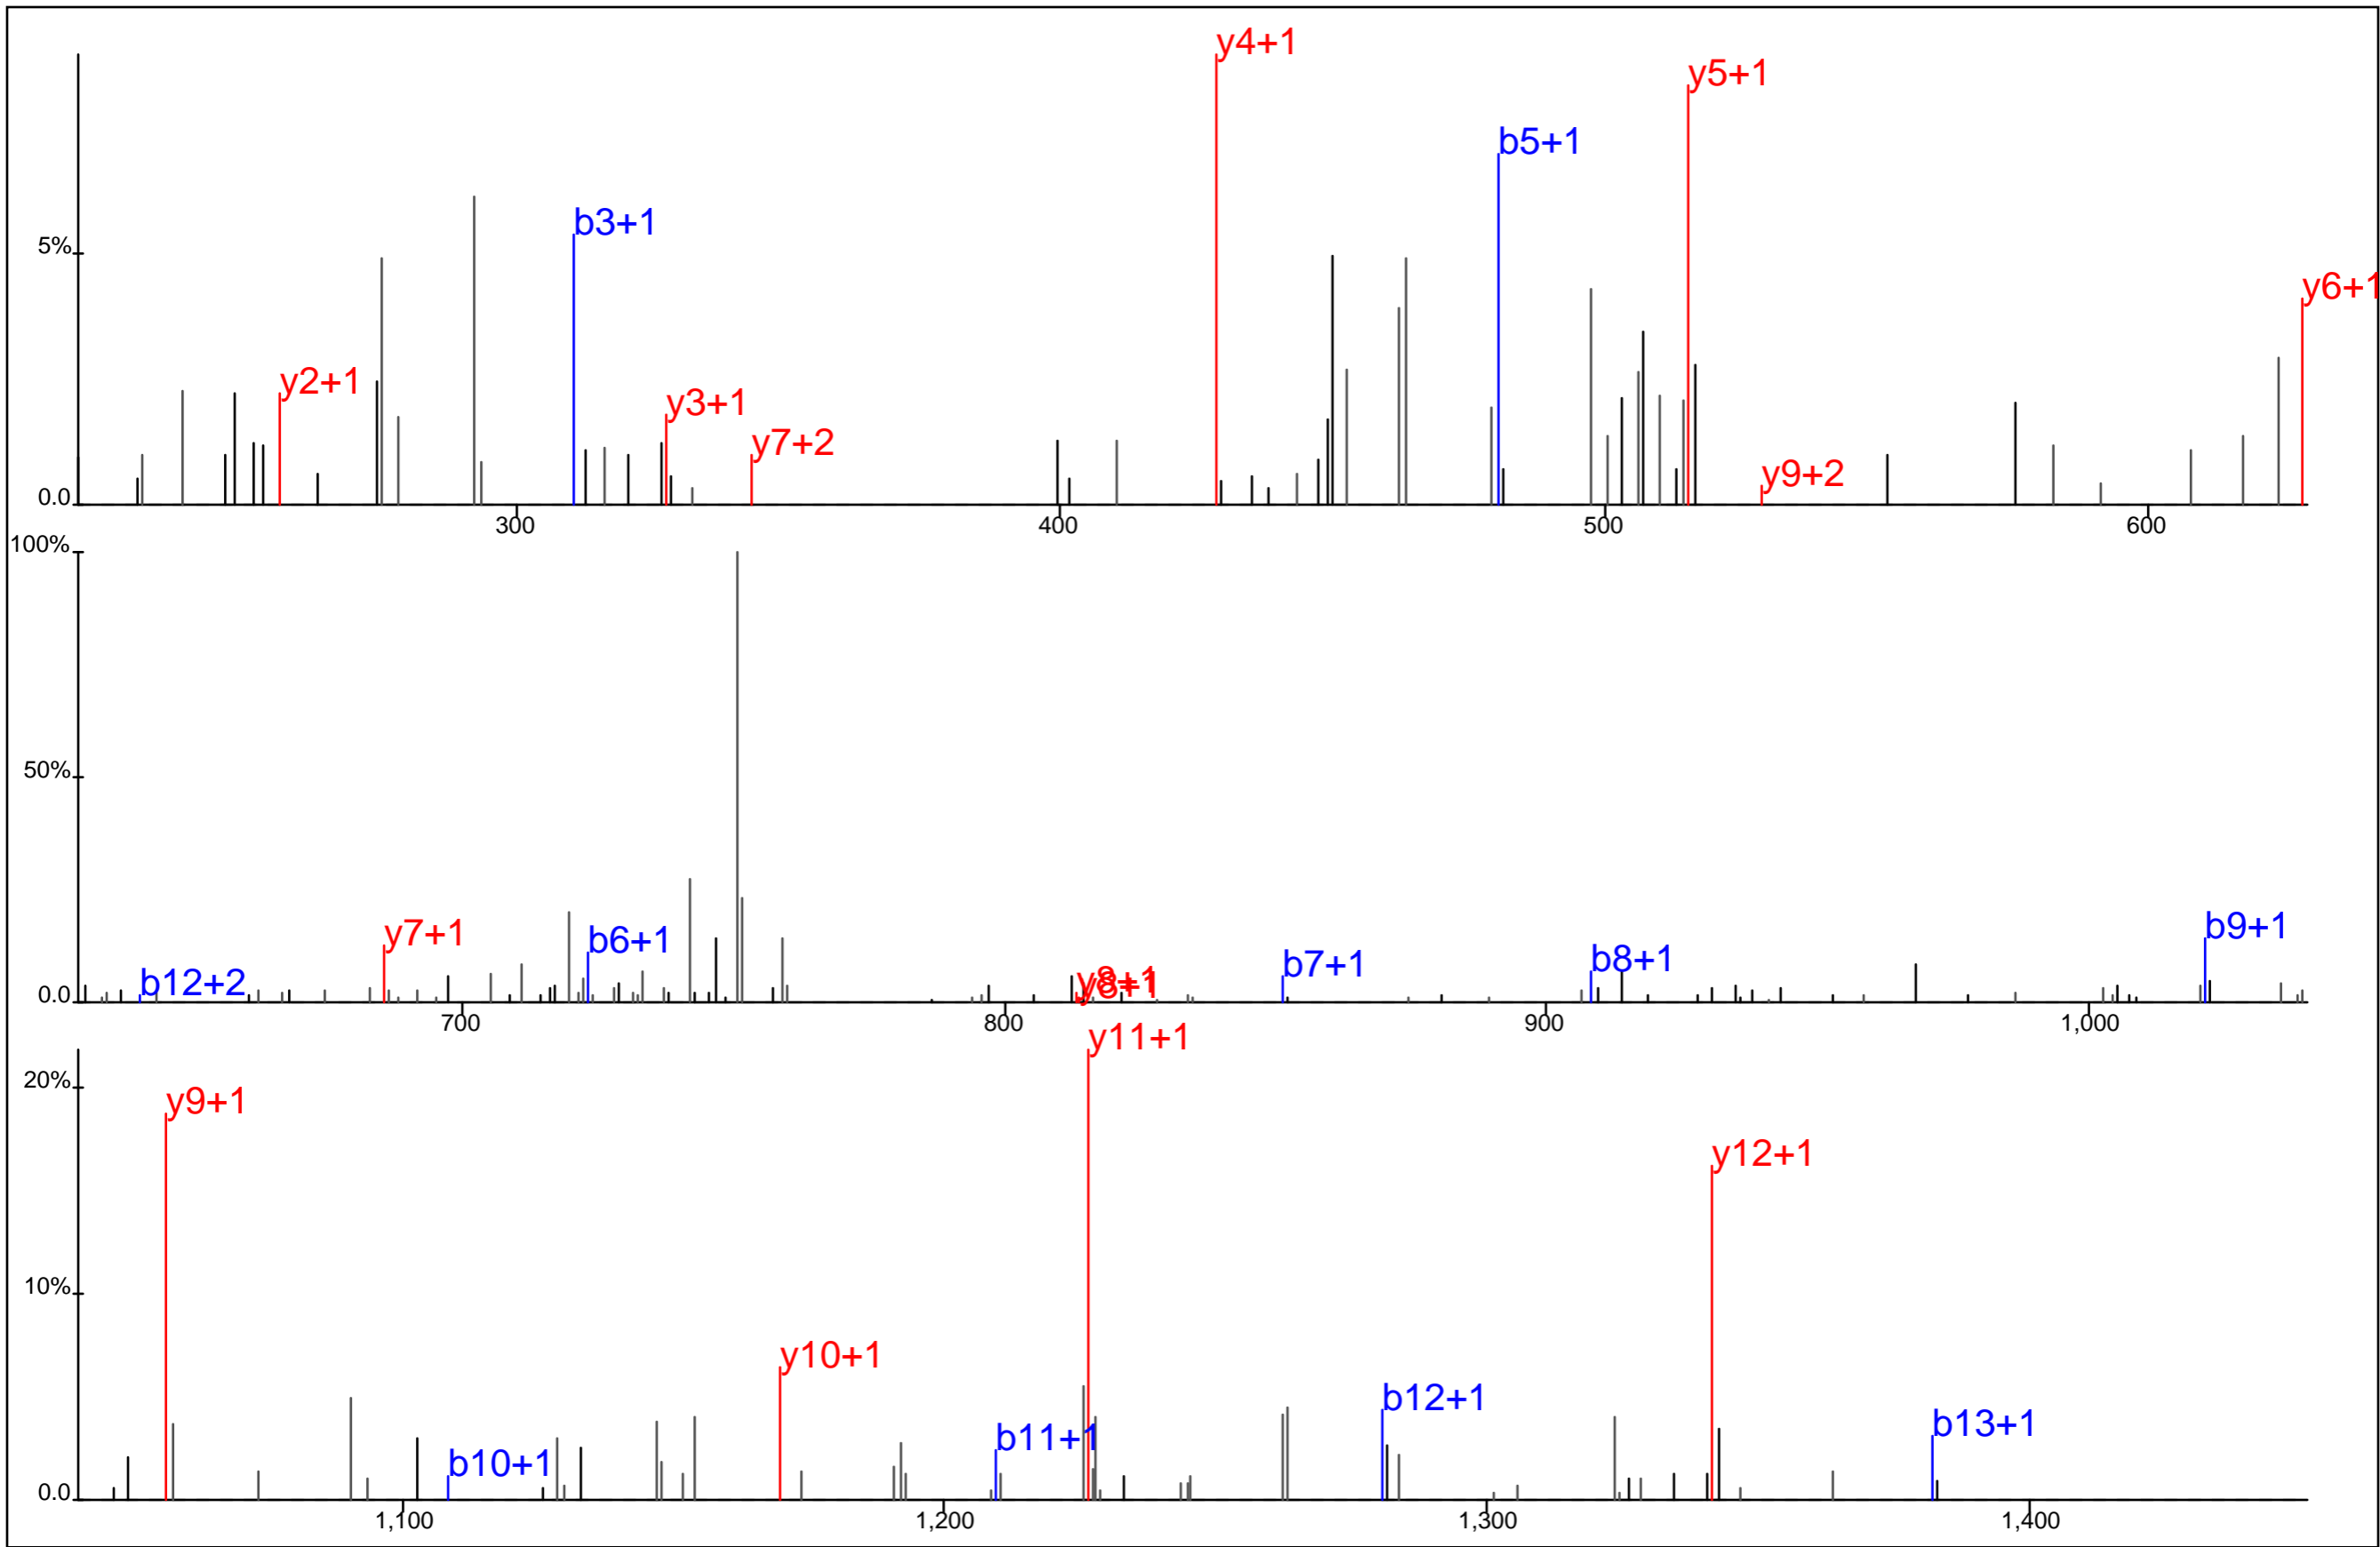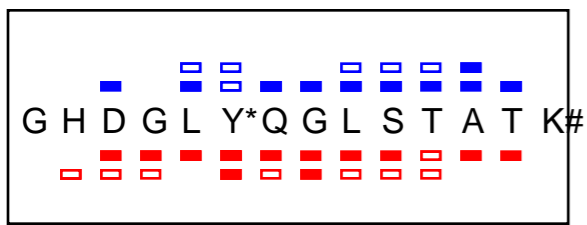

Protein Name: CD3 zeta  
 gi Accession: 37595565  
 Precursor Mass: 768.3528+2  
 Delta Mass: 0.109 ppm  
 XCorr: 52.14

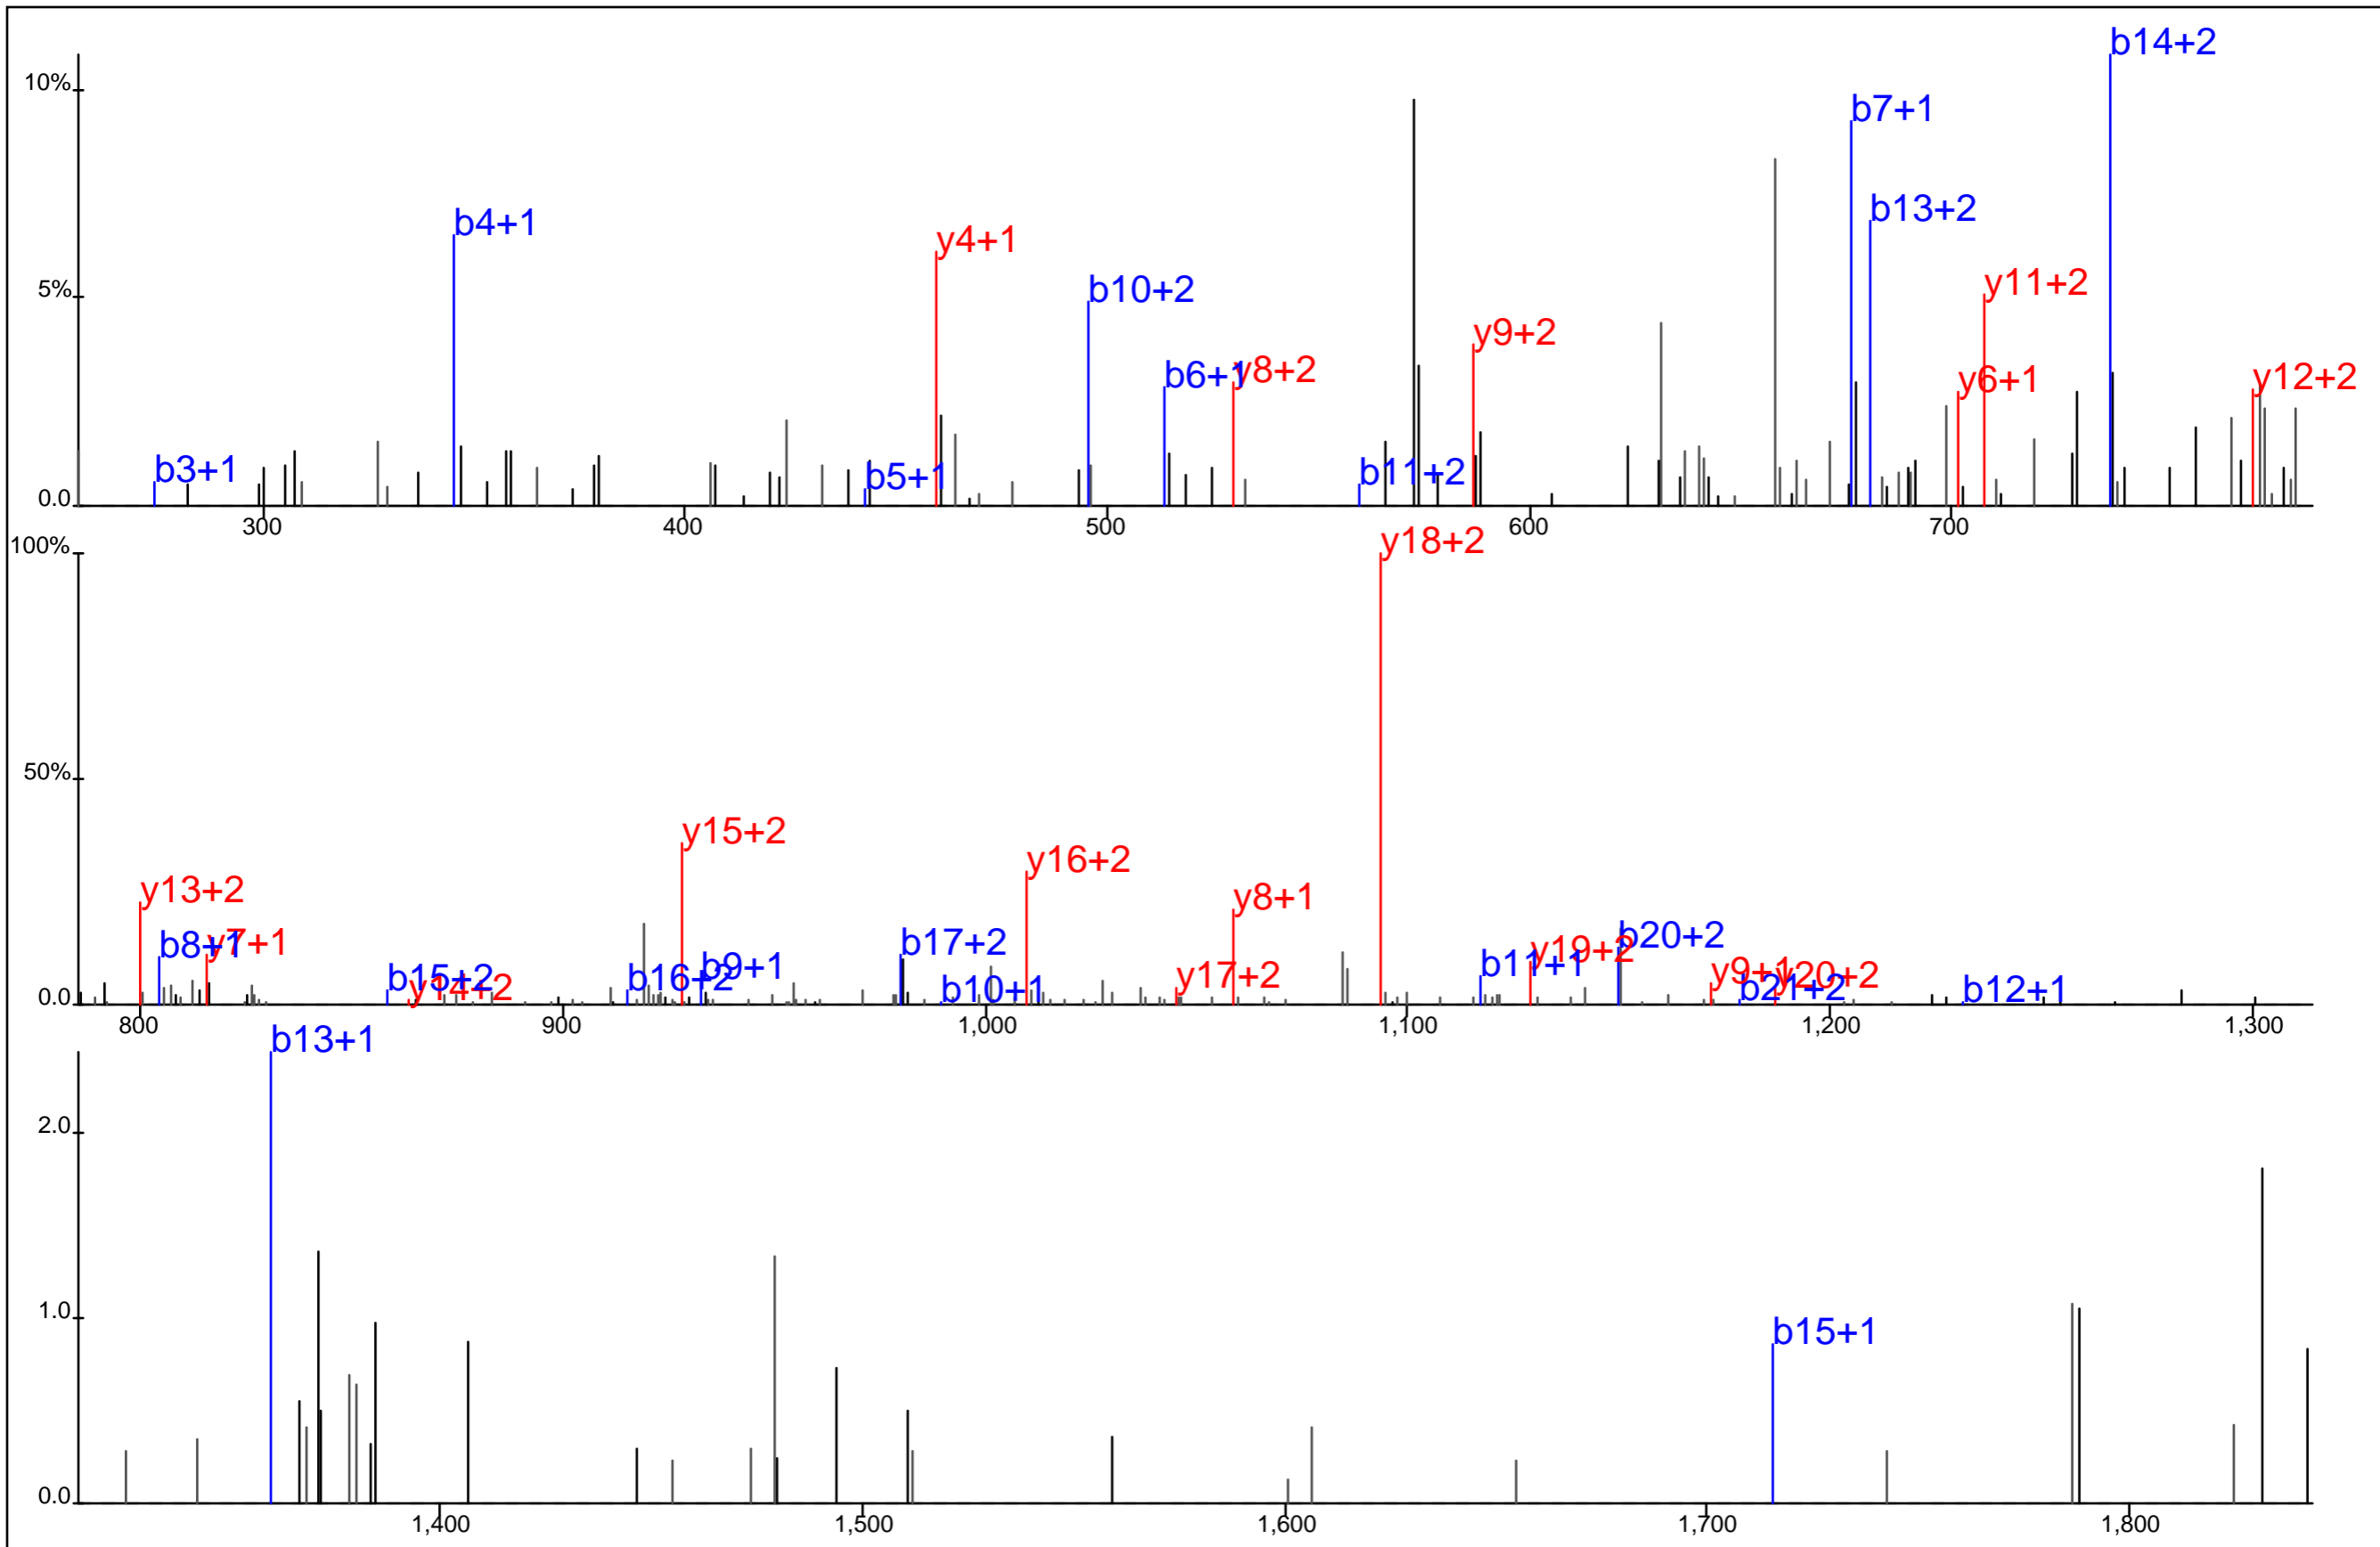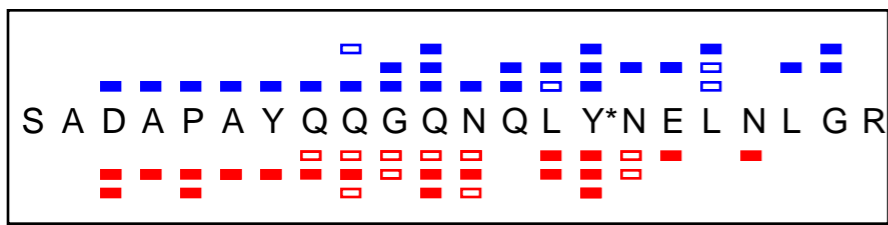

Protein Name: CD3 zeta  
 gi Accession: 37595565  
 Precursor Mass: 844.0534+3  
 Delta Mass: 3.908 ppm  
 XCorr: 42.06

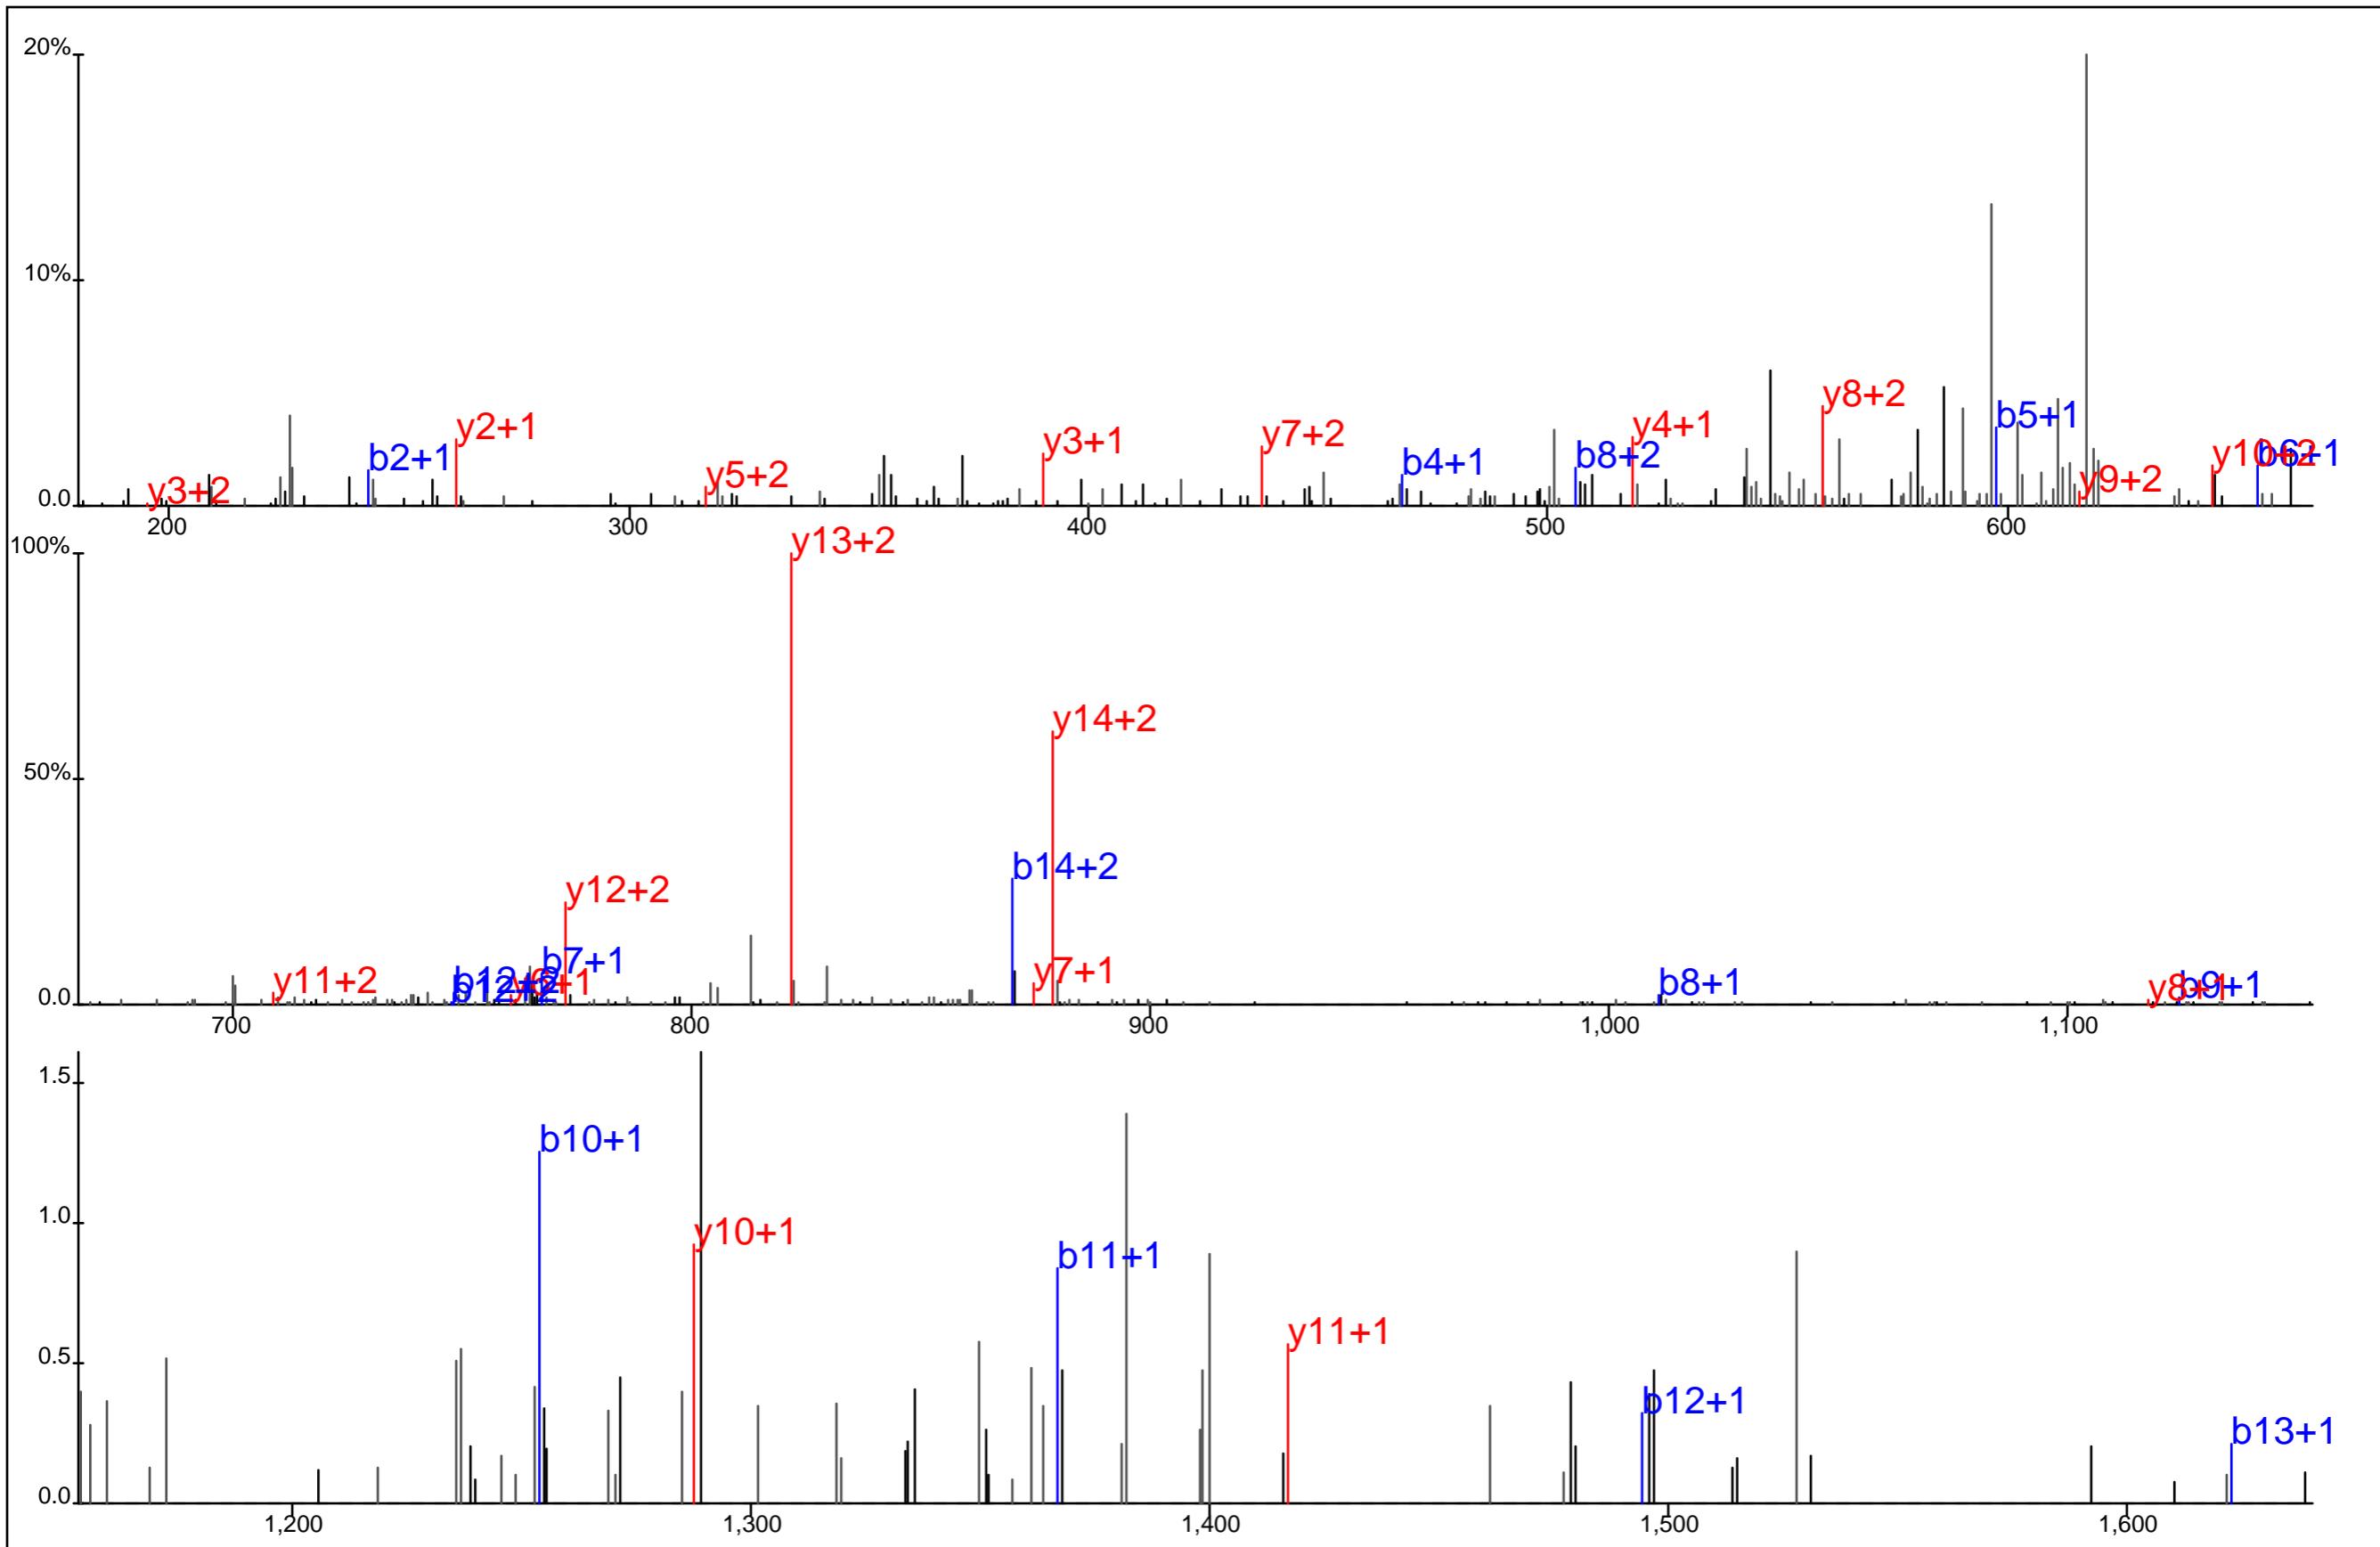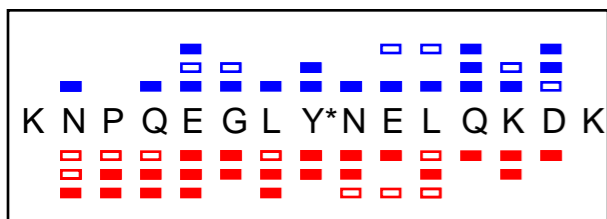

Protein Name: CD3 zeta  
 gi Accession: 37595565  
 Precursor Mass: 628.6342+3  
 Delta Mass: 1.020 ppm  
 XCorr: 47.64



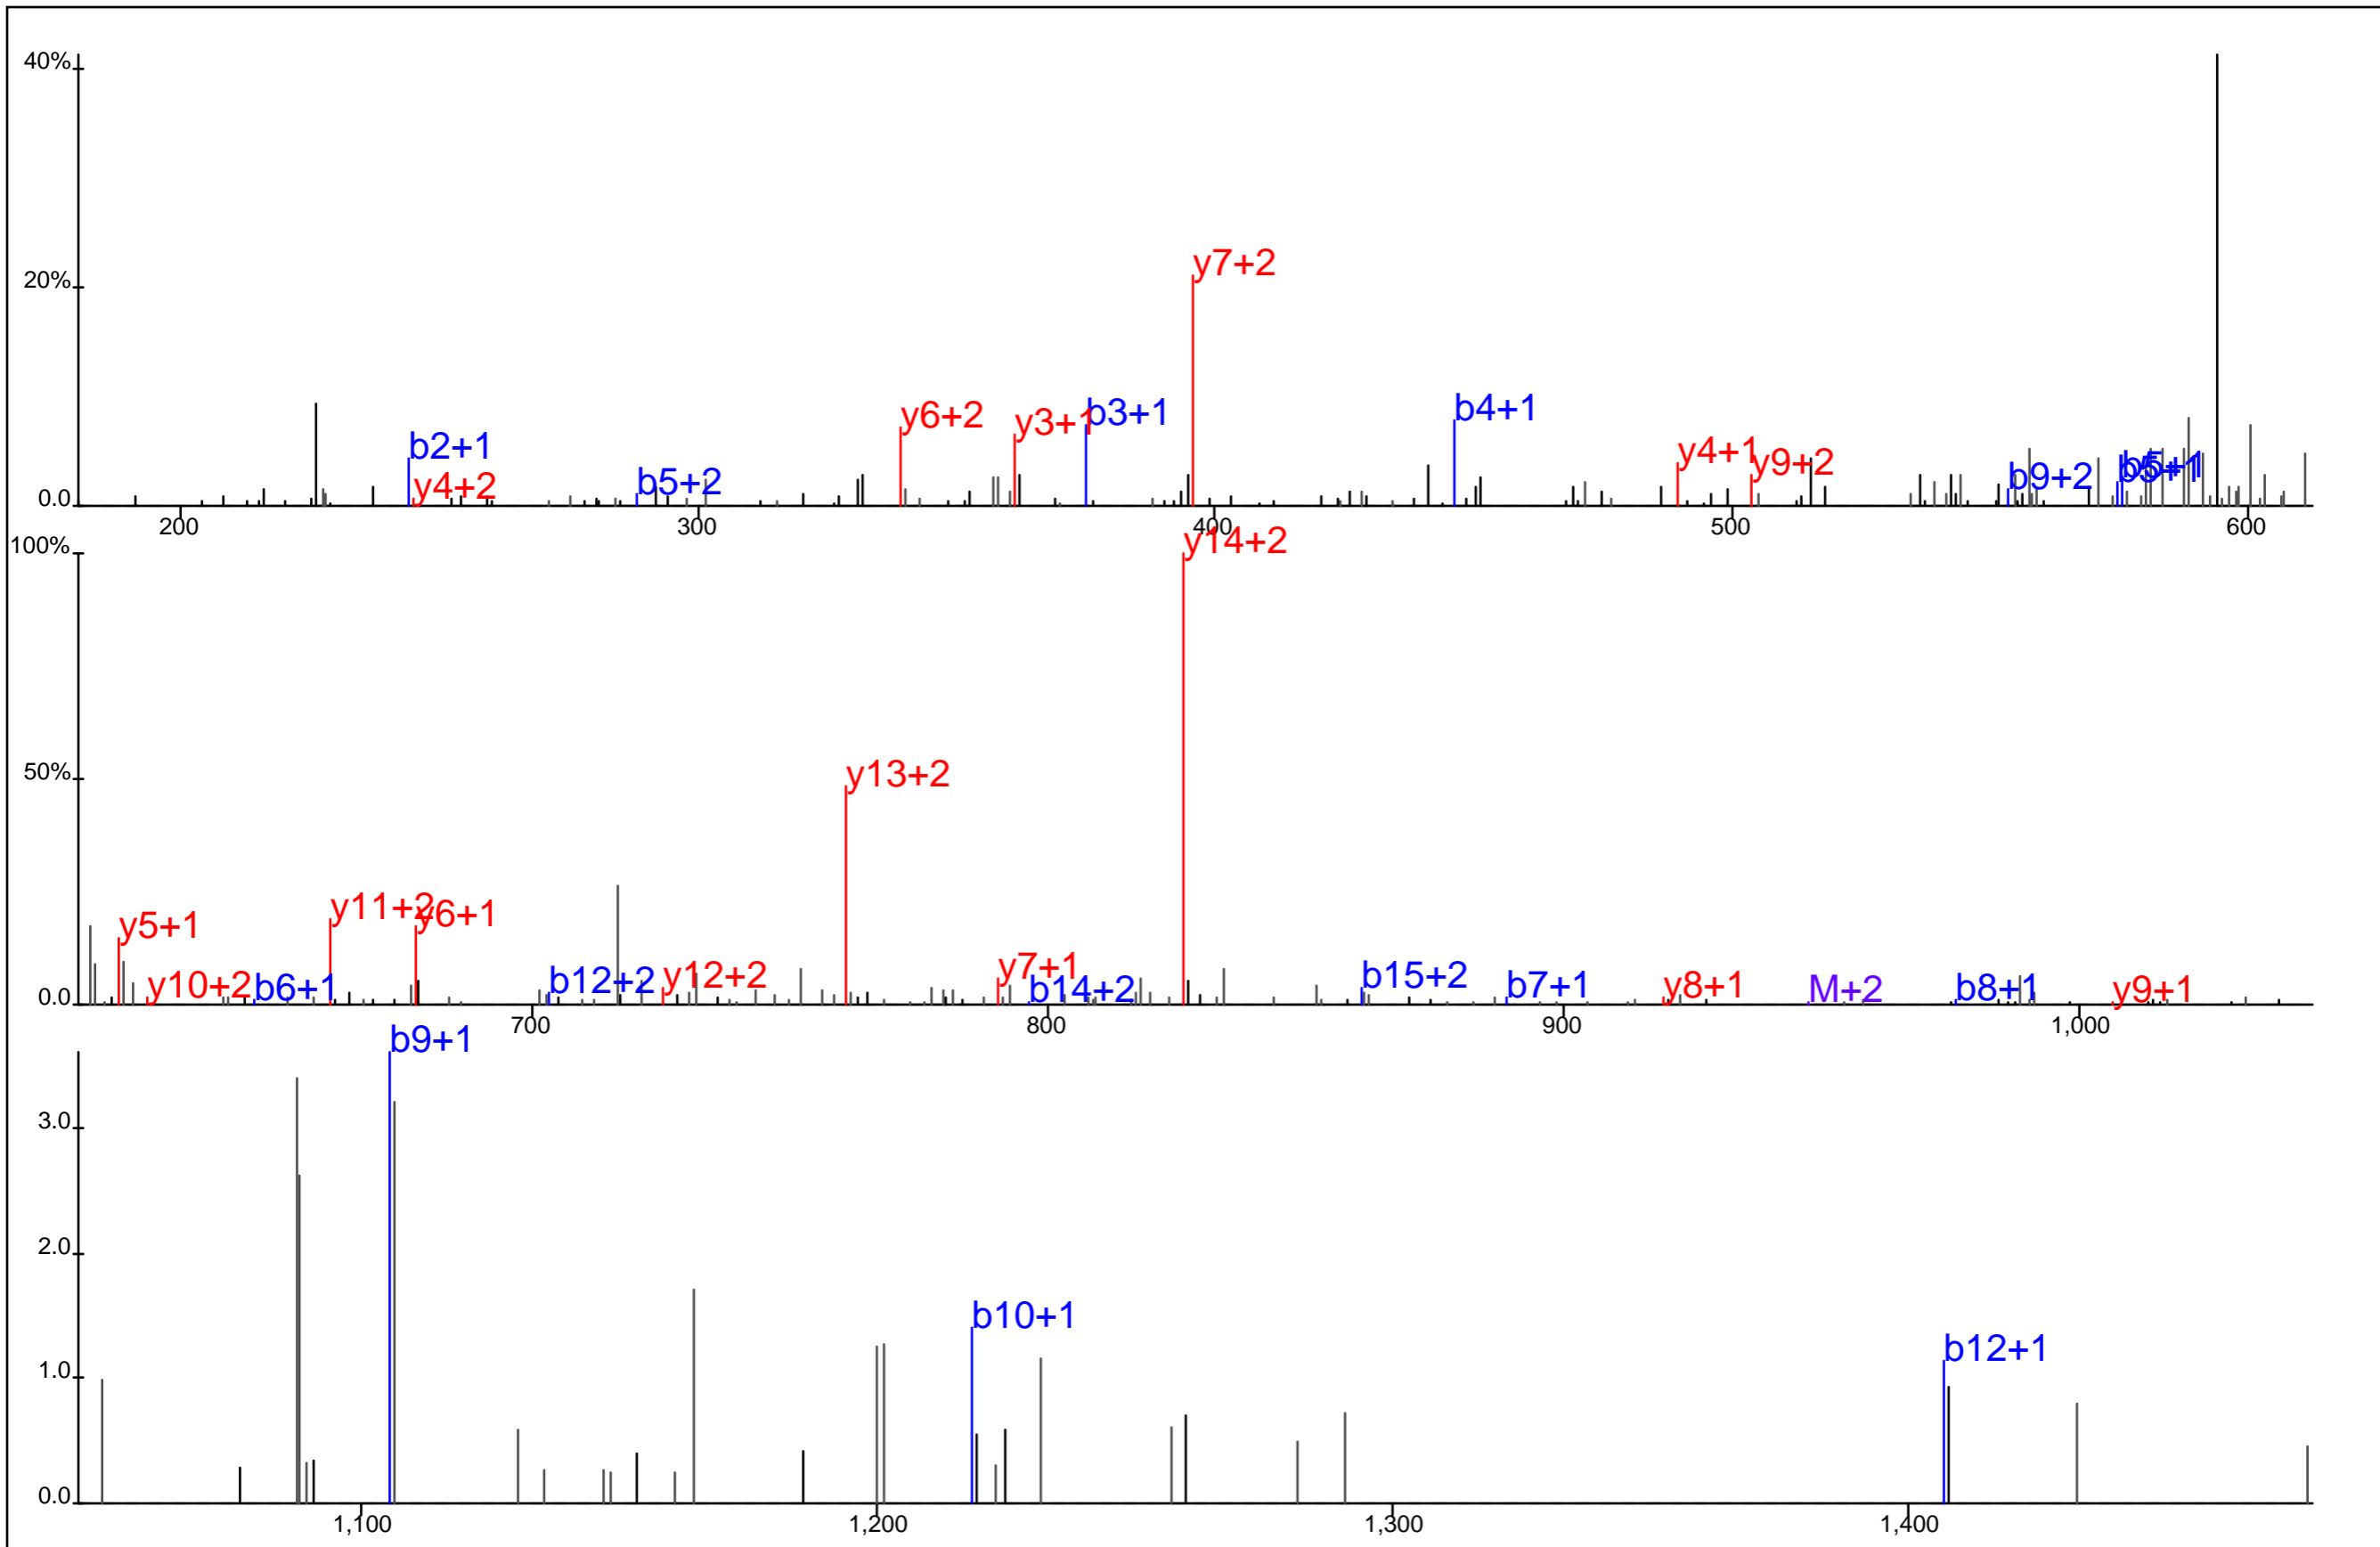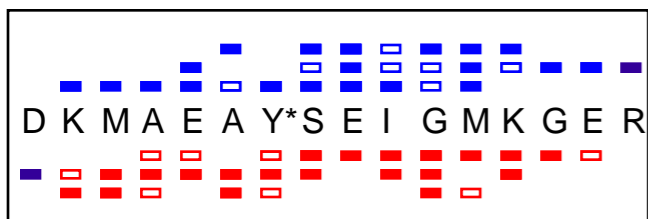

Protein Name: CD3 zeta  
 gi Accession: 37595565  
 Precursor Mass: 632.2751+3  
 Delta Mass: 1.735 ppm  
 XCorr: 36.14

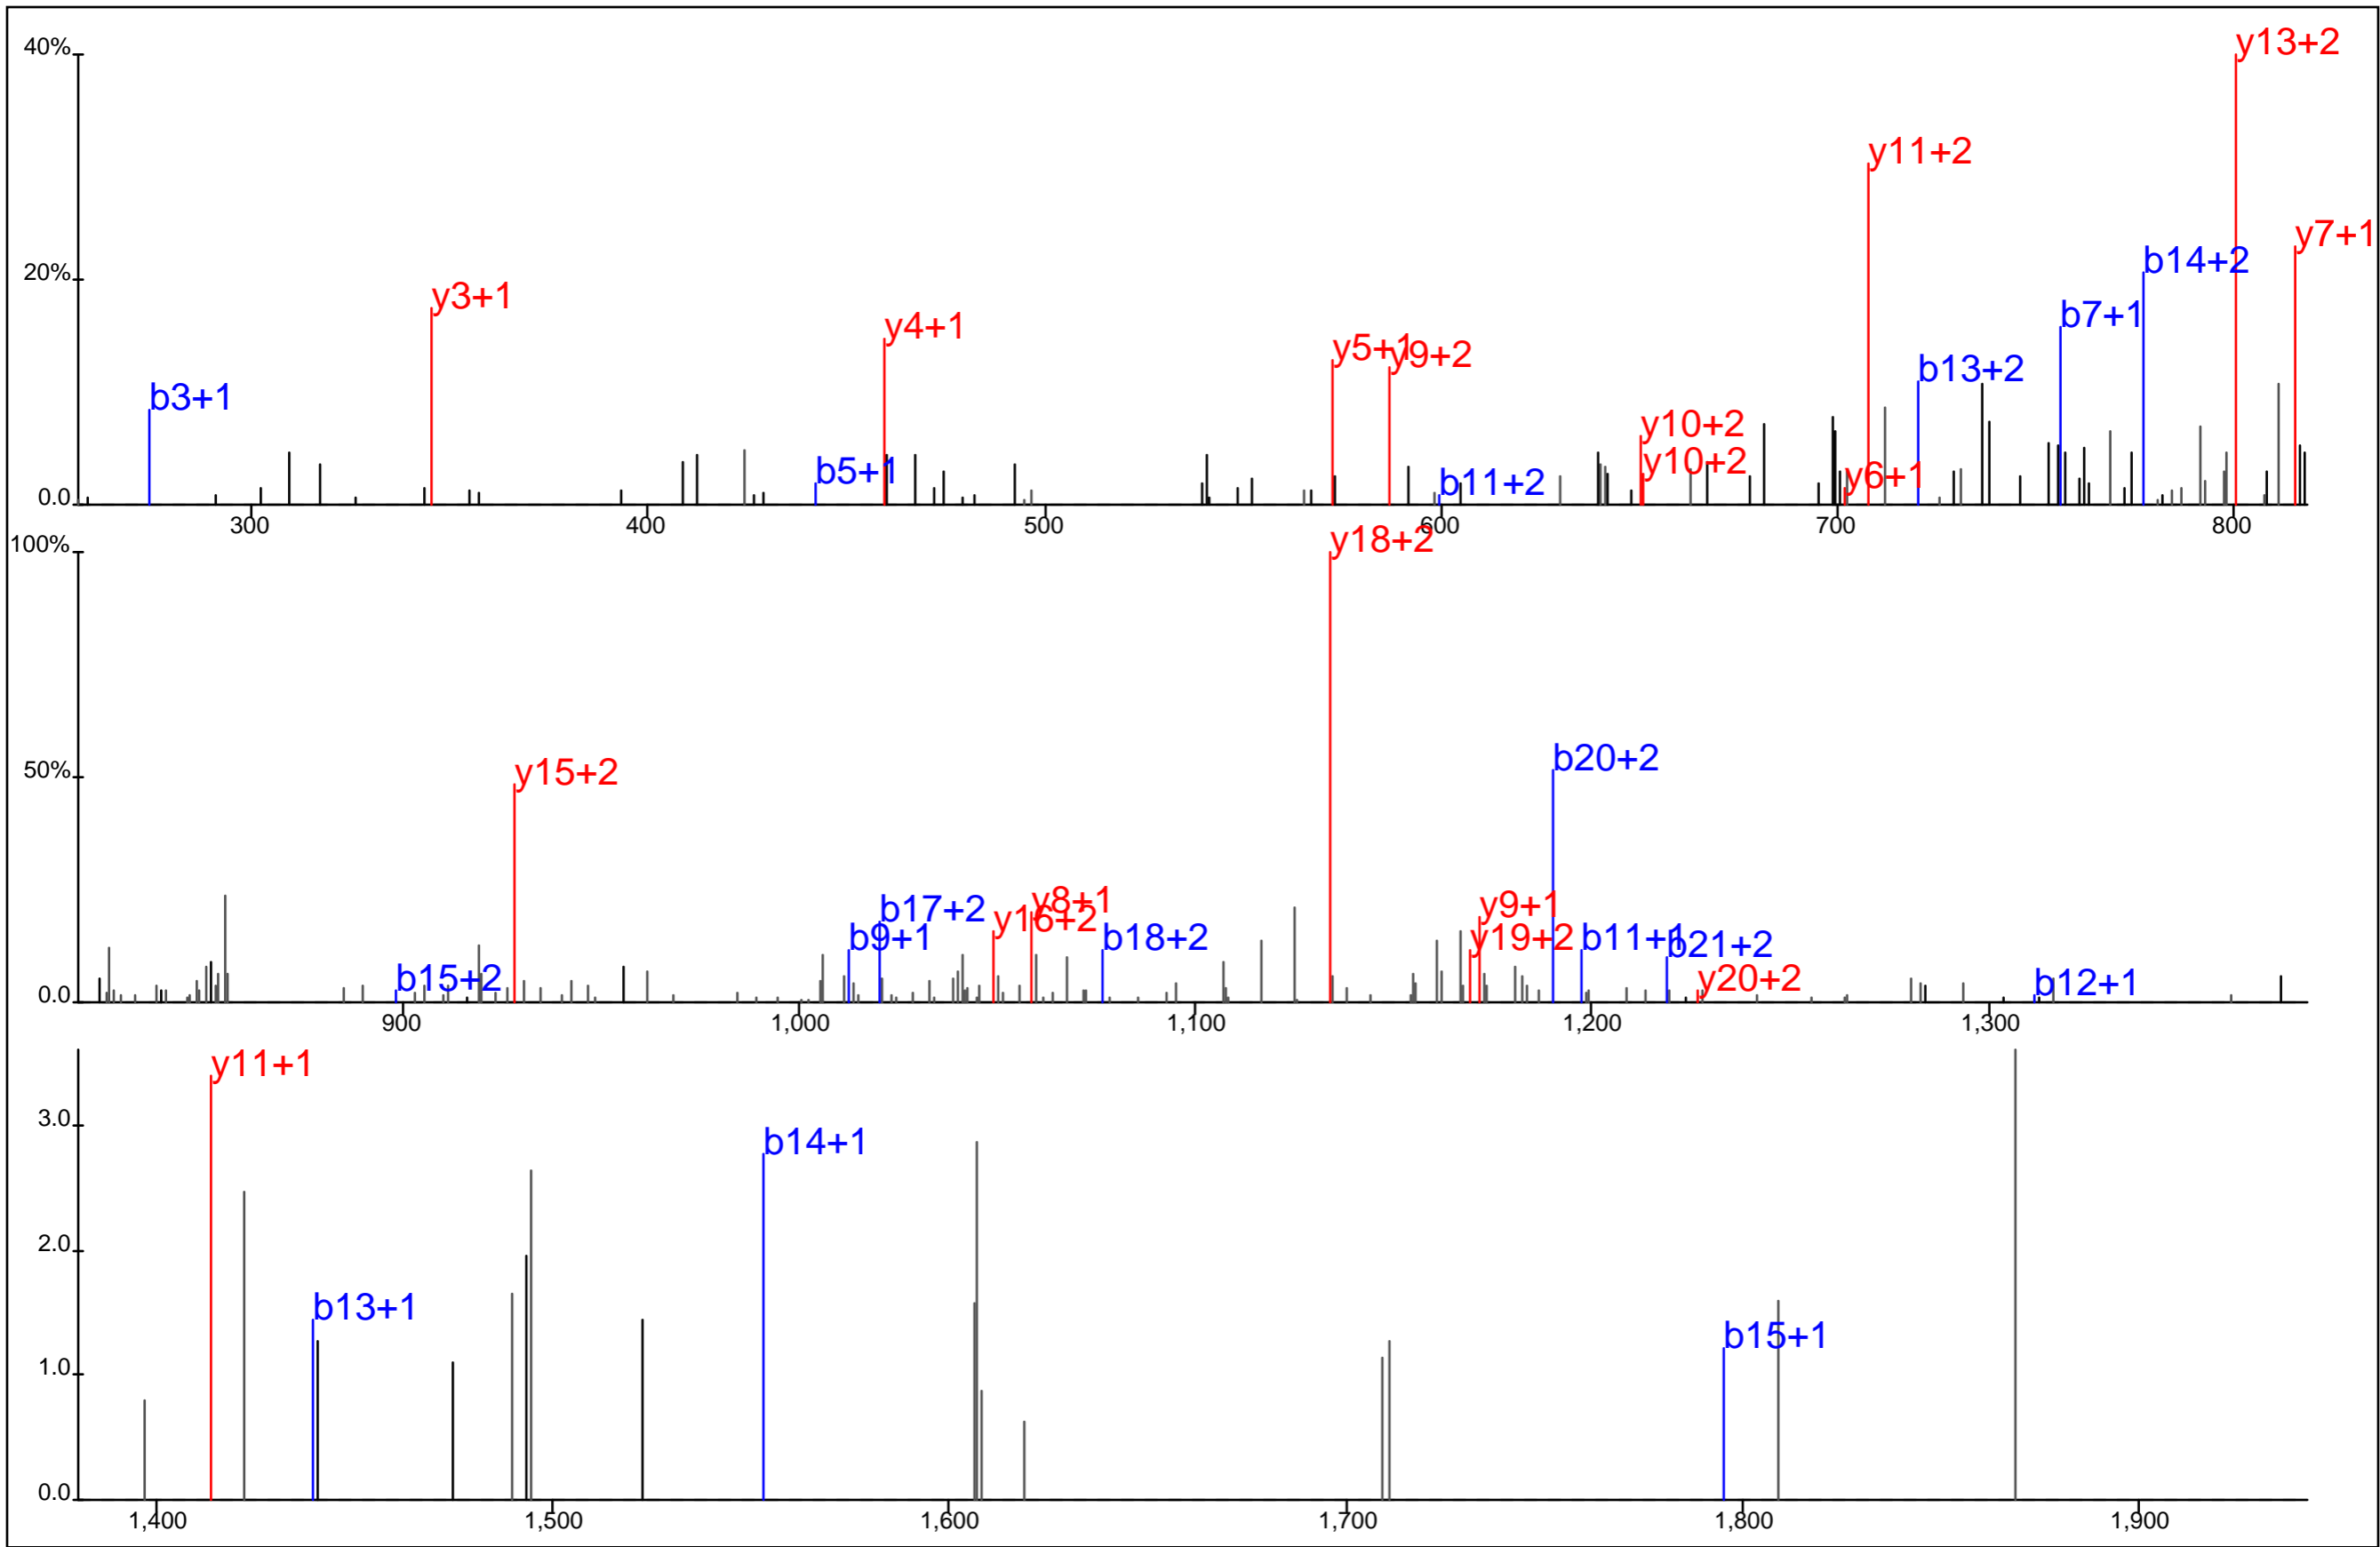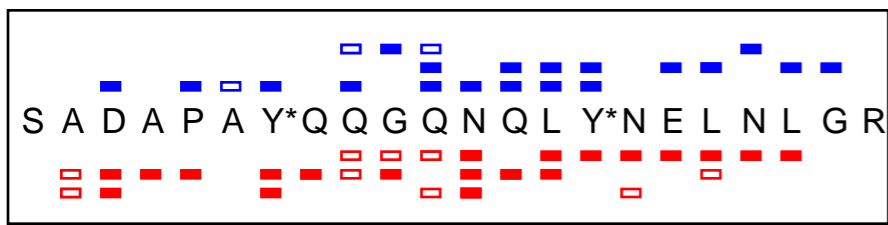

Protein Name: CD3 zeta  
 gi Accession: 37595565  
 Precursor Mass: 870.7101+3  
 Delta Mass: 5.214 ppm  
 XCorr: 45.45

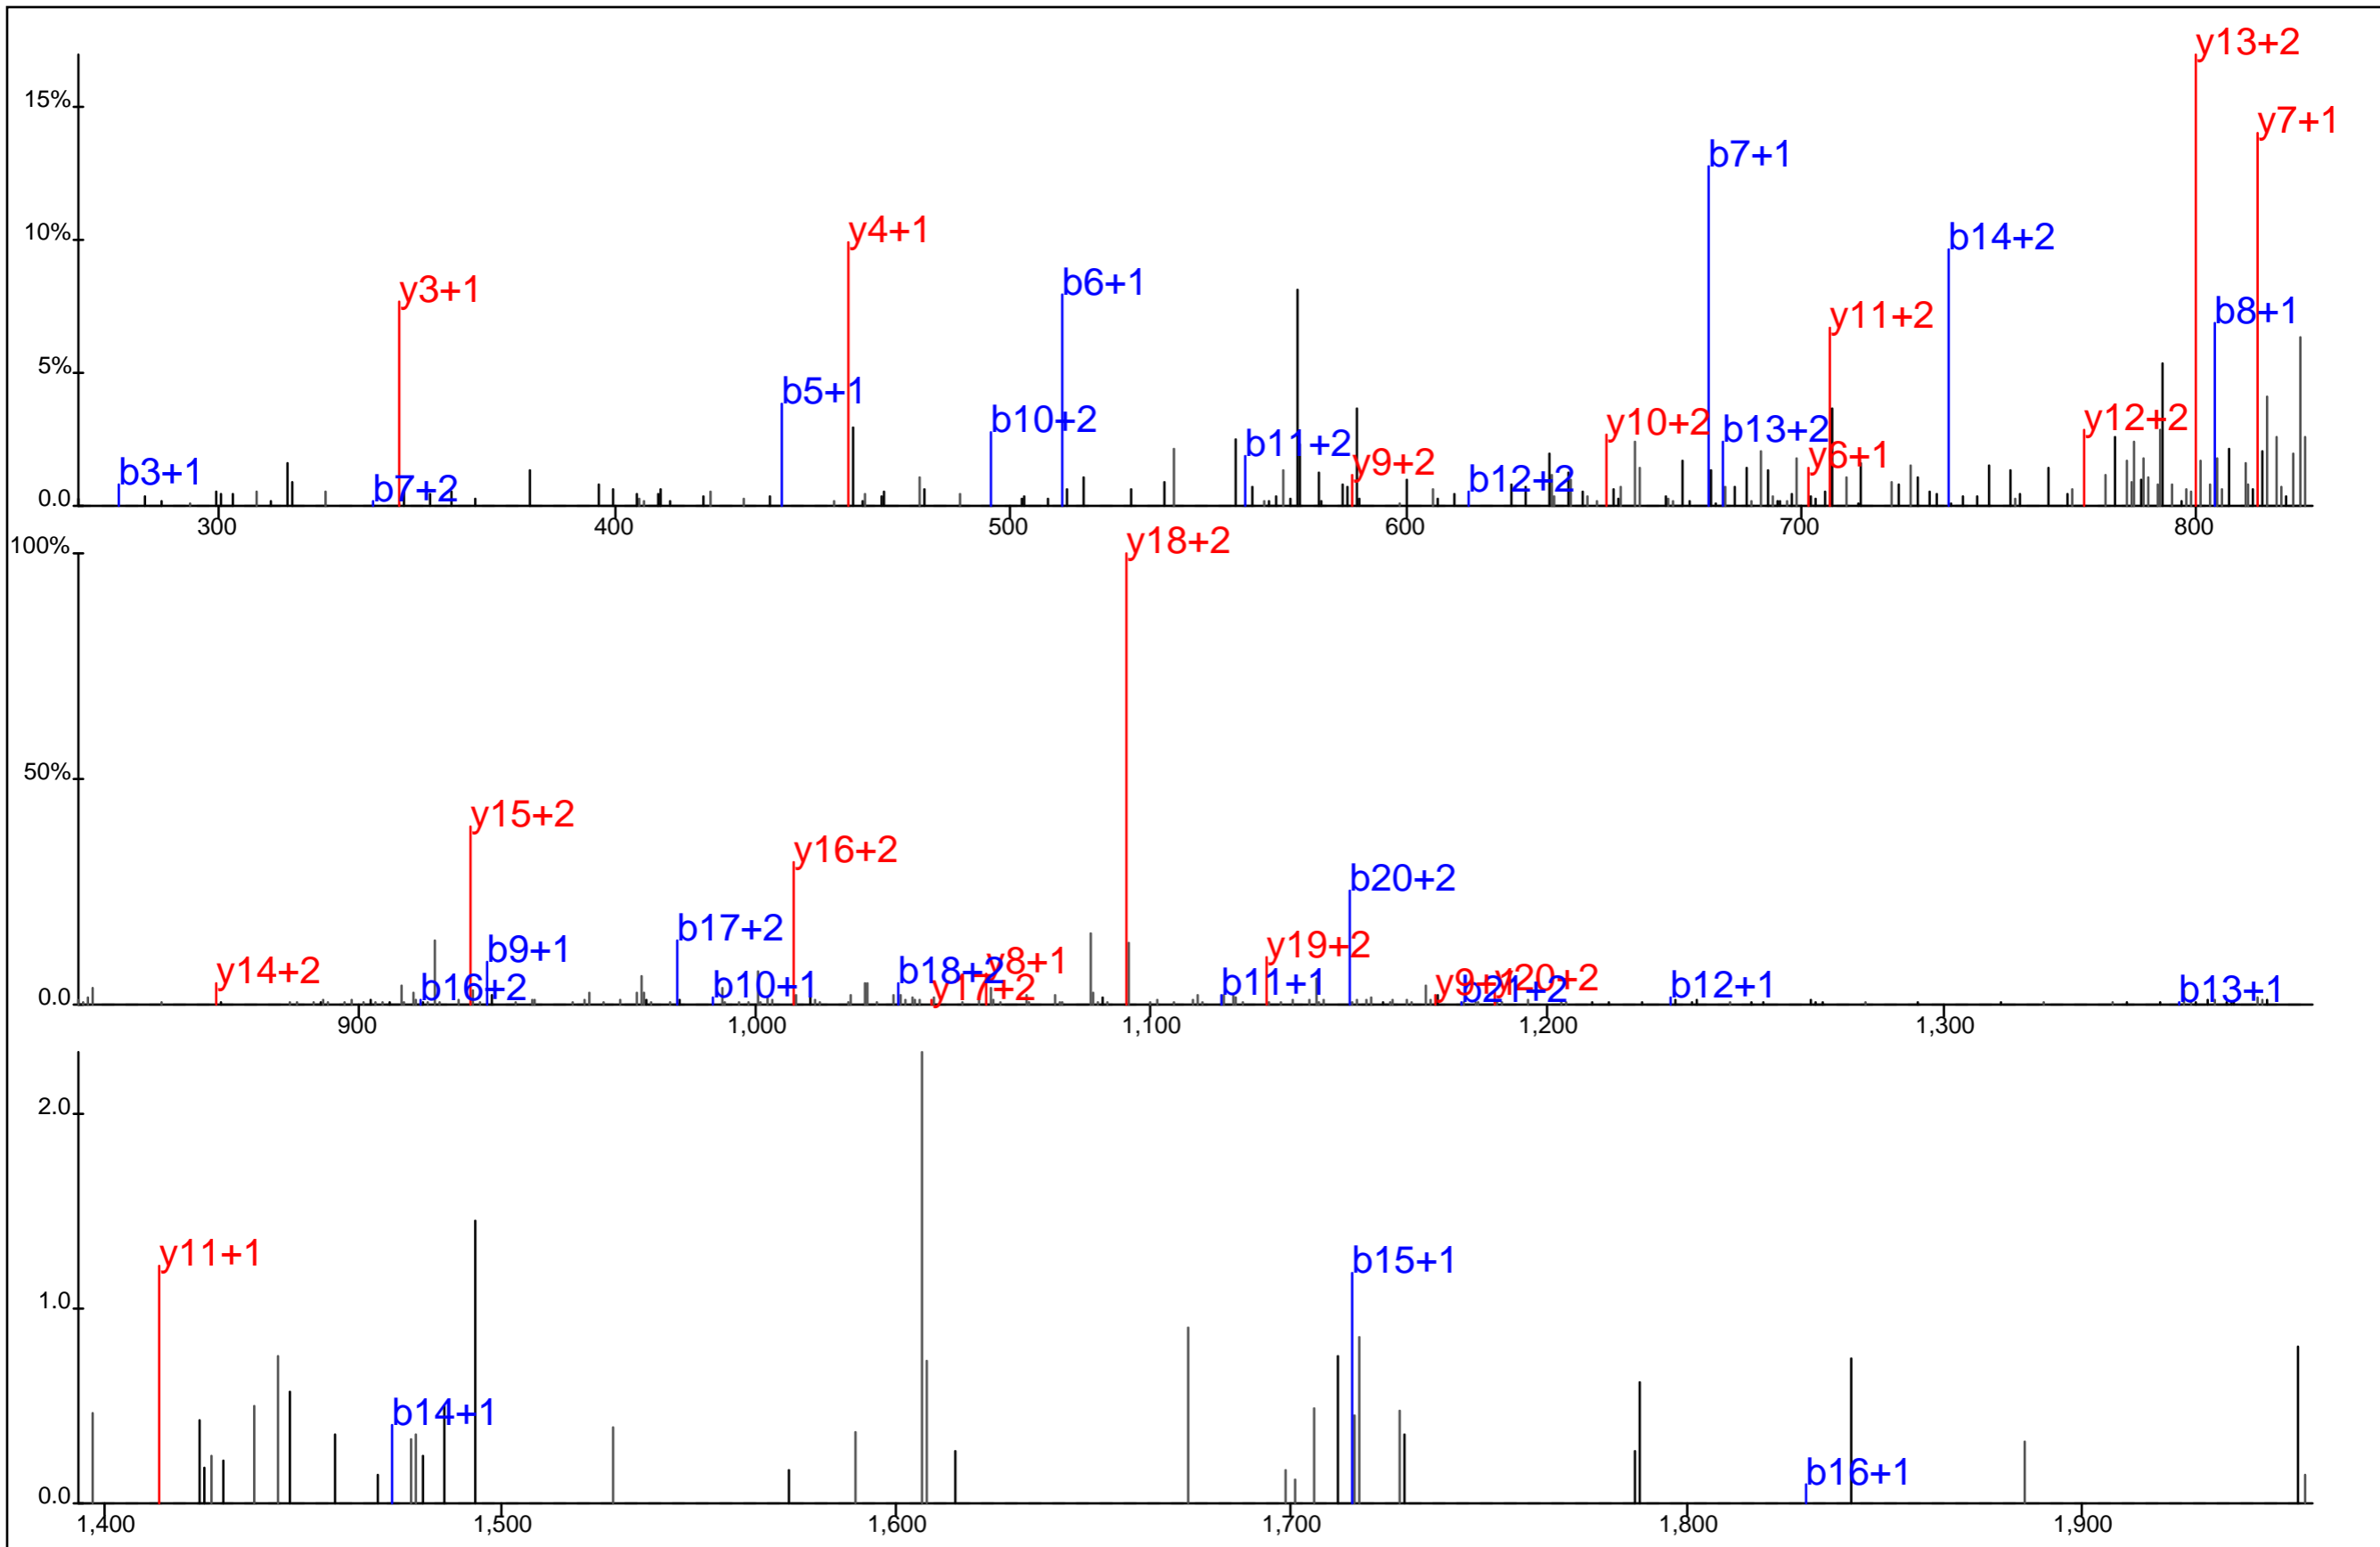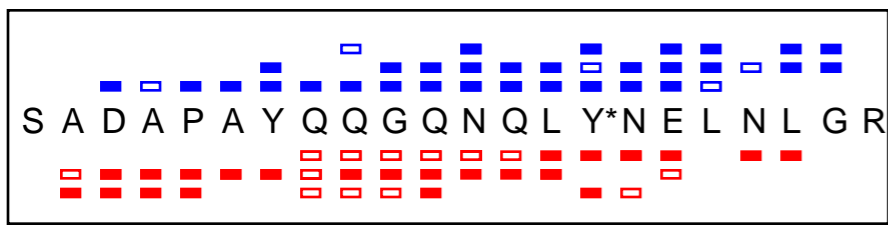

Protein Name: CD3 zeta  
 gi Accession: 37595565  
 Precursor Mass: 844.0536+3  
 Delta Mass: 4.201 ppm  
 XCorr: 65.48

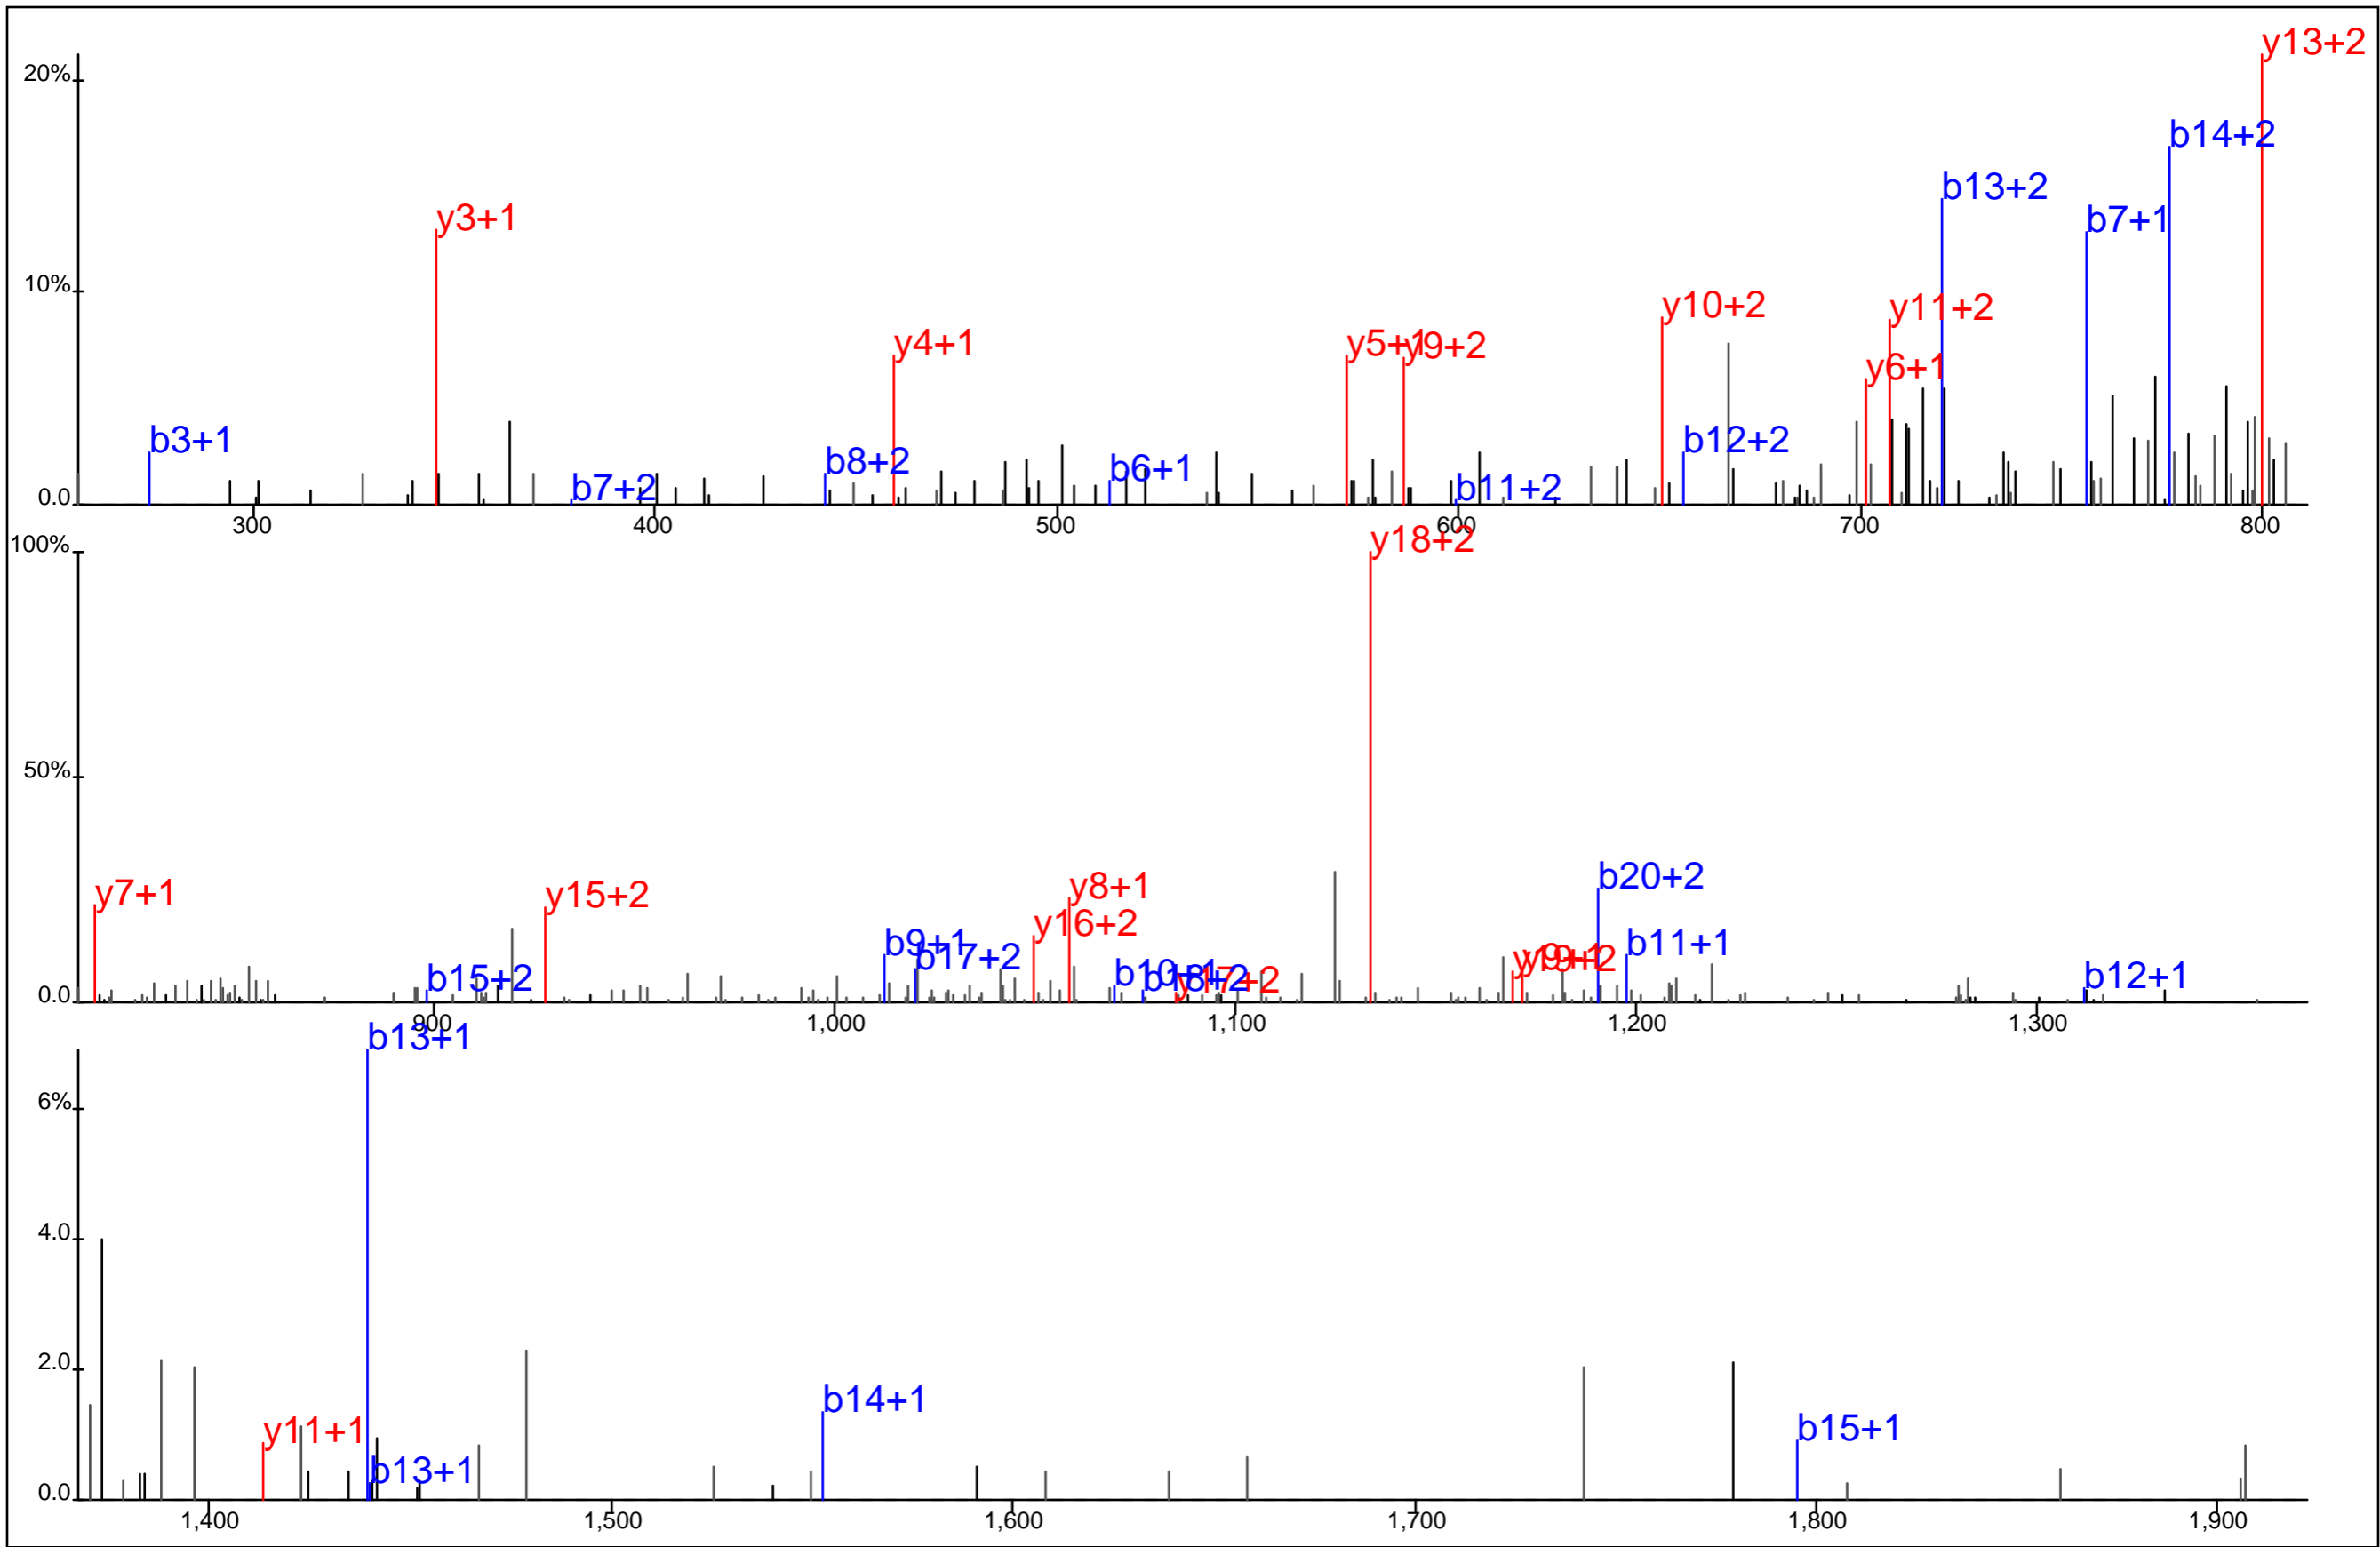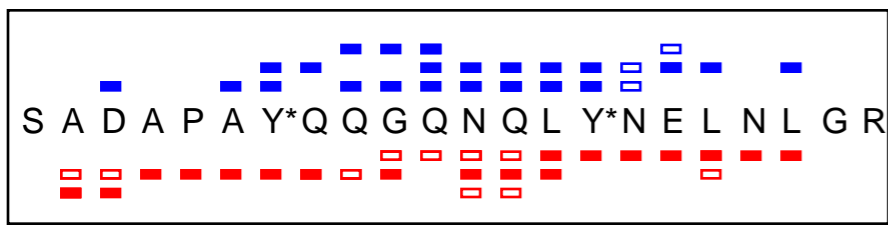

Protein Name: CD3 zeta  
 gi Accession: 37595565  
 Precursor Mass: 870.7094+3  
 Delta Mass: 4.371 ppm  
 XCorr: 48.42

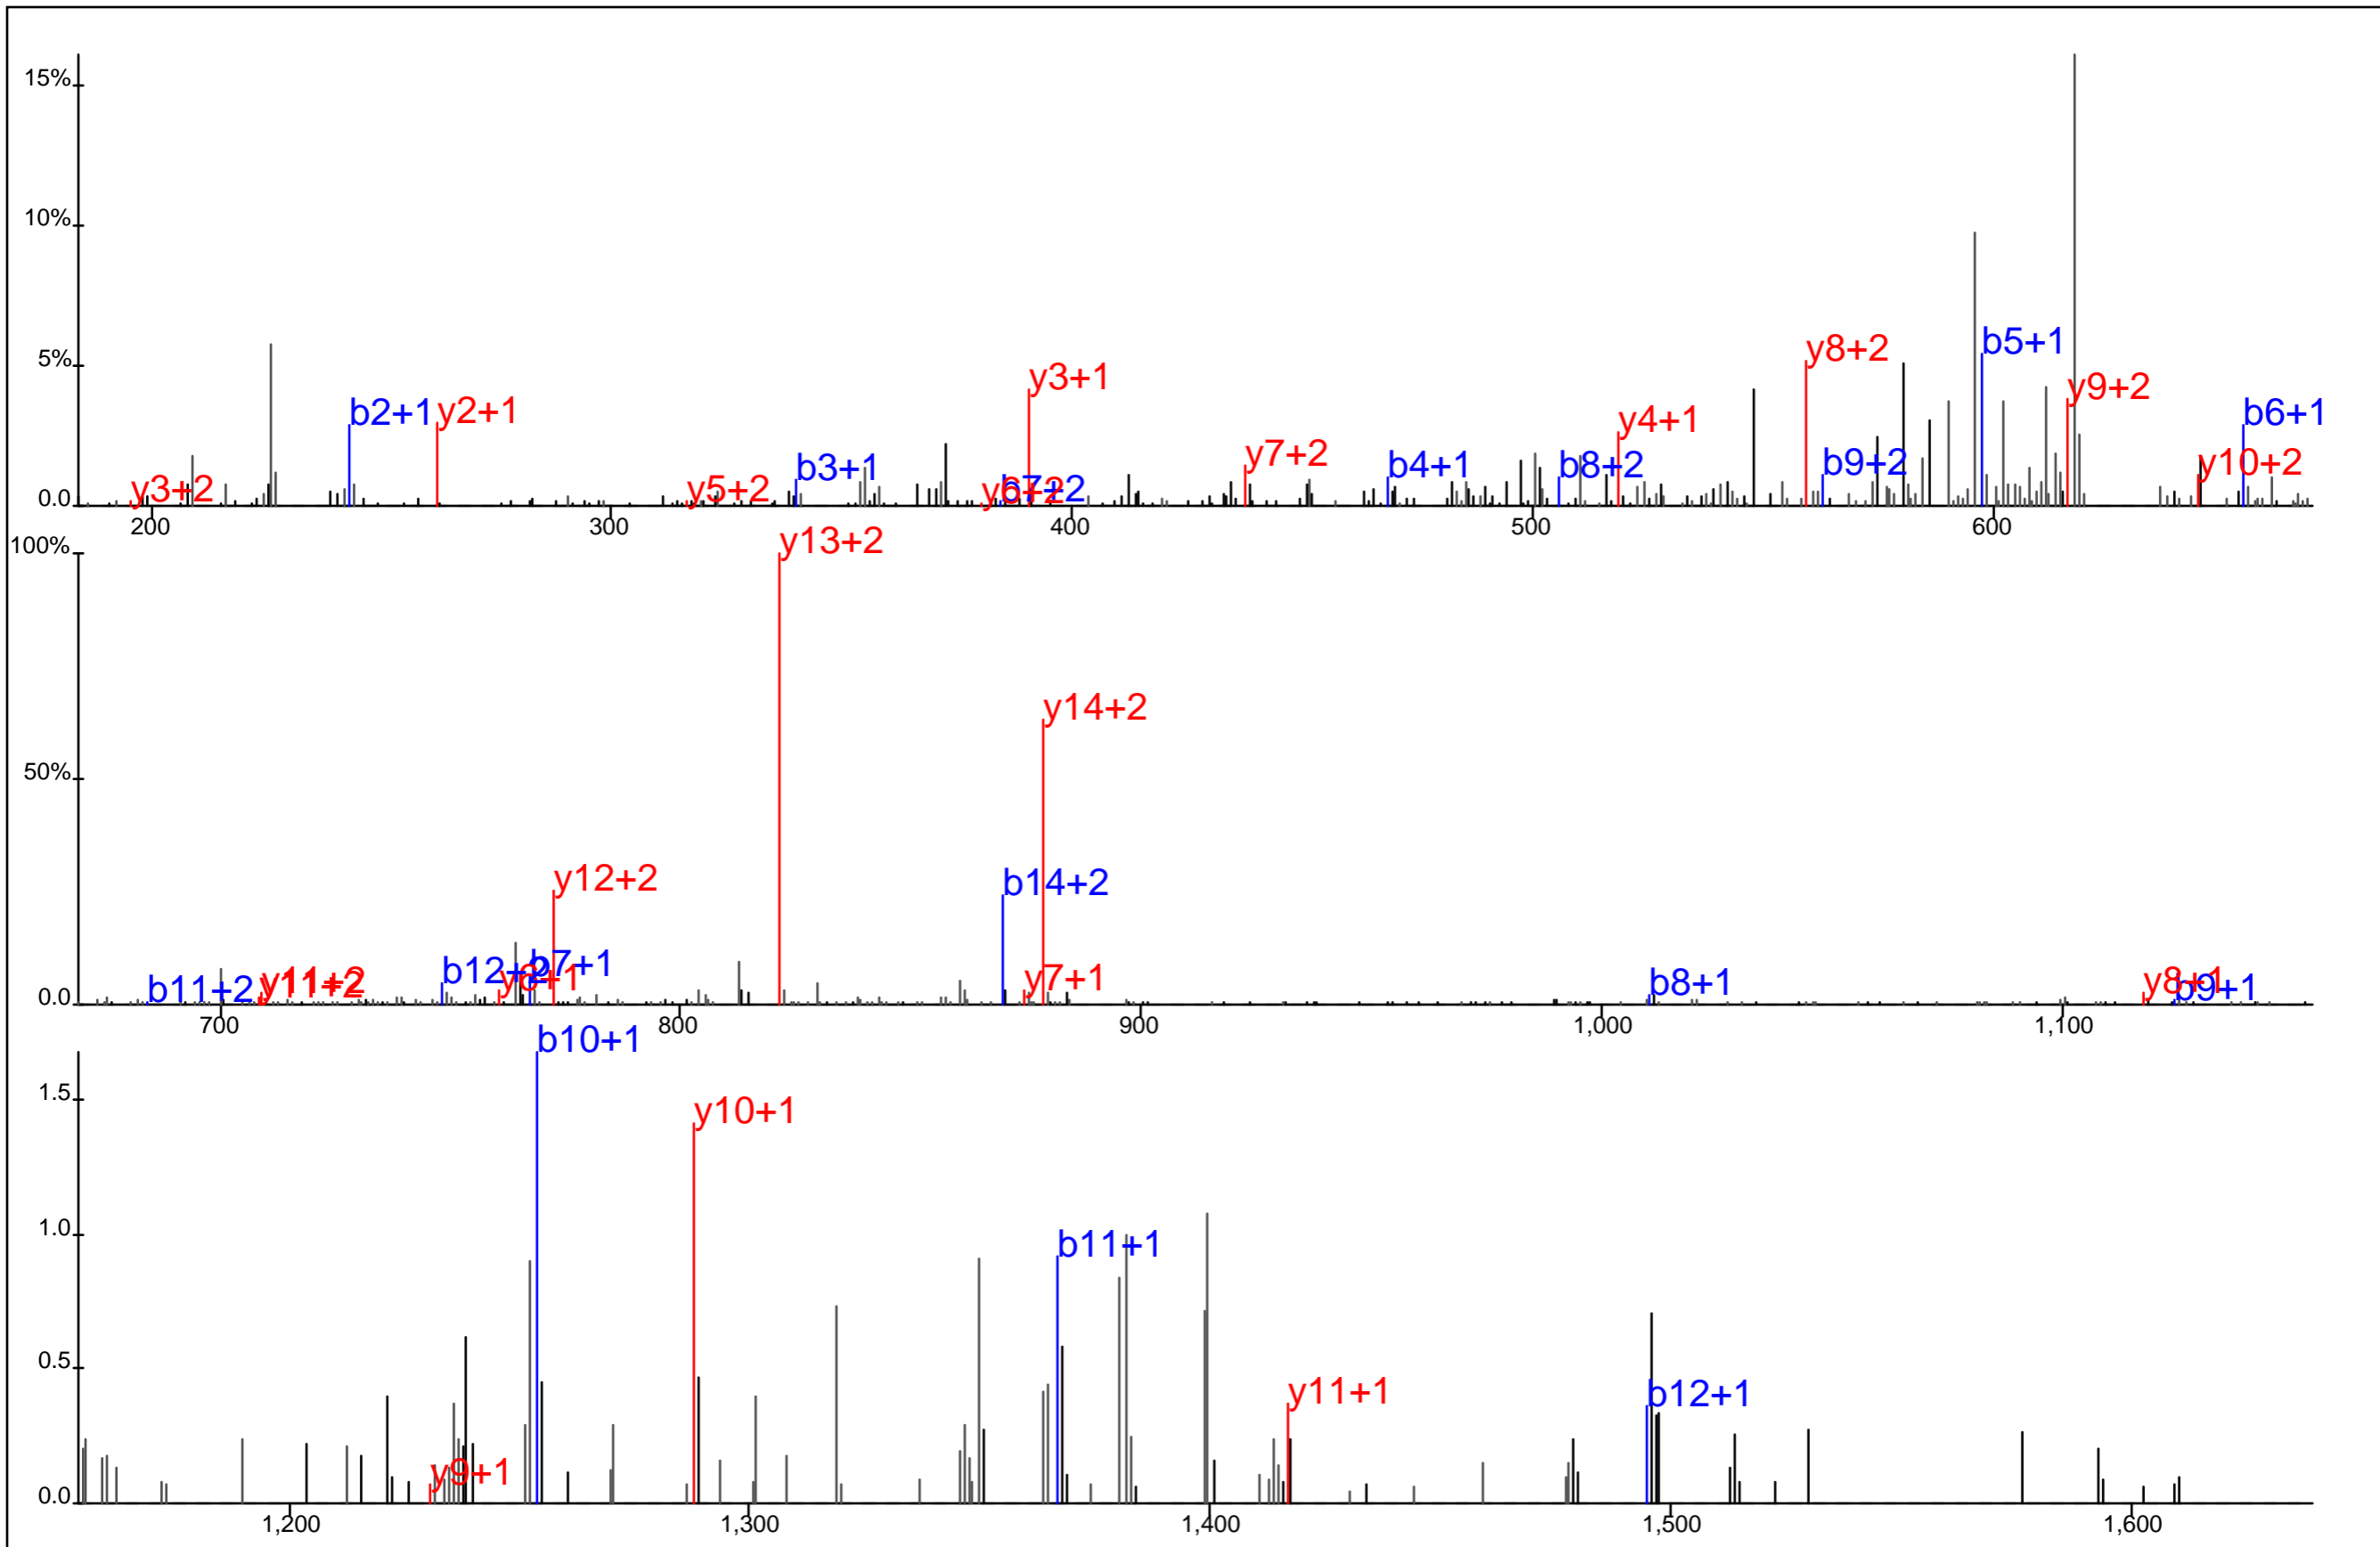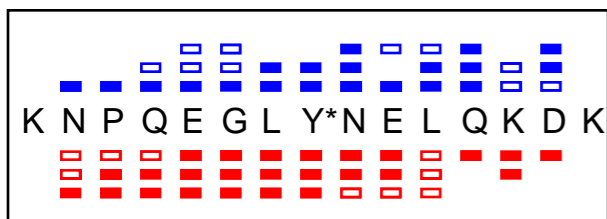

Protein Name: CD3 zeta  
 gi Accession: 37595565  
 Precursor Mass: 628.6359+3  
 Delta Mass: 1.703 ppm  
 XCorr: 46.93

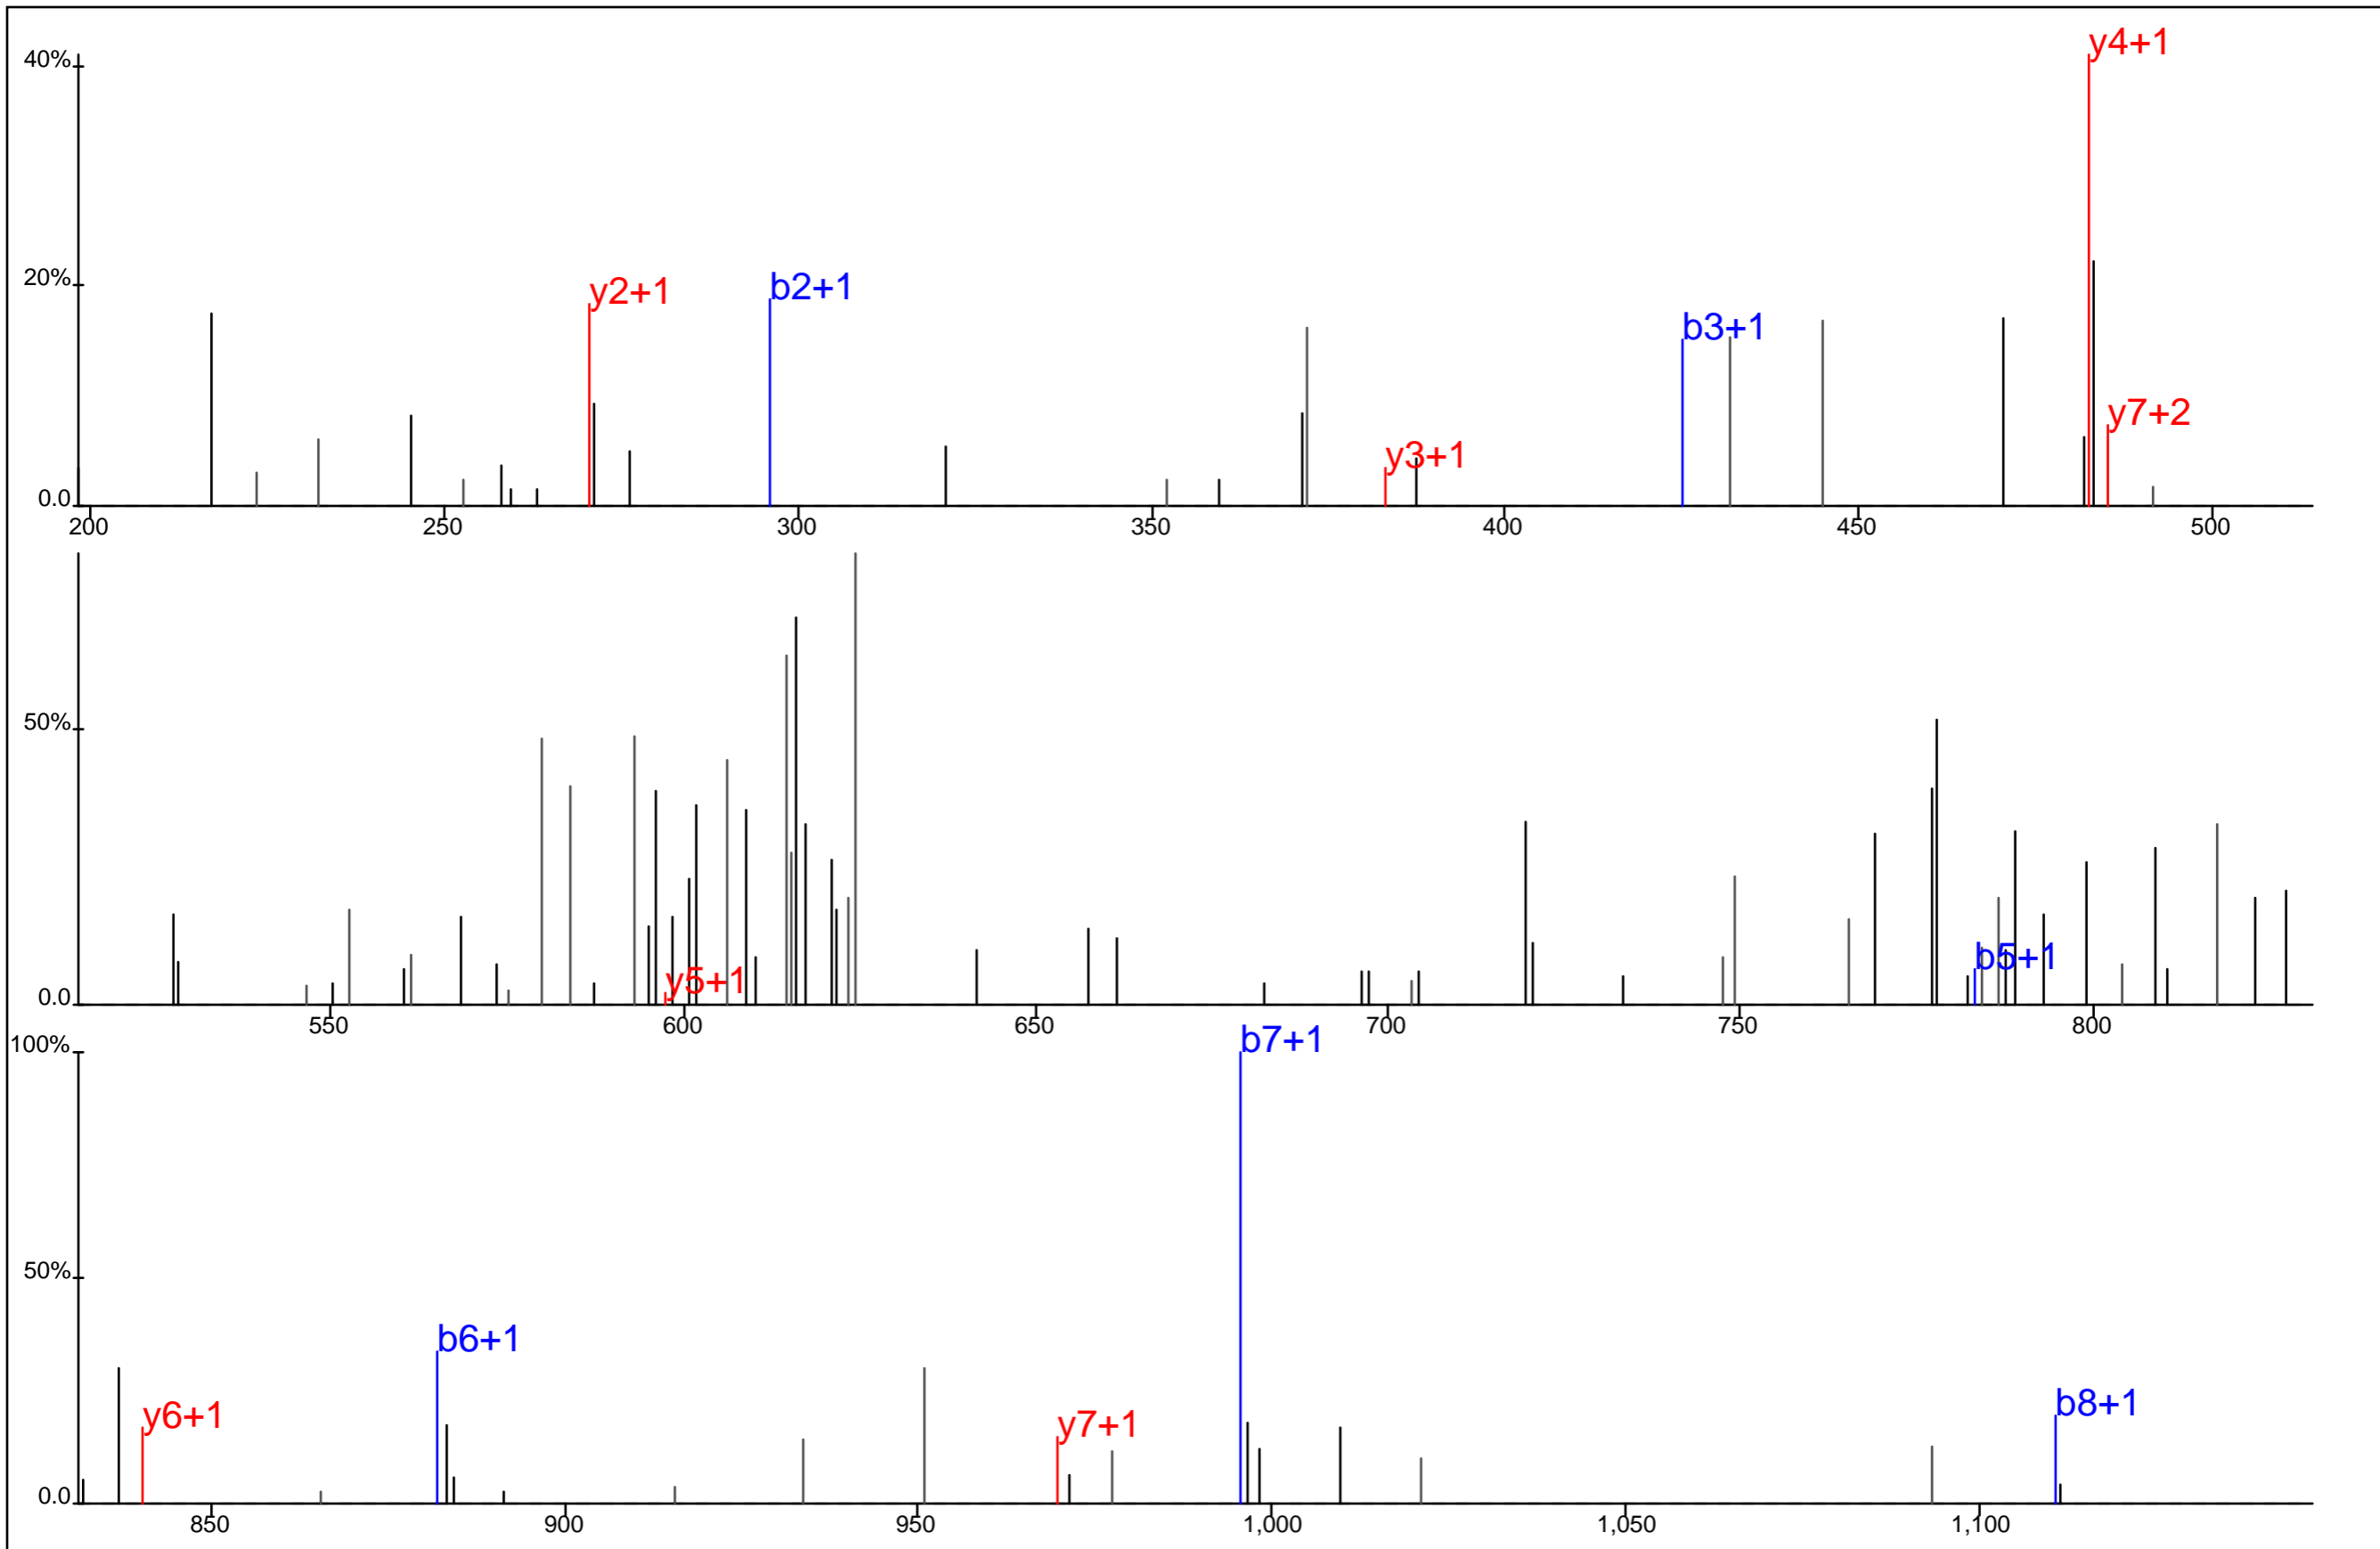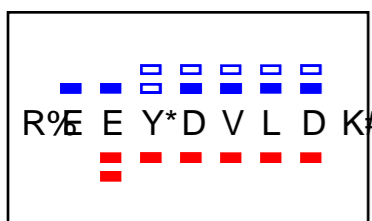

Protein Name: CD3 zeta  
 gi Accession: 37595565  
 Precursor Mass: 632.7827+2  
 Delta Mass: 0.457 ppm  
 XCorr: 14.03

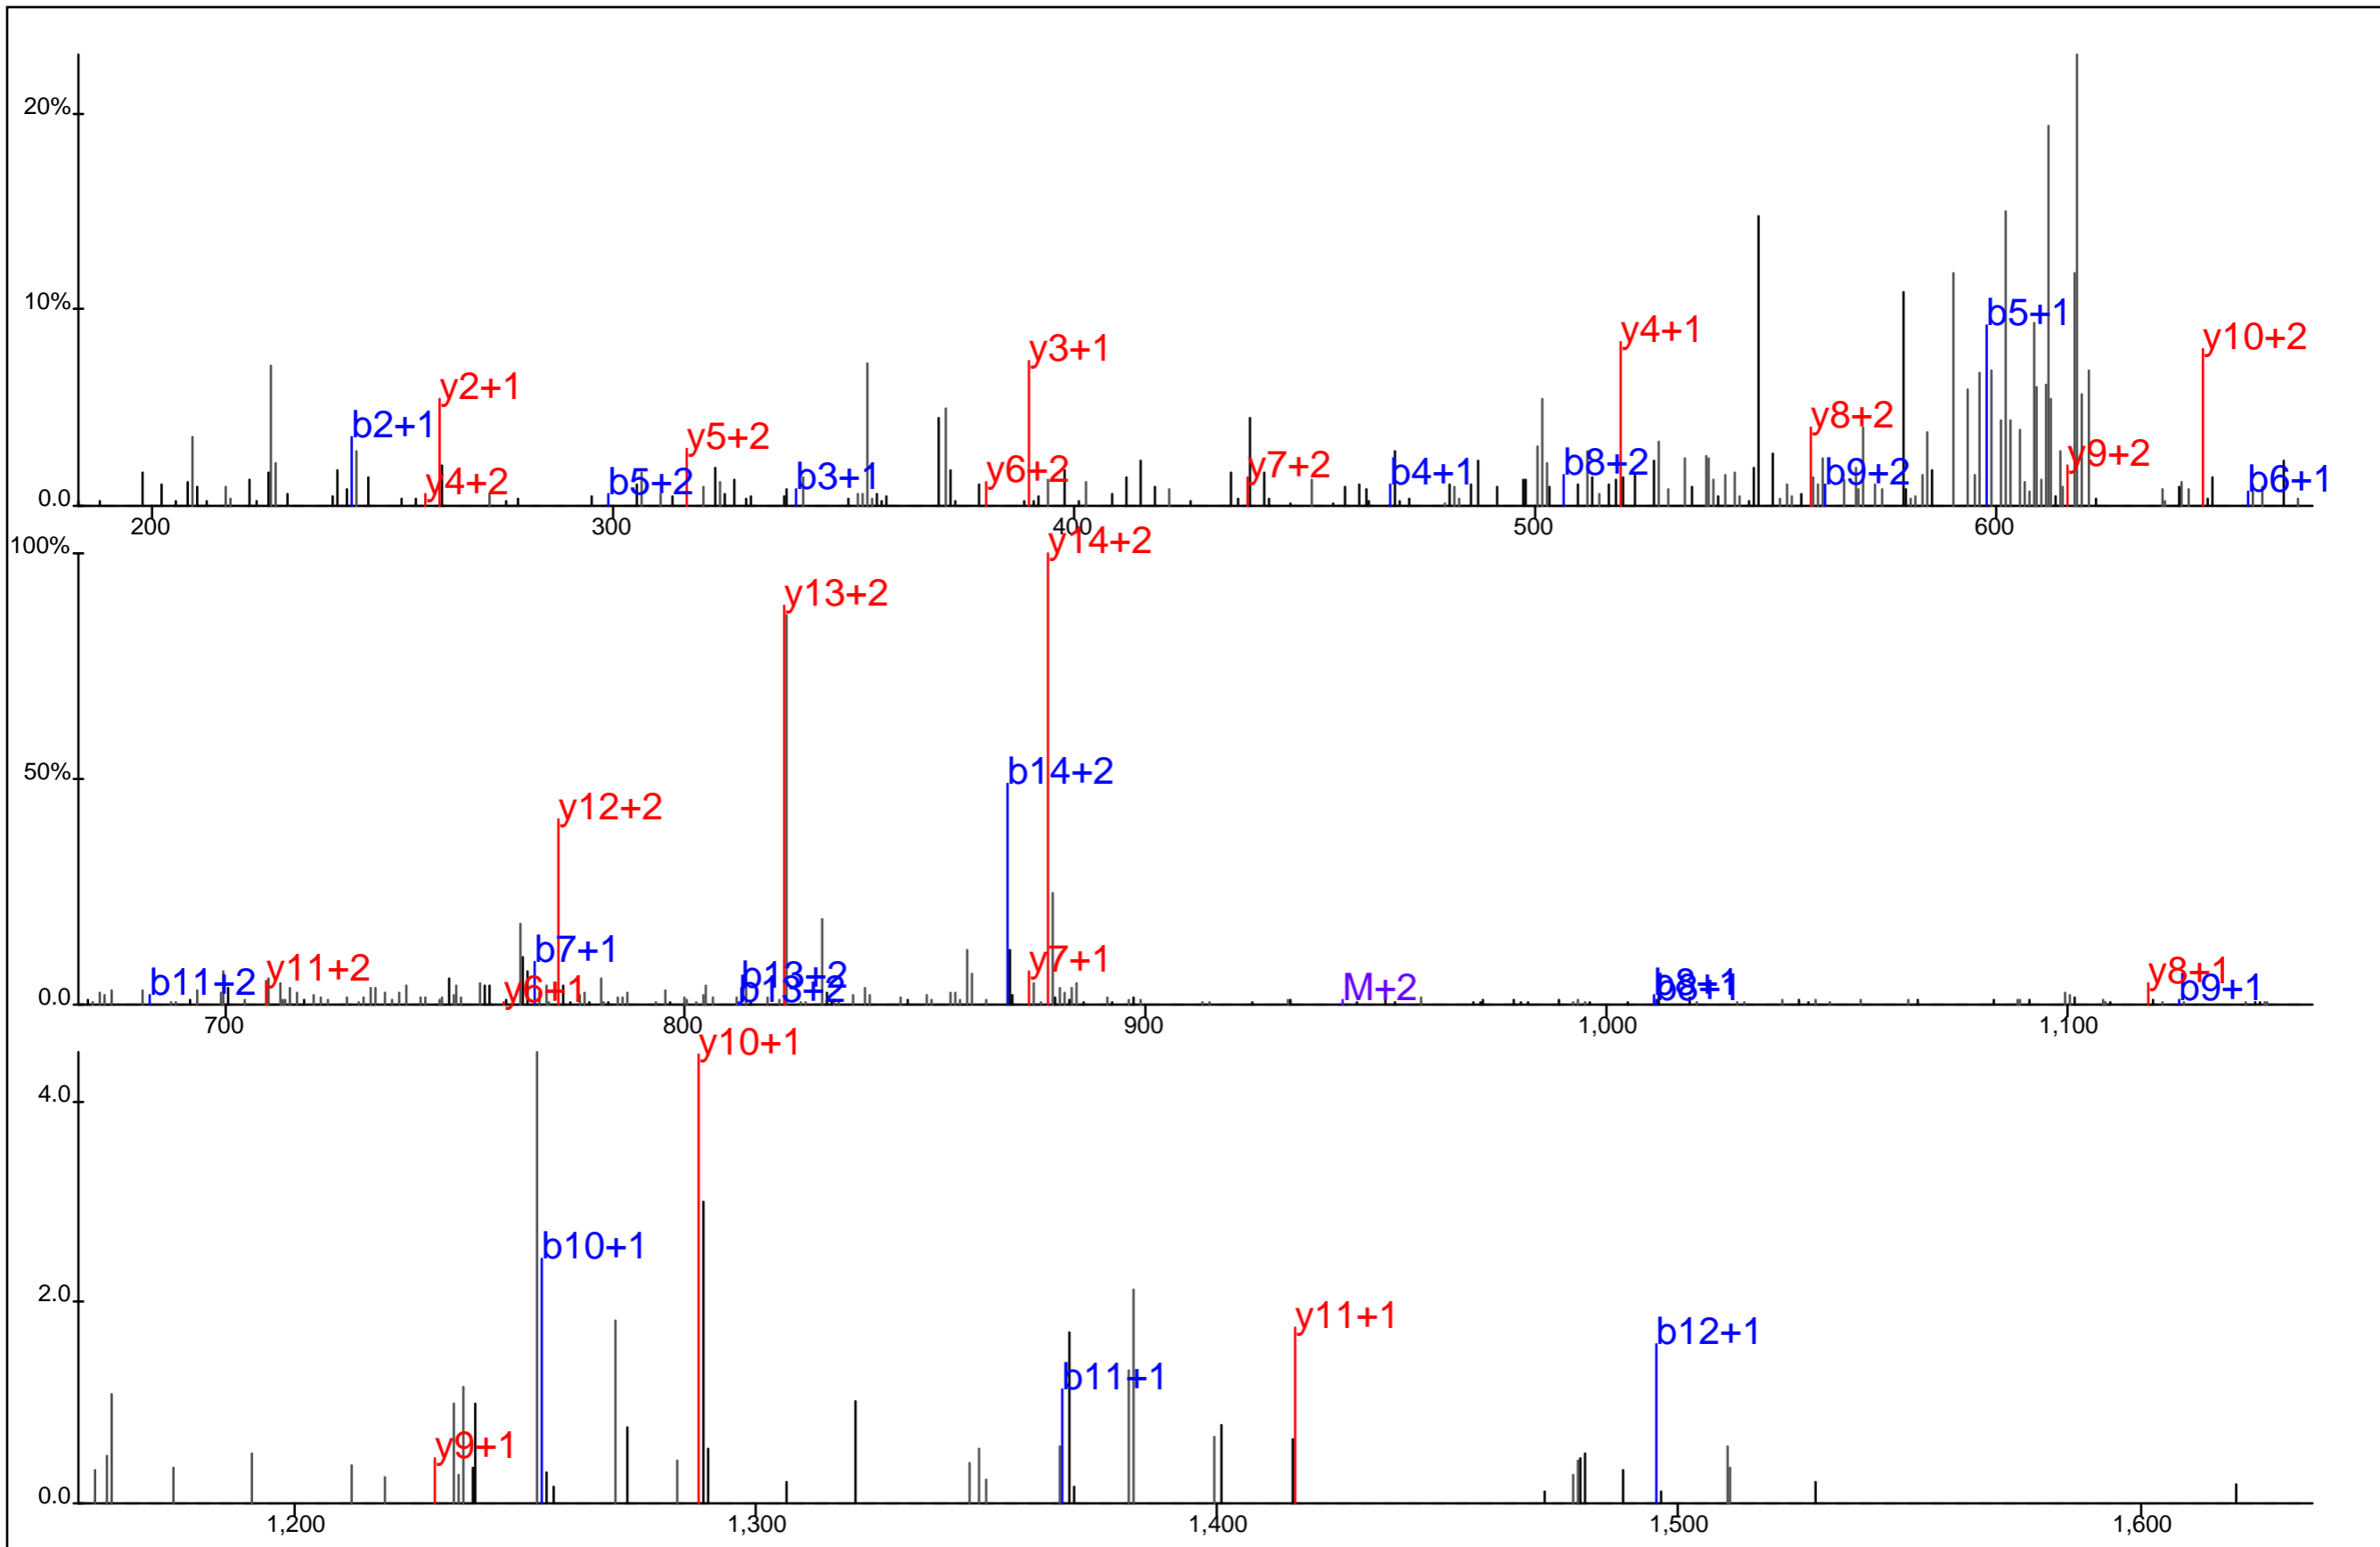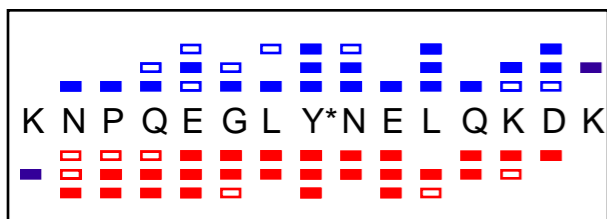

Protein Name: CD3 zeta  
 gi Accession: 37595565  
 Precursor Mass: 628.6358+3  
 Delta Mass: 1.607 ppm  
 XCorr: 33.16

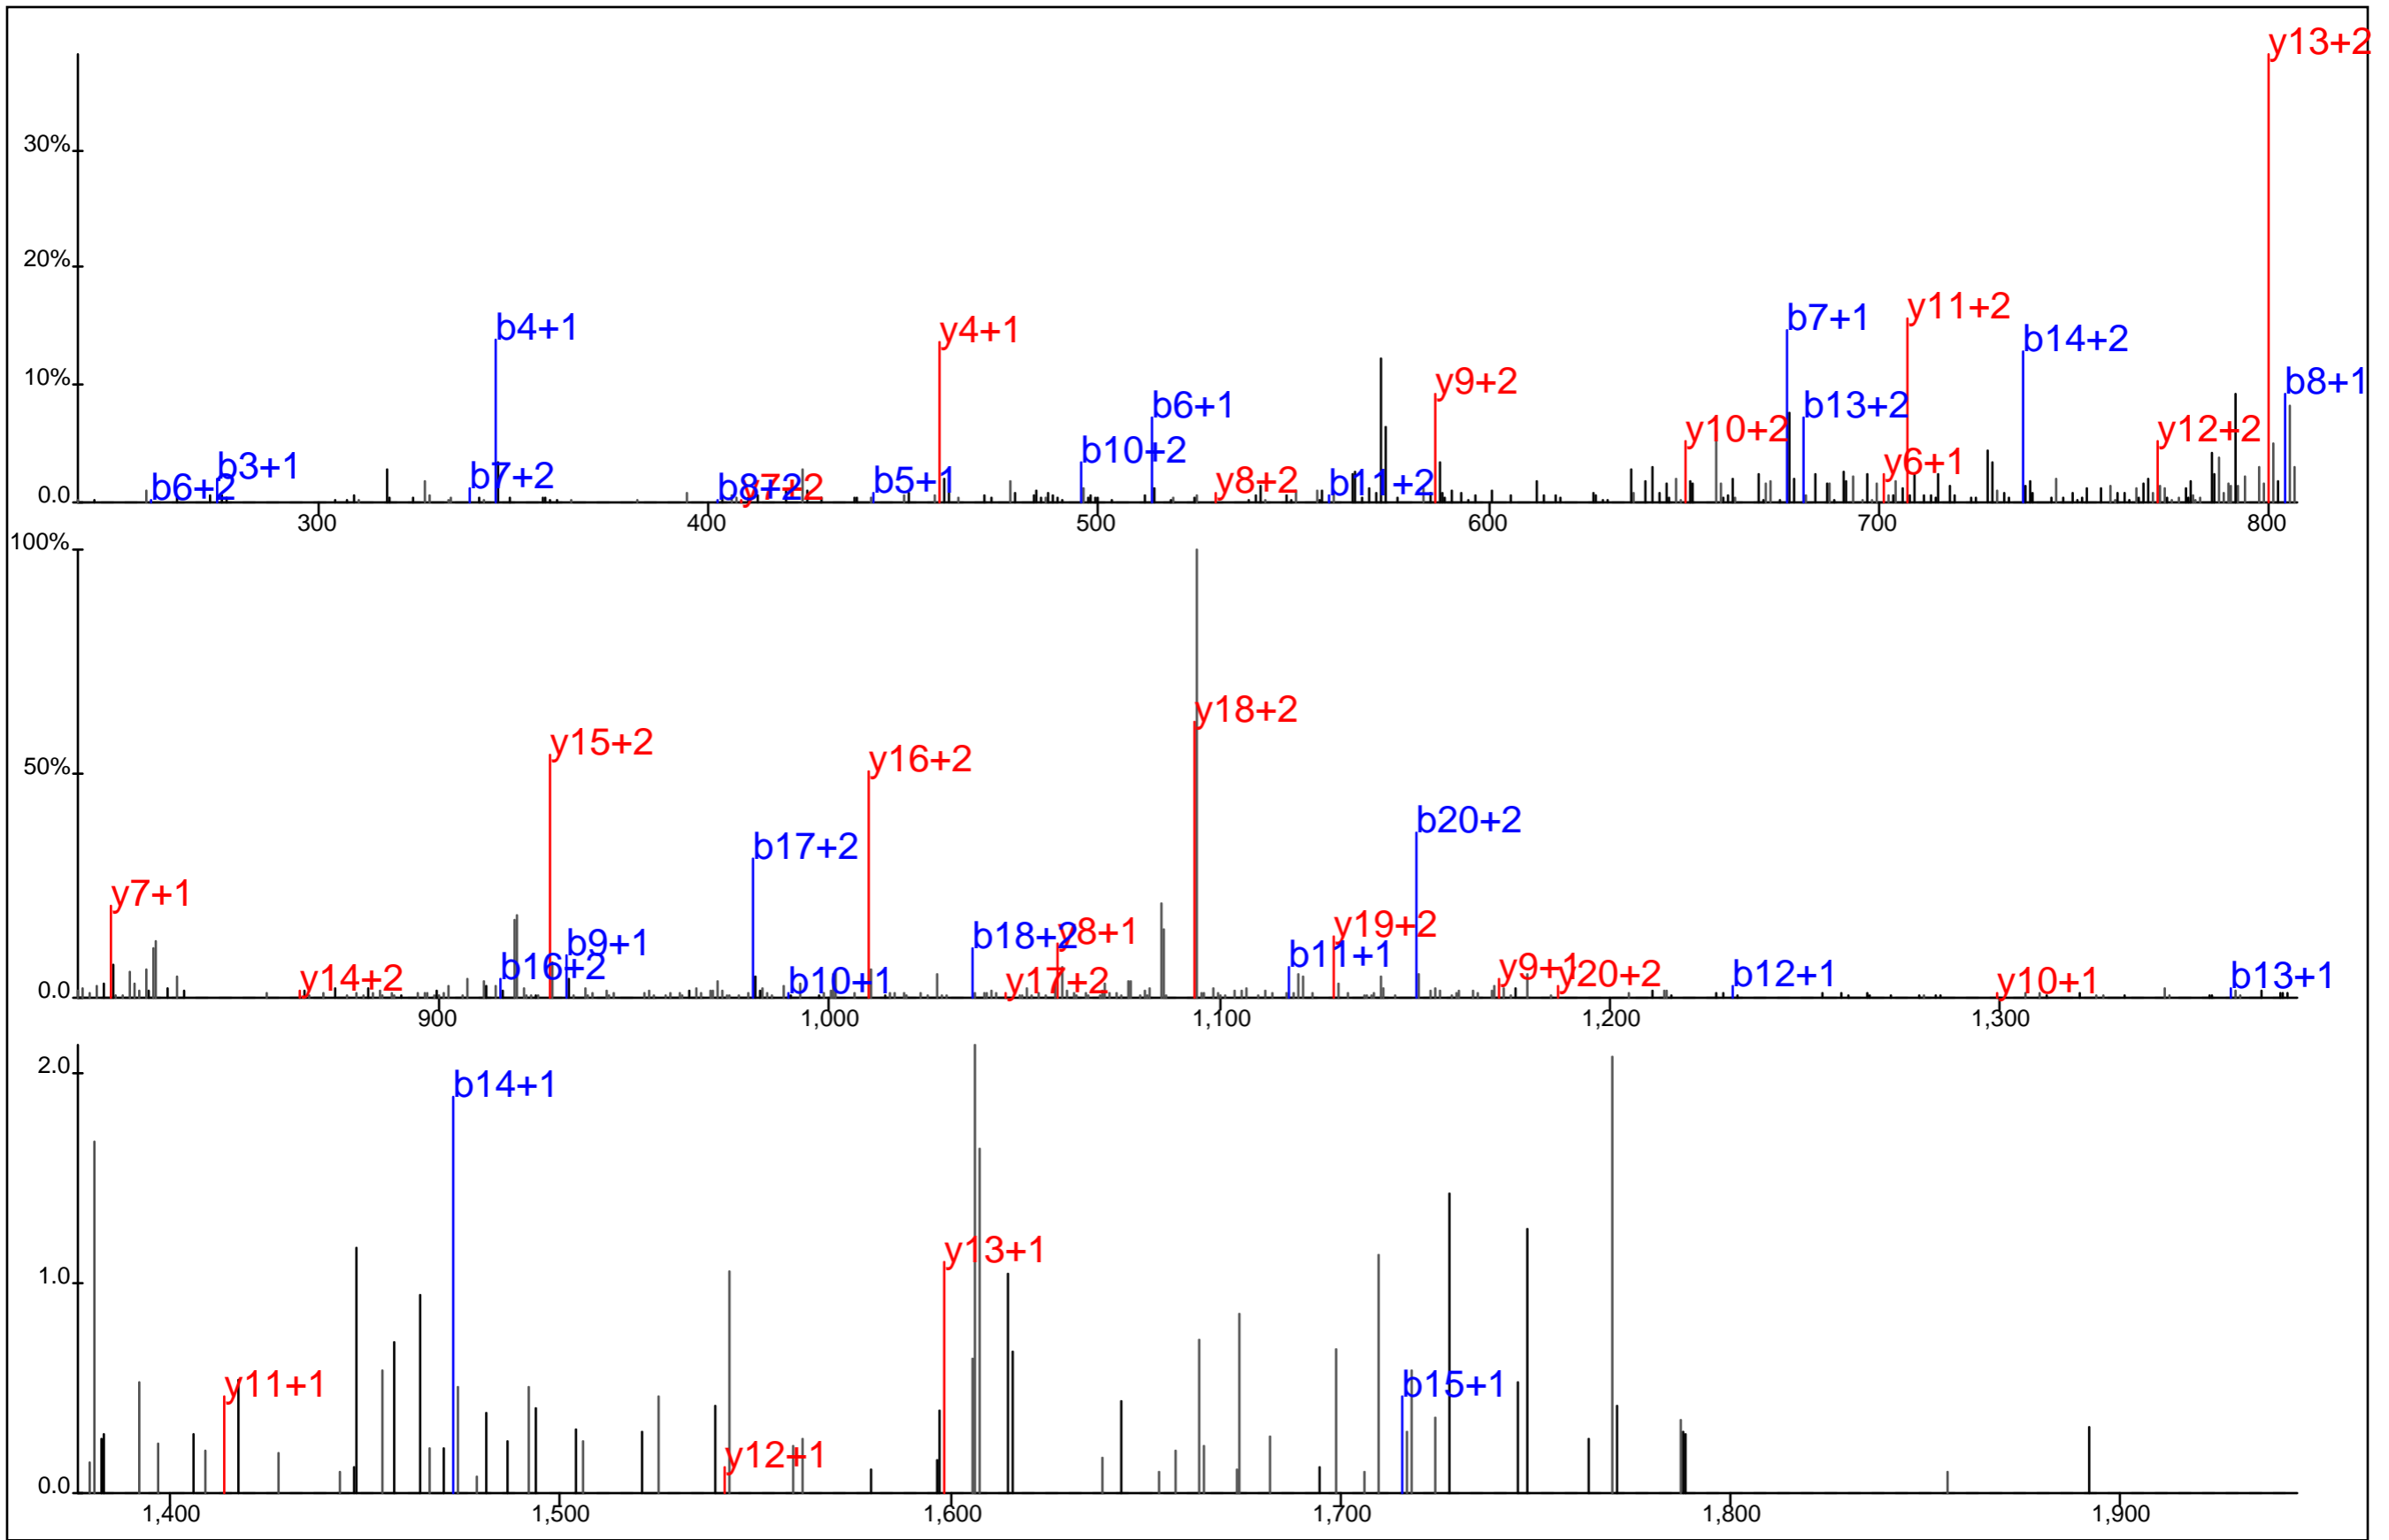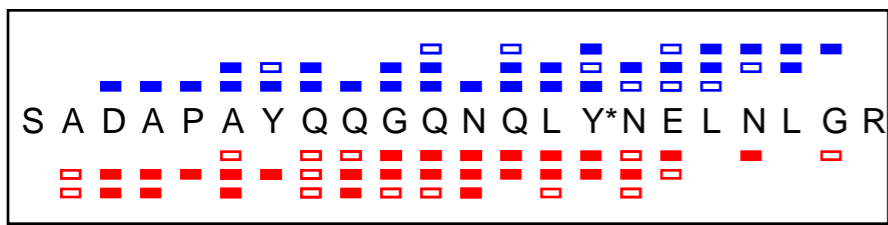

Protein Name: CD3 zeta  
 gi Accession: 37595565  
 Precursor Mass: 844.0529+3  
 Delta Mass: 3.331 ppm  
 XCorr: 50.18



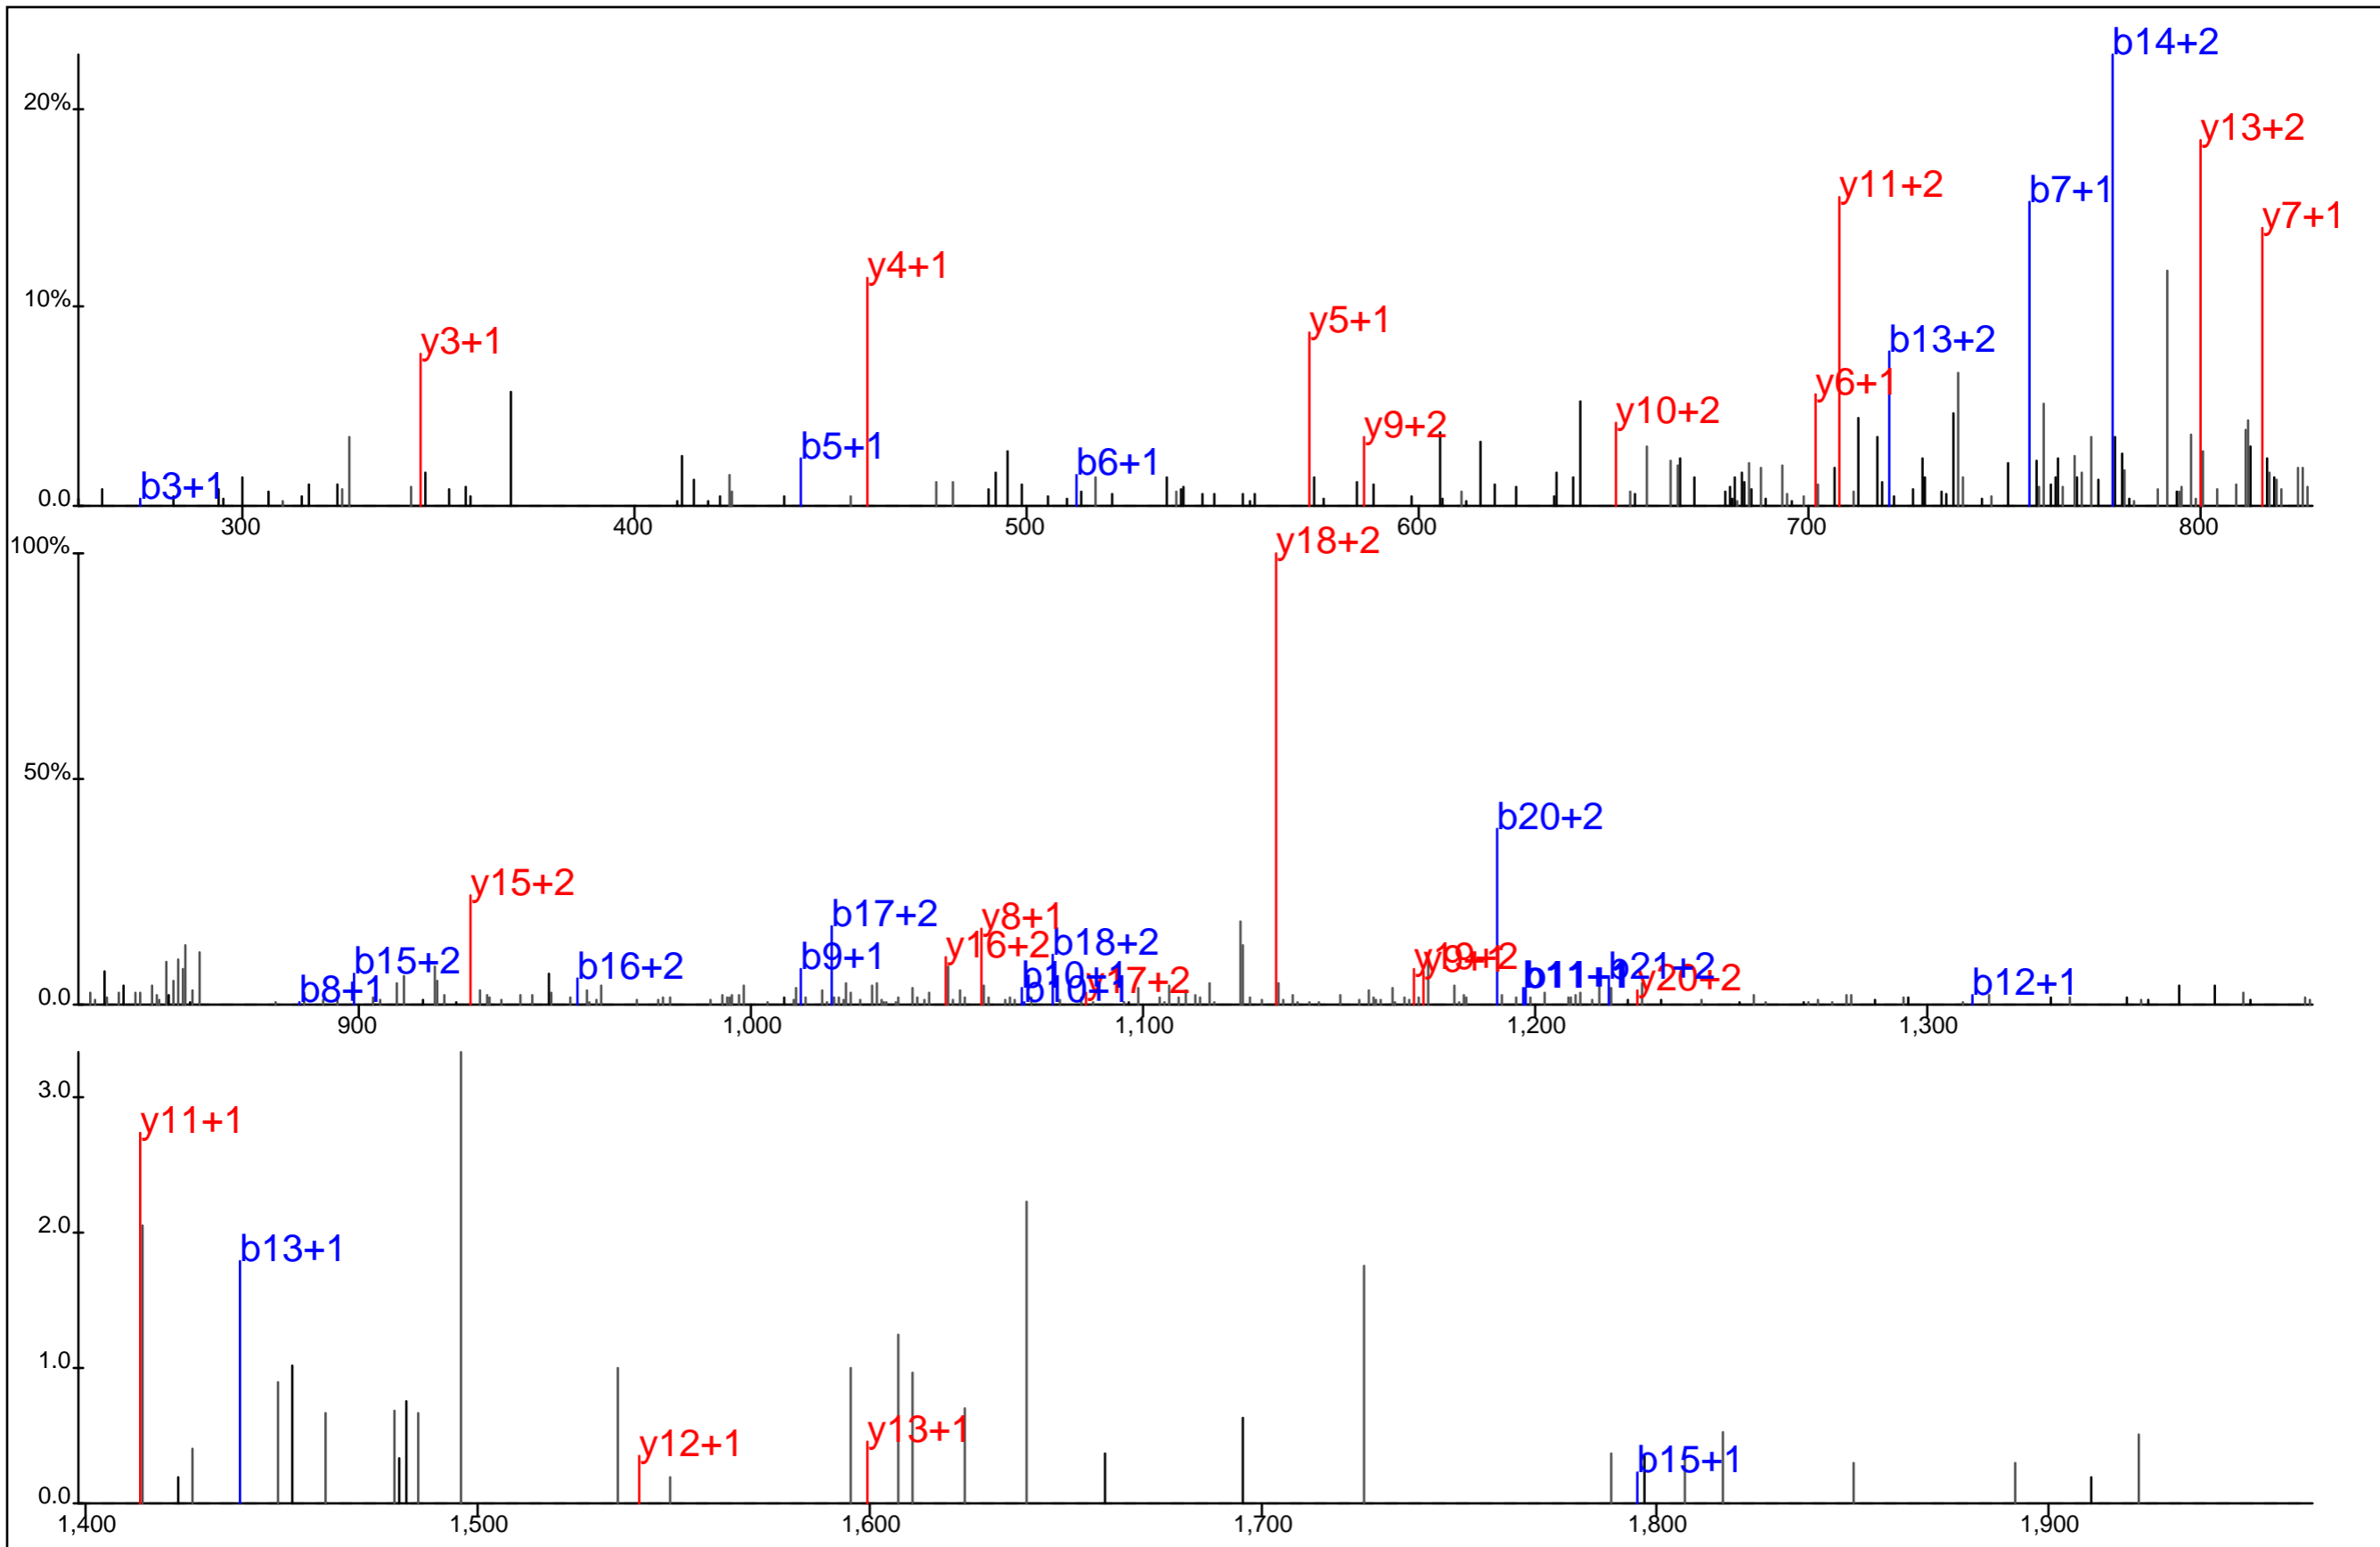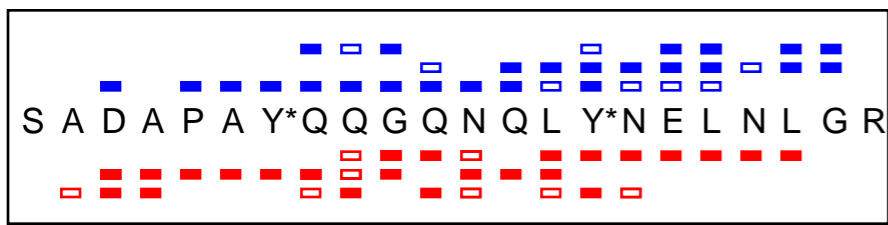

Protein Name: CD3 zeta  
 gi Accession: 37595565  
 Precursor Mass: 870.7053+3  
 Delta Mass: 0.330 ppm  
 XCorr: 42.5

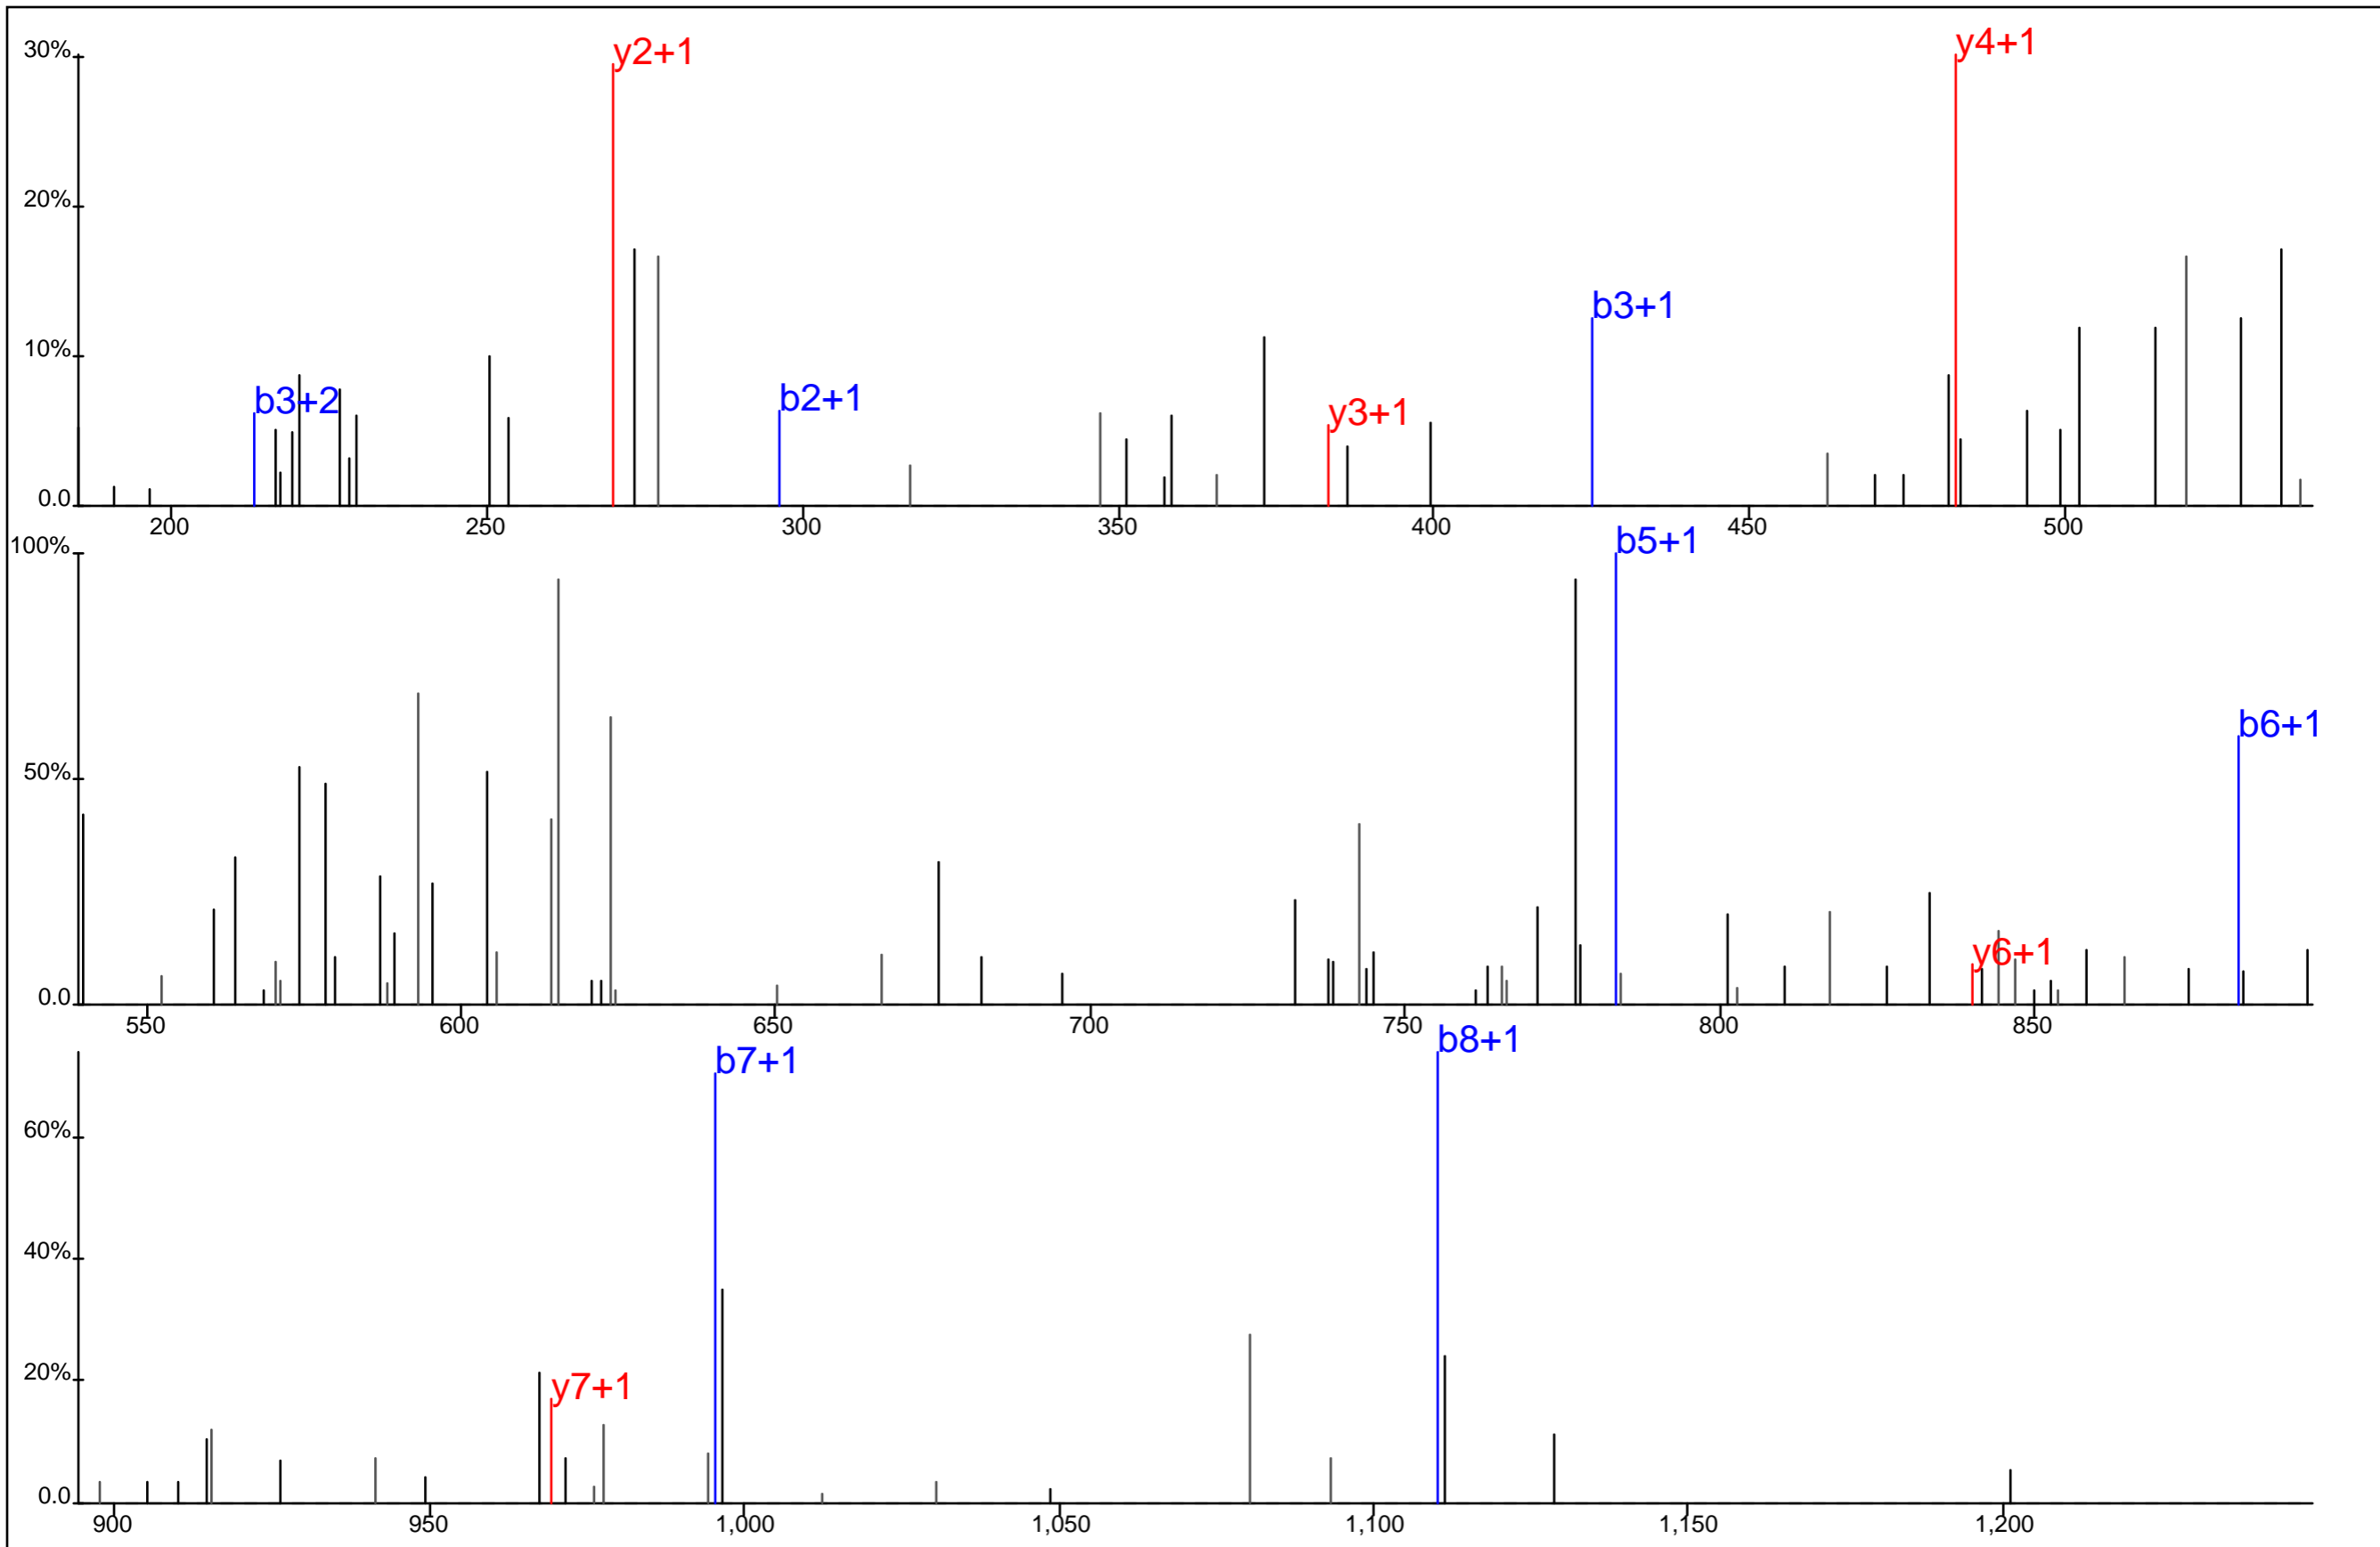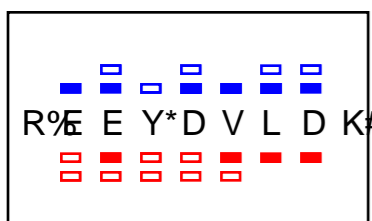

Protein Name: CD3 zeta  
 gi Accession: 37595565  
 Precursor Mass: 632.7826+2  
 Delta Mass: 0.267 ppm  
 XCorr: 28.42

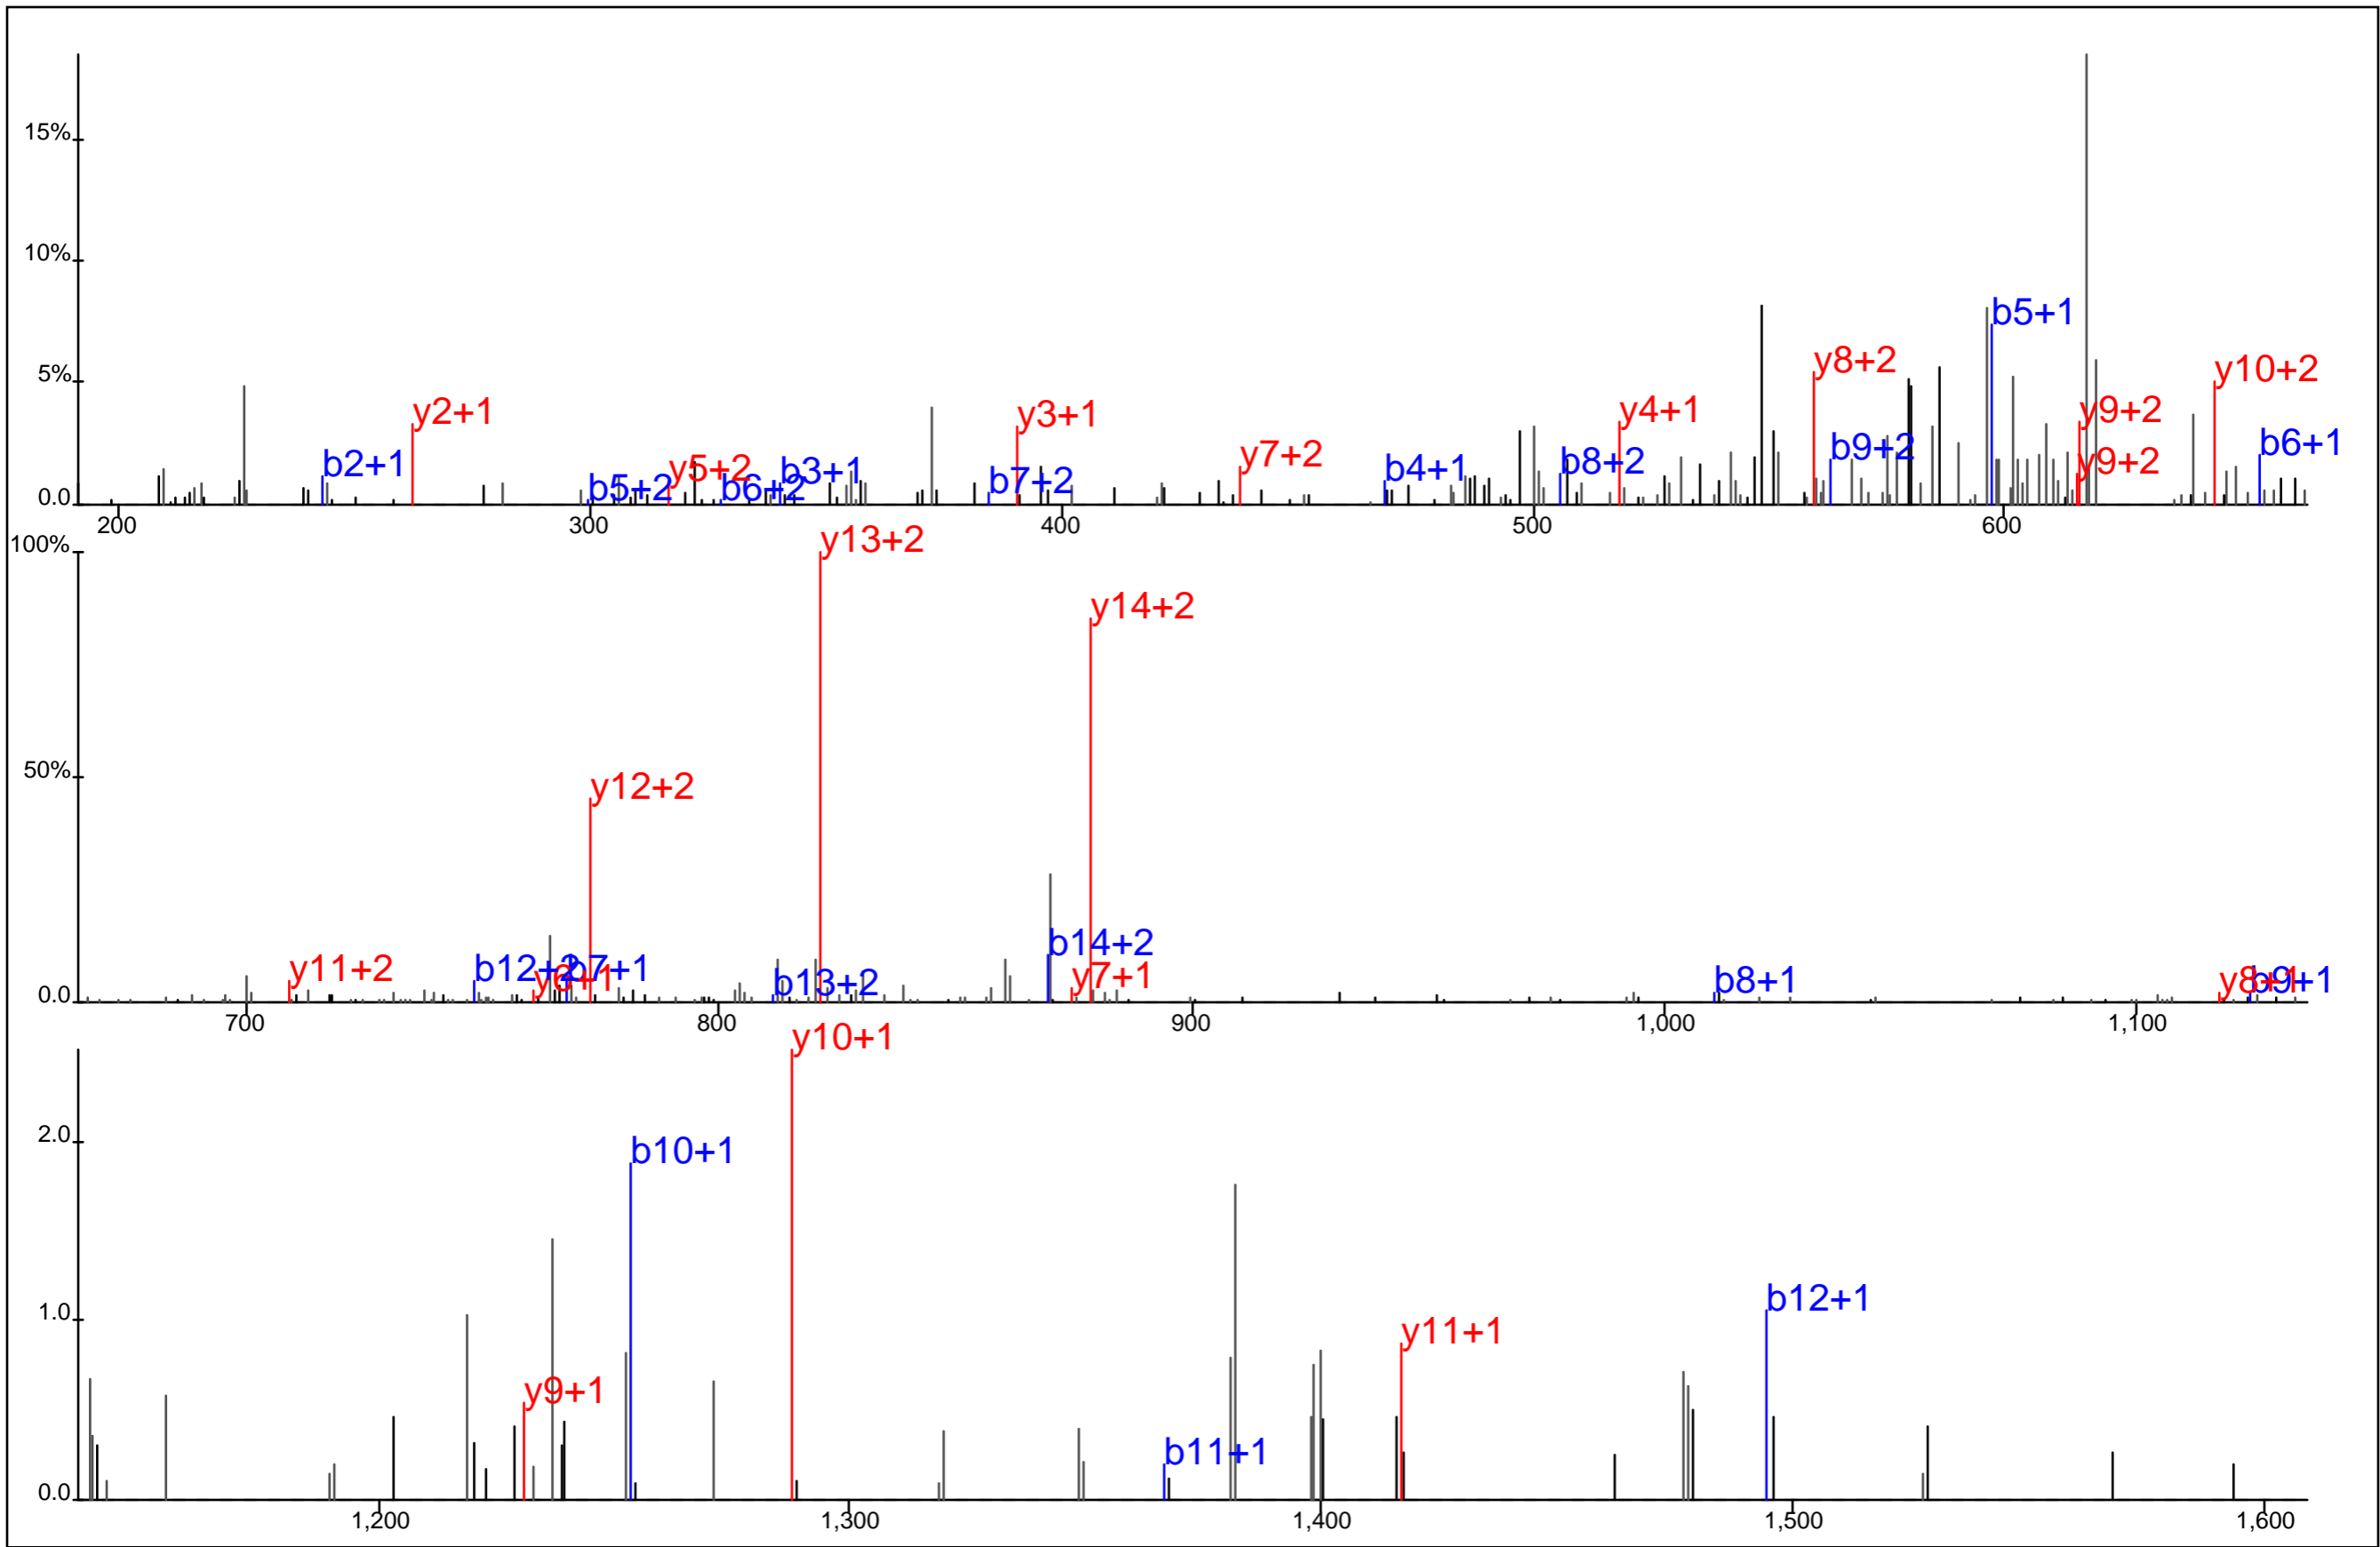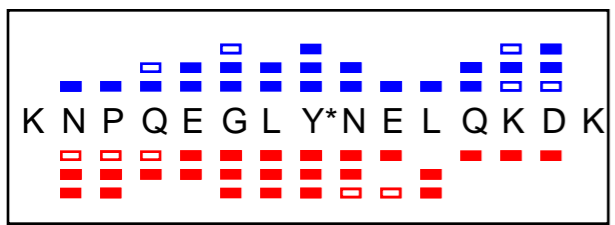

Protein Name: CD3 zeta  
 gi Accession: 37595565  
 Precursor Mass: 628.6362+3  
 Delta Mass: 2.192 ppm  
 XCorr: 40.94

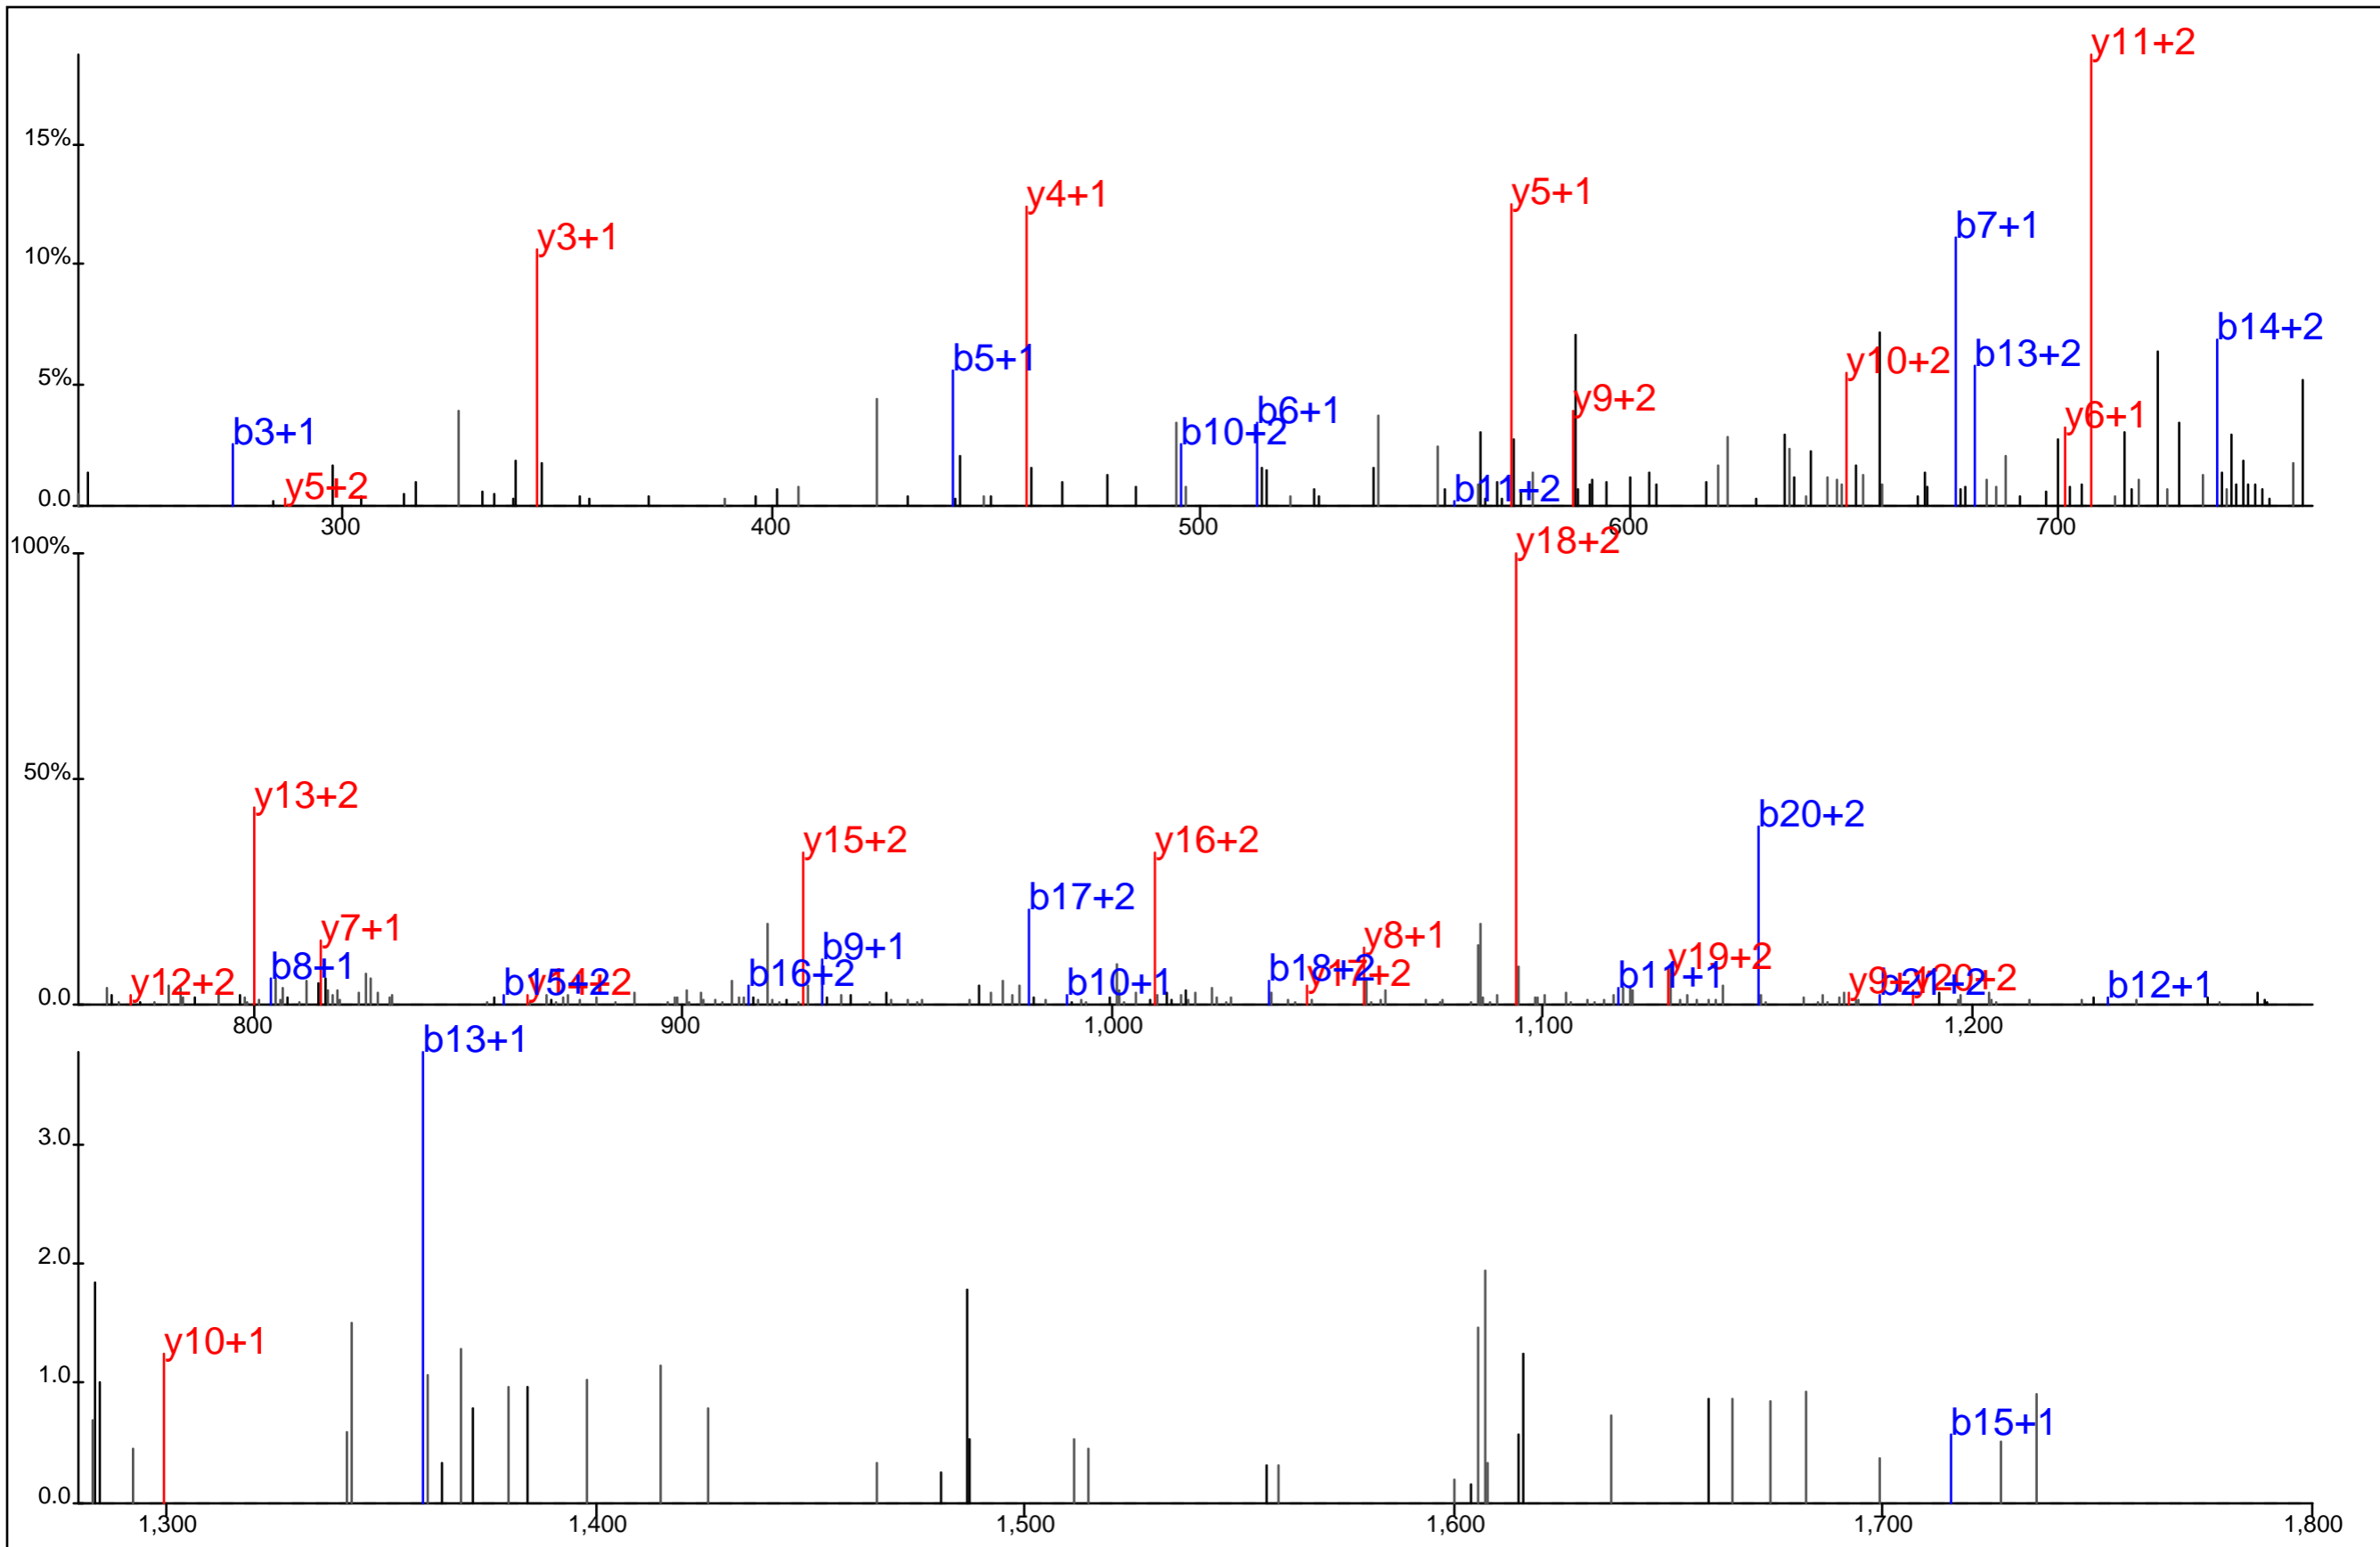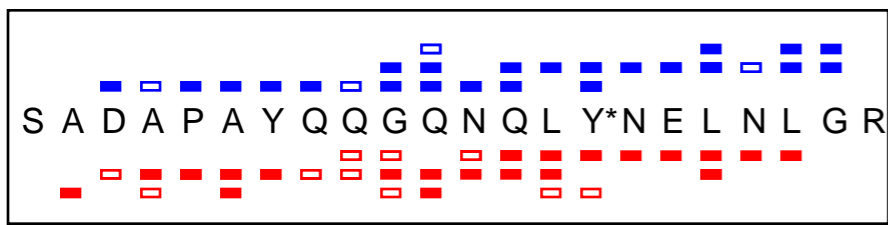

Protein Name: CD3 zeta  
 gi Accession: 37595565  
 Precursor Mass: 844.0544+3  
 Delta Mass: 5.067 ppm  
 XCorr: 45.22

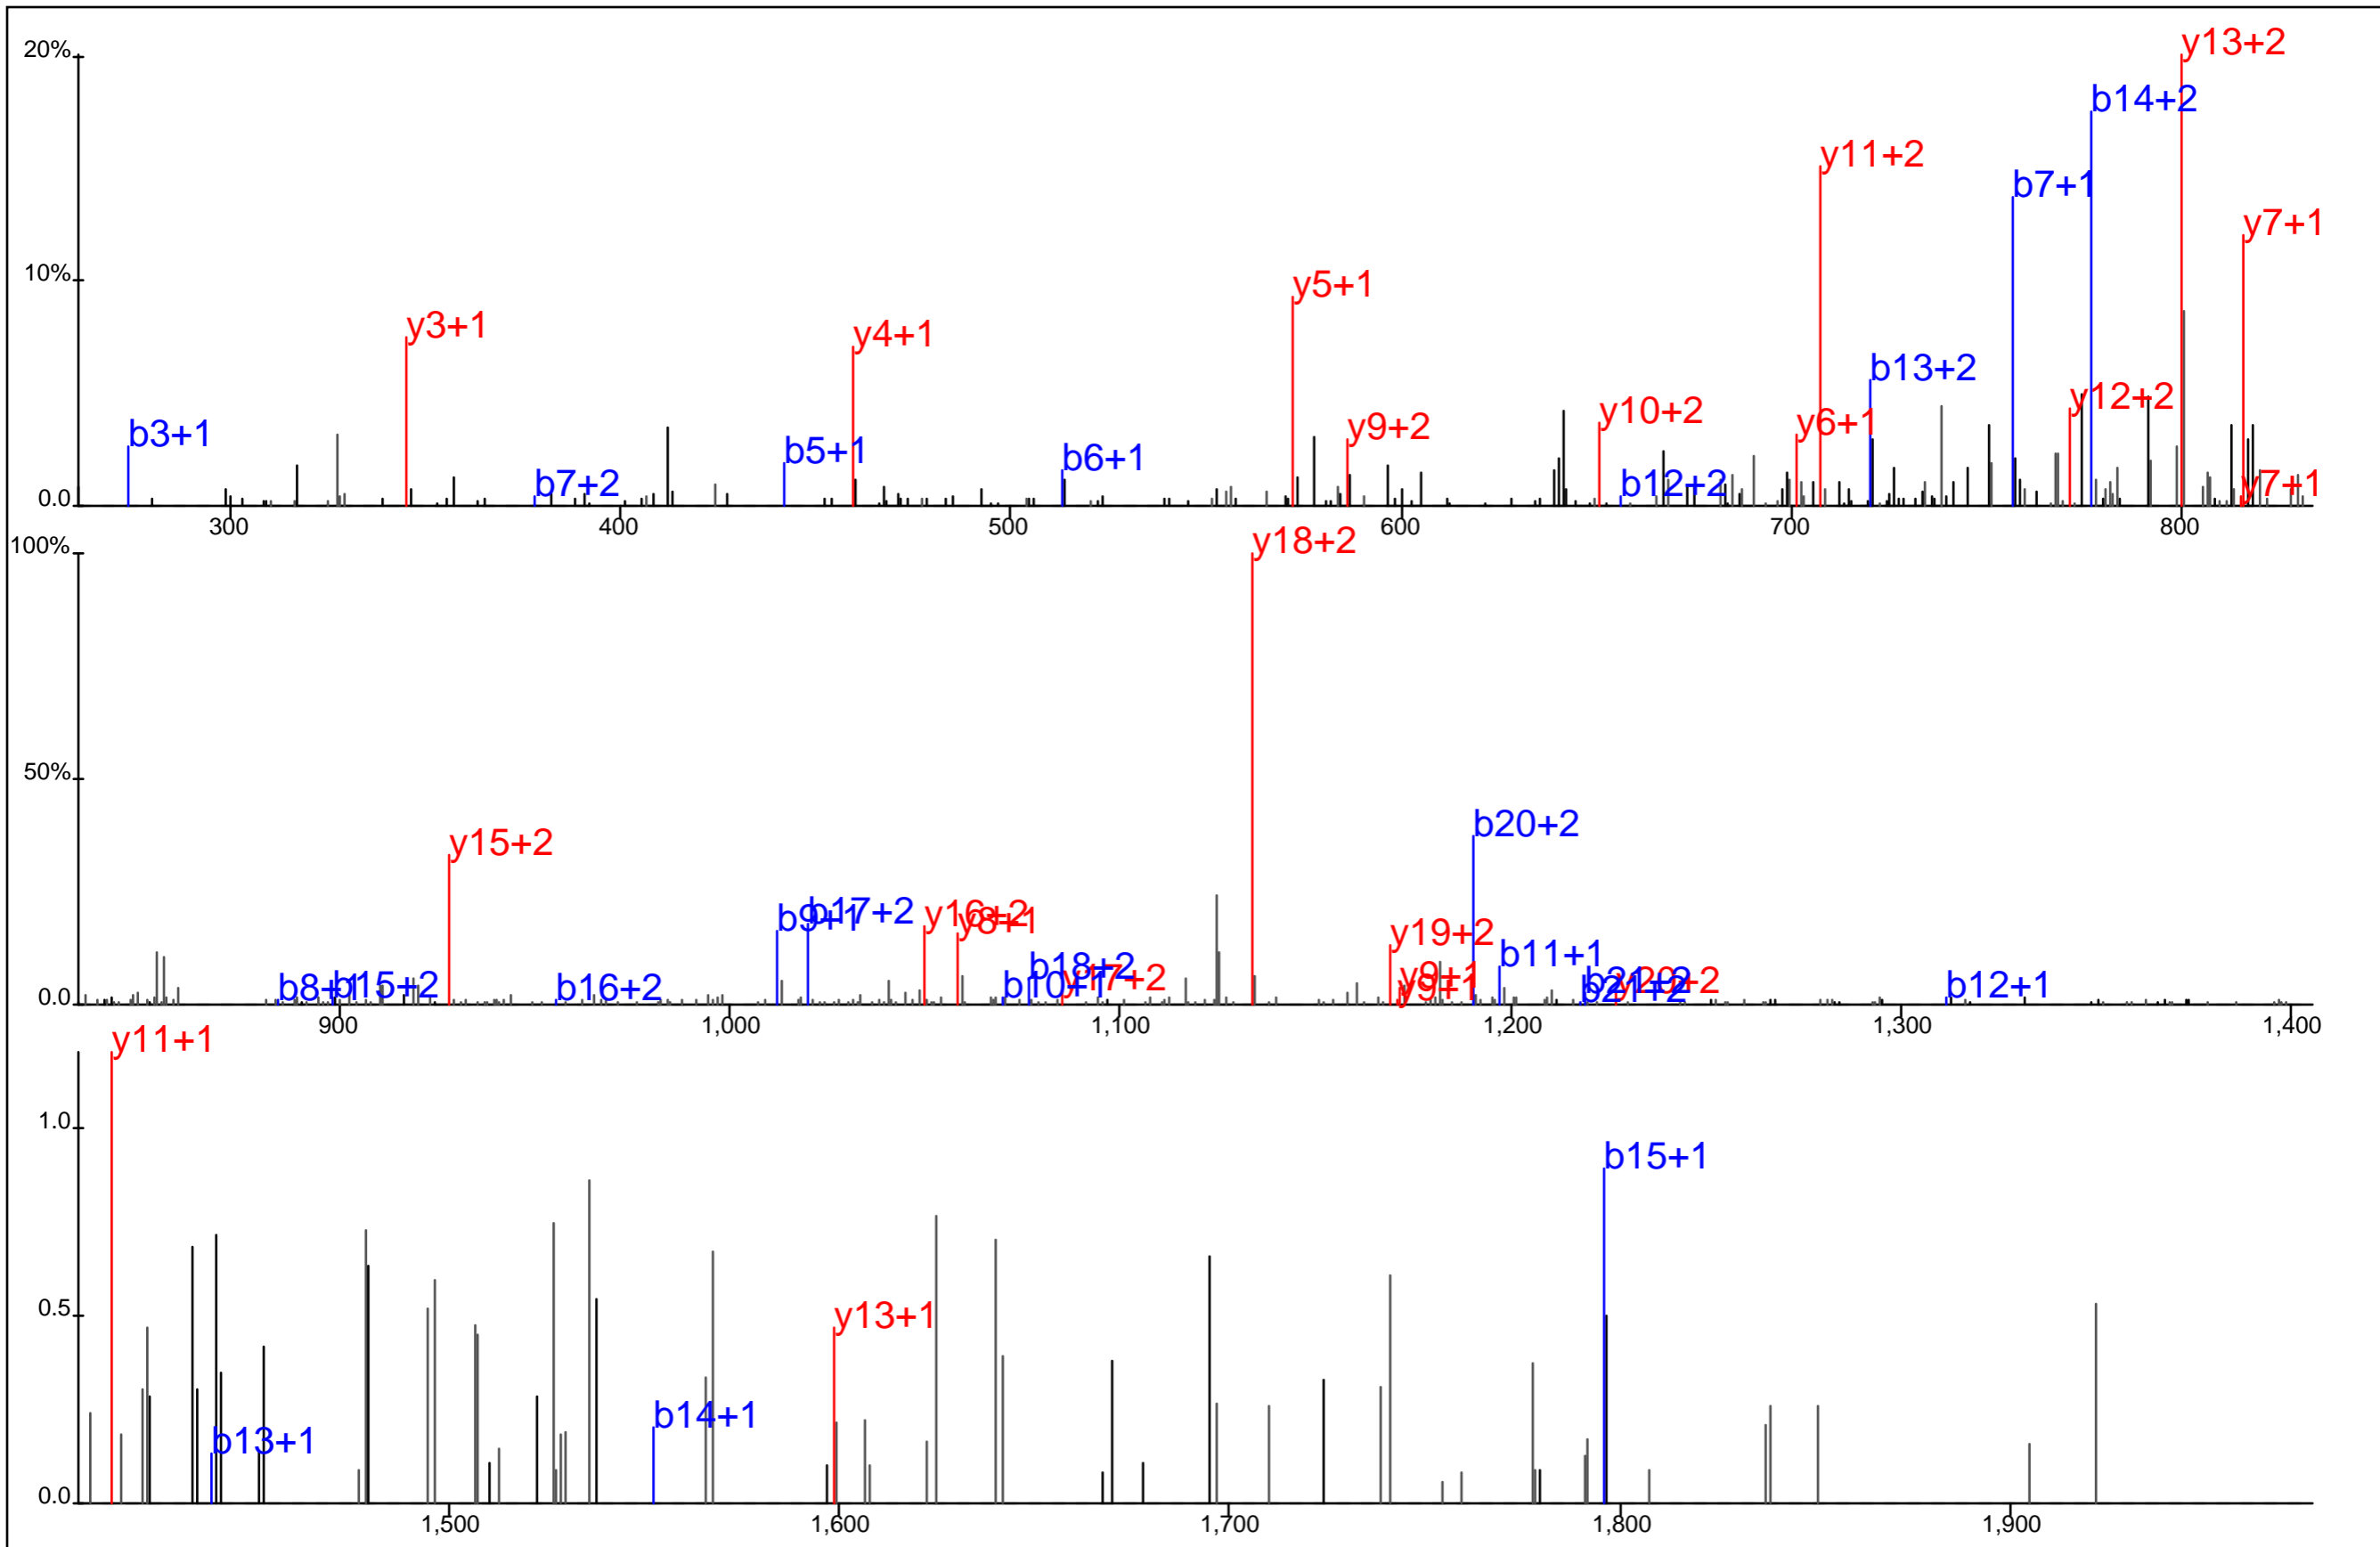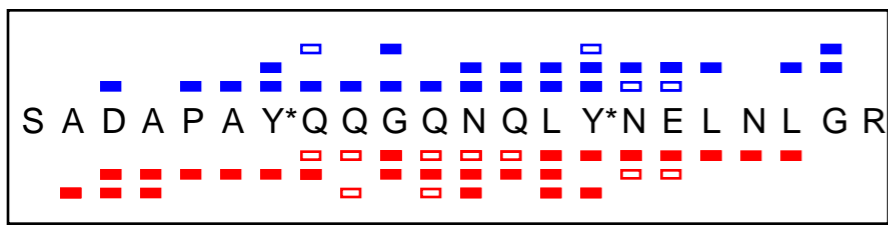

Protein Name: CD3 zeta  
 gi Accession: 37595565  
 Precursor Mass: 870.7090+3  
 Delta Mass: 4.018 ppm  
 XCorr: 48.53

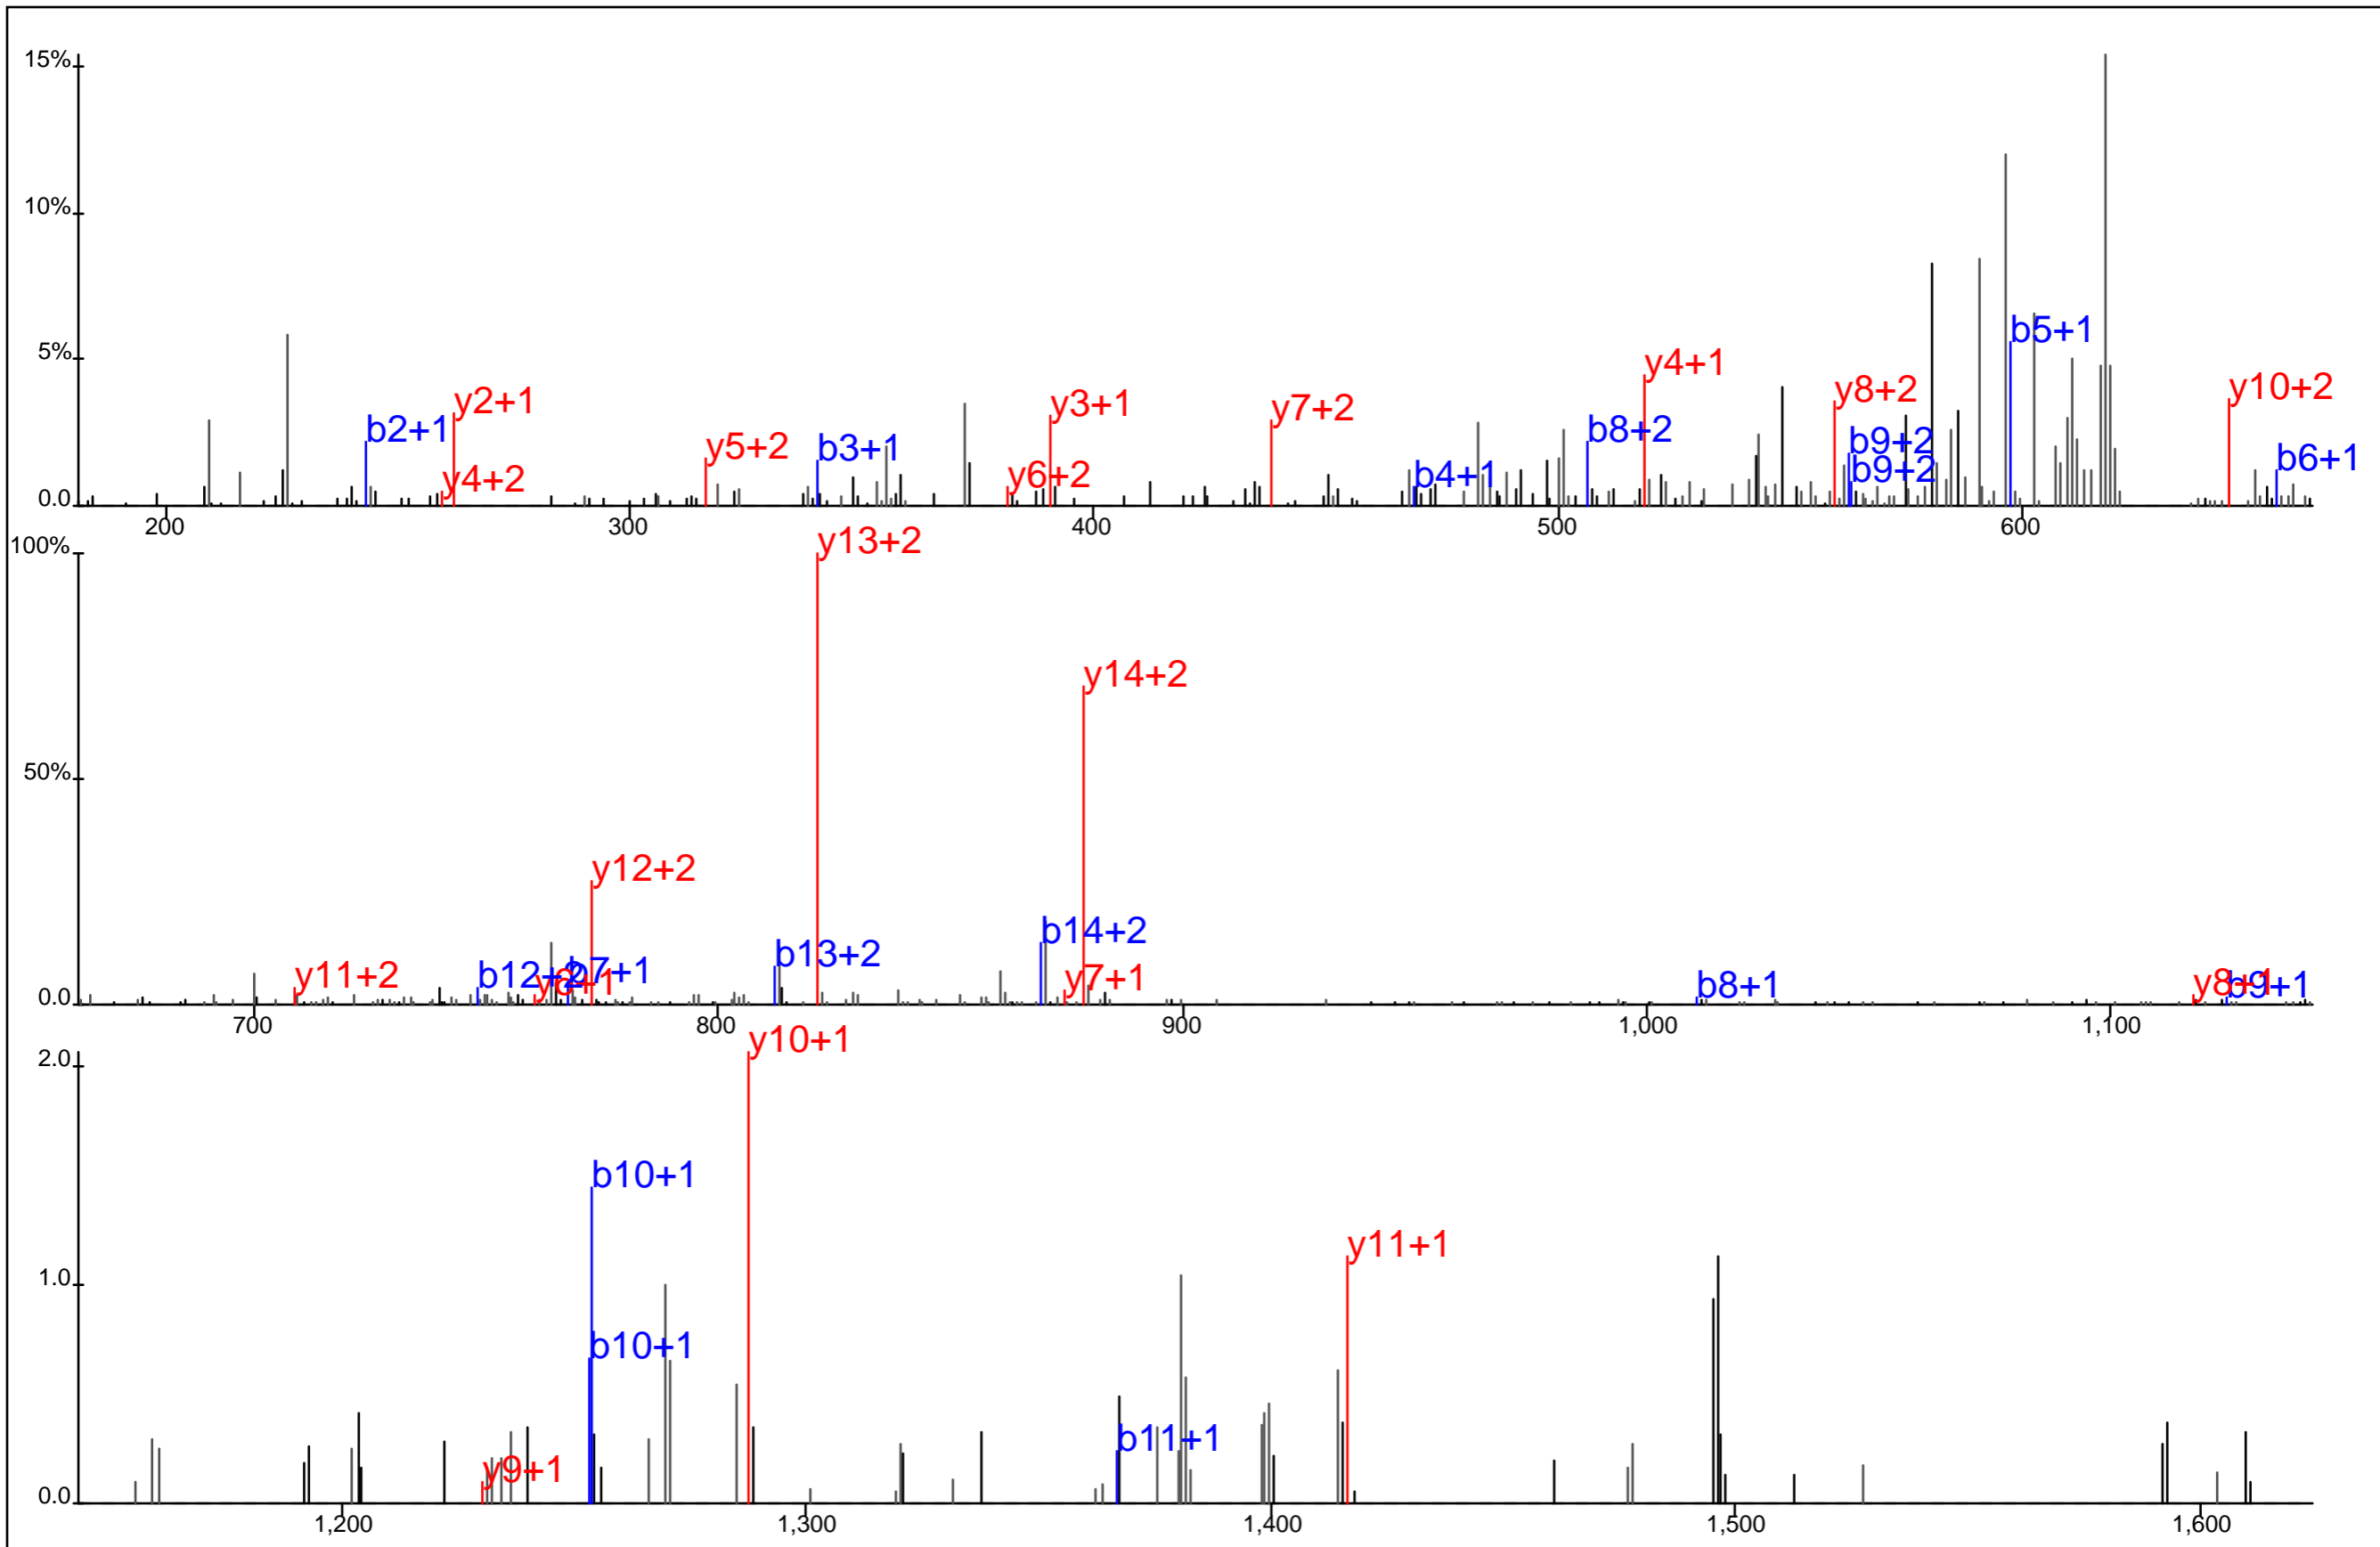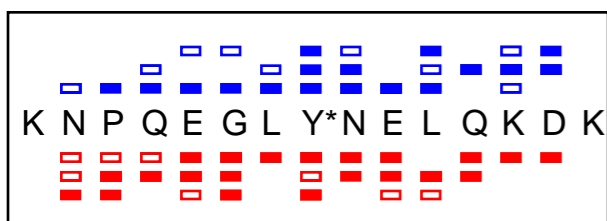

Protein Name: CD3 zeta  
 gi Accession: 37595565  
 Precursor Mass: 628.6366+3  
 Delta Mass: 2.870 ppm  
 XCorr: 40.79

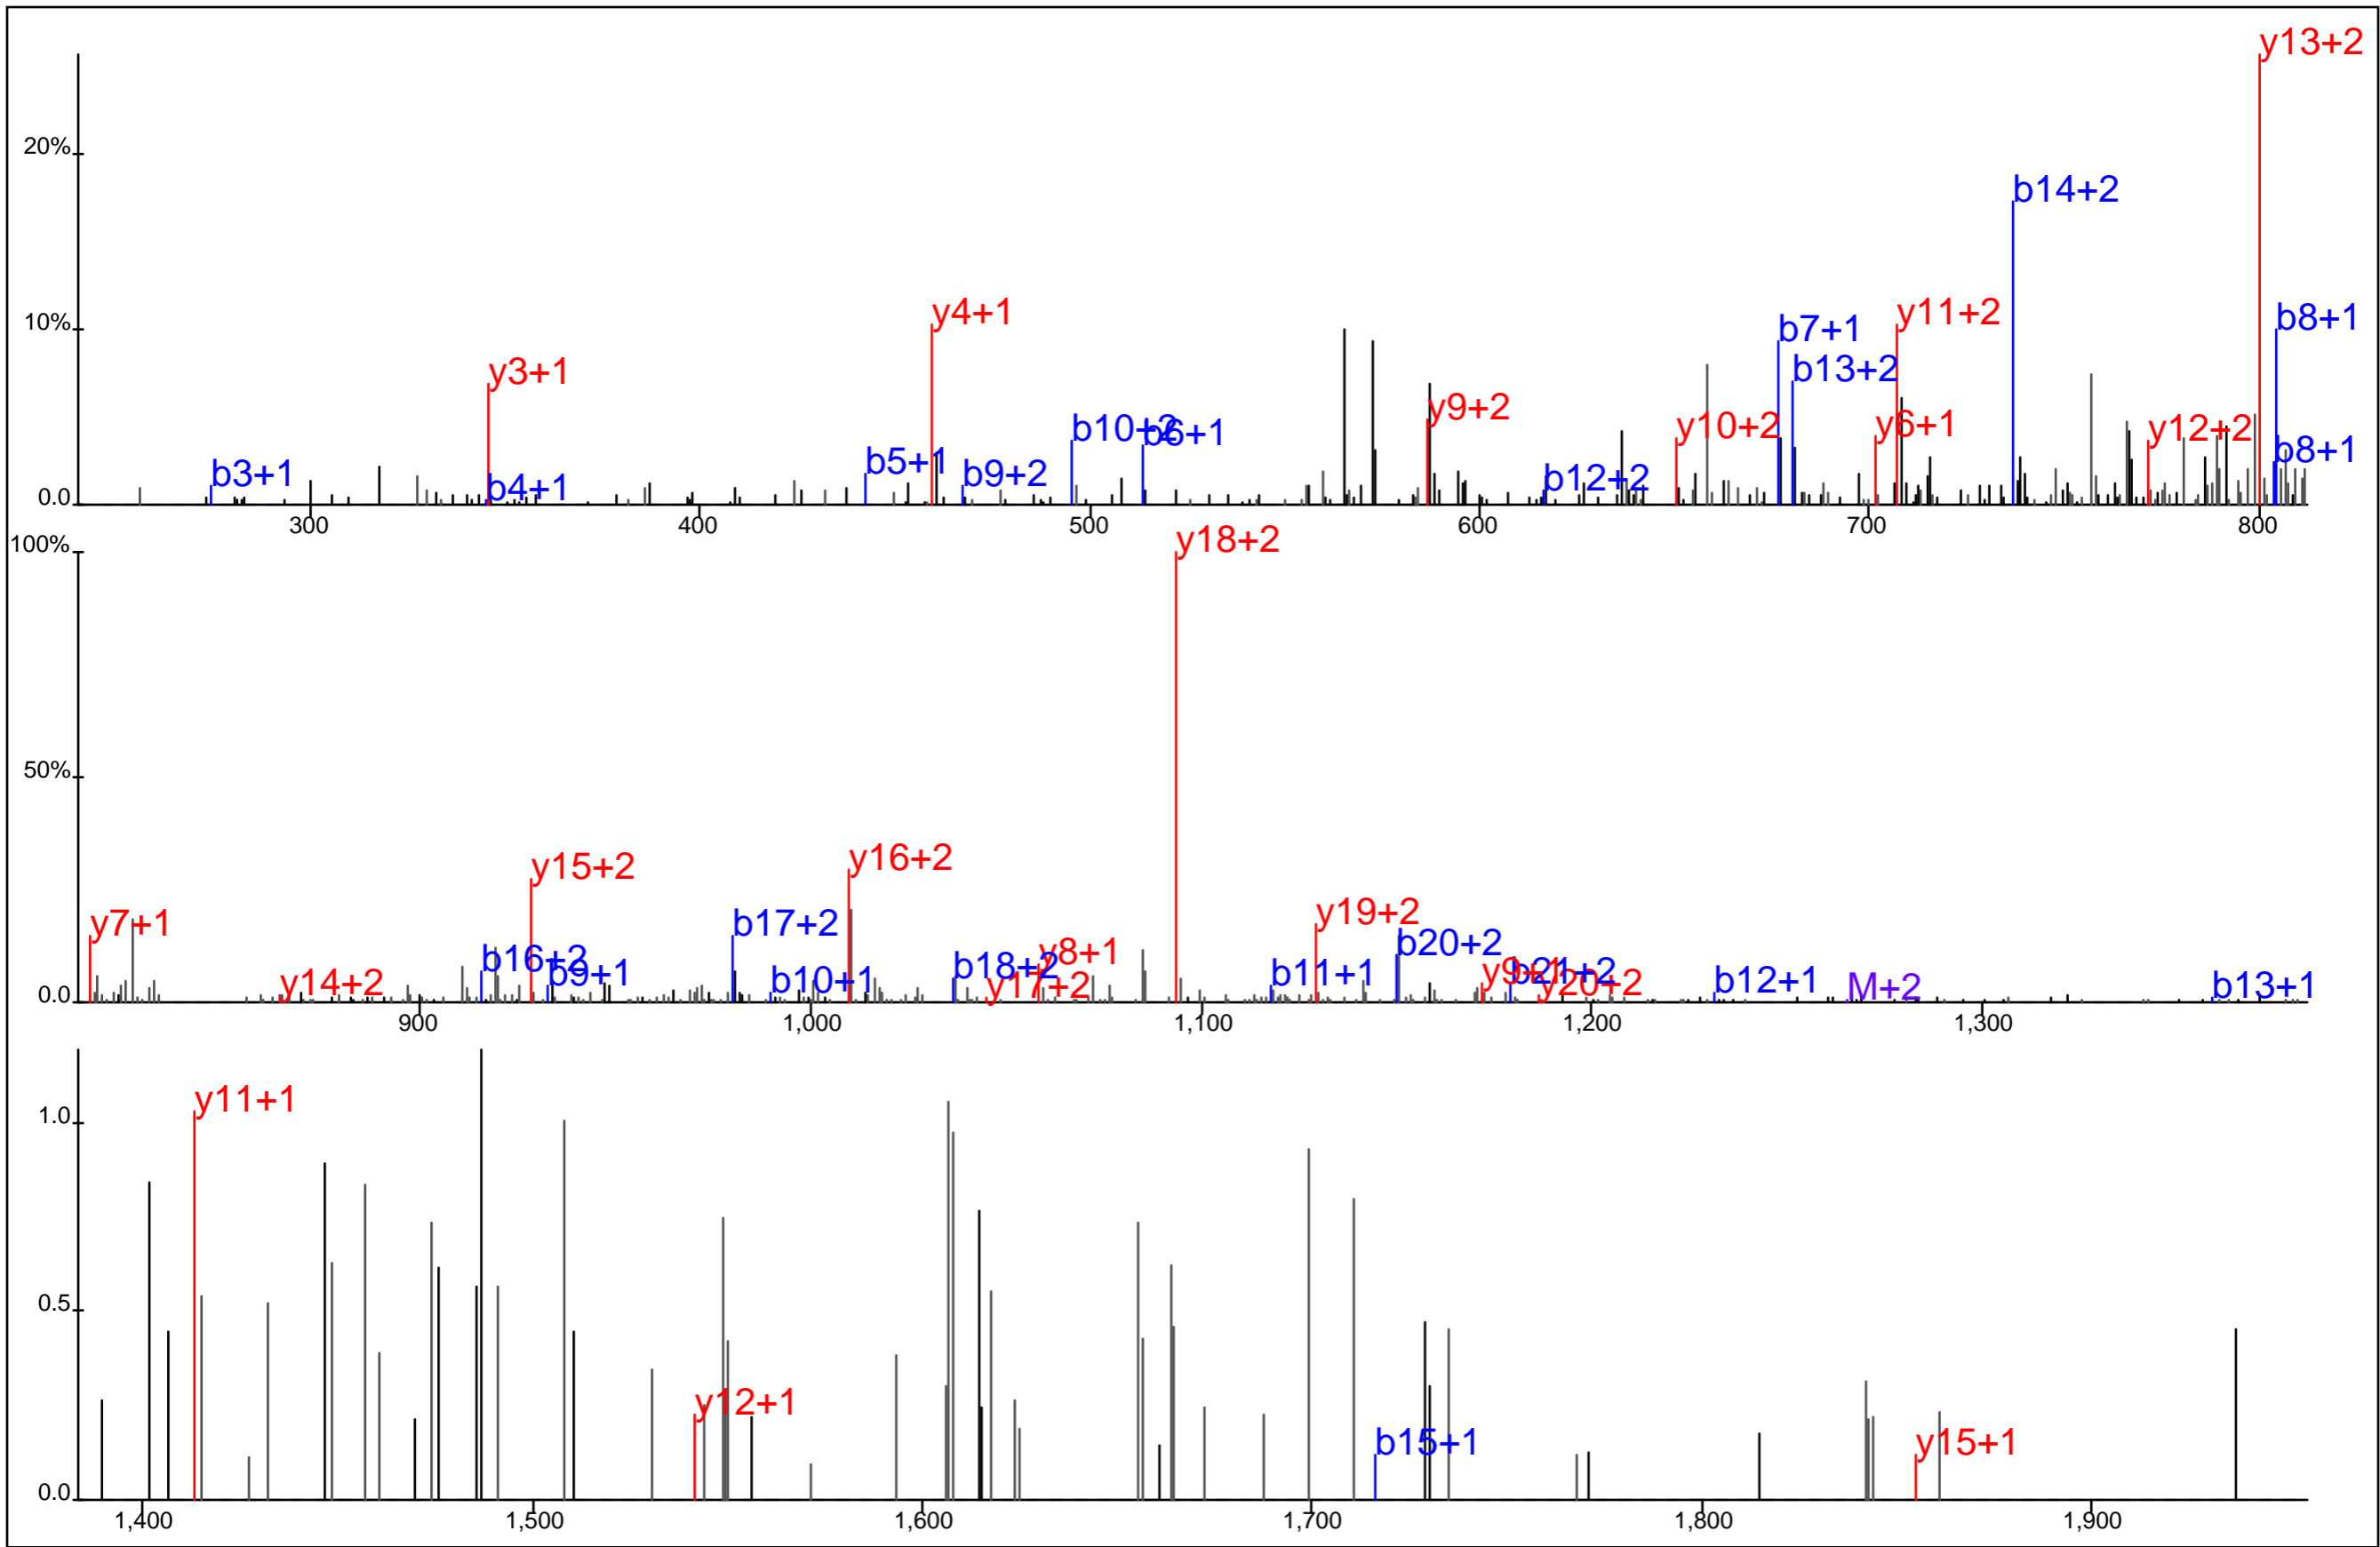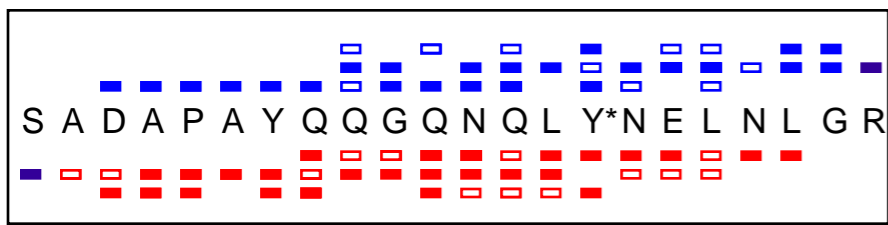

Protein Name: CD3 zeta  
 gi Accession: 37595565  
 Precursor Mass: 844.0542+3  
 Delta Mass: 4.848 ppm  
 XCorr: 40.49

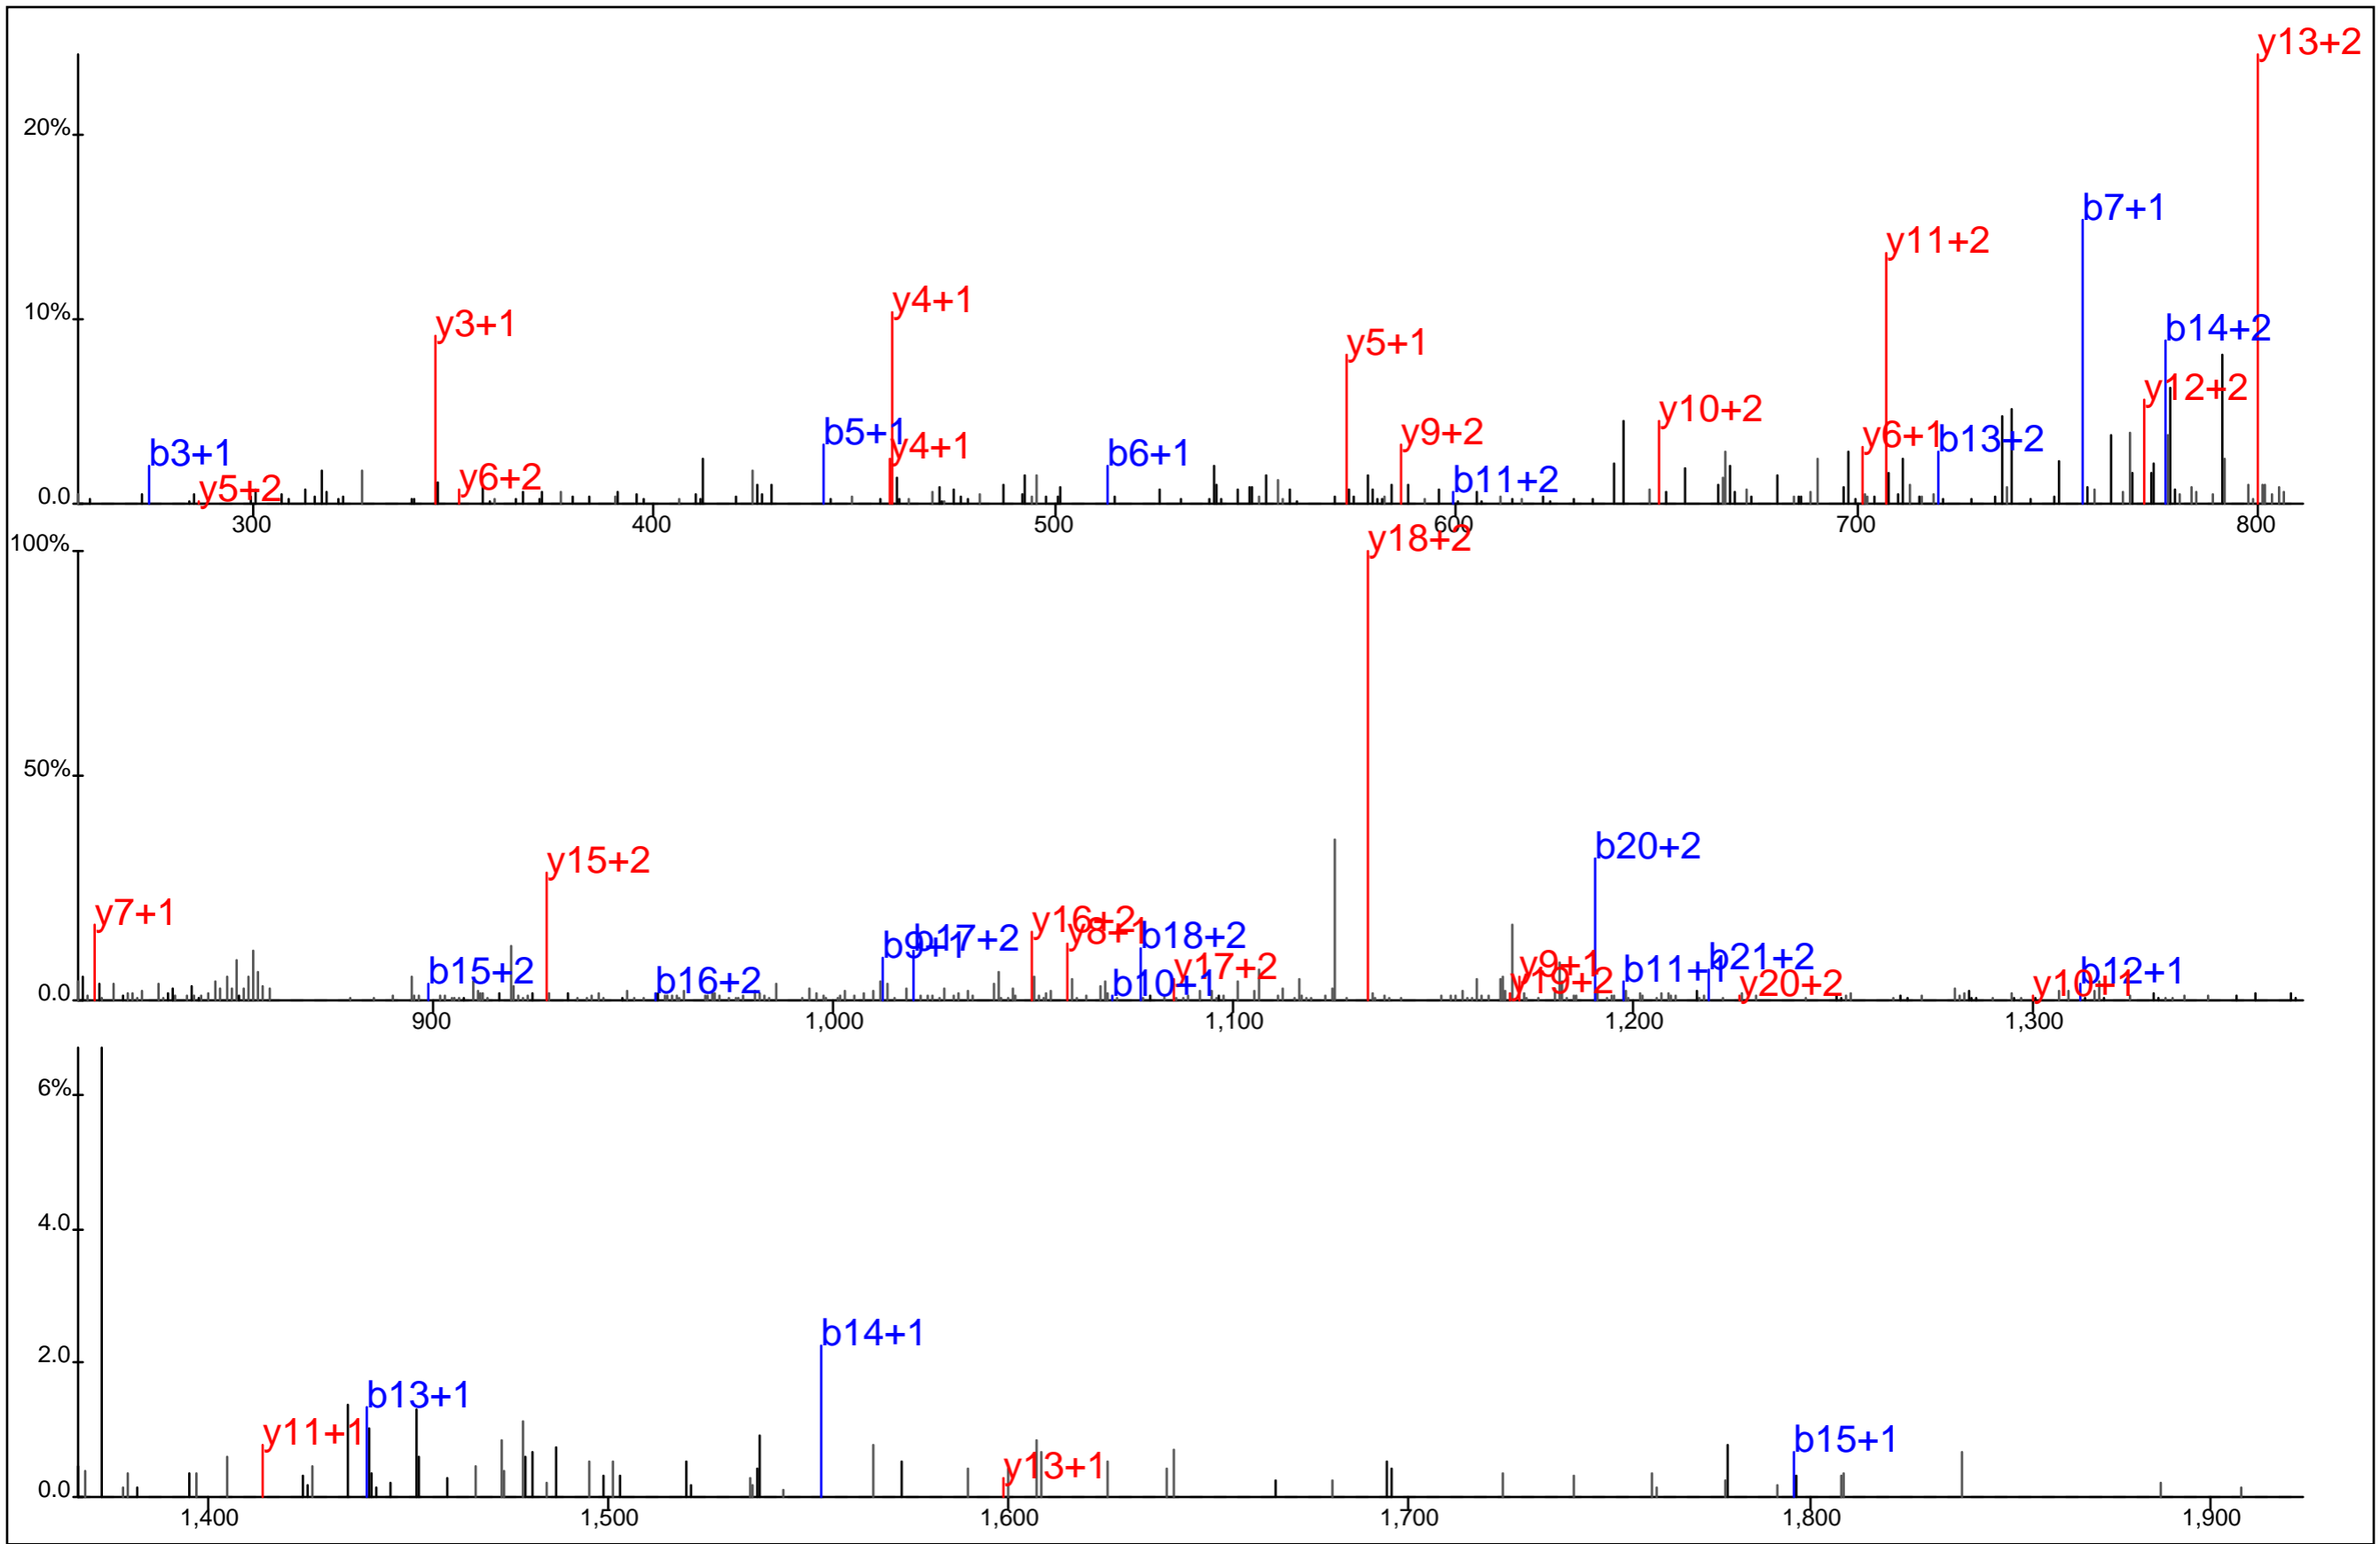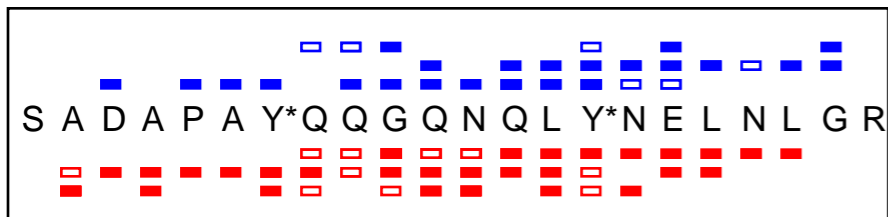

Protein Name: CD3 zeta  
 gi Accession: 37595565  
 Precursor Mass: 870.7144+3  
 Delta Mass: 10.121 ppm  
 XCorr: 53.49



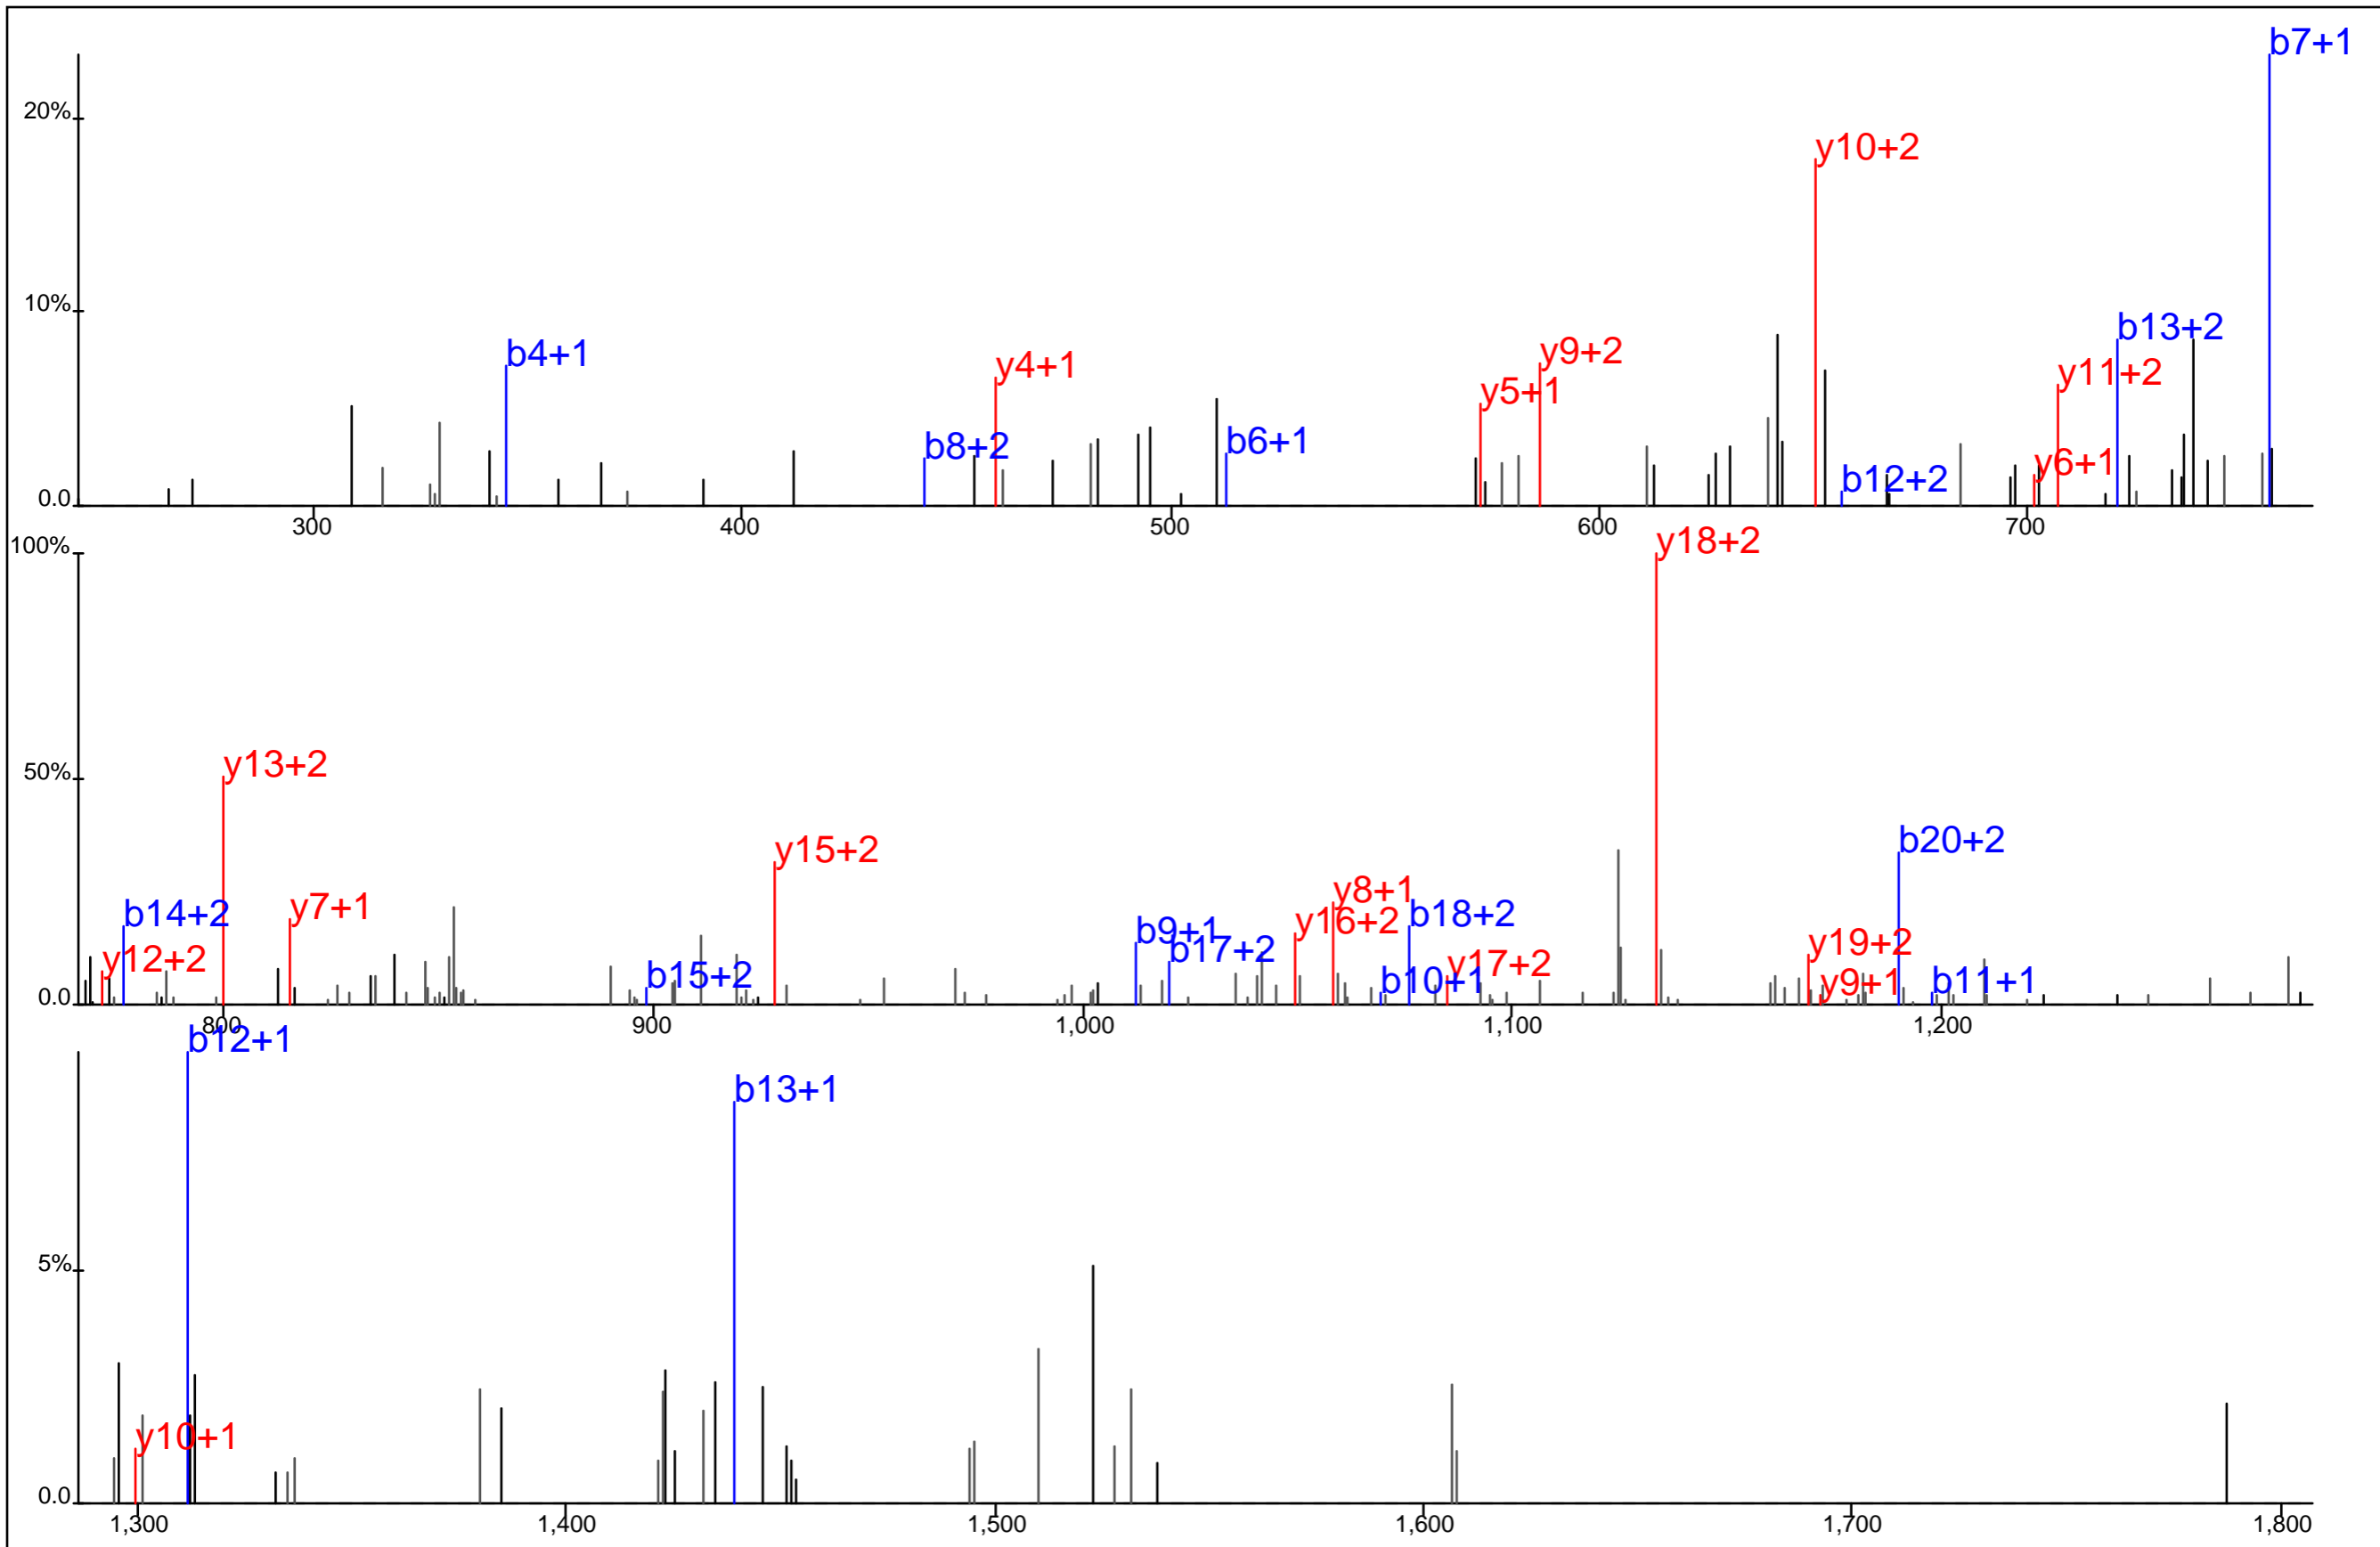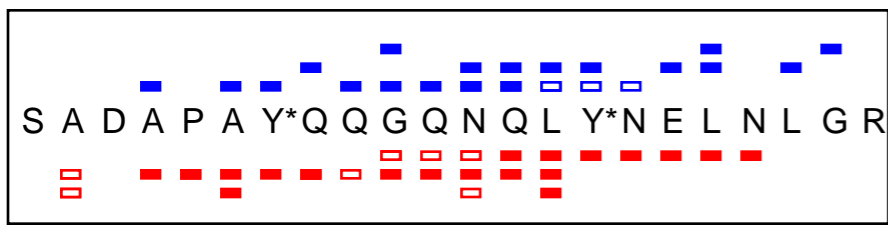

Protein Name: CD3 zeta  
 gi Accession: 37595565  
 Precursor Mass: 870.7115+3  
 Delta Mass: 6.895 ppm  
 XCorr: 34.19

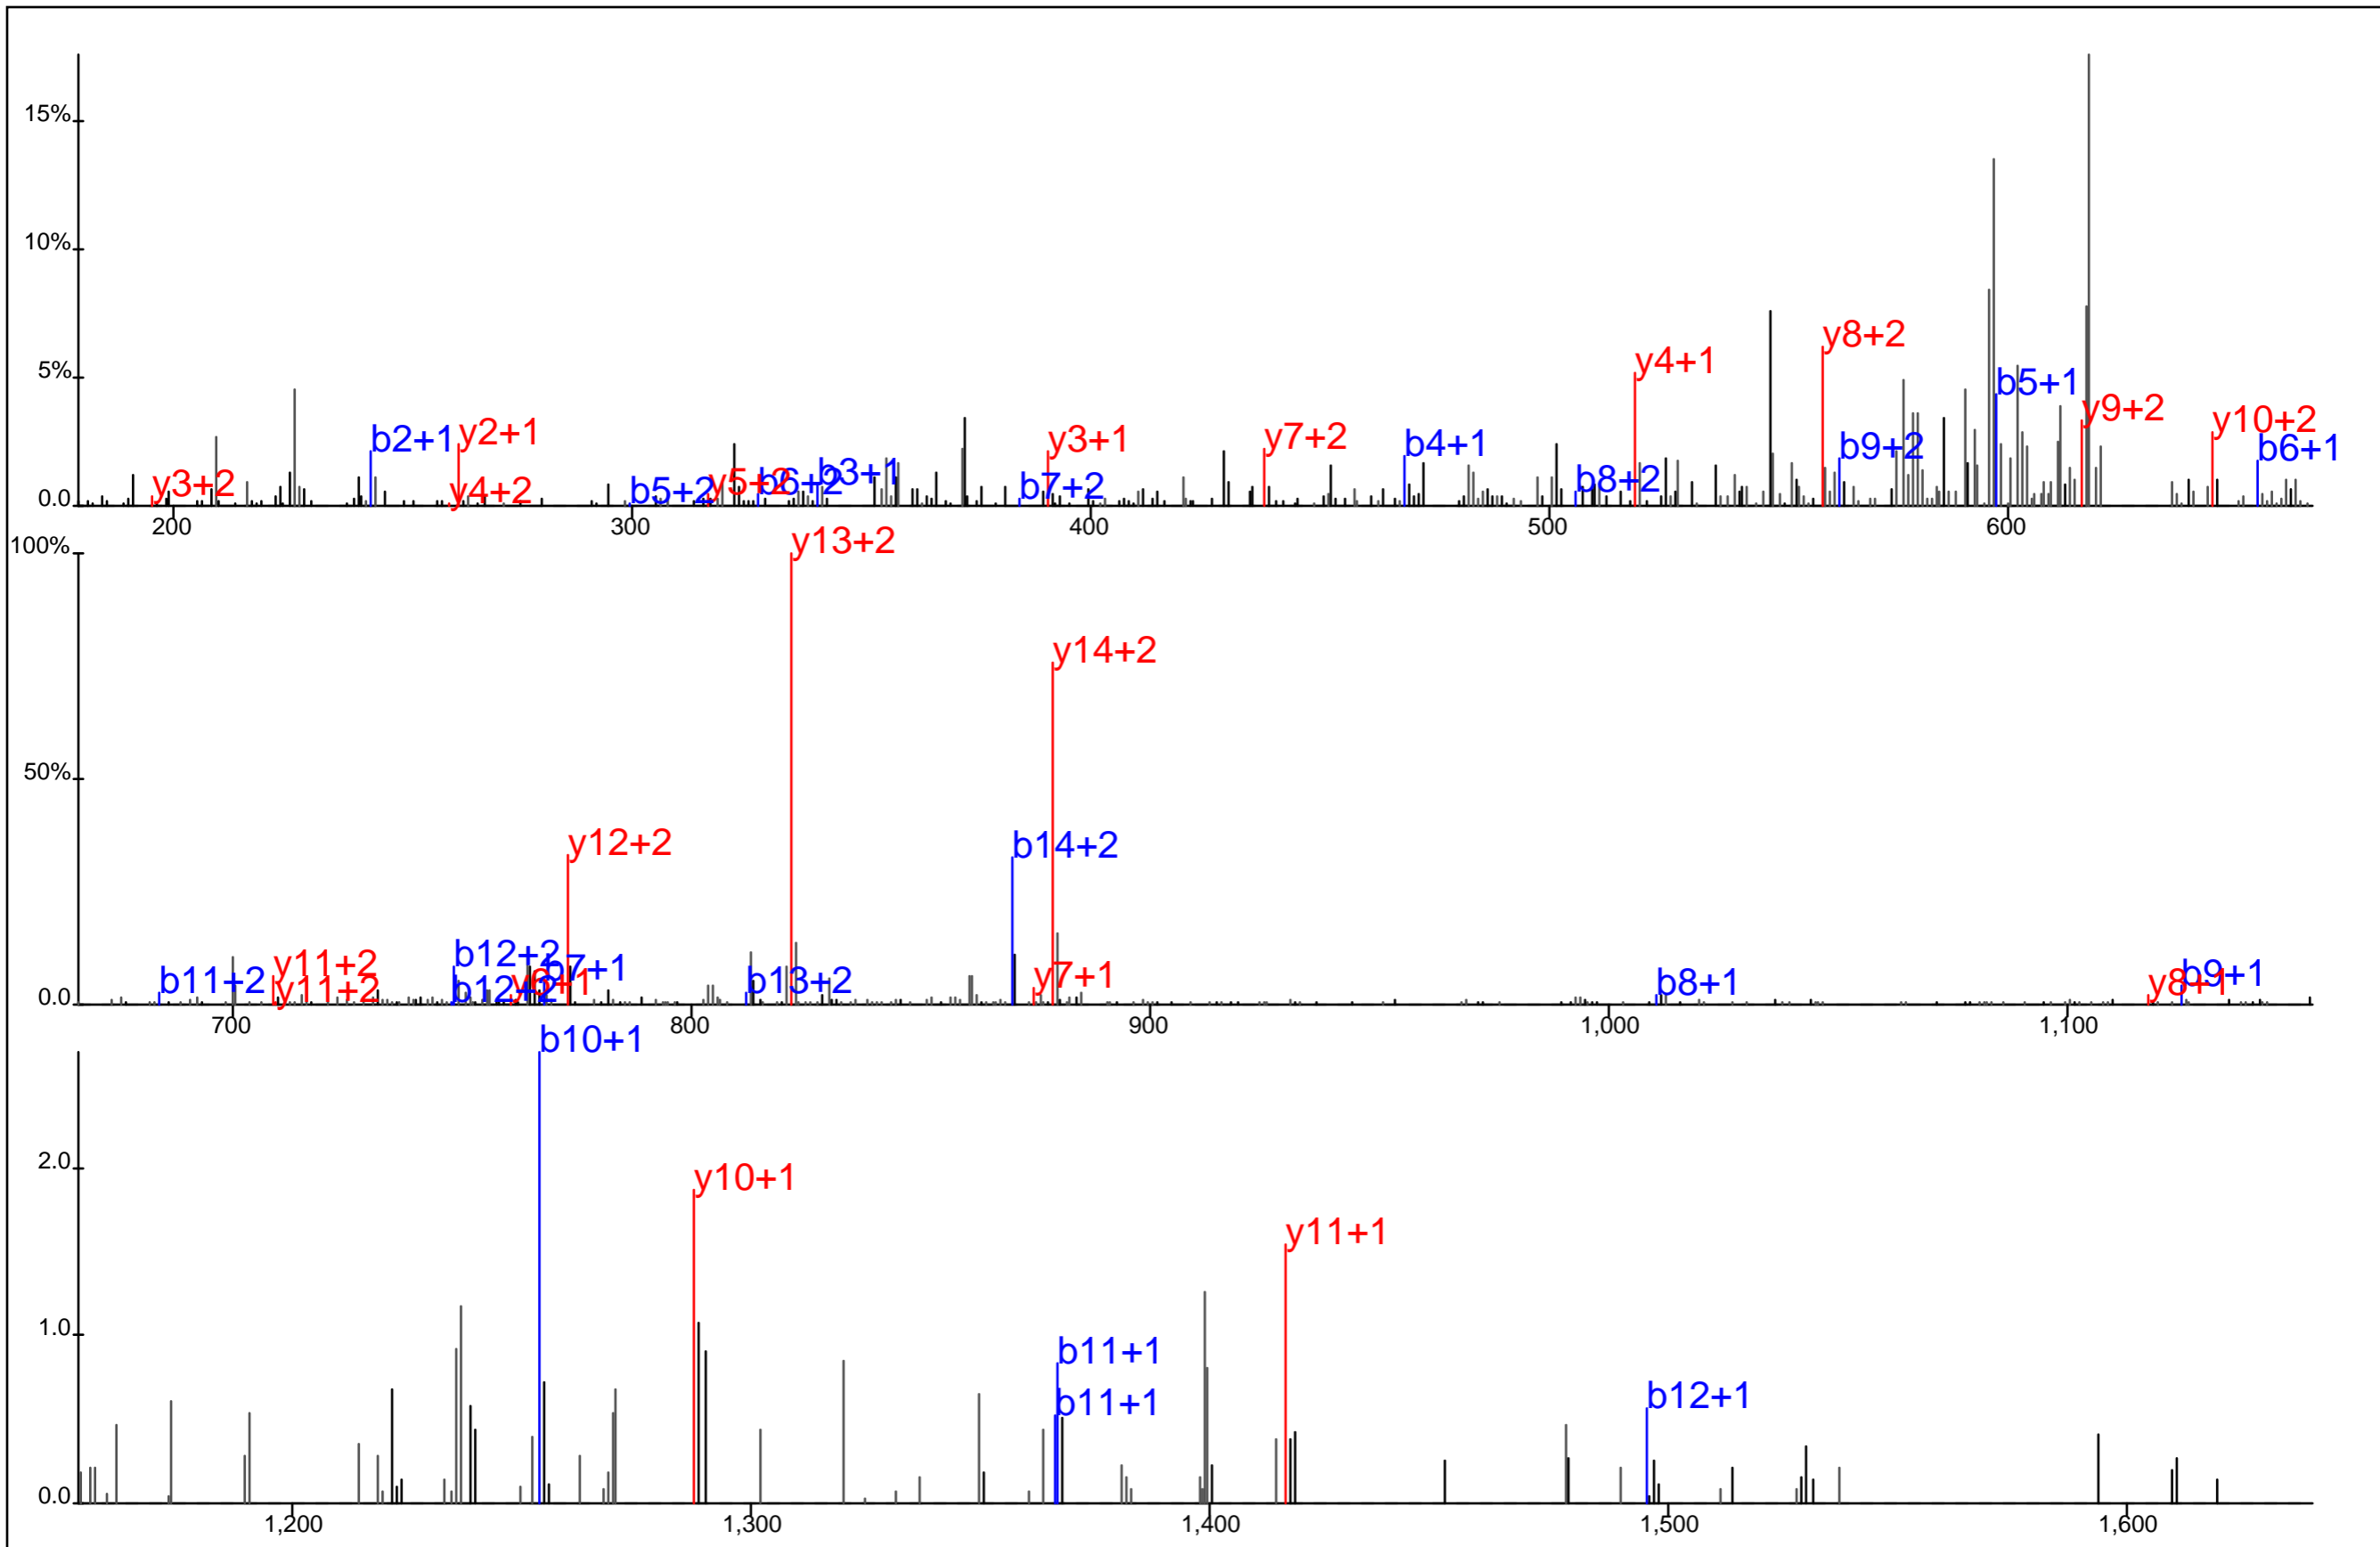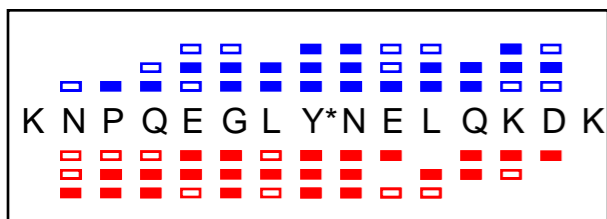

Protein Name: CD3 zeta  
 gi Accession: 37595565  
 Precursor Mass: 628.6354+3  
 Delta Mass: 0.923 ppm  
 XCorr: 37.02

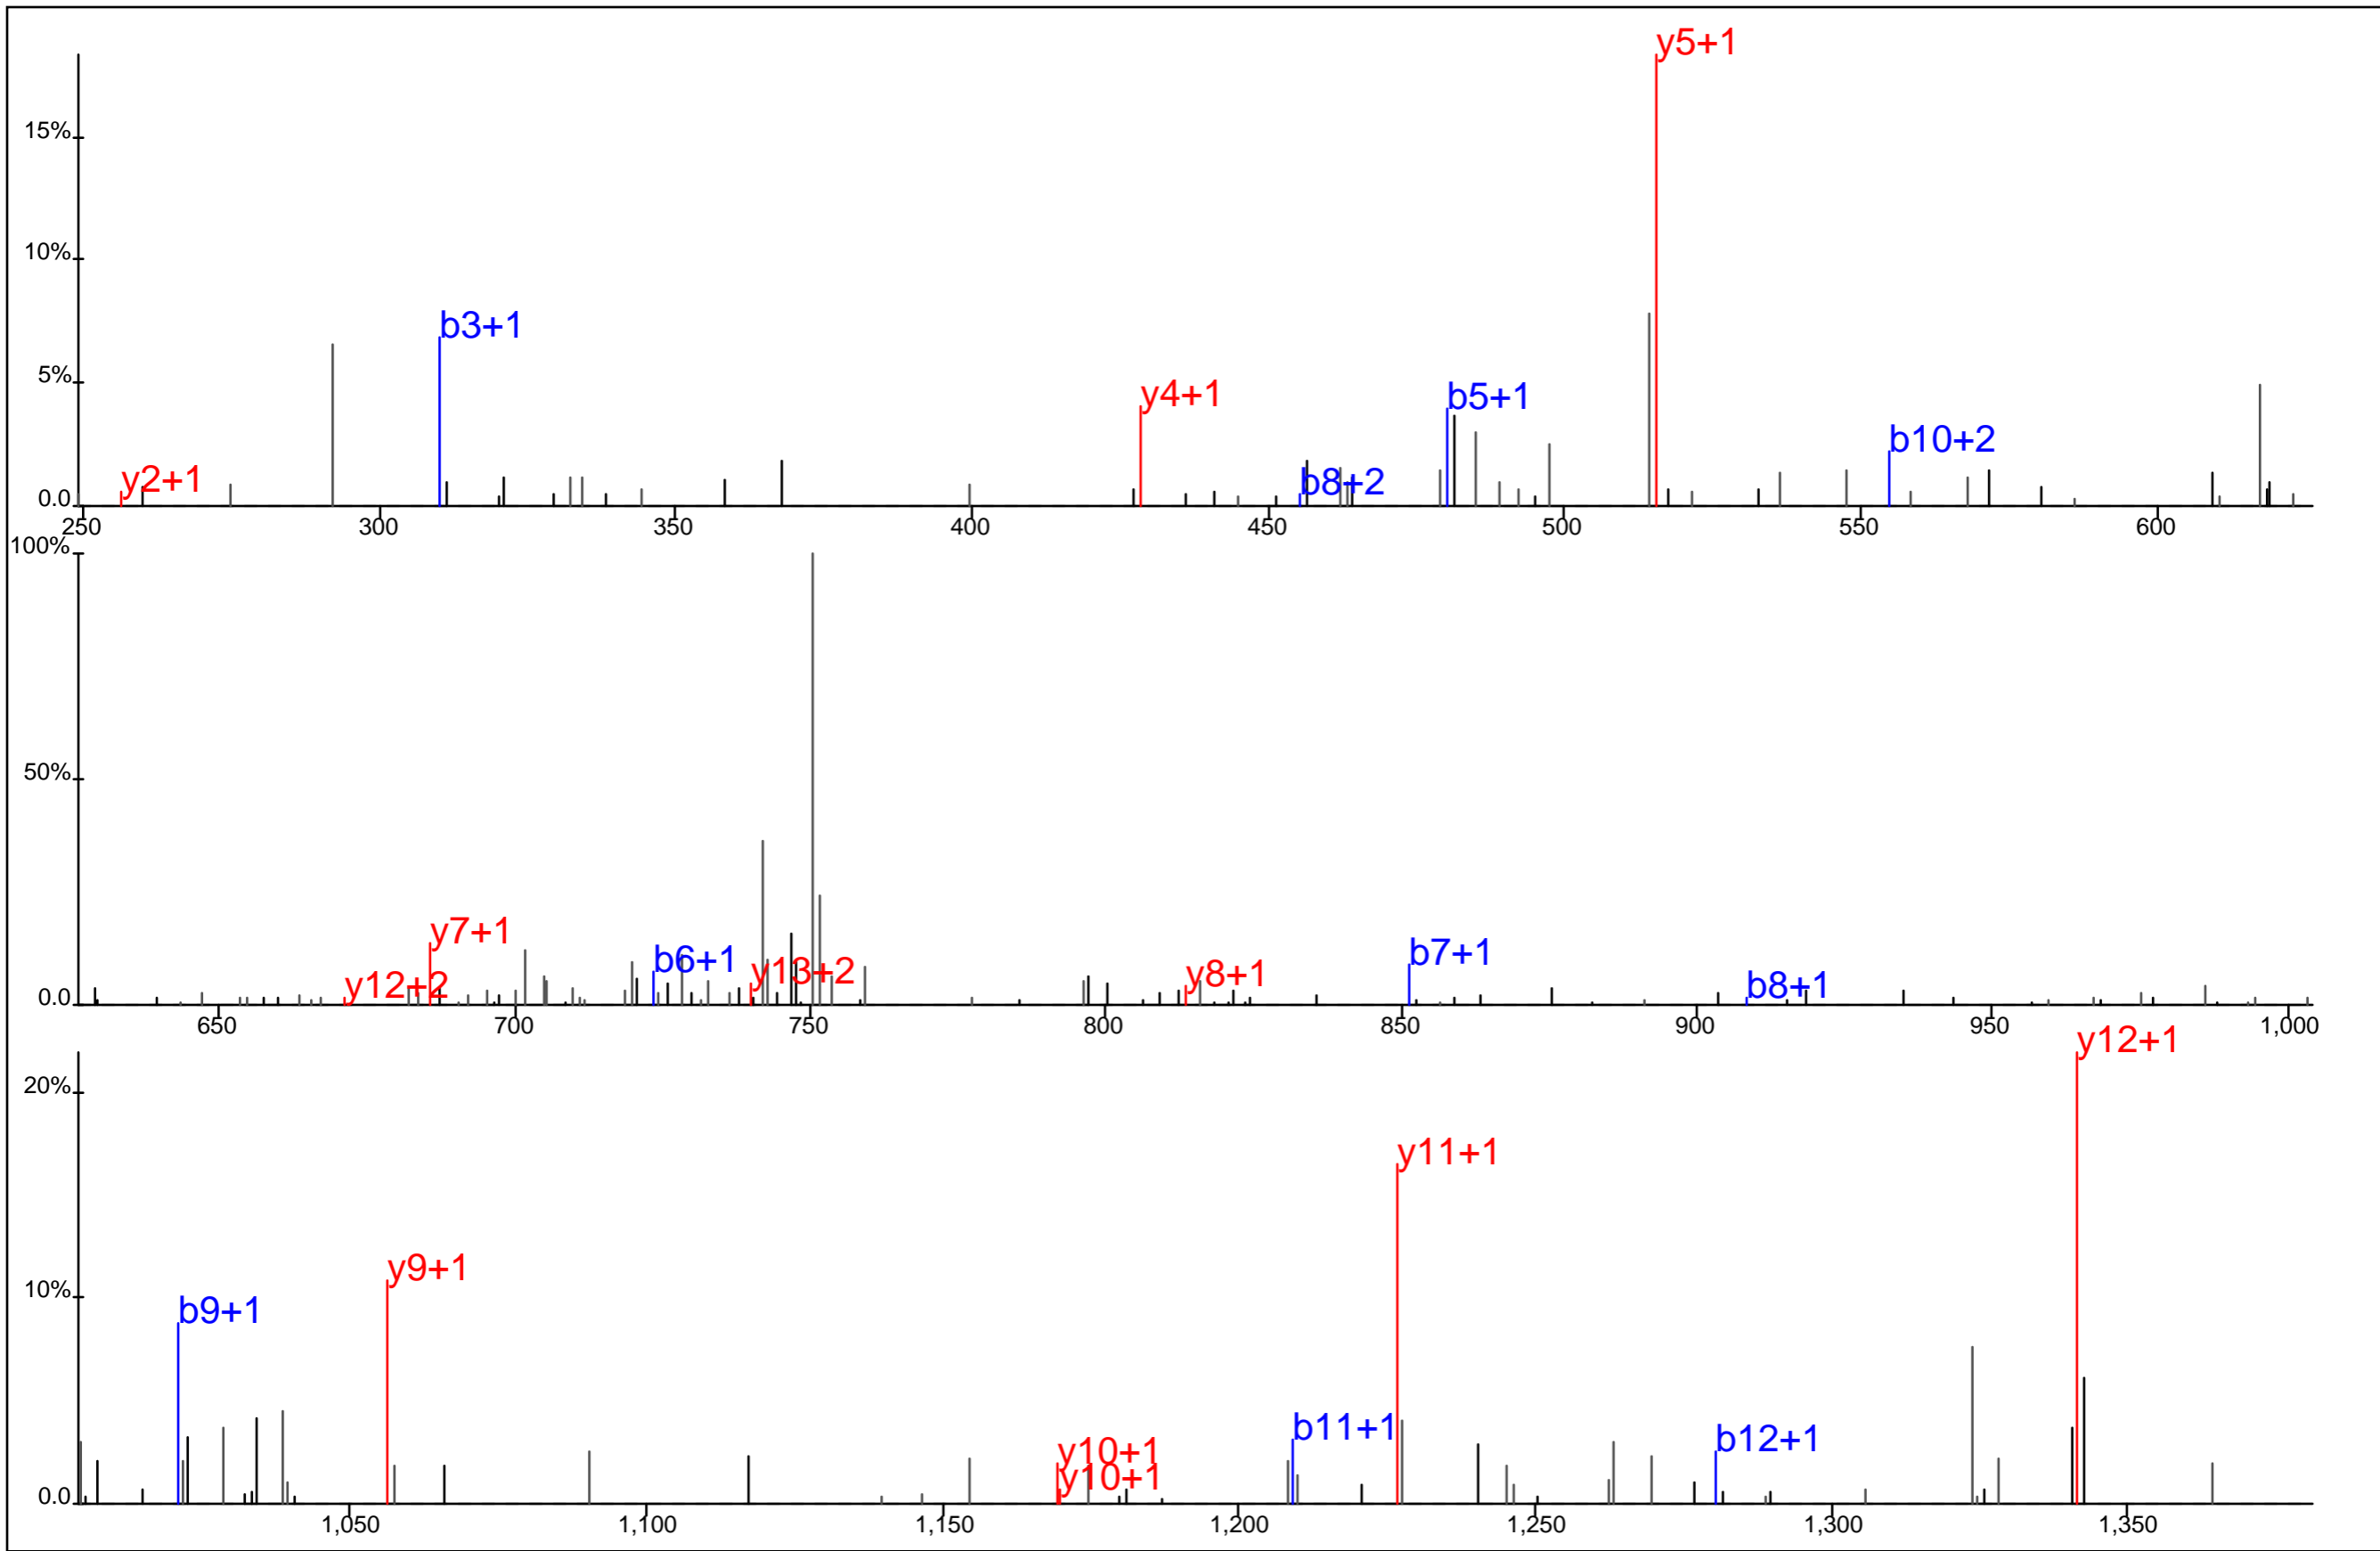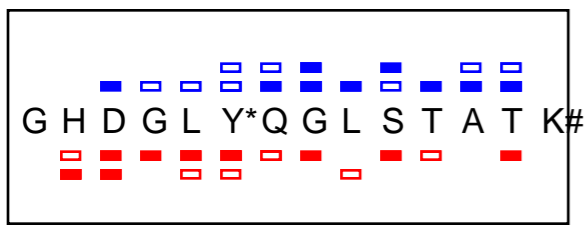

Protein Name: CD3 zeta  
 gi Accession: 37595565  
 Precursor Mass: 768.3522+2  
 Delta Mass: 0.685 ppm  
 XCorr: 36.51

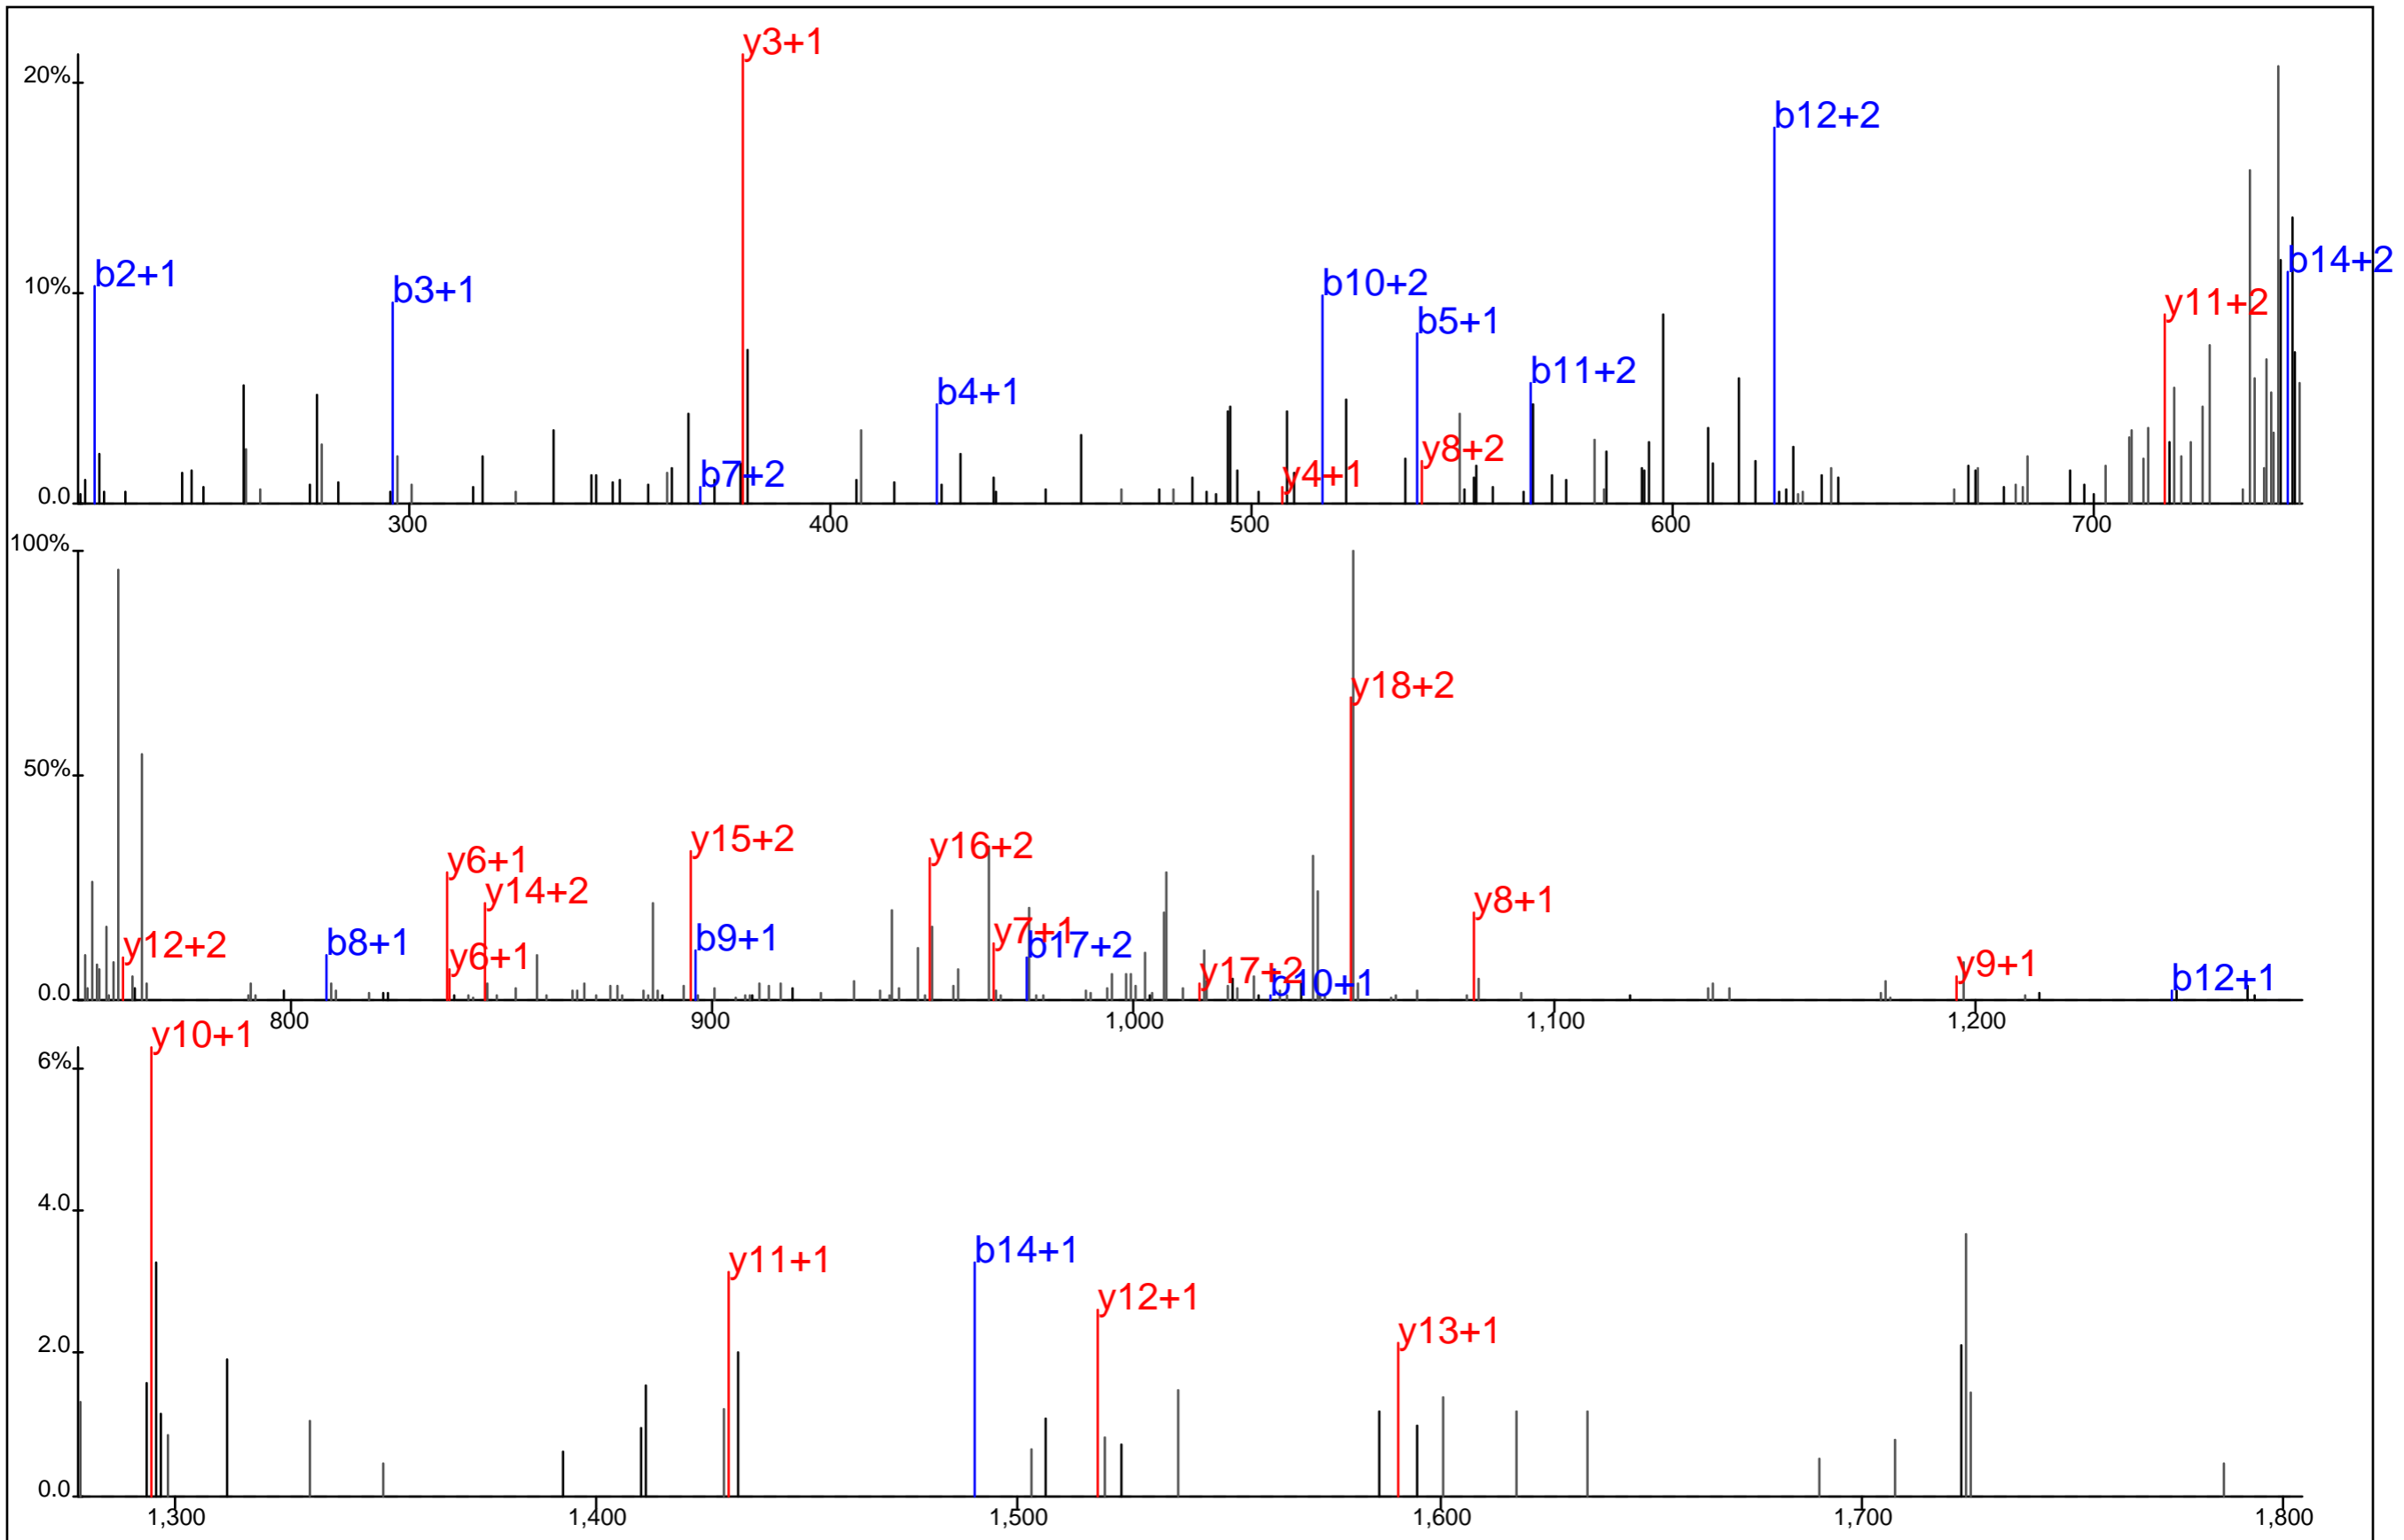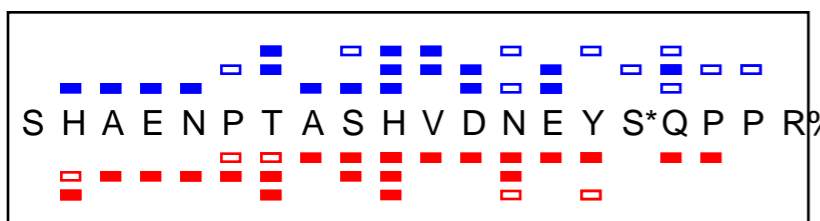

Protein Name: CD5  
 gi Accession: 116024  
 Precursor Mass: 775.9984+3  
 Delta Mass: 2.046 ppm  
 XCorr: 34.07

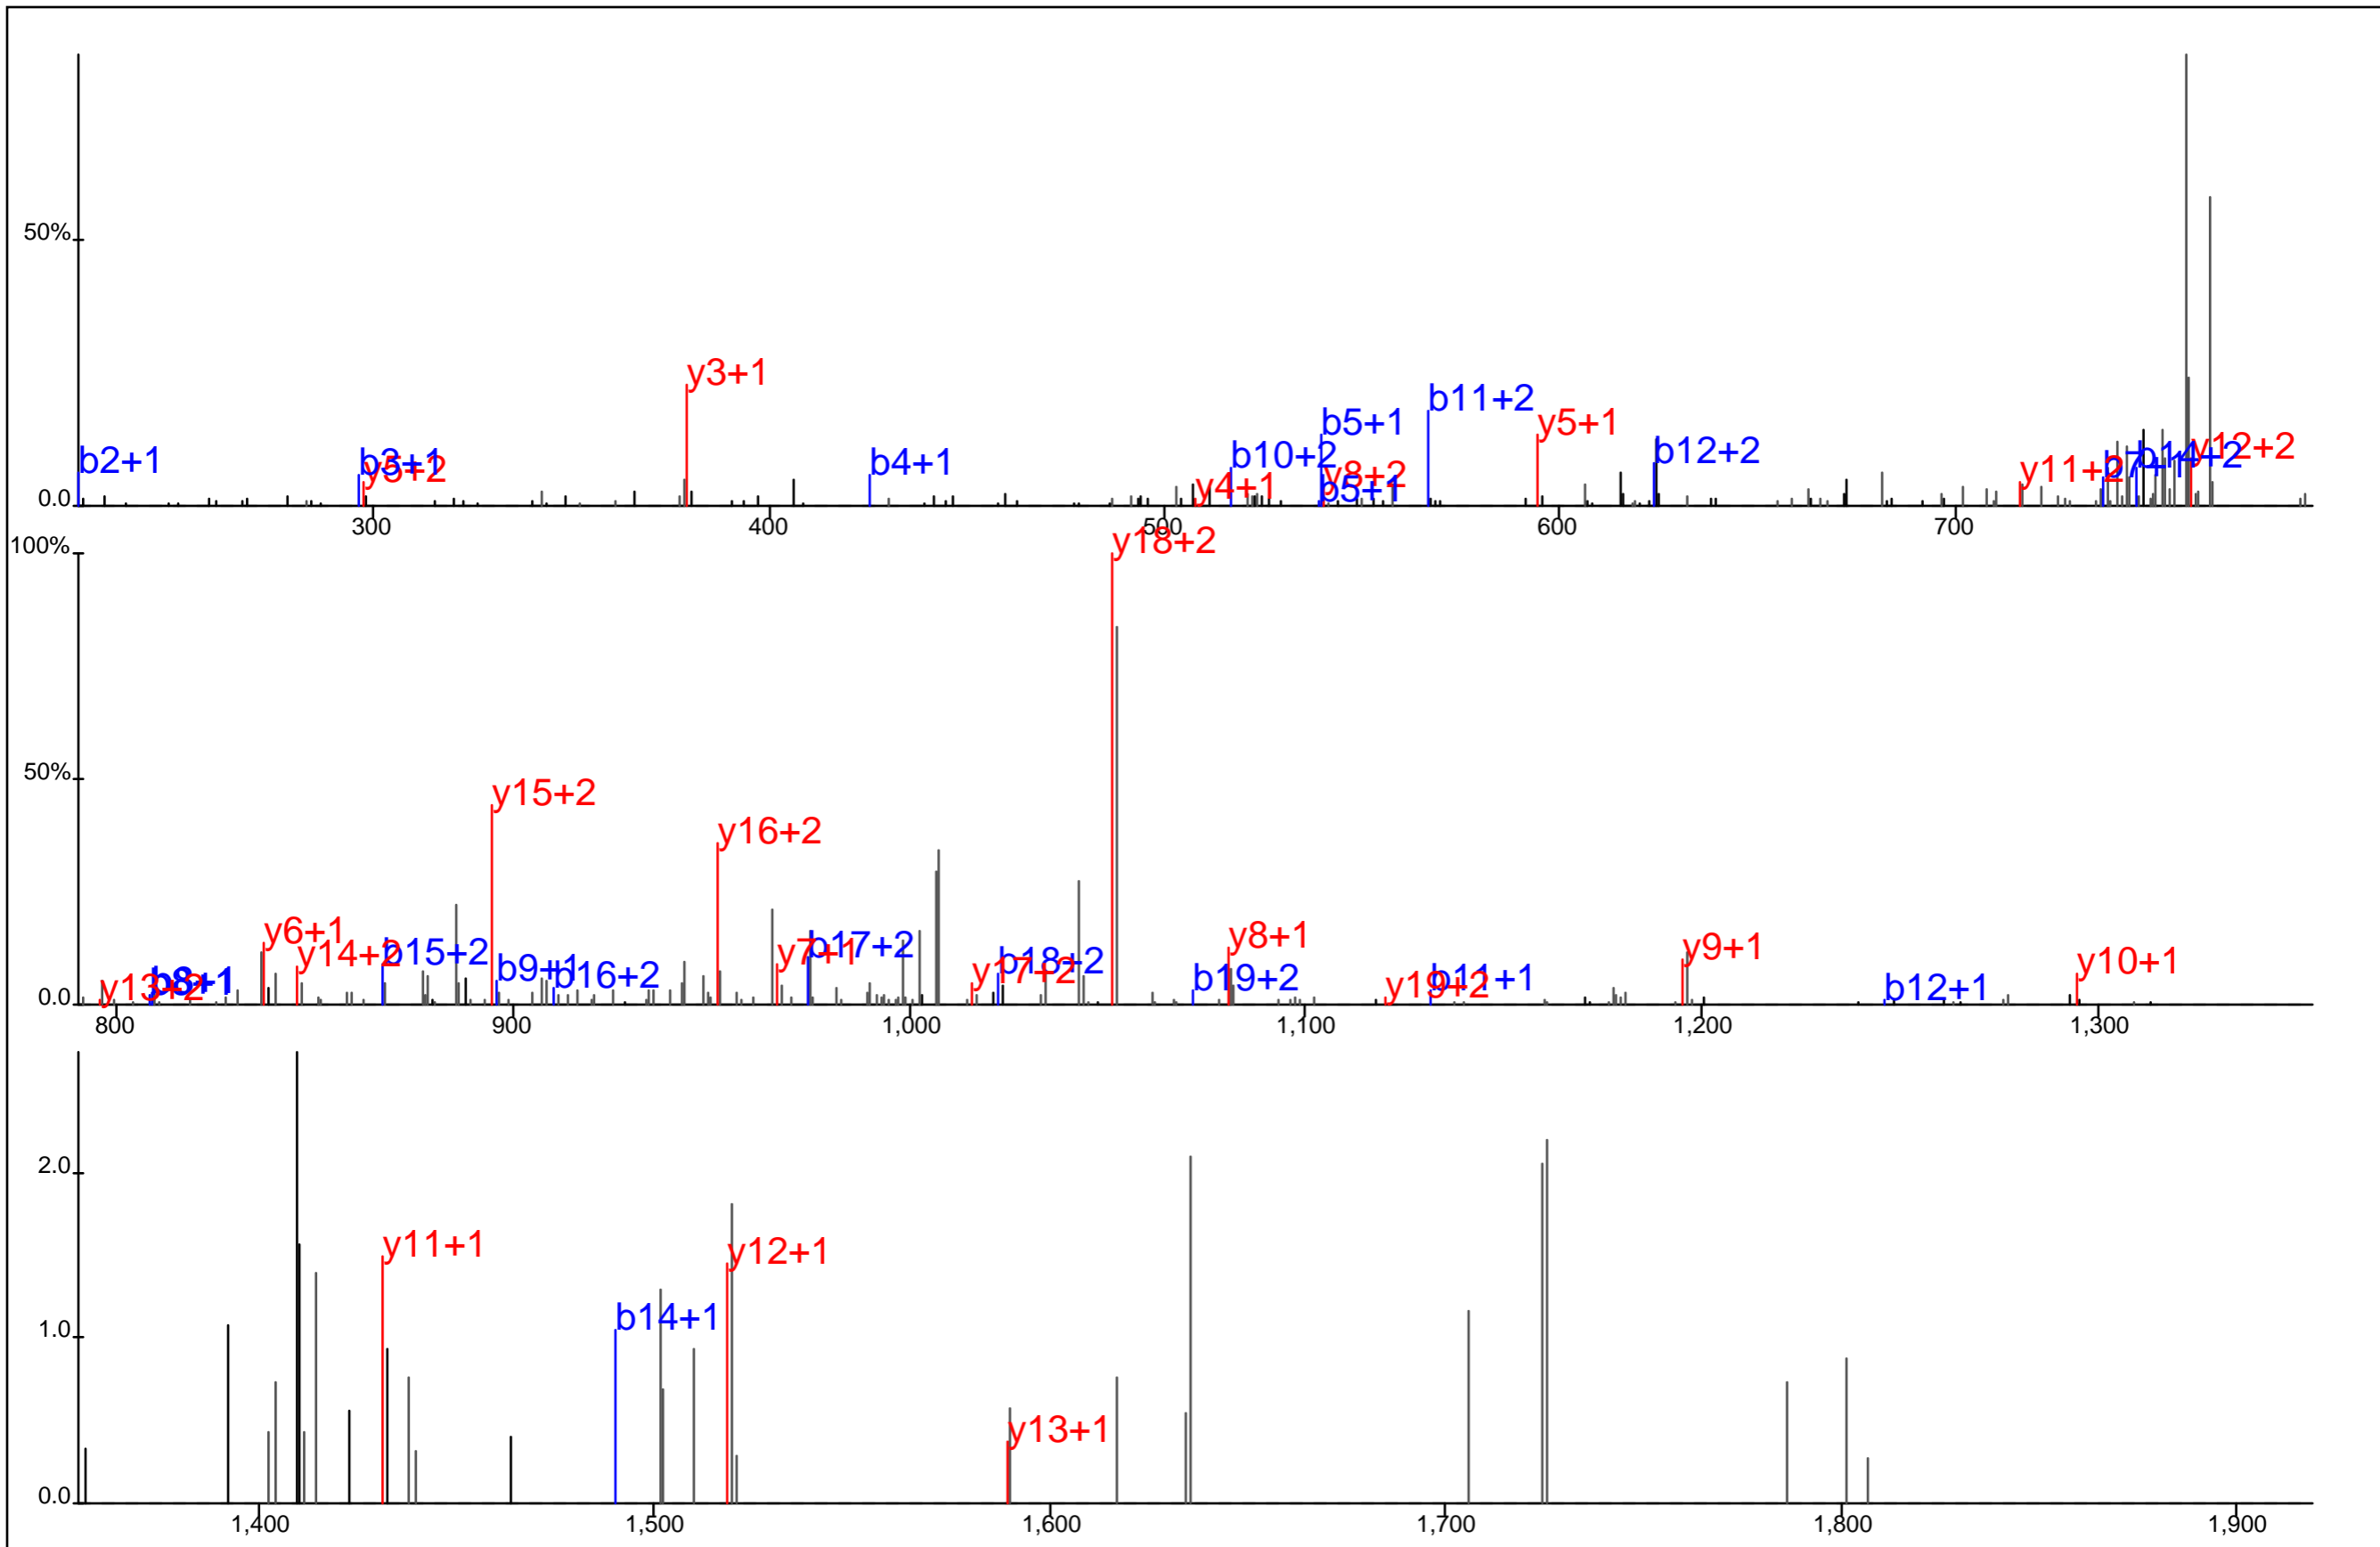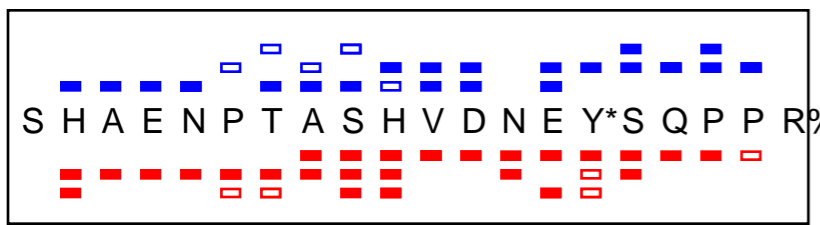

Protein Name: CD5  
 gi Accession: 116024  
 Precursor Mass: 776.0000+3  
 Delta Mass: 4.092 ppm  
 XCorr: 48.14

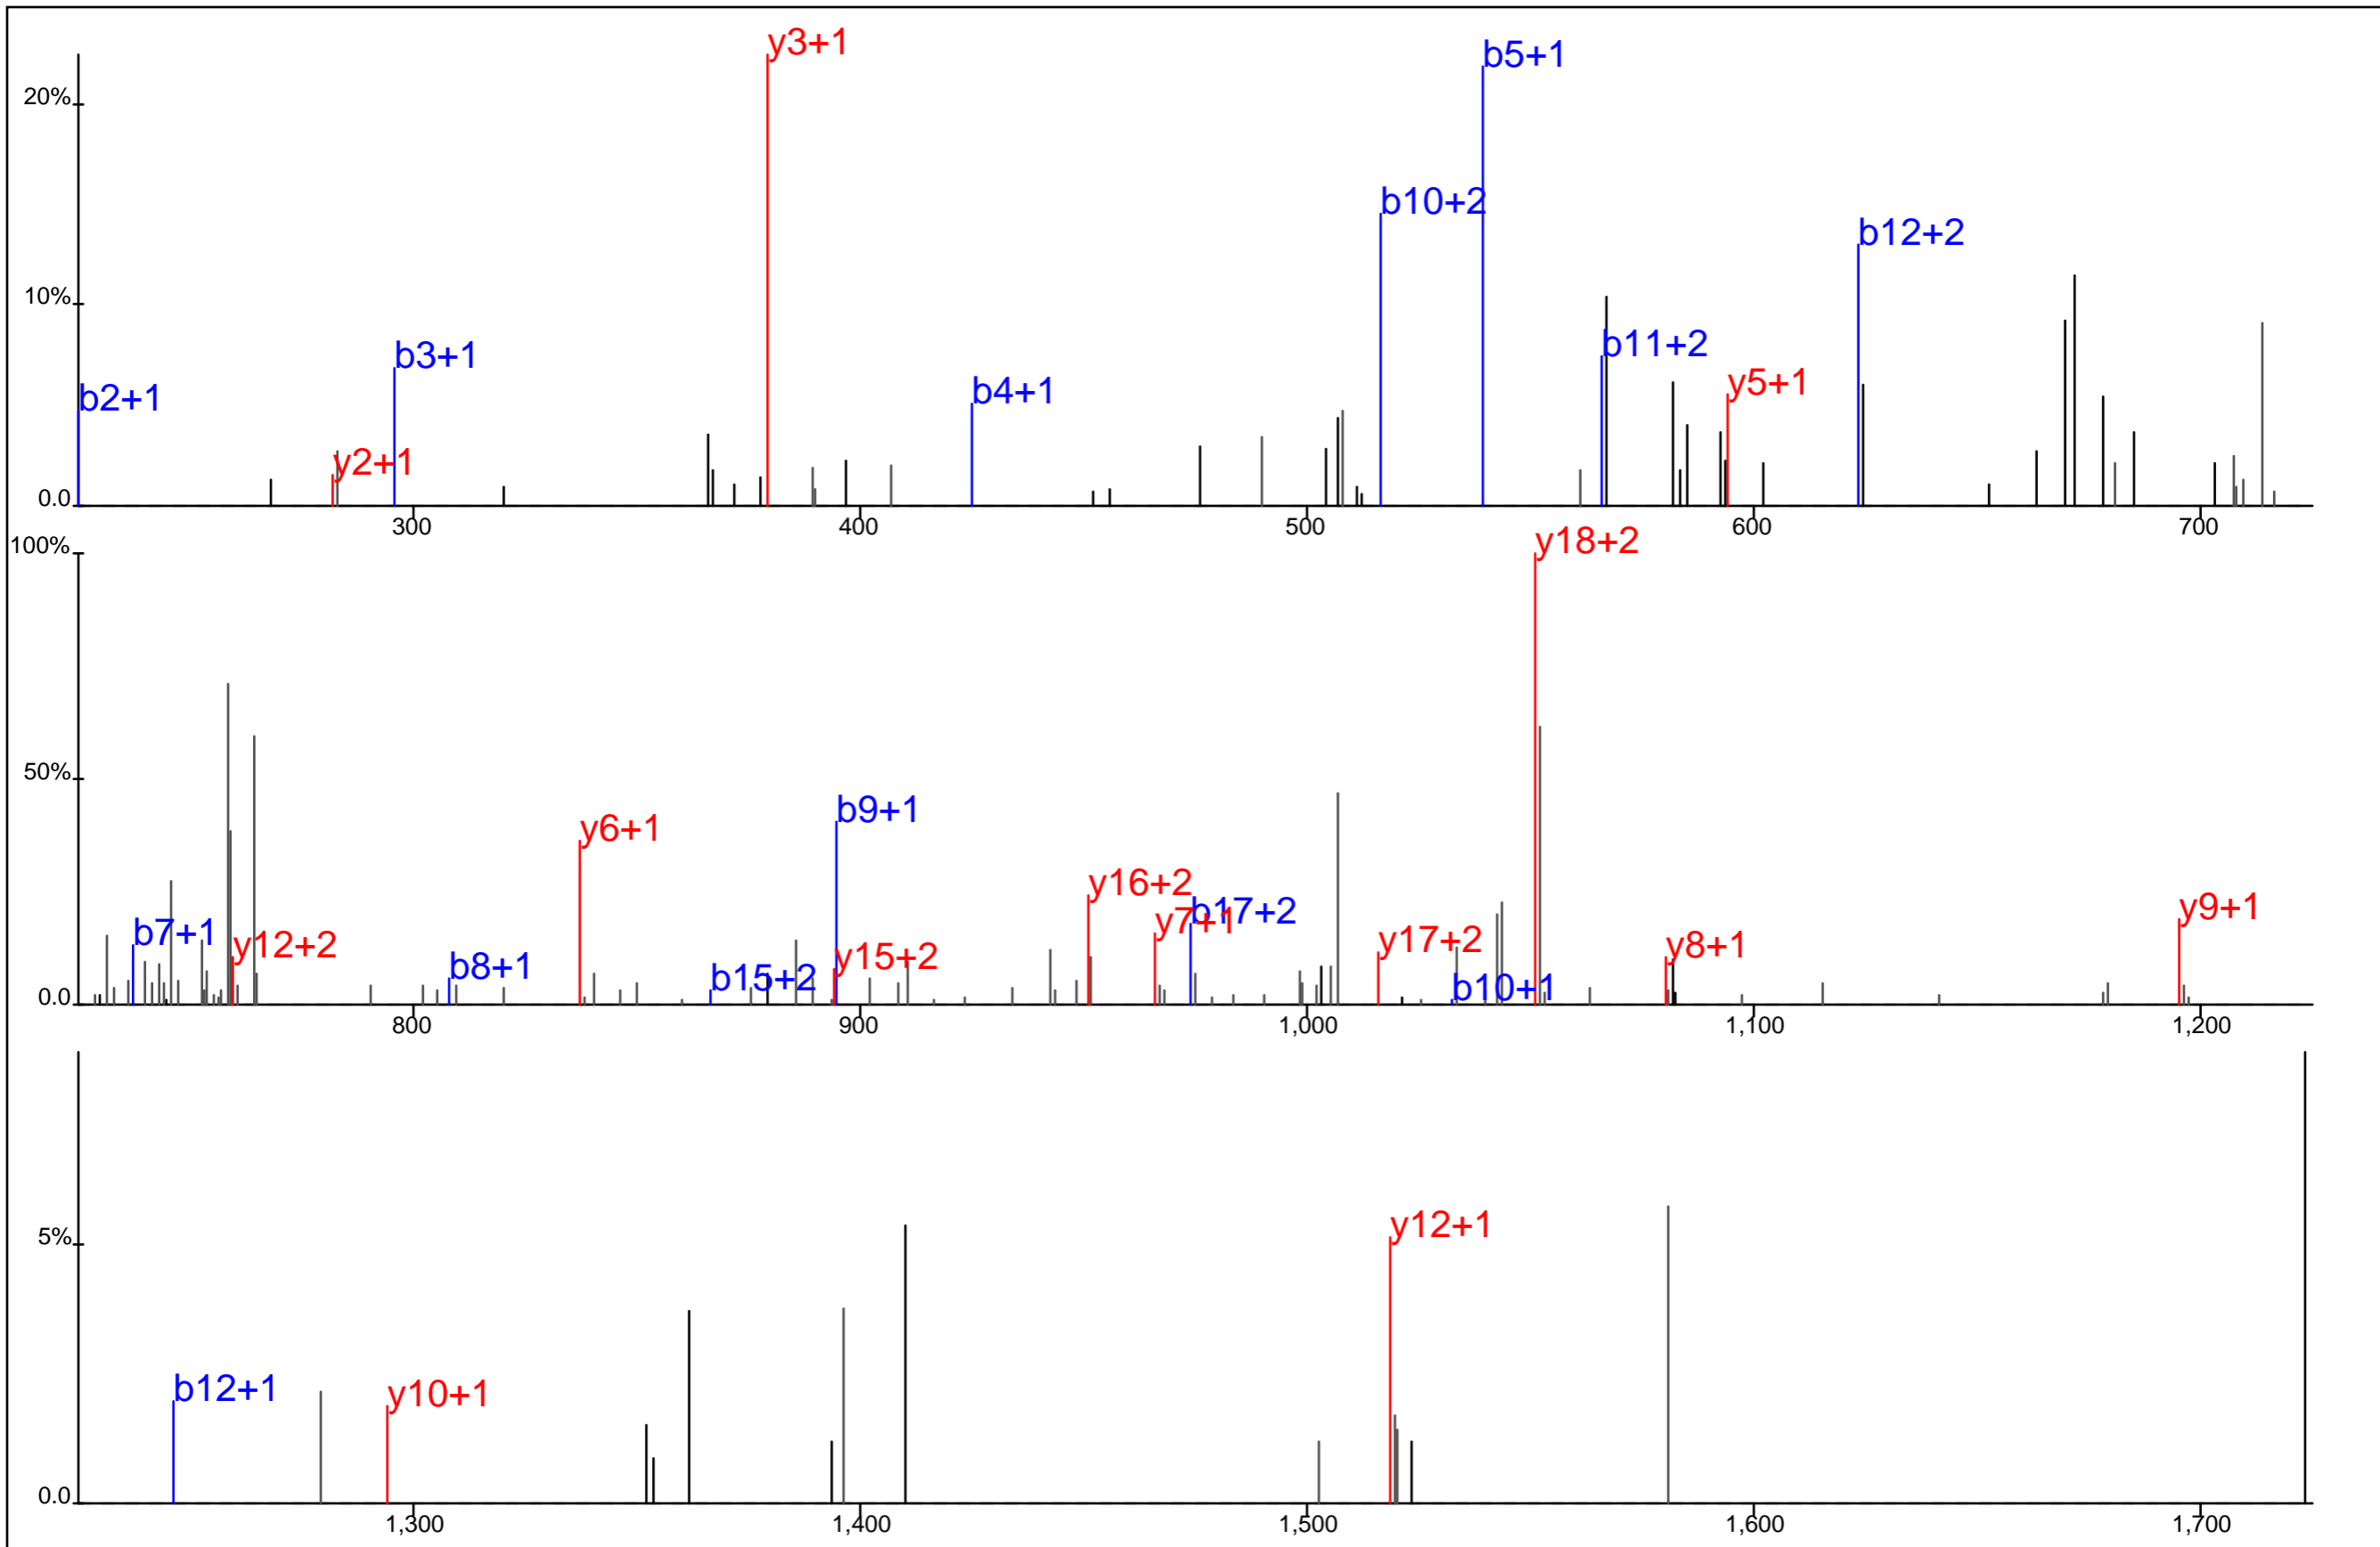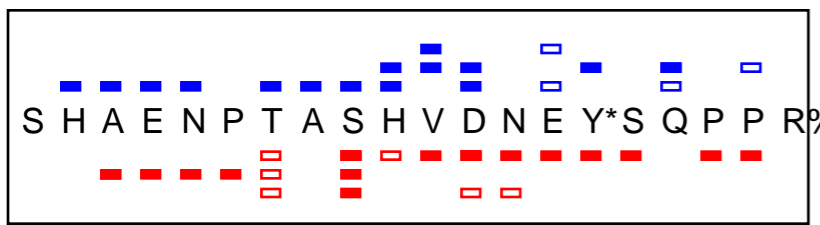

Protein Name: CD5  
 gi Accession: 116024  
 Precursor Mass: 775.9993+3  
 Delta Mass: 3.146 ppm  
 XCorr: 48.37

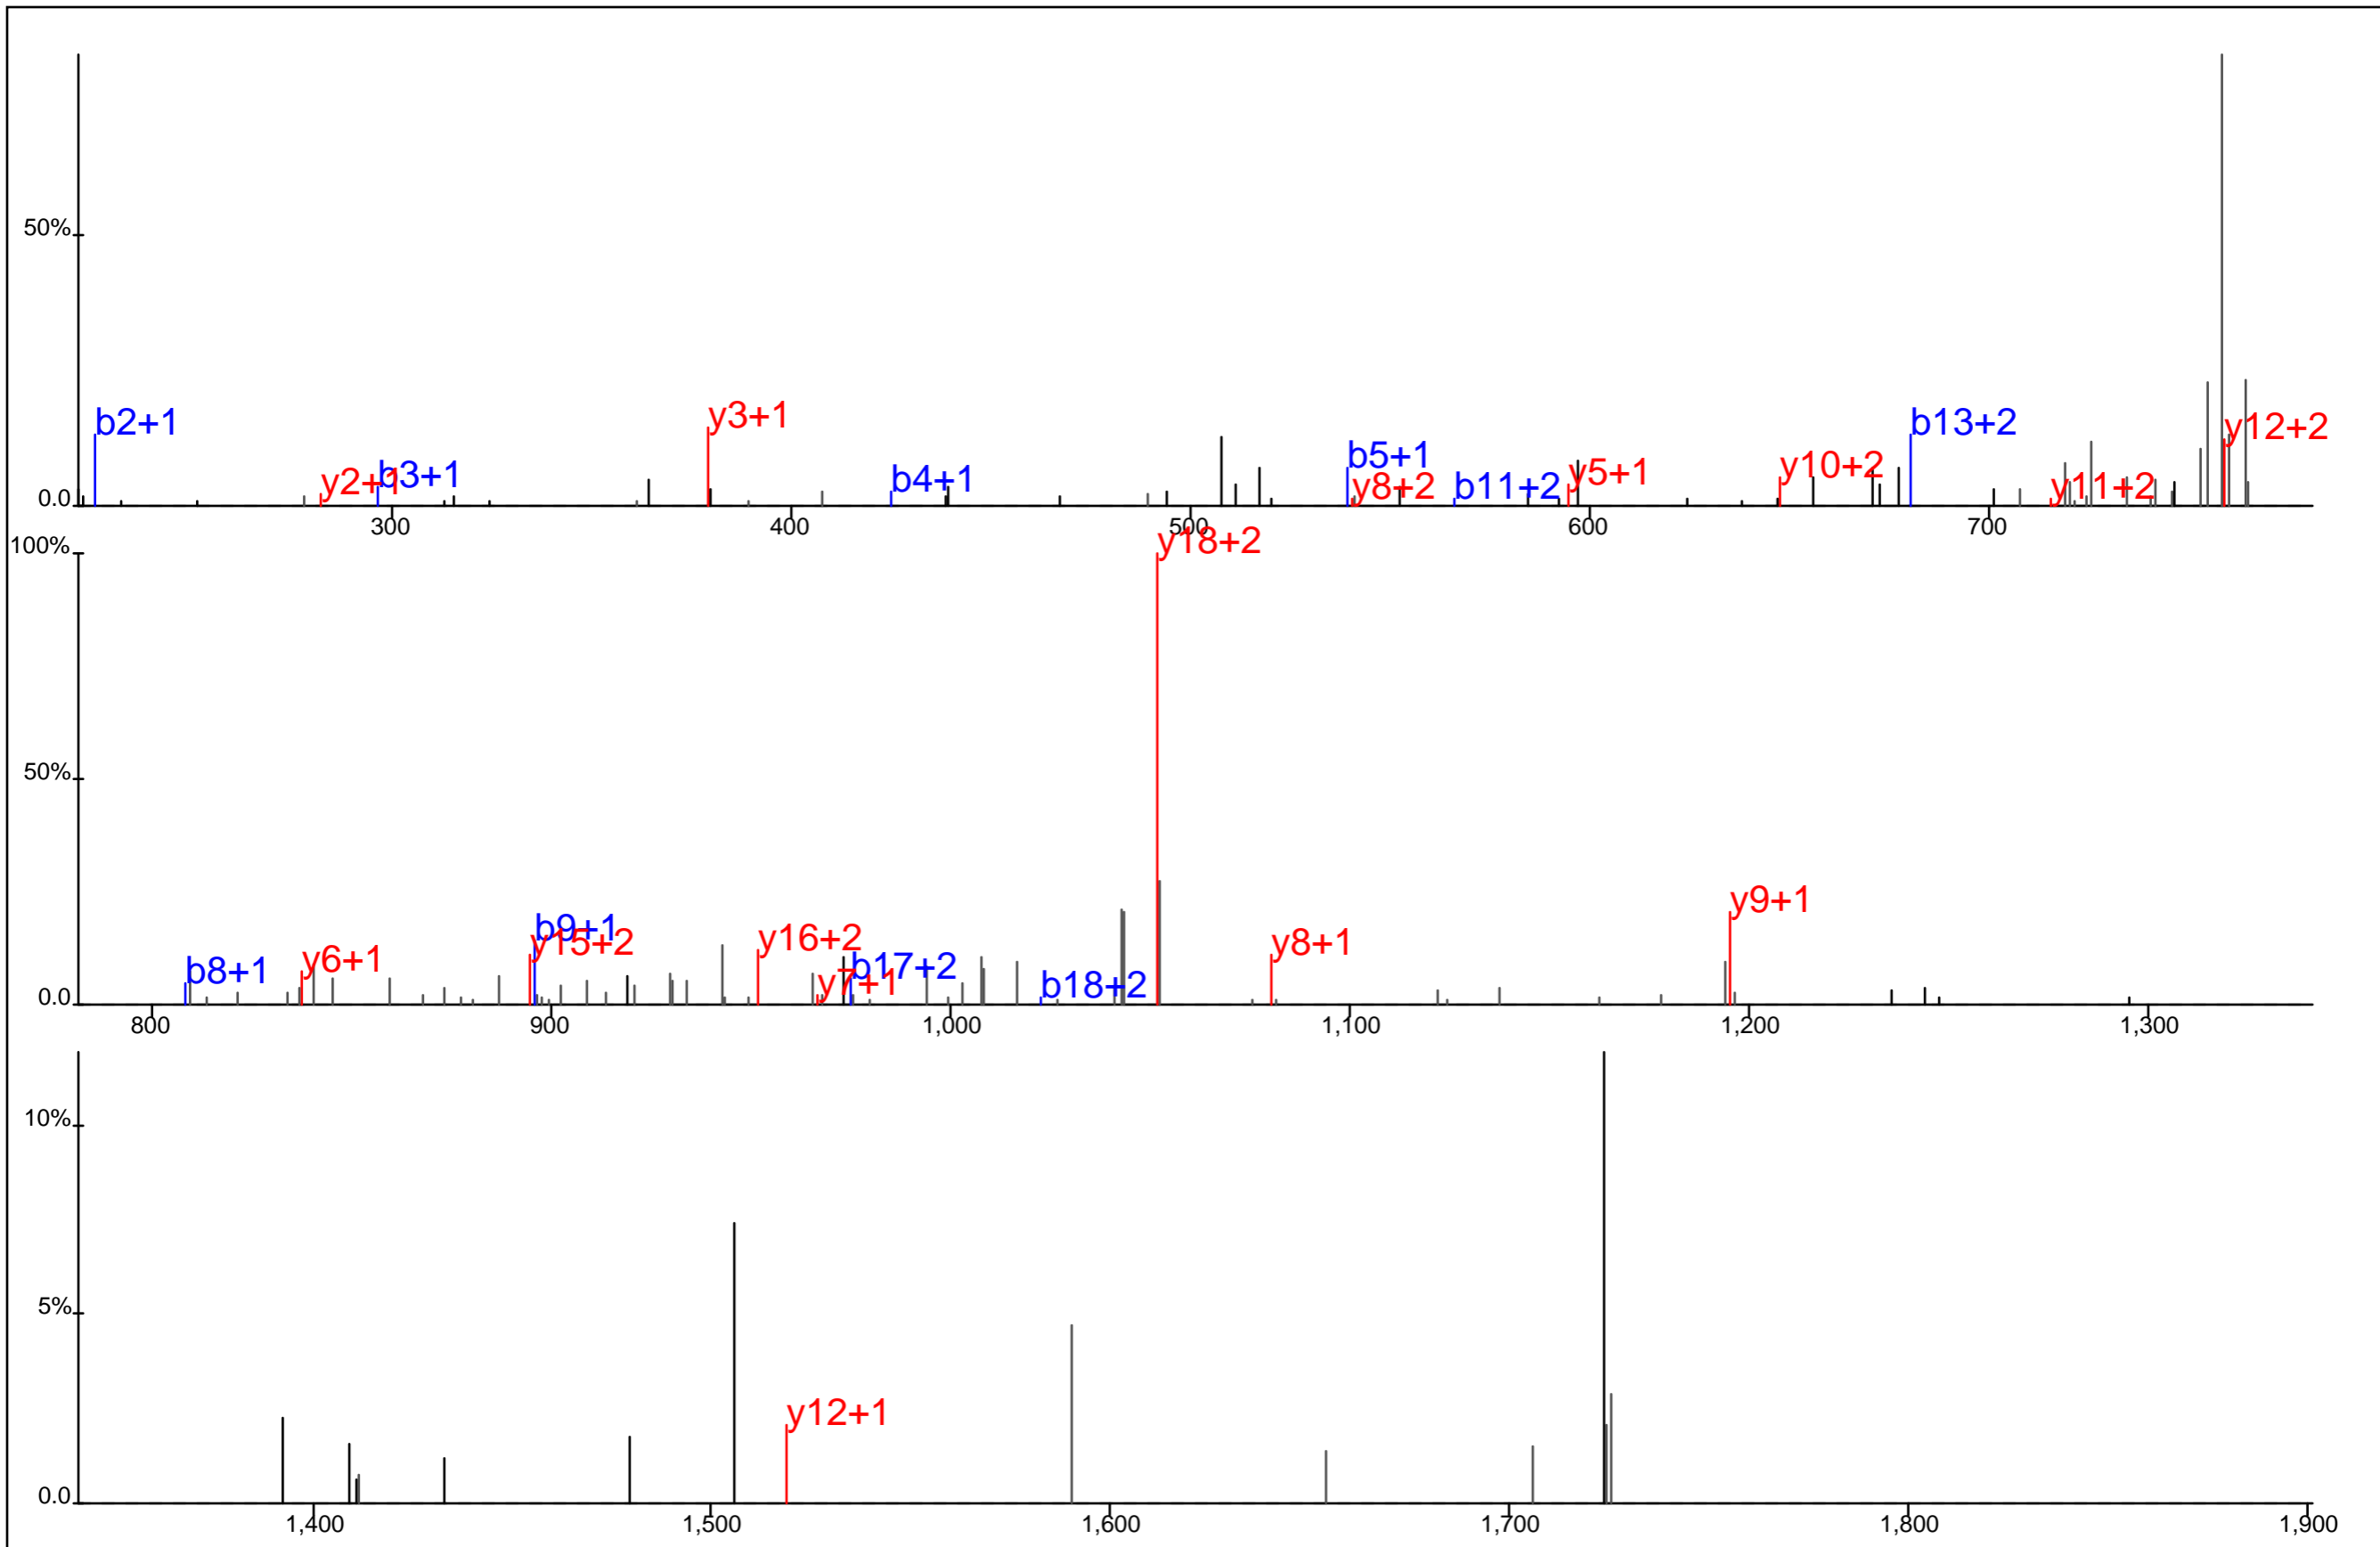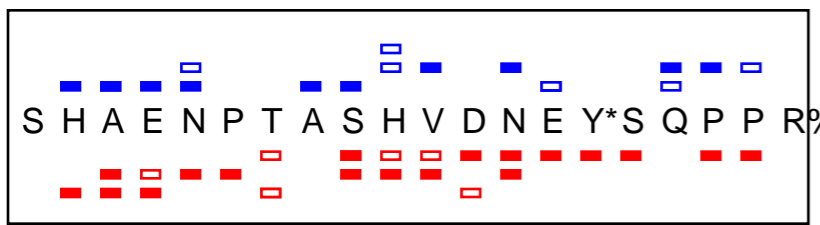

Protein Name: CD5  
 gi Accession: 116024  
 Precursor Mass: 776.0038+3  
 Delta Mass: 8.972 ppm  
 XCorr: 23.83

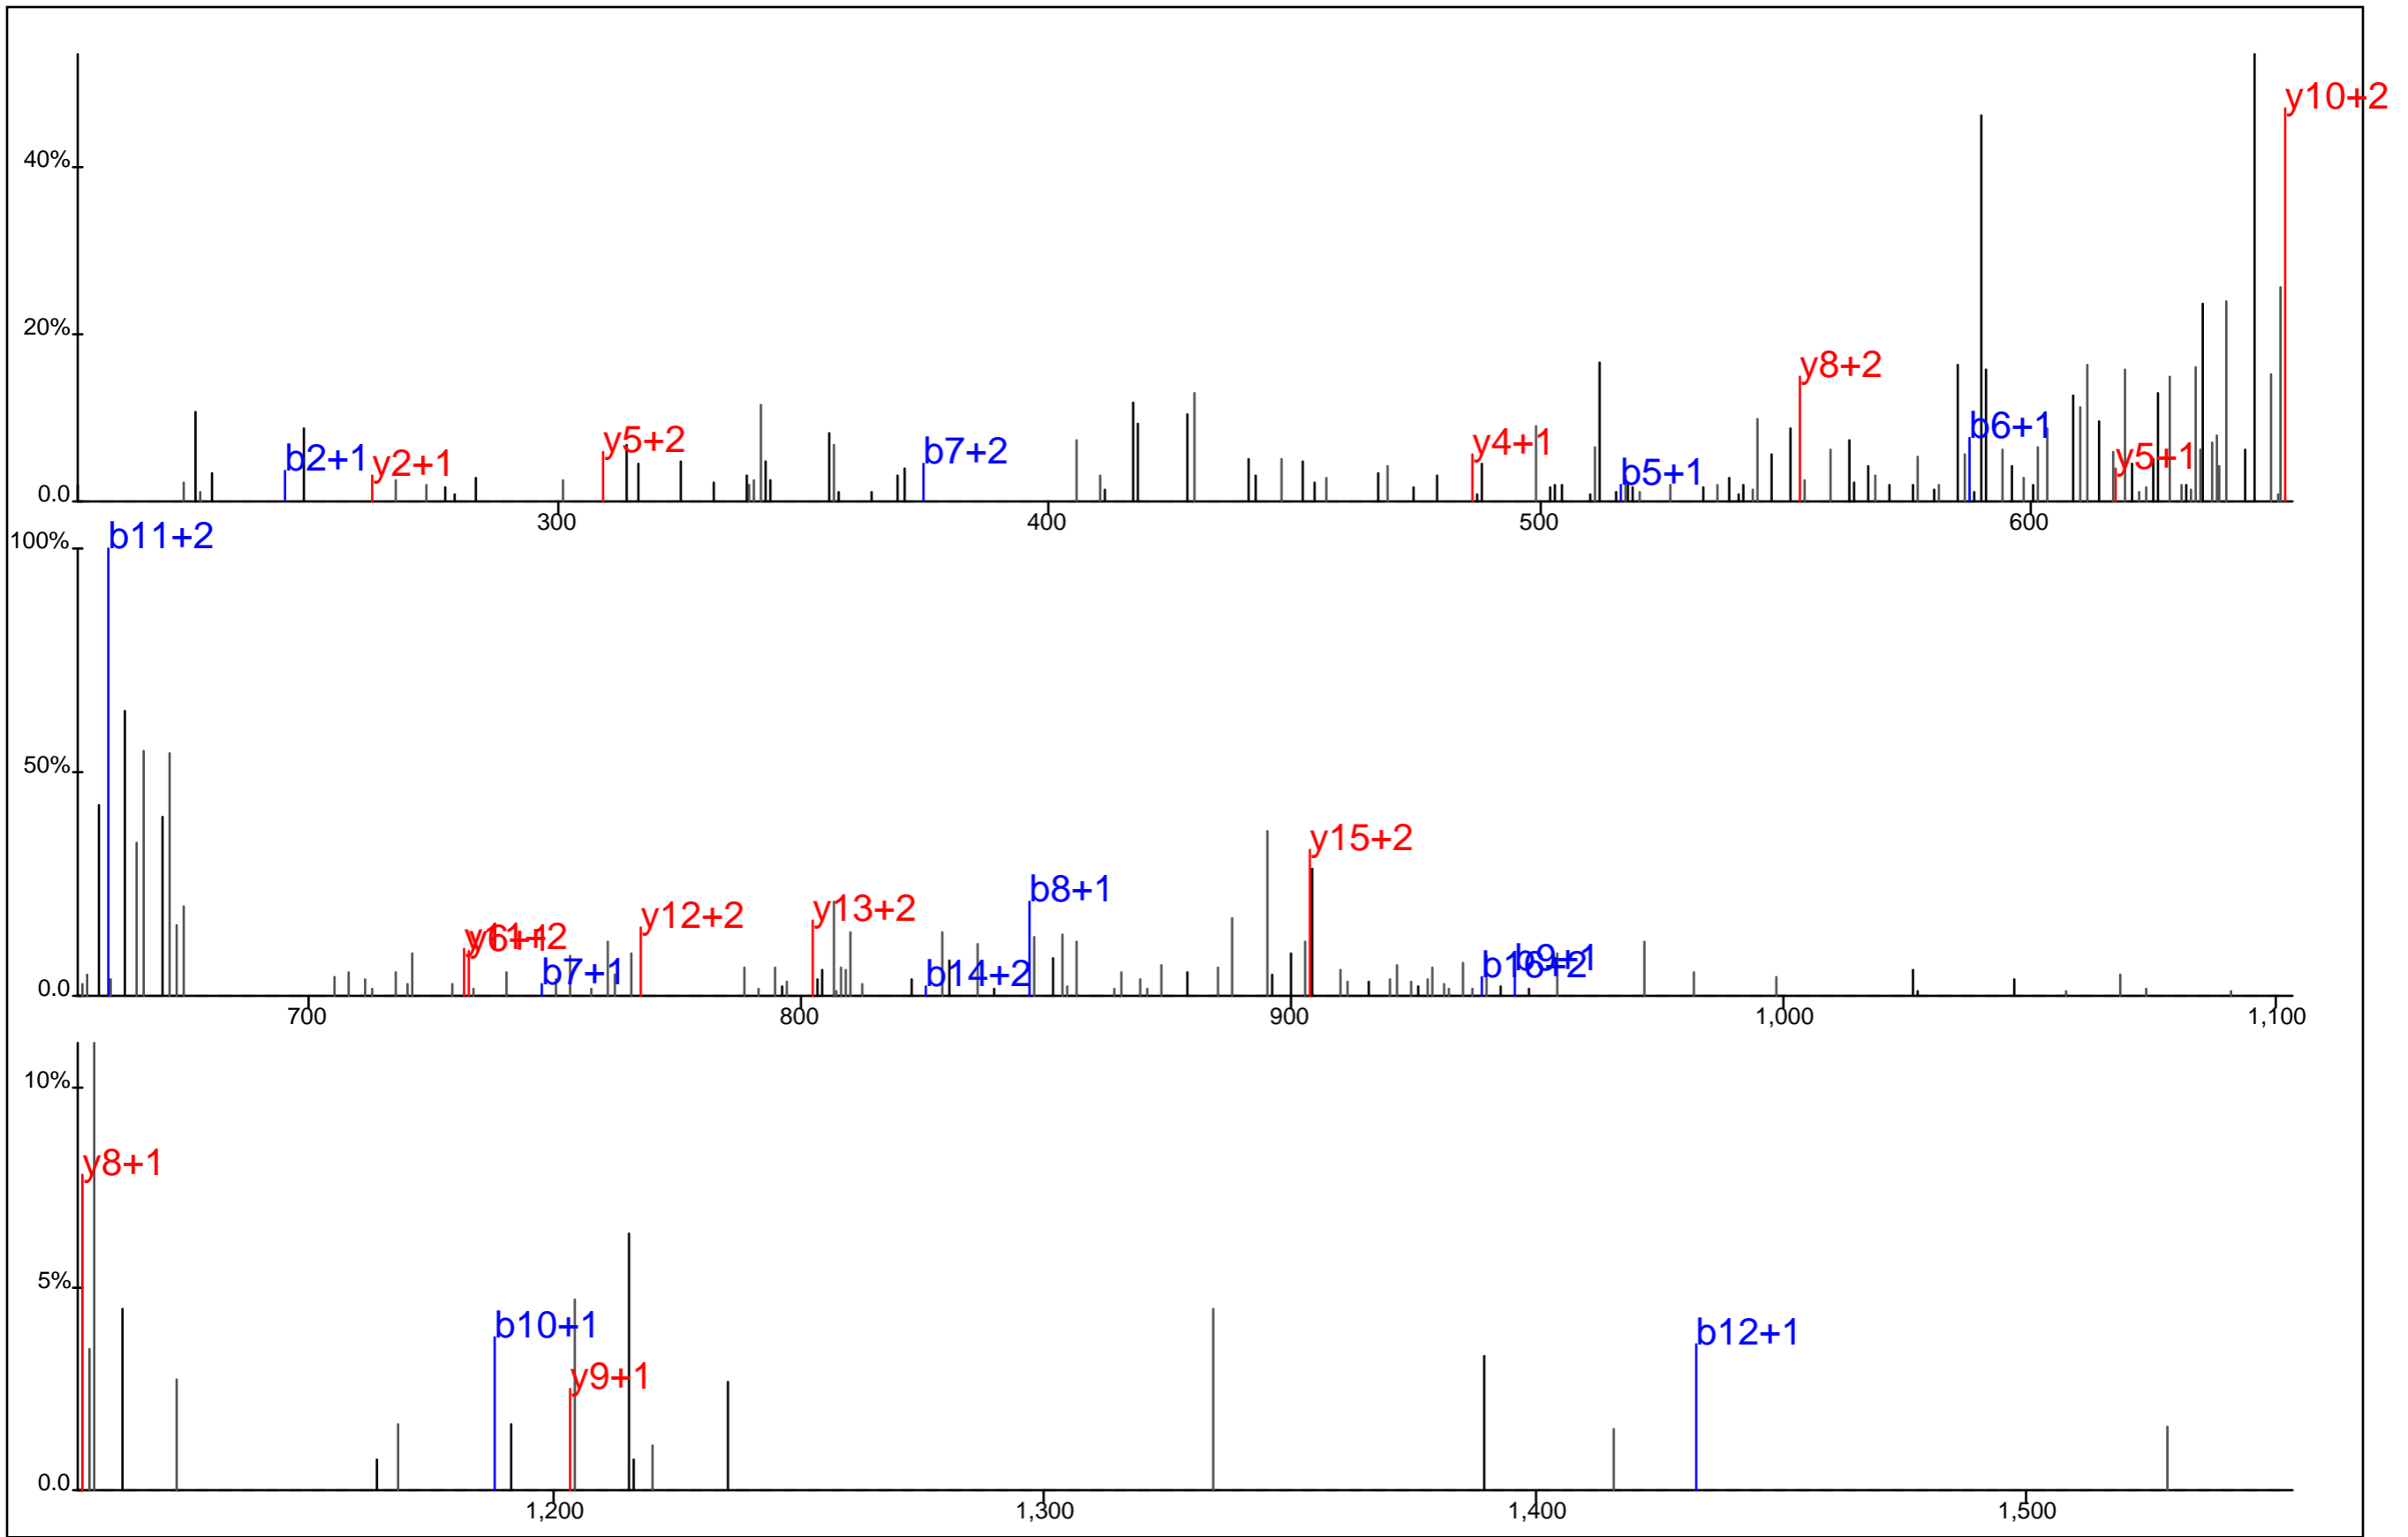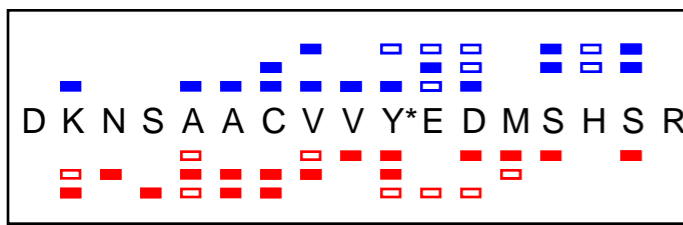

Protein Name: CD7  
 gi Accession: 5453613  
 Precursor Mass: 683.6118+3  
 Delta Mass: 0.277 ppm  
 XCorr: 21.79



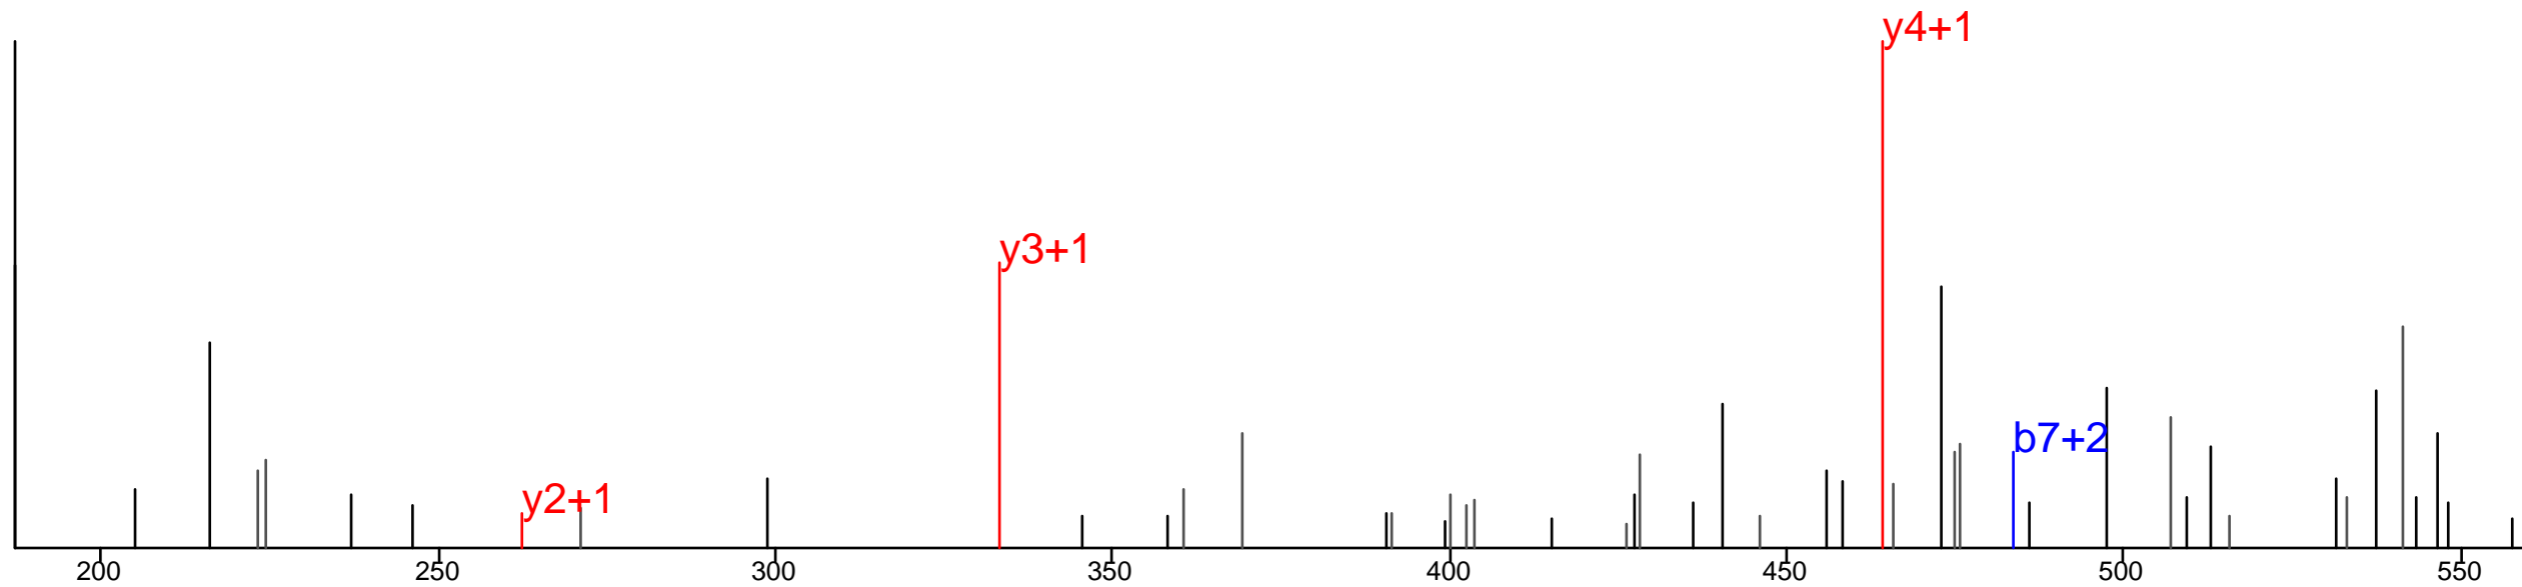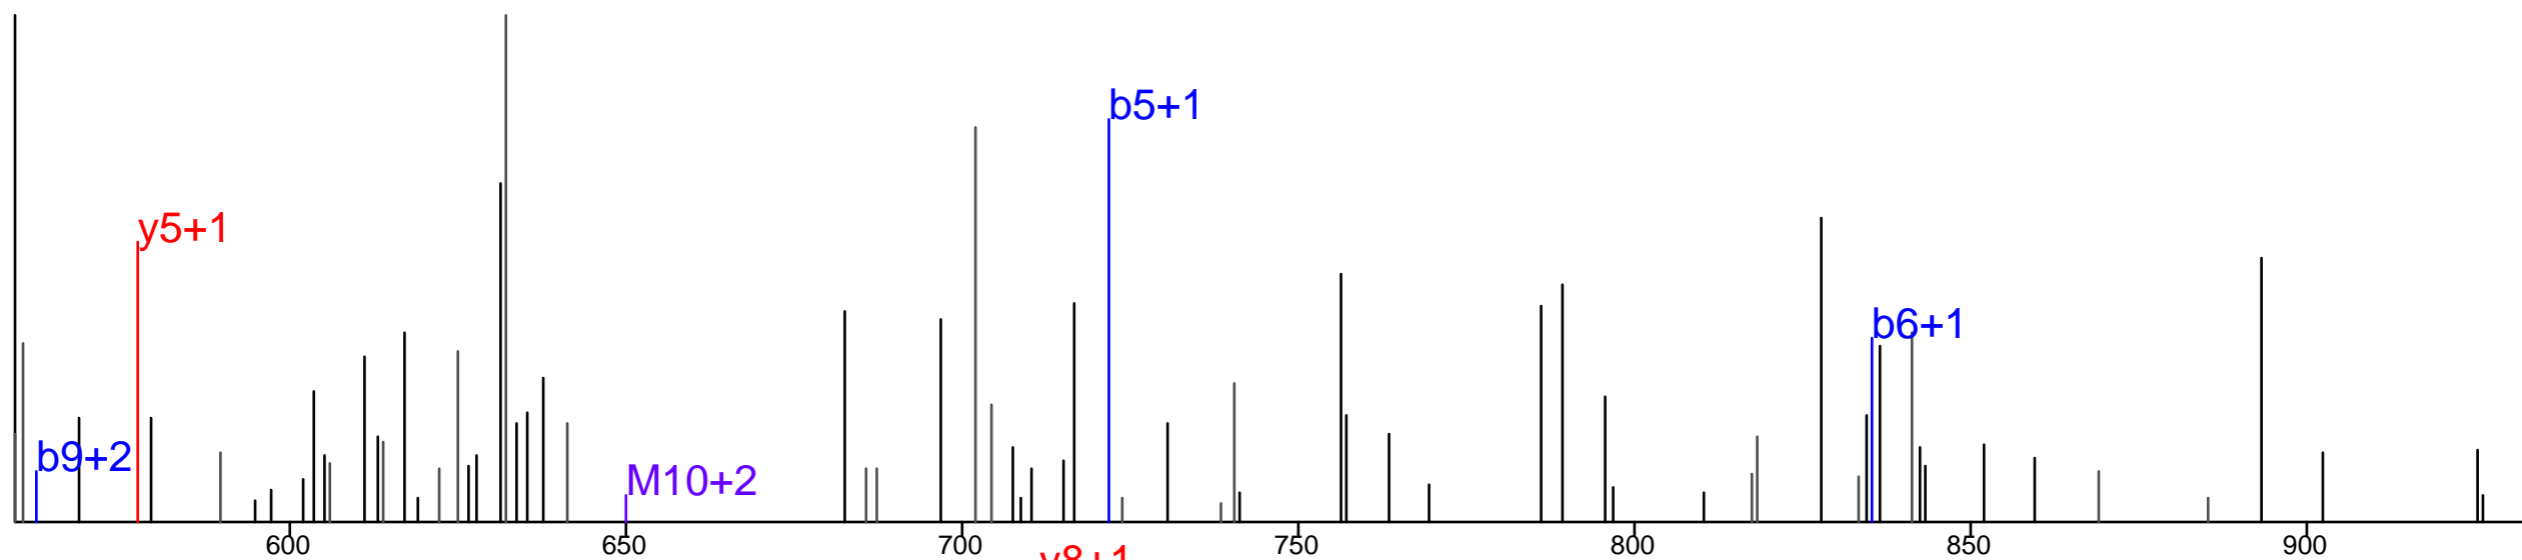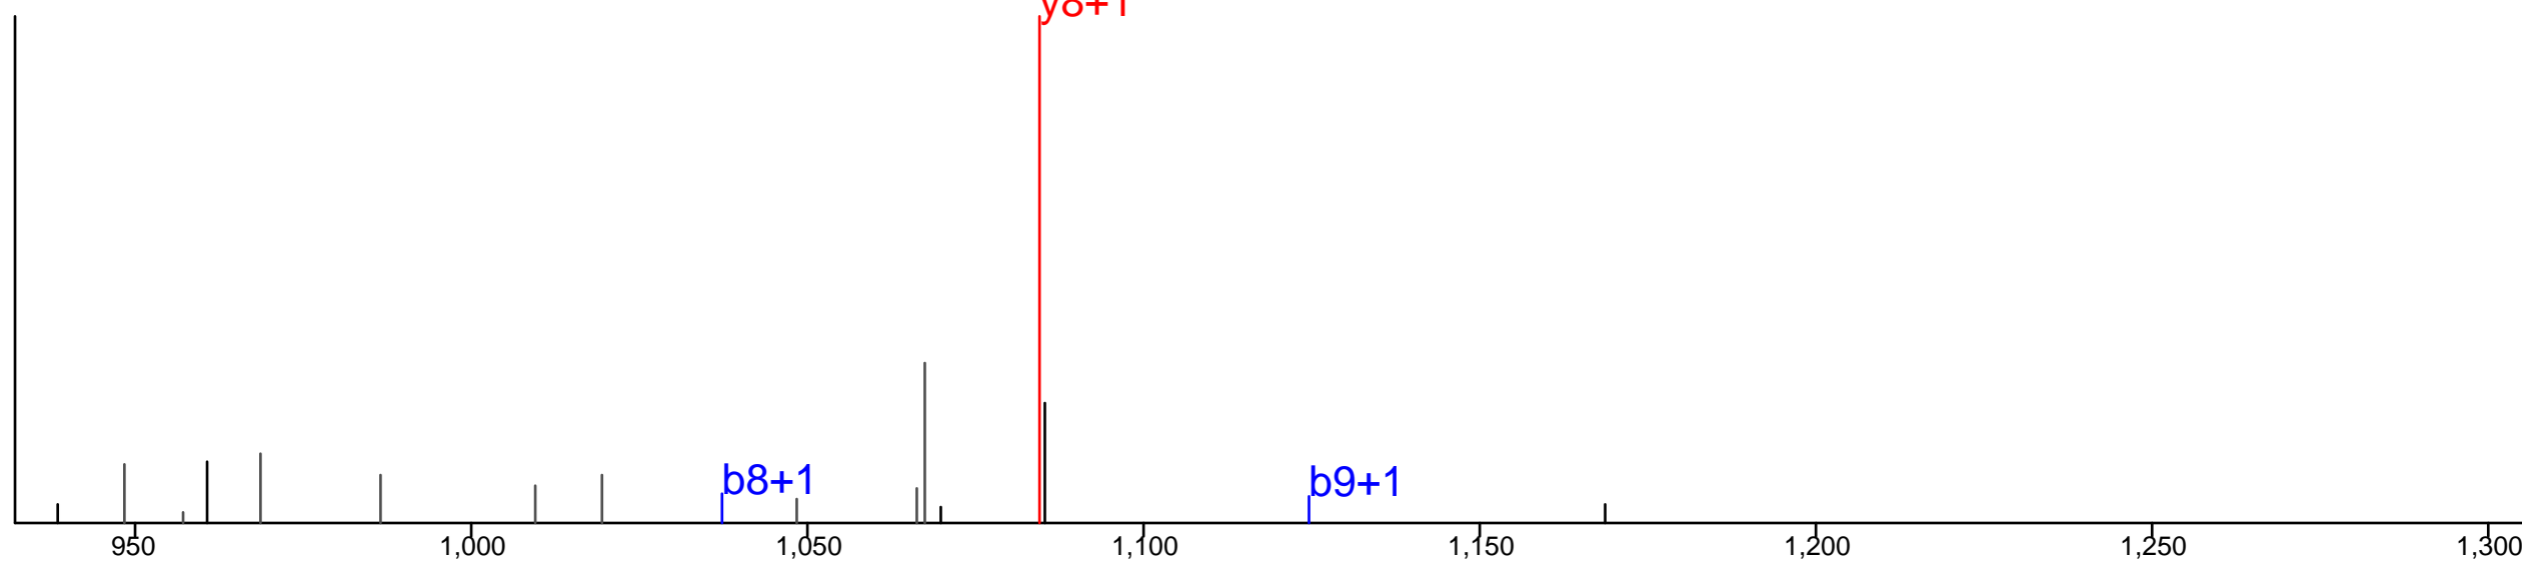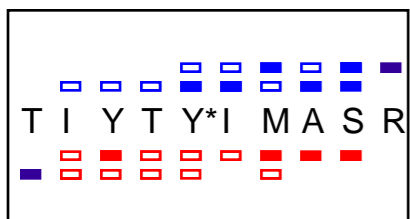

Protein Name: CD84  
 gi Accession: 74762772  
 Precursor Mass: 649.7964+2  
 Delta Mass: 0.368 ppm  
 XCorr: 22.68

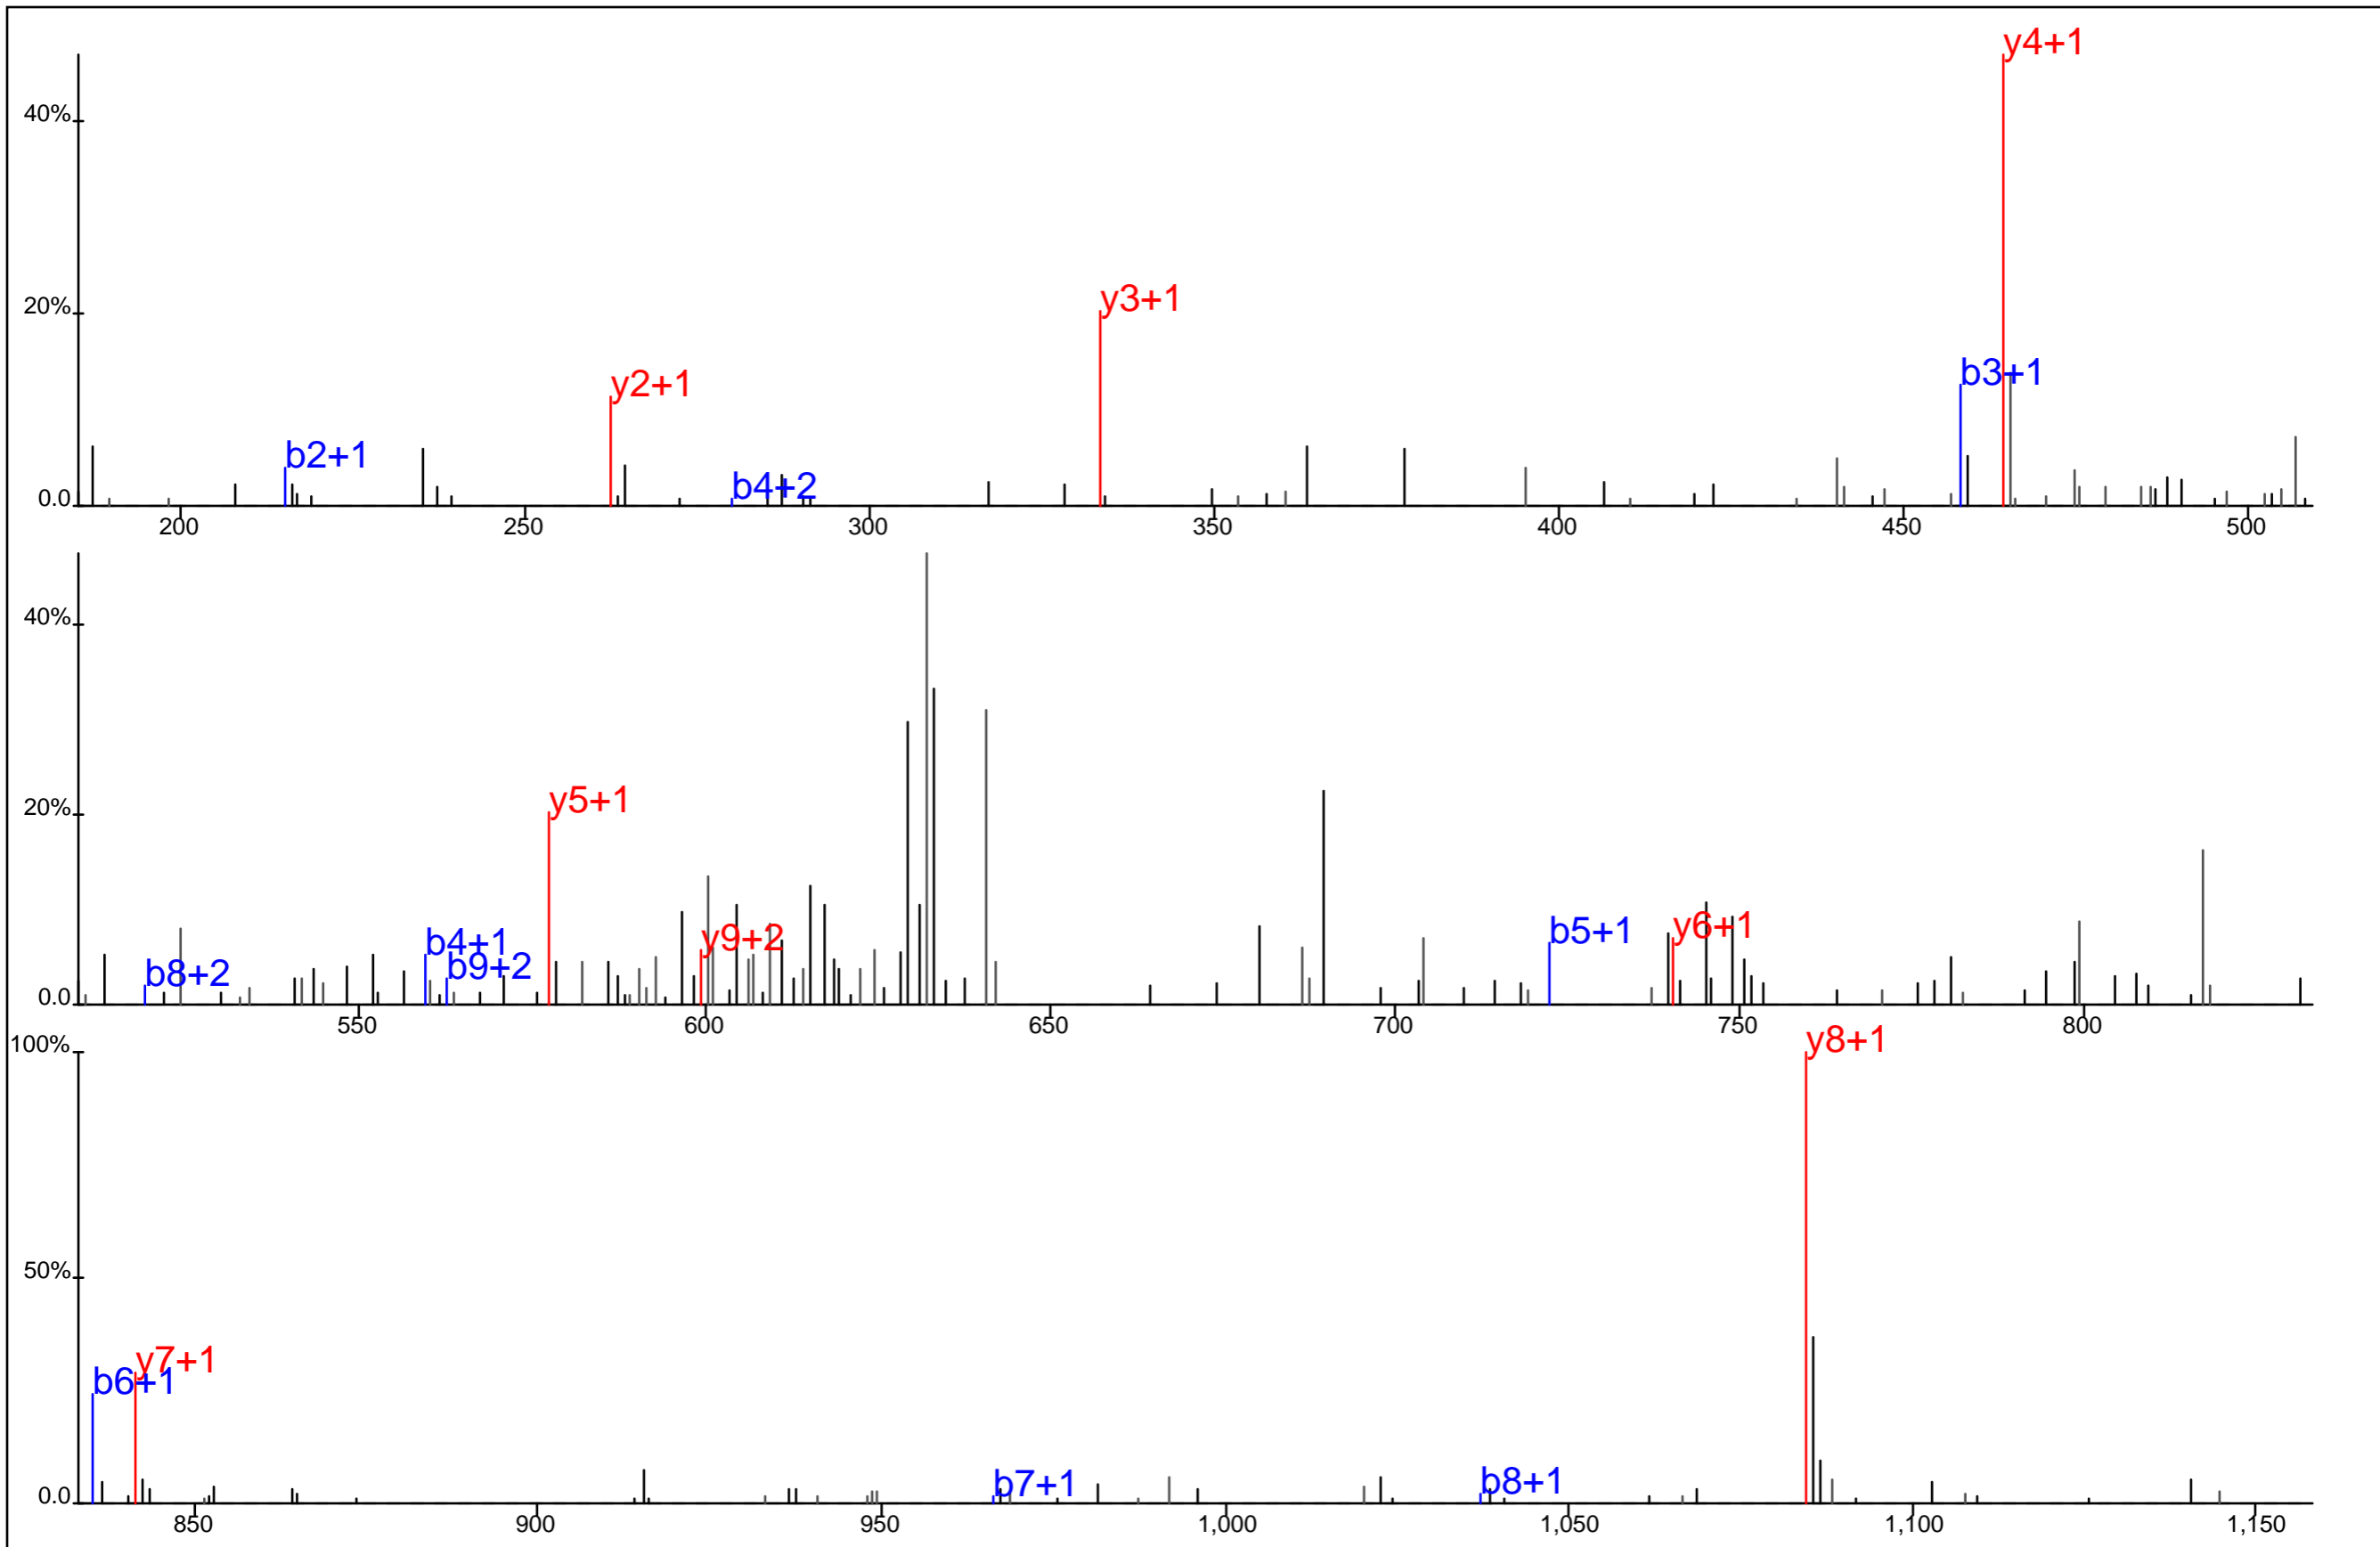

T I Y\* T Y I M A S R

Protein Name: CD84  
 gi Accession: 74762772  
 Precursor Mass: 649.7988+2  
 Delta Mass: 4.034 ppm  
 XCorr: 41.17

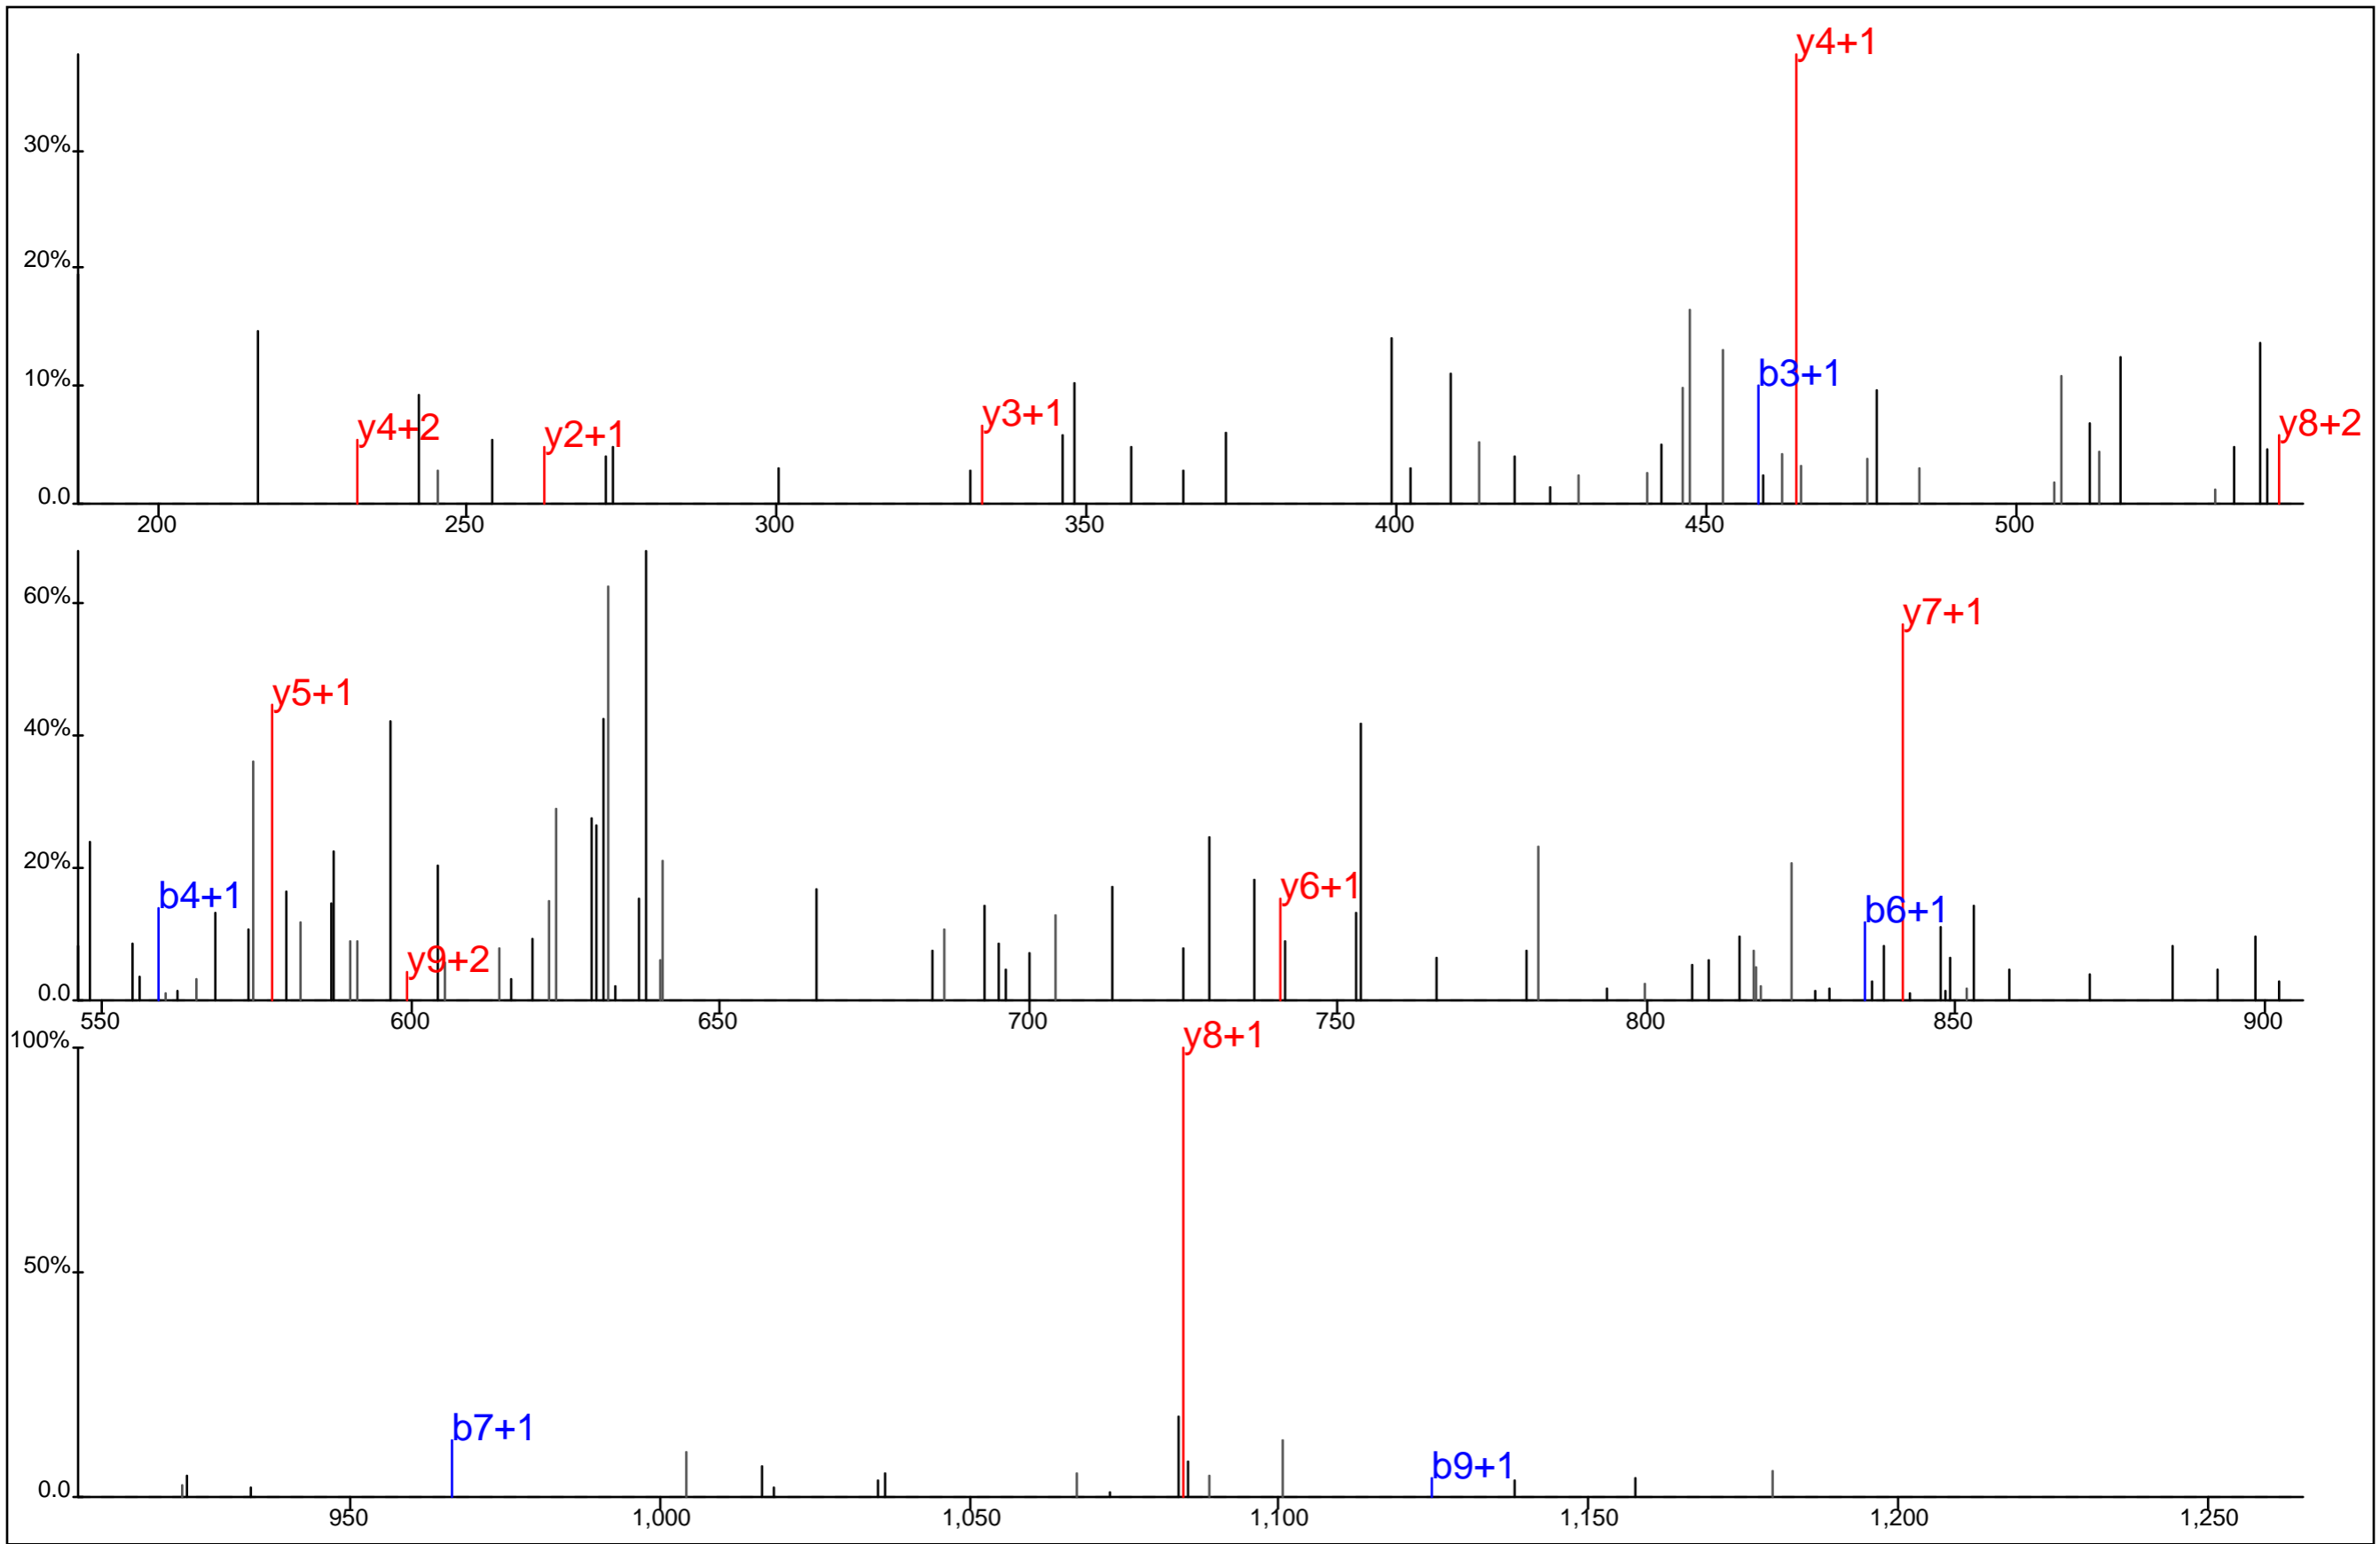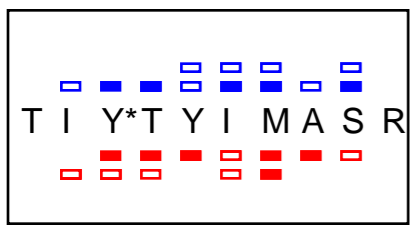

Protein Name: CD84  
 gi Accession: 74762772  
 Precursor Mass: 649.7974+2  
 Delta Mass: 1.870 ppm  
 XCorr: 17.88

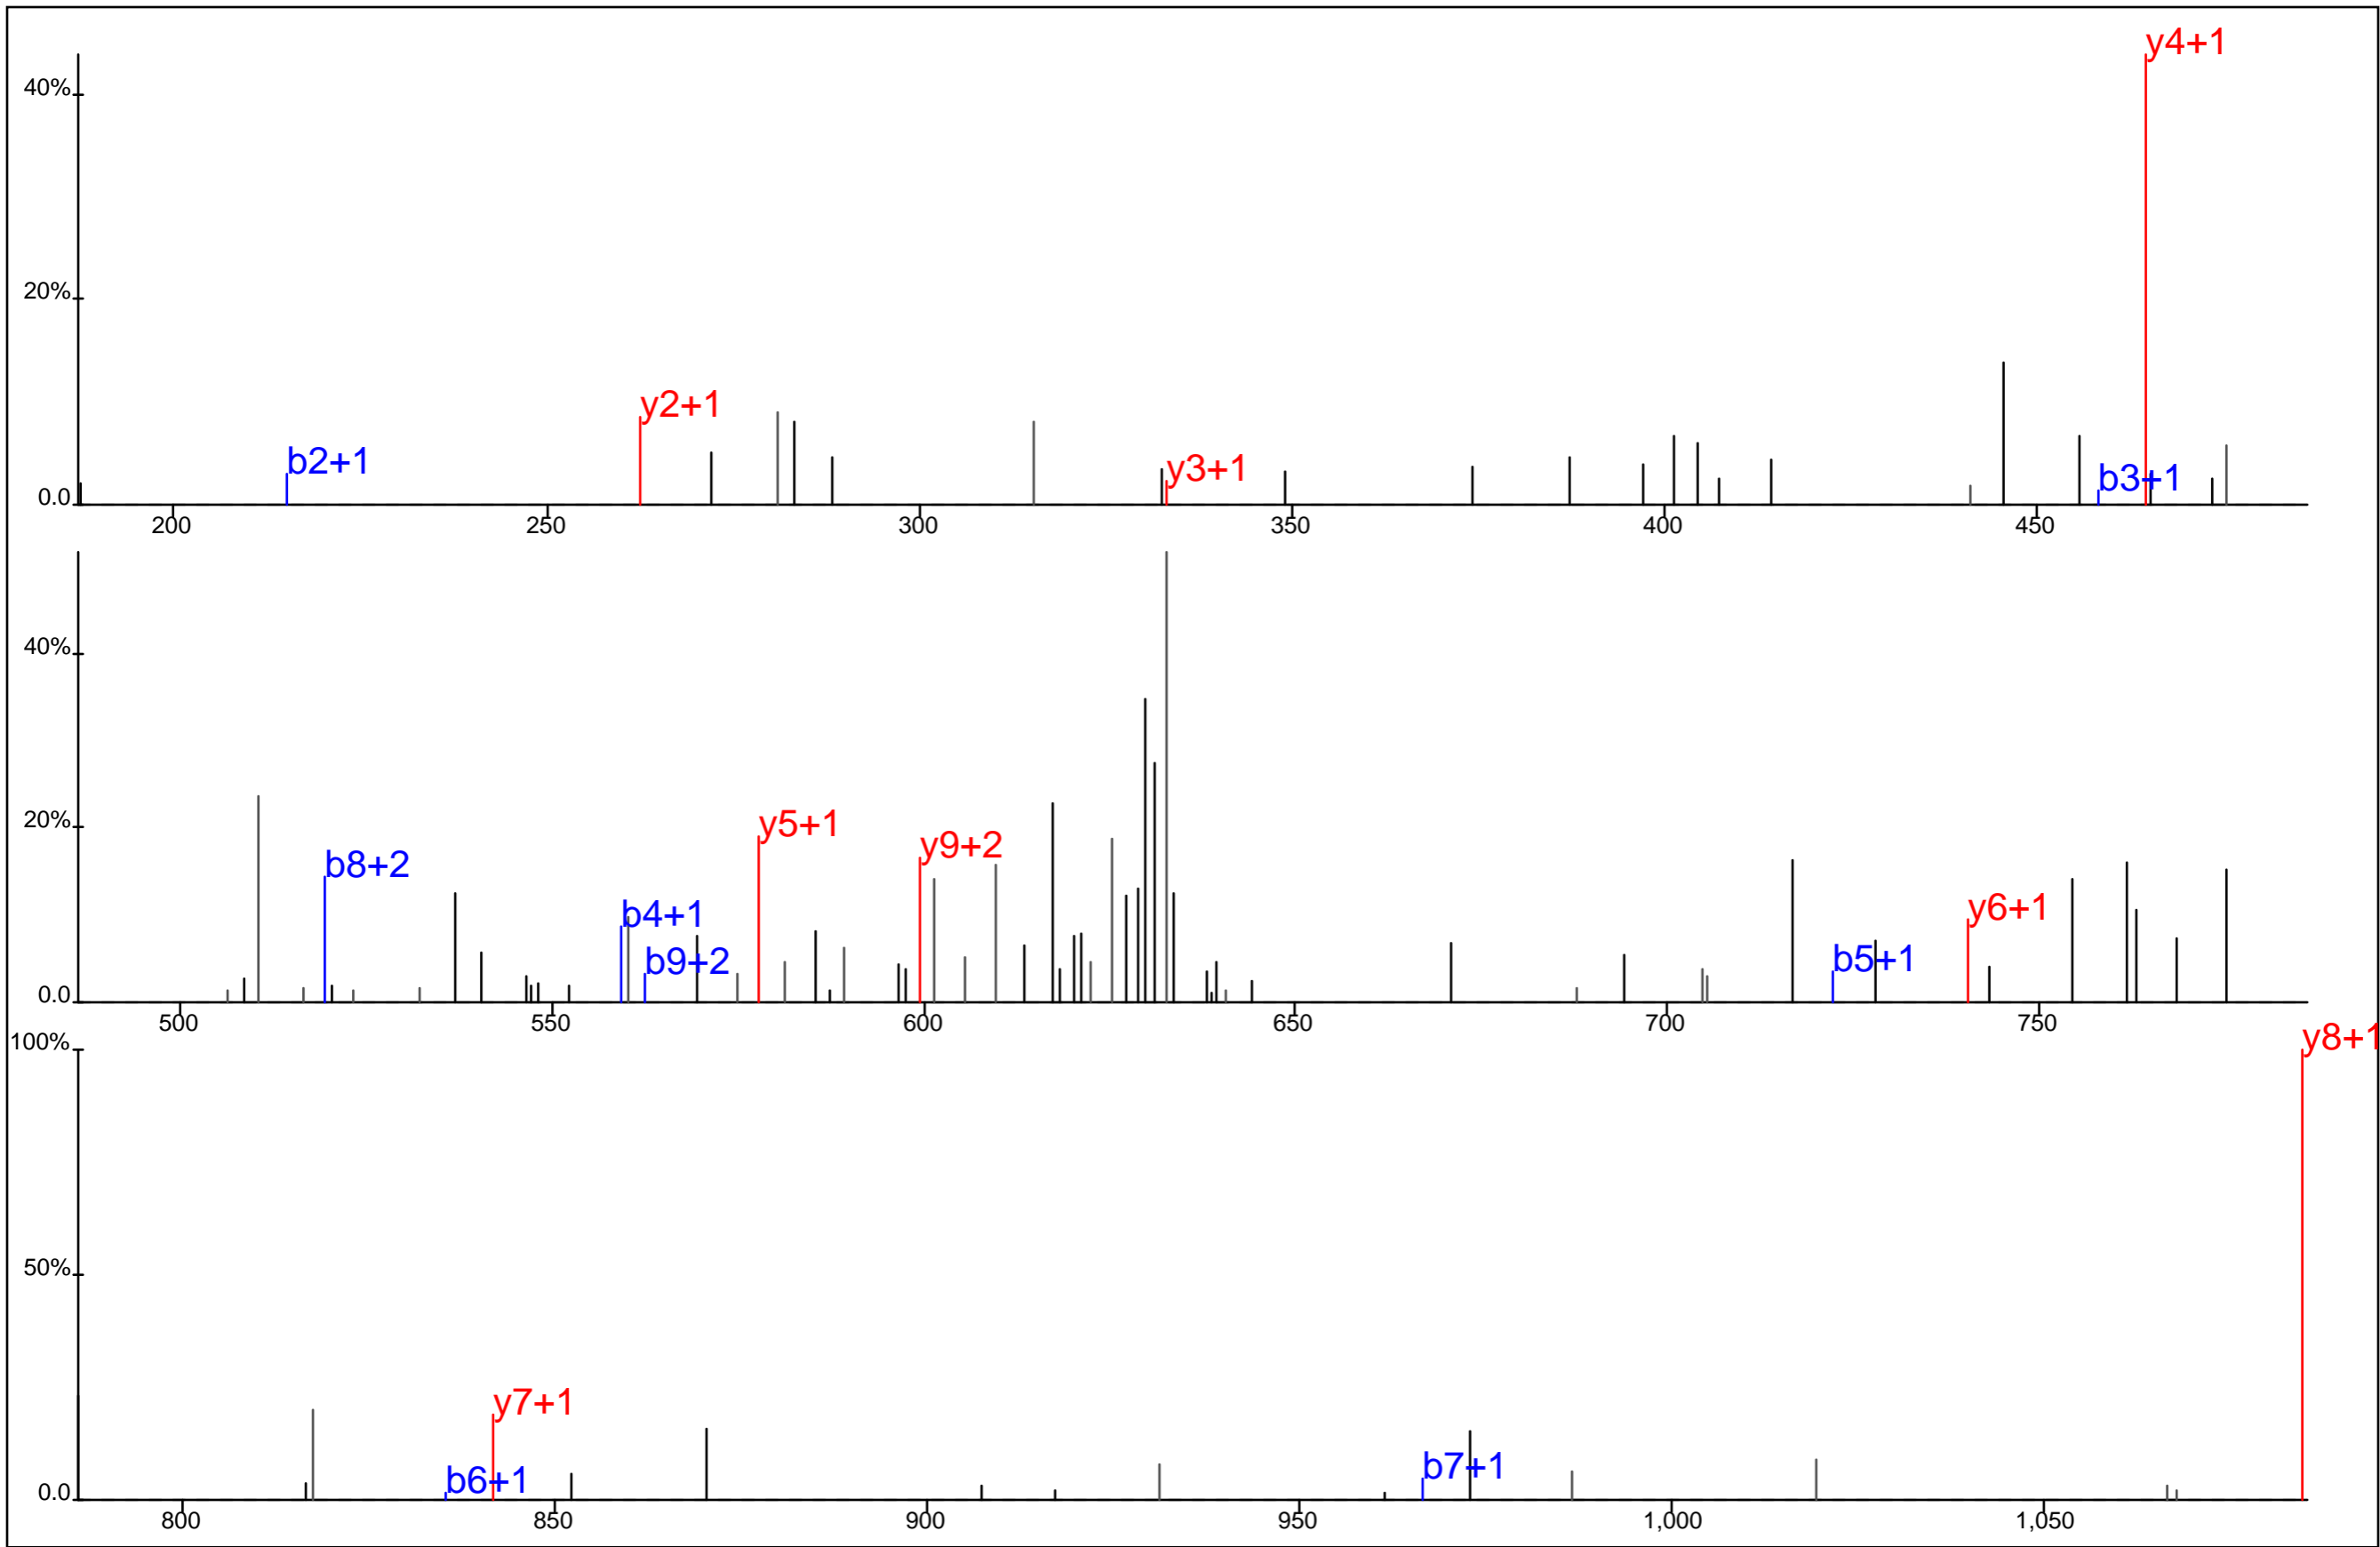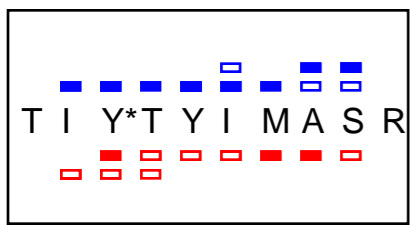

Protein Name: CD84  
 gi Accession: 74762772  
 Precursor Mass: 649.8002+2  
 Delta Mass: 6.198 ppm  
 XCorr: 23.63

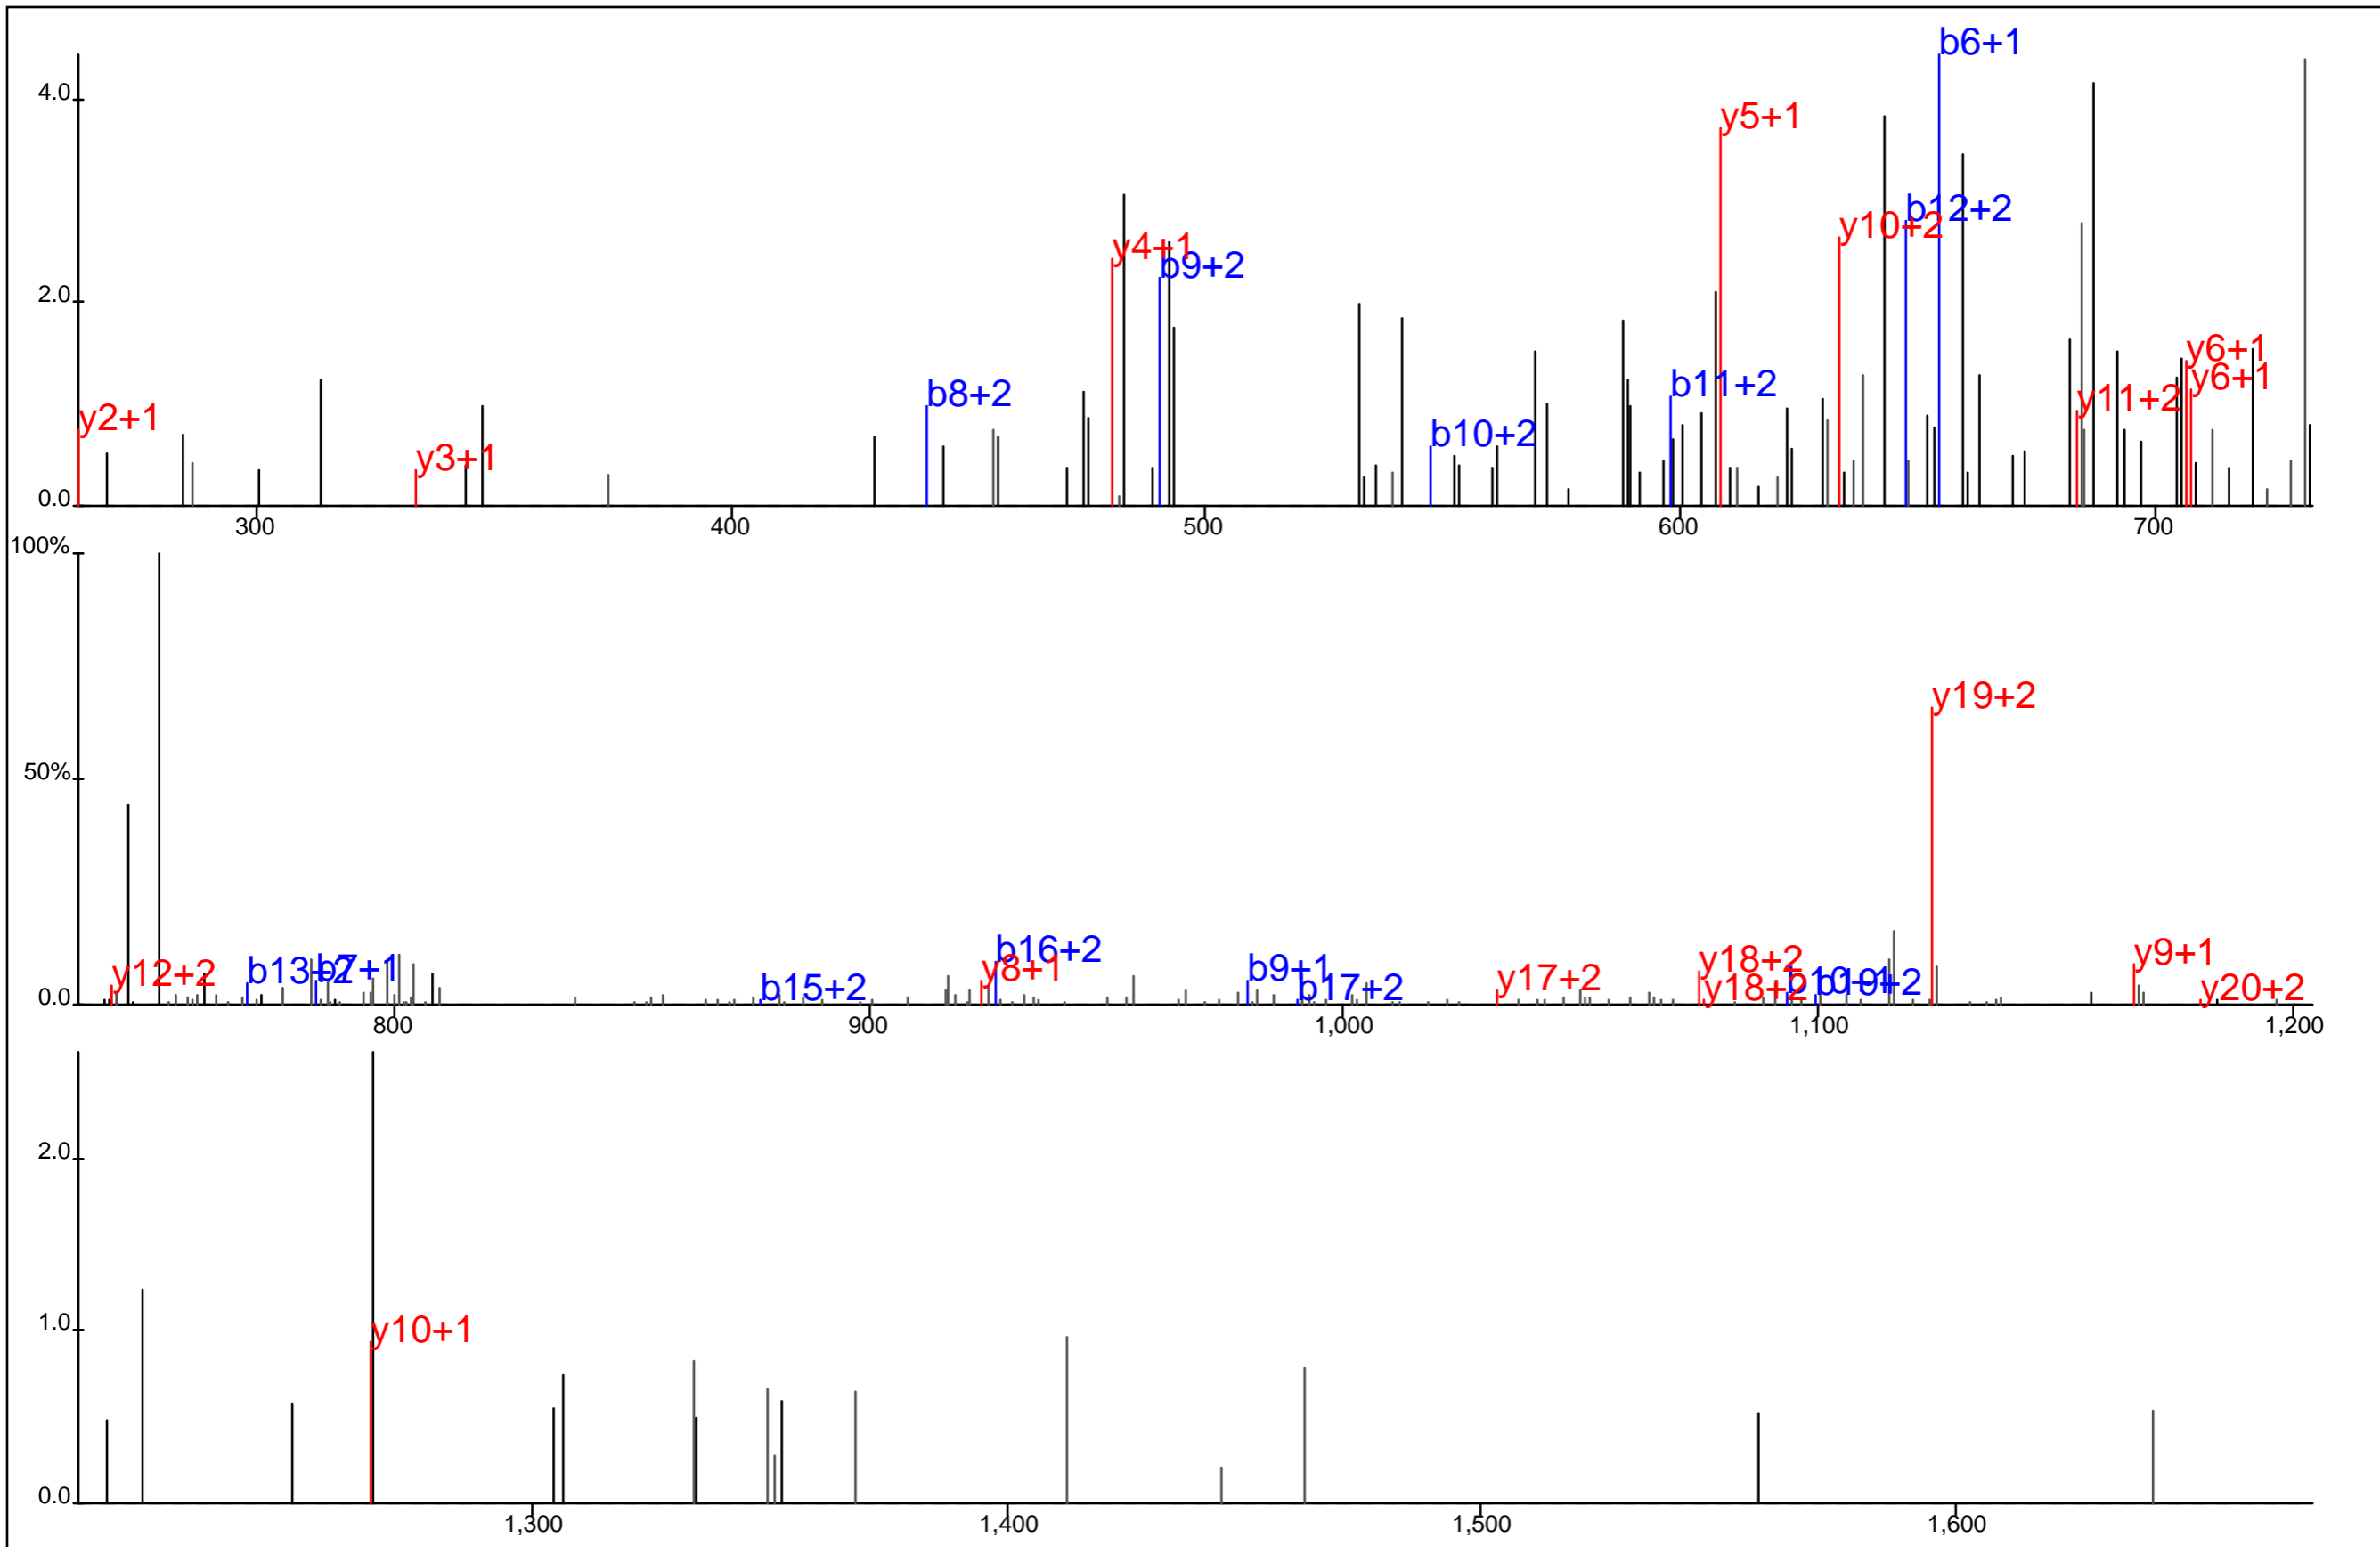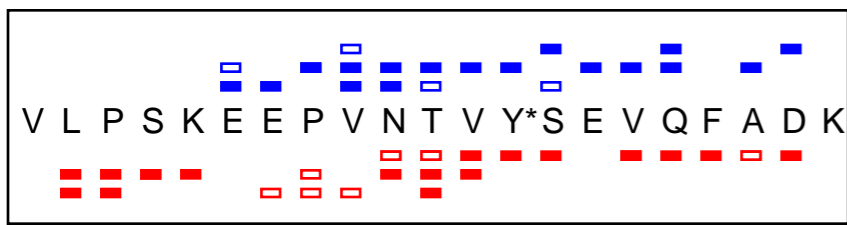

Protein Name: CD84  
 gi Accession: 74762772  
 Precursor Mass: 820.3973+3  
 Delta Mass: 1.349 ppm  
 XCorr: 18.58

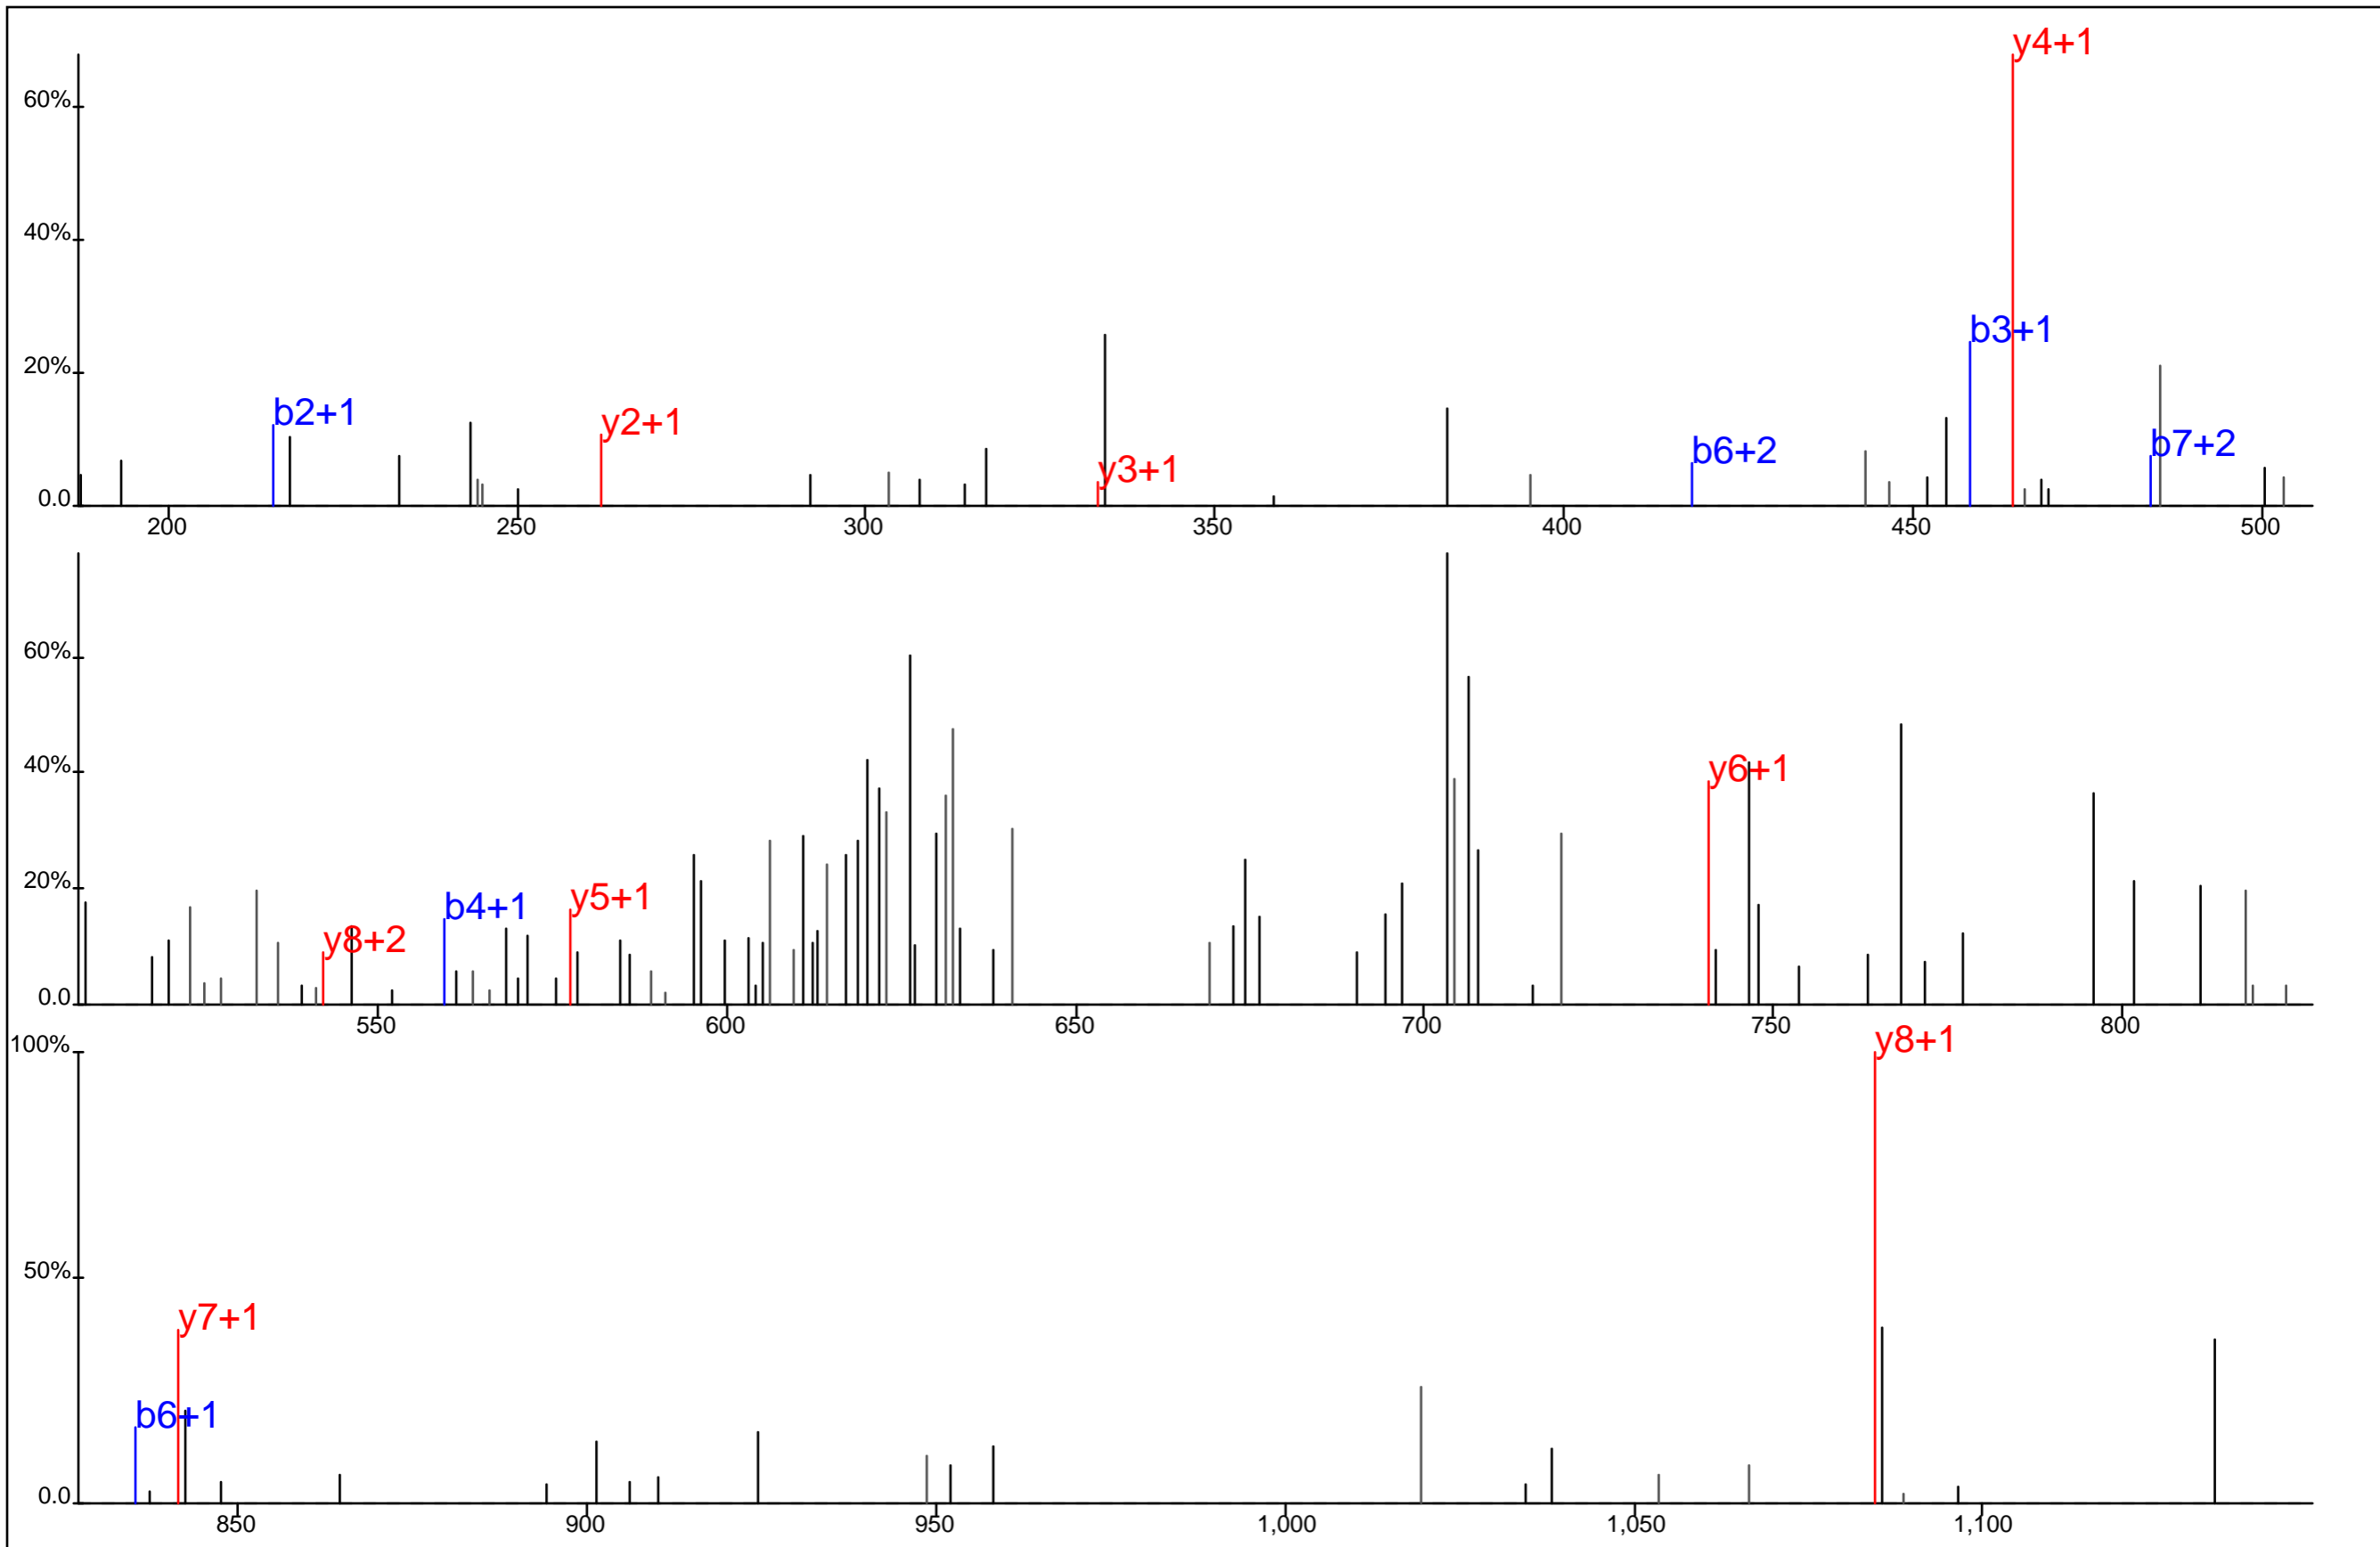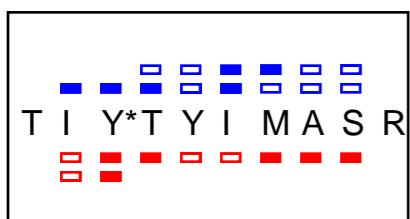

Protein Name: CD84  
 gi Accession: 74762772  
 Precursor Mass: 649.7984+2  
 Delta Mass: 3.471 ppm  
 XCorr: 18.2

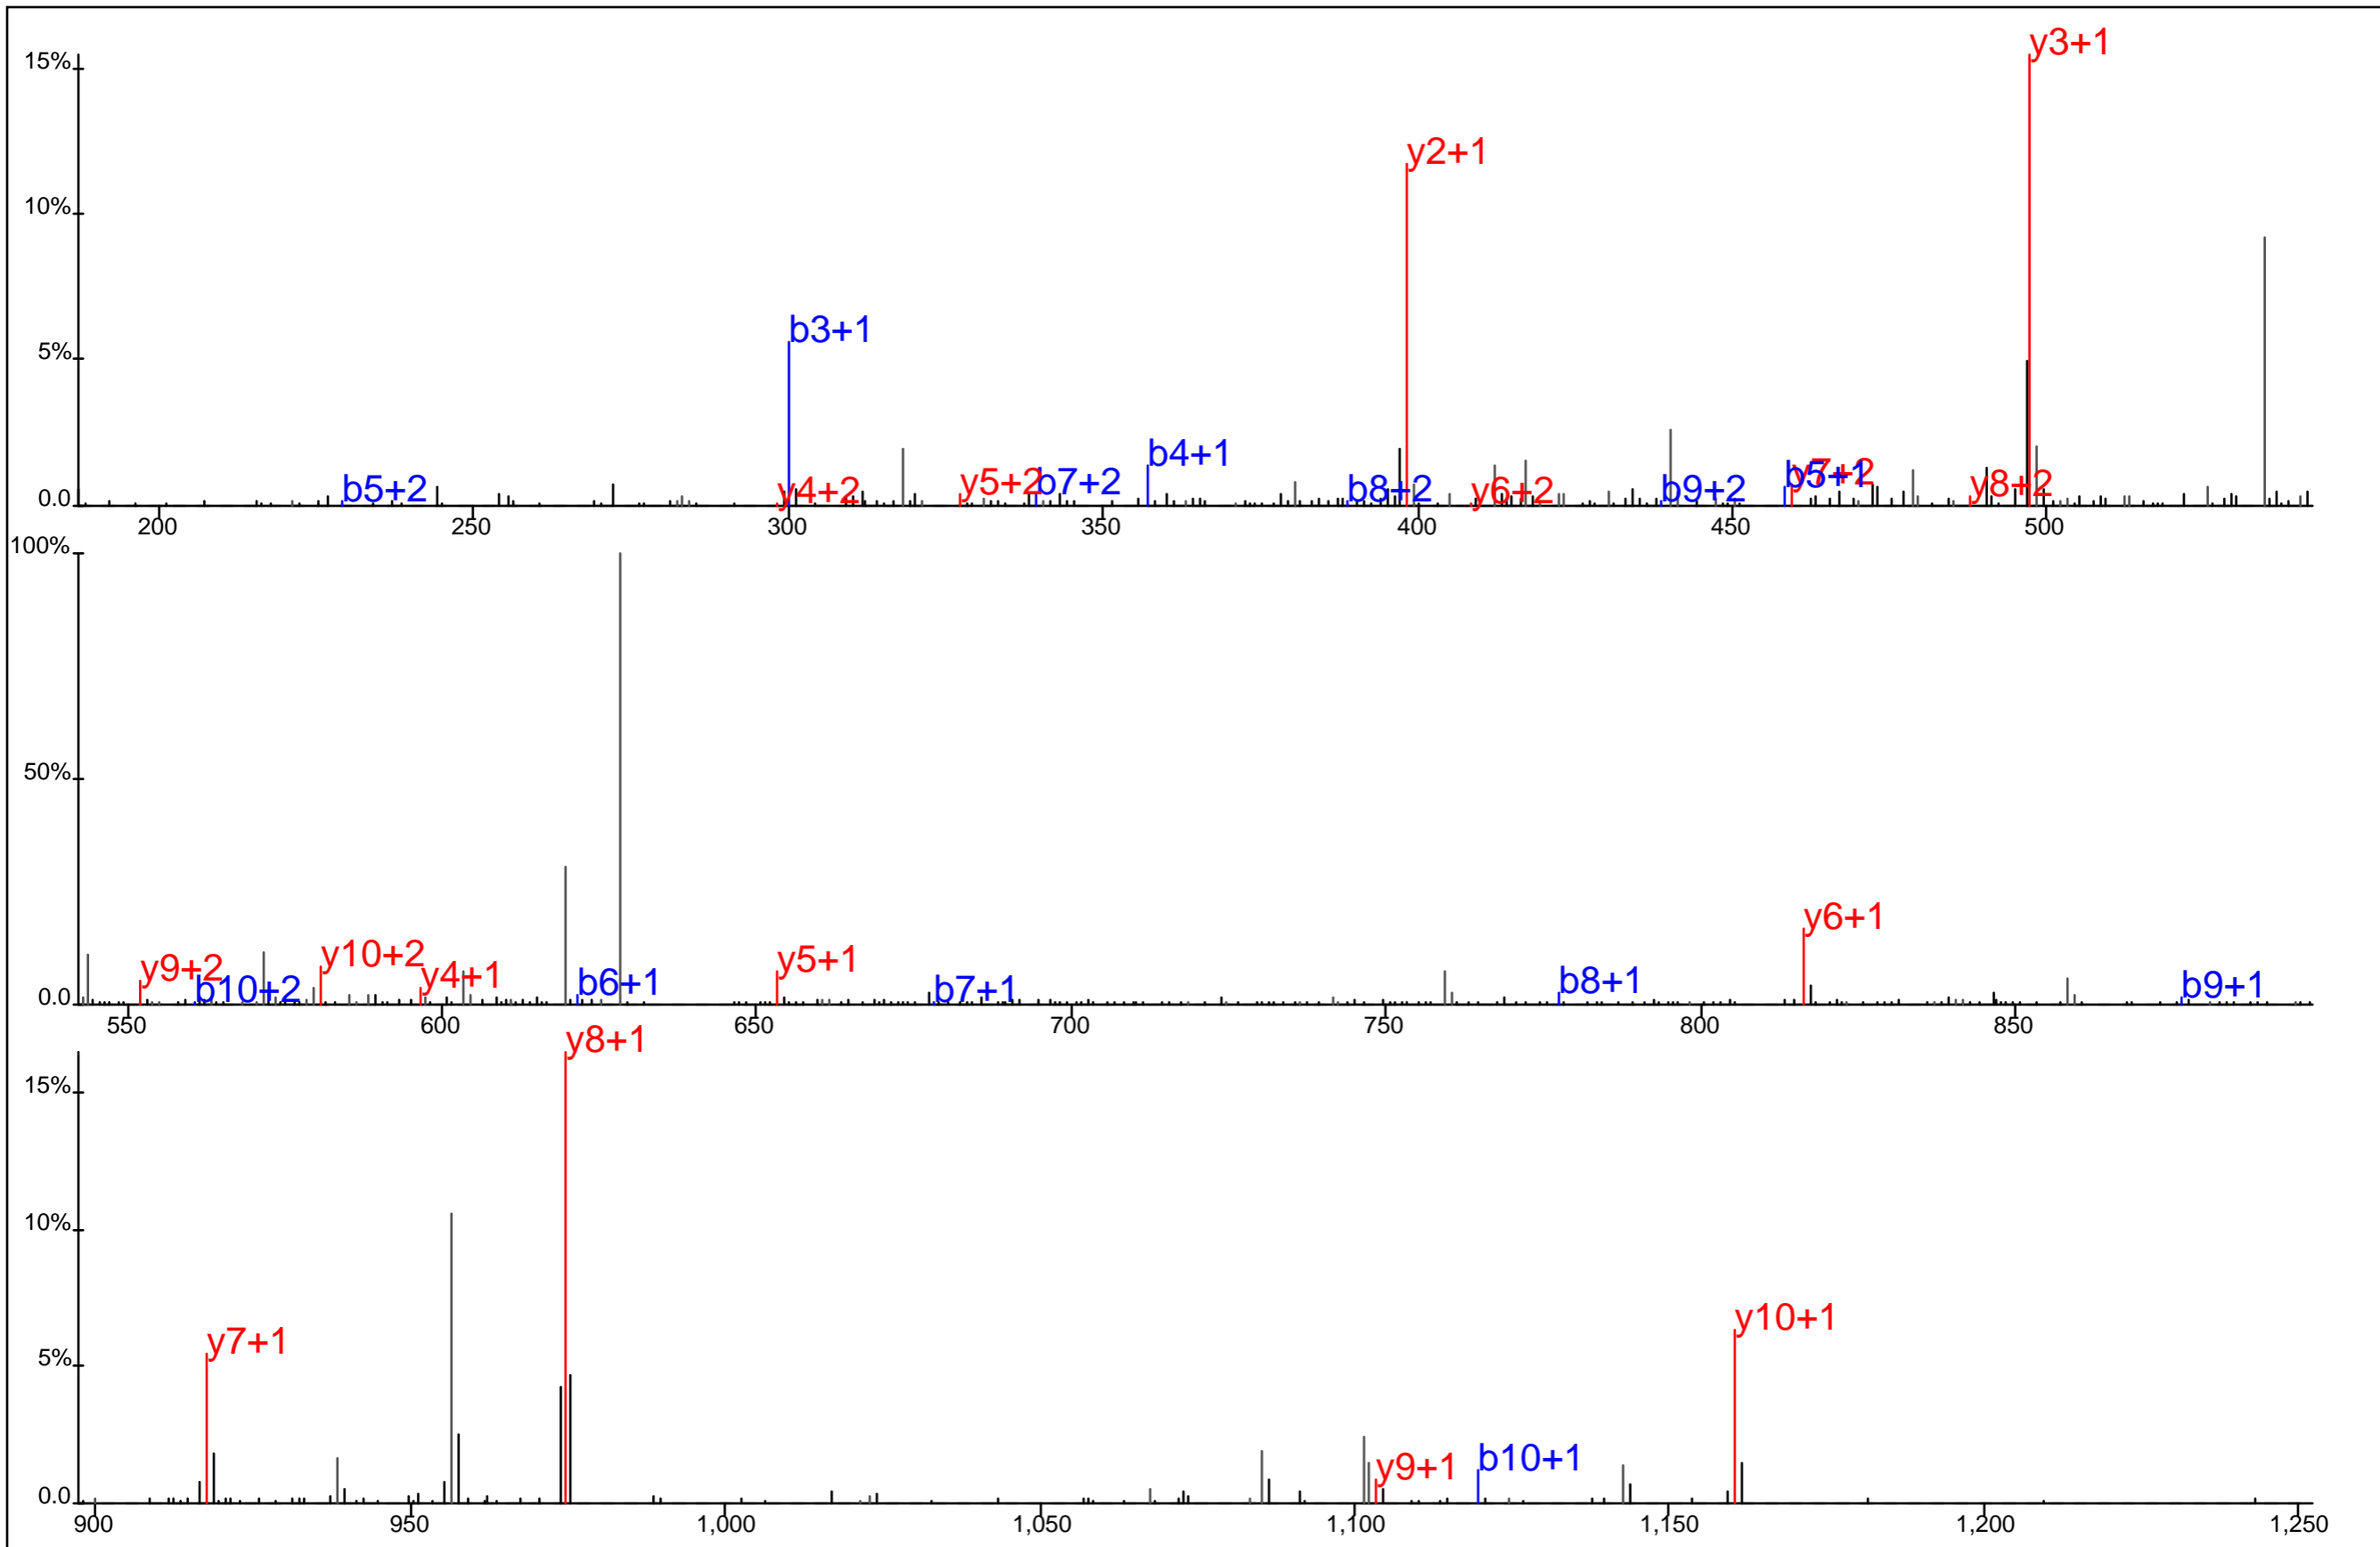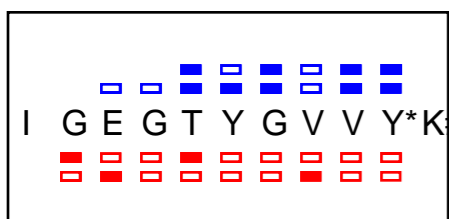

Protein Name: CDC2  
 gi Accession: 24158643  
 Precursor Mass: 637.3041+2  
 Delta Mass: 4.278 ppm  
 XCorr: 47.92

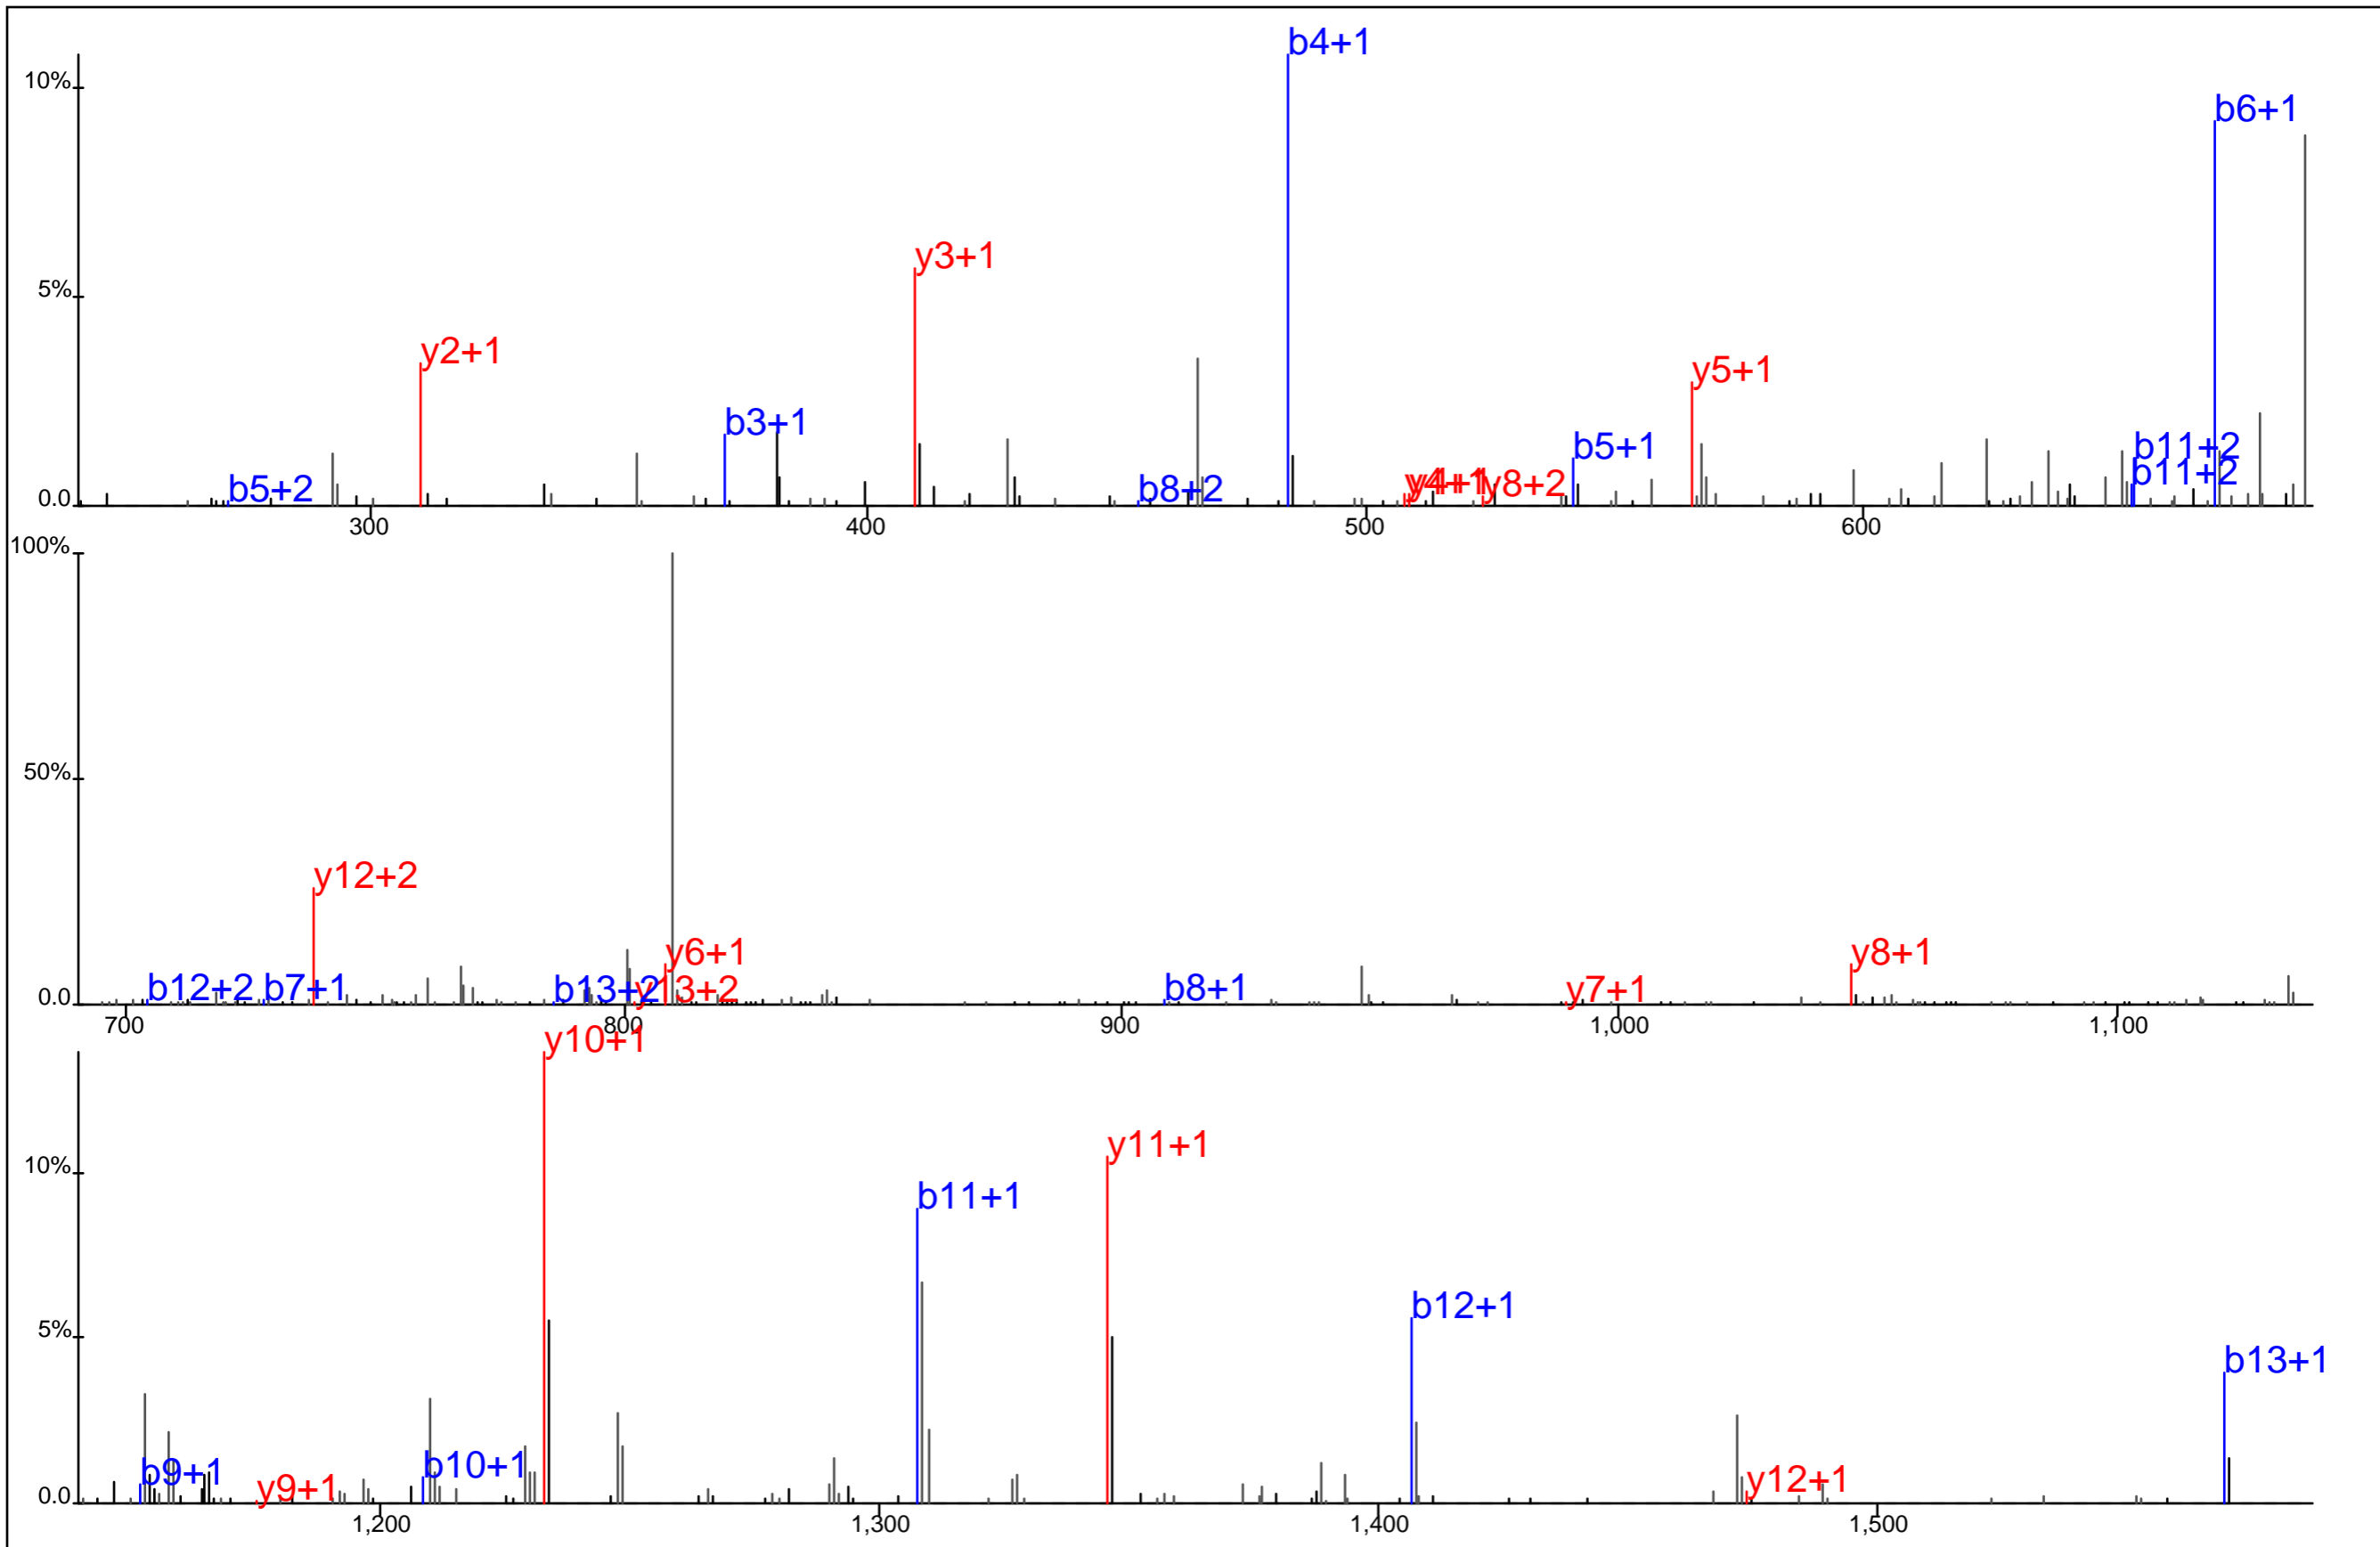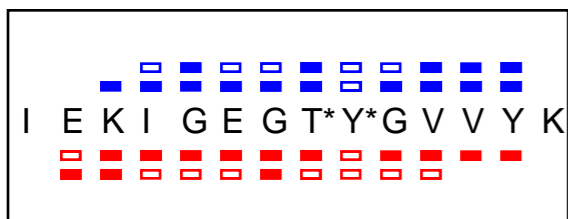

Protein Name: CDC2  
 gi Accession: 16306492  
 Precursor Mass: 858.3904+2  
 Delta Mass: 2.458 ppm  
 XCorr: 48.24



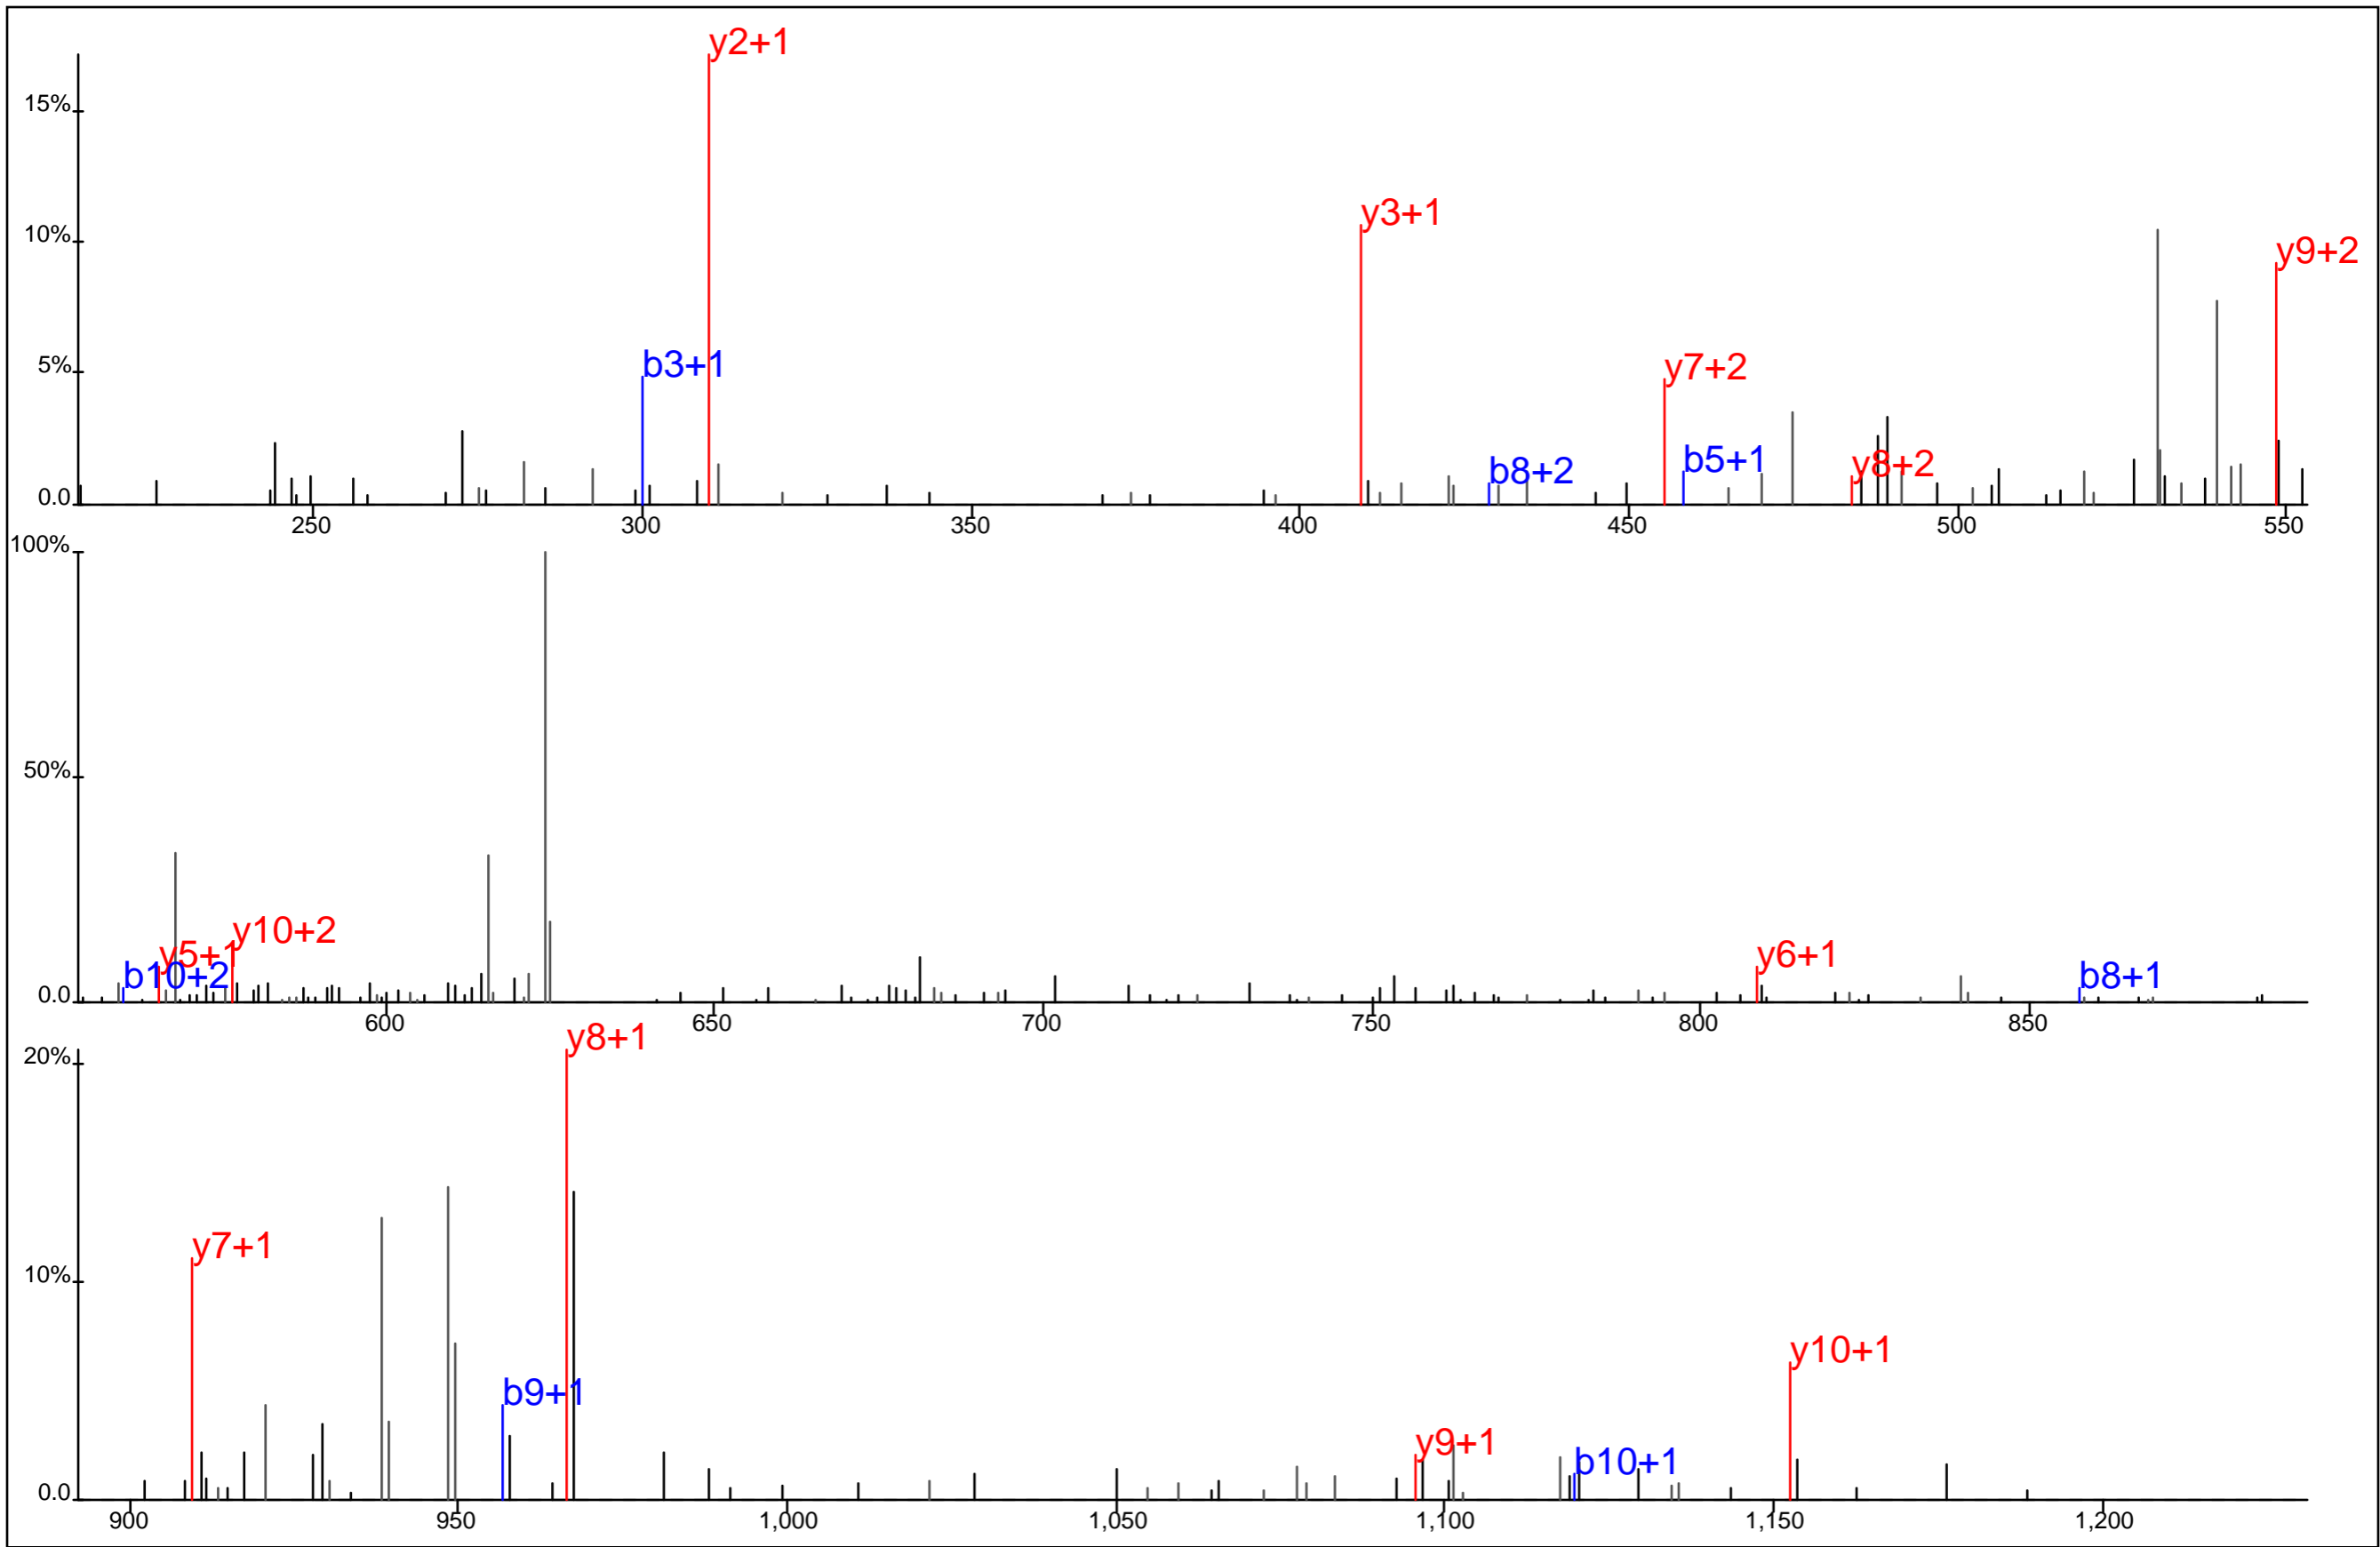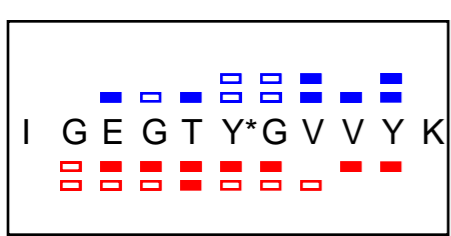

Protein Name: CDC2  
 gi Accession: 24158643  
 Precursor Mass: 633.2957+2  
 Delta Mass: 2.219 ppm  
 XCorr: 48.85

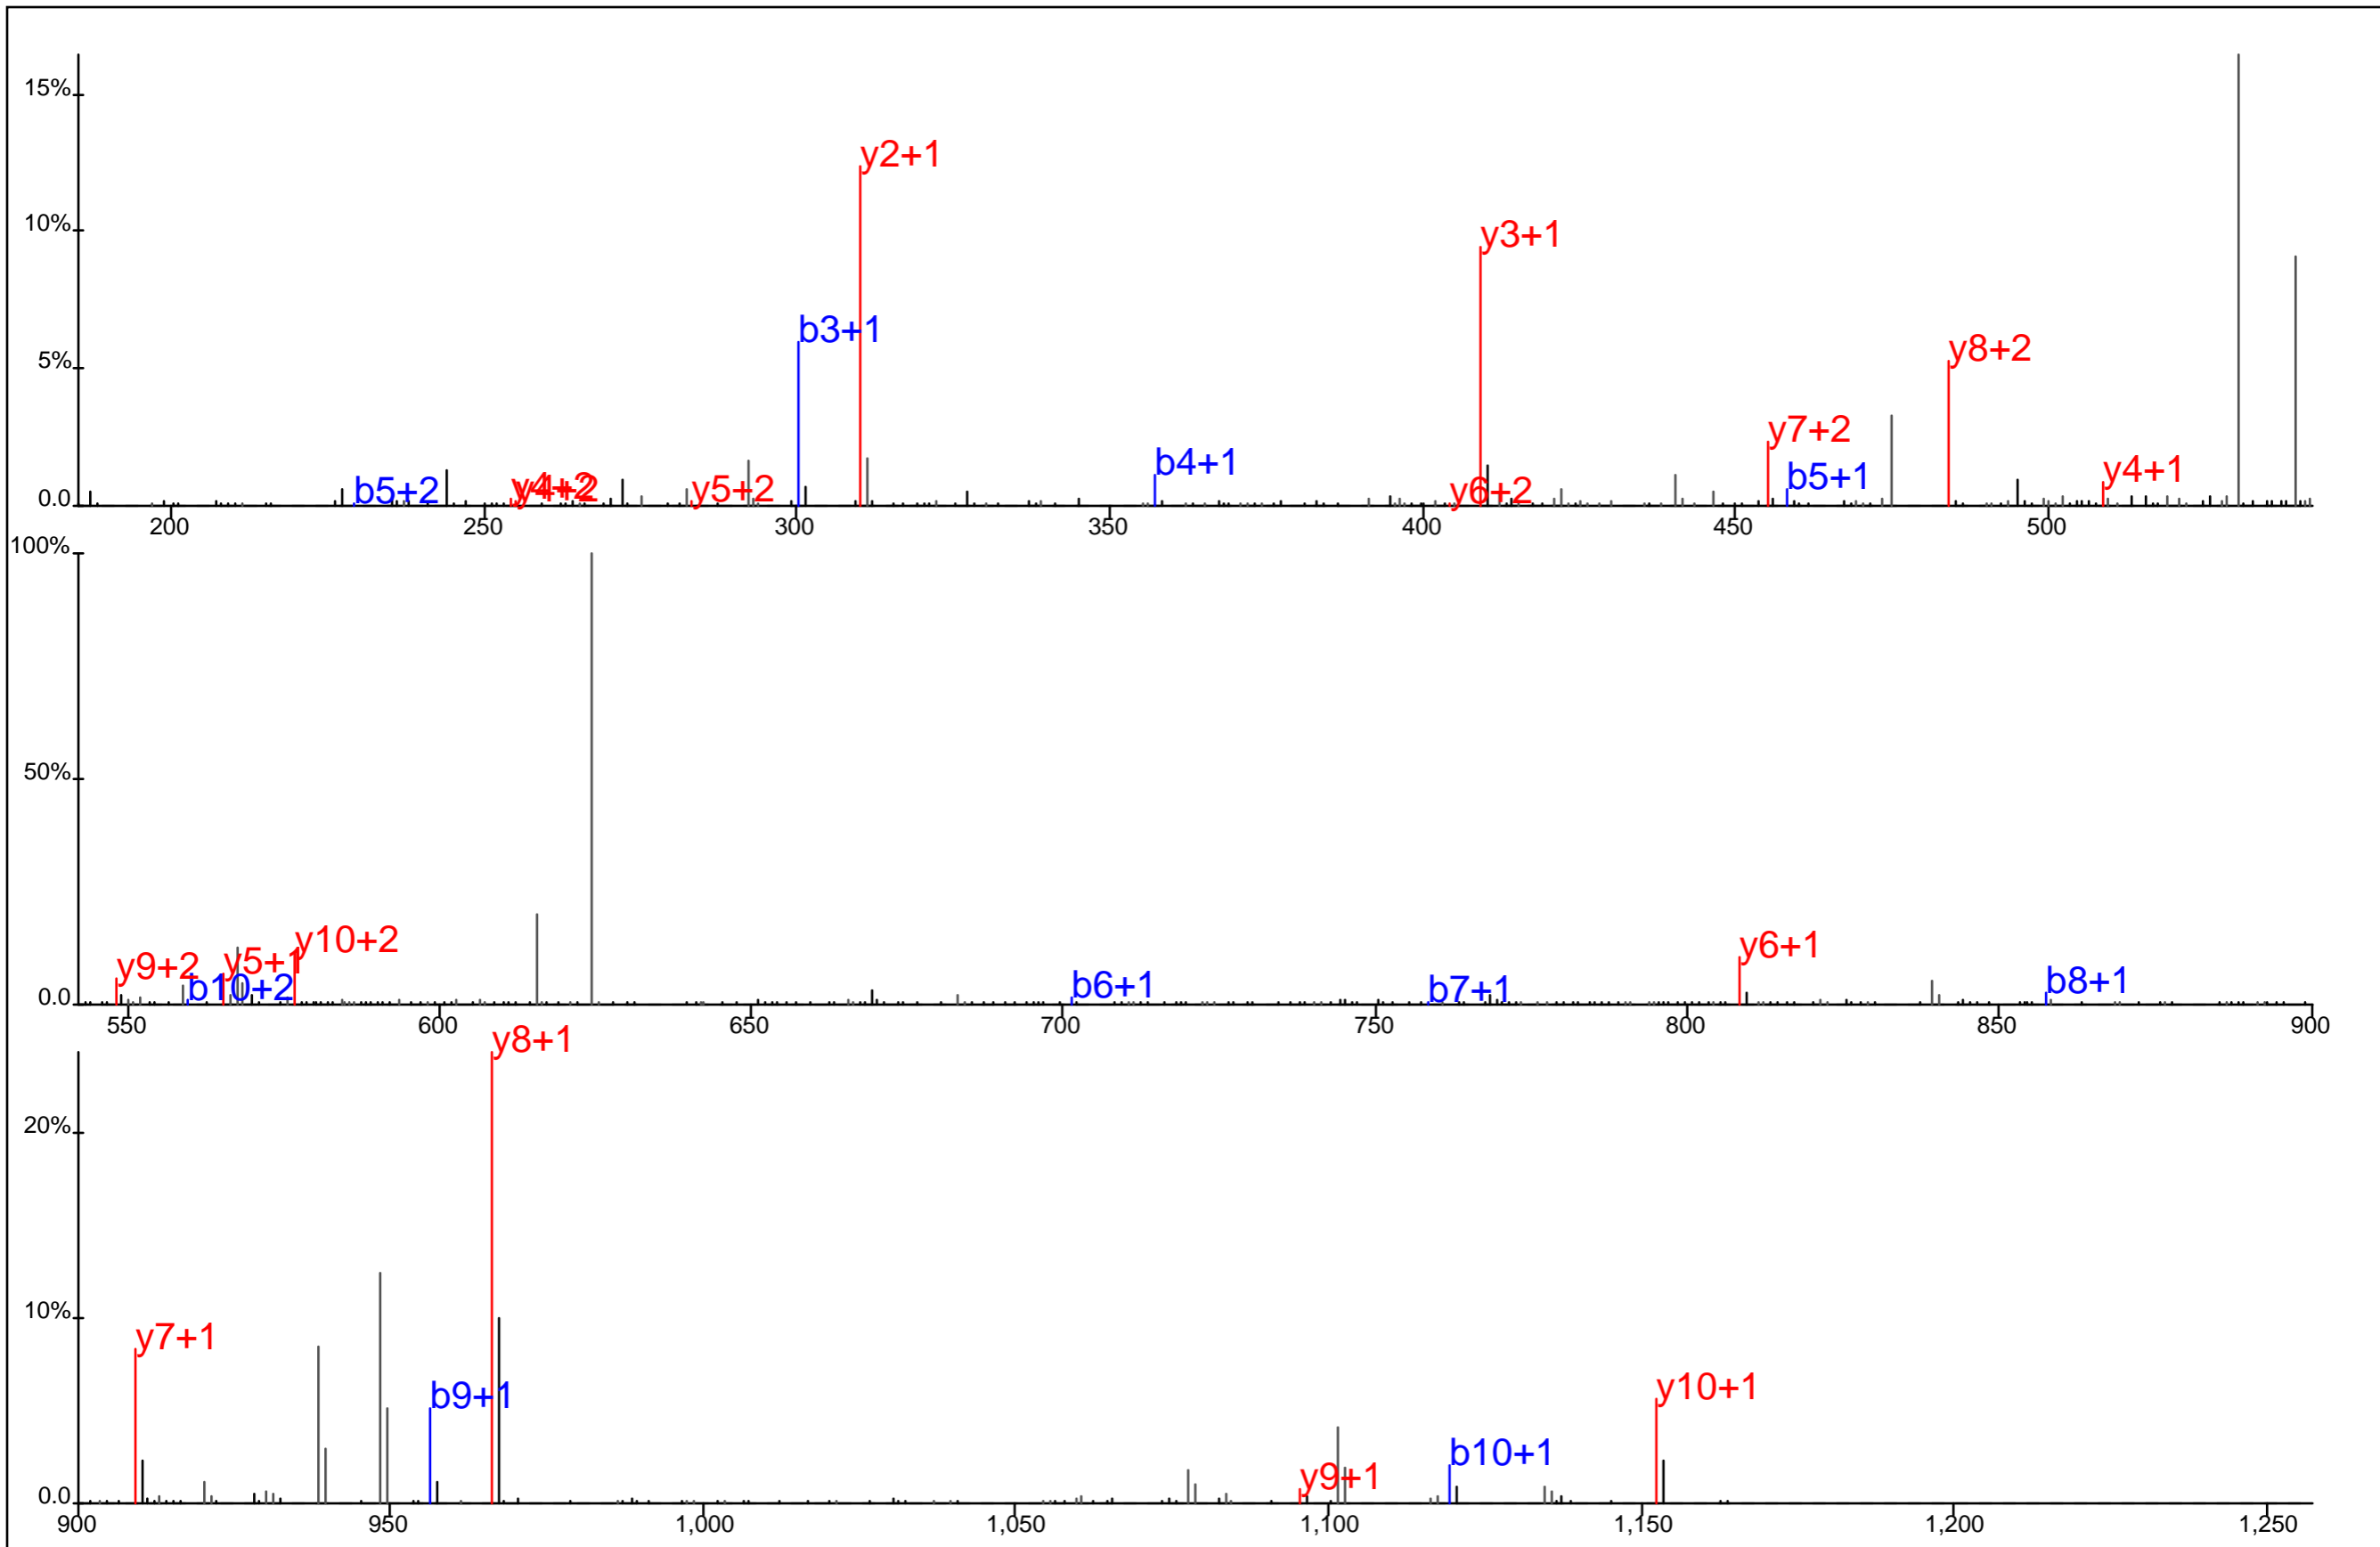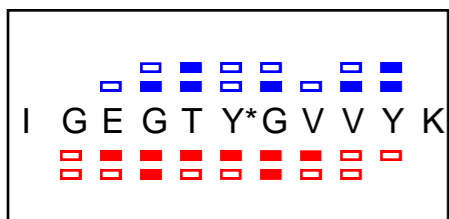

Protein Name: CDC2  
 gi Accession: 24158643  
 Precursor Mass: 633.2950+2  
 Delta Mass: 1.160 ppm  
 XCorr: 42.98

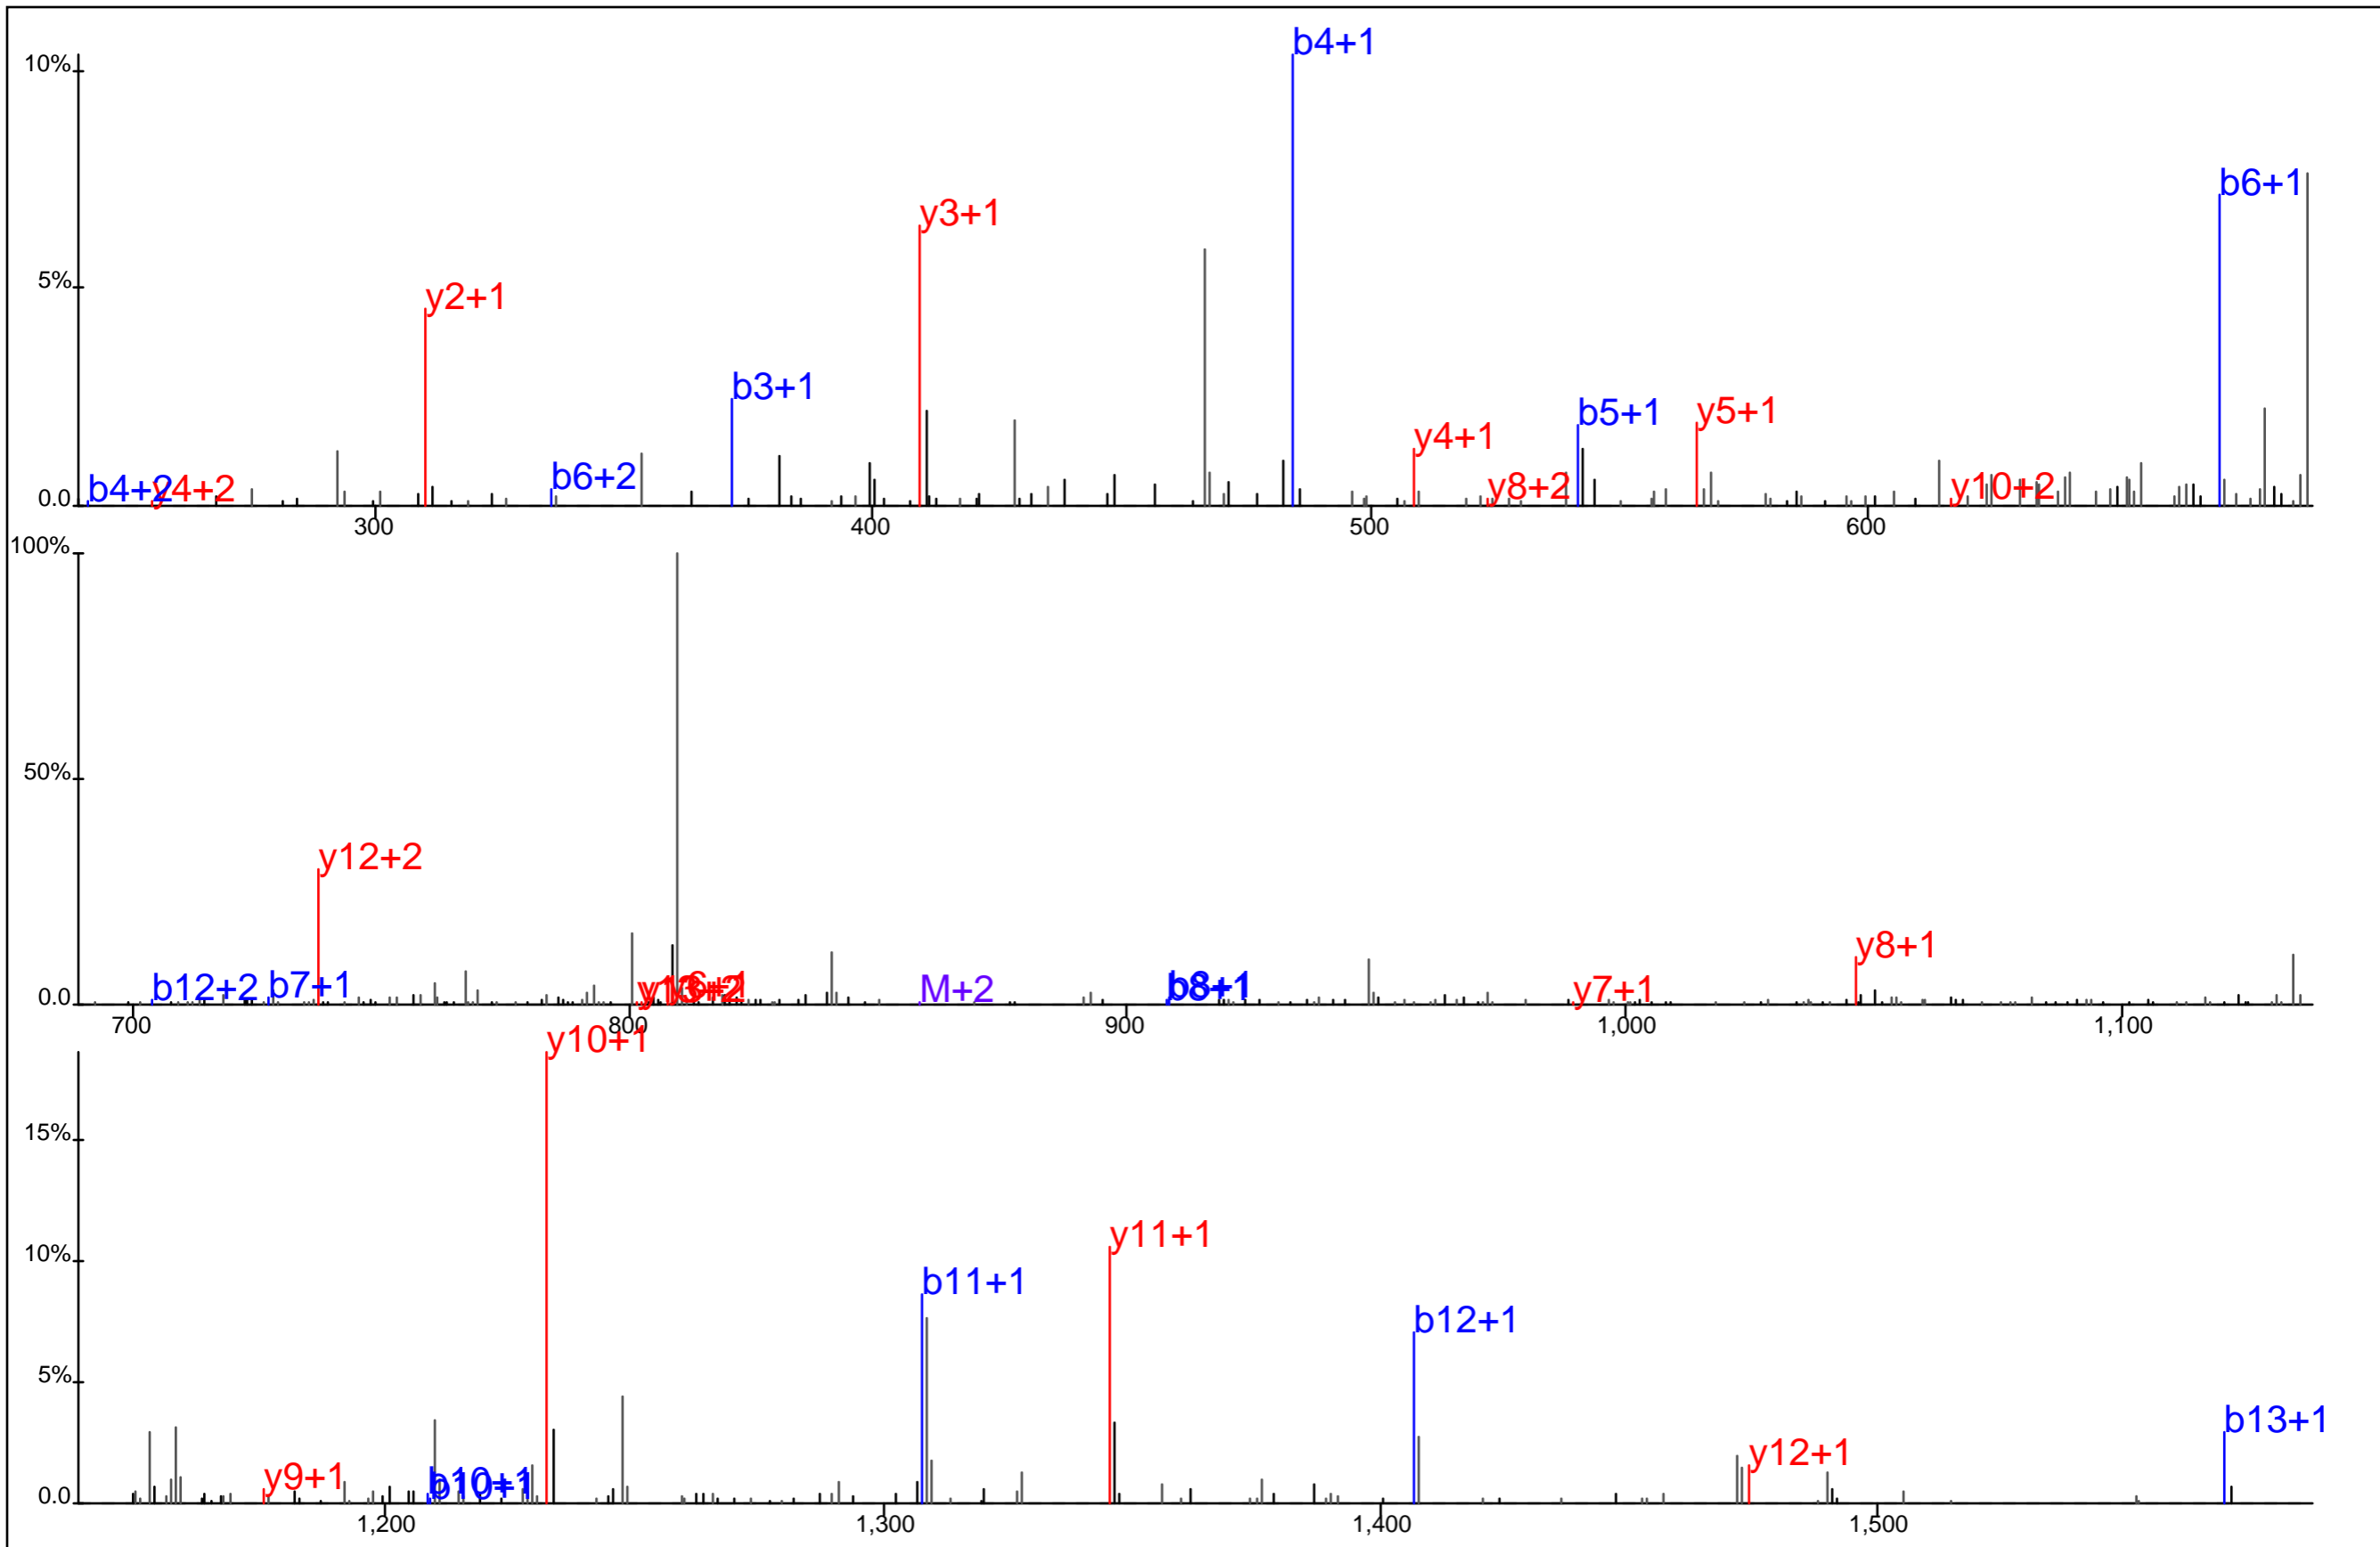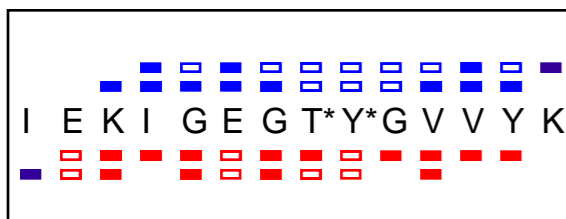

Protein Name: CDC2  
 gi Accession: 16306492  
 Precursor Mass: 858.3882+2  
 Delta Mass: 0.036 ppm  
 XCorr: 45.78

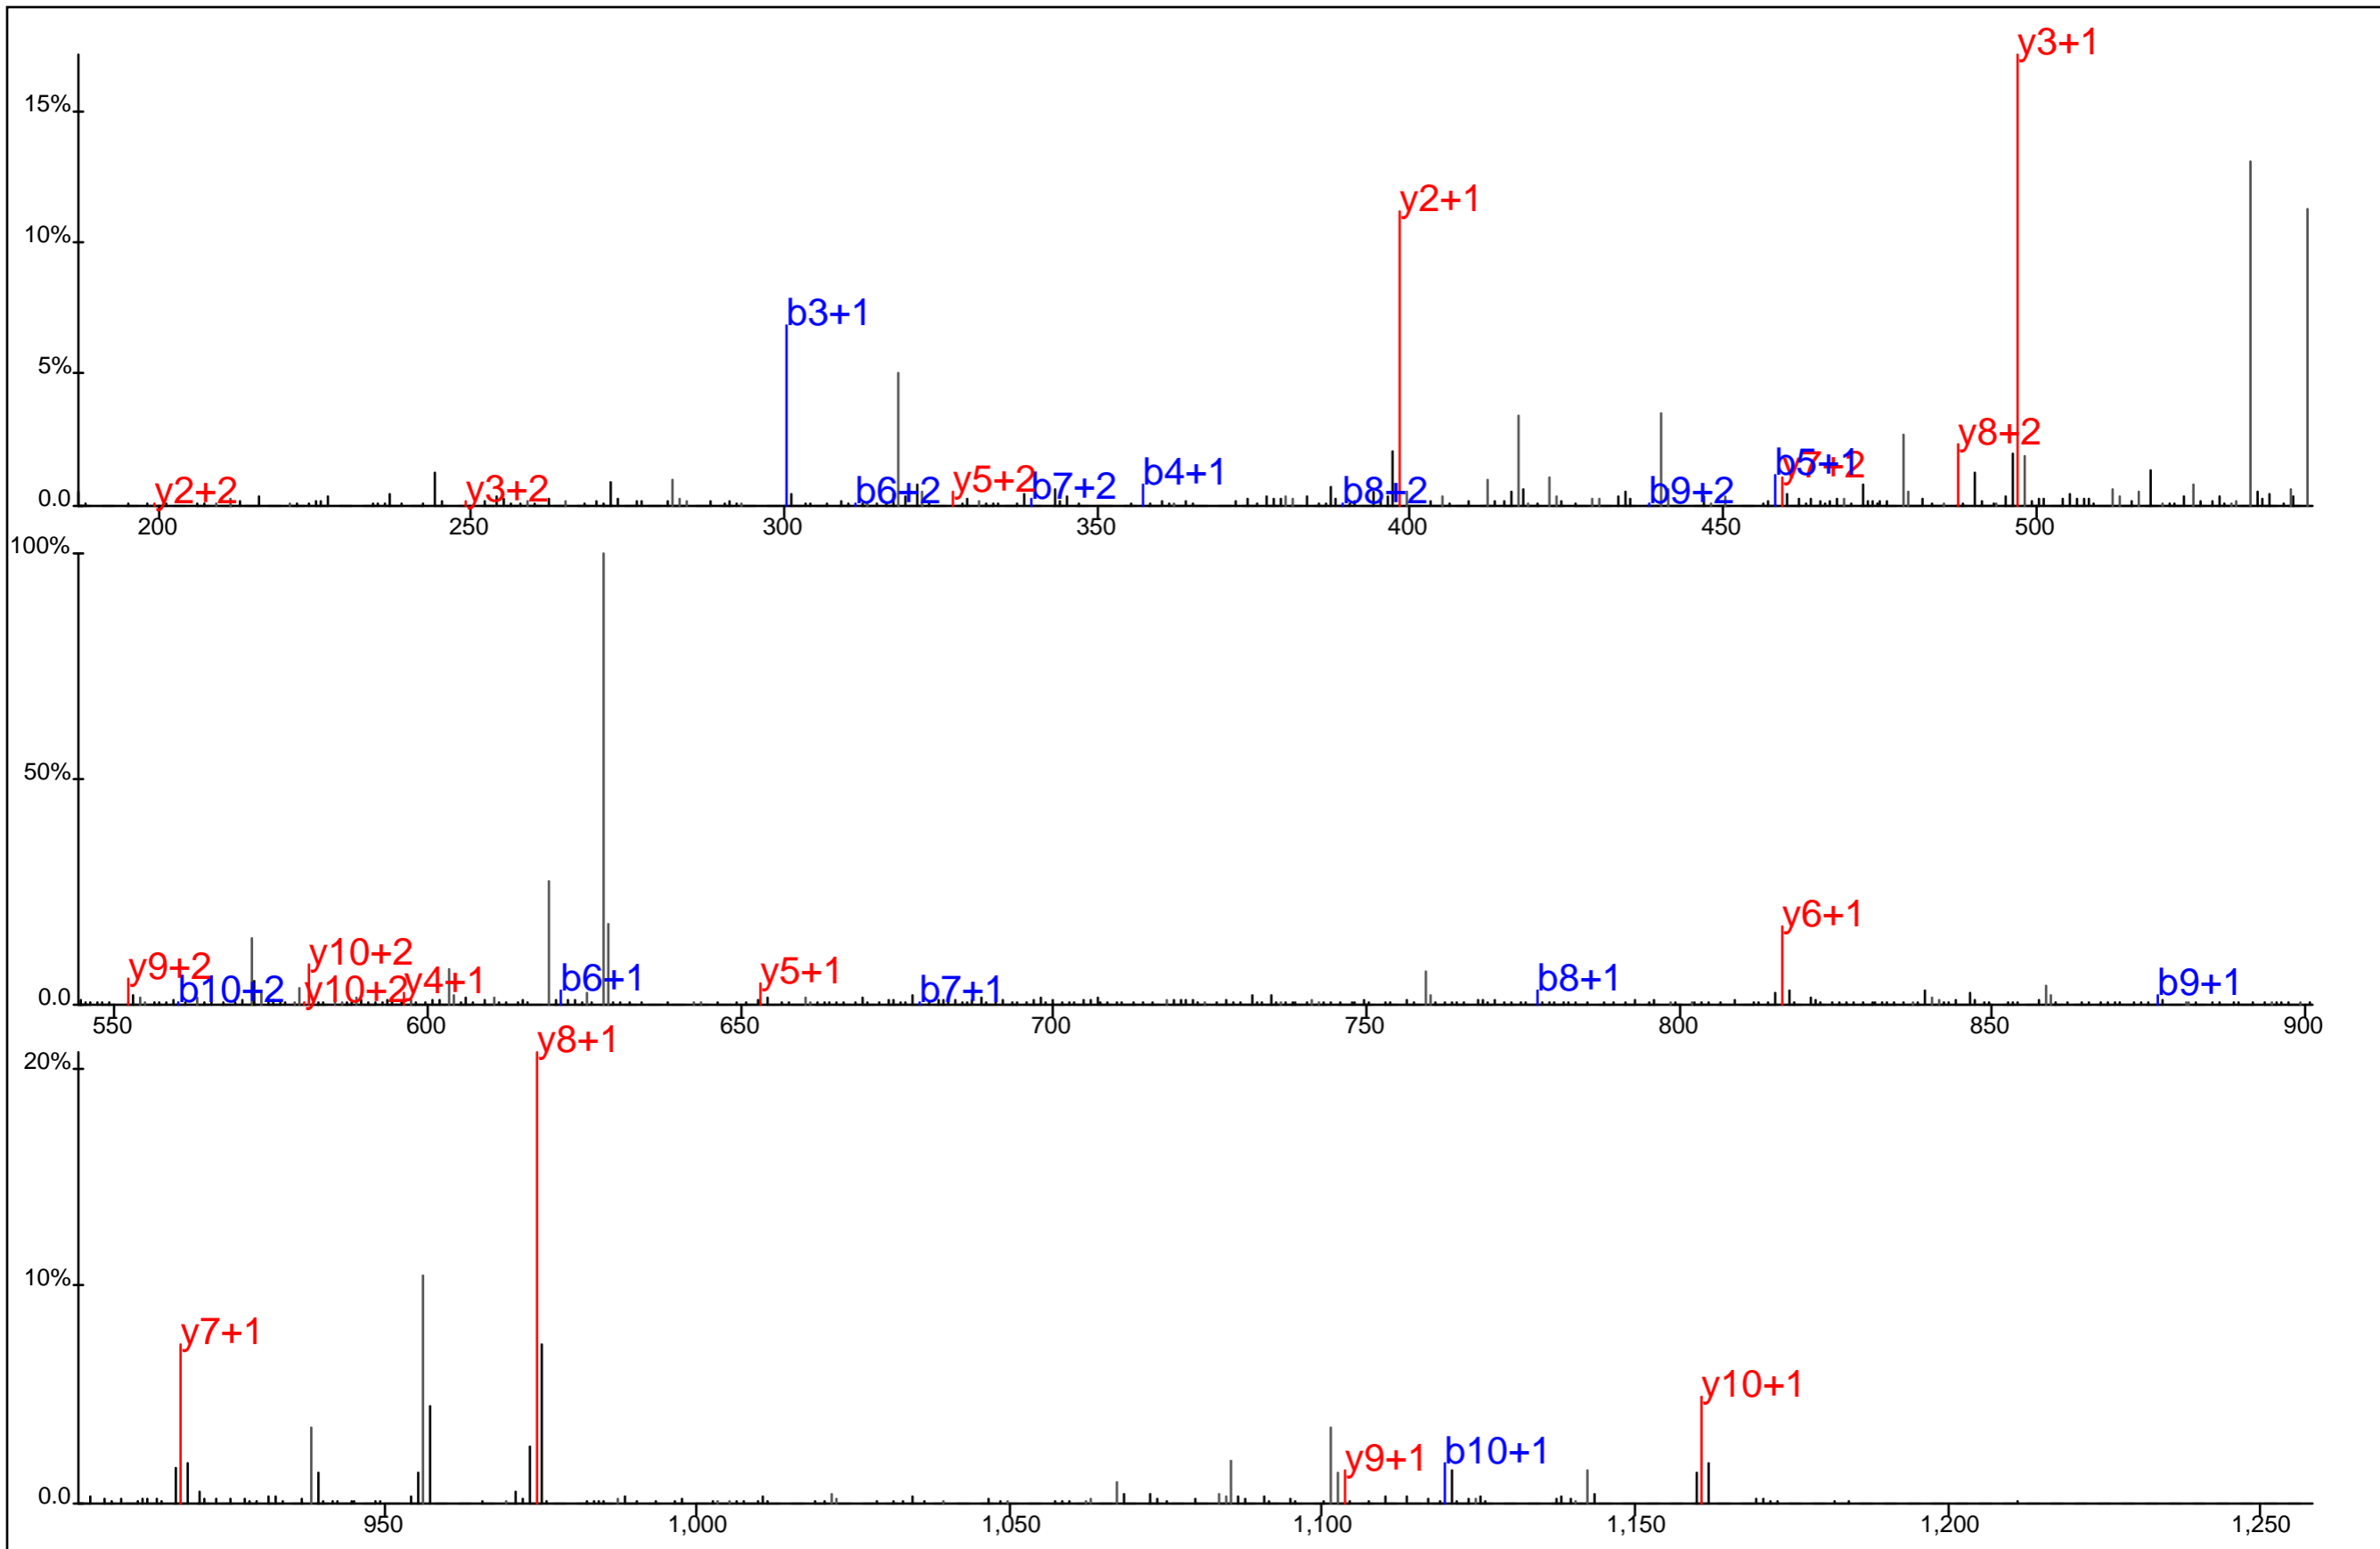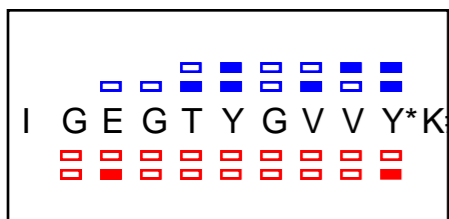

Protein Name: CDC2  
 gi Accession: 24158643  
 Precursor Mass: 637.3022+2  
 Delta Mass: 1.310 ppm  
 XCorr: 47.75

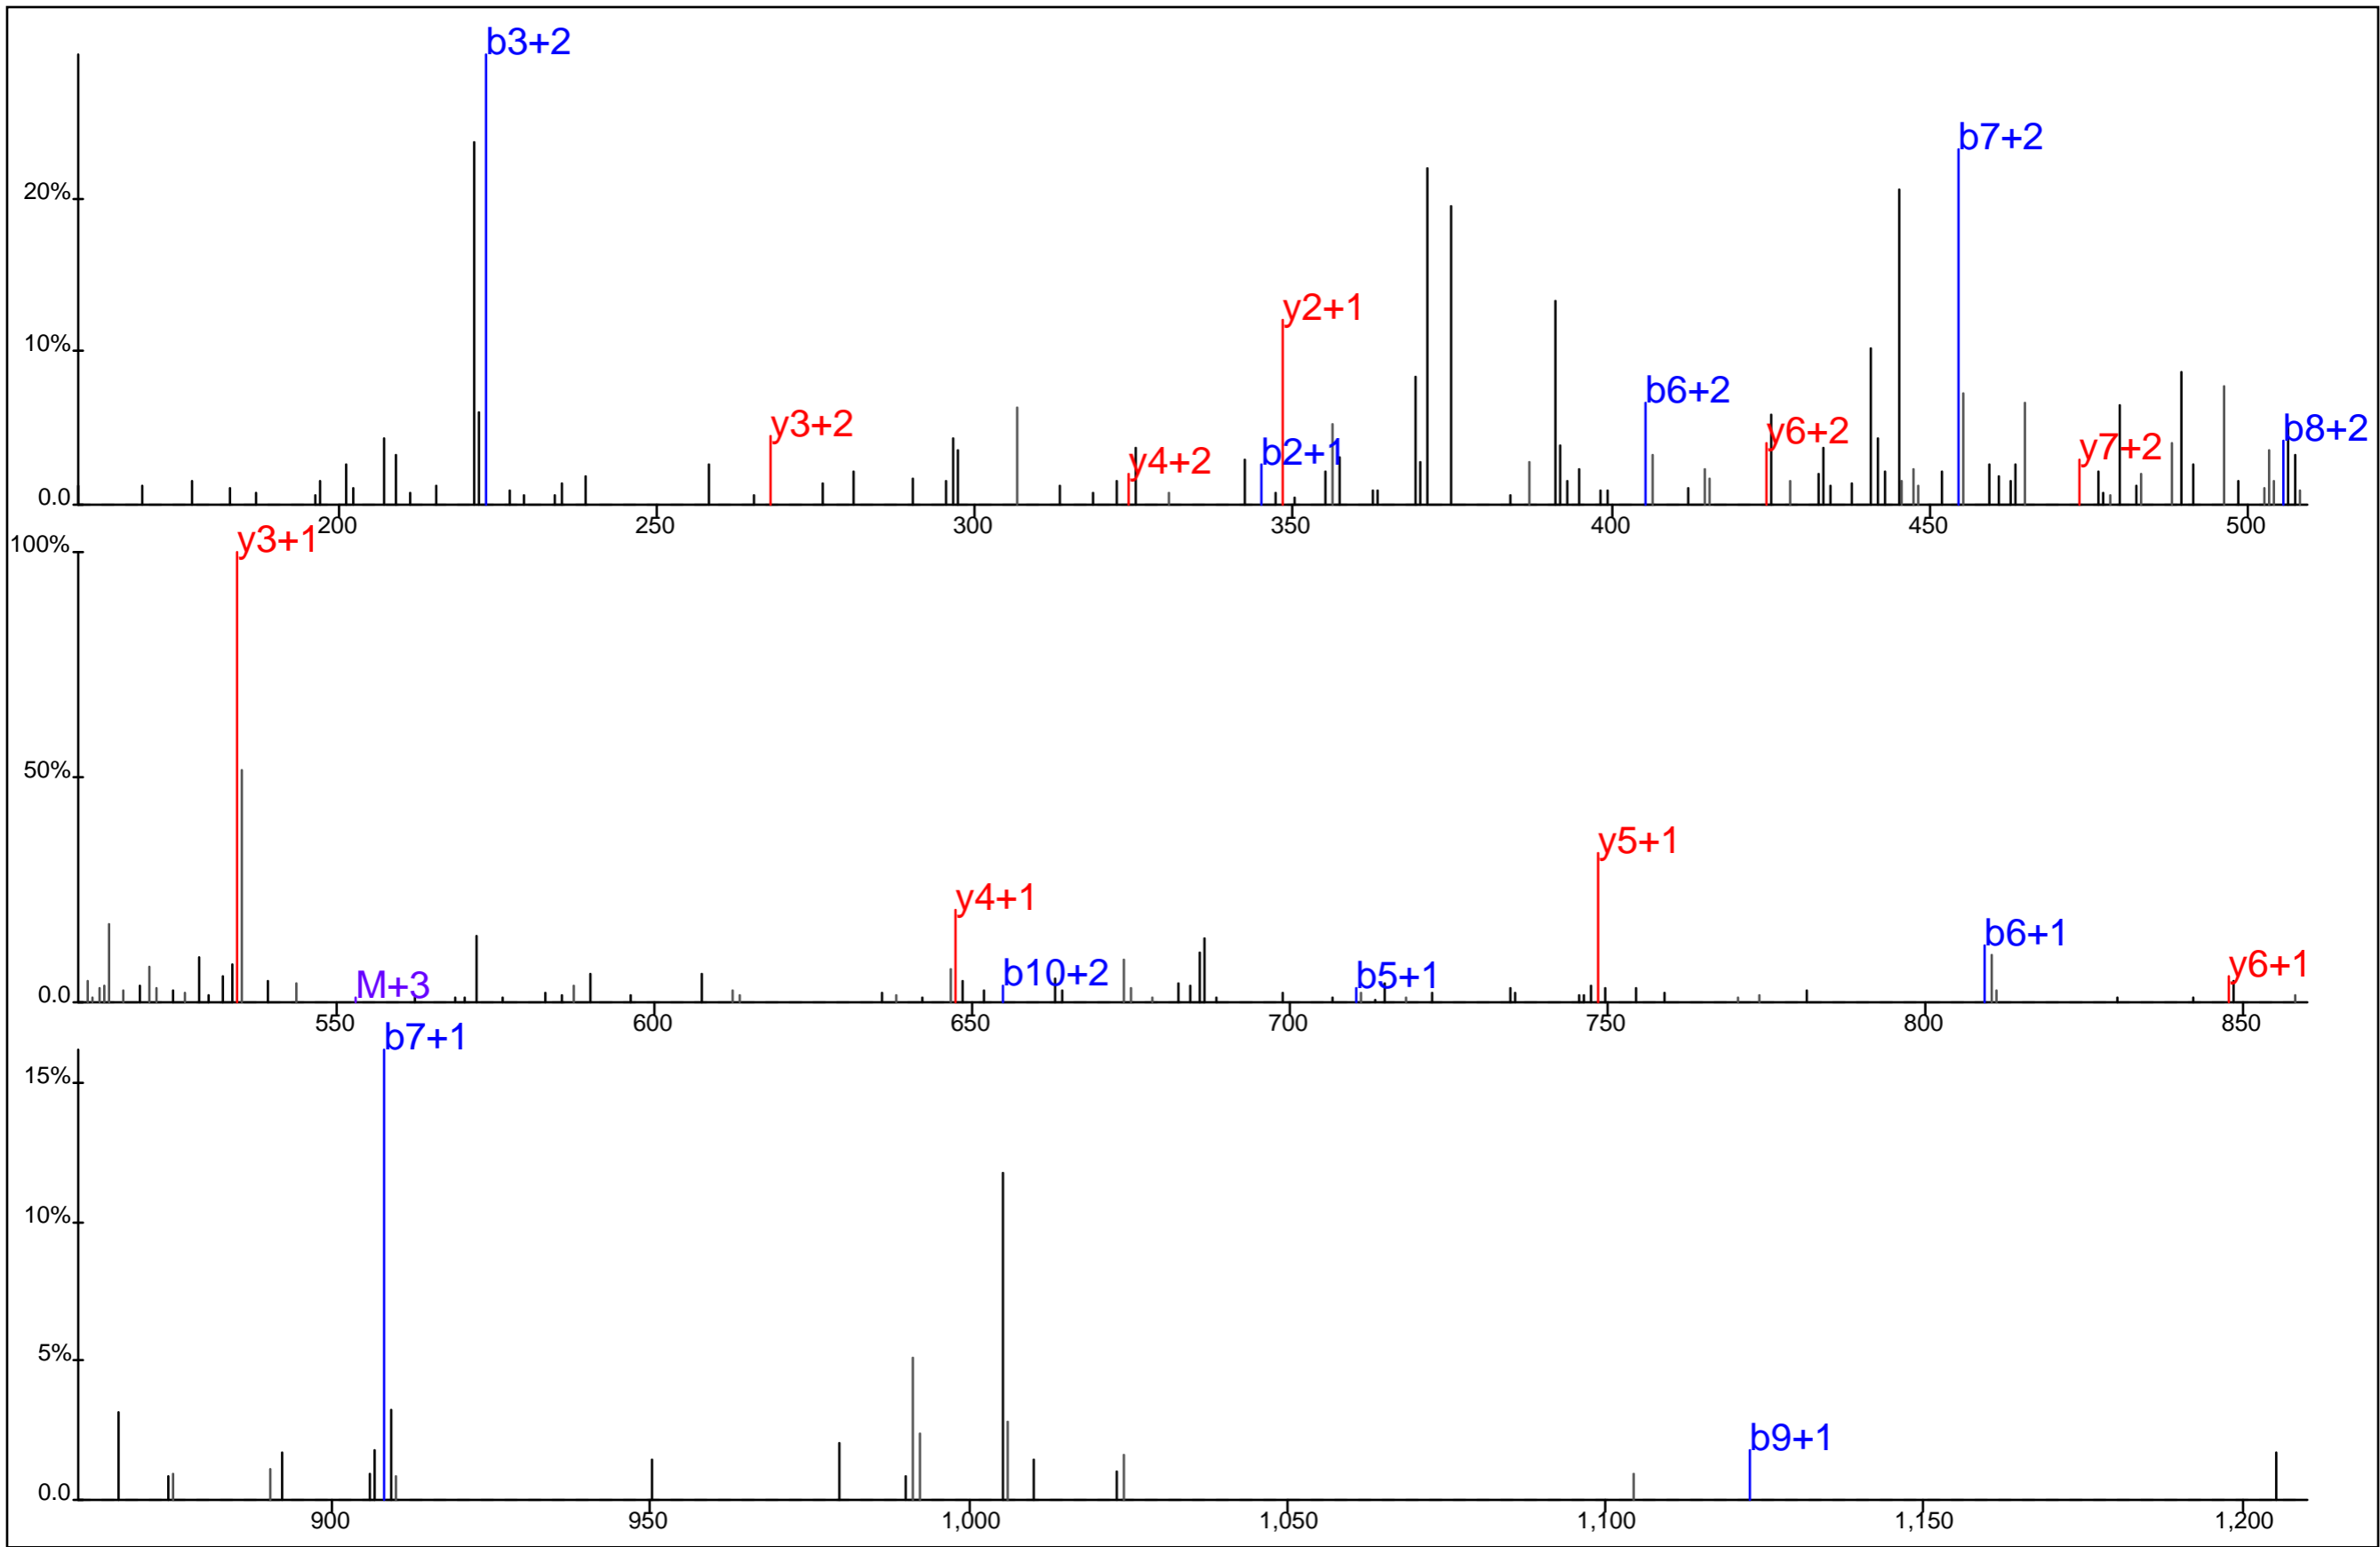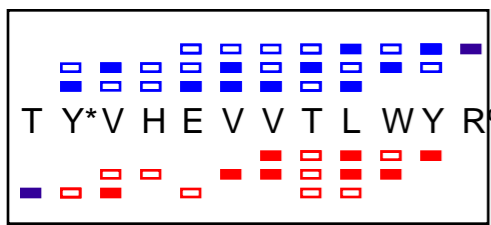

Protein Name: CDC2  
 gi Accession: 24158643  
 Precursor Mass: 552.6034+3  
 Delta Mass: 6.002 ppm  
 XCorr: 27.89

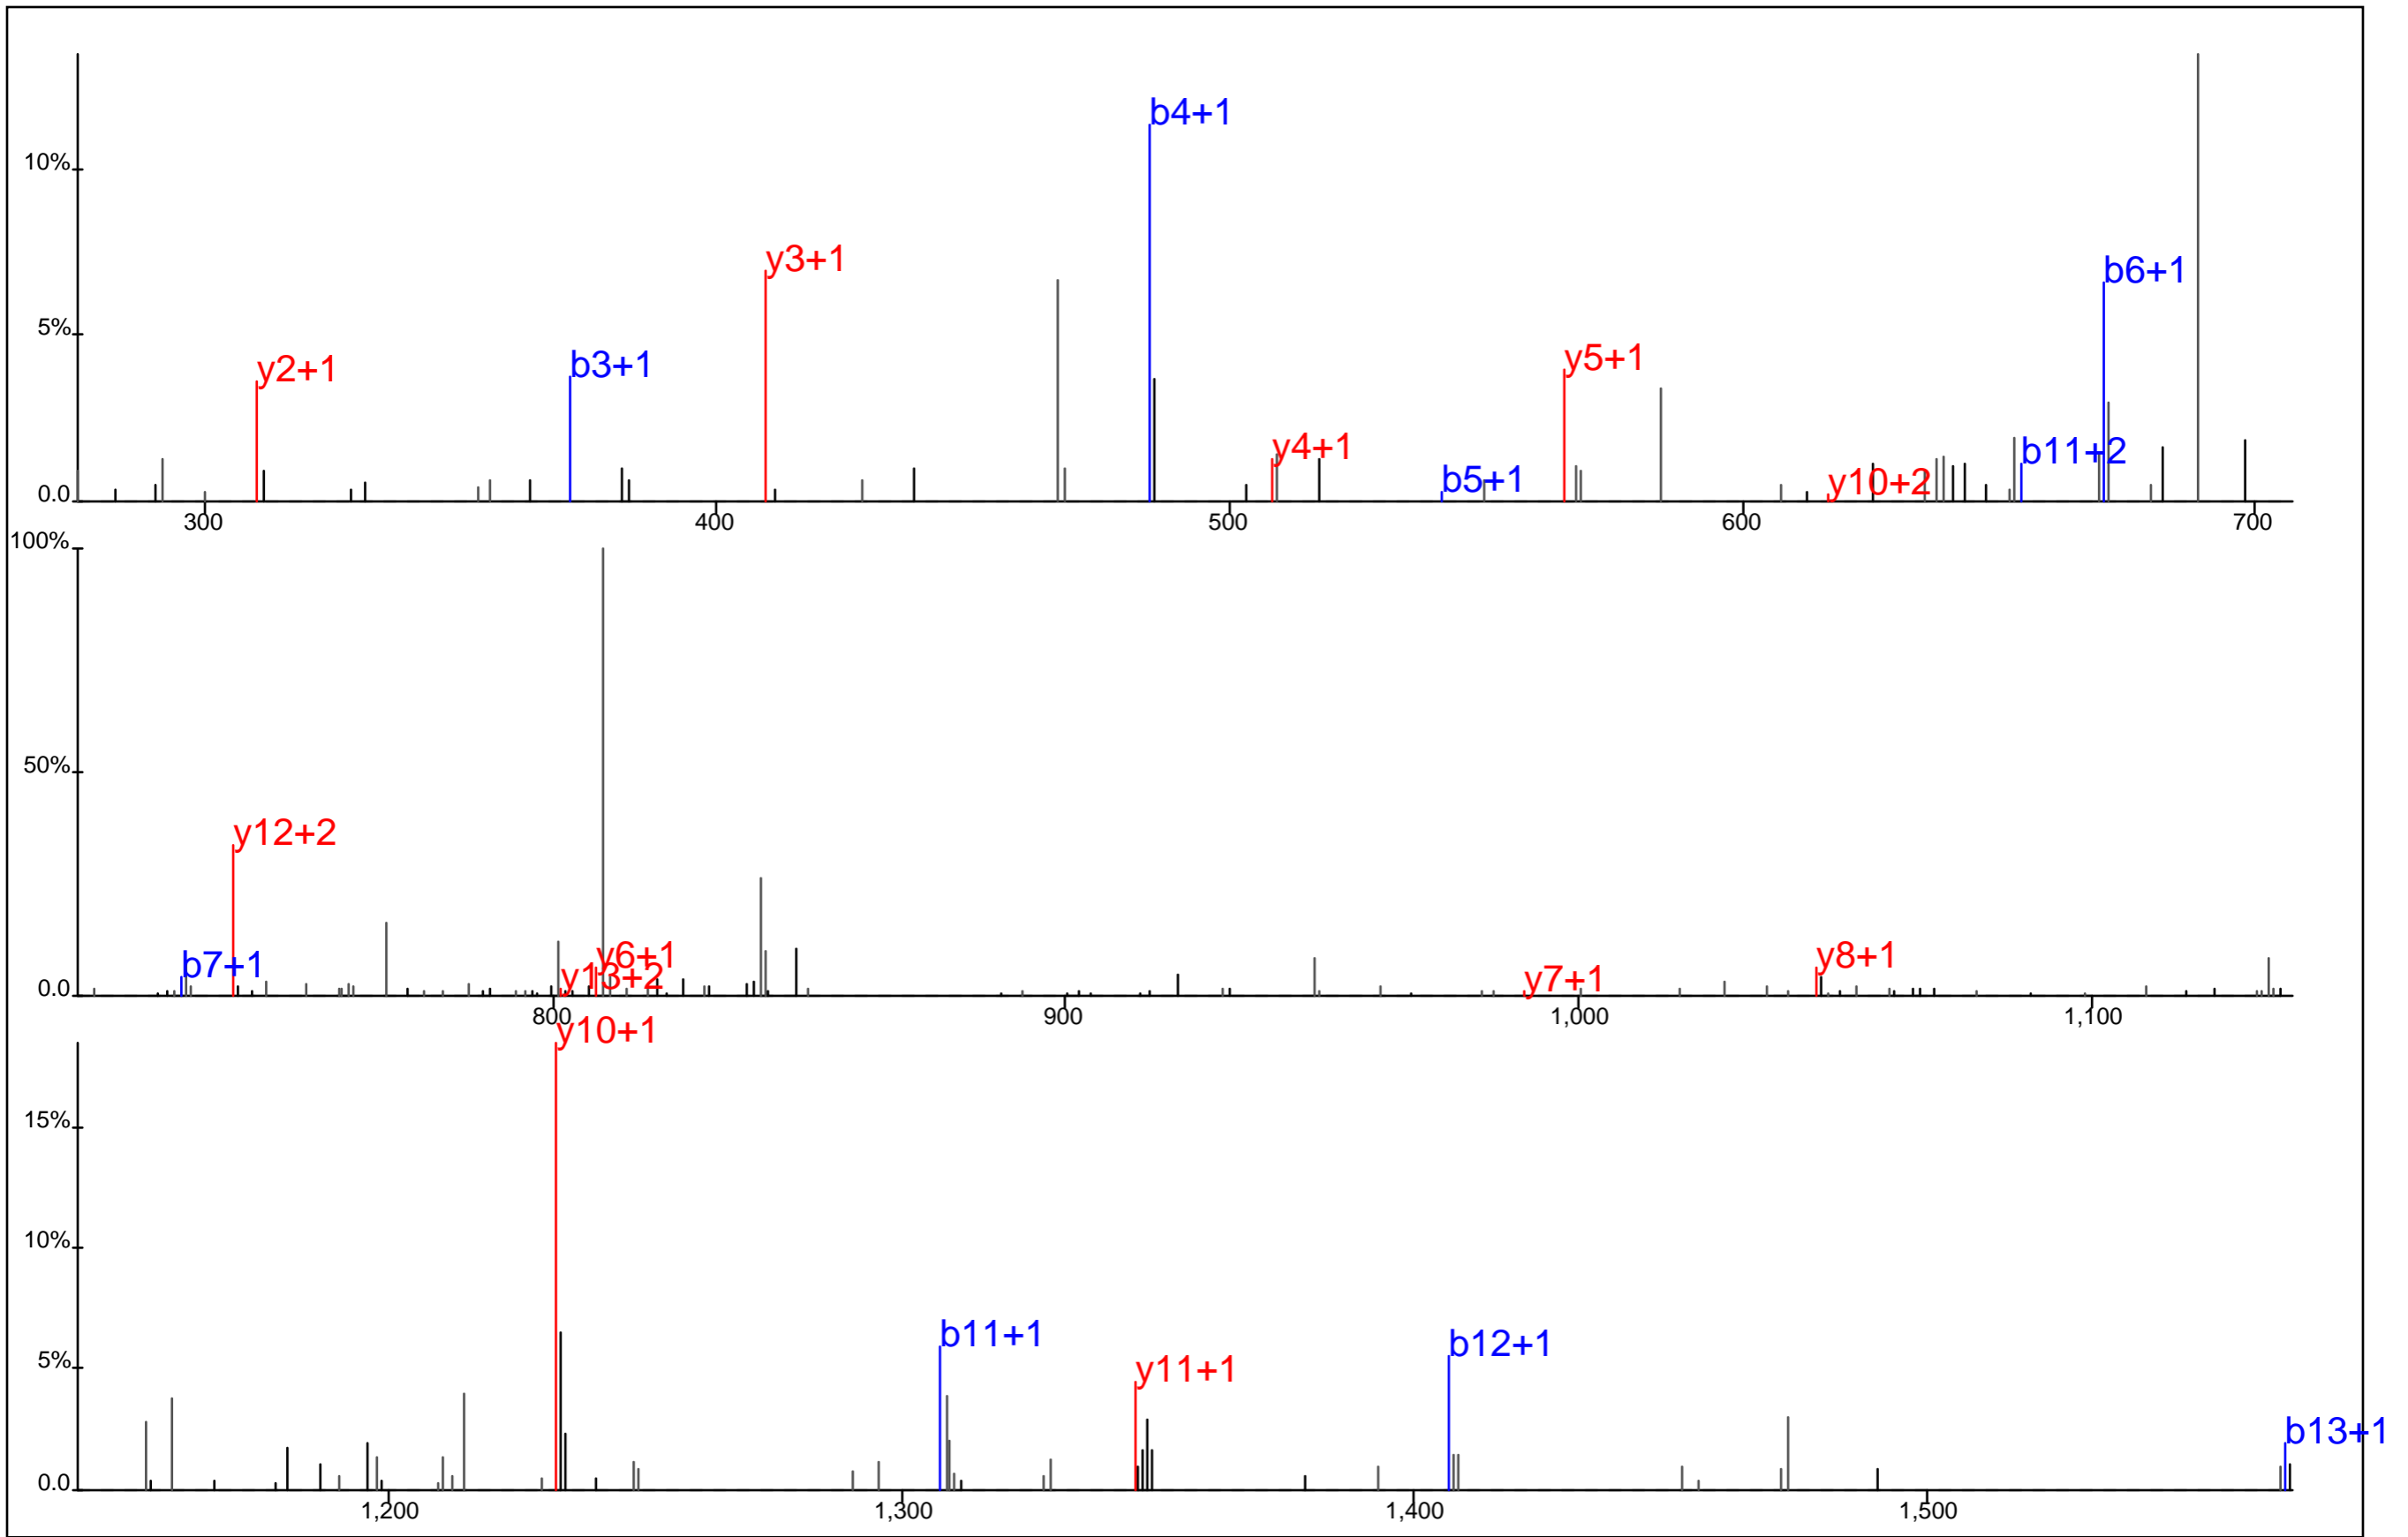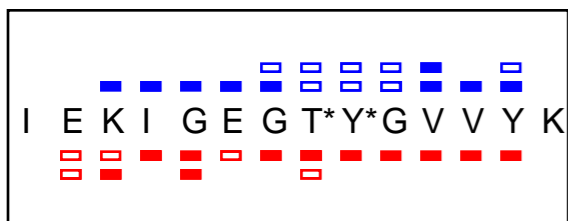

Protein Name: CDC2  
 gi Accession: 16306492  
 Precursor Mass: 858.3895+2  
 Delta Mass: 1.462 ppm  
 XCorr: 43.68

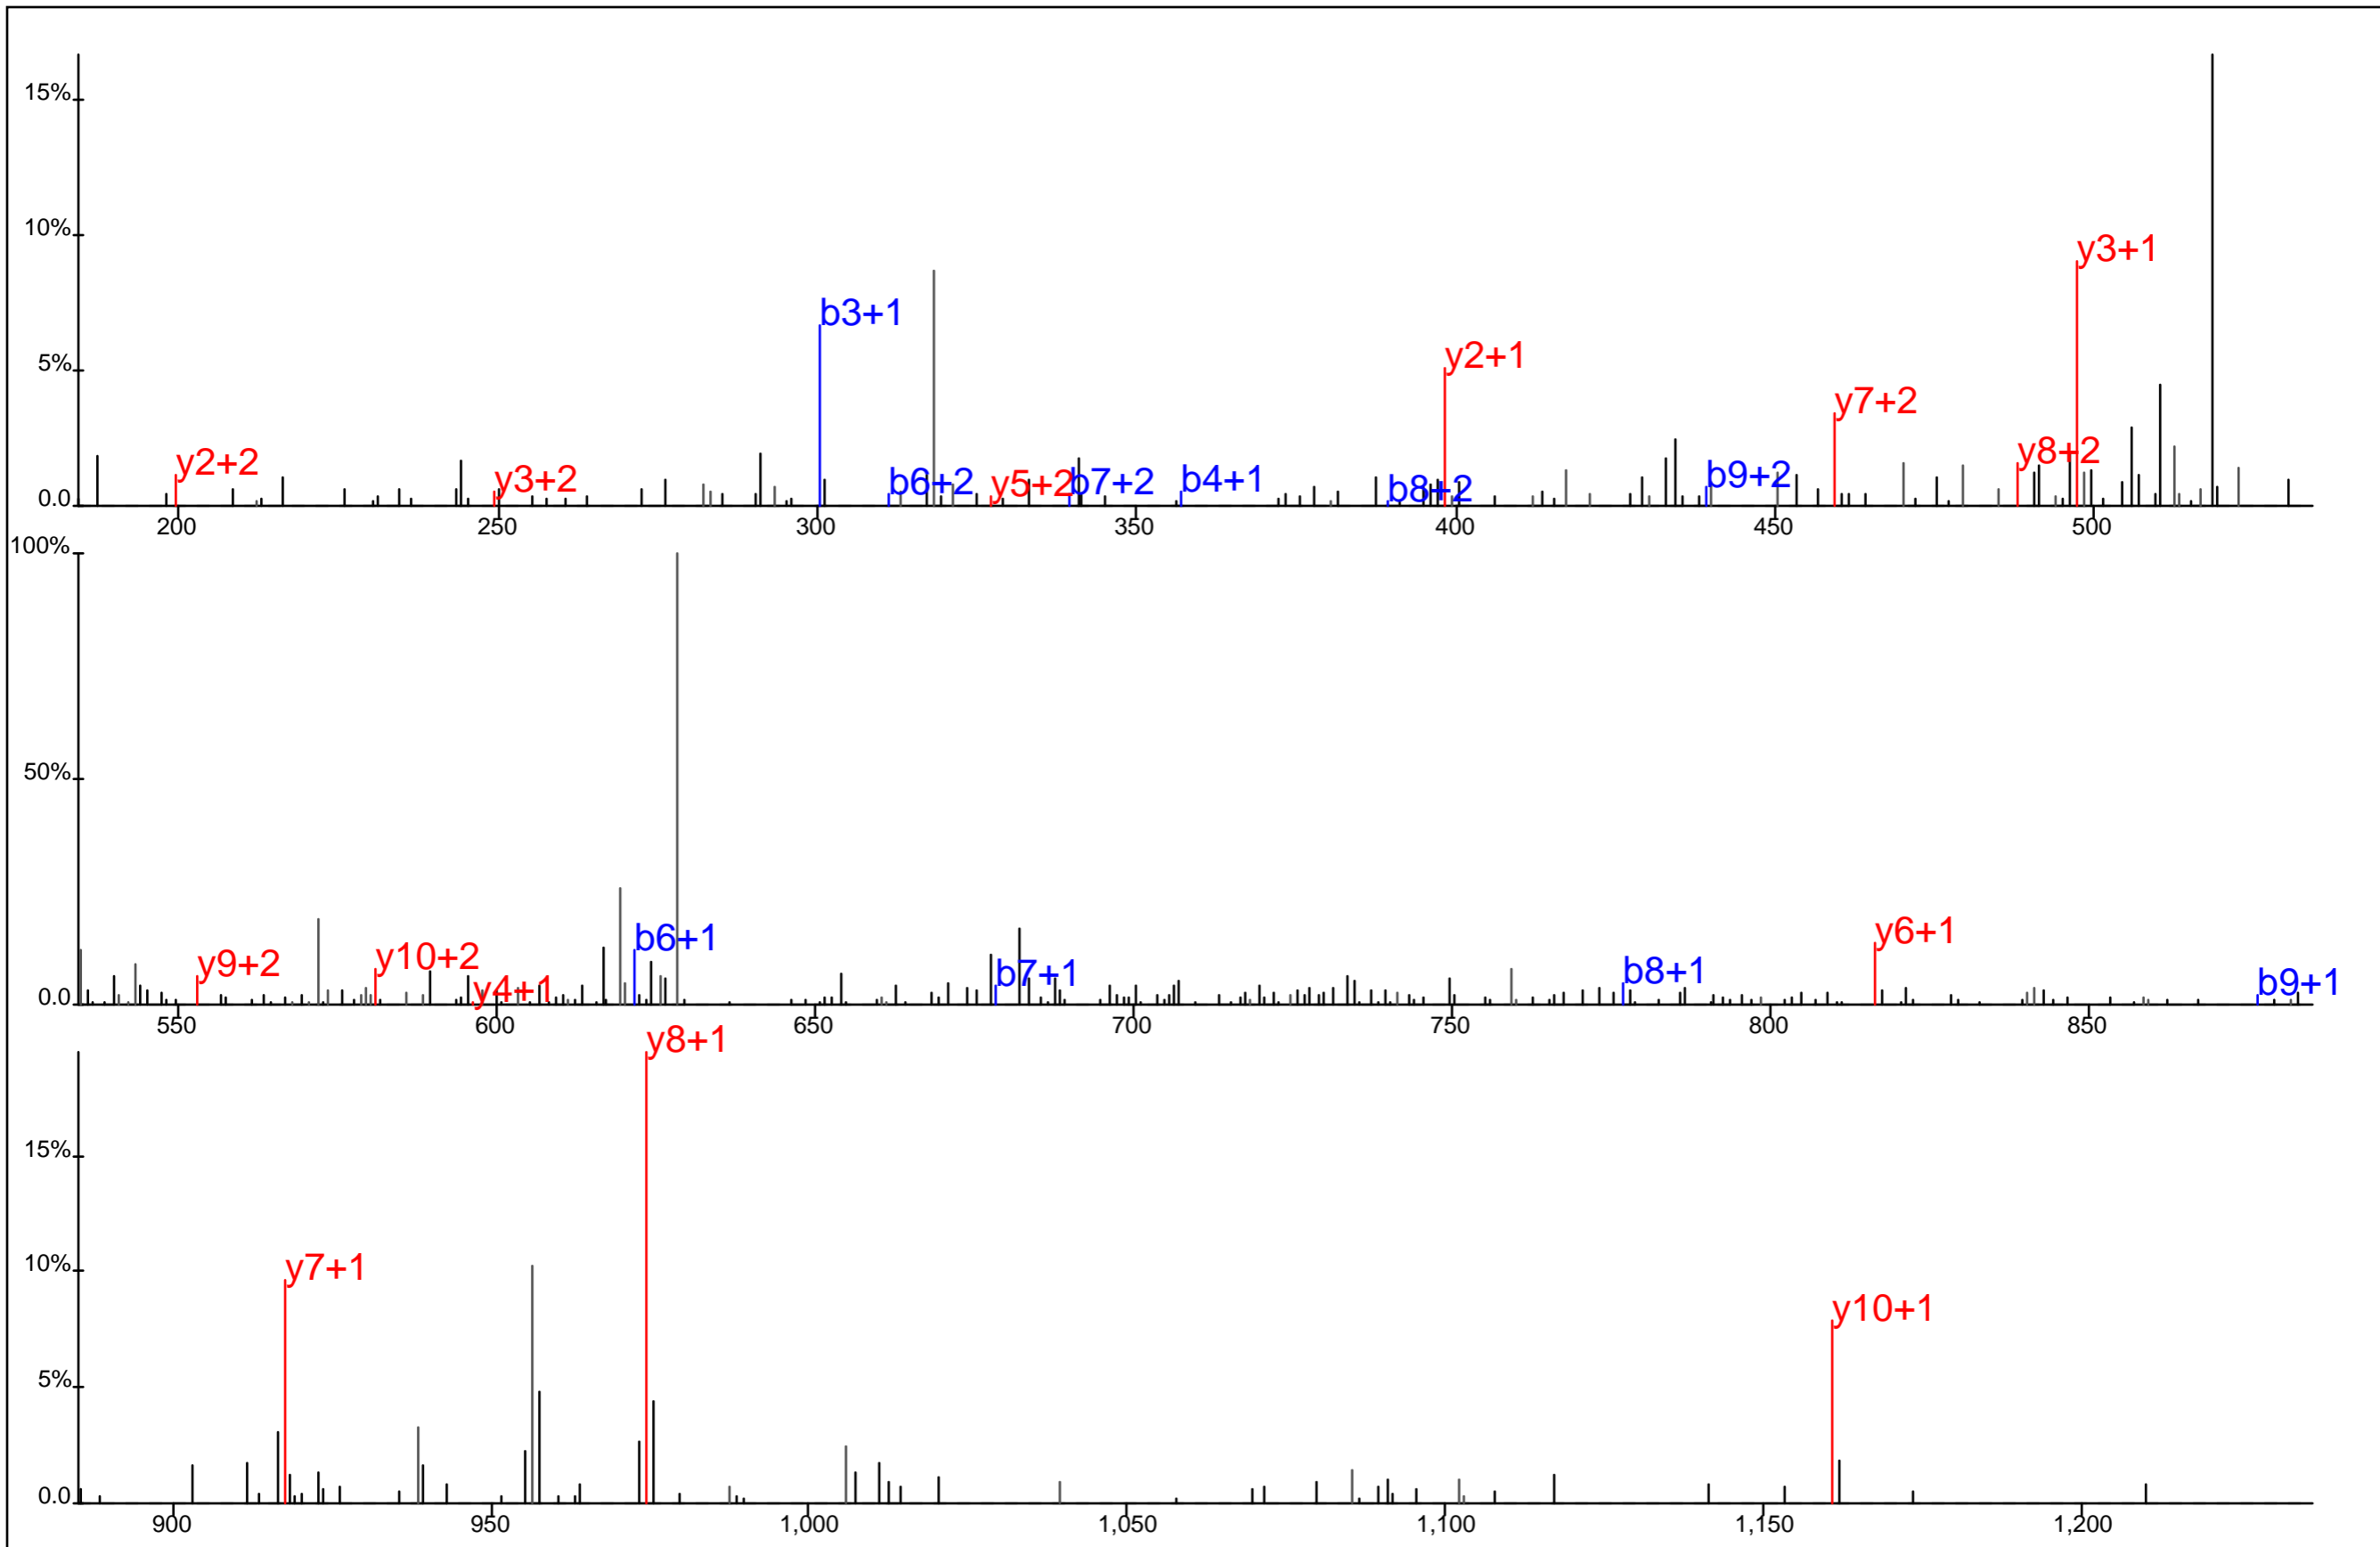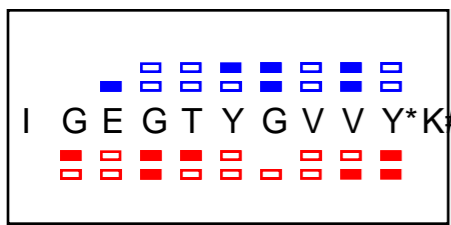

Protein Name: CDC2  
 gi Accession: 24158643  
 Precursor Mass: 637.3025+2  
 Delta Mass: 1.687 ppm  
 XCorr: 22.34

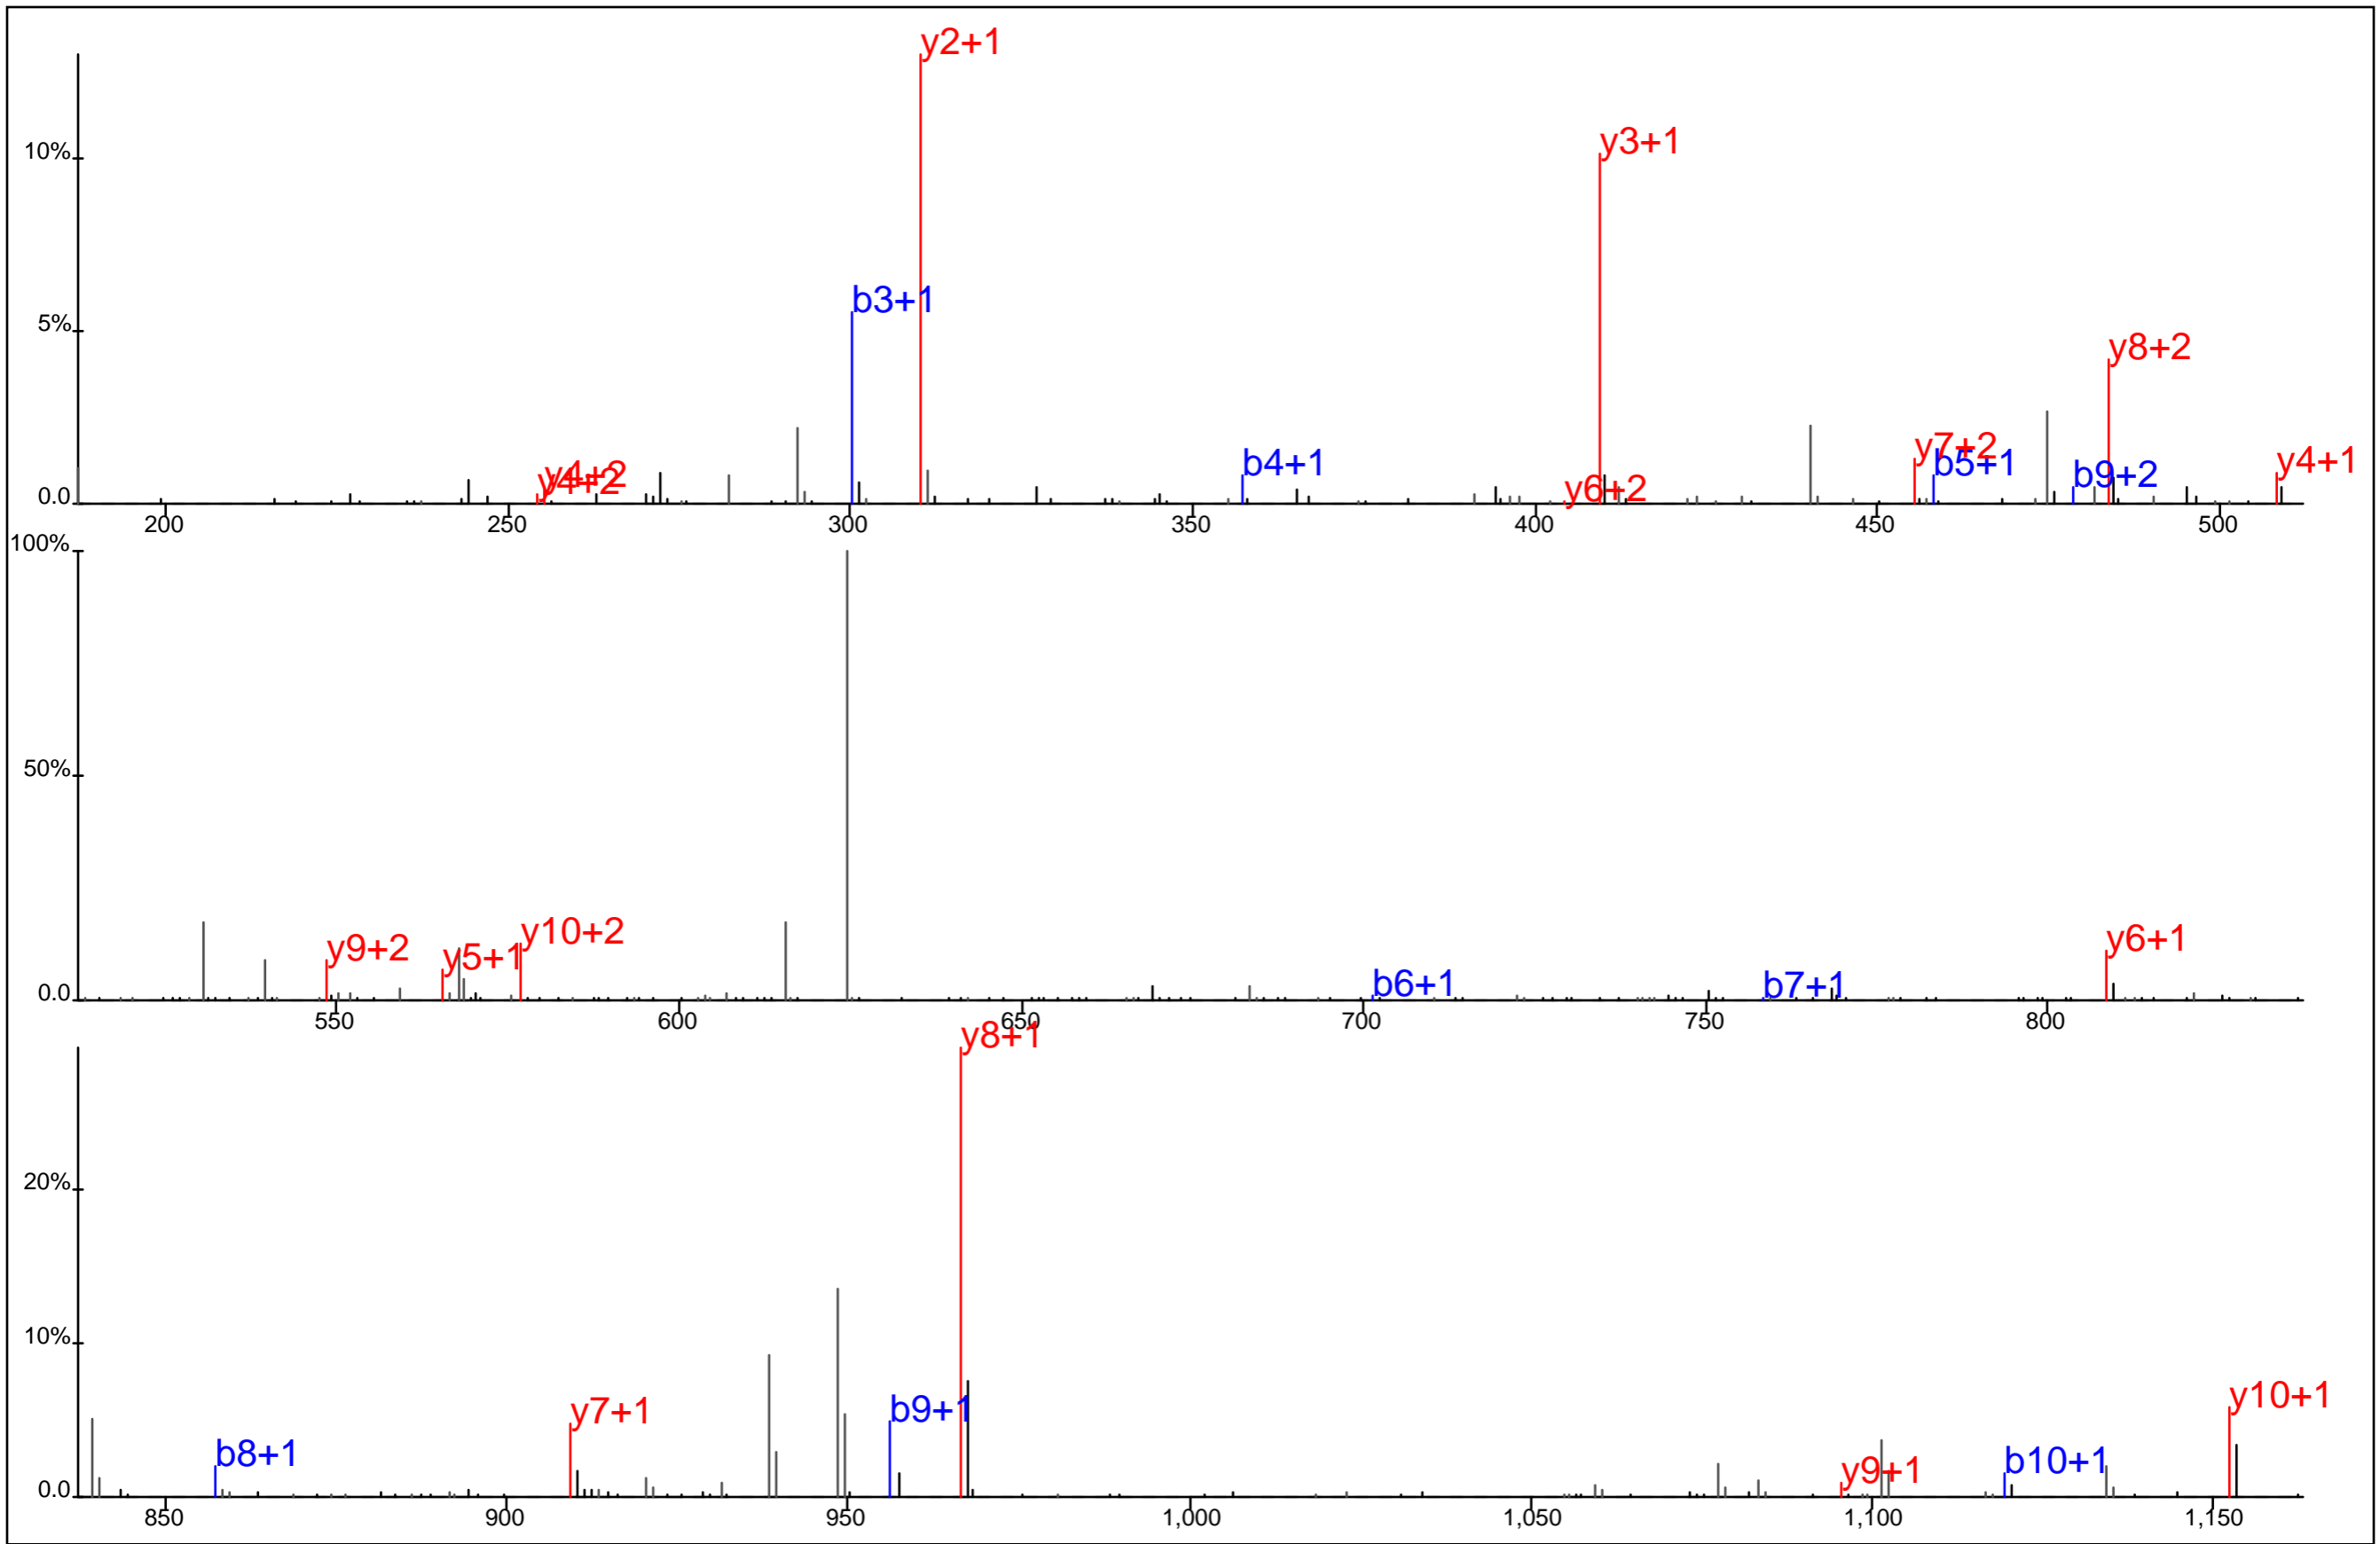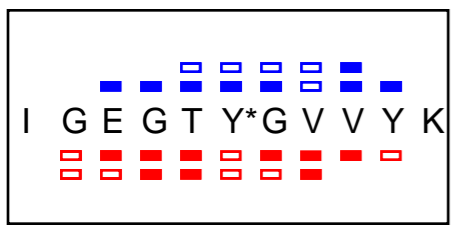

Protein Name: CDC2  
 gi Accession: 24158643  
 Precursor Mass: 633.2935+2  
 Delta Mass: 1.250 ppm  
 XCorr: 48.84



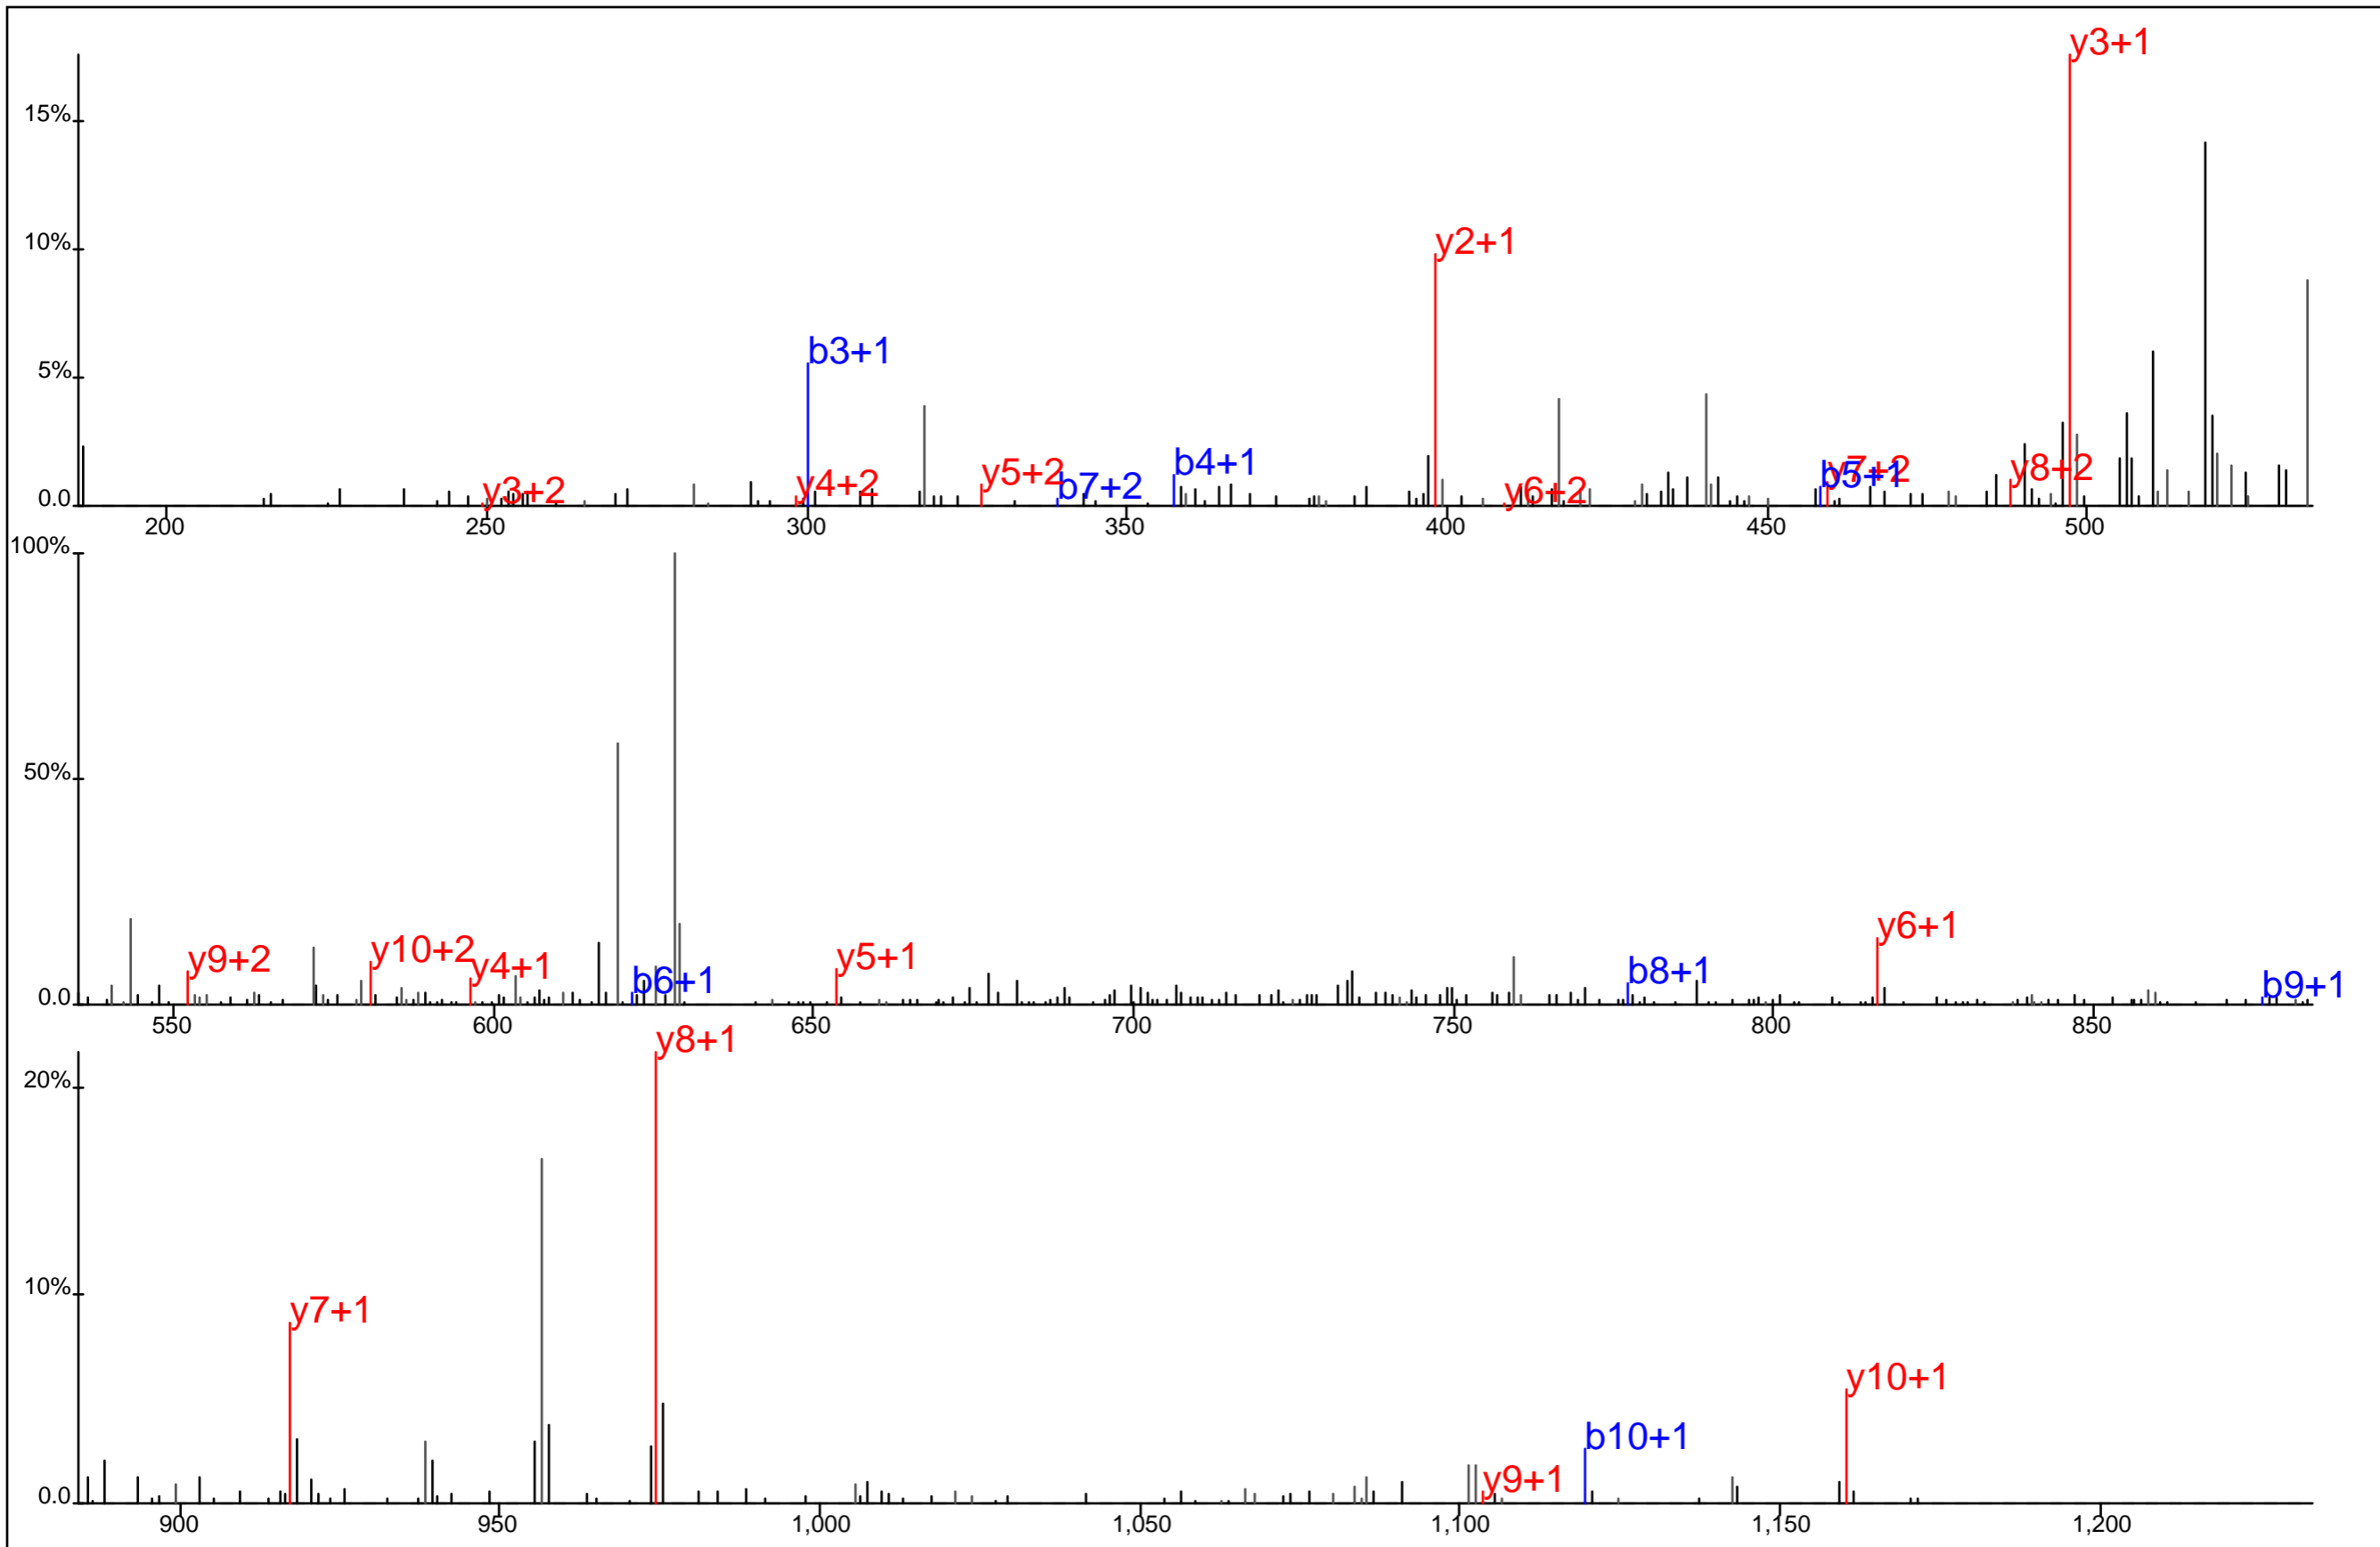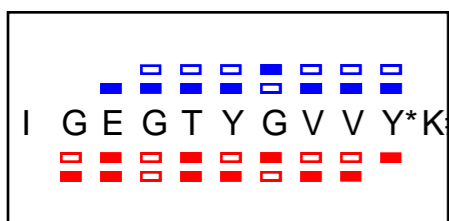

Protein Name: CDC2  
 gi Accession: 24158643  
 Precursor Mass: 637.3022+2  
 Delta Mass: 1.310 ppm  
 XCorr: 36.17

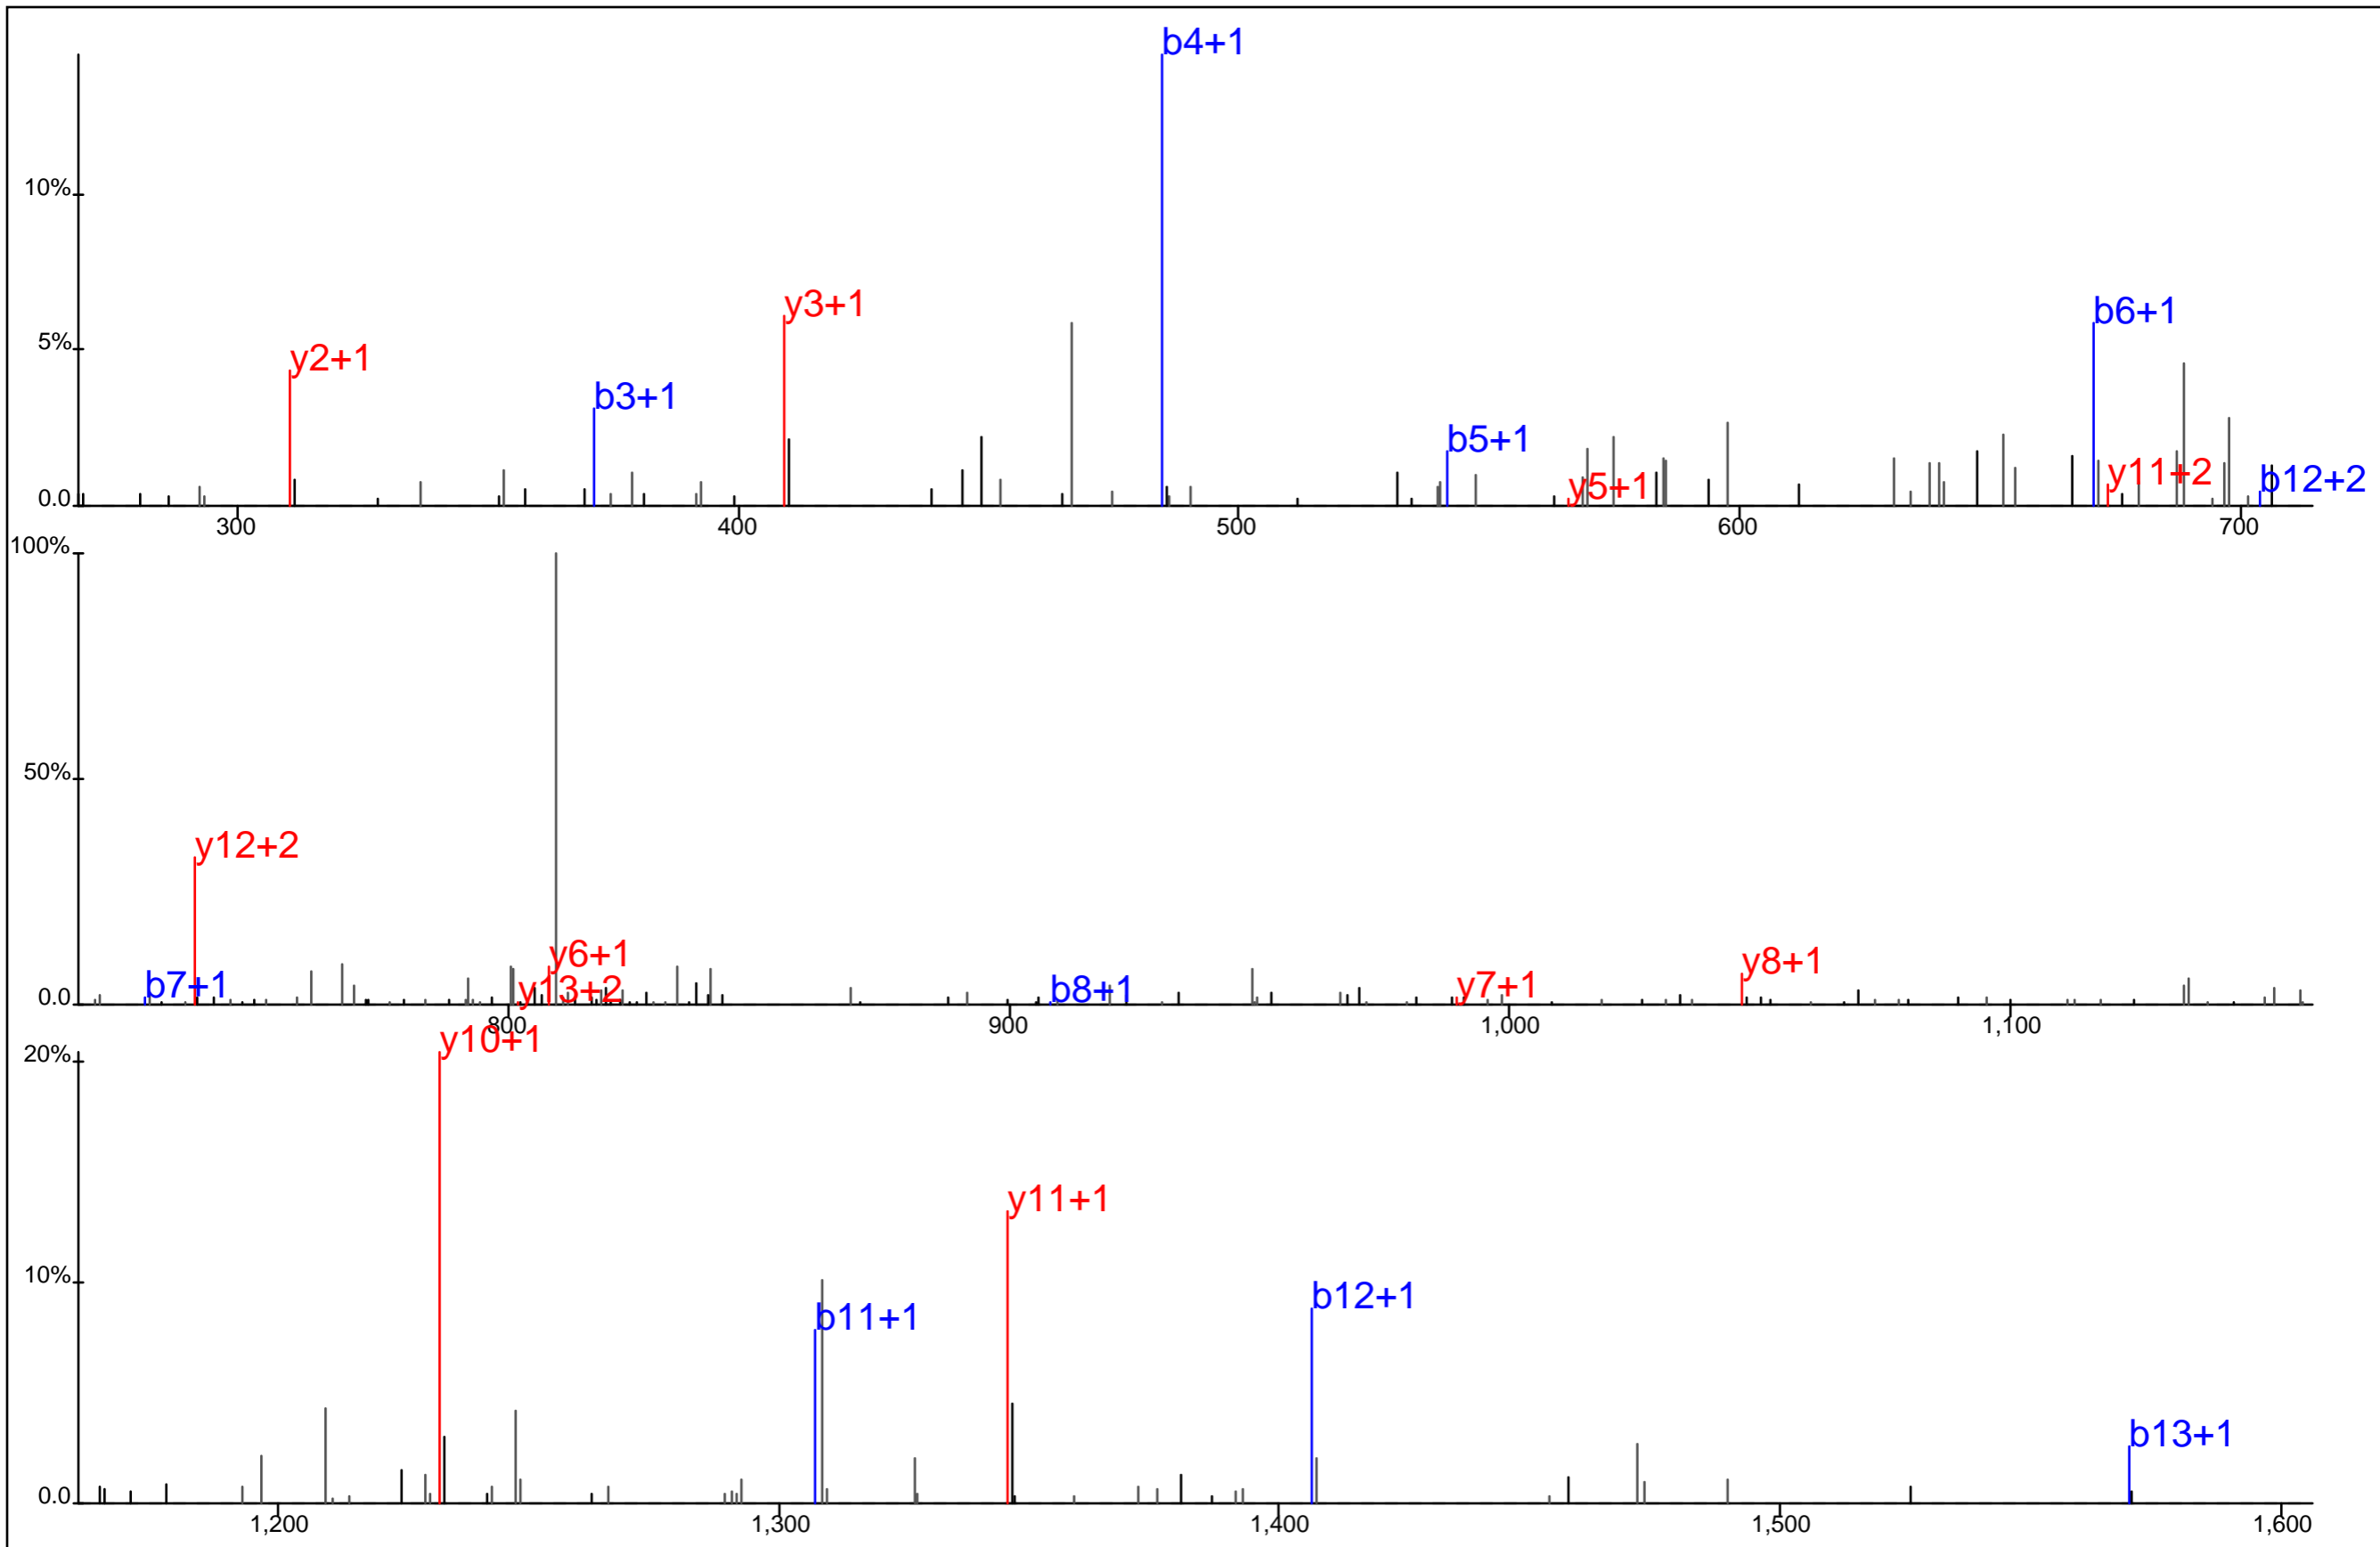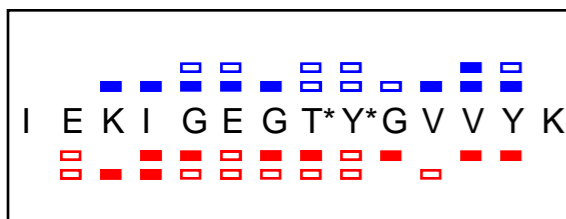

Protein Name: CDC2  
 gi Accession: 16306492  
 Precursor Mass: 858.3910+2  
 Delta Mass: 3.169 ppm  
 XCorr: 32.29

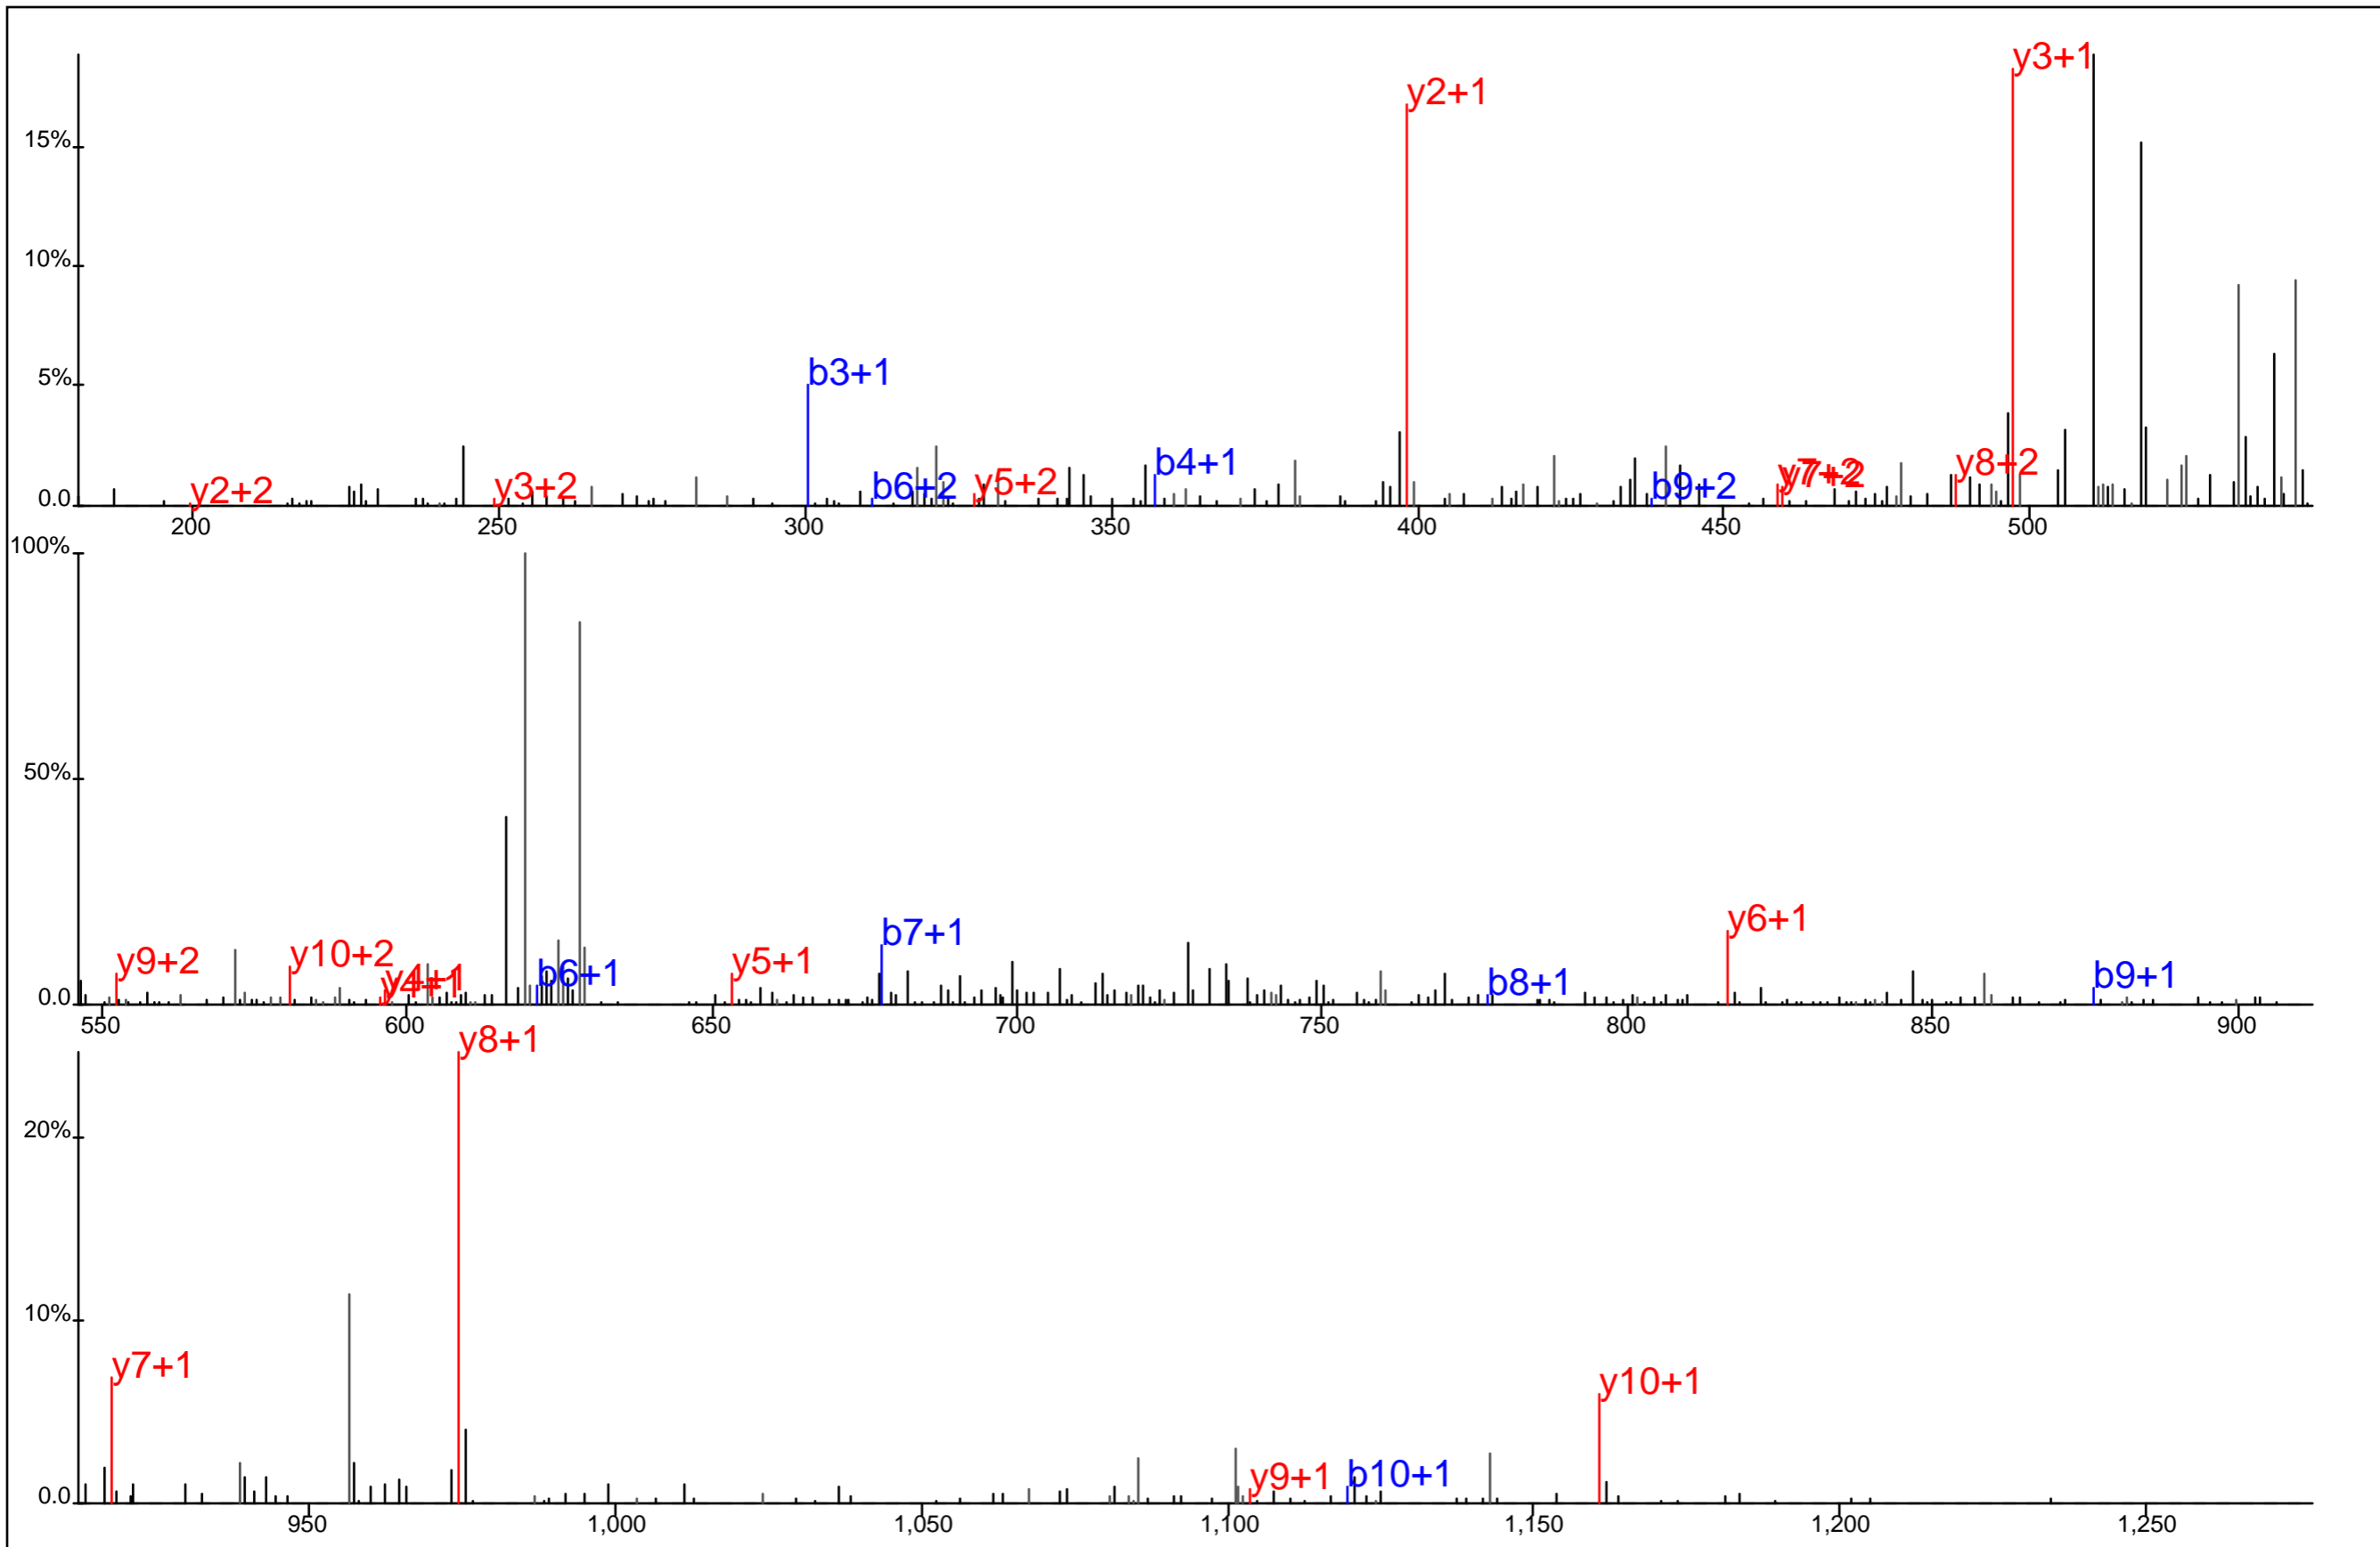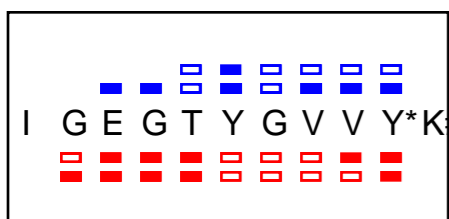

Protein Name: CDC2  
 gi Accession: 24158643  
 Precursor Mass: 637.3030+2  
 Delta Mass: 2.550 ppm  
 XCorr: 24.24

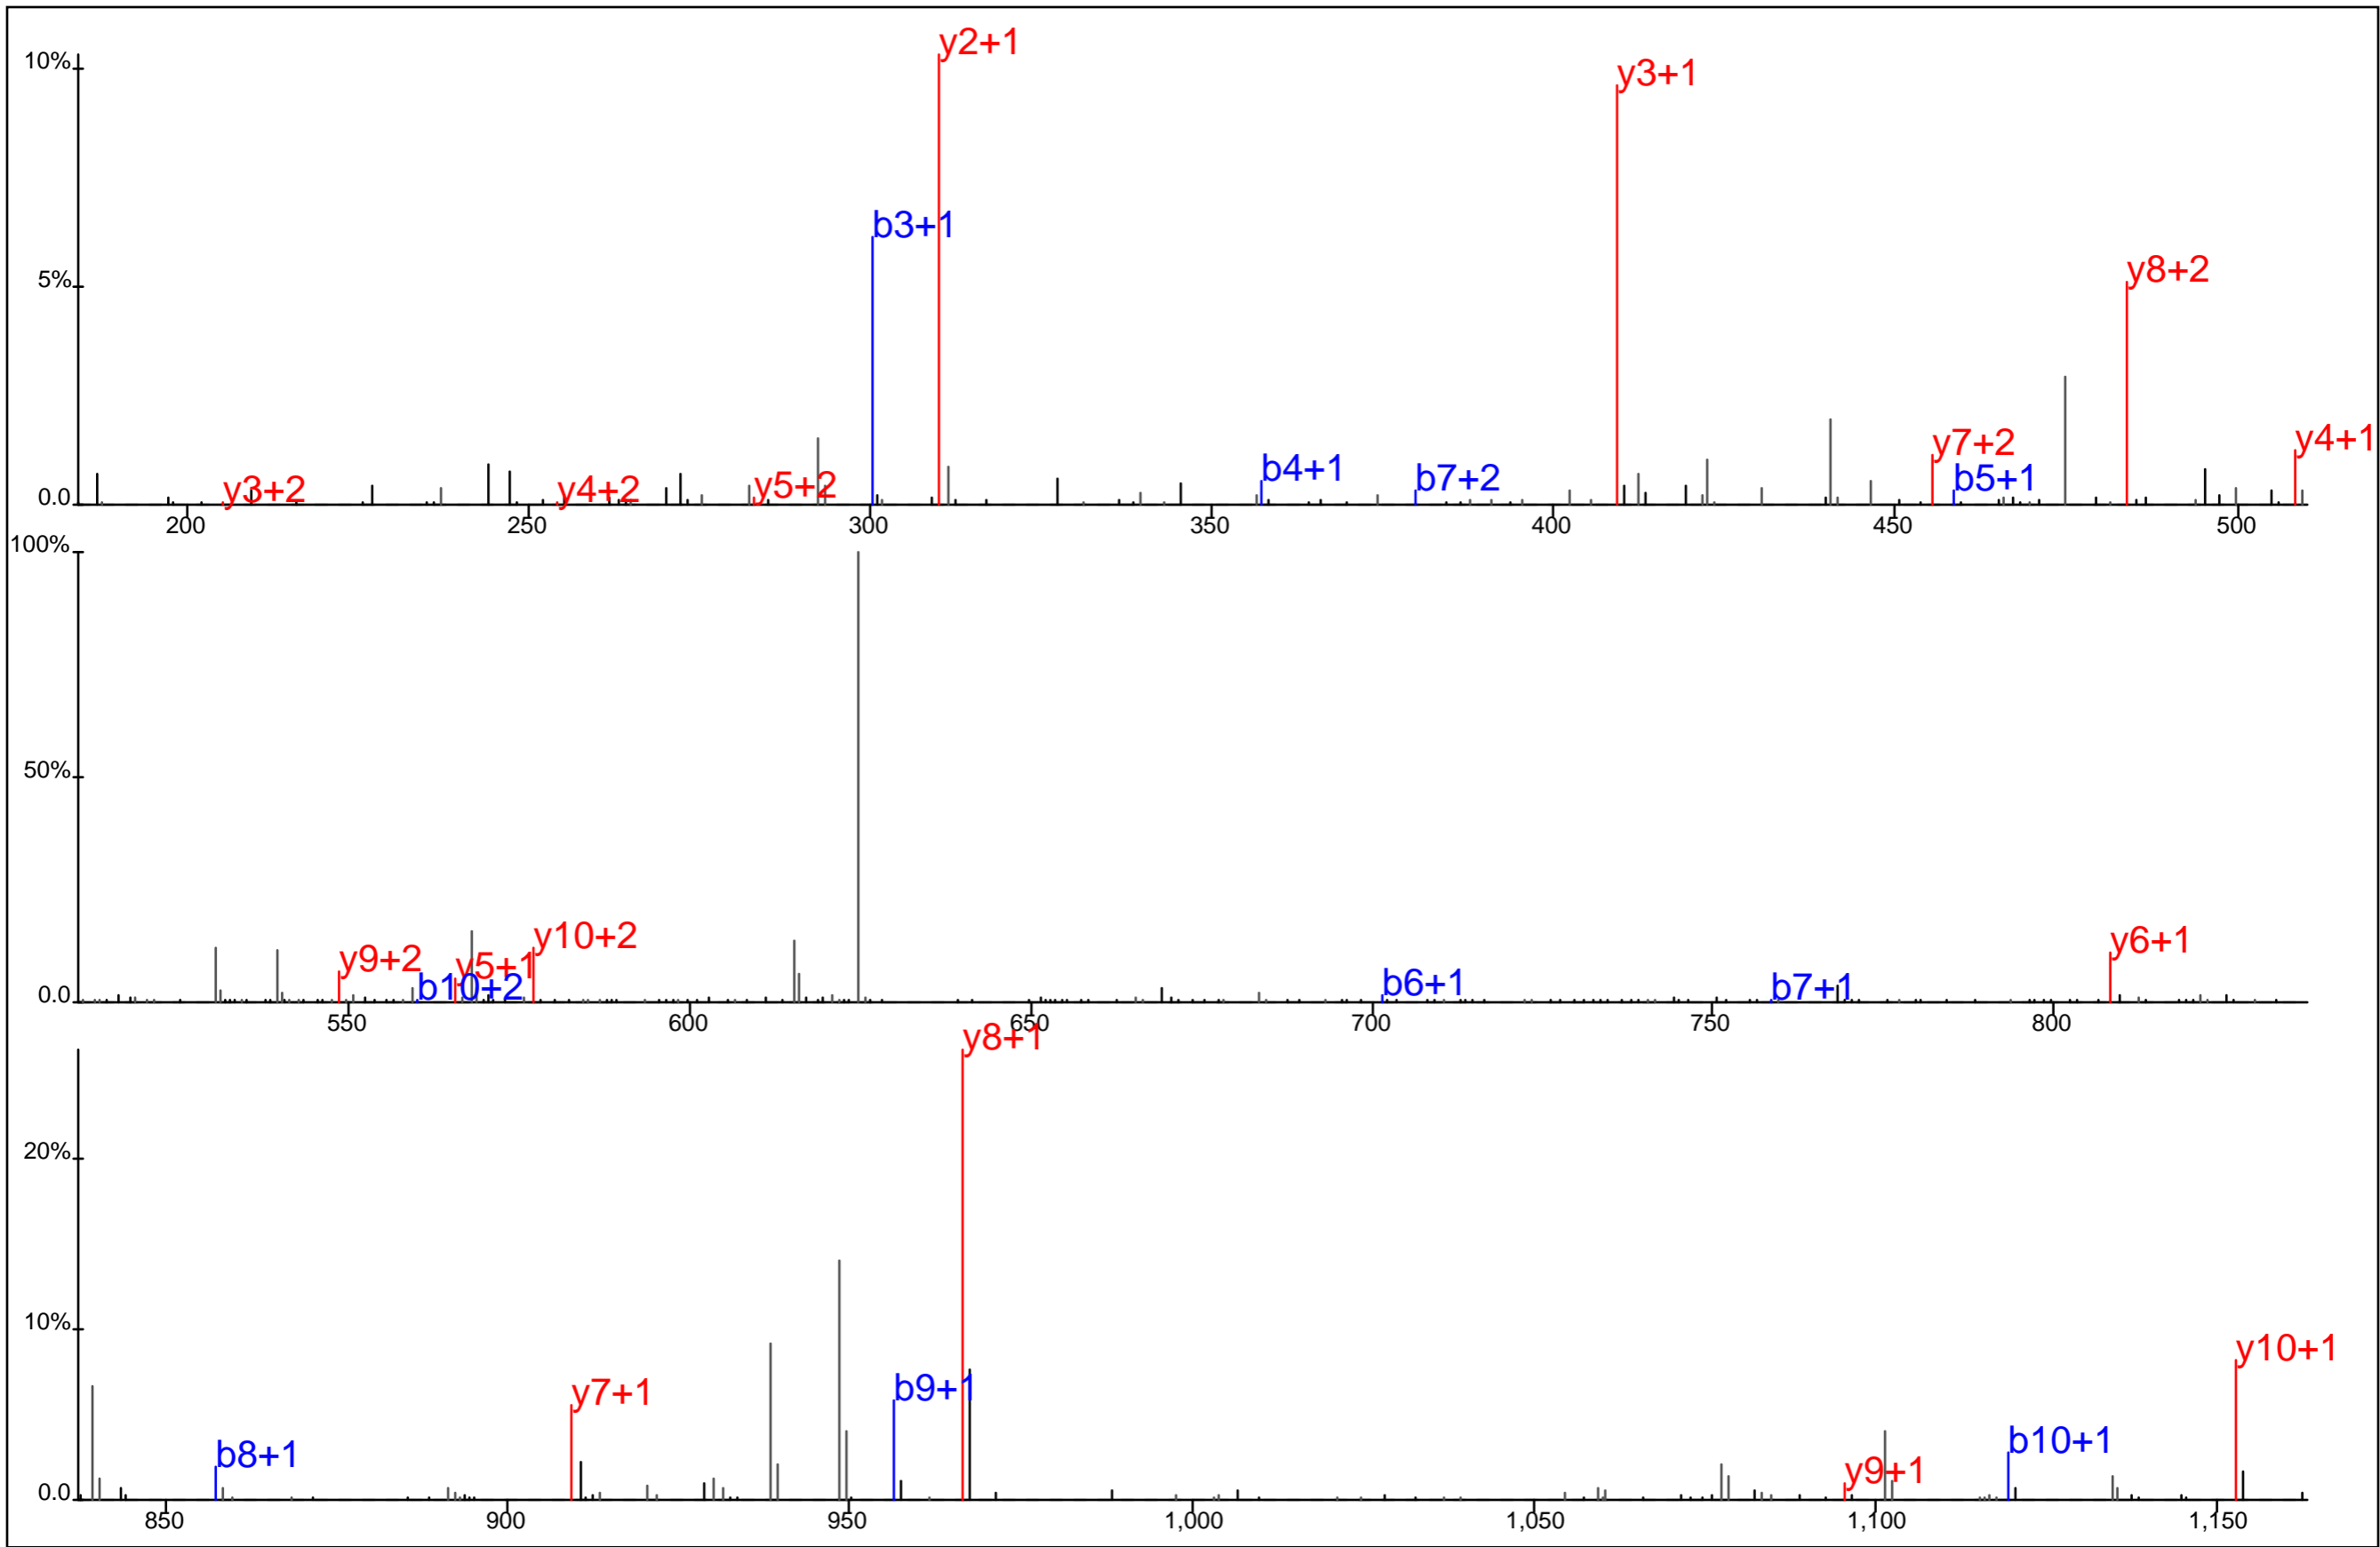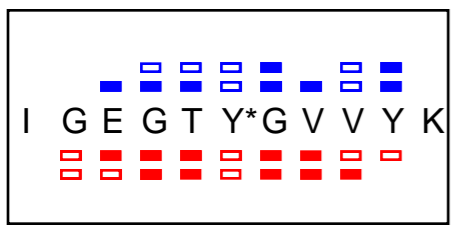

Protein Name: CDC2  
 gi Accession: 24158643  
 Precursor Mass: 633.2947+2  
 Delta Mass: 0.583 ppm  
 XCorr: 41.96

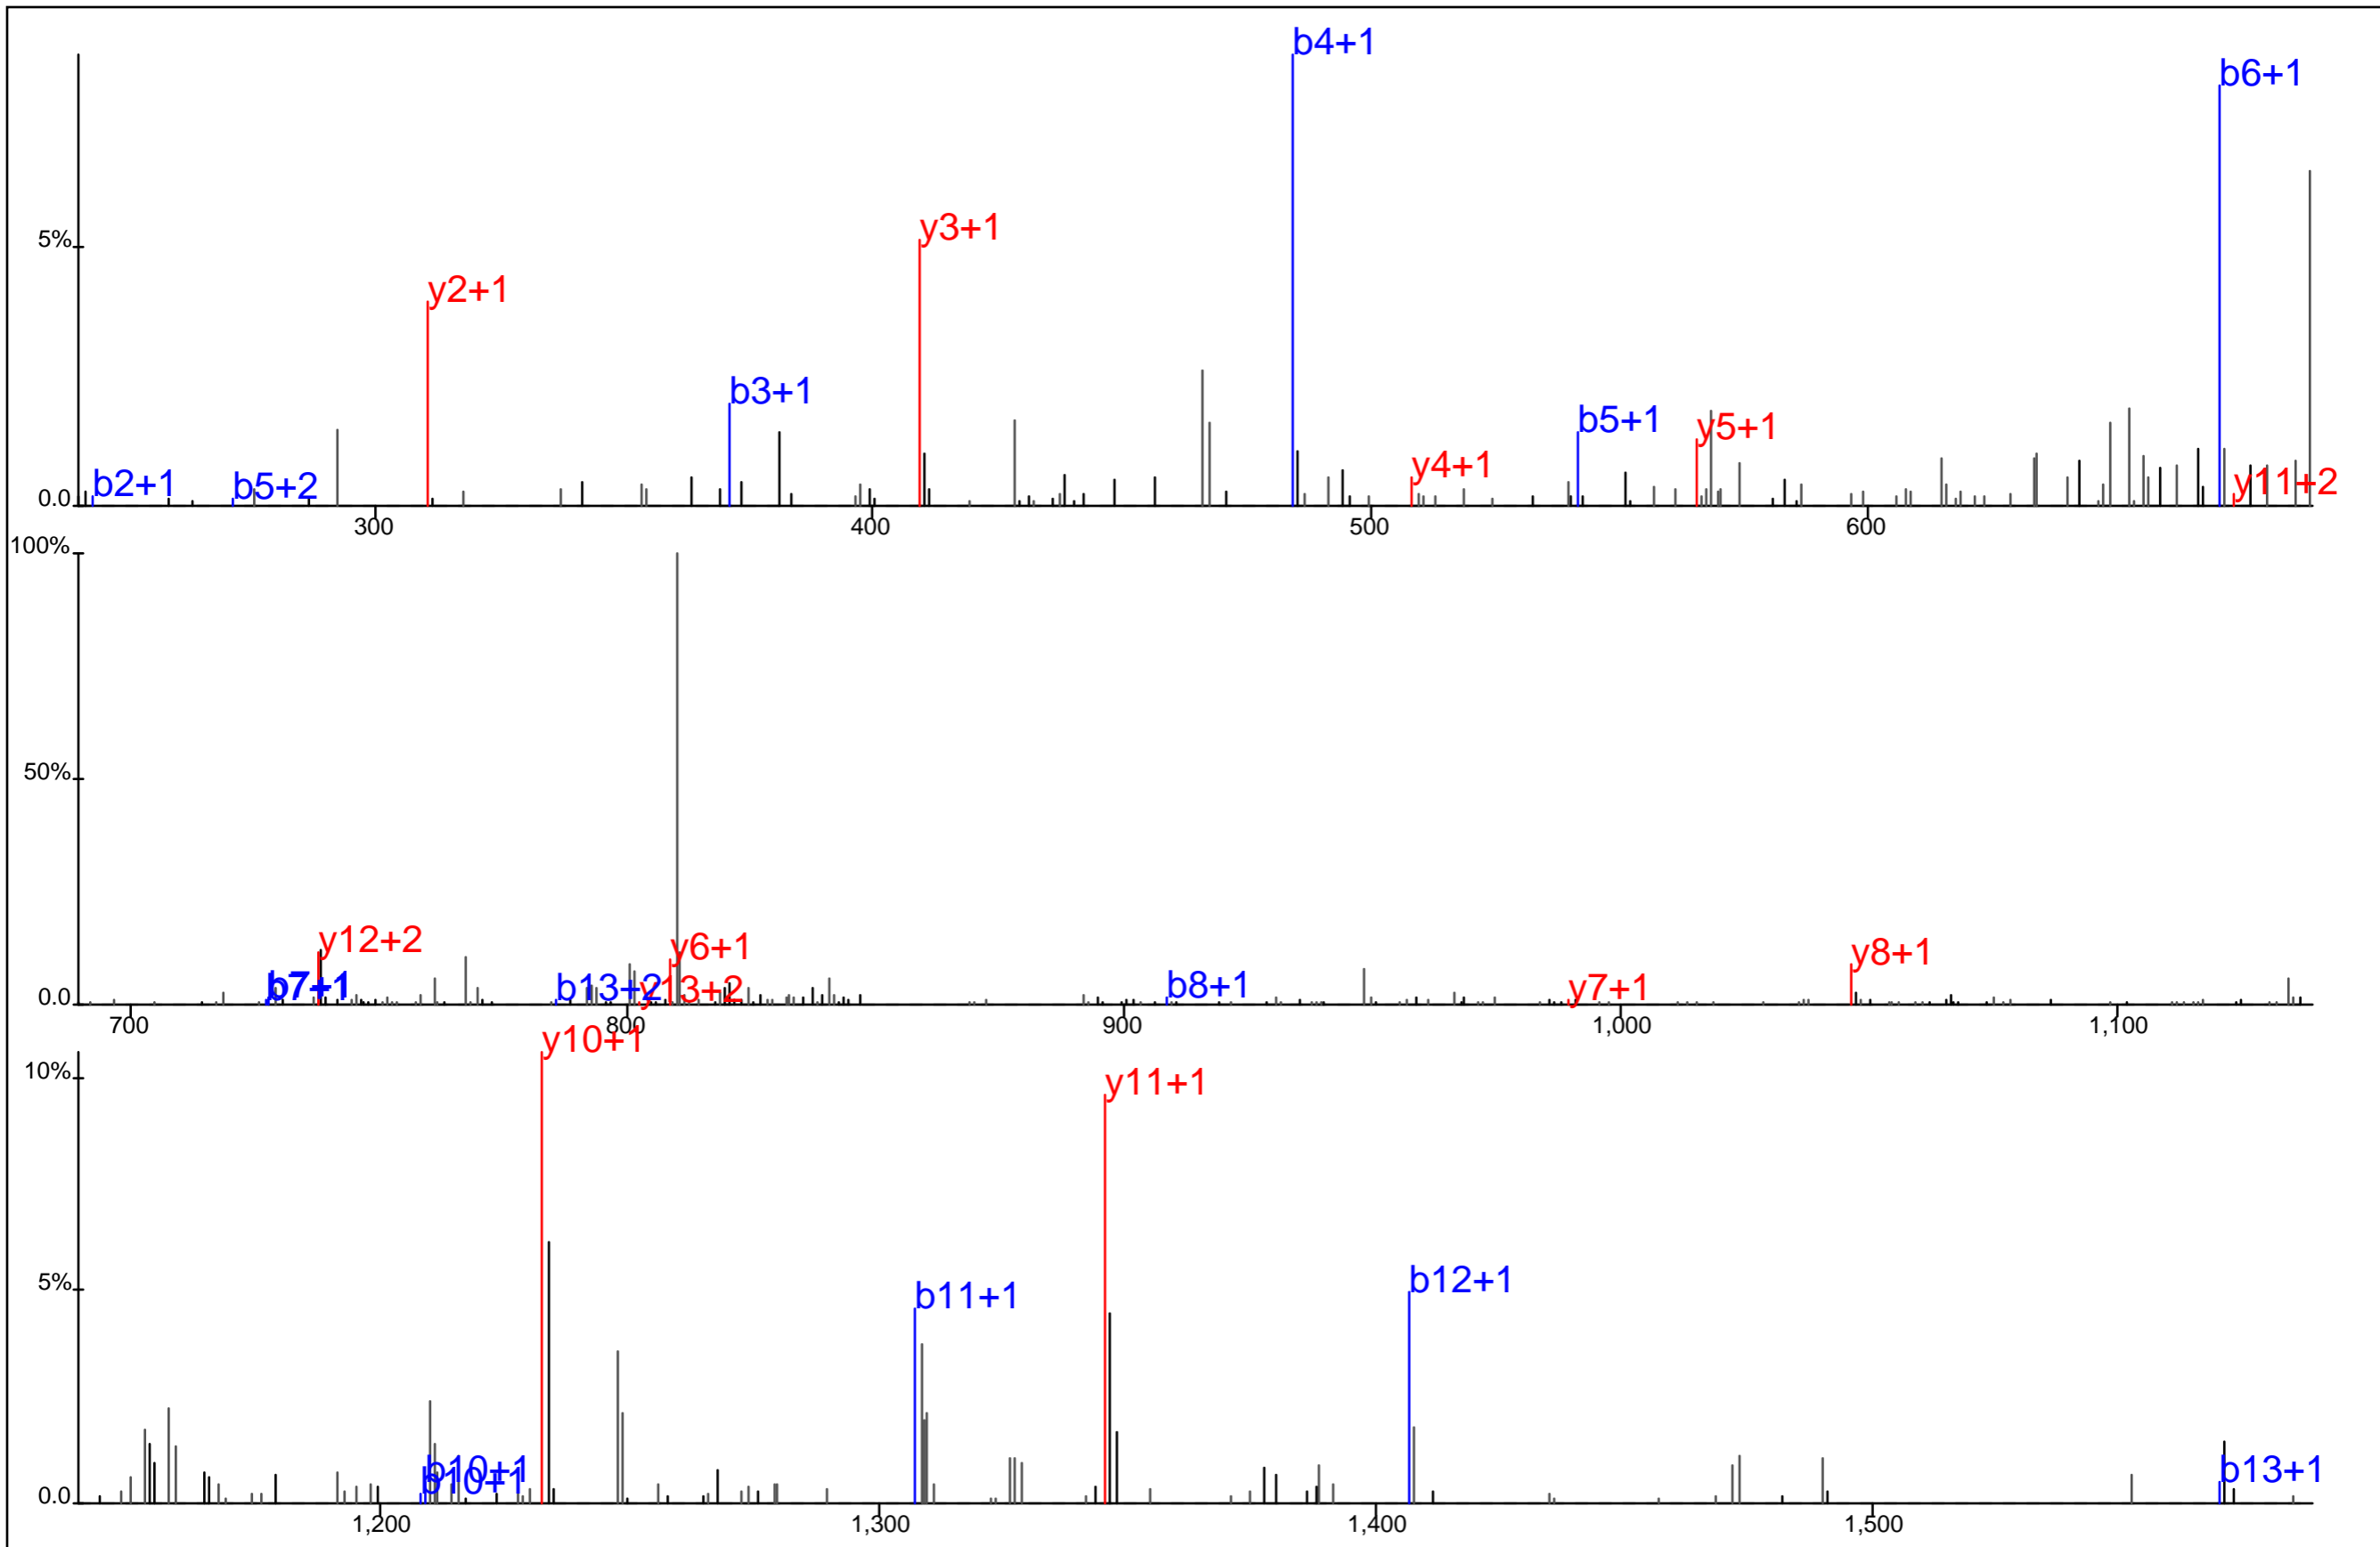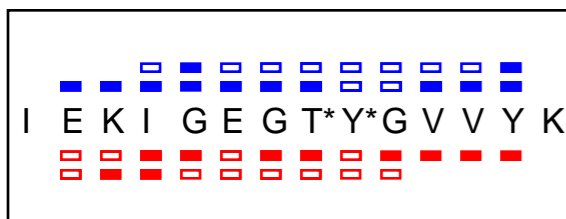

Protein Name: CDC2  
 gi Accession: 16306492  
 Precursor Mass: 858.3903+2  
 Delta Mass: 2.383 ppm  
 XCorr: 41.99

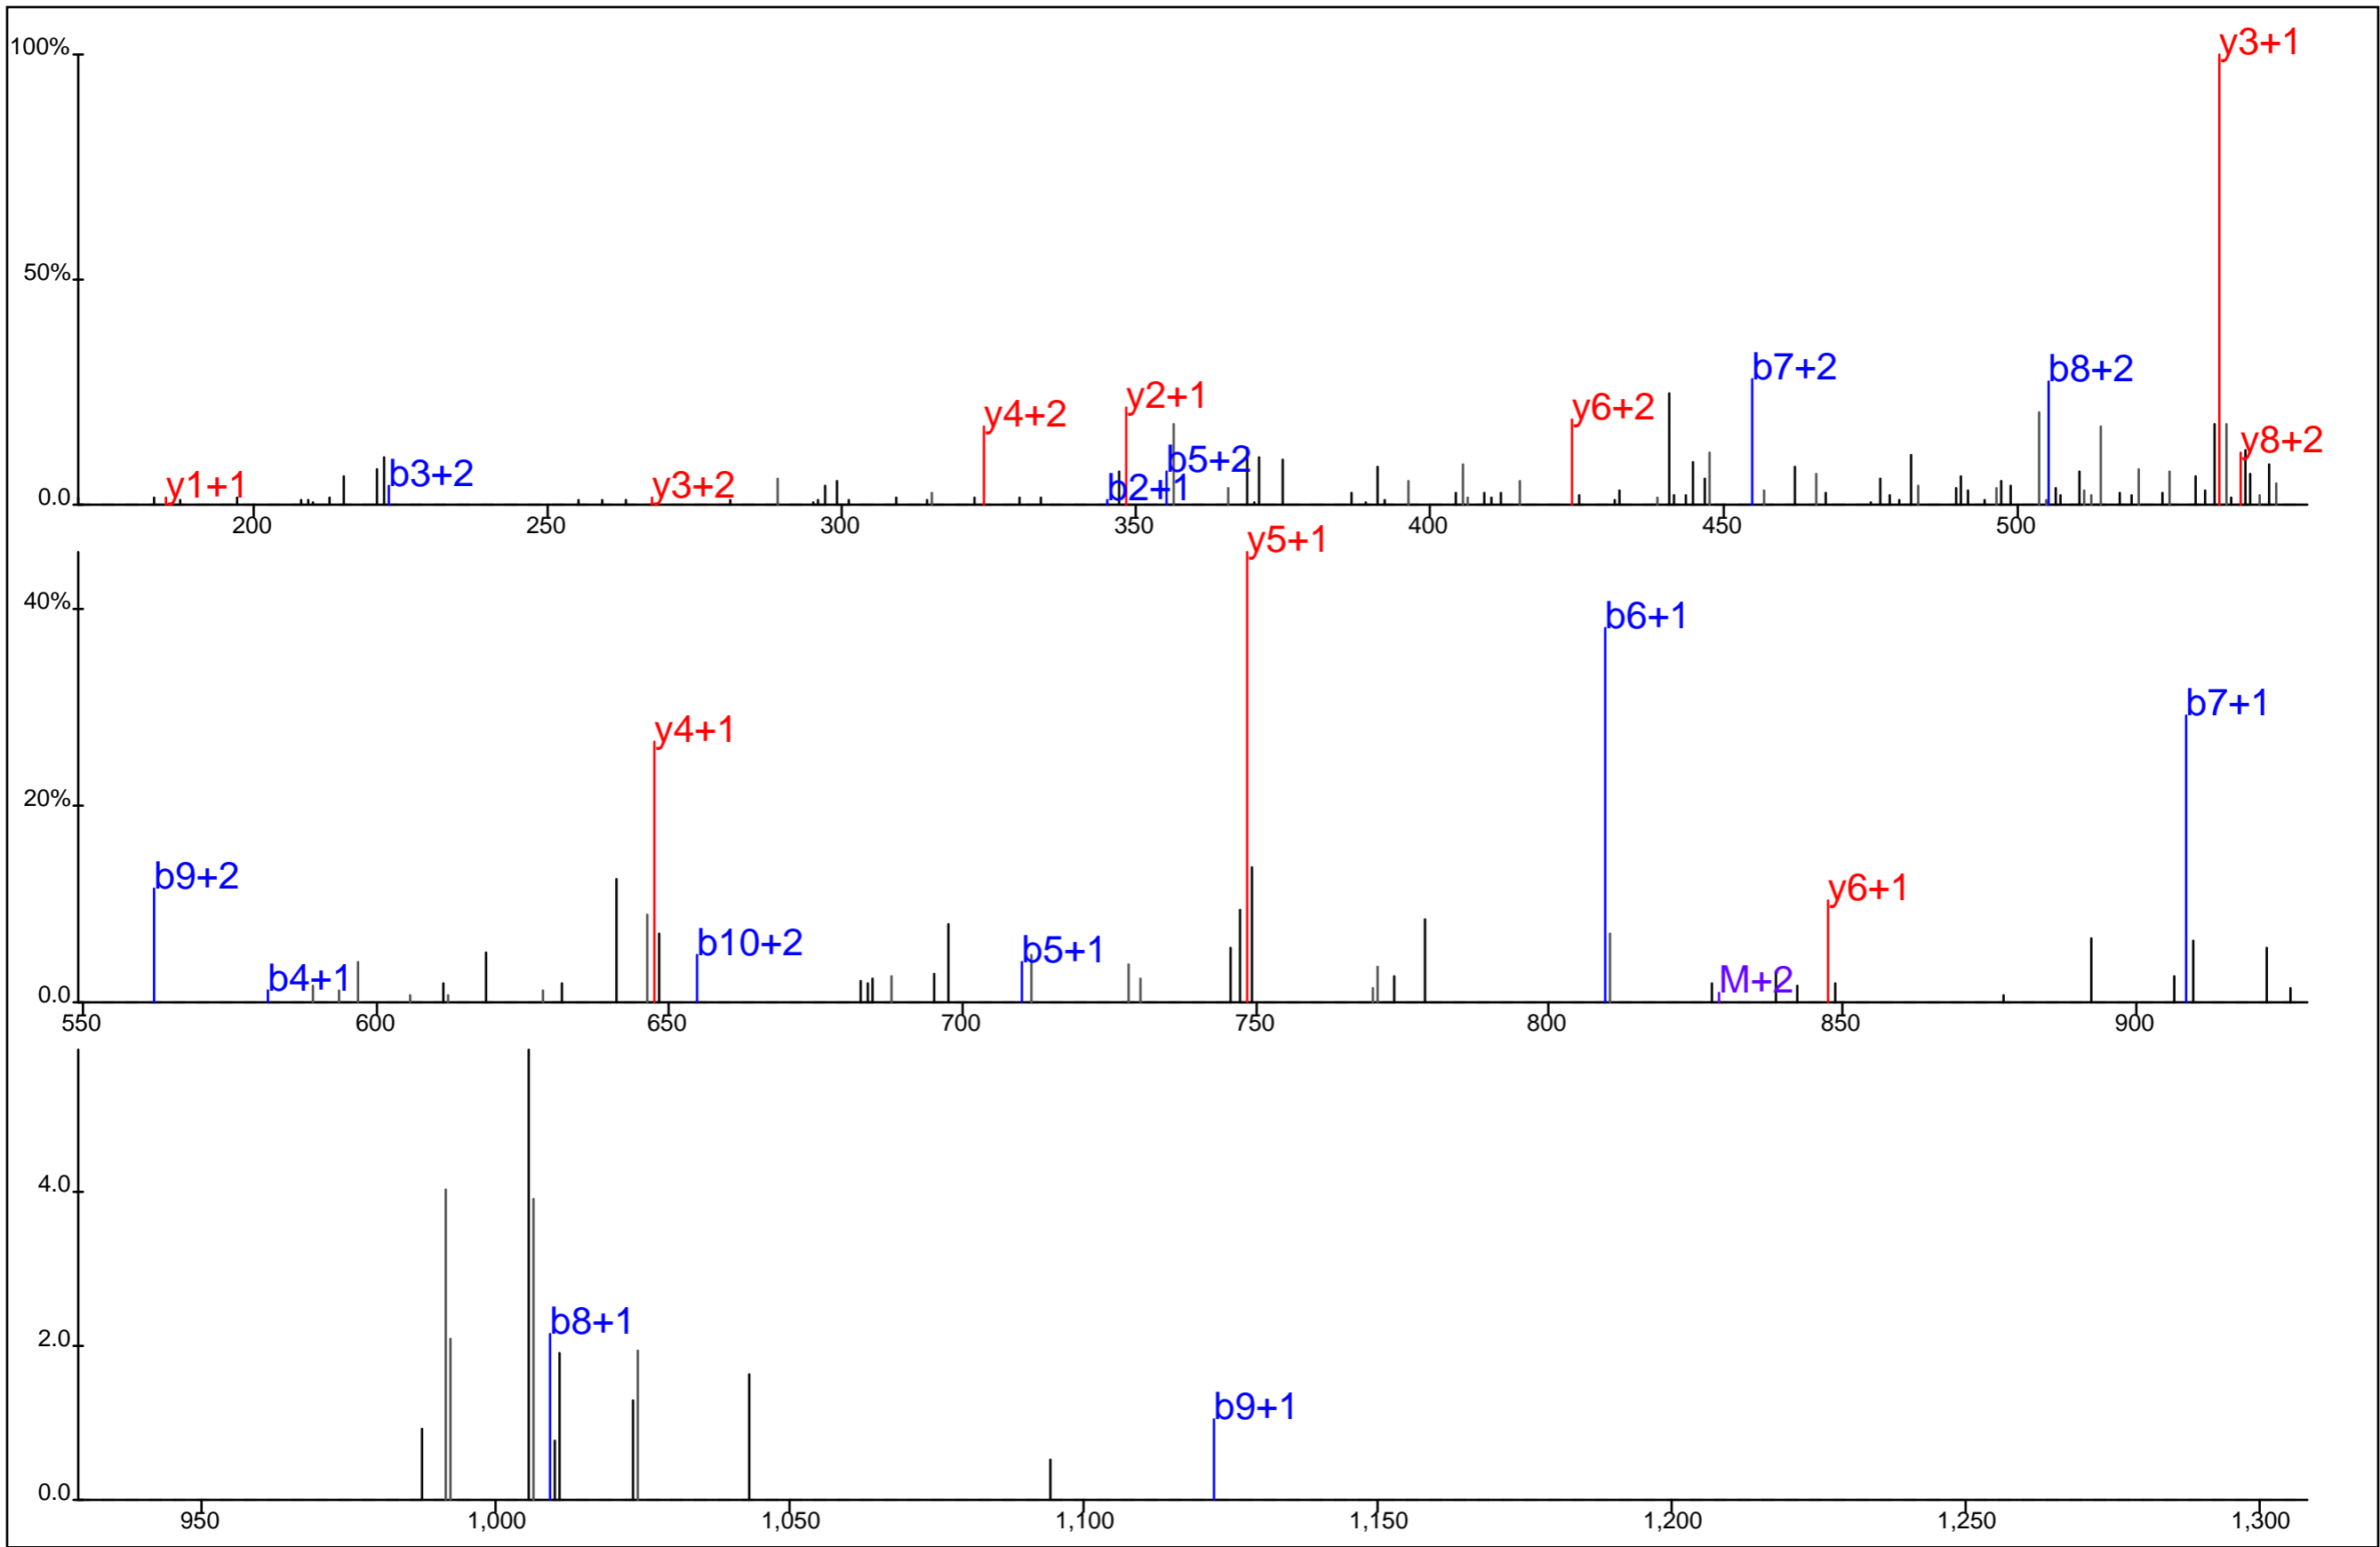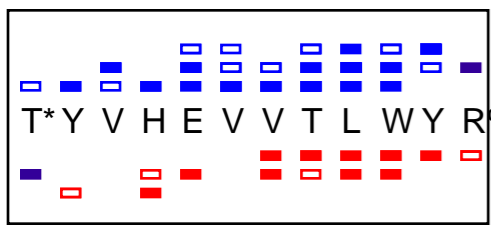

Protein Name: CDC2  
 gi Accession: 24158643  
 Precursor Mass: 552.5987+3  
 Delta Mass: 2.514 ppm  
 XCorr: 31.77

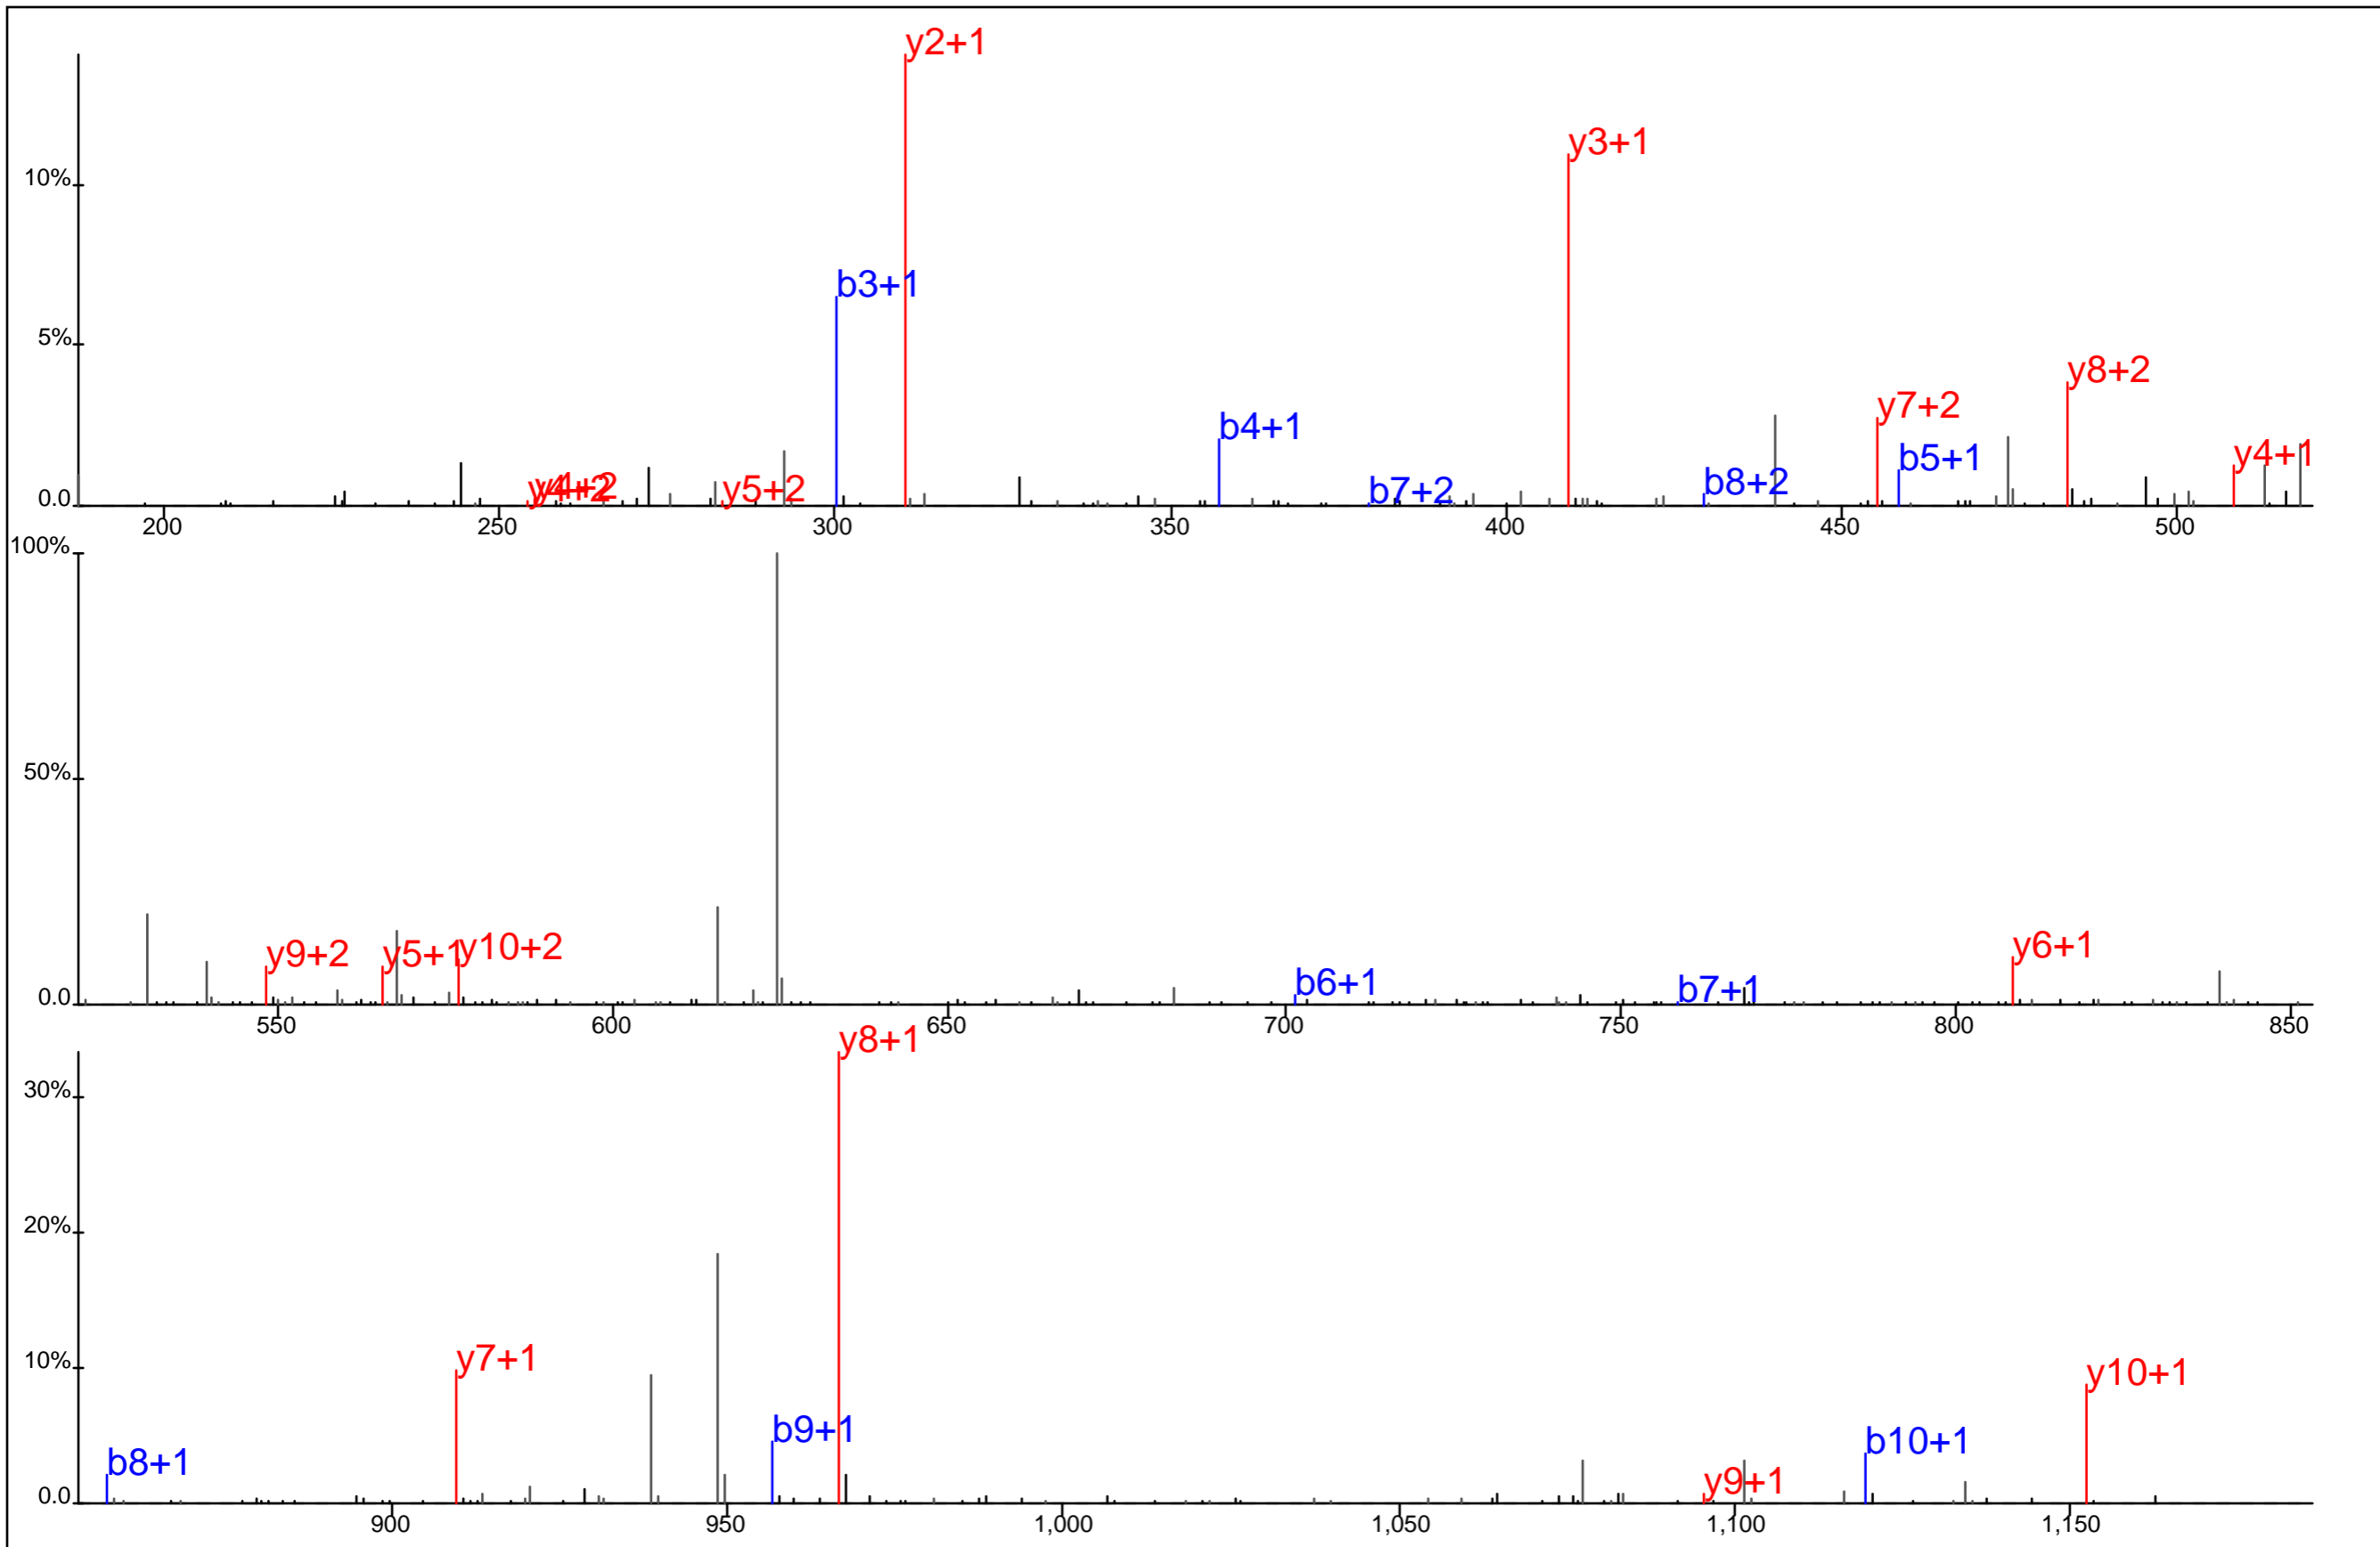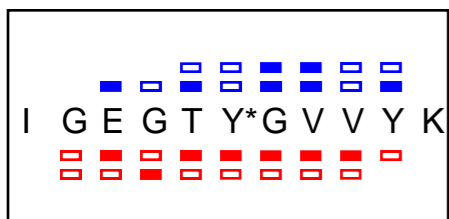

Protein Name: CDC2  
 gi Accession: 24158643  
 Precursor Mass: 633.2961+2  
 Delta Mass: 2.898 ppm  
 XCorr: 47.73

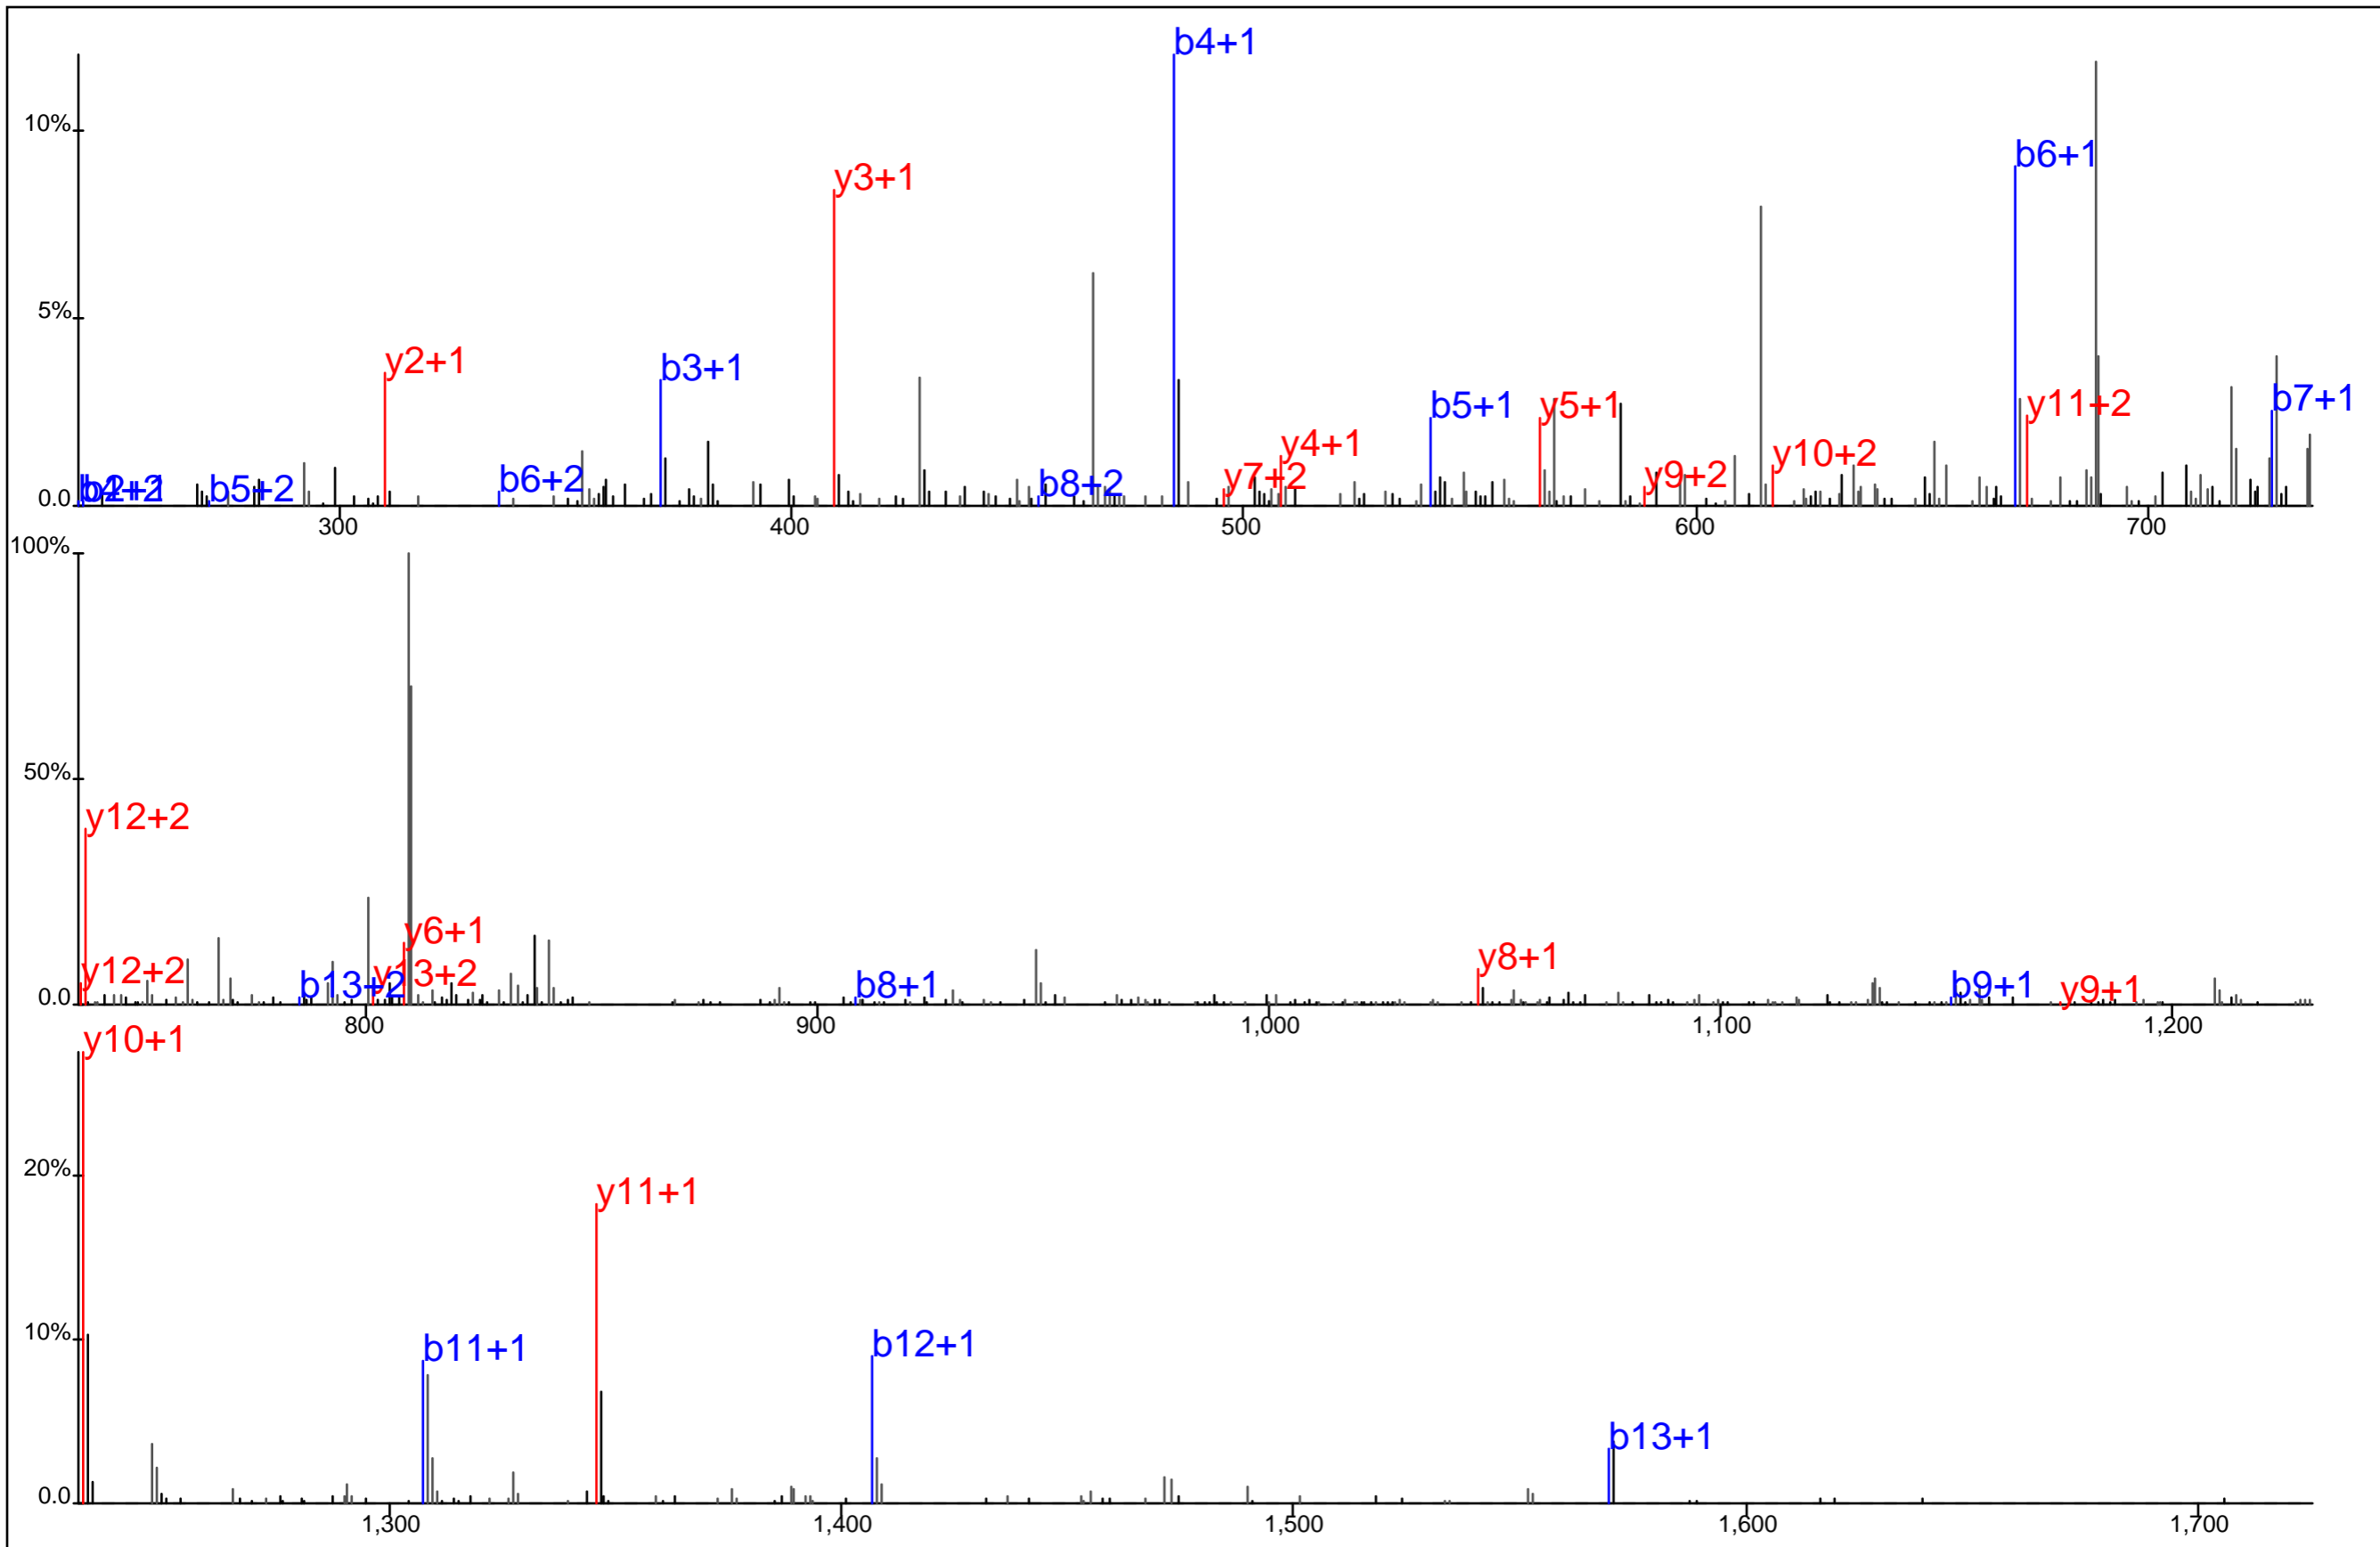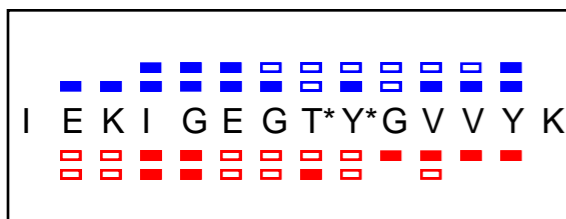

Protein Name: CDC2  
 gi Accession: 16306492  
 Precursor Mass: 858.3878+2  
 Delta Mass: 0.532 ppm  
 XCorr: 42.94



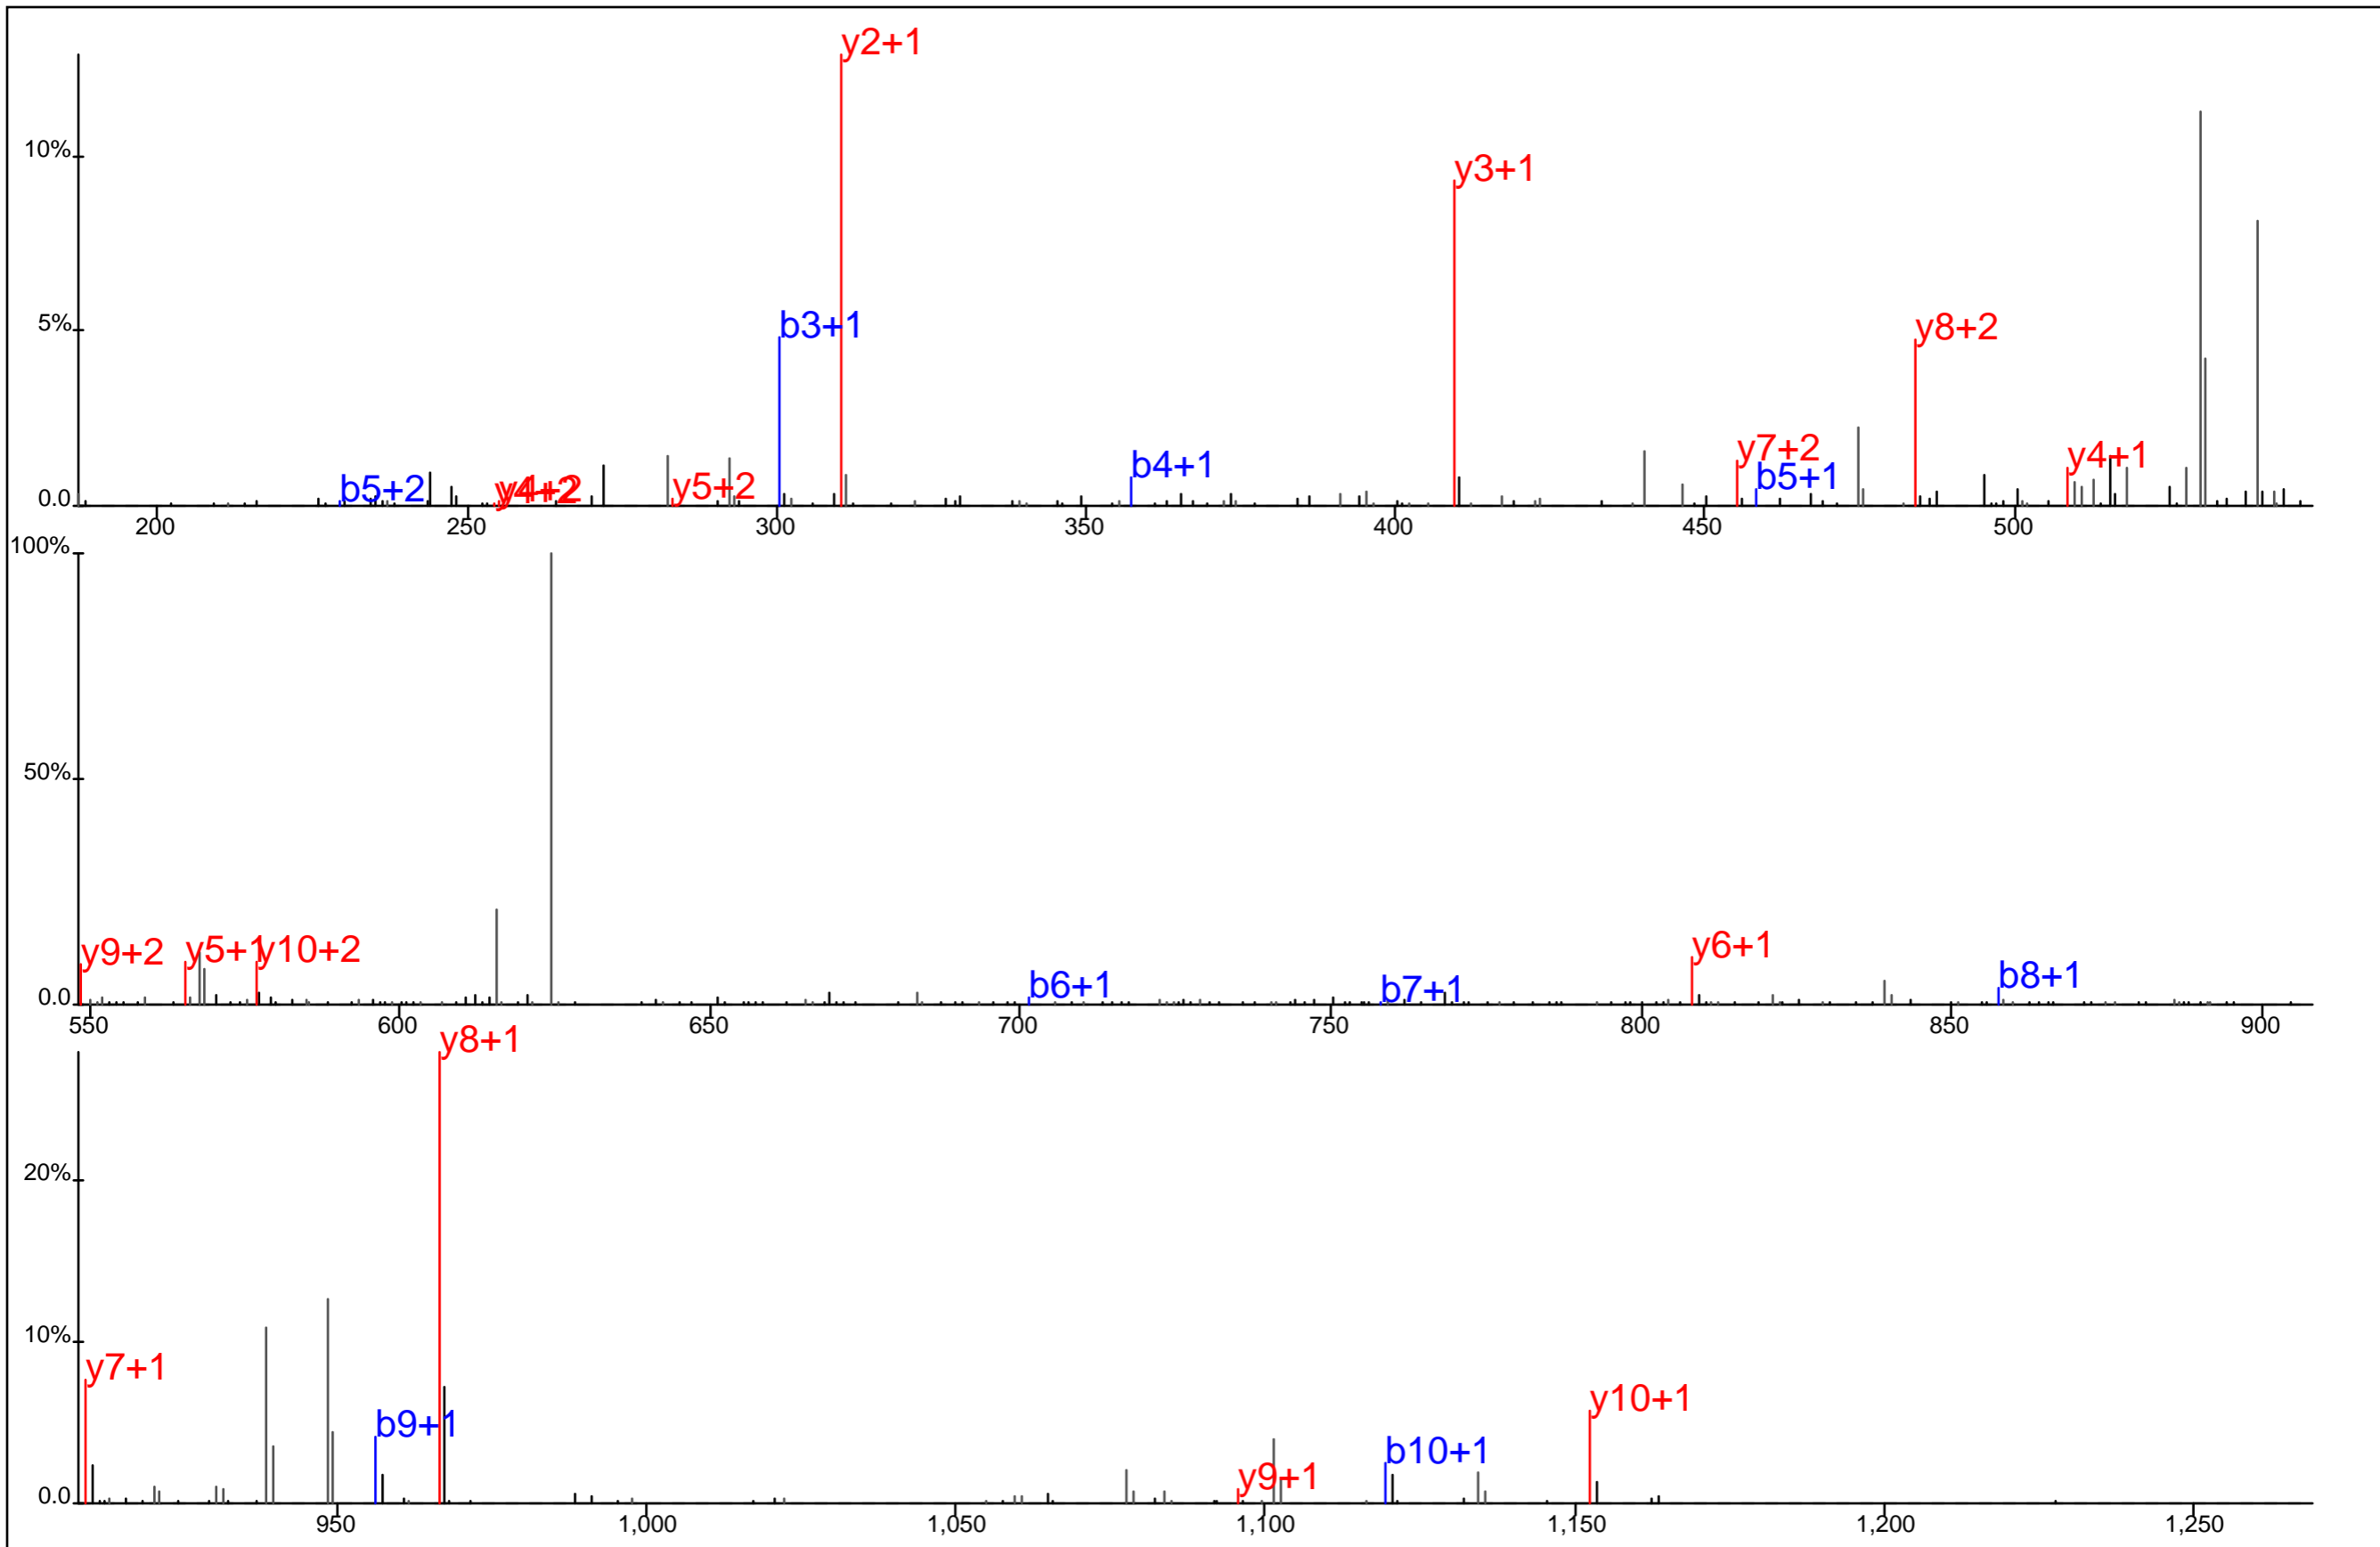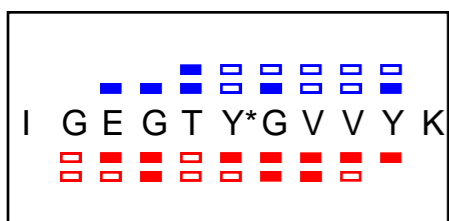

Protein Name: CDC2  
 gi Accession: 24158643  
 Precursor Mass: 633.2955+2  
 Delta Mass: 1.839 ppm  
 XCorr: 45.38

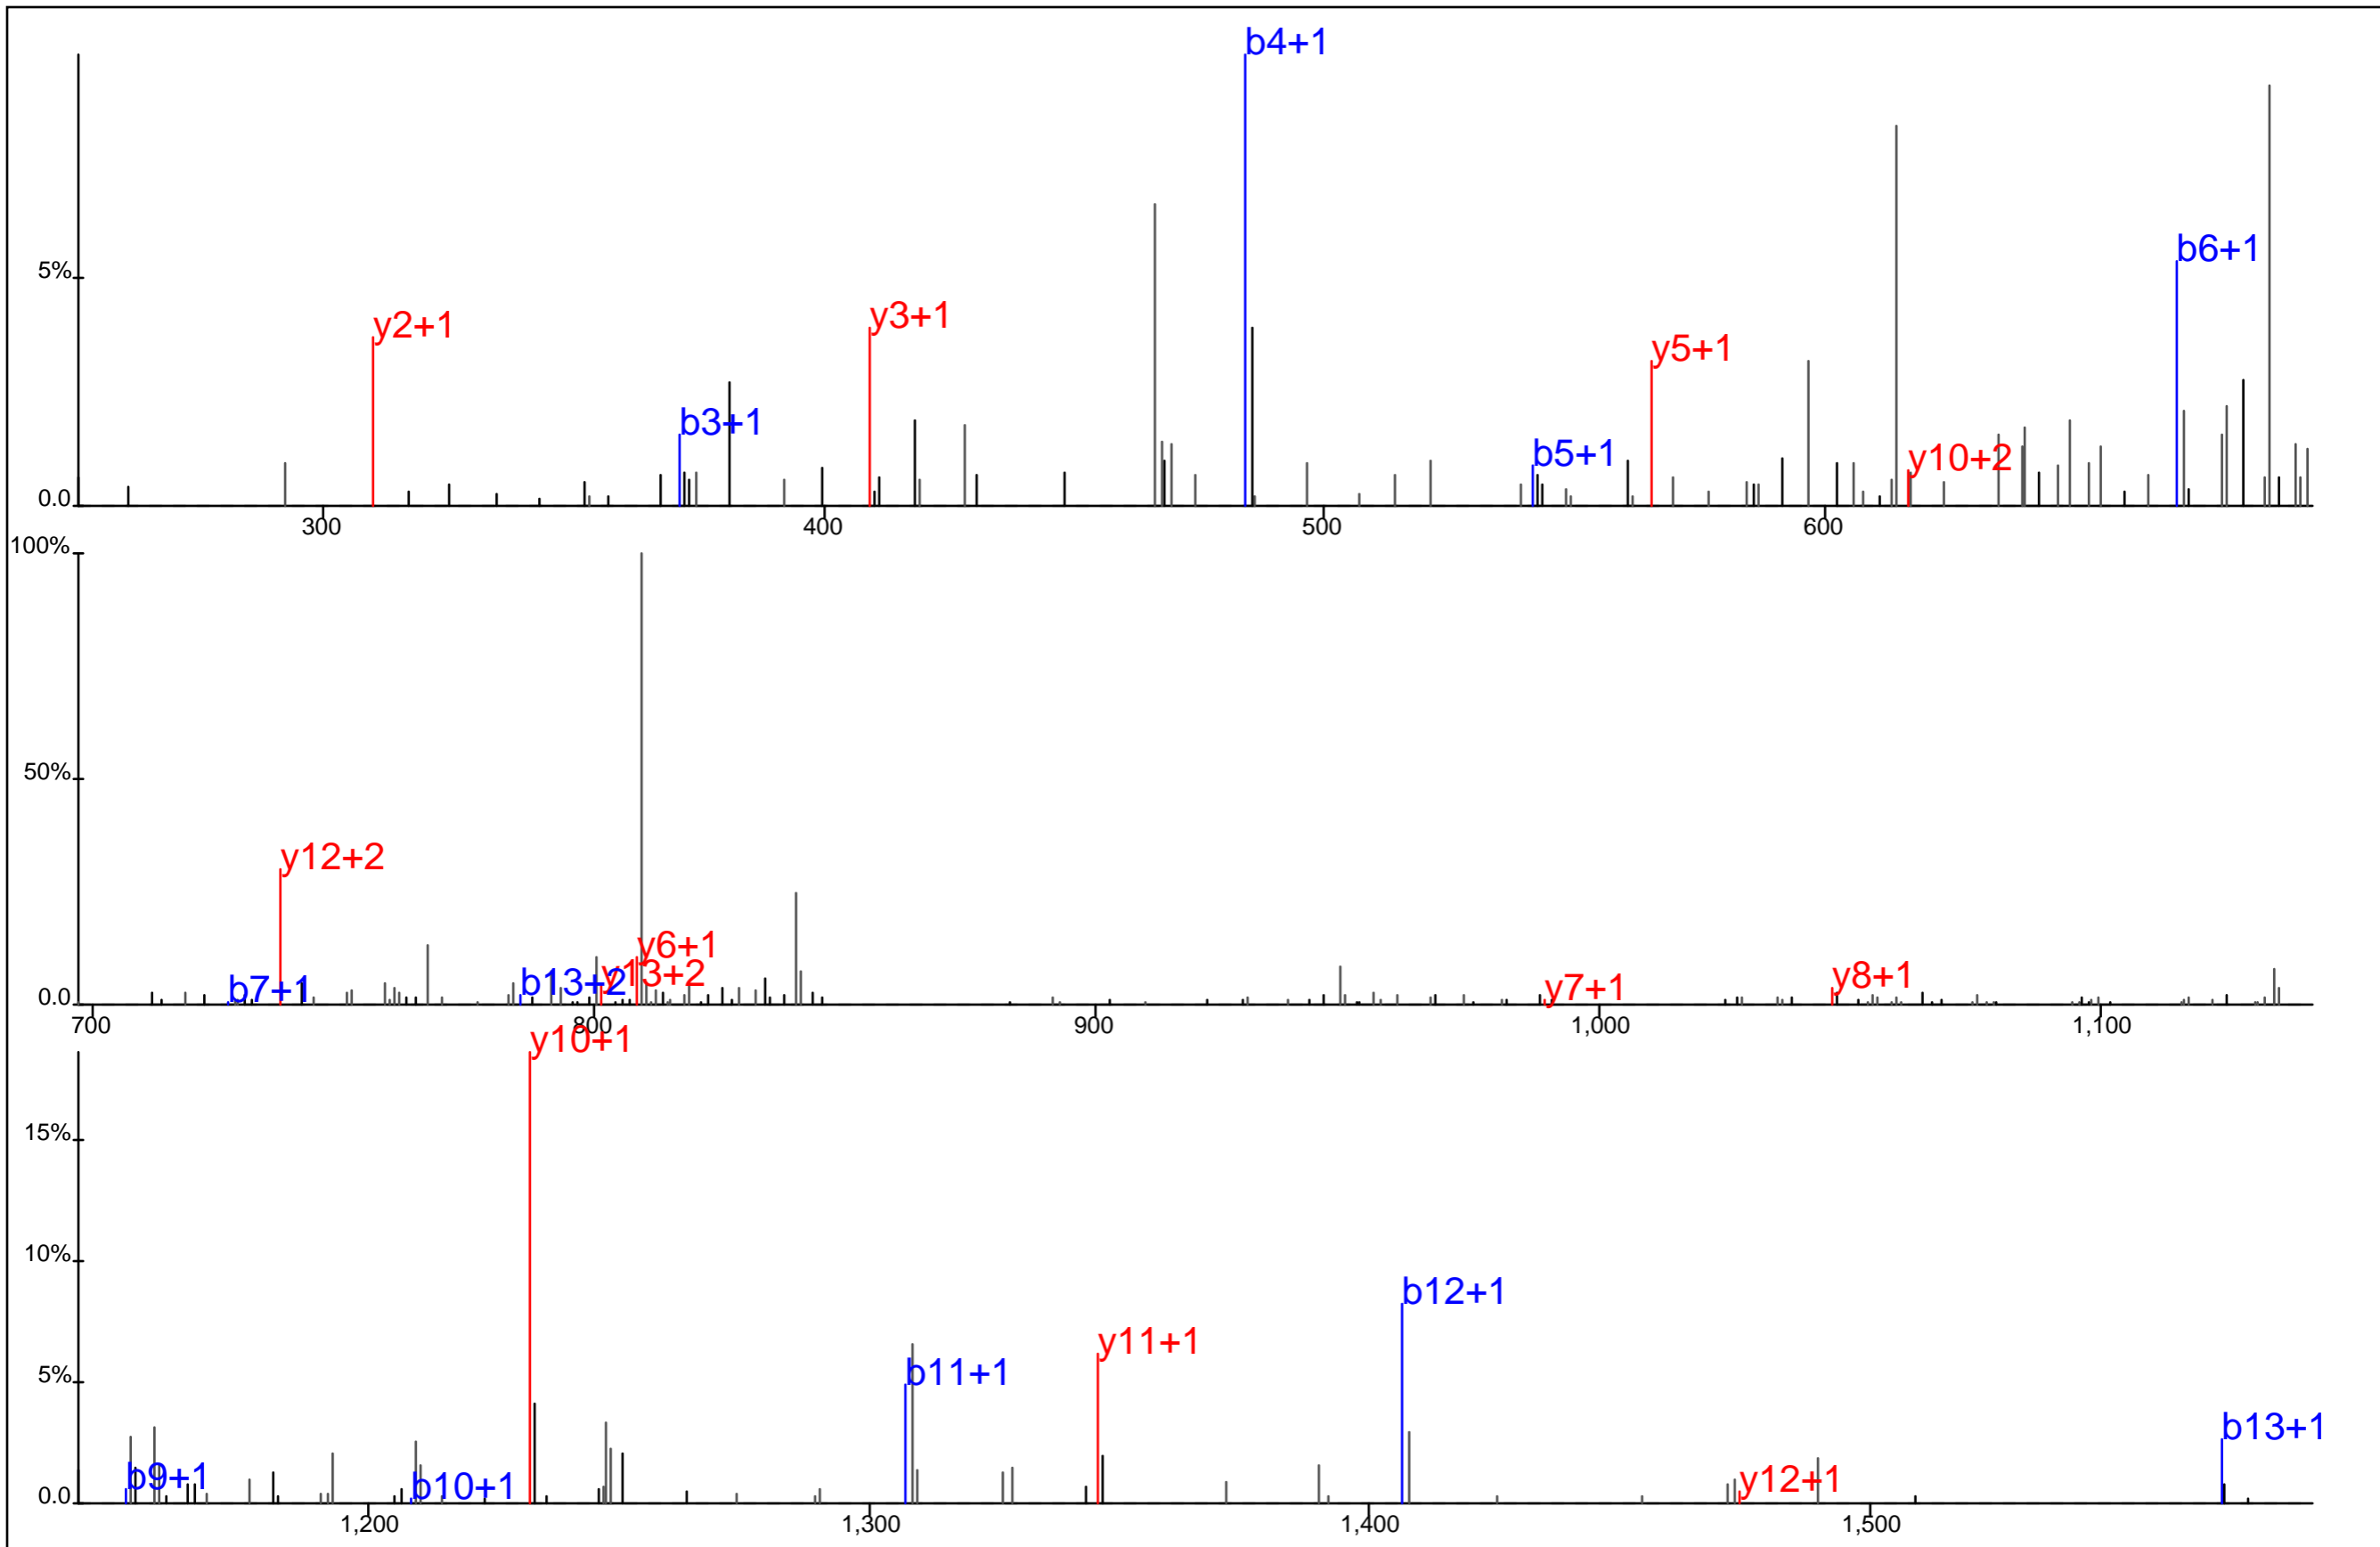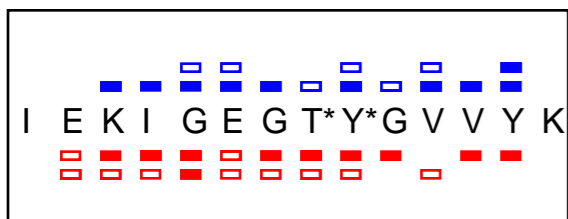

Protein Name: CDC2  
 gi Accession: 16306492  
 Precursor Mass: 858.3896+2  
 Delta Mass: 1.602 ppm  
 XCorr: 27.78

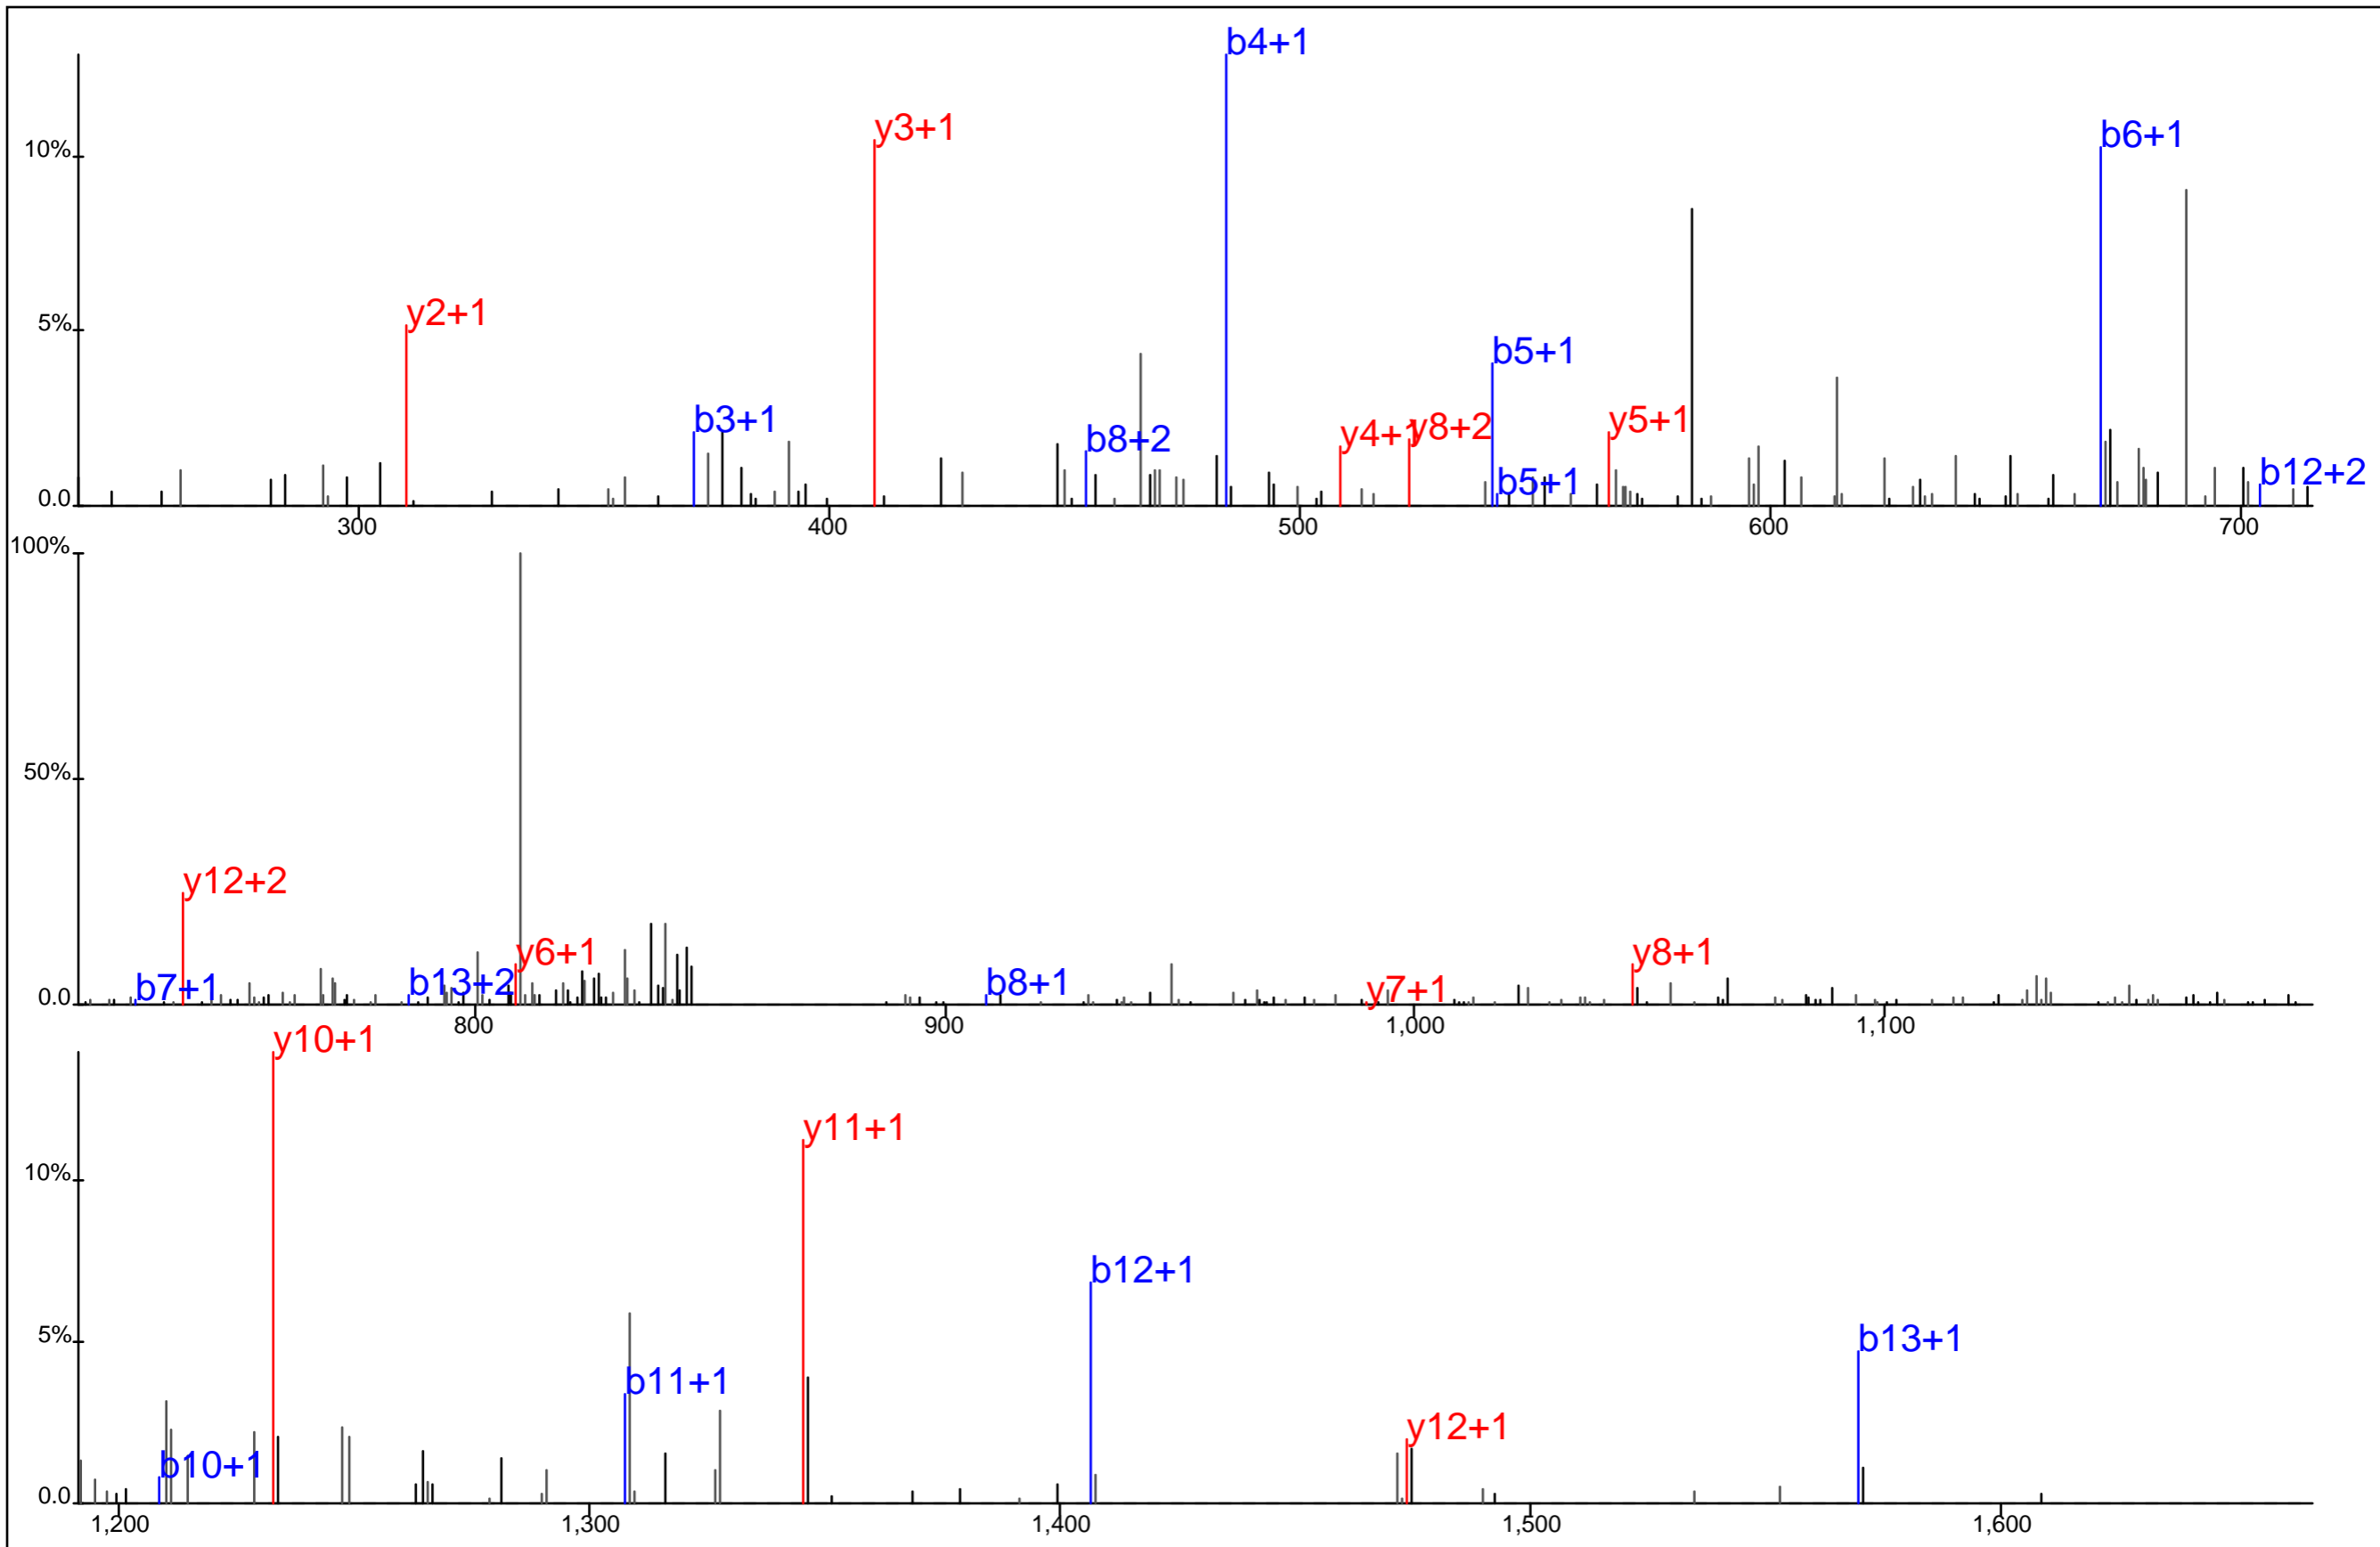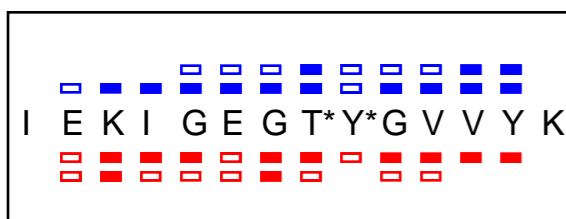

Protein Name: CDC2  
 gi Accession: 16306492  
 Precursor Mass: 858.3919+2  
 Delta Mass: 4.236 ppm  
 XCorr: 36.08

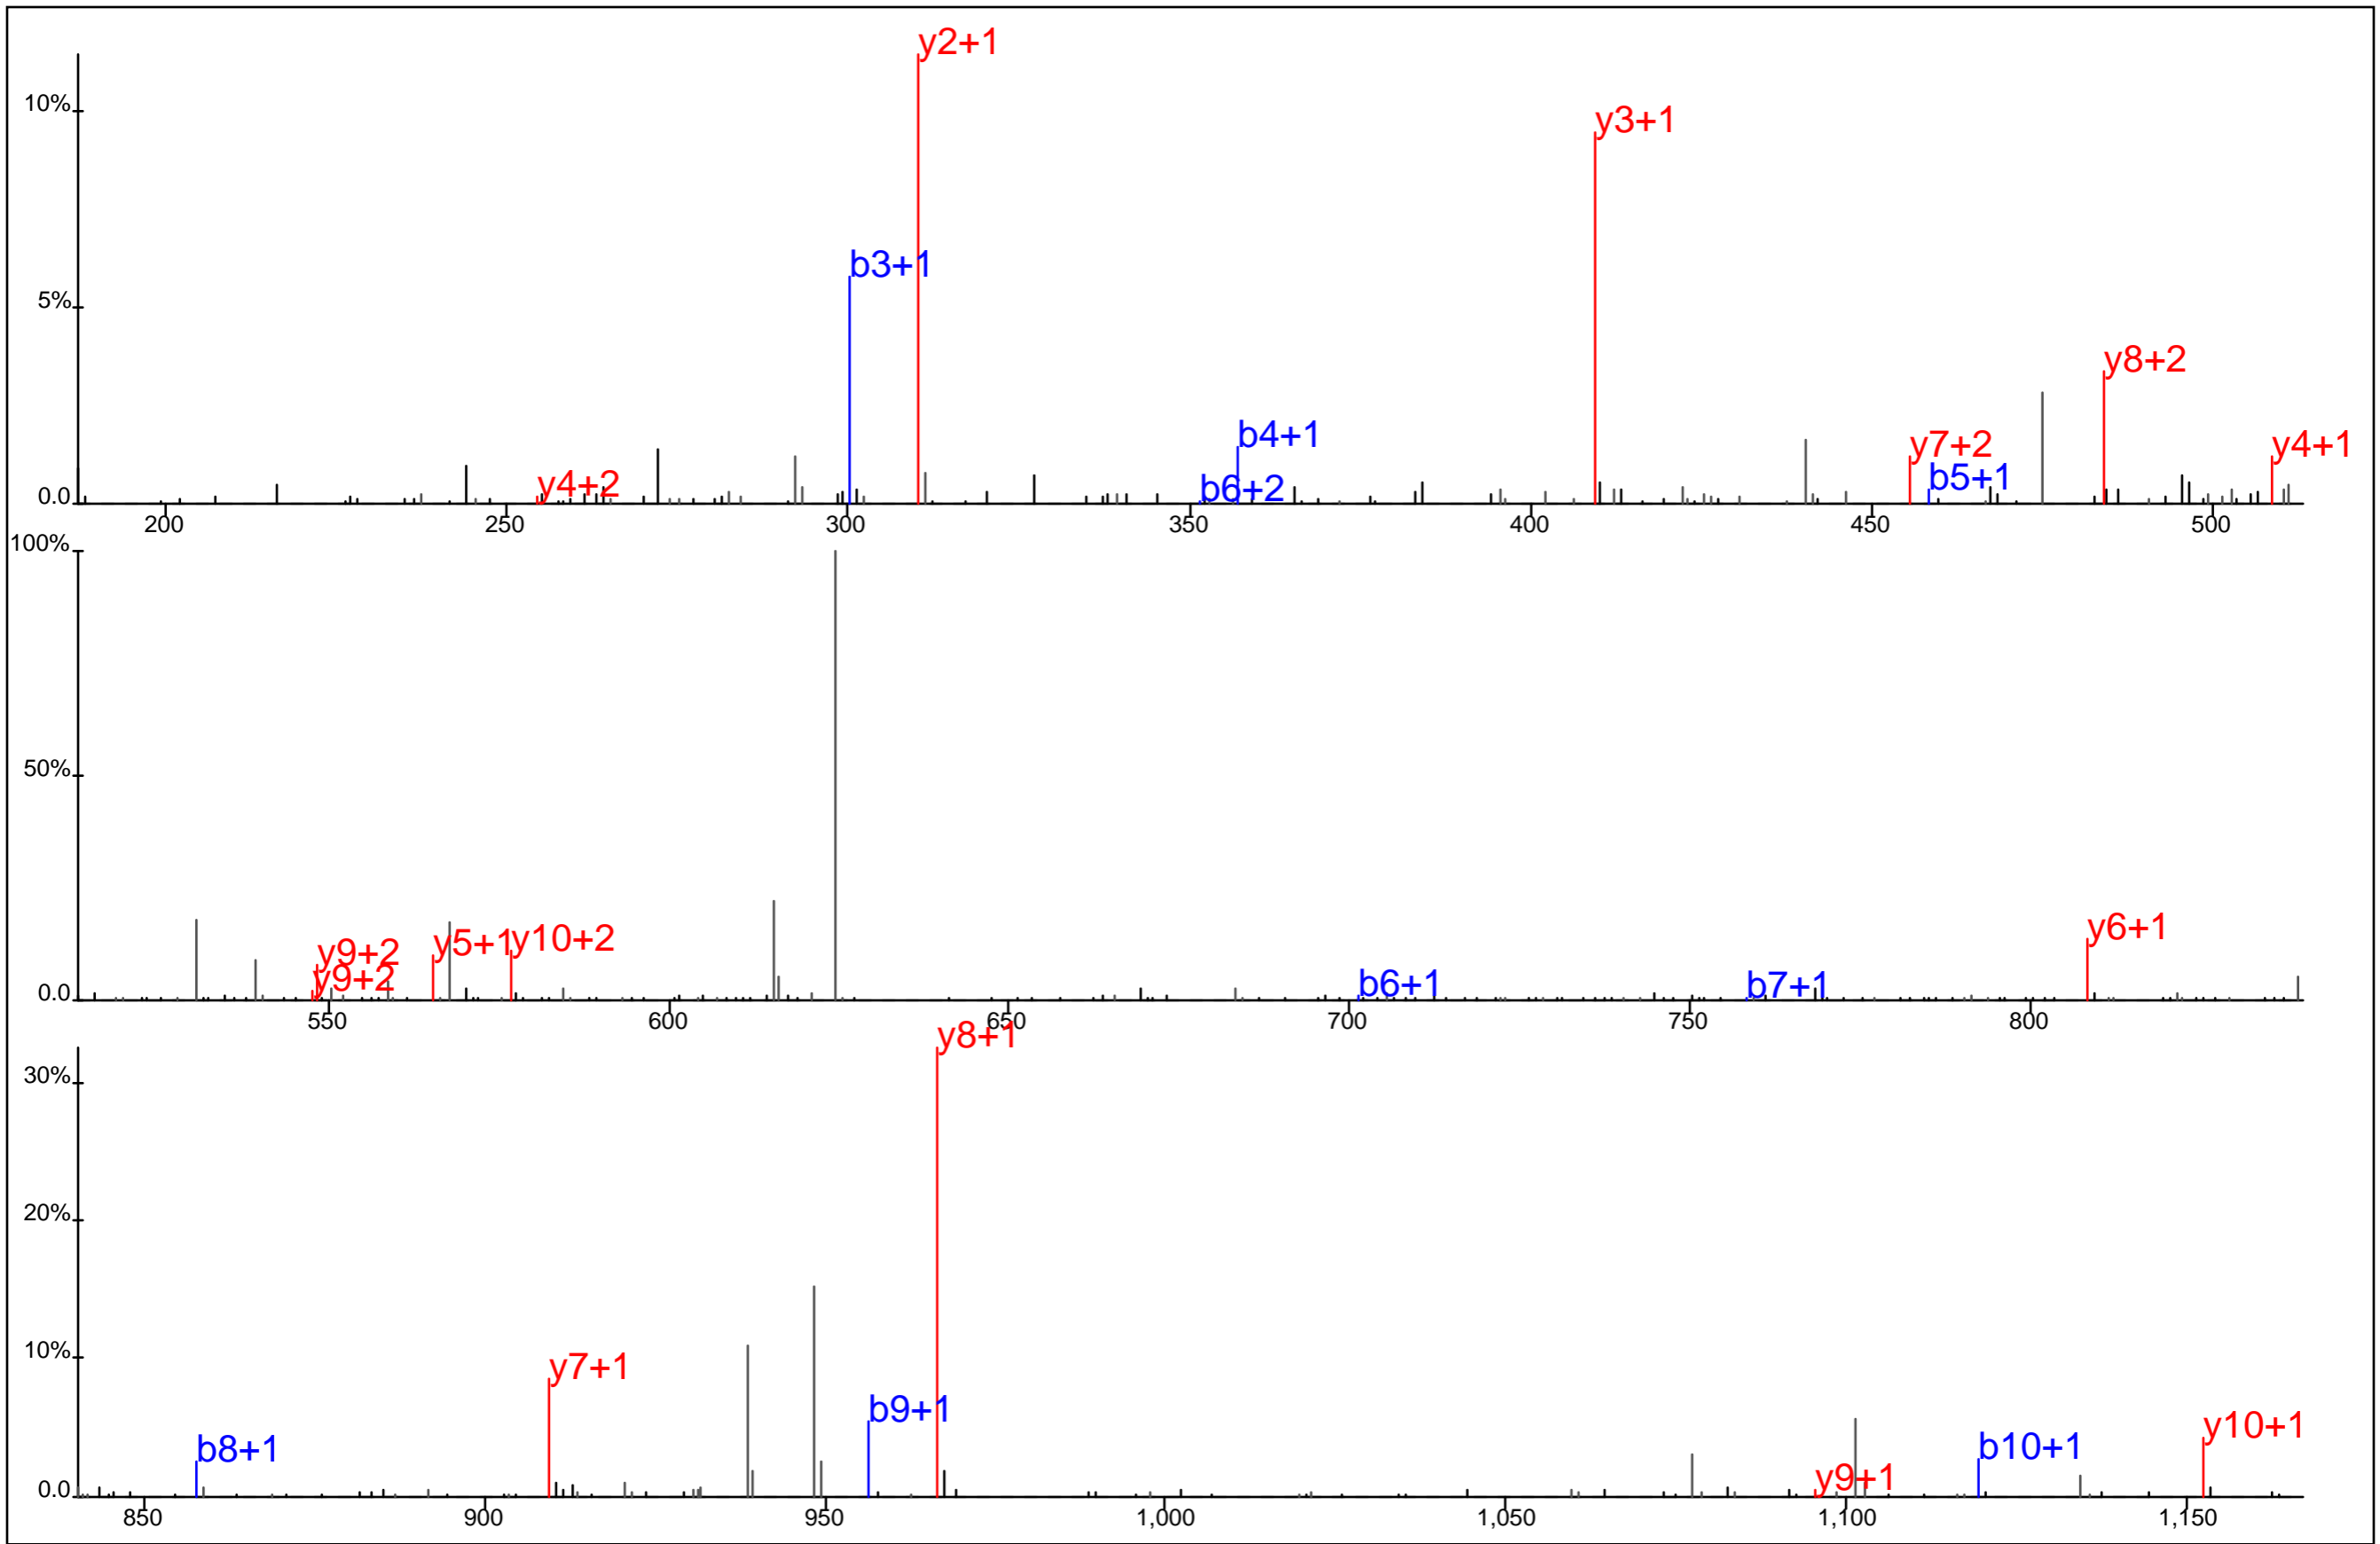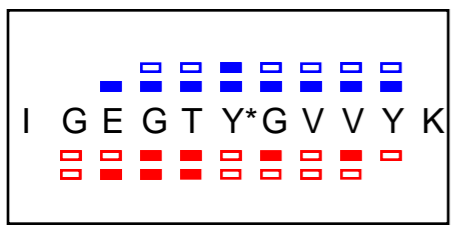

Protein Name: CDC2  
 gi Accession: 24158643  
 Precursor Mass: 633.2942+2  
 Delta Mass: 0.191 ppm  
 XCorr: 44.16

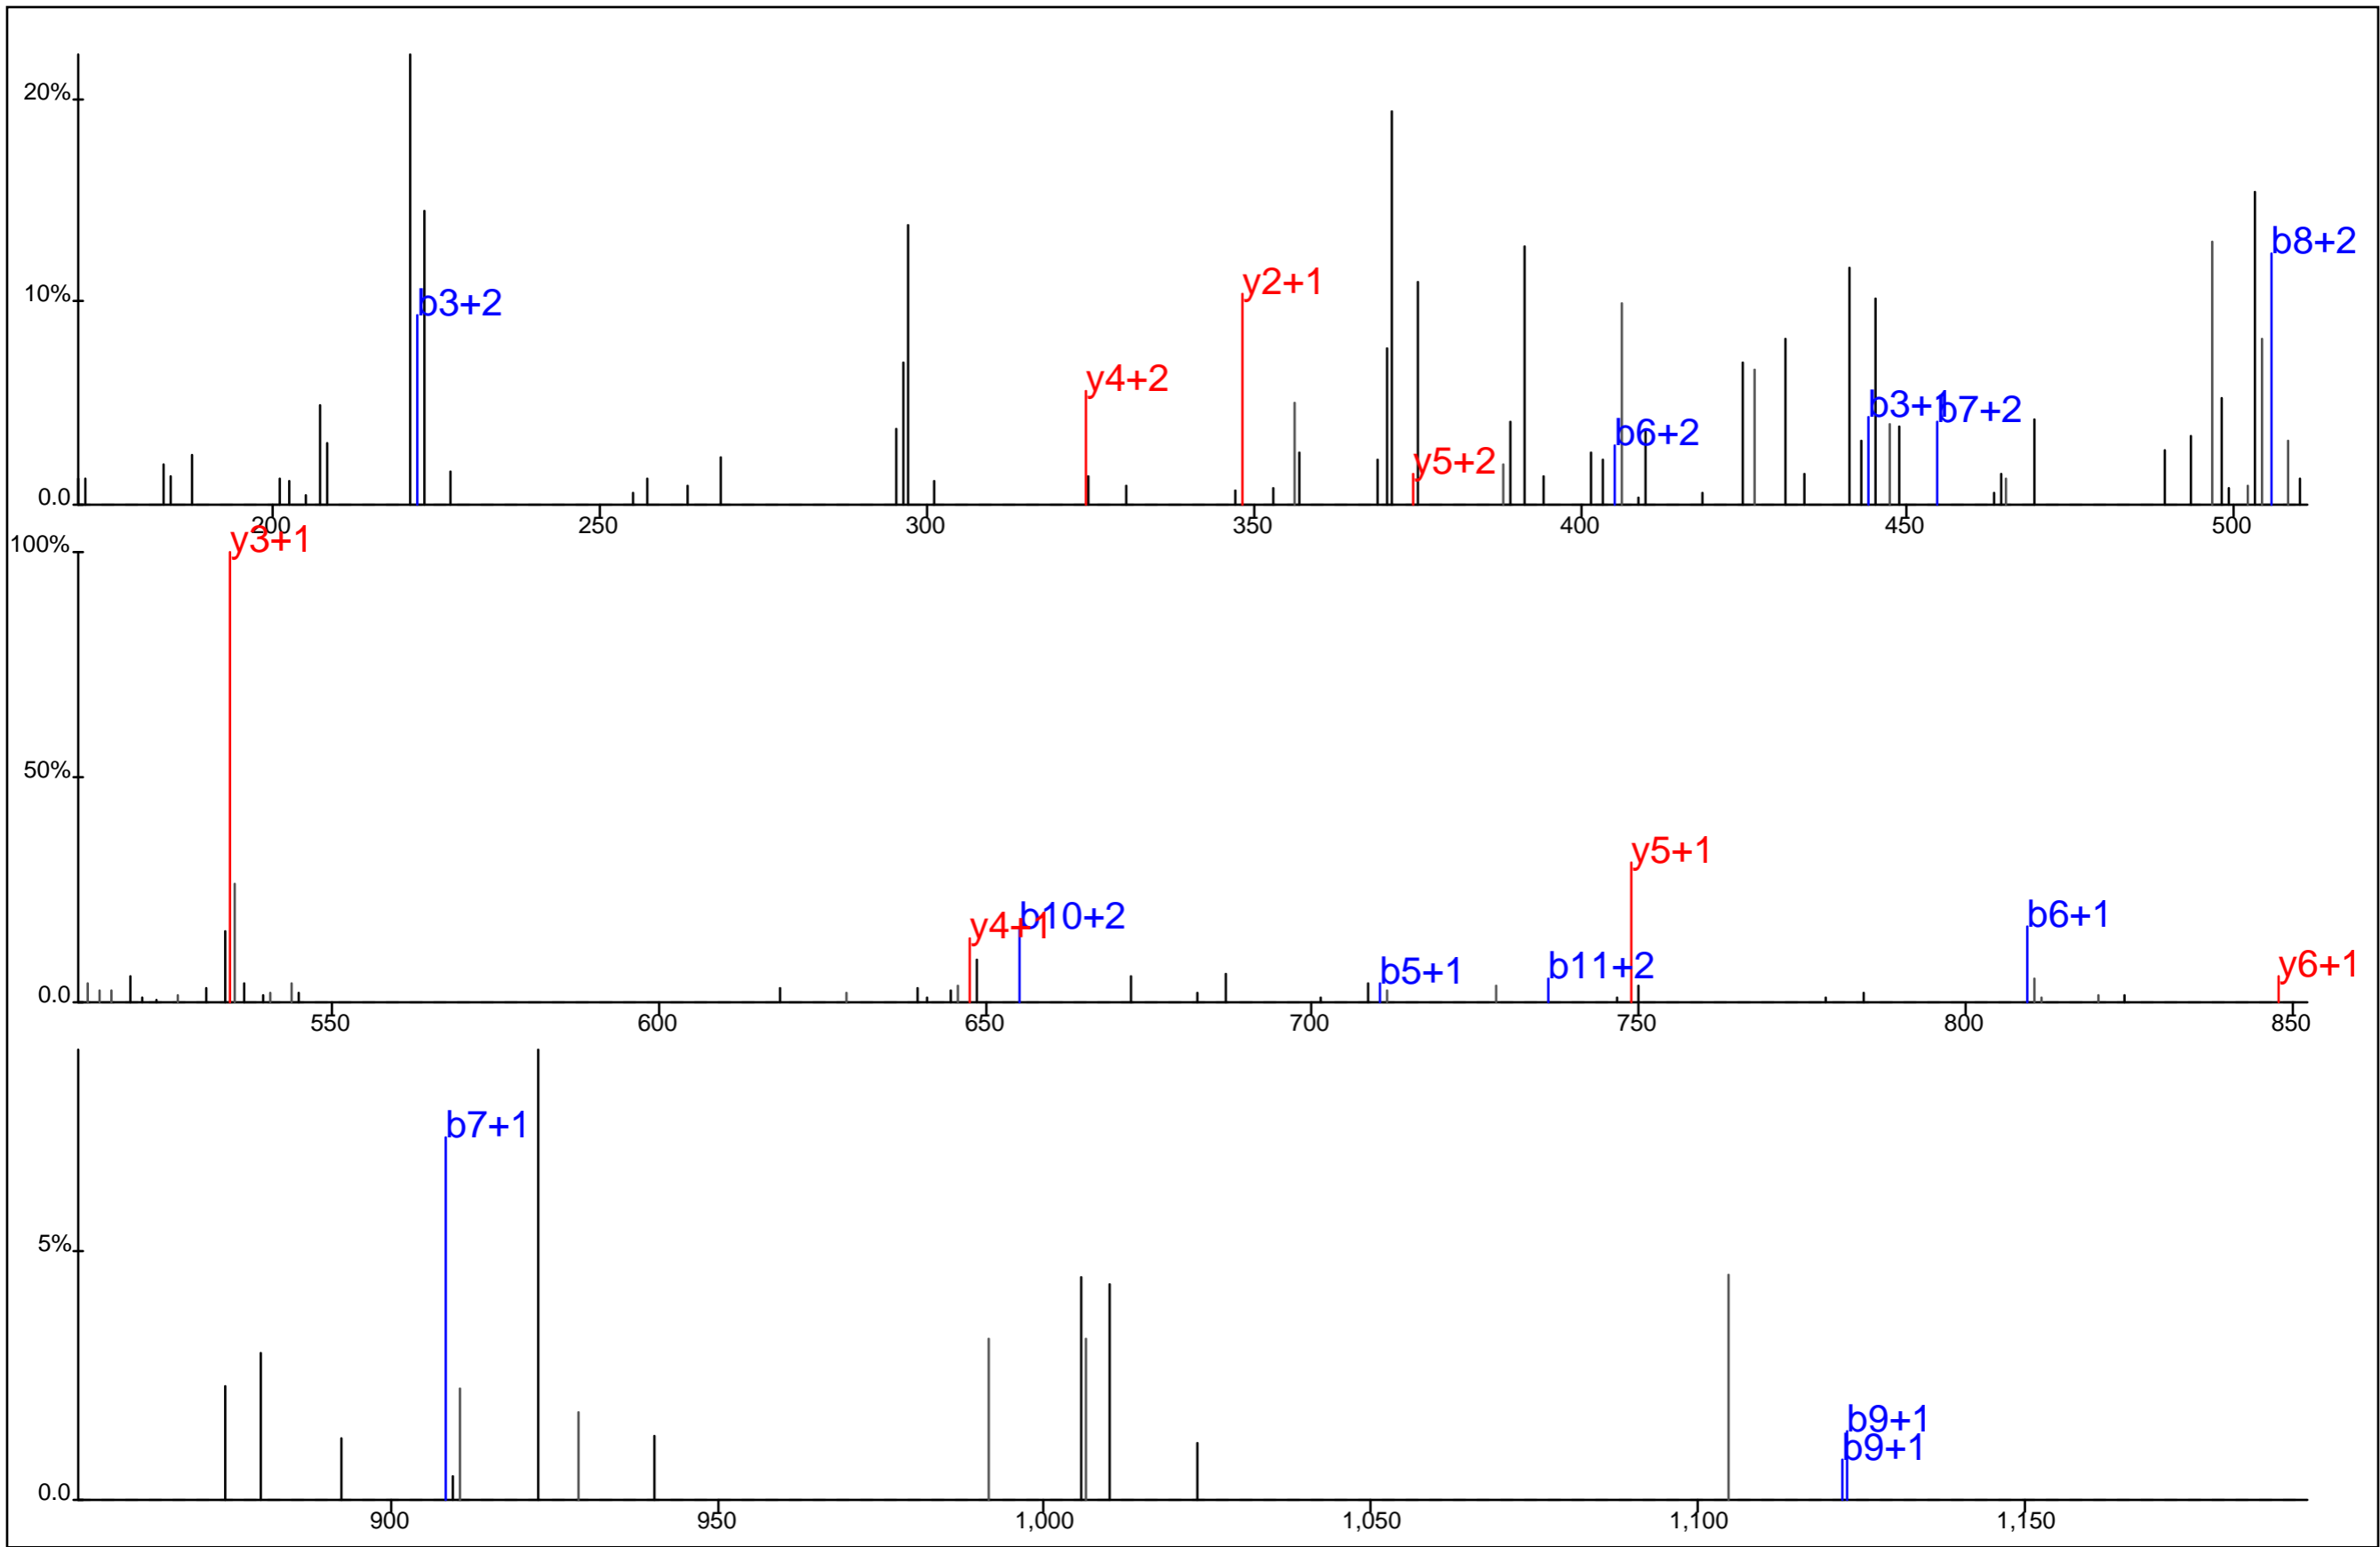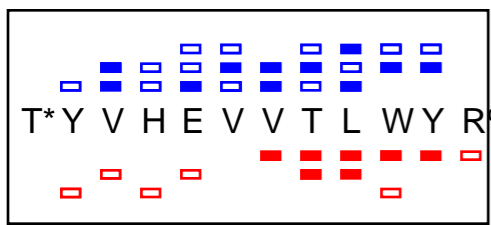

Protein Name: CDC2  
 gi Accession: 24158643  
 Precursor Mass: 552.5995+3  
 Delta Mass: 0.968 ppm  
 XCorr: 19.88

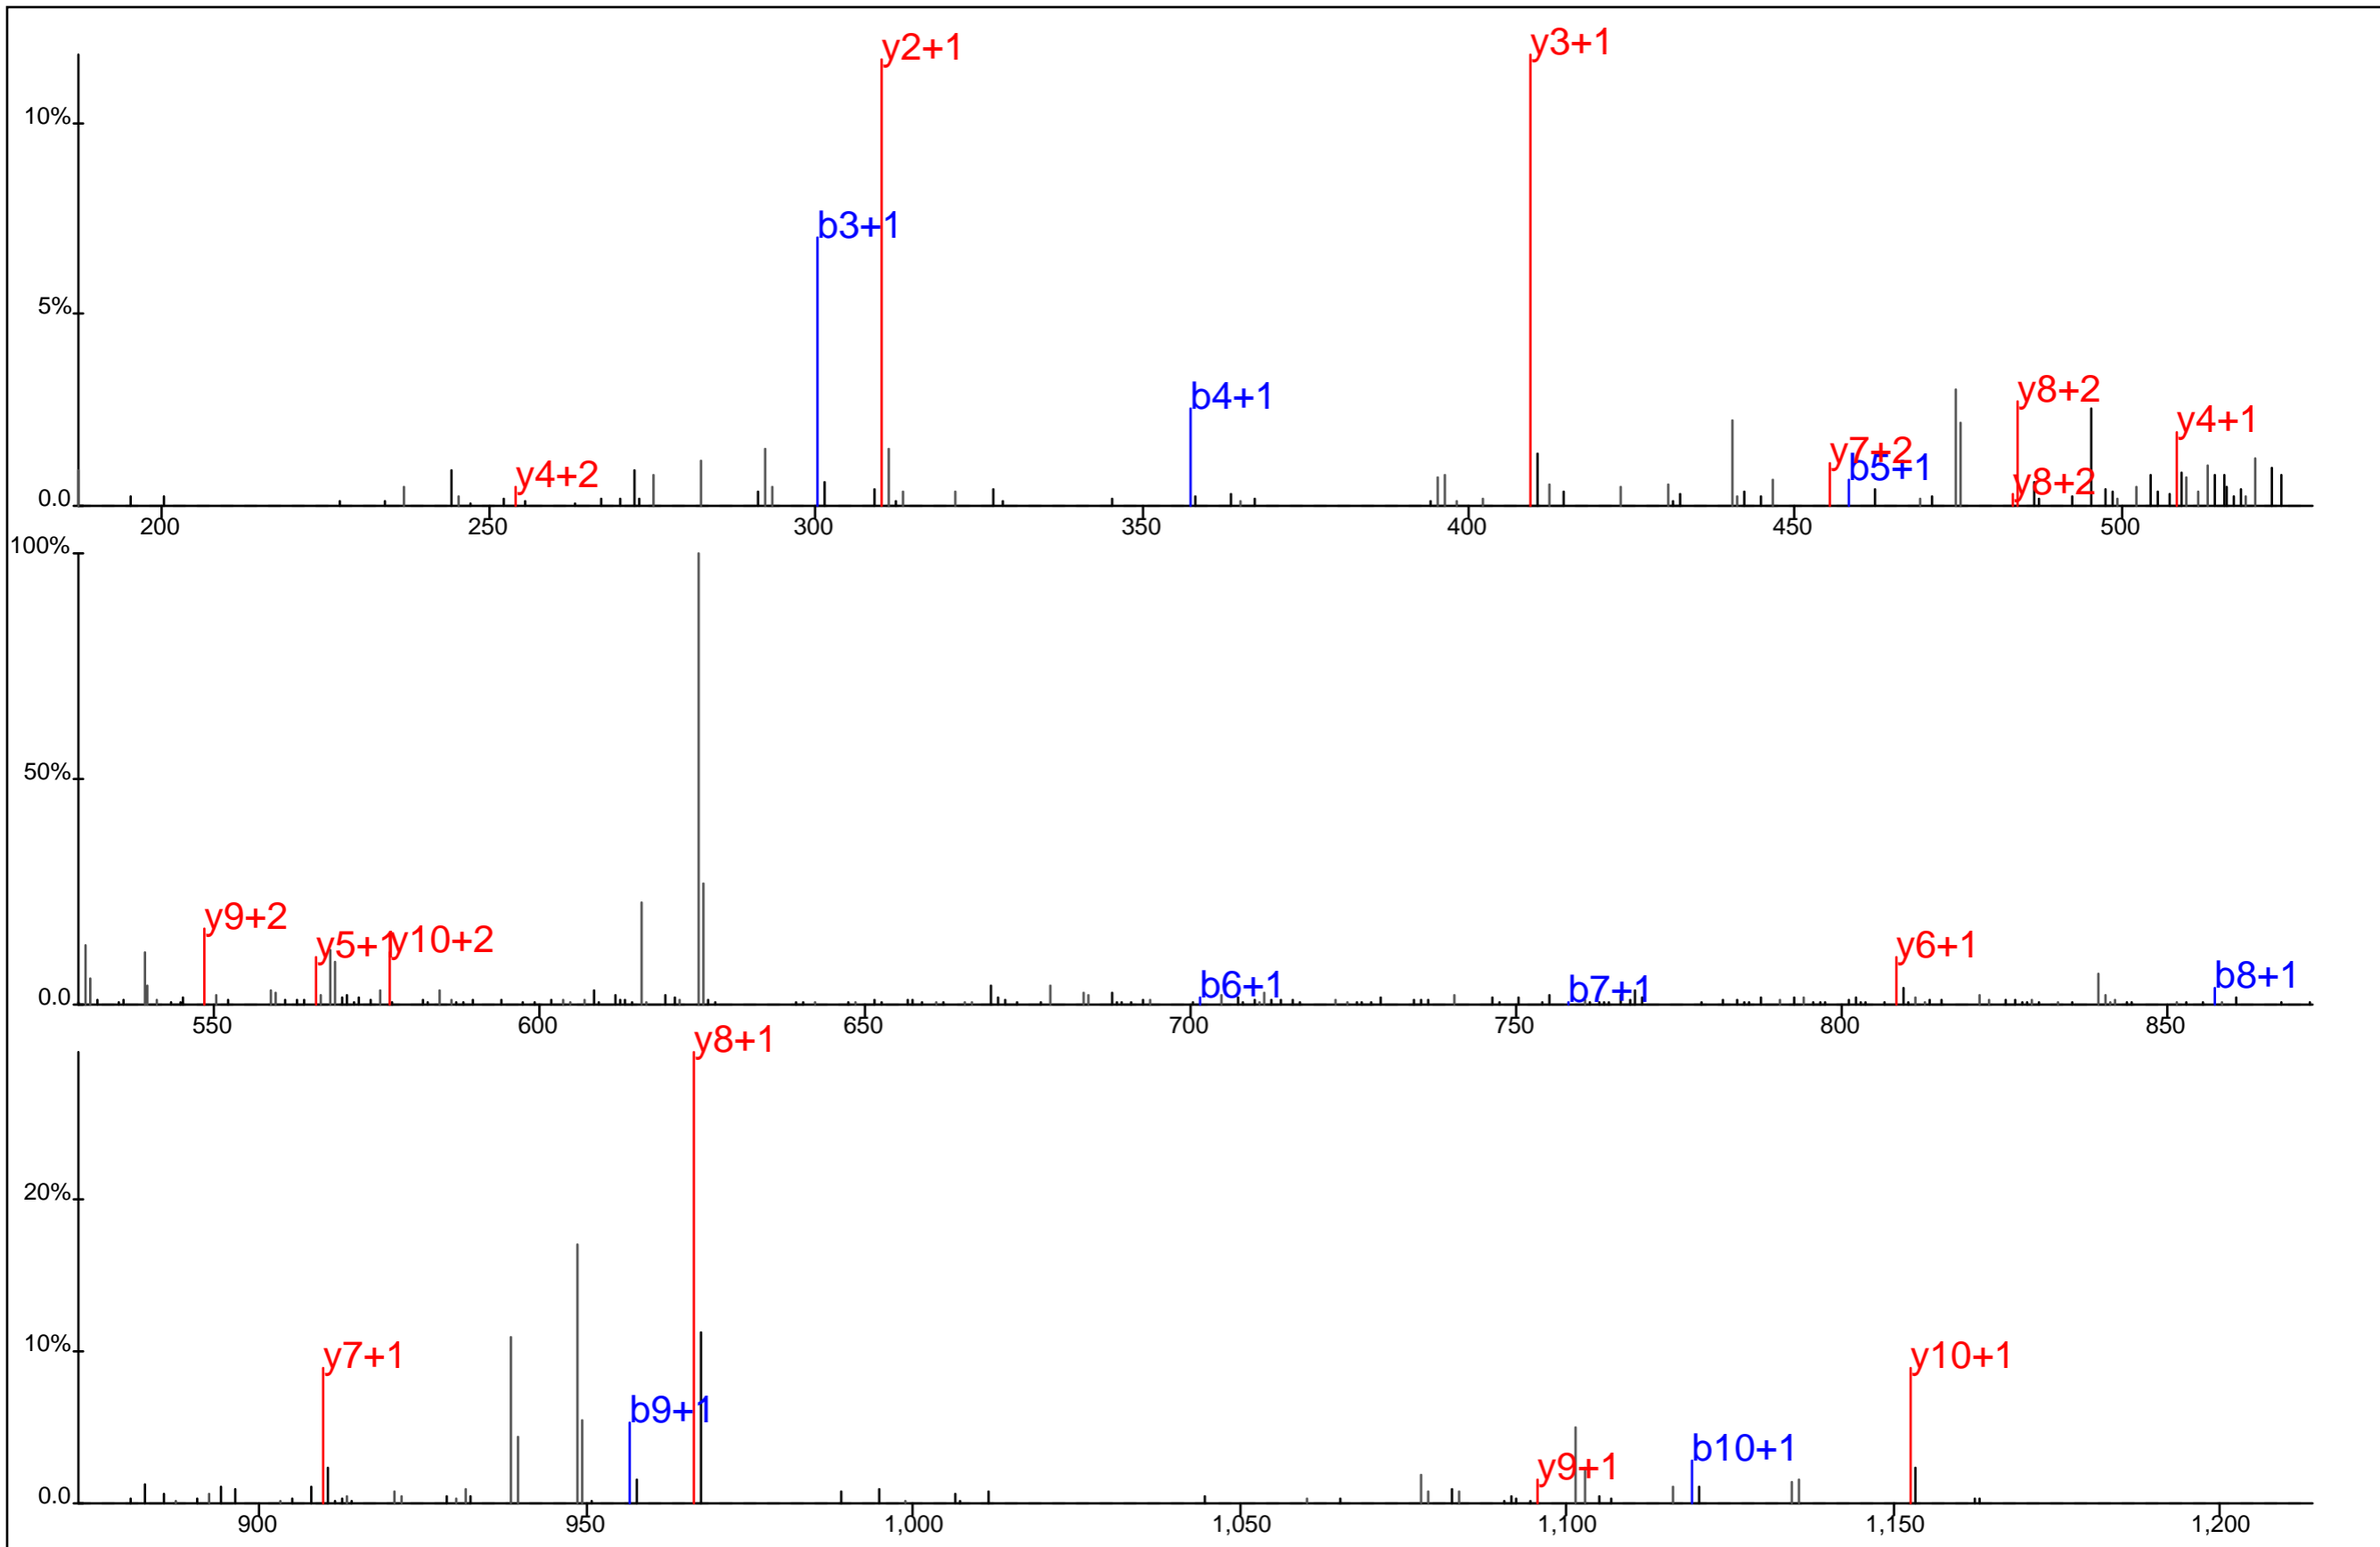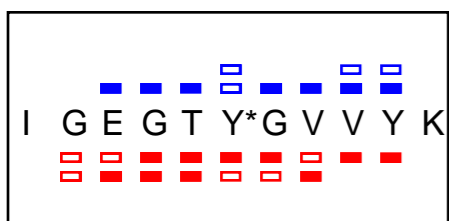

Protein Name: CDC2  
 gi Accession: 24158643  
 Precursor Mass: 633.2962+2  
 Delta Mass: 2.993 ppm  
 XCorr: 43.55

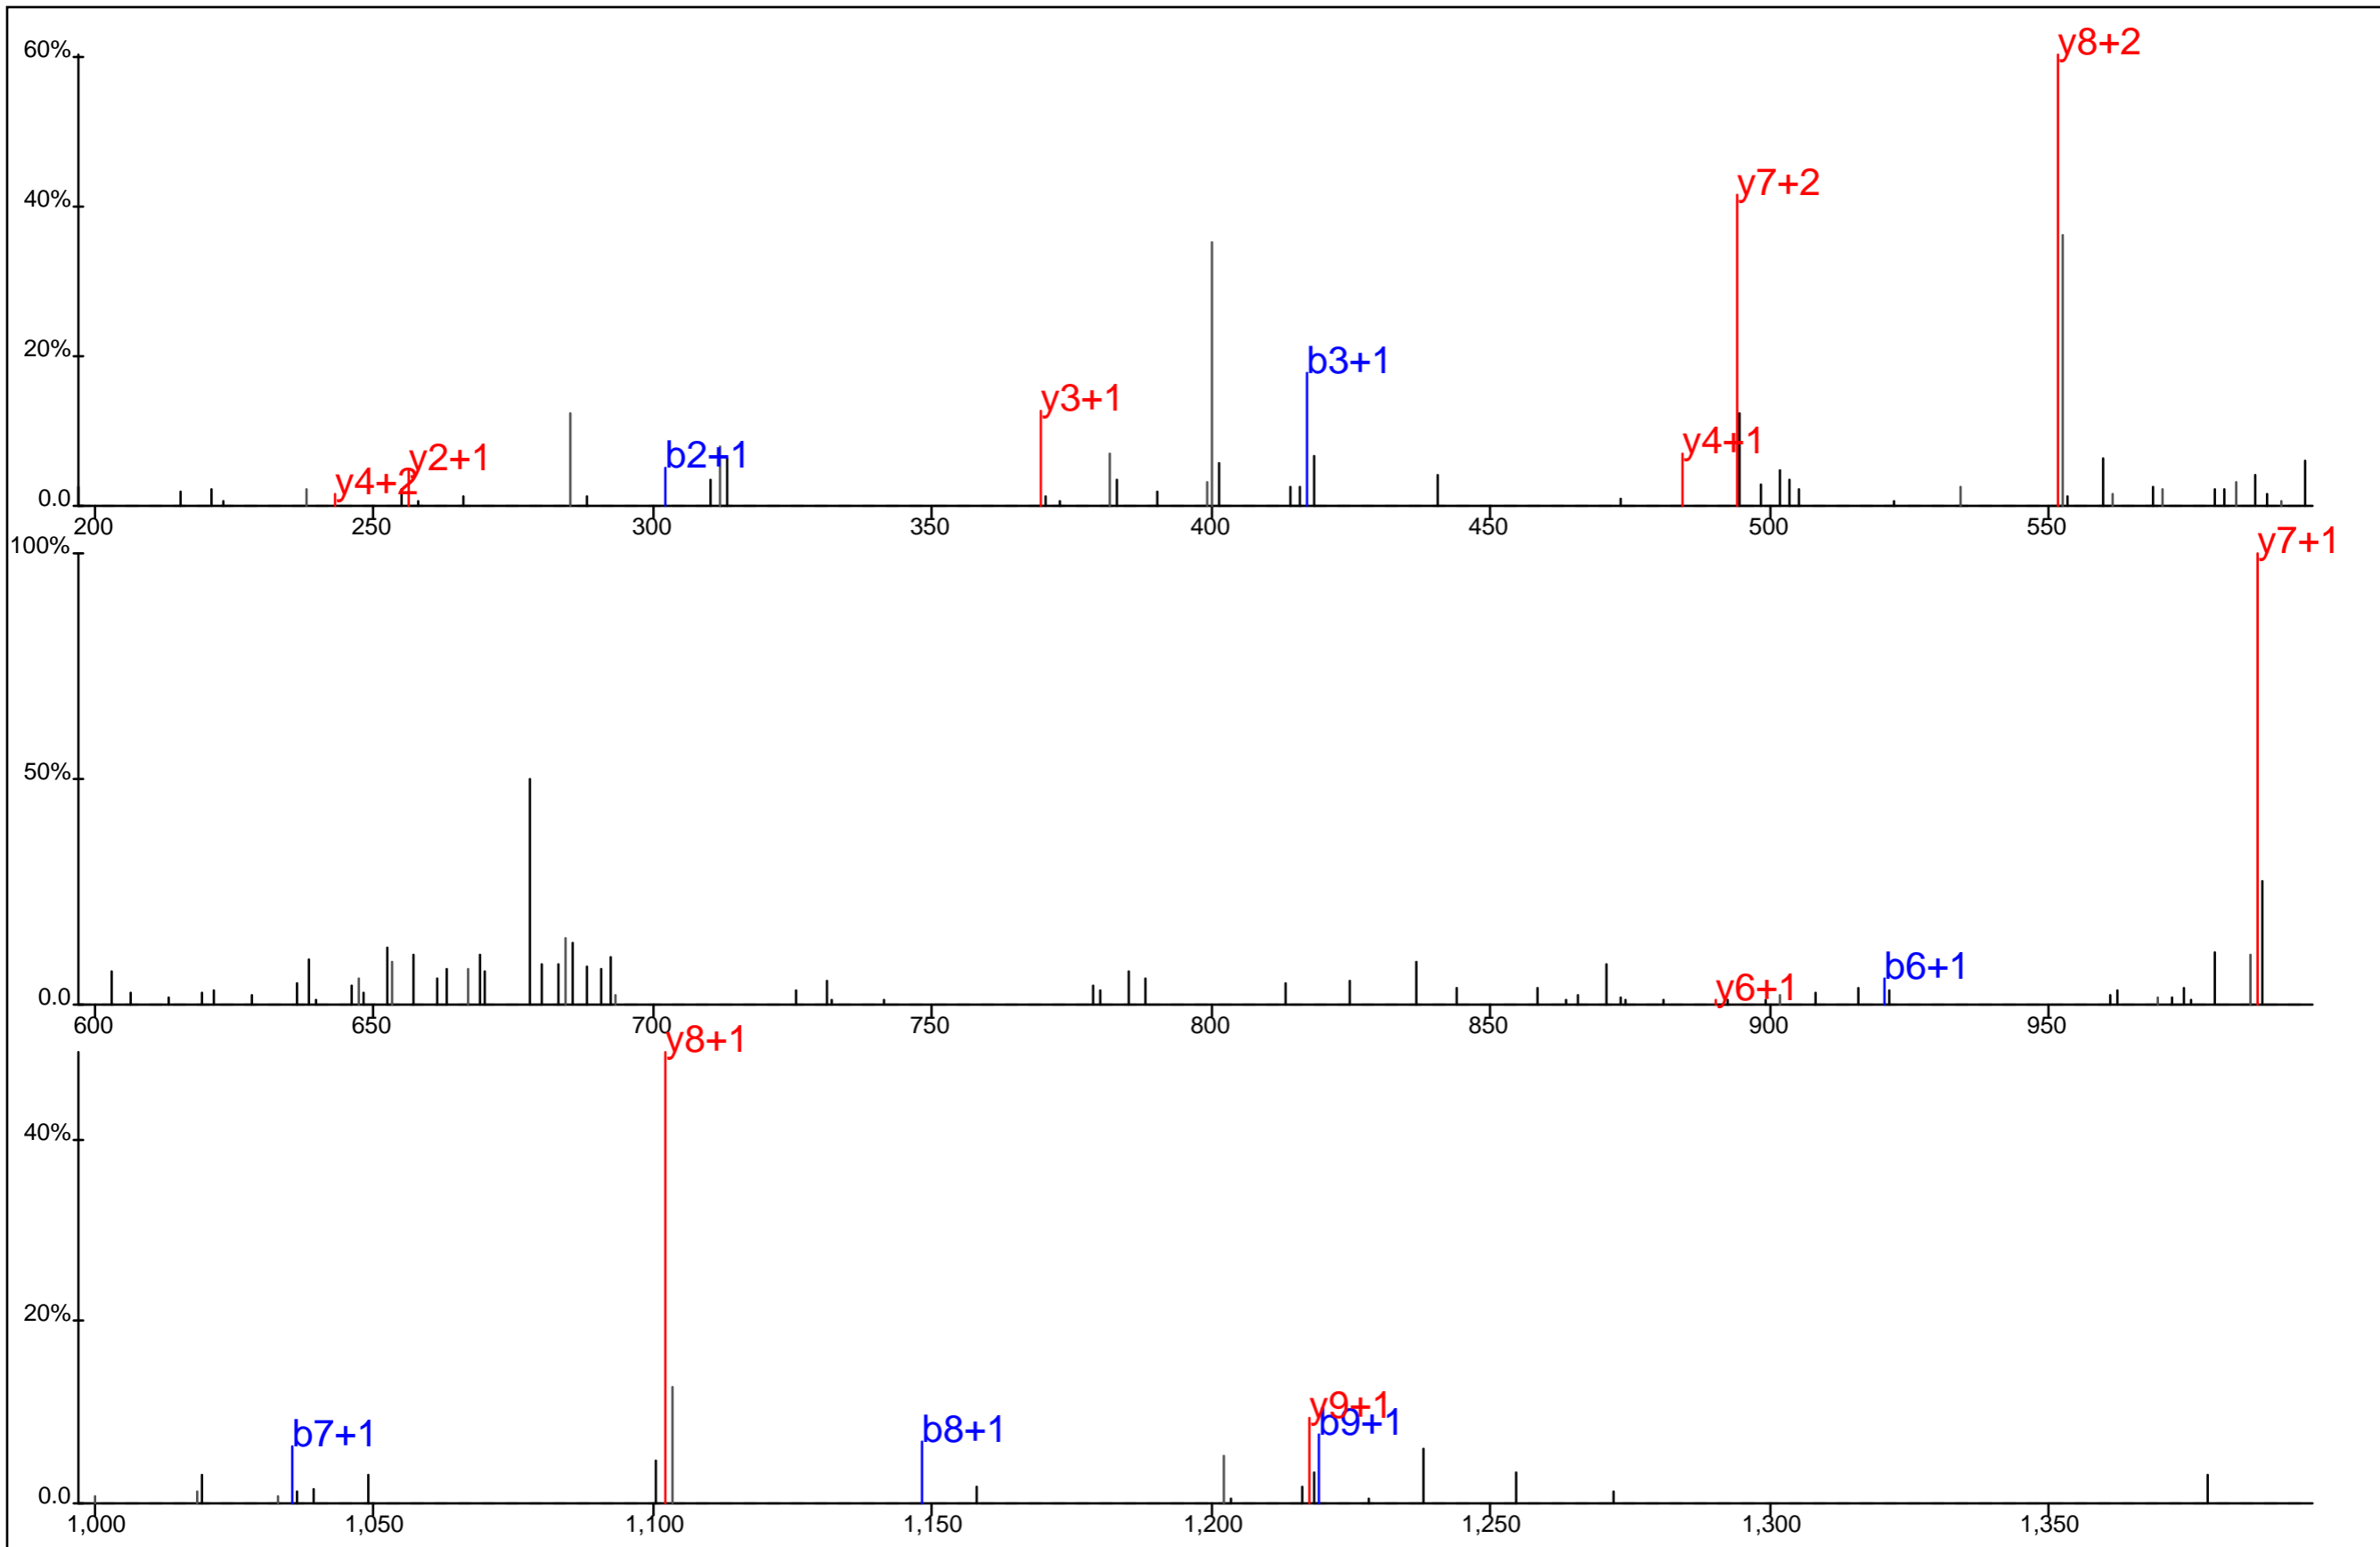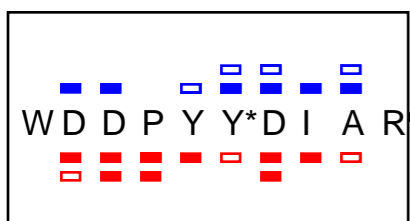

Protein Name: CDC42GAP  
 gi Accession: 4757766  
 Precursor Mass: 702.2848+2  
 Delta Mass: 5.720 ppm  
 XCorr: 18.66

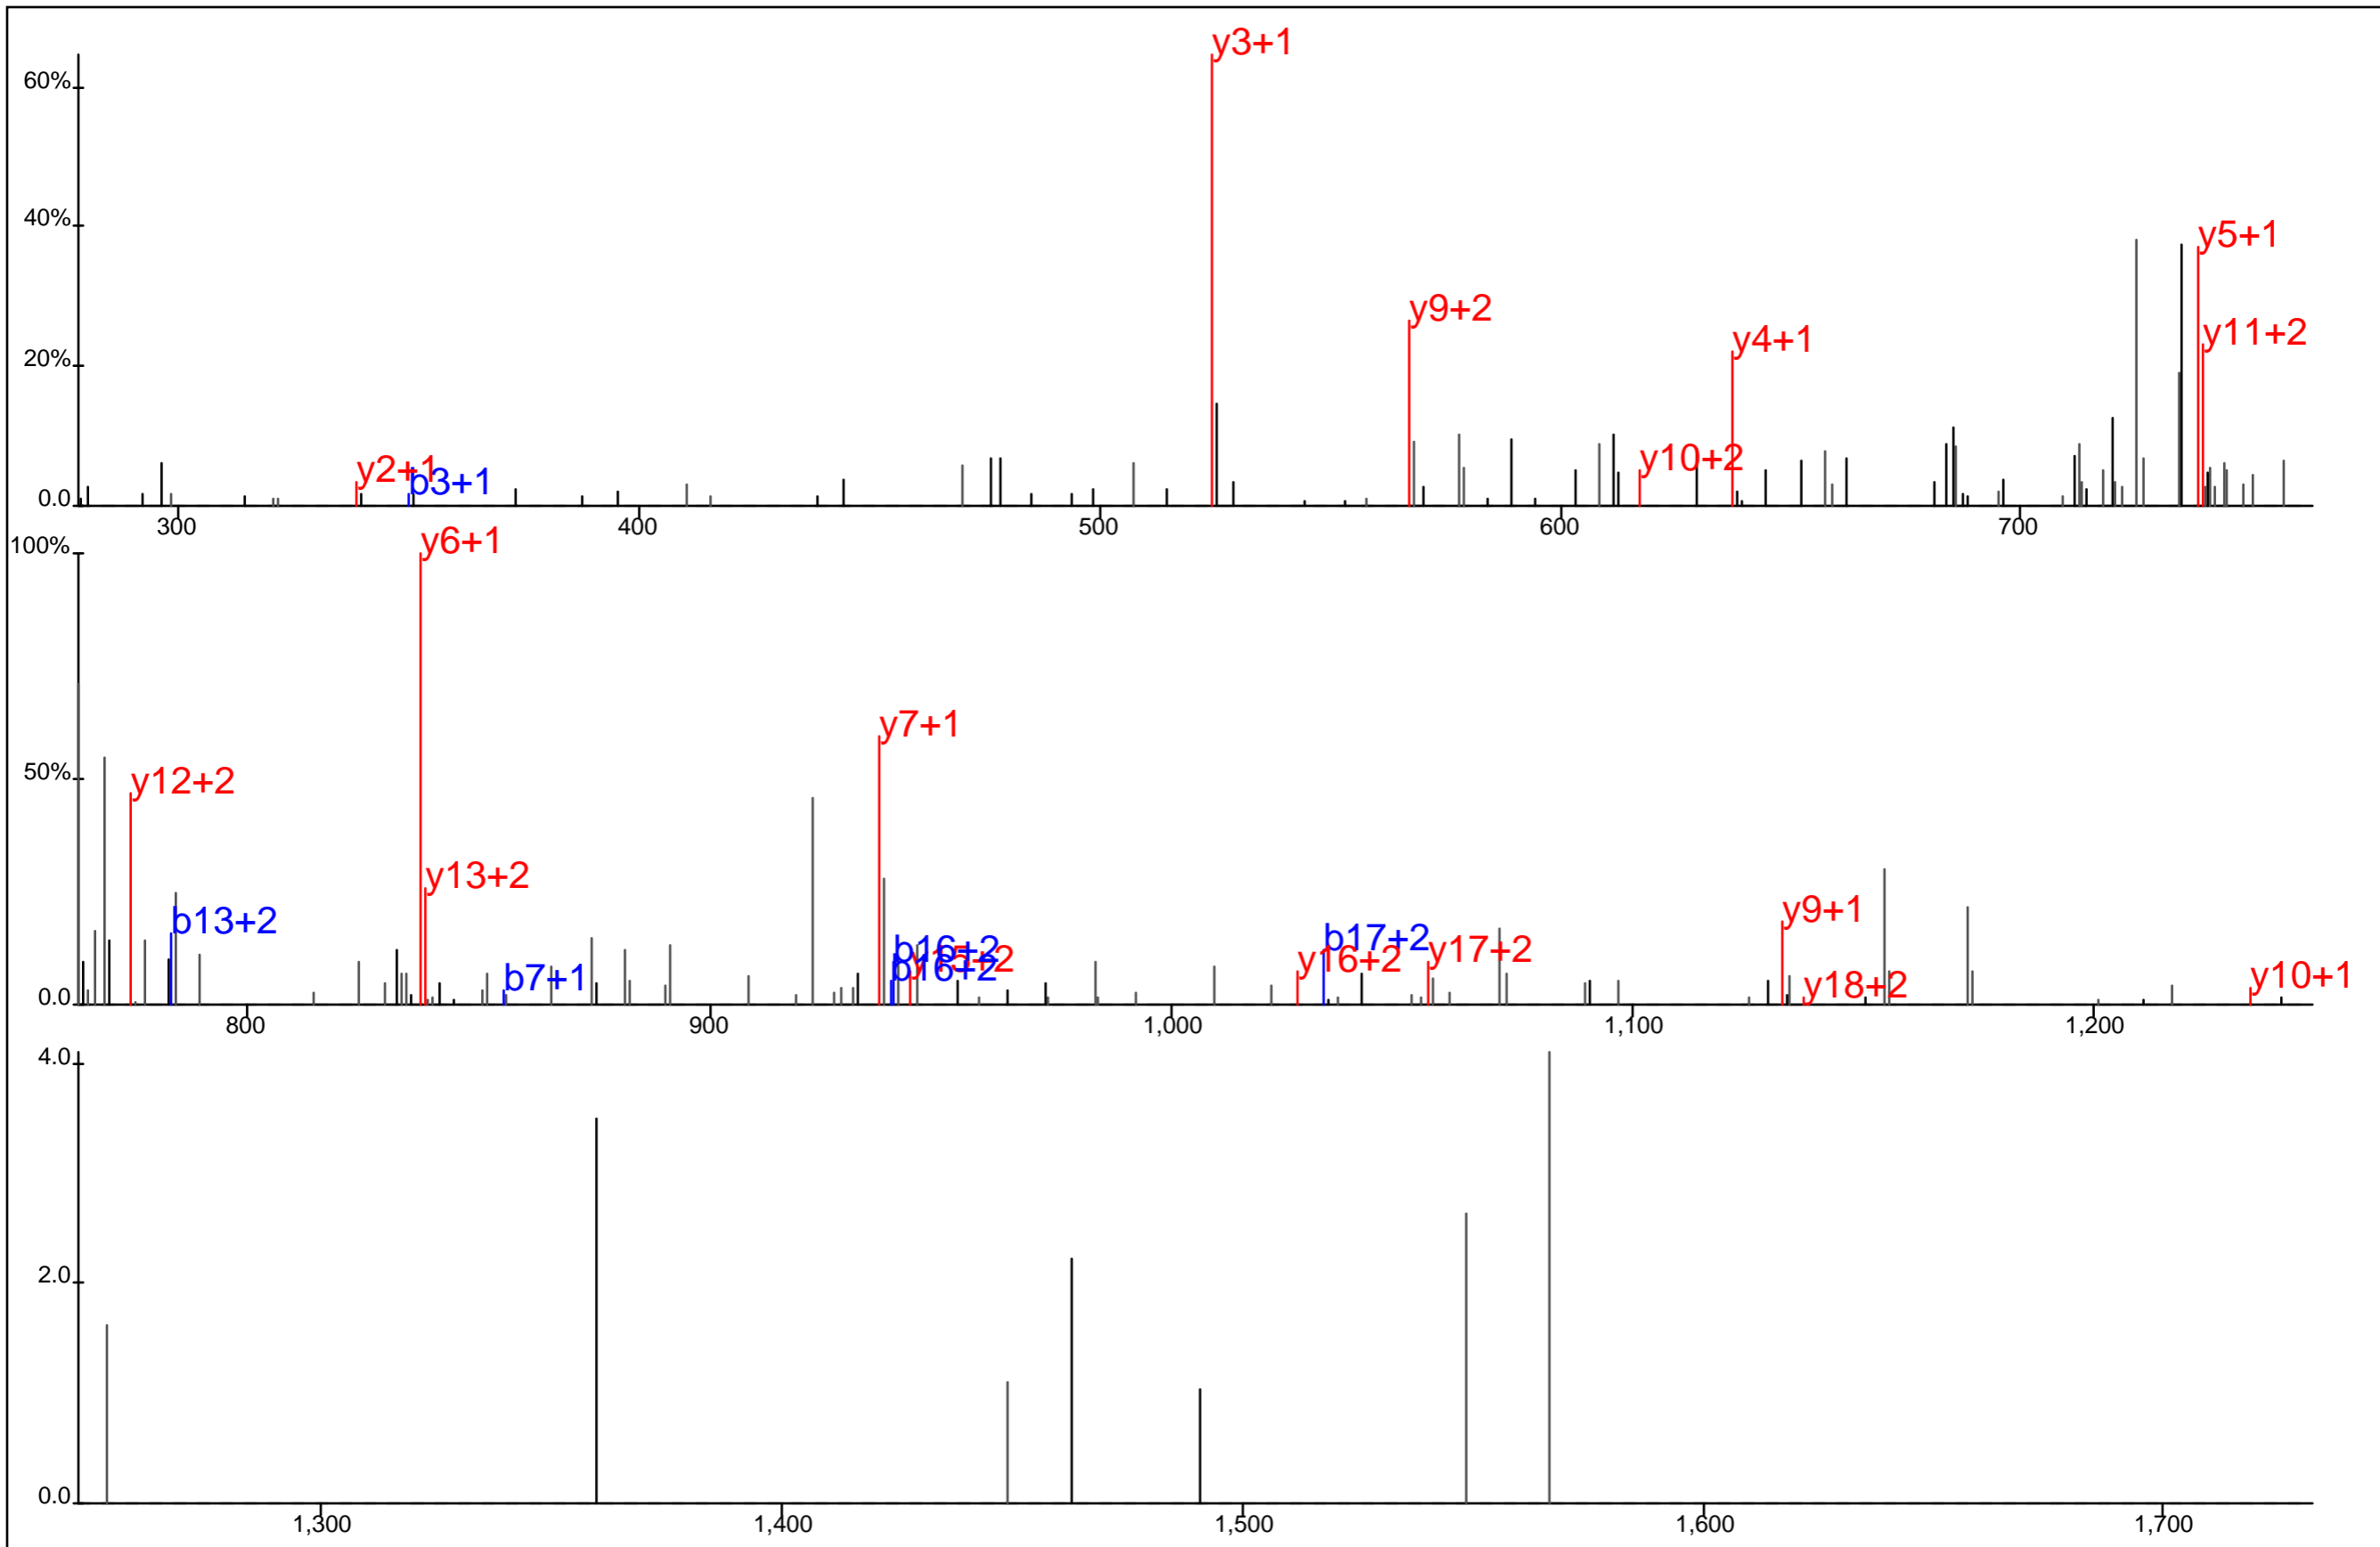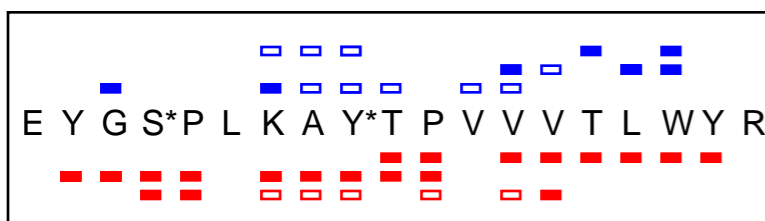

Protein Name: CDK11  
 gi Accession: 34978359  
 Precursor Mass: 801.3840+3  
 Delta Mass: 5.931 ppm  
 XCorr: 27.21



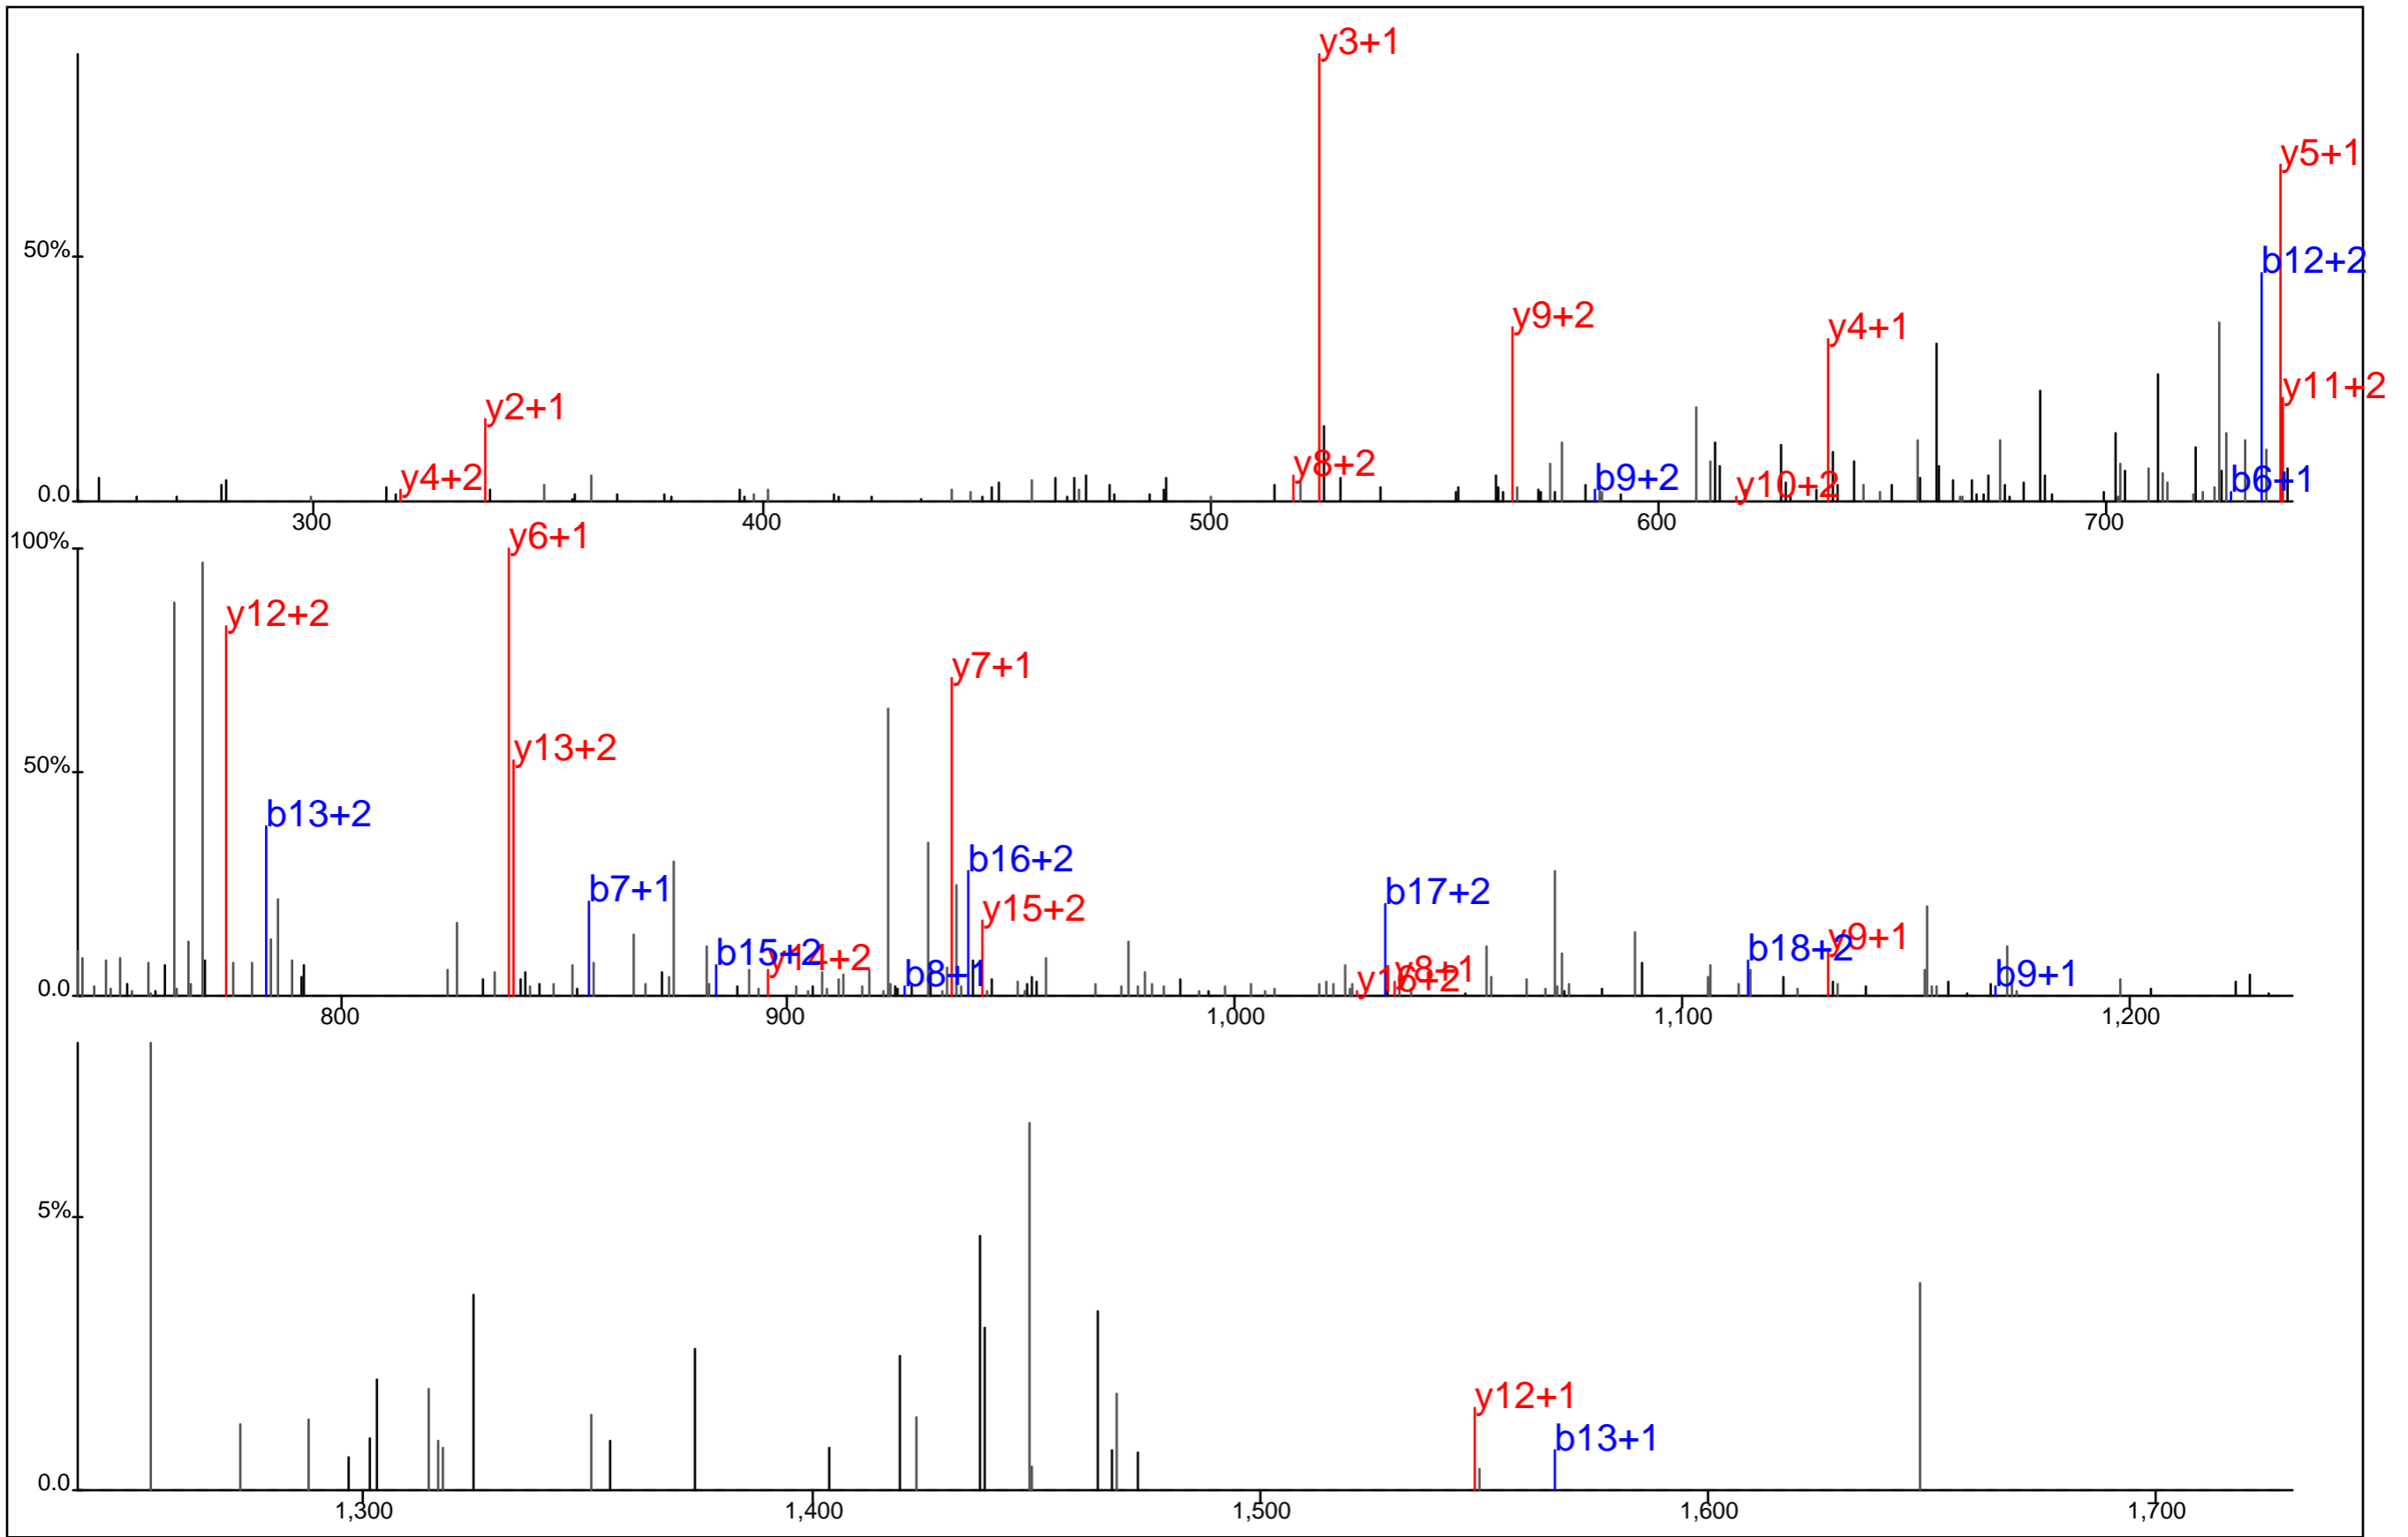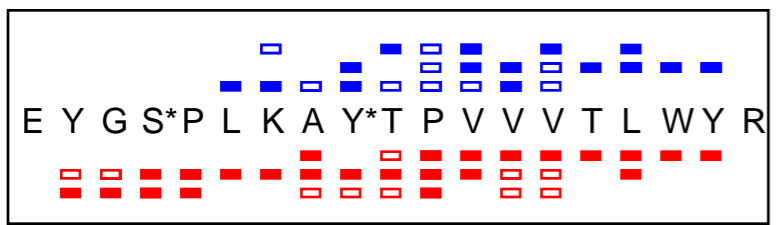

Protein Name: CDK11  
 gi Accession: 34978359  
 Precursor Mass: 801.3823+3  
 Delta Mass: 3.796 ppm  
 XCorr: 29.05

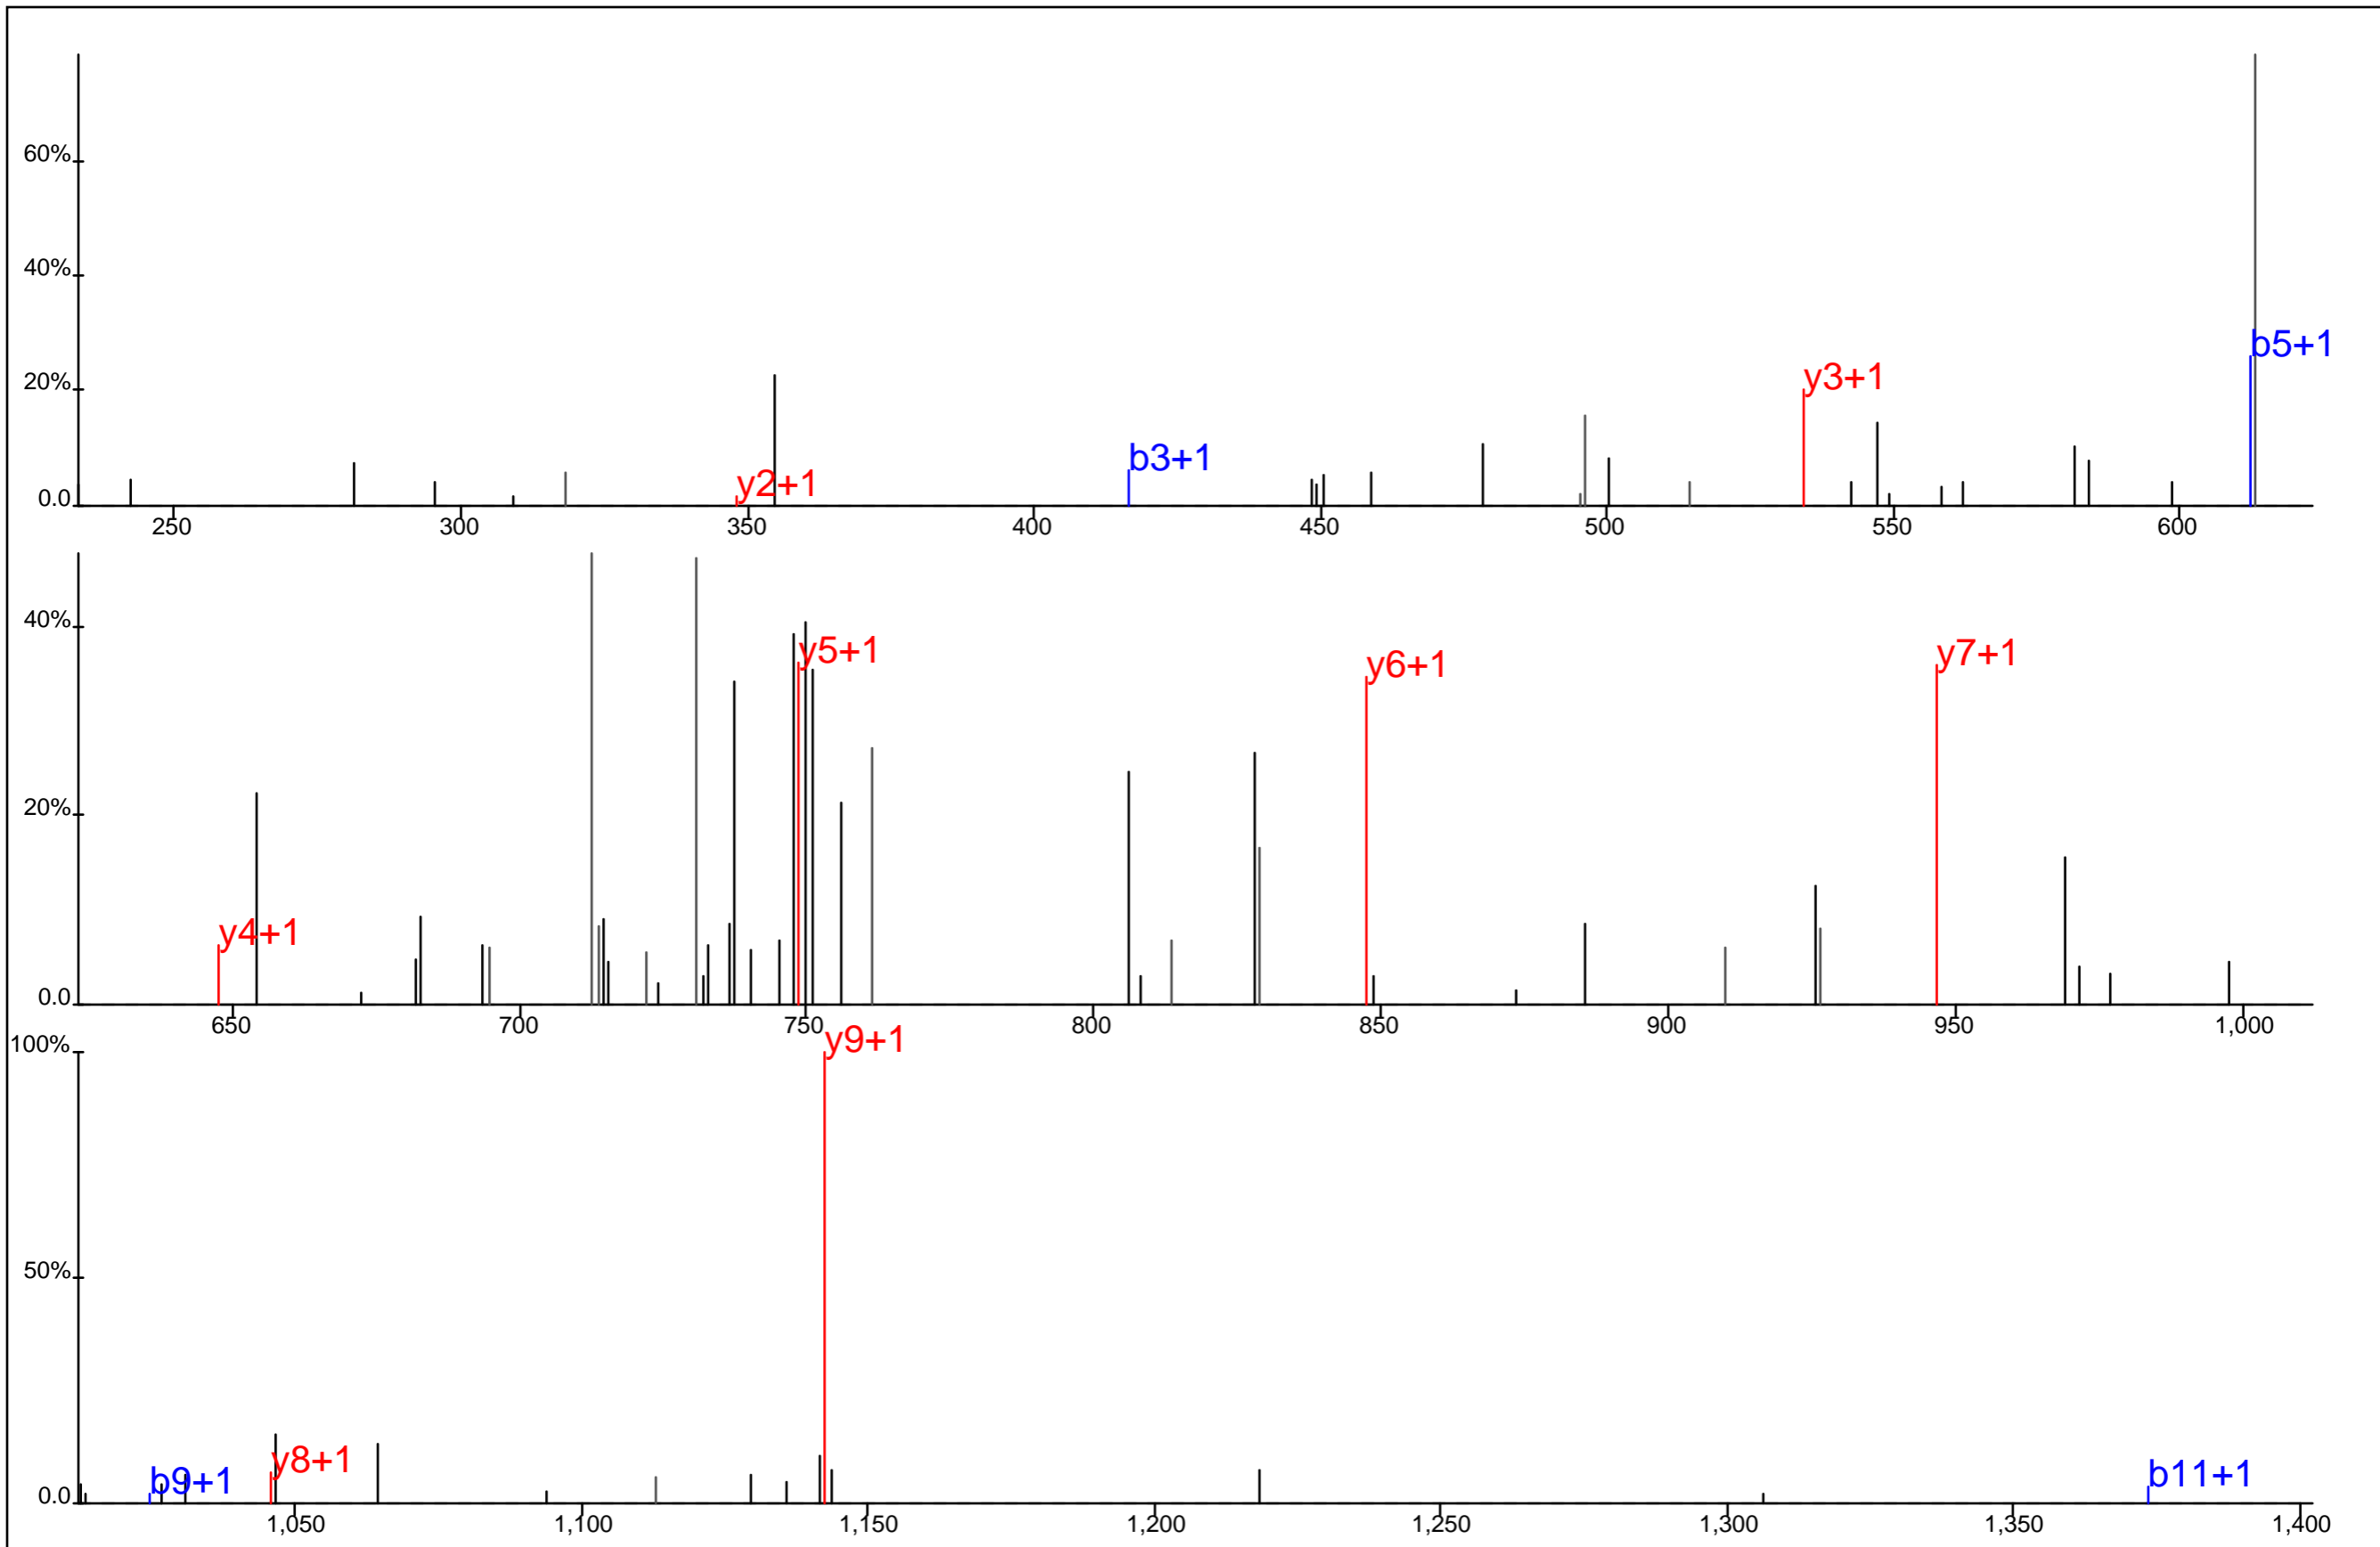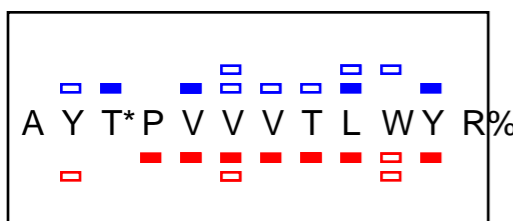

Protein Name: CDK11  
 gi Accession: 34978359  
 Precursor Mass: 779.4008+2  
 Delta Mass: 12.953 ppm  
 XCorr: 31.52

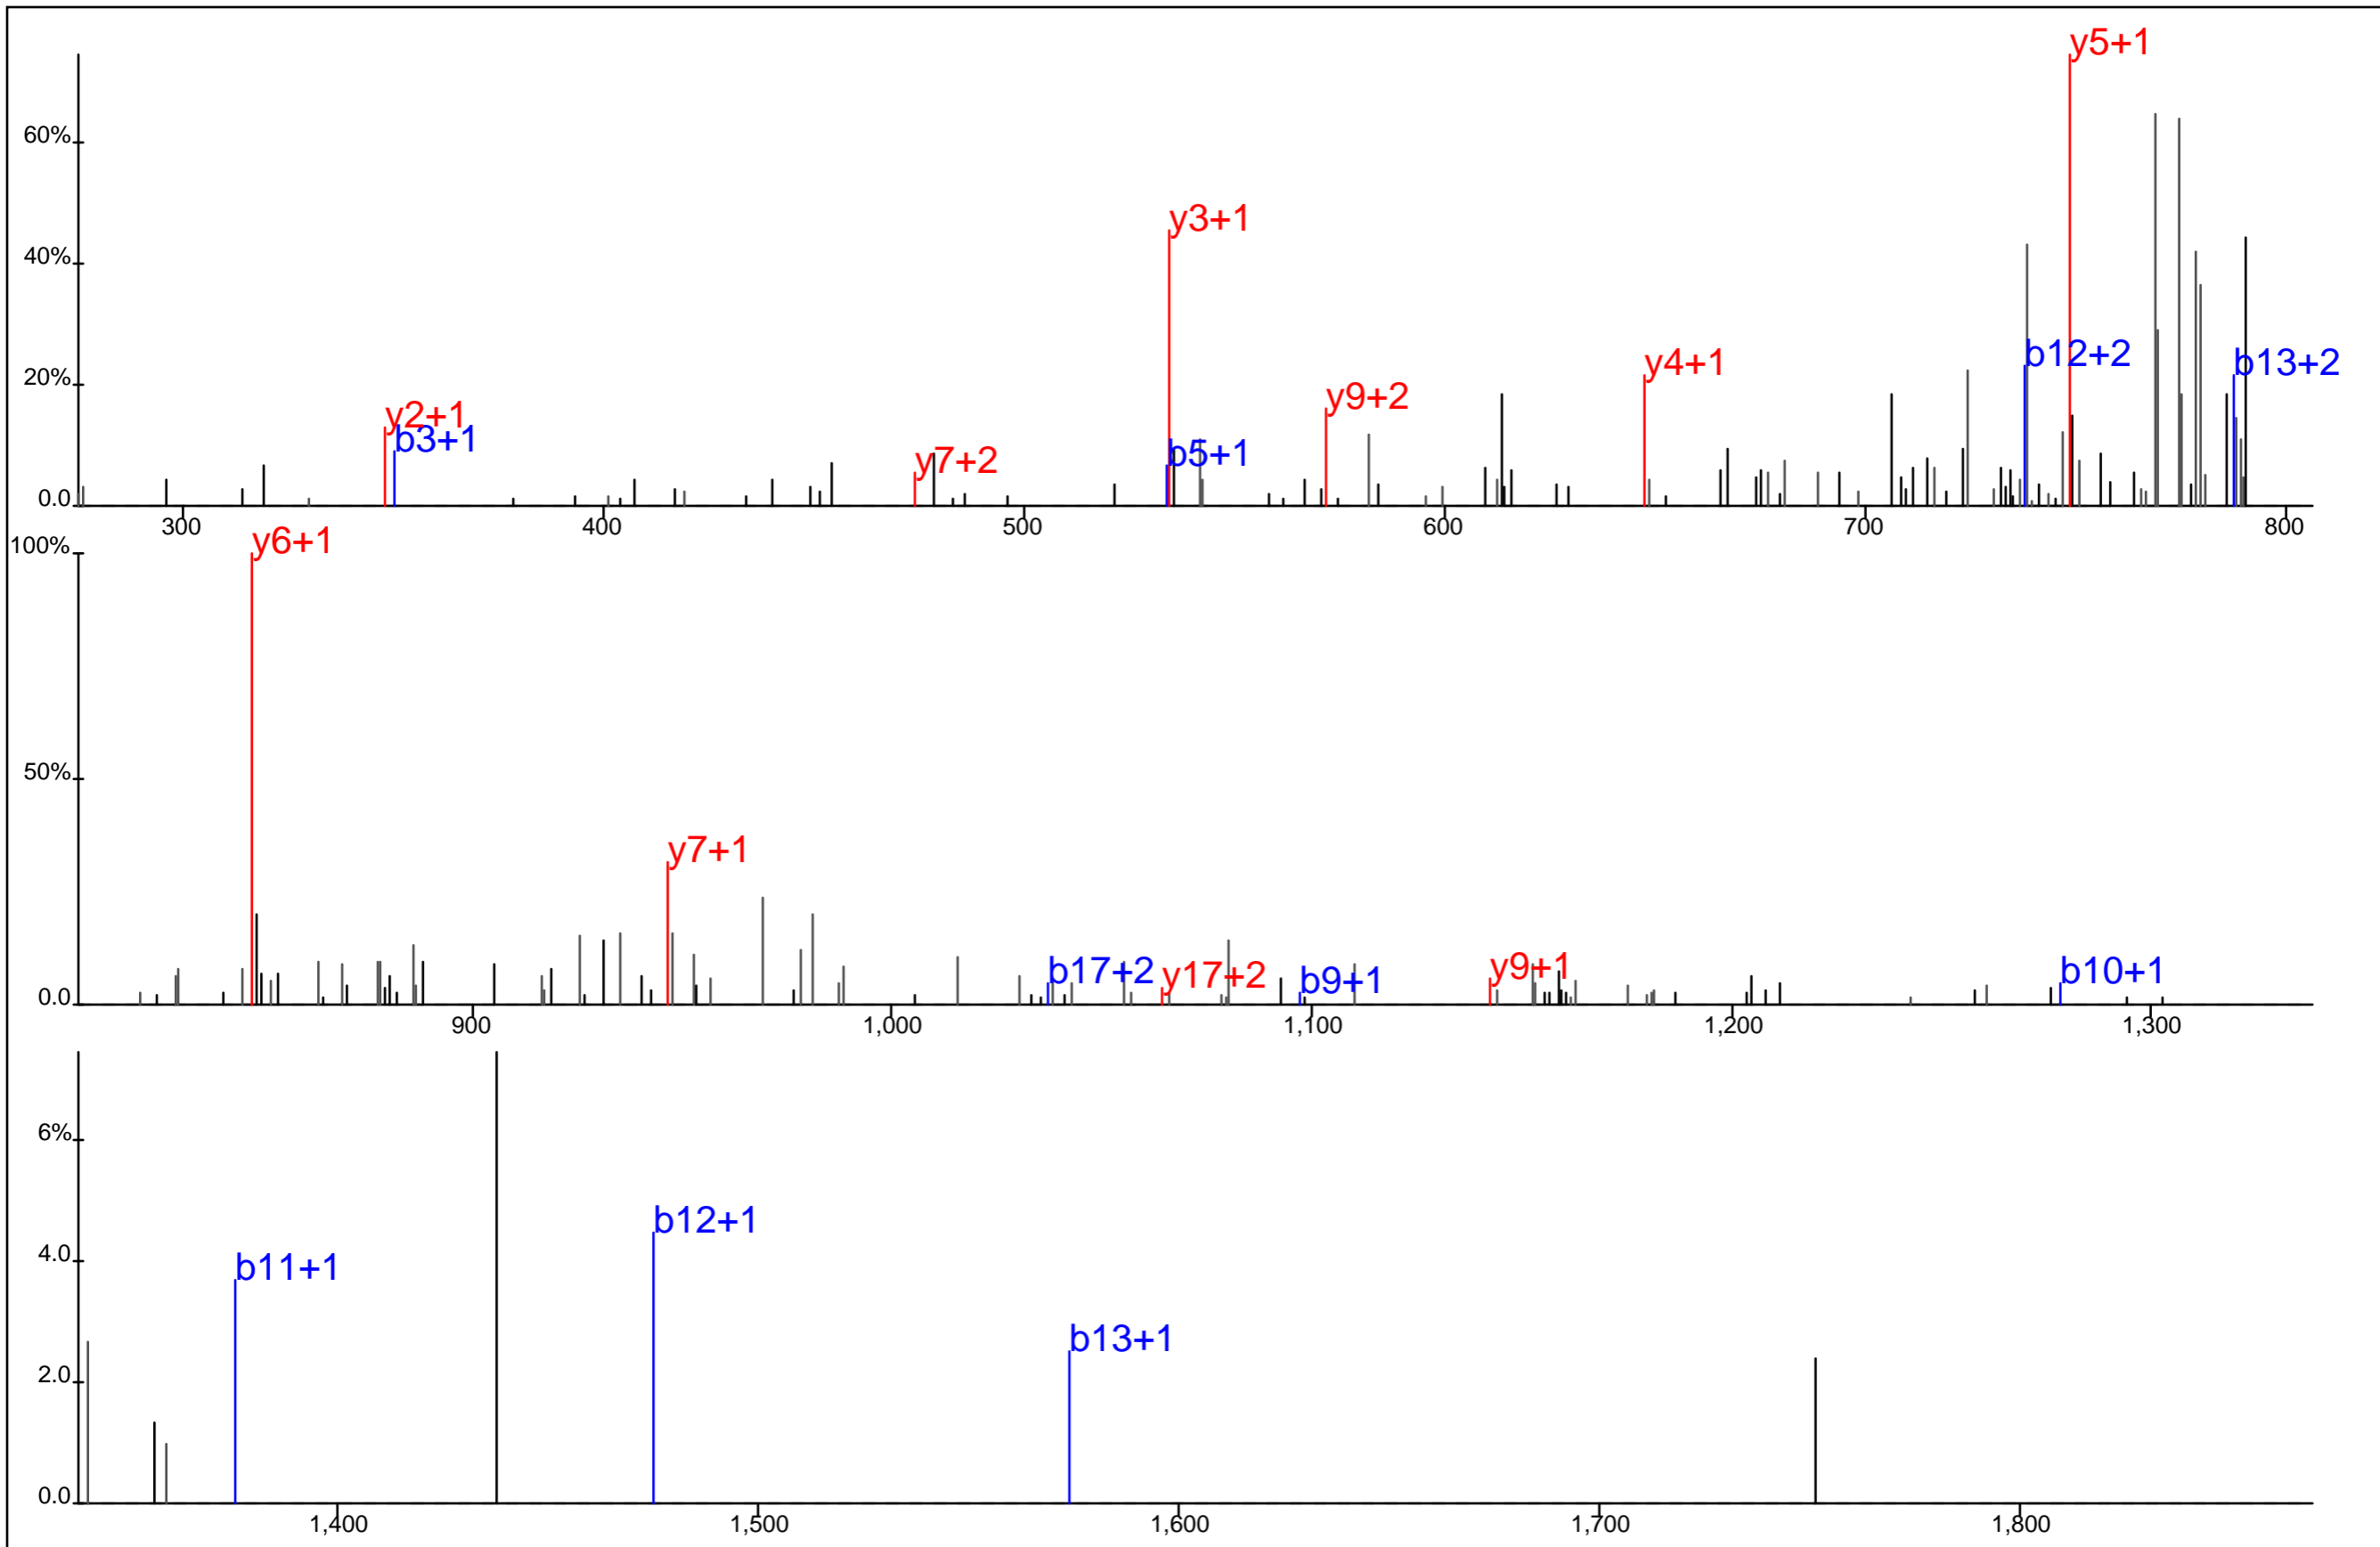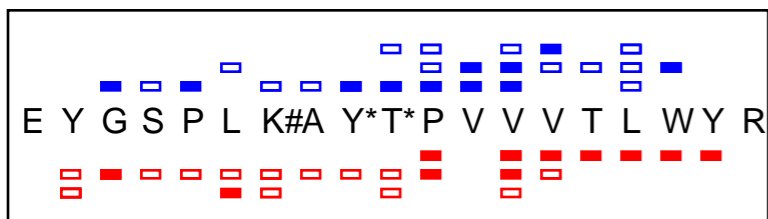

Protein Name: CDK11  
 gi Accession: 34978359  
 Precursor Mass: 807.3903+3  
 Delta Mass: 4.313 ppm  
 XCorr: 31.98

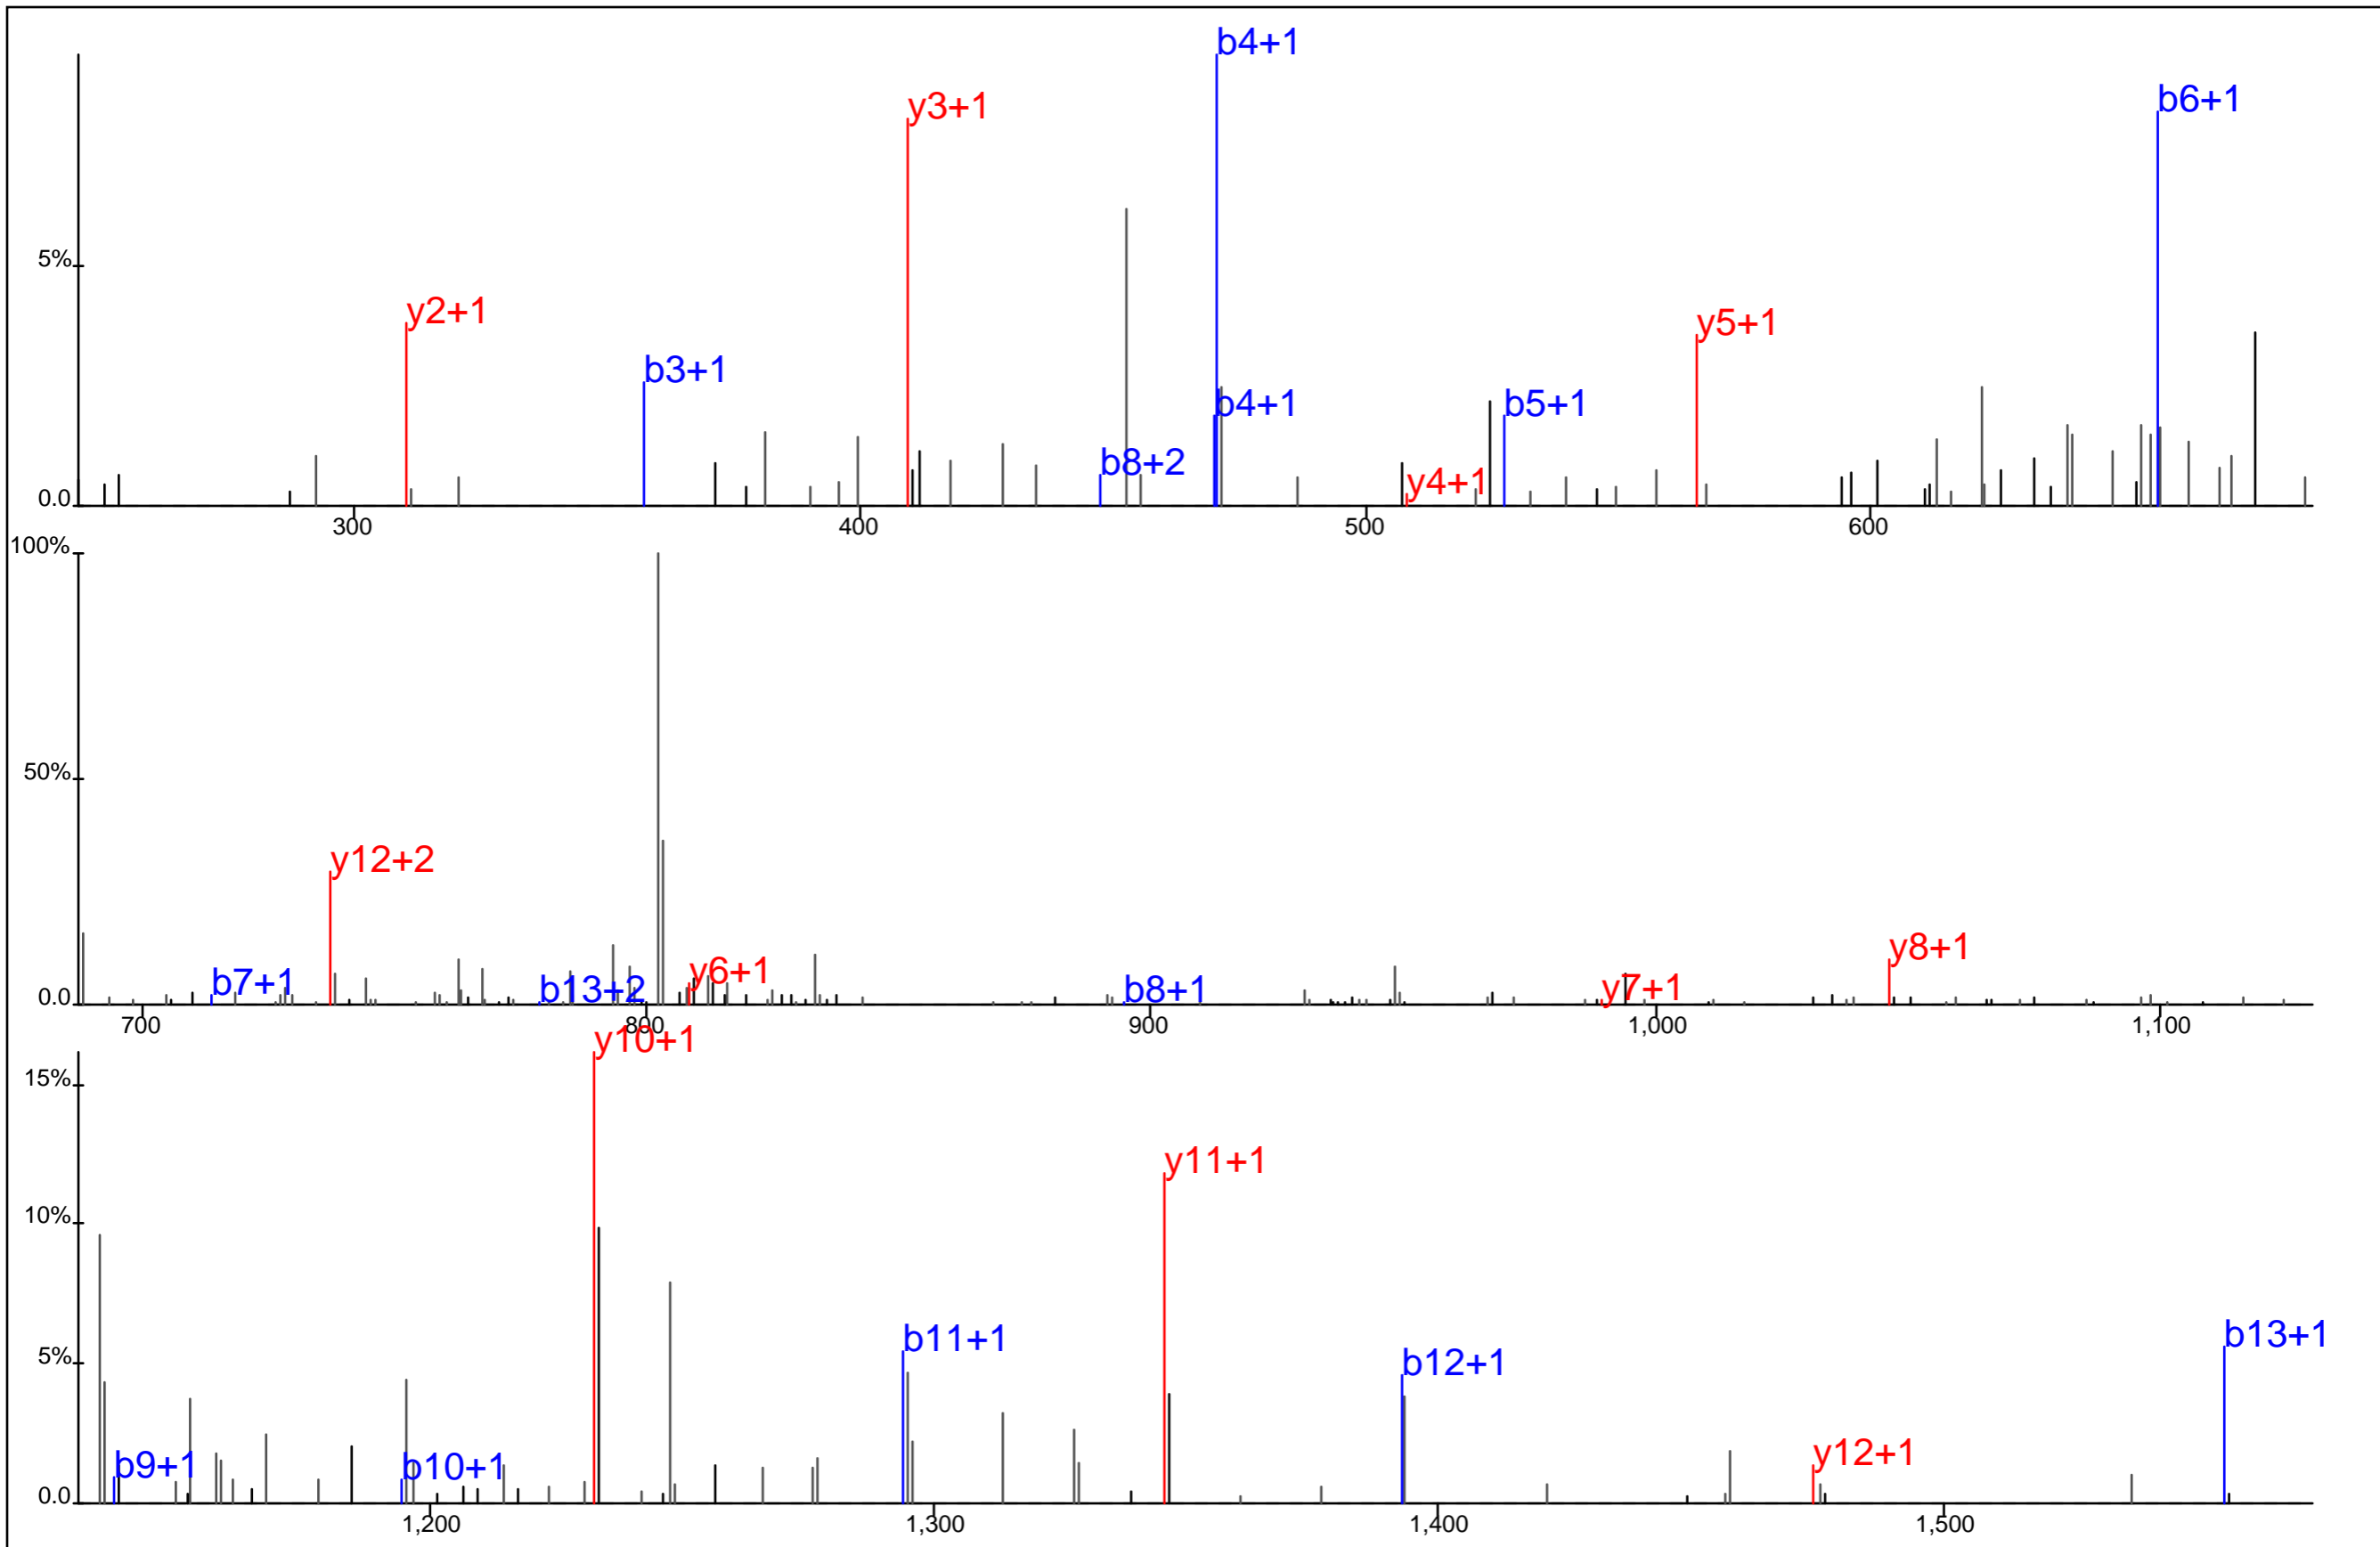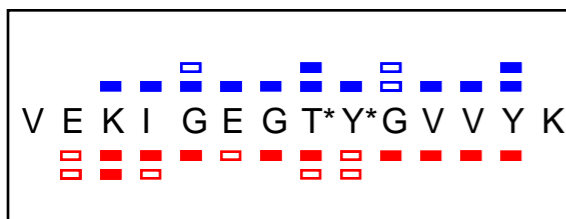

Protein Name: CDK2  
 gi Accession: 24158643  
 Precursor Mass: 851.3840+2  
 Delta Mass: 4.136 ppm  
 XCorr: 45.43

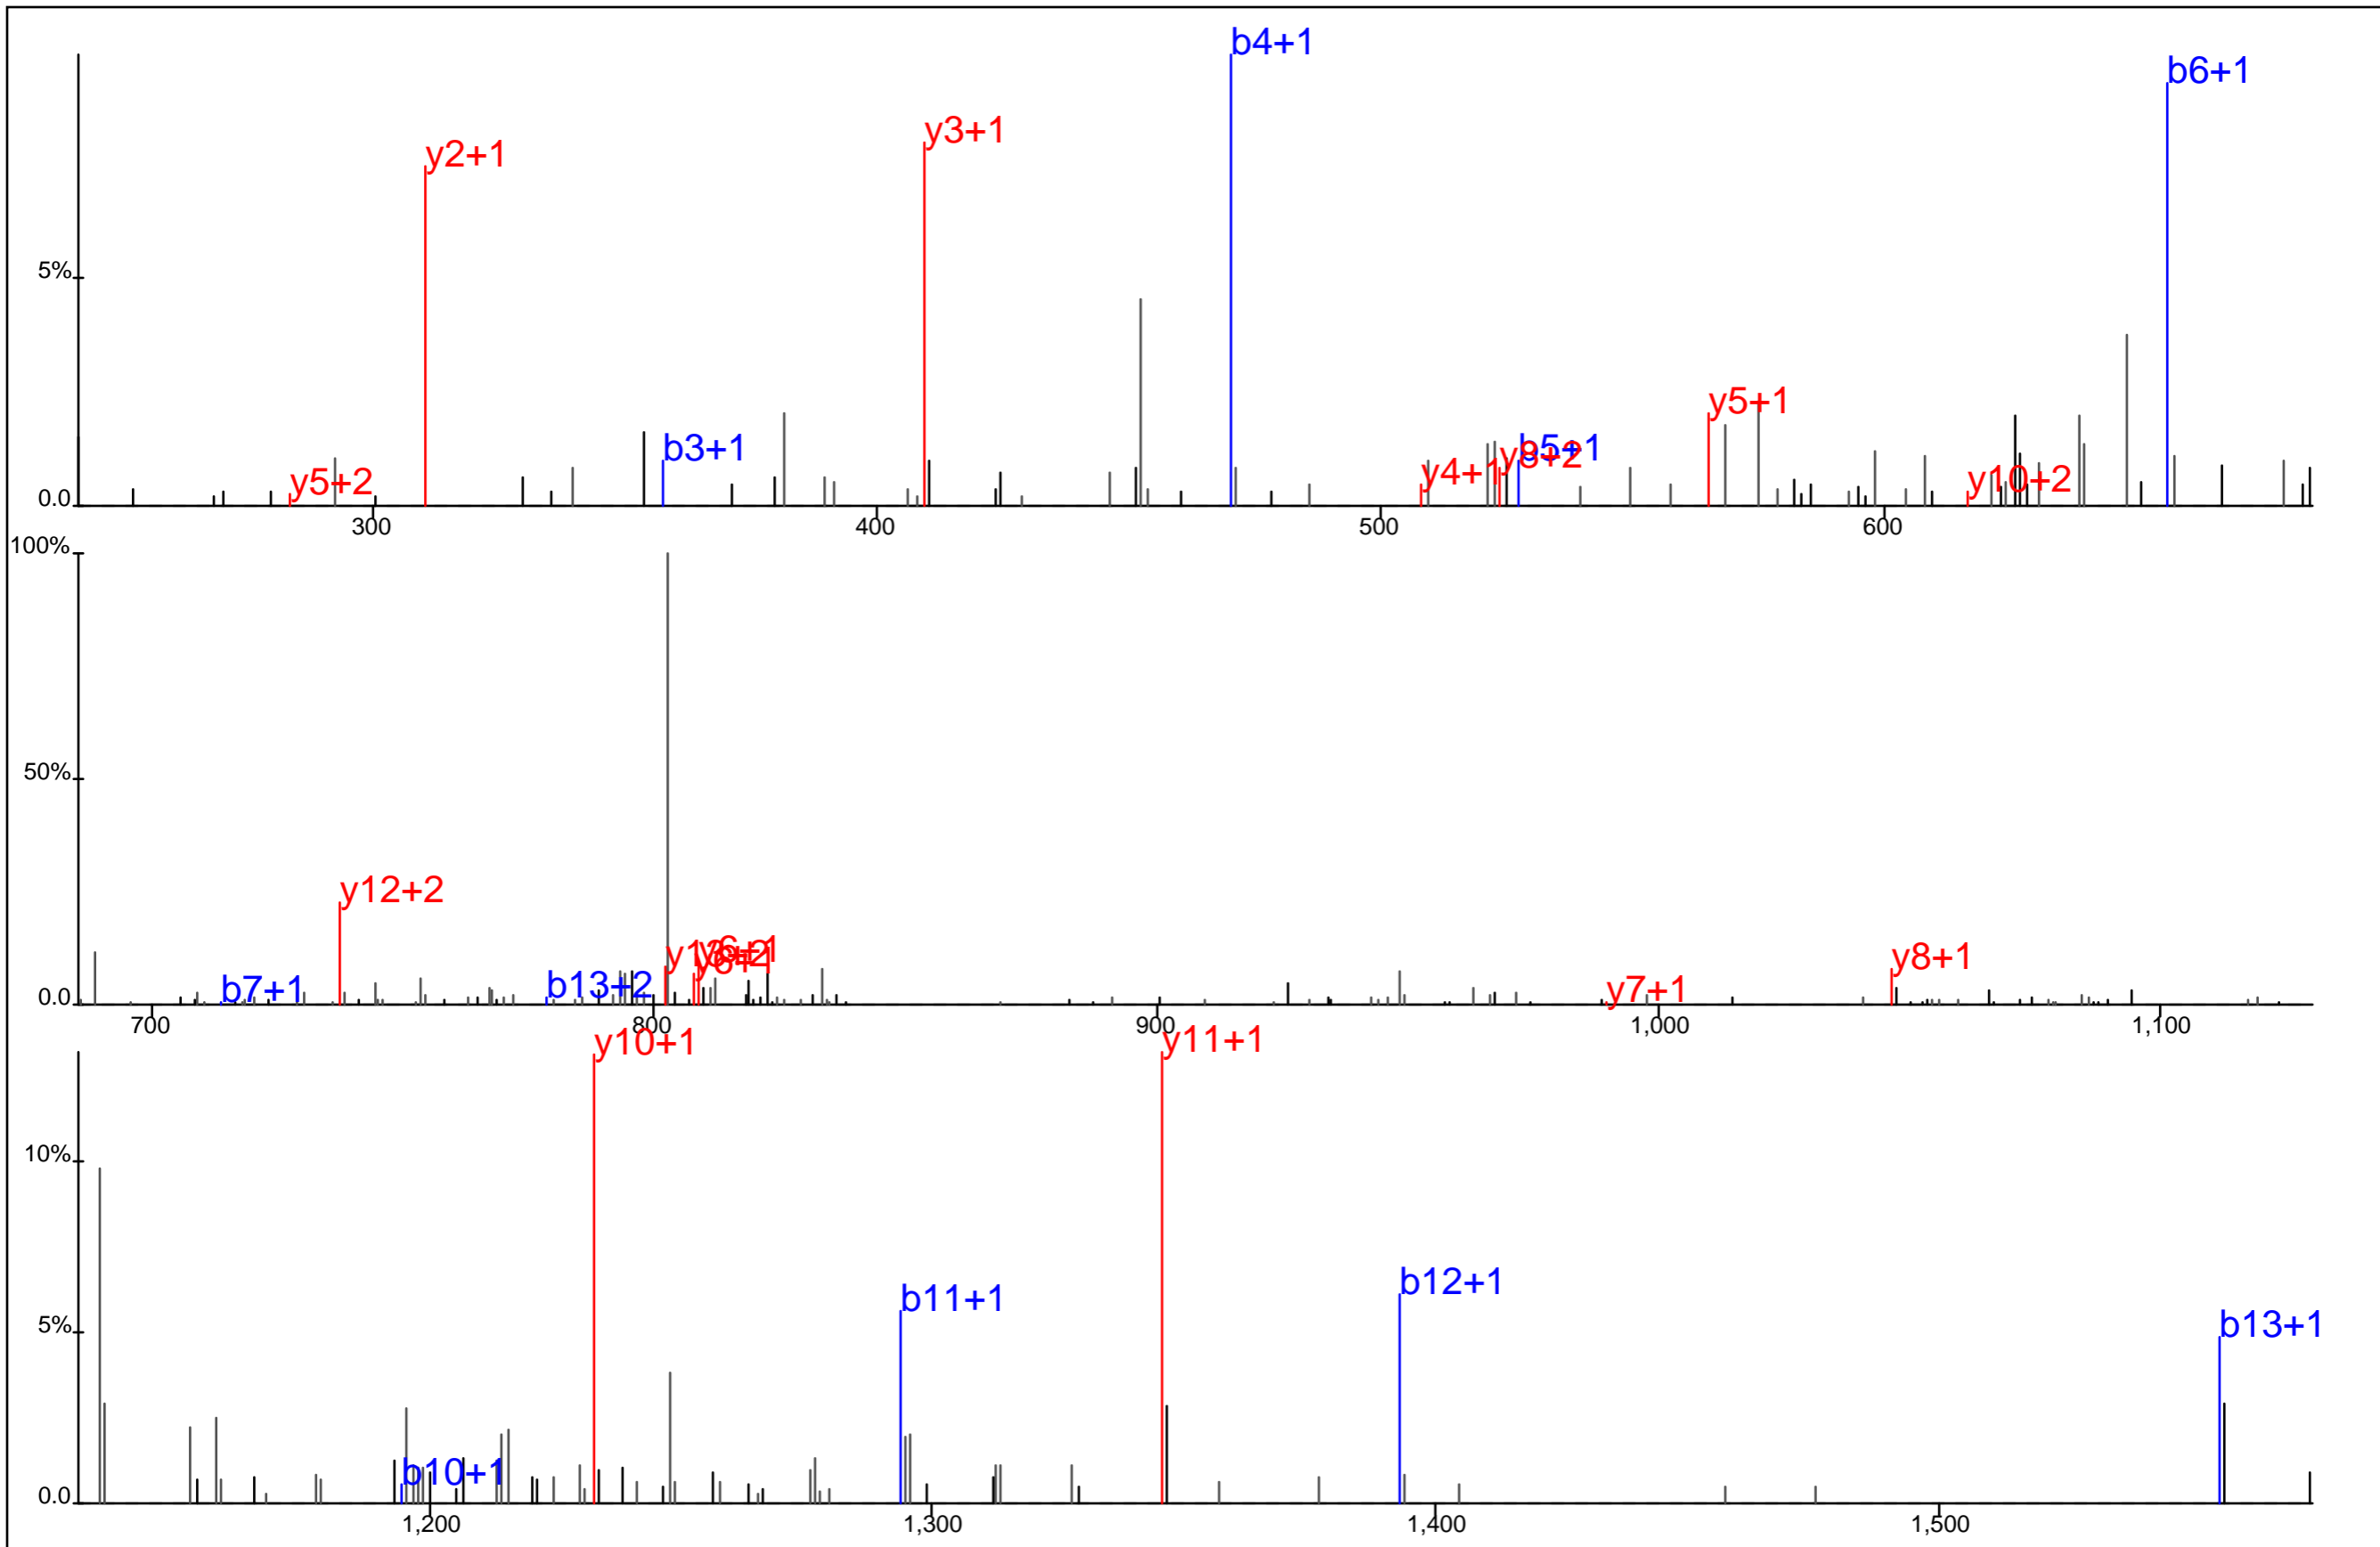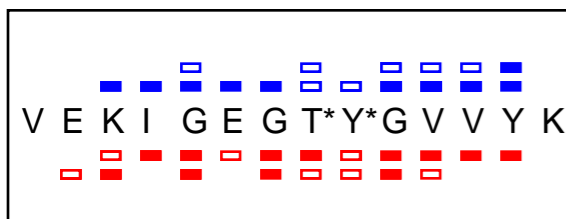

Protein Name: CDK2  
 gi Accession: 24158643  
 Precursor Mass: 851.3781+2  
 Delta Mass: 2.822 ppm  
 XCorr: 42.33

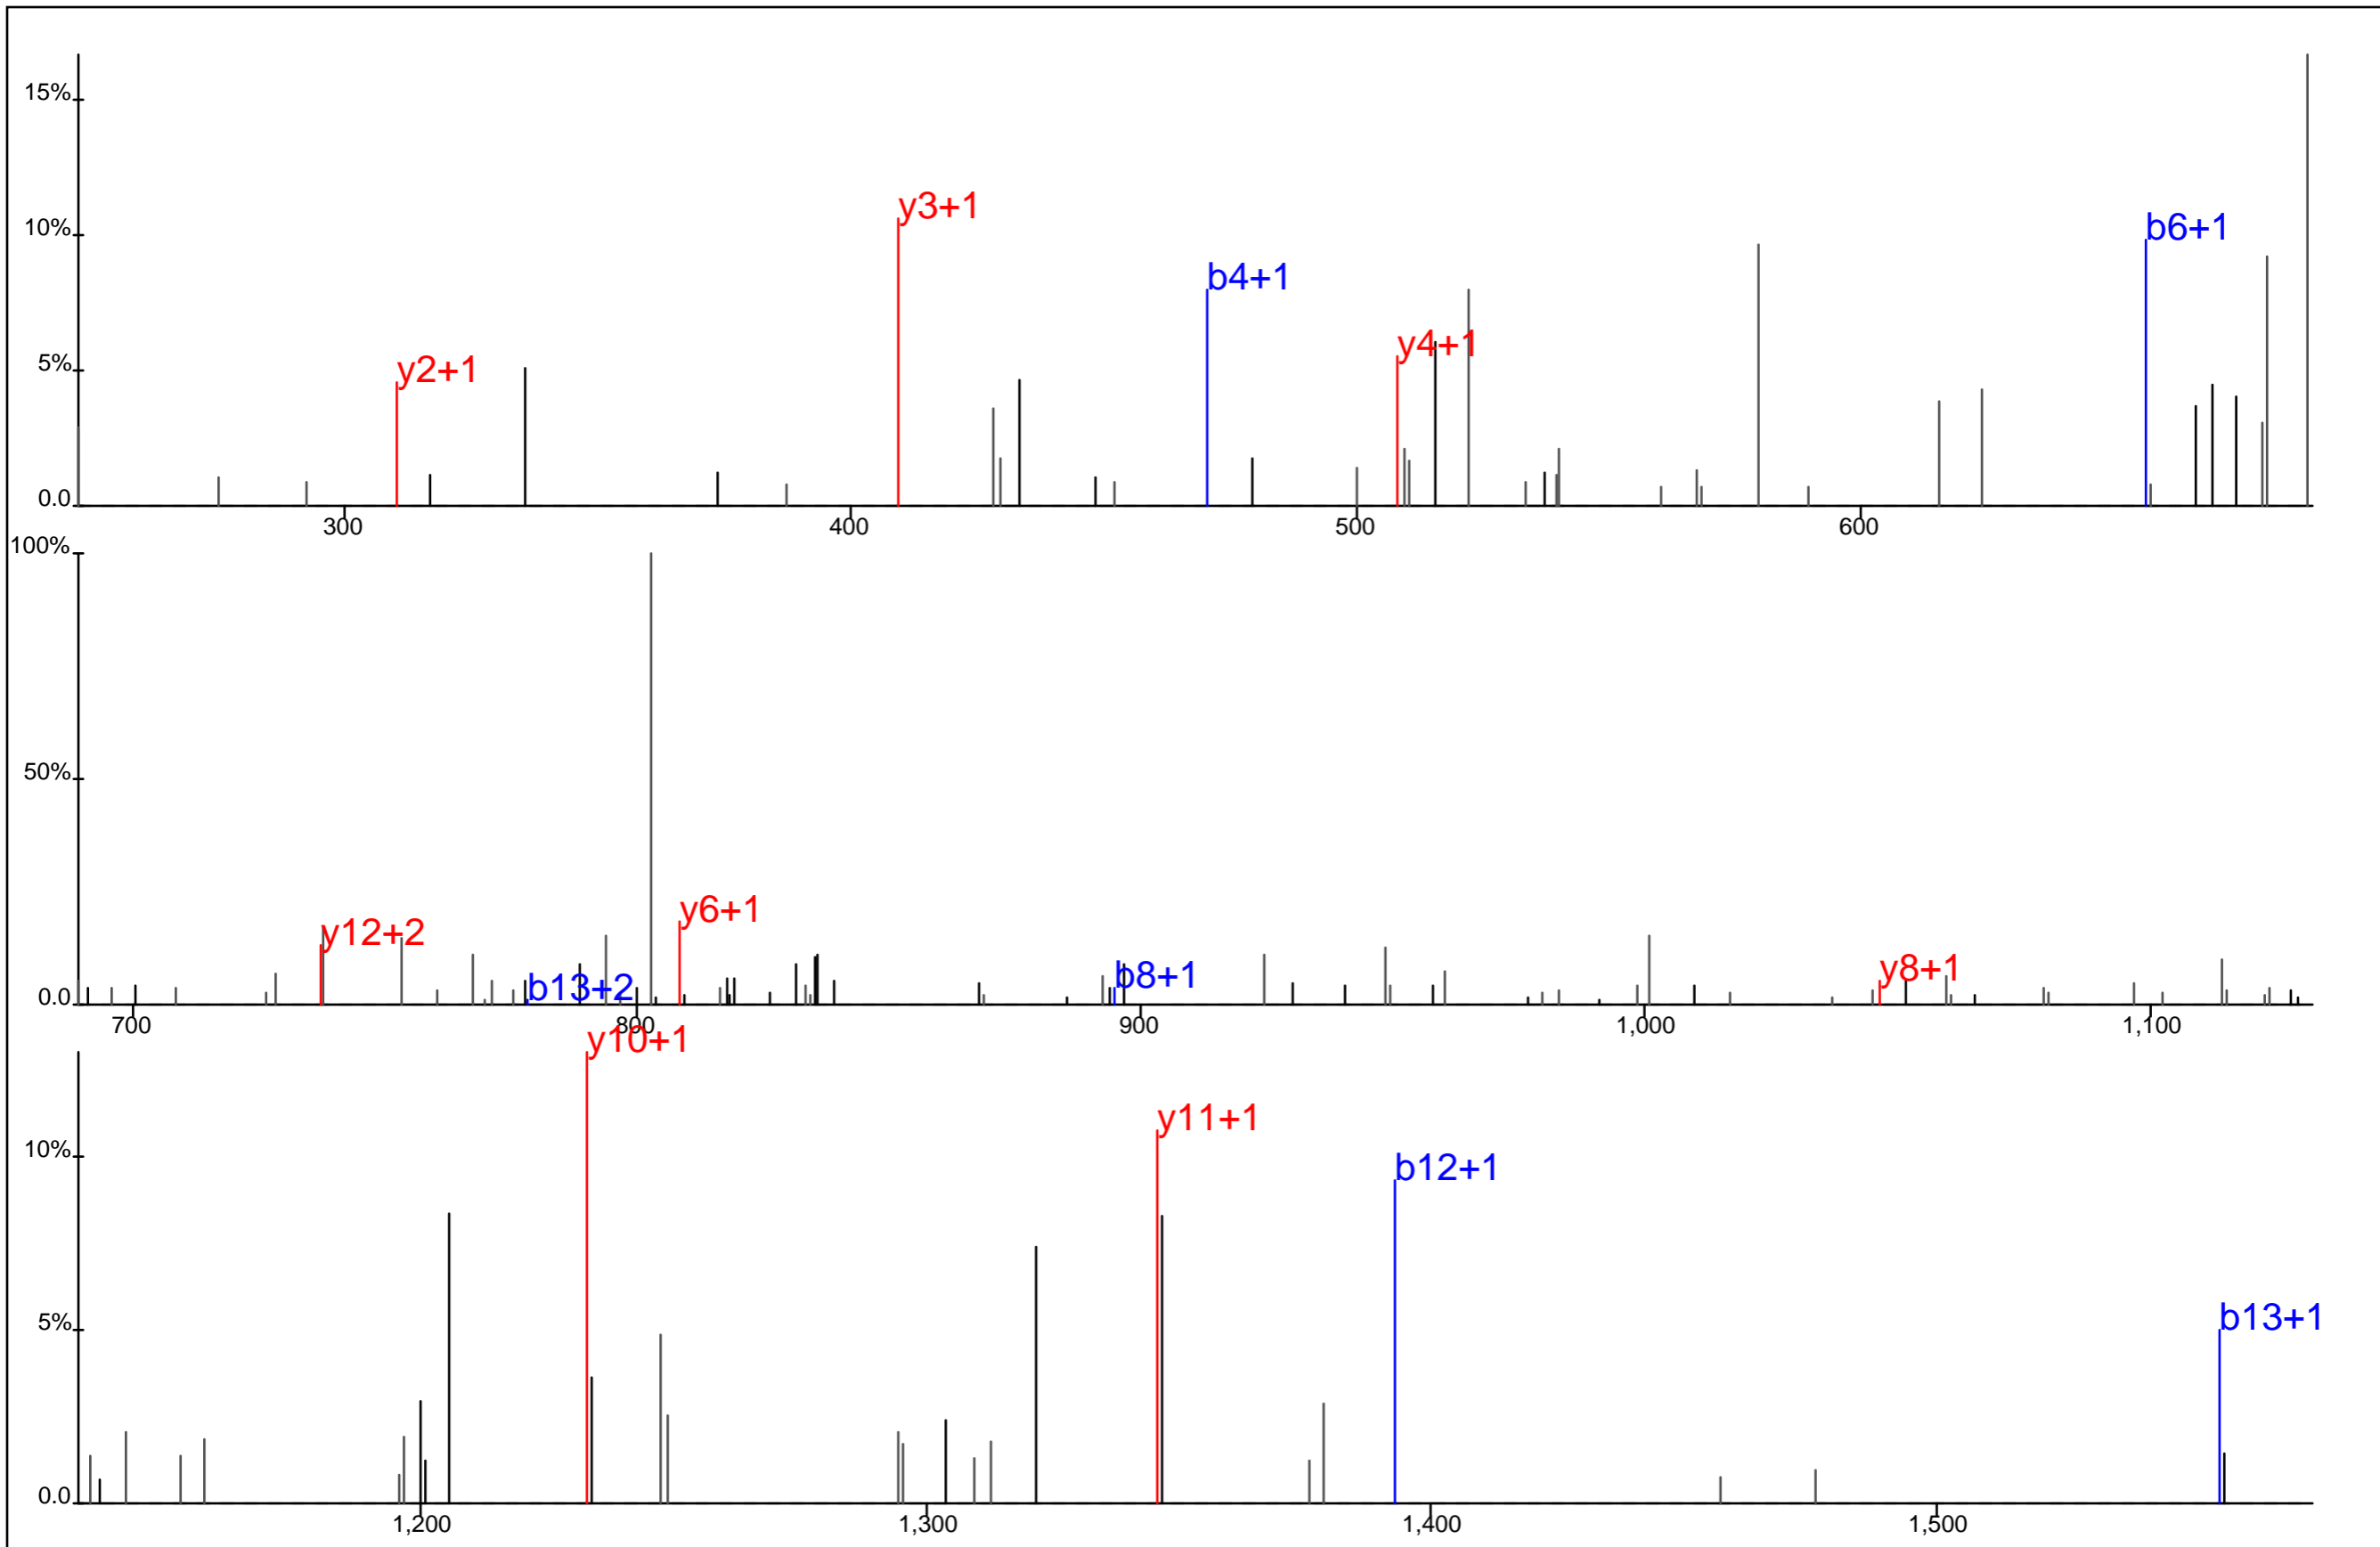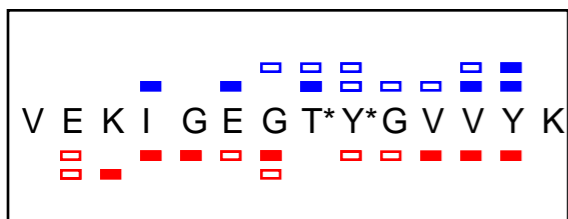

Protein Name: CDK2  
 gi Accession: 24158643  
 Precursor Mass: 851.3876+2  
 Delta Mass: 8.367 ppm  
 XCorr: 25.39

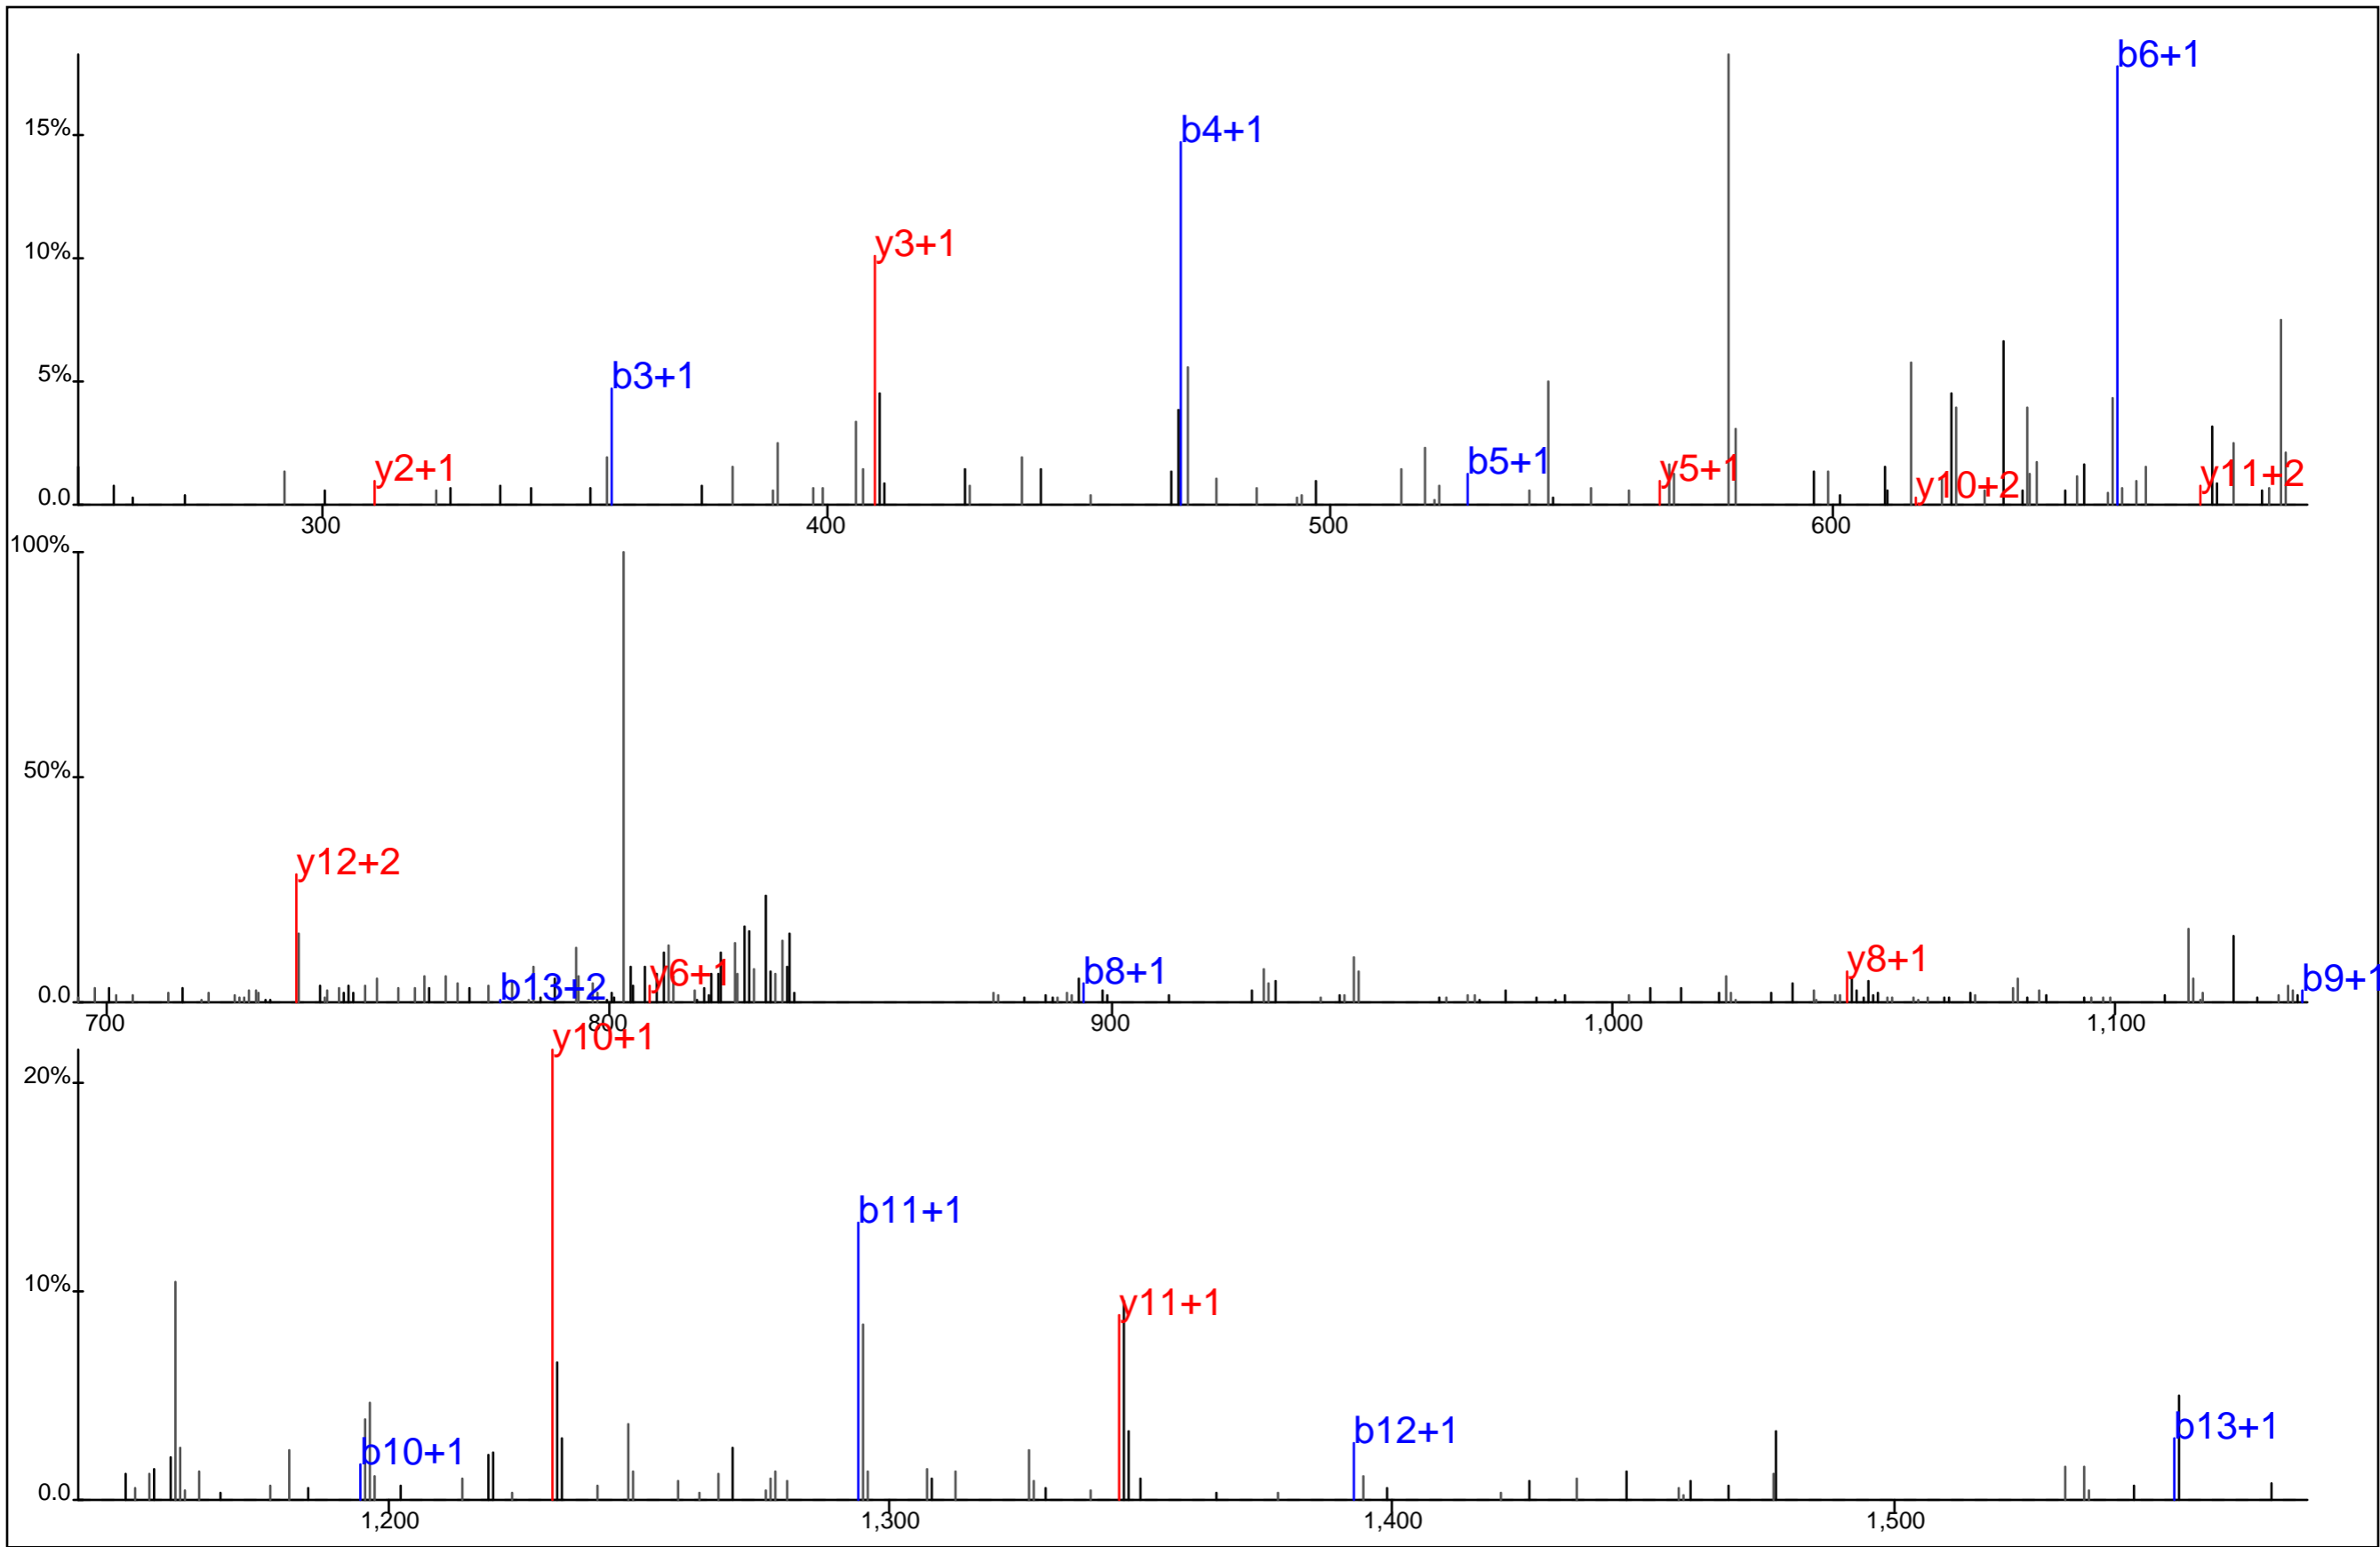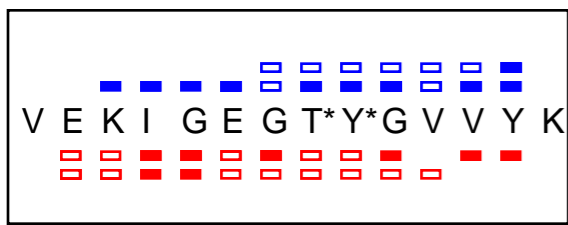

Protein Name: CDK2  
 gi Accession: 24158643  
 Precursor Mass: 851.3804+2  
 Delta Mass: 0.025 ppm  
 XCorr: 20.43

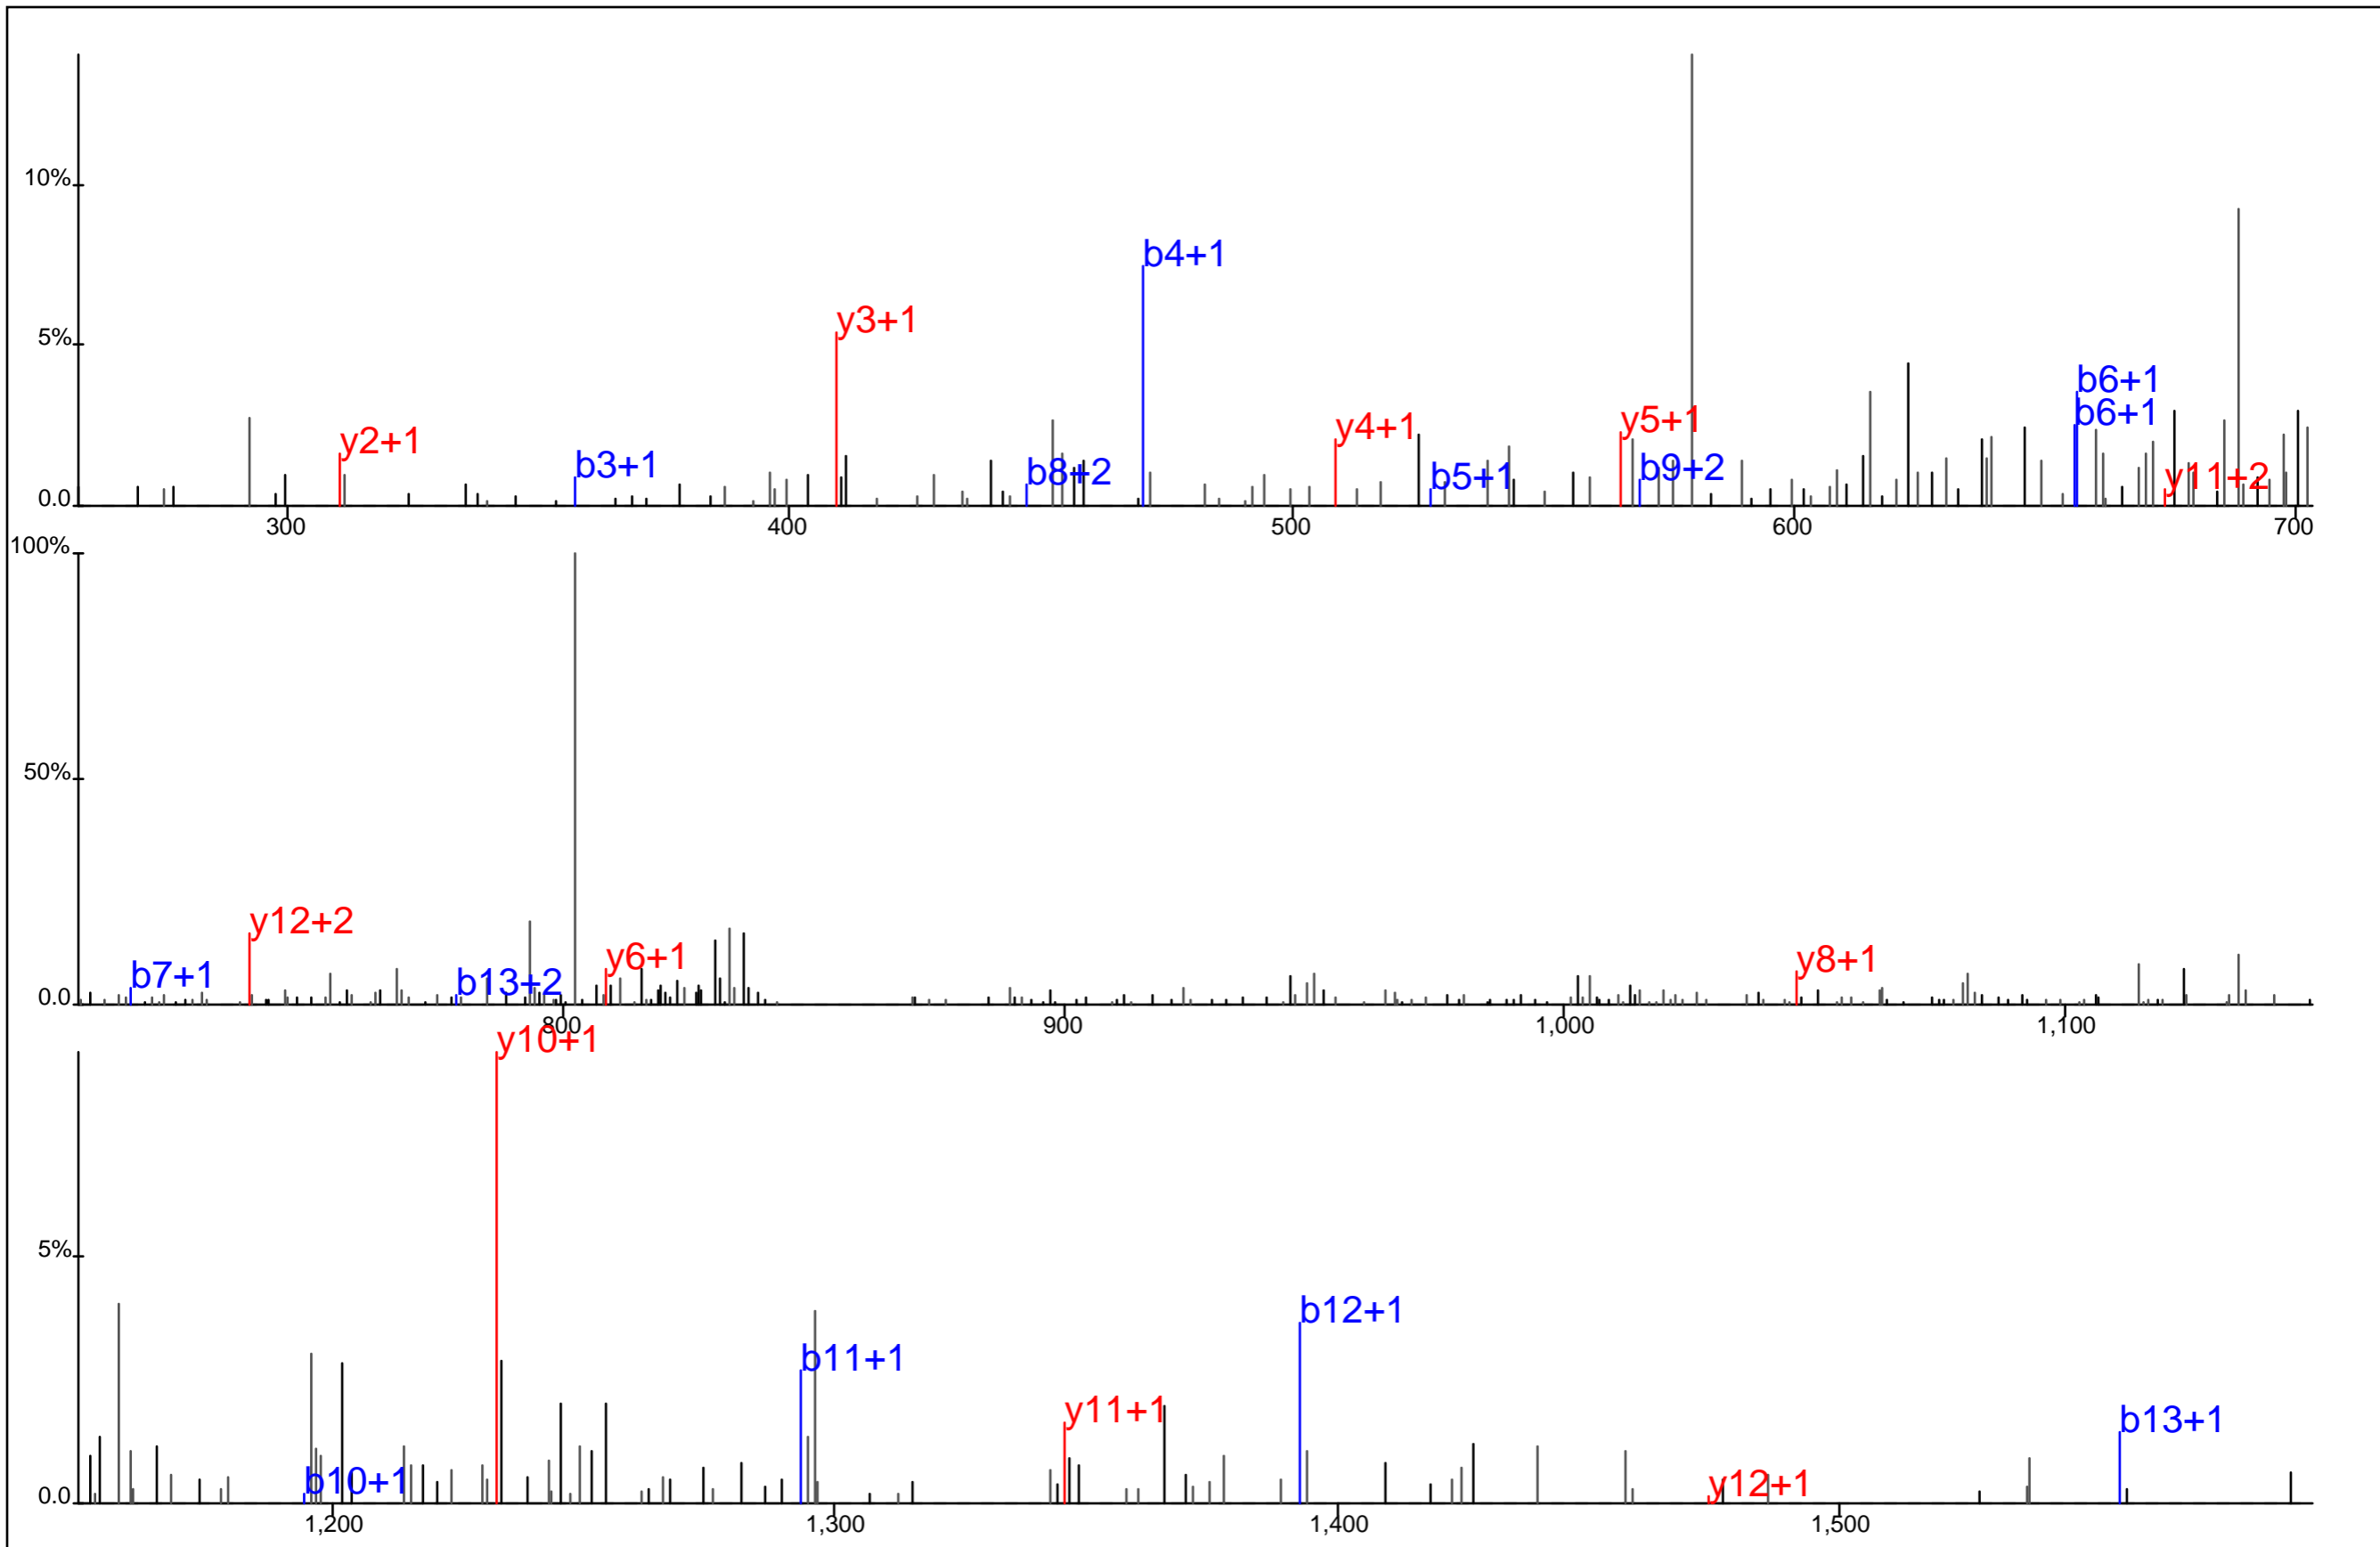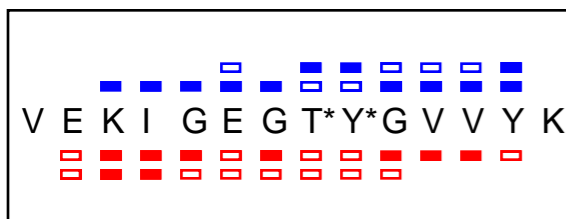

Protein Name: CDK2  
 gi Accession: 24158643  
 Precursor Mass: 851.3798+2  
 Delta Mass: 0.742 ppm  
 XCorr: 19.66



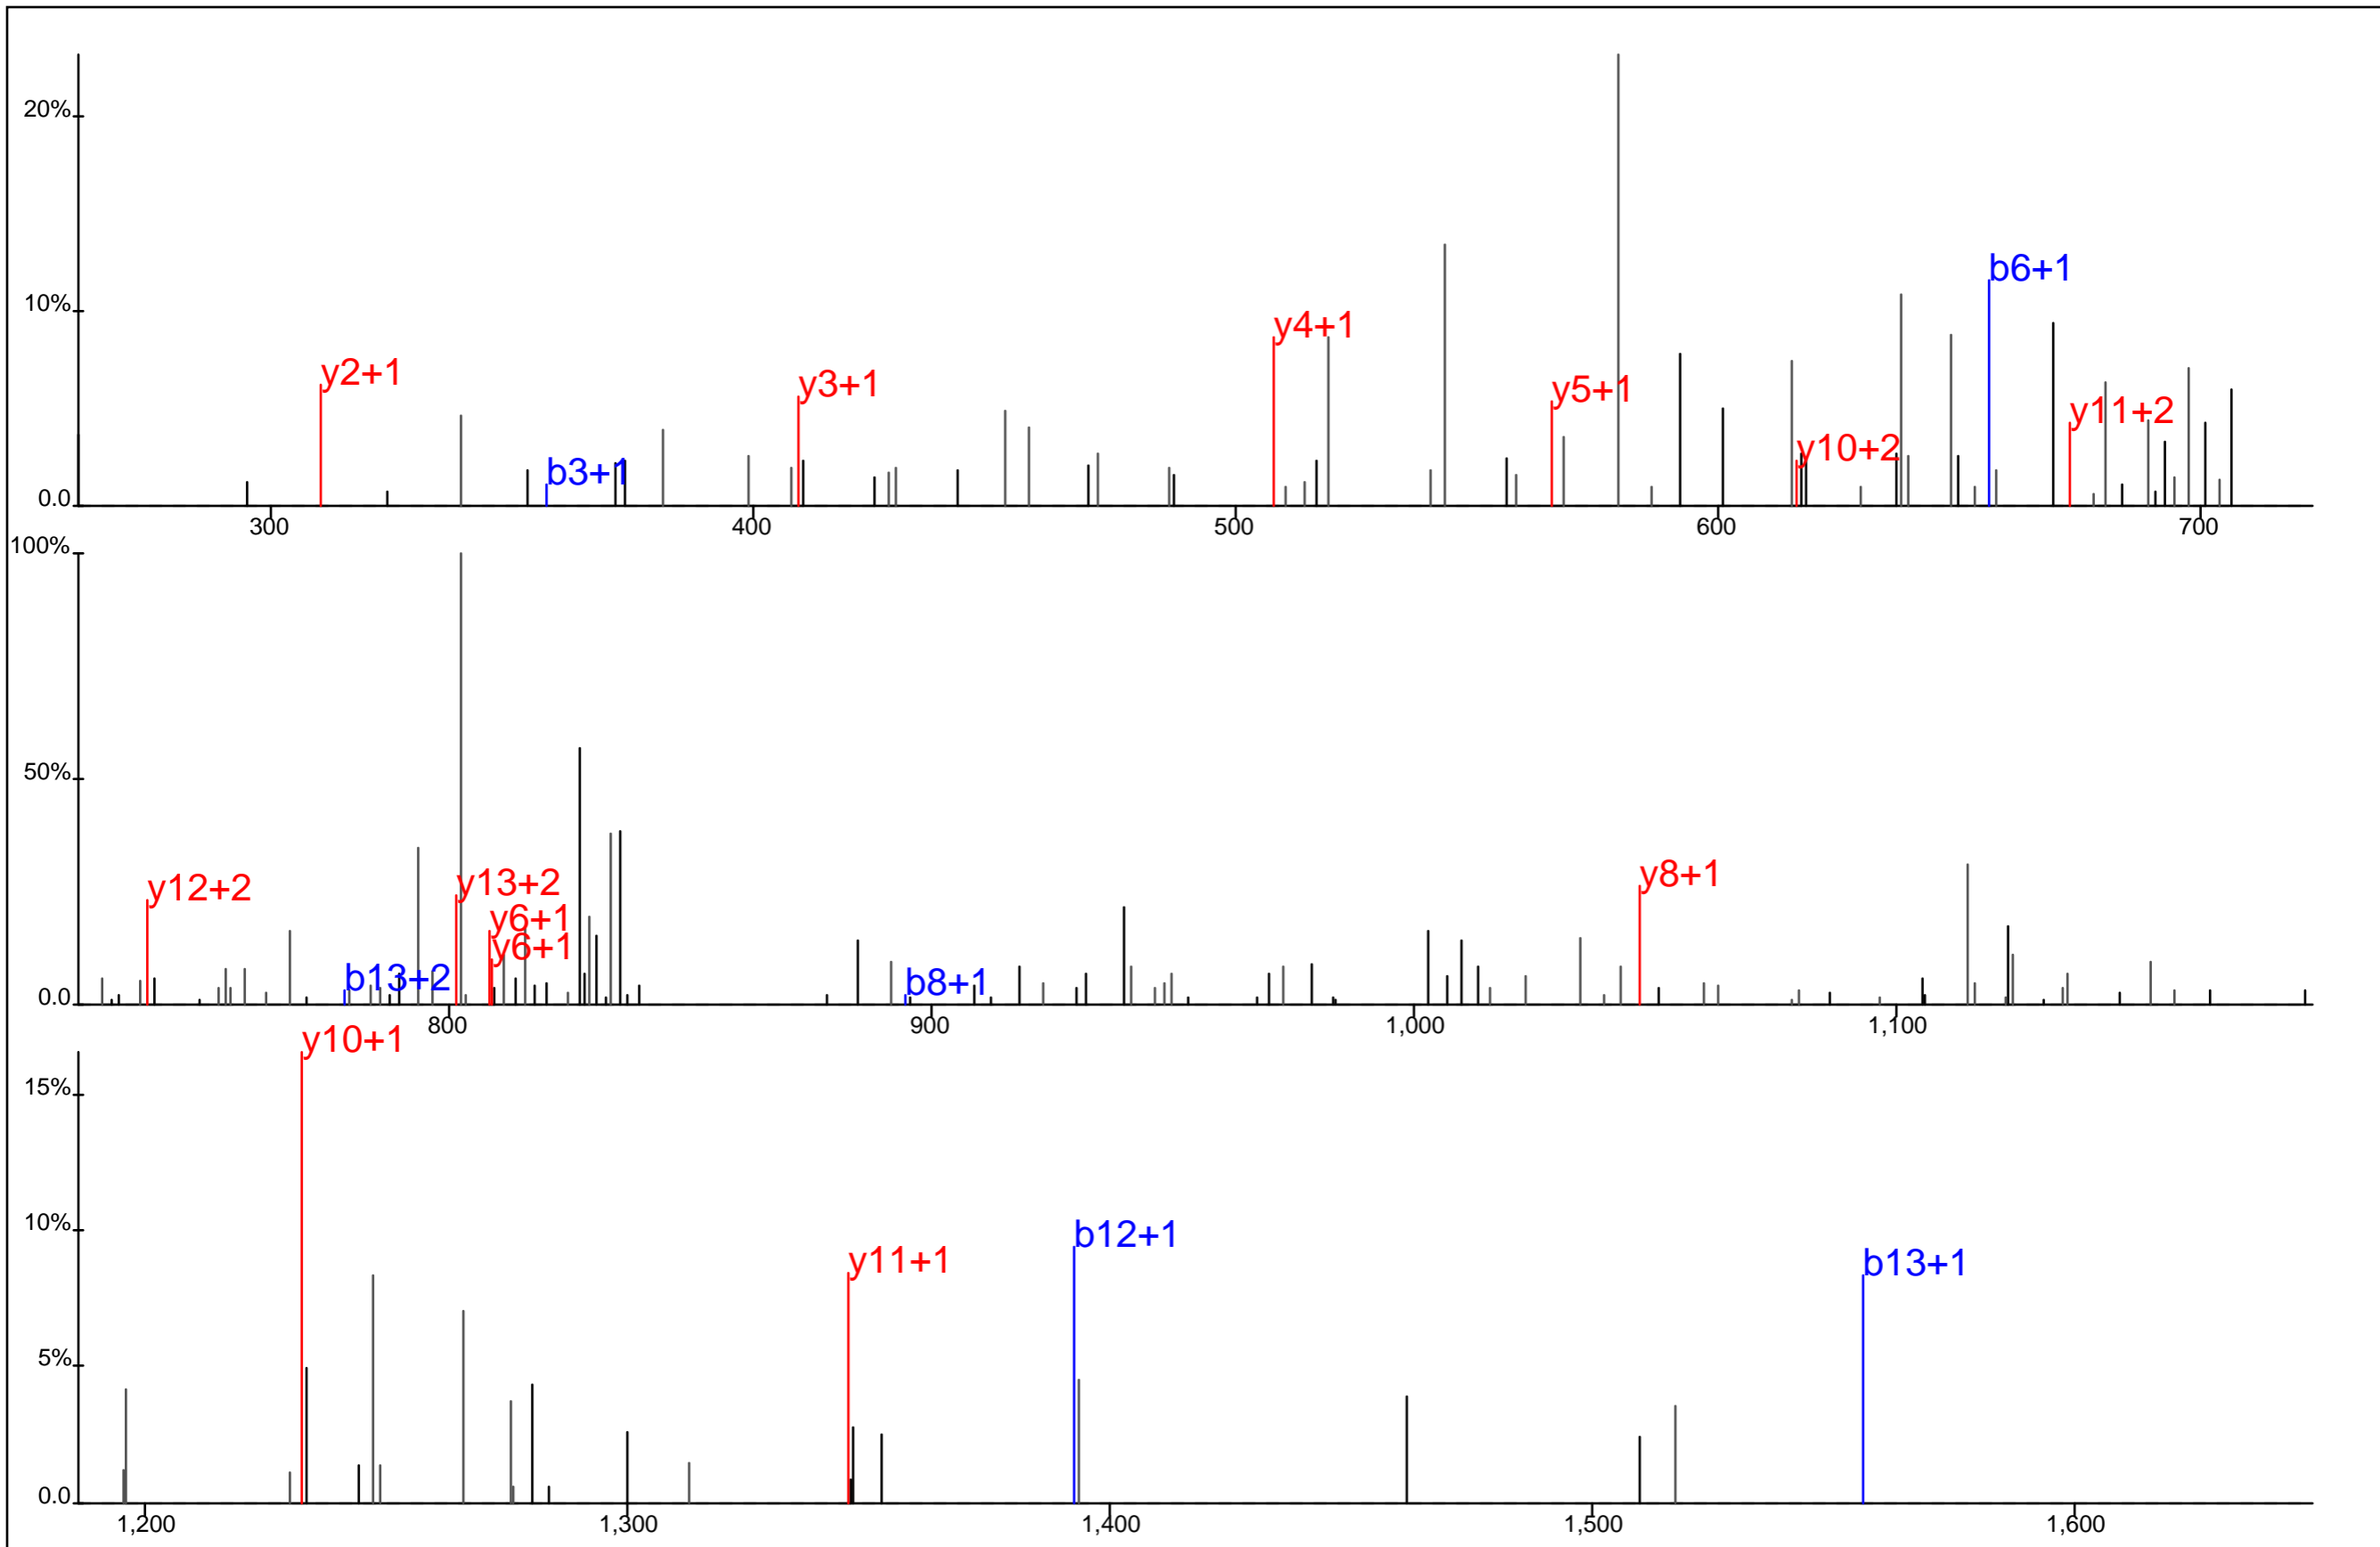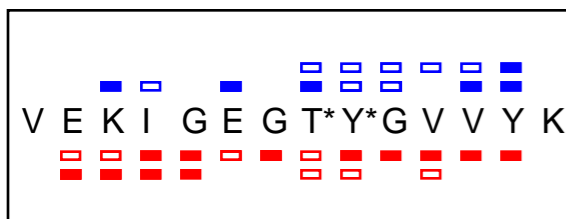

Protein Name: CDK2  
 gi Accession: 24158643  
 Precursor Mass: 851.3849+2  
 Delta Mass: 5.282 ppm  
 XCorr: 23.11

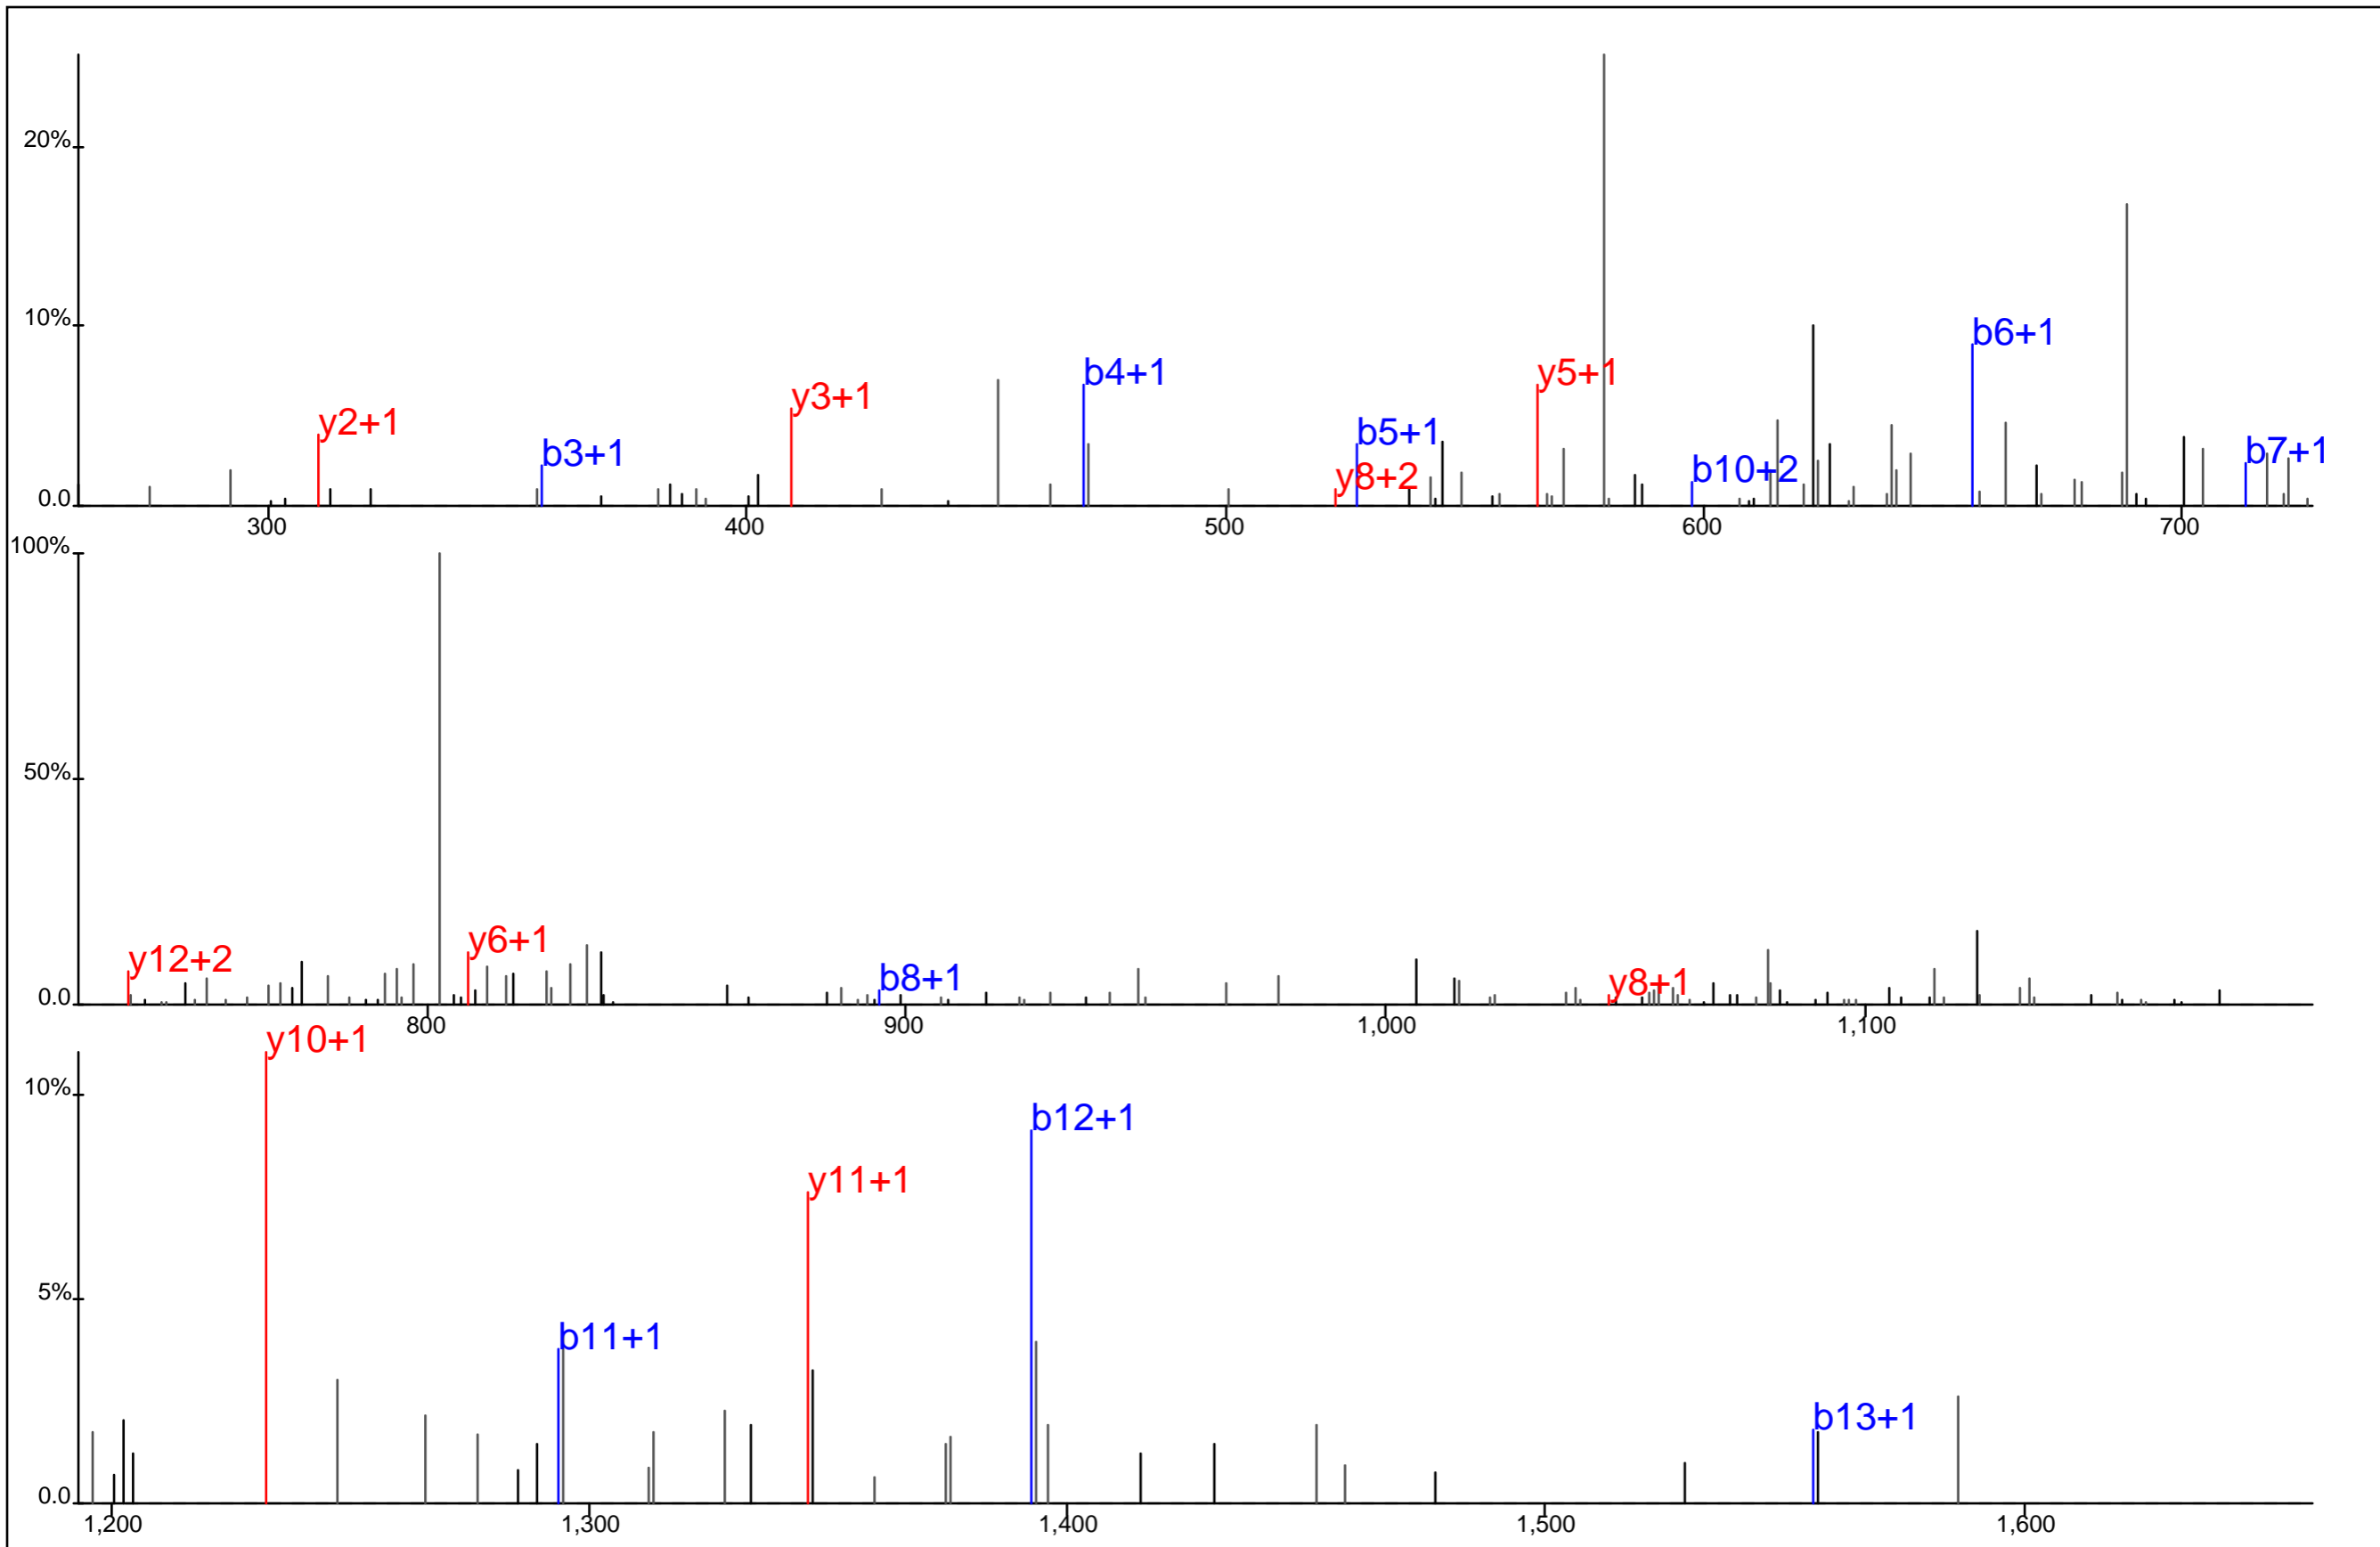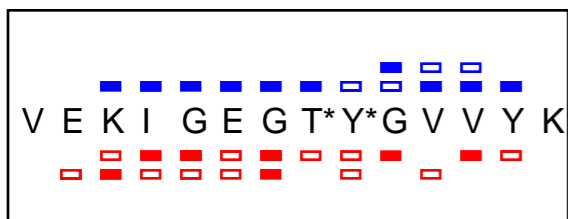

Protein Name: CDK2  
 gi Accession: 24158643  
 Precursor Mass: 851.3770+2  
 Delta Mass: 4.115 ppm  
 XCorr: 27.27

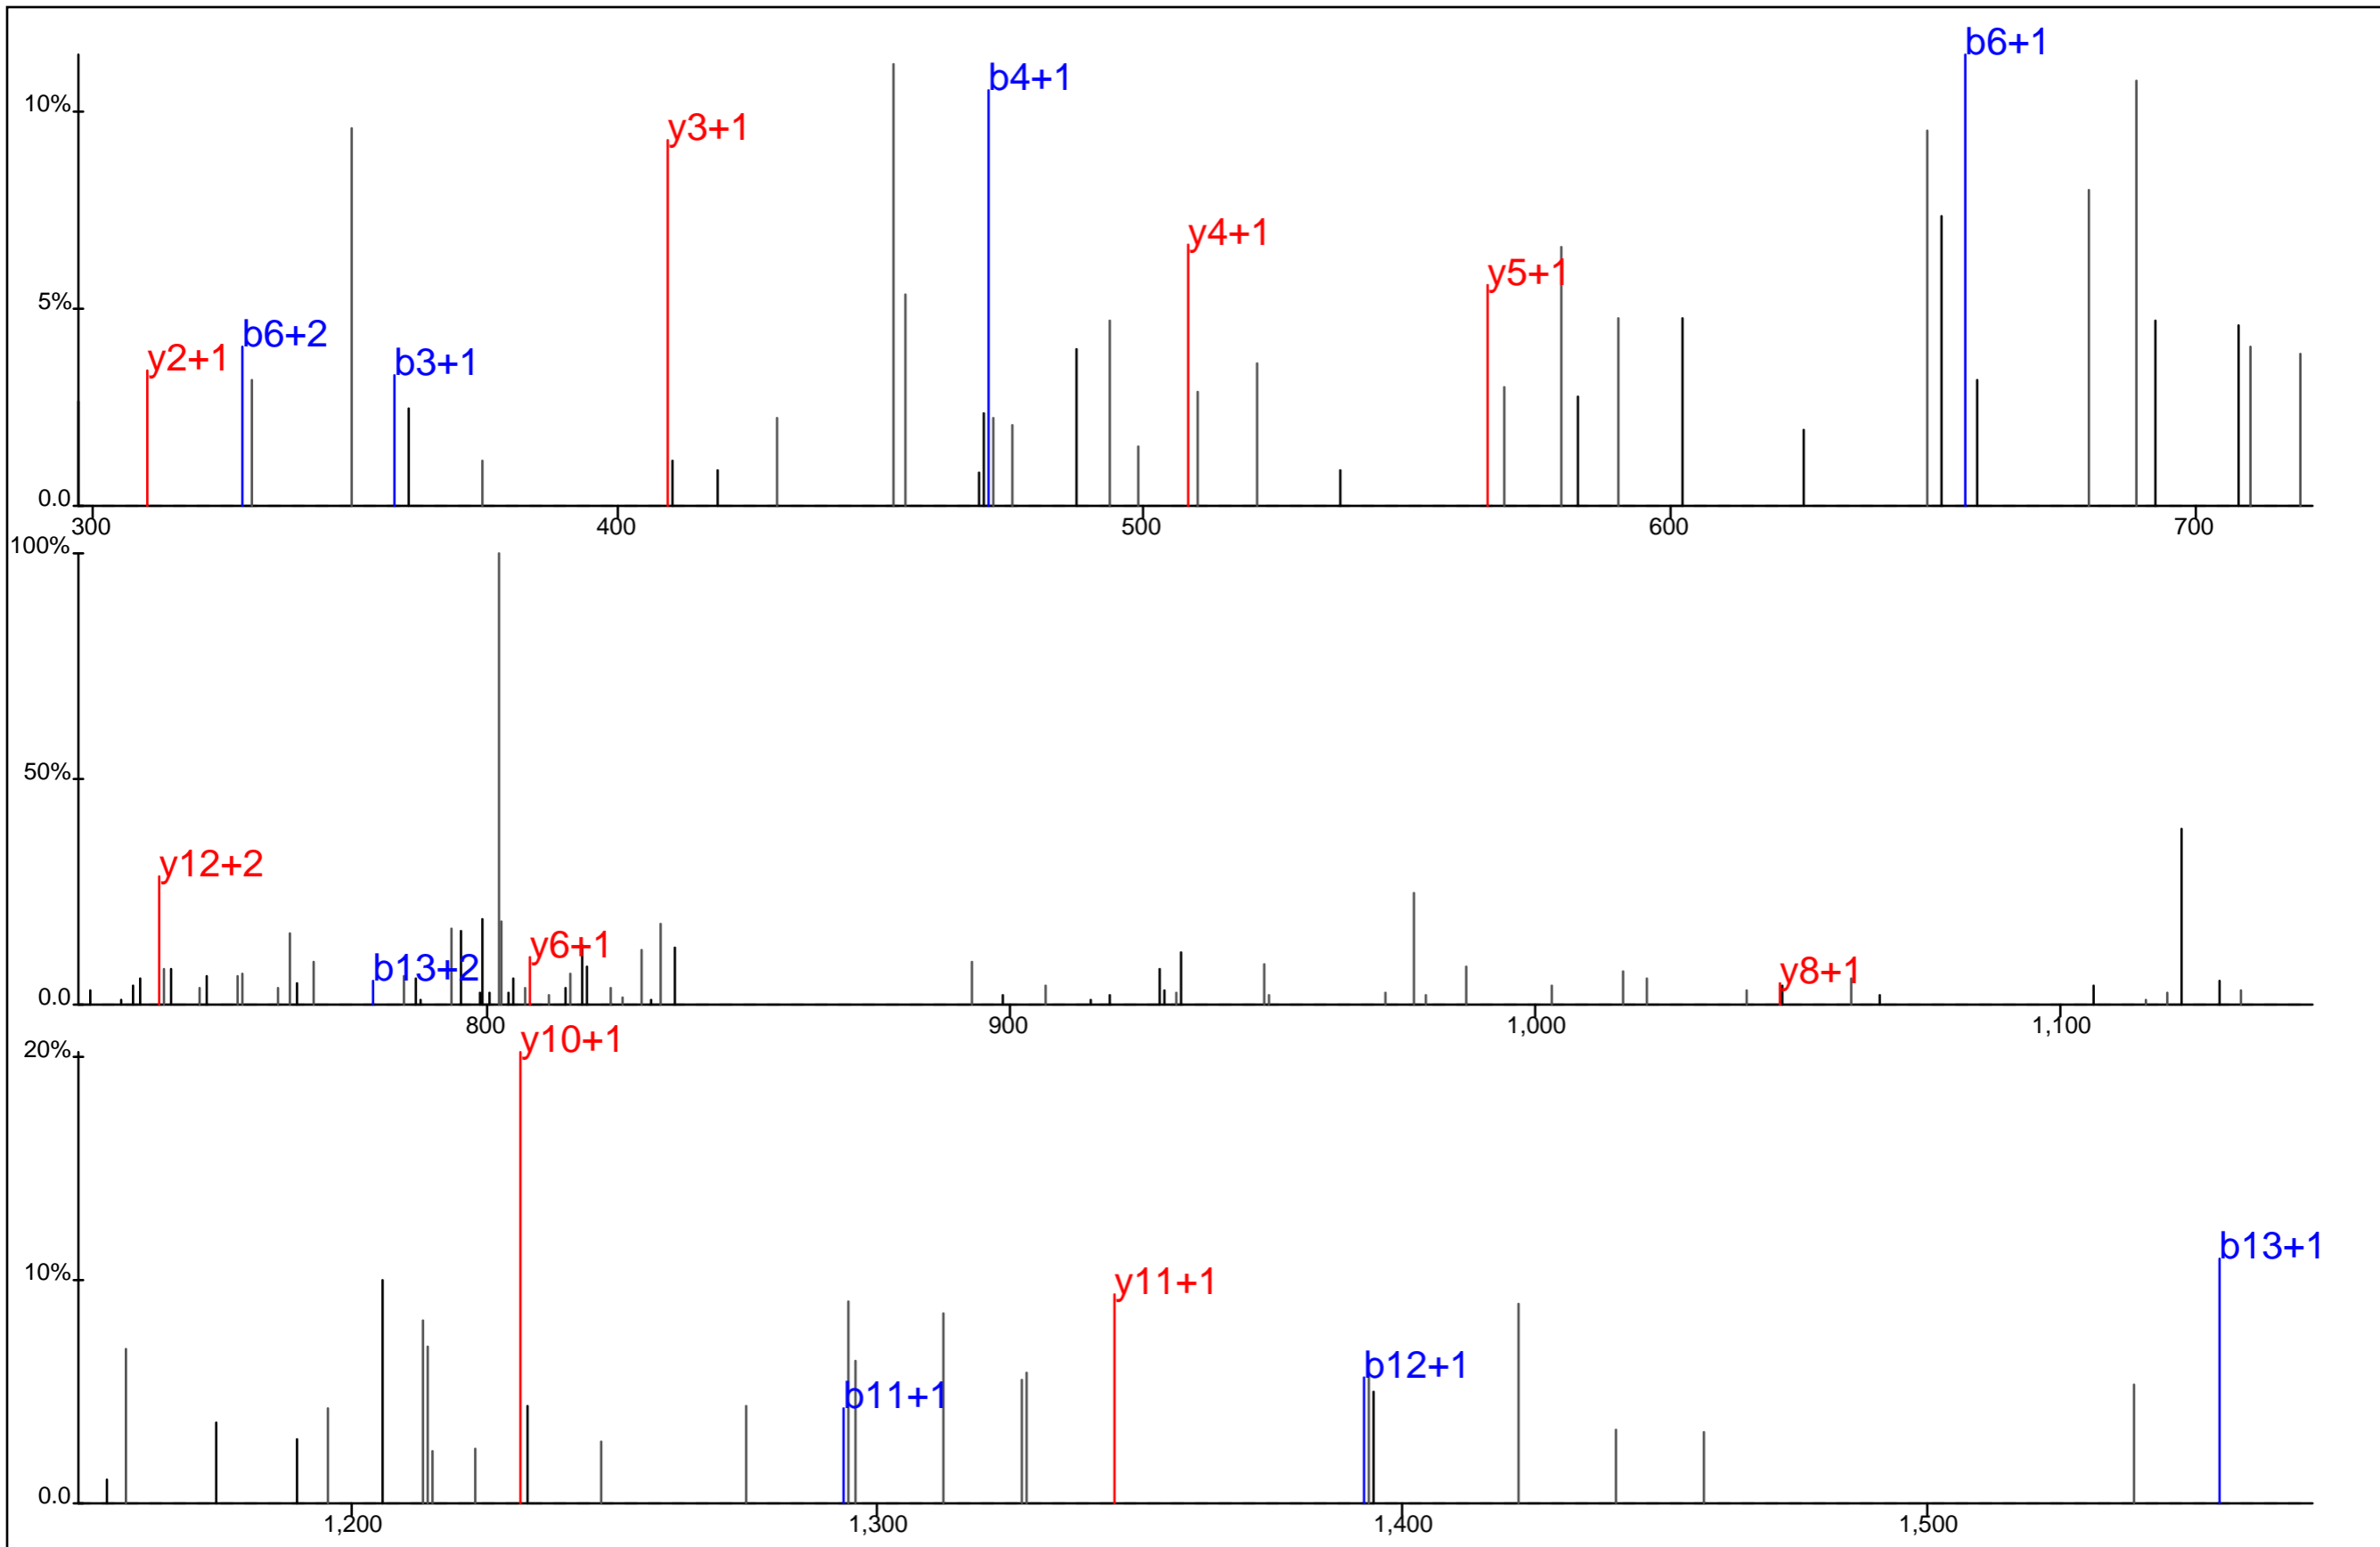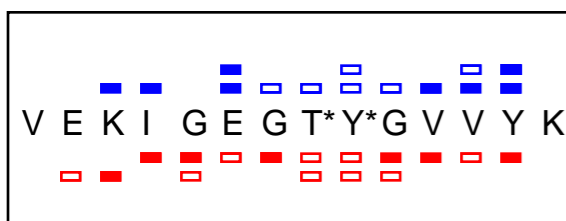

Protein Name: CDK2  
 gi Accession: 24158643  
 Precursor Mass: 851.3826+2  
 Delta Mass: 2.484 ppm  
 XCorr: 23.45

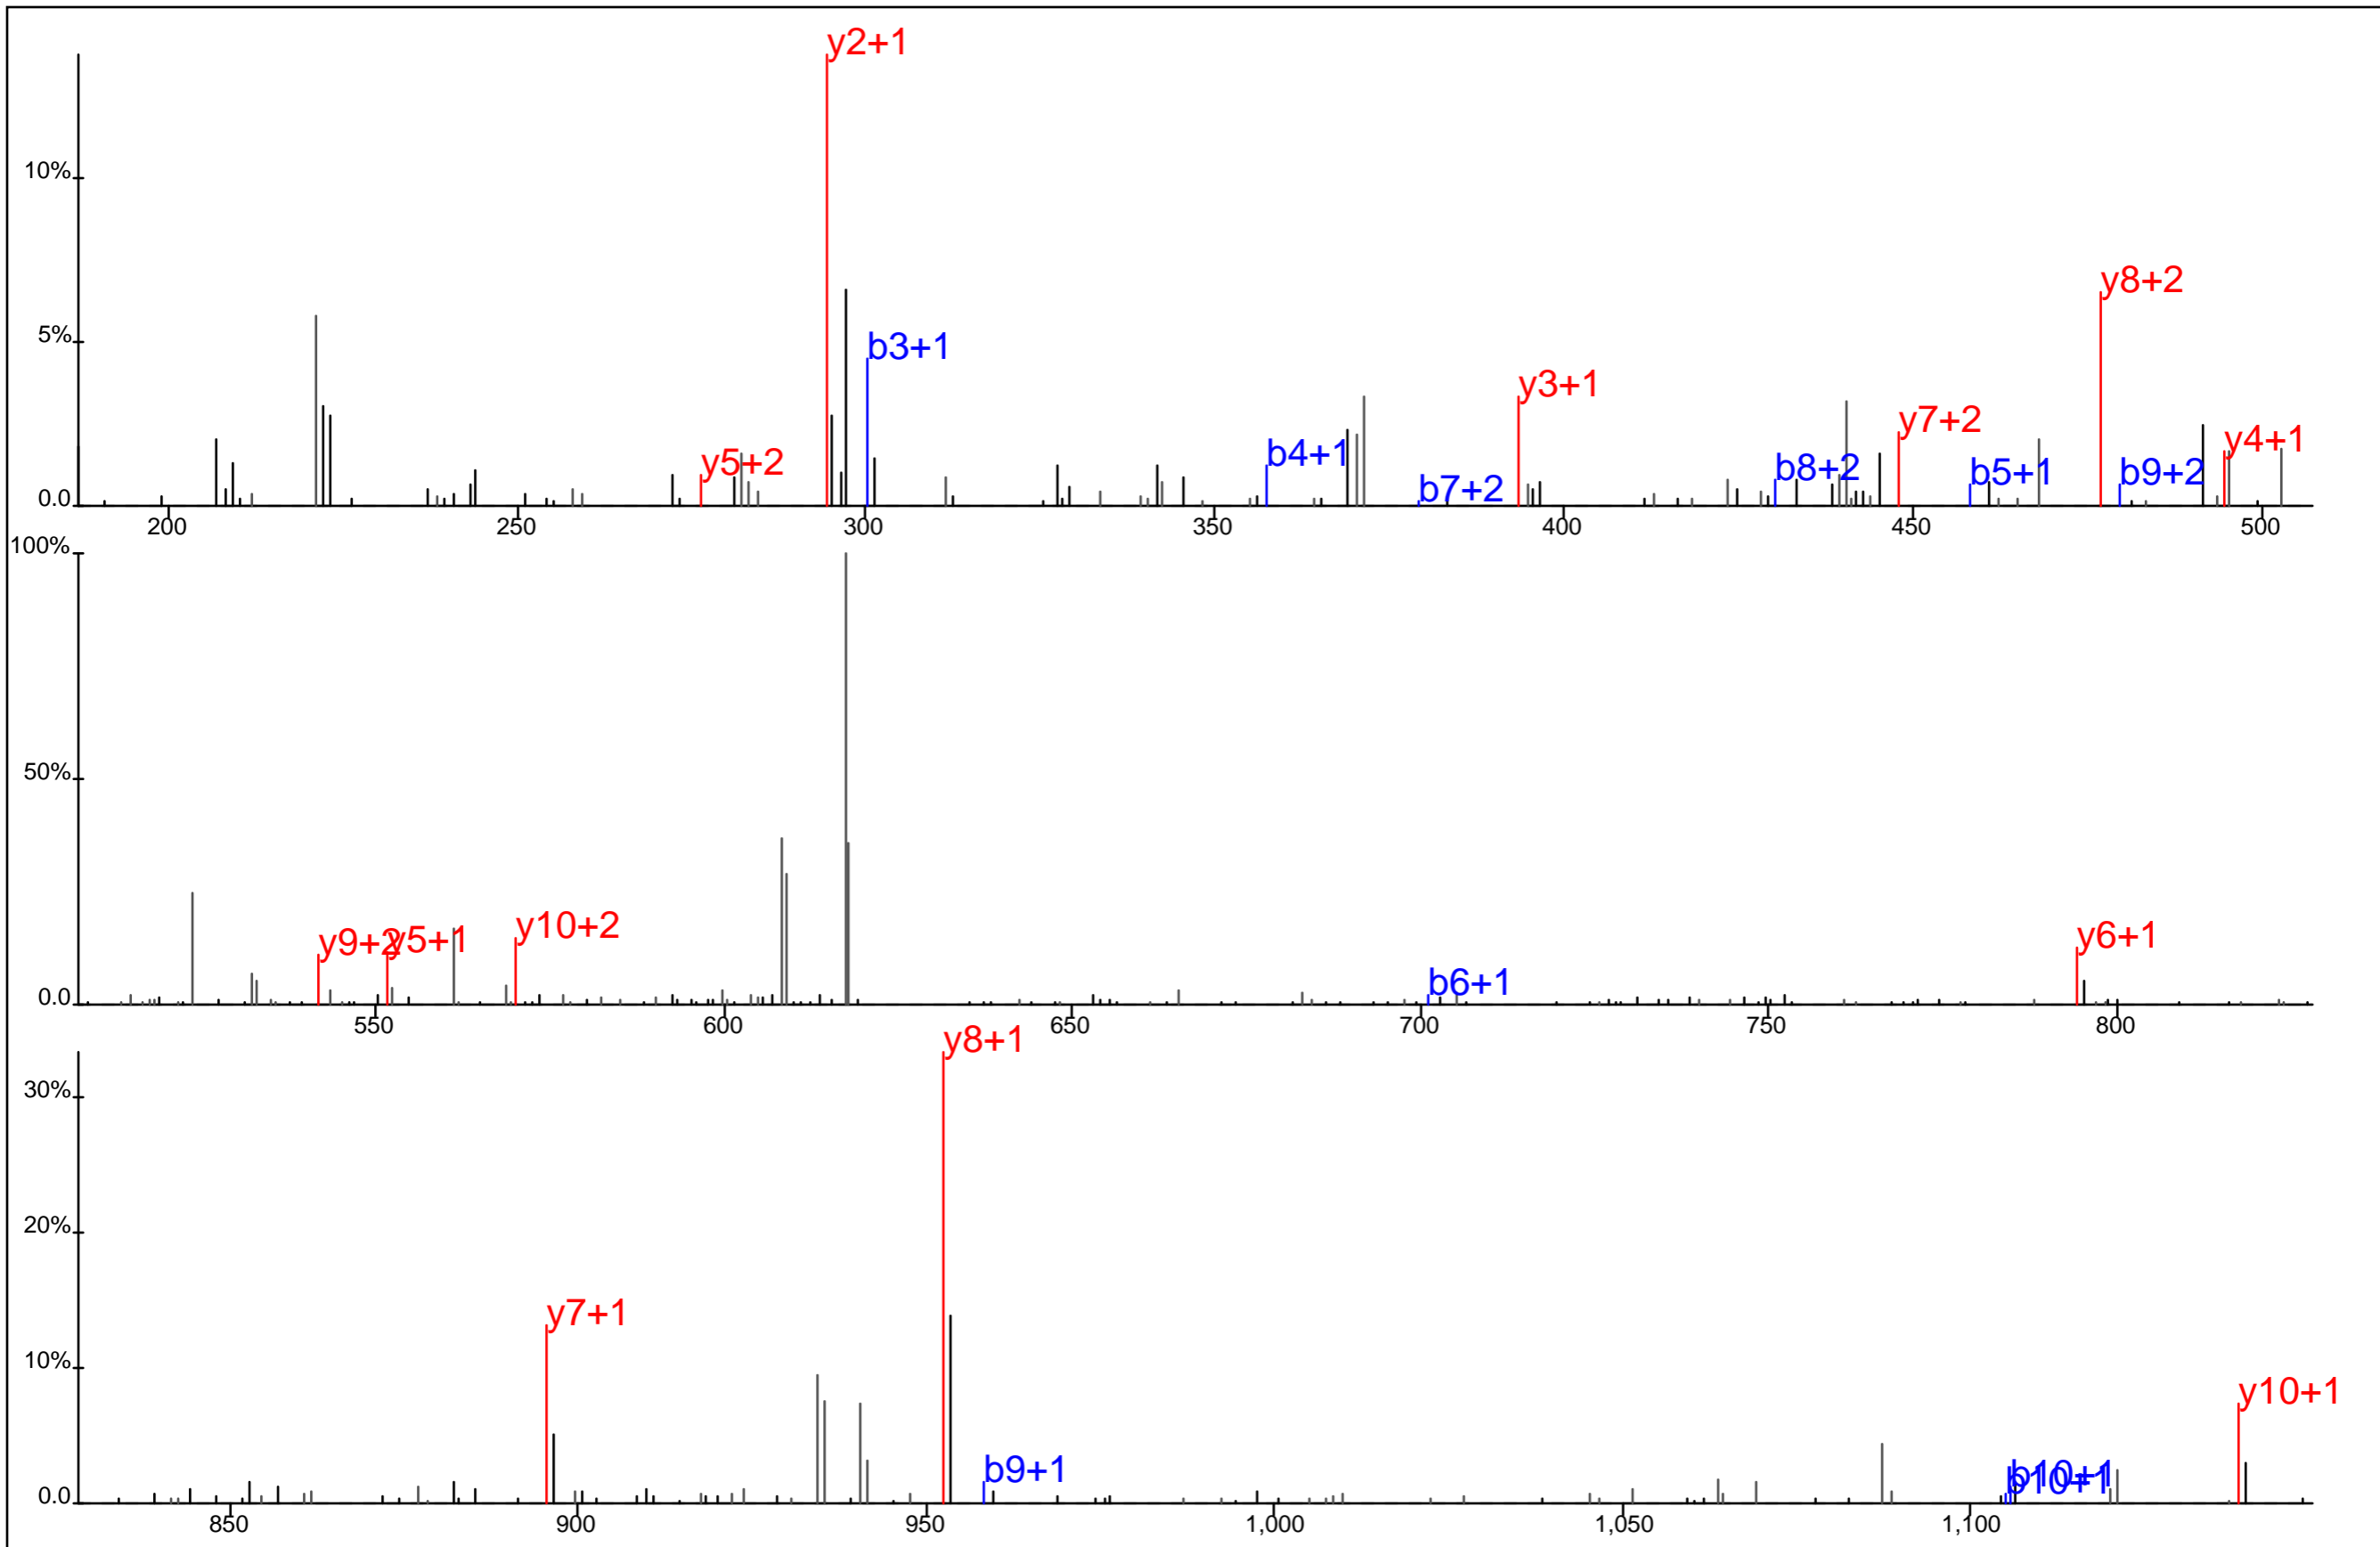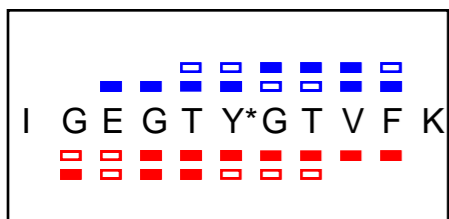

Protein Name: CDK5  
 gi Accession: 4826675  
 Precursor Mass: 626.2895+2  
 Delta Mass: 4.792 ppm  
 XCorr: 39.78

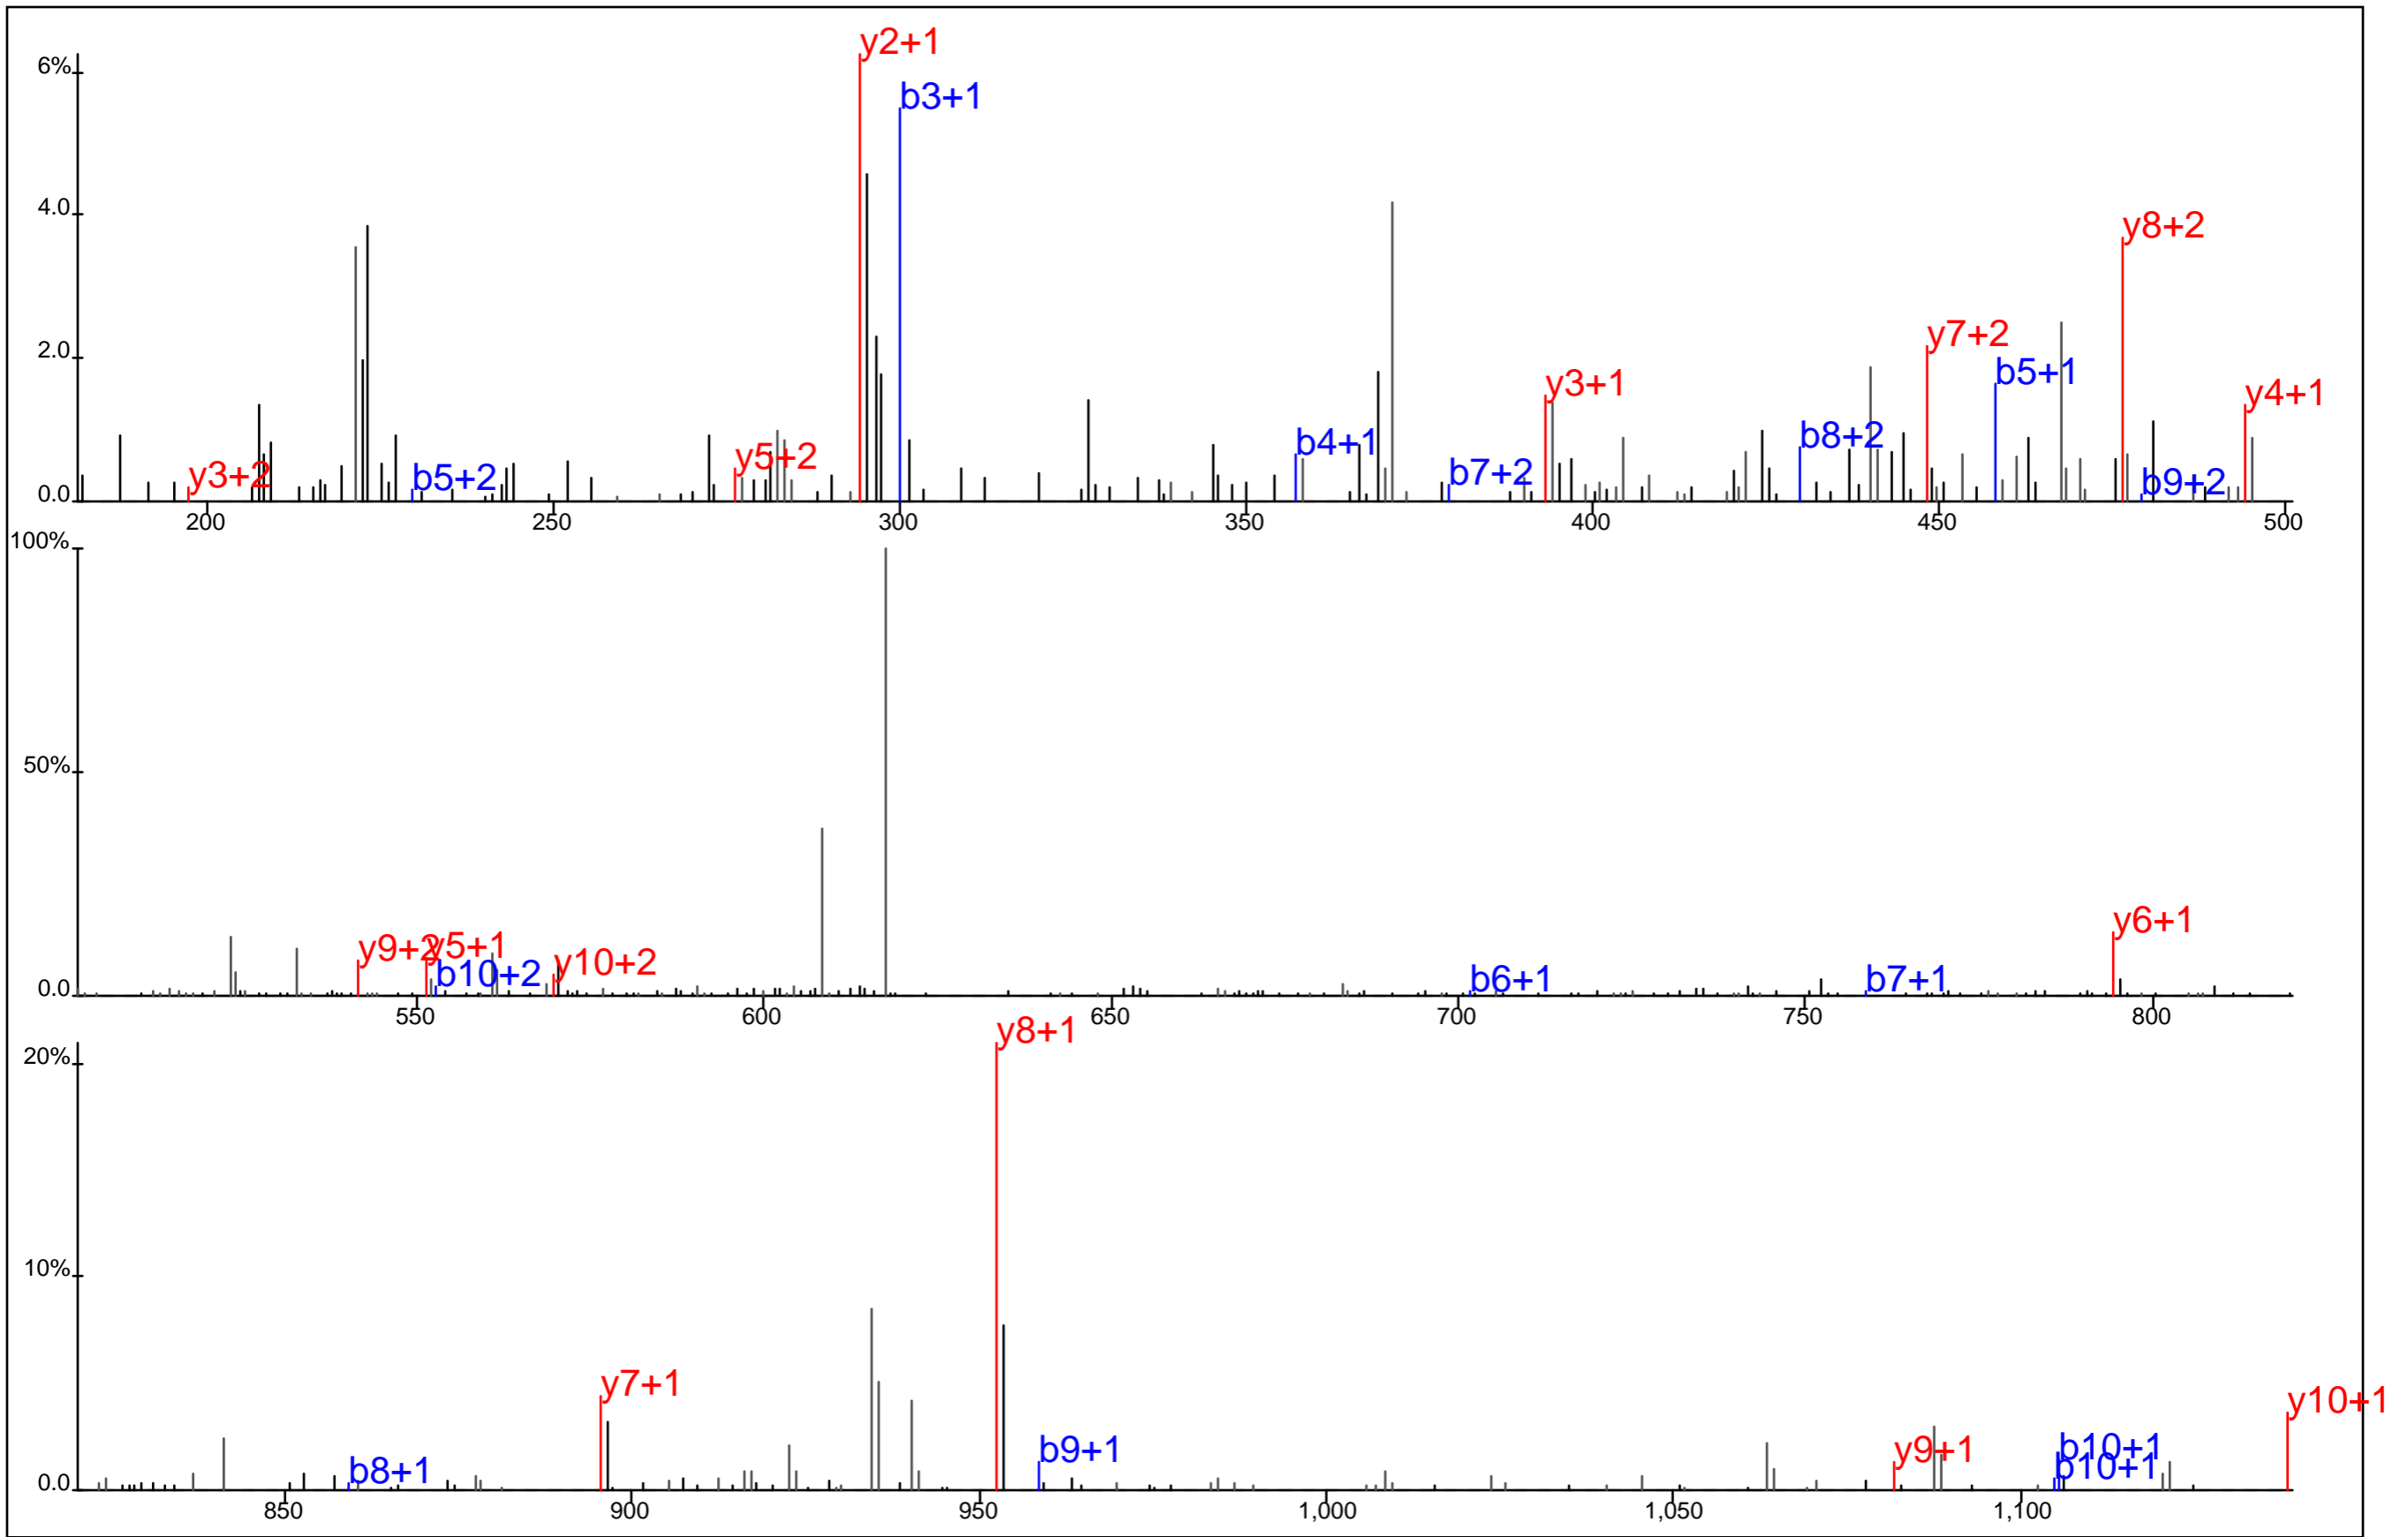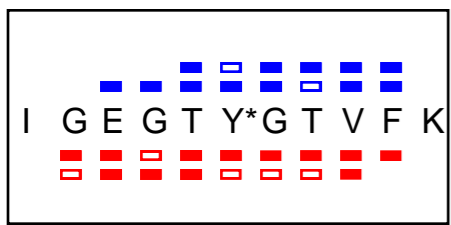

Protein Name: CDK5  
 gi Accession: 4826675  
 Precursor Mass: 626.2901+2  
 Delta Mass: 5.767 ppm  
 XCorr: 42.16

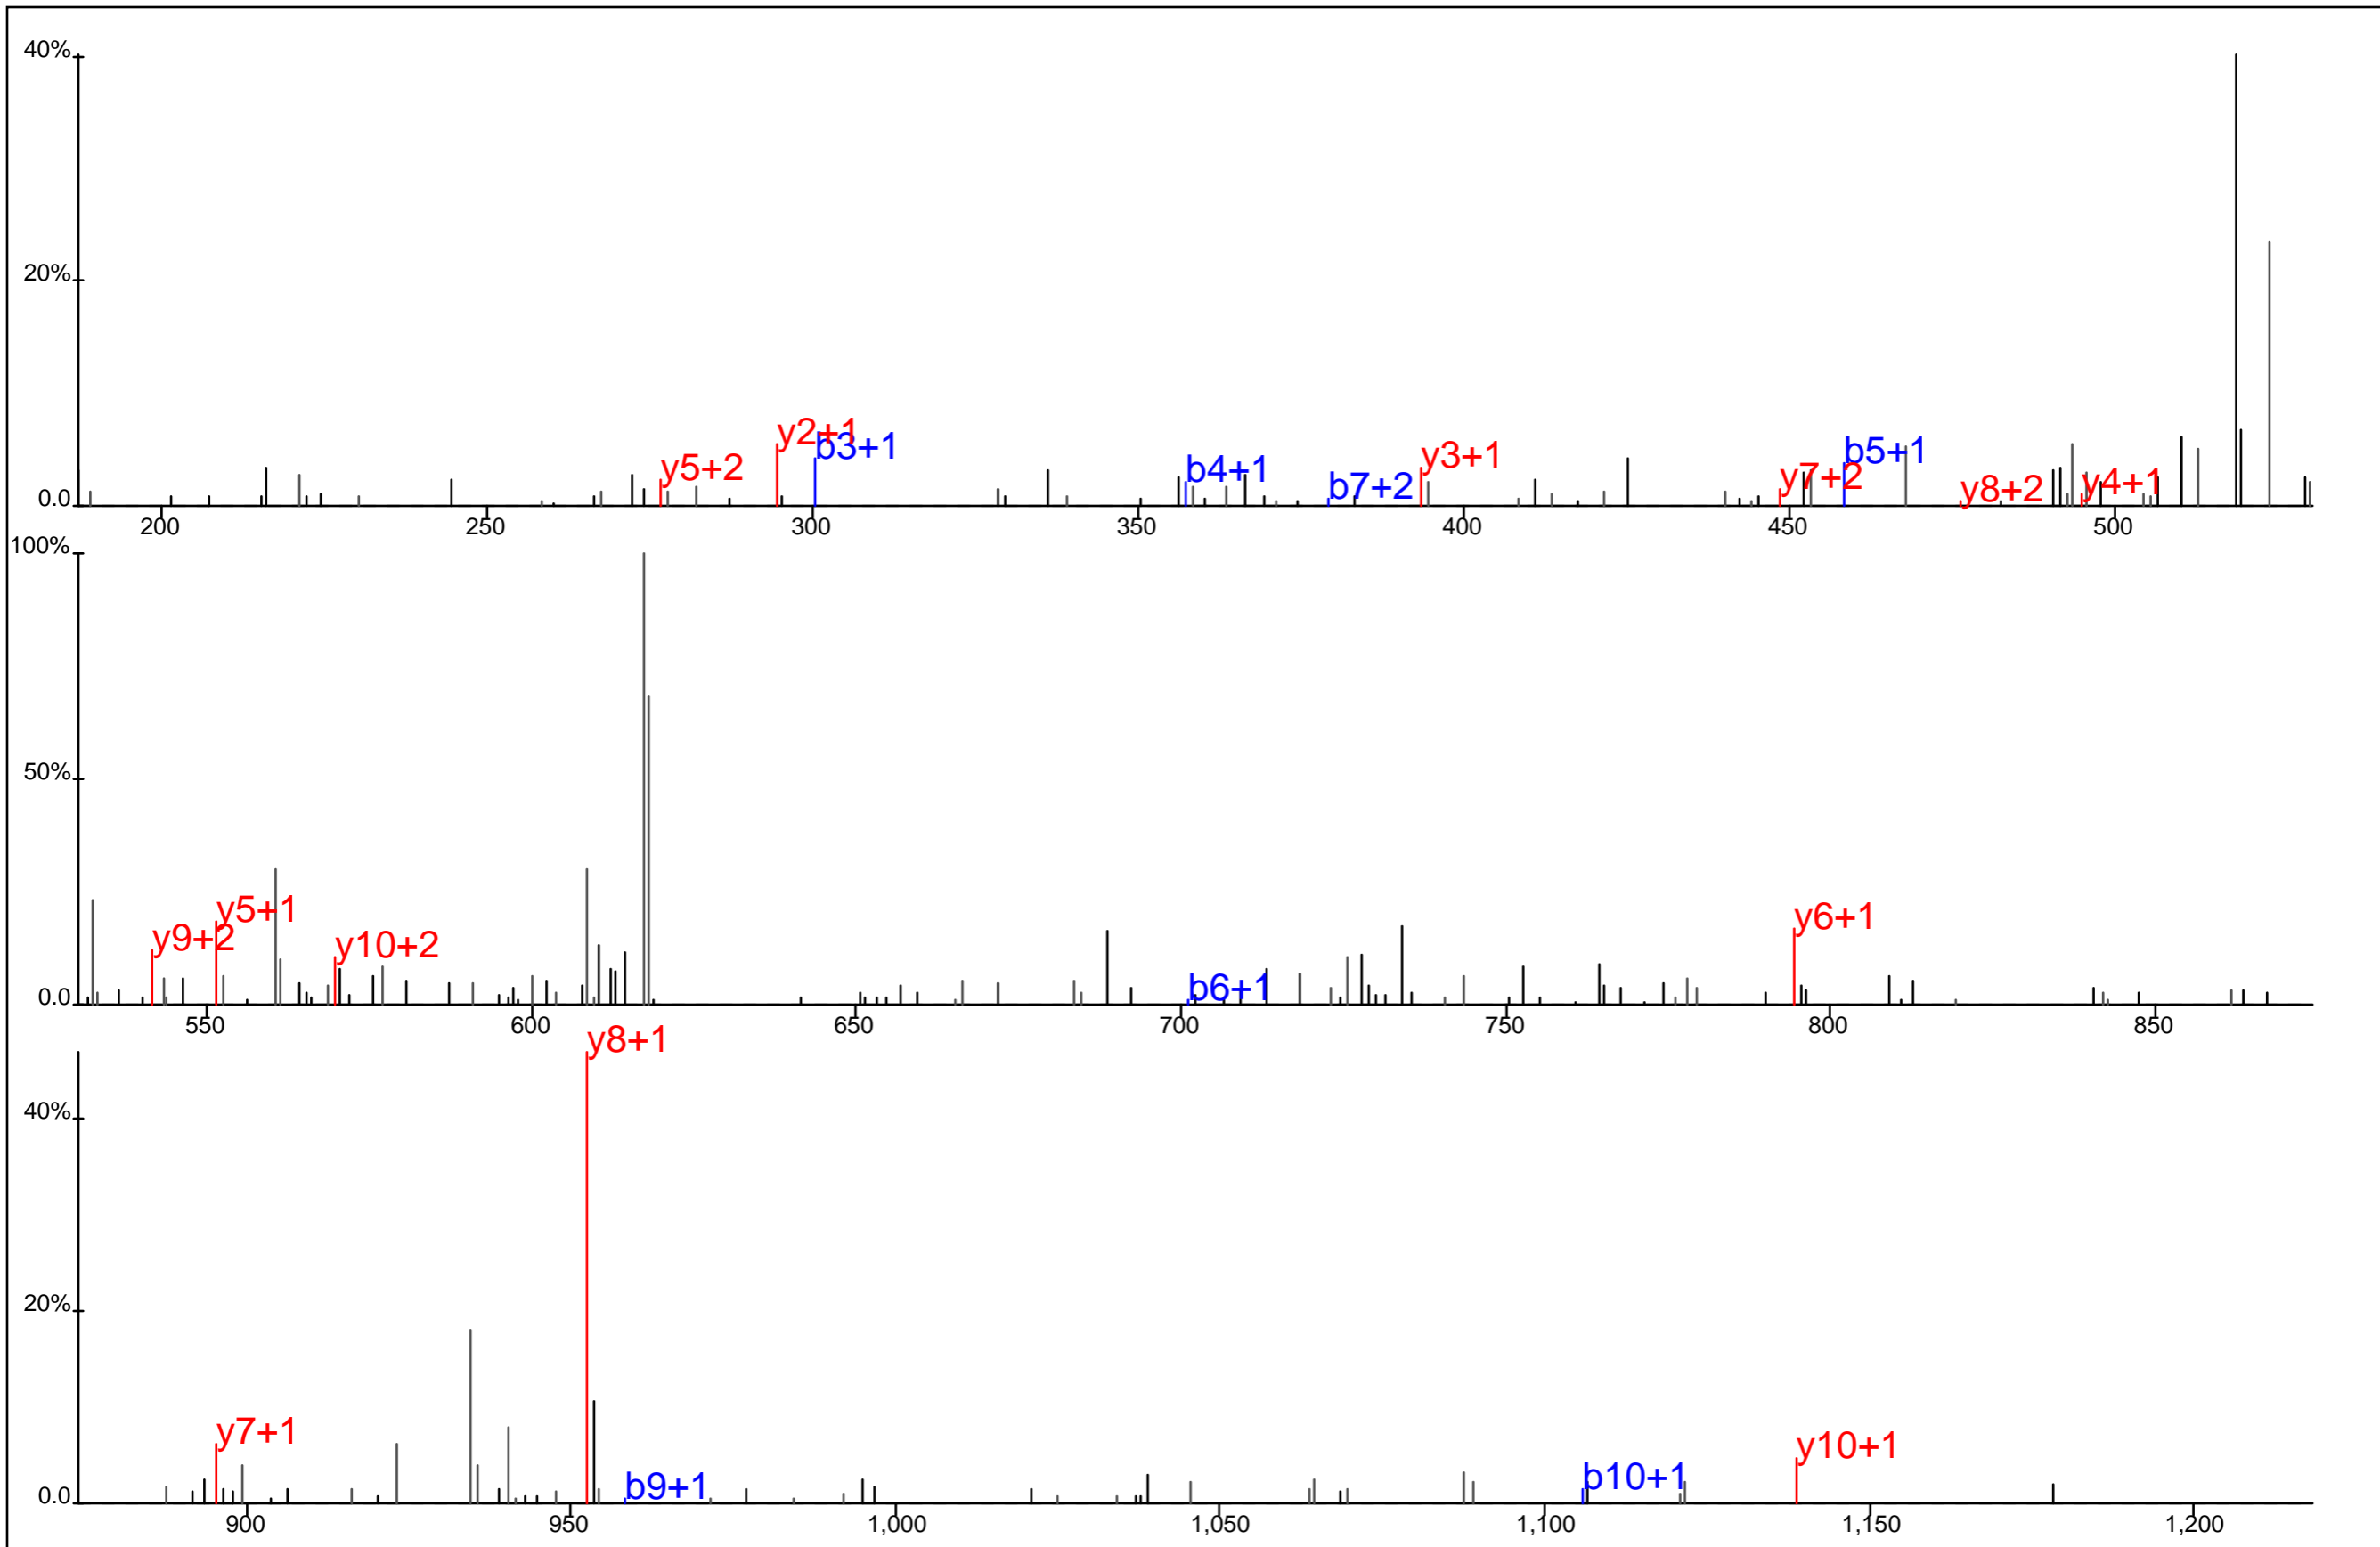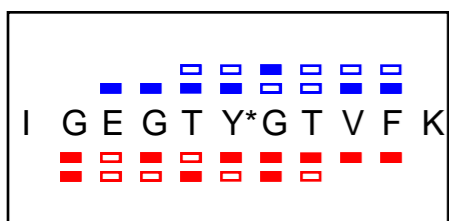

Protein Name: CDK5  
 gi Accession: 4826675  
 Precursor Mass: 626.2889+2  
 Delta Mass: 3.913 ppm  
 XCorr: 25.65

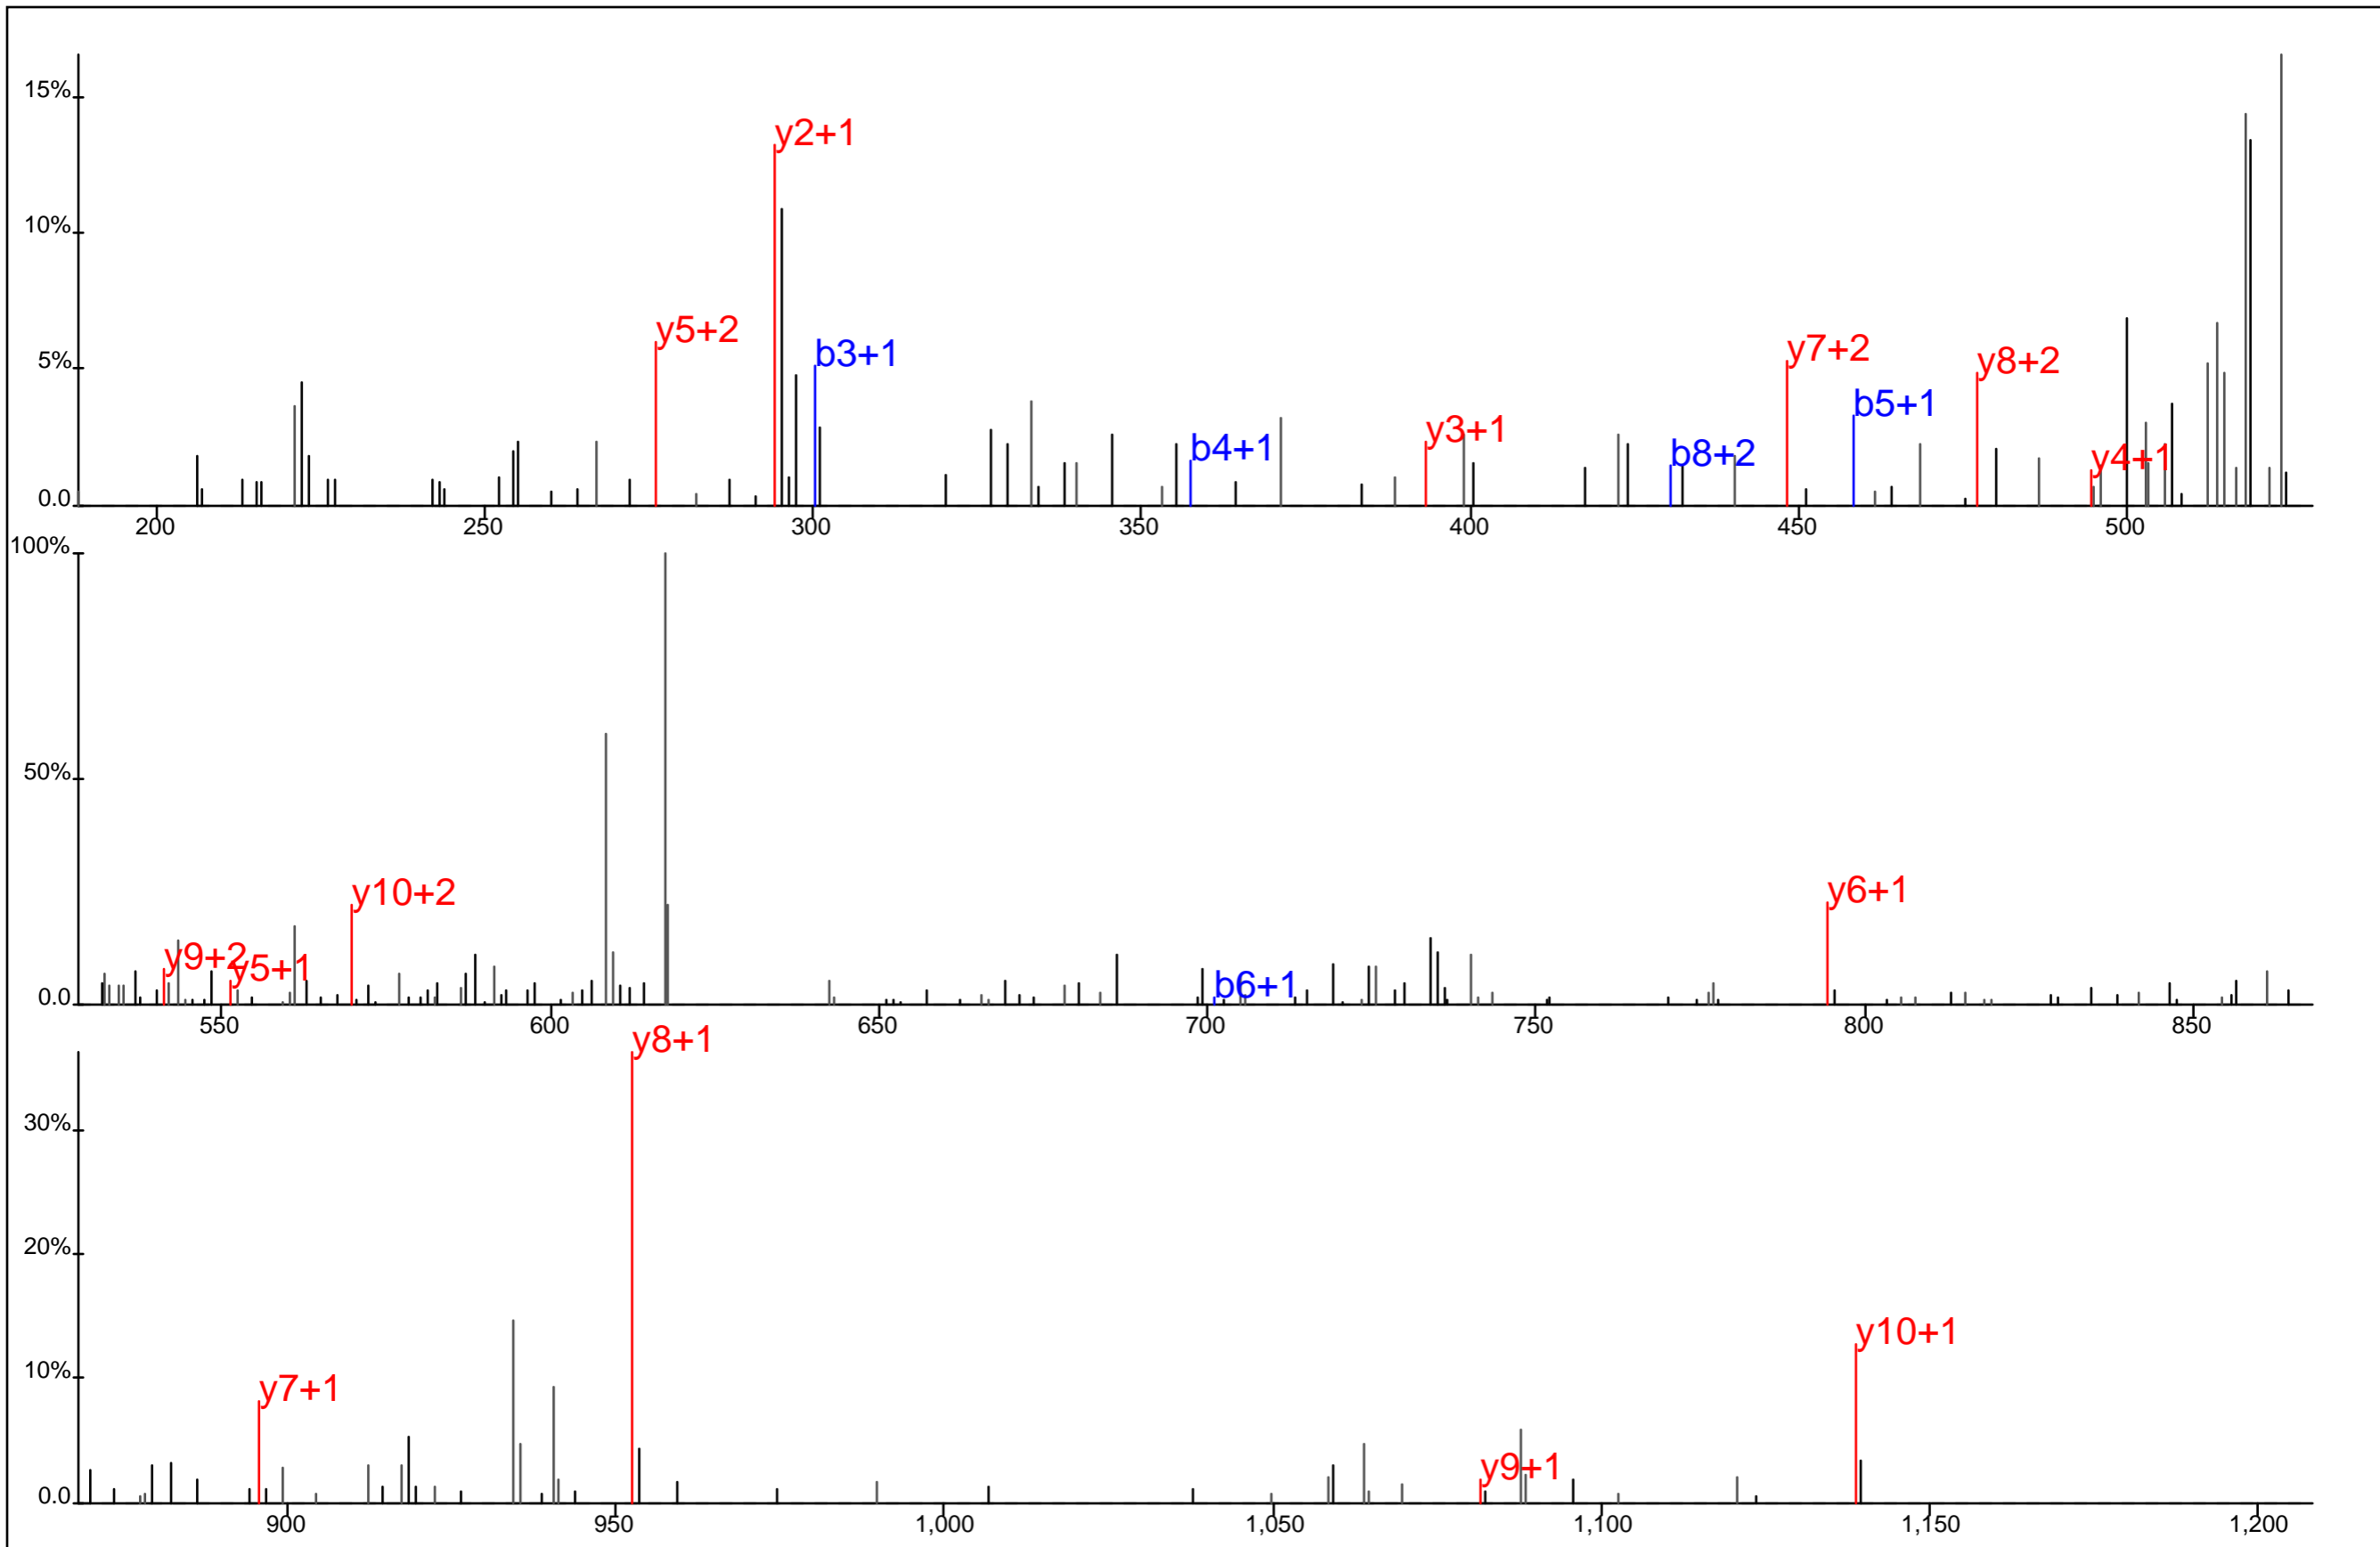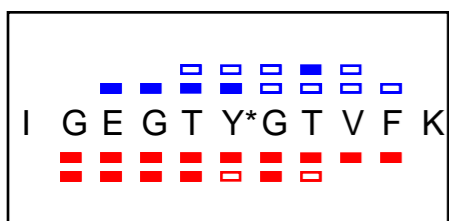

Protein Name: CDK5  
 gi Accession: 4826675  
 Precursor Mass: 626.2878+2  
 Delta Mass: 2.060 ppm  
 XCorr: 29.77

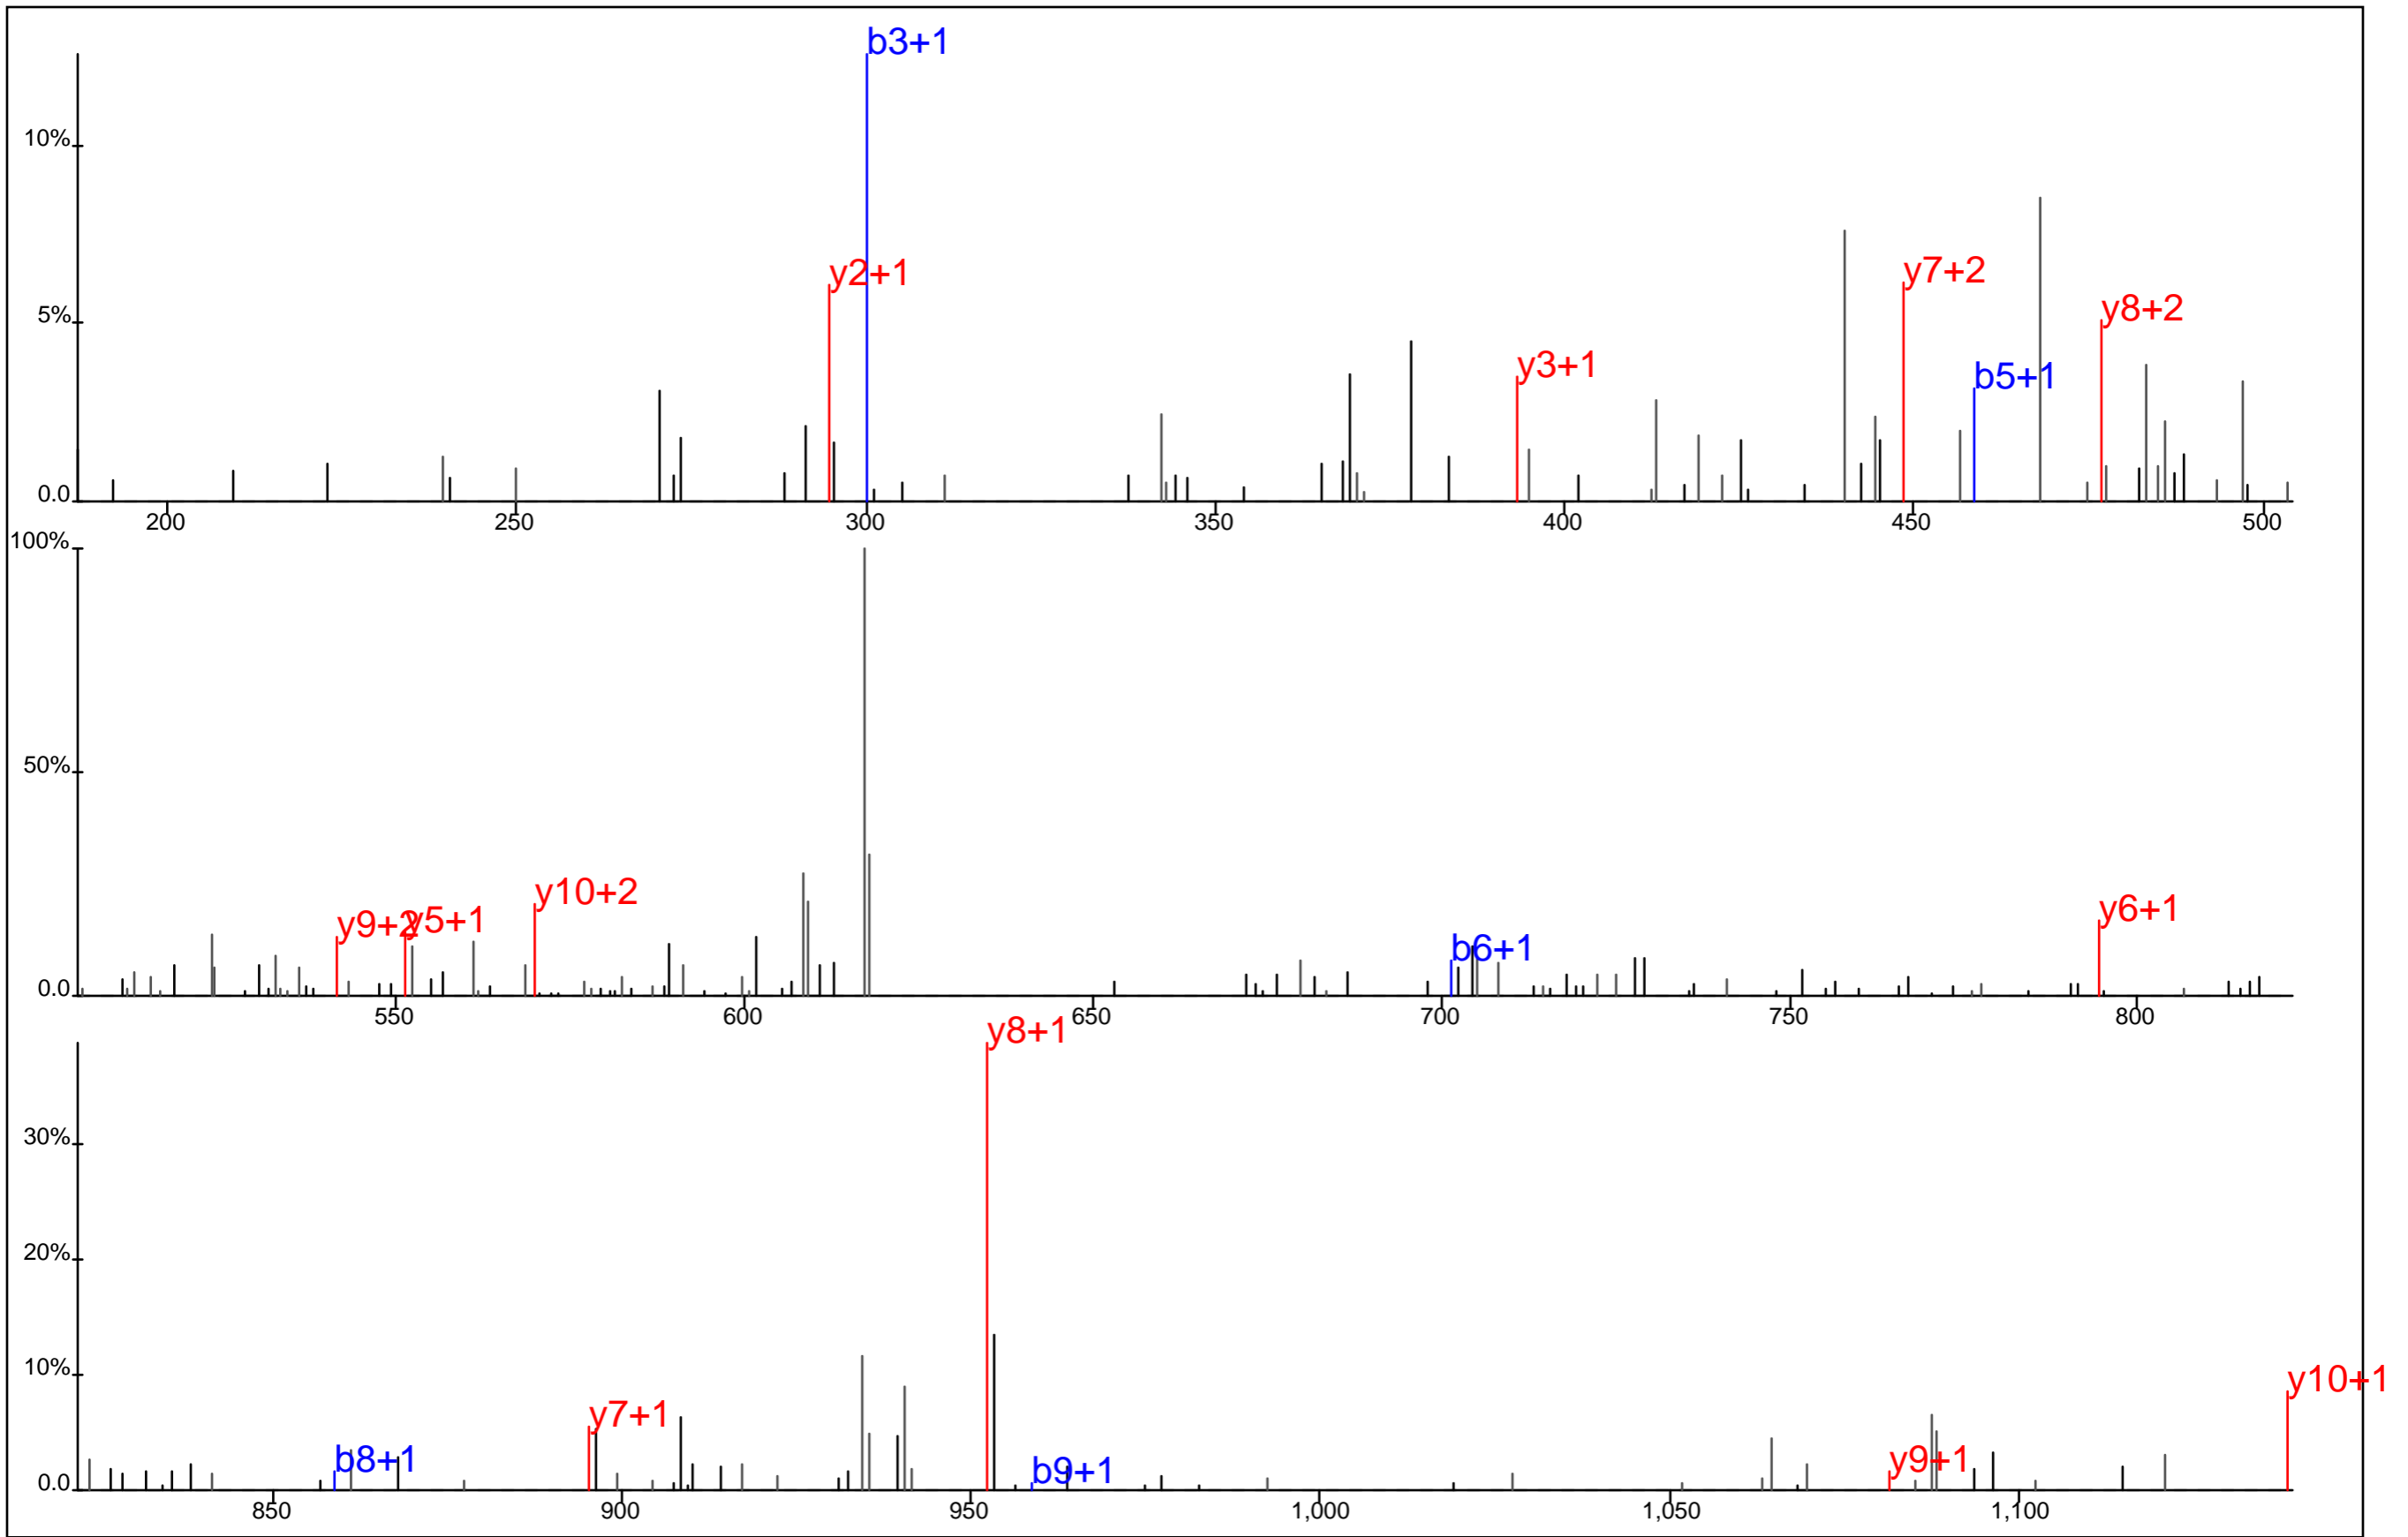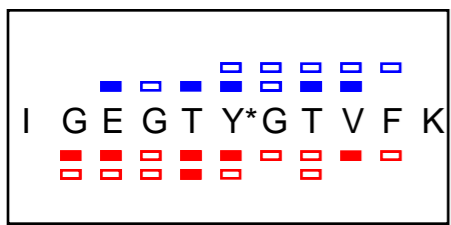

Protein Name: CDK5  
 gi Accession: 4826675  
 Precursor Mass: 626.2889+2  
 Delta Mass: 3.913 ppm  
 XCorr: 36.68



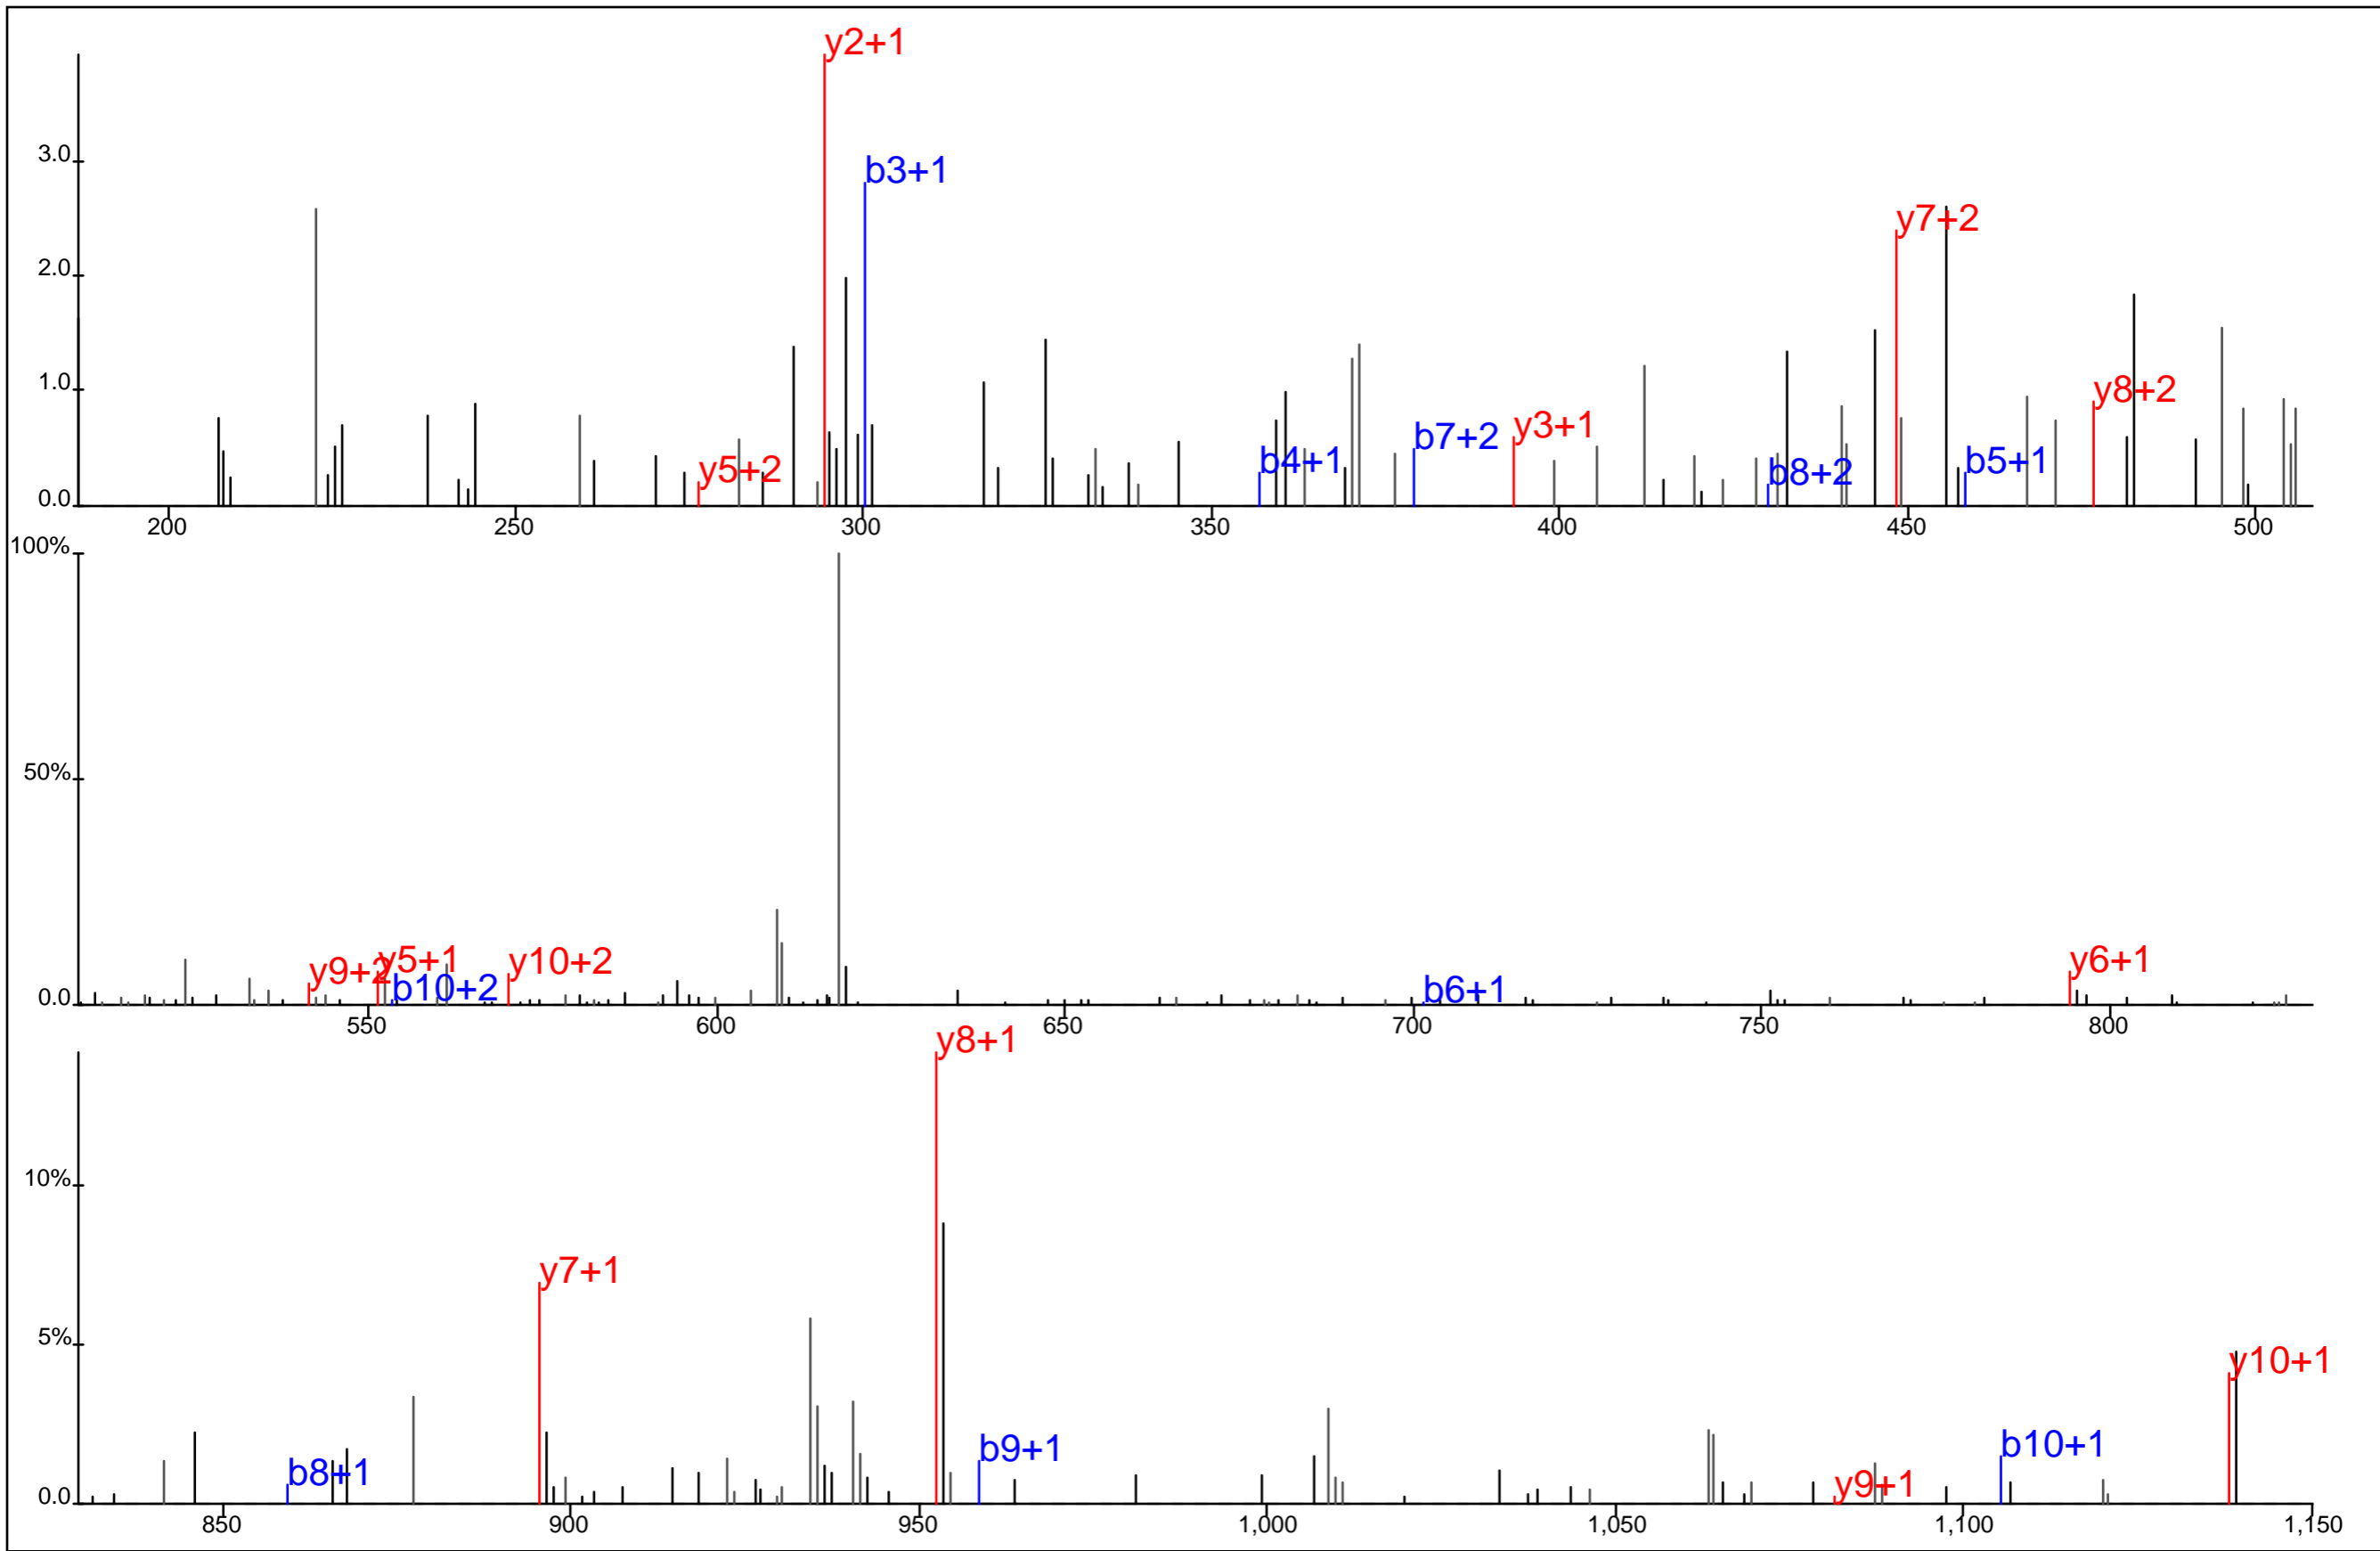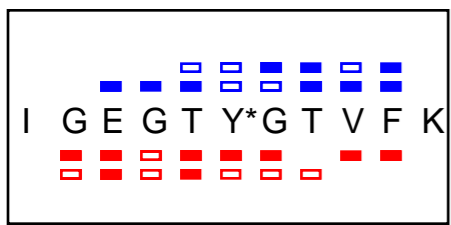

Protein Name: CDK5  
 gi Accession: 4826675  
 Precursor Mass: 626.2870+2  
 Delta Mass: 0.797 ppm  
 XCorr: 28.86

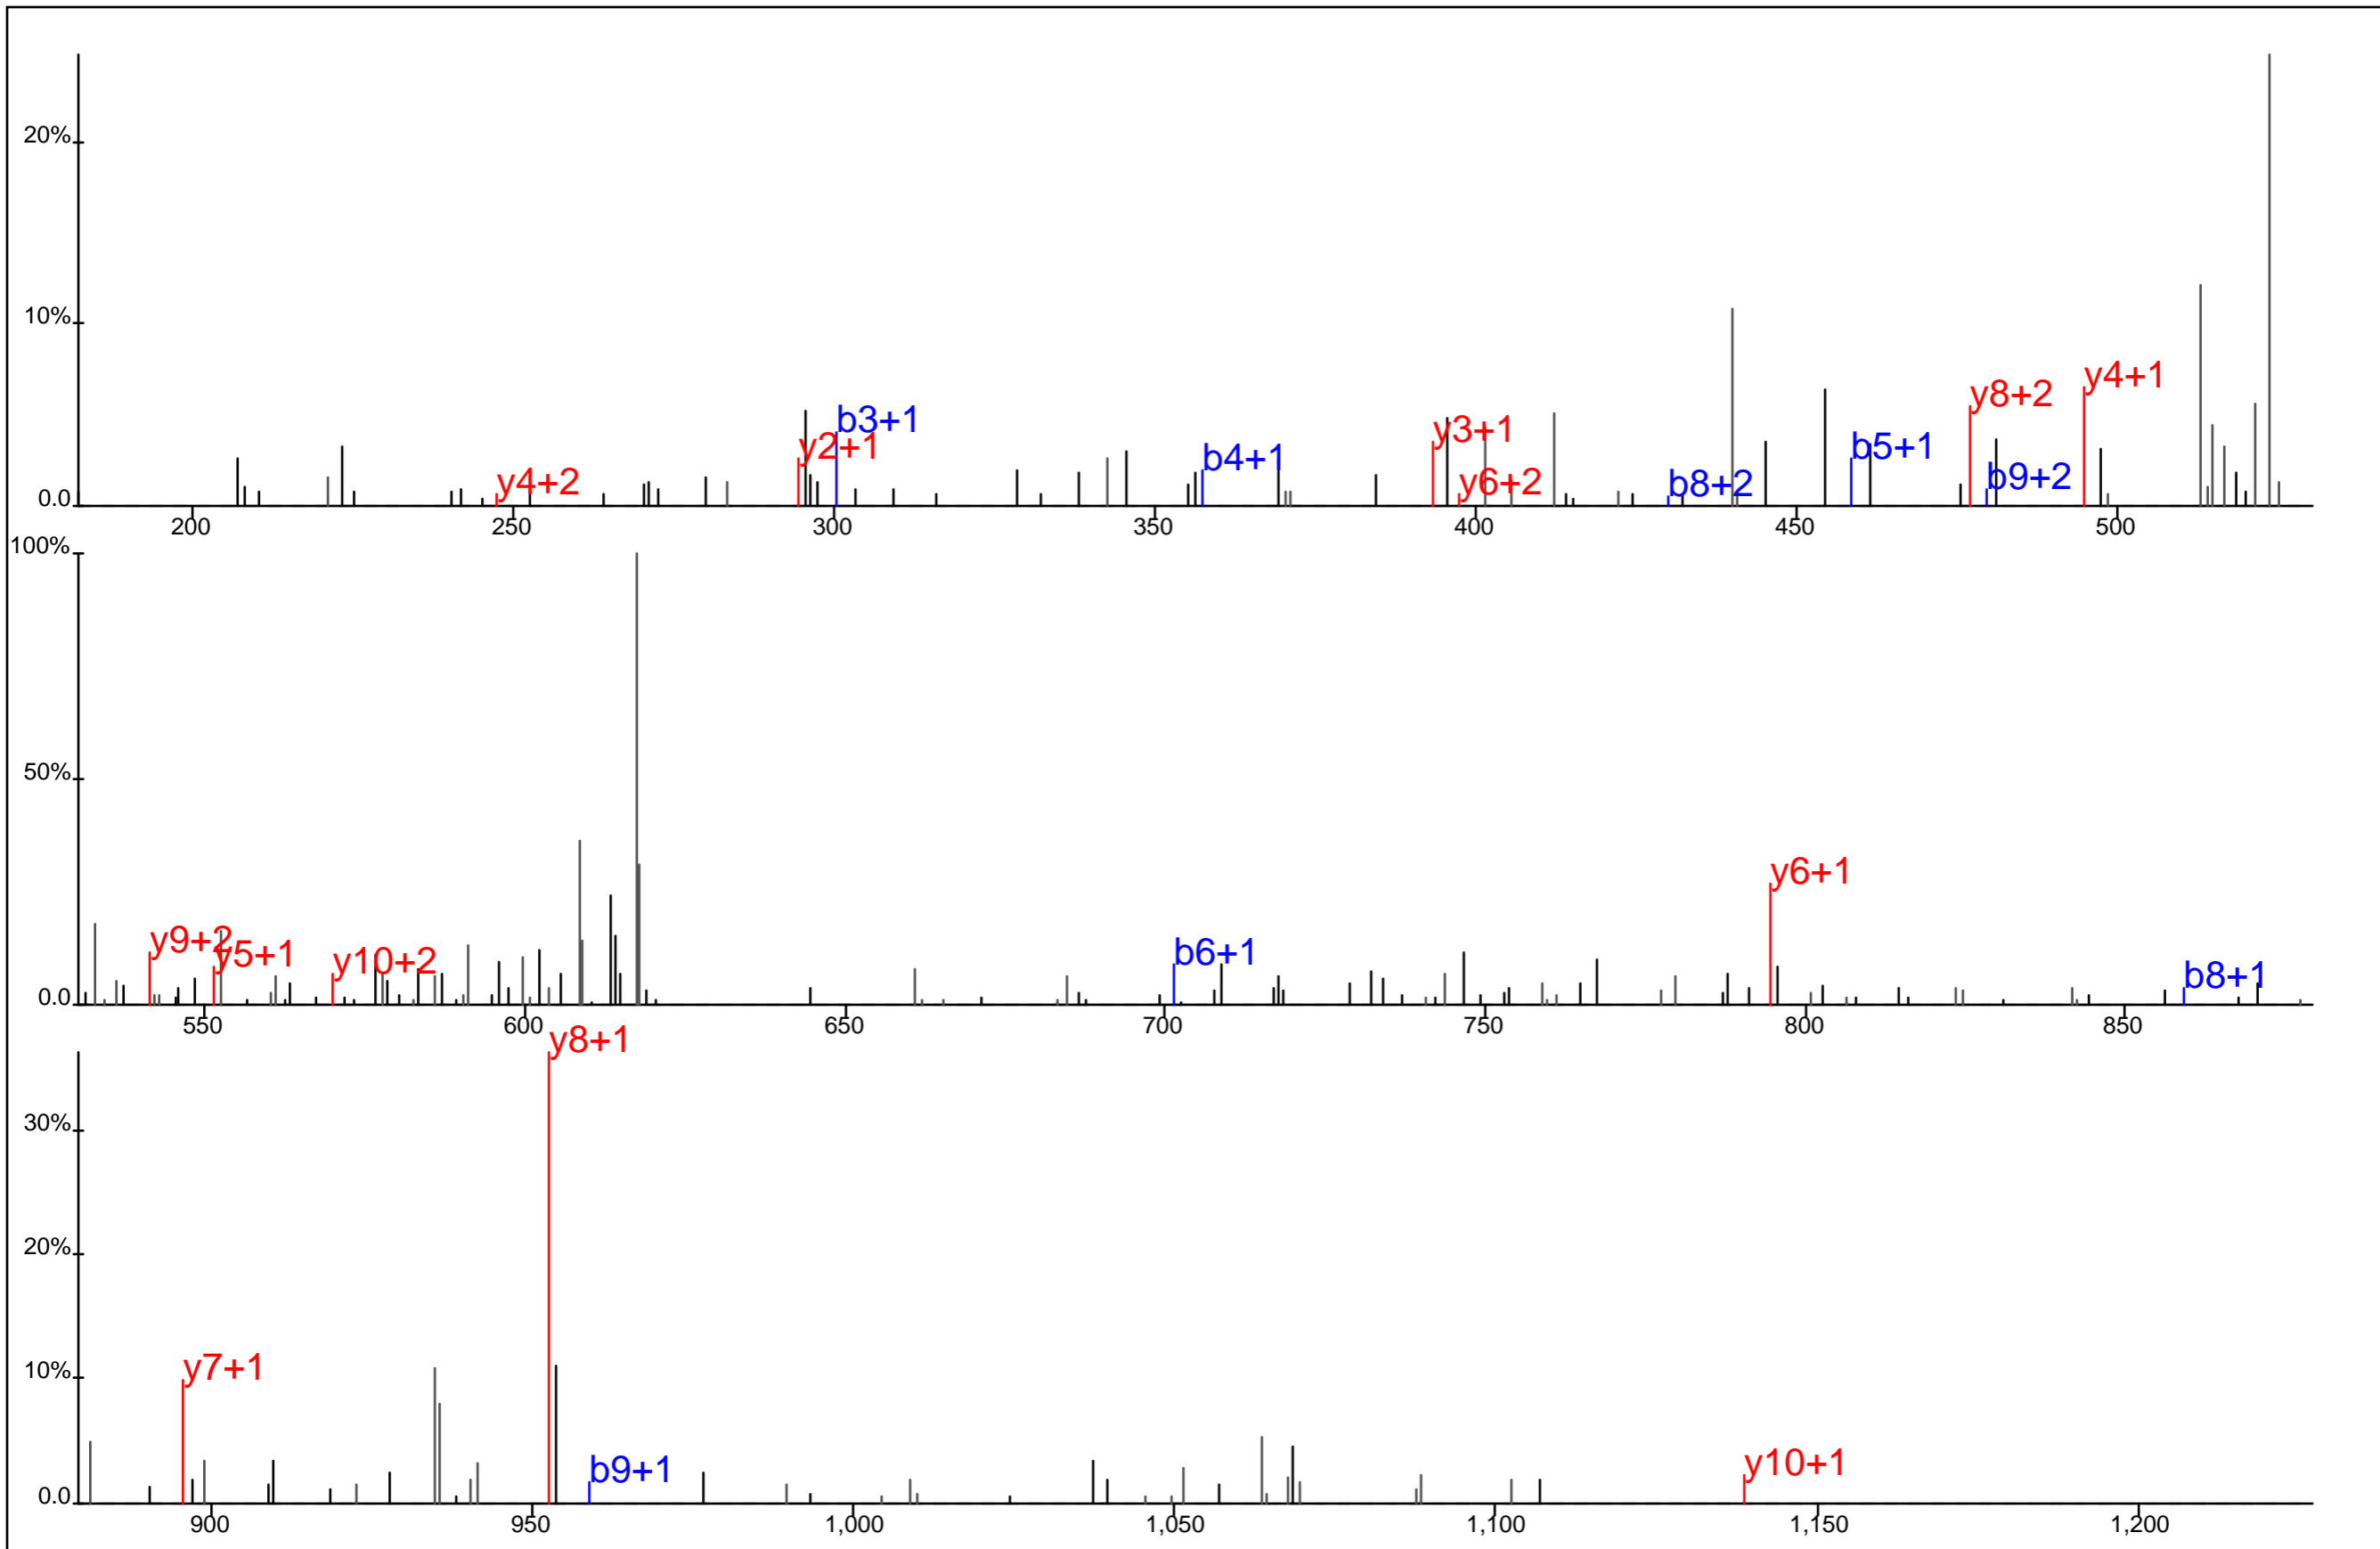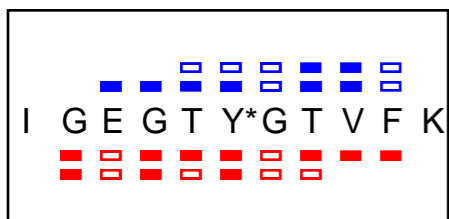

Protein Name: CDK5  
 gi Accession: 4826675  
 Precursor Mass: 626.2893+2  
 Delta Mass: 4.505 ppm  
 XCorr: 24.15

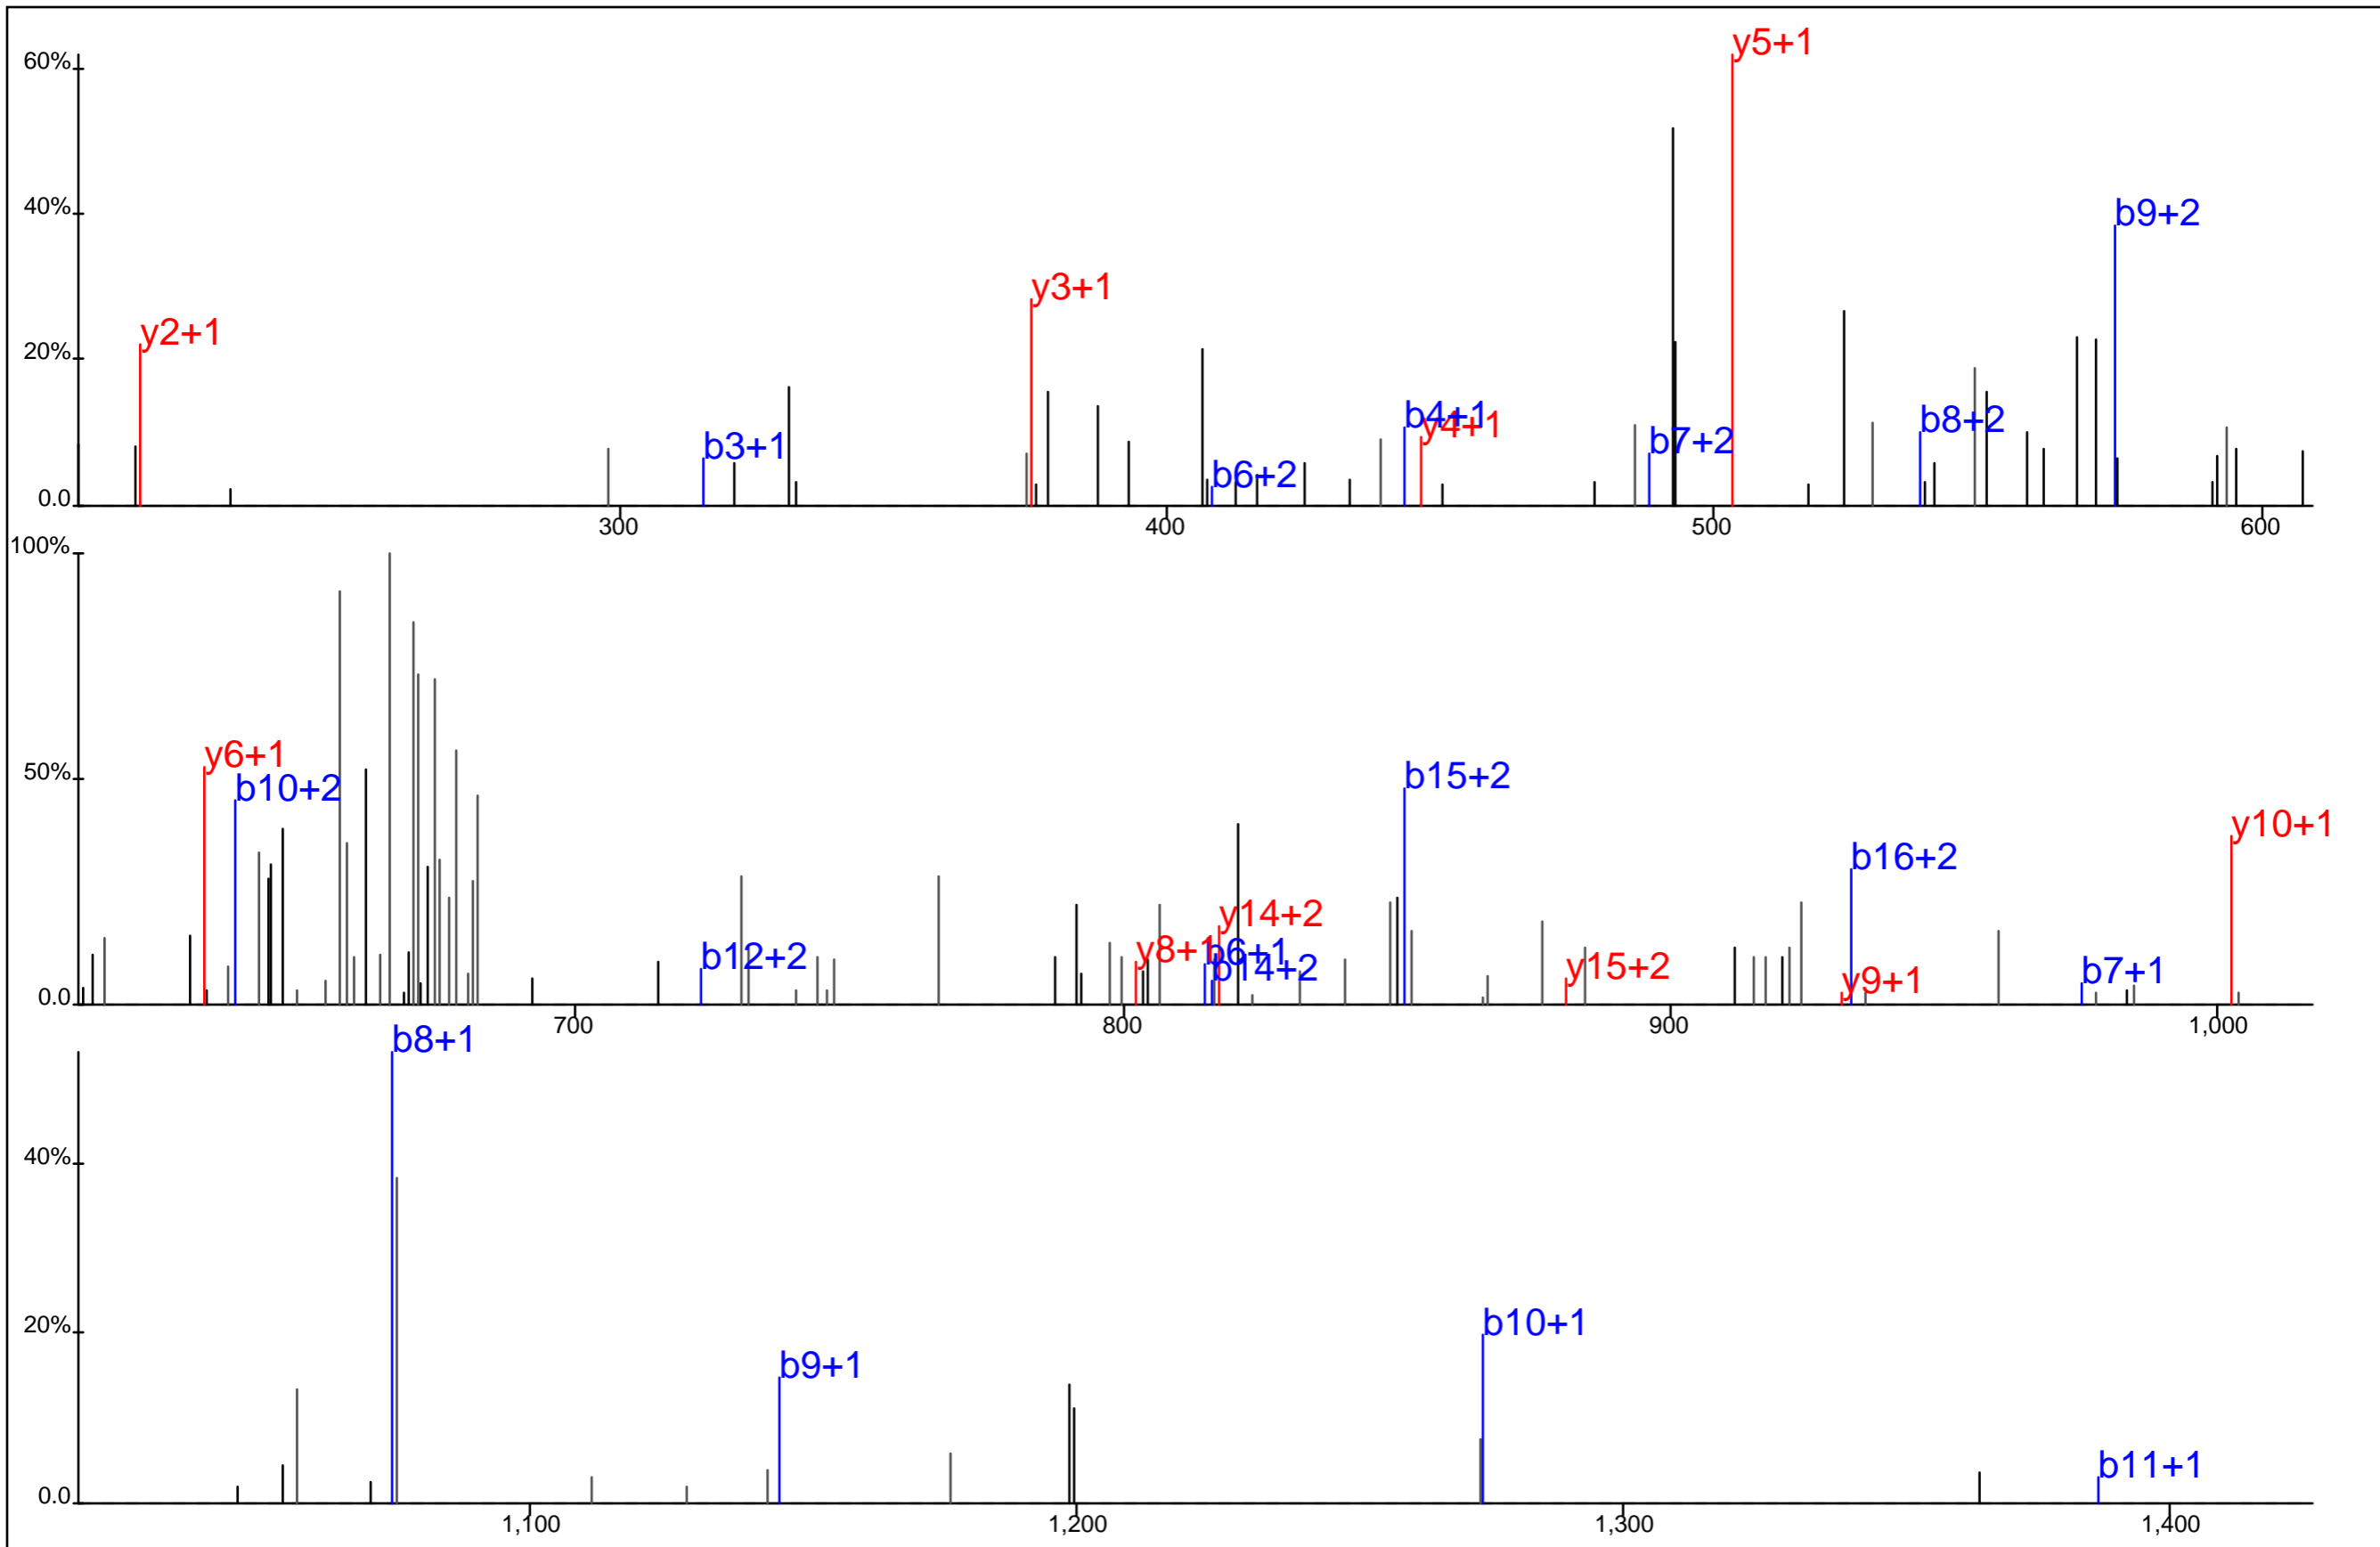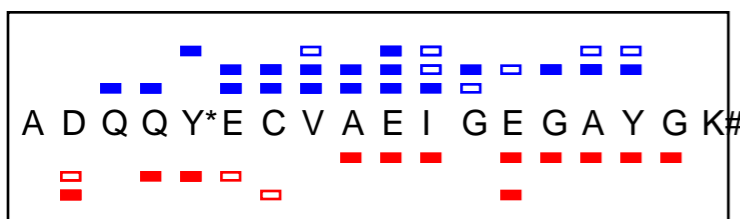

Protein Name: CDK6  
 gi Accession: 4502741  
 Precursor Mass: 692.6265+3  
 Delta Mass: 6.897 ppm  
 XCorr: 23.83

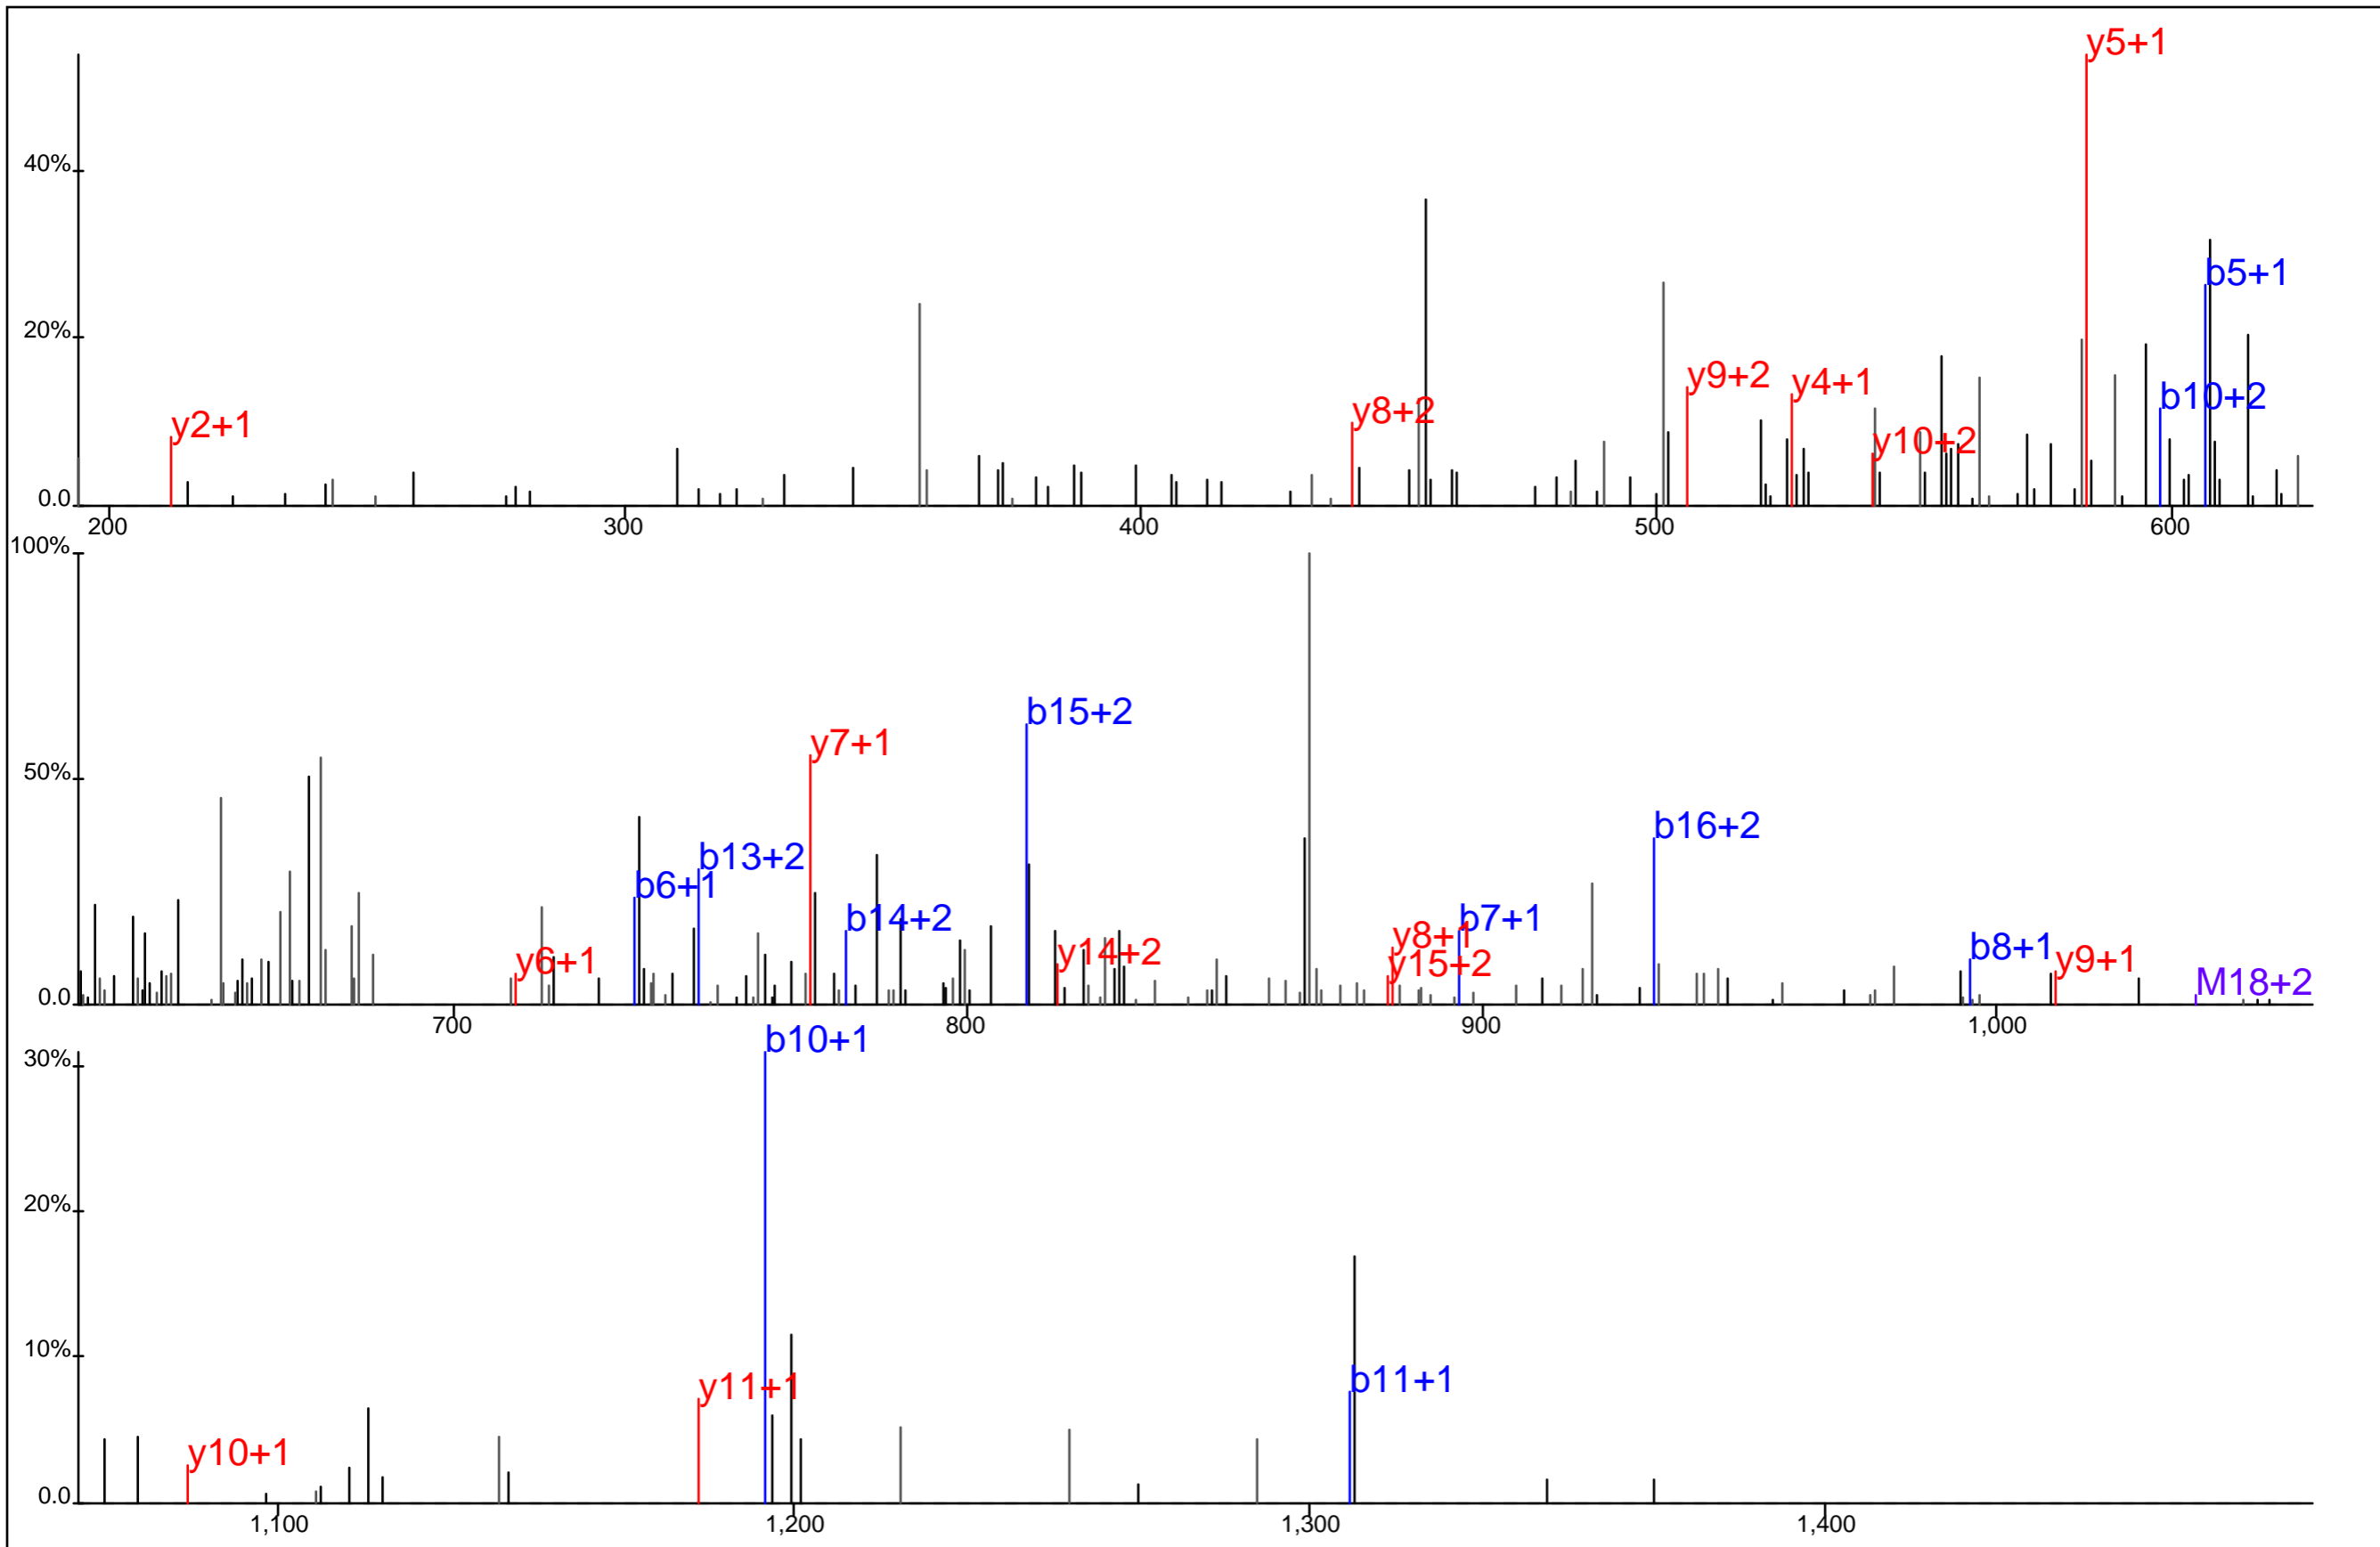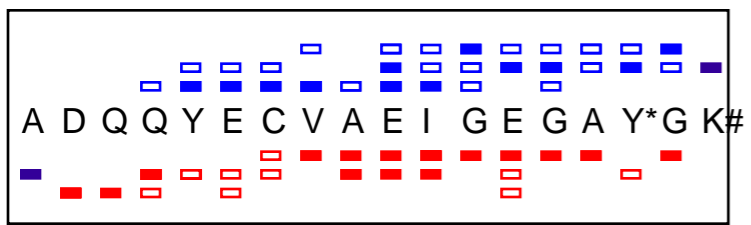

Protein Name: CDK6  
 gi Accession: 4502741  
 Precursor Mass: 692.6183+3  
 Delta Mass: 4.920 ppm  
 XCorr: 22.87

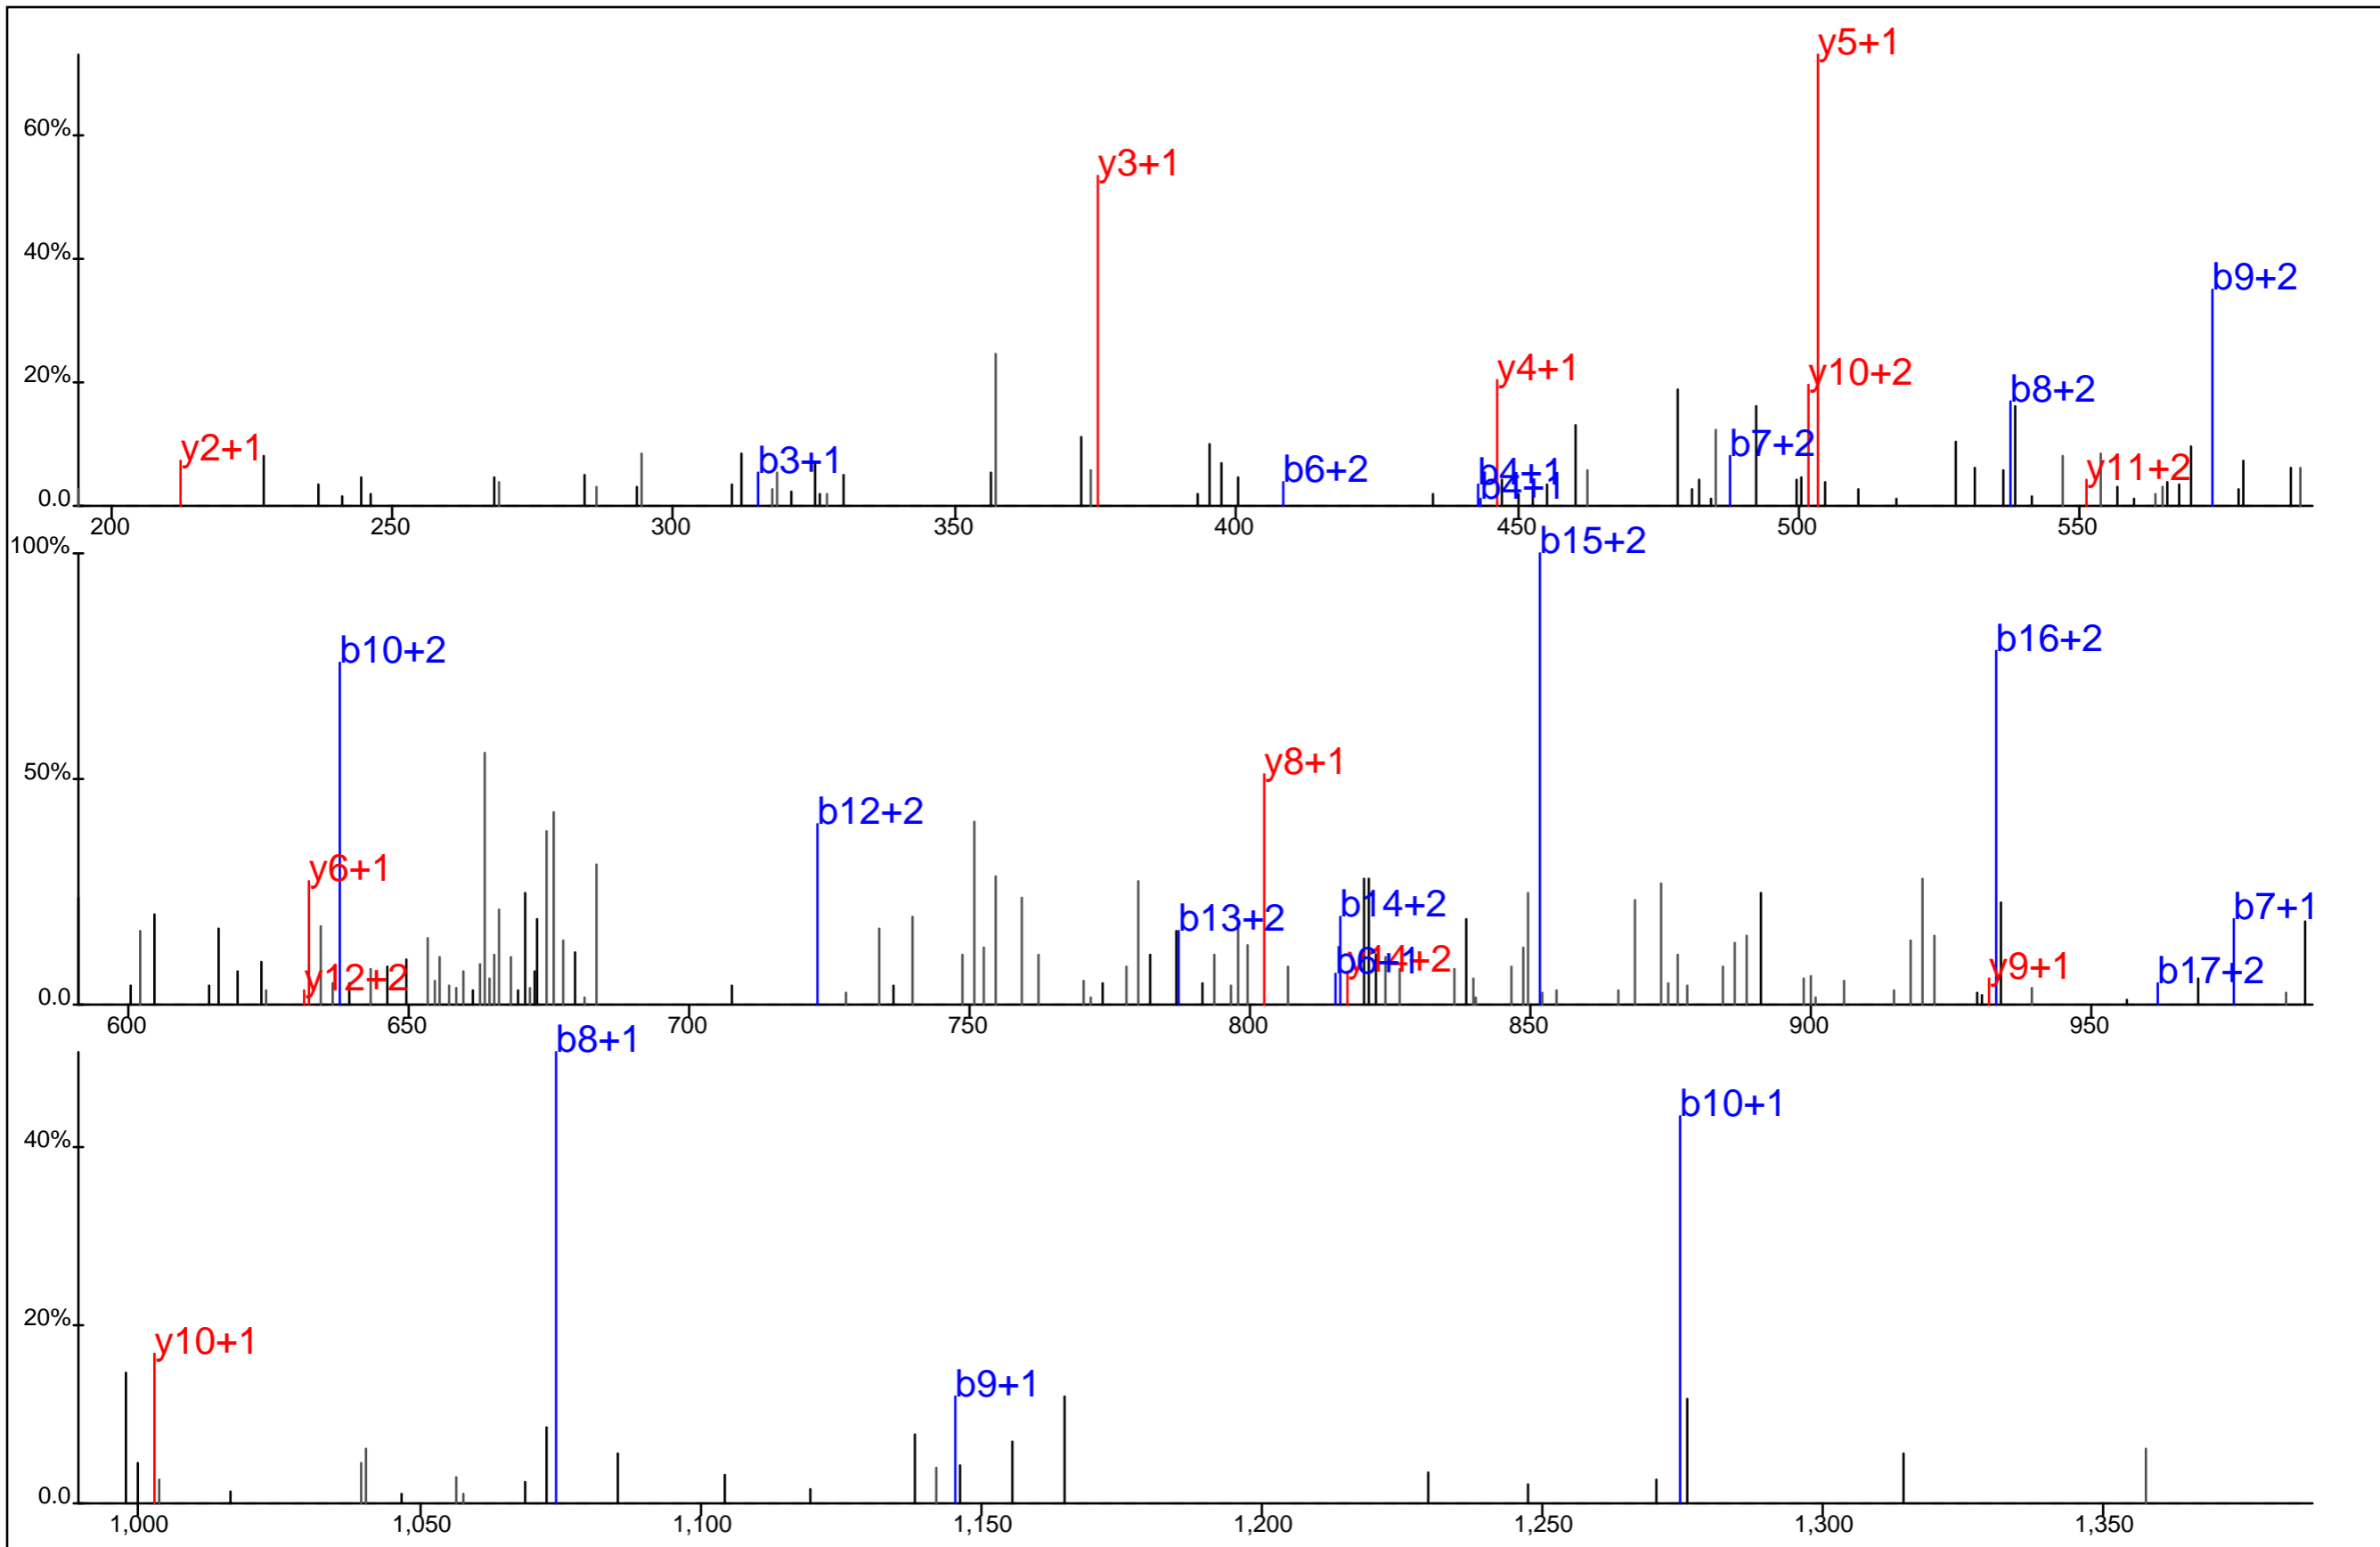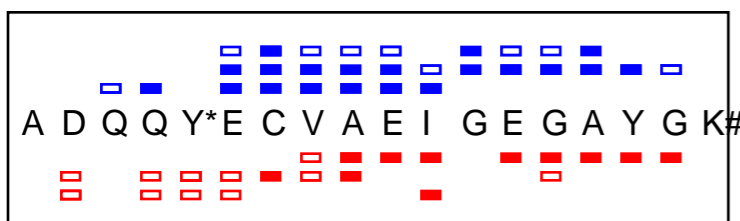

Protein Name: CDK6  
 gi Accession: 4502741  
 Precursor Mass: 692.6249+3  
 Delta Mass: 4.604 ppm  
 XCorr: 33.19

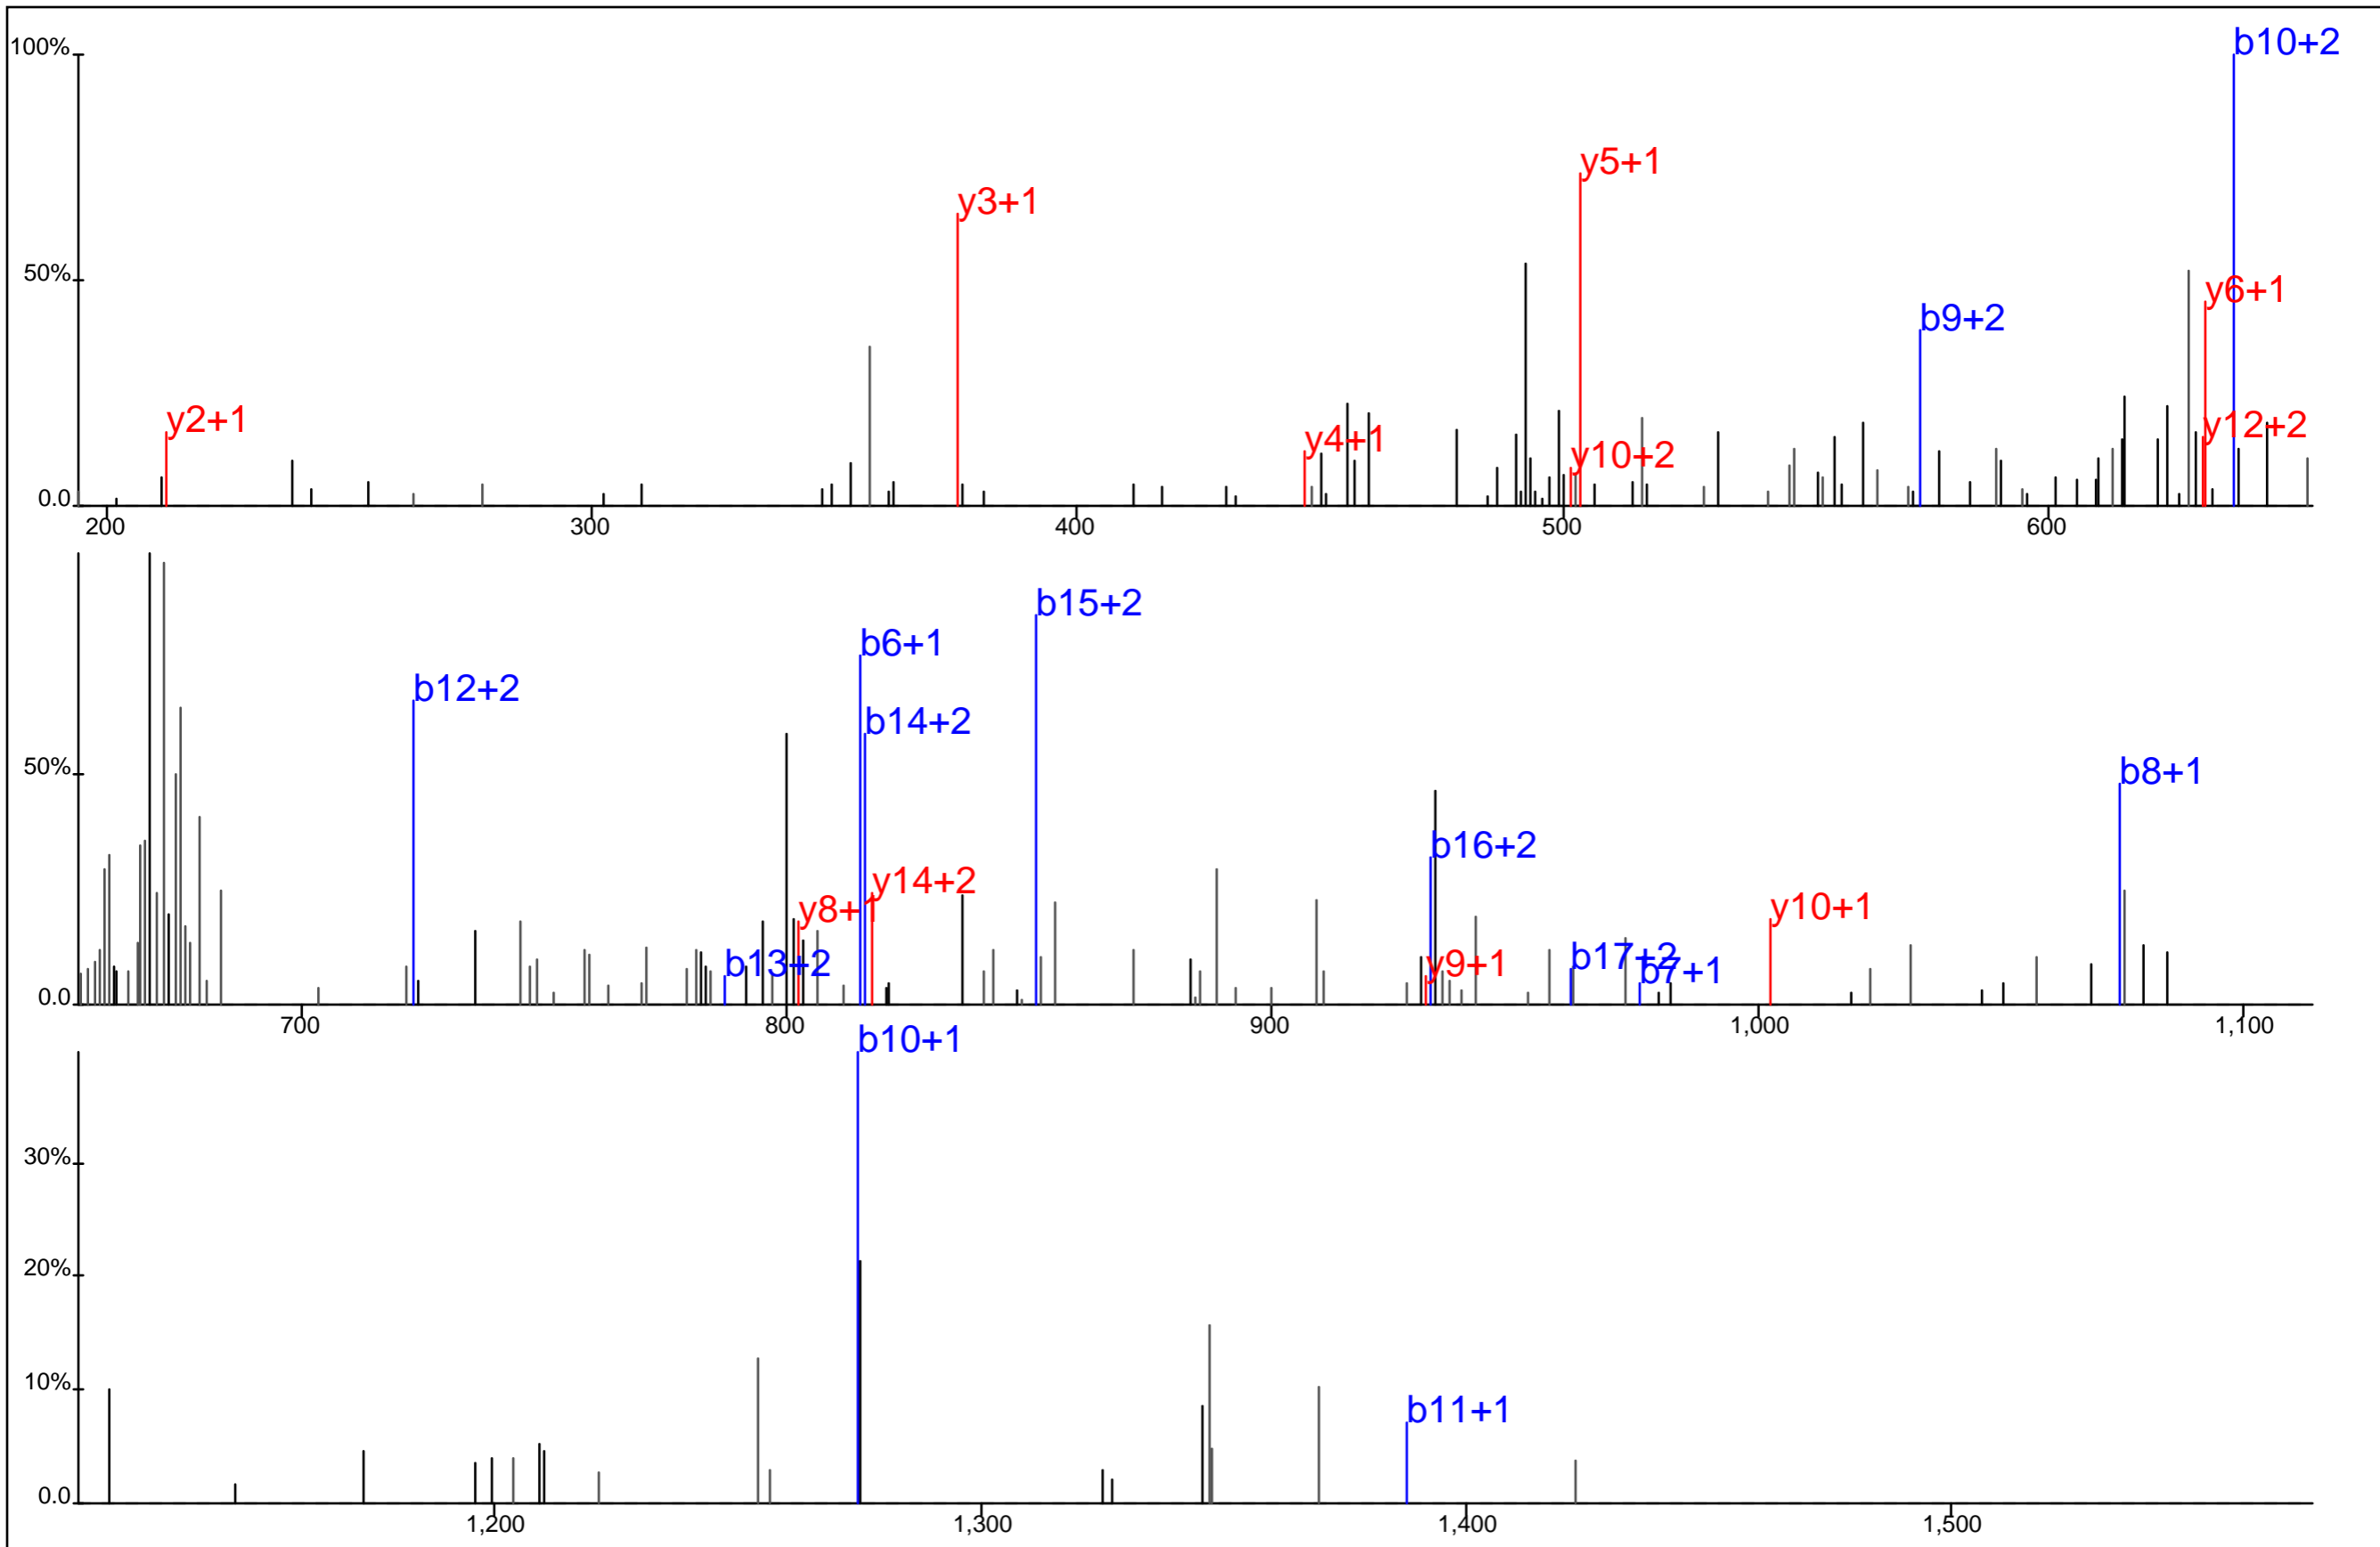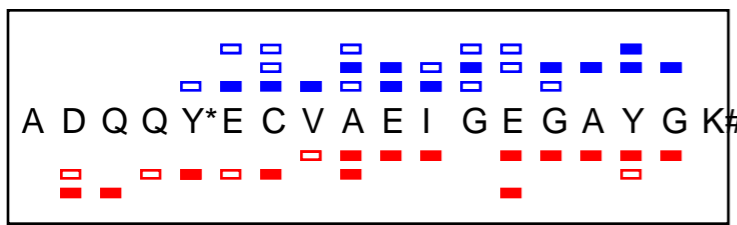

Protein Name: CDK6  
 gi Accession: 4502741  
 Precursor Mass: 692.6242+3  
 Delta Mass: 3.549 ppm  
 XCorr: 21.46

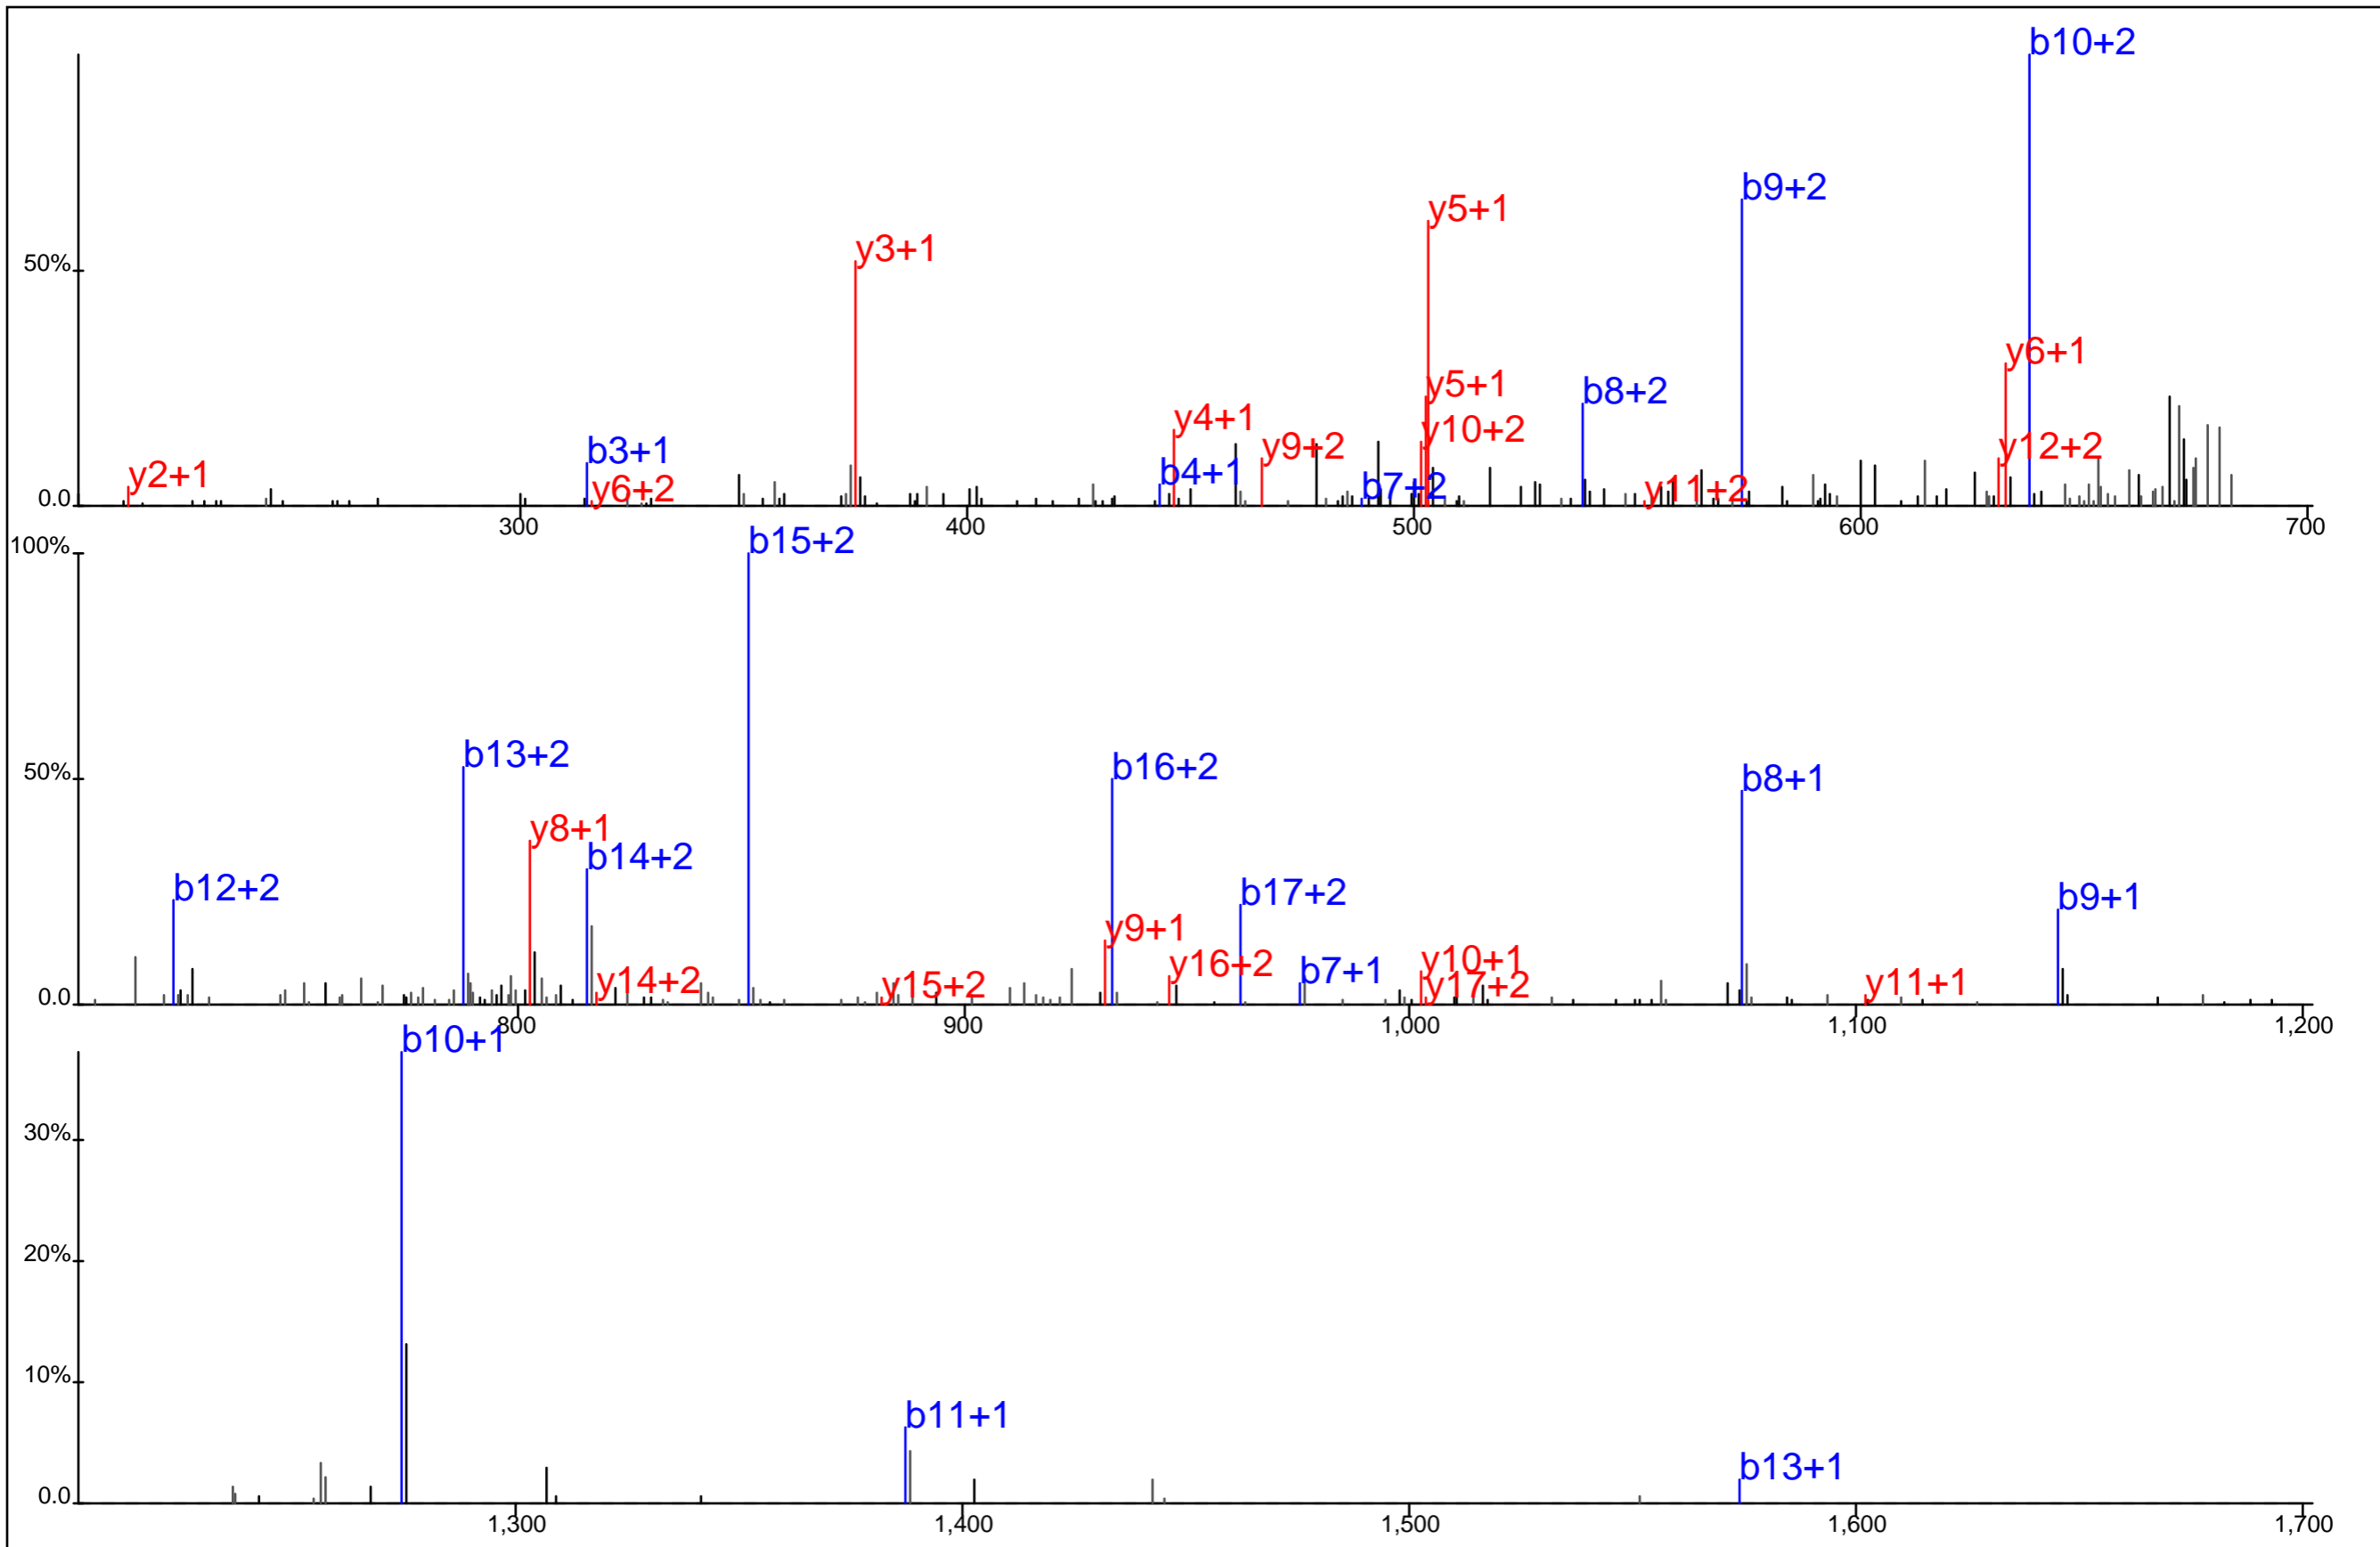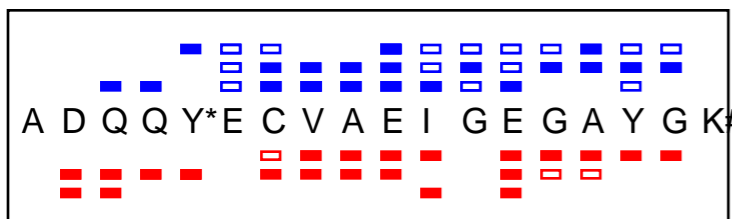

Protein Name: CDK6  
 gi Accession: 4502741  
 Precursor Mass: 692.6228+3  
 Delta Mass: 1.517 ppm  
 XCorr: 62.63

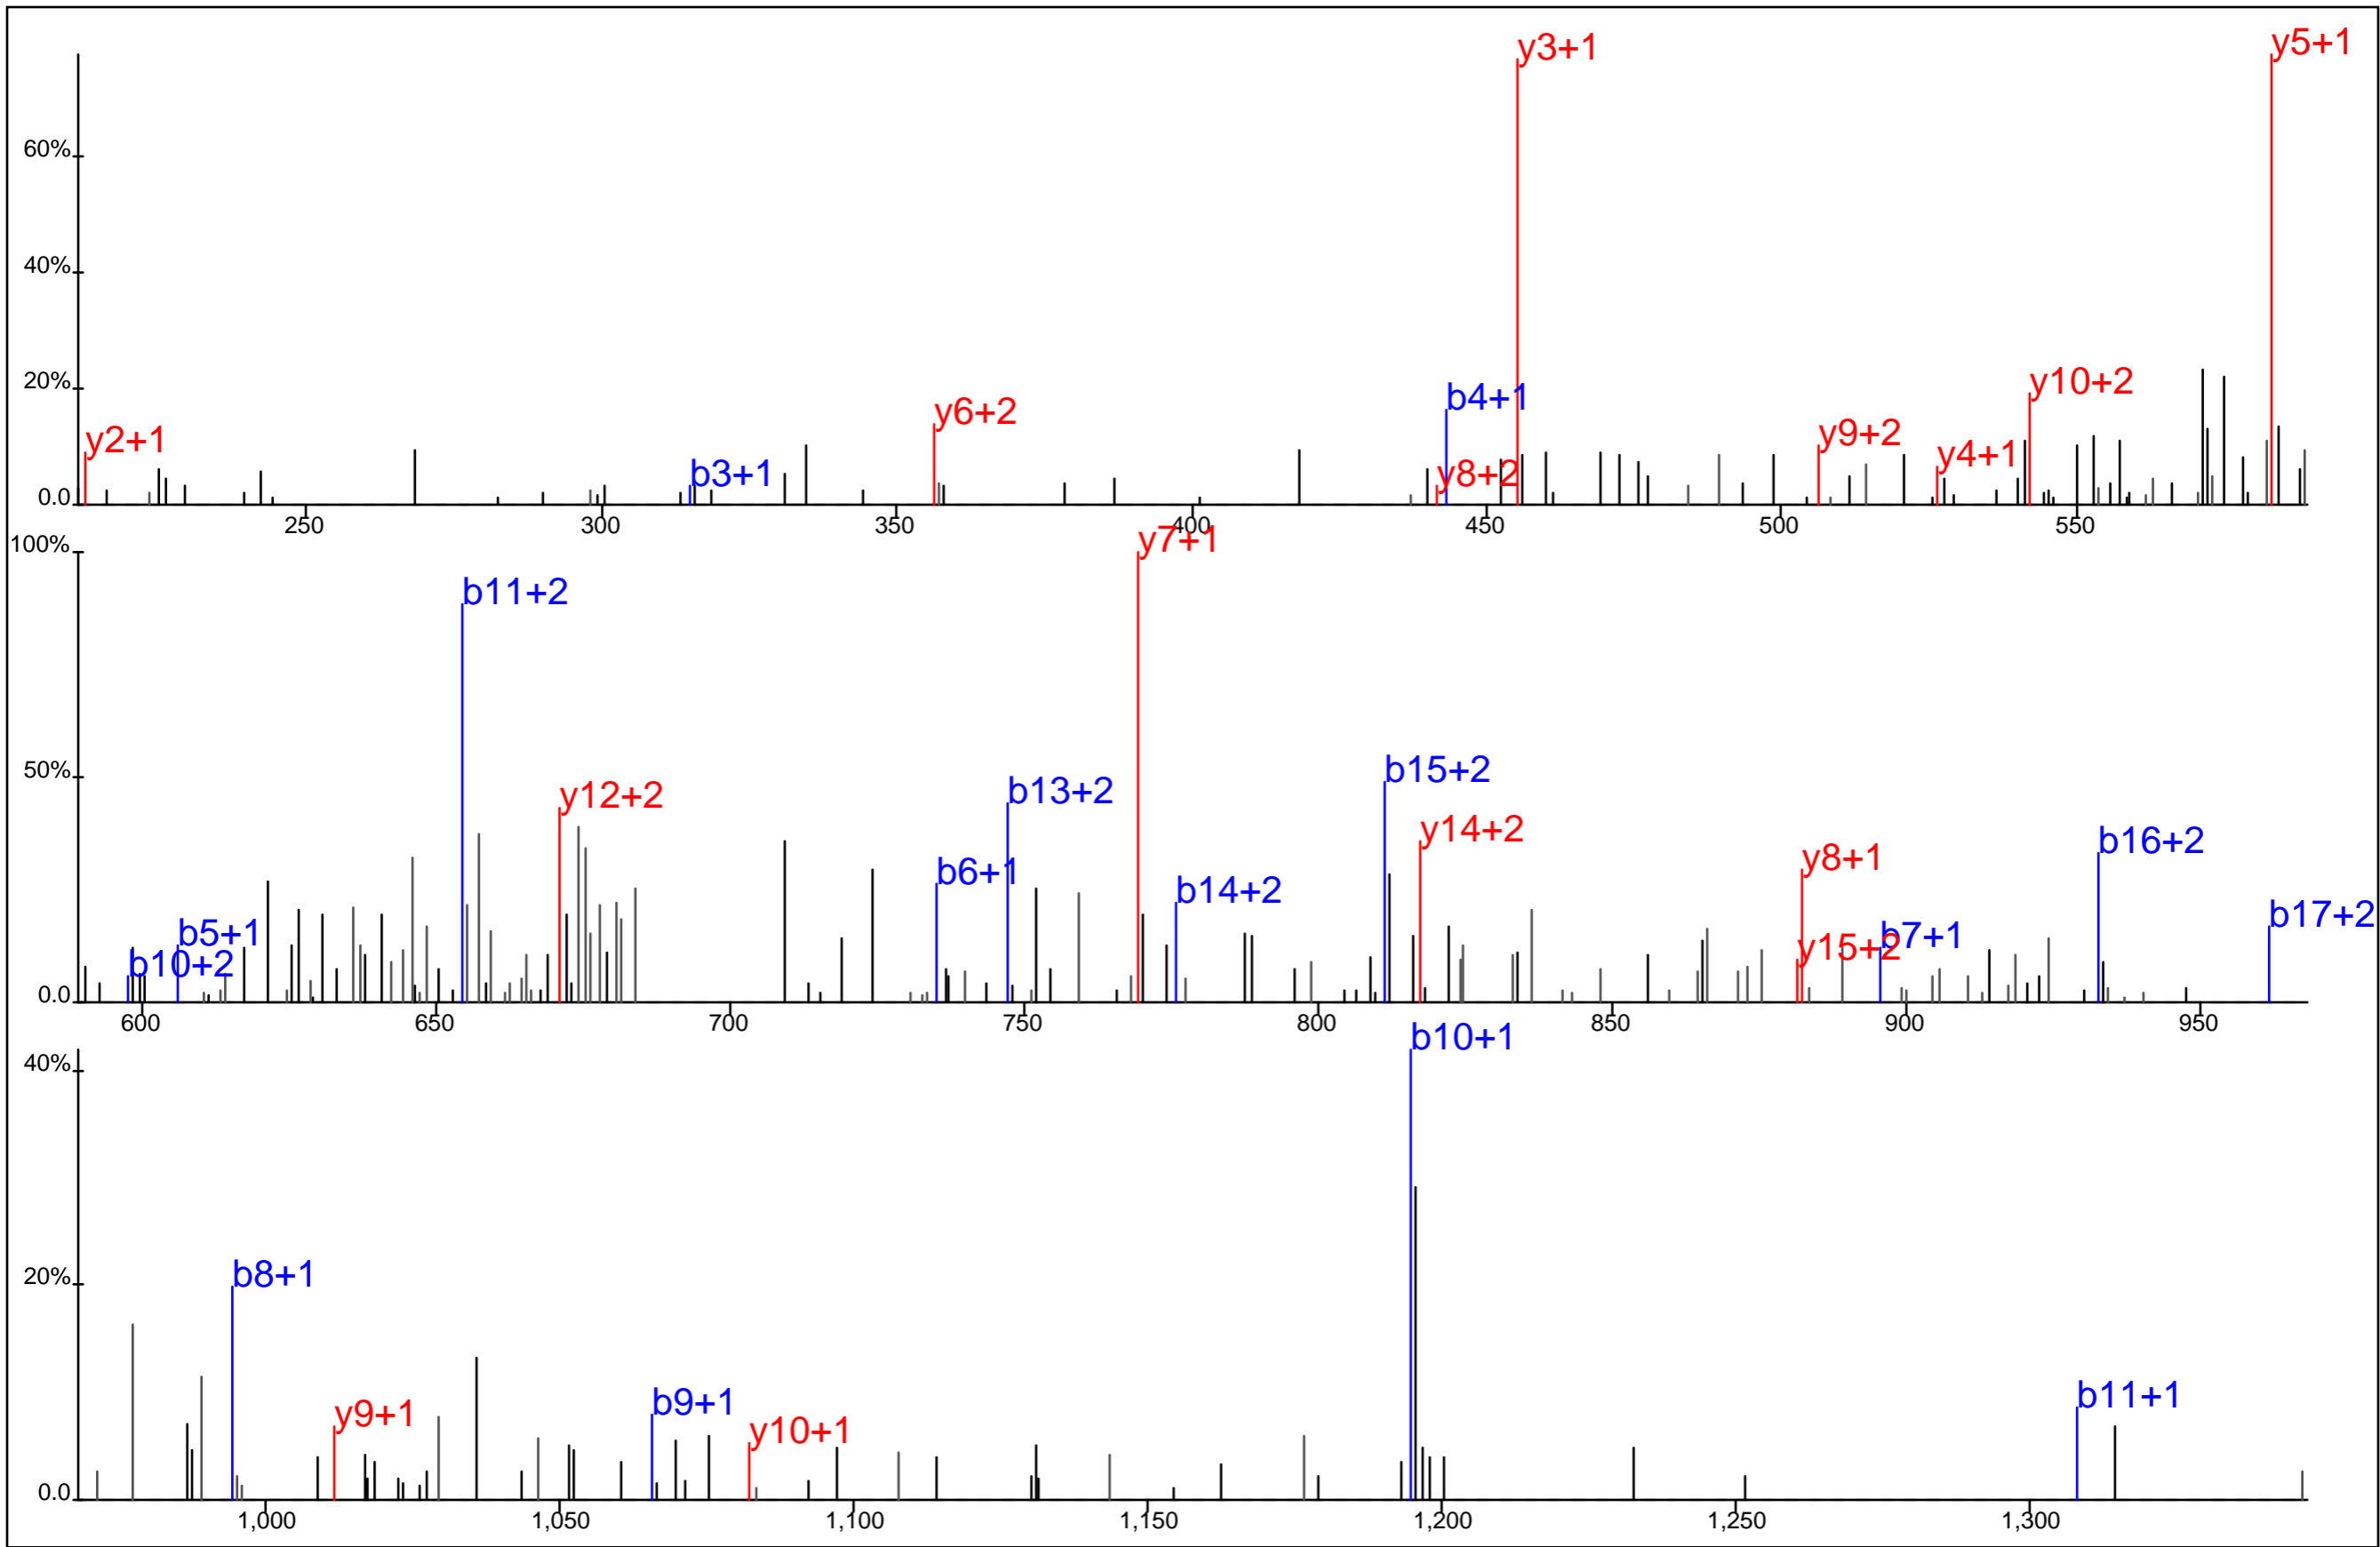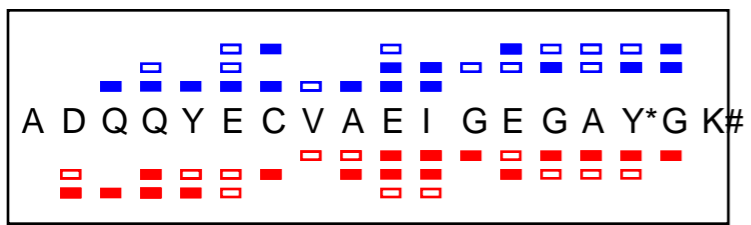

Protein Name: CDK6  
 gi Accession: 4502741  
 Precursor Mass: 692.6248+3  
 Delta Mass: 4.339 ppm  
 XCorr: 38.54



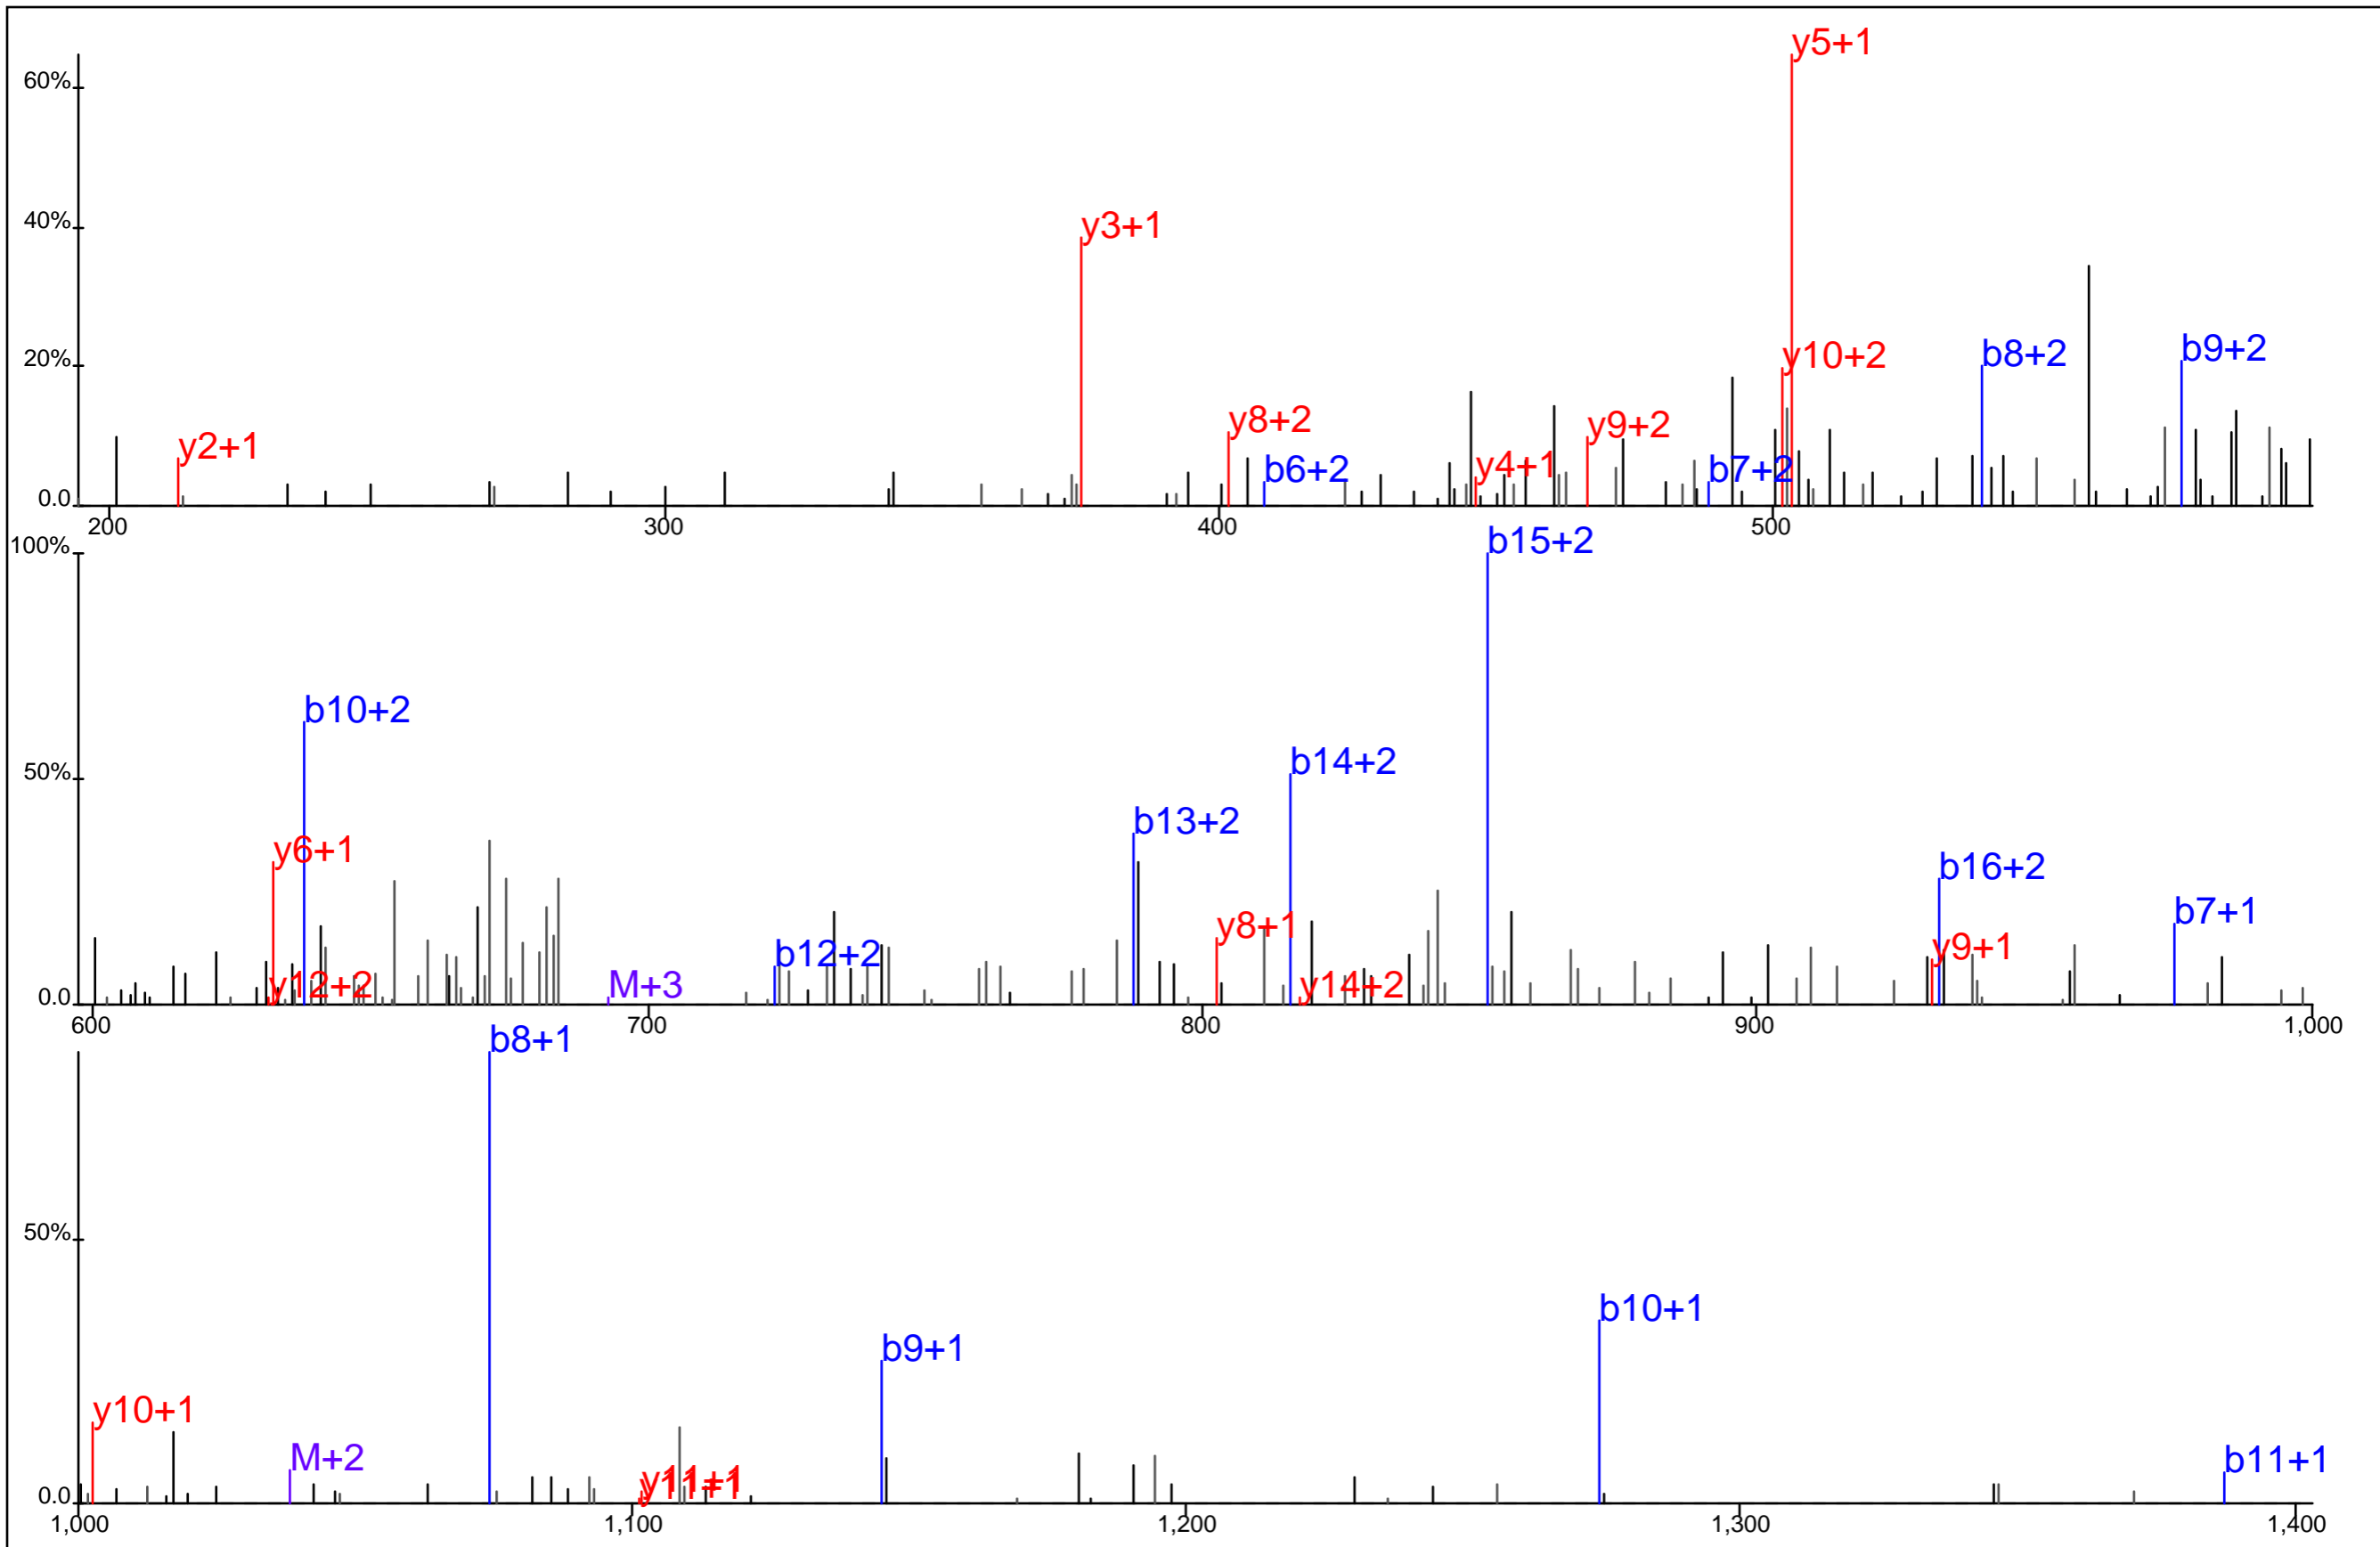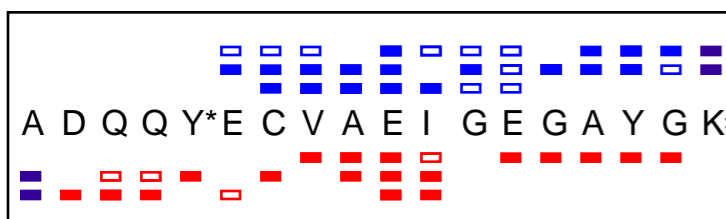

Protein Name: CDK6  
 gi Accession: 4502741  
 Precursor Mass: 692.6238+3  
 Delta Mass: 3.020 ppm  
 XCorr: 39.06

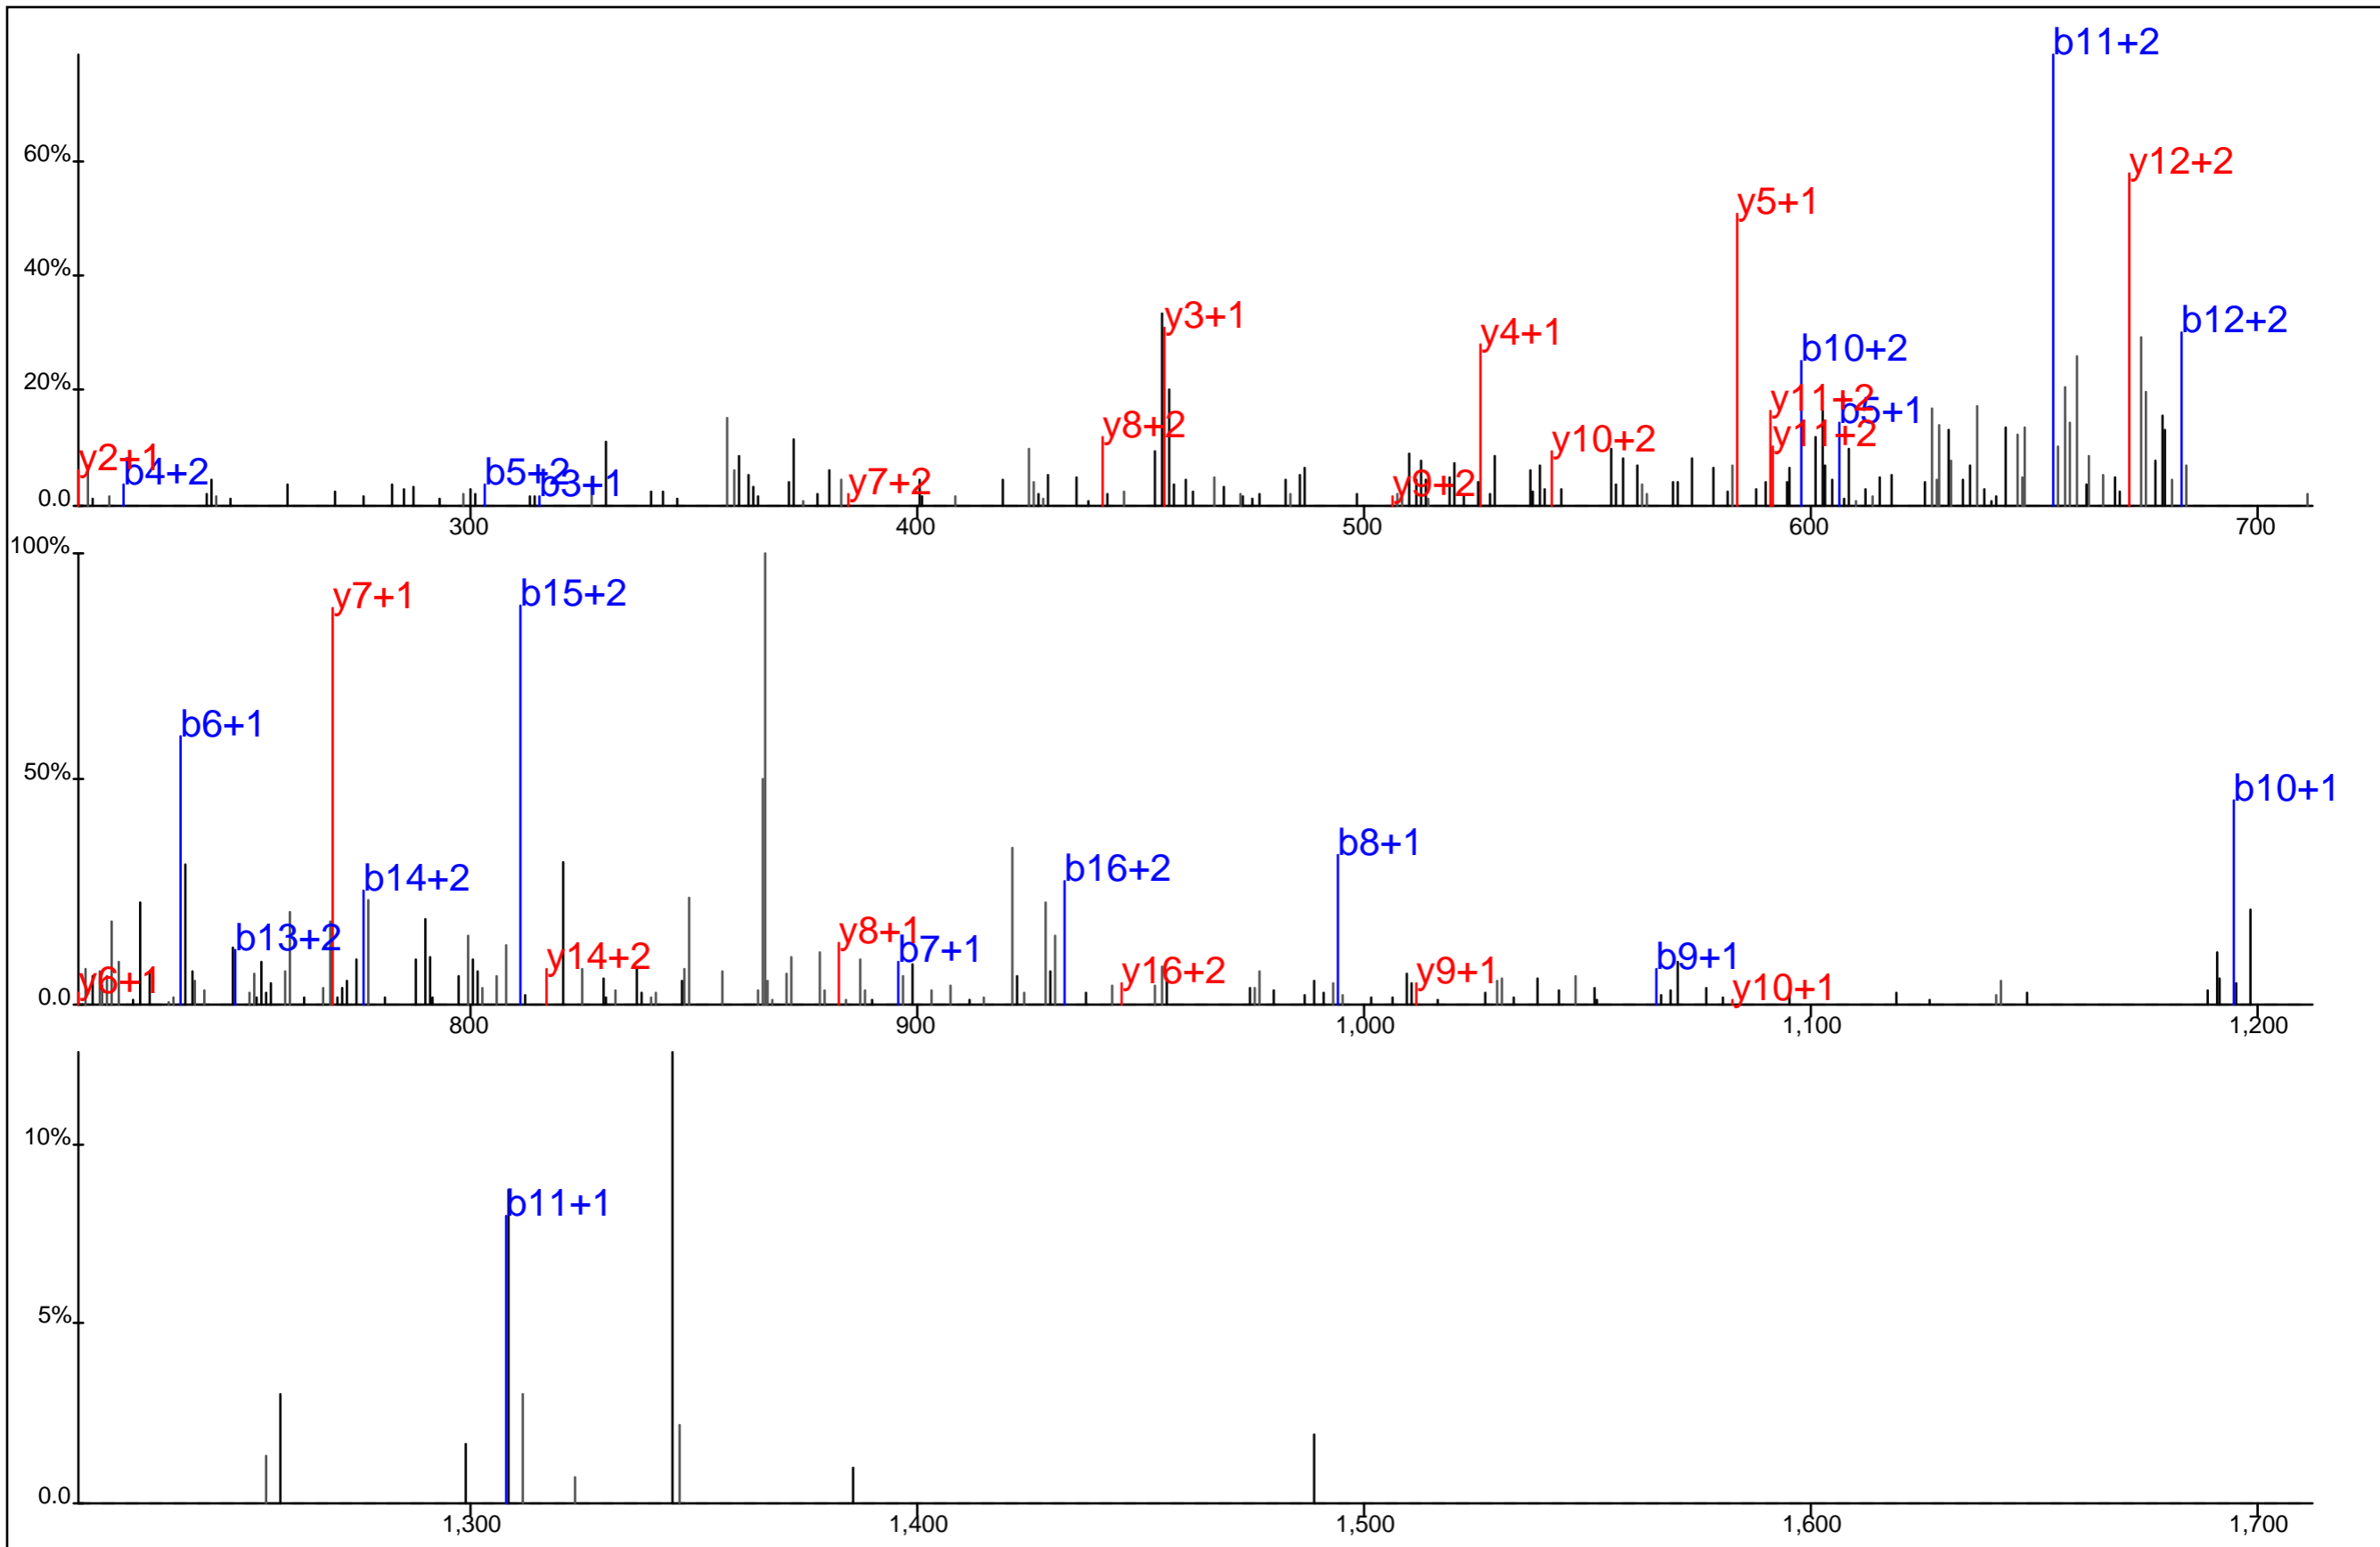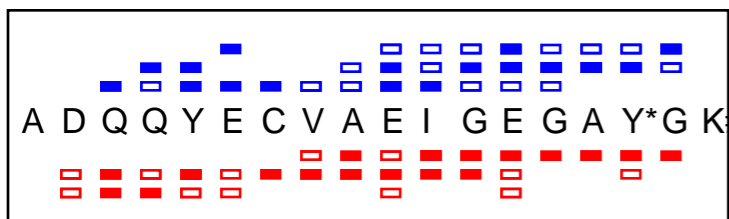

Protein Name: CDK6  
 gi Accession: 4502741  
 Precursor Mass: 692.6289+3  
 Delta Mass: 10.341 ppm  
 XCorr: 26.65

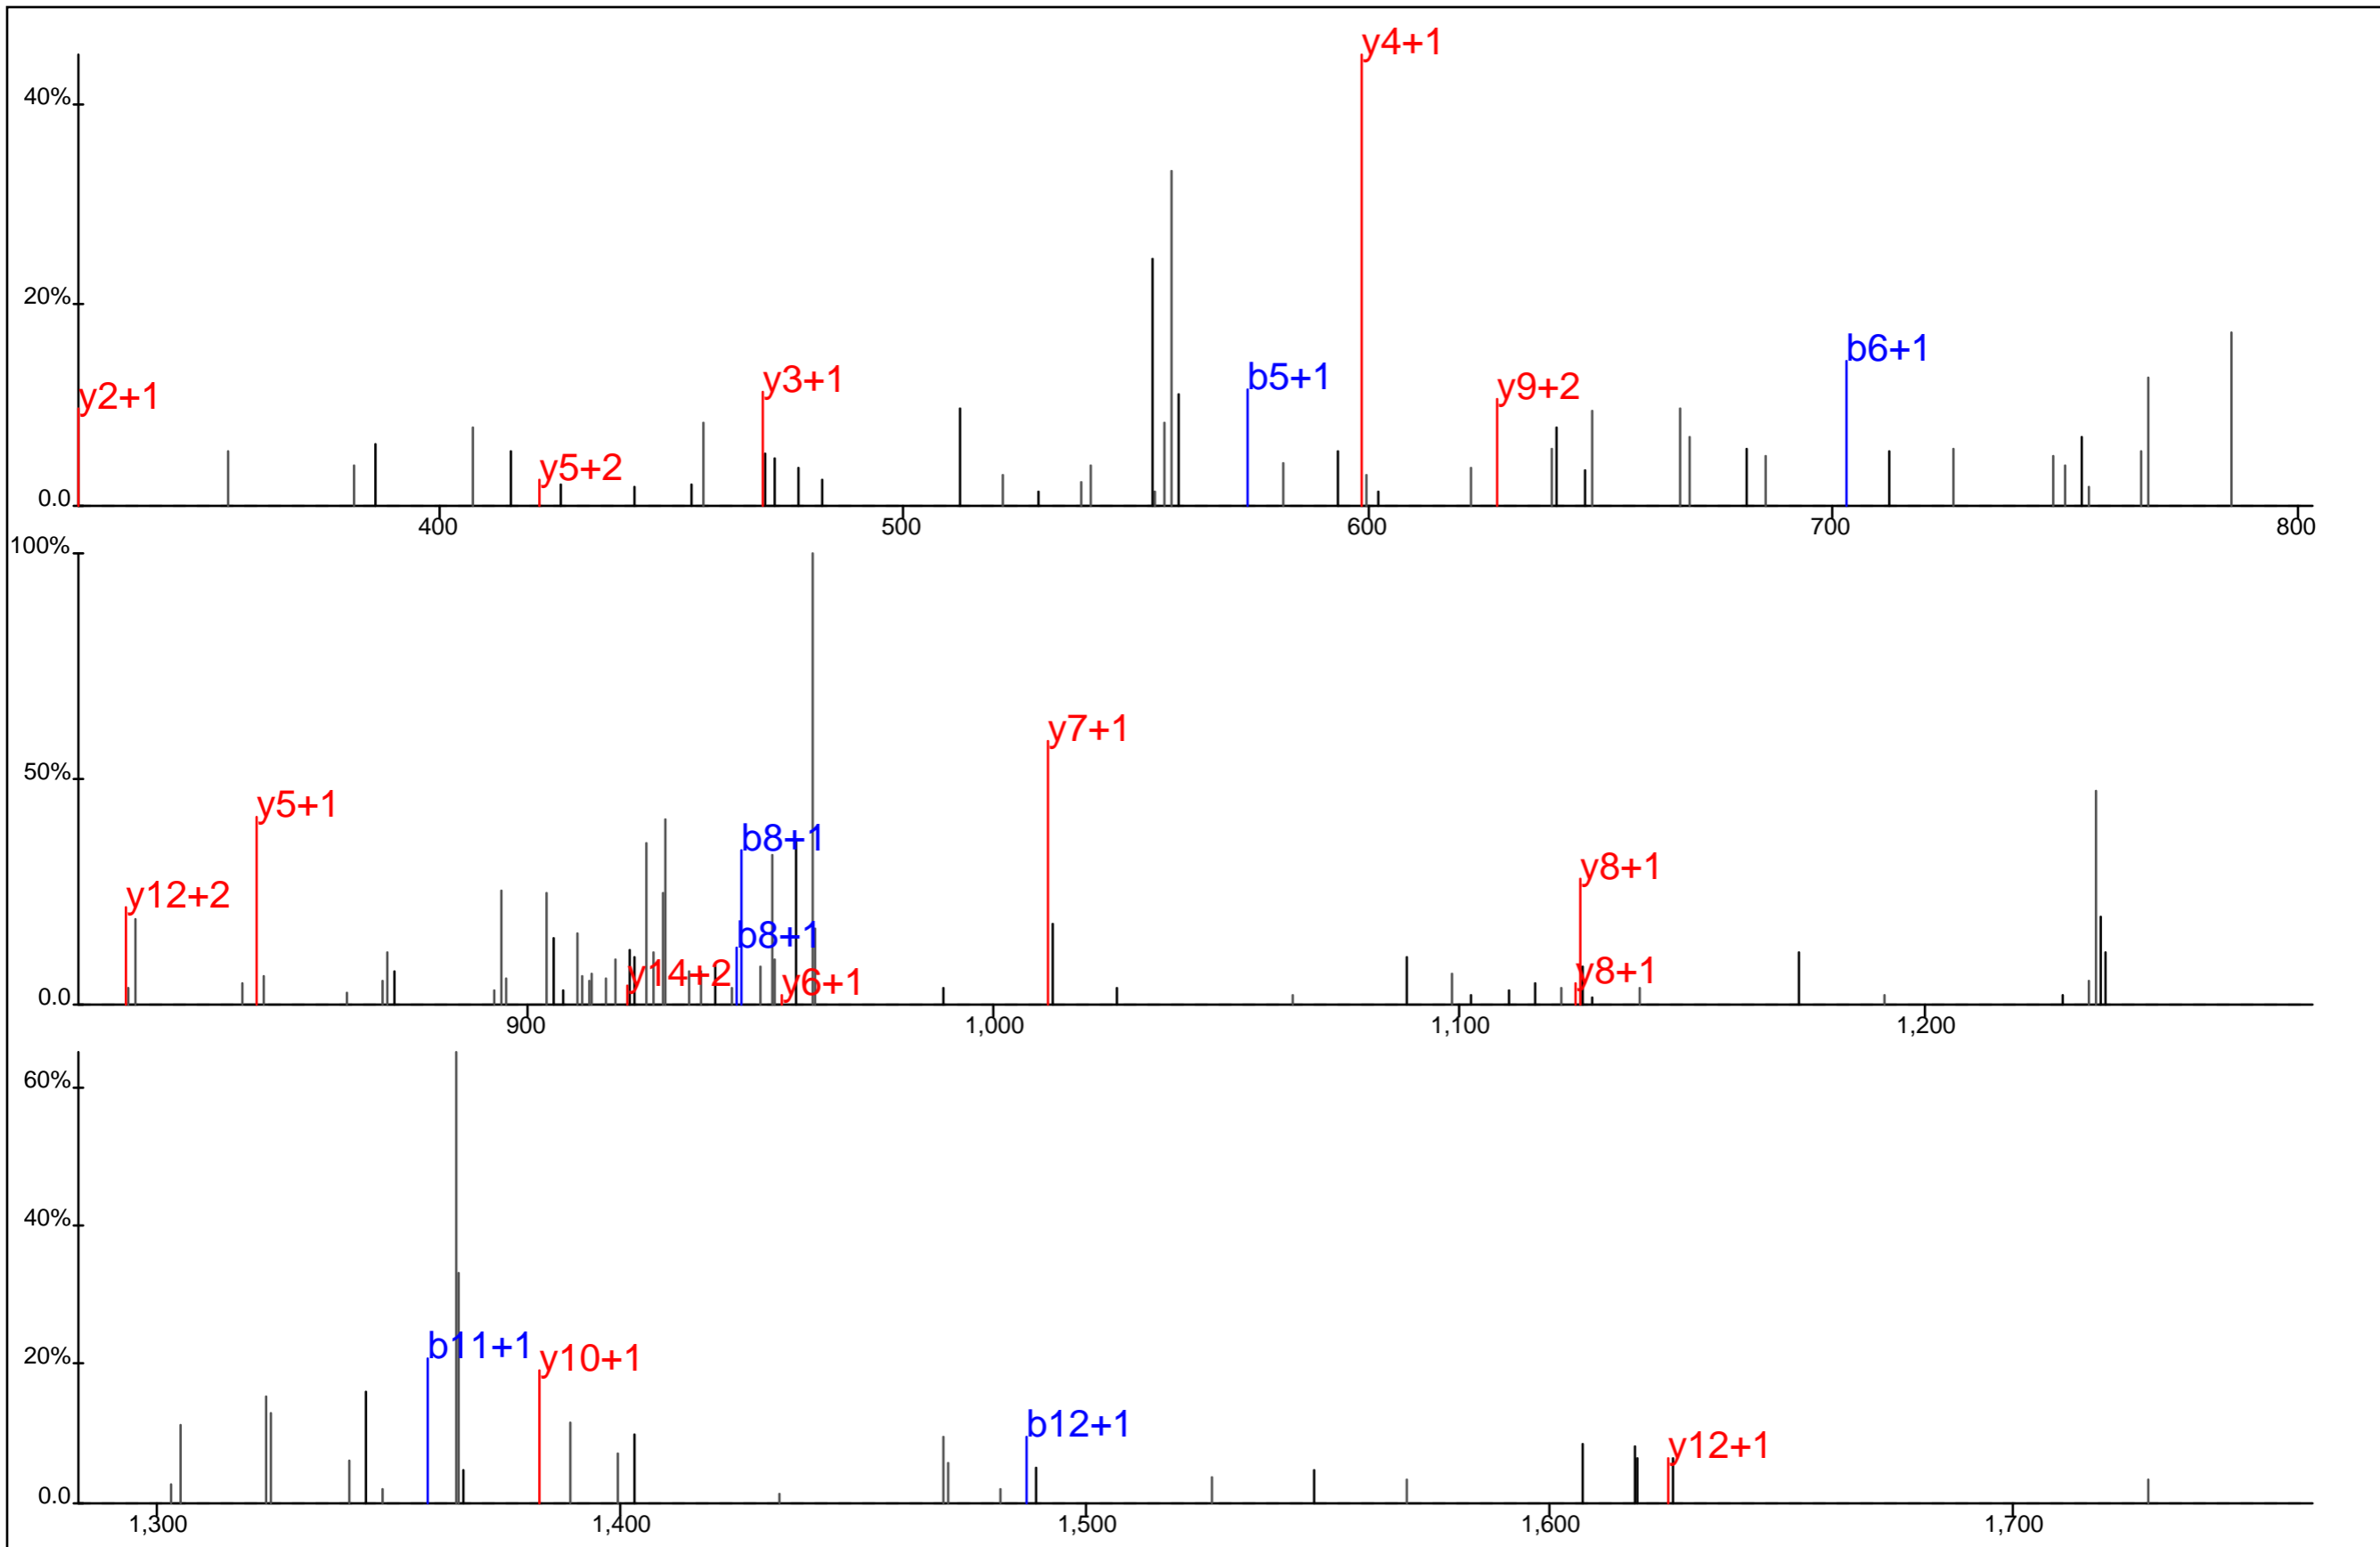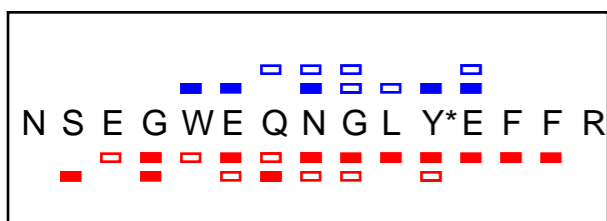

Protein Name: CHERP  
 gi Accession: 25992622  
 Precursor Mass: 978.4077+2  
 Delta Mass: 6.170 ppm  
 XCorr: 39.3

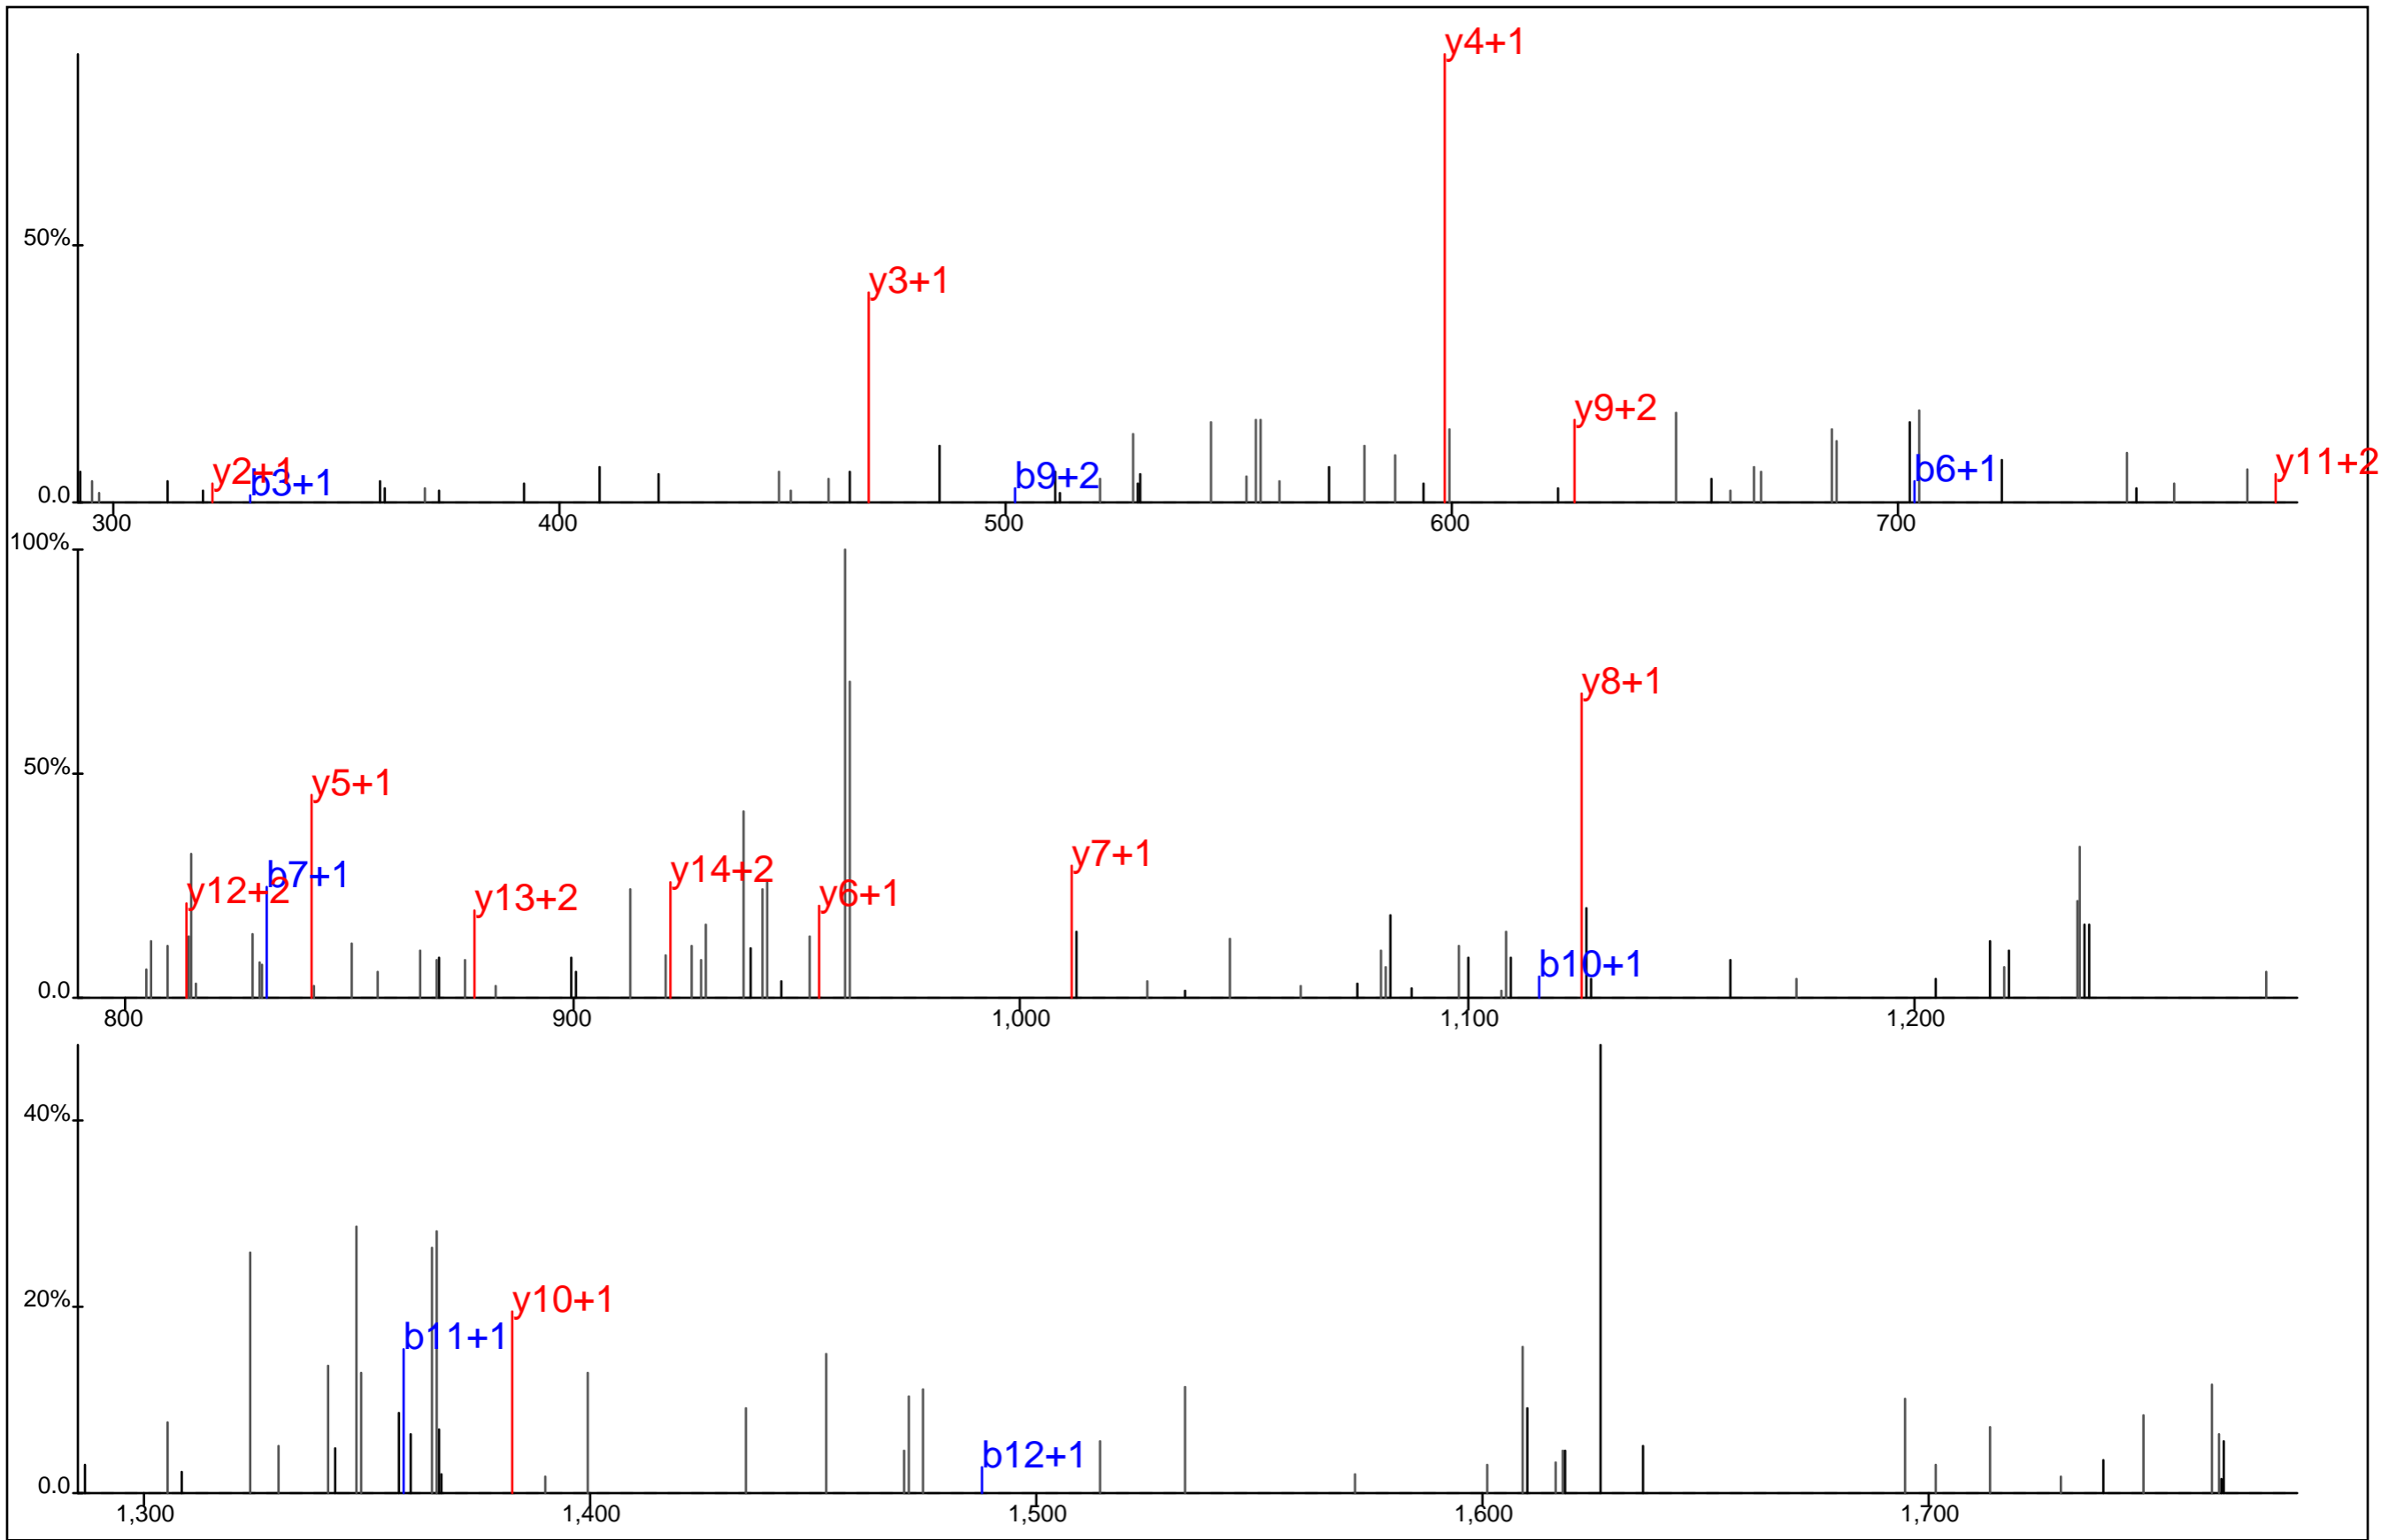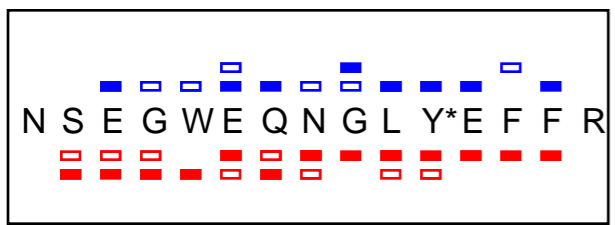

Protein Name: CHERP  
 gi Accession: 25992622  
 Precursor Mass: 978.4067+2  
 Delta Mass: 5.173 ppm  
 XCorr: 30.38

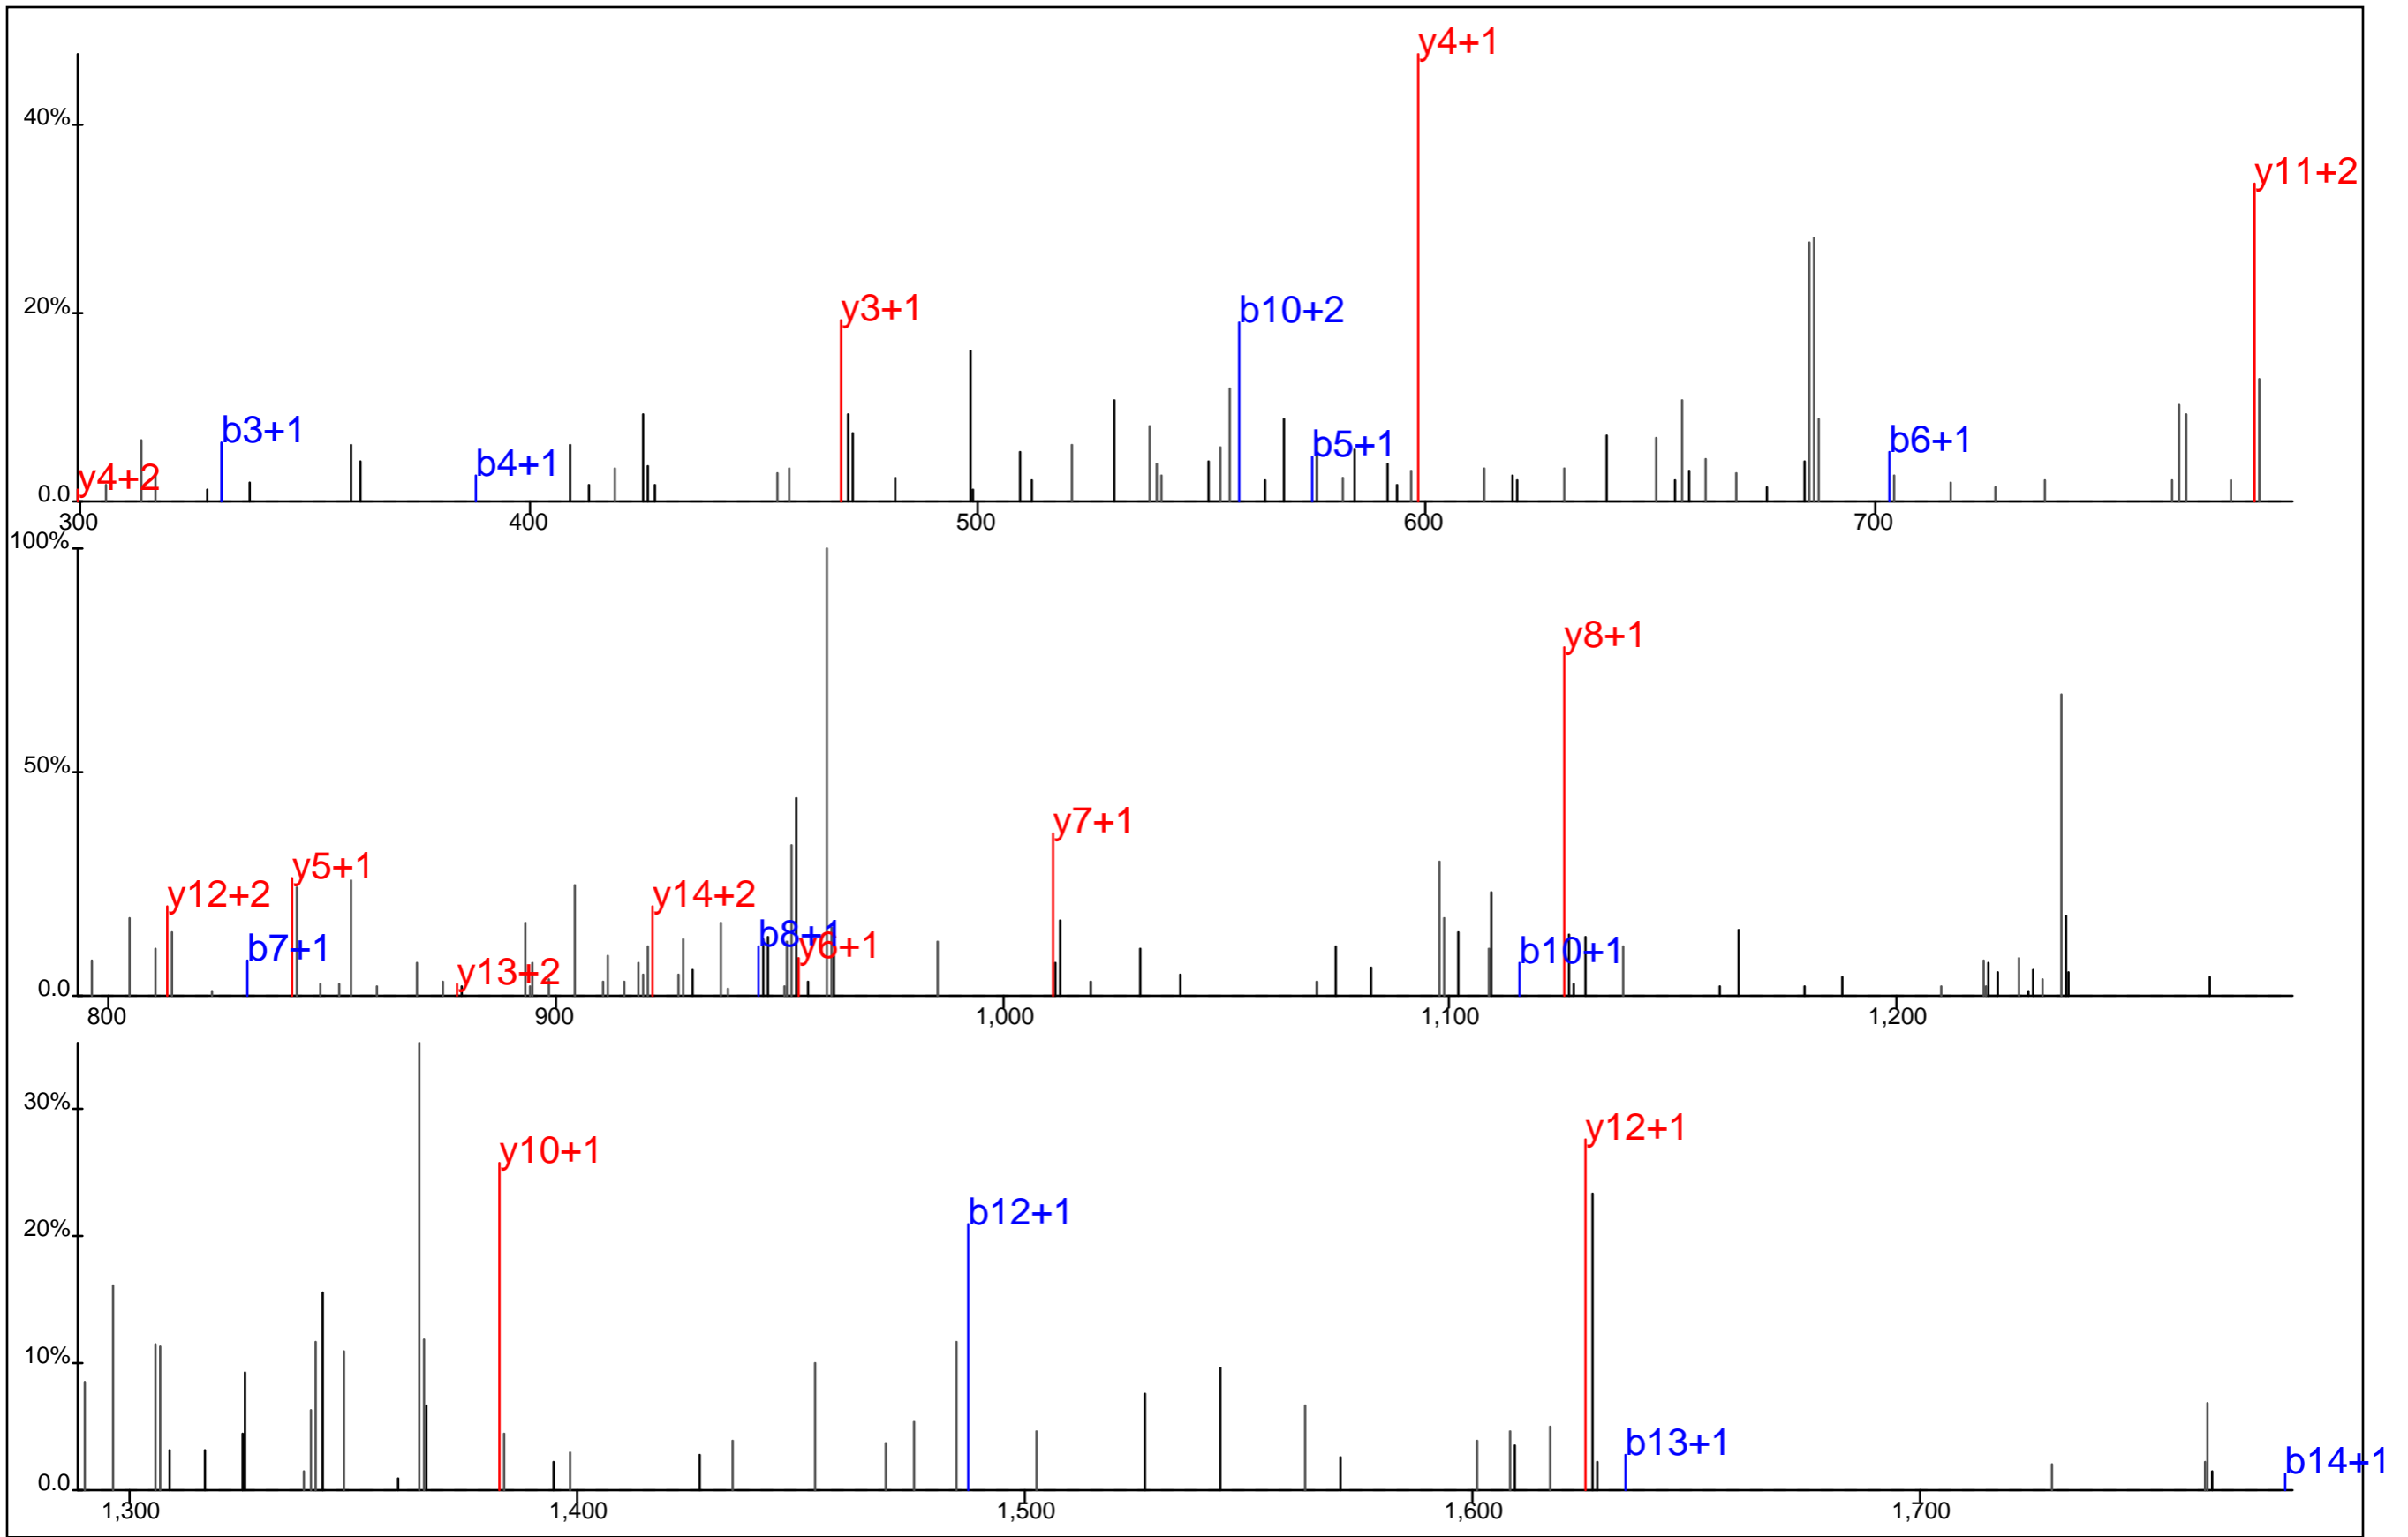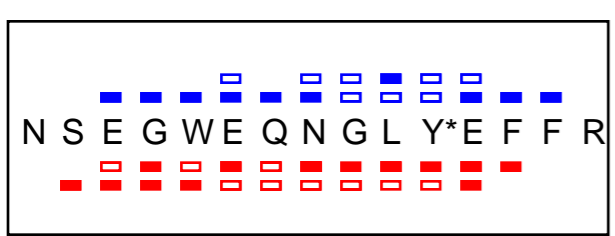

Protein Name: CHERP  
 gi Accession: 25992622  
 Precursor Mass: 978.4062+2  
 Delta Mass: 4.734 ppm  
 XCorr: 34.43

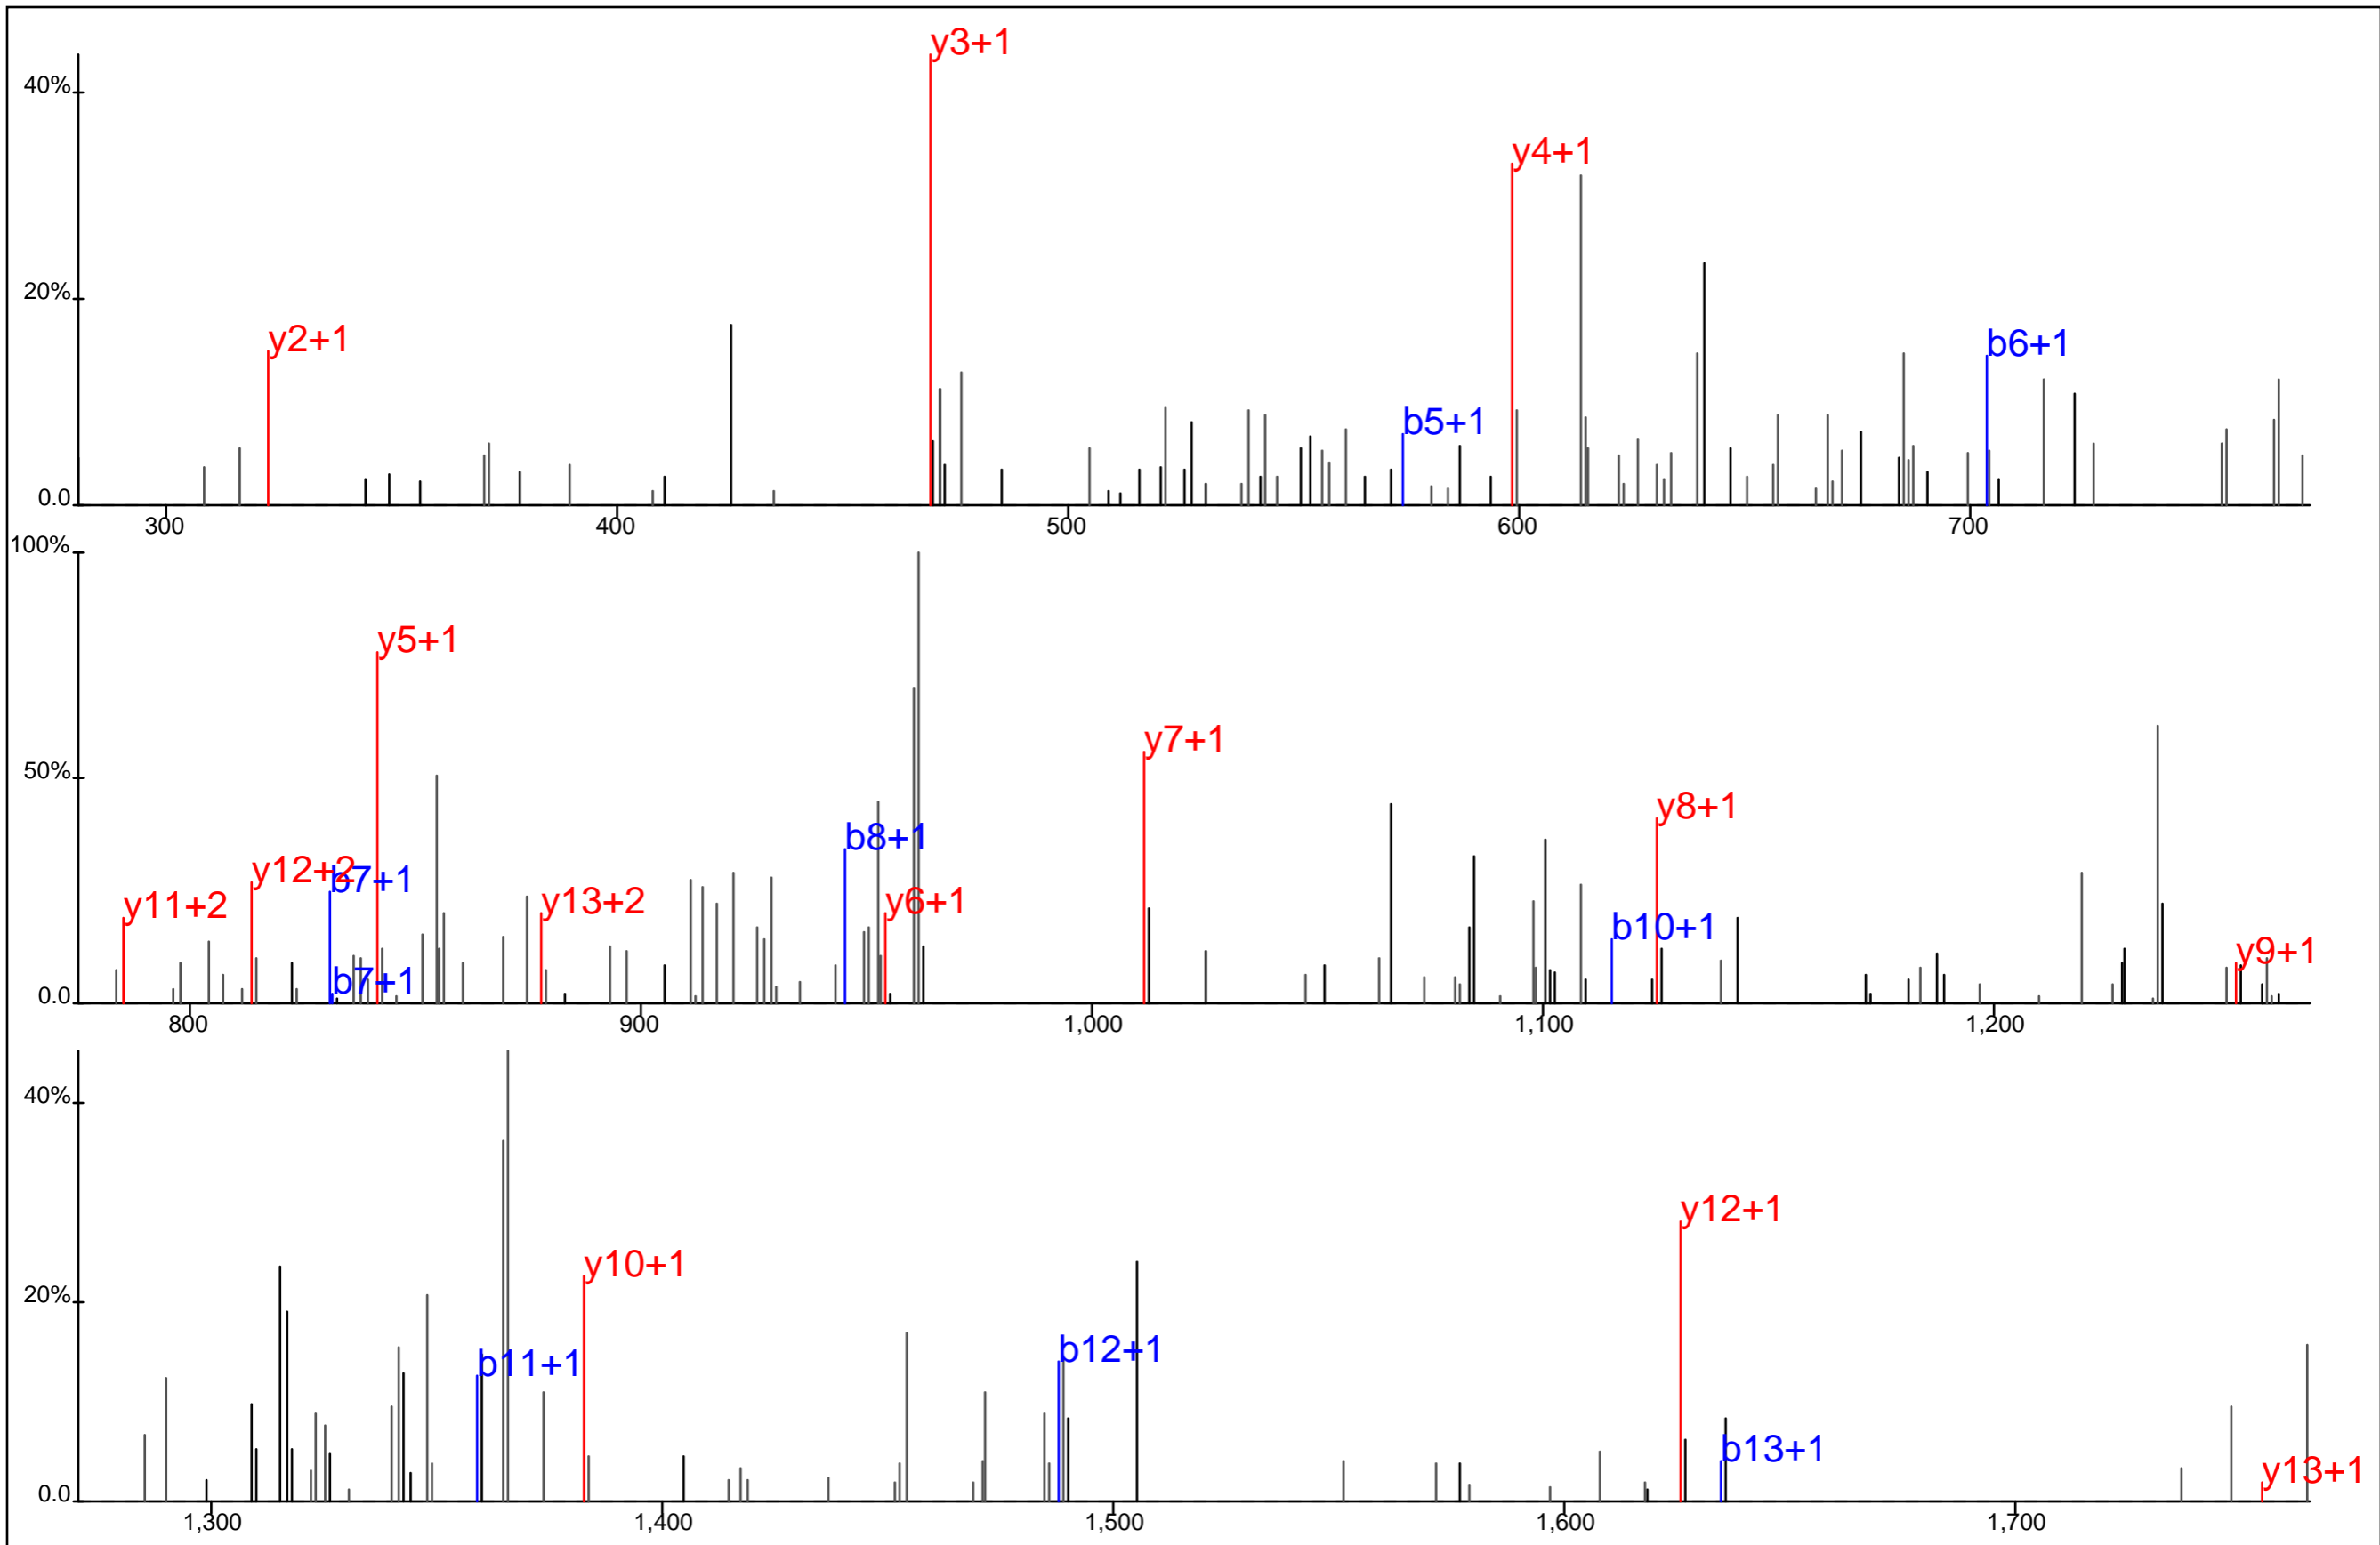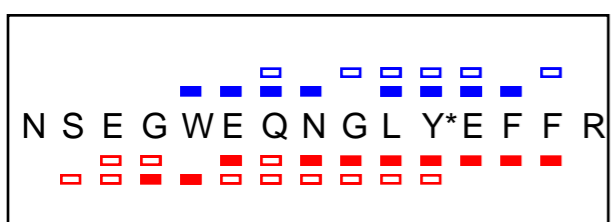

Protein Name: CHERP  
gi Accession: 25992622  
Precursor Mass: 978.4061+2  
Delta Mass: 4.611 ppm  
XCorr: 53.17

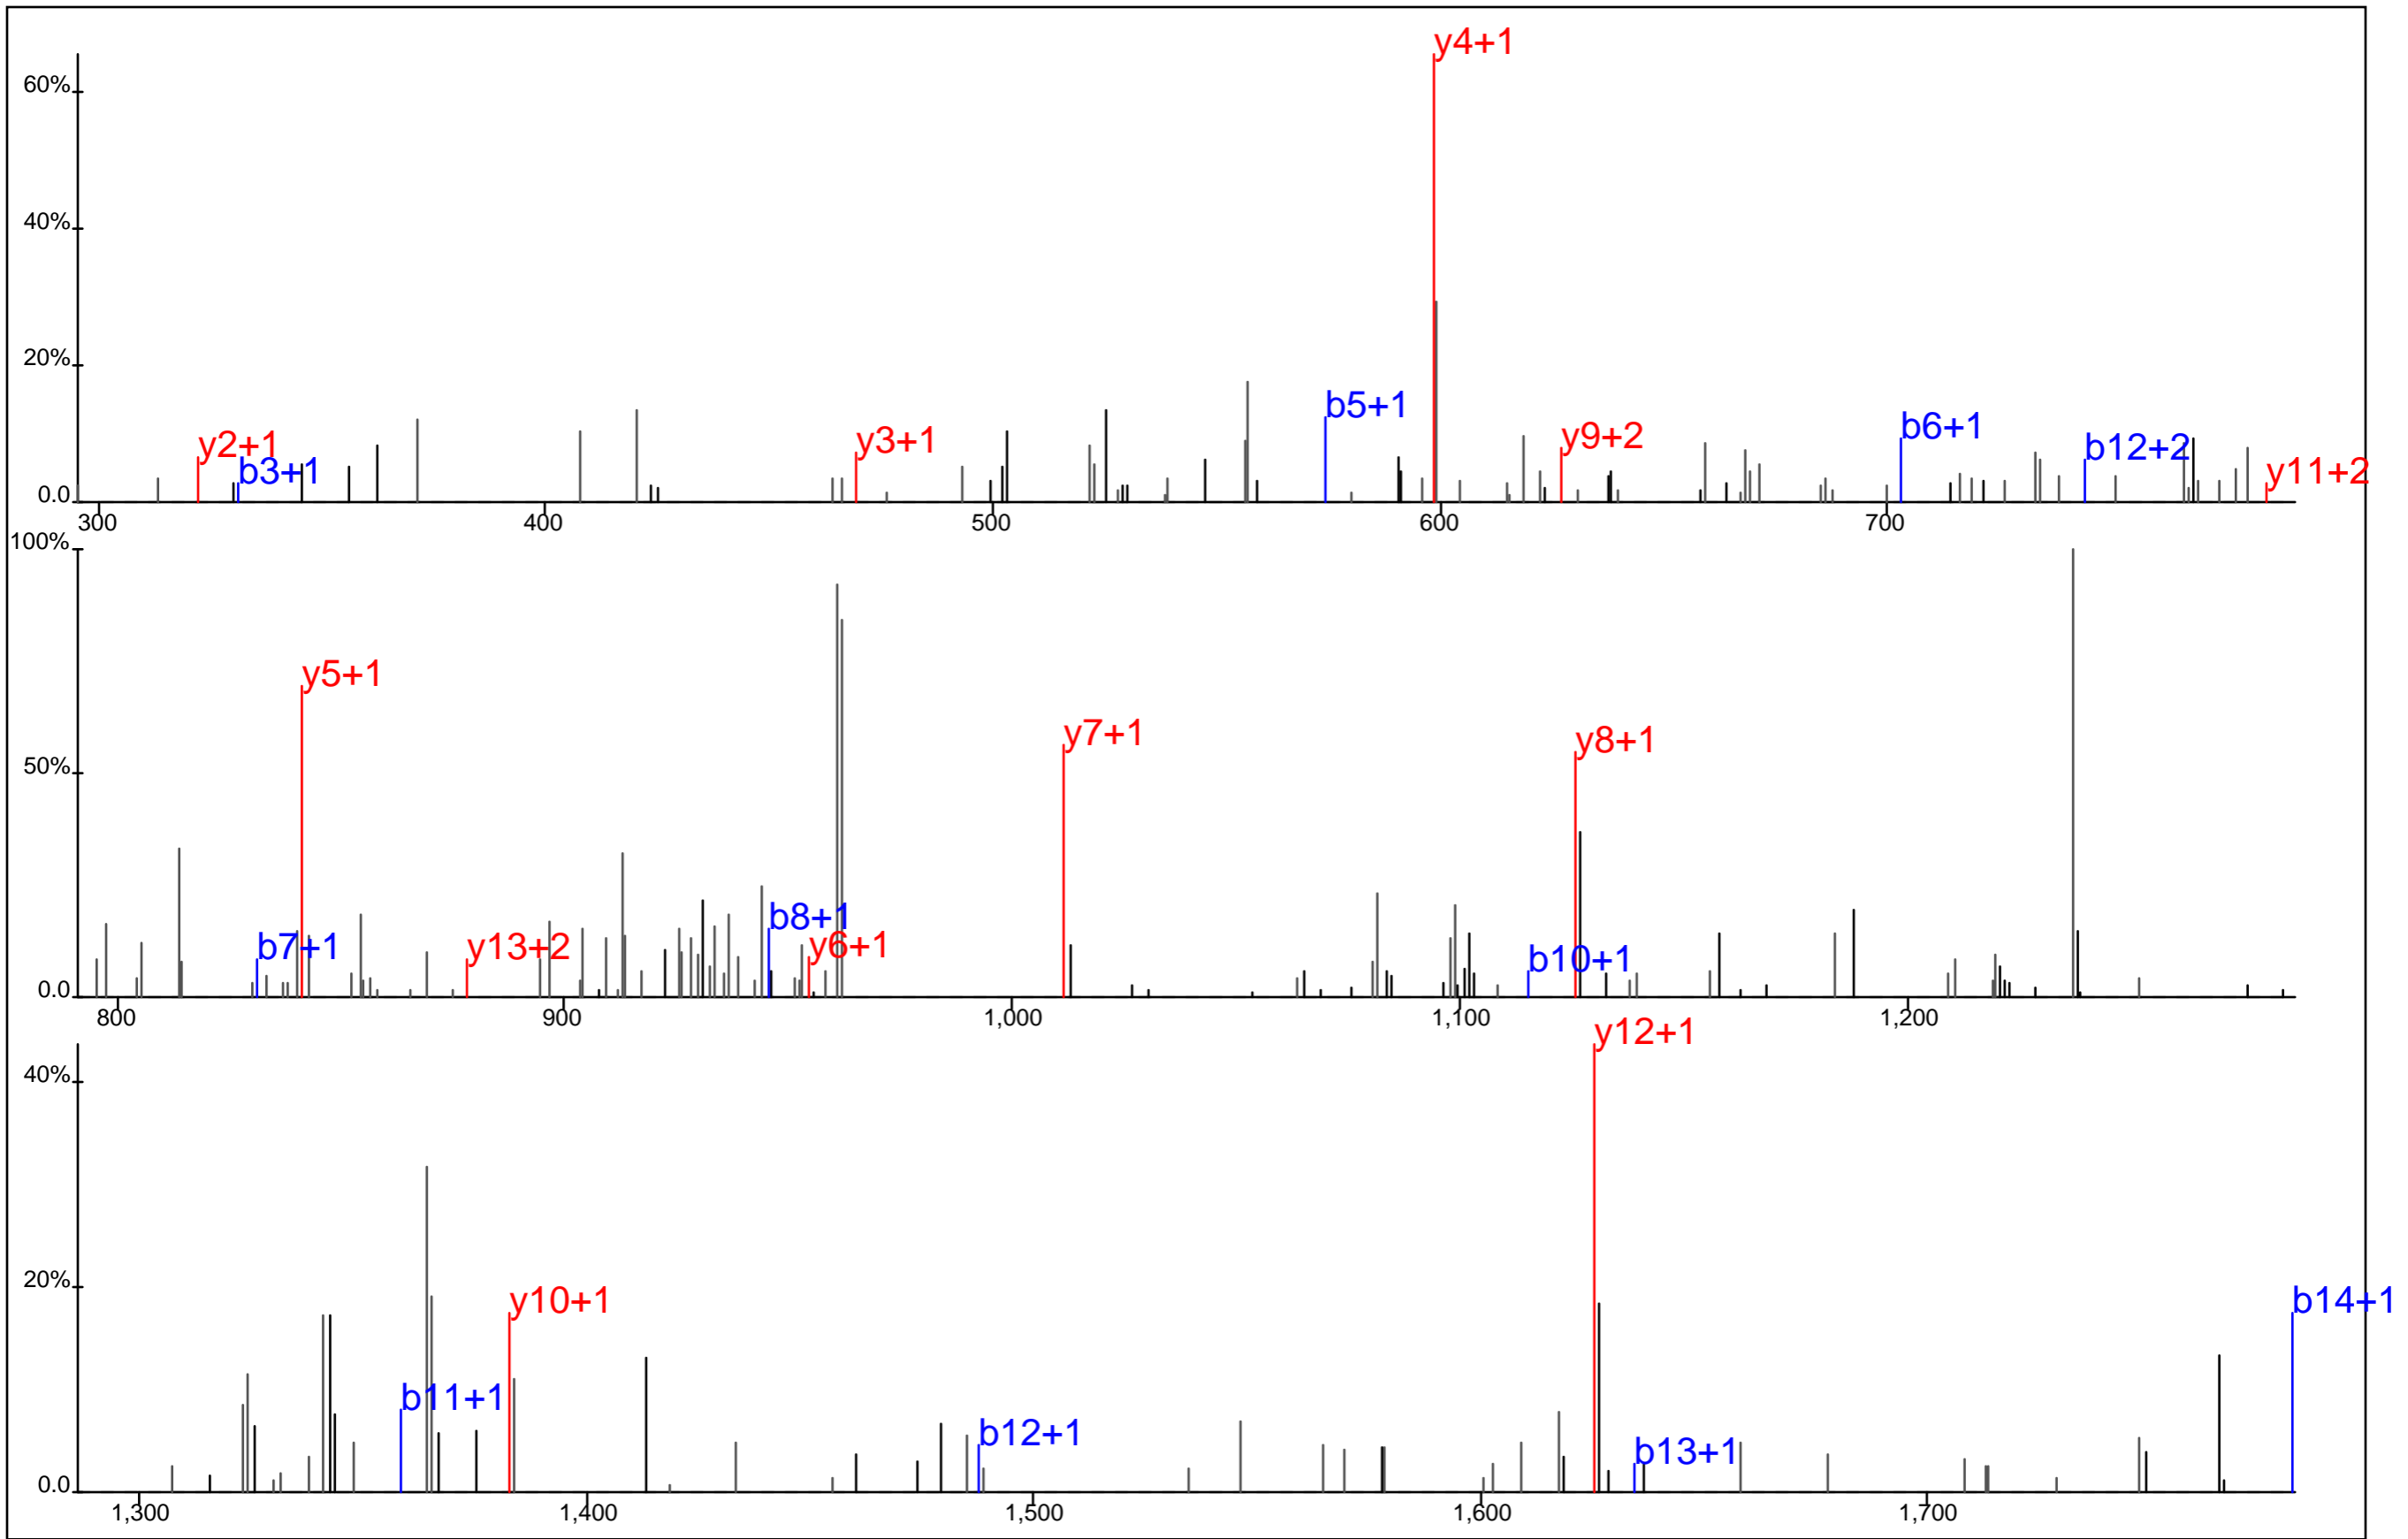

■ ■  
 N S E G W E Q N G L Y\* E F F R  
■ ■ ■ ■ ■ ■ ■ ■ ■ ■ ■ ■

Protein Name: CHERP  
 gi Accession: 25992622  
 Precursor Mass: 978.4073+2  
 Delta Mass: 5.797 ppm  
 XCorr: 35.74

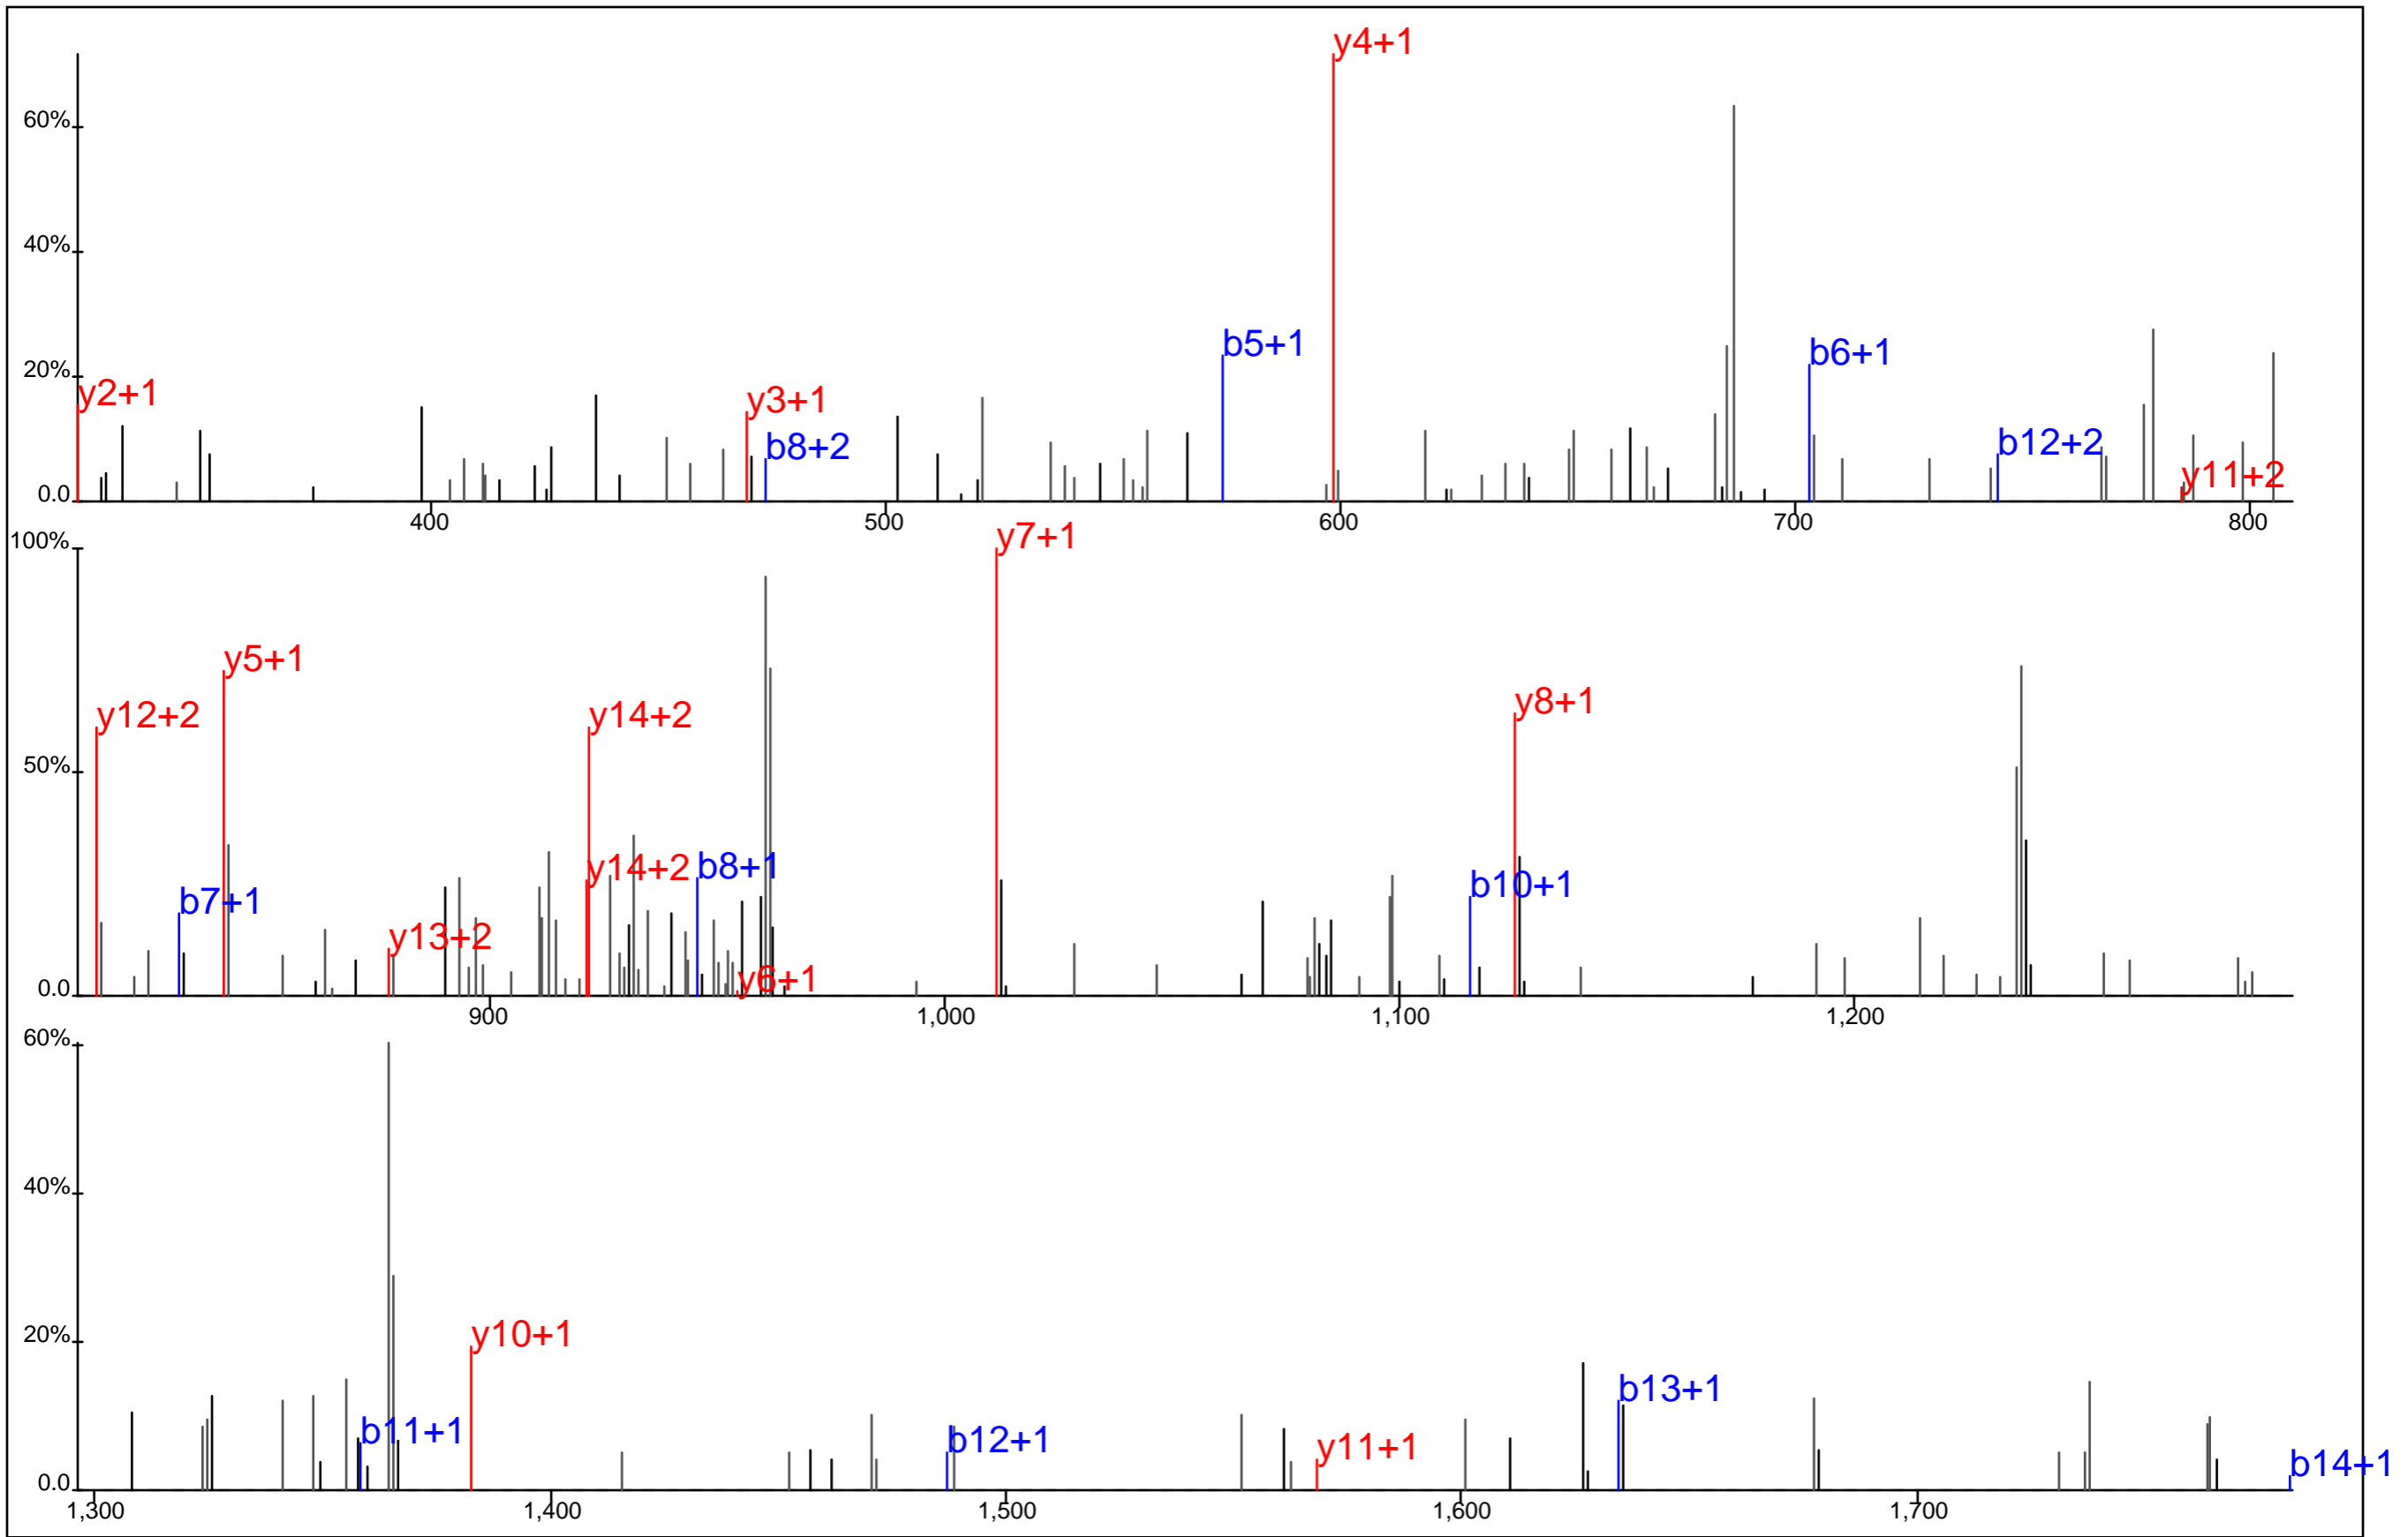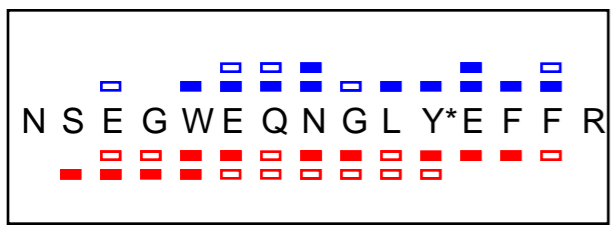

Protein Name: CHERP  
 gi Accession: 25992622  
 Precursor Mass: 978.4031+2  
 Delta Mass: 1.553 ppm  
 XCorr: 32.54



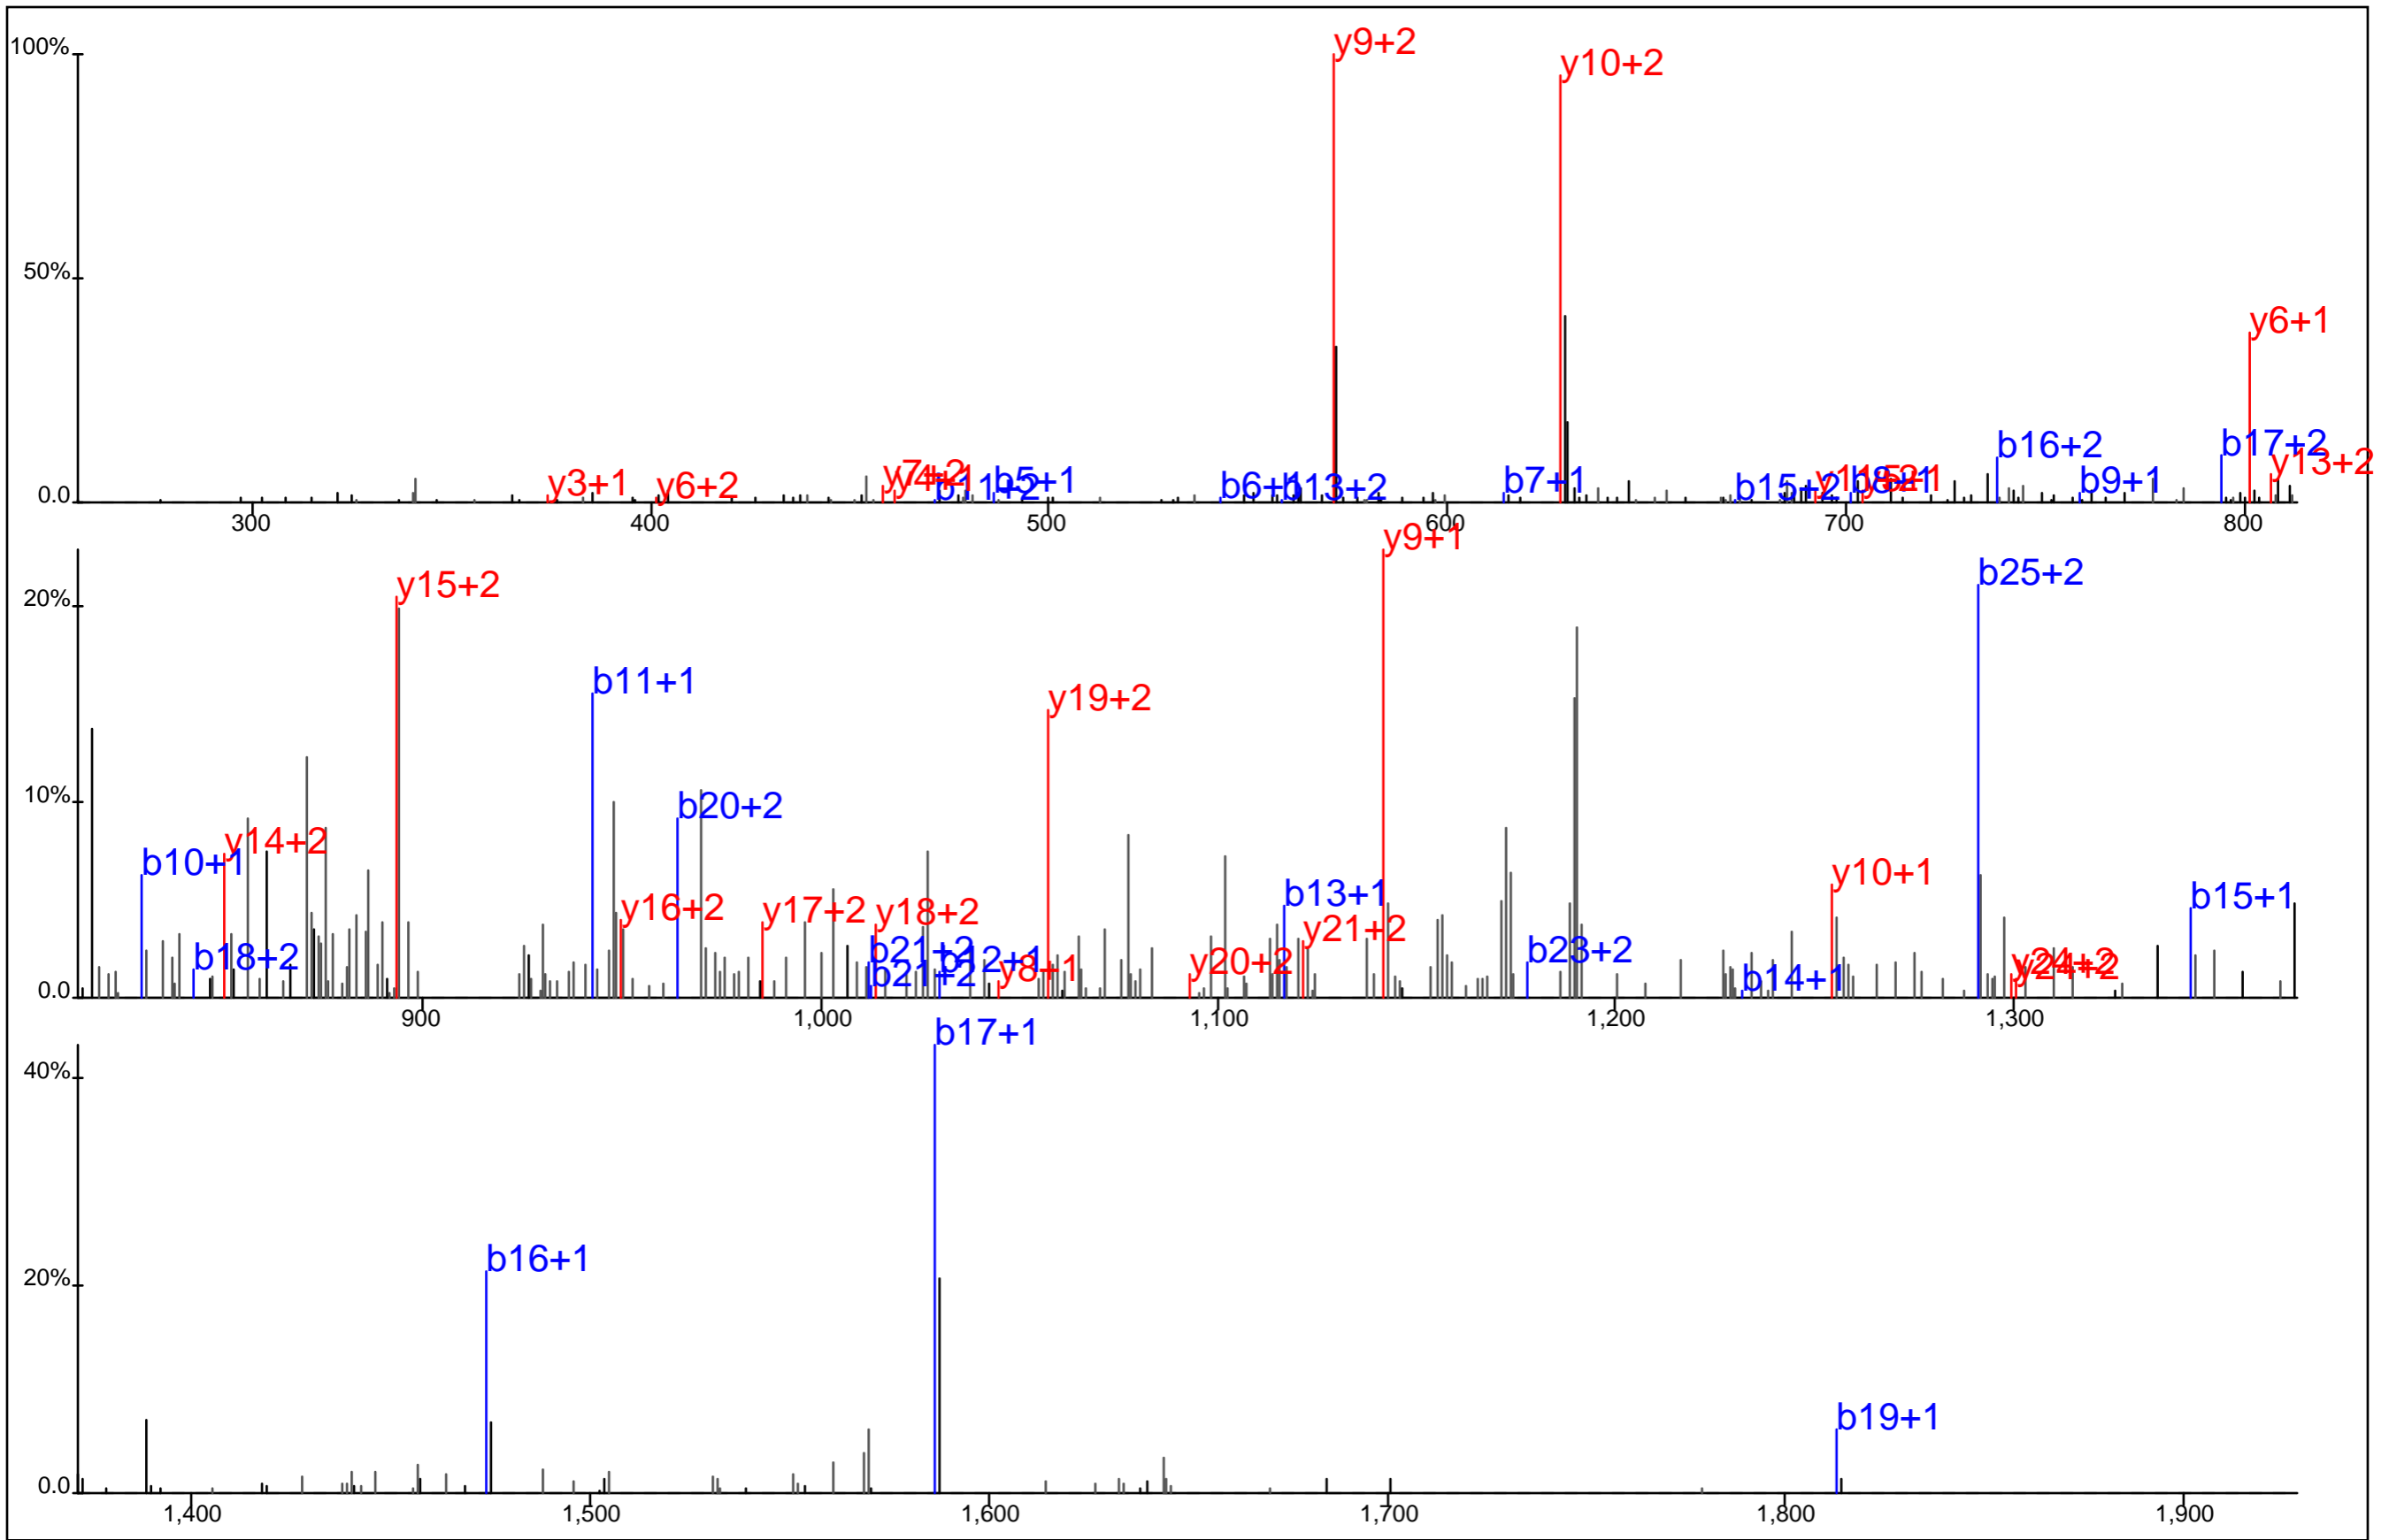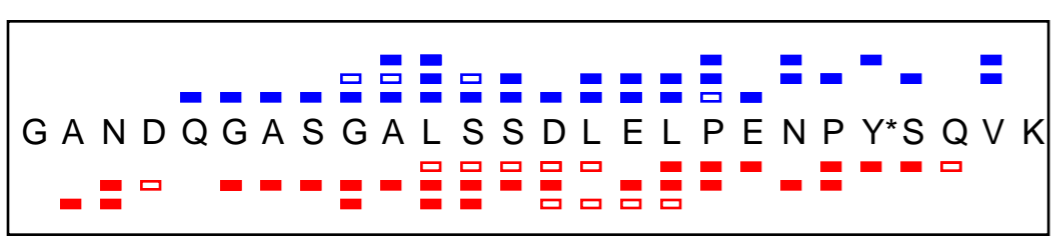

Protein Name: Cingulin  
 gi Accession: 16262452  
 Precursor Mass: 909.7468+3  
 Delta Mass: 4.194 ppm  
 XCorr: 23.18

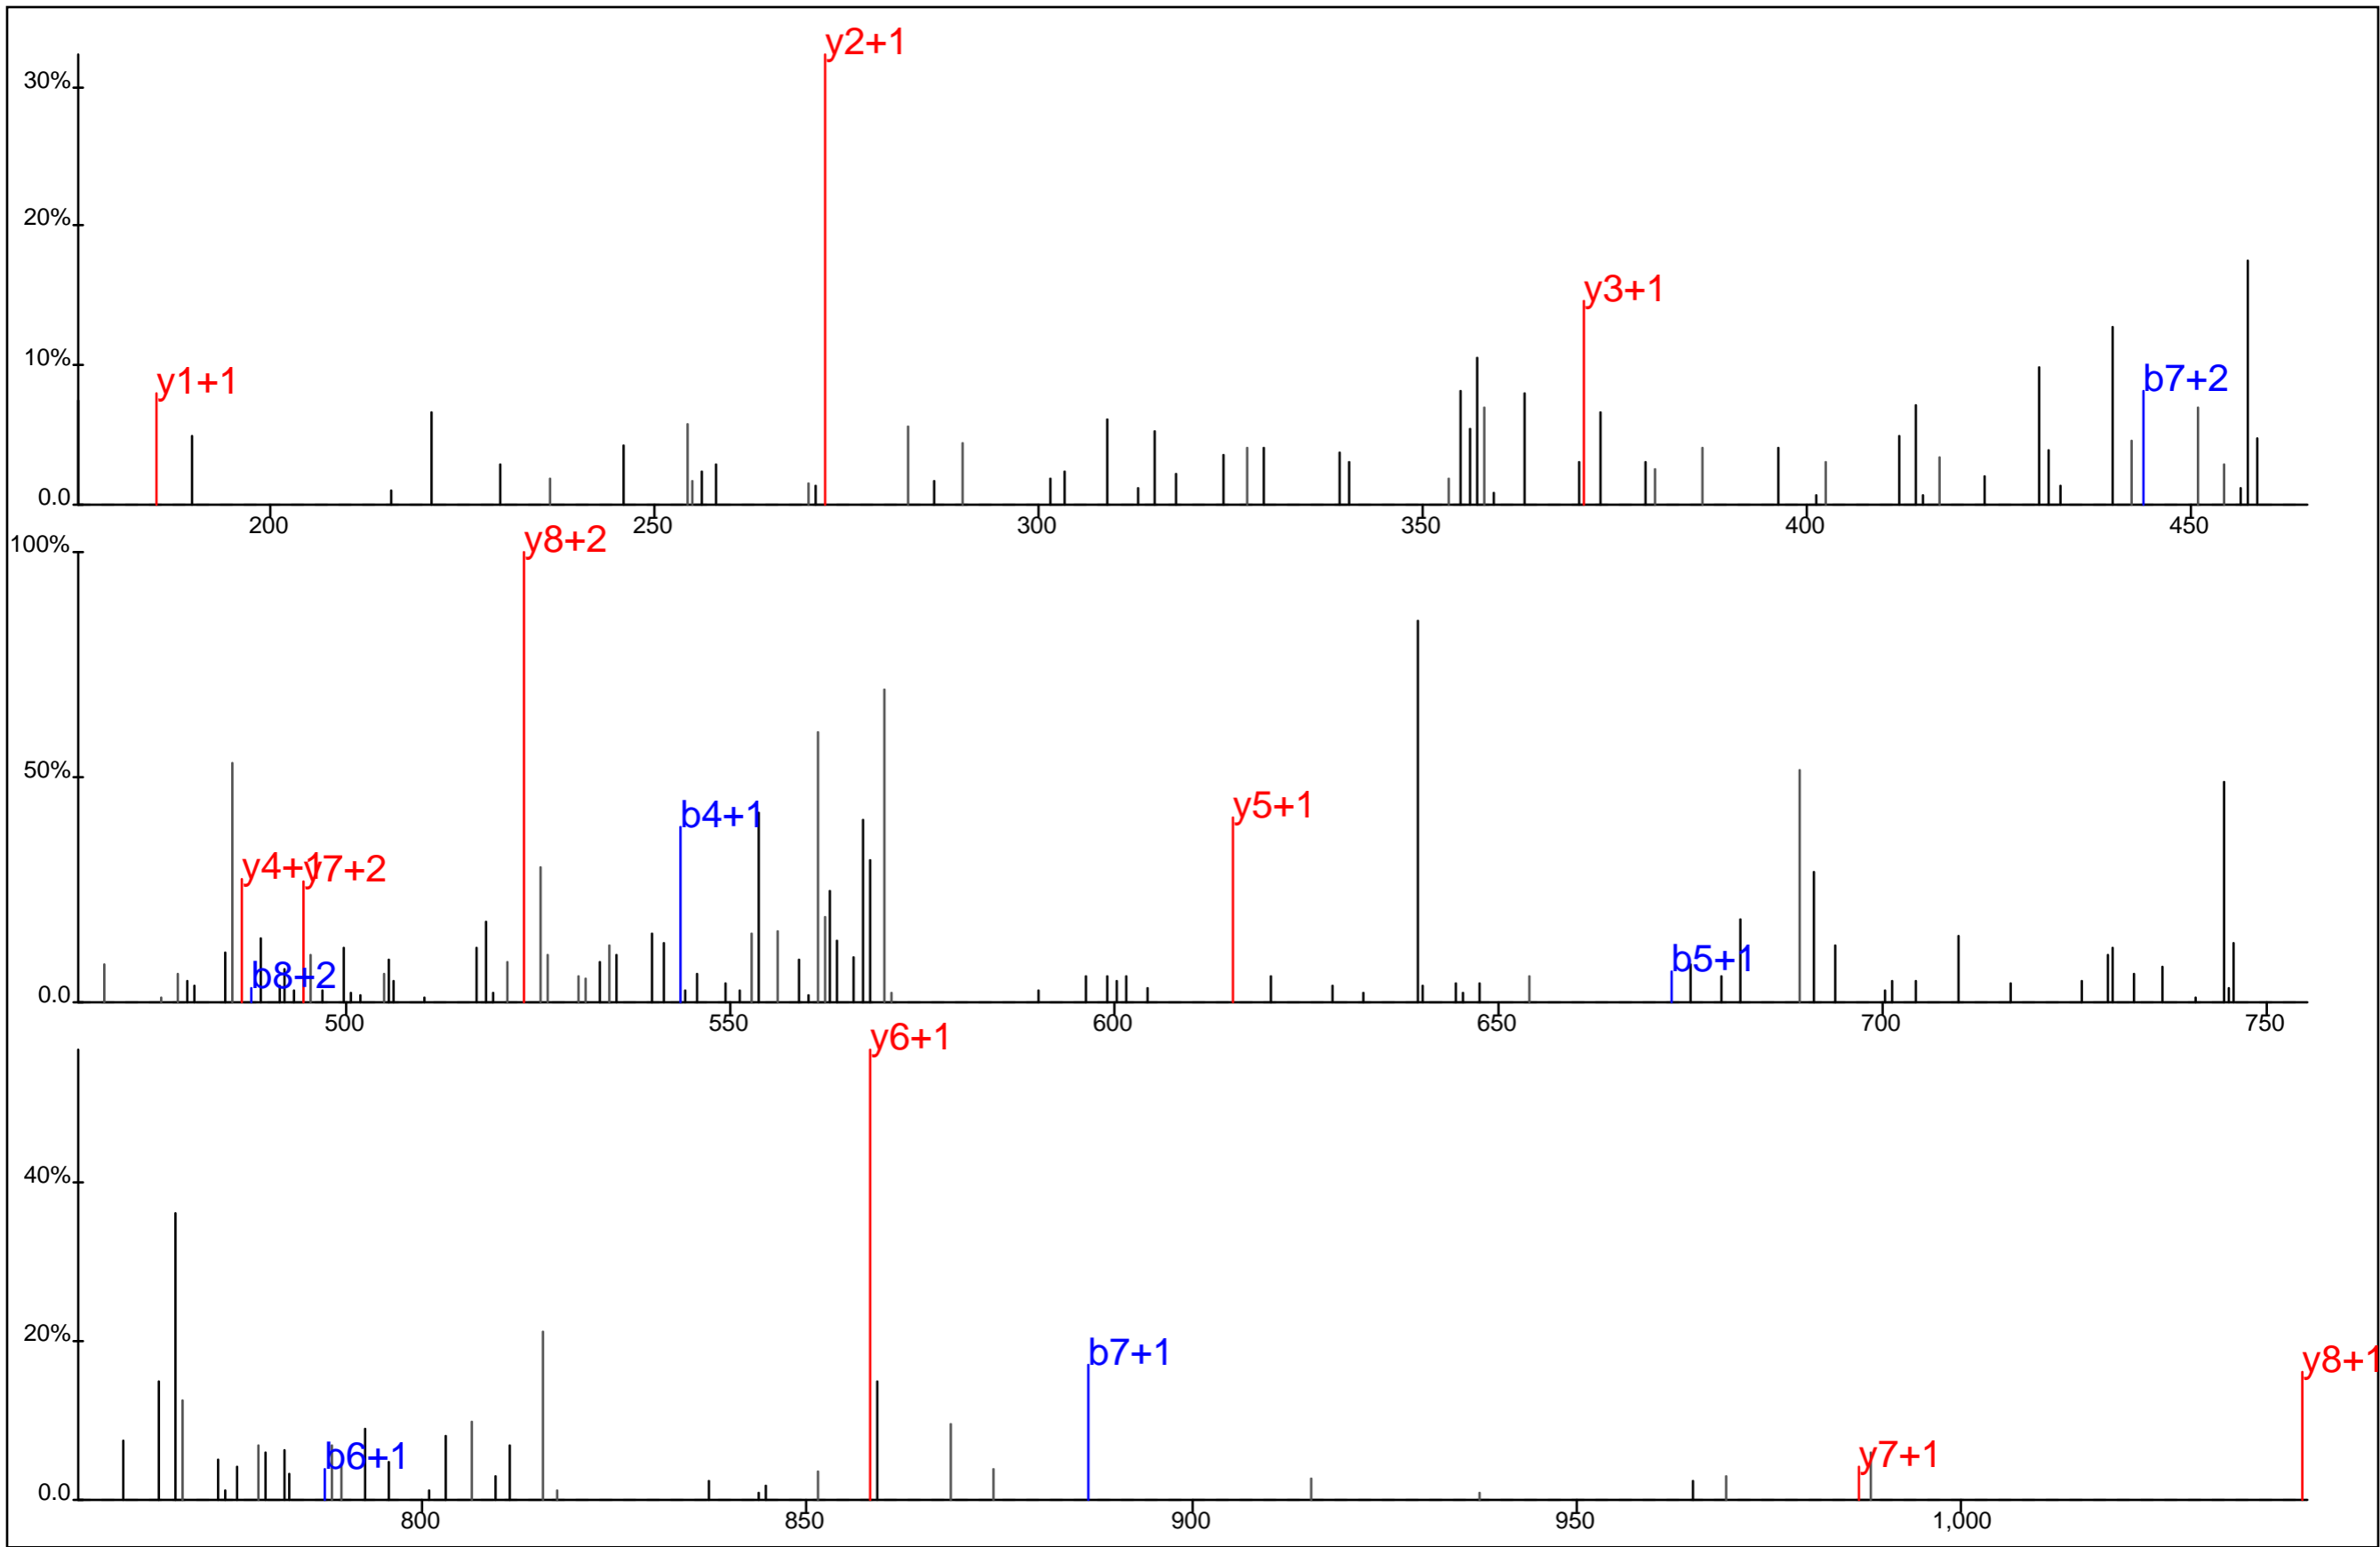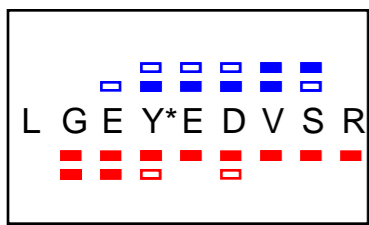

Protein Name: CKAP1  
 gi Accession: 736704  
 Precursor Mass: 579.2377+2  
 Delta Mass: 5.851 ppm  
 XCorr: 31.92

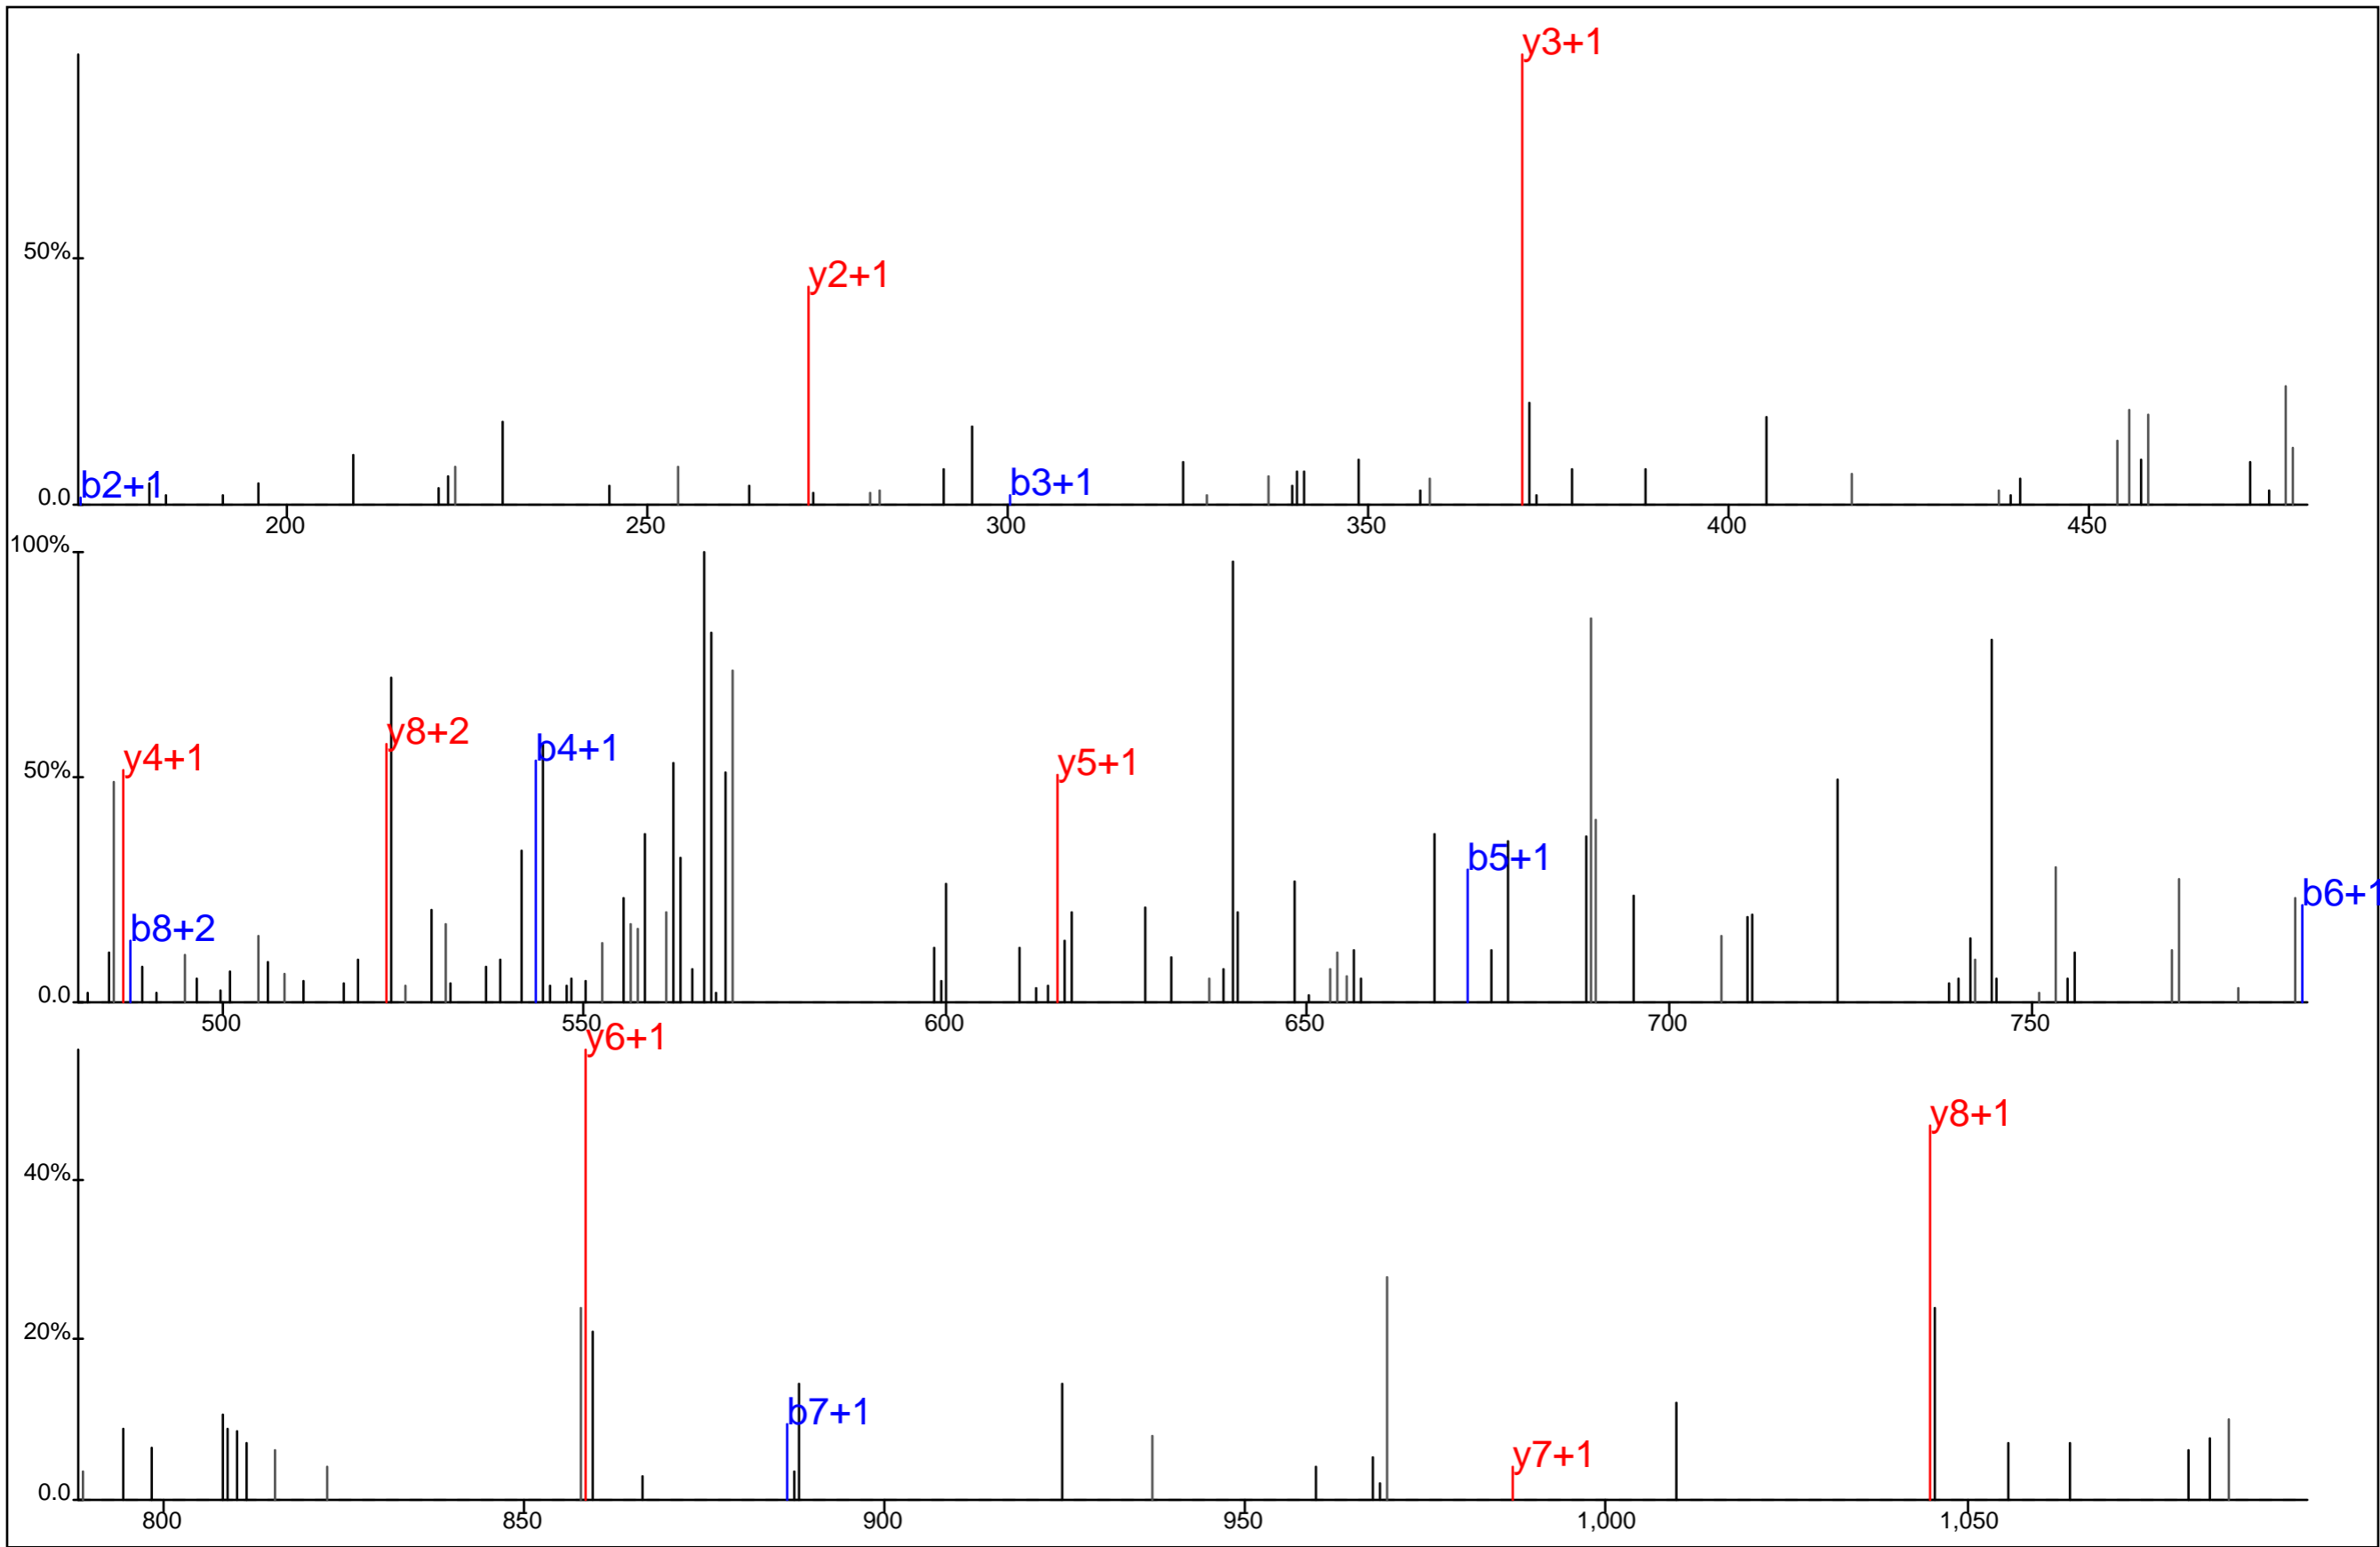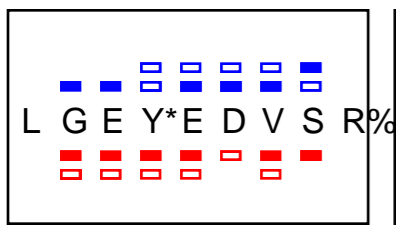

Protein Name: CKAP1  
 gi Accession: 736704  
 Precursor Mass: 579.2431+2  
 Delta Mass: 3.428 ppm  
 XCorr: 13.56

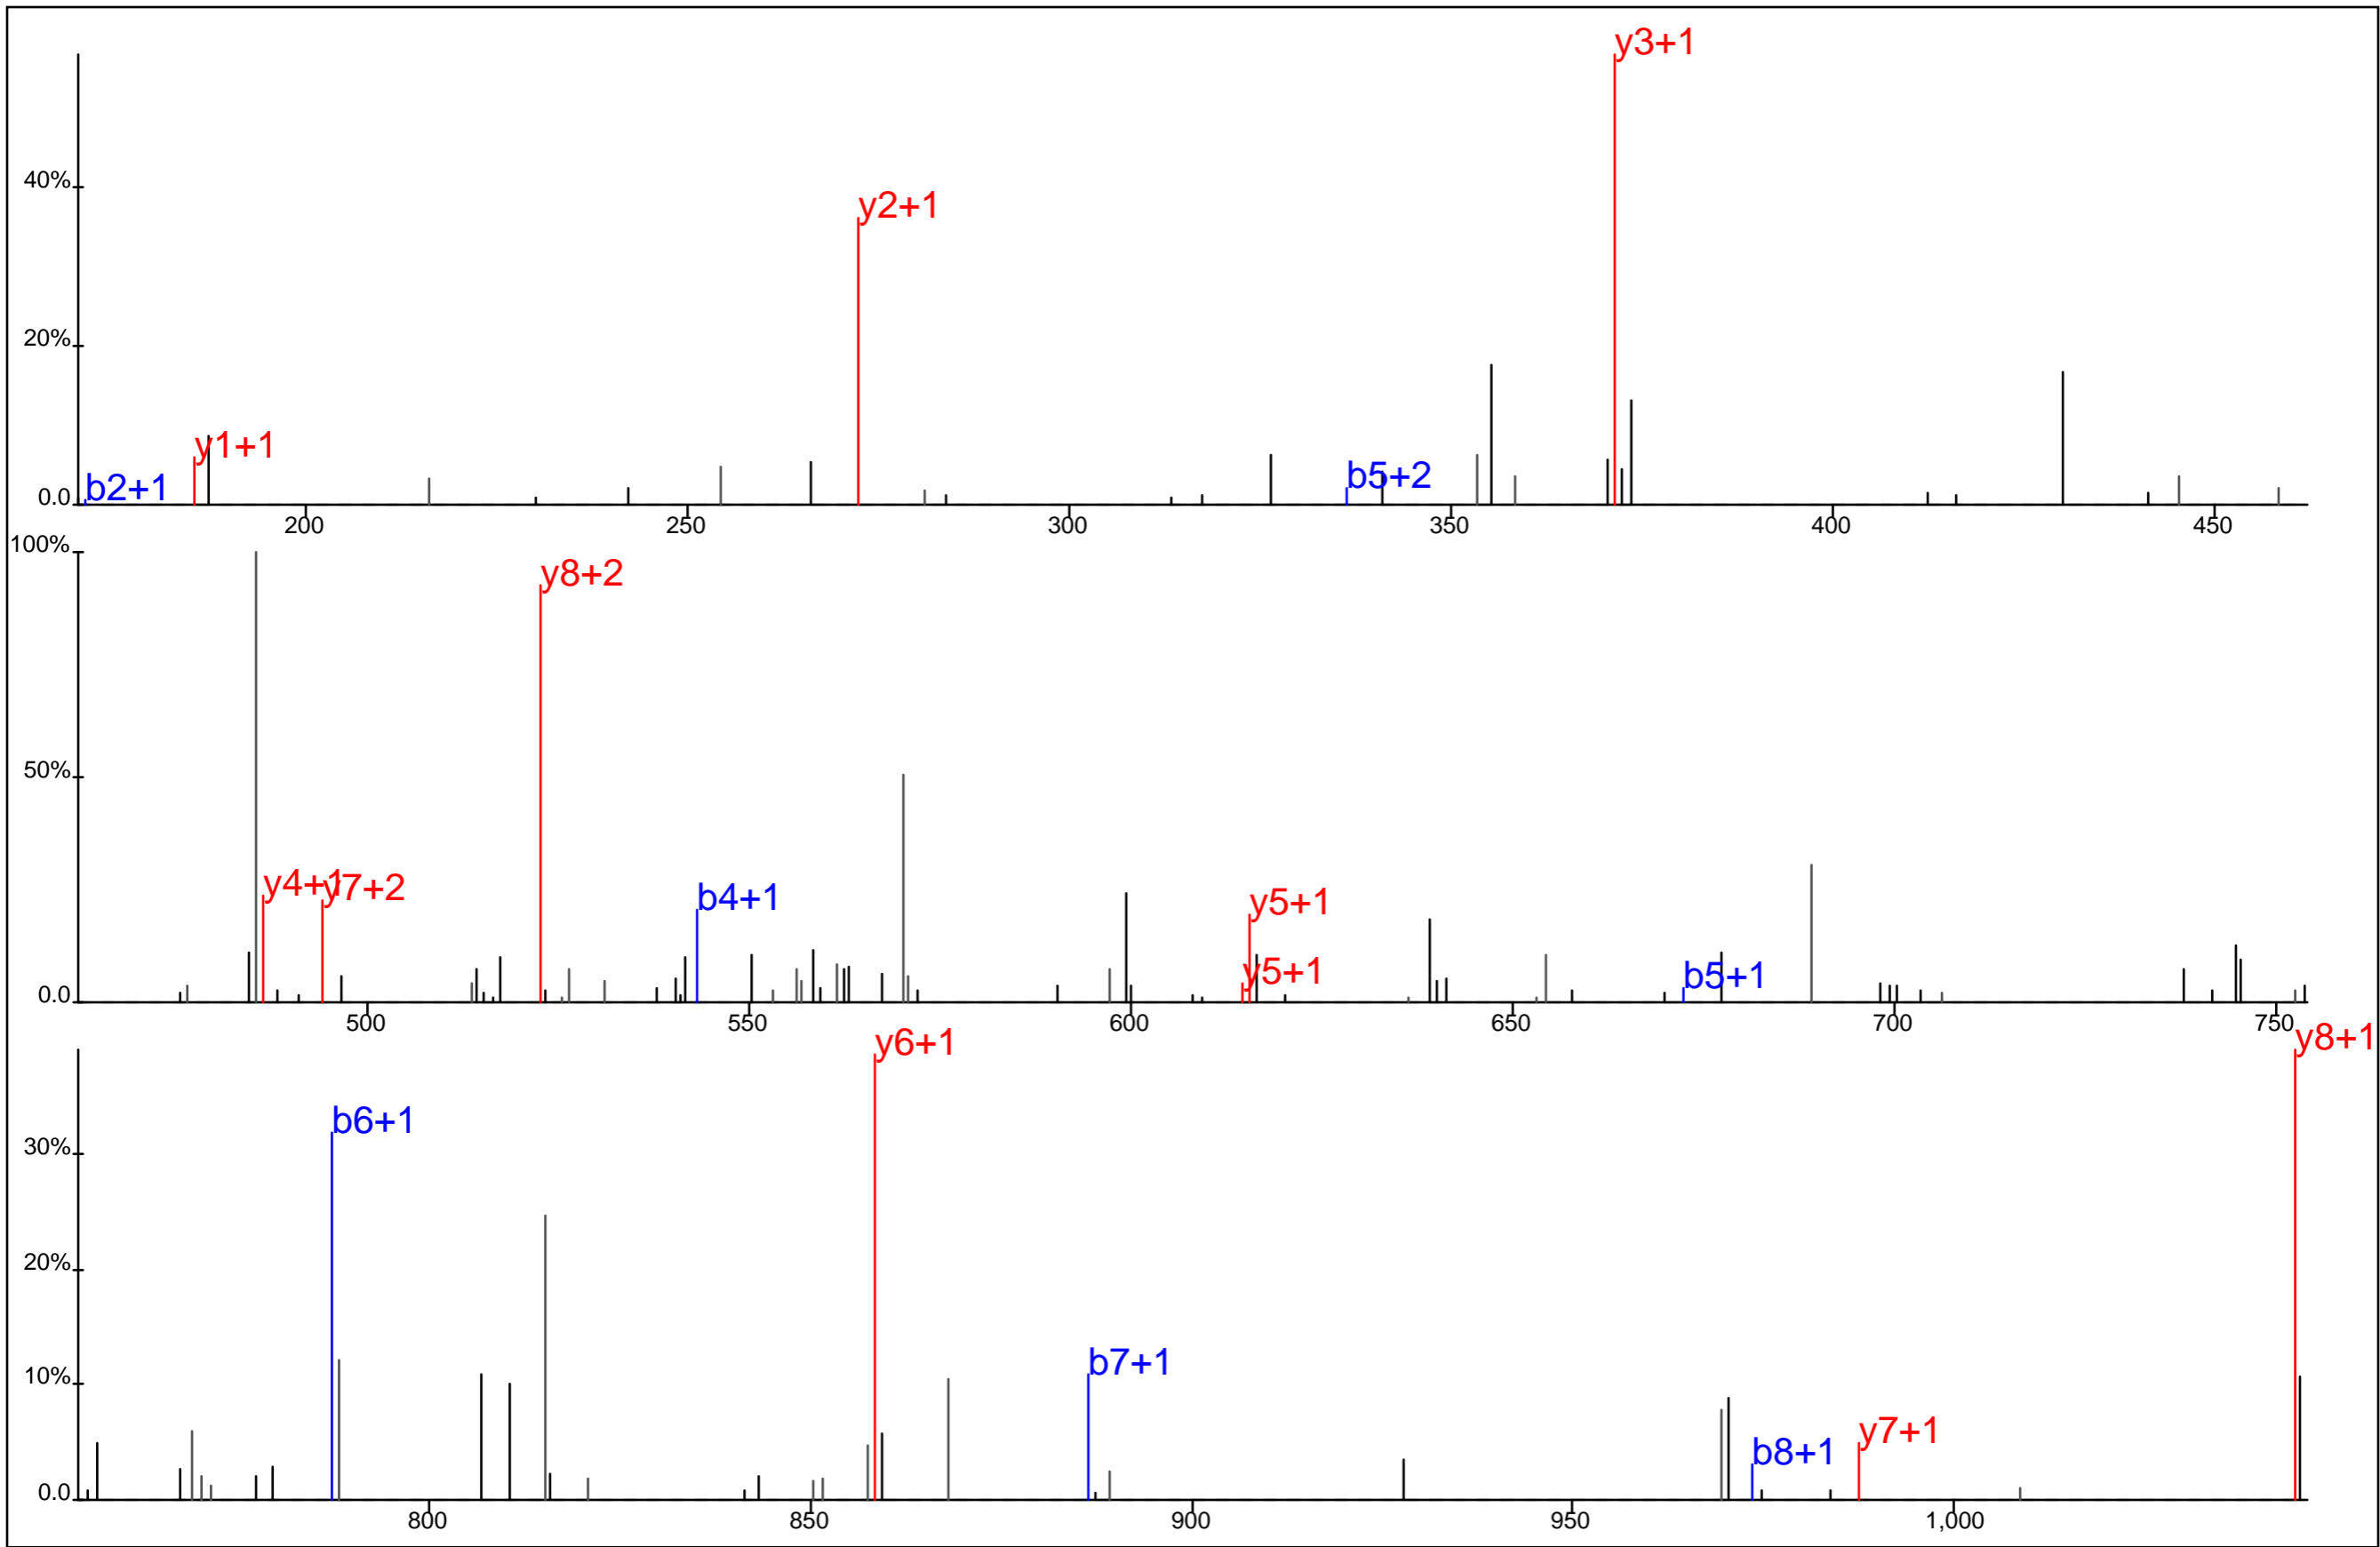

|  |                                                                                                                                                                   |
|--|-------------------------------------------------------------------------------------------------------------------------------------------------------------------|
|  | <p>Protein Name: CKAP1<br/>         gi Accession: 736704<br/>         Precursor Mass: 579.2421+2<br/>         Delta Mass: 1.743 ppm<br/>         XCorr: 49.57</p> |
|--|-------------------------------------------------------------------------------------------------------------------------------------------------------------------|

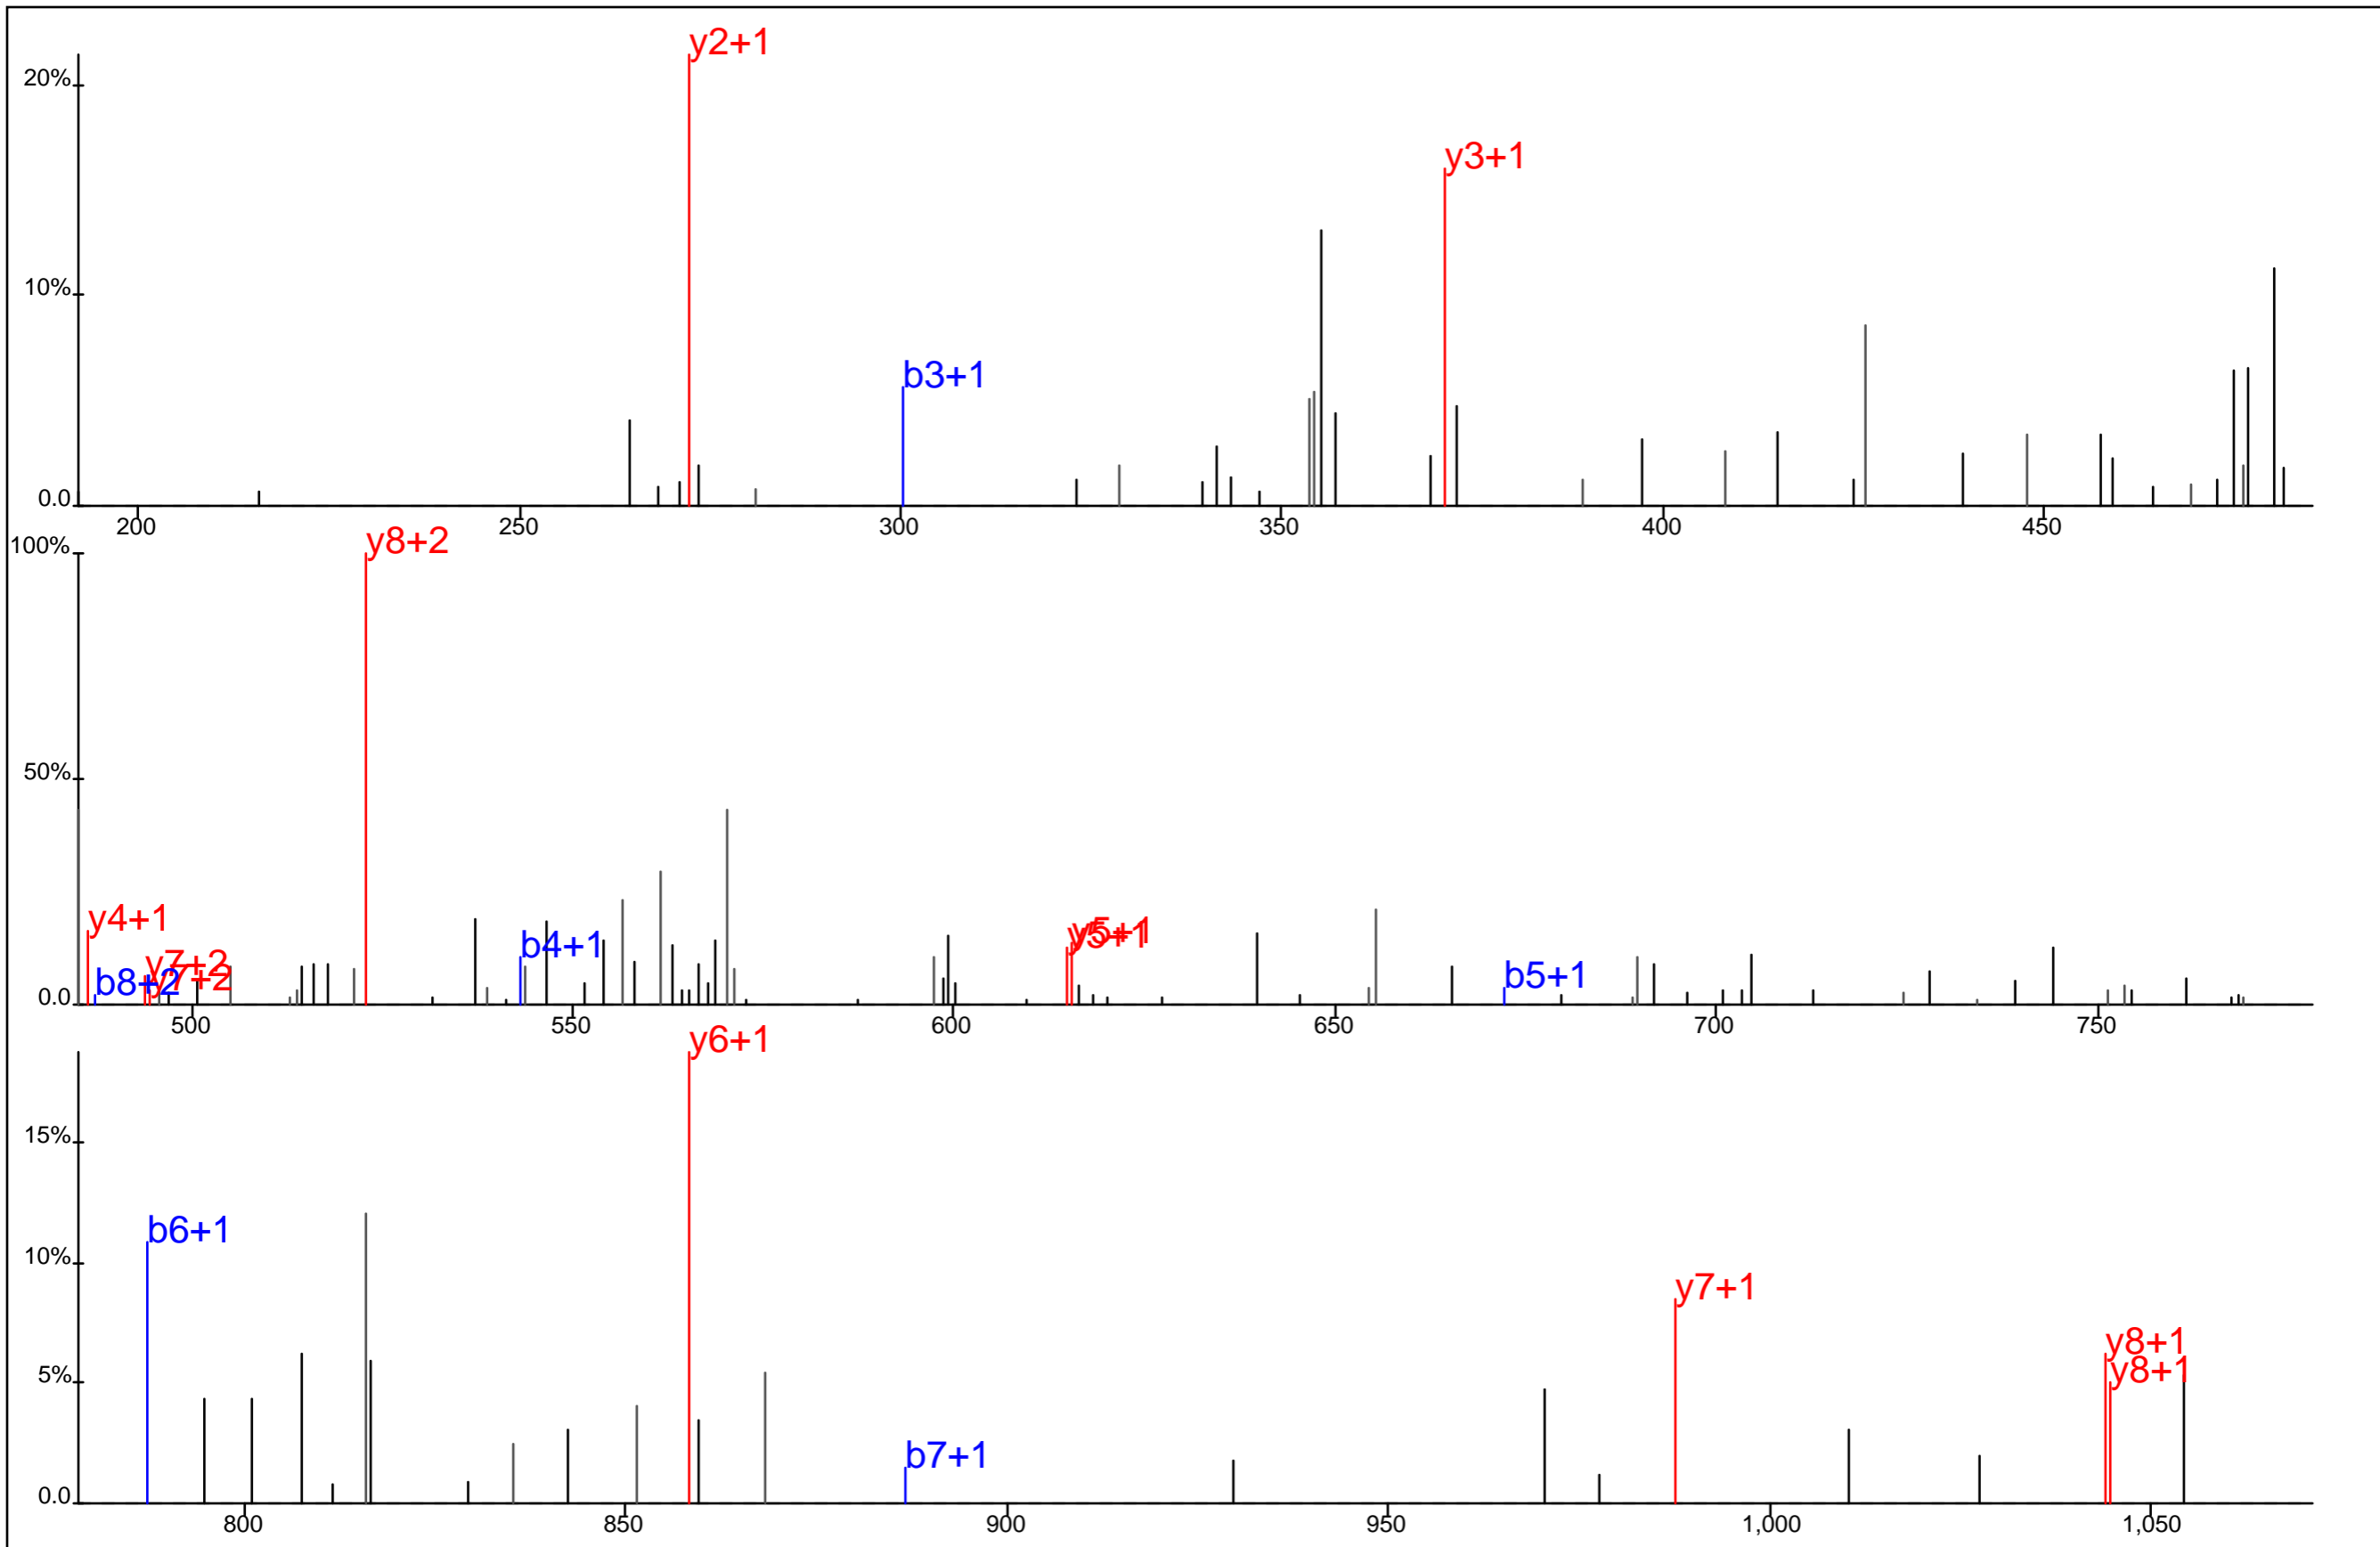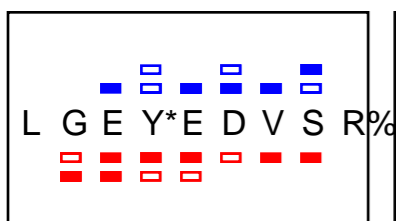

Protein Name: CKAP1  
 gi Accession: 736704  
 Precursor Mass: 579.2441+2  
 Delta Mass: 5.217 ppm  
 XCorr: 34.7

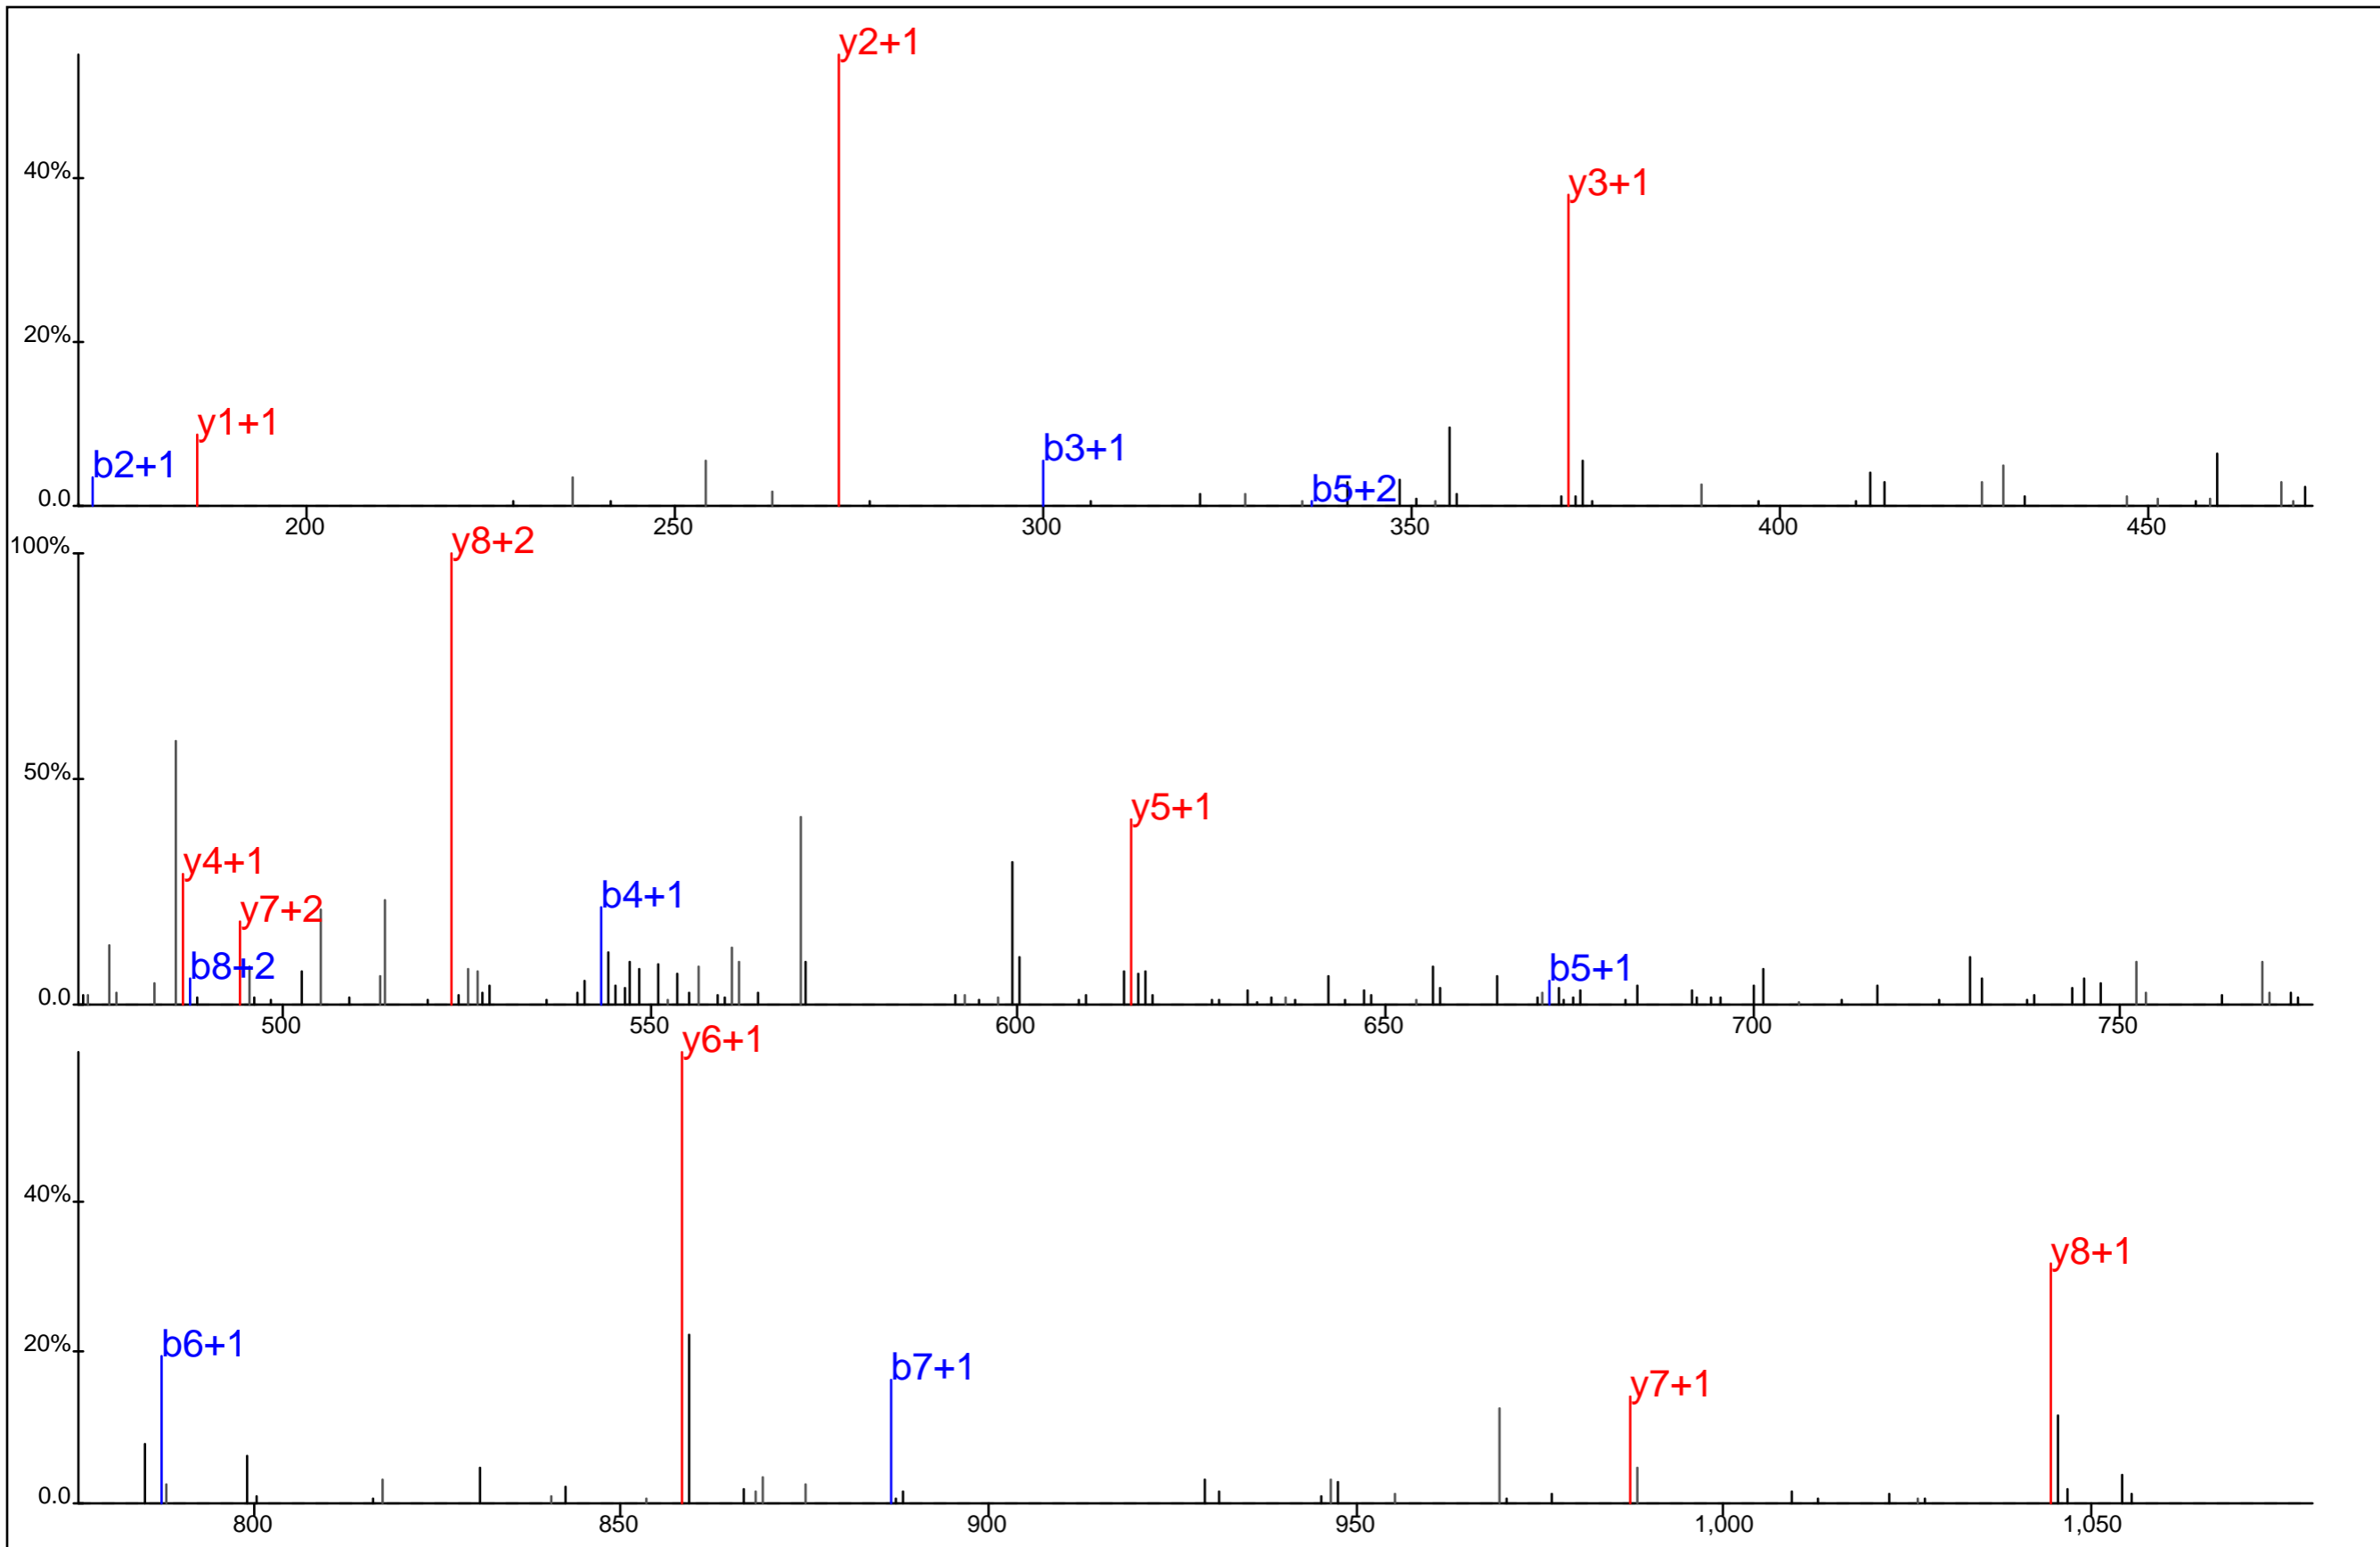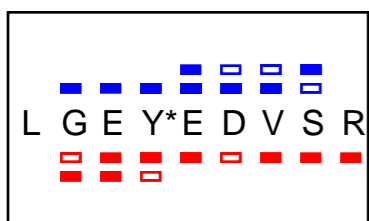

Protein Name: CKAP1  
 gi Accession: 736704  
 Precursor Mass: 579.2435+2  
 Delta Mass: 4.059 ppm  
 XCorr: 54.62

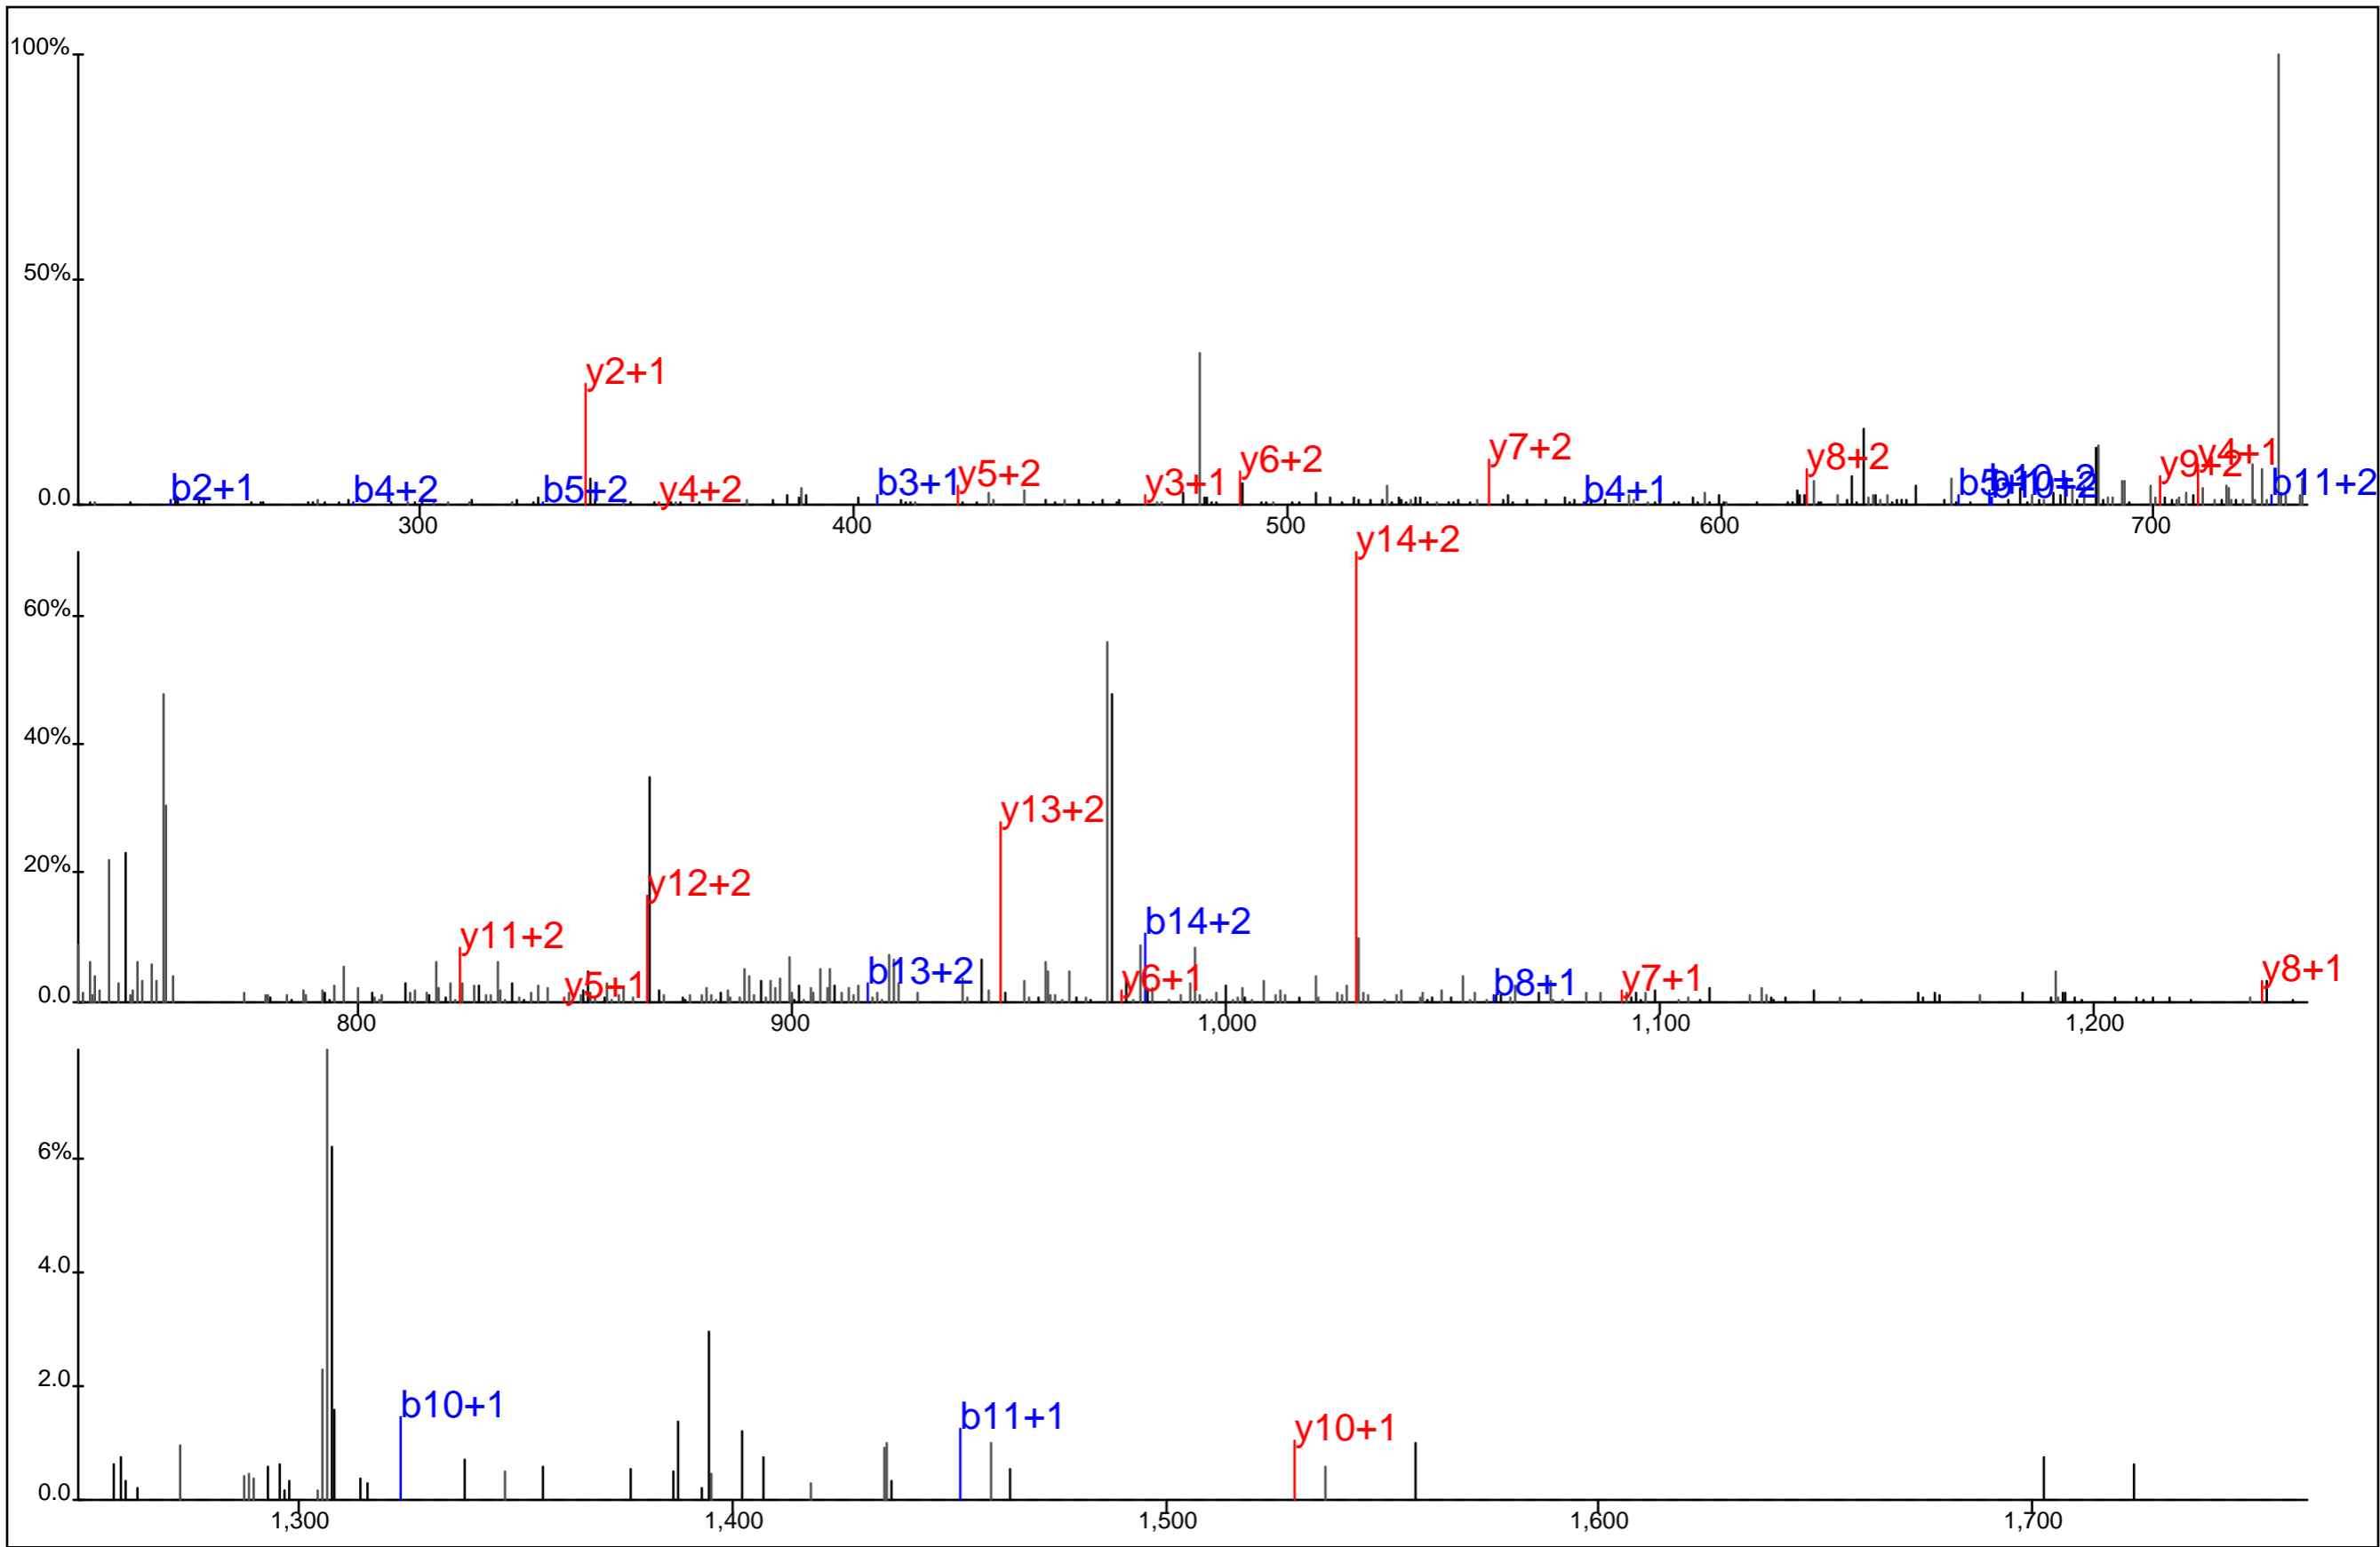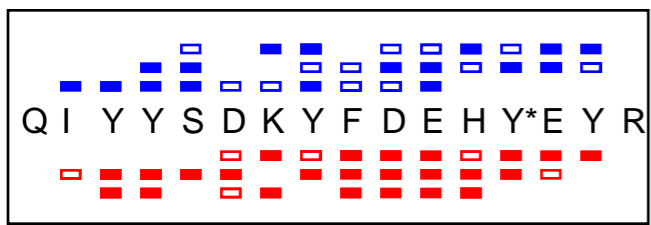

Protein Name: CKS2  
 gi Accession: 4502859  
 Precursor Mass: 766.9894+3  
 Delta Mass: 6.820 ppm  
 XCorr: 24.08

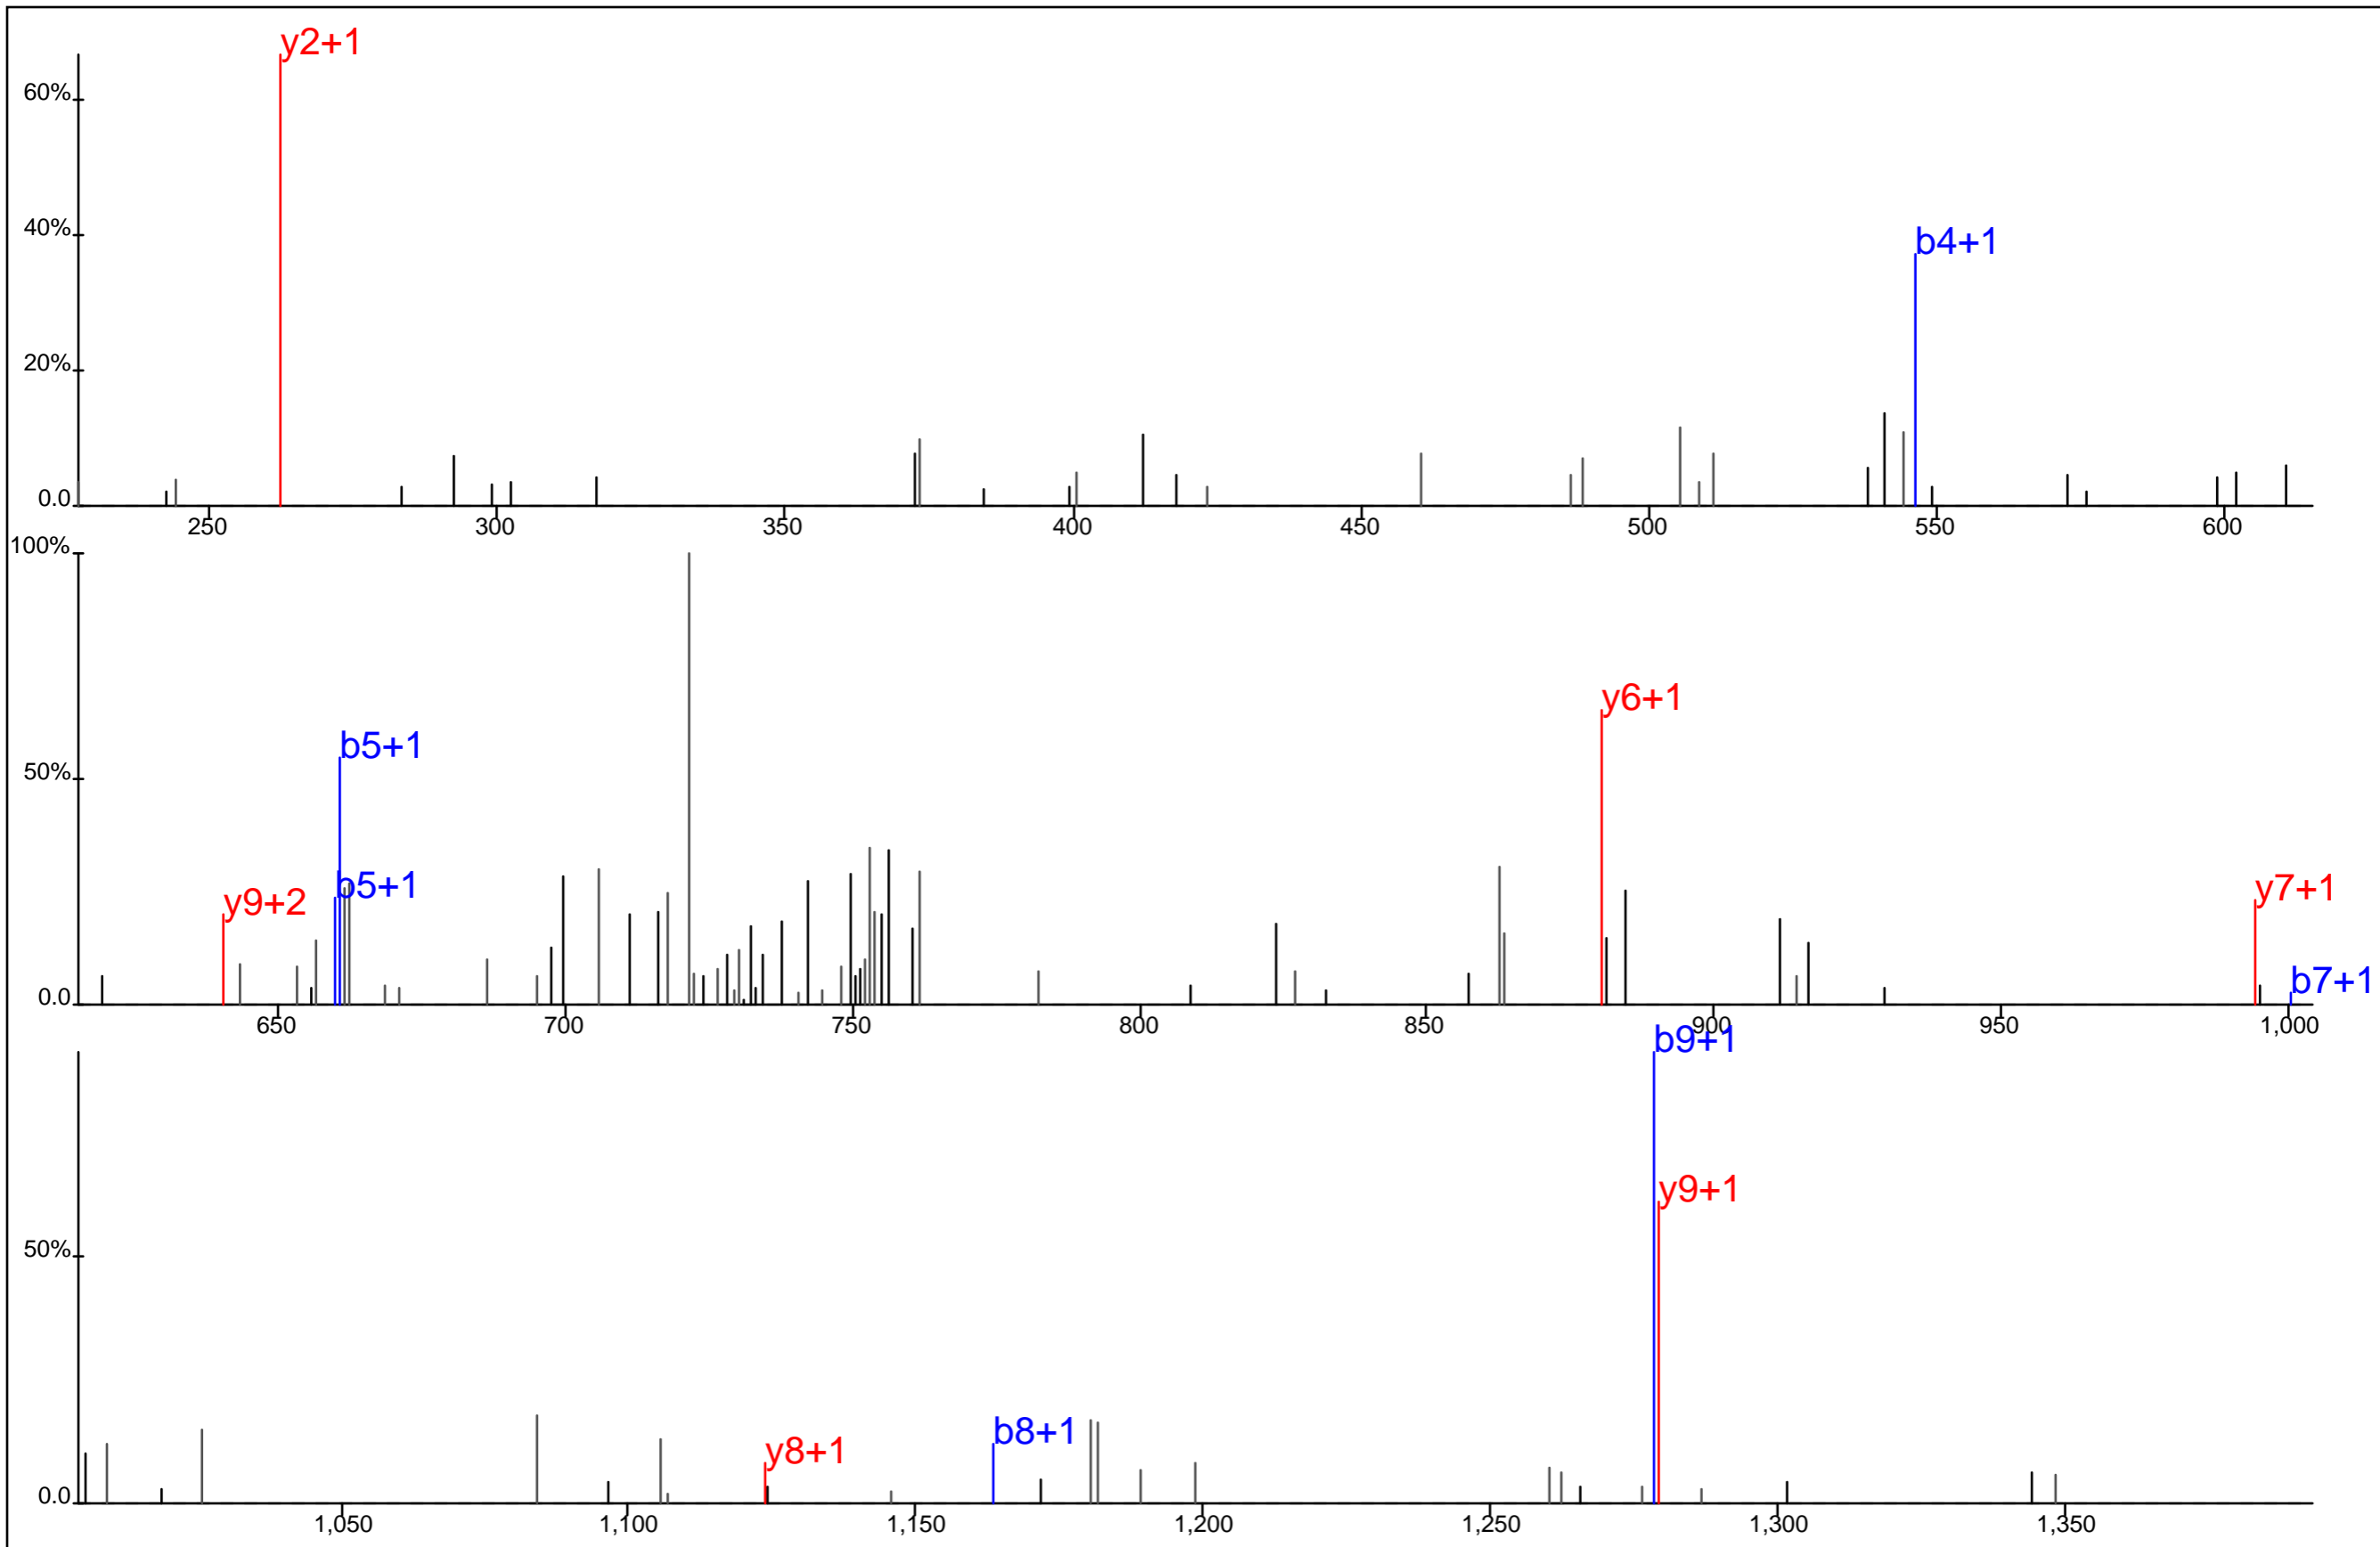

F L R E N P Y\*Y D S R  
▢ ▢ ▢ ▢ ▢ ▢ ▢ ▢  
▢ ▢ ▢ ▢ ▢ ▢

Protein Name: Clathrin, heavy polypeptide  
 gi Accession: 4758012  
 Precursor Mass: 770.3329+2  
 Delta Mass: 2.786 ppm  
 XCorr: 2.8871



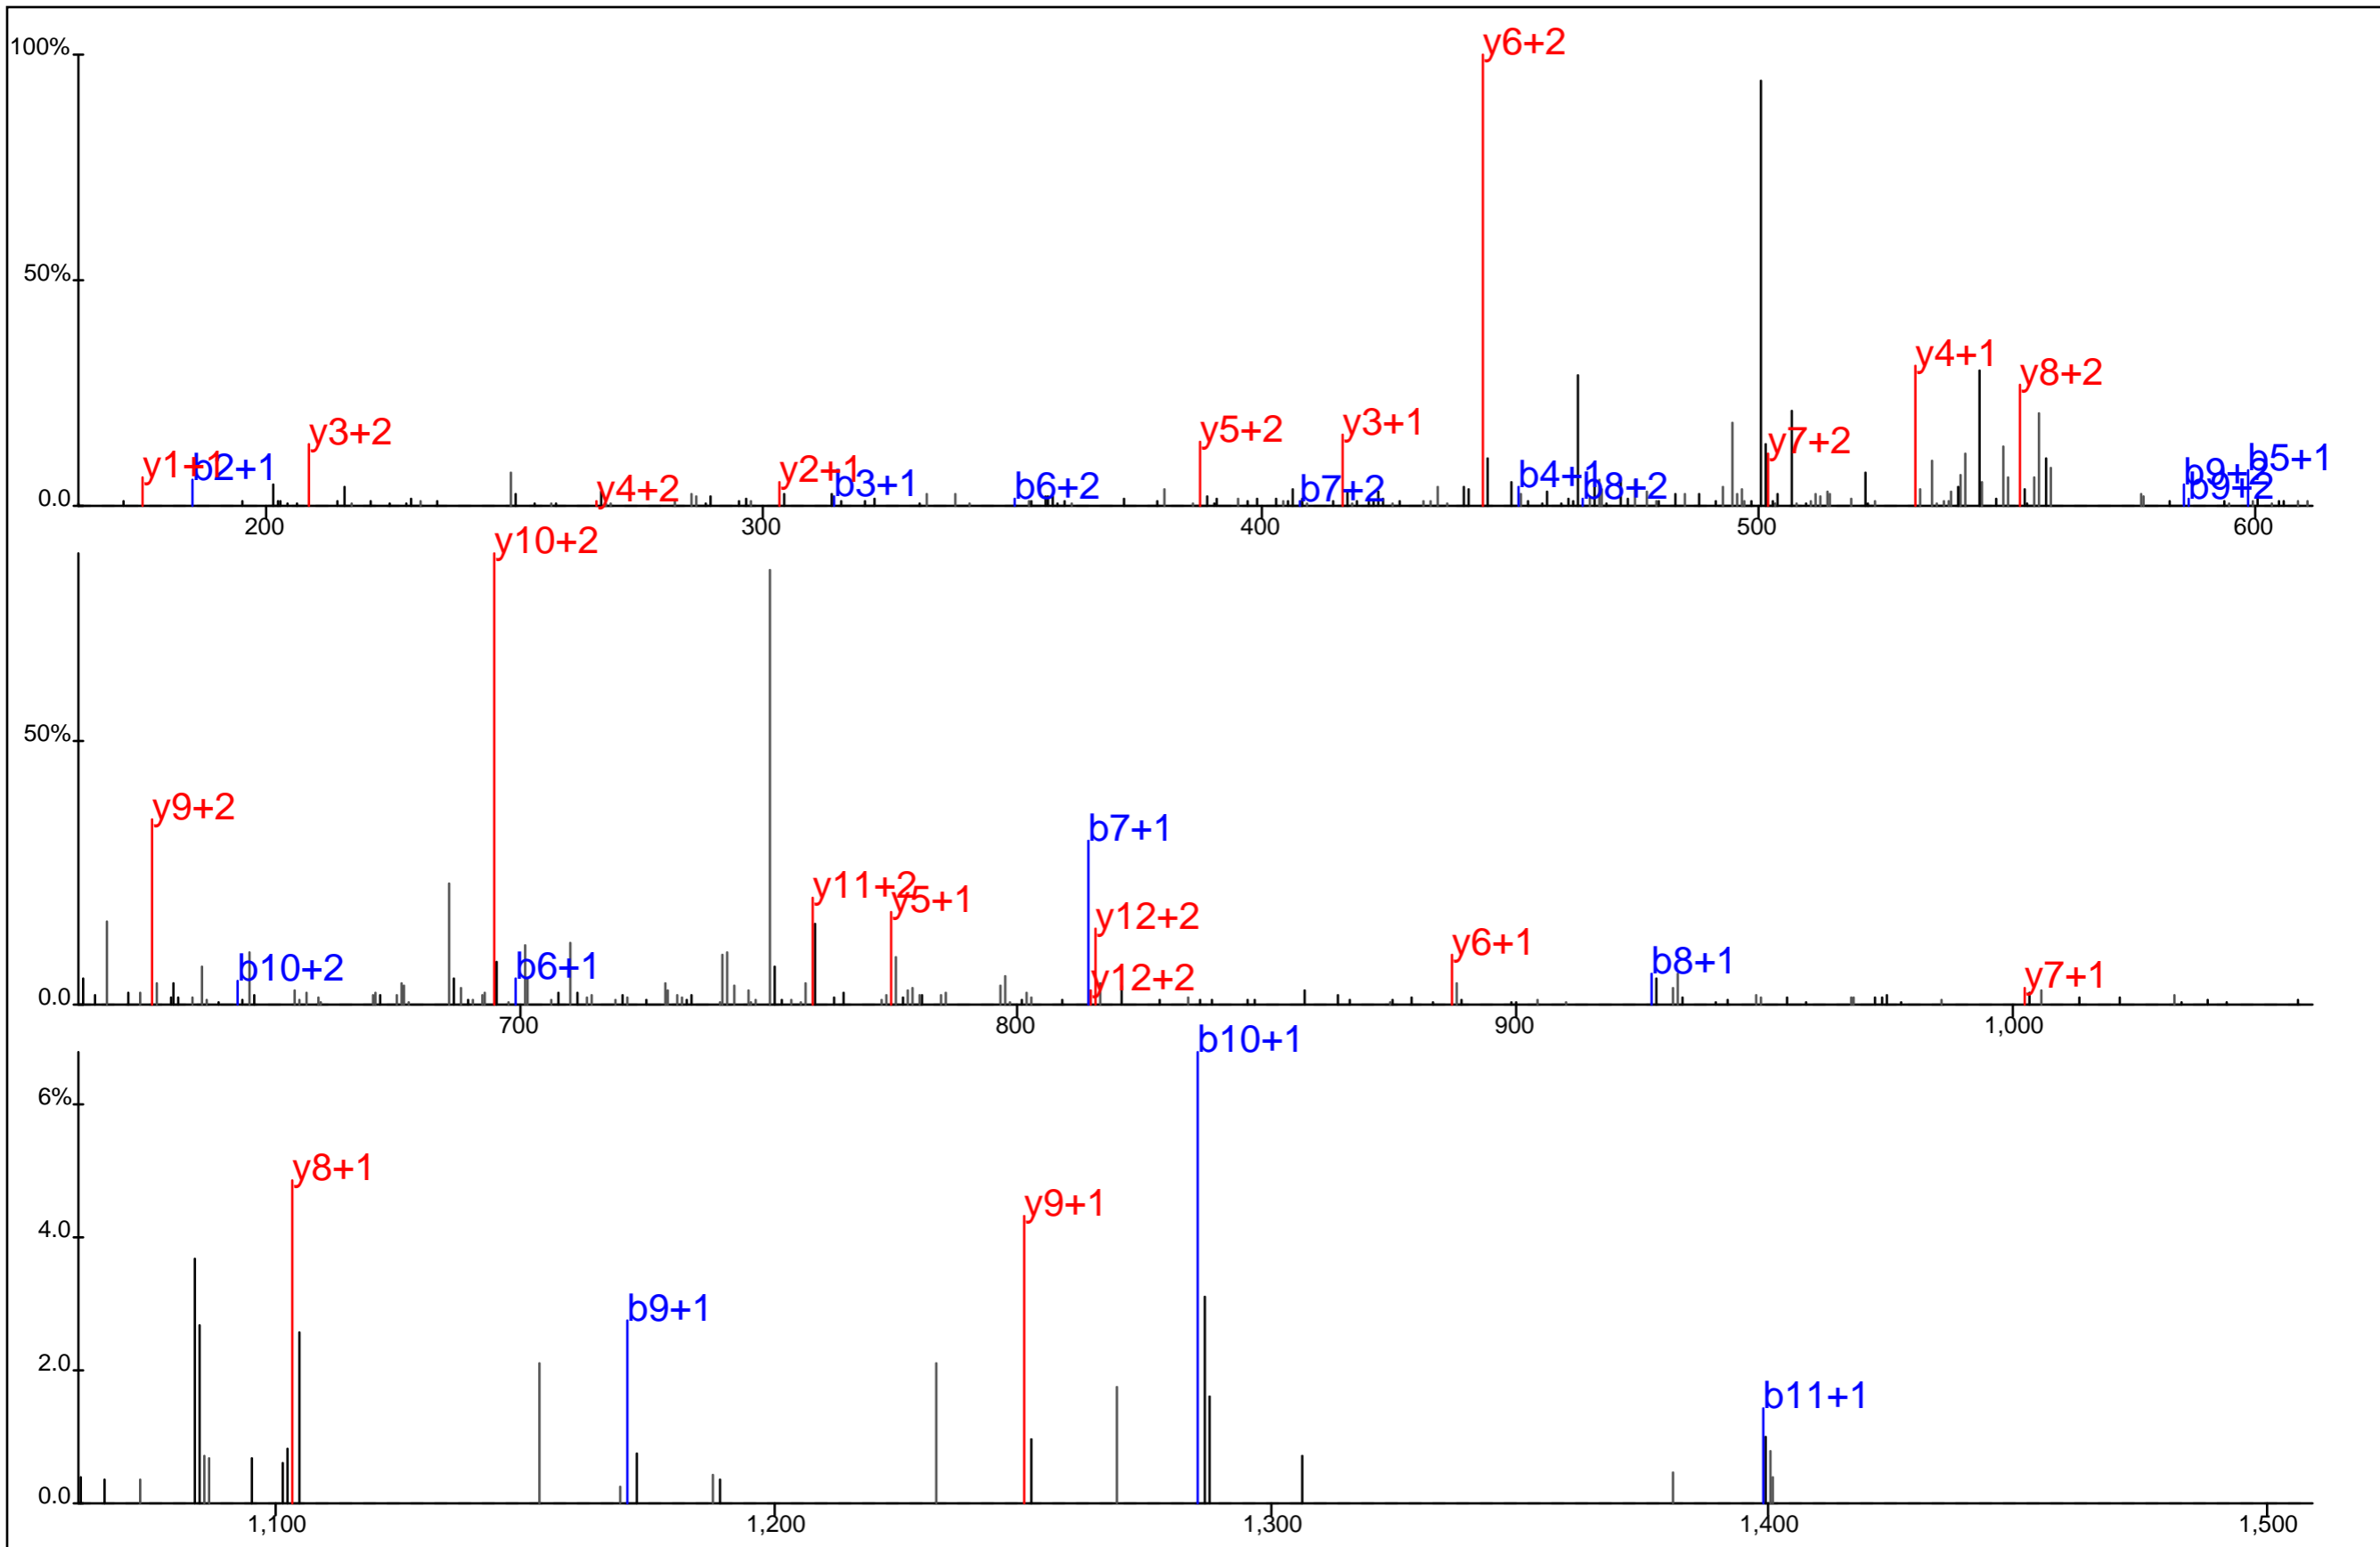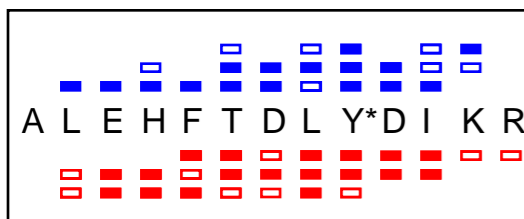

Protein Name: Clathrin, heavy polypeptide  
 gi Accession: 4758012  
 Precursor Mass: 567.6088+3  
 Delta Mass: 4.356 ppm  
 XCorr: 58.09

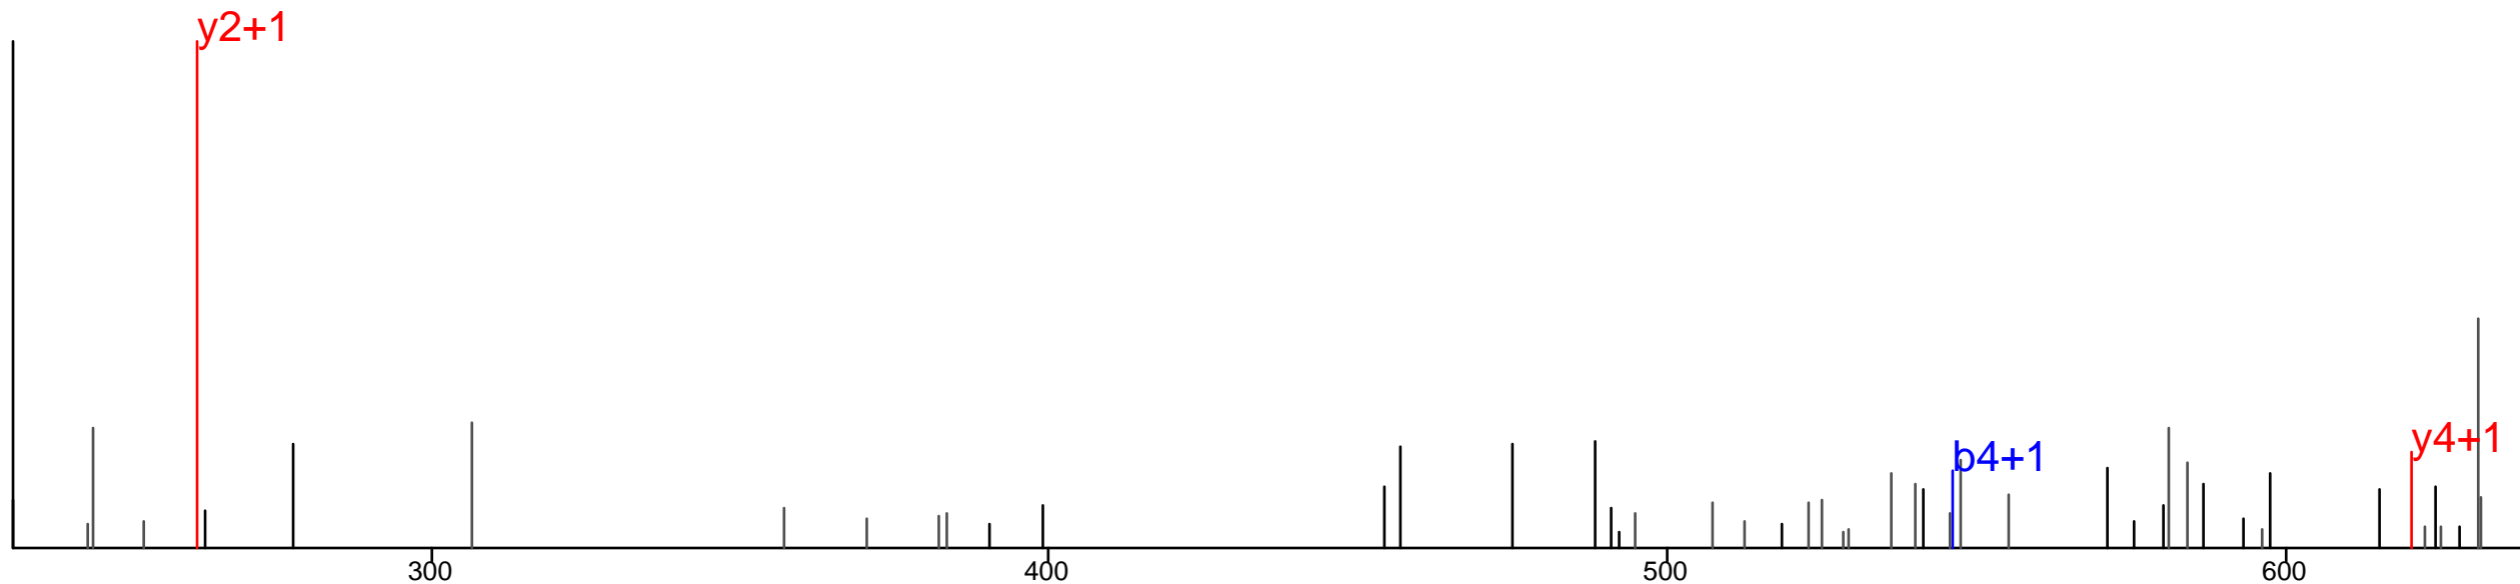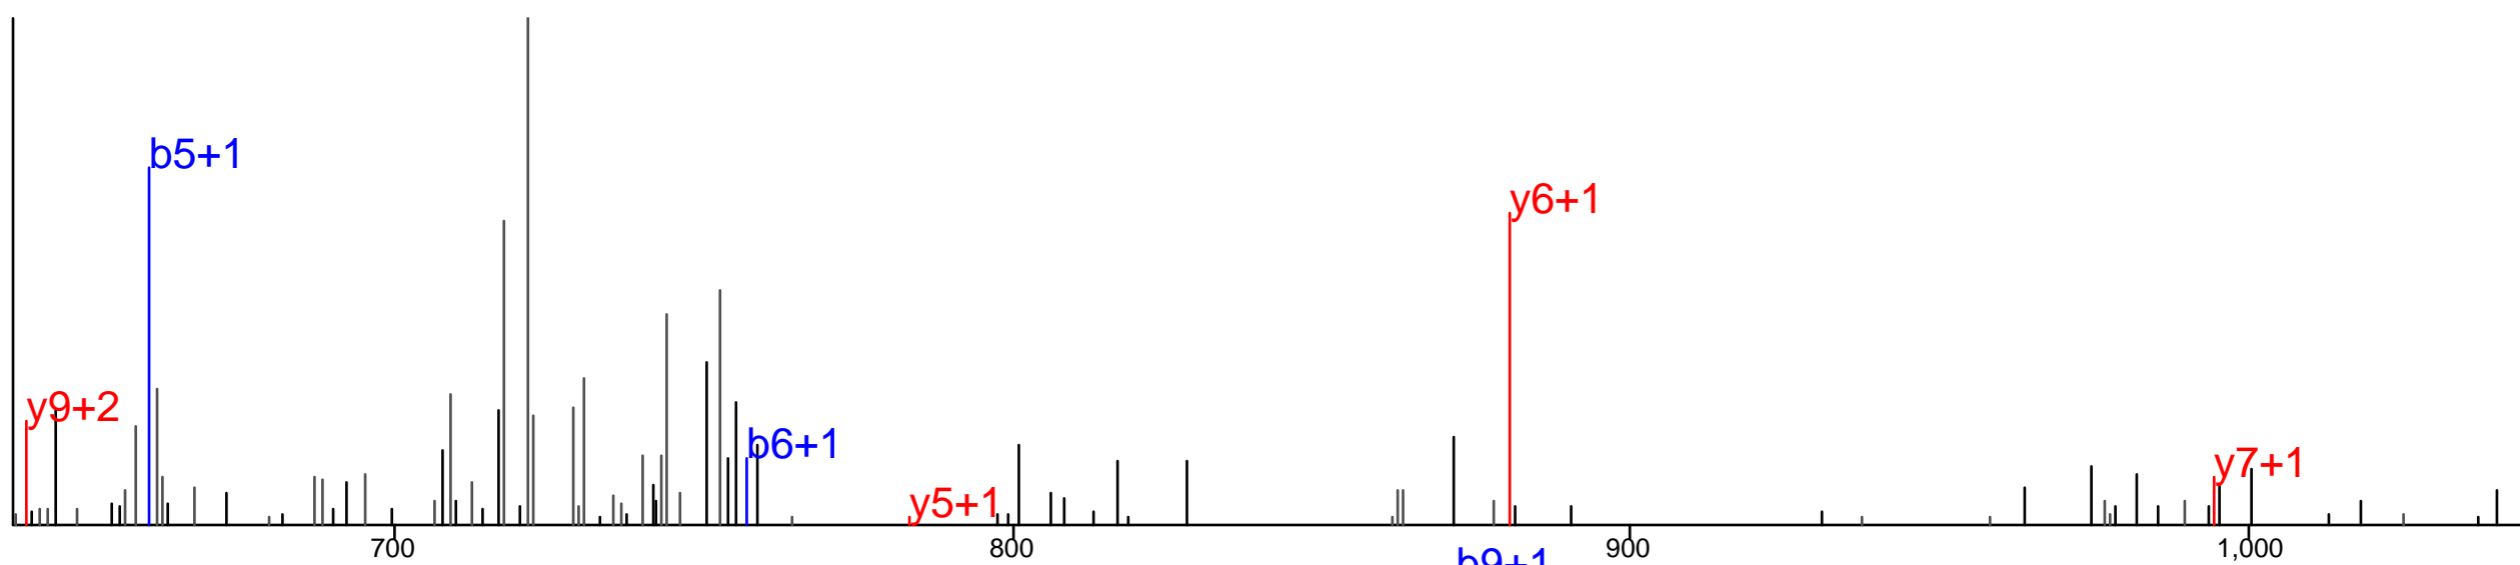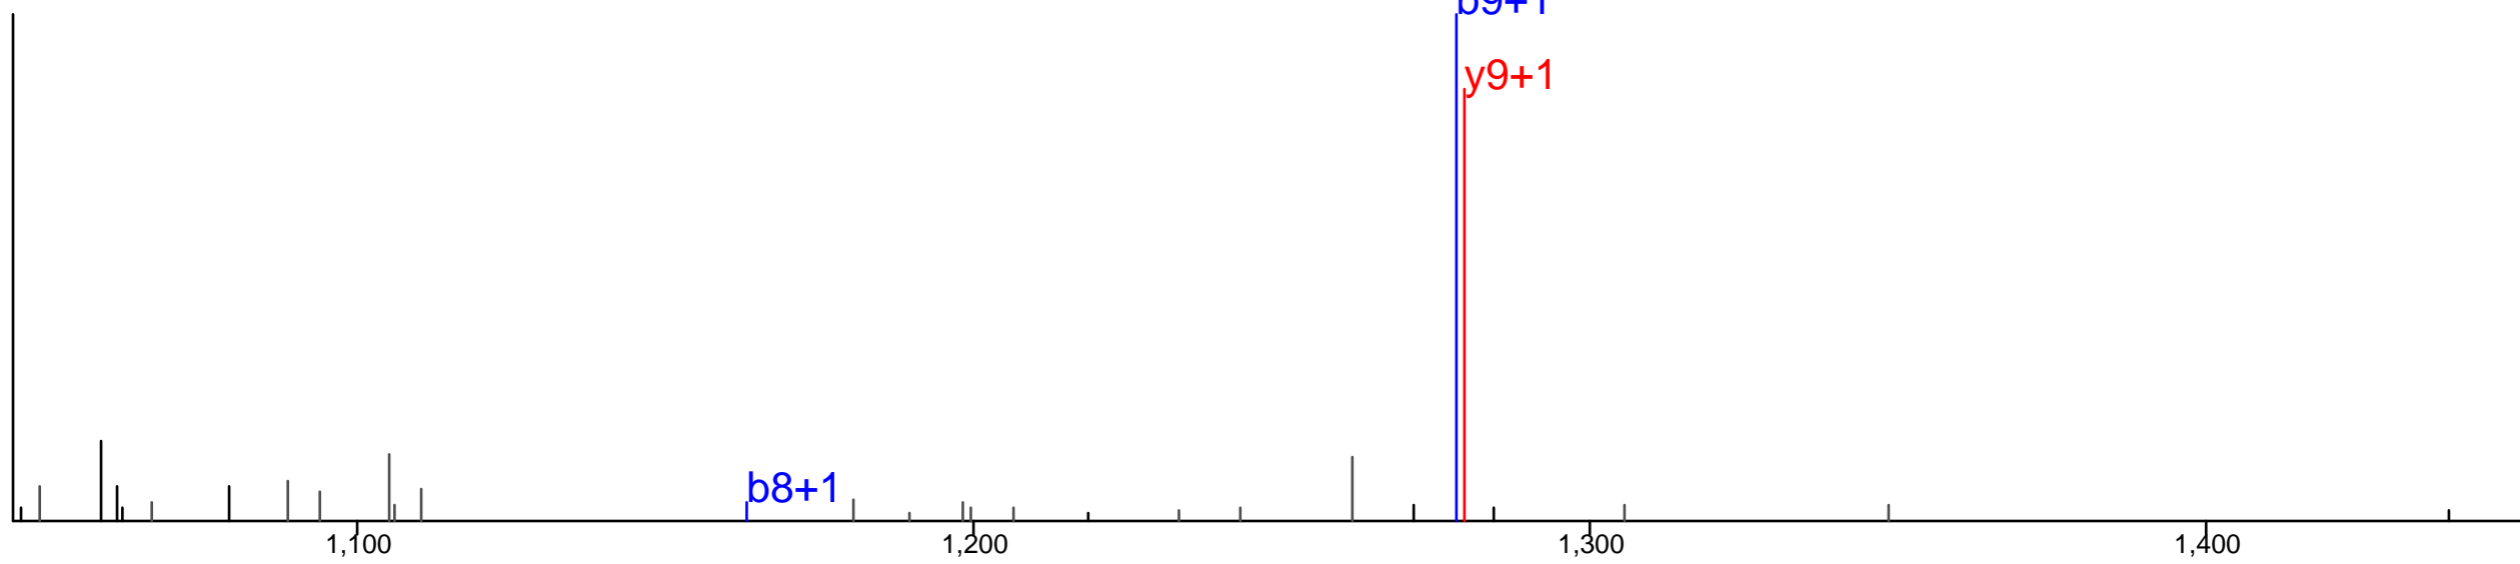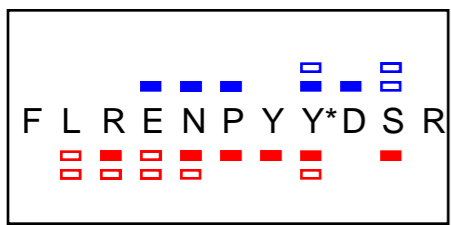

Protein Name: Clathrin, heavy polypeptide  
 gi Accession: 4758012  
 Precursor Mass: 770.3391+2  
 Delta Mass: 5.325 ppm  
 XCorr: 11.63

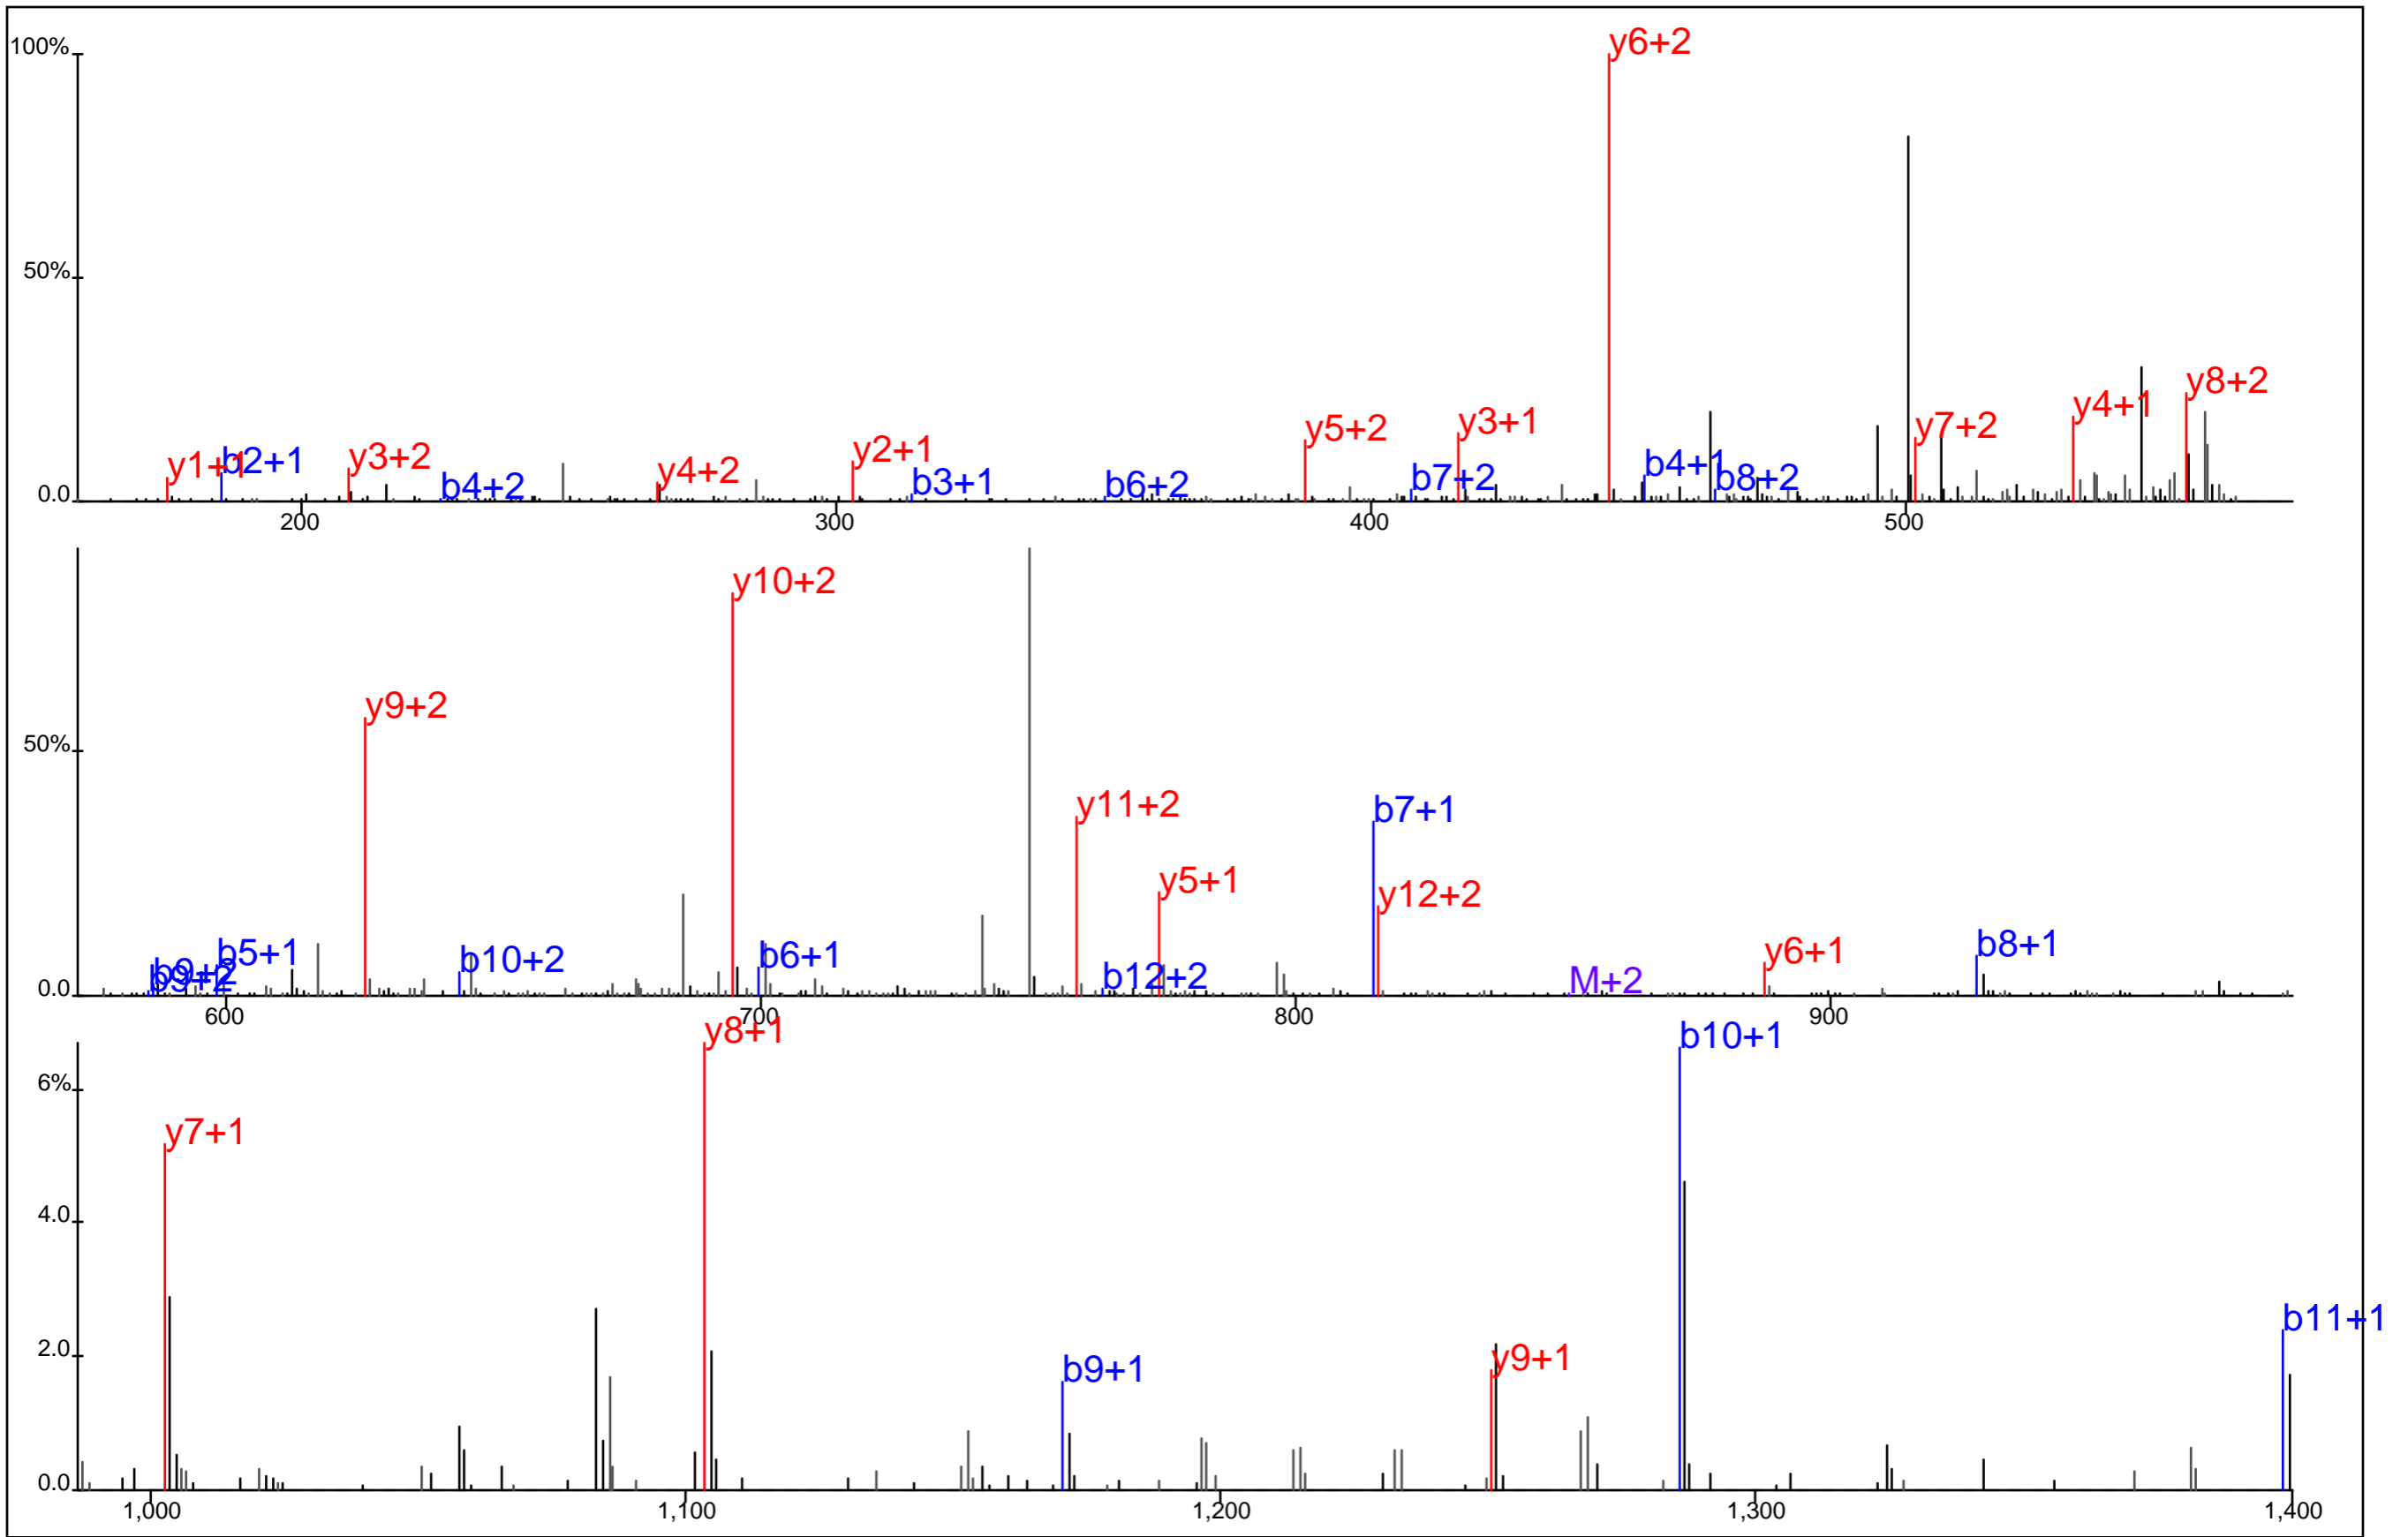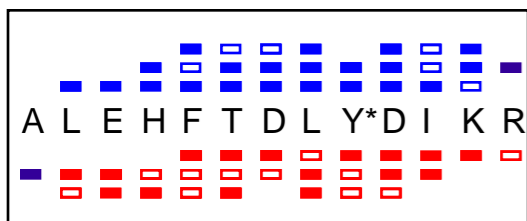

Protein Name: Clathrin, heavy polypeptide  
 gi Accession: 4758012  
 Precursor Mass: 567.6085+3  
 Delta Mass: 3.927 ppm  
 XCorr: 60.88

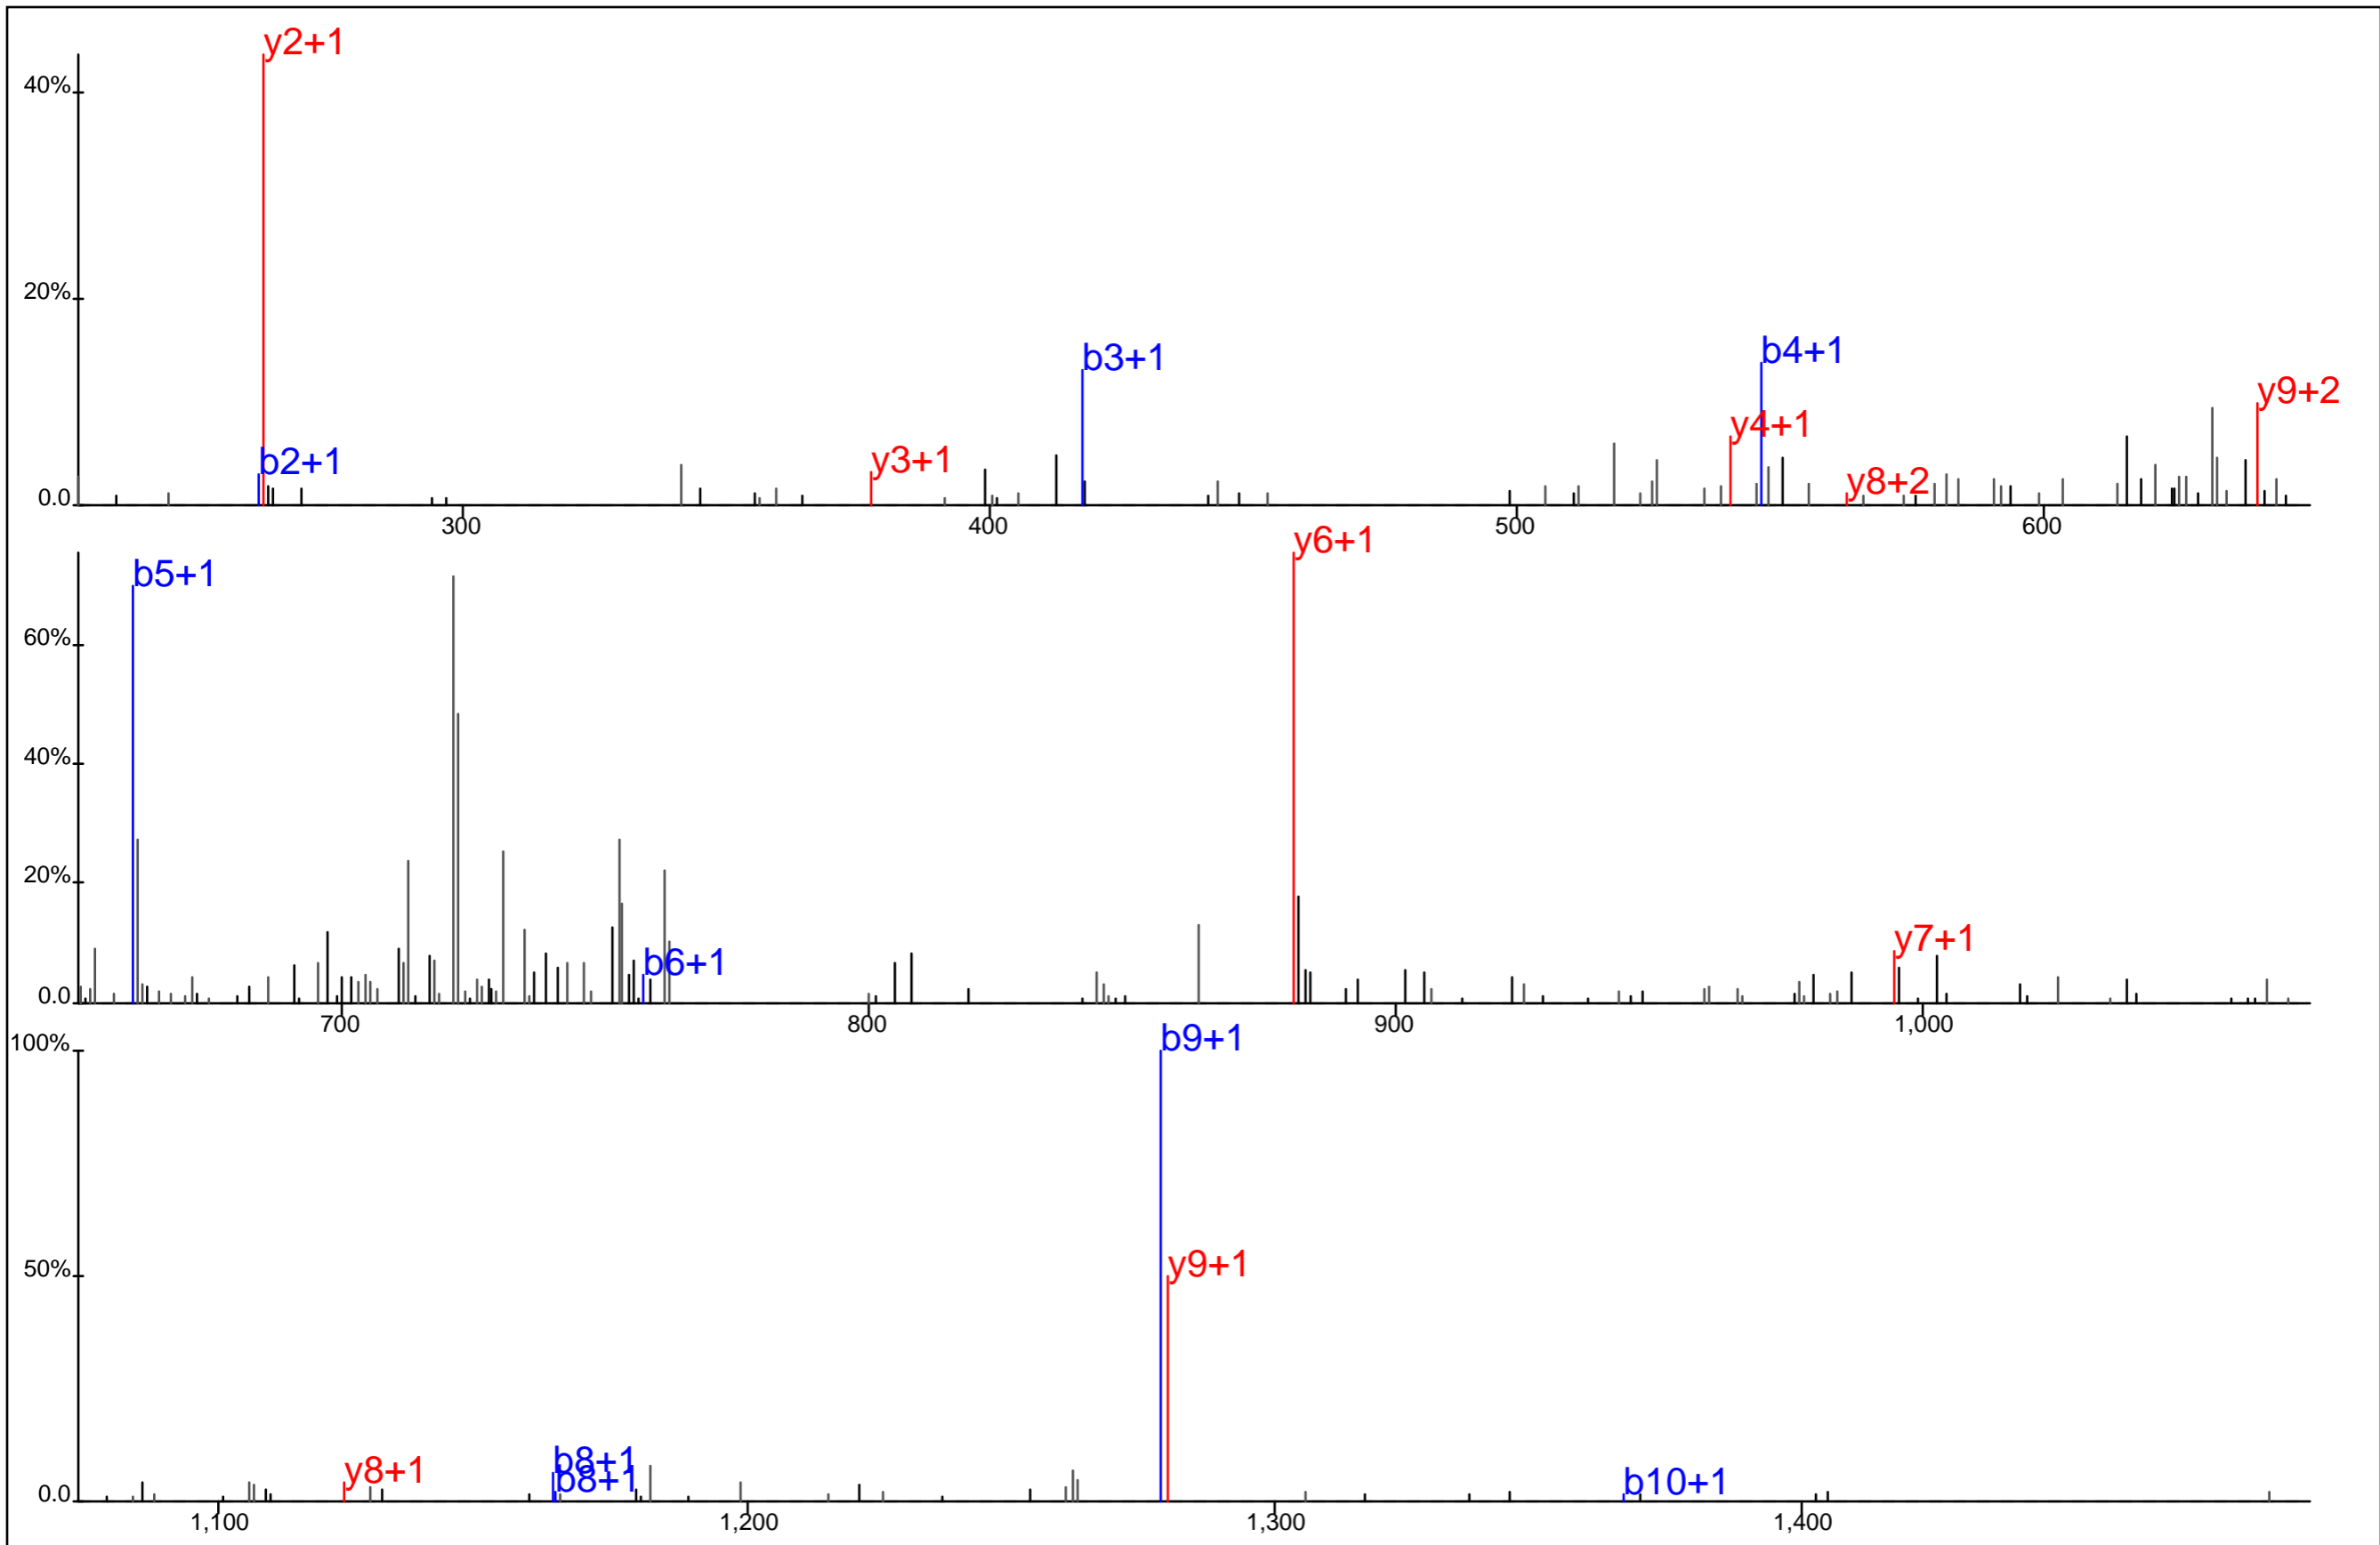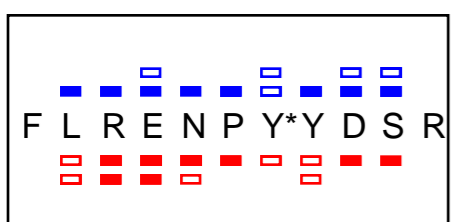

Protein Name: Clathrin, heavy polypeptide  
 gi Accession: 4758012  
 Precursor Mass: 770.3395+2  
 Delta Mass: 5.799 ppm  
 XCorr: 34.38

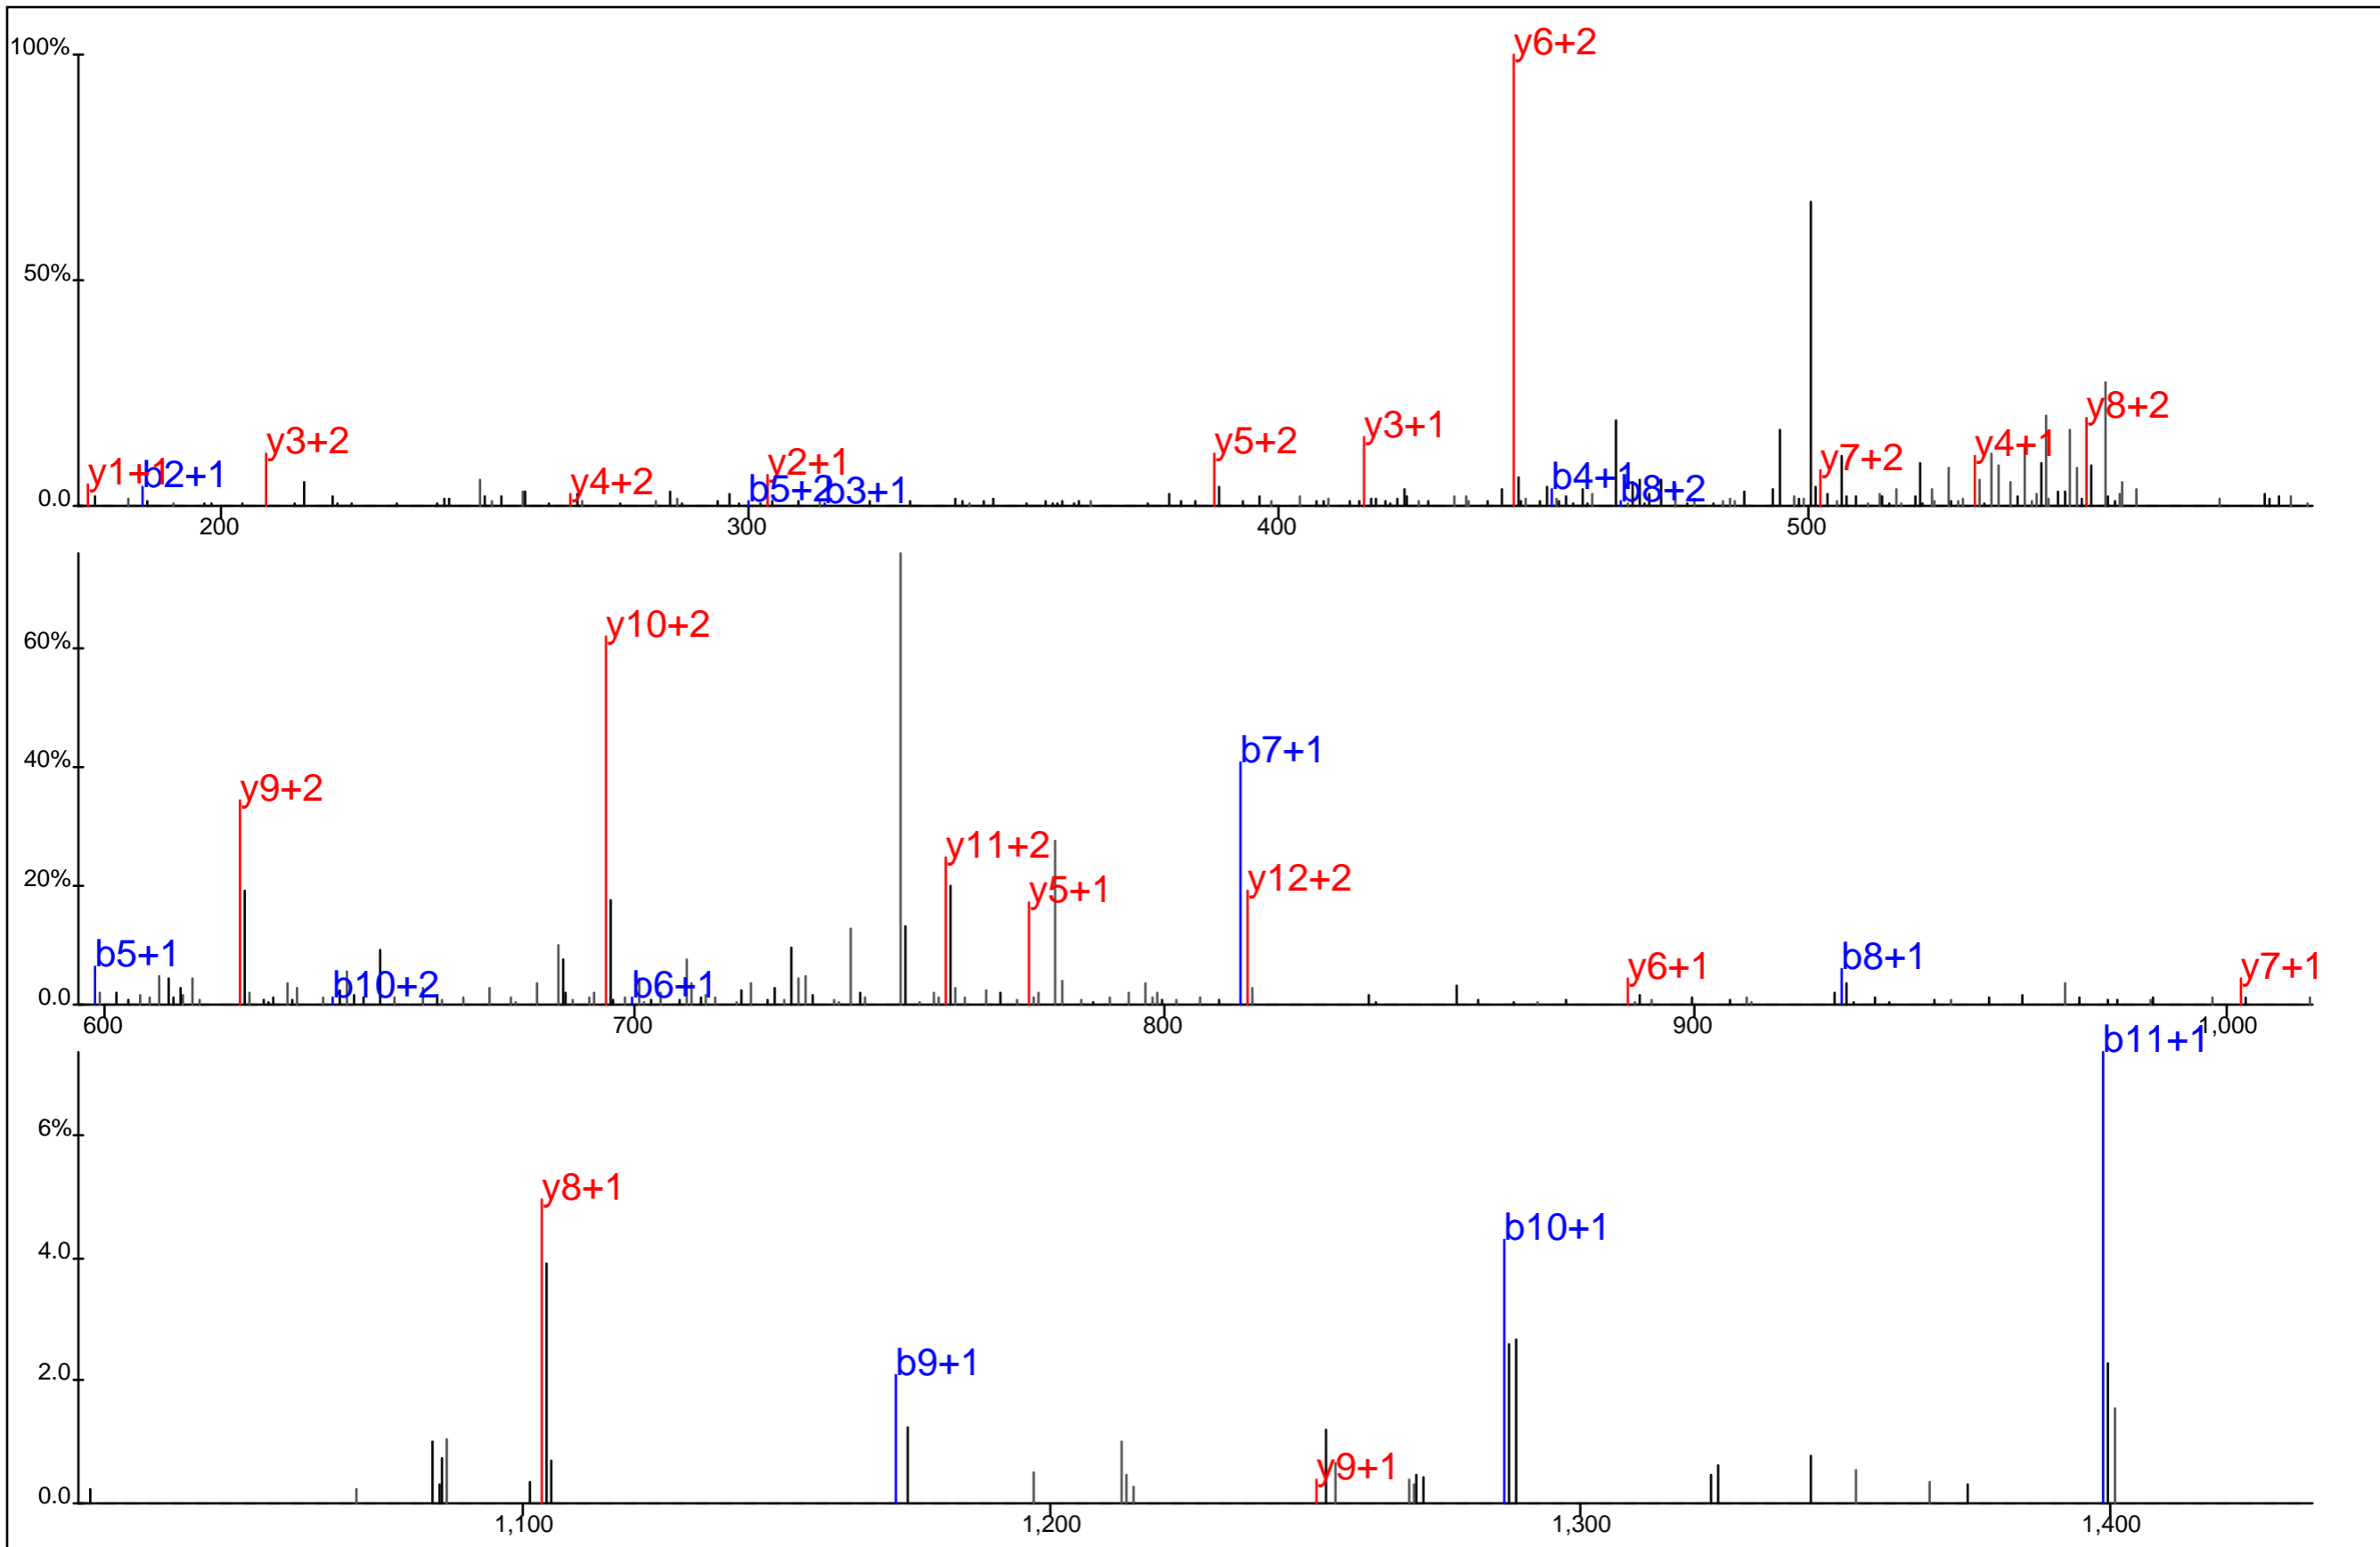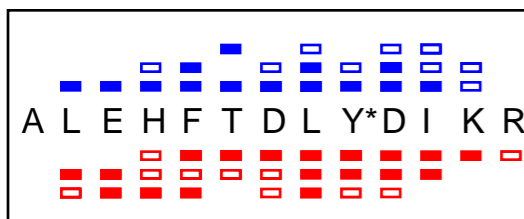

Protein Name: Clathrin, heavy polypeptide  
 gi Accession: 4758012  
 Precursor Mass: 567.6075+3  
 Delta Mass: 2.098 ppm  
 XCorr: 41.95

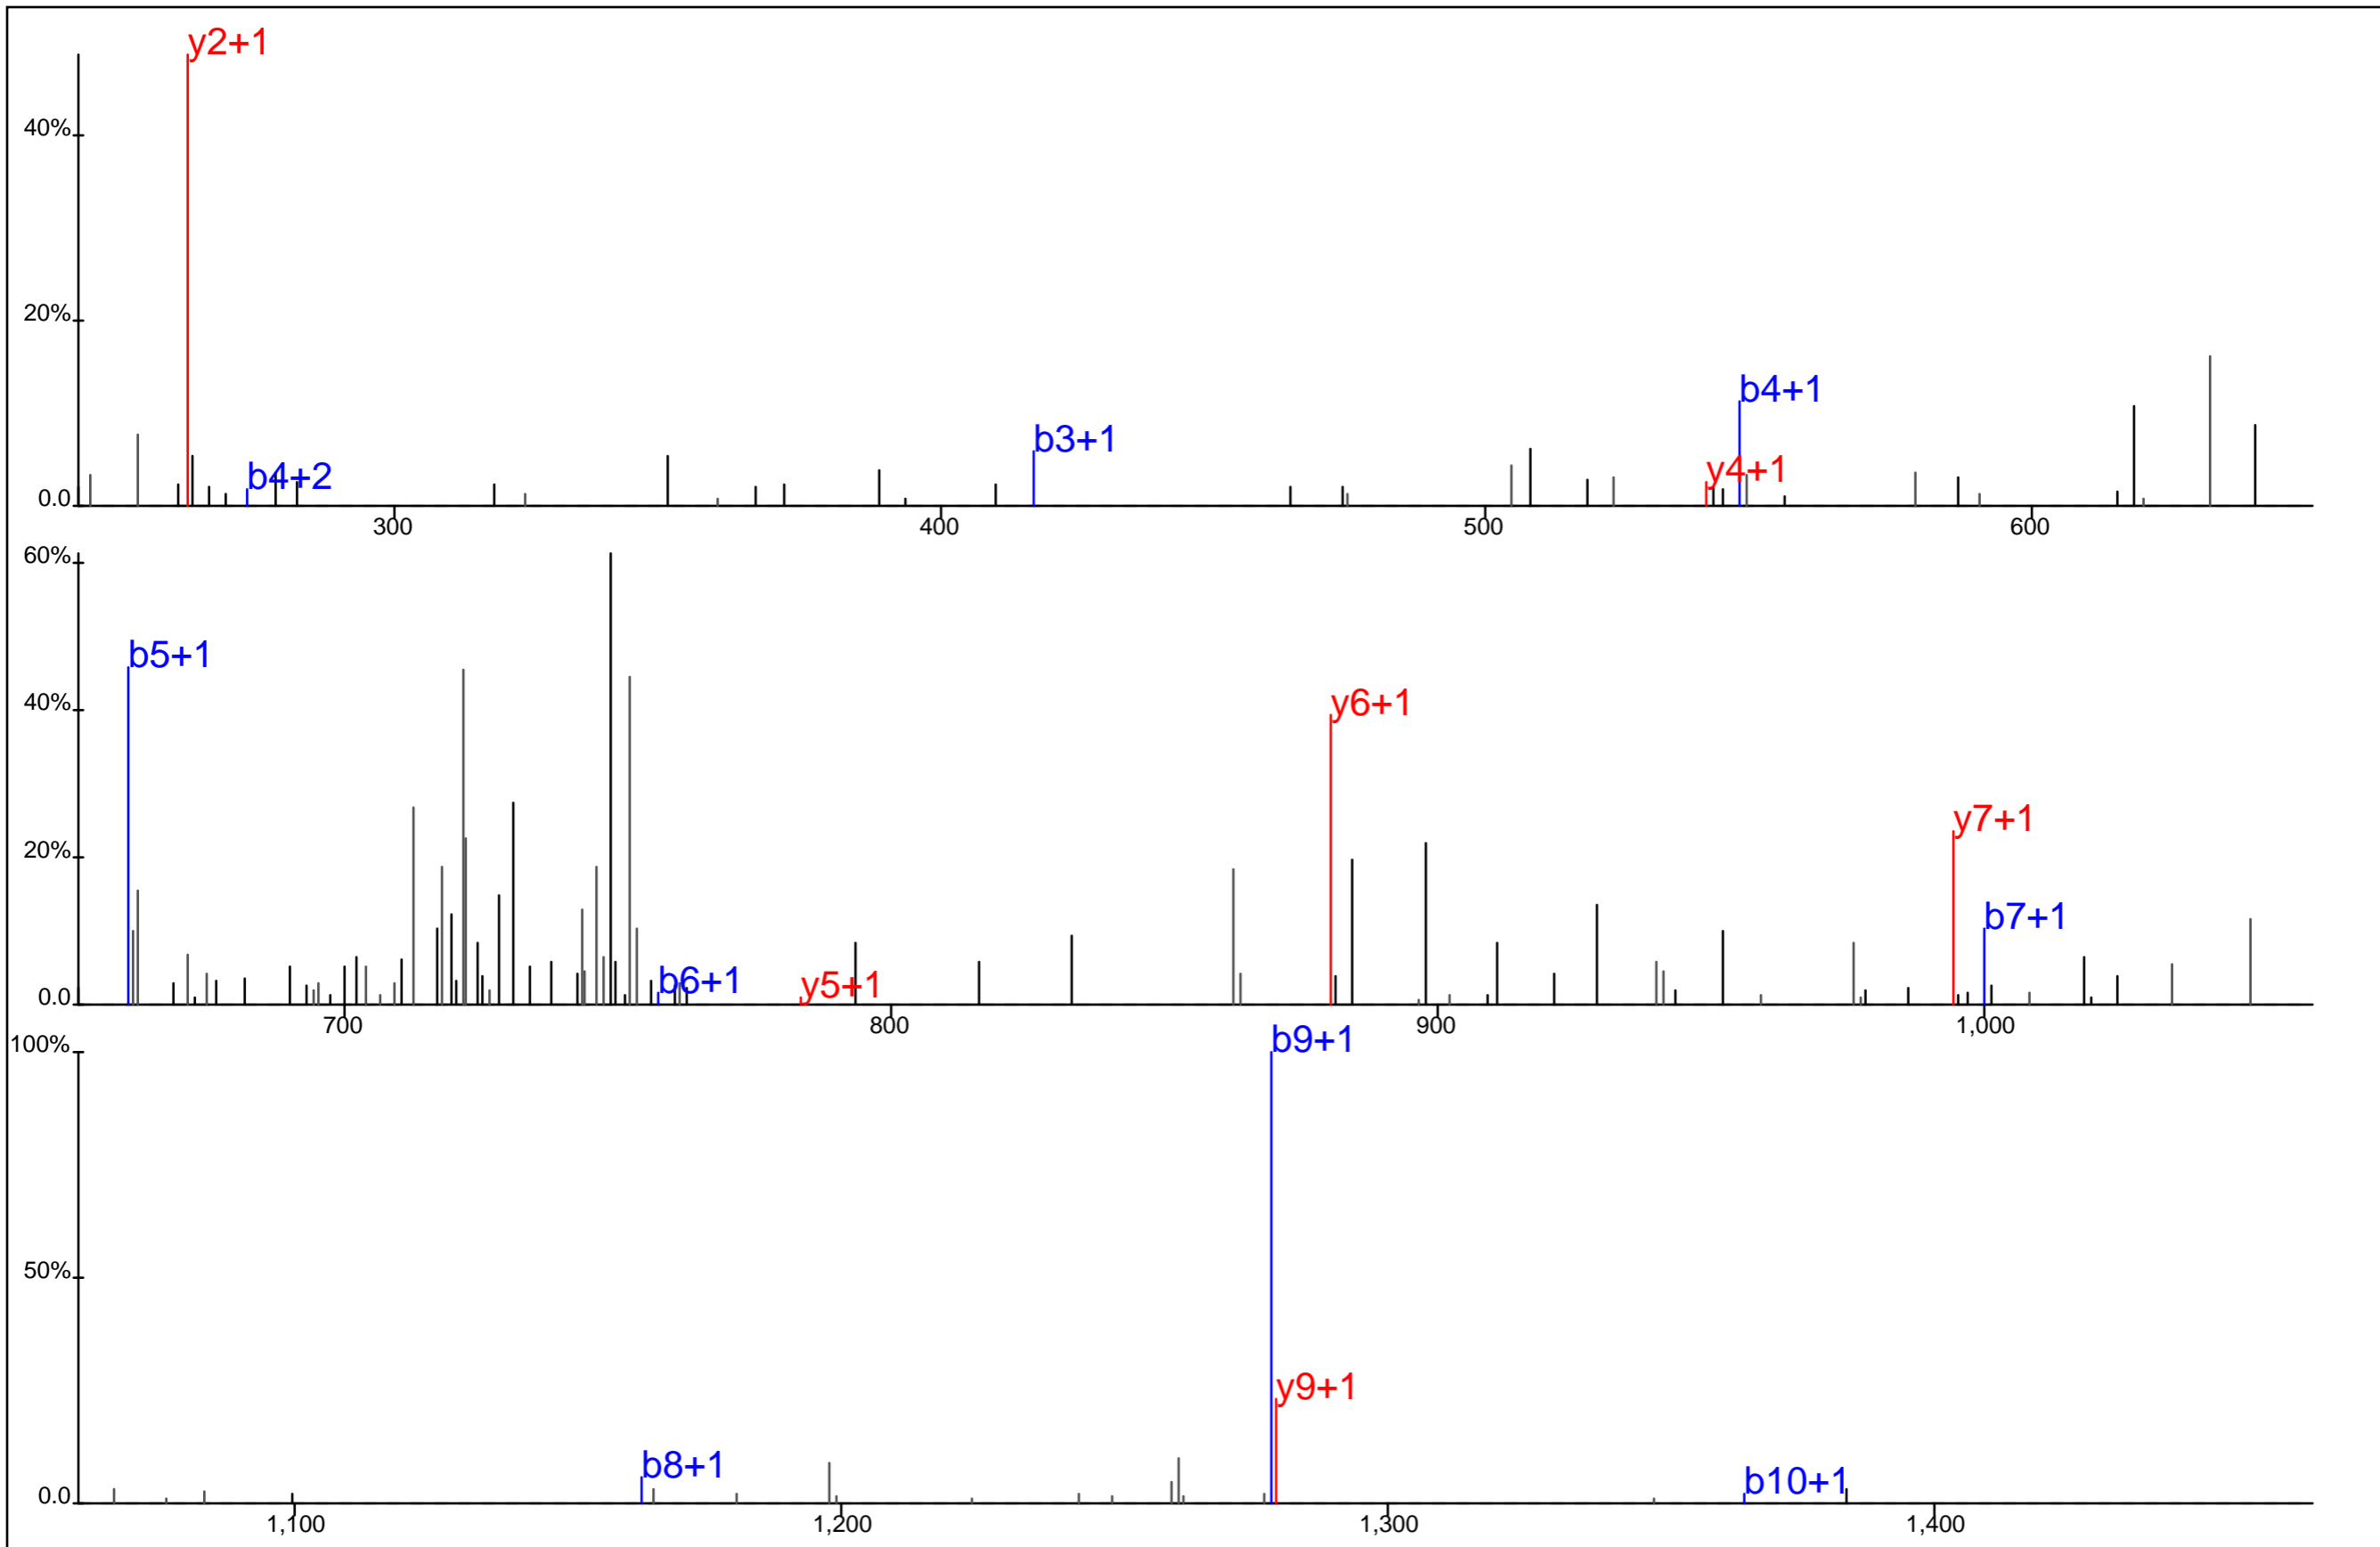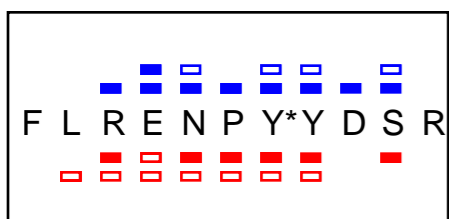

Protein Name: Clathrin, heavy polypeptide  
 gi Accession: 4758012  
 Precursor Mass: 770.3392+2  
 Delta Mass: 5.480 ppm  
 XCorr: 35.98

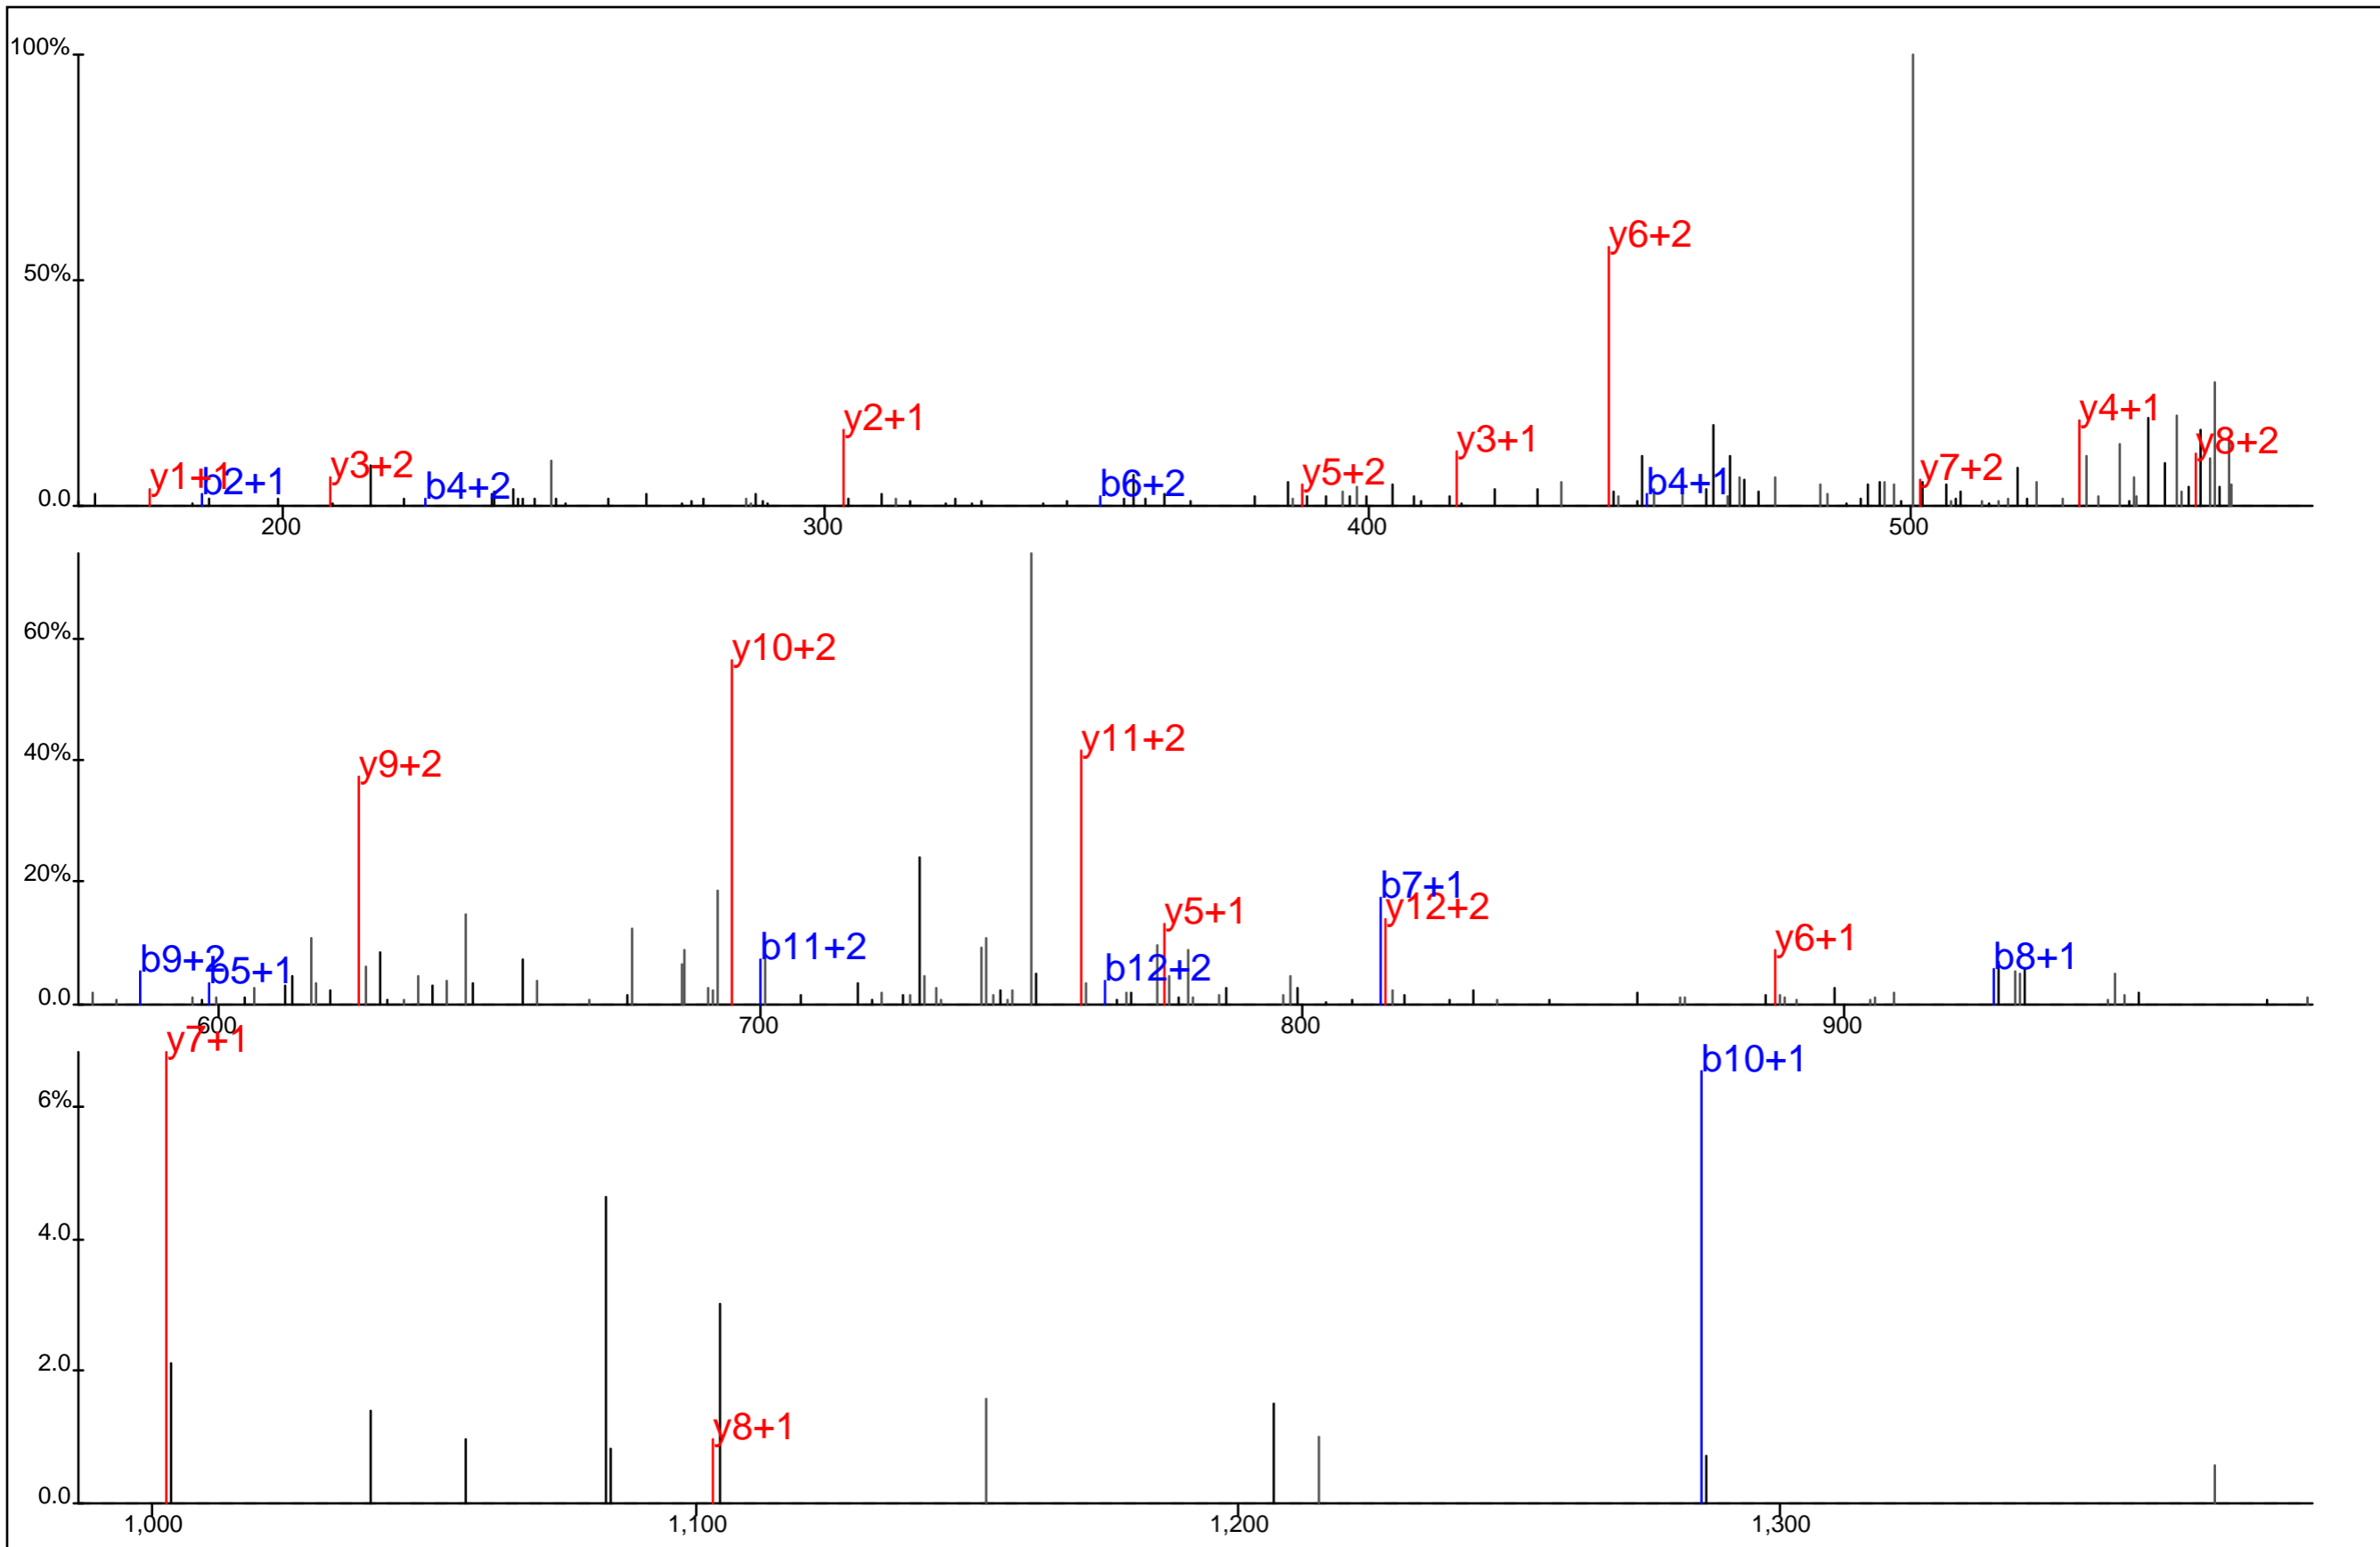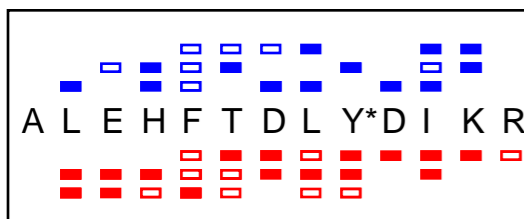

Protein Name: Clathrin, heavy polypeptide  
 gi Accession: 4758012  
 Precursor Mass: 567.6055+3  
 Delta Mass: 1.347 ppm  
 XCorr: 40.83

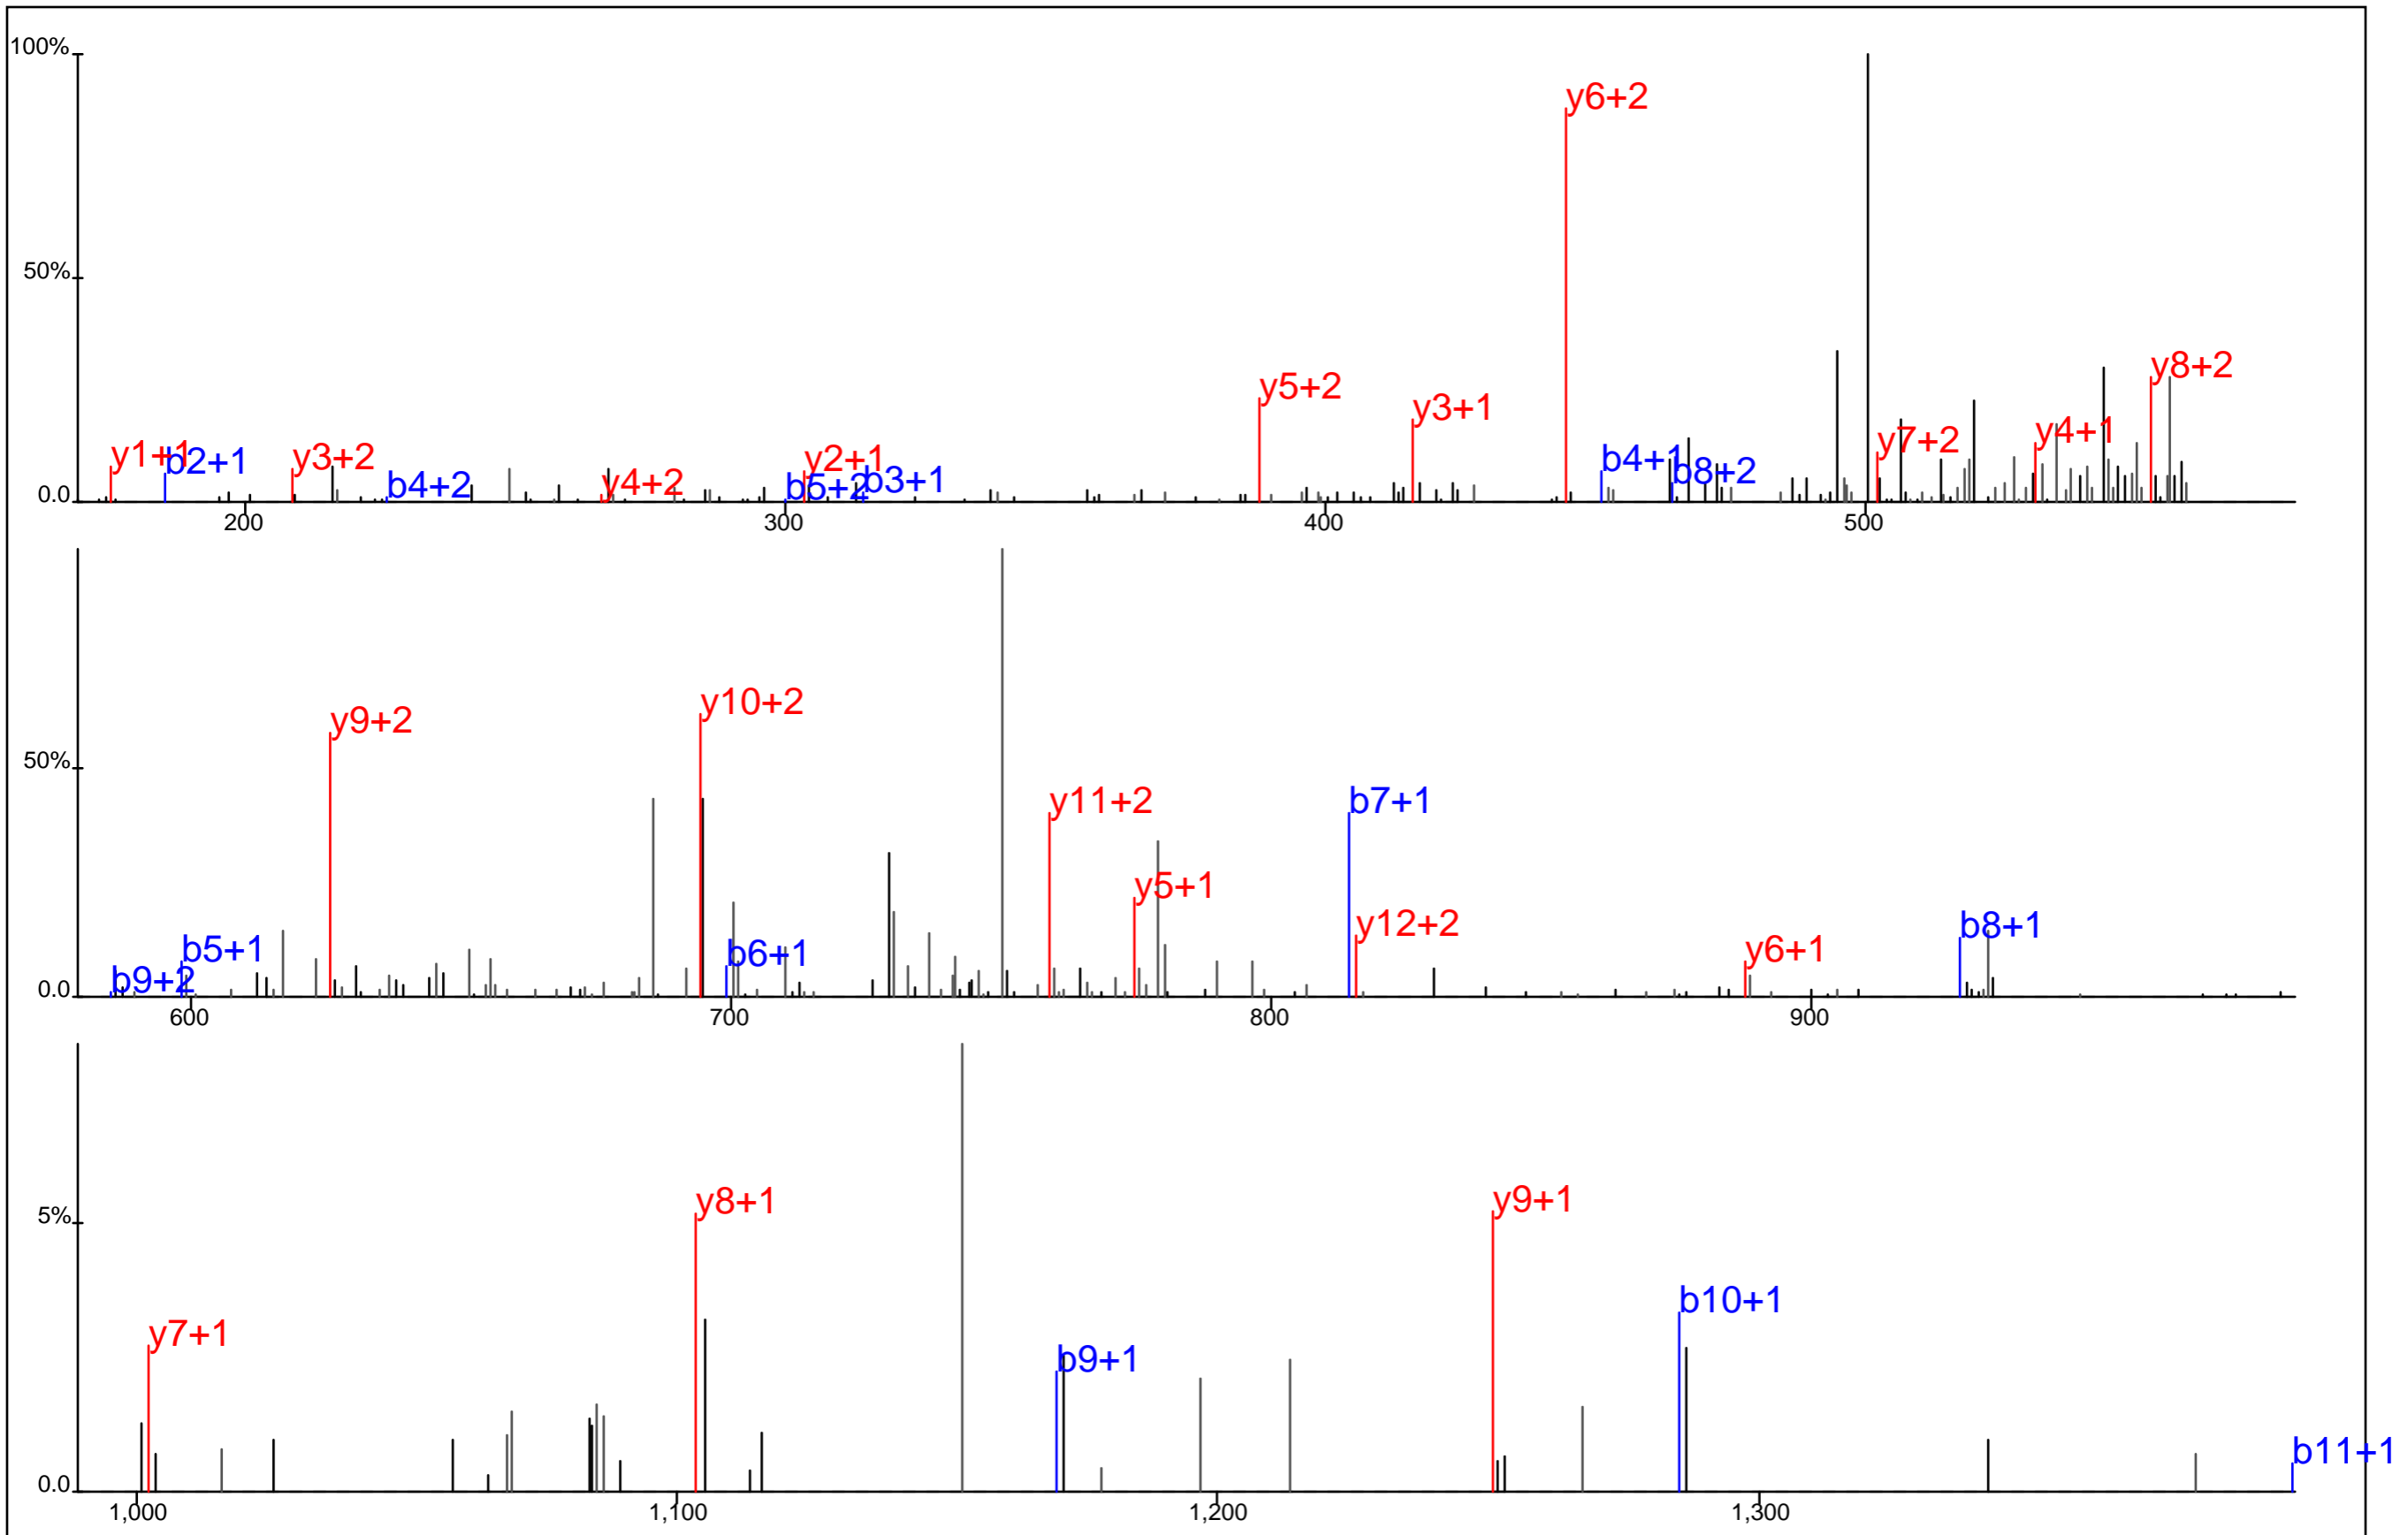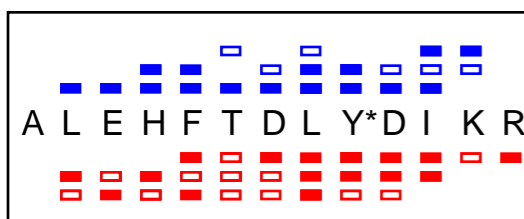

Protein Name: Clathrin, heavy polypeptide  
 gi Accession: 4758012  
 Precursor Mass: 567.6069+3  
 Delta Mass: 1.128 ppm  
 XCorr: 42.44



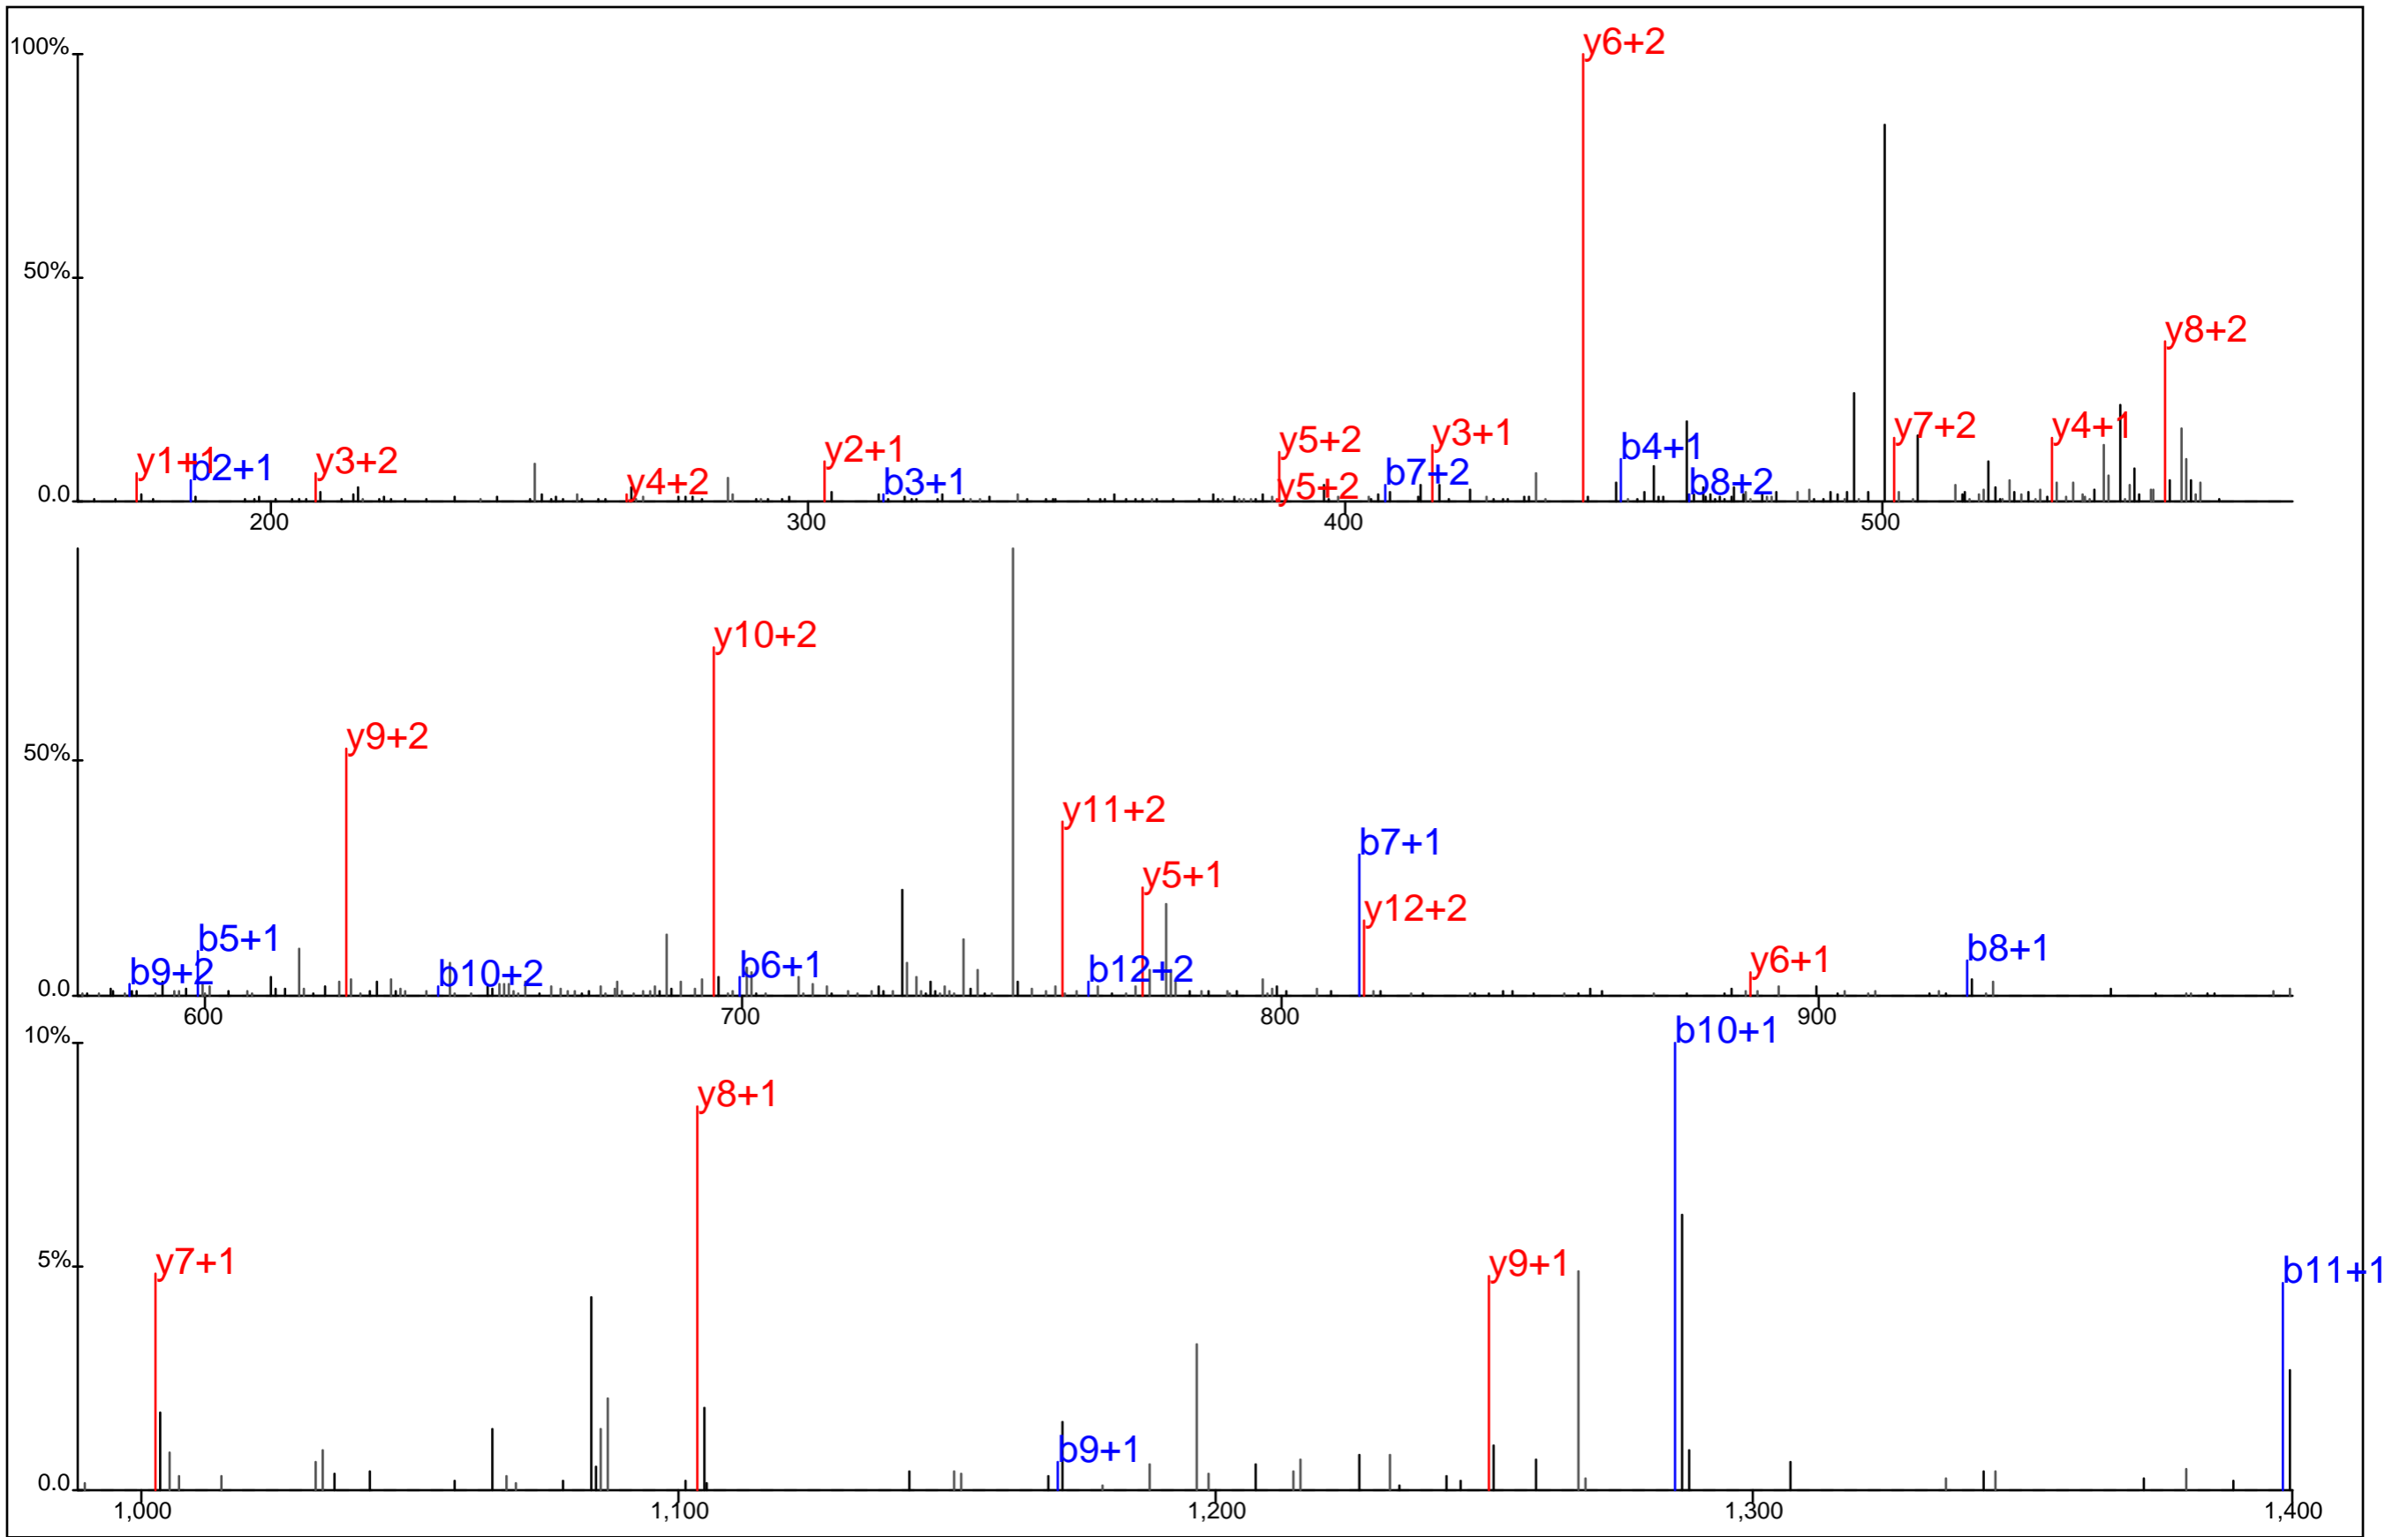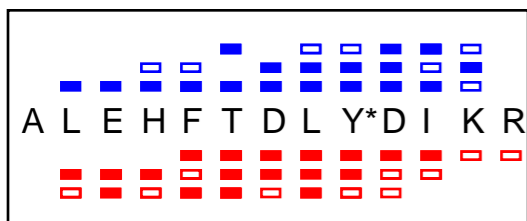

Protein Name: Clathrin, heavy polypeptide  
 gi Accession: 4758012  
 Precursor Mass: 567.6070+3  
 Delta Mass: 1.234 ppm  
 XCorr: 49.54

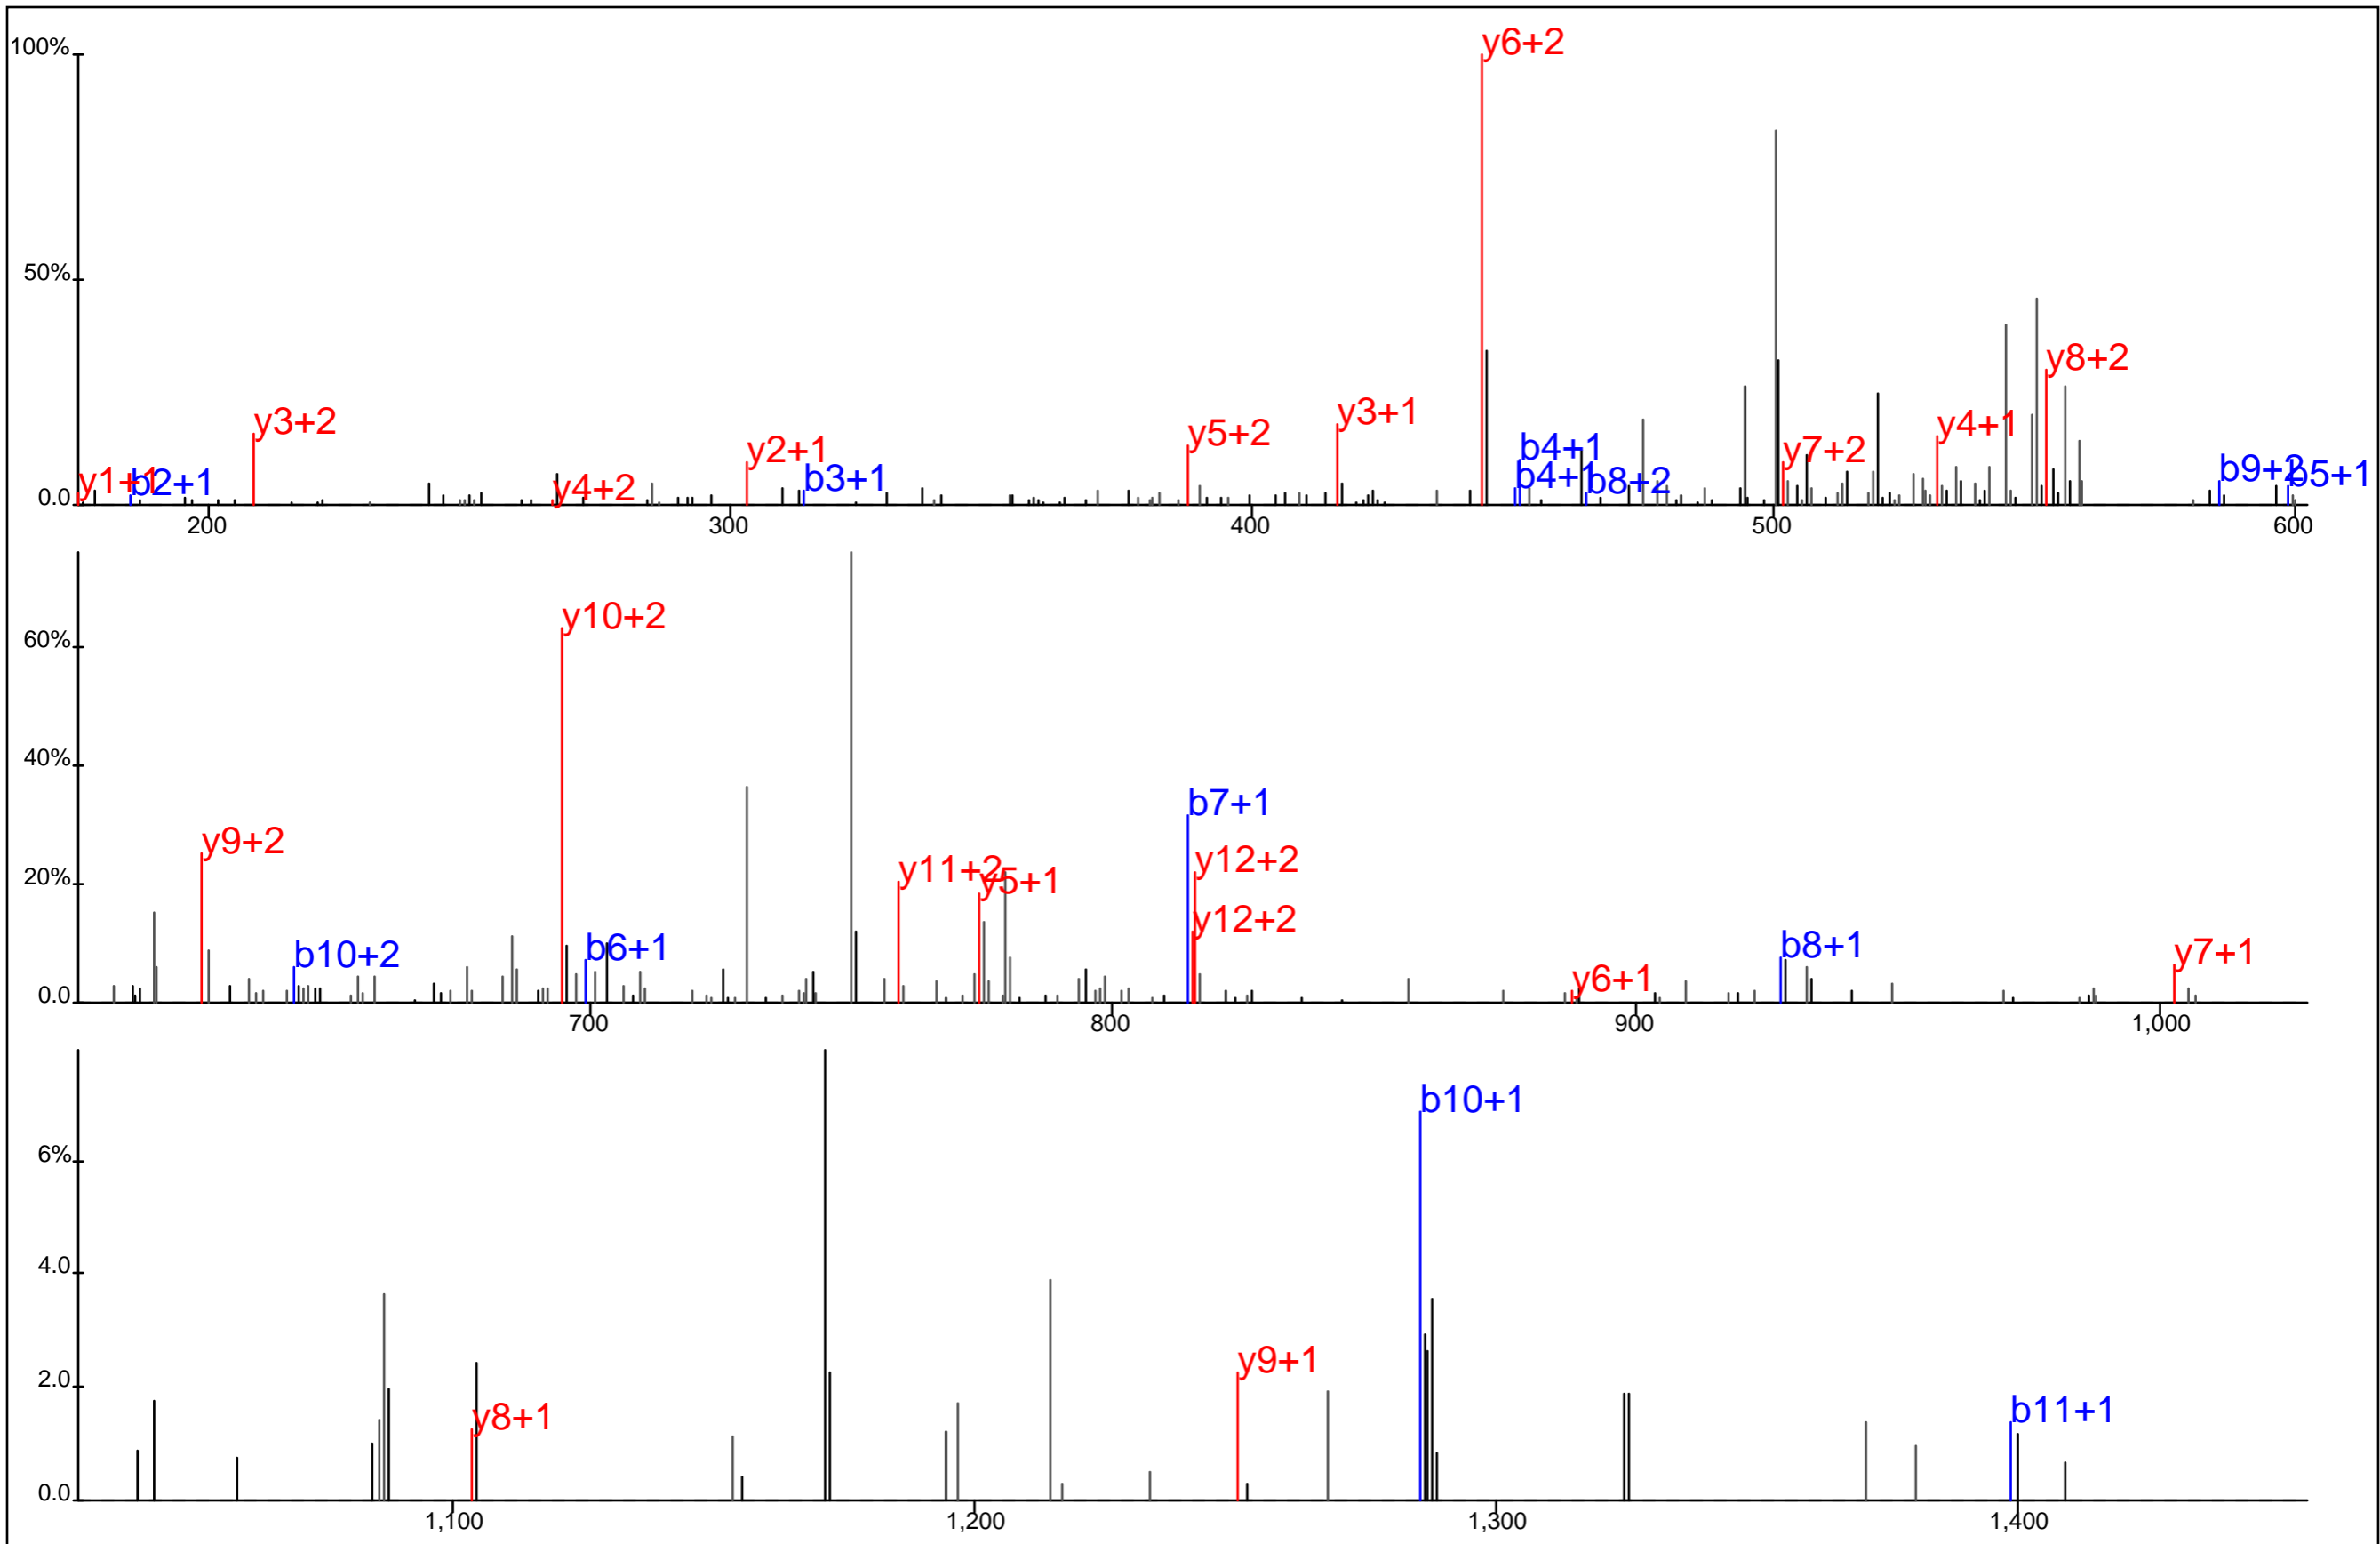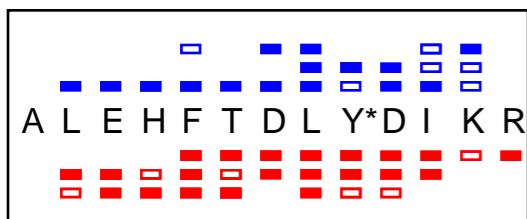

Protein Name: Clathrin, heavy polypeptide  
 gi Accession: 4758012  
 Precursor Mass: 567.6086+3  
 Delta Mass: 4.033 ppm  
 XCorr: 29.64

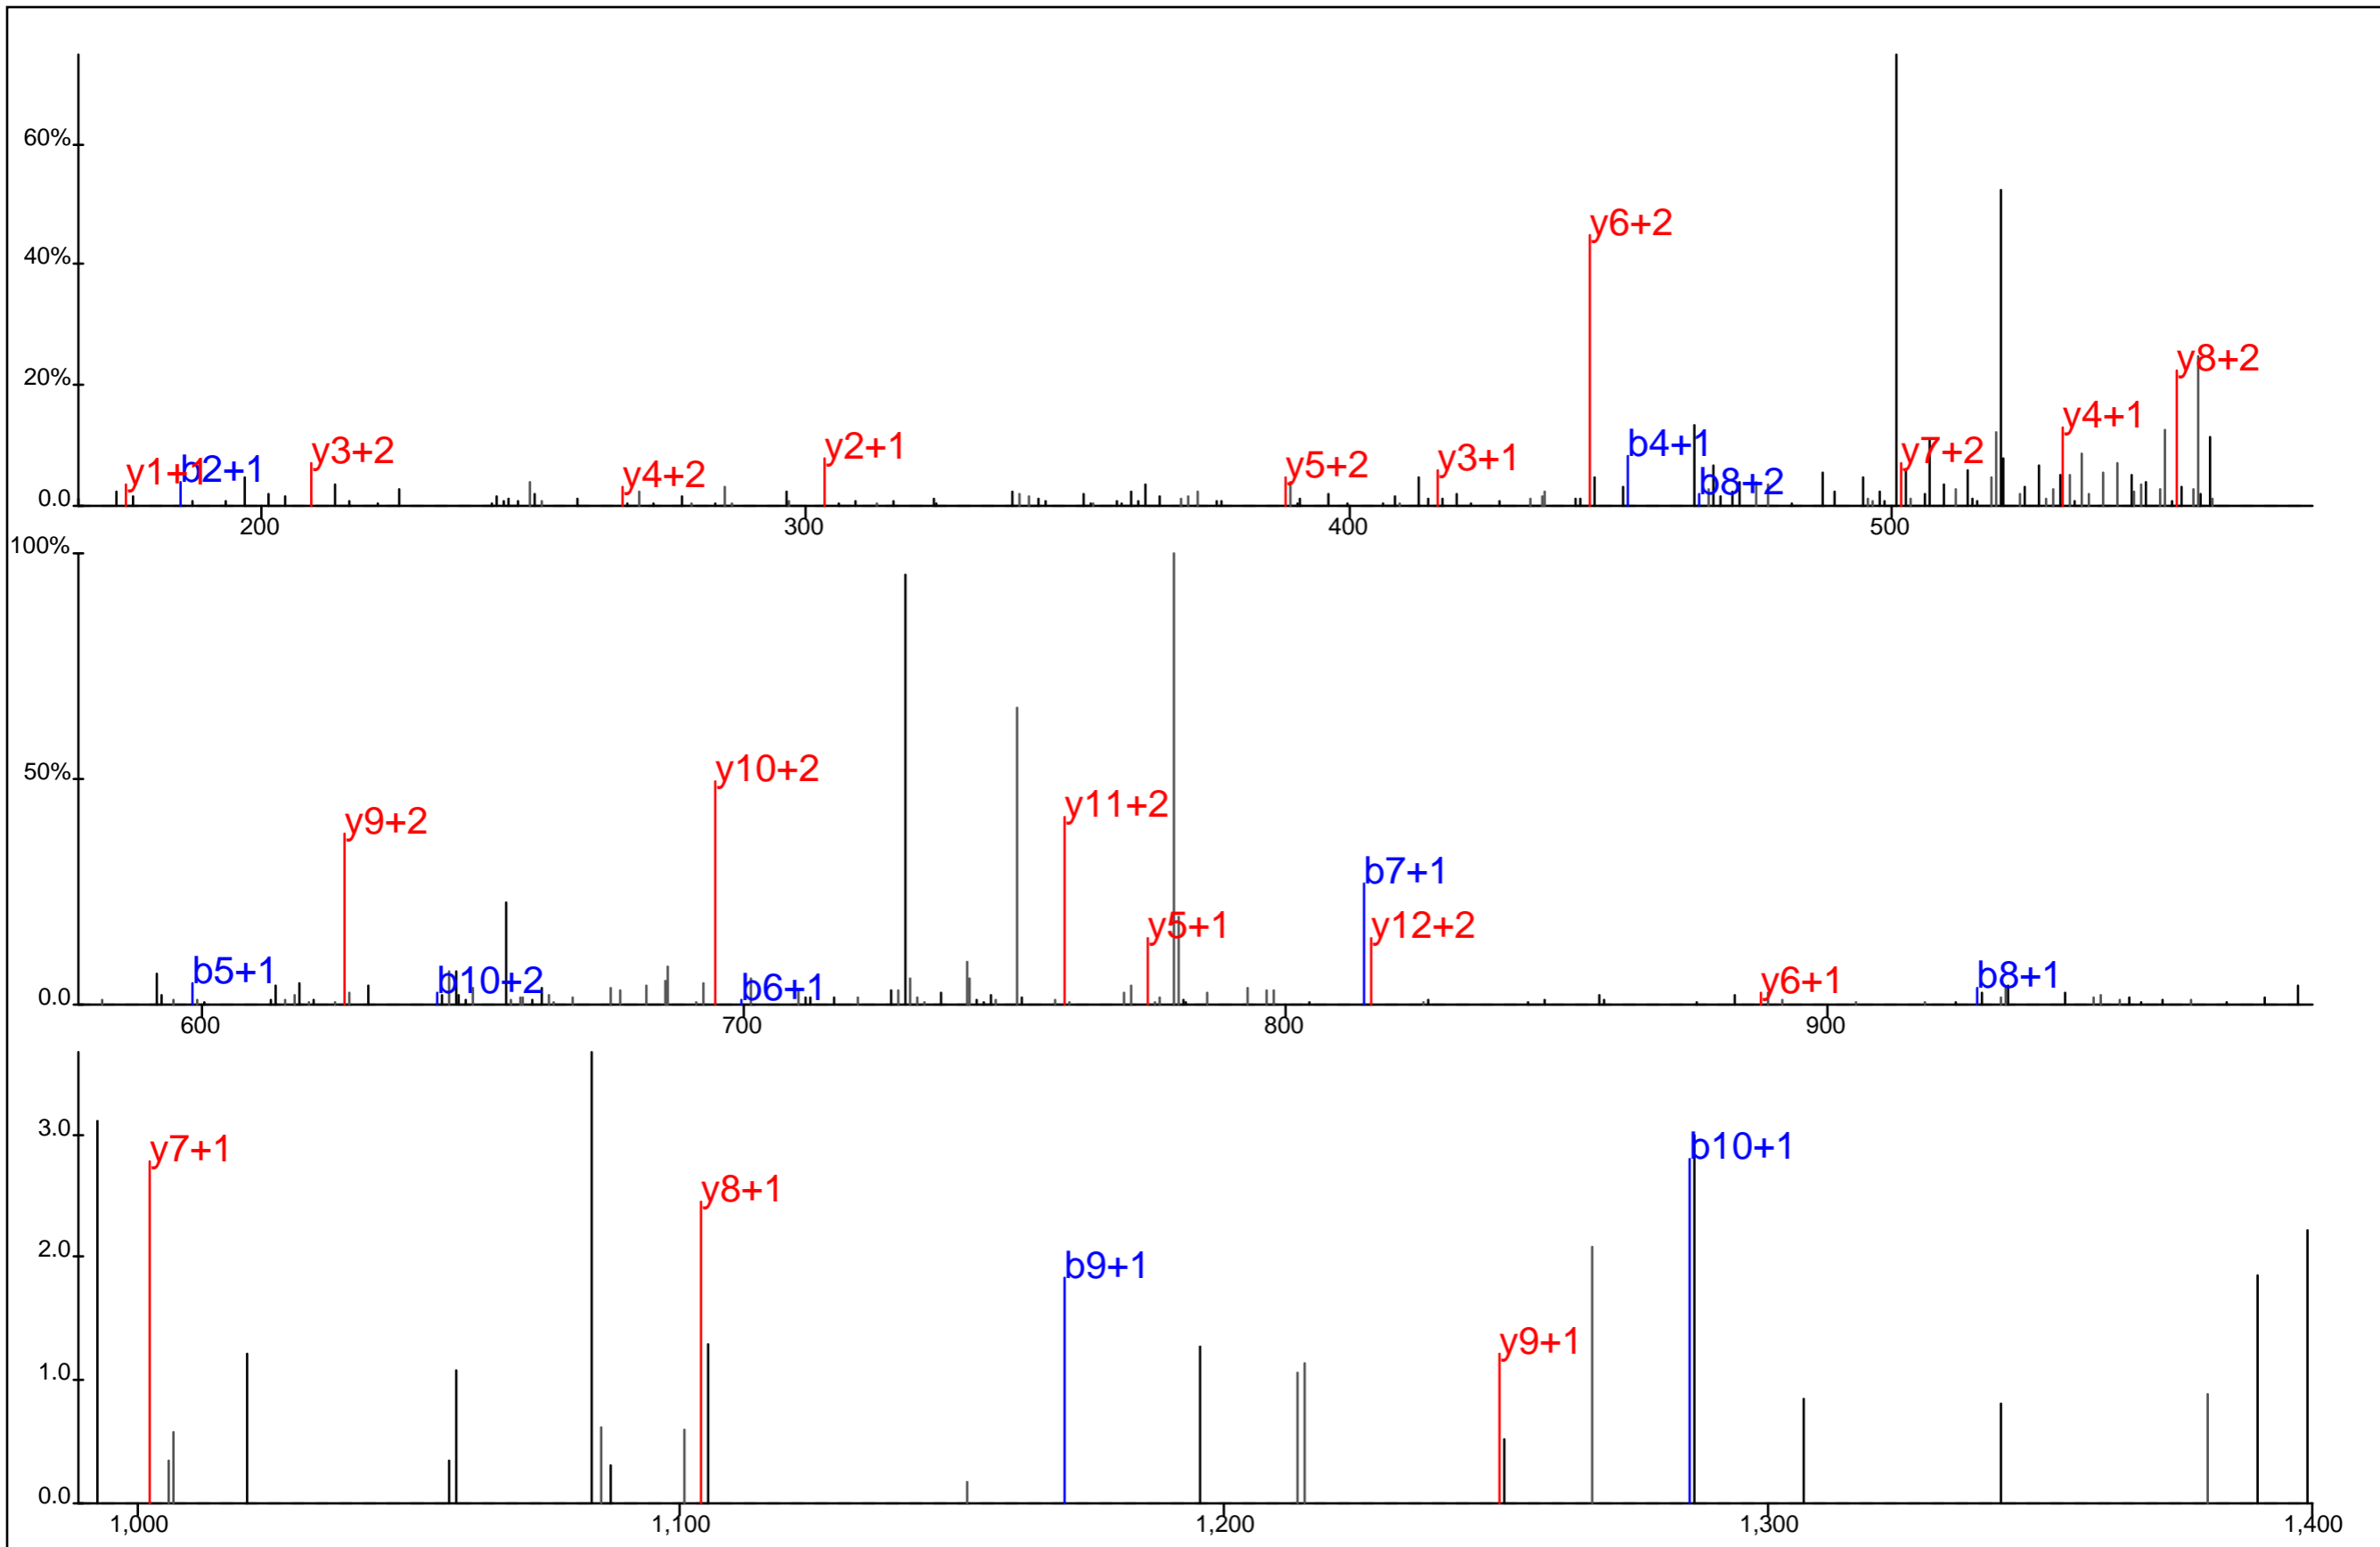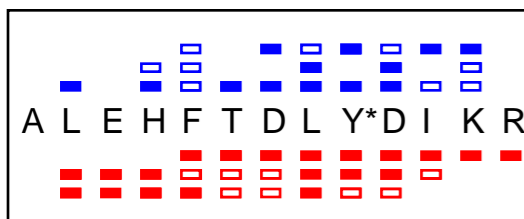

Protein Name: Clathrin, heavy polypeptide  
 gi Accession: 4758012  
 Precursor Mass: 567.6093+3  
 Delta Mass: 5.326 ppm  
 XCorr: 44.4

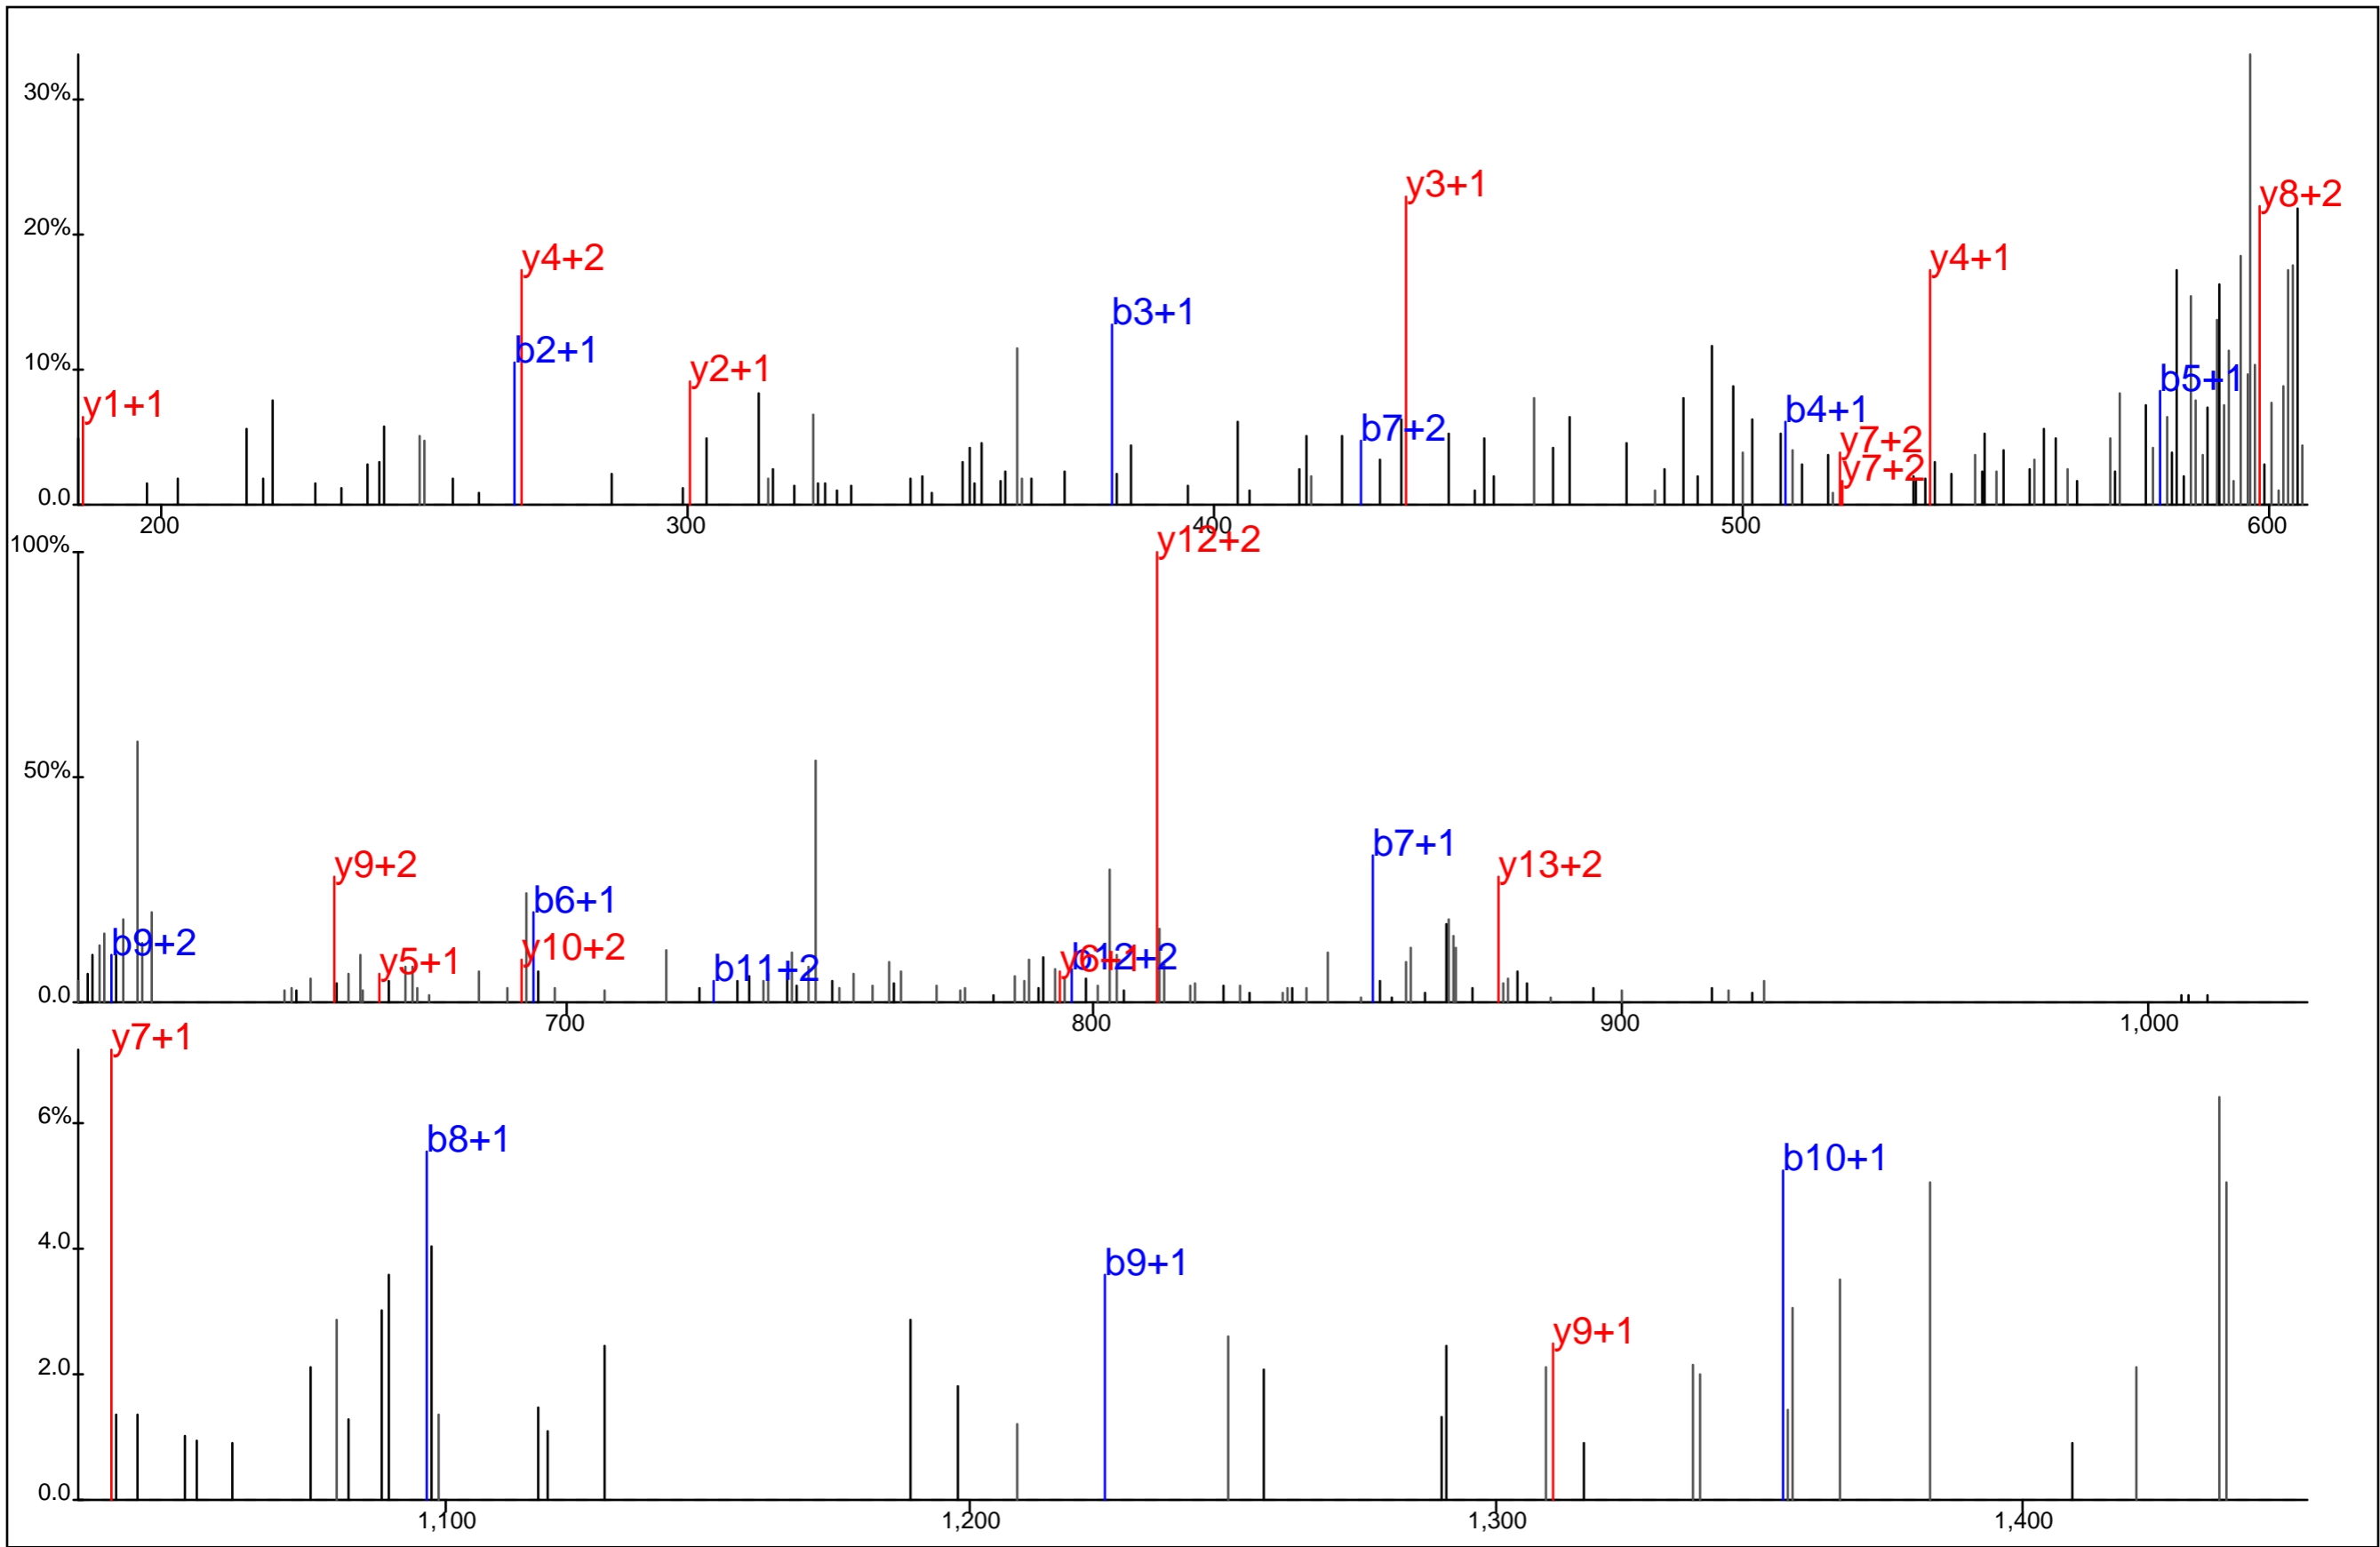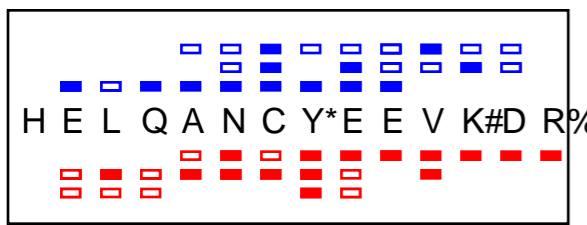

Protein Name: Cofilin 1  
 gi Accession: 5031635  
 Precursor Mass: 630.2734+3  
 Delta Mass: 2.217 ppm  
 XCorr: 31.45

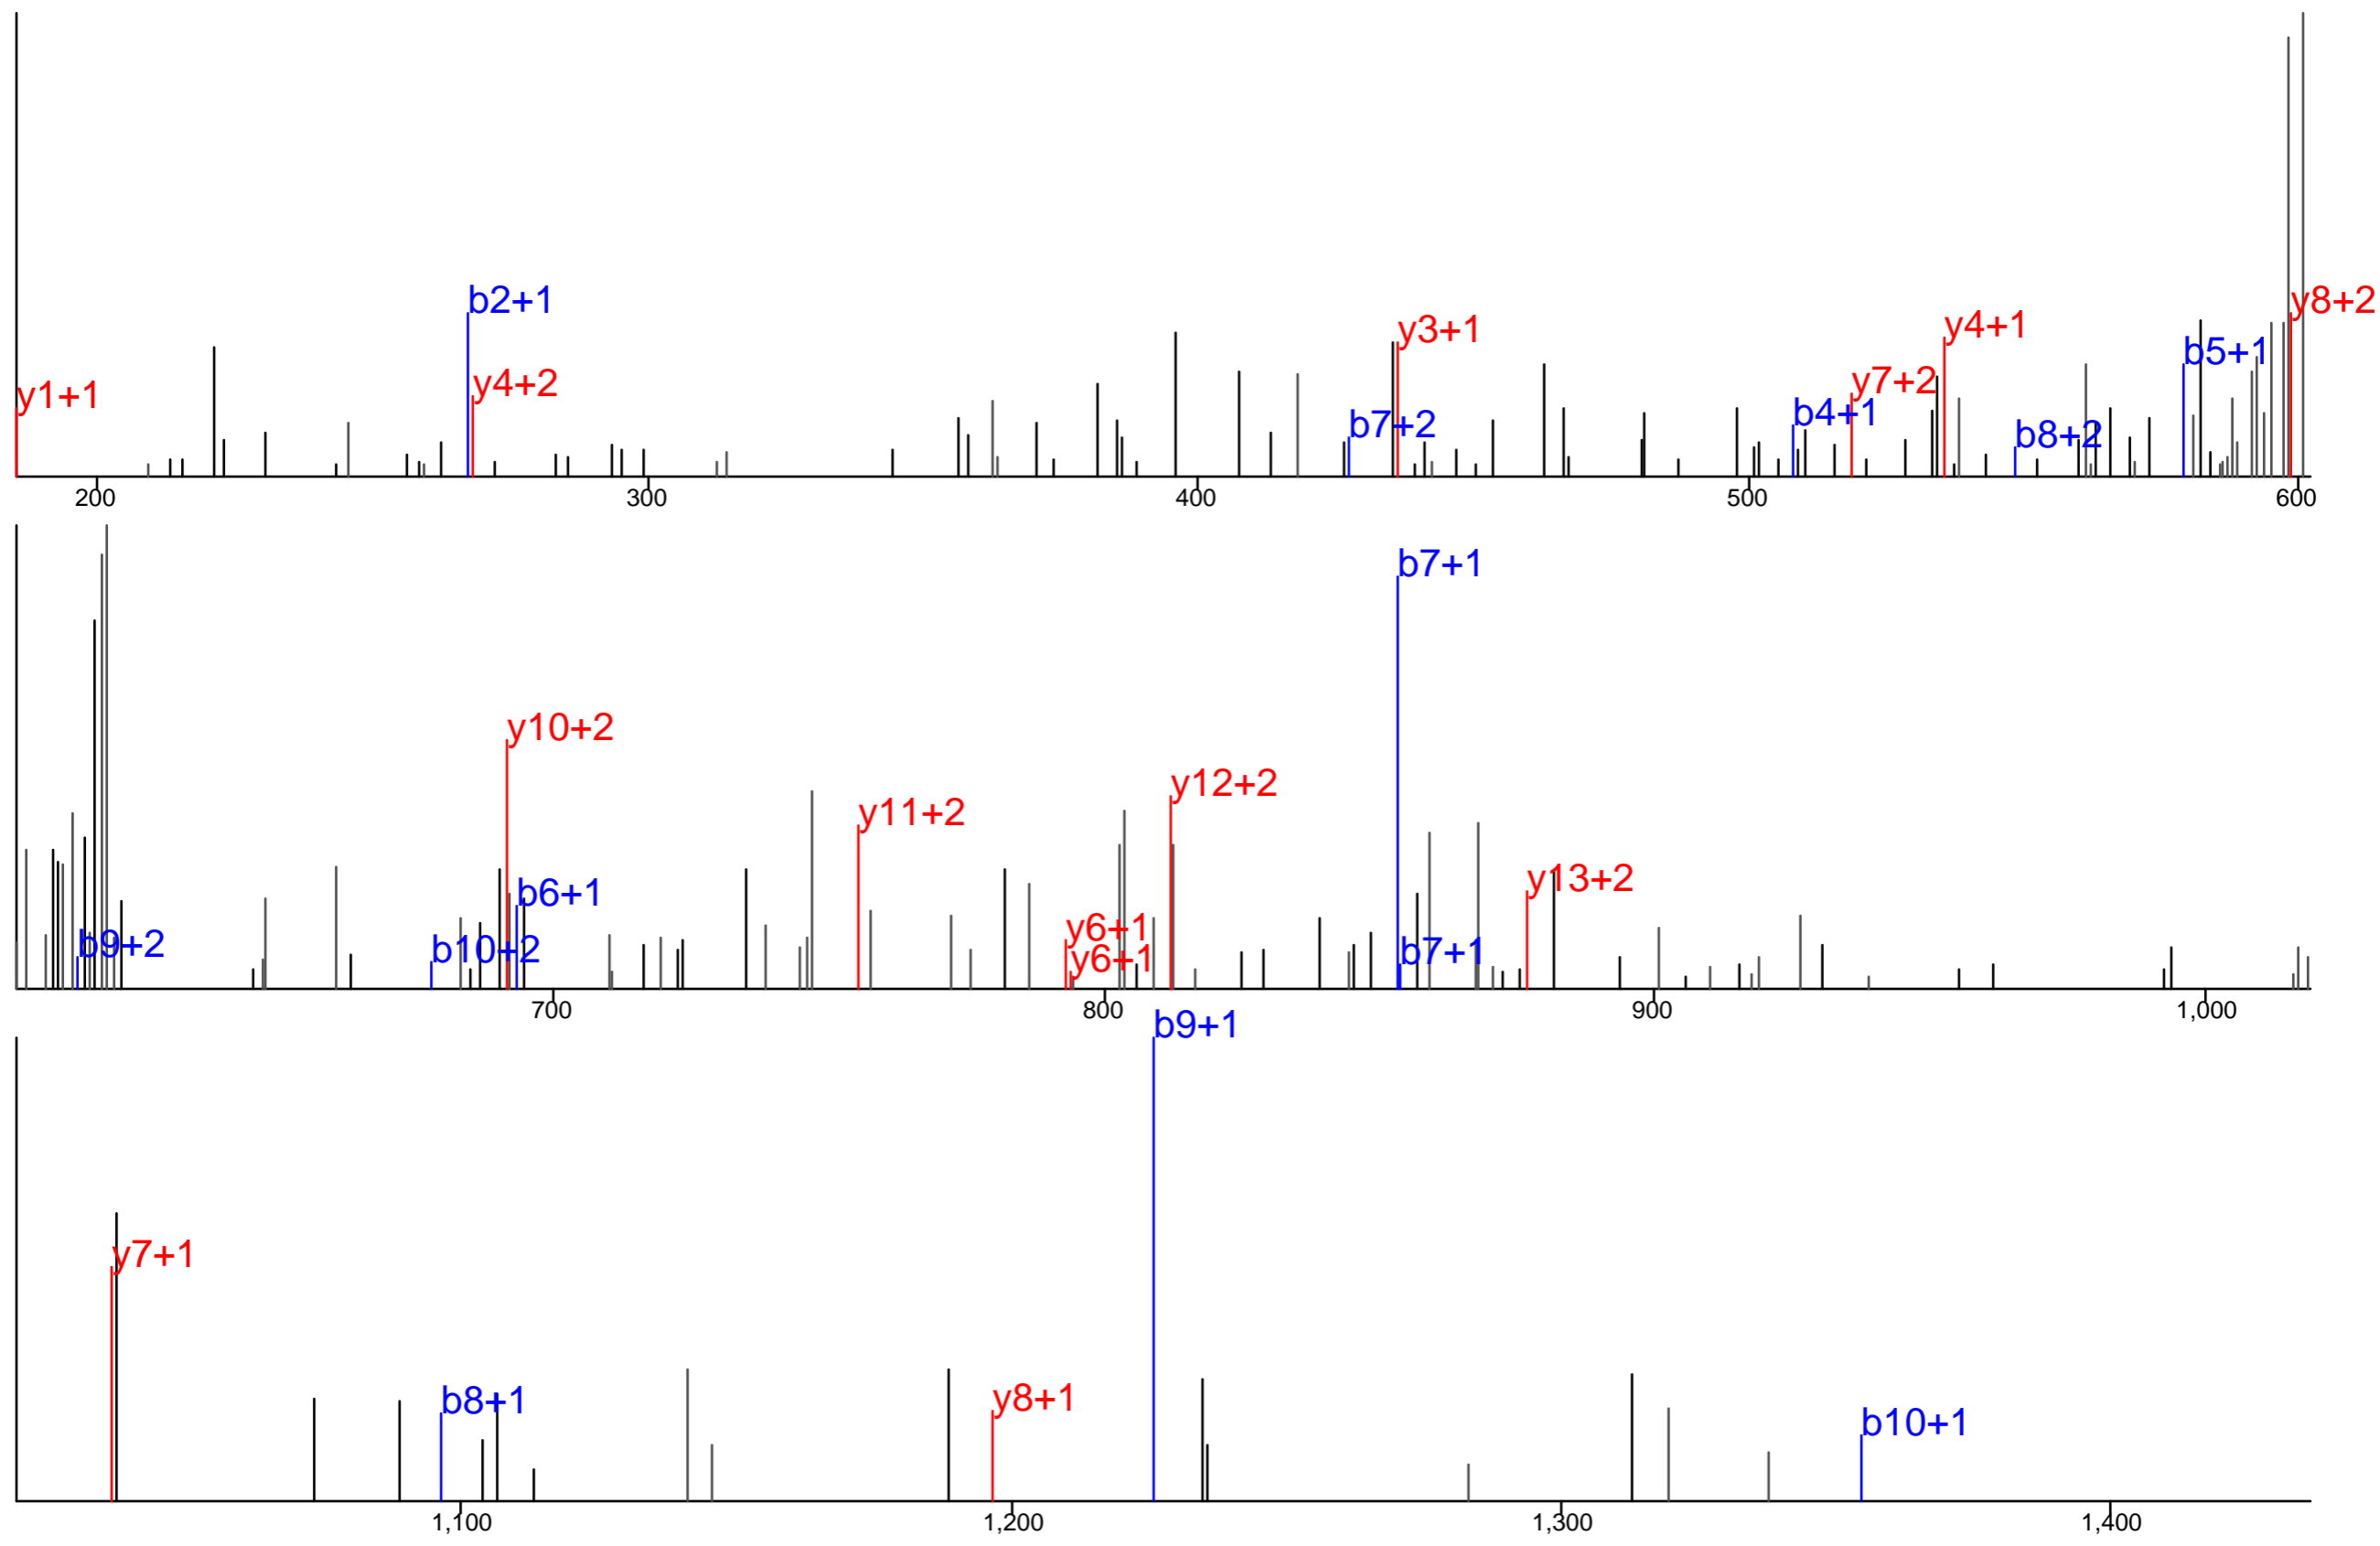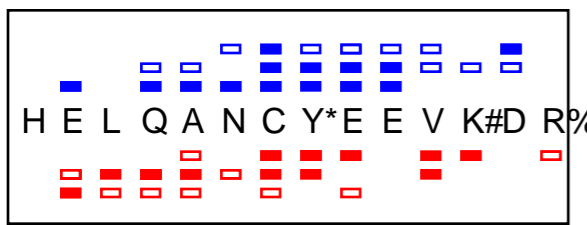

Protein Name: Cofilin 1  
 gi Accession: 5031635  
 Precursor Mass: 630.2743+3  
 Delta Mass: 3.668 ppm  
 XCorr: 24.5

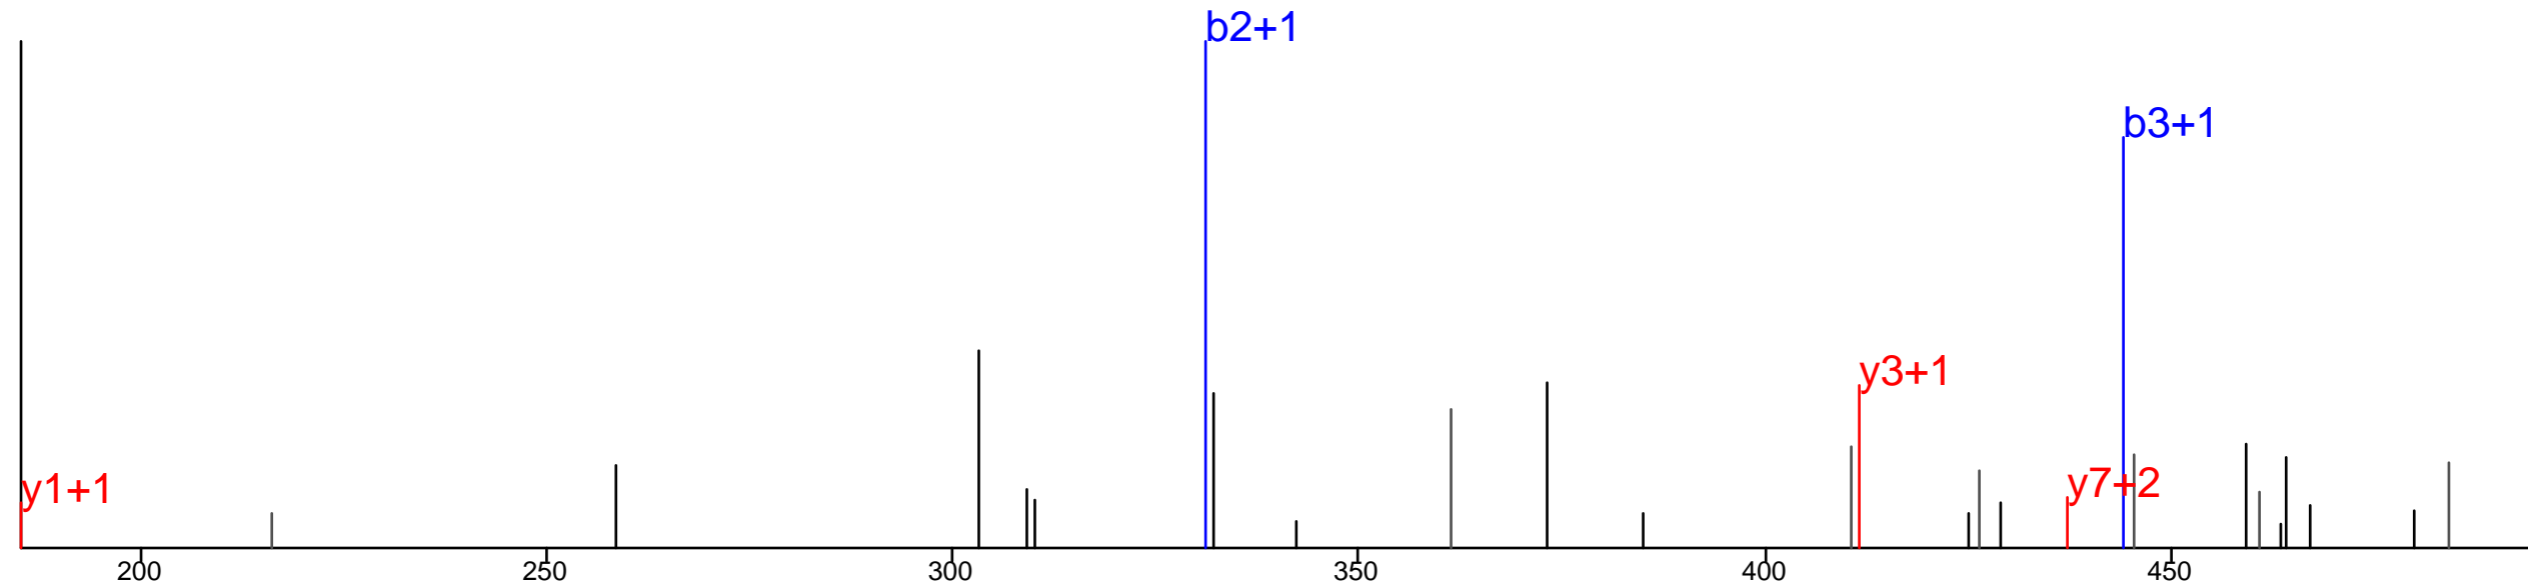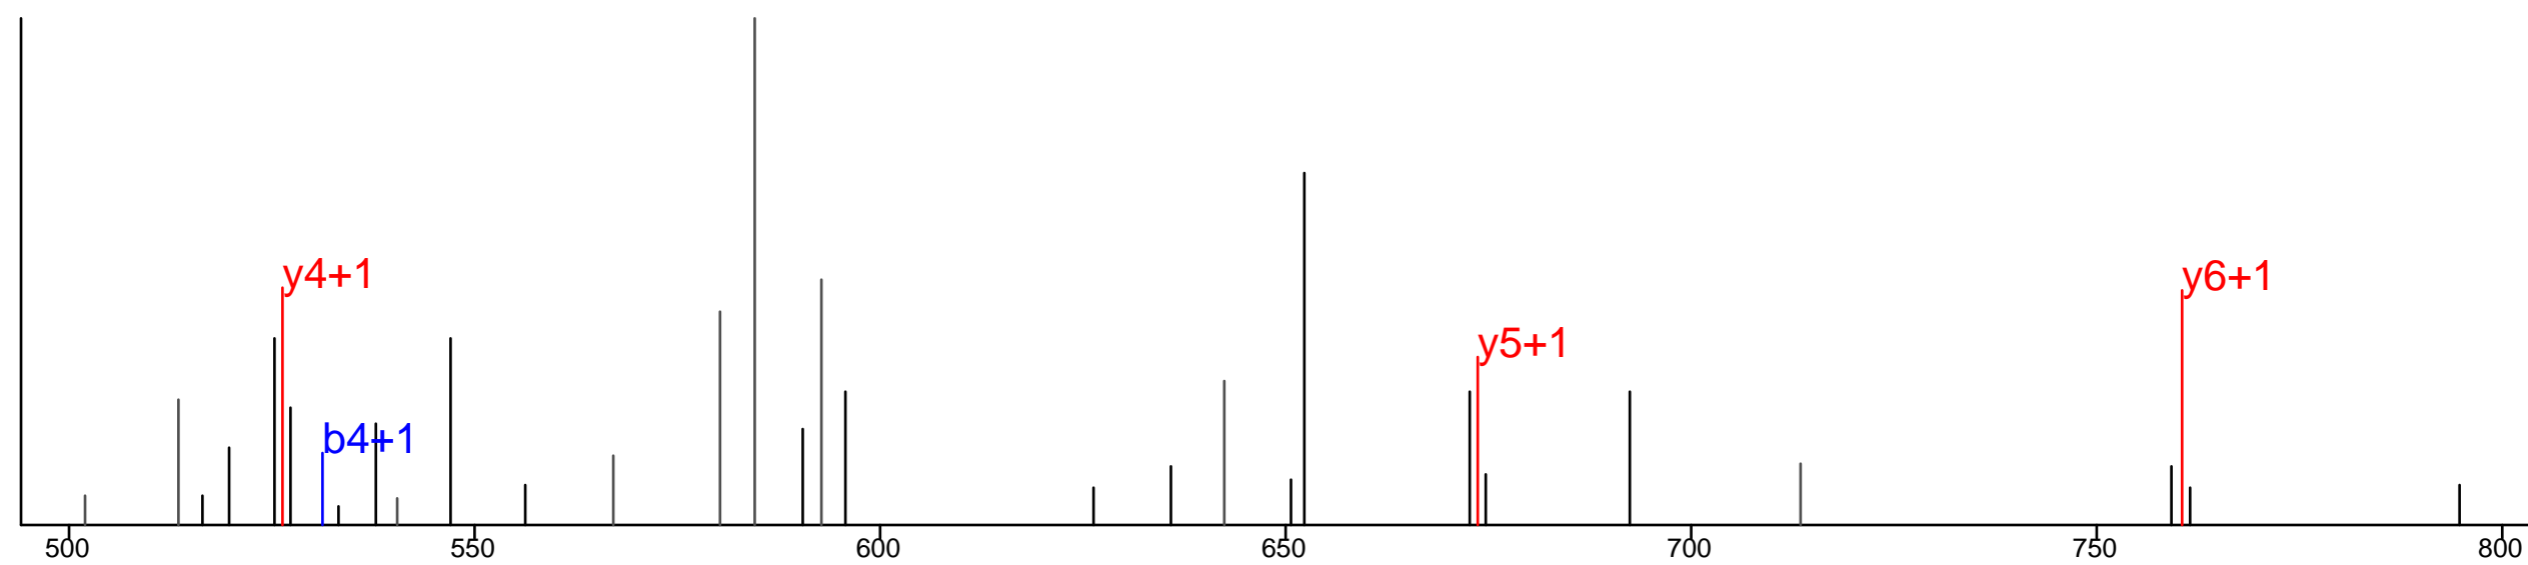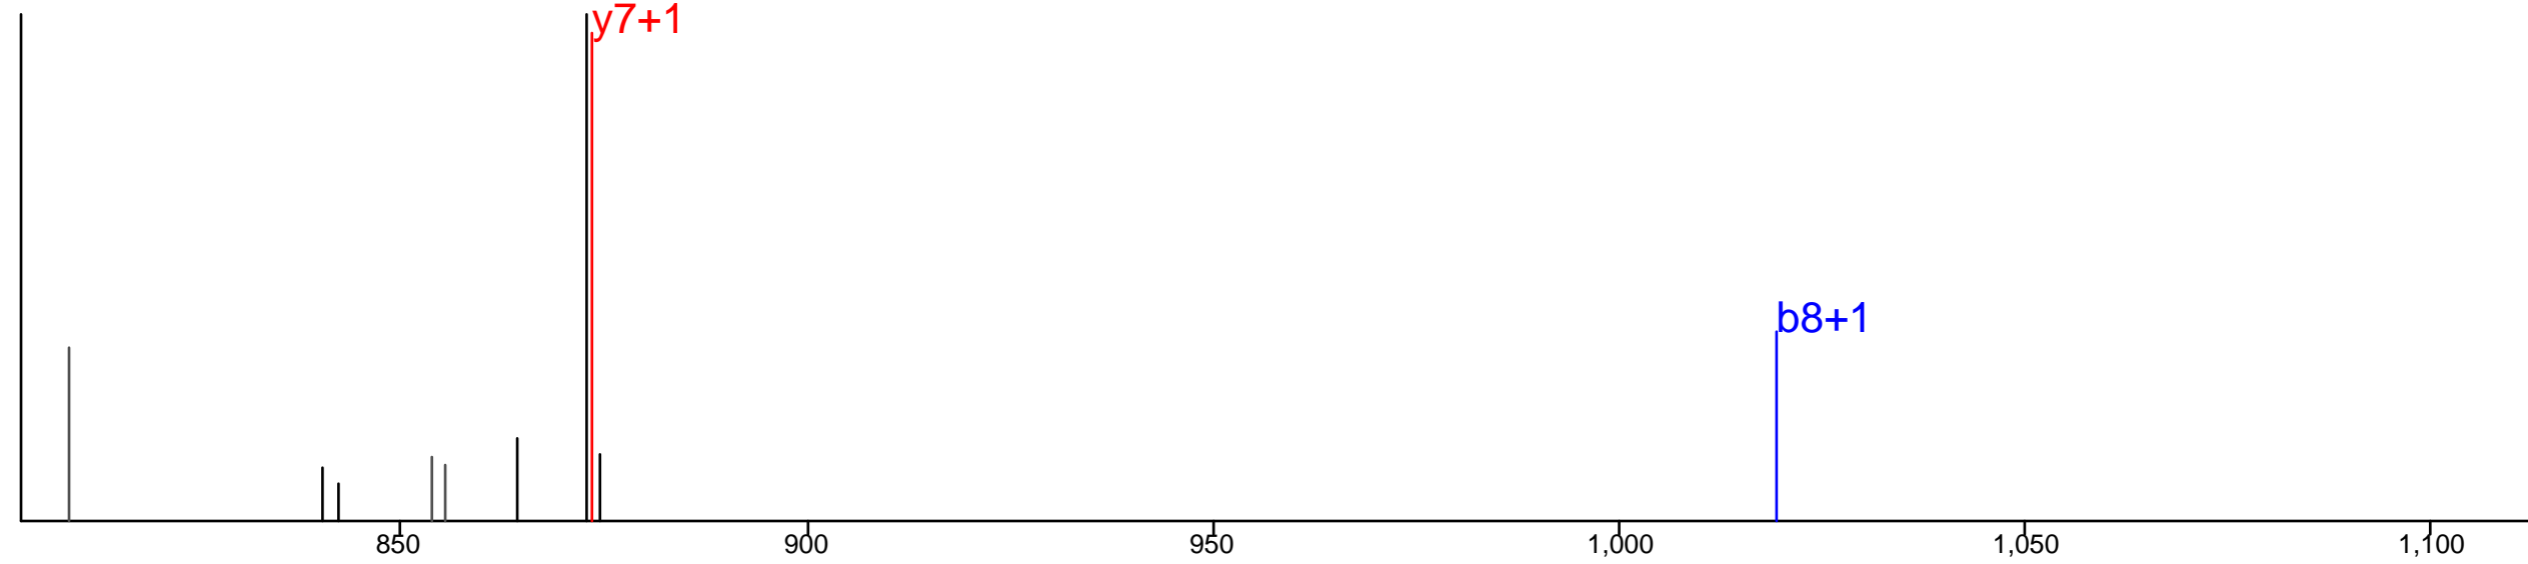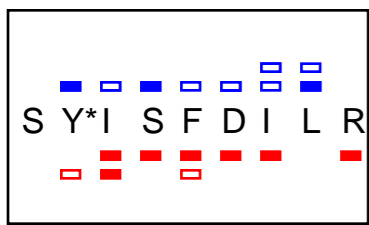

Protein Name: Cysteinyl-tRNA synthetase  
 gi Accession: 10835051  
 Precursor Mass: 602.2893+2  
 Delta Mass: 2.391 ppm  
 XCorr: 31.78

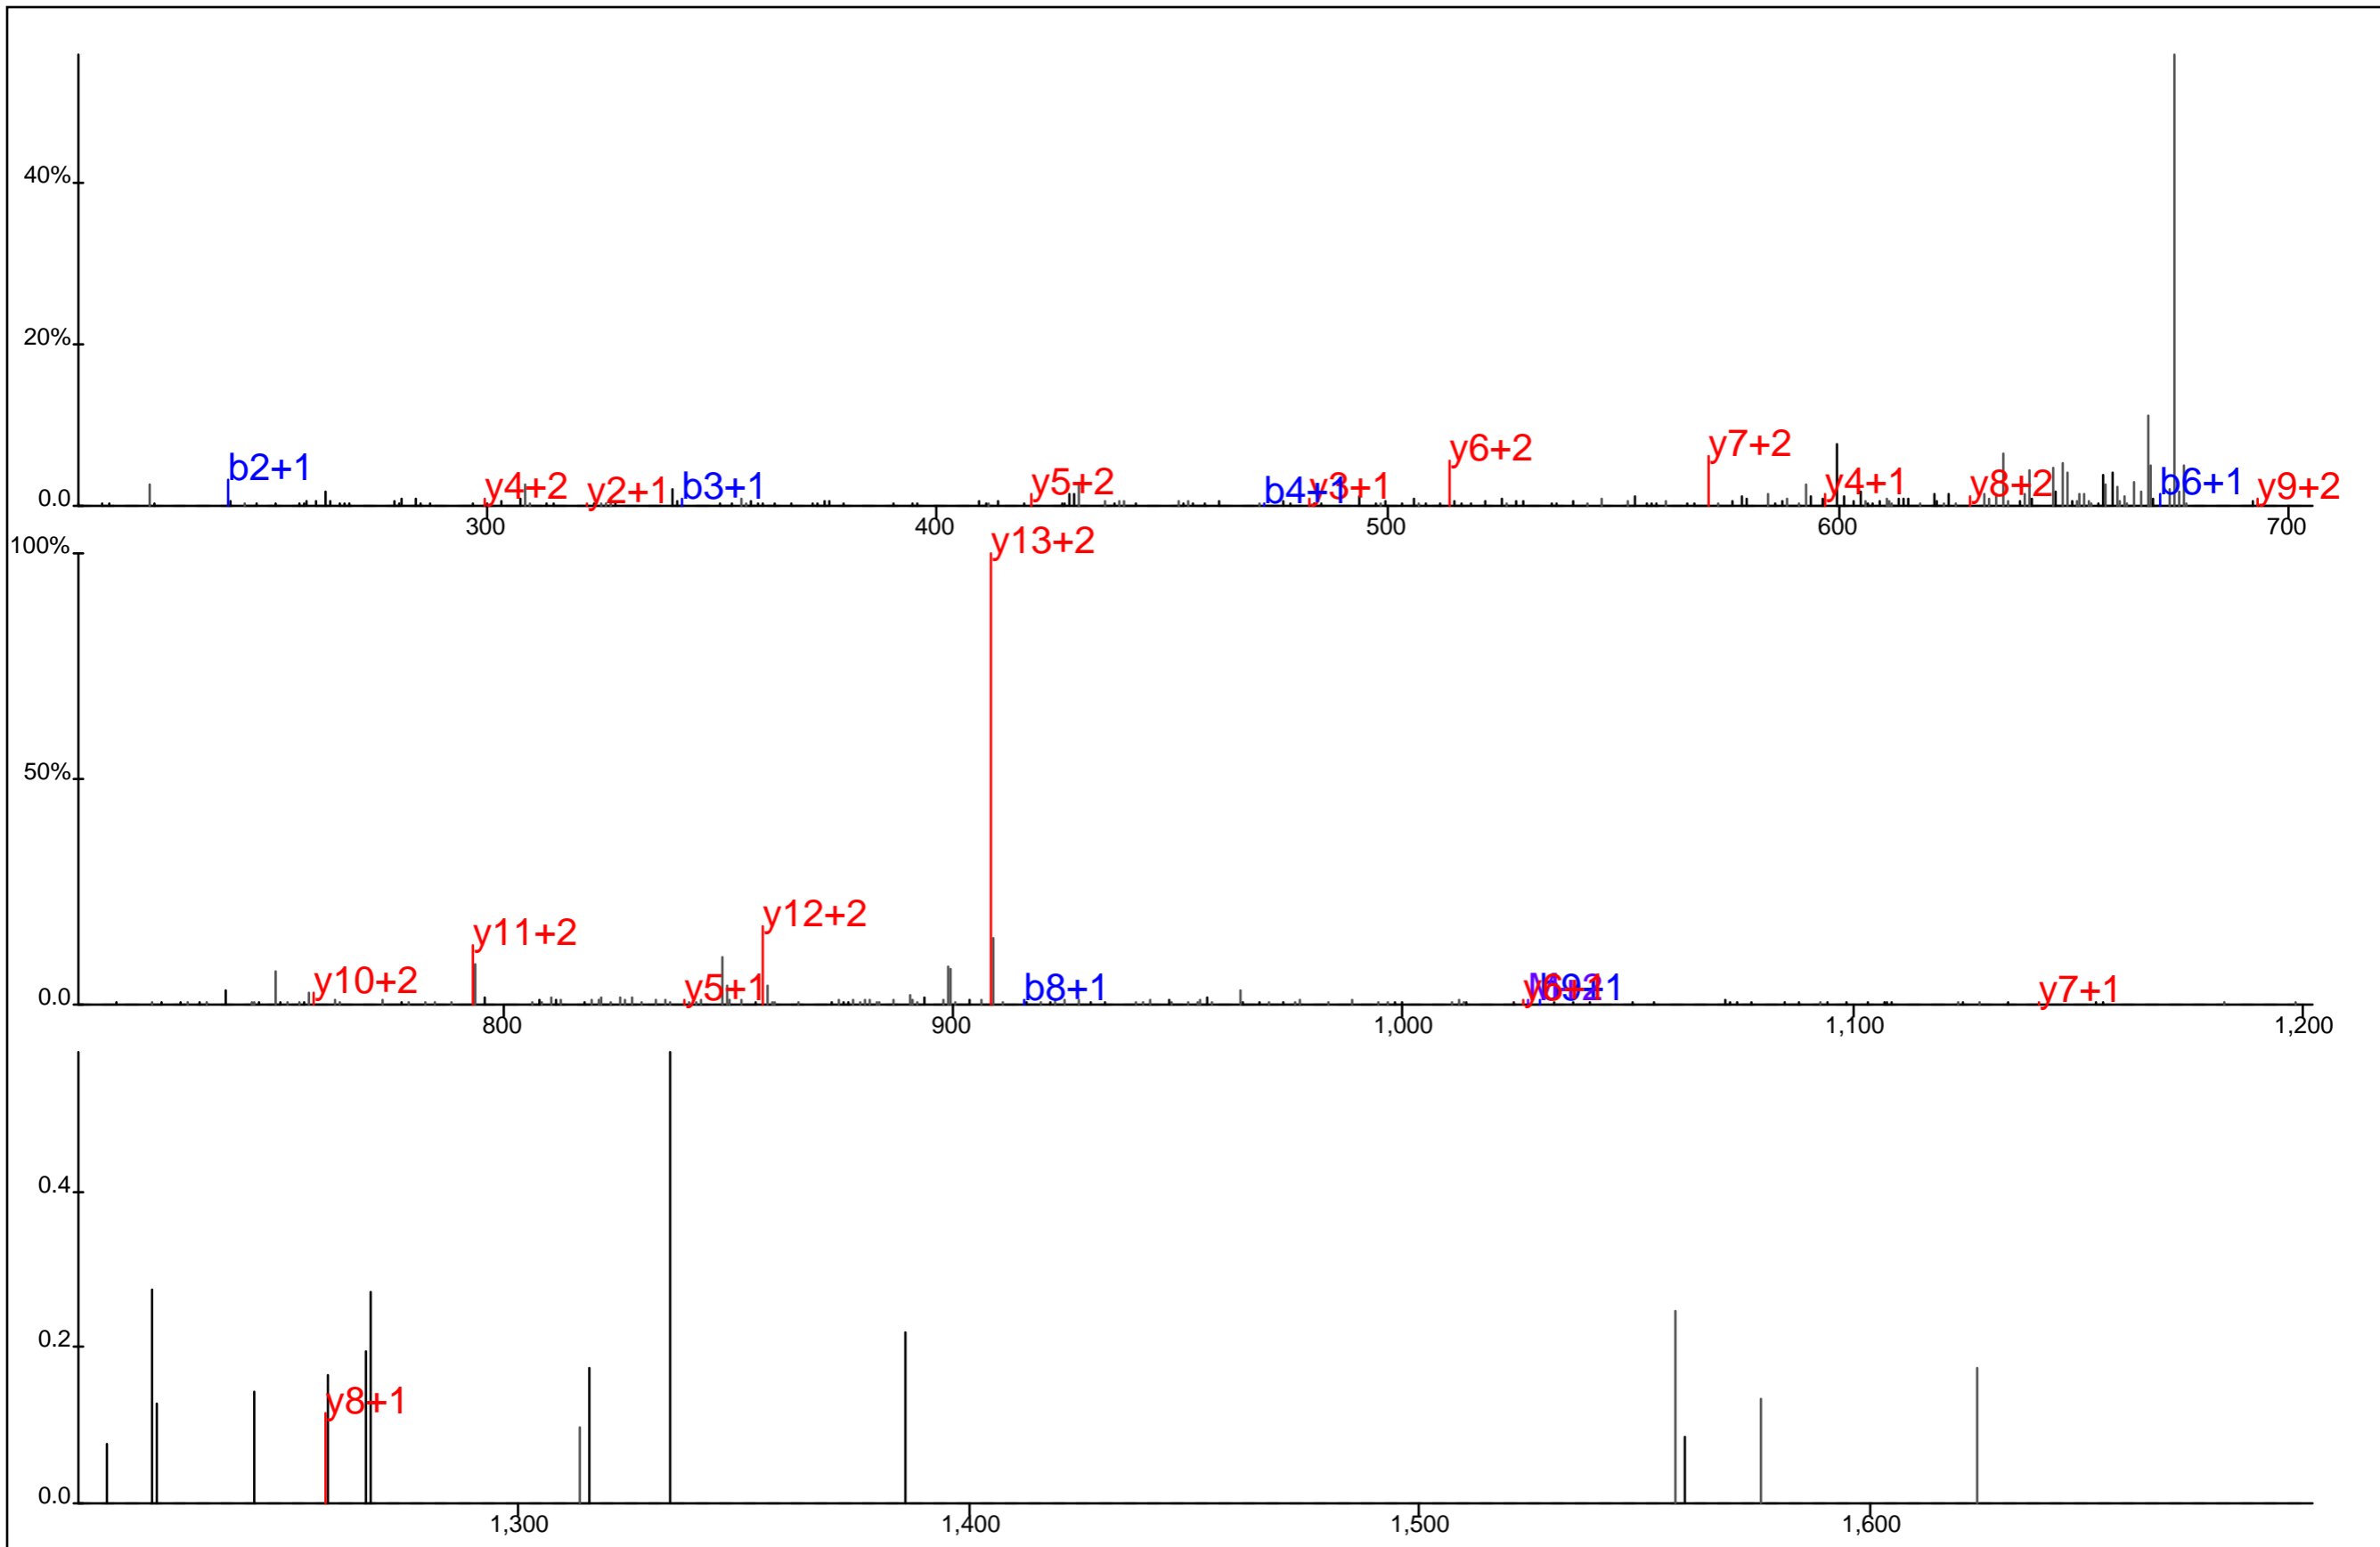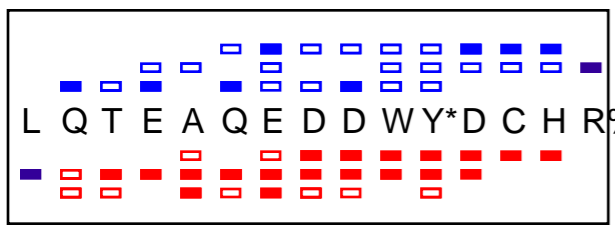

Protein Name: DDX20  
 gi Accession: 12643886  
 Precursor Mass: 685.9323+3  
 Delta Mass: 2.154 ppm  
 XCorr: 18.95

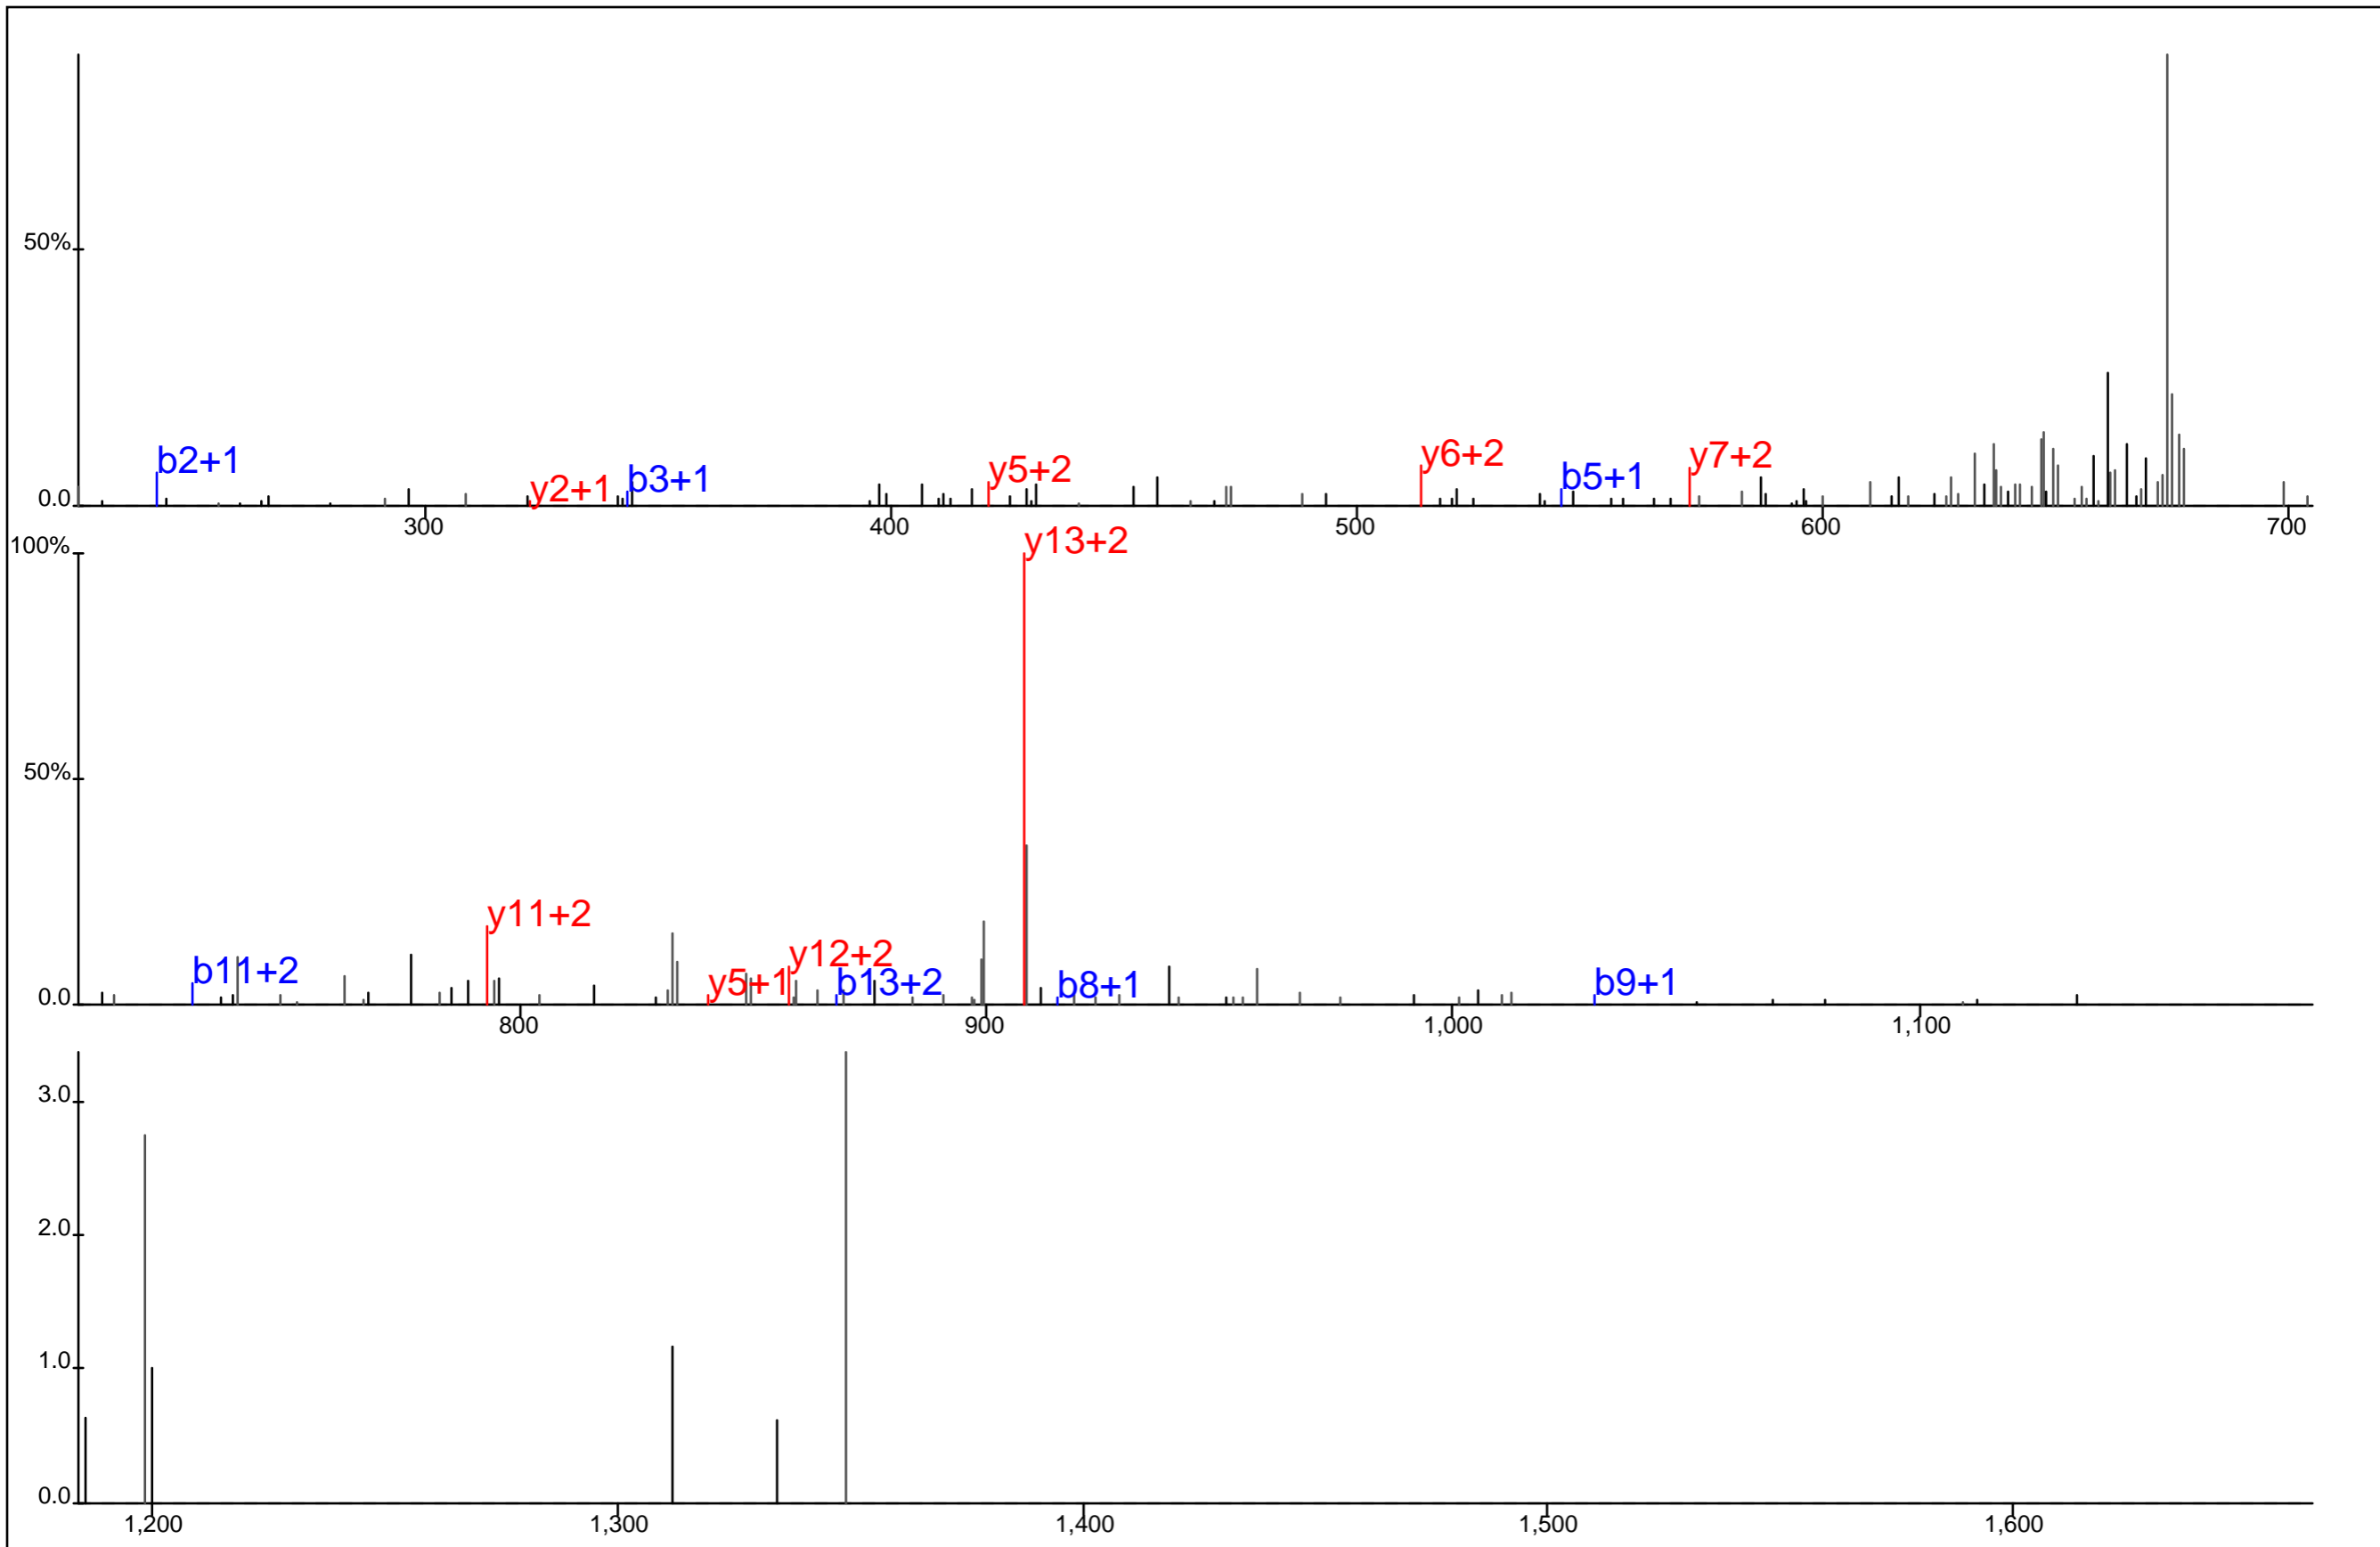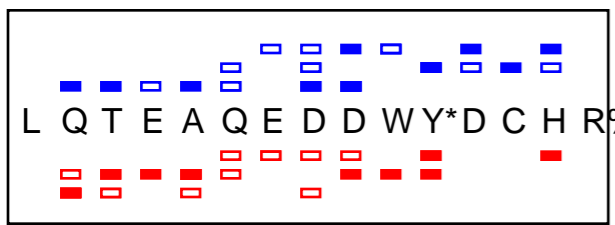

Protein Name: DDX20  
 gi Accession: 12643886  
 Precursor Mass: 685.9350+3  
 Delta Mass: 6.162 ppm  
 XCorr: 23.62



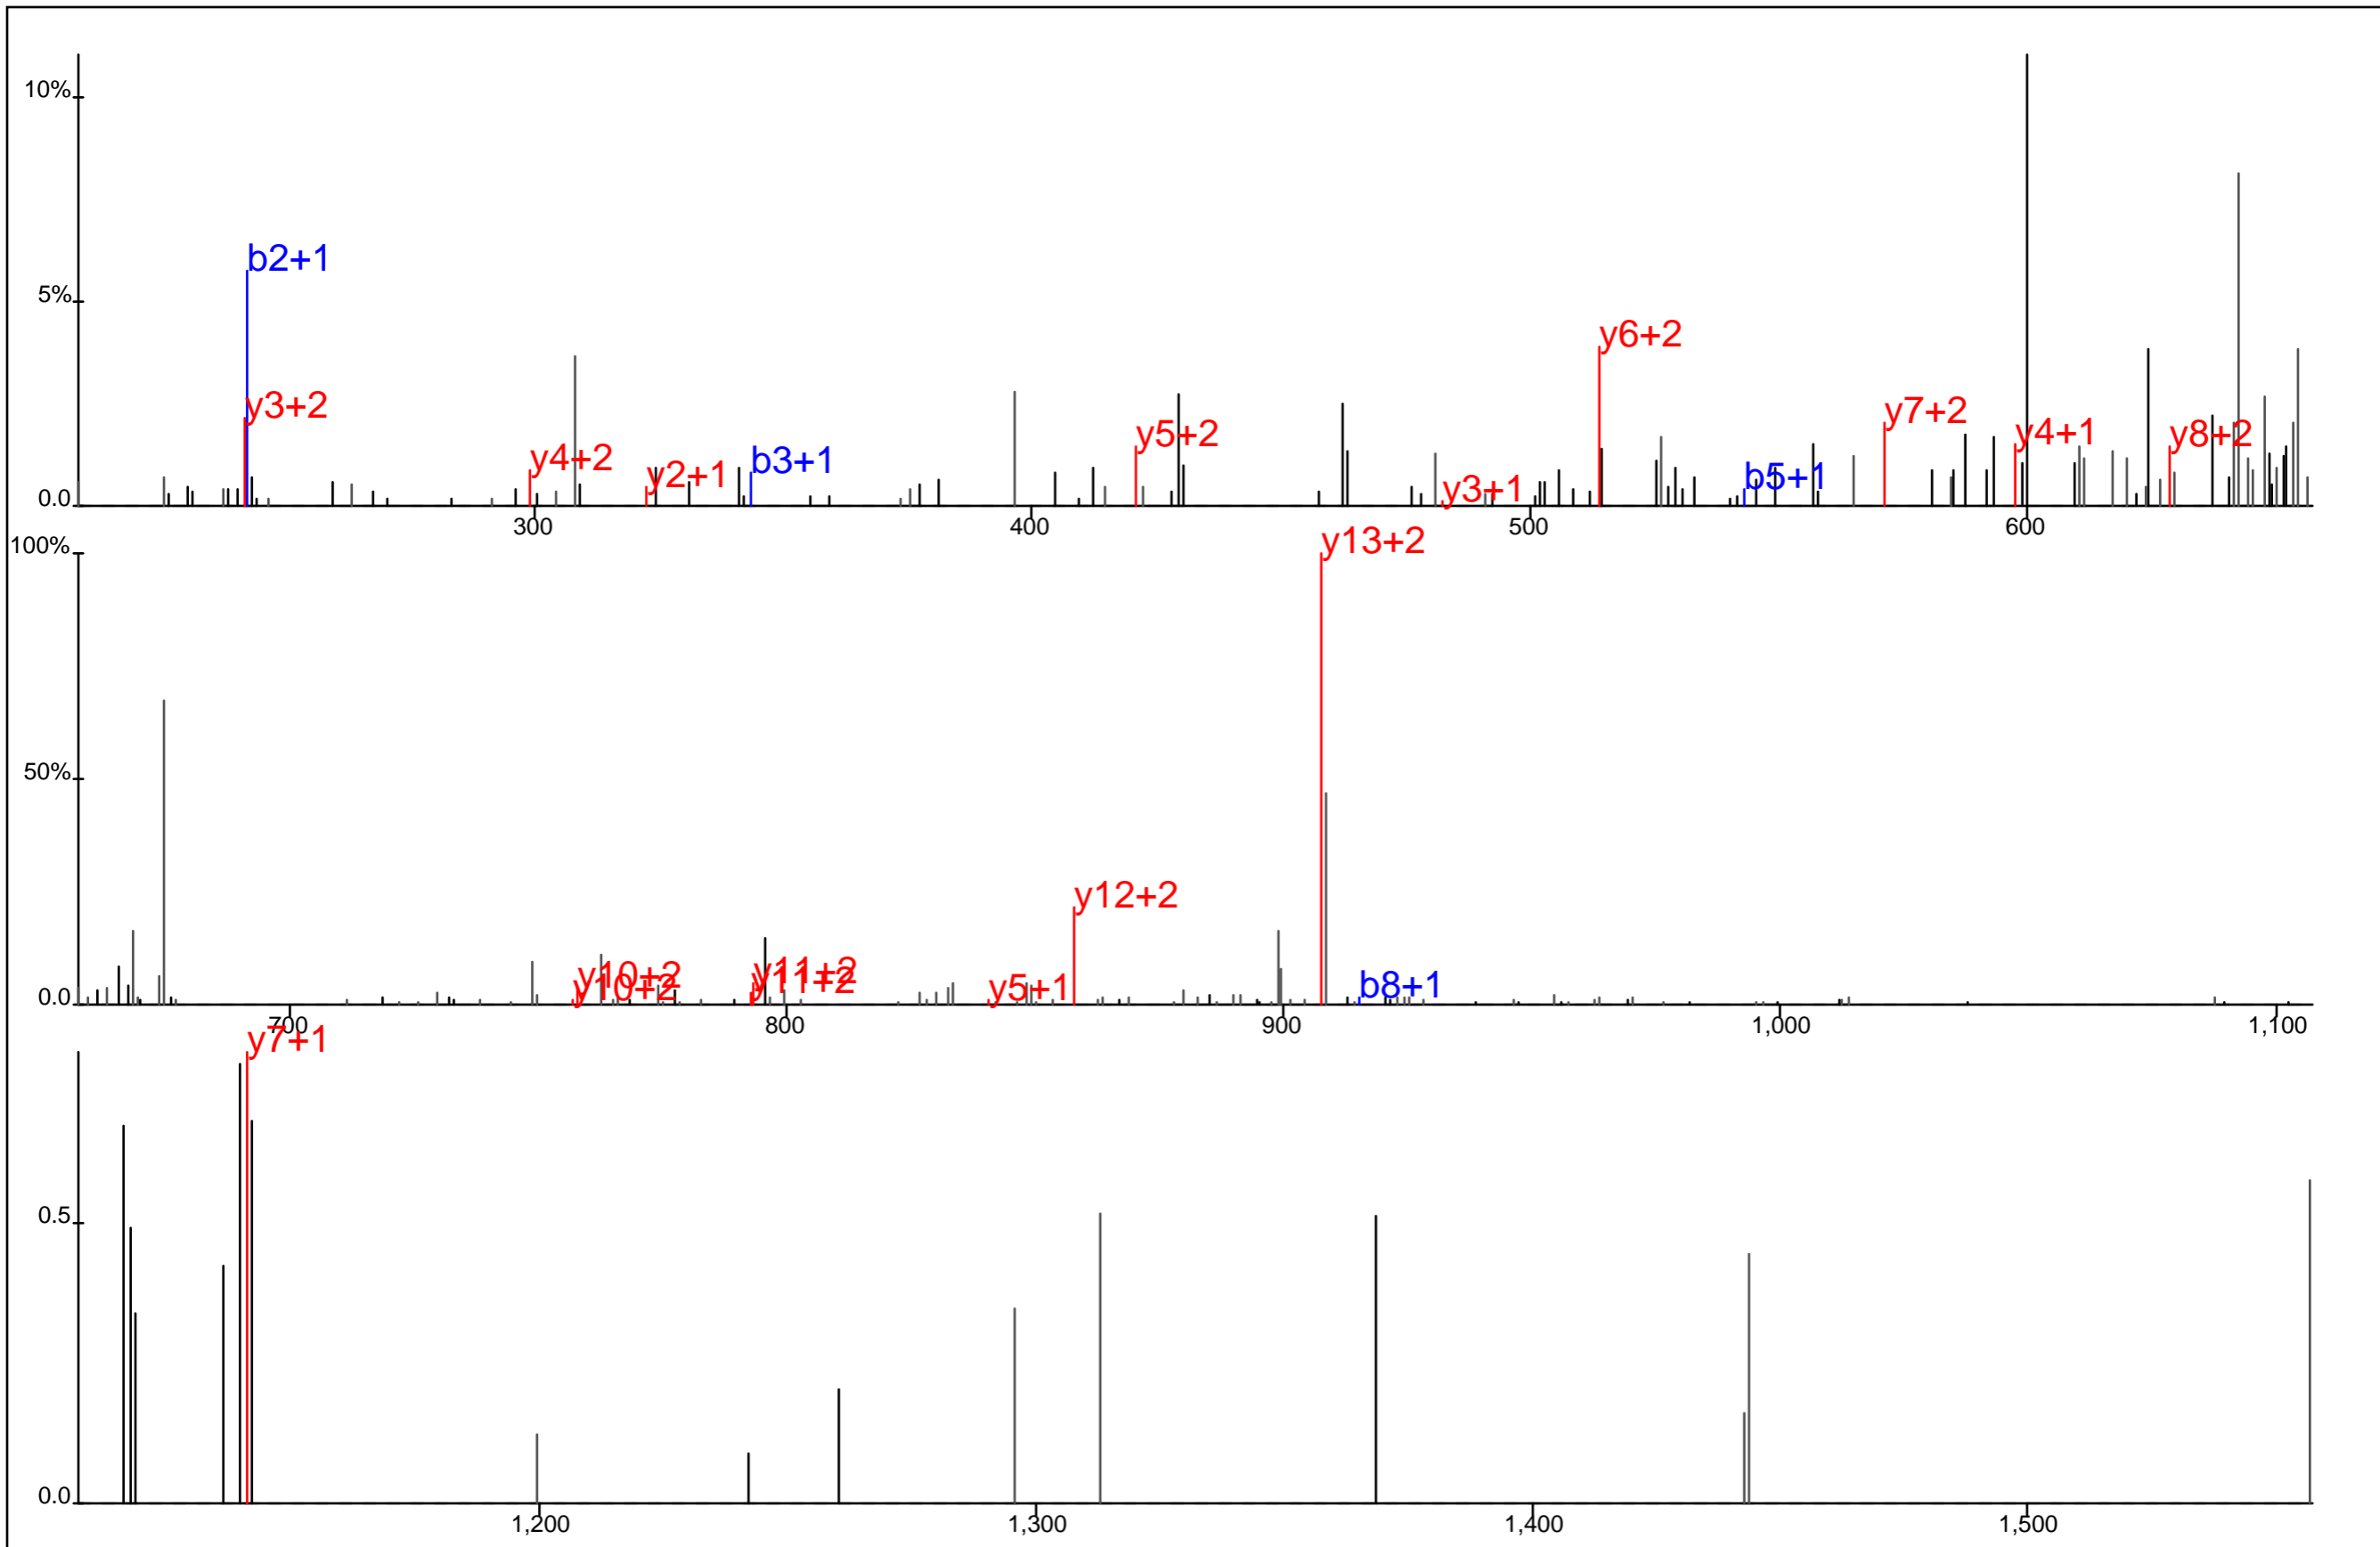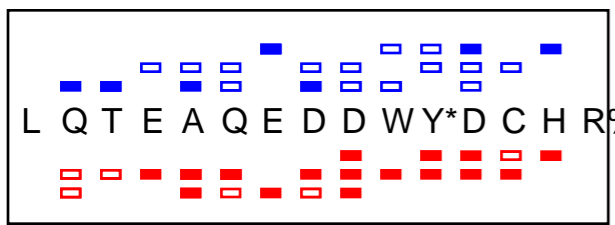

Protein Name: DDX20  
 gi Accession: 12643886  
 Precursor Mass: 685.9316+3  
 Delta Mass: 1.177 ppm  
 XCorr: 19.19

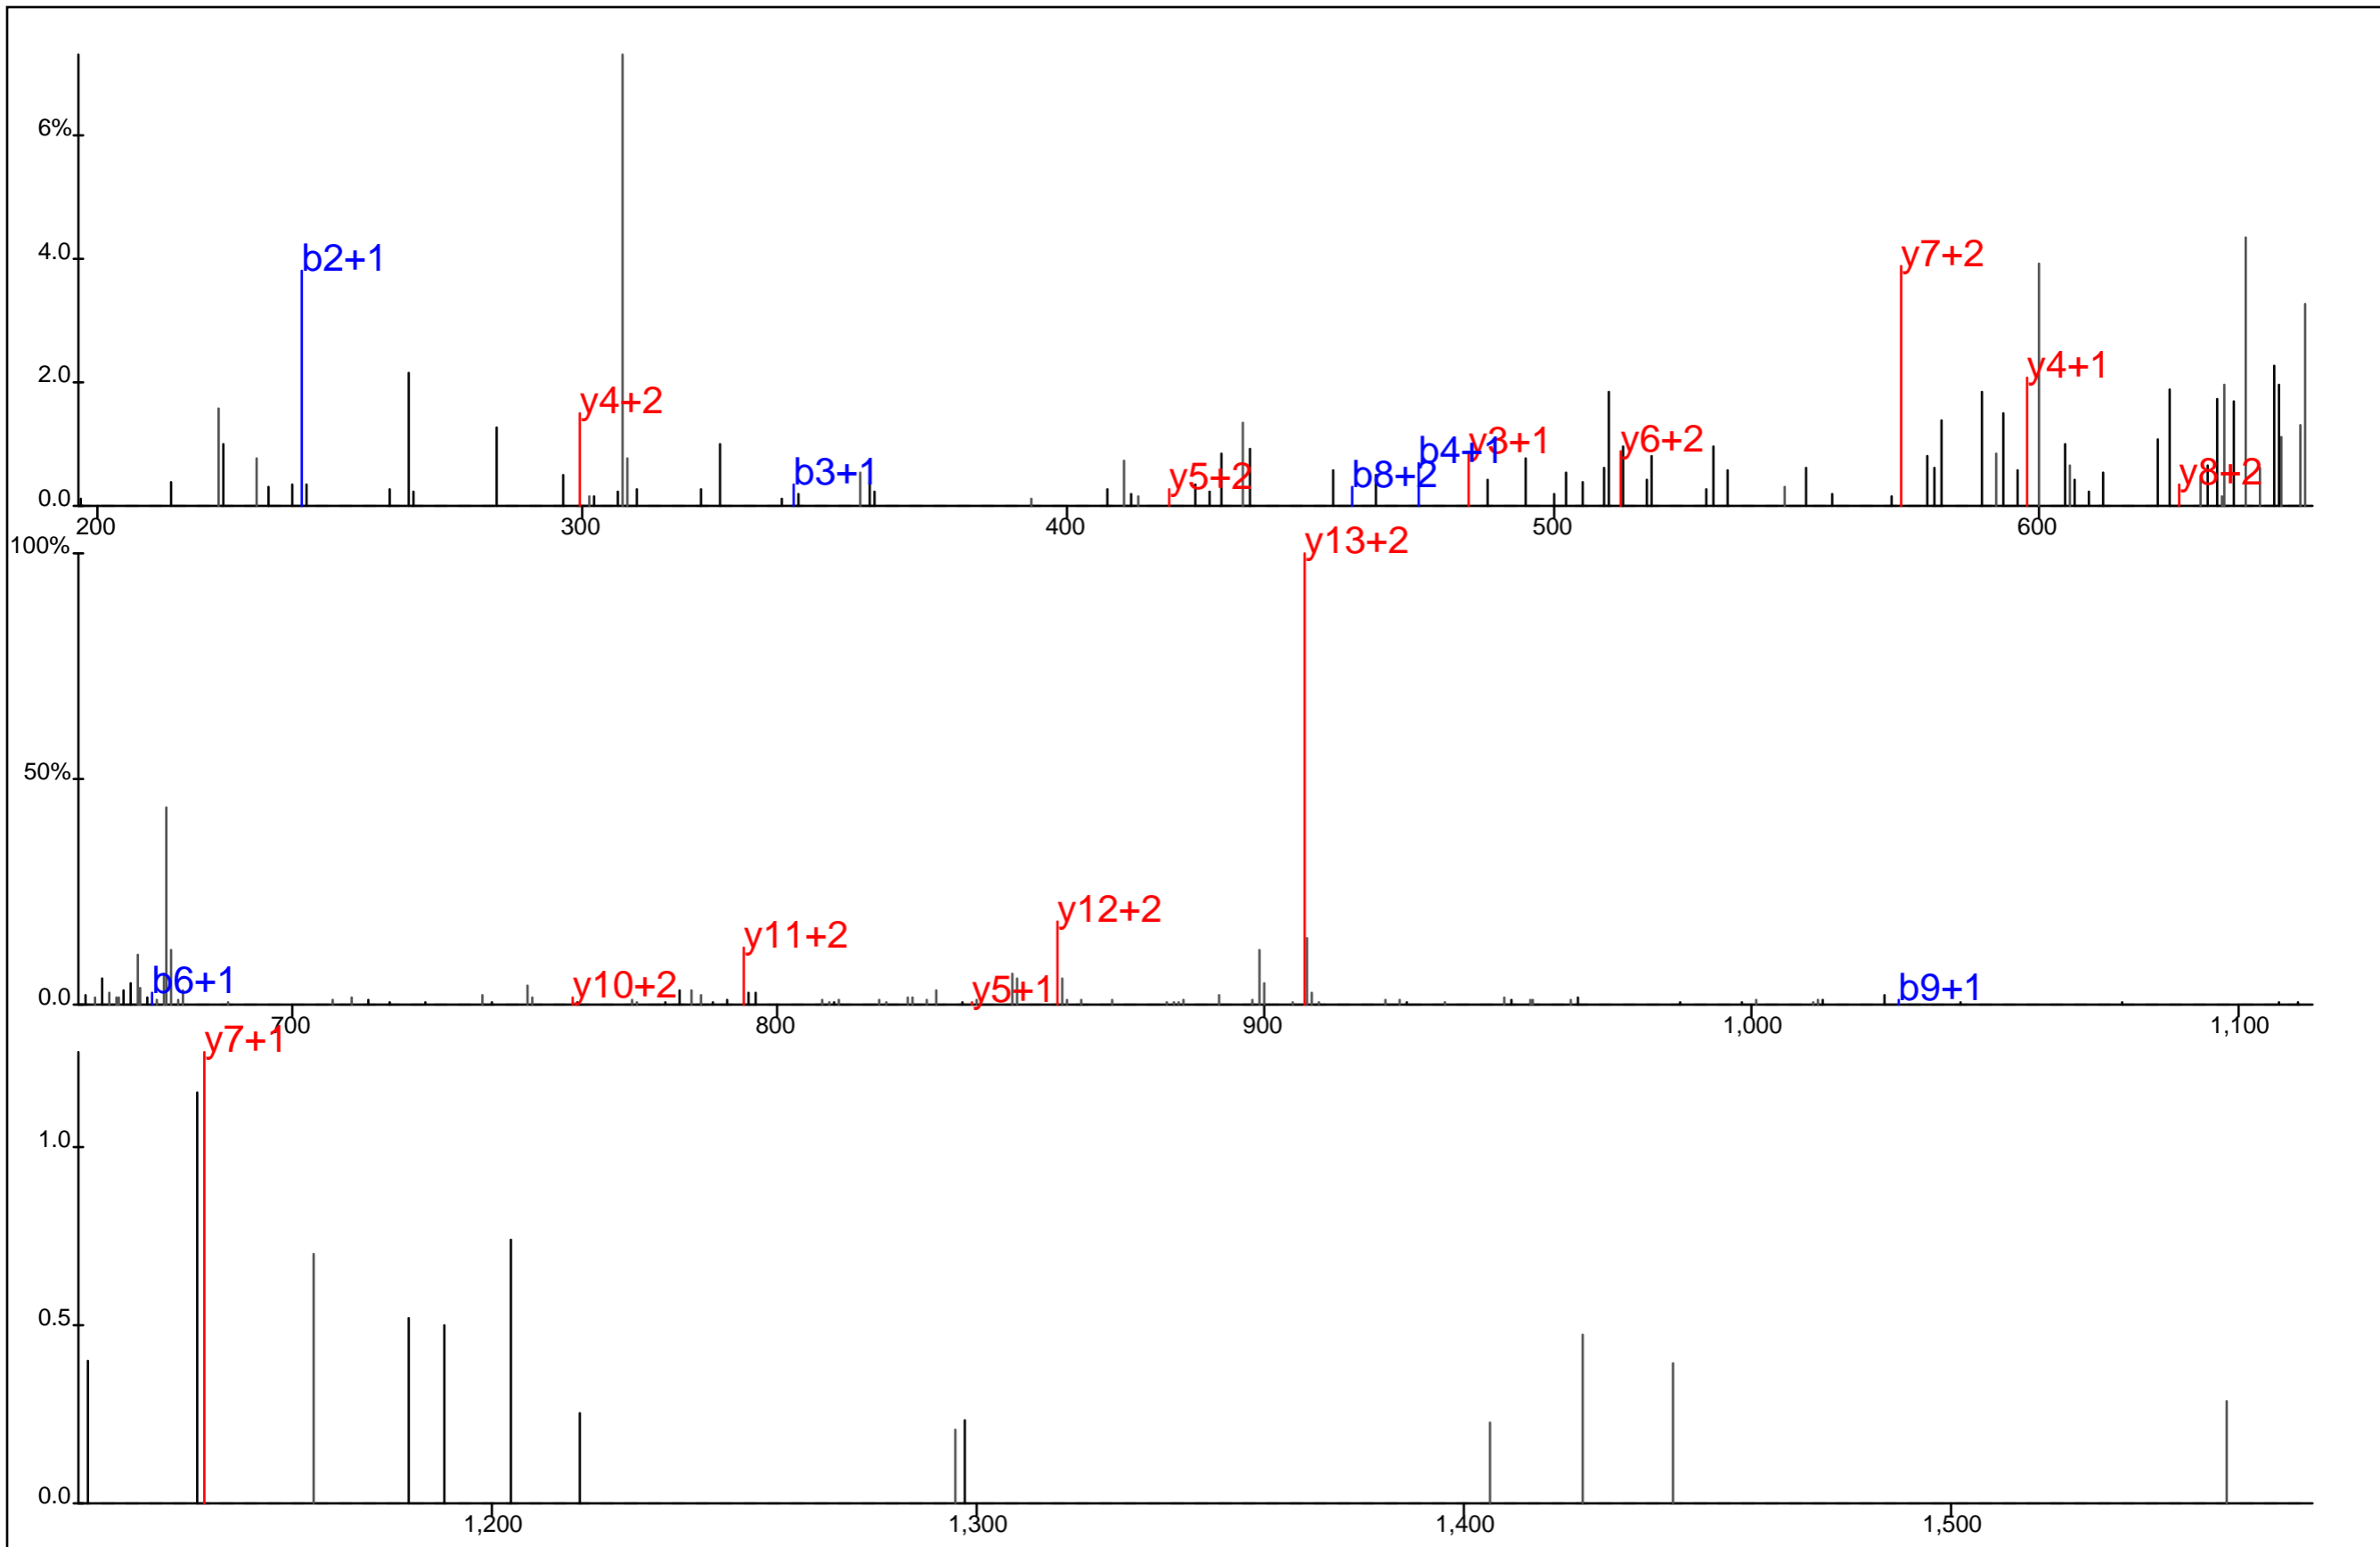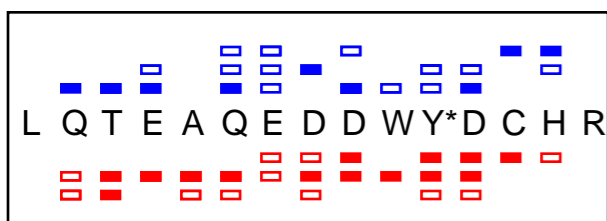

Protein Name: DDX20  
 gi Accession: 12643886  
 Precursor Mass: 685.9318+3  
 Delta Mass: 1.531 ppm  
 XCorr: 13.73

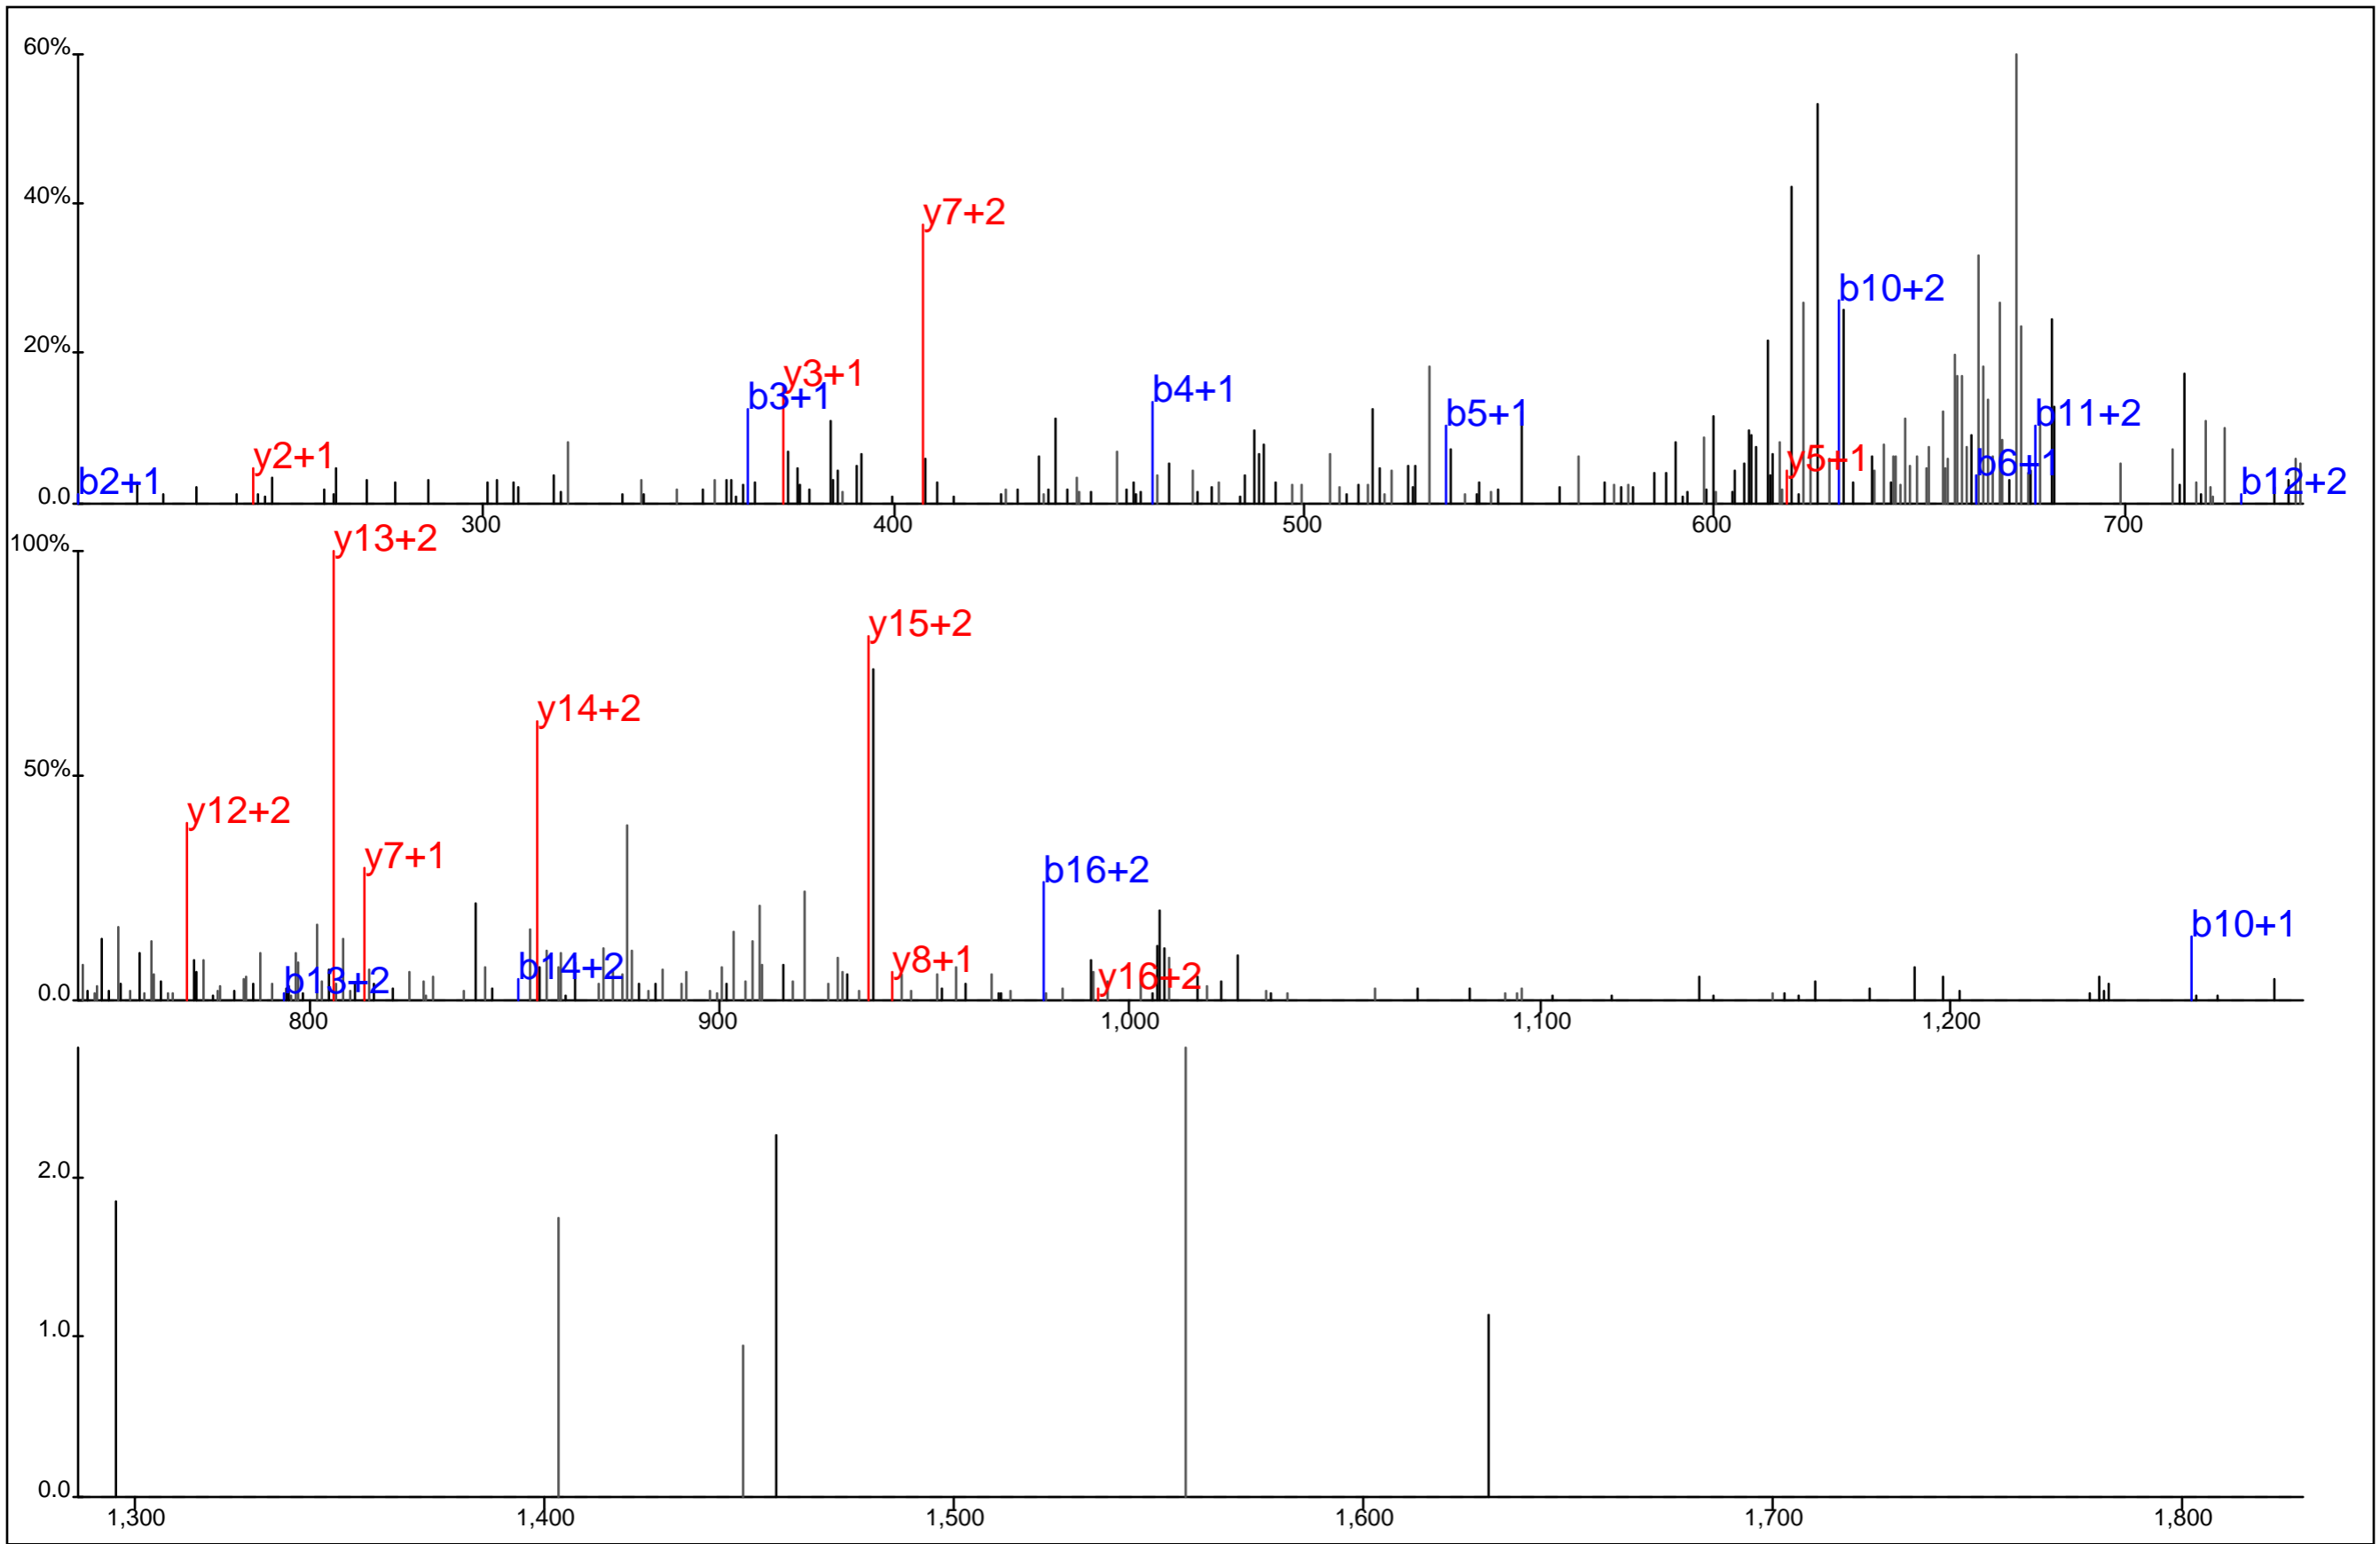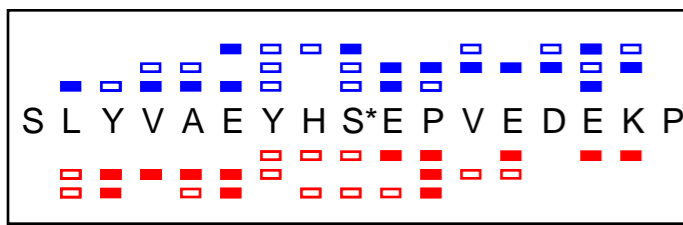

Protein Name: DDX6  
 gi Accession: 458727  
 Precursor Mass: 691.3044+3  
 Delta Mass: 4.353 ppm  
 XCorr: 14.26

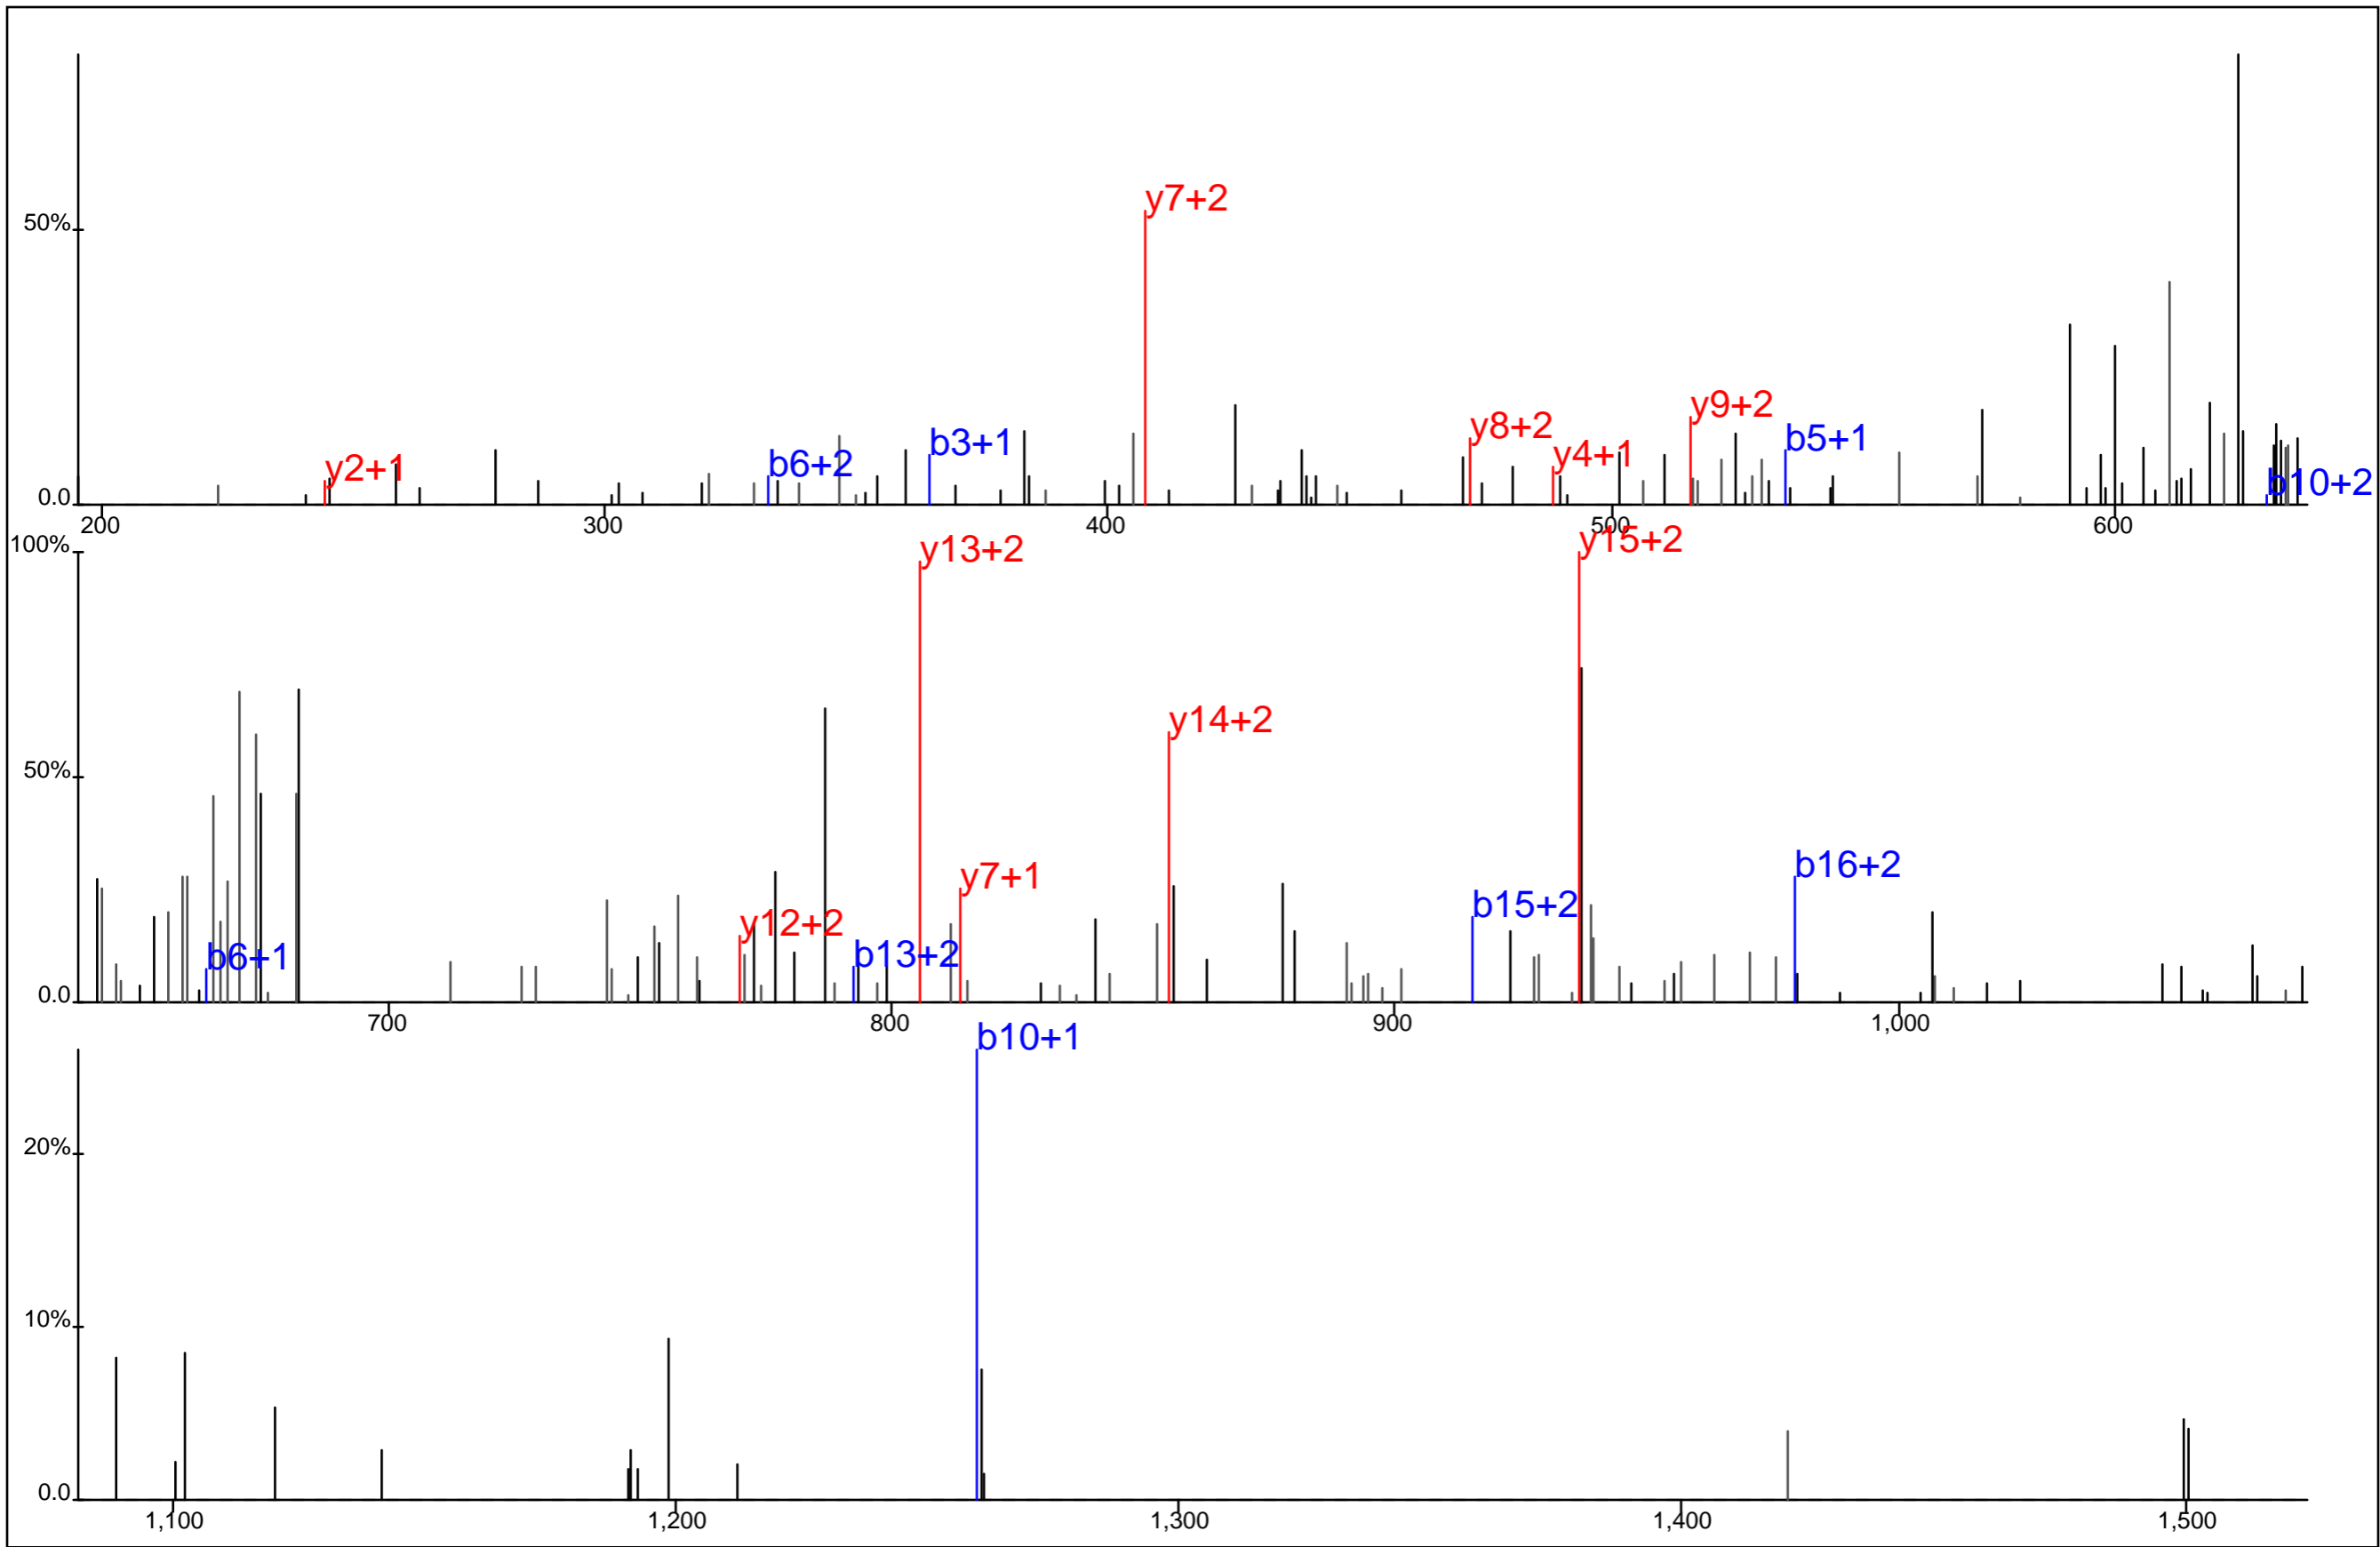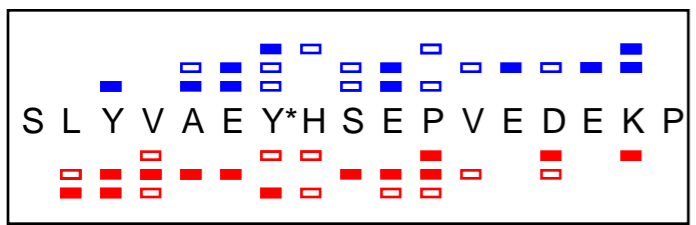

Protein Name: DDX6  
 gi Accession: 458727  
 Precursor Mass: 691.3016+3  
 Delta Mass: 0.289 ppm  
 XCorr: 12.0

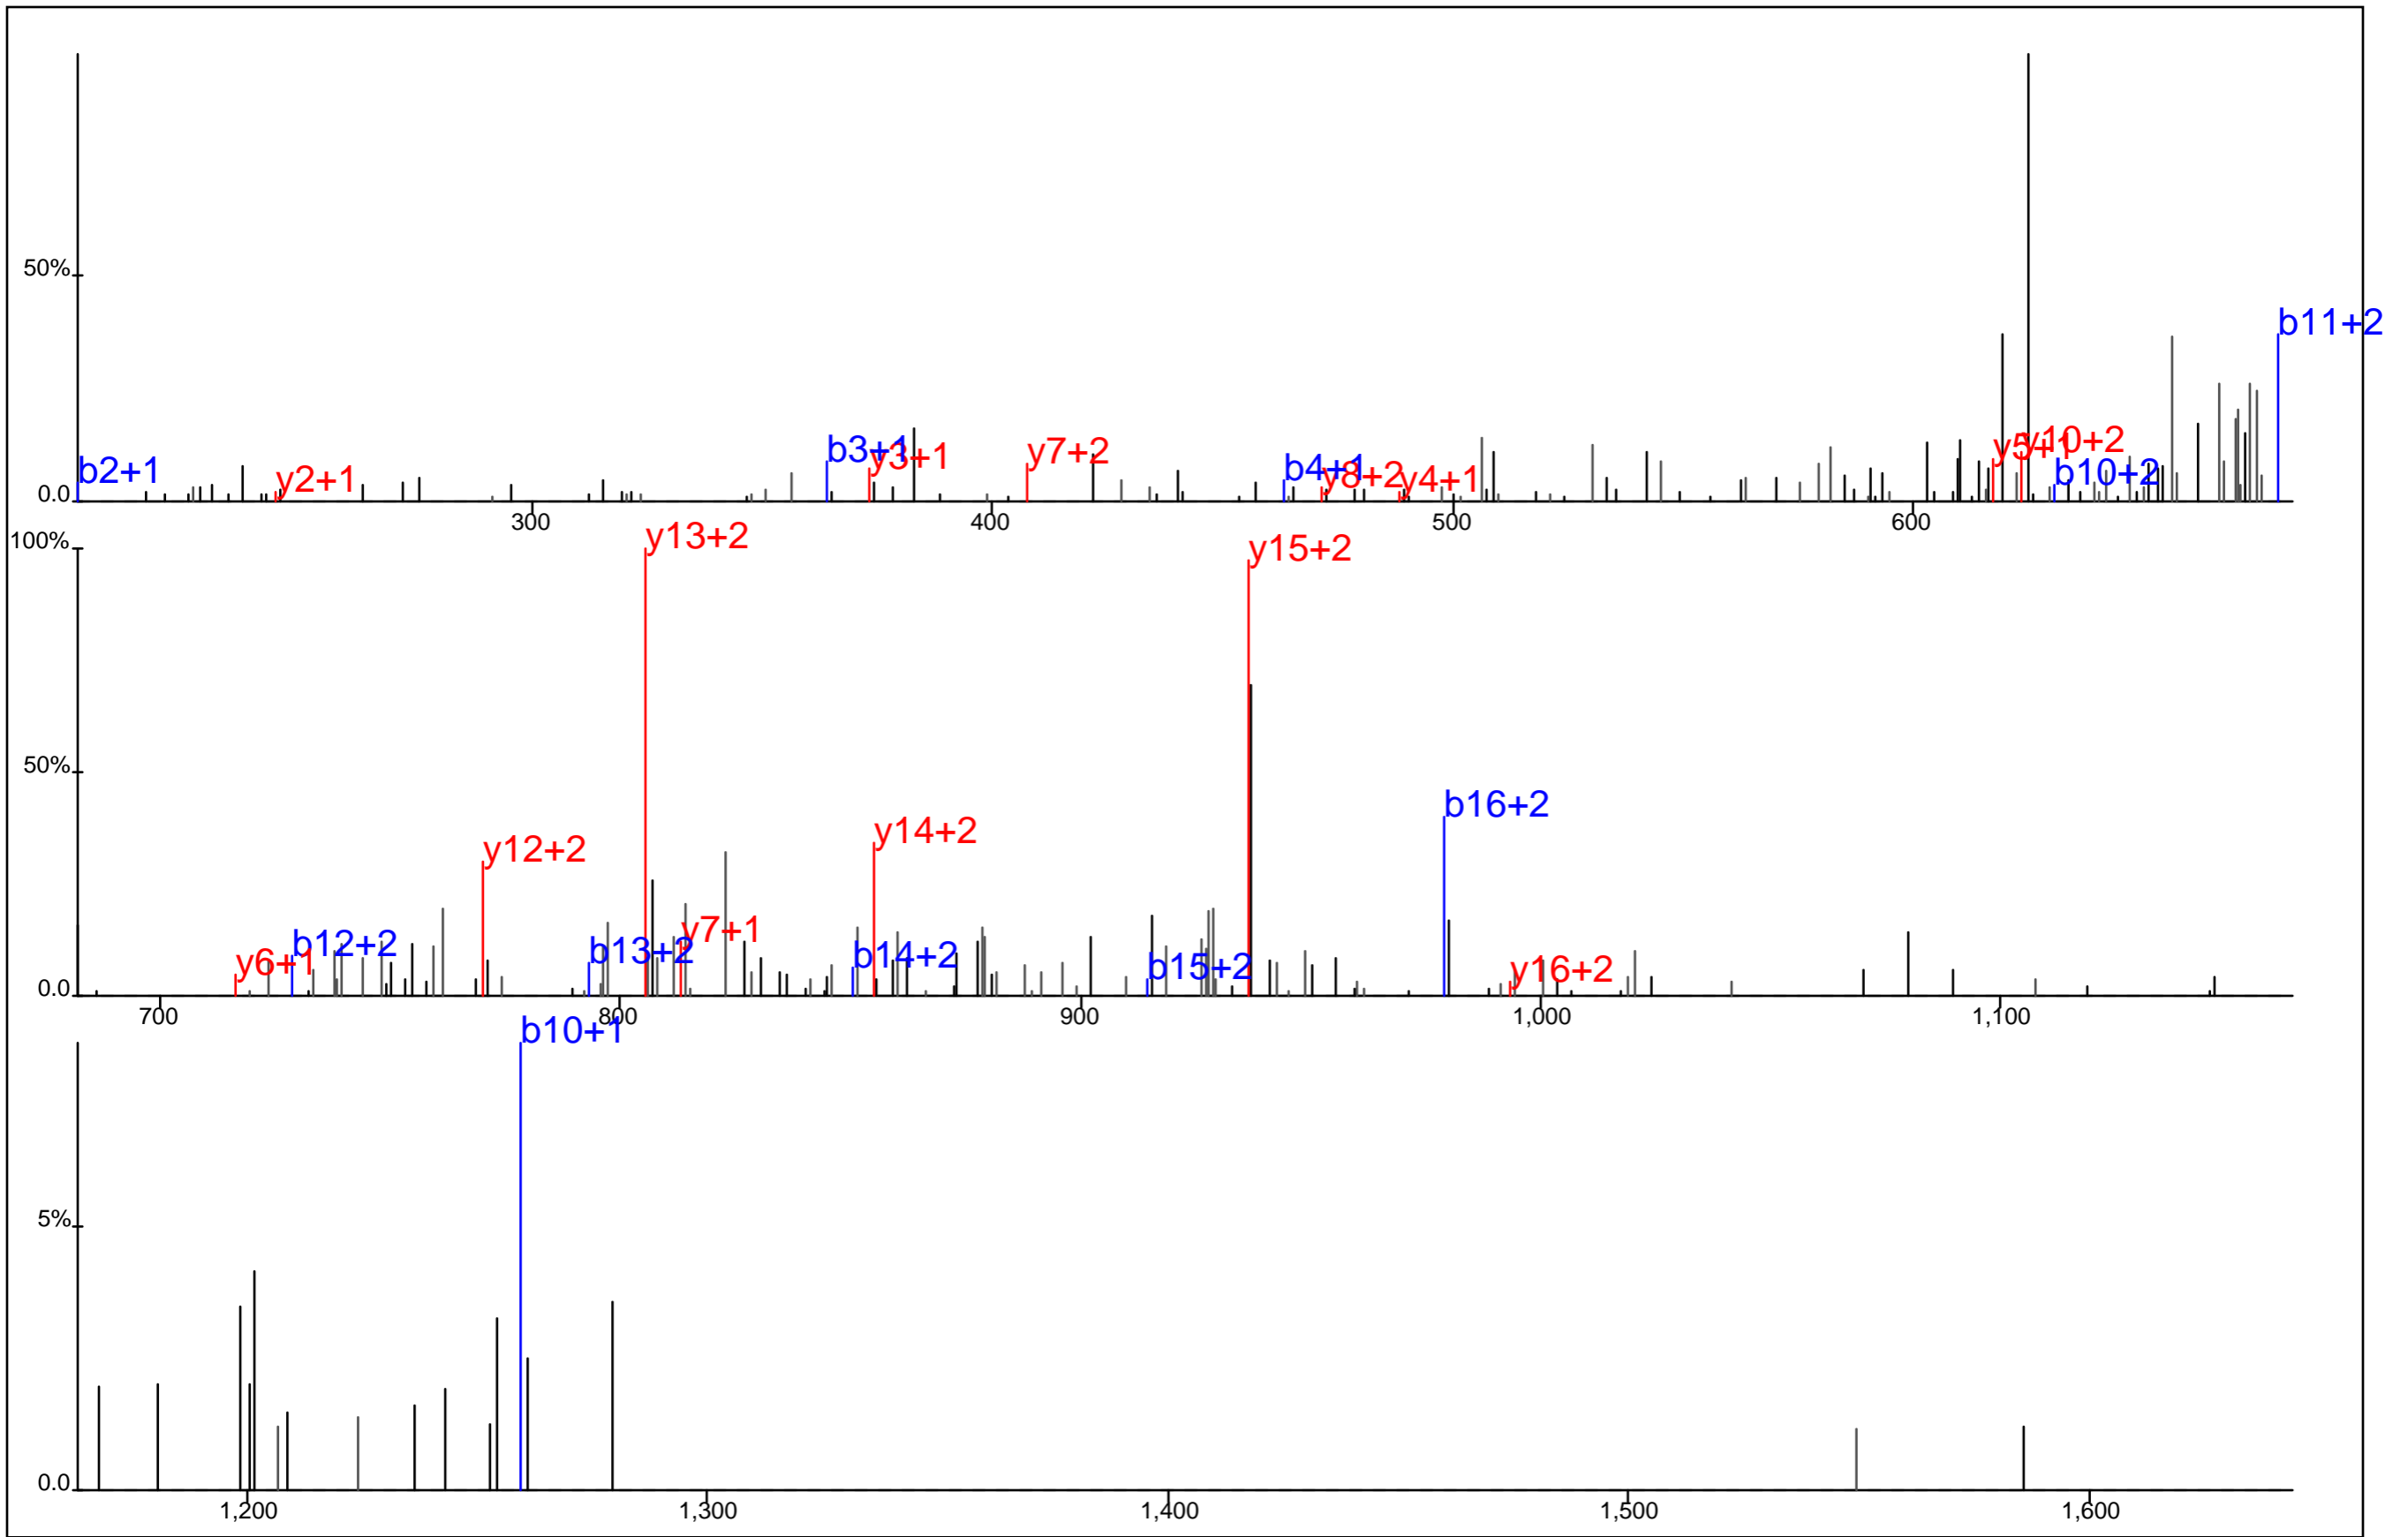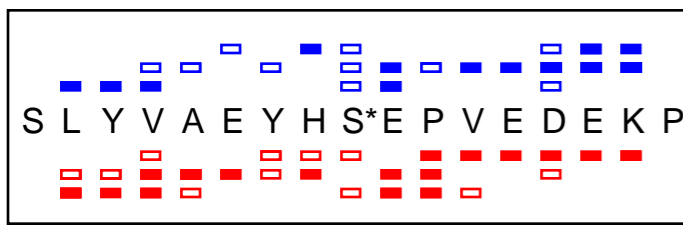

Protein Name: DDX6  
 gi Accession: 458727  
 Precursor Mass: 691.3028+3  
 Delta Mass: 2.055 ppm  
 XCorr: 10.65

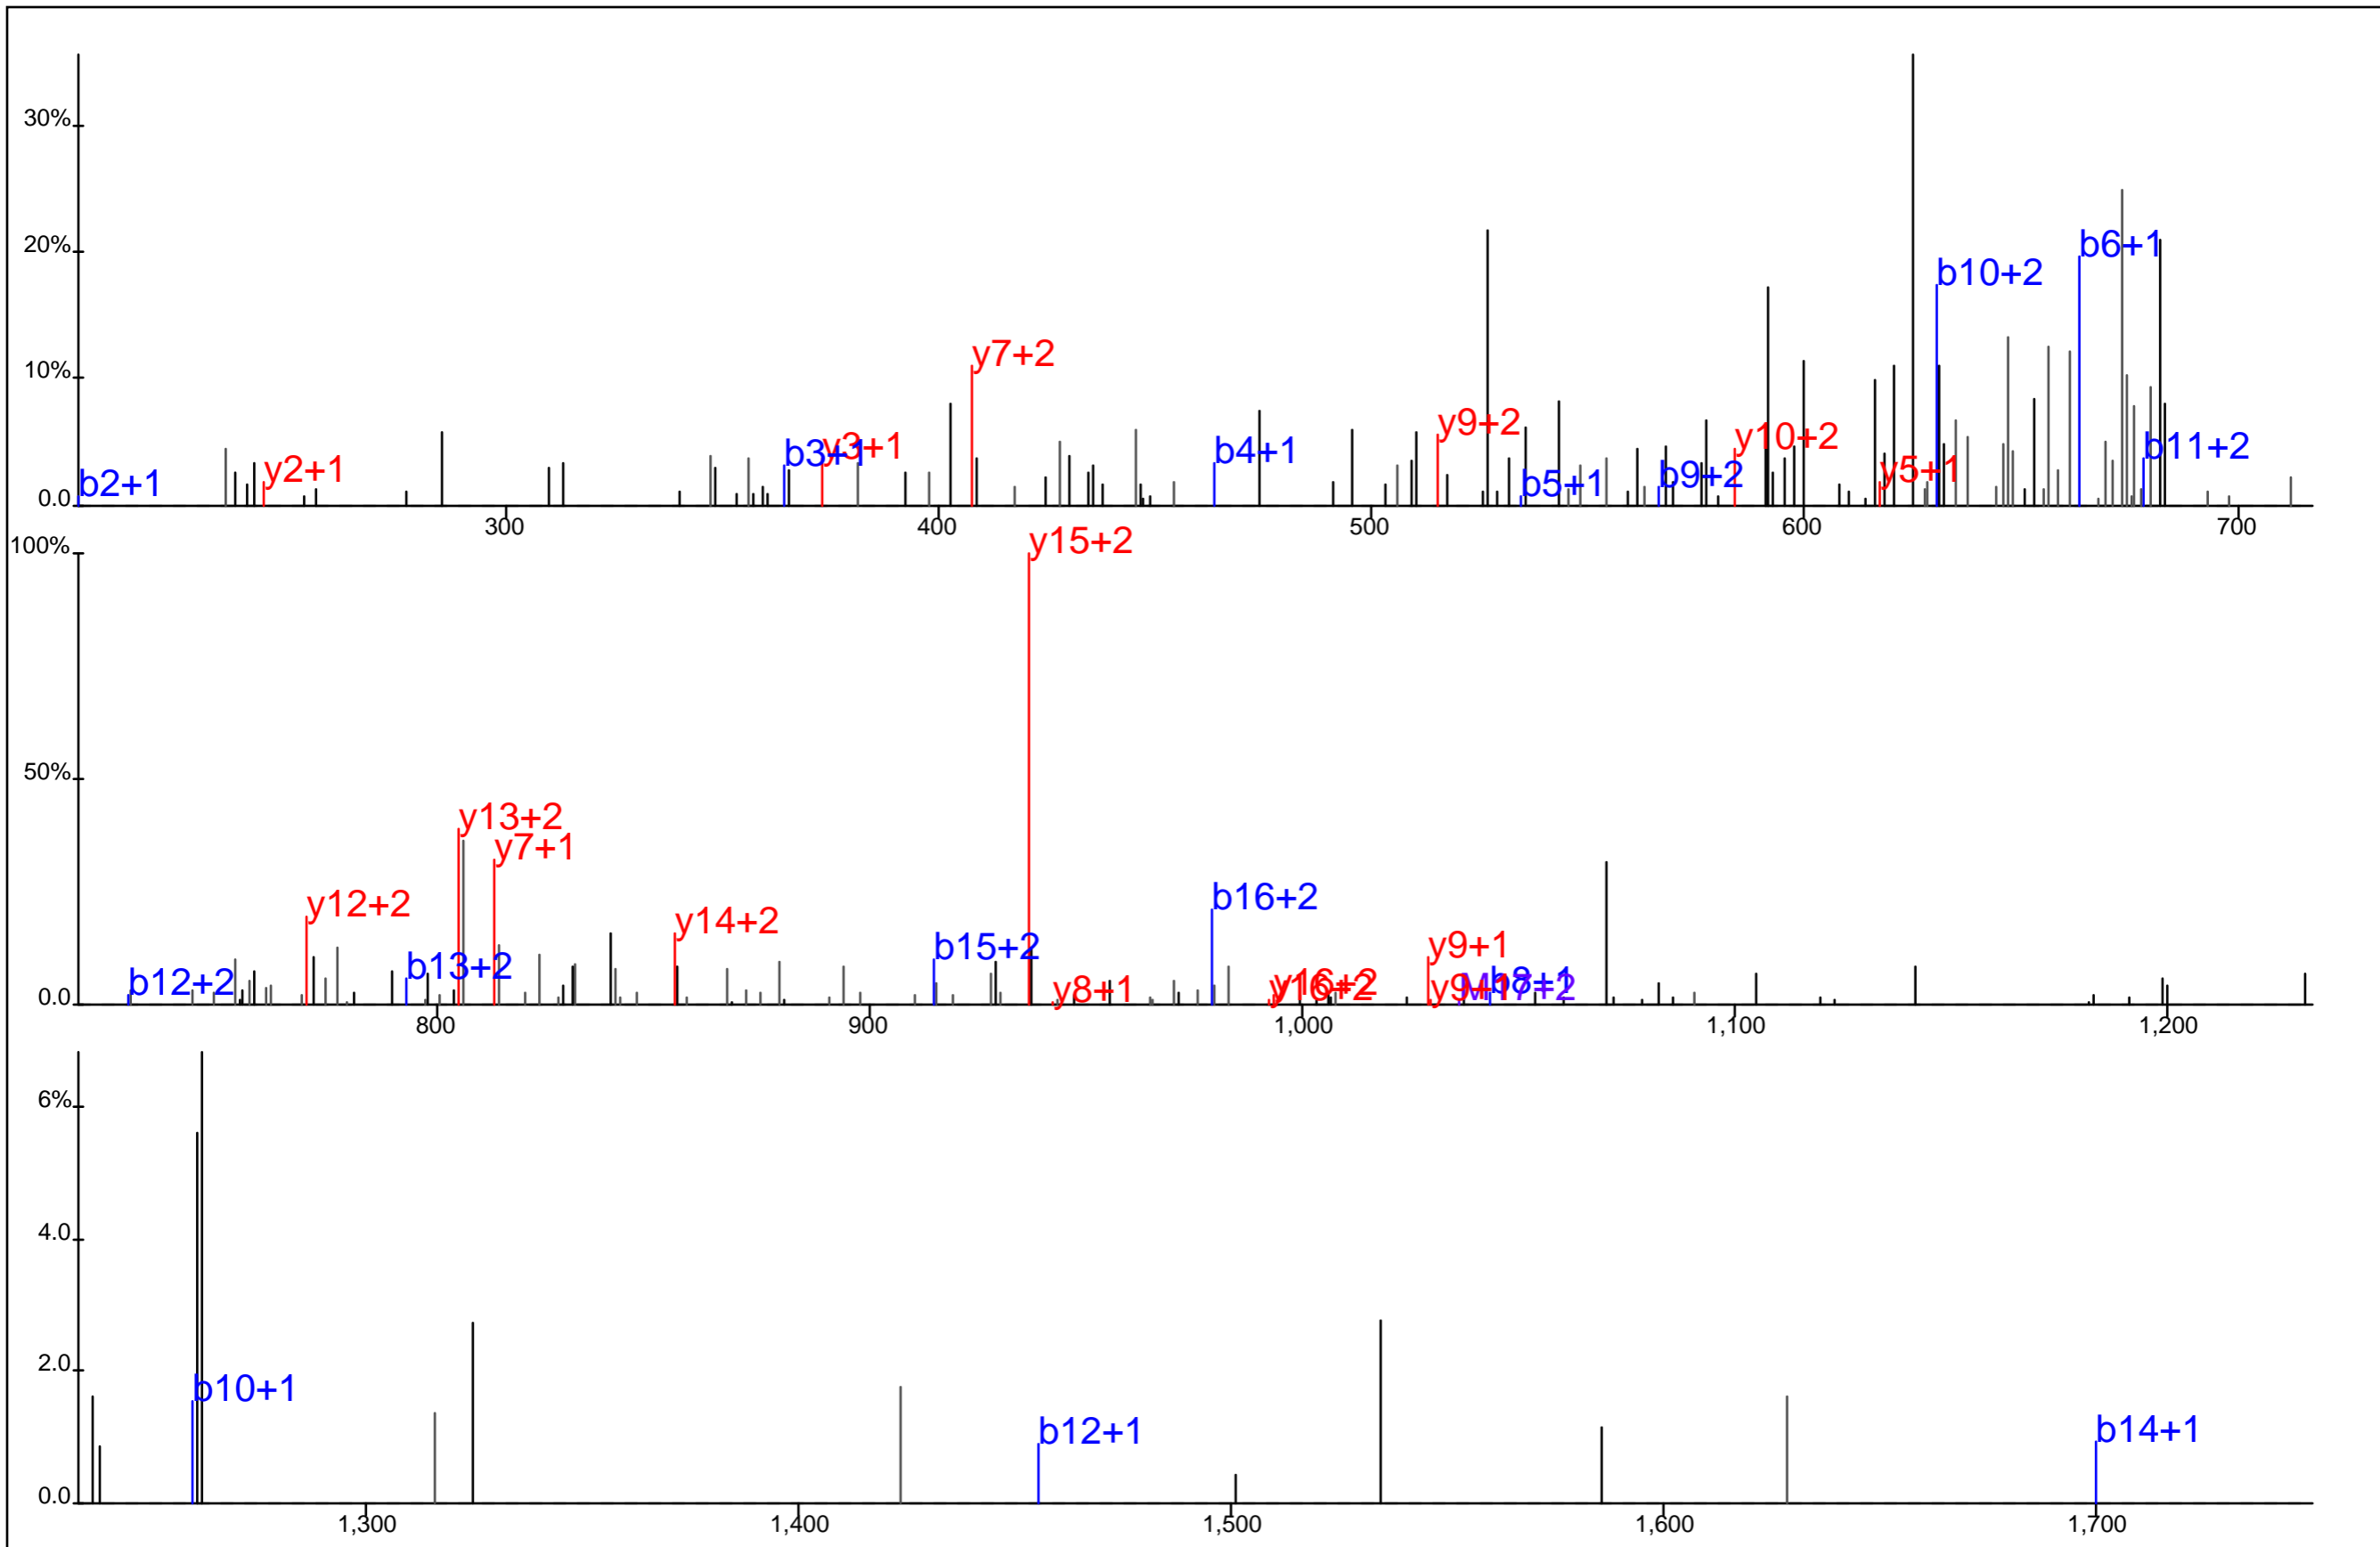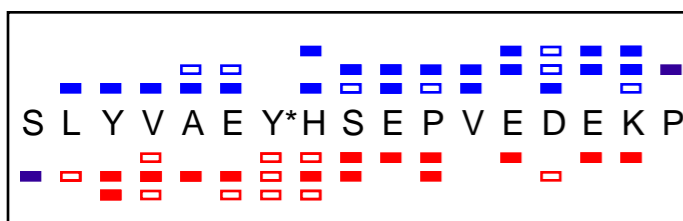

Protein Name: DDX6  
 gi Accession: 458727  
 Precursor Mass: 691.3049+3  
 Delta Mass: 5.149 ppm  
 XCorr: 14.5

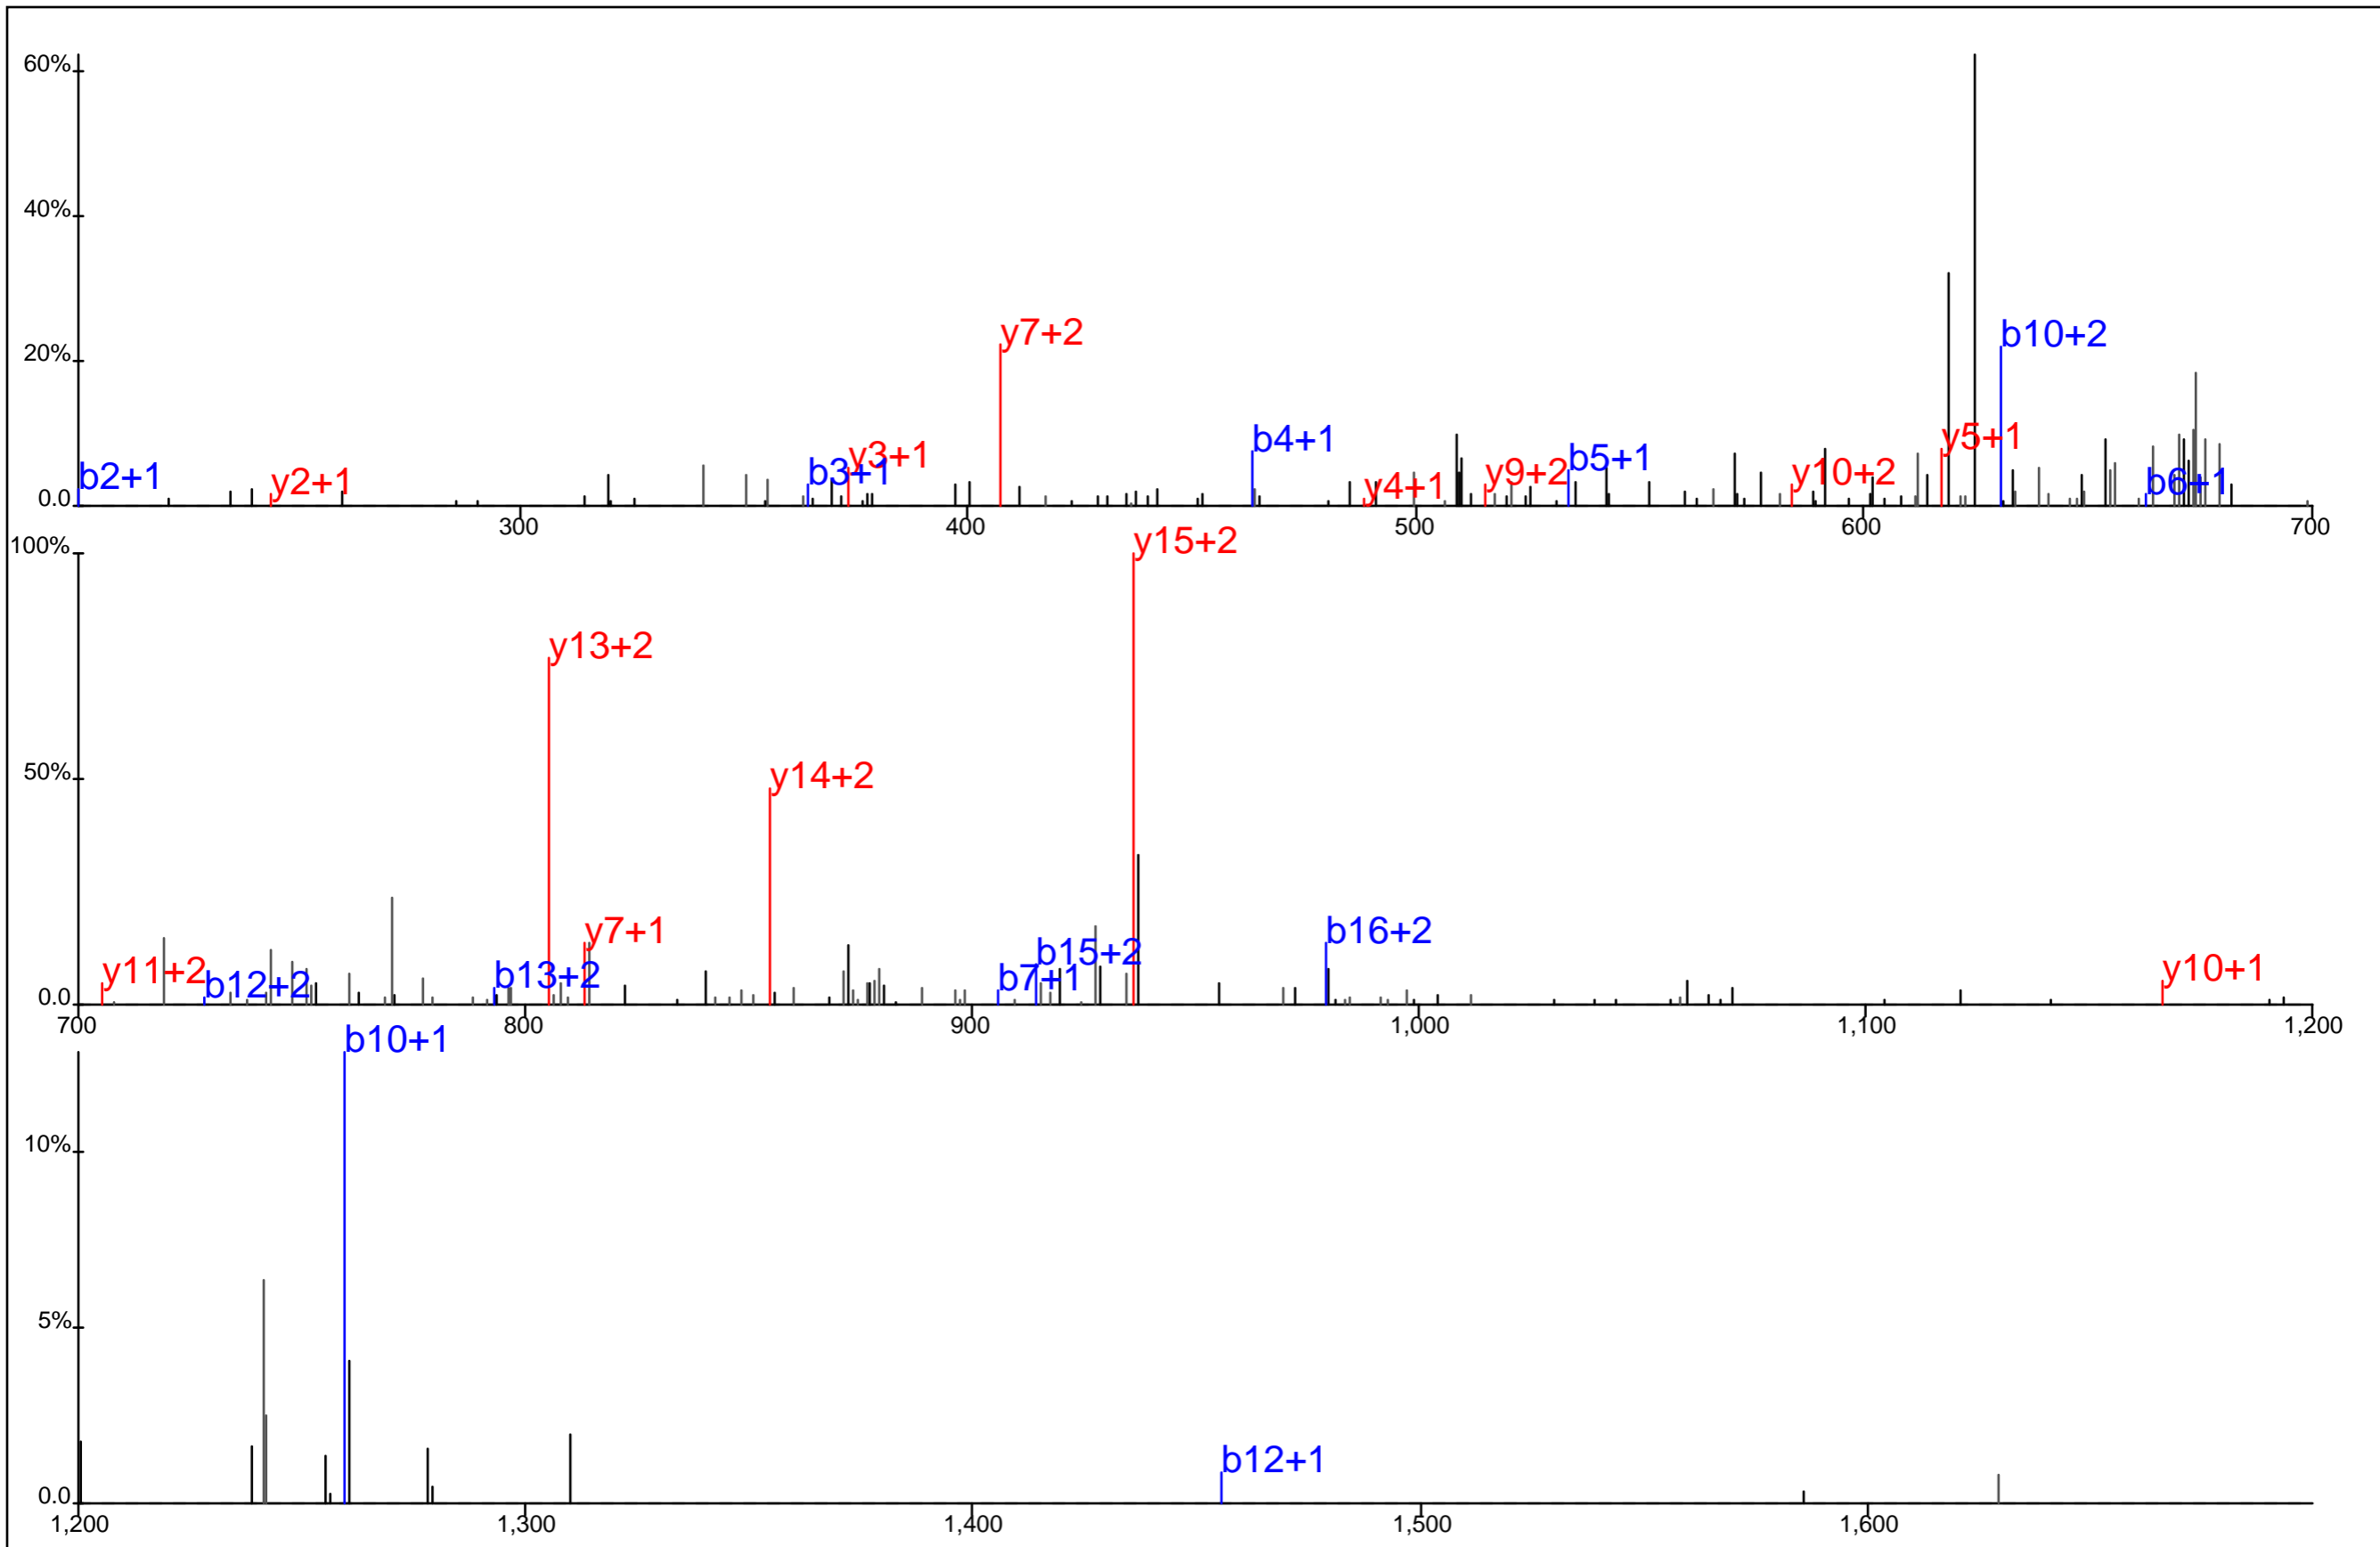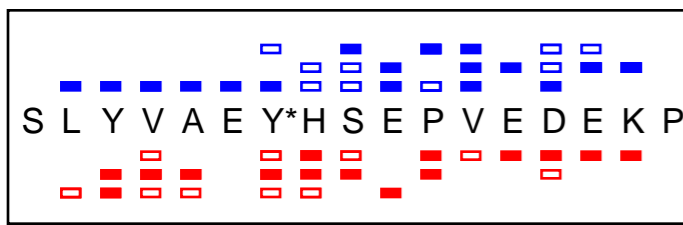

Protein Name: DDX6  
 gi Accession: 458727  
 Precursor Mass: 691.3055+3  
 Delta Mass: 6.033 ppm  
 XCorr: 17.85

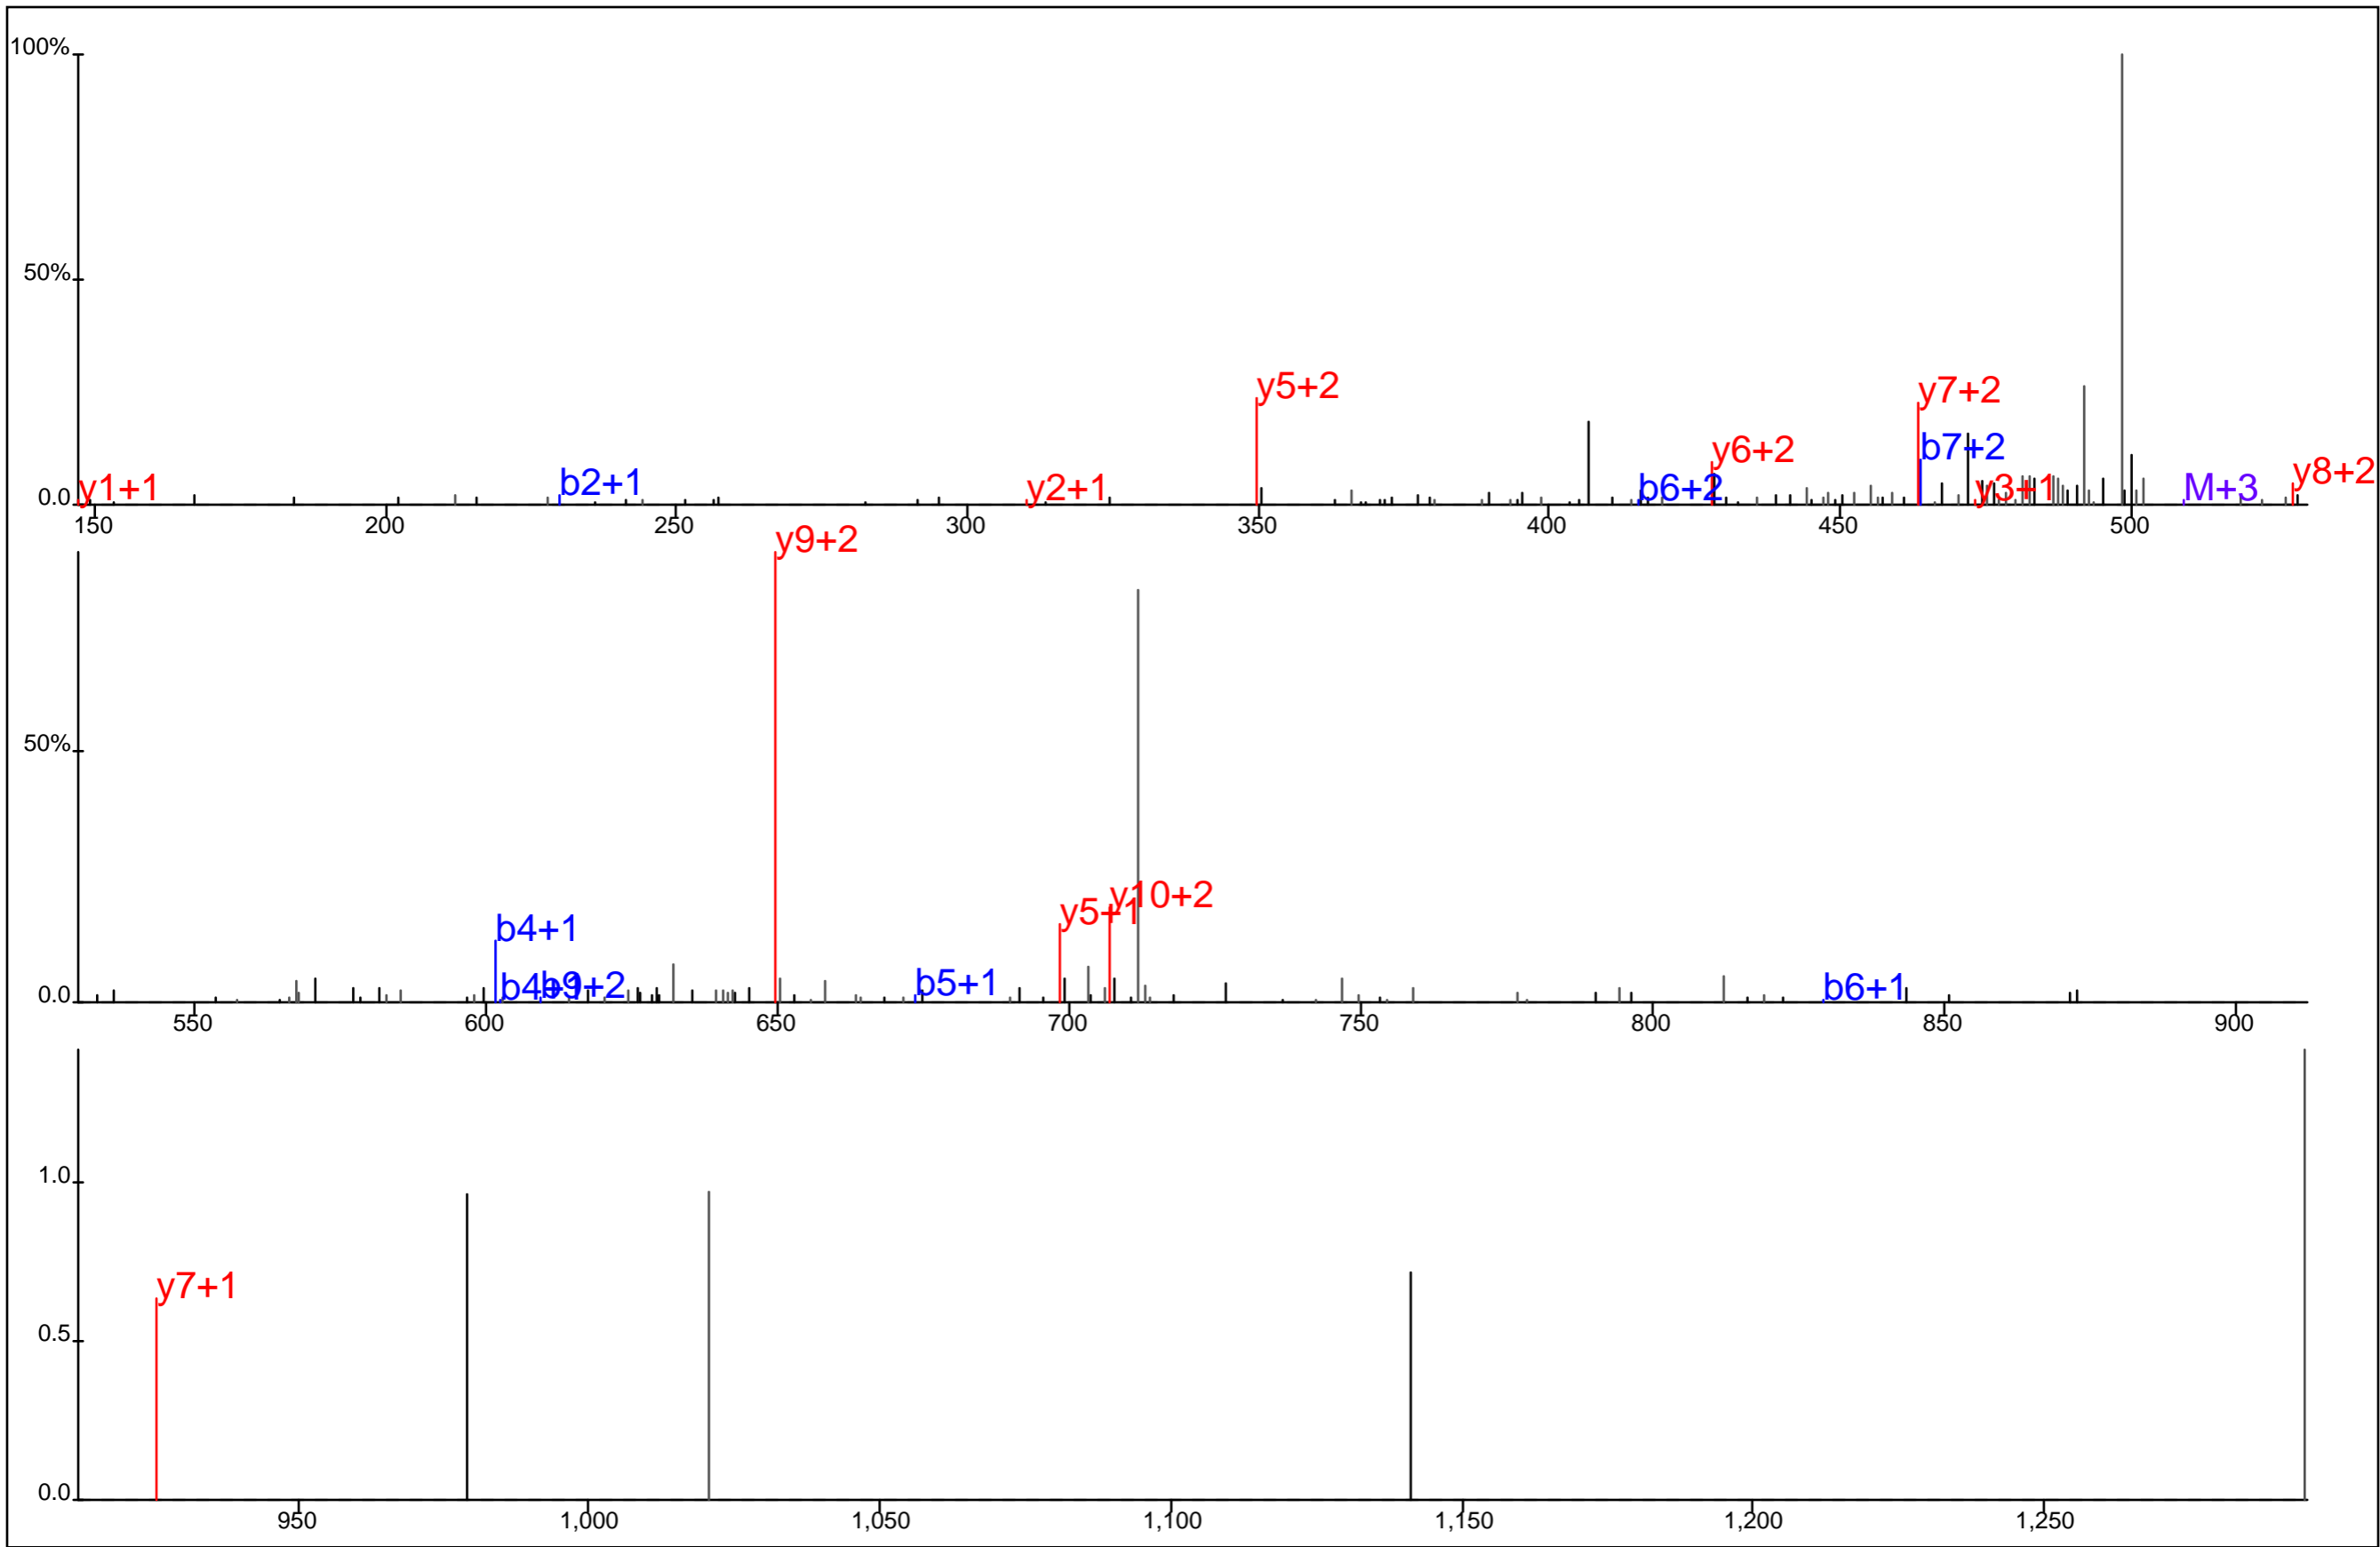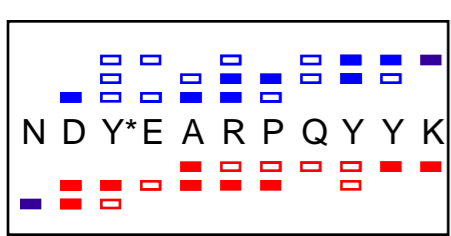

Protein Name: Diaphanous 1  
 gi Accession: 10435239  
 Precursor Mass: 509.5492+3  
 Delta Mass: 1.322 ppm  
 XCorr: 13.94



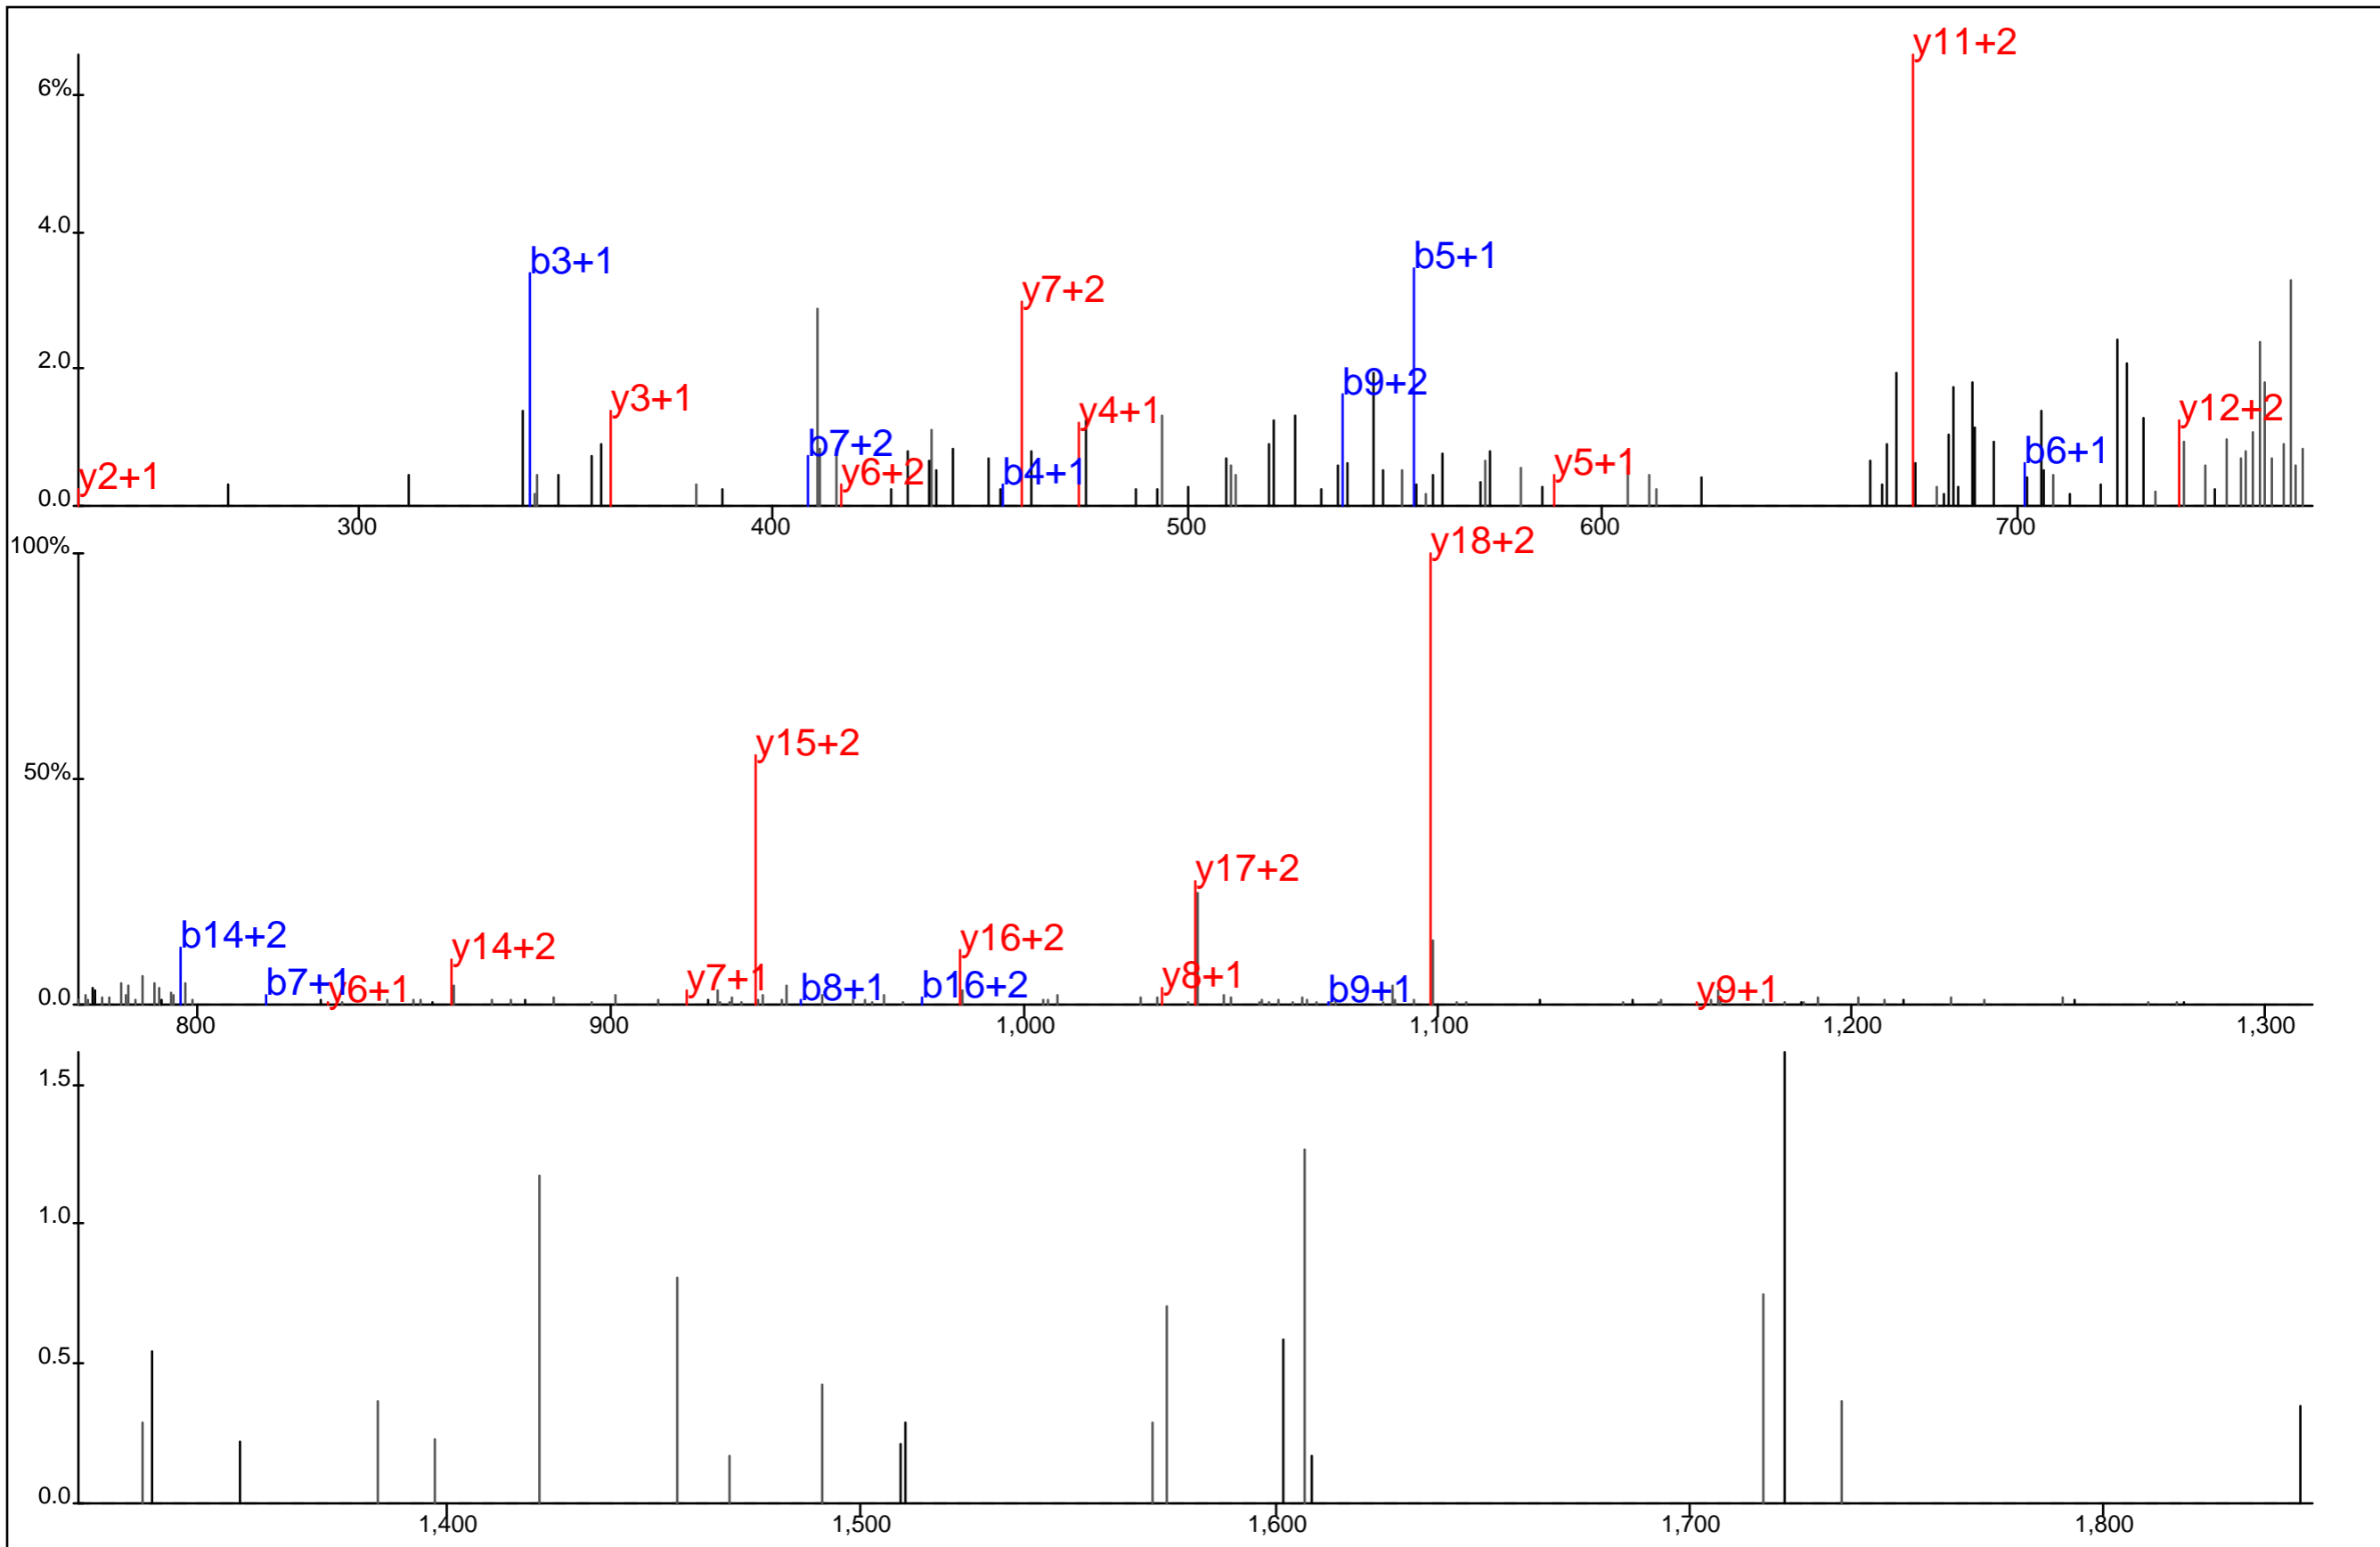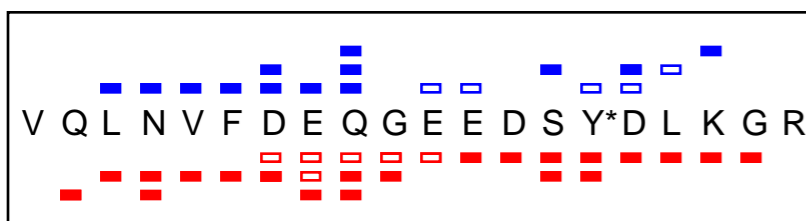

Protein Name: Diaphanous 1  
 gi Accession: 10435239  
 Precursor Mass: 807.6954+3  
 Delta Mass: 4.617 ppm  
 XCorr: 22.17

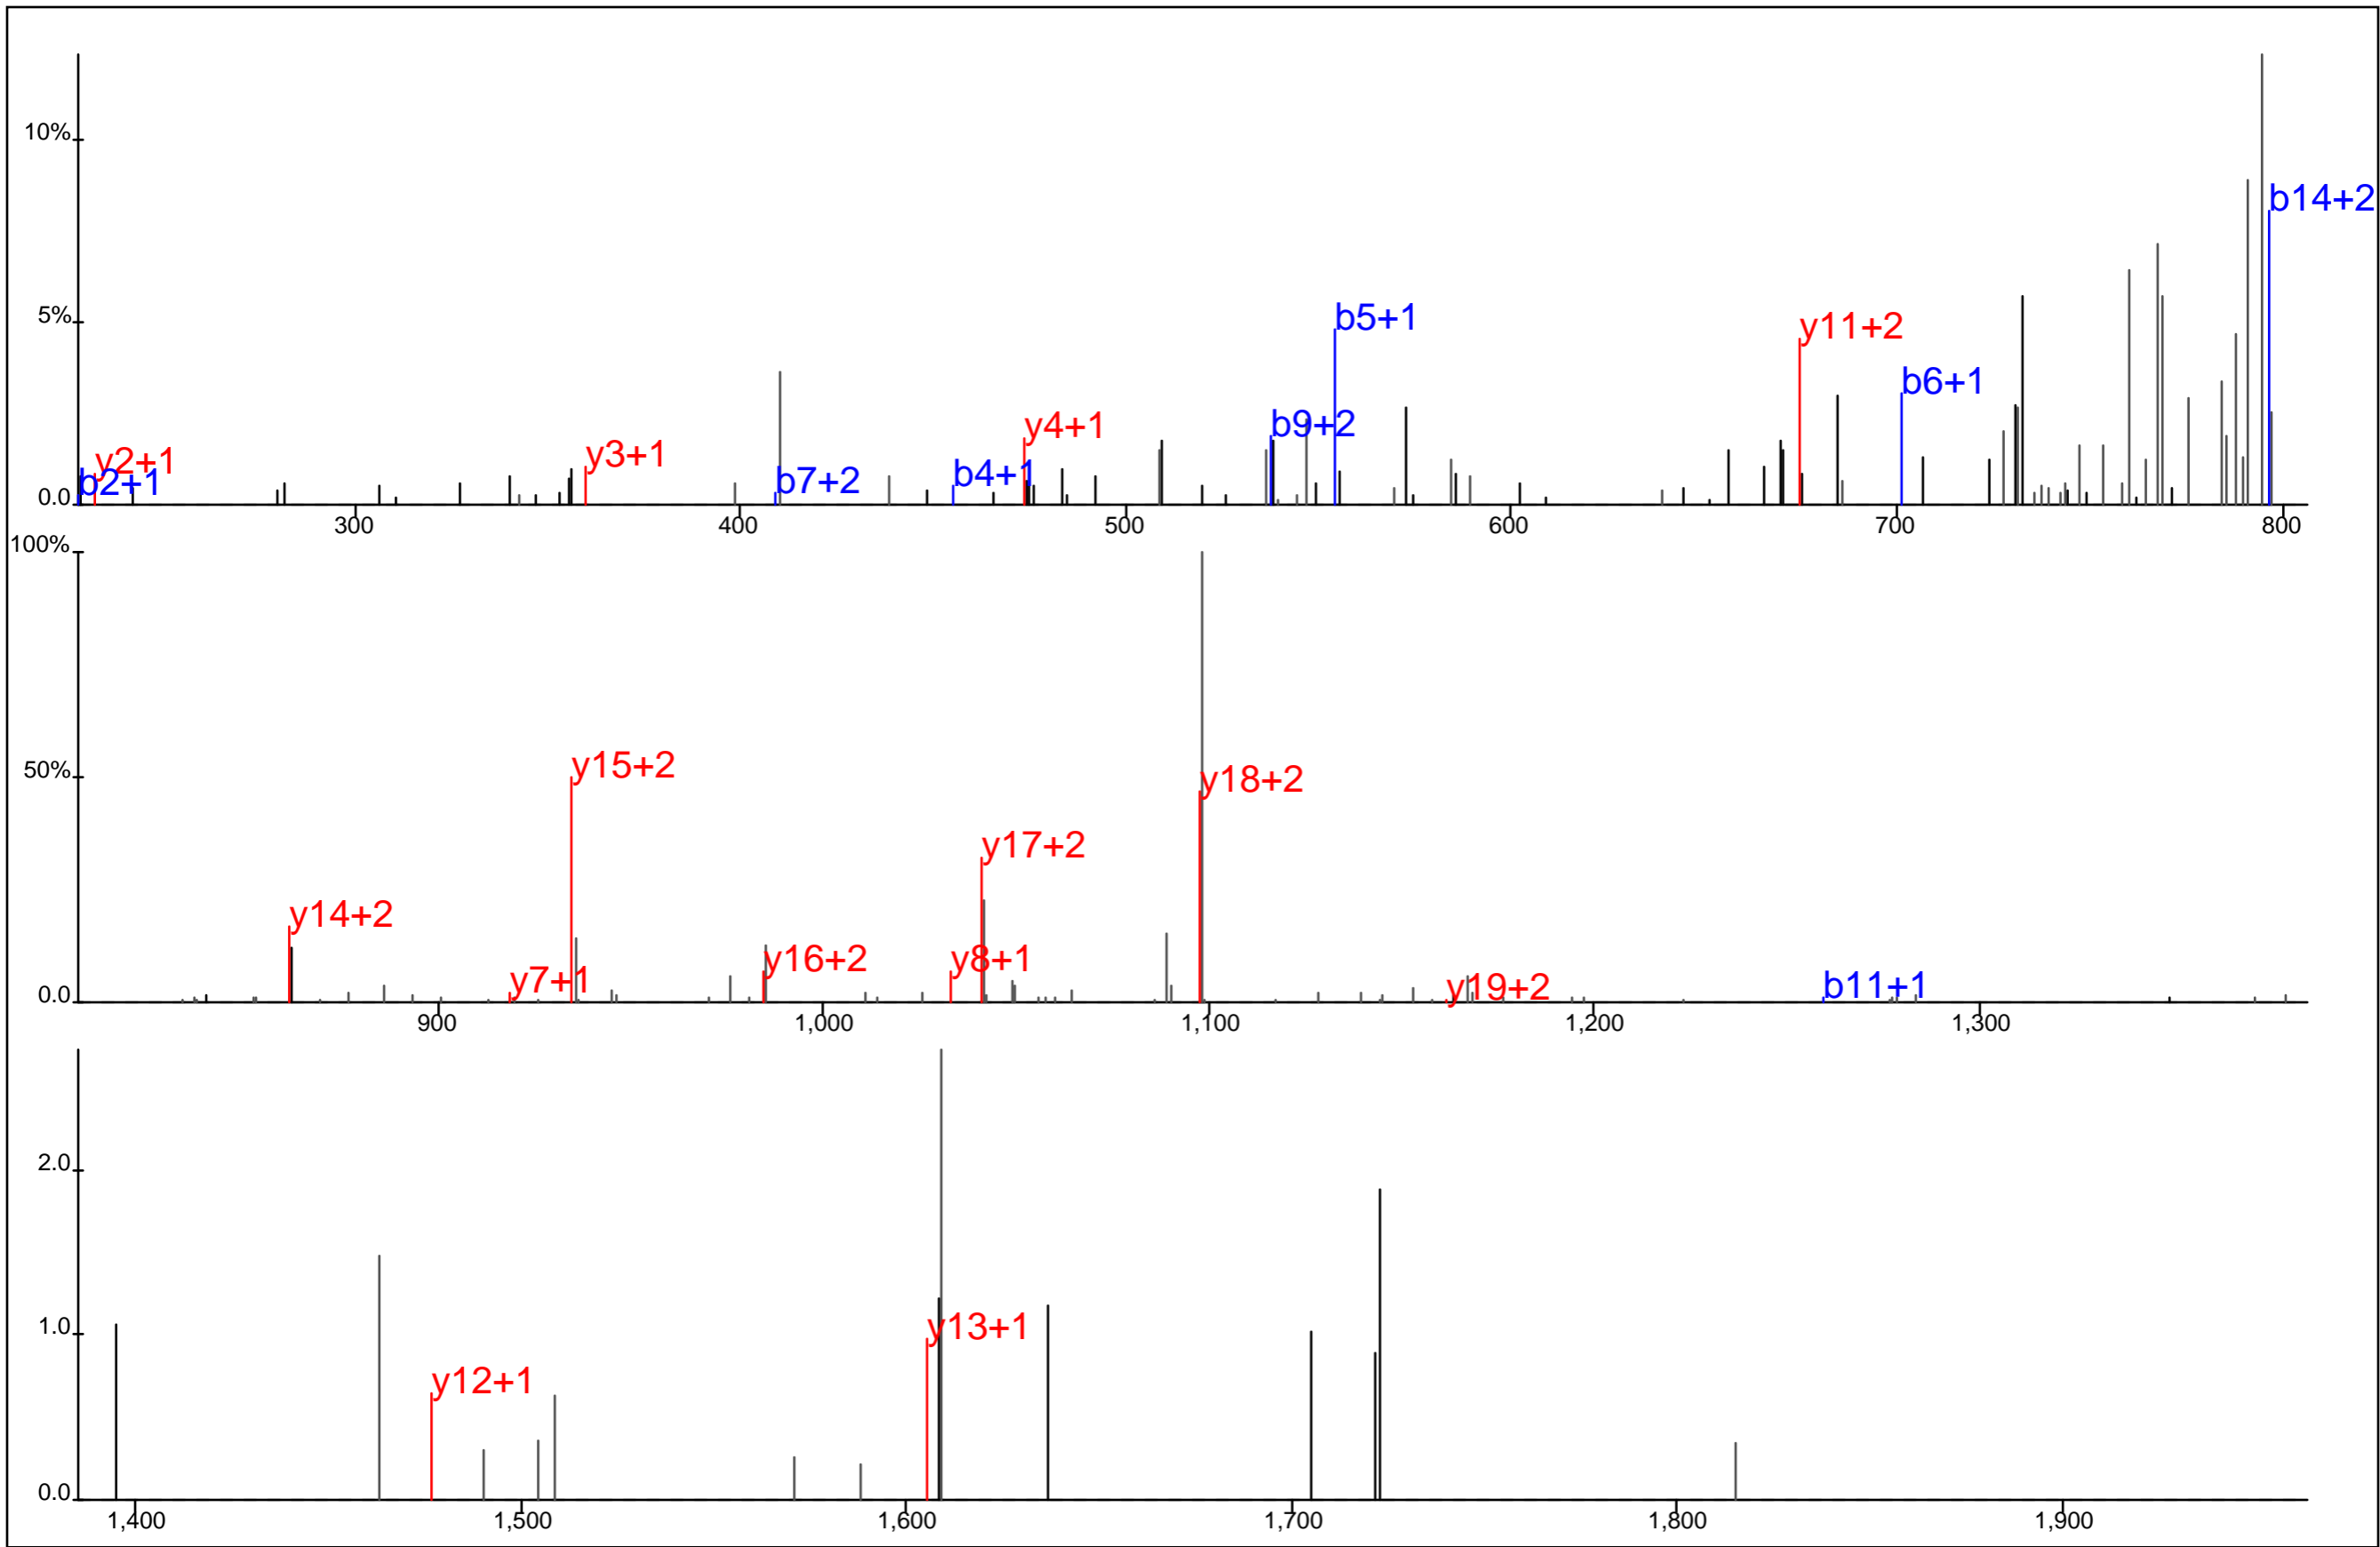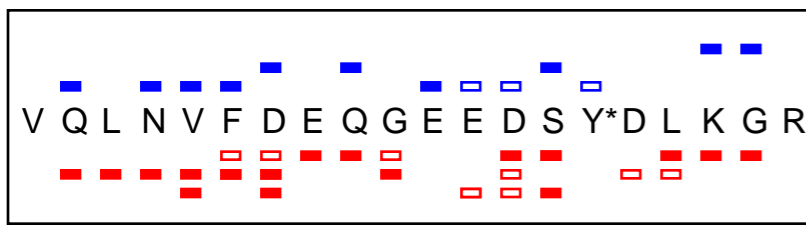

Protein Name: Diaphanous 1  
 gi Accession: 10435239  
 Precursor Mass: 807.6942+3  
 Delta Mass: 3.105 ppm  
 XCorr: 21.84

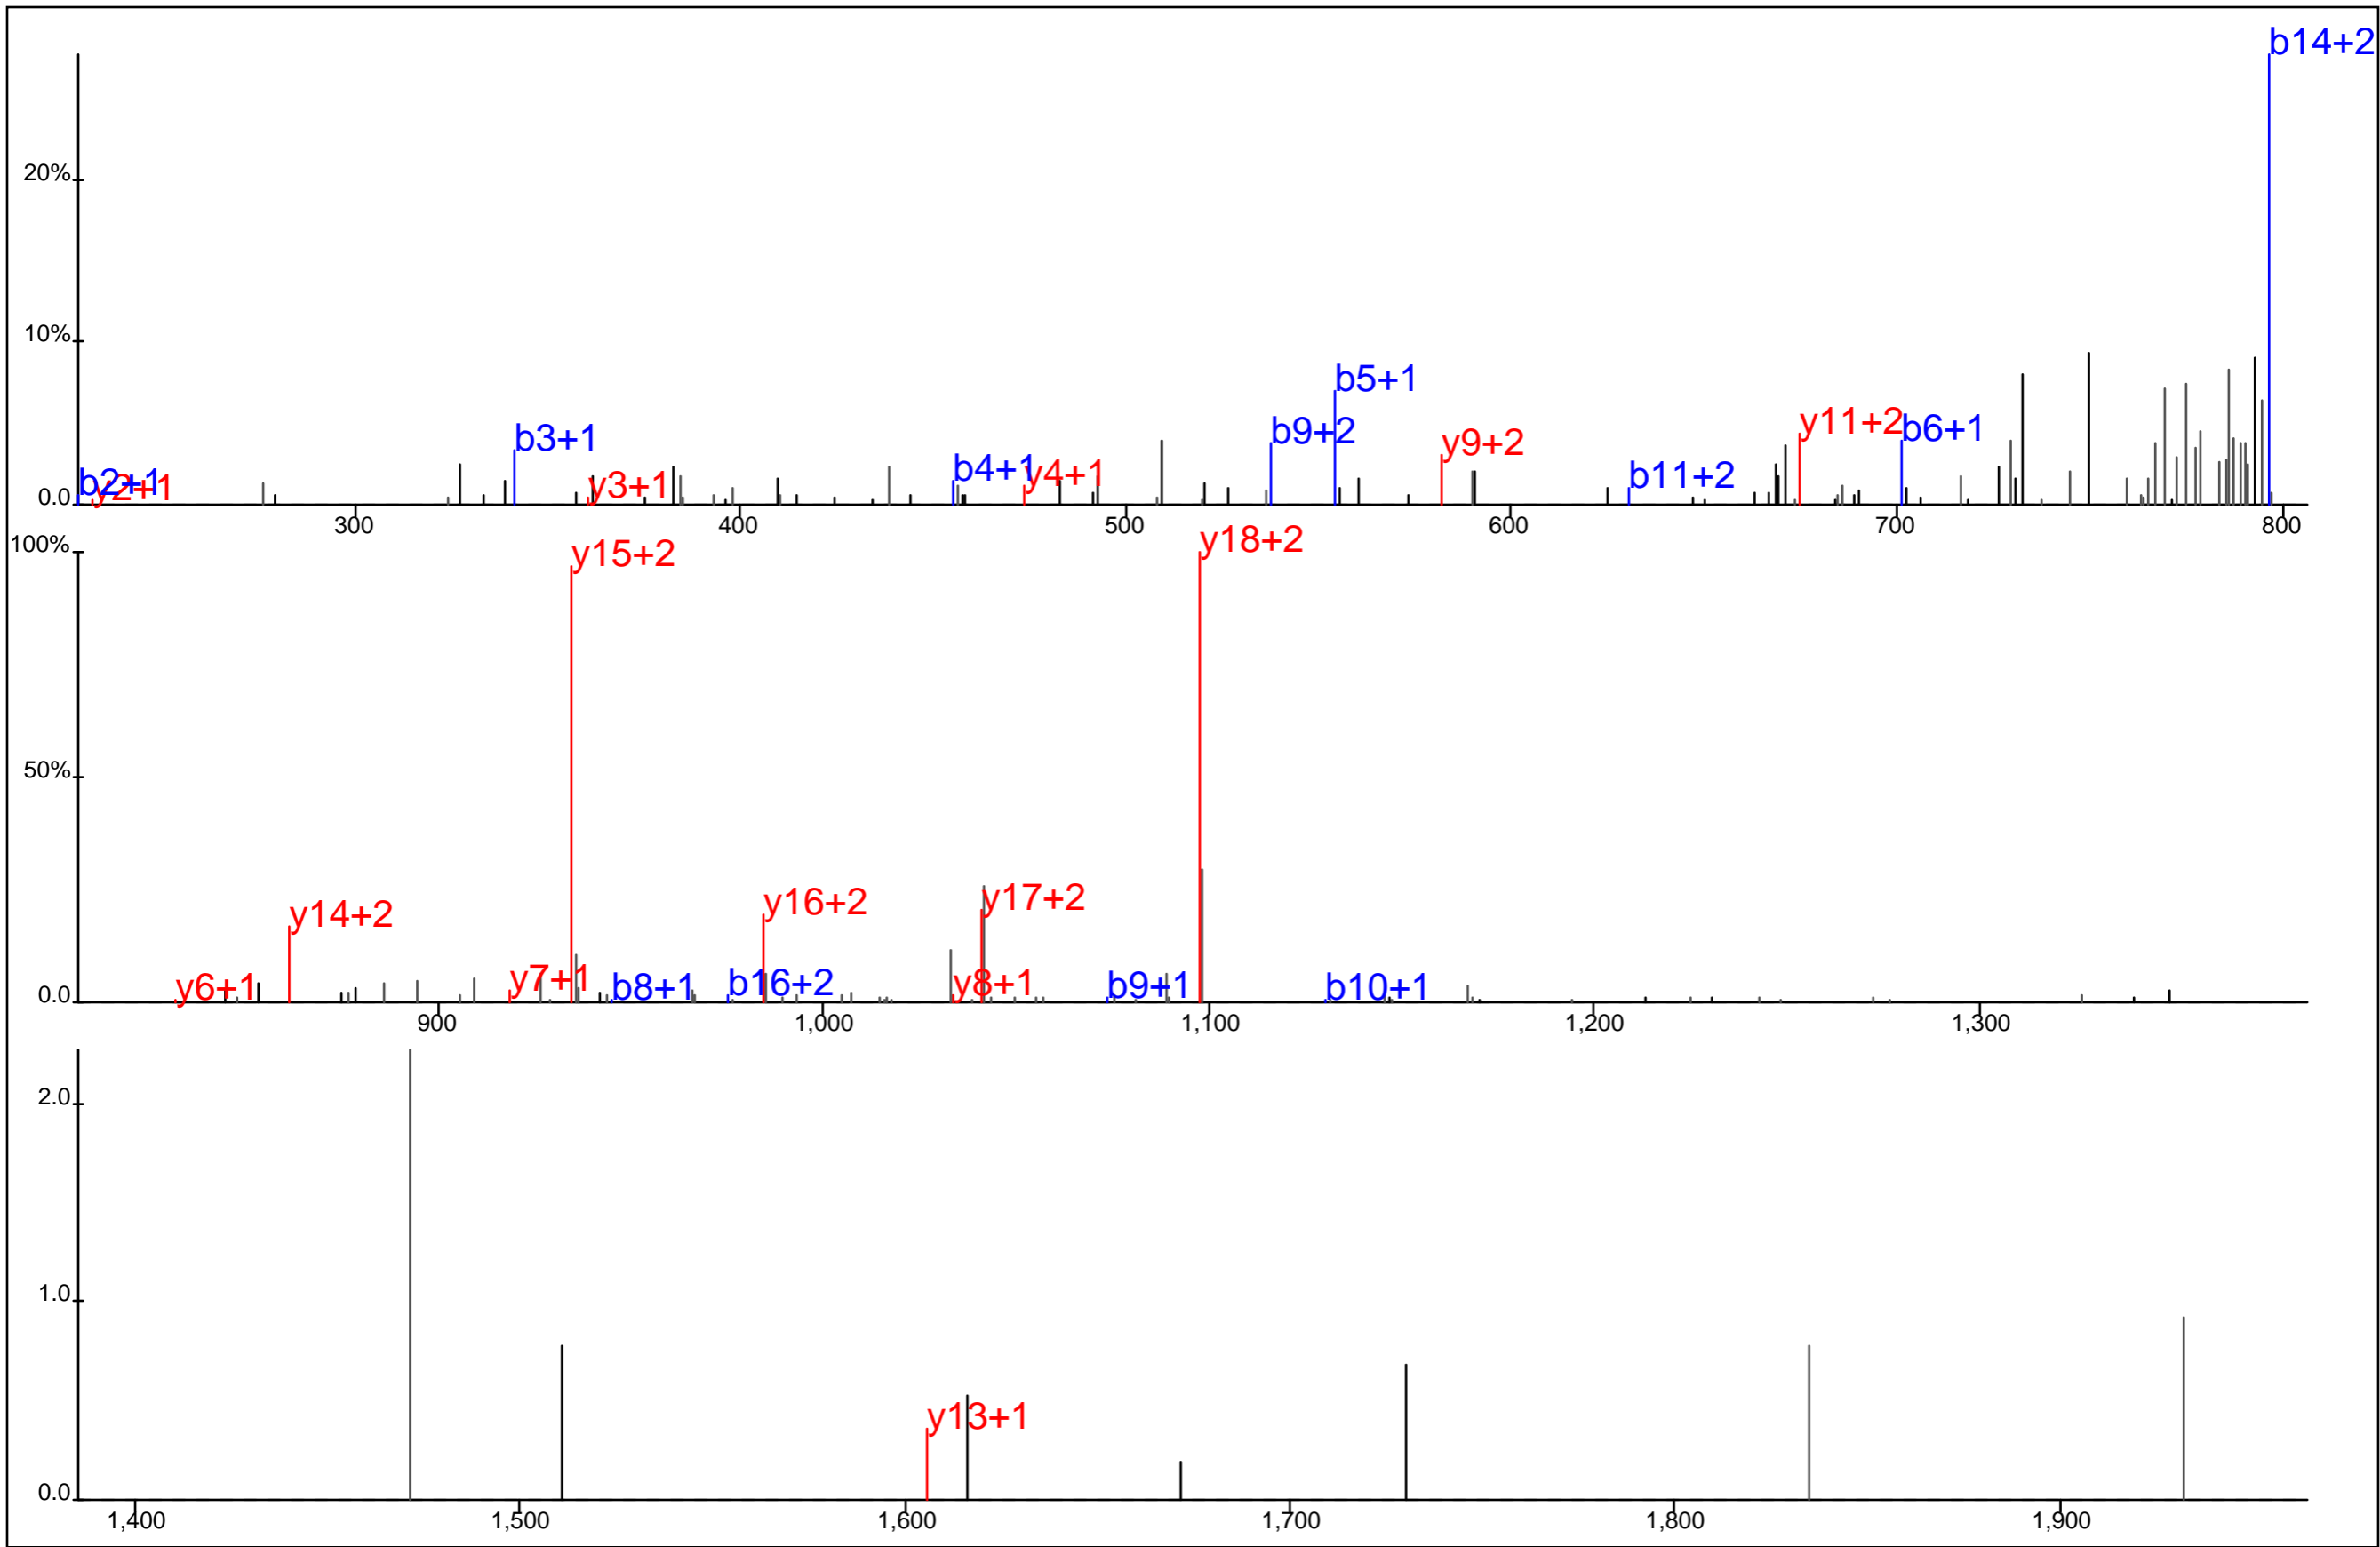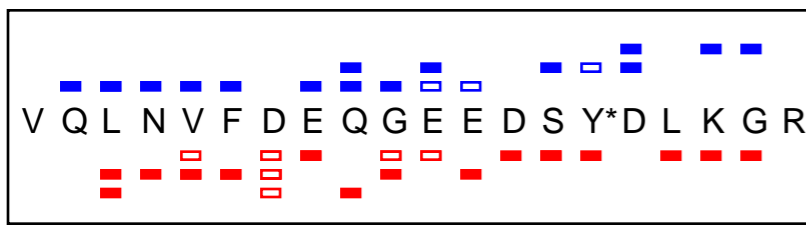

Protein Name: Diaphanous 1  
 gi Accession: 10435239  
 Precursor Mass: 807.6951+3  
 Delta Mass: 4.237 ppm  
 XCorr: 15.35

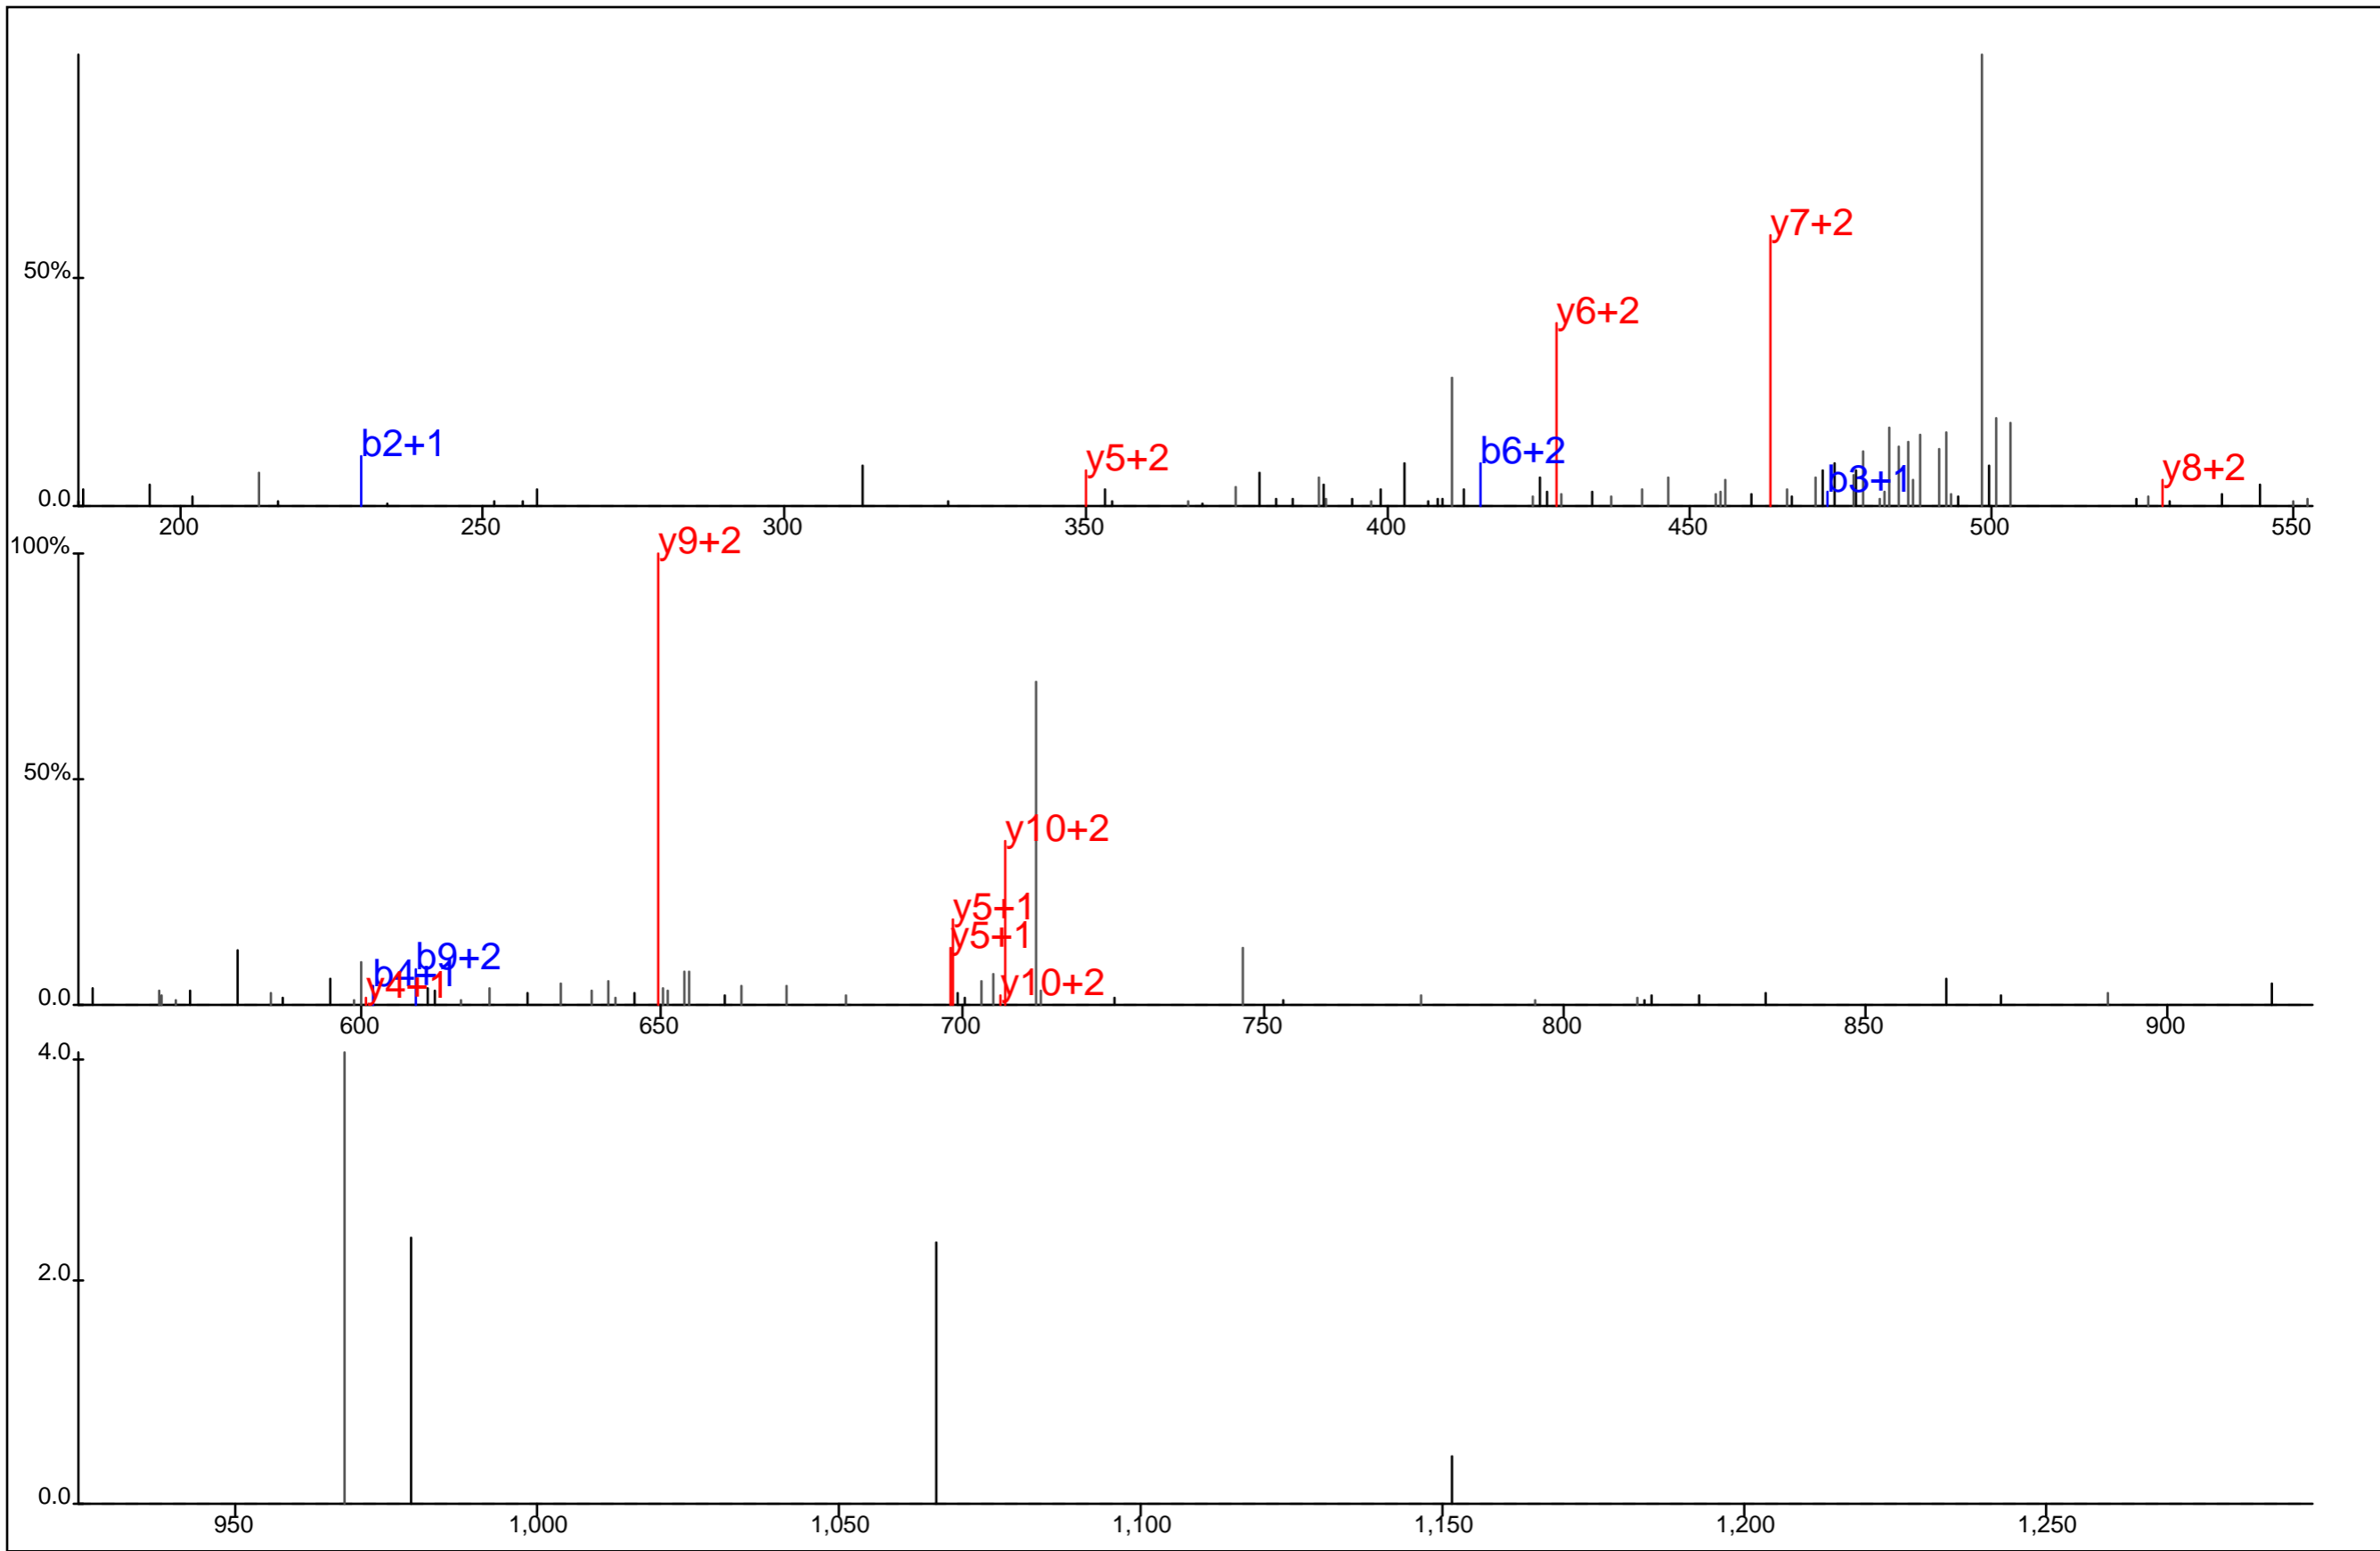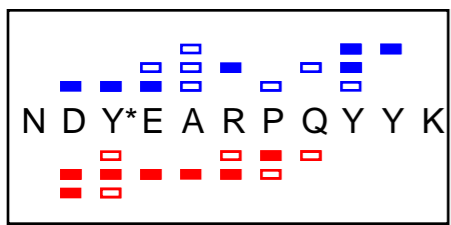

Protein Name: Diaphanous 1  
 gi Accession: 10435239  
 Precursor Mass: 509.5495+3  
 Delta Mass: 1.866 ppm  
 XCorr: 13.86

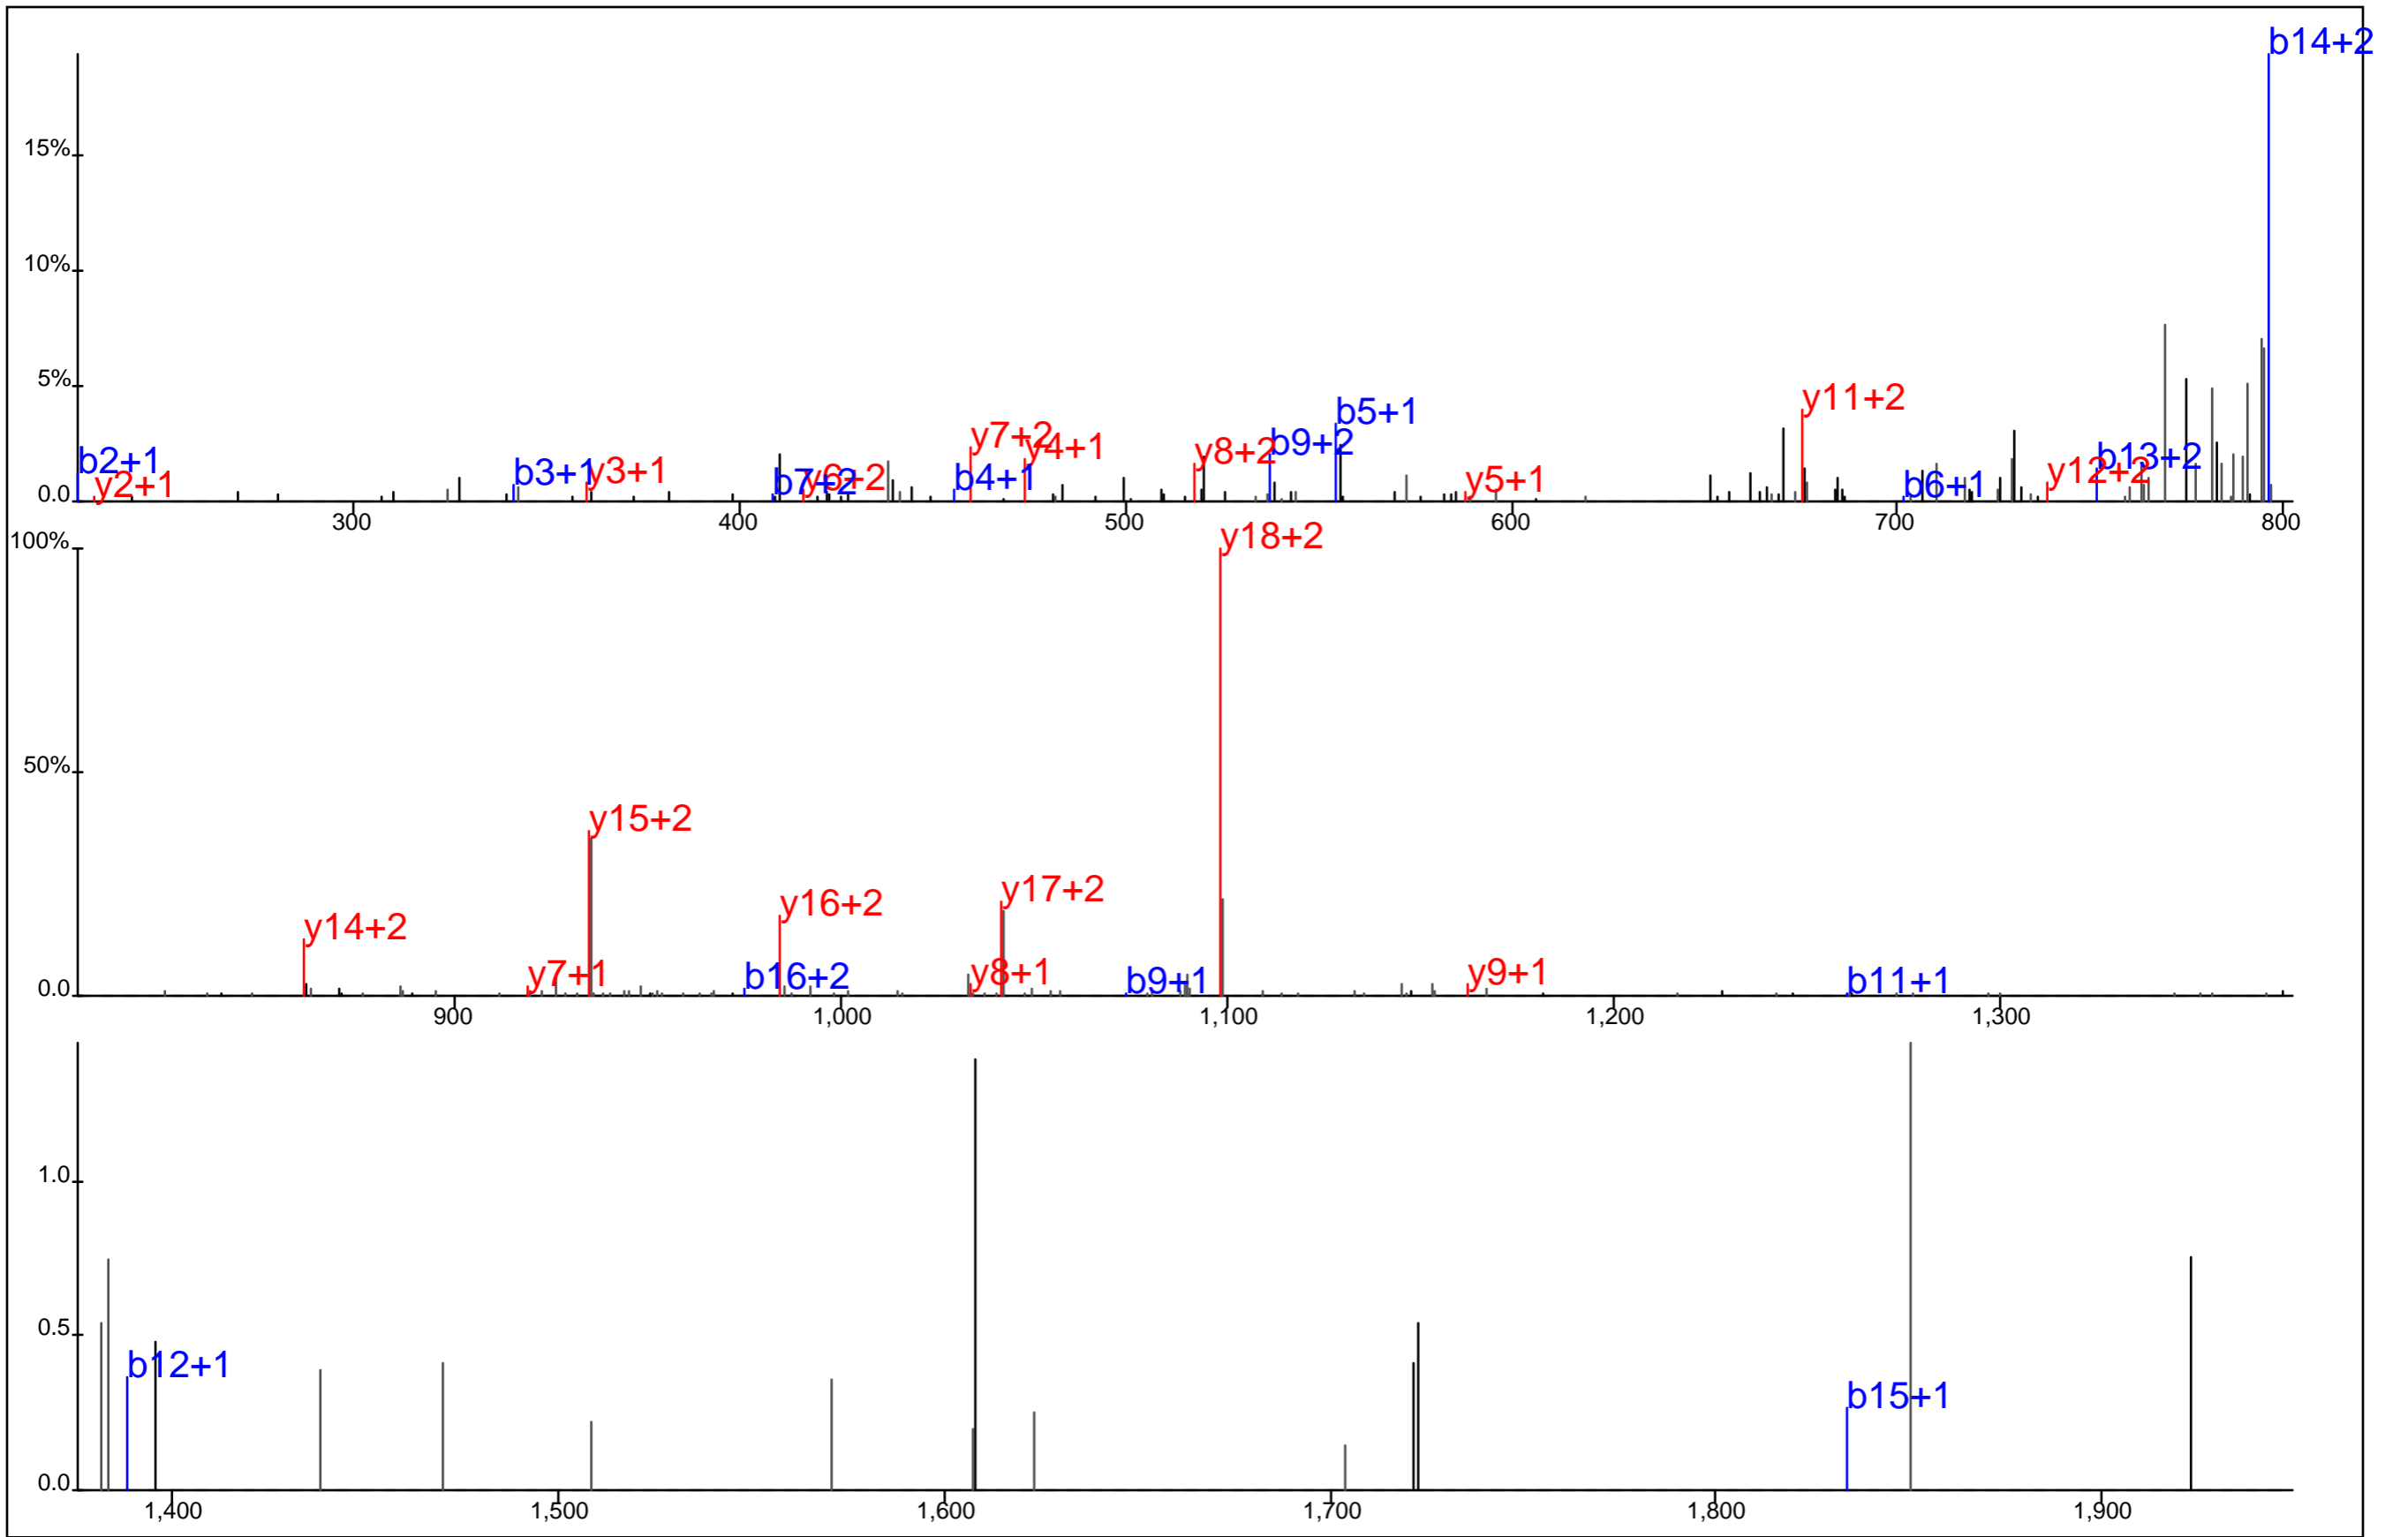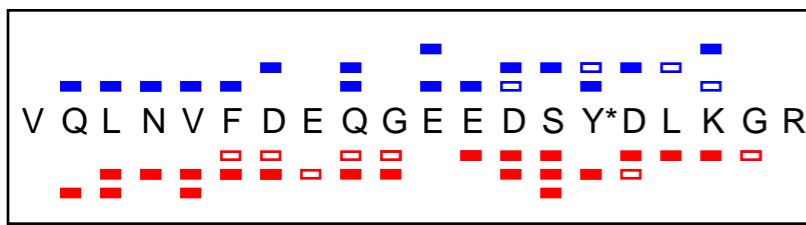

Protein Name: Diaphanous 1  
 gi Accession: 10435239  
 Precursor Mass: 807.6920+3  
 Delta Mass: 0.383 ppm  
 XCorr: 30.1

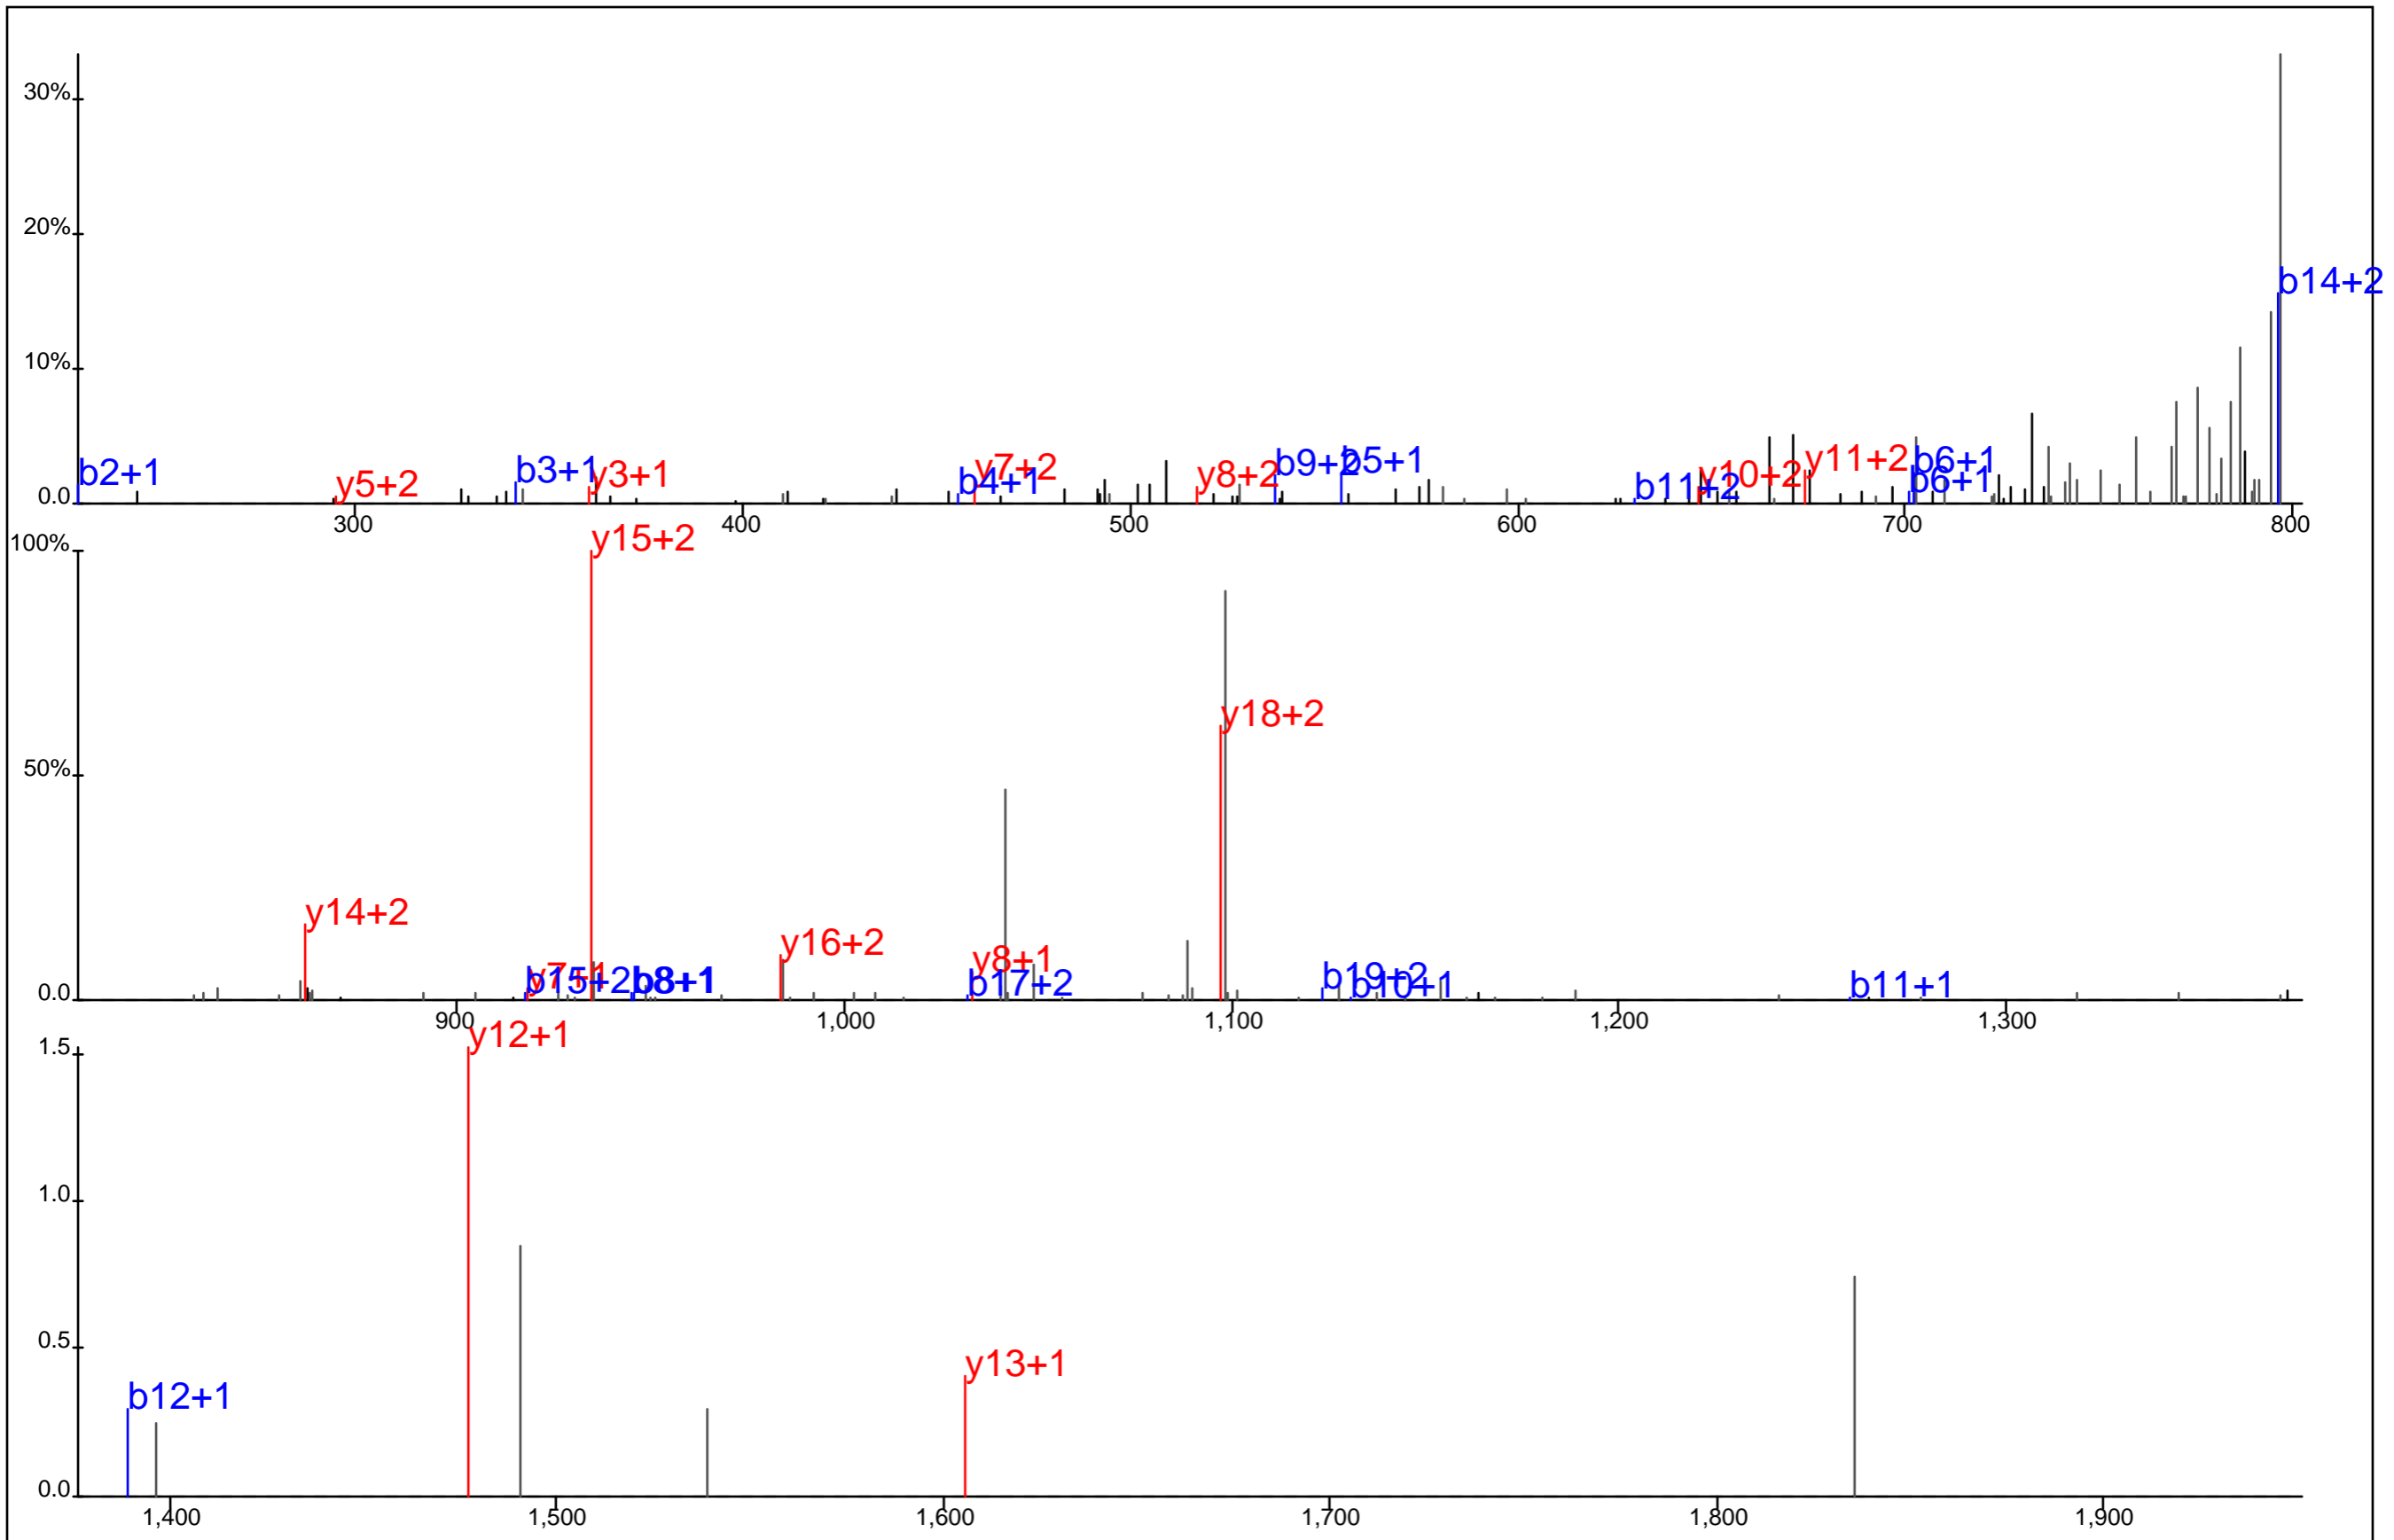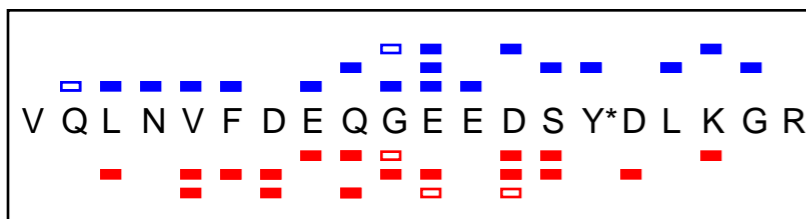

Protein Name: Diaphanous 1  
 gi Accession: 10435239  
 Precursor Mass: 807.6925+3  
 Delta Mass: 0.986 ppm  
 XCorr: 23.67

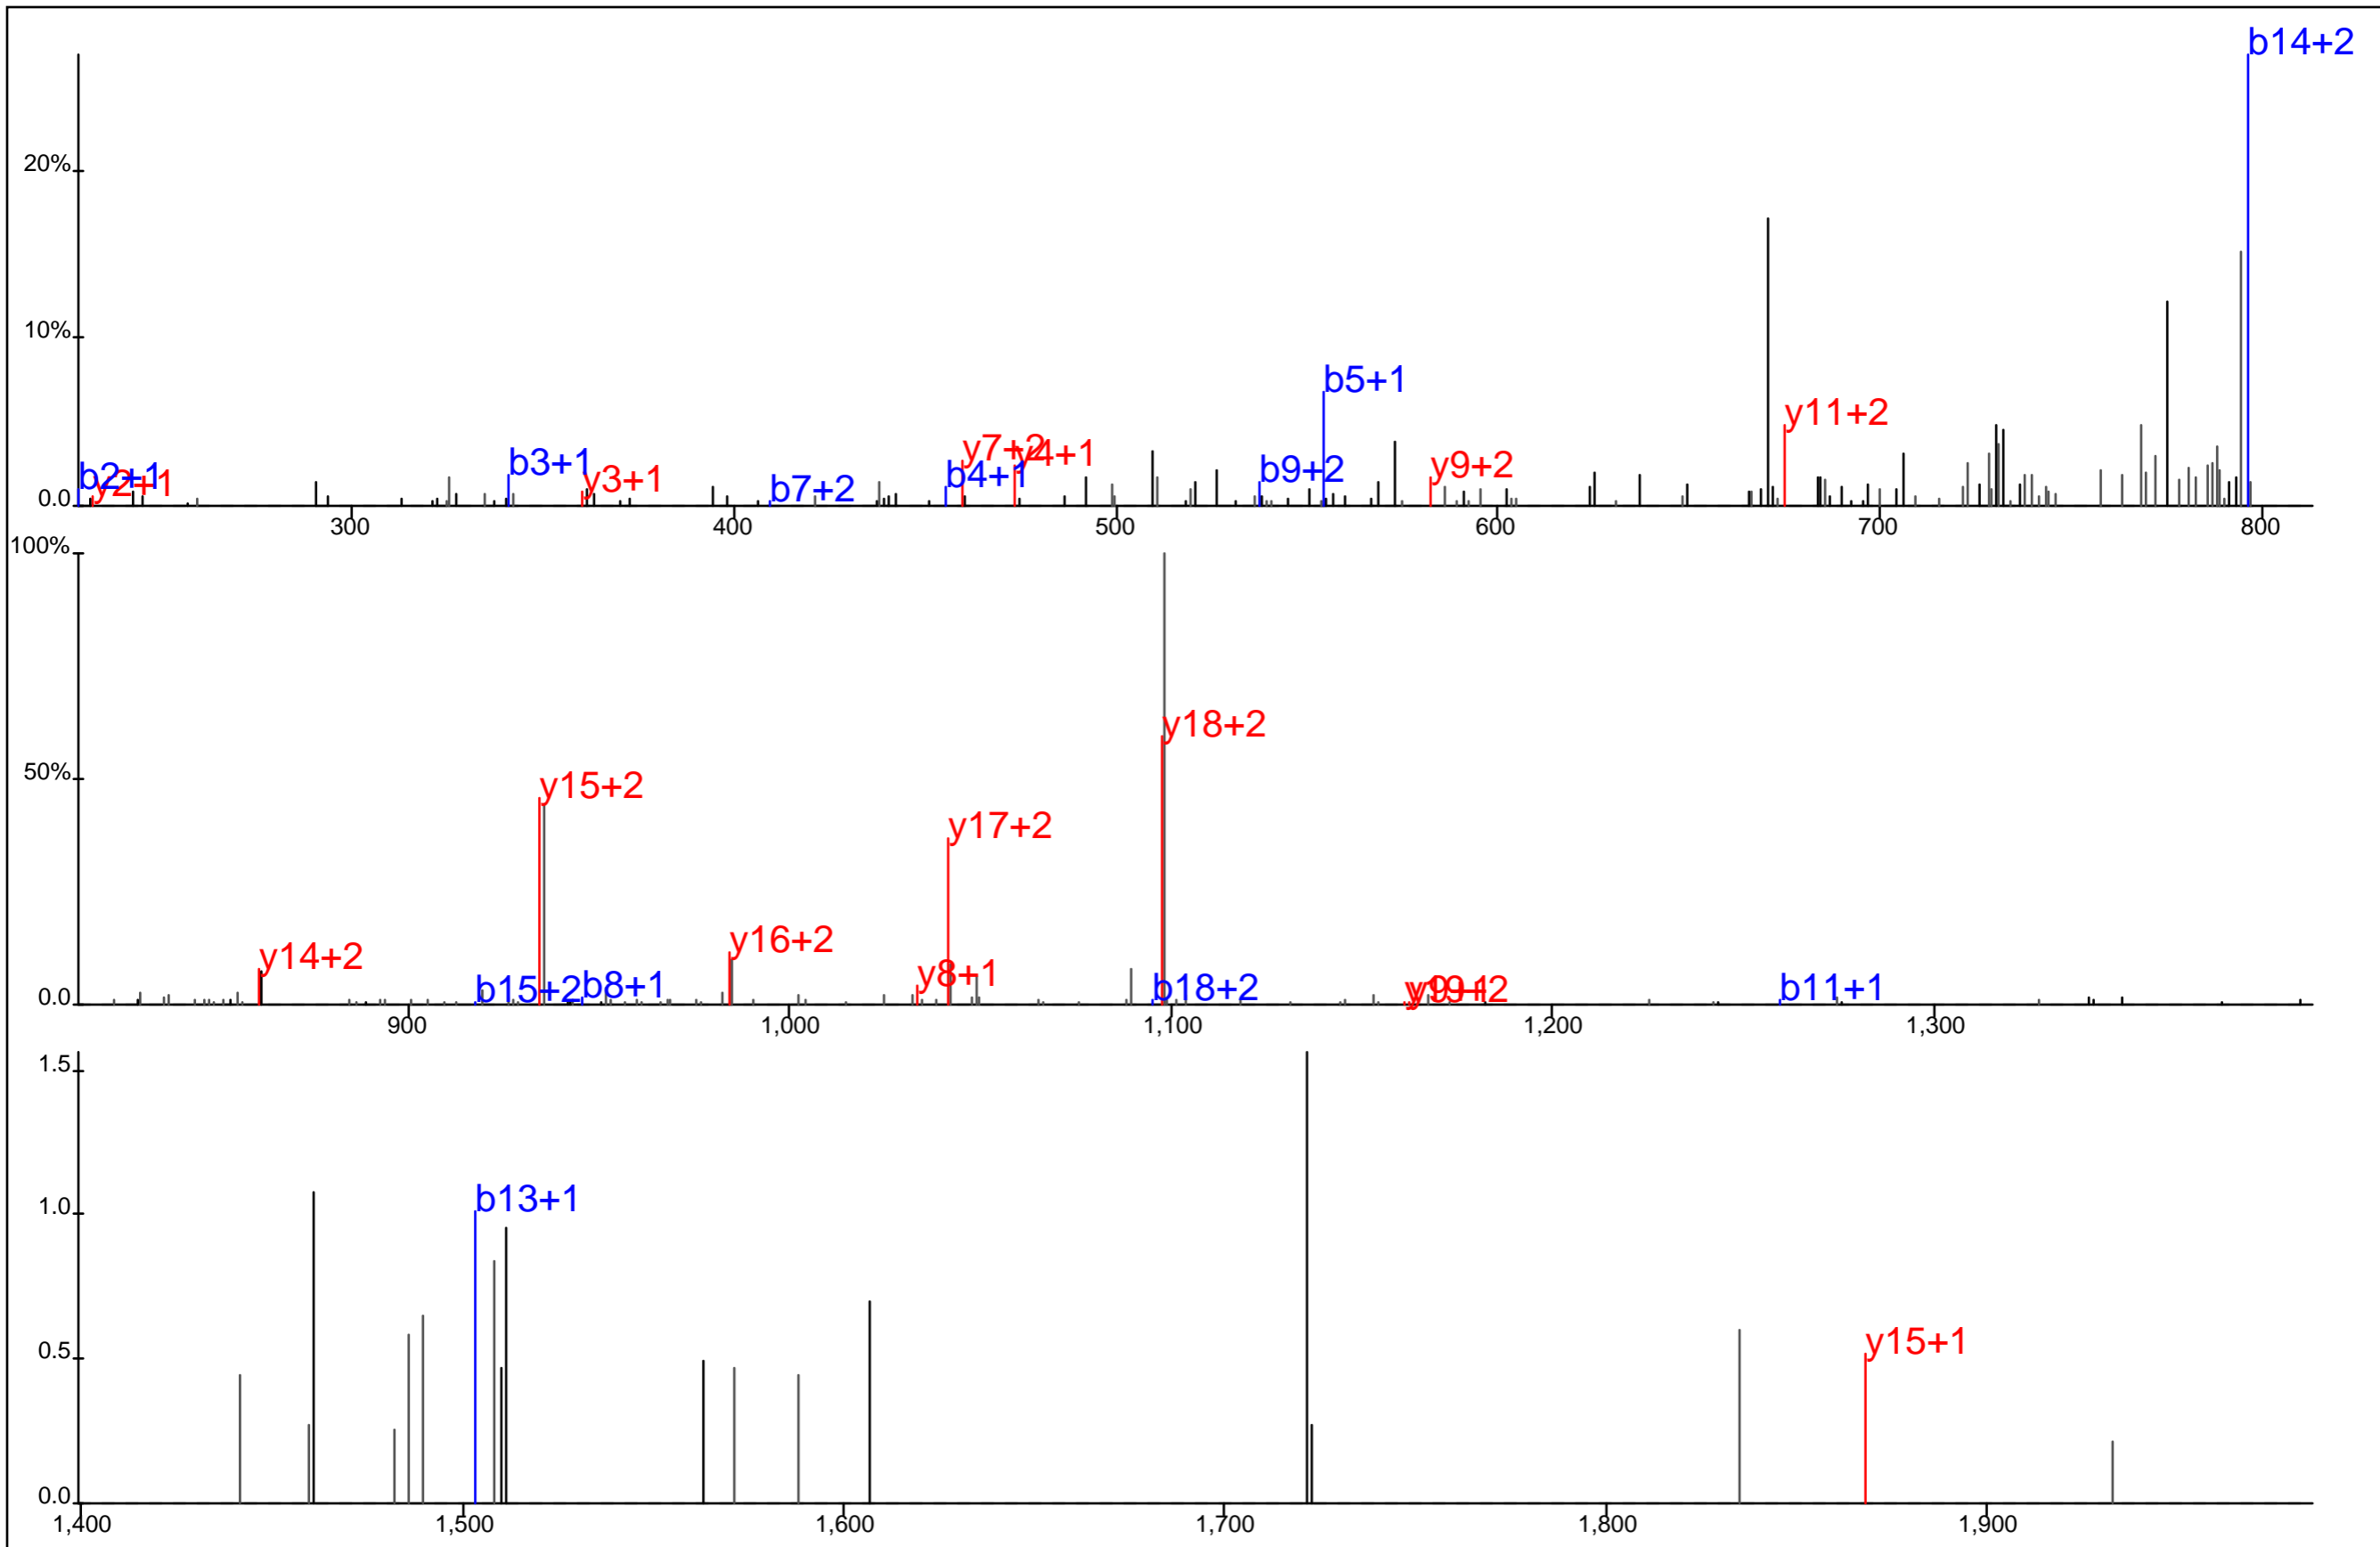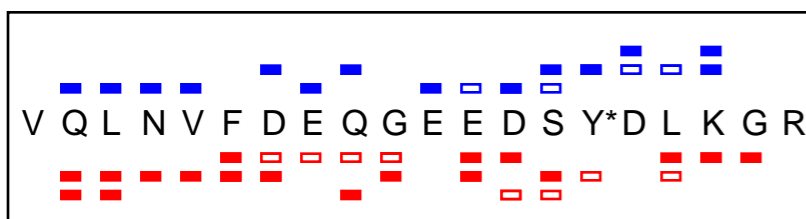

Protein Name: Diaphanous 1  
 gi Accession: 10435239  
 Precursor Mass: 807.6961+3  
 Delta Mass: 5.447 ppm  
 XCorr: 22.11

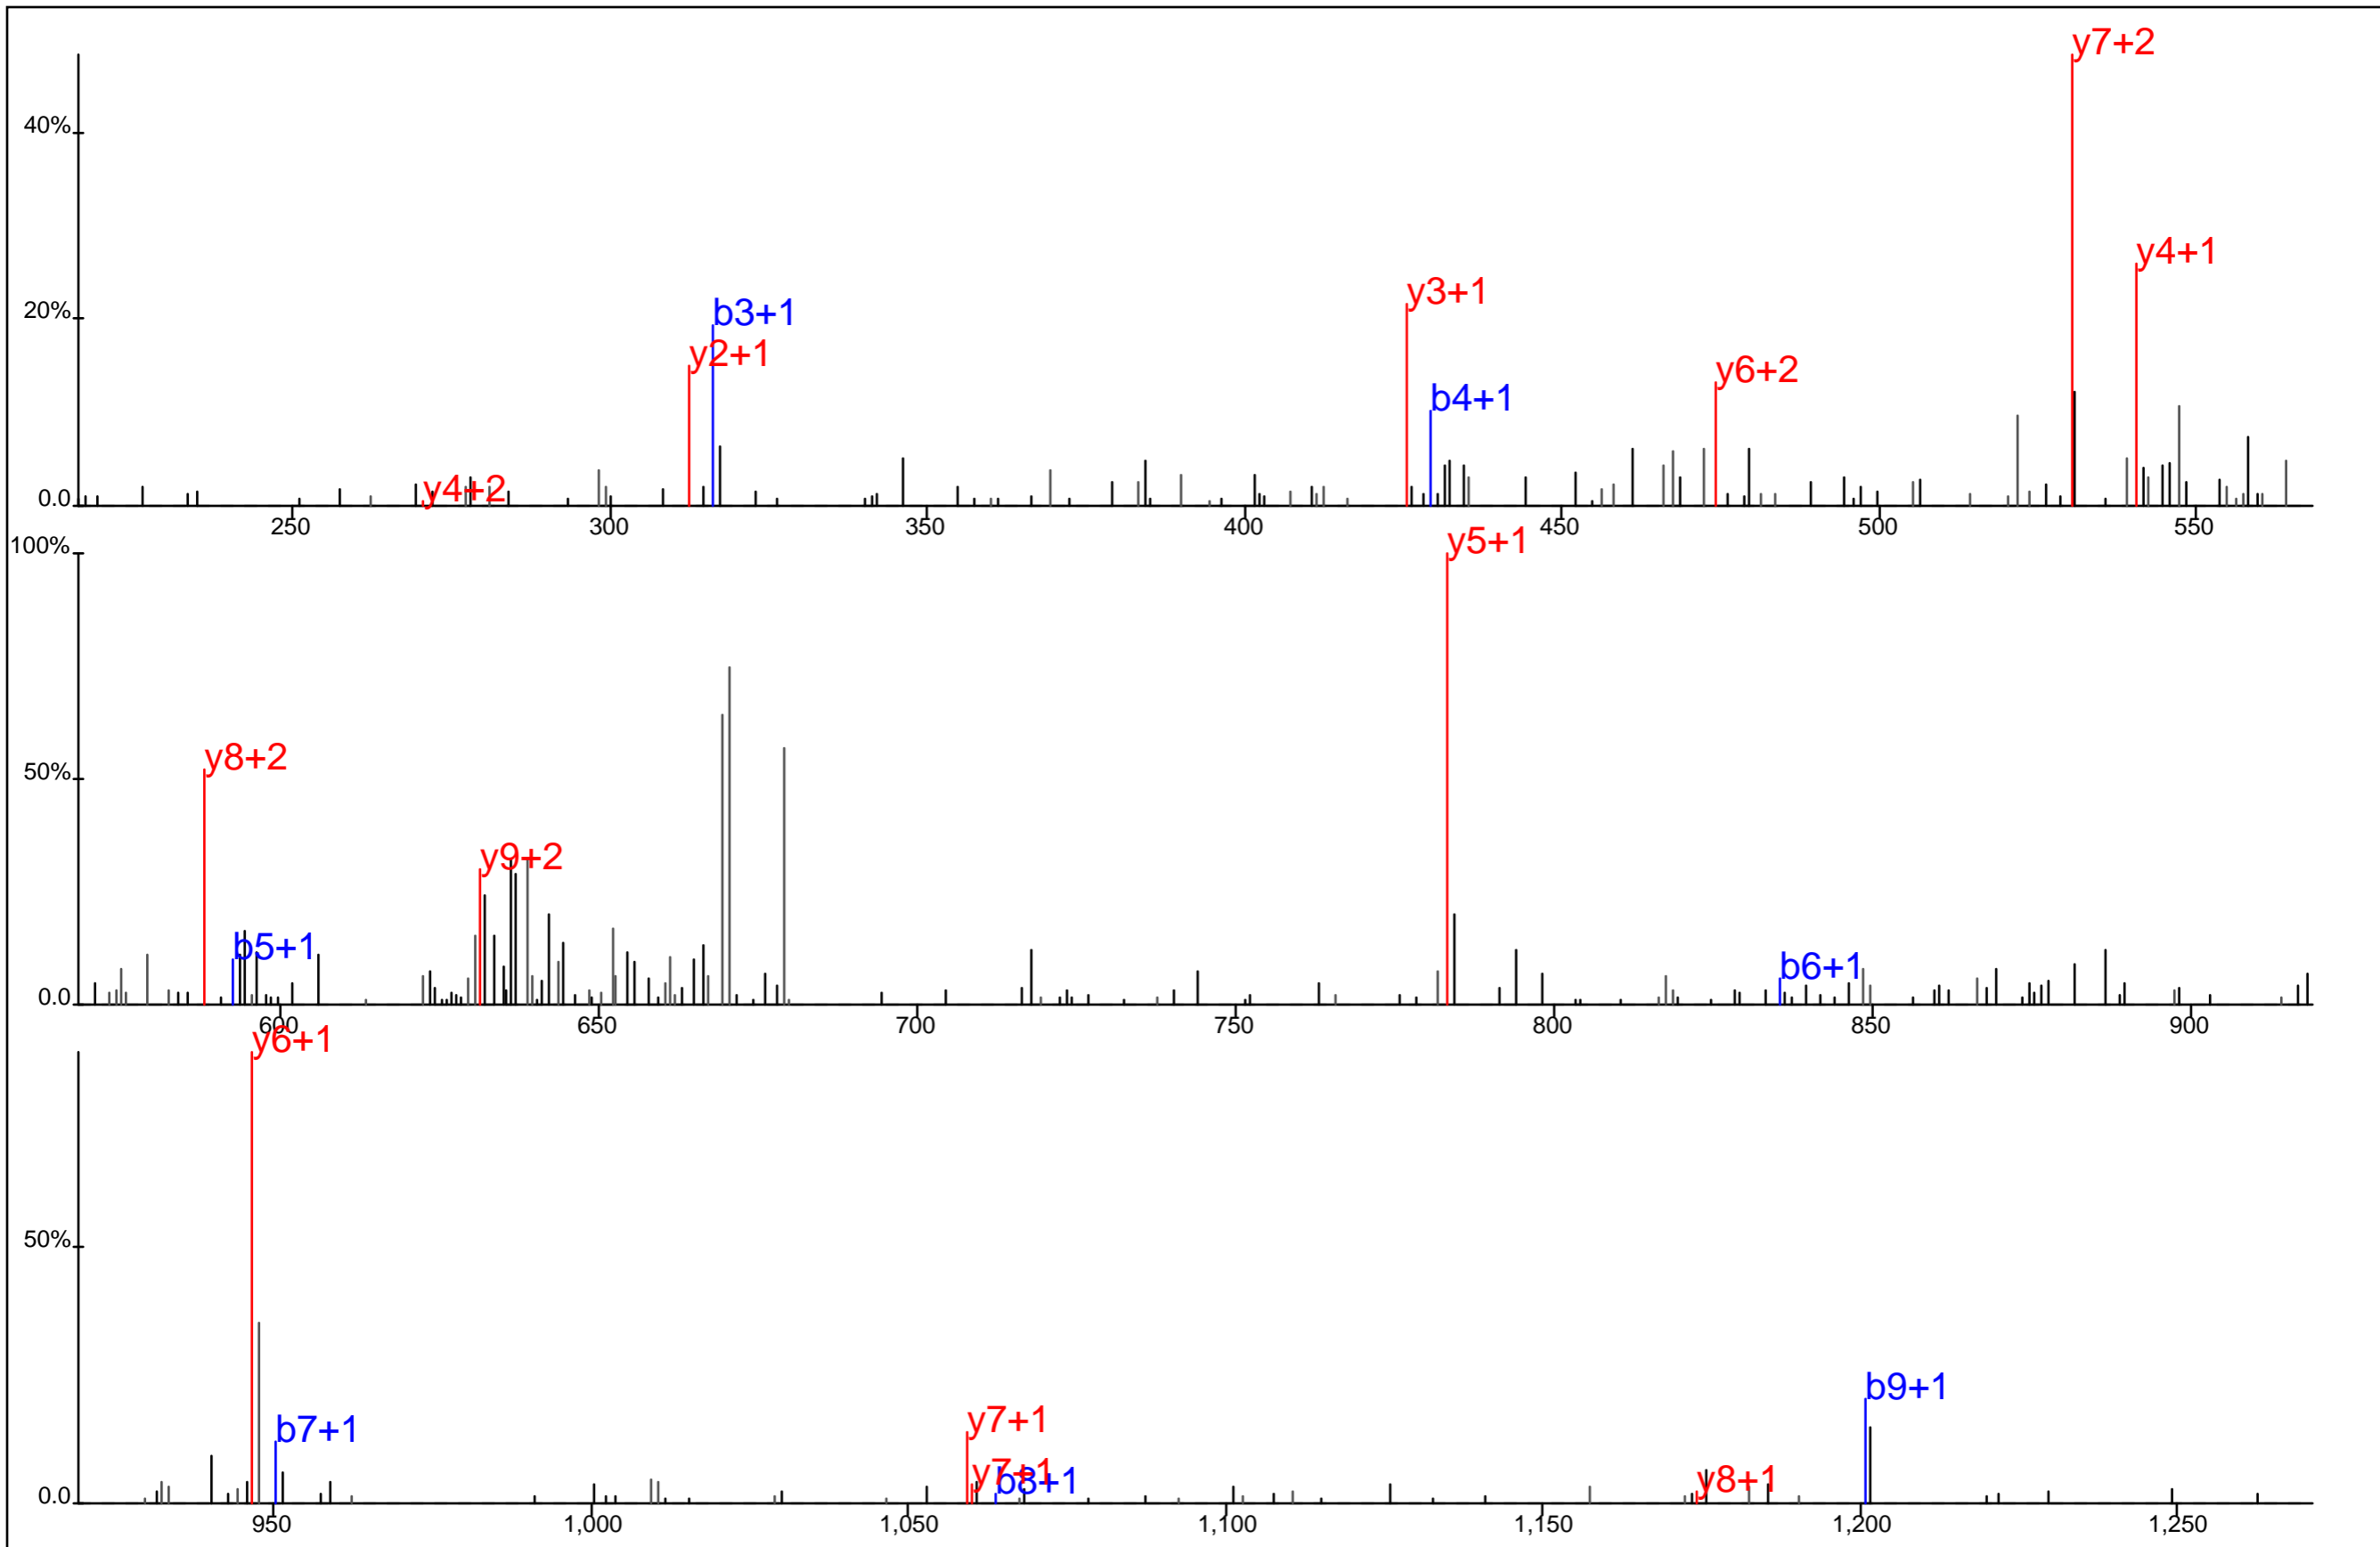

▢ ▢ ▢ ▢ ▢ ▢ ▢ ▢  
 L S D L Y Y\* D I H R  
▢ ▢ ▢ ▢ ▢ ▢ ▢ ▢

Protein Name: DOCK10  
 gi Accession: 7020173  
 Precursor Mass: 687.8108+2  
 Delta Mass: 3.912 ppm  
 XCorr: 33.56



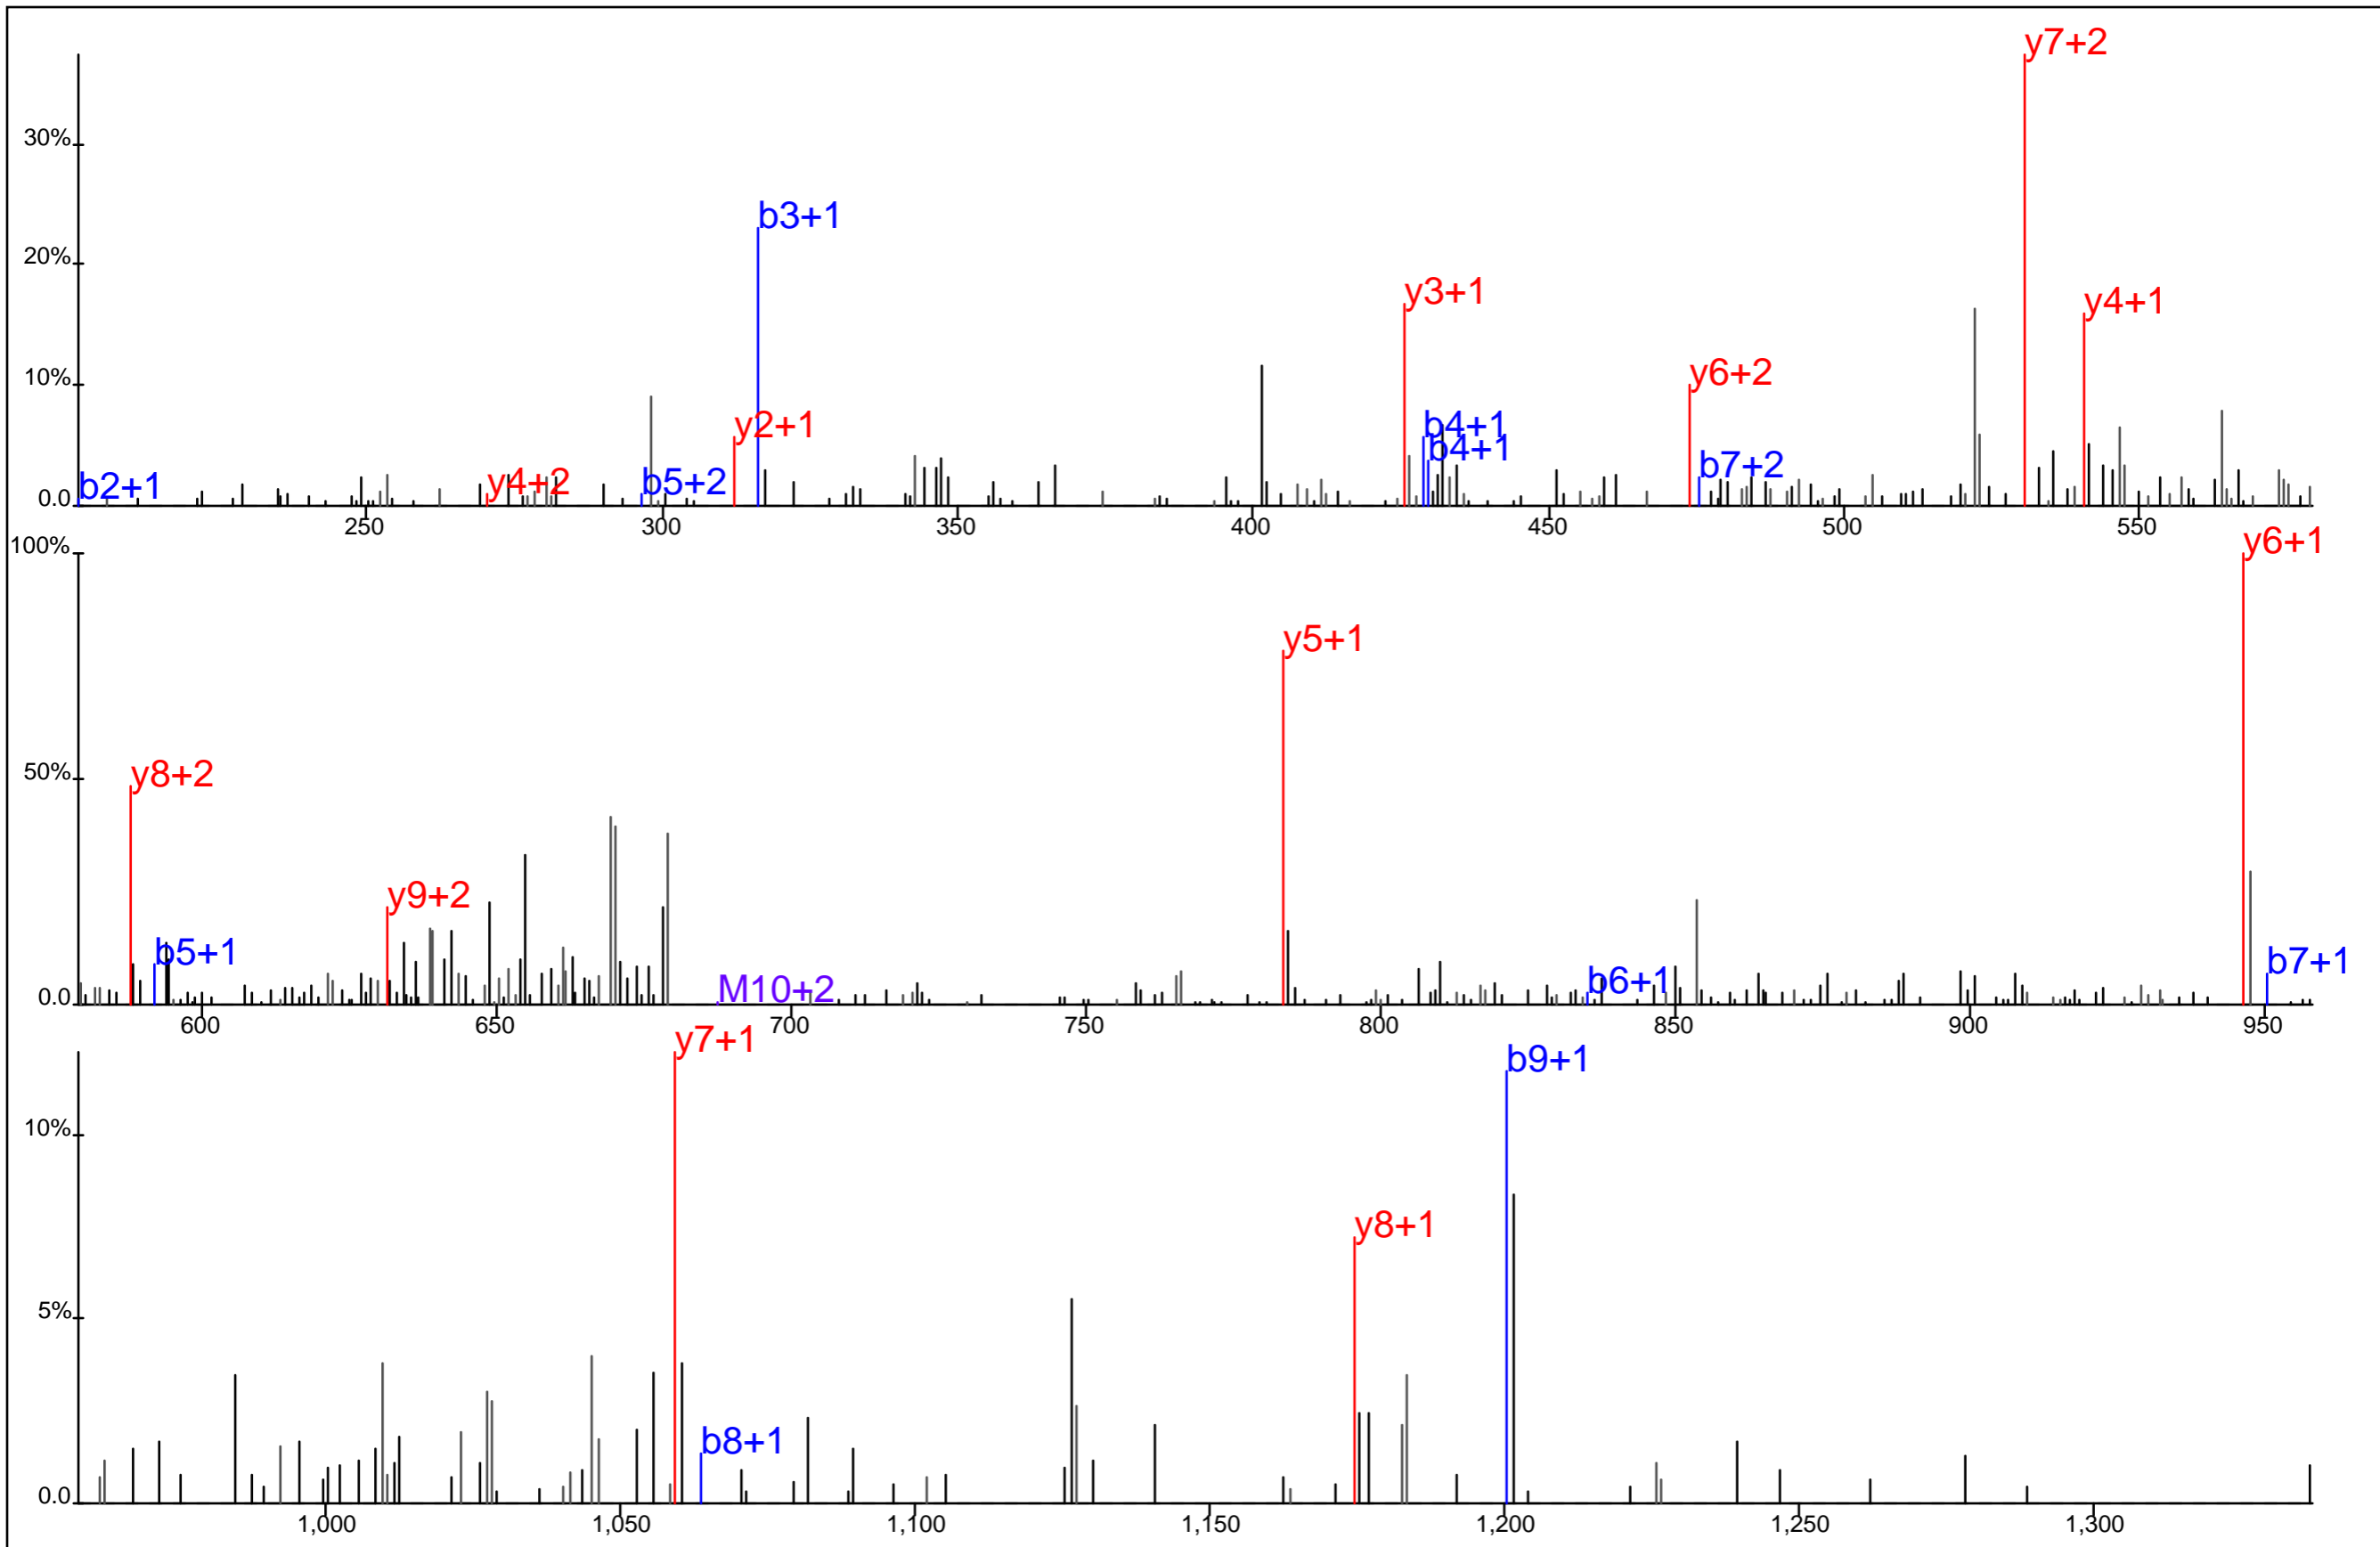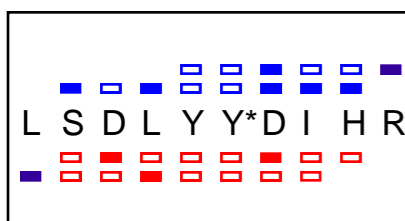

Protein Name: DOCK10  
 gi Accession: 7020173  
 Precursor Mass: 687.8108+2  
 Delta Mass: 3.912 ppm  
 XCorr: 33.57

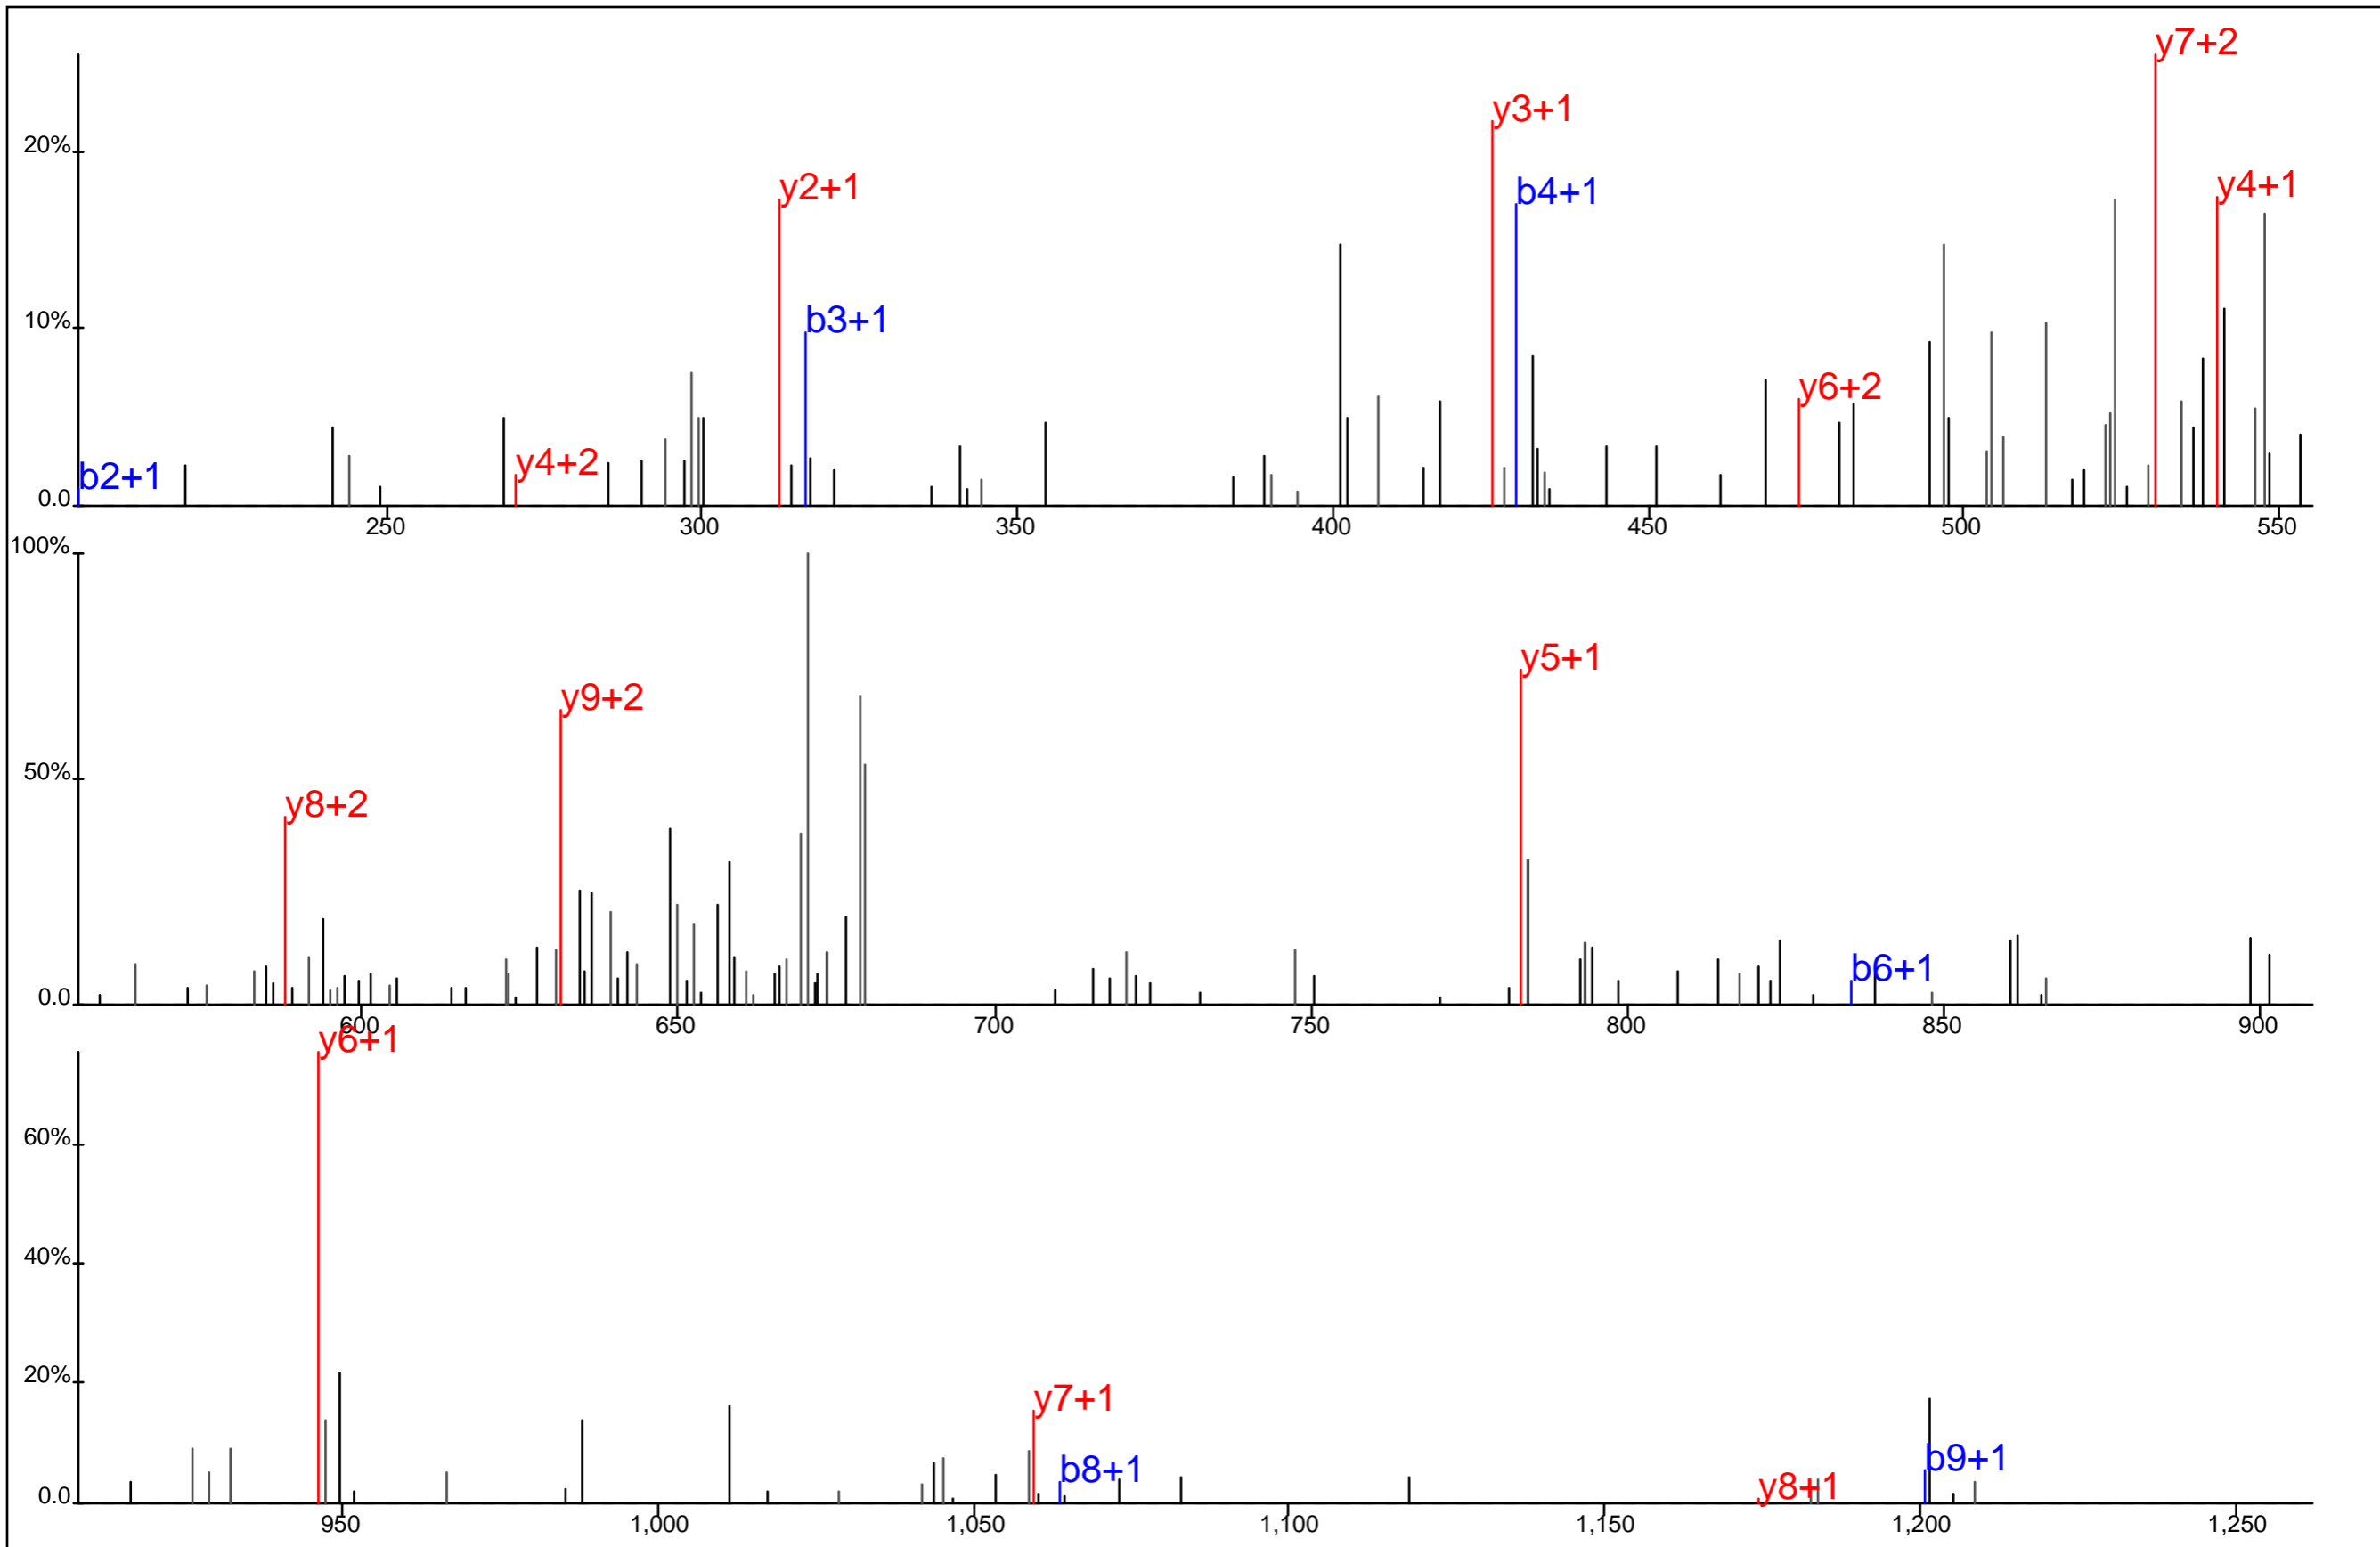

■ ■ ■ ■ ■ ■ ■ ■  
 L S D L Y Y\* D I H R  
■ ■ ■ ■ ■ ■ ■ ■

Protein Name: DOCK10  
 gi Accession: 7020173  
 Precursor Mass: 687.8111+2  
 Delta Mass: 4.356 ppm  
 XCorr: 24.82

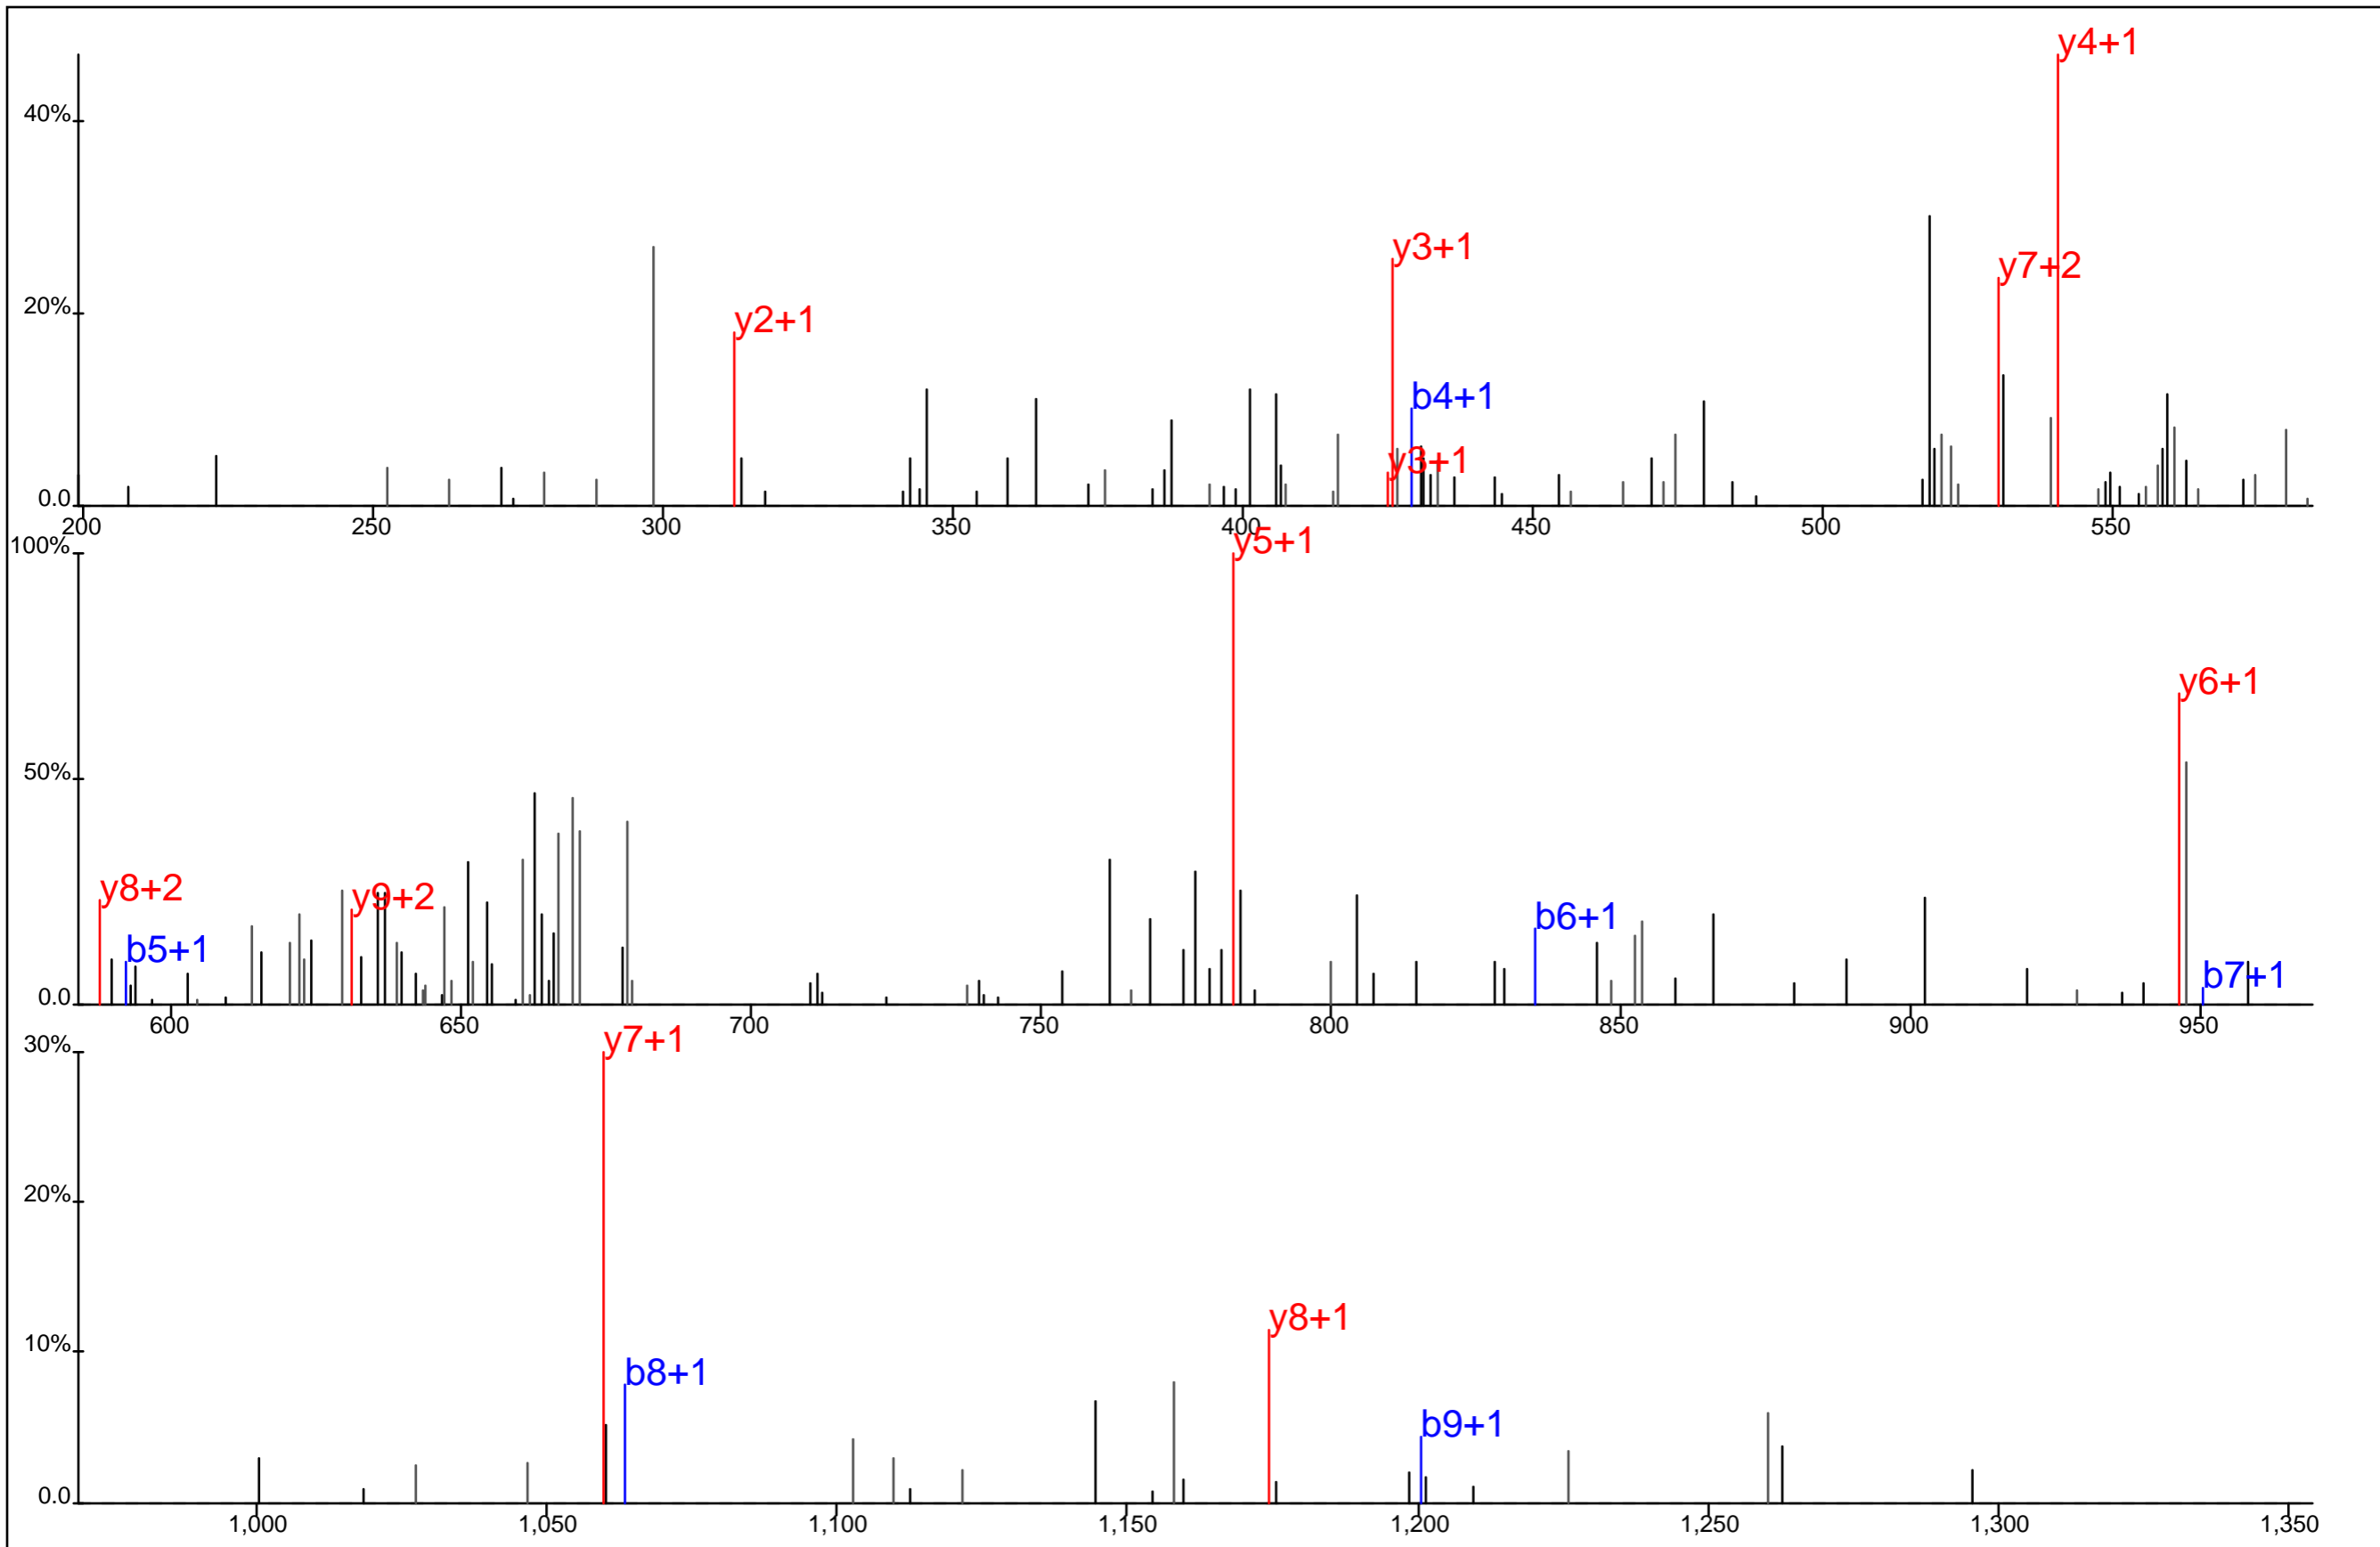

▢ ▢ ▢ ▢ ▢ ▢ ▢ ▢  
**L S D L Y Y\* D I H R**  
▢ ▢ ▢ ▢ ▢ ▢ ▢ ▢

Protein Name: DOCK10  
 gi Accession: 7020173  
 Precursor Mass: 687.8099+2  
 Delta Mass: 2.668 ppm  
 XCorr: 47.03

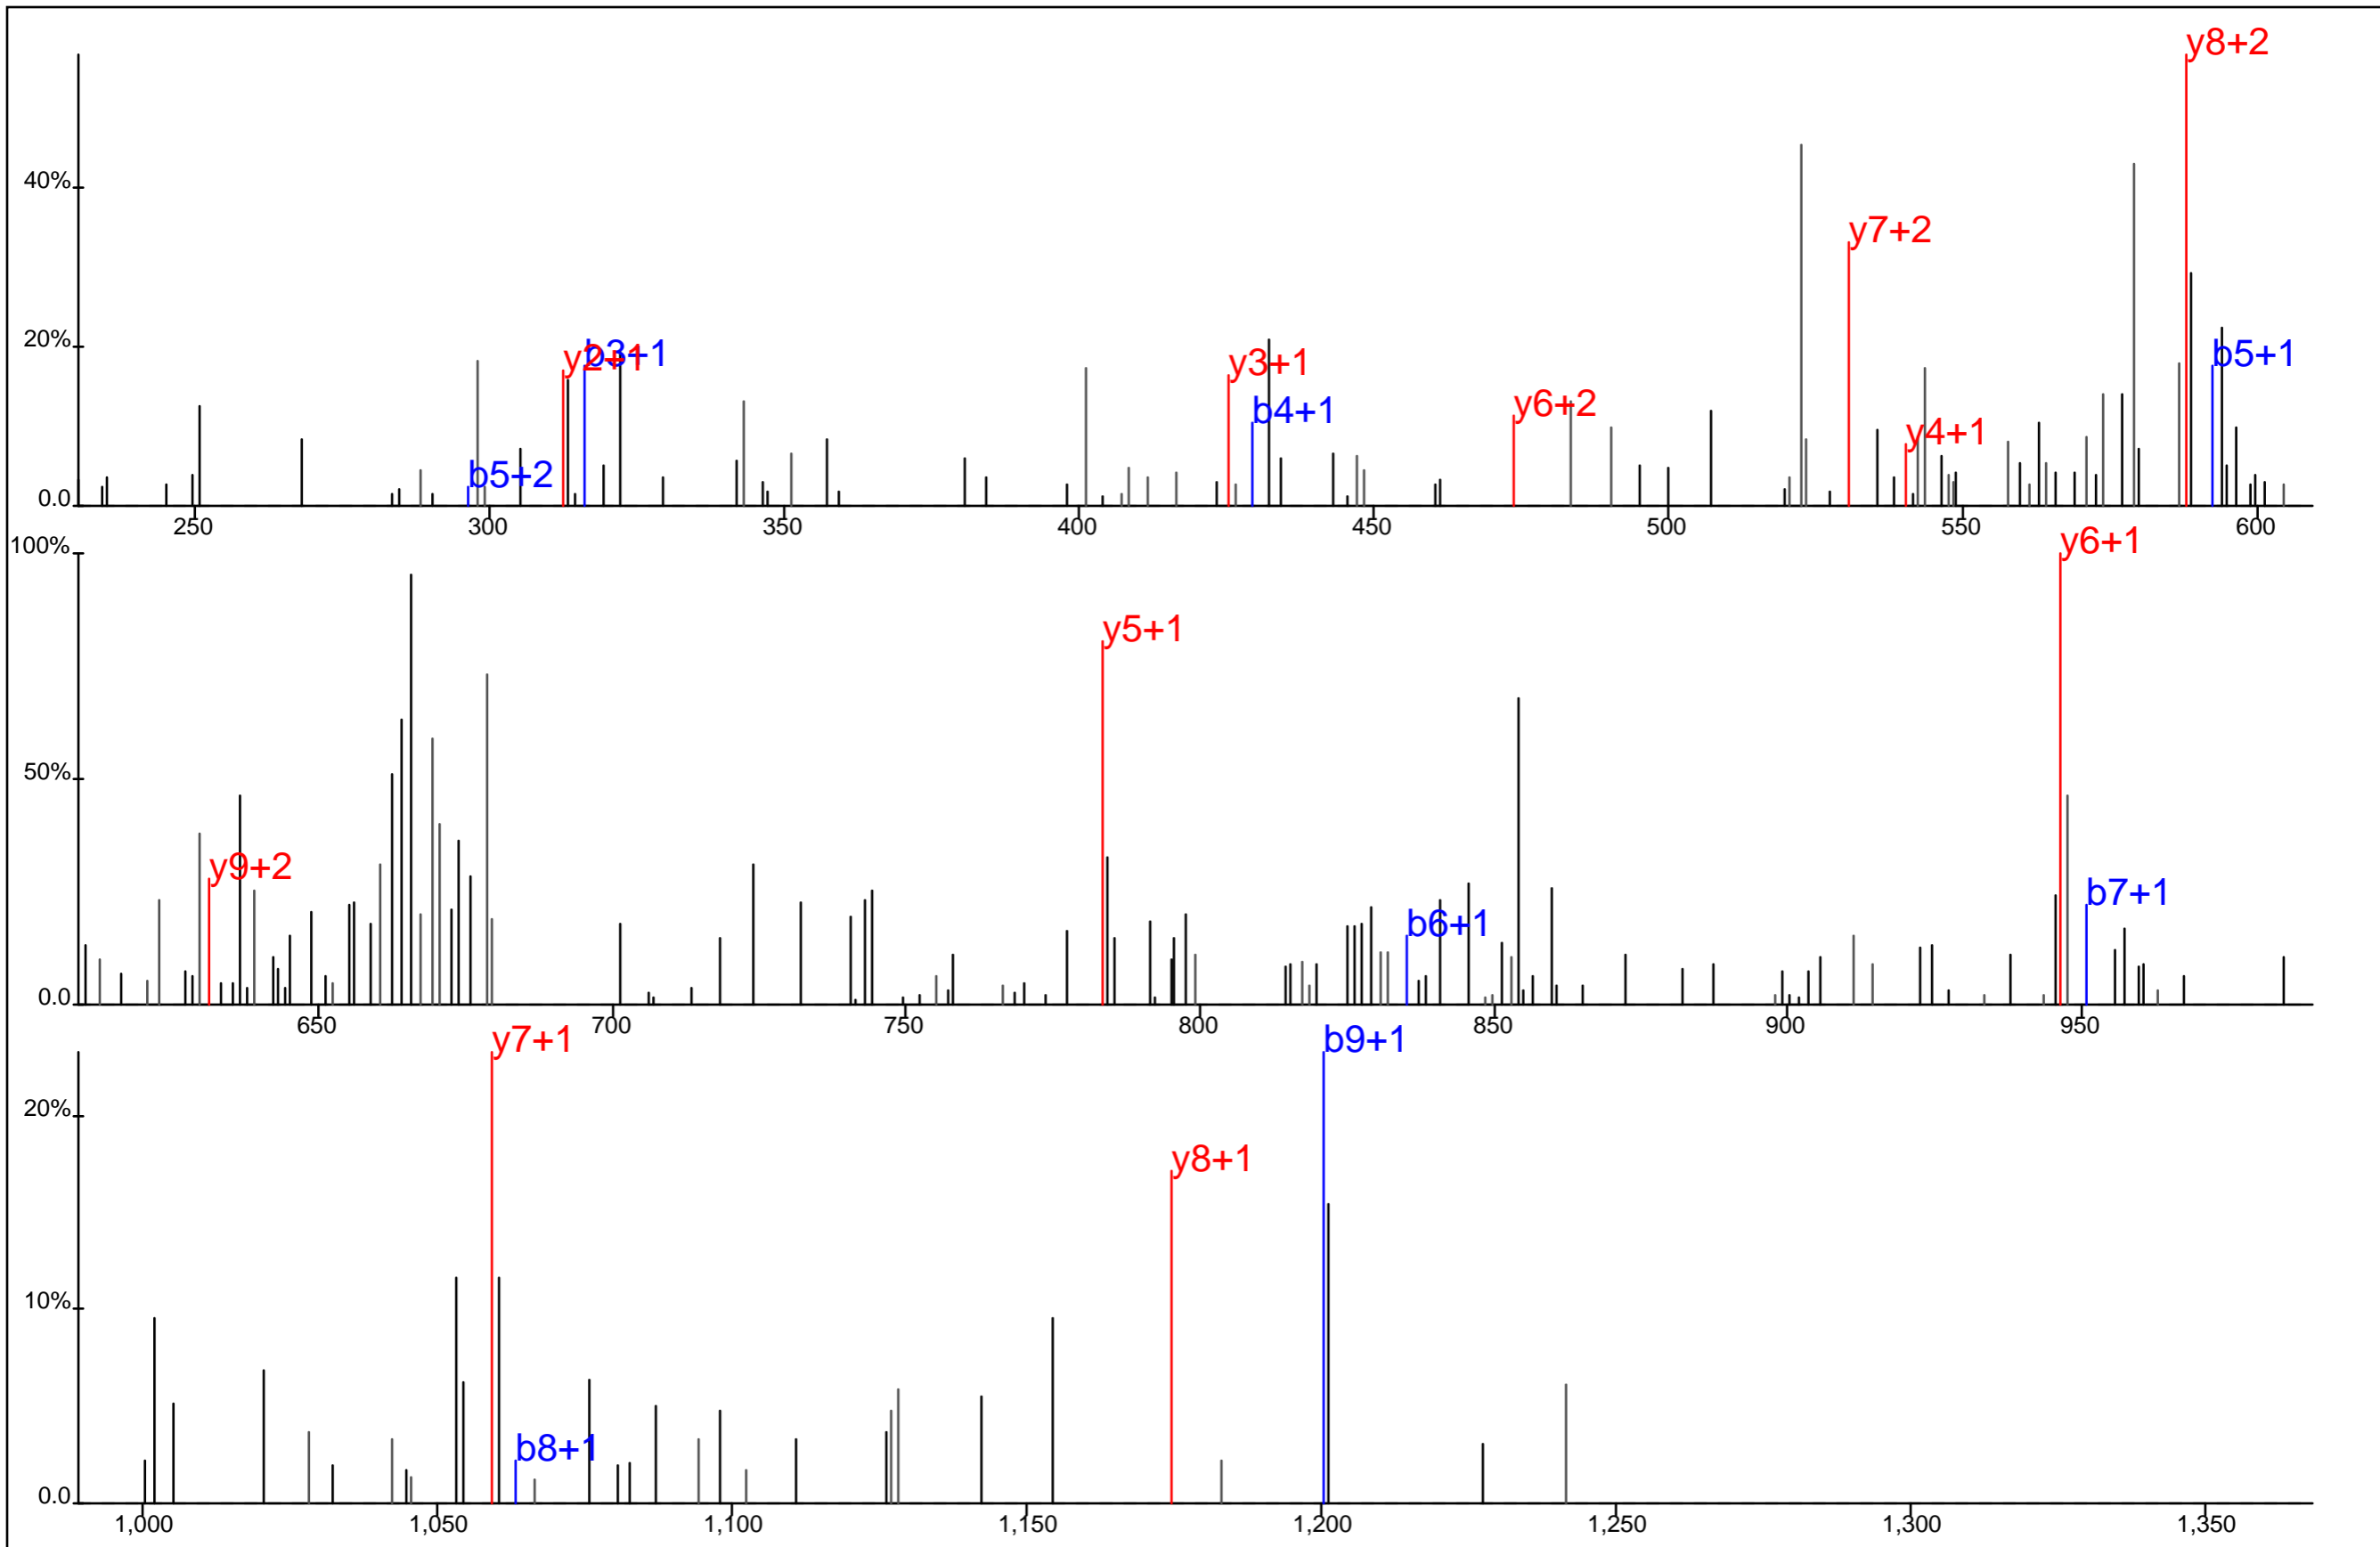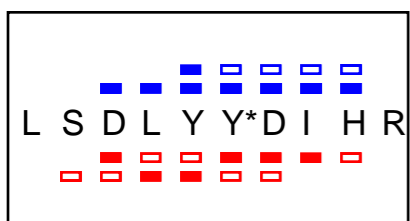

Protein Name: DOCK10  
 gi Accession: 7020173  
 Precursor Mass: 687.8090+2  
 Delta Mass: 1.337 ppm  
 XCorr: 20.15

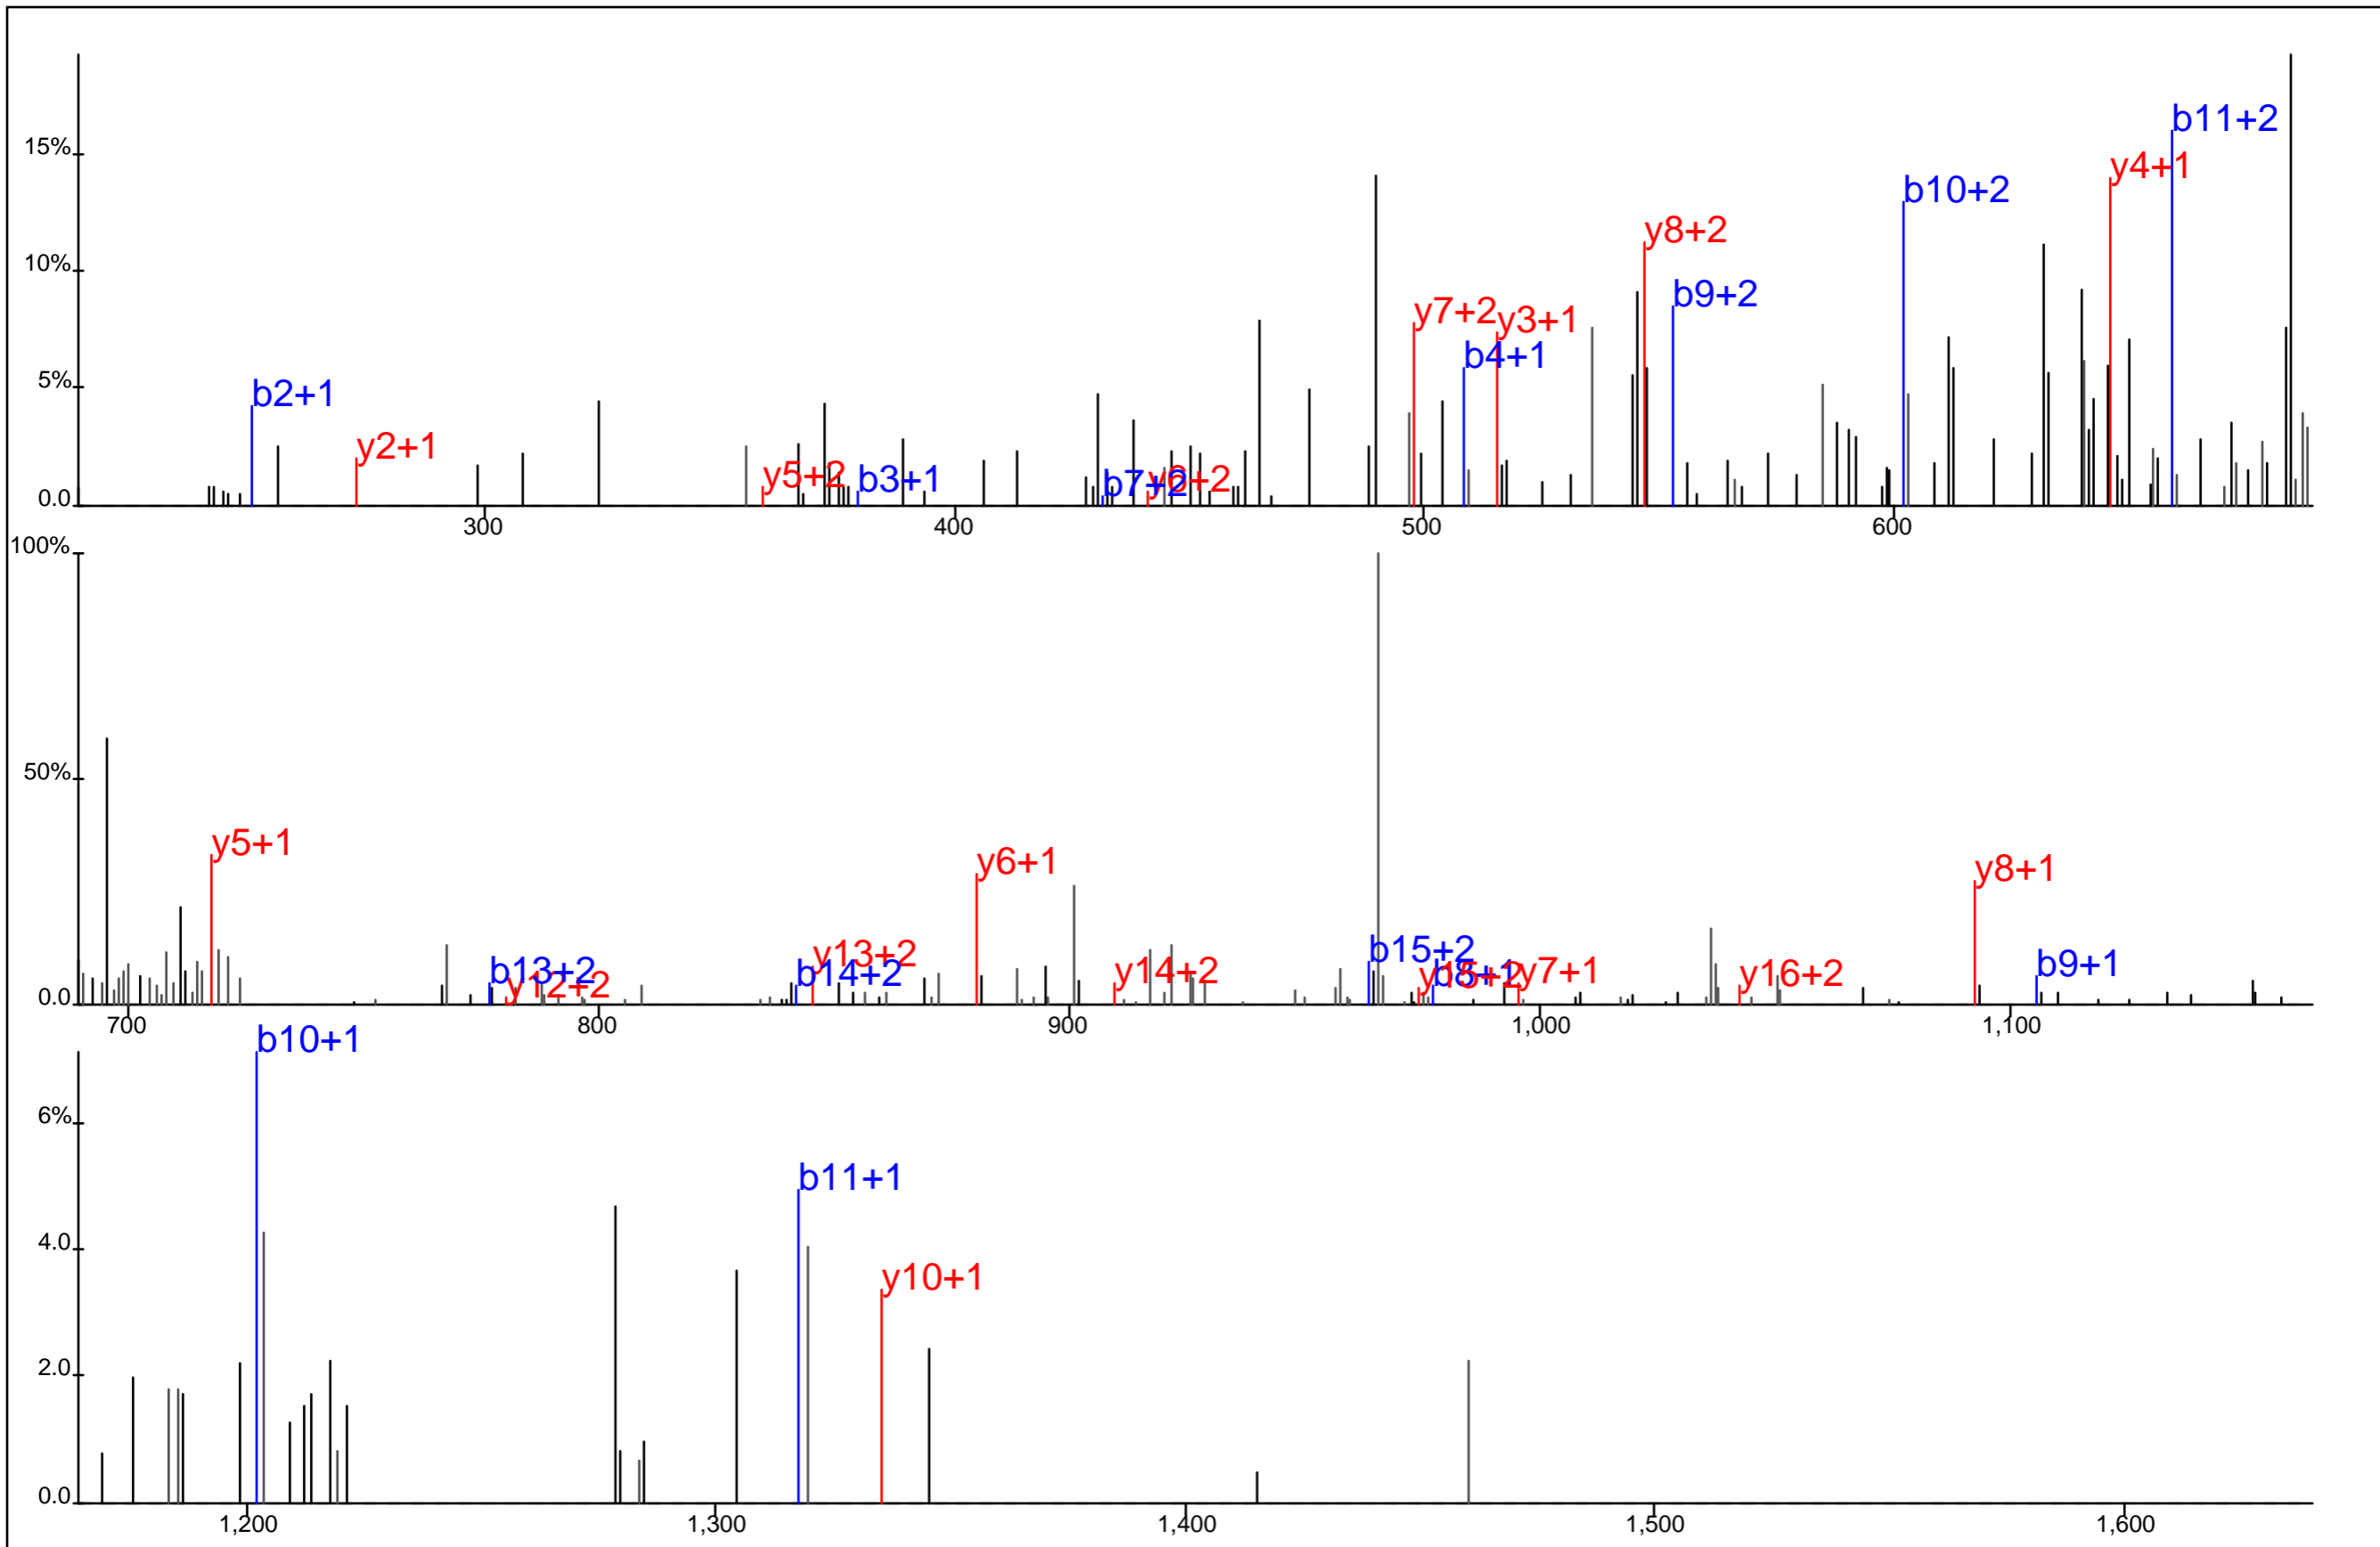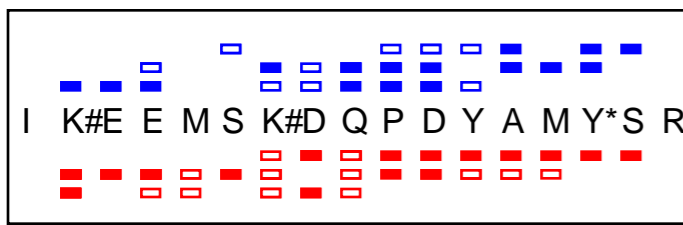

Protein Name: DOCK2  
 gi Accession: 1504002  
 Precursor Mass: 732.9909+3  
 Delta Mass: 1.392 ppm  
 XCorr: 19.25

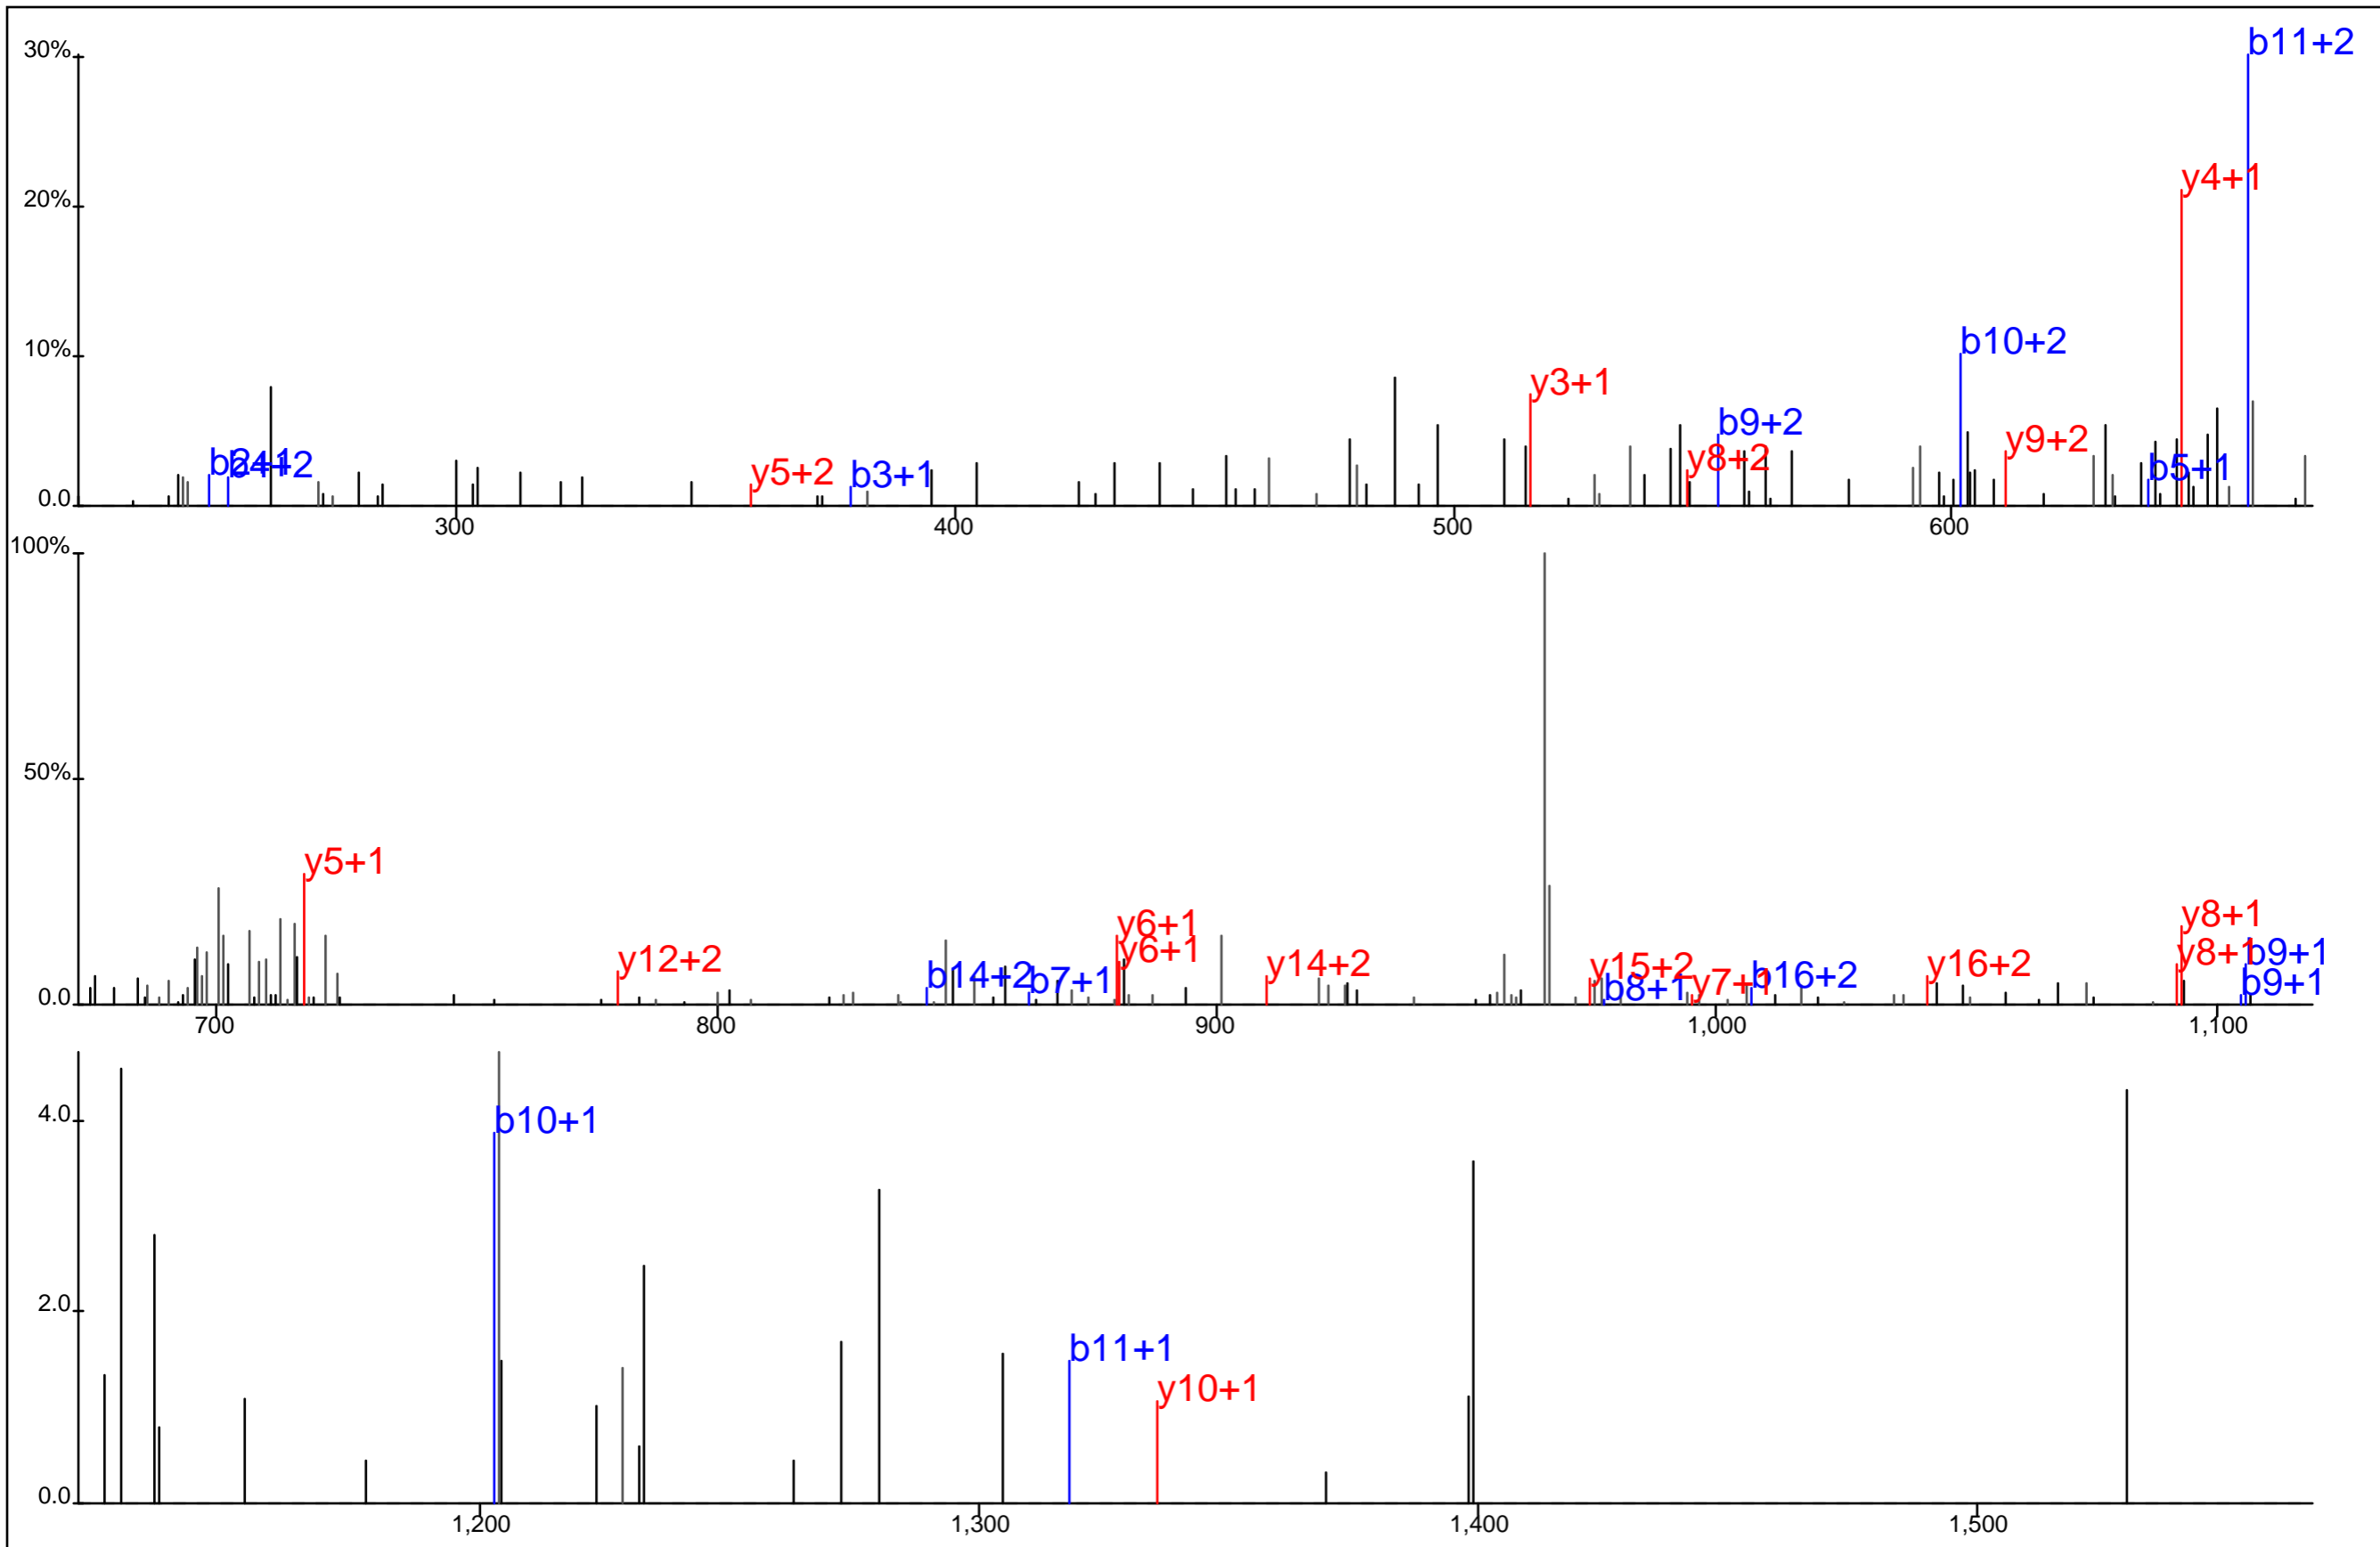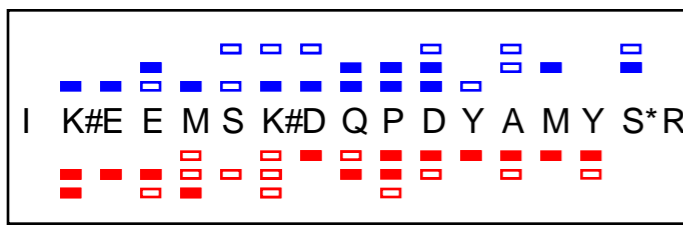

Protein Name: DOCK2  
 gi Accession: 1504002  
 Precursor Mass: 732.9904+3  
 Delta Mass: 0.727 ppm  
 XCorr: 18.41

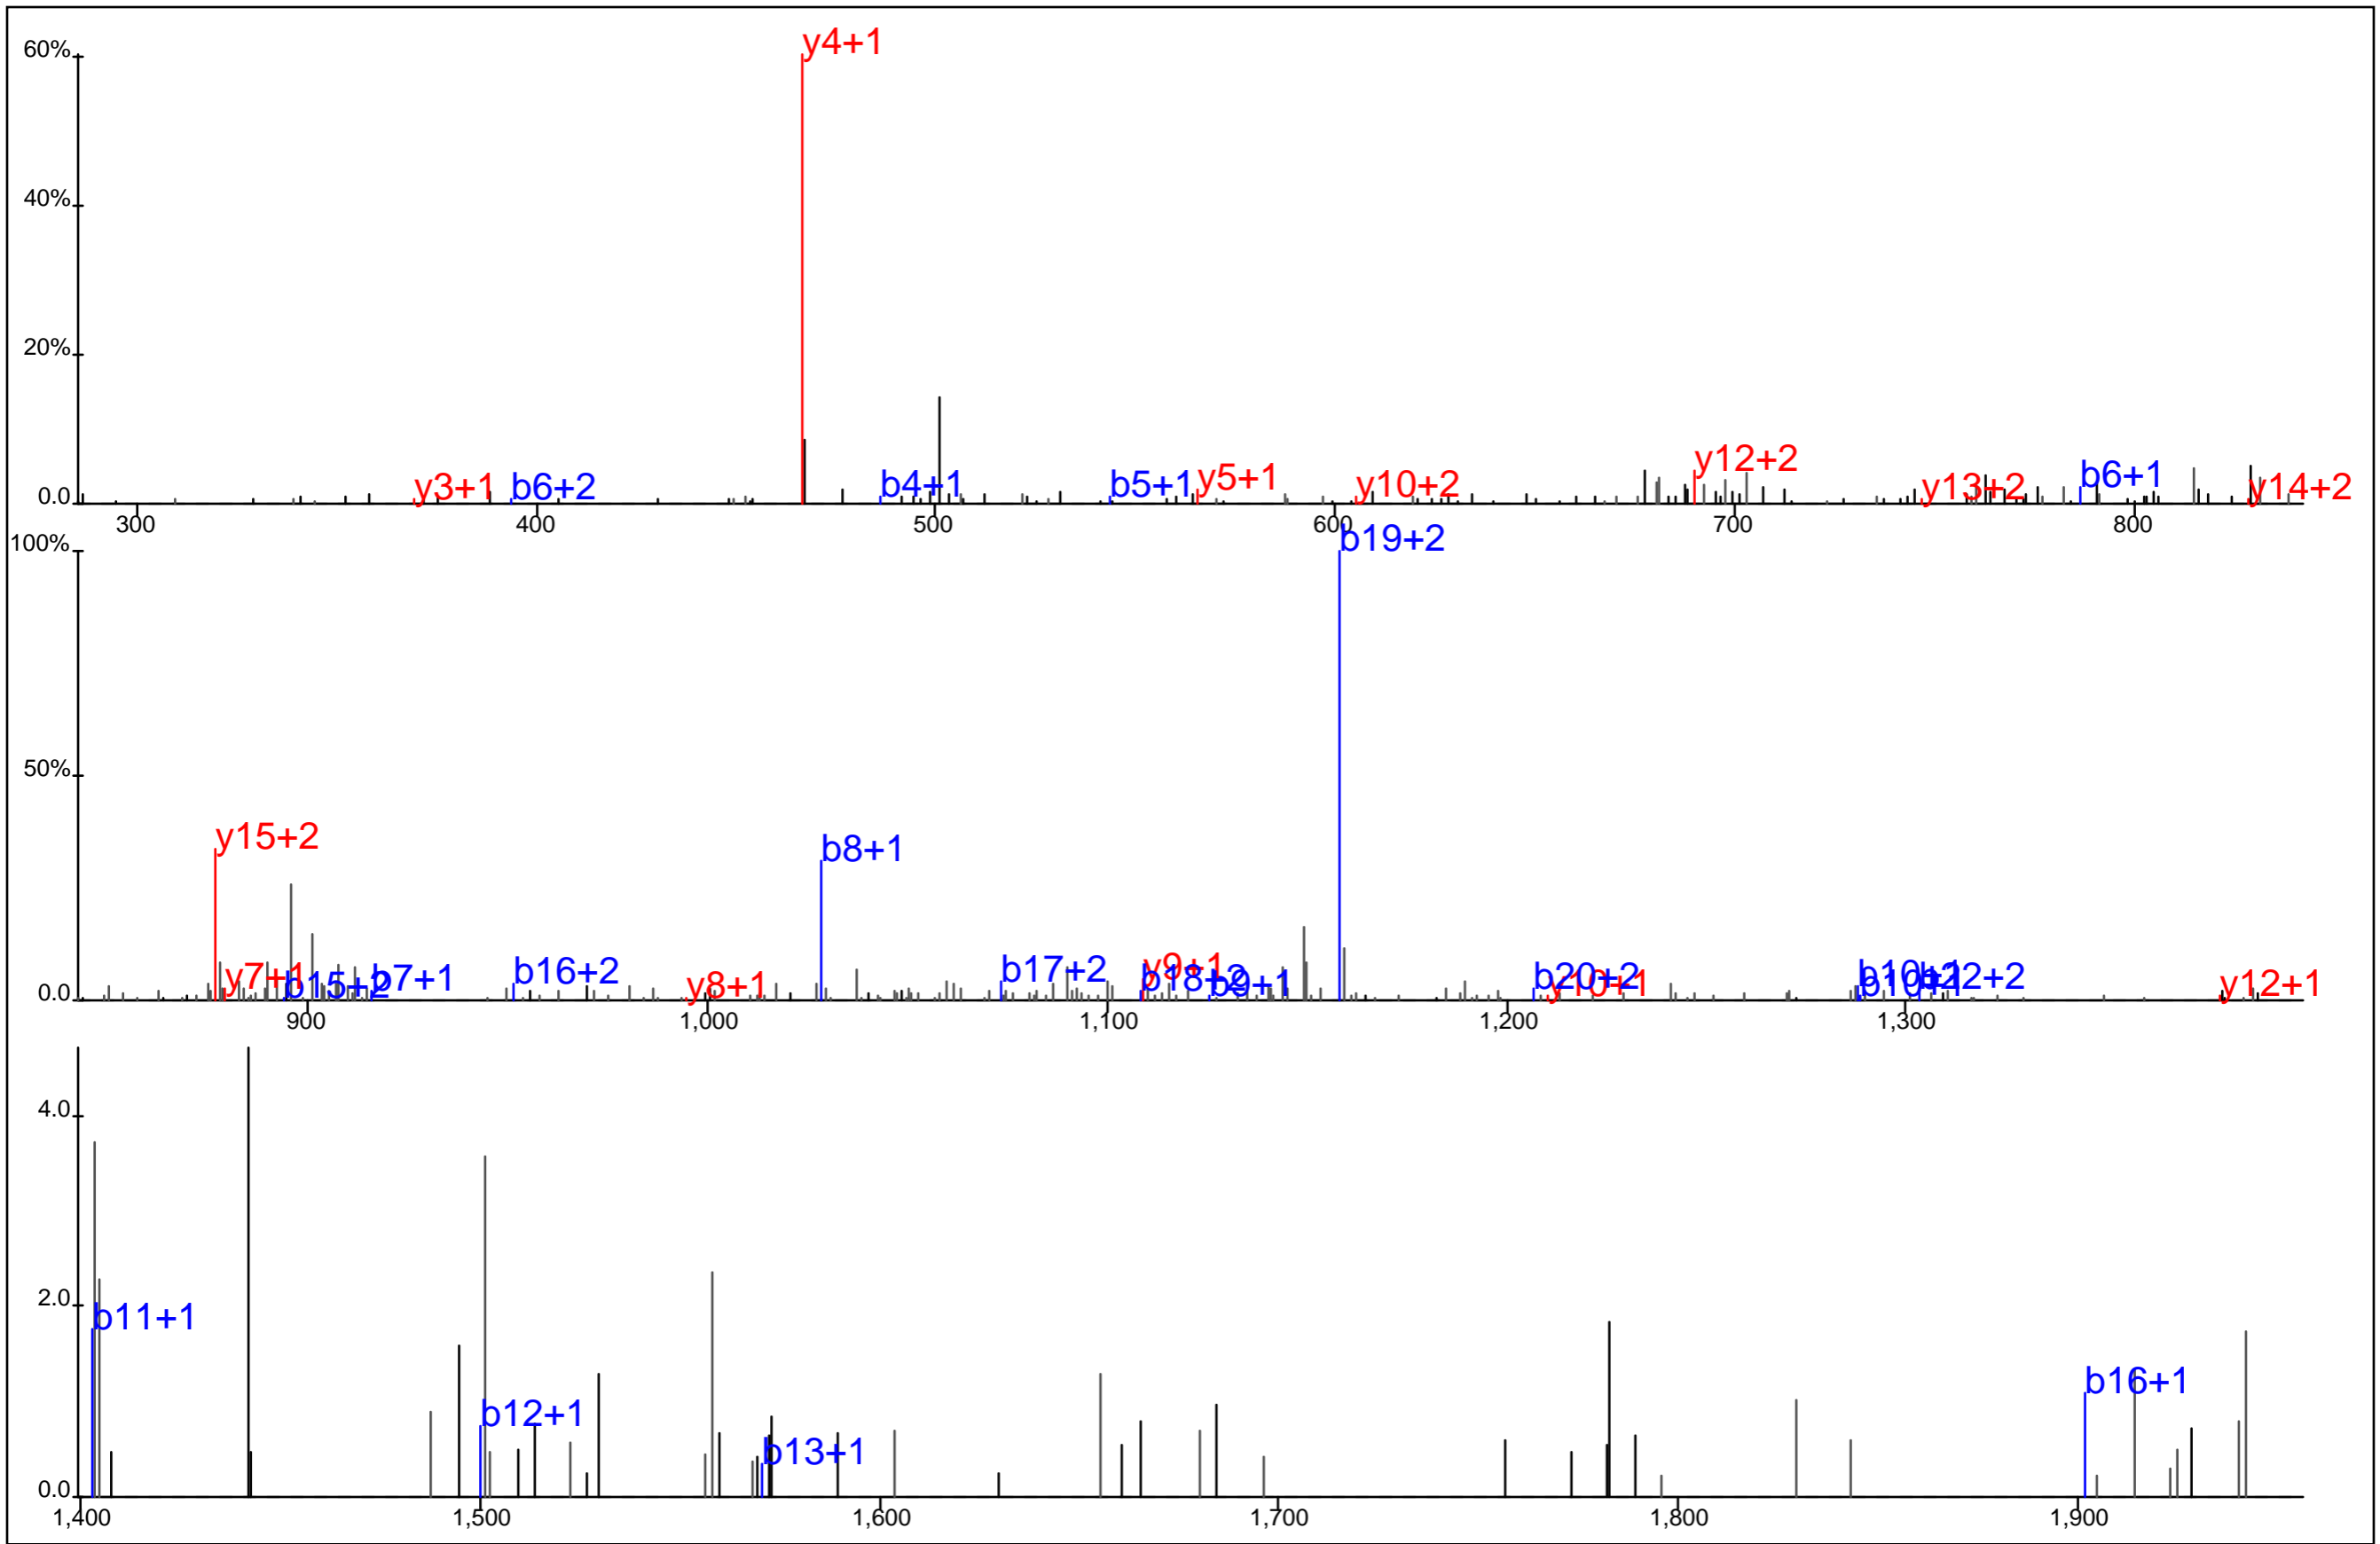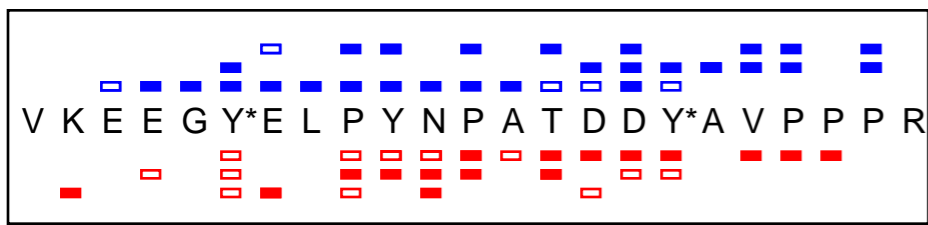

Protein Name: DOK1  
 gi Accession: 4503357  
 Precursor Mass: 927.3994+3  
 Delta Mass: 1.993 ppm  
 XCorr: 2.6606

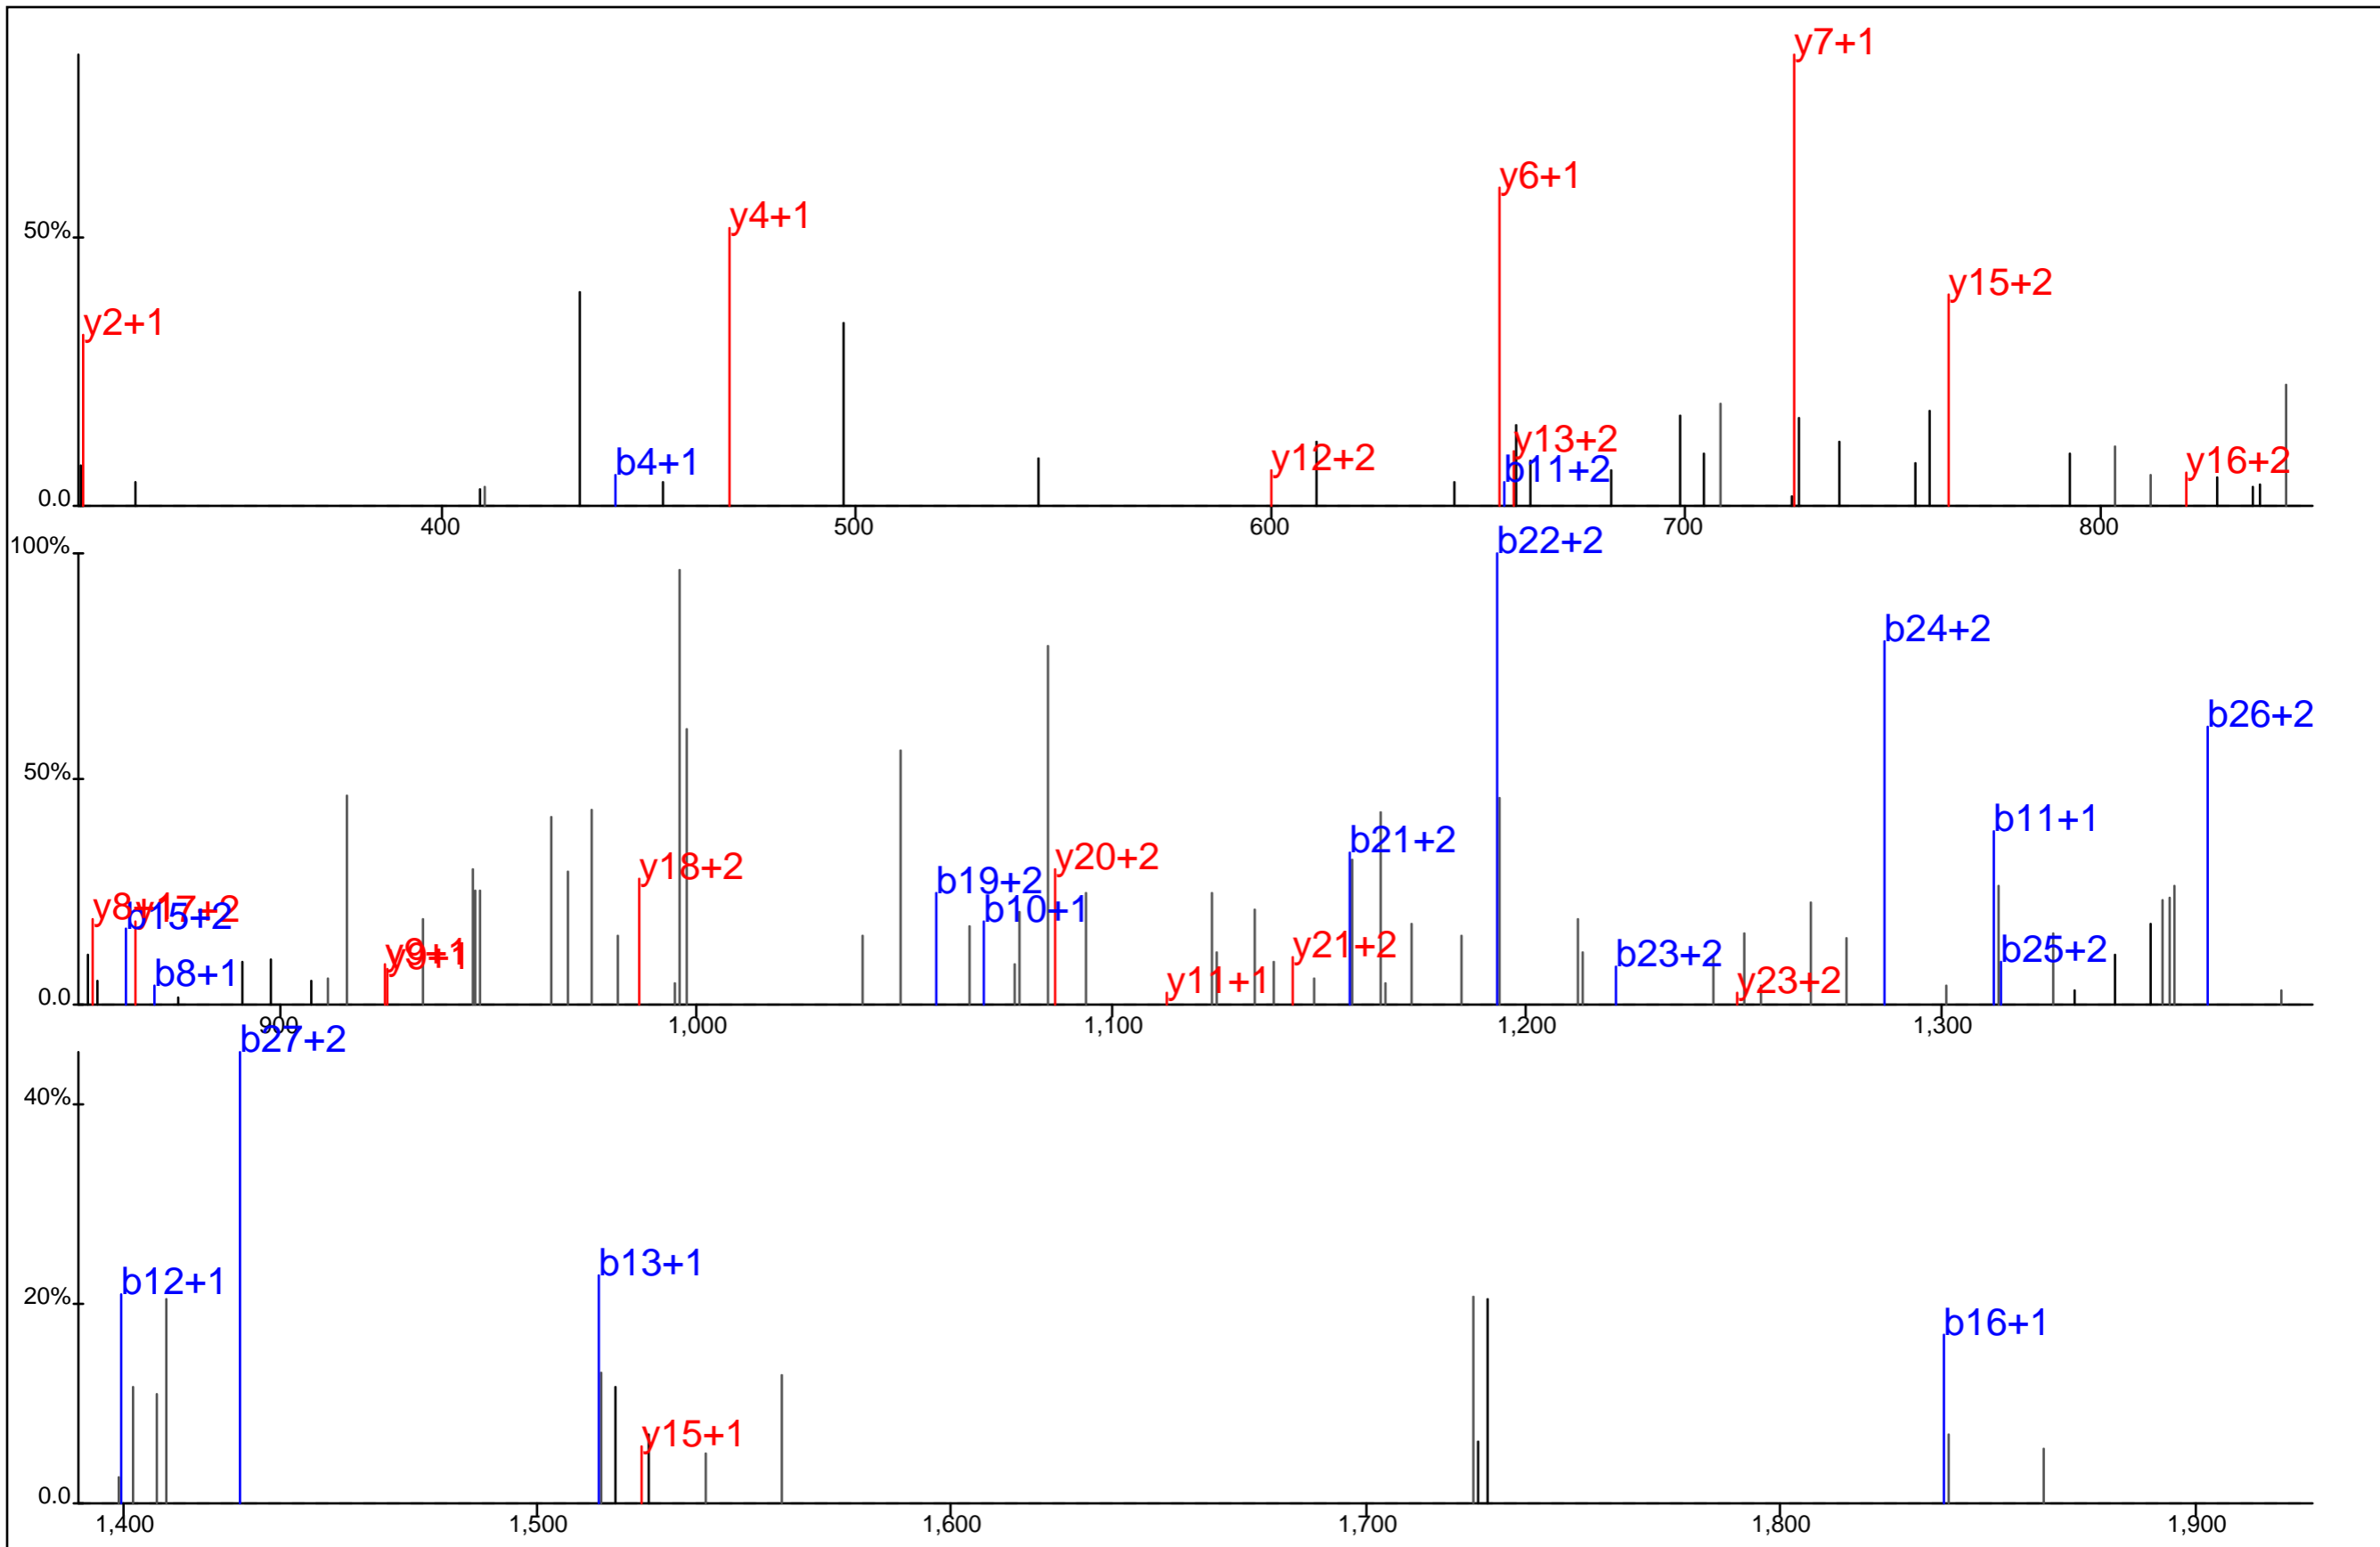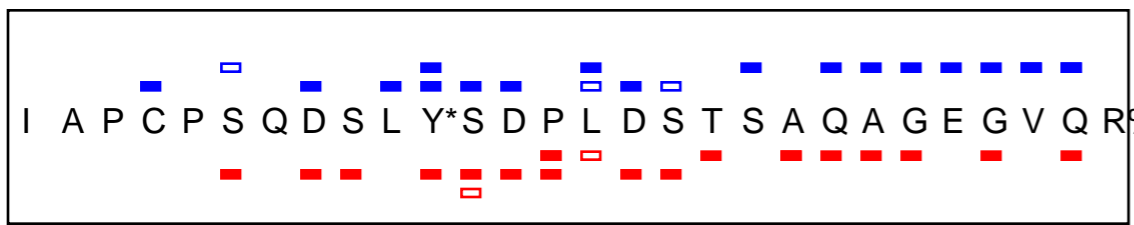

Protein Name: DOK1  
 gi Accession: 4503357  
 Precursor Mass: 1,013.7863+3  
 Delta Mass: 5.504 ppm  
 XCorr: 32.61



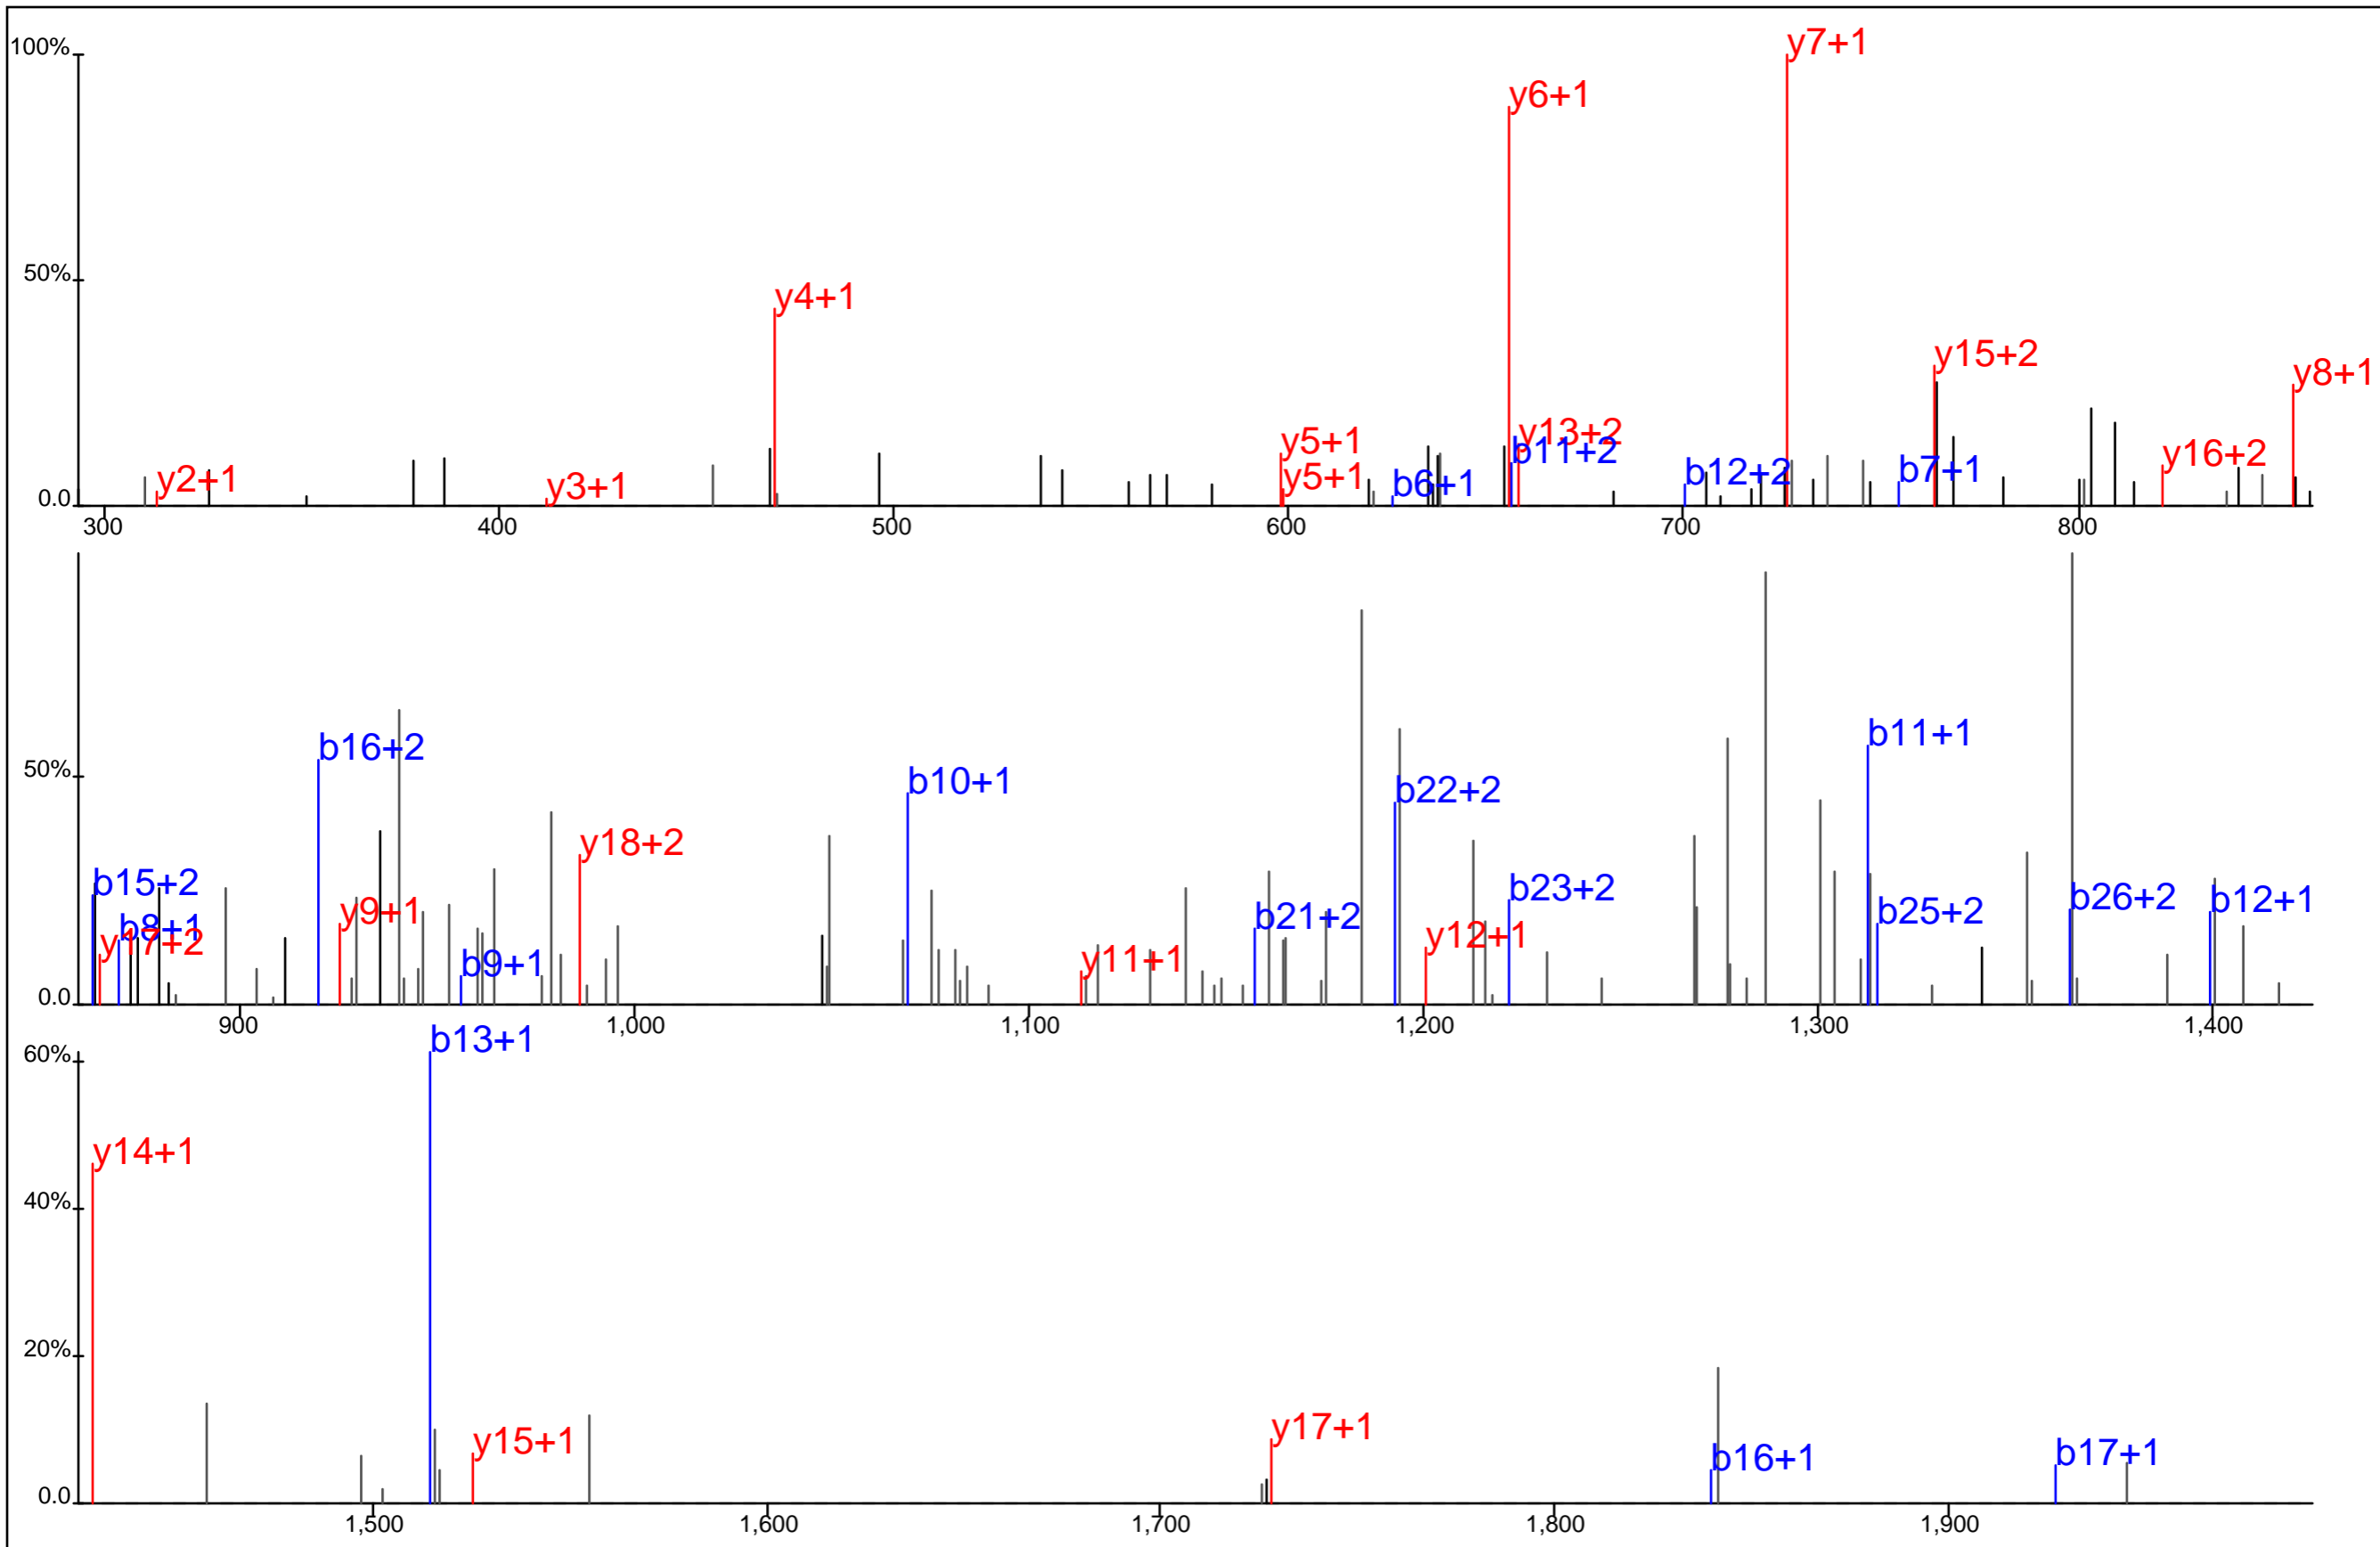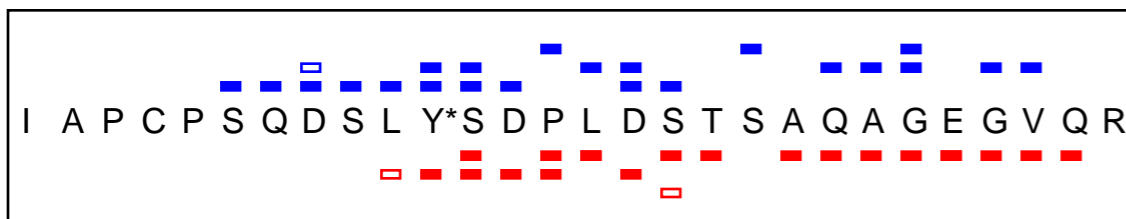

Protein Name: DOK1  
 gi Accession: 4503357  
 Precursor Mass: 1,013.7837+3  
 Delta Mass: 2.915 ppm  
 XCorr: 30.4

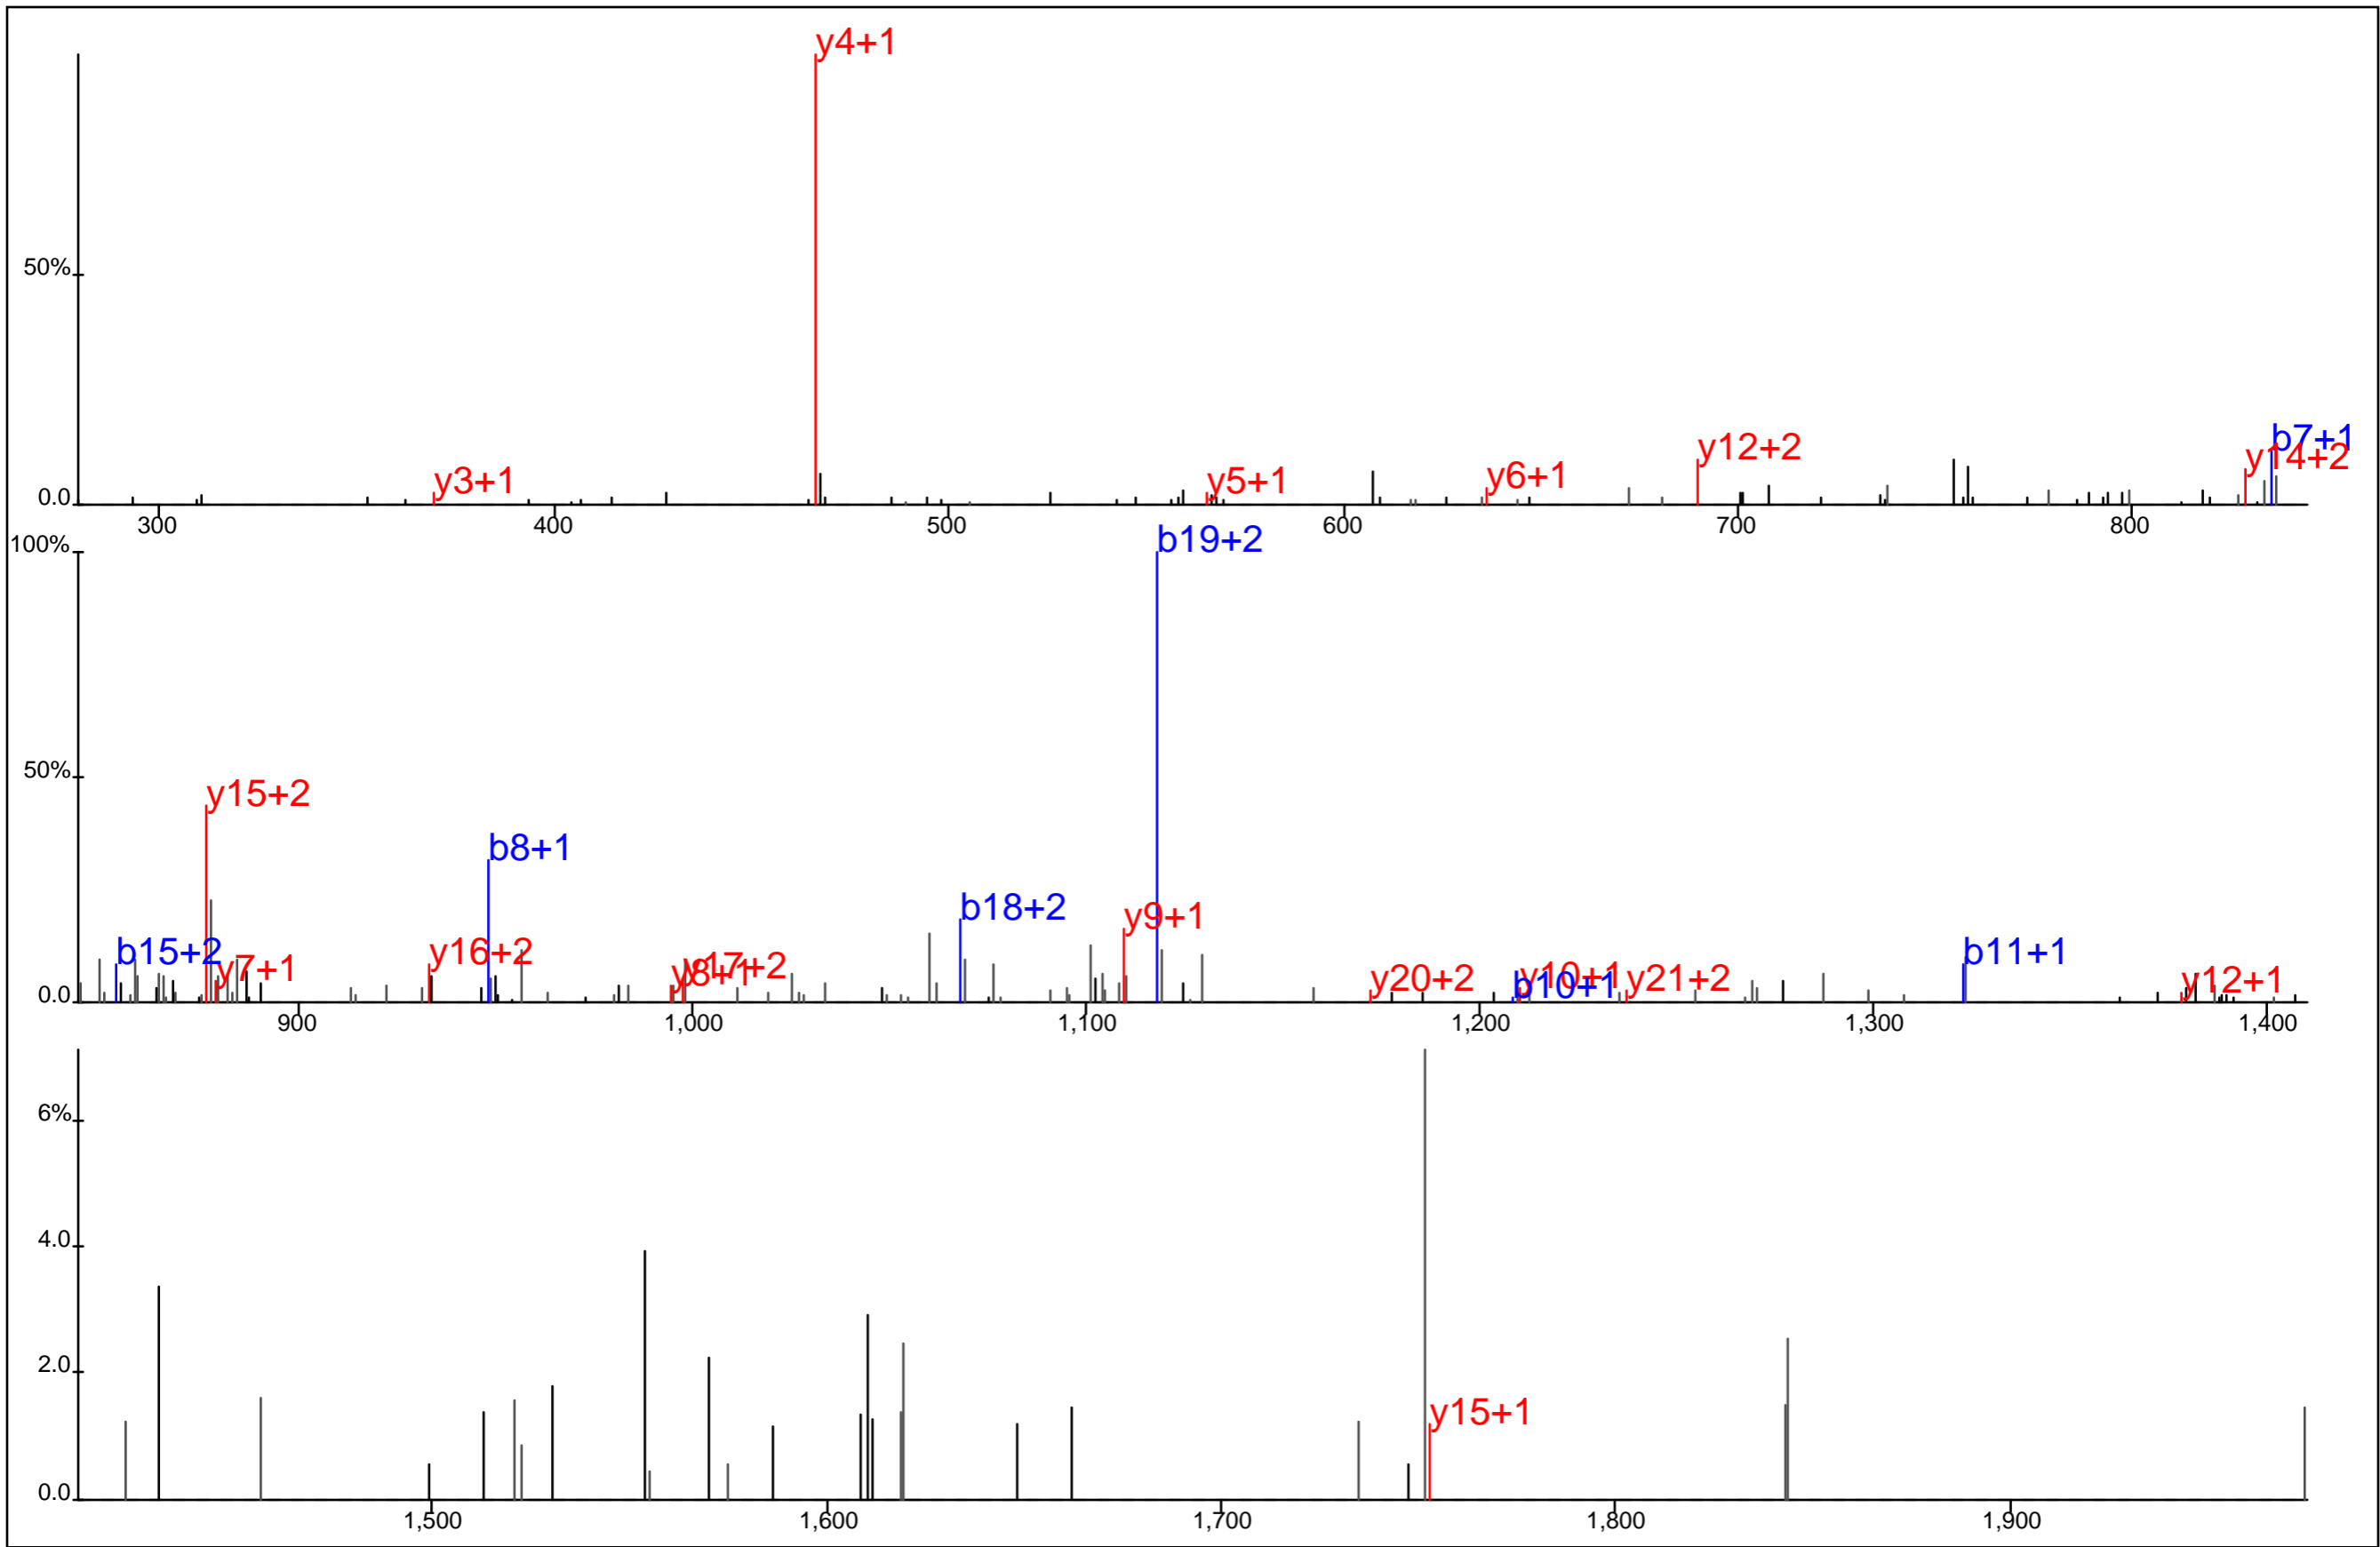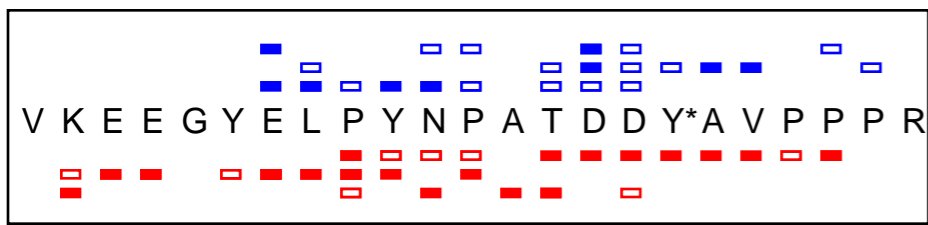

Protein Name: DOK1  
 gi Accession: 4503357  
 Precursor Mass: 900.7465+3  
 Delta Mass: 0.796 ppm  
 XCorr: 12.24

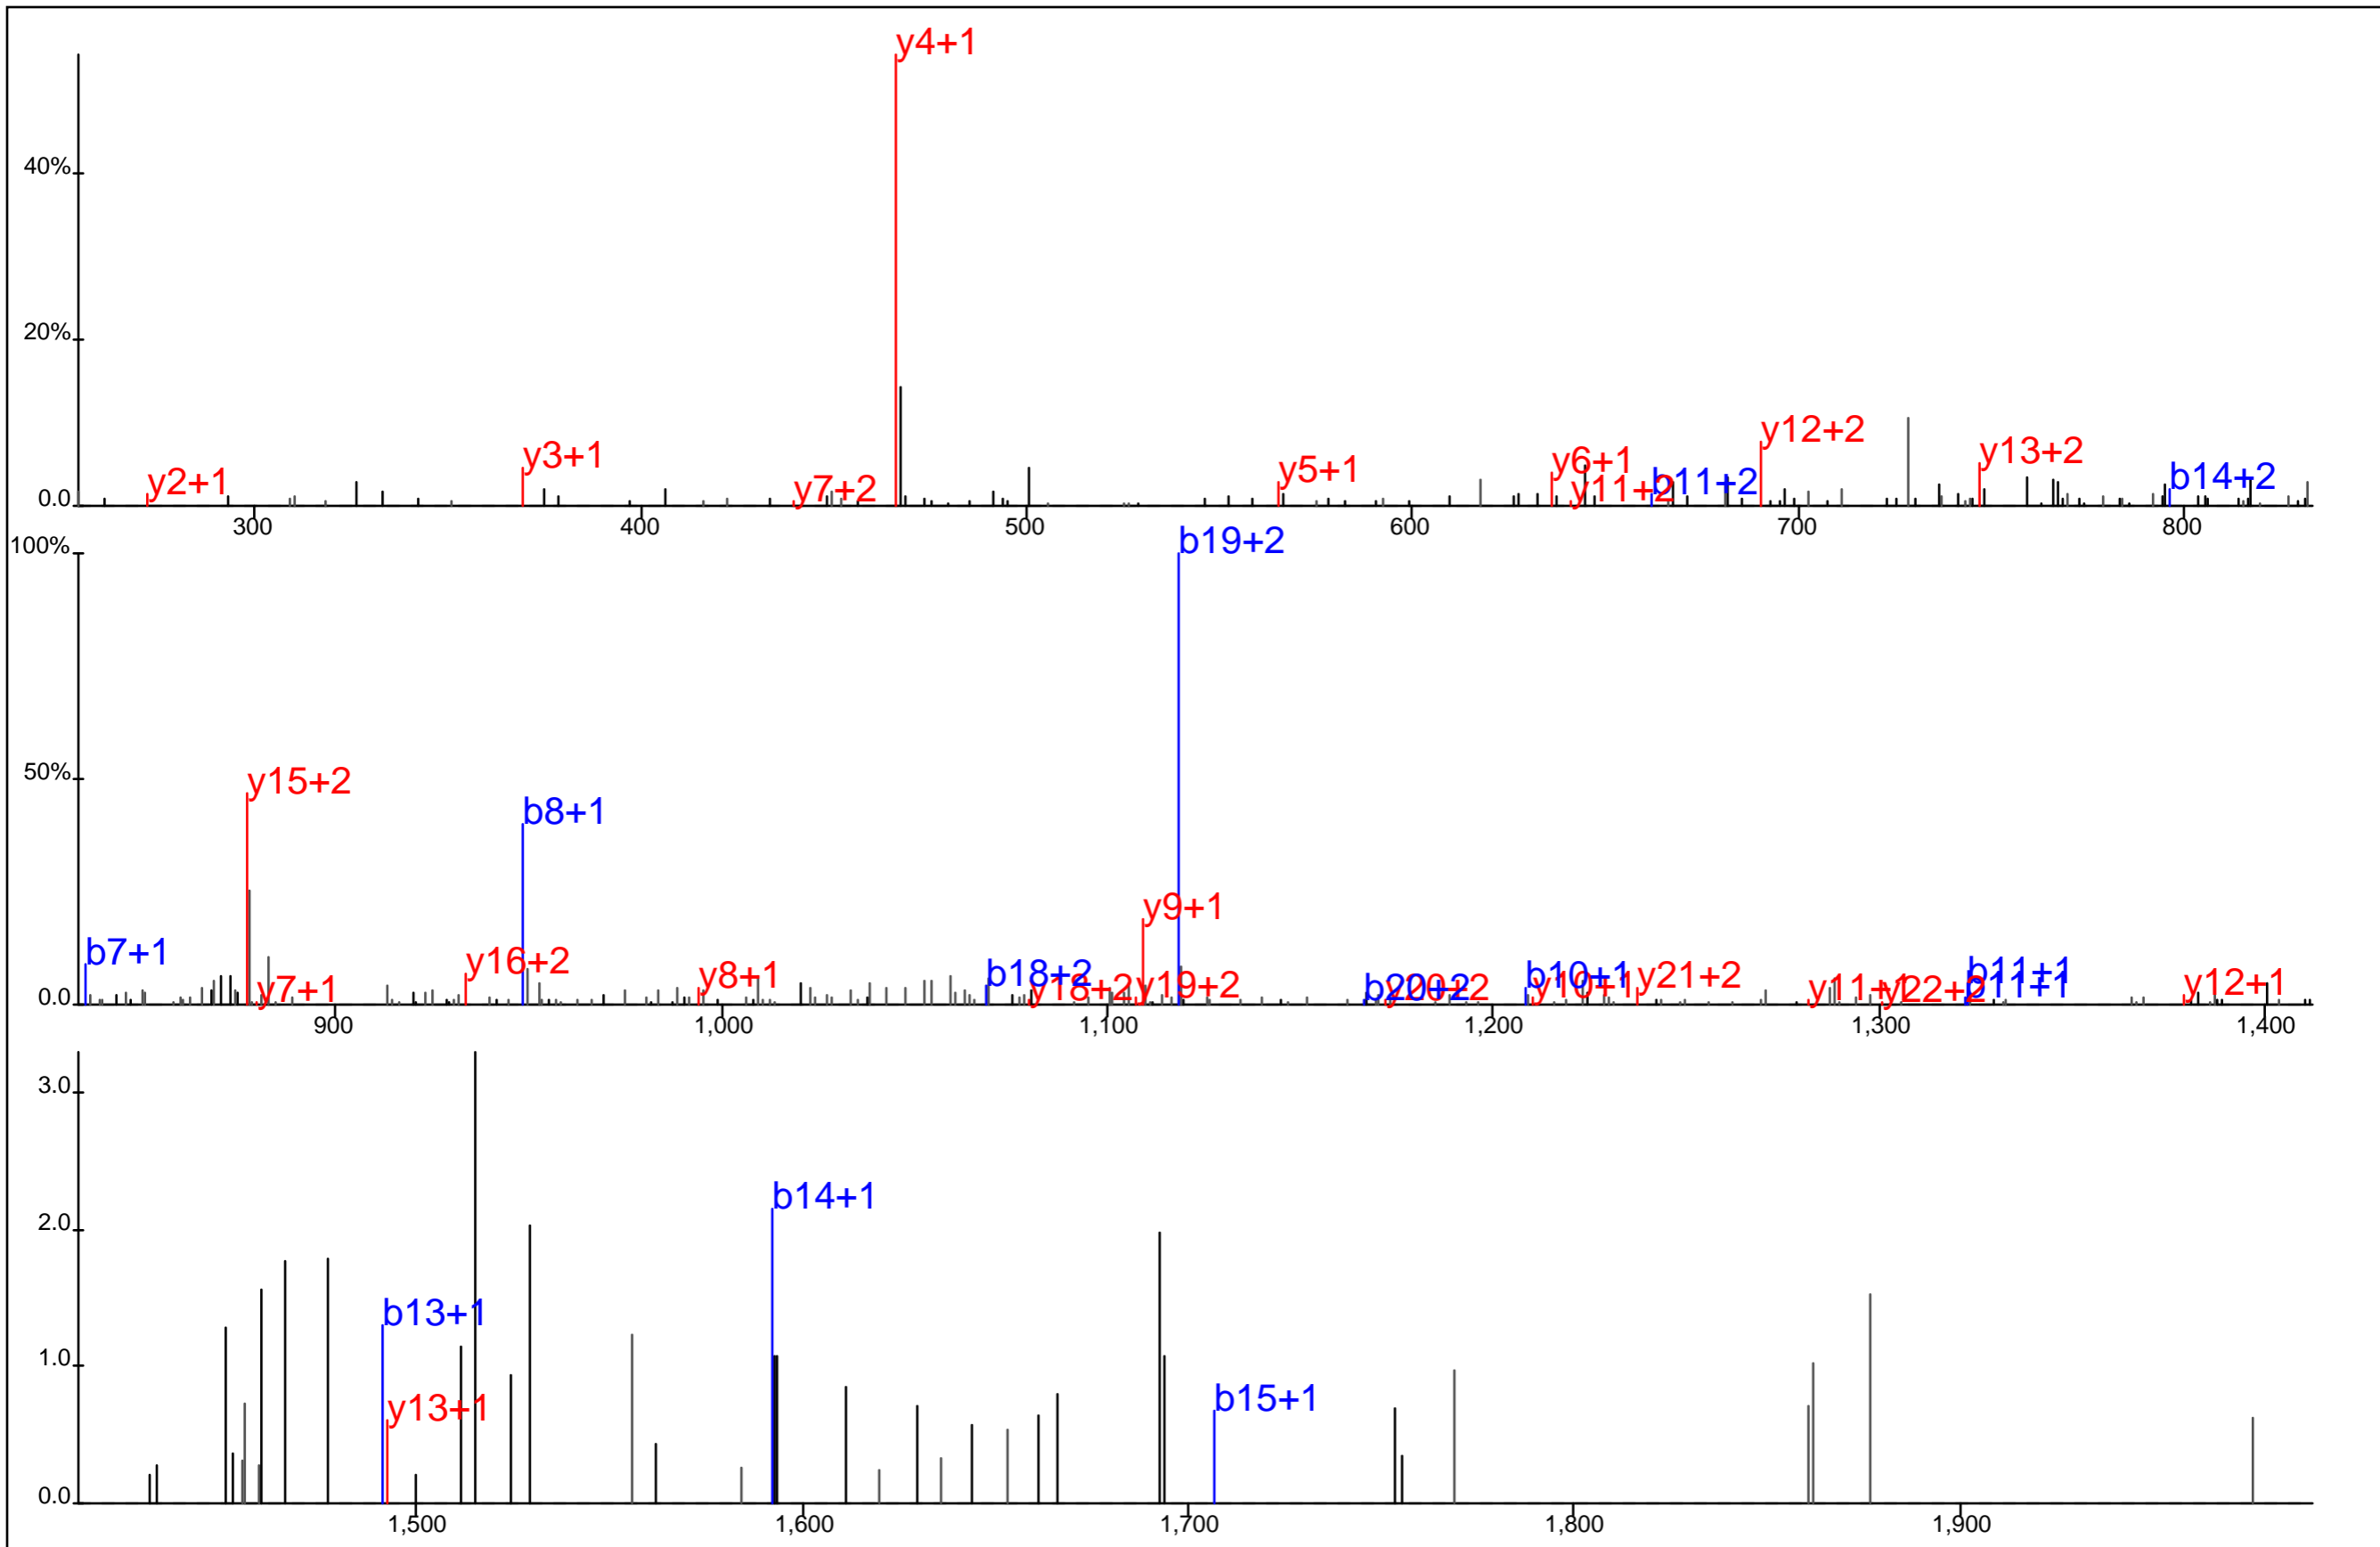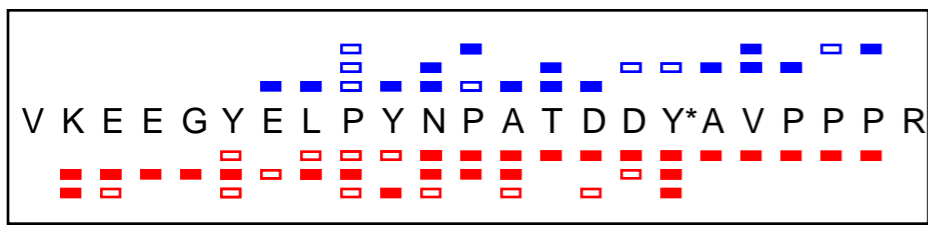

Protein Name: DOK1  
 gi Accession: 4503357  
 Precursor Mass: 900.7410+3  
 Delta Mass: 5.308 ppm  
 XCorr: 16.7

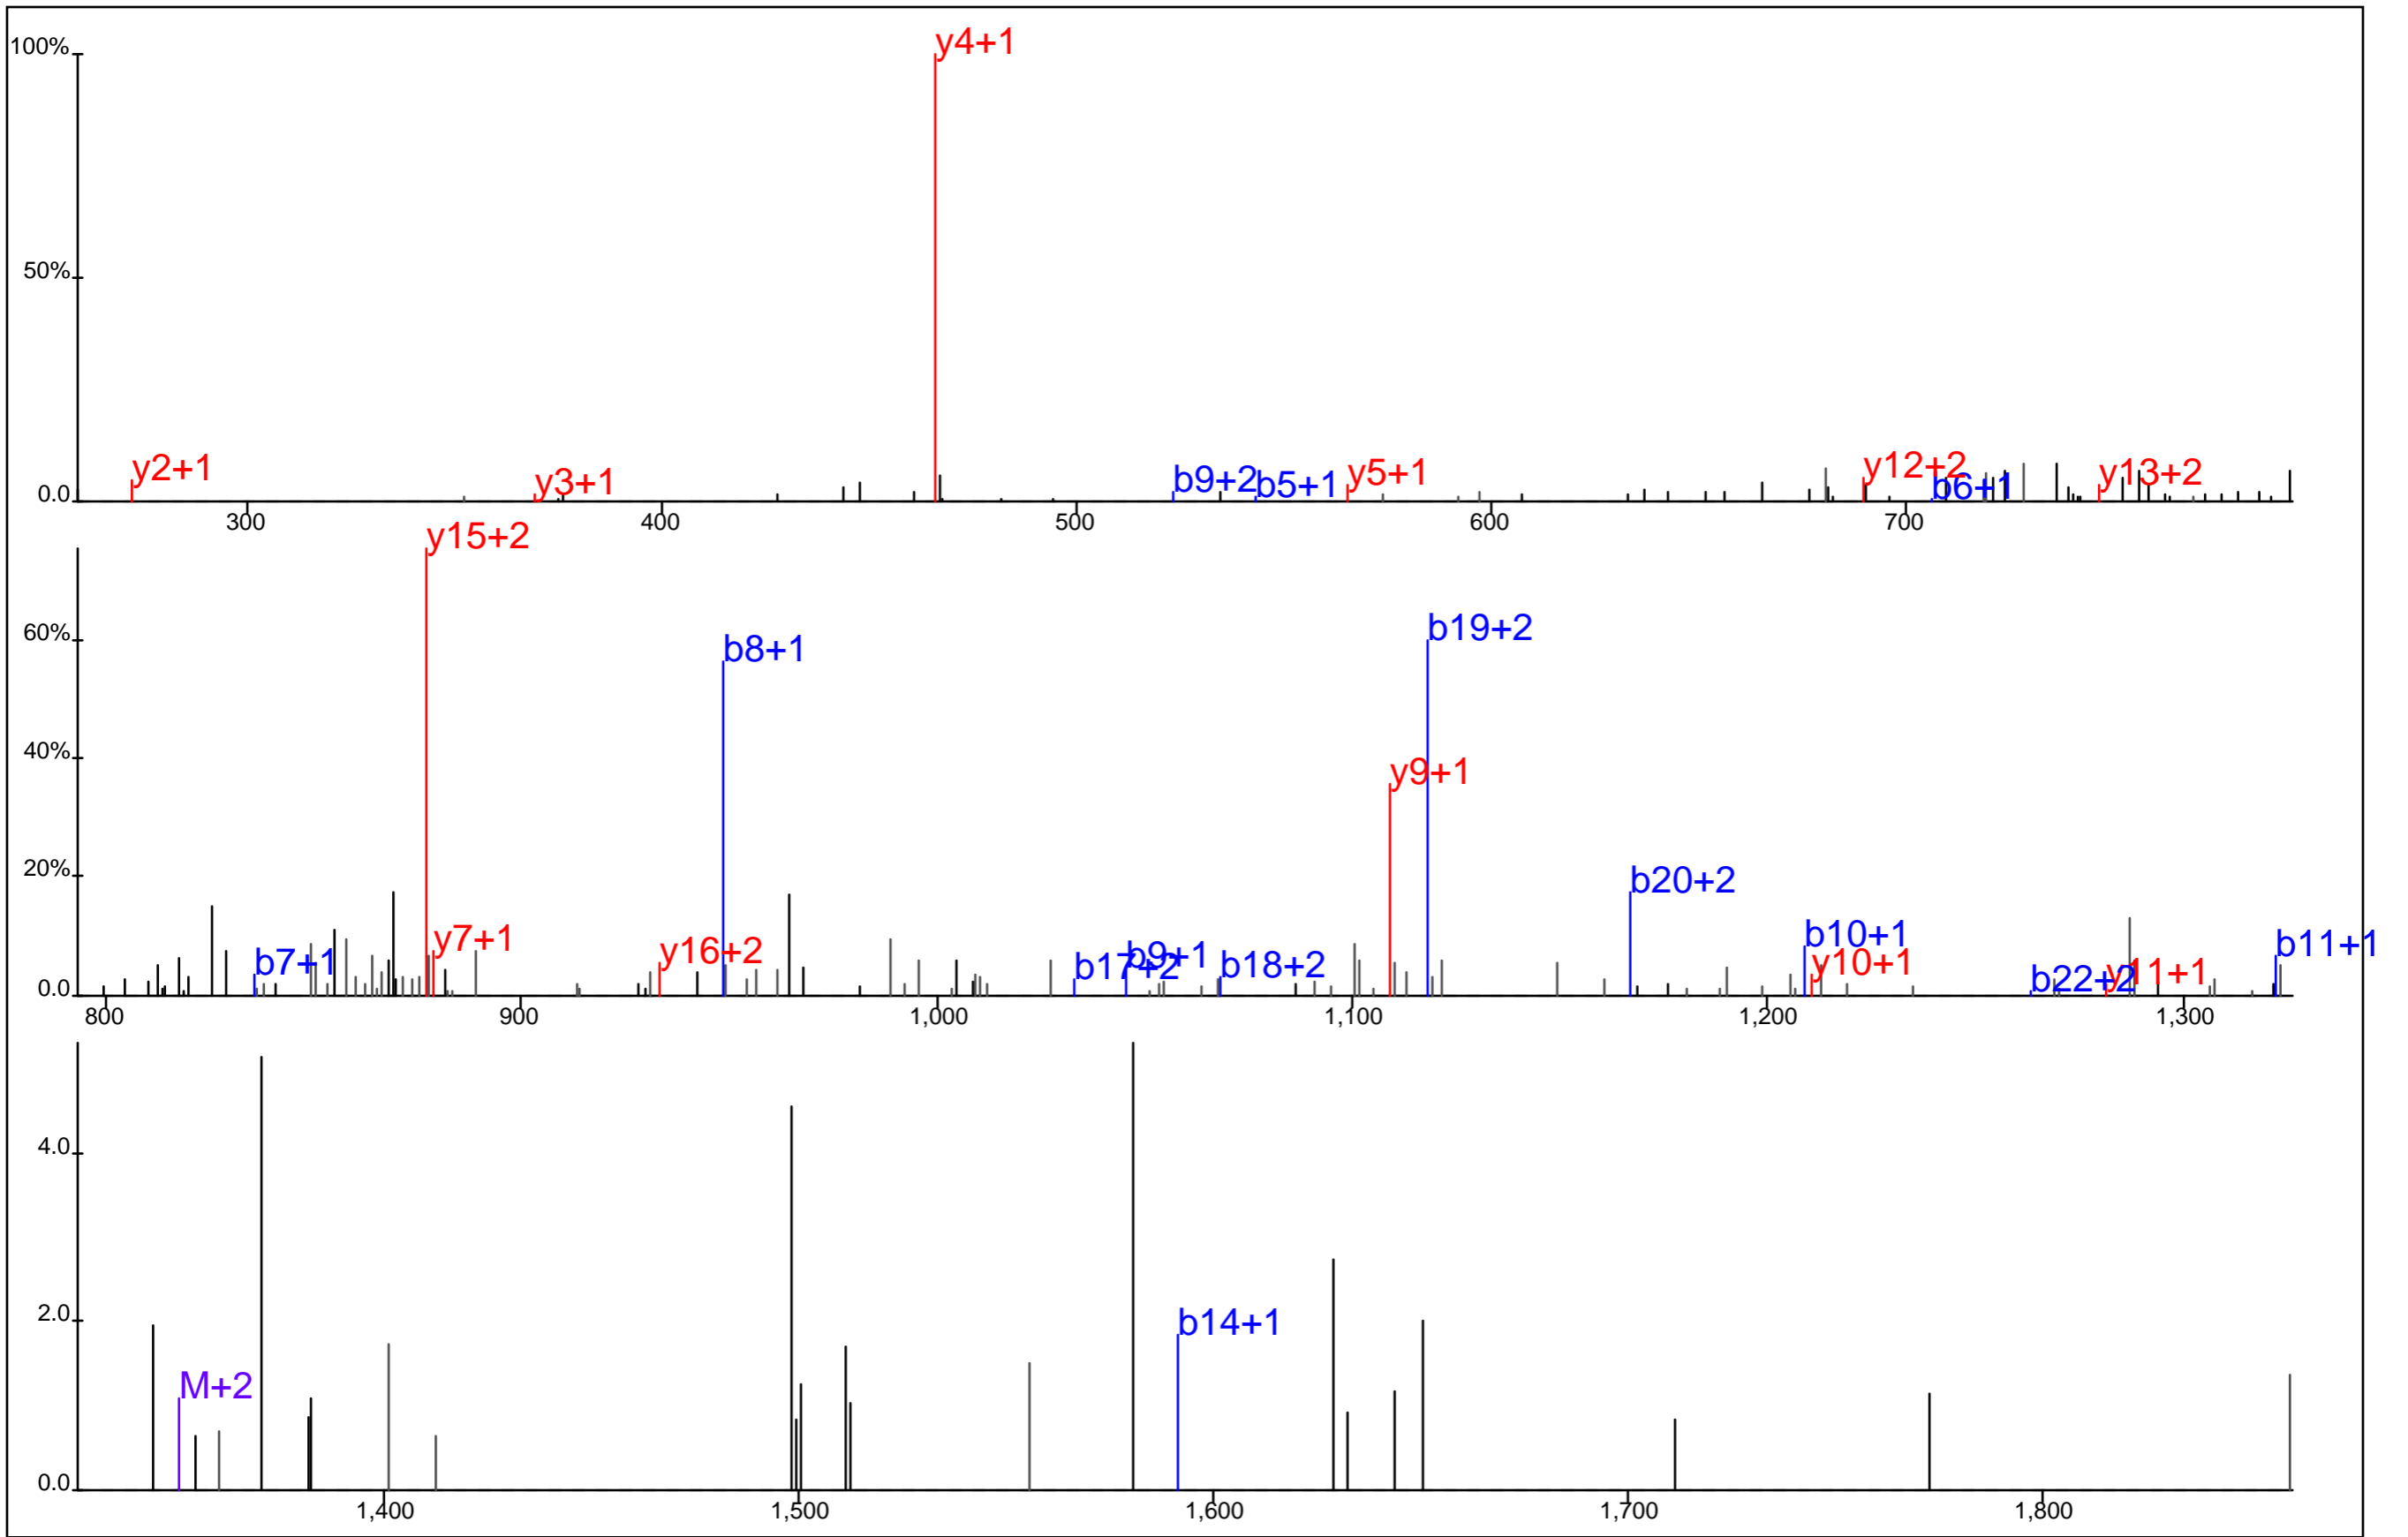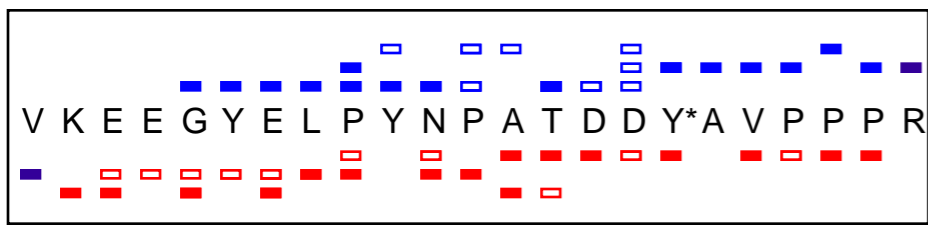

Protein Name: DOK1  
 gi Accession: 4503357  
 Precursor Mass: 900.7521+3  
 Delta Mass: 6.965 ppm  
 XCorr: 17.44

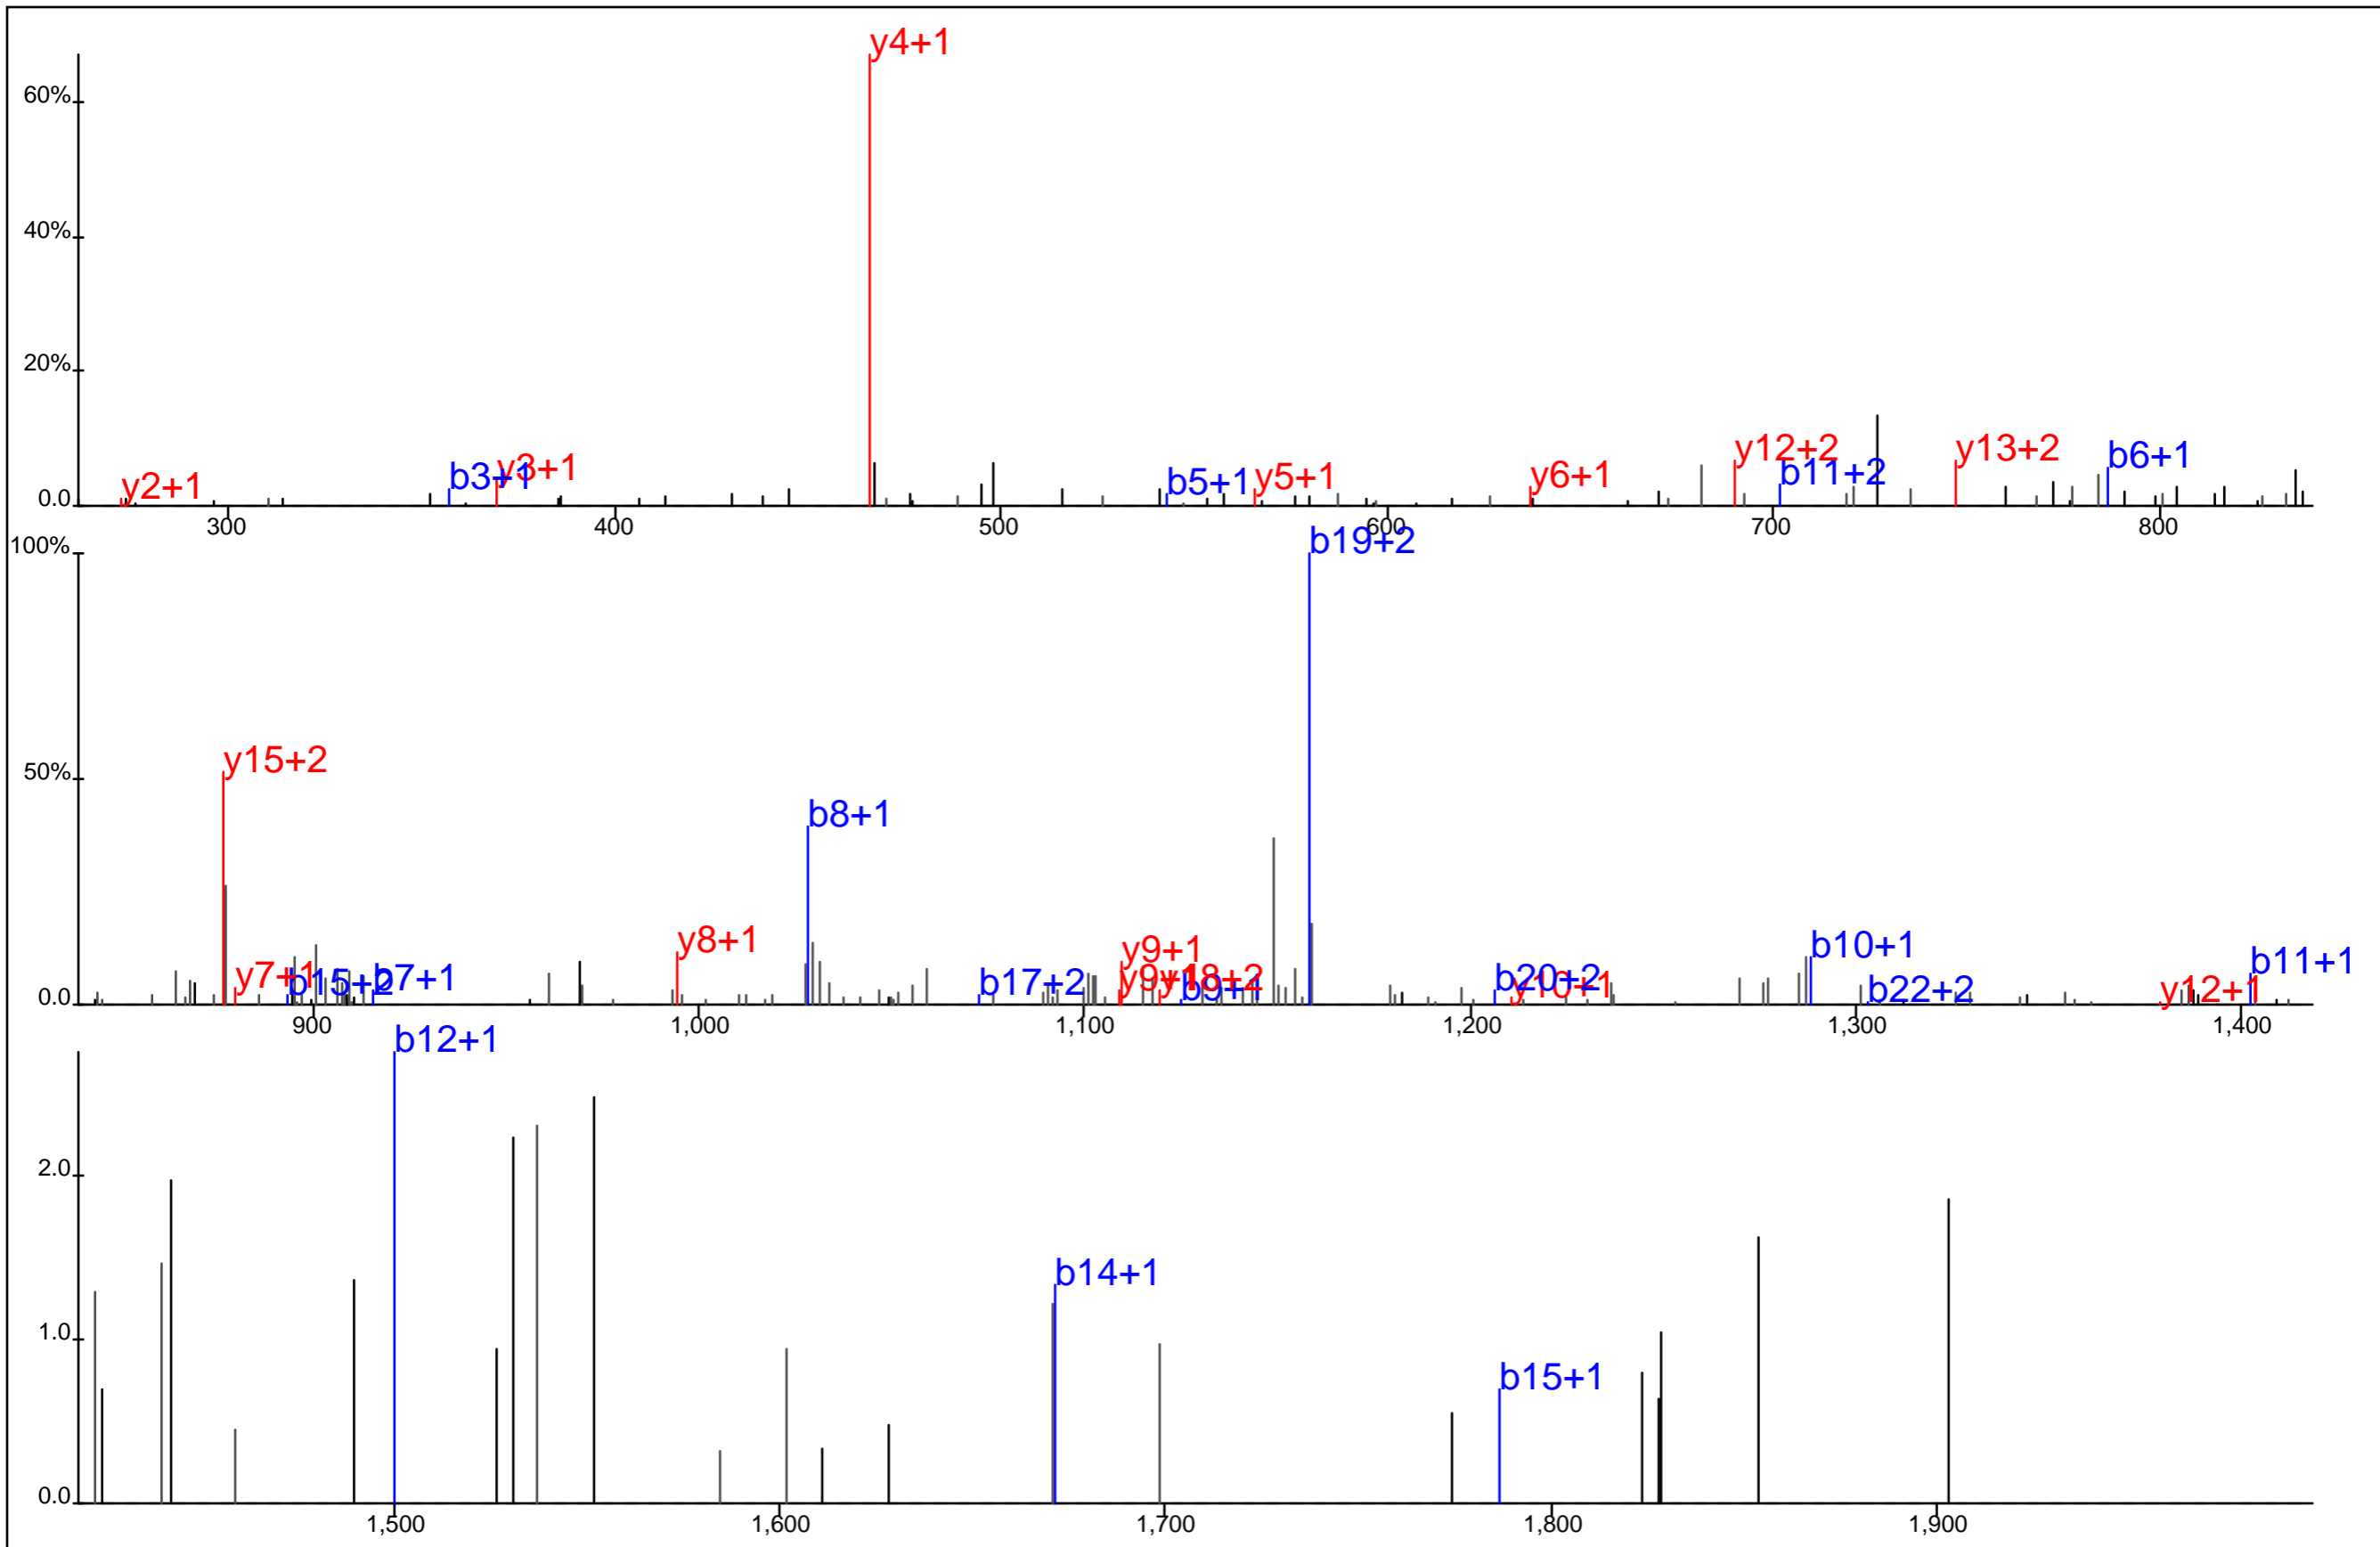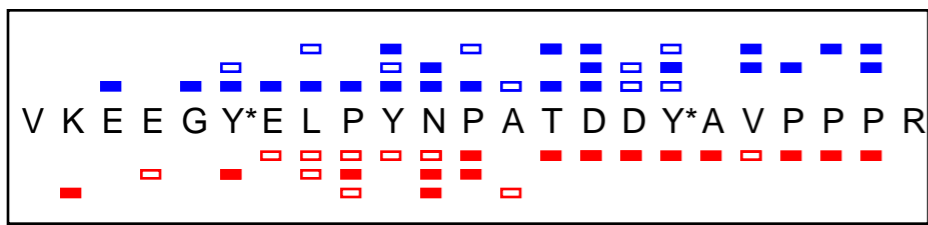

Protein Name: DOK1  
 gi Accession: 4503357  
 Precursor Mass: 927.4031+3  
 Delta Mass: 1.974 ppm  
 XCorr: 27.12

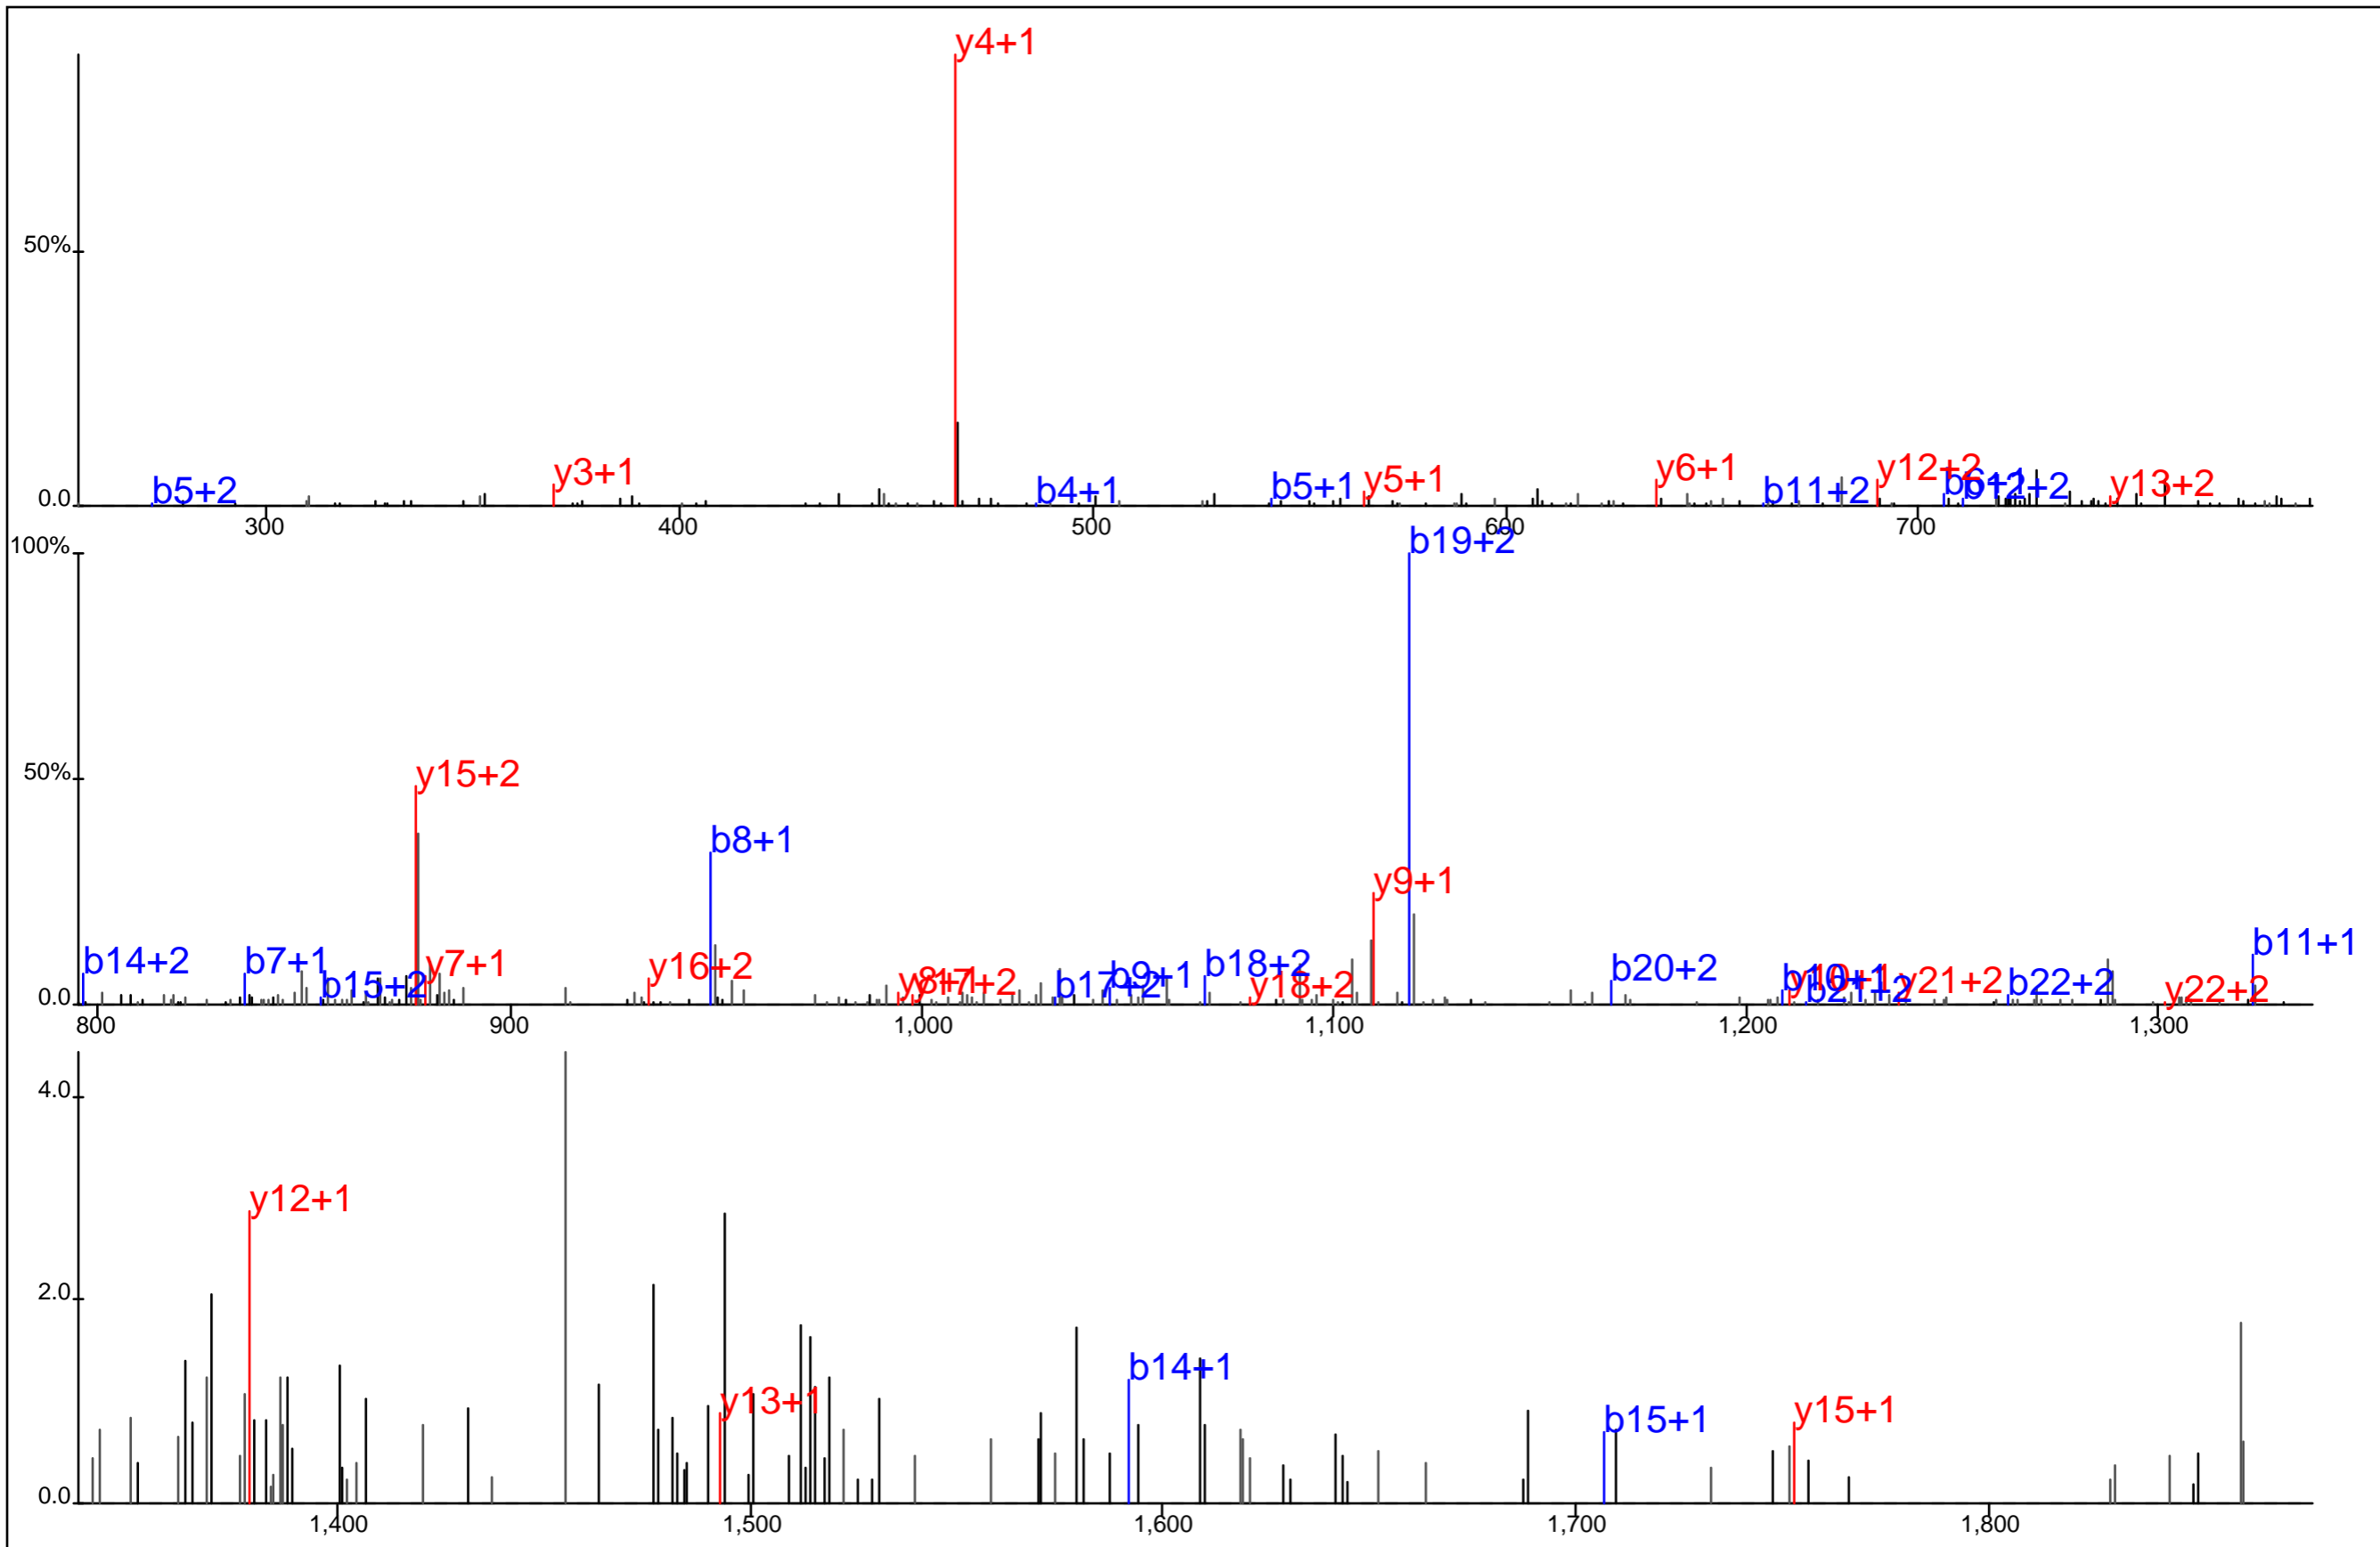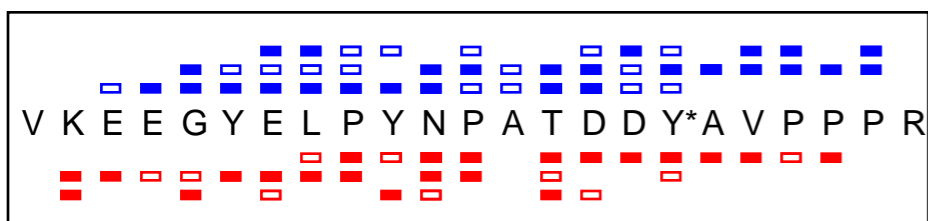

Protein Name: DOK1  
 gi Accession: 4503357  
 Precursor Mass: 900.7444+3  
 Delta Mass: 1.512 ppm  
 XCorr: 31.74

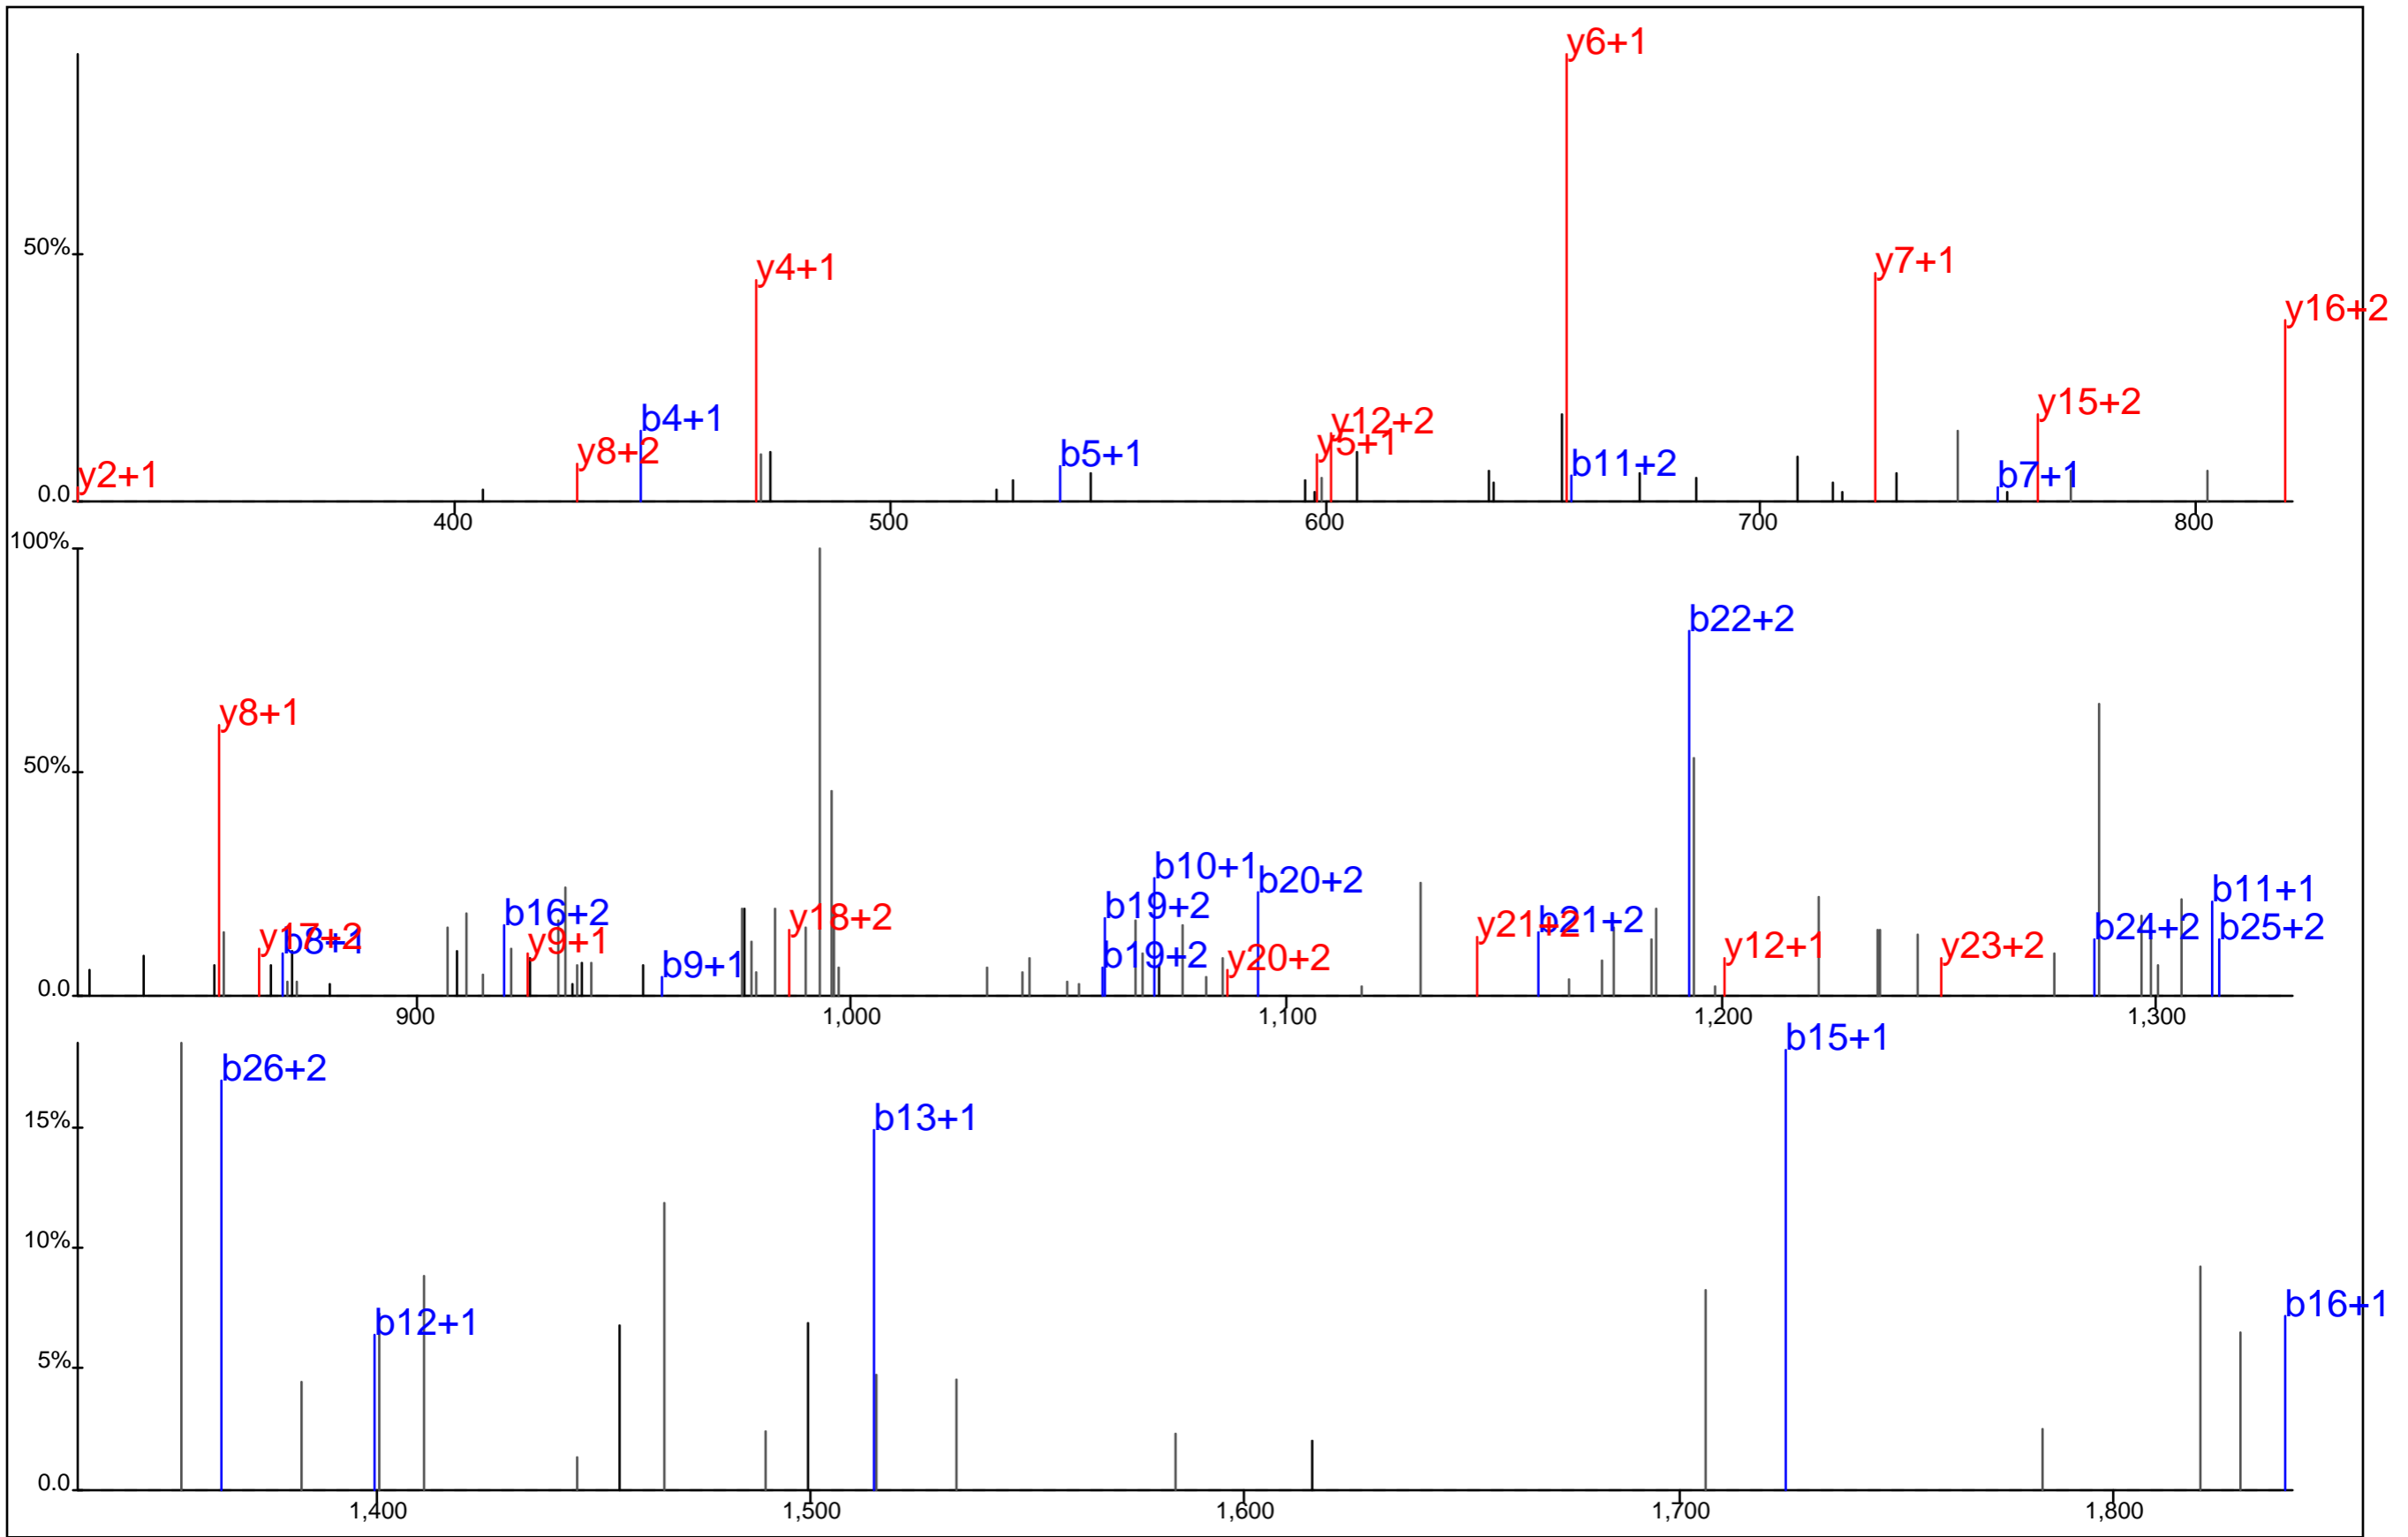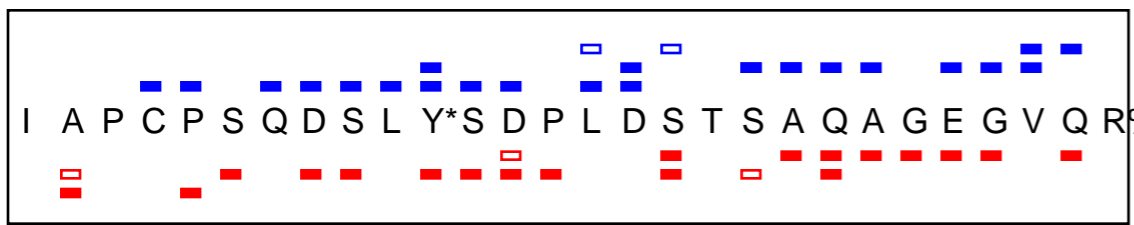

Protein Name: DOK1  
 gi Accession: 4503357  
 Precursor Mass: 1,013.7812+3  
 Delta Mass: 0.443 ppm  
 XCorr: 46.63

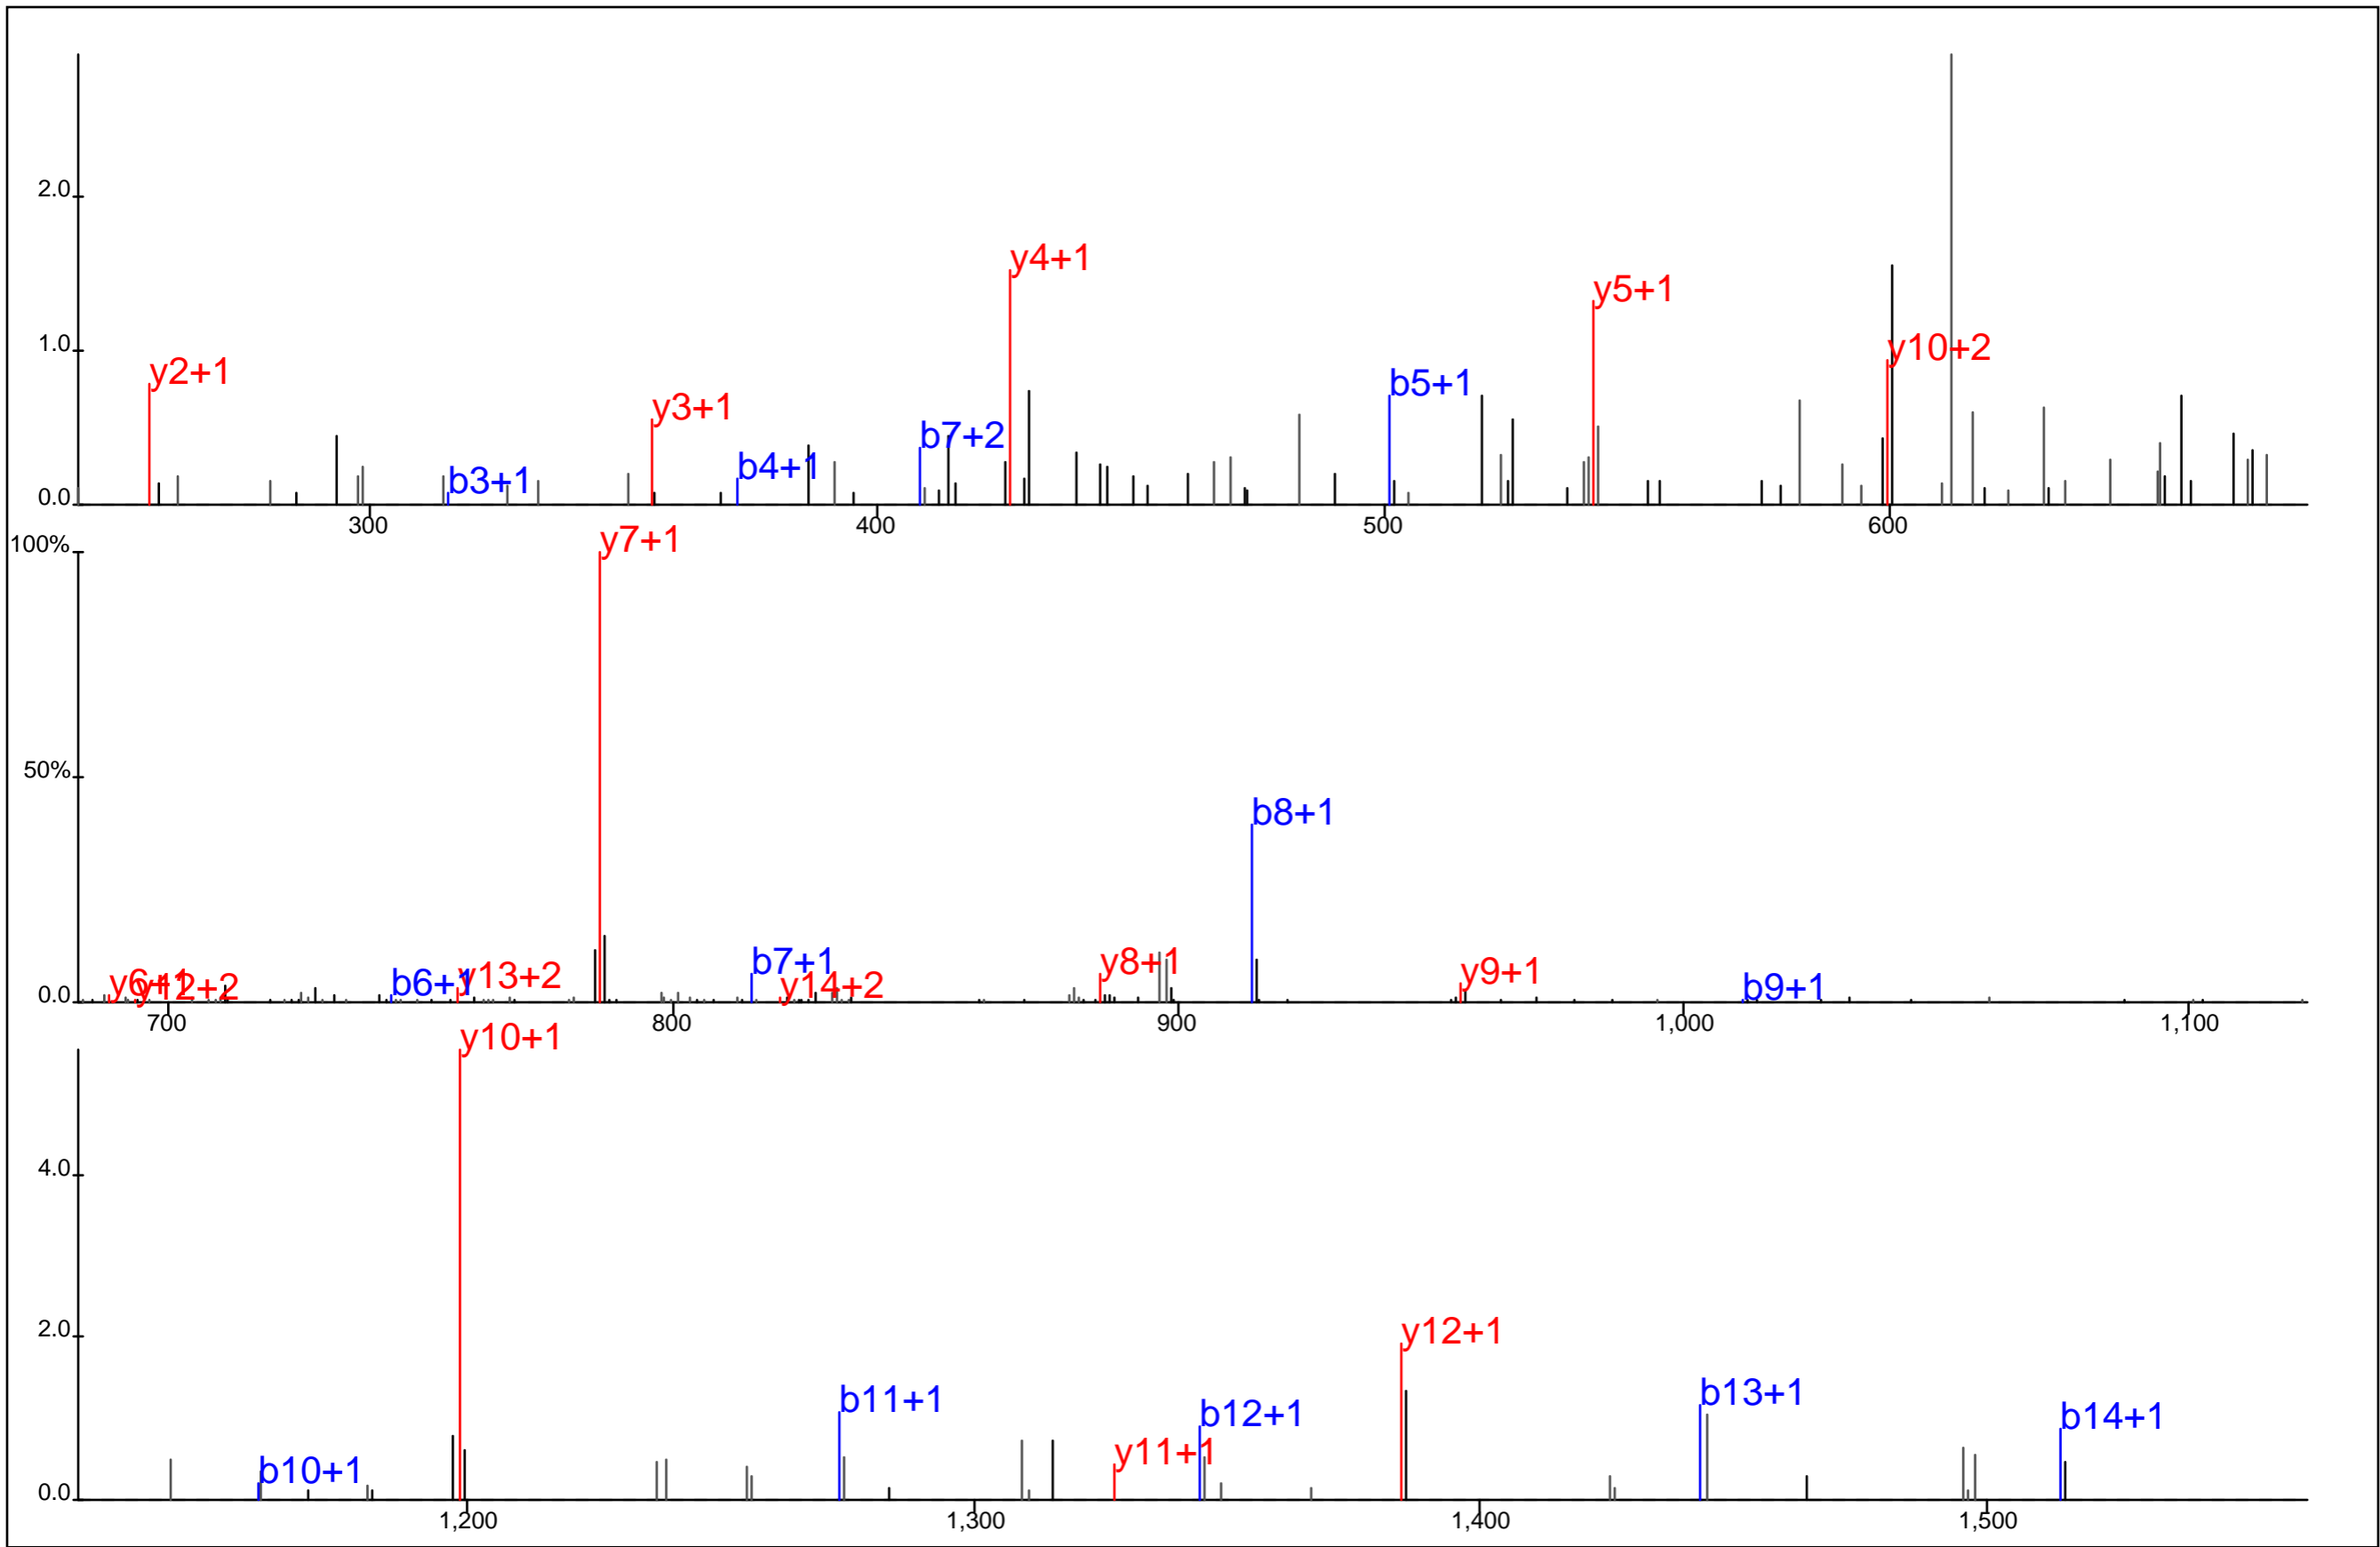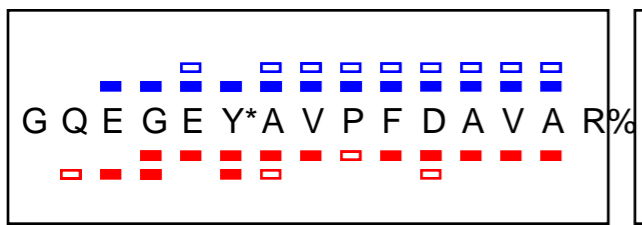

Protein Name: DOK2  
 gi Accession: 3043919  
 Precursor Mass: 849.8810+2  
 Delta Mass: 8.805 ppm  
 XCorr: 56.52



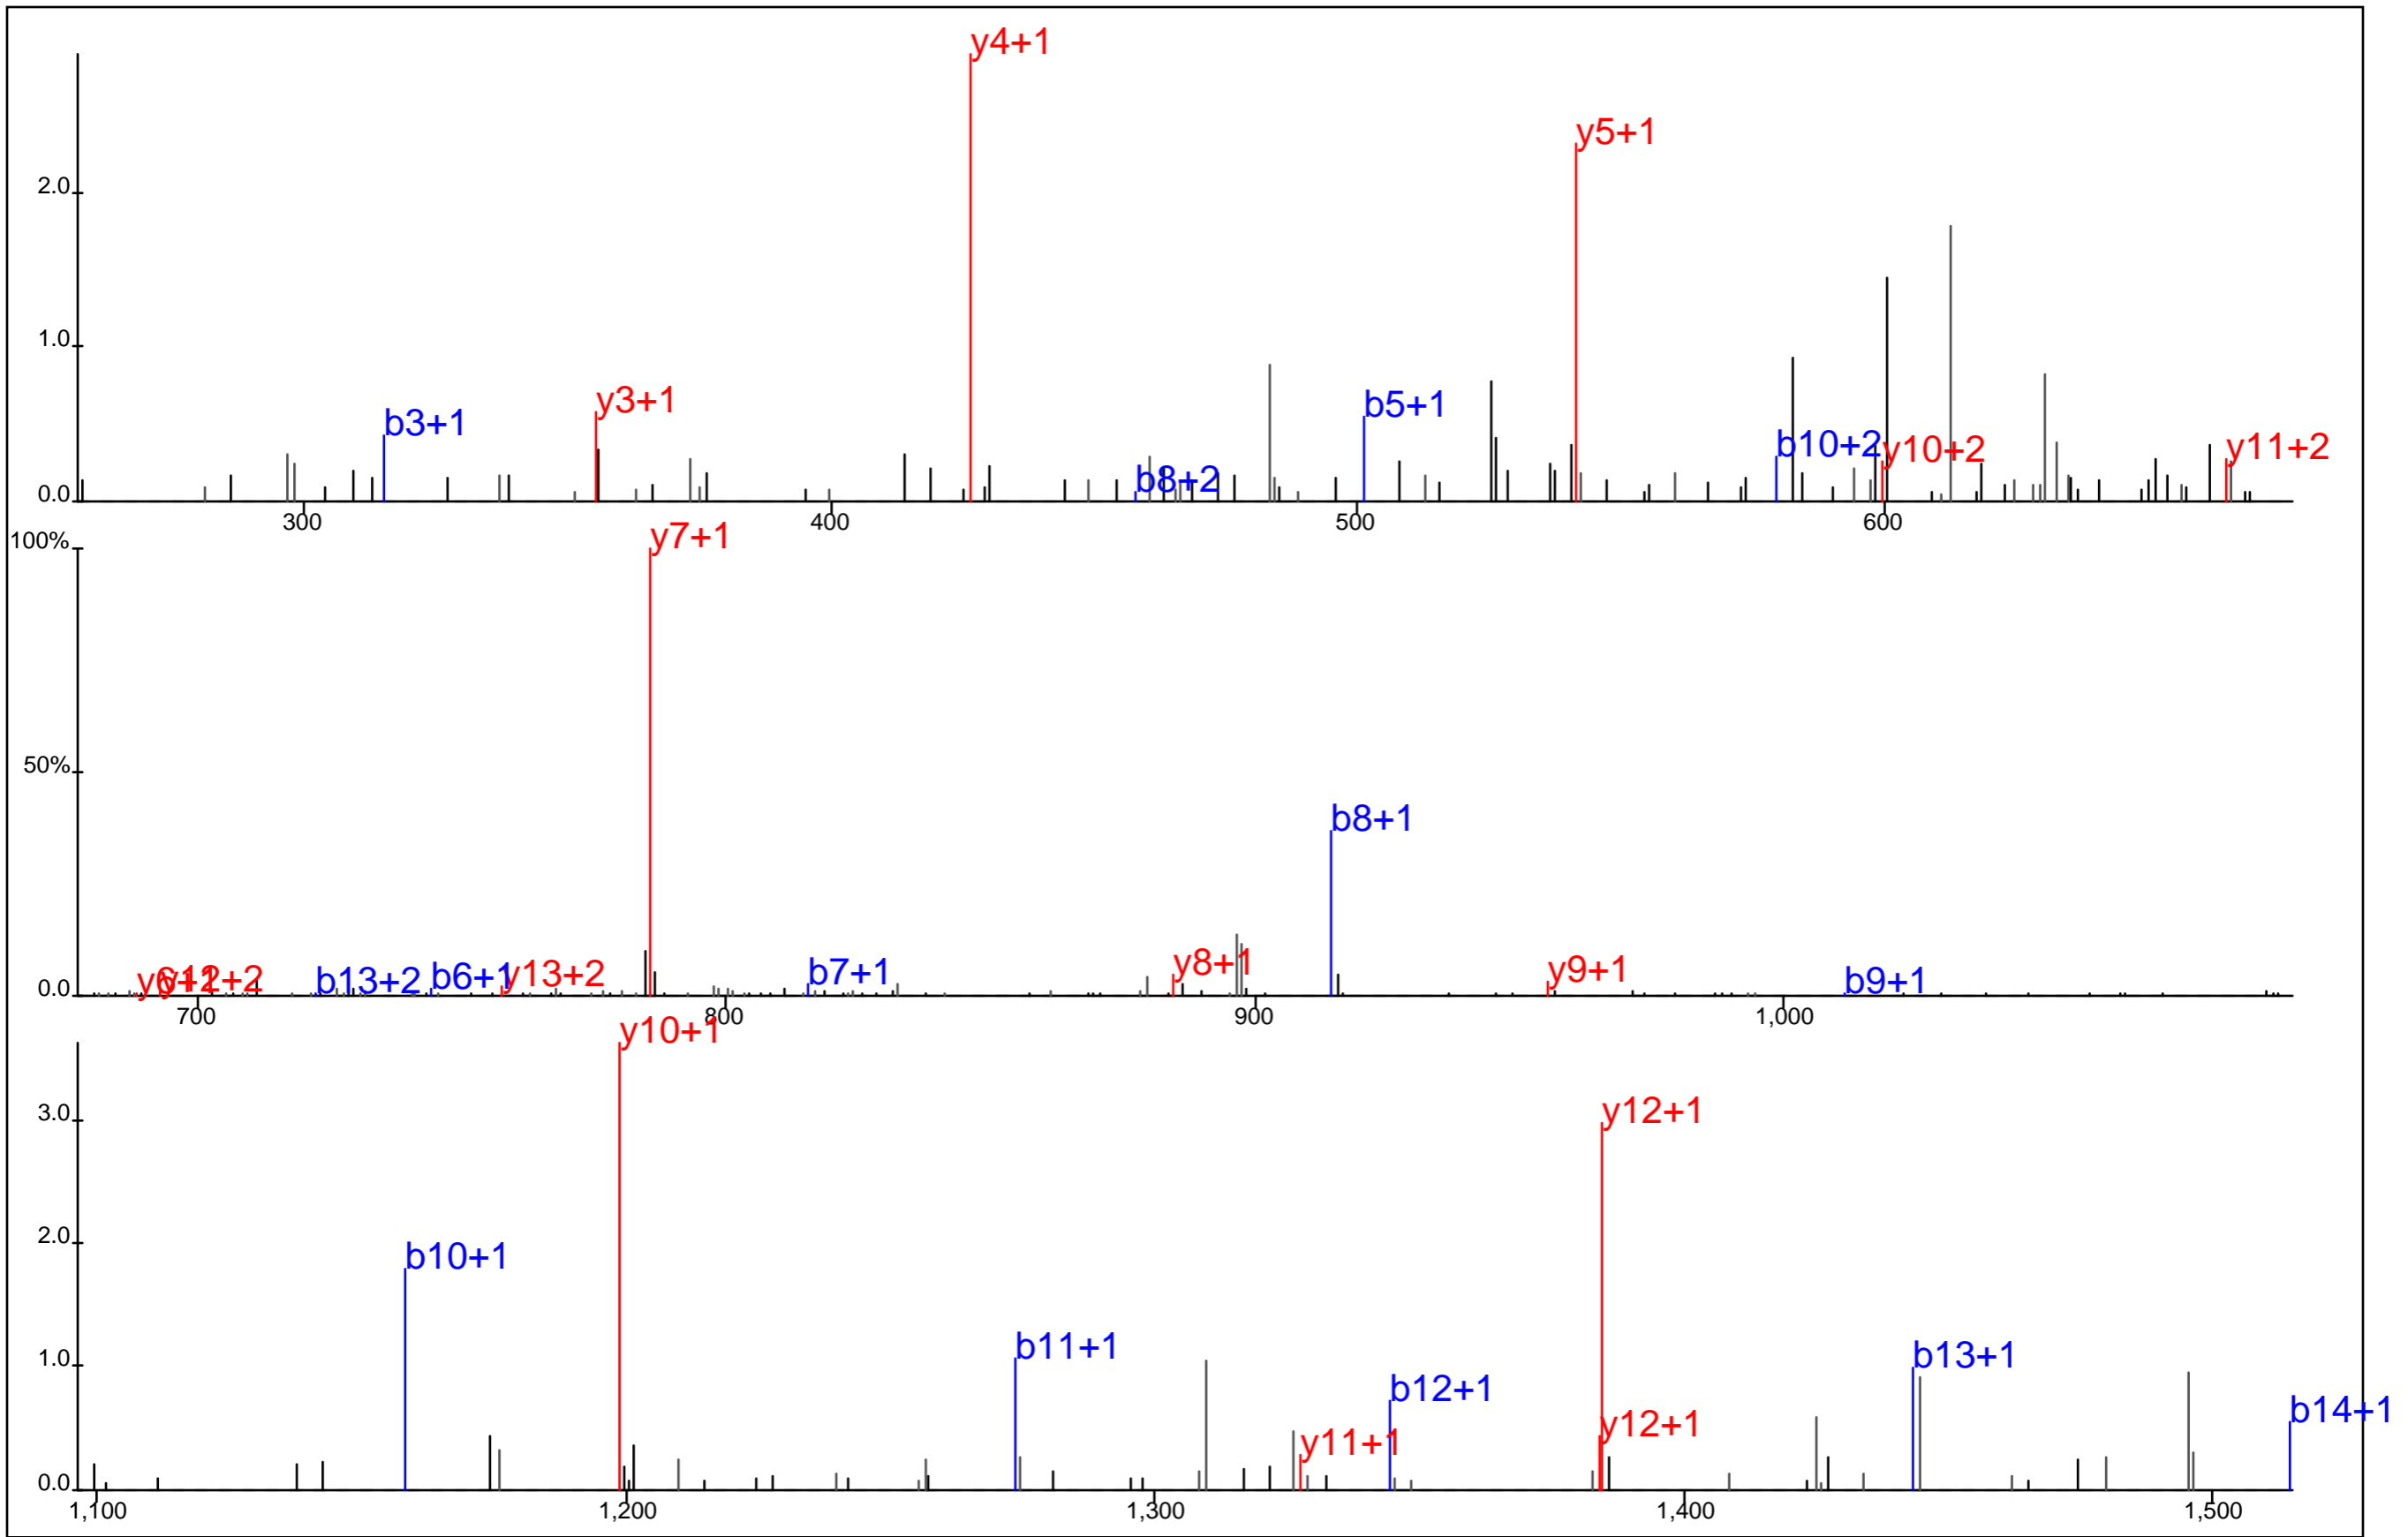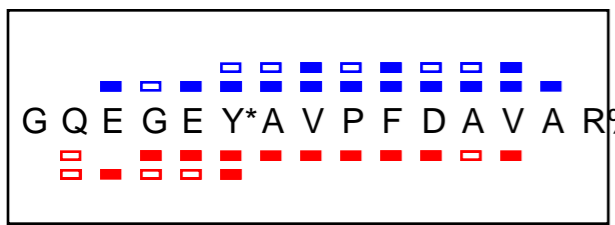

Protein Name: DOK2  
 gi Accession: 3043919  
 Precursor Mass: 849.8753+2  
 Delta Mass: 2.047 ppm  
 XCorr: 61.46

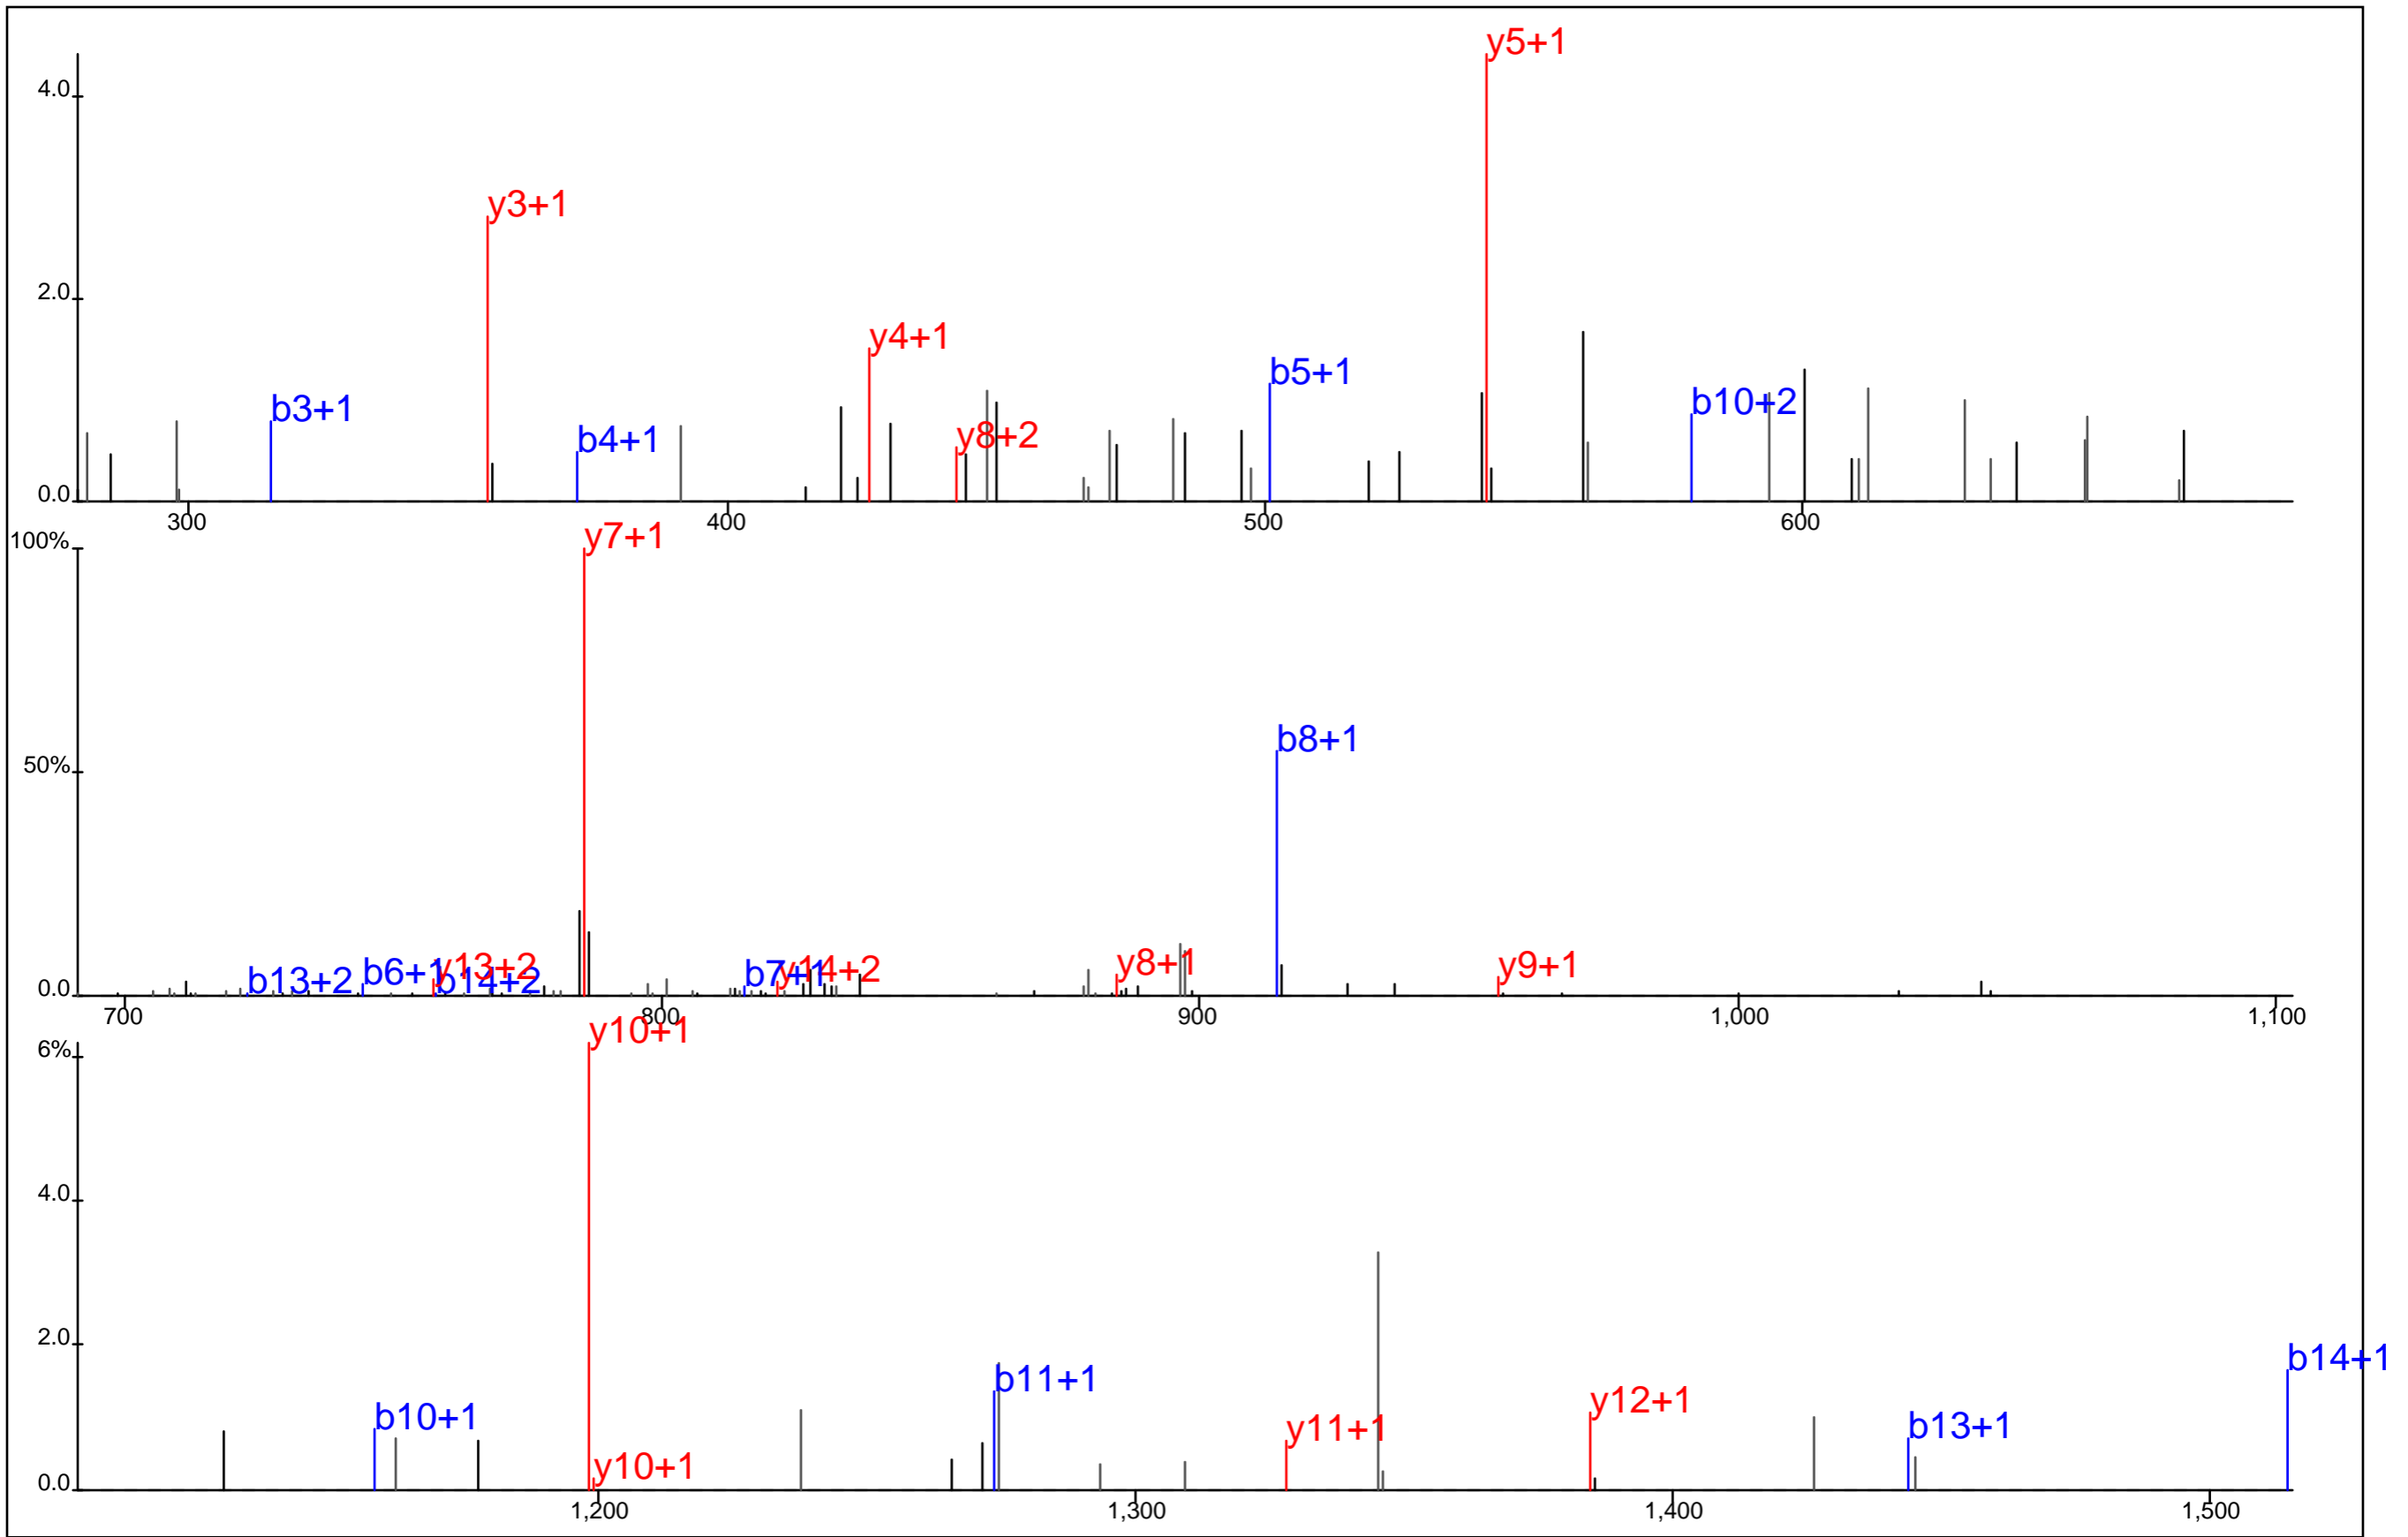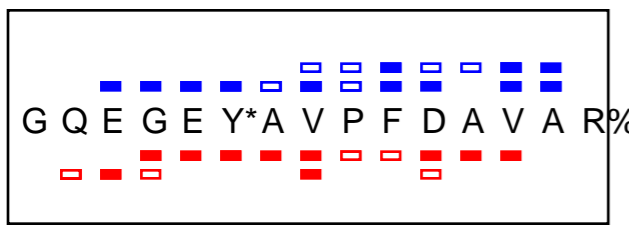

Protein Name: DOK2  
 gi Accession: 3043919  
 Precursor Mass: 849.8783+2  
 Delta Mass: 5.574 ppm  
 XCorr: 49.23

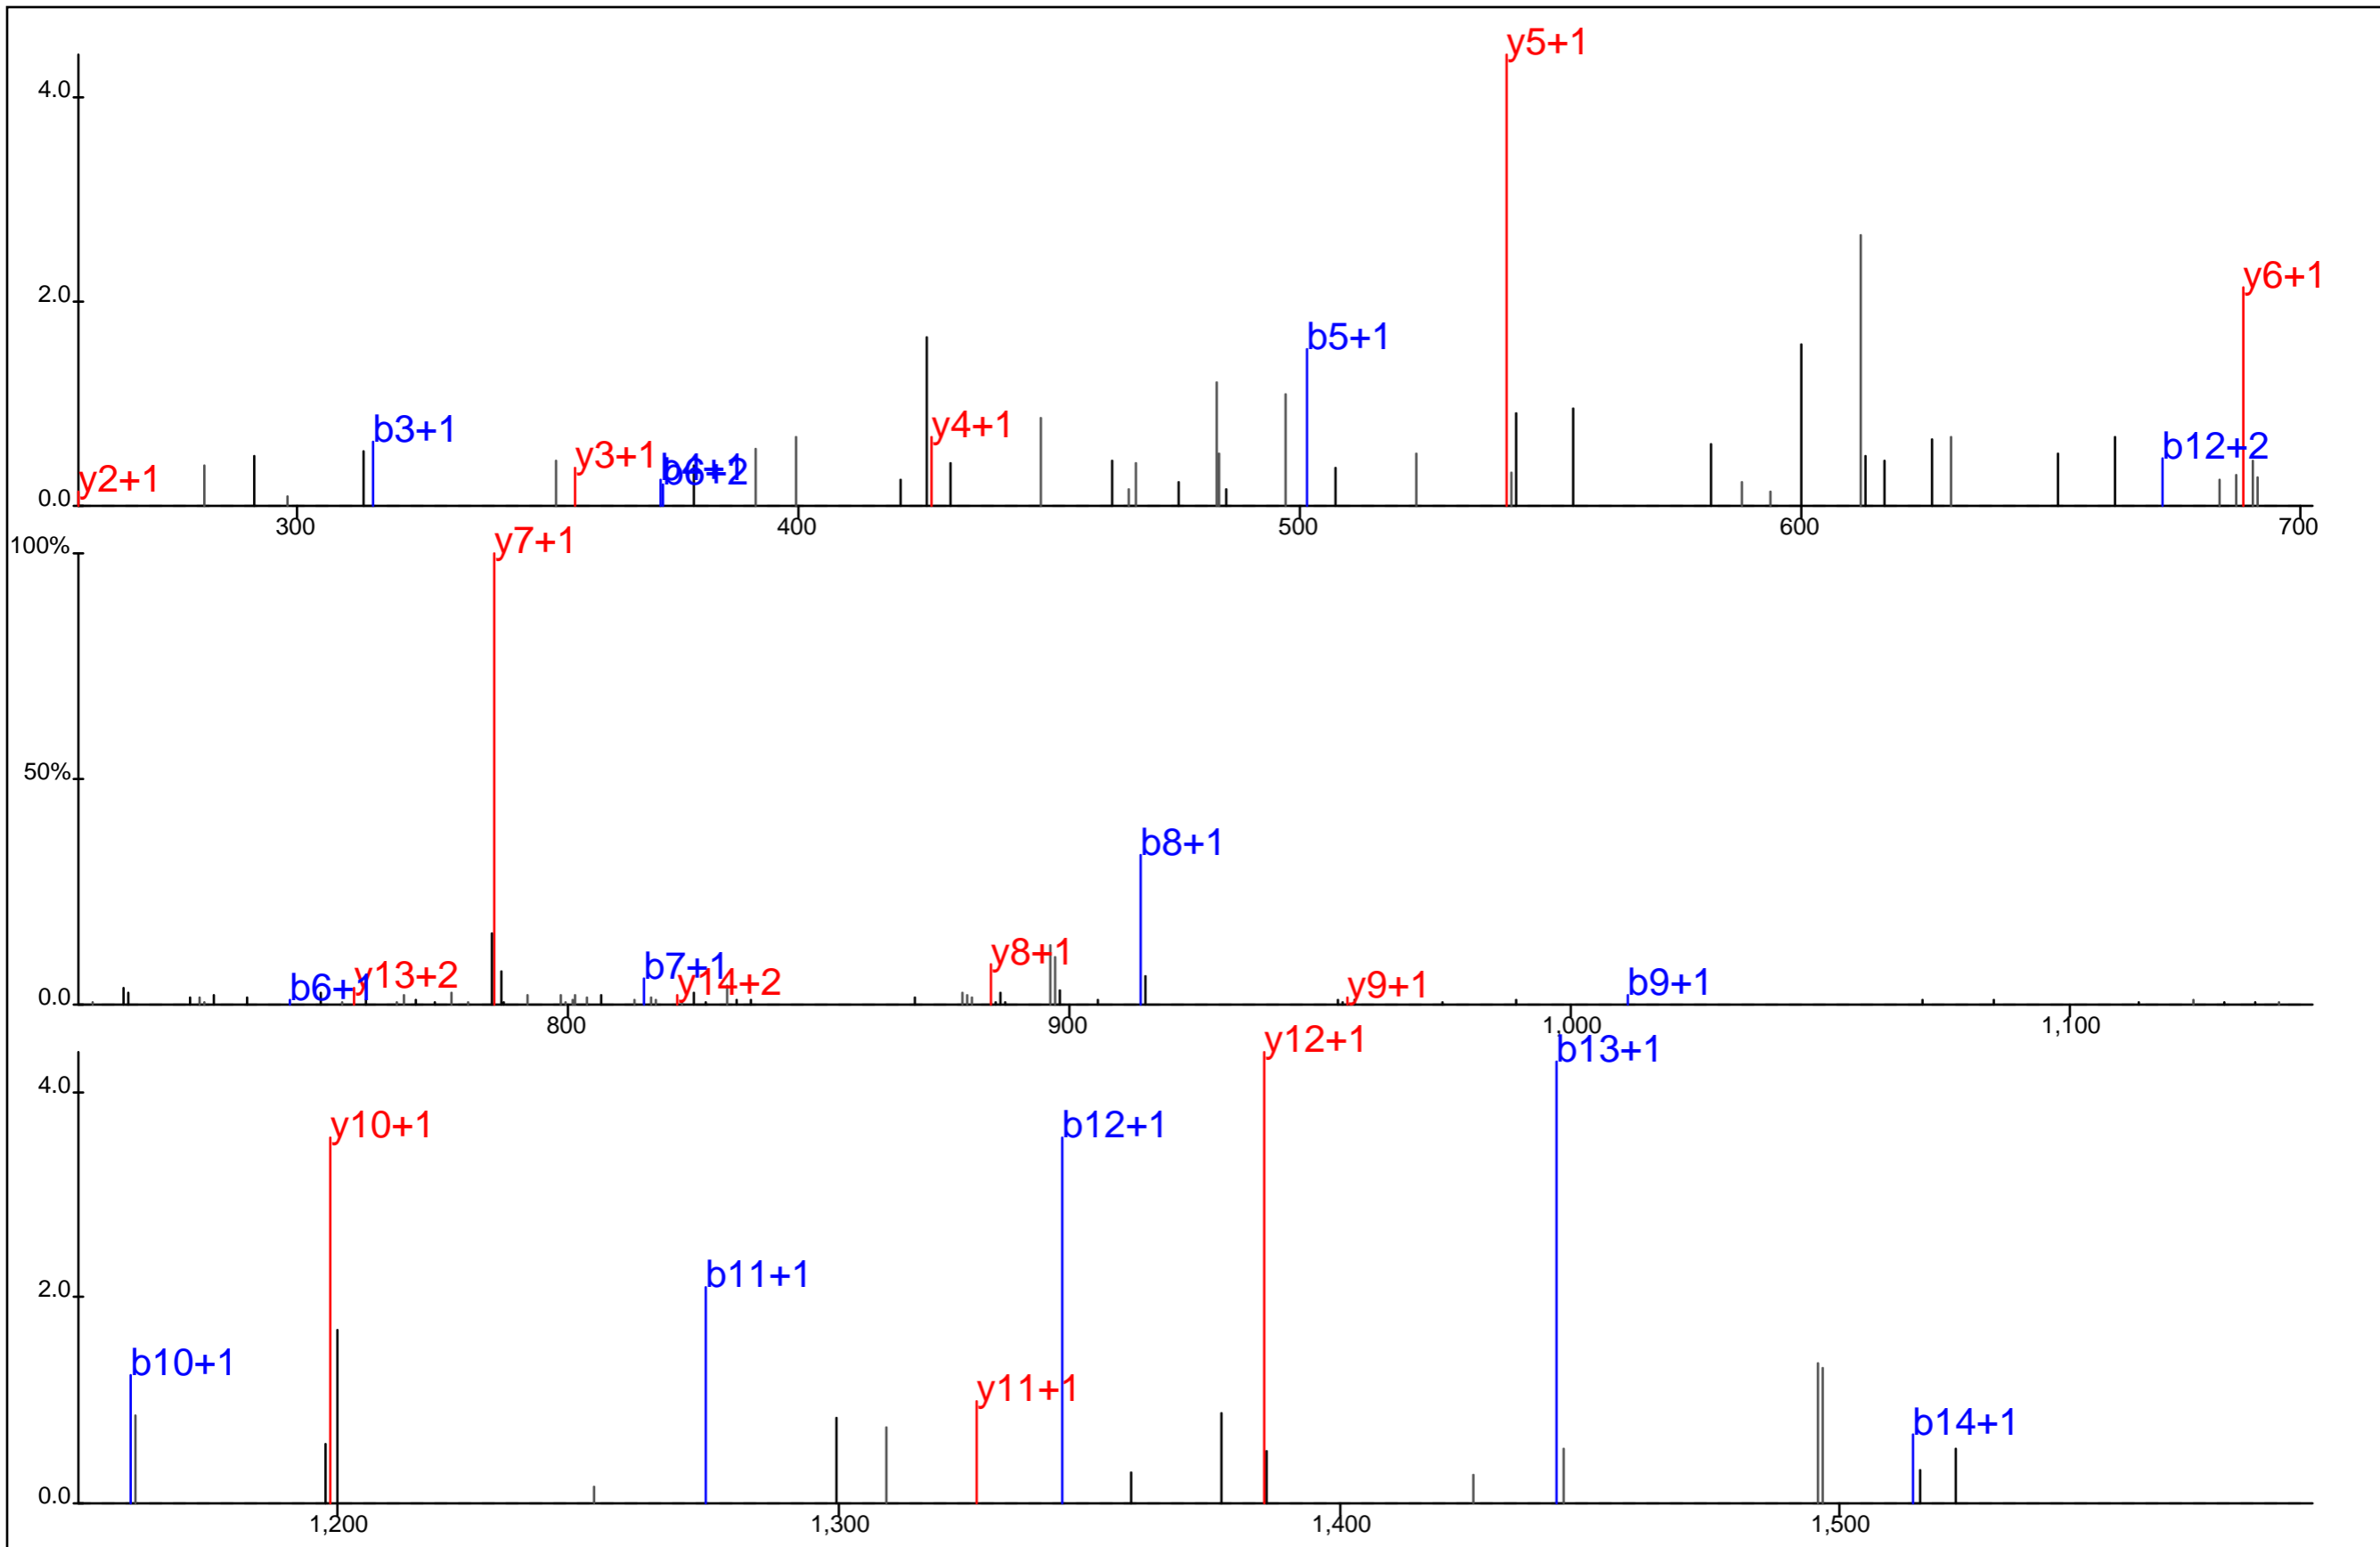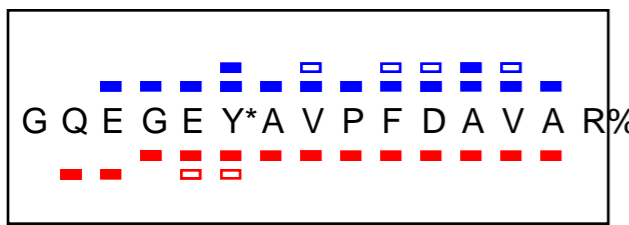

Protein Name: DOK2  
 gi Accession: 3043919  
 Precursor Mass: 849.8795+2  
 Delta Mass: 7.010 ppm  
 XCorr: 56.42

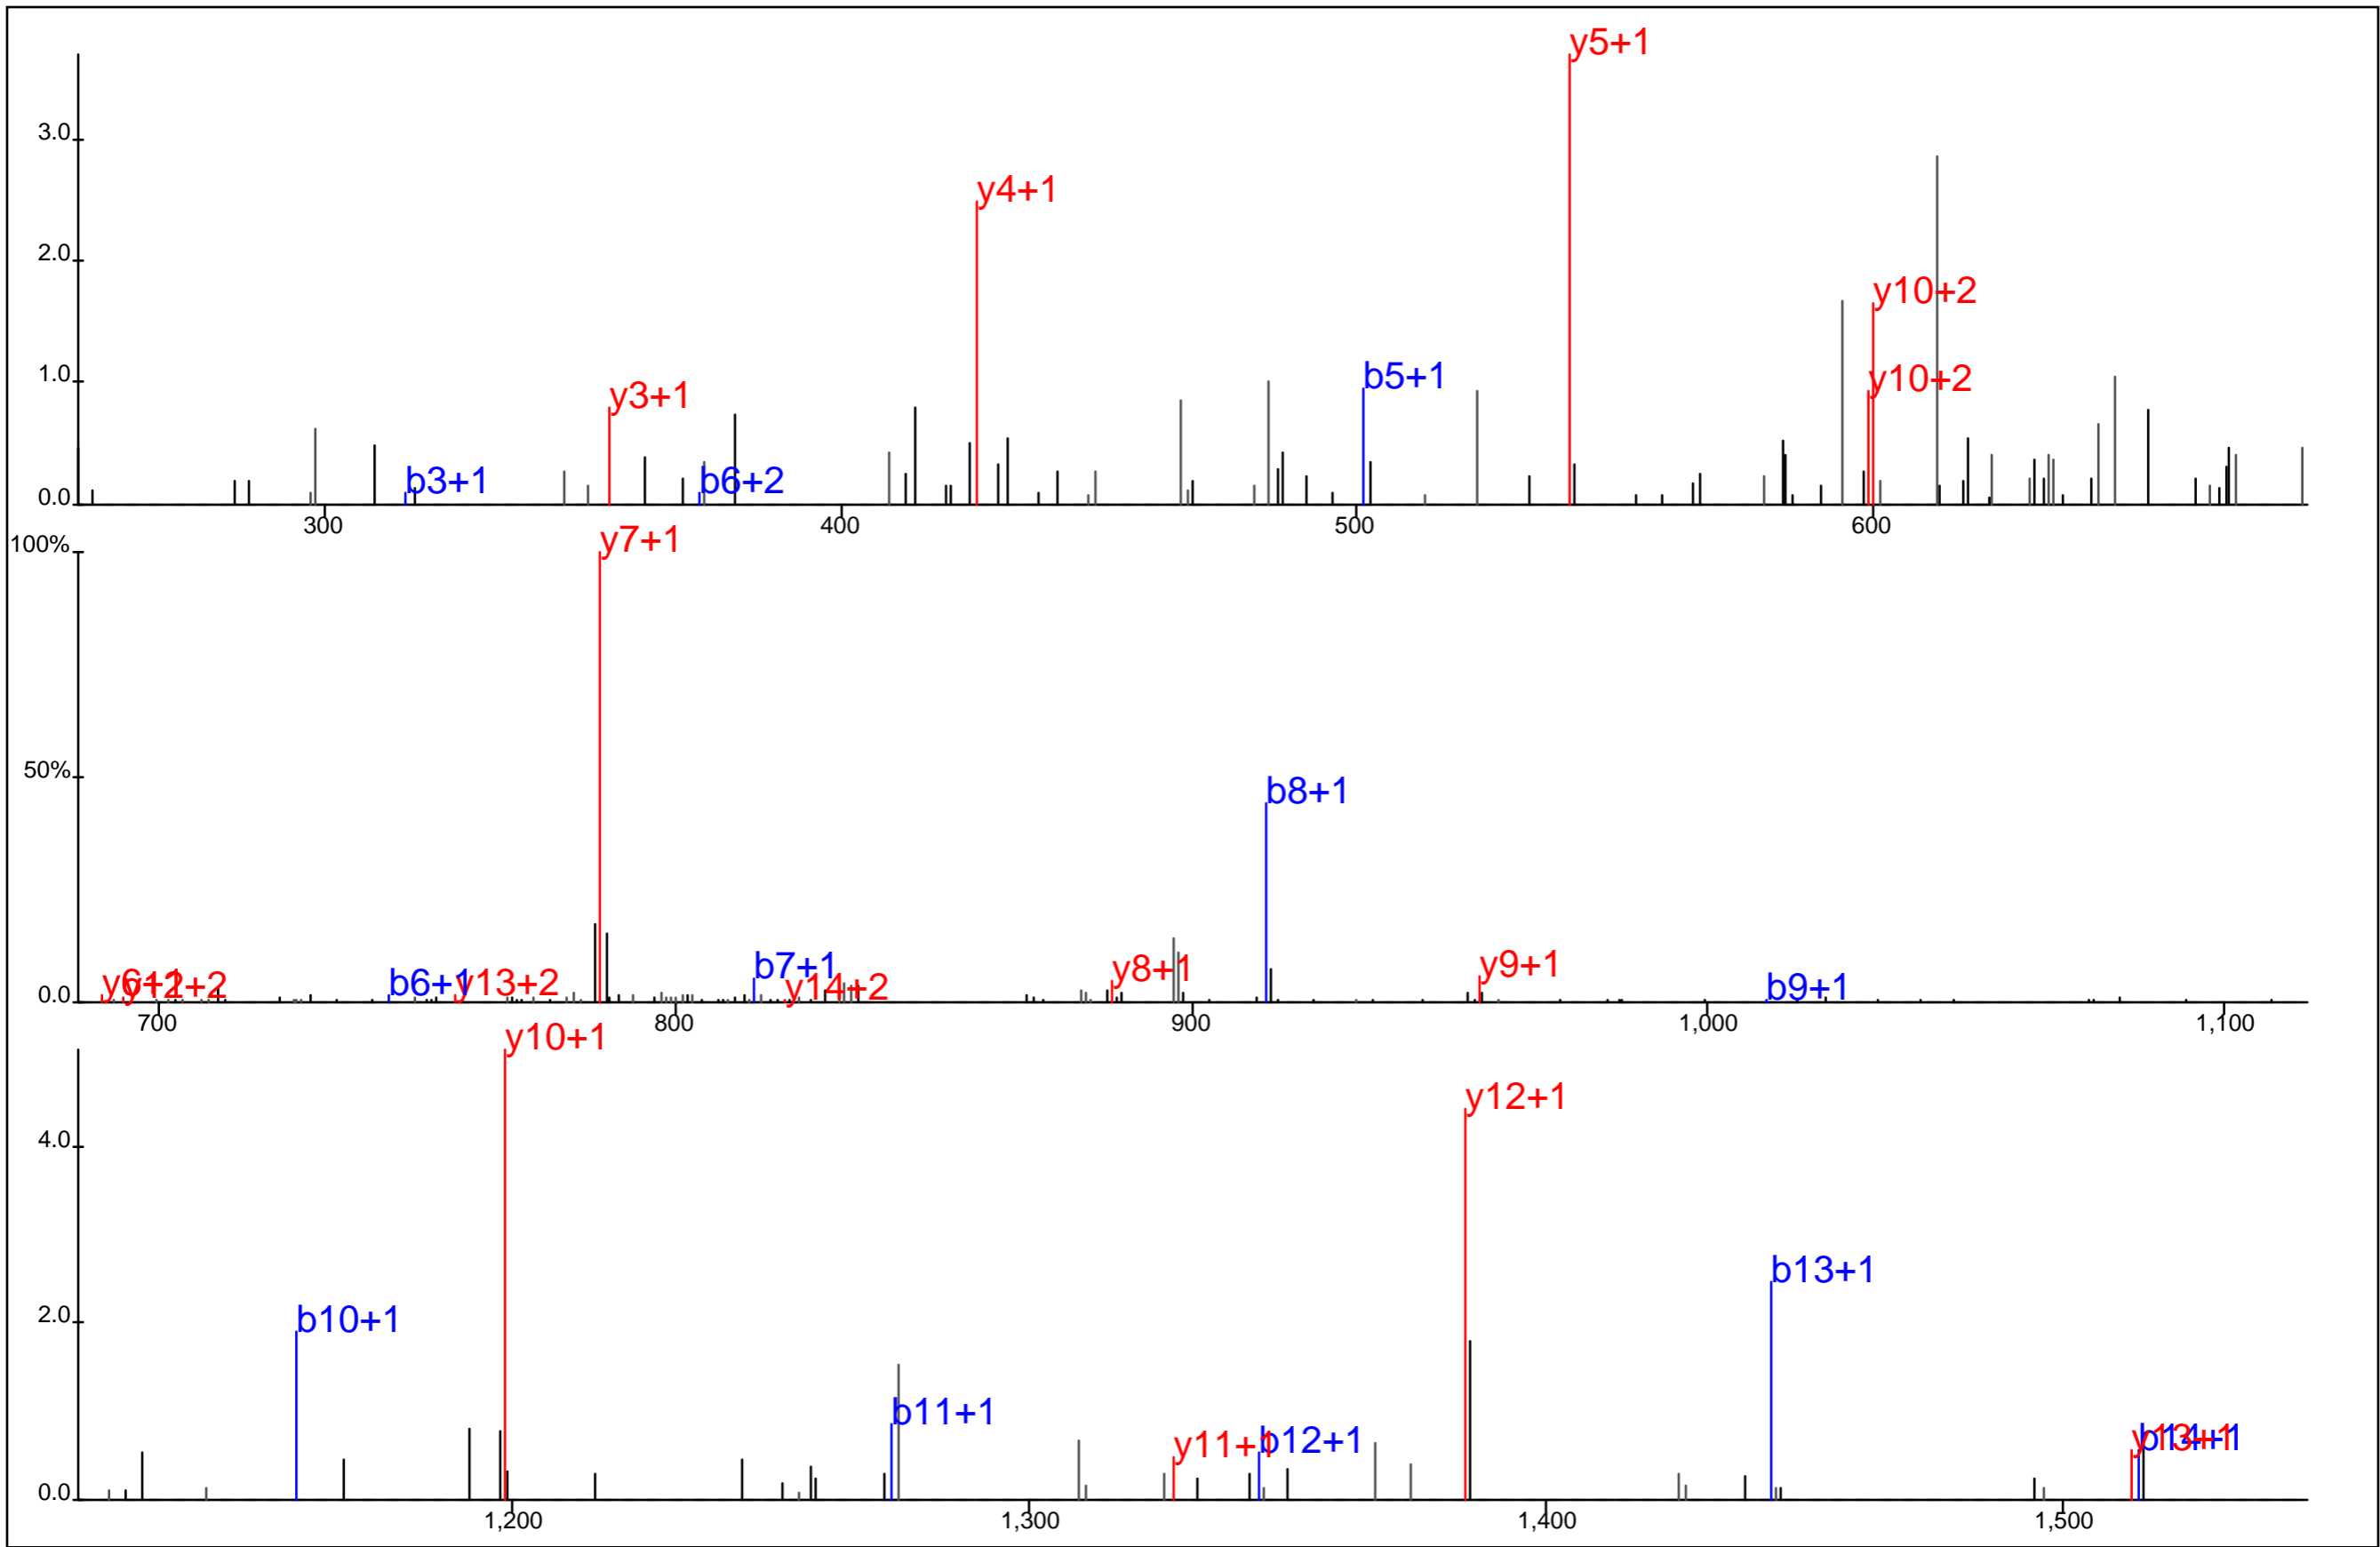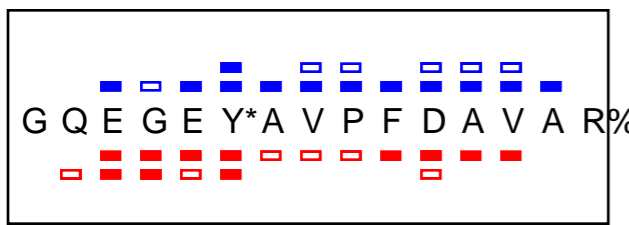

Protein Name: DOK2  
 gi Accession: 3043919  
 Precursor Mass: 849.8755+2  
 Delta Mass: 2.265 ppm  
 XCorr: 57.09

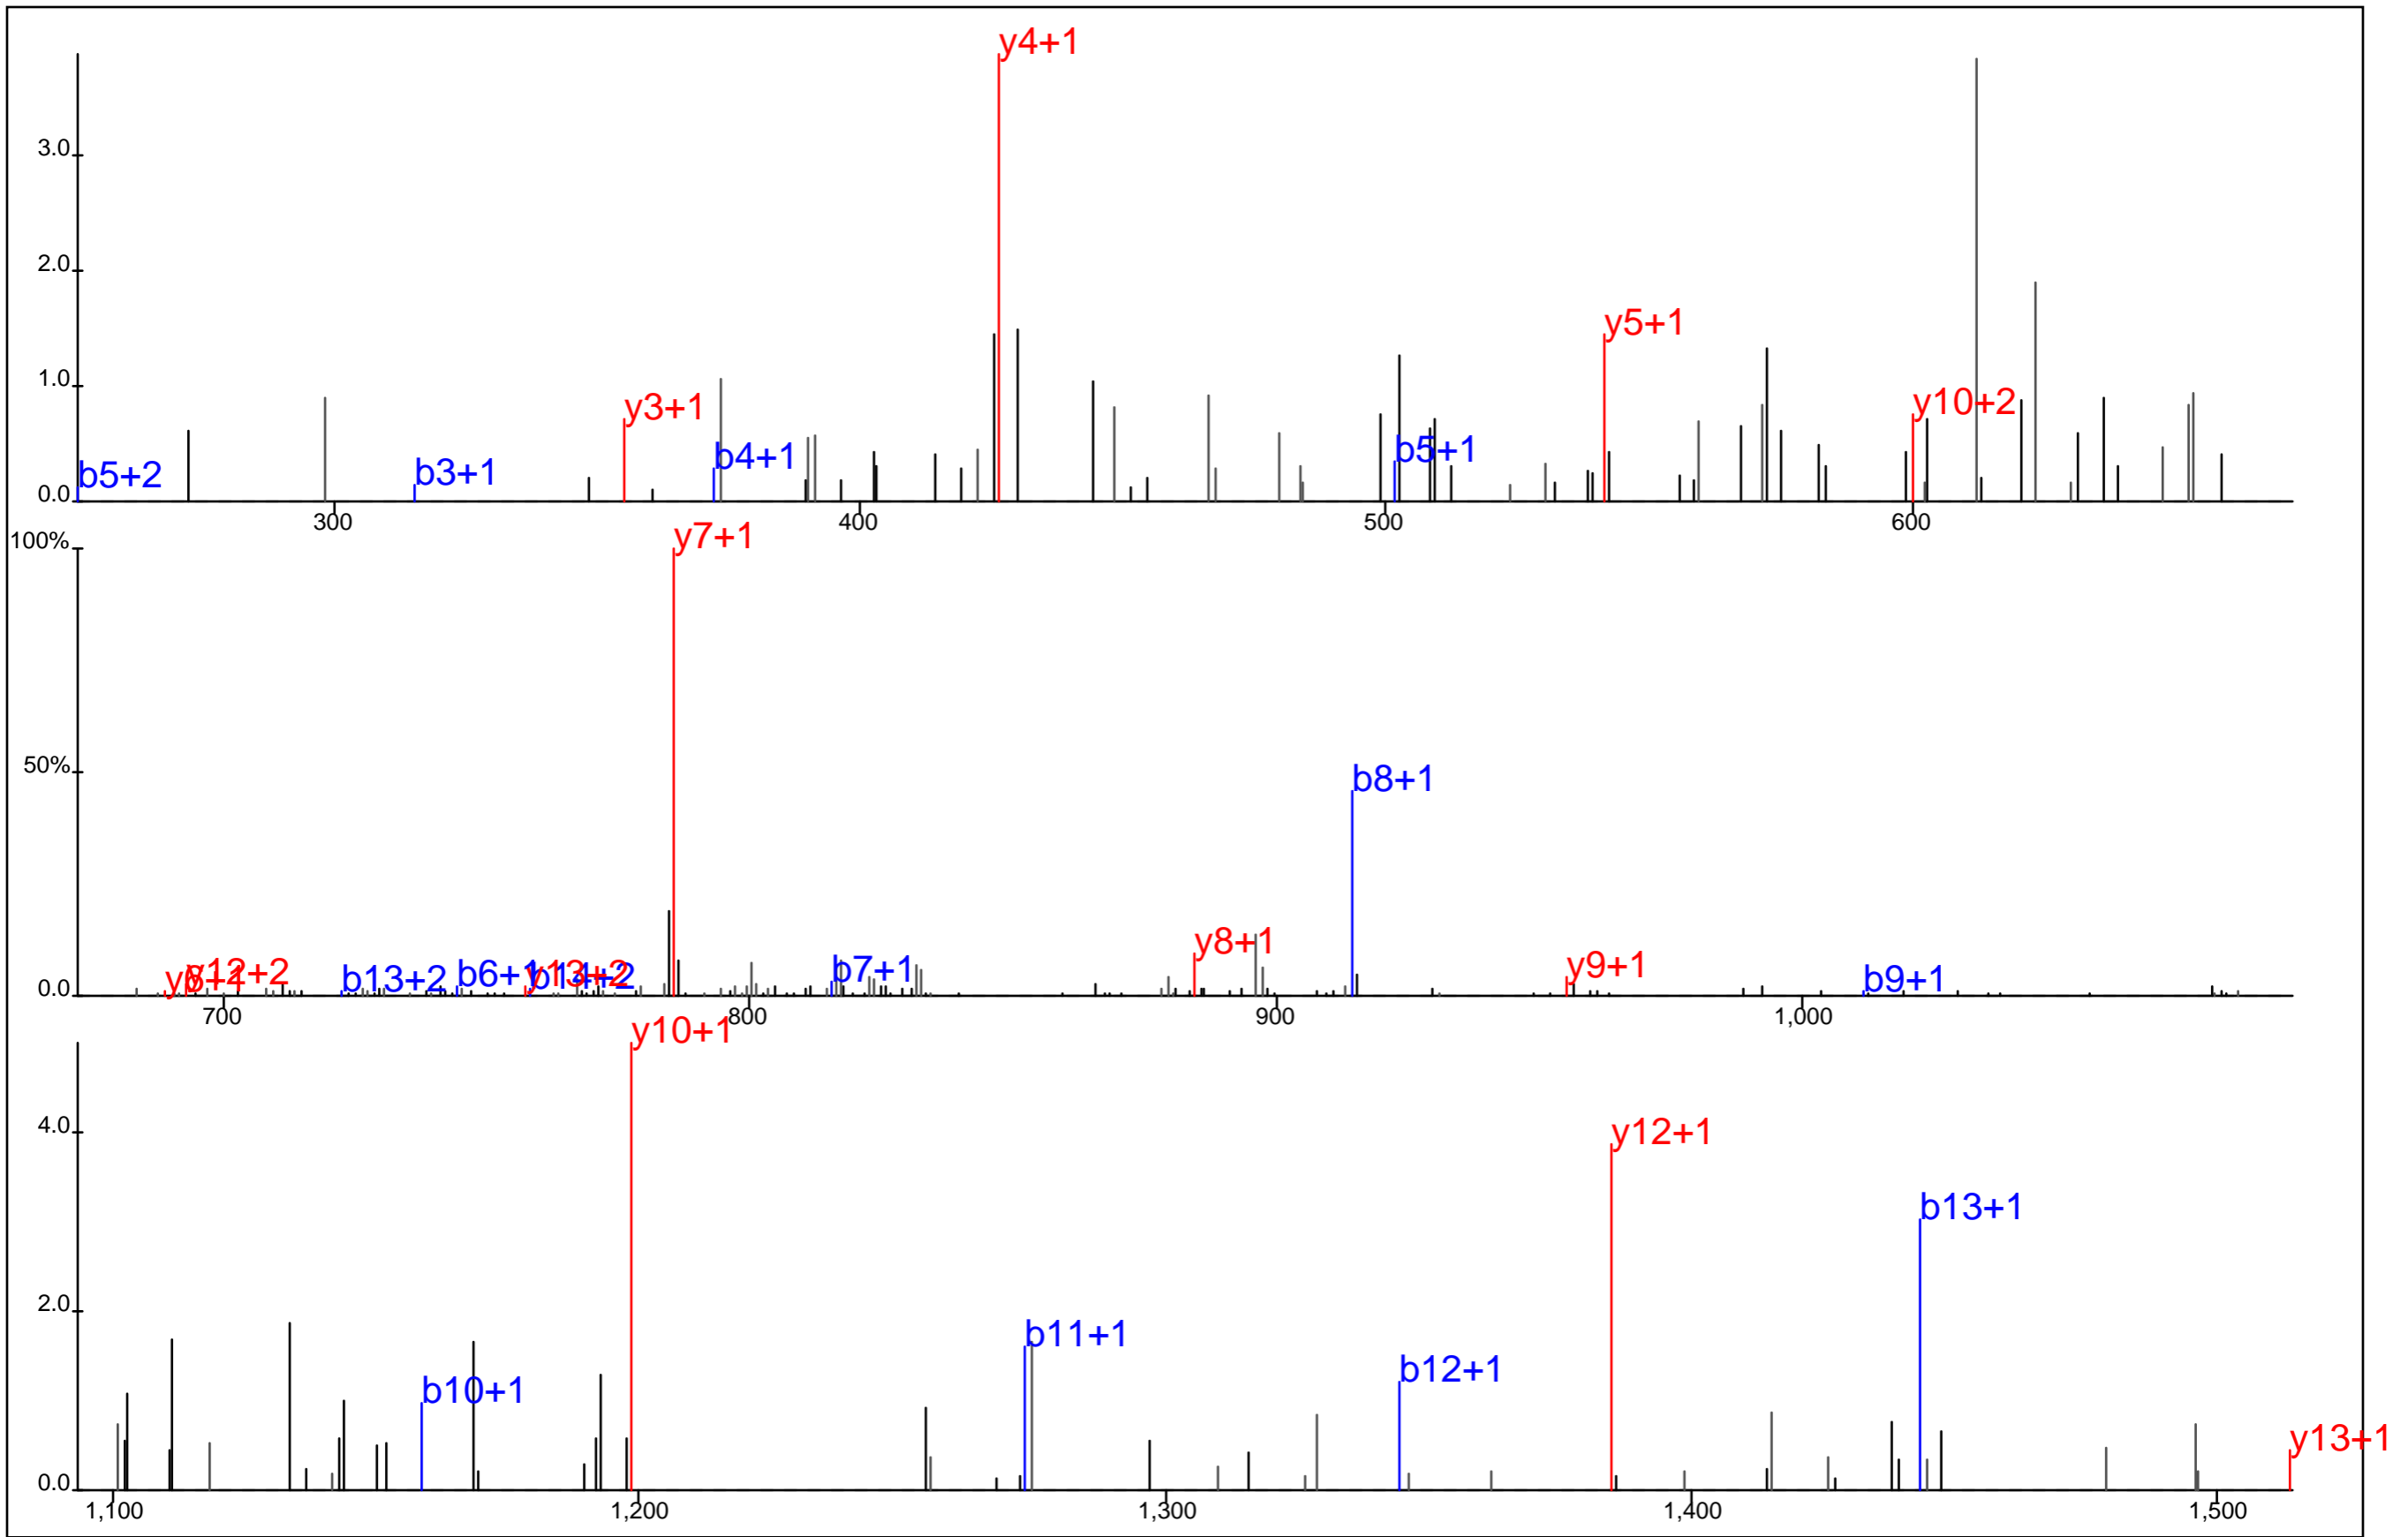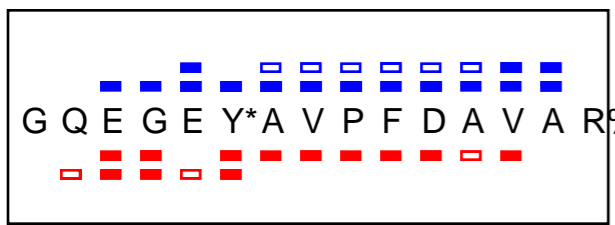

Protein Name: DOK2  
 gi Accession: 3043919  
 Precursor Mass: 849.8807+2  
 Delta Mass: 8.376 ppm  
 XCorr: 40.49

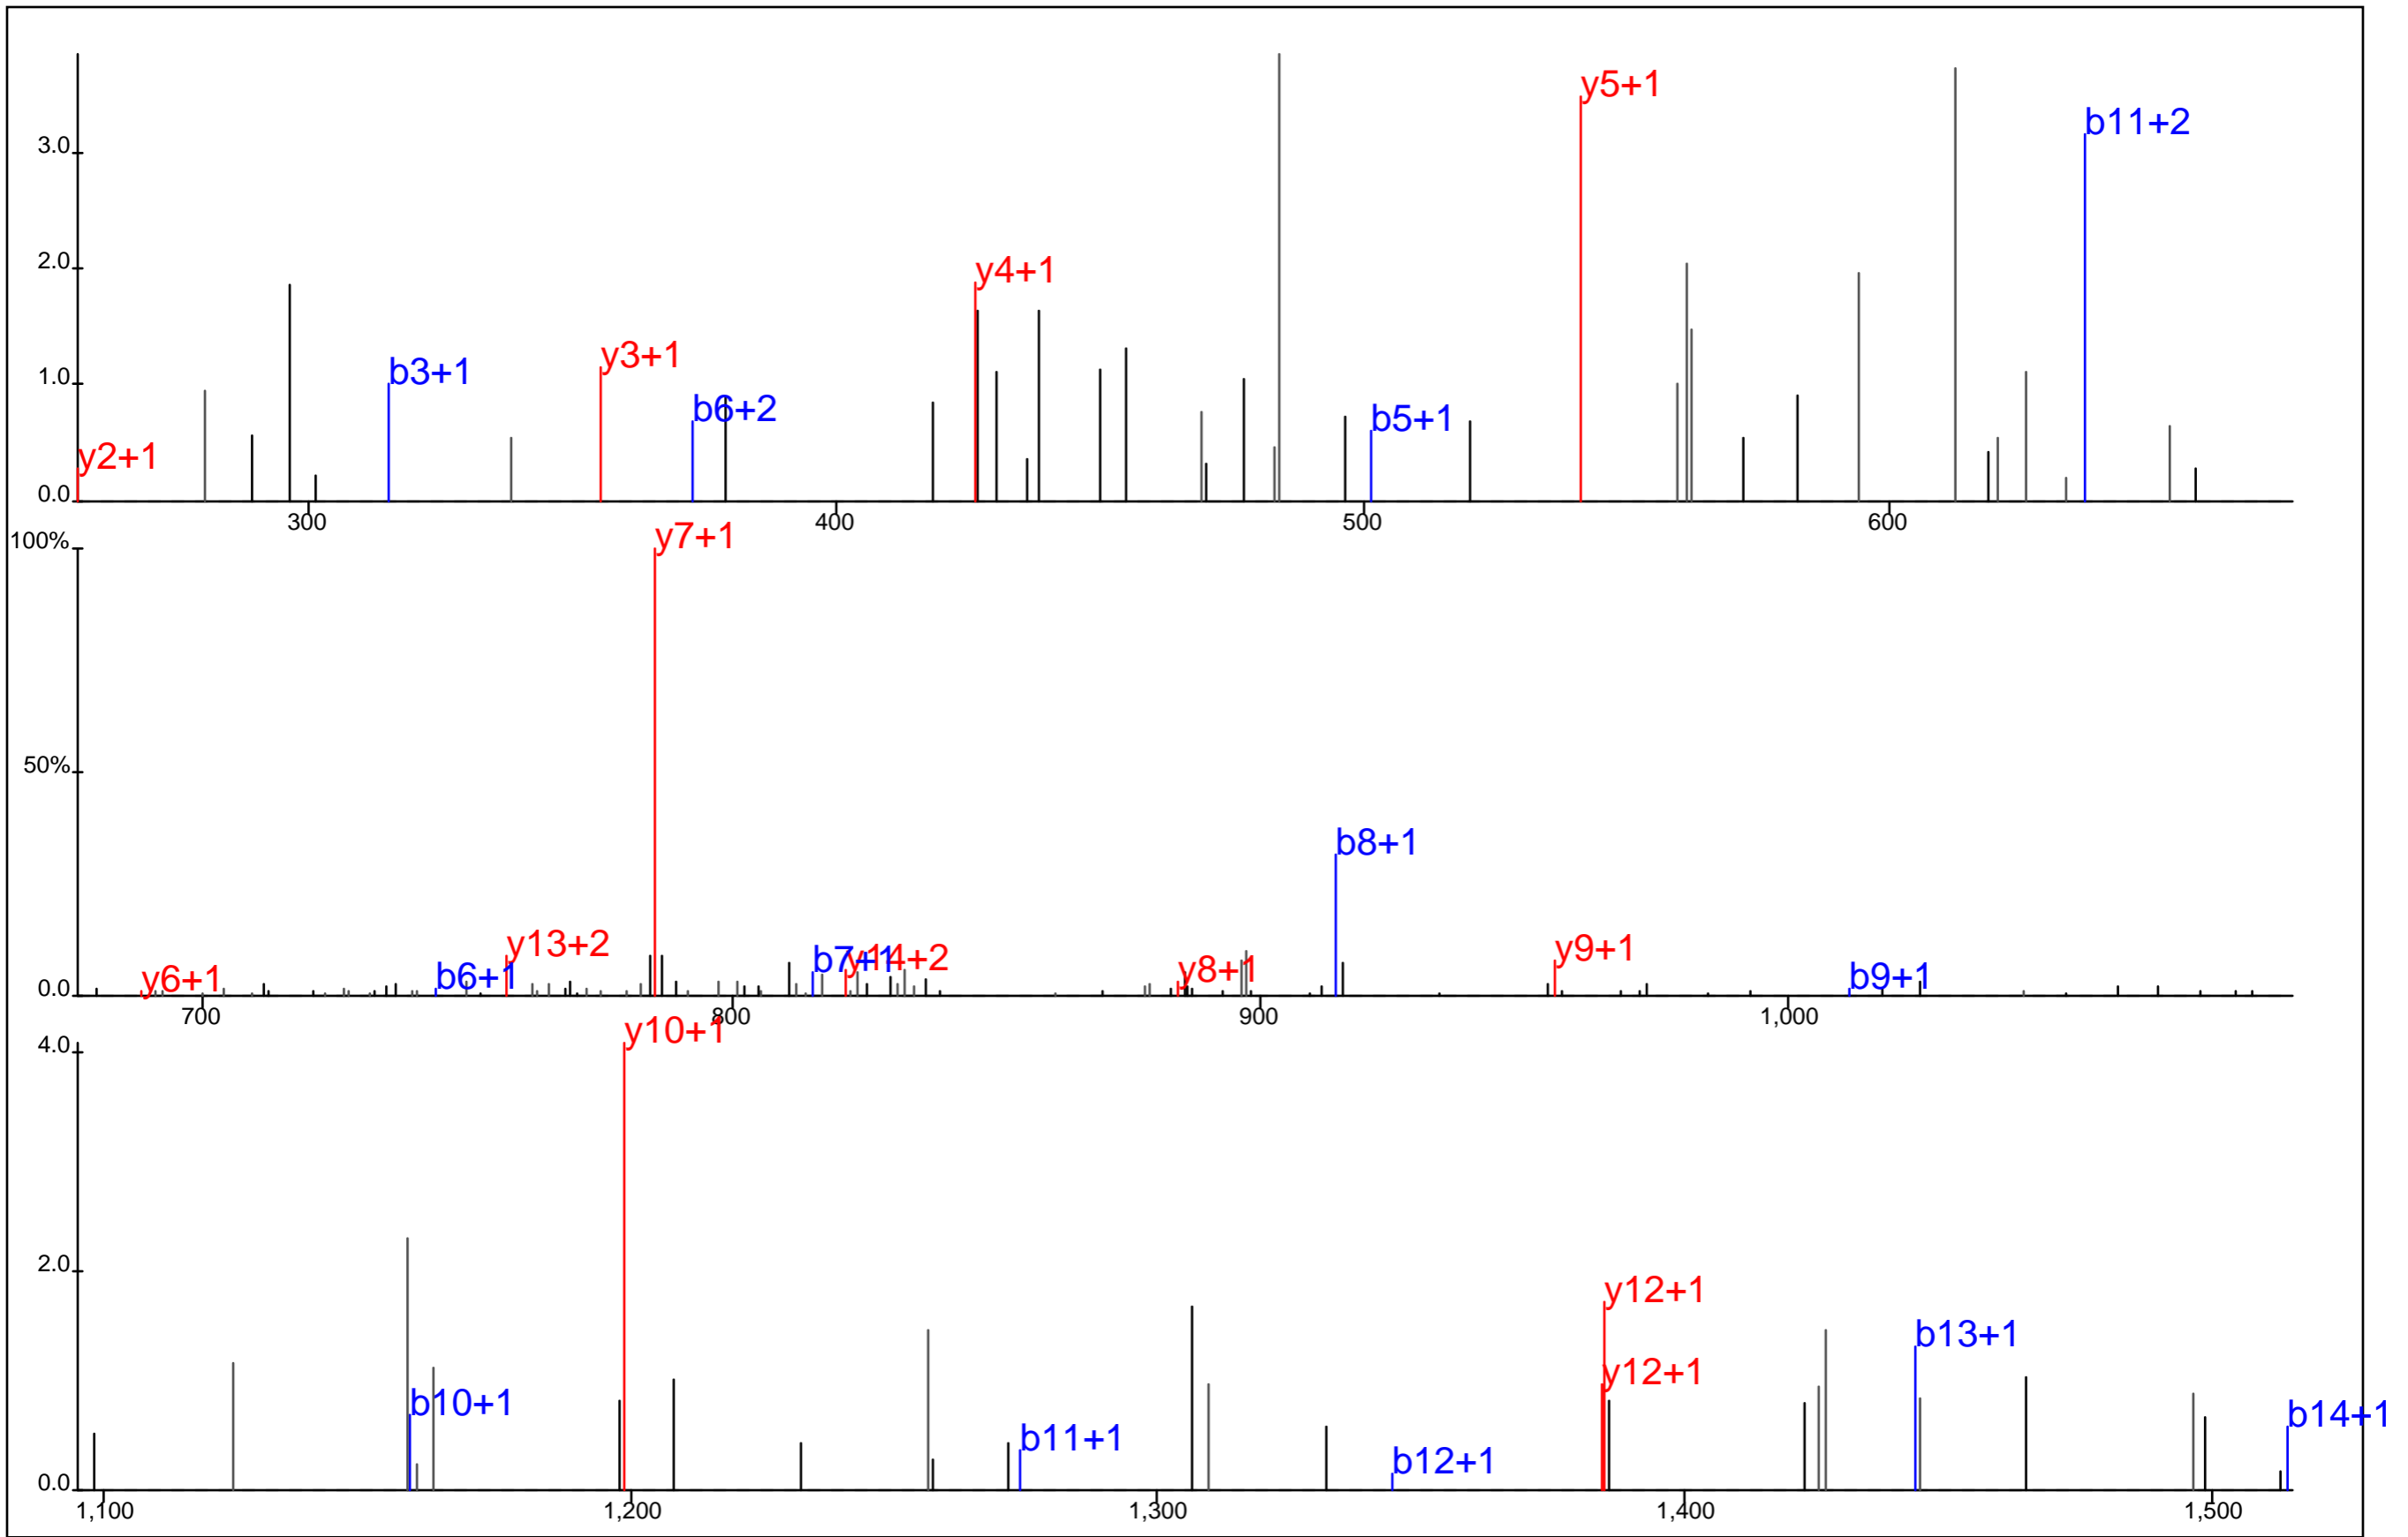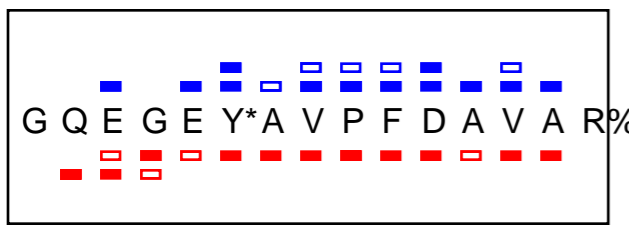

Protein Name: DOK2  
 gi Accession: 3043919  
 Precursor Mass: 849.8831+2  
 Delta Mass: 11.248 ppm  
 XCorr: 41.97

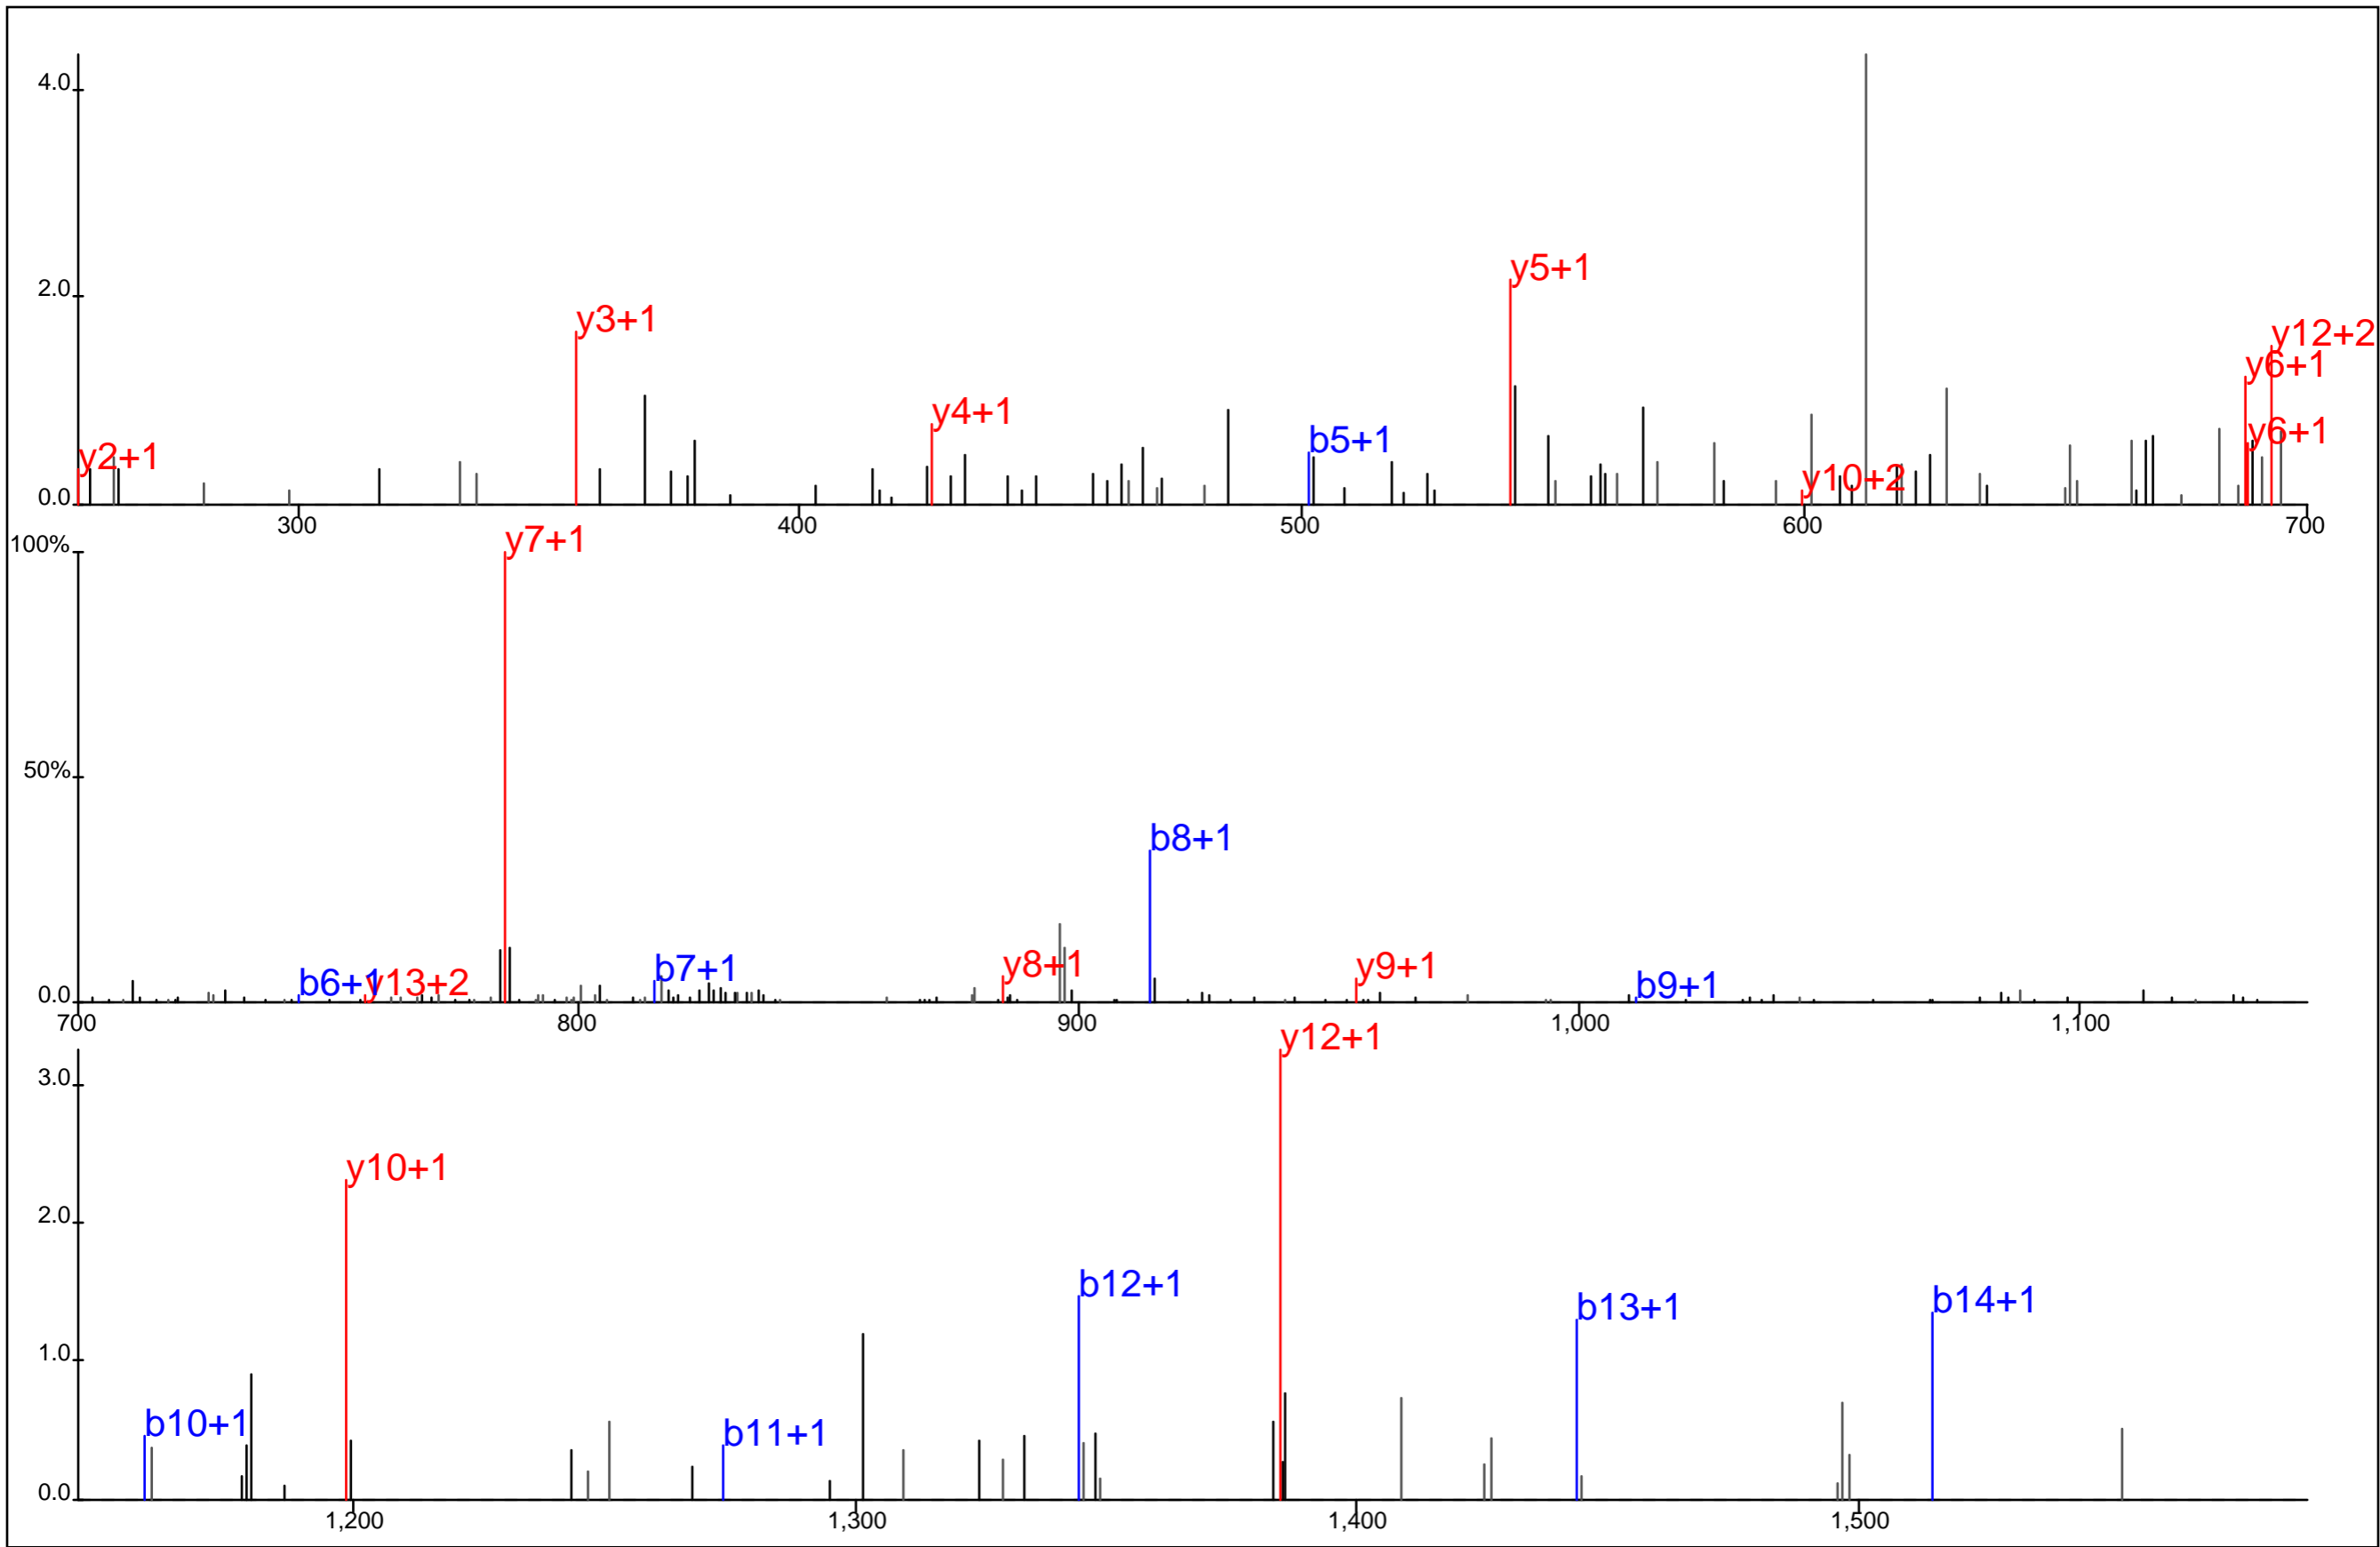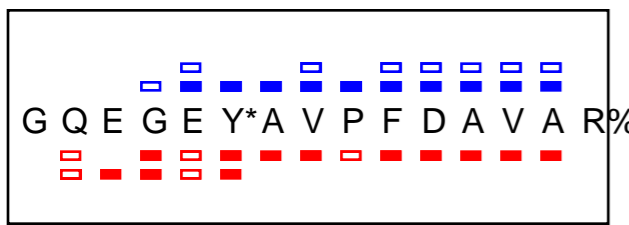

Protein Name: DOK2  
 gi Accession: 3043919  
 Precursor Mass: 849.8763+2  
 Delta Mass: 3.201 ppm  
 XCorr: 35.51

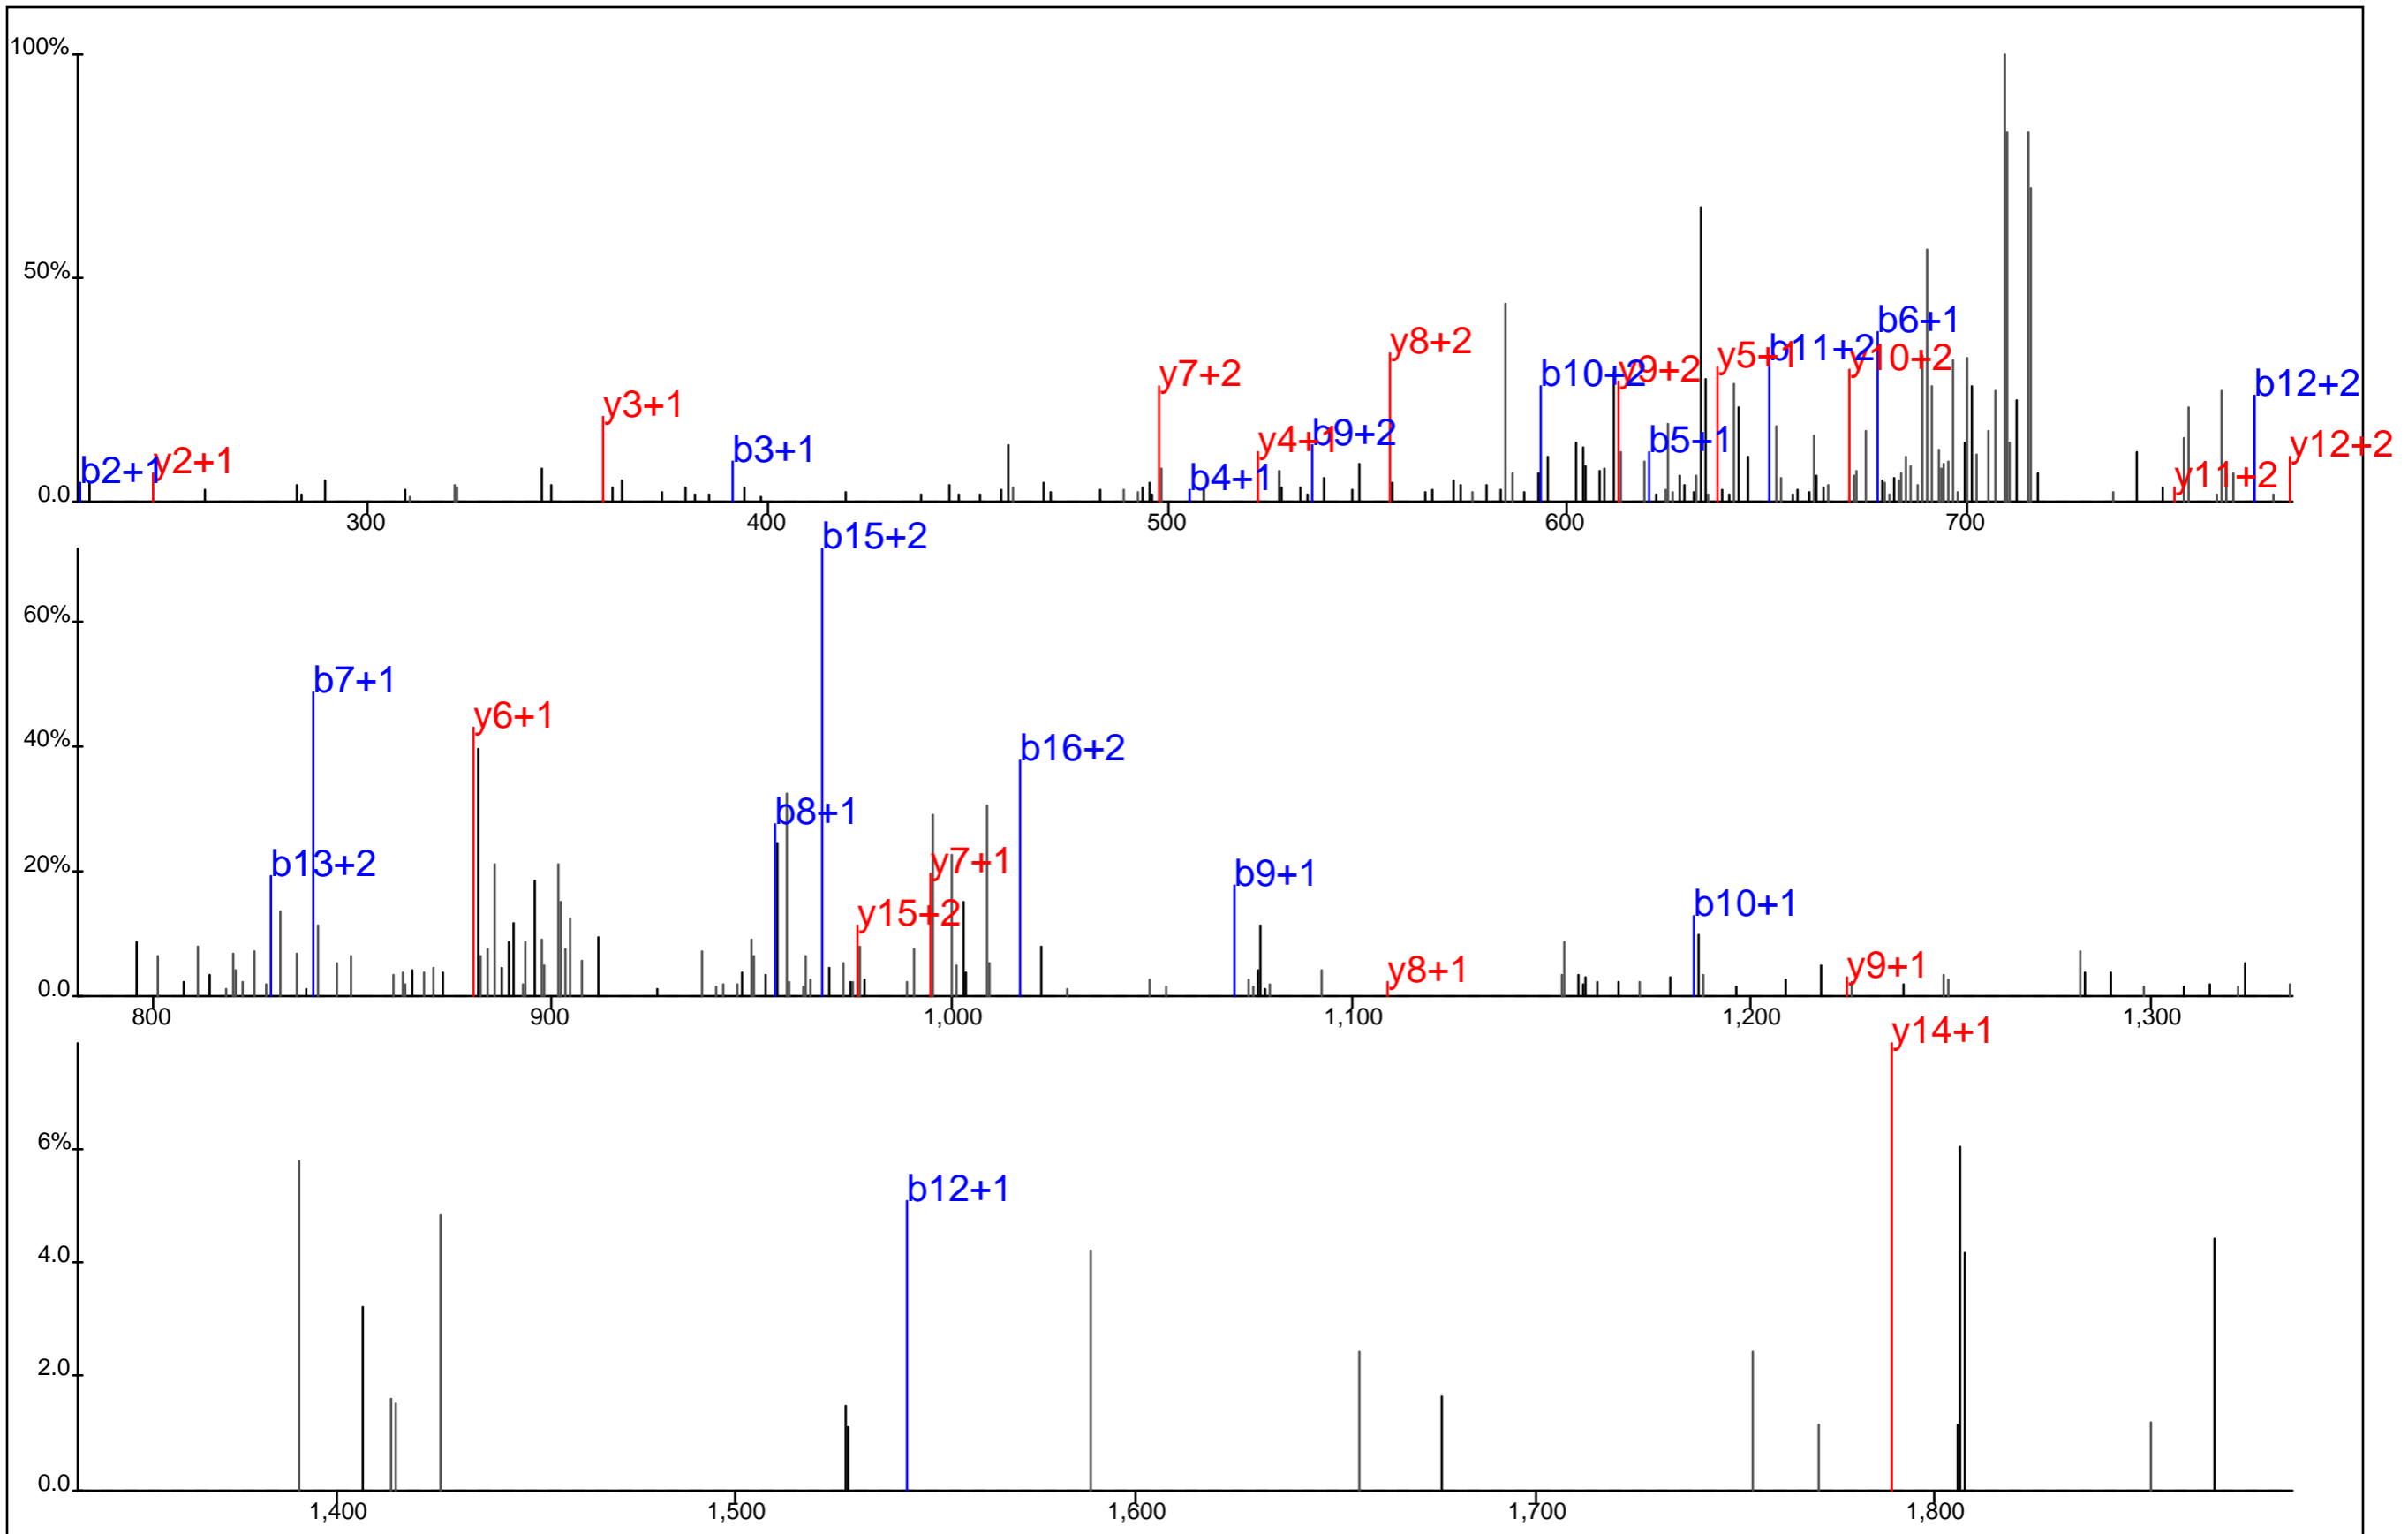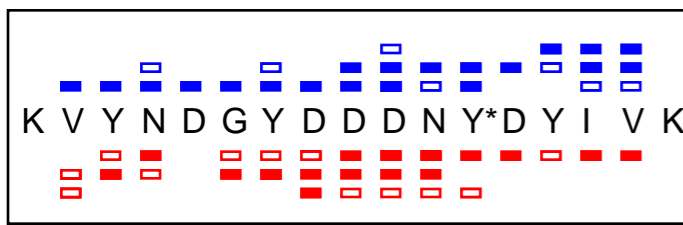

Protein Name: DYRK1A  
 gi Accession: 18765752  
 Precursor Mass: 726.9736+3  
 Delta Mass: 7.269 ppm  
 XCorr: 25.95



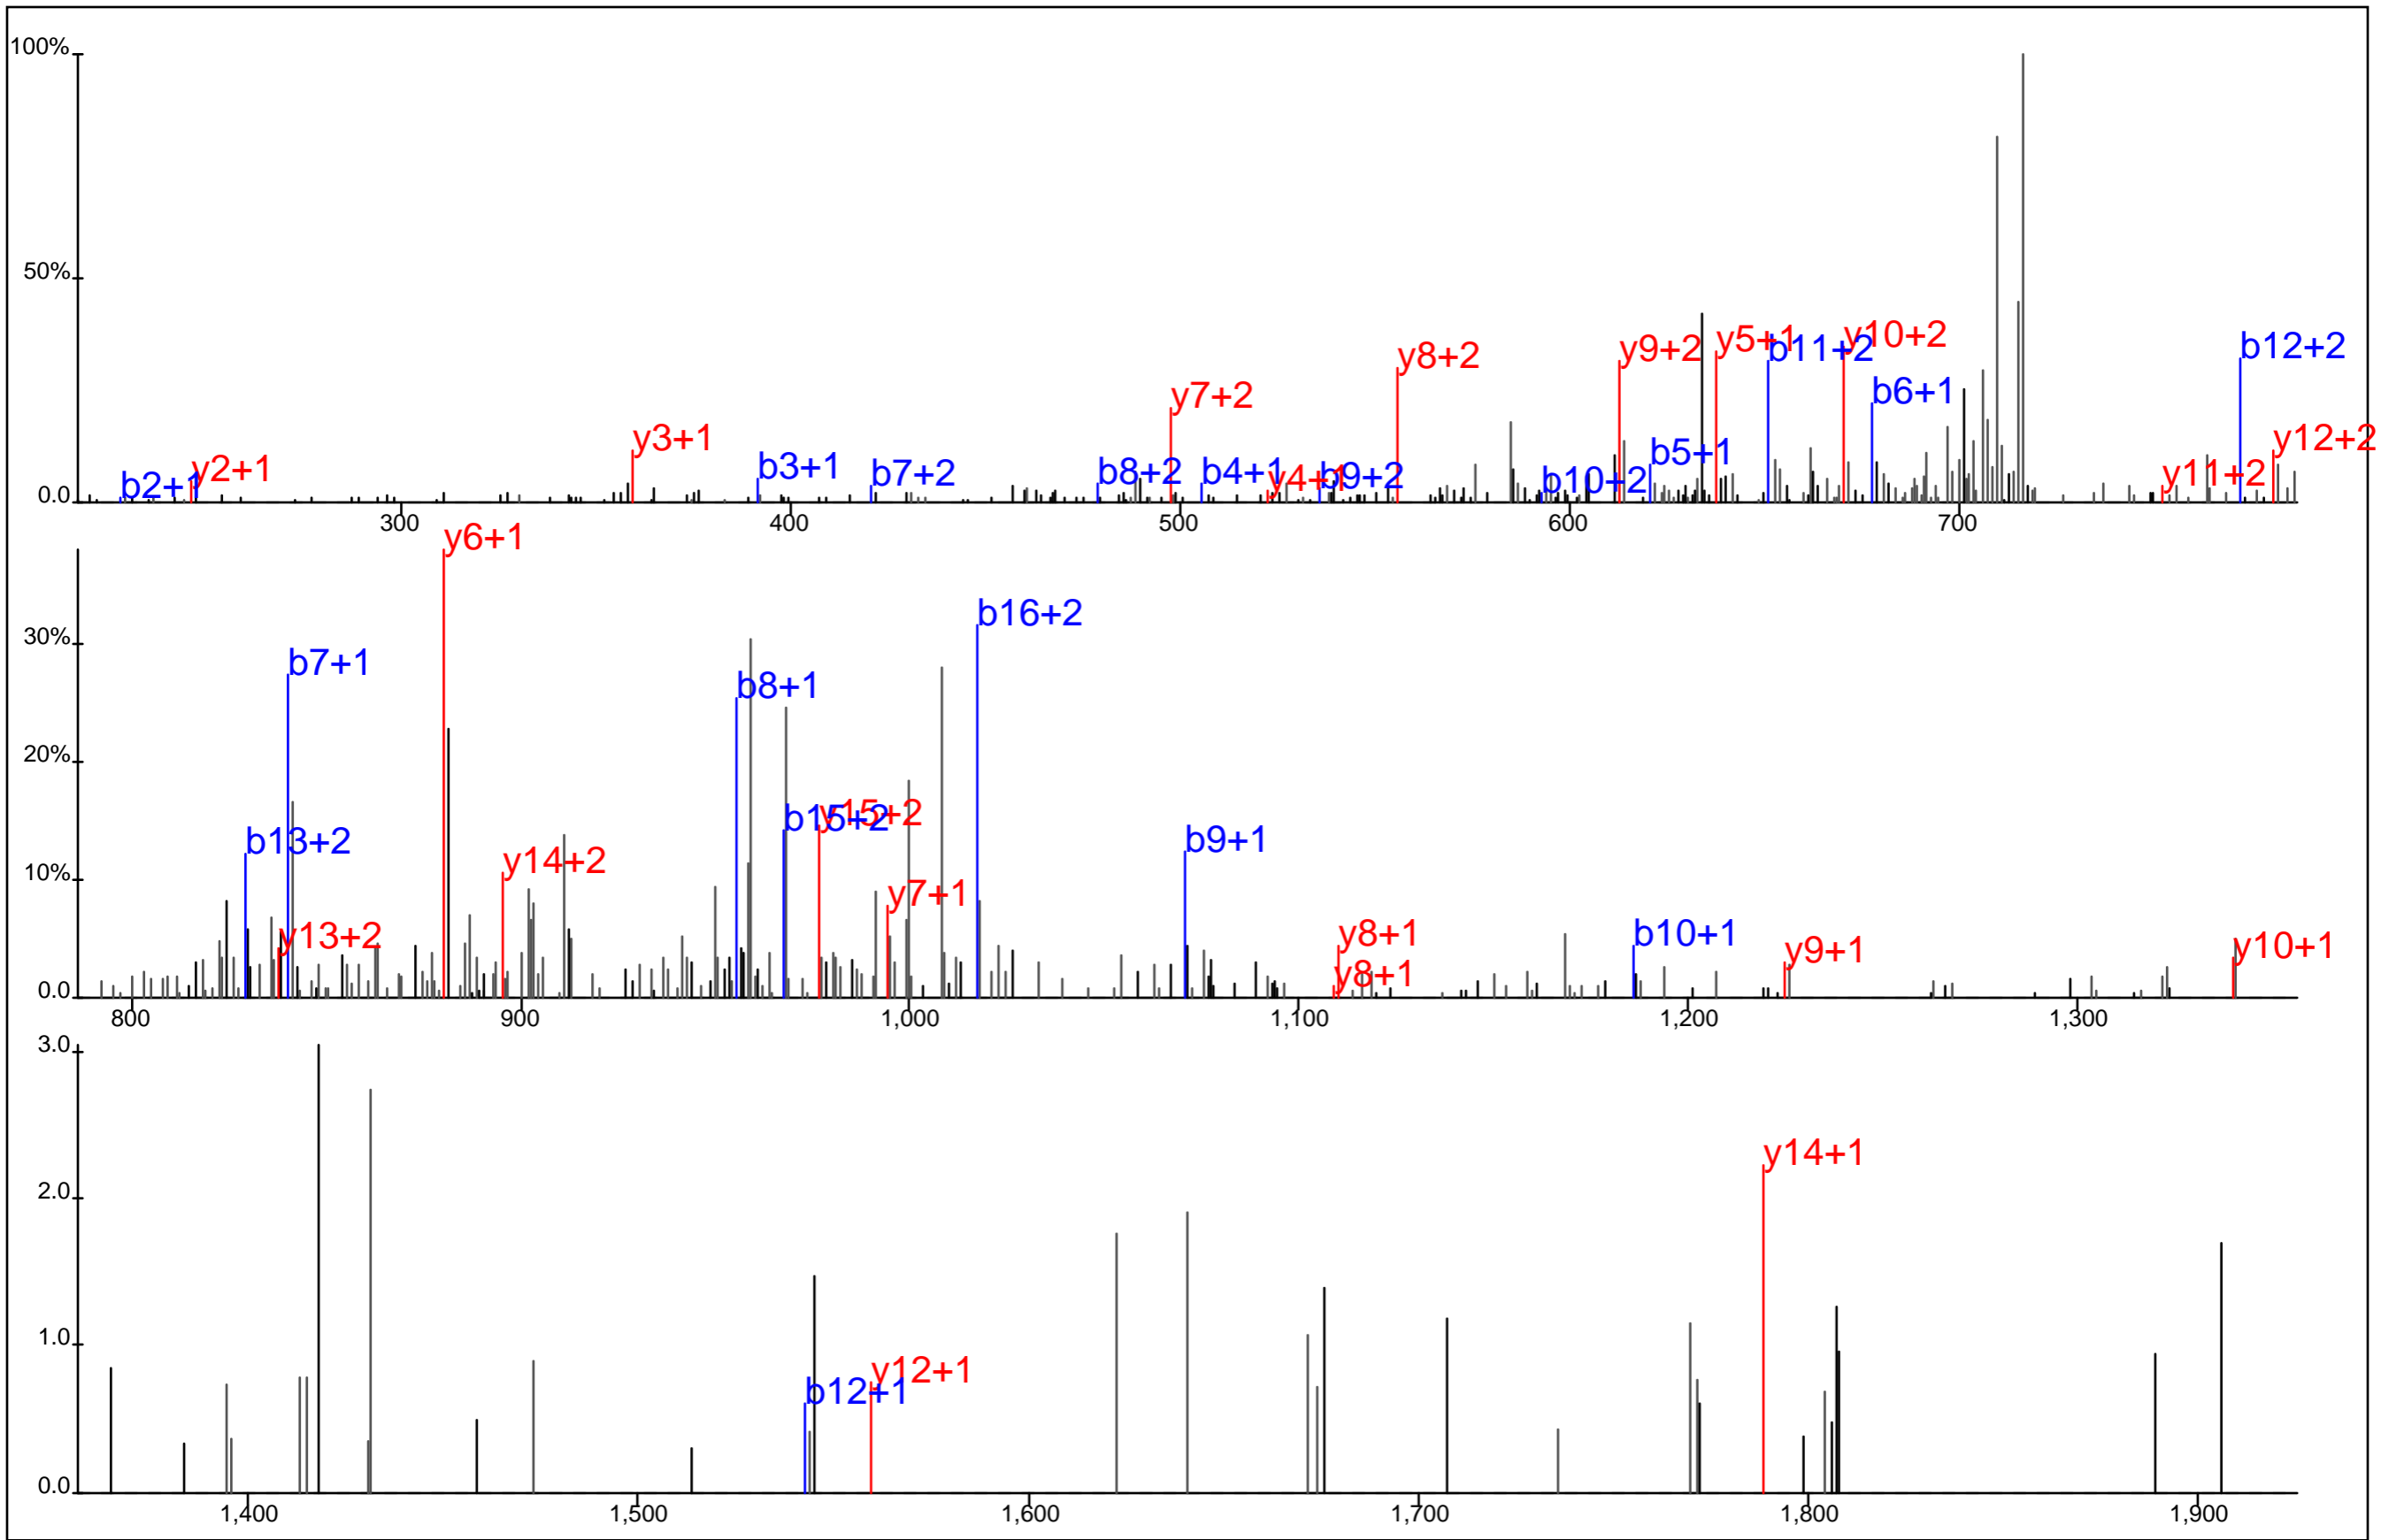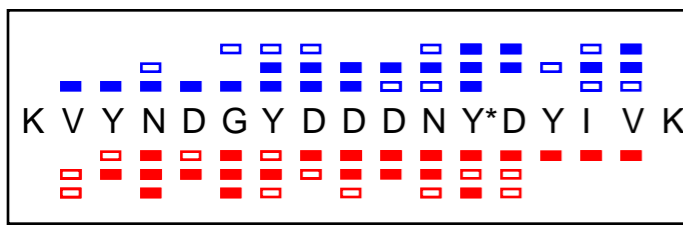

Protein Name: DYRK1A  
 gi Accession: 18765752  
 Precursor Mass: 726.9711+3  
 Delta Mass: 3.822 ppm  
 XCorr: 33.0

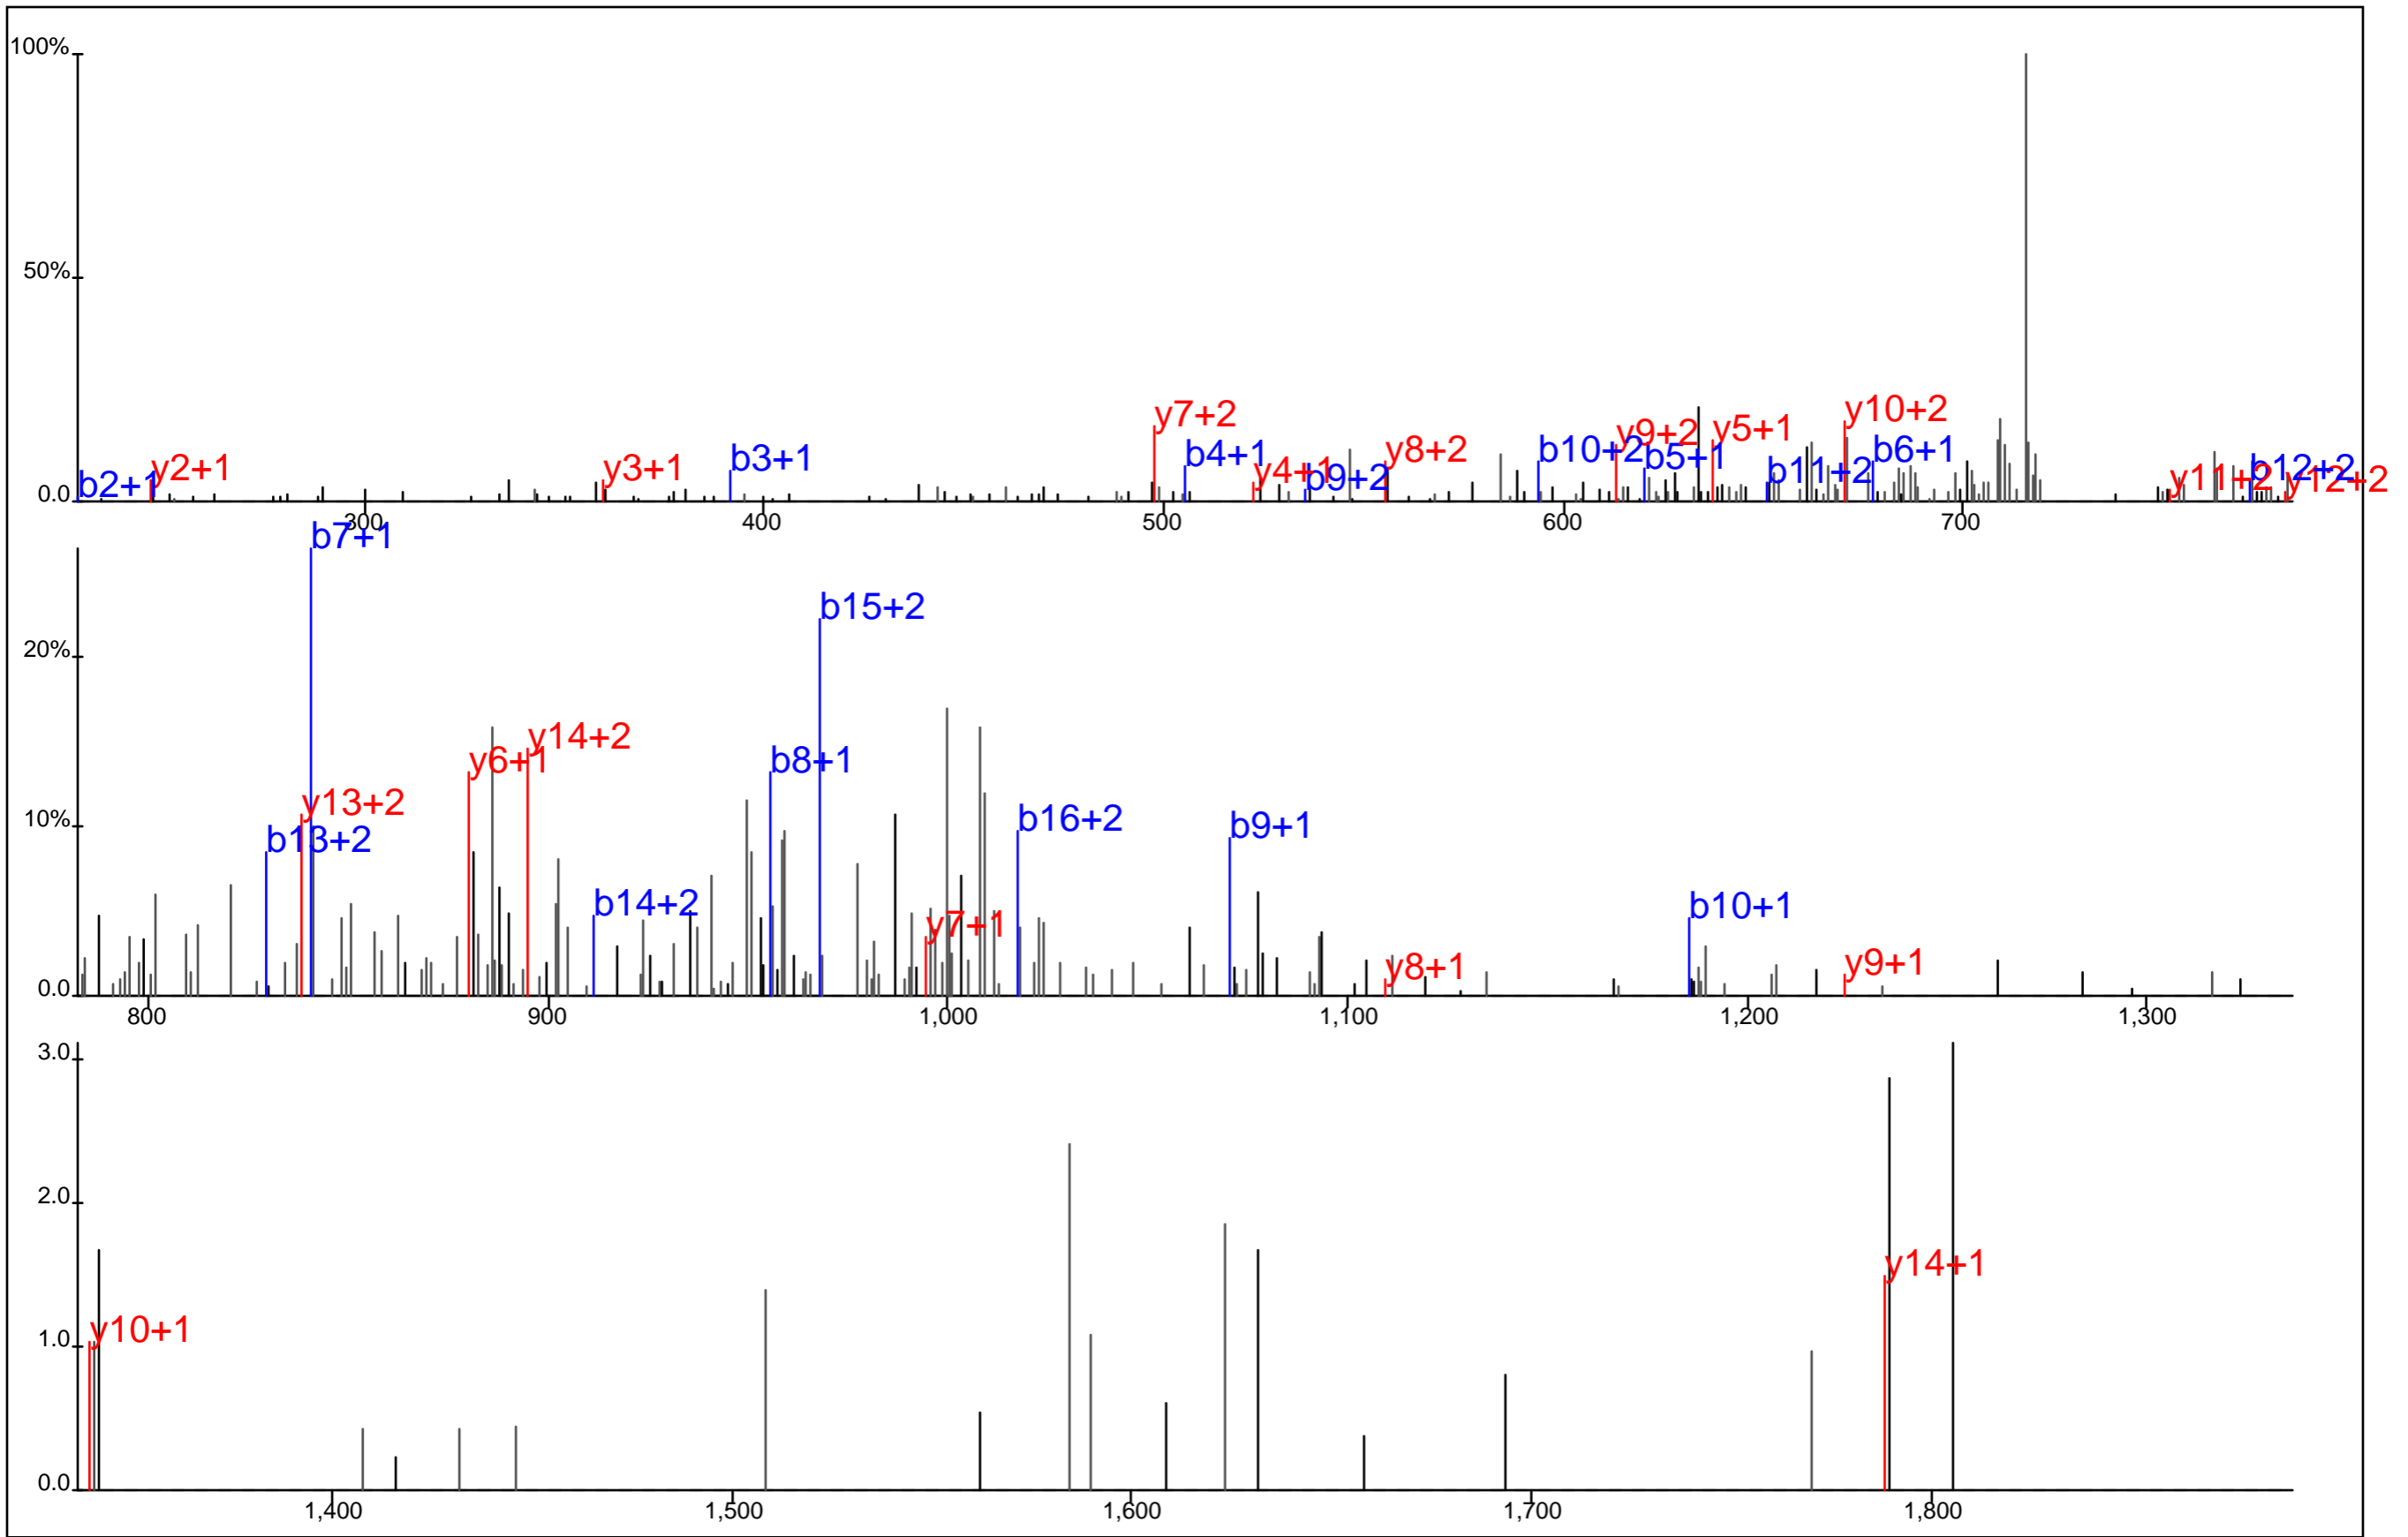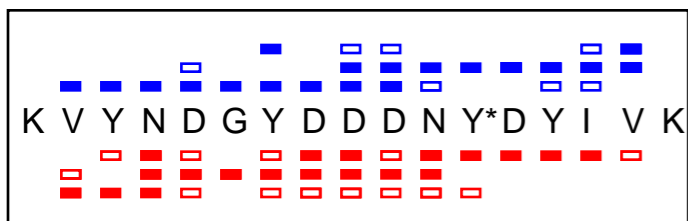

Protein Name: DYRK1A  
 gi Accession: 18765752  
 Precursor Mass: 726.9719+3  
 Delta Mass: 4.919 ppm  
 XCorr: 24.4

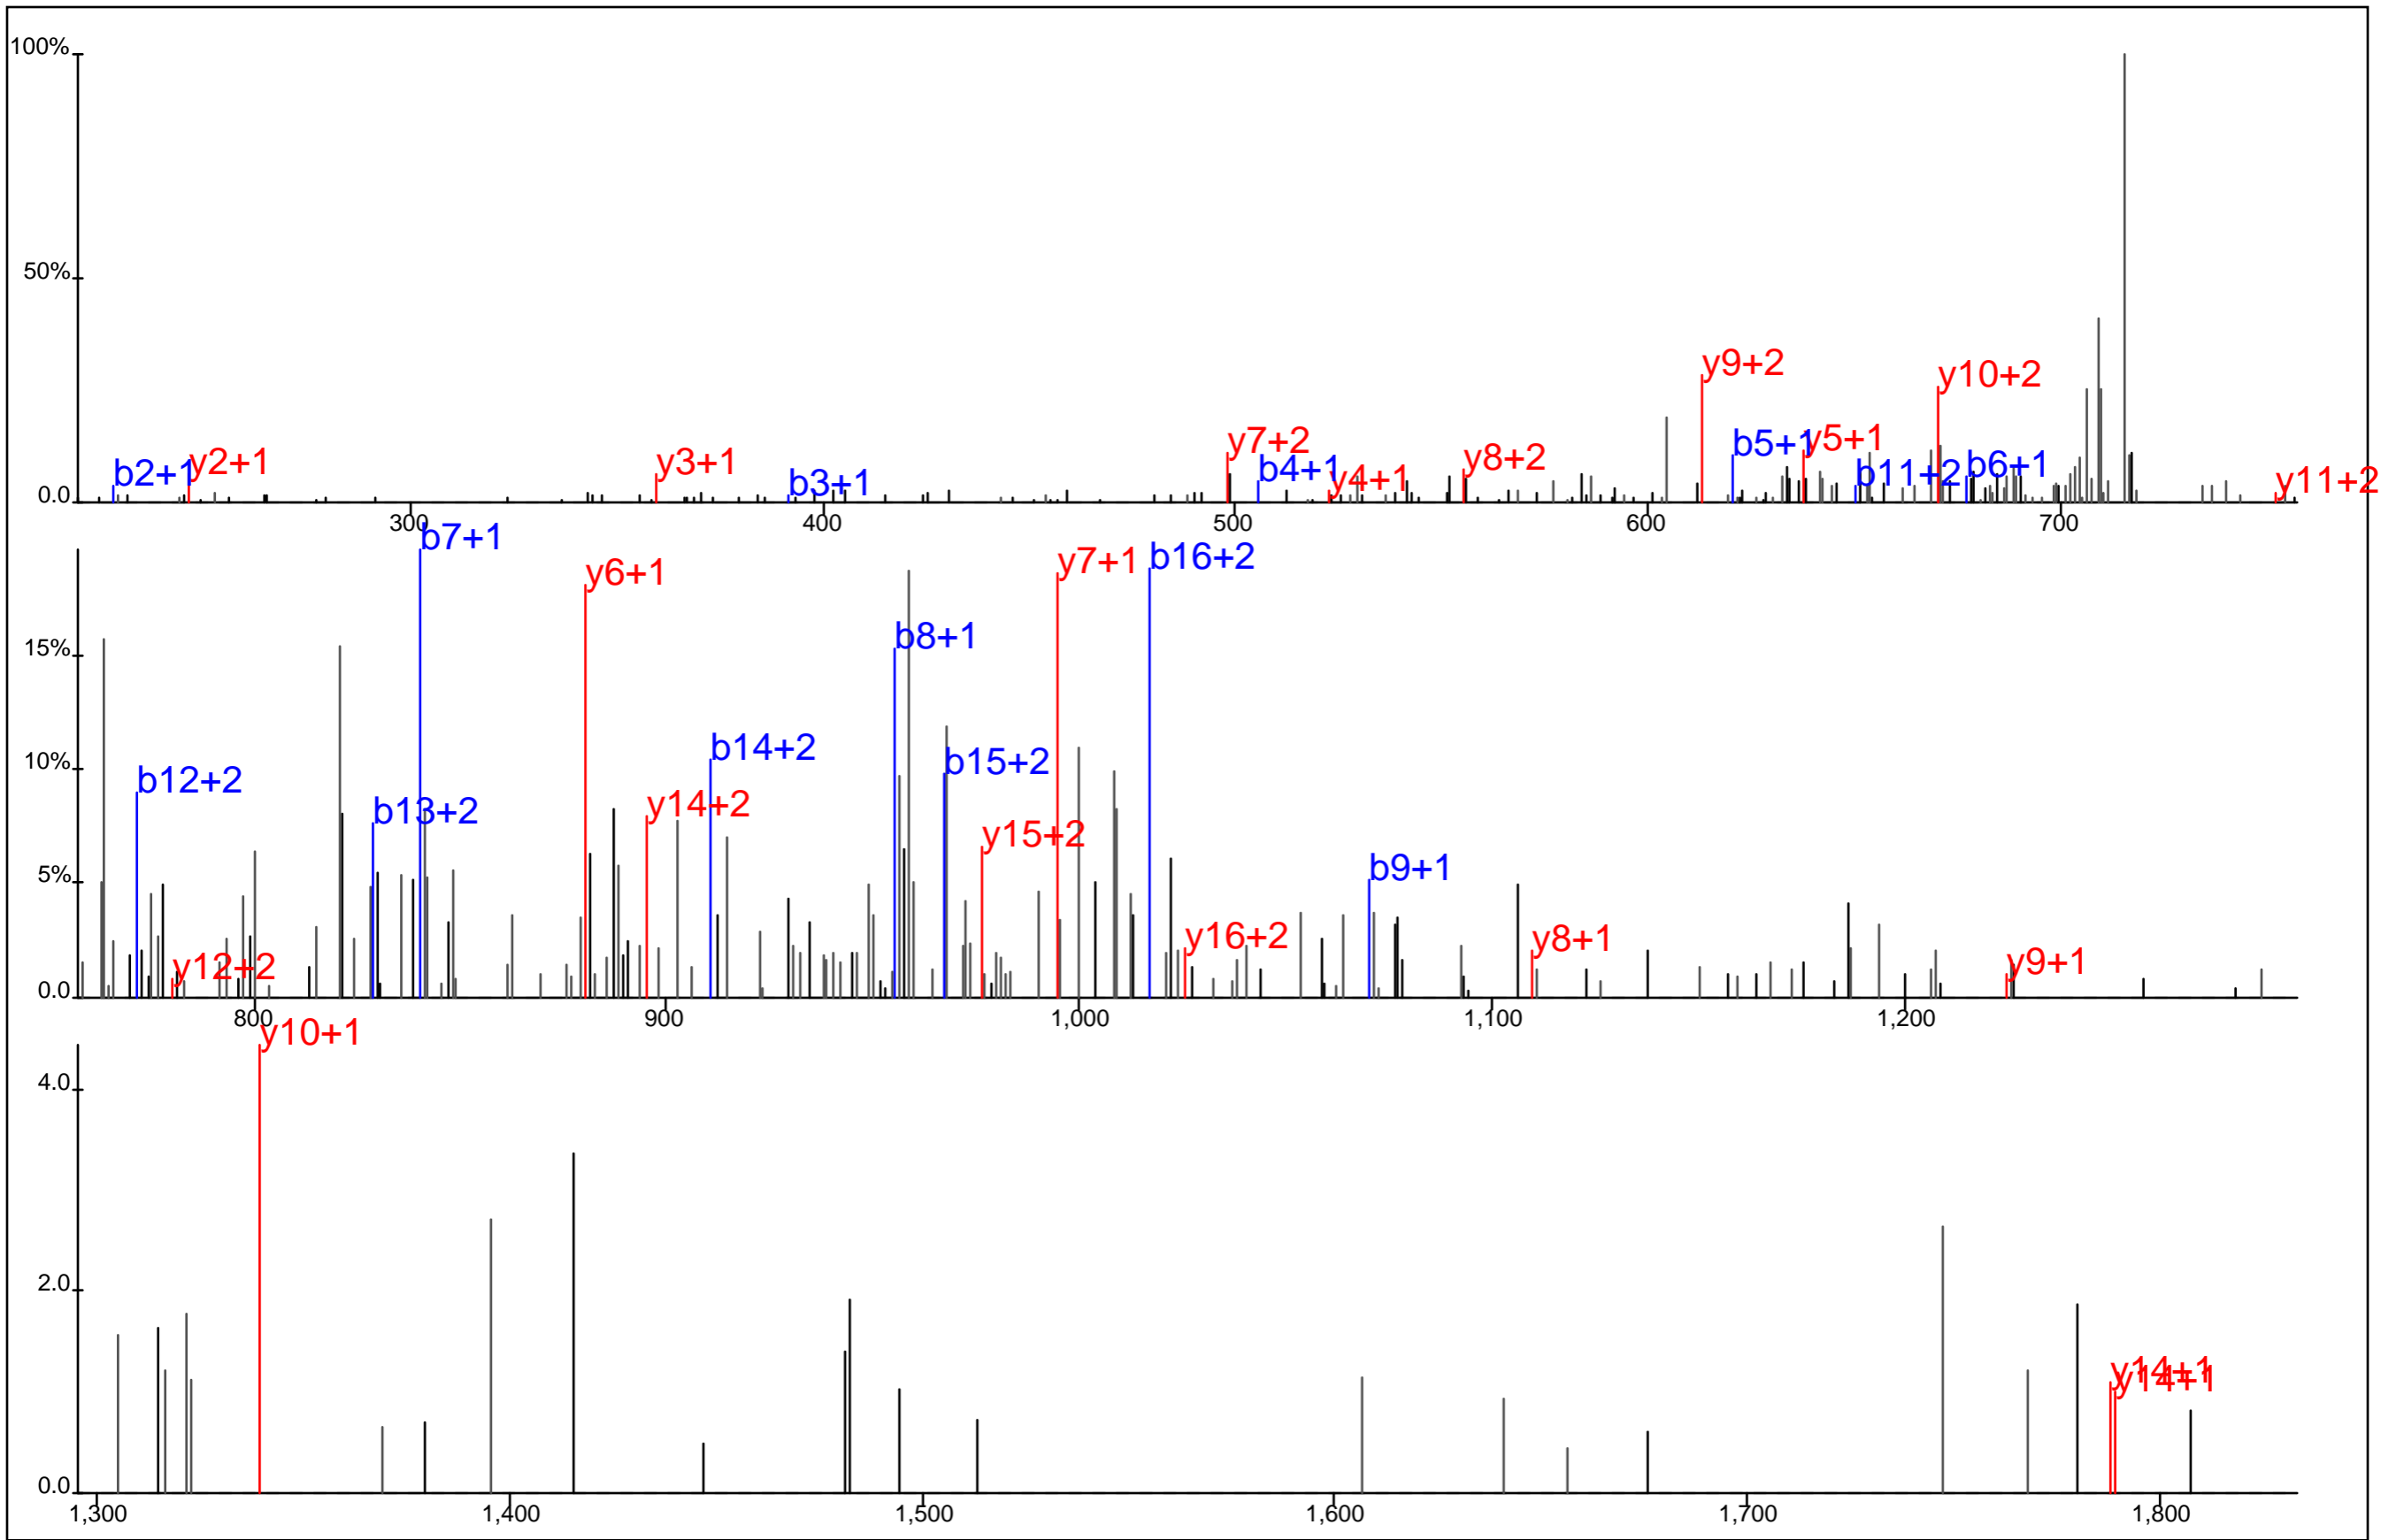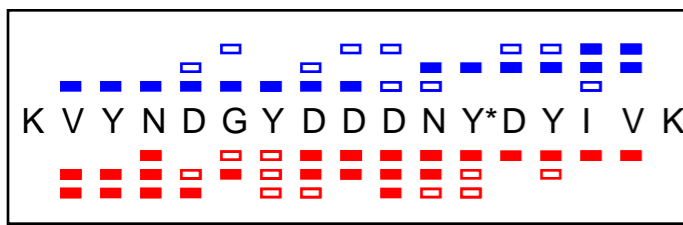

Protein Name: DYRK1A  
 gi Accession: 18765752  
 Precursor Mass: 726.9721+3  
 Delta Mass: 5.254 ppm  
 XCorr: 23.19

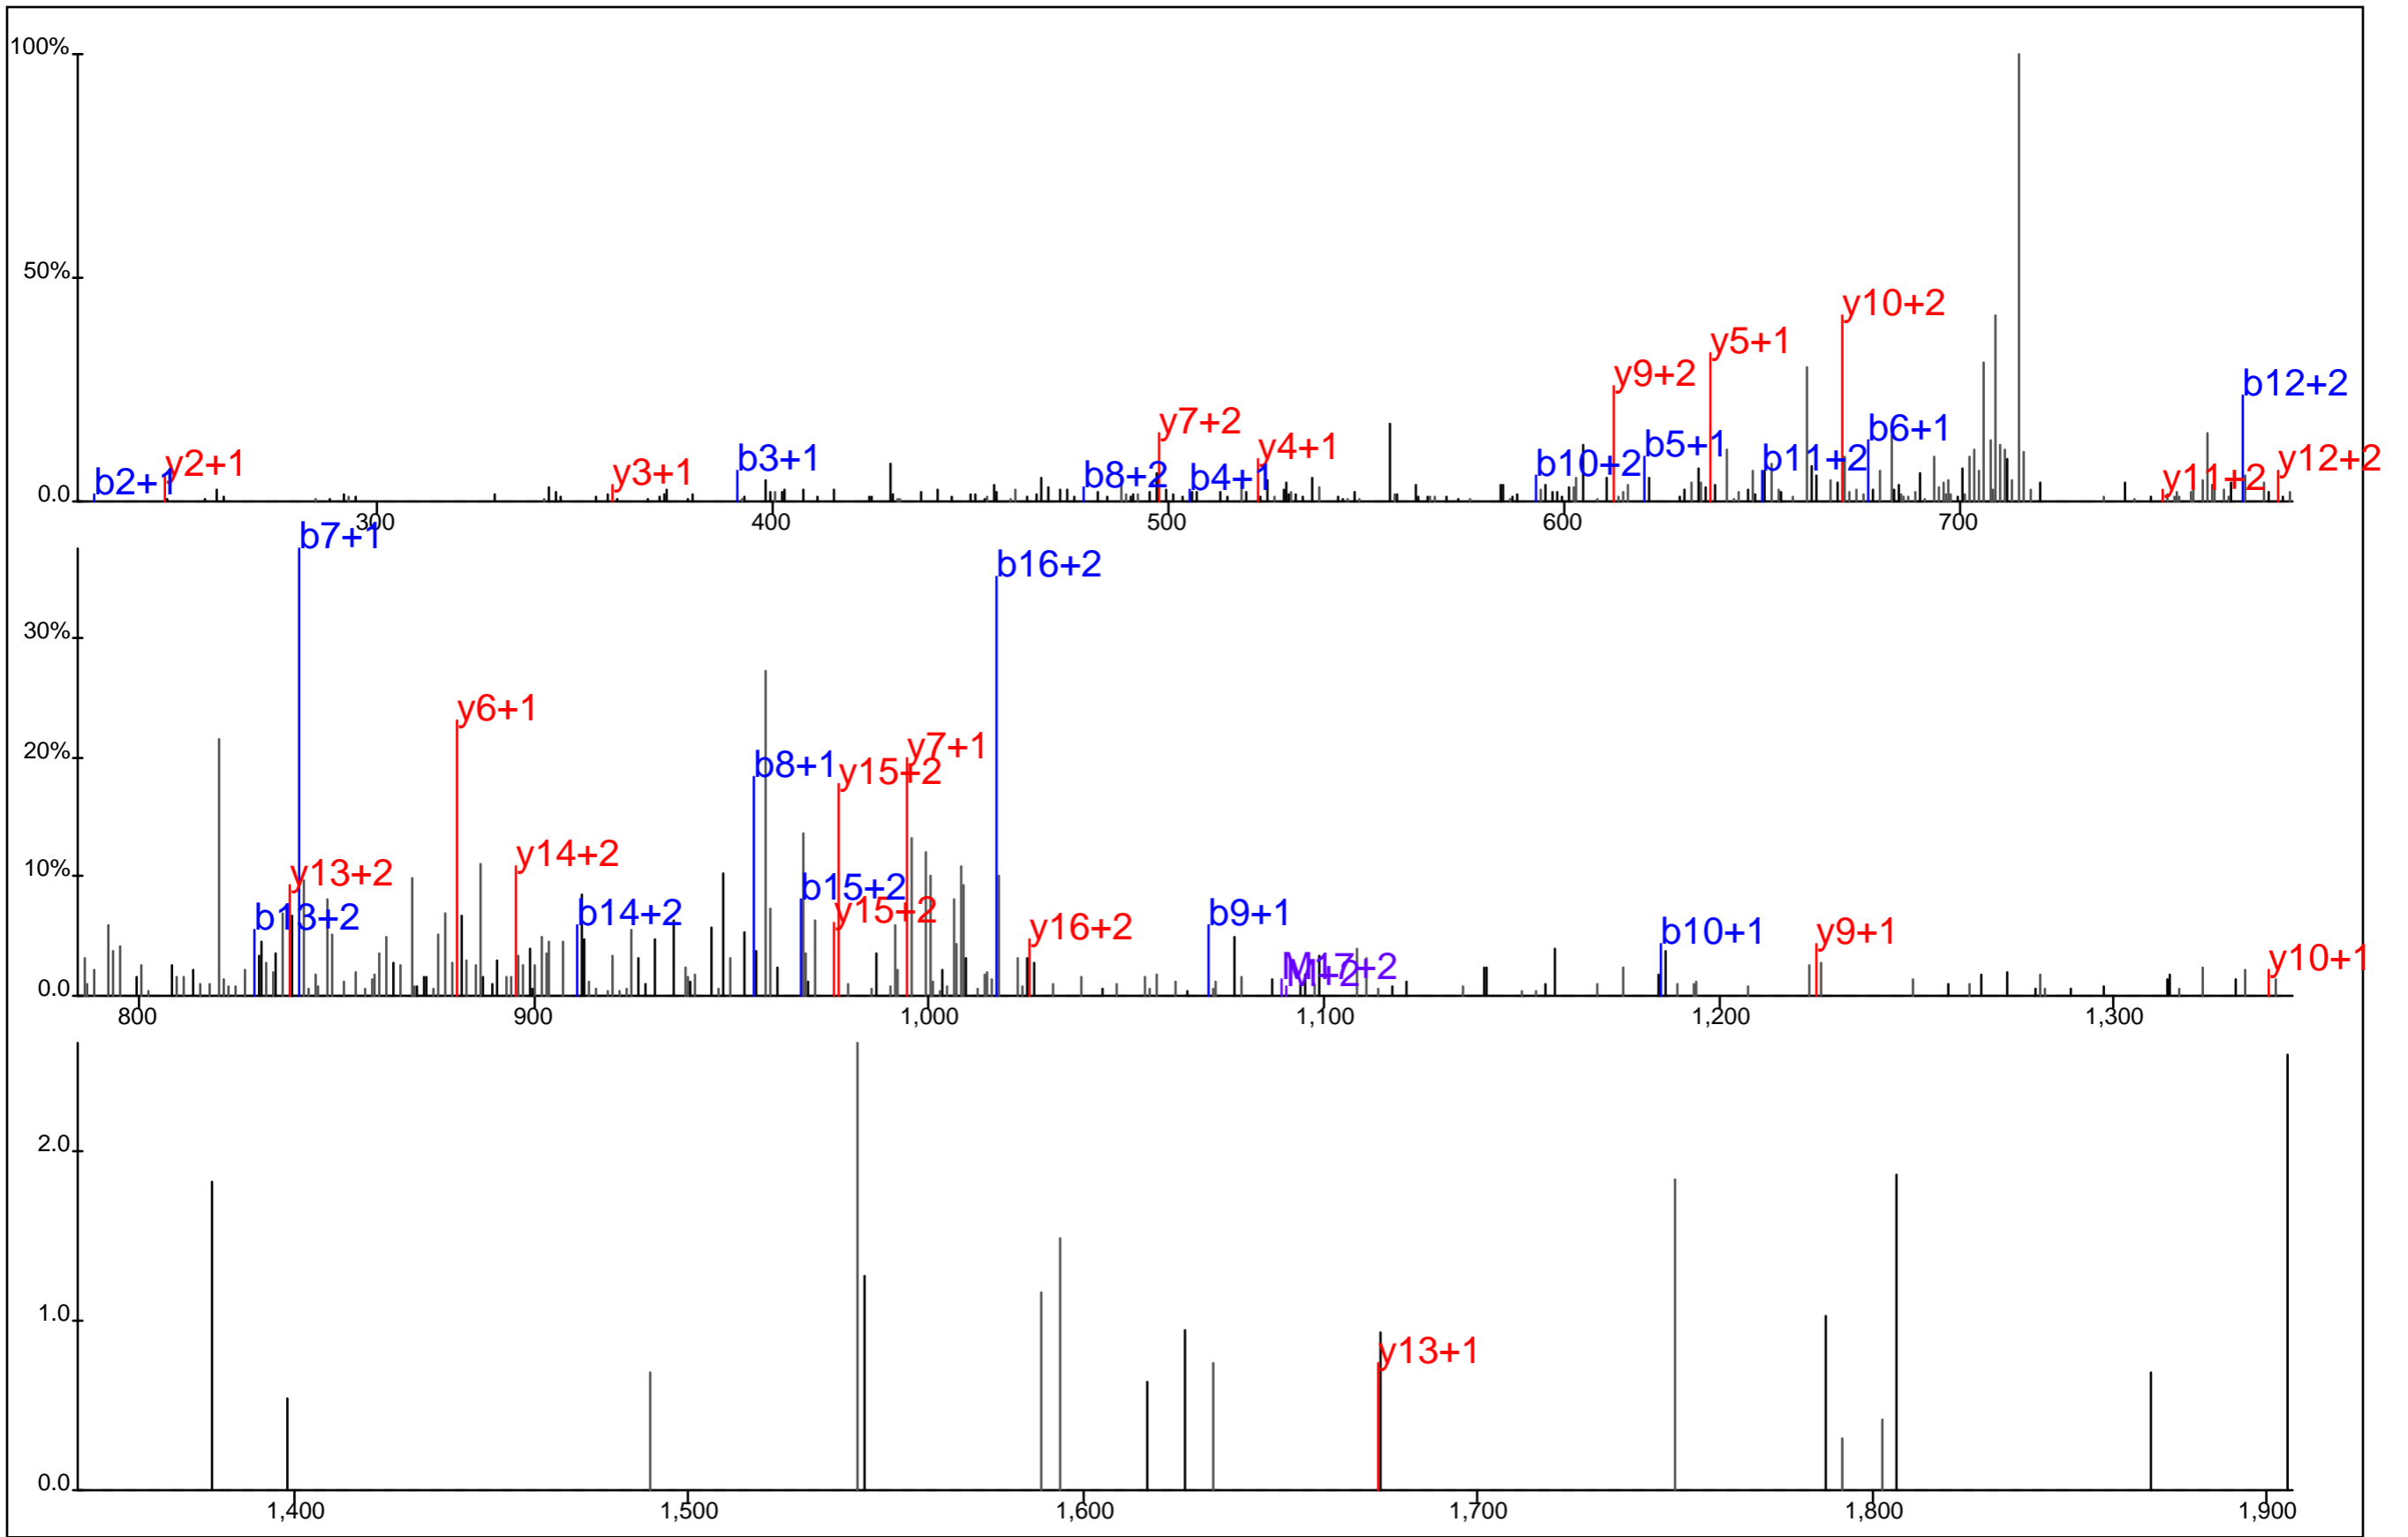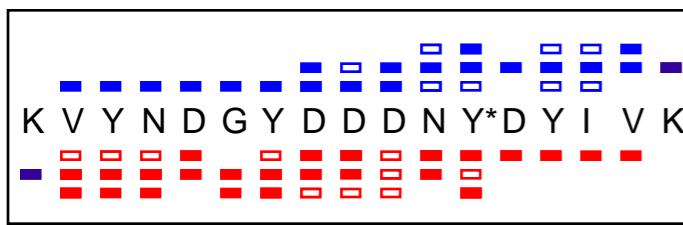

Protein Name: DYRK1A  
 gi Accession: 18765752  
 Precursor Mass: 726.9728+3  
 Delta Mass: 6.176 ppm  
 XCorr: 45.47

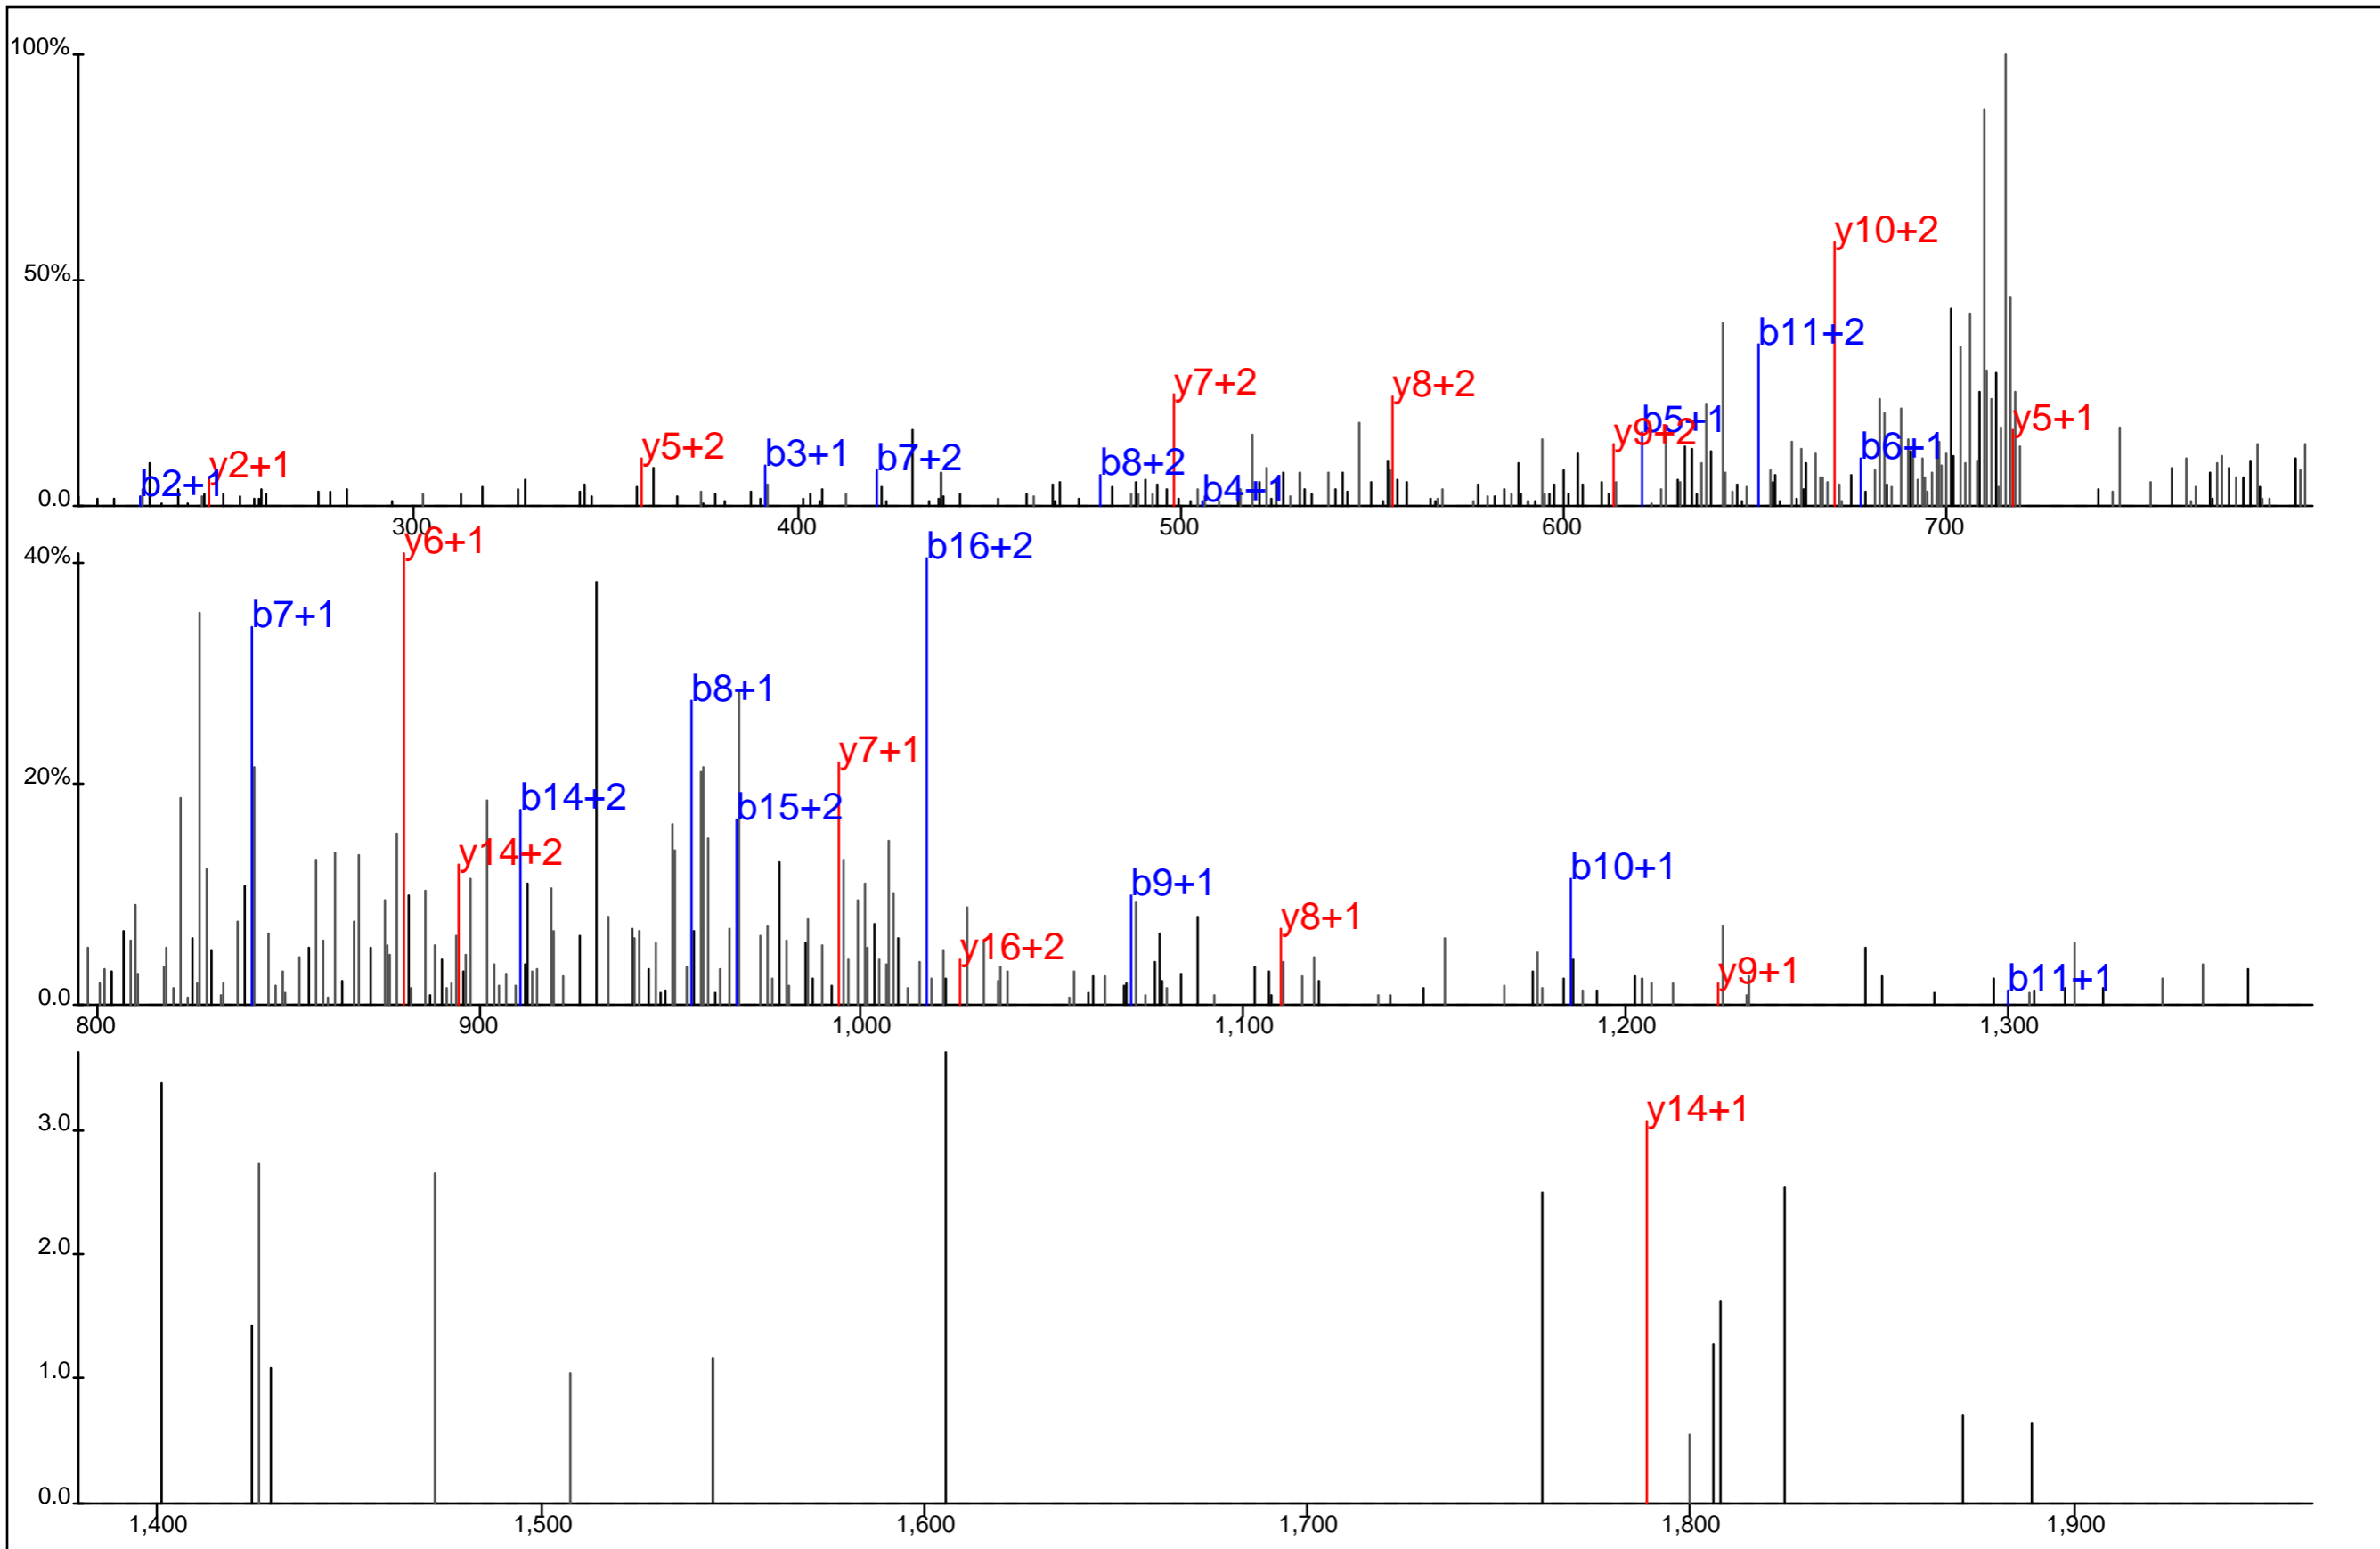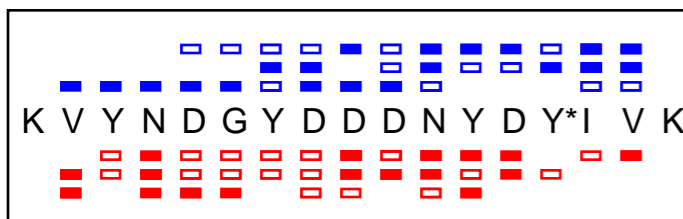

Protein Name: DYRK1A  
 gi Accession: 18765752  
 Precursor Mass: 726.9701+3  
 Delta Mass: 2.482 ppm  
 XCorr: 17.11

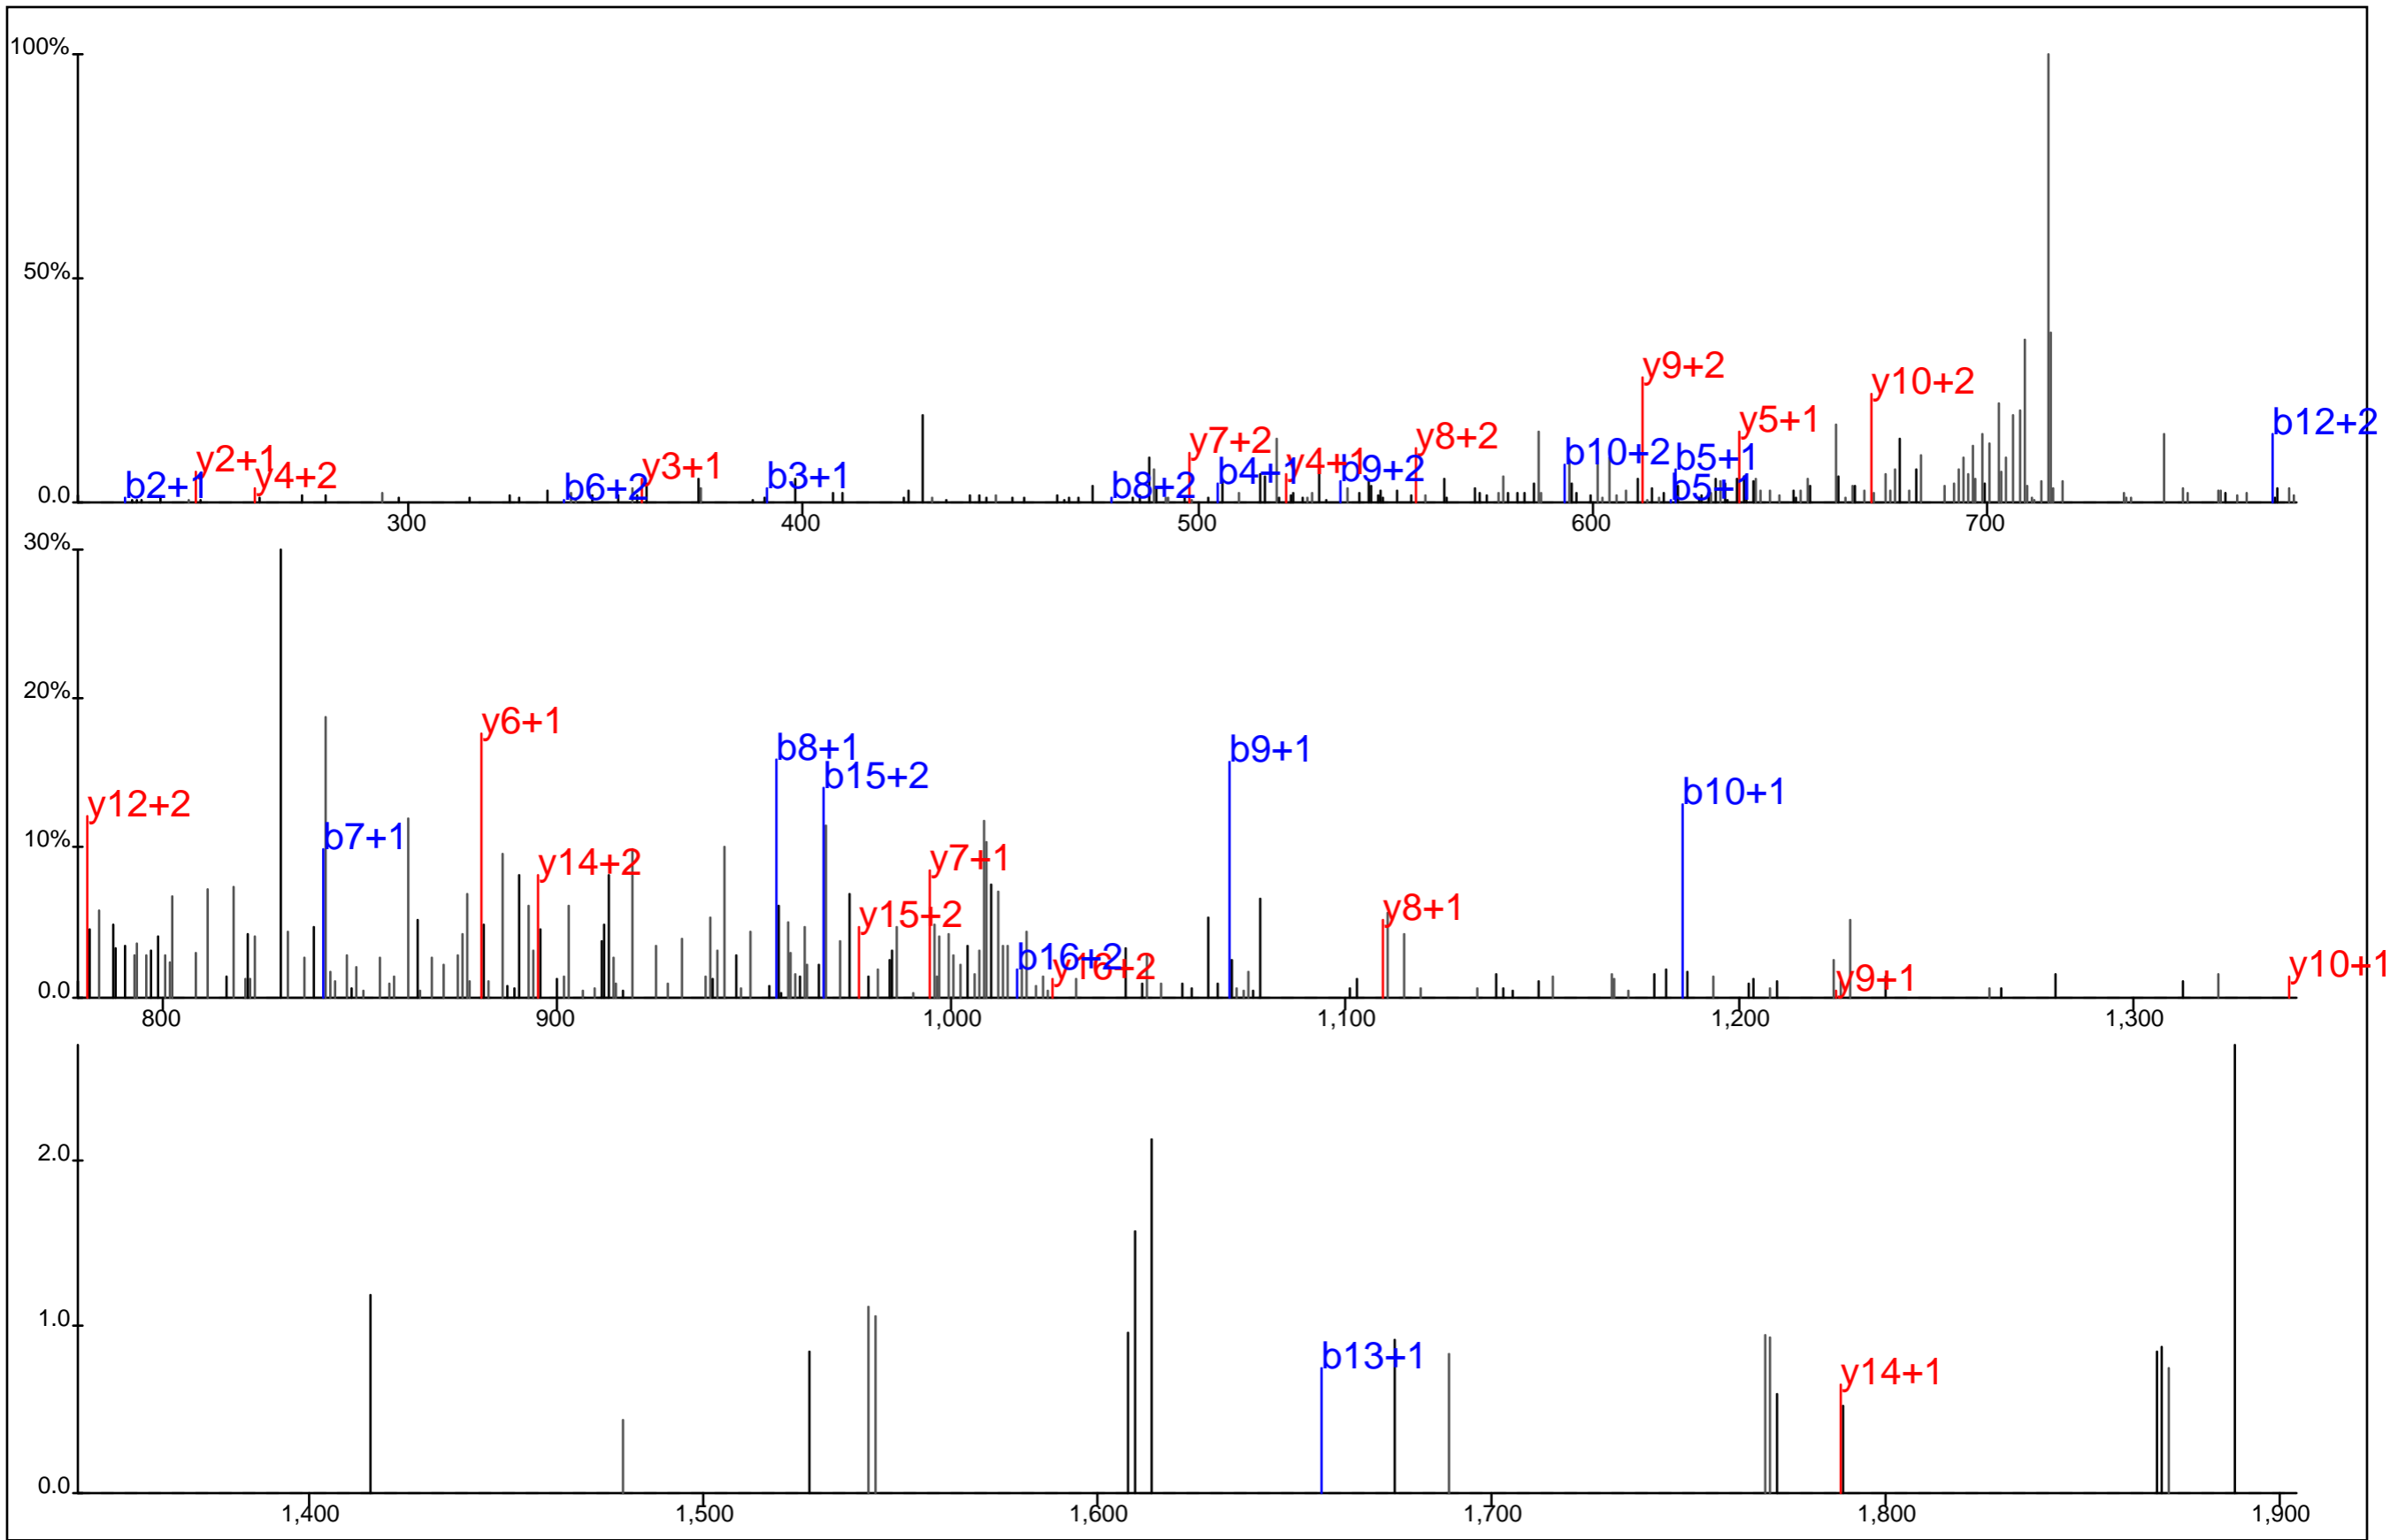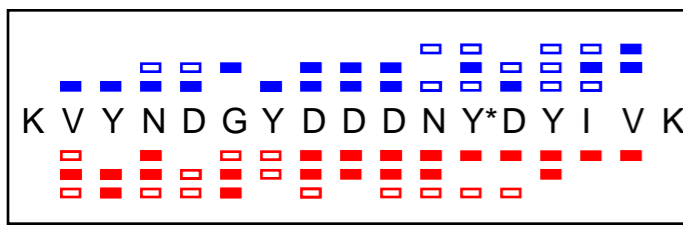

Protein Name: DYRK1A  
 gi Accession: 18765752  
 Precursor Mass: 726.9711+3  
 Delta Mass: 3.822 ppm  
 XCorr: 22.69

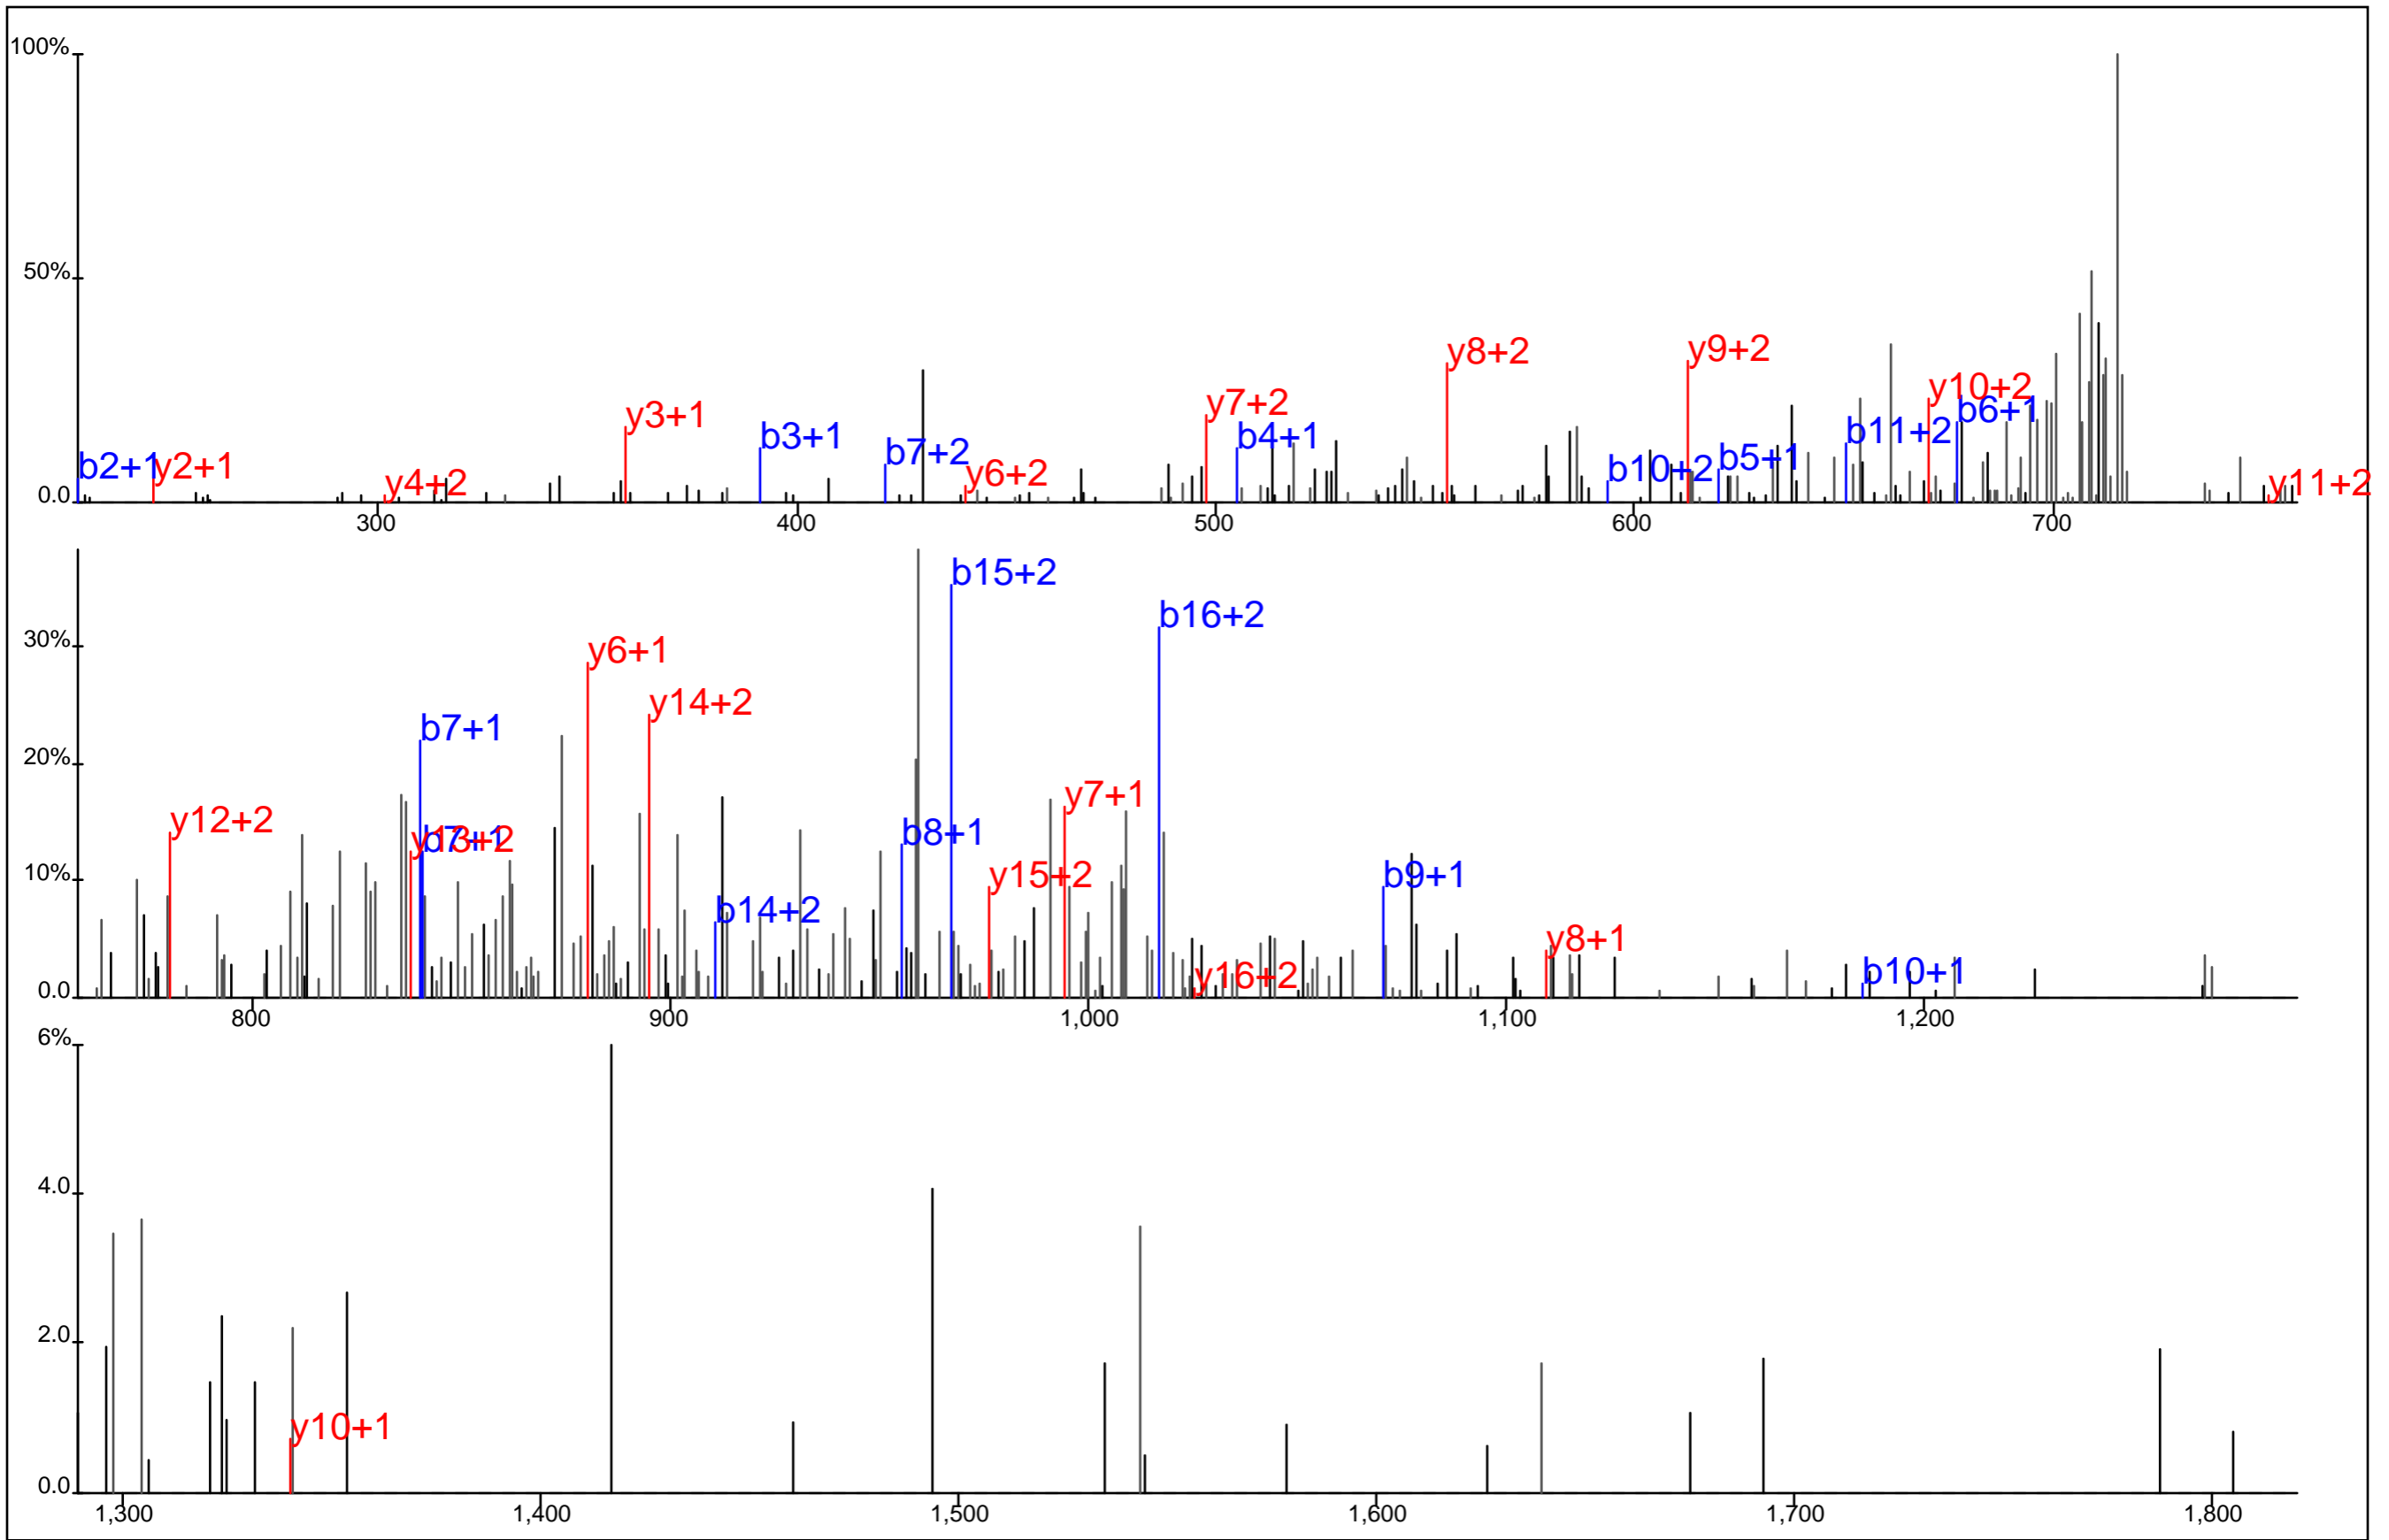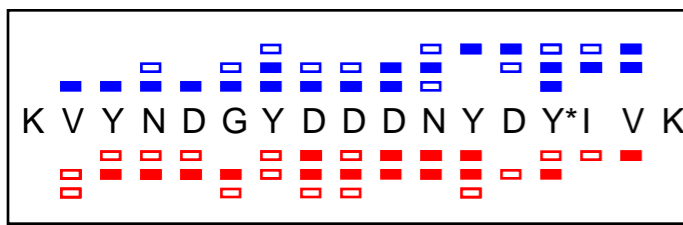

Protein Name: DYRK1A  
 gi Accession: 18765752  
 Precursor Mass: 726.9680+3  
 Delta Mass: 0.460 ppm  
 XCorr: 21.61

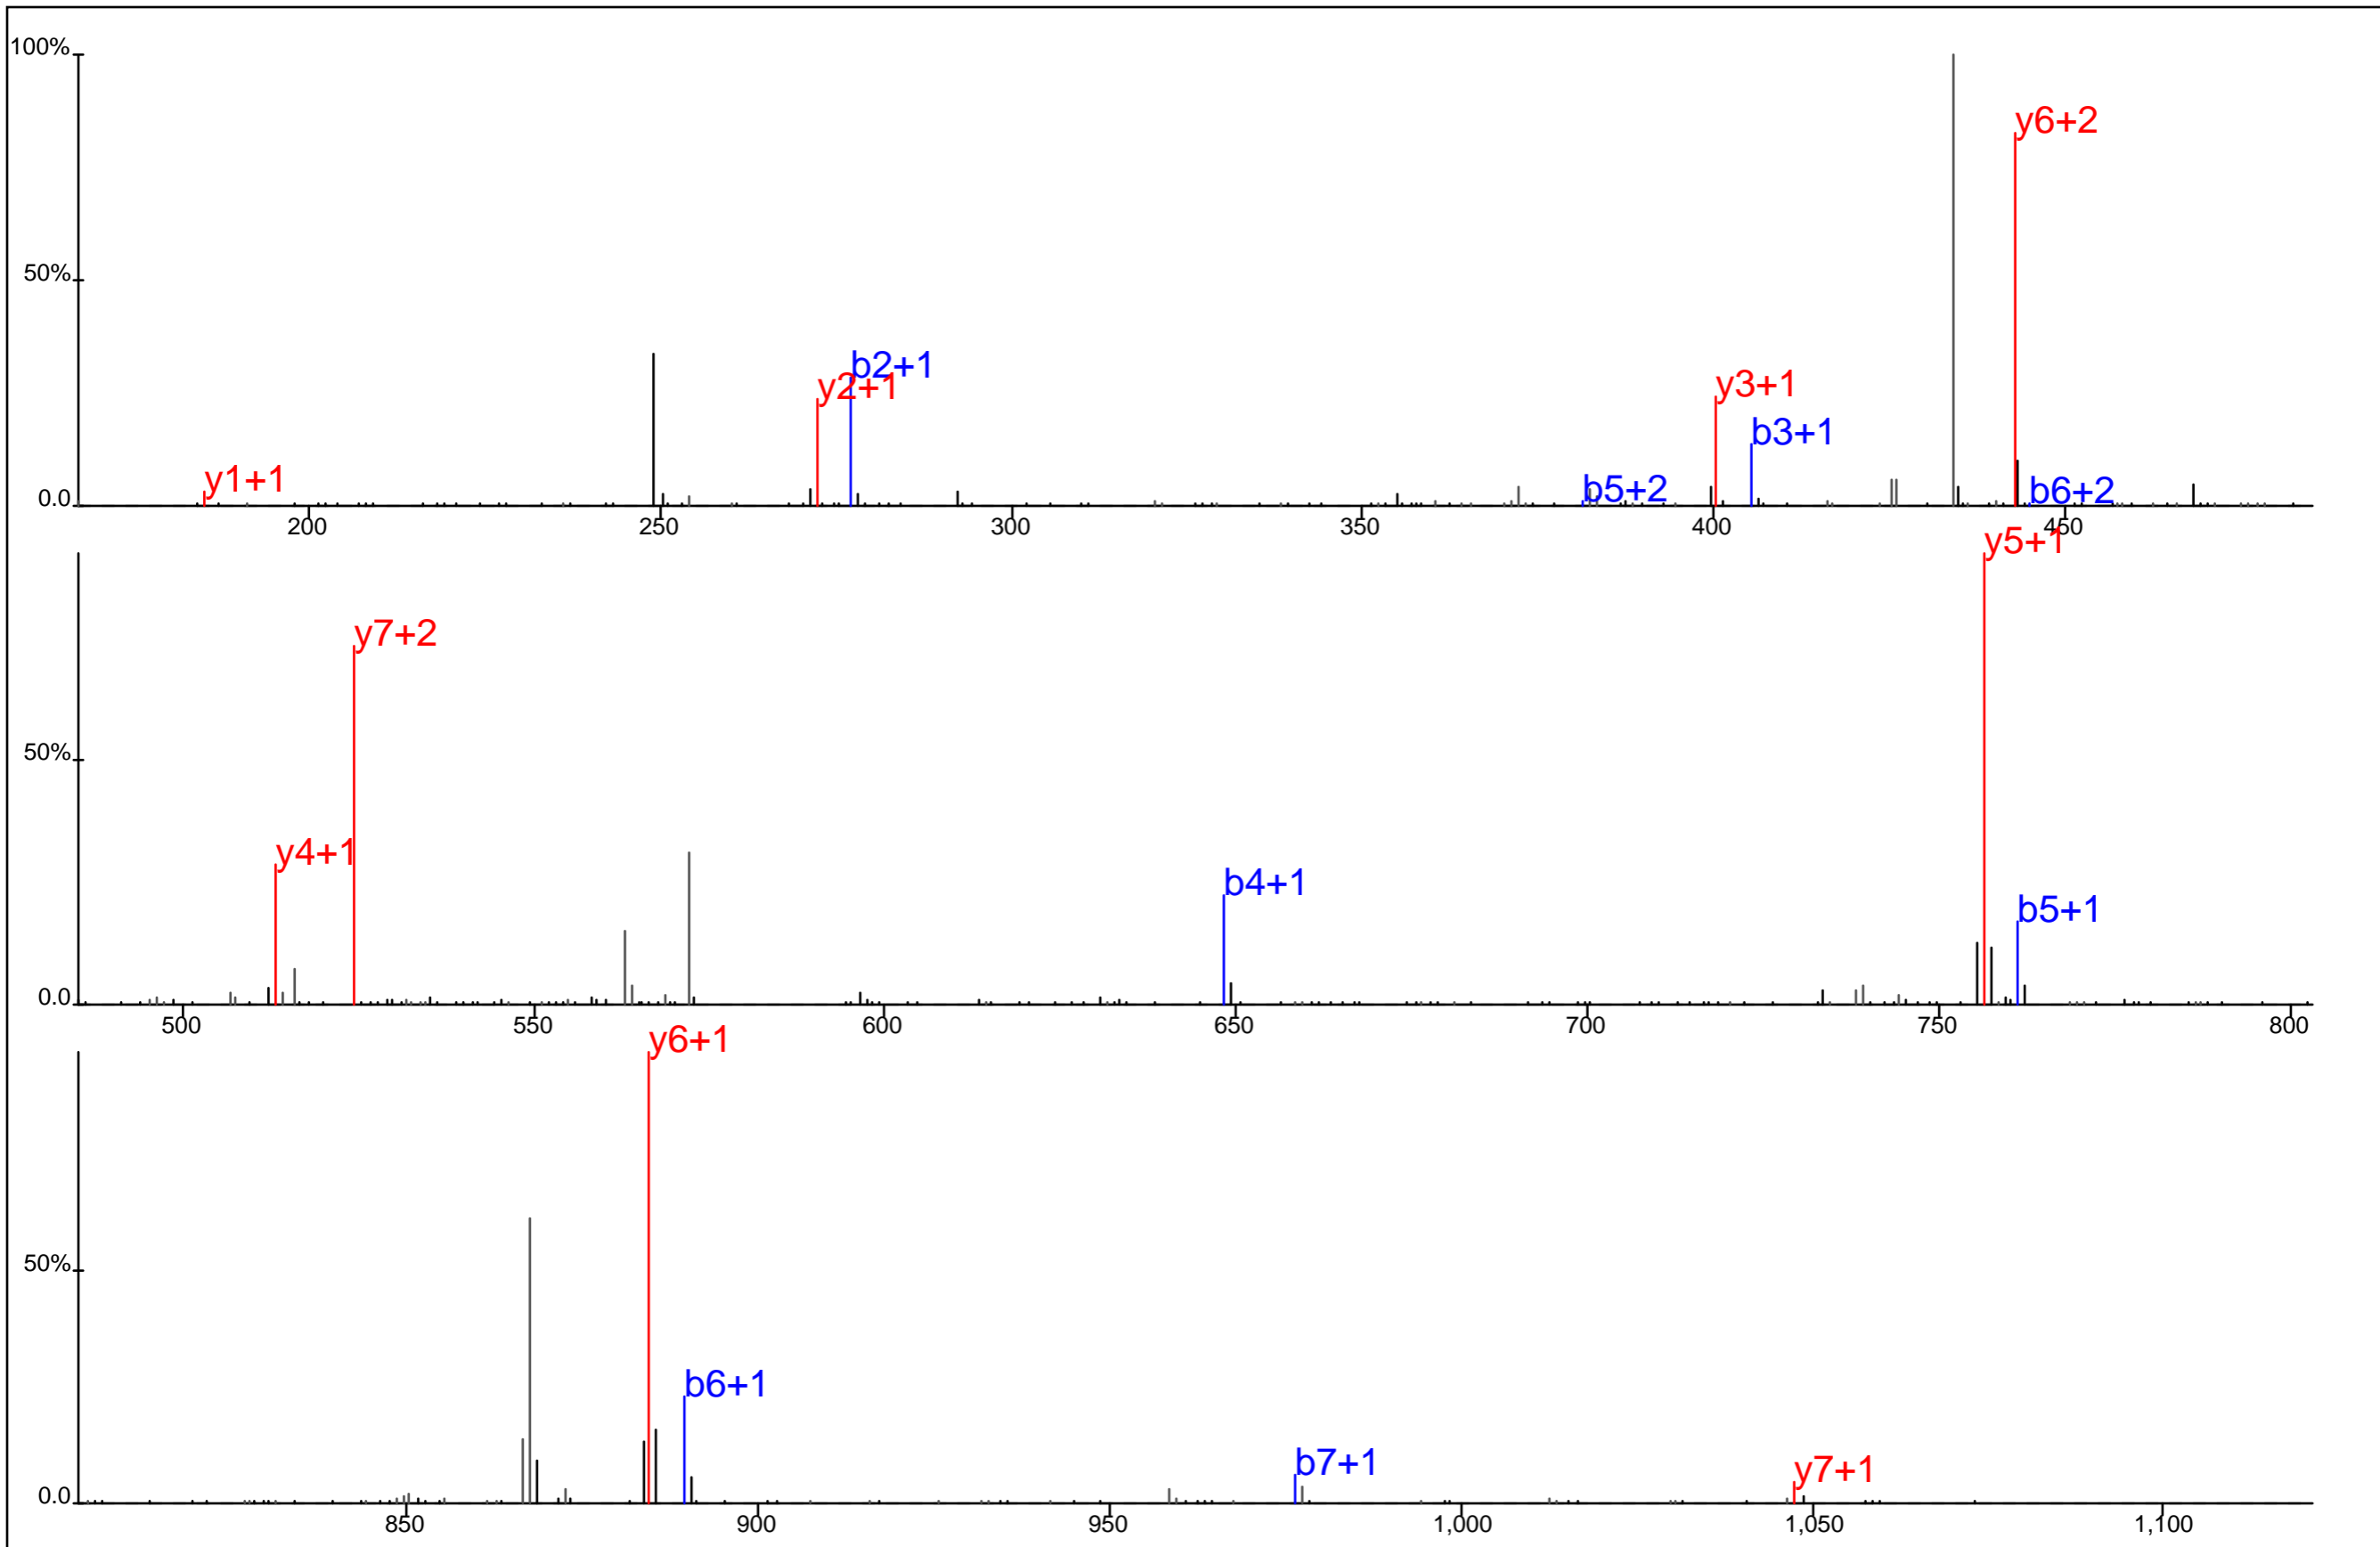

|   |   |   |    |   |   |   |   |
|---|---|---|----|---|---|---|---|
| I | Y | Q | Y* | I | Q | S | R |
| ▢ | ▢ | ▢ | ▢  | ▢ | ▢ | ▢ | ▢ |
| ▢ | ▢ | ▢ | ▢  | ▢ | ▢ | ▢ | ▢ |

Protein Name: DYRK1B  
 gi Accession: 405725  
 Precursor Mass: 580.7716+2  
 Delta Mass: 1.337 ppm  
 XCorr: 50.75



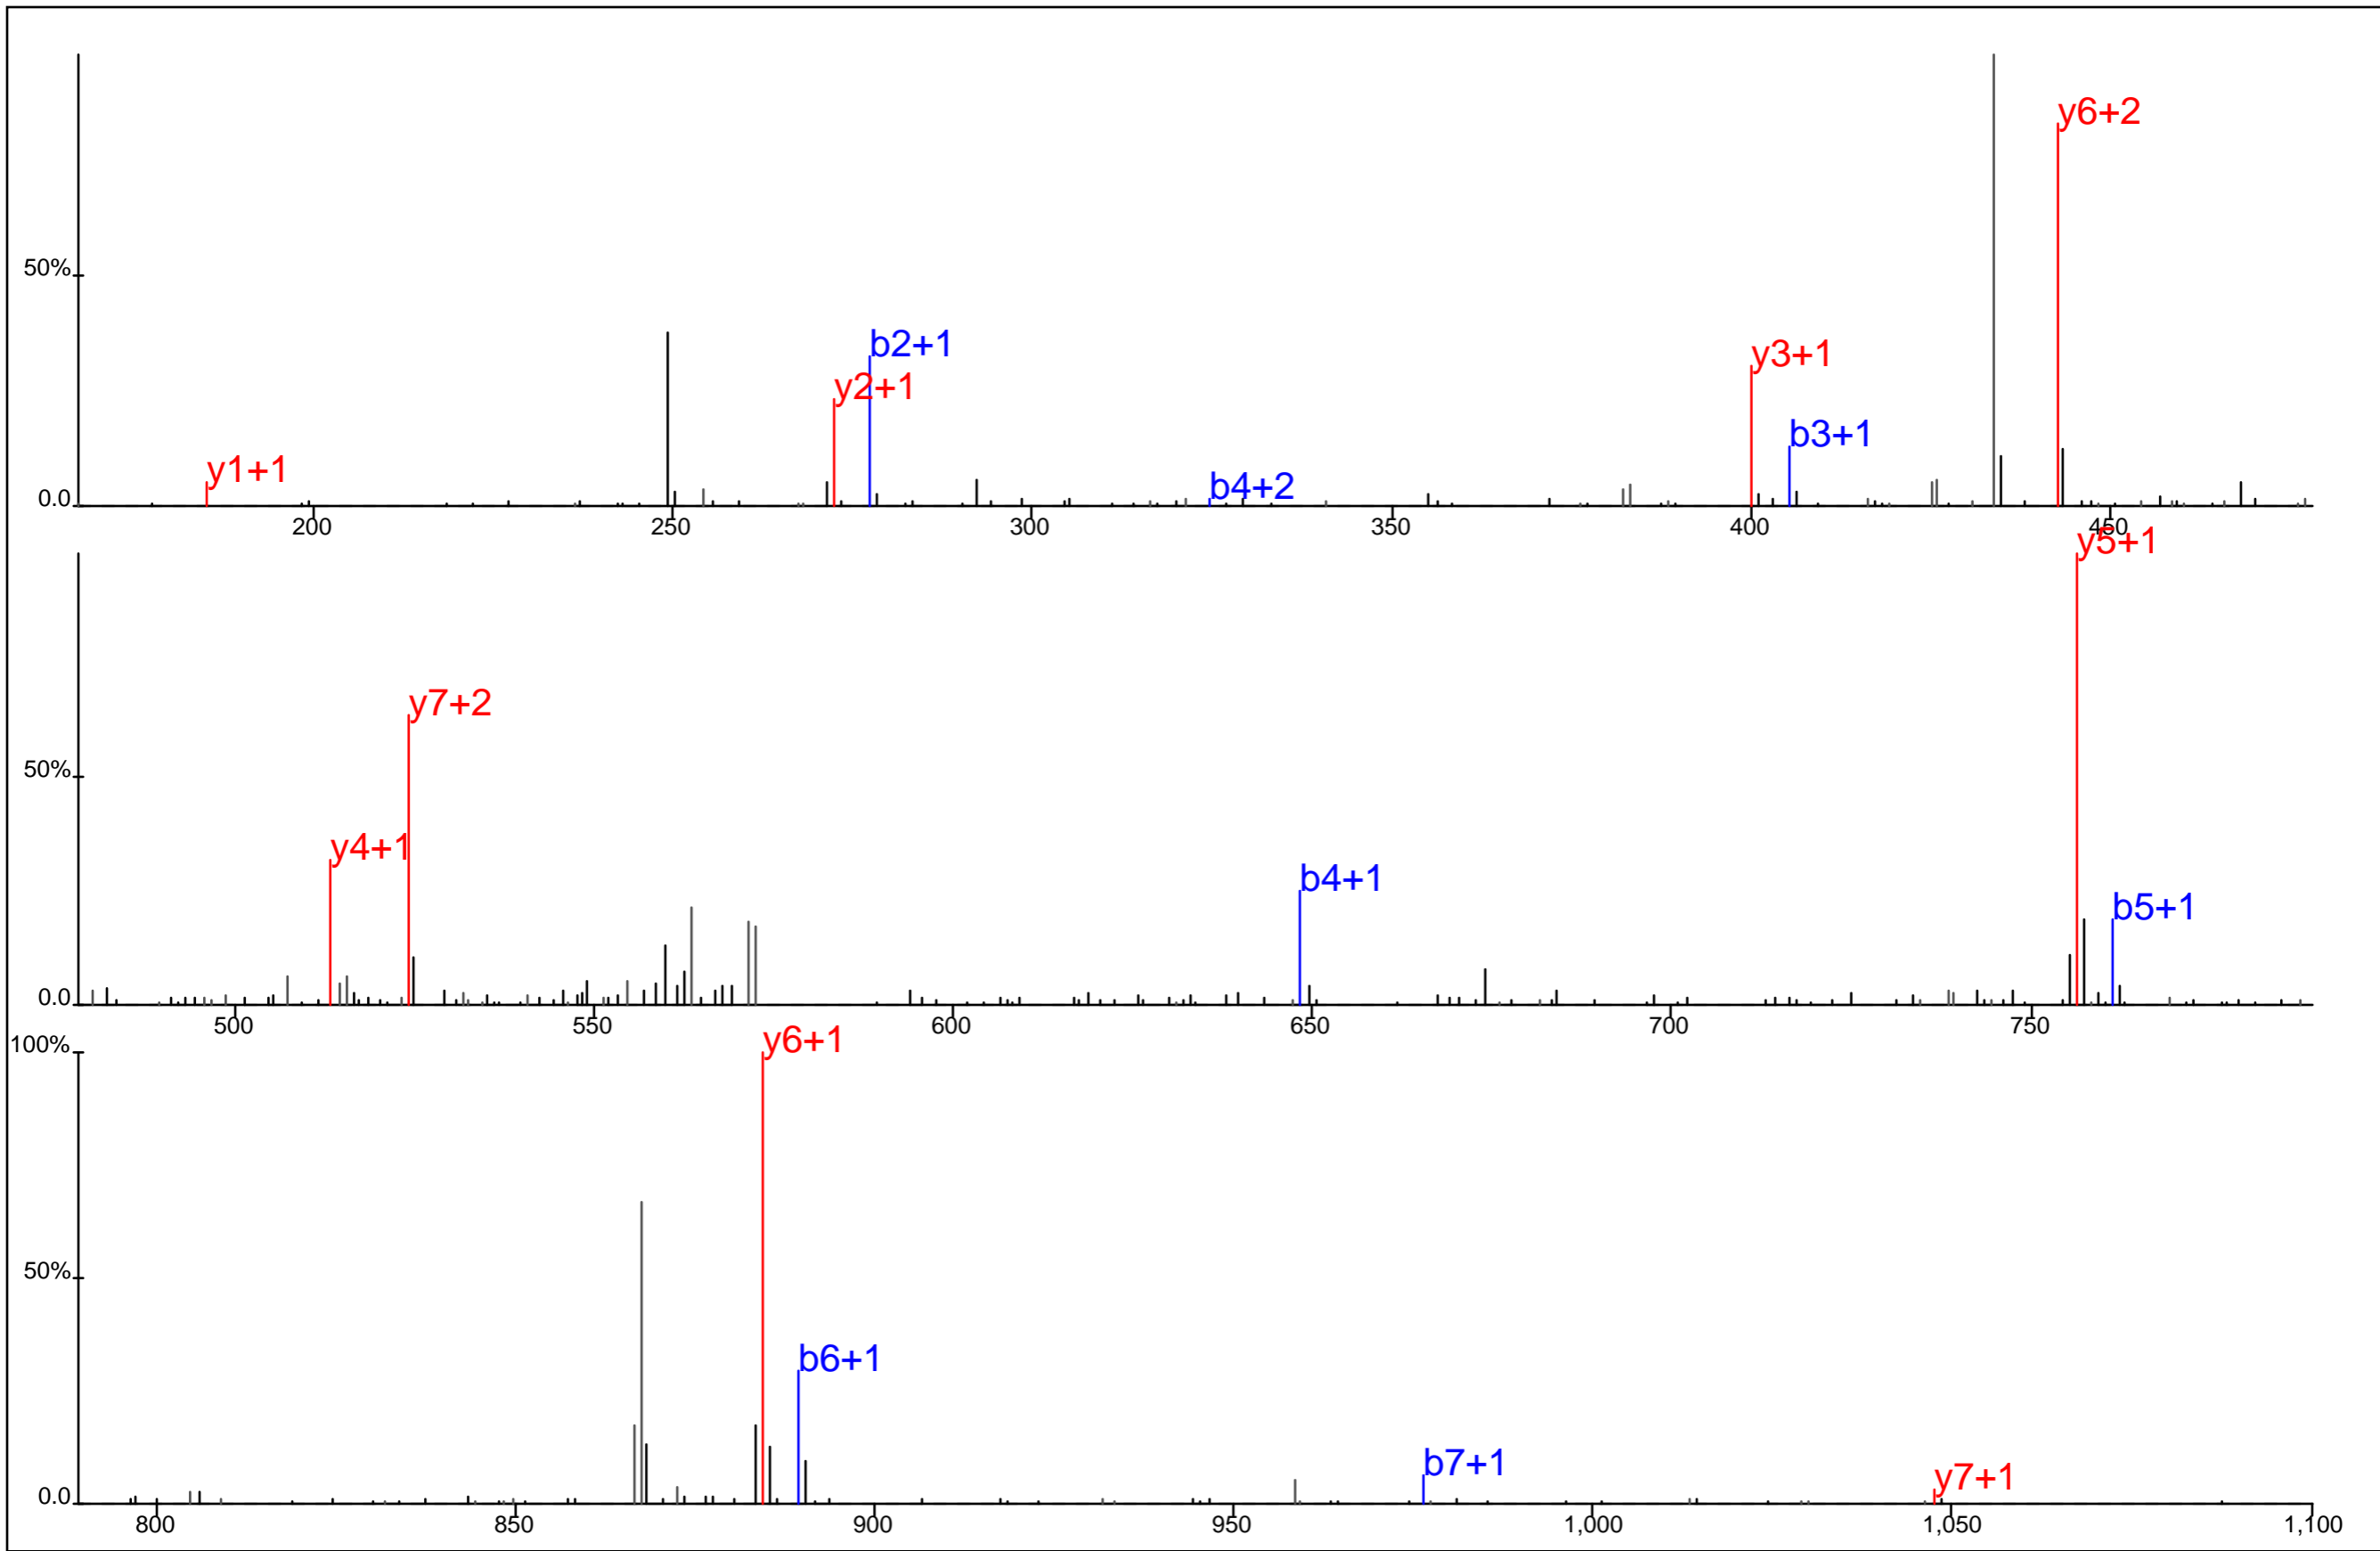

|   |   |   |    |   |   |   |   |
|---|---|---|----|---|---|---|---|
| I | Y | Q | Y* | I | Q | S | R |
| ▢ | ▢ | ▢ | ▢  | ▢ | ▢ | ▢ | ▢ |
| ▢ | ▢ | ▢ | ▢  | ▢ | ▢ | ▢ | ▢ |

Protein Name: DYRK1B  
 gi Accession: 405725  
 Precursor Mass: 580.7741+2  
 Delta Mass: 2.971 ppm  
 XCorr: 54.1

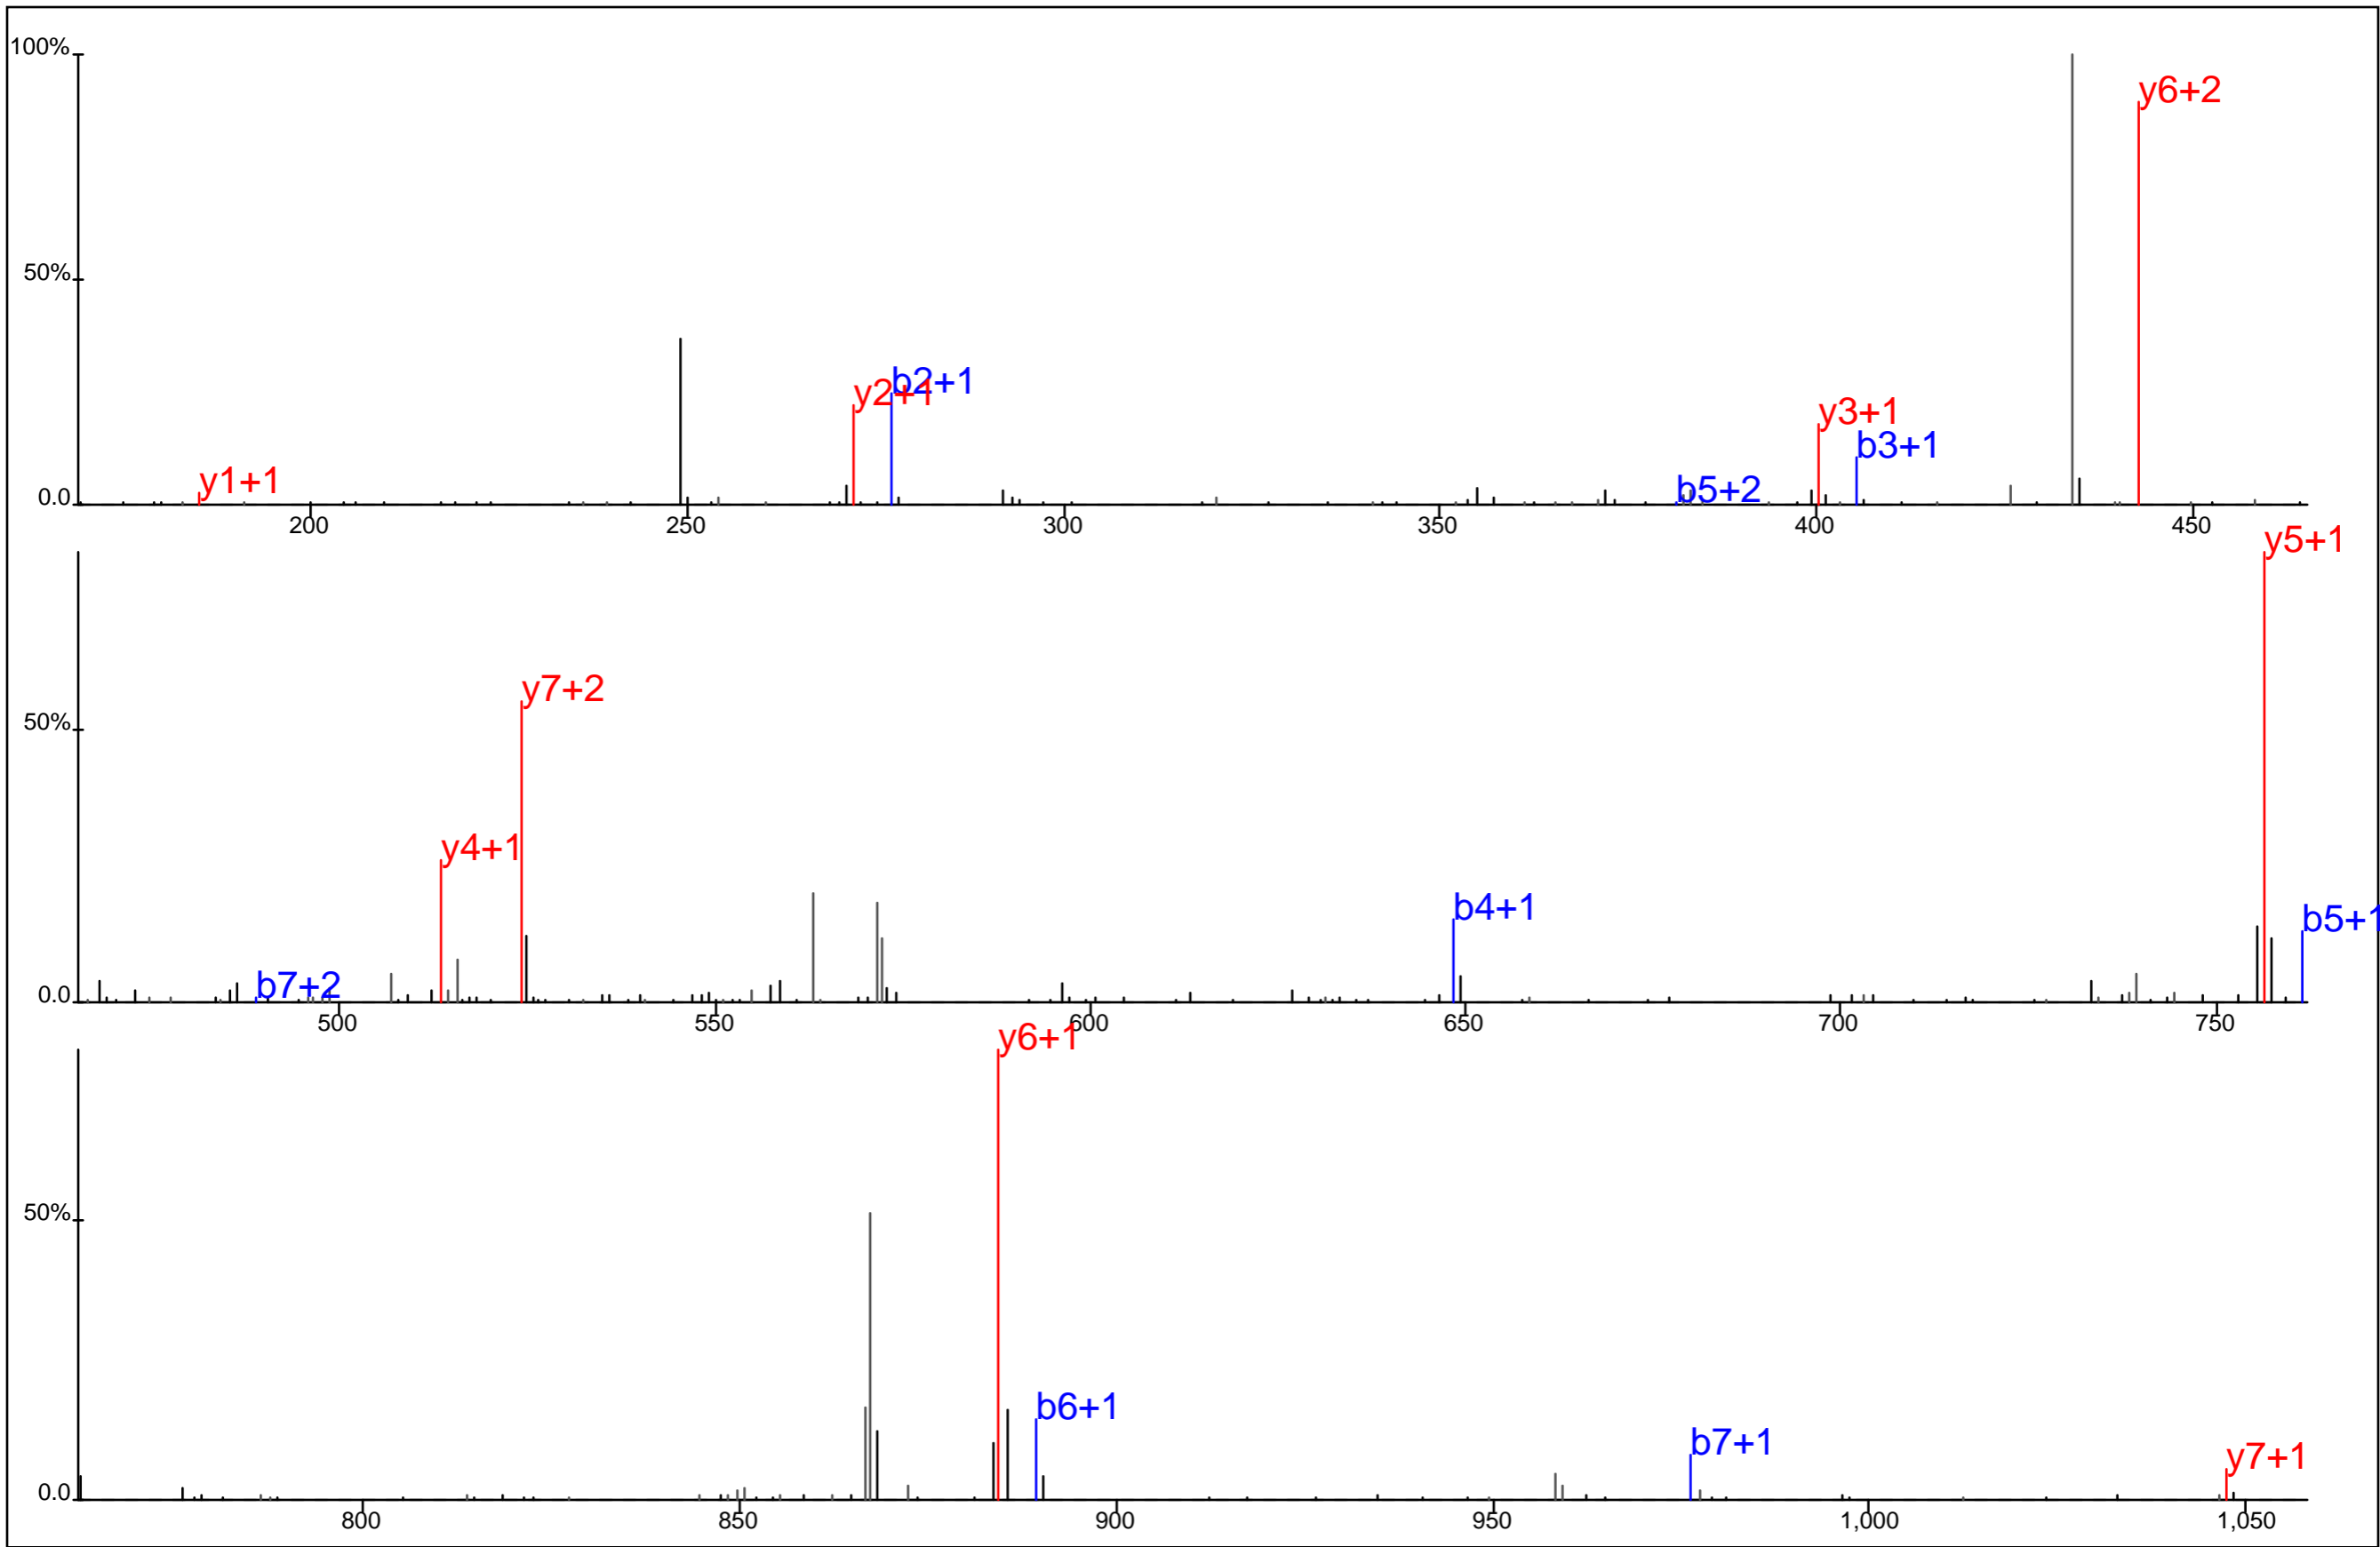

|   |   |   |    |   |   |   |    |
|---|---|---|----|---|---|---|----|
| I | Y | Q | Y* | I | Q | S | R% |
| ■ | ■ | ■ | ■  | ■ | ■ | ■ | ■  |
| □ | □ | □ | □  | □ | □ | □ | □  |

Protein Name: DYRK1B  
 gi Accession: 405725  
 Precursor Mass: 580.7729+2  
 Delta Mass: 0.972 ppm  
 XCorr: 57.9

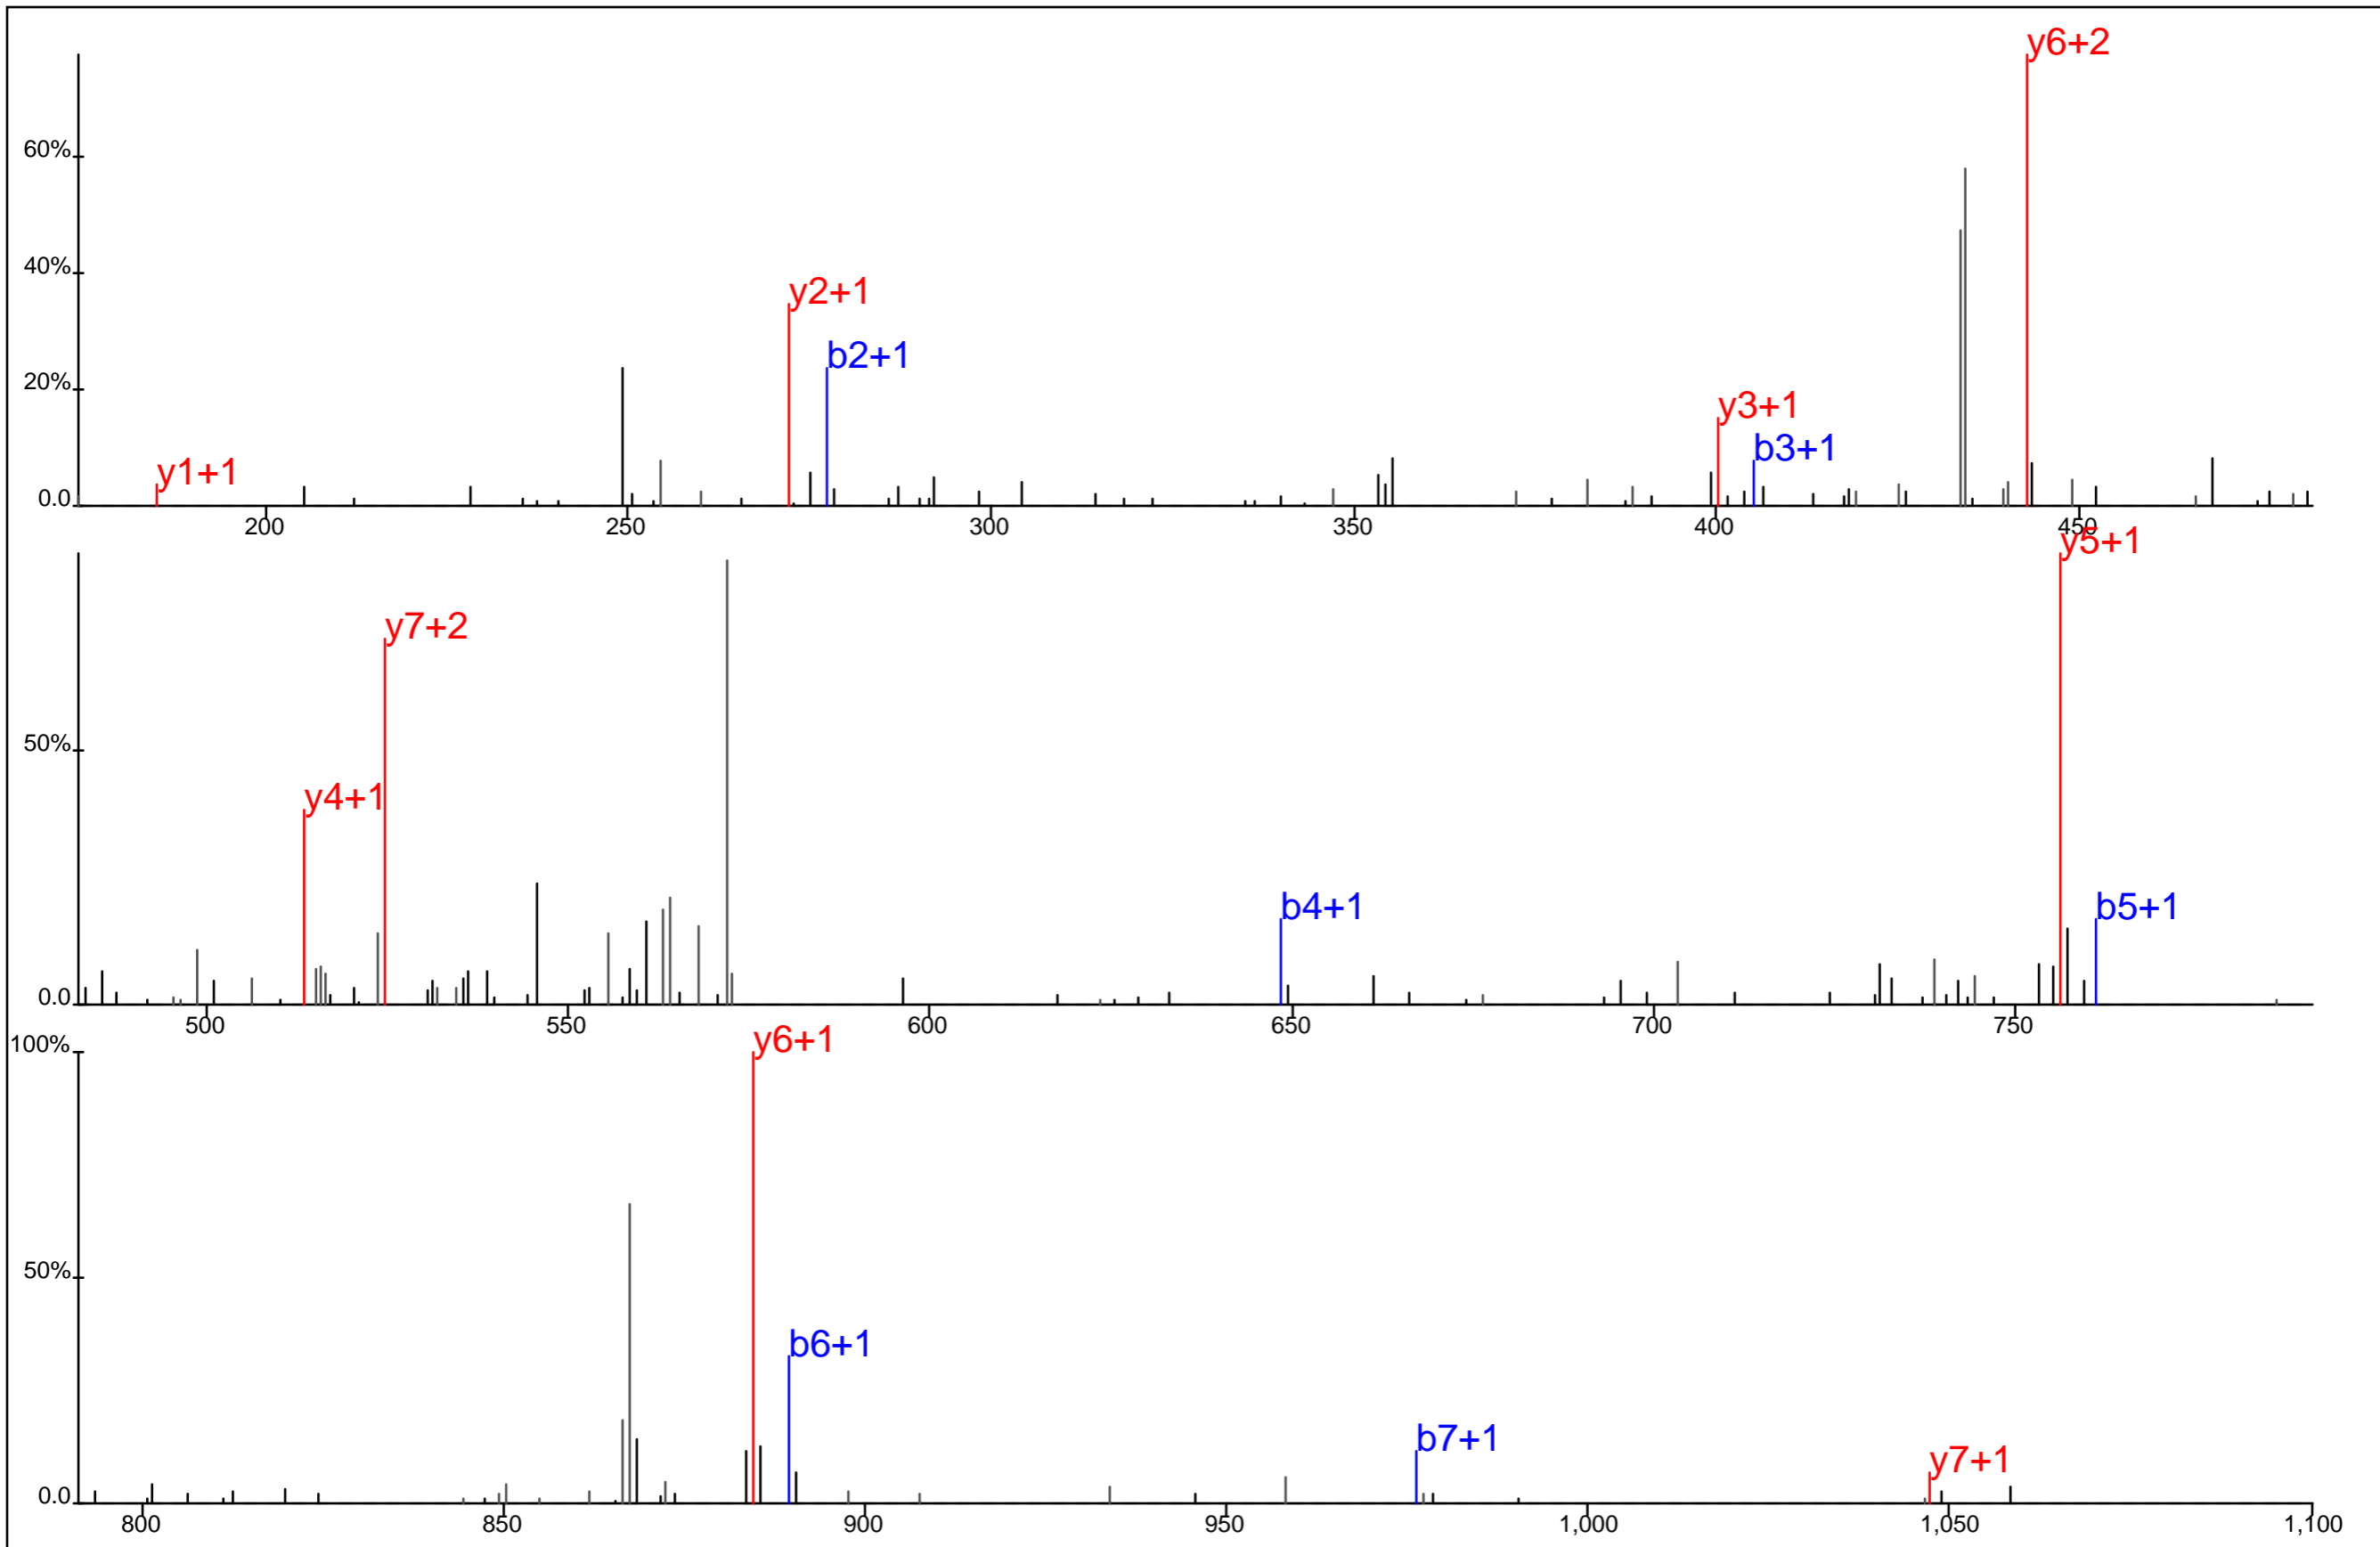

|   |   |   |    |   |   |   |   |
|---|---|---|----|---|---|---|---|
| I | Y | Q | Y* | I | Q | S | R |
| ▢ | ▢ | ▢ | ▢  | ▢ | ▢ | ▢ | ▢ |
| ▣ | ▣ | ▣ | ▣  | ▣ | ▣ | ▣ | ▣ |

Protein Name: DYRK1B  
 gi Accession: 405725  
 Precursor Mass: 580.7732+2  
 Delta Mass: 1.394 ppm  
 XCorr: 44.69

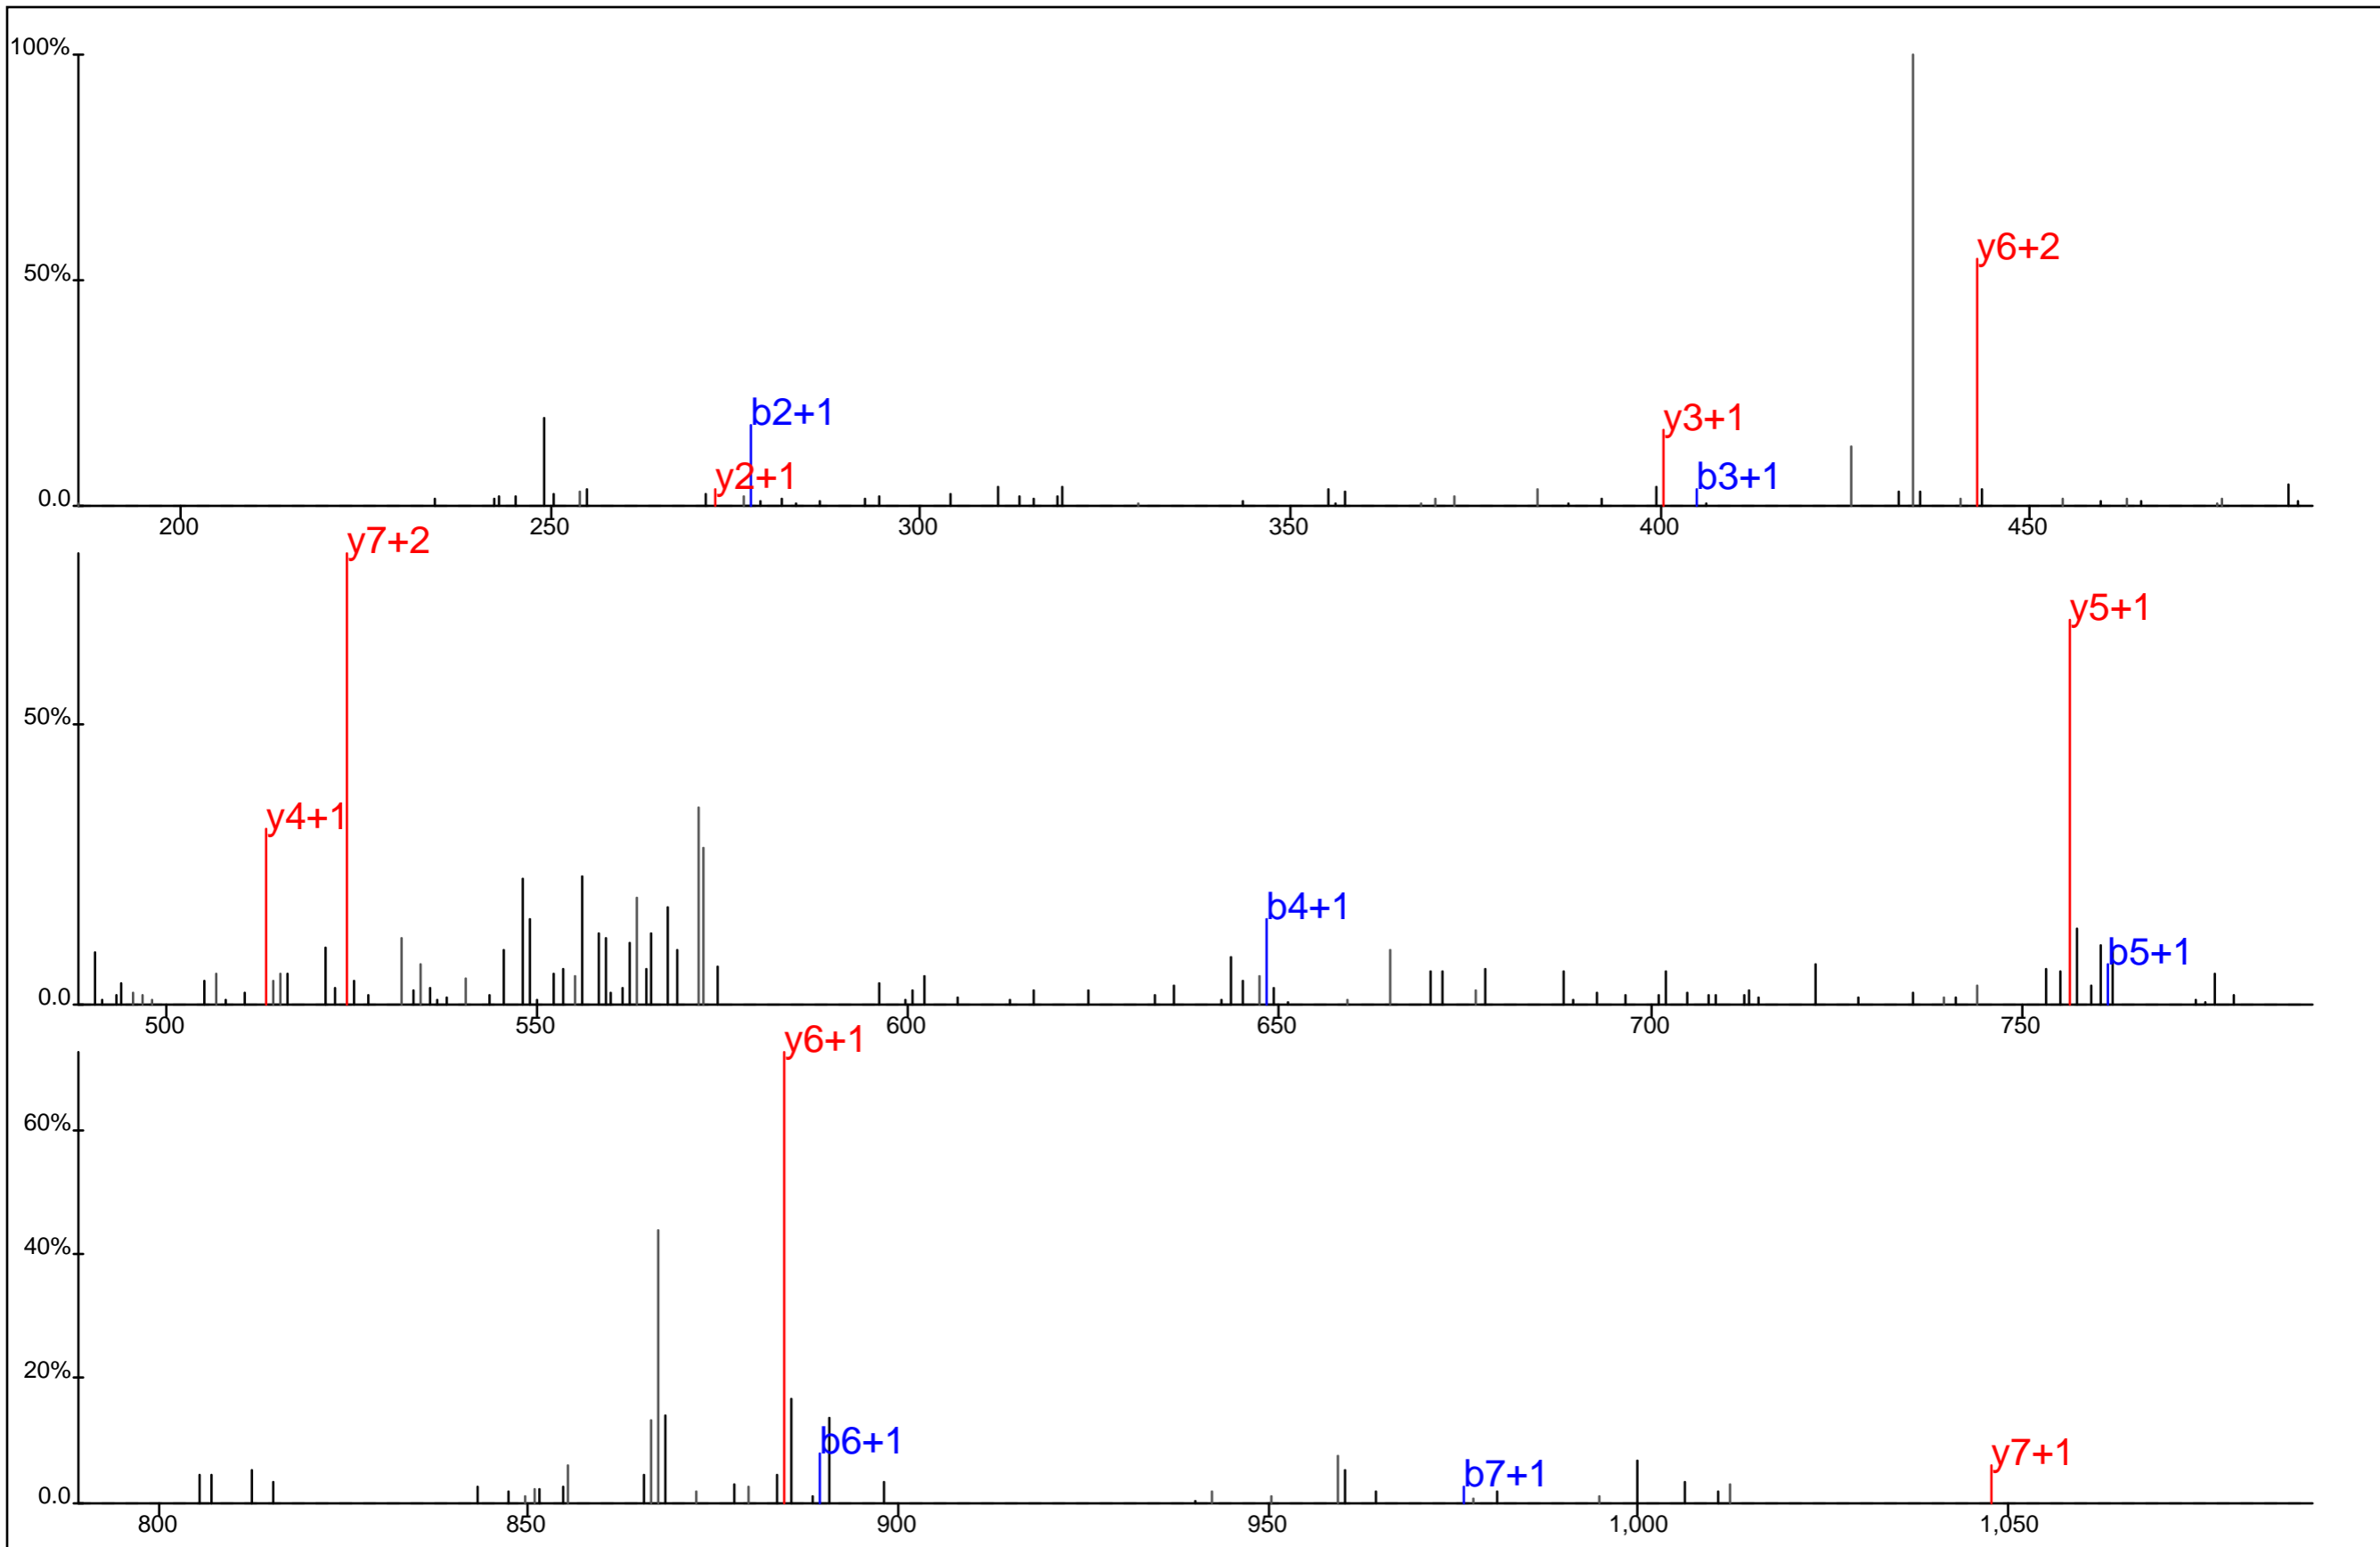

|   |   |   |    |   |   |   |   |
|---|---|---|----|---|---|---|---|
| I | Y | Q | Y* | I | Q | S | R |
| ■ | ■ | ■ | ■  | ■ | ■ | ■ | ■ |
| ■ | ■ | ■ | ■  | ■ | ■ | ■ | ■ |

Protein Name: DYRK1B  
 gi Accession: 405725  
 Precursor Mass: 580.7750+2  
 Delta Mass: 4.548 ppm  
 XCorr: 35.43

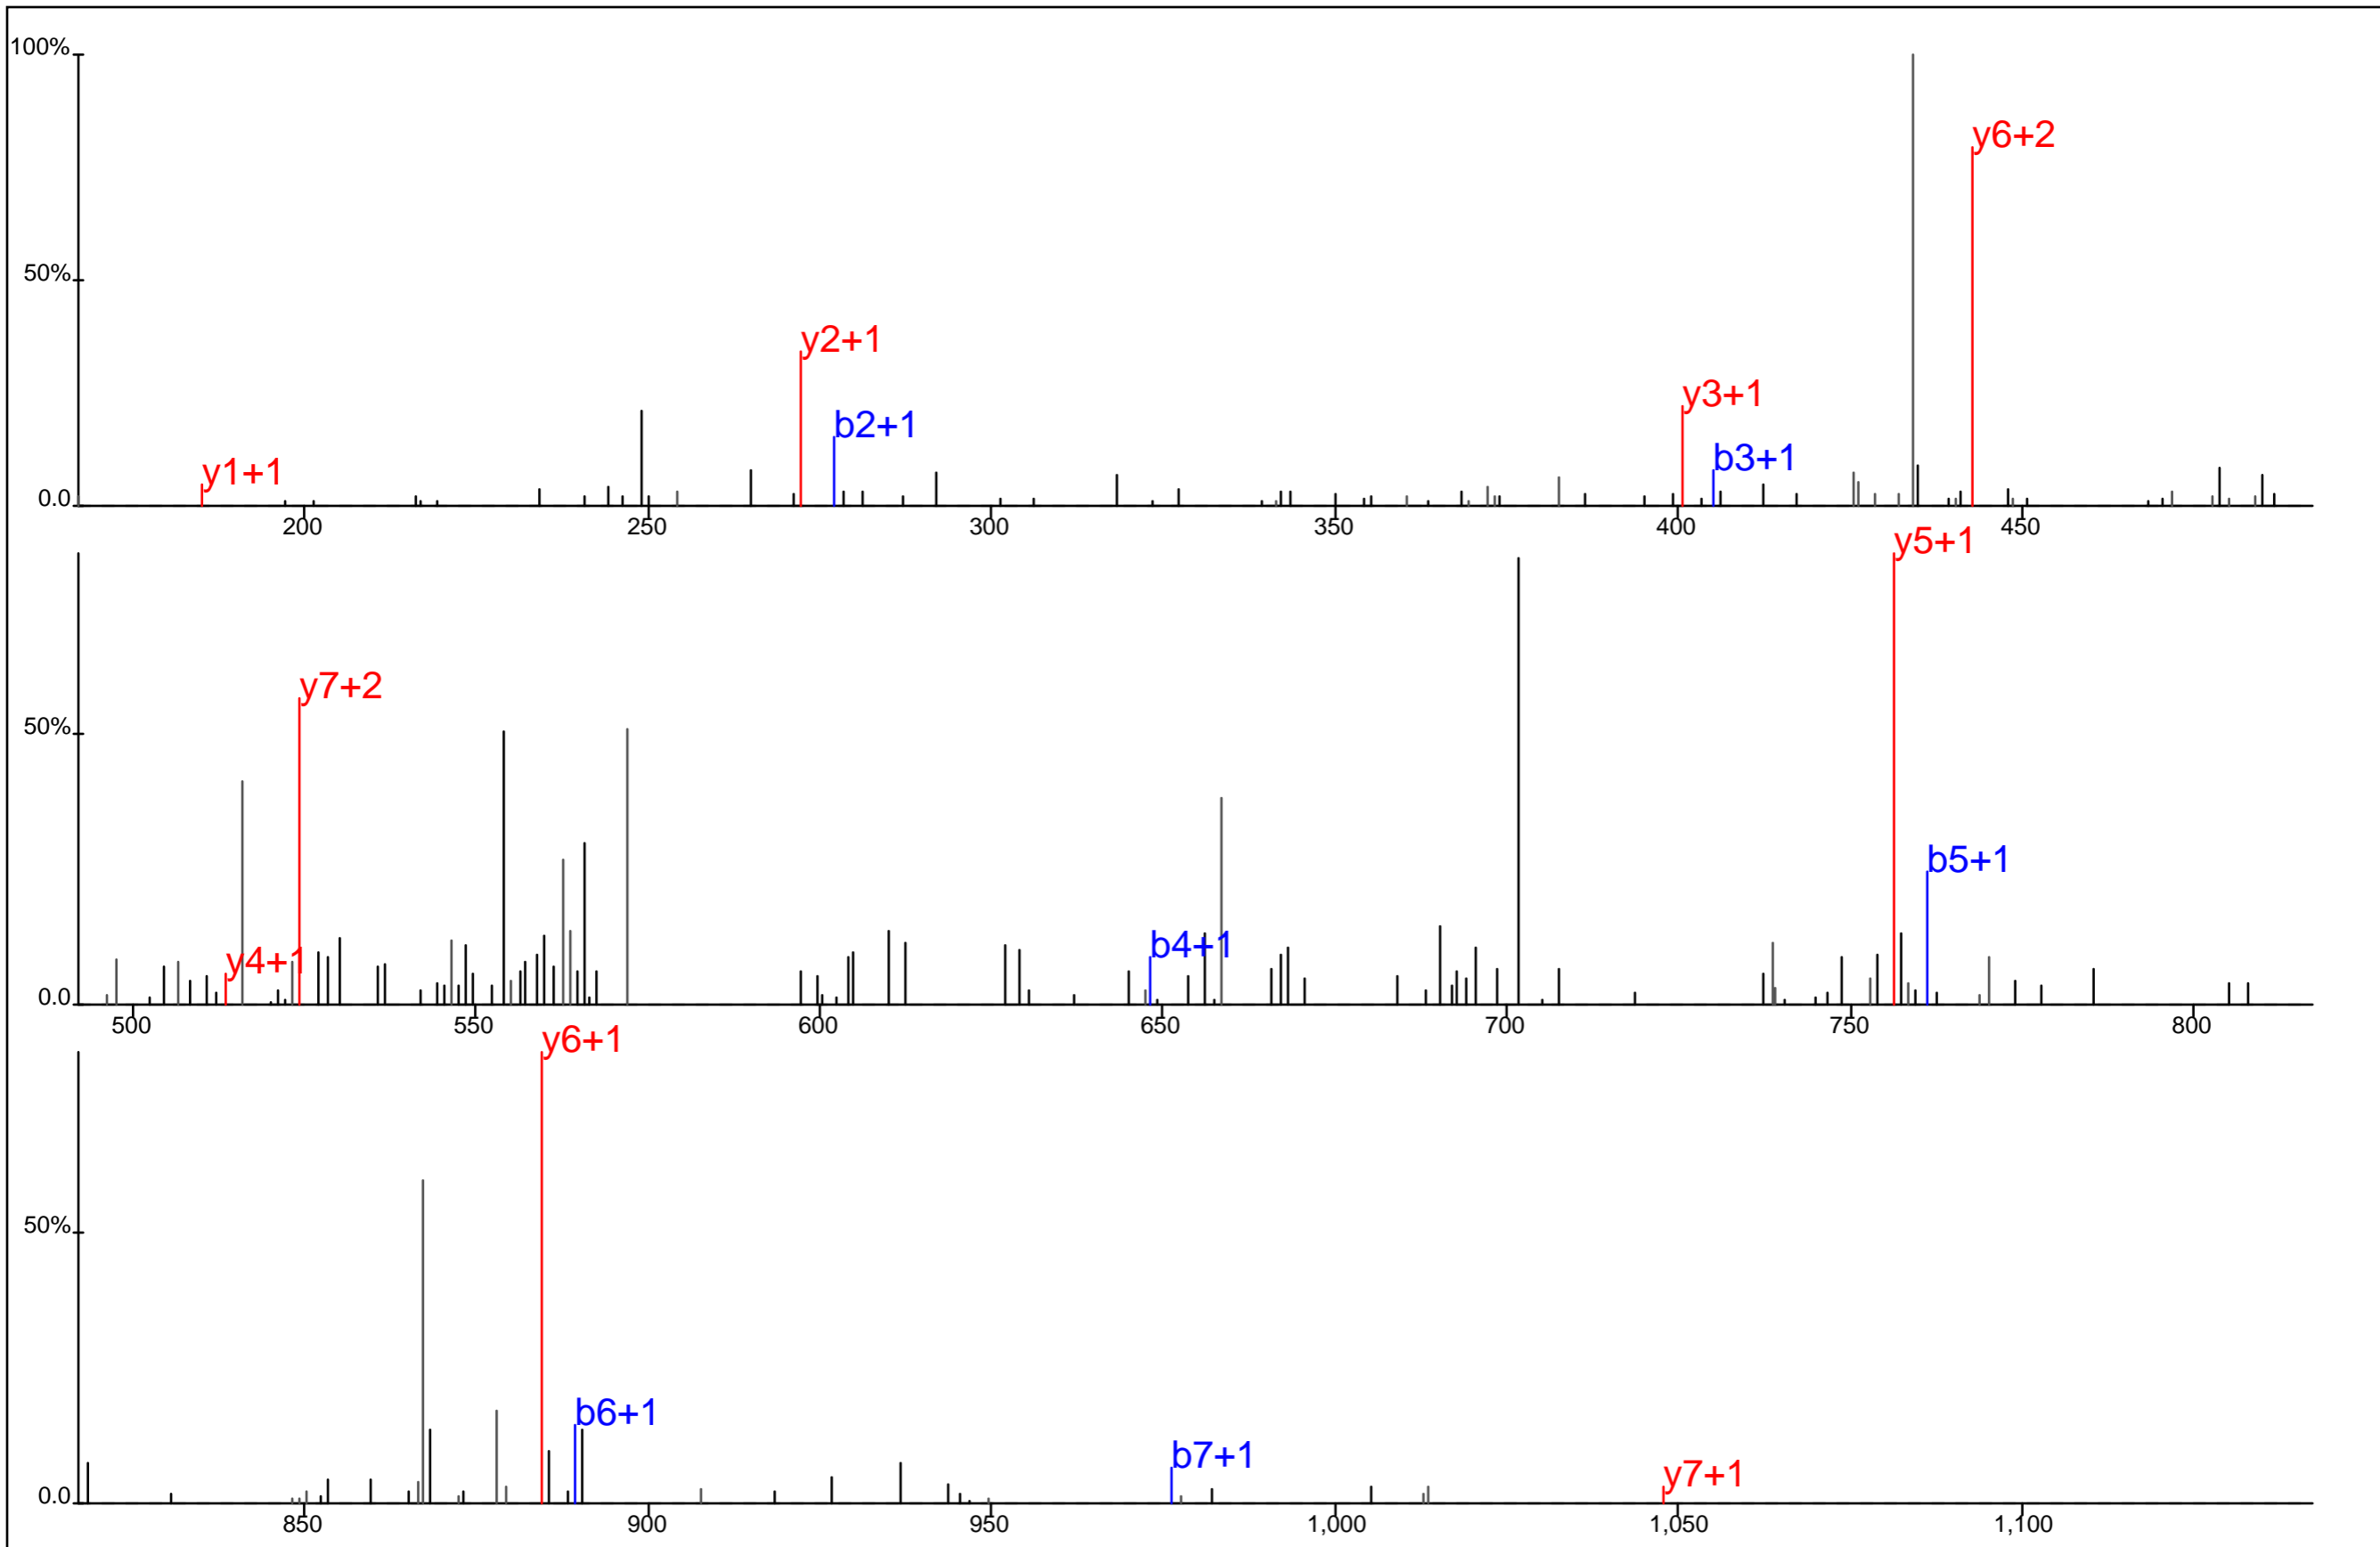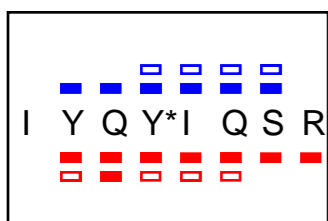

Protein Name: DYRK1B  
 gi Accession: 405725  
 Precursor Mass: 580.7734+2  
 Delta Mass: 1.816 ppm  
 XCorr: 34.9

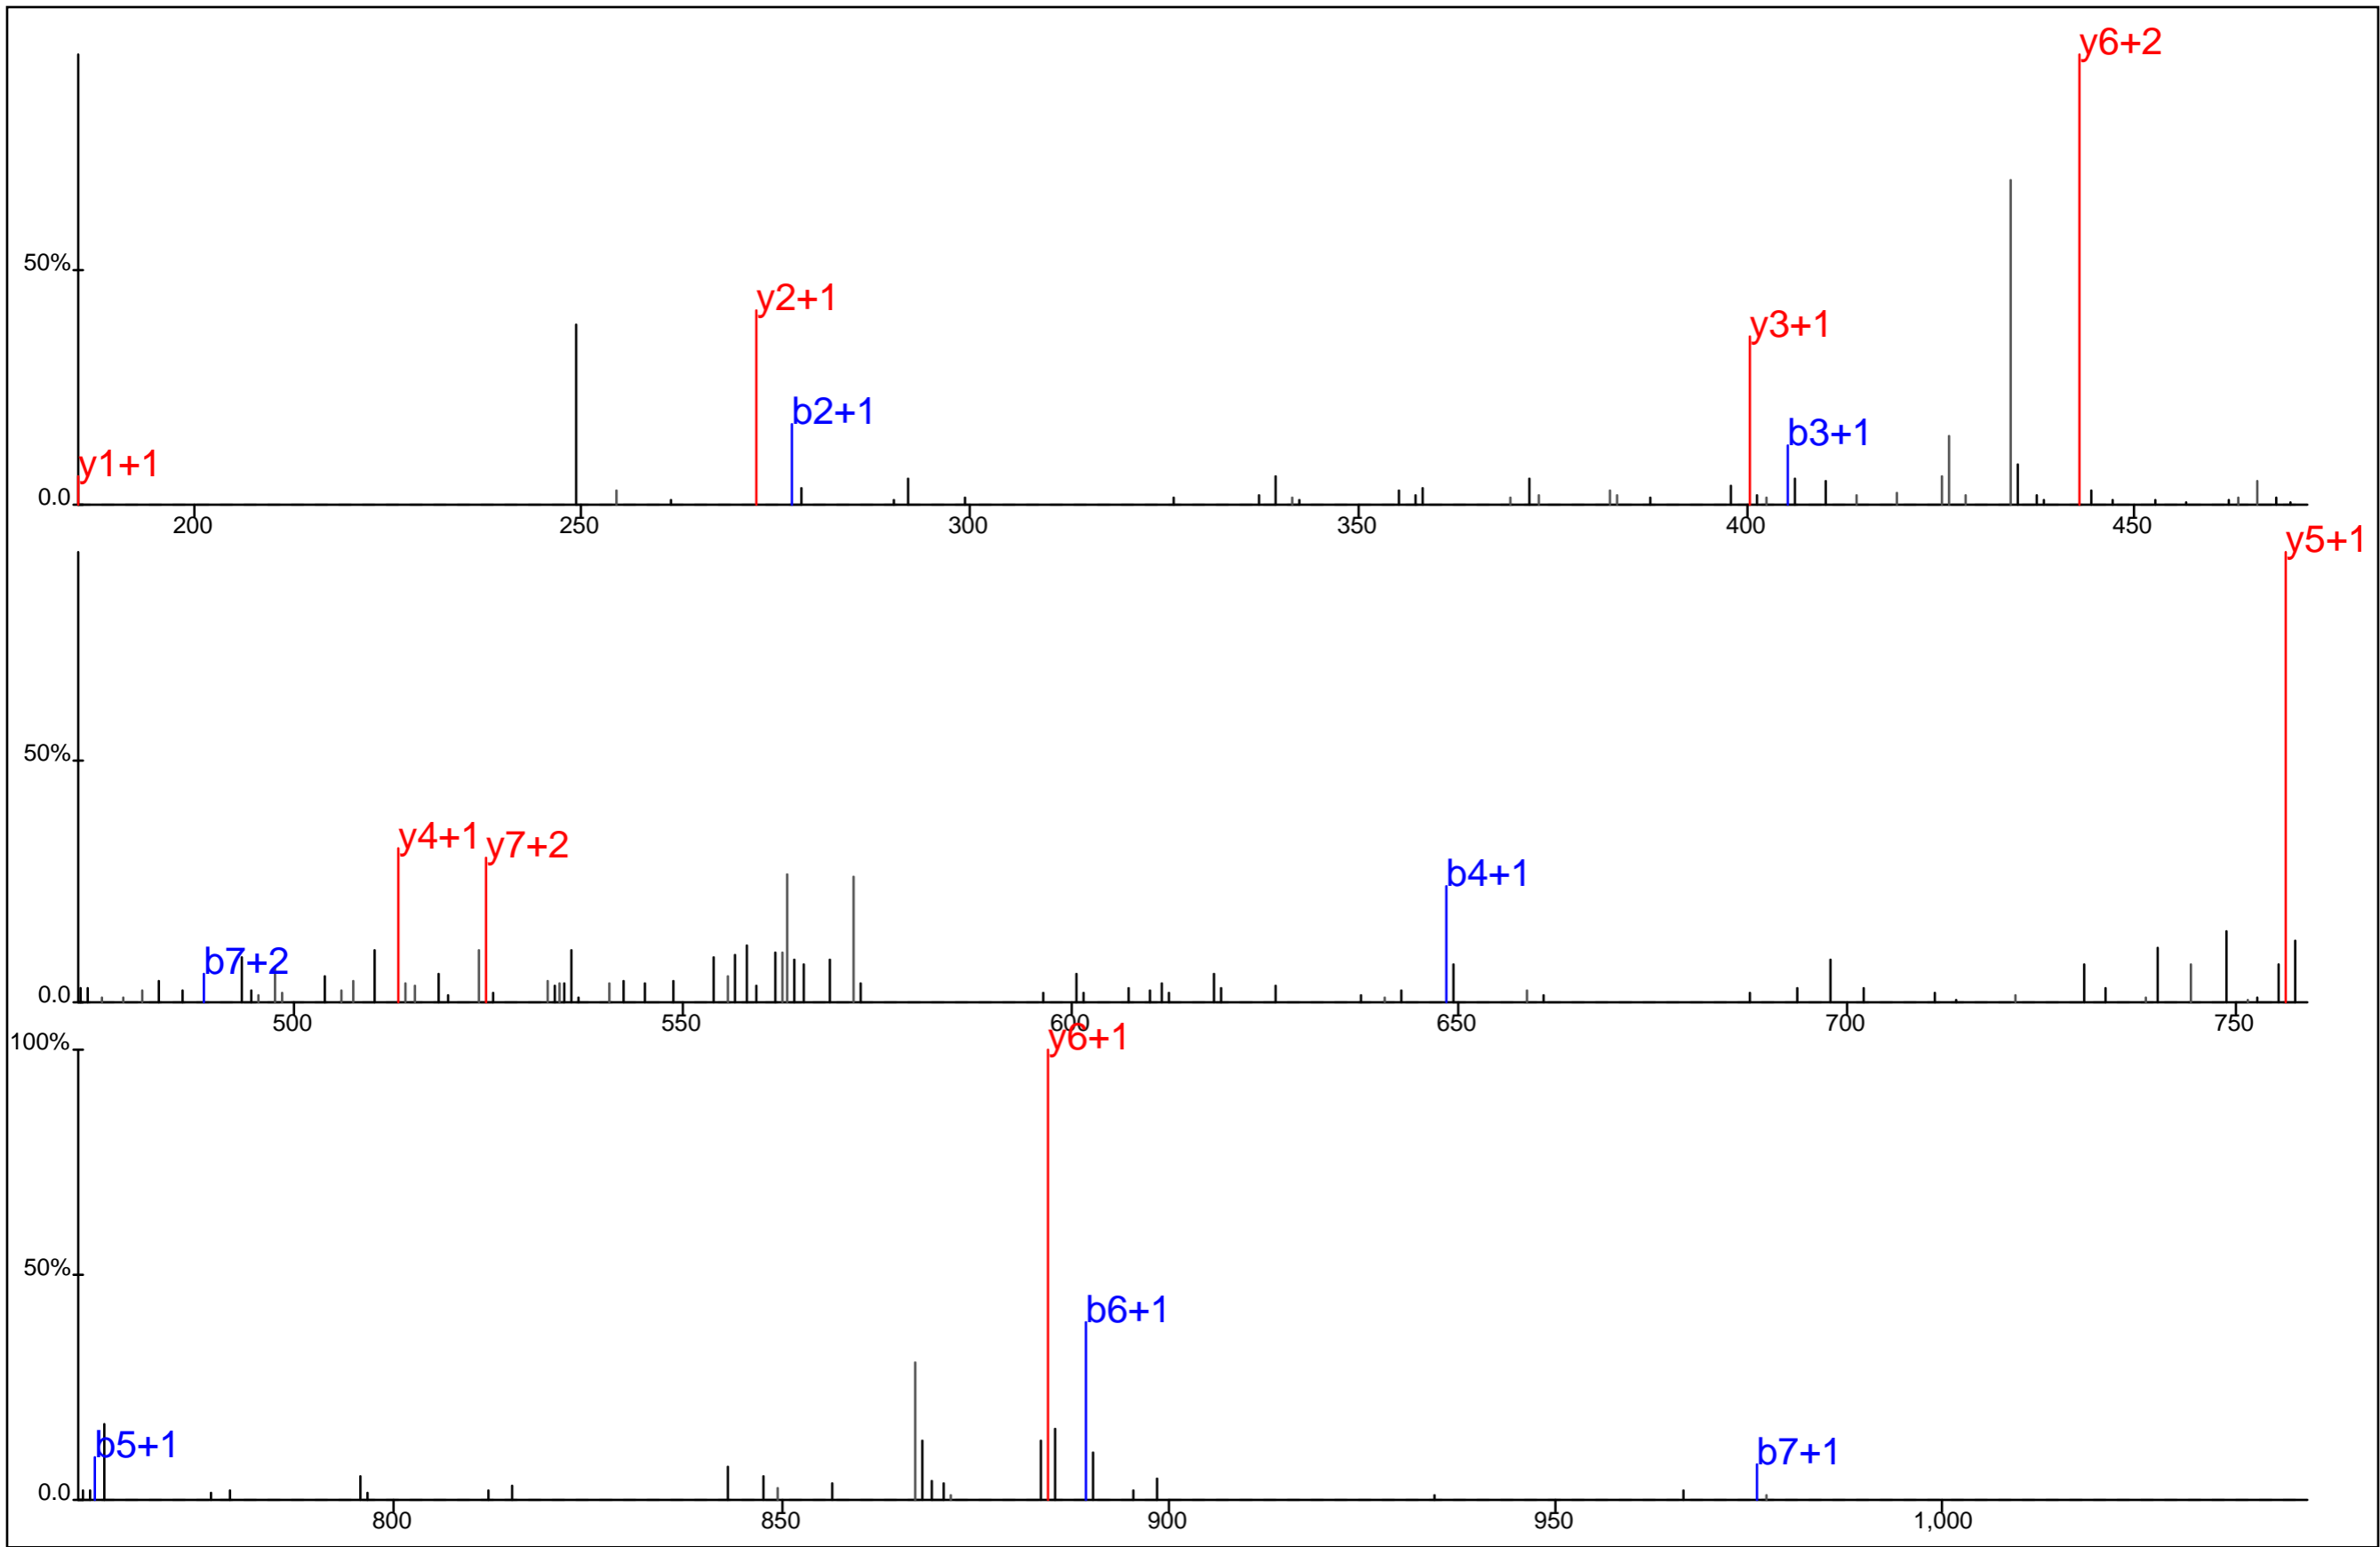

|  |                                                                                                                                    |
|--|------------------------------------------------------------------------------------------------------------------------------------|
|  | <p>Protein Name: DYRK1B<br/> gi Accession: 405725<br/> Precursor Mass: 580.7738+2<br/> Delta Mass: 2.445 ppm<br/> XCorr: 41.61</p> |
|--|------------------------------------------------------------------------------------------------------------------------------------|

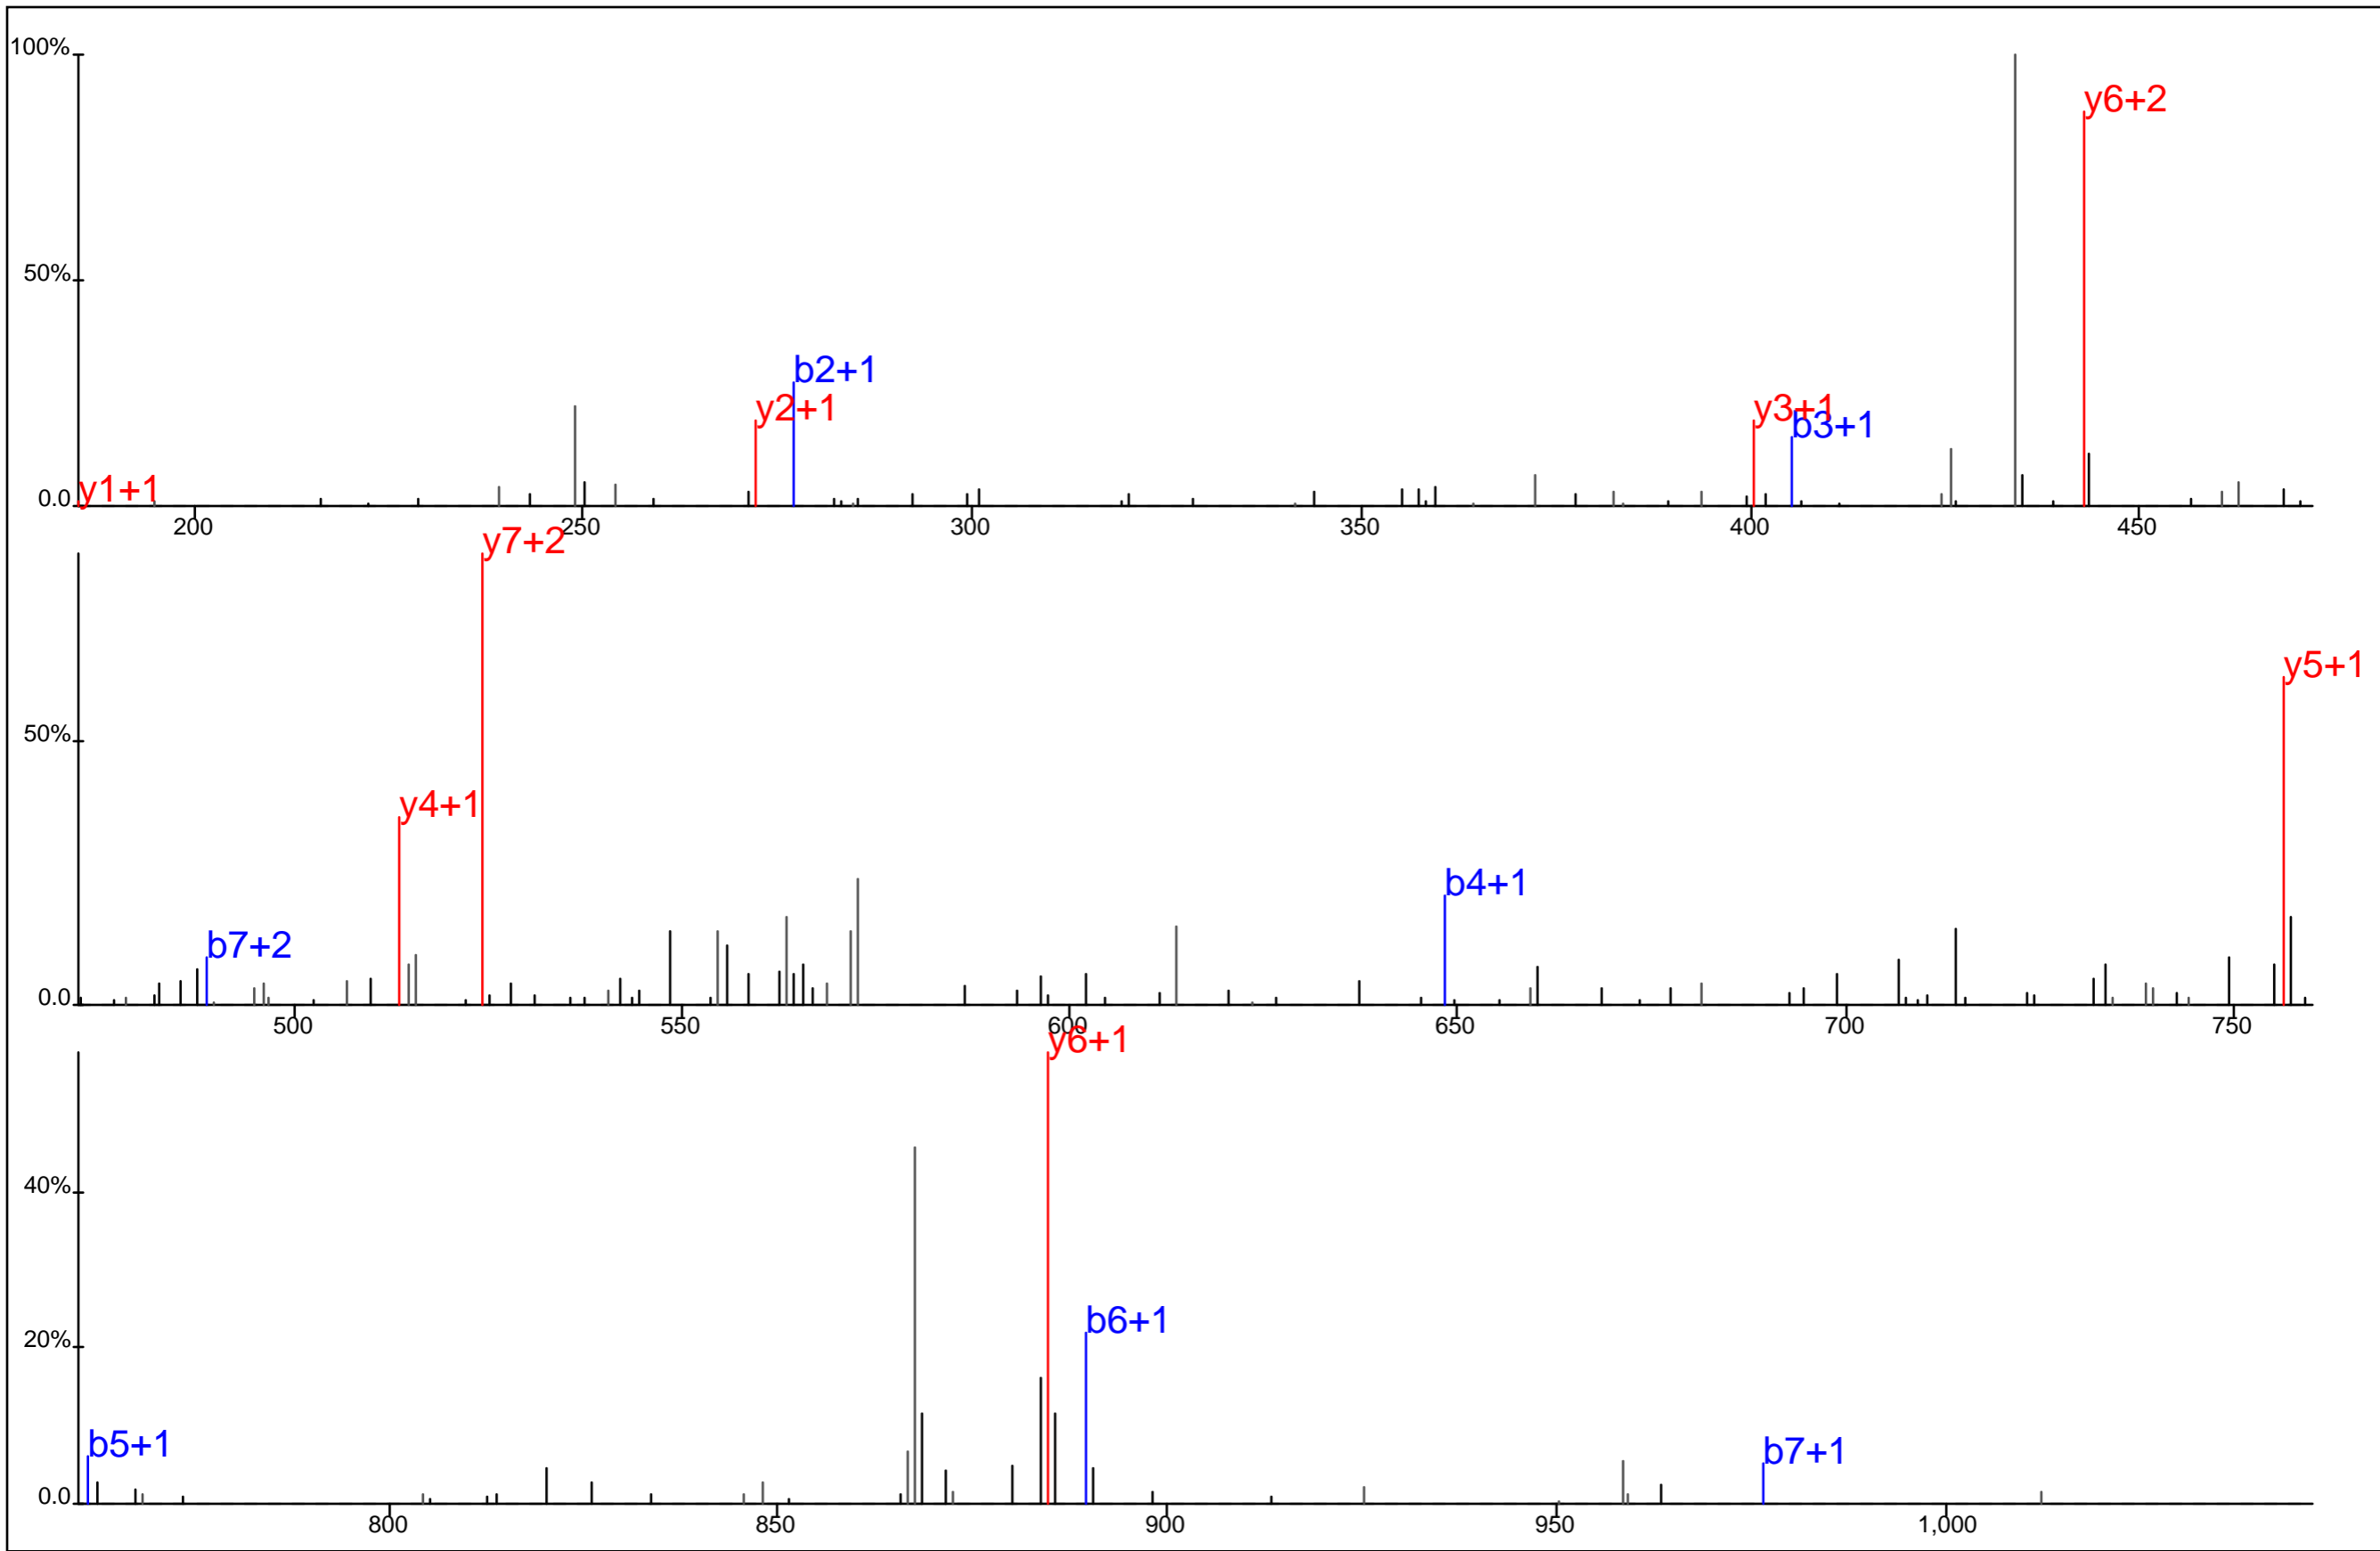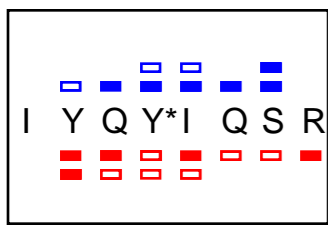

Protein Name: DYRK1B  
 gi Accession: 405725  
 Precursor Mass: 580.7761+2  
 Delta Mass: 6.444 ppm  
 XCorr: 40.06

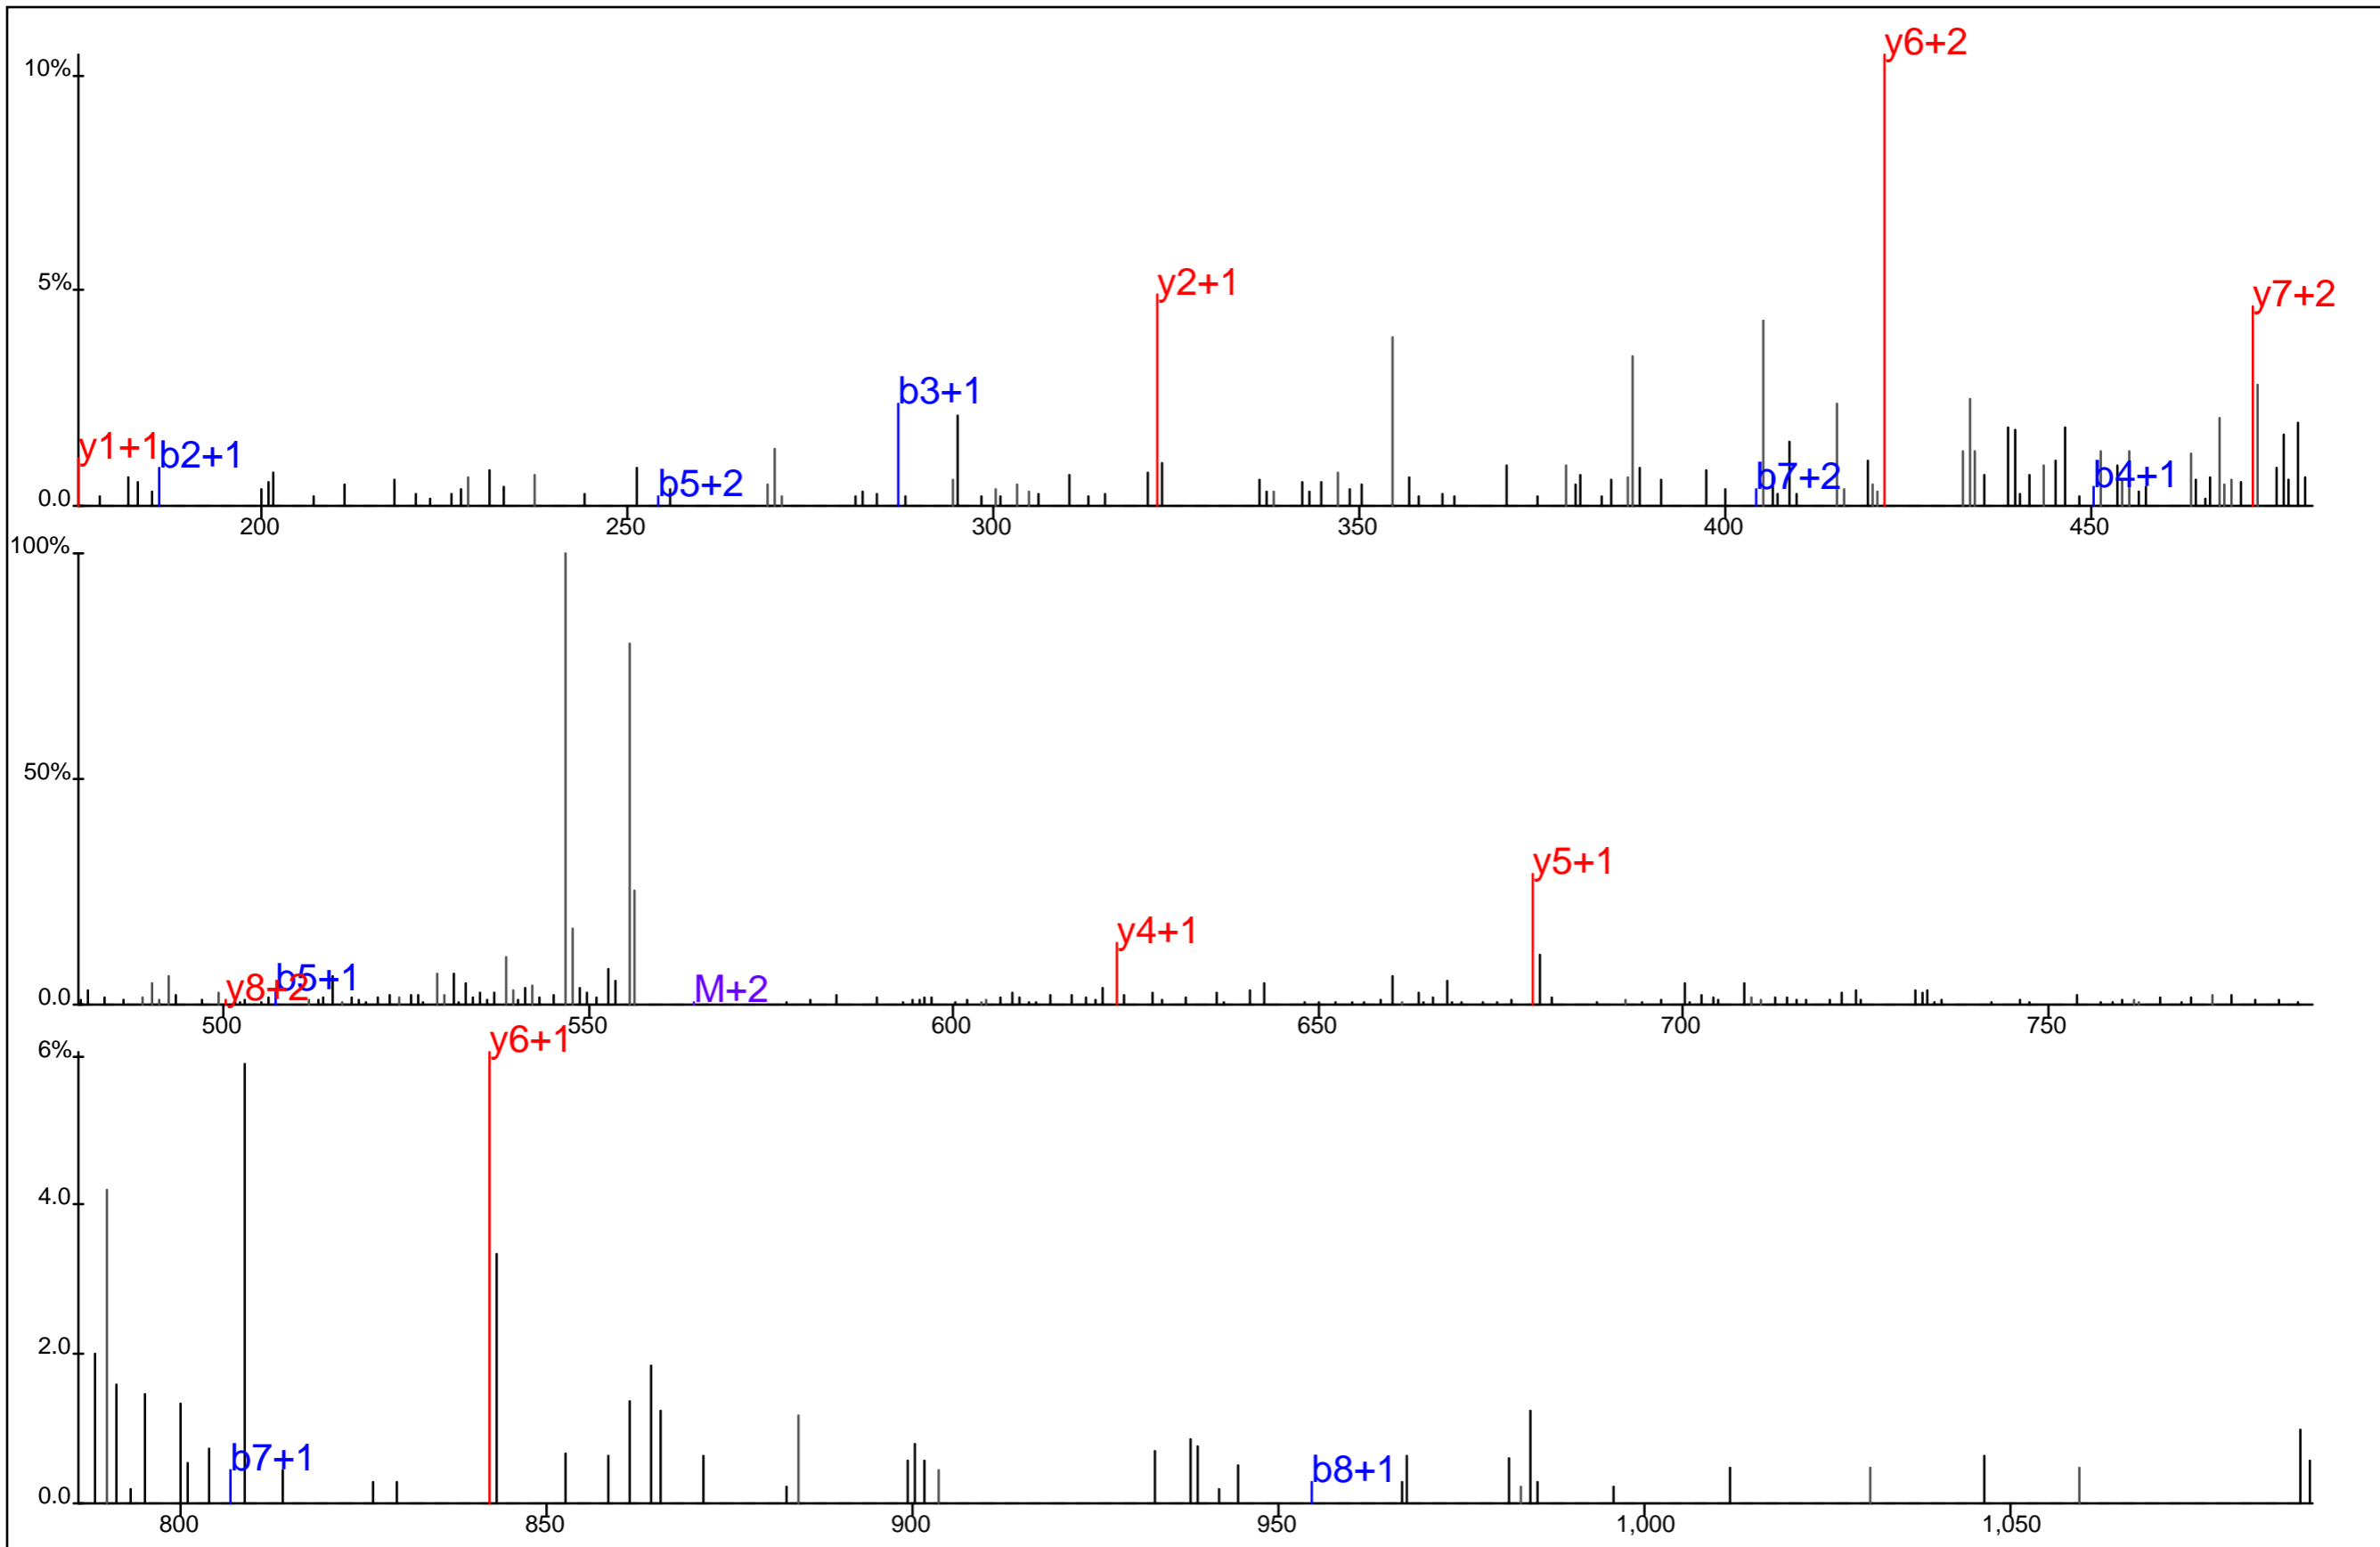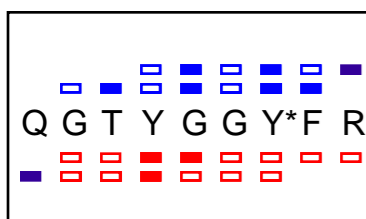

Protein Name: EIF3S8  
 gi Accession: 4503525  
 Precursor Mass: 564.7303+2  
 Delta Mass: 2.028 ppm  
 XCorr: 22.81



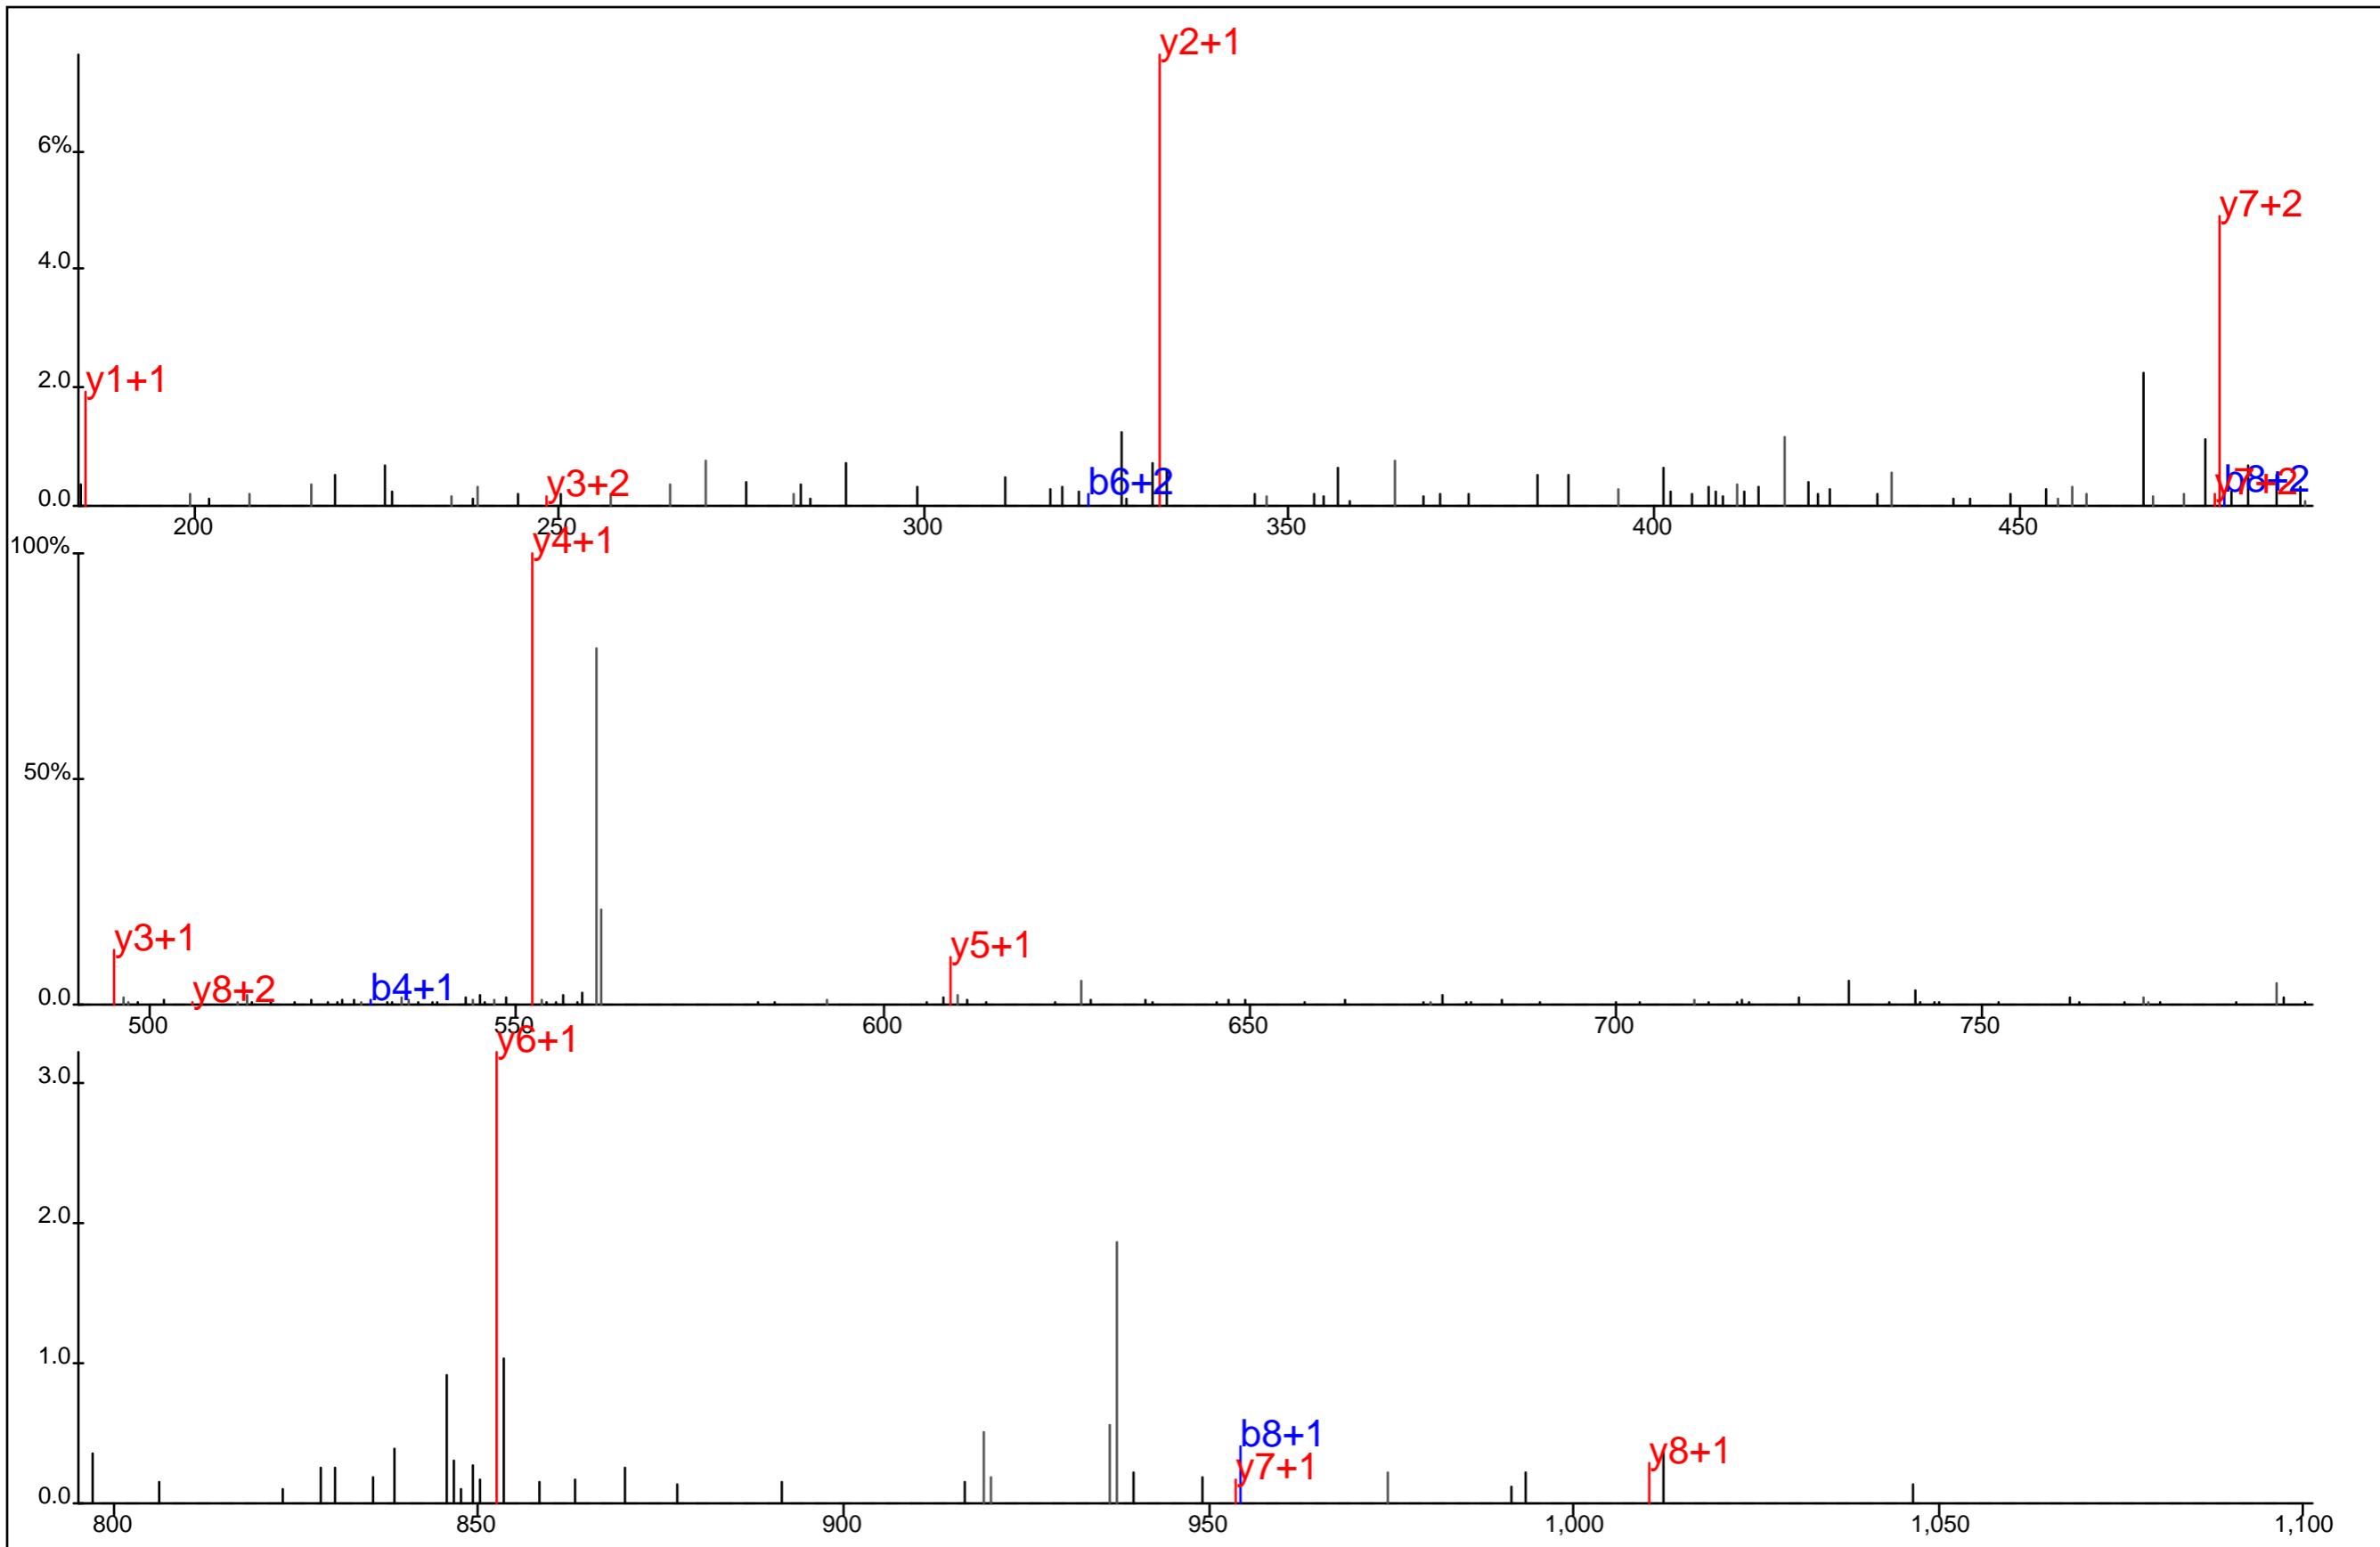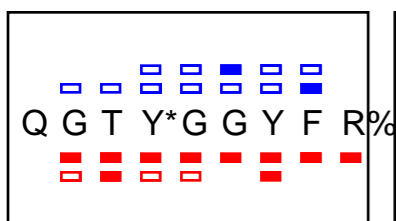

Protein Name: EIF3S8  
 gi Accession: 4503525  
 Precursor Mass: 569.7360+2  
 Delta Mass: 4.829 ppm  
 XCorr: 33.46

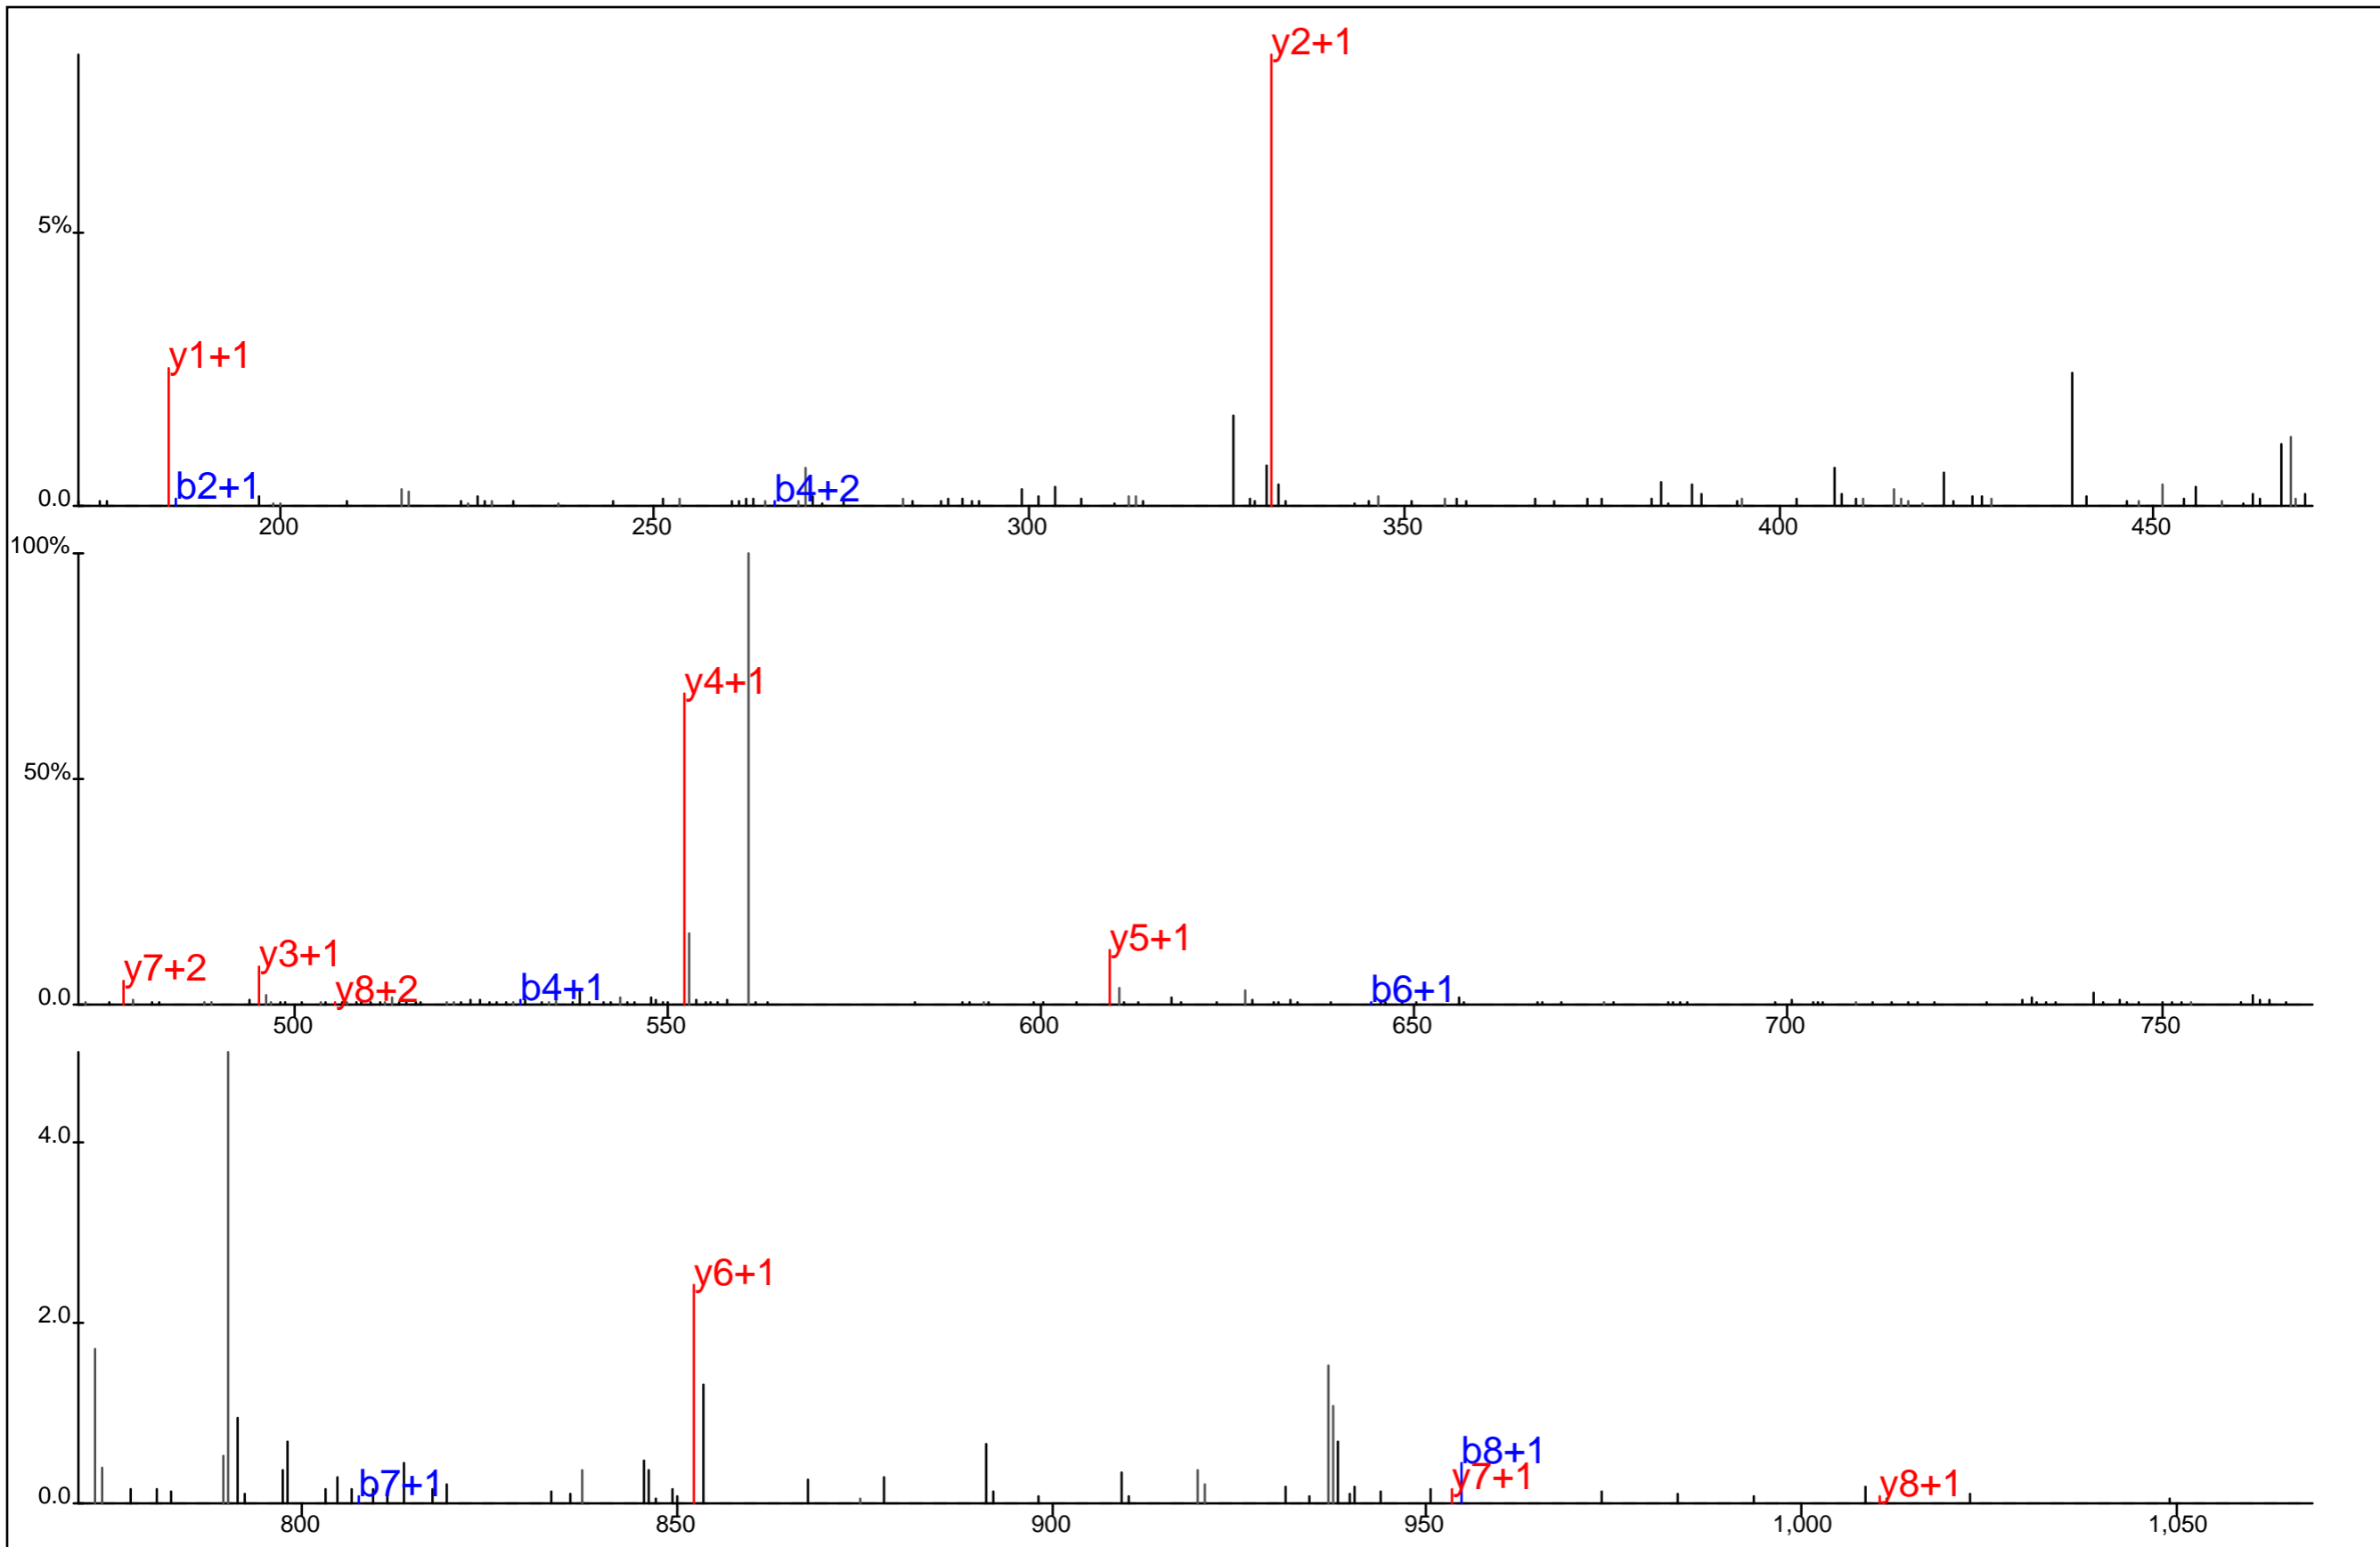

■ ■ ■ ■ ■ ■  
 Q G T Y\* G G Y F R%  
■ ■ ■ ■ ■ ■

Protein Name: EIF3S8  
 gi Accession: 4503525  
 Precursor Mass: 569.7360+2  
 Delta Mass: 4.724 ppm  
 XCorr: 24.37

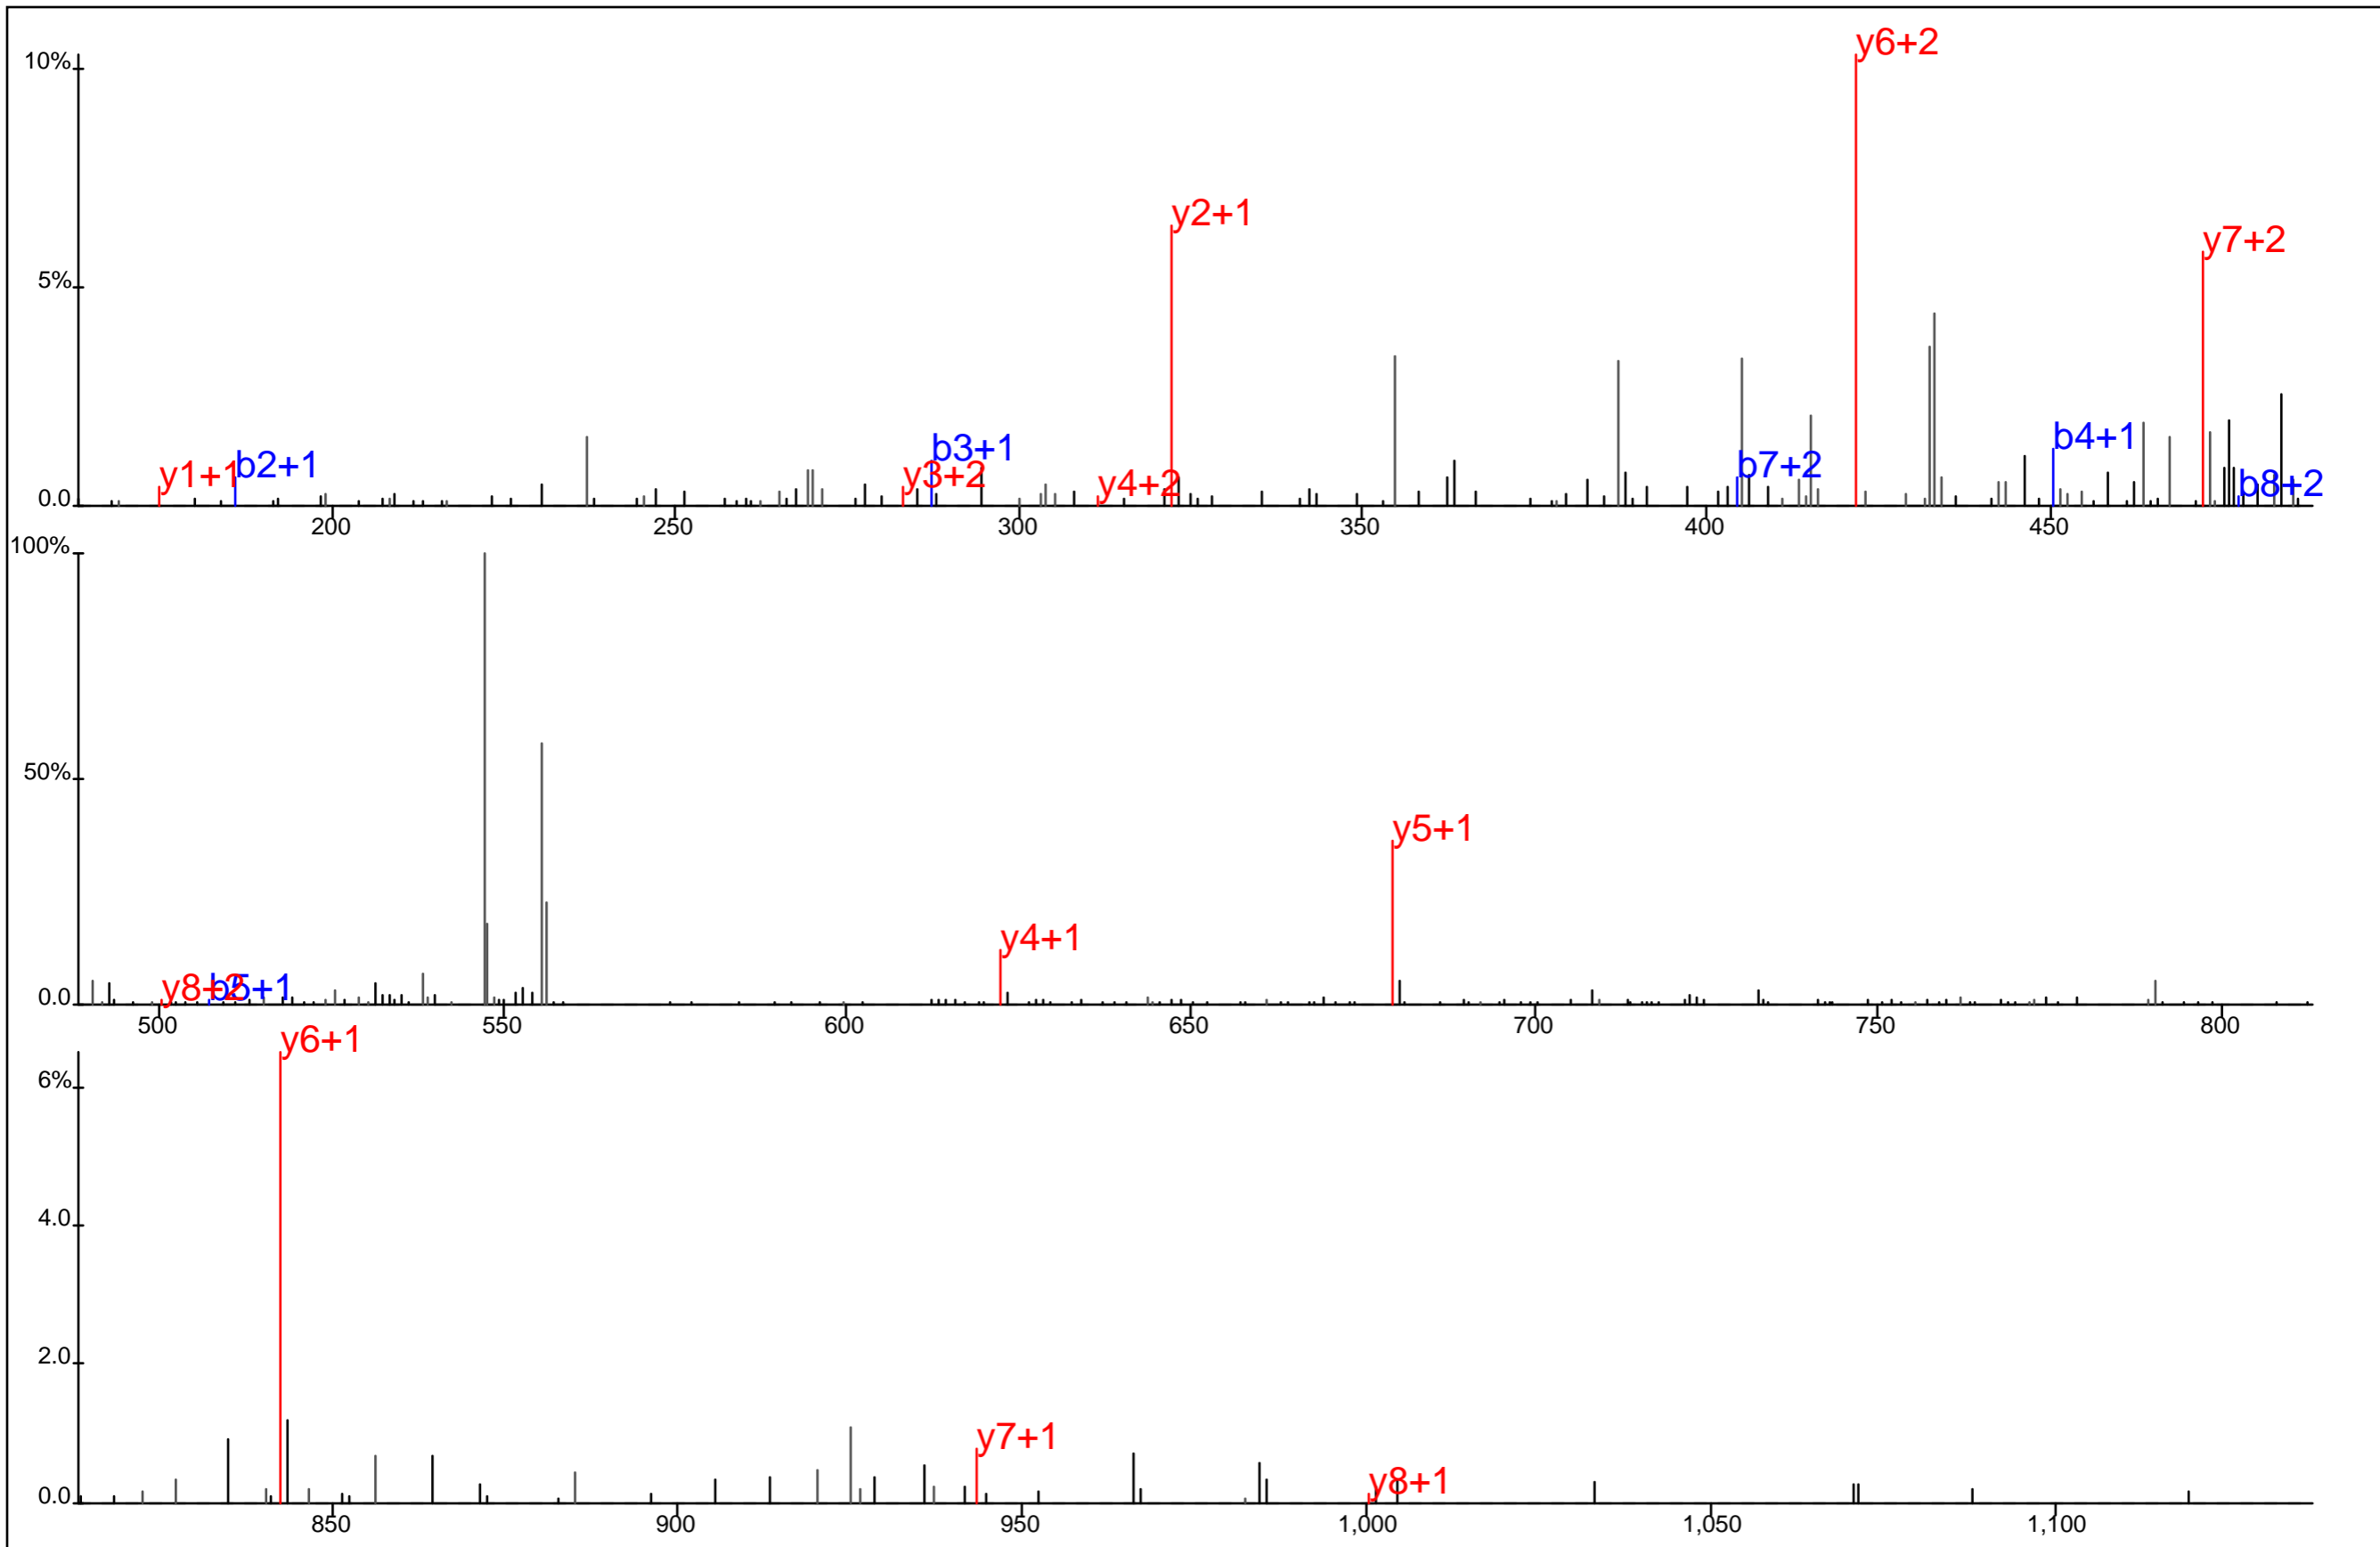

Q G T Y G G Y\*F R

Protein Name: EIF3S8  
 gi Accession: 4503525  
 Precursor Mass: 564.7313+2  
 Delta Mass: 3.871 ppm  
 XCorr: 26.44

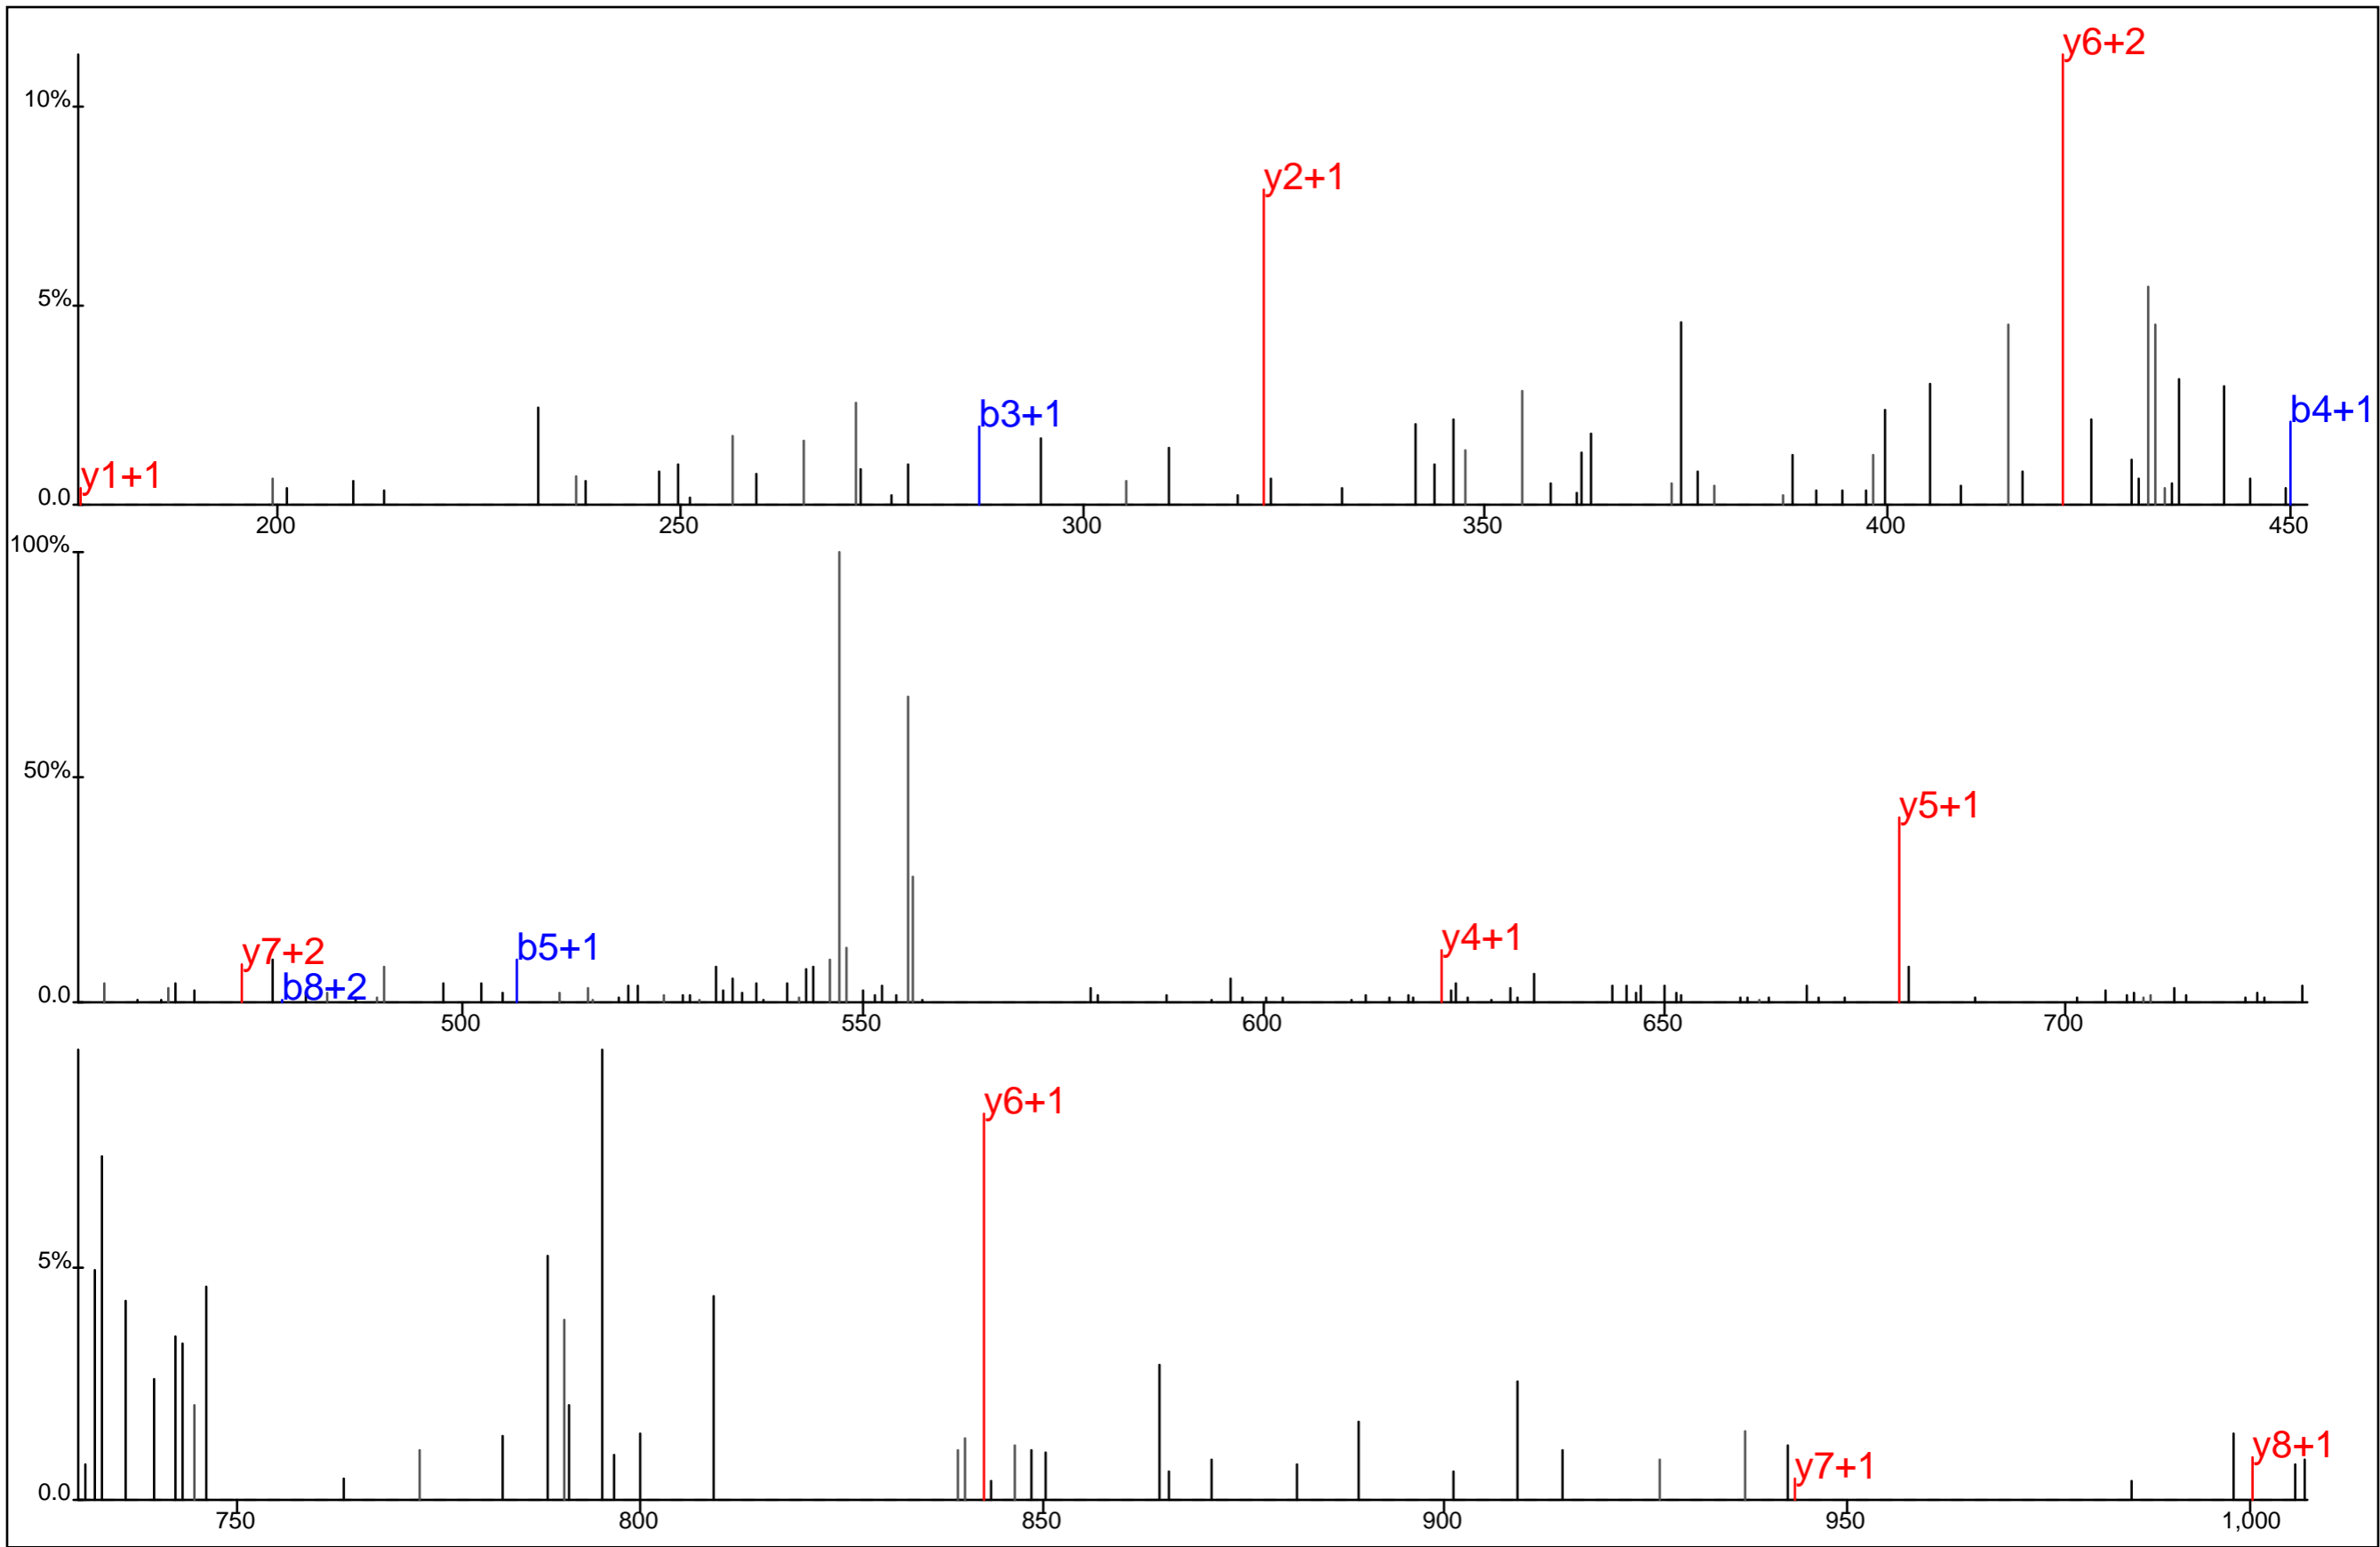

□ ■ □ ■ □ ■ □ ■  
 Q G T Y G G Y\* F R  
□ ■ □ ■ □ ■ □ ■

Protein Name: EIF3S8  
 gi Accession: 4503525  
 Precursor Mass: 564.7306+2  
 Delta Mass: 2.577 ppm  
 XCorr: 22.57

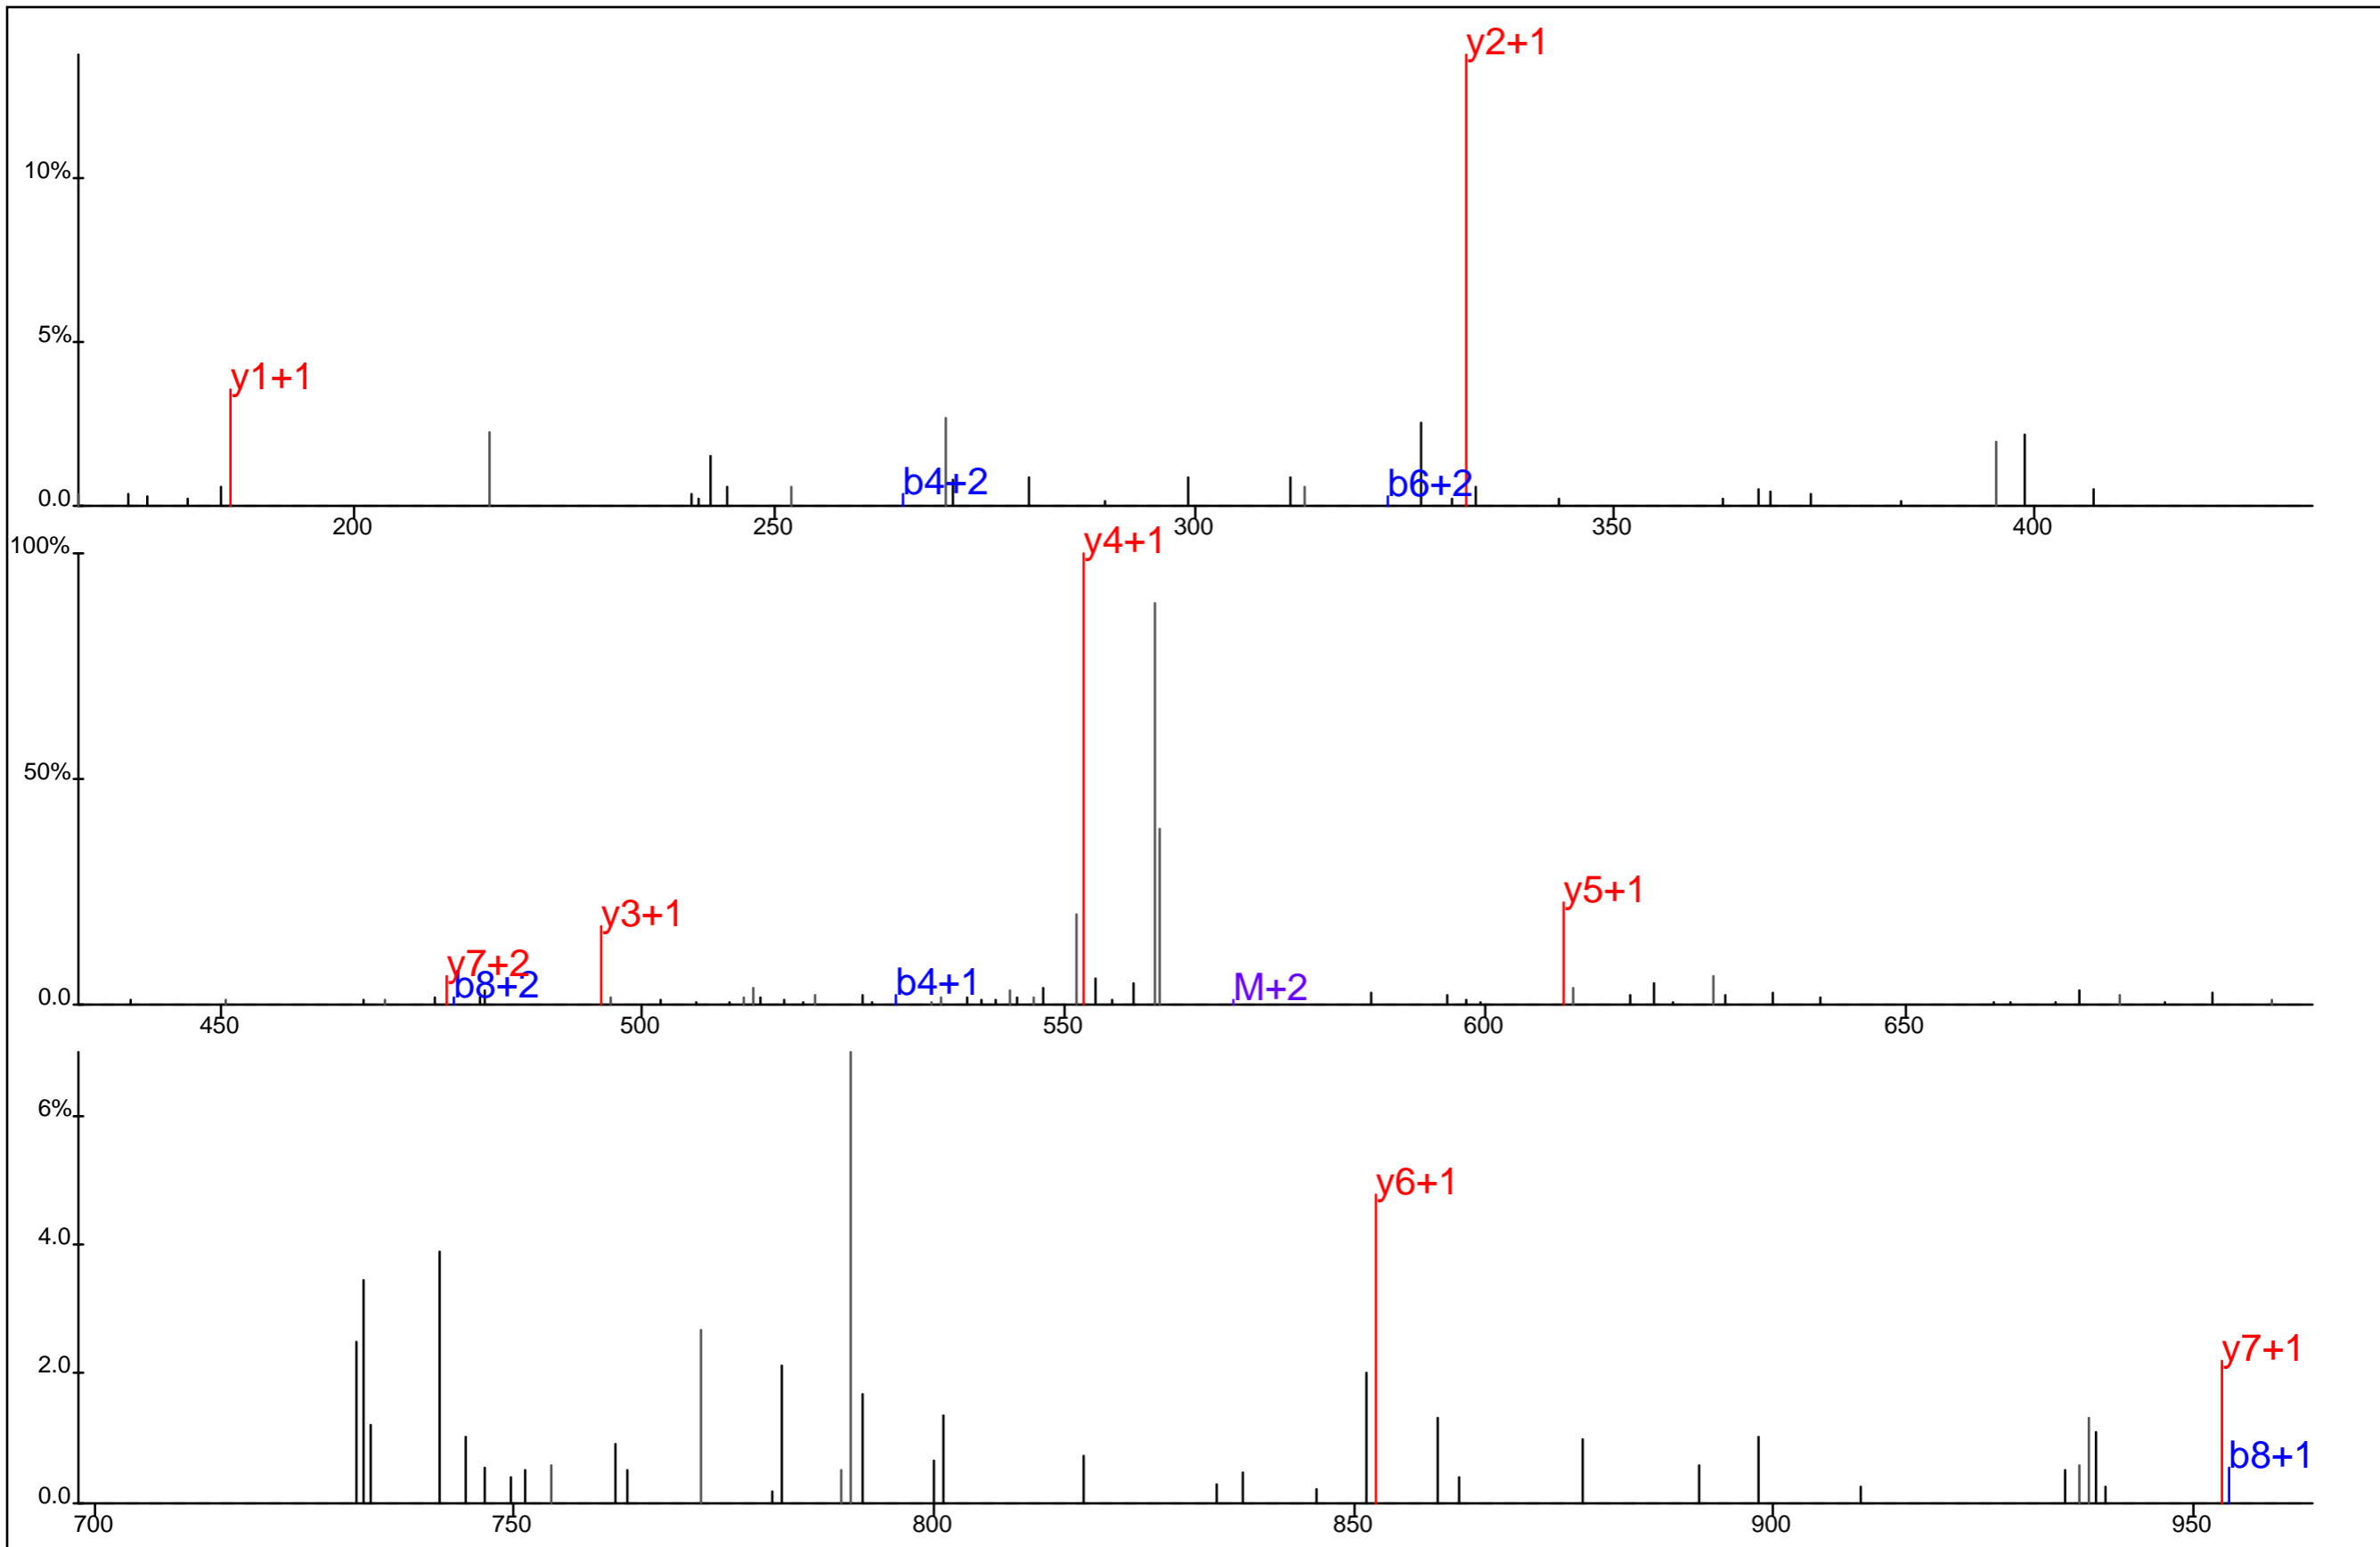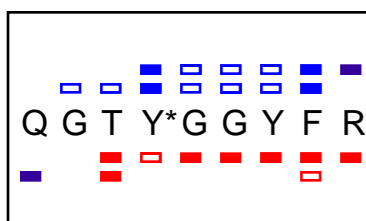

Protein Name: EIF3S8  
 gi Accession: 4503525  
 Precursor Mass: 569.7353+2  
 Delta Mass: 3.538 ppm  
 XCorr: 34.78

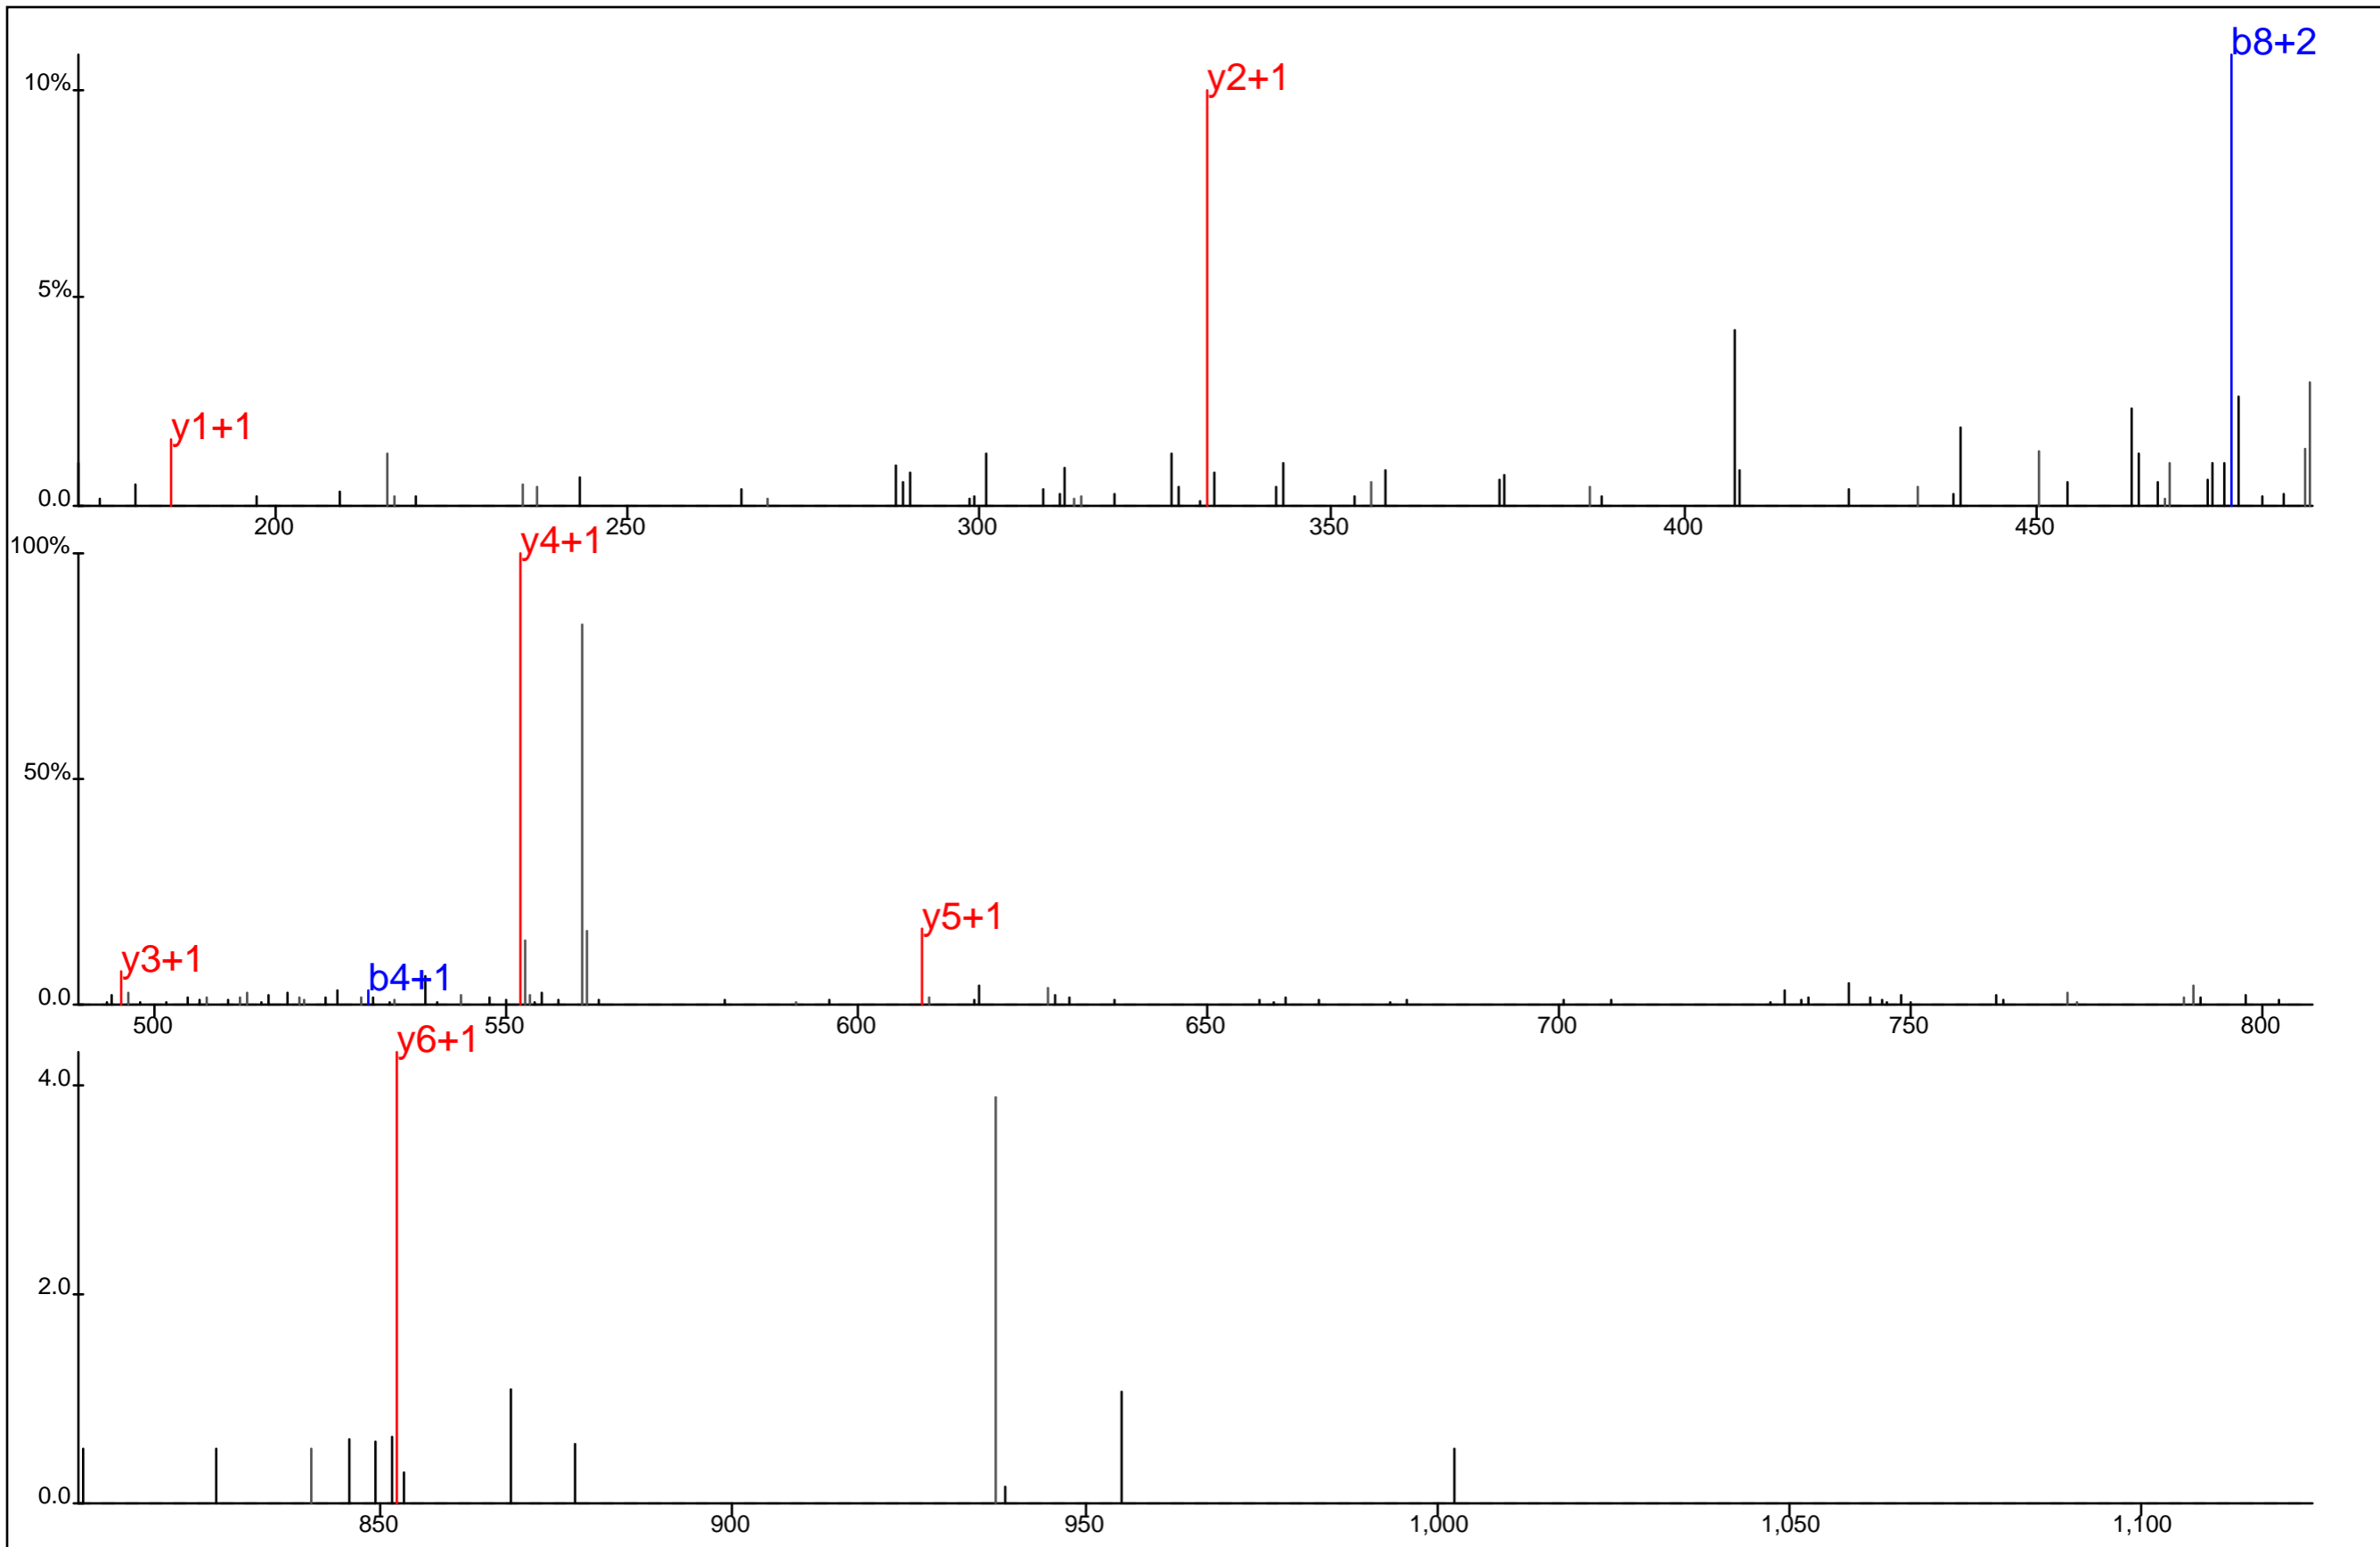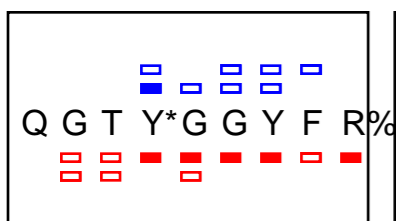

Protein Name: EIF3S8  
 gi Accession: 4503525  
 Precursor Mass: 569.7352+2  
 Delta Mass: 3.433 ppm  
 XCorr: 29.46

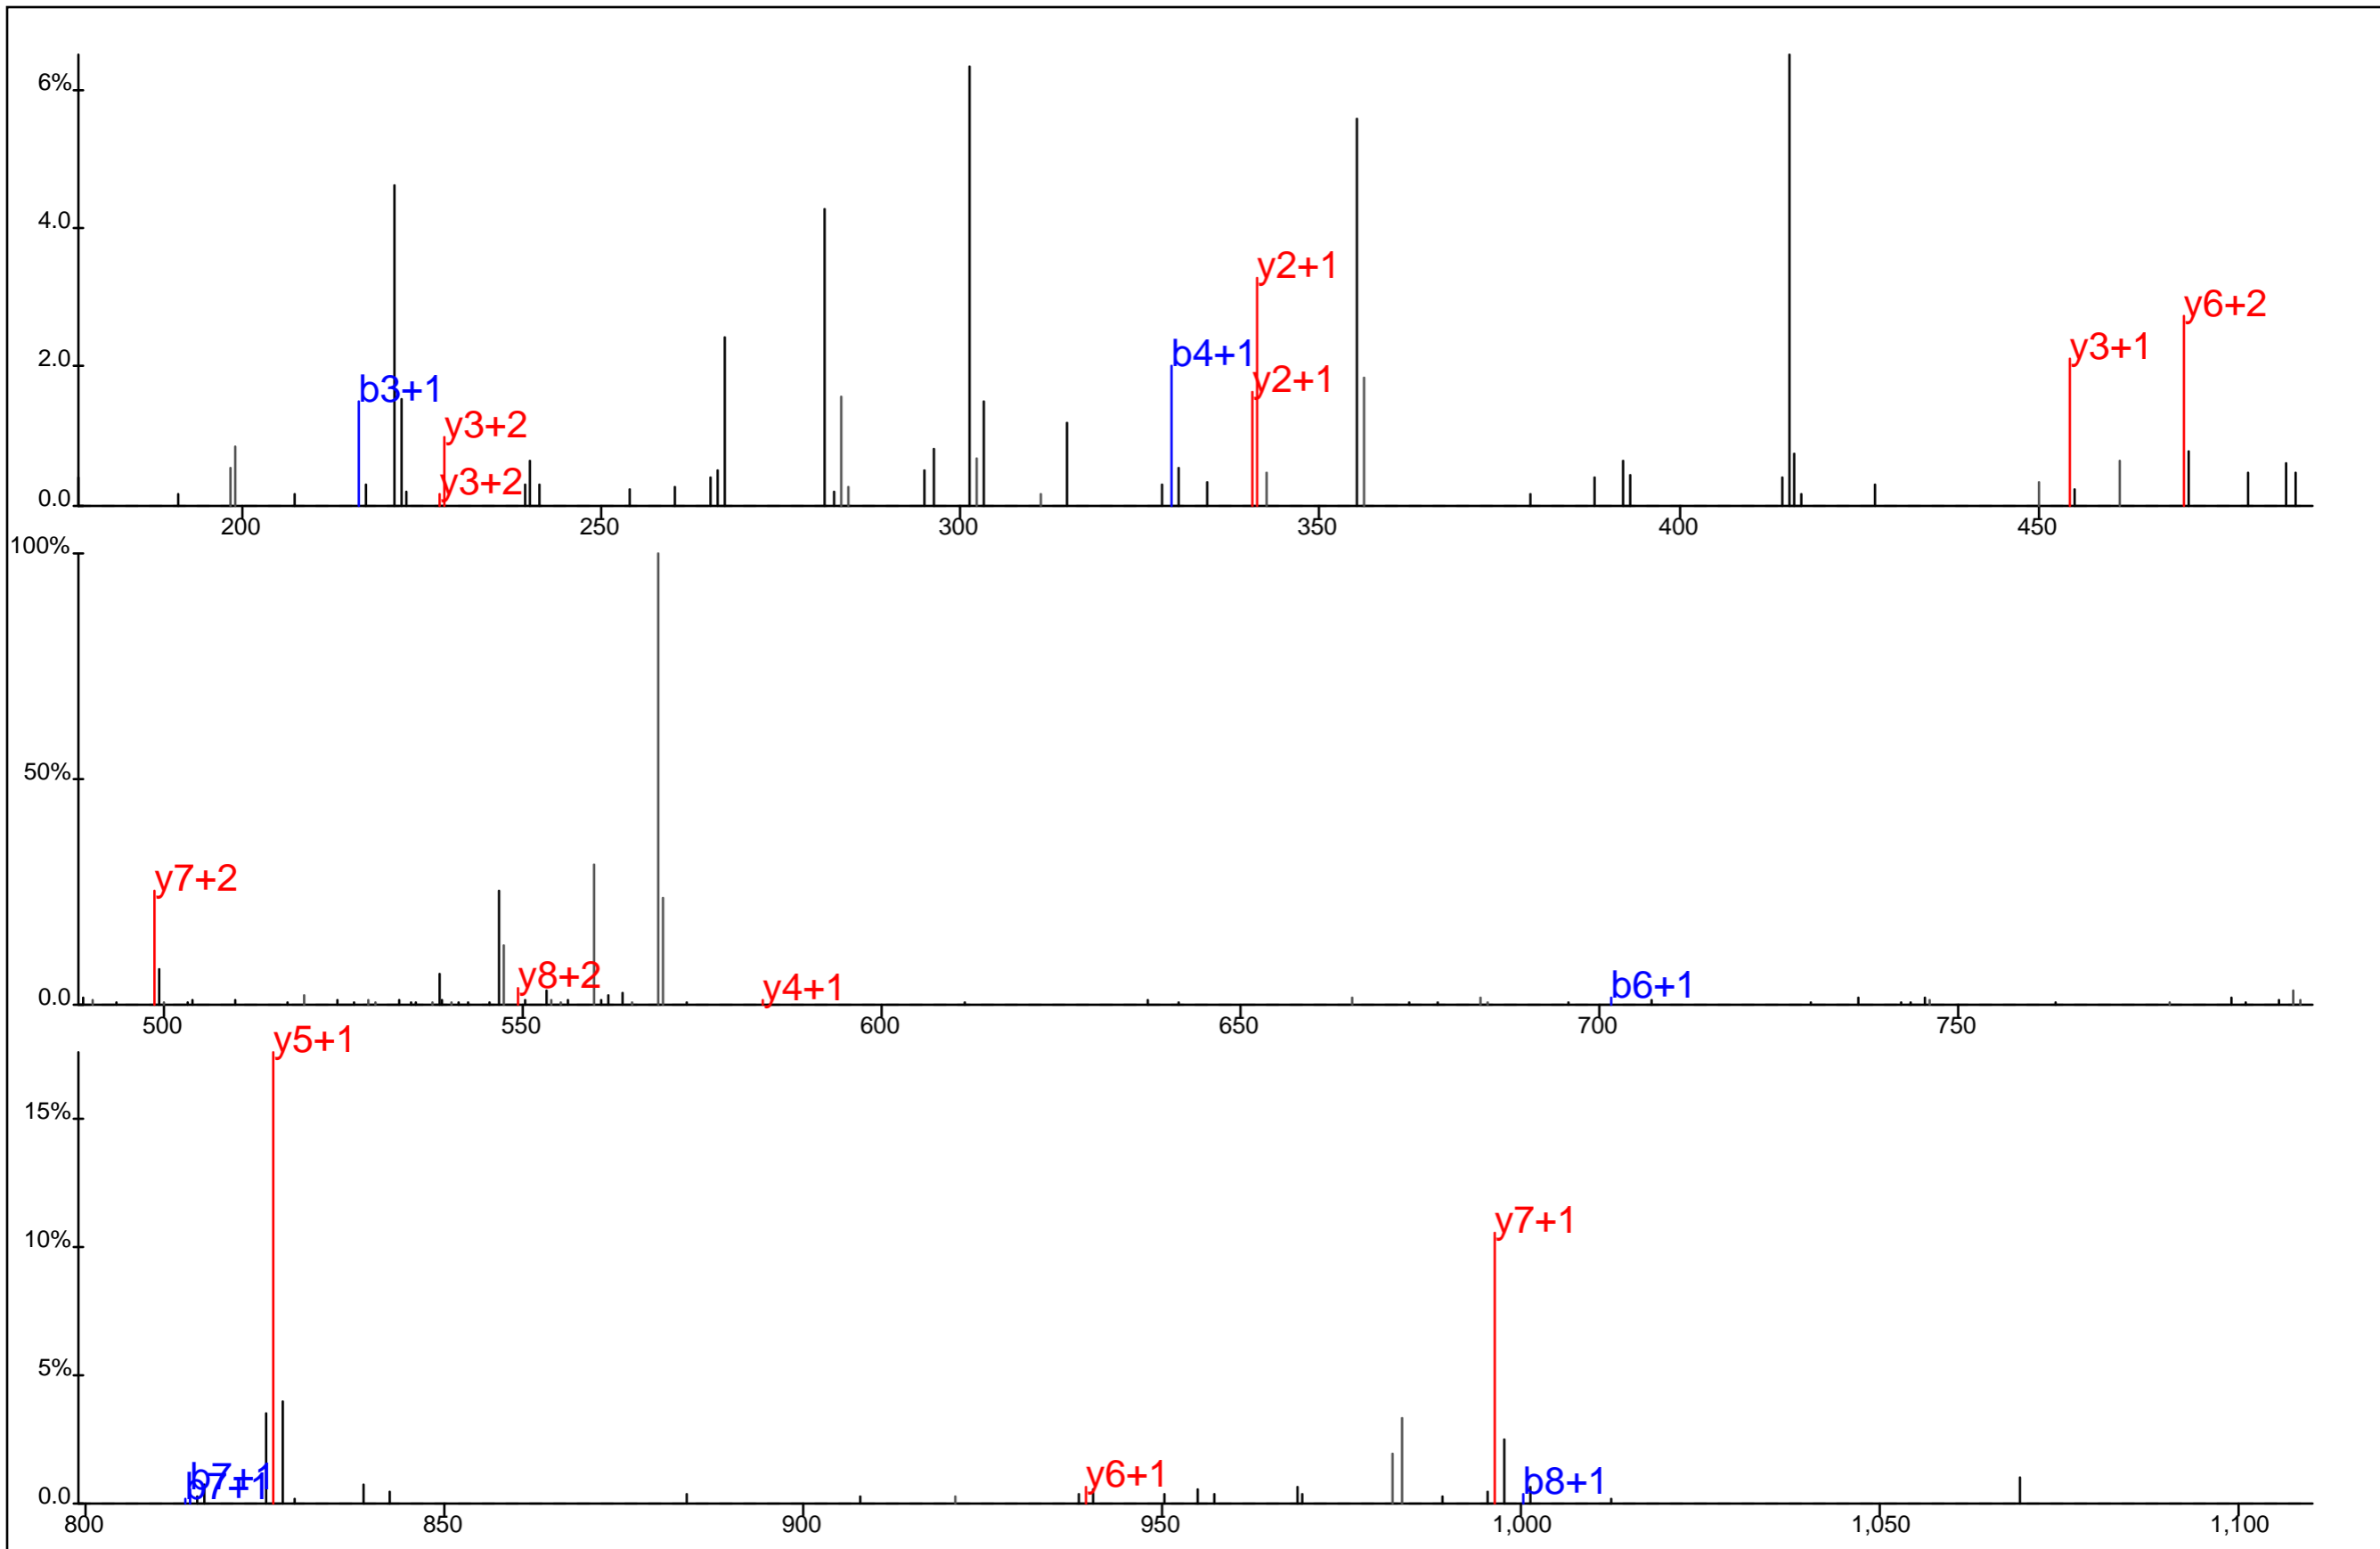

■ ■ ■ ■ ■ ■  
 G T G L Y\* E L W K#  
■ ■ ■ ■ ■ ■

Protein Name: Elongation protein 3  
 gi Accession: 23510283  
 Precursor Mass: 577.7748+2  
 Delta Mass: 4.433 ppm  
 XCorr: 26.04

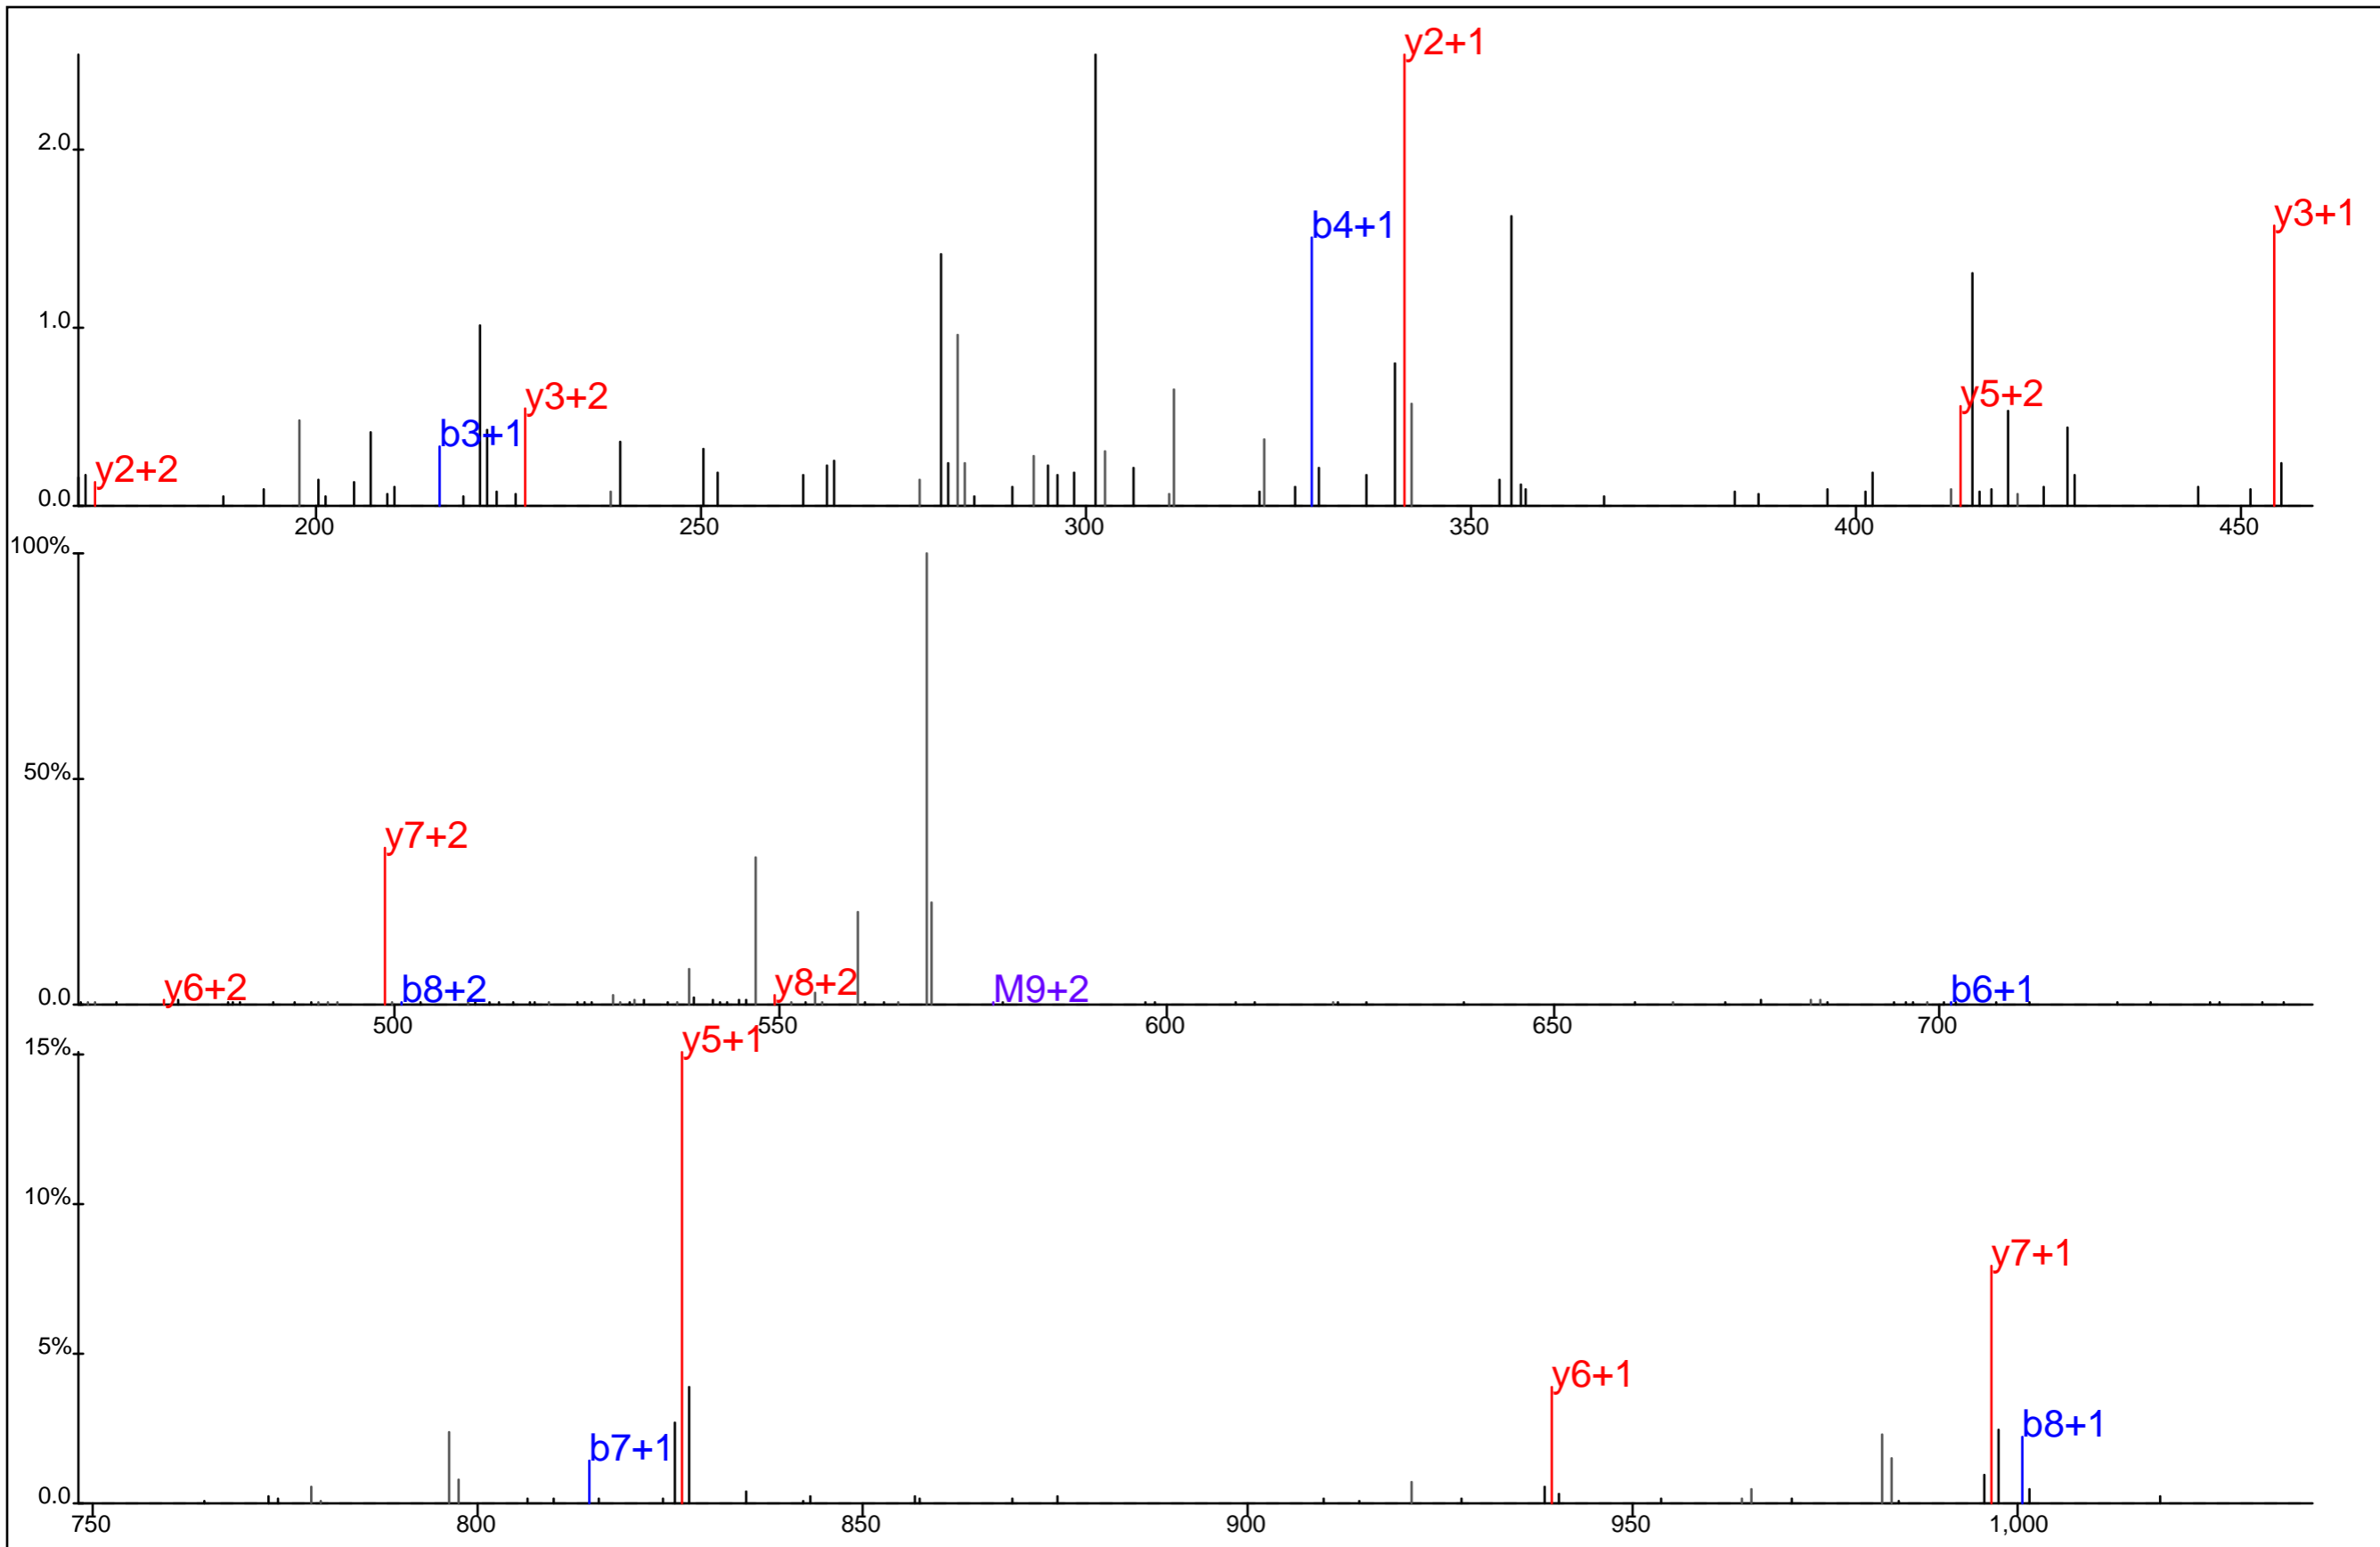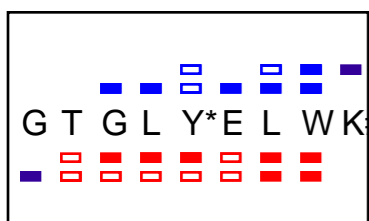

Protein Name: Elongation protein 3  
 gi Accession: 23510283  
 Precursor Mass: 577.7744+2  
 Delta Mass: 3.584 ppm  
 XCorr: 40.12



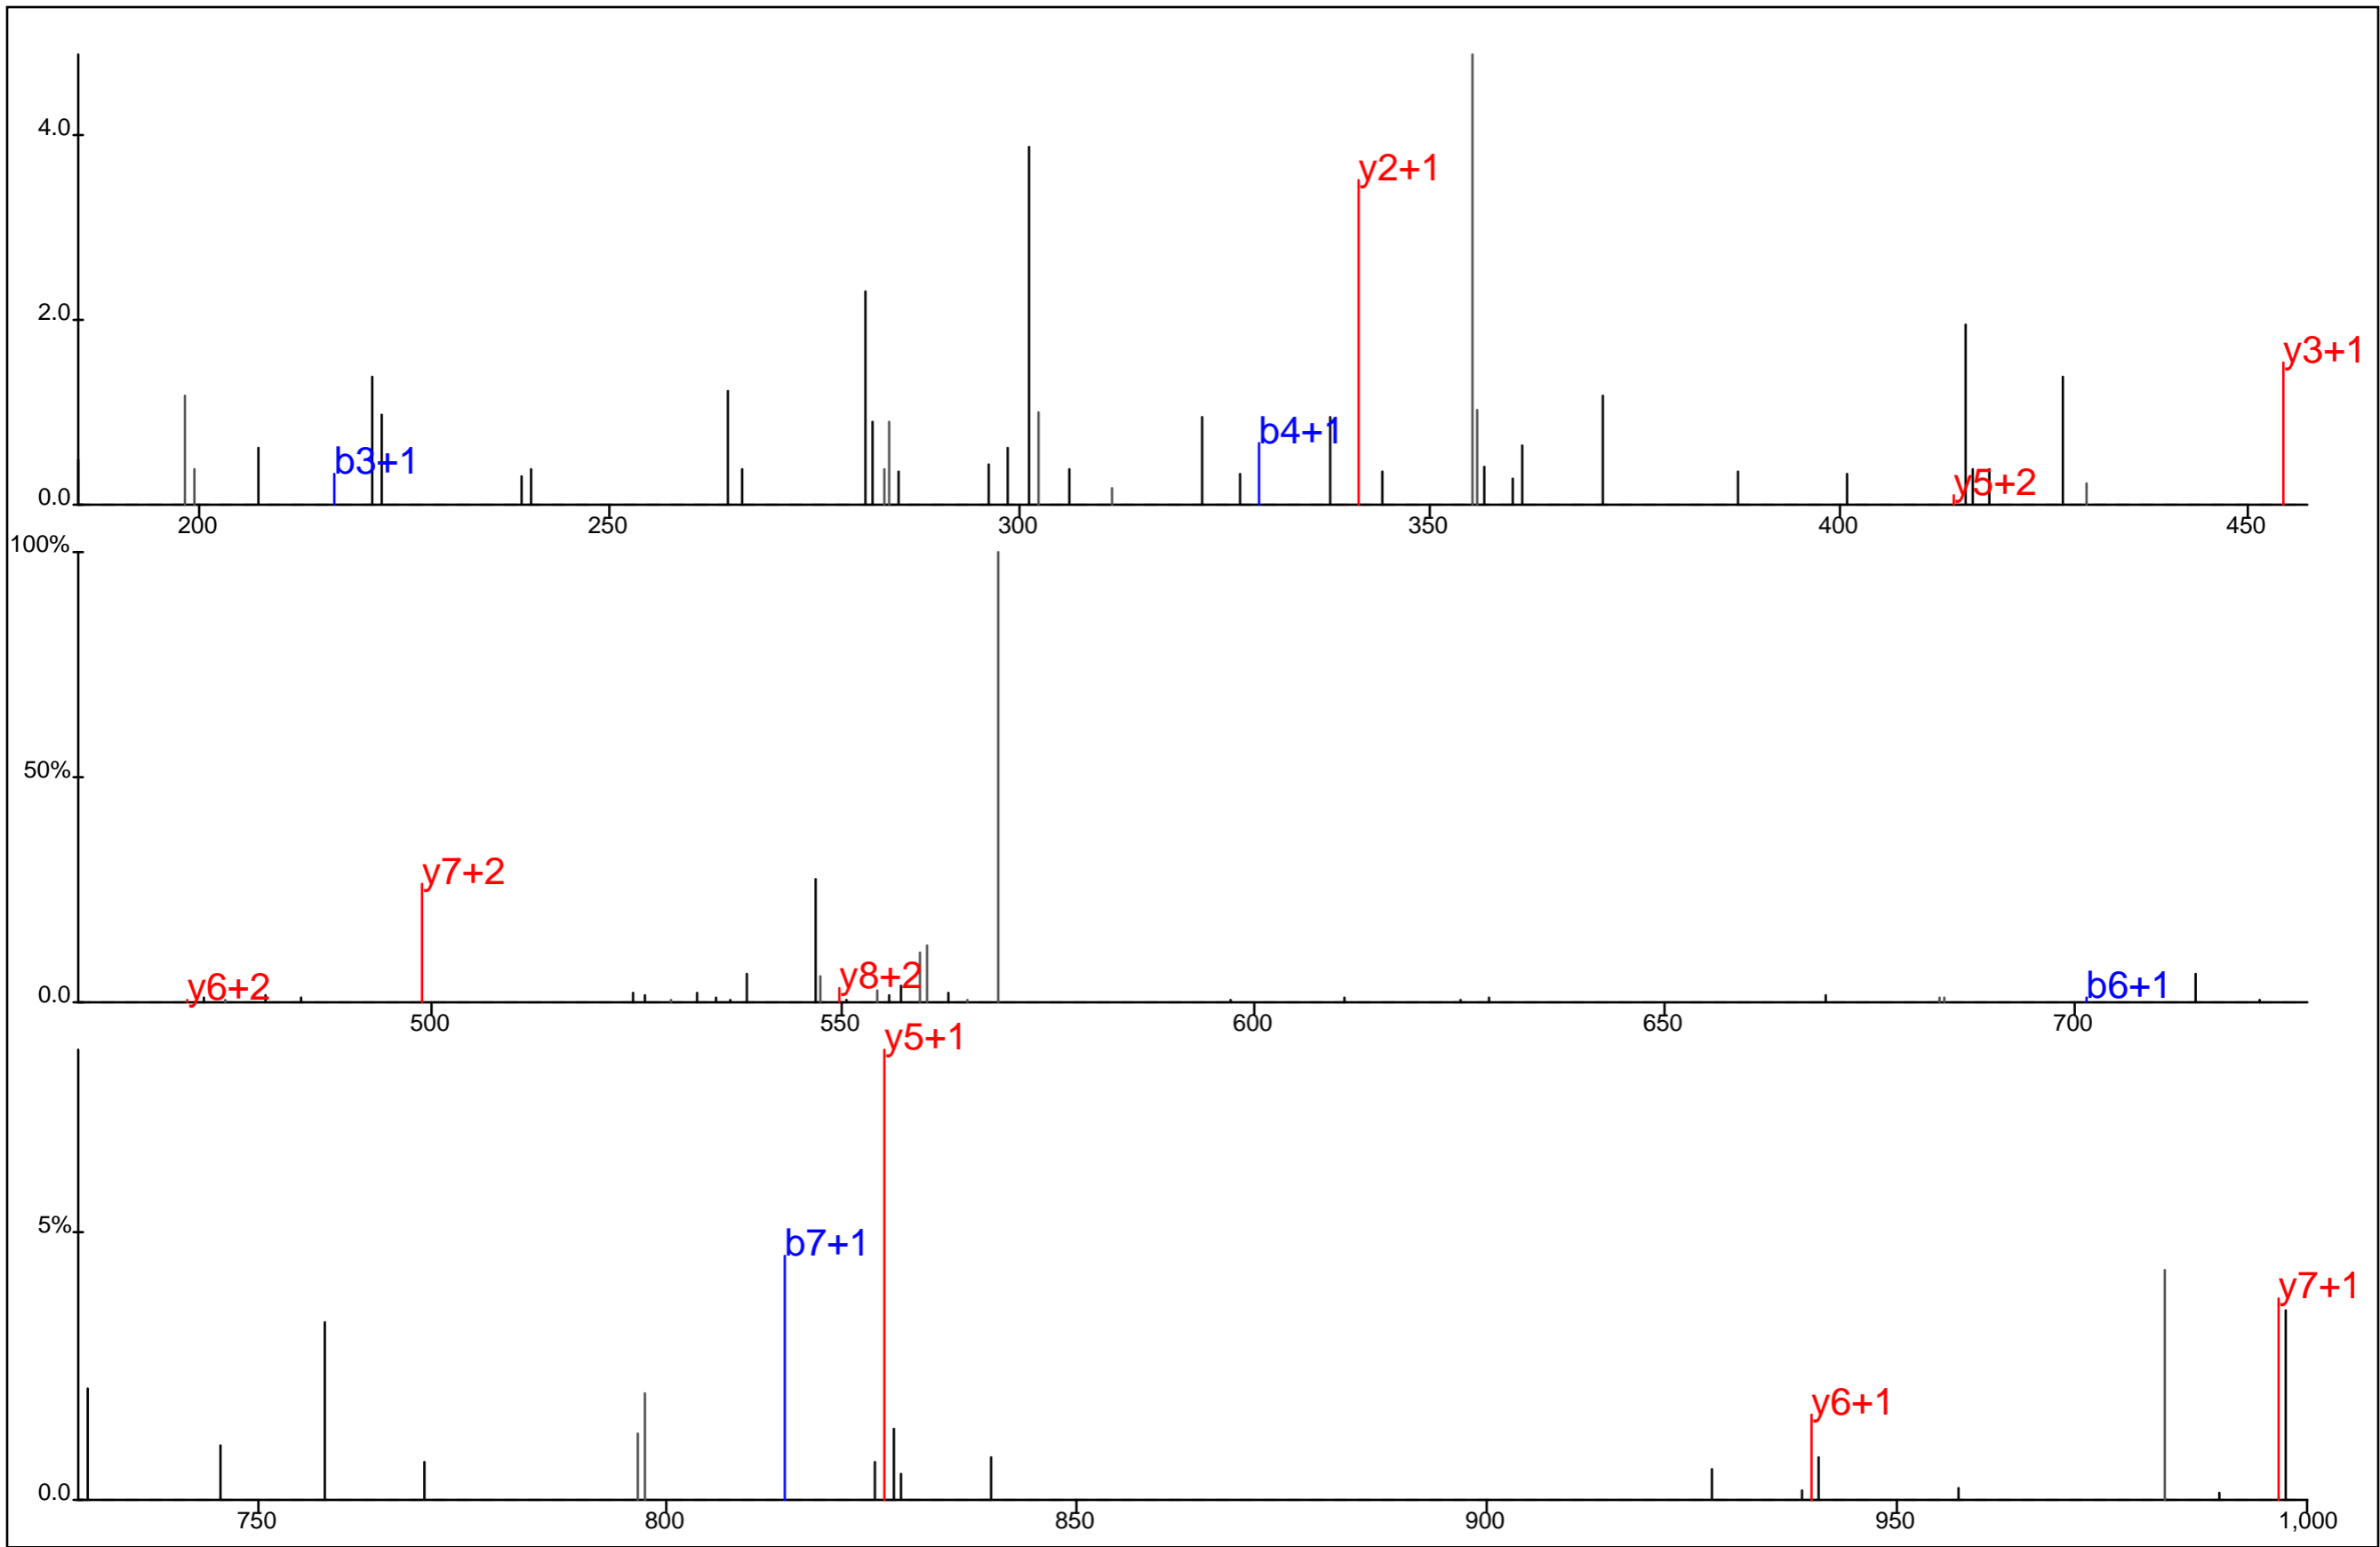

■ ■ ■ ■ ■  
 G T G L Y\* E L W K#  
 ■ ■ ■ ■ ■  
 ■ ■ ■ ■ ■

Protein Name: Elongation protein 3  
 gi Accession: 23510283  
 Precursor Mass: 577.7738+2  
 Delta Mass: 2.631 ppm  
 XCorr: 18.29

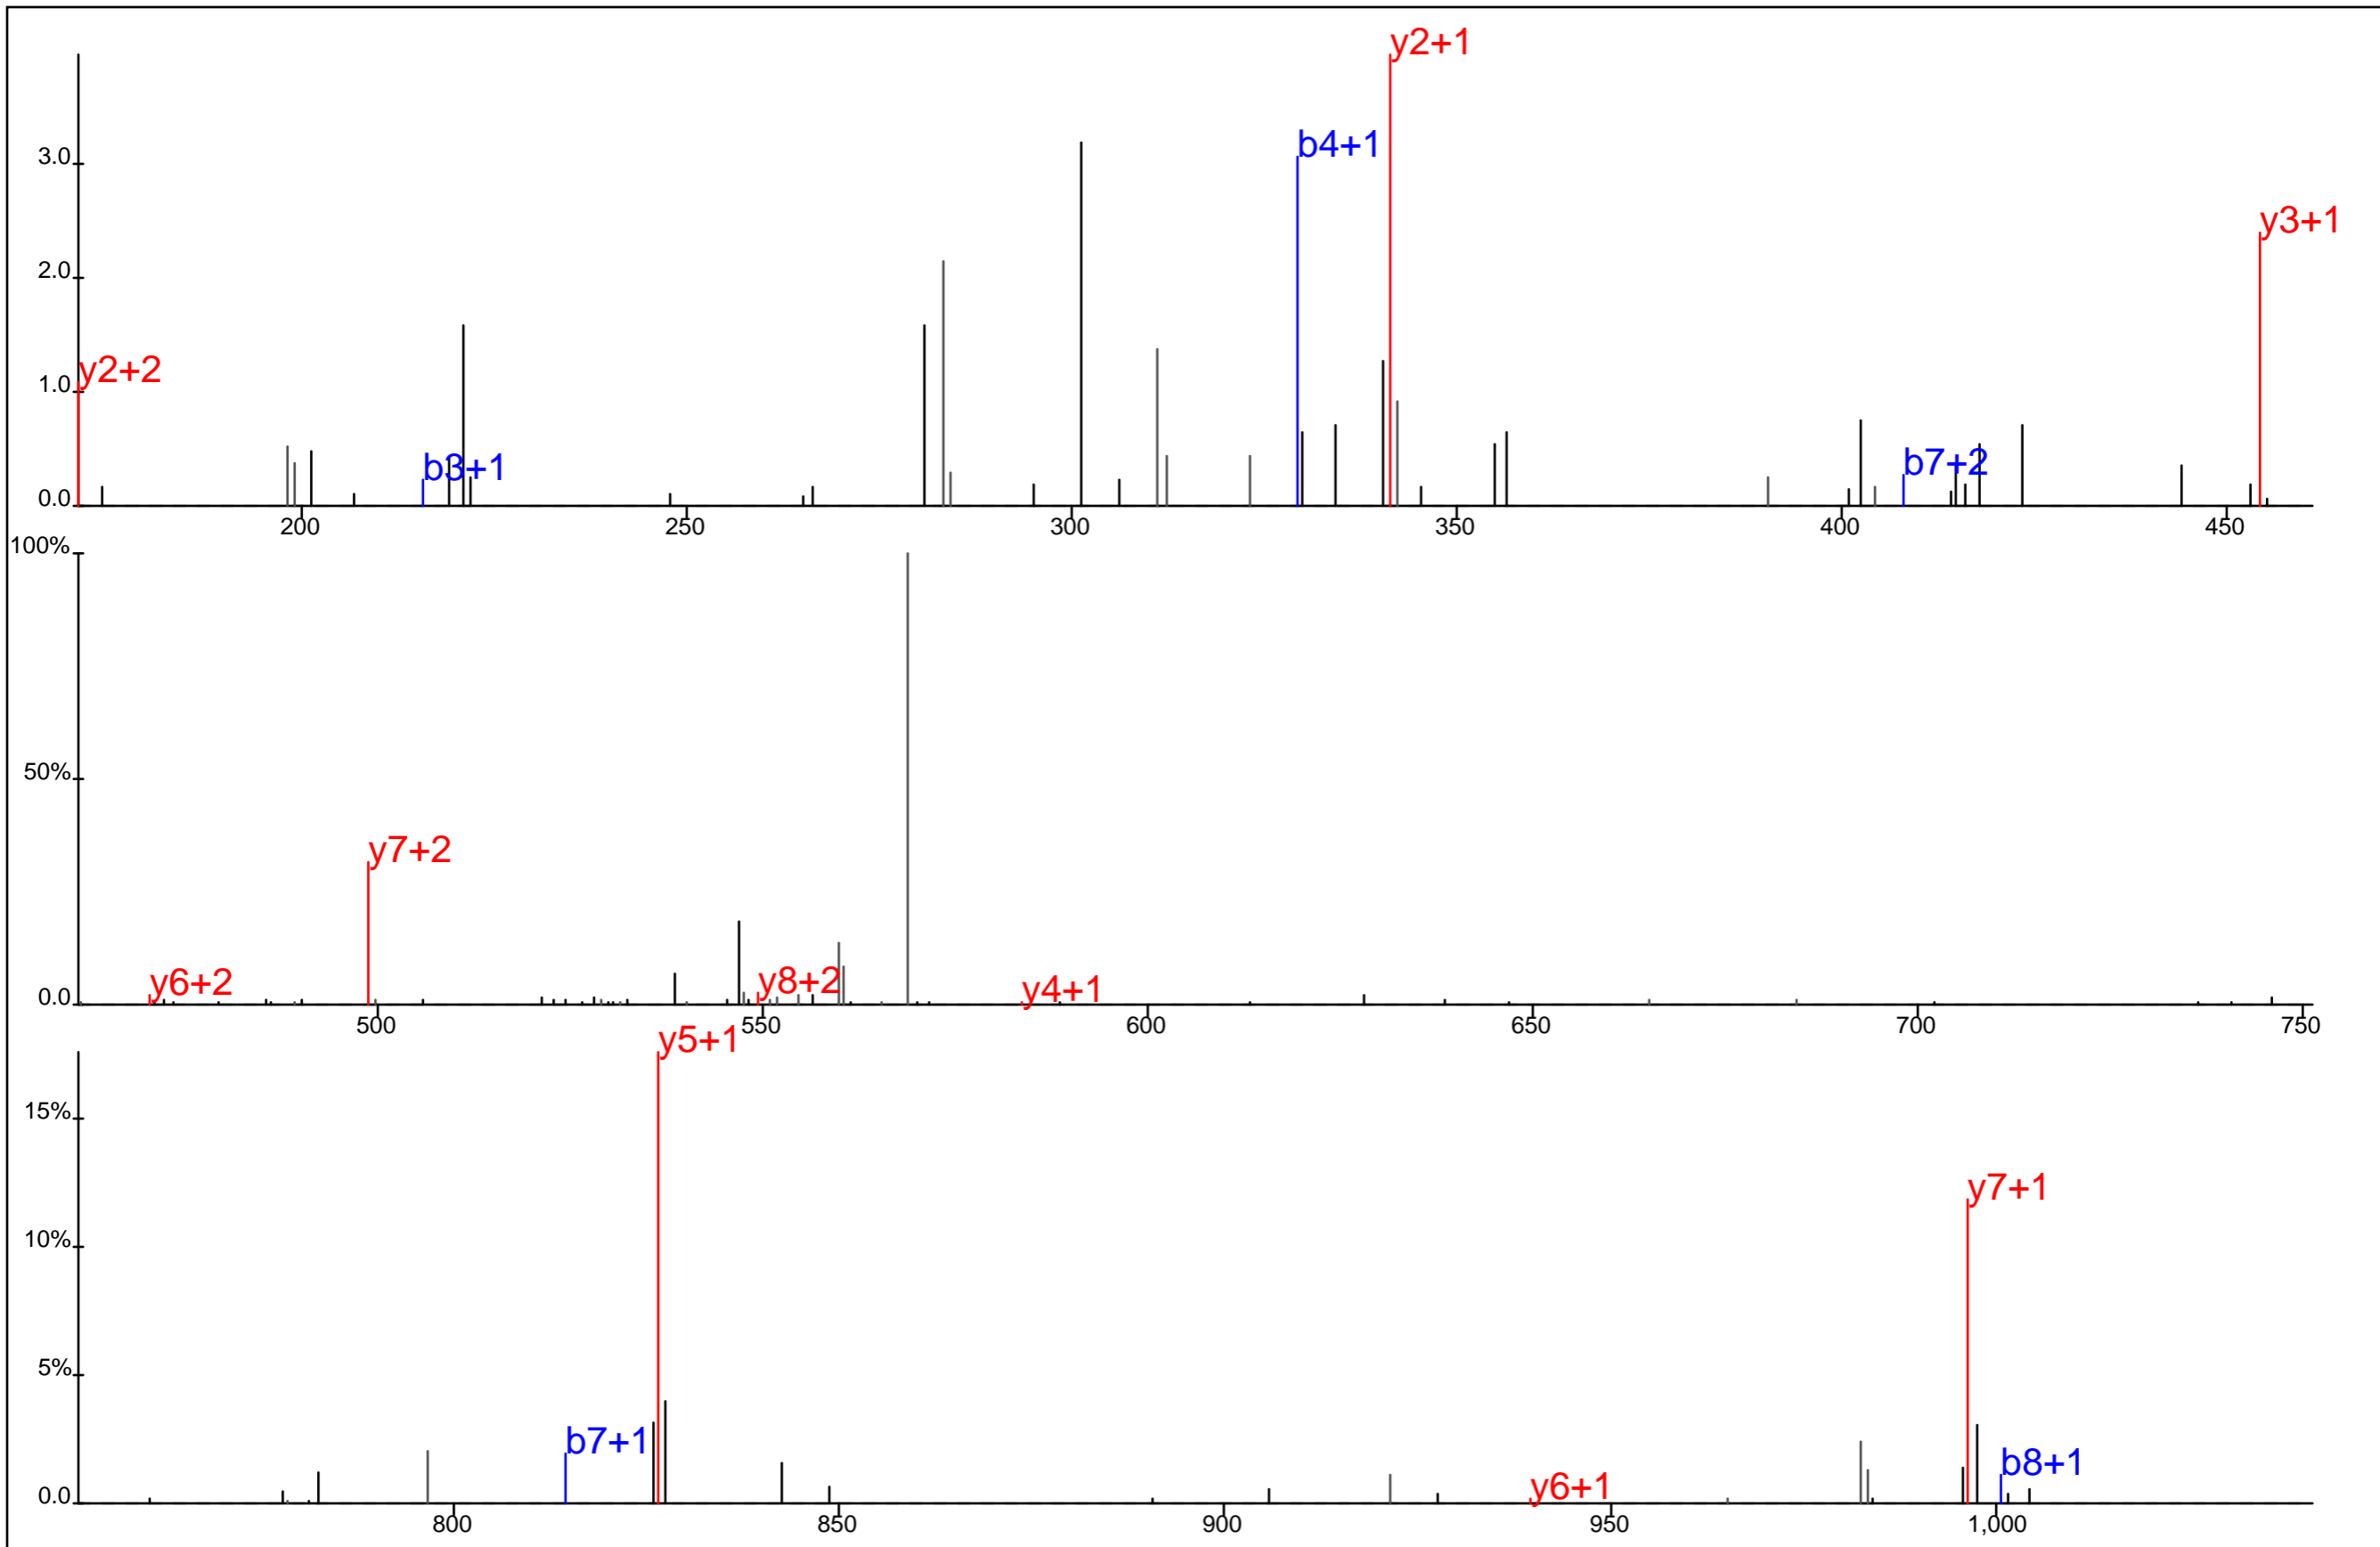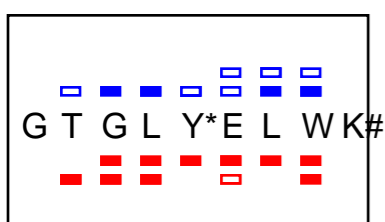

Protein Name: Elongation protein 3  
 gi Accession: 23510283  
 Precursor Mass: 577.7745+2  
 Delta Mass: 3.905 ppm  
 XCorr: 26.34

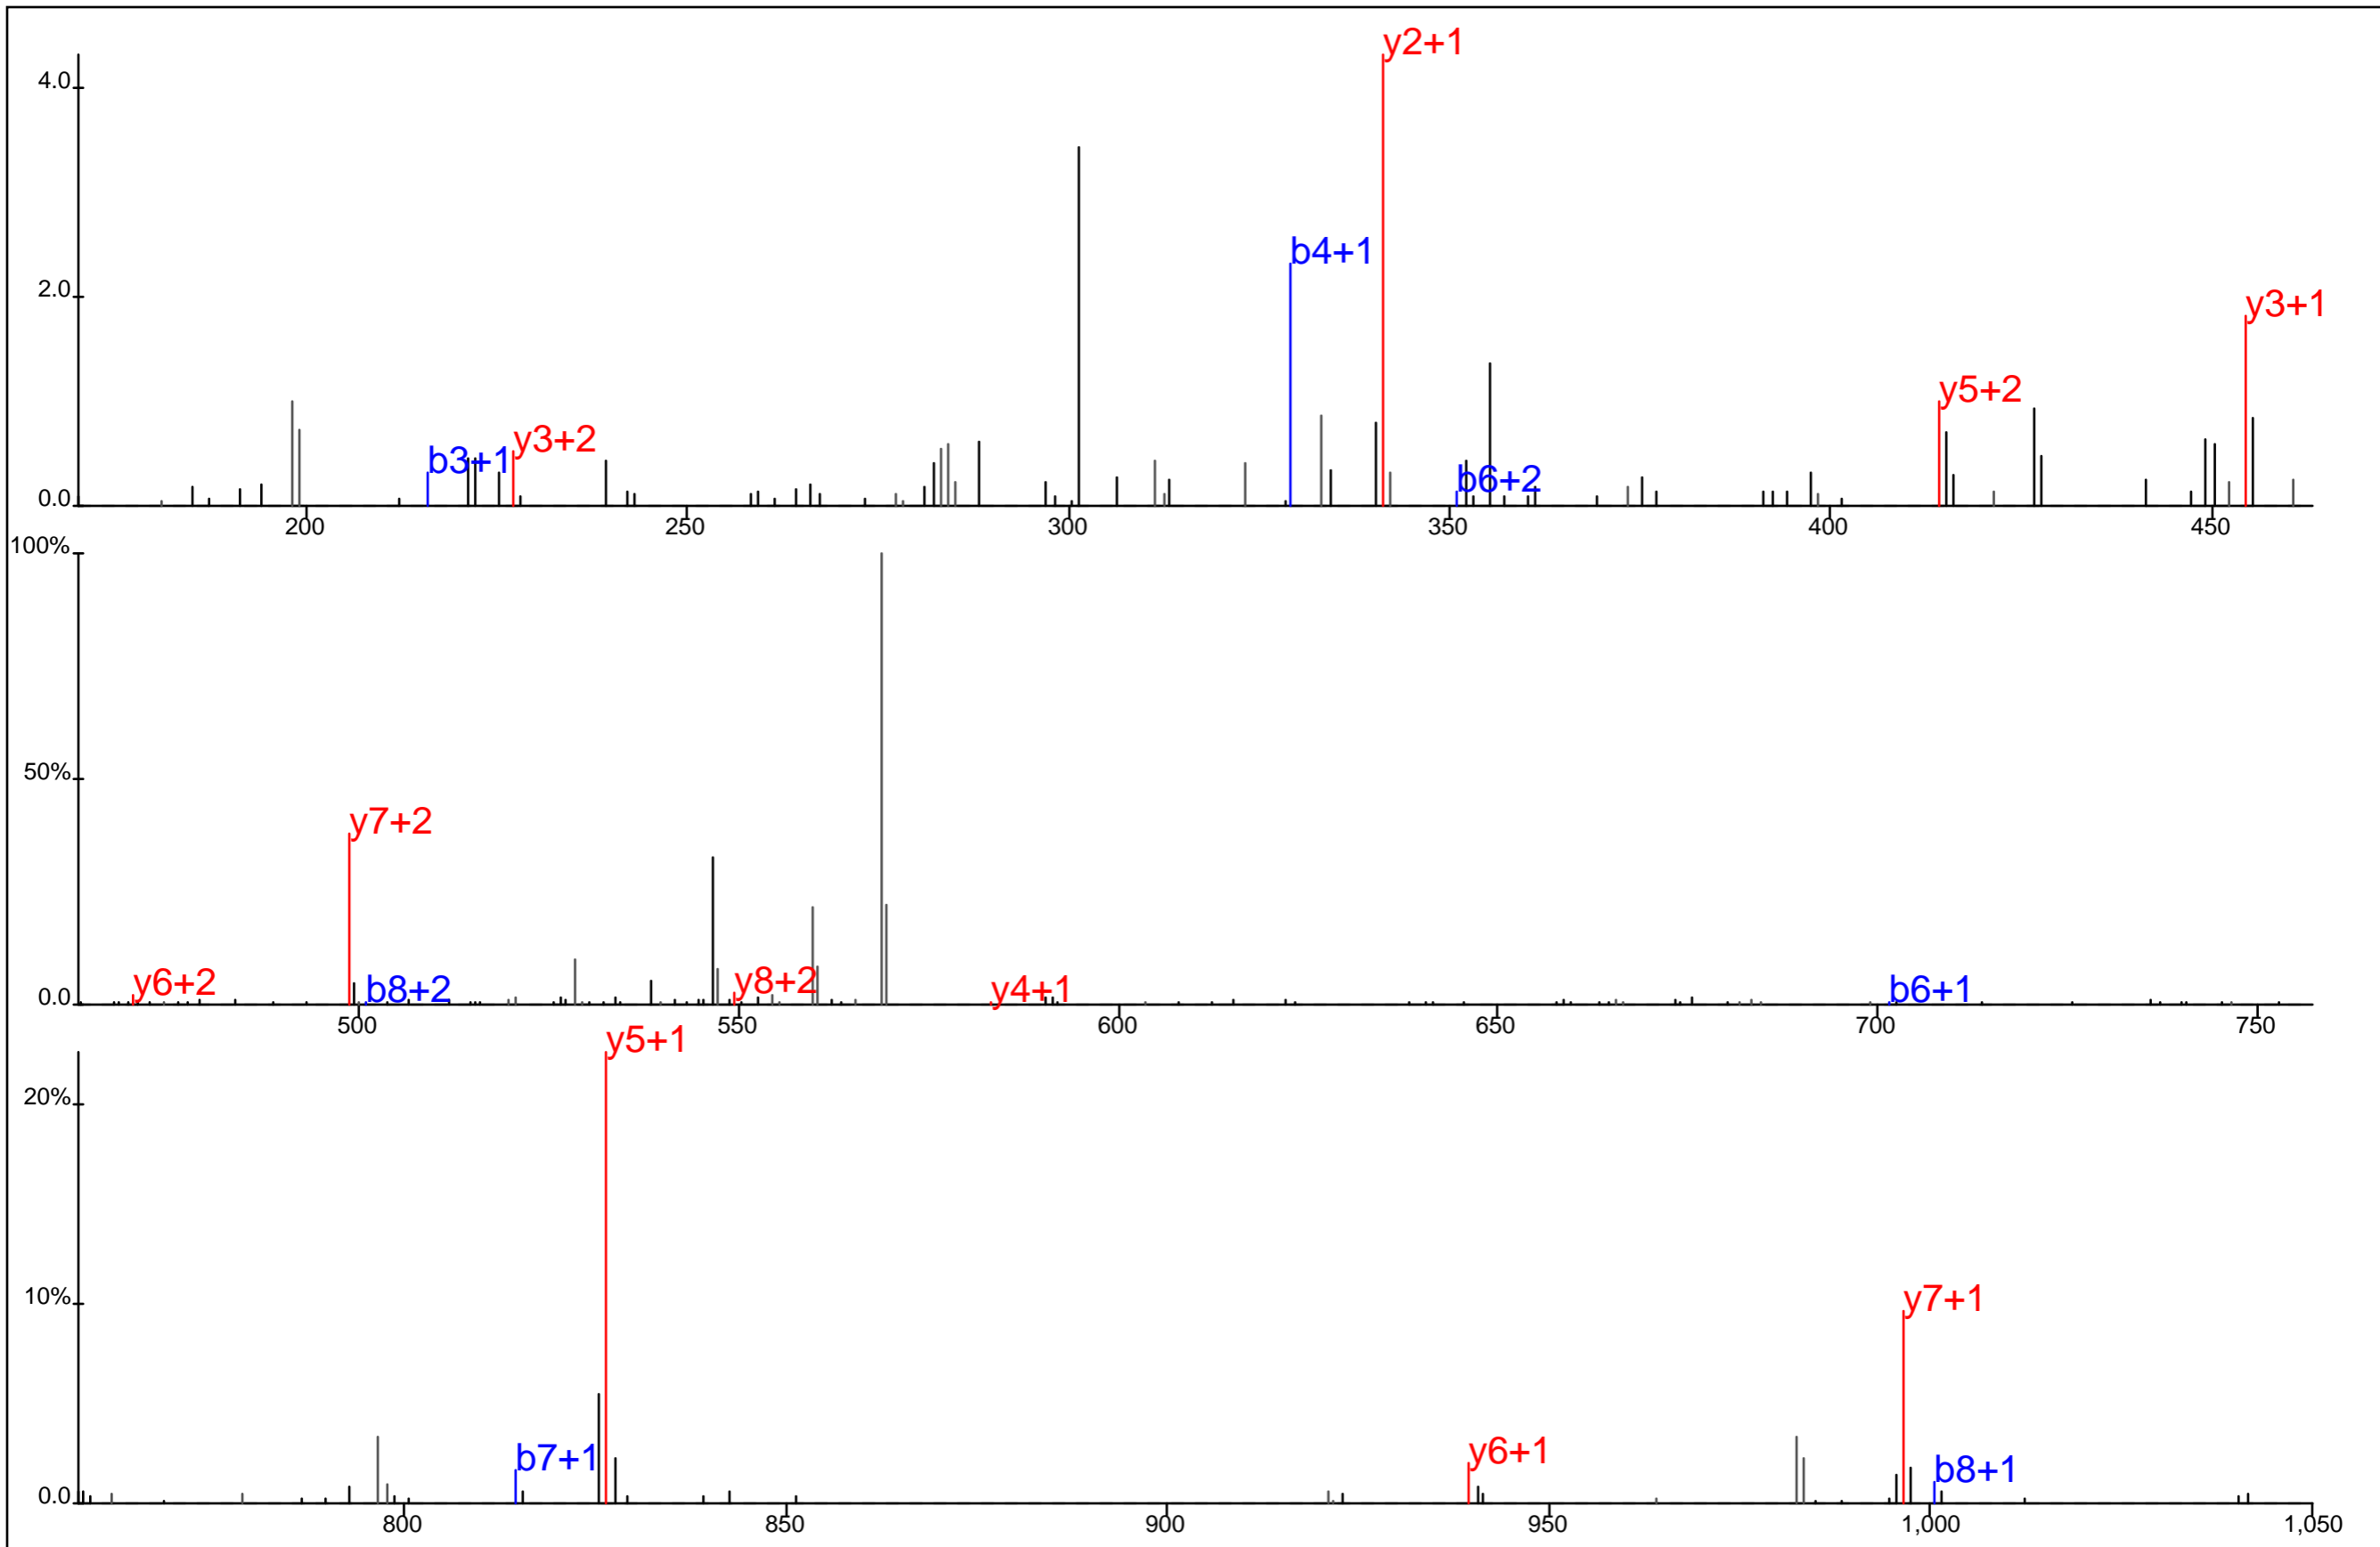

■ ■ ■ ■ ■ ■  
 G T G L Y\* E L W K#  
 □ □ □ □ □ □ □

Protein Name: Elongation protein 3  
 gi Accession: 23510283  
 Precursor Mass: 577.7756+2  
 Delta Mass: 5.698 ppm  
 XCorr: 35.63

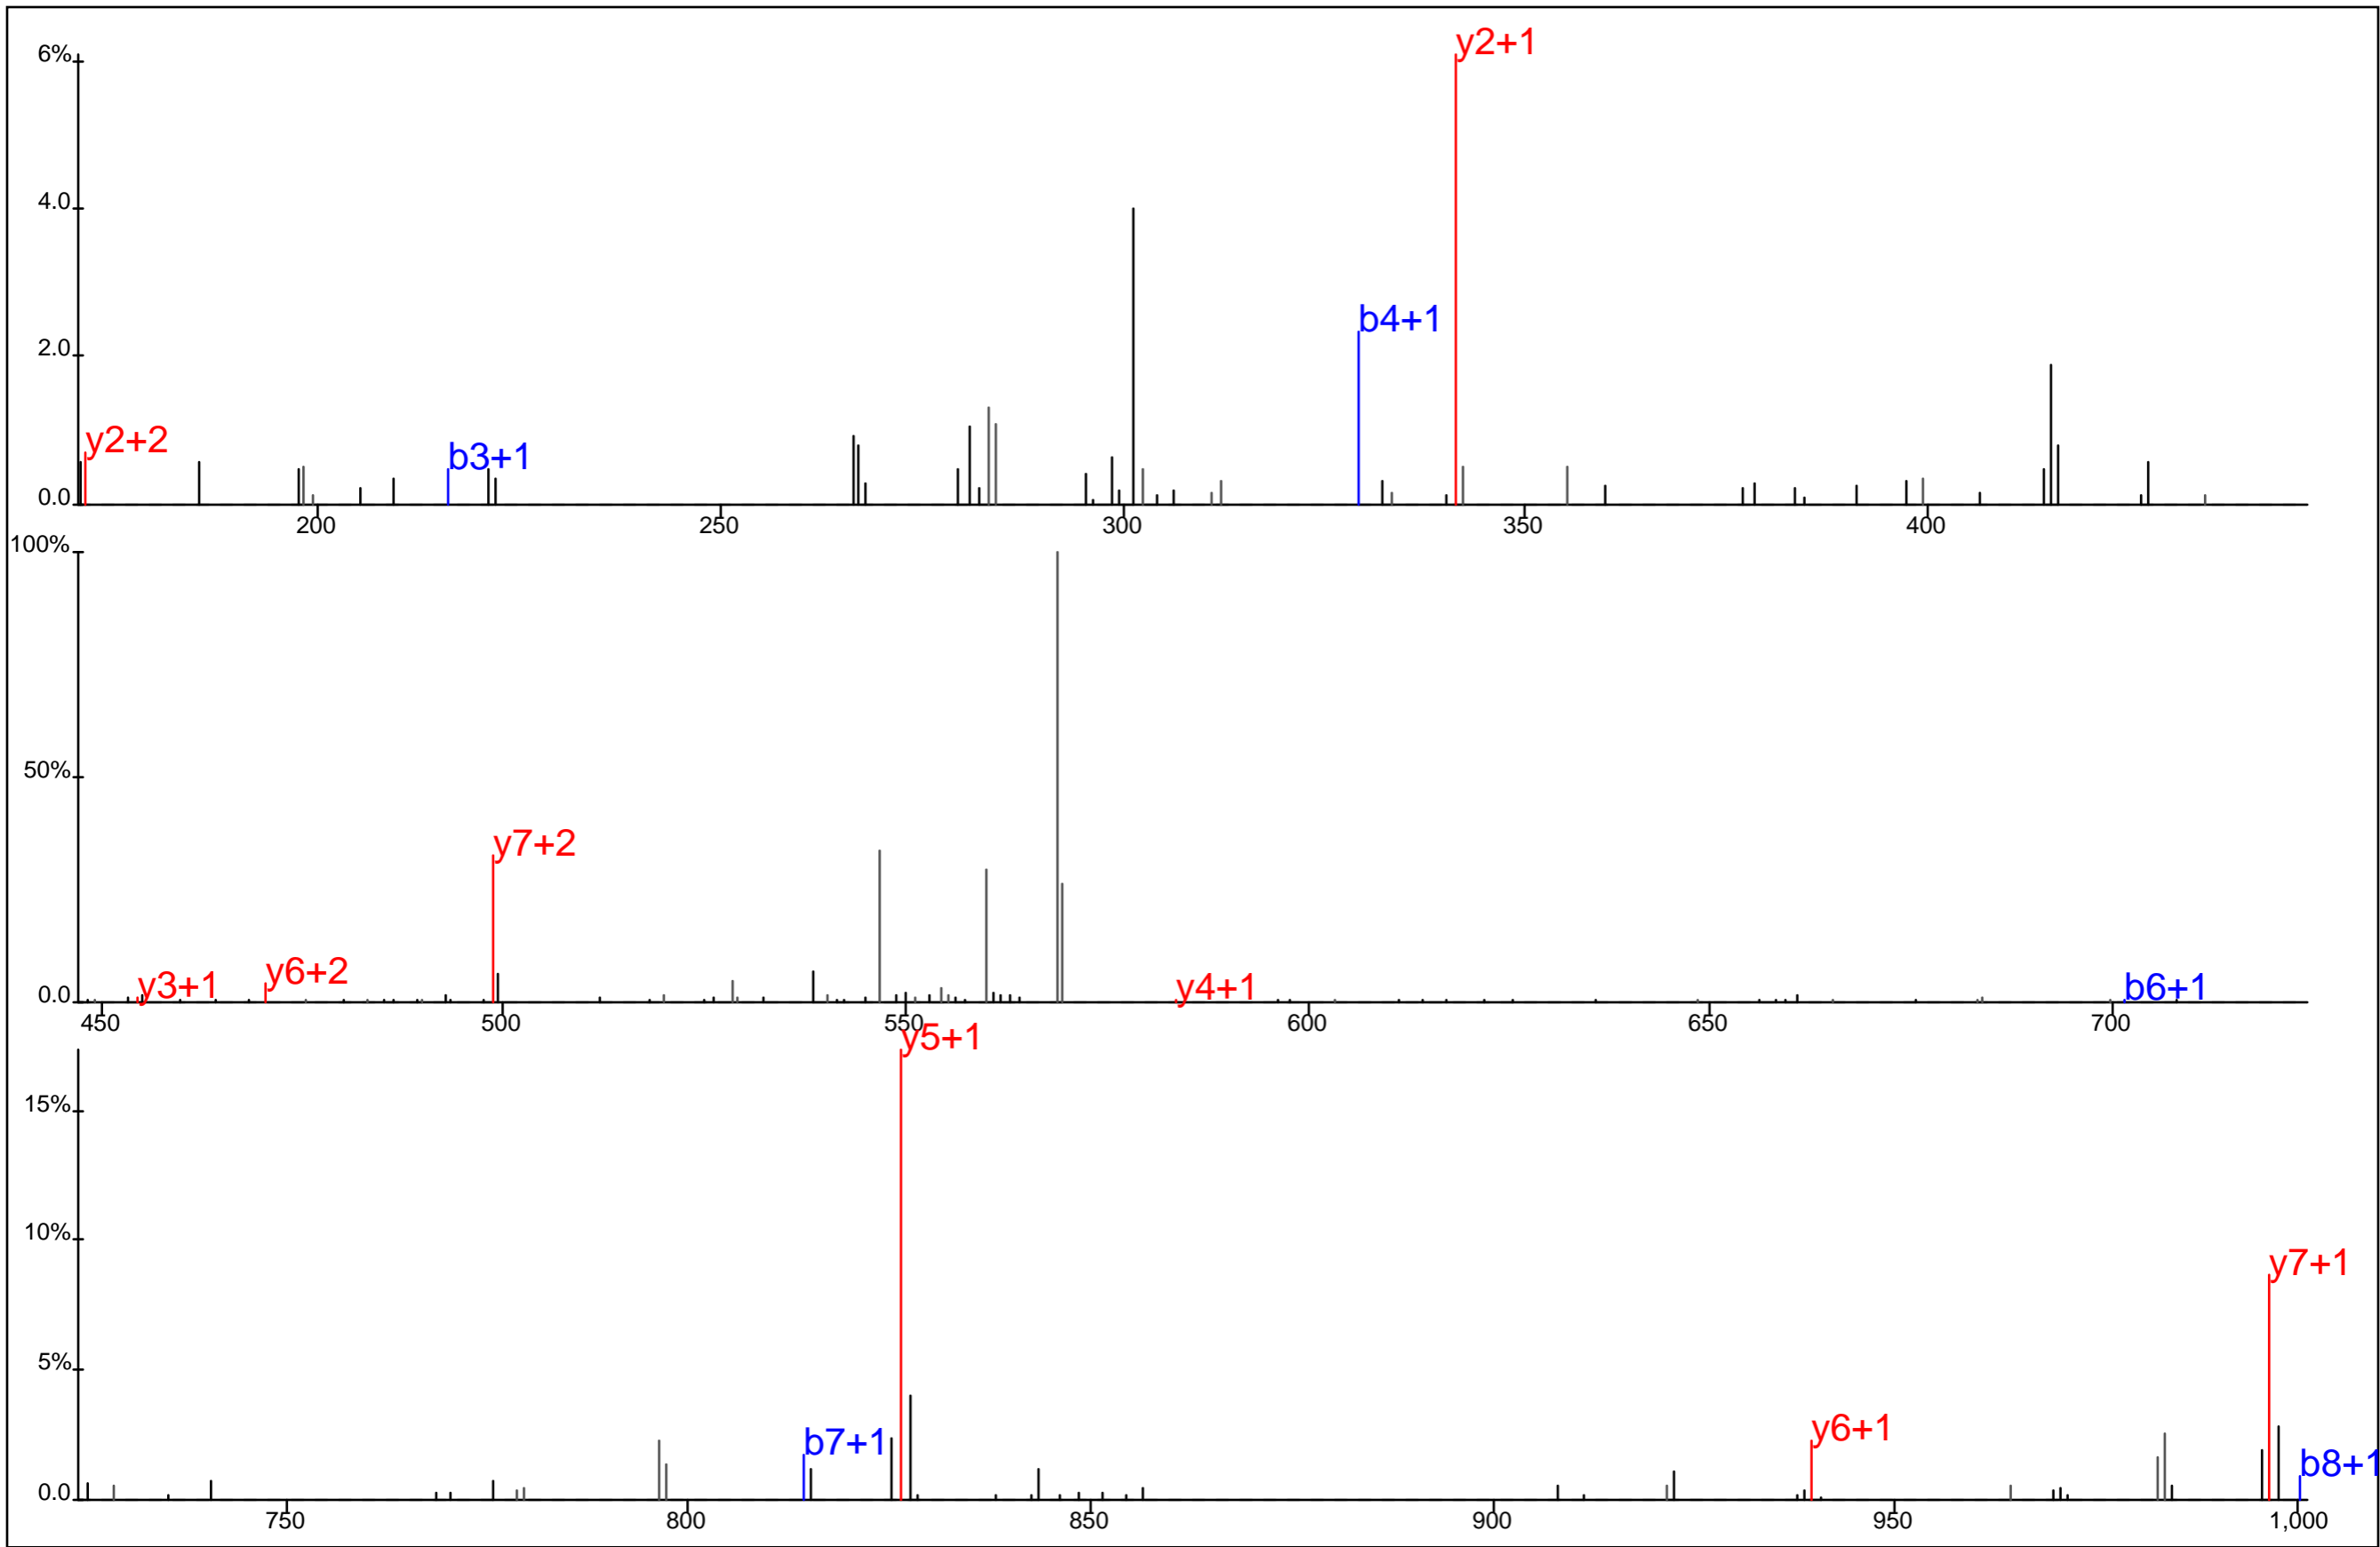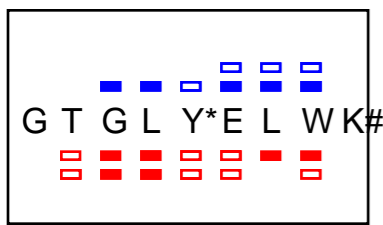

Protein Name: Elongation protein 3  
 gi Accession: 23510283  
 Precursor Mass: 577.7745+2  
 Delta Mass: 3.792 ppm  
 XCorr: 23.92

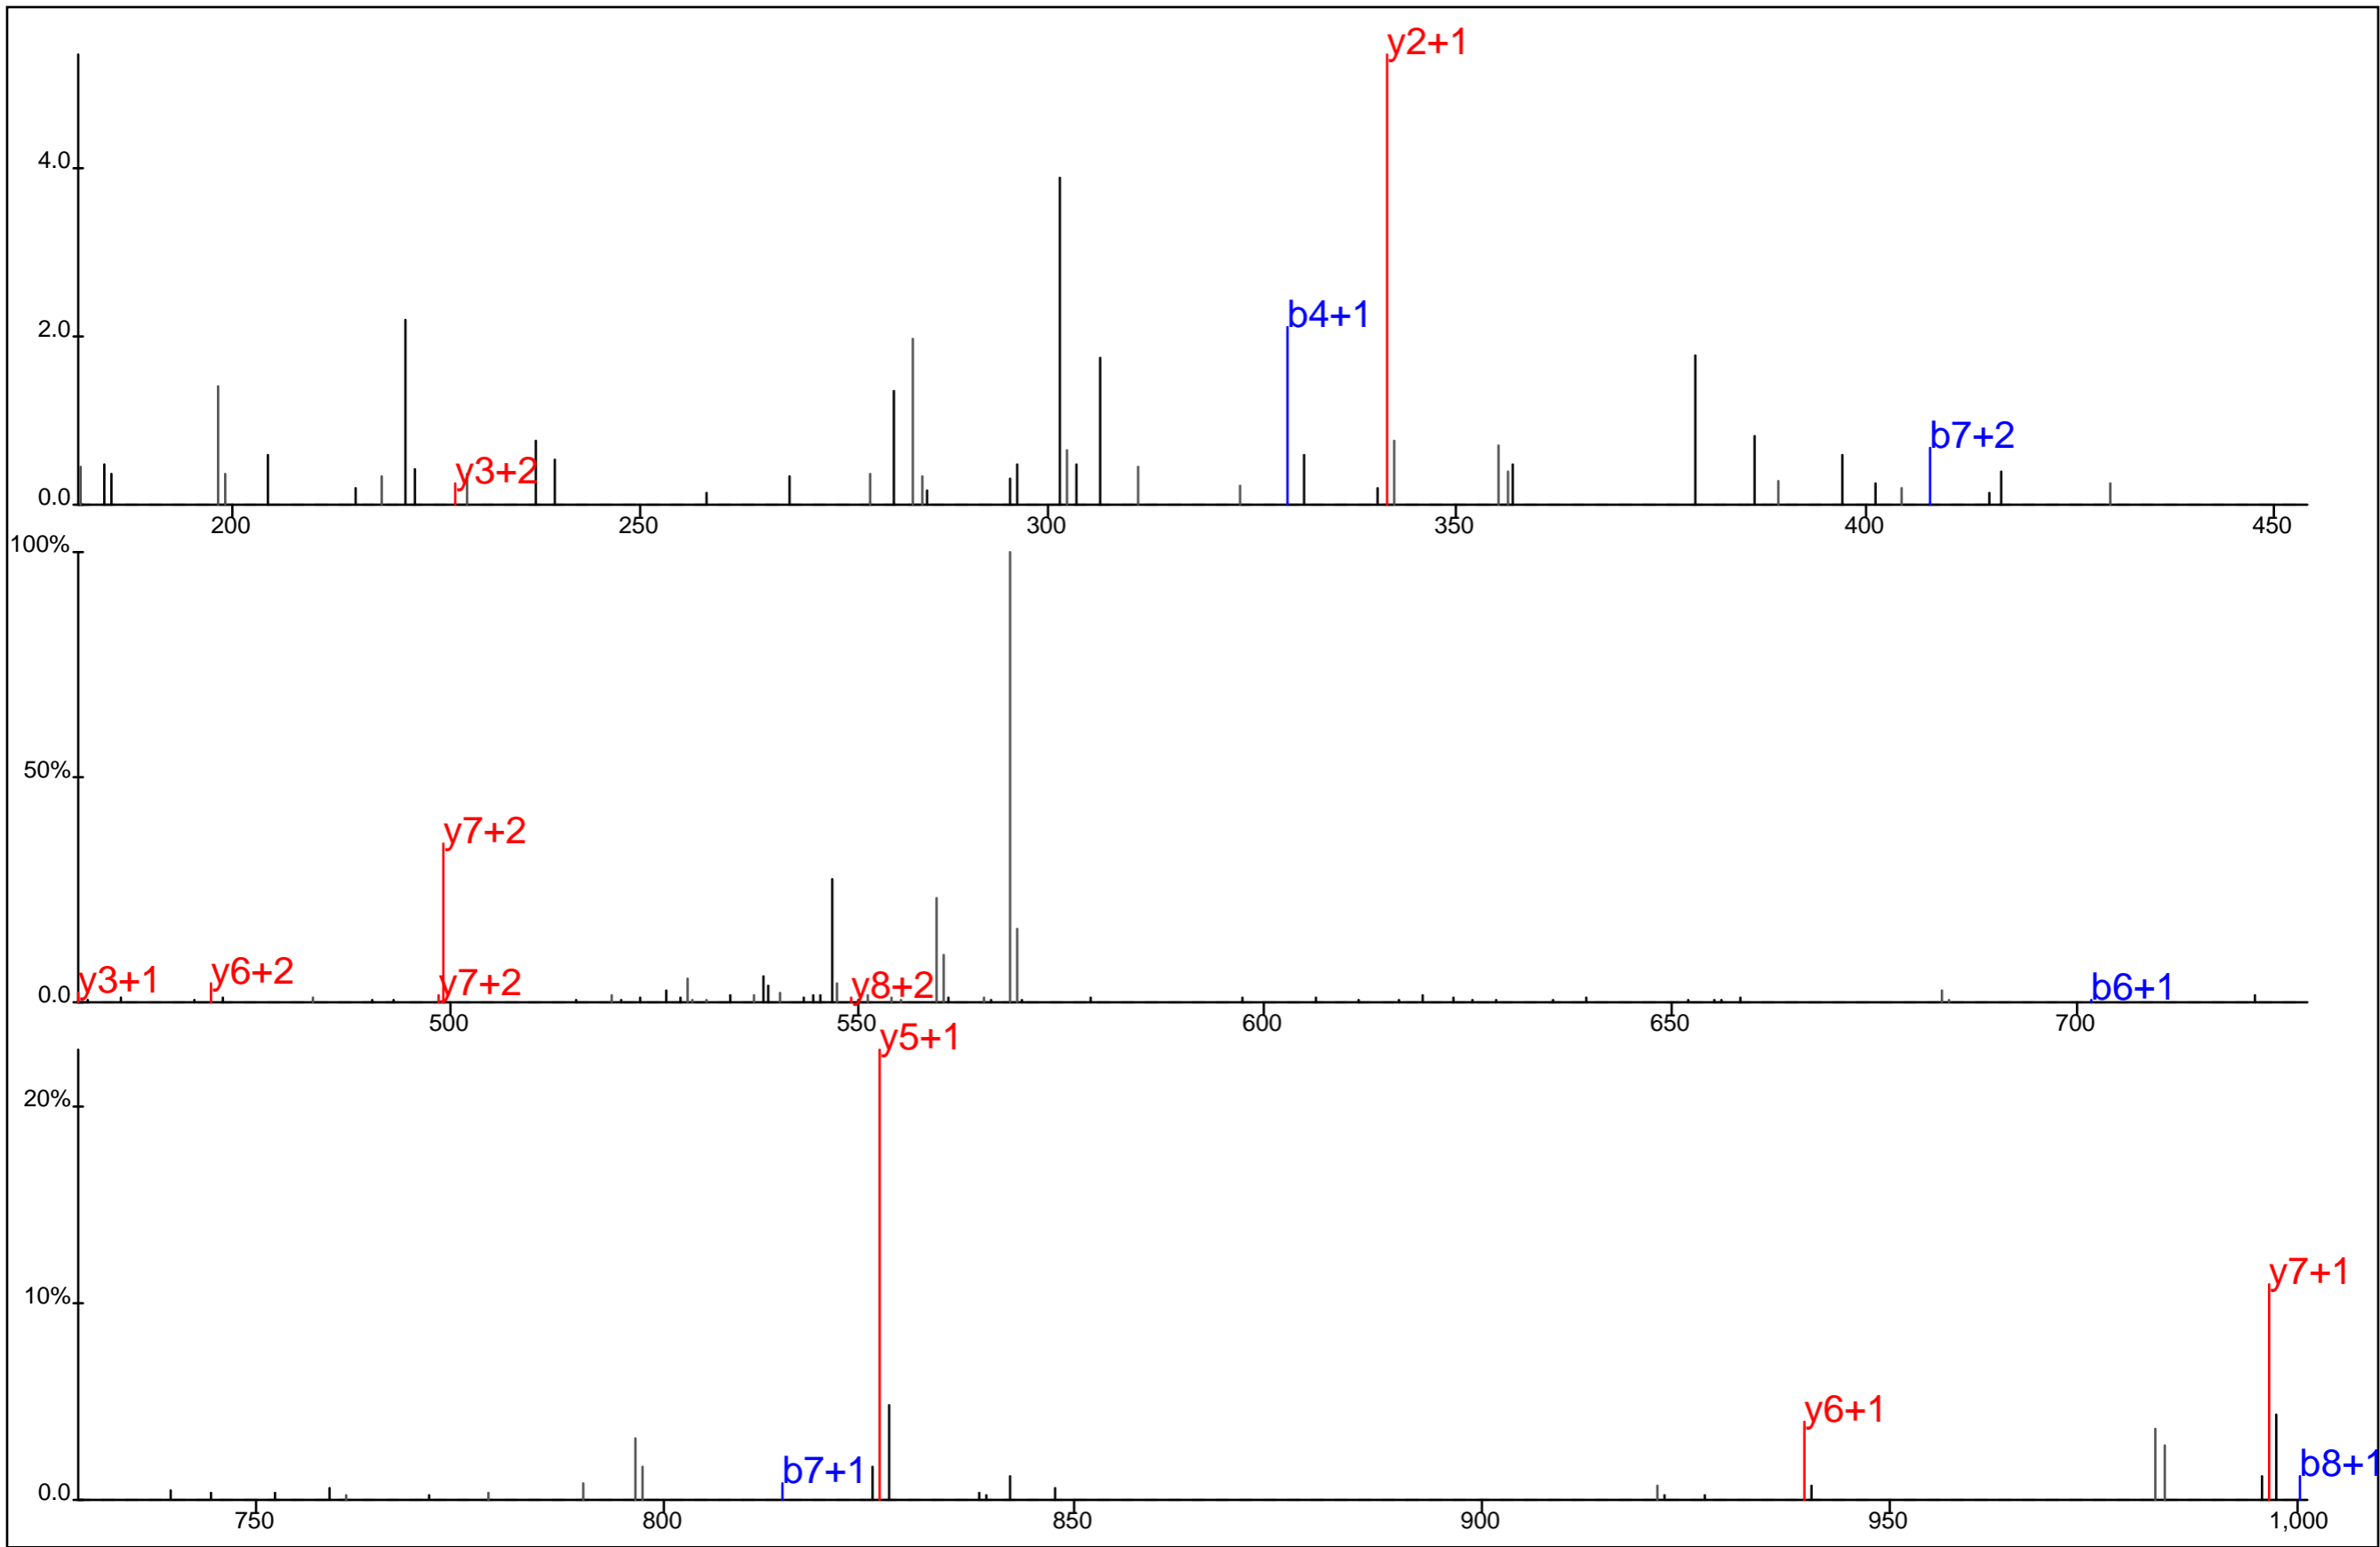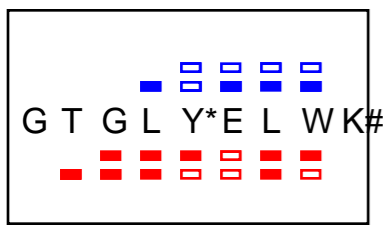

Protein Name: Elongation protein 3  
 gi Accession: 23510283  
 Precursor Mass: 577.7755+2  
 Delta Mass: 5.594 ppm  
 XCorr: 27.11

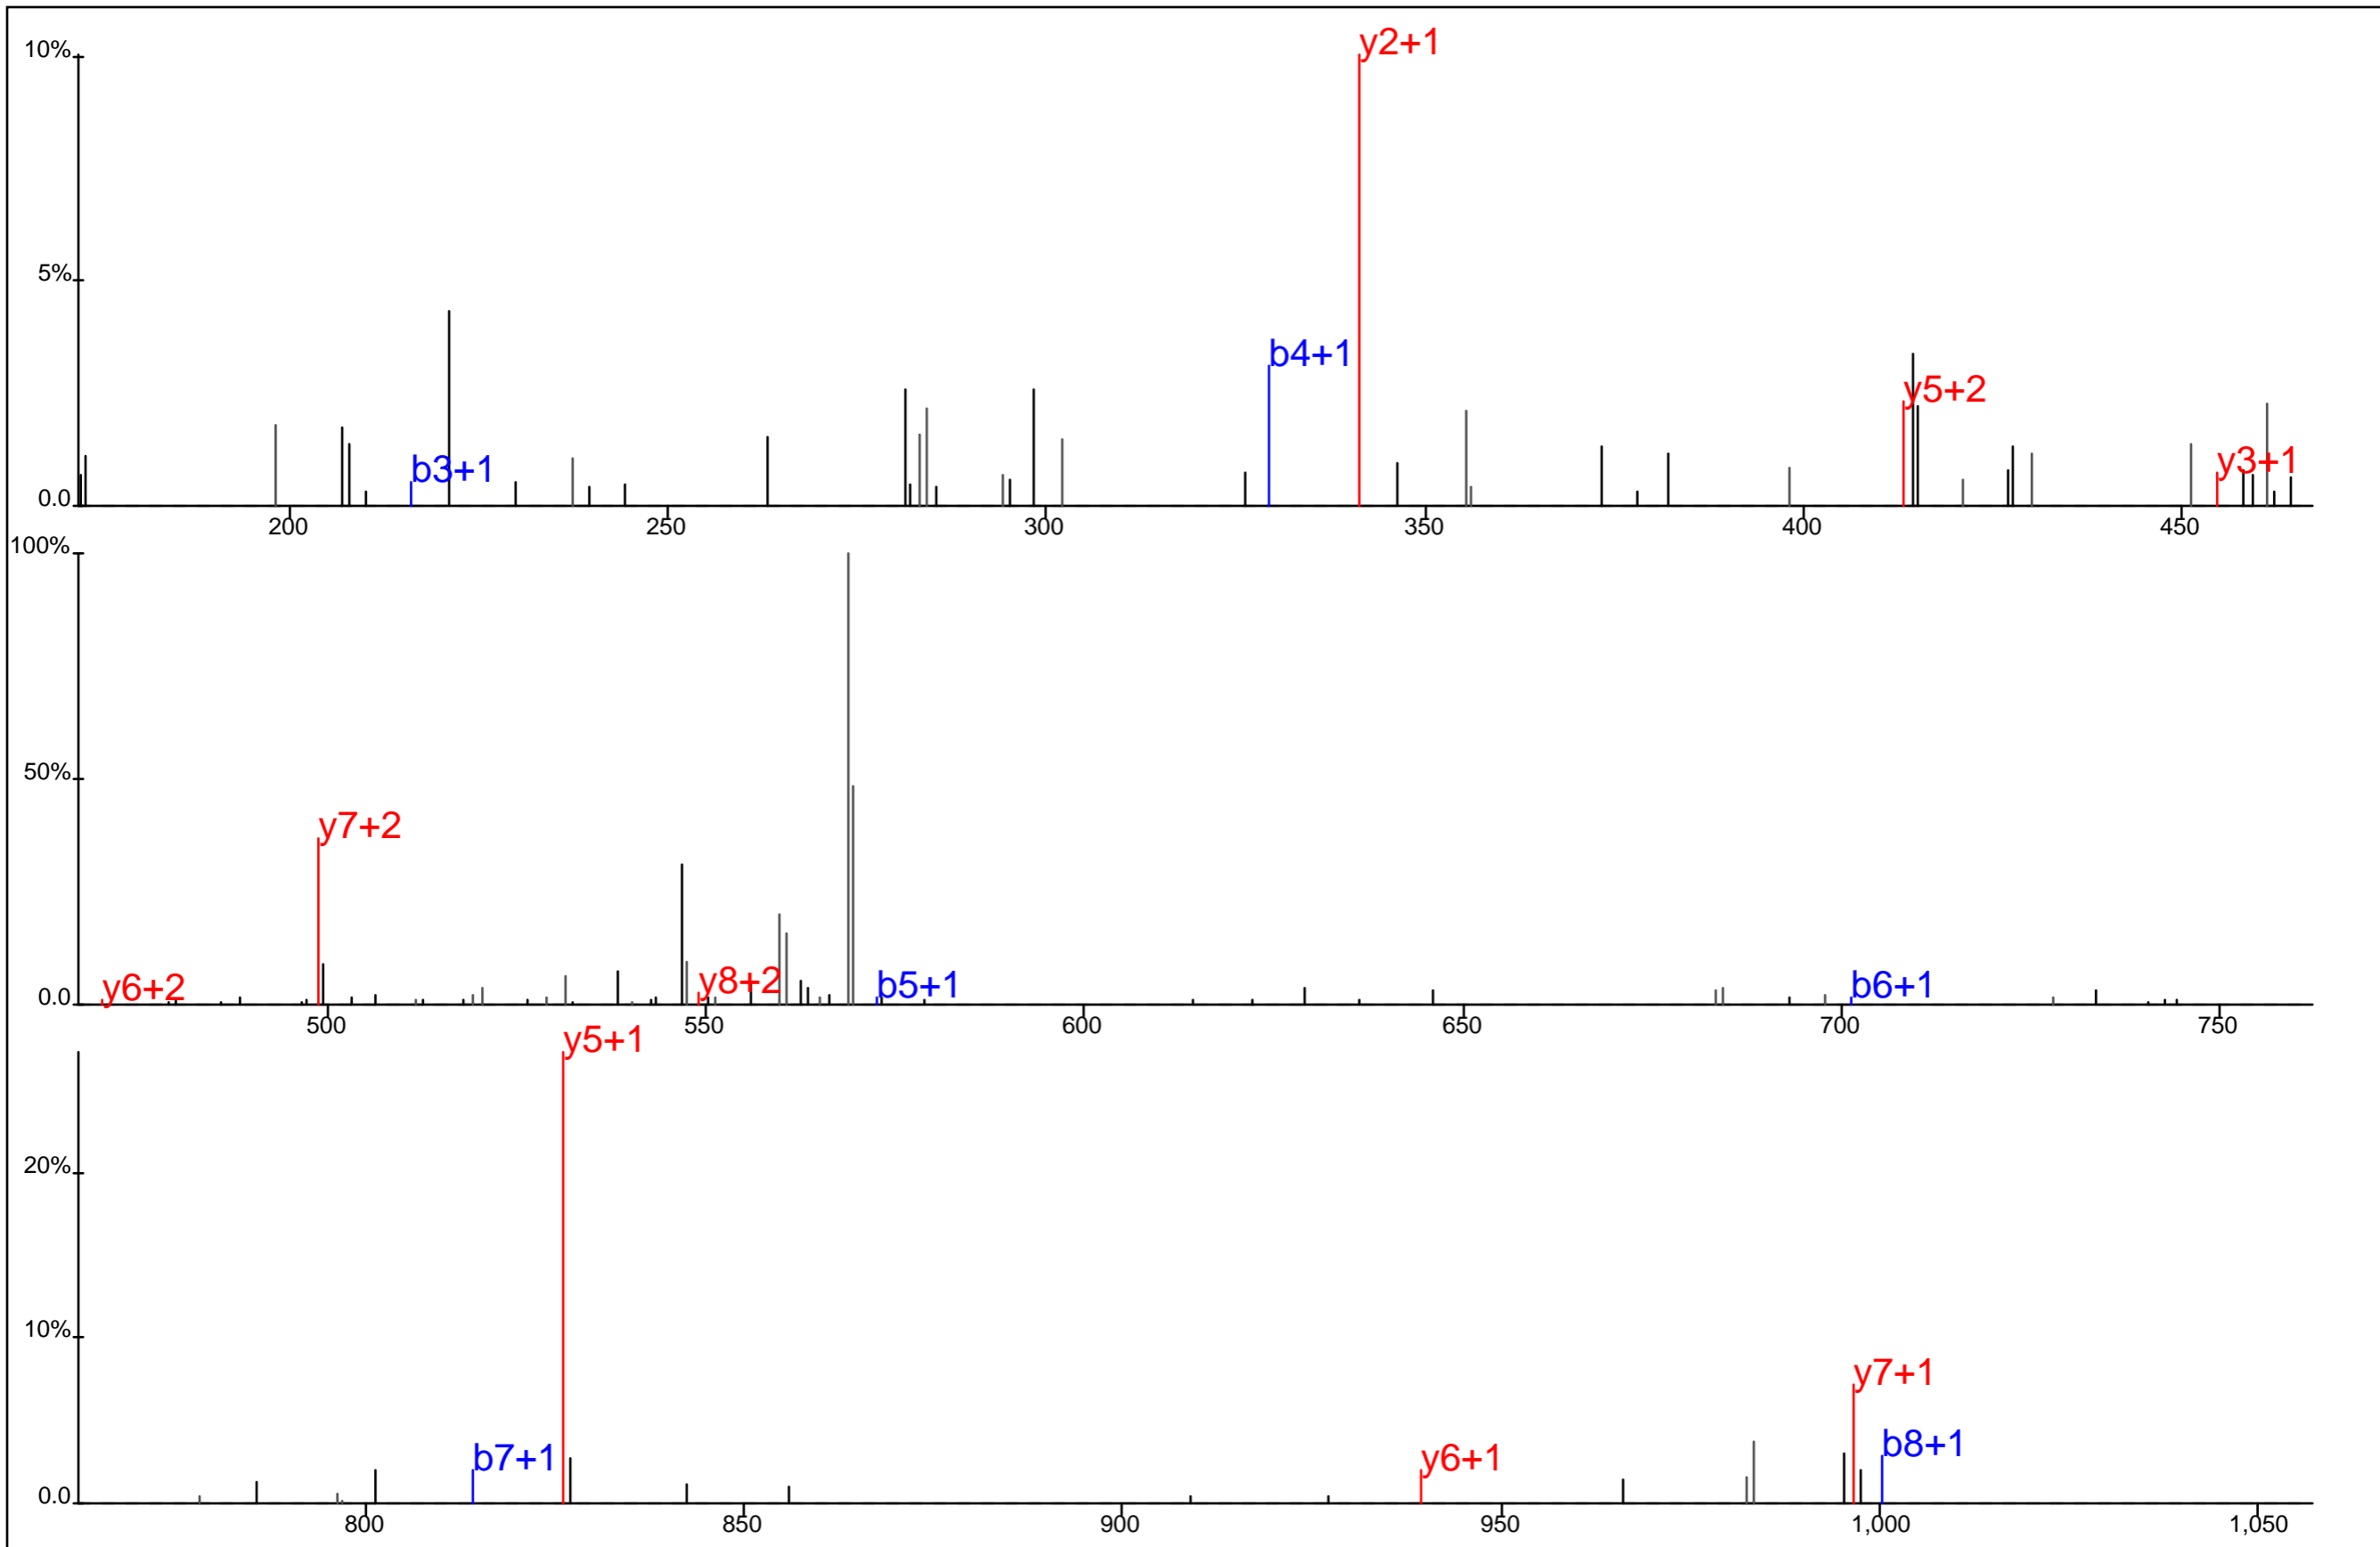

■ ■ ■ ■ ■ ■  
 G T G L Y\* E L W K#  
 ■ ■ ■ ■ ■ ■ ■ ■

Protein Name: Elongation protein 3  
 gi Accession: 23510283  
 Precursor Mass: 577.7762+2  
 Delta Mass: 6.858 ppm  
 XCorr: 22.08

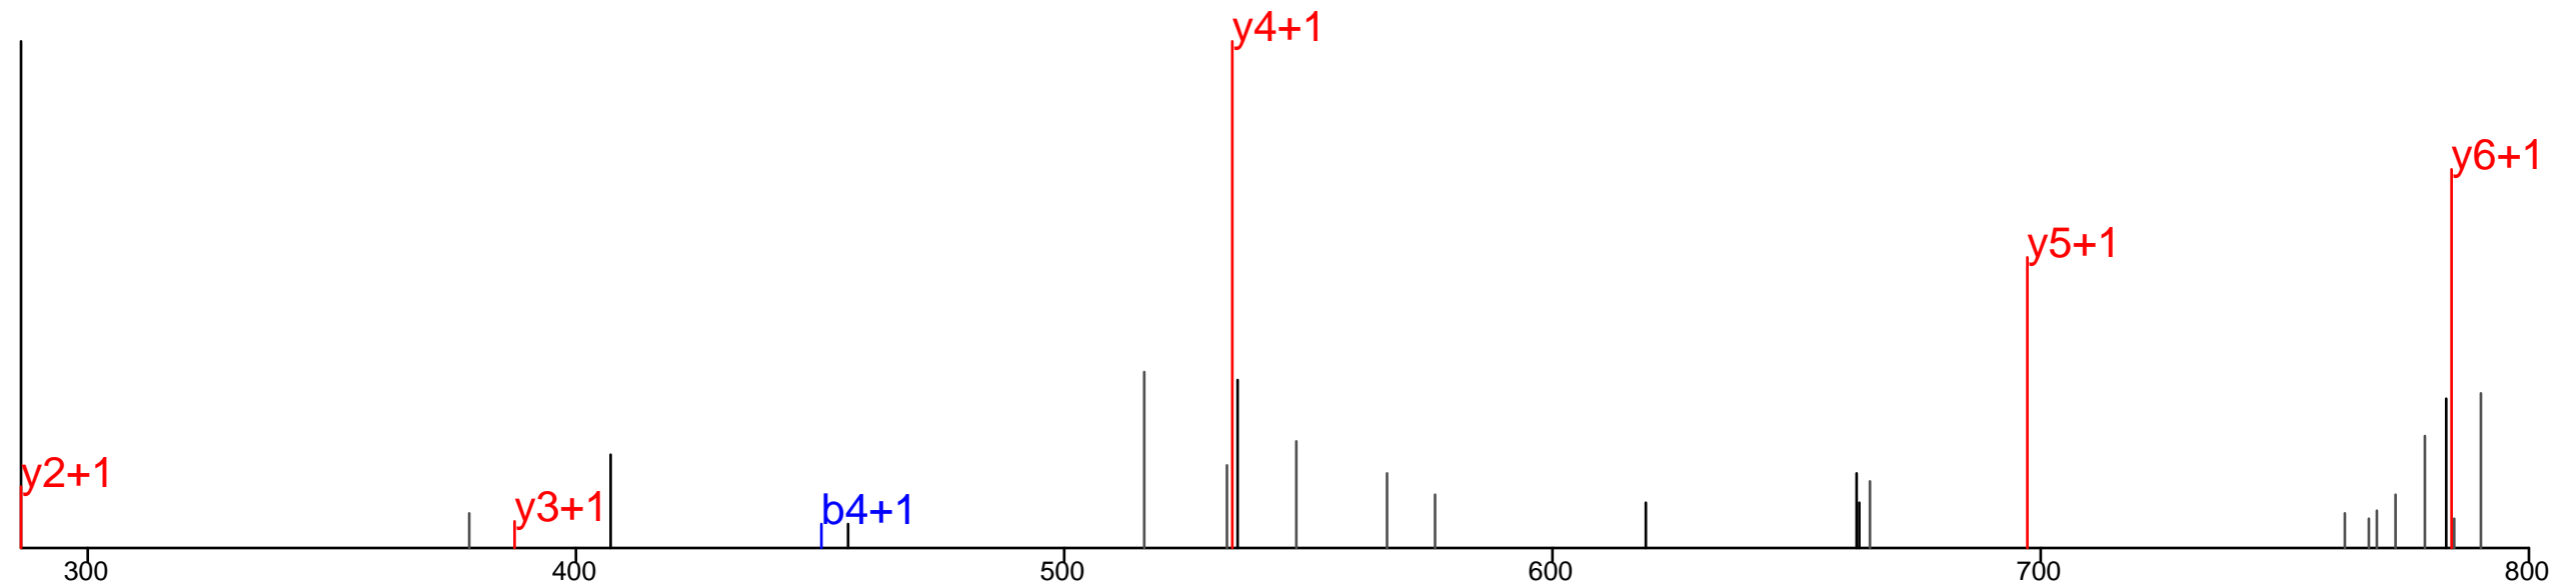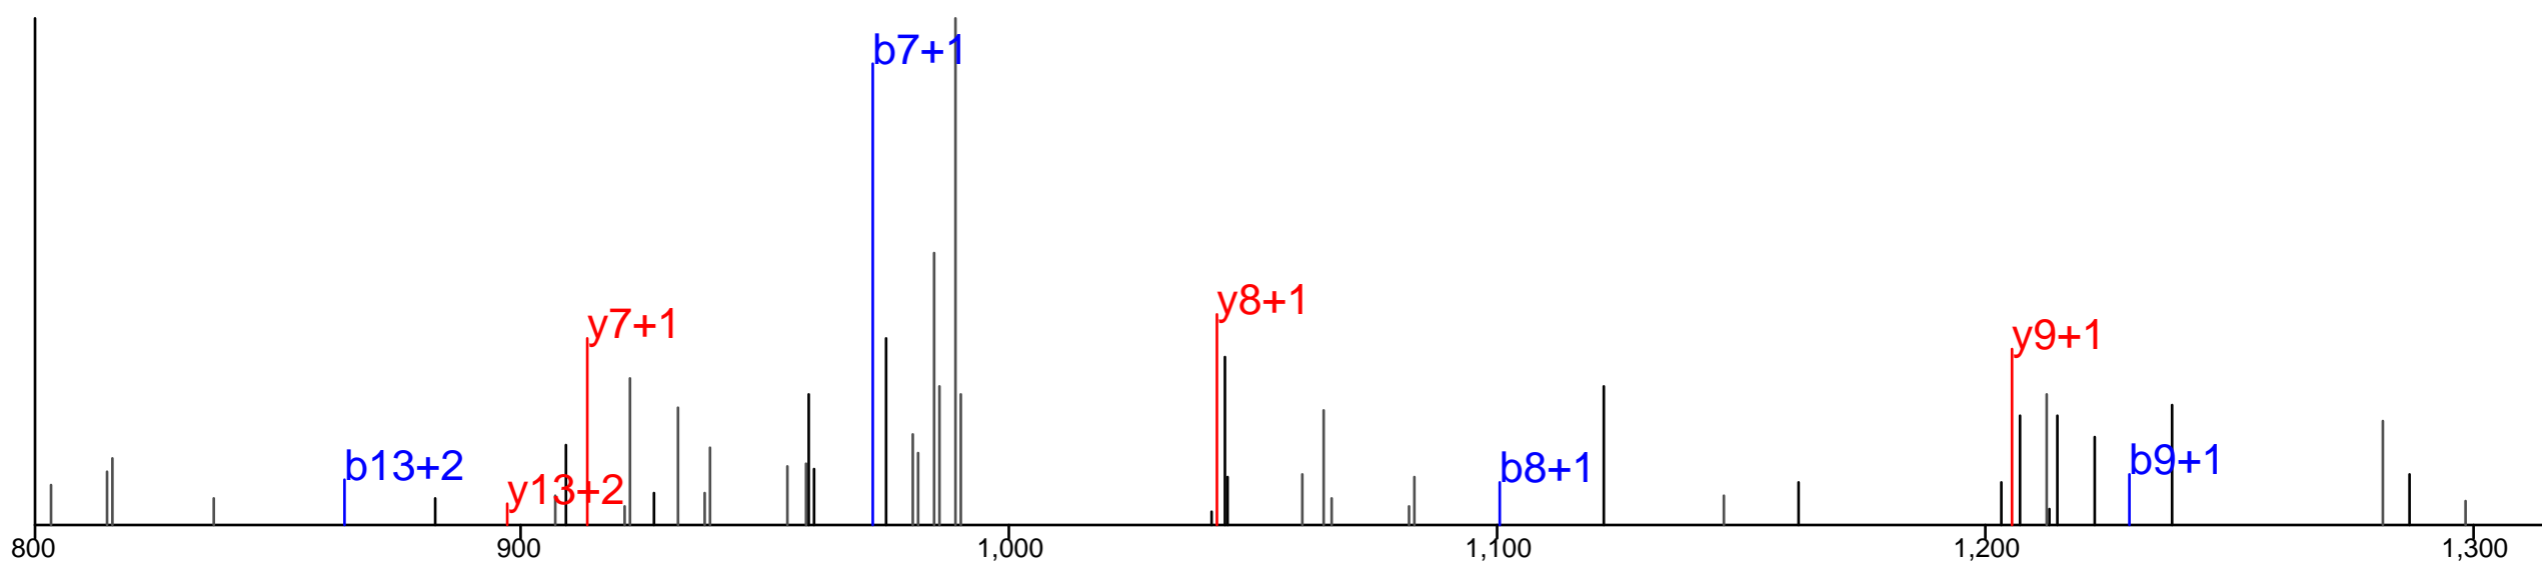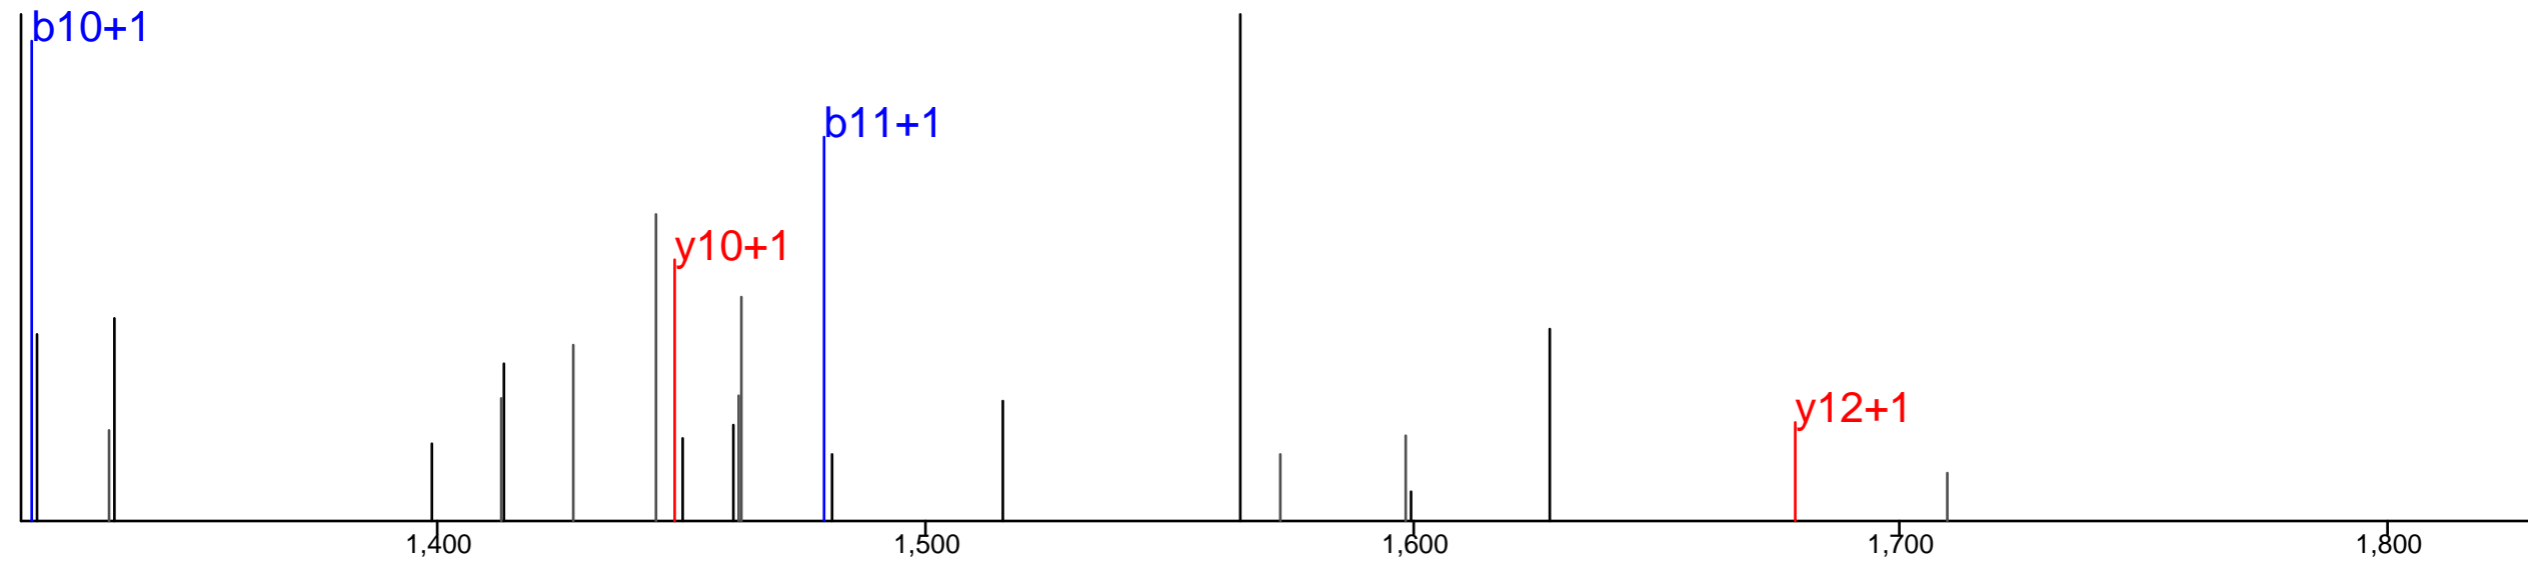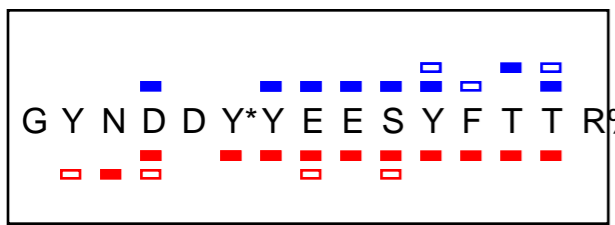

Protein Name: Emerin  
 gi Accession: 4557553  
 Precursor Mass: 1,006.8837+2  
 Delta Mass: 6.994 ppm  
 XCorr: 44.28

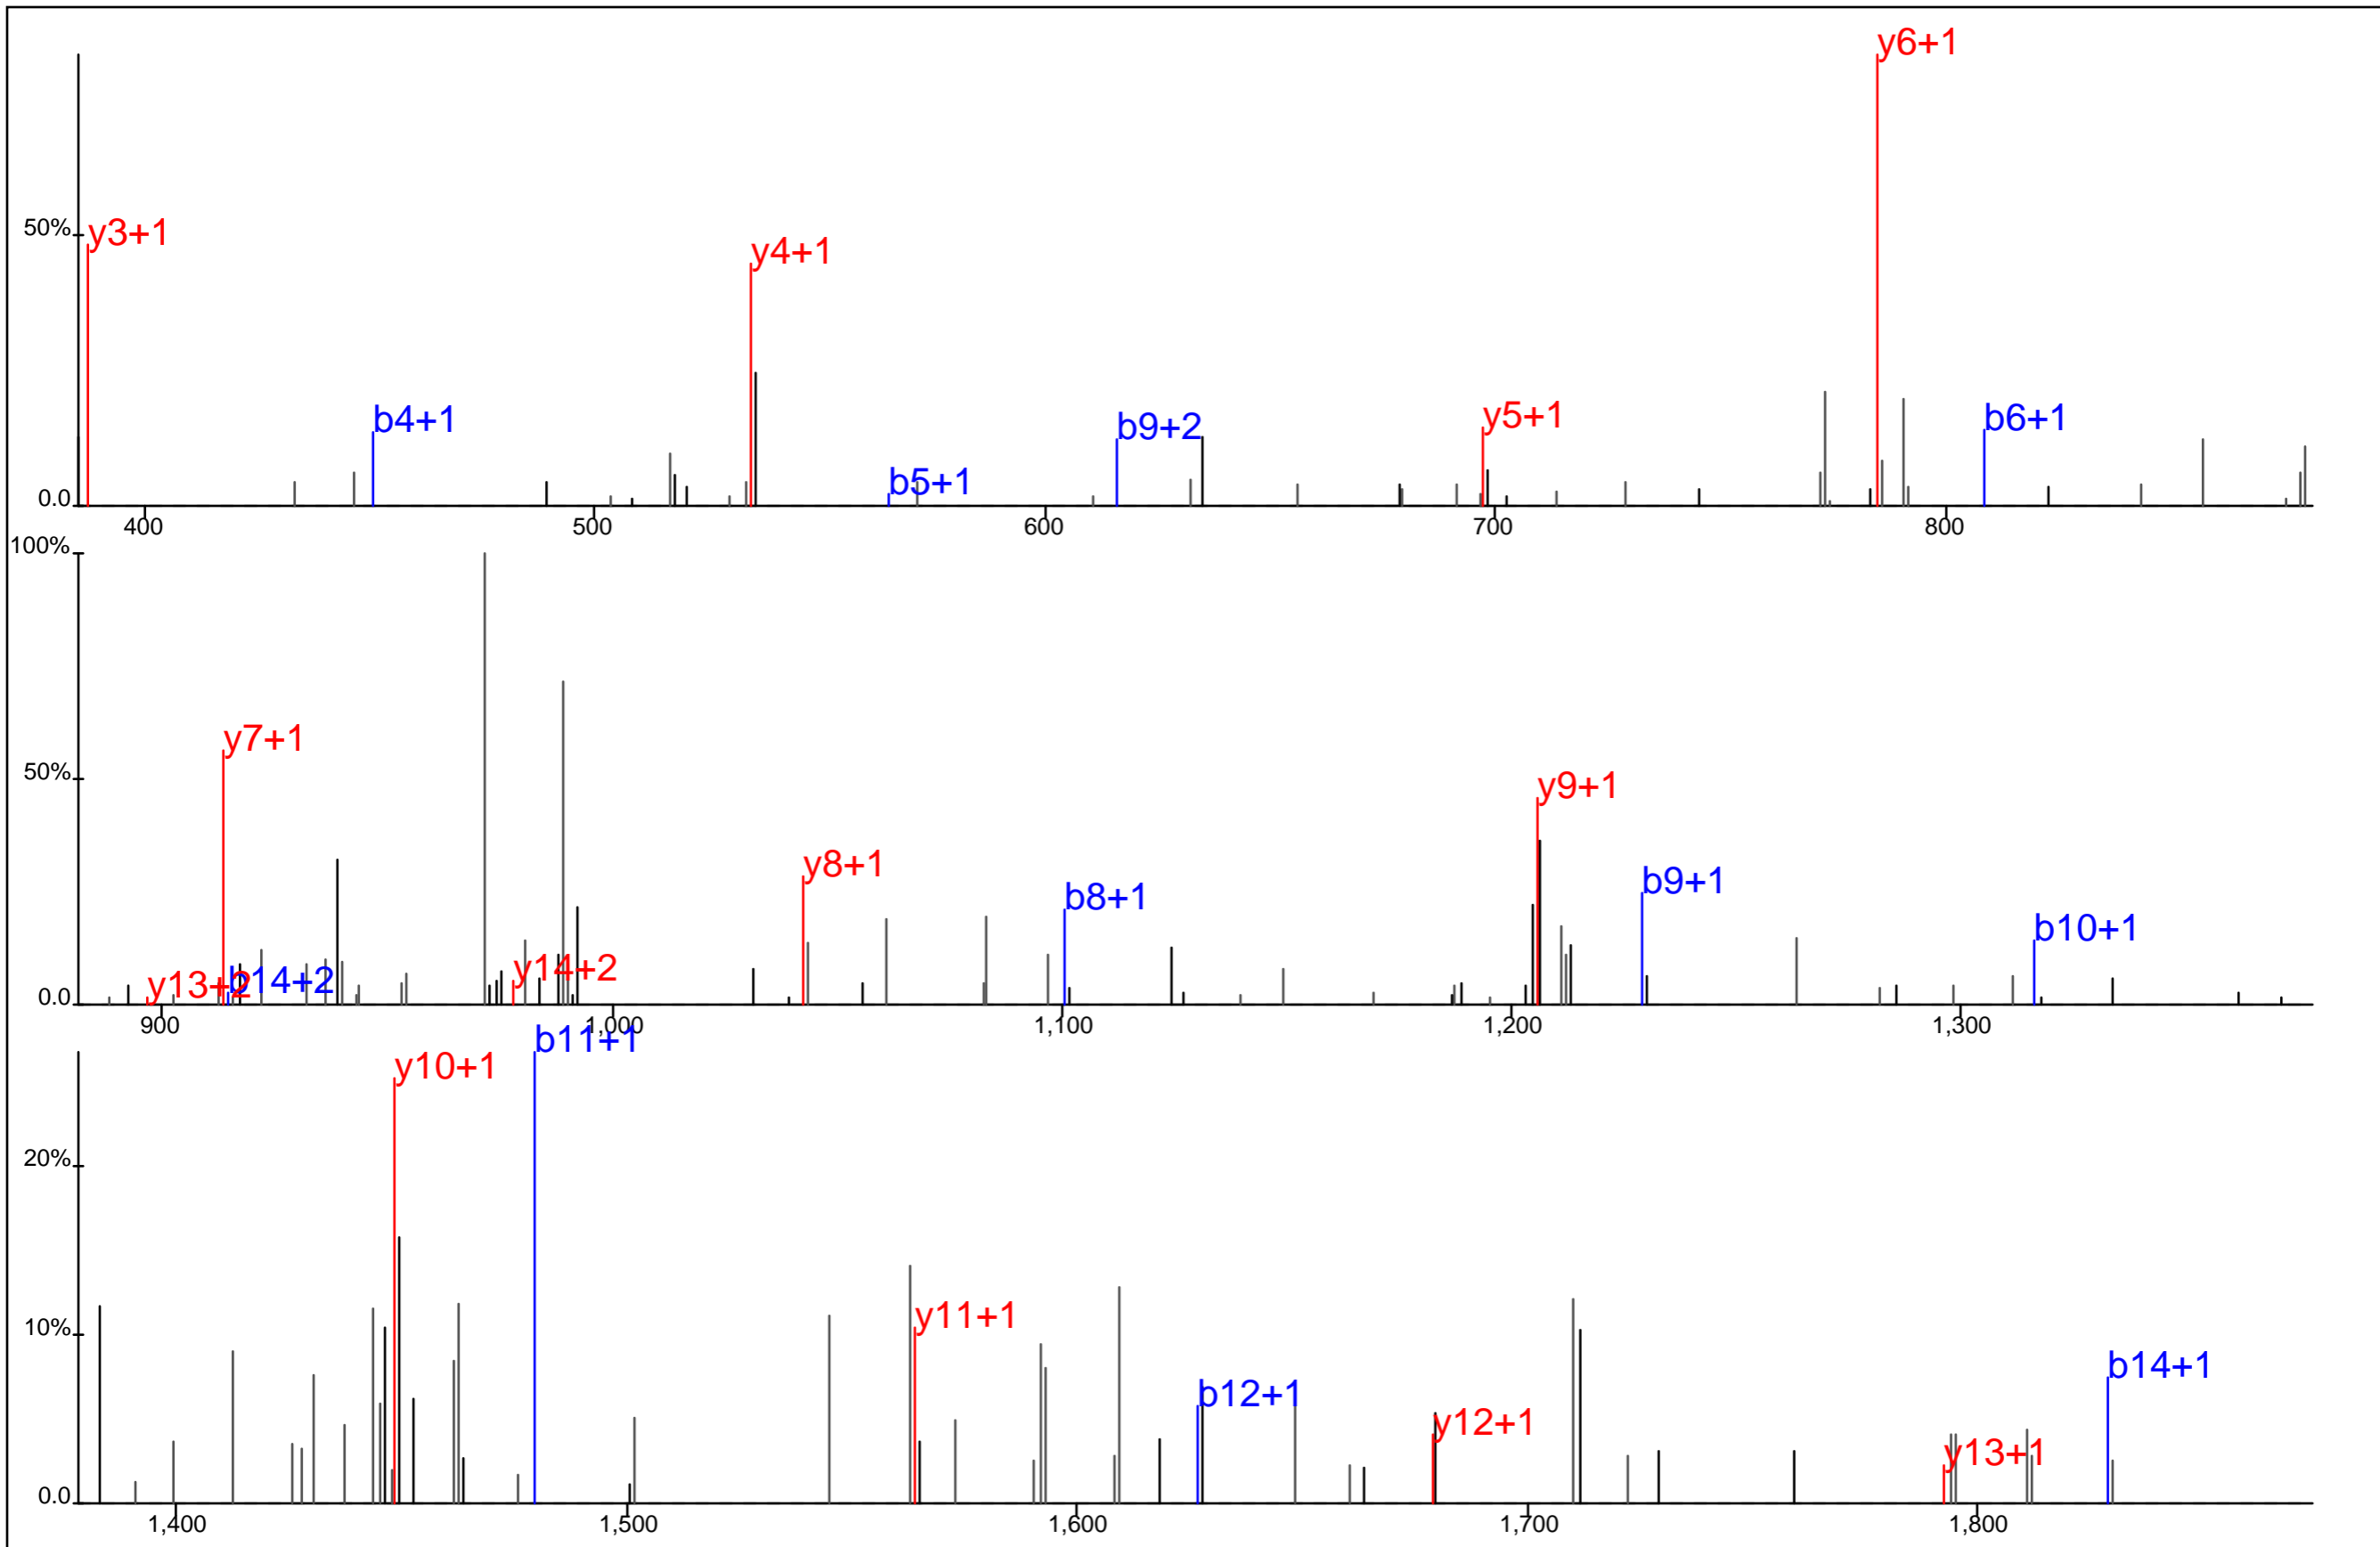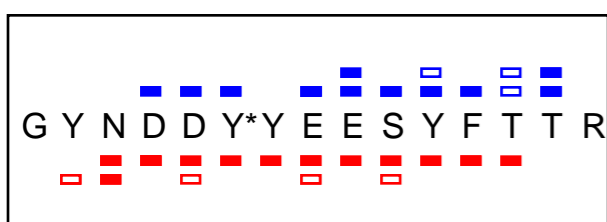

Protein Name: Emerin  
 gi Accession: 4557553  
 Precursor Mass: 1,006.8843+2  
 Delta Mass: 7.601 ppm  
 XCorr: 44.07



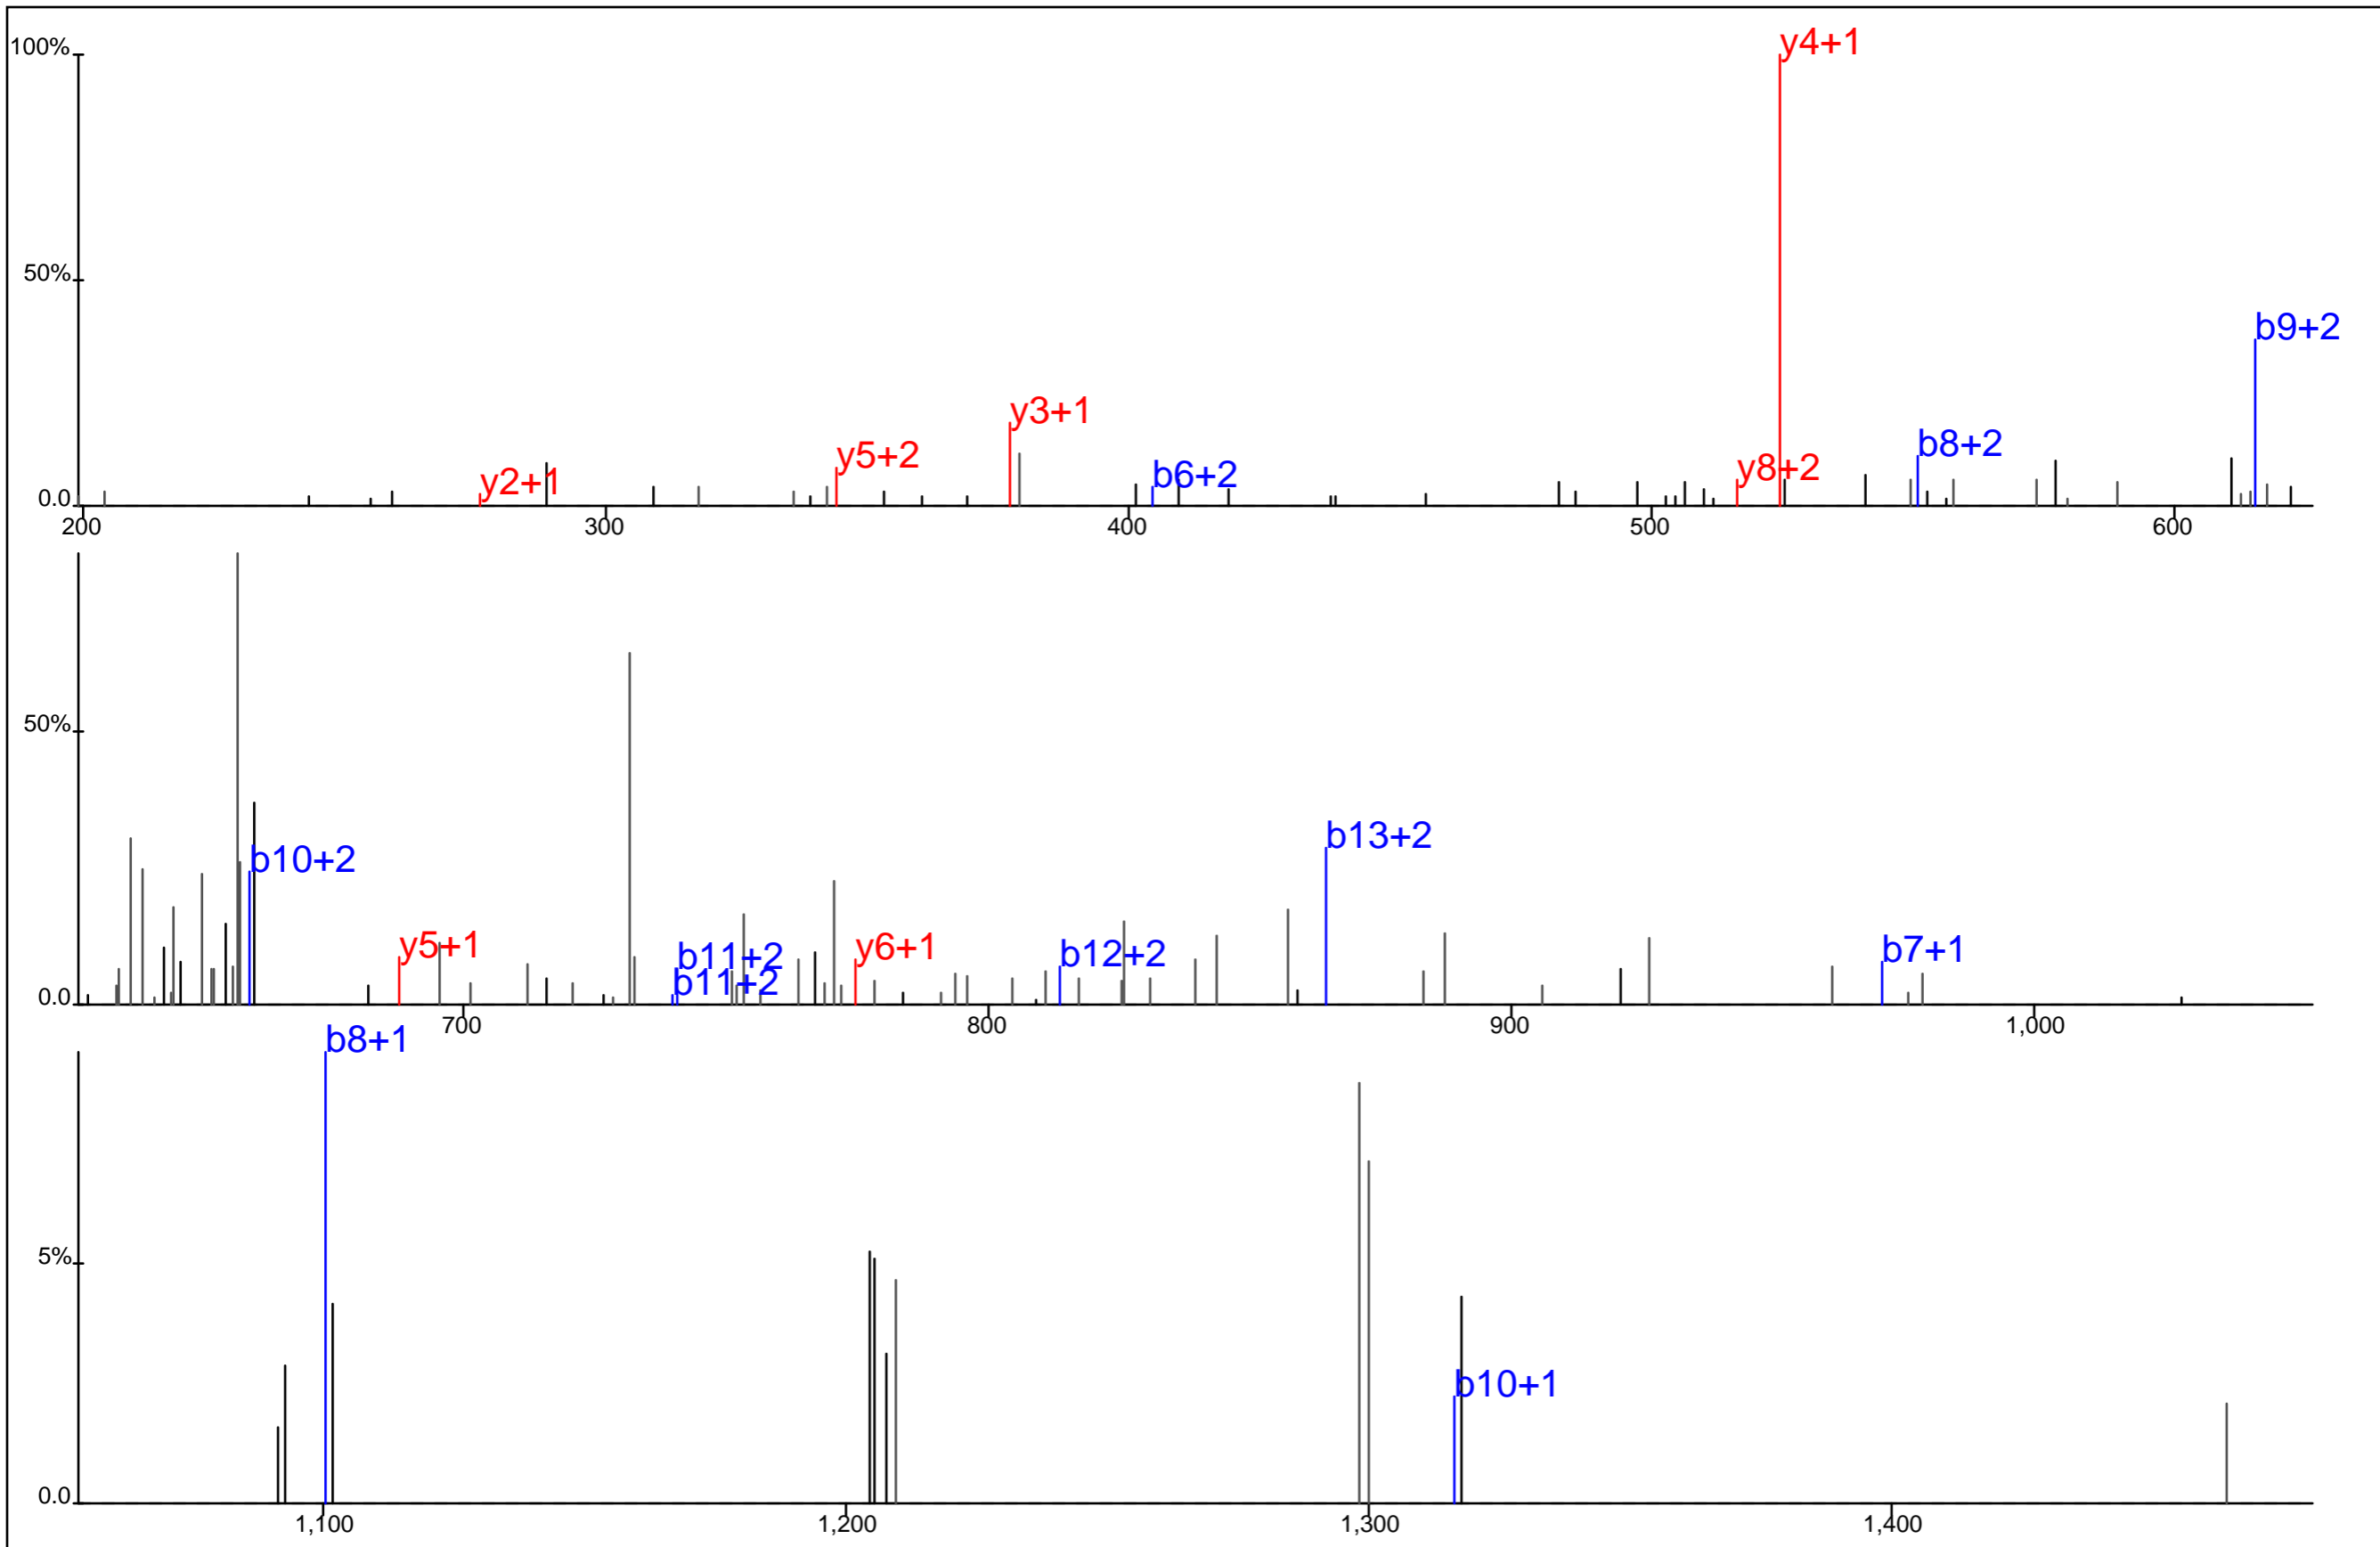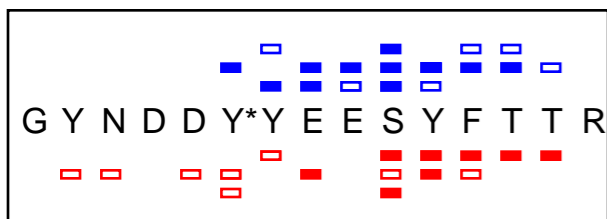

Protein Name: Emerin  
 gi Accession: 4557553  
 Precursor Mass: 668.2517+3  
 Delta Mass: 1.367 ppm  
 XCorr: 12.6

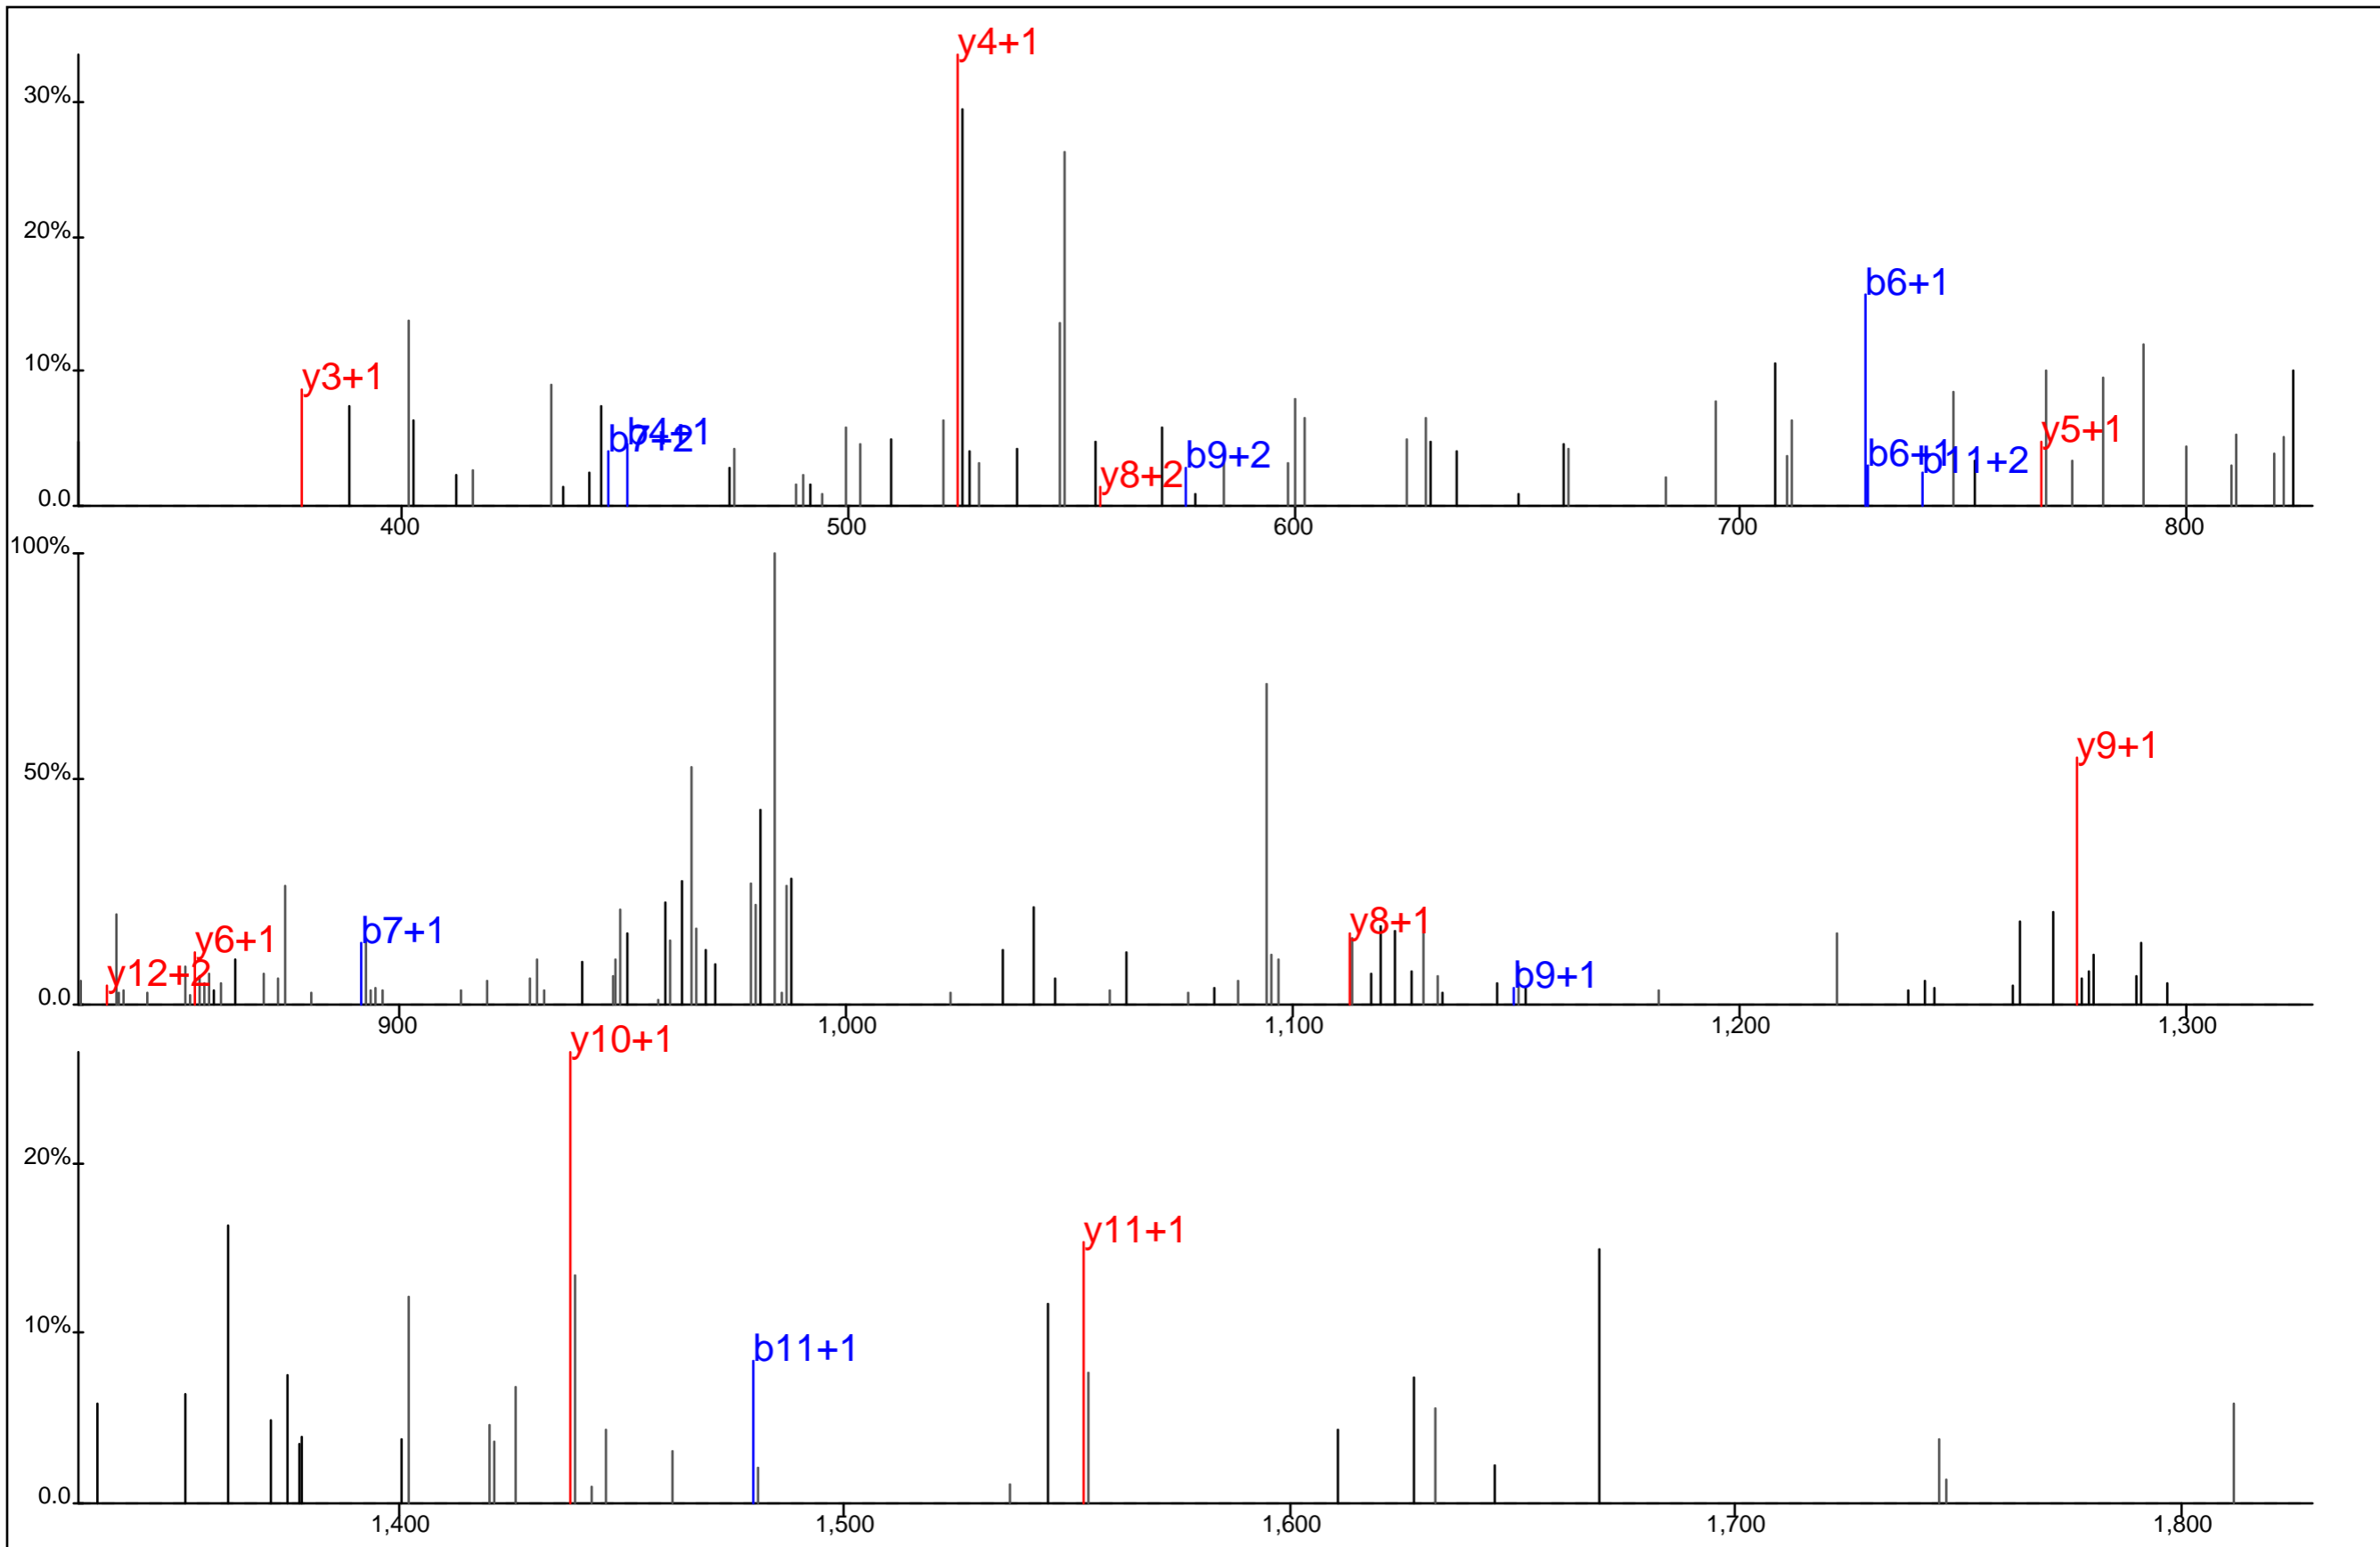

G Y N D D Y Y E E S Y\* F T T R  
□ □ □ □ □ □ □ □ □ □ □ □ □ □ □ □ □

Protein Name: Emerin  
 gi Accession: 4557553  
 Precursor Mass: 1,001.8753+2  
 Delta Mass: 2.745 ppm  
 XCorr: 14.62

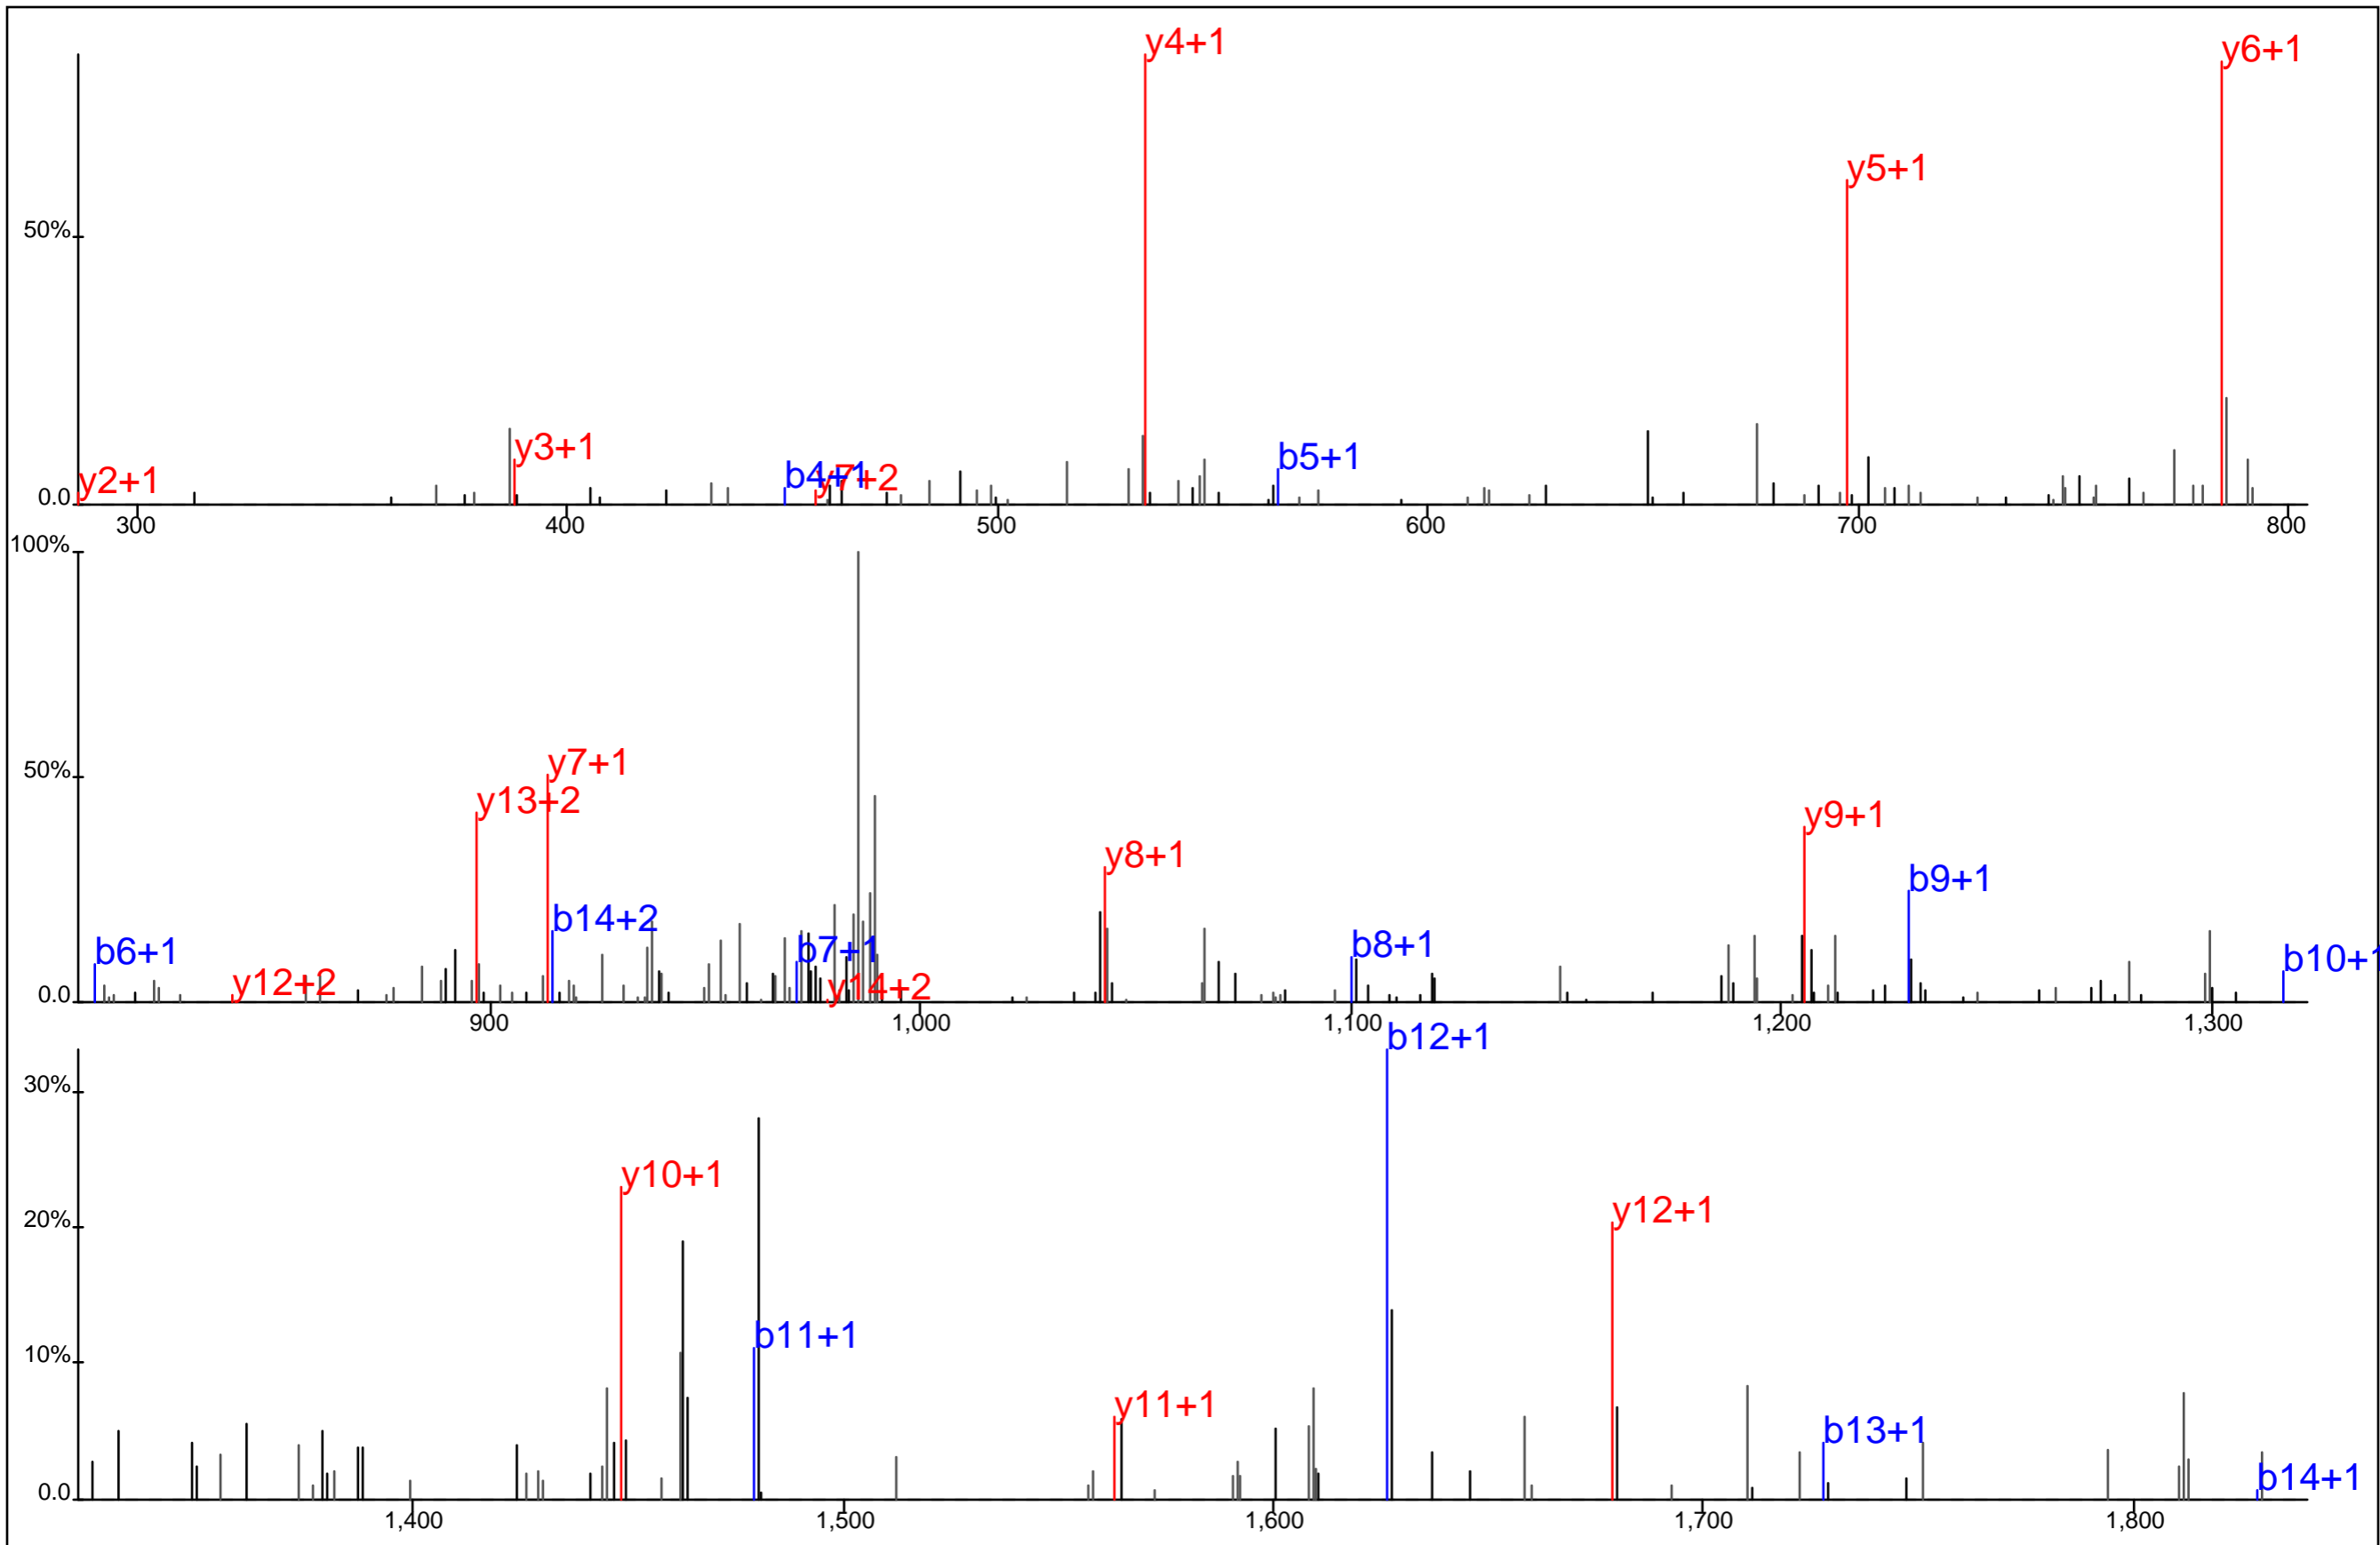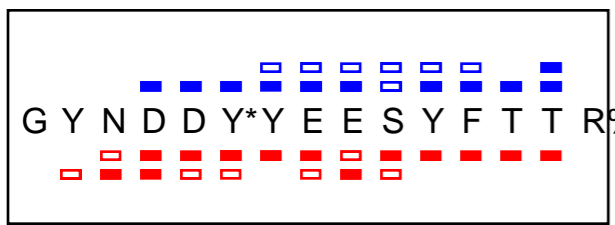

Protein Name: Emerin  
 gi Accession: 4557553  
 Precursor Mass: 1,006.8769+2  
 Delta Mass: 0.203 ppm  
 XCorr: 79.39

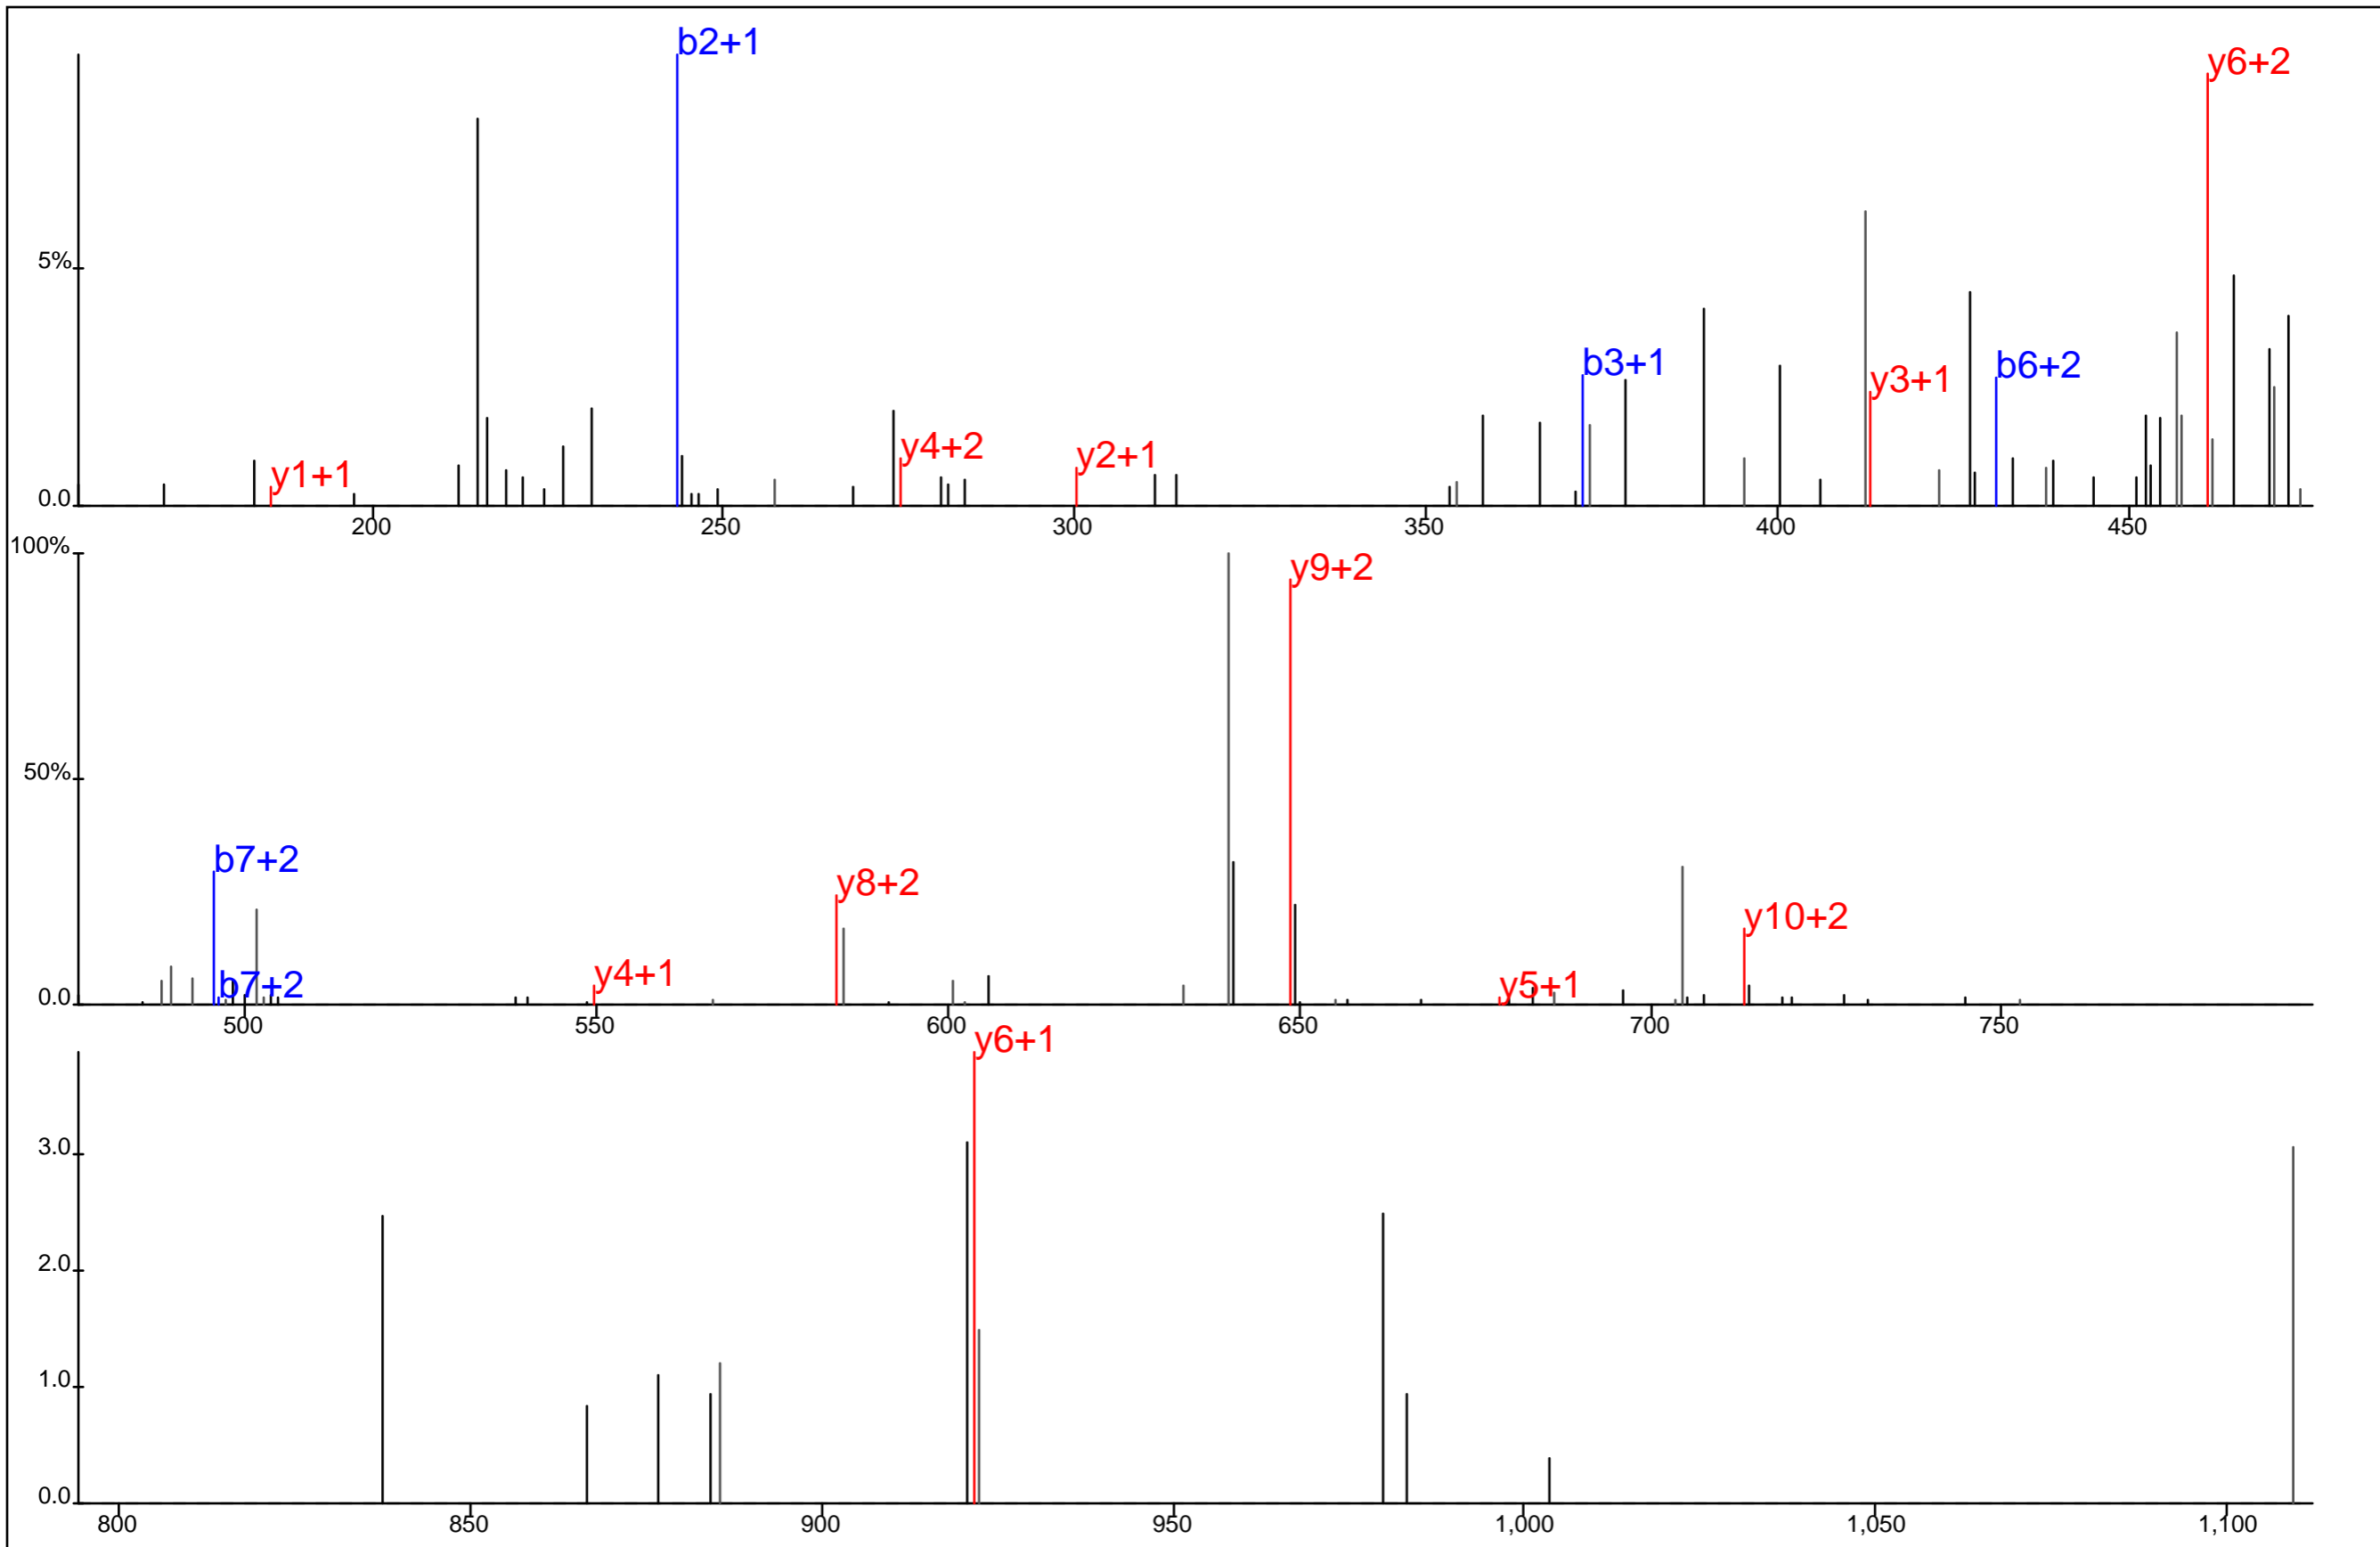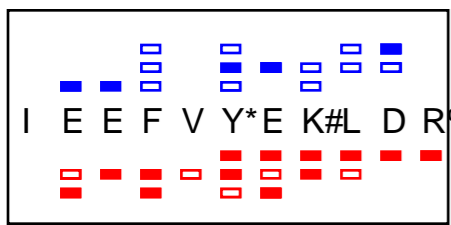

Protein Name: Endophilin B1  
 gi Accession: 8118530  
 Precursor Mass: 513.5831+3  
 Delta Mass: 5.946 ppm  
 XCorr: 16.11

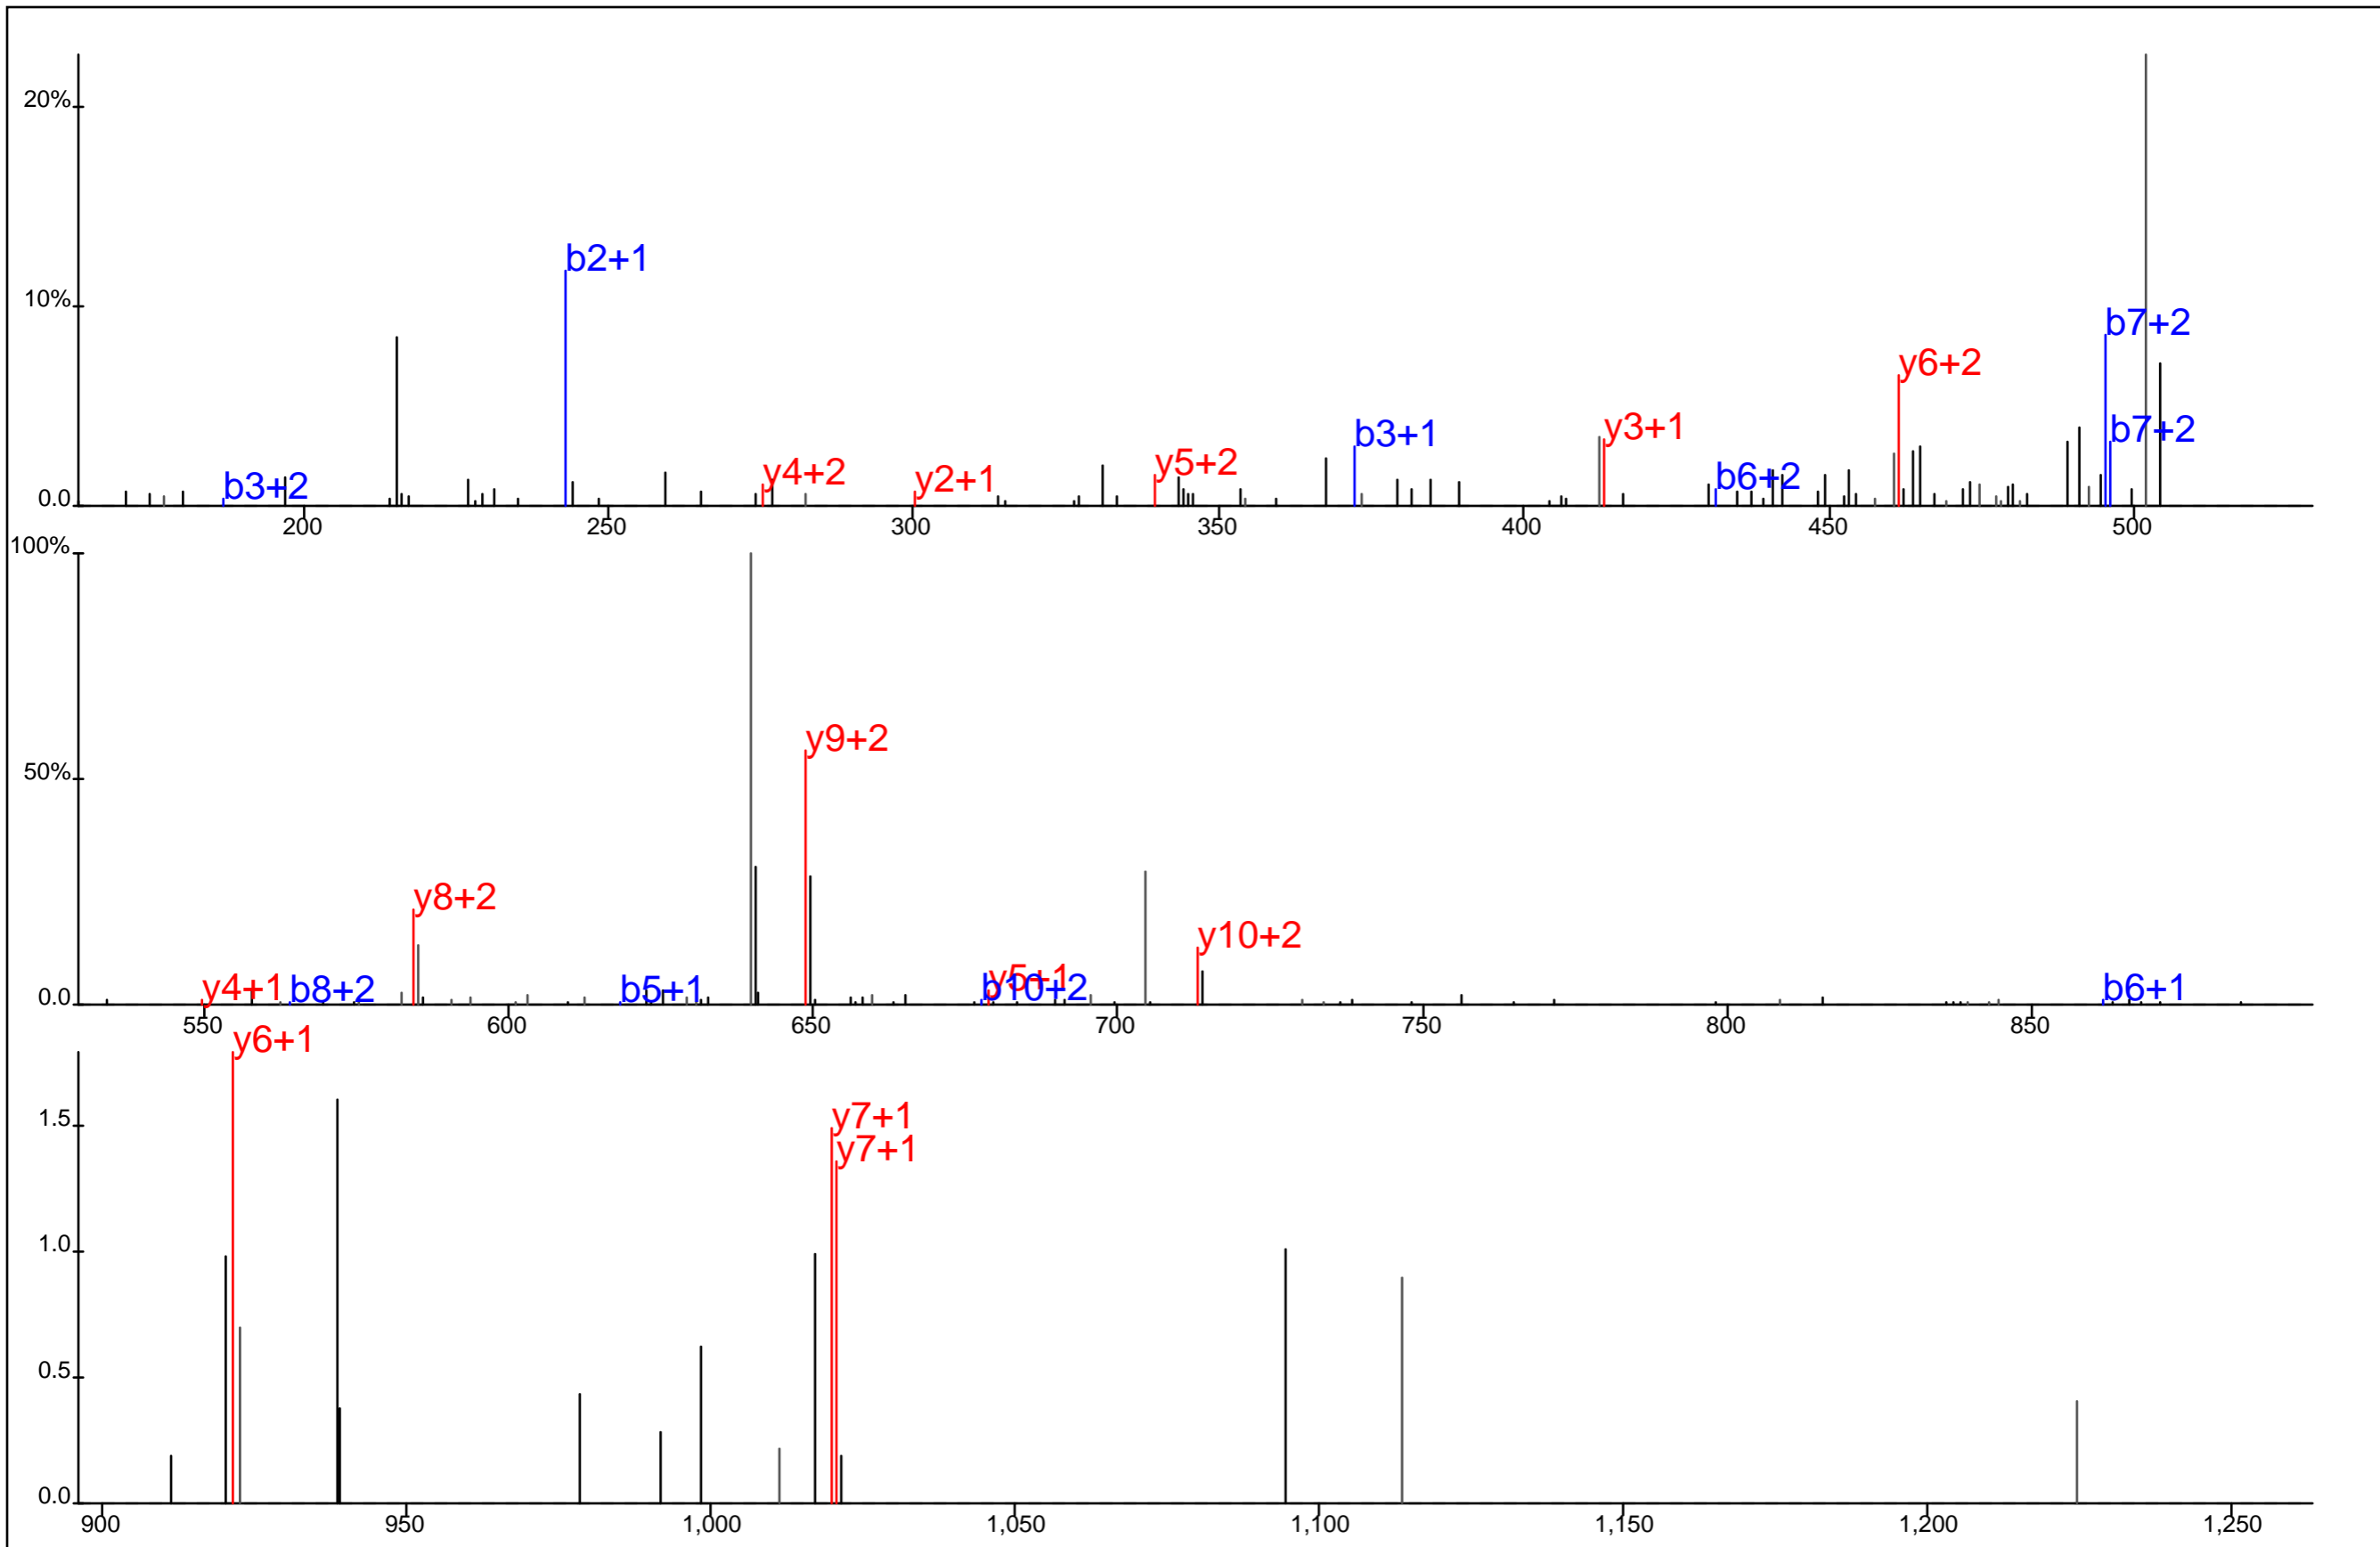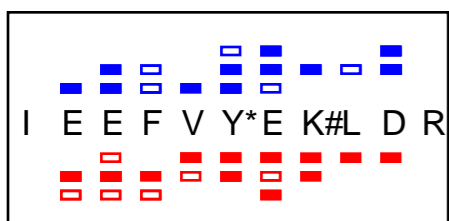

Protein Name: Endophilin B1  
 gi Accession: 8118530  
 Precursor Mass: 513.5812+3  
 Delta Mass: 2.136 ppm  
 XCorr: 22.69

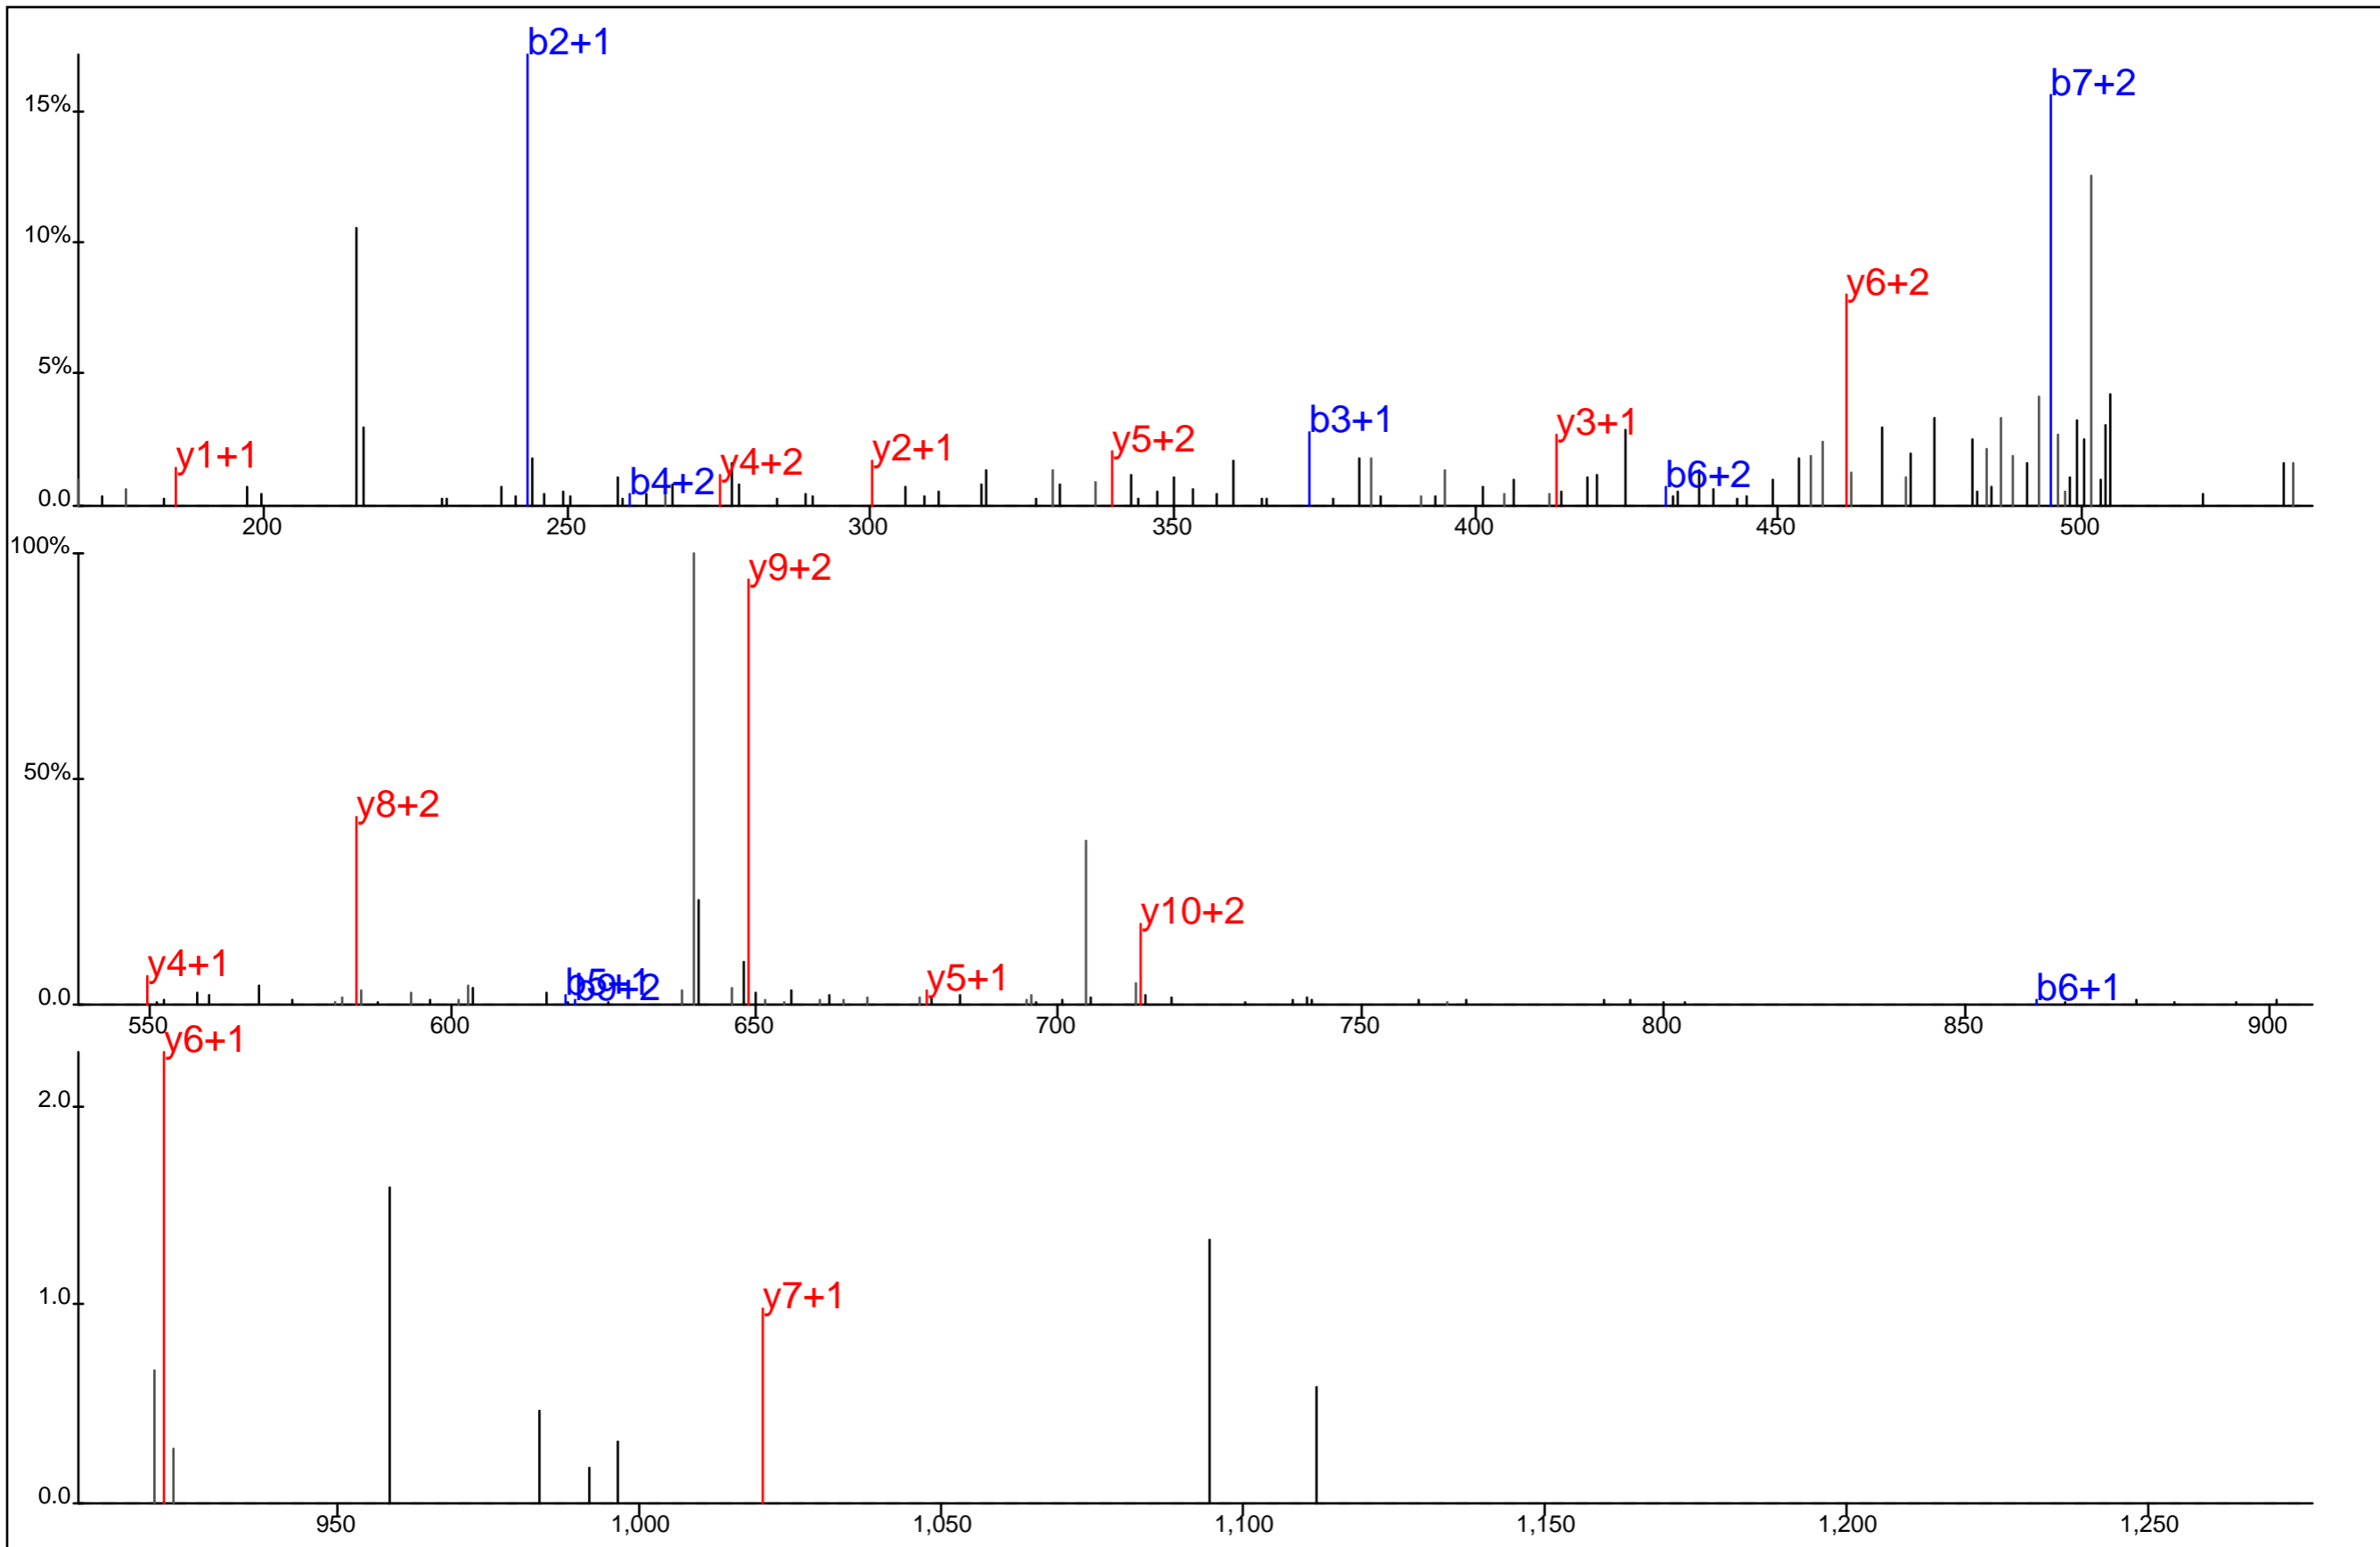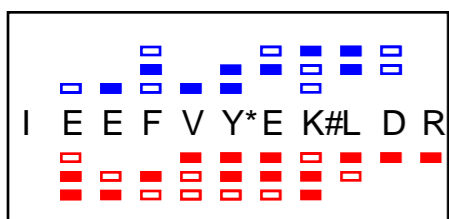

Protein Name: Endophilin B1  
 gi Accession: 8118530  
 Precursor Mass: 513.5810+3  
 Delta Mass: 1.779 ppm  
 XCorr: 36.07

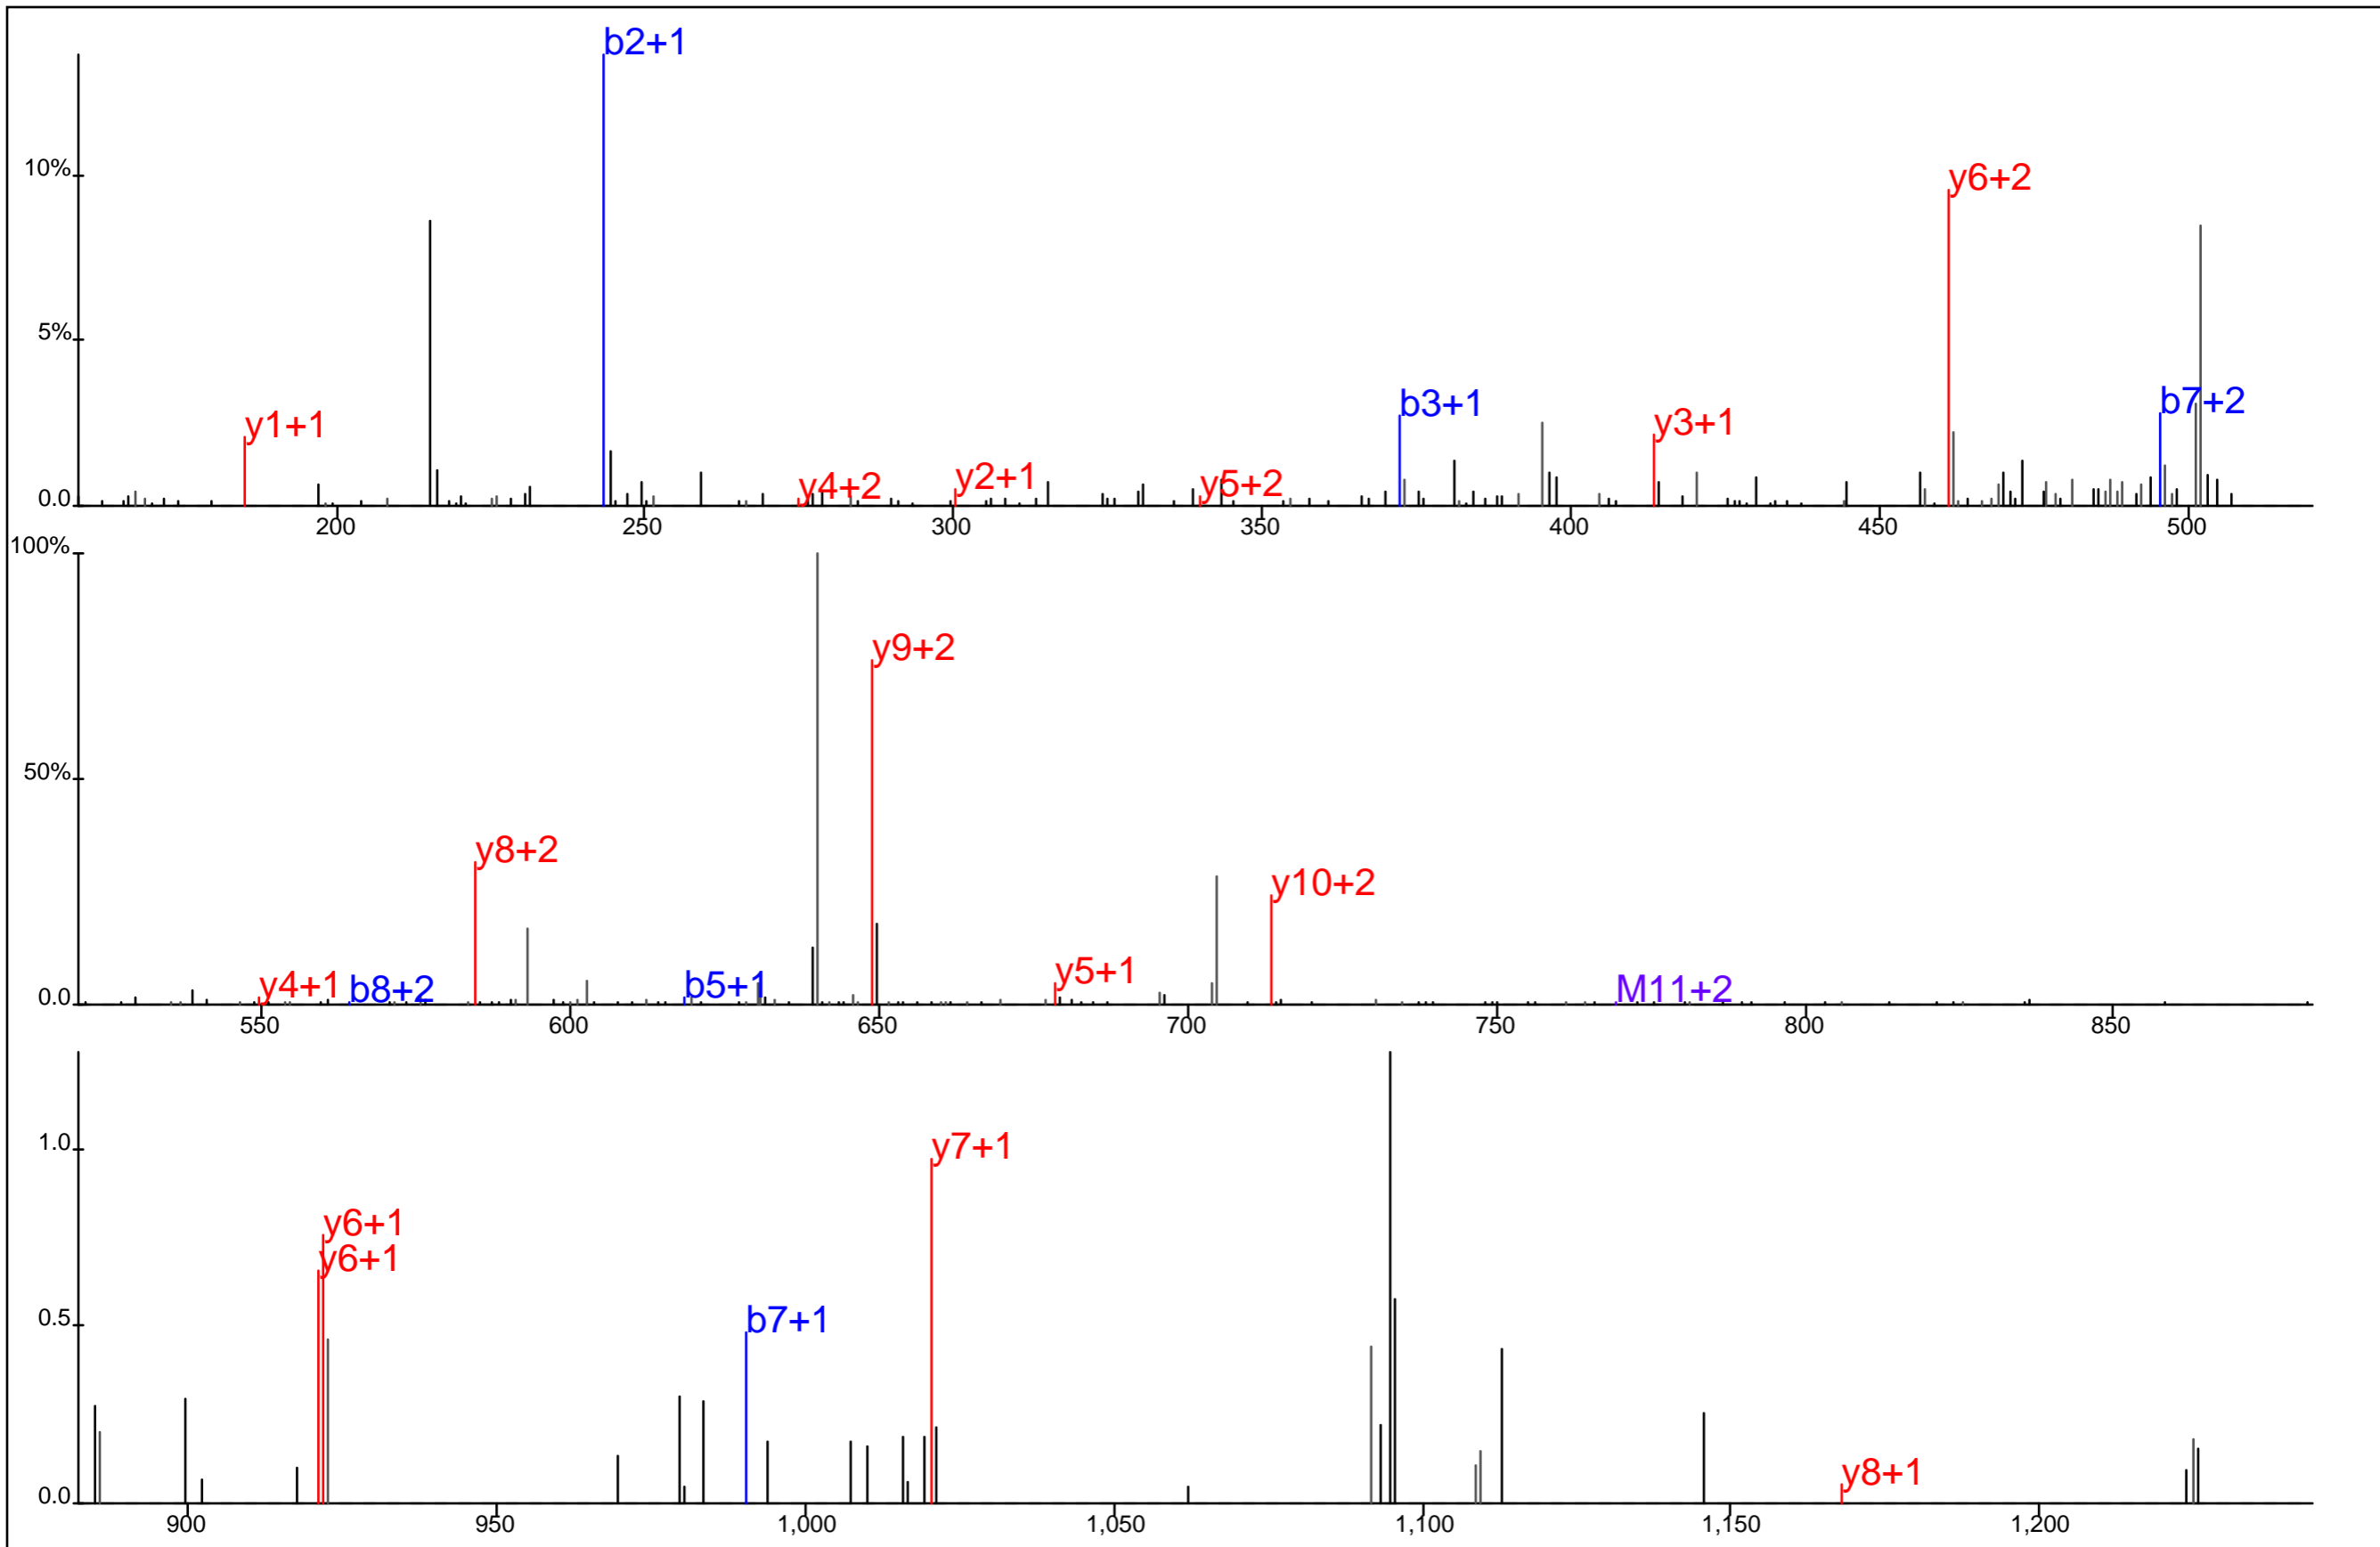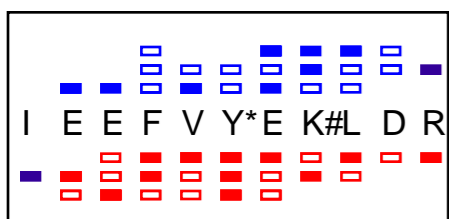

Protein Name: Endophilin B1  
 gi Accession: 8118530  
 Precursor Mass: 513.5815+3  
 Delta Mass: 2.729 ppm  
 XCorr: 30.45

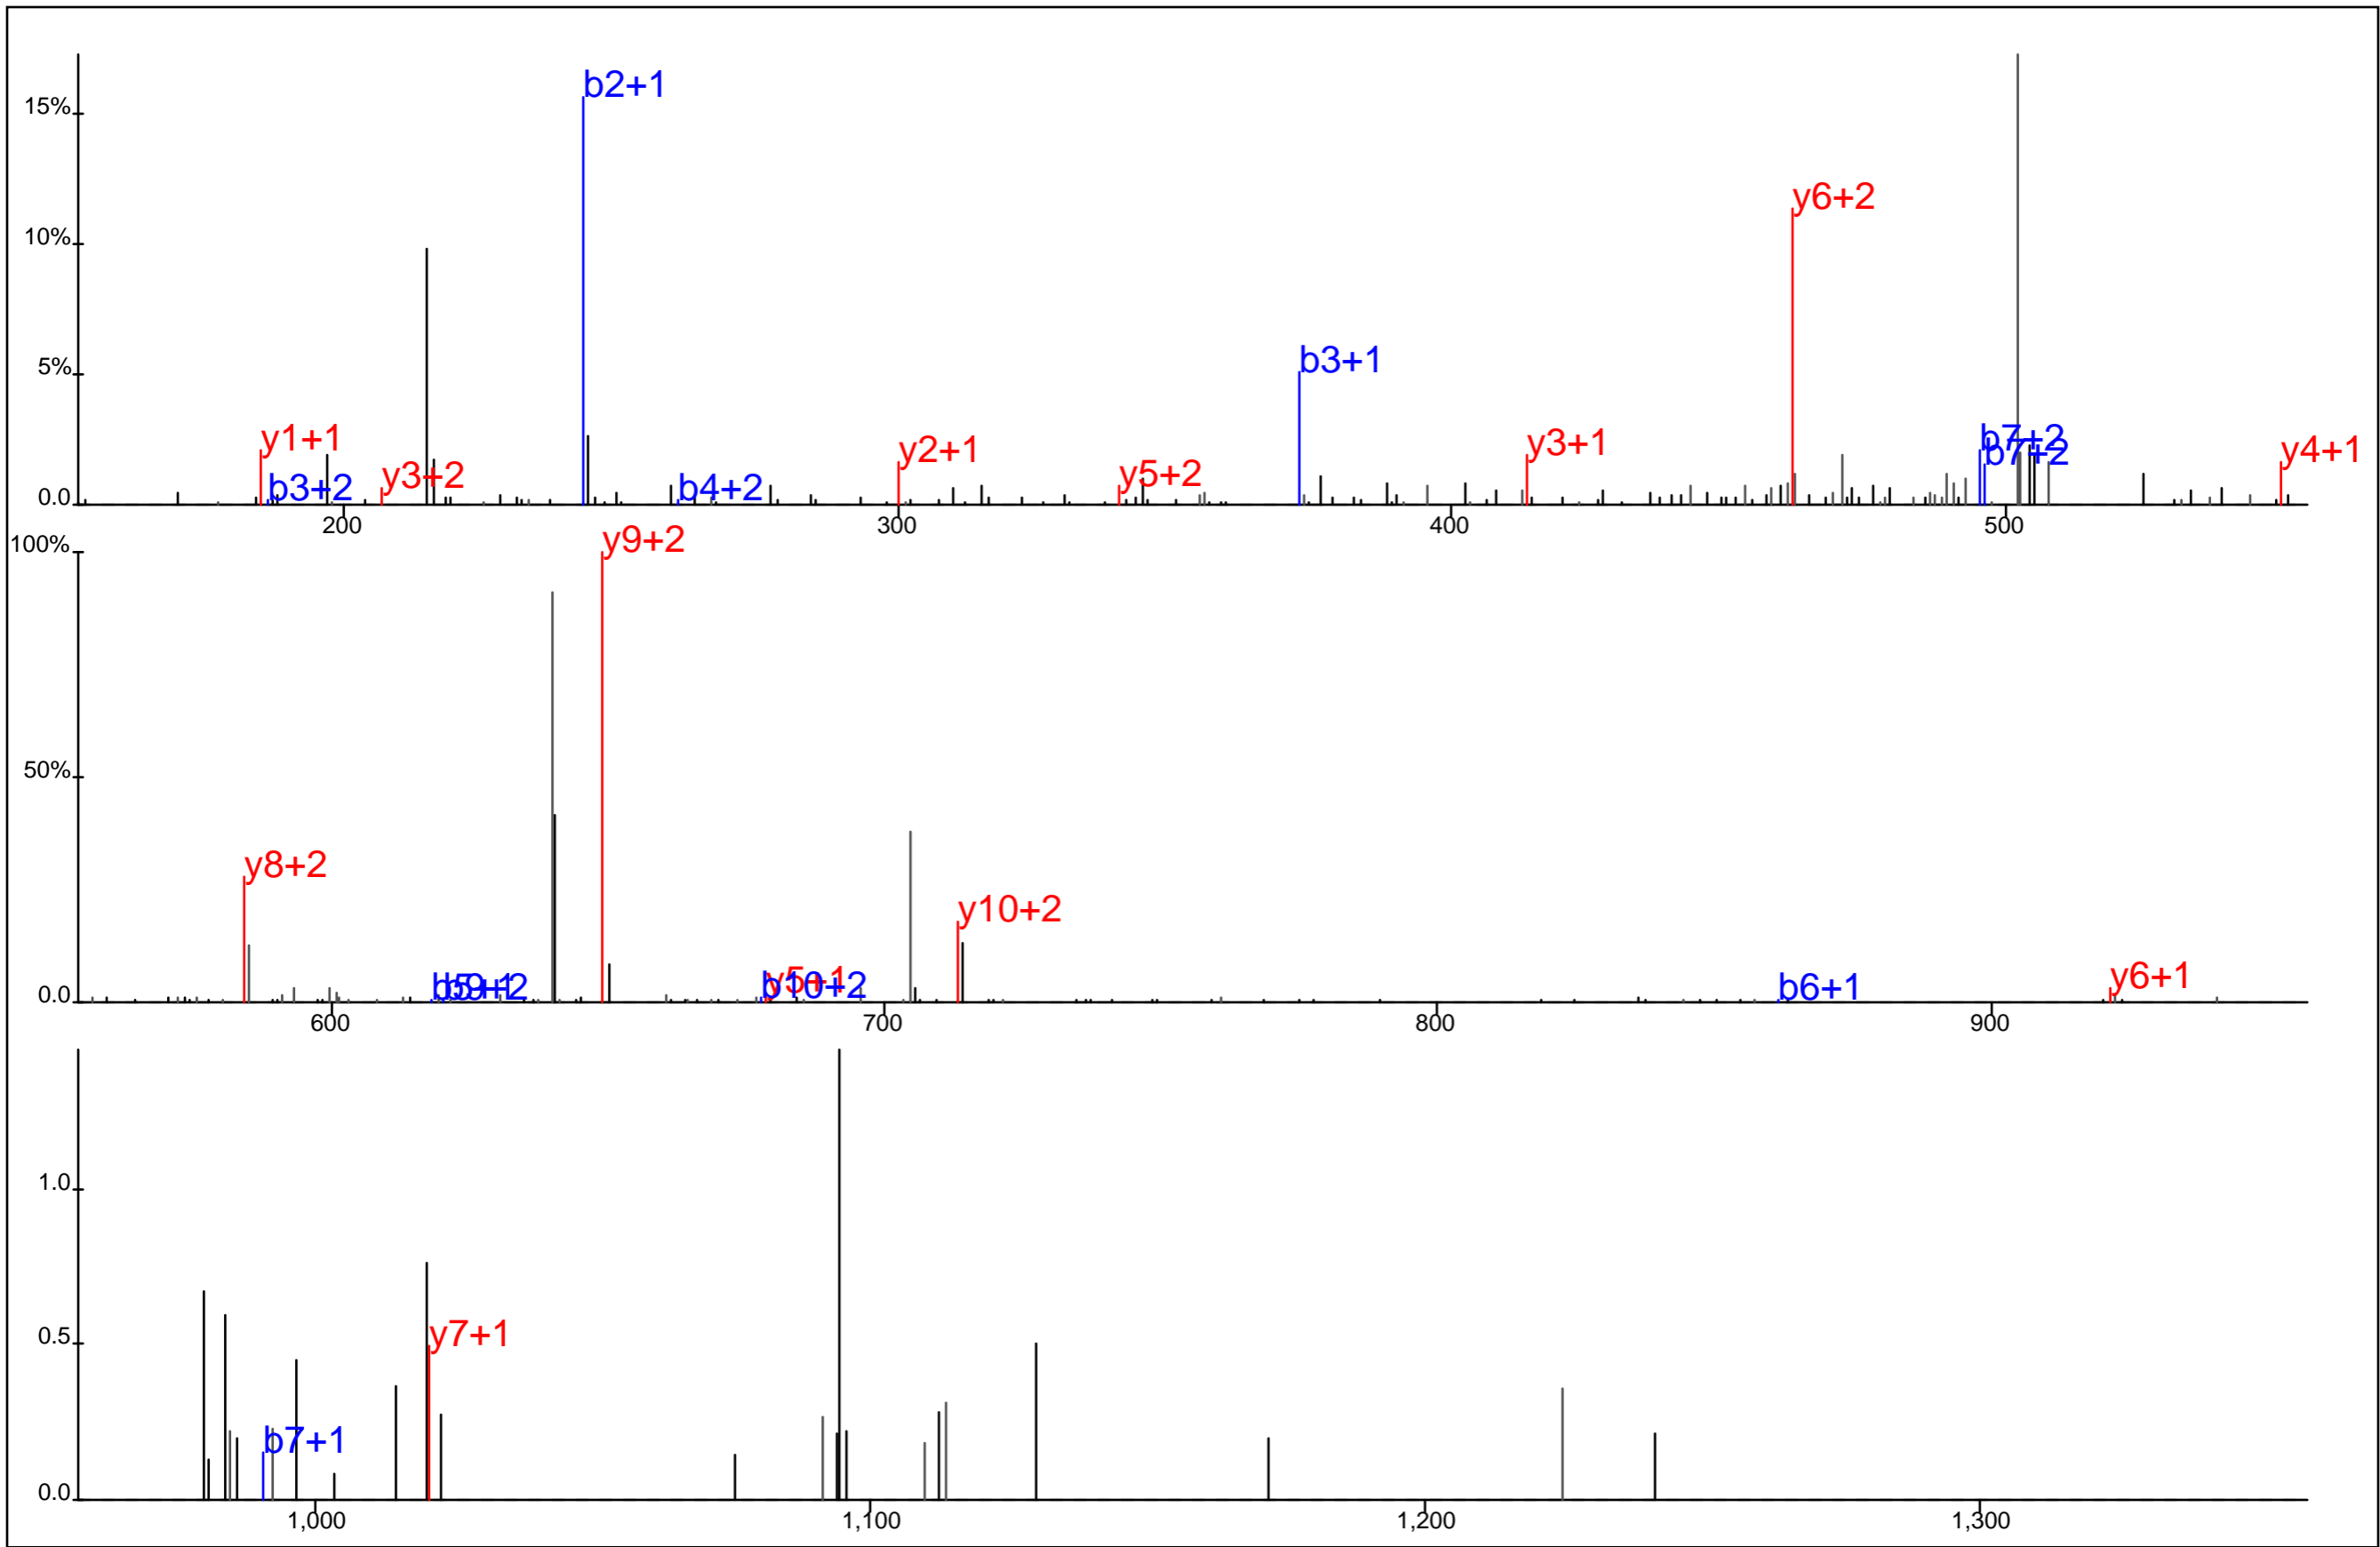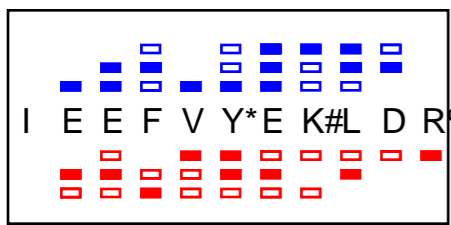

Protein Name: Endophilin B1  
 gi Accession: 8118530  
 Precursor Mass: 513.5807+3  
 Delta Mass: 1.306 ppm  
 XCorr: 25.1



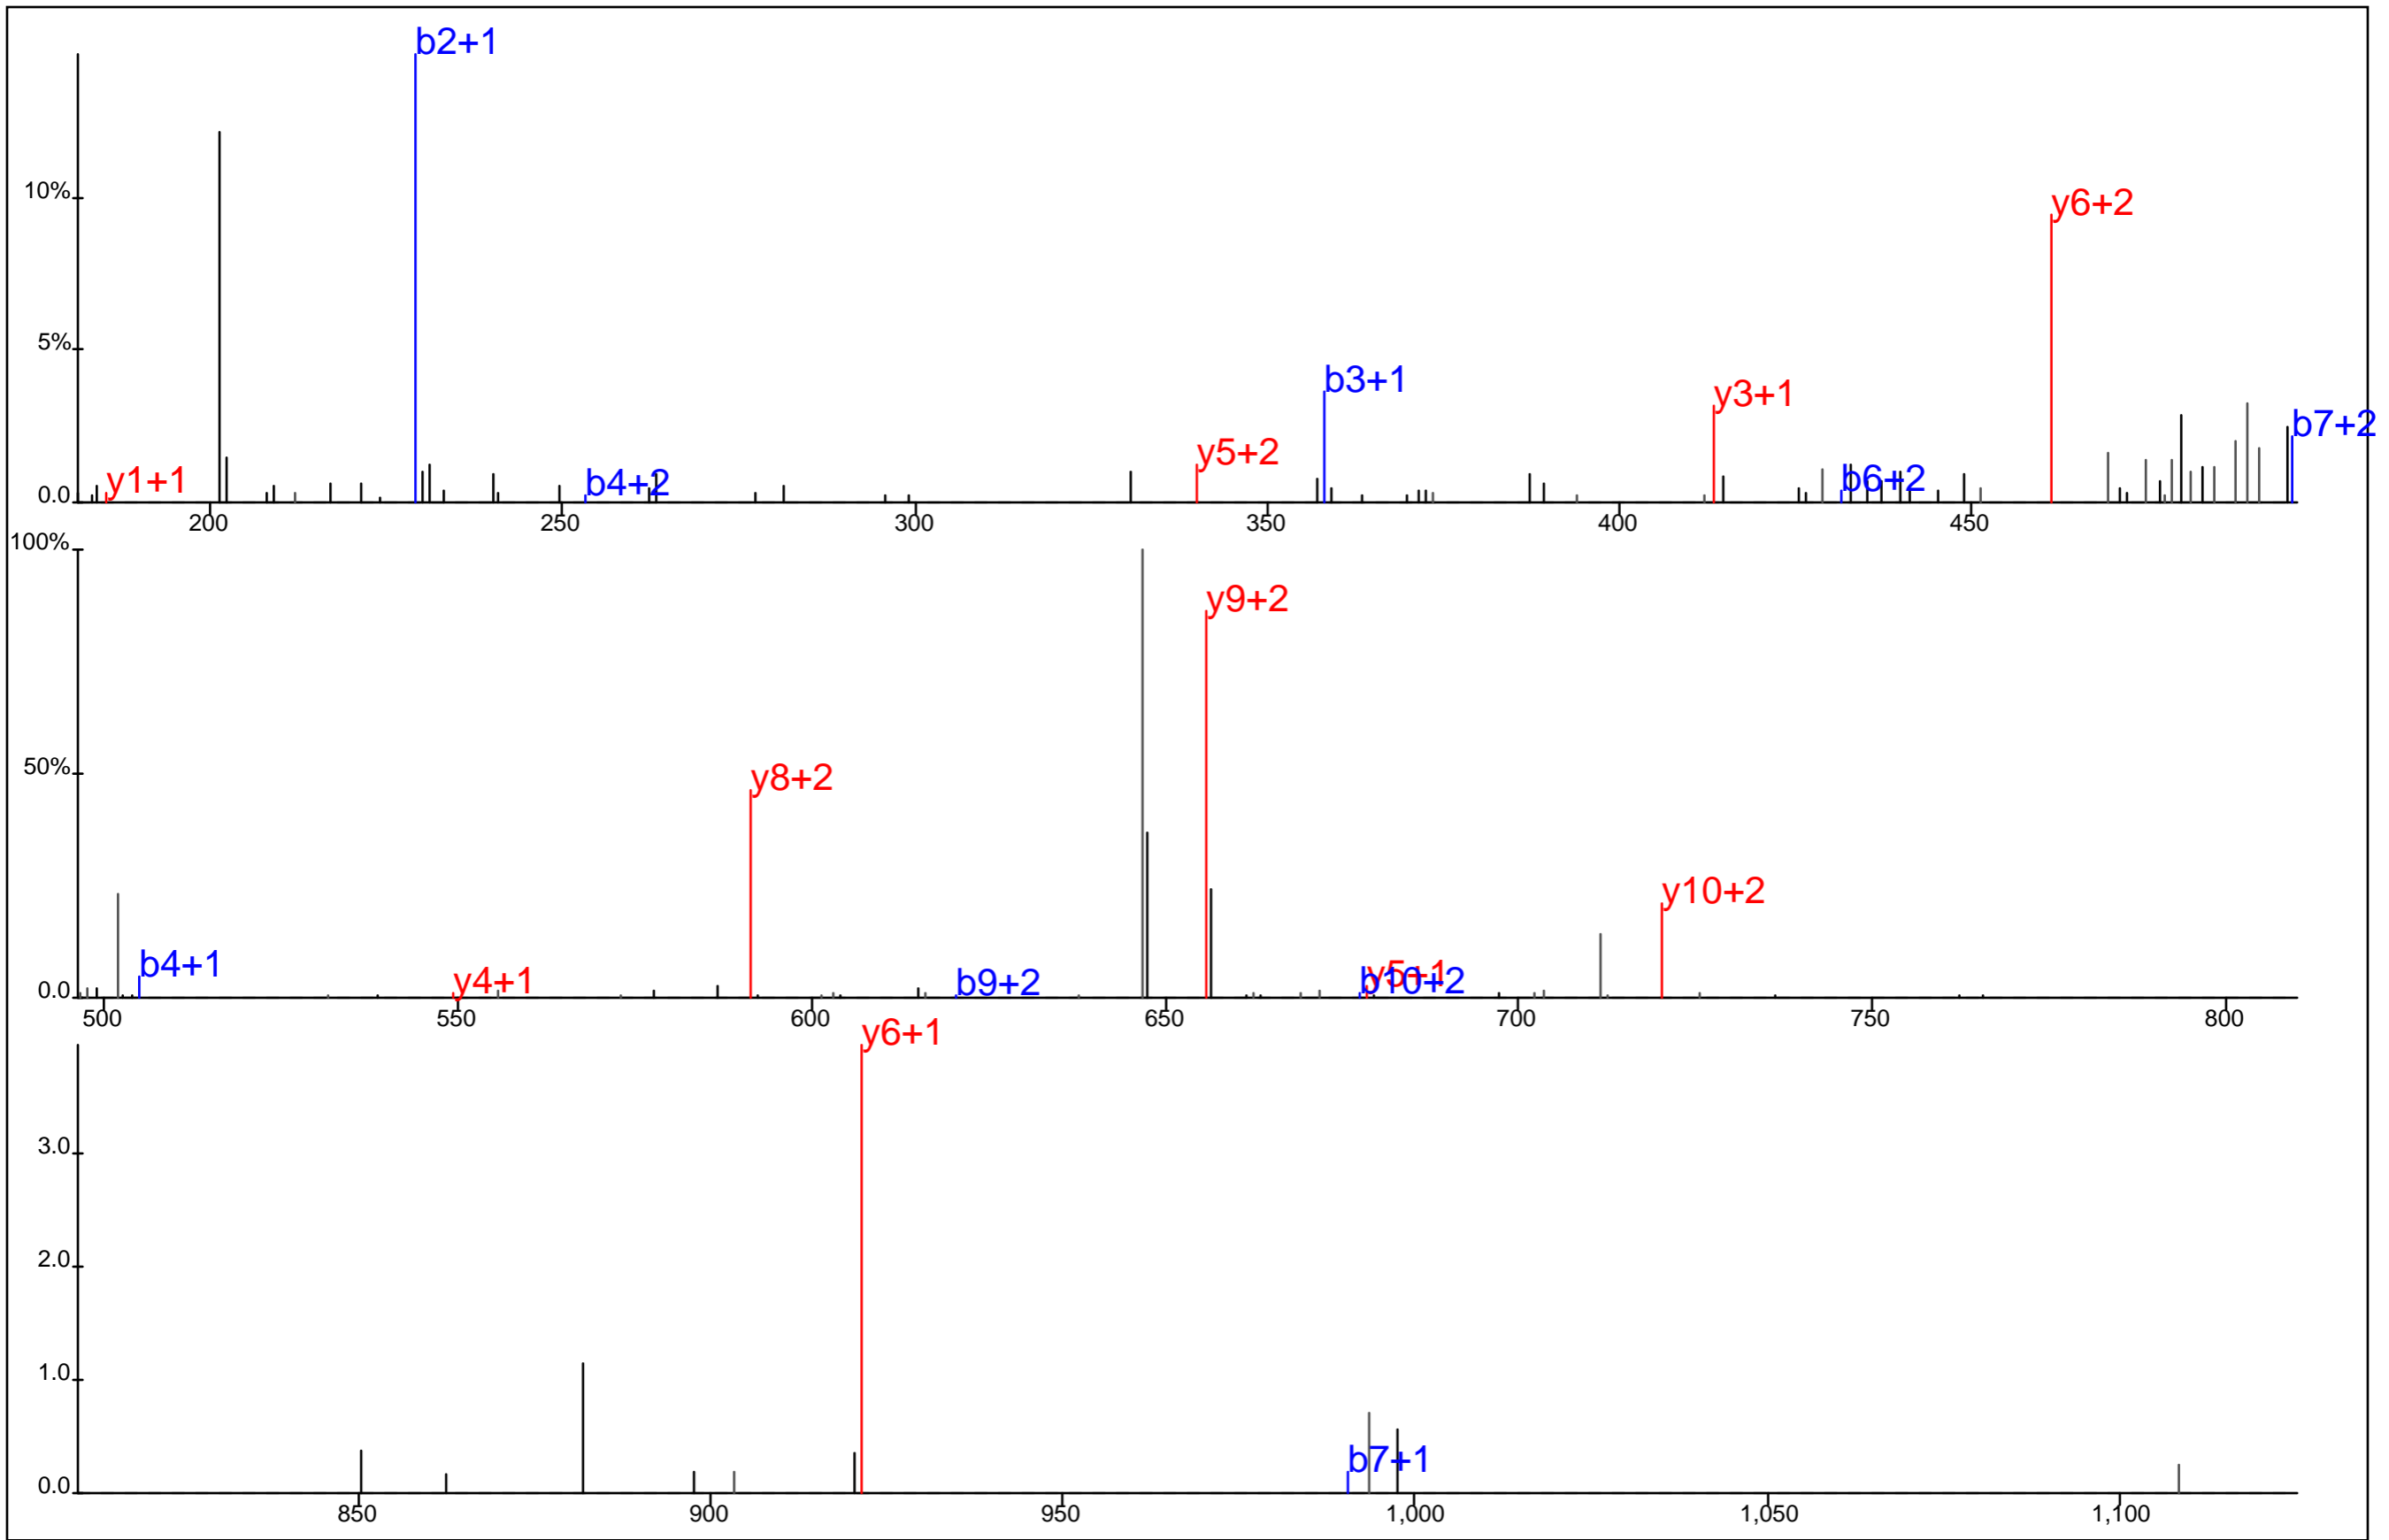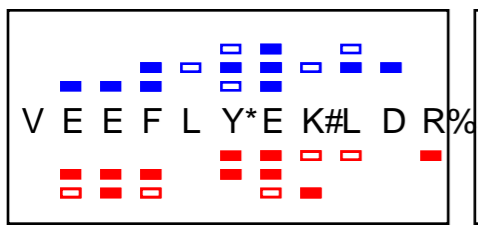

Protein Name: Endophilin B2  
 gi Accession: 55961144  
 Precursor Mass: 513.5814+3  
 Delta Mass: 2.612 ppm  
 XCorr: 27.77

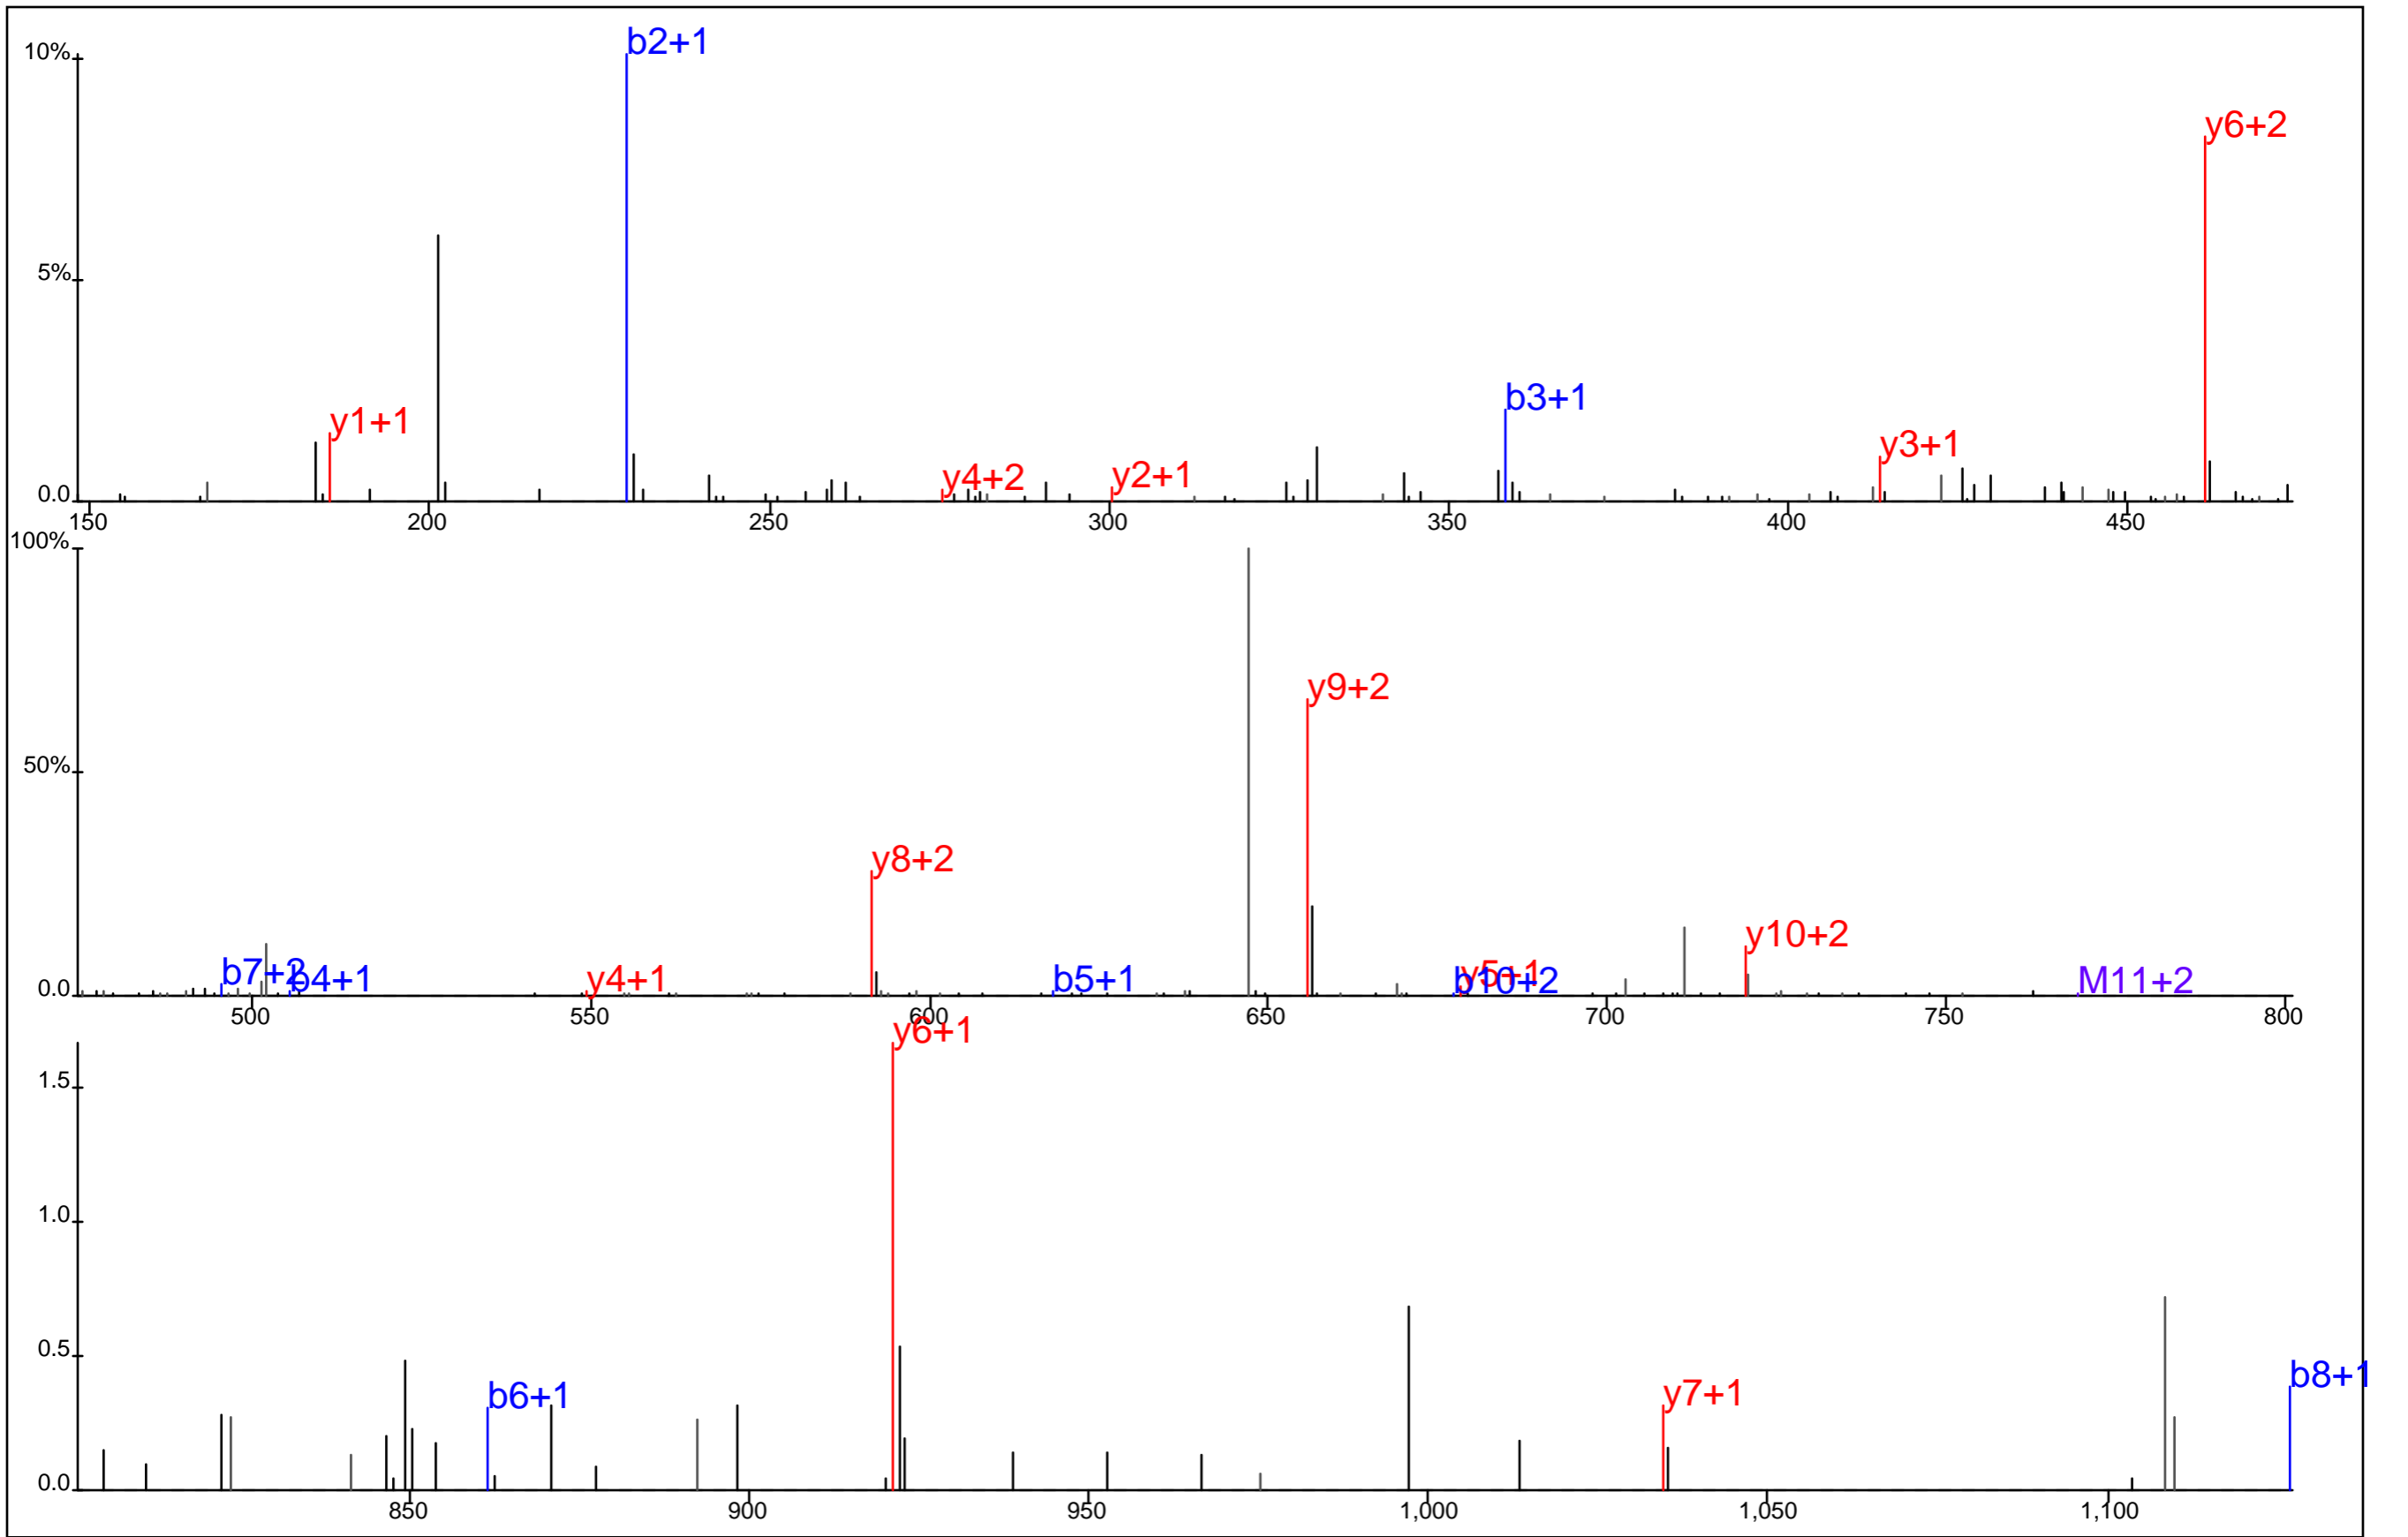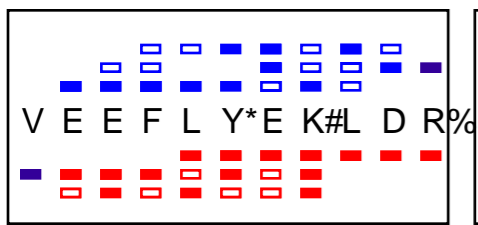

Protein Name: Endophilin B2  
 gi Accession: 55961144  
 Precursor Mass: 513.5809+3  
 Delta Mass: 1.540 ppm  
 XCorr: 24.56

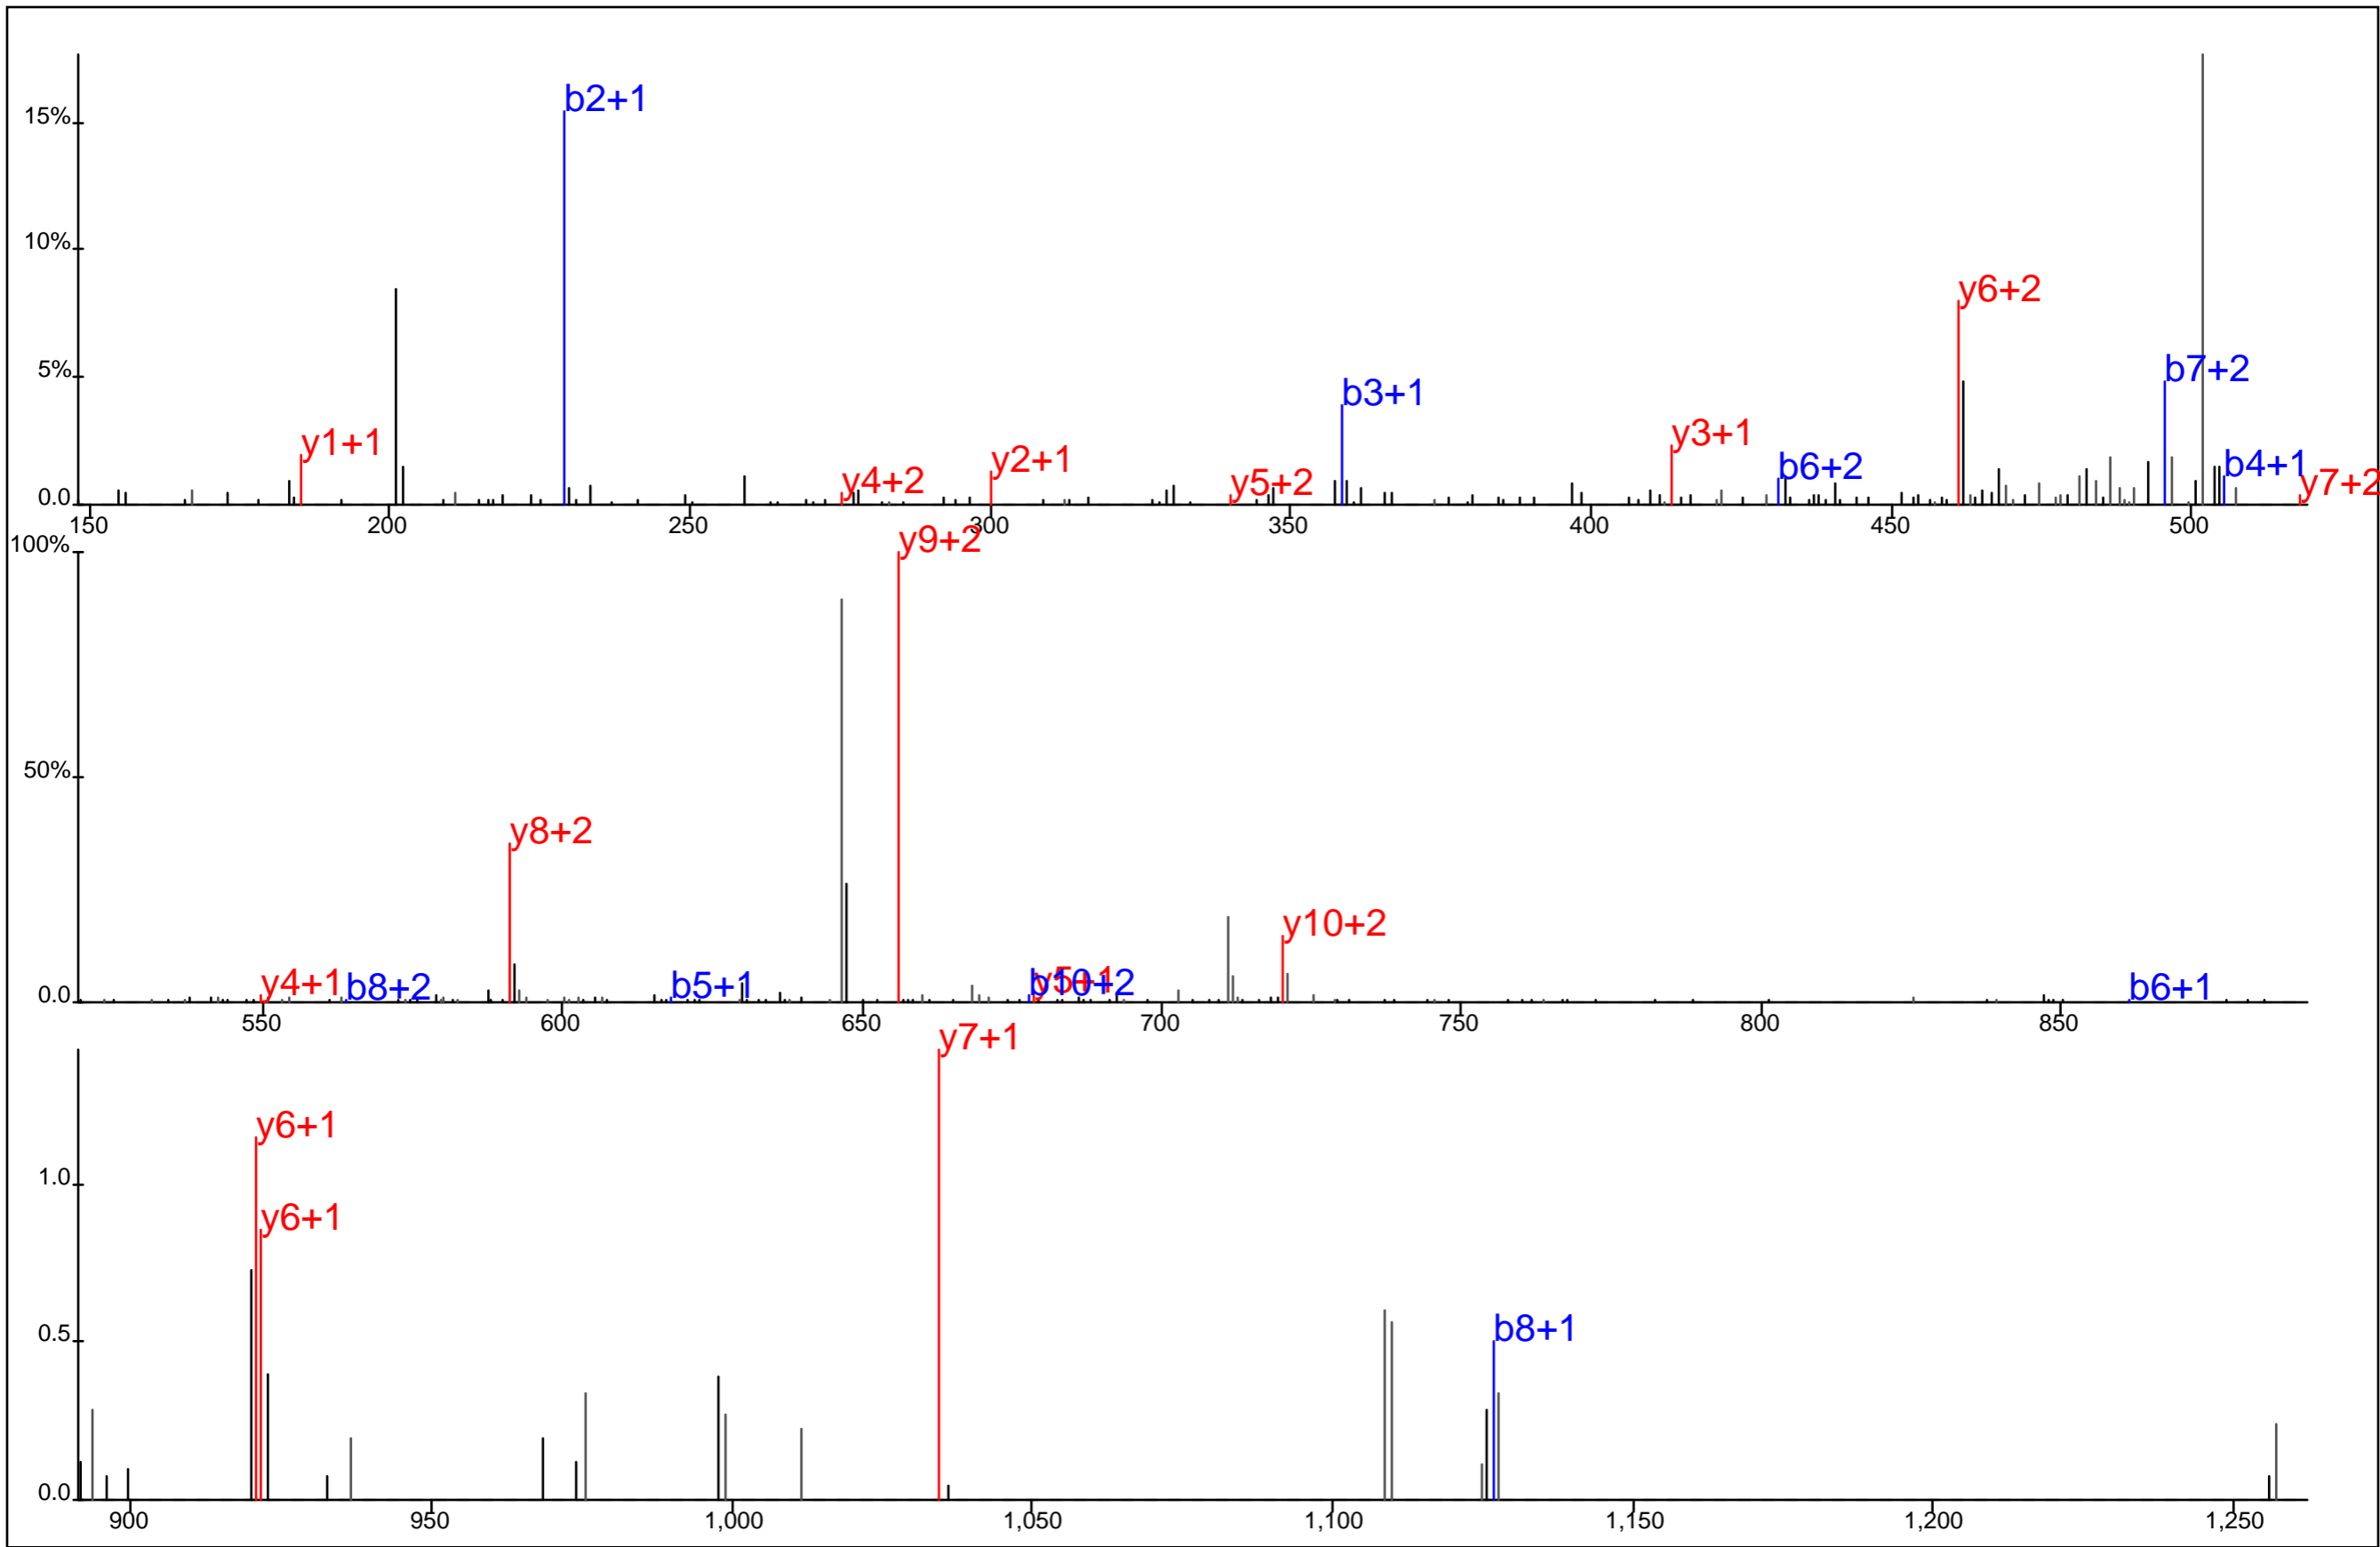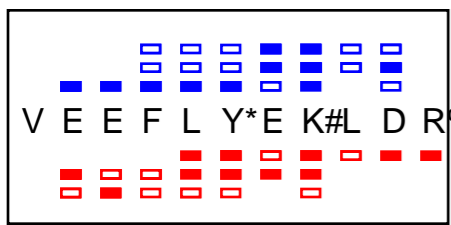

Protein Name: Endophilin B2  
 gi Accession: 55961144  
 Precursor Mass: 513.5803+3  
 Delta Mass: 0.350 ppm  
 XCorr: 31.77

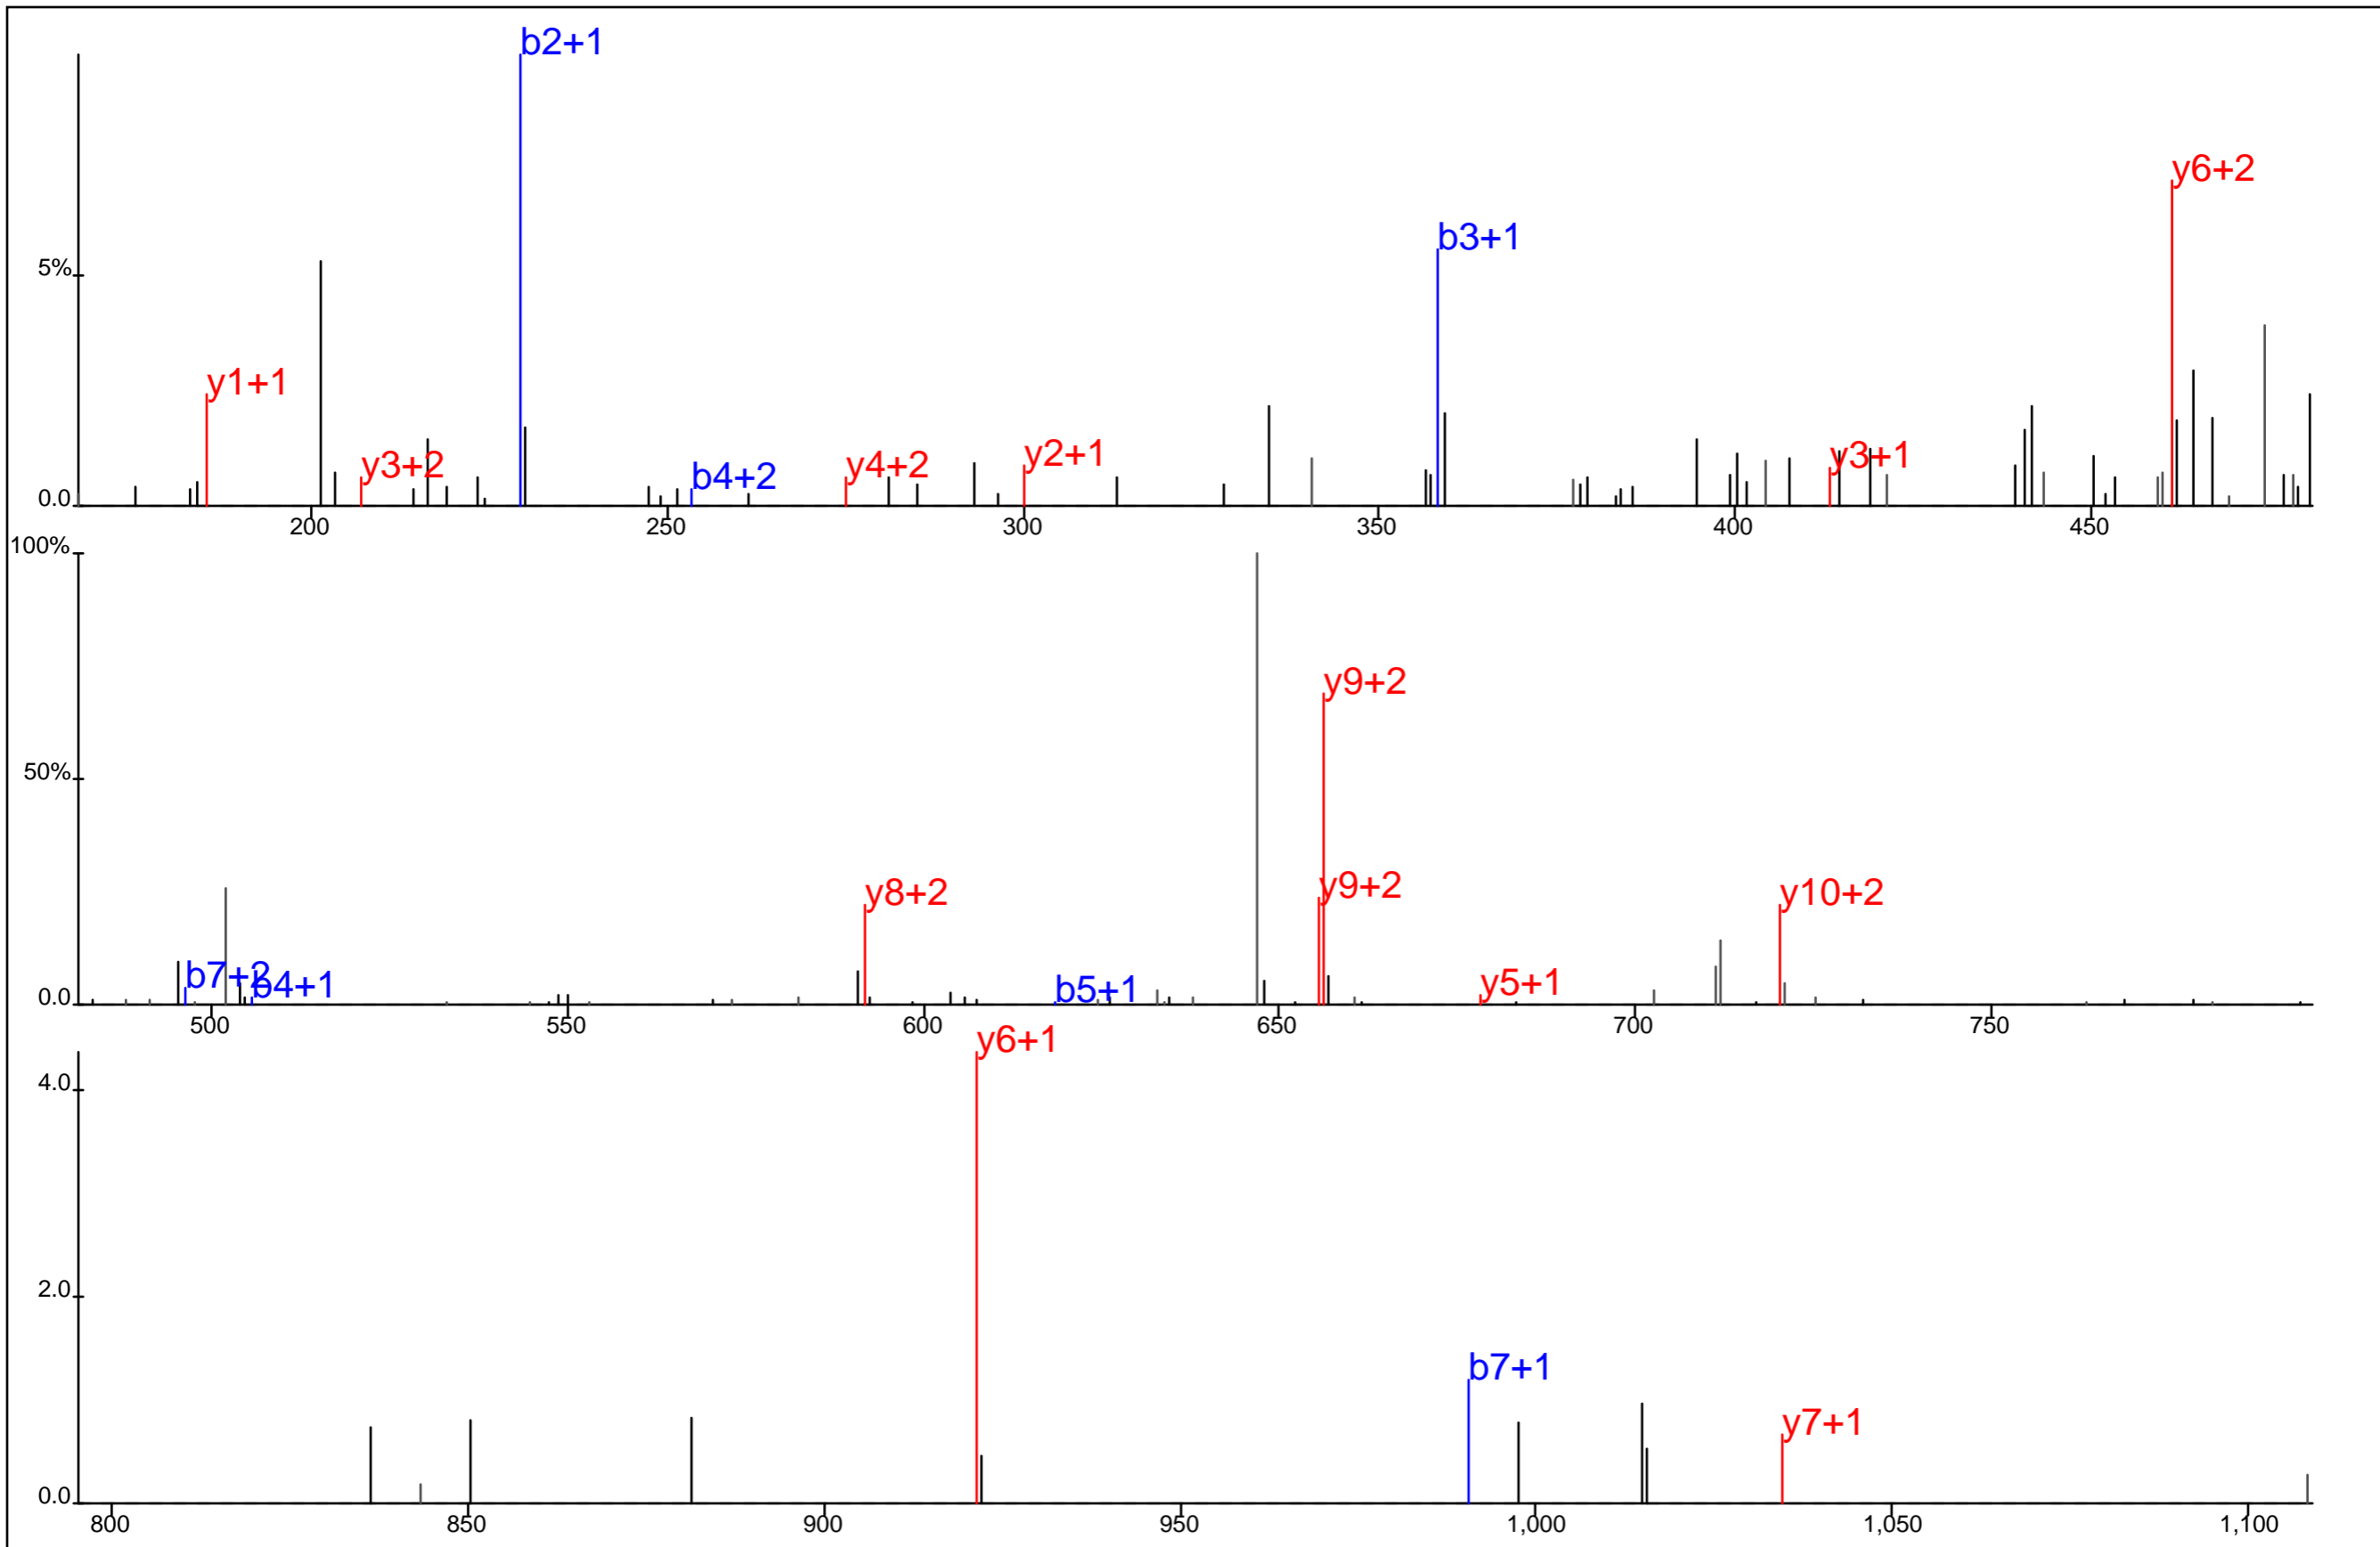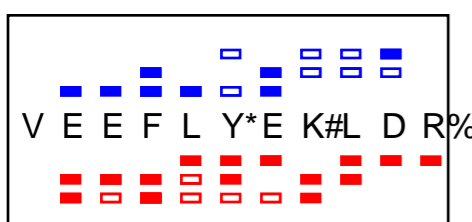

Protein Name: Endophilin B2  
 gi Accession: 55961144  
 Precursor Mass: 513.5810+3  
 Delta Mass: 1.779 ppm  
 XCorr: 22.81

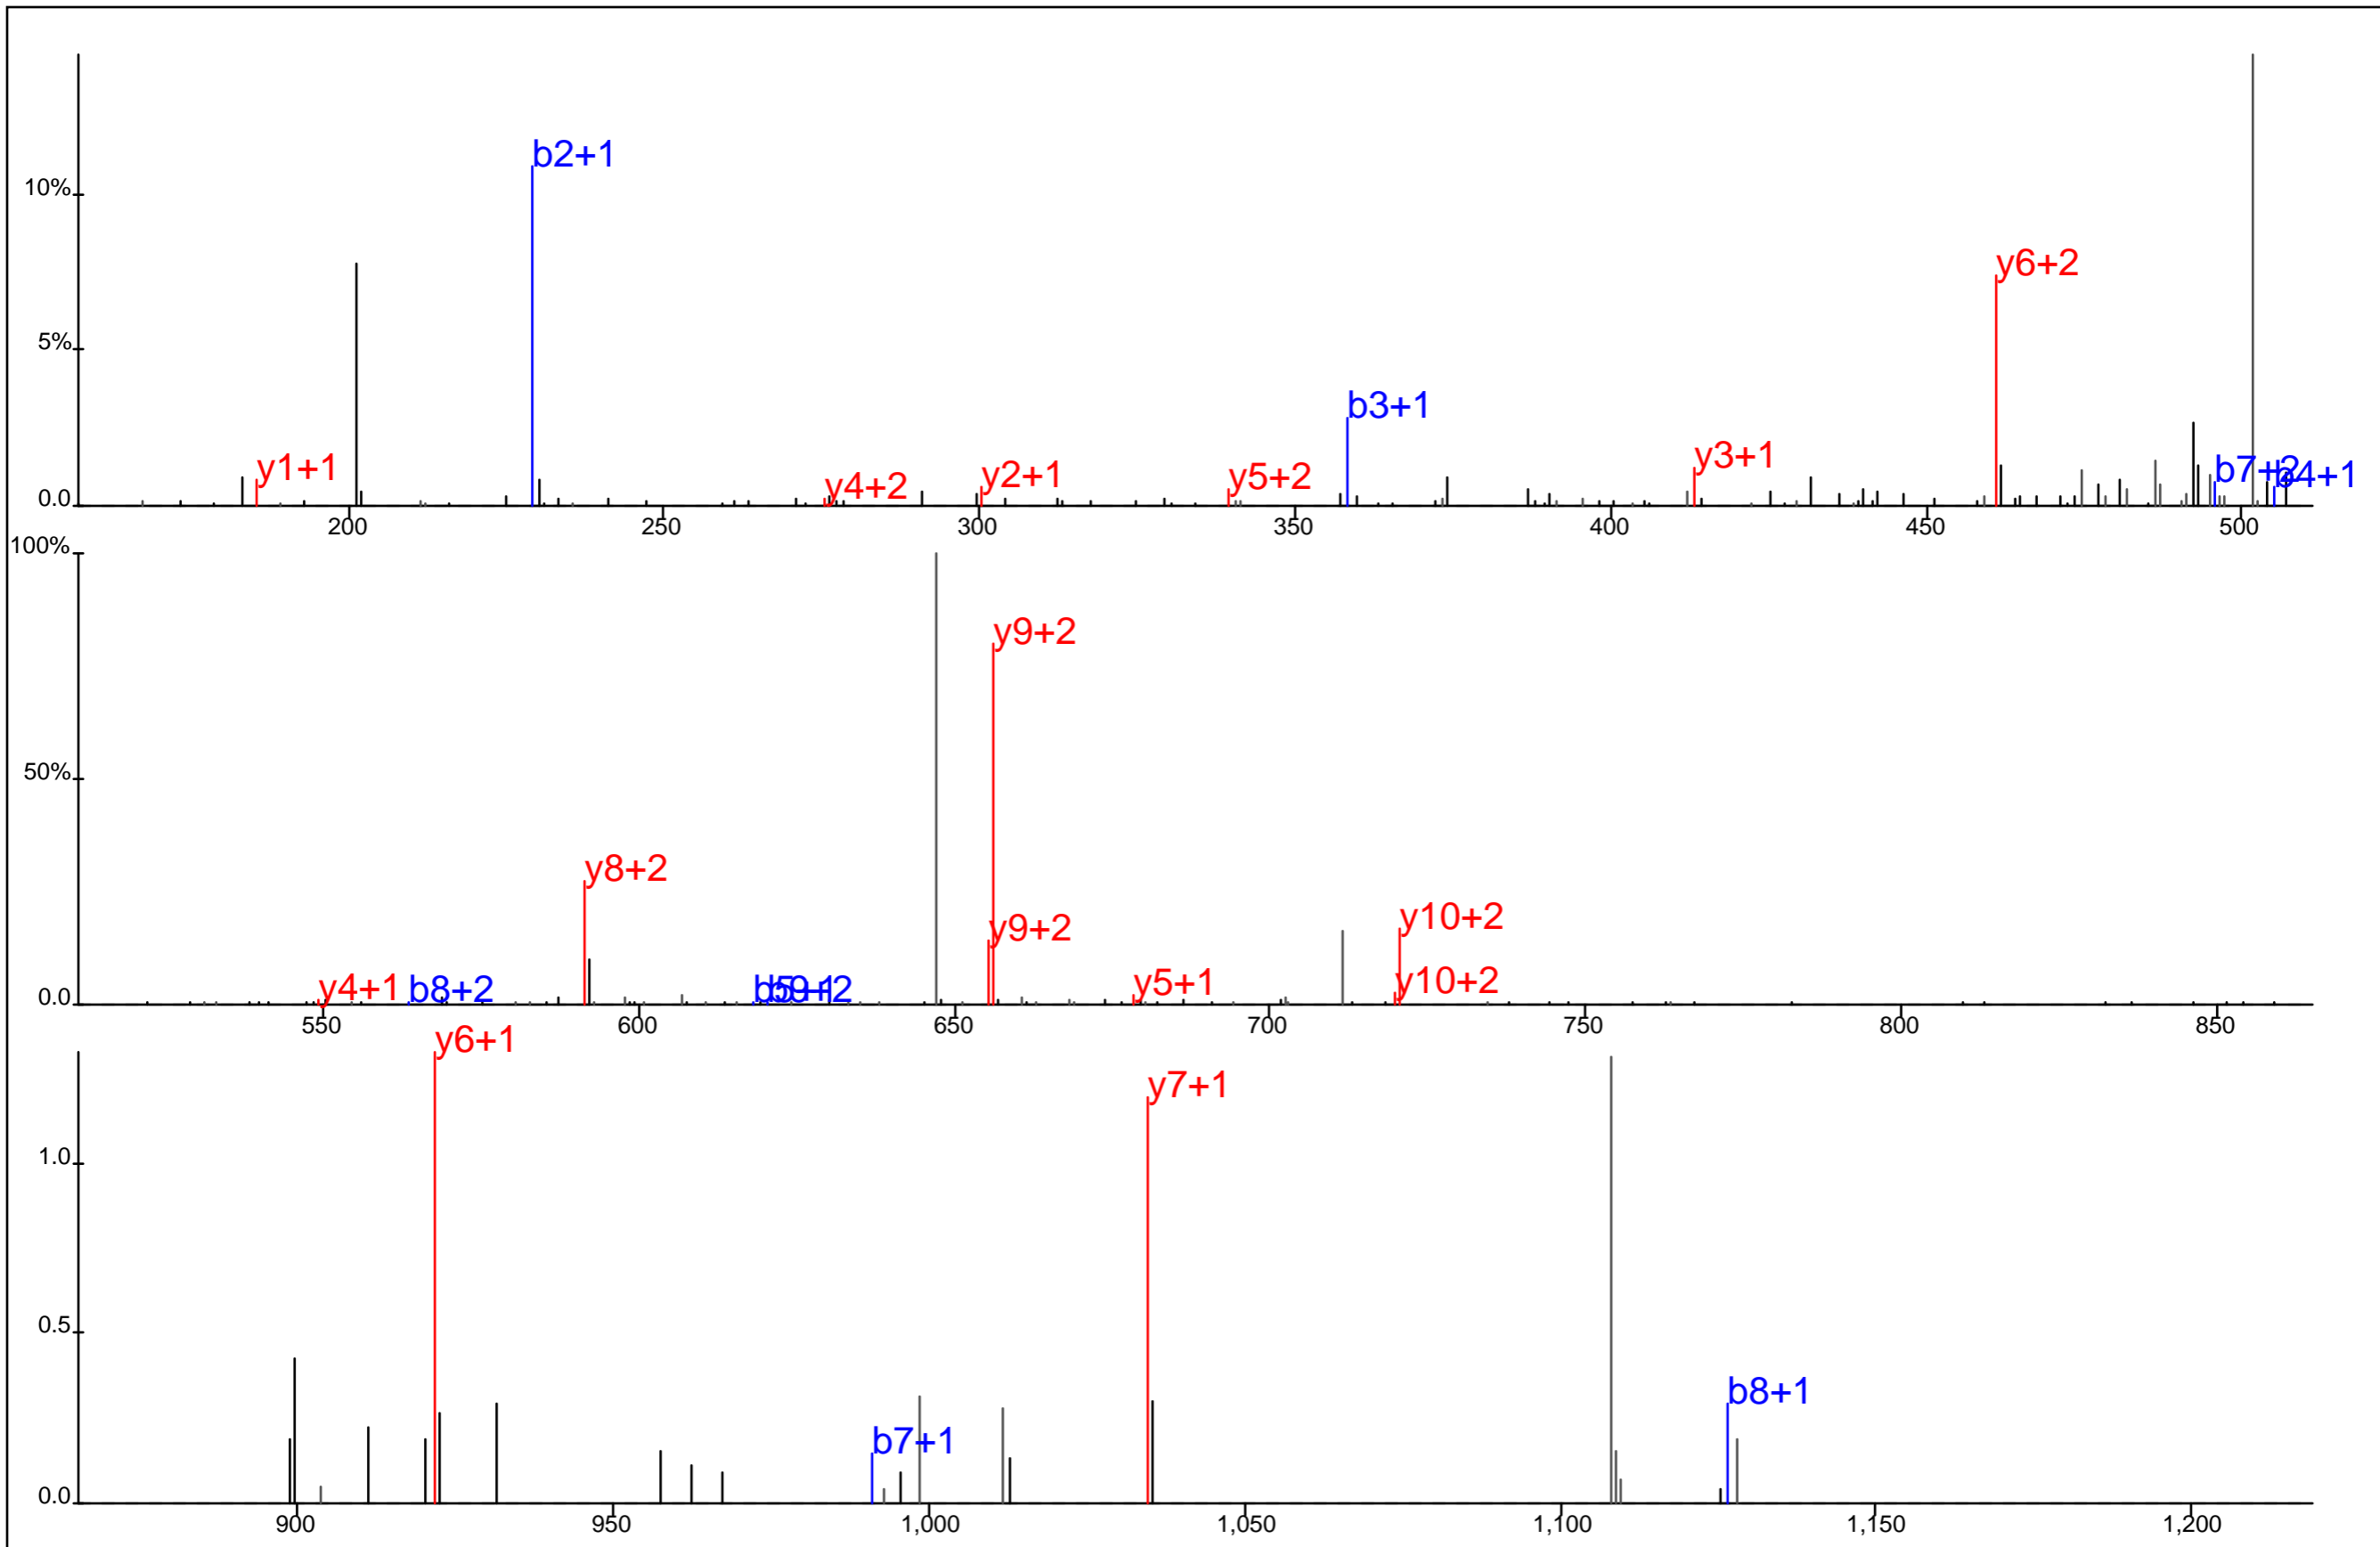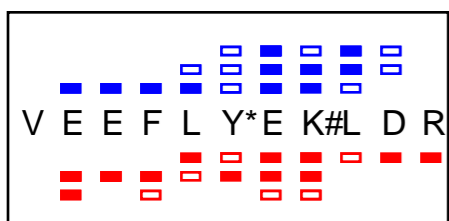

Protein Name: Endophilin B2  
 gi Accession: 55961144  
 Precursor Mass: 513.5808+3  
 Delta Mass: 1.423 ppm  
 XCorr: 32.48

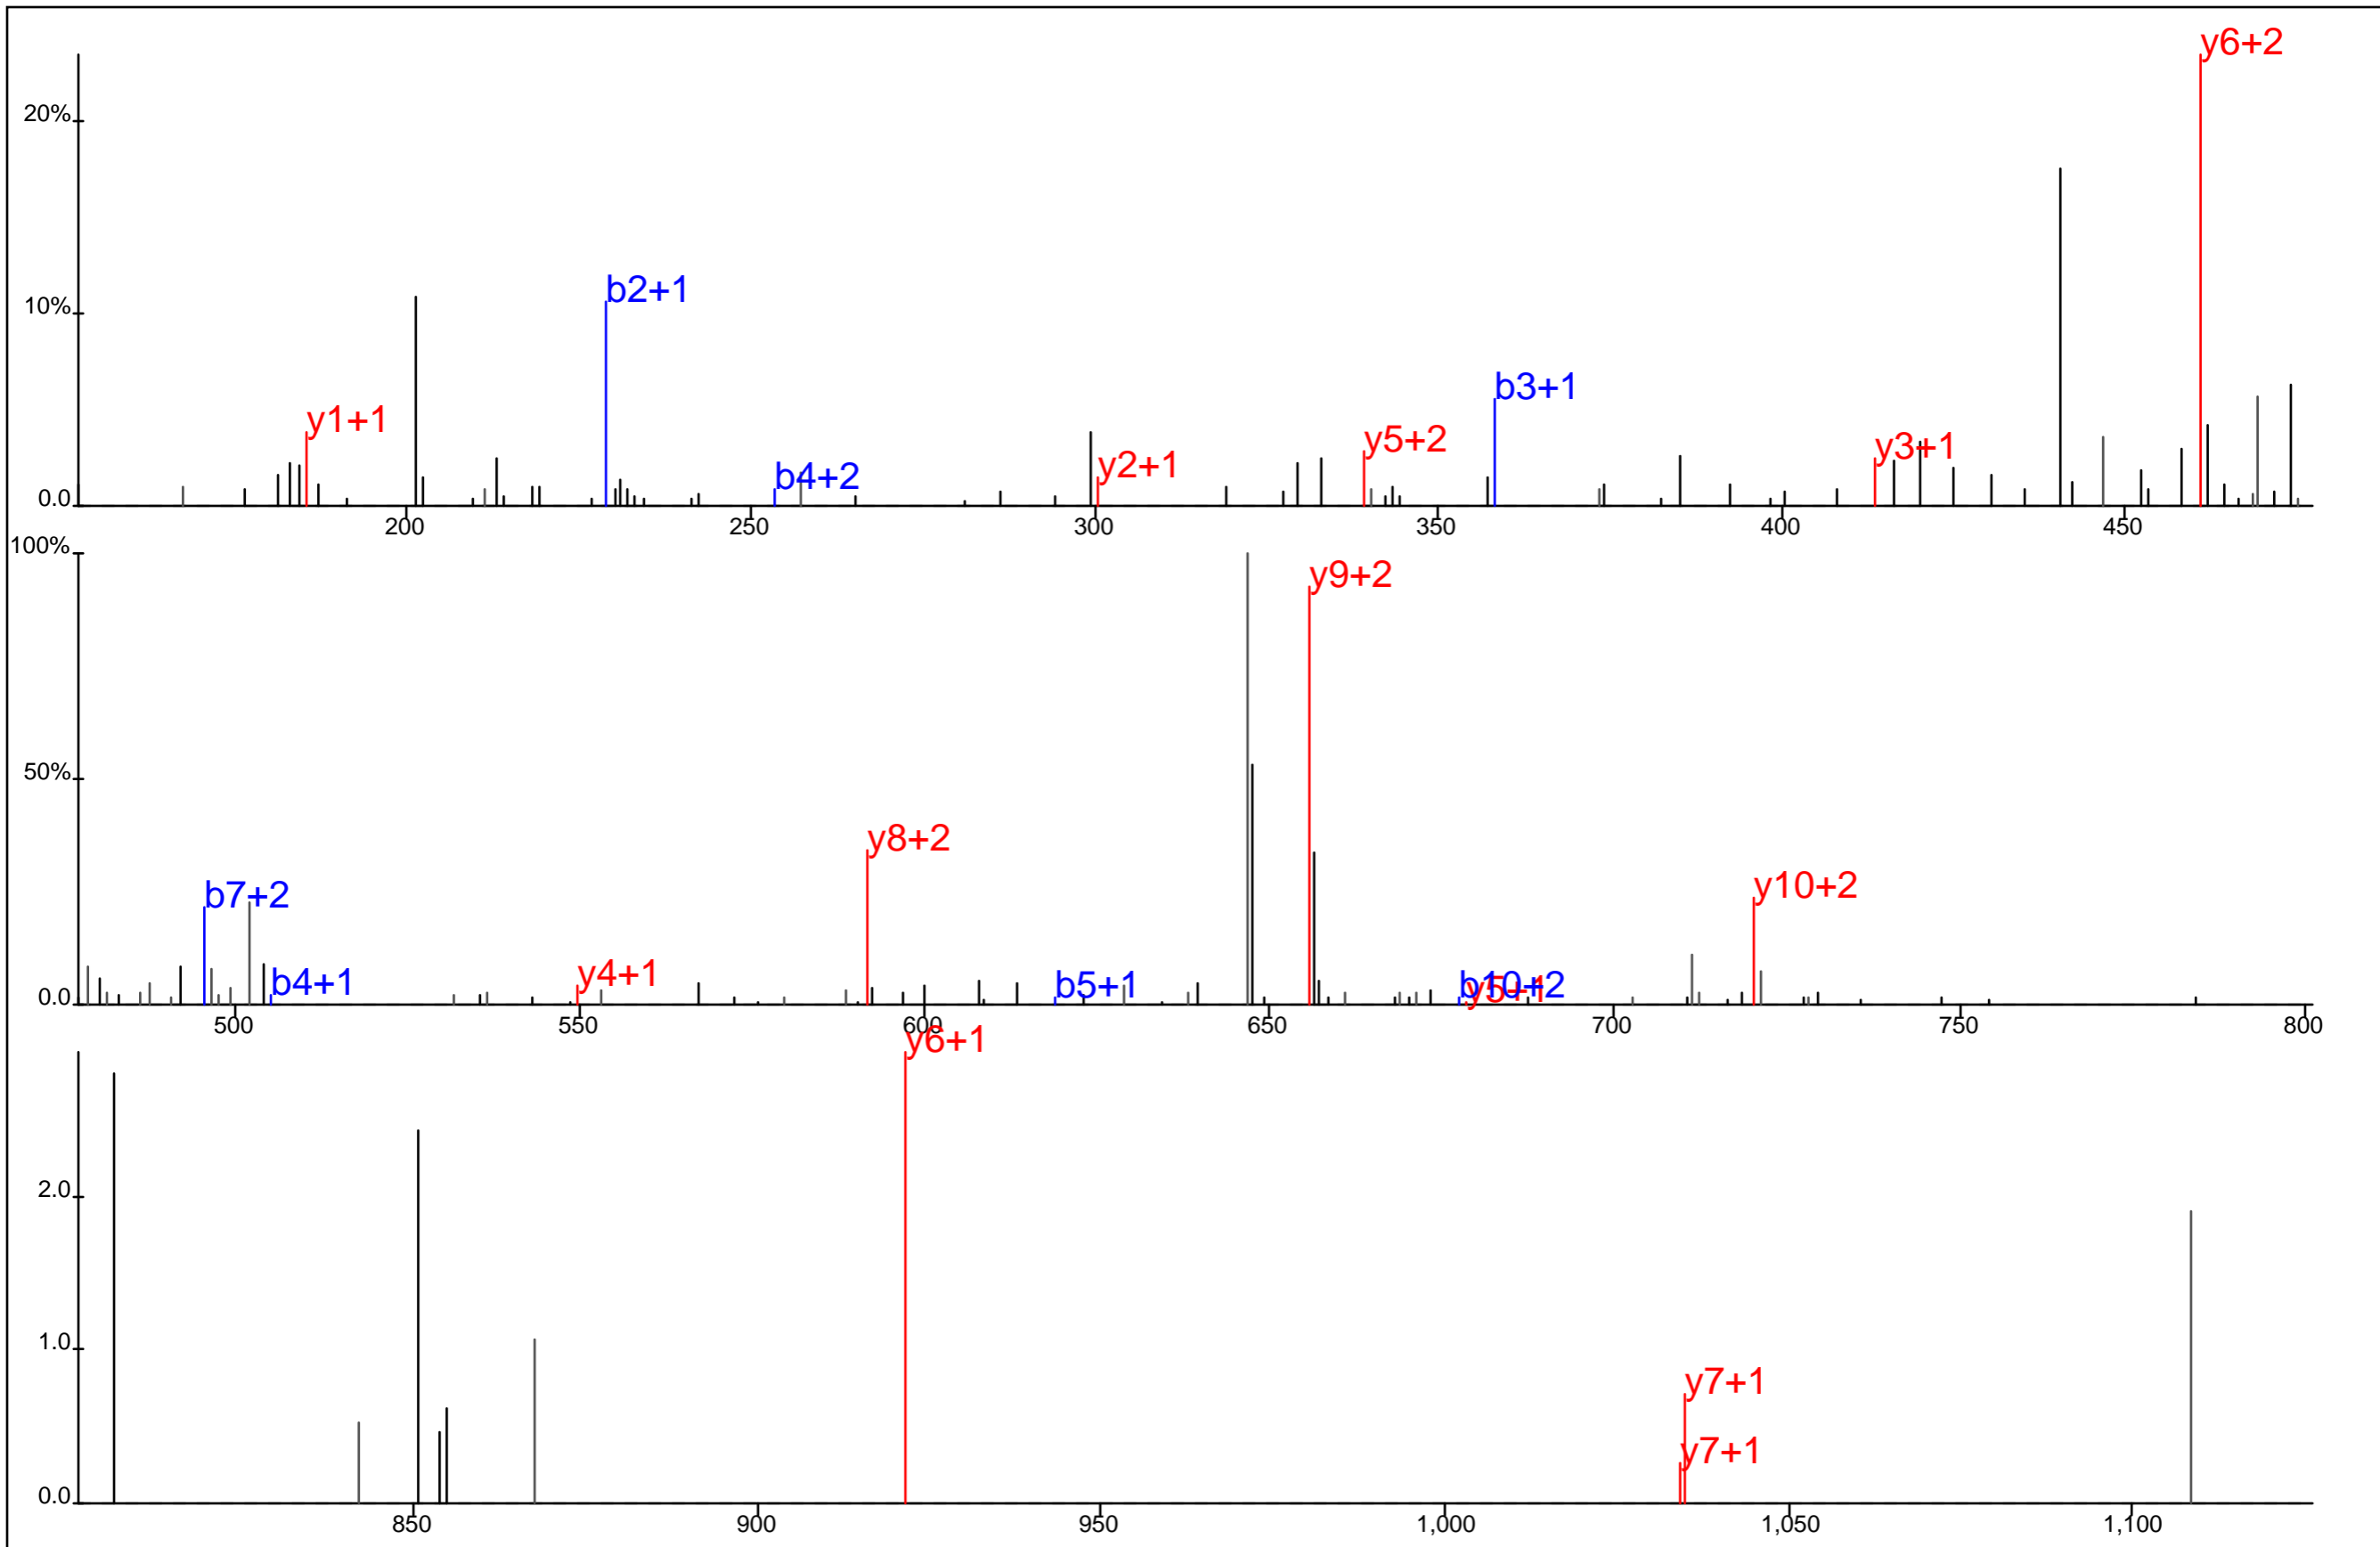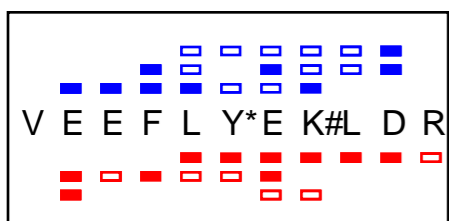

Protein Name: Endophilin B2  
 gi Accession: 55961144  
 Precursor Mass: 513.5810+3  
 Delta Mass: 1.779 ppm  
 XCorr: 25.06

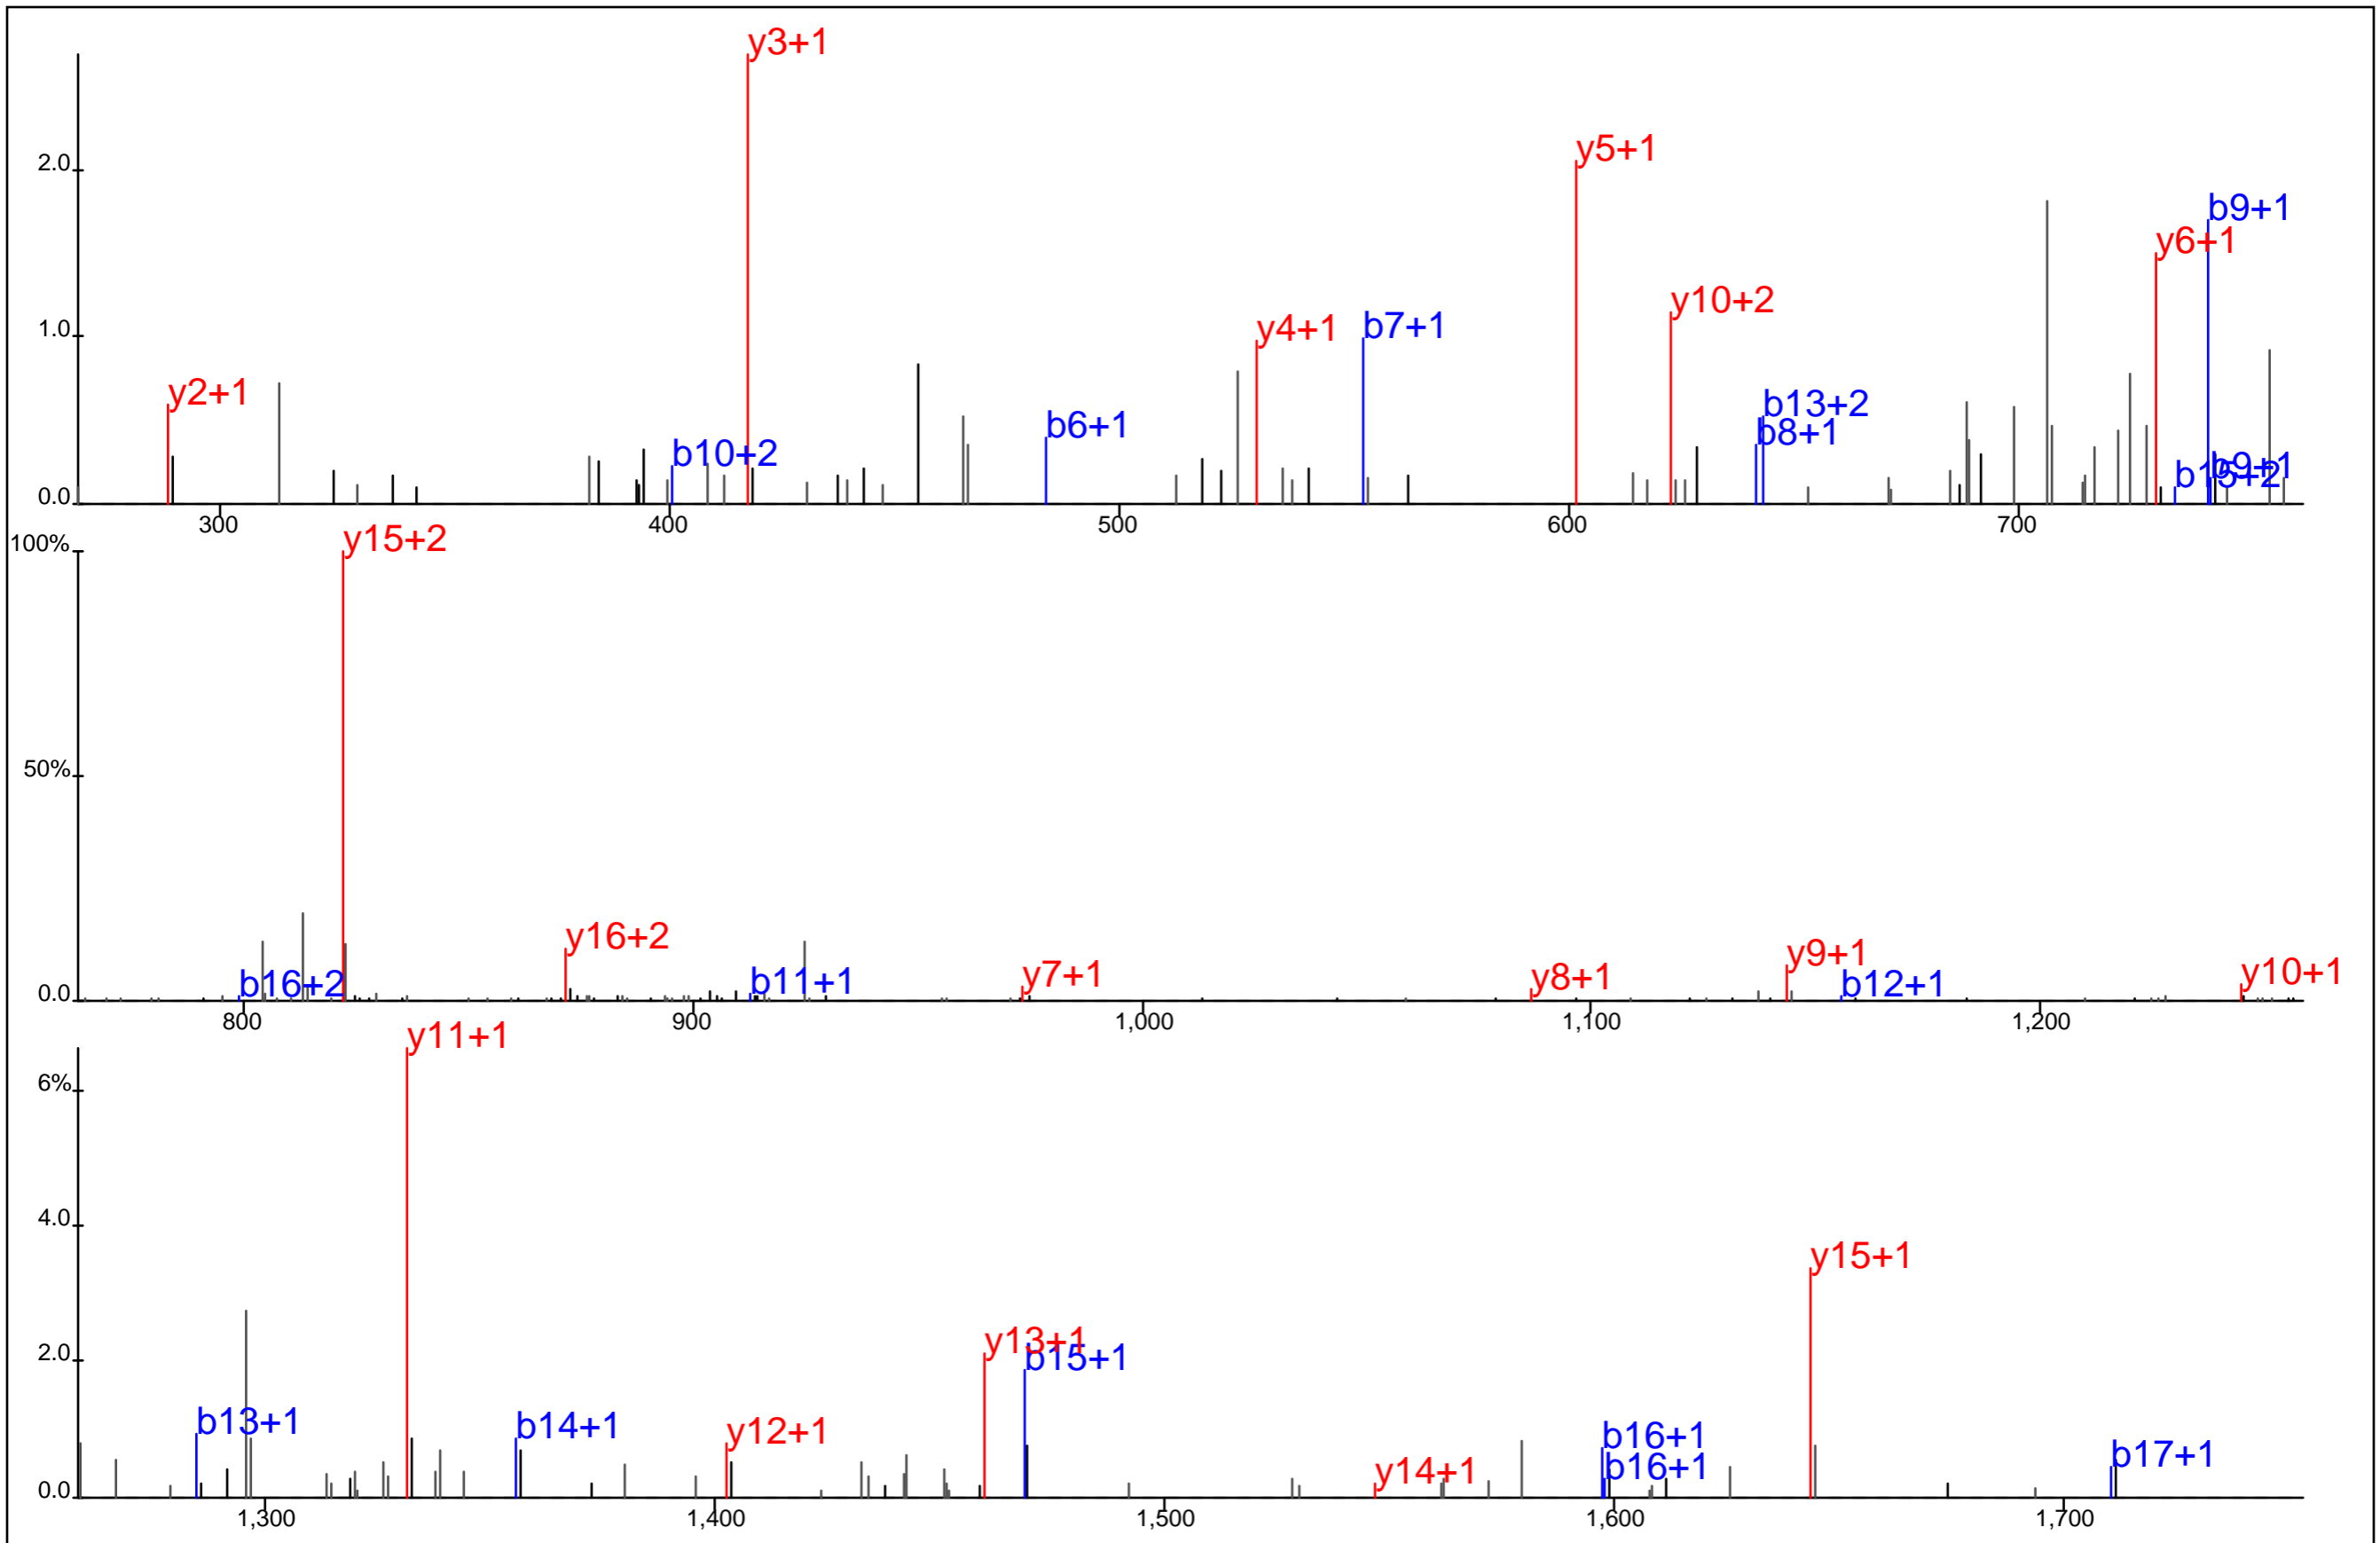

A A V P S G A S T G I Y\* E A L E L R  
▬ ▬ ▬ ▬ ▬ ▬ ▬ ▬ ▬ ▬ ▬ ▬ ▬ ▬ ▬ ▬

Protein Name: Enolase 2  
 gi Accession: 114665857  
 Precursor Mass: 942.9620+2  
 Delta Mass: 3.479 ppm  
 XCorr: 100.46

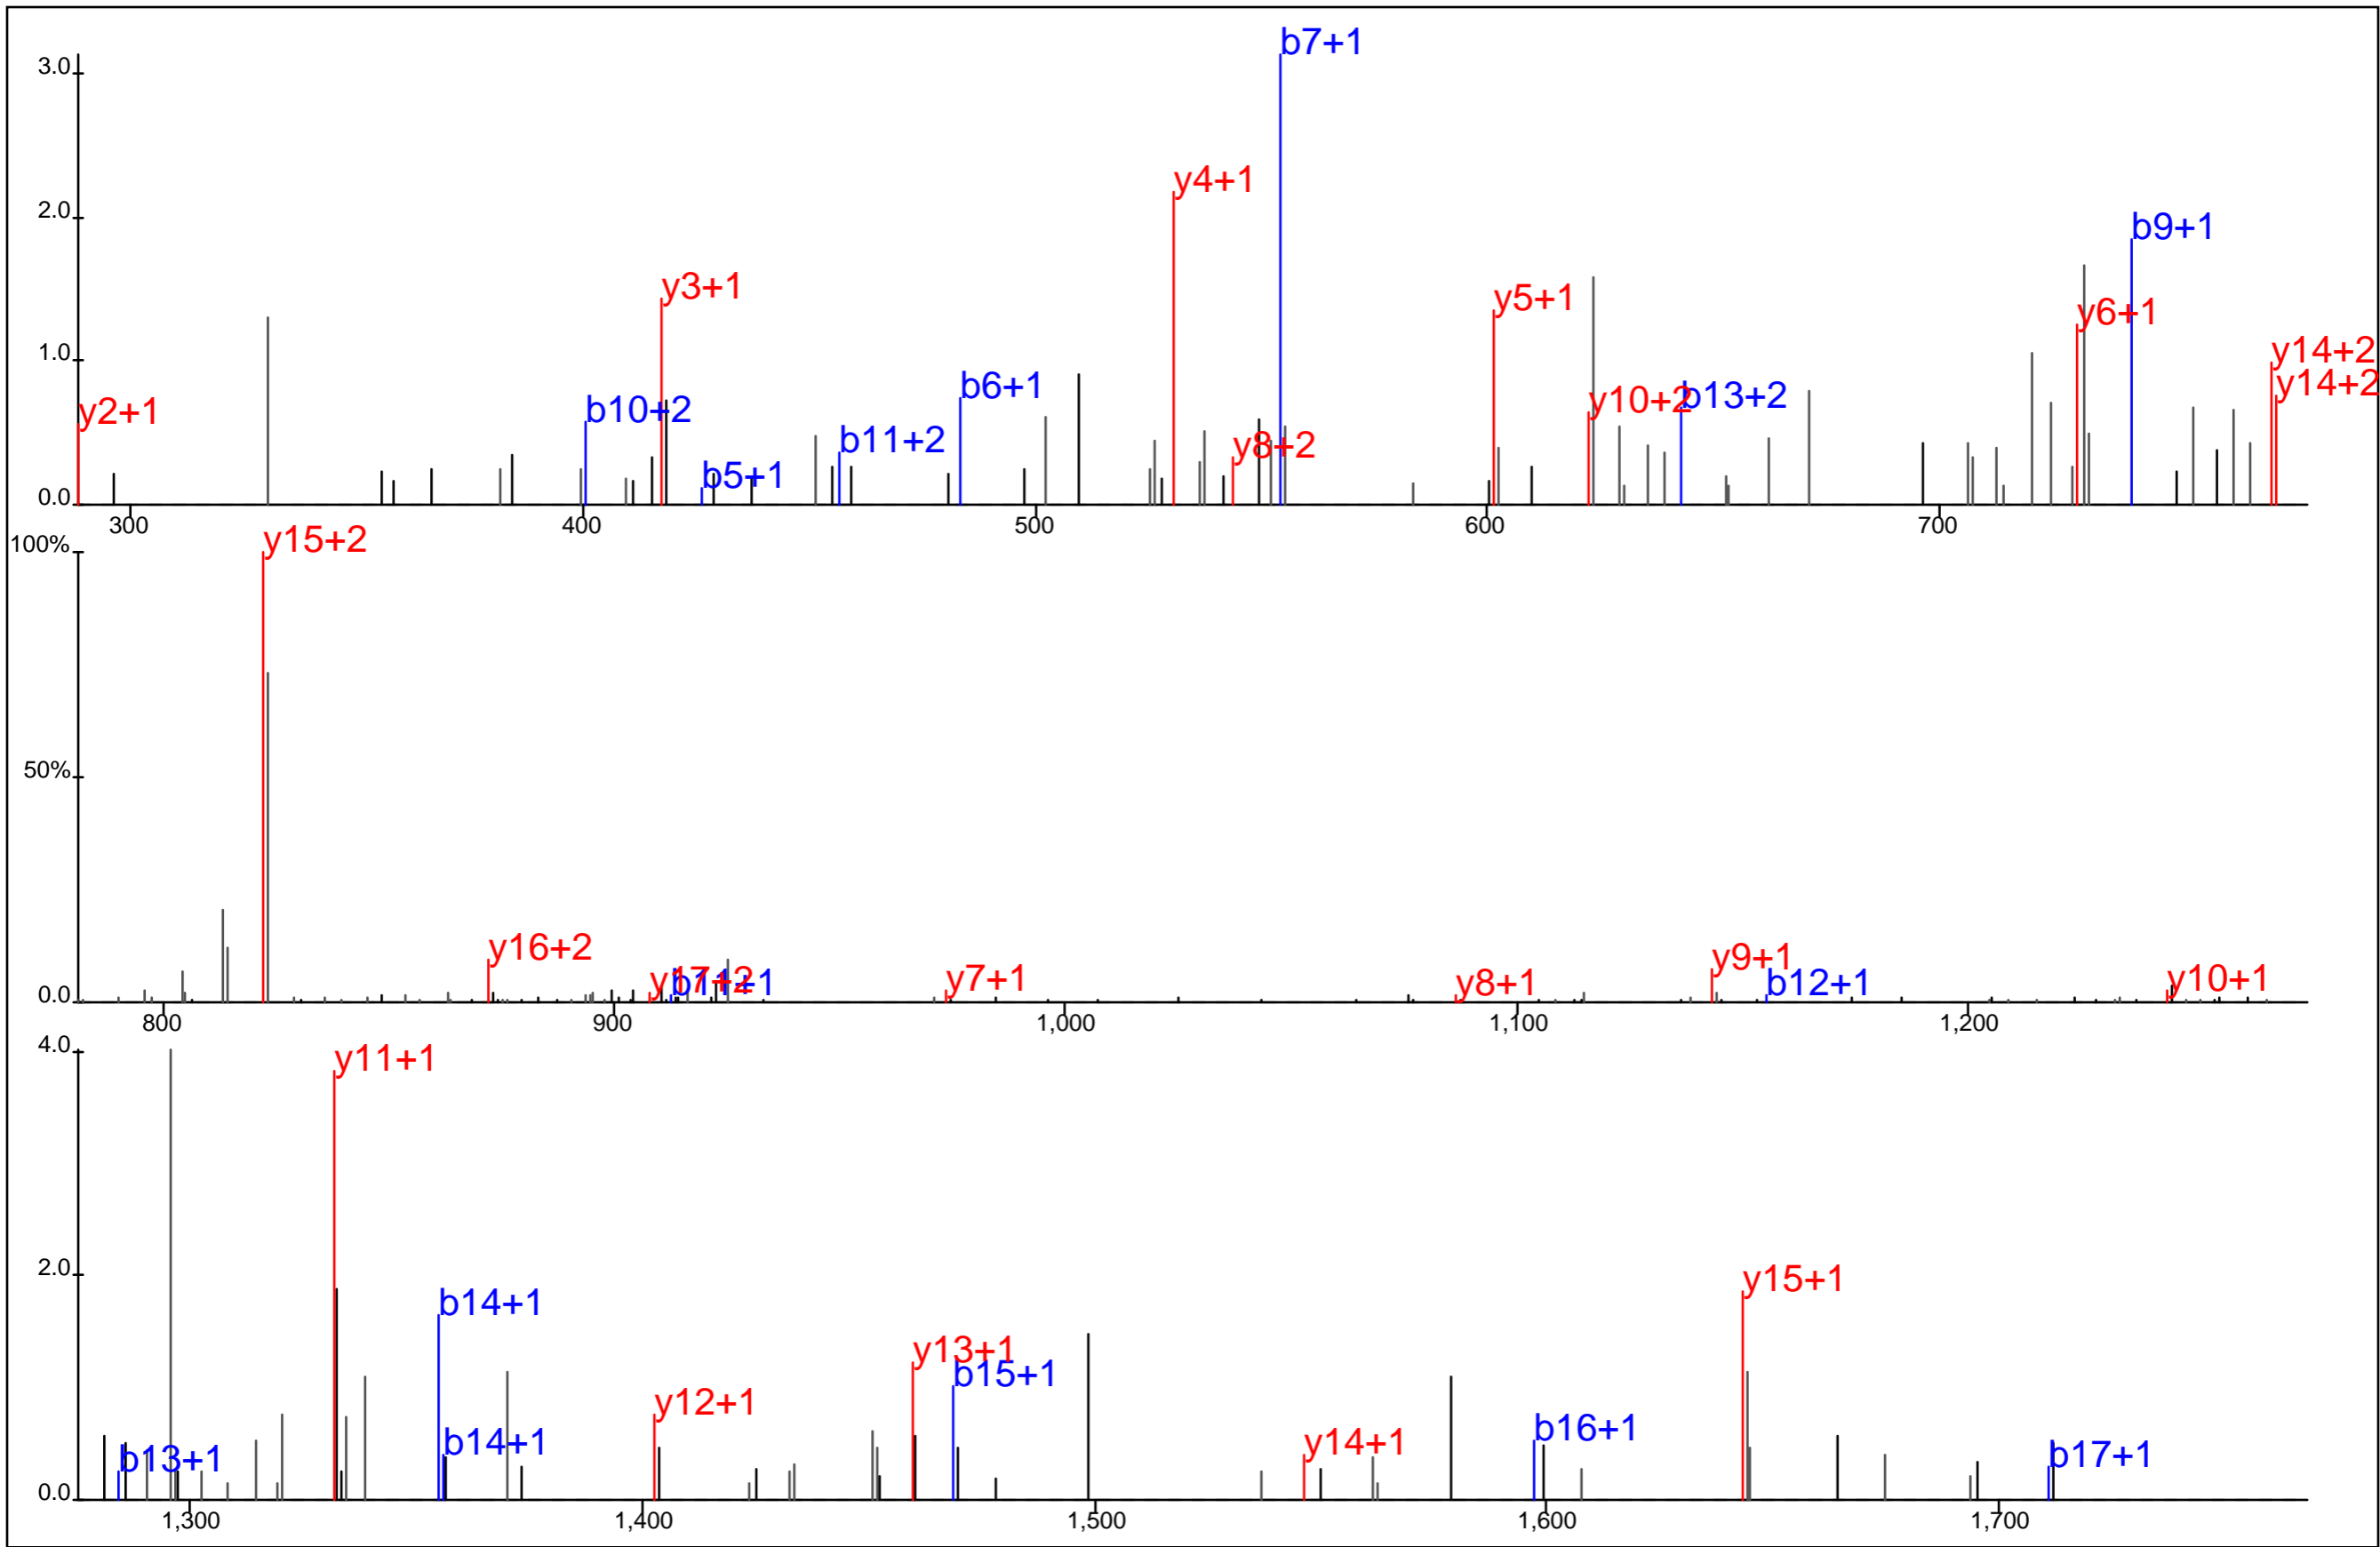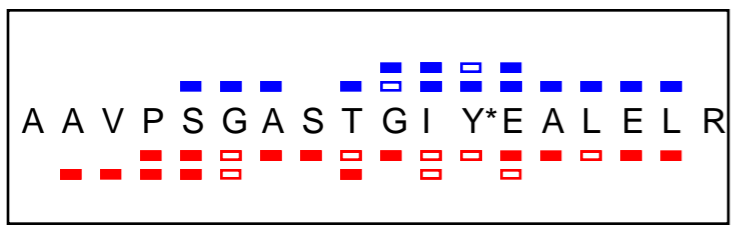

Protein Name: Enolase 2  
 gi Accession: 114665857  
 Precursor Mass: 942.9605+2  
 Delta Mass: 1.856 ppm  
 XCorr: 77.72



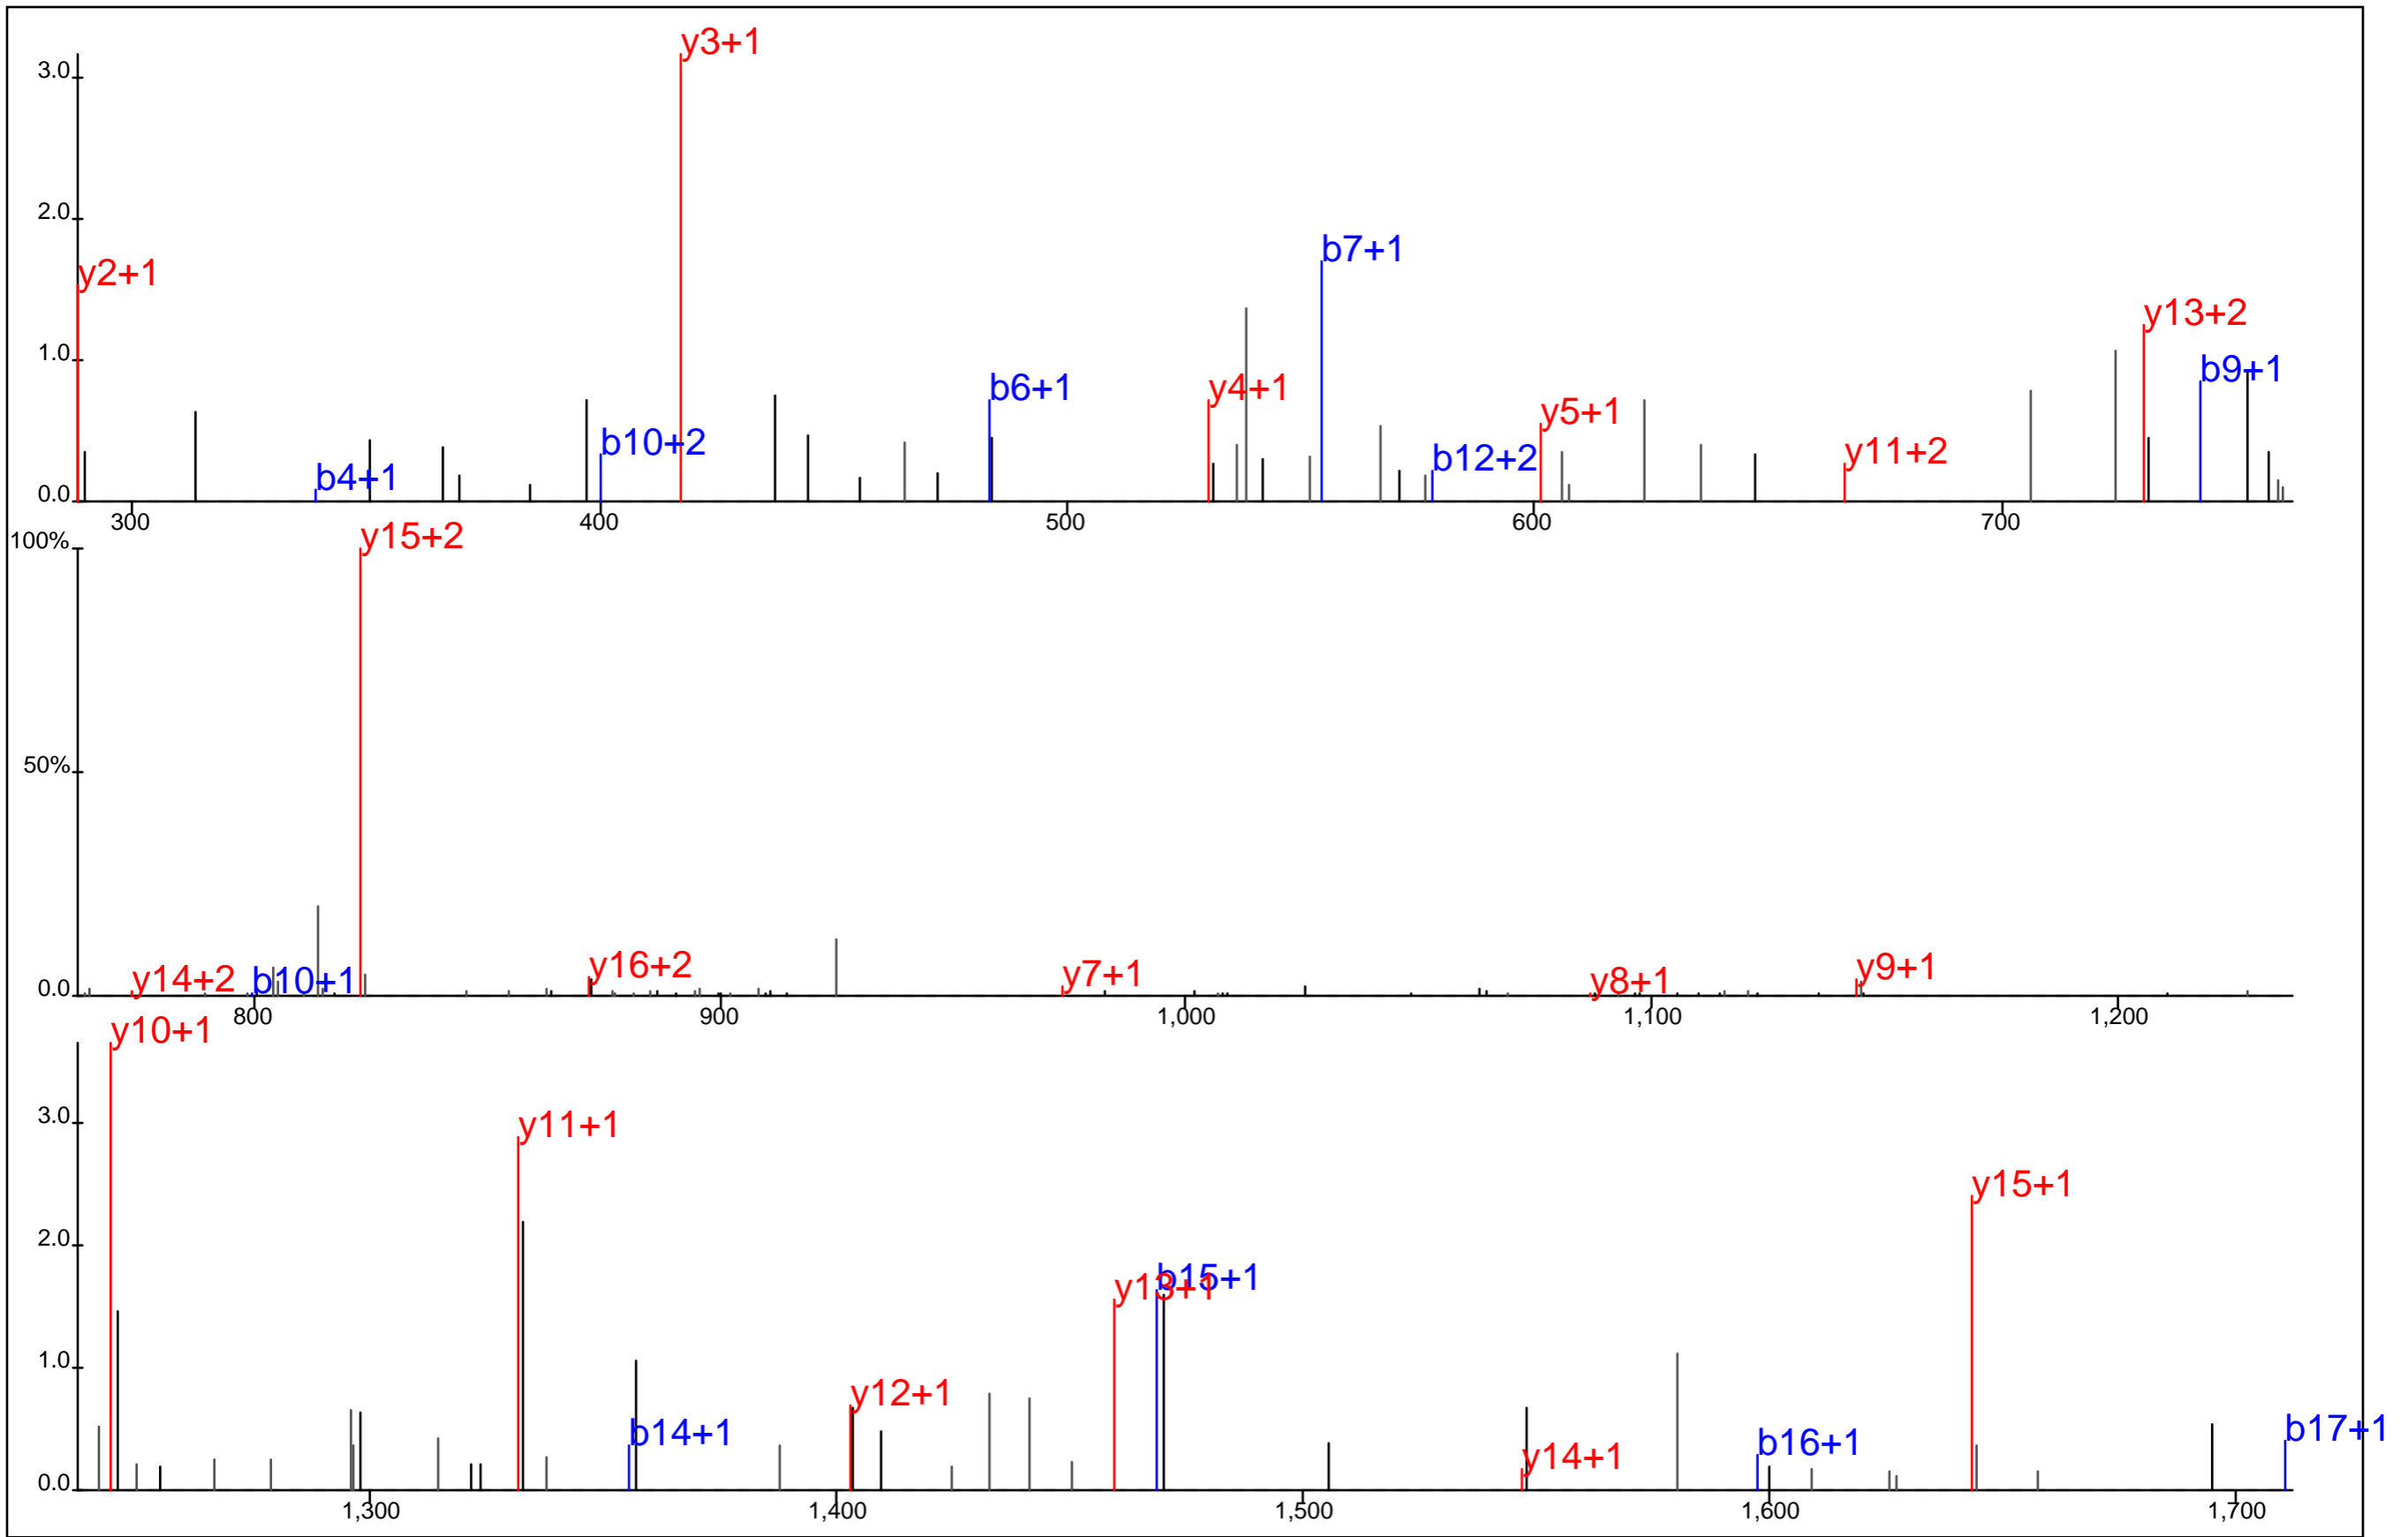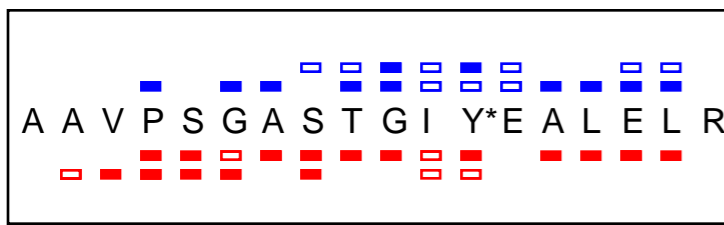

Protein Name: Enolase 2  
 gi Accession: 114665857  
 Precursor Mass: 942.9613+2  
 Delta Mass: 2.699 ppm  
 XCorr: 67.13

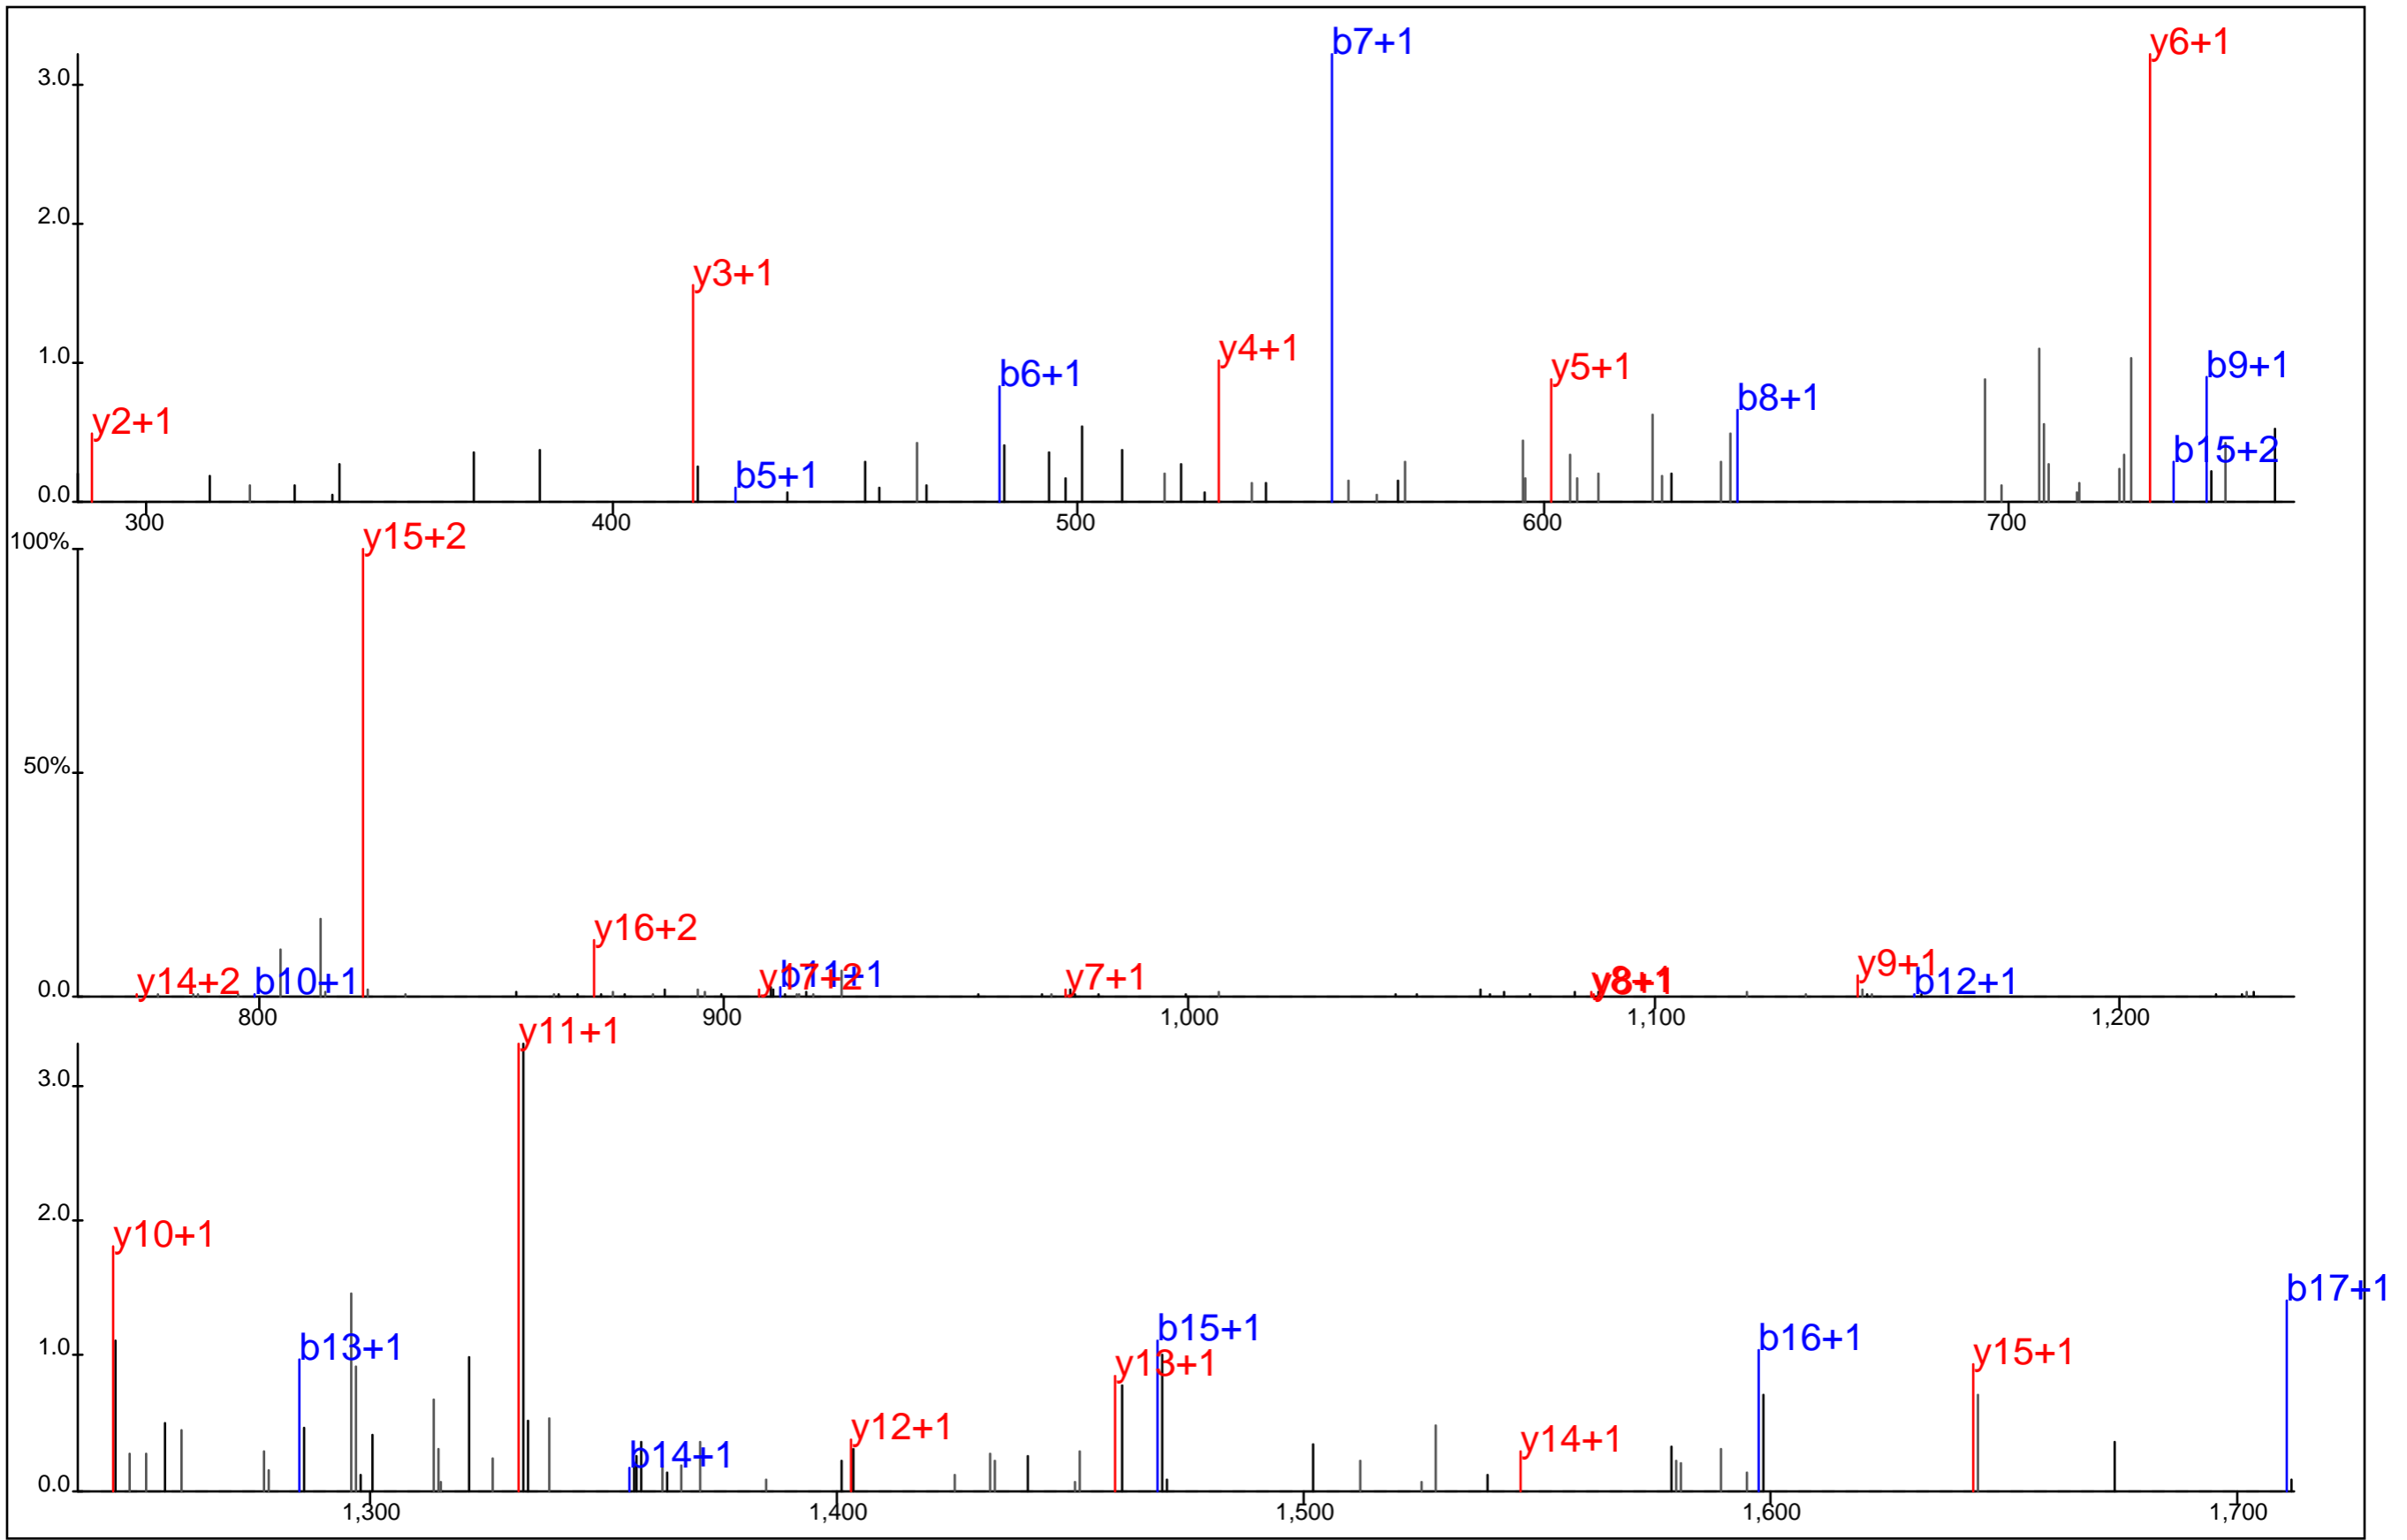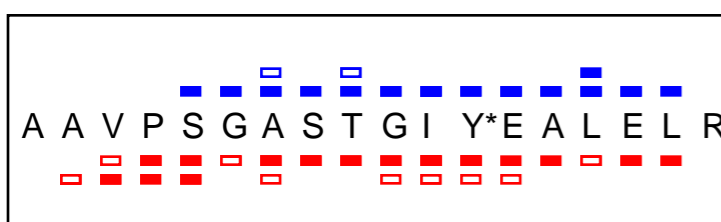

Protein Name: Enolase 2  
gi Accession: 114665857  
Precursor Mass: 942.9613+2  
Delta Mass: 2.699 ppm  
XCorr: 70.99

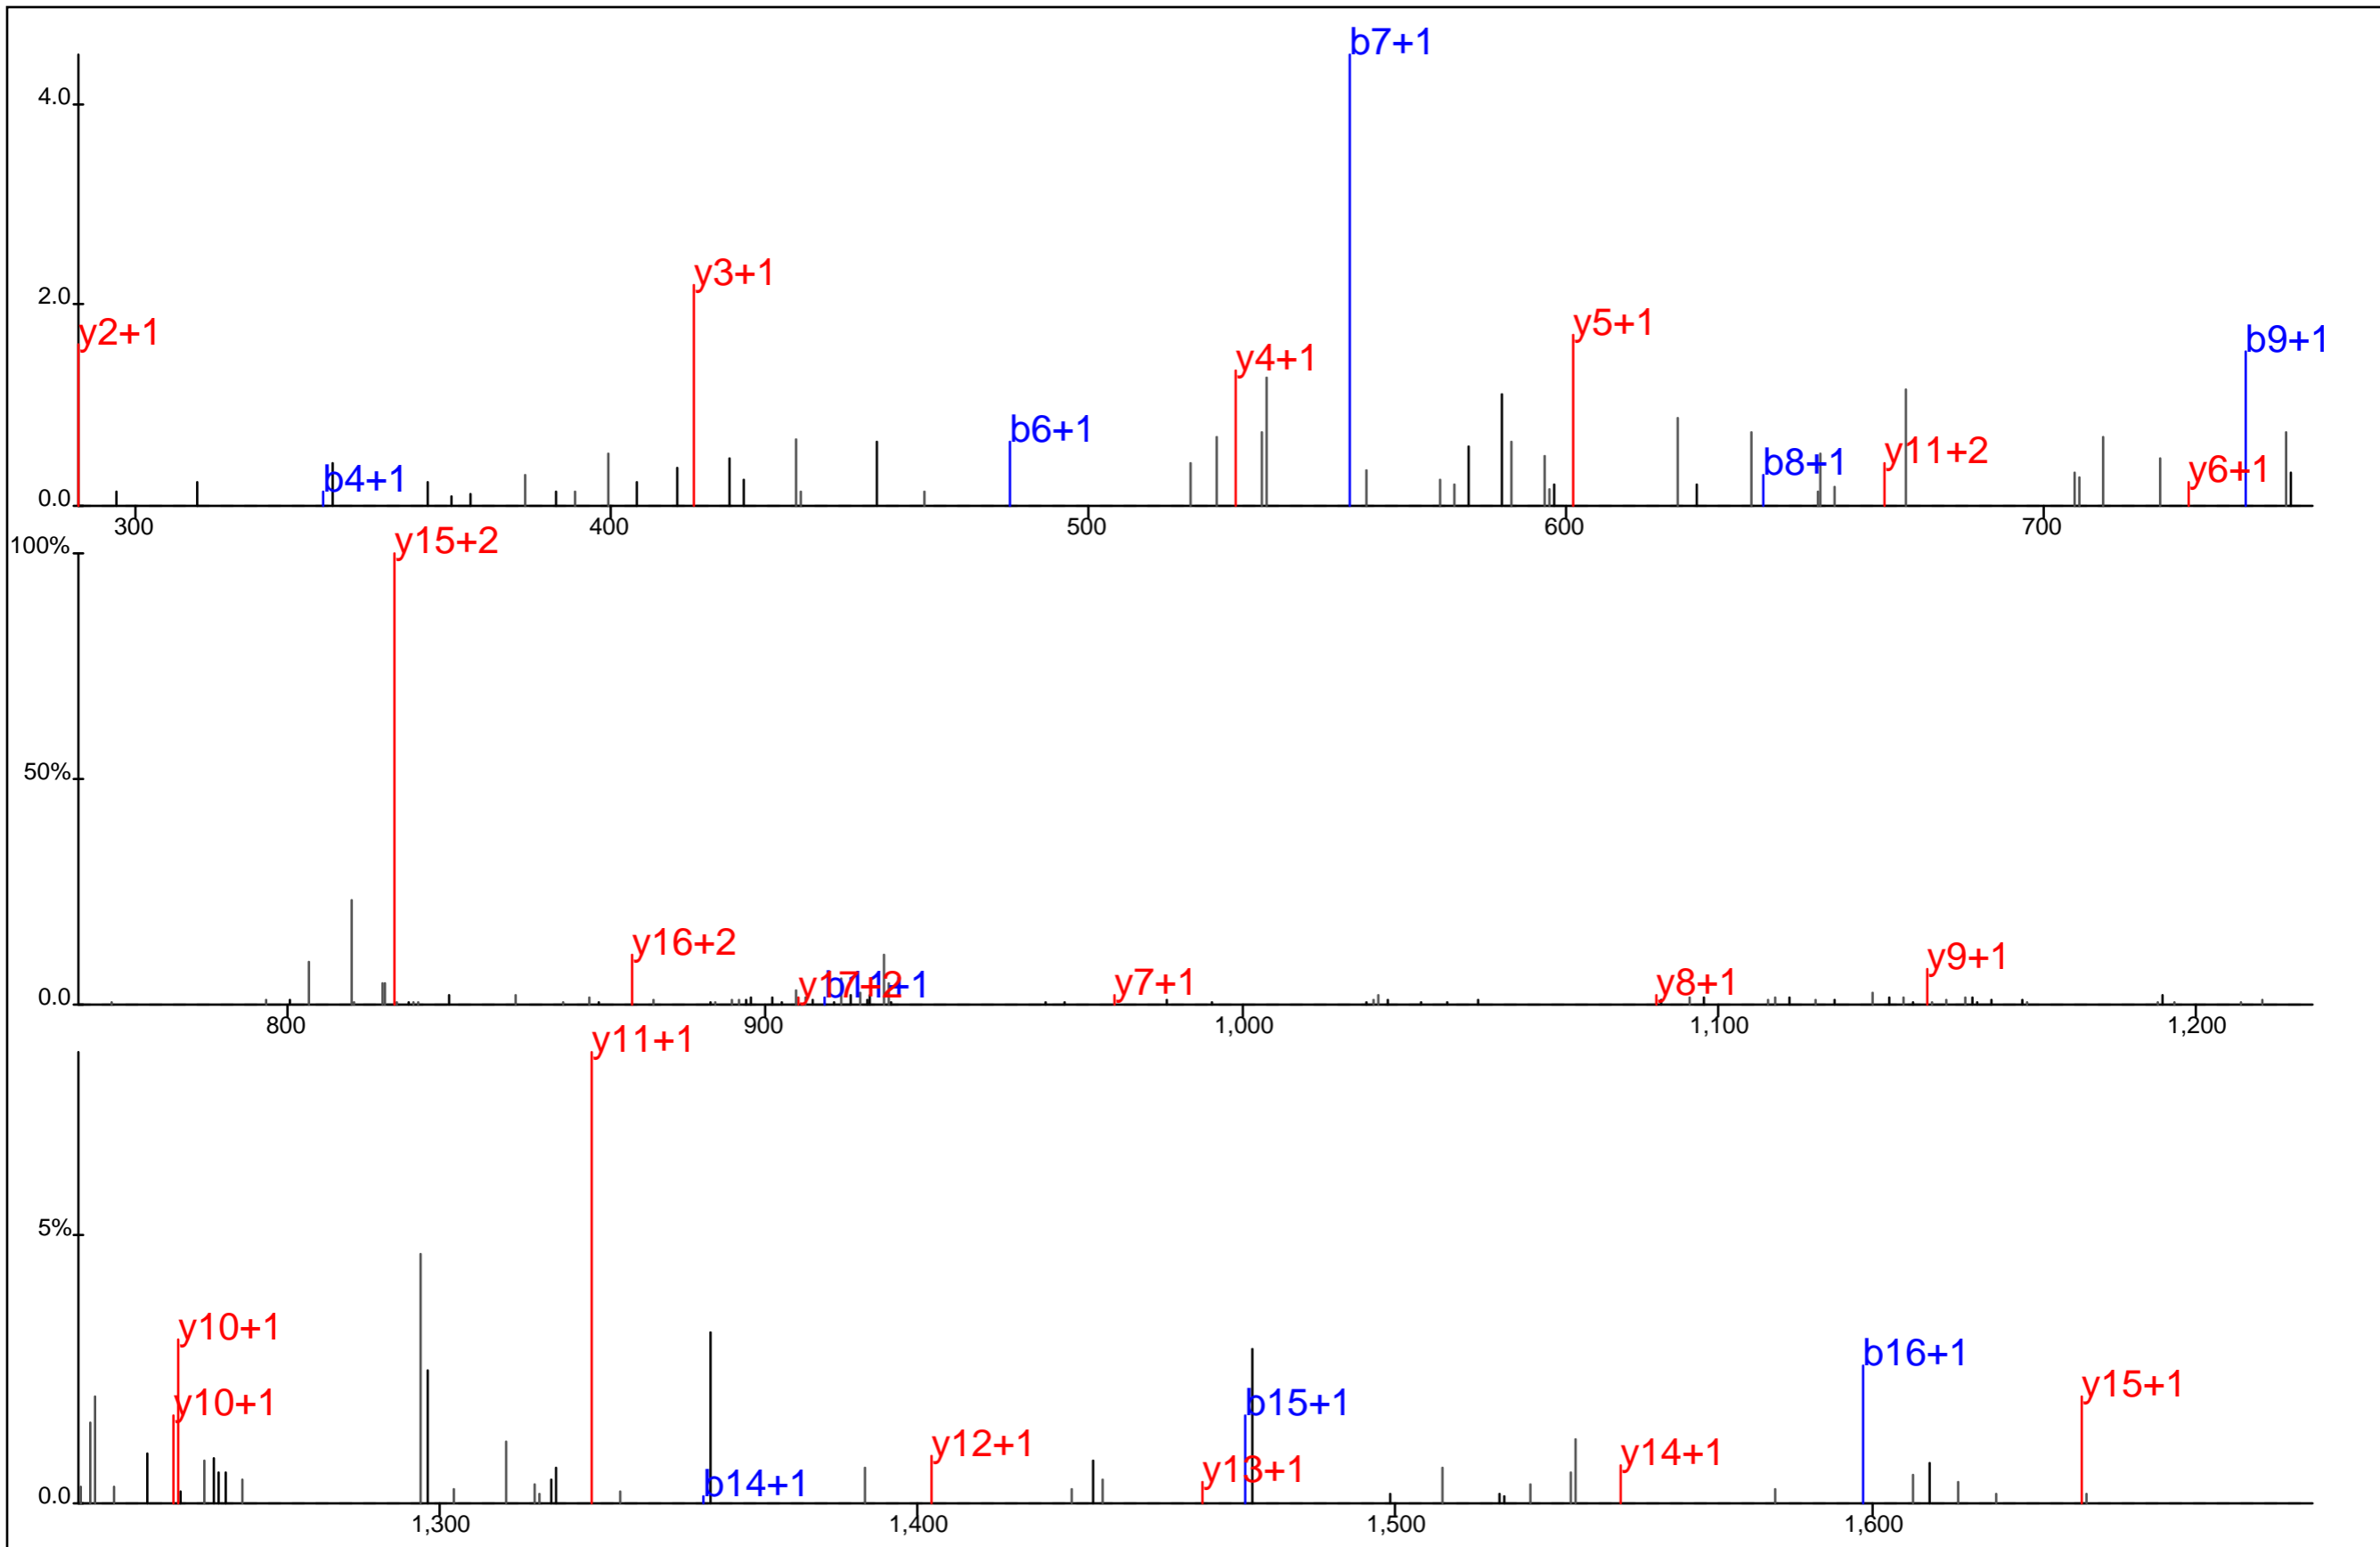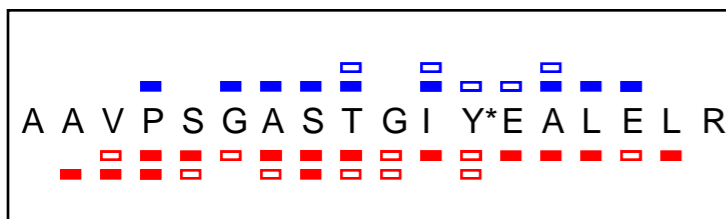

Protein Name: Enolase 2  
 gi Accession: 114665857  
 Precursor Mass: 942.9591+2  
 Delta Mass: 0.370 ppm  
 XCorr: 68.9

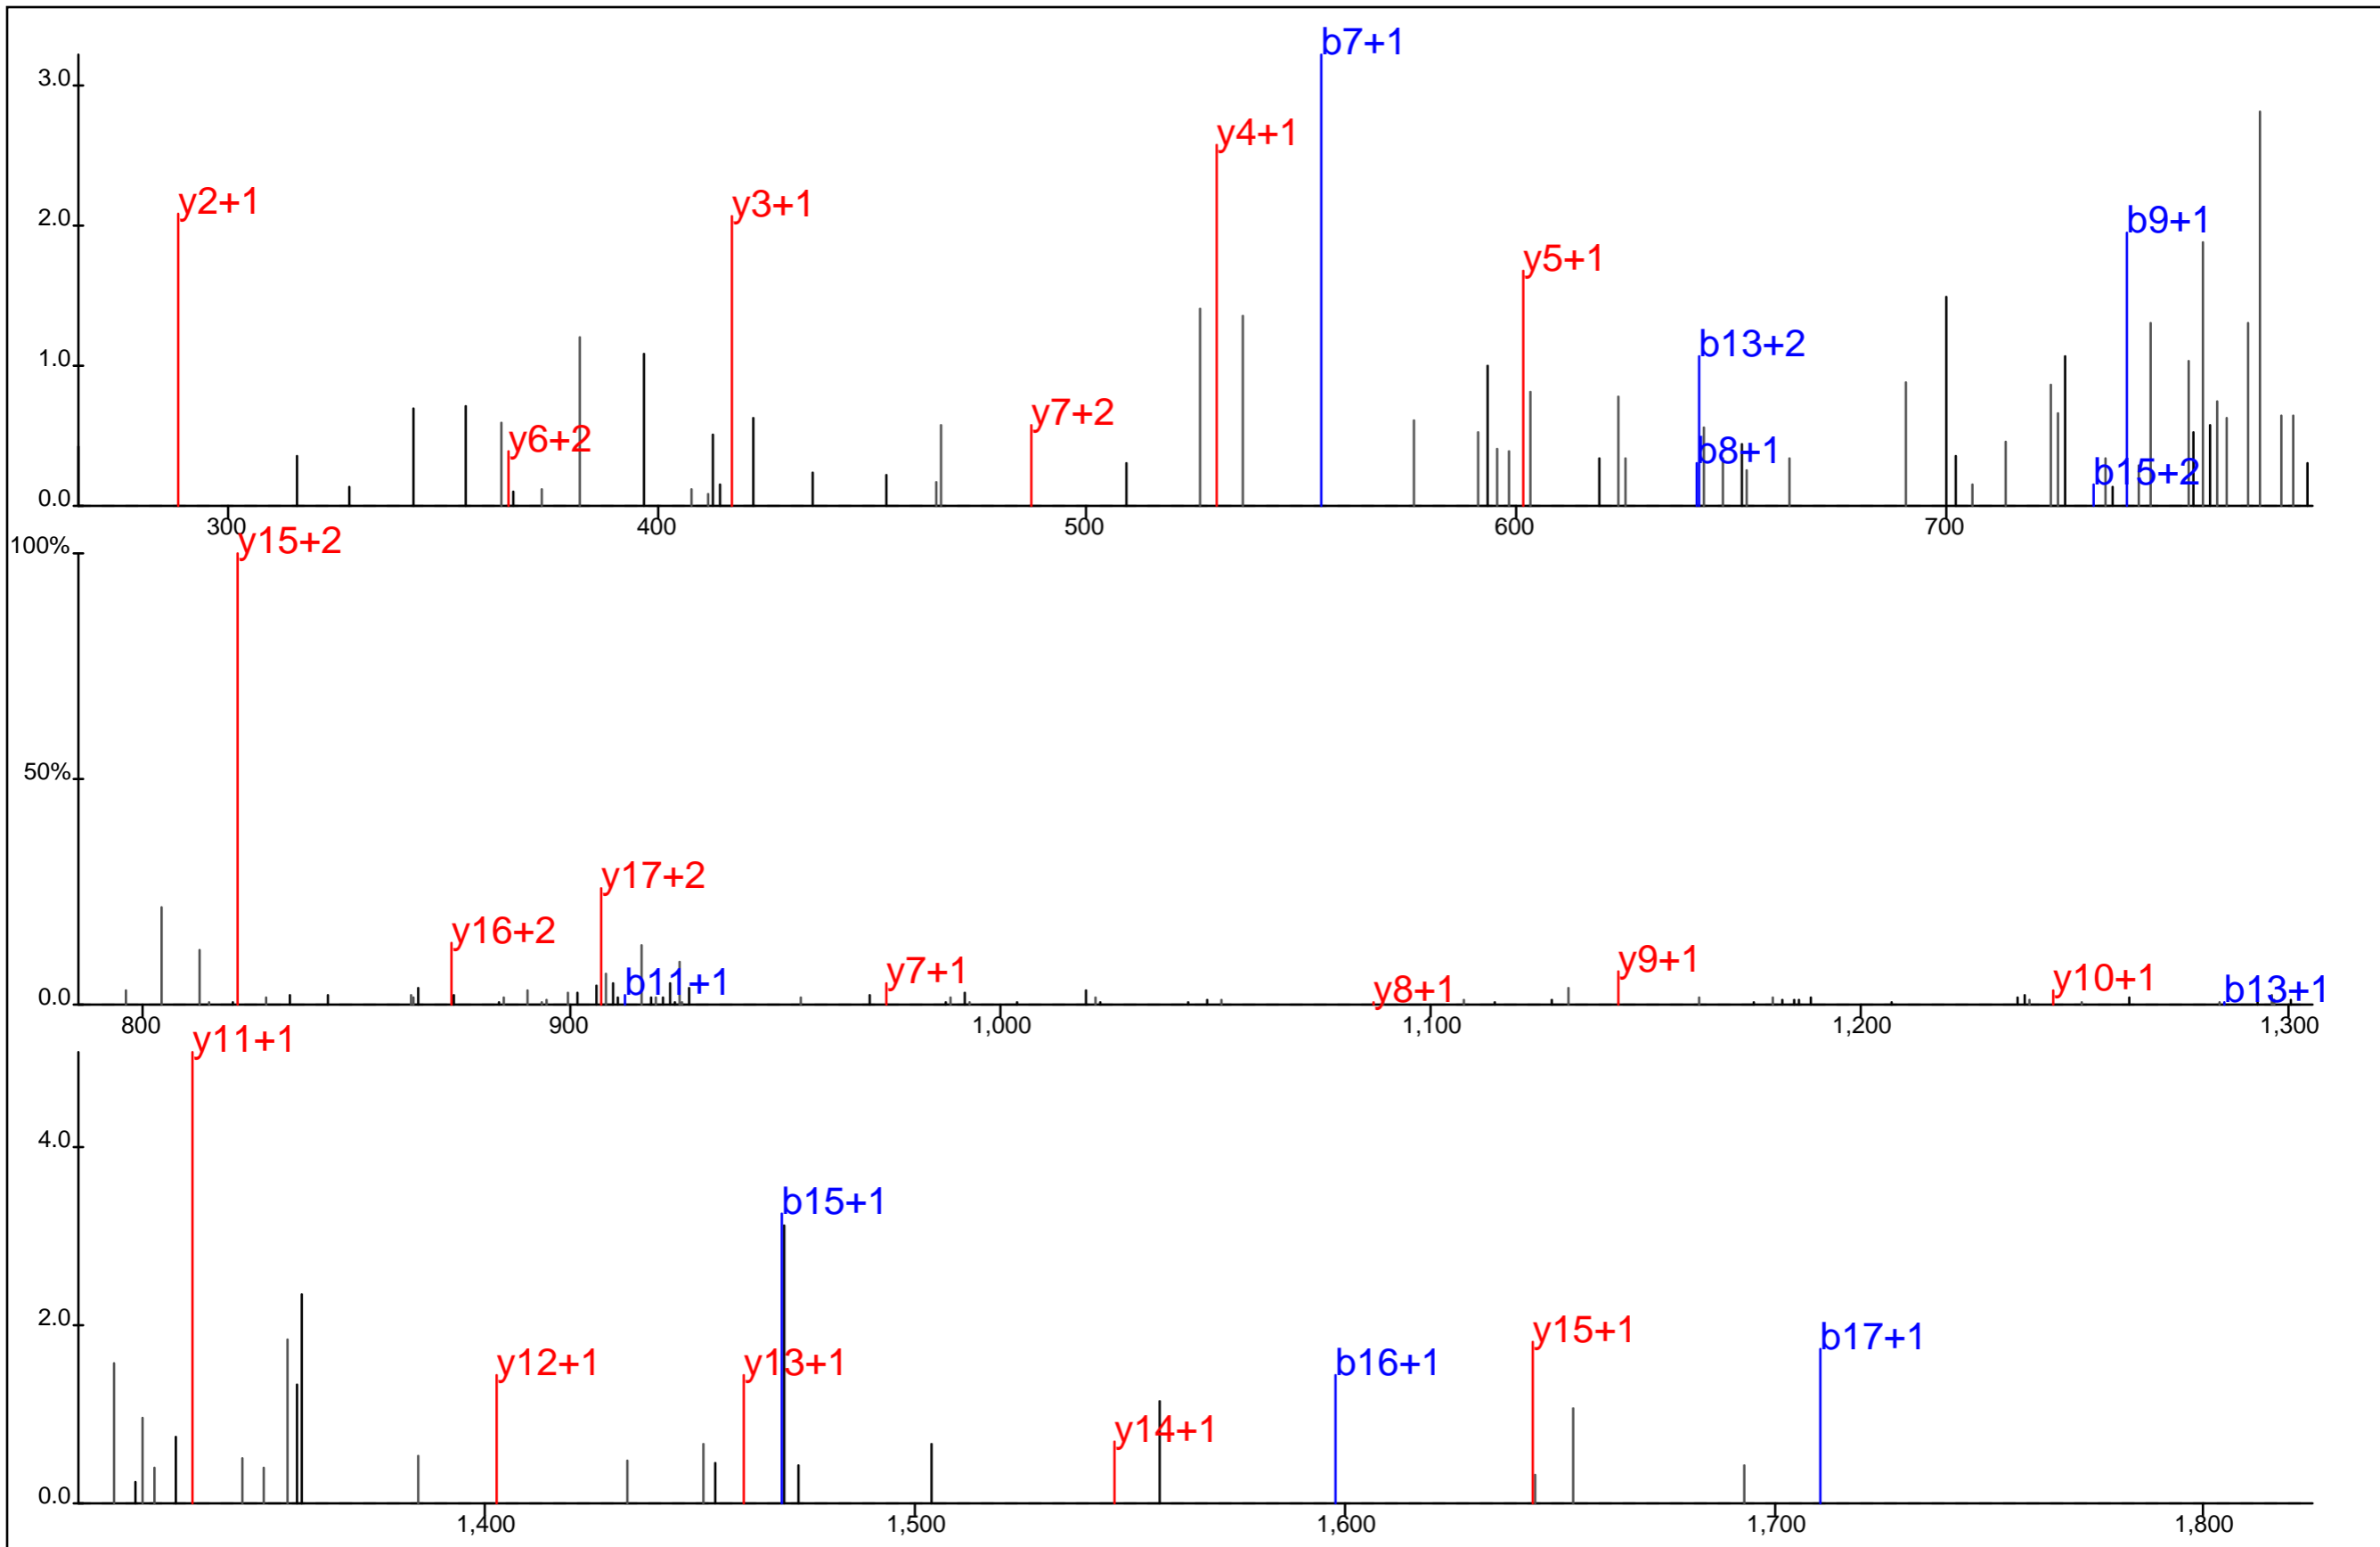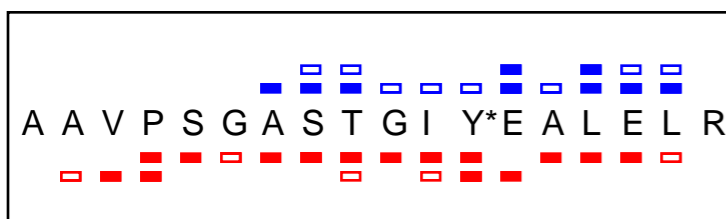

Protein Name: Enolase 2  
 gi Accession: 114665857  
 Precursor Mass: 942.9606+2  
 Delta Mass: 1.988 ppm  
 XCorr: 84.57

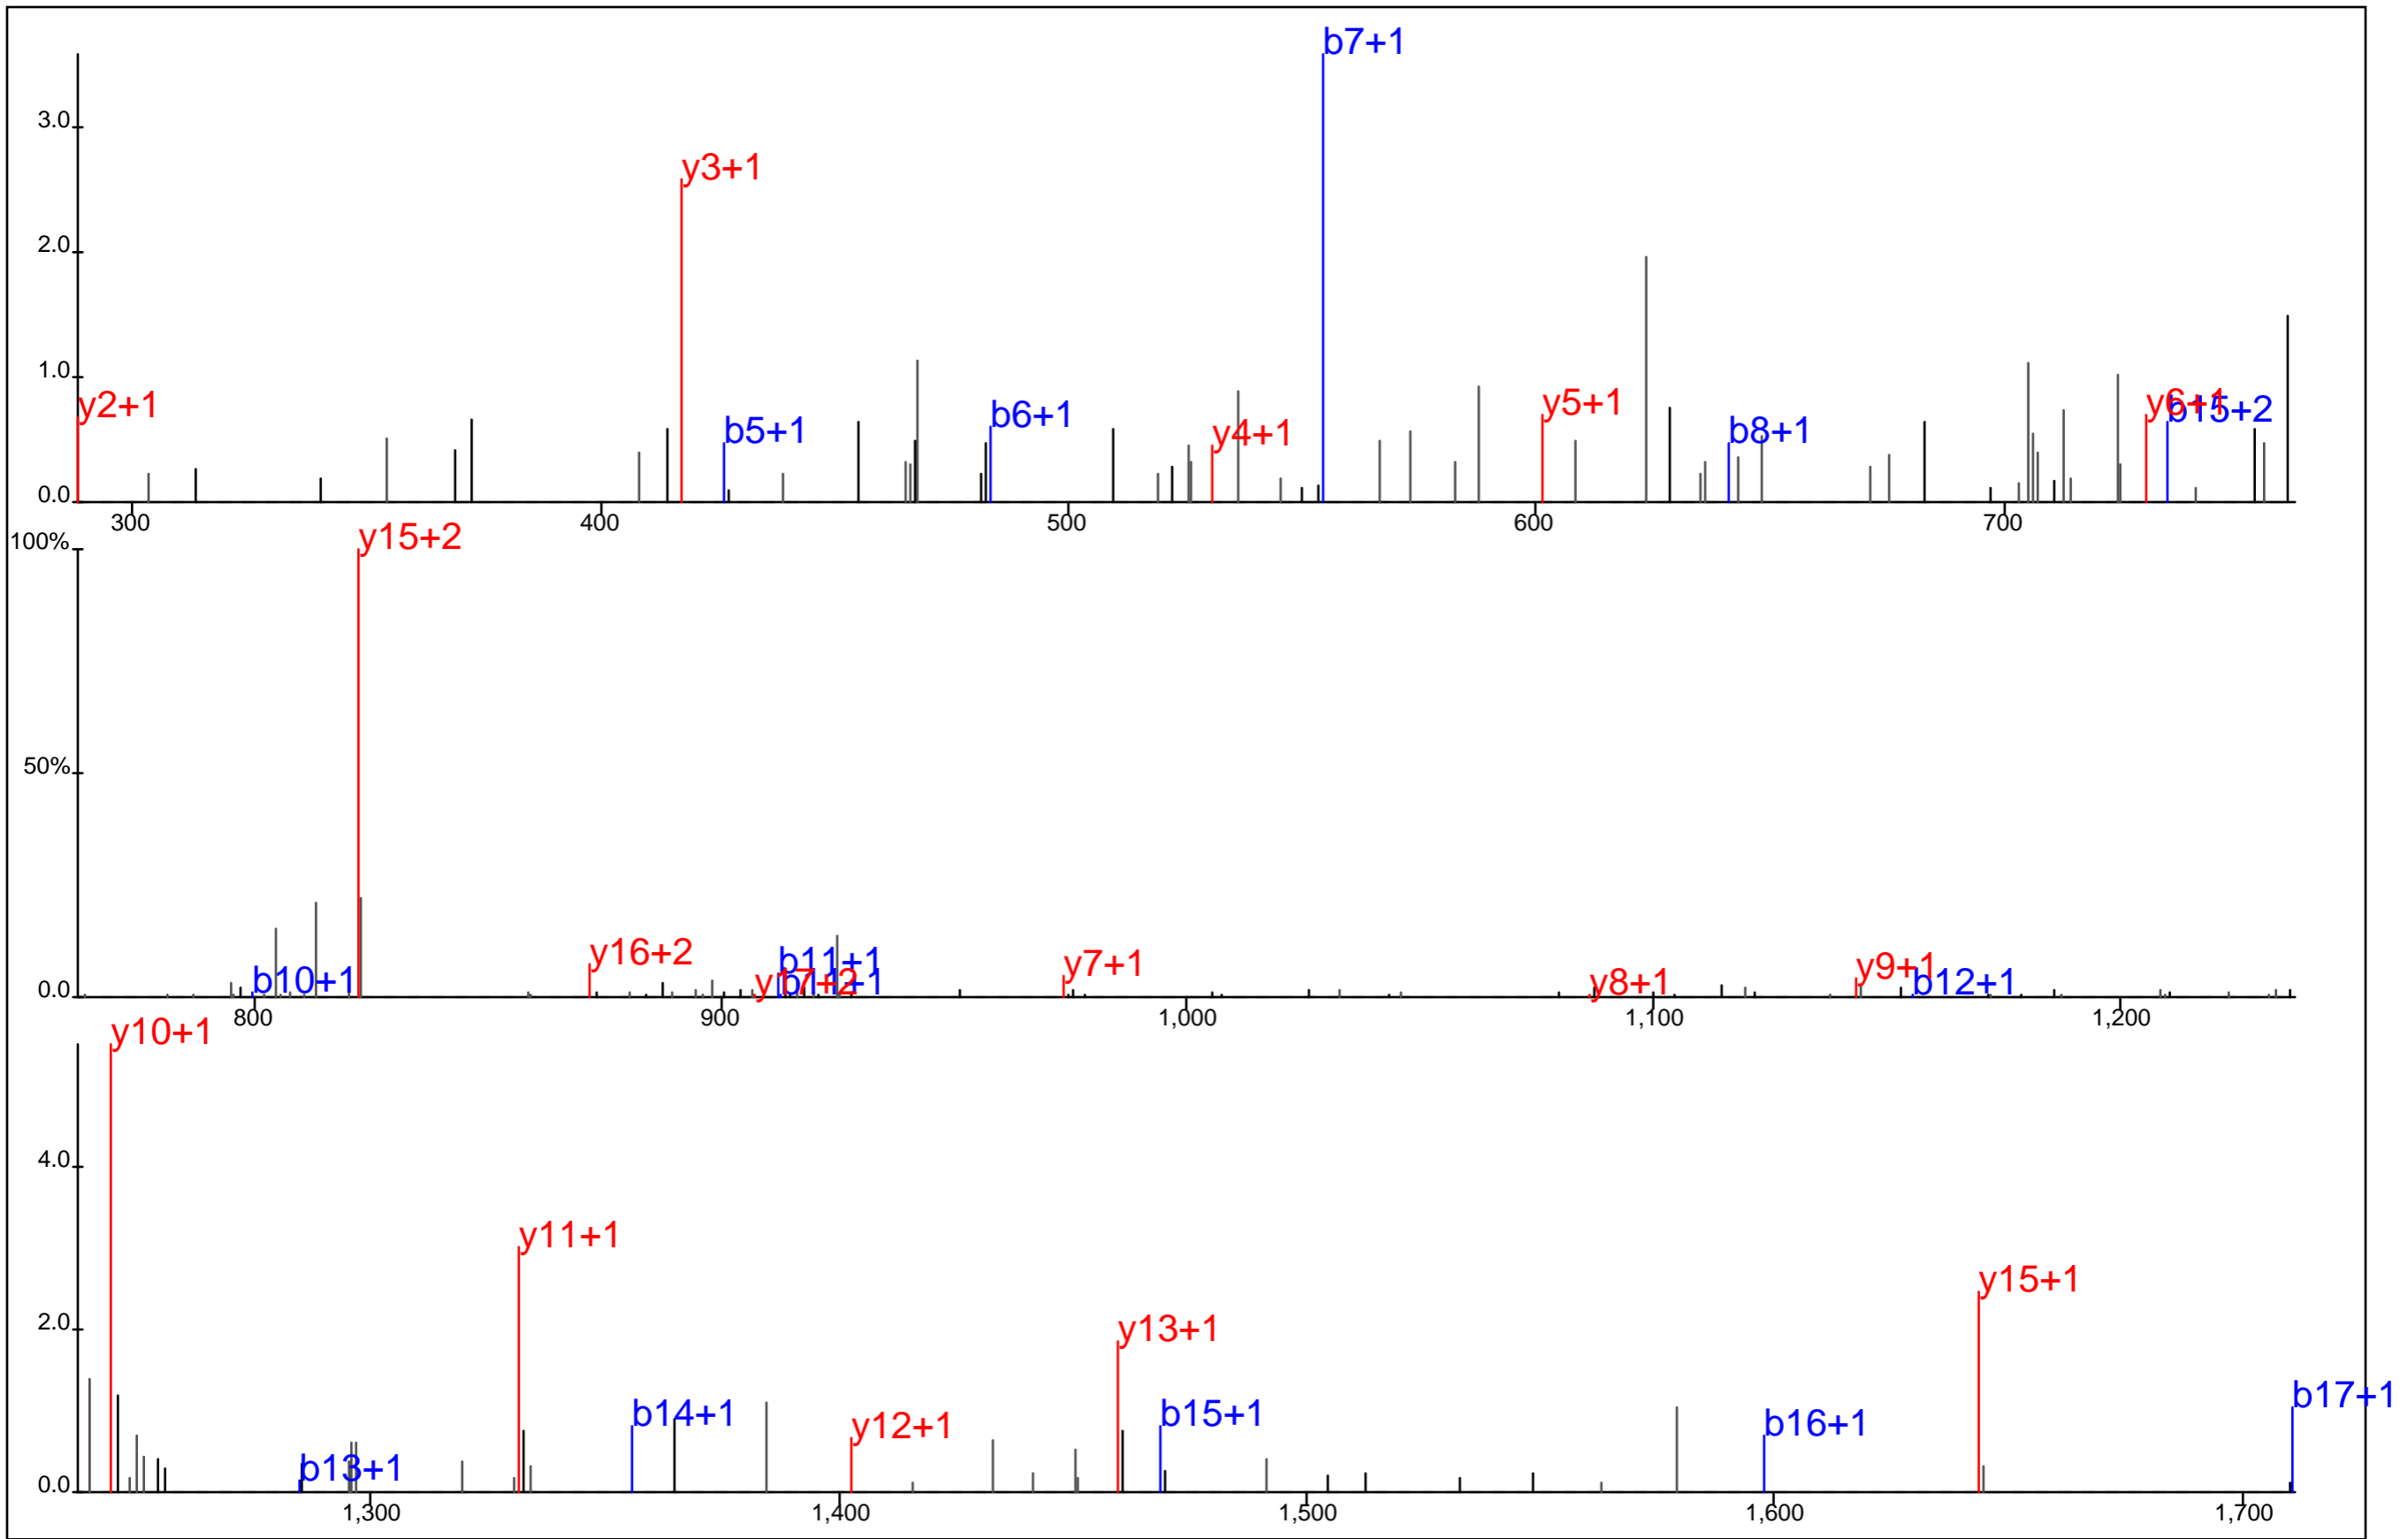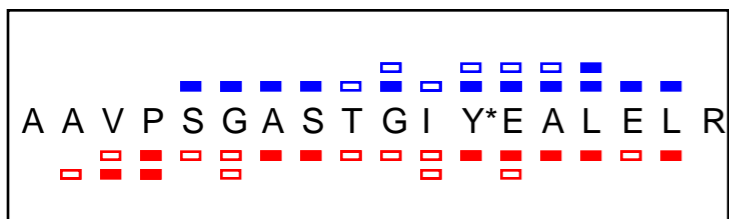

Protein Name: Enolase 2  
 gi Accession: 114665857  
 Precursor Mass: 942.9592+2  
 Delta Mass: 0.498 ppm  
 XCorr: 52.8

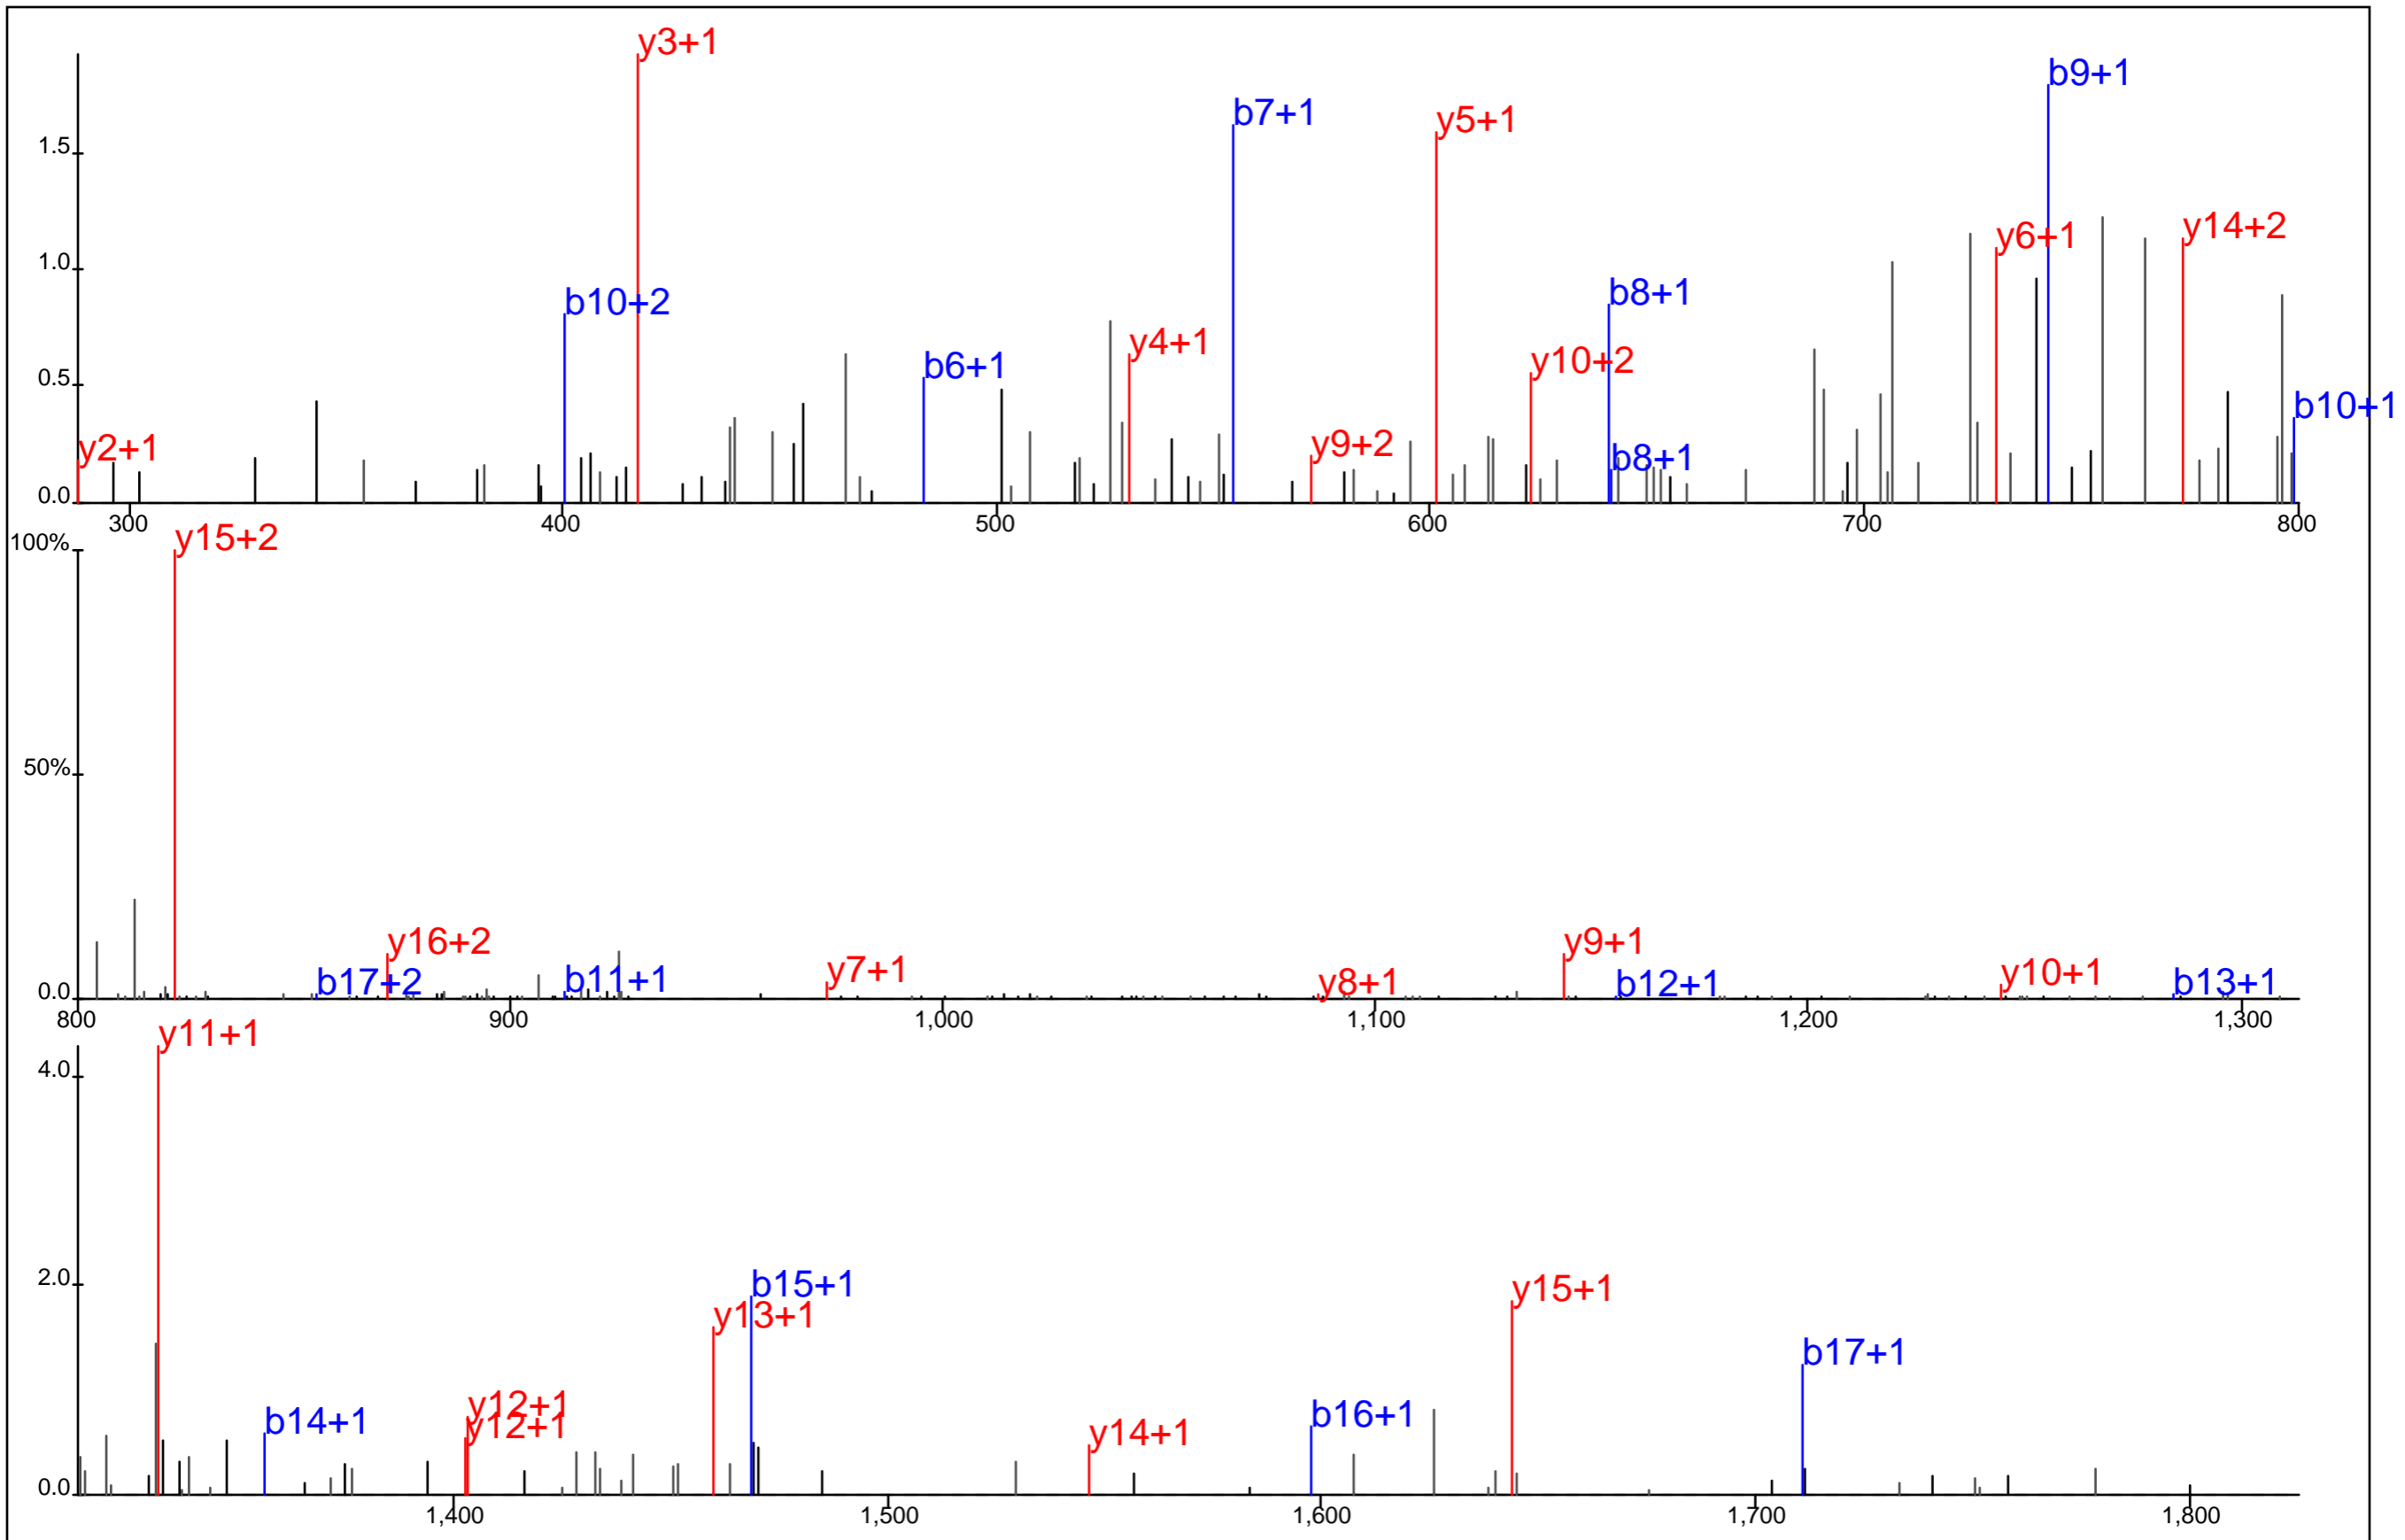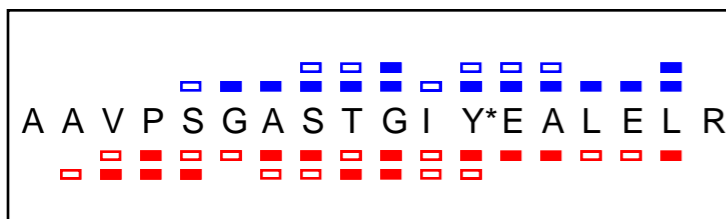

Protein Name: Enolase 2  
 gi Accession: 114665857  
 Precursor Mass: 942.9608+2  
 Delta Mass: 2.116 ppm  
 XCorr: 94.61

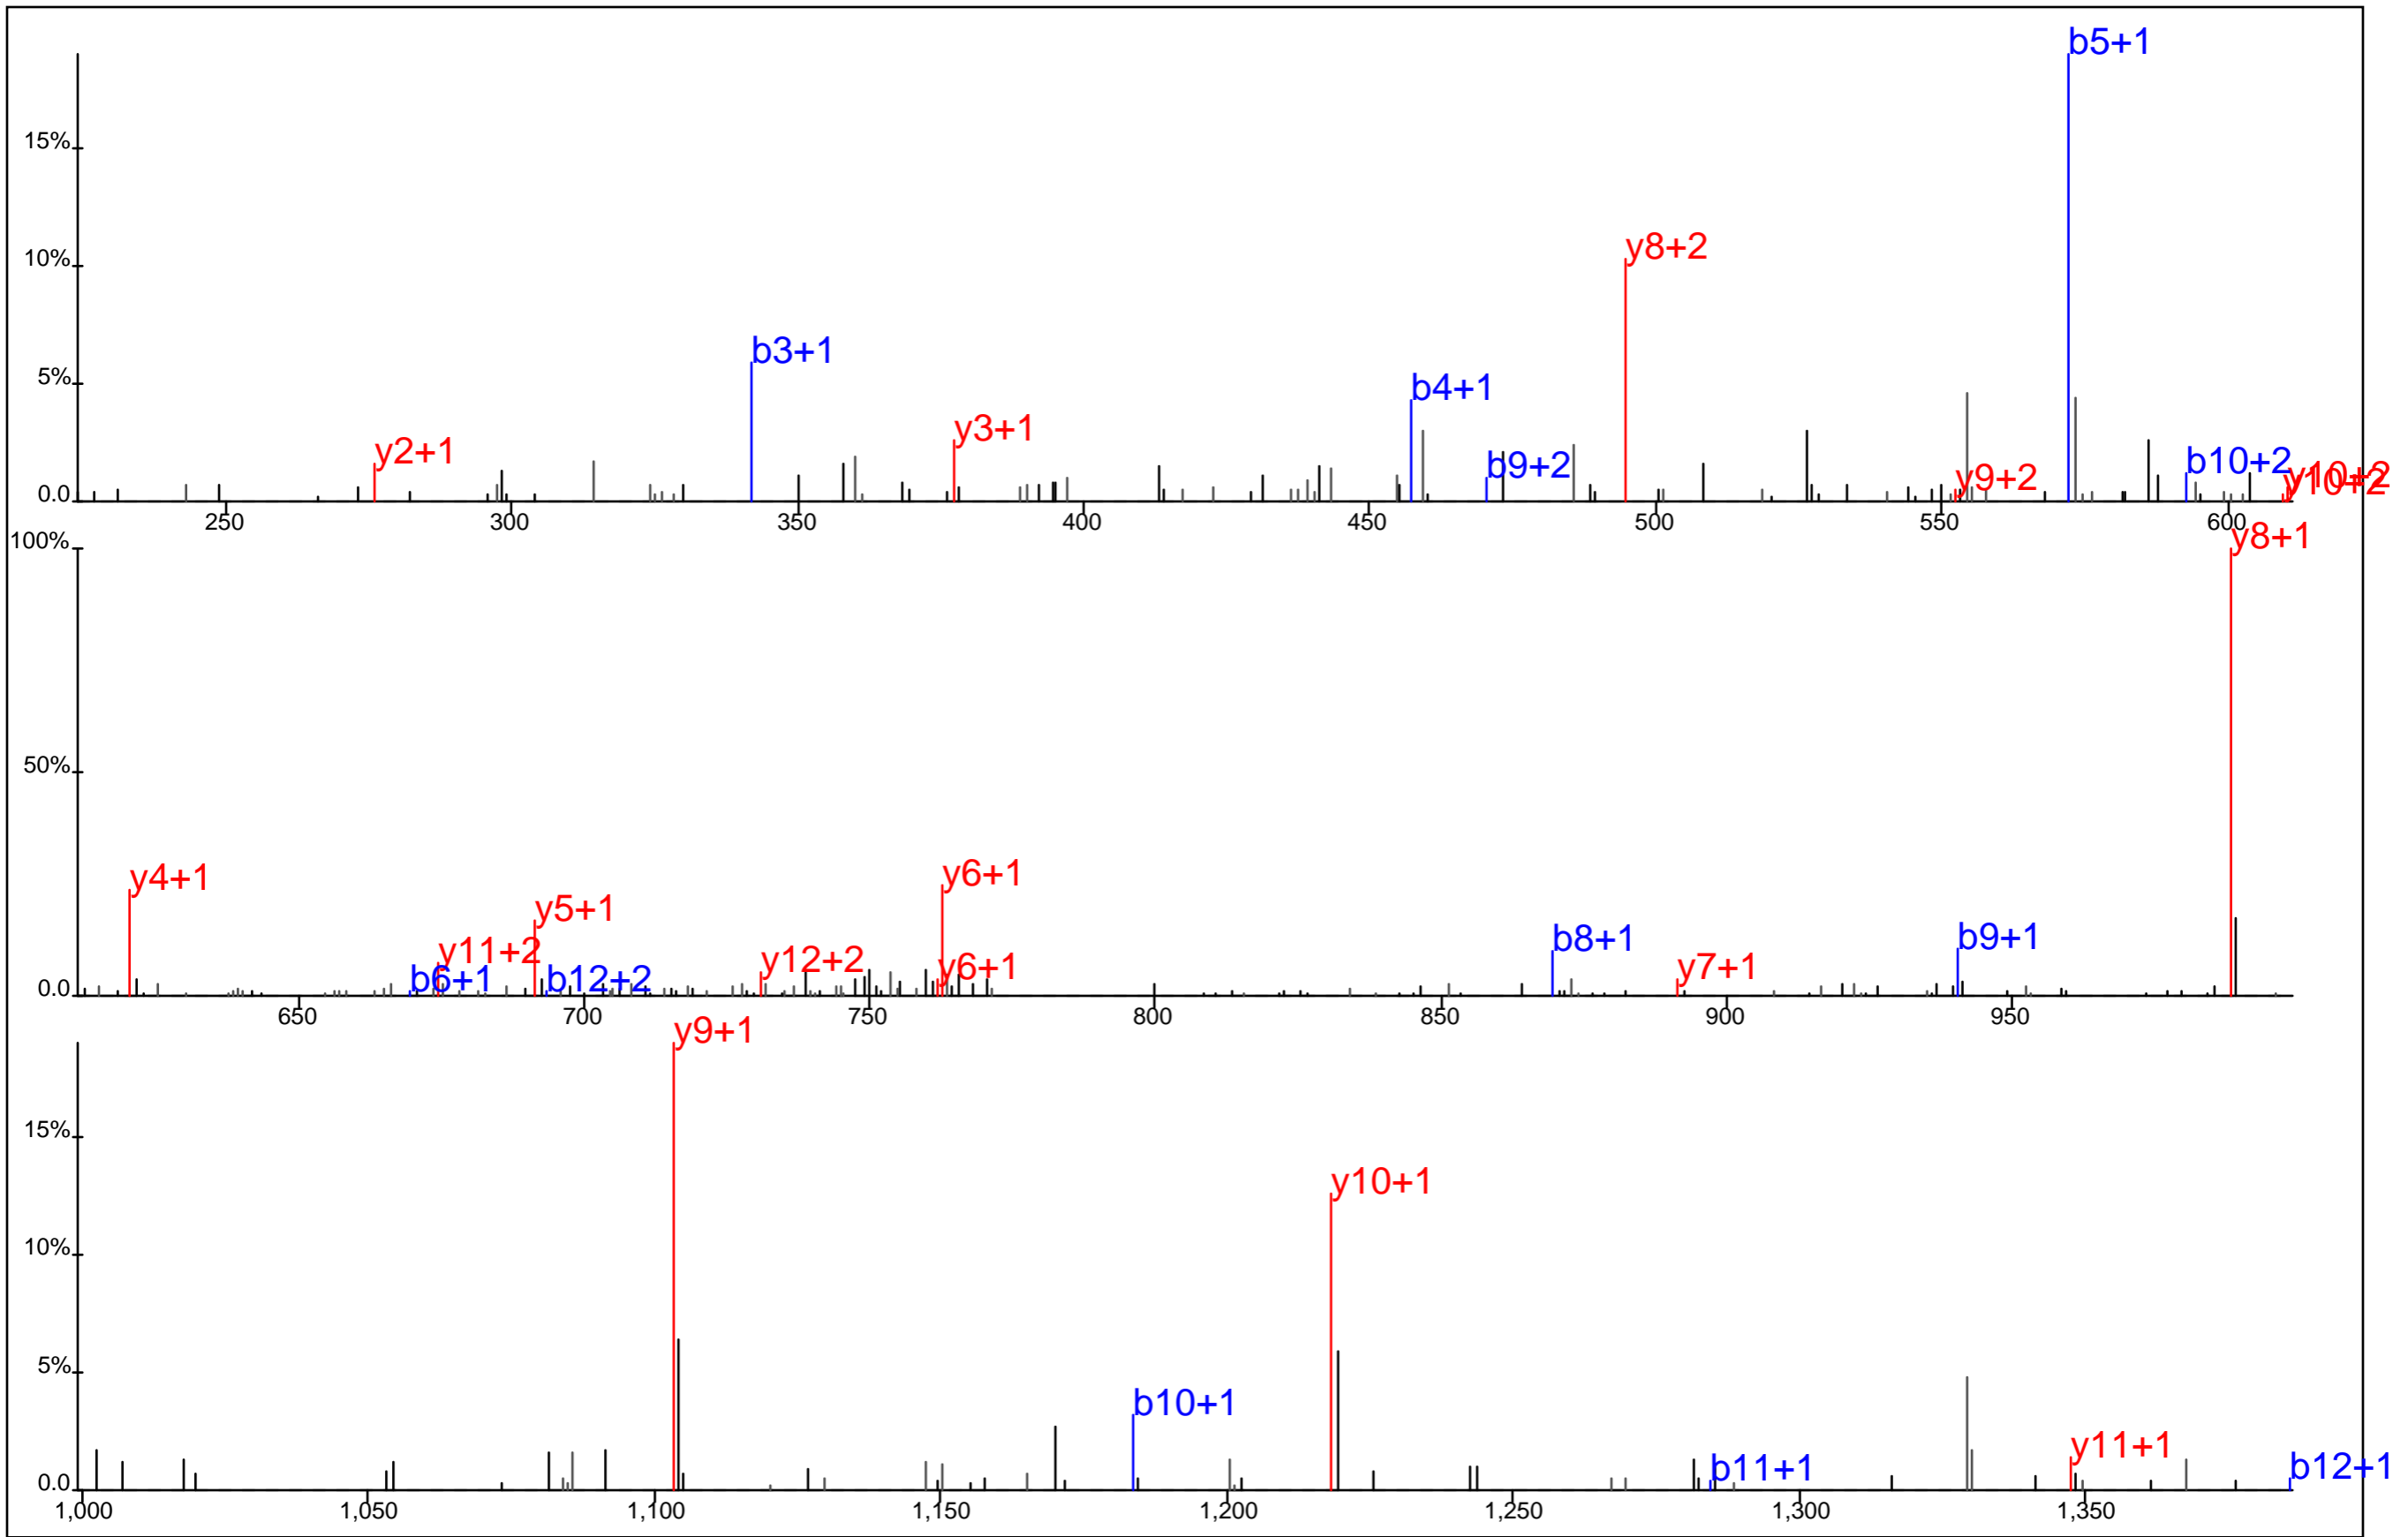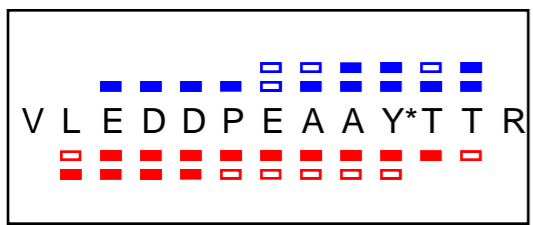

Protein Name: EphA3  
 gi Accession: 7434436  
 Precursor Mass: 780.3361+2  
 Delta Mass: 1.582 ppm  
 XCorr: 72.17

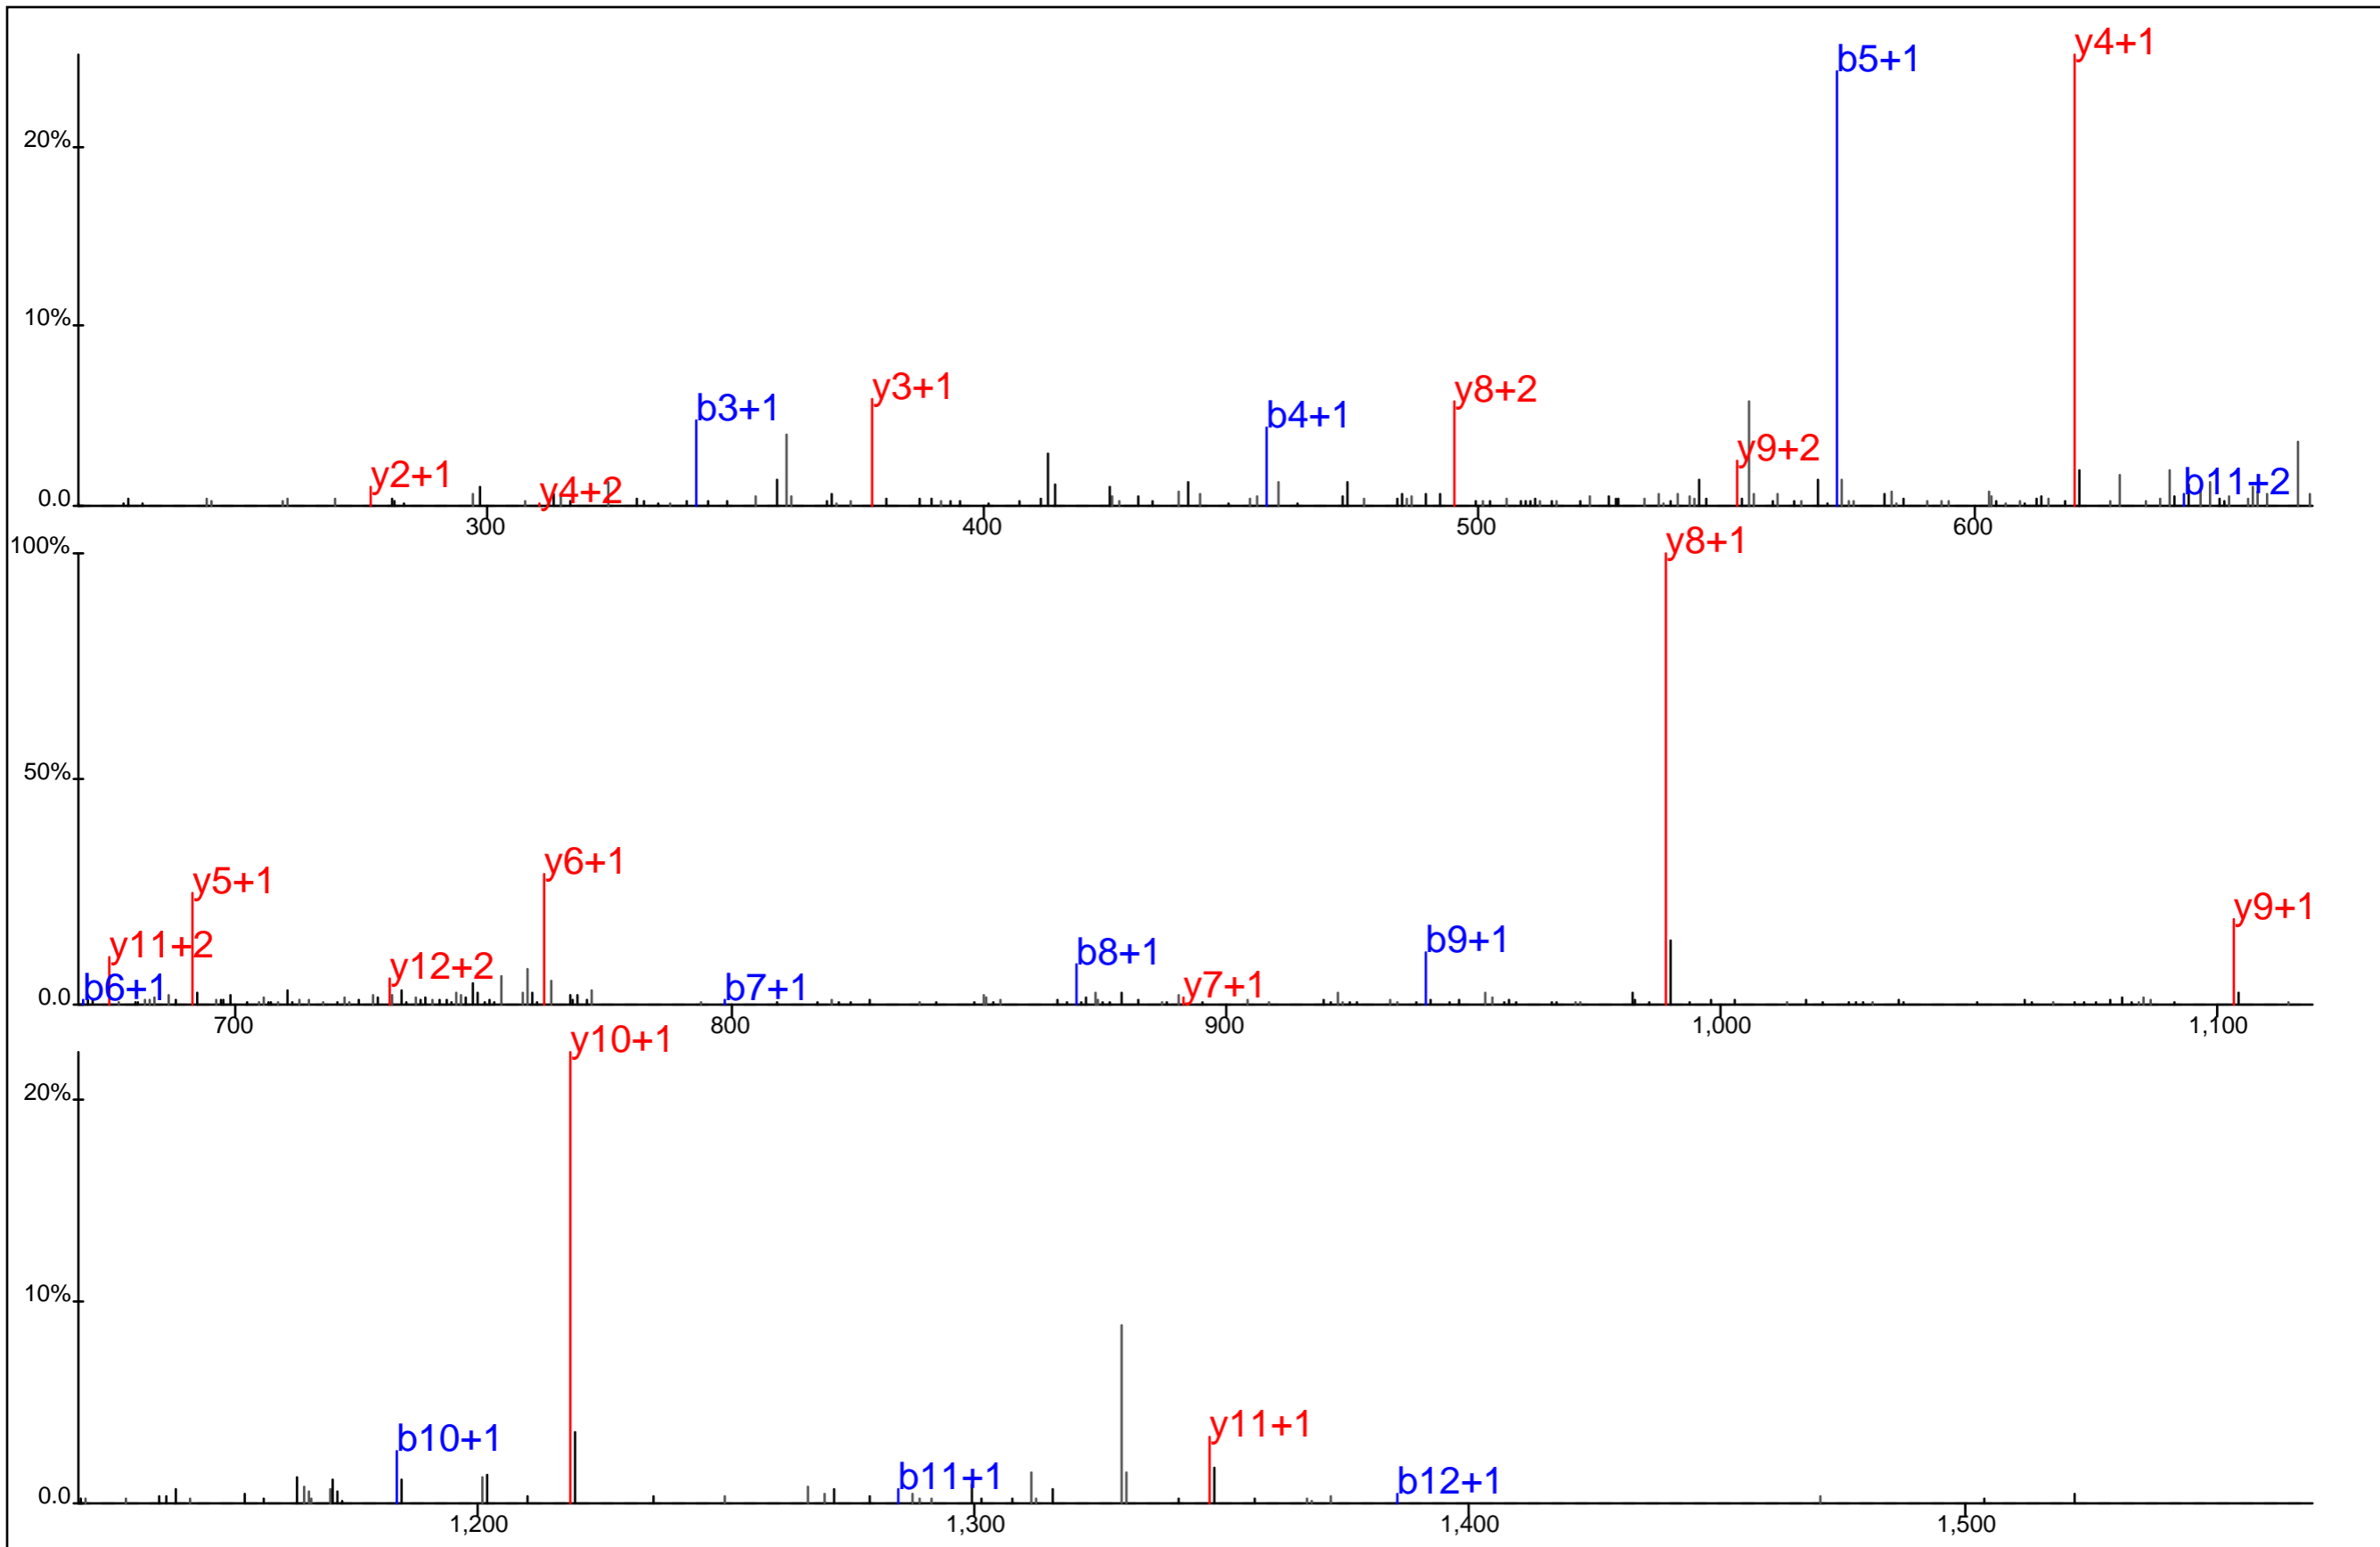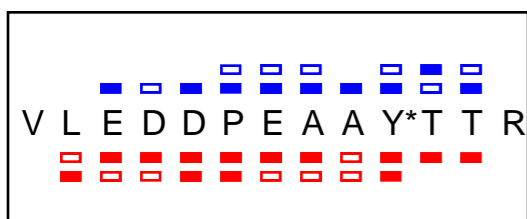

Protein Name: EphA3  
 gi Accession: 7434436  
 Precursor Mass: 780.3369+2  
 Delta Mass: 2.525 ppm  
 XCorr: 61.97



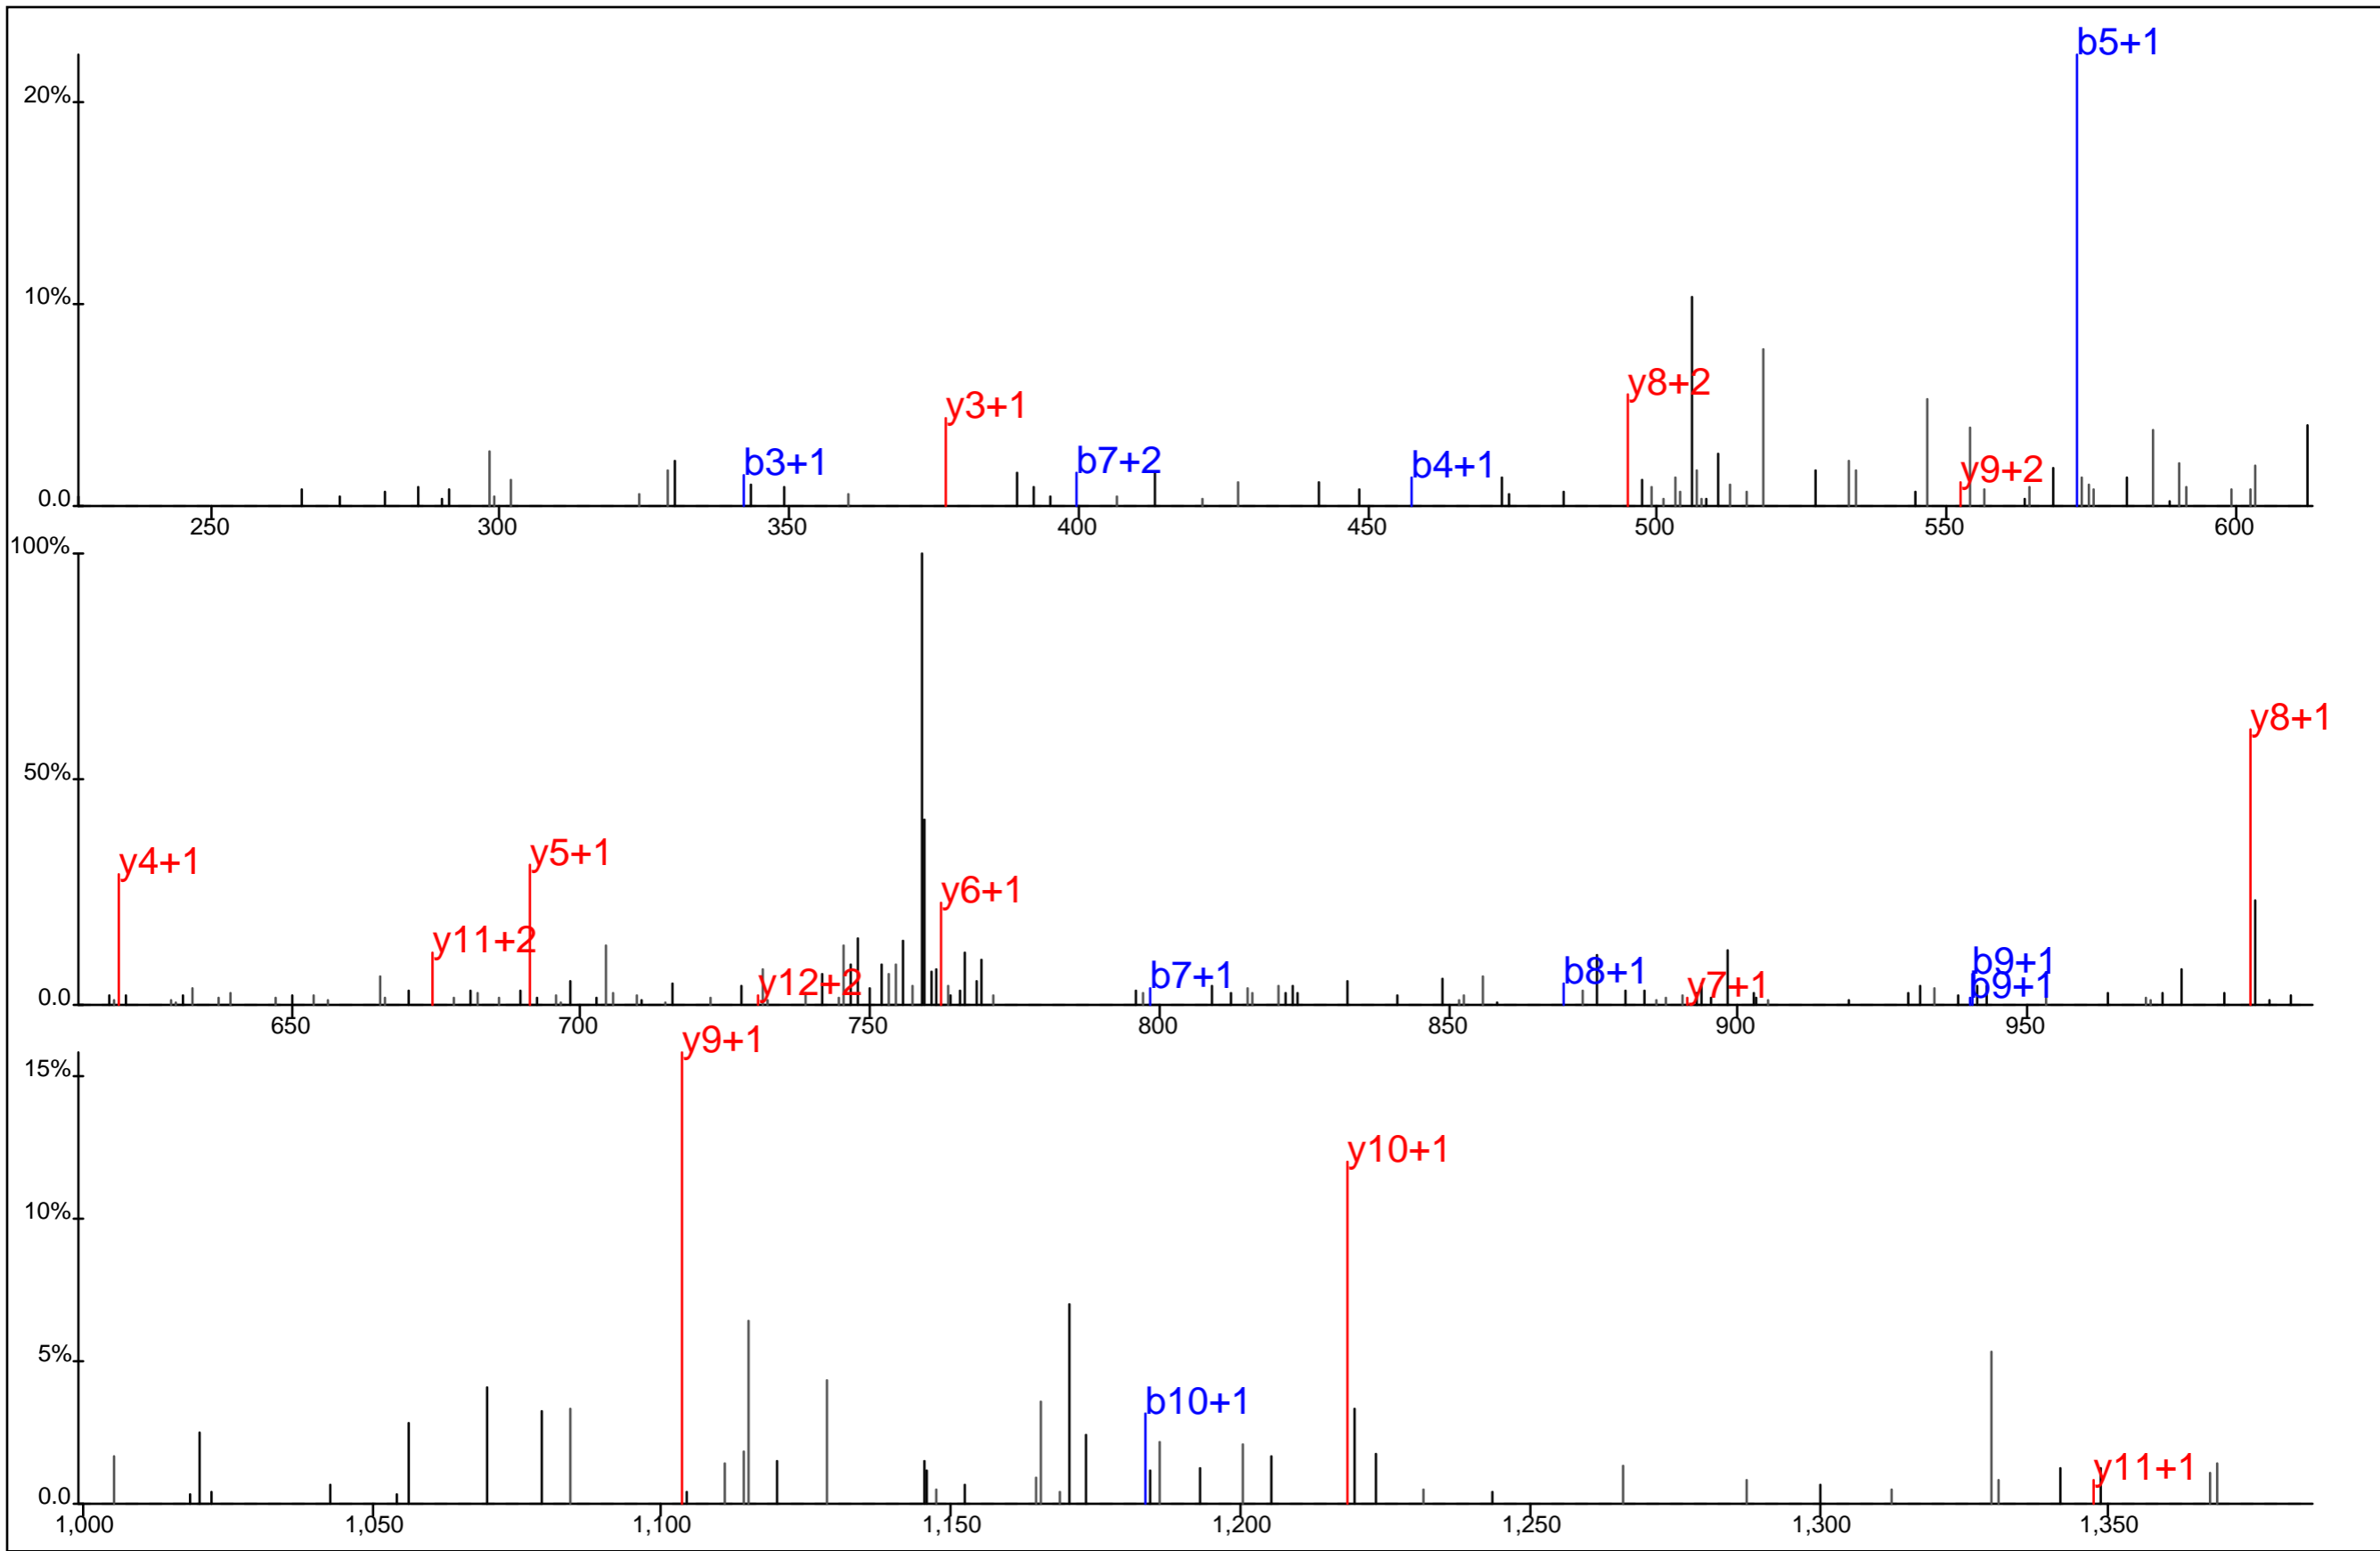

■ ■  
■ ■ ■ ■ ■ ■ ■ ■ ■ ■ ■ ■ ■ ■ ■ ■ ■ ■ ■ ■  
V L E D D P E A A Y\* T T R

Protein Name: EphA3  
 gi Accession: 7434436  
 Precursor Mass: 780.3383+2  
 Delta Mass: 4.327 ppm  
 XCorr: 34.49

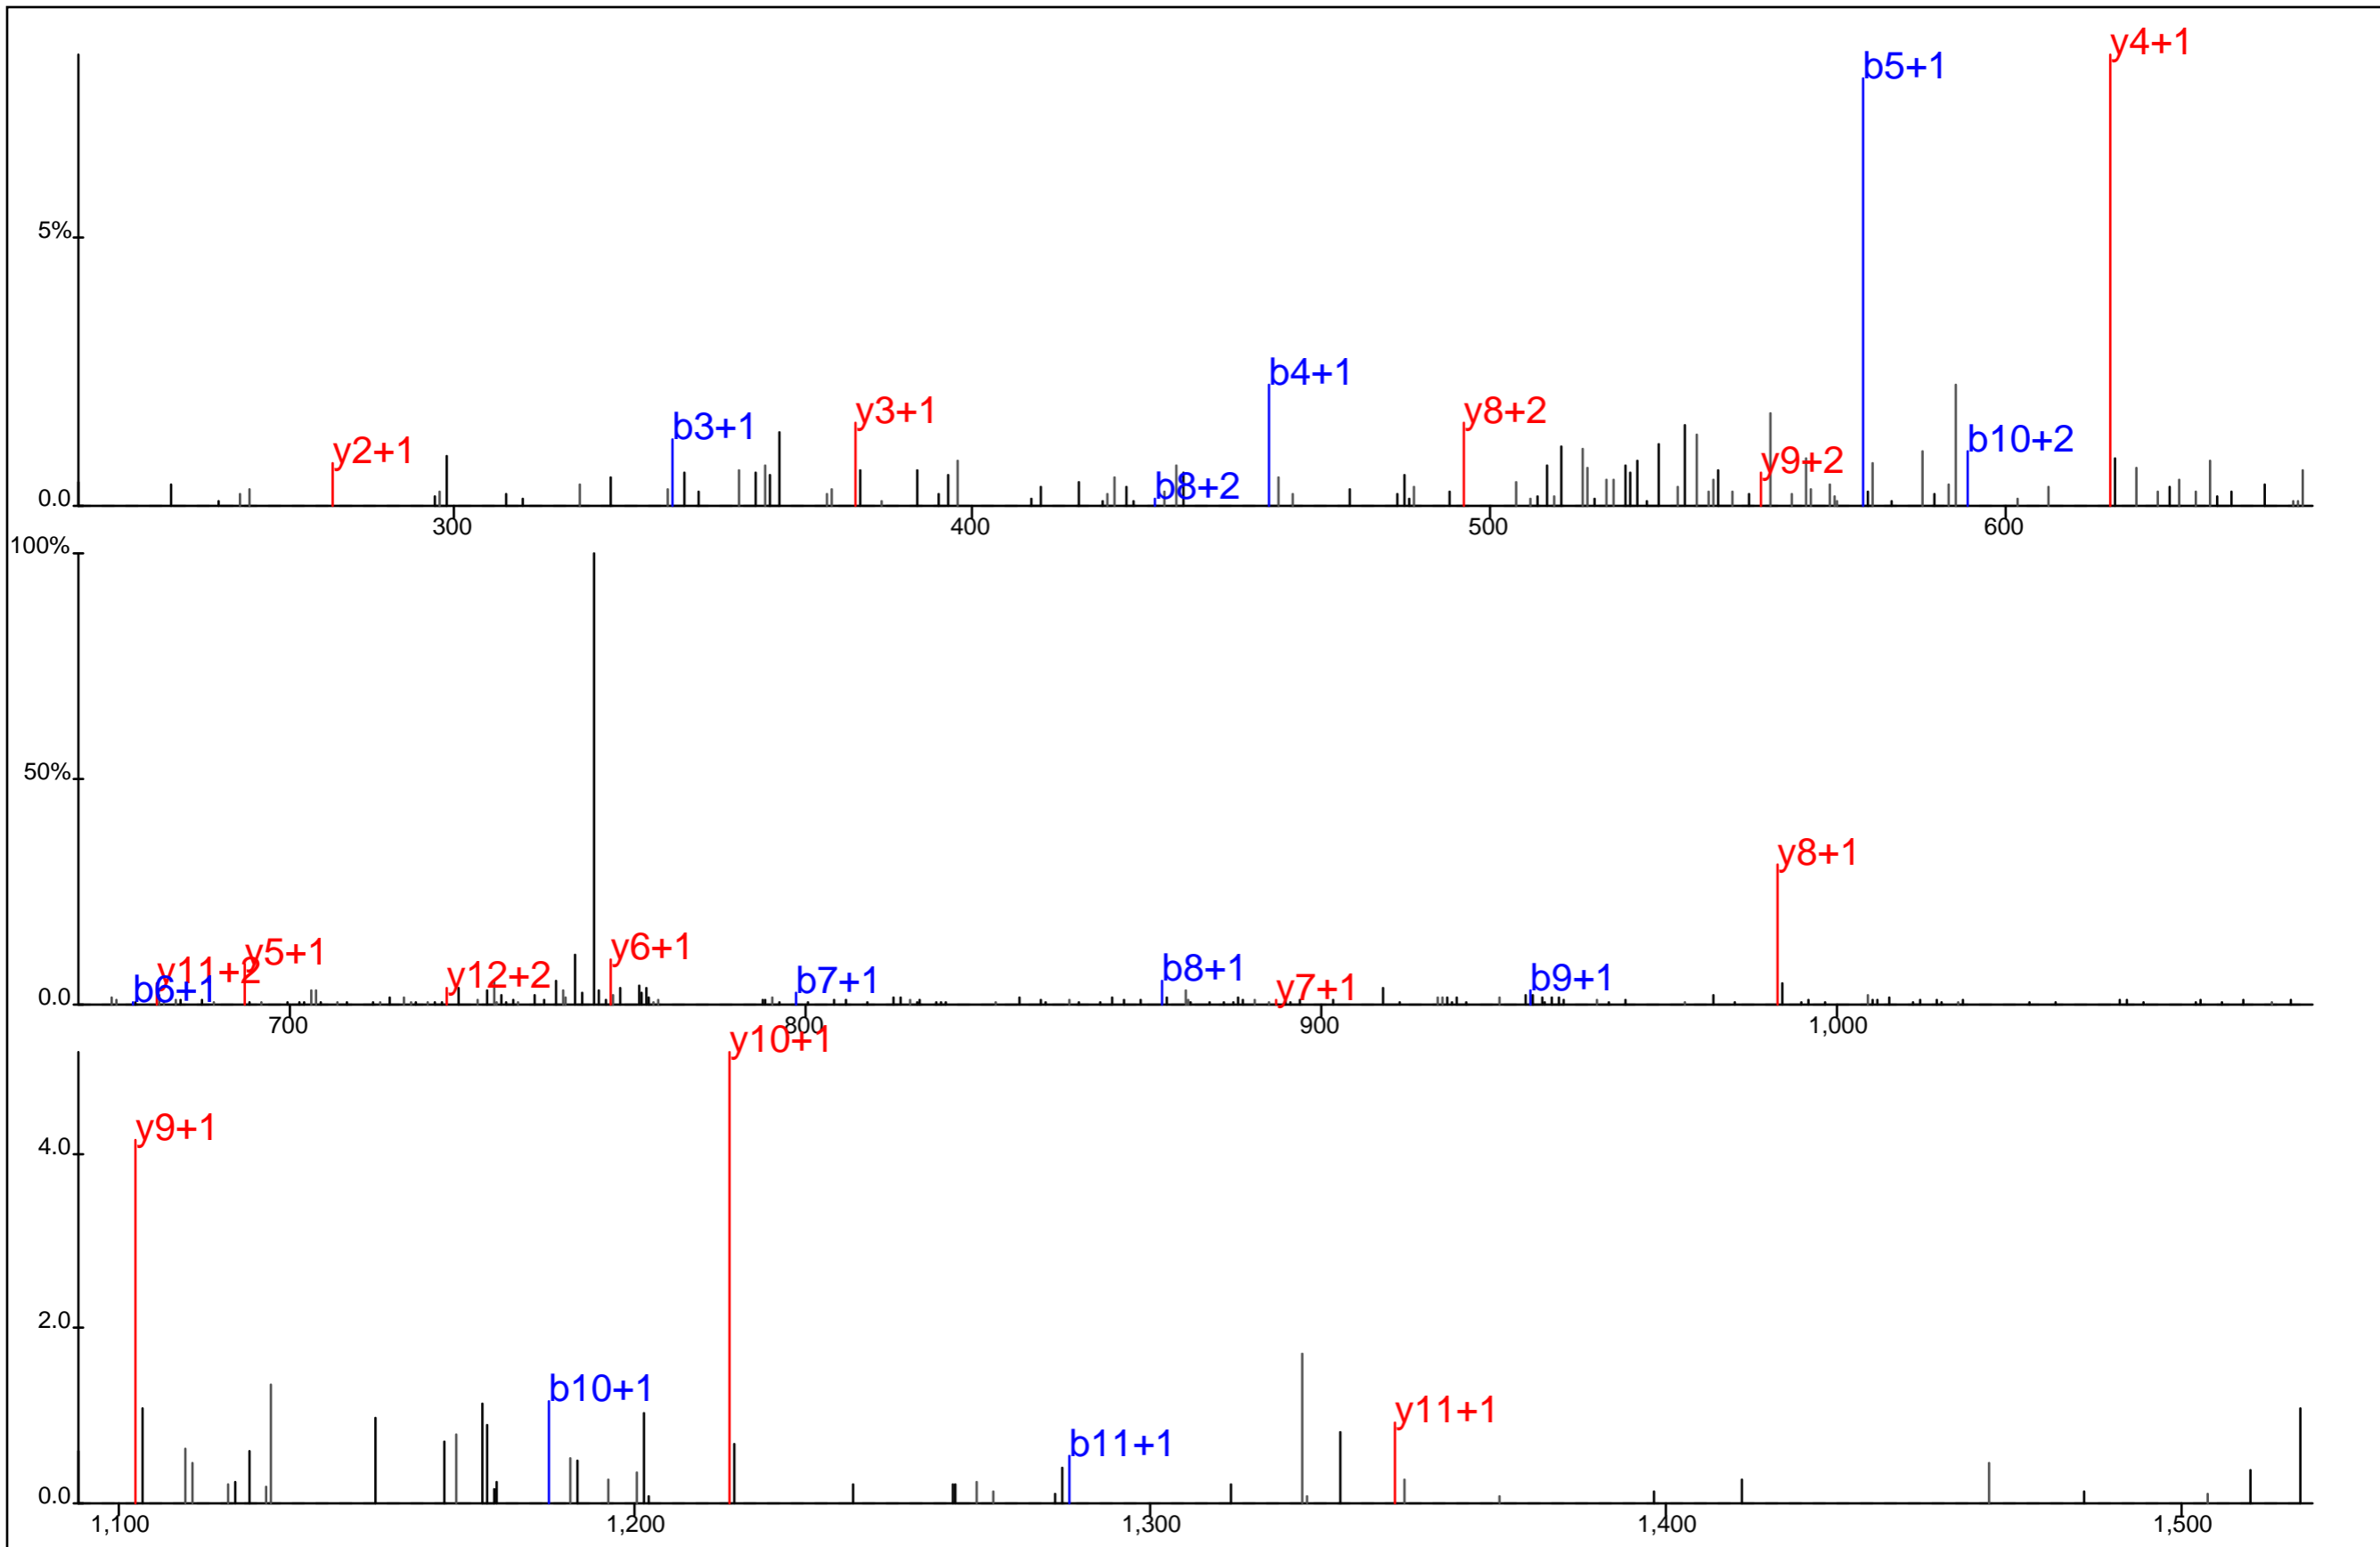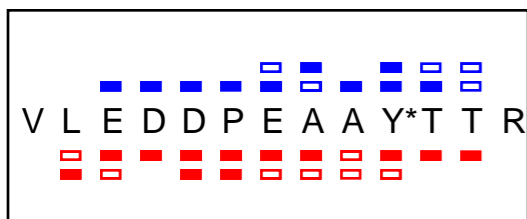

Protein Name: EphA3  
 gi Accession: 7434436  
 Precursor Mass: 780.3367+2  
 Delta Mass: 2.371 ppm  
 XCorr: 50.8

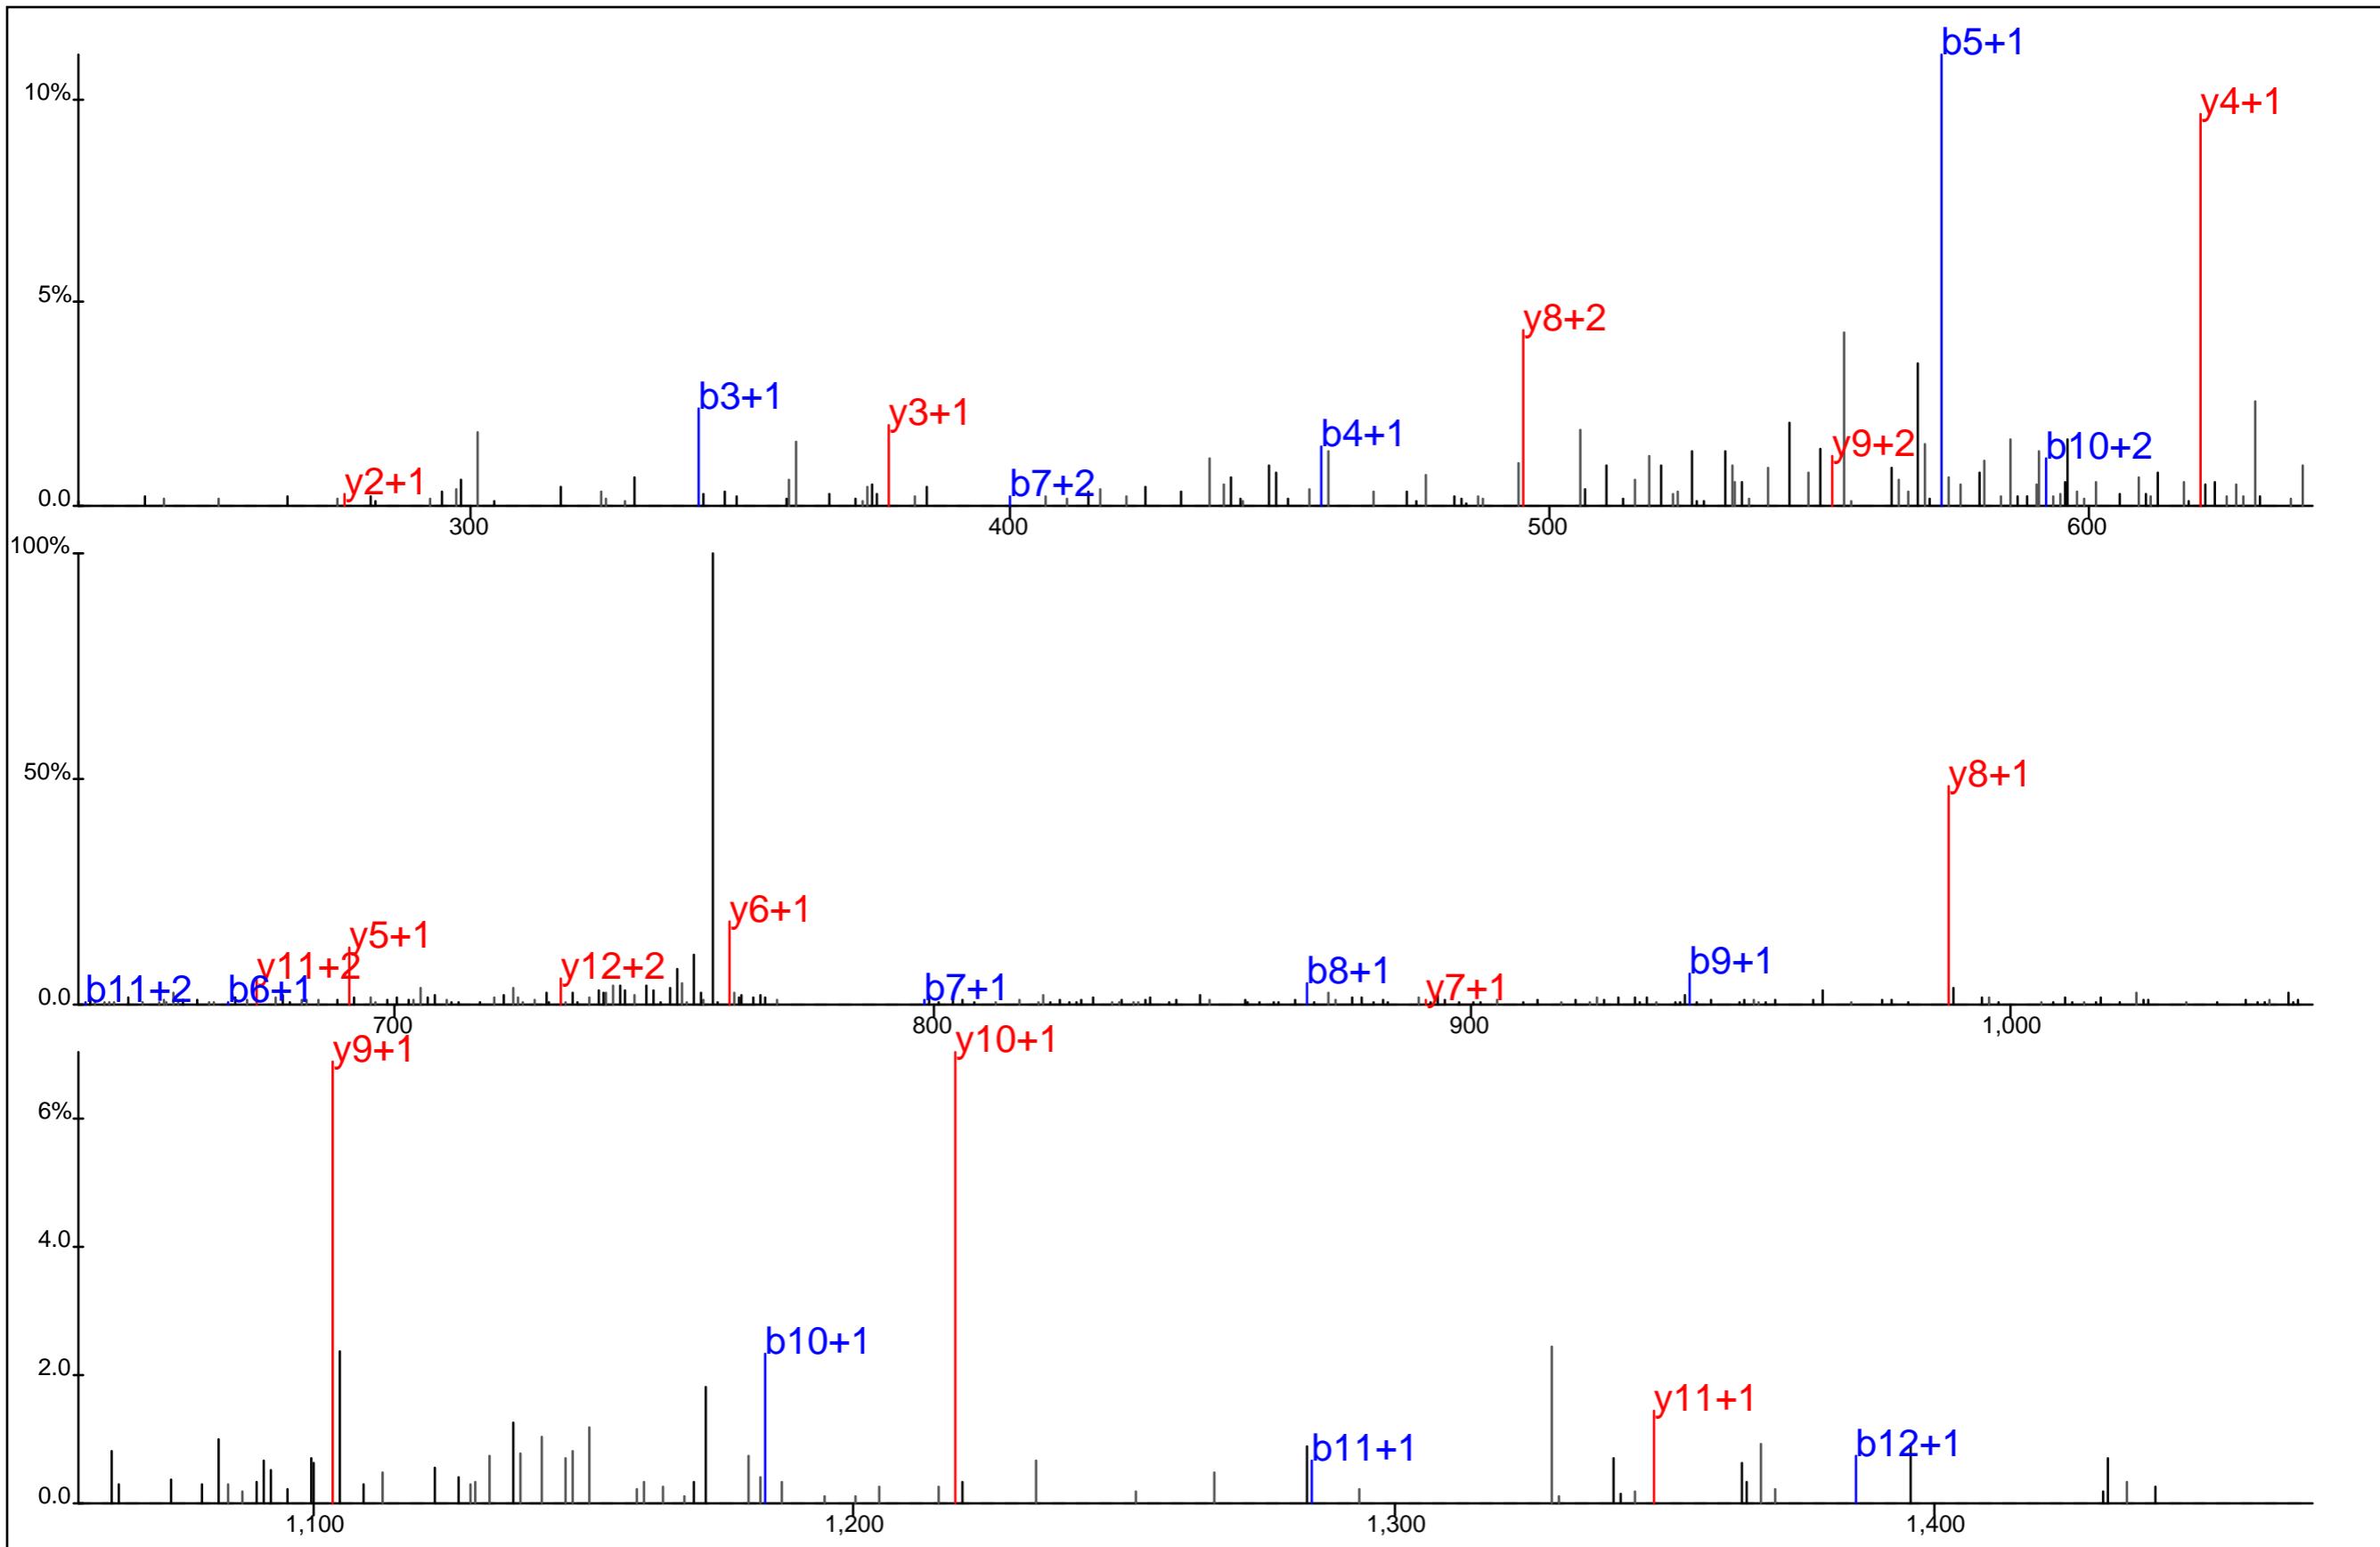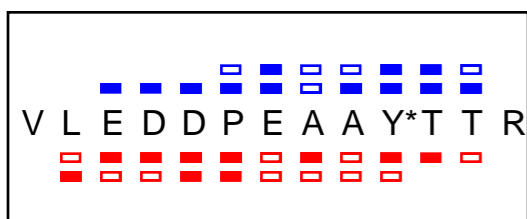

Protein Name: EphA3  
 gi Accession: 7434436  
 Precursor Mass: 780.3342+2  
 Delta Mass: 0.918 ppm  
 XCorr: 57.6

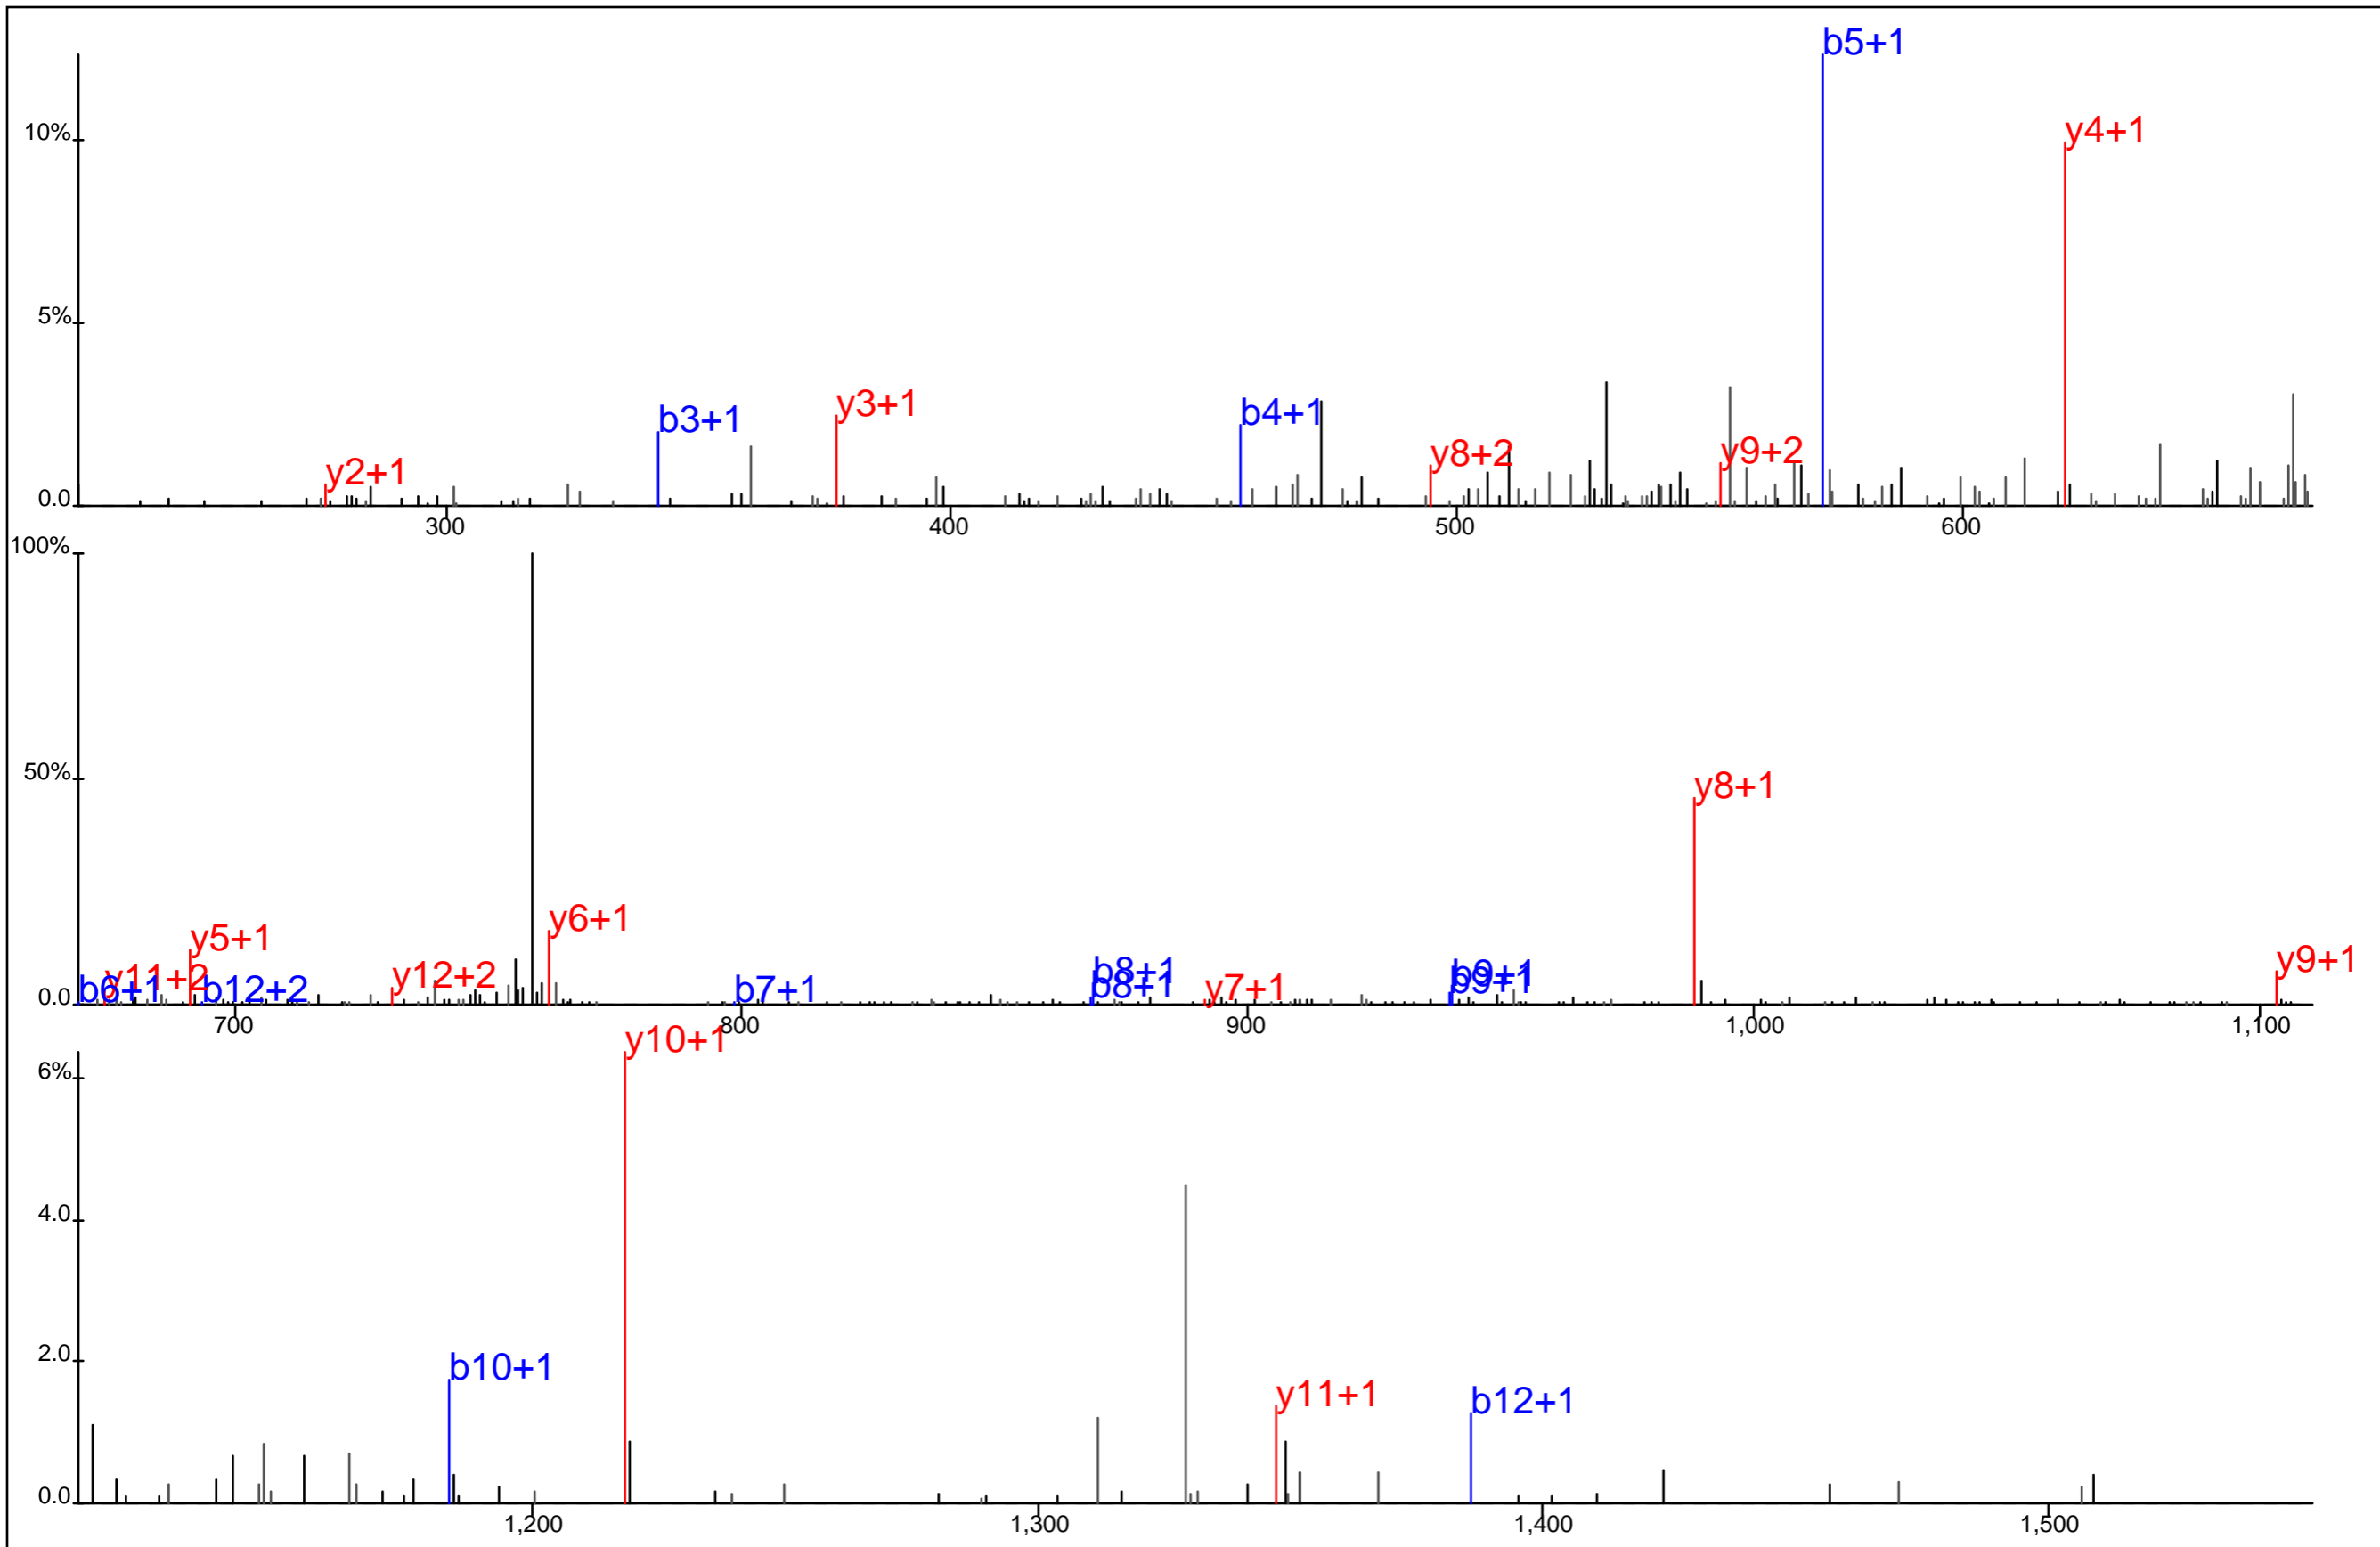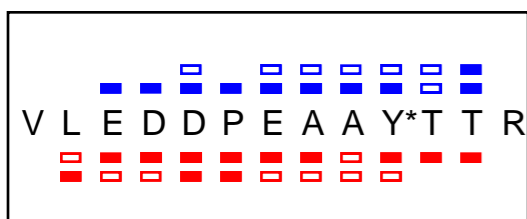

Protein Name: EphA3  
 gi Accession: 7434436  
 Precursor Mass: 780.3357+2  
 Delta Mass: 1.037 ppm  
 XCorr: 52.18

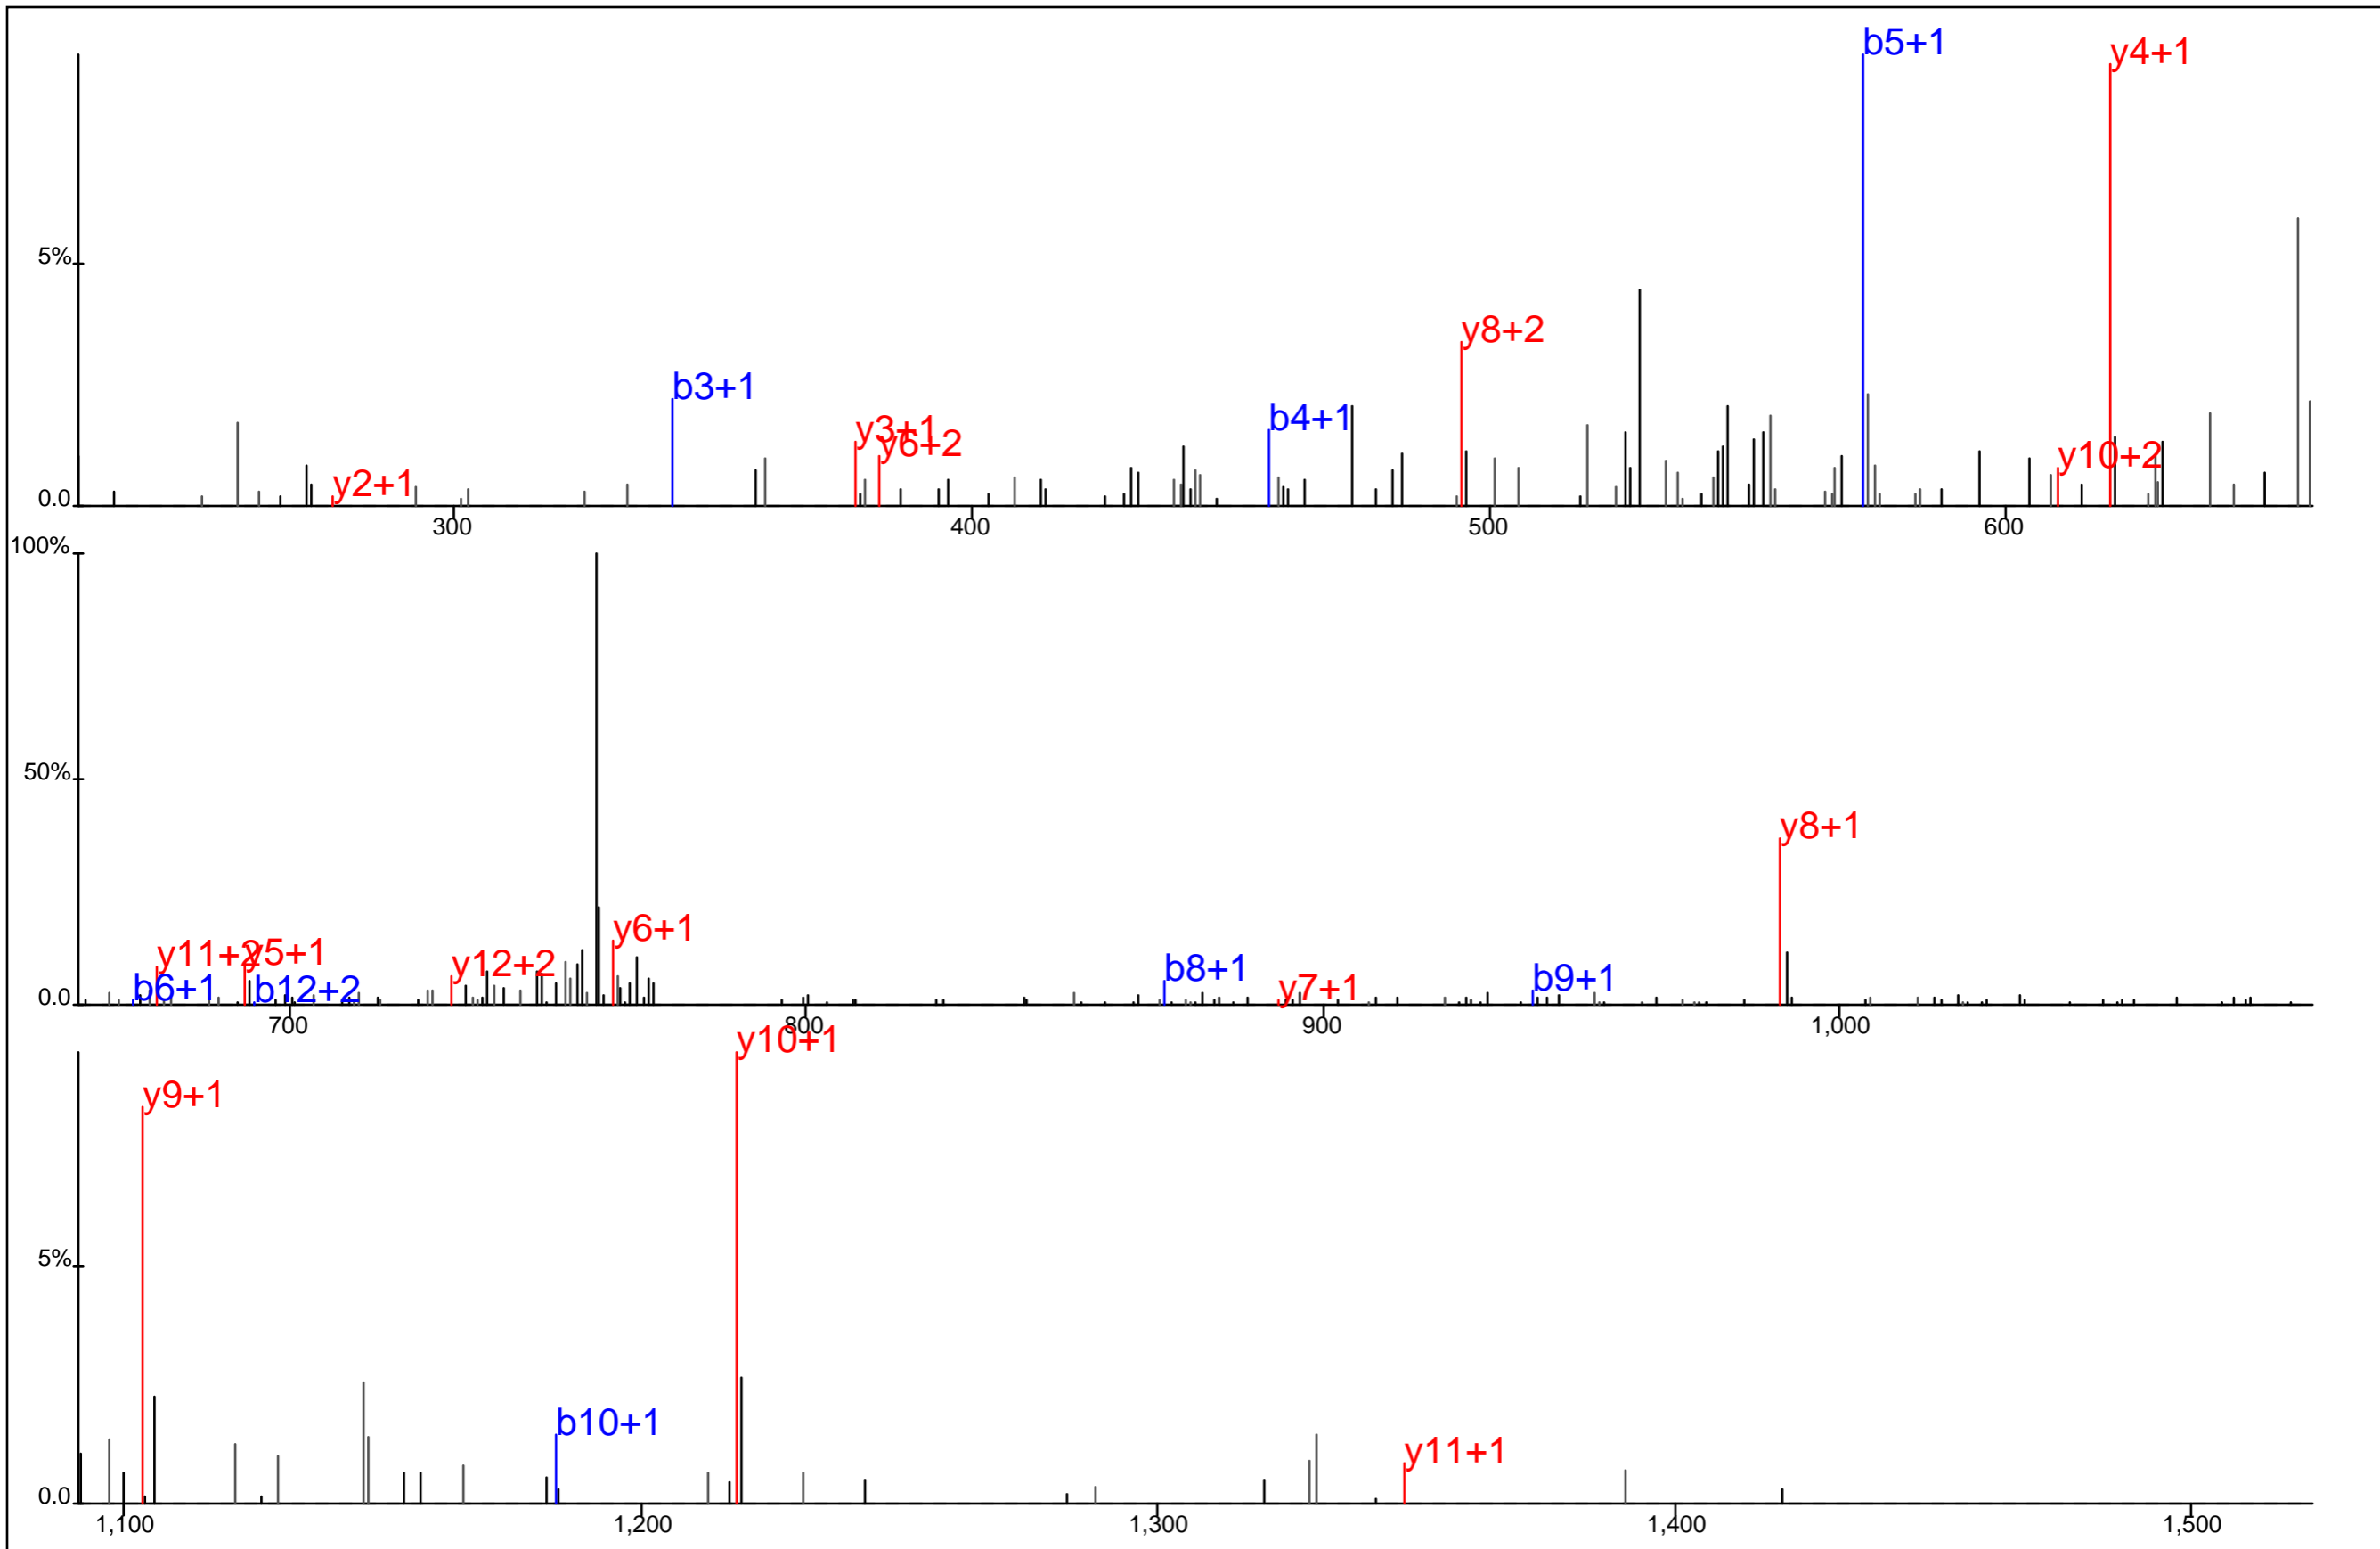

■ ■ ■ ■ ■ ■ ■ ■ ■ ■ ■ ■ ■ ■ ■ ■ ■ ■ ■ ■
  
■ ■ ■ ■ ■ ■ ■ ■ ■ ■ ■ ■ ■ ■ ■ ■ ■ ■ ■ ■

Protein Name: EphA3  
 gi Accession: 7434436  
 Precursor Mass: 780.3395+2  
 Delta Mass: 5.891 ppm  
 XCorr: 40.13

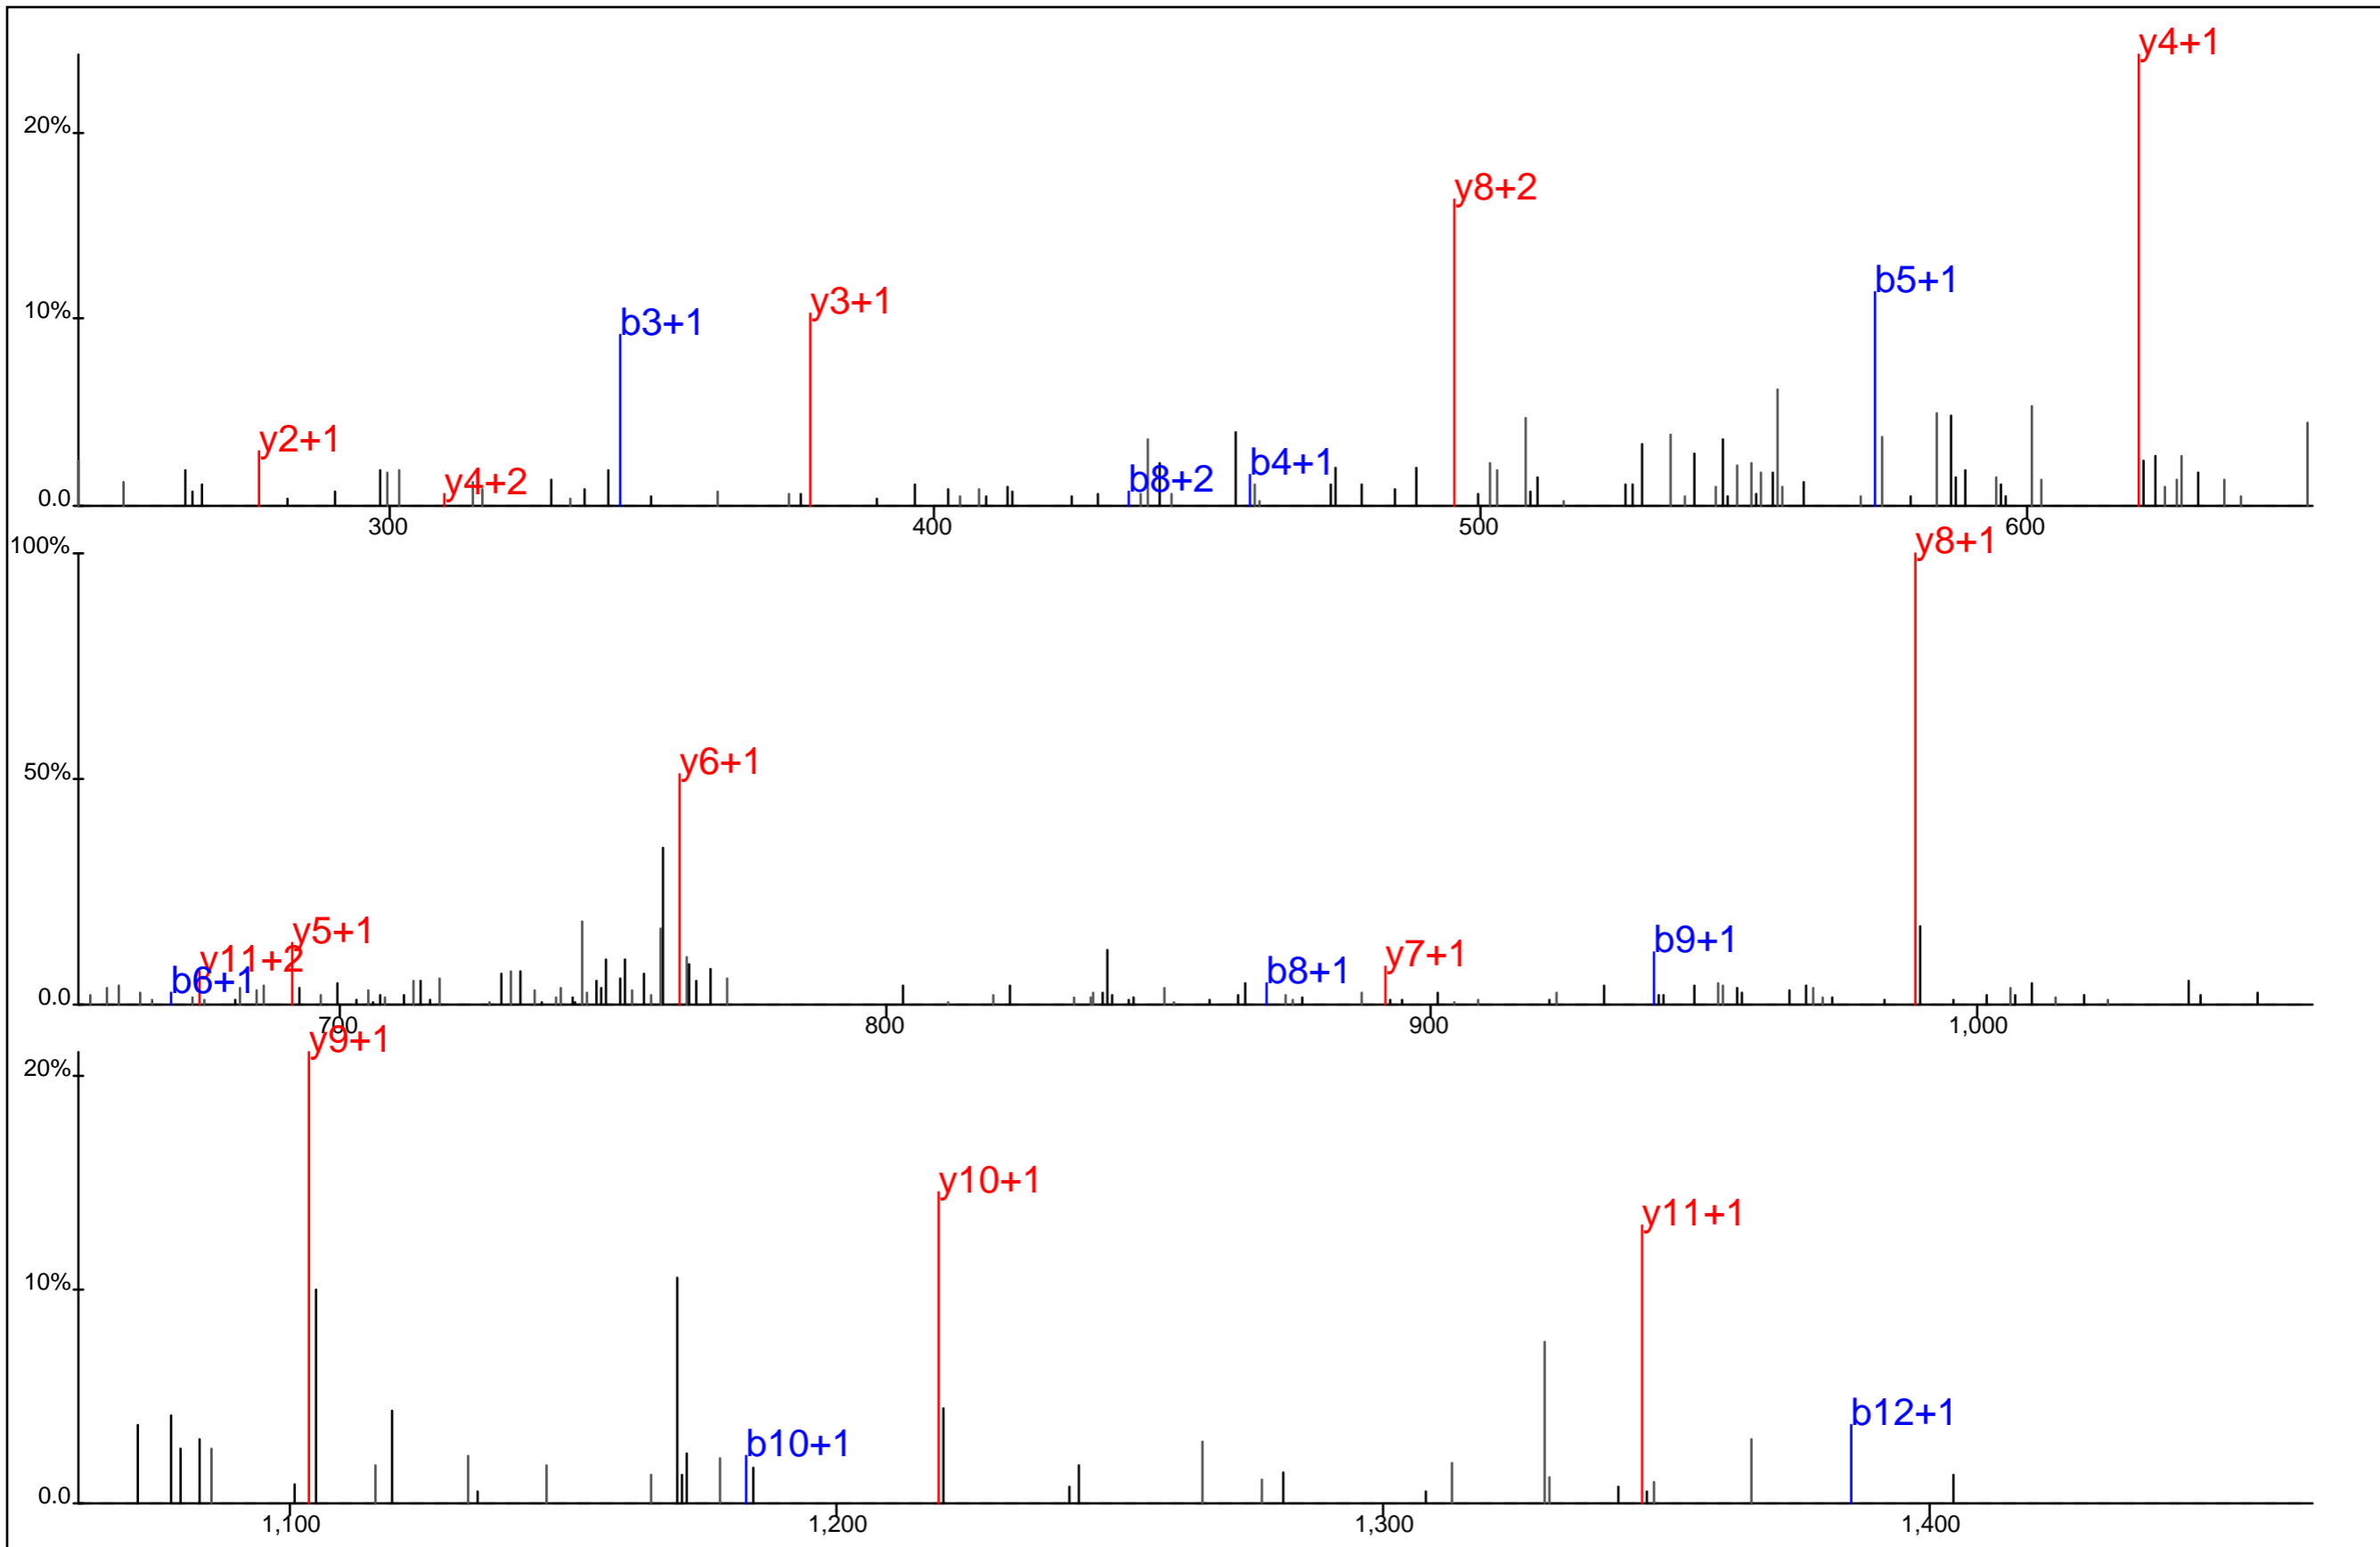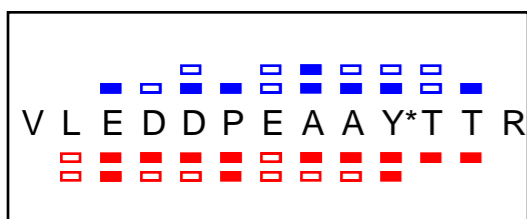

Protein Name: EphA3  
 gi Accession: 7434436  
 Precursor Mass: 780.3355+2  
 Delta Mass: 0.800 ppm  
 XCorr: 84.5

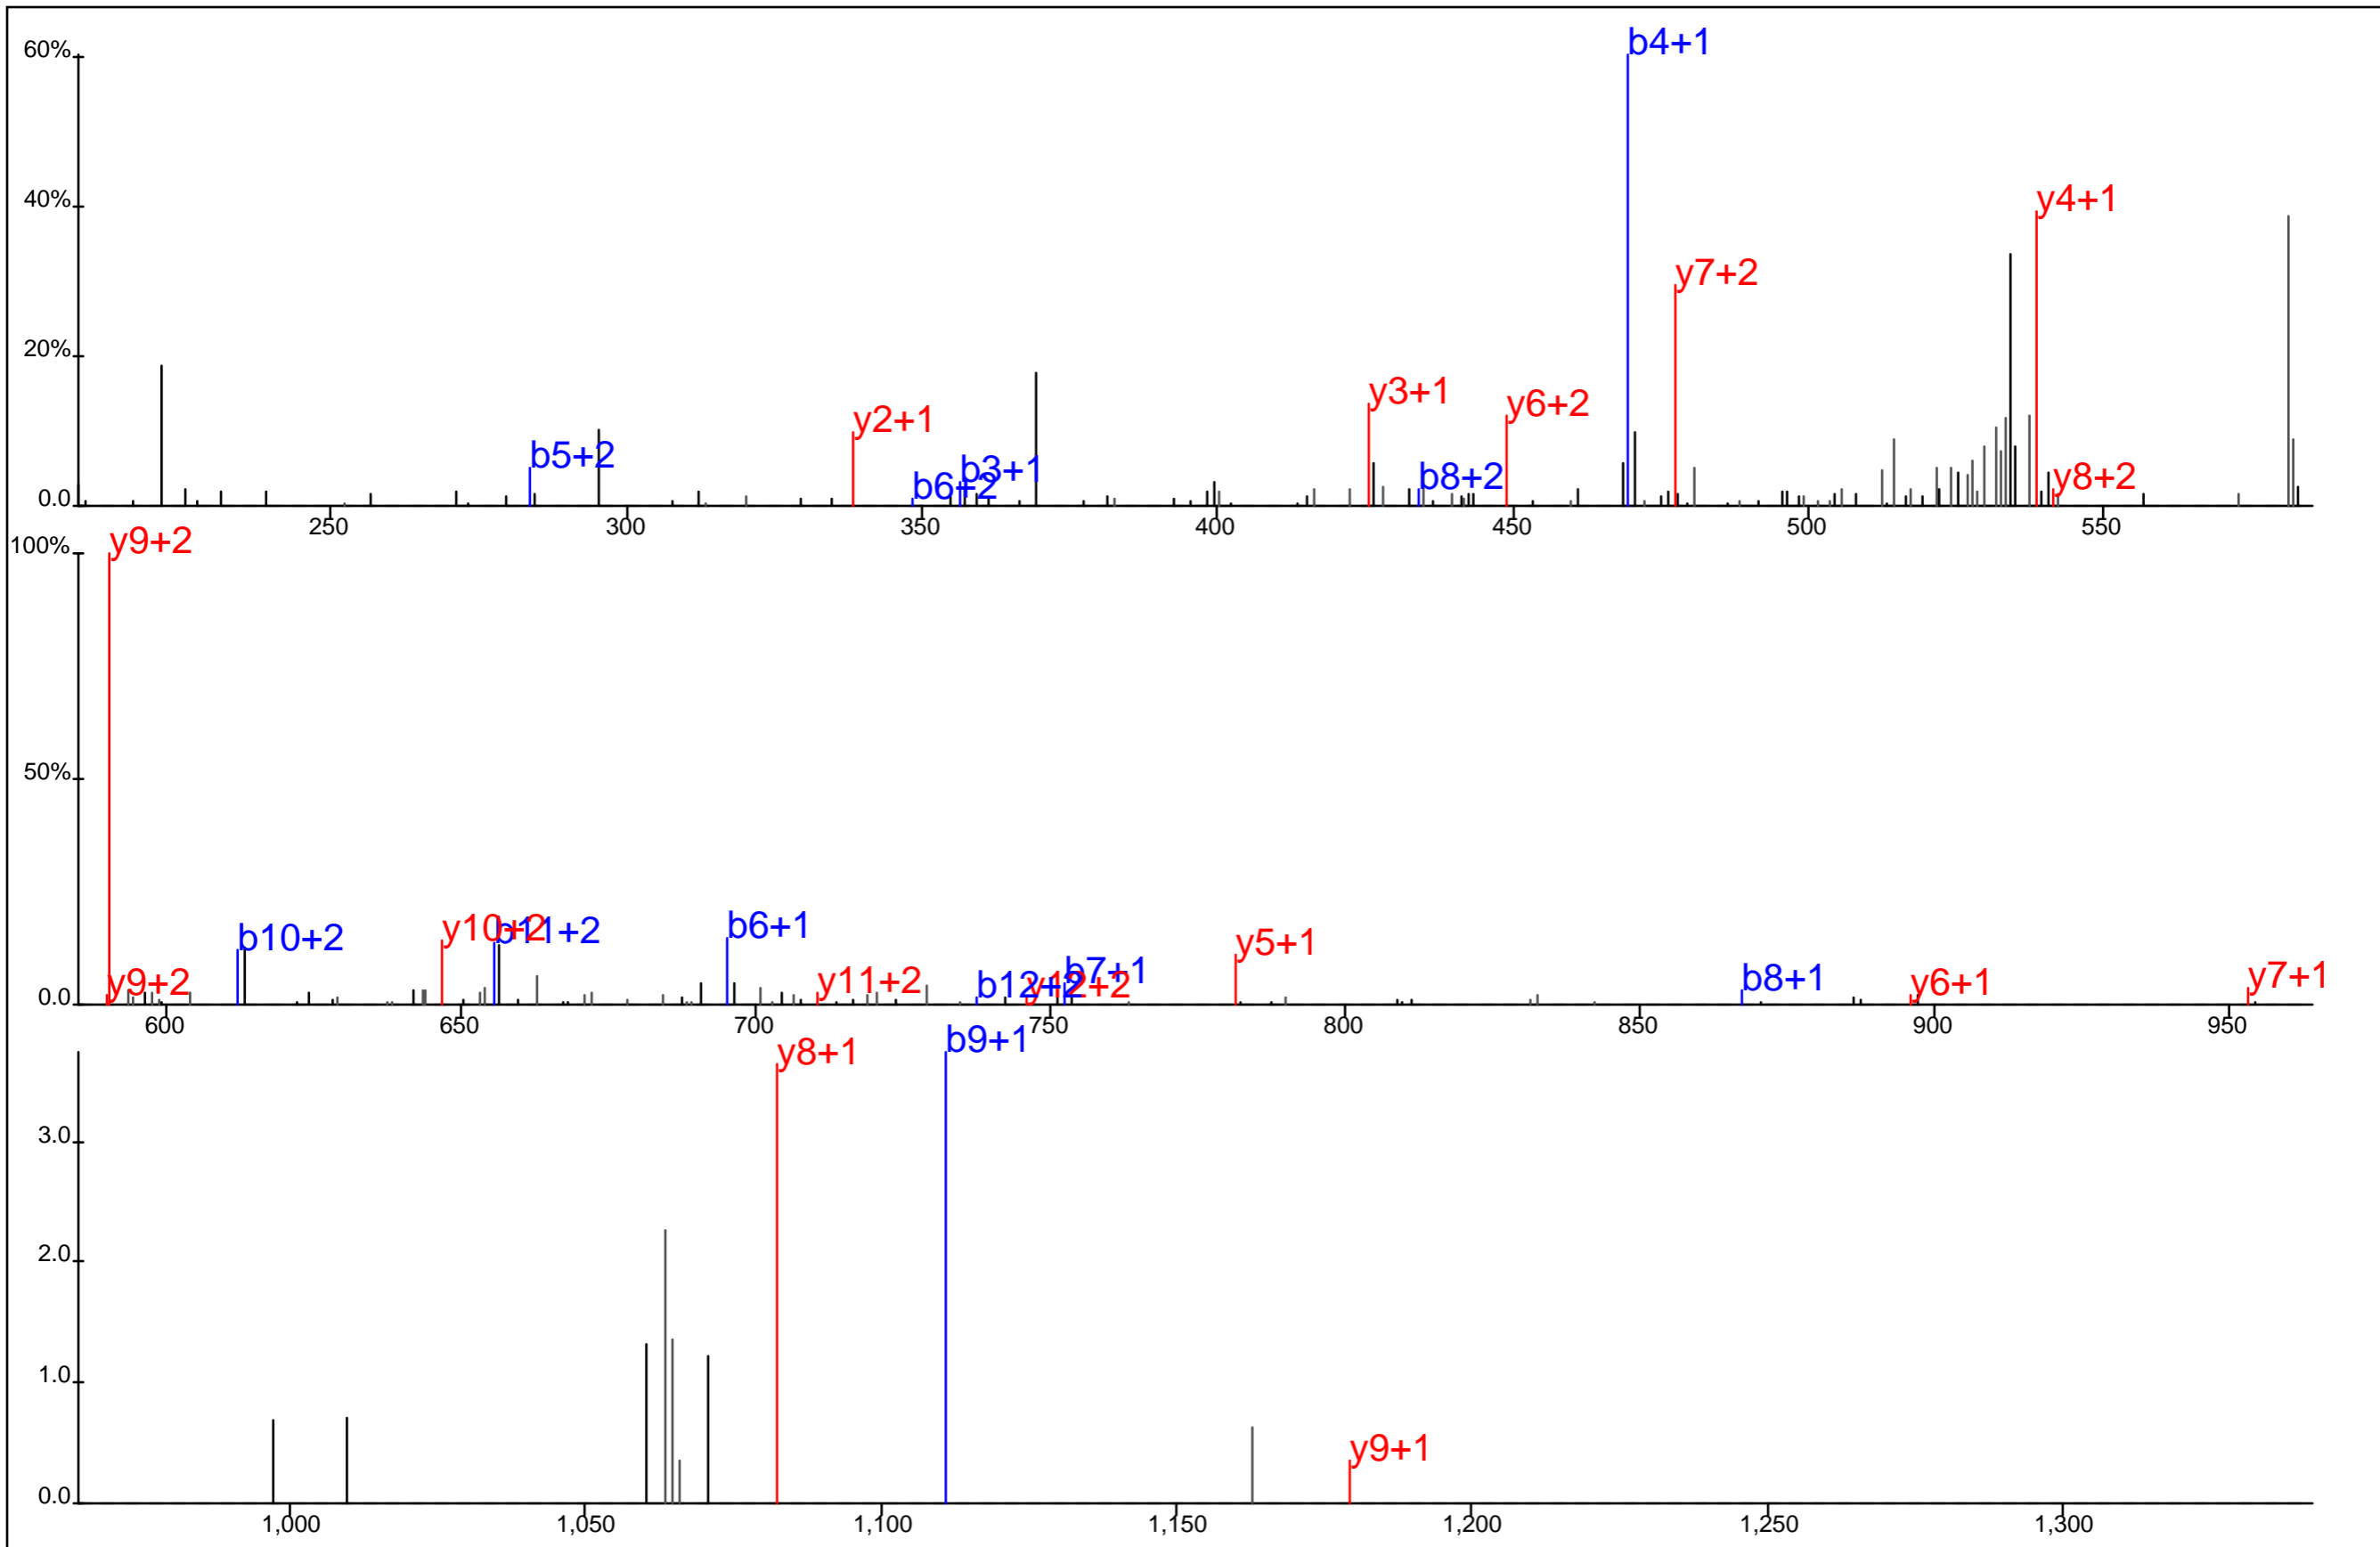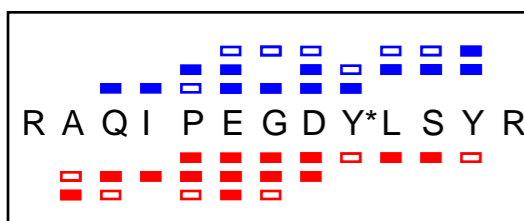

Protein Name: Erbin  
 gi Accession: 7022273  
 Precursor Mass: 549.9238+3  
 Delta Mass: 2.505 ppm  
 XCorr: 51.74

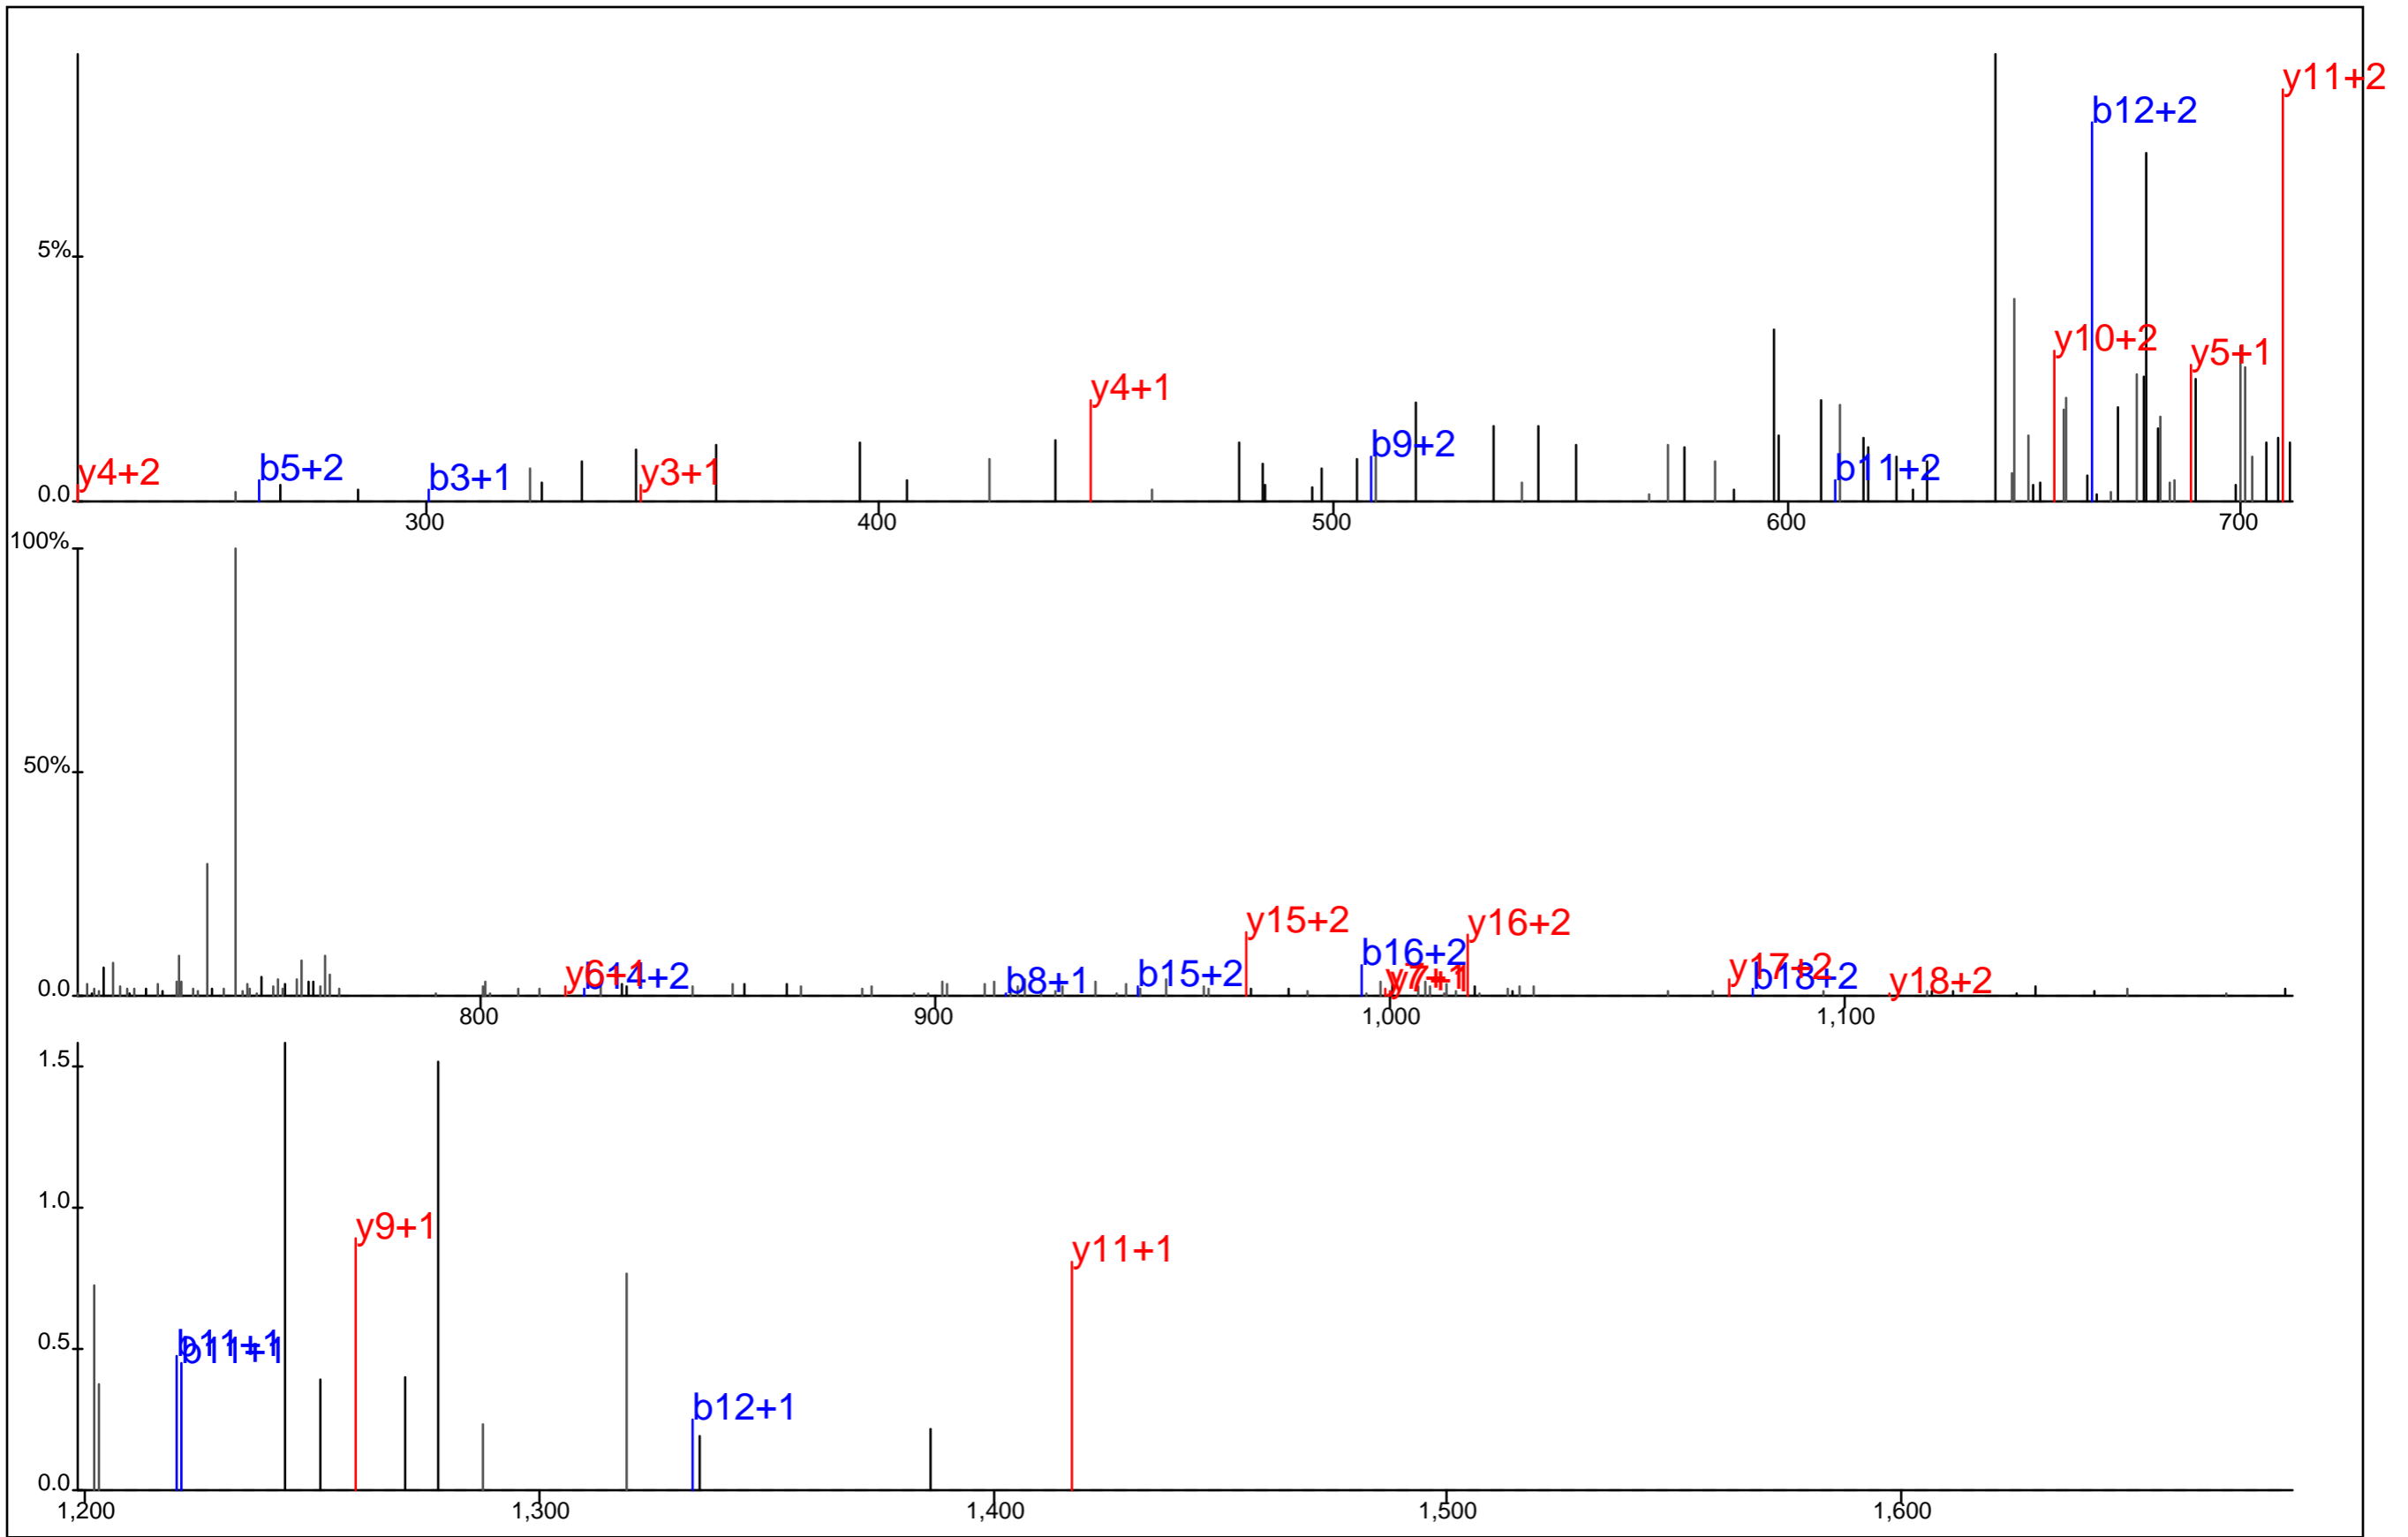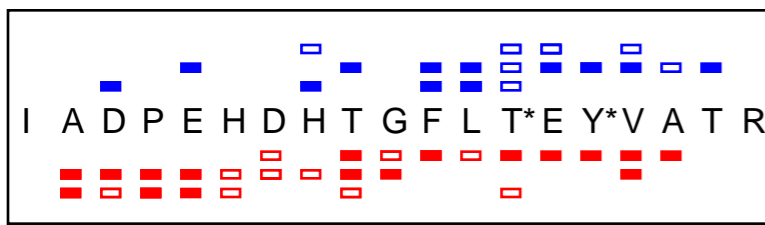

Protein Name: ERK1  
 gi Accession: 31221  
 Precursor Mass: 778.0002+3  
 Delta Mass: 7.599 ppm  
 XCorr: 2.5865



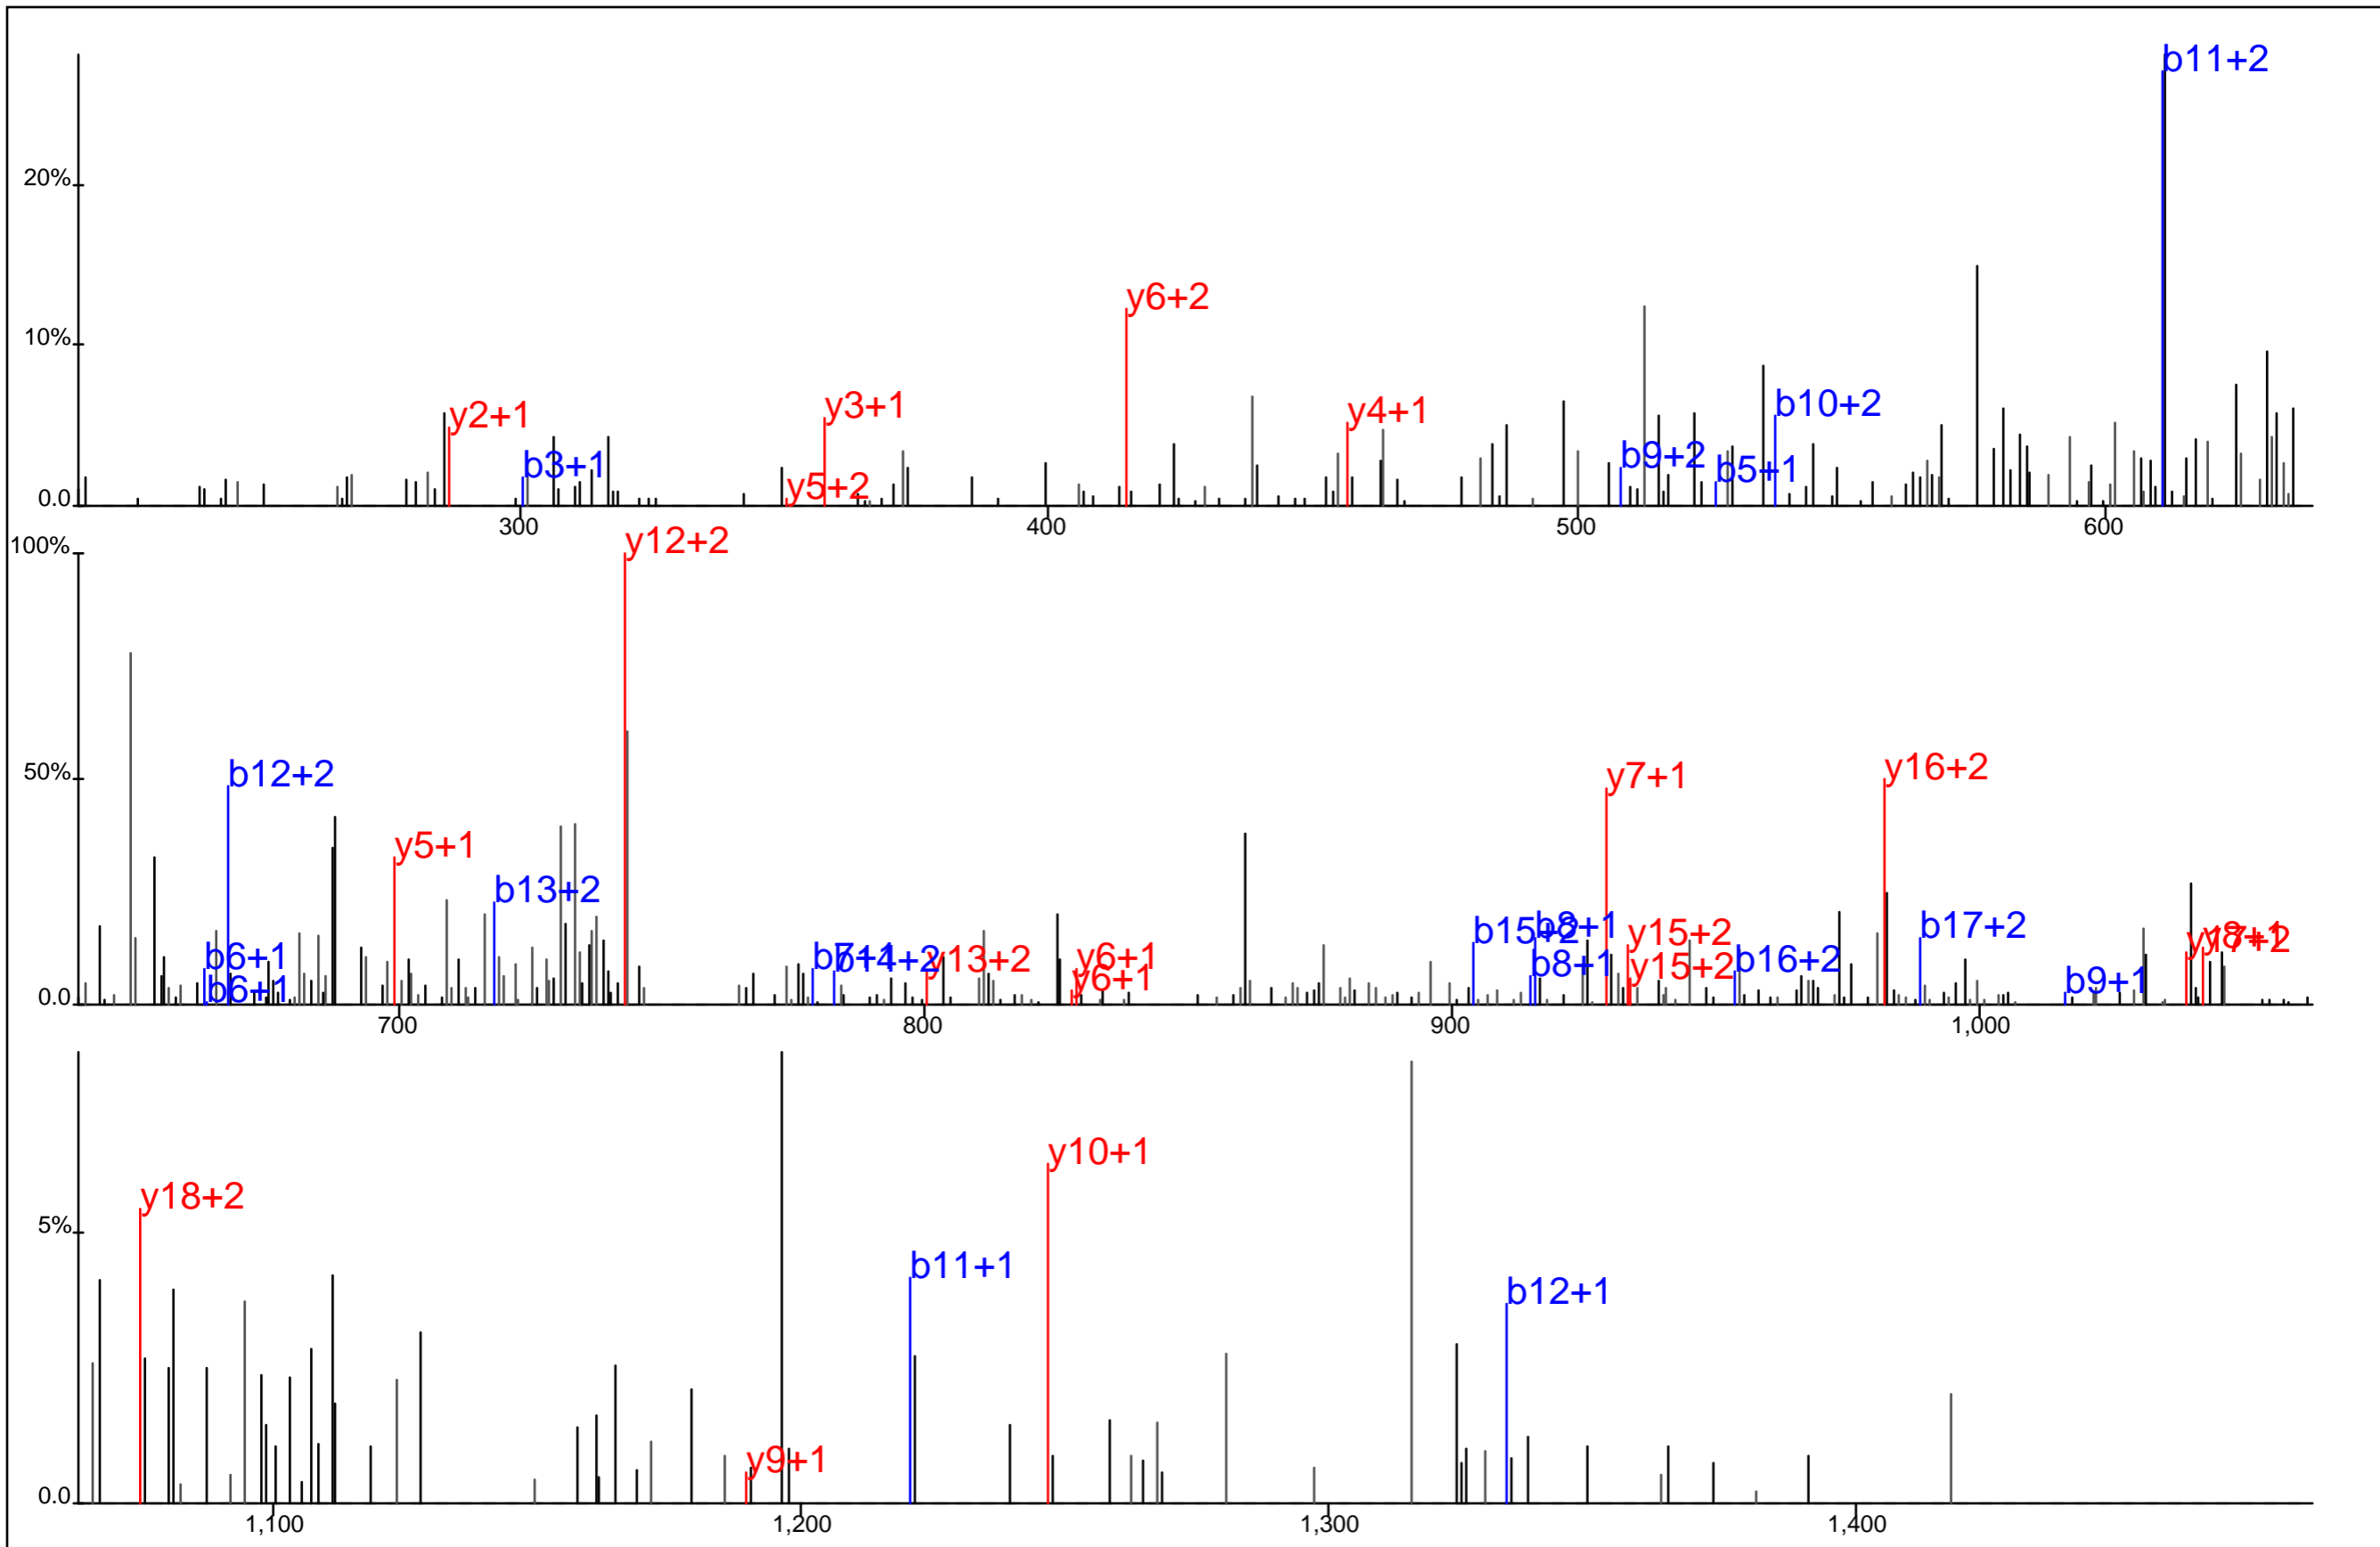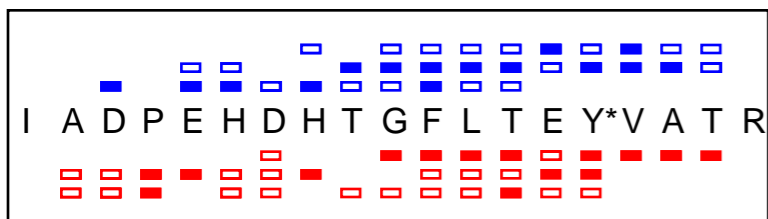

Protein Name: ERK1  
 gi Accession: 31221  
 Precursor Mass: 754.6790+3  
 Delta Mass: 5.427 ppm  
 XCorr: 26.07

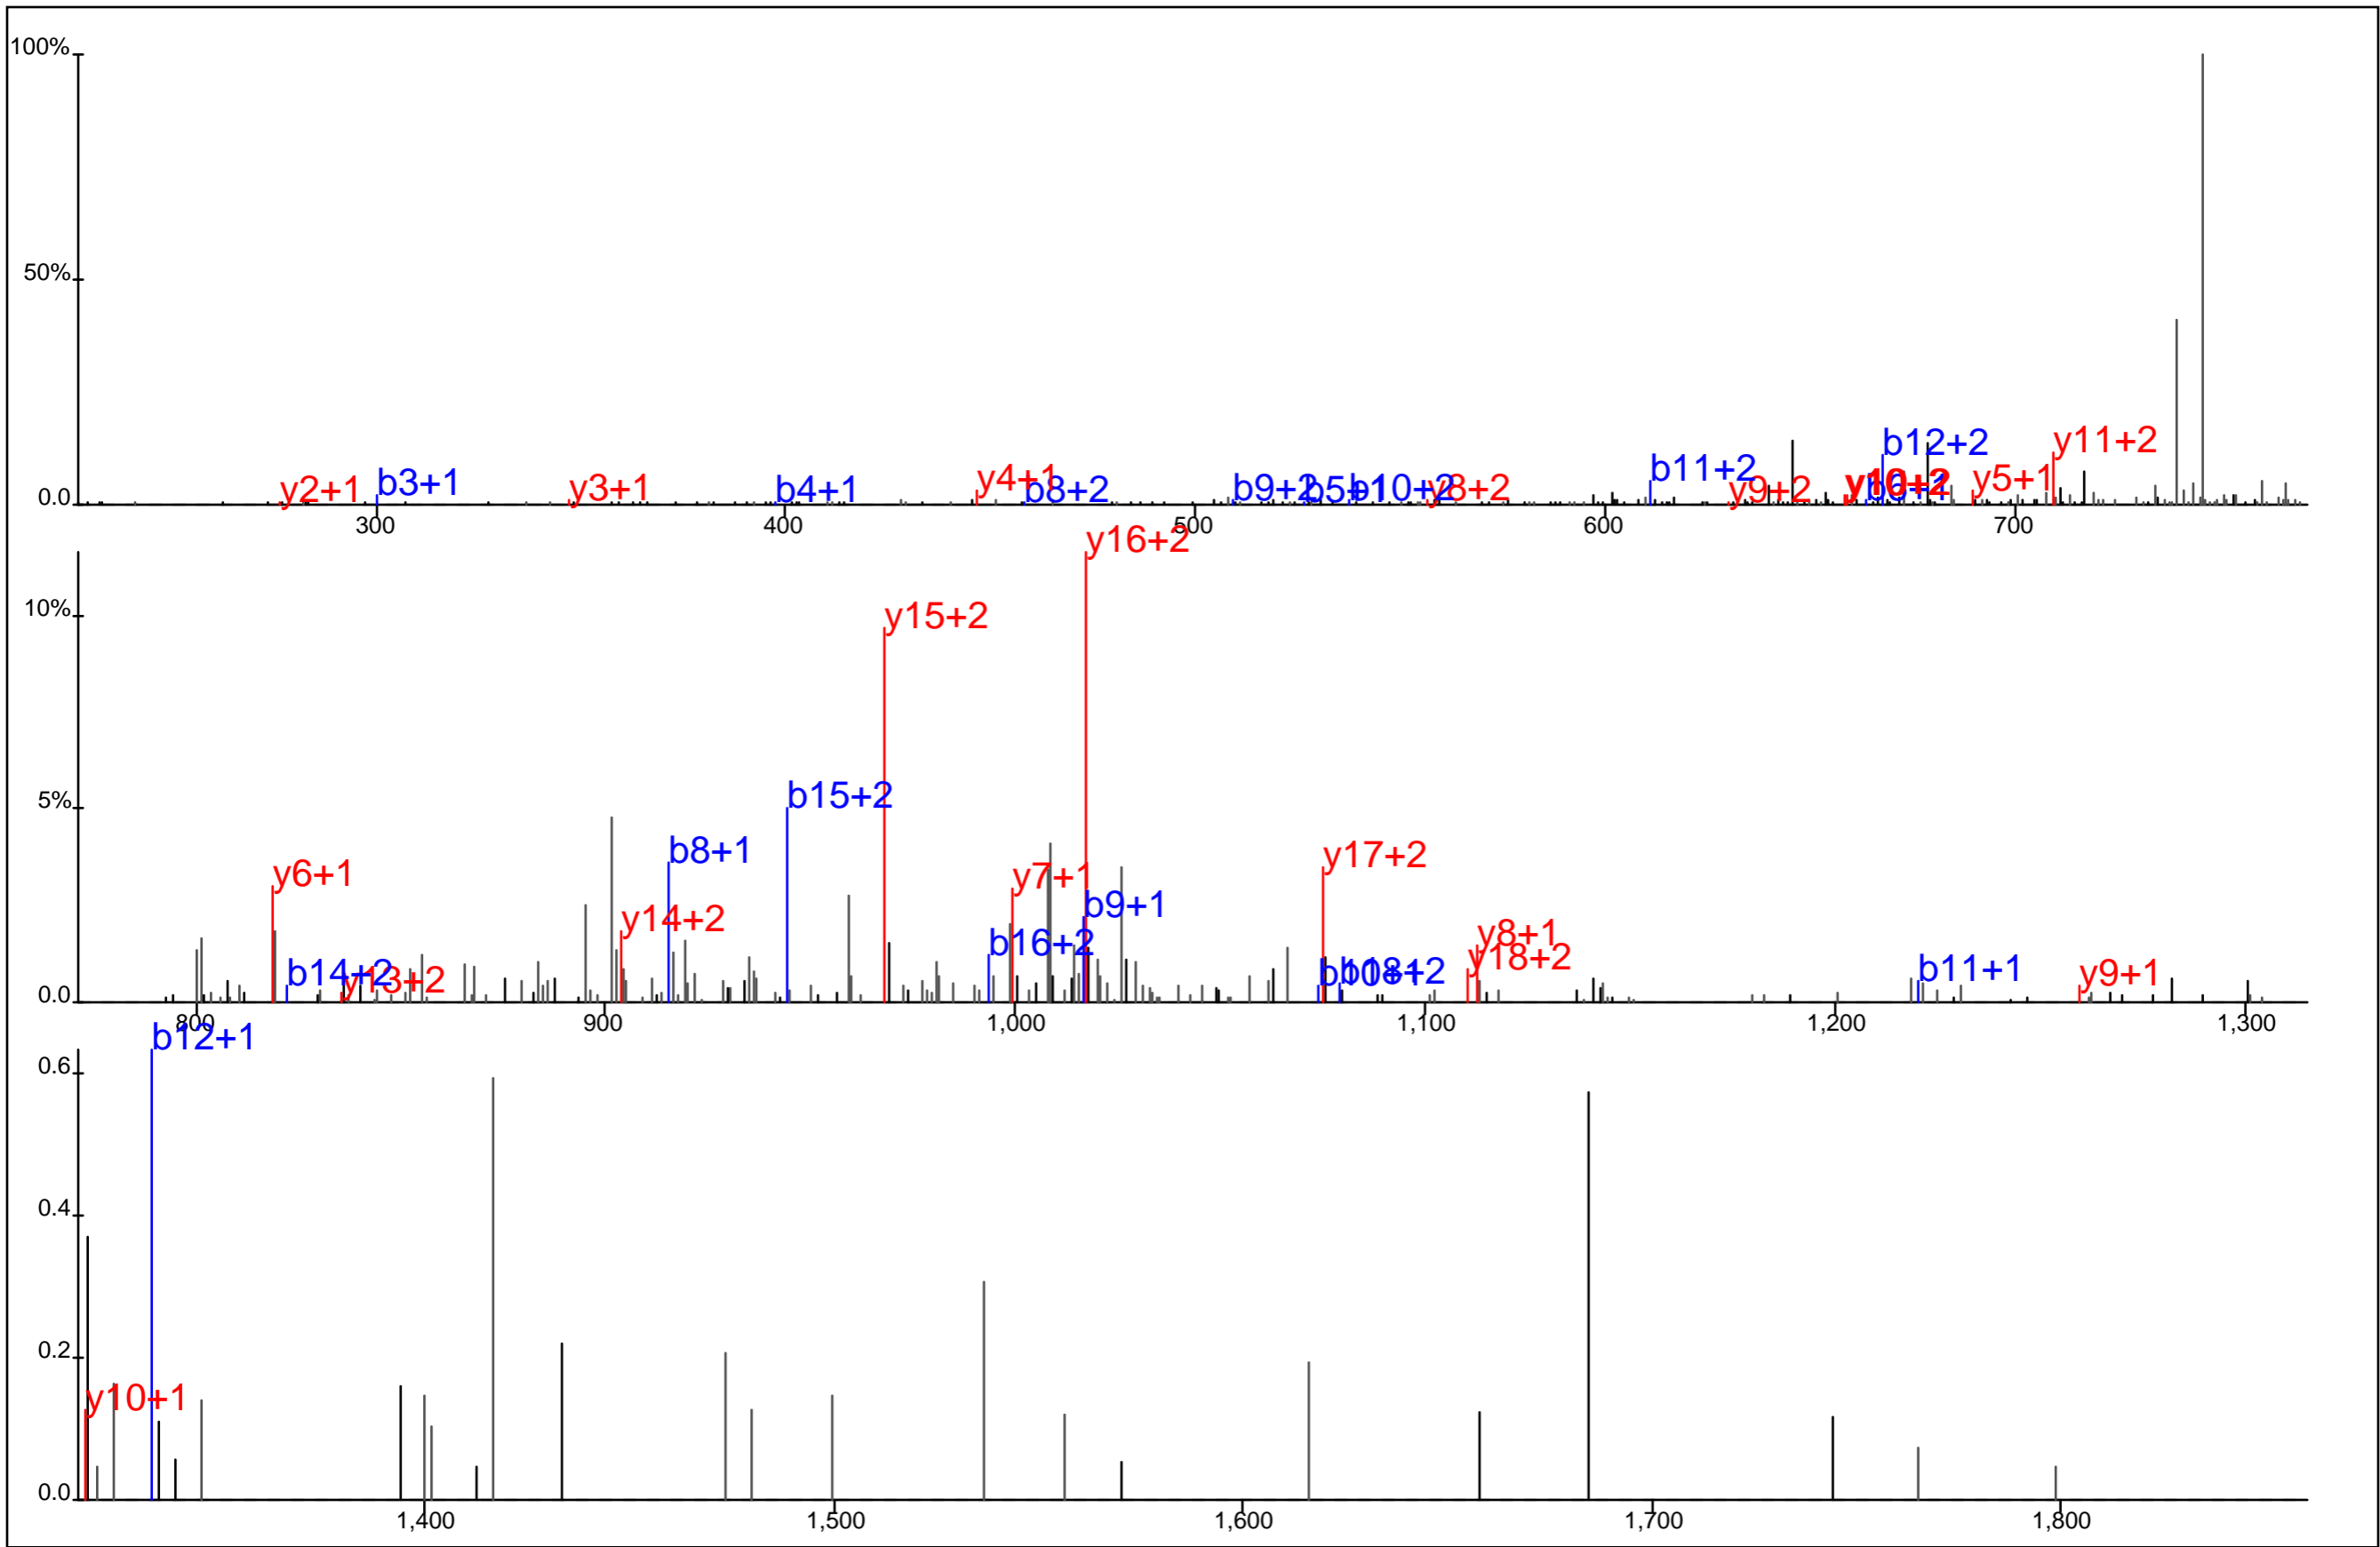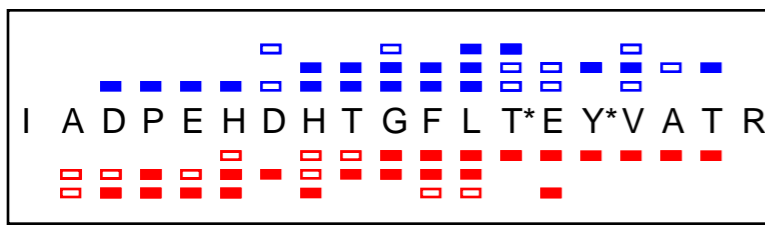

Protein Name: ERK1  
 gi Accession: 31221  
 Precursor Mass: 777.9960+3  
 Delta Mass: 2.182 ppm  
 XCorr: 21.61

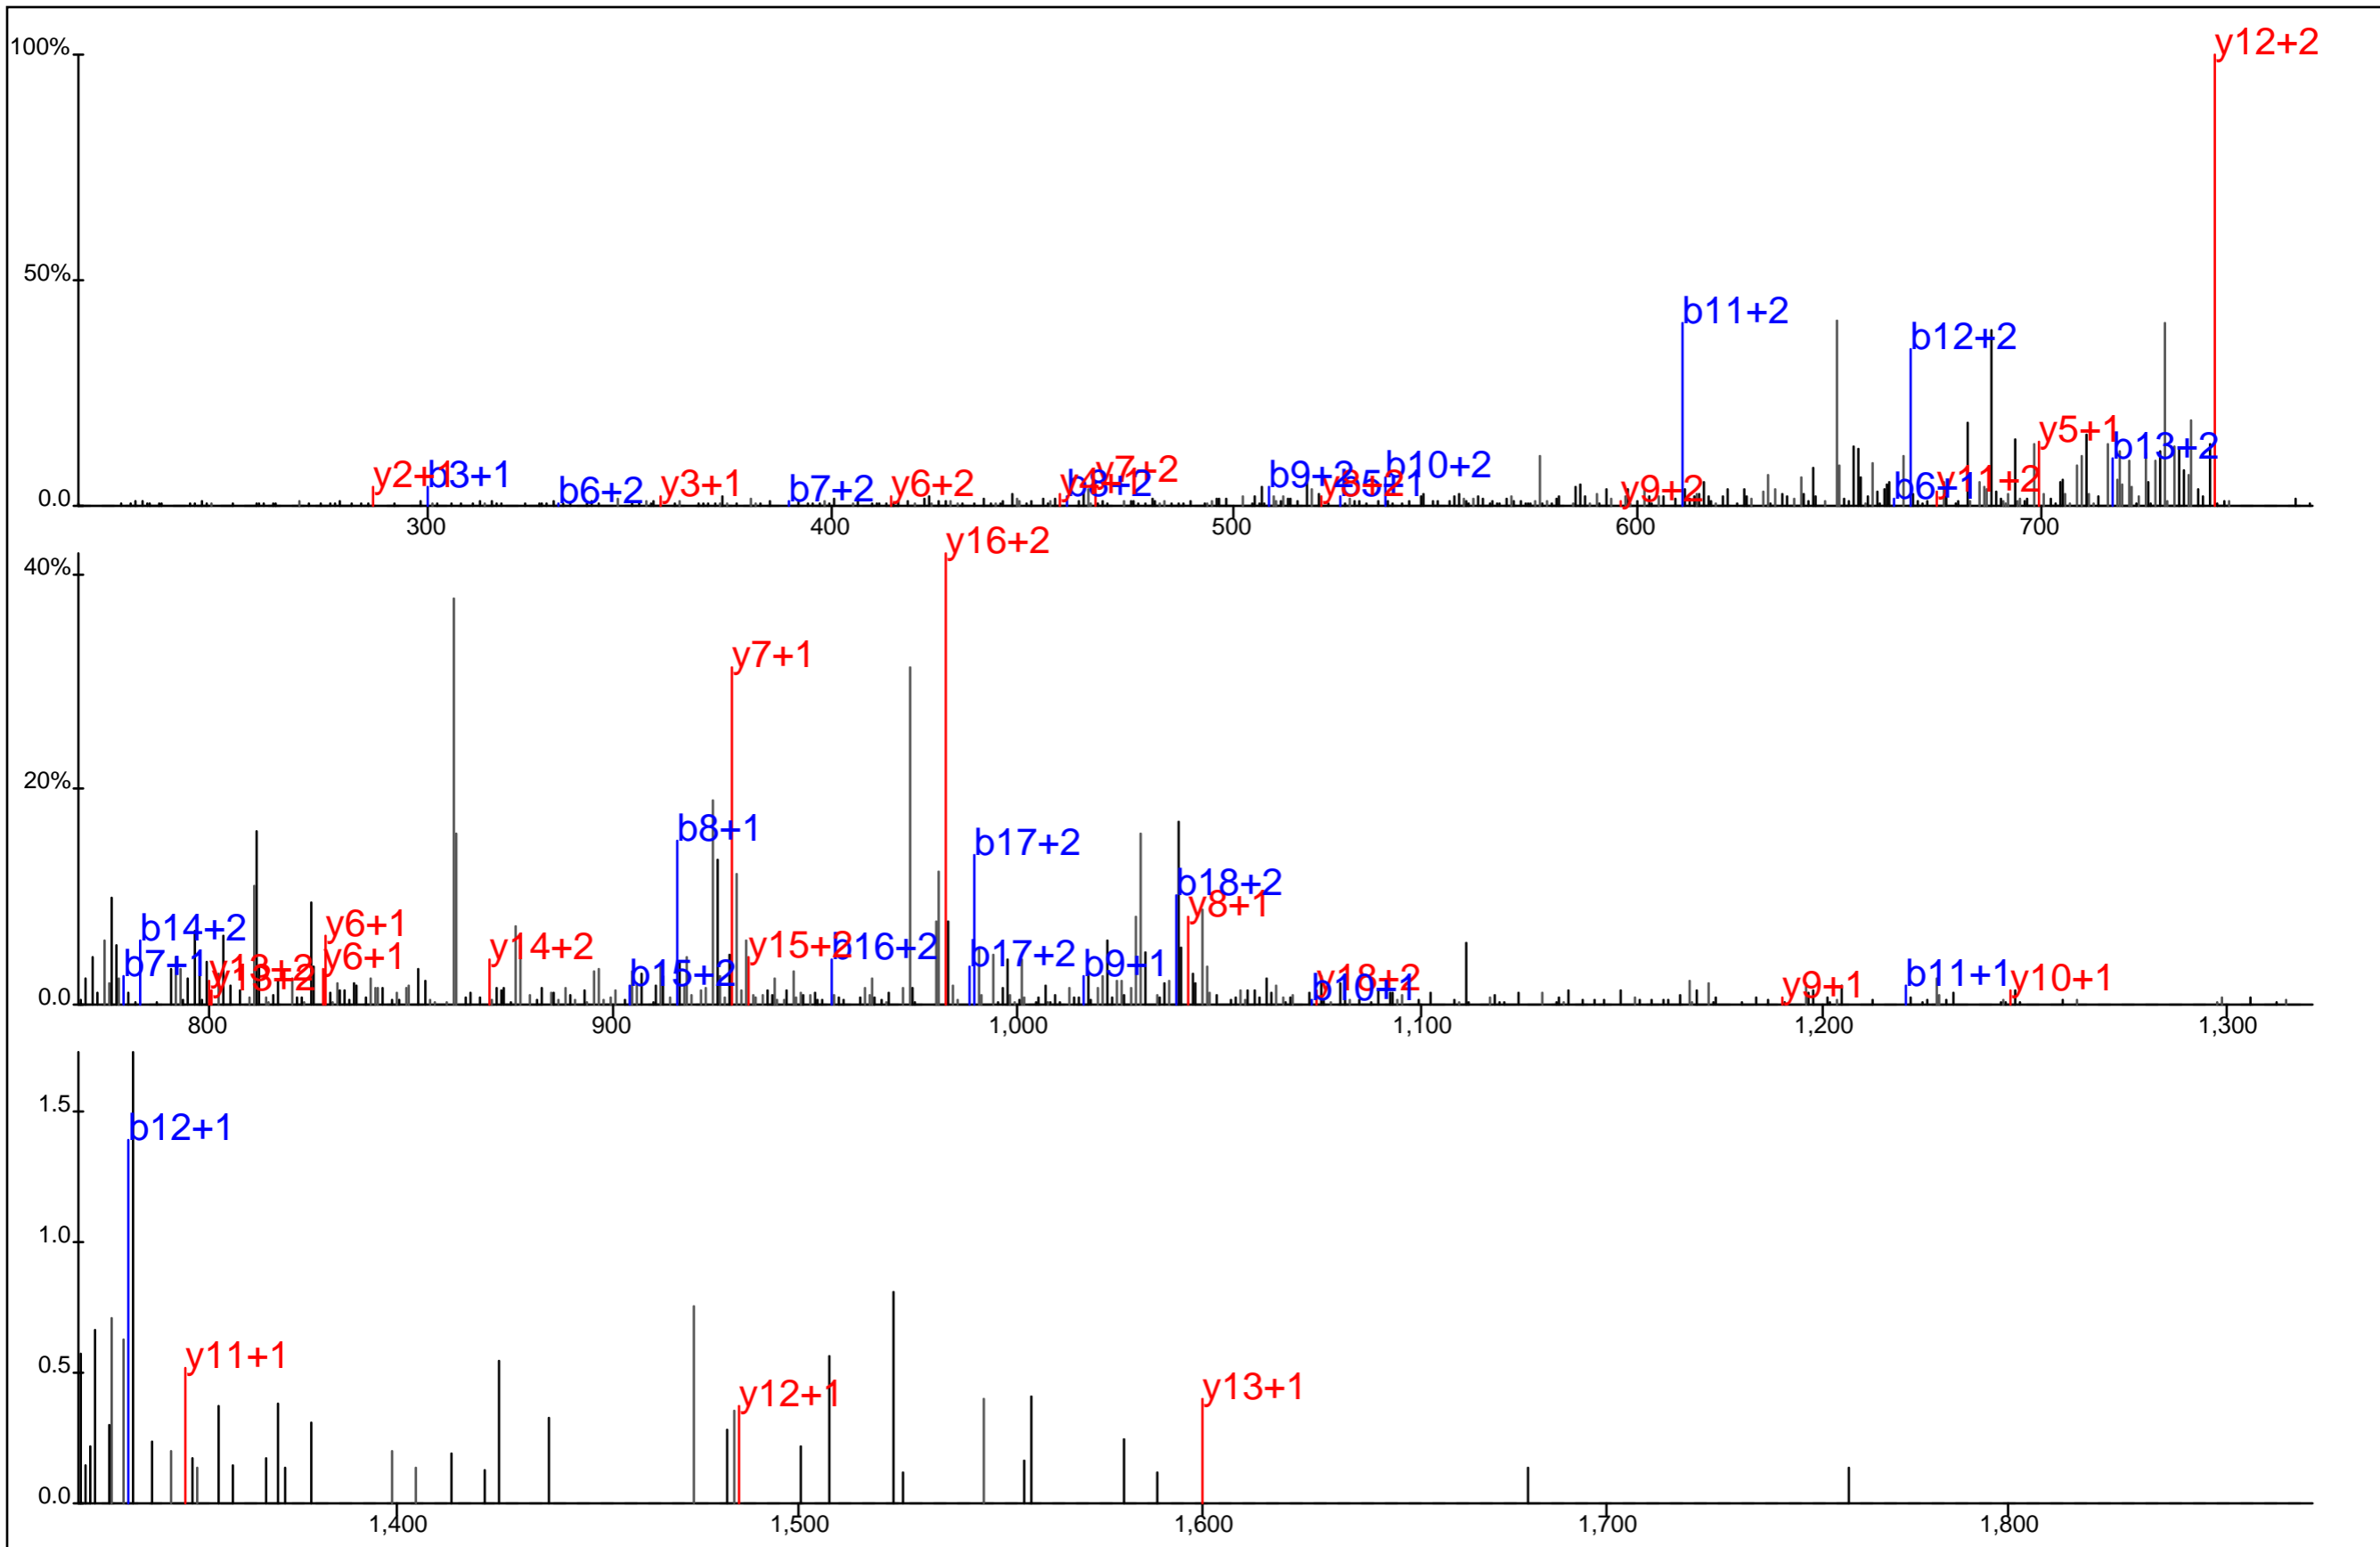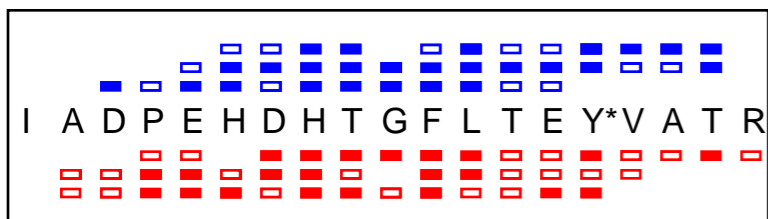

Protein Name: ERK1  
 gi Accession: 31221  
 Precursor Mass: 754.6741+3  
 Delta Mass: 1.132 ppm  
 XCorr: 36.13

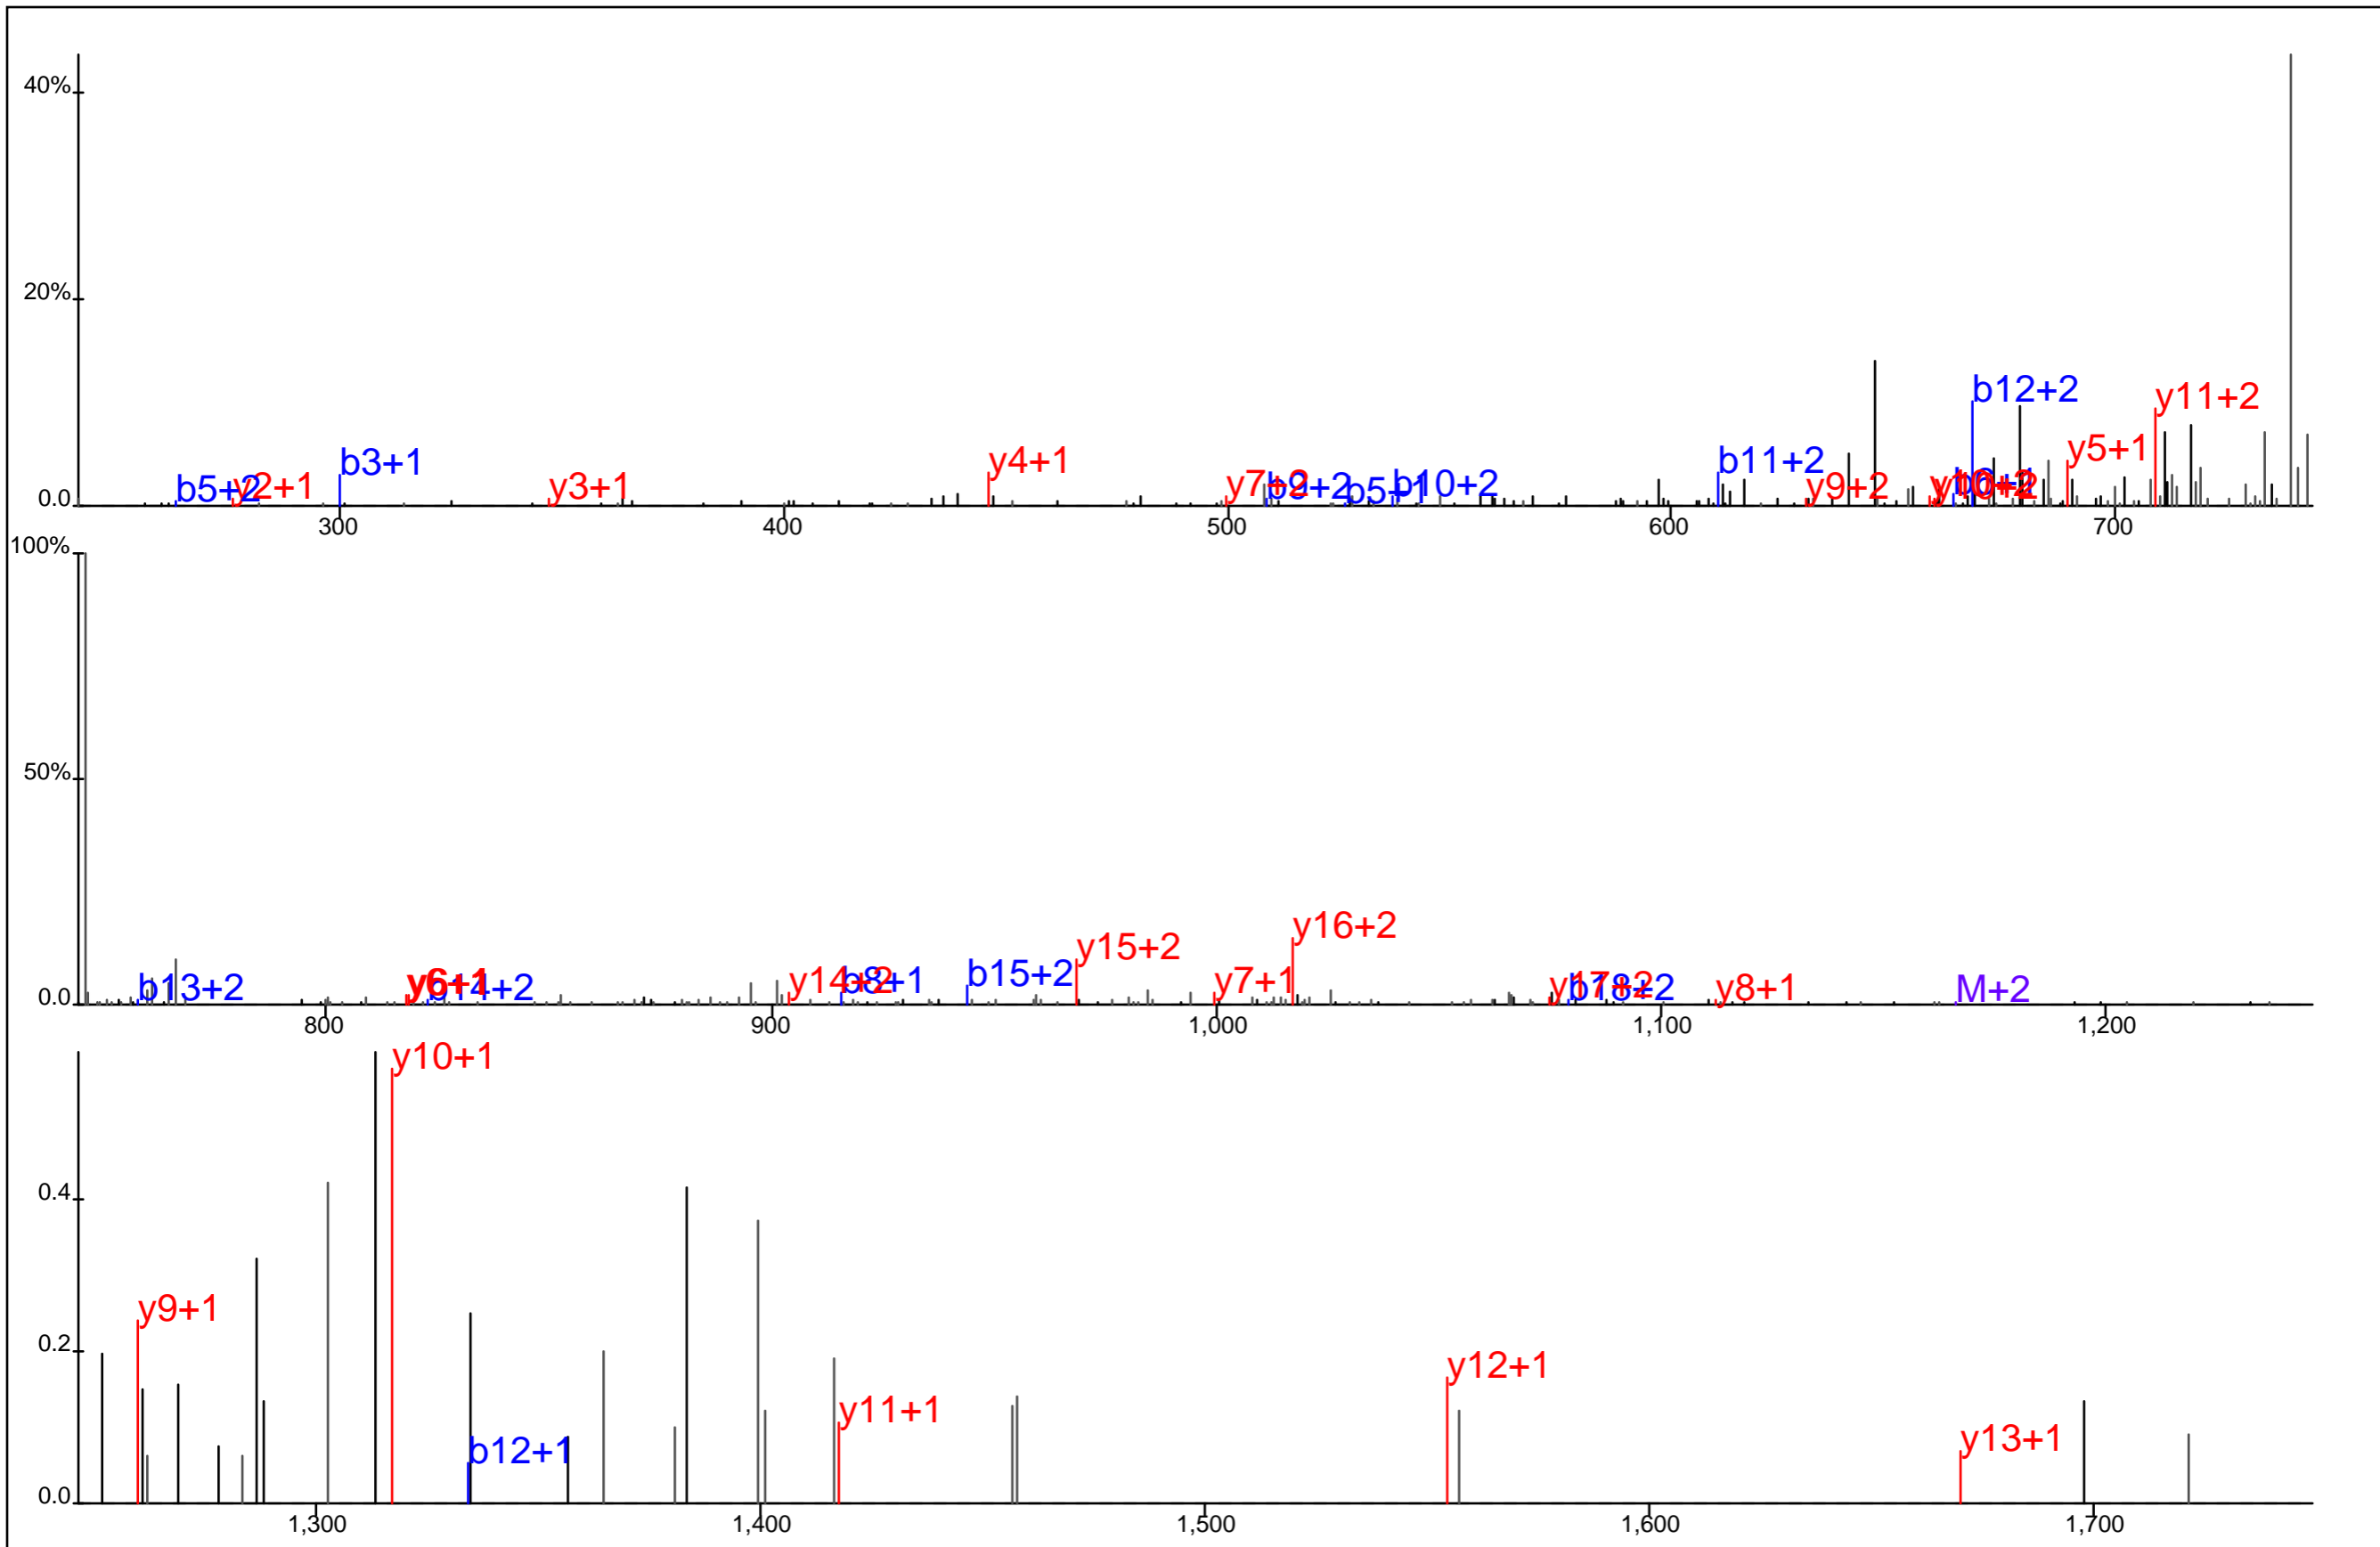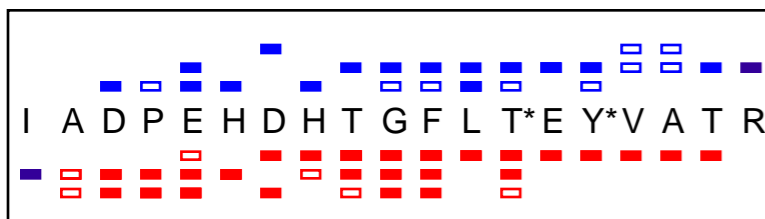

Protein Name: ERK1  
 gi Accession: 31221  
 Precursor Mass: 777.9987+3  
 Delta Mass: 5.638 ppm  
 XCorr: 28.75

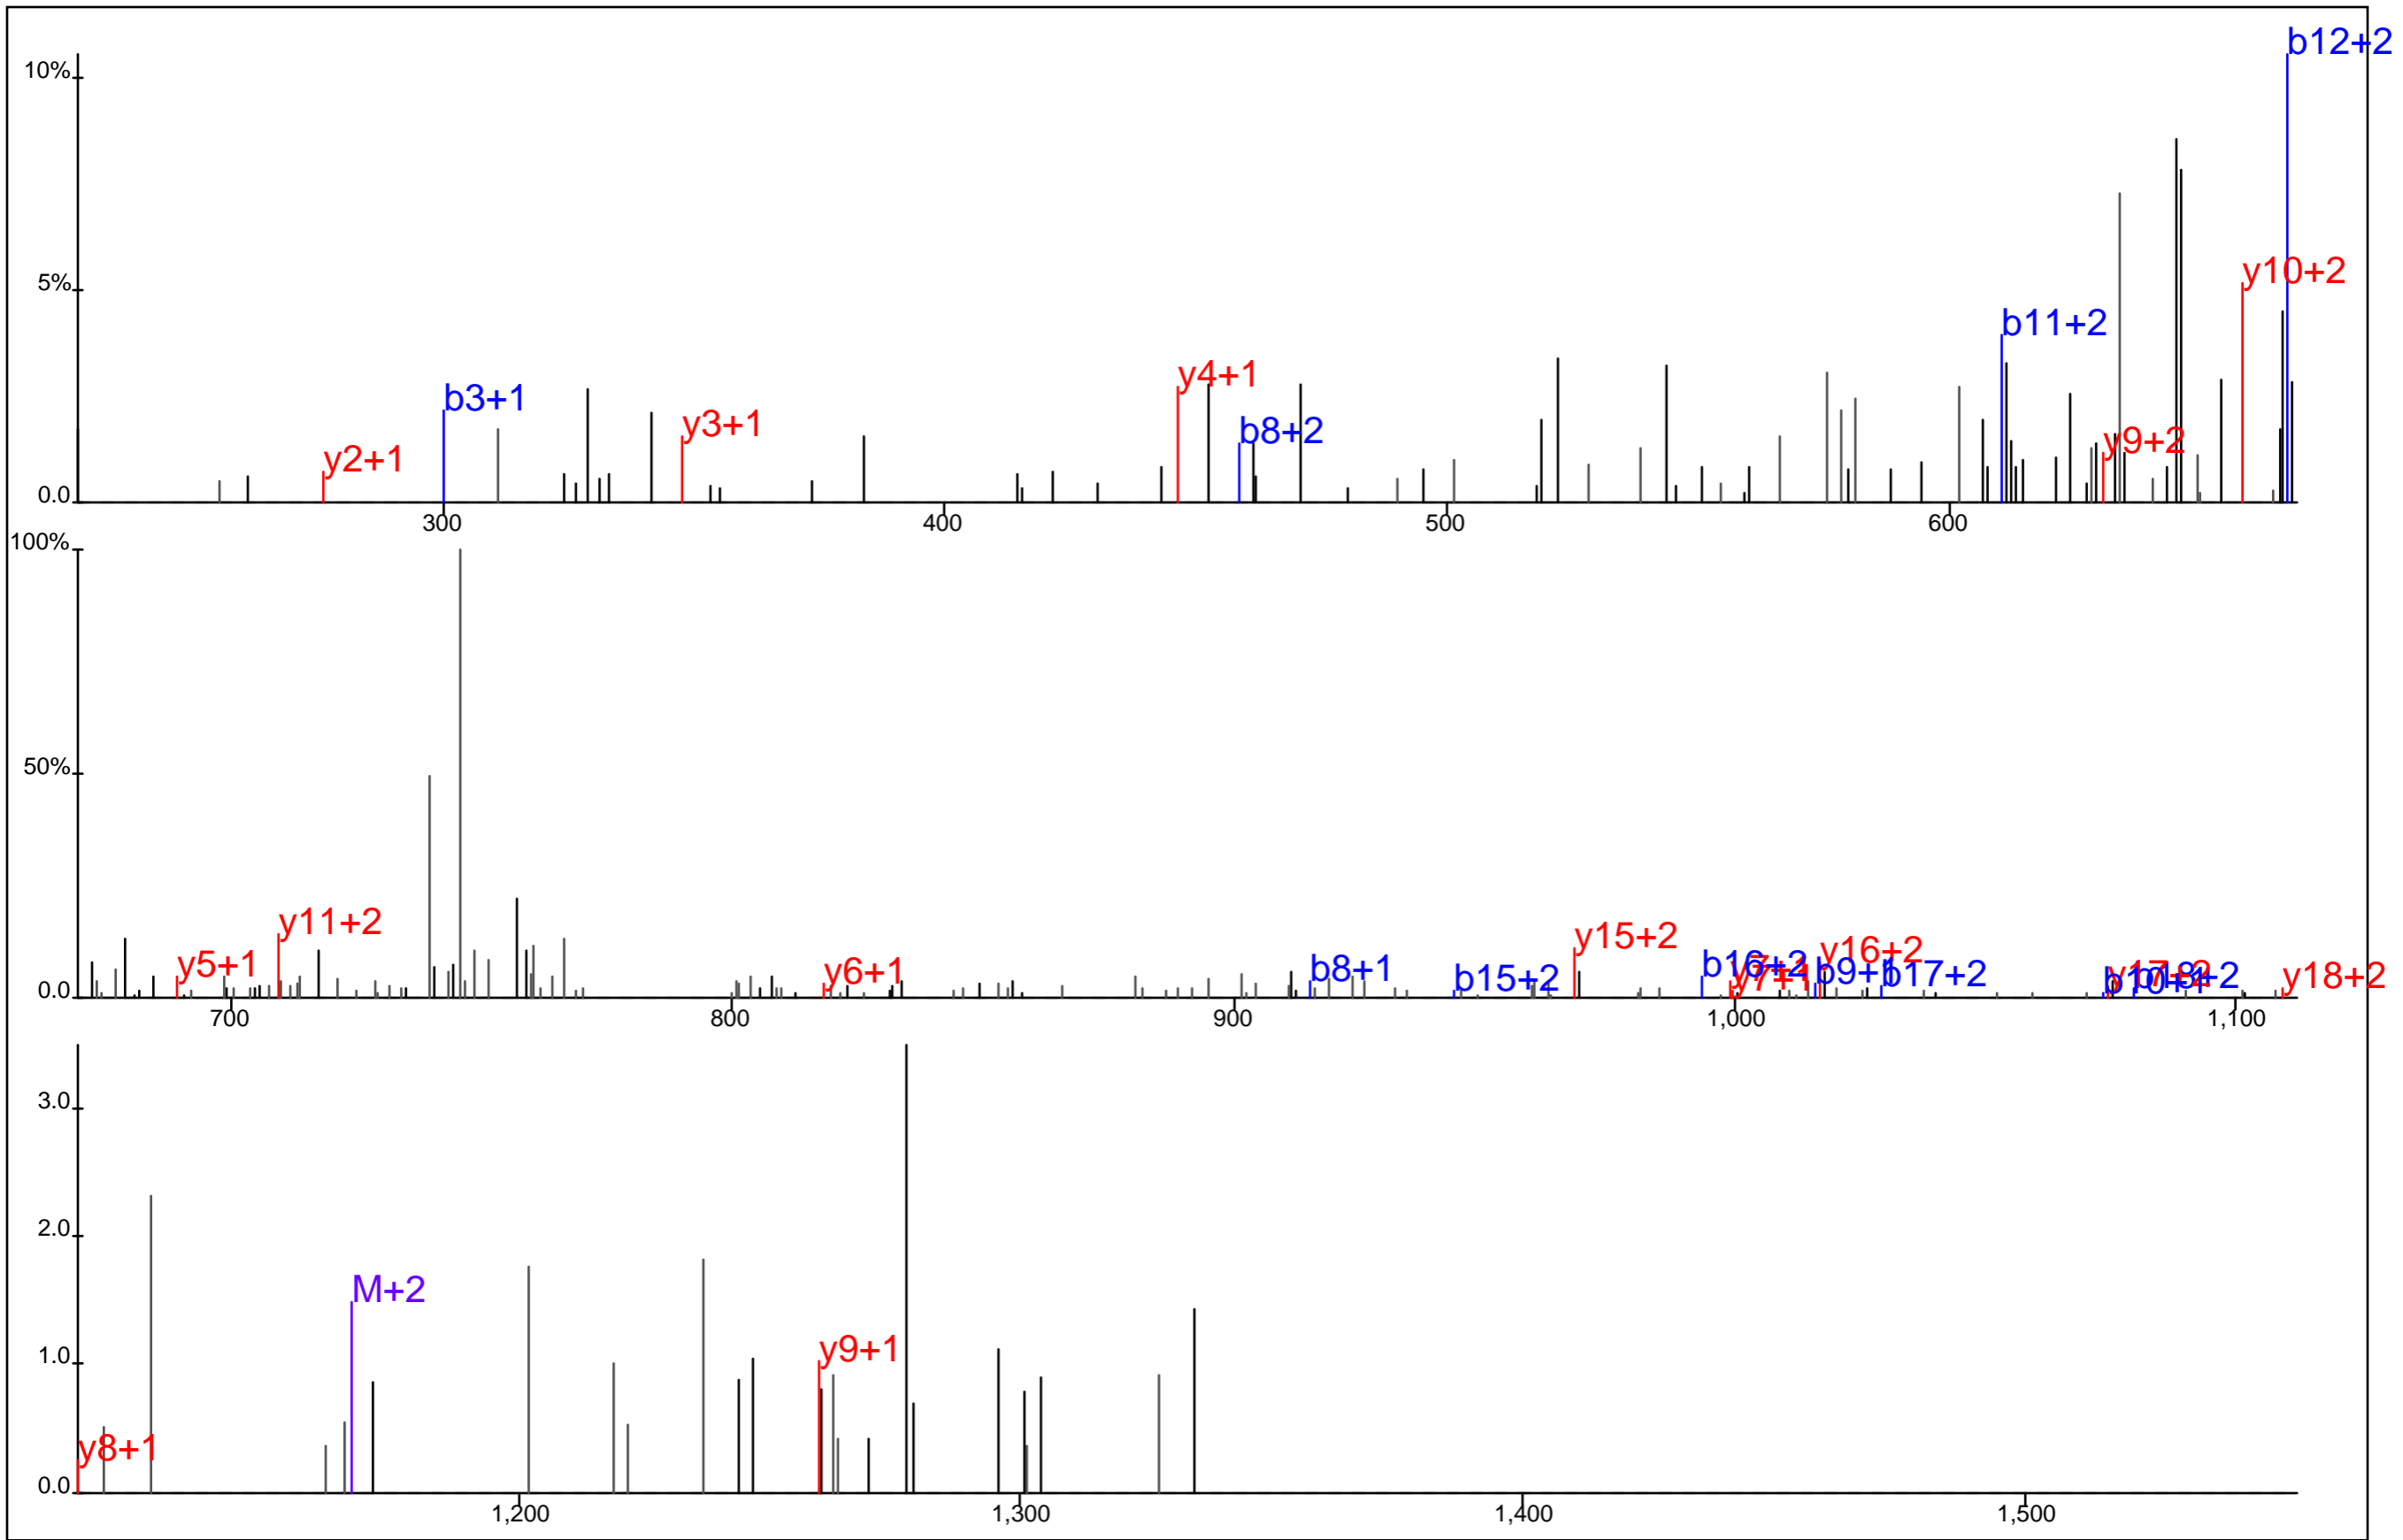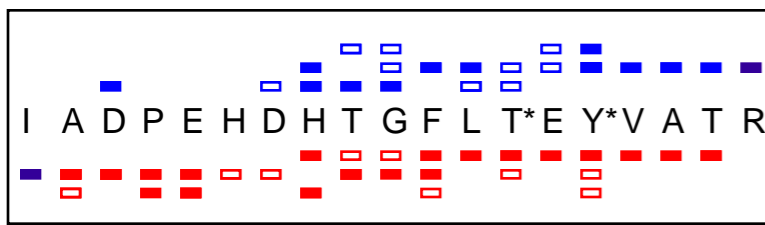

Protein Name: ERK1  
 gi Accession: 31221  
 Precursor Mass: 777.9967+3  
 Delta Mass: 3.125 ppm  
 XCorr: 13.37

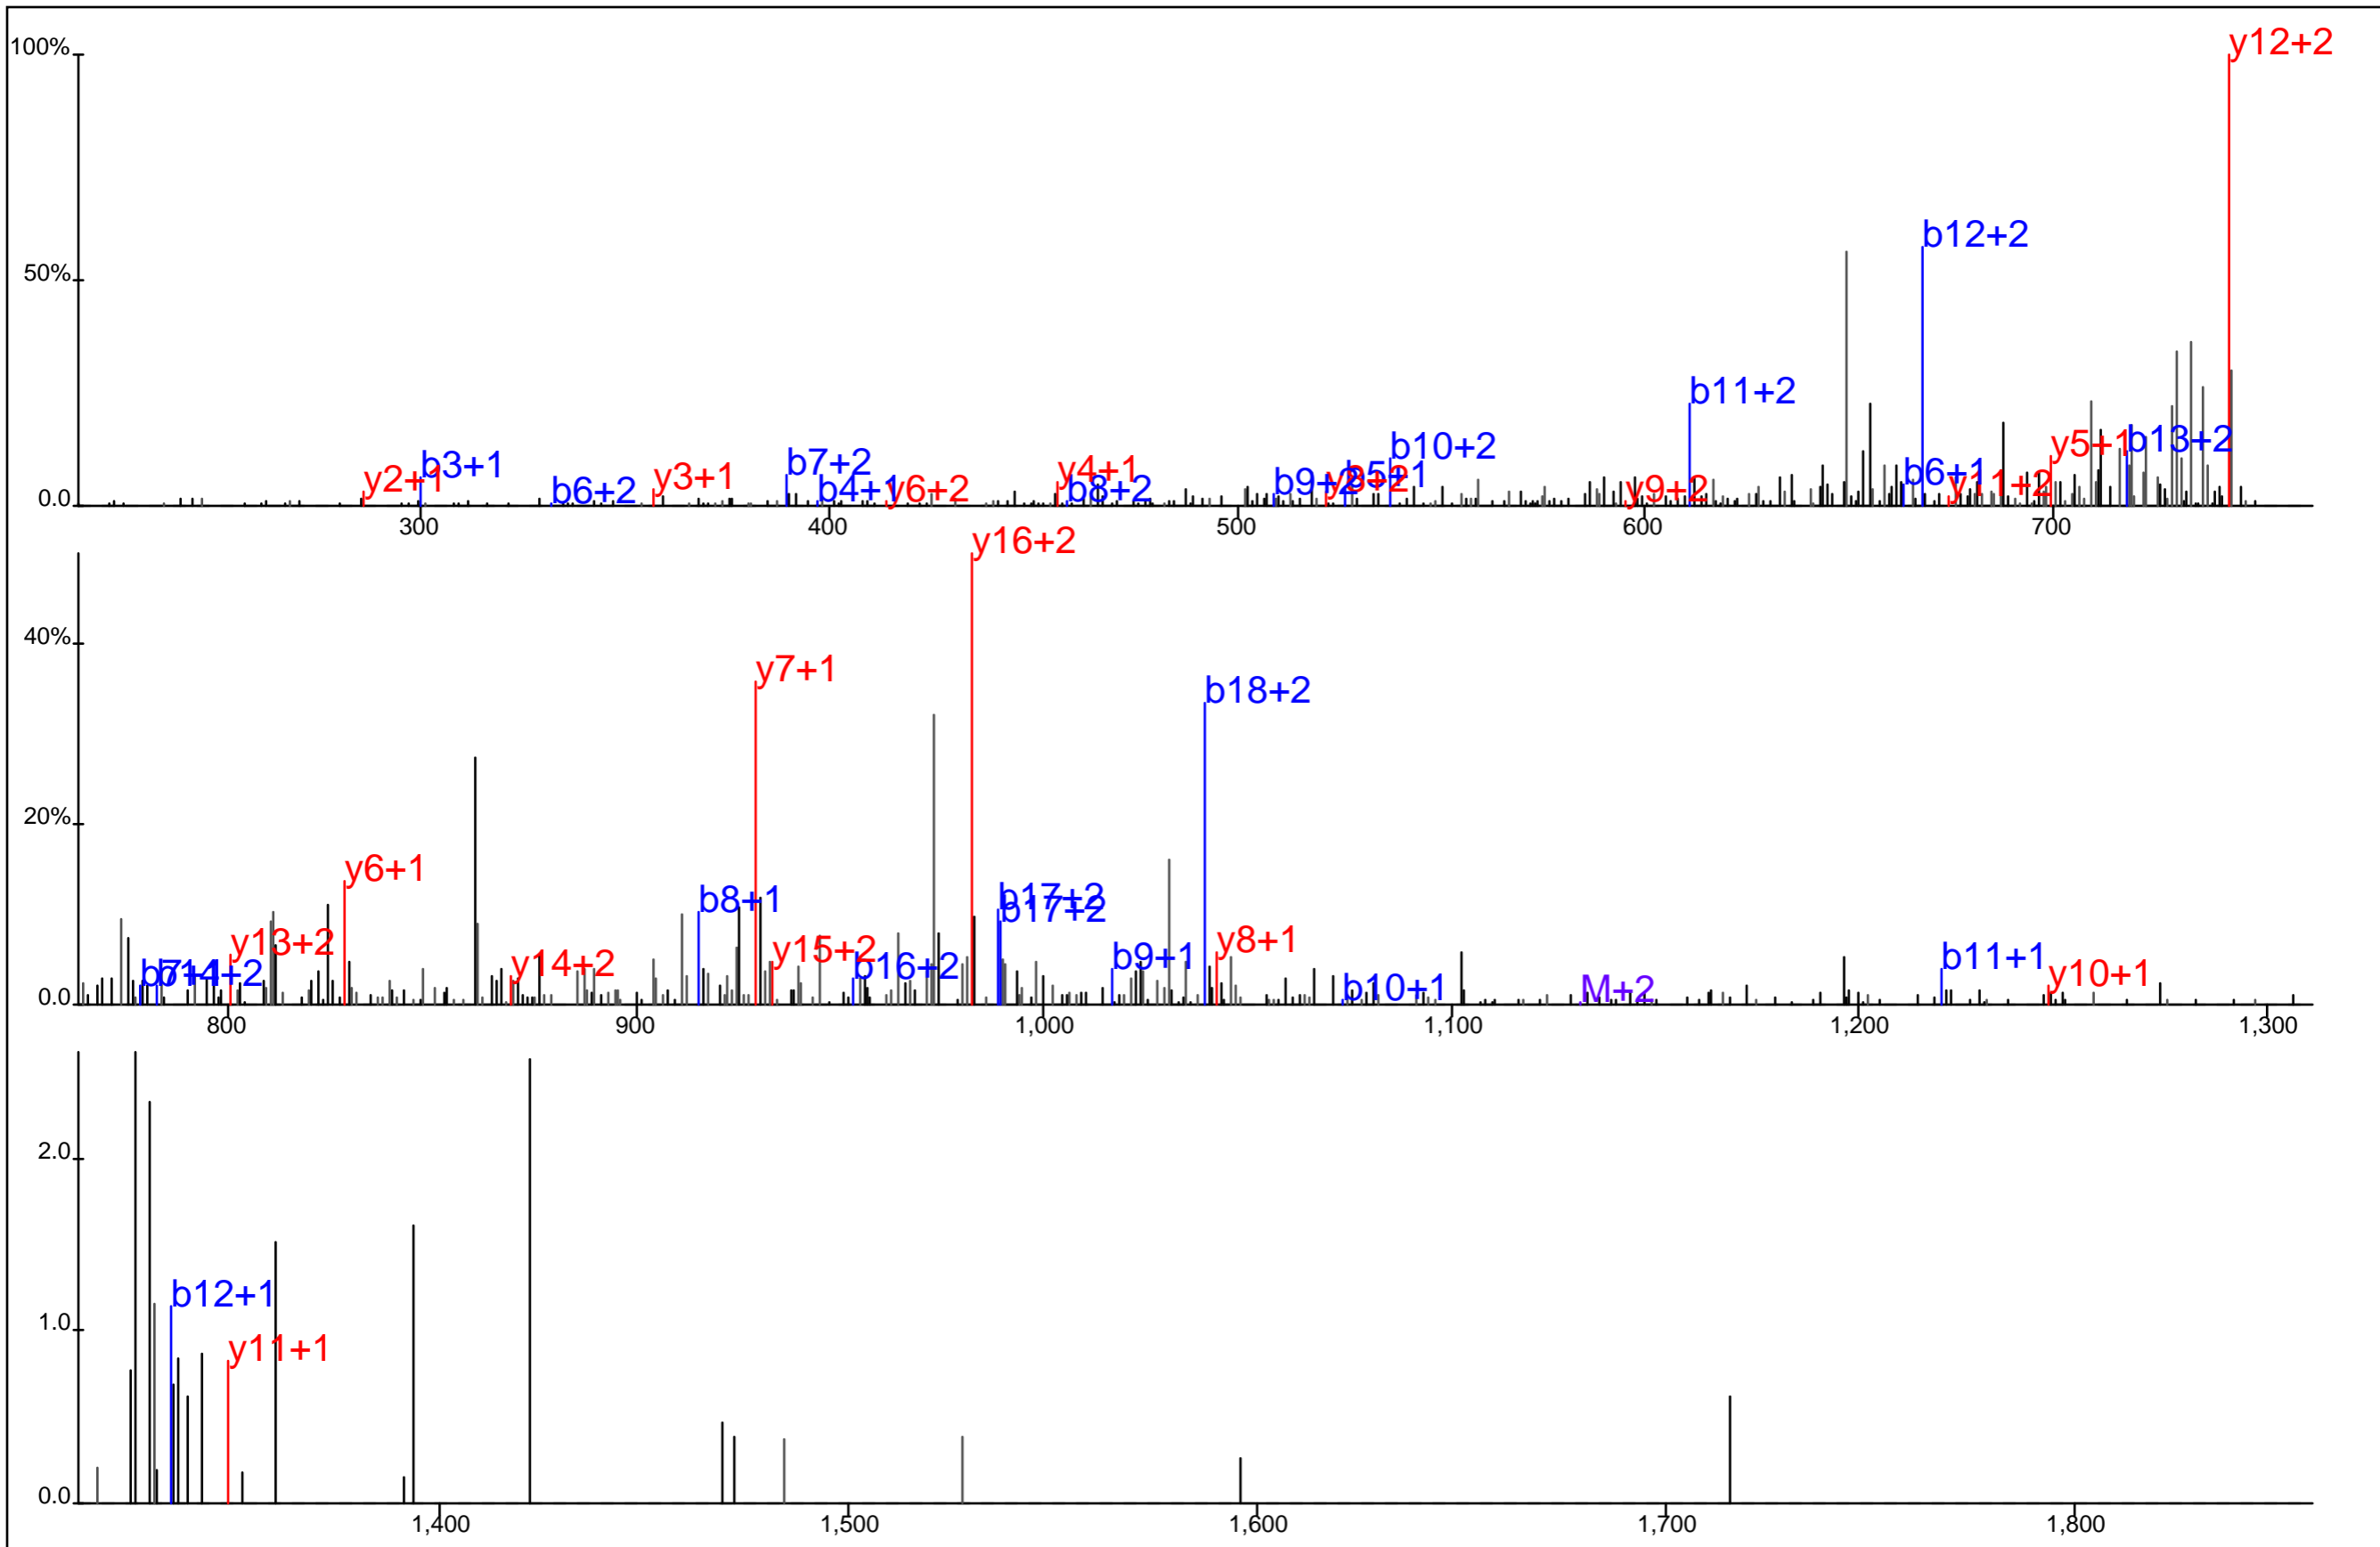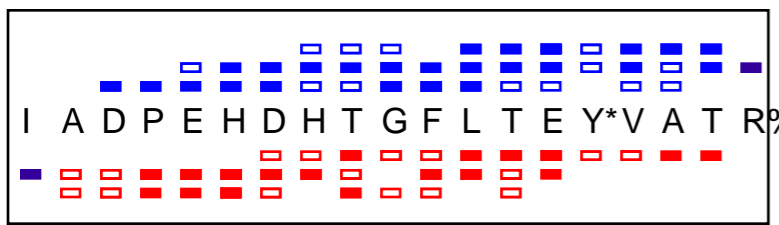

Protein Name: ERK1  
 gi Accession: 31221  
 Precursor Mass: 754.6797+3  
 Delta Mass: 6.396 ppm  
 XCorr: 28.37

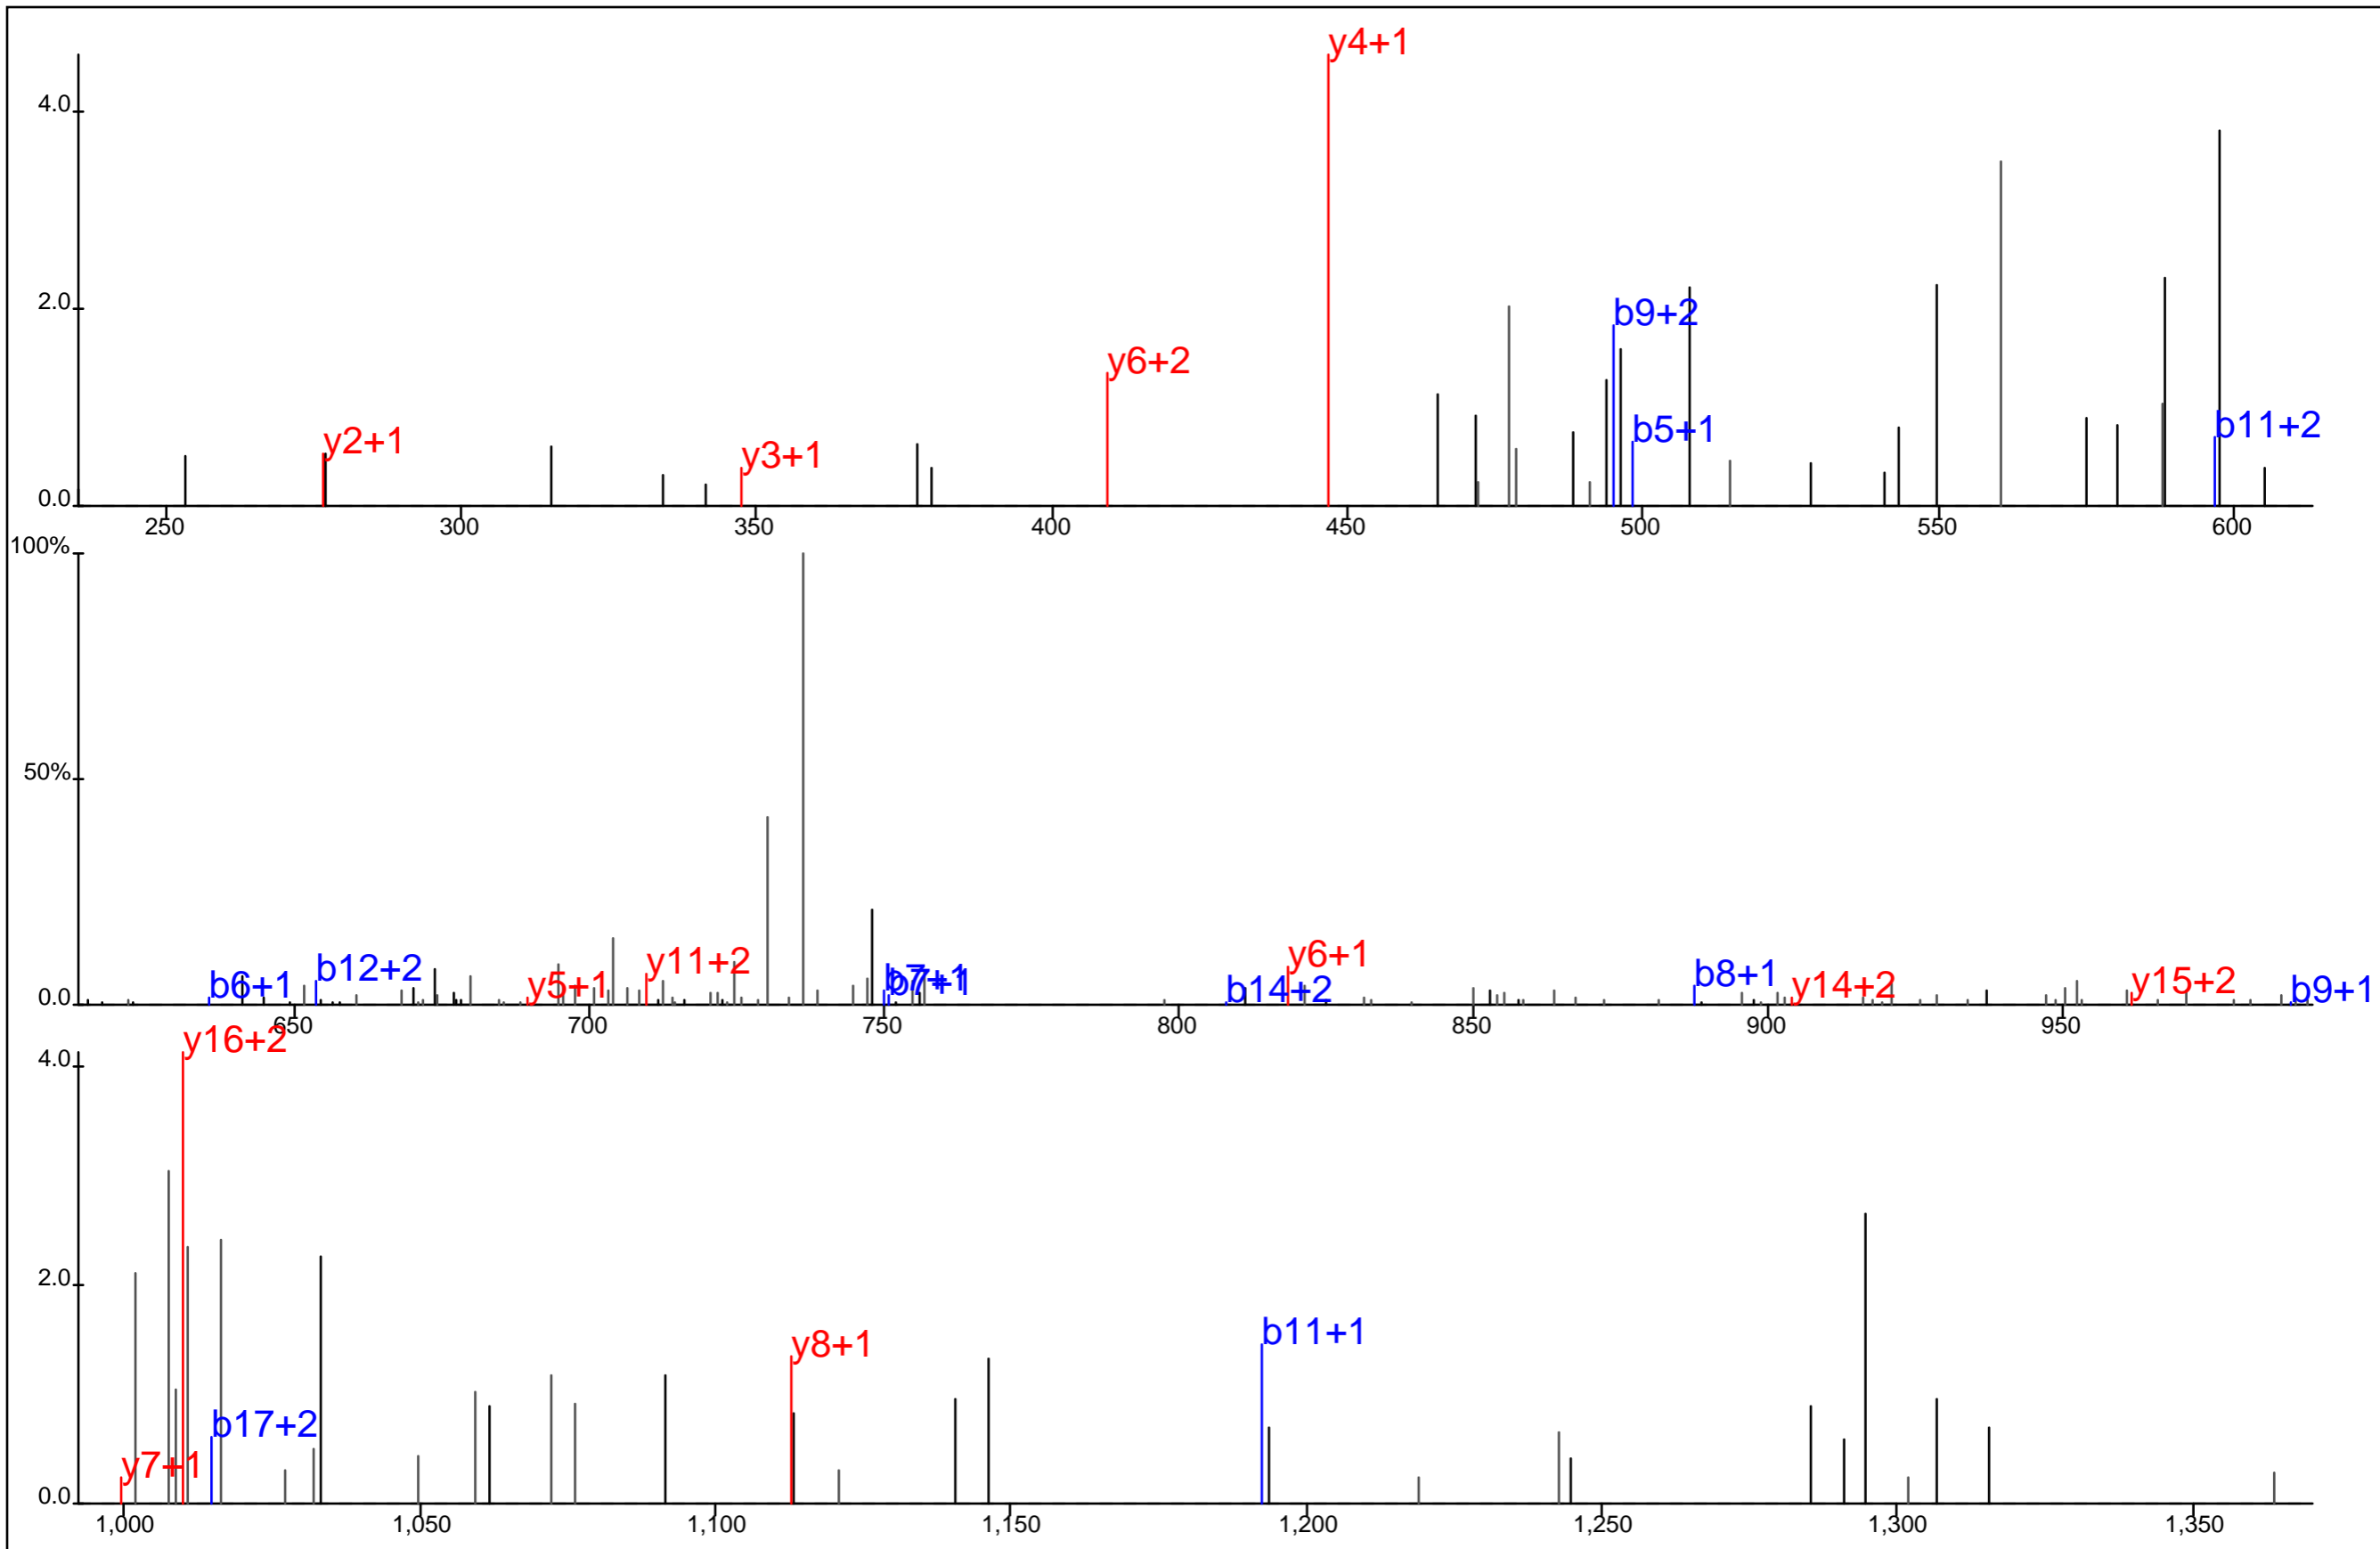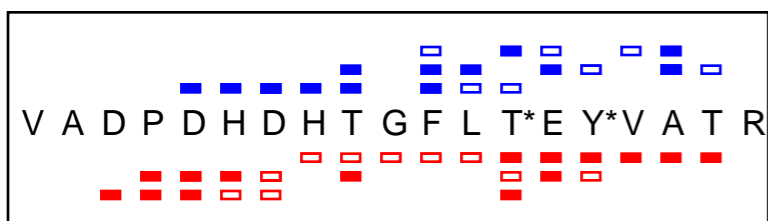

Protein Name: ERK2  
 gi Accession: 23881  
 Precursor Mass: 768.6531+3  
 Delta Mass: 3.342 ppm  
 XCorr: 2.7

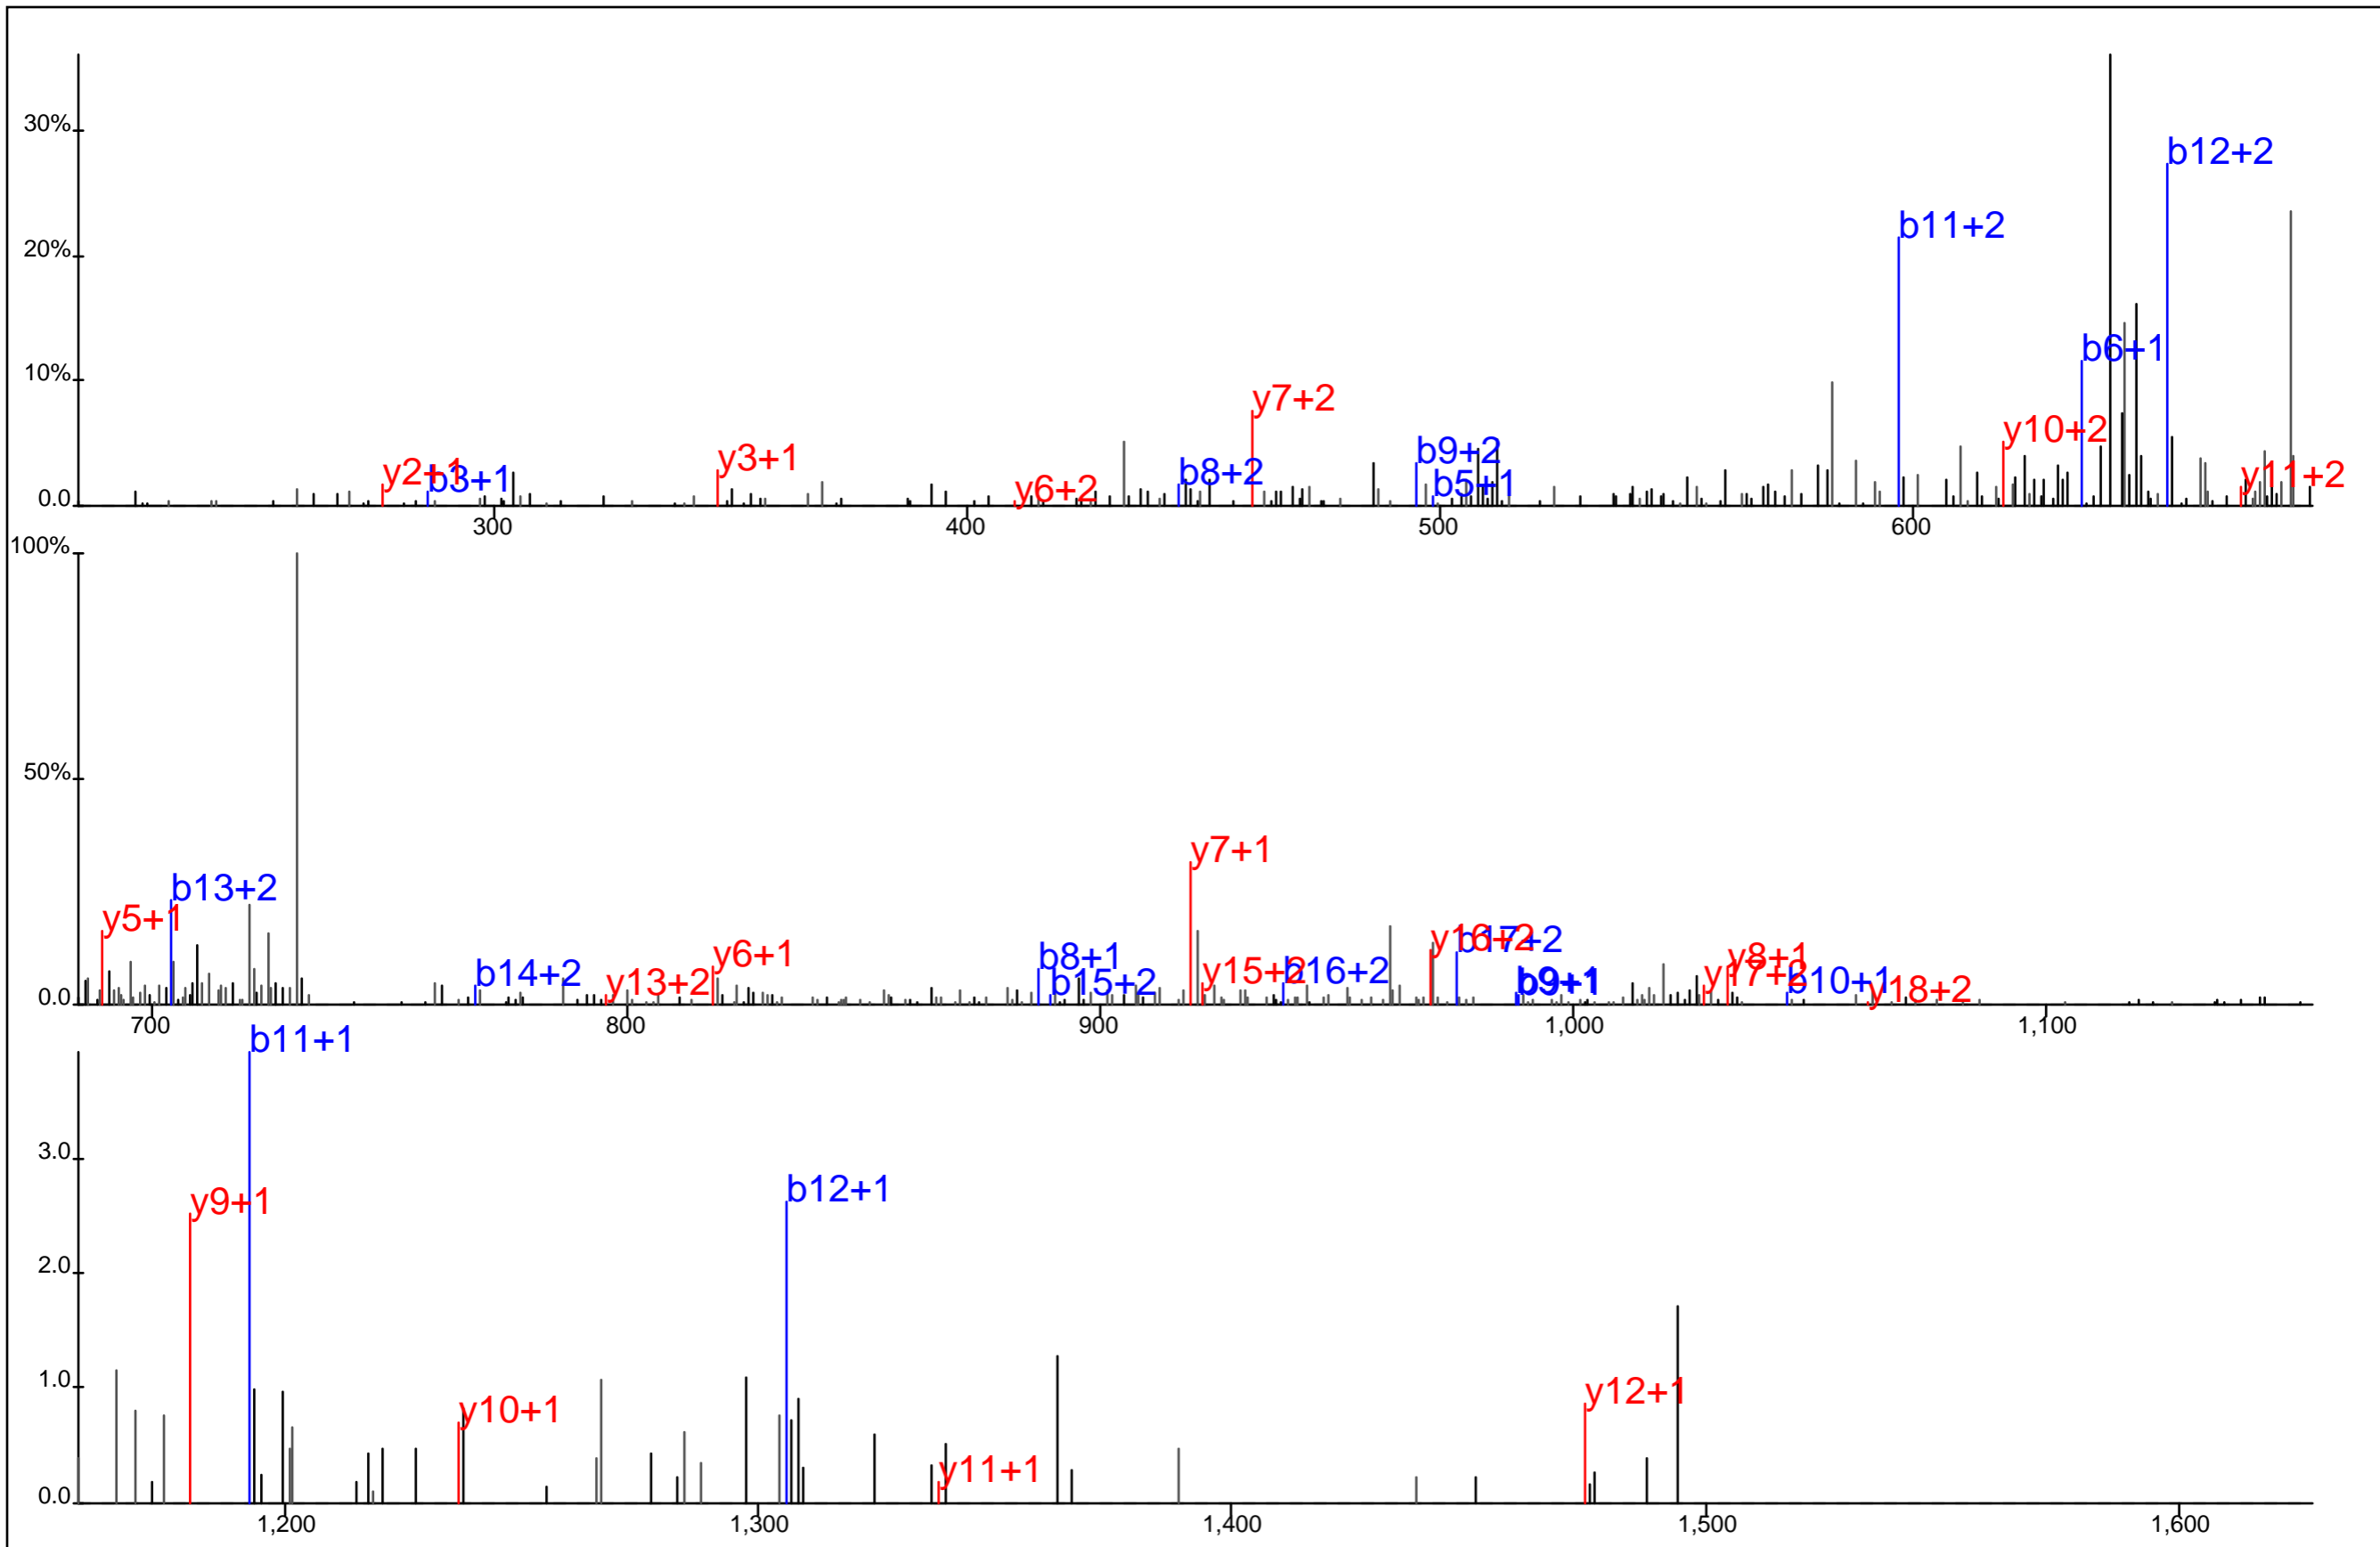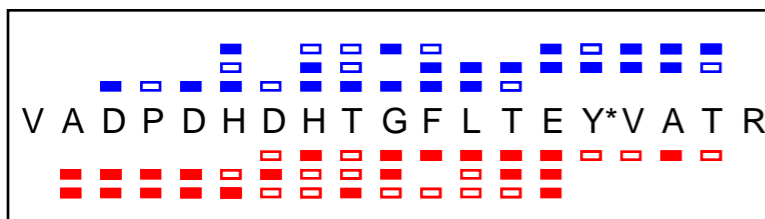

Protein Name: ERK2  
 gi Accession: 23881  
 Precursor Mass: 741.9973+3  
 Delta Mass: 2.940 ppm  
 XCorr: 35.2



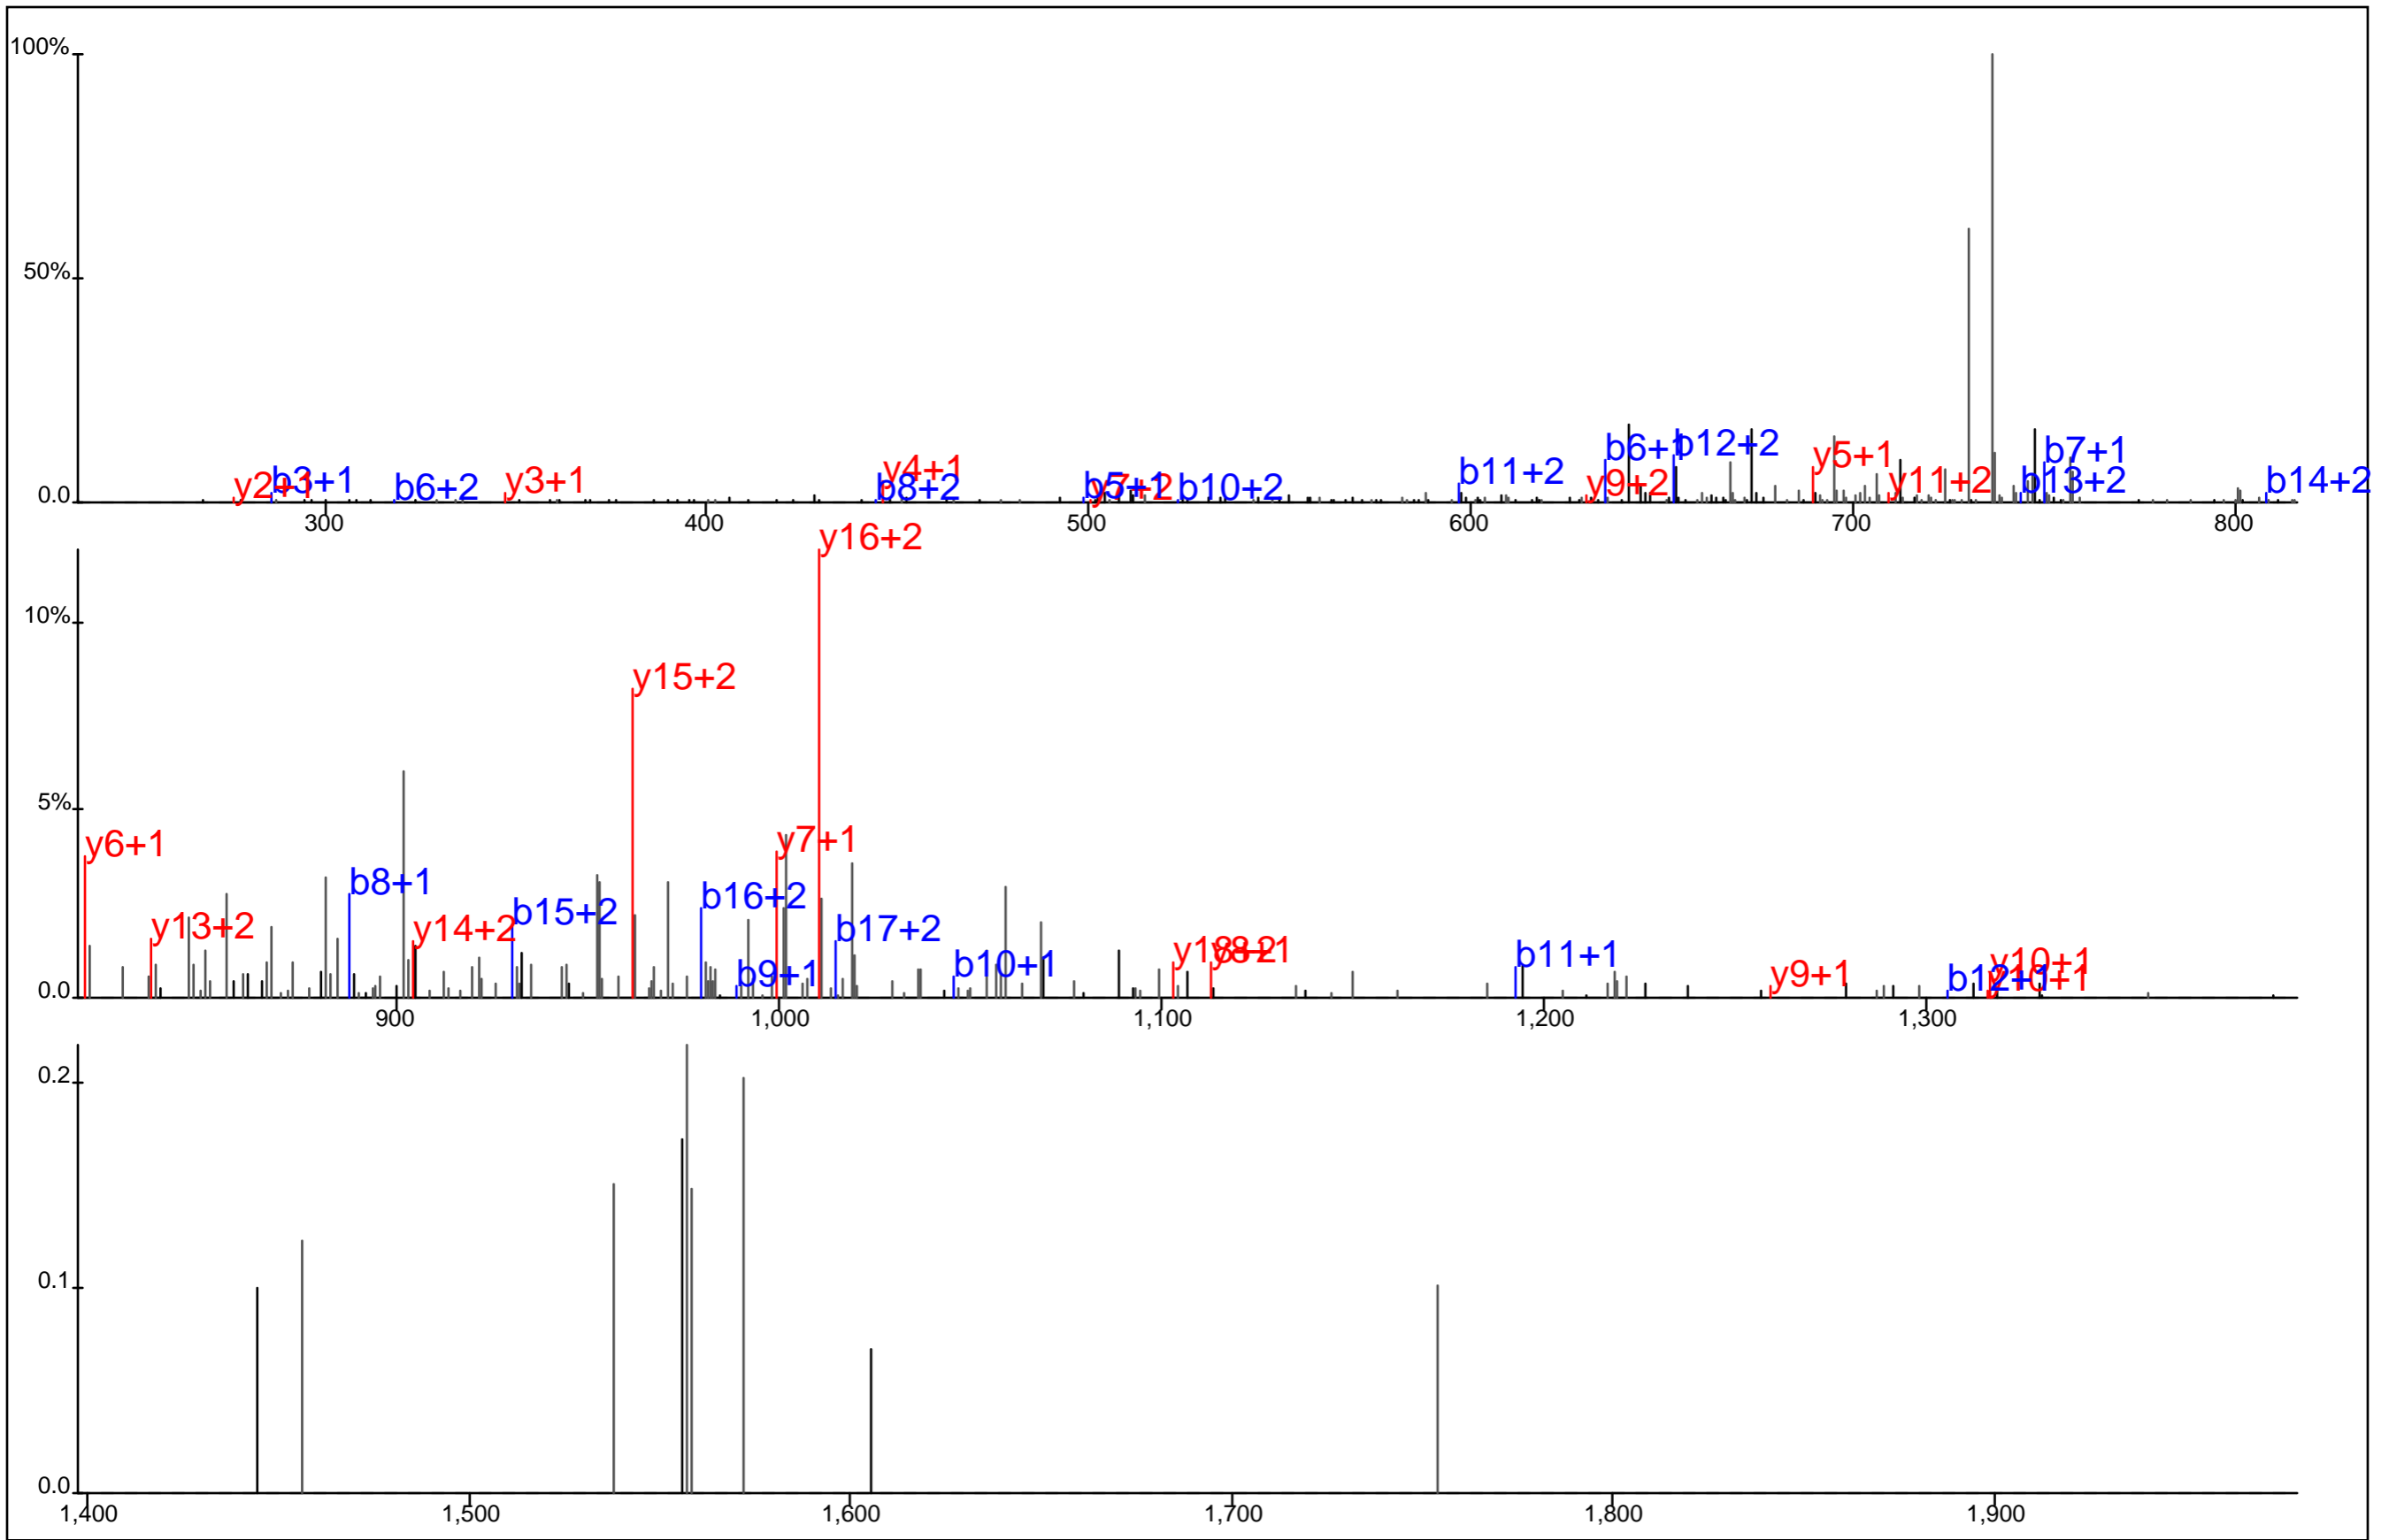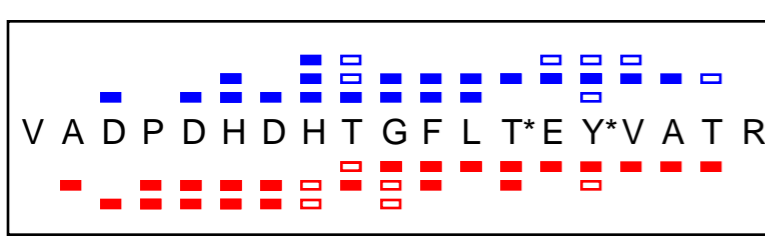

Protein Name: ERK2  
 gi Accession: 23881  
 Precursor Mass: 768.6525+3  
 Delta Mass: 2.538 ppm  
 XCorr: 35.75

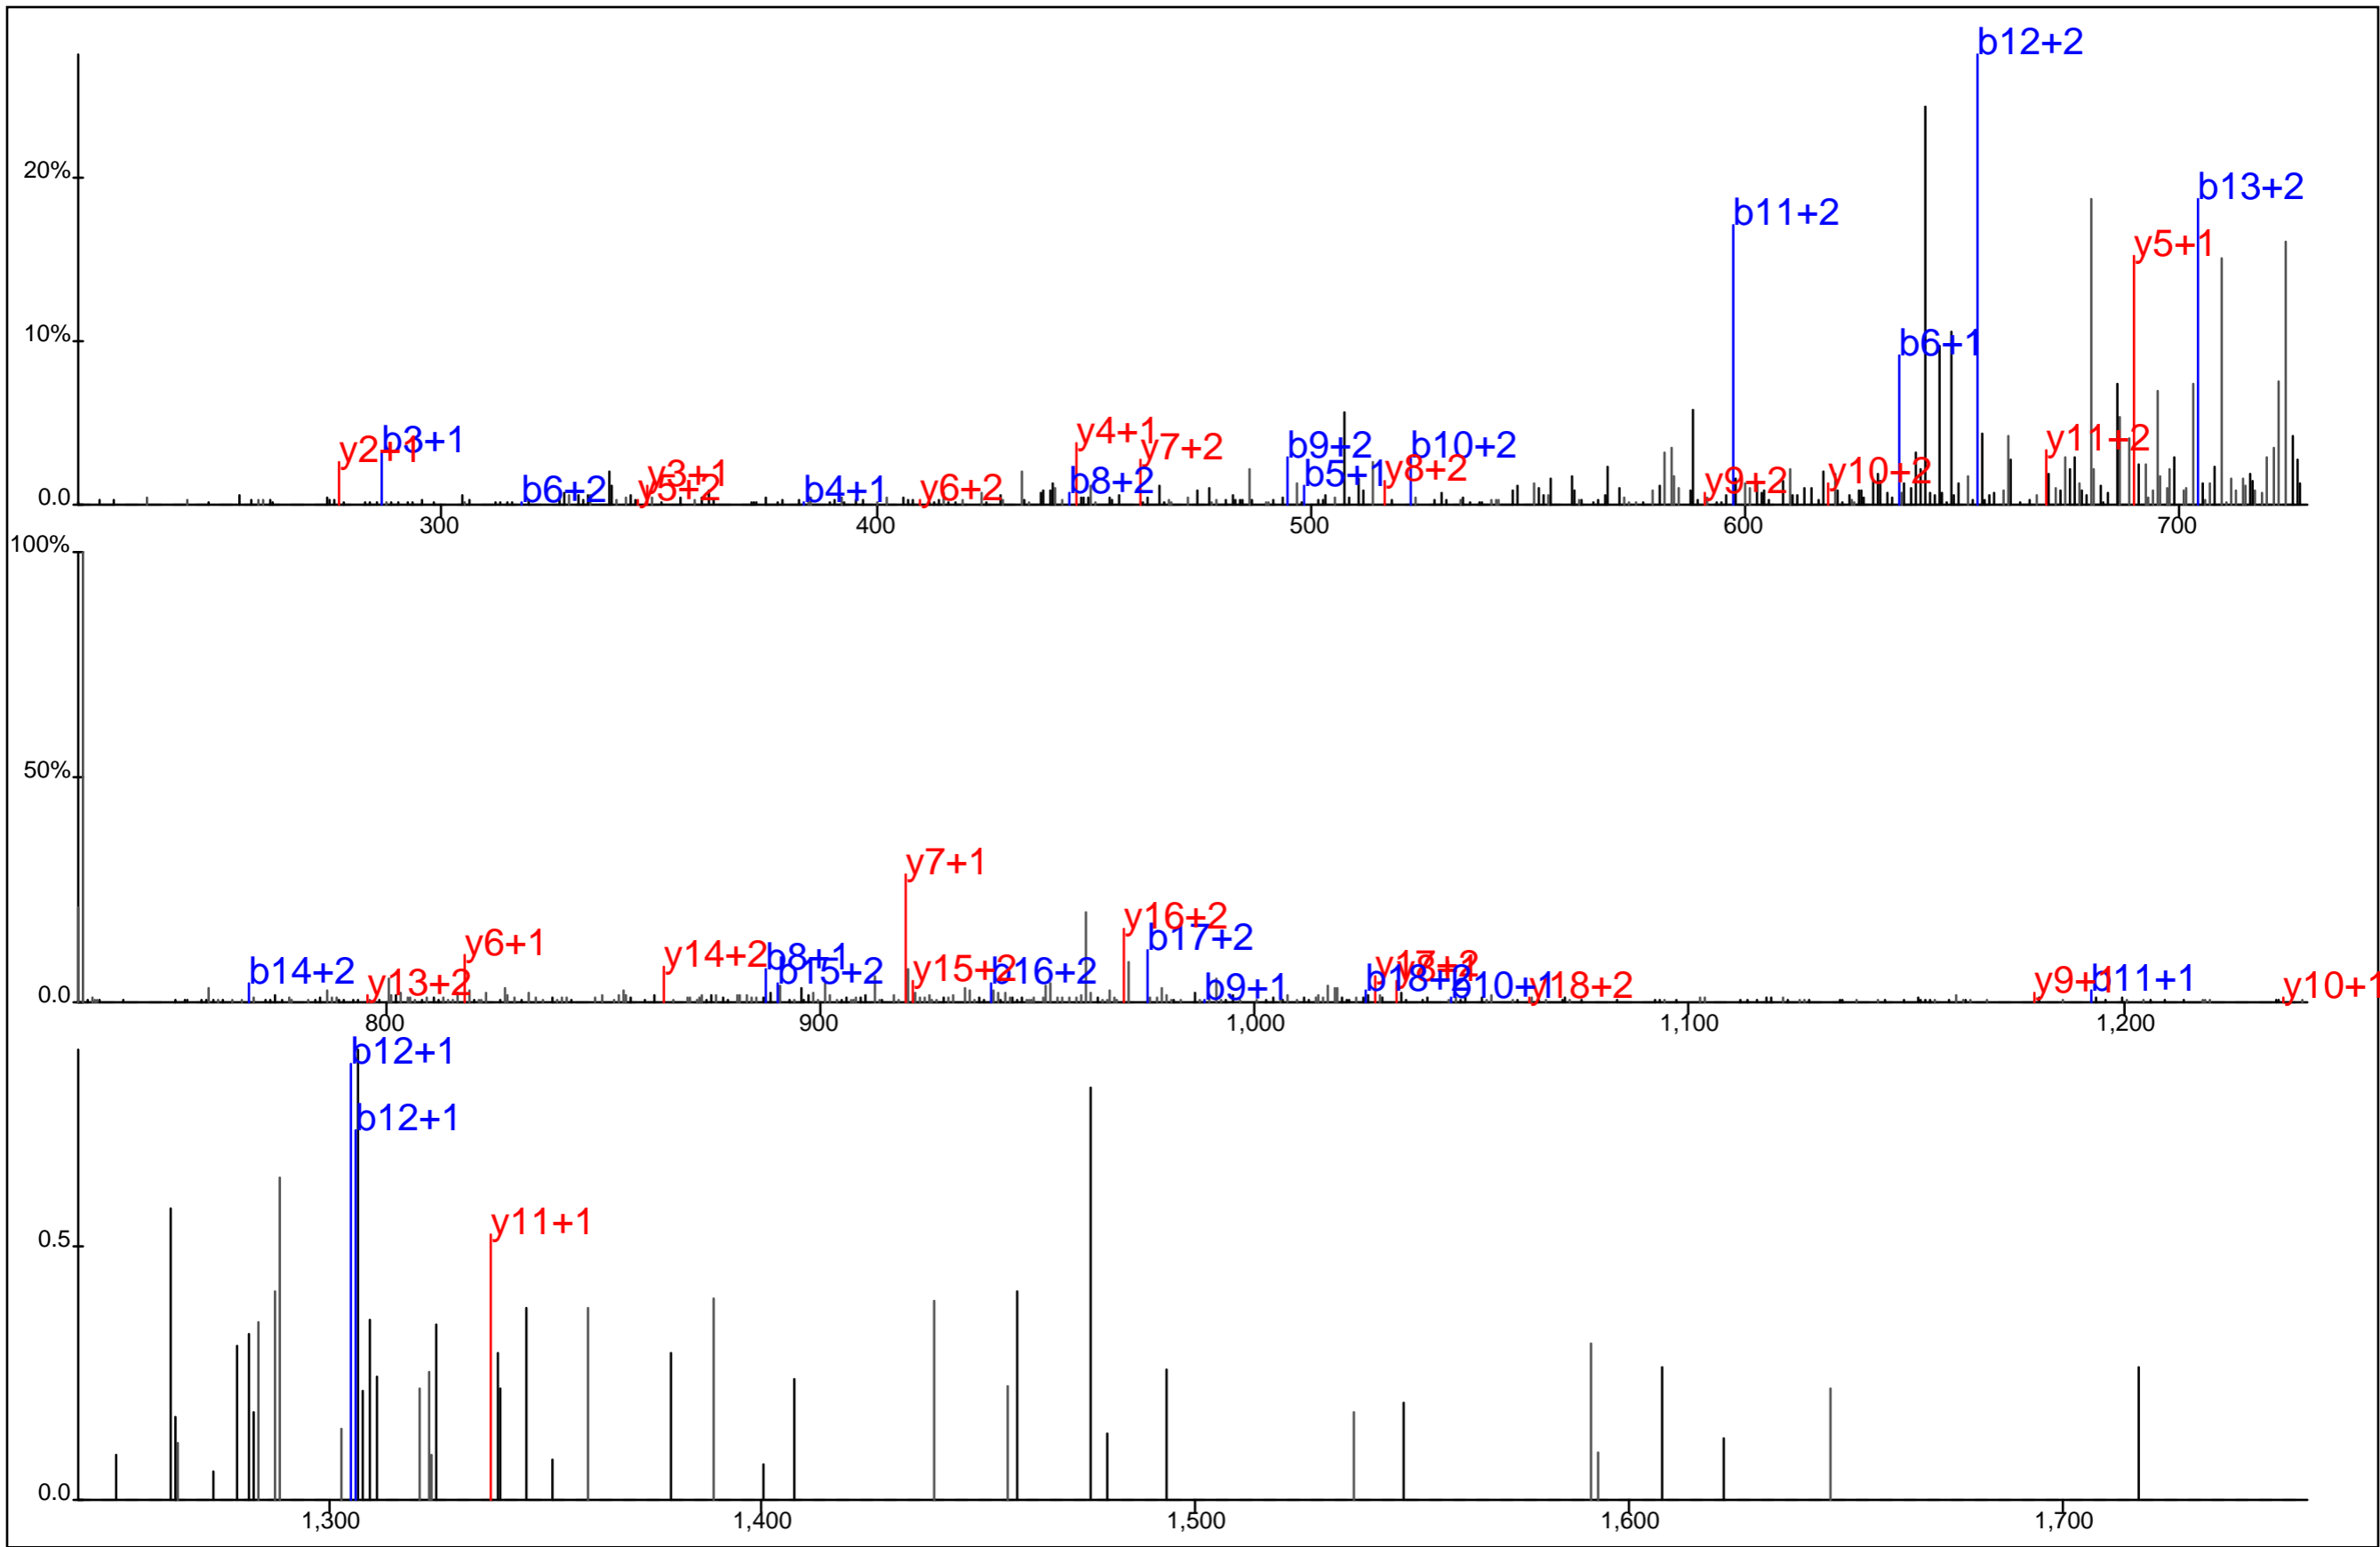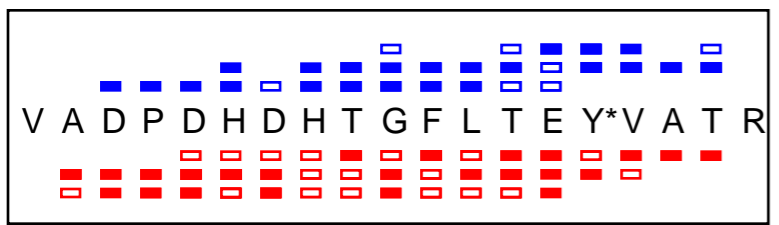

Protein Name: ERK2  
 gi Accession: 23881  
 Precursor Mass: 741.9971+3  
 Delta Mass: 2.774 ppm  
 XCorr: 41.46

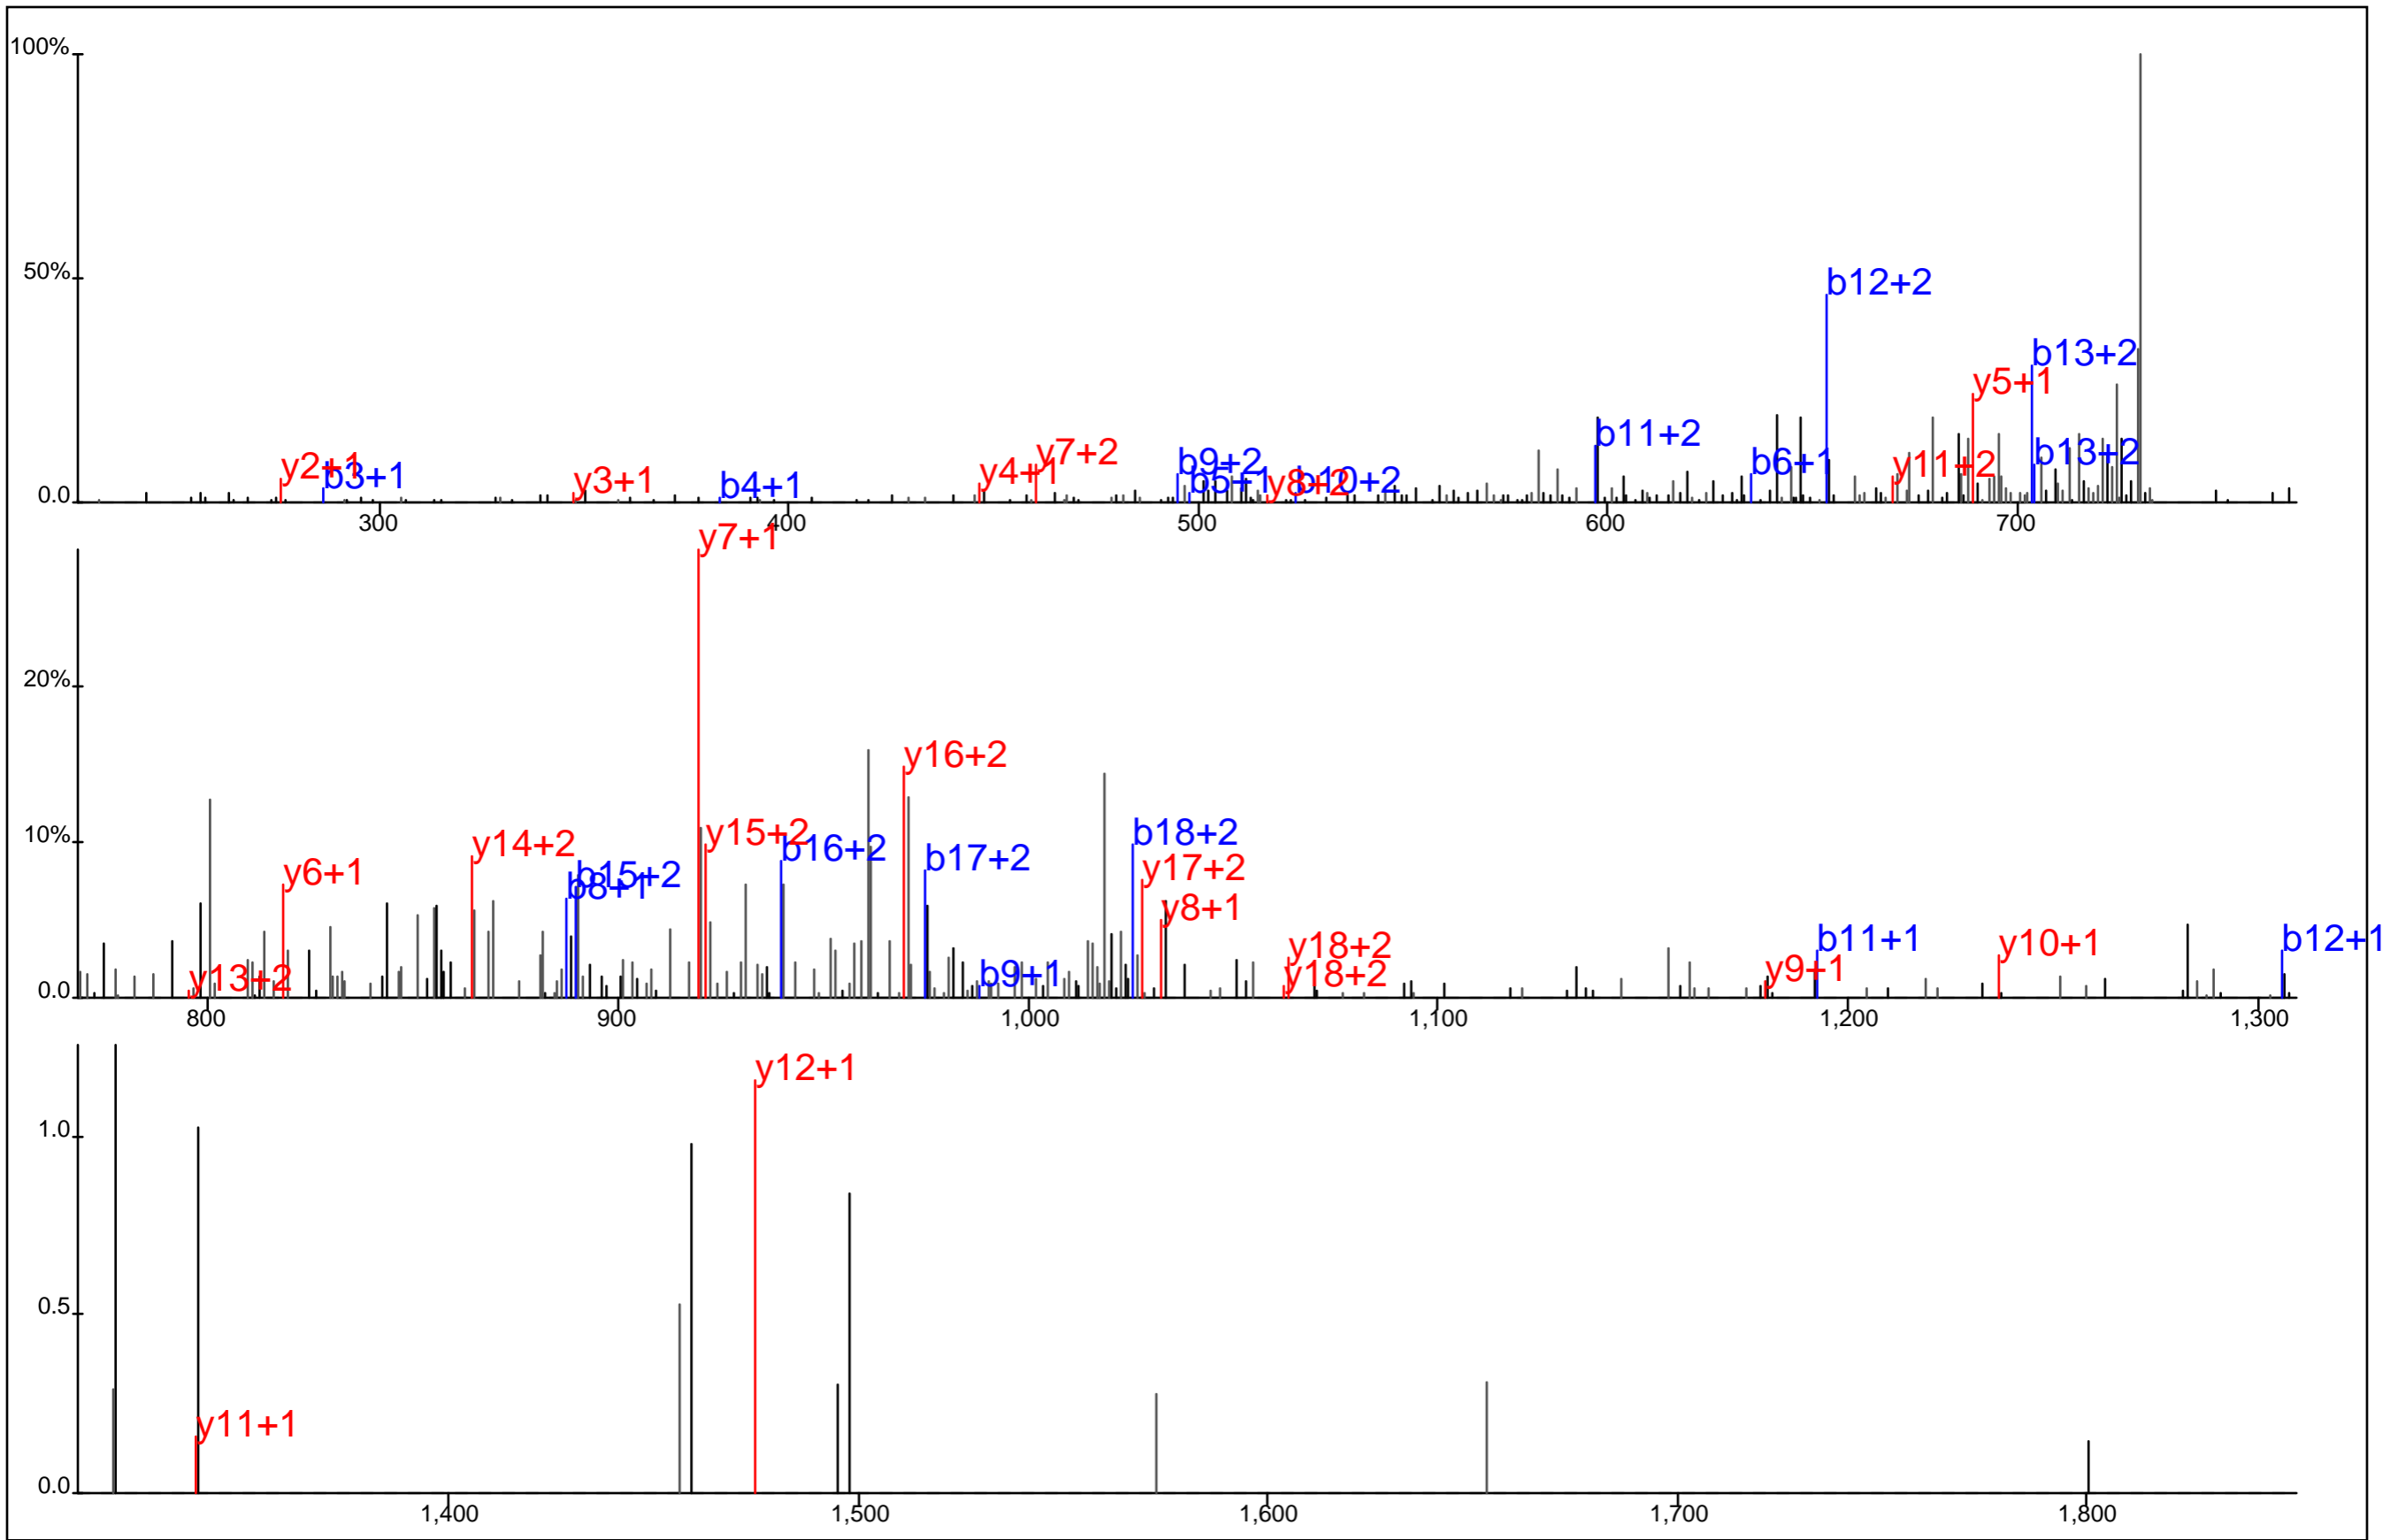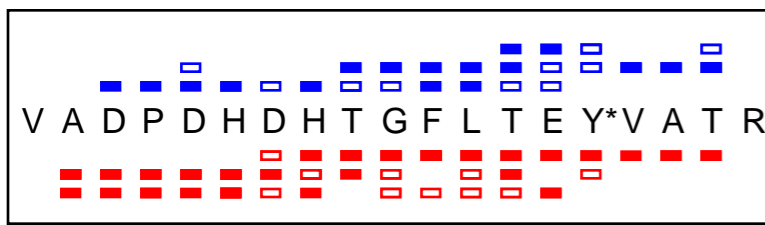

Protein Name: ERK2  
 gi Accession: 23881  
 Precursor Mass: 741.9982+3  
 Delta Mass: 4.258 ppm  
 XCorr: 47.39

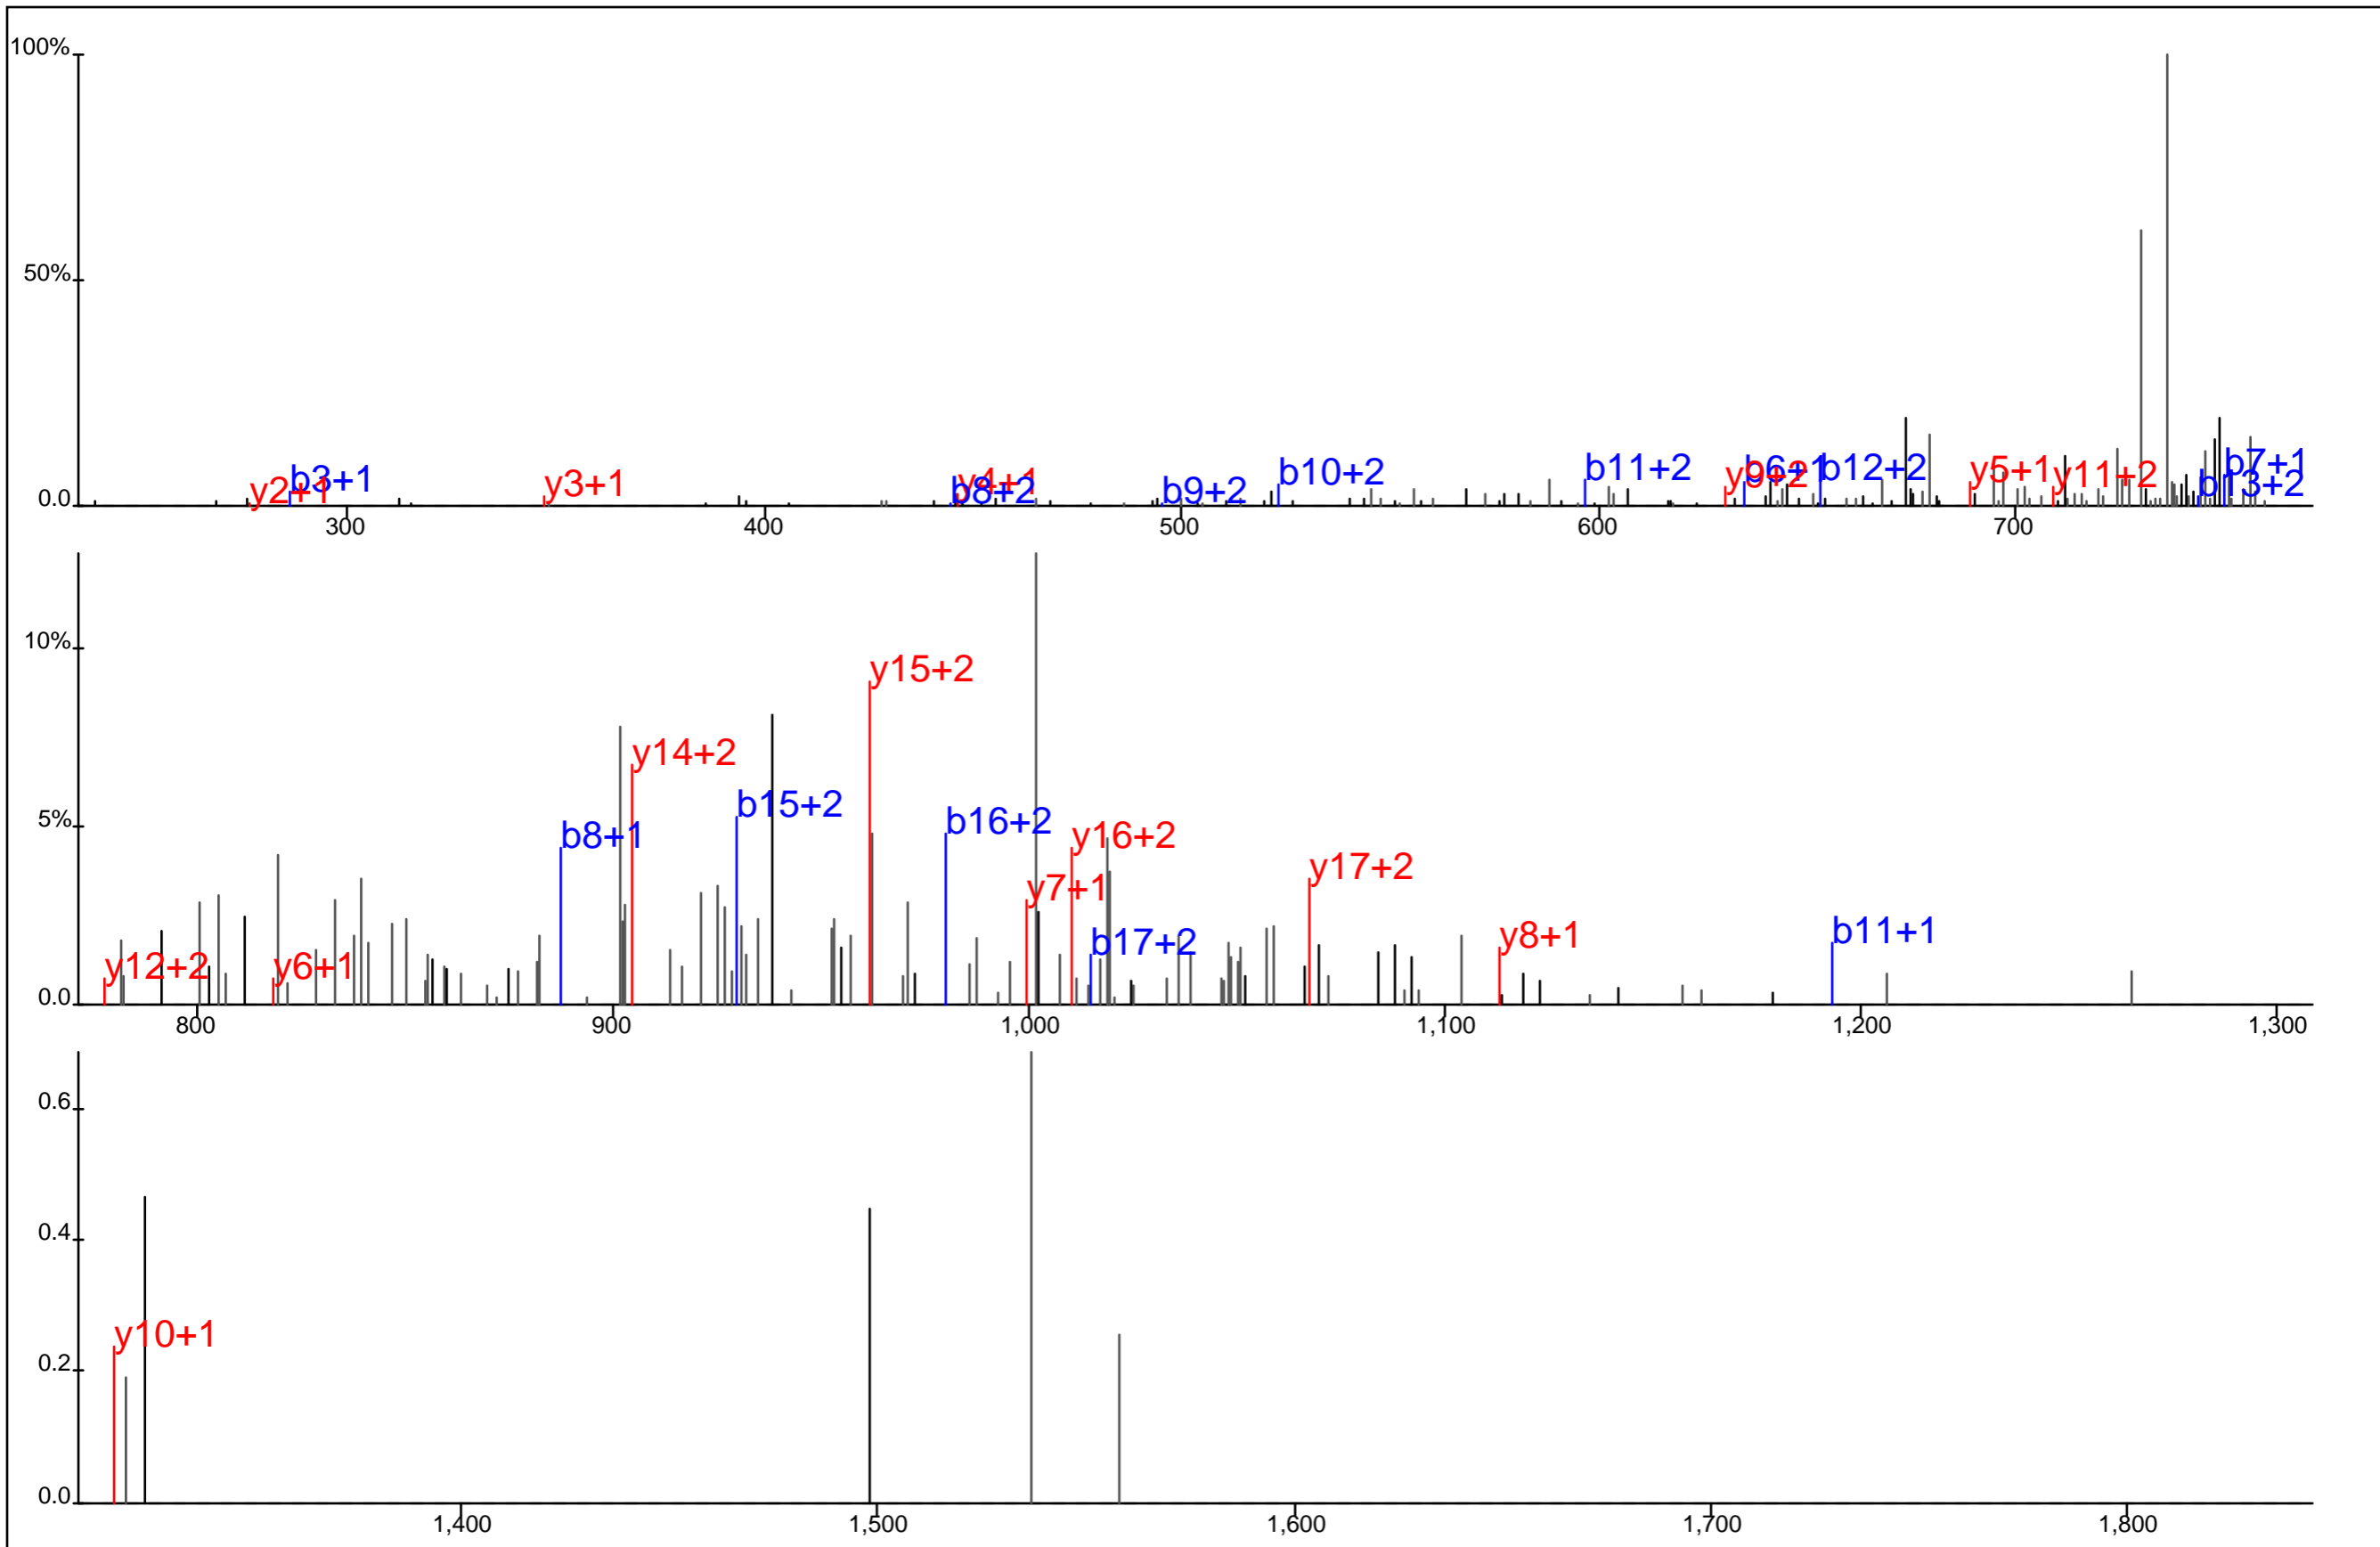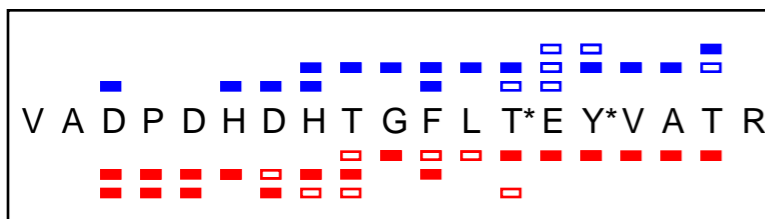

Protein Name: ERK2  
 gi Accession: 23881  
 Precursor Mass: 768.6541+3  
 Delta Mass: 4.605 ppm  
 XCorr: 16.96

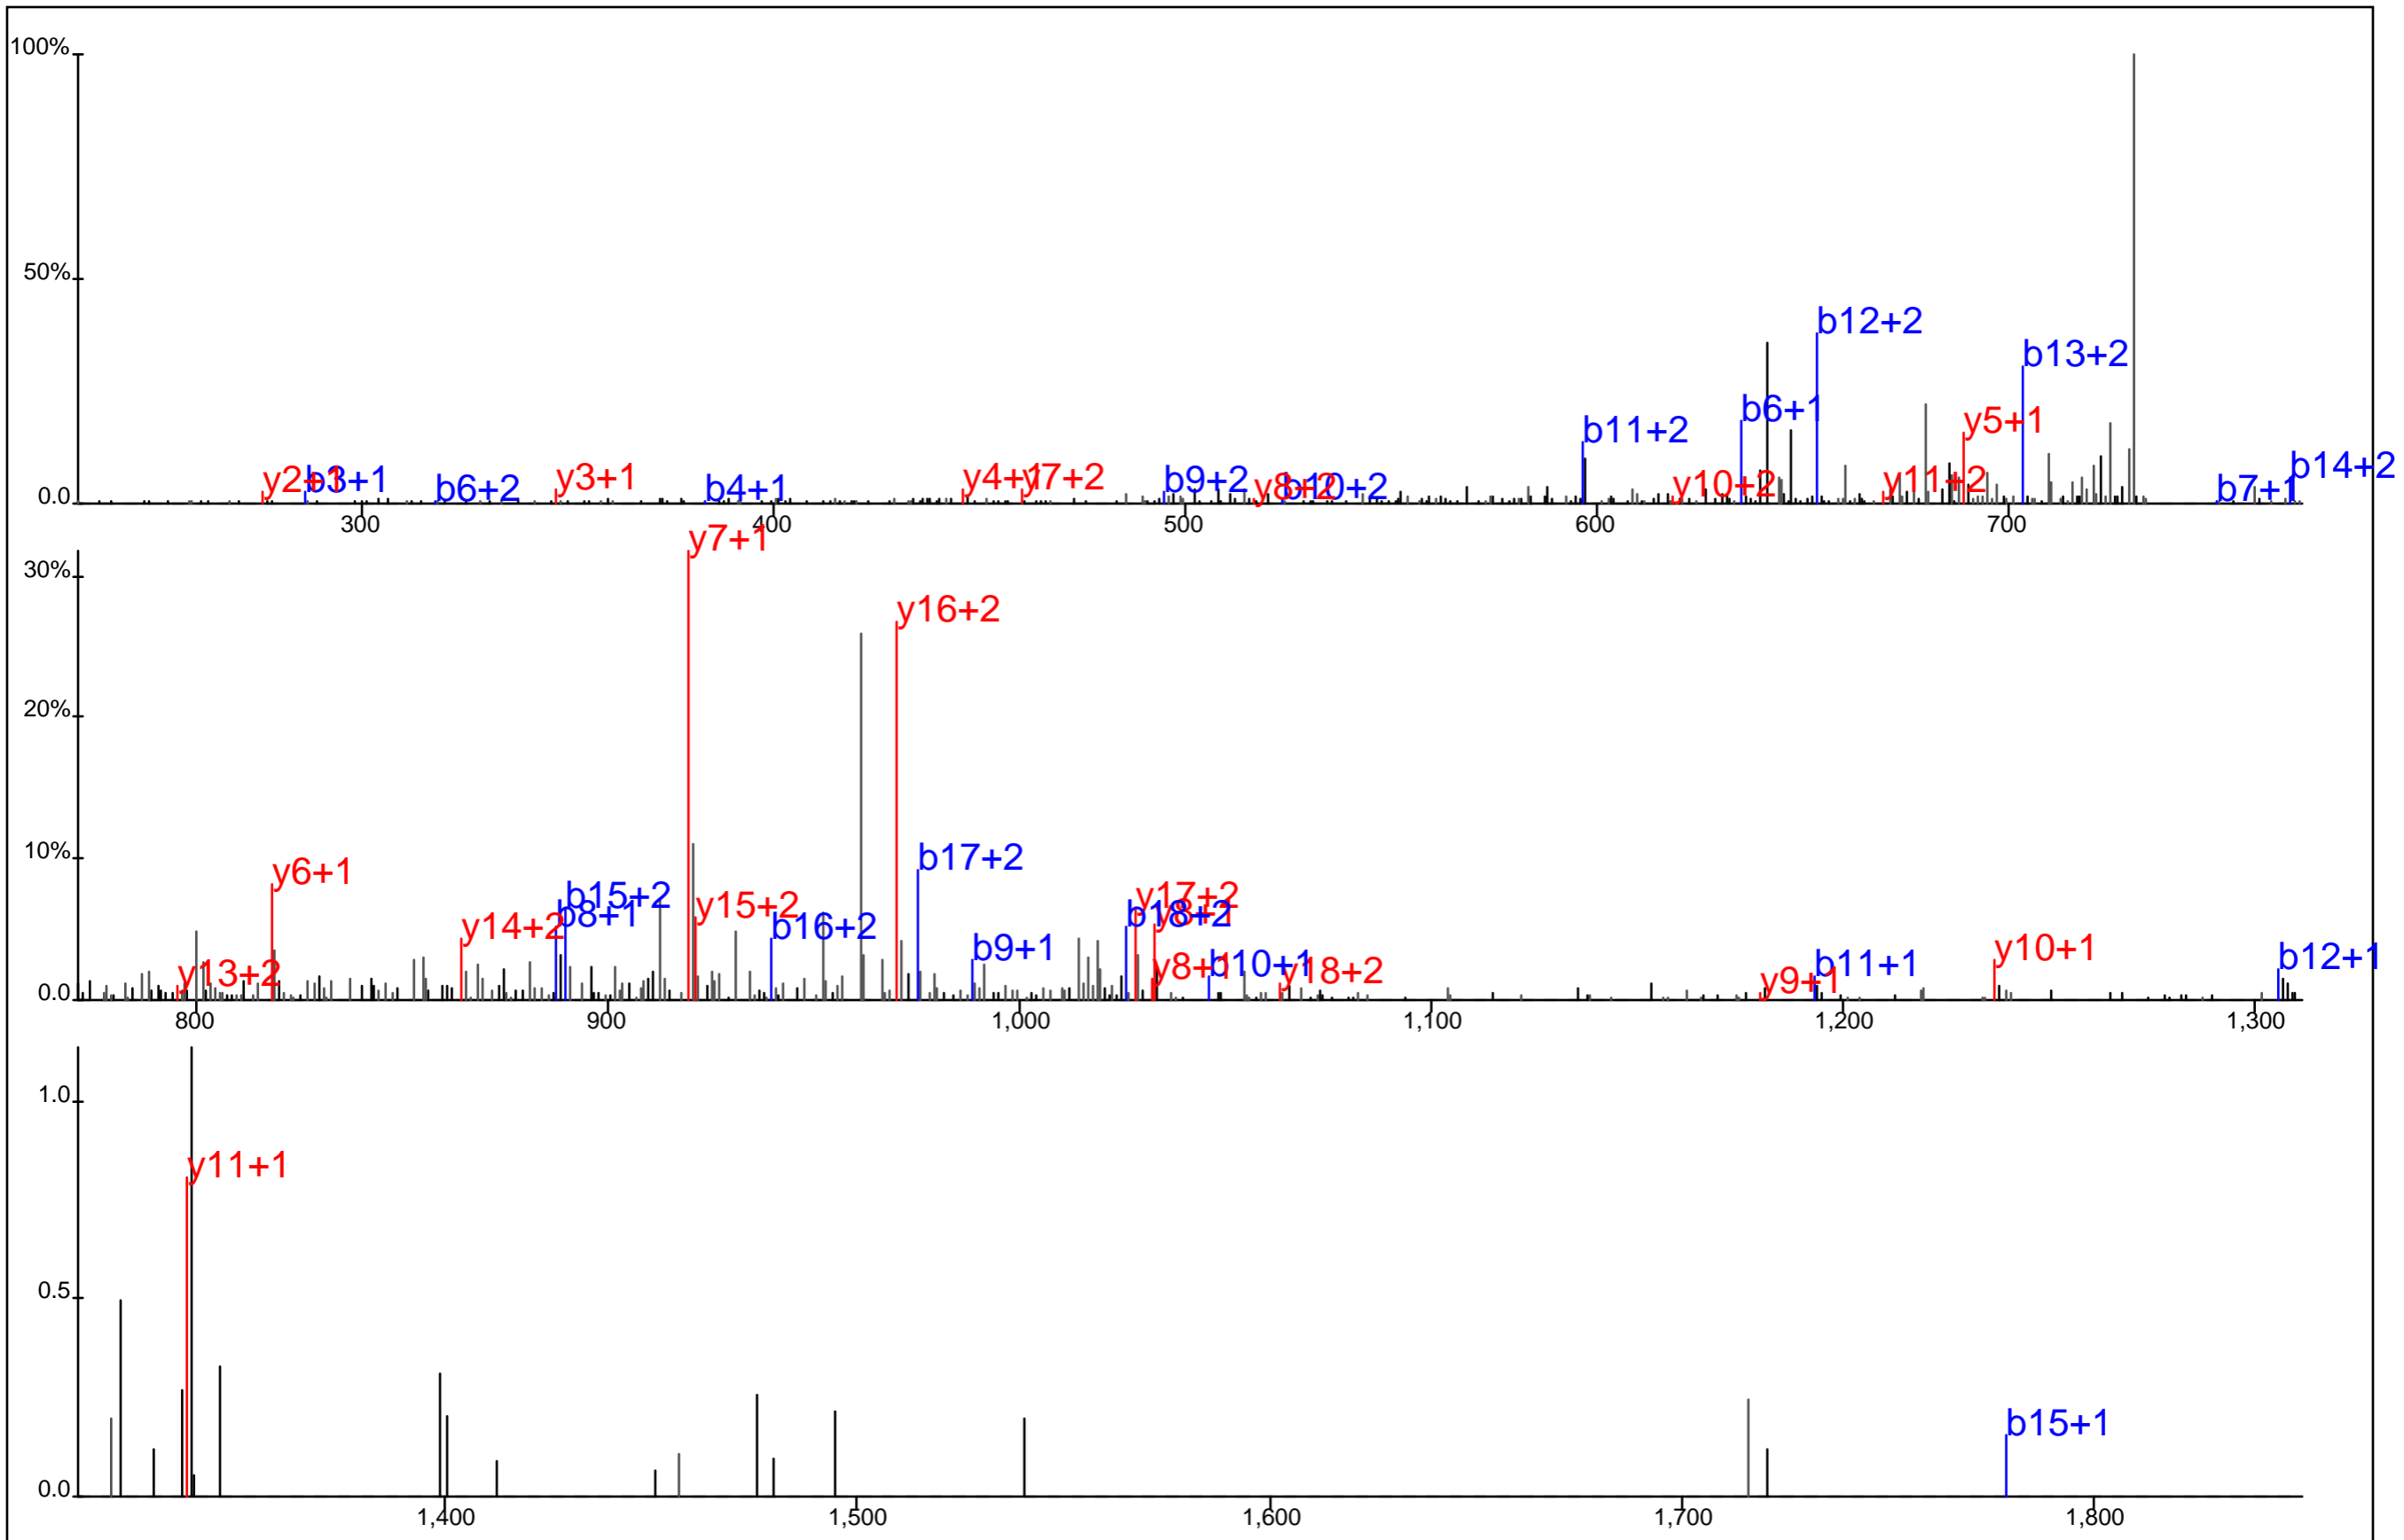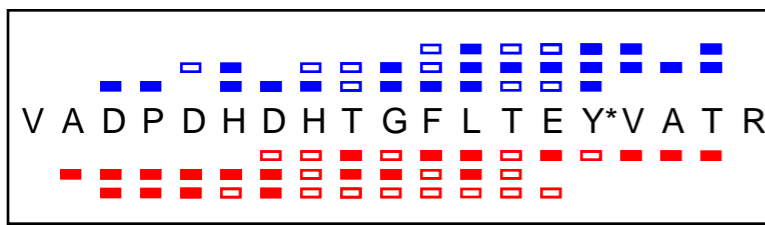

Protein Name: ERK2  
 gi Accession: 23881  
 Precursor Mass: 741.9996+3  
 Delta Mass: 6.069 ppm  
 XCorr: 40.39

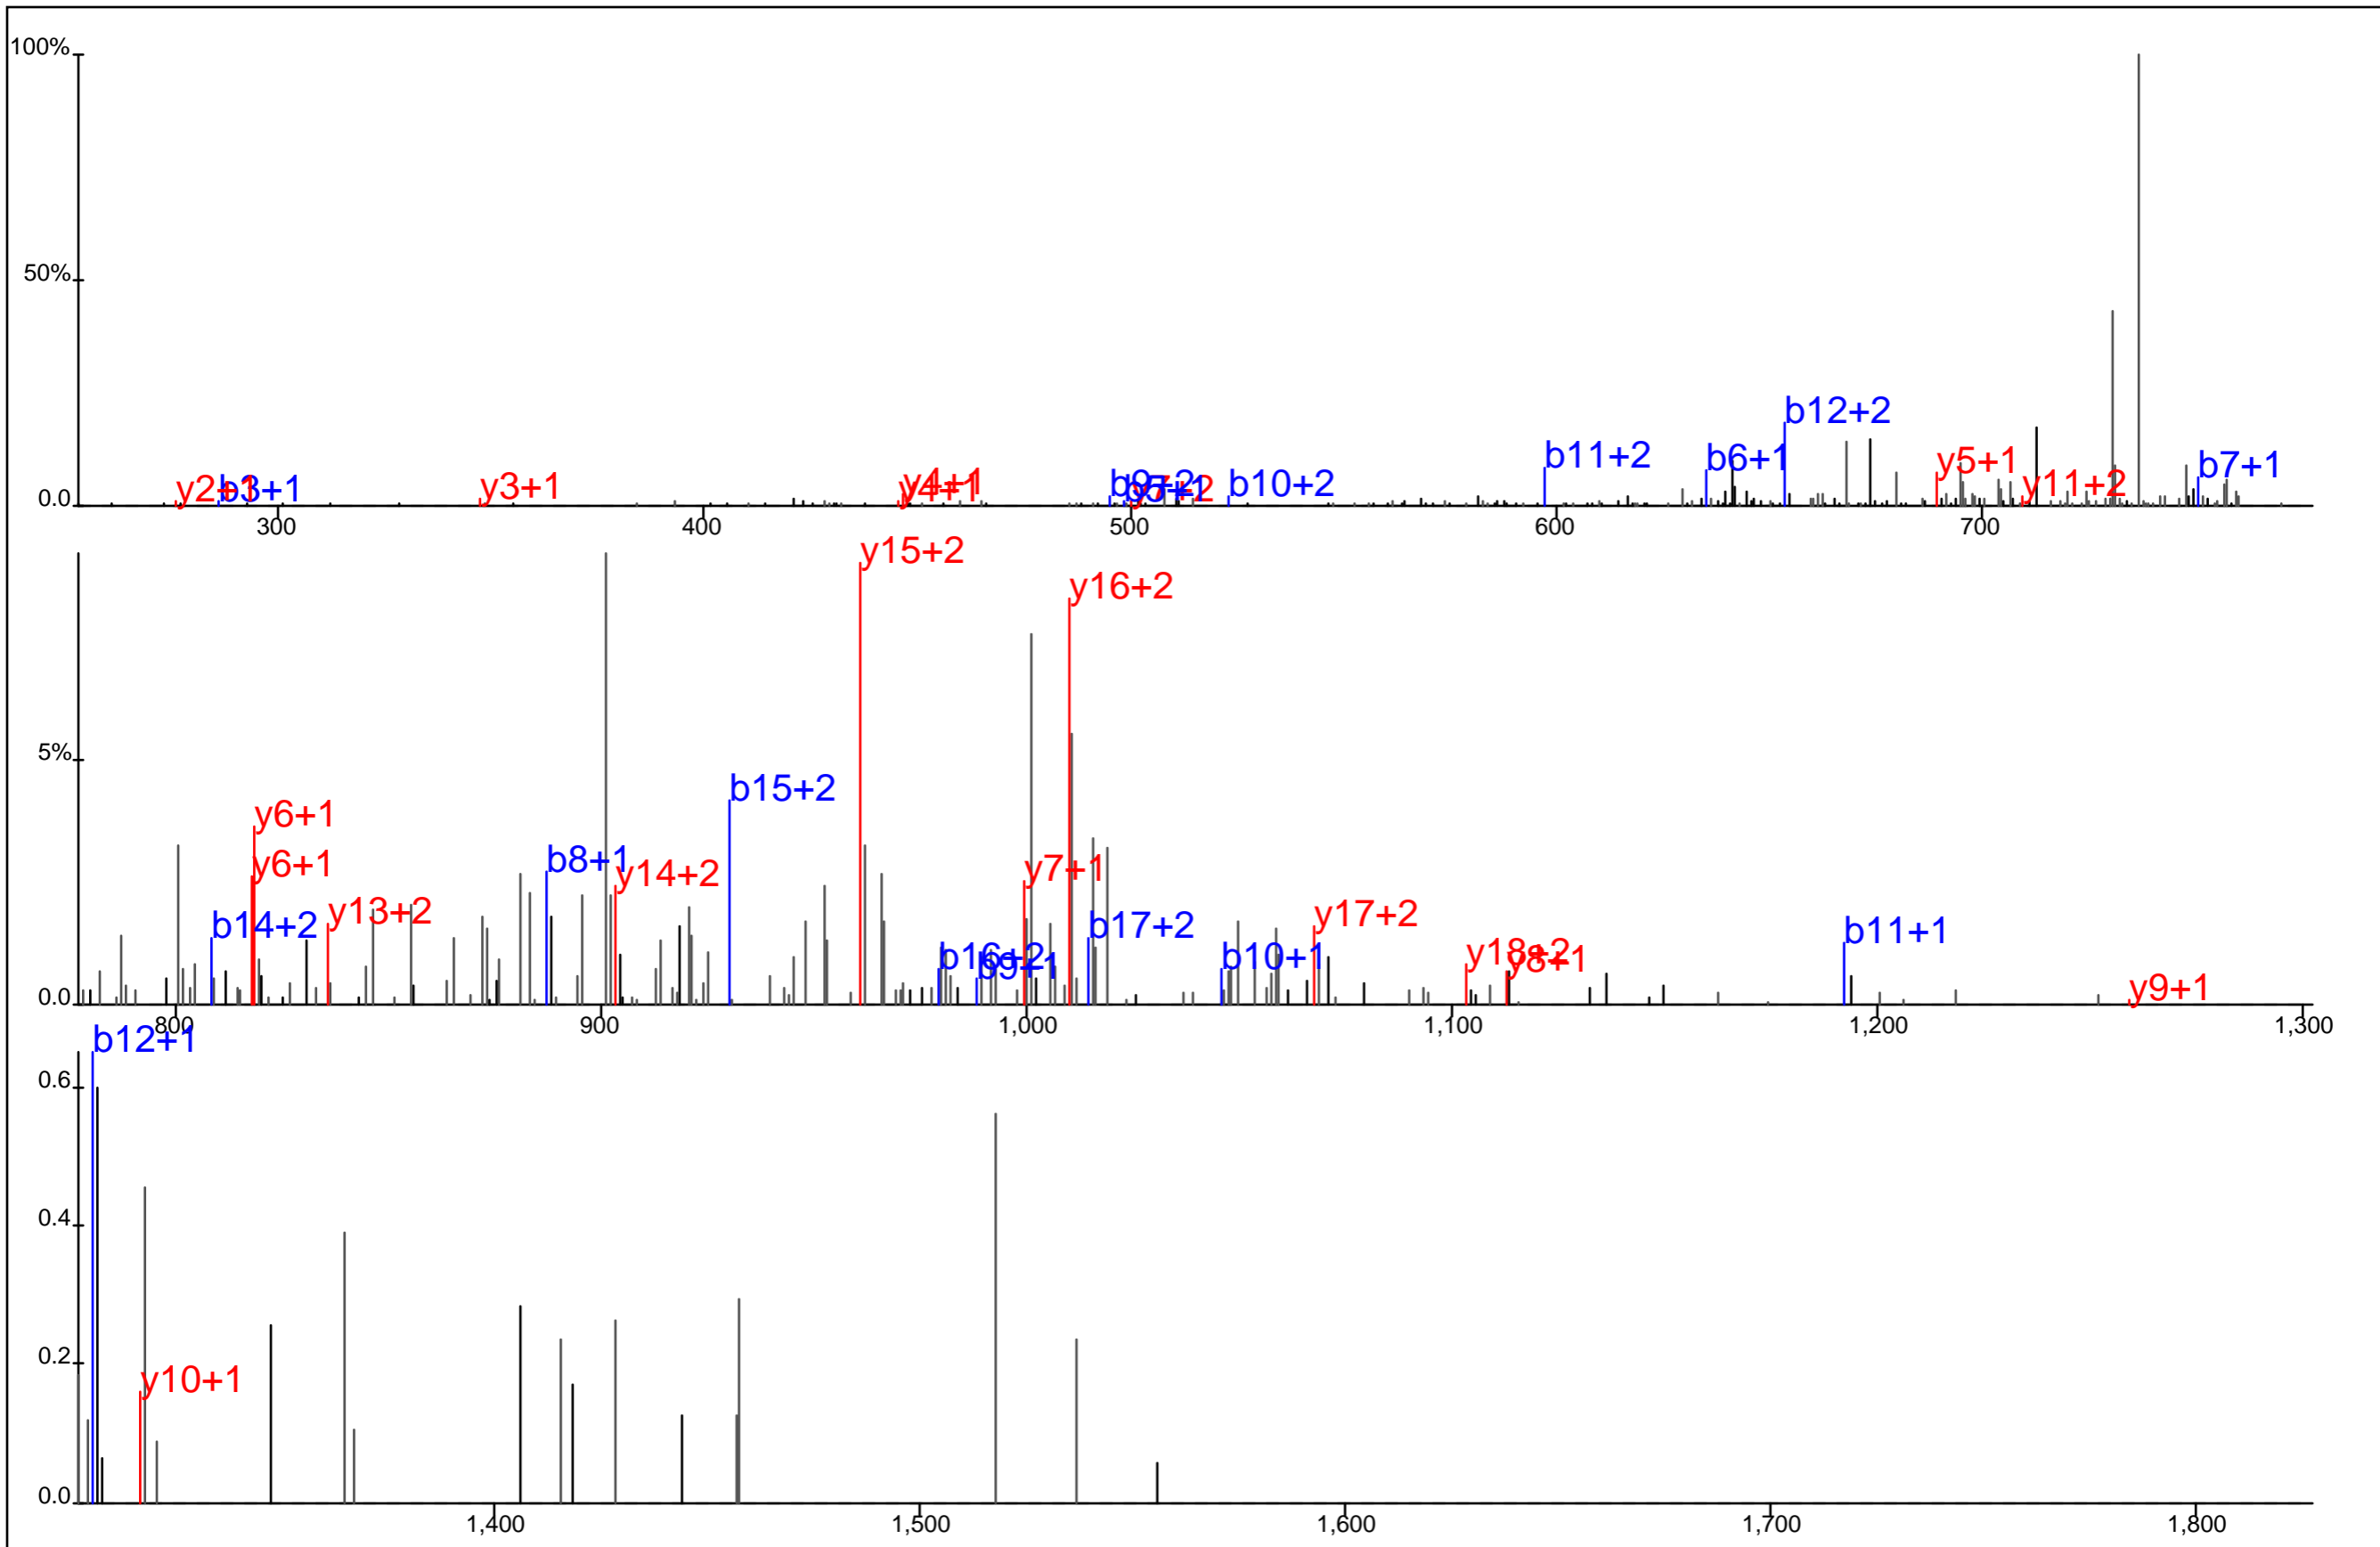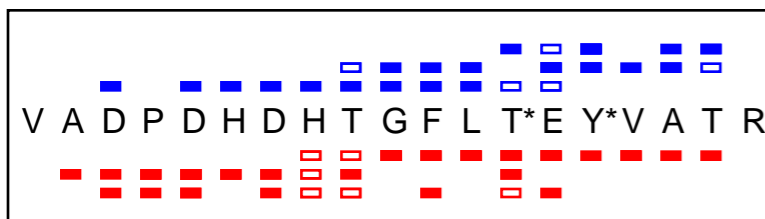

Protein Name: ERK2  
 gi Accession: 23881  
 Precursor Mass: 768.6506+3  
 Delta Mass: 0.077 ppm  
 XCorr: 33.21

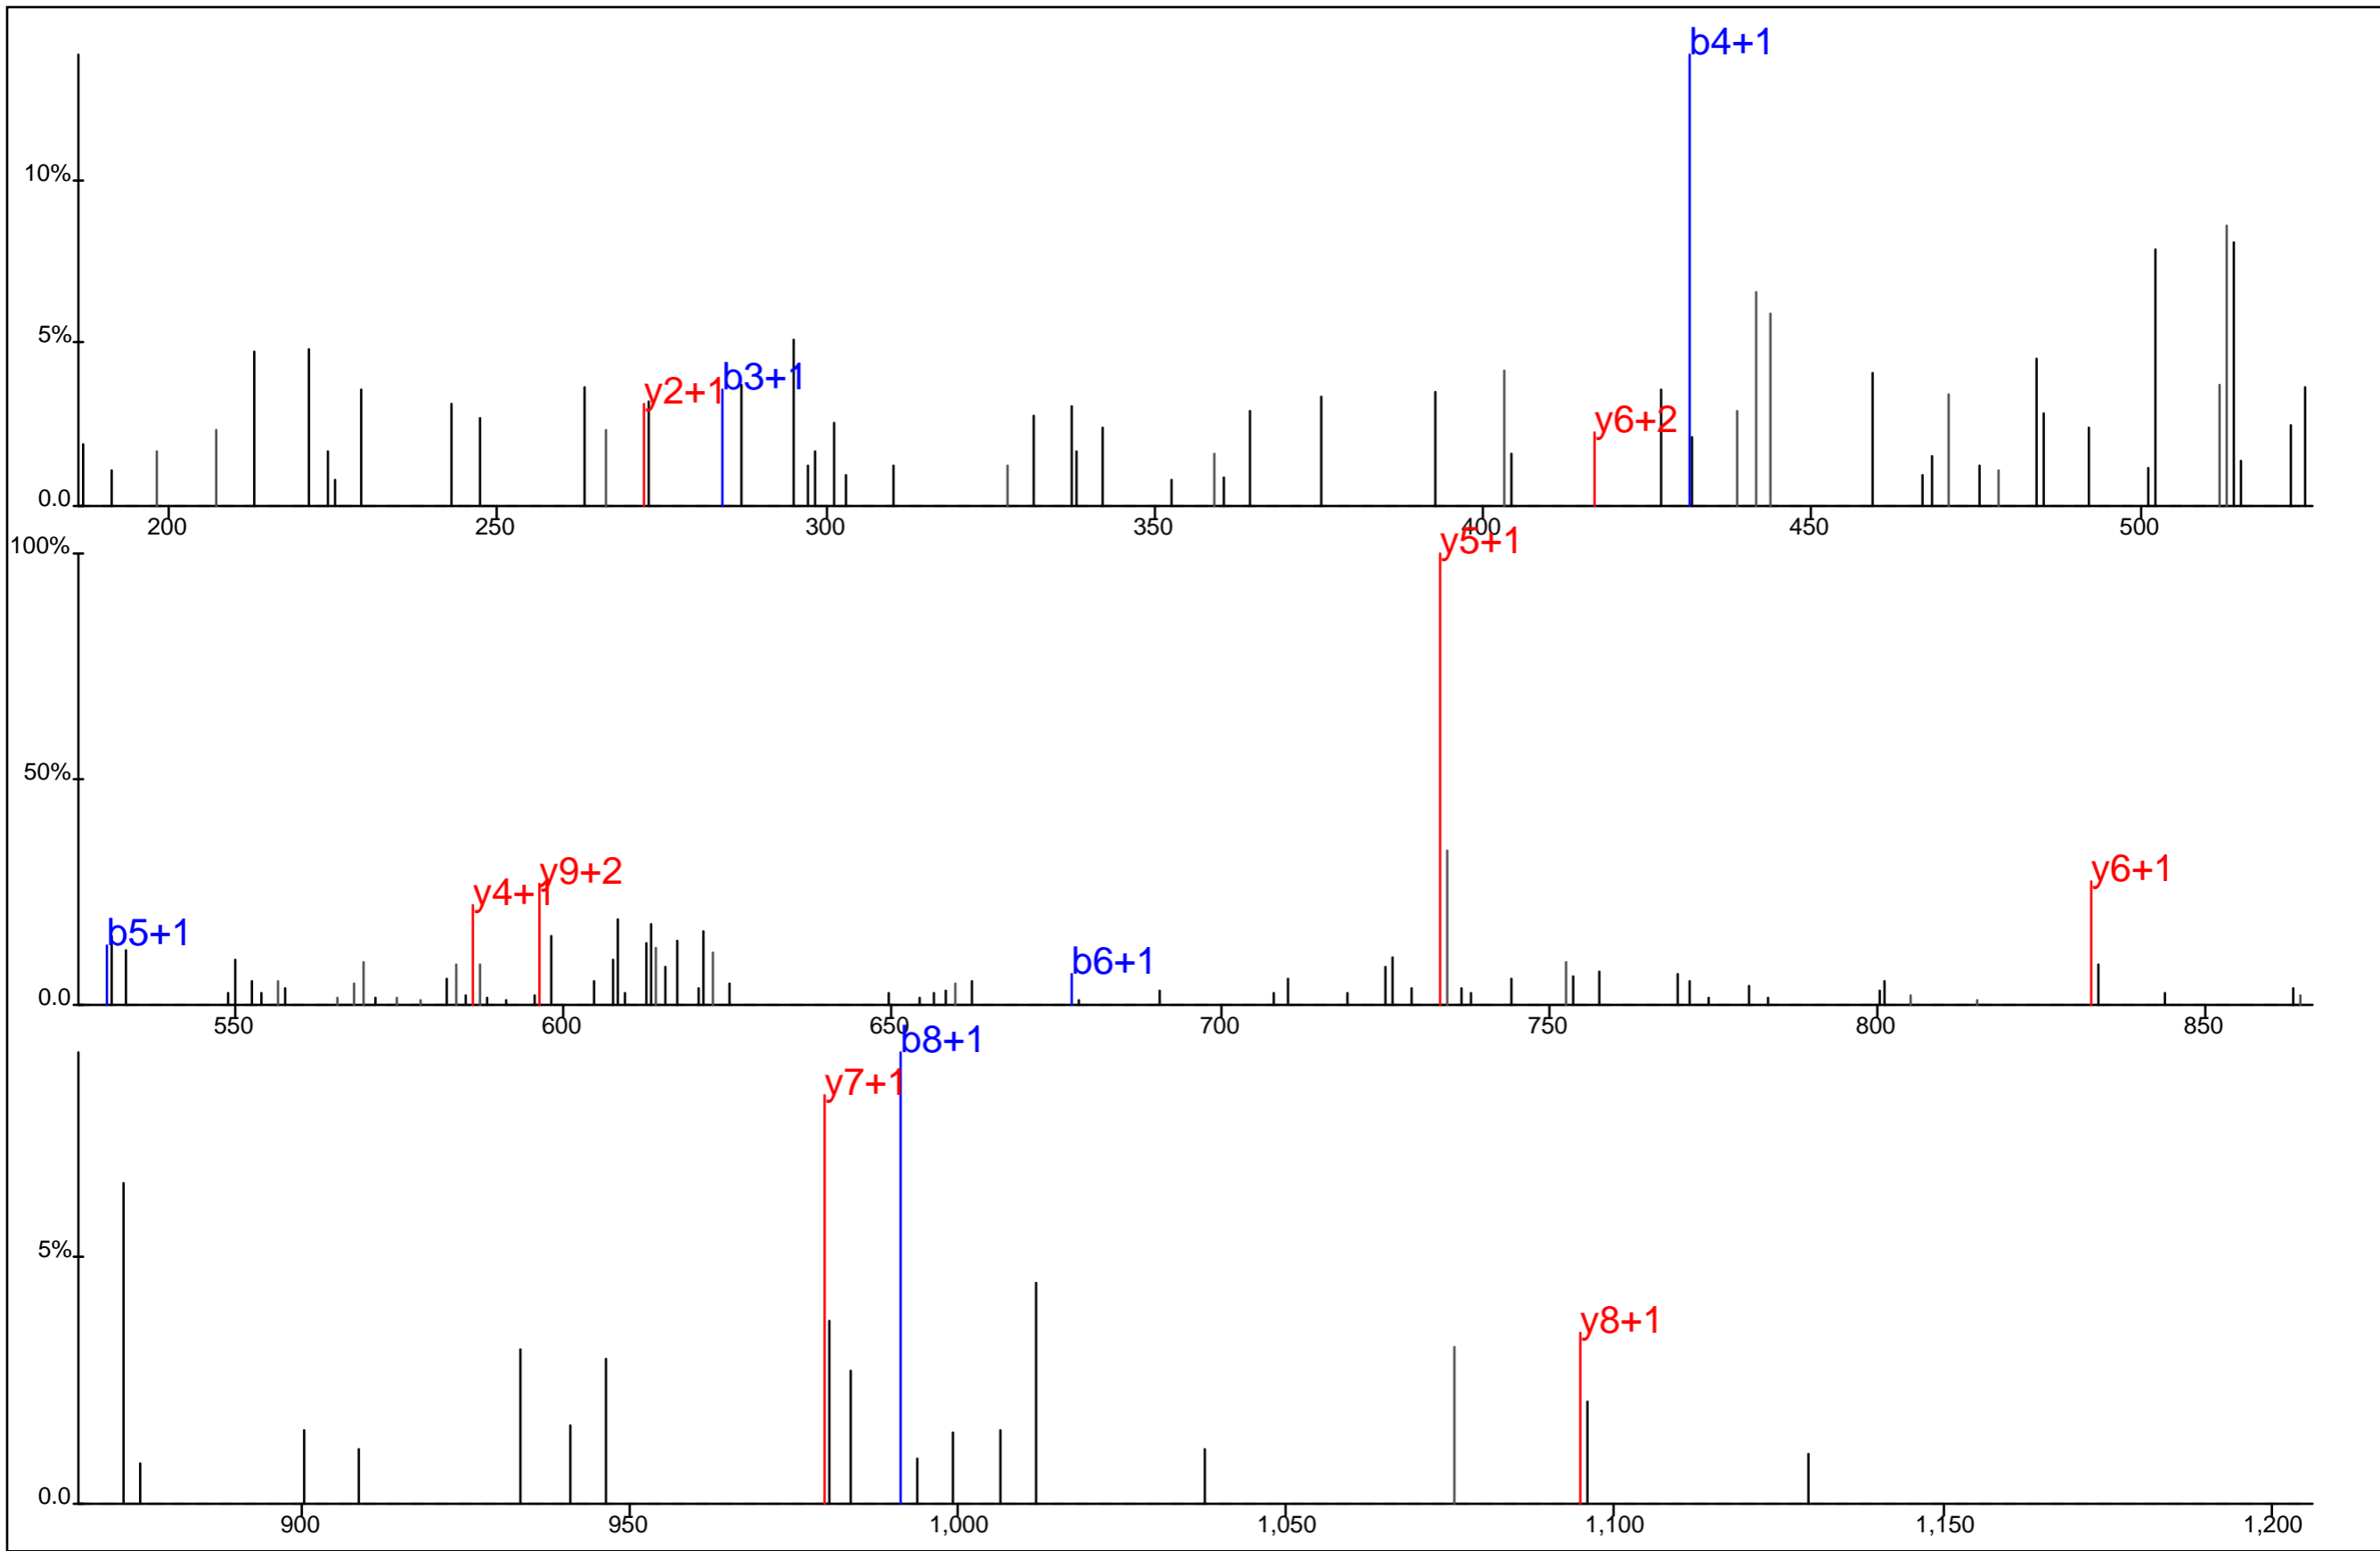

■ ■ □ □ □ ■ □  
 A P D F V F Y\* A P R  
■ ■ □ □ □ □ ■

Protein Name: Ezrin  
 gi Accession: 31283  
 Precursor Mass: 631.7859+2  
 Delta Mass: 3.230 ppm  
 XCorr: 31.34

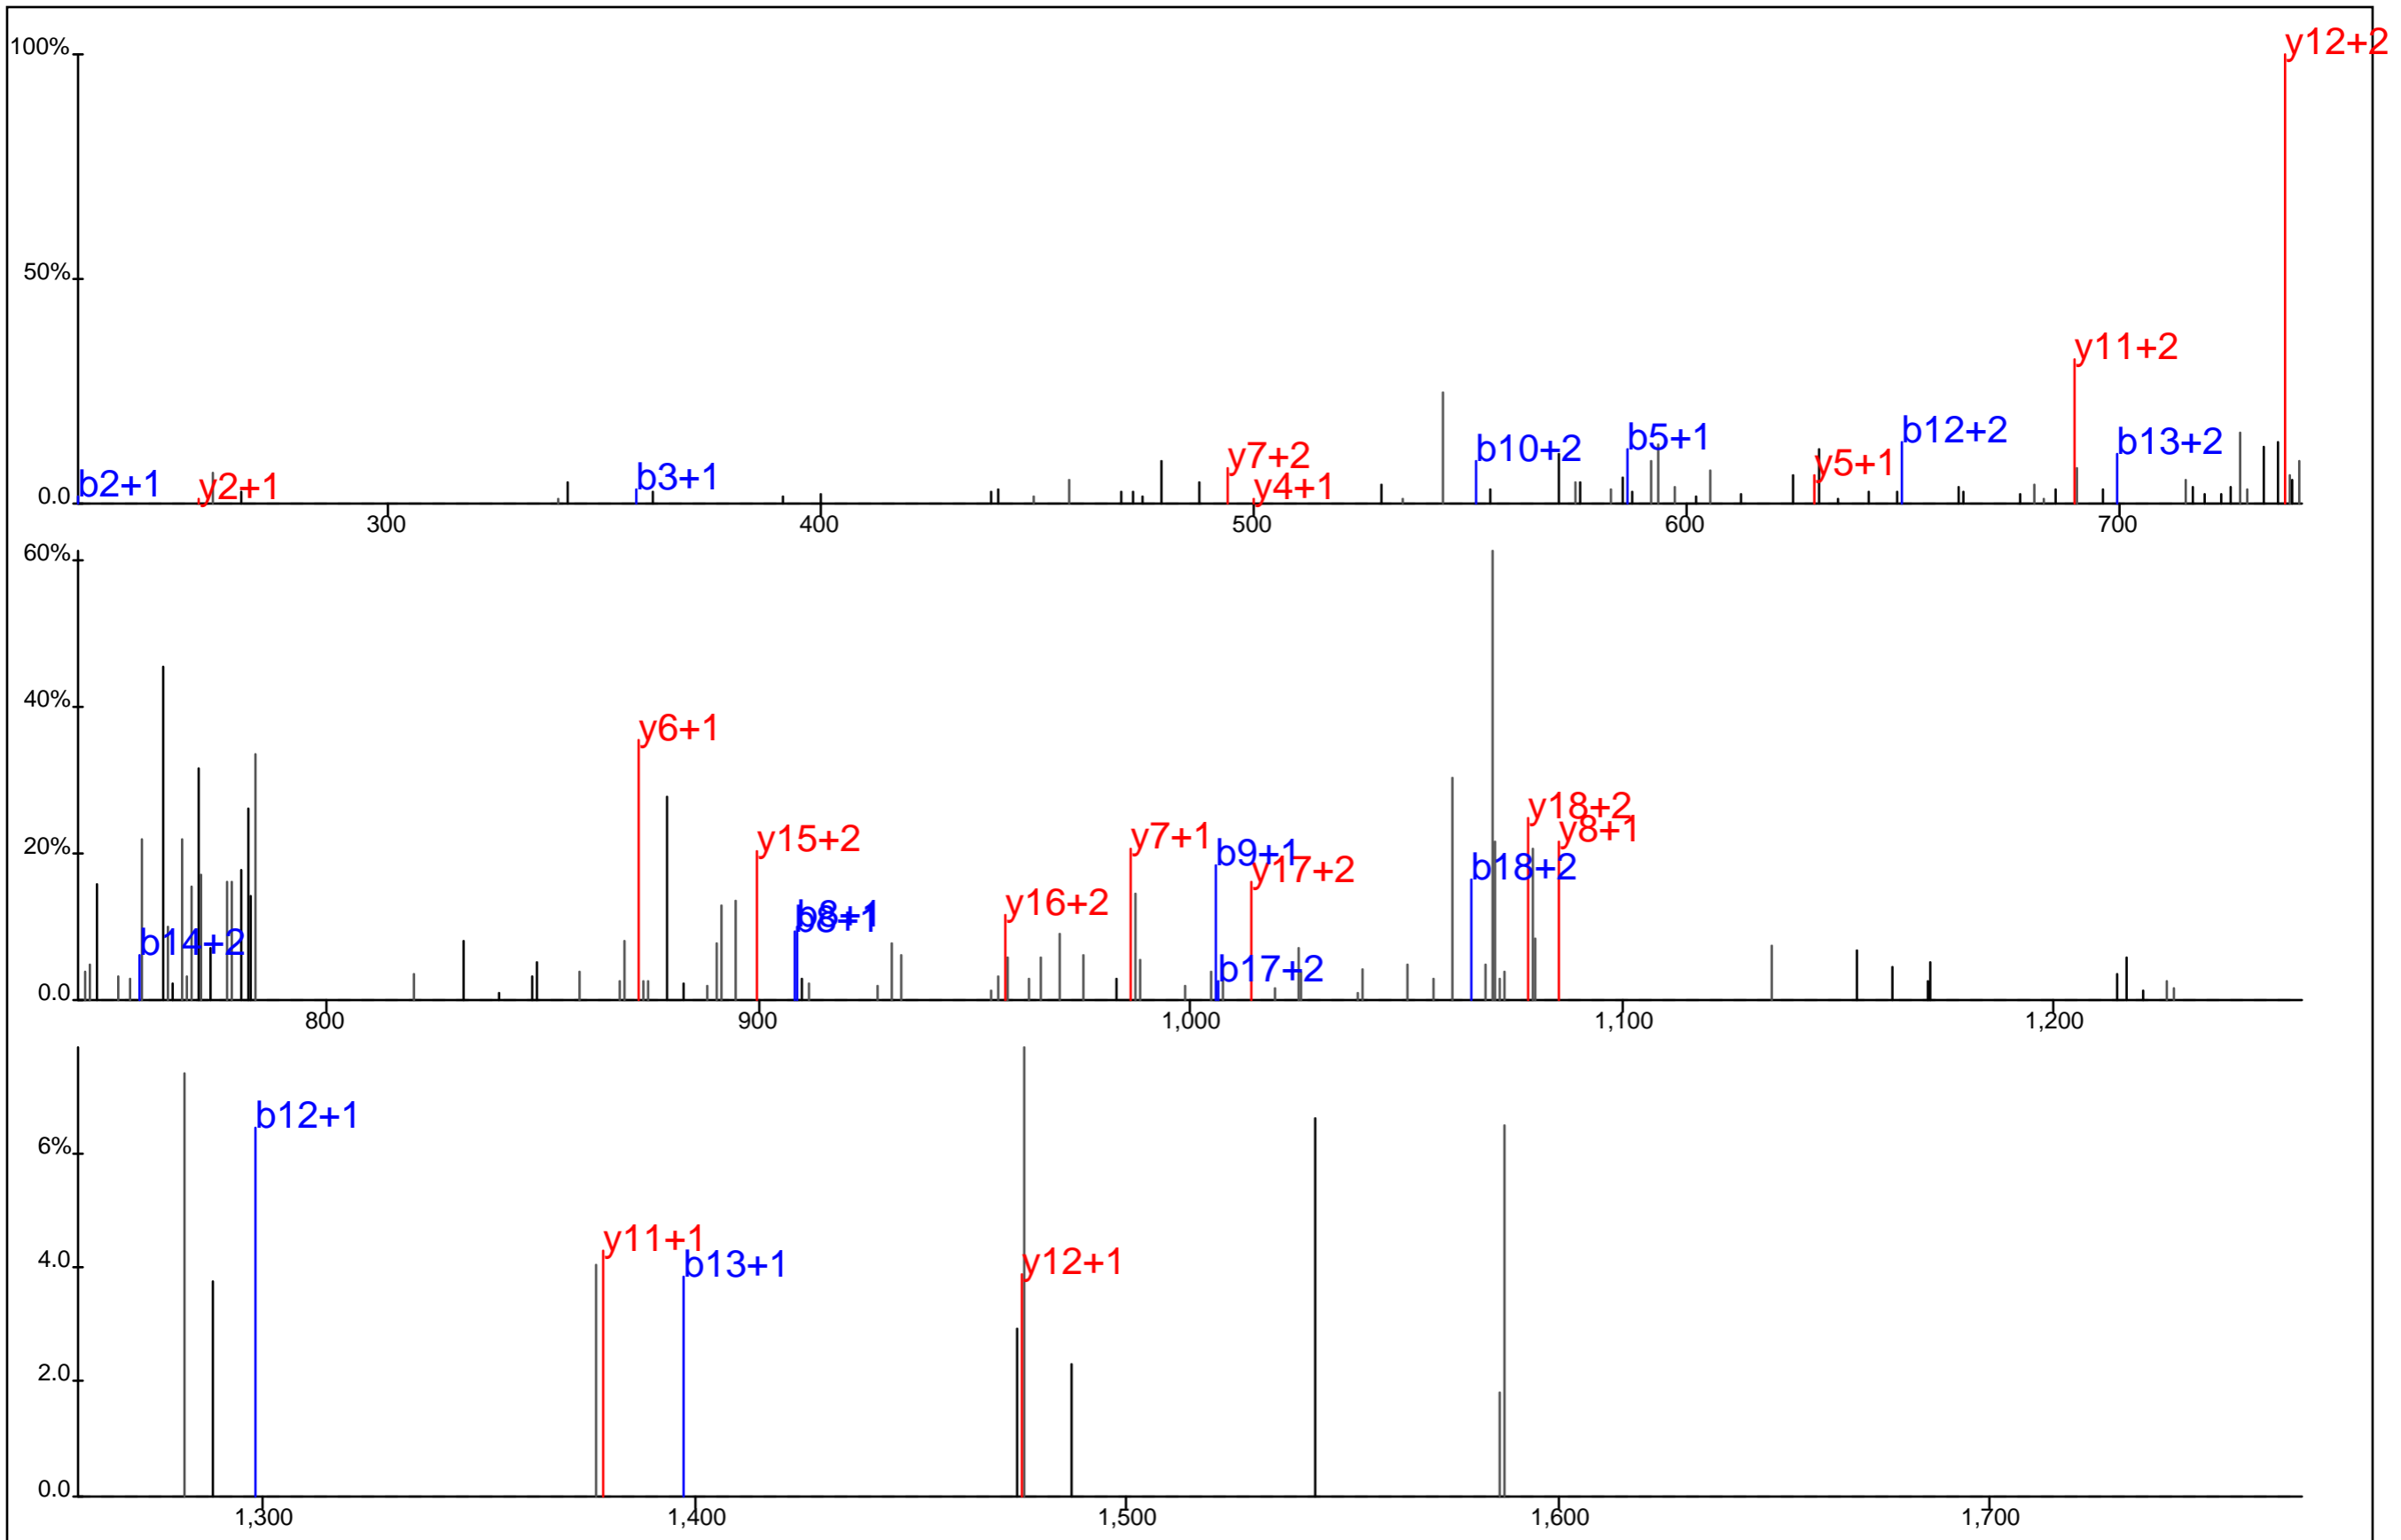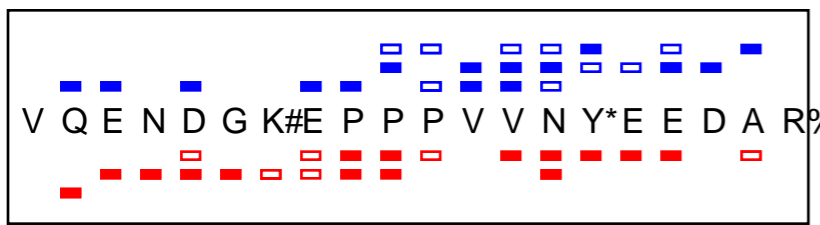

Protein Name: FER  
 gi Accession: 119964721  
 Precursor Mass: 795.0258+3  
 Delta Mass: 2.550 ppm  
 XCorr: 28.88



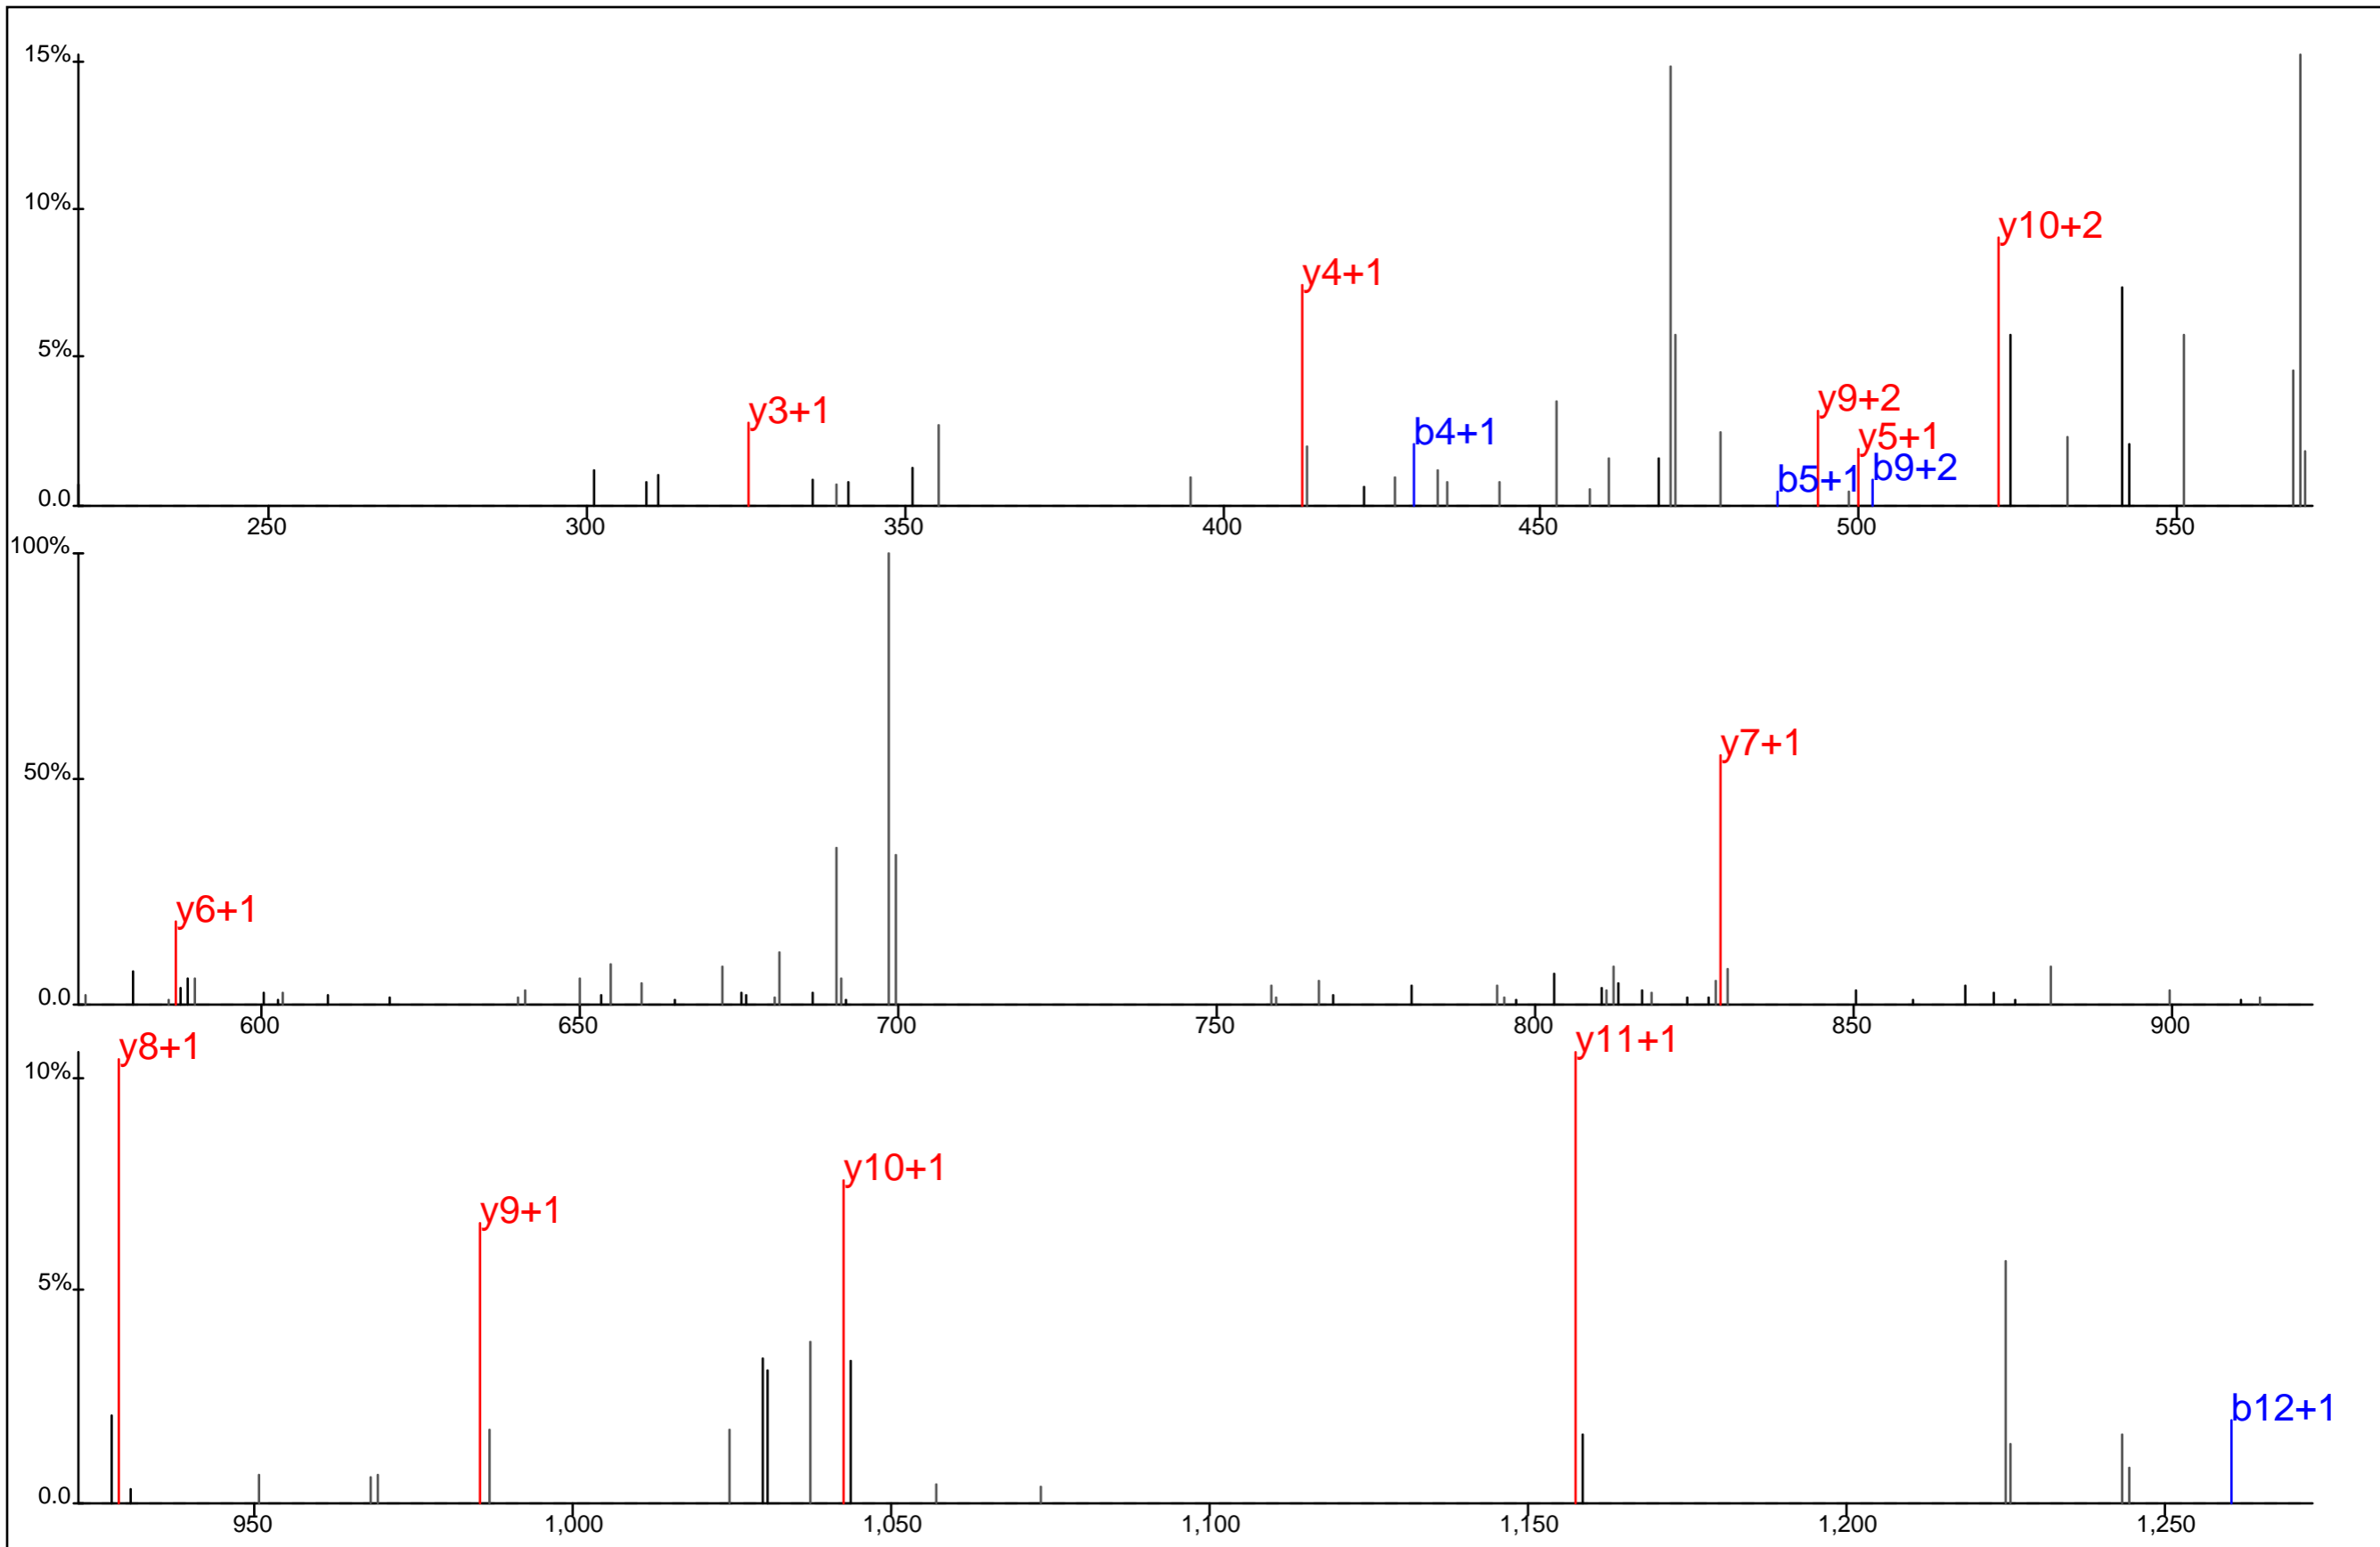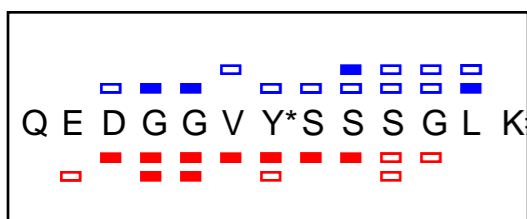

Protein Name: FER  
 gi Accession: 119964721  
 Precursor Mass: 707.8046+2  
 Delta Mass: 3.003 ppm  
 XCorr: 58.53

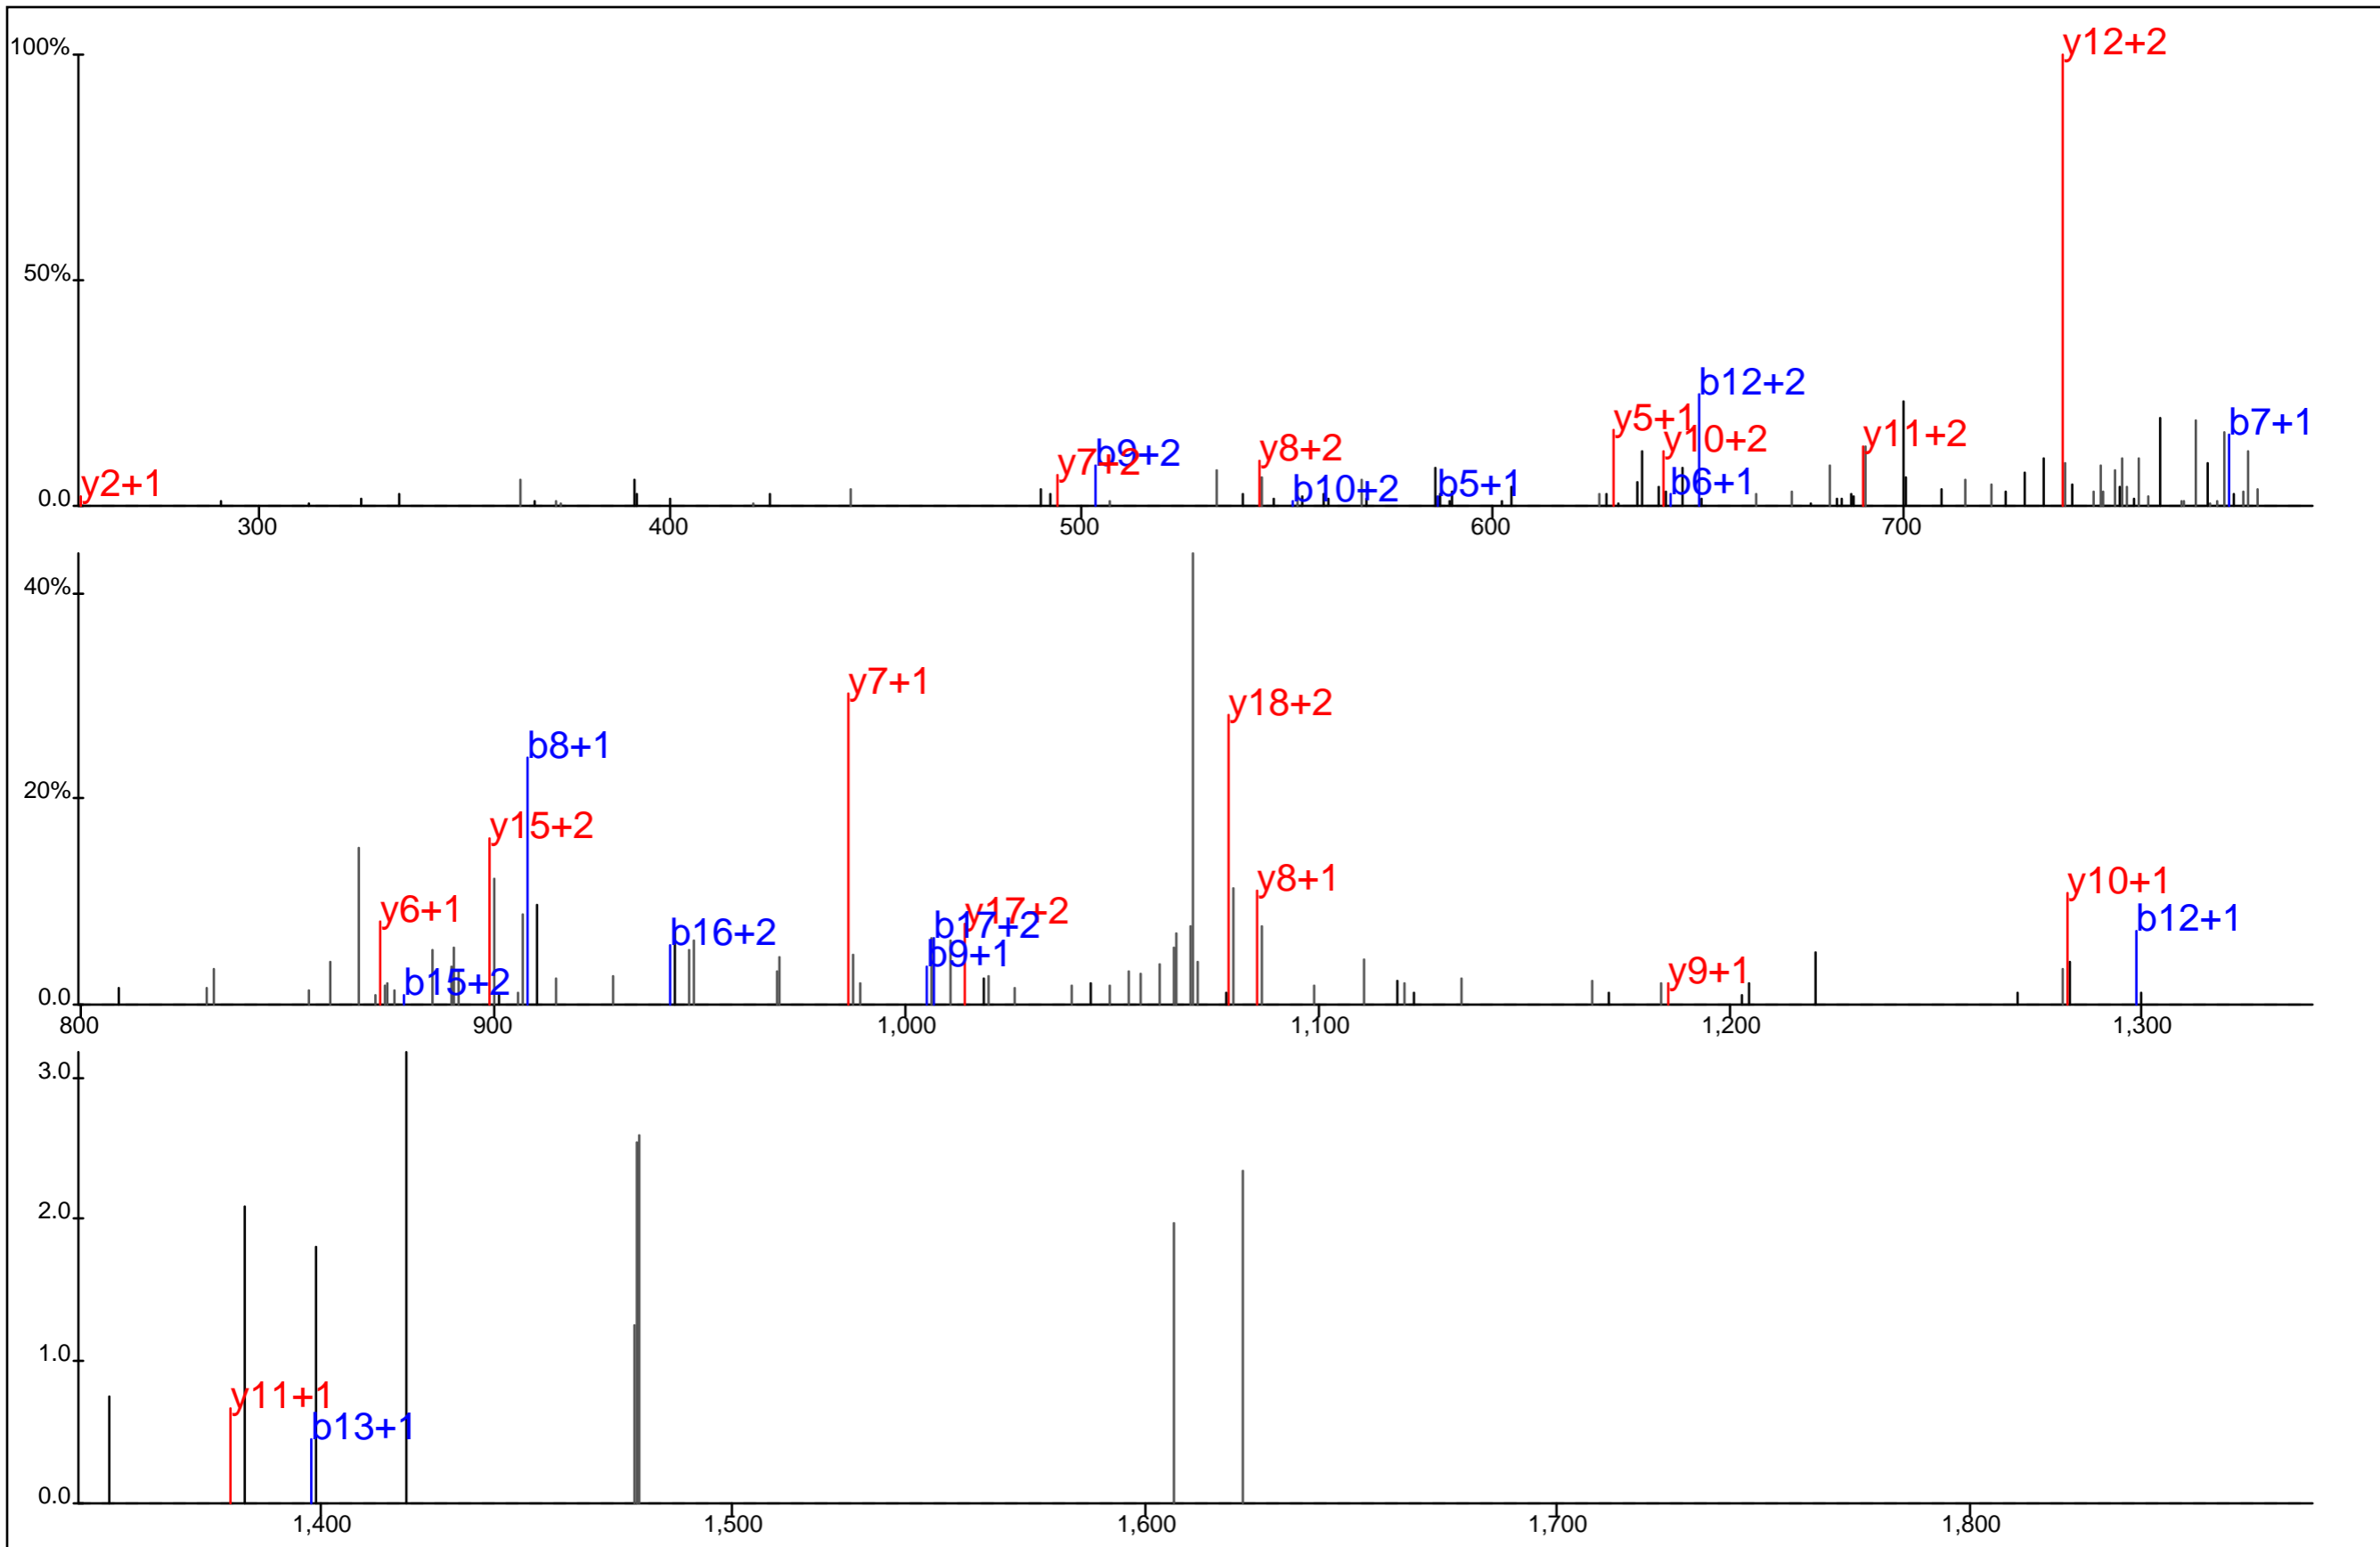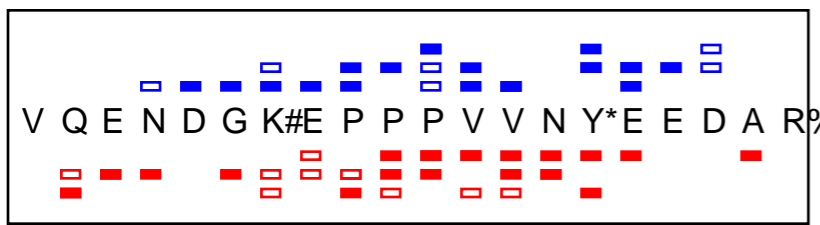

Protein Name: FER  
 gi Accession: 119964721  
 Precursor Mass: 795.0248+3  
 Delta Mass: 1.246 ppm  
 XCorr: 32.78

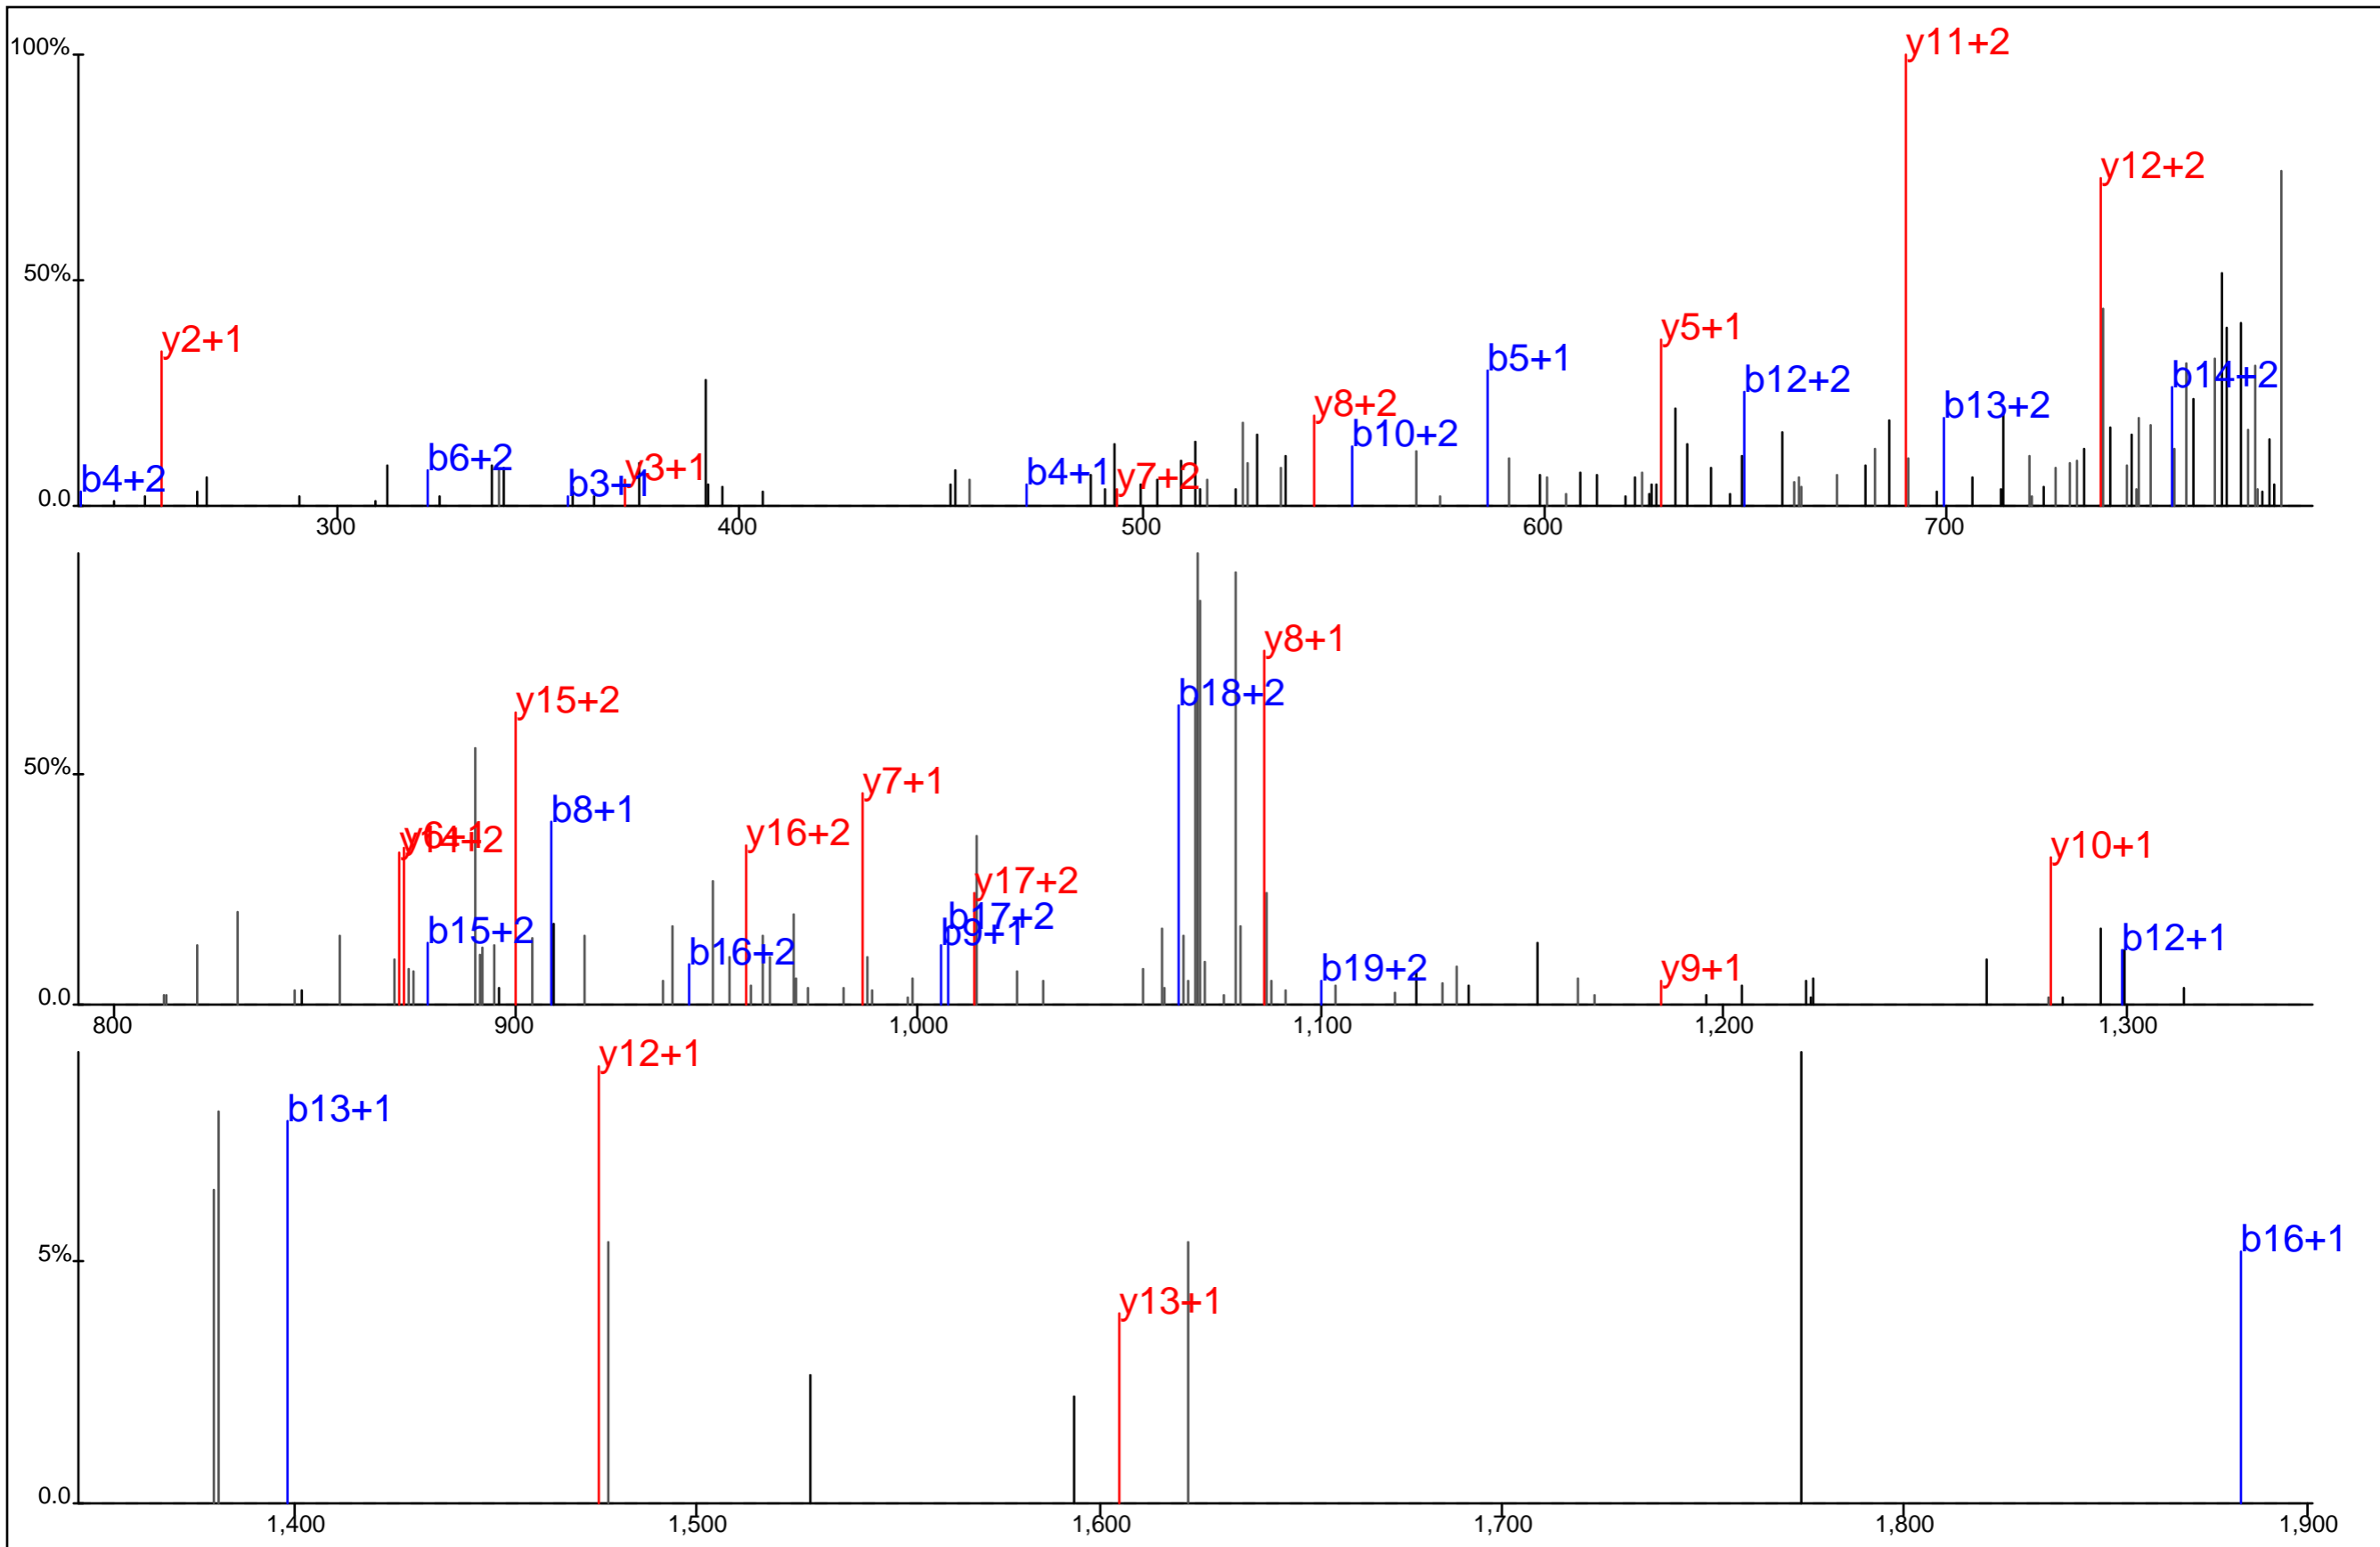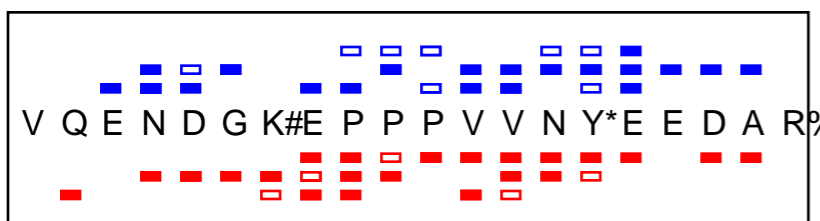

Protein Name: FER  
 gi Accession: 119964721  
 Precursor Mass: 795.0276+3  
 Delta Mass: 4.778 ppm  
 XCorr: 49.89

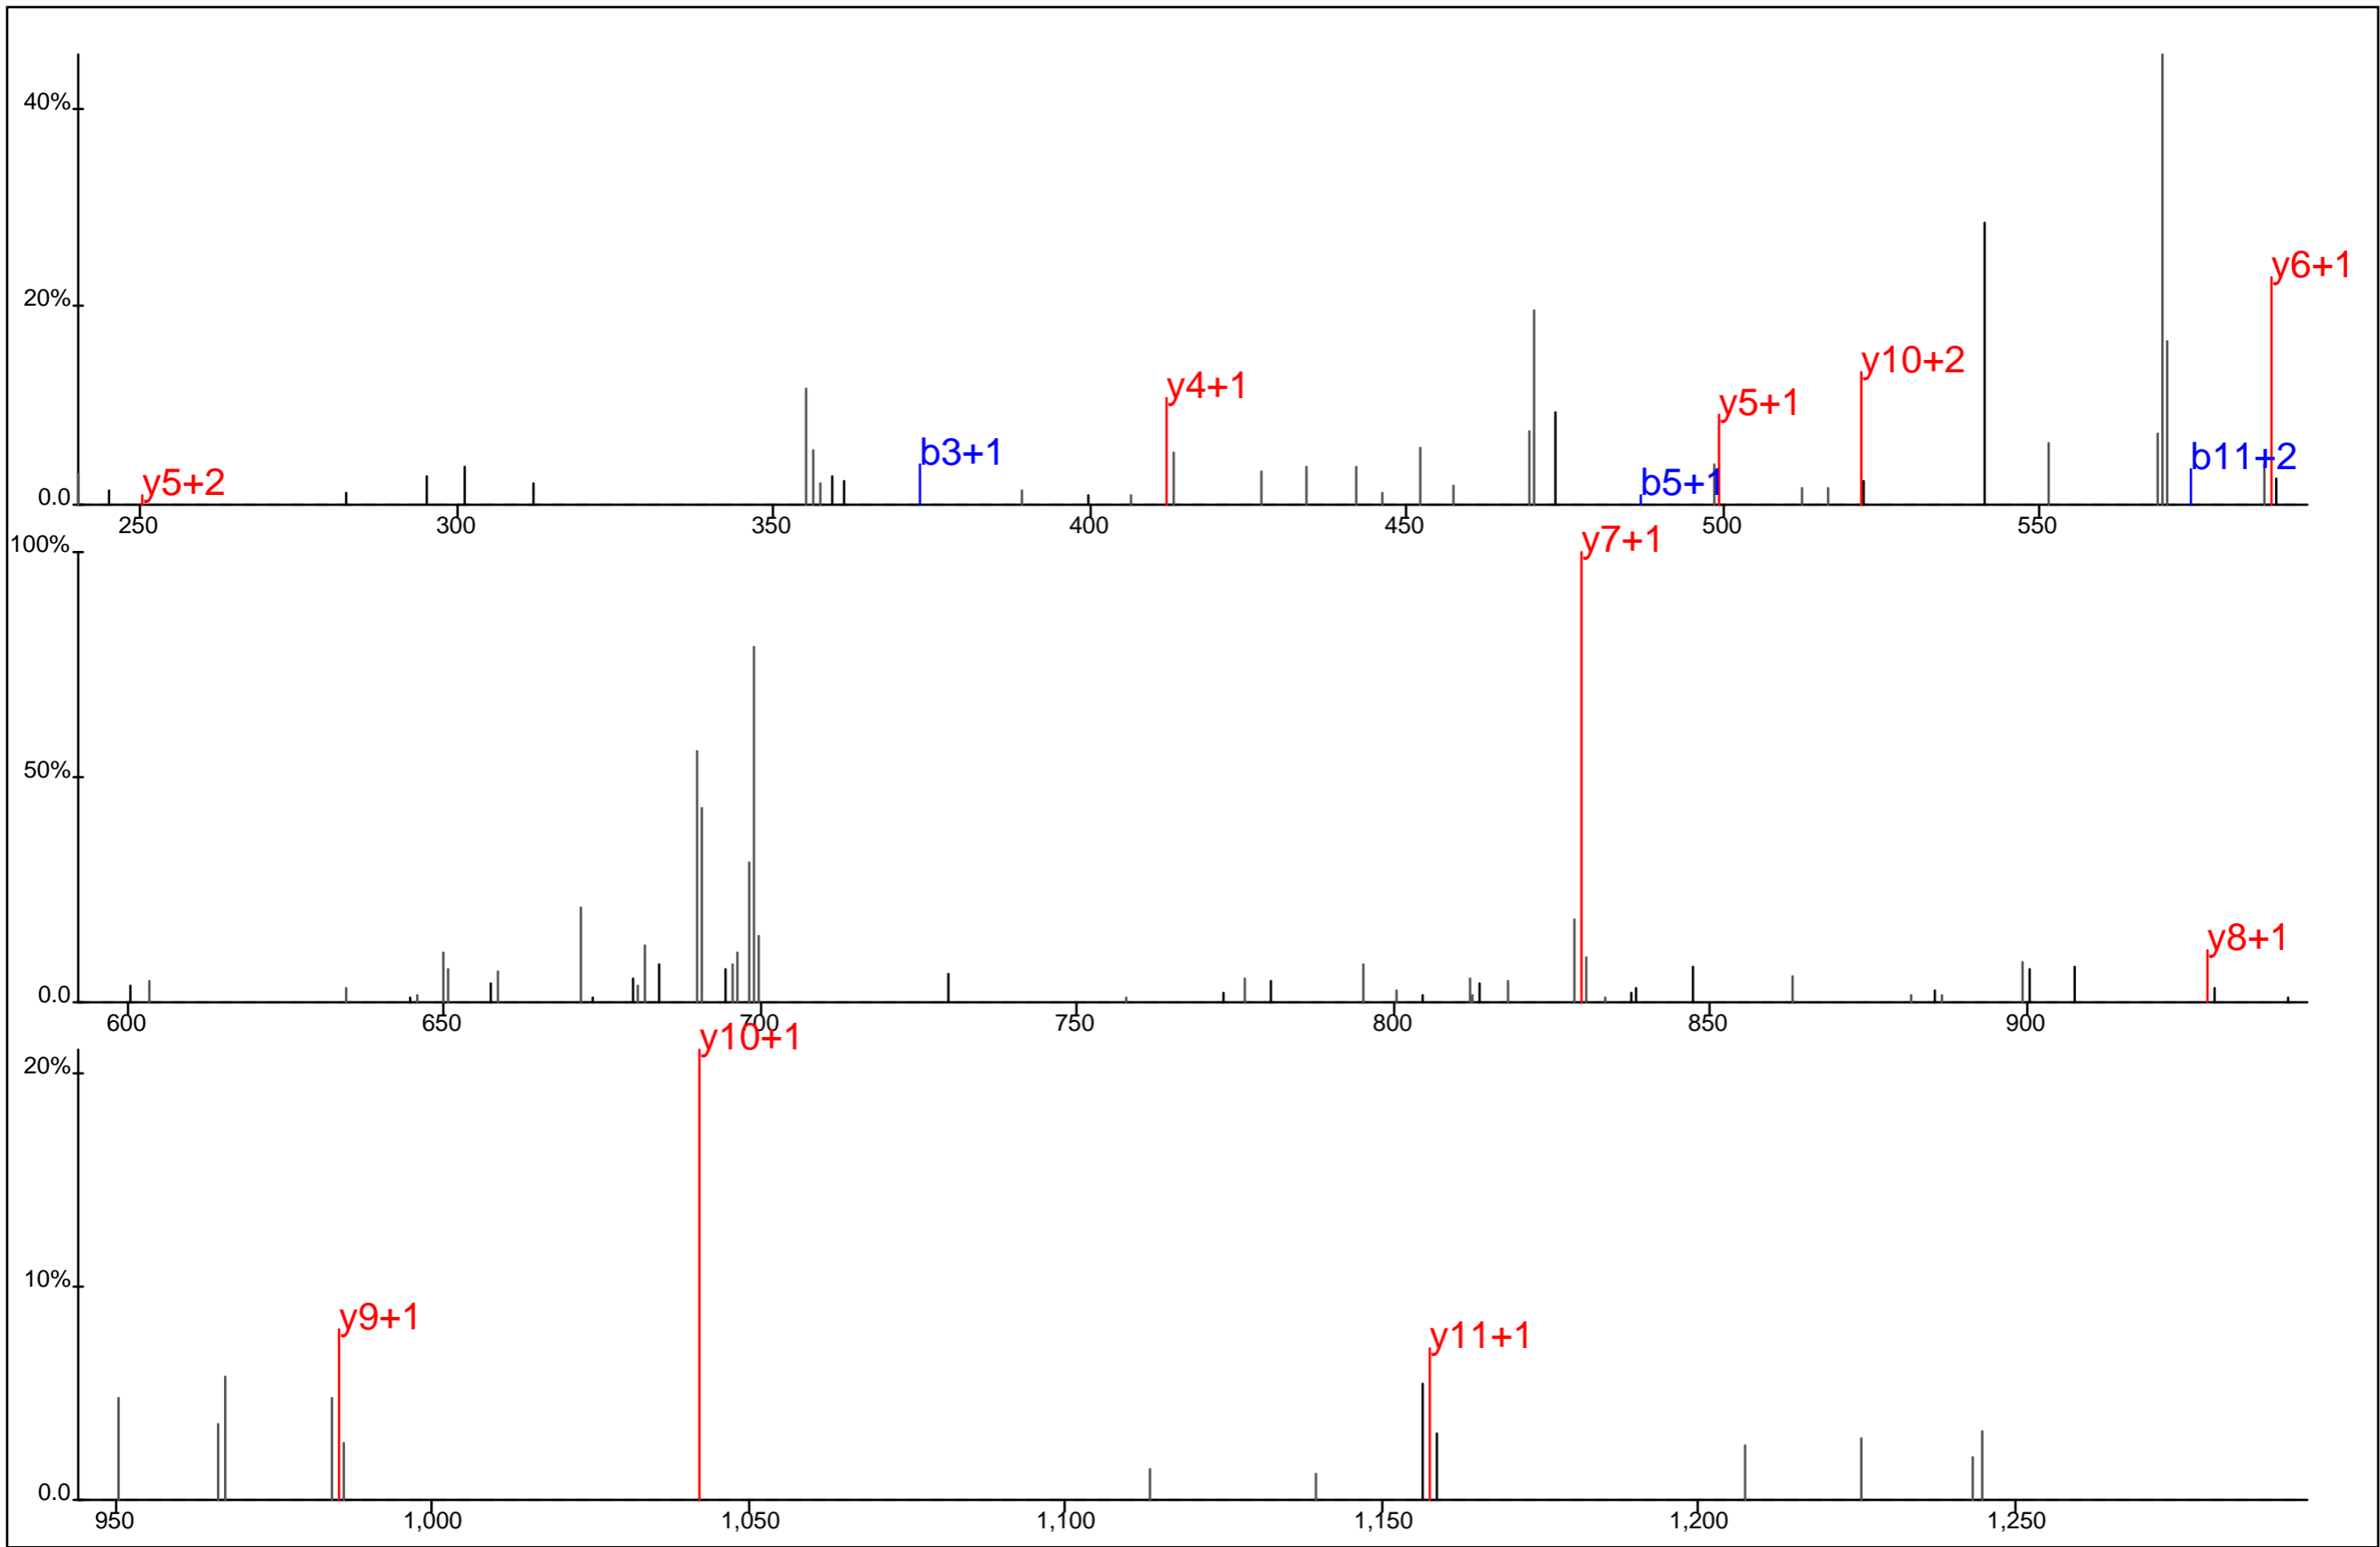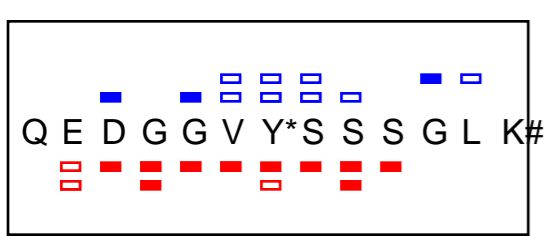

Protein Name: FER  
 gi Accession: 119964721  
 Precursor Mass: 707.8057+2  
 Delta Mass: 4.466 ppm  
 XCorr: 46.9

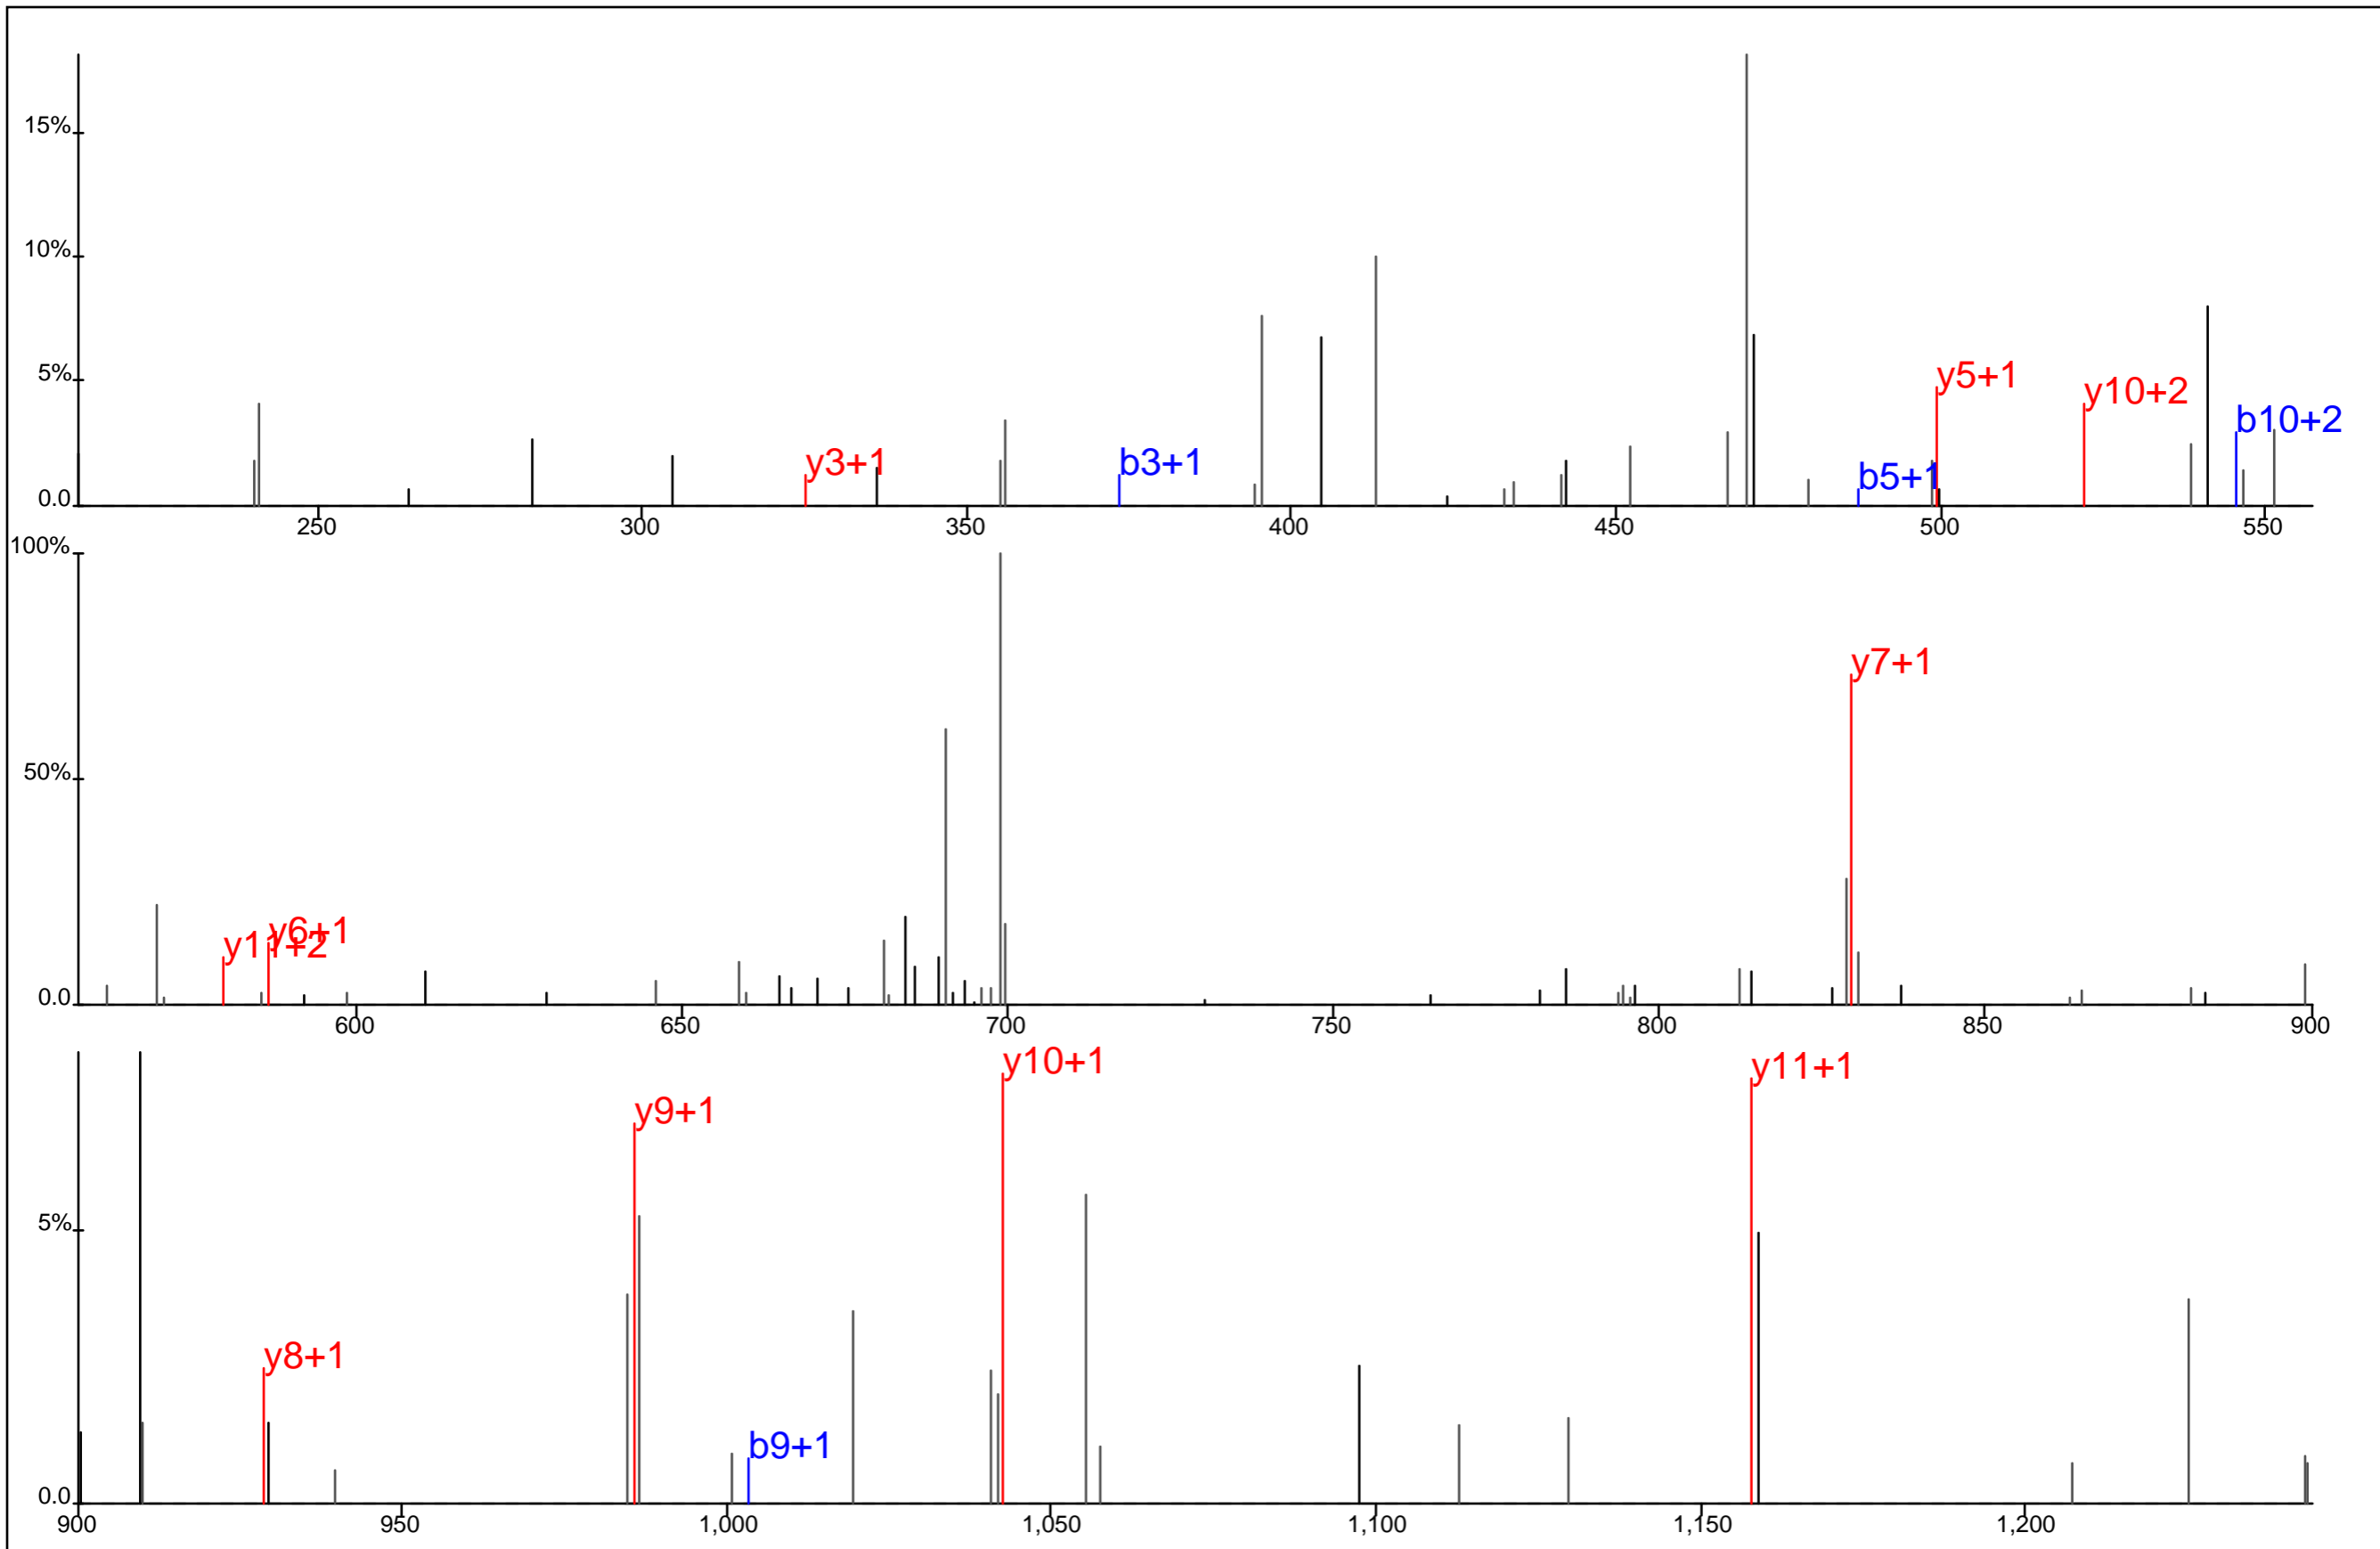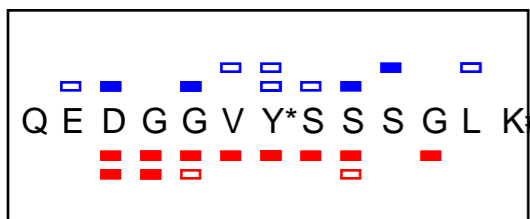

Protein Name: FER  
 gi Accession: 119964721  
 Precursor Mass: 707.8062+2  
 Delta Mass: 5.244 ppm  
 XCorr: 30.78

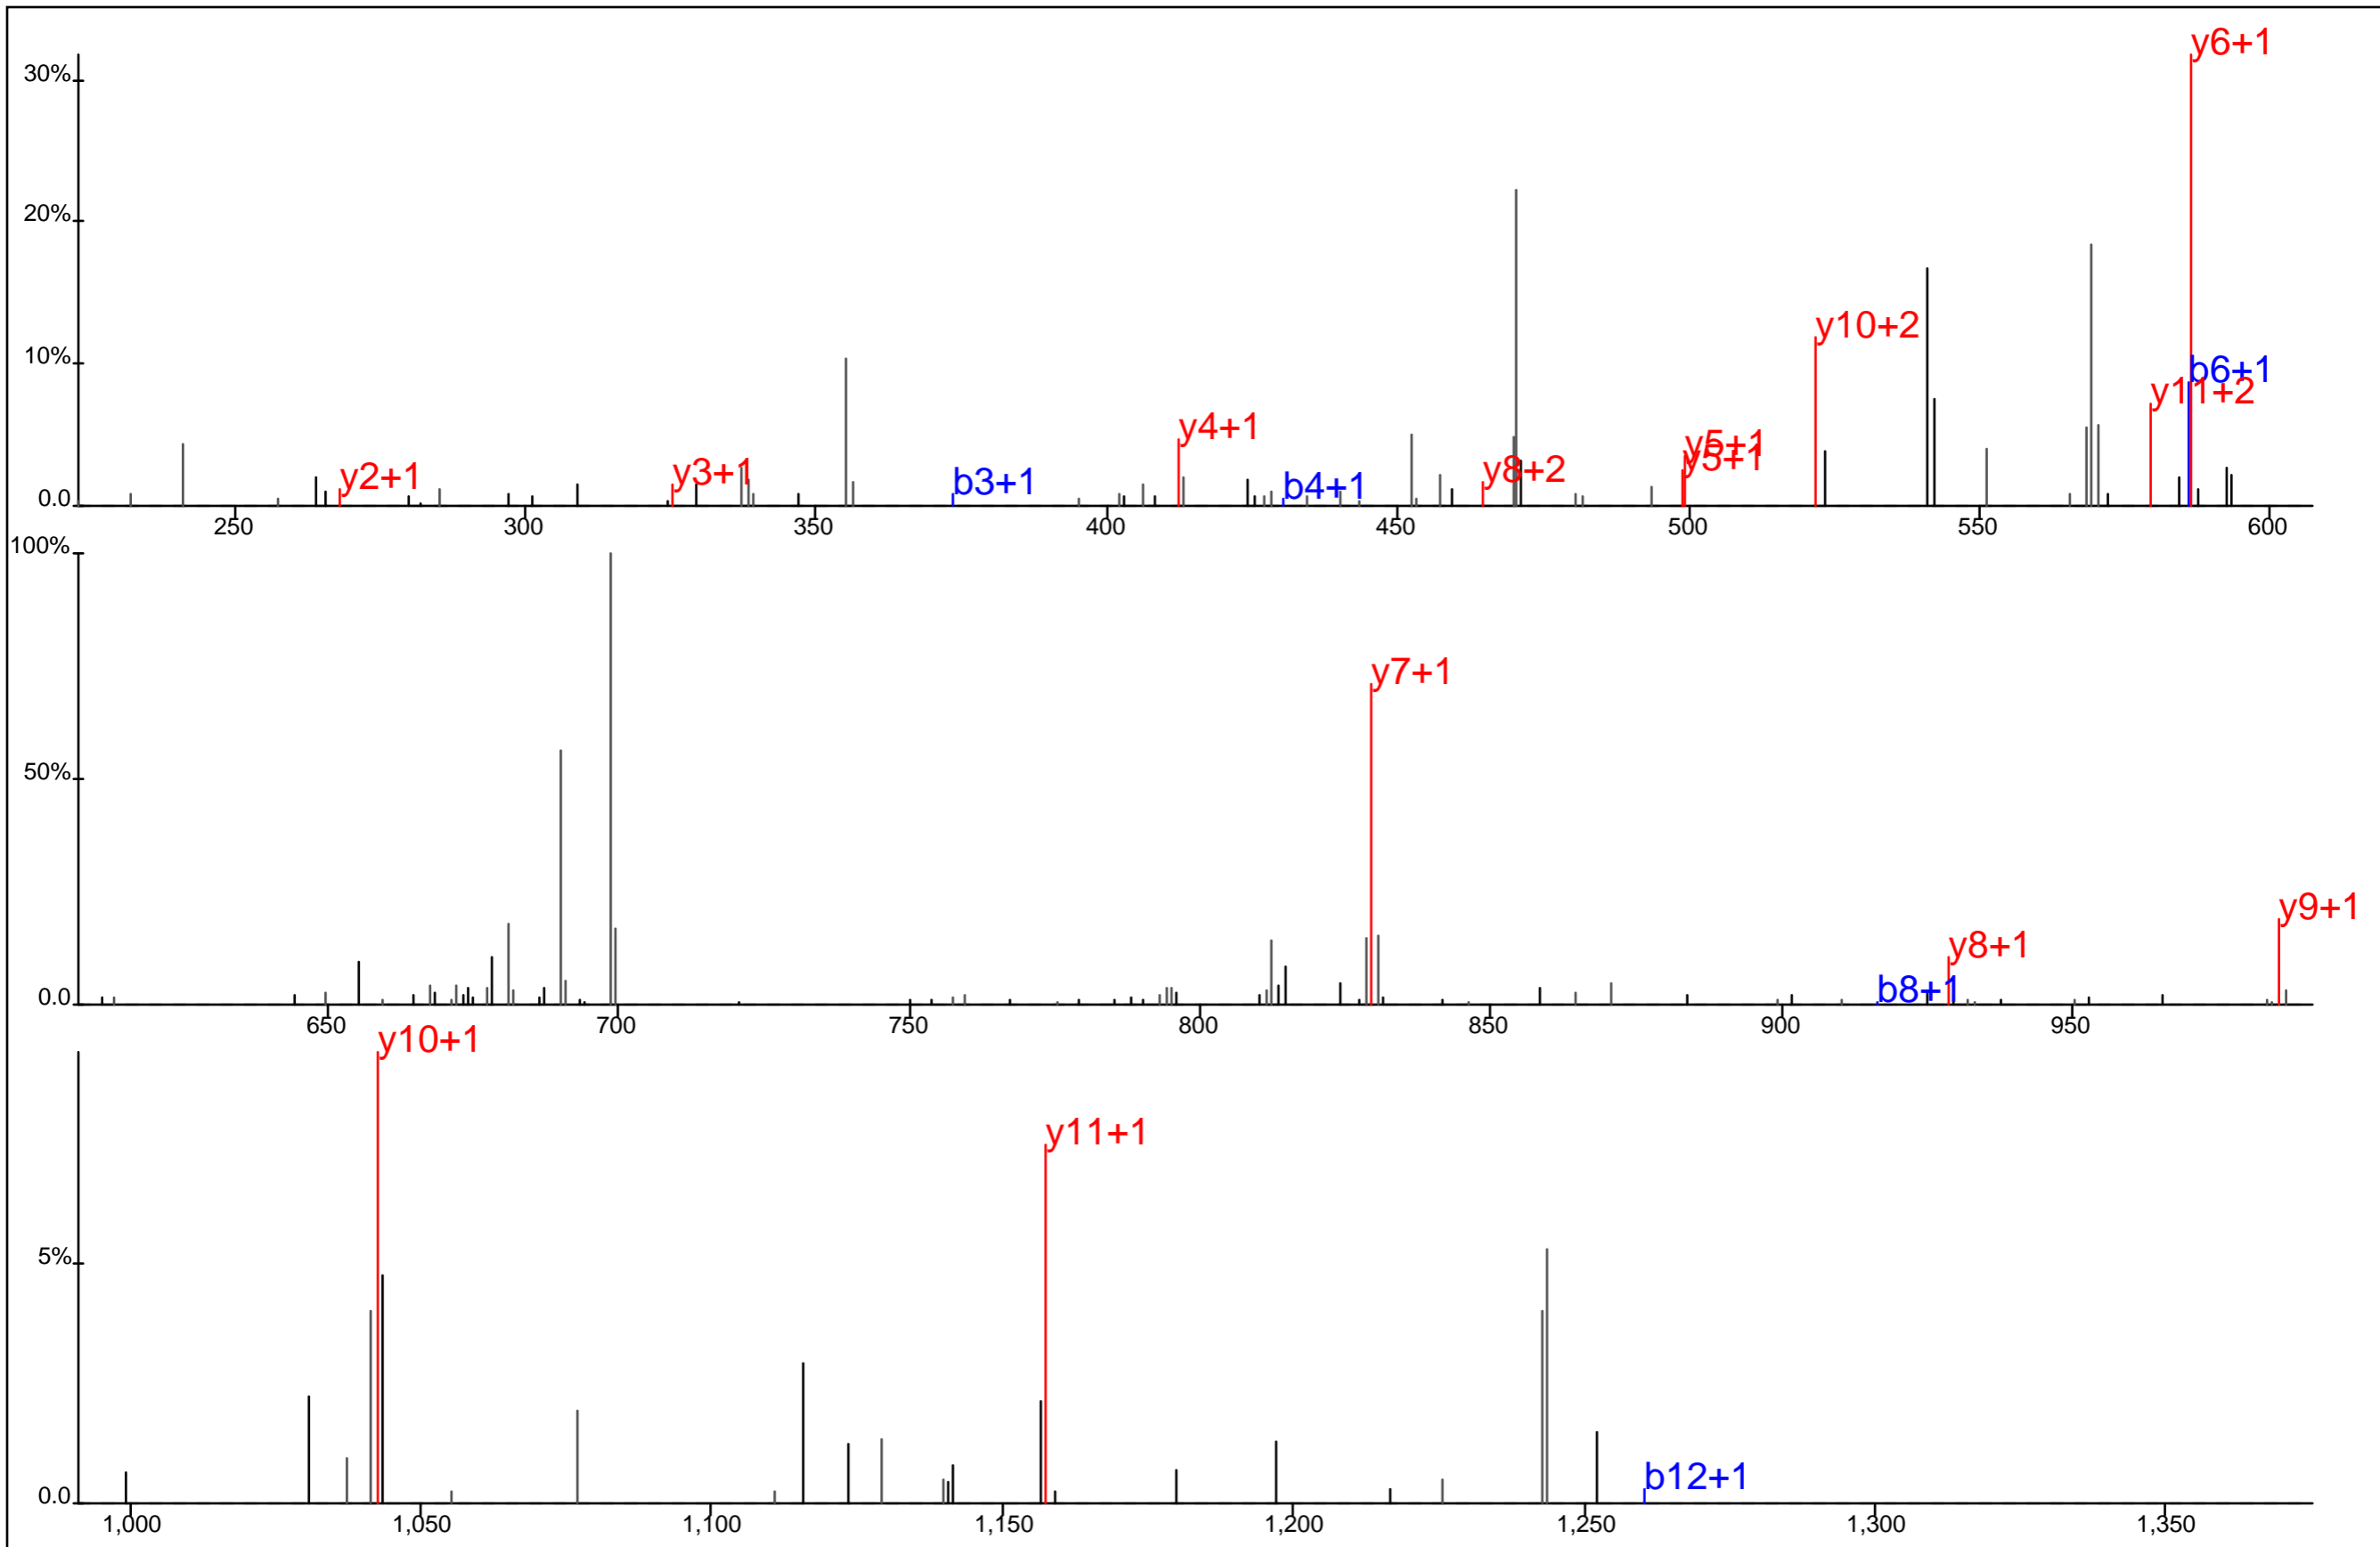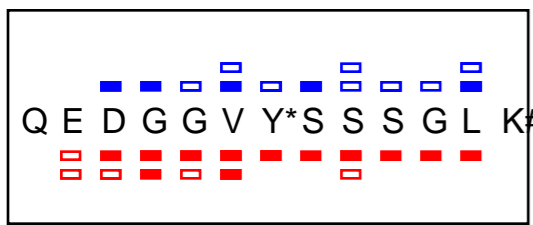

Protein Name: FER  
 gi Accession: 119964721  
 Precursor Mass: 707.8089+2  
 Delta Mass: 9.040 ppm  
 XCorr: 50.61

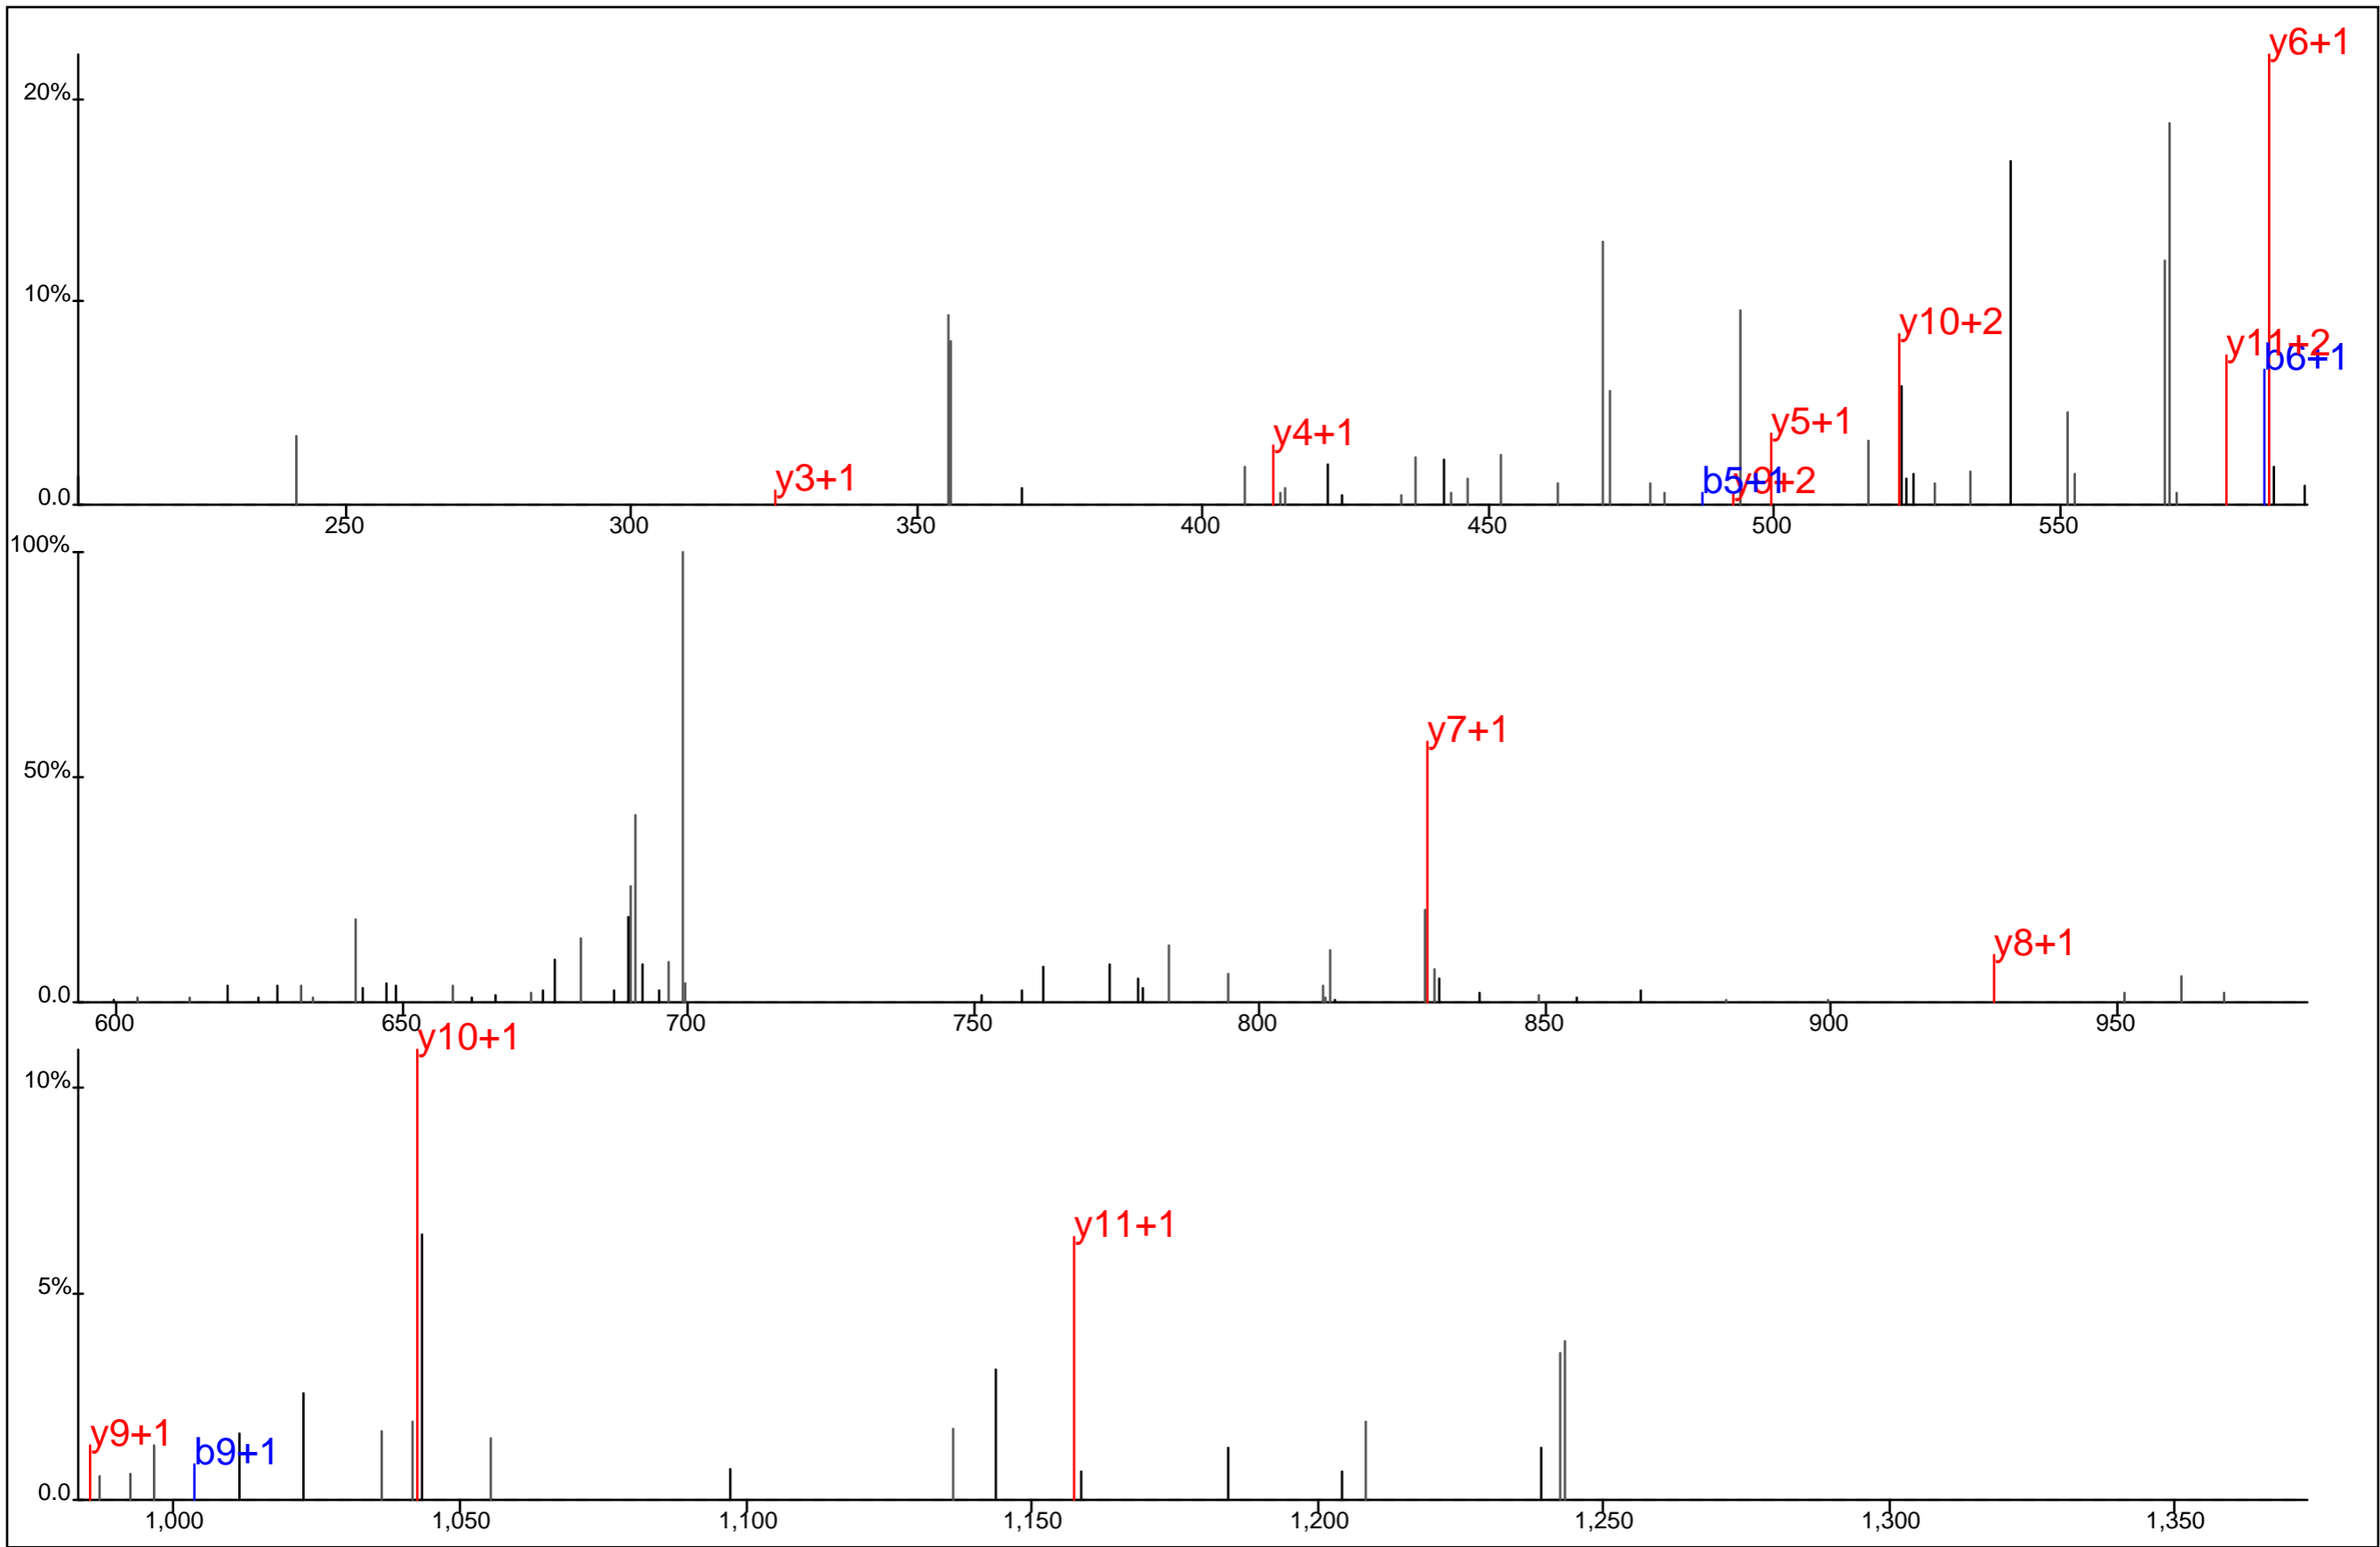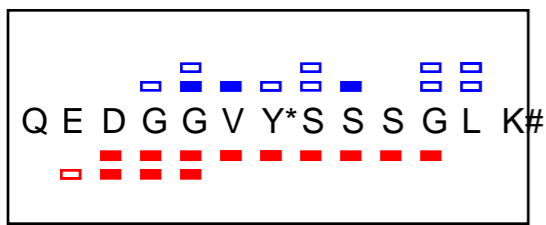

Protein Name: FER  
 gi Accession: 119964721  
 Precursor Mass: 707.8065+2  
 Delta Mass: 5.590 ppm  
 XCorr: 38.14

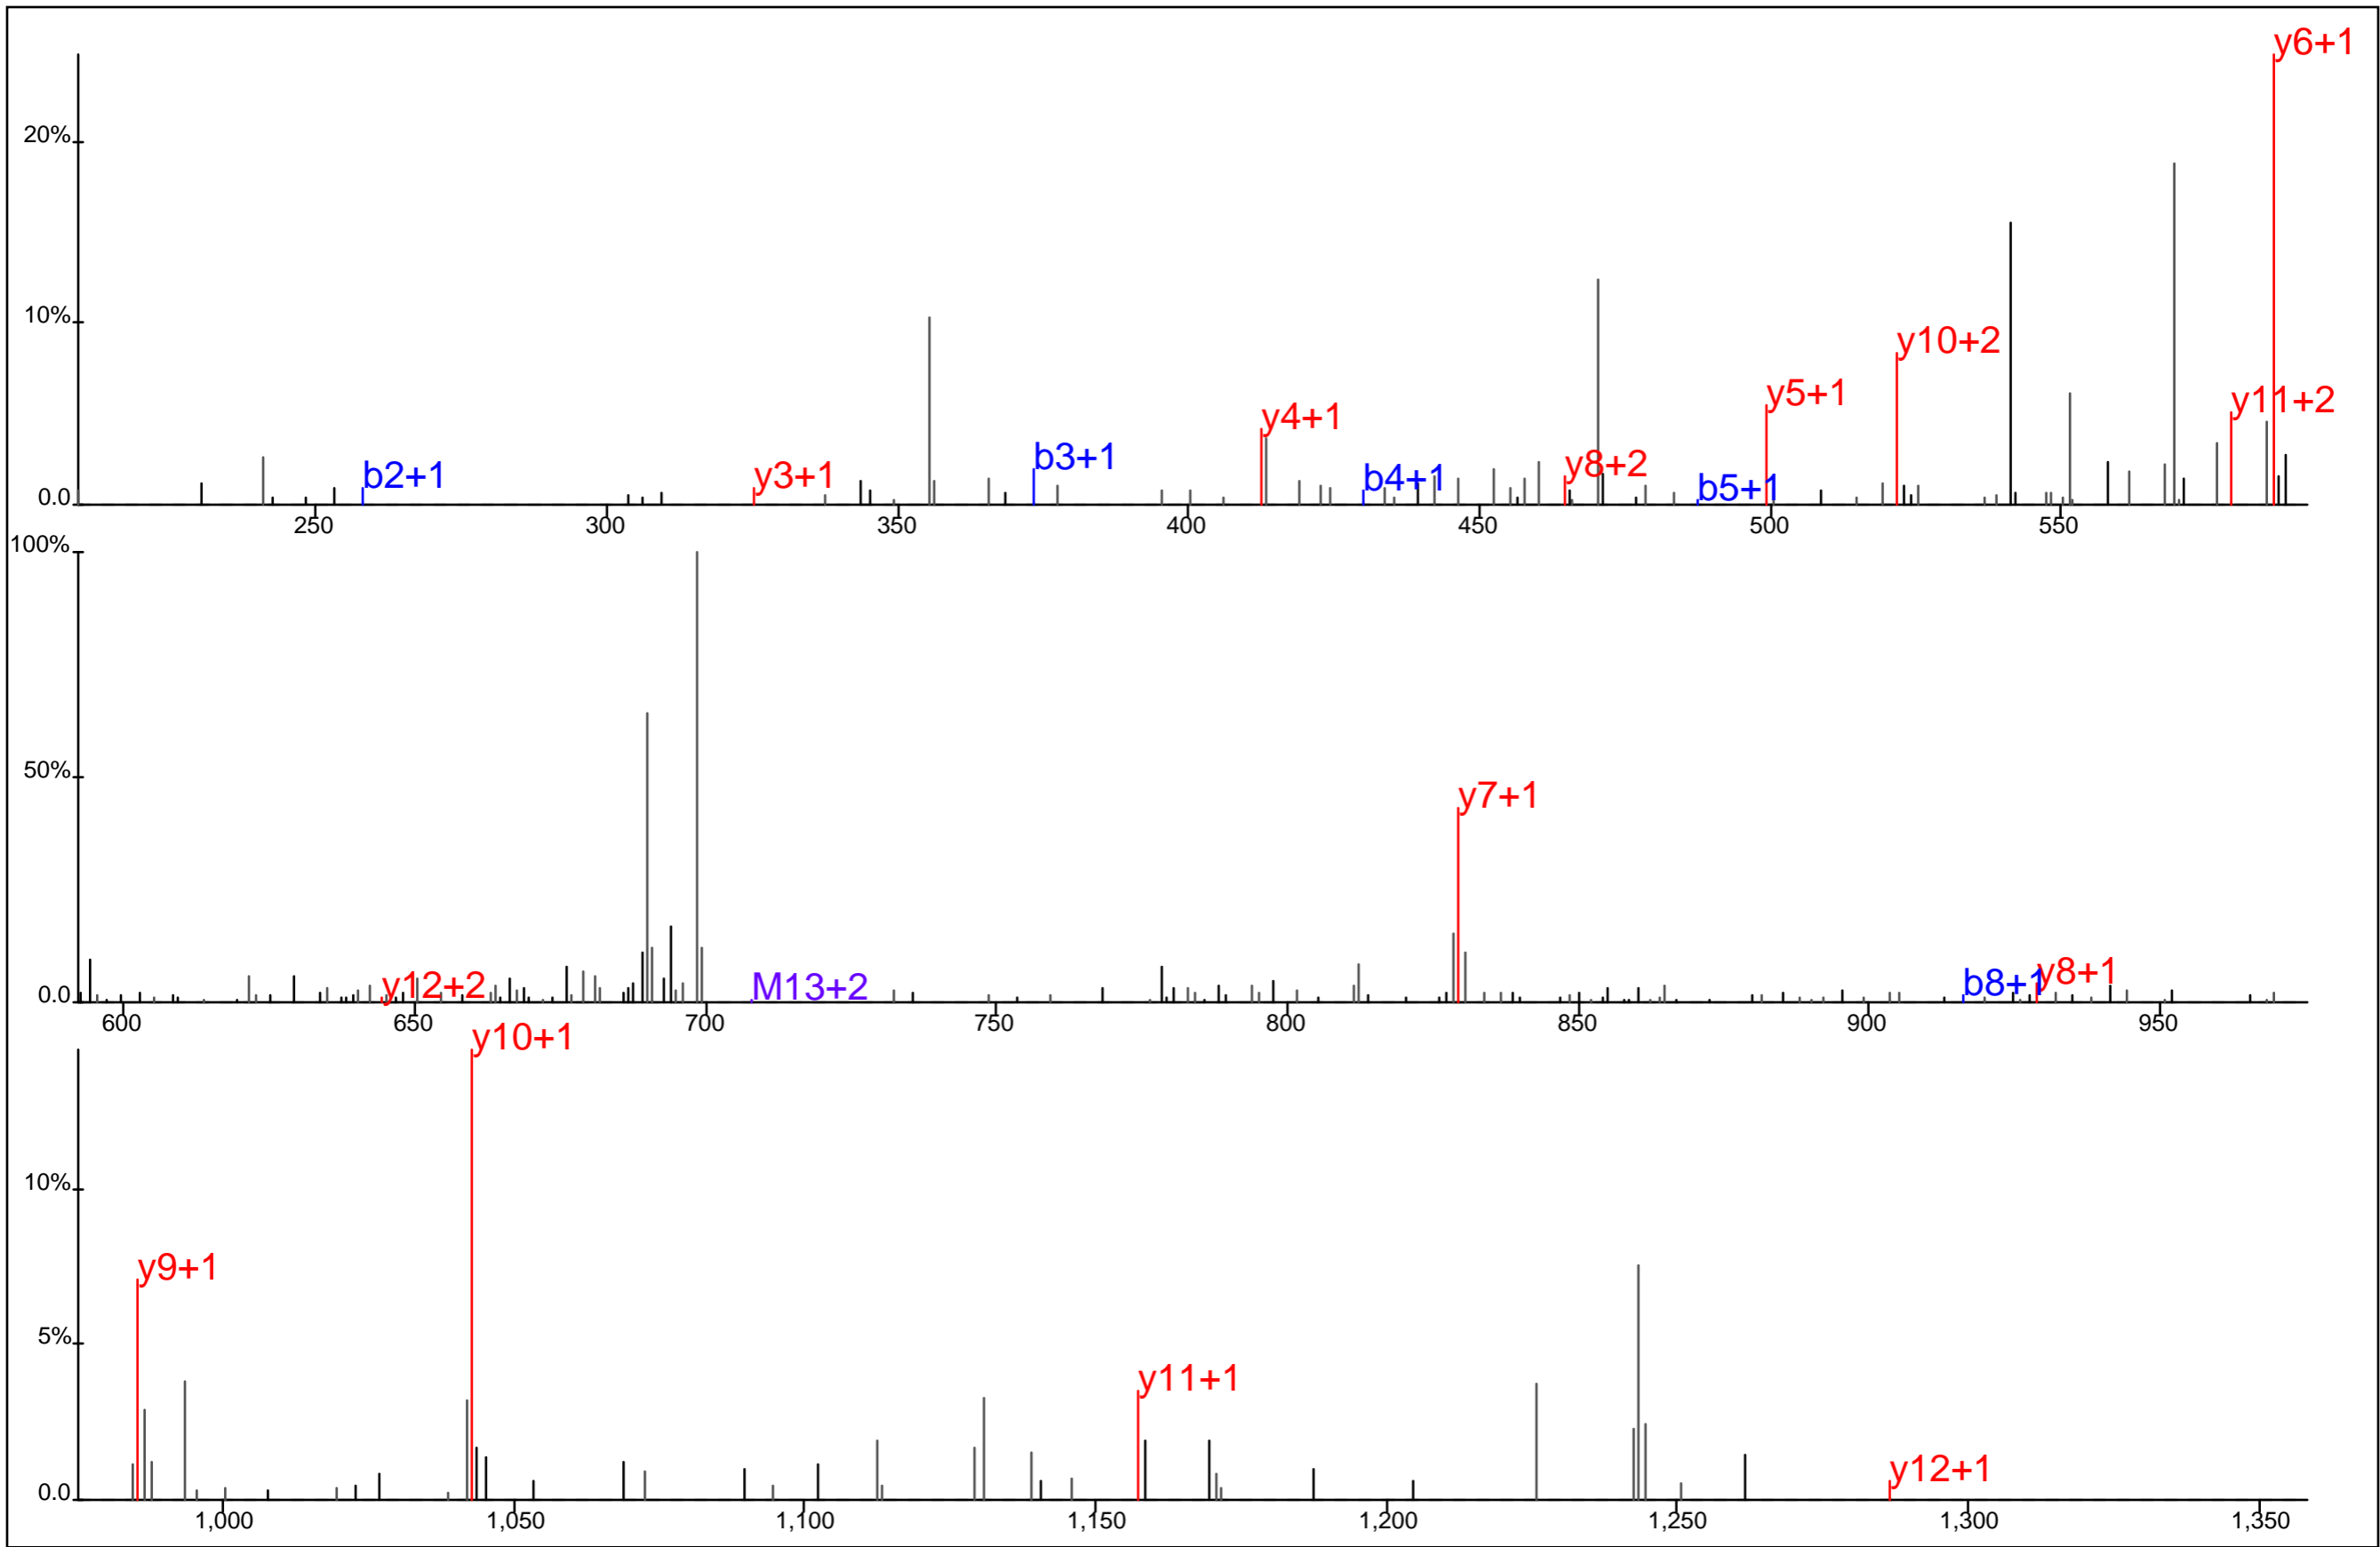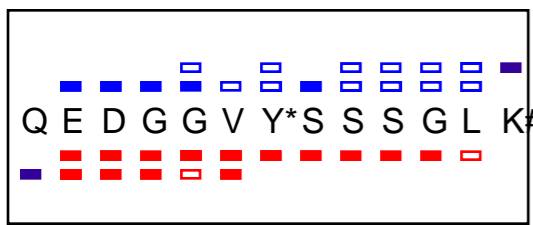

Protein Name: FER  
 gi Accession: 119964721  
 Precursor Mass: 707.8035+2  
 Delta Mass: 1.448 ppm  
 XCorr: 50.13



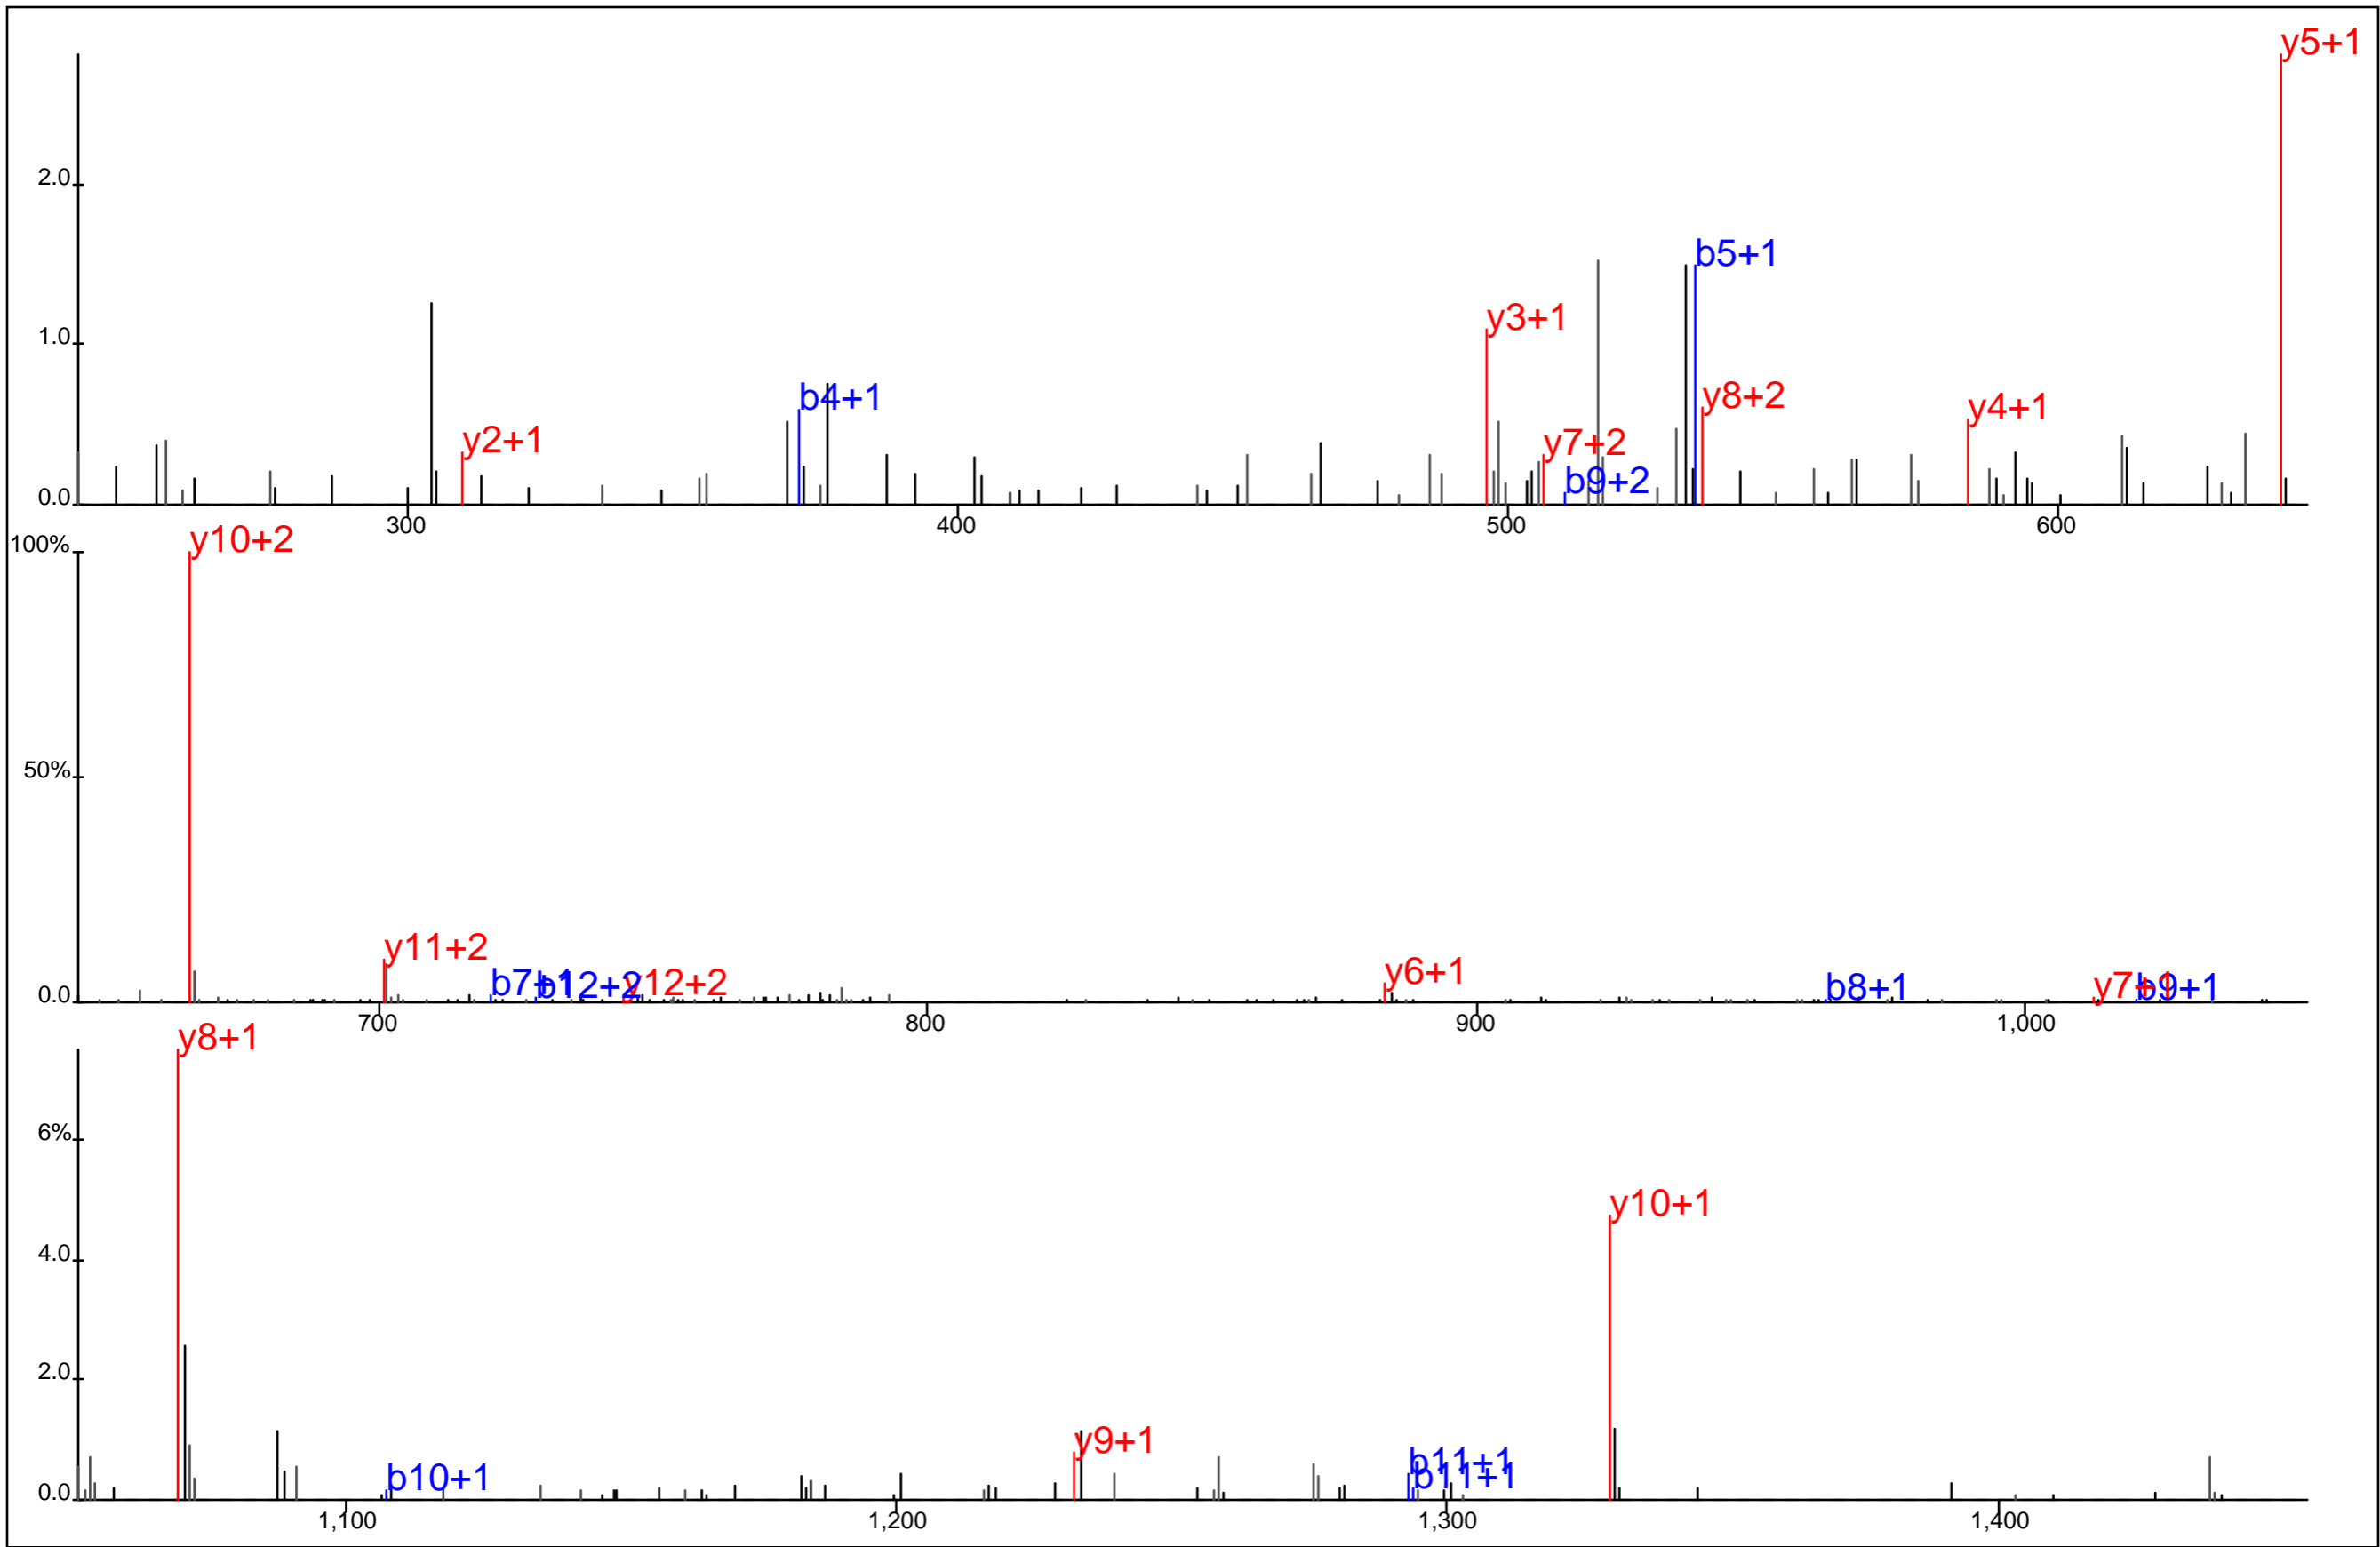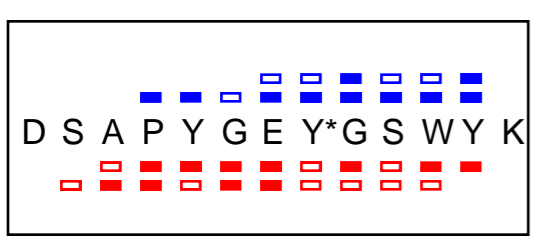

Protein Name: FLJ12387  
 gi Accession: 10433849  
 Precursor Mass: 801.8164+2  
 Delta Mass: 6.700 ppm  
 XCorr: 37.07

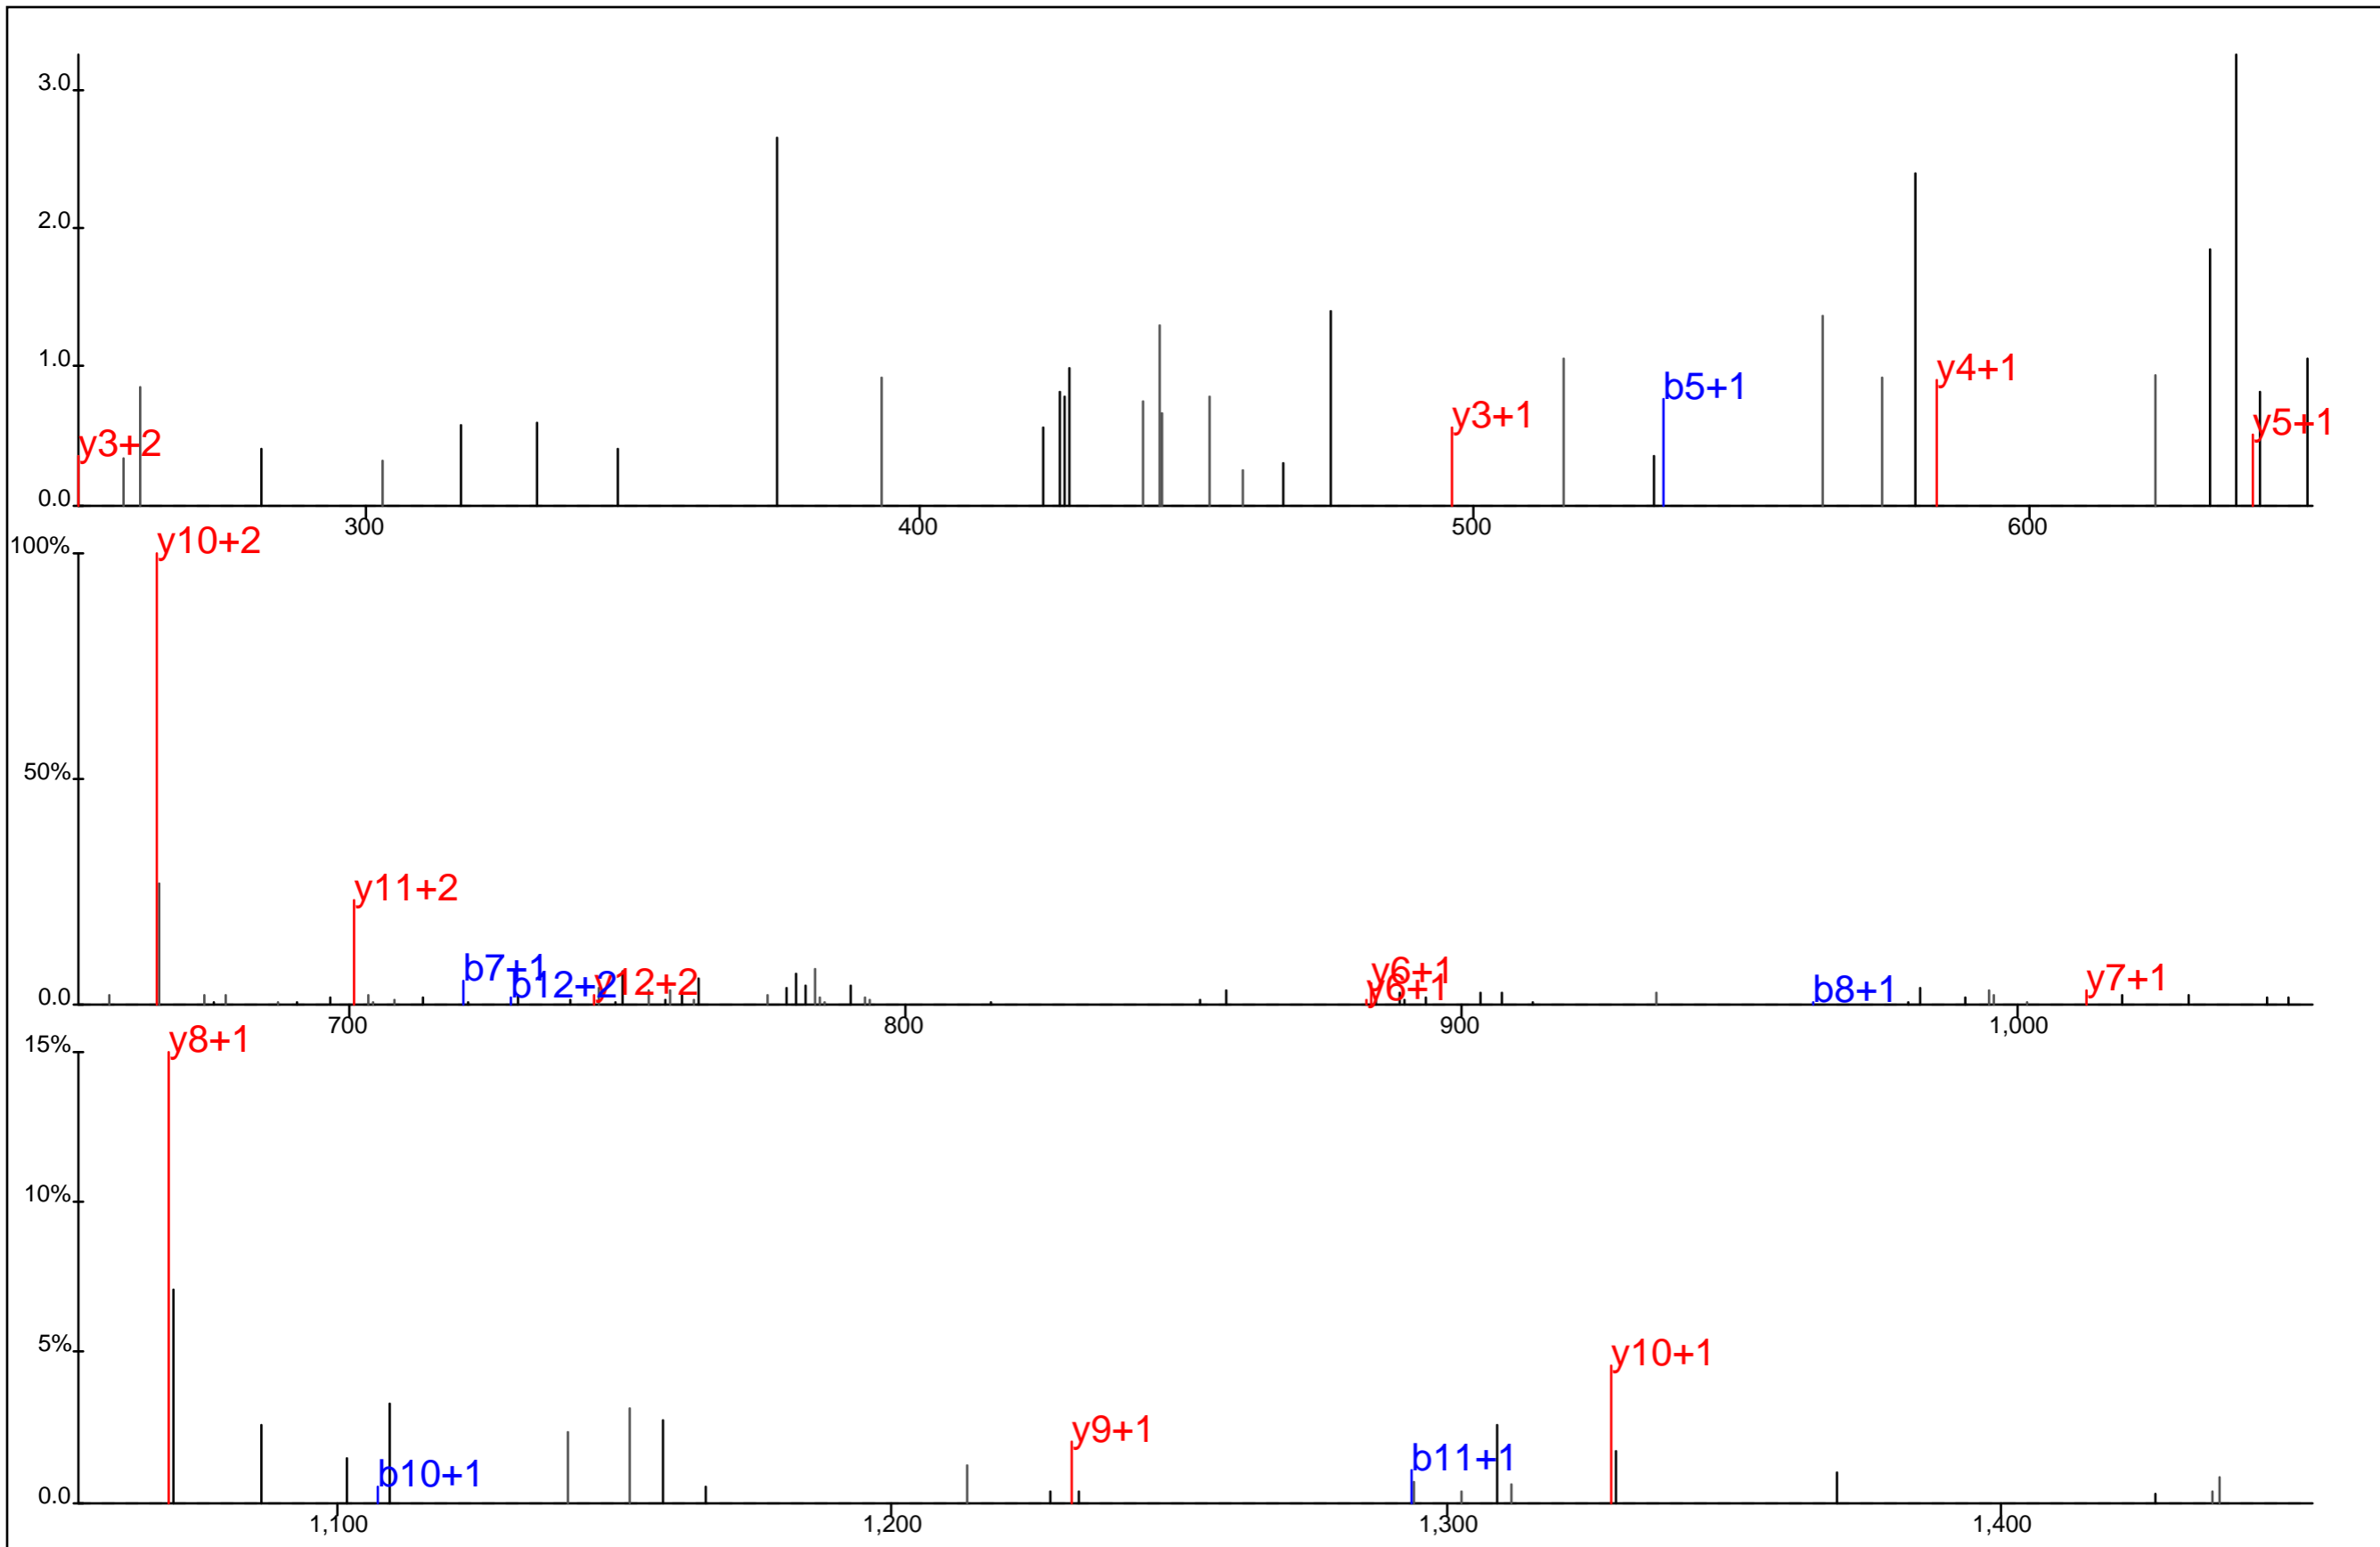

D S A P Y G E Y\*G S W Y K

Protein Name: FLJ12387  
gi Accession: 10433849  
Precursor Mass: 801.8150+2  
Delta Mass: 4.947 ppm  
XCorr: 19.69

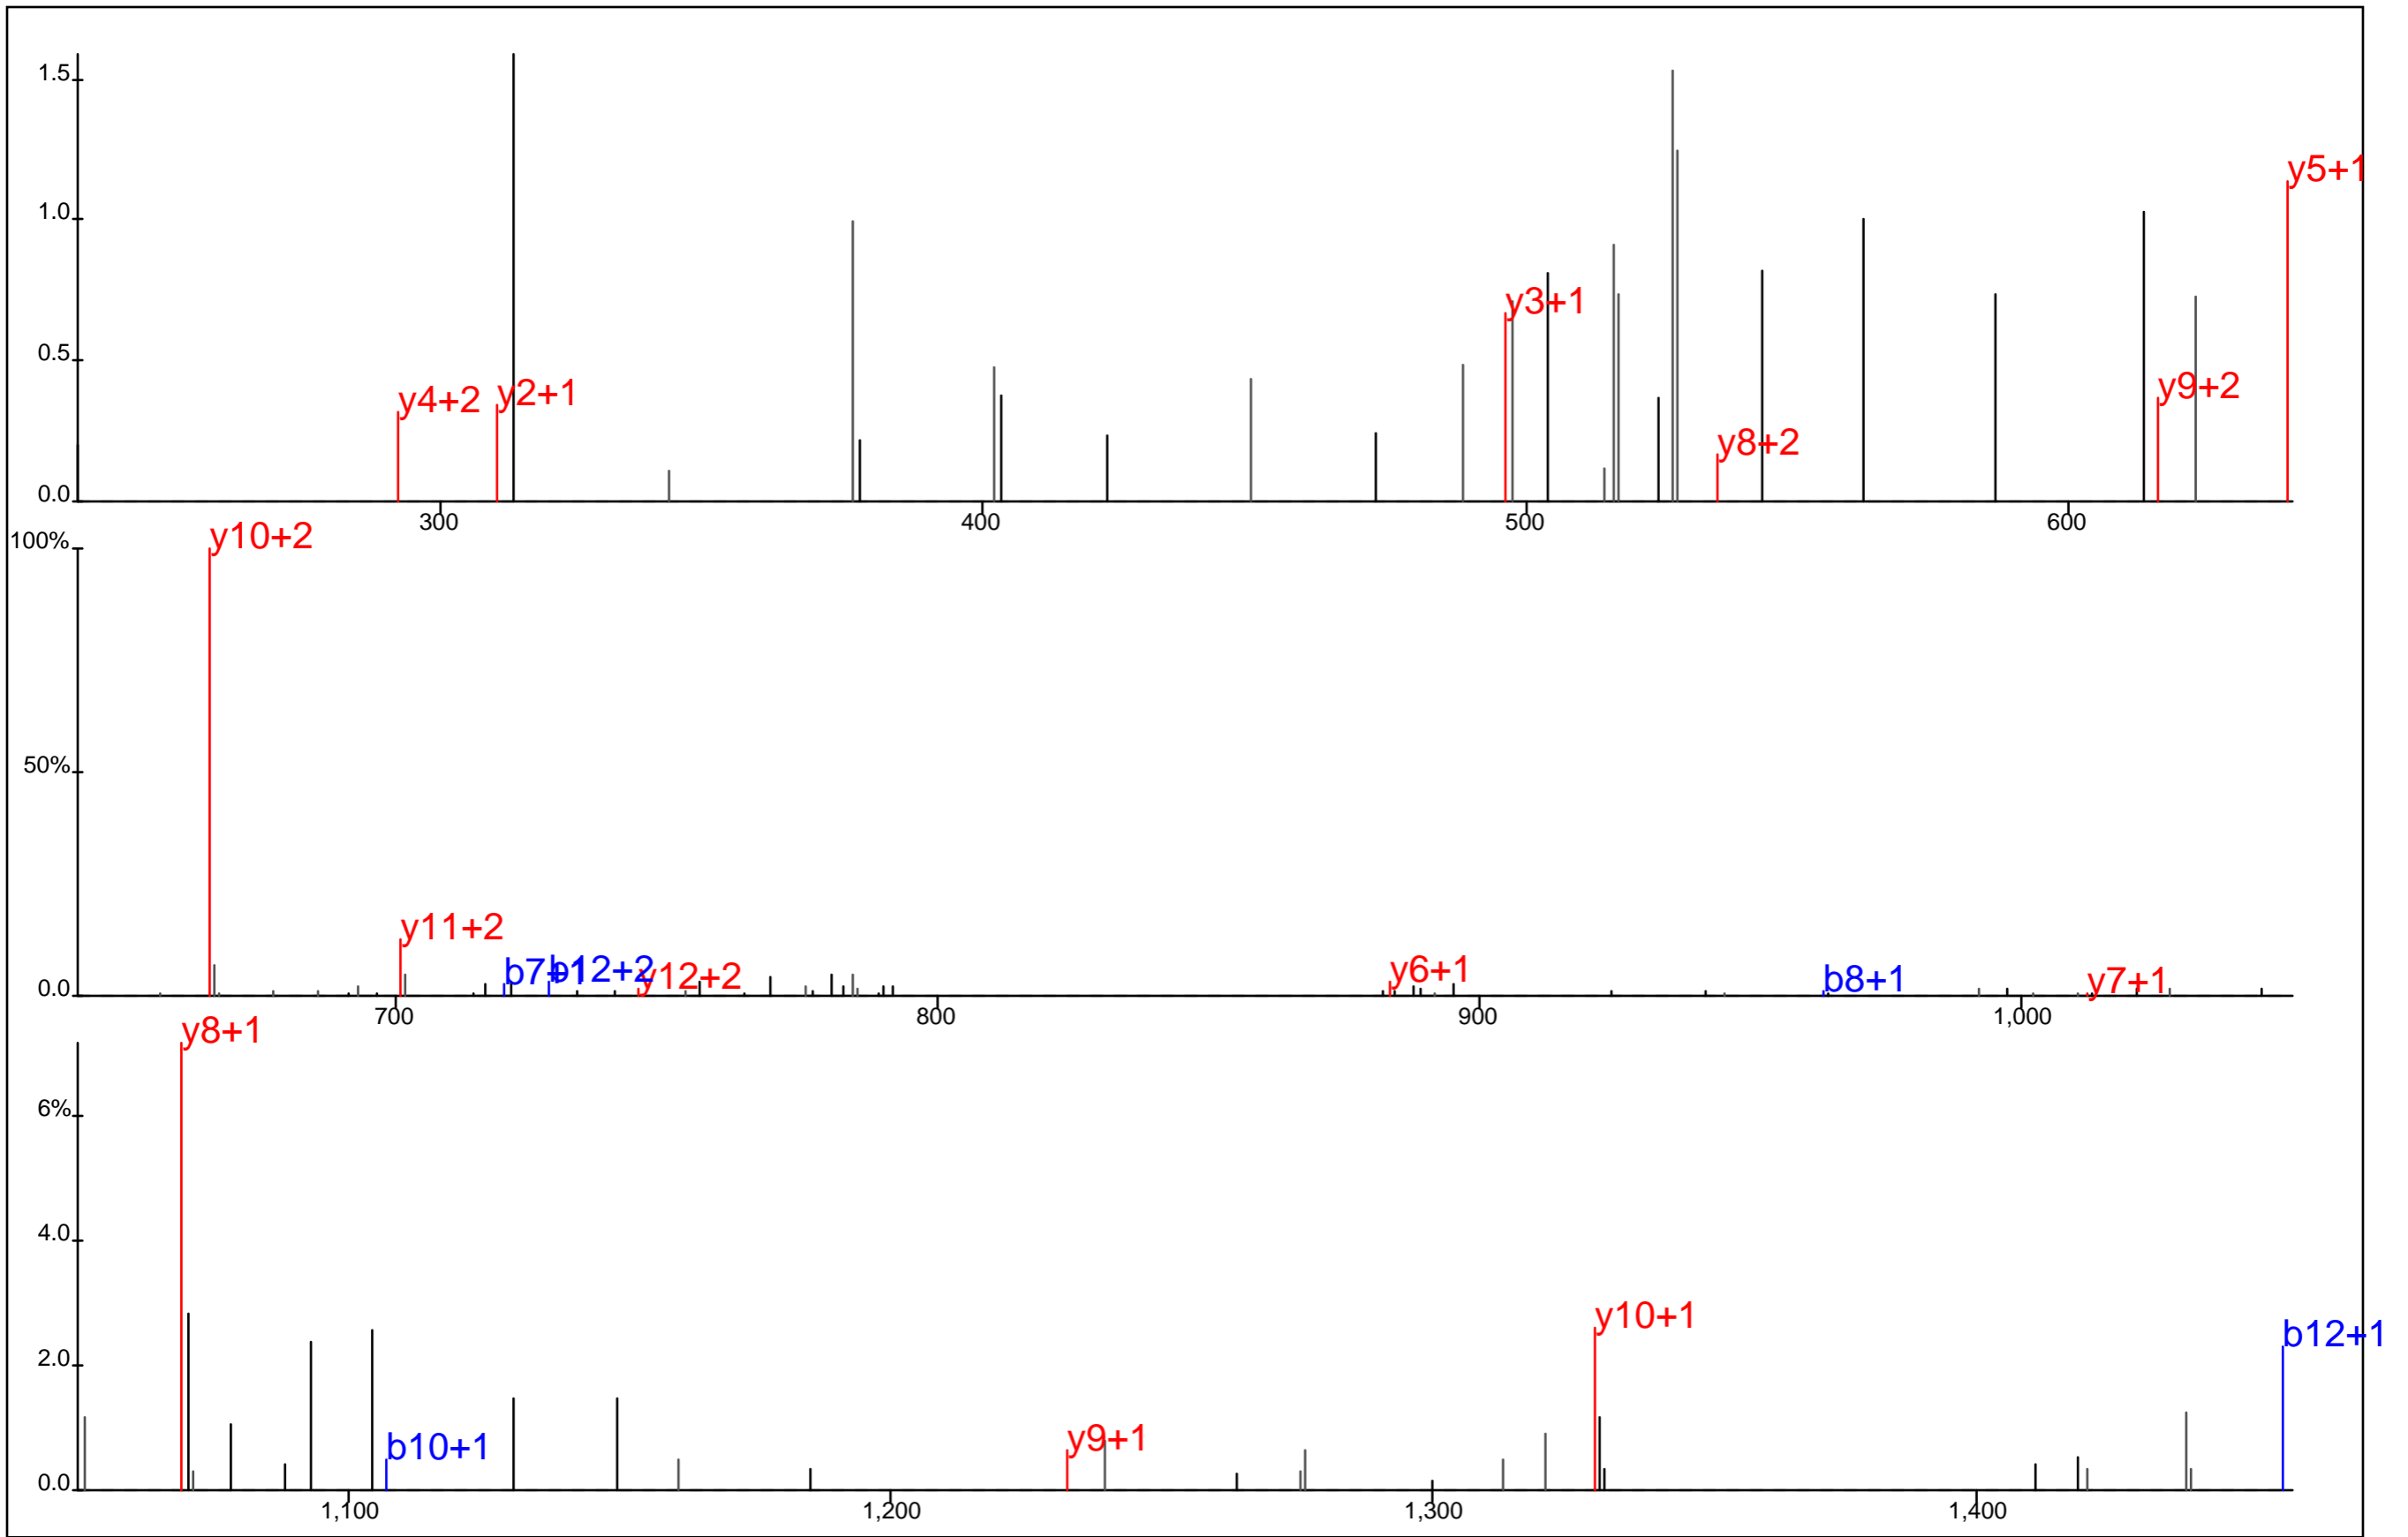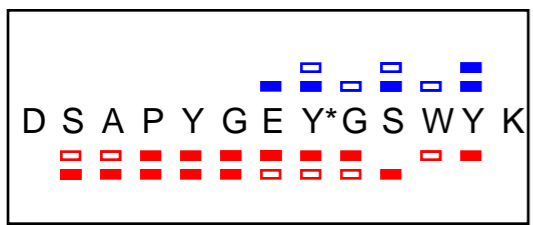

Protein Name: FLJ12387  
 gi Accession: 10433849  
 Precursor Mass: 801.8148+2  
 Delta Mass: 4.641 ppm  
 XCorr: 26.84

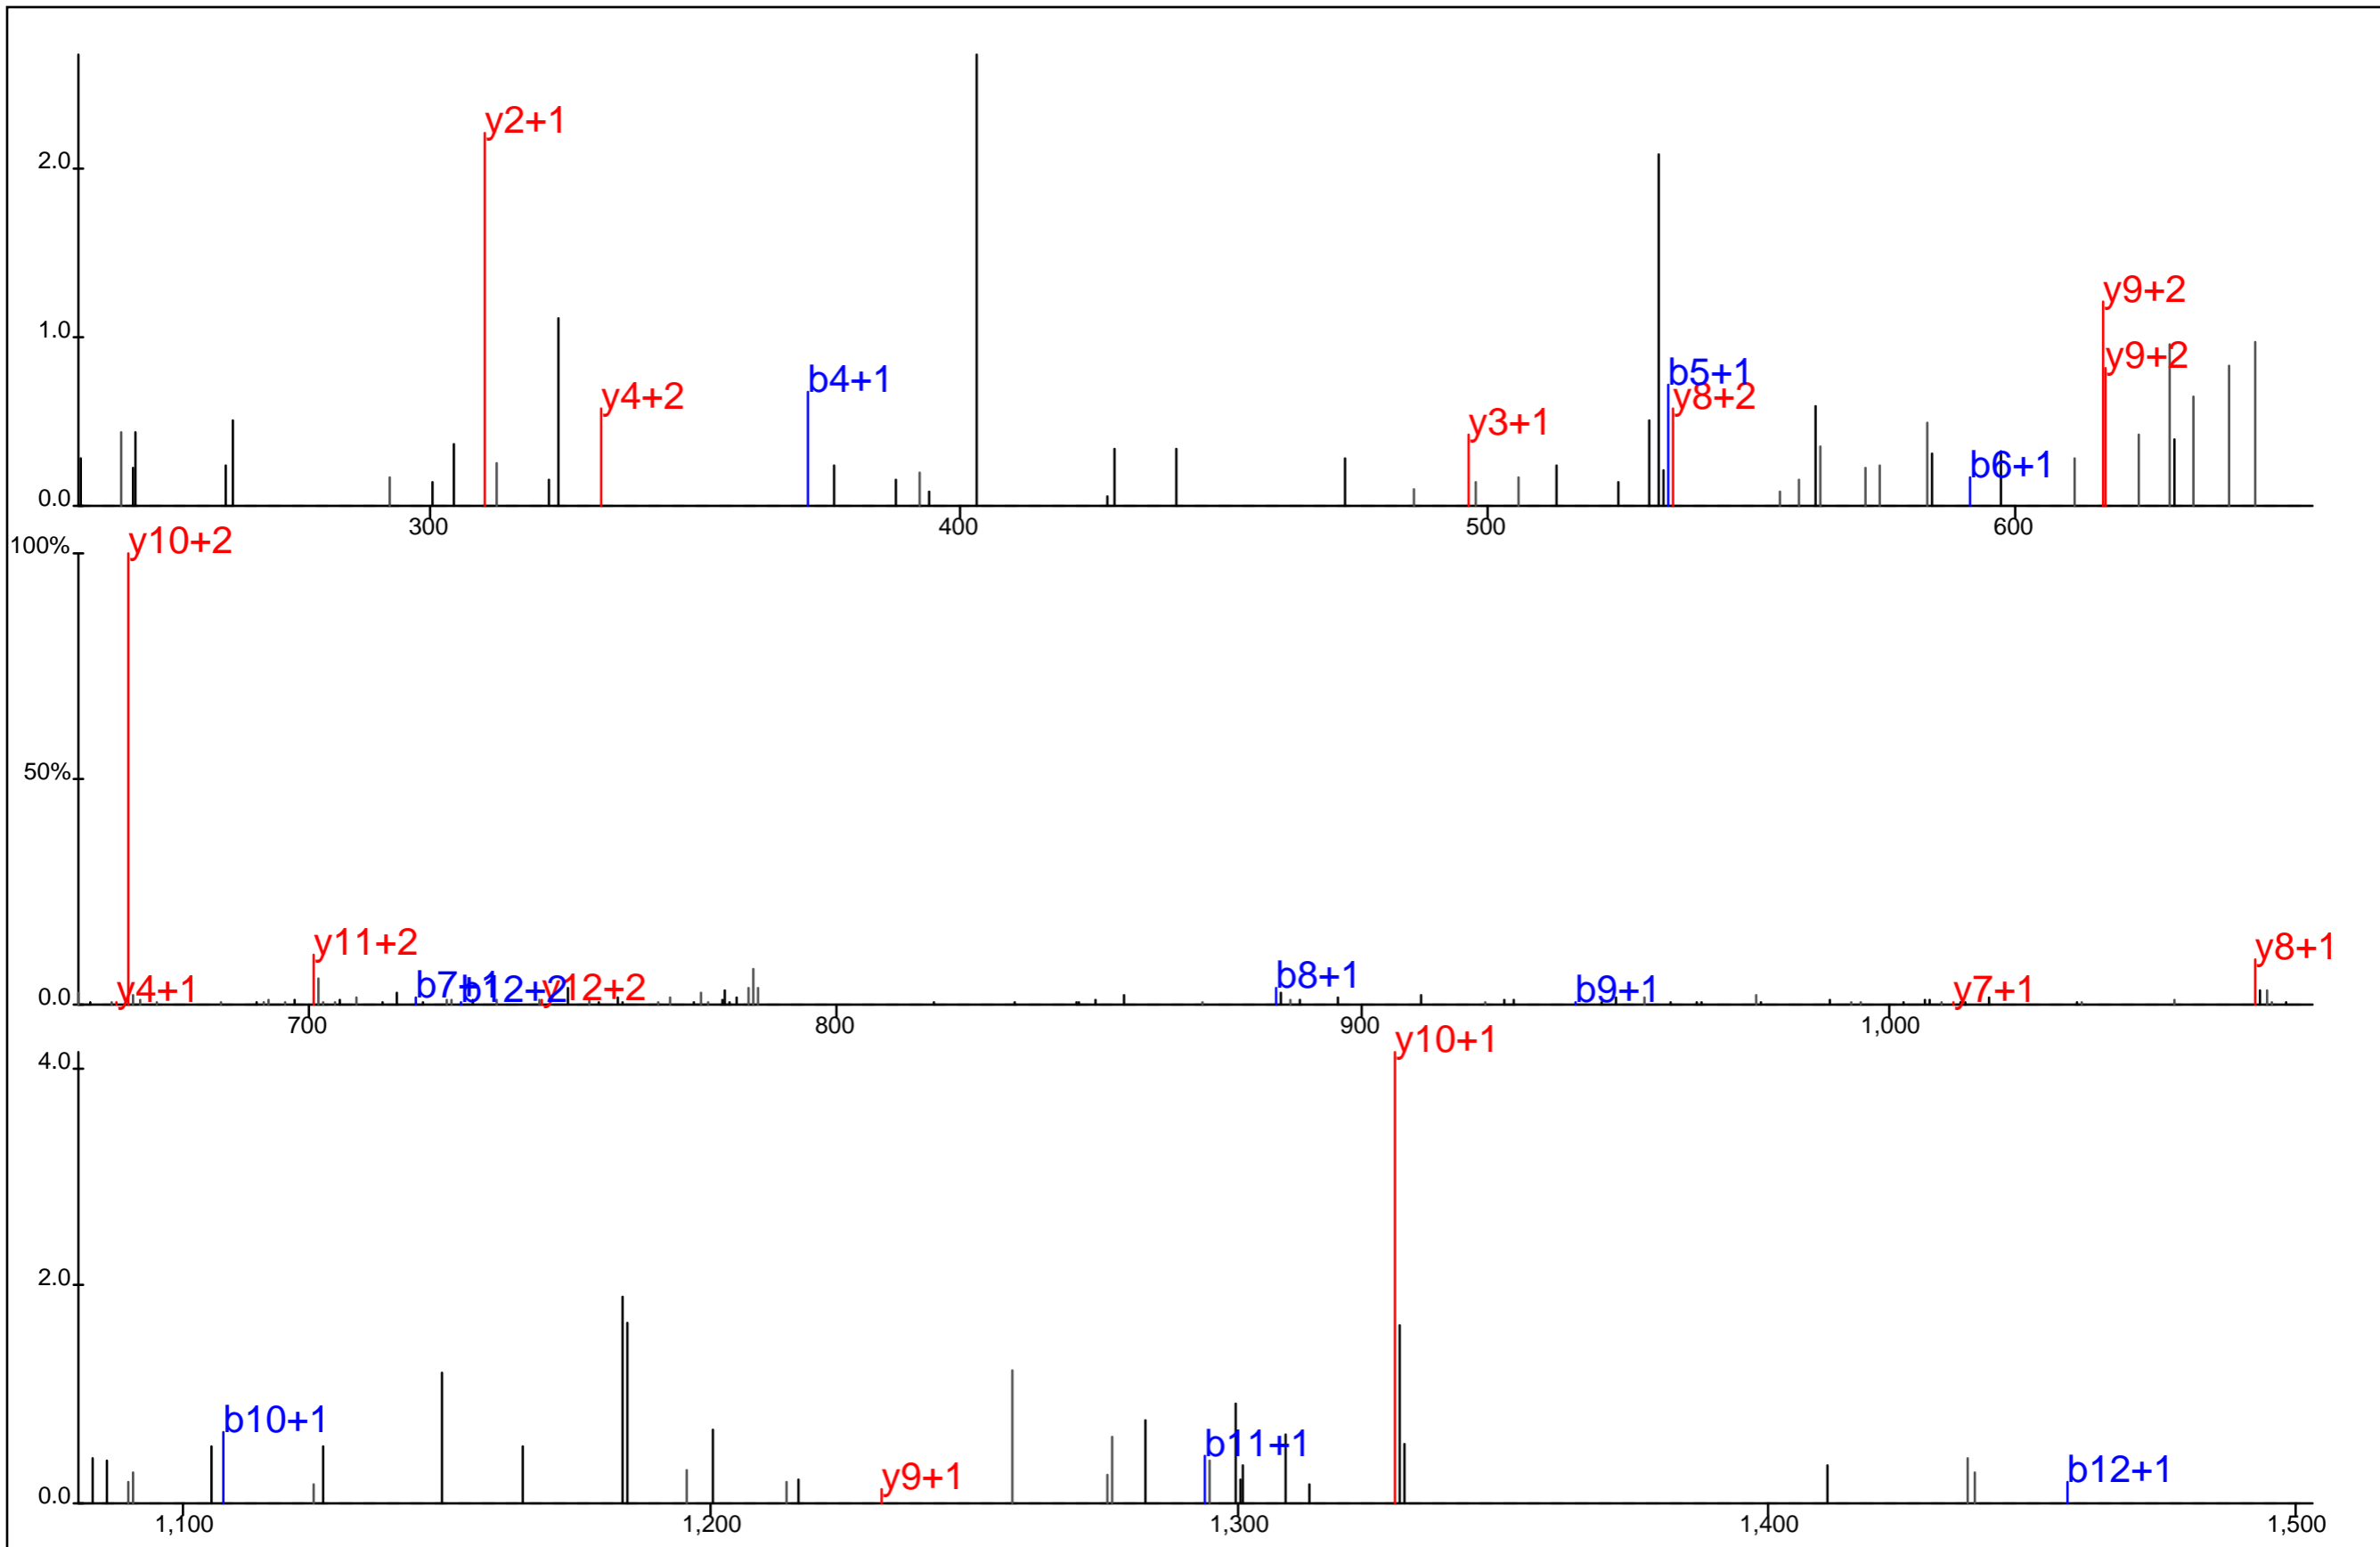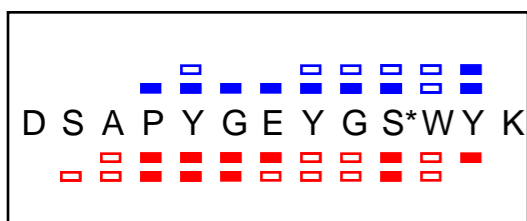

Protein Name: FLJ12387  
 gi Accession: 10433849  
 Precursor Mass: 801.8138+2  
 Delta Mass: 3.499 ppm  
 XCorr: 22.42

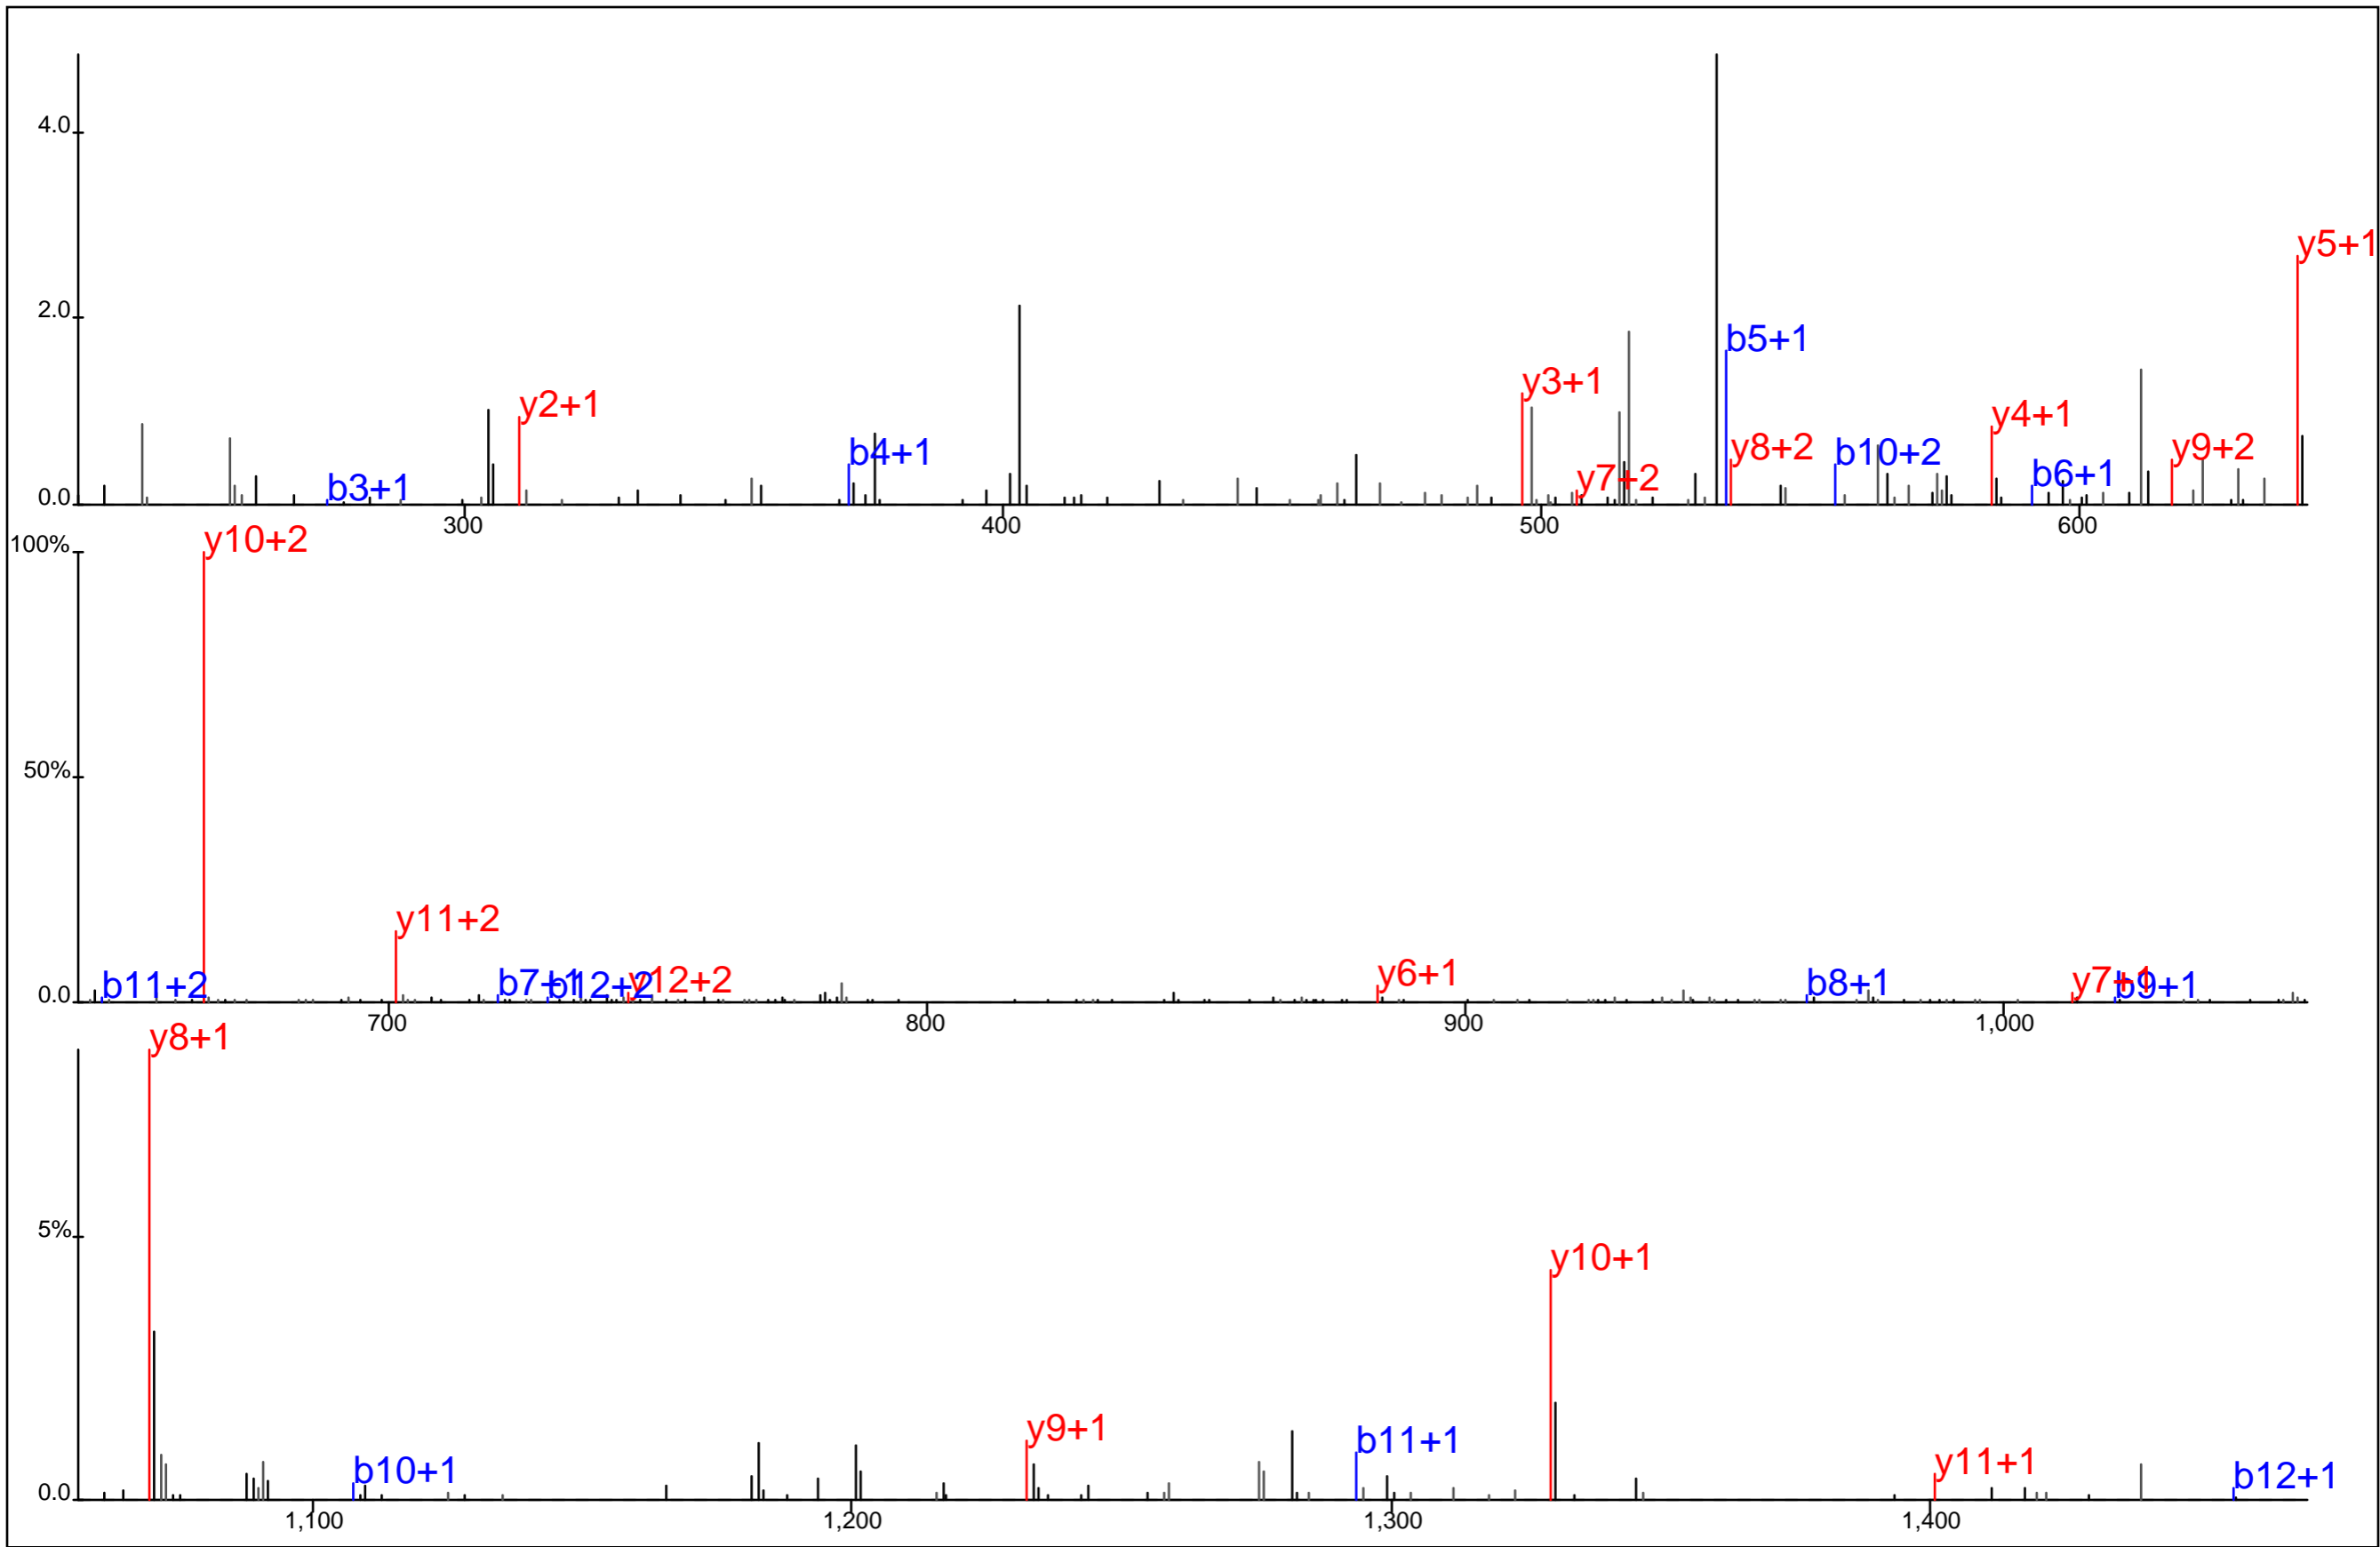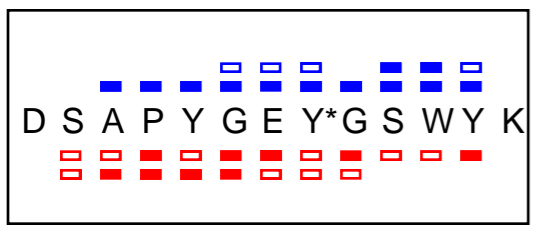

Protein Name: FLJ12387  
 gi Accession: 10433849  
 Precursor Mass: 801.8165+2  
 Delta Mass: 6.775 ppm  
 XCorr: 55.99

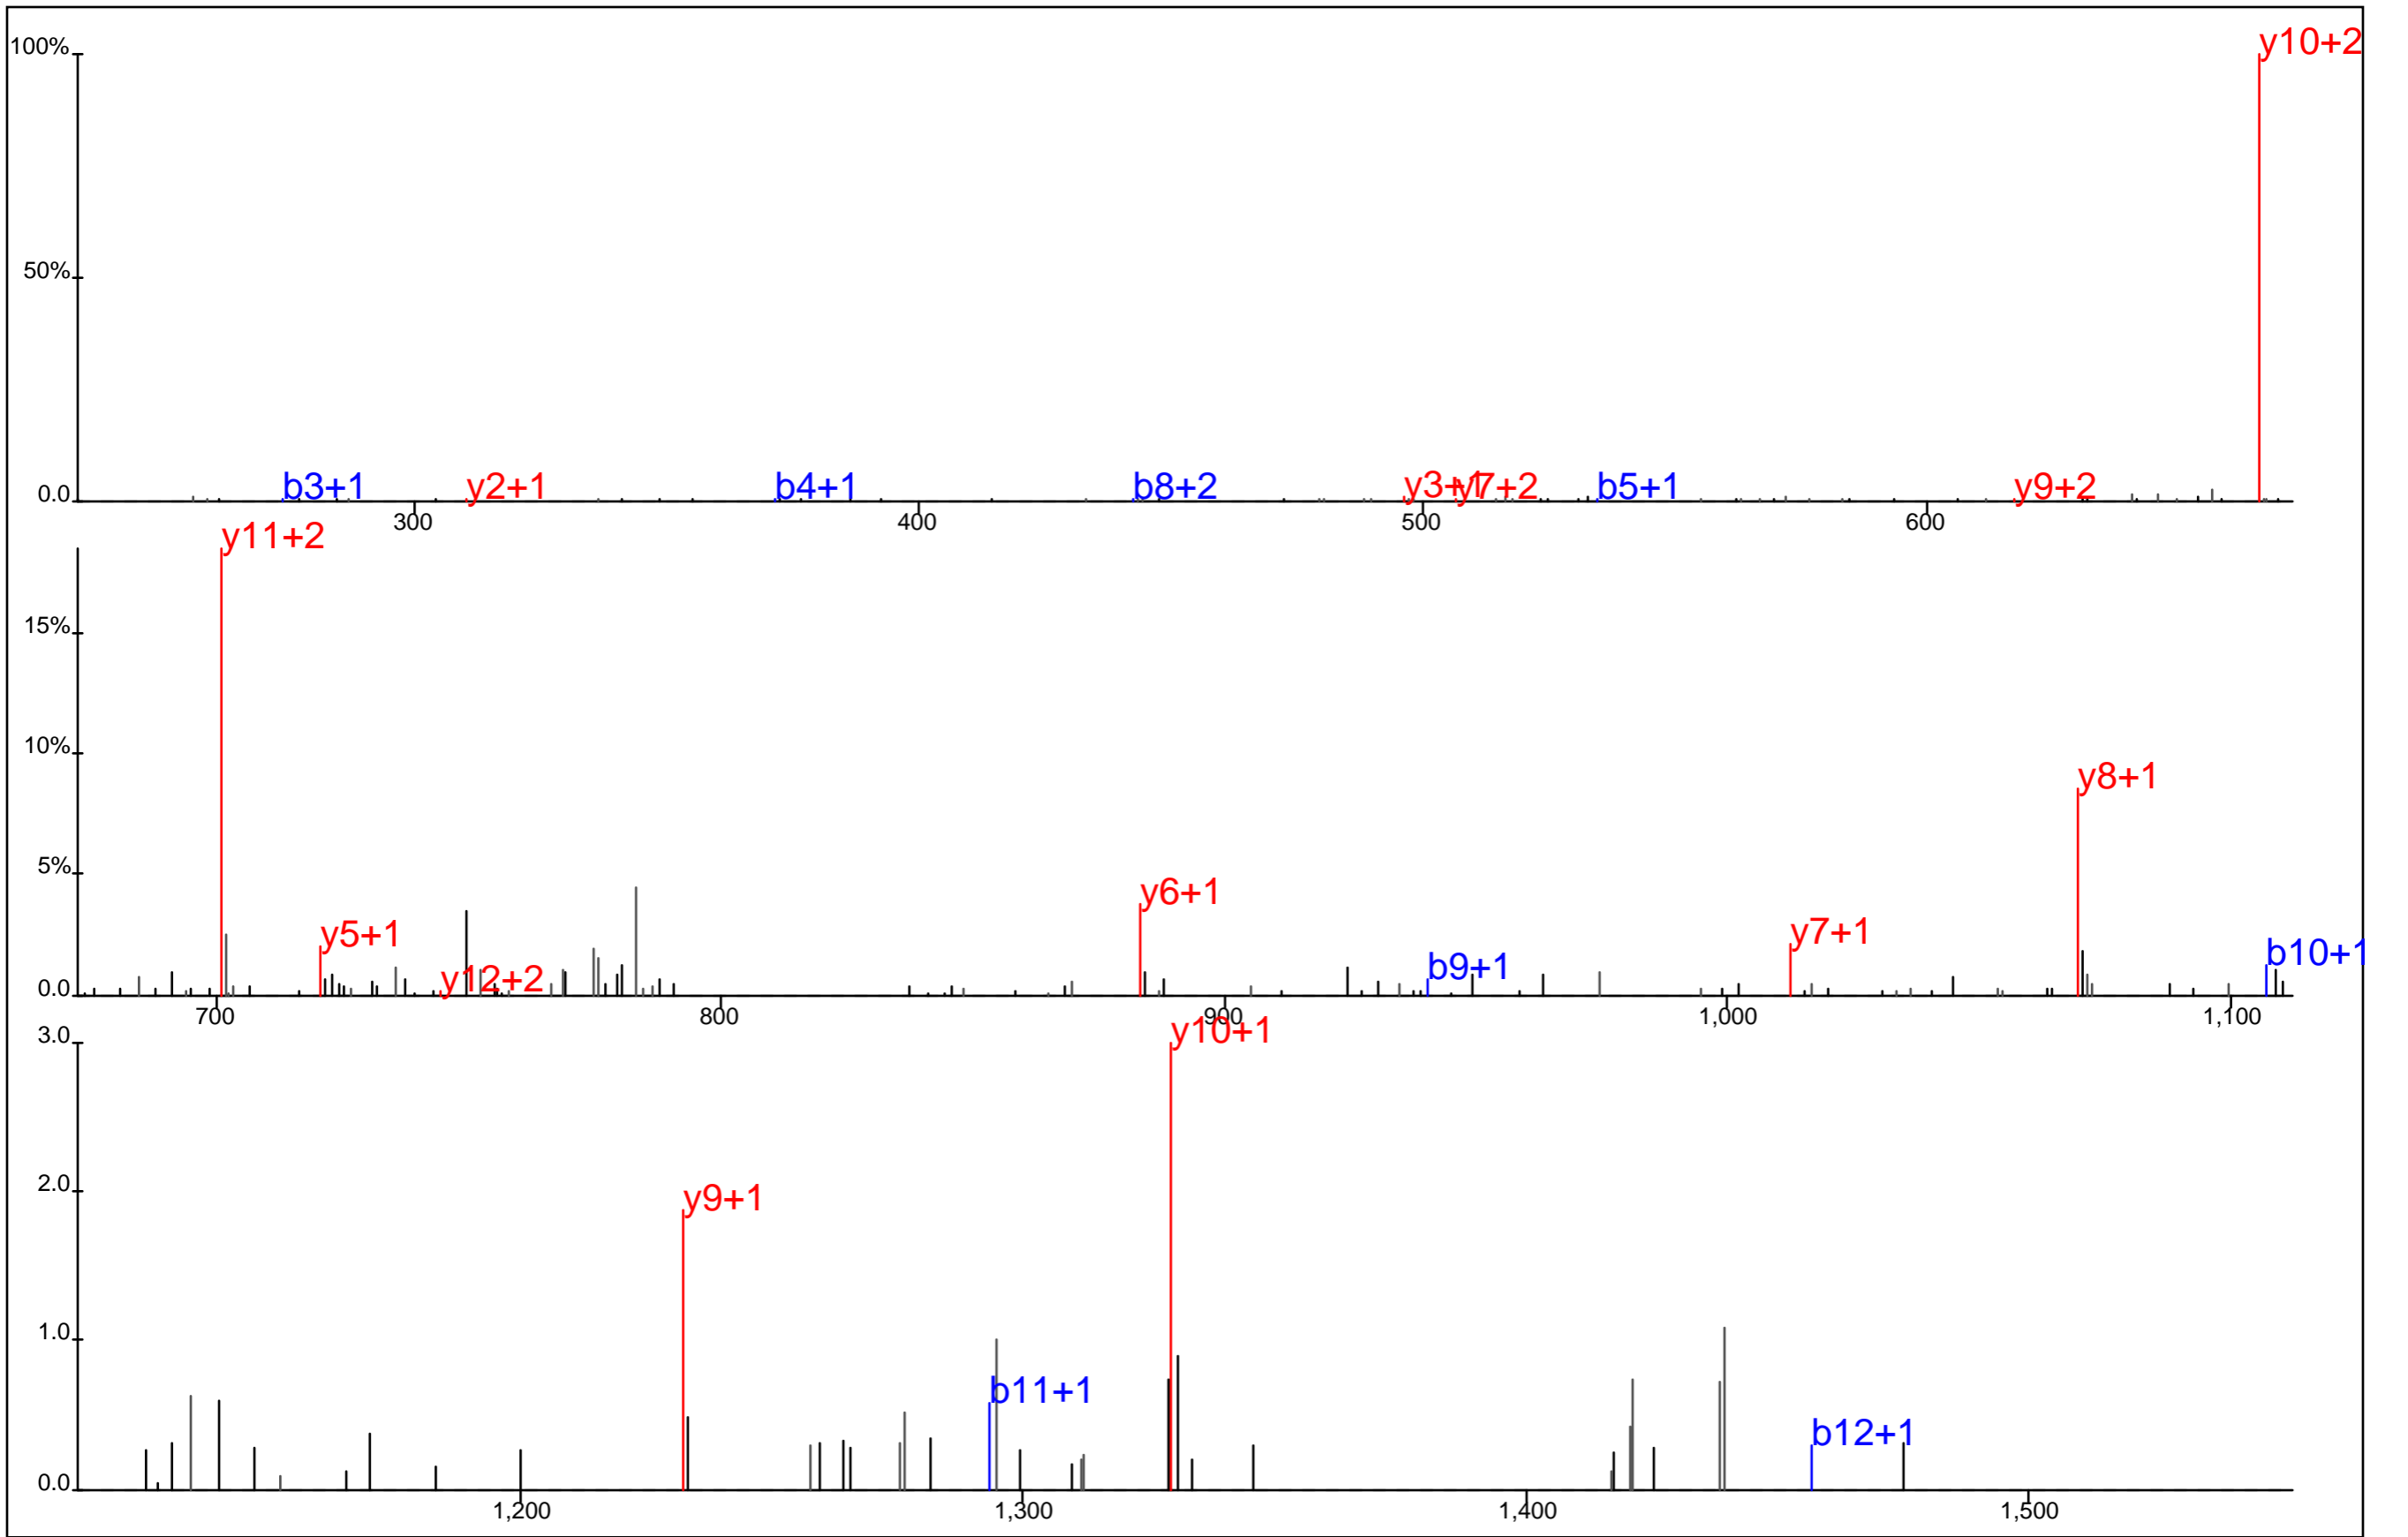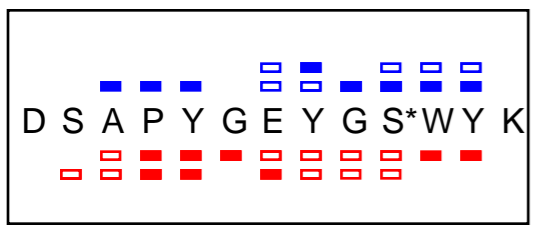

Protein Name: FLJ12387  
 gi Accession: 10433849  
 Precursor Mass: 801.8151+2  
 Delta Mass: 5.097 ppm  
 XCorr: 33.39

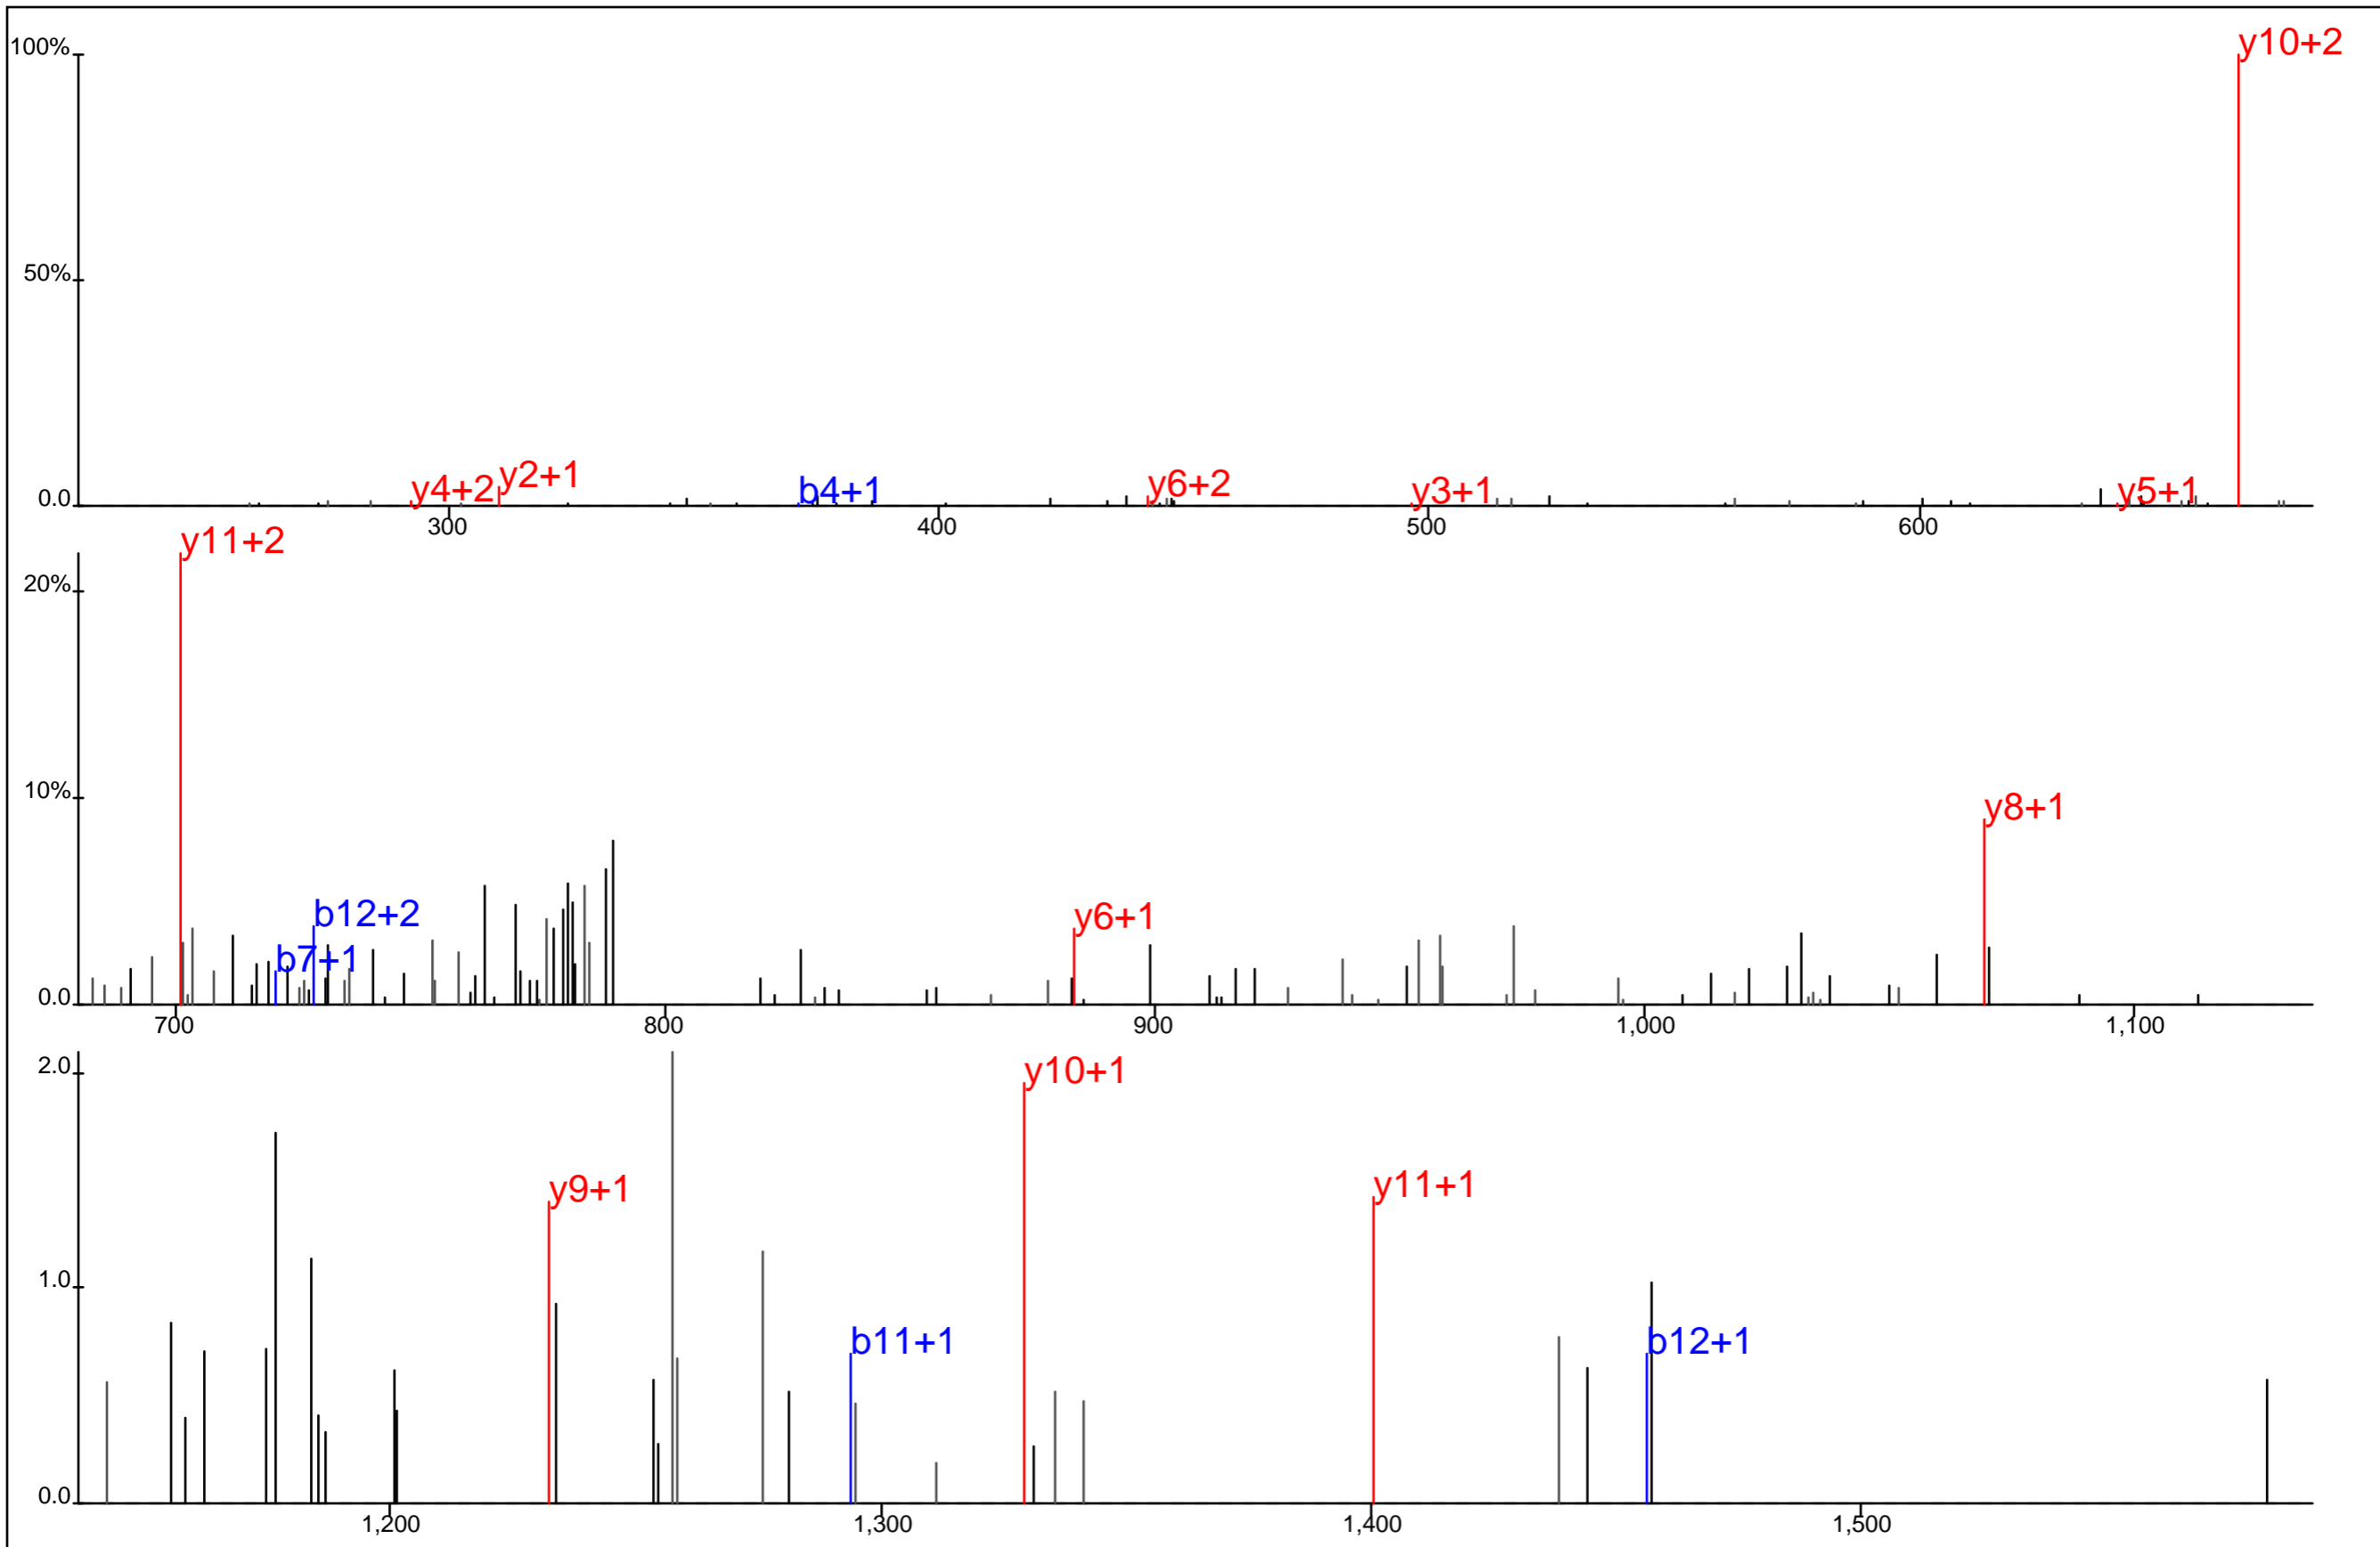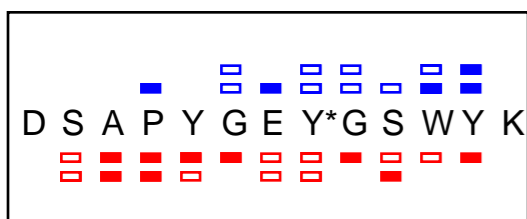

Protein Name: FLJ12387  
 gi Accession: 10433849  
 Precursor Mass: 801.8156+2  
 Delta Mass: 5.633 ppm  
 XCorr: 21.75

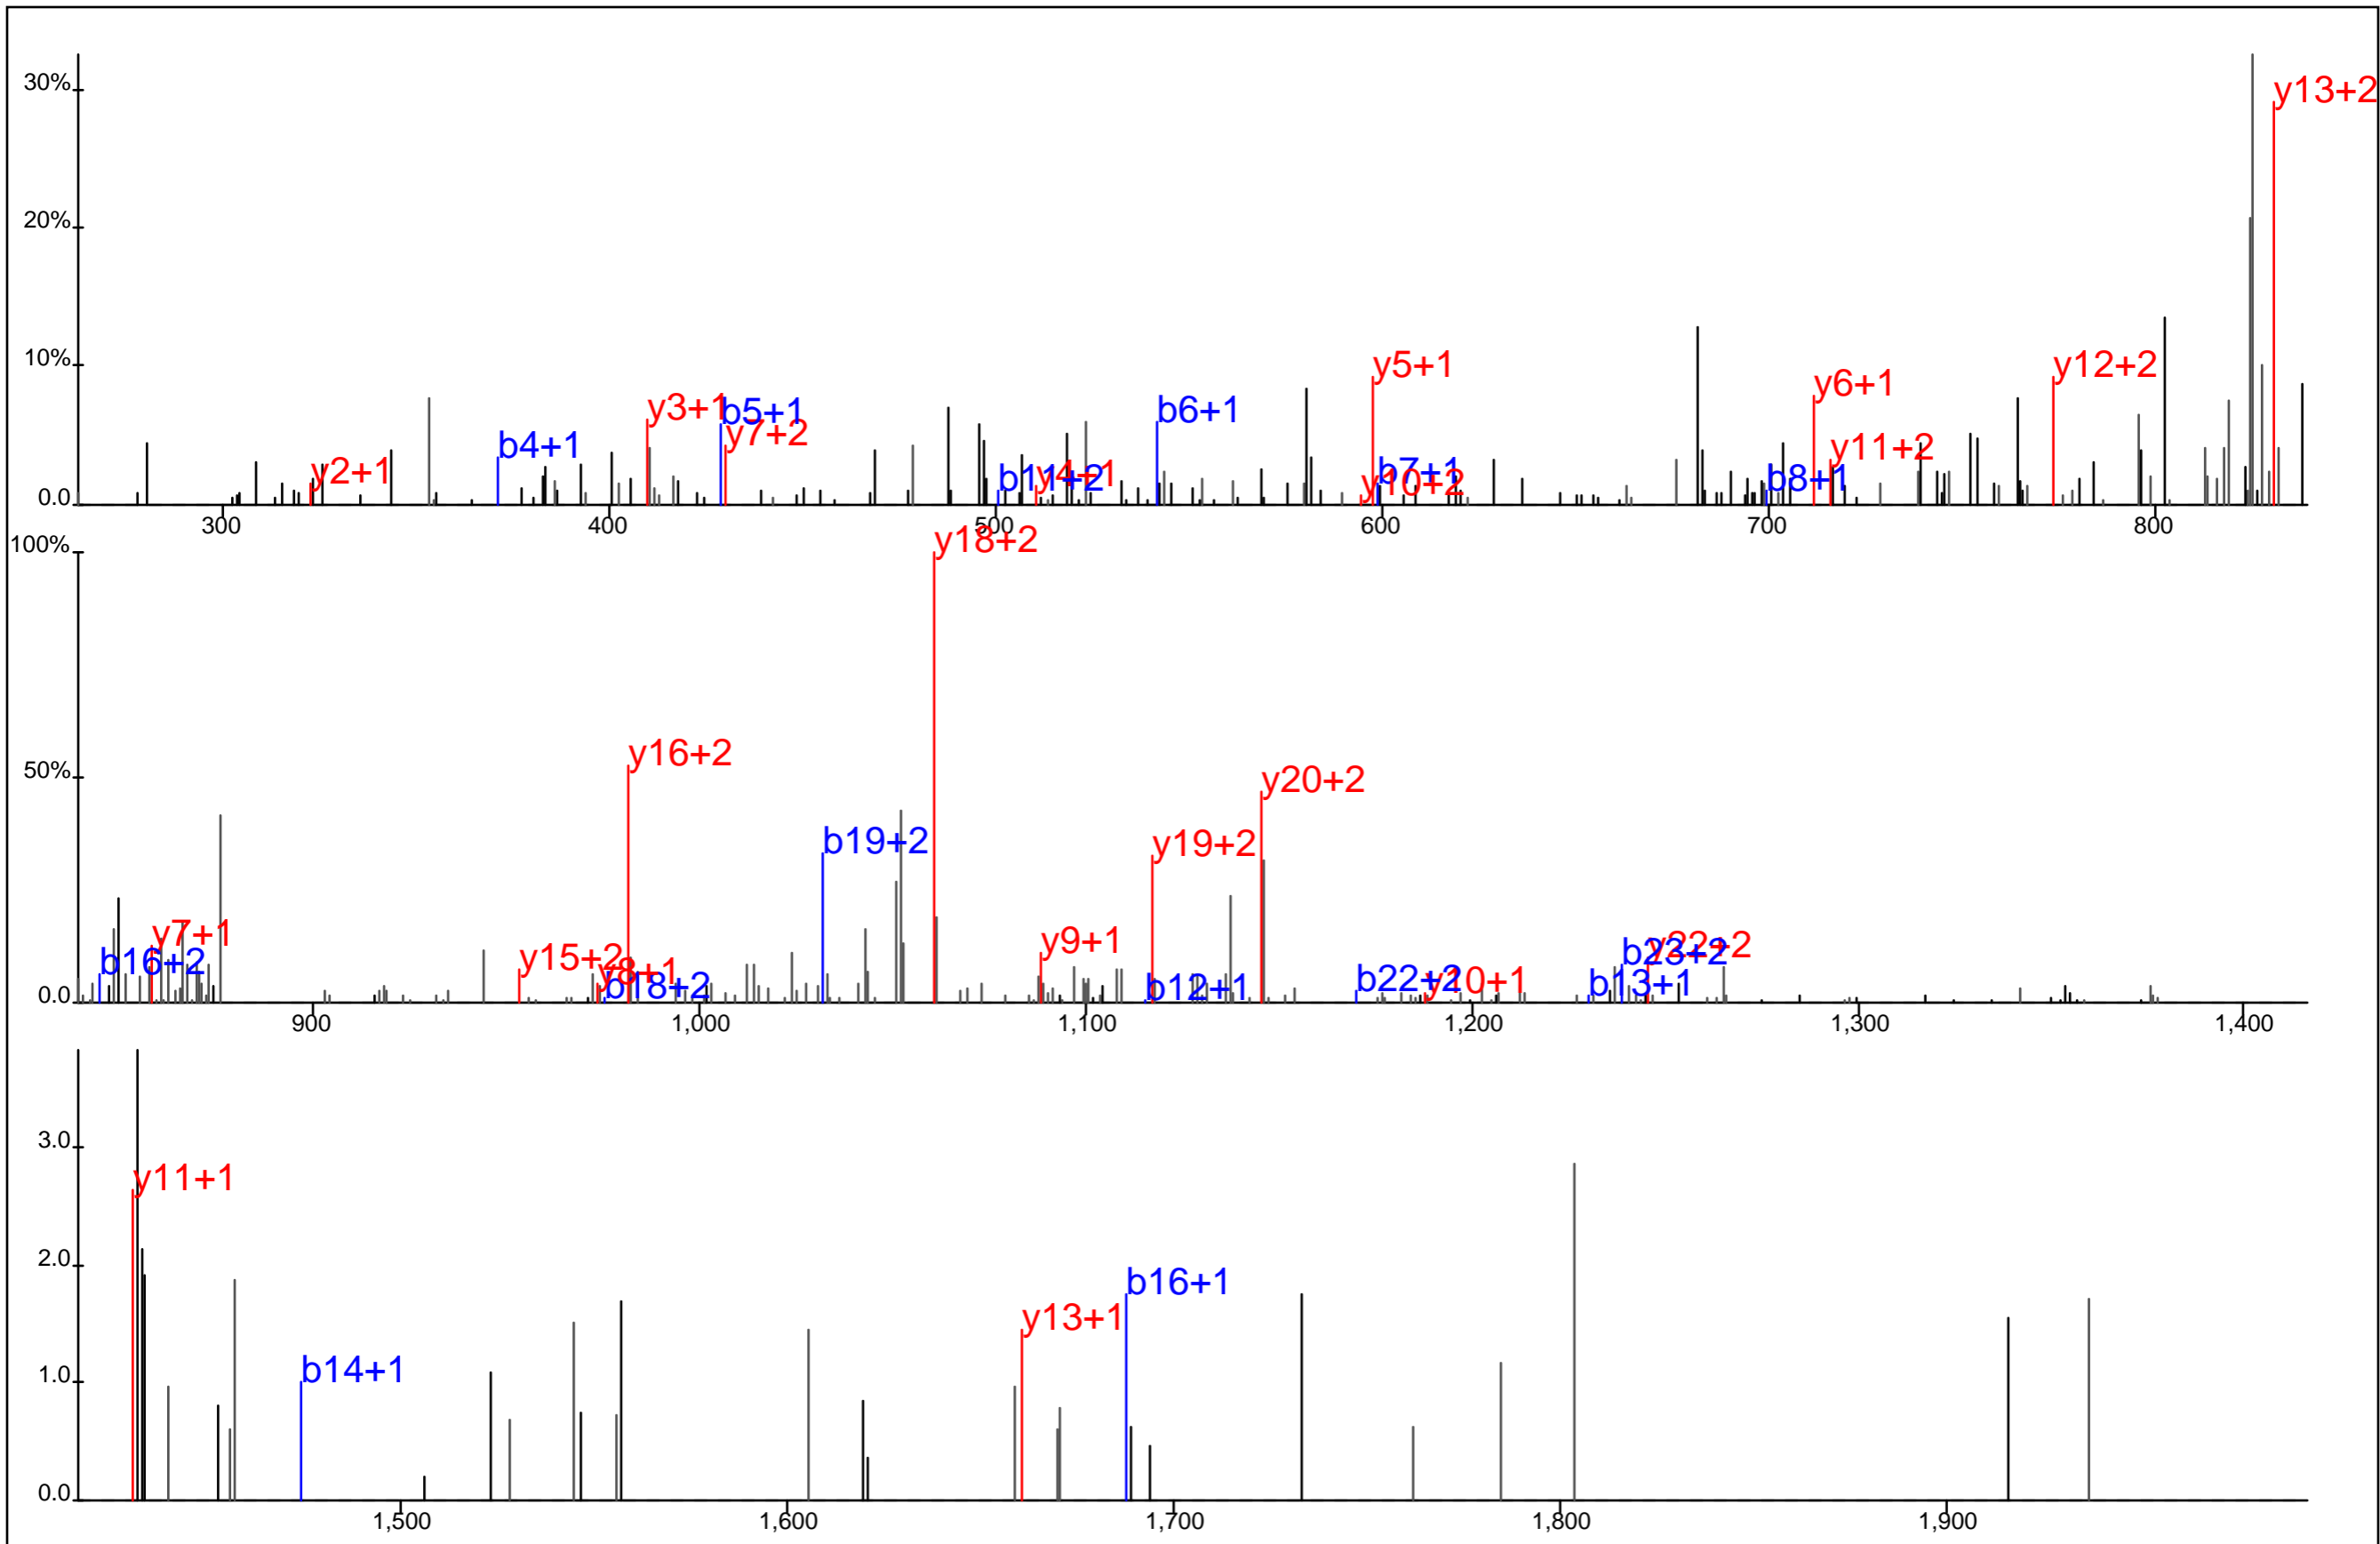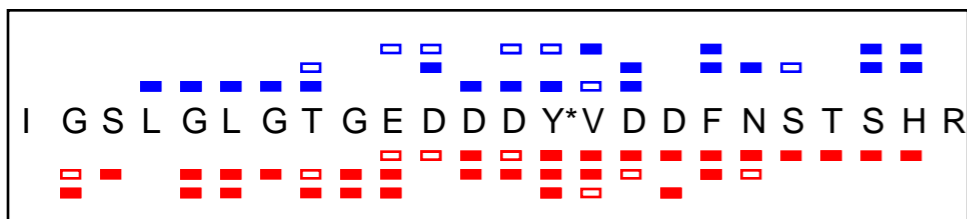

Protein Name: FOP  
 gi Accession: 5901954  
 Precursor Mass: 887.3713+3  
 Delta Mass: 1.163 ppm  
 XCorr: 34.34



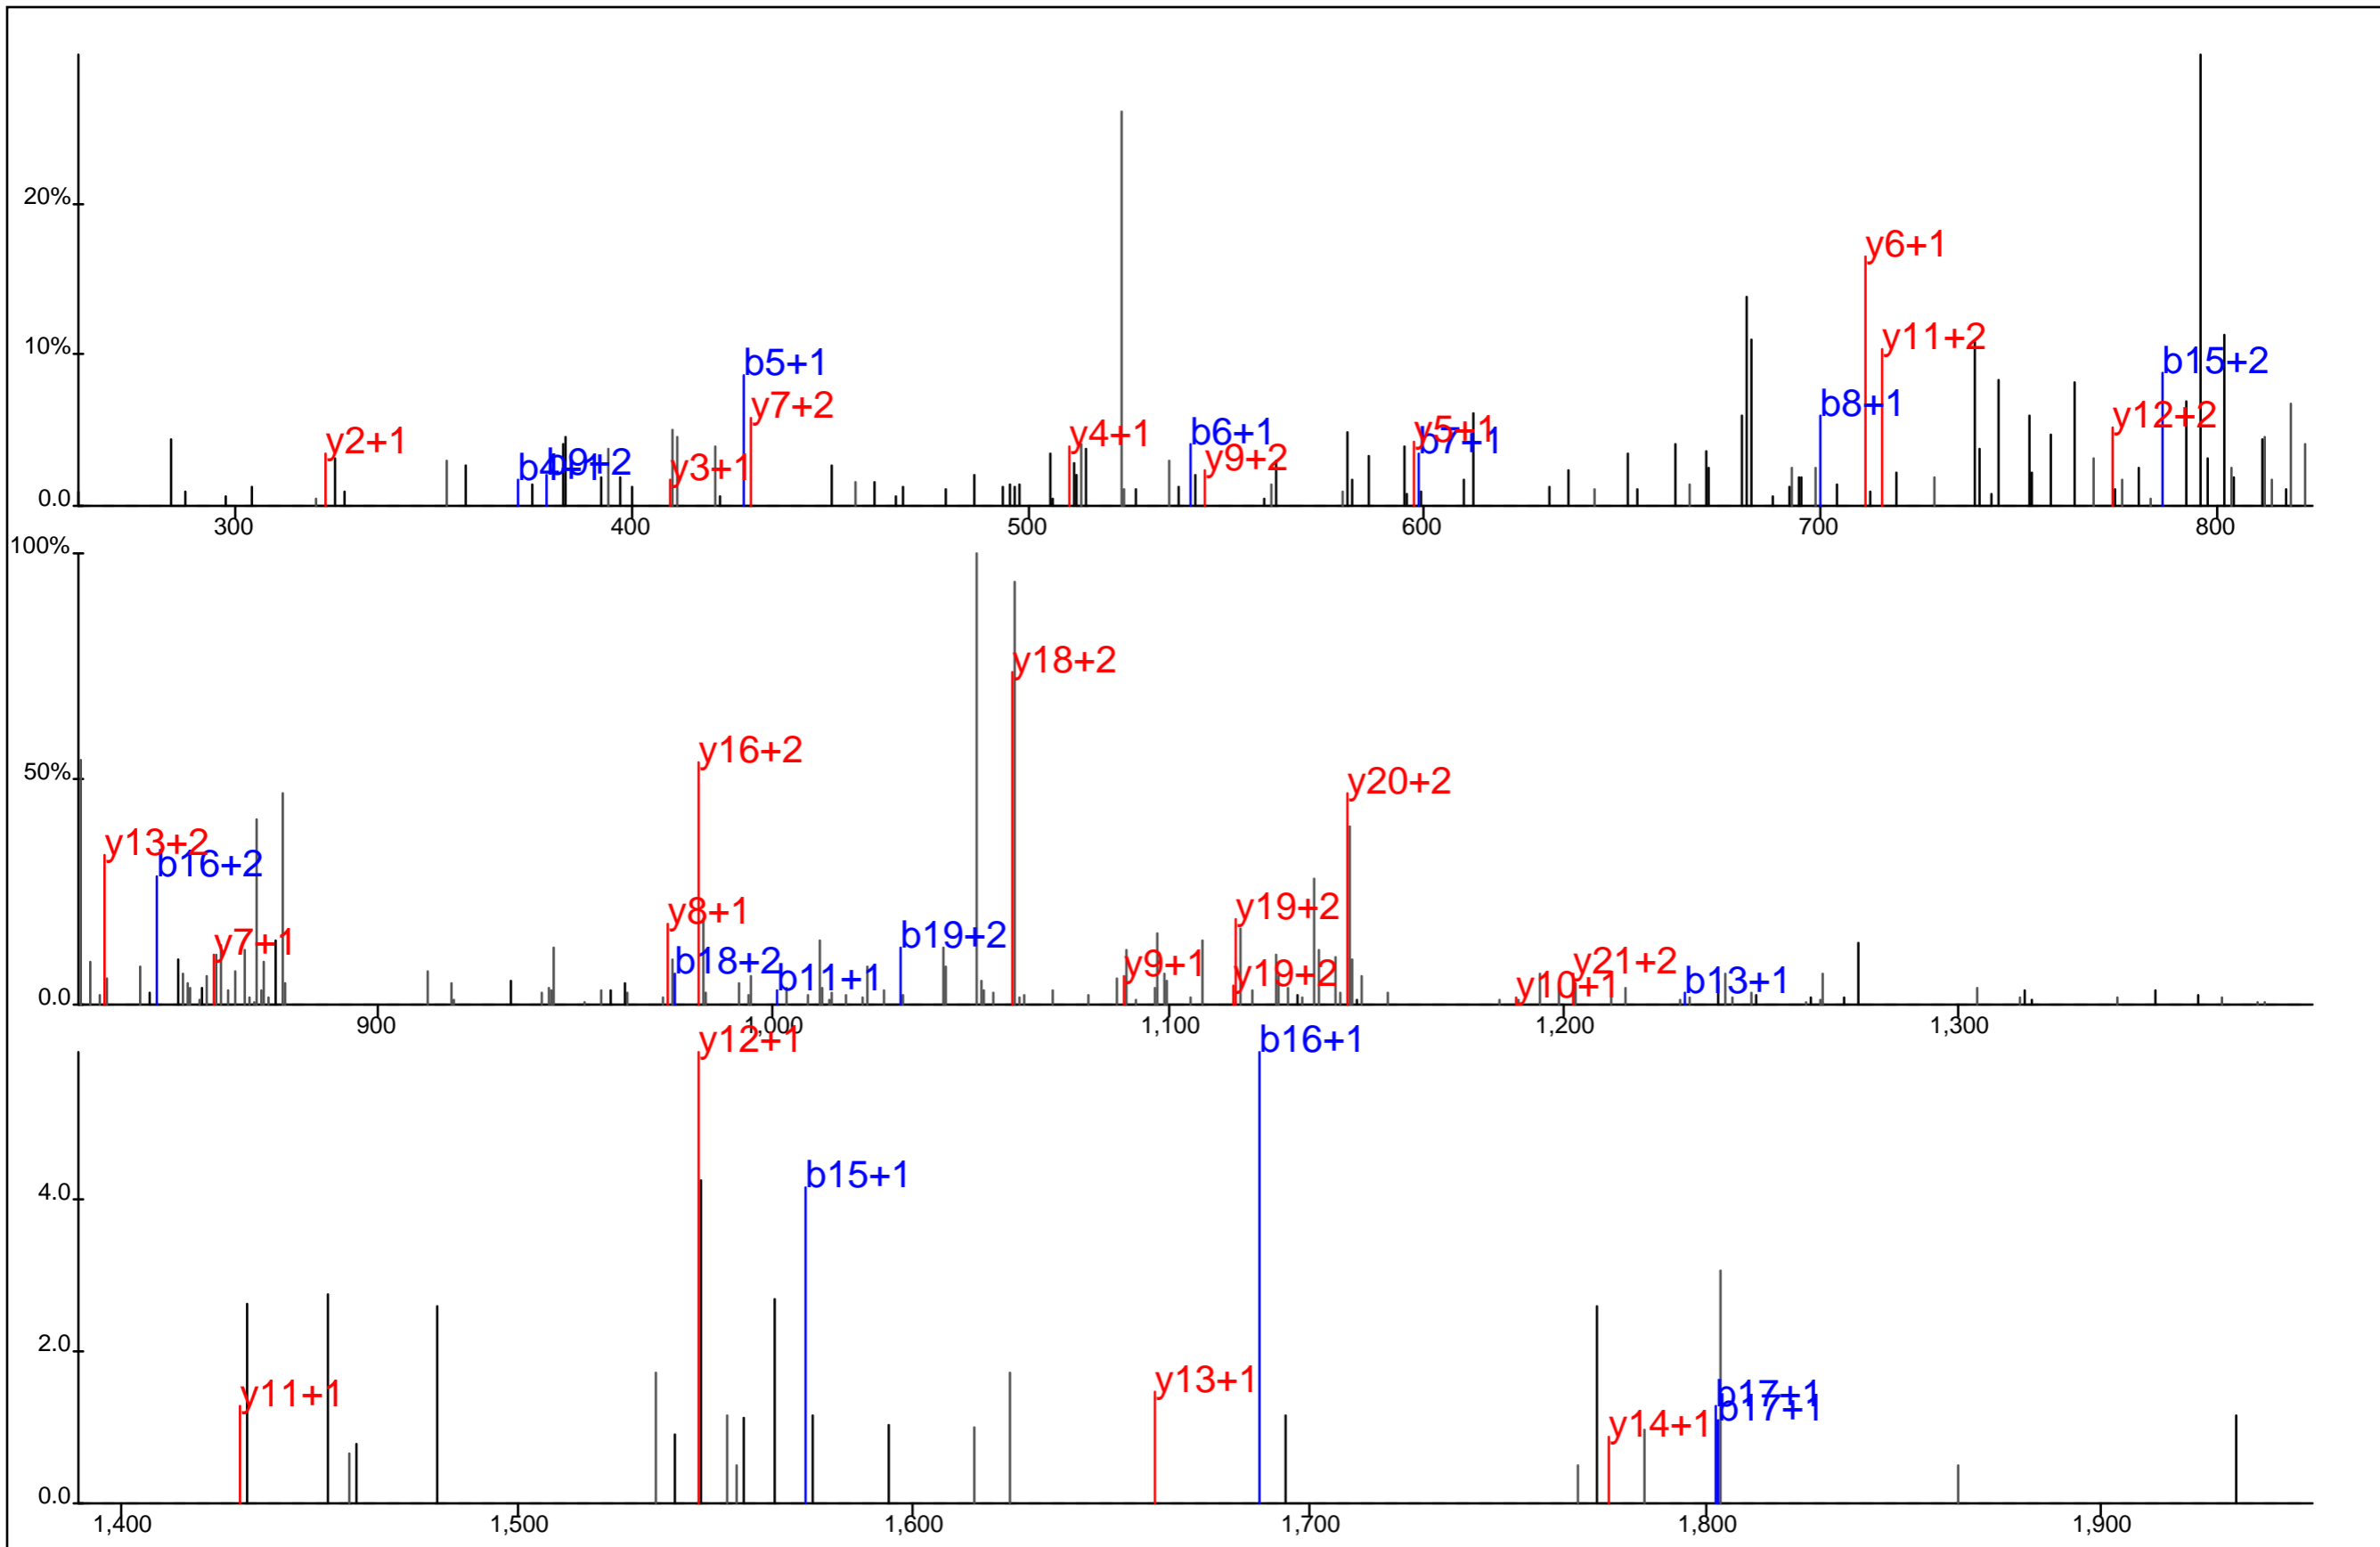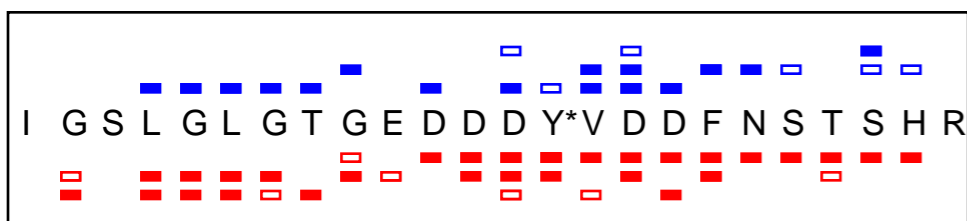

Protein Name: FOP  
 gi Accession: 5901954  
 Precursor Mass: 887.3731+3  
 Delta Mass: 0.901 ppm  
 XCorr: 39.77

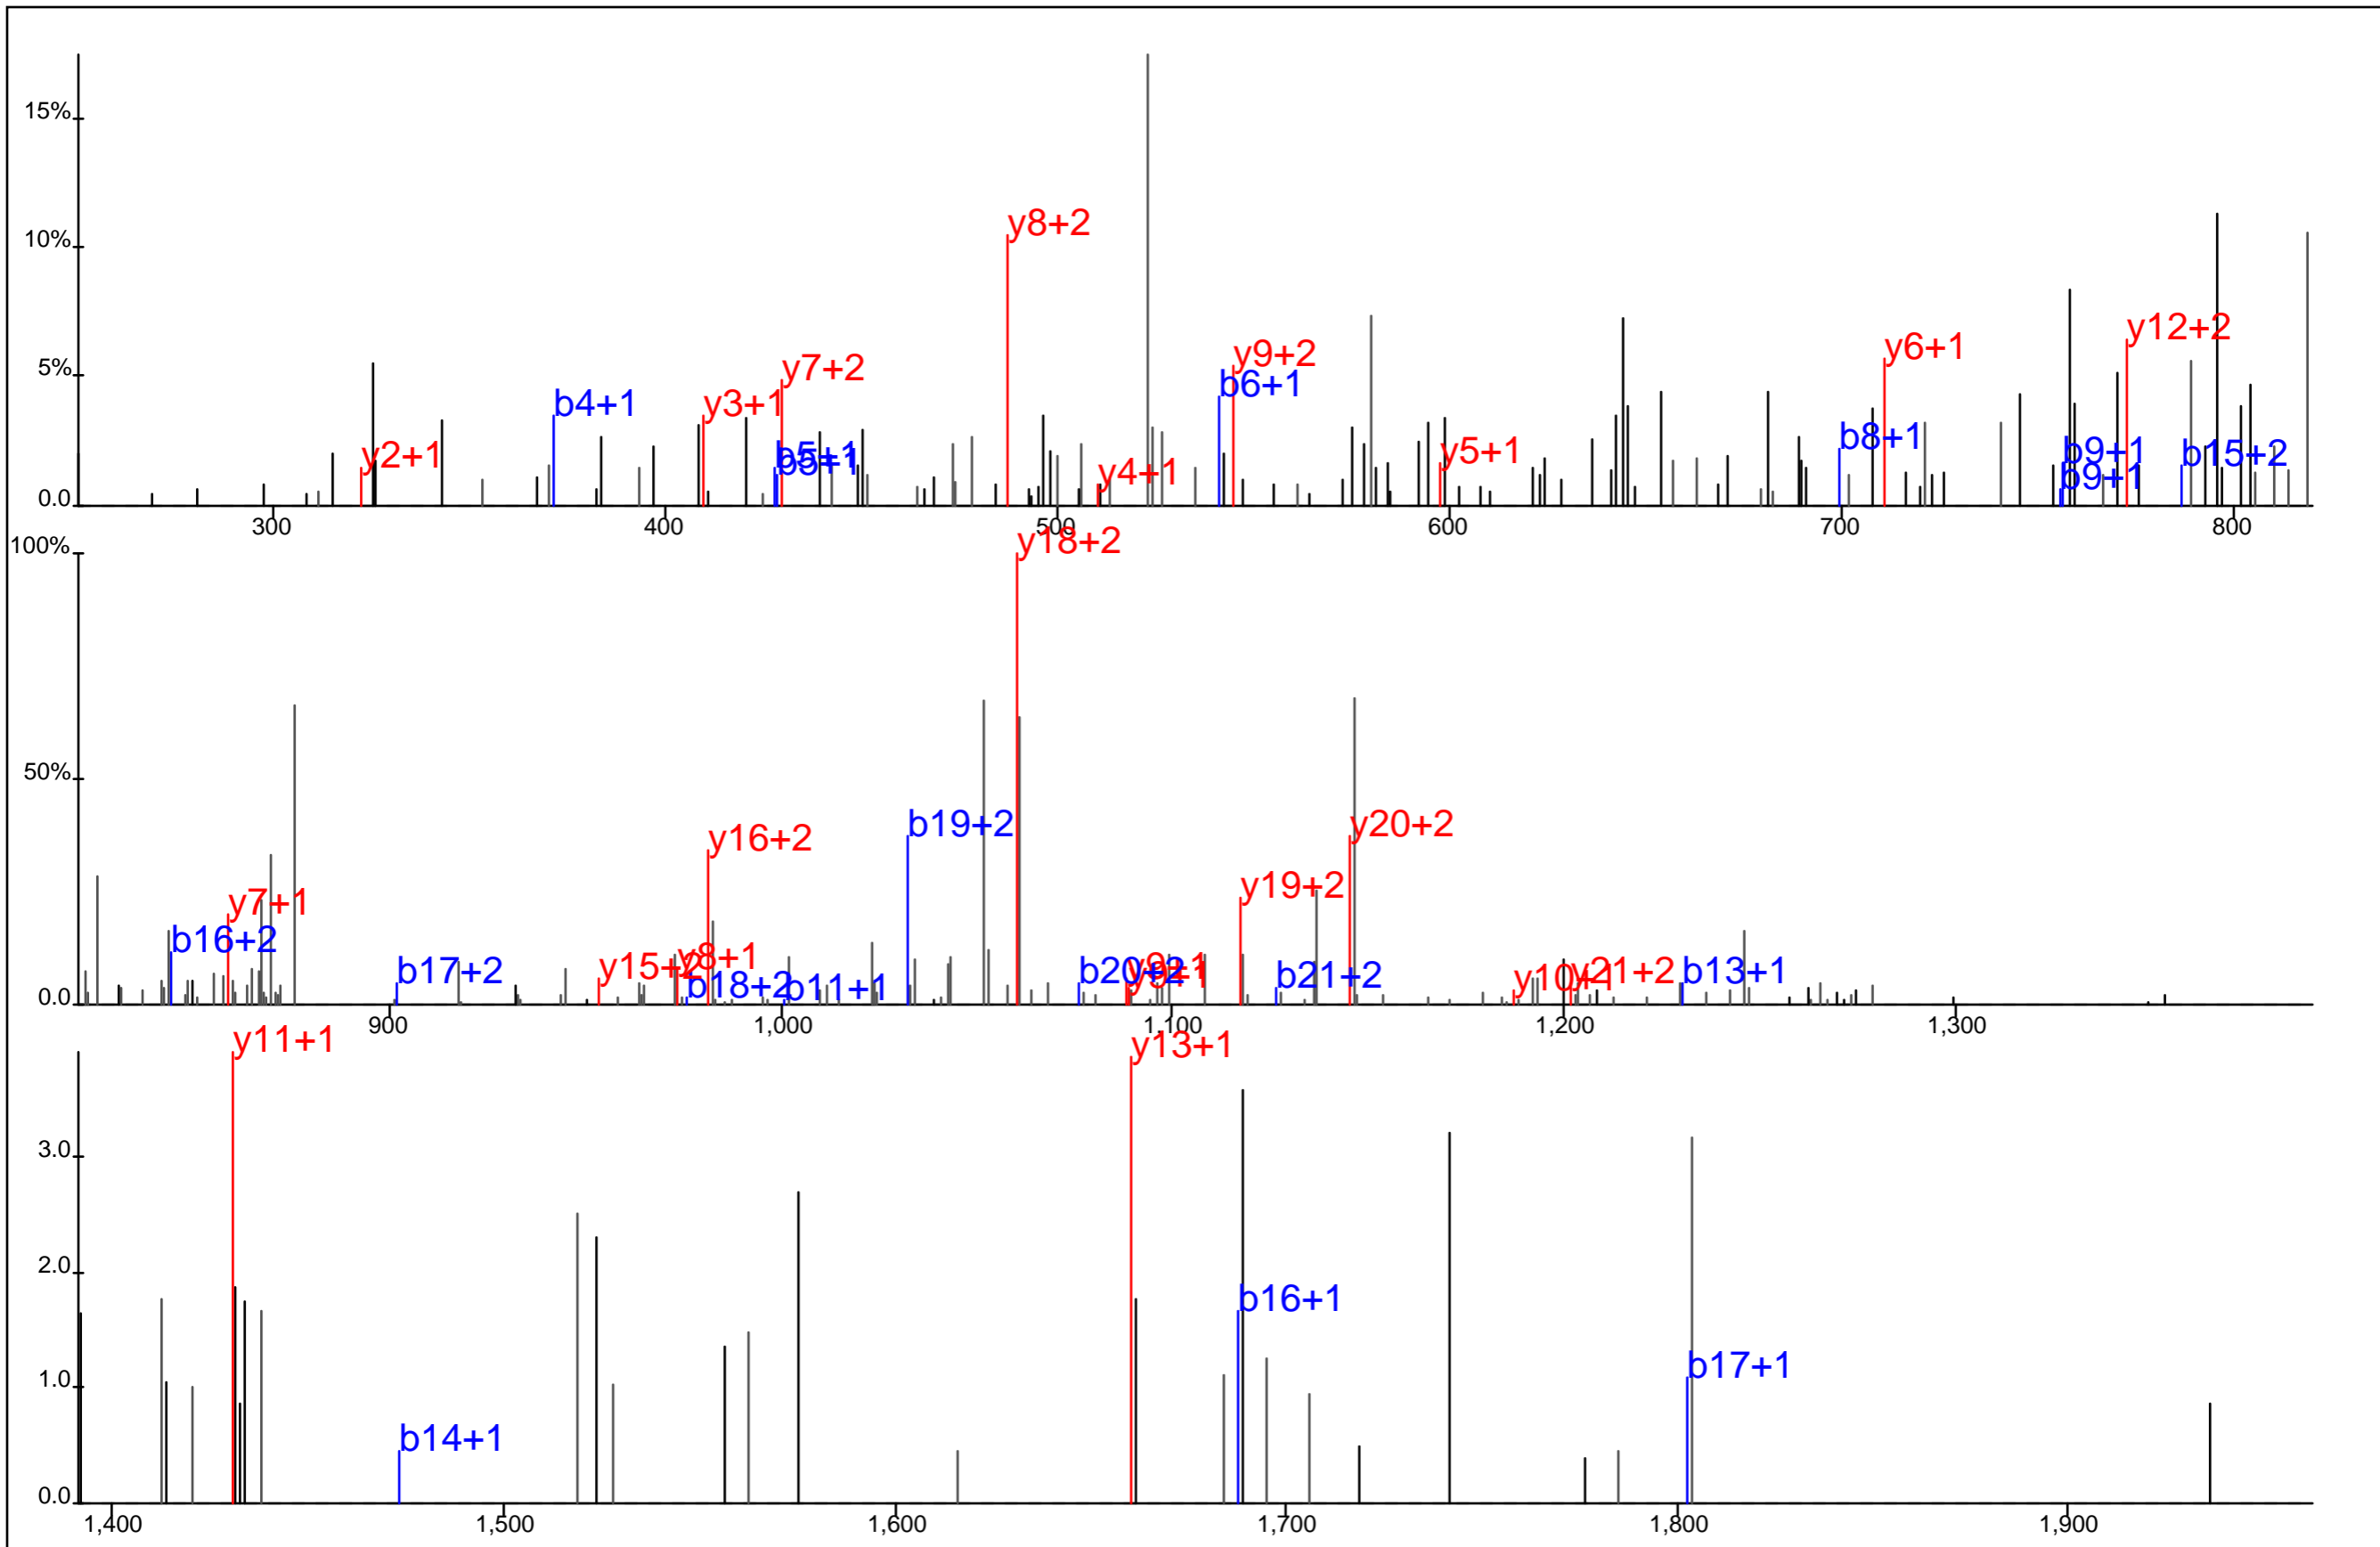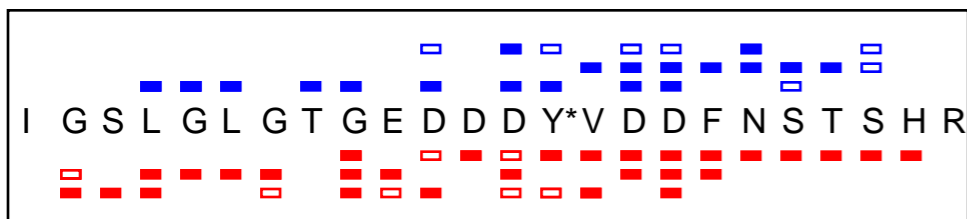

Protein Name: FOP  
 gi Accession: 5901954  
 Precursor Mass: 887.3735+3  
 Delta Mass: 1.383 ppm  
 XCorr: 30.85

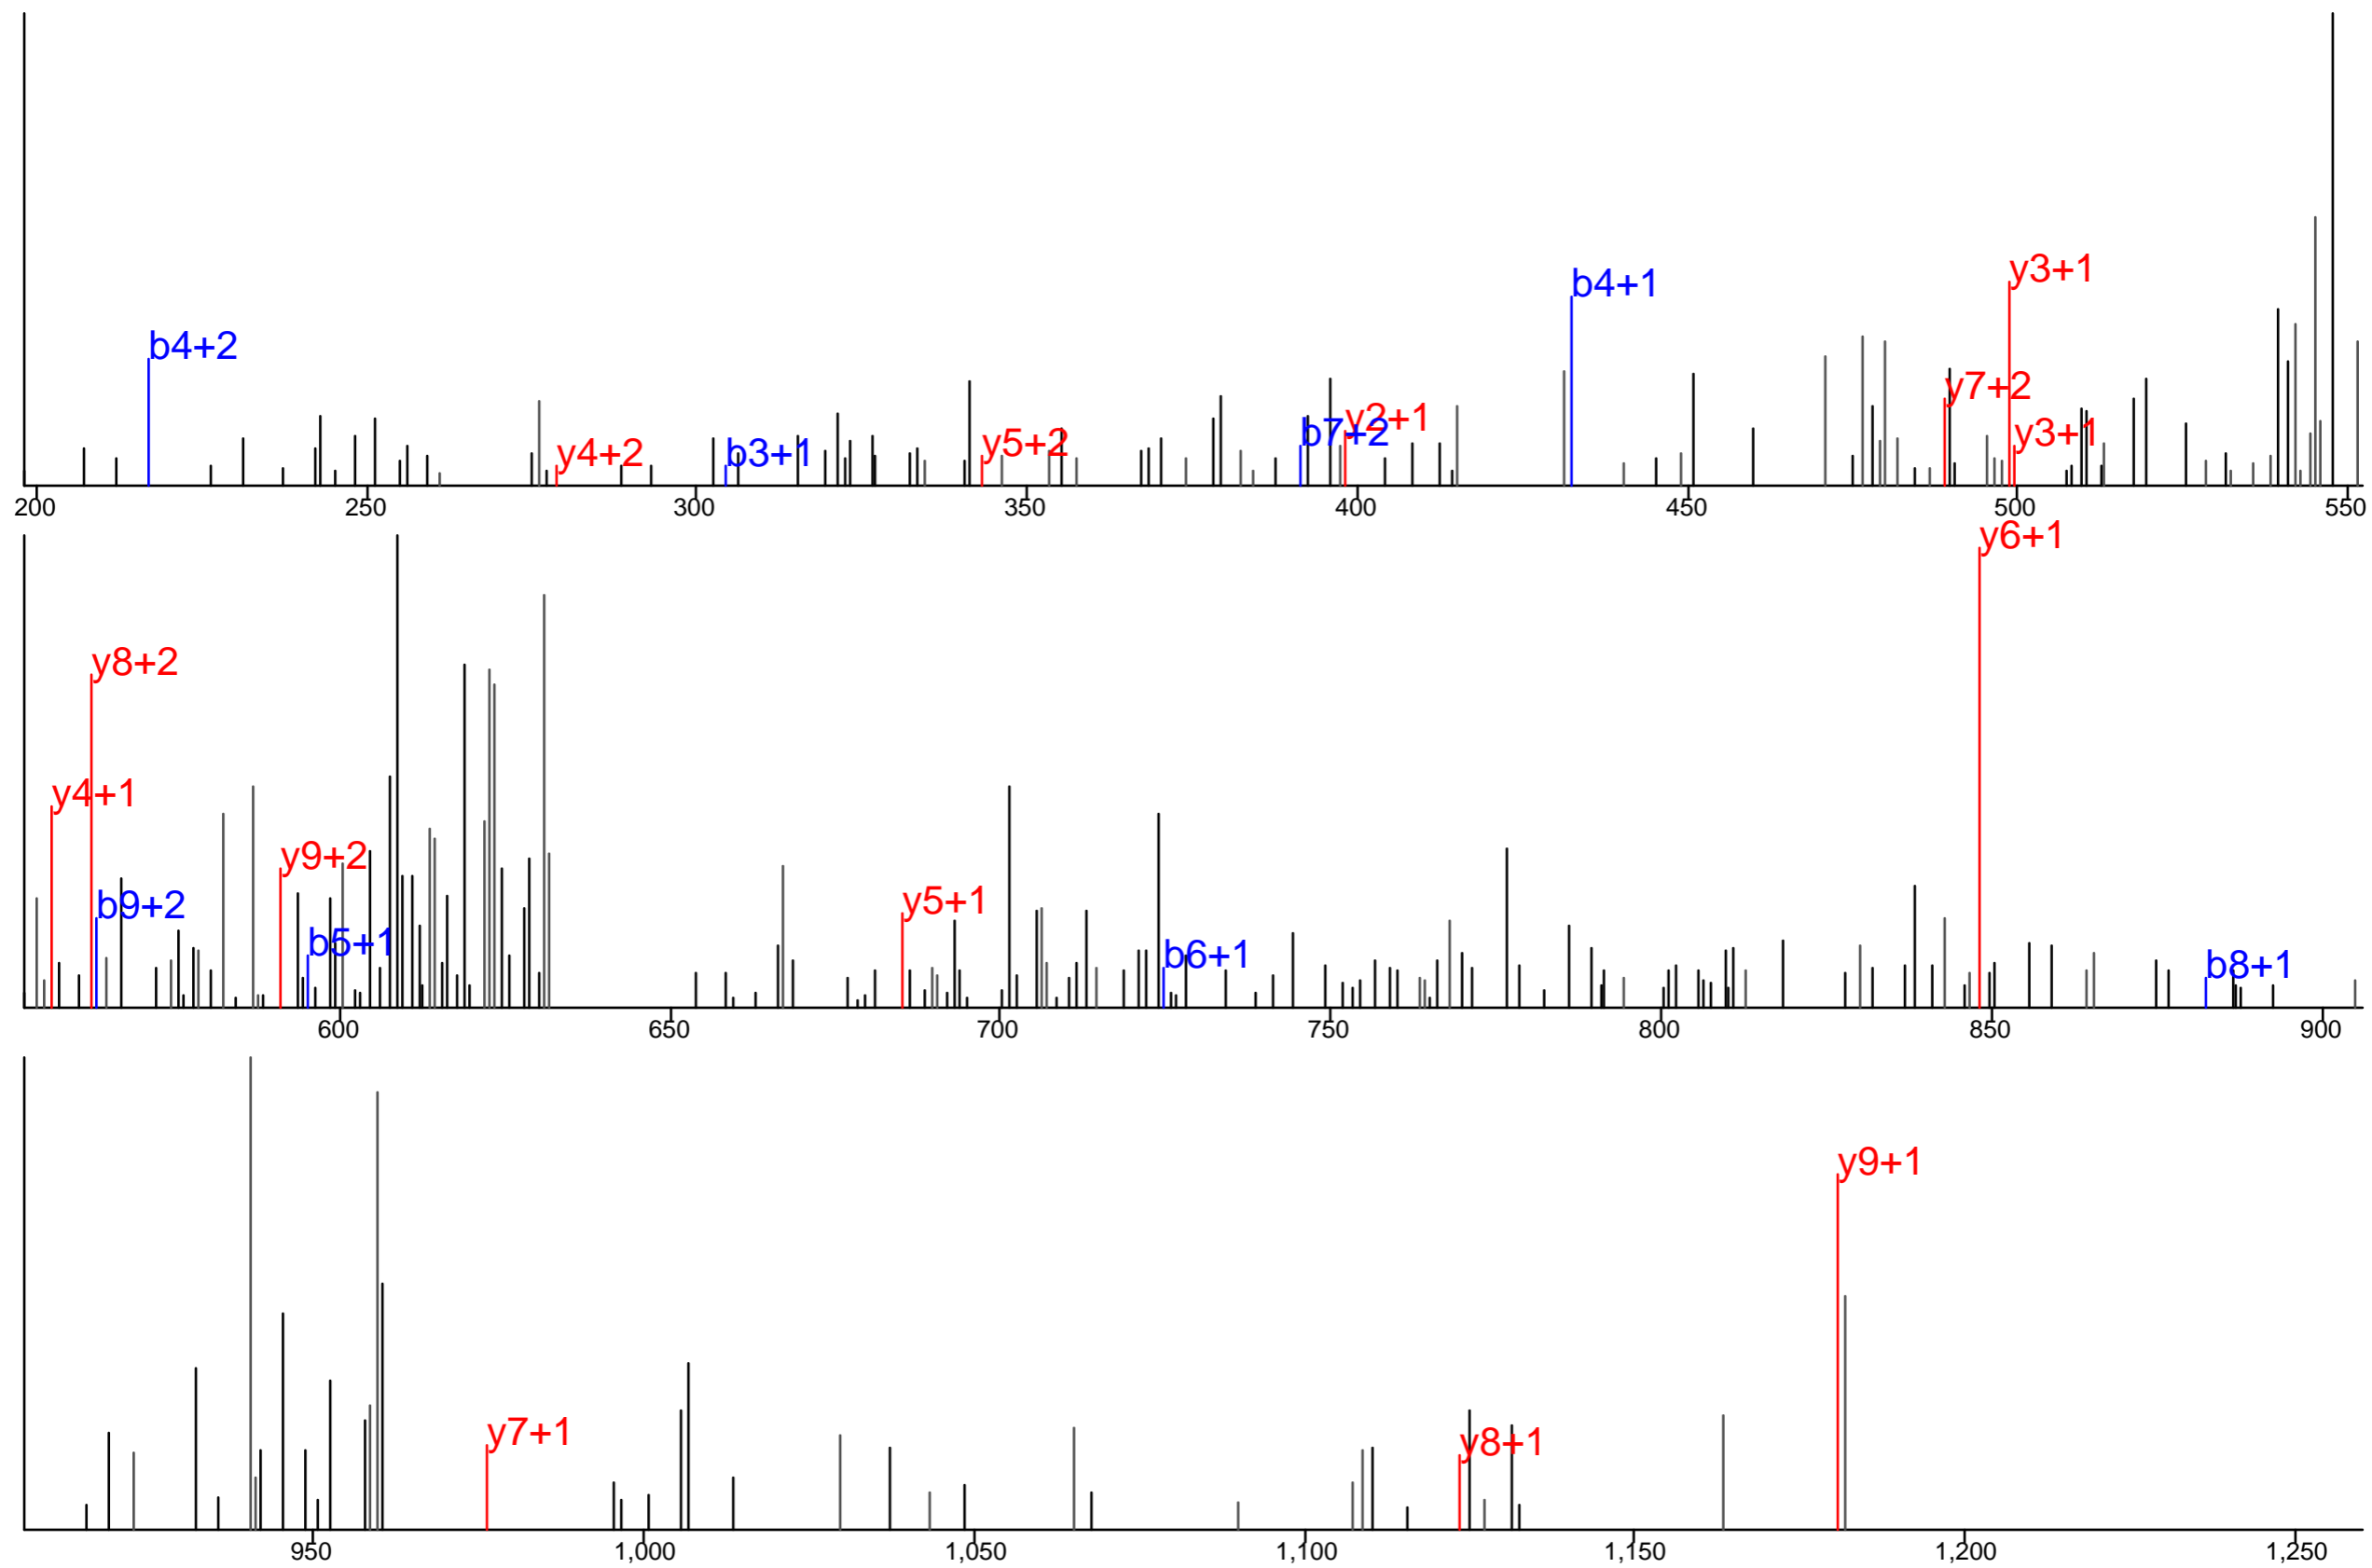

V G F Q Y E G T Y\* K@

Protein Name: G6PD  
 gi Accession: 31543  
 Precursor Mass: 640.2814+2  
 Delta Mass: 5.377 ppm  
 XCorr: 2.0654

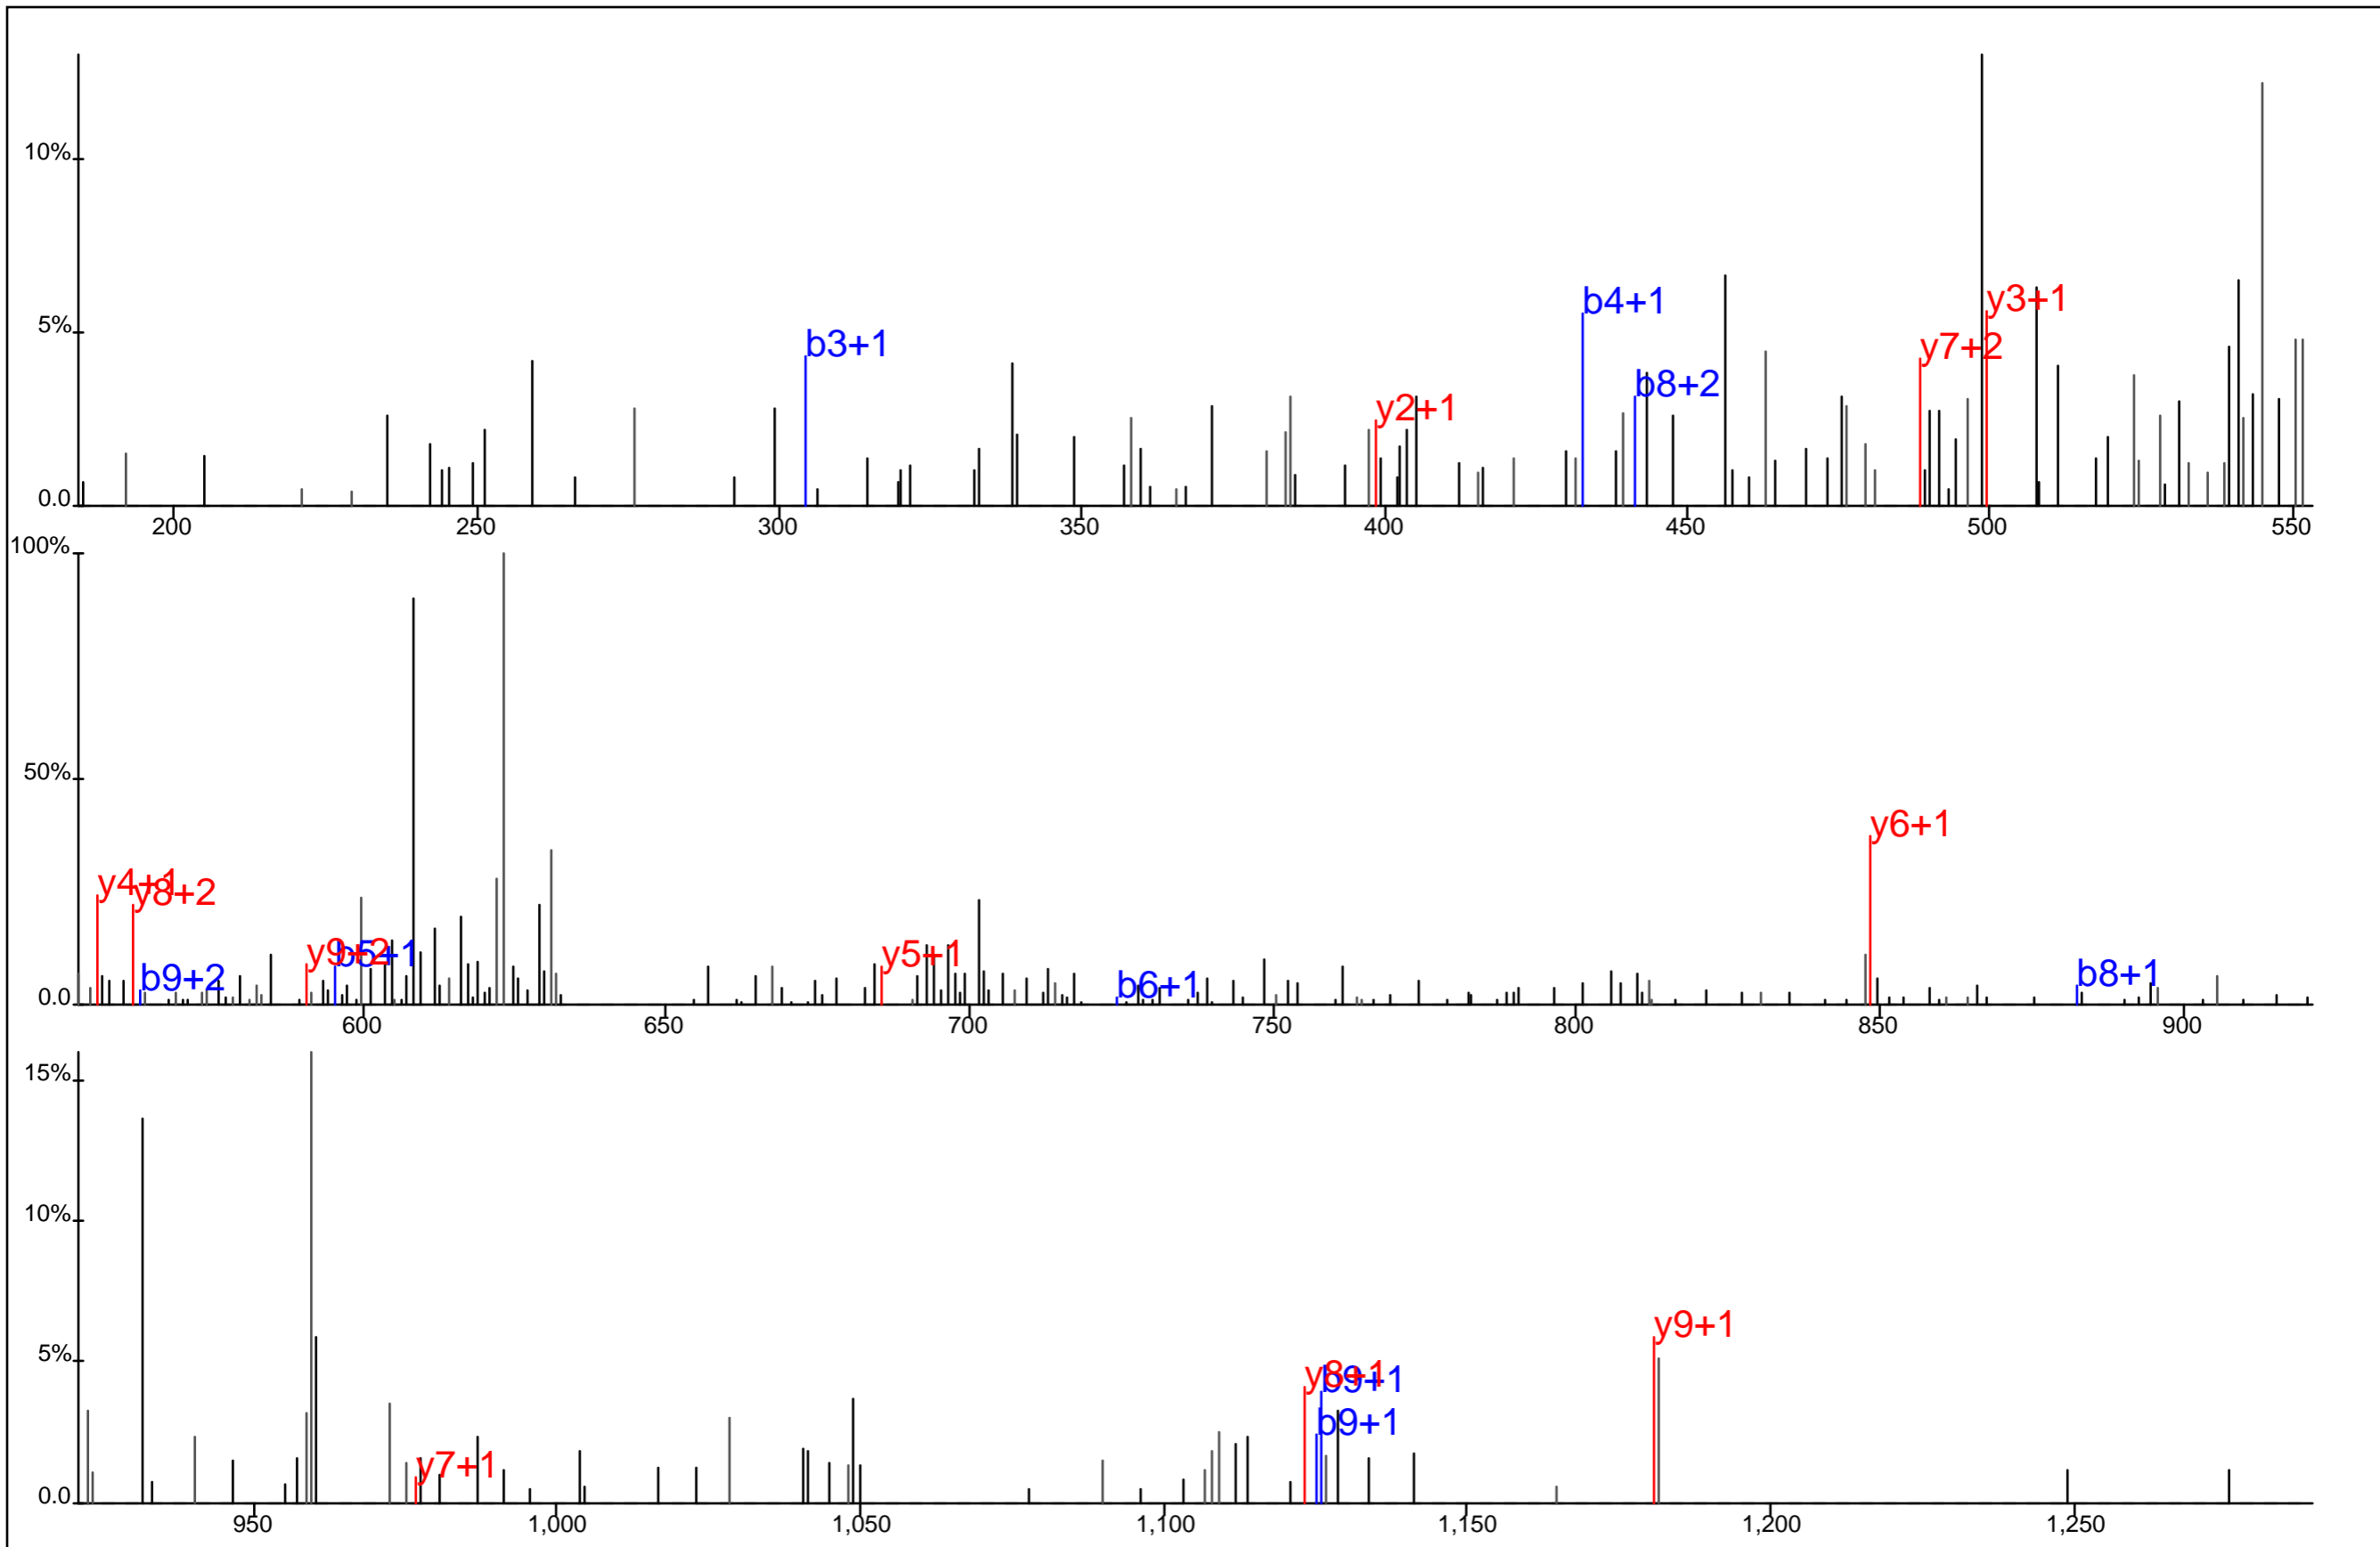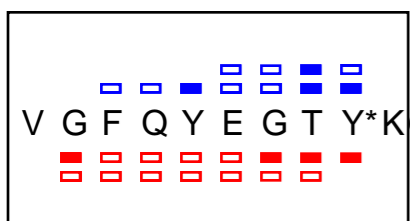

Protein Name: G6PD  
 gi Accession: 31543  
 Precursor Mass: 640.2830+2  
 Delta Mass: 7.854 ppm  
 XCorr: 2.3201

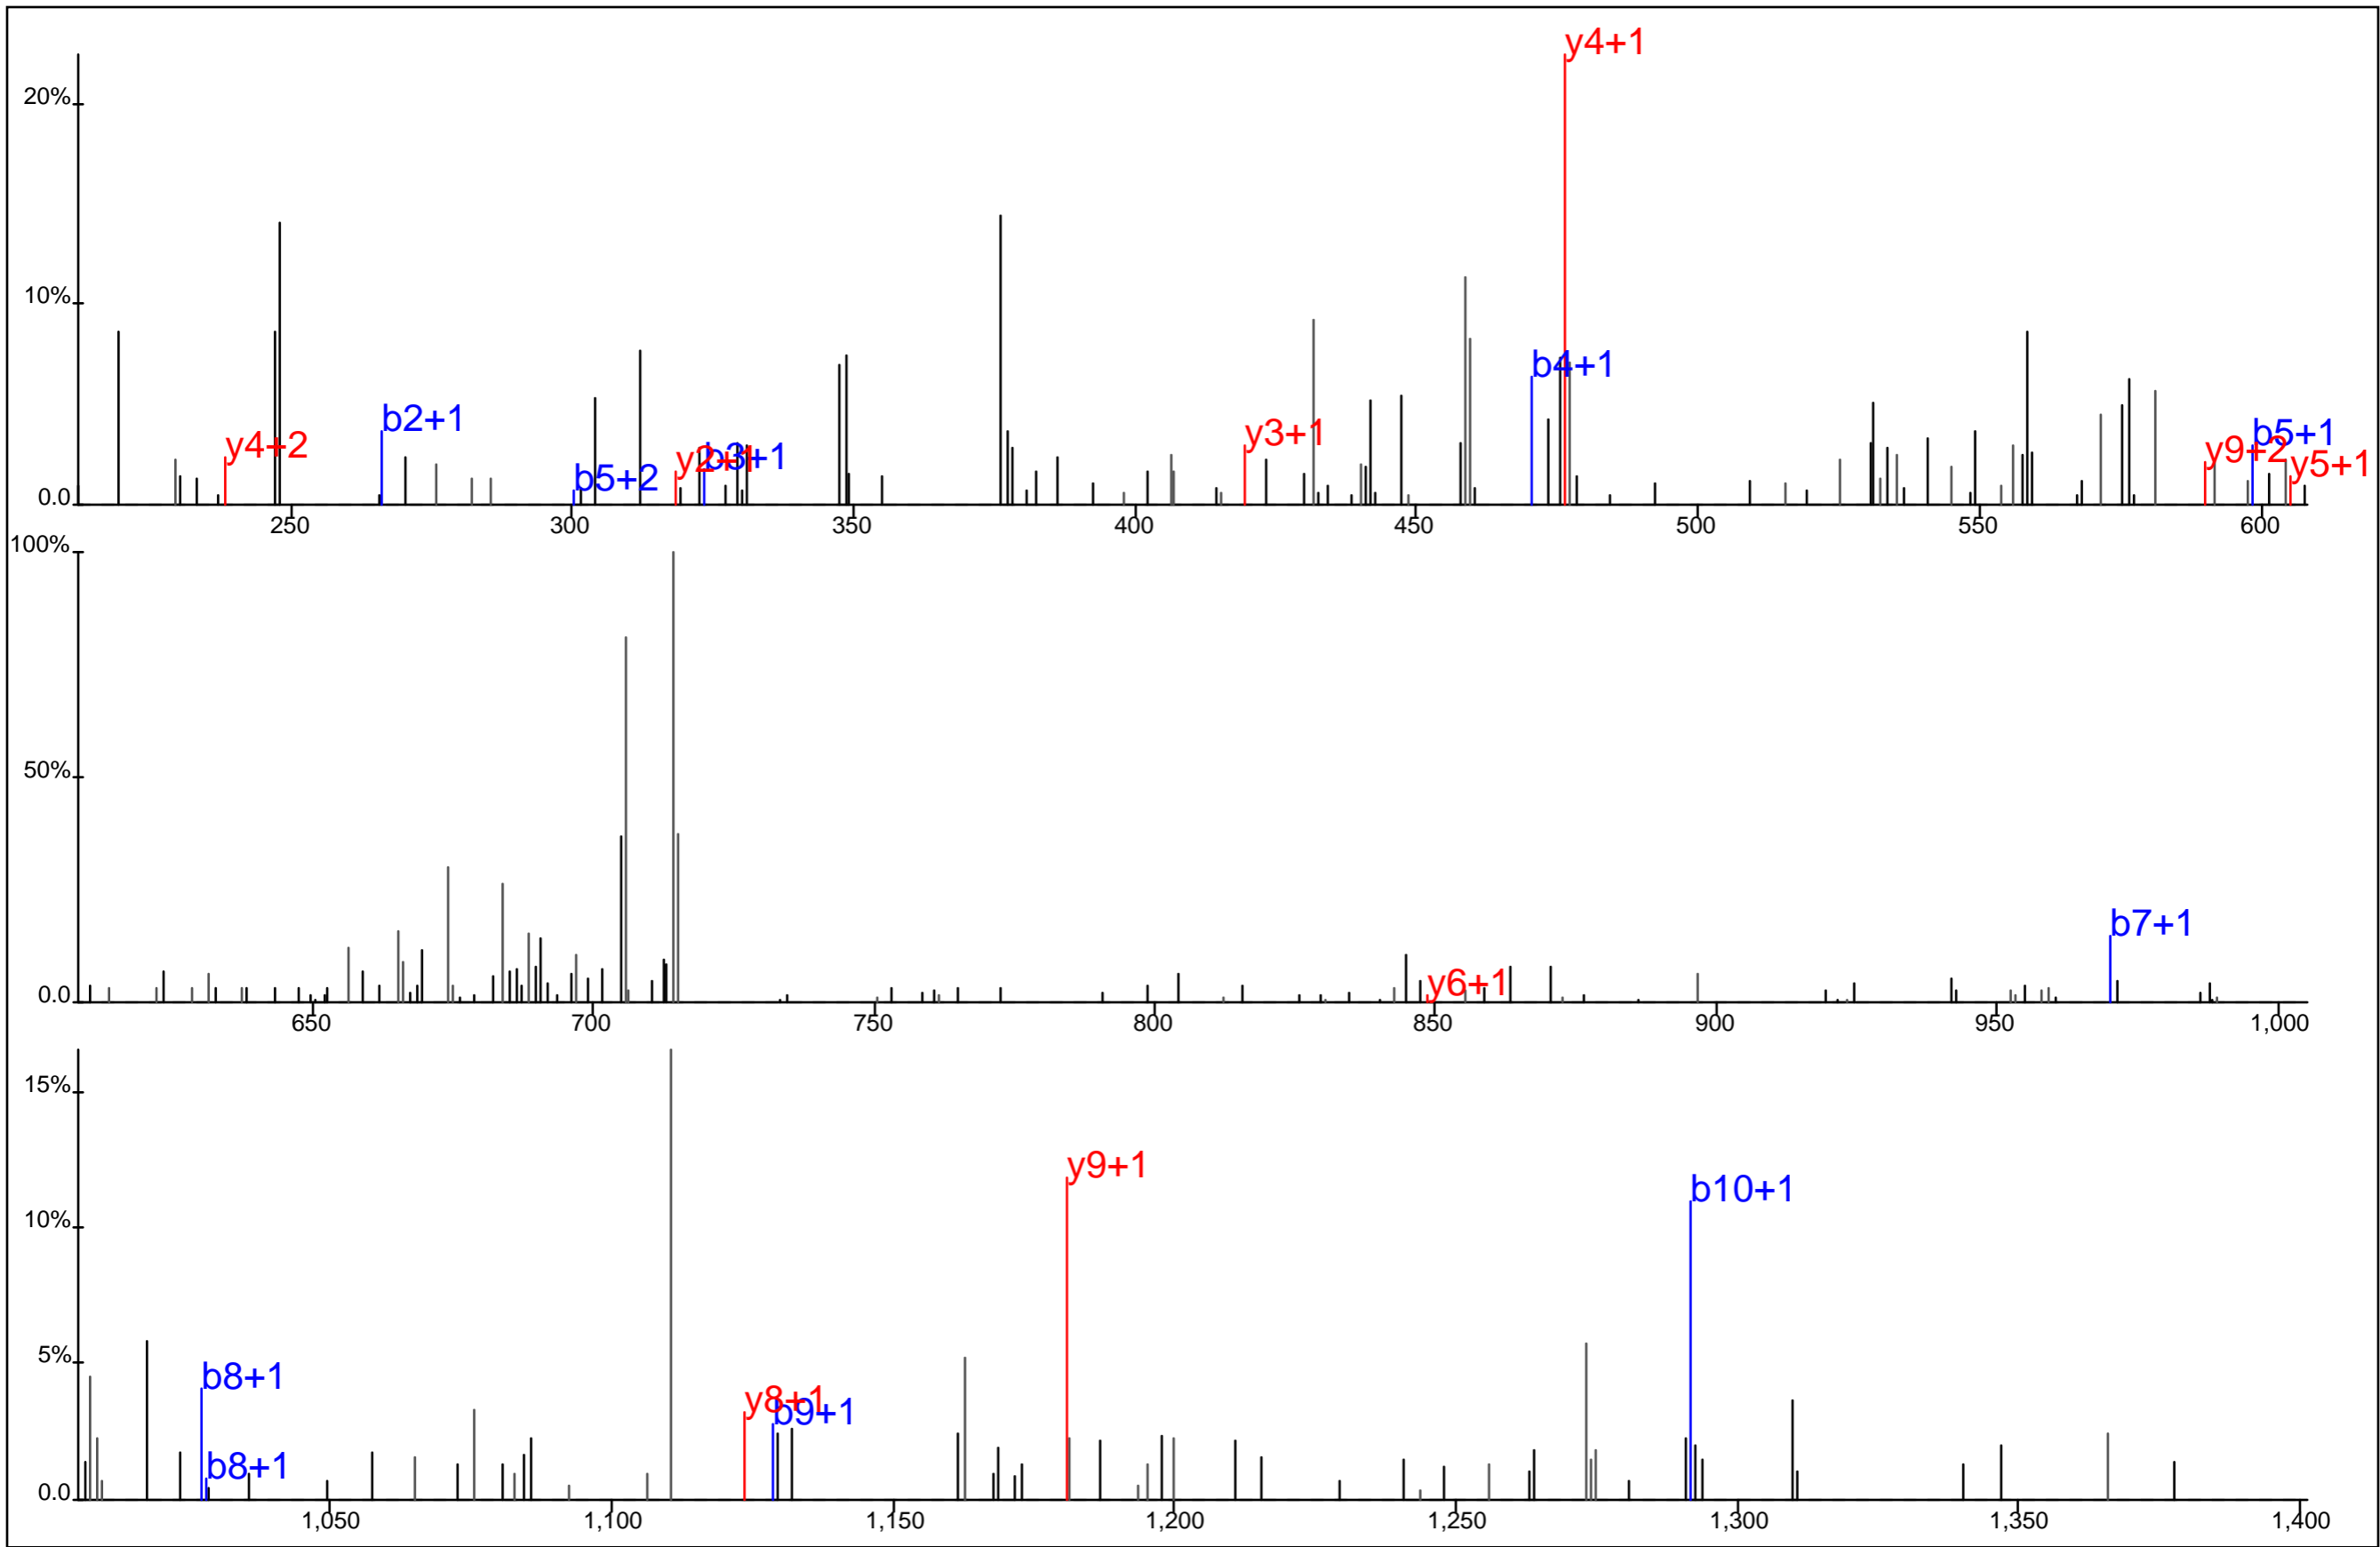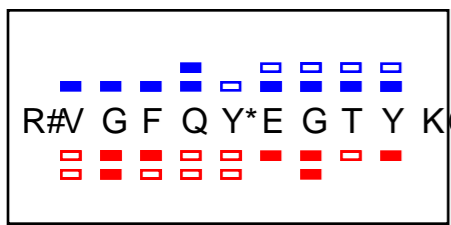

Protein Name: G6PD  
 gi Accession: 31543  
 Precursor Mass: 723.3350+2  
 Delta Mass: 3.237 ppm  
 XCorr: 2.3645

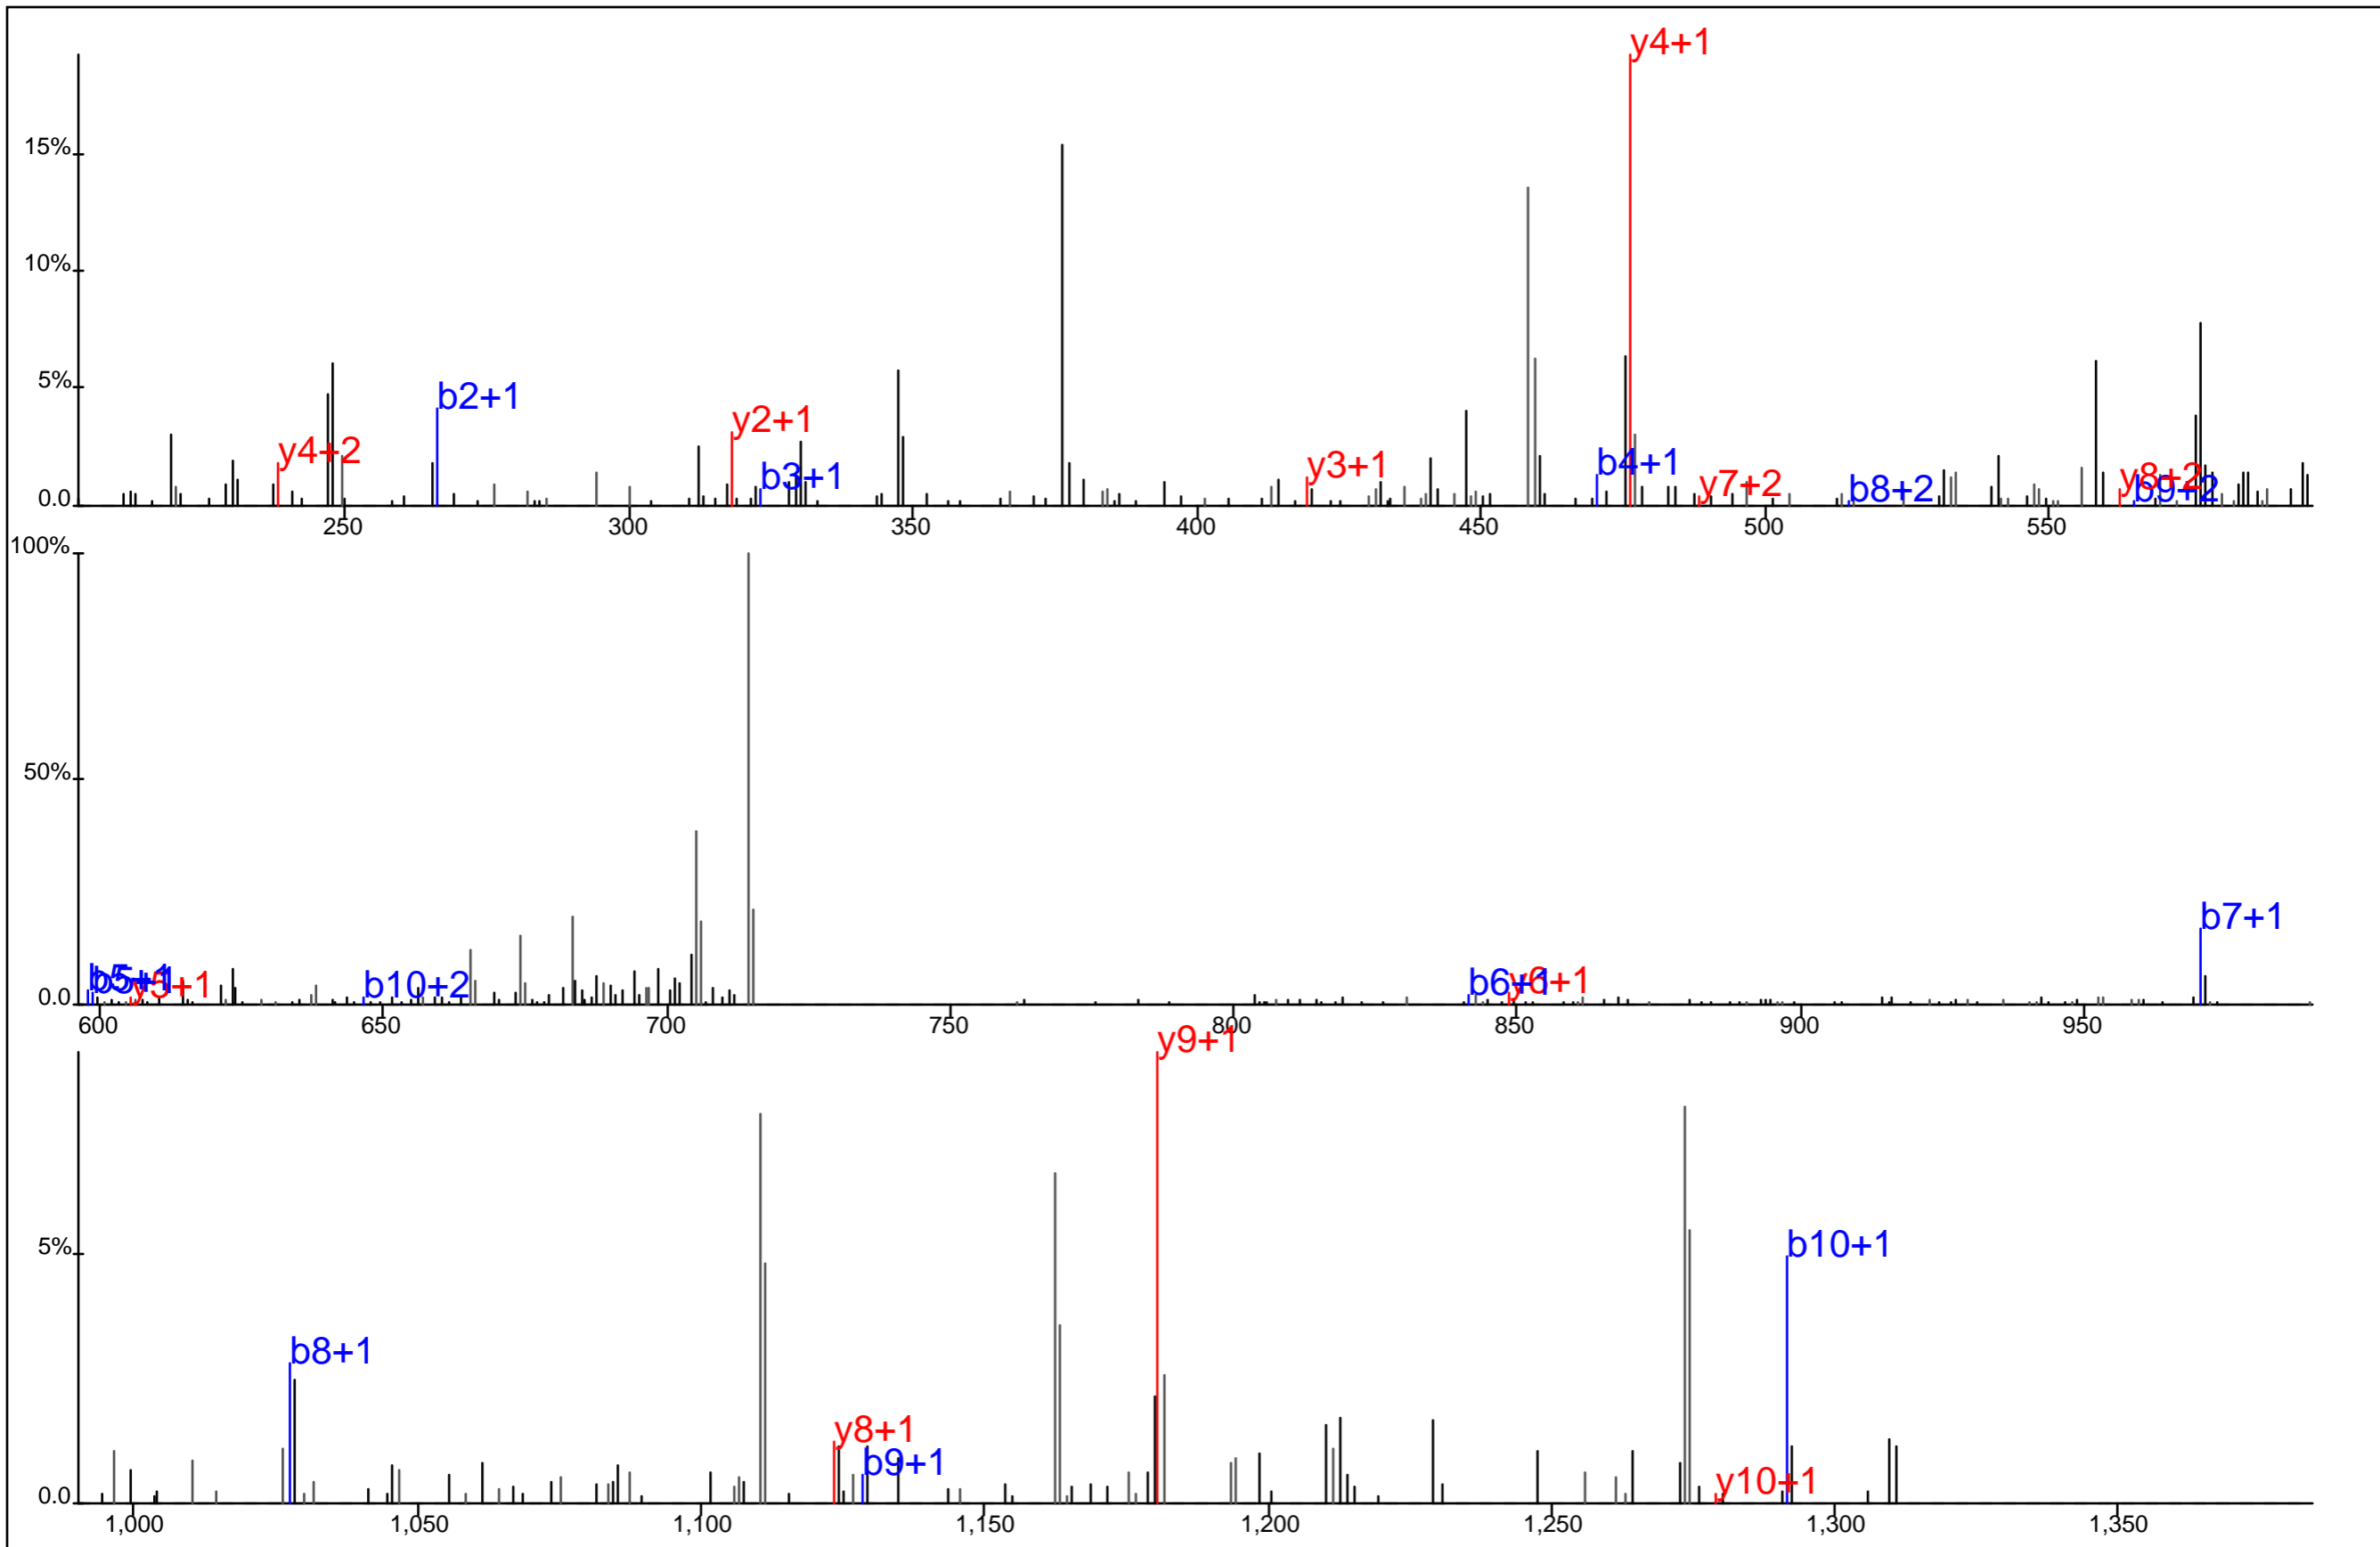

|  |   |   |   |   |    |   |   |   |   |    |
|--|---|---|---|---|----|---|---|---|---|----|
|  | R | G | F | Q | Y* | E | G | T | Y | K# |
|  | □ | □ | □ | □ | □  | □ | □ | □ | □ | □  |
|  | □ | □ | □ | □ | □  | □ | □ | □ | □ | □  |

Protein Name: G6PD  
 gi Accession: 31543  
 Precursor Mass: 723.3333+2  
 Delta Mass: 0.870 ppm  
 XCorr: 24.14

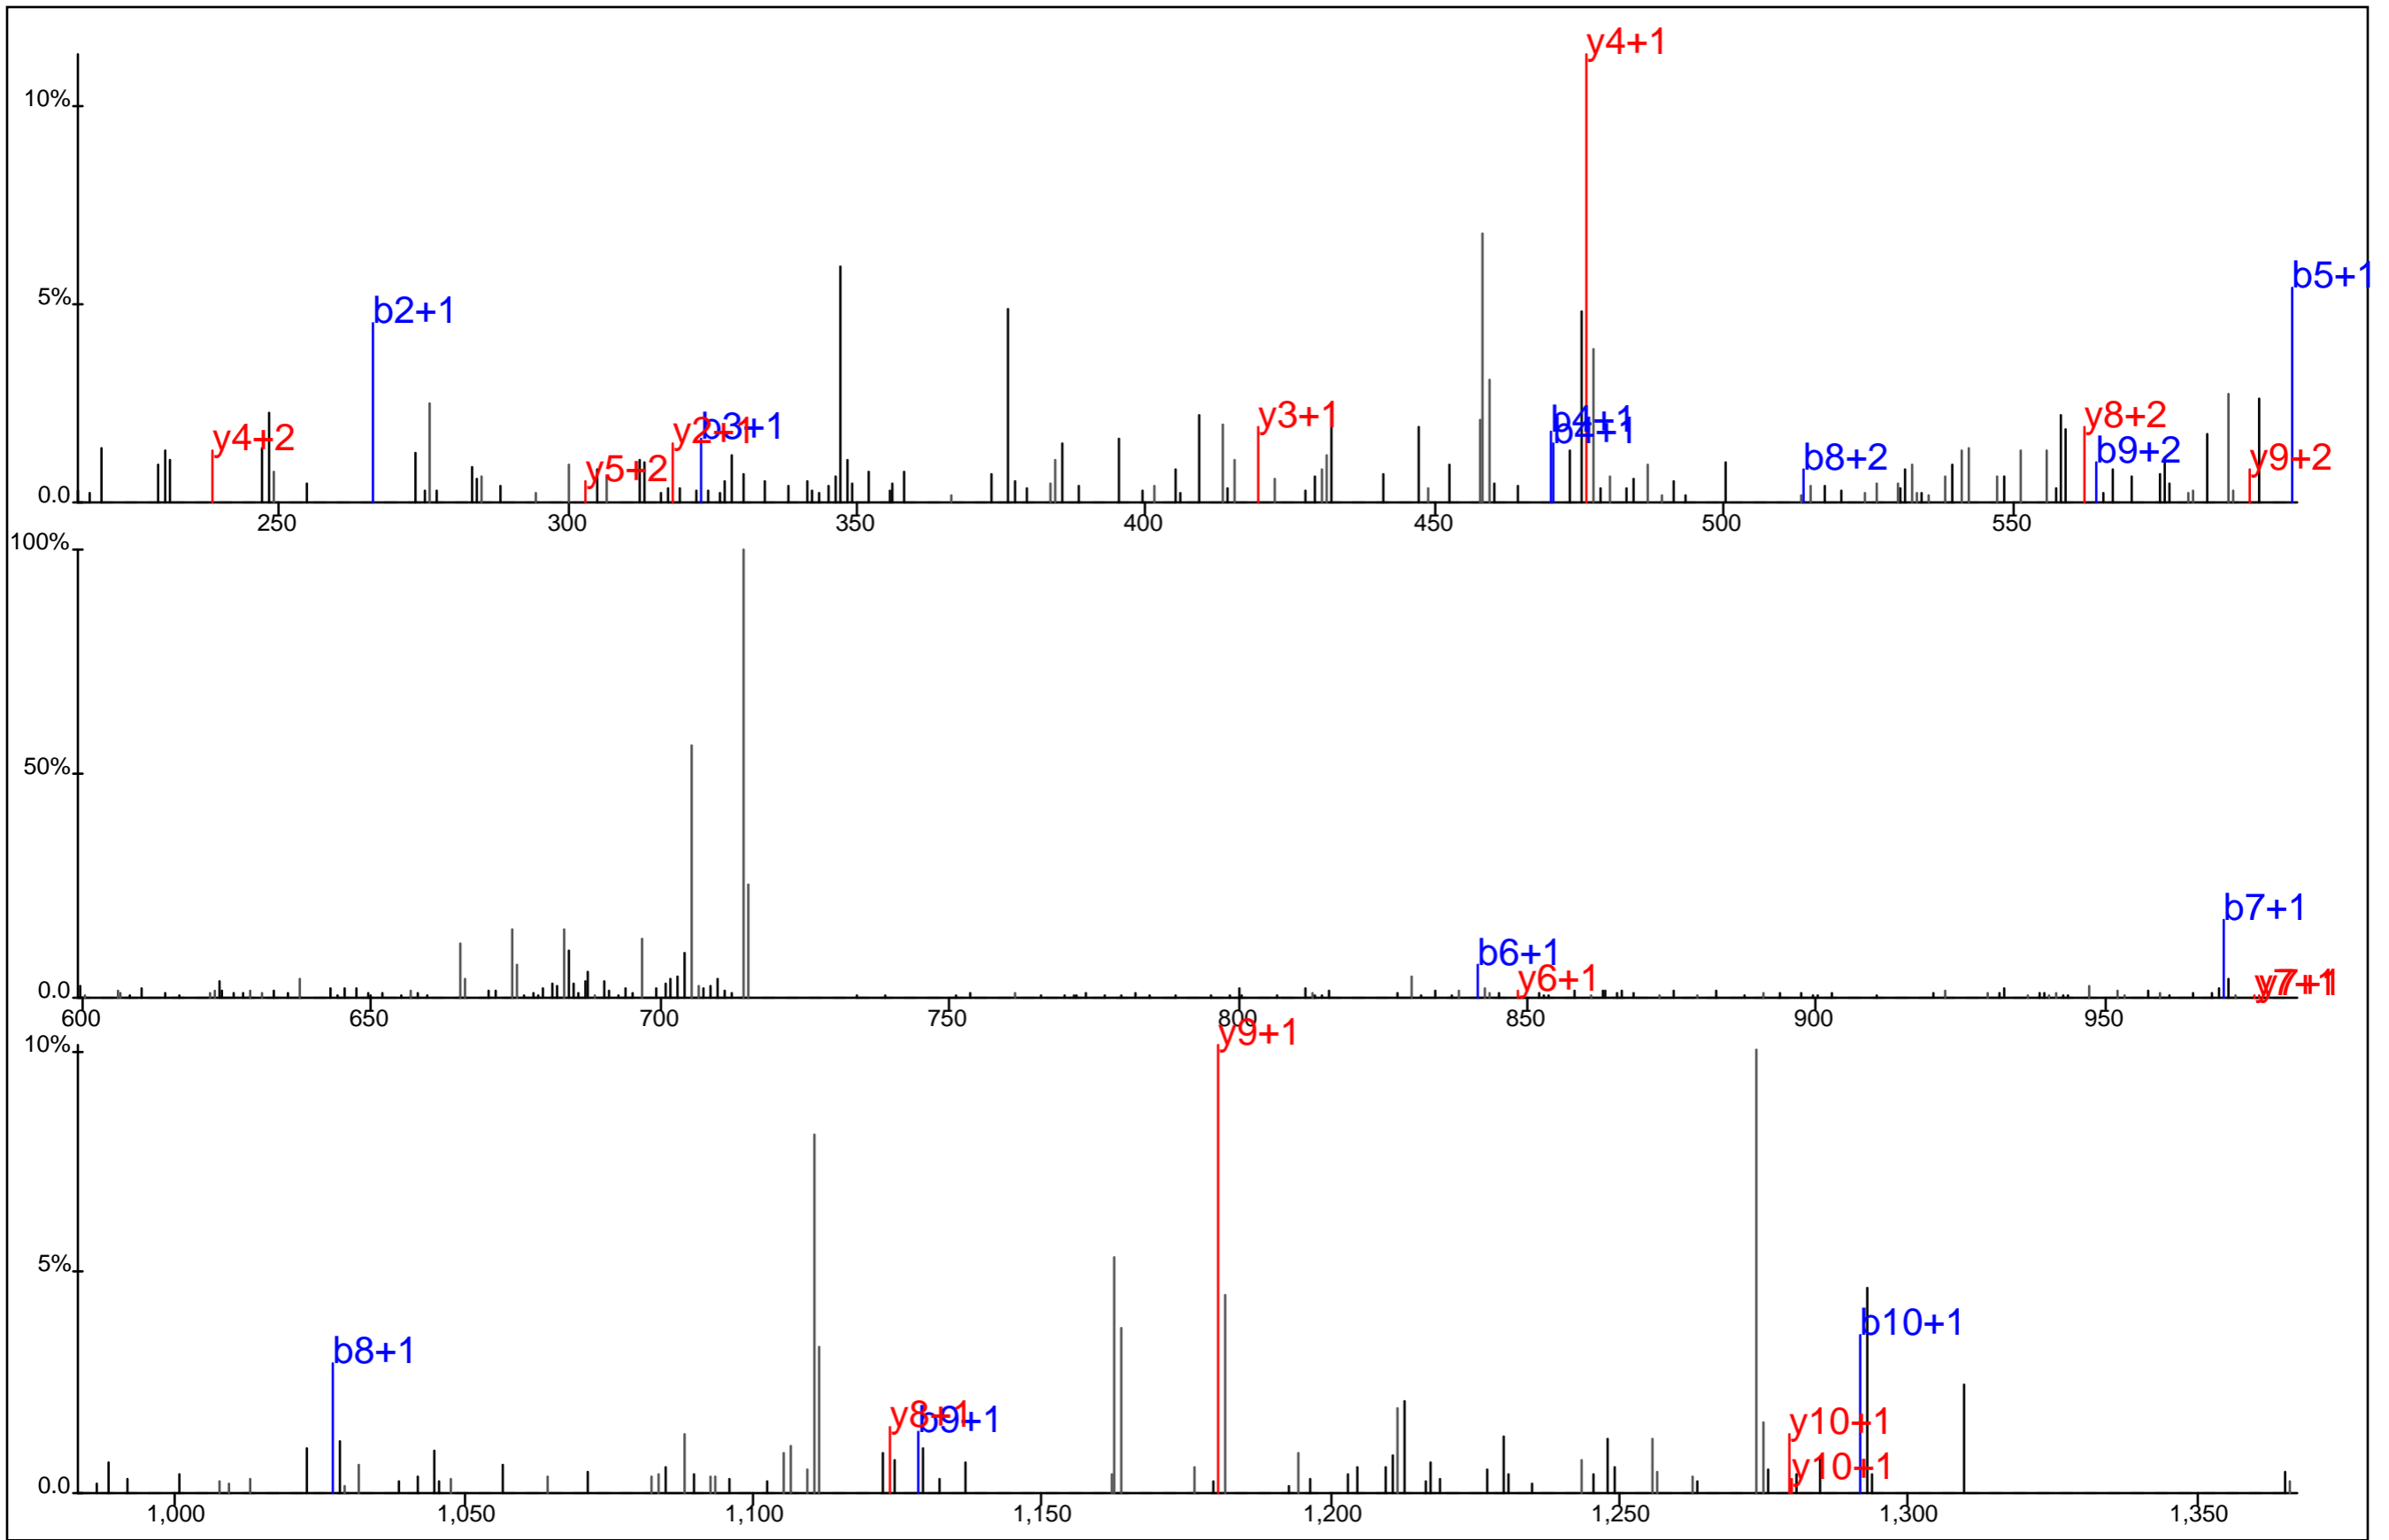

|   |   |   |   |   |    |   |   |   |   |    |
|---|---|---|---|---|----|---|---|---|---|----|
| ■ | □ | ■ | □ | □ | ■  | ■ | □ |   |   |    |
| R | V | G | F | Q | Y* | E | G | T | Y | K# |
| ■ | ■ | ■ | ■ | □ | □  | ■ | □ |   |   |    |

Protein Name: G6PD  
 gi Accession: 31543  
 Precursor Mass: 723.3364+2  
 Delta Mass: 5.173 ppm  
 XCorr: 26.9

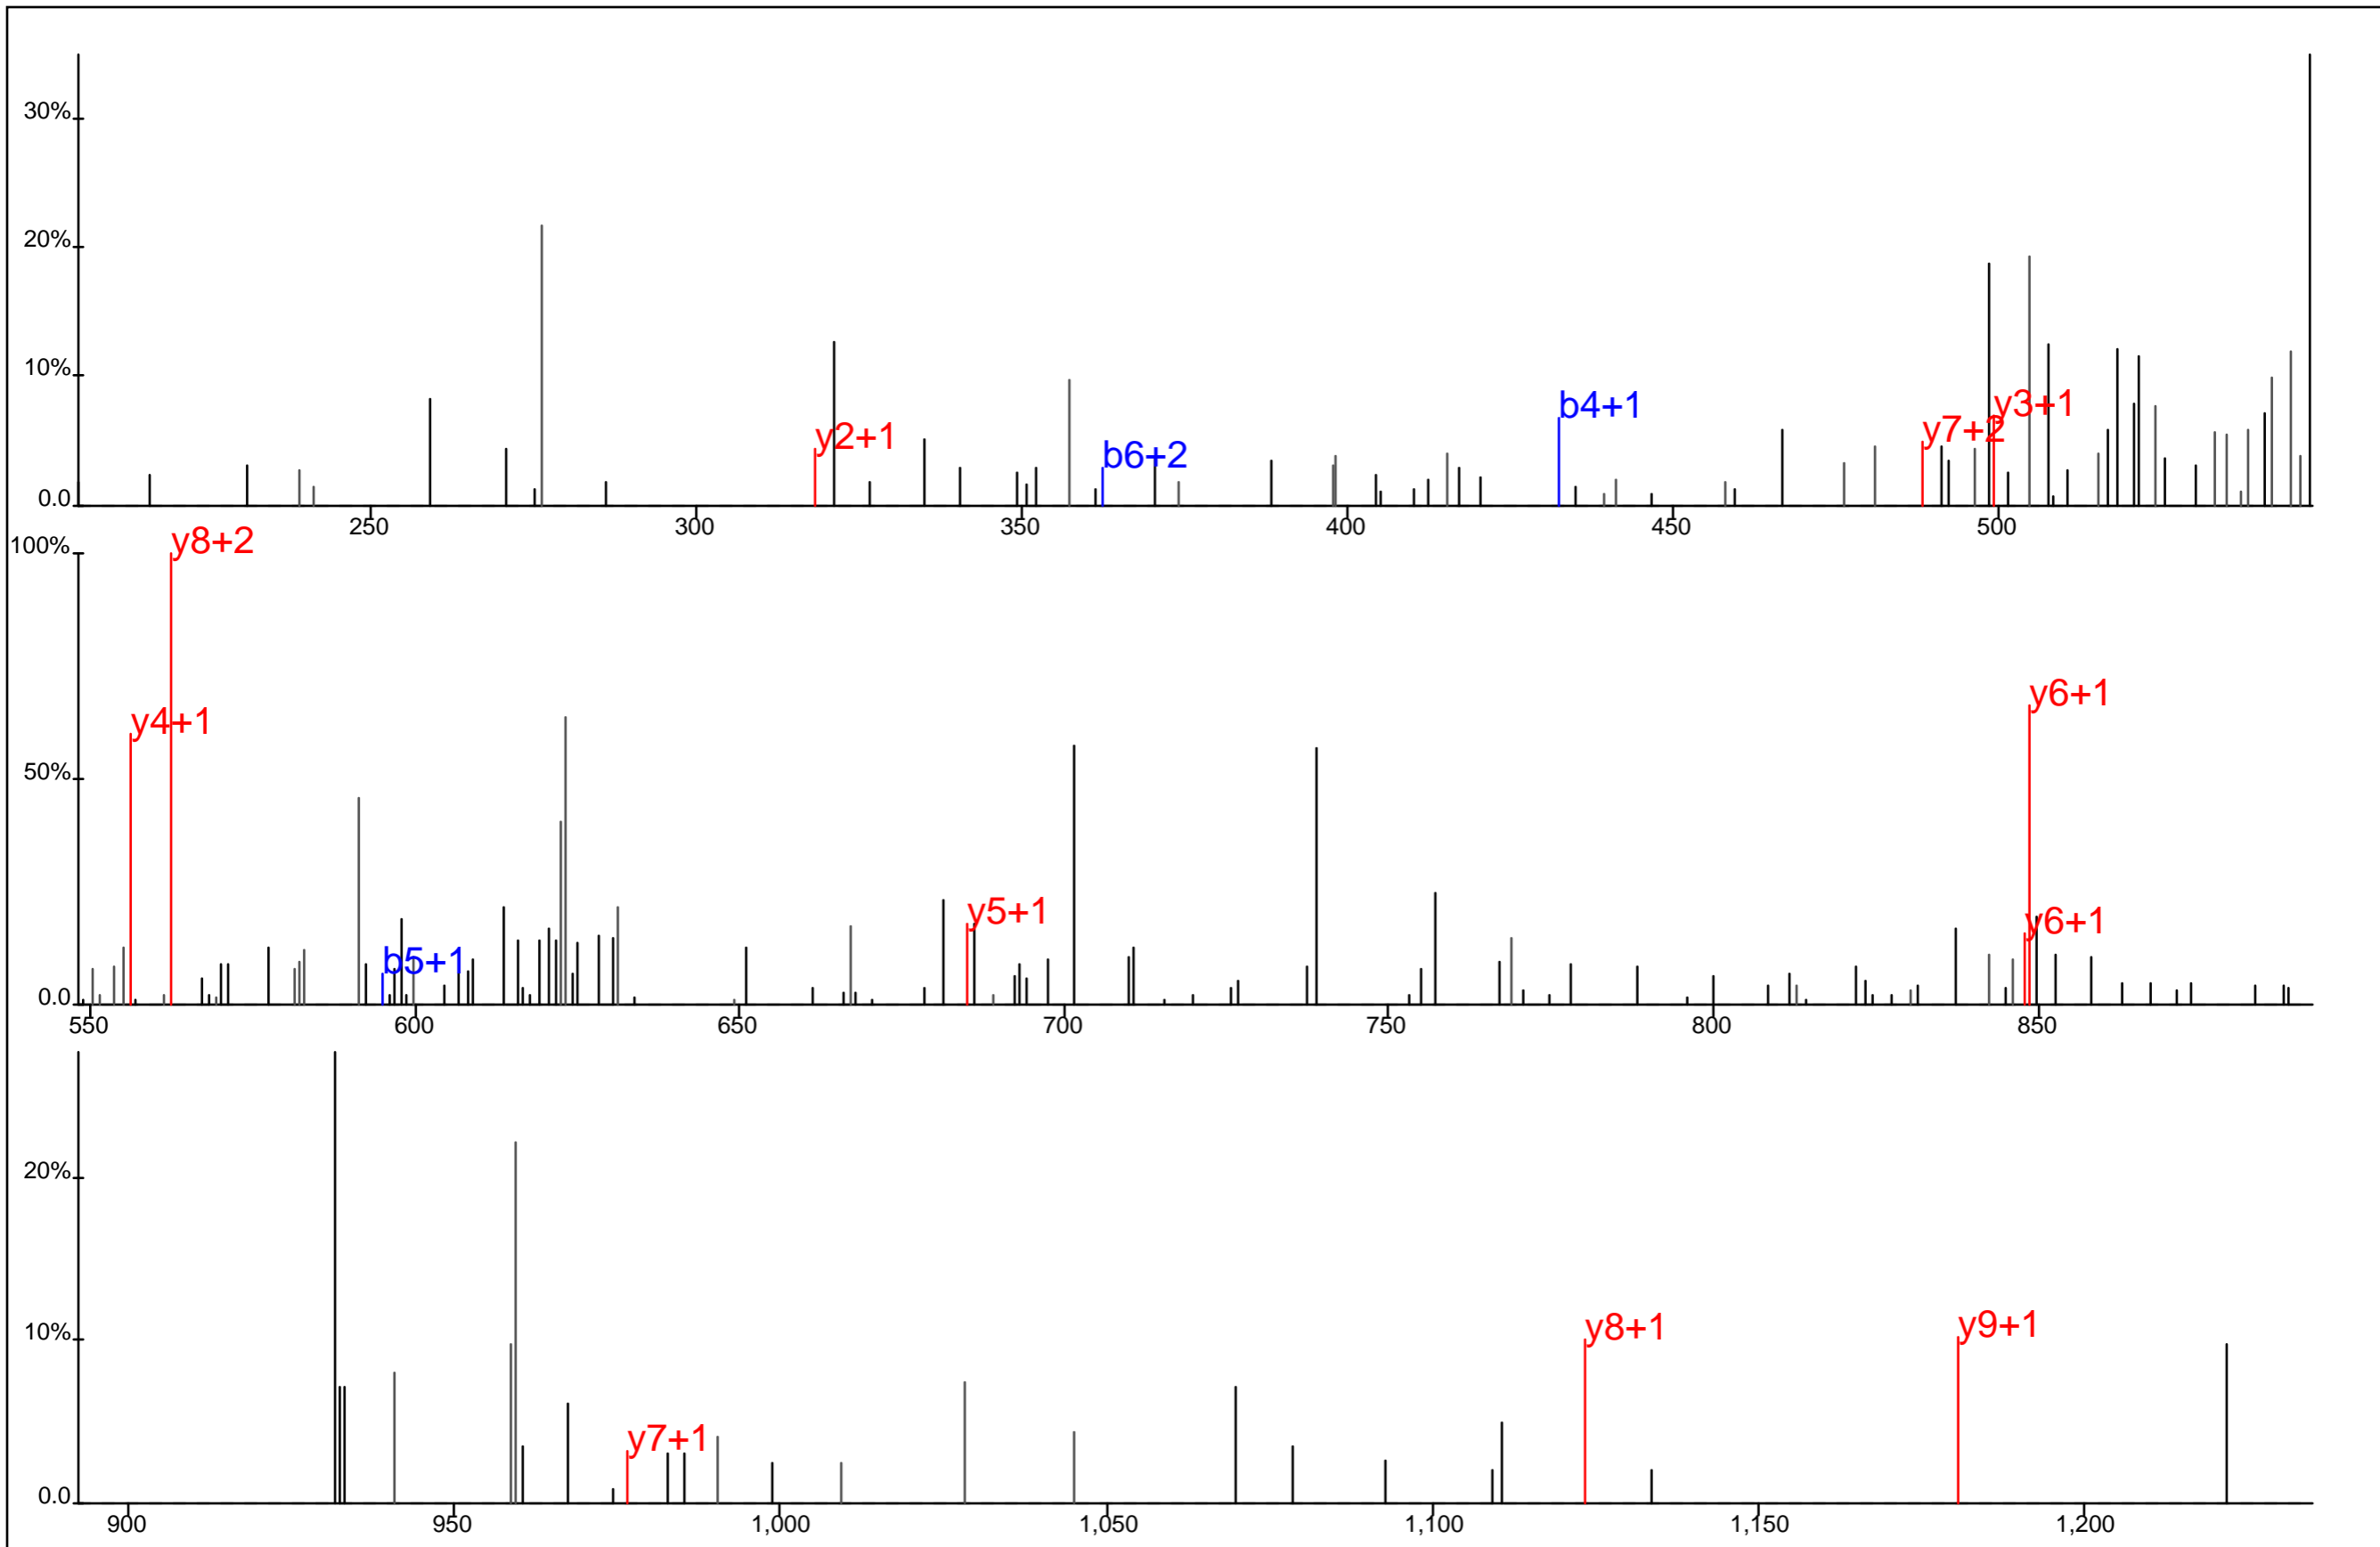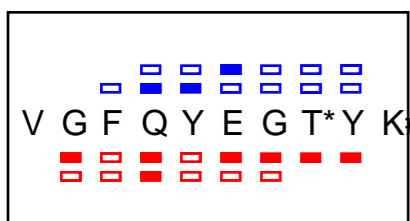

Protein Name: G6PD  
 gi Accession: 31543  
 Precursor Mass: 640.2791+2  
 Delta Mass: 1.741 ppm  
 XCorr: 15.4



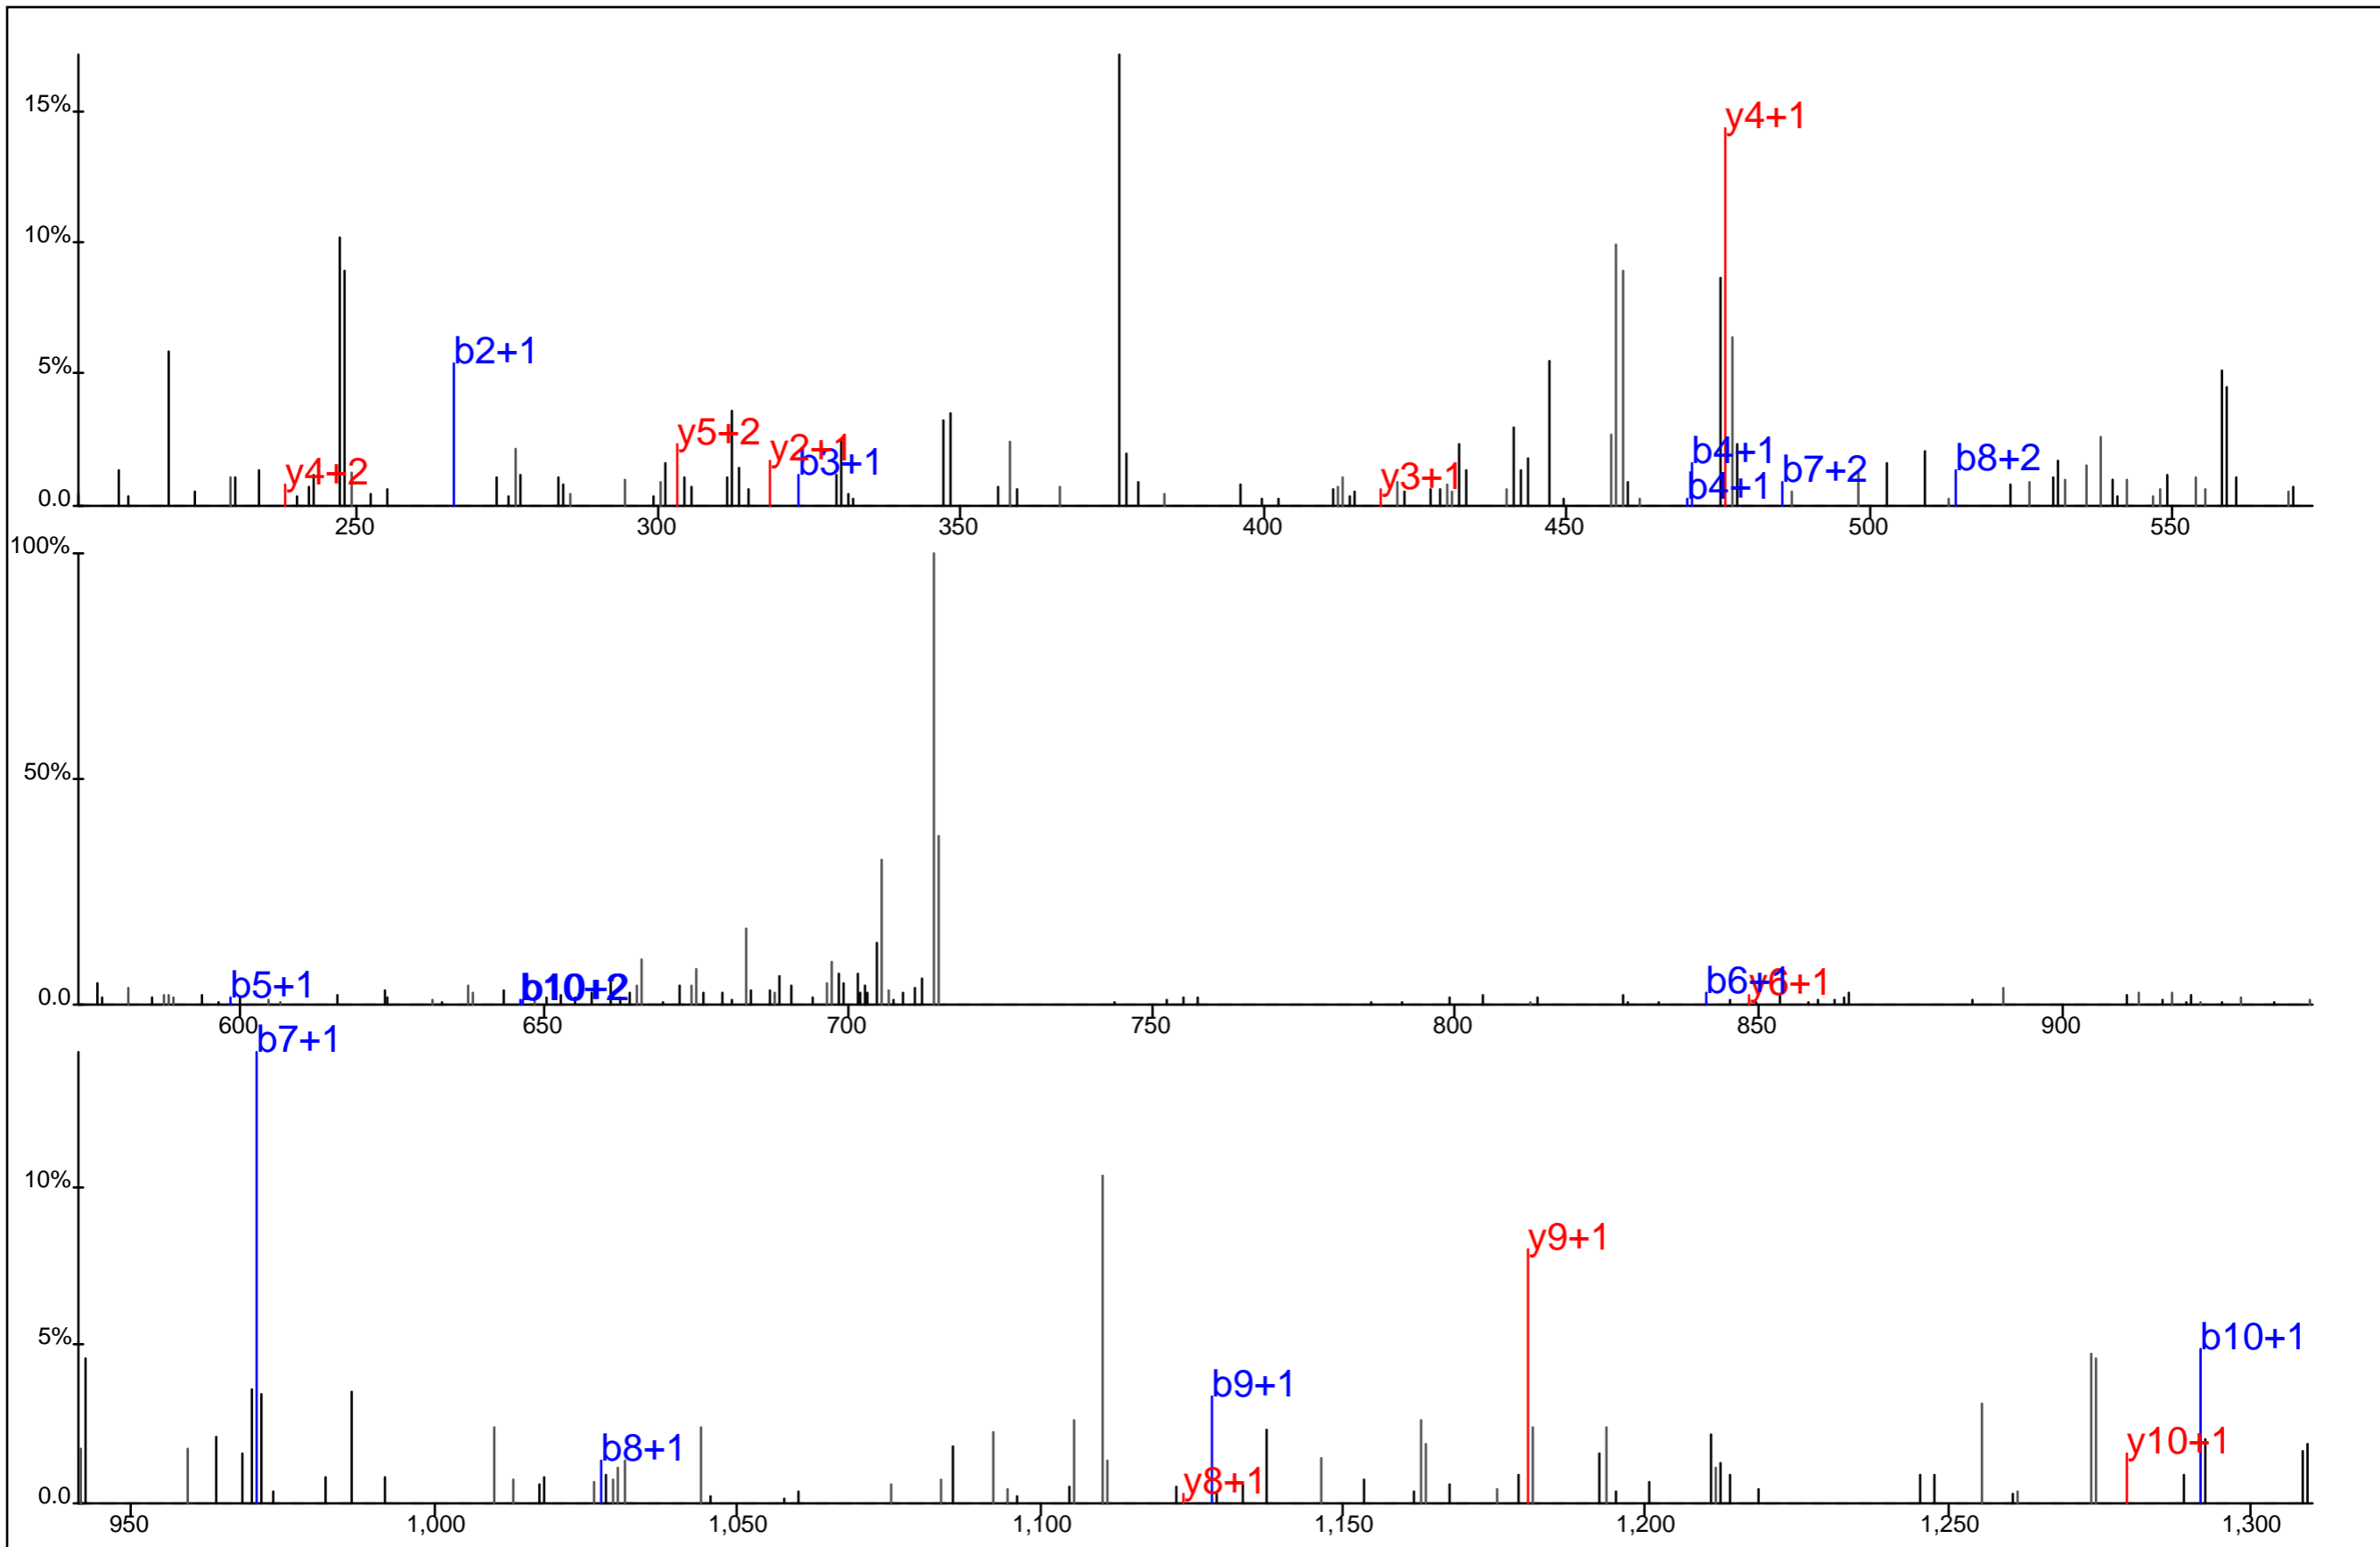

|   |   |   |   |   |    |   |   |   |   |    |
|---|---|---|---|---|----|---|---|---|---|----|
| ■ | ■ | □ | □ | ■ | ■  | □ | ■ |   |   |    |
| R | V | G | F | Q | Y* | E | G | T | Y | K# |
| ■ | ■ | □ | □ | □ | □  | ■ | ■ | □ | ■ | ■  |

Protein Name: G6PD  
 gi Accession: 31543  
 Precursor Mass: 723.3342+2  
 Delta Mass: 2.136 ppm  
 XCorr: 17.43

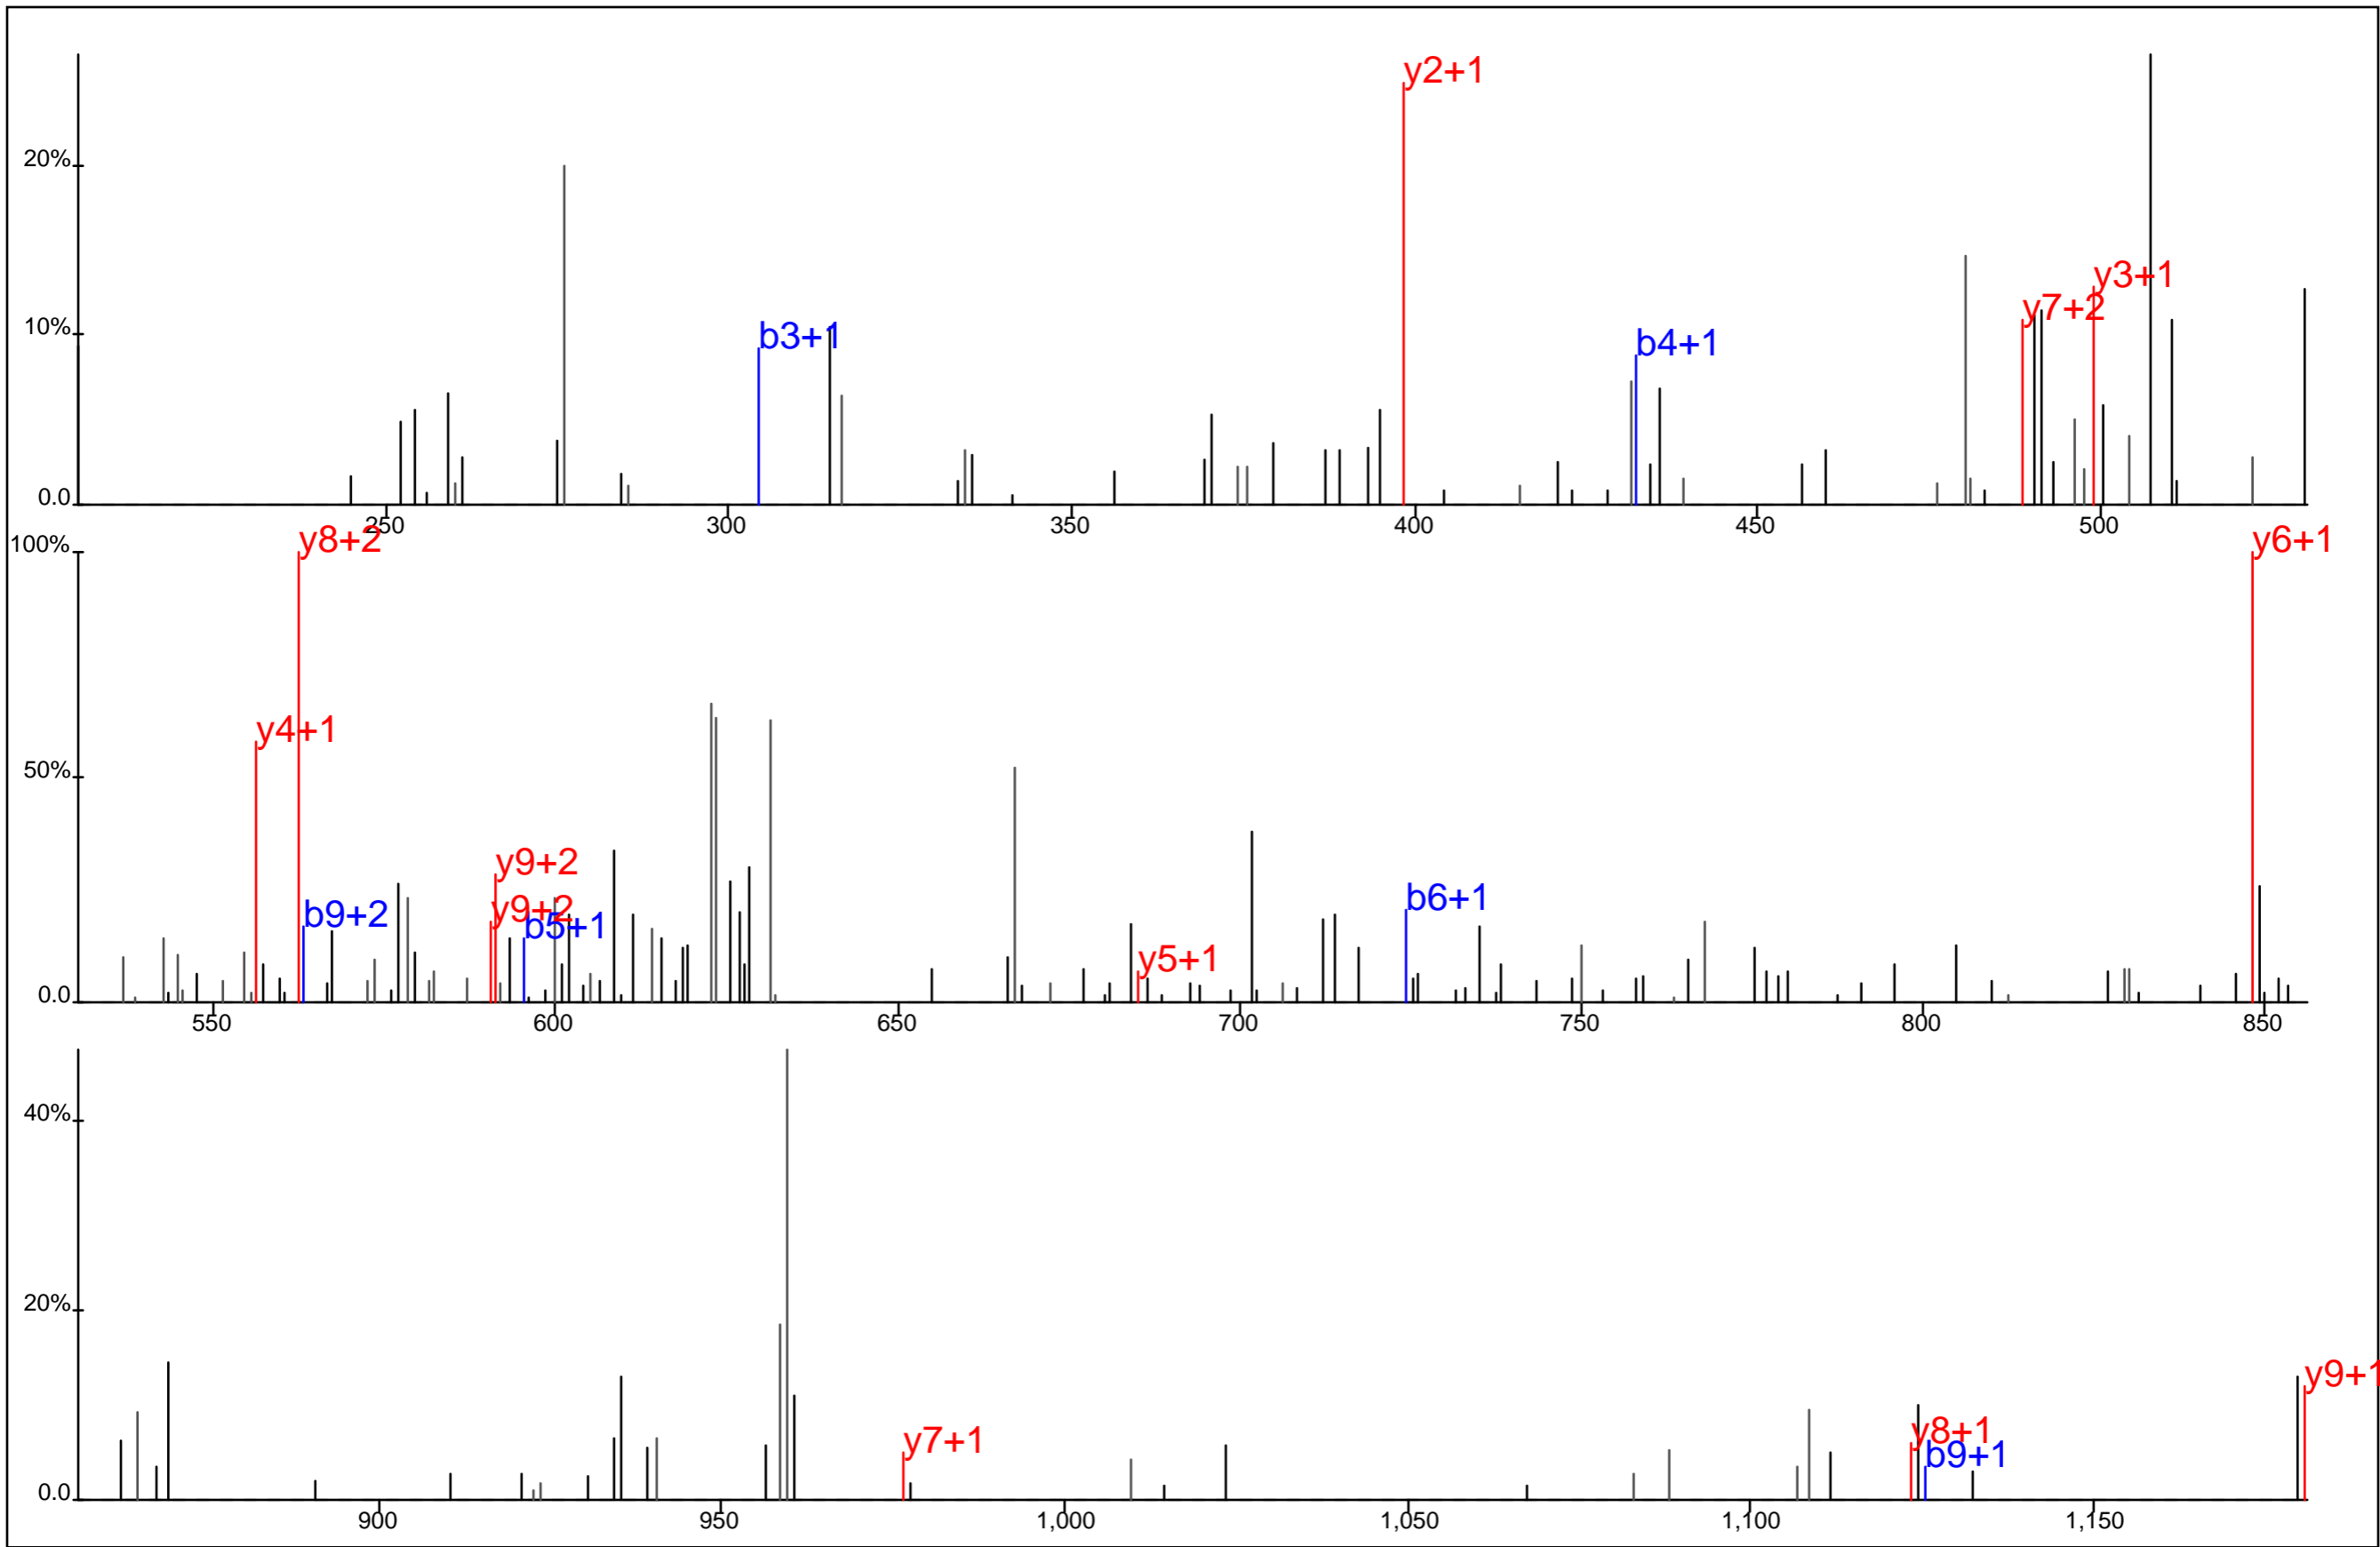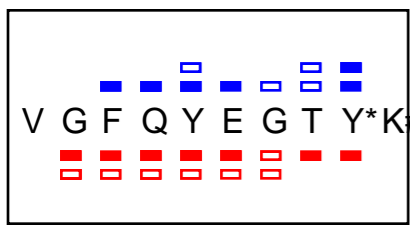

Protein Name: G6PD  
 gi Accession: 31543  
 Precursor Mass: 640.2803+2  
 Delta Mass: 3.648 ppm  
 XCorr: 19.72

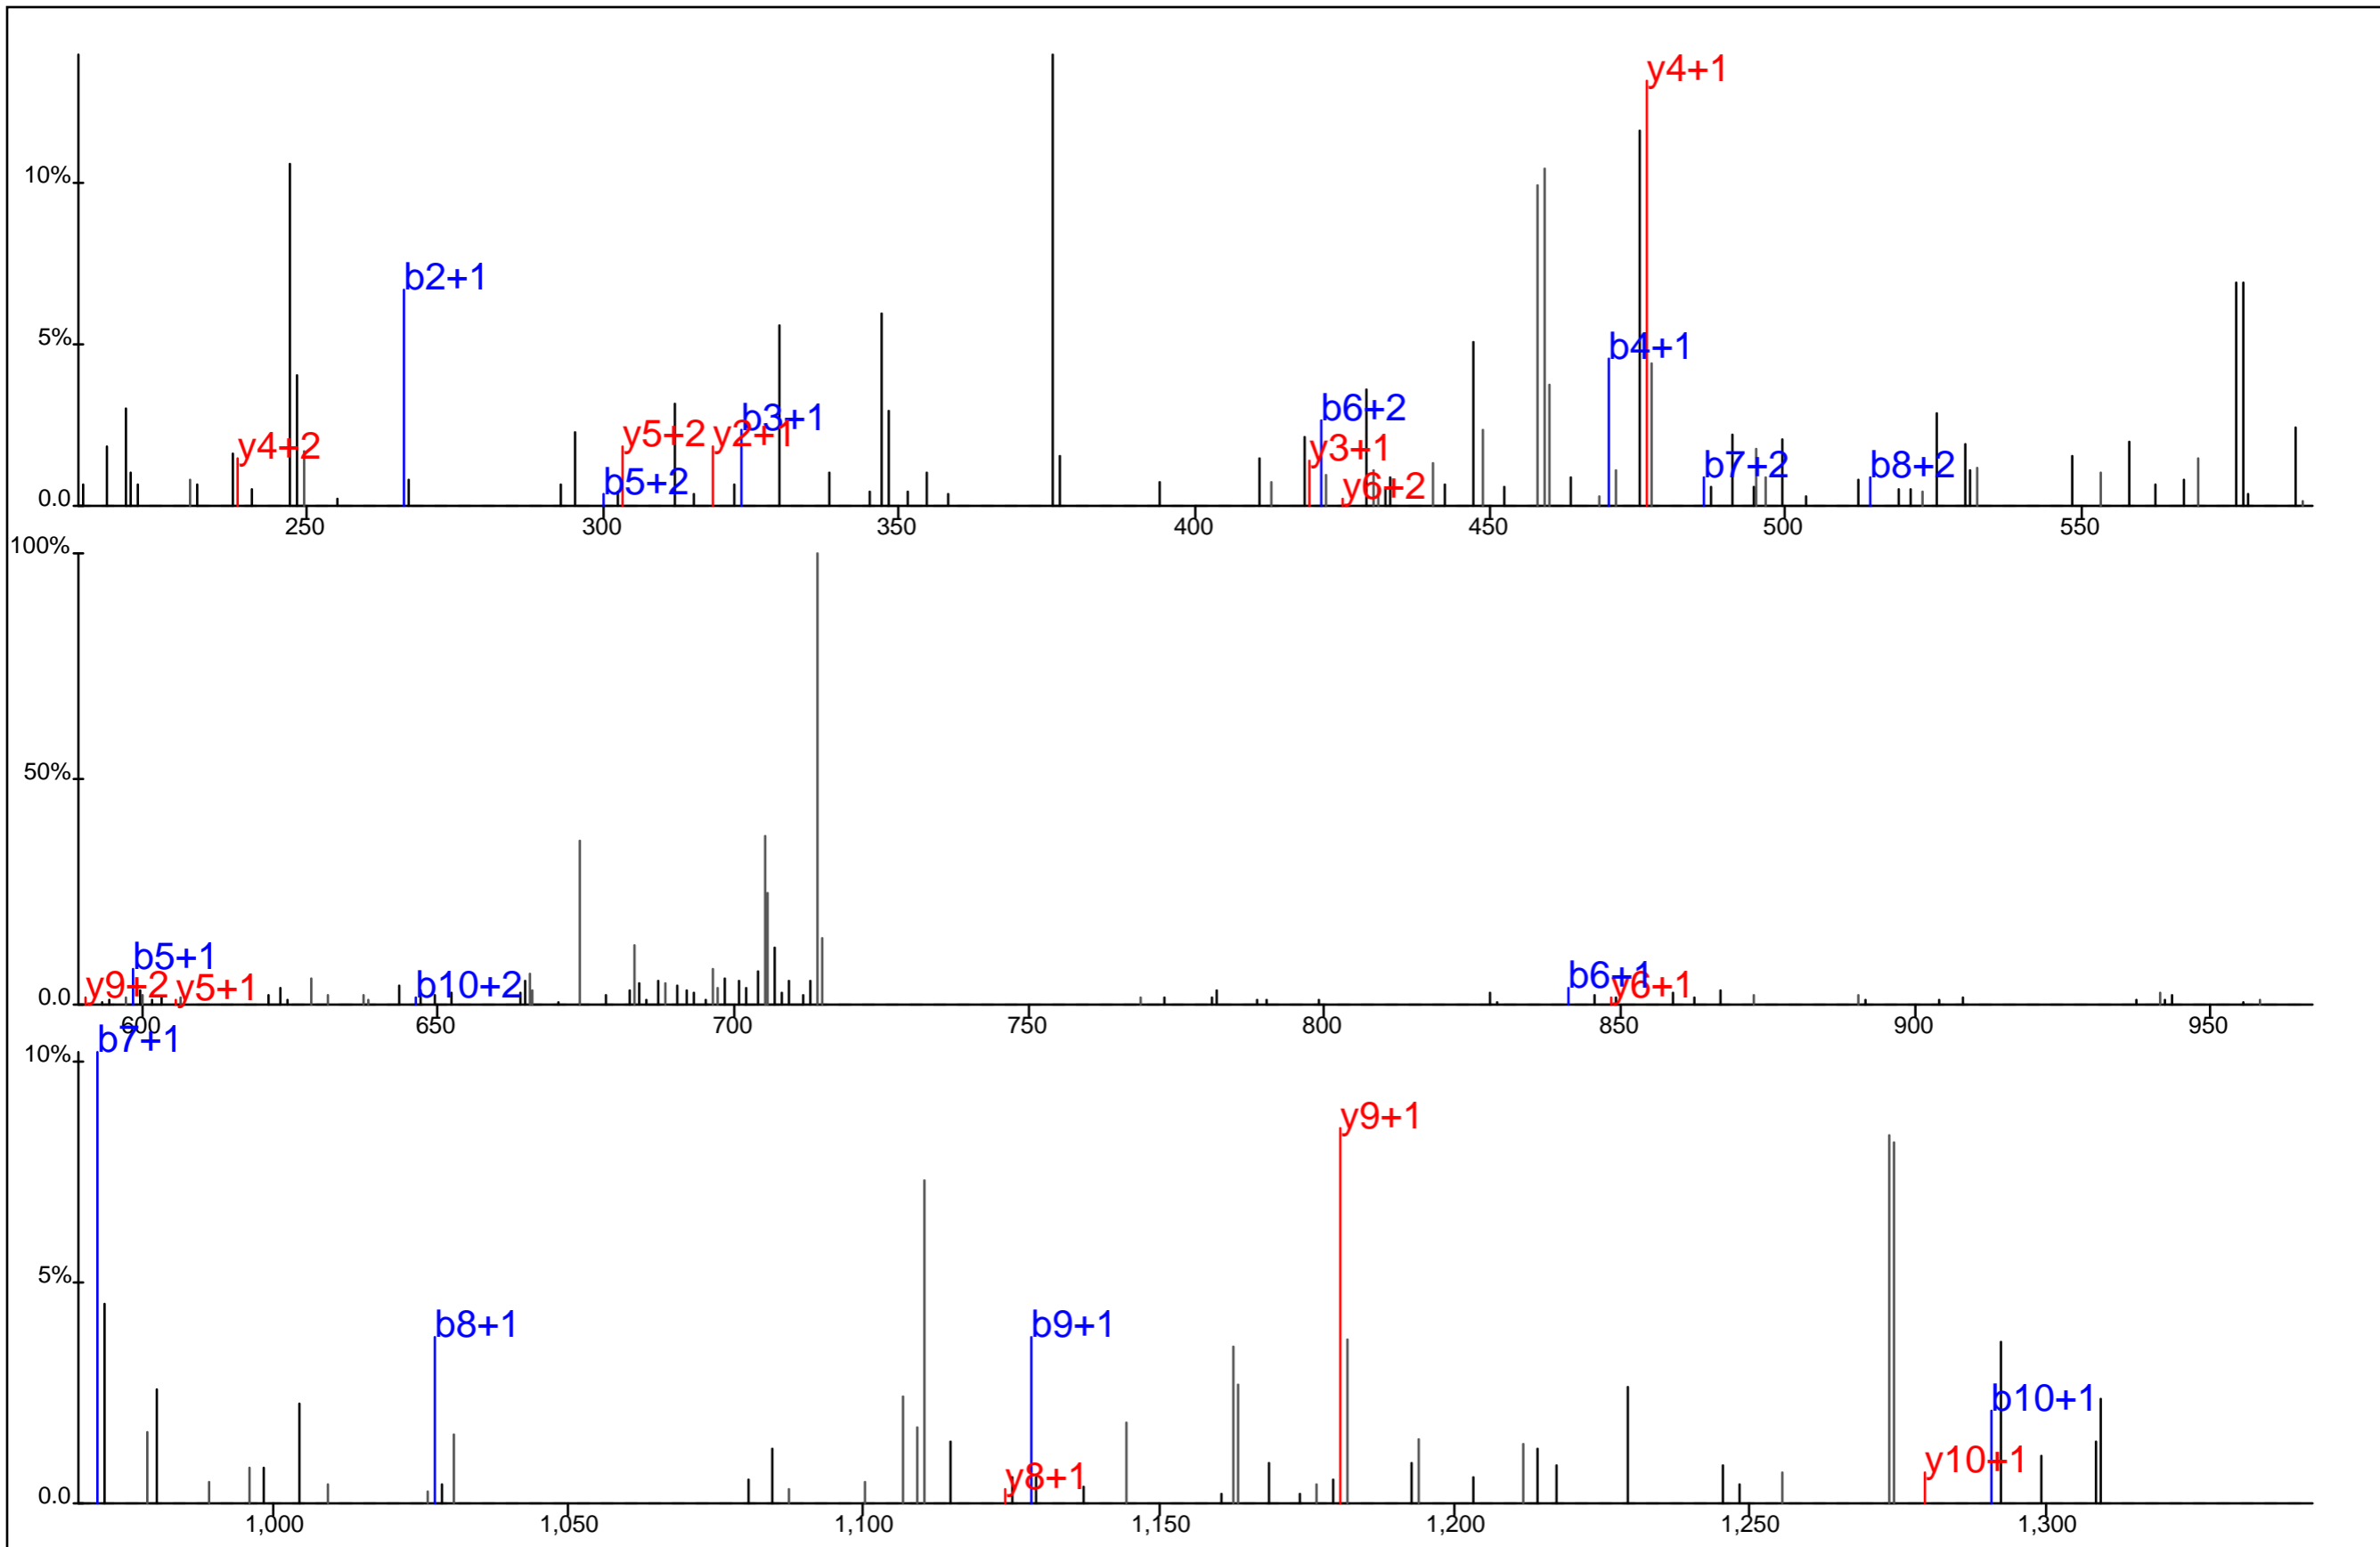

■ □ ■ ■ ■ ■ ■ ■  
 R% G F Q Y\* E G T Y K#  
 ■ ■ ■ ■ ■ ■ ■ ■

Protein Name: G6PD  
 gi Accession: 31543  
 Precursor Mass: 723.3335+2  
 Delta Mass: 1.209 ppm  
 XCorr: 33.76

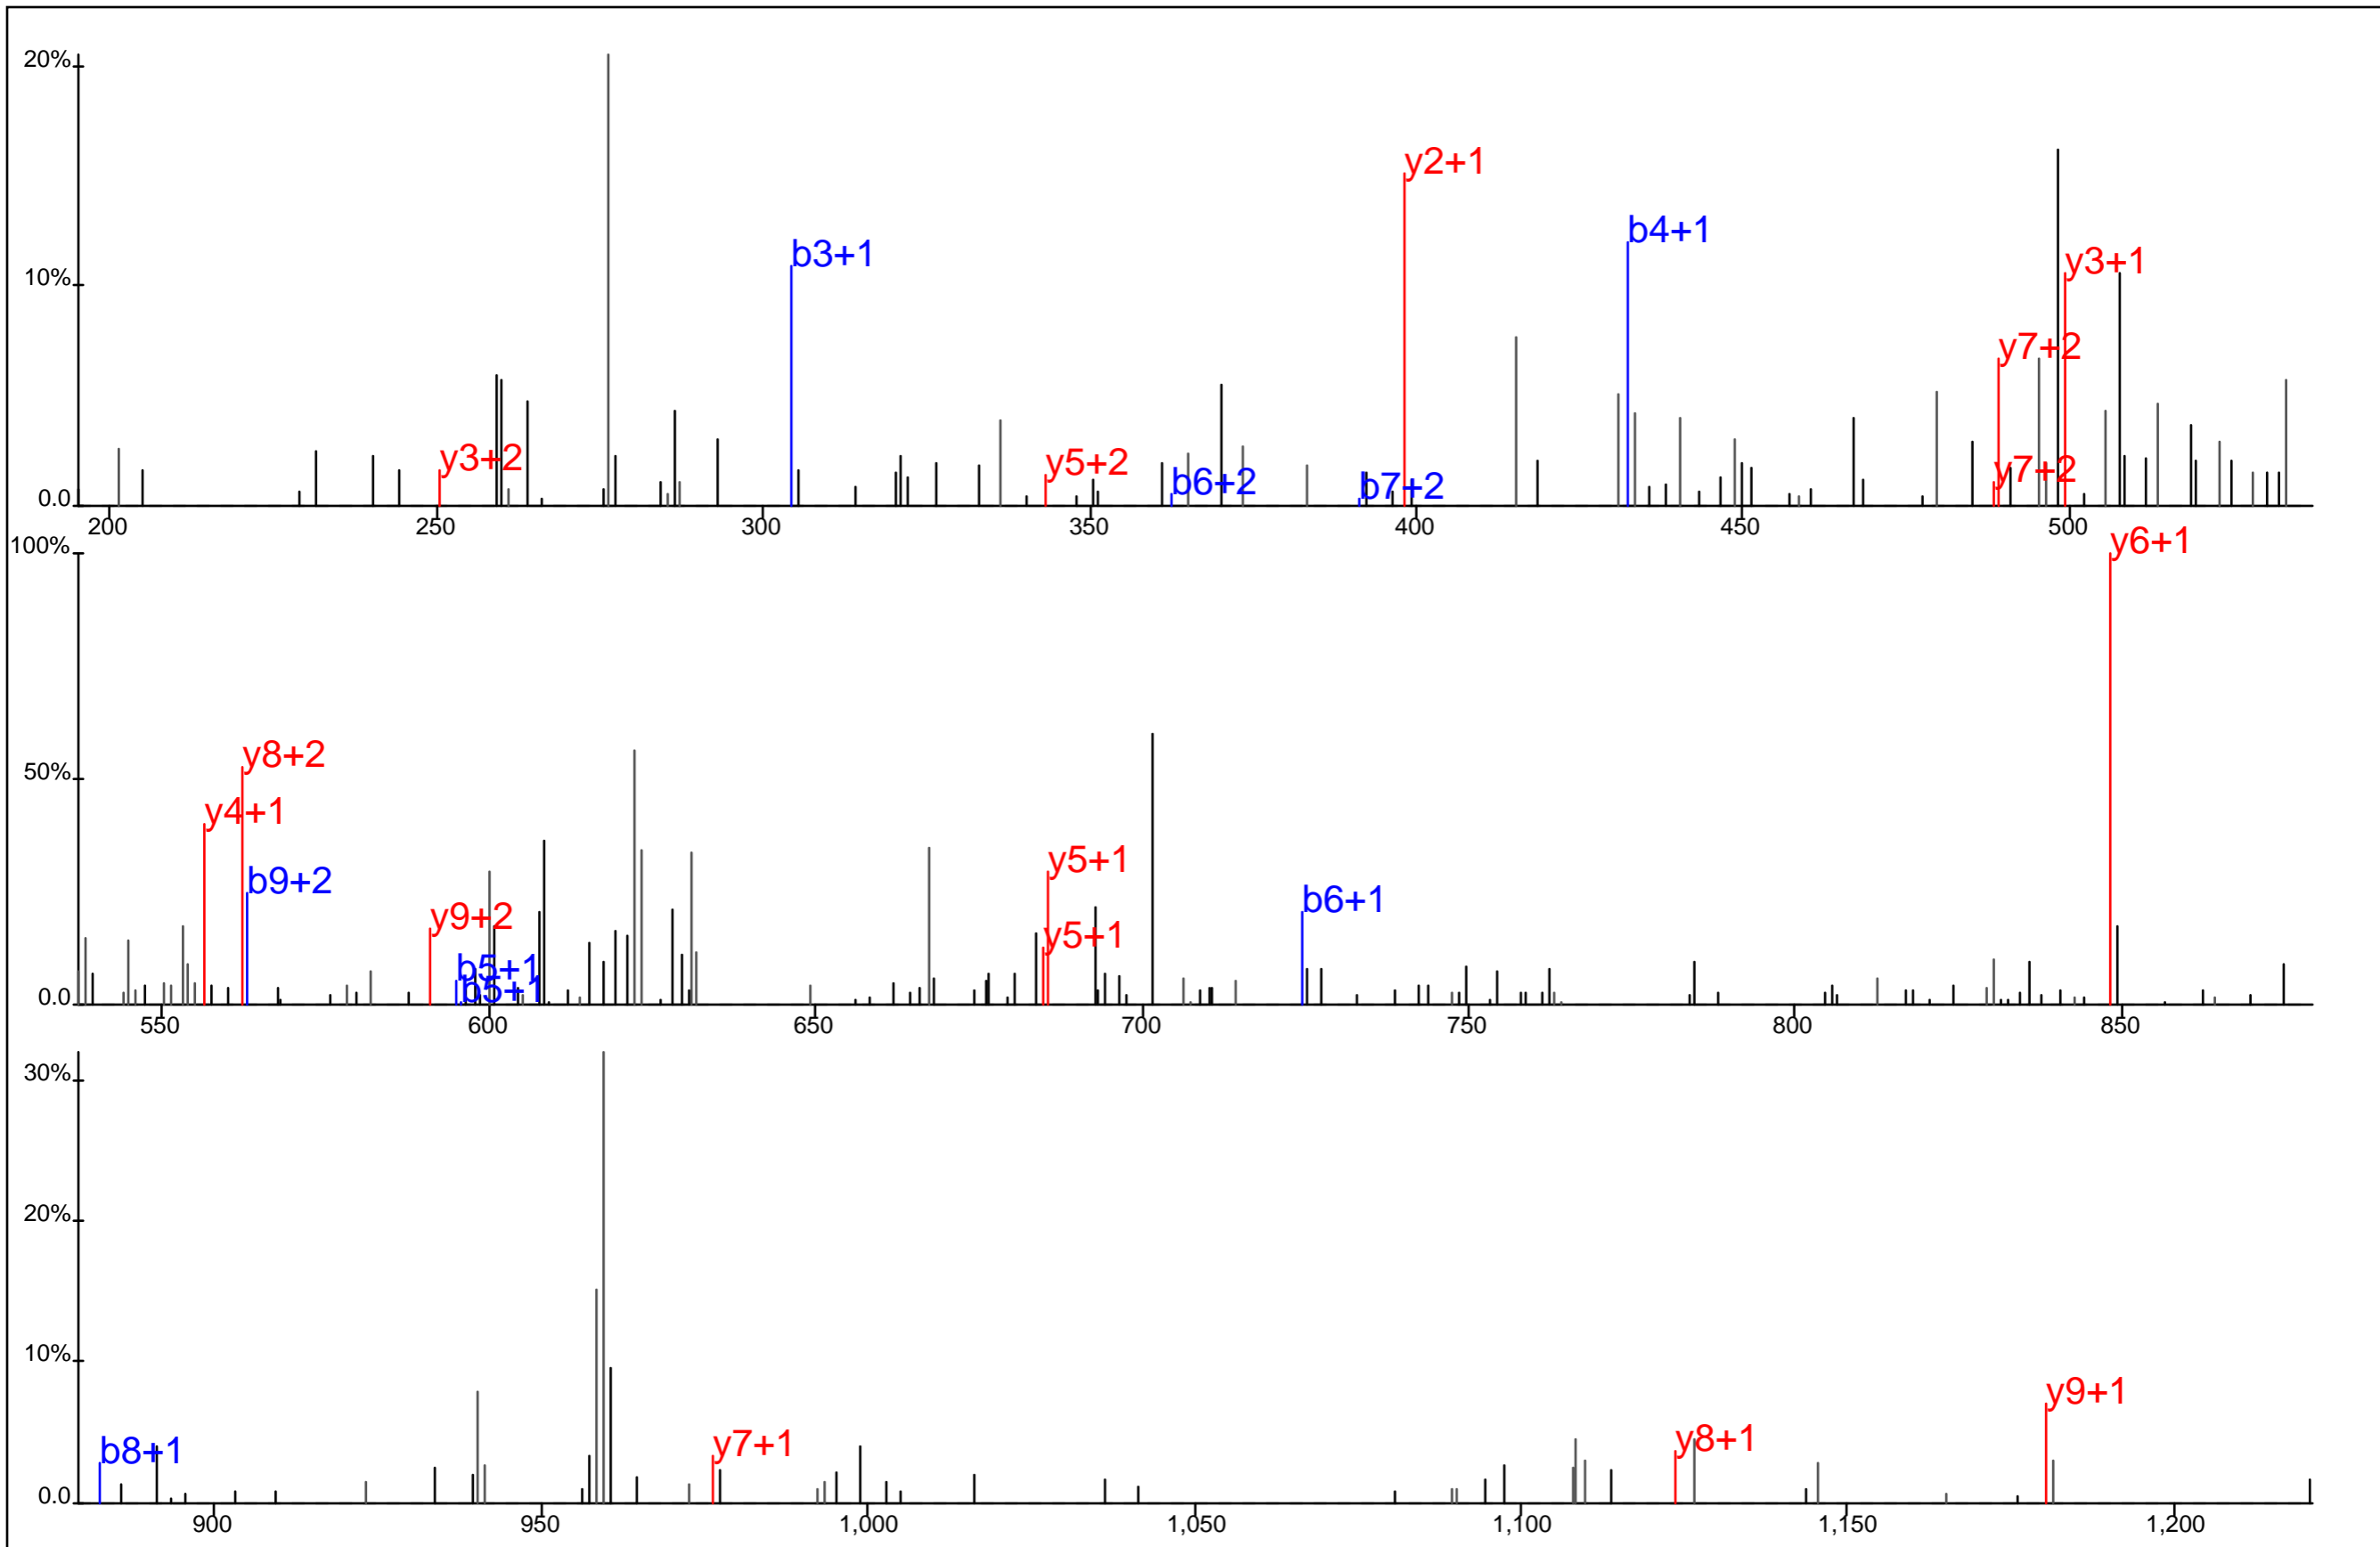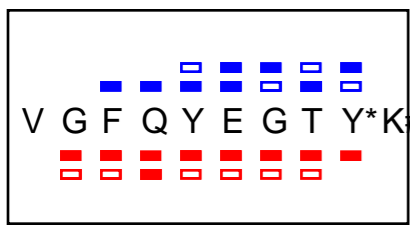

Protein Name: G6PD  
 gi Accession: 31543  
 Precursor Mass: 640.2794+2  
 Delta Mass: 2.218 ppm  
 XCorr: 25.32

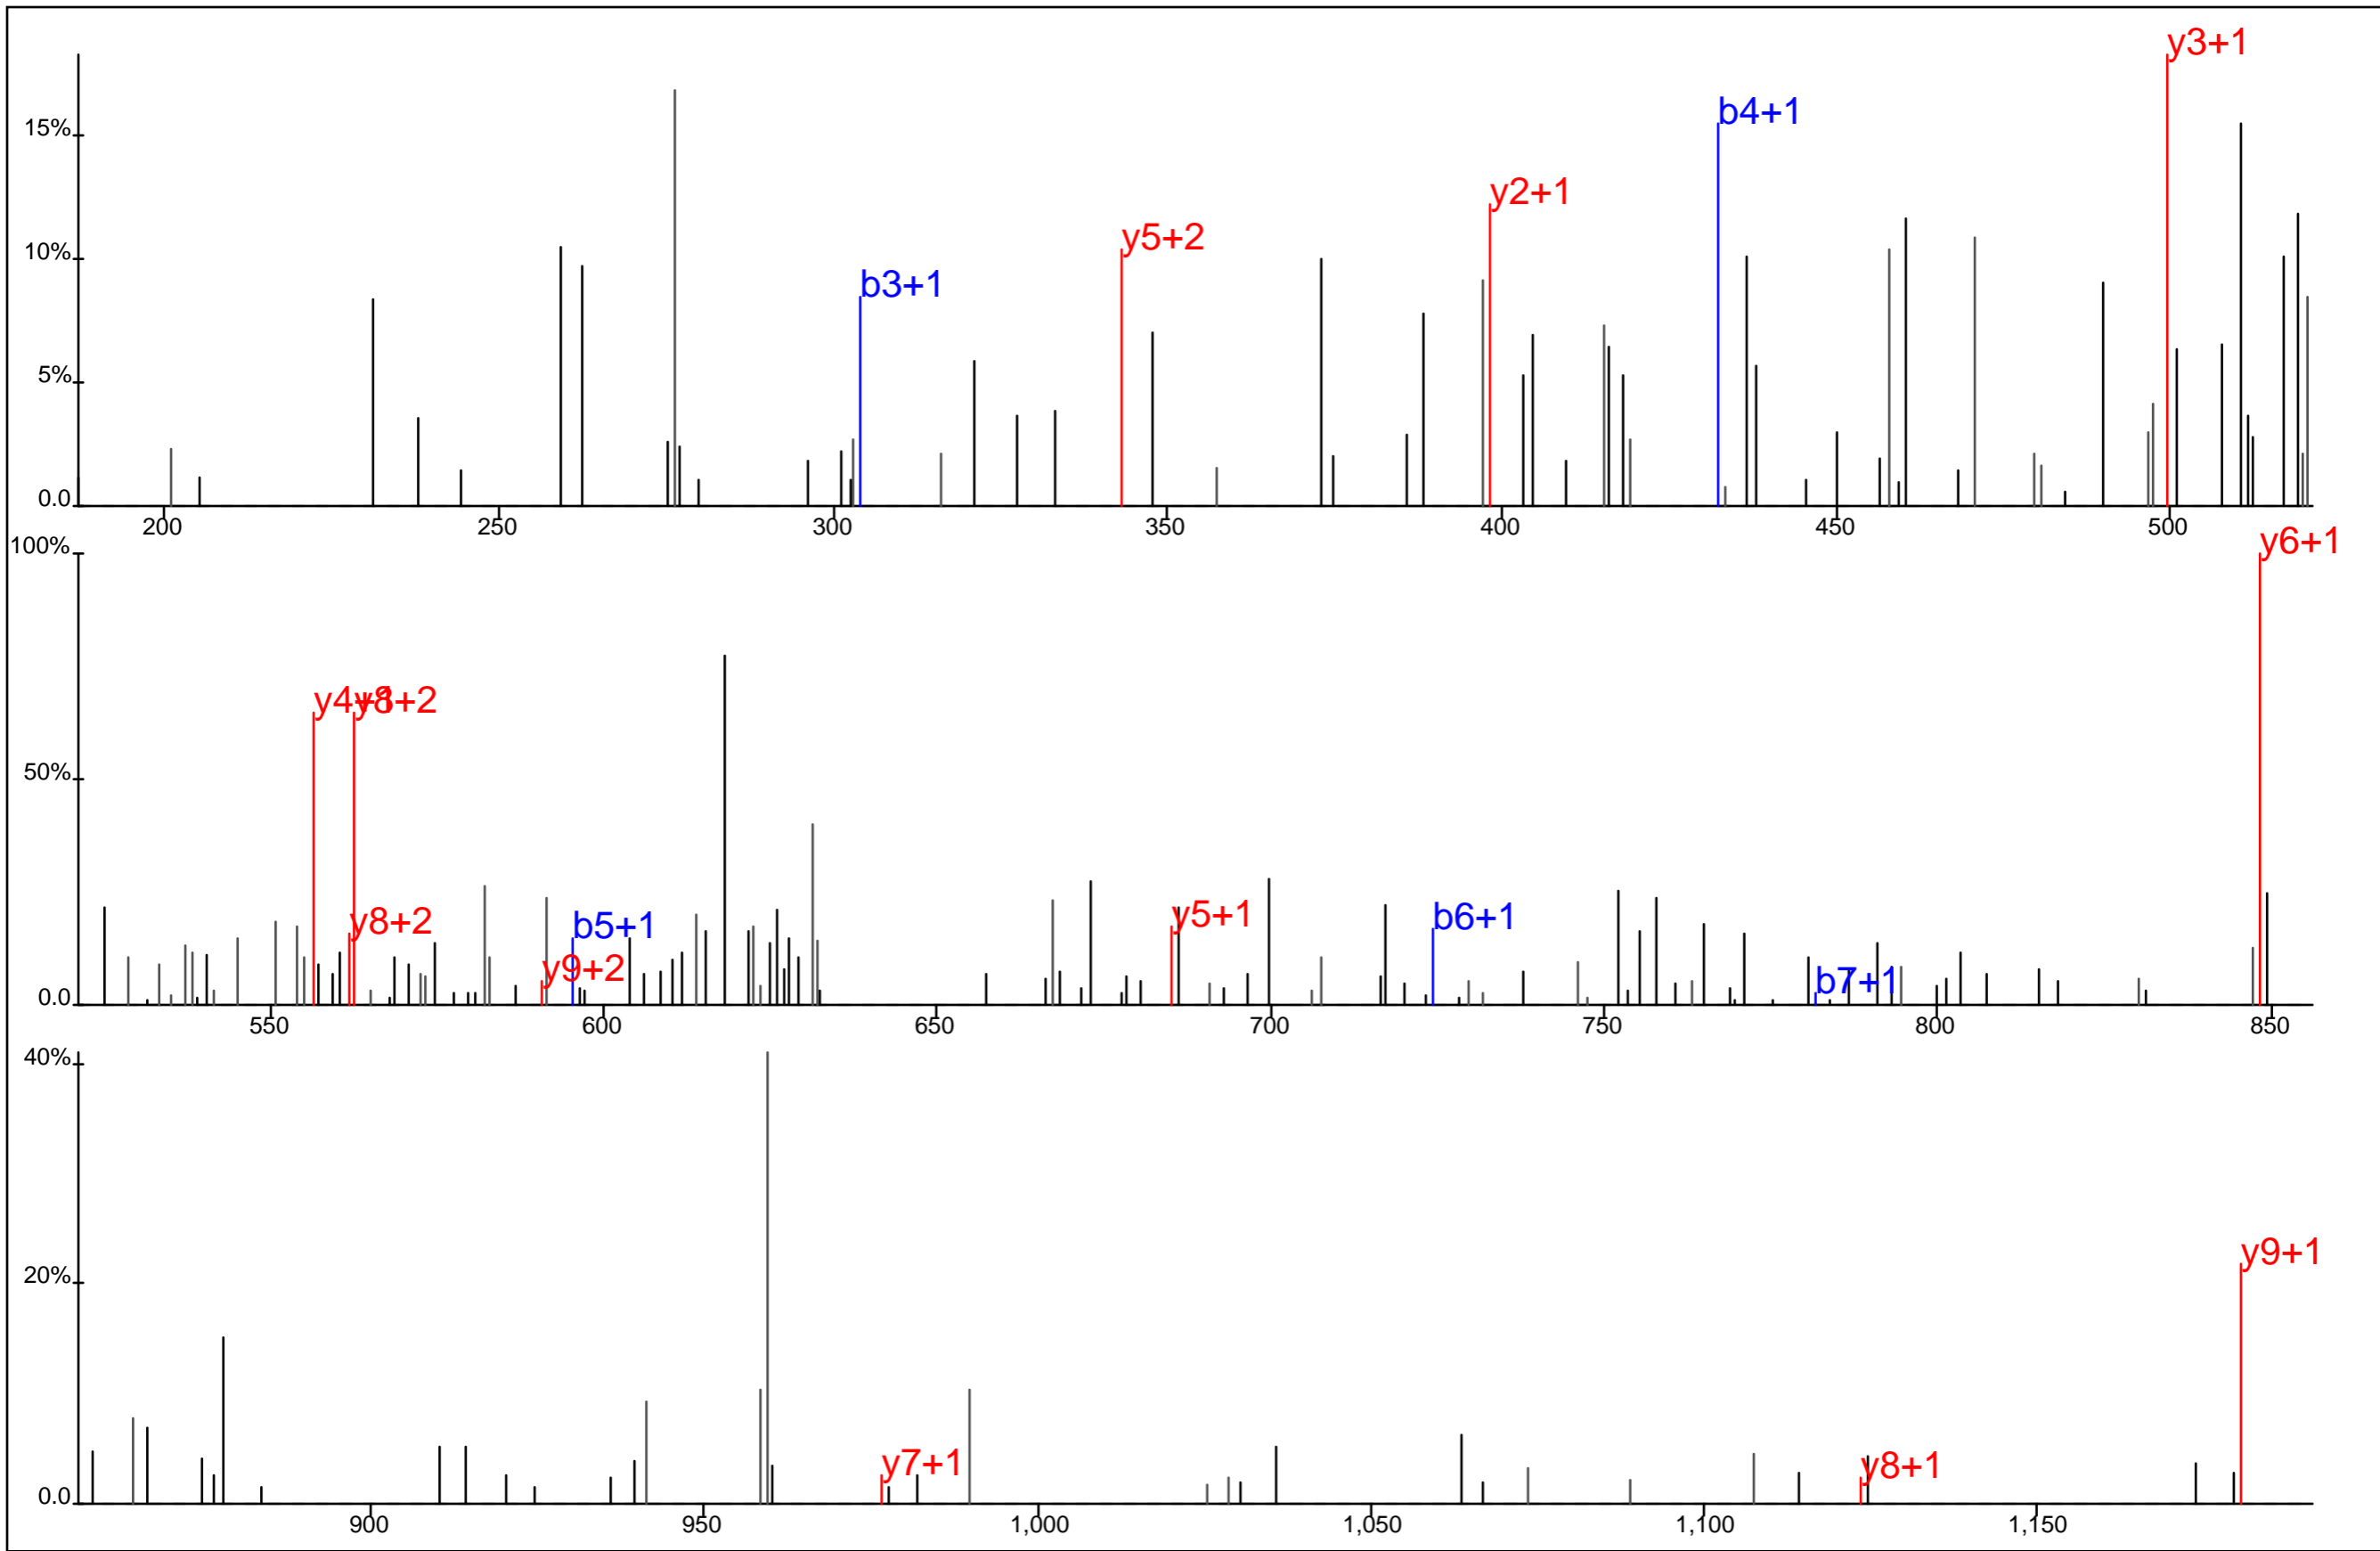

■ ■ ■ ■ ■ ■ ■  
 V G F Q Y E G T Y\* K#  
□ □ □ □ □ □ □ □

Protein Name: G6PD  
 gi Accession: 31543  
 Precursor Mass: 640.2805+2  
 Delta Mass: 3.937 ppm  
 XCorr: 18.66

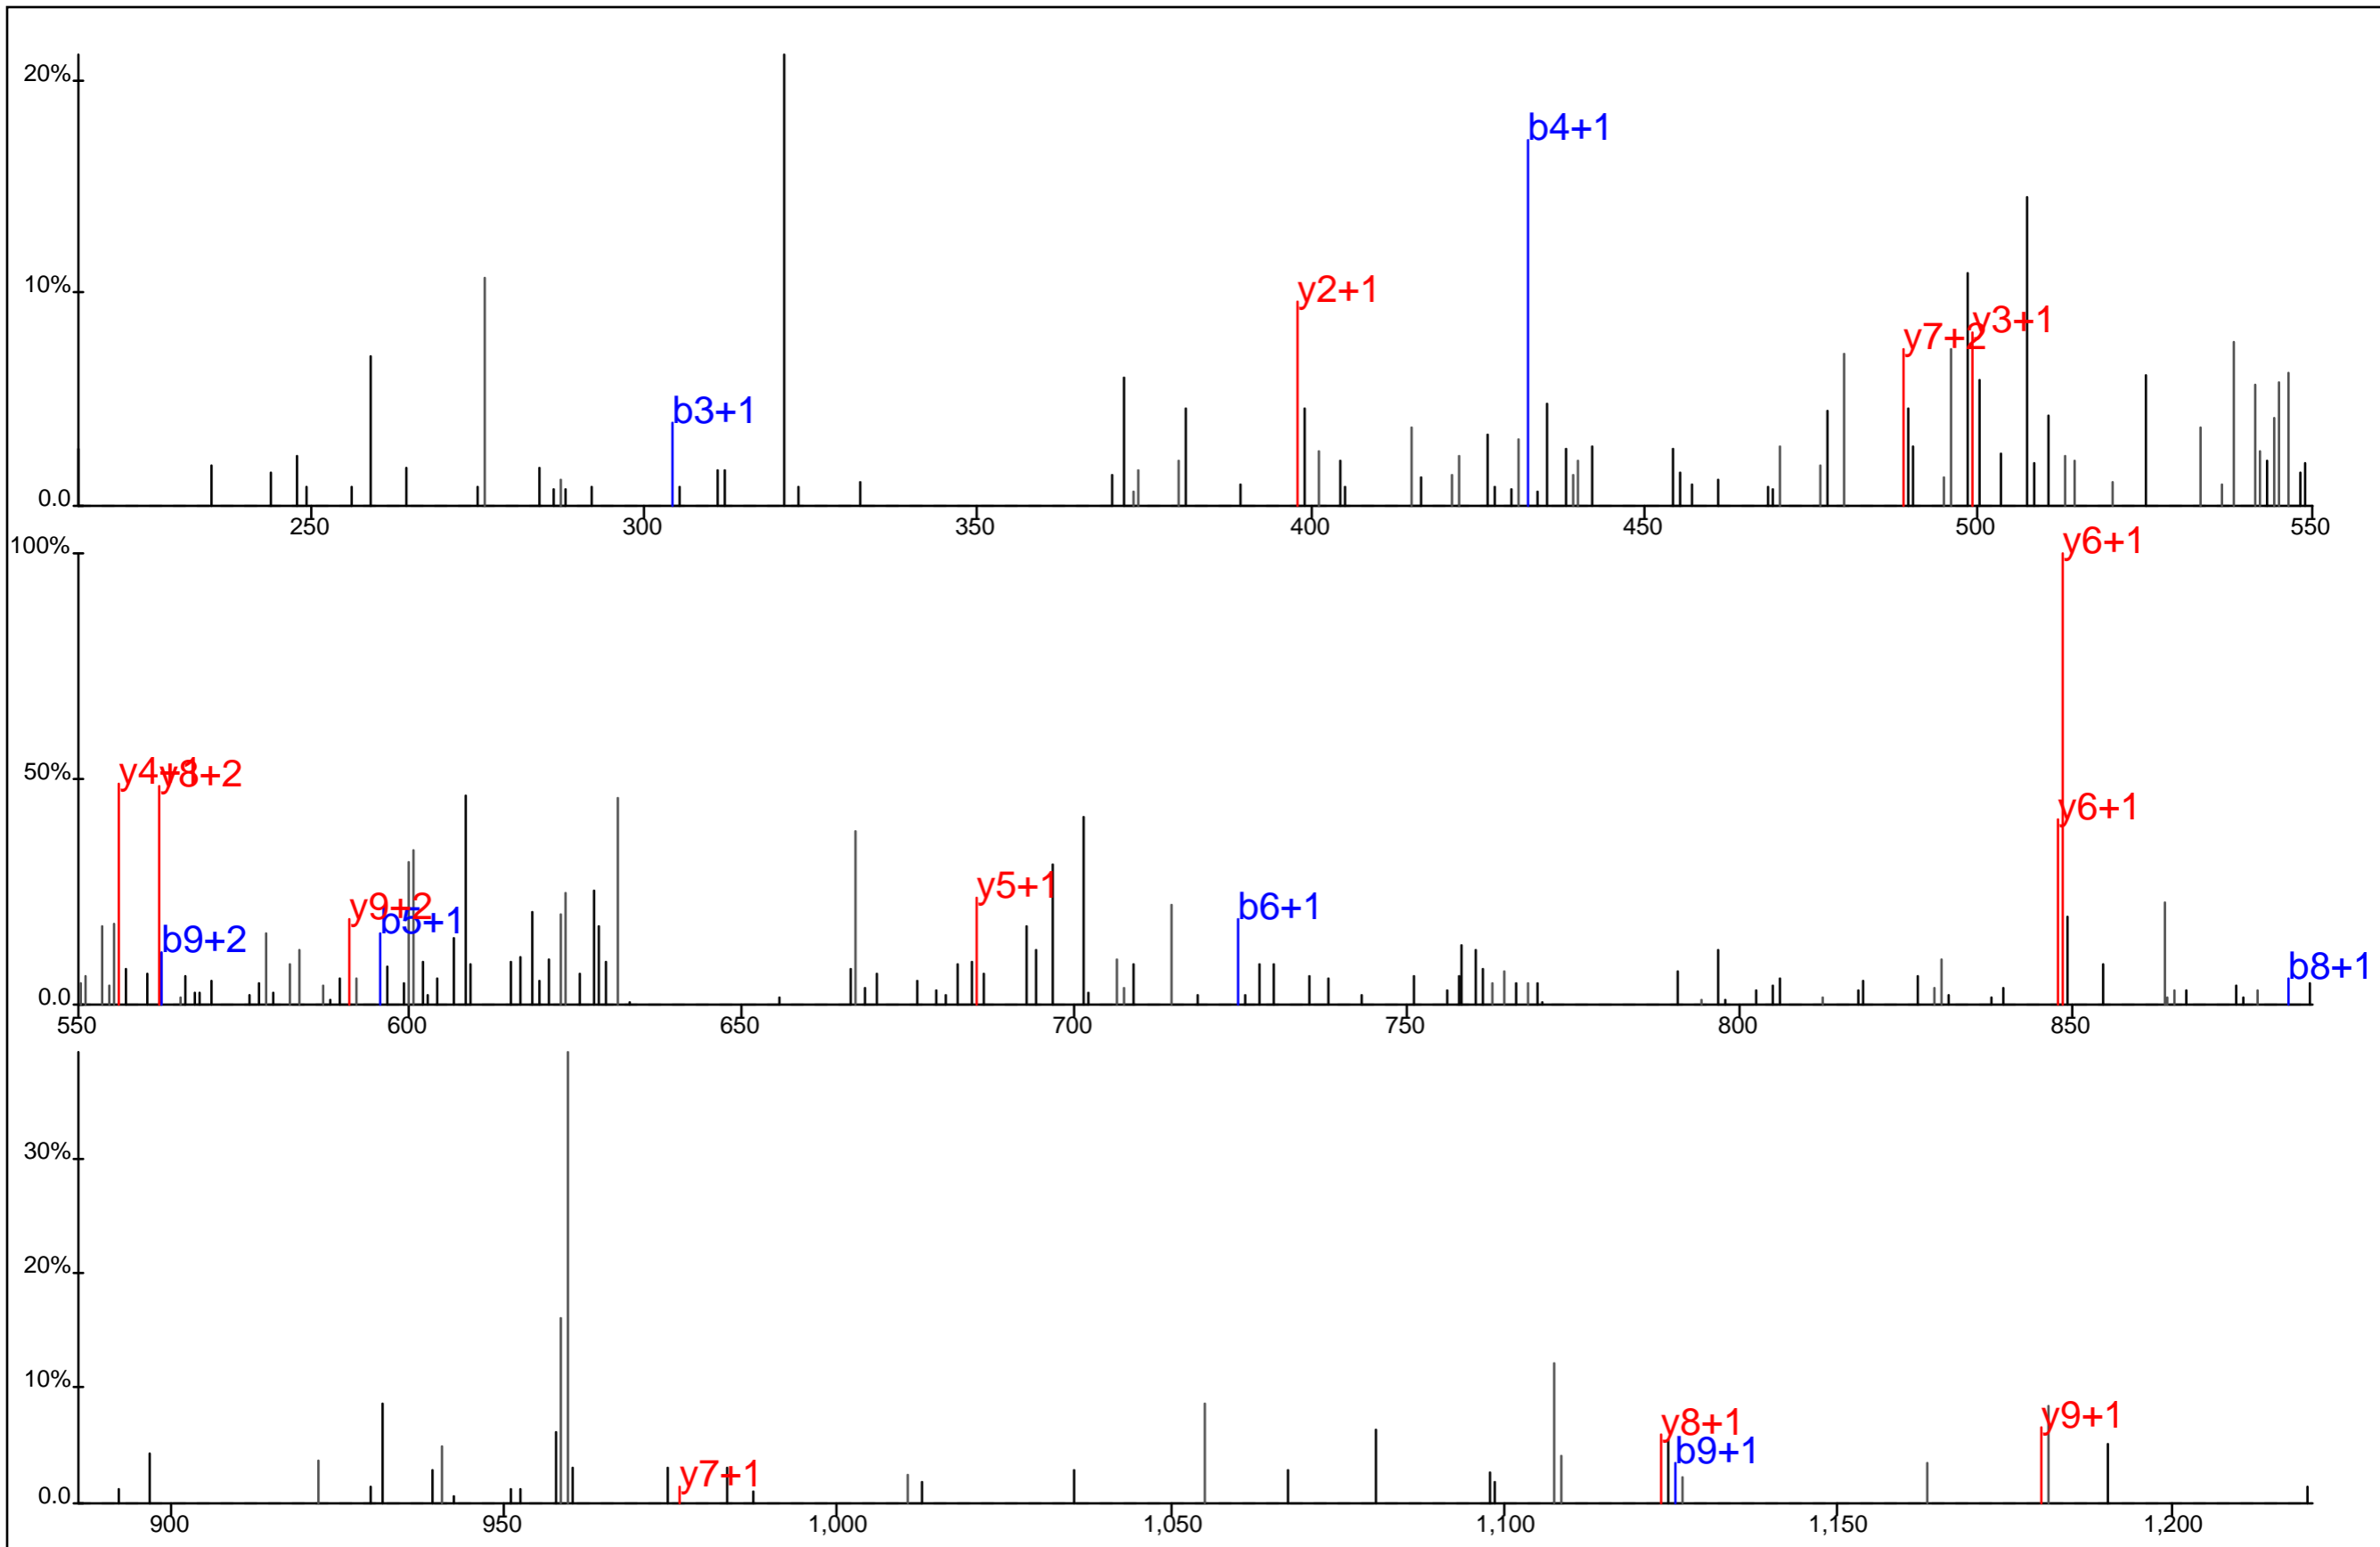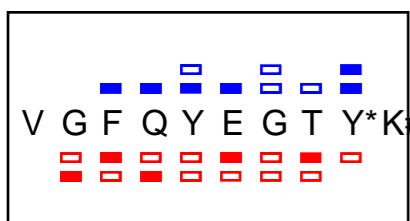

Protein Name: G6PD  
 gi Accession: 31543  
 Precursor Mass: 640.2787+2  
 Delta Mass: 1.265 ppm  
 XCorr: 24.8

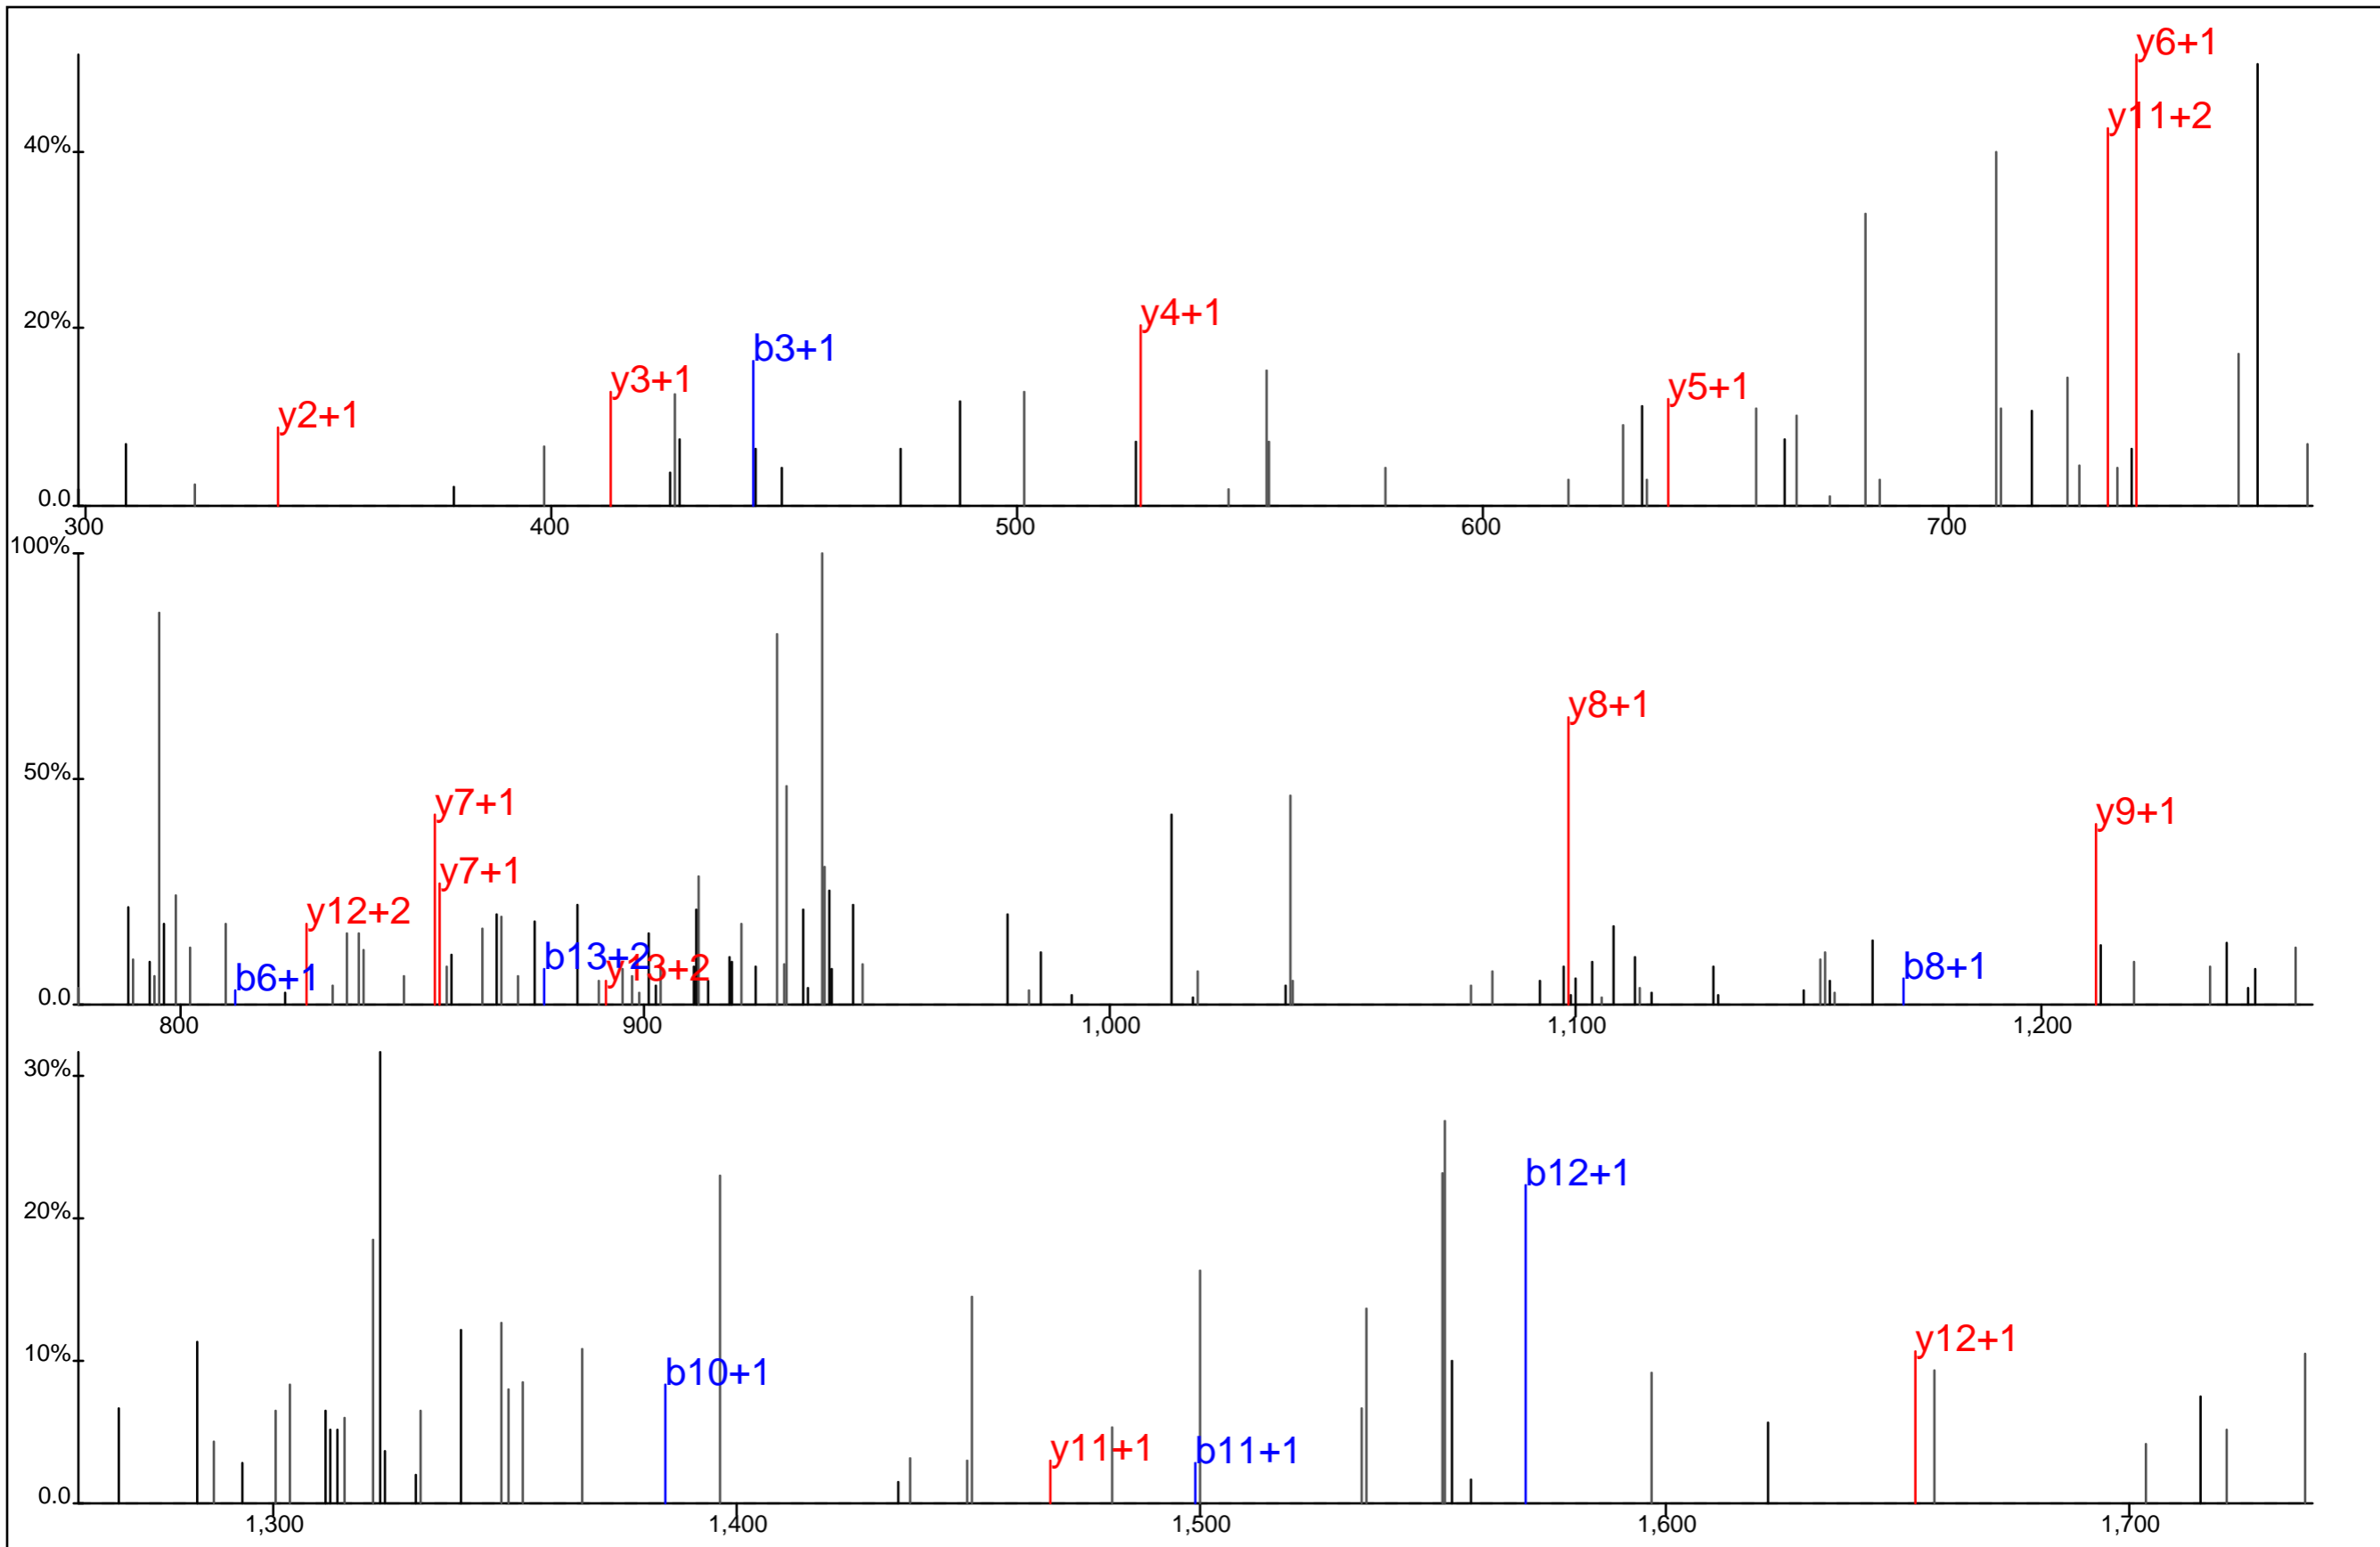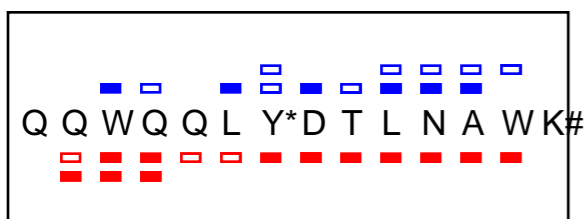

Protein Name: GA17  
 gi Accession: 23397429  
 Precursor Mass: 955.4443+2  
 Delta Mass: 4.727 ppm  
 XCorr: 39.47

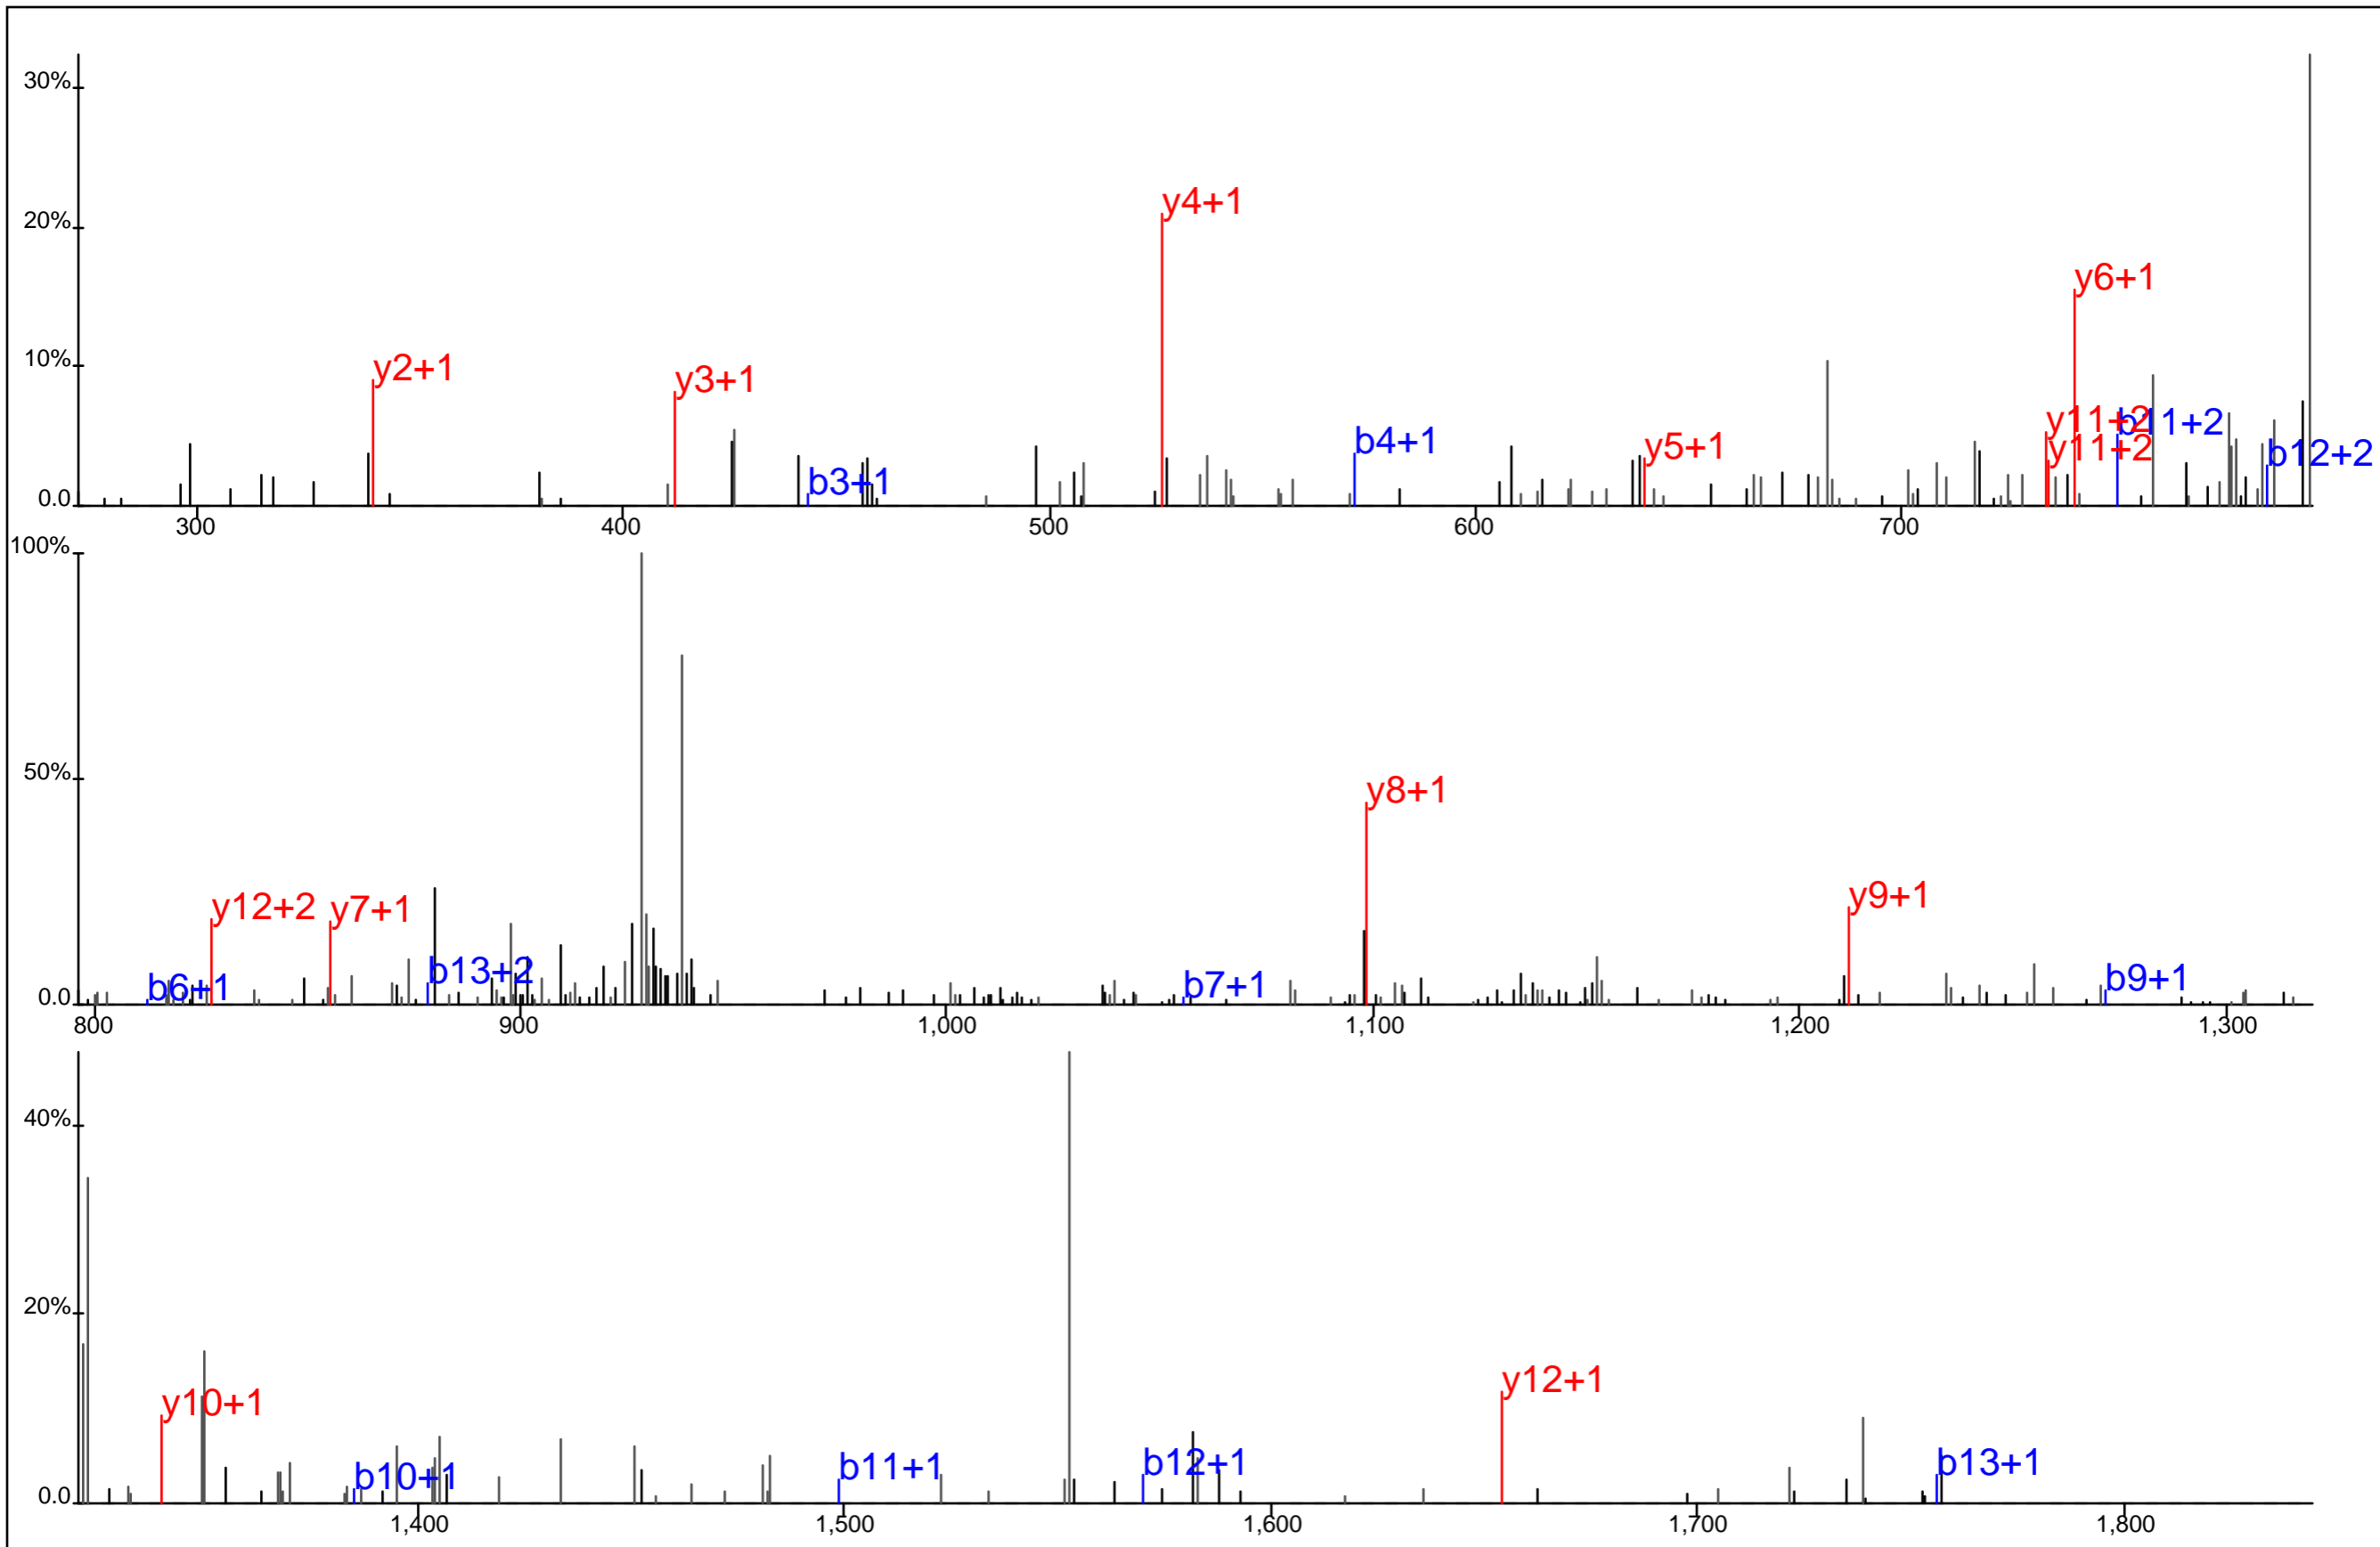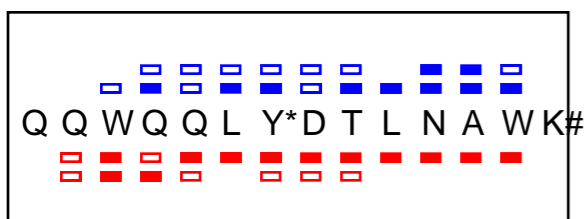

Protein Name: GA17  
 gi Accession: 23397429  
 Precursor Mass: 955.4433+2  
 Delta Mass: 3.638 ppm  
 XCorr: 35.59



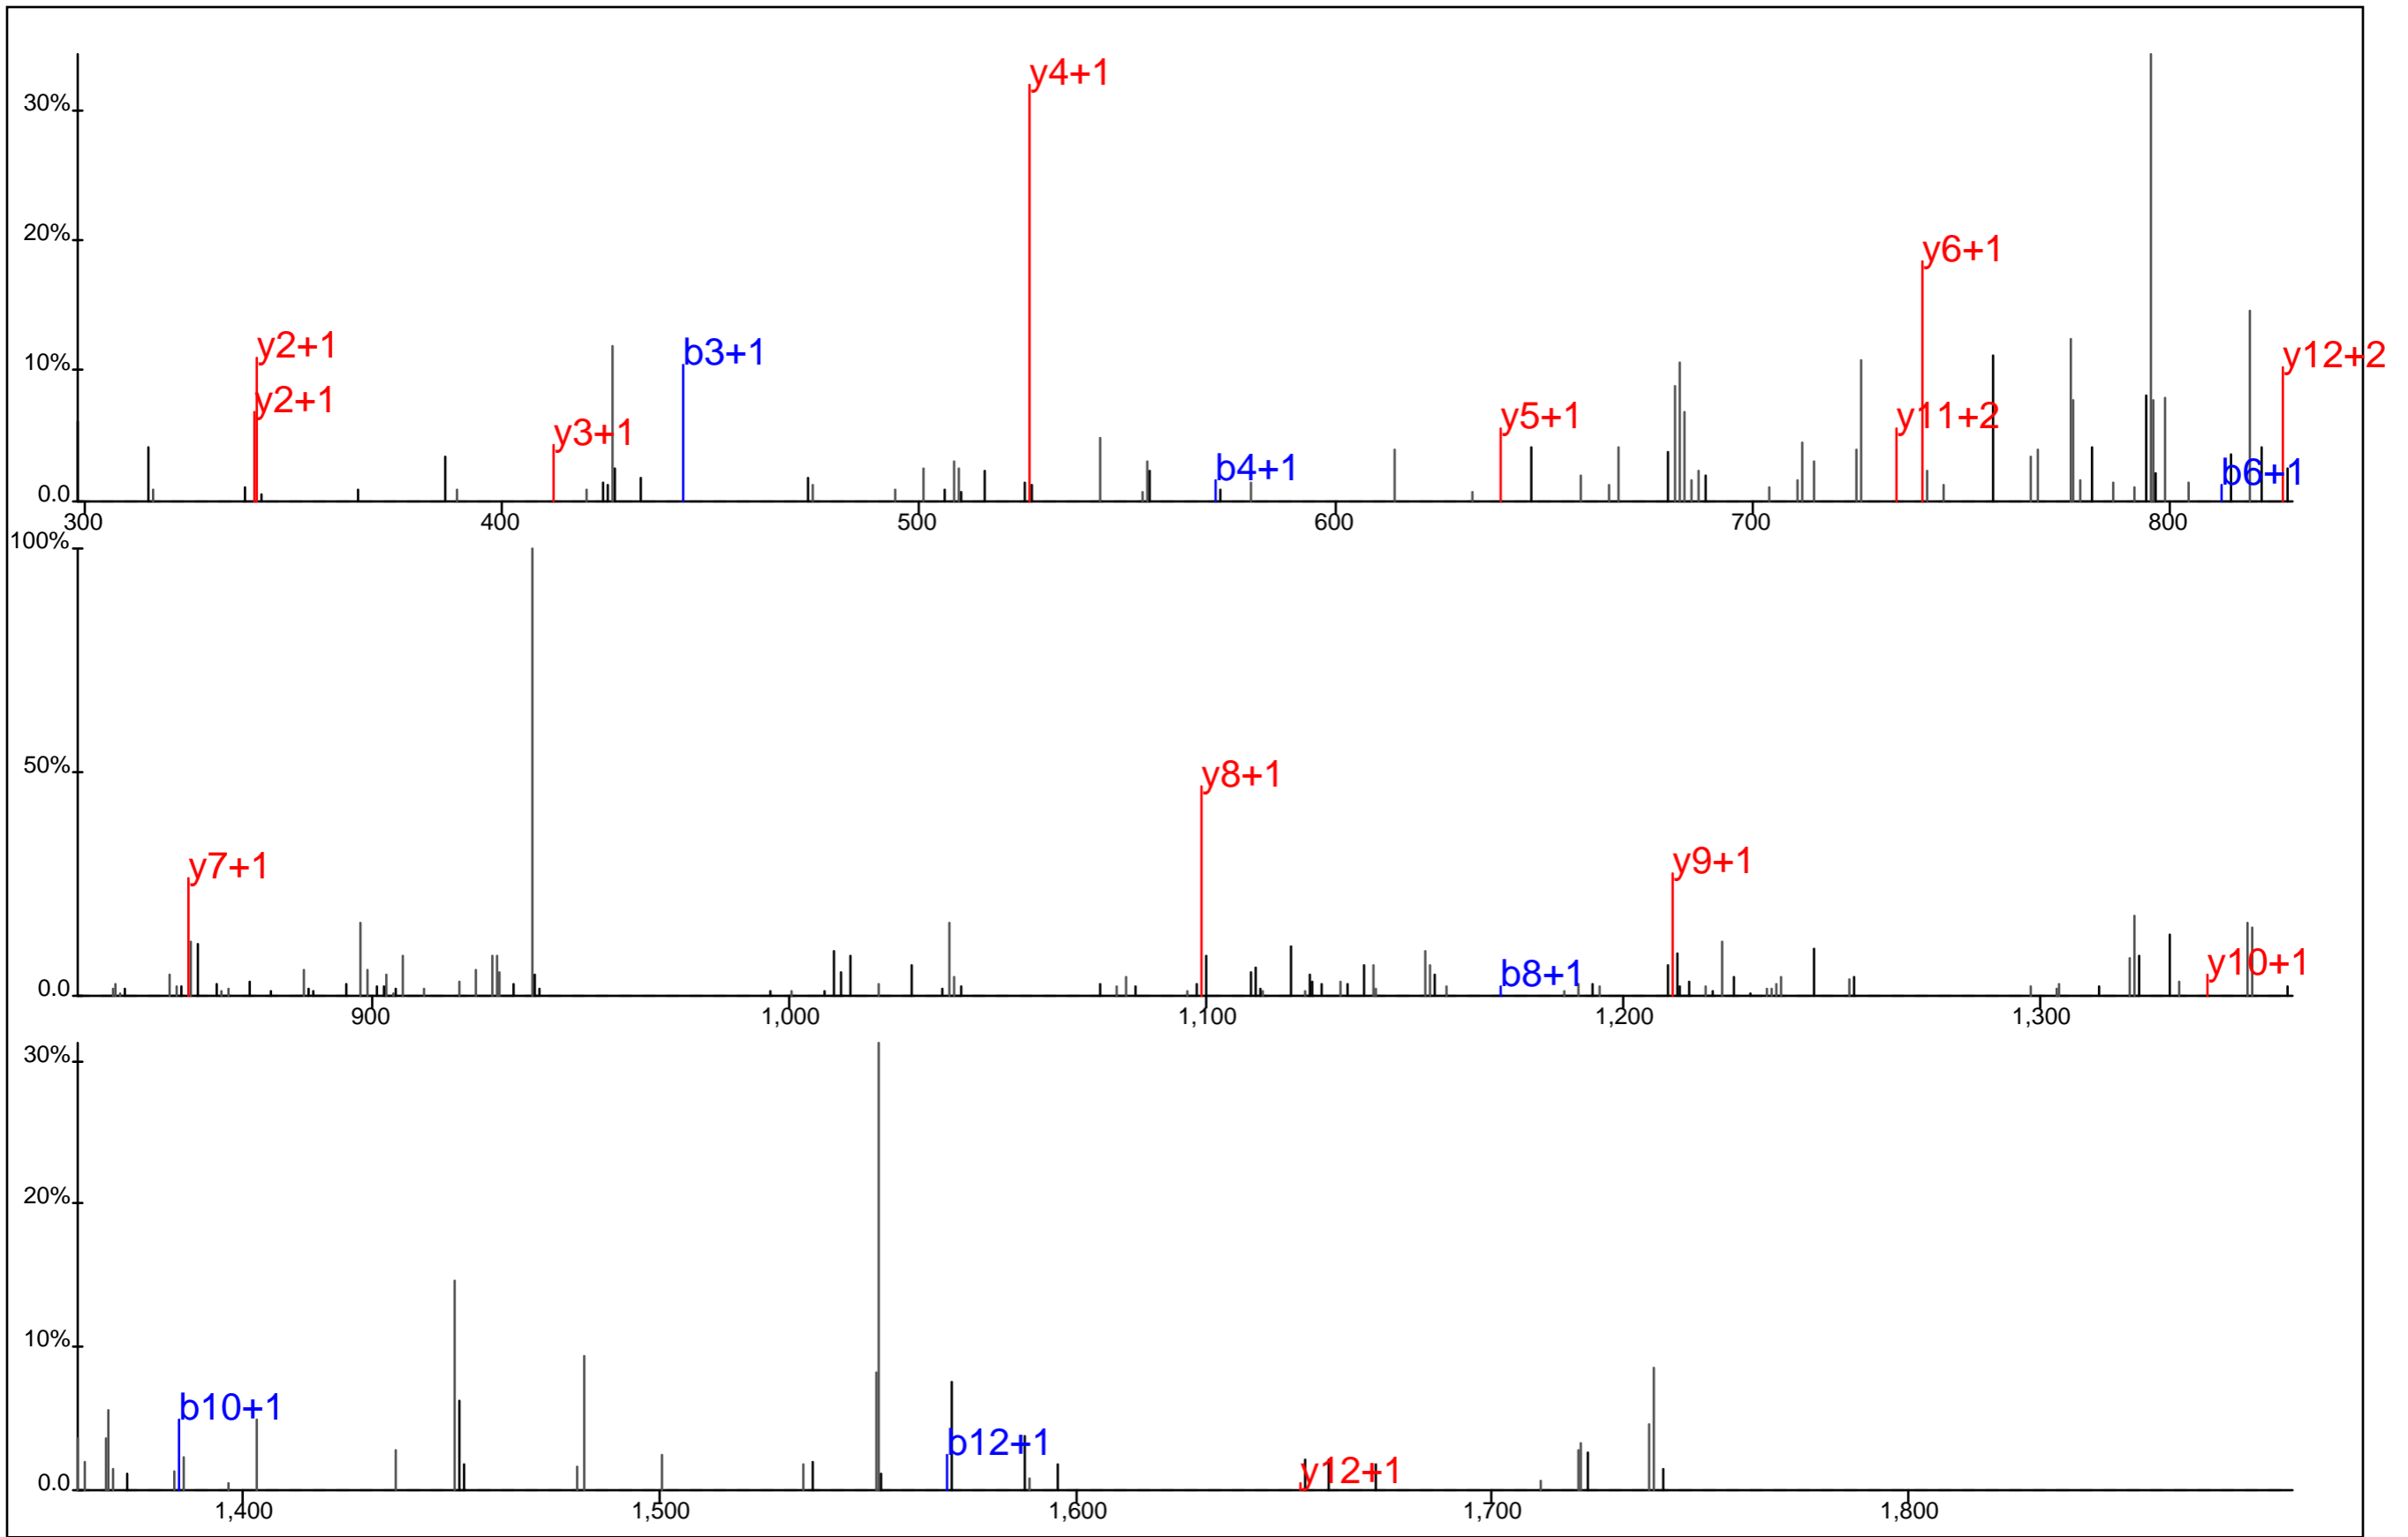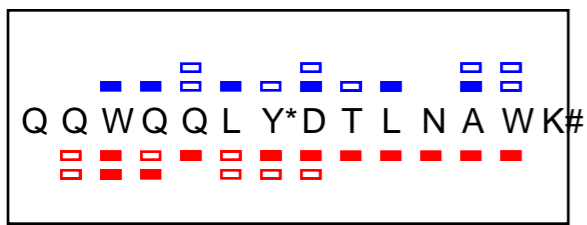

Protein Name: GA17  
 gi Accession: 23397429  
 Precursor Mass: 955.4456+2  
 Delta Mass: 6.005 ppm  
 XCorr: 27.71

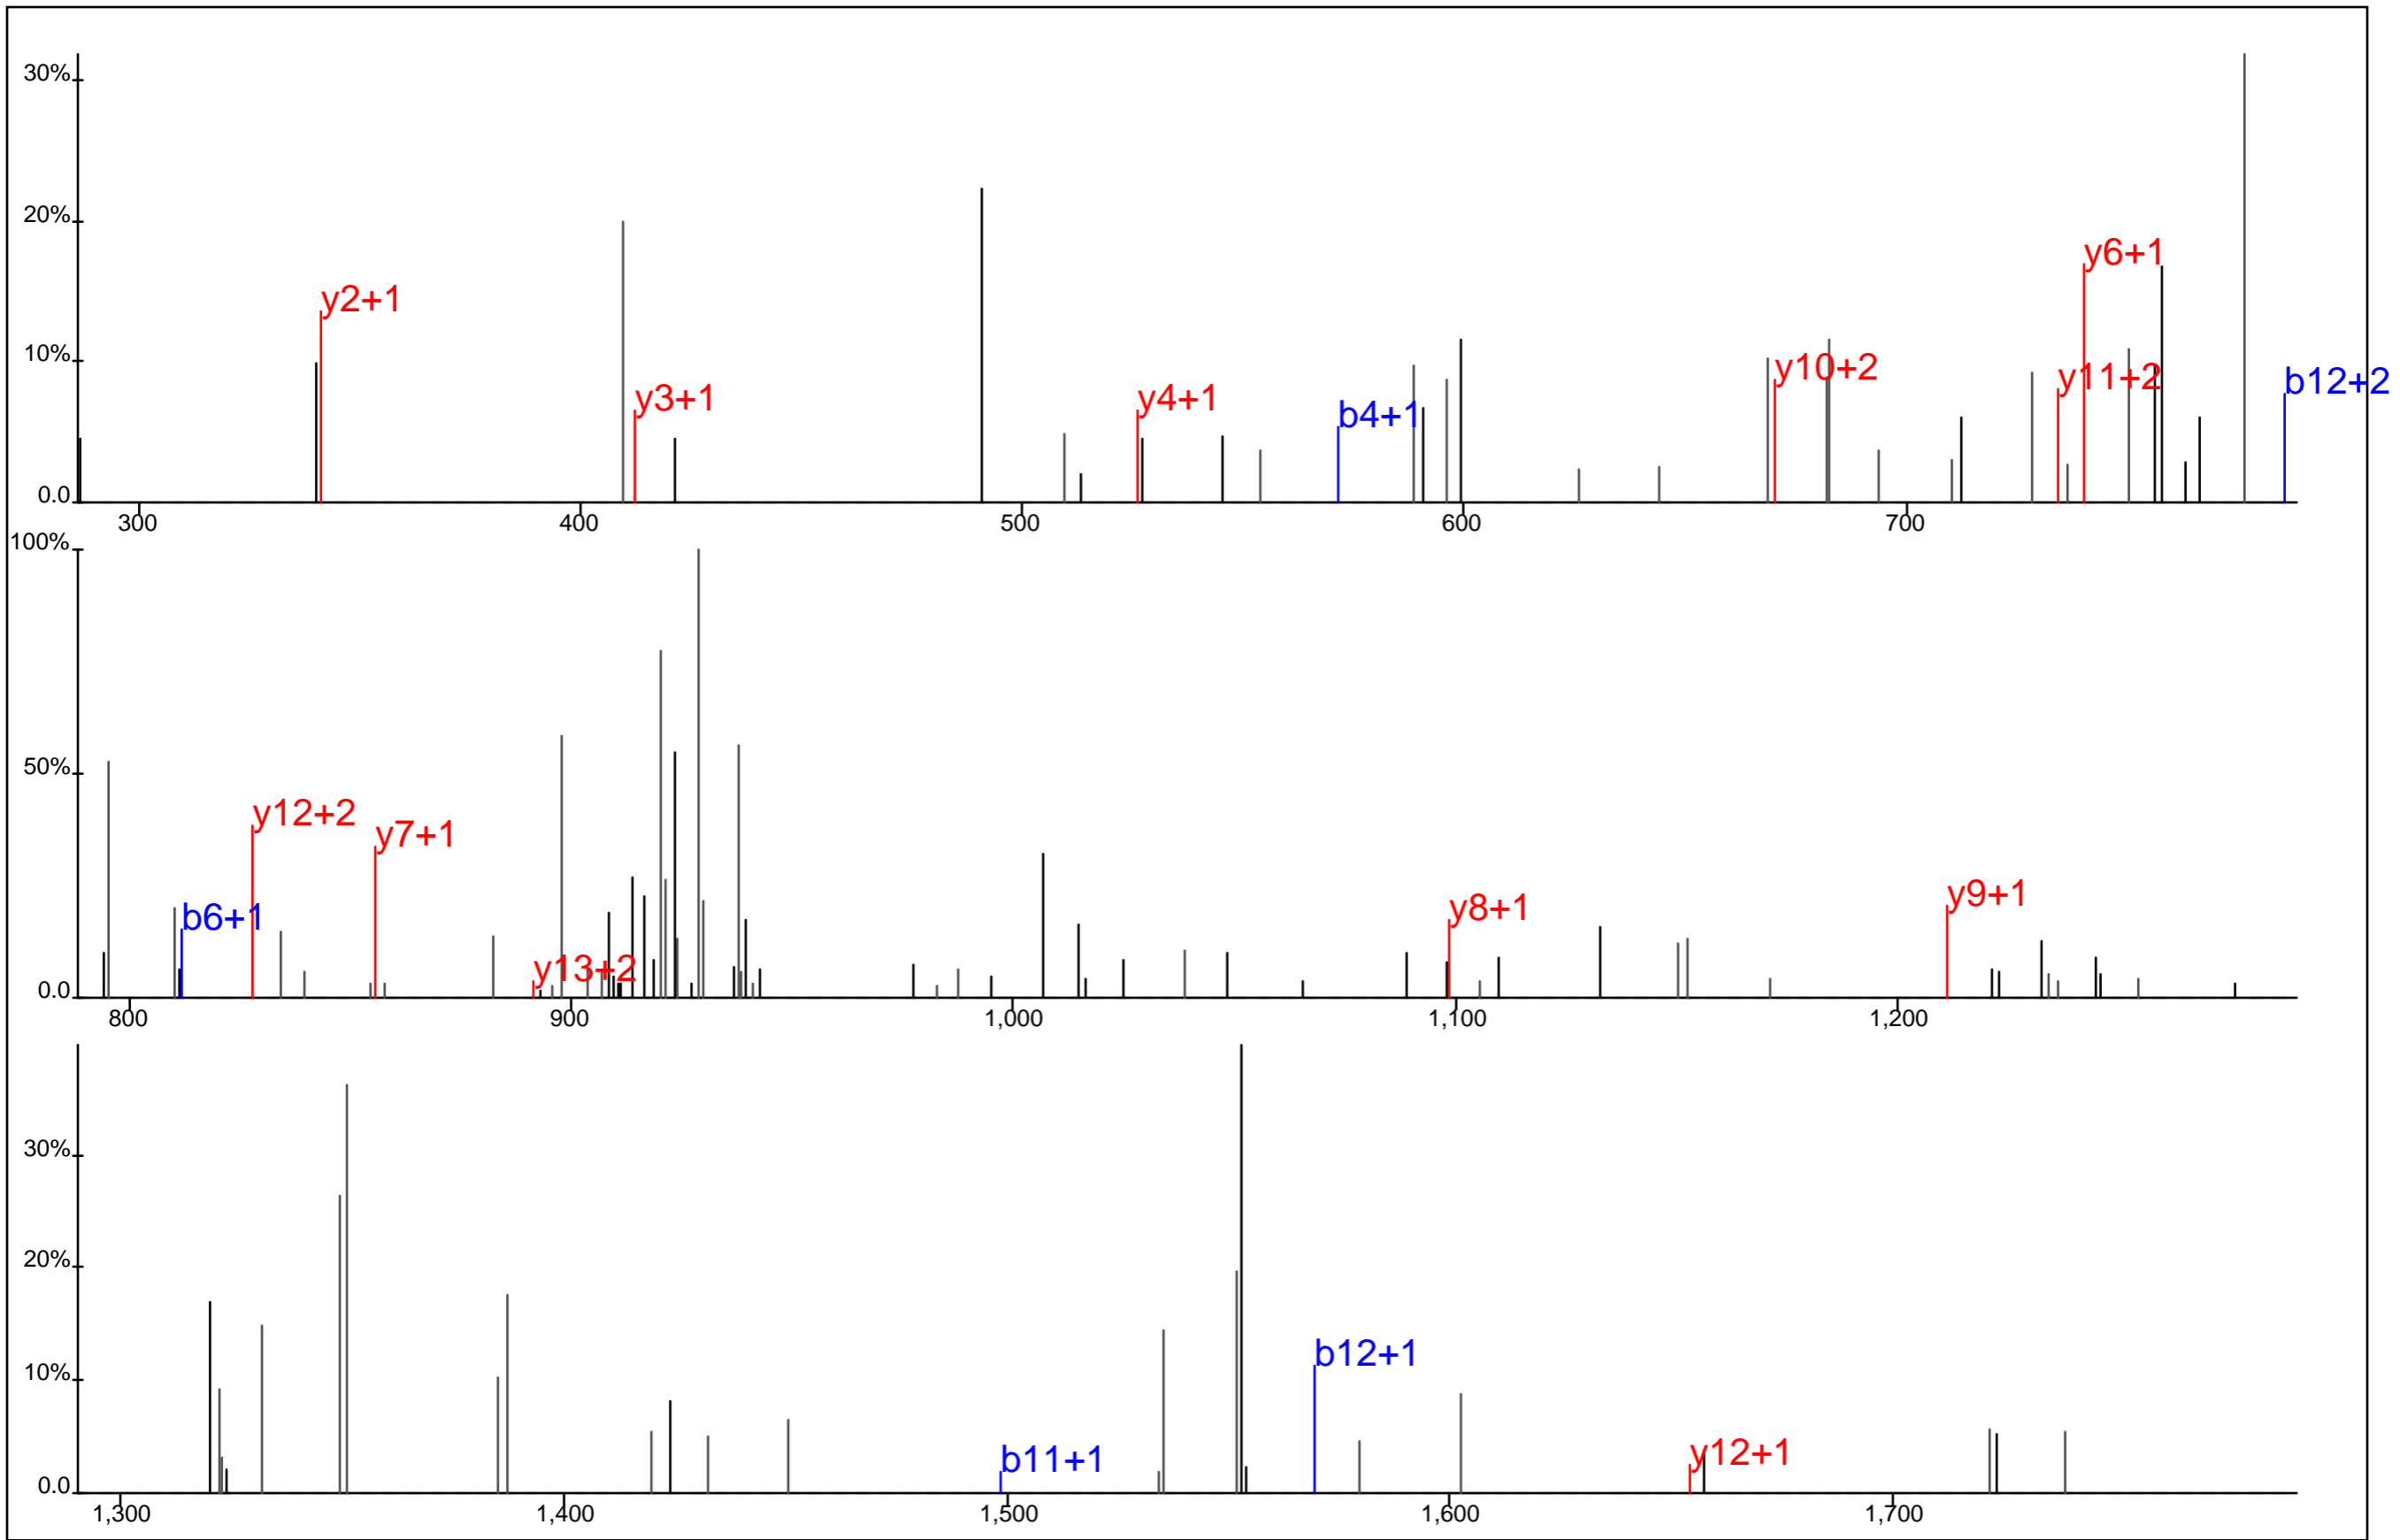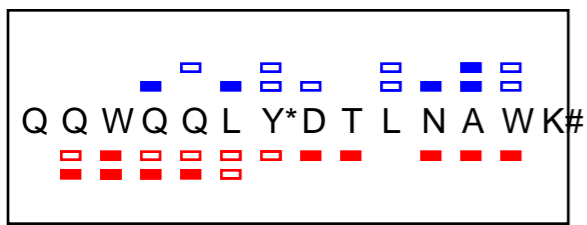

Protein Name: GA17  
 gi Accession: 23397429  
 Precursor Mass: 955.4420+2  
 Delta Mass: 2.298 ppm  
 XCorr: 18.78

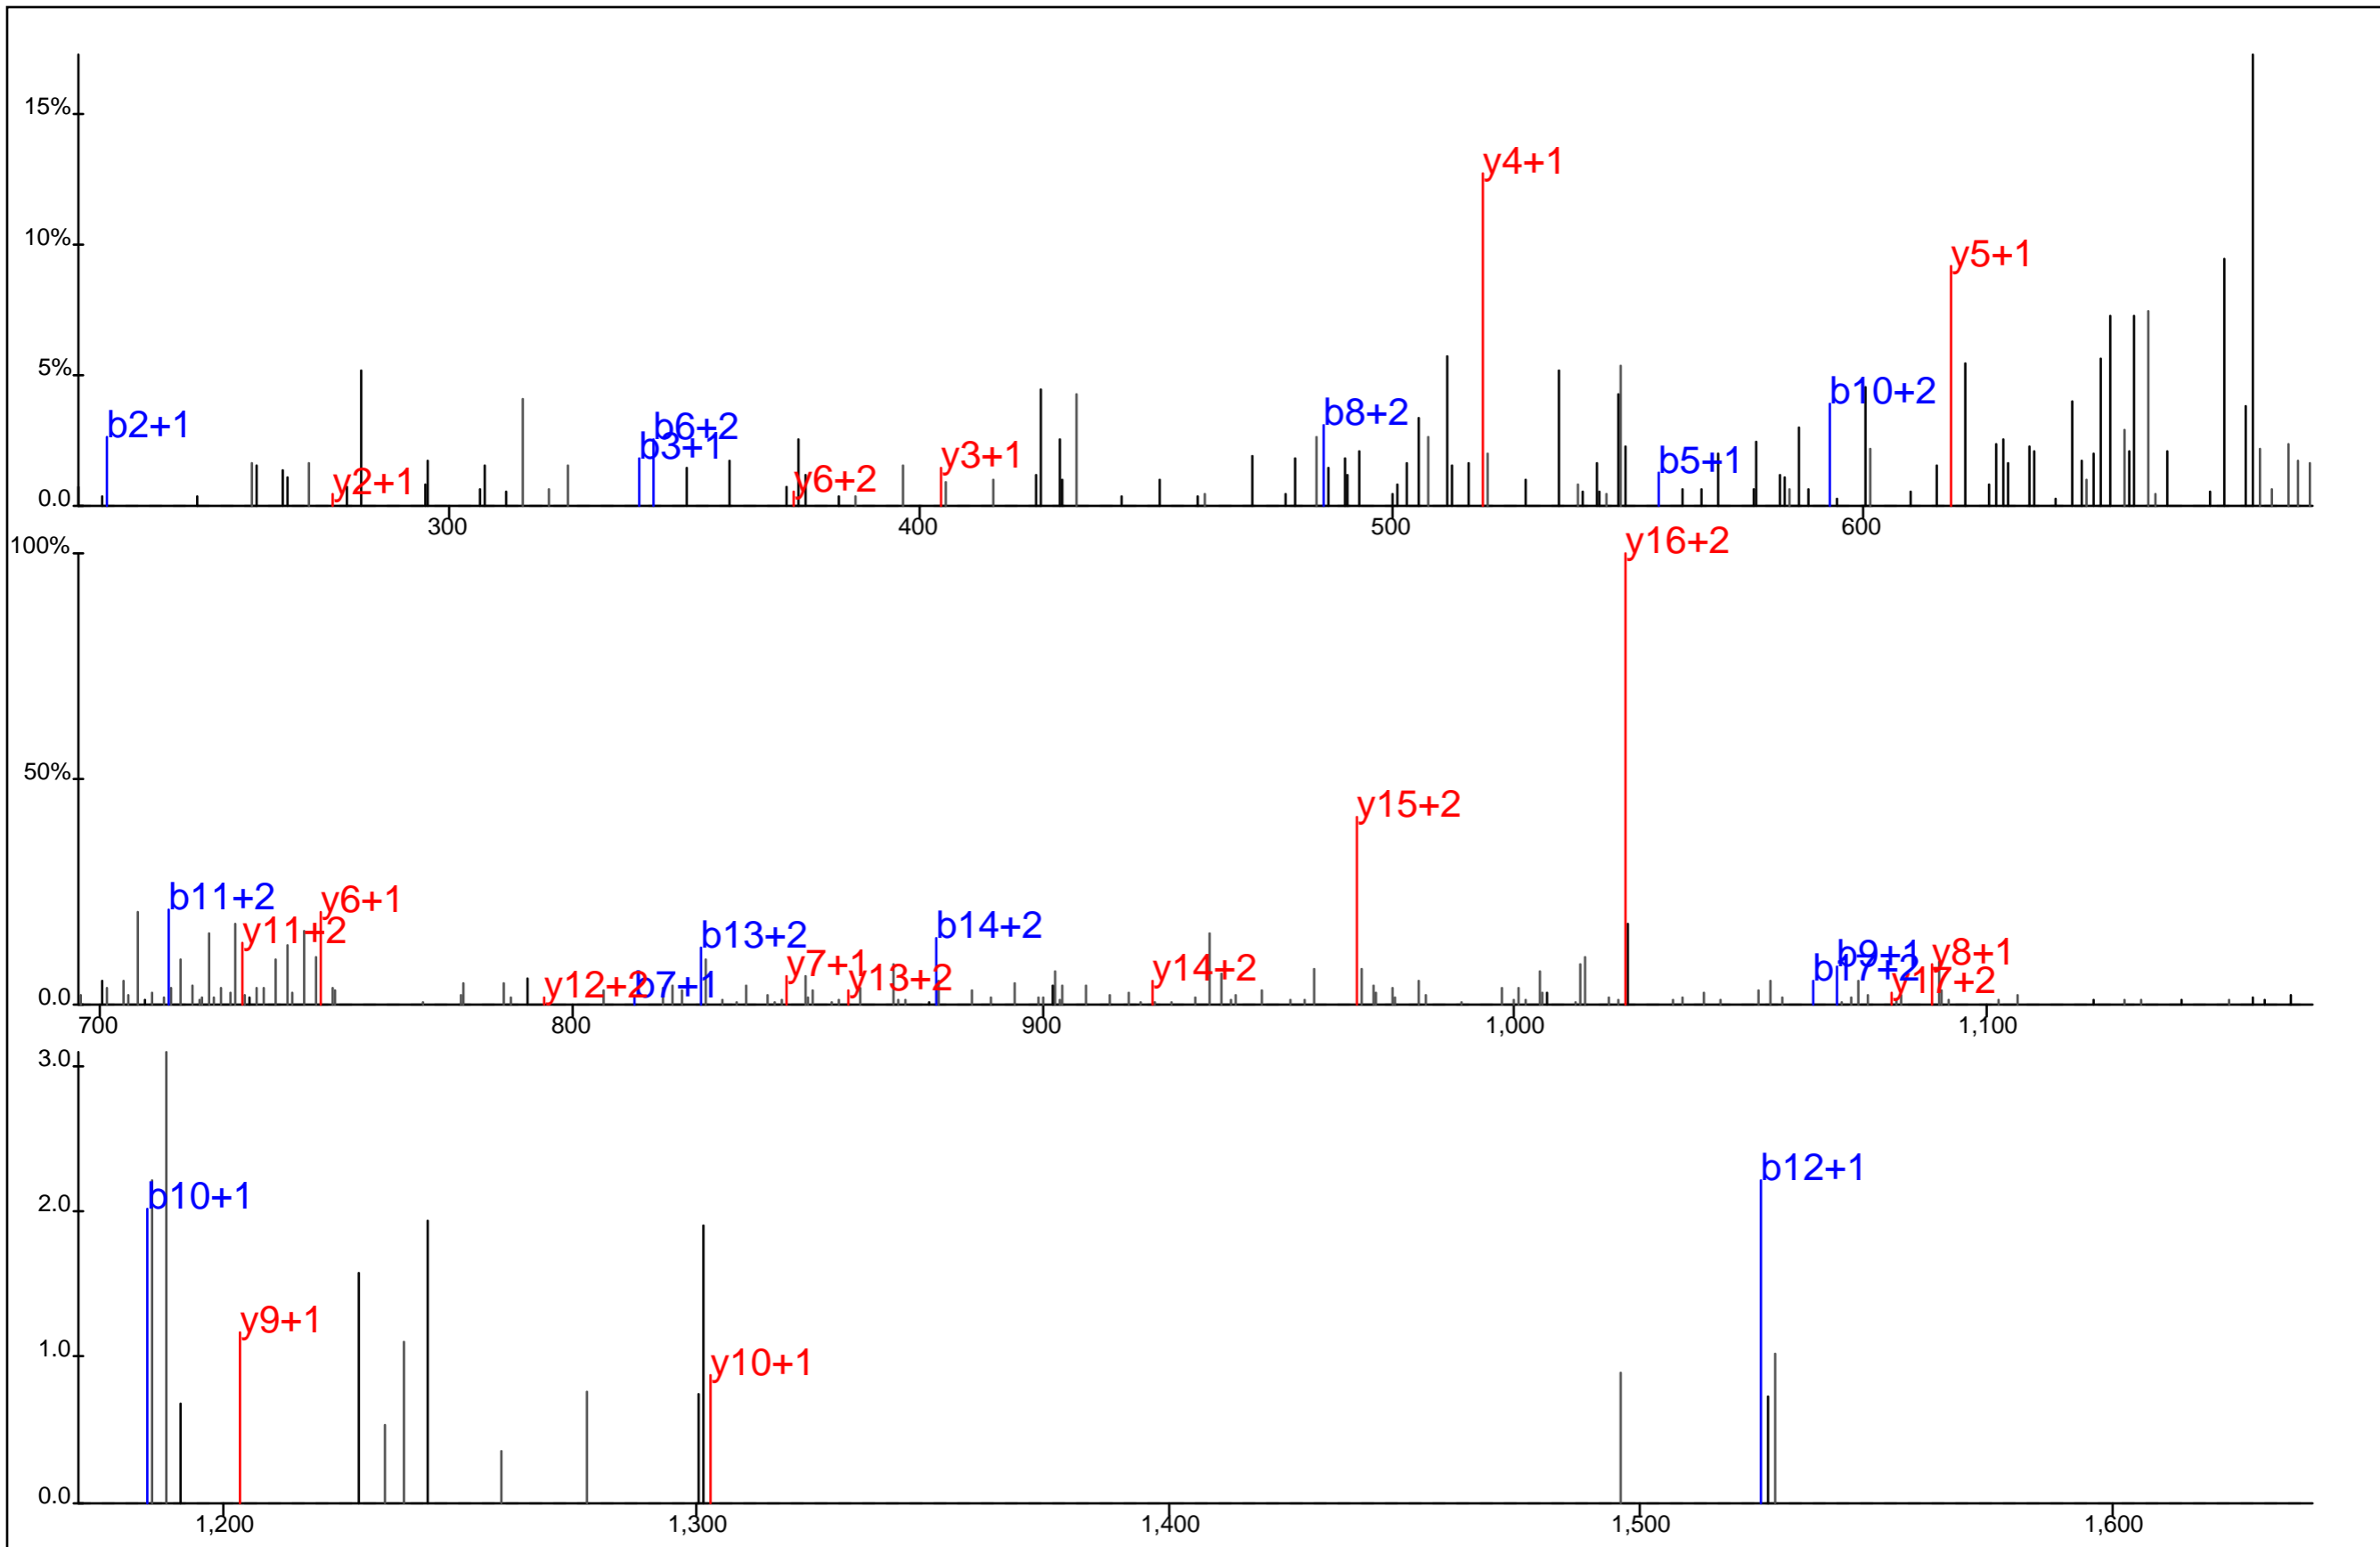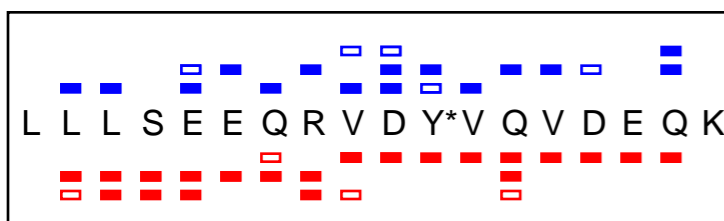

Protein Name: GAB3  
 gi Accession: 18079323  
 Precursor Mass: 757.7050+3  
 Delta Mass: 4.446 ppm  
 XCorr: 25.68

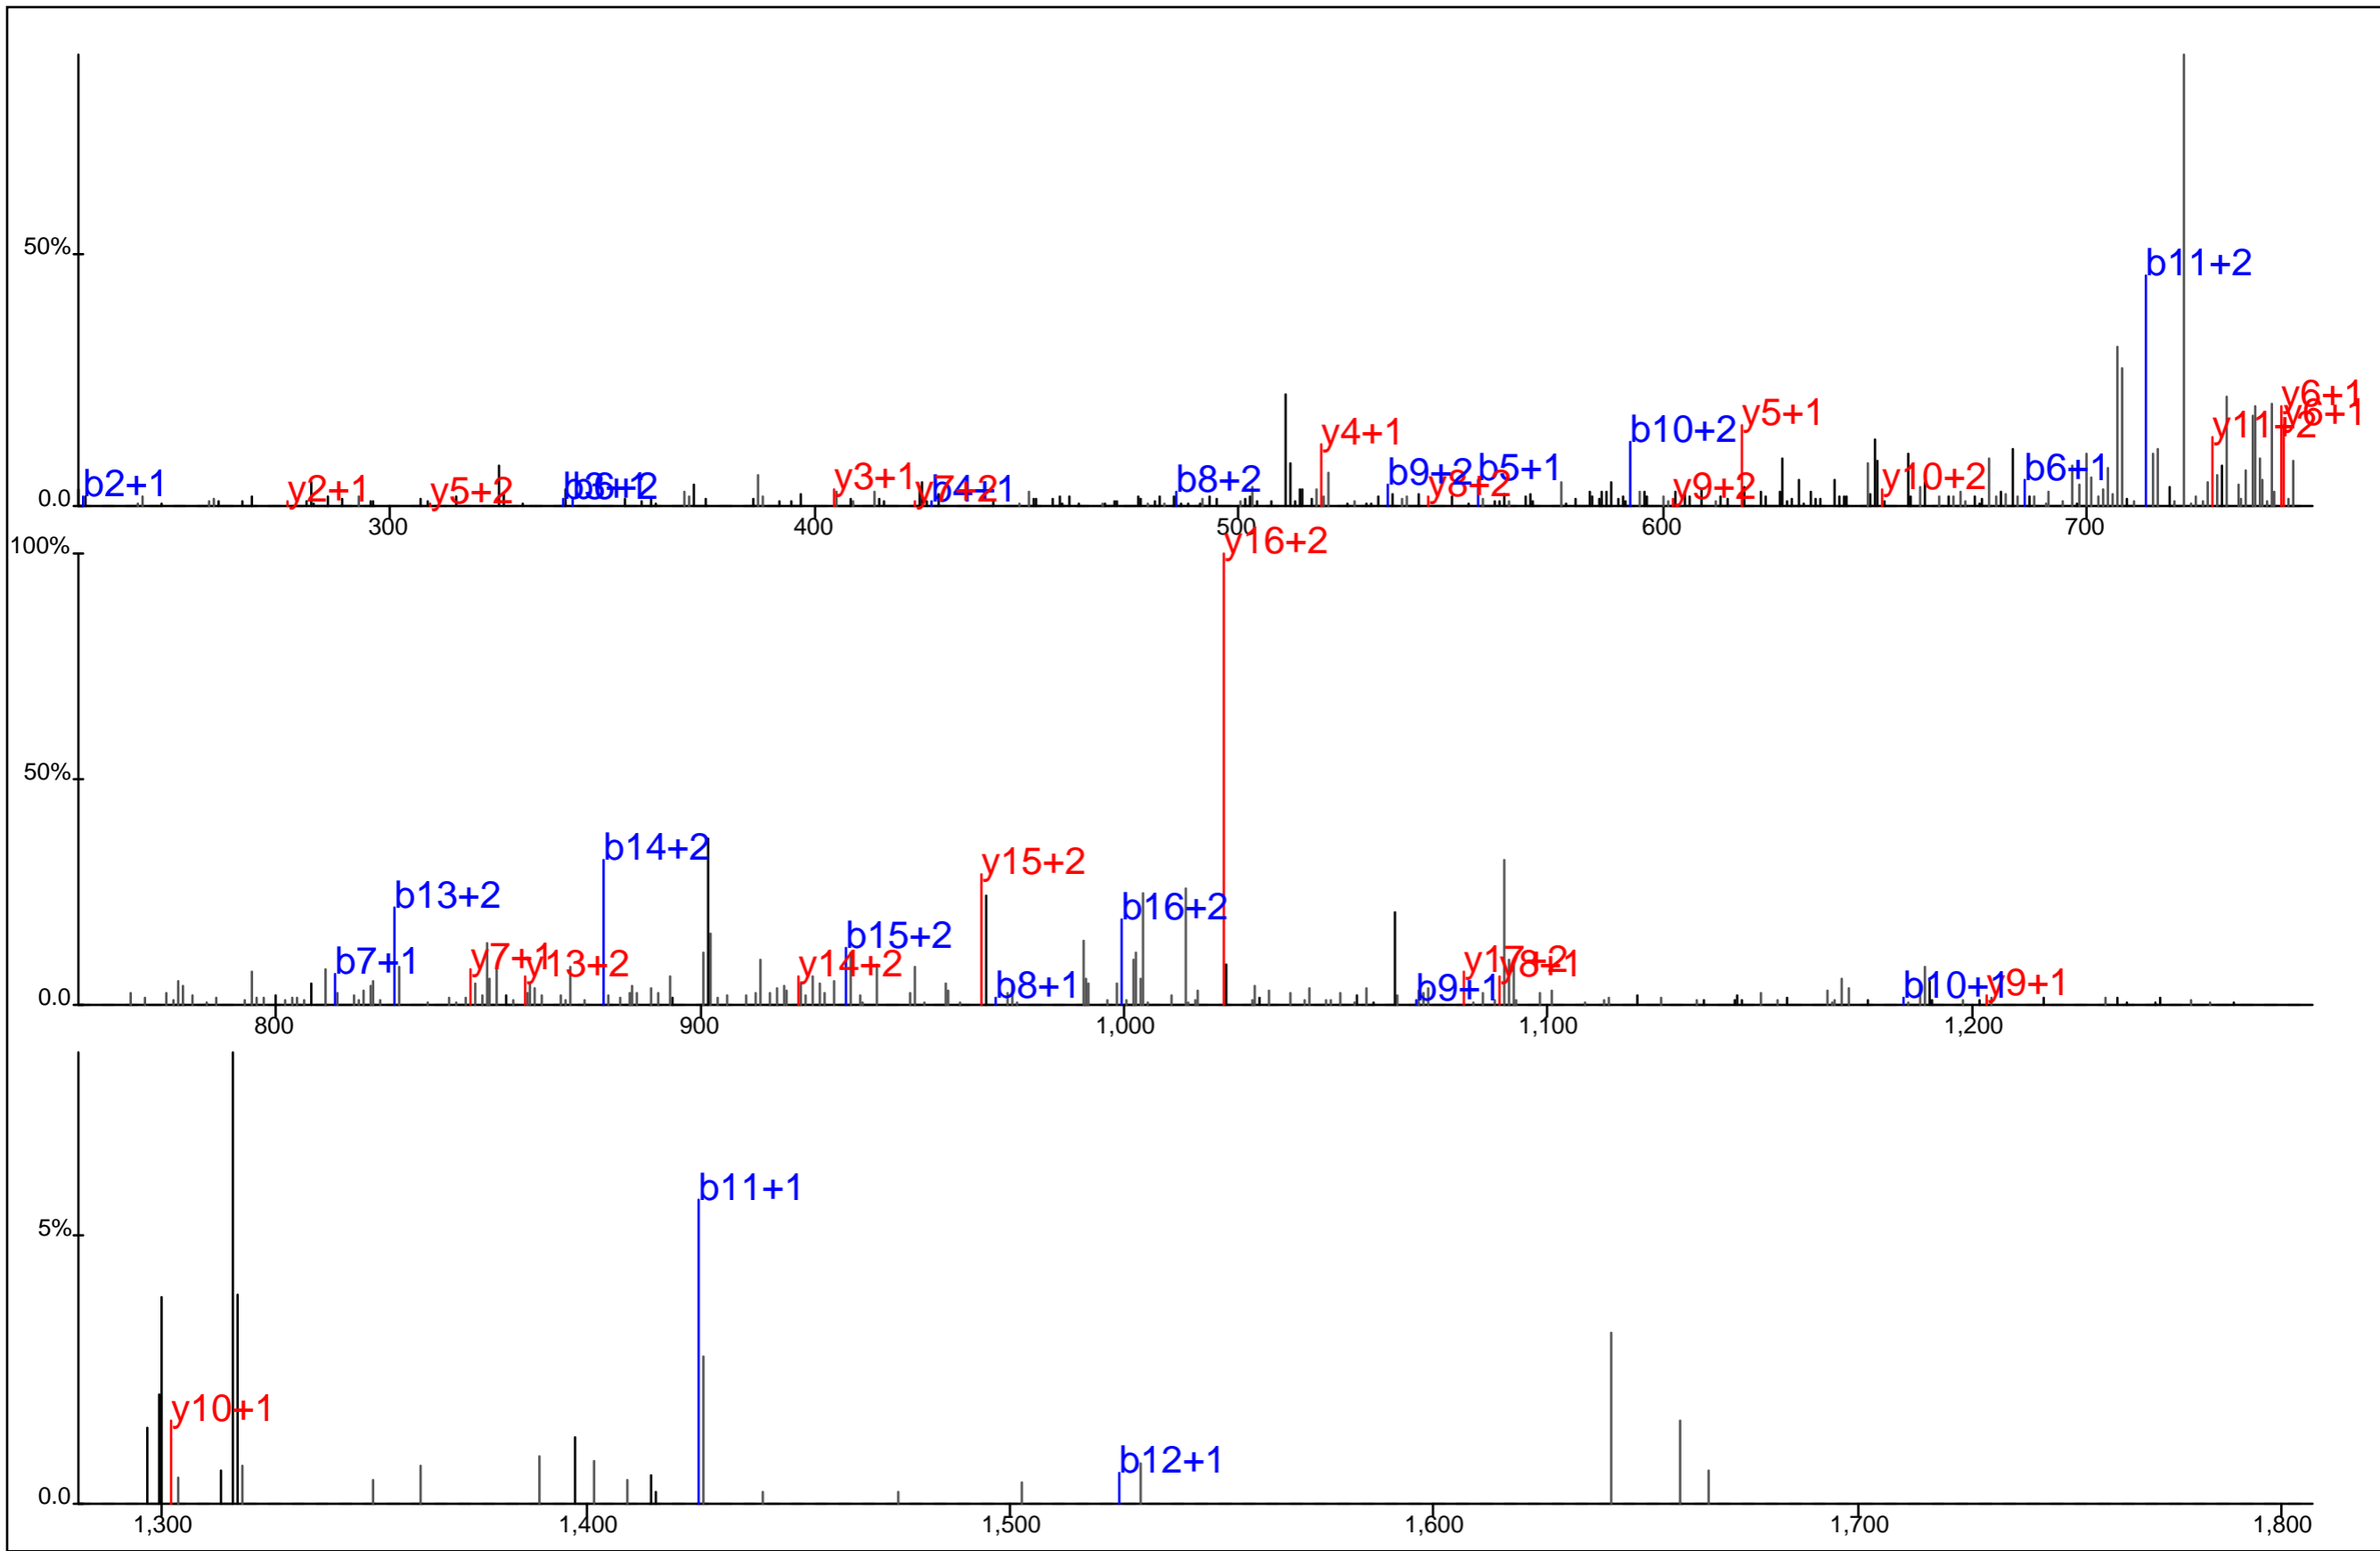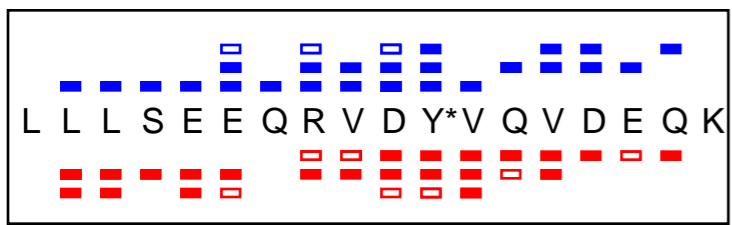

Protein Name: GAB3  
 gi Accession: 18079323  
 Precursor Mass: 757.7081+3  
 Delta Mass: 8.475 ppm  
 XCorr: 11.43

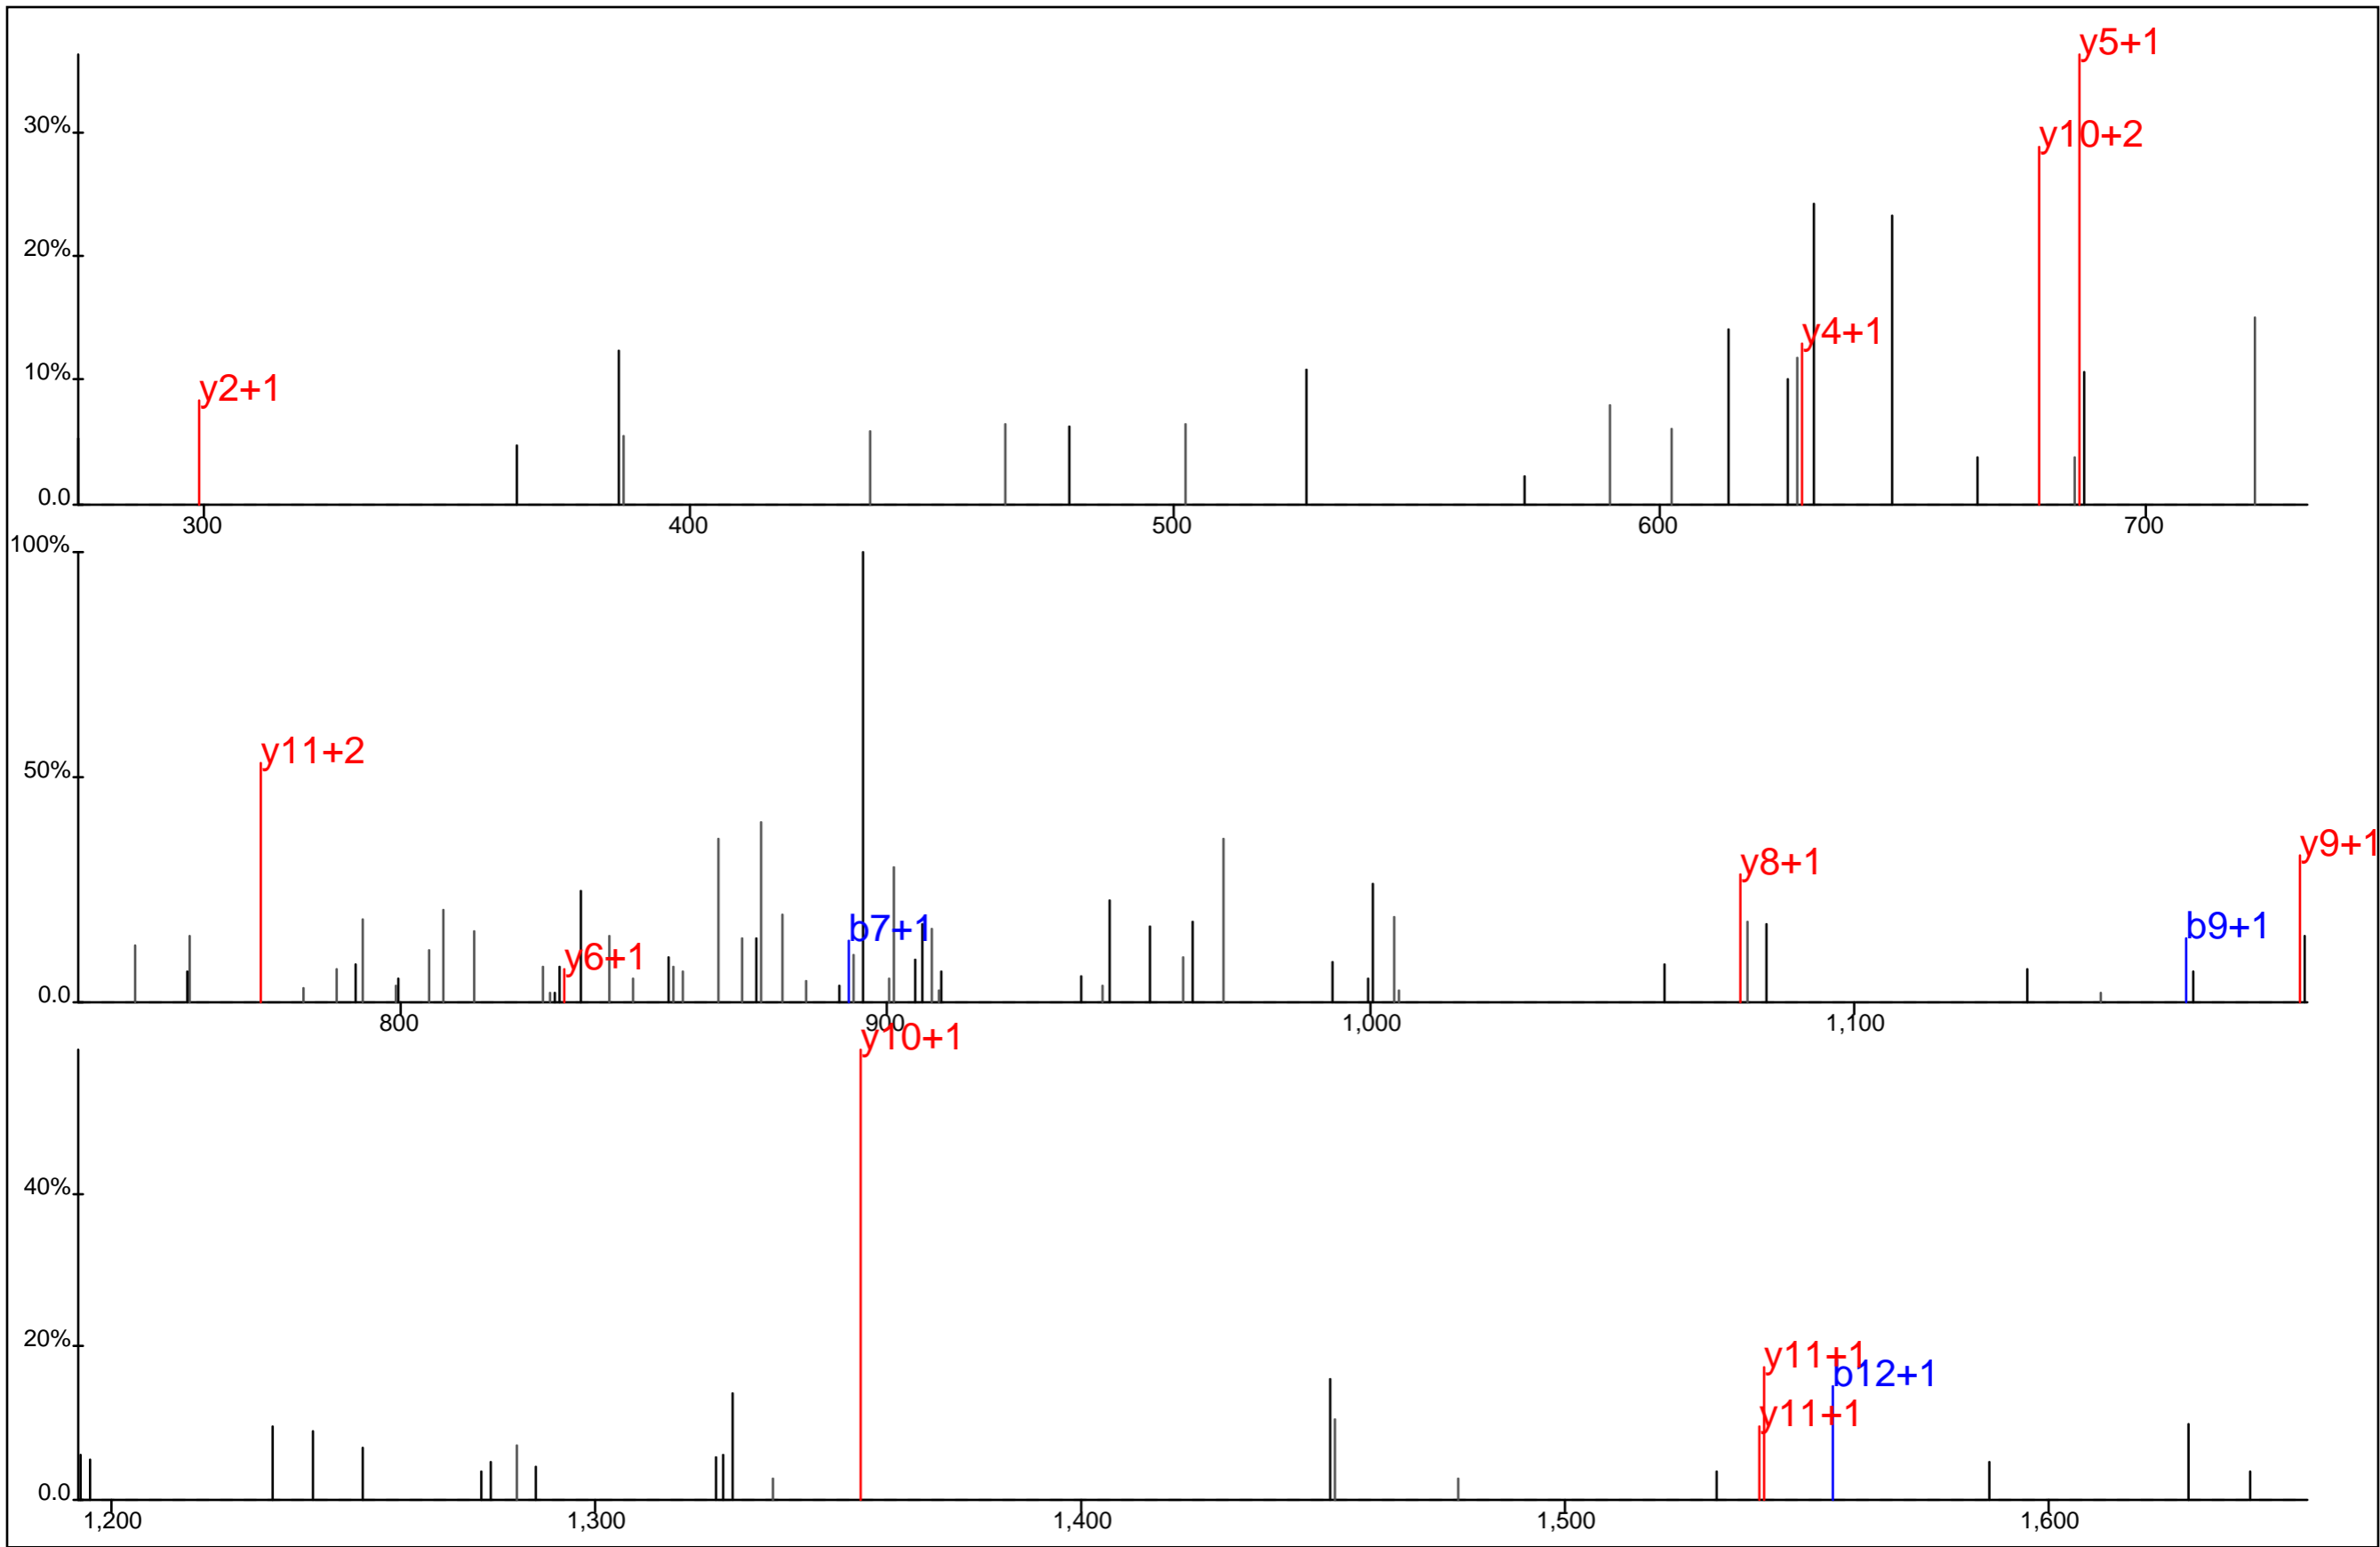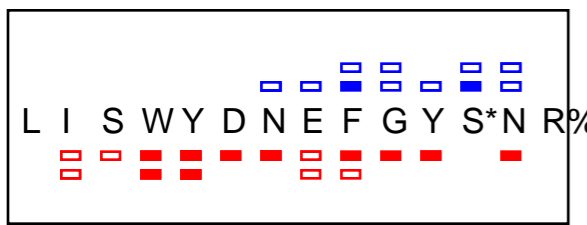

Protein Name: GAPDH  
 gi Accession: 7669492  
 Precursor Mass: 927.3979+2  
 Delta Mass: 6.300 ppm  
 XCorr: 16.97

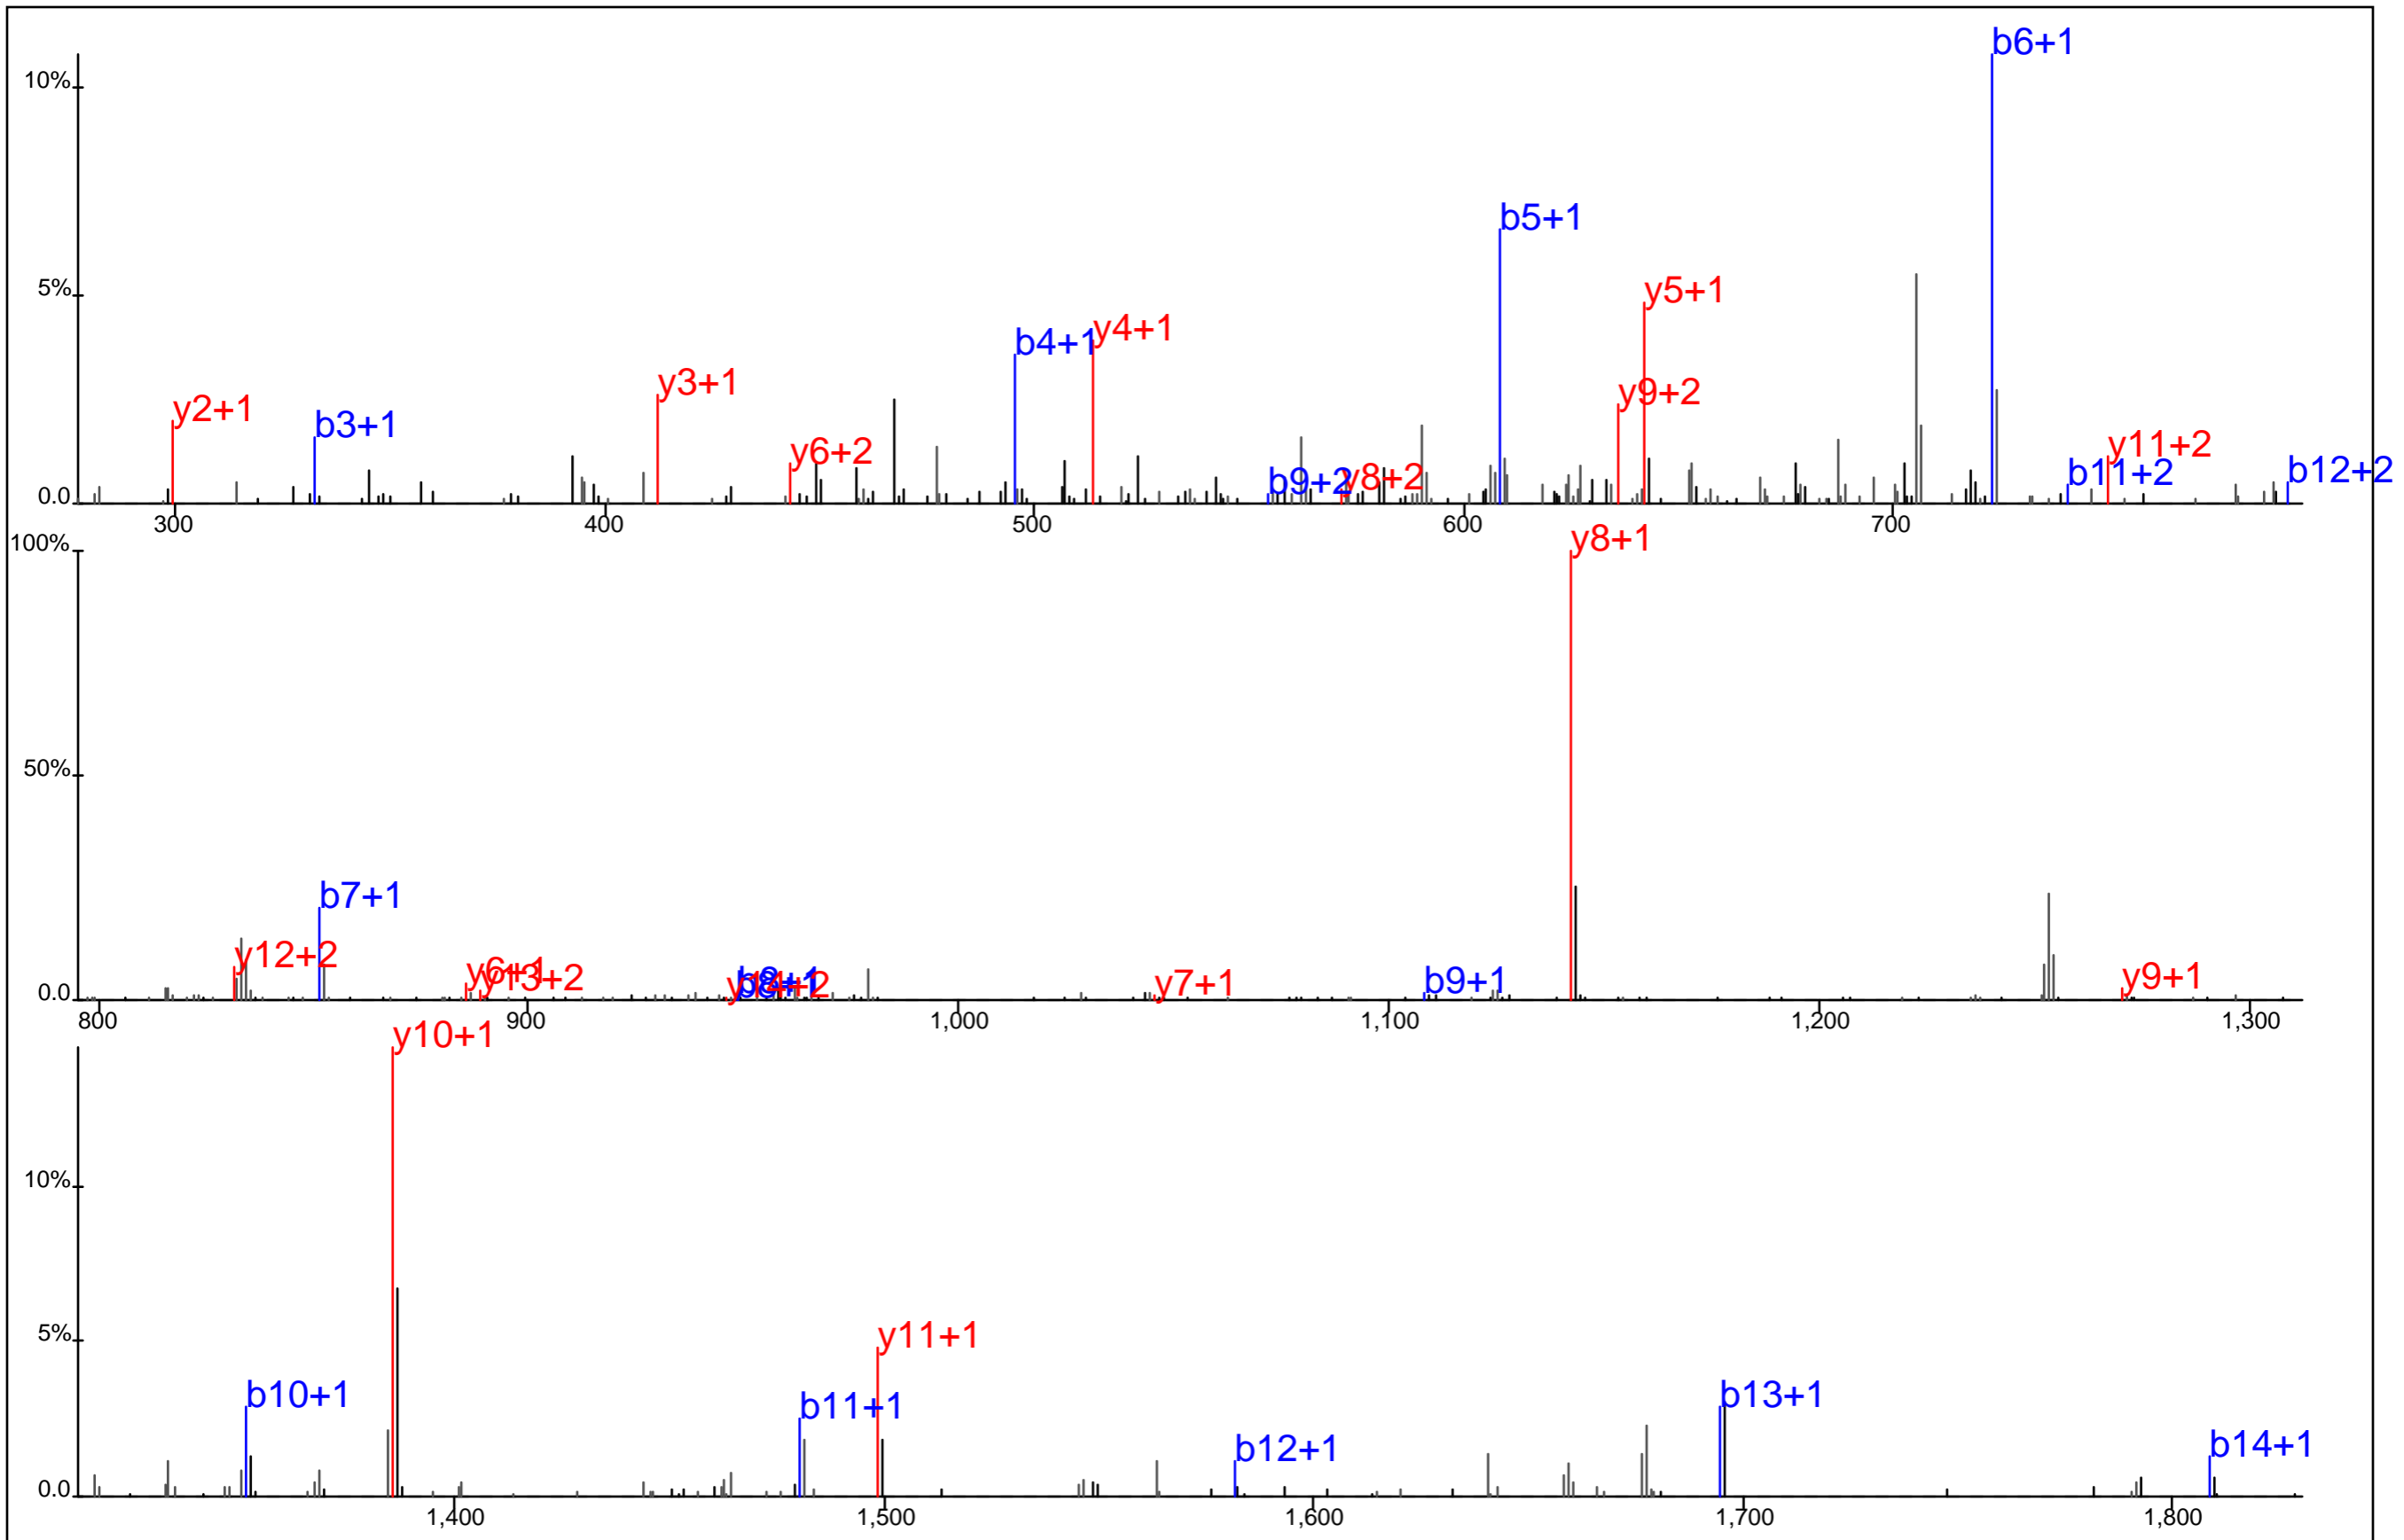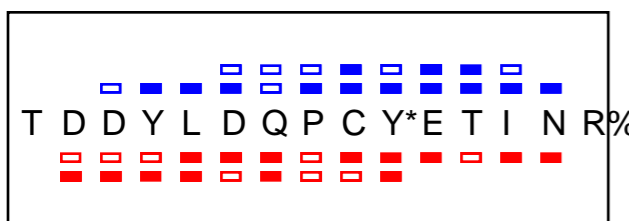

Protein Name: GDP dissociation inhibitor 2  
 gi Accession: 6598323  
 Precursor Mass: 996.9056+2  
 Delta Mass: 5.950 ppm  
 XCorr: 70.46

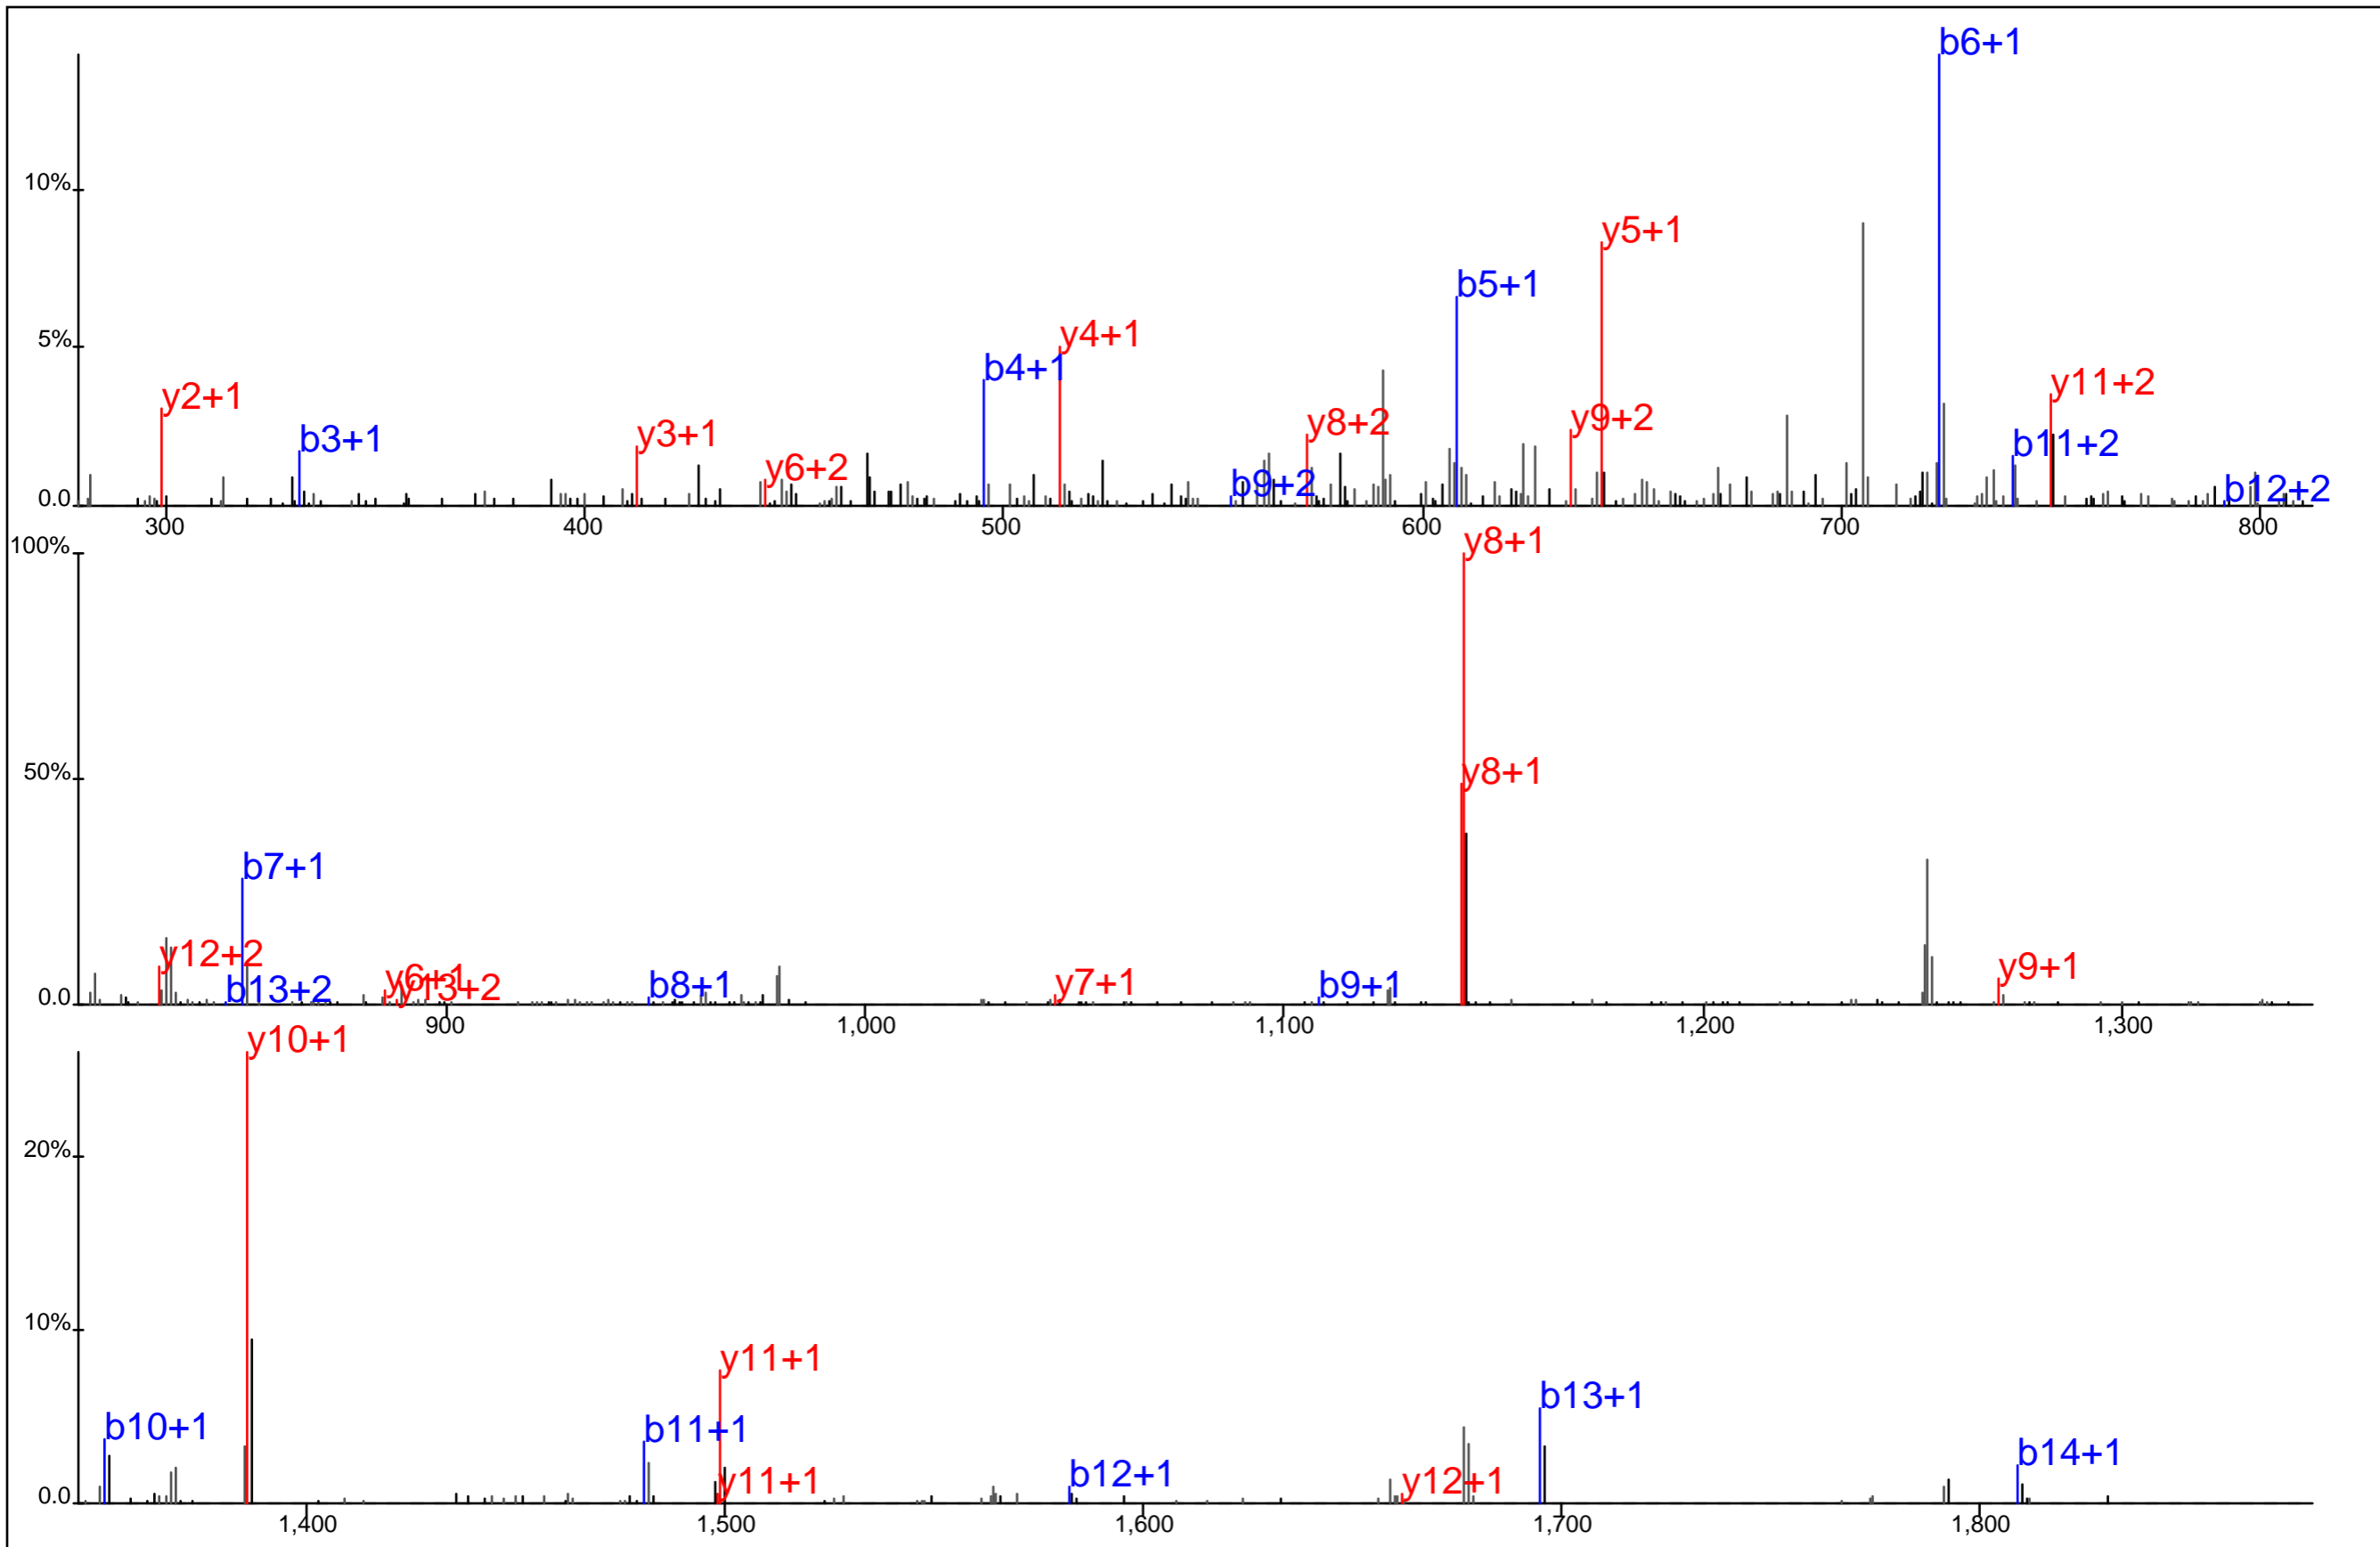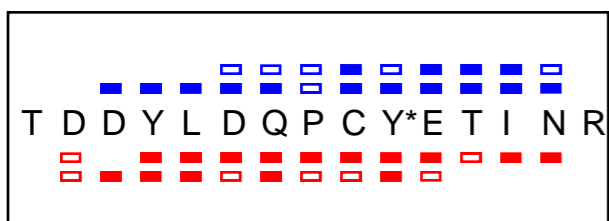

Protein Name: GDP dissociation inhibitor 2  
 gi Accession: 6598323  
 Precursor Mass: 996.9064+2  
 Delta Mass: 6.809 ppm  
 XCorr: 77.89

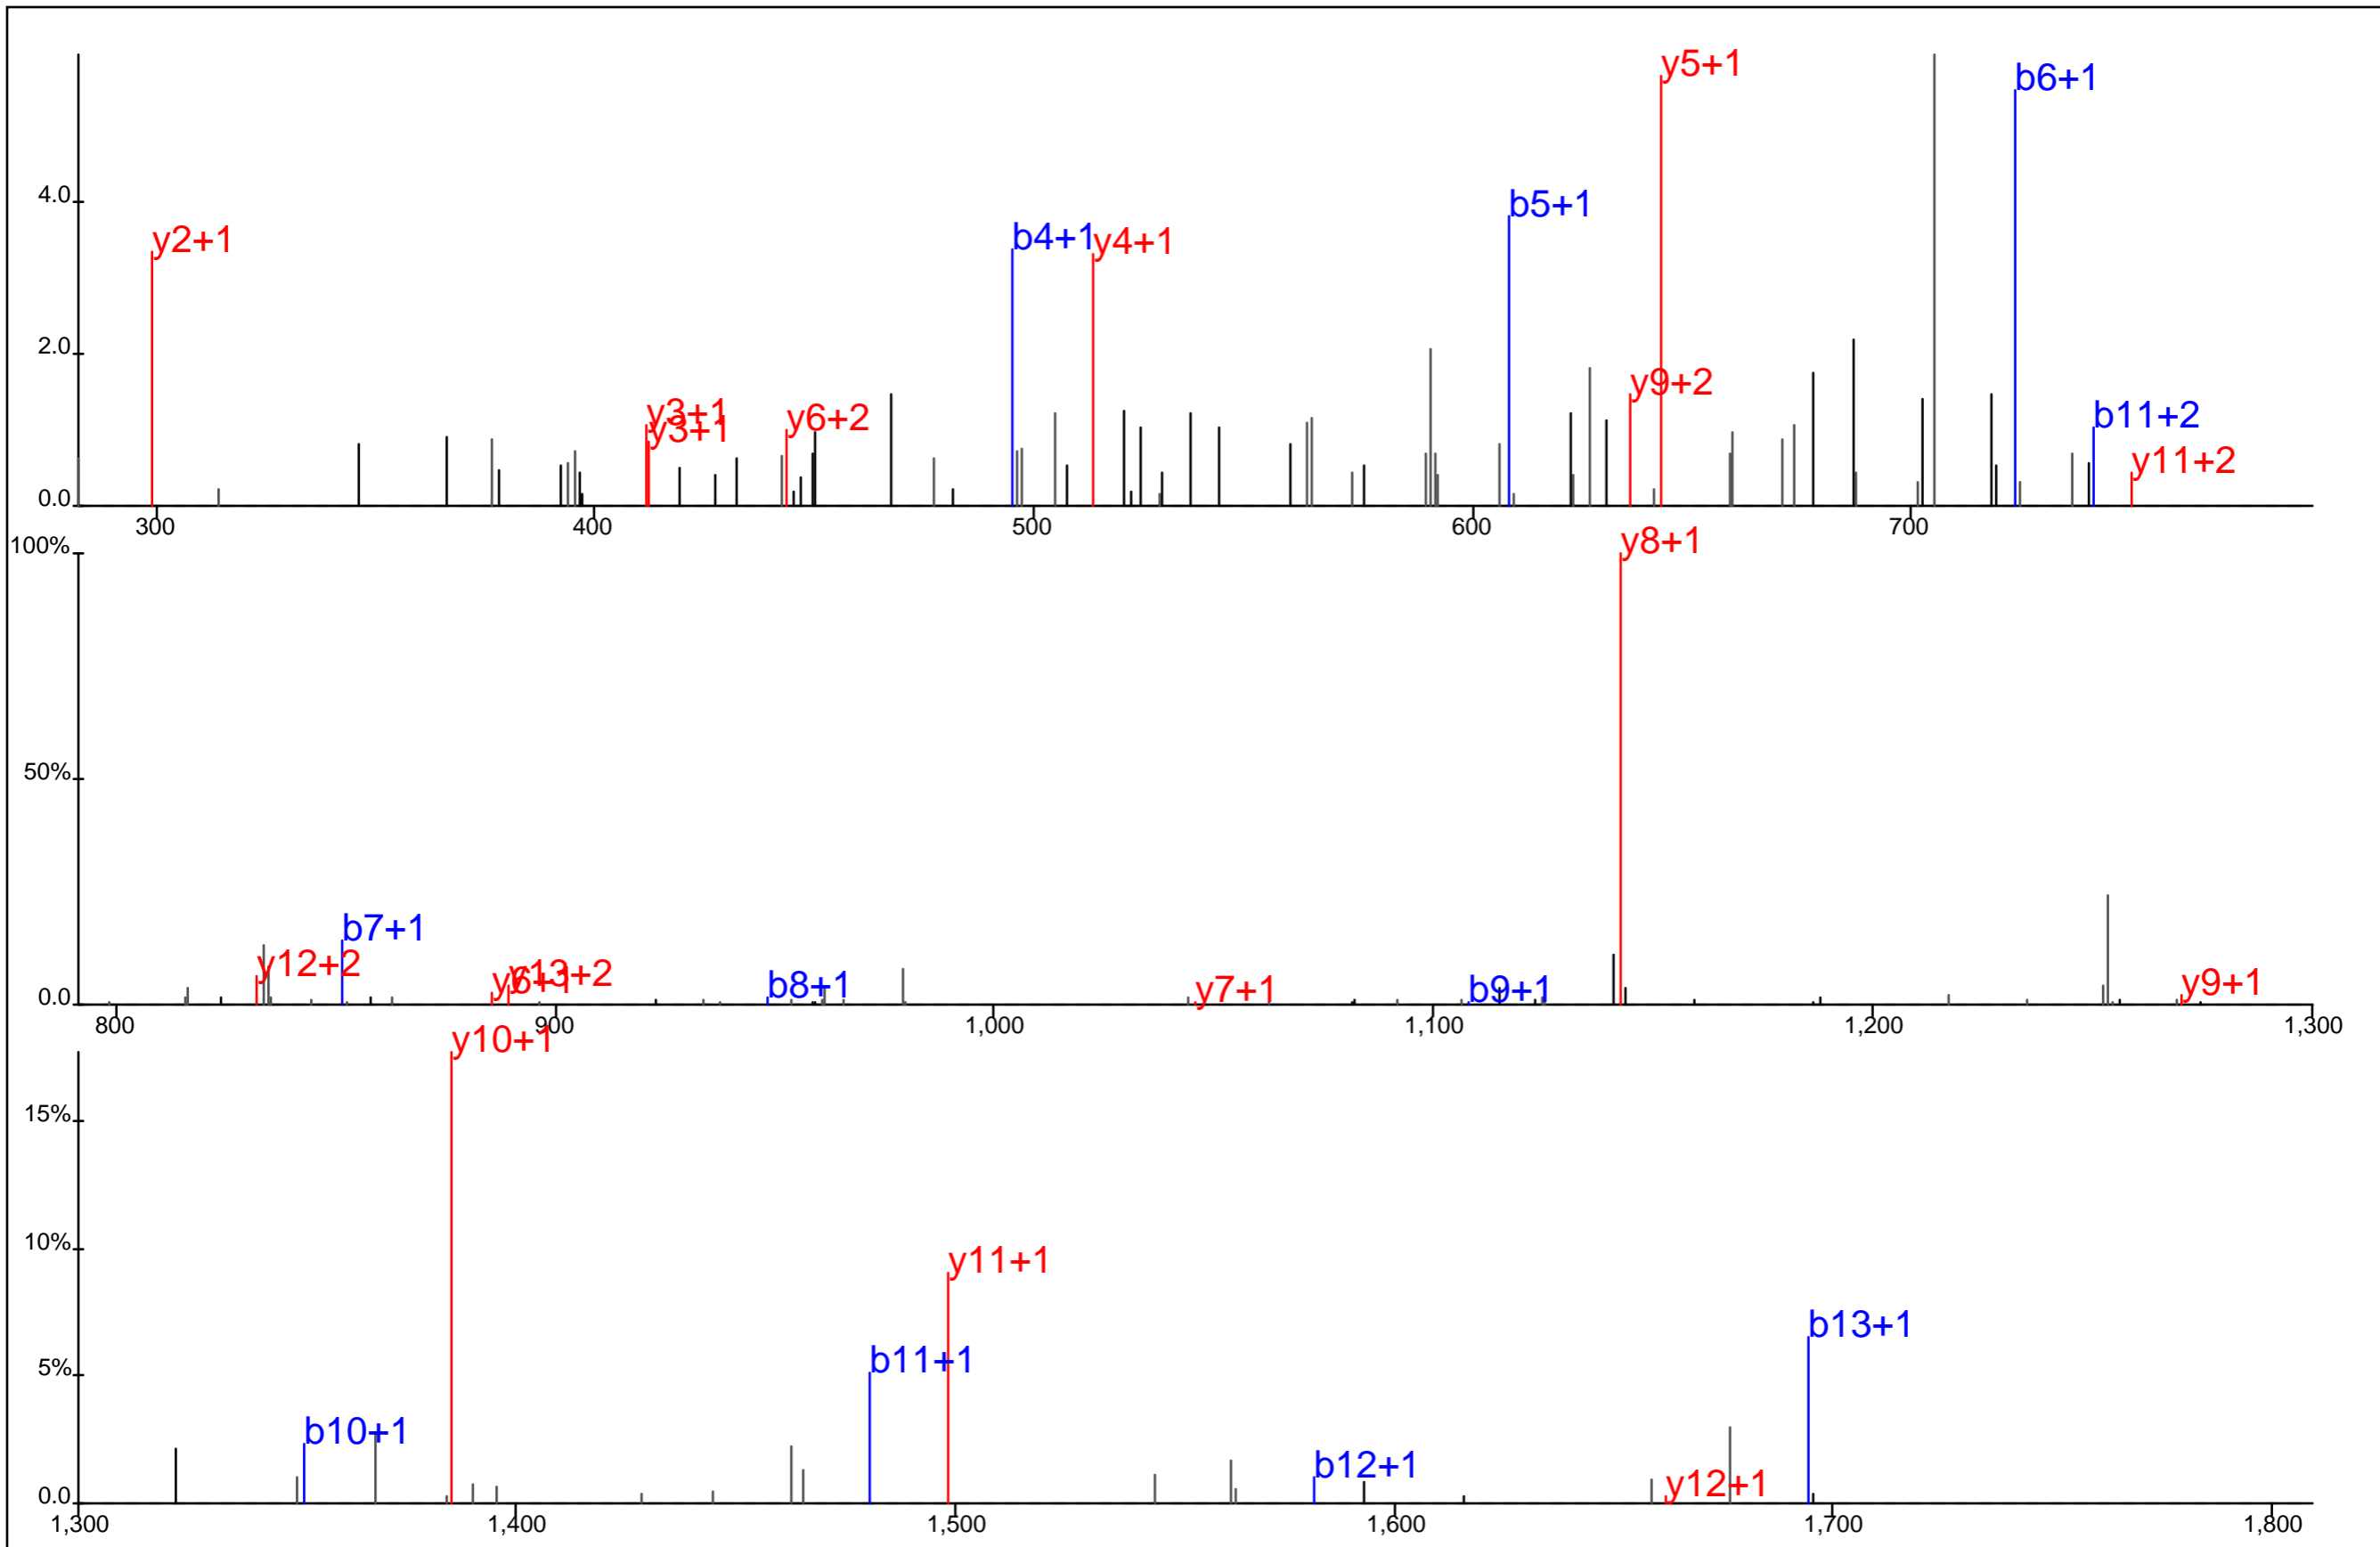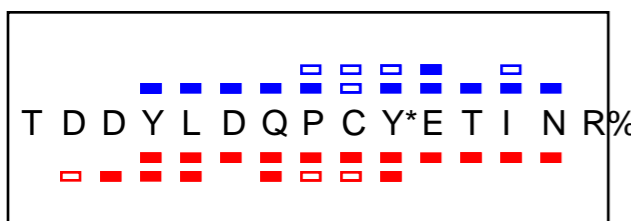

Protein Name: GDP dissociation inhibitor 2  
 gi Accession: 6598323  
 Precursor Mass: 996.9006+2  
 Delta Mass: 0.988 ppm  
 XCorr: 67.31



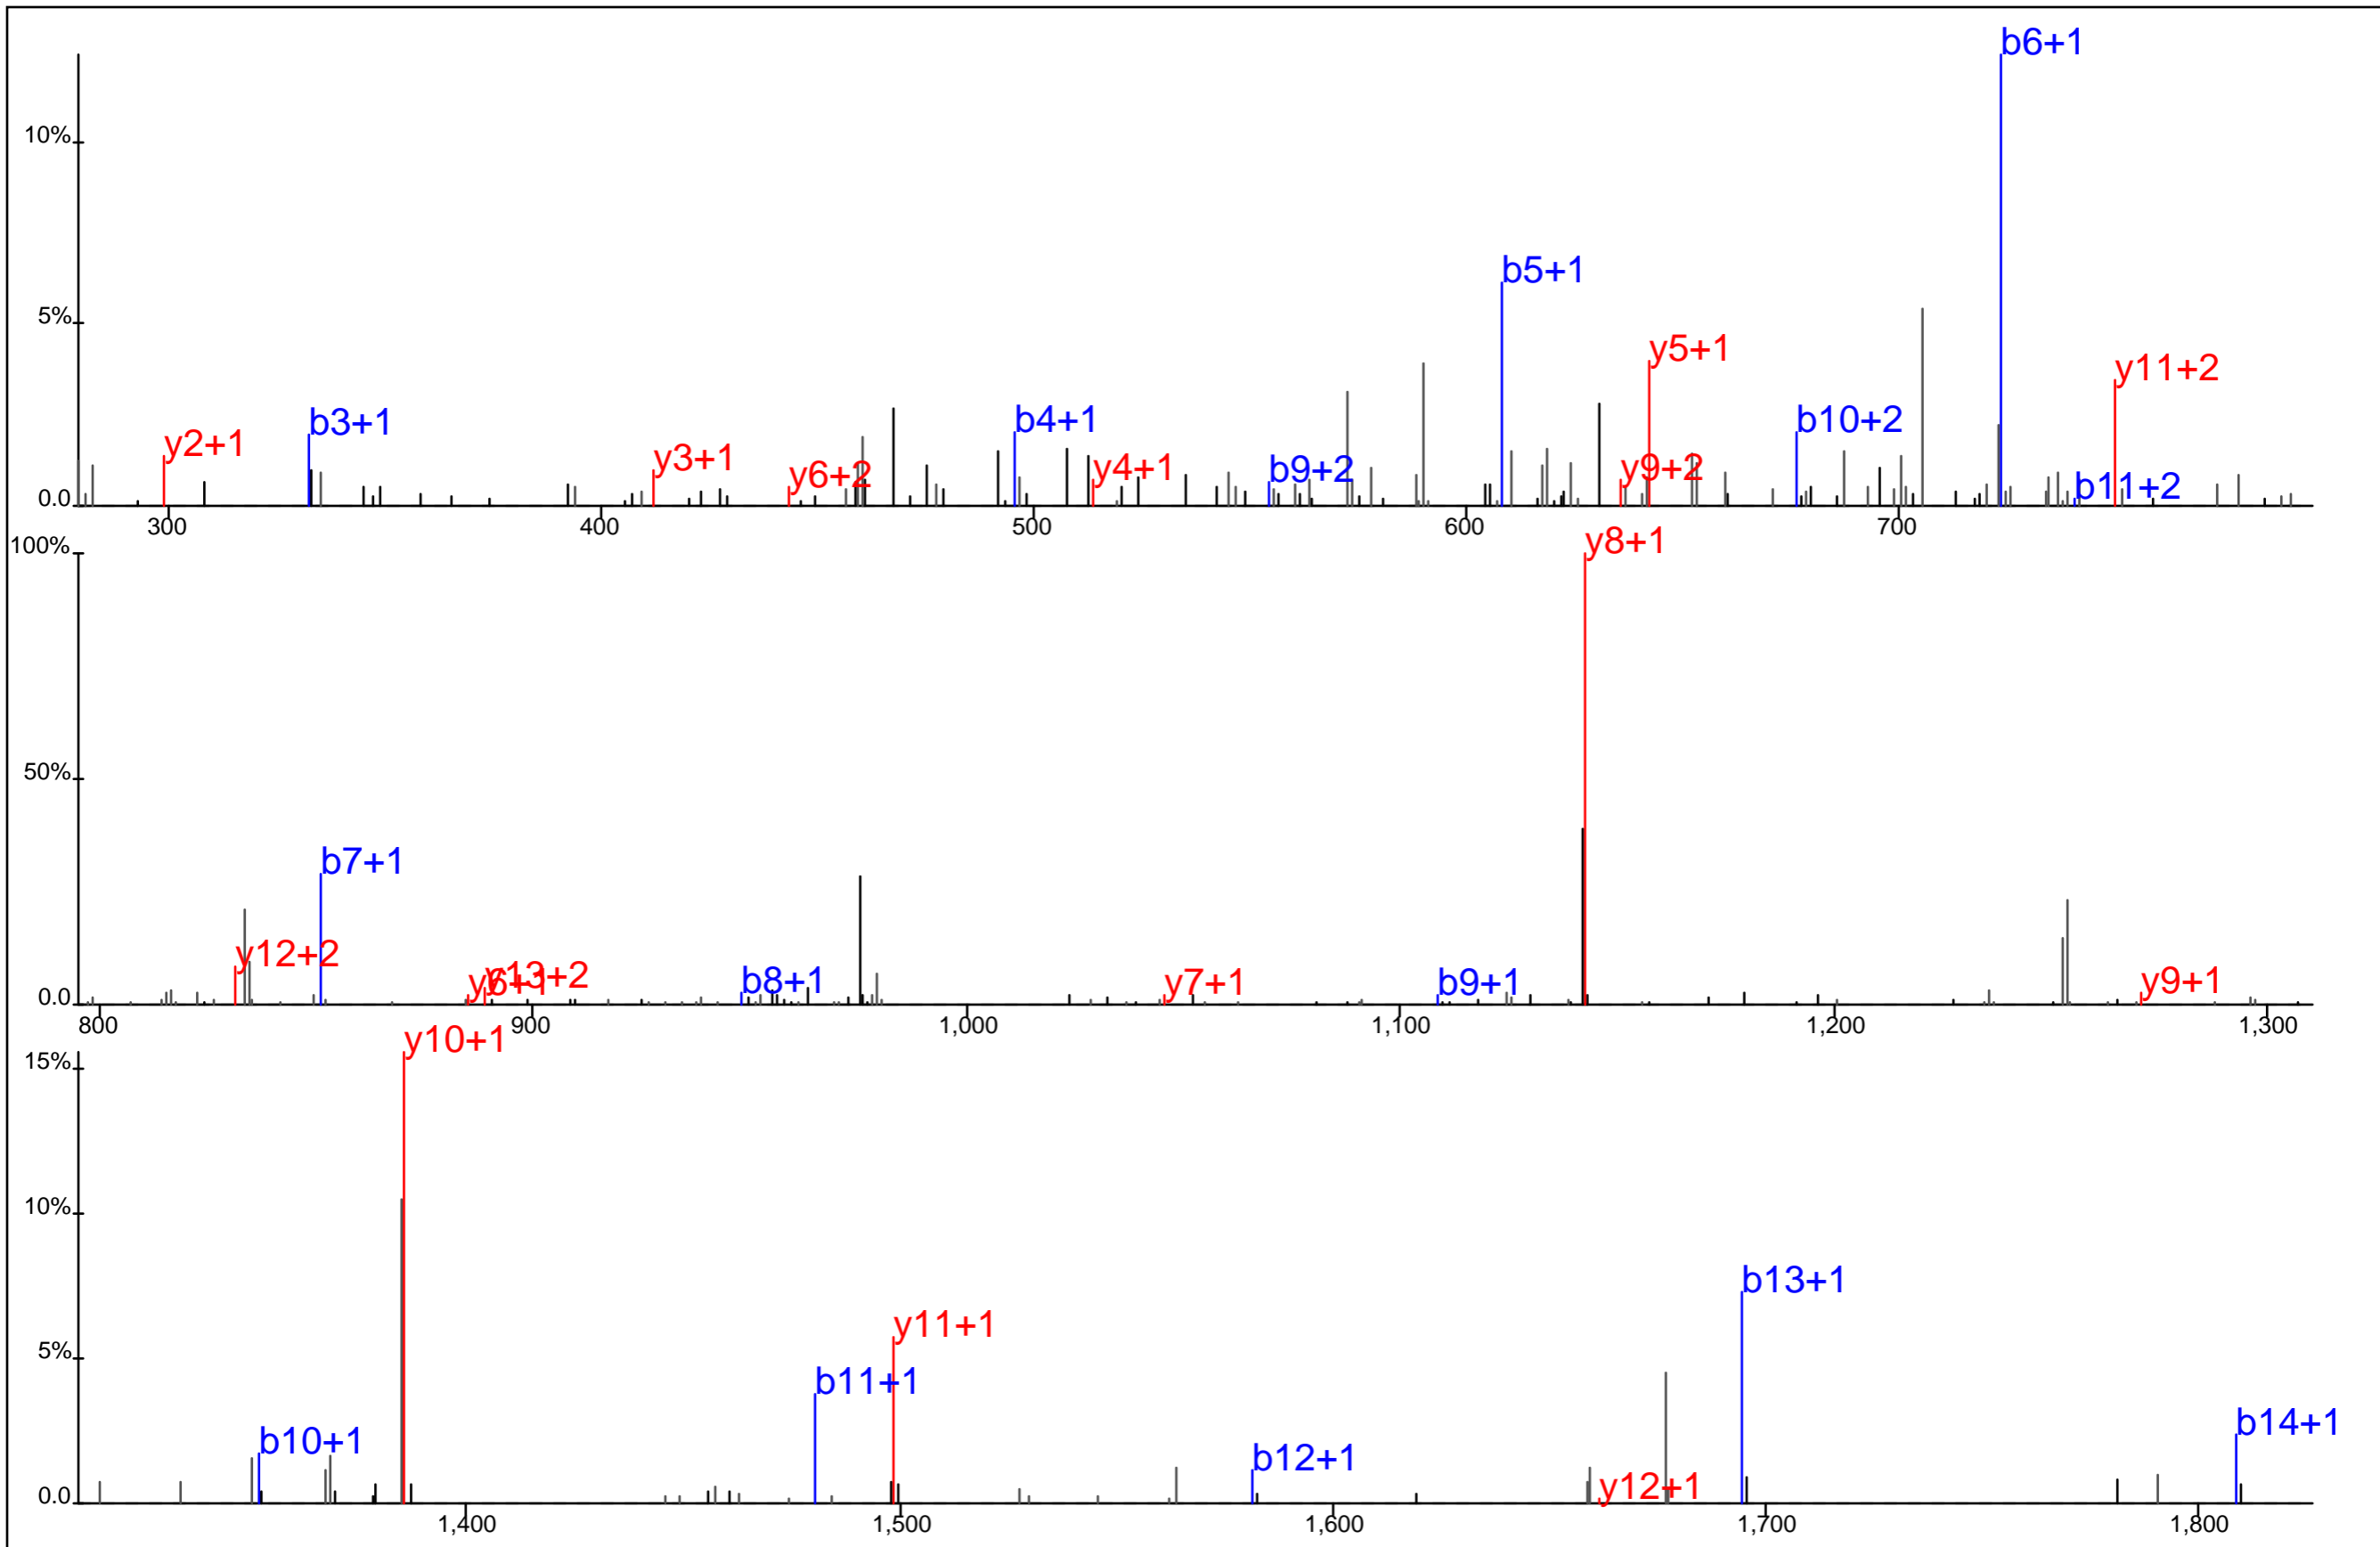

▣ ▣ ▣ ▣ ▣ ▣ ▣ ▣ ▣ ▣ ▣ ▣ ▣ ▣ ▣ ▣ ▣ ▣ ▣ ▣
  
 T D D Y L D Q P C Y\* E T I N R%
   
▣ ▣ ▣ ▣ ▣ ▣ ▣ ▣ ▣ ▣ ▣ ▣ ▣ ▣ ▣ ▣ ▣ ▣ ▣ ▣

Protein Name: GDP dissociation inhibitor 2  
 gi Accession: 6598323  
 Precursor Mass: 996.9018+2  
 Delta Mass: 2.152 ppm  
 XCorr: 60.83

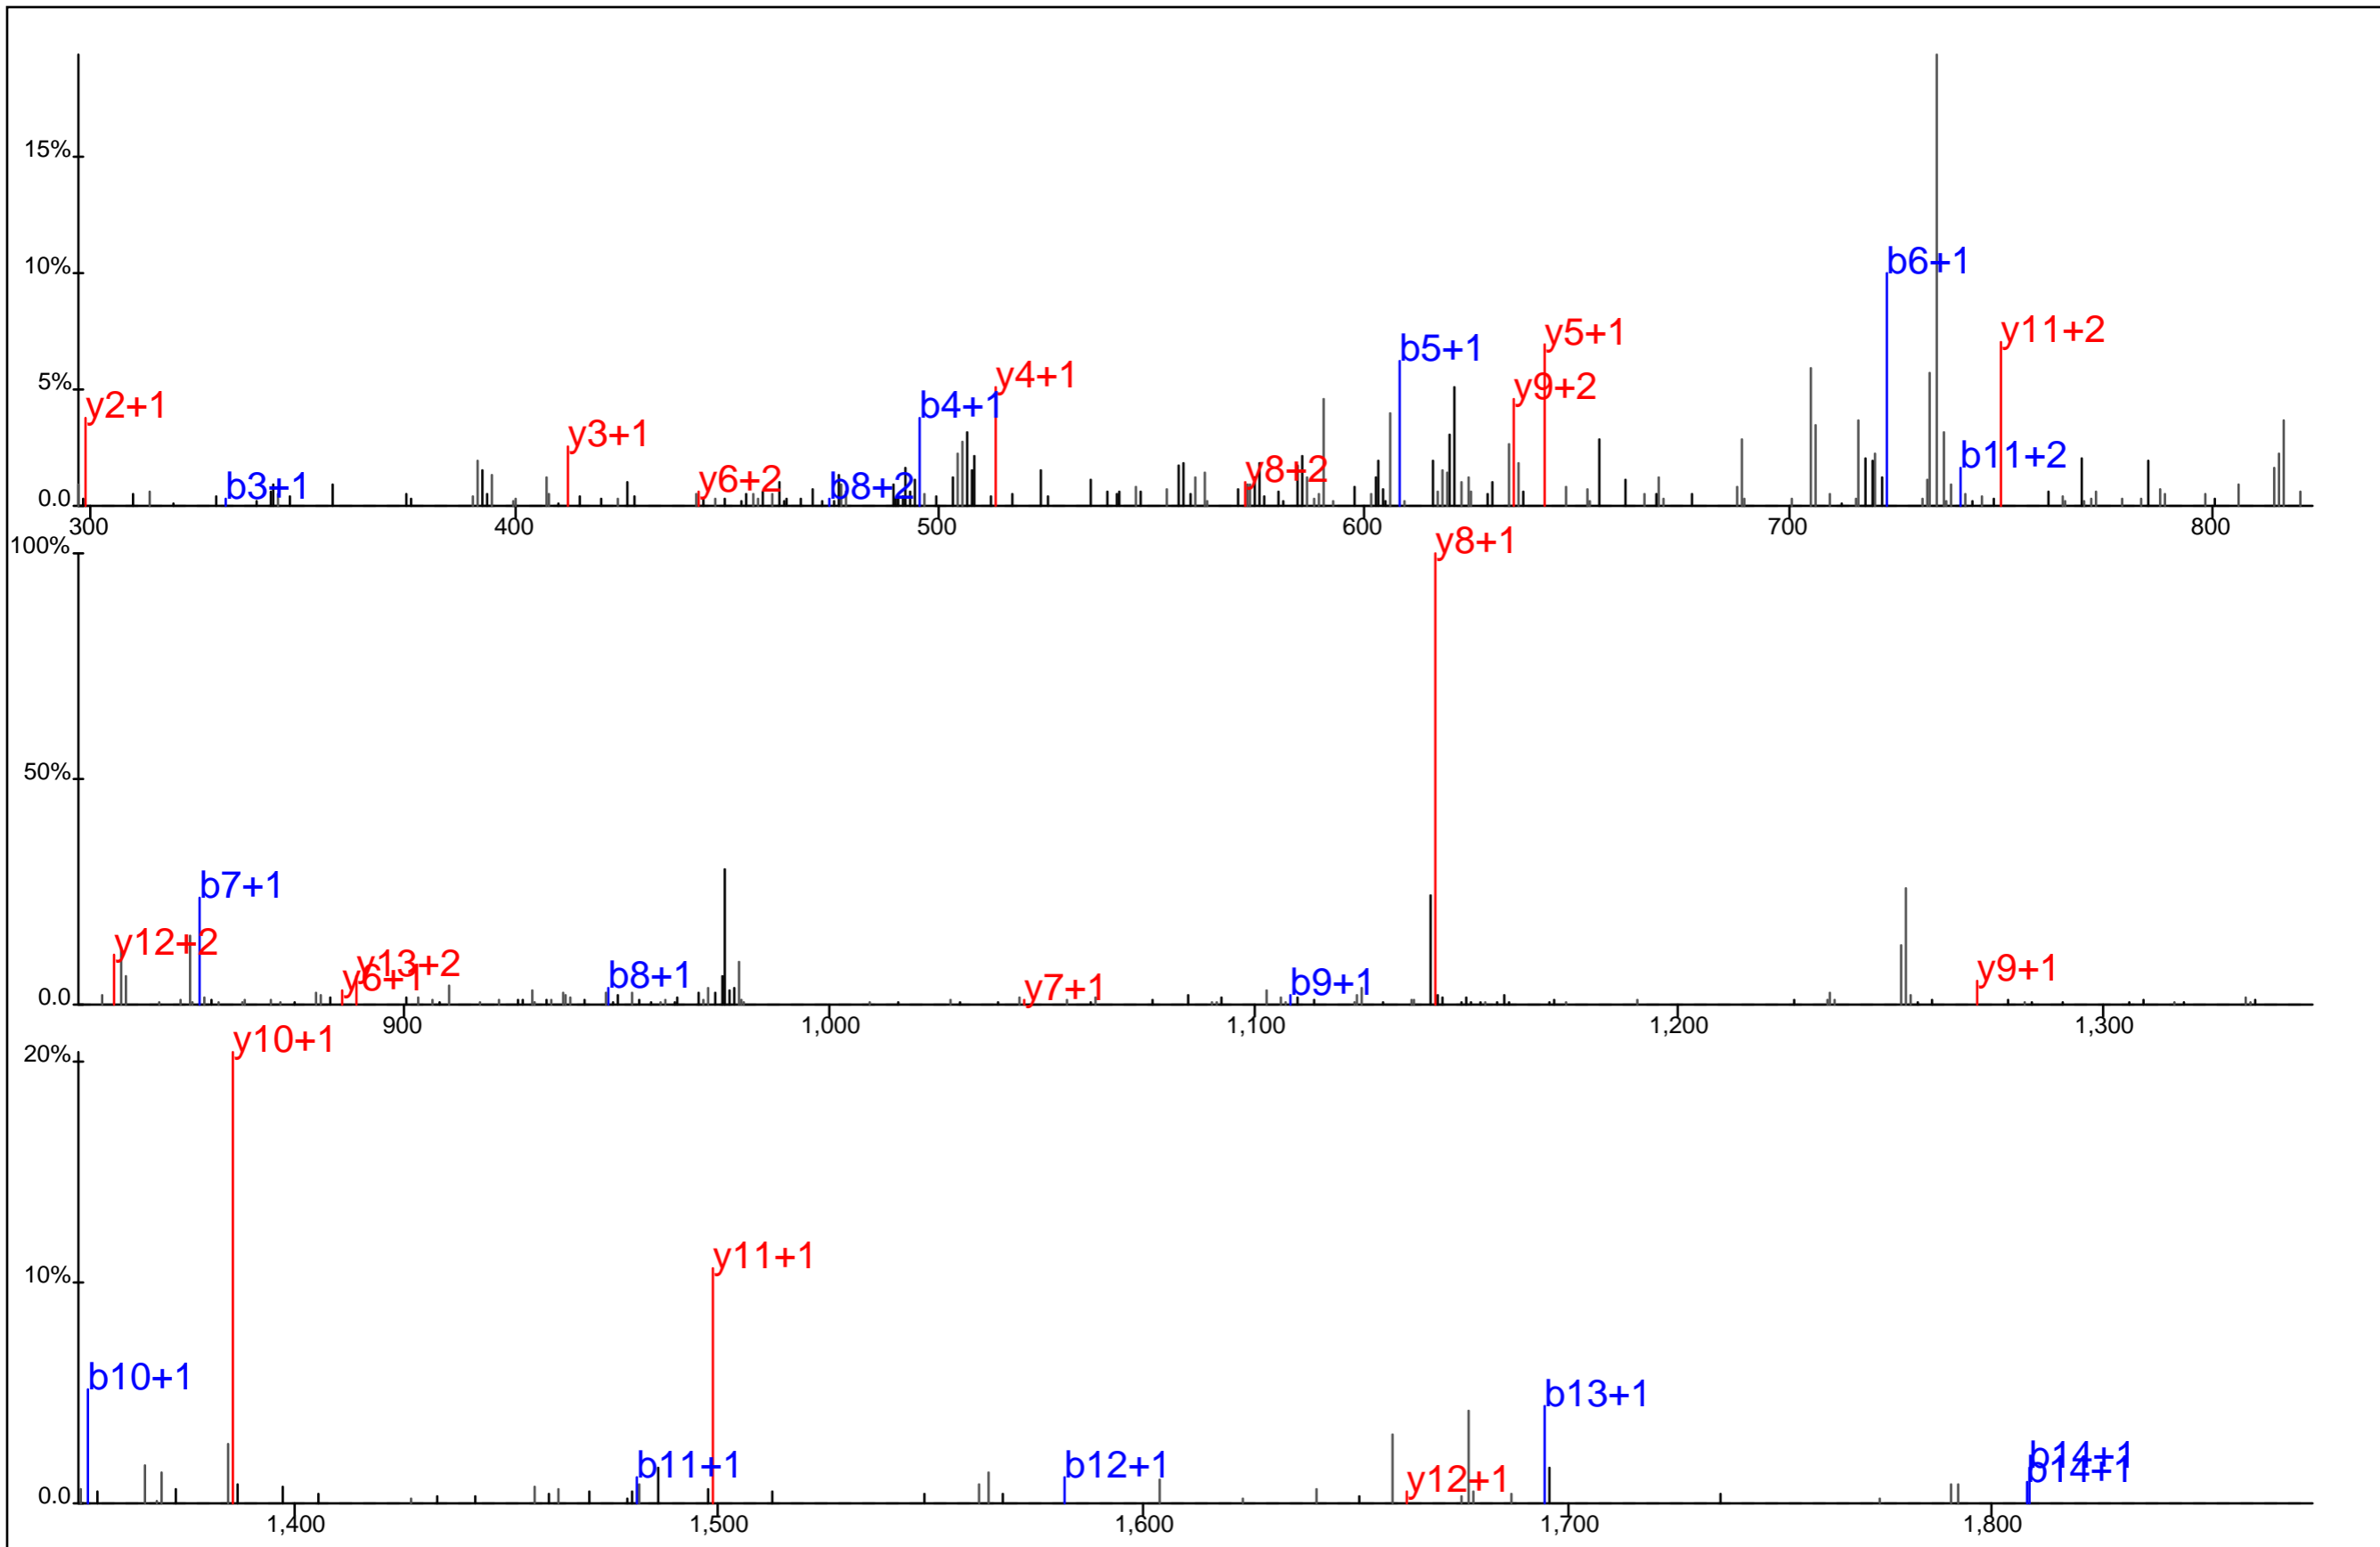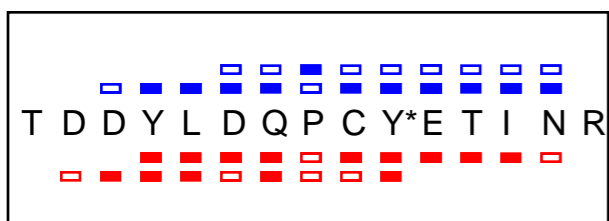

Protein Name: GDP dissociation inhibitor 2  
 gi Accession: 6598323  
 Precursor Mass: 996.9050+2  
 Delta Mass: 5.398 ppm  
 XCorr: 56.41

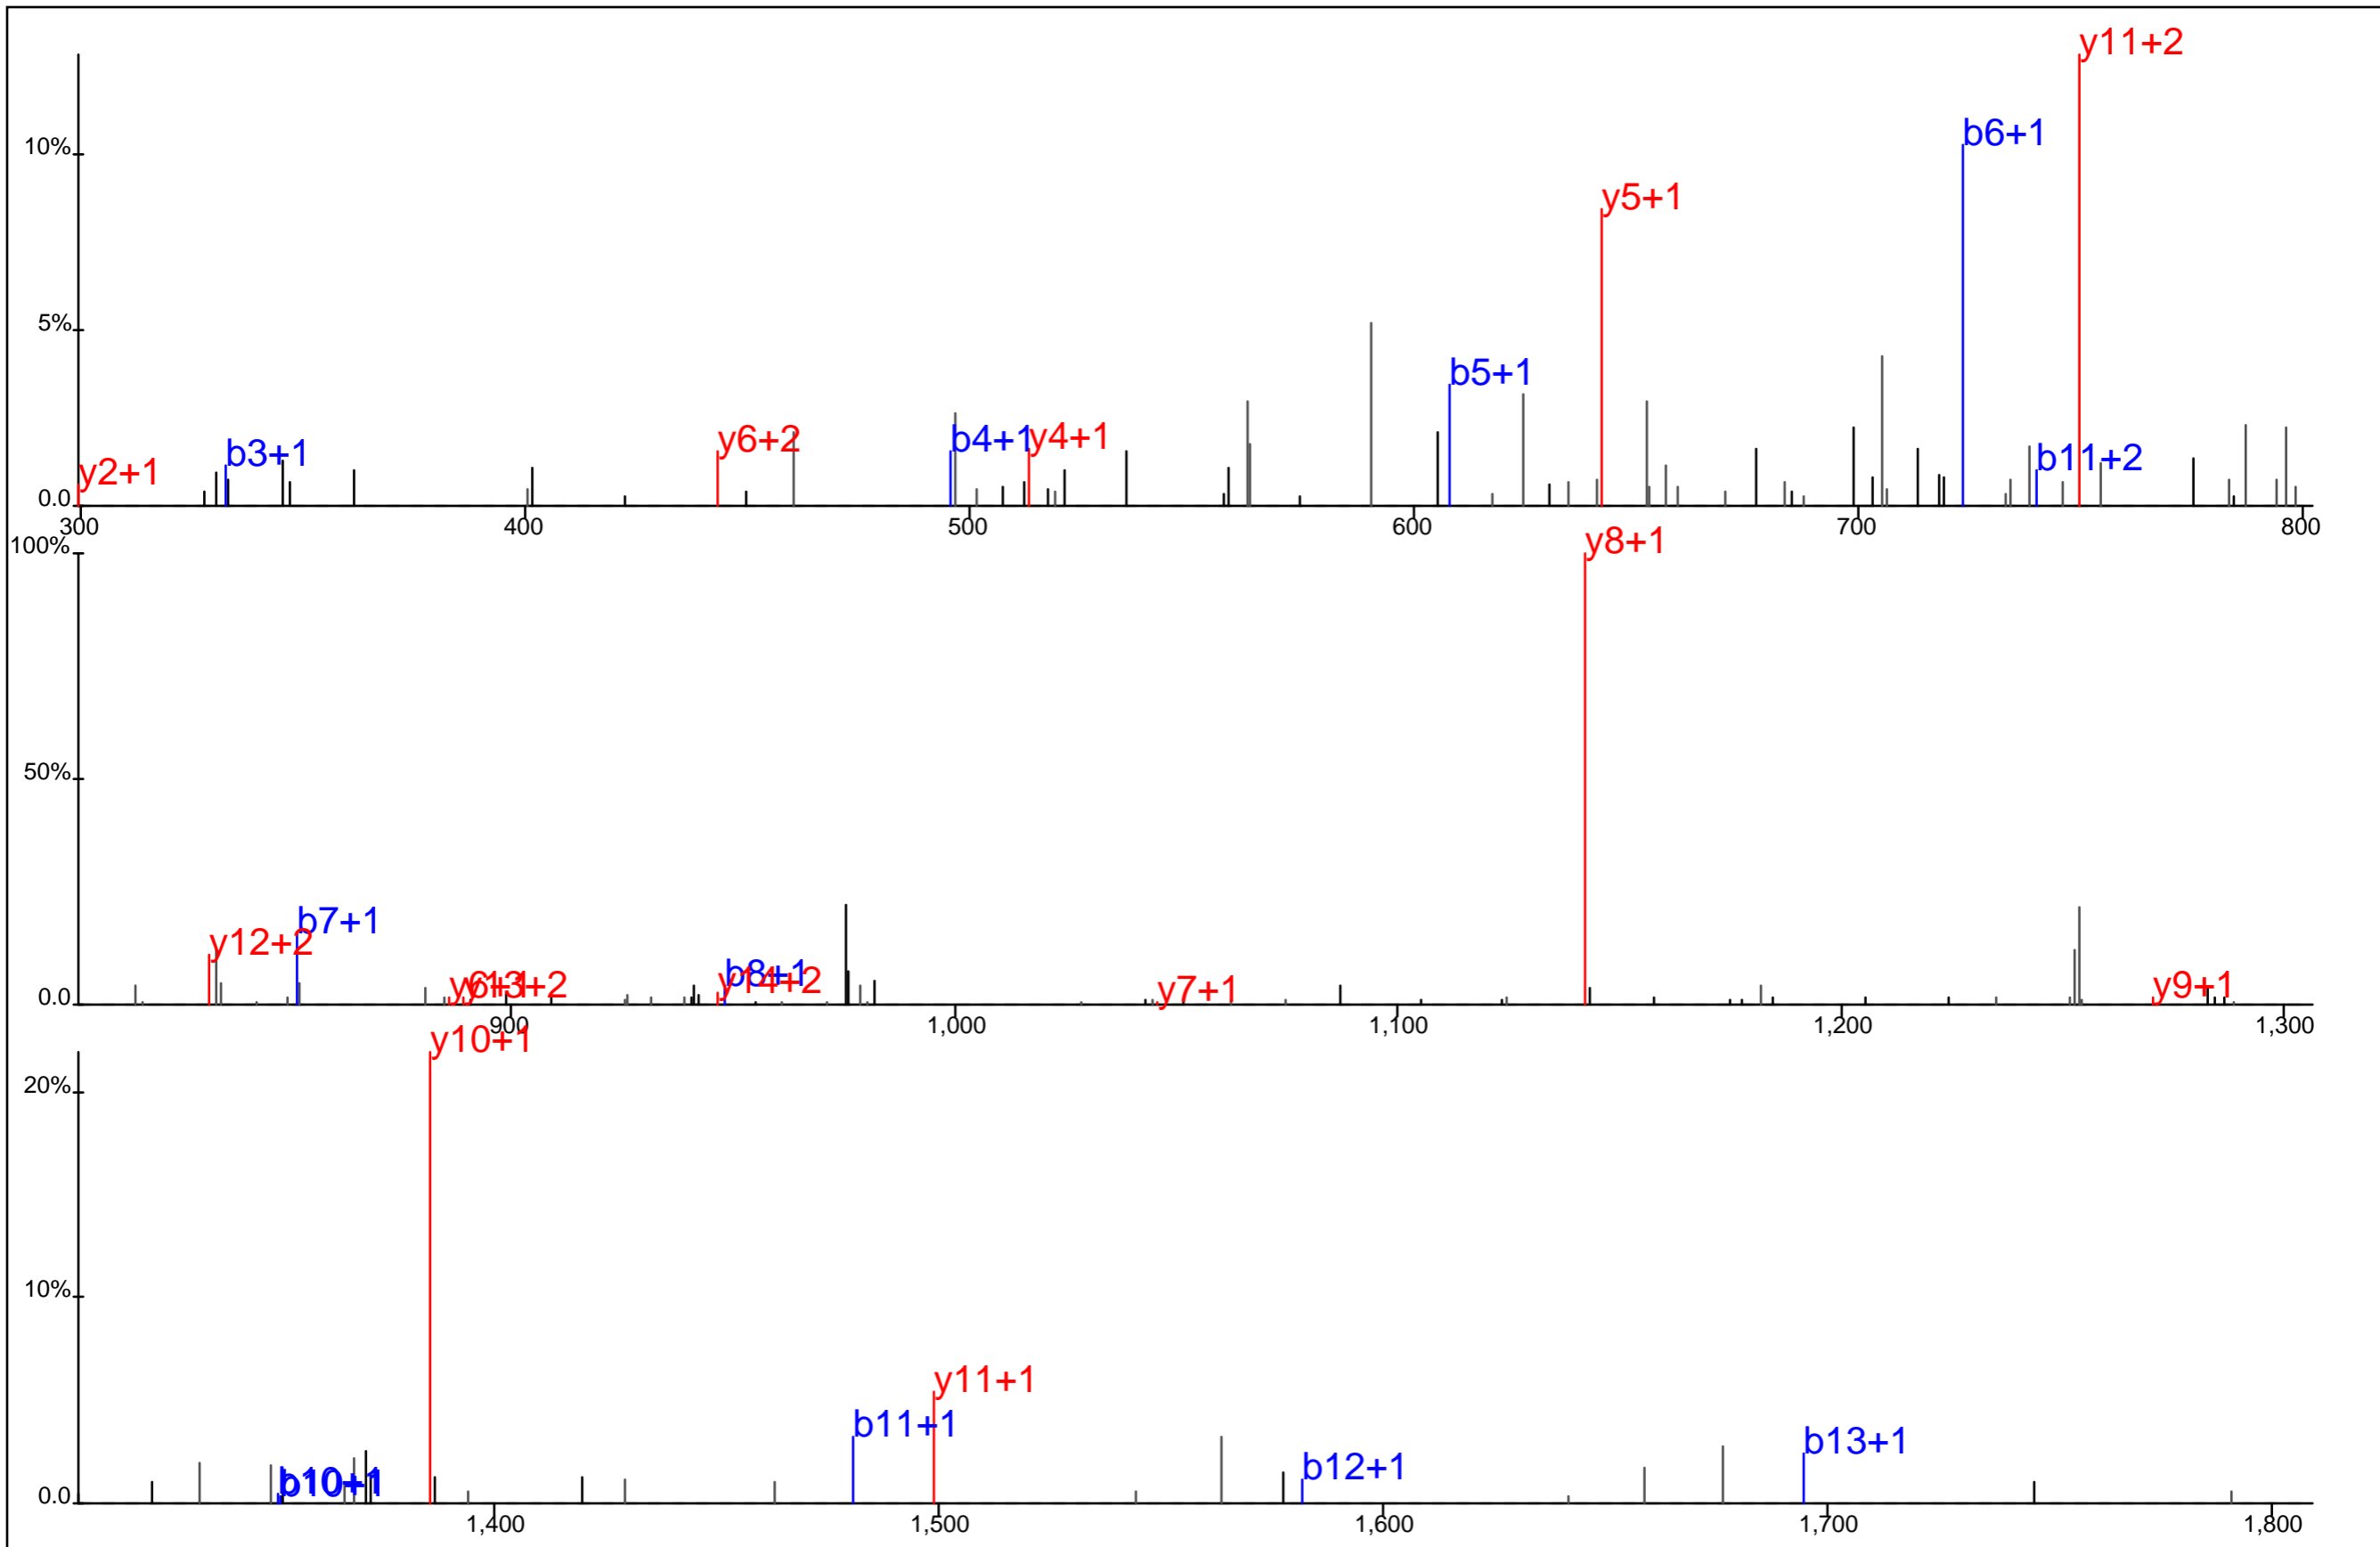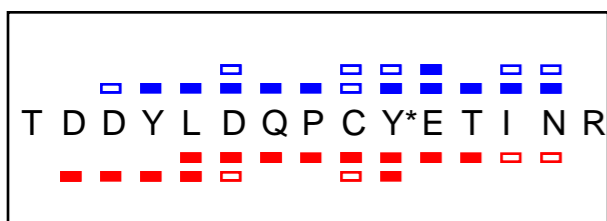

Protein Name: GDP dissociation inhibitor 2  
 gi Accession: 6598323  
 Precursor Mass: 996.9023+2  
 Delta Mass: 2.704 ppm  
 XCorr: 54.55



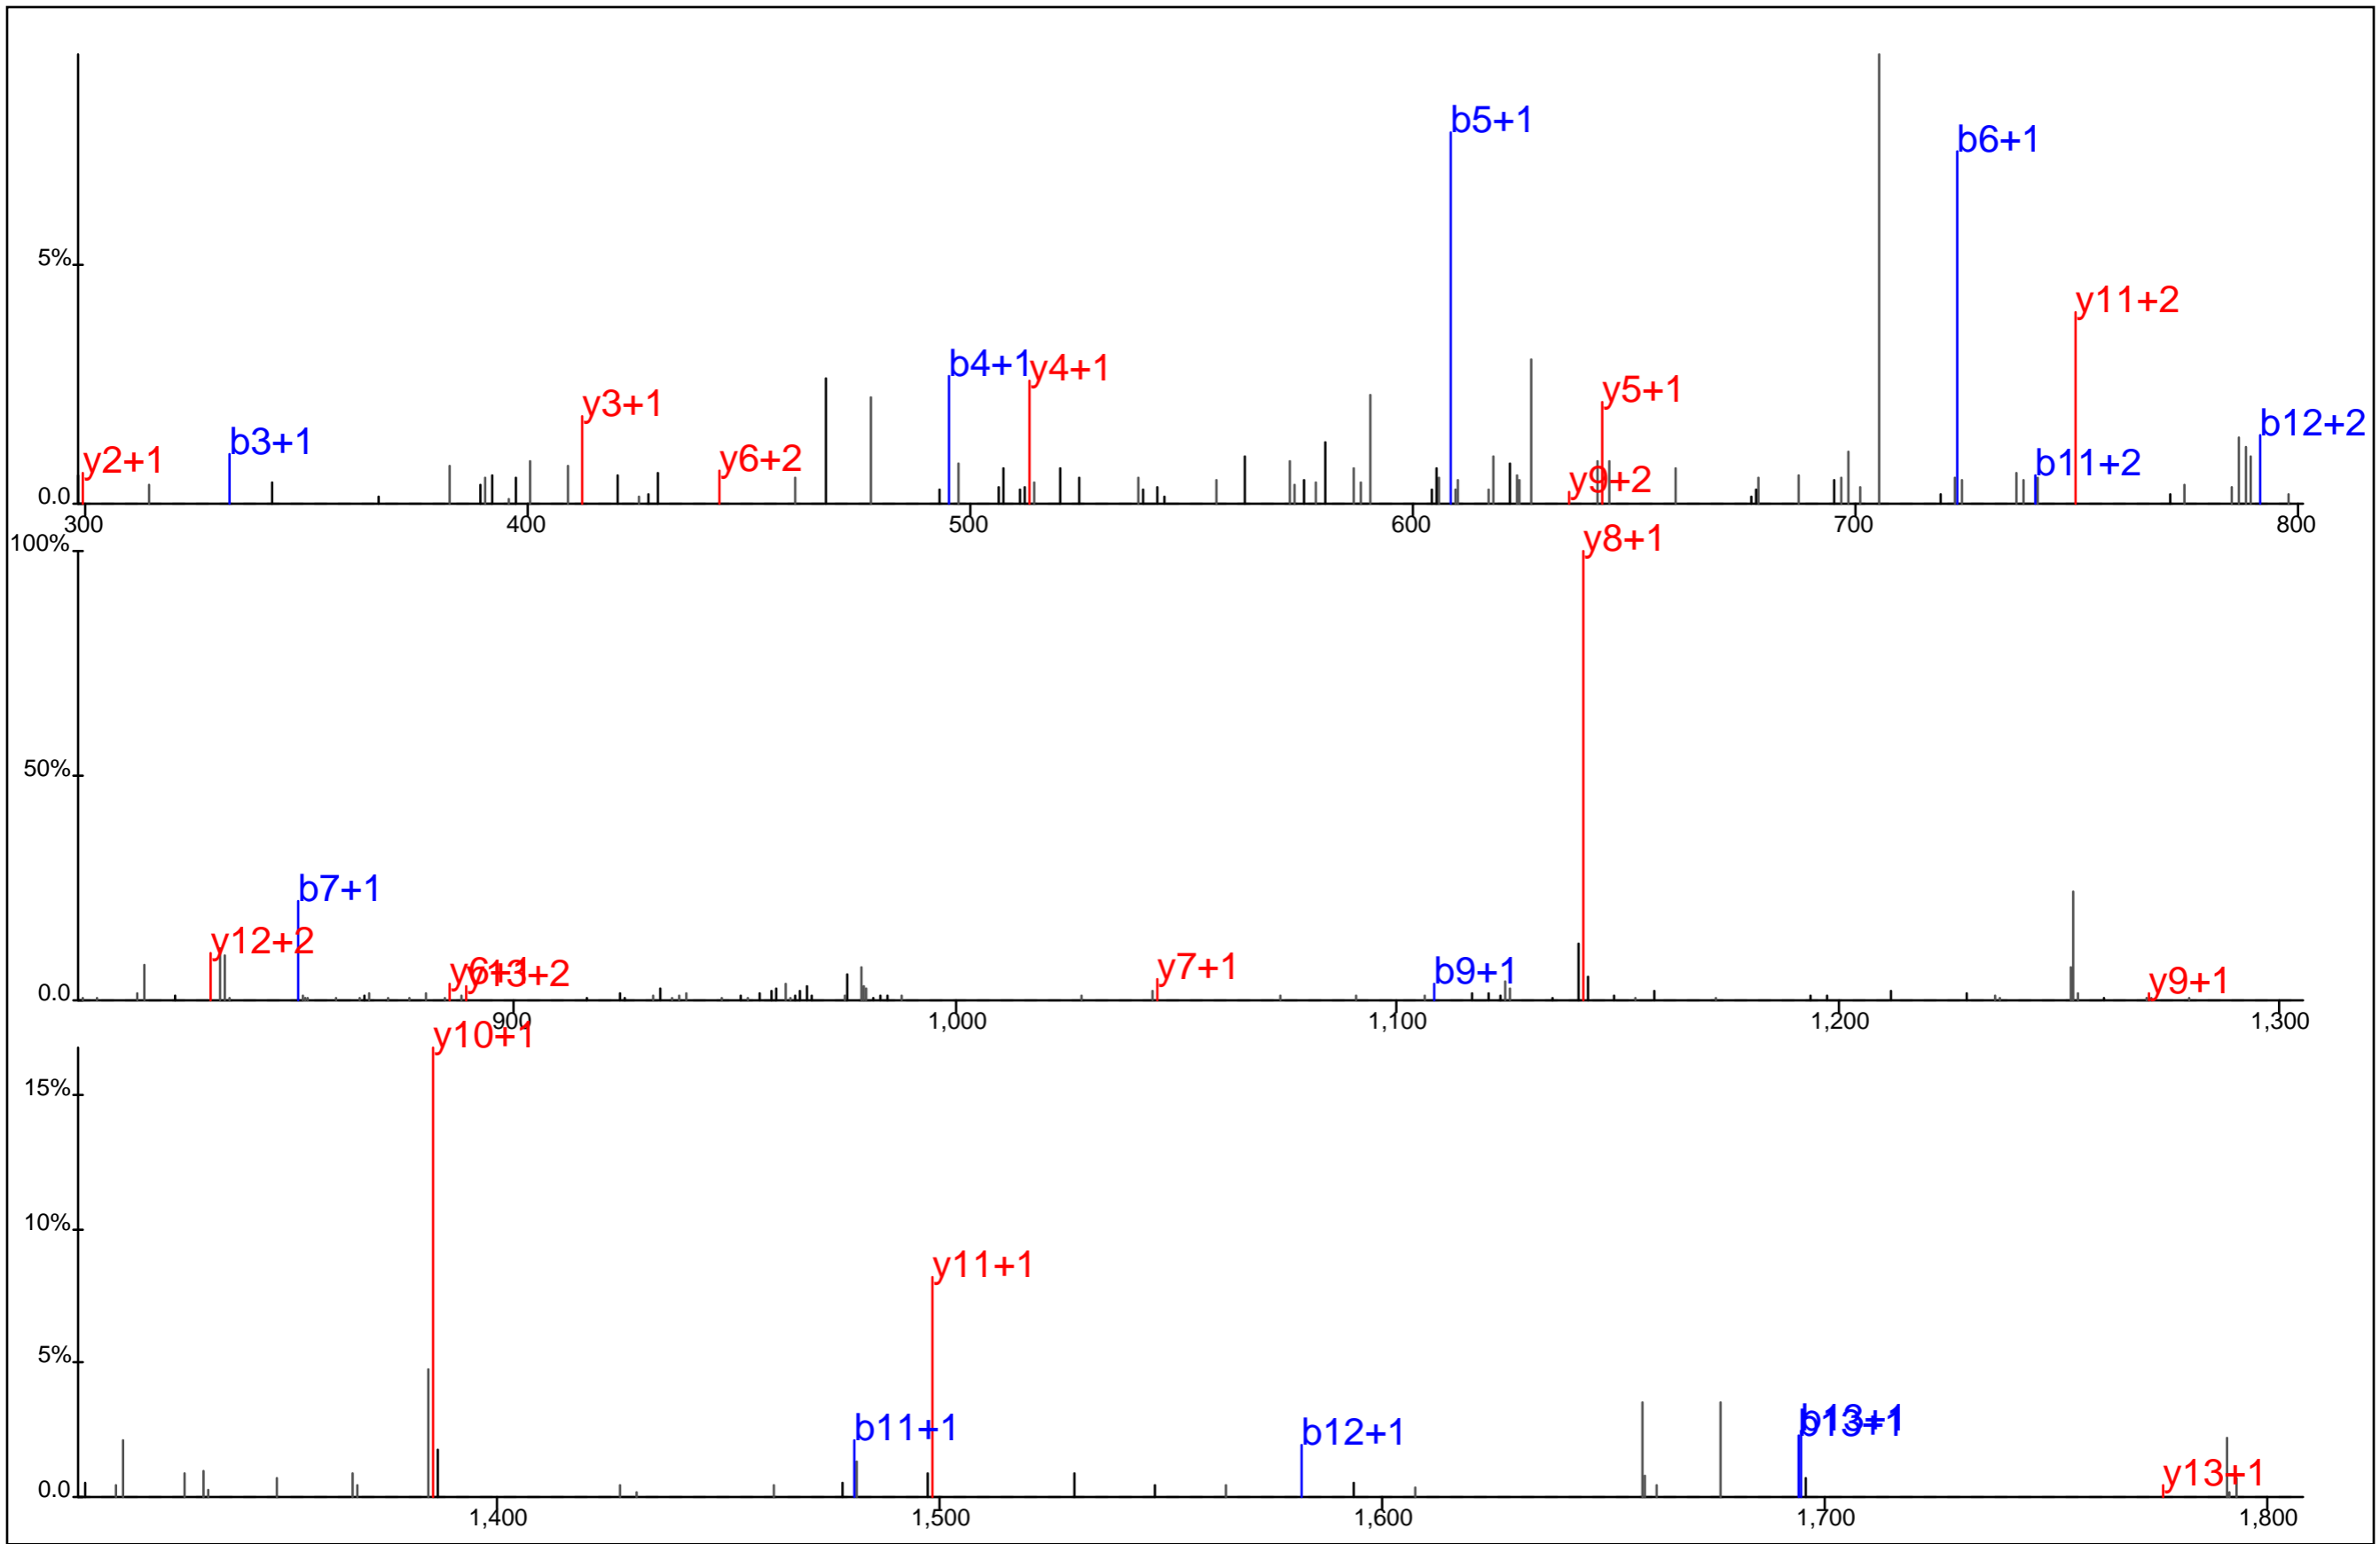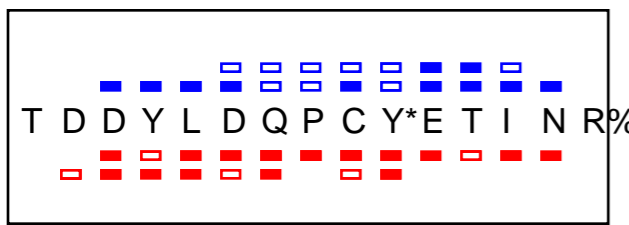

Protein Name: GDP dissociation inhibitor 2  
 gi Accession: 6598323  
 Precursor Mass: 996.9021+2  
 Delta Mass: 2.458 ppm  
 XCorr: 62.43

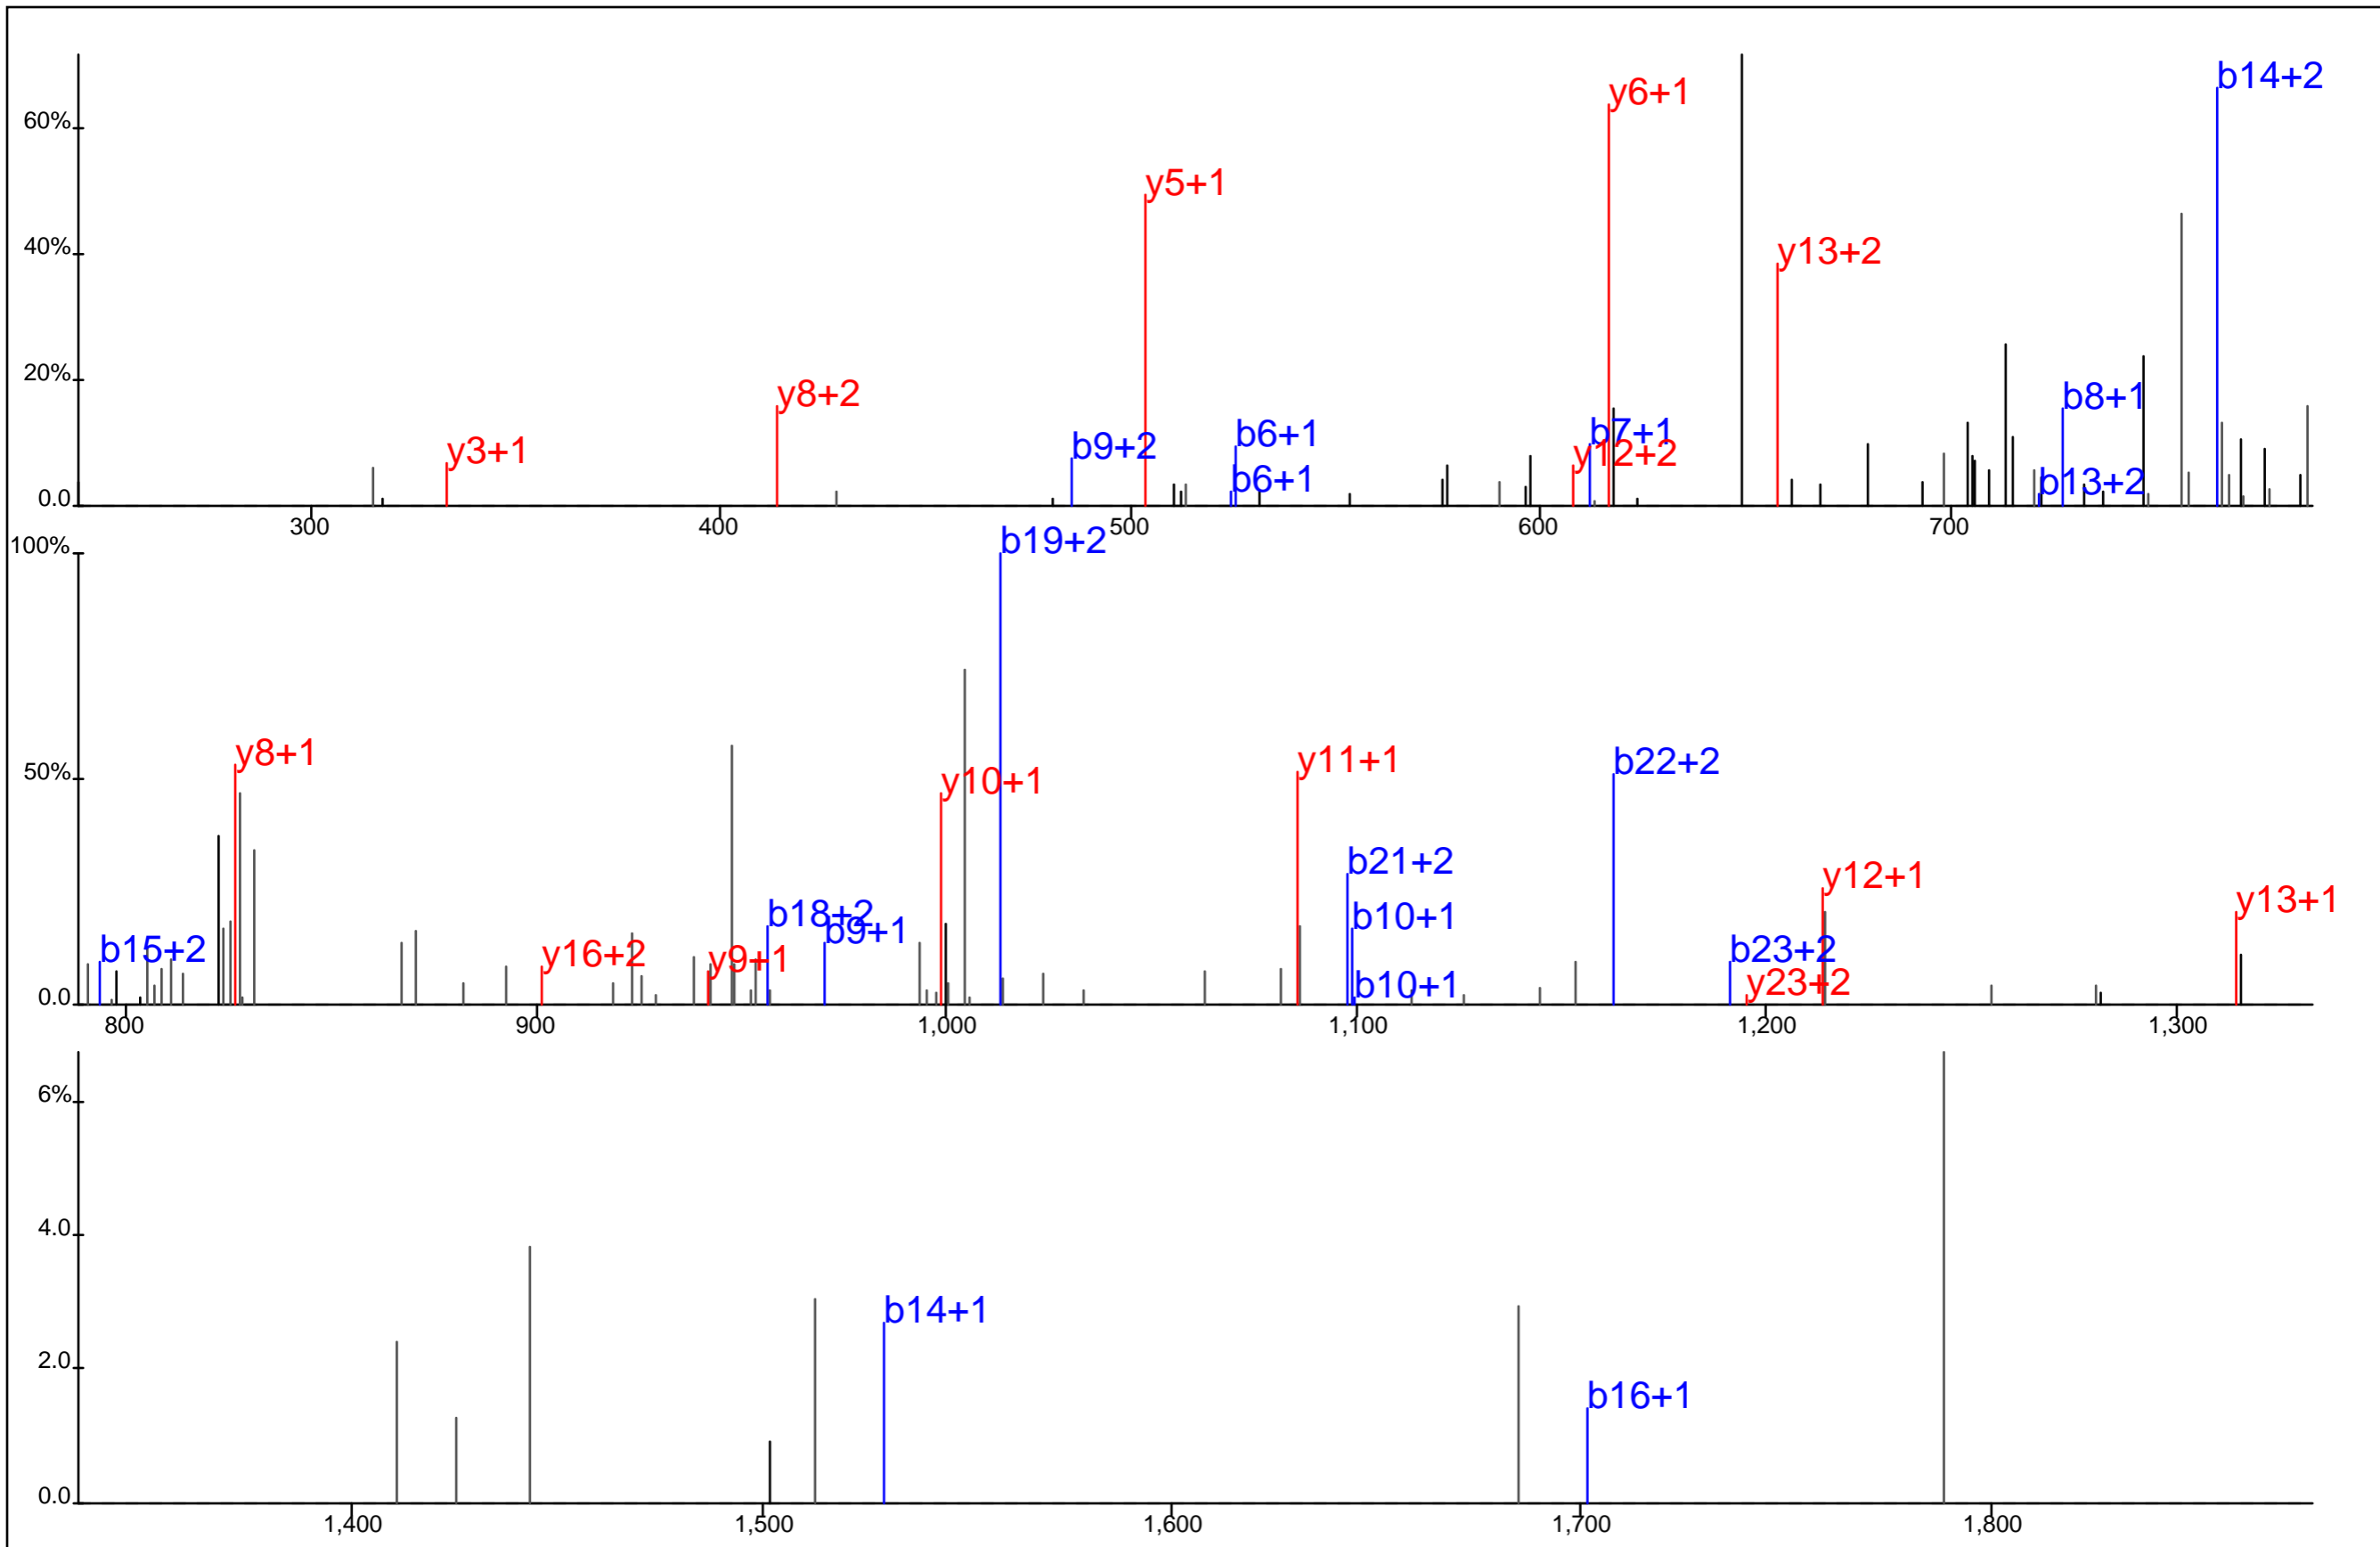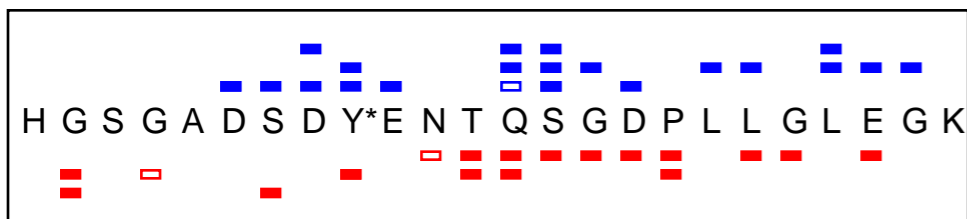

Protein Name: GIT1  
 gi Accession: 41393573  
 Precursor Mass: 843.0291+3  
 Delta Mass: 4.178 ppm  
 XCorr: 55.68

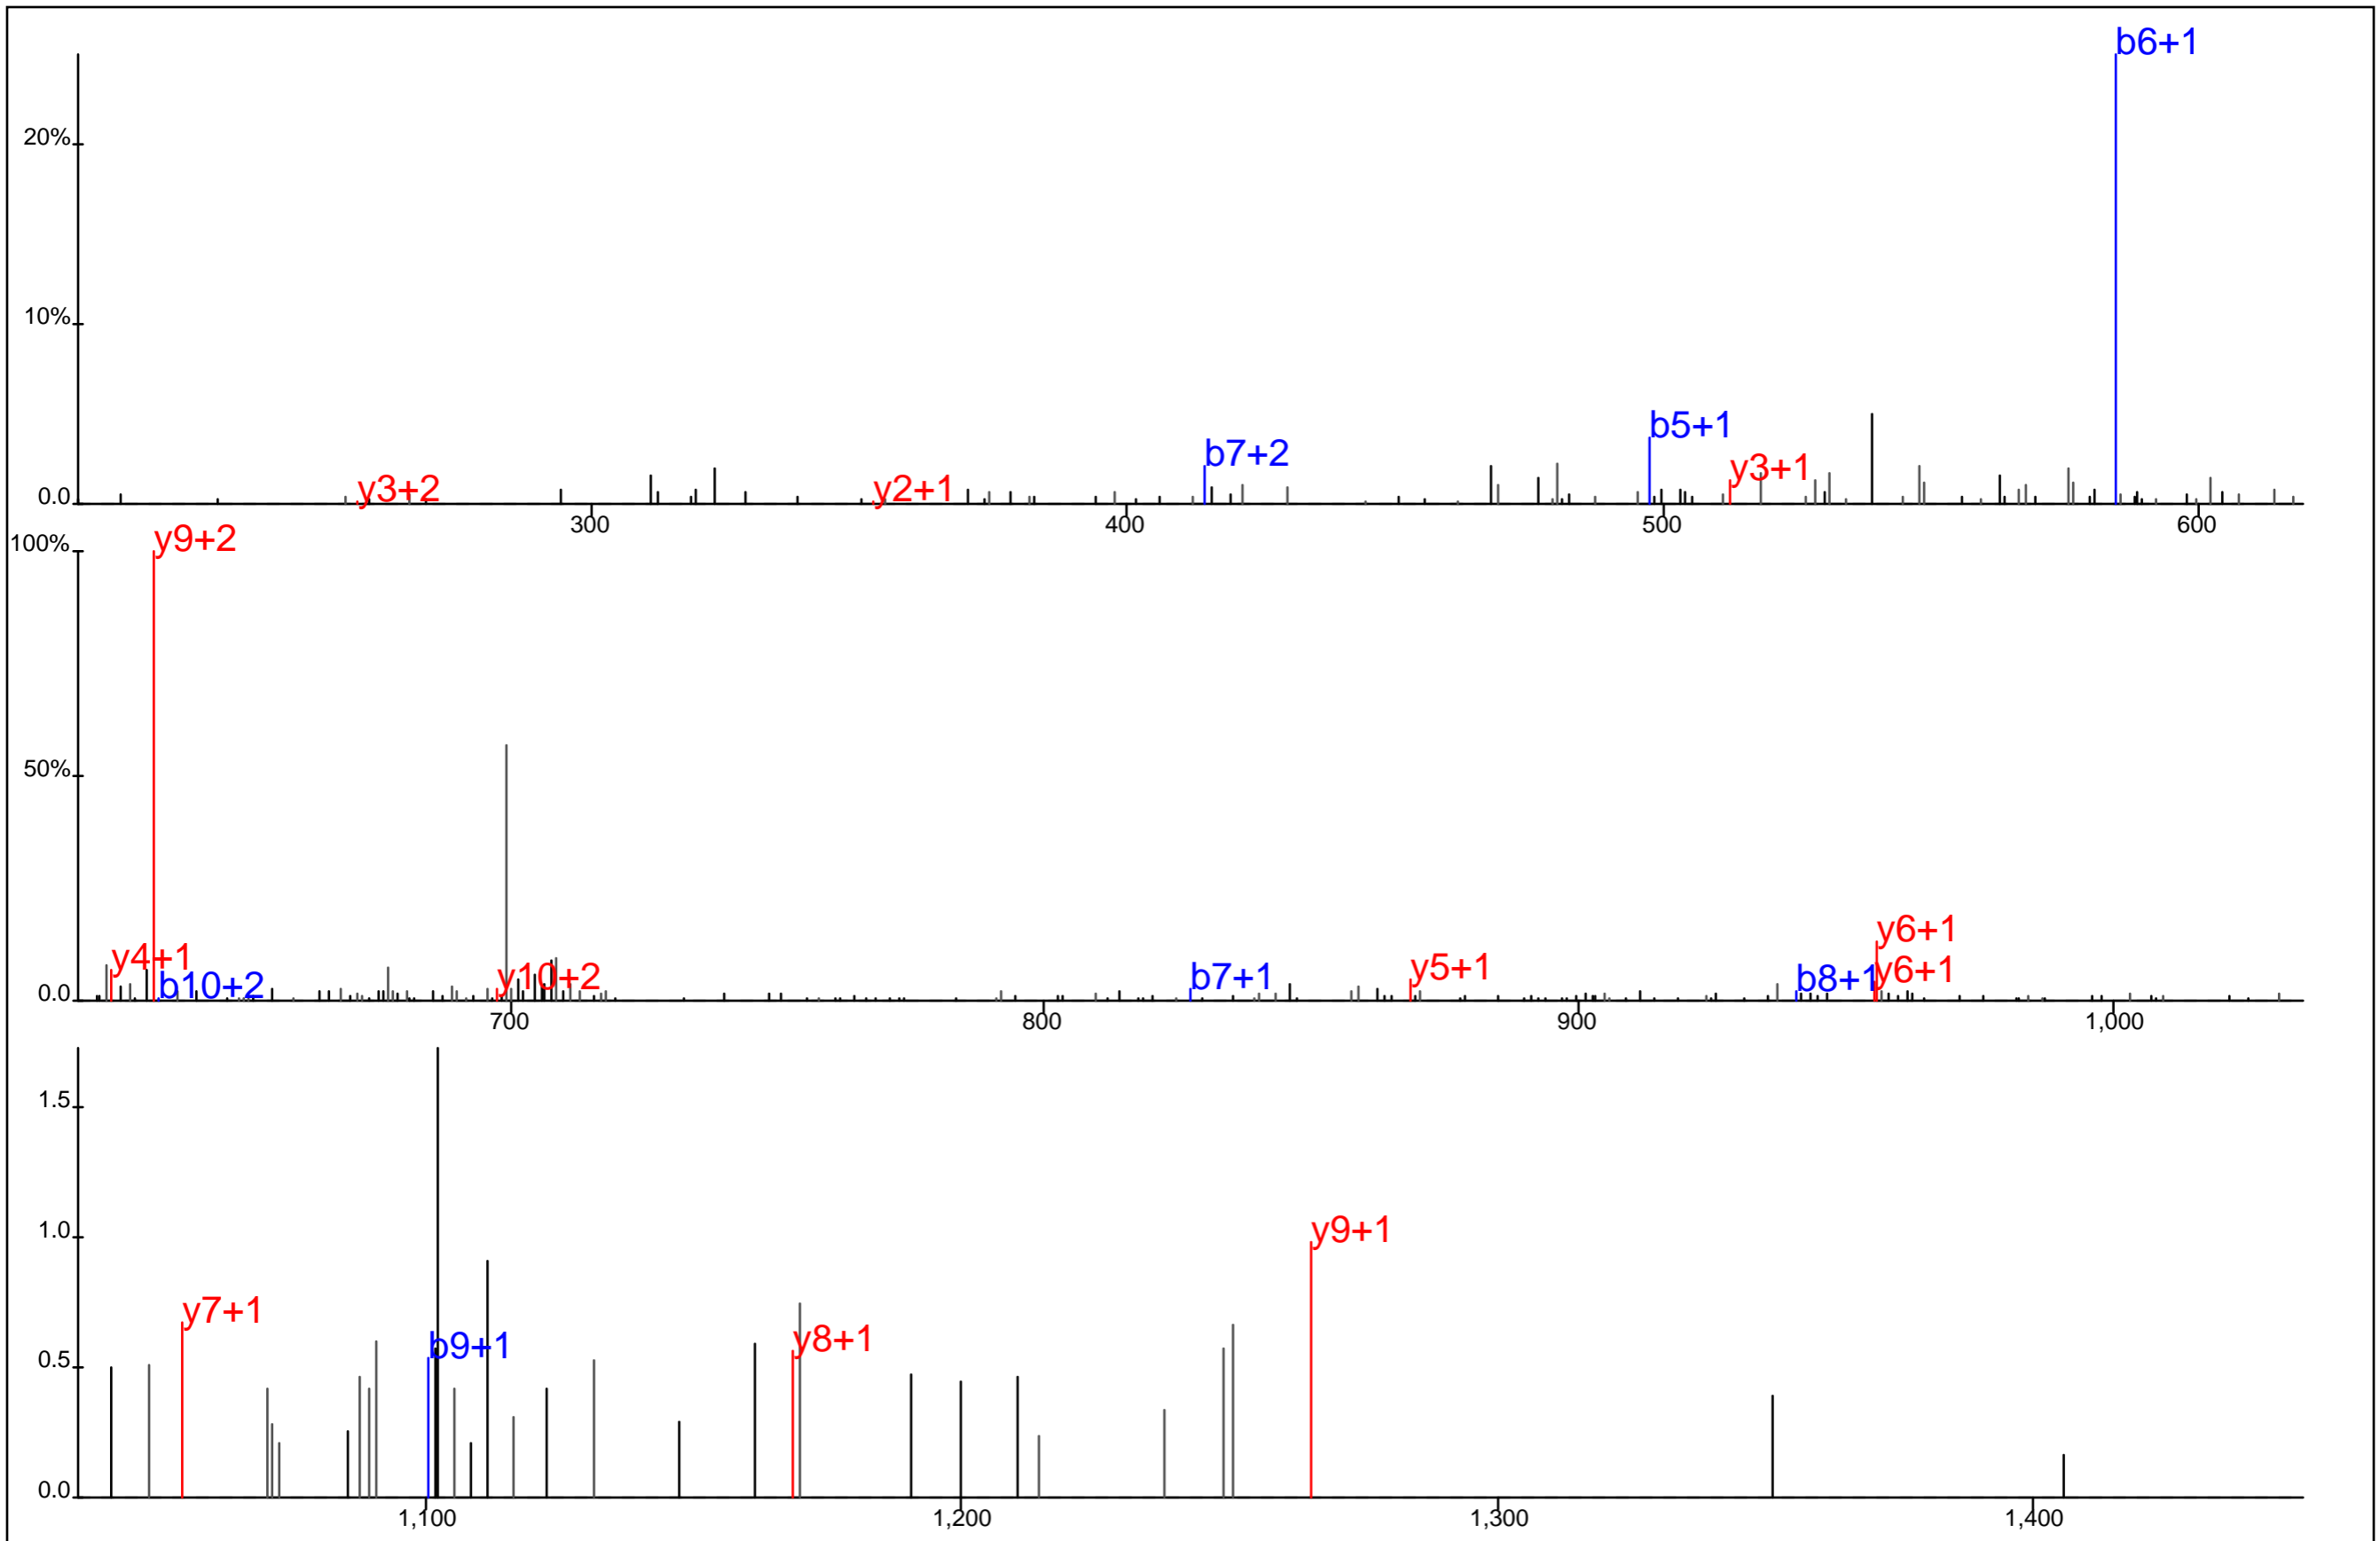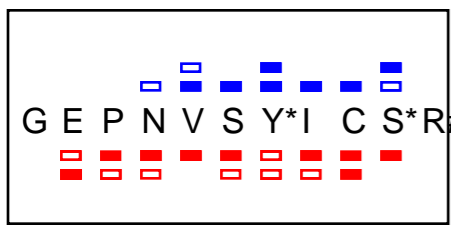

Protein Name: GSK 3  
 gi Accession: 49574532  
 Precursor Mass: 726.2708+2  
 Delta Mass: 2.900 ppm  
 XCorr: 2.8991

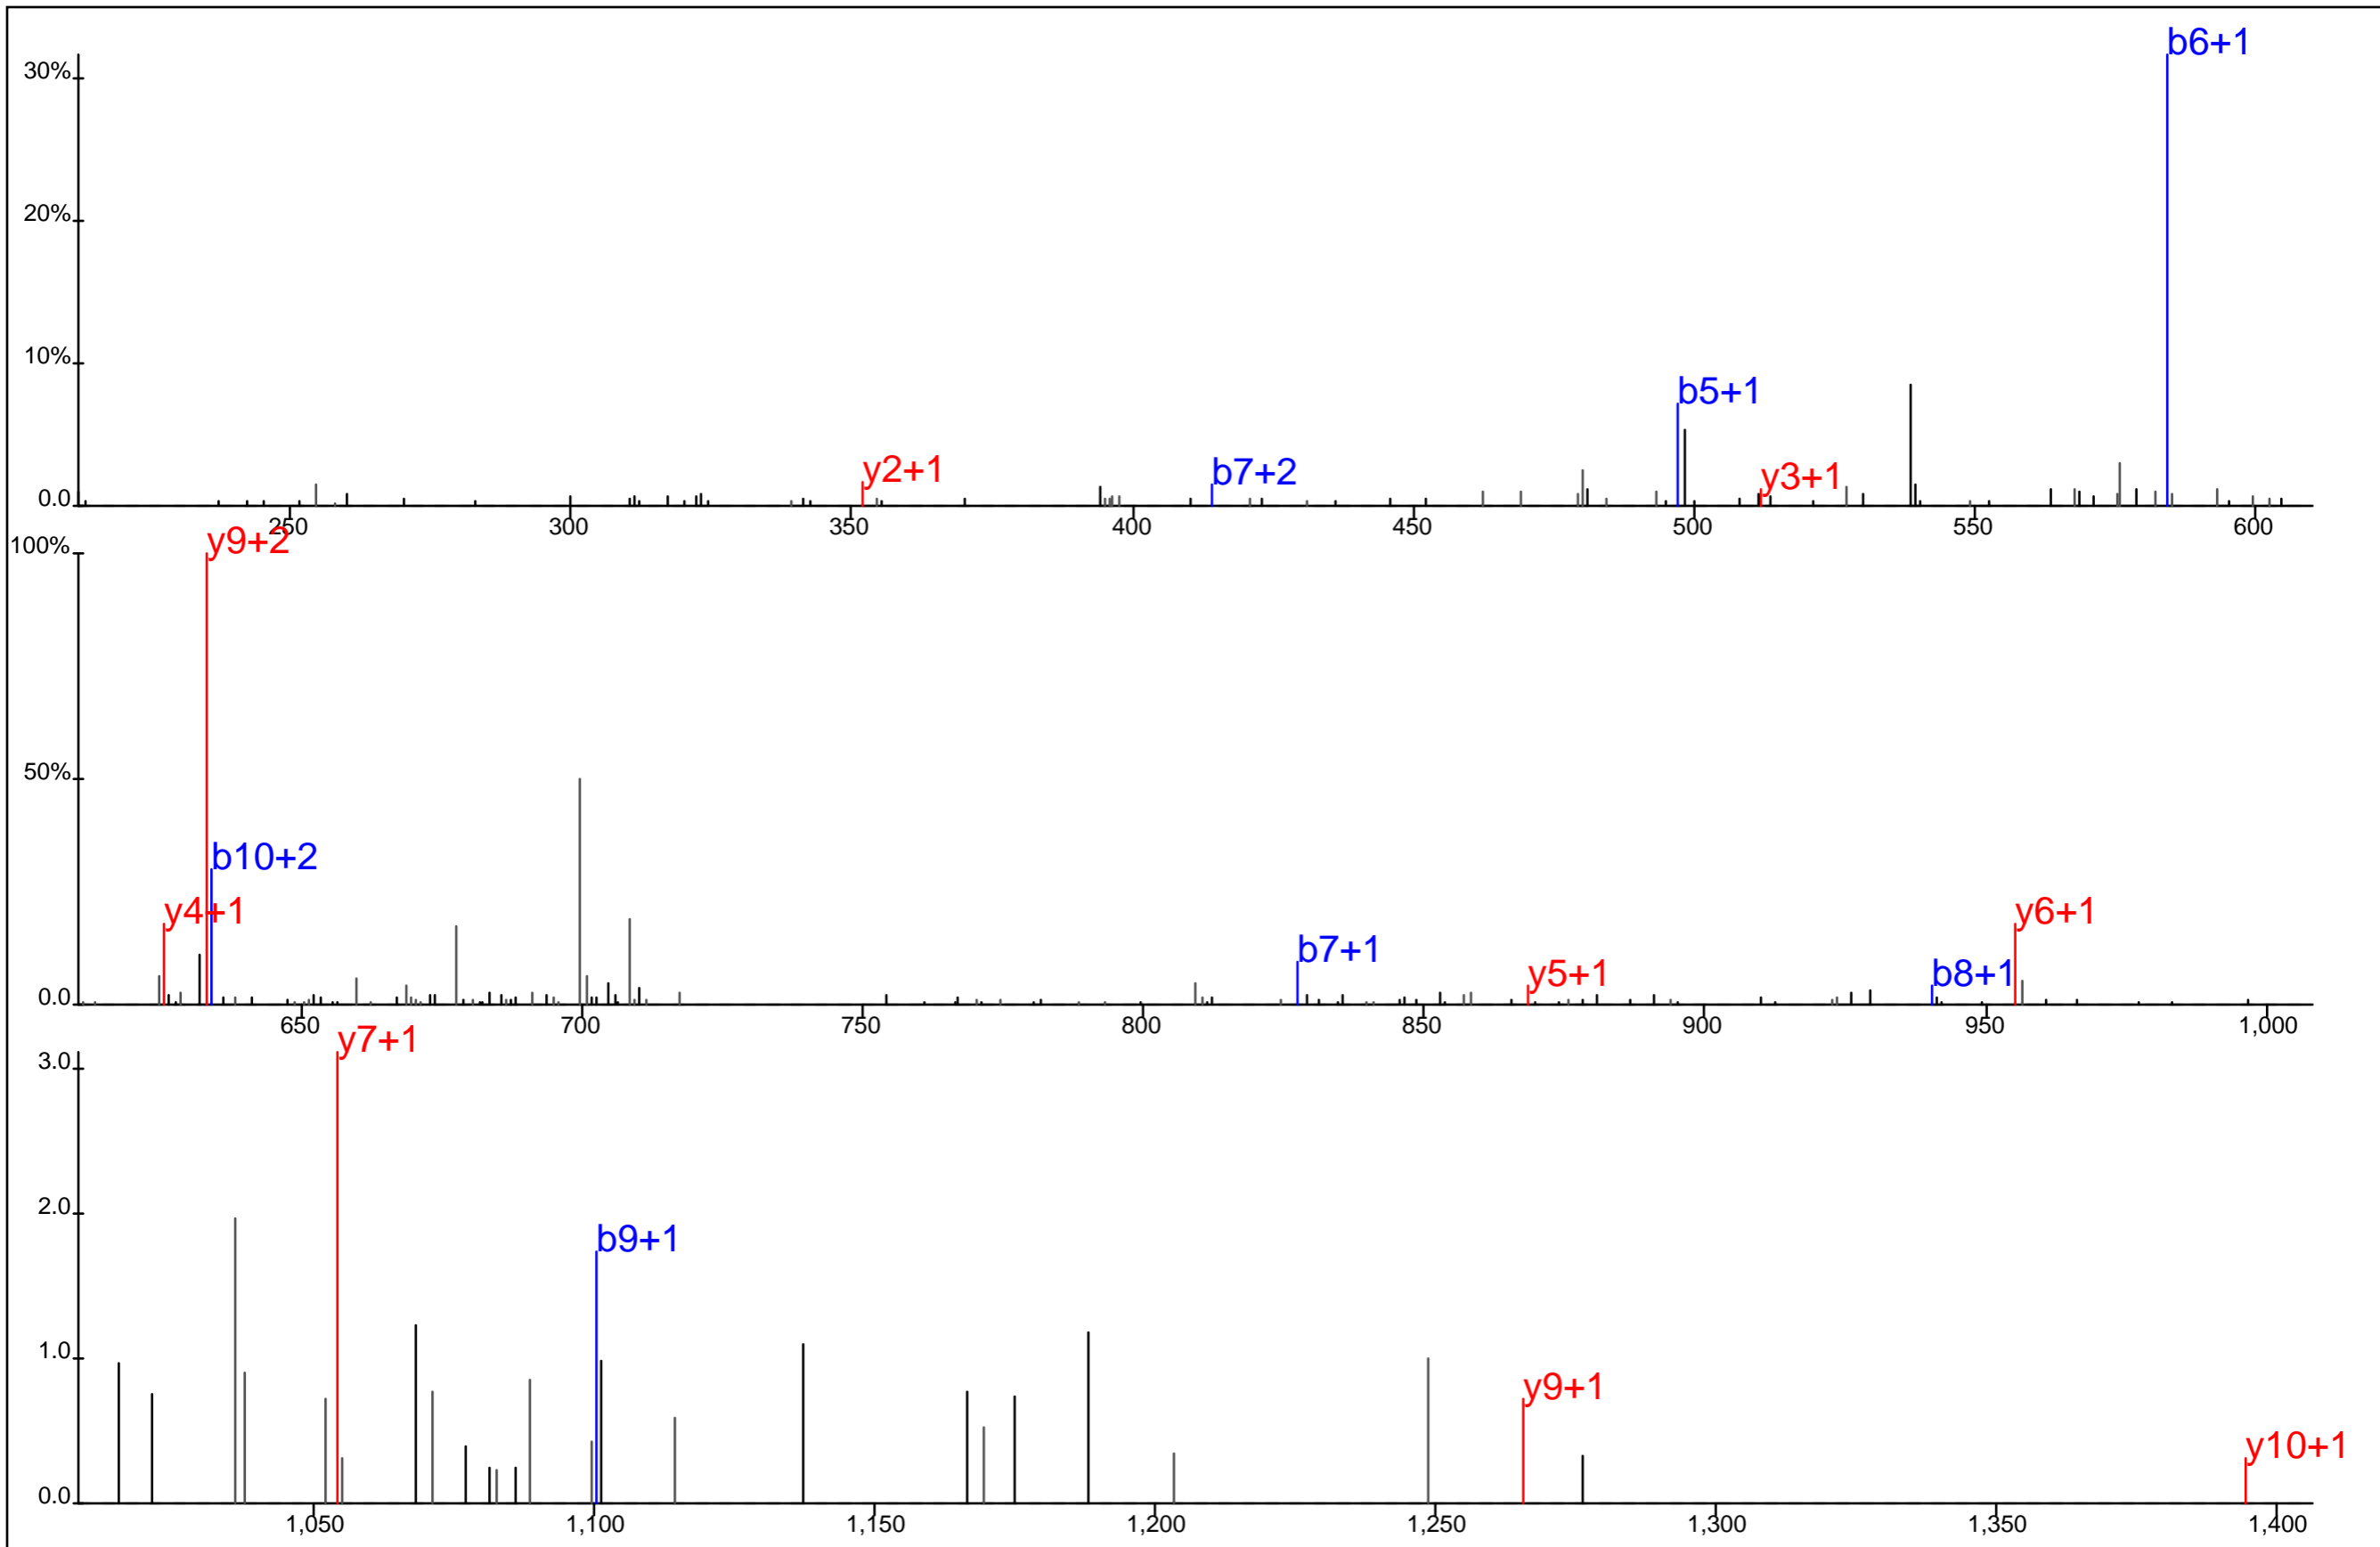

G E P N V S Y\* I C S\* R%  
 ■ ■ ■ ■ ■ ■ ■ ■ ■ ■  
 ■ ■ ■ ■ ■ ■ ■ ■ ■ ■

Protein Name: GSK 3  
 gi Accession: 49574532  
 Precursor Mass: 726.2732+2  
 Delta Mass: 6.192 ppm  
 XCorr: 34.61



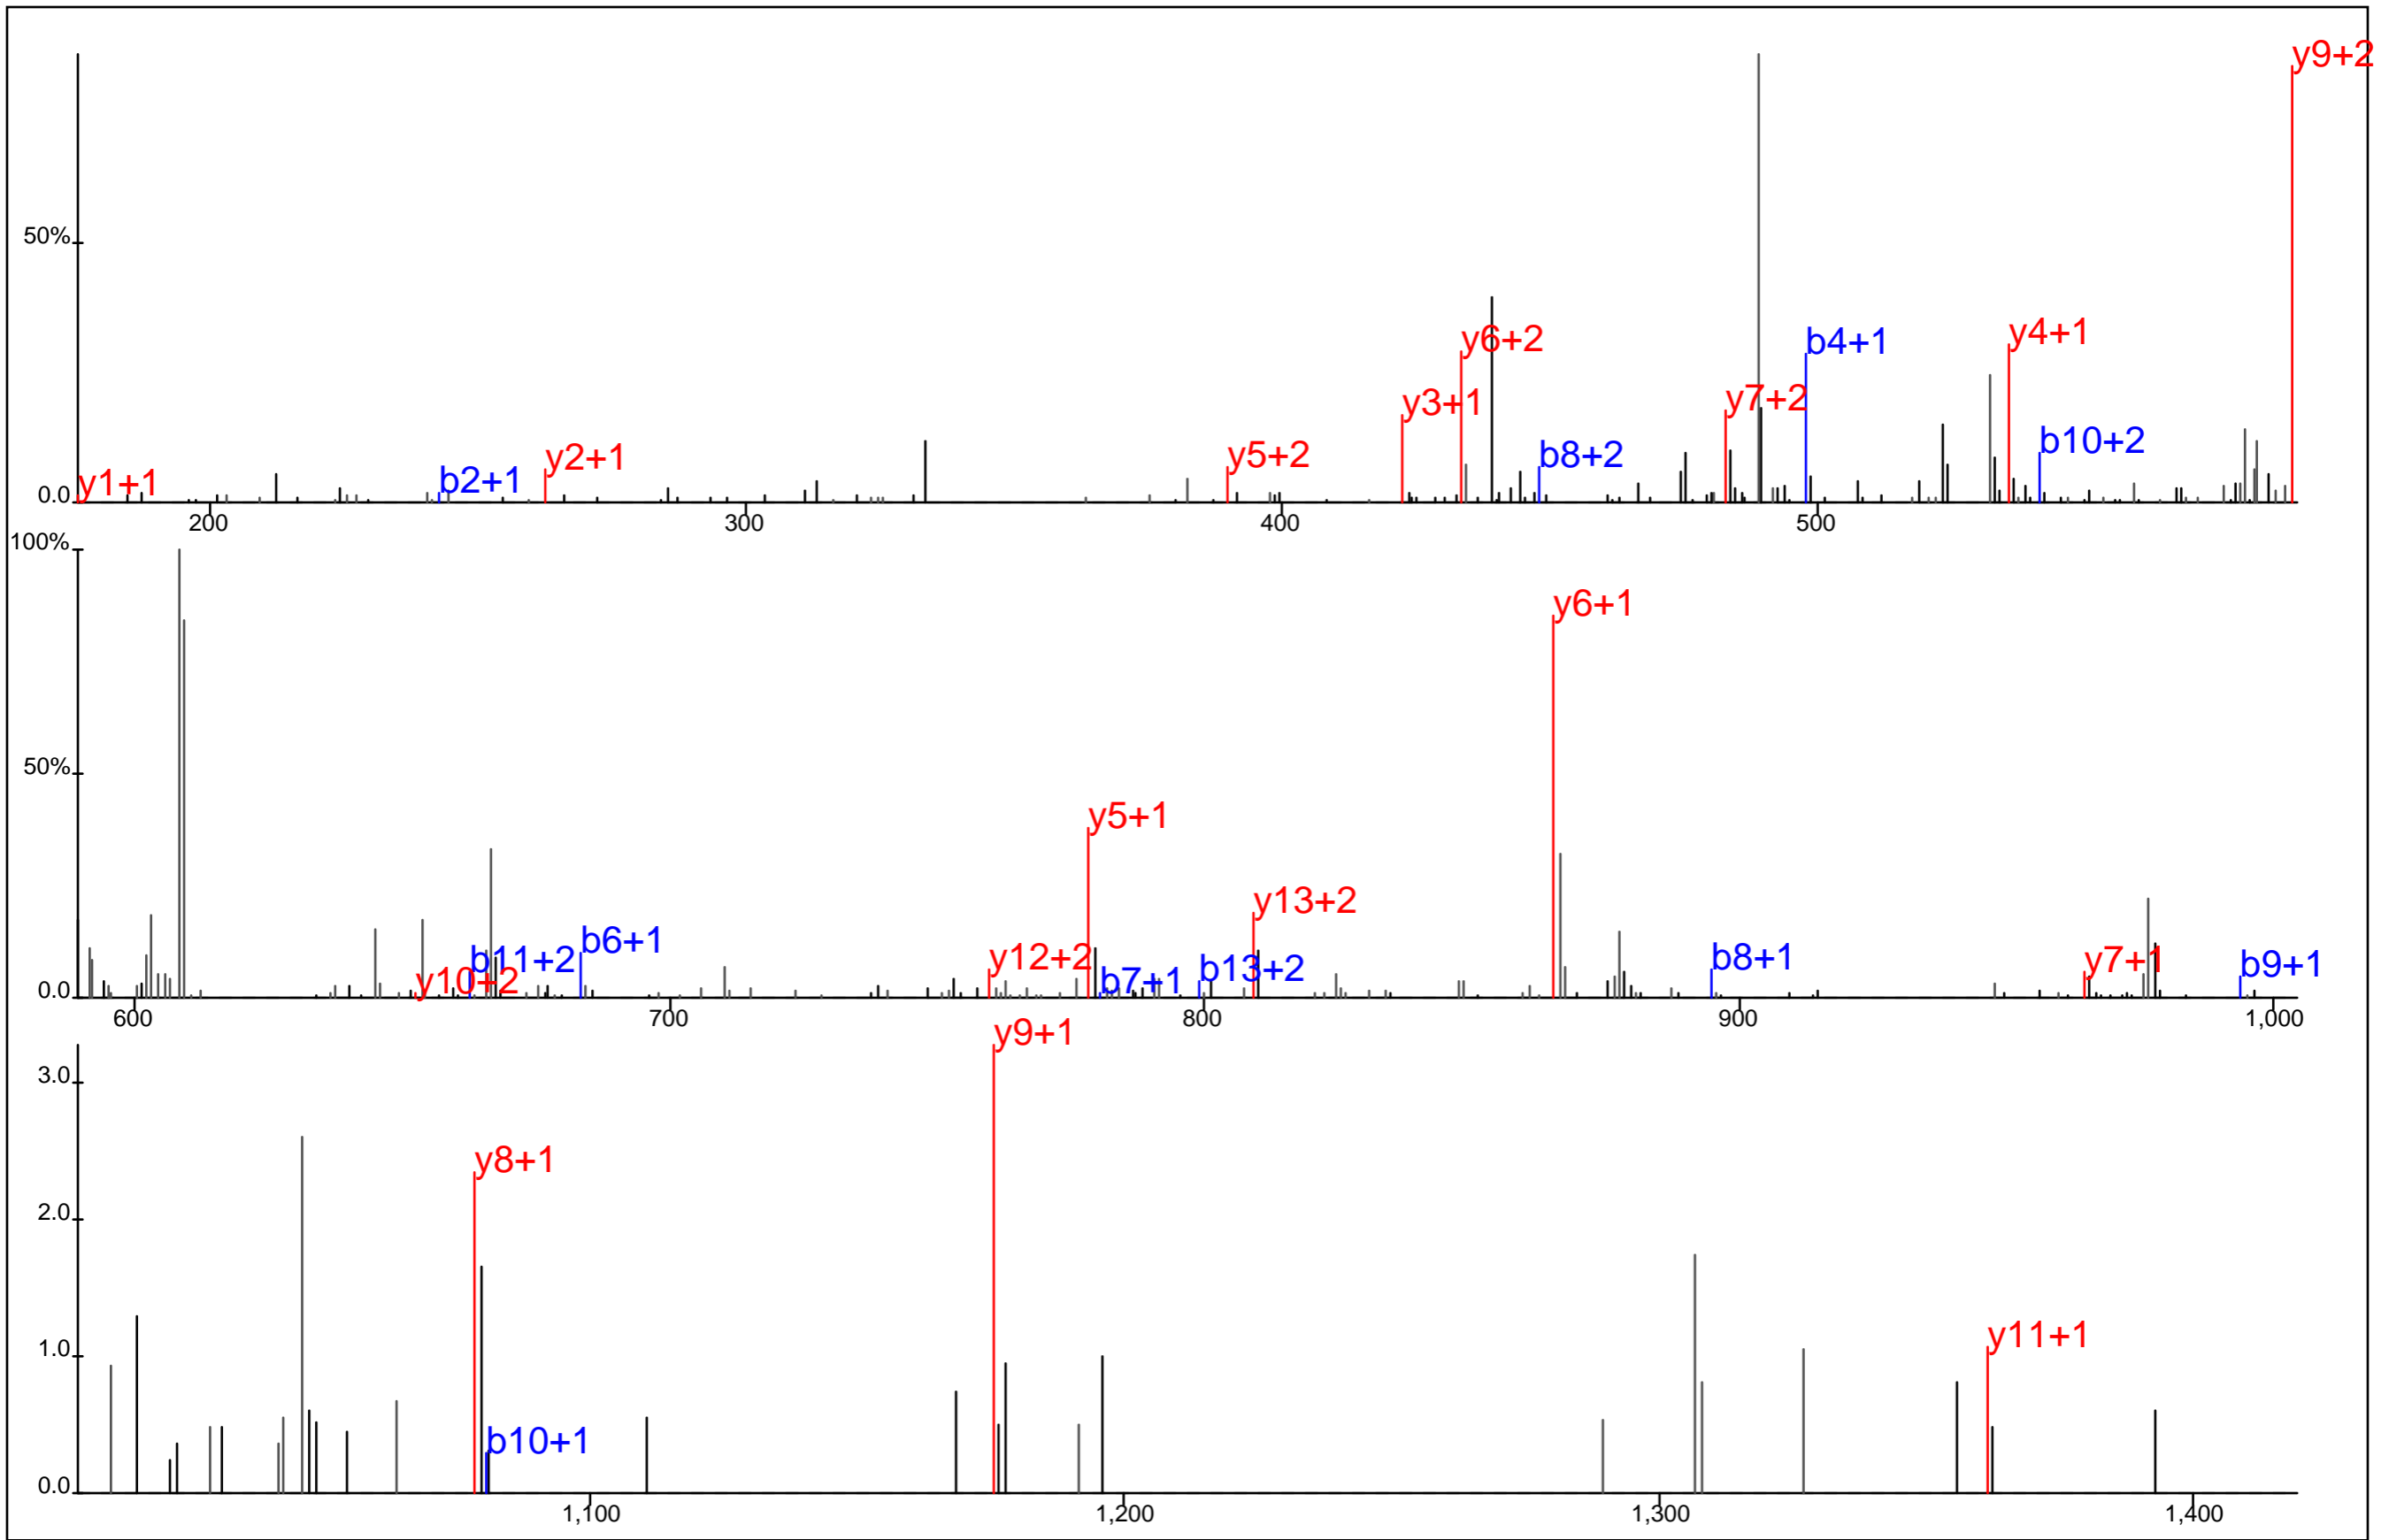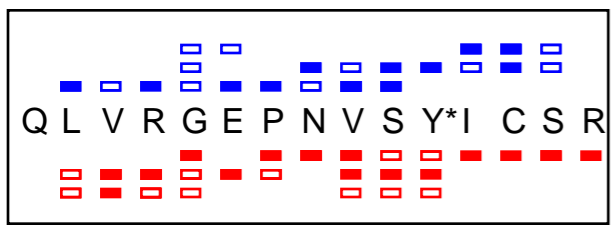

Protein Name: GSK 3  
 gi Accession: 49574532  
 Precursor Mass: 619.9626+3  
 Delta Mass: 2.965 ppm  
 XCorr: 55.58

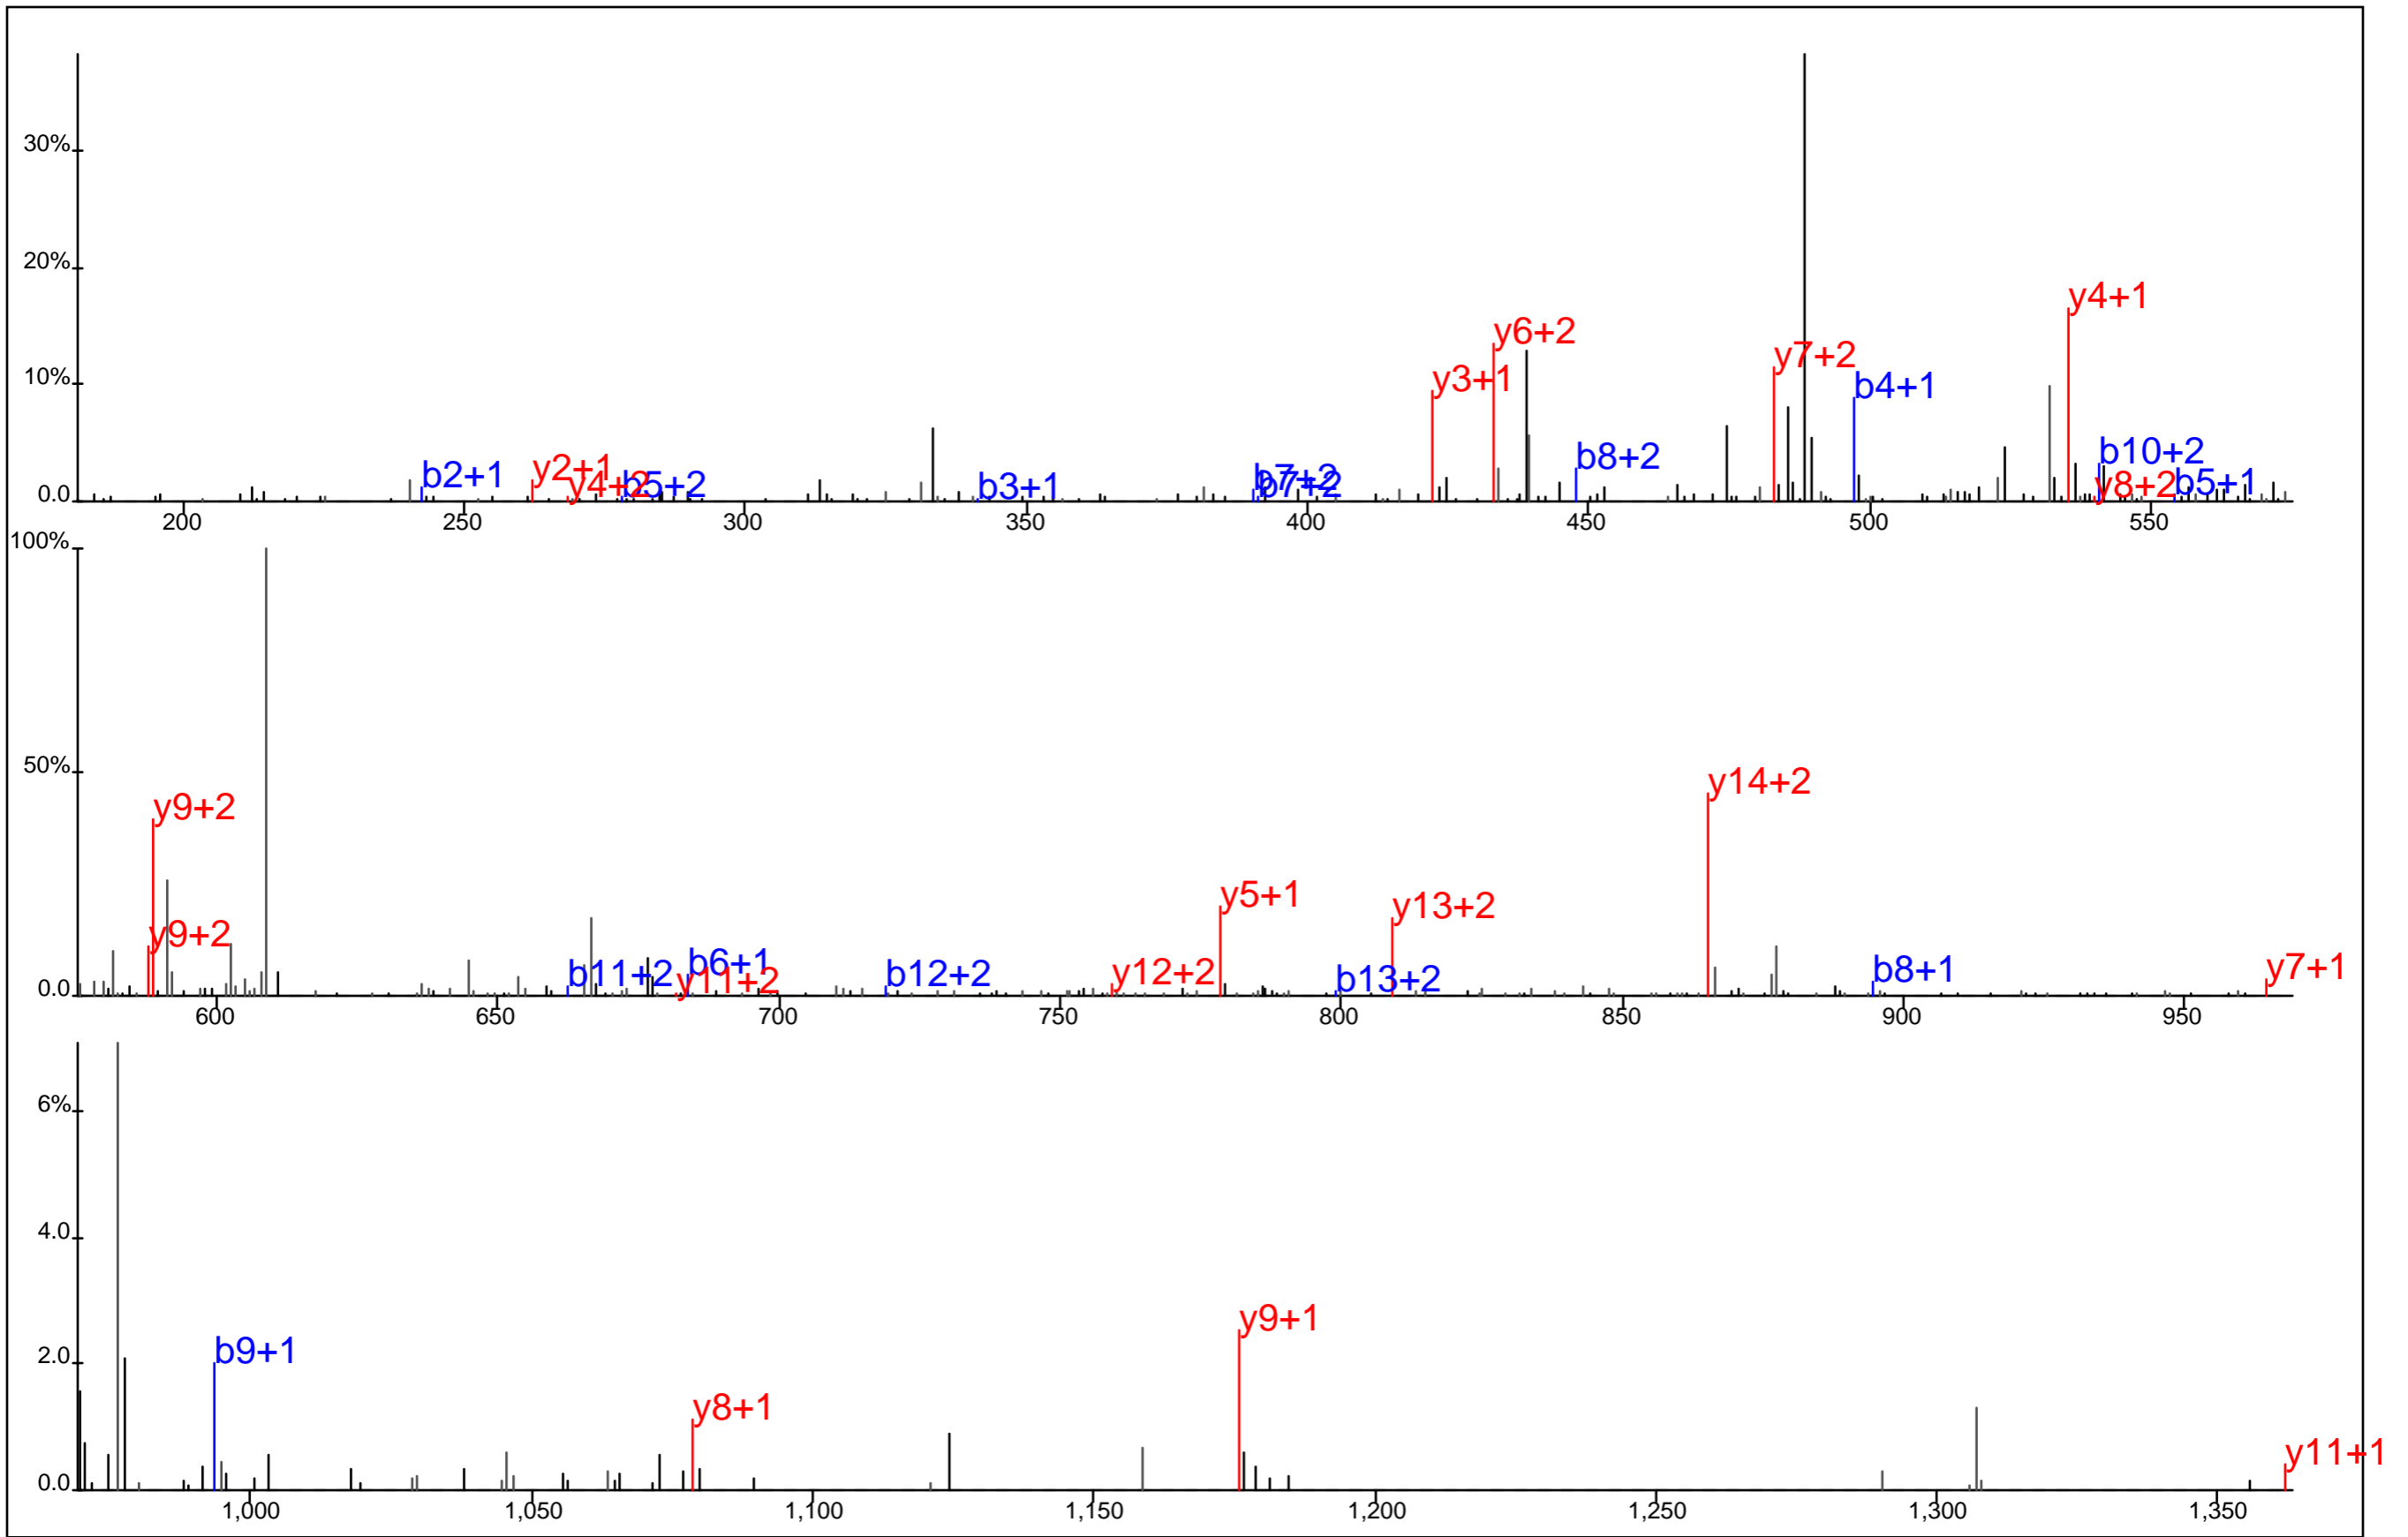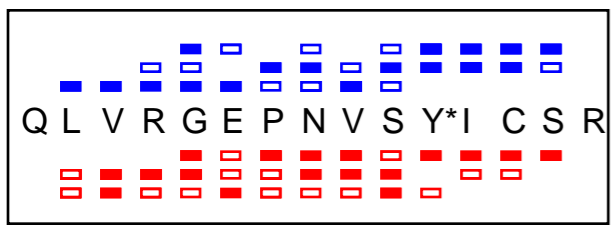

Protein Name: GSK 3  
 gi Accession: 49574532  
 Precursor Mass: 619.9625+3  
 Delta Mass: 2.868 ppm  
 XCorr: 64.45

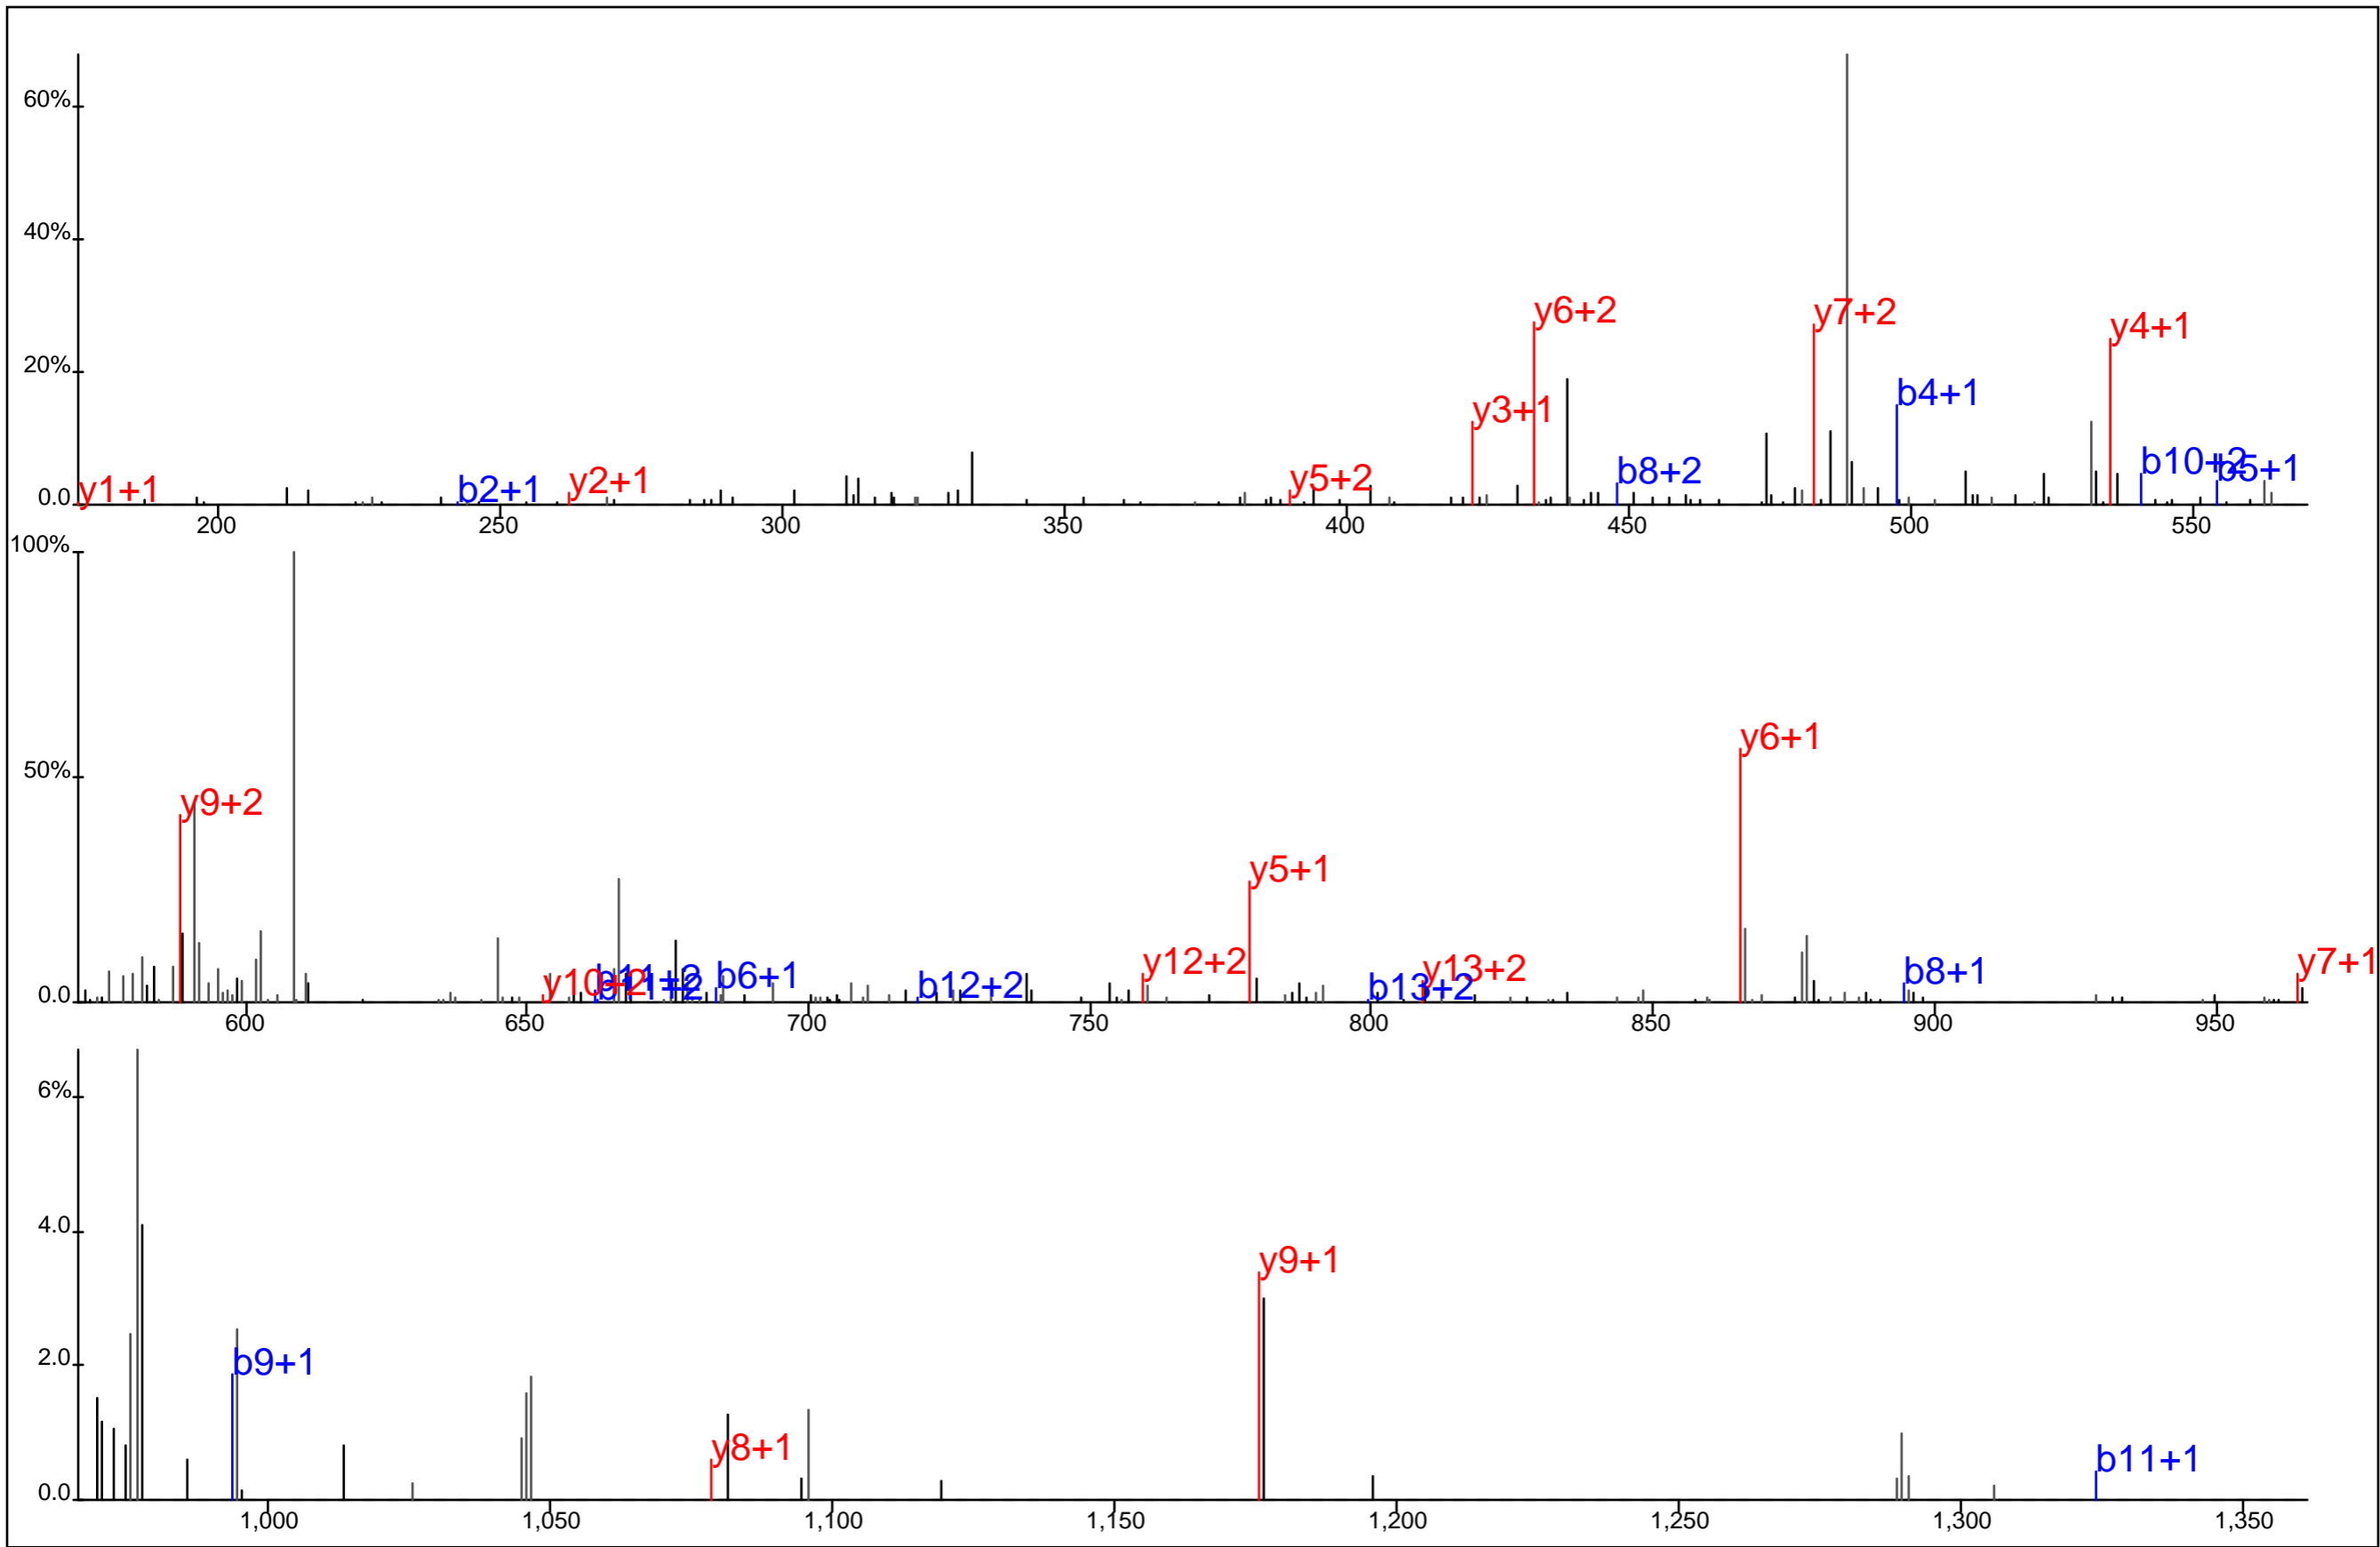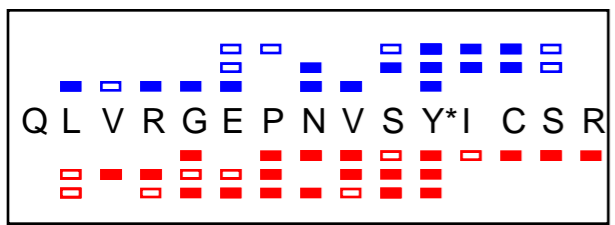

Protein Name: GSK 3  
 gi Accession: 49574532  
 Precursor Mass: 619.9621+3  
 Delta Mass: 2.178 ppm  
 XCorr: 42.22

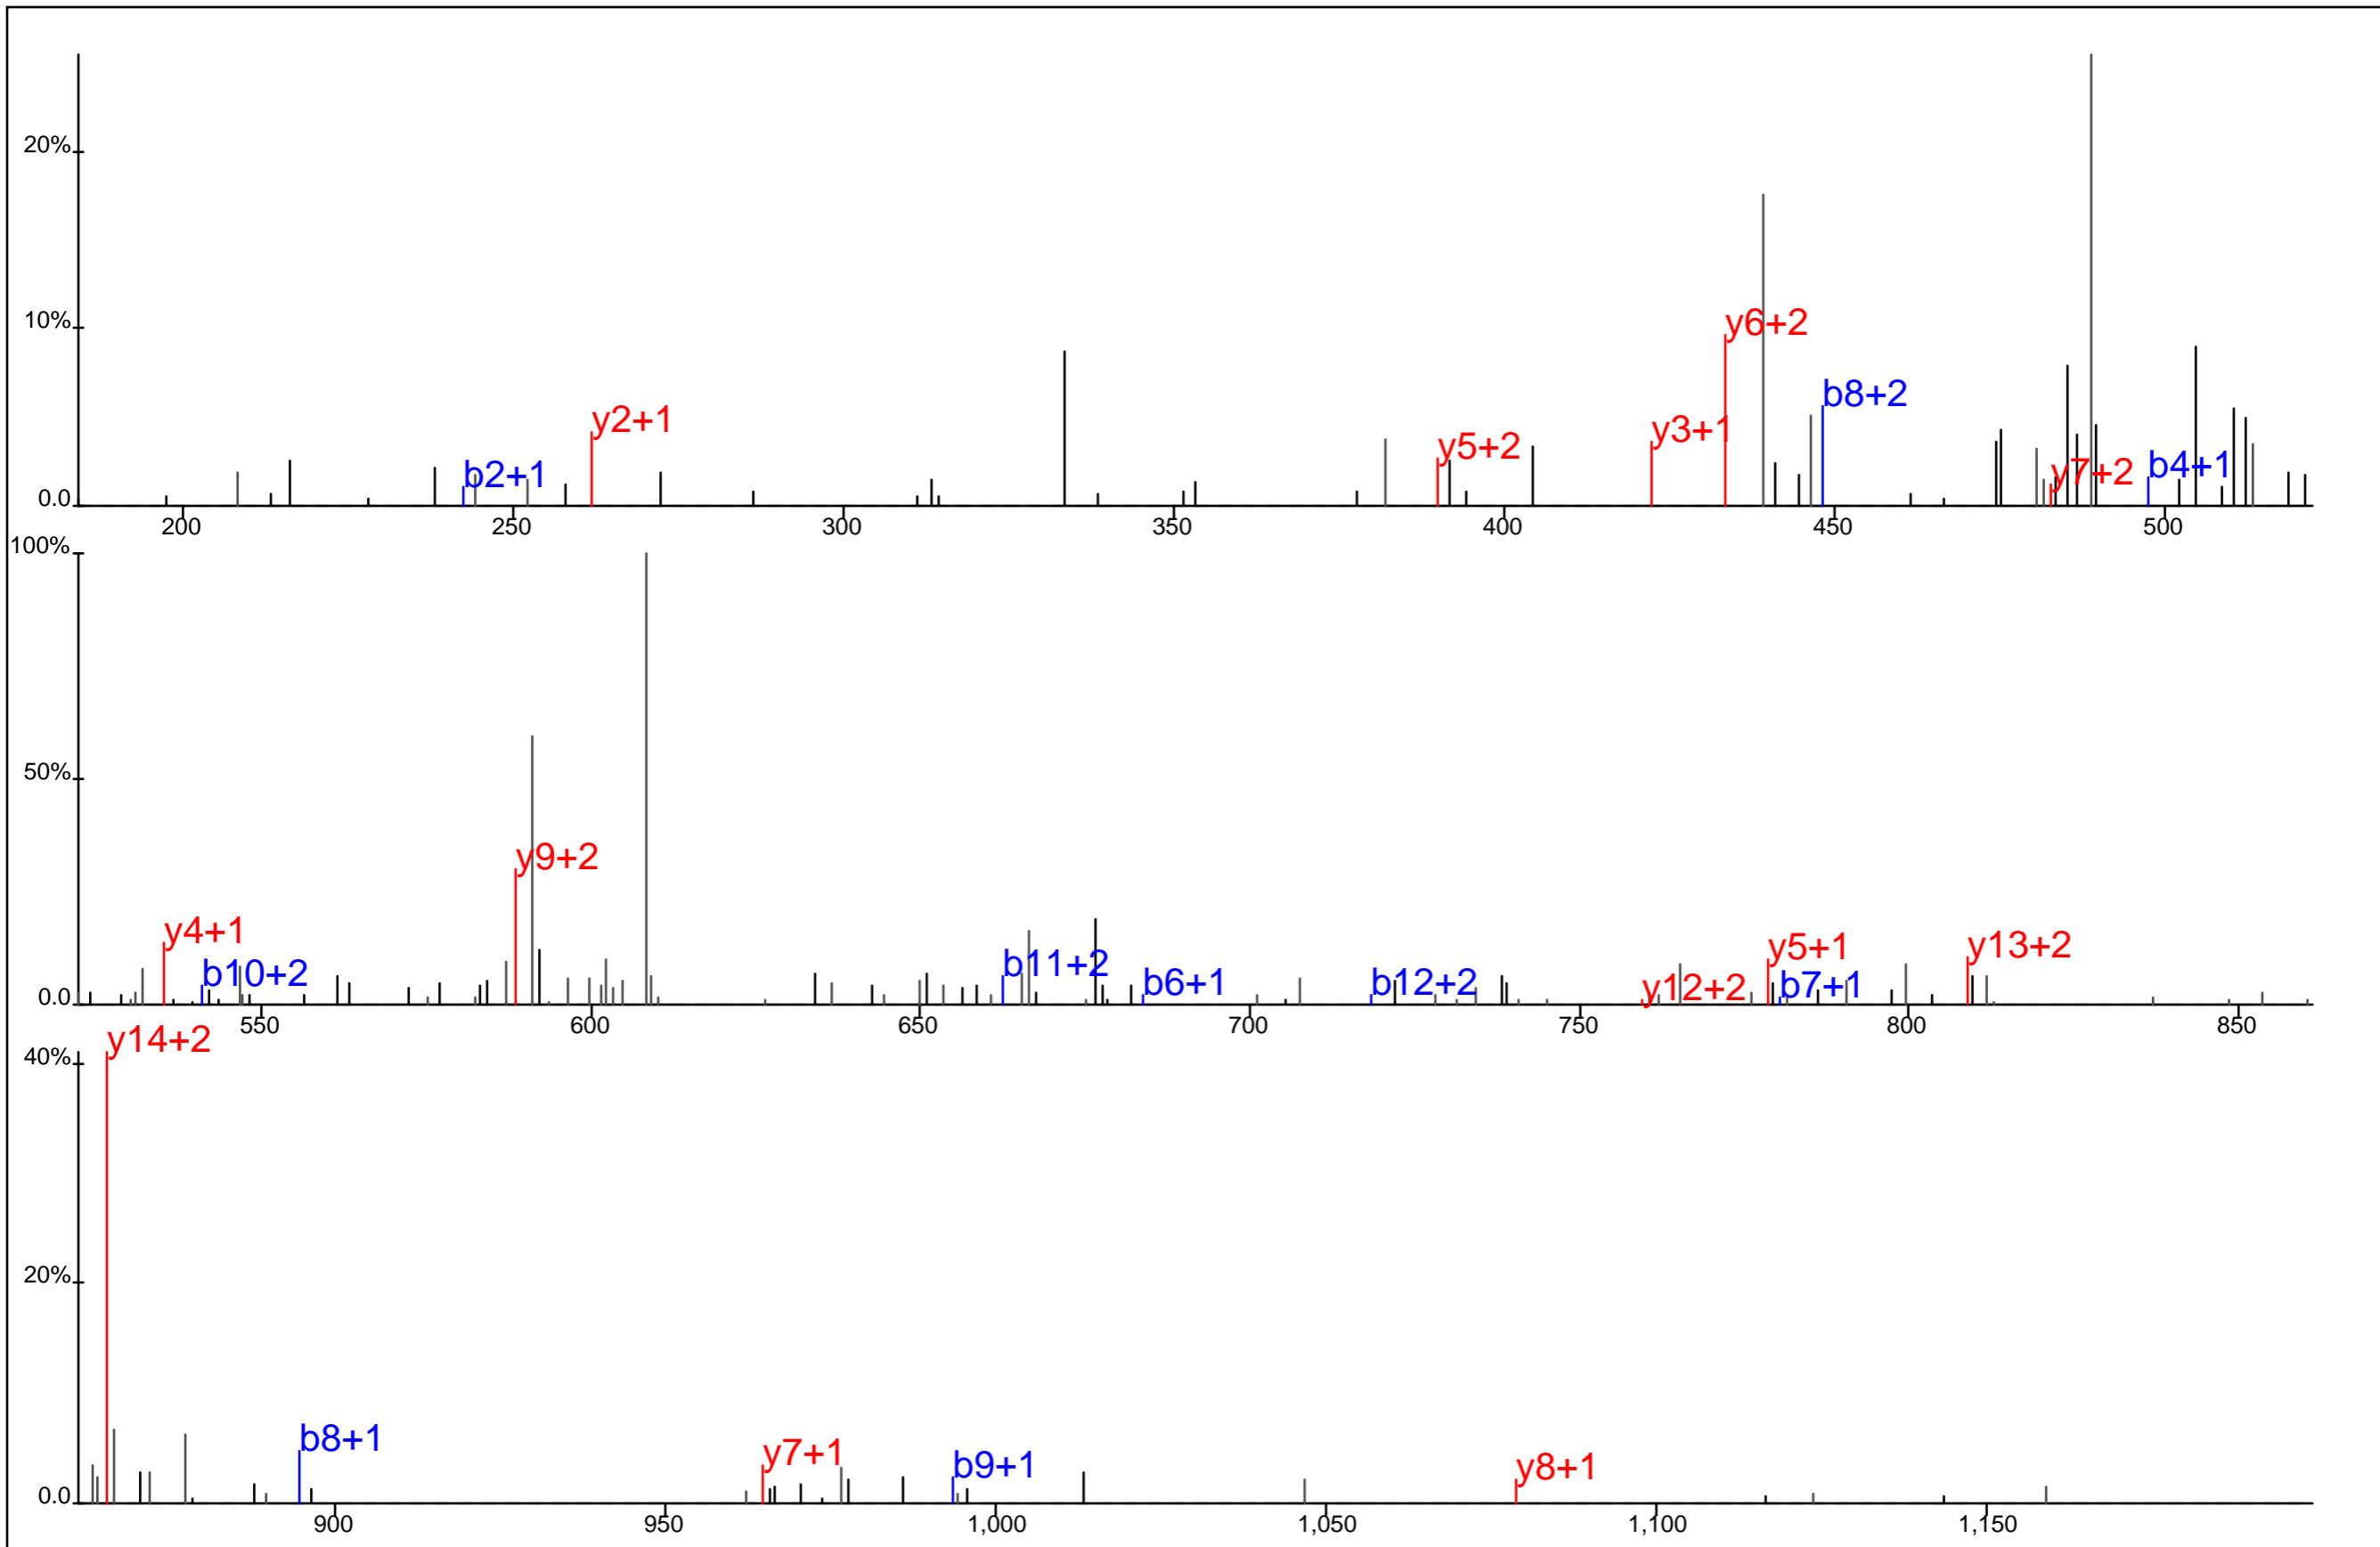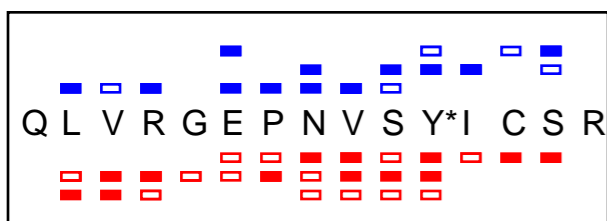

Protein Name: GSK 3  
 gi Accession: 49574532  
 Precursor Mass: 619.9625+3  
 Delta Mass: 2.771 ppm  
 XCorr: 23.54

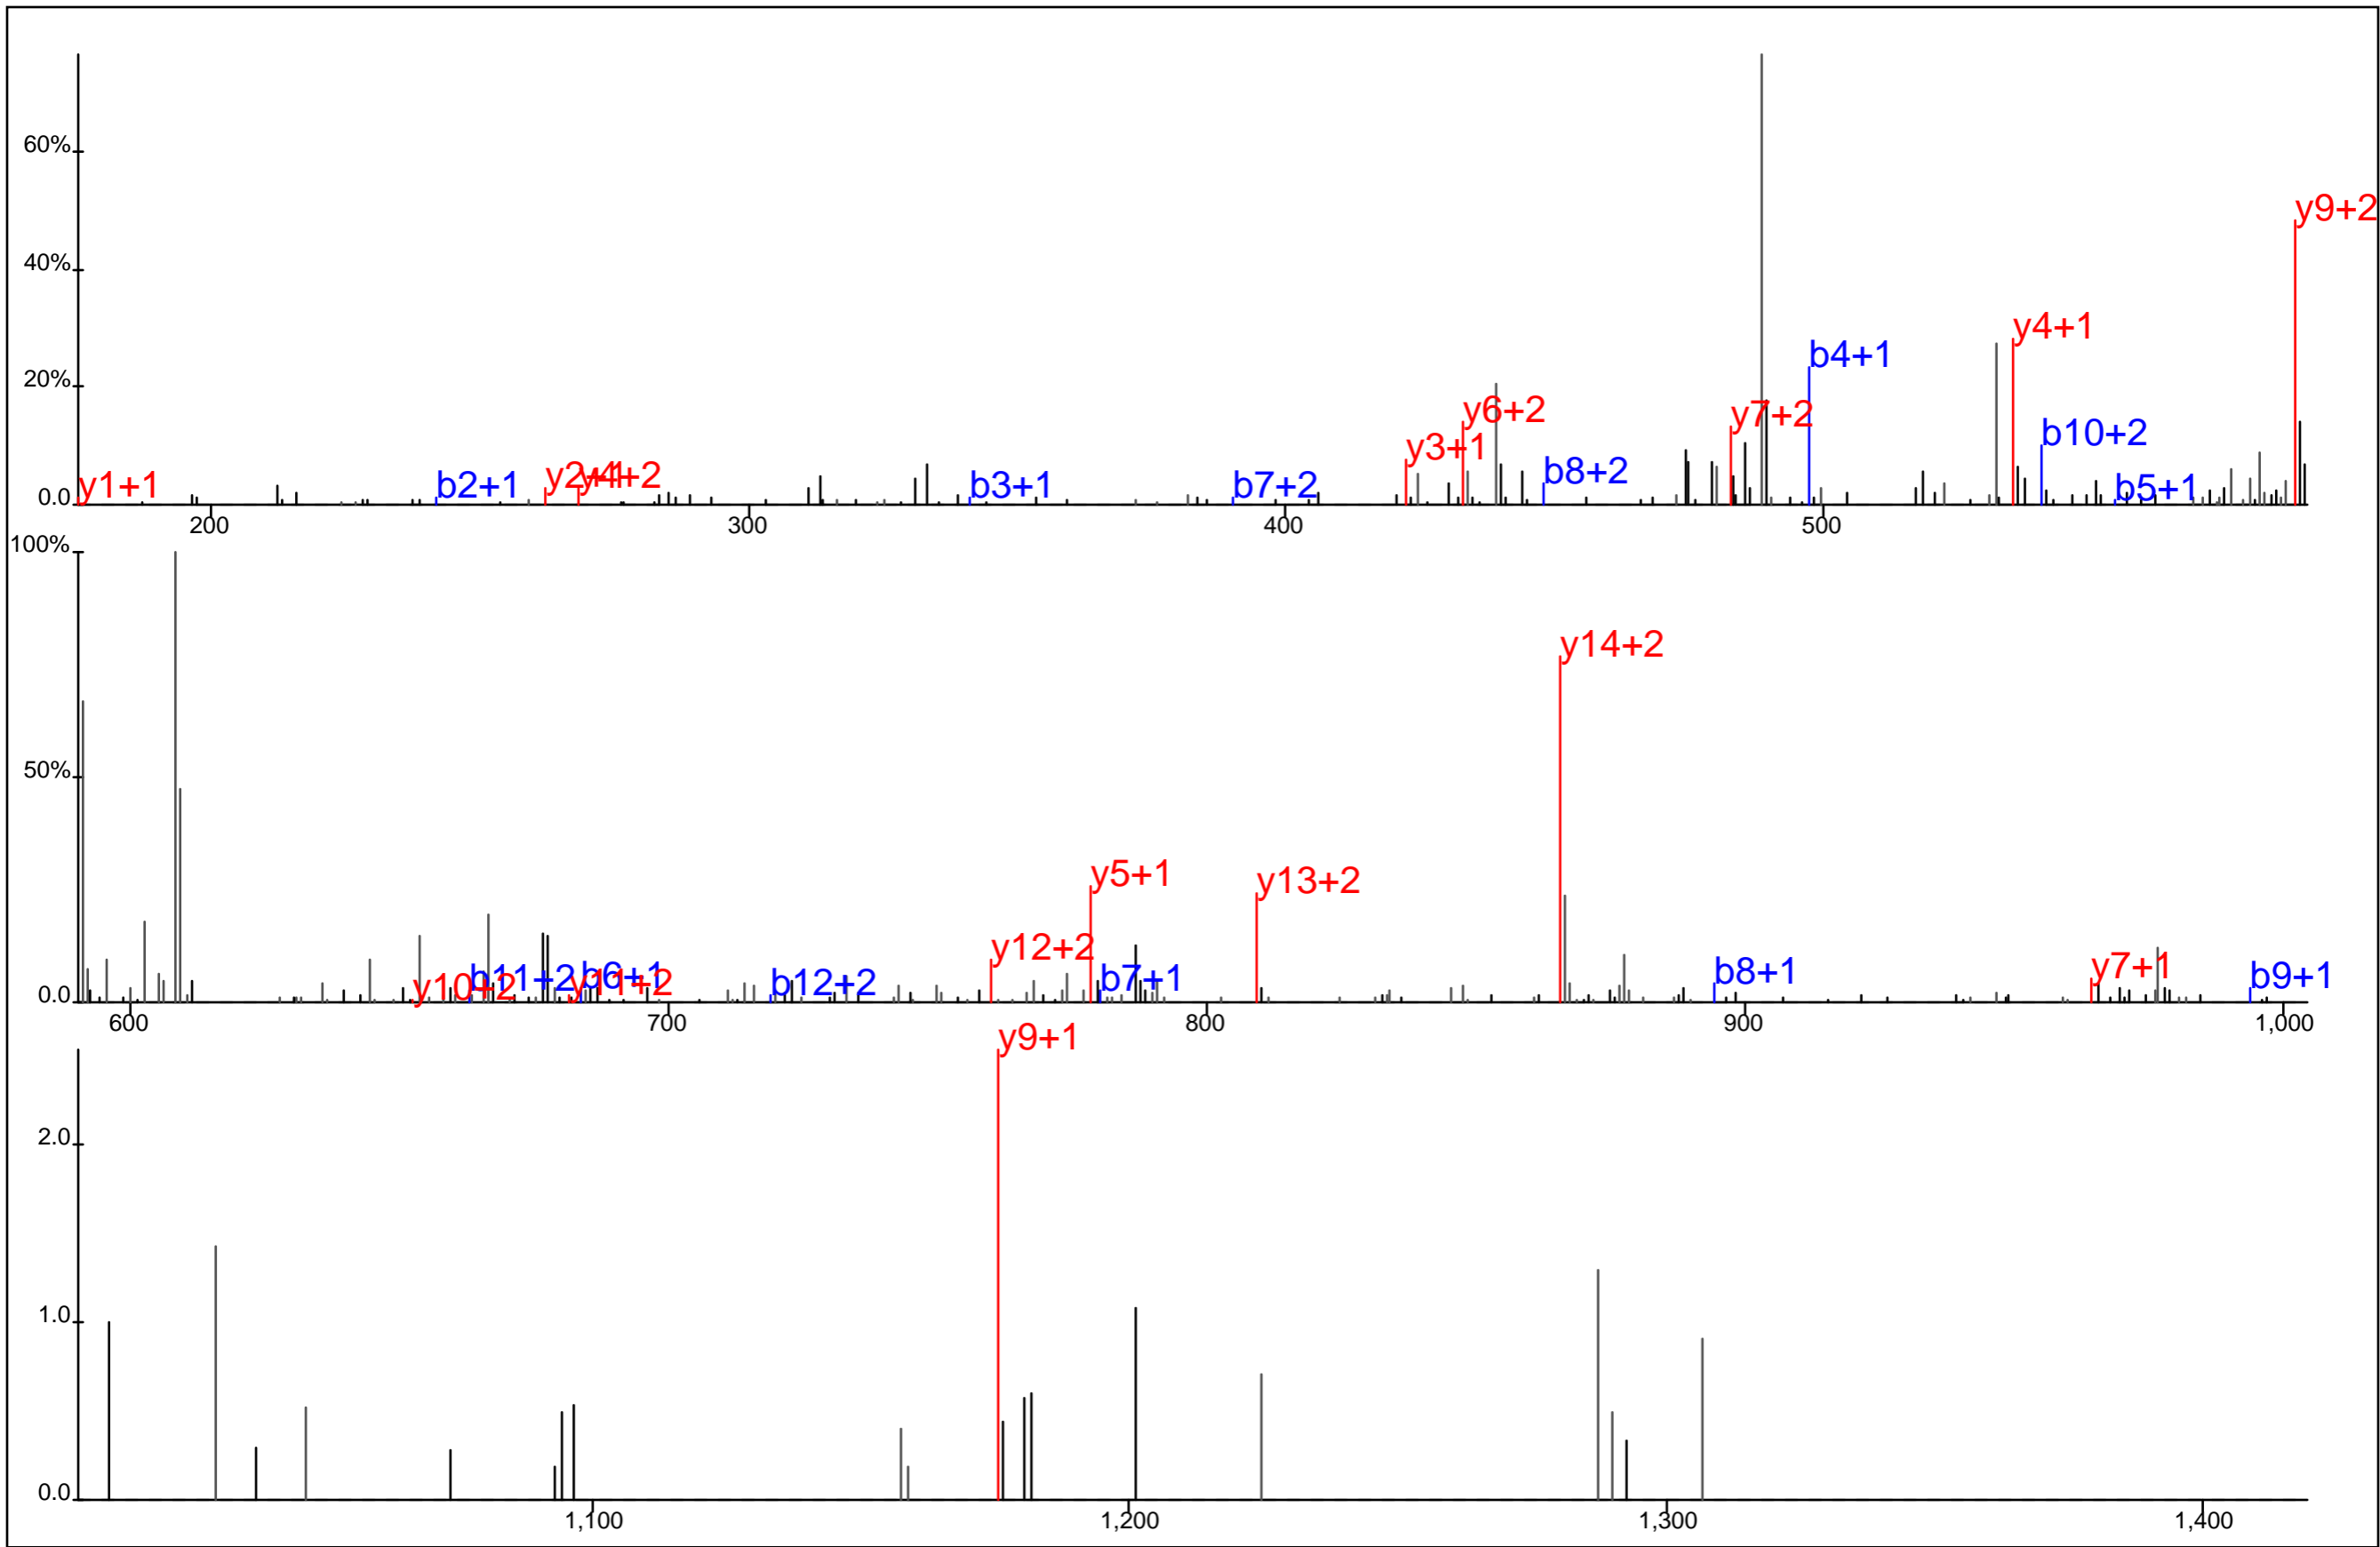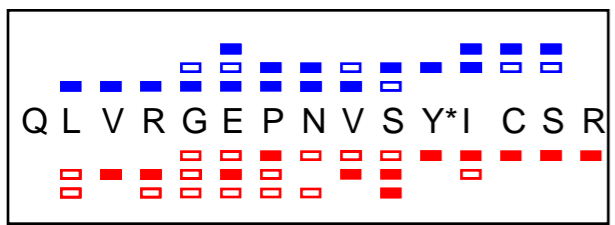

Protein Name: GSK 3  
 gi Accession: 49574532  
 Precursor Mass: 619.9621+3  
 Delta Mass: 2.178 ppm  
 XCorr: 36.15

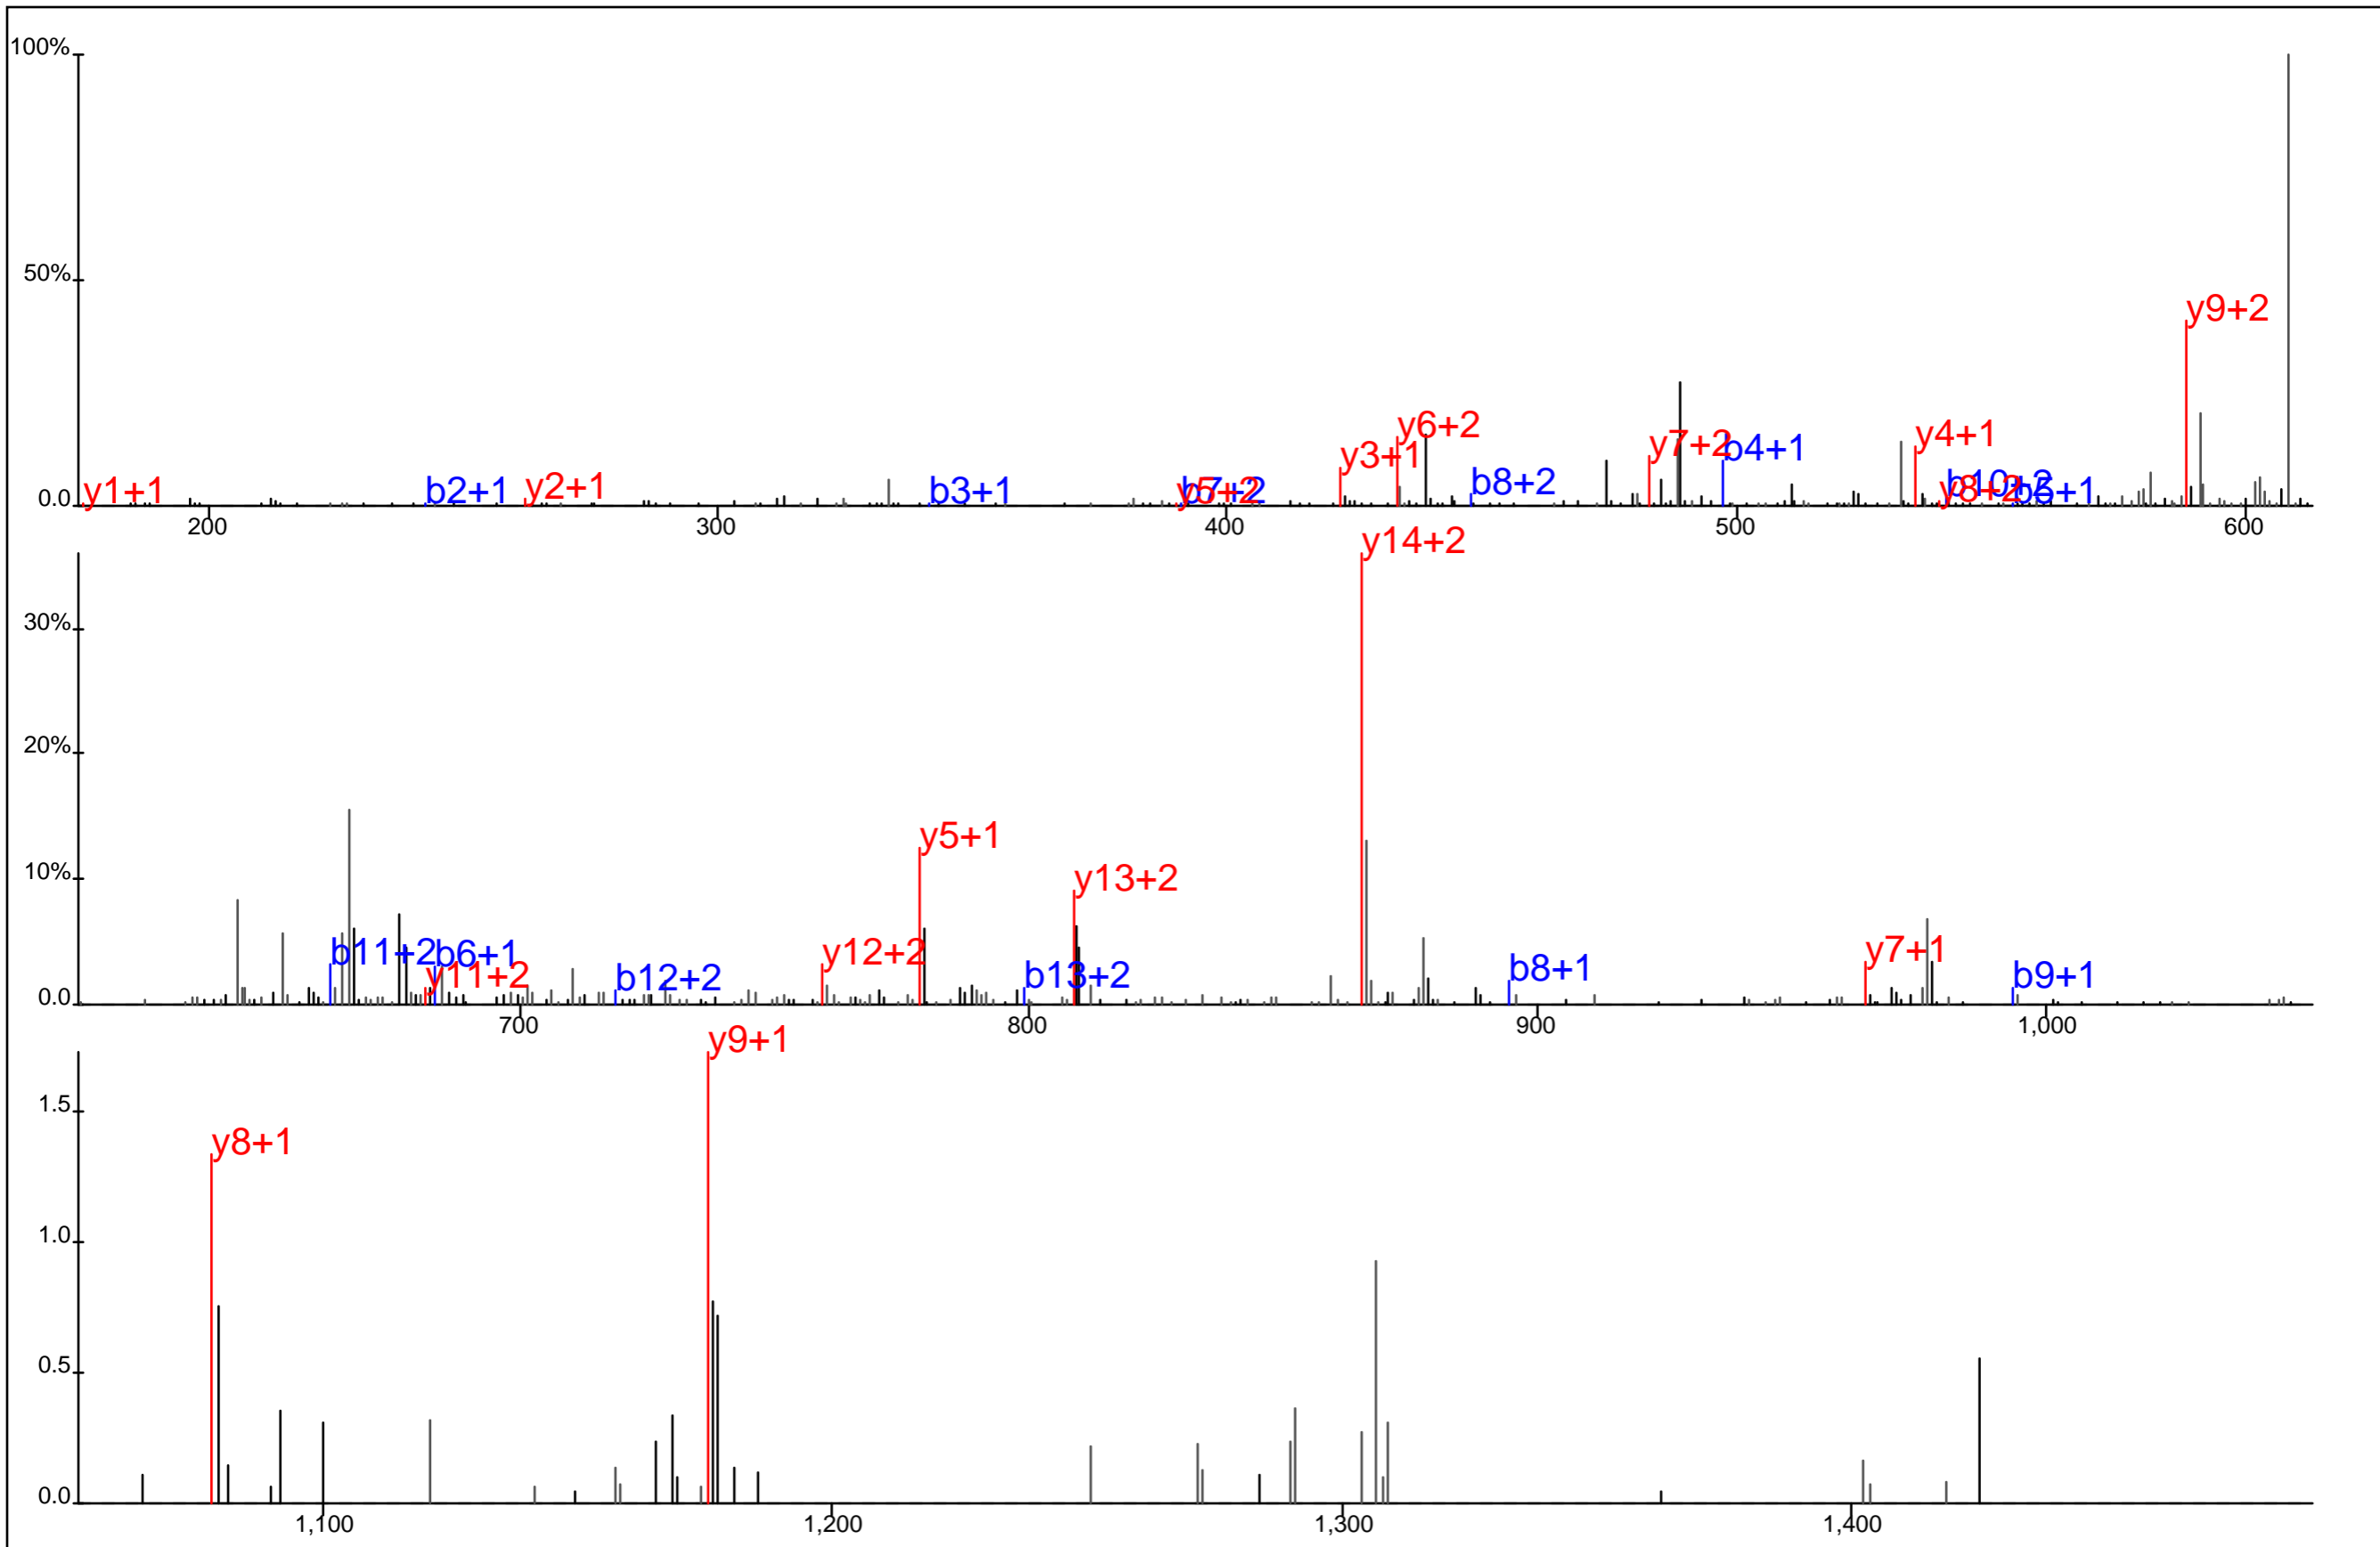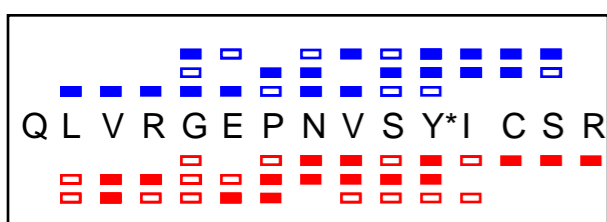

Protein Name: GSK 3  
 gi Accession: 49574532  
 Precursor Mass: 619.9617+3  
 Delta Mass: 1.587 ppm  
 XCorr: 36.36

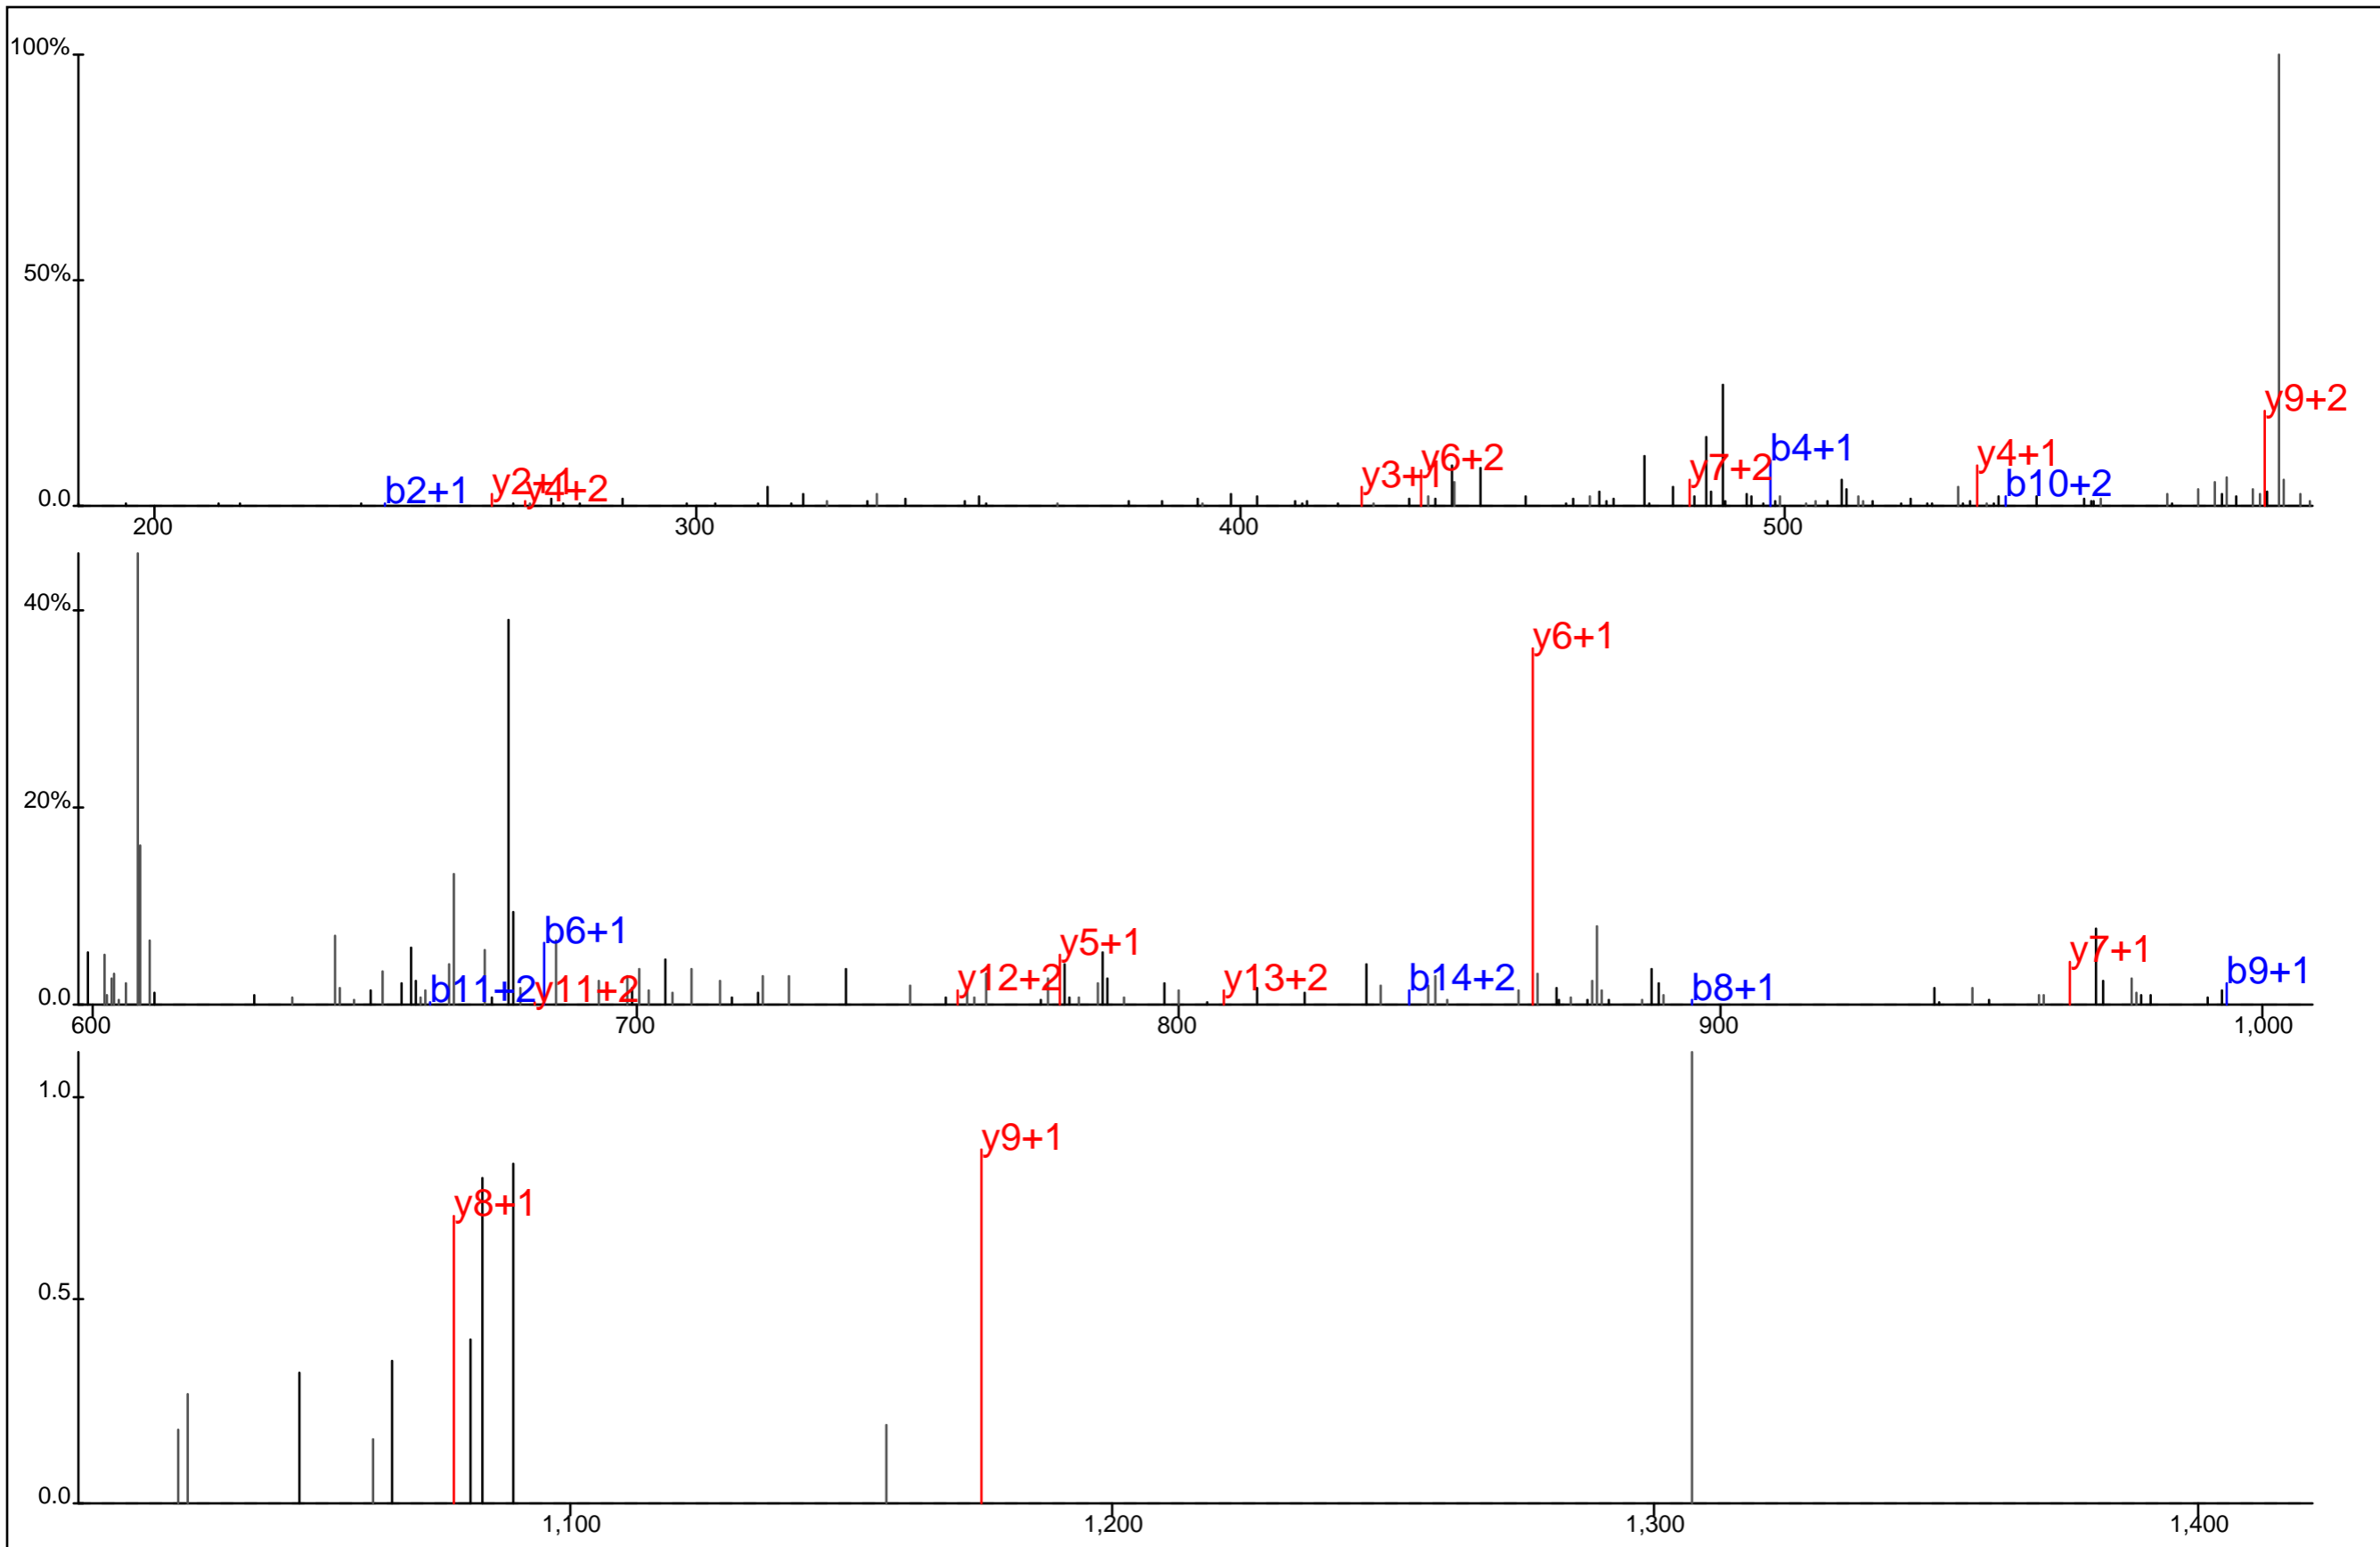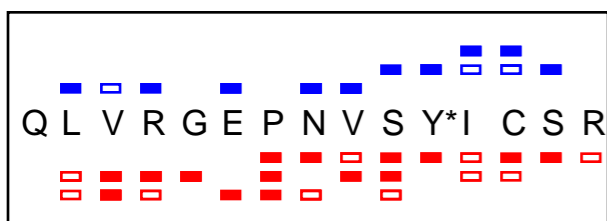

Protein Name: GSK 3  
 gi Accession: 49574532  
 Precursor Mass: 619.9646+3  
 Delta Mass: 6.222 ppm  
 XCorr: 26.86

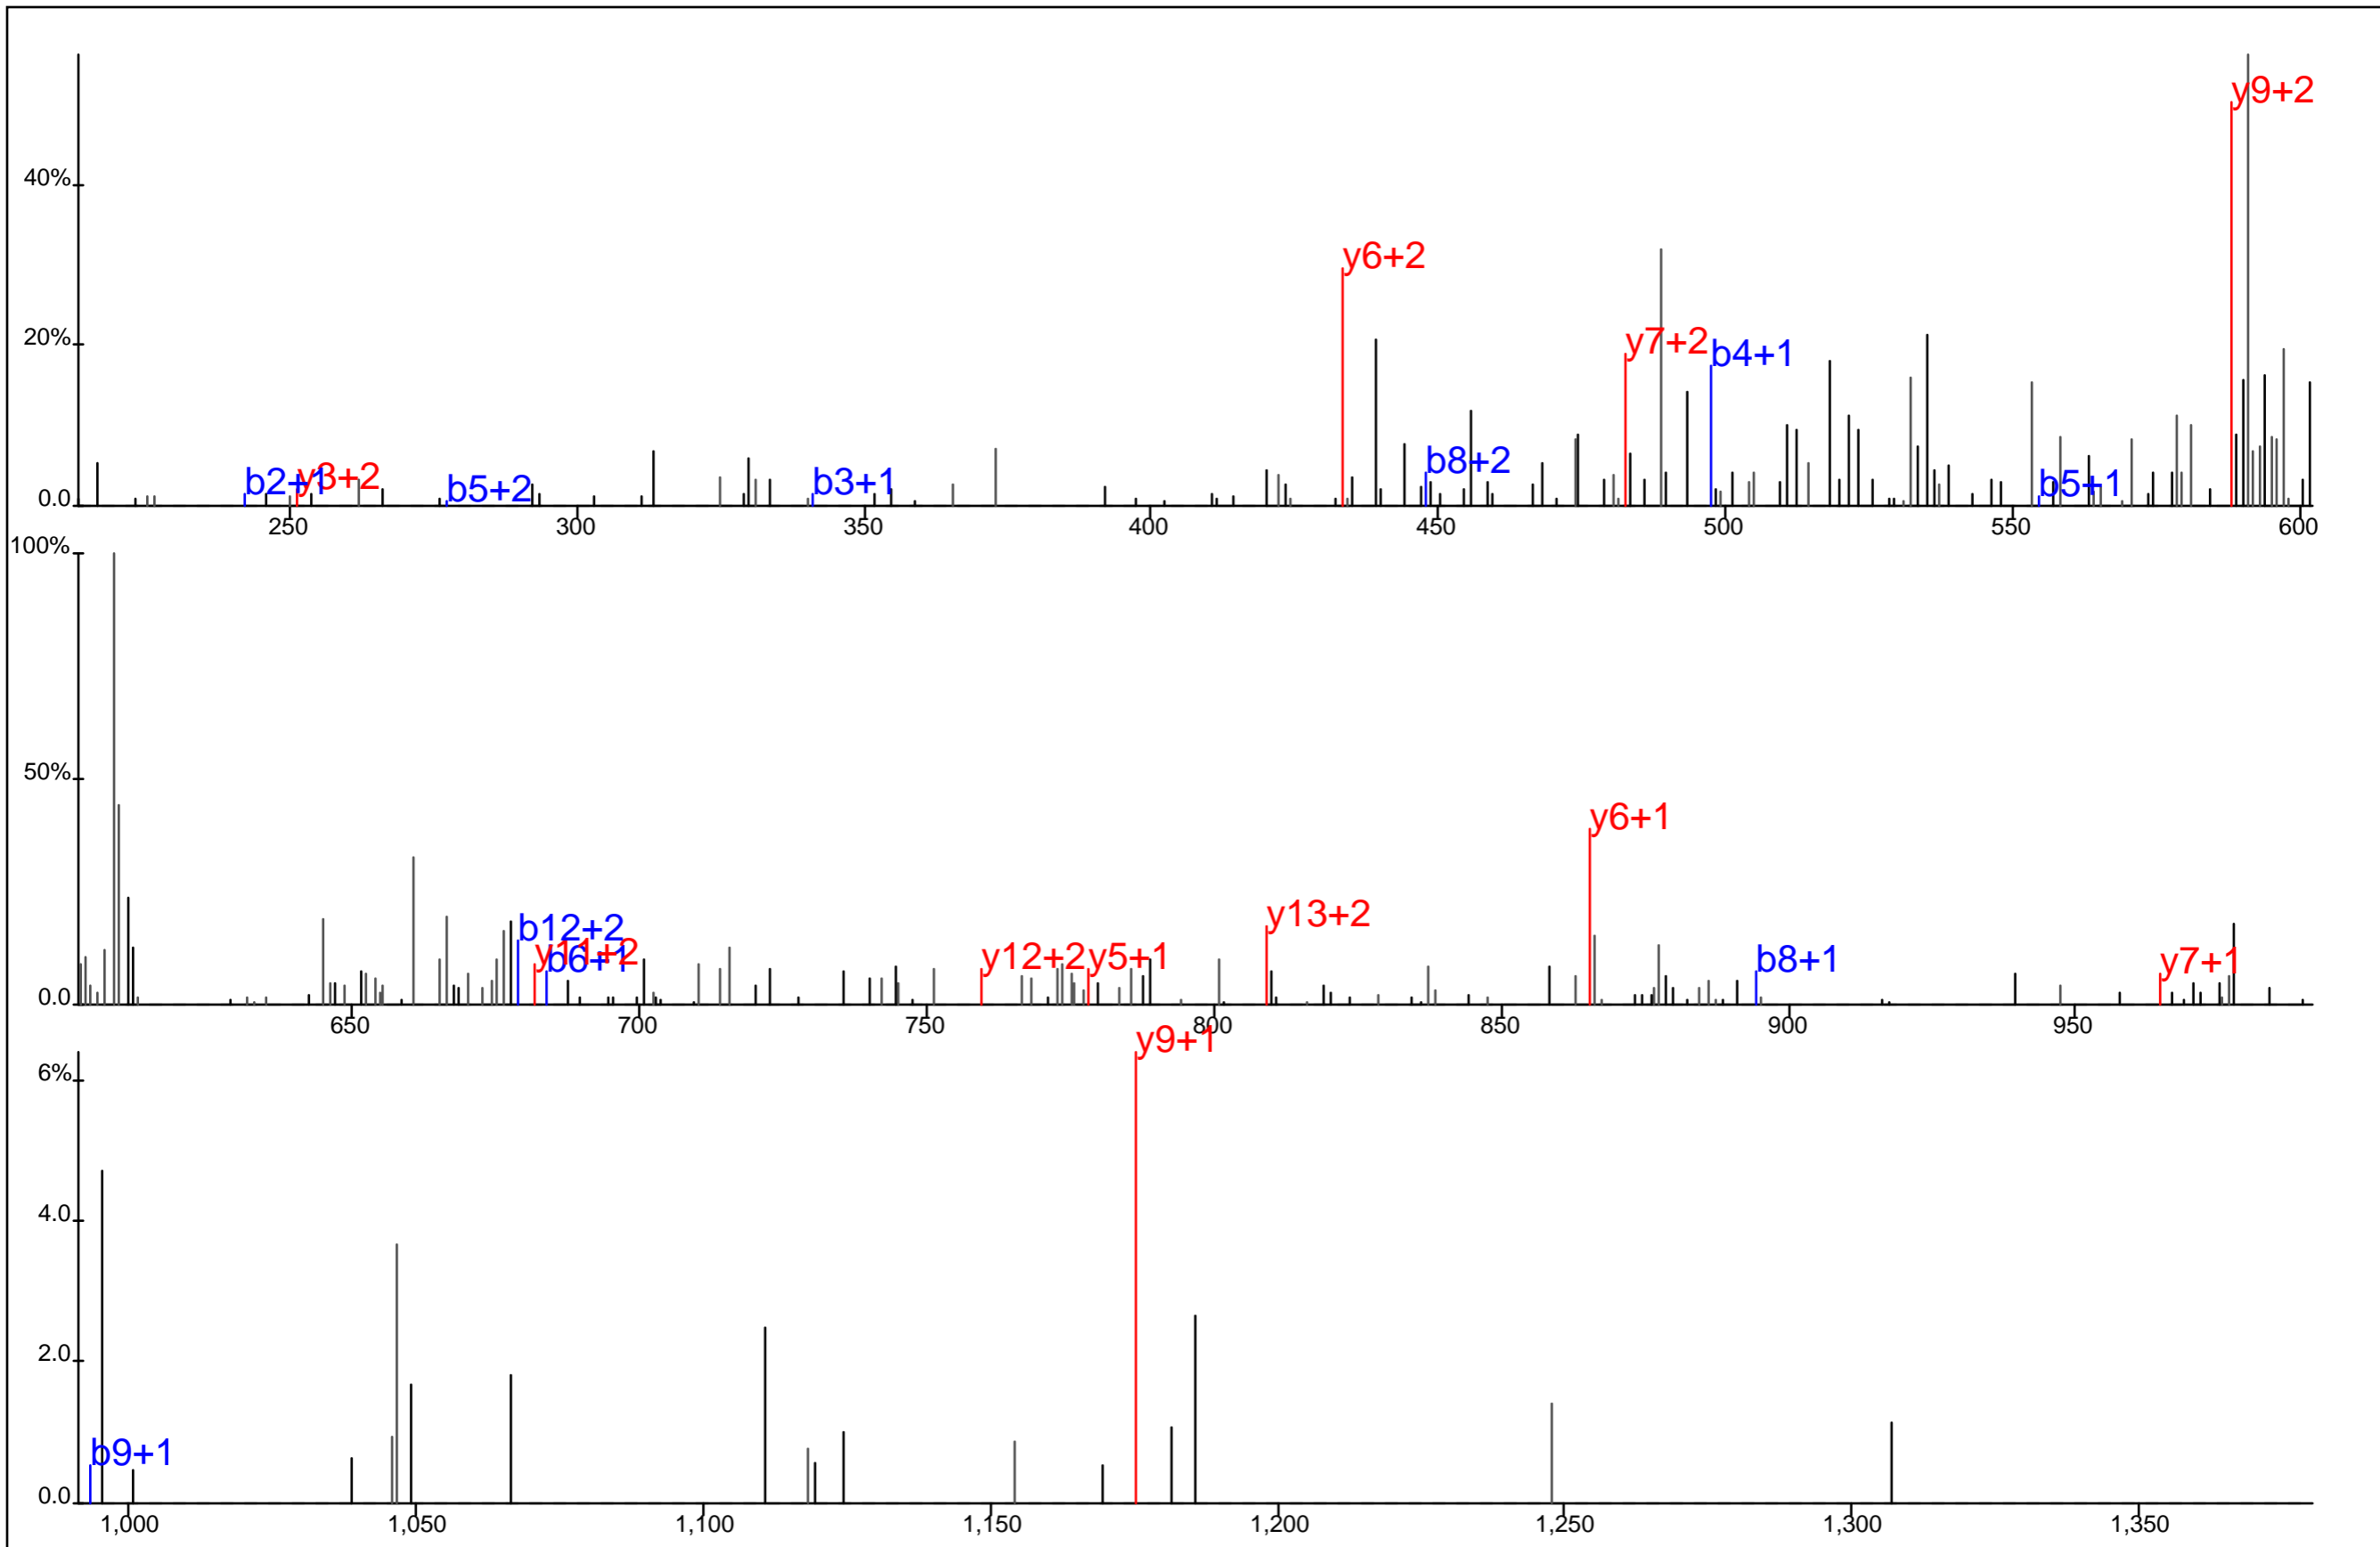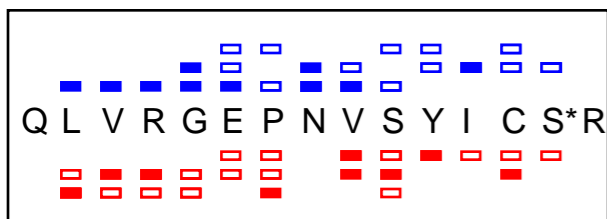

Protein Name: GSK 3  
 gi Accession: 49574532  
 Precursor Mass: 619.9624+3  
 Delta Mass: 2.669 ppm  
 XCorr: 11.56



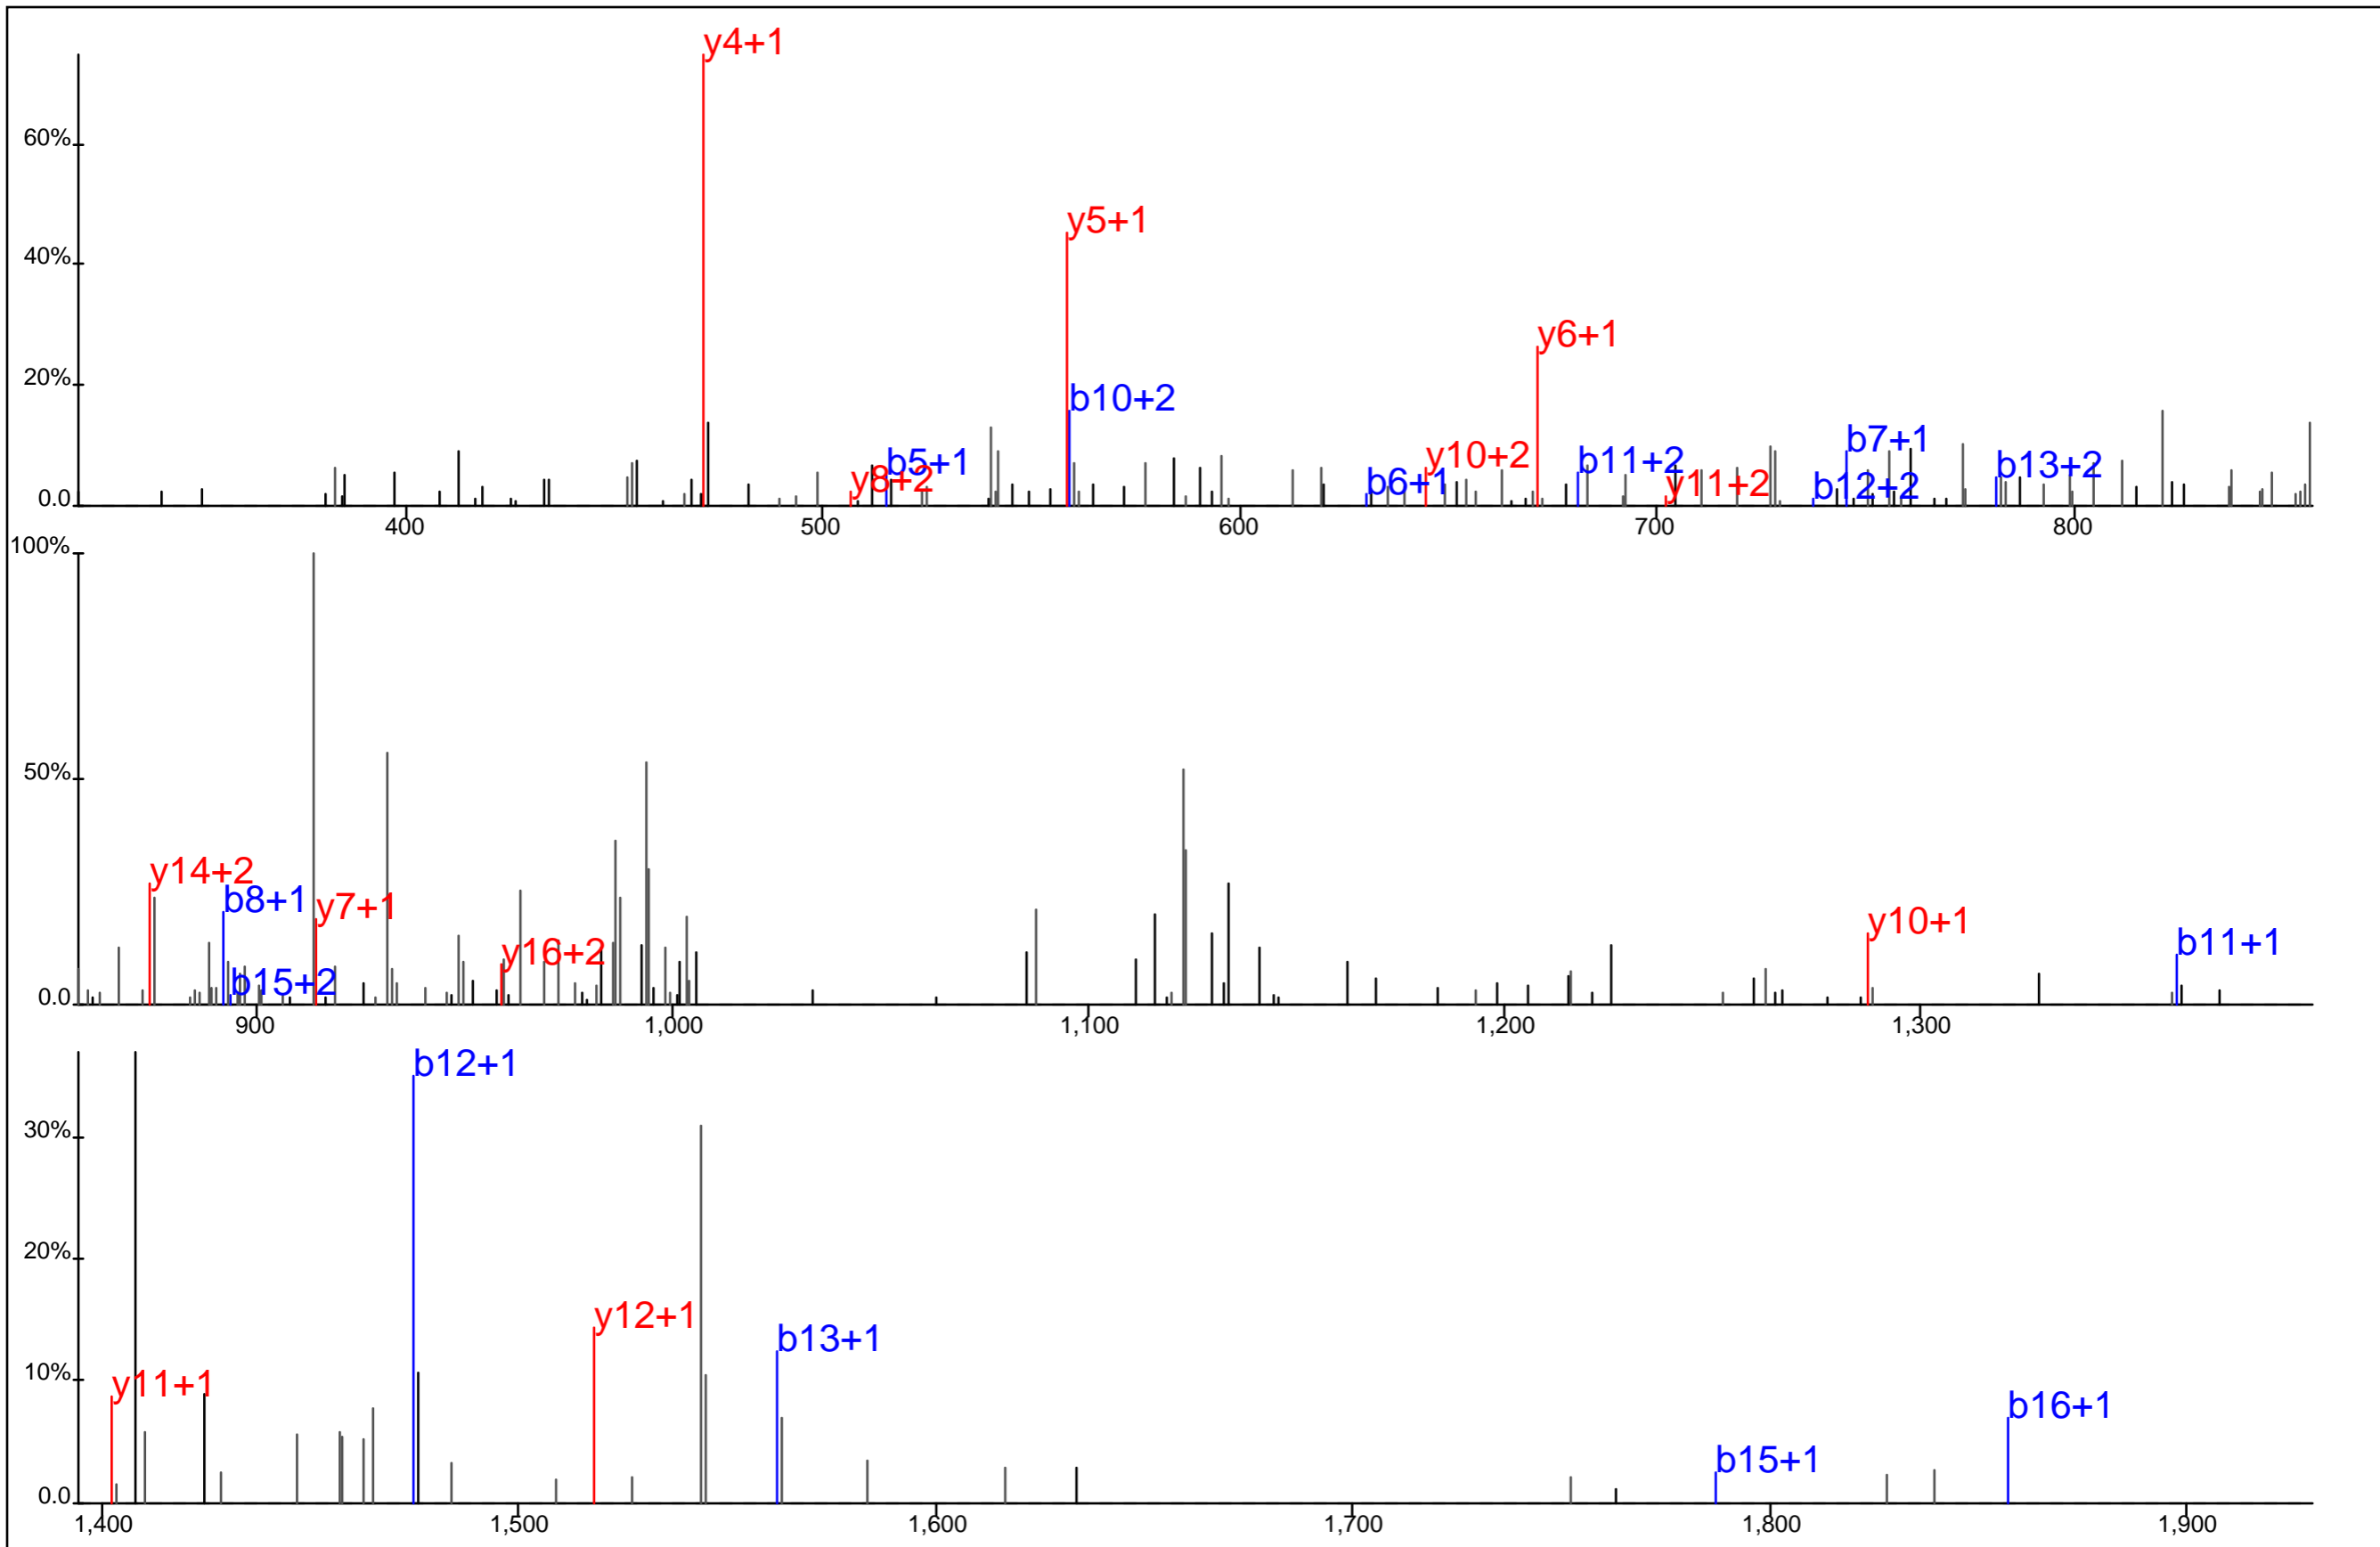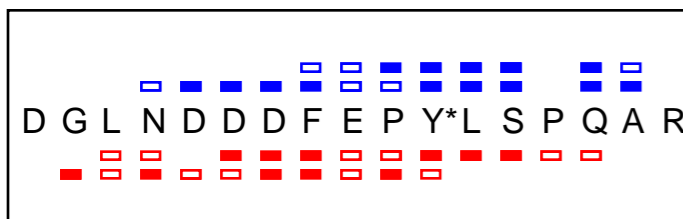

Protein Name: HGRG8  
 gi Accession: 116812575  
 Precursor Mass: 1,016.4171+2  
 Delta Mass: 3.115 ppm  
 XCorr: 3.0193

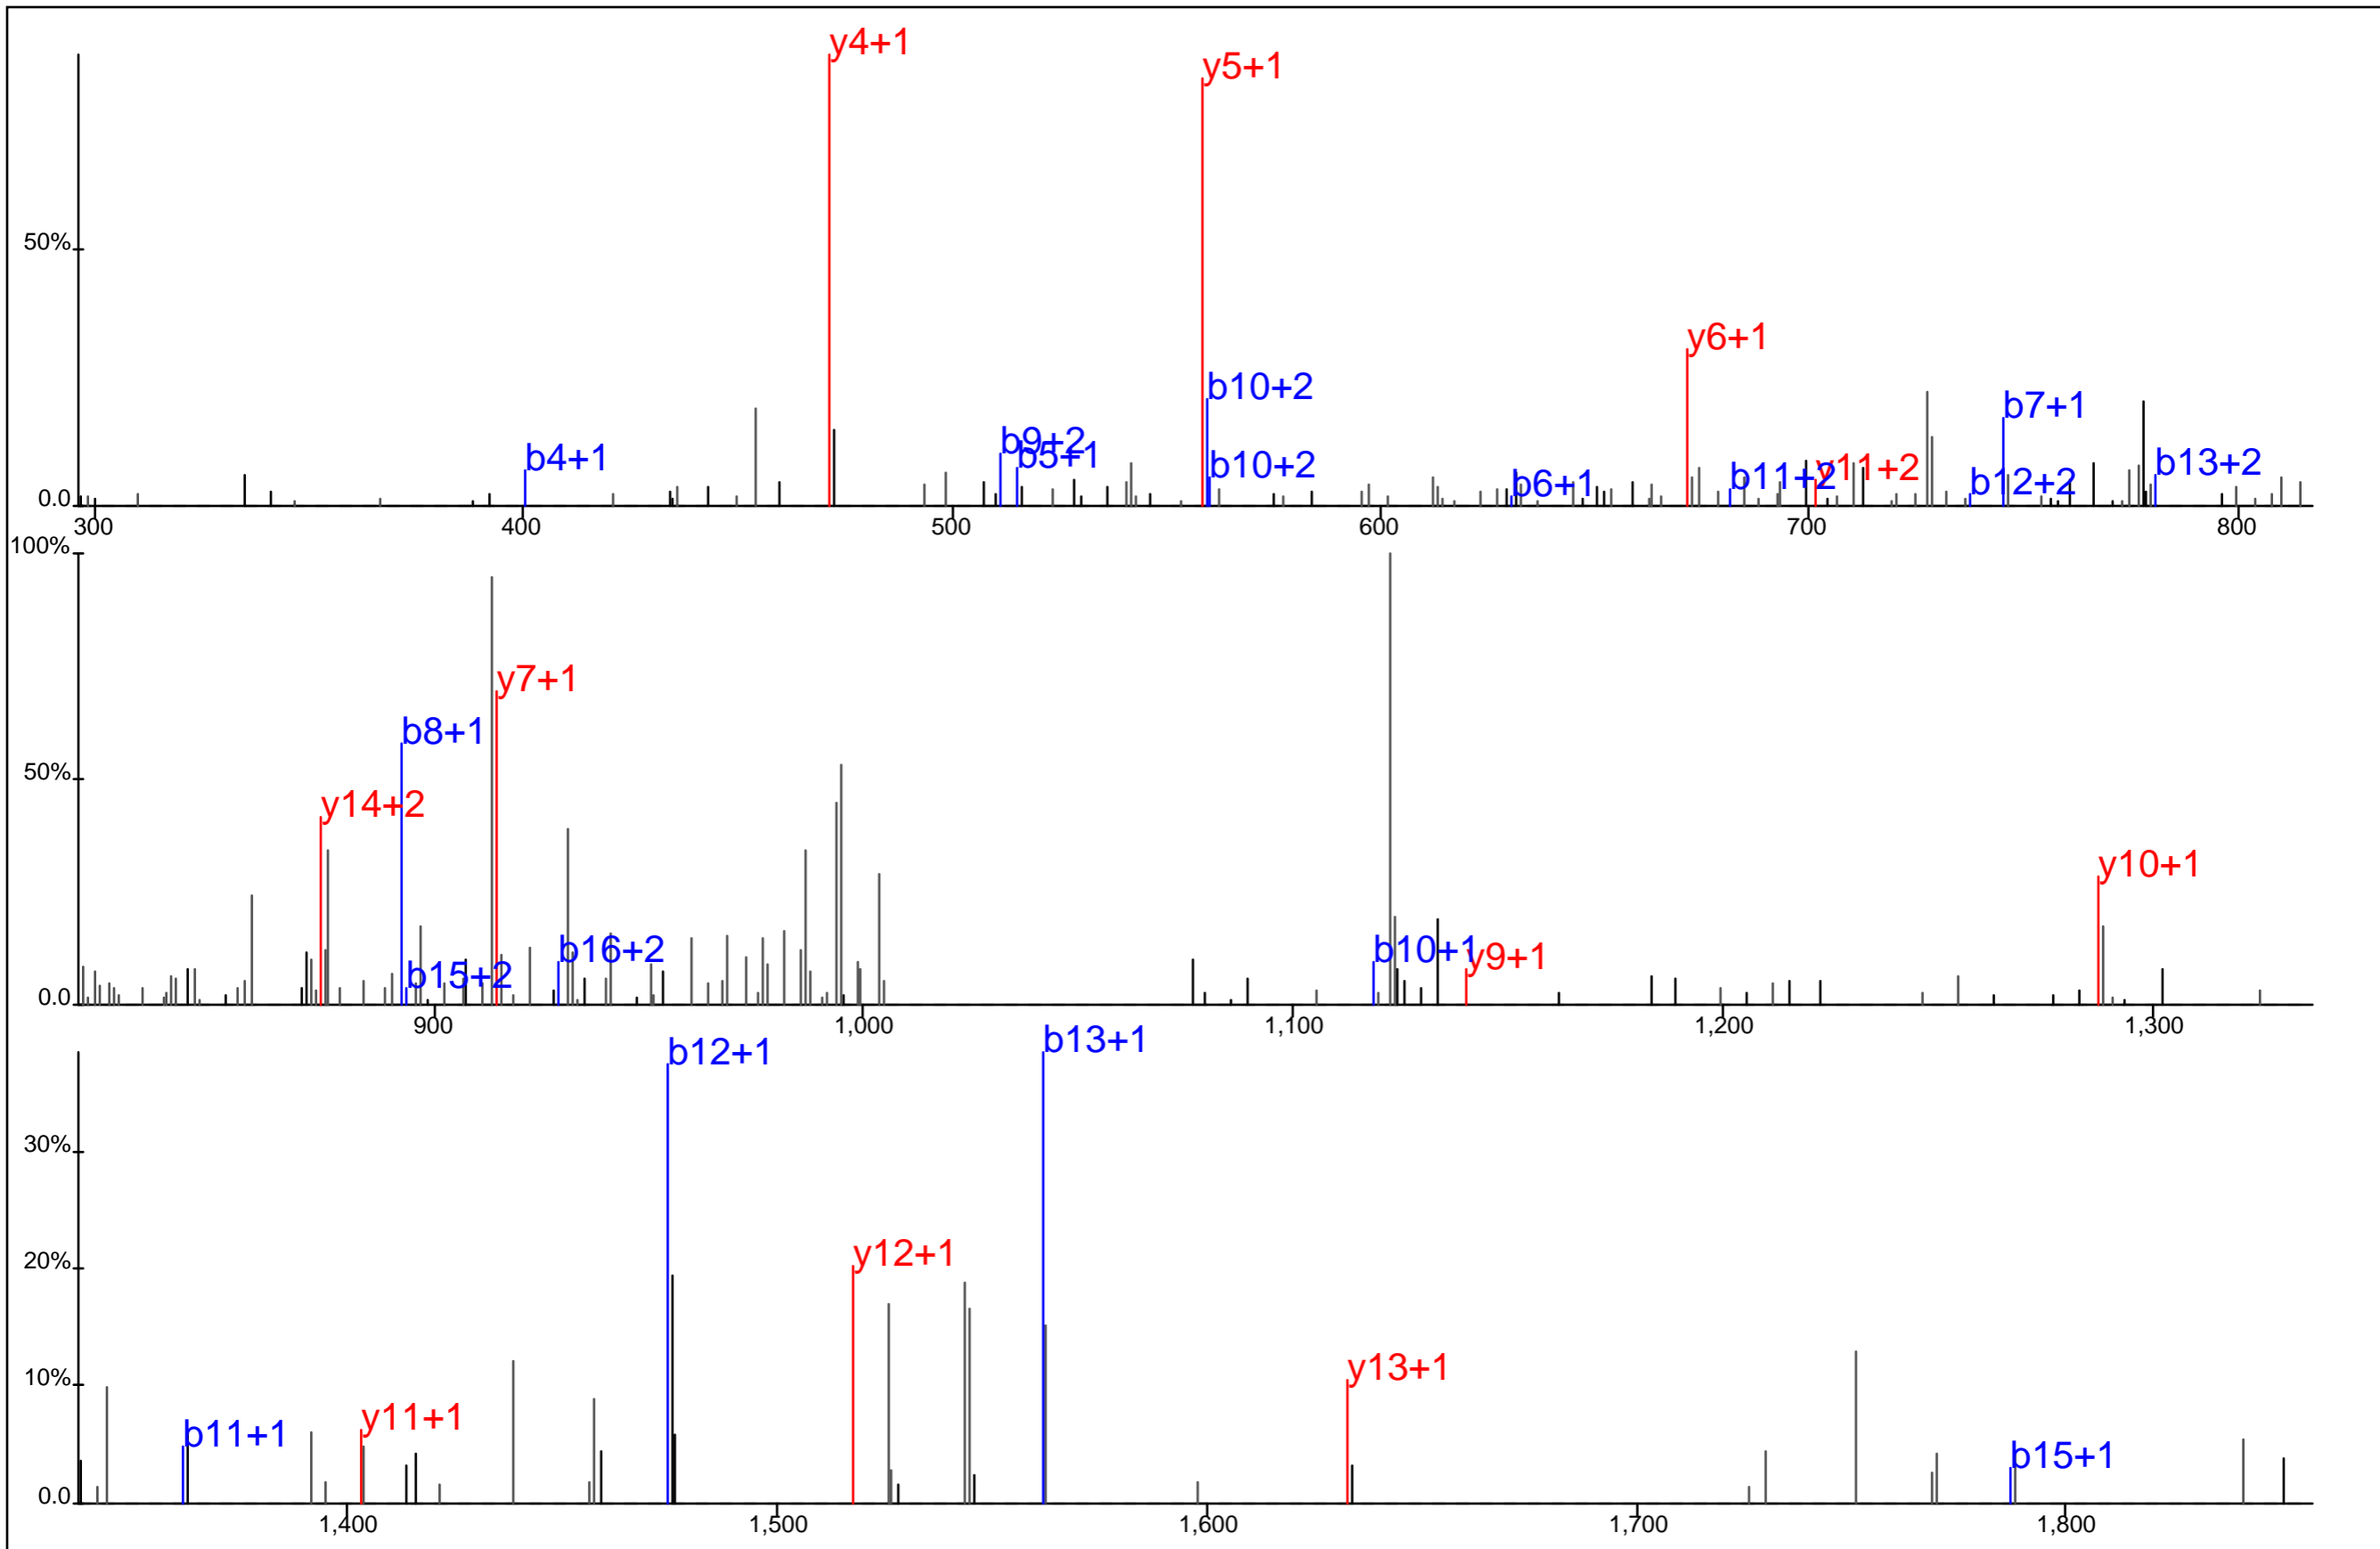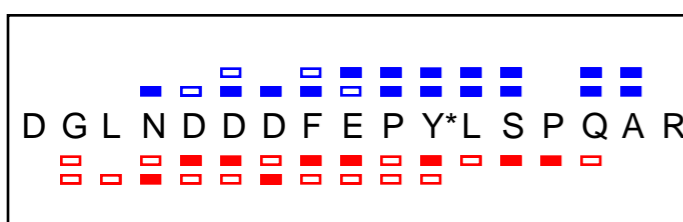

Protein Name: HGRG8  
 gi Accession: 116812575  
 Precursor Mass: 1,016.4301+2  
 Delta Mass: 9.681 ppm  
 XCorr: 3.6512

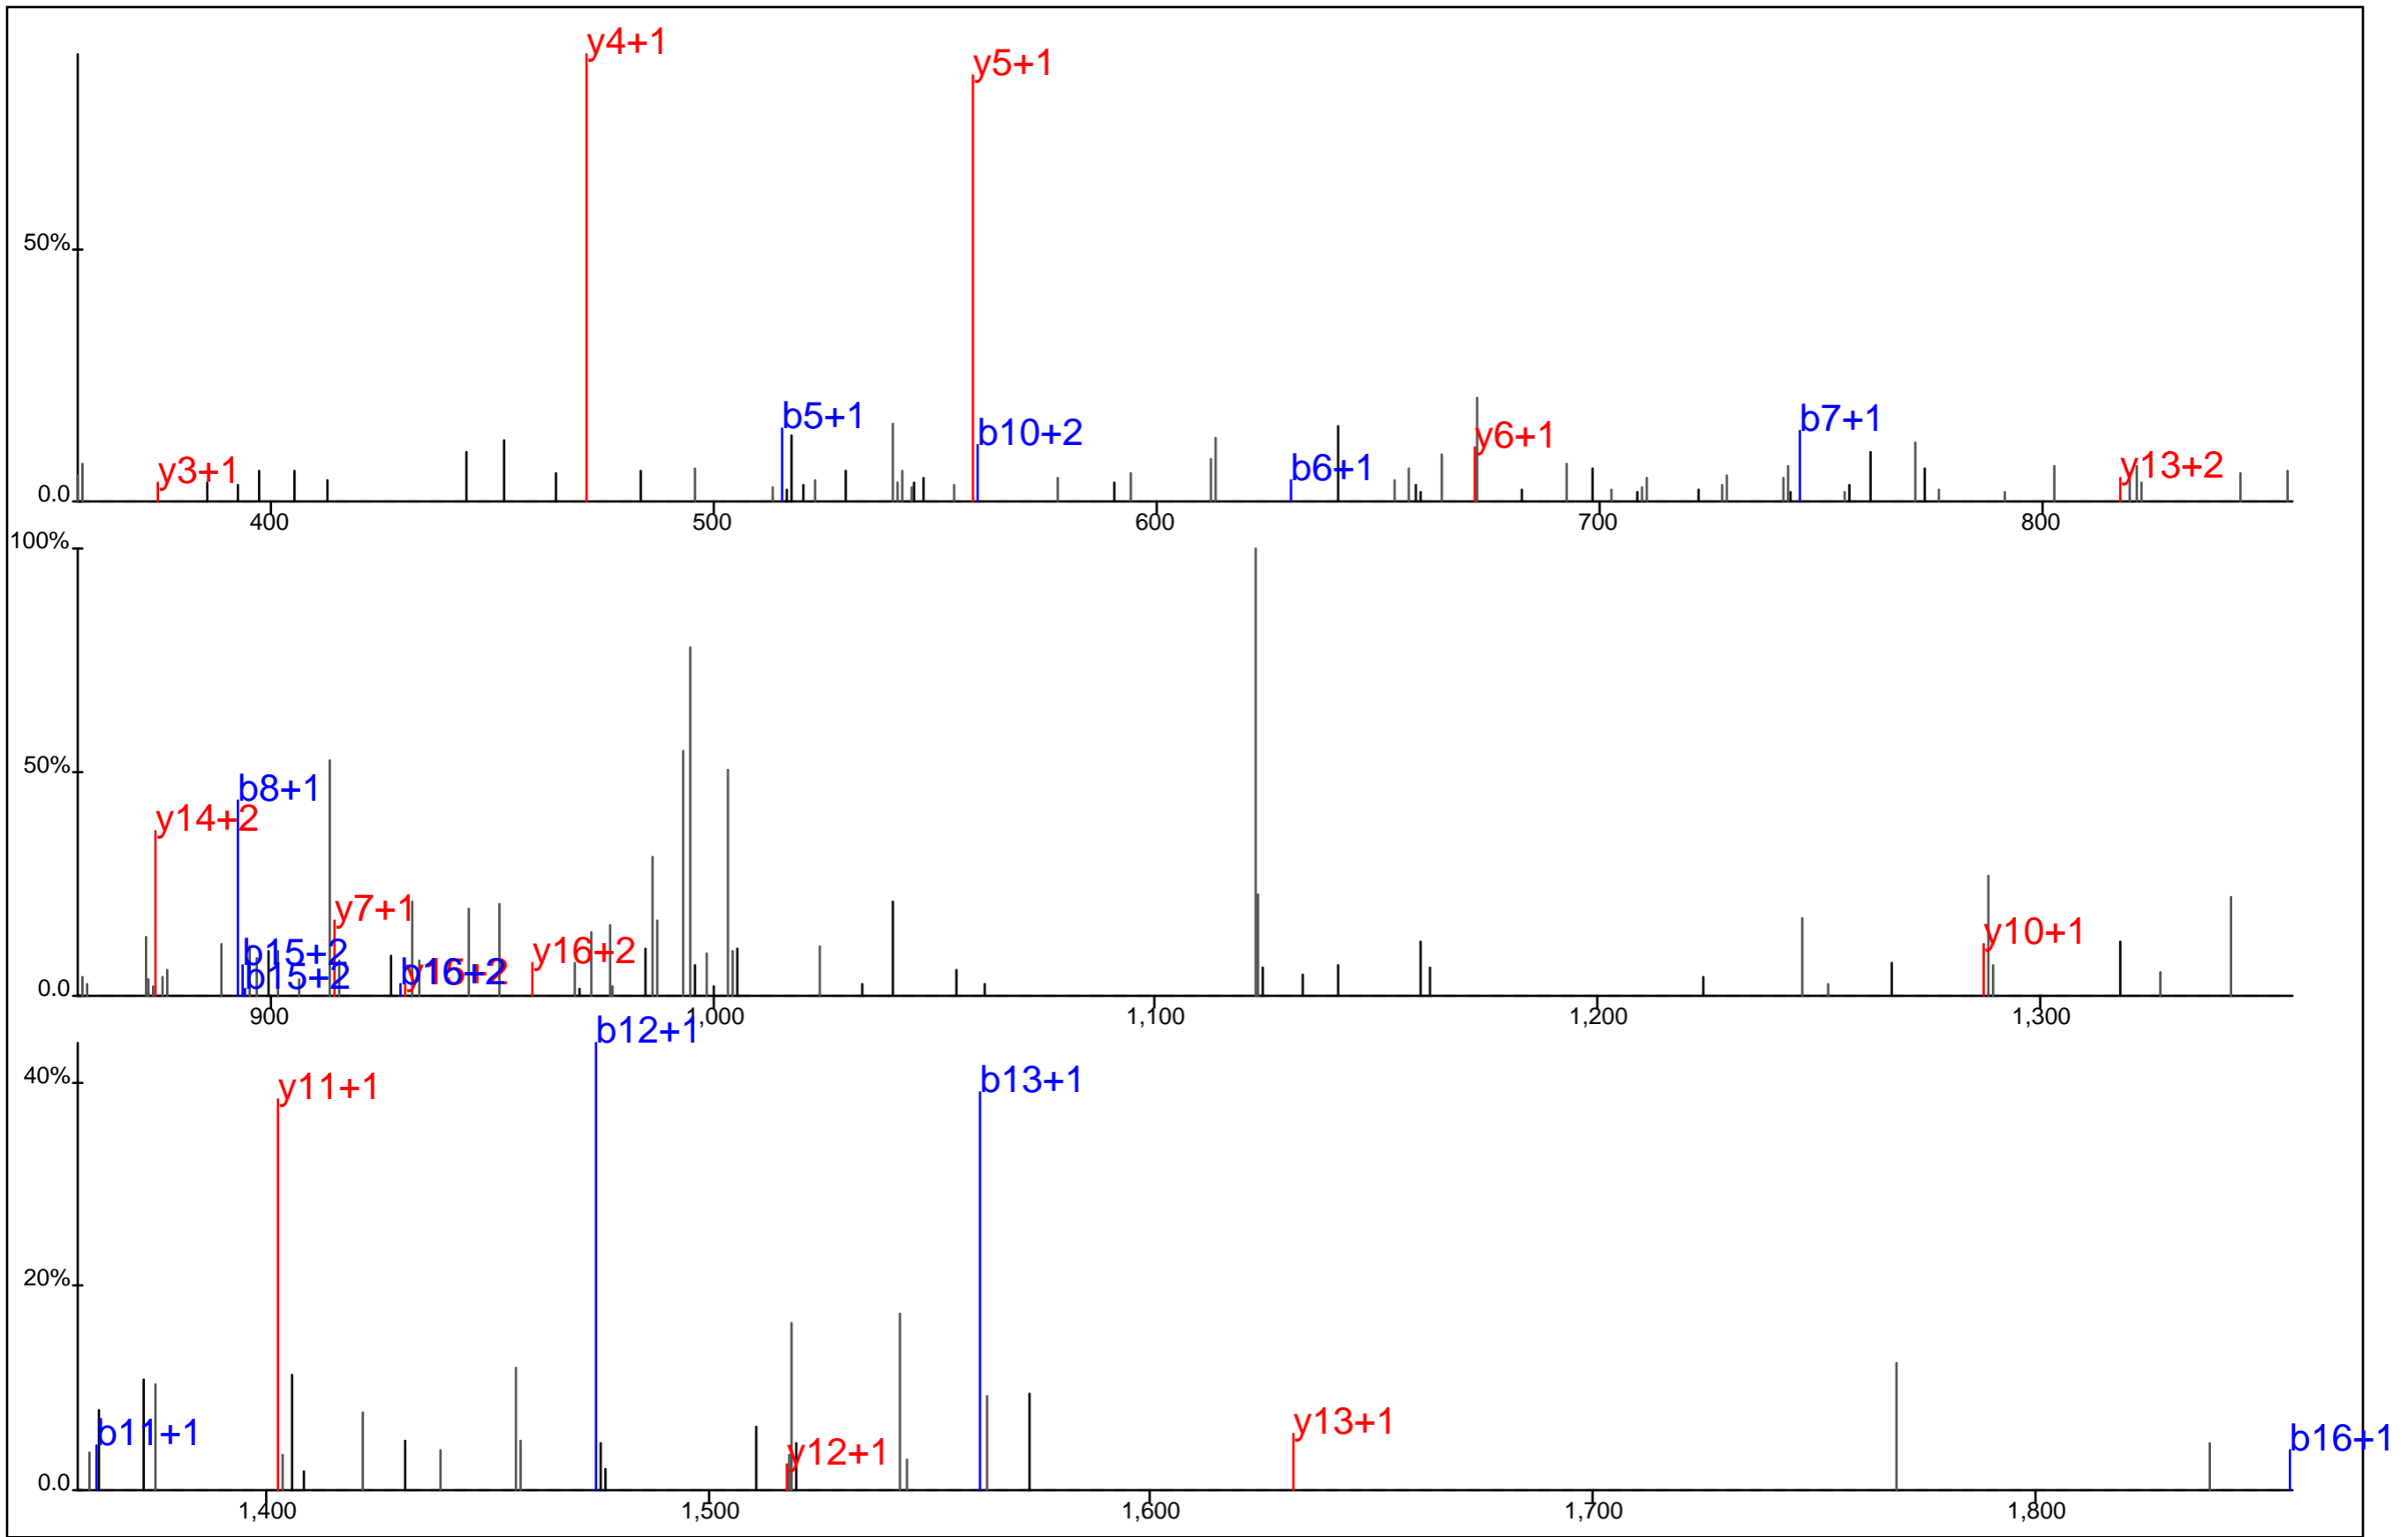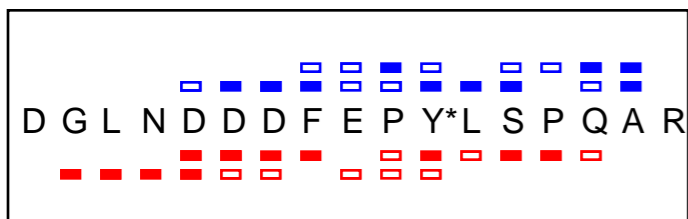

Protein Name: HGRG8  
 gi Accession: 116812575  
 Precursor Mass: 1,016.4249+2  
 Delta Mass: 4.572 ppm  
 XCorr: 2.5193

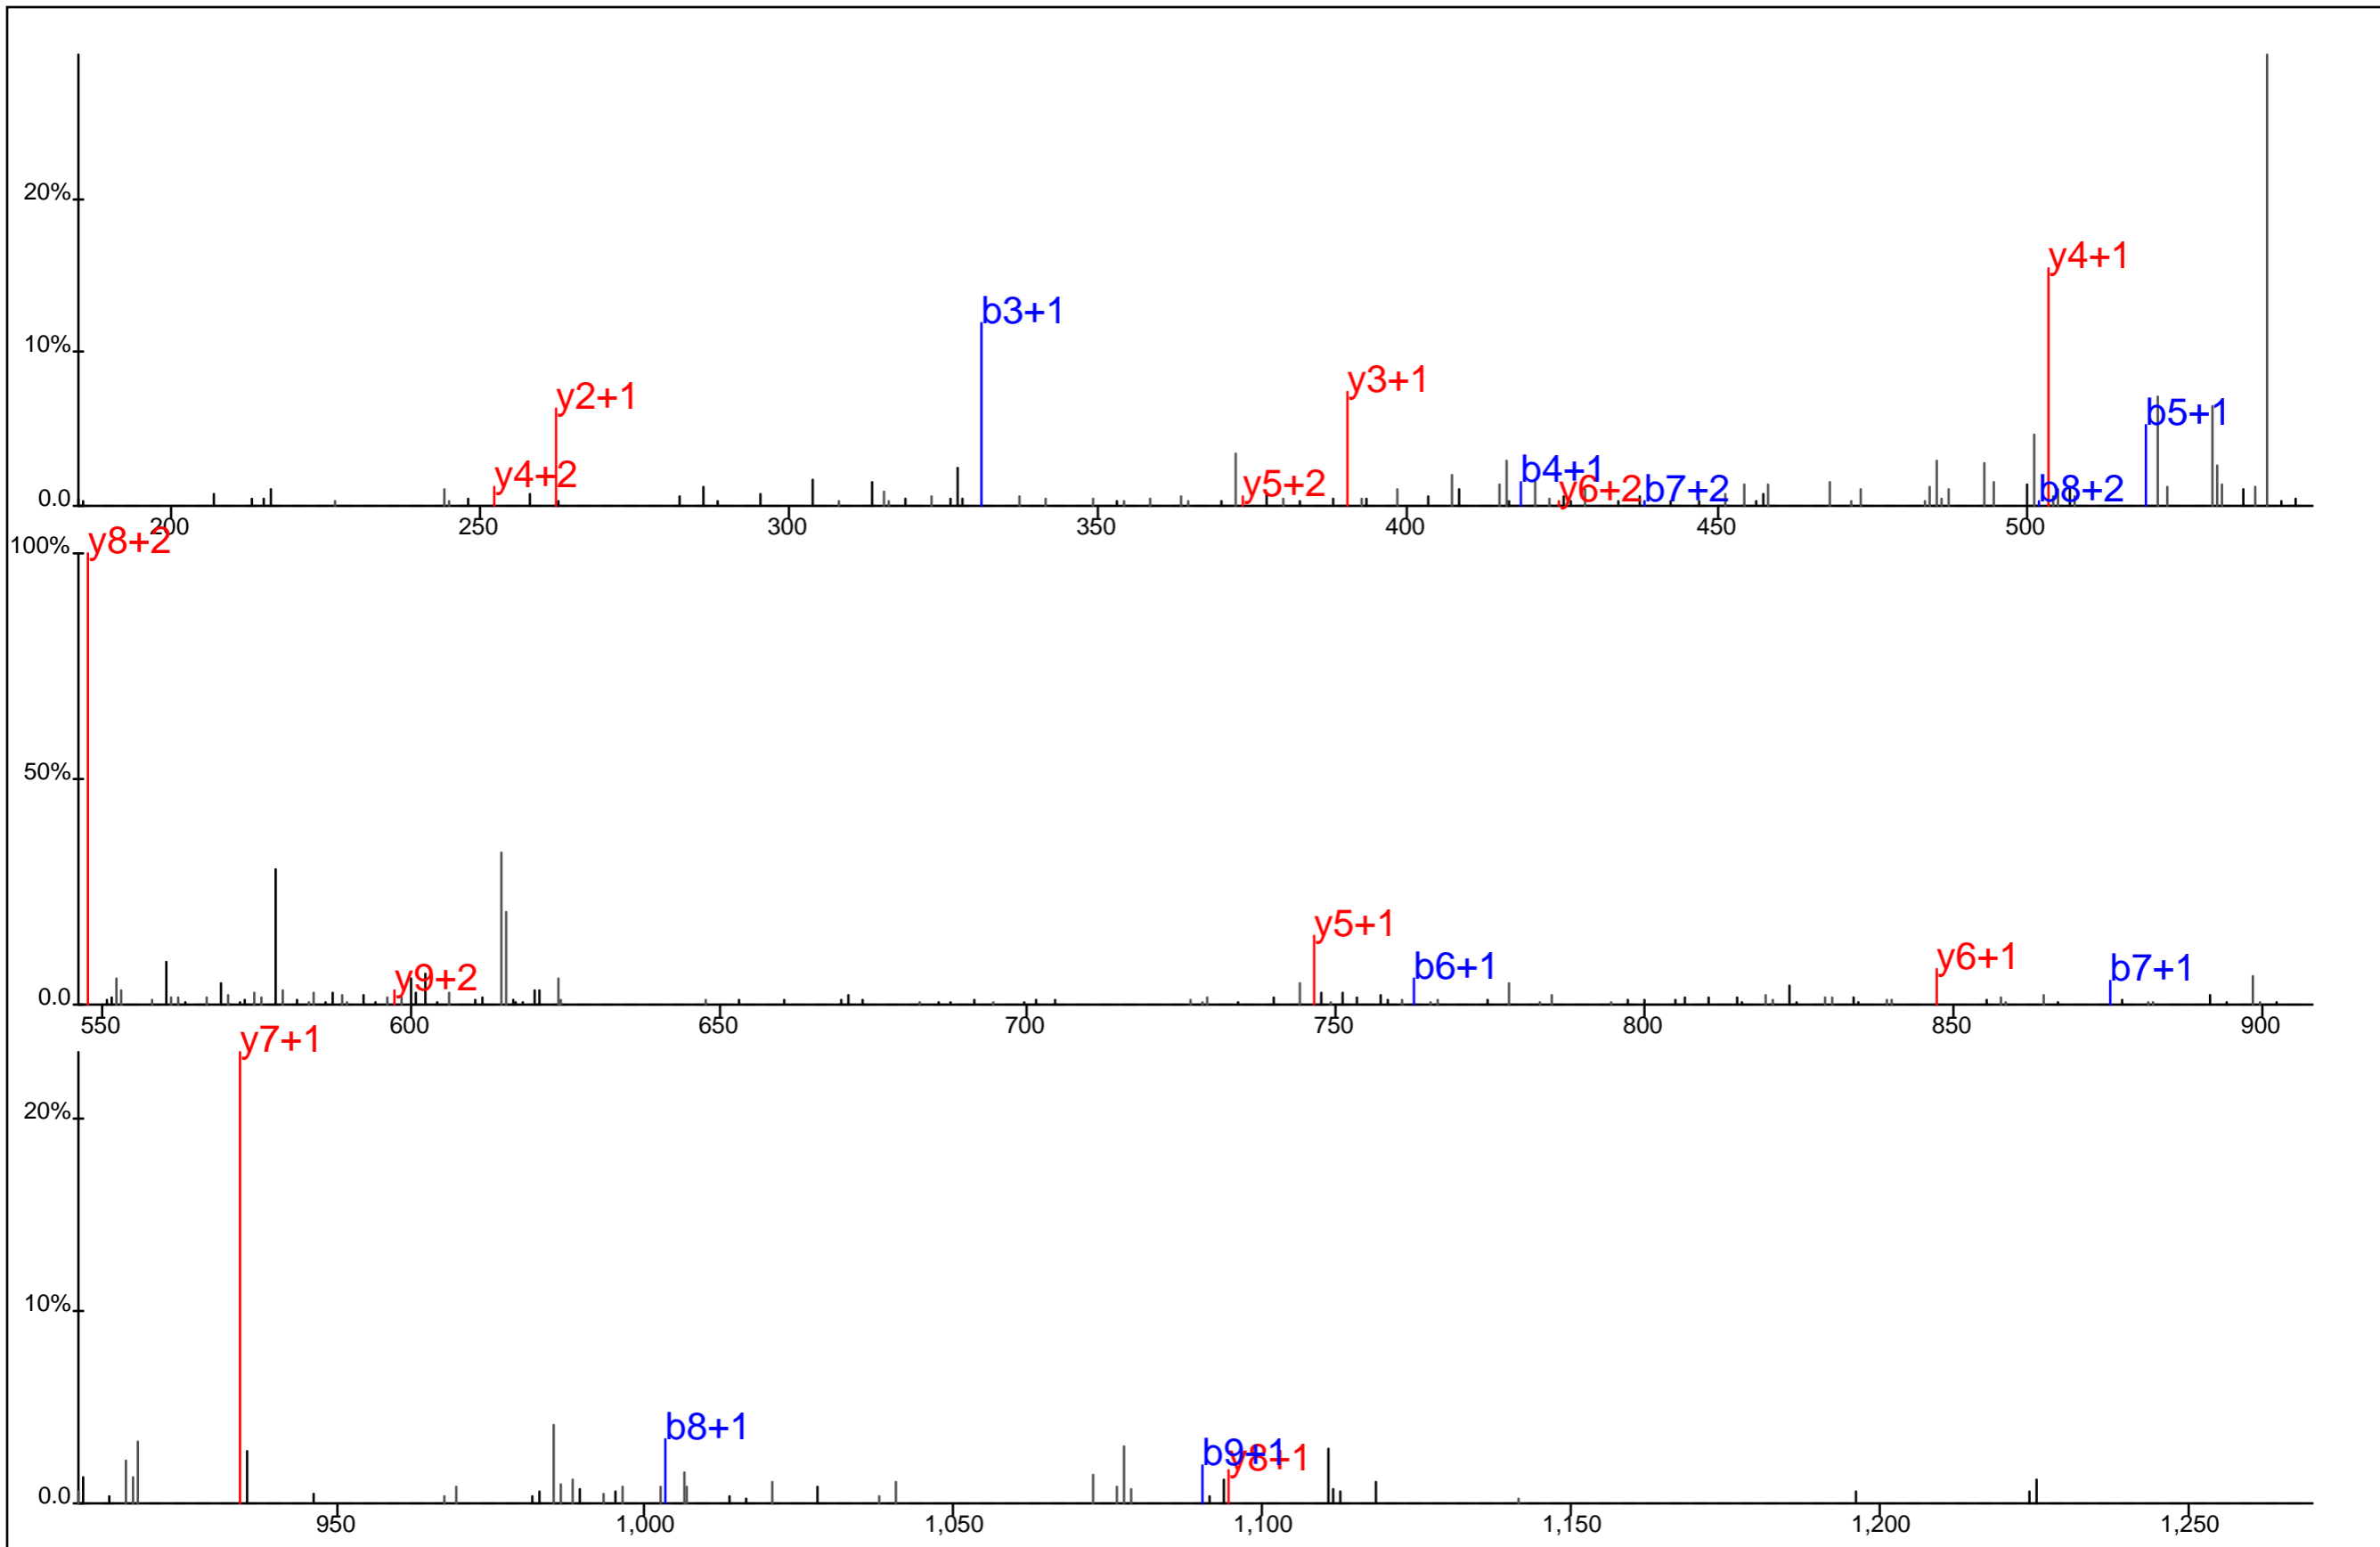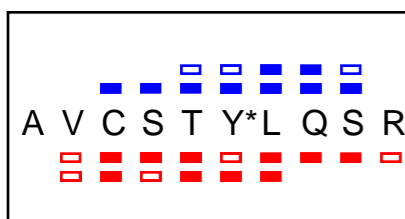

Protein Name: HIPK1  
 gi Accession: 38201640  
 Precursor Mass: 632.7764+2  
 Delta Mass: 5.083 ppm  
 XCorr: 43.34

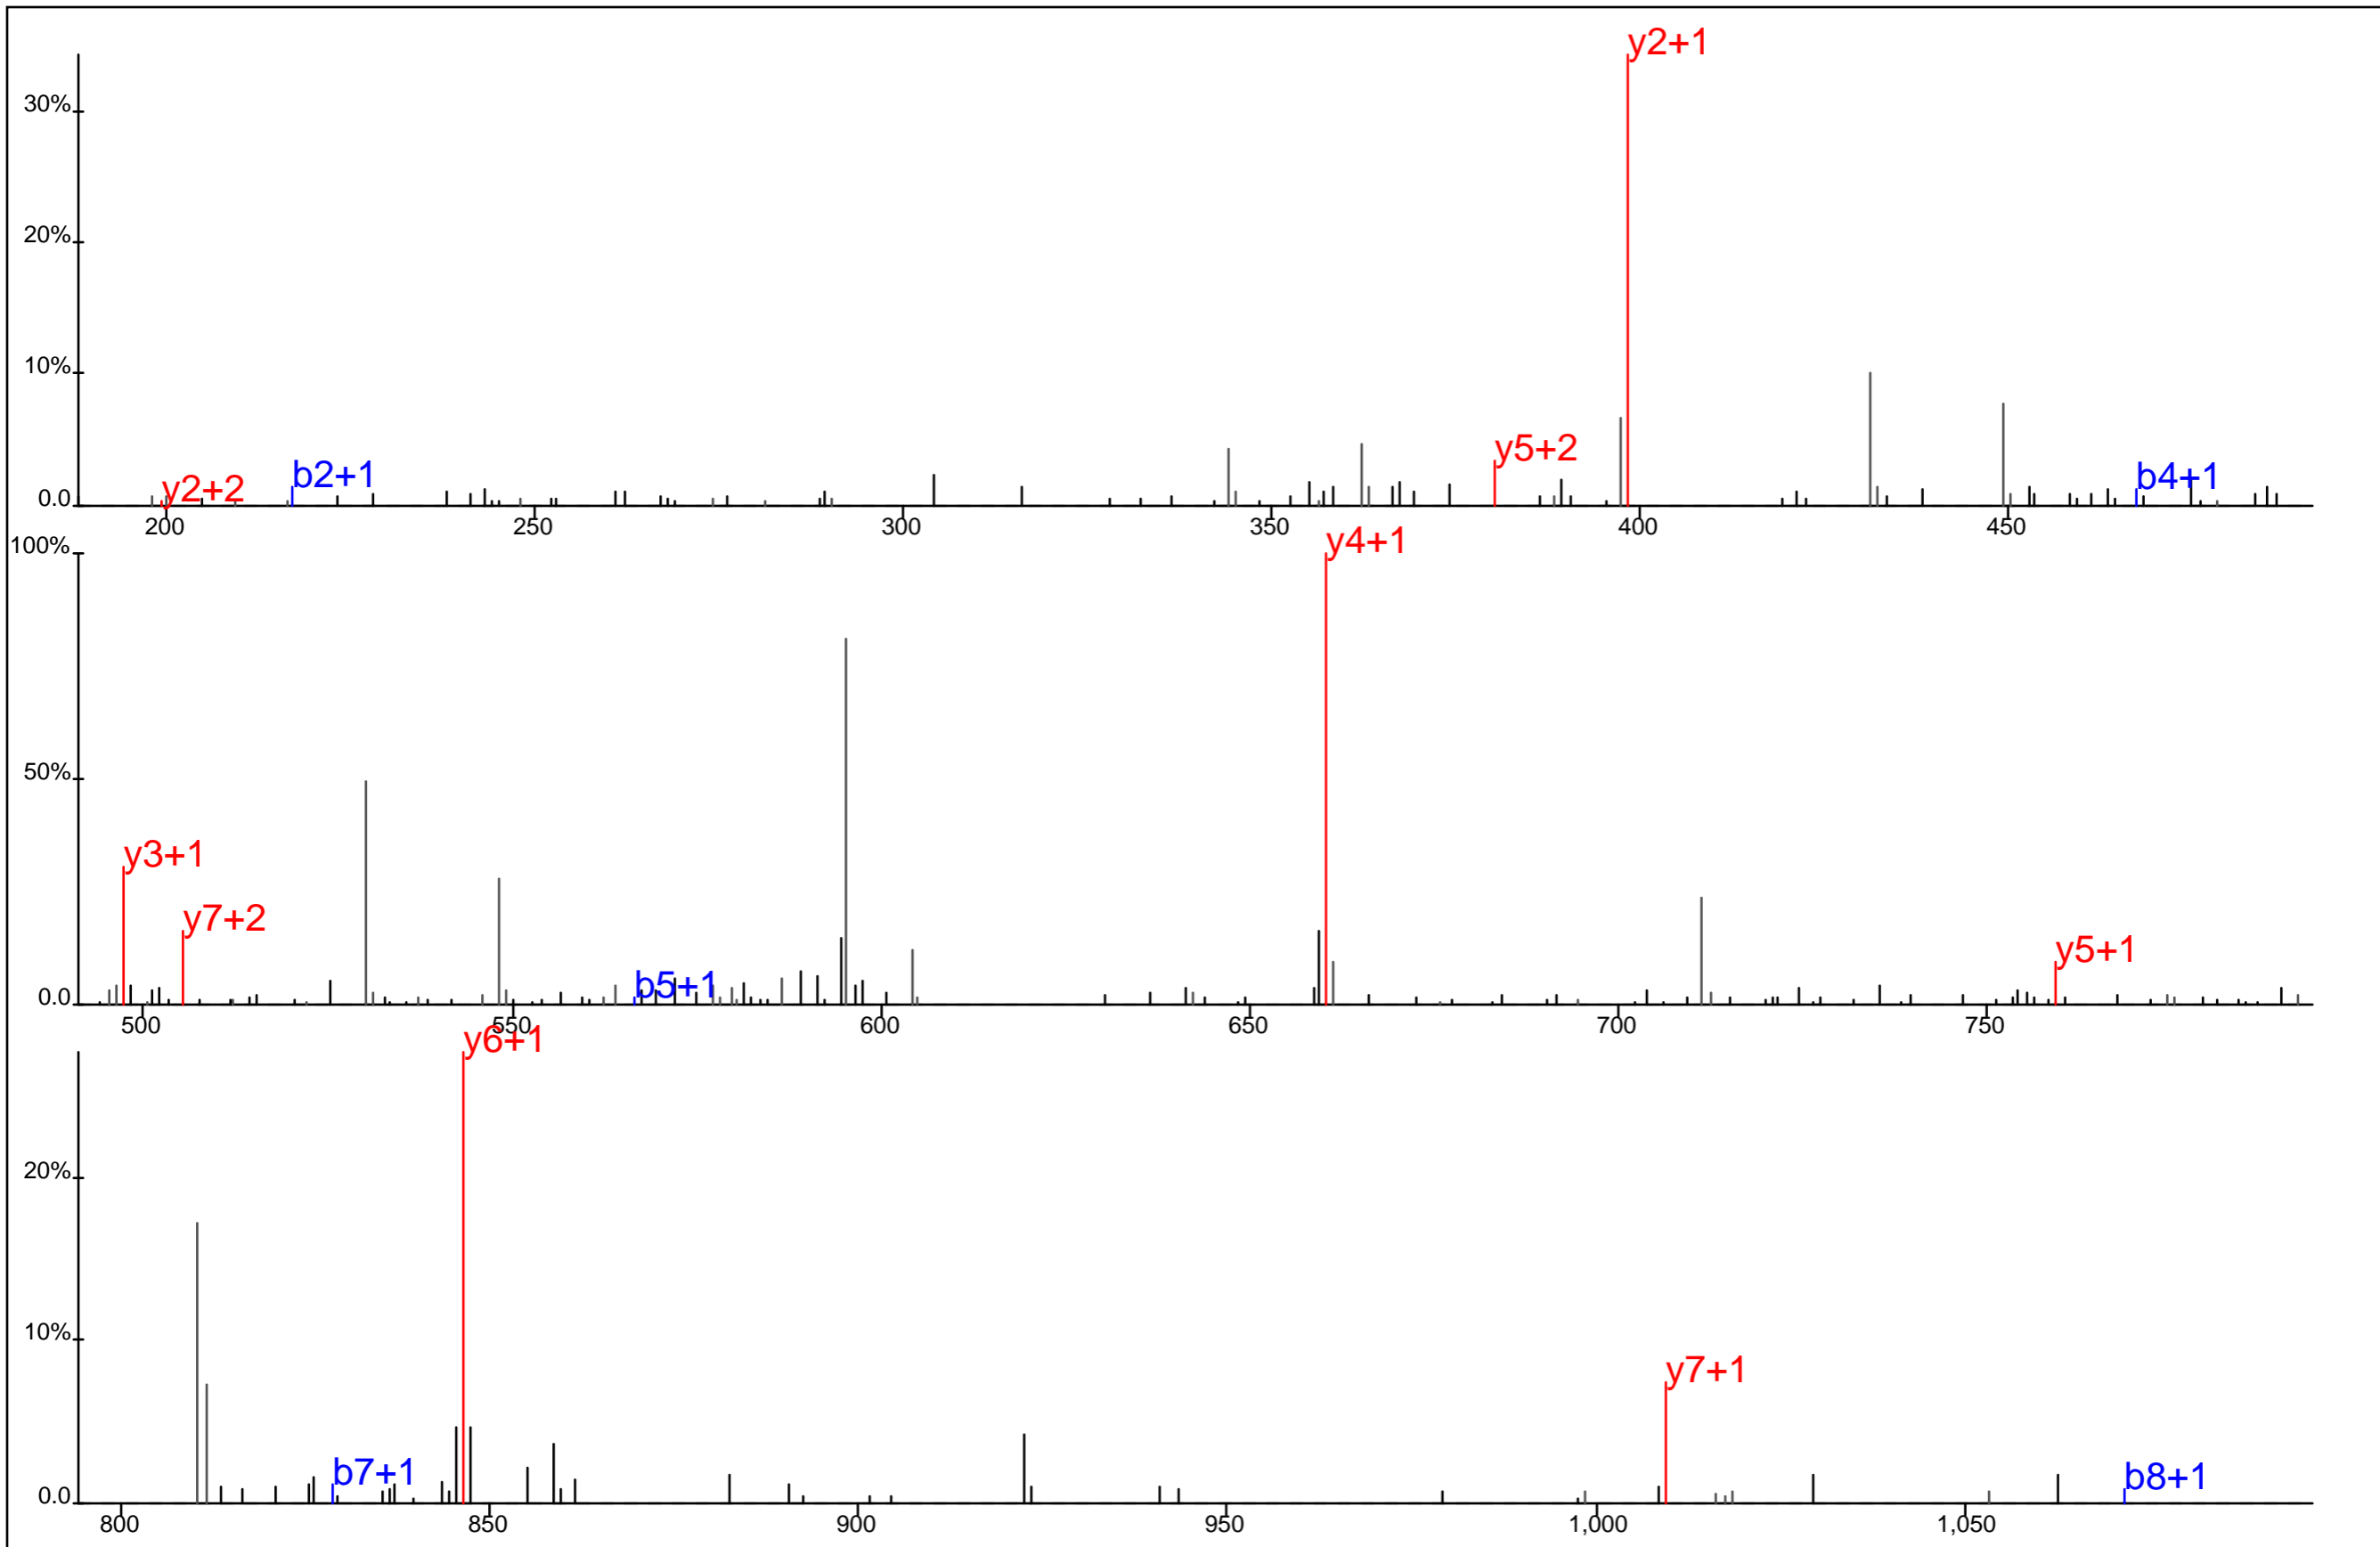

**E S Y S V Y V Y\* K#**

Protein Name: Histone H2B  
 gi Accession: 1568557  
 Precursor Mass: 613.2697+2  
 Delta Mass: 4.380 ppm  
 XCorr: 31.37

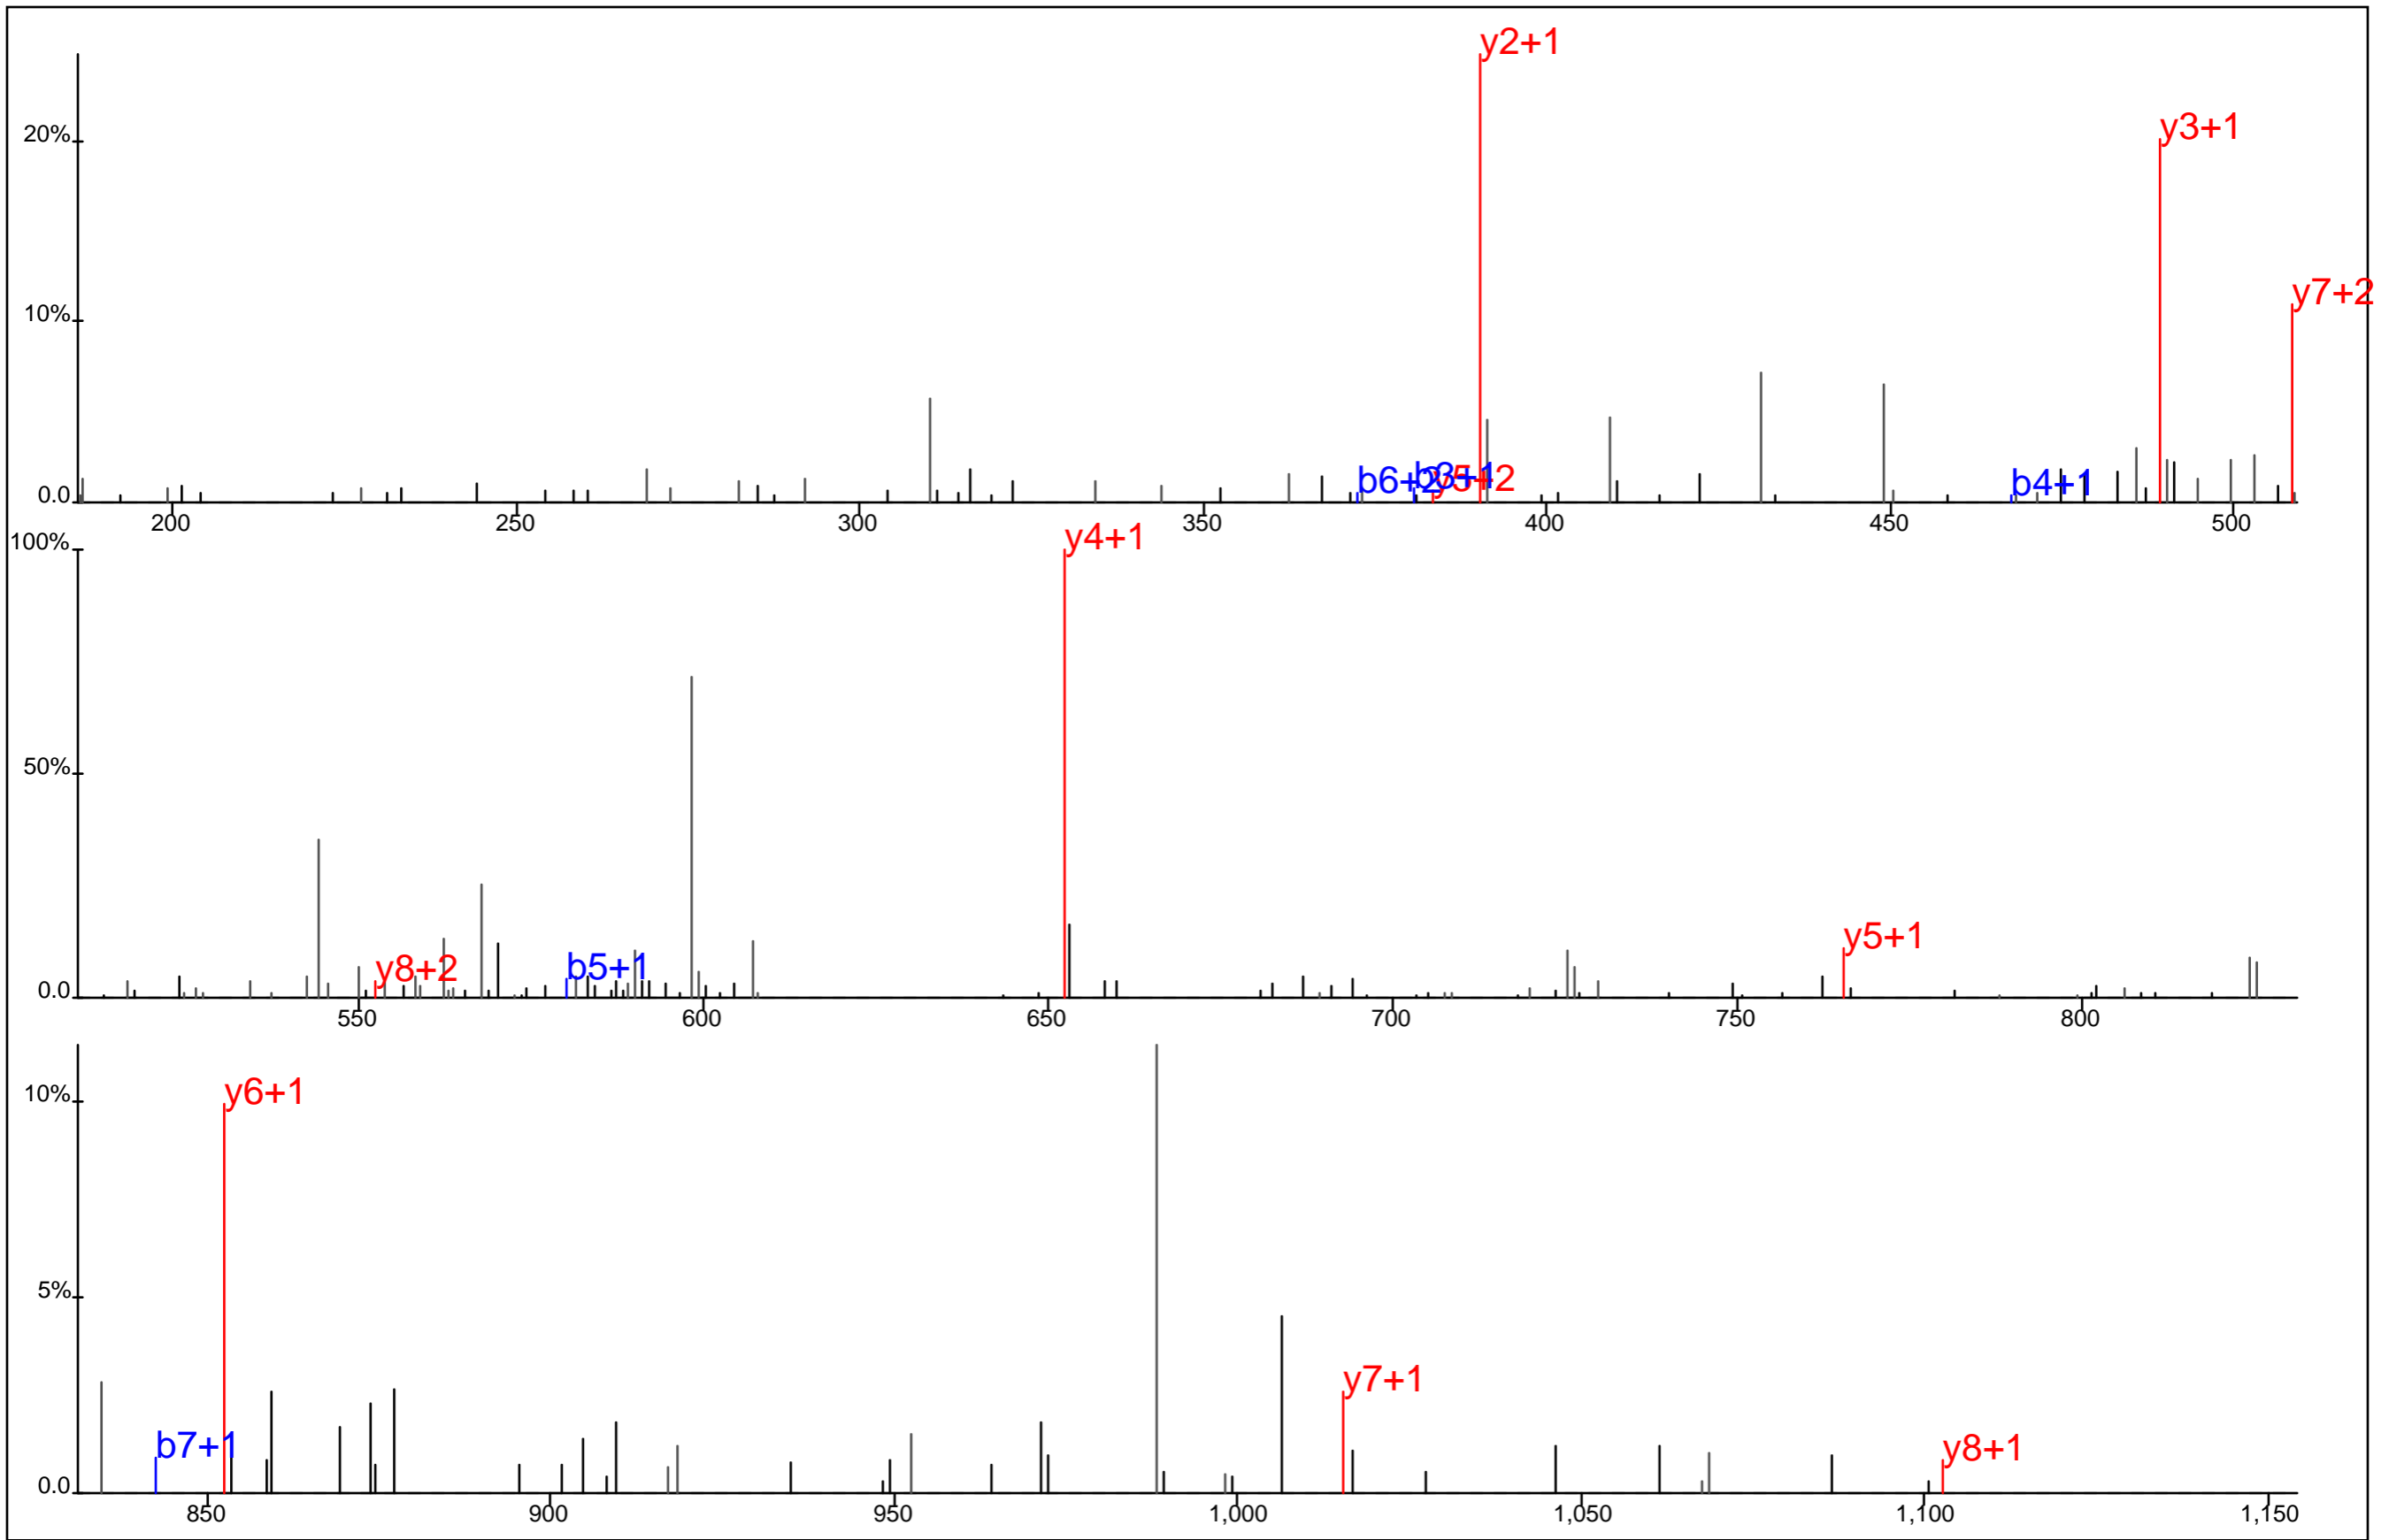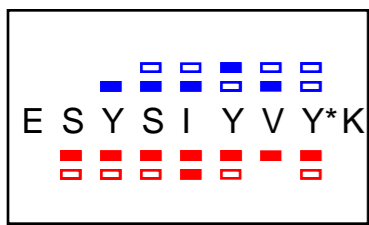

Protein Name: Histone H2B  
 gi Accession: 31979  
 Precursor Mass: 616.2711+2  
 Delta Mass: 5.479 ppm  
 XCorr: 26.9

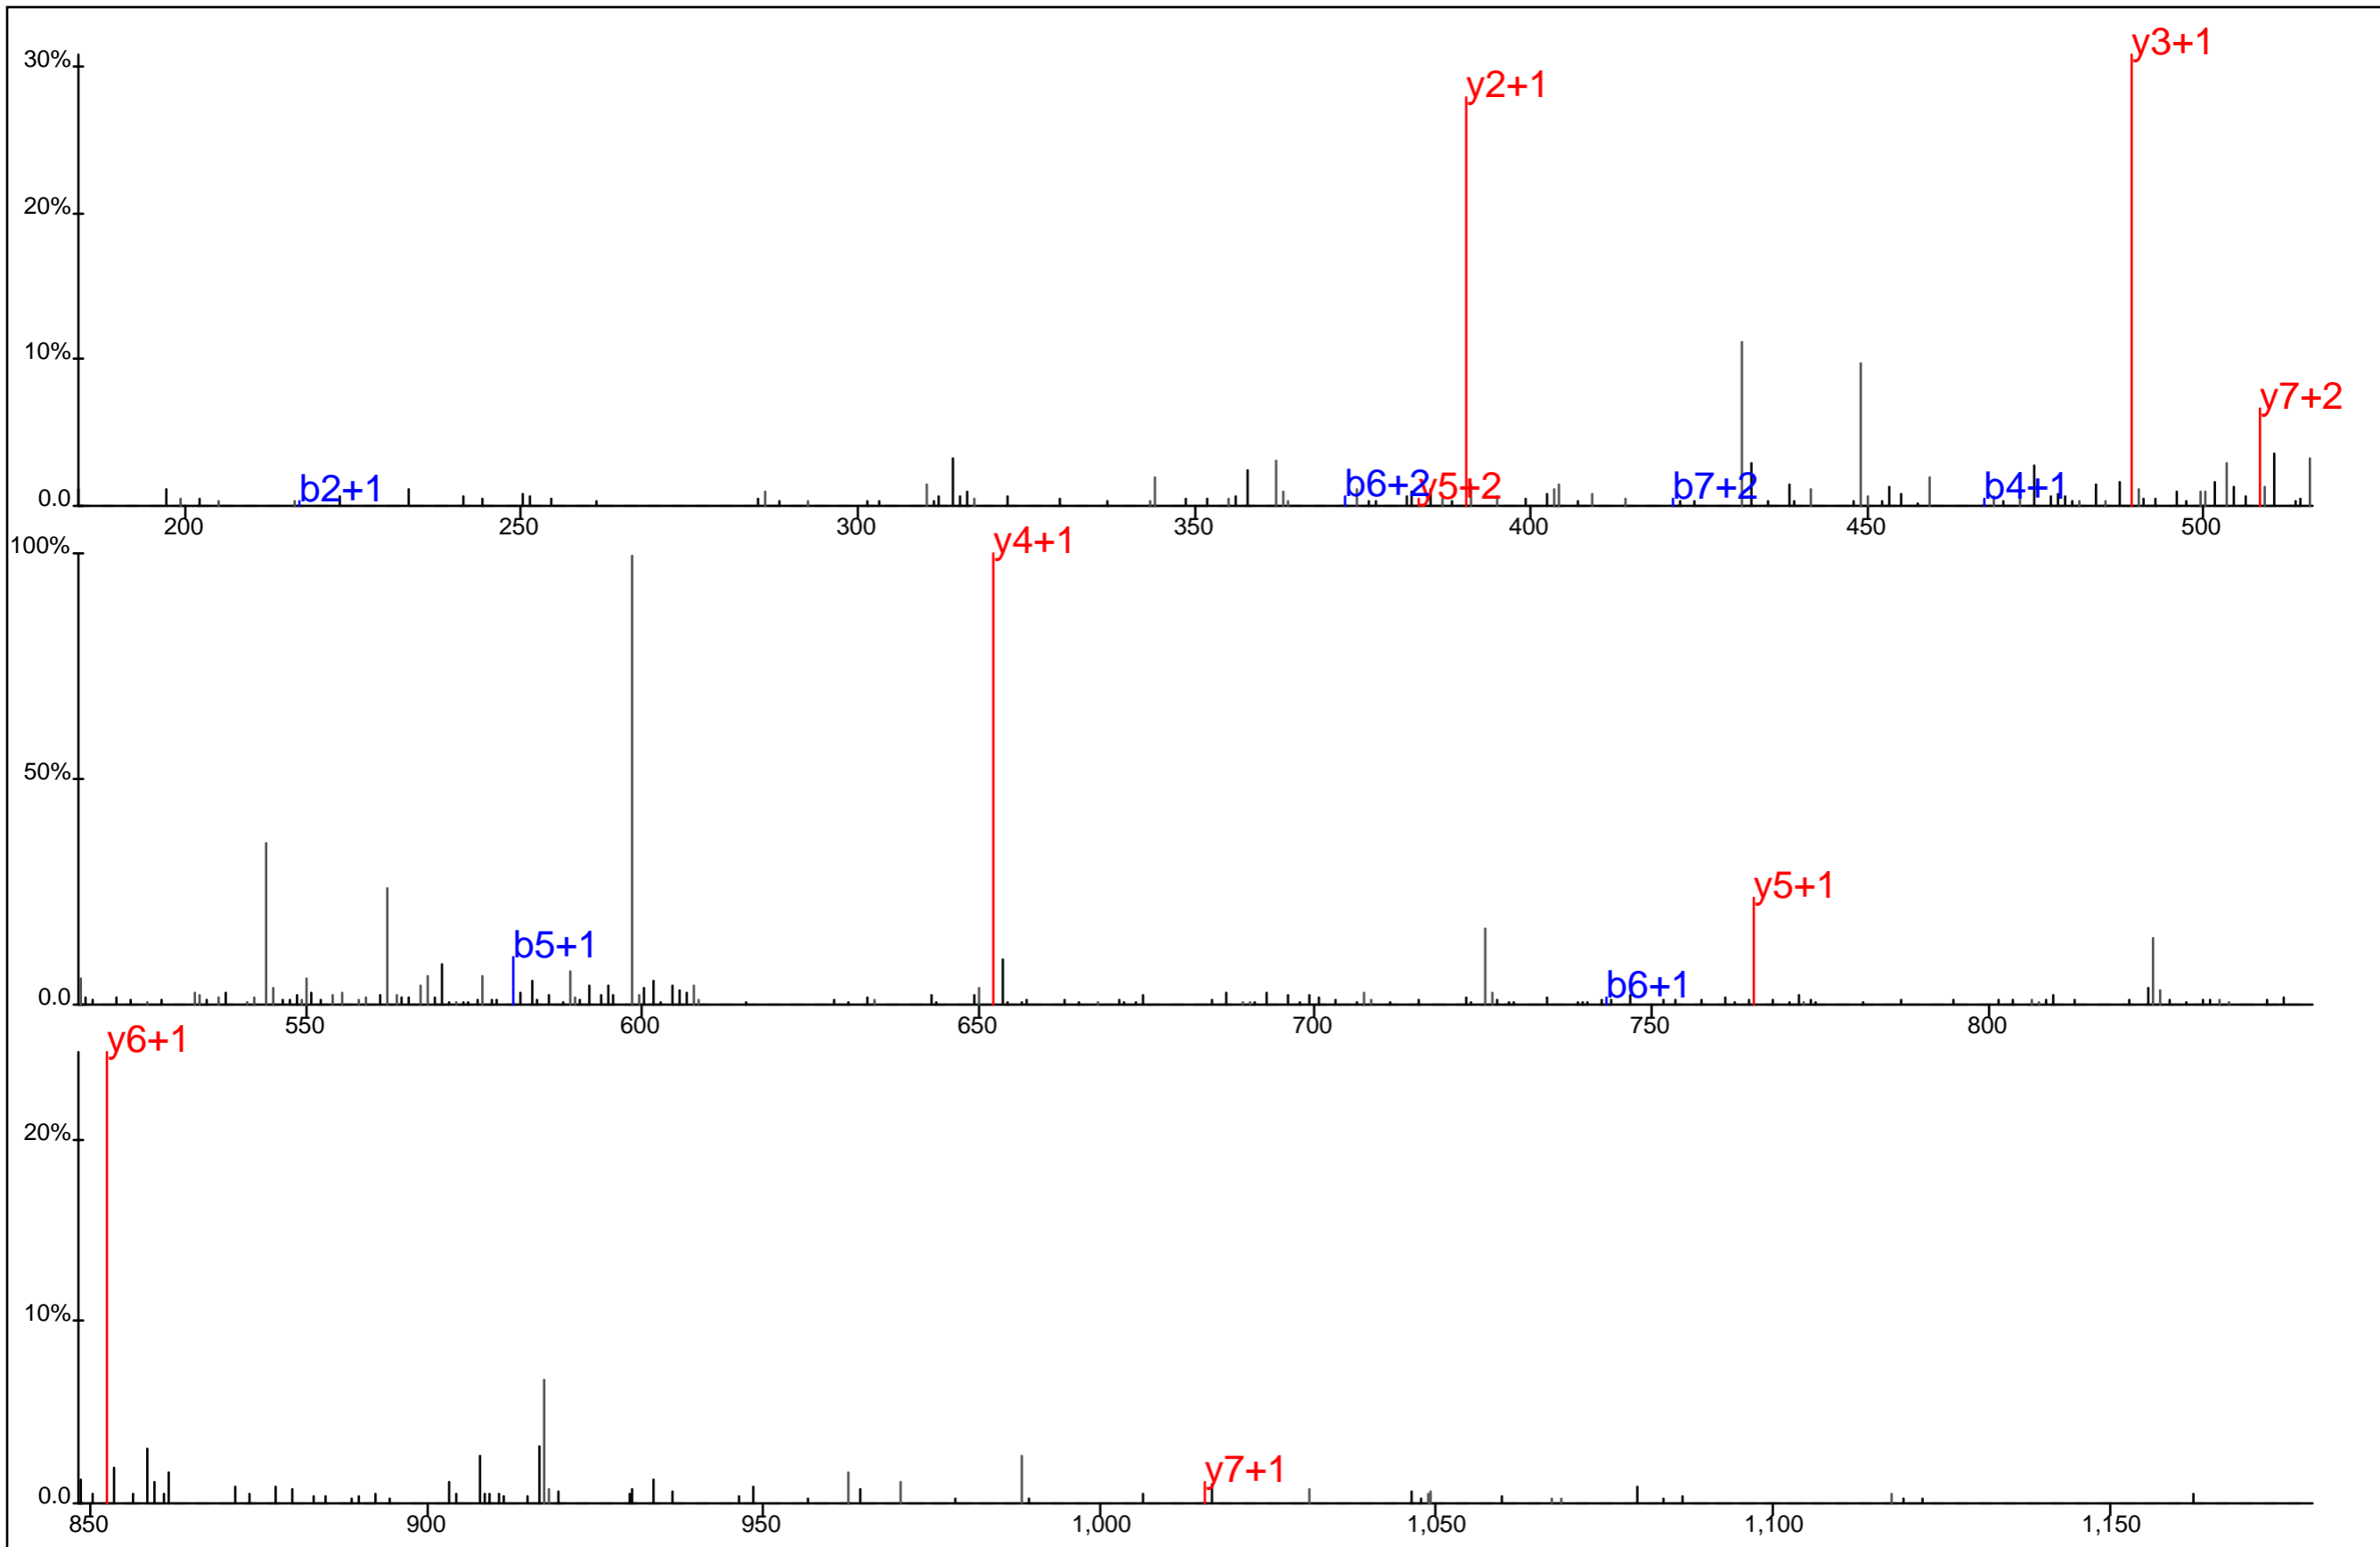

■ □ ■ □ ■ □ ■ □  
**E S Y S I Y V Y\*K**  
□ □ □ □ □ □ □

Protein Name: Histone H2B  
 gi Accession: 31979  
 Precursor Mass: 616.2651+2  
 Delta Mass: 4.232 ppm  
 XCorr: 23.53

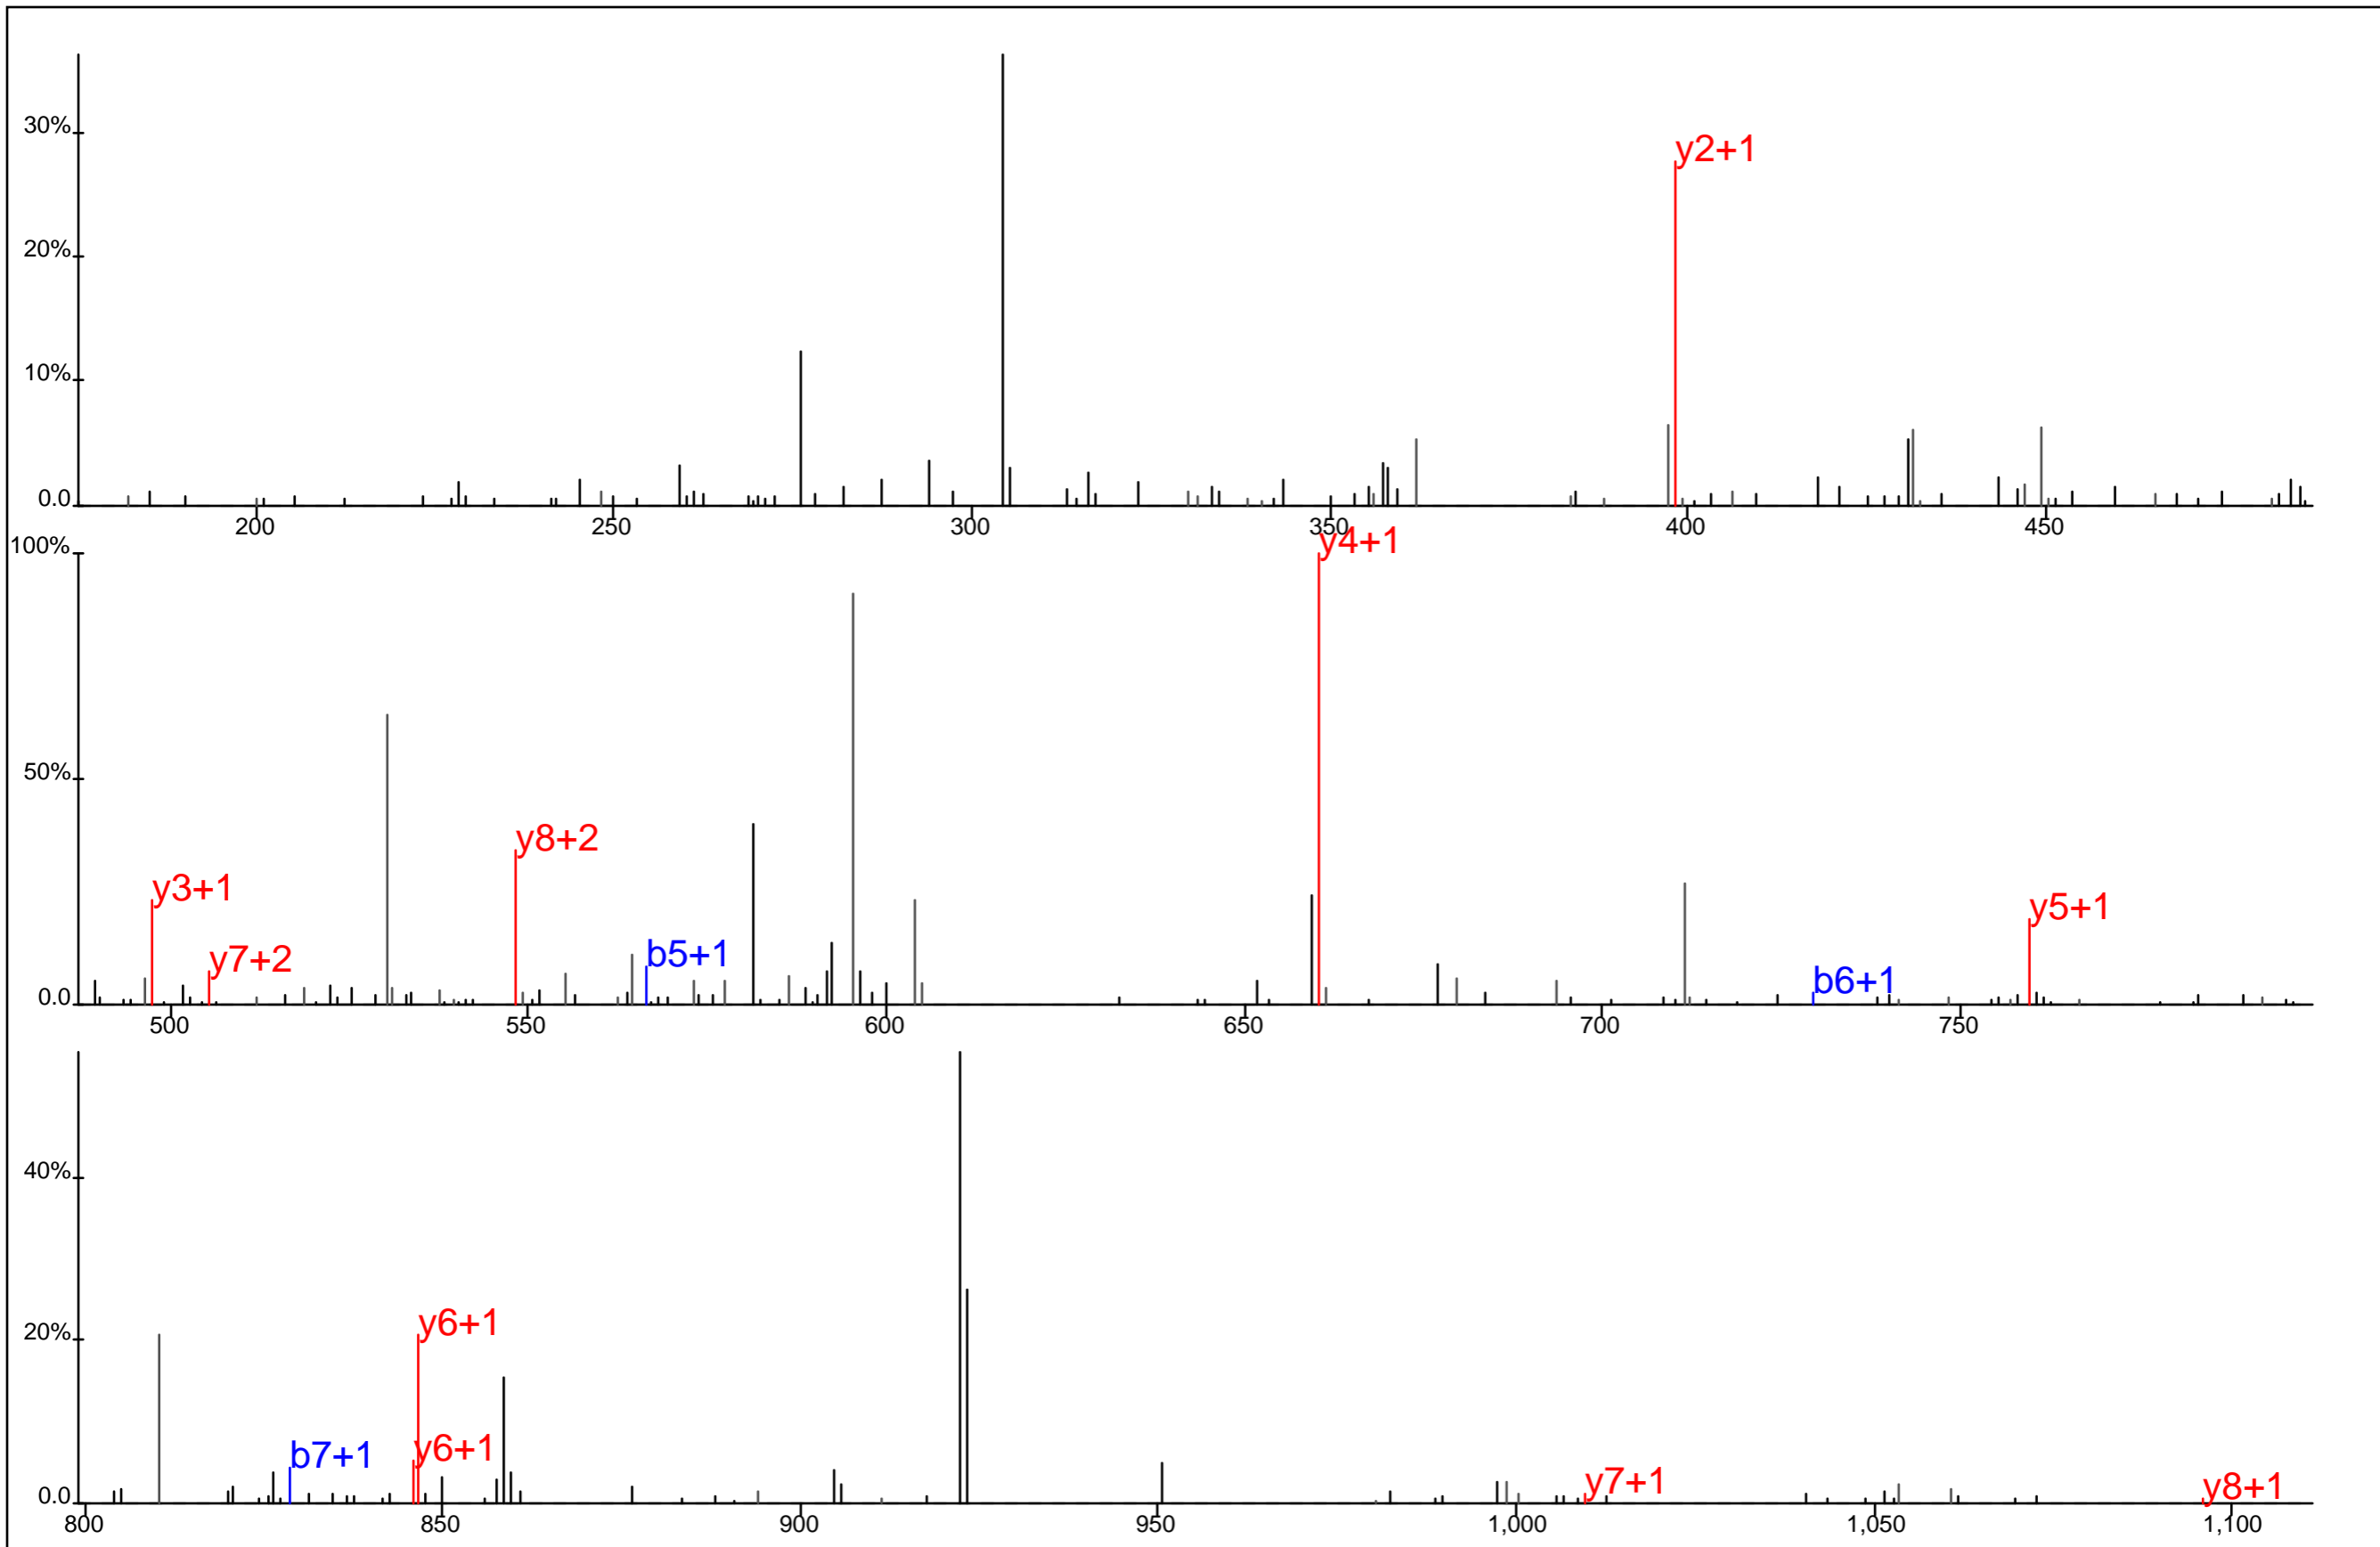

■ ■ ■ ■ ■ ■  
 E S Y S V Y V Y\* K#  
■ ■ ■ ■ ■ ■

Protein Name: Histone H2B  
 gi Accession: 1568557  
 Precursor Mass: 613.2664+2  
 Delta Mass: 0.997 ppm  
 XCorr: 18.97



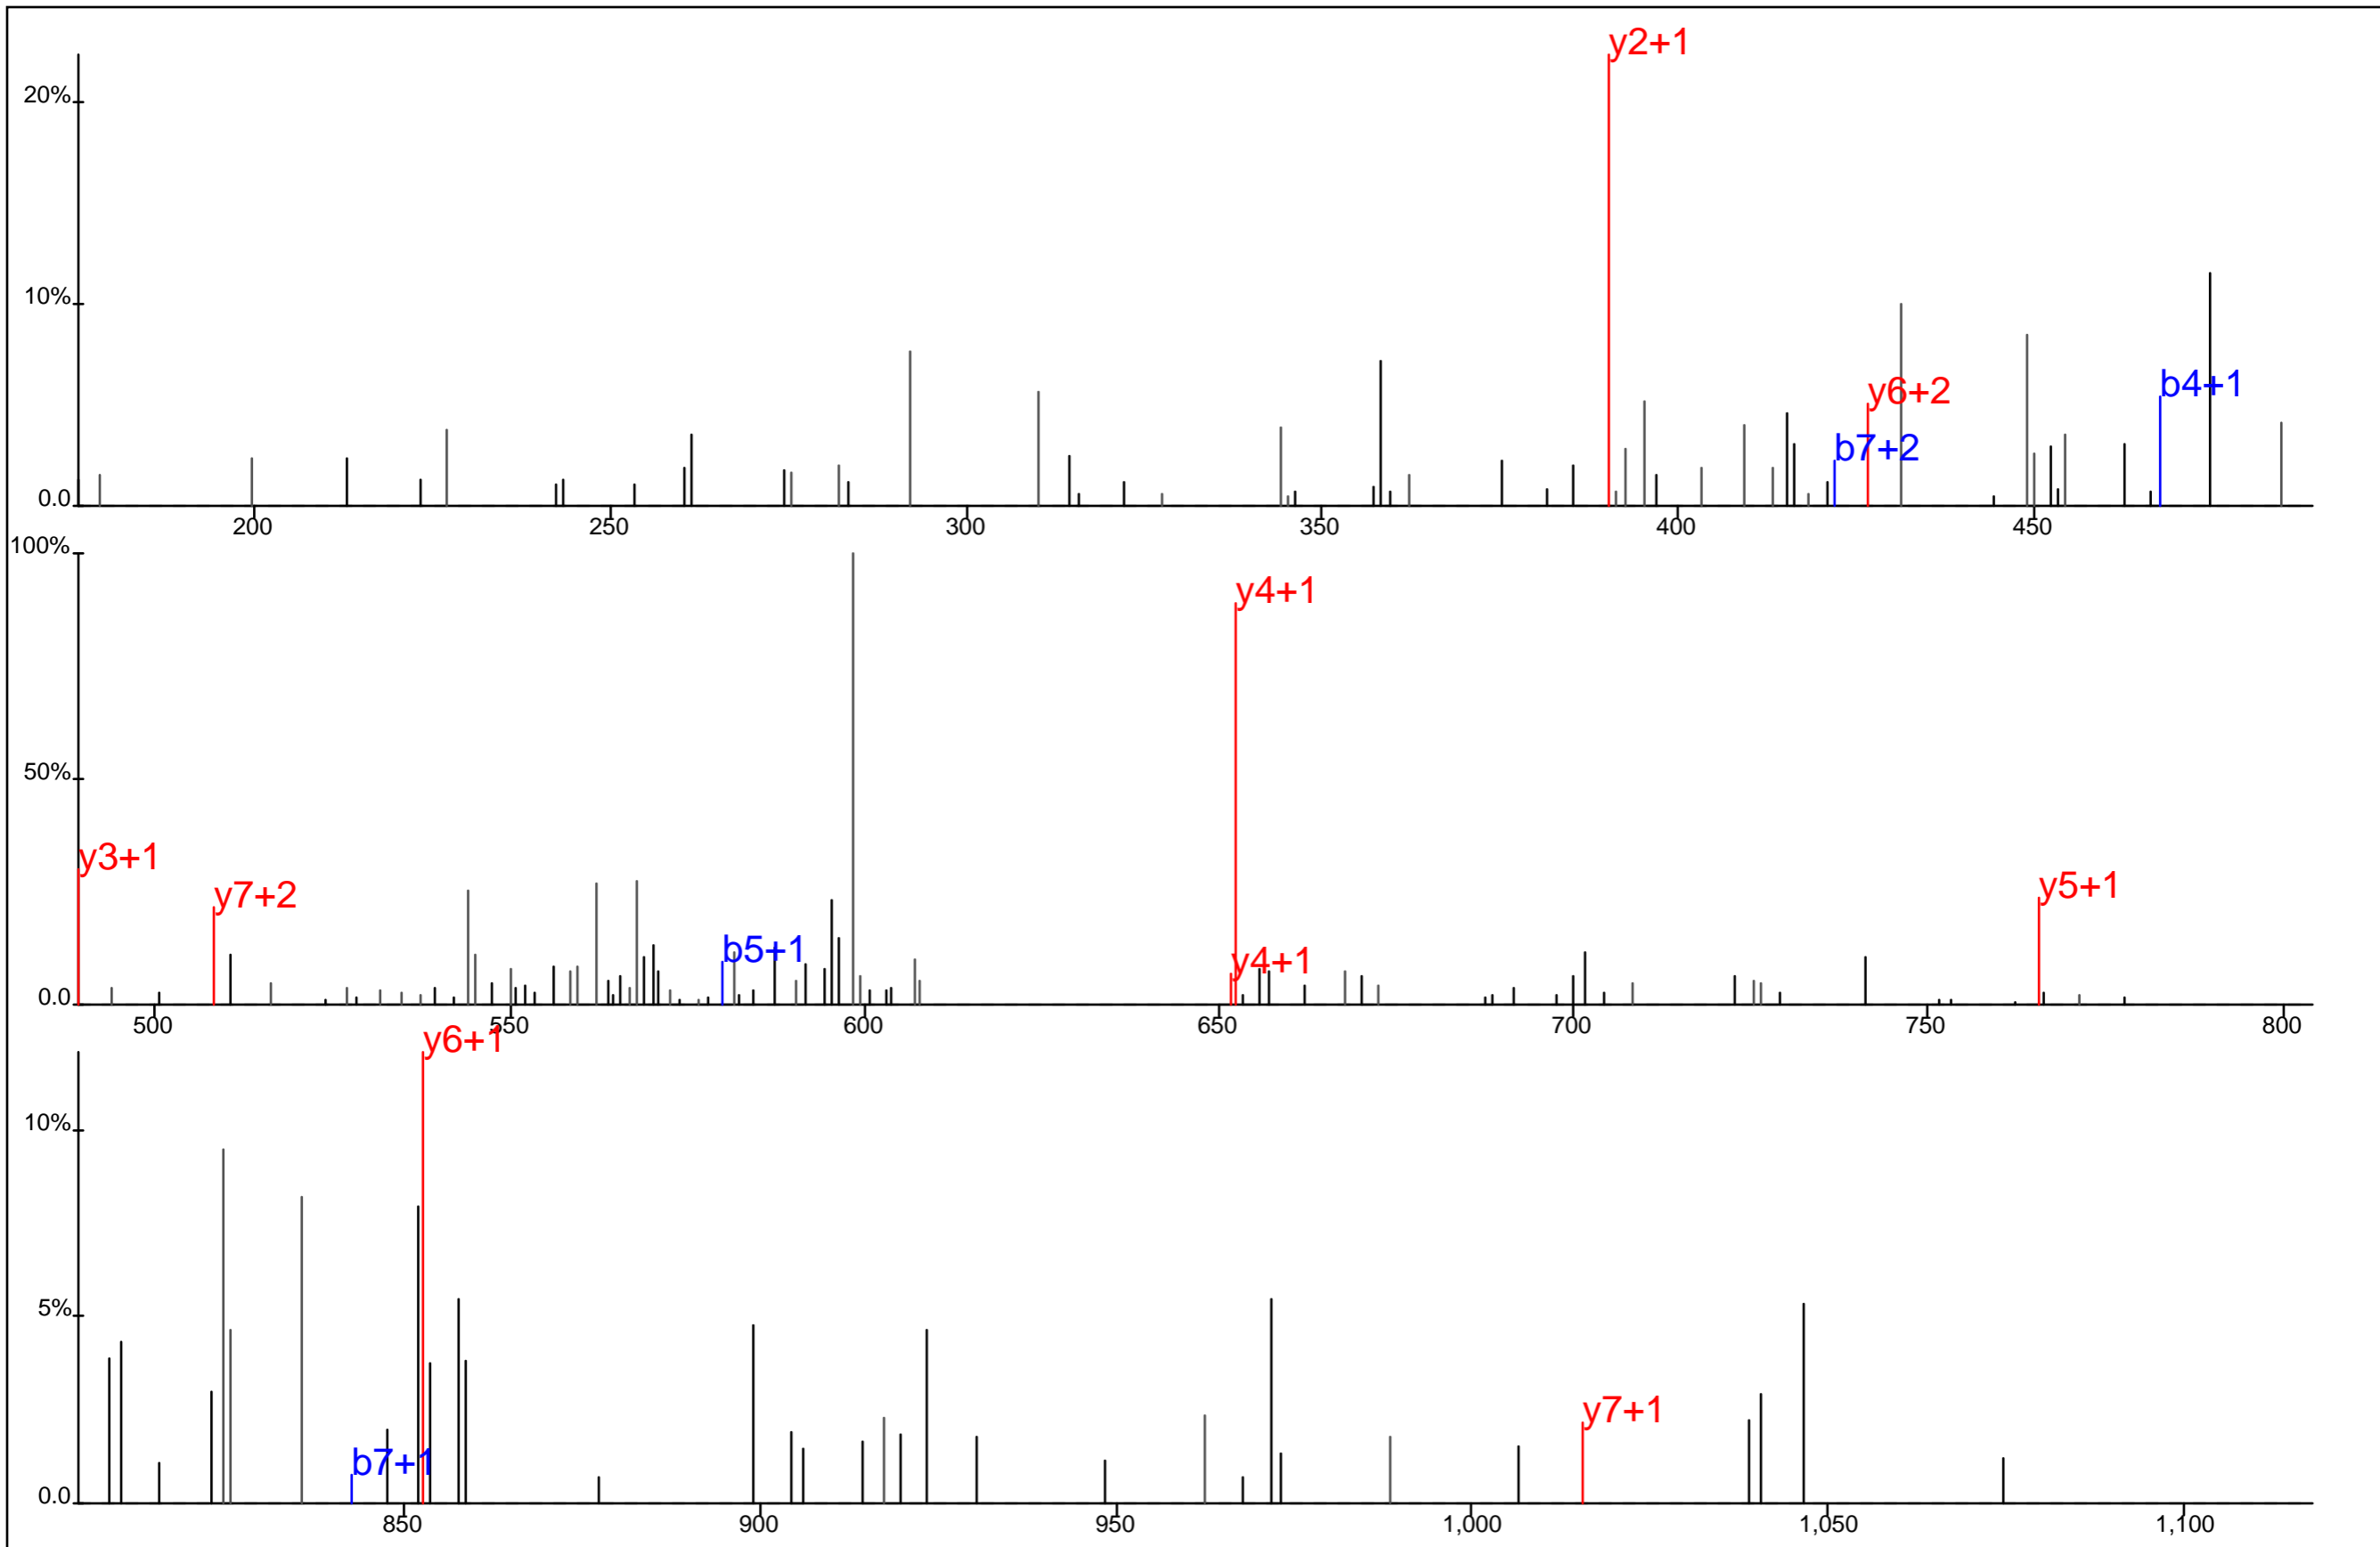

▢ ▢ ▢ ▢ ▢ ▢  
**E S Y S I Y V Y\*K**  
▢ ▢ ▢ ▢ ▢ ▢ ▢

Protein Name: Histone H2B  
 gi Accession: 31979  
 Precursor Mass: 616.2698+2  
 Delta Mass: 3.295 ppm  
 XCorr: 13.72

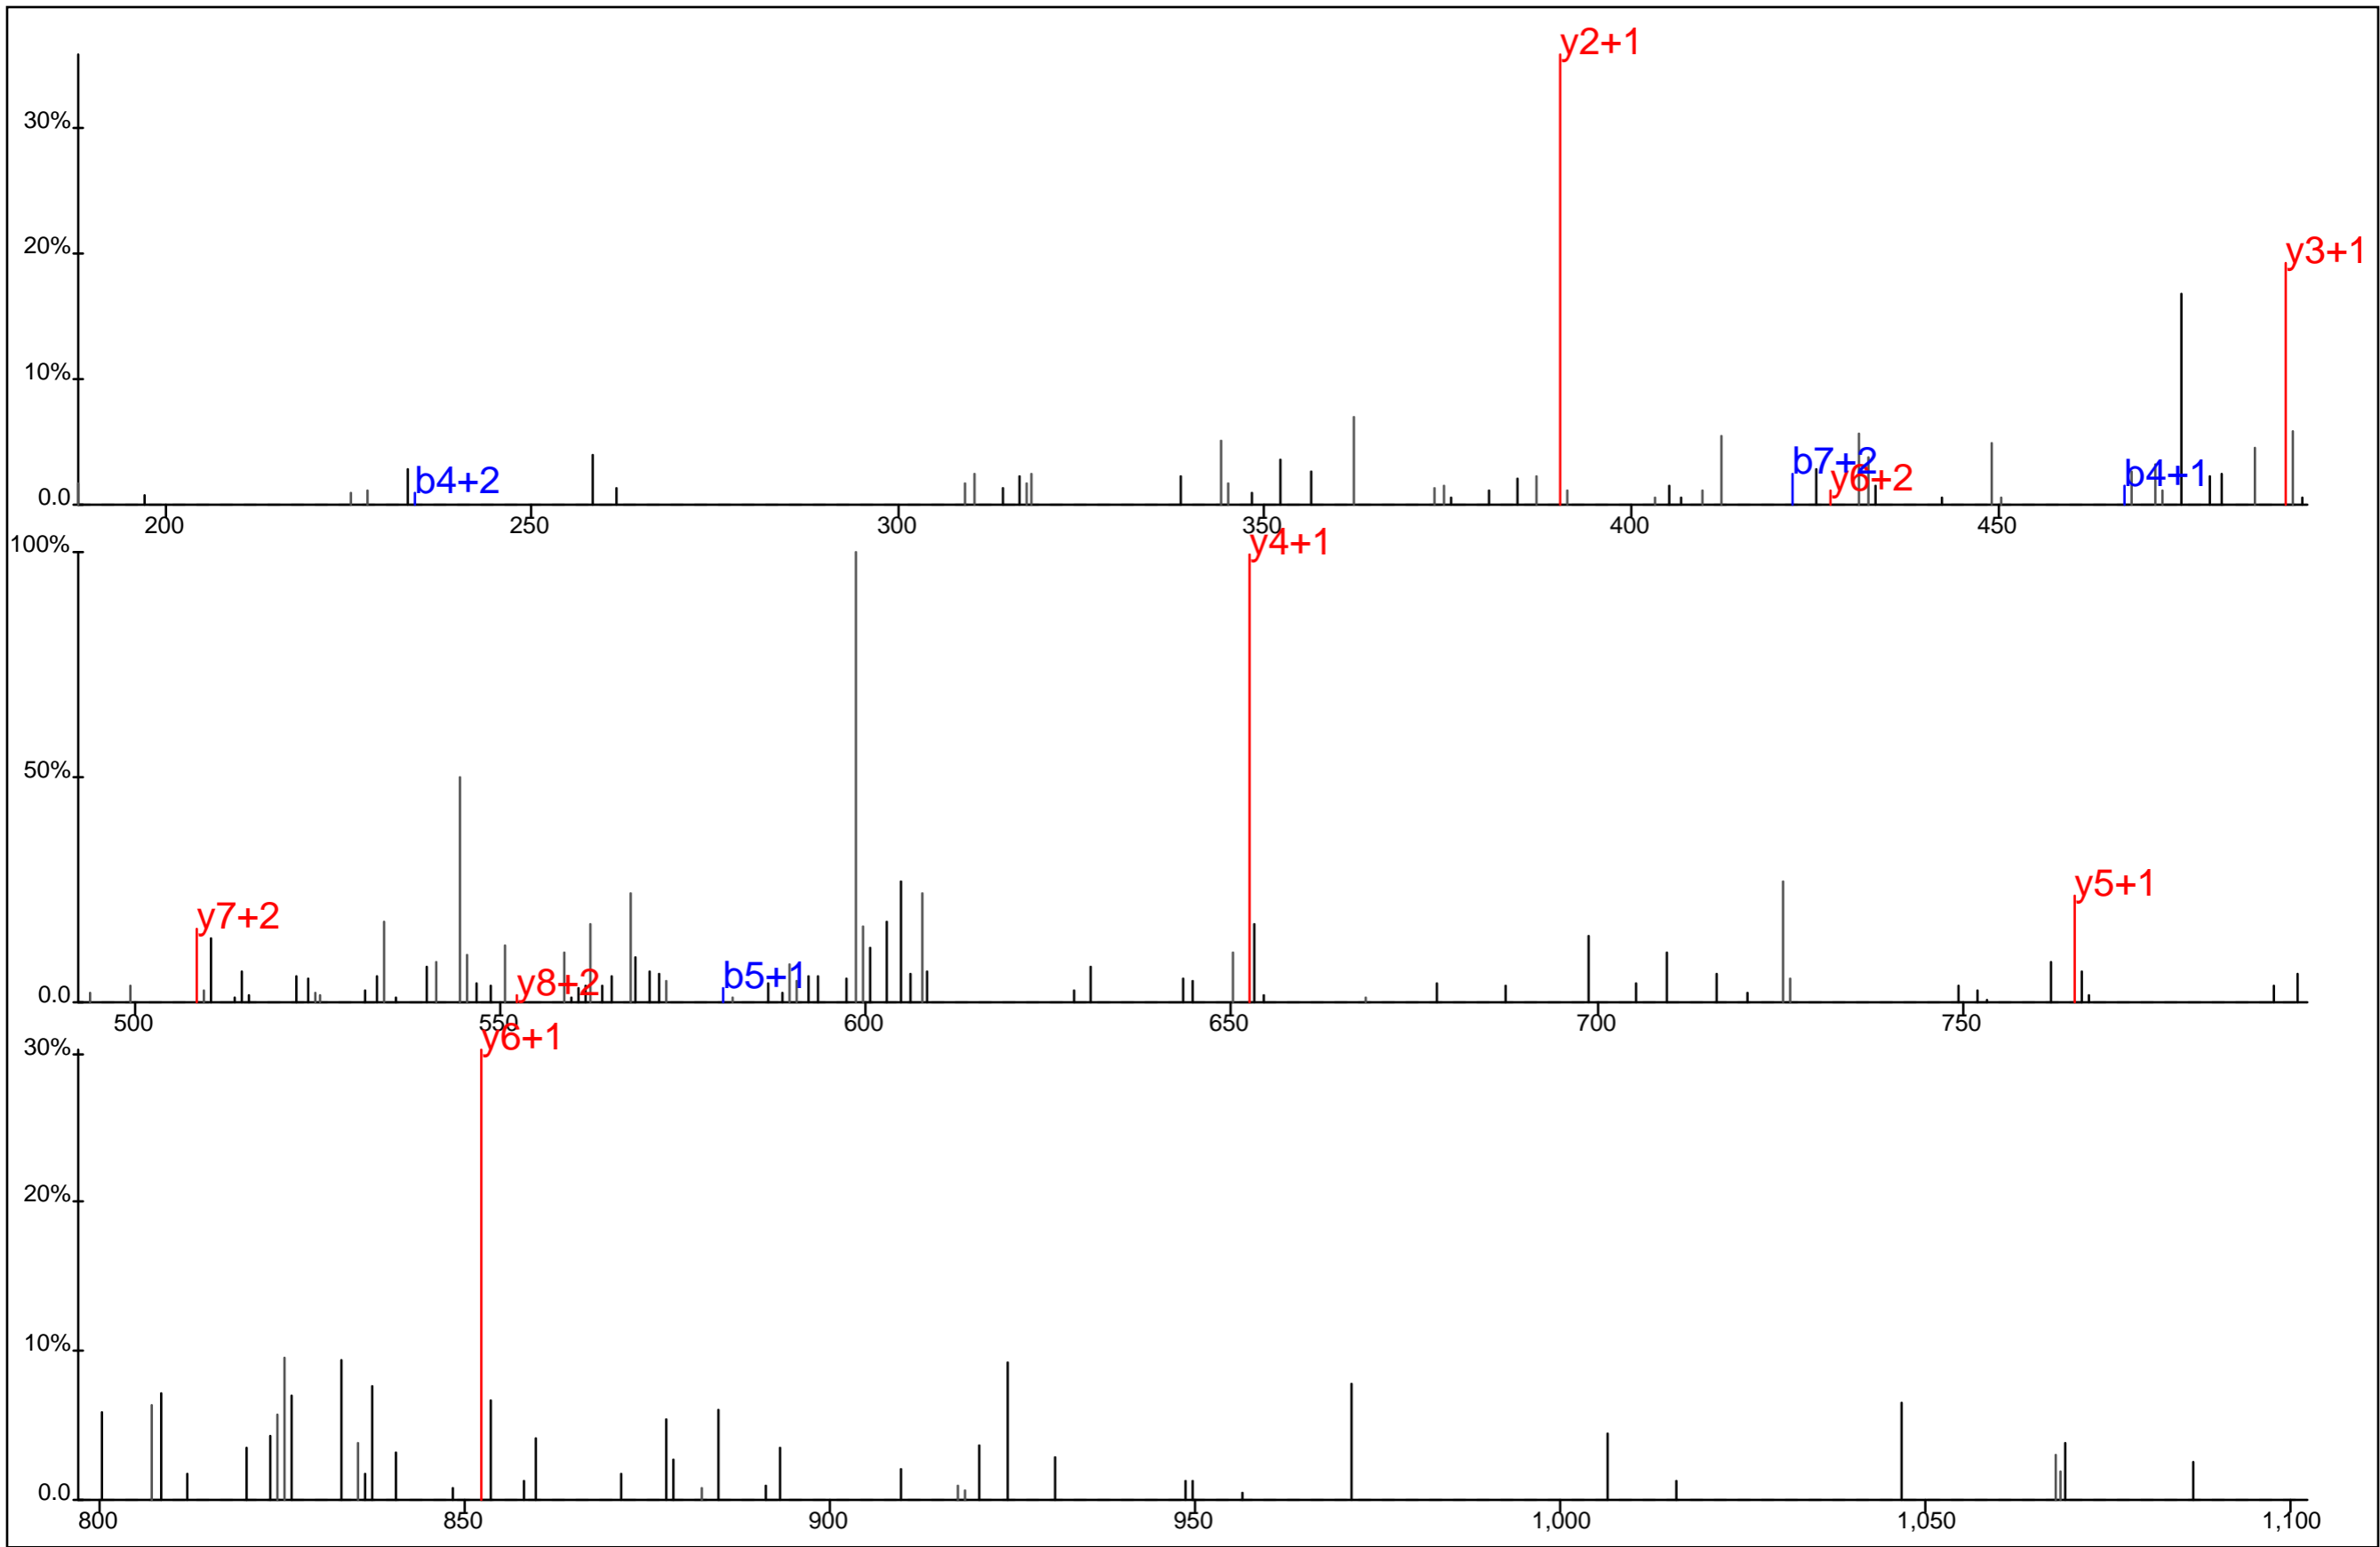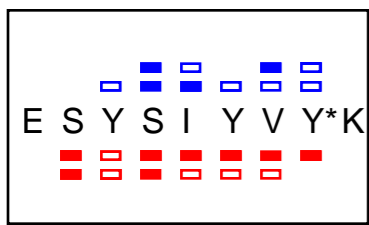

Protein Name: Histone H2B  
 gi Accession: 31979  
 Precursor Mass: 616.2700+2  
 Delta Mass: 3.693 ppm  
 XCorr: 14.49

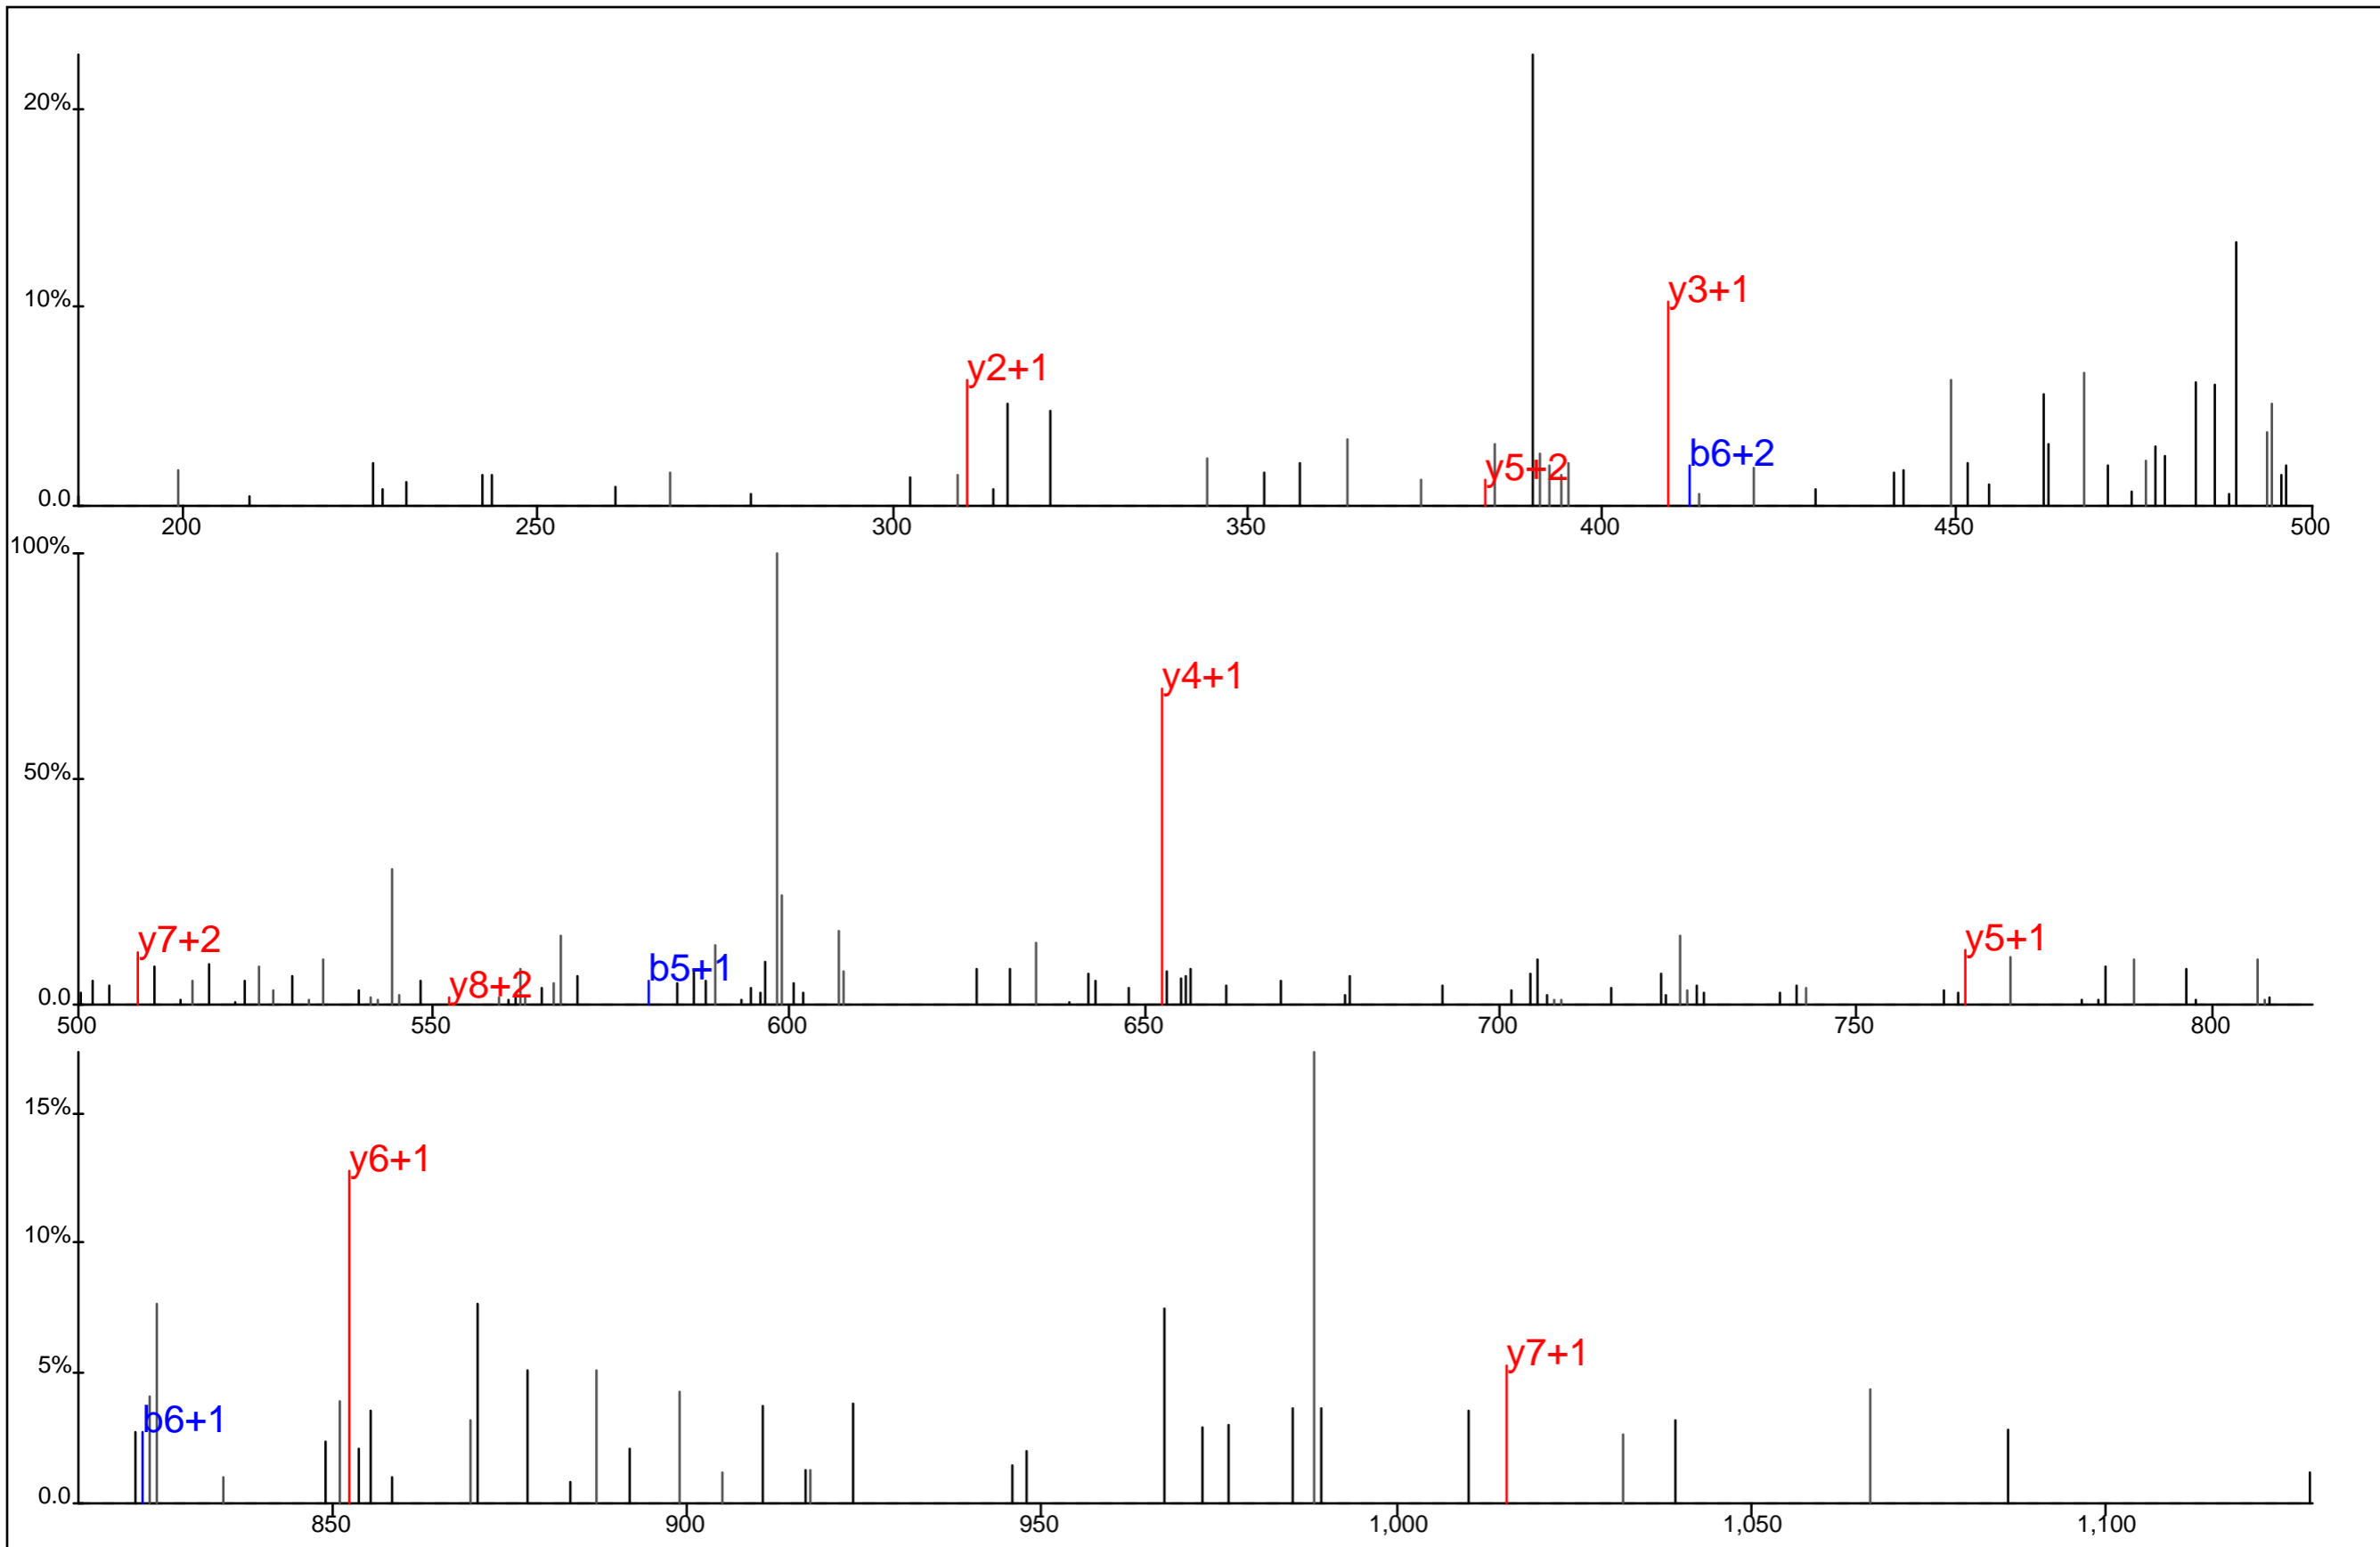

▢ ▢ ▢ ▢ ▢ ▢  
 E S Y S I Y\*V Y K  
▢ ▢ ▢ ▢ ▢ ▢

Protein Name: Histone H2B  
 gi Accession: 31979  
 Precursor Mass: 616.2690+2  
 Delta Mass: 2.110 ppm  
 XCorr: 20.2

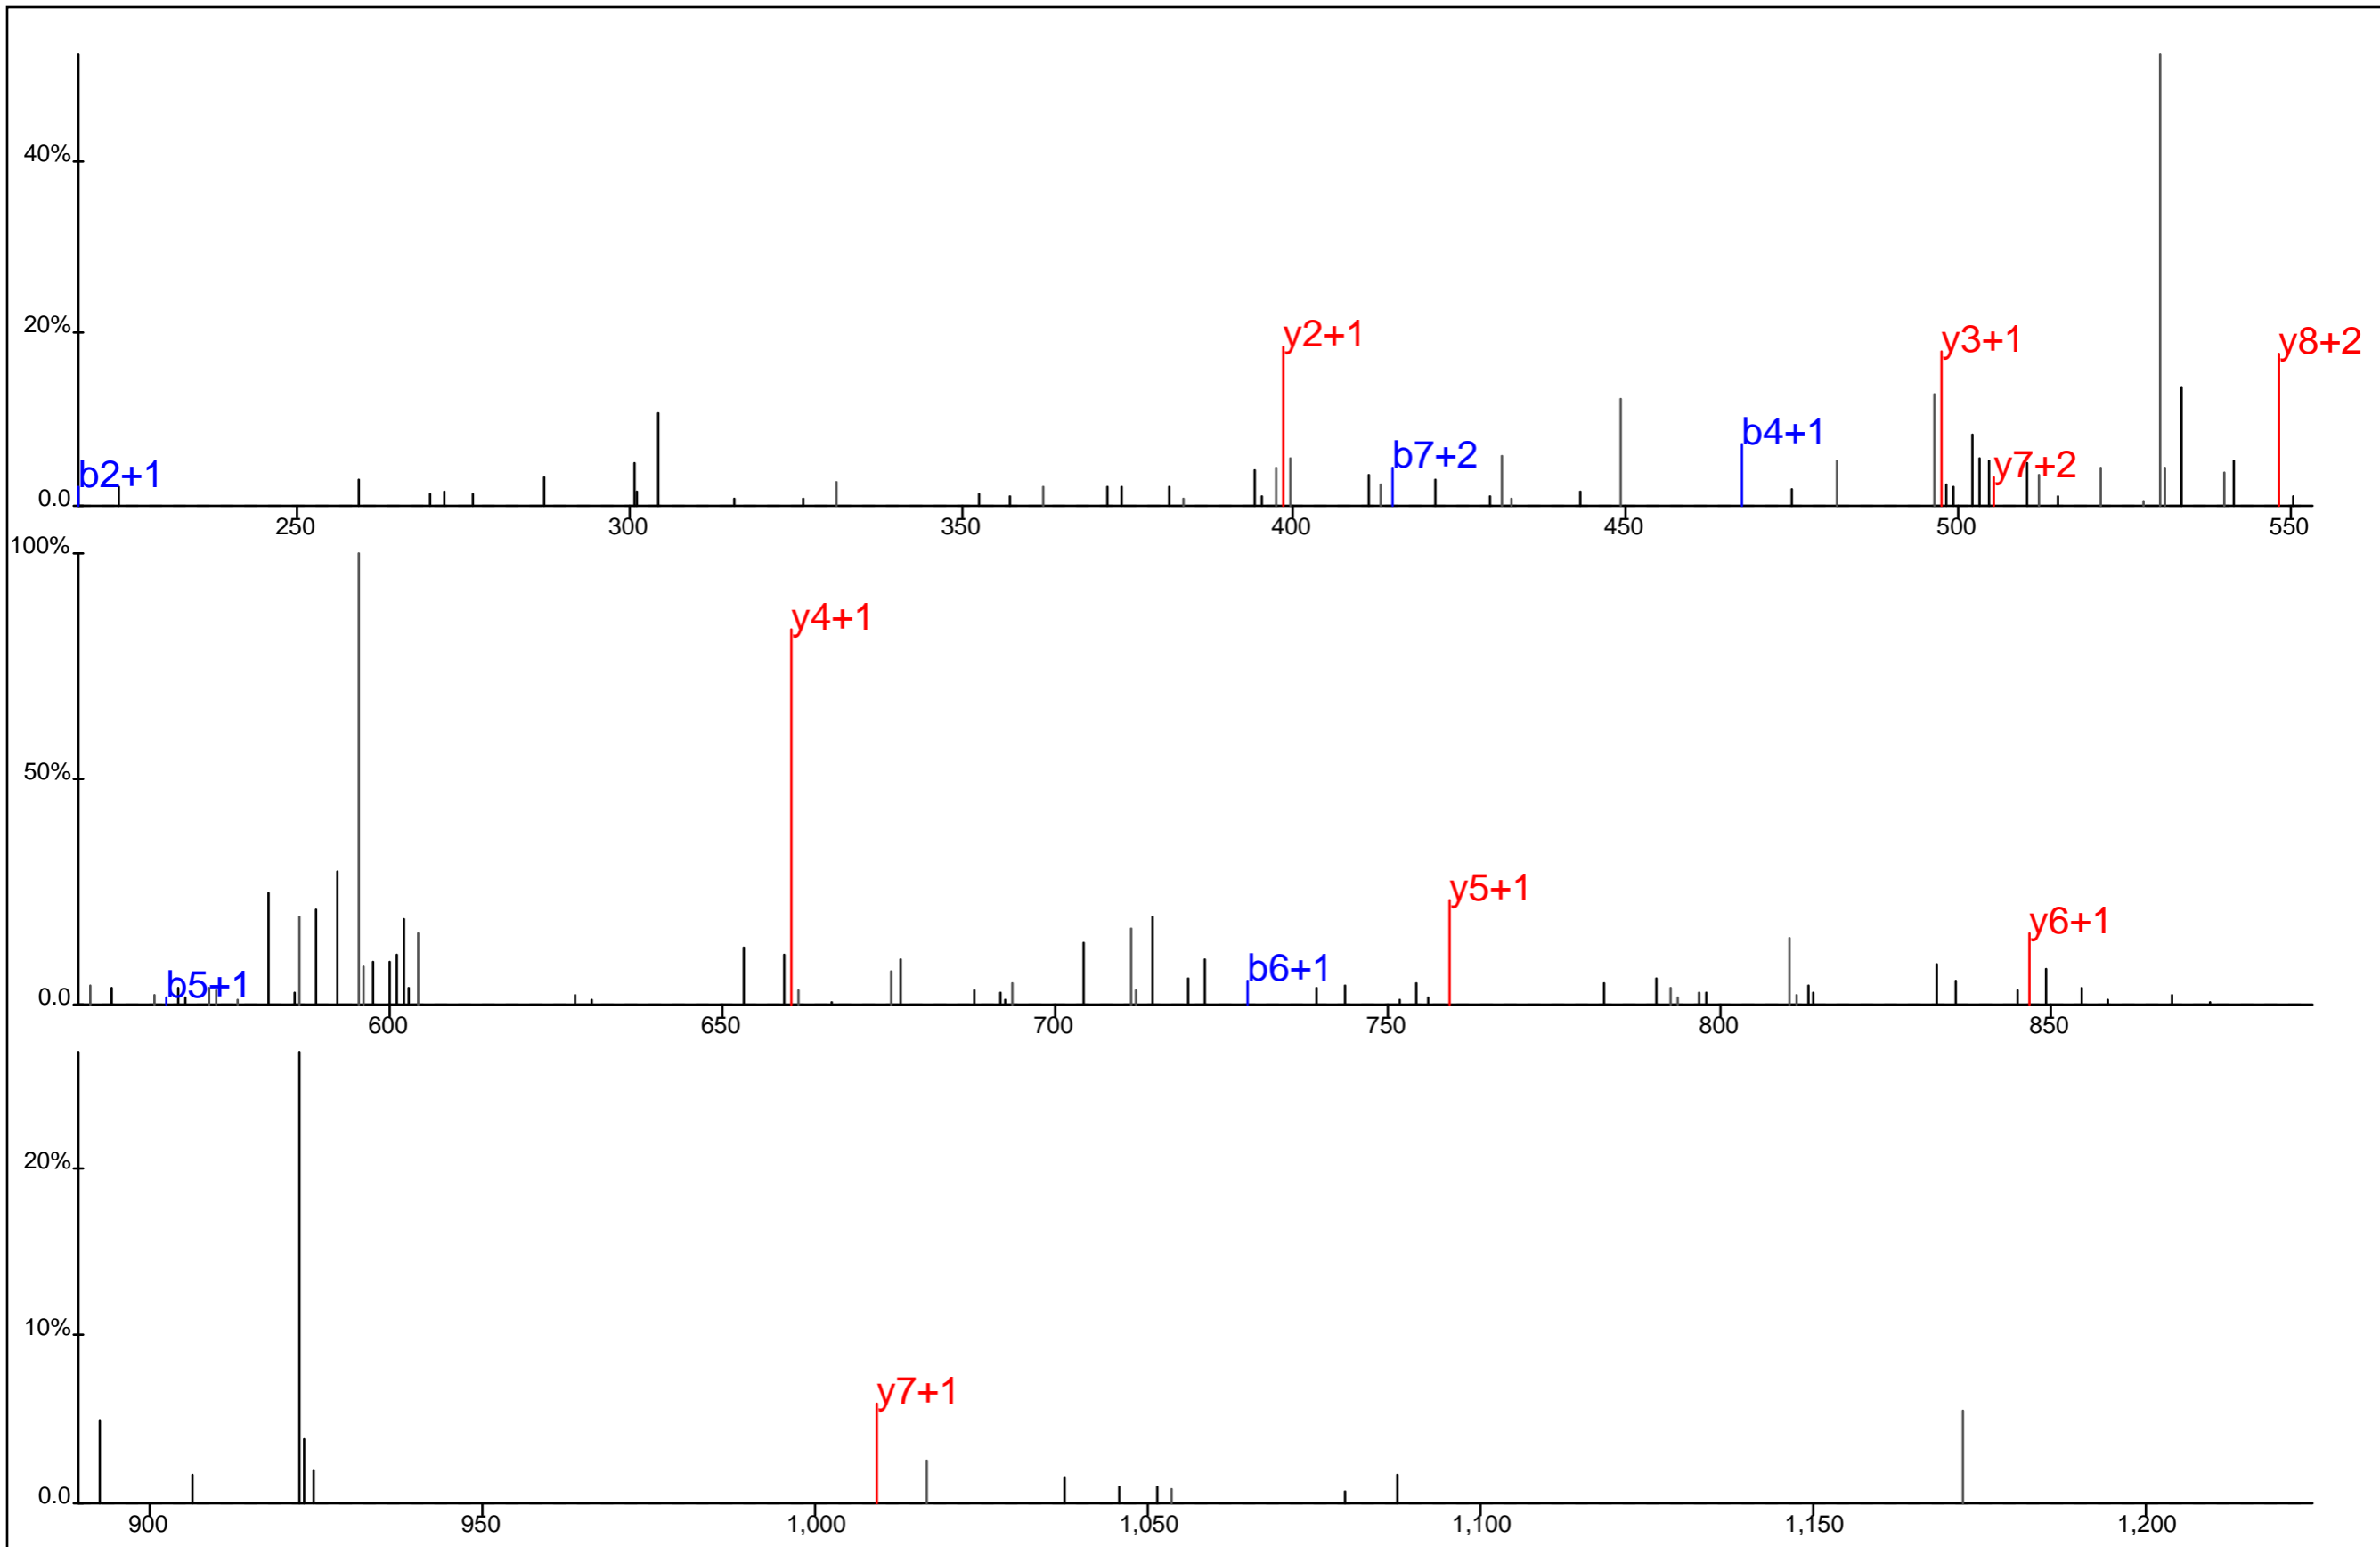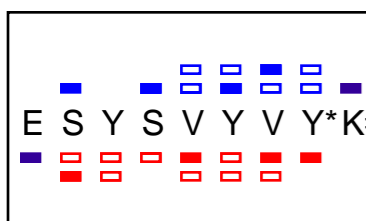

Protein Name: Histone H2B  
 gi Accession: 1568557  
 Precursor Mass: 613.2651+2  
 Delta Mass: 3.086 ppm  
 XCorr: 27.73

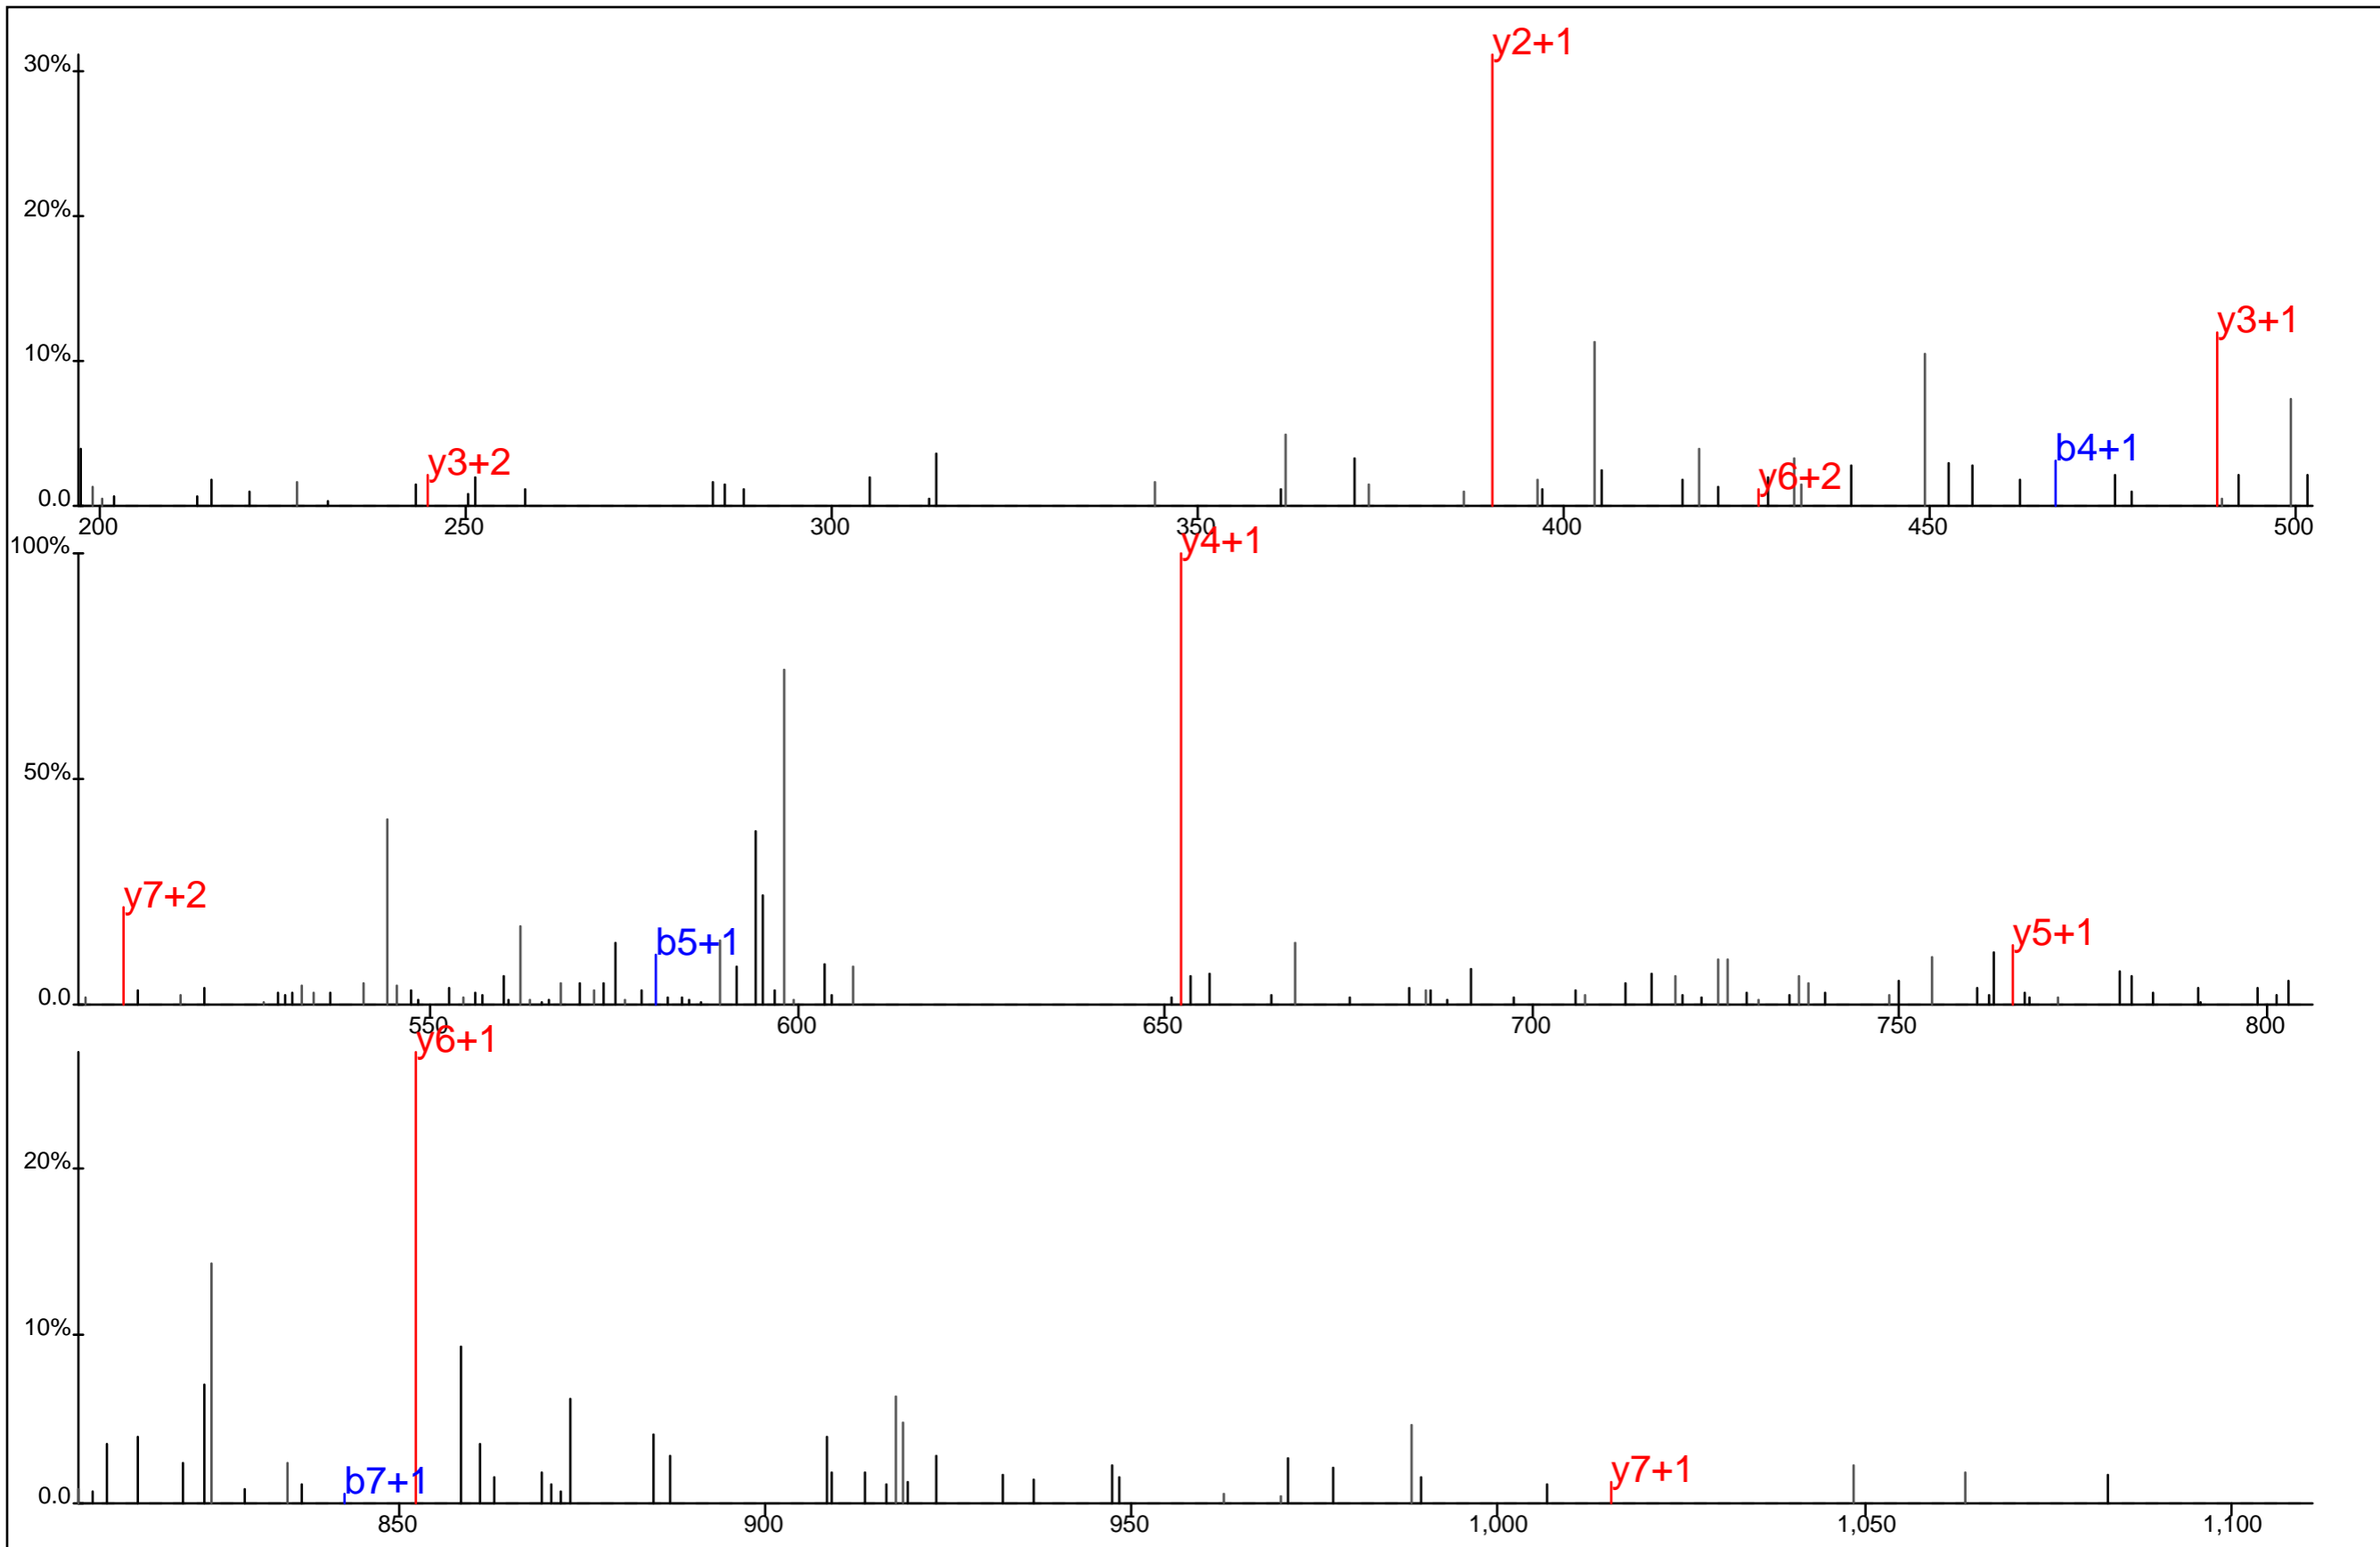

|   |   |   |   |   |   |   |    |   |
|---|---|---|---|---|---|---|----|---|
| E | S | Y | S | I | Y | V | Y* | K |
|   |   | ■ | ■ | ■ | ■ | ■ | ■  | ■ |
| □ | □ | □ | □ | □ | □ | □ | □  | □ |

Protein Name: Histone H2B  
 gi Accession: 31979  
 Precursor Mass: 616.2703+2  
 Delta Mass: 4.091 ppm  
 XCorr: 26.68

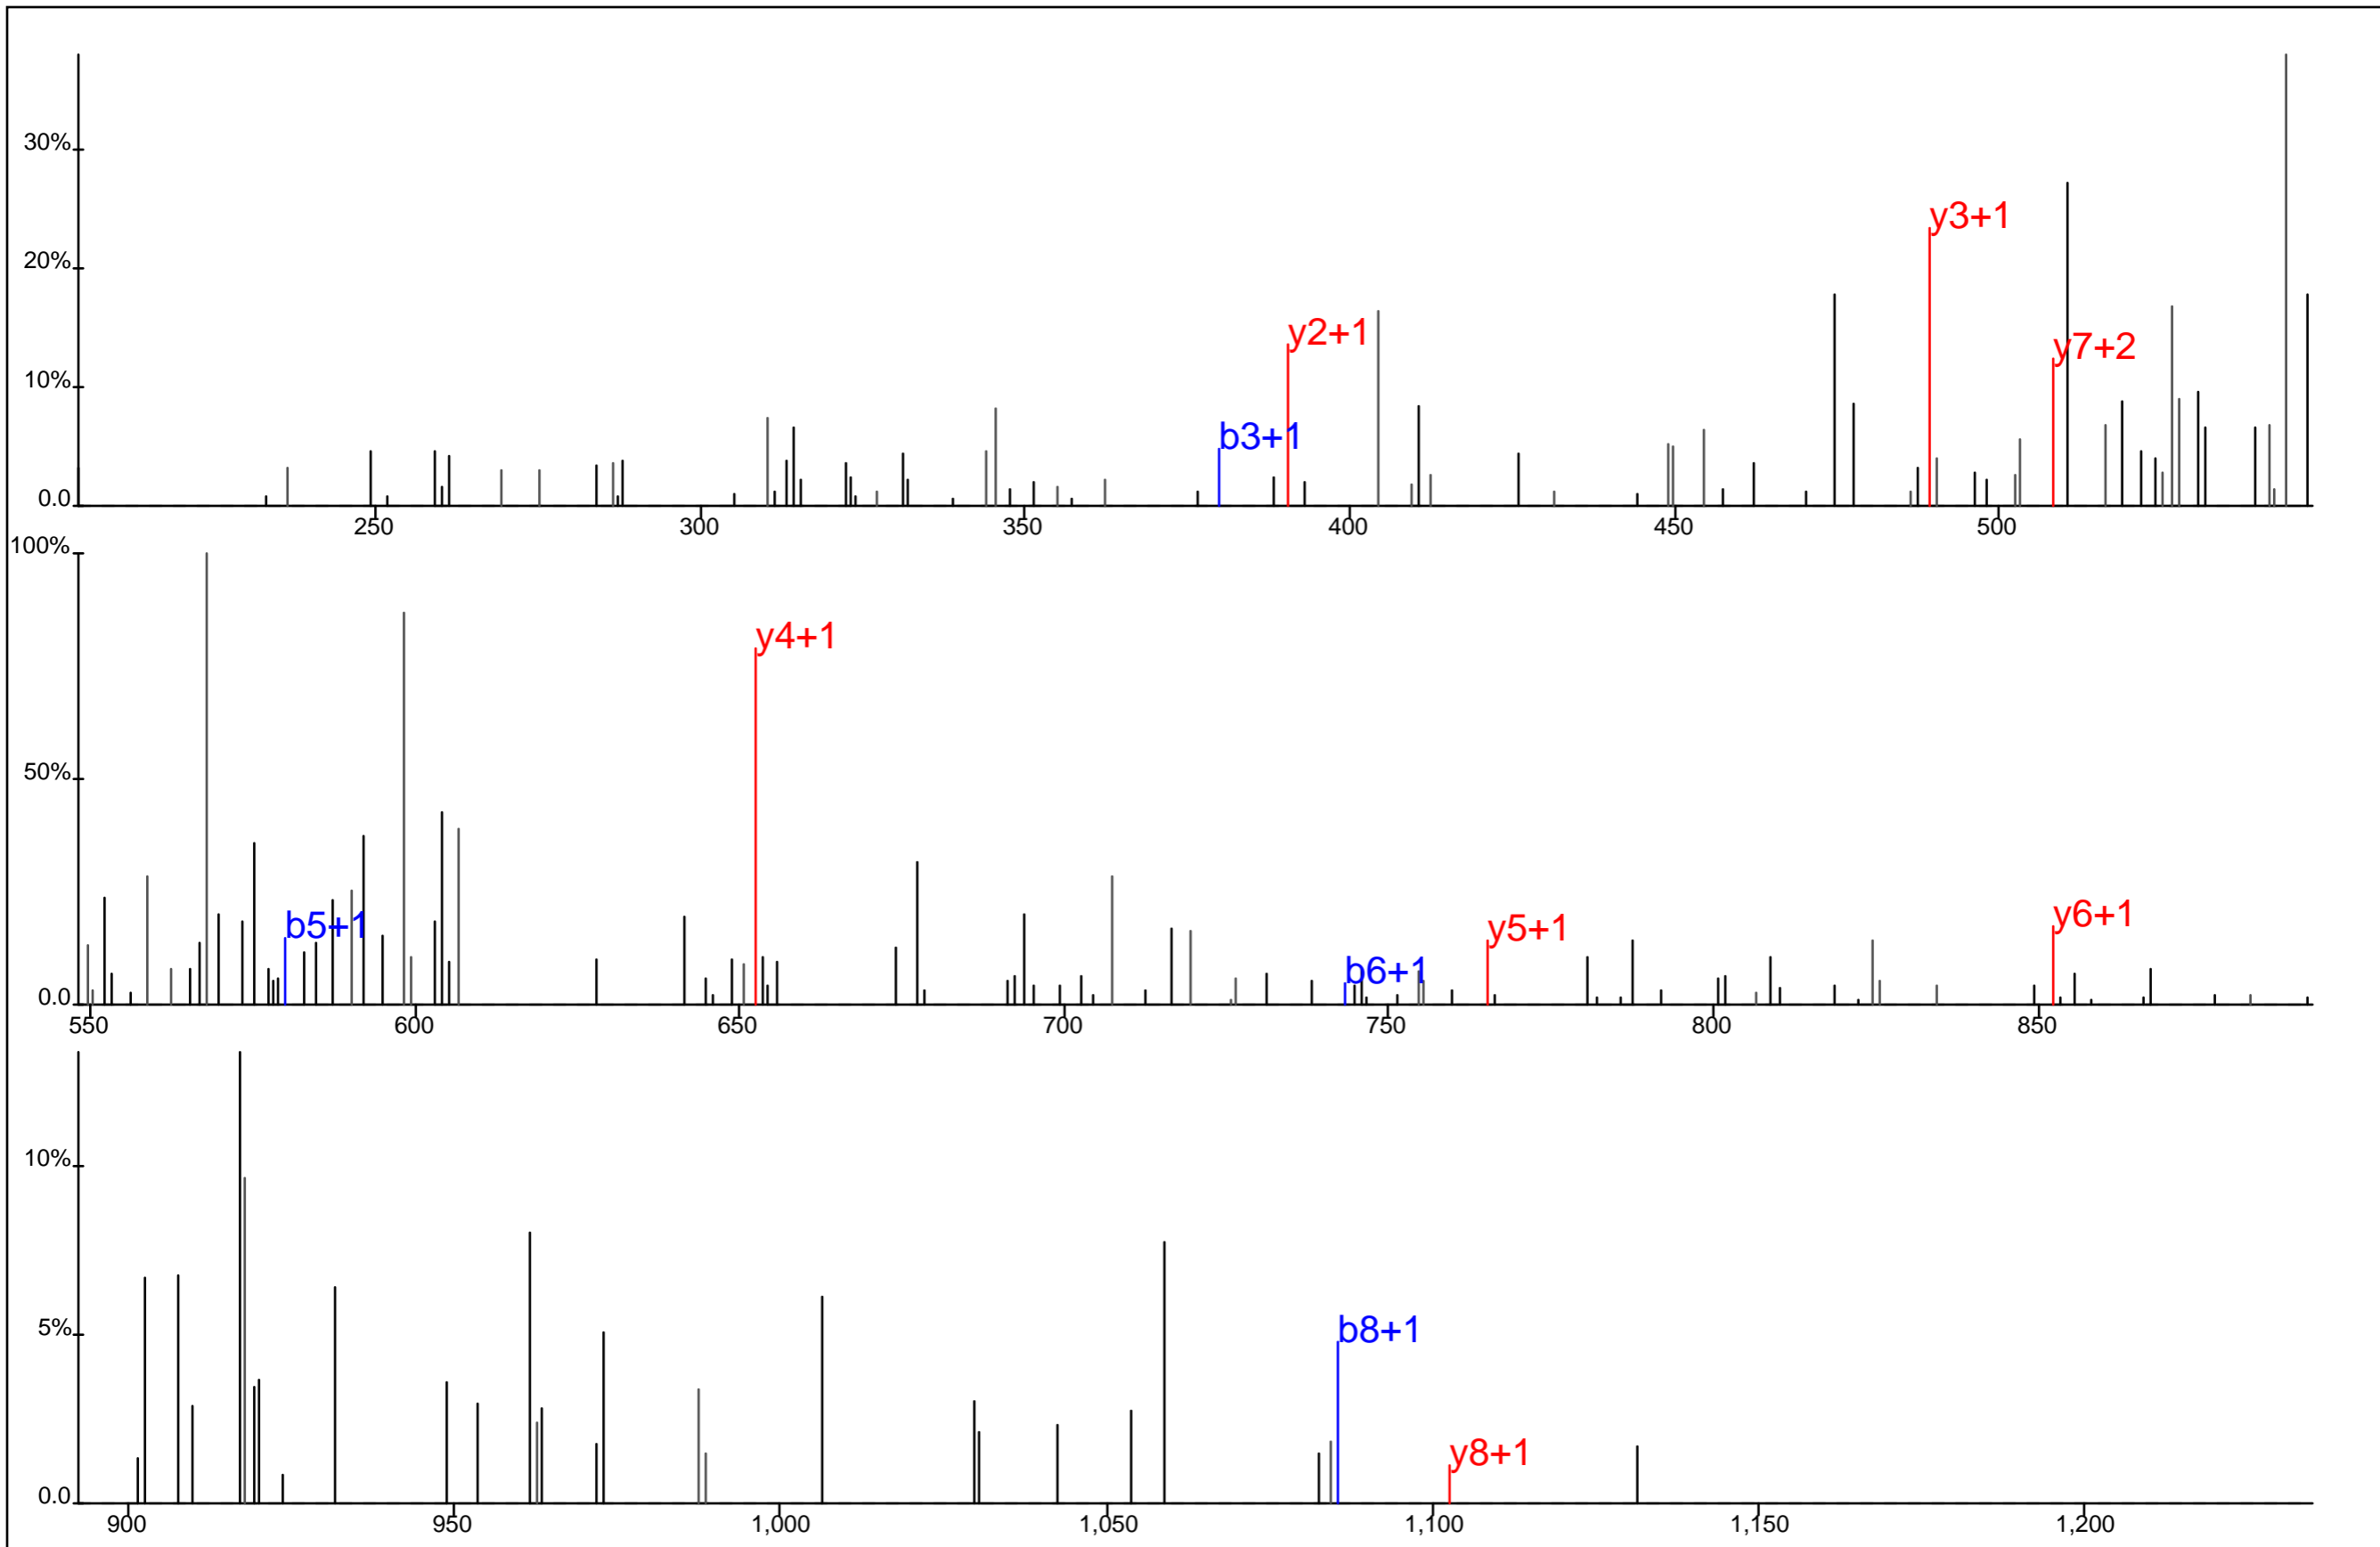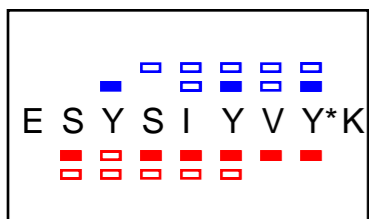

Protein Name: Histone H2B  
 gi Accession: 31979  
 Precursor Mass: 616.2706+2  
 Delta Mass: 4.684 ppm  
 XCorr: 12.23

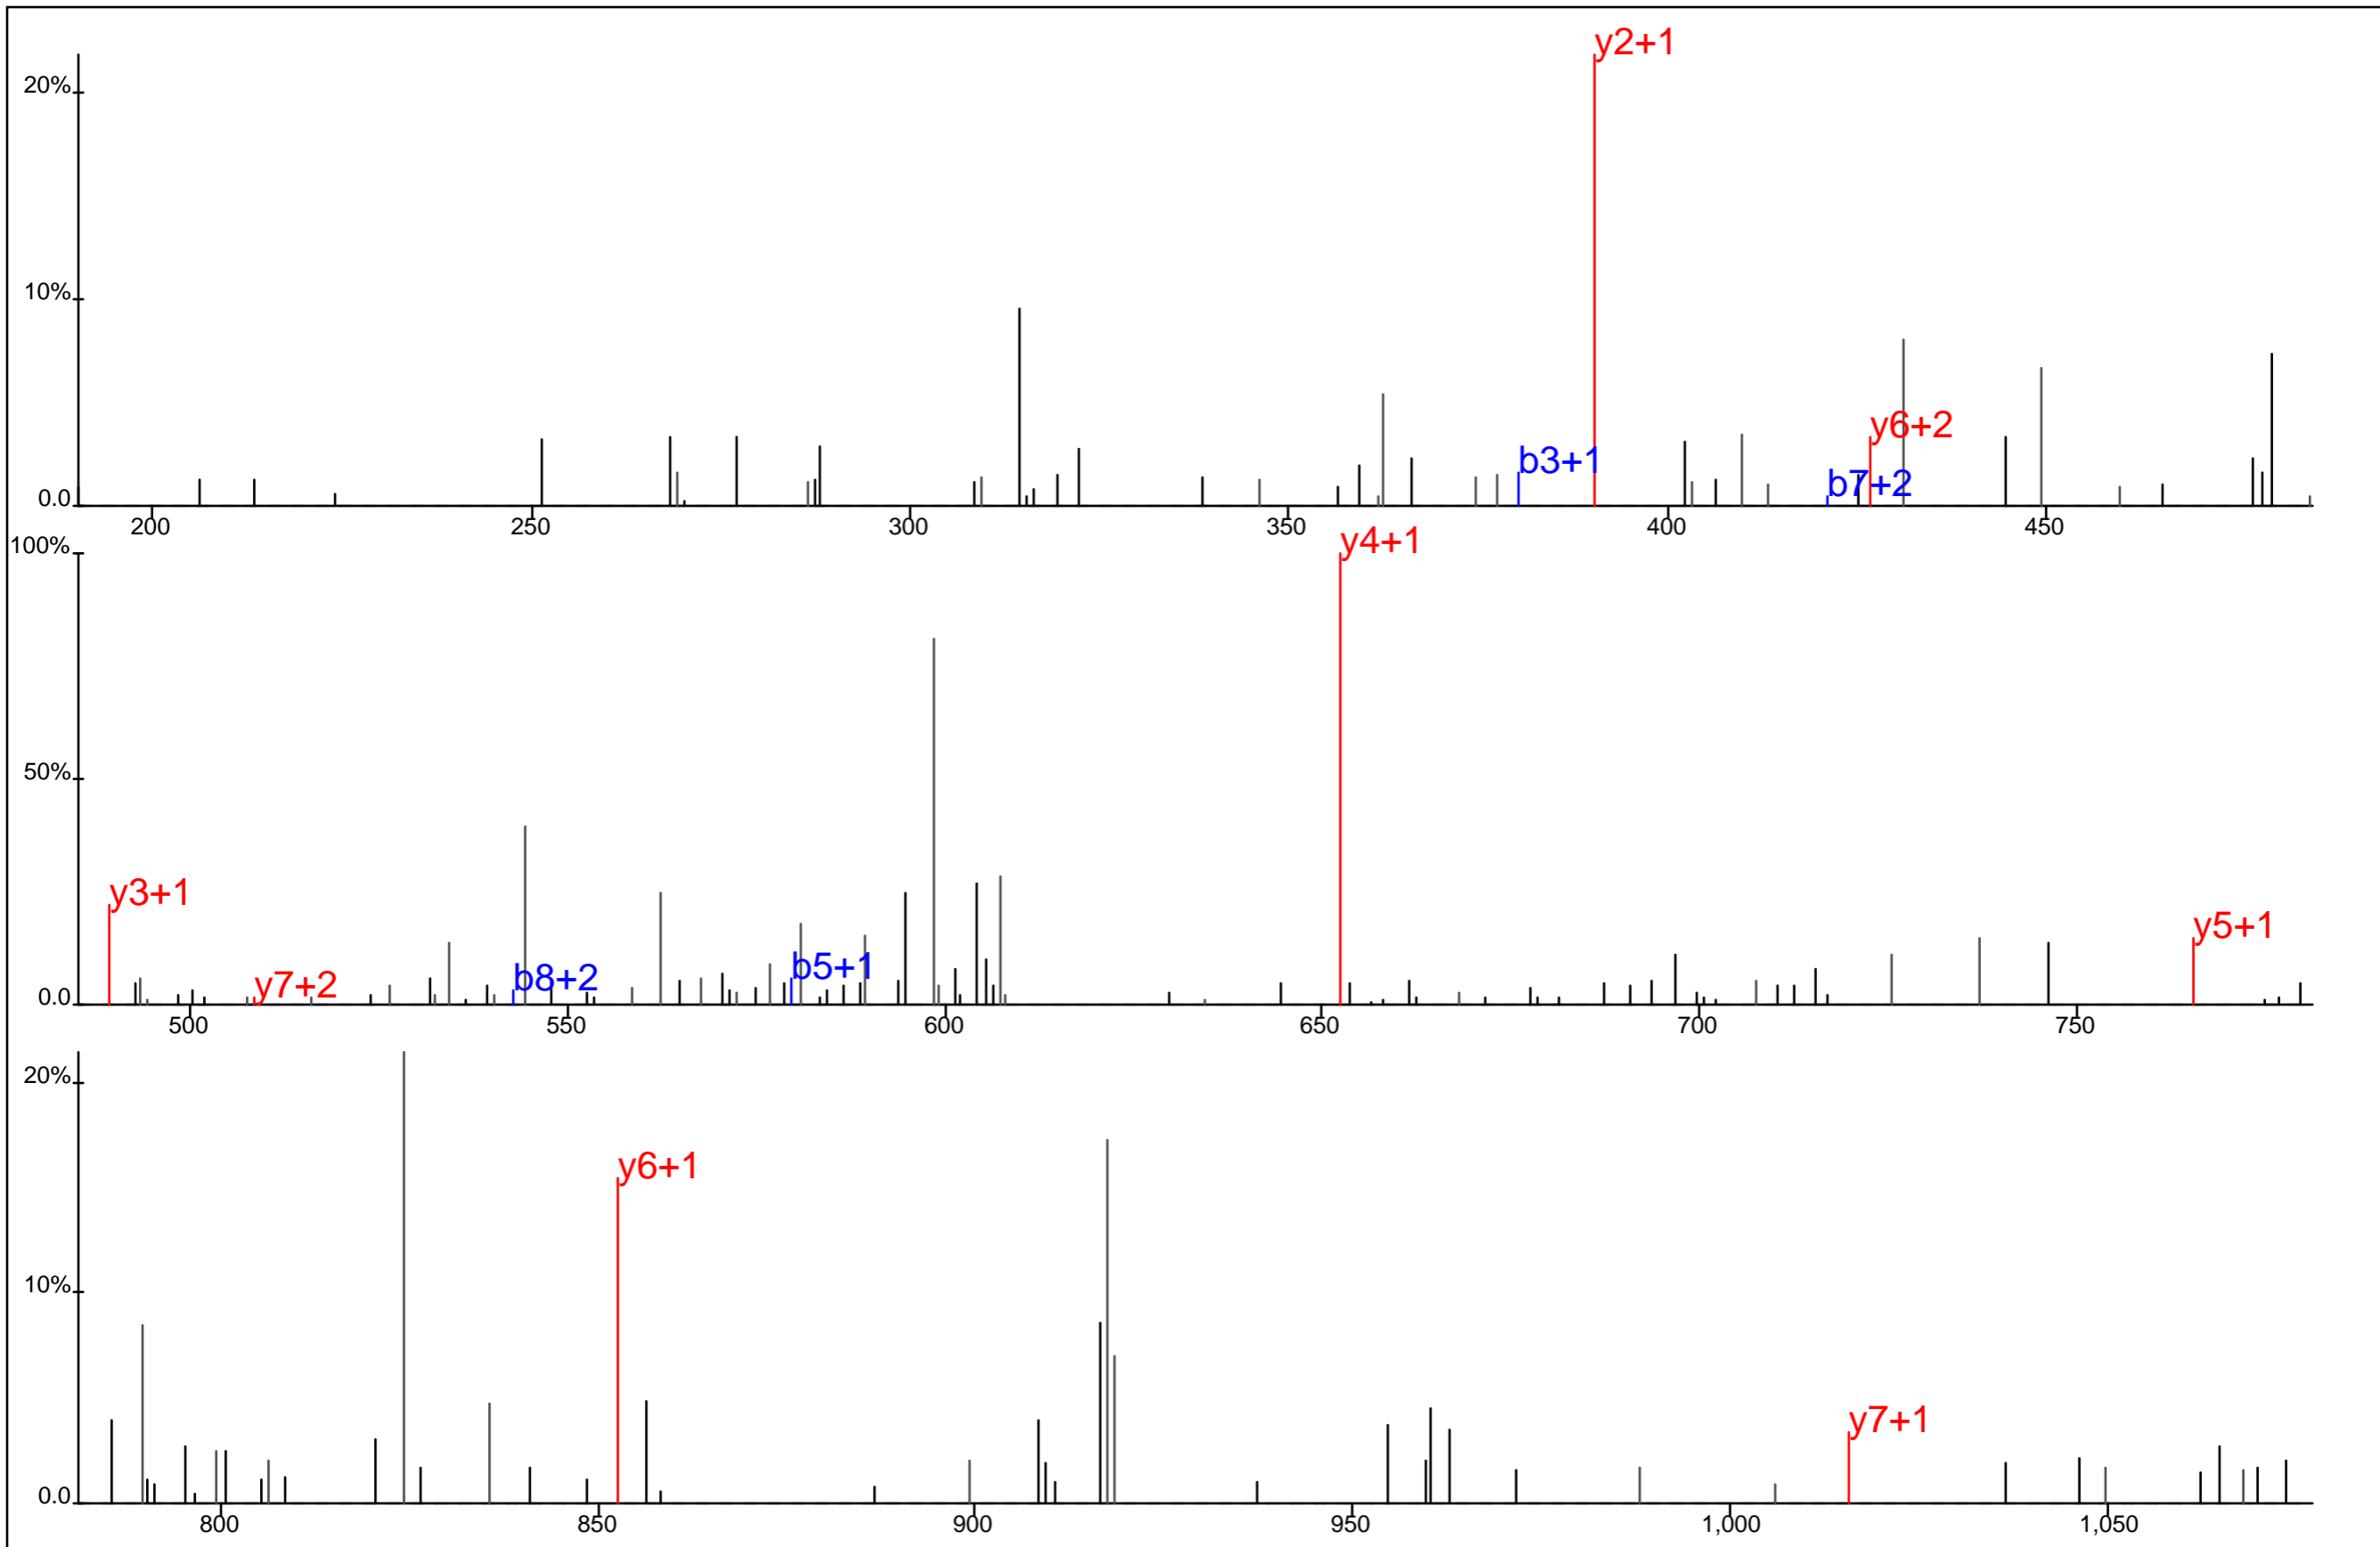

E S Y S I Y V Y\* K

Protein Name: Histone H2B  
 gi Accession: 31979  
 Precursor Mass: 616.2724+2  
 Delta Mass: 7.558 ppm  
 XCorr: 24.18

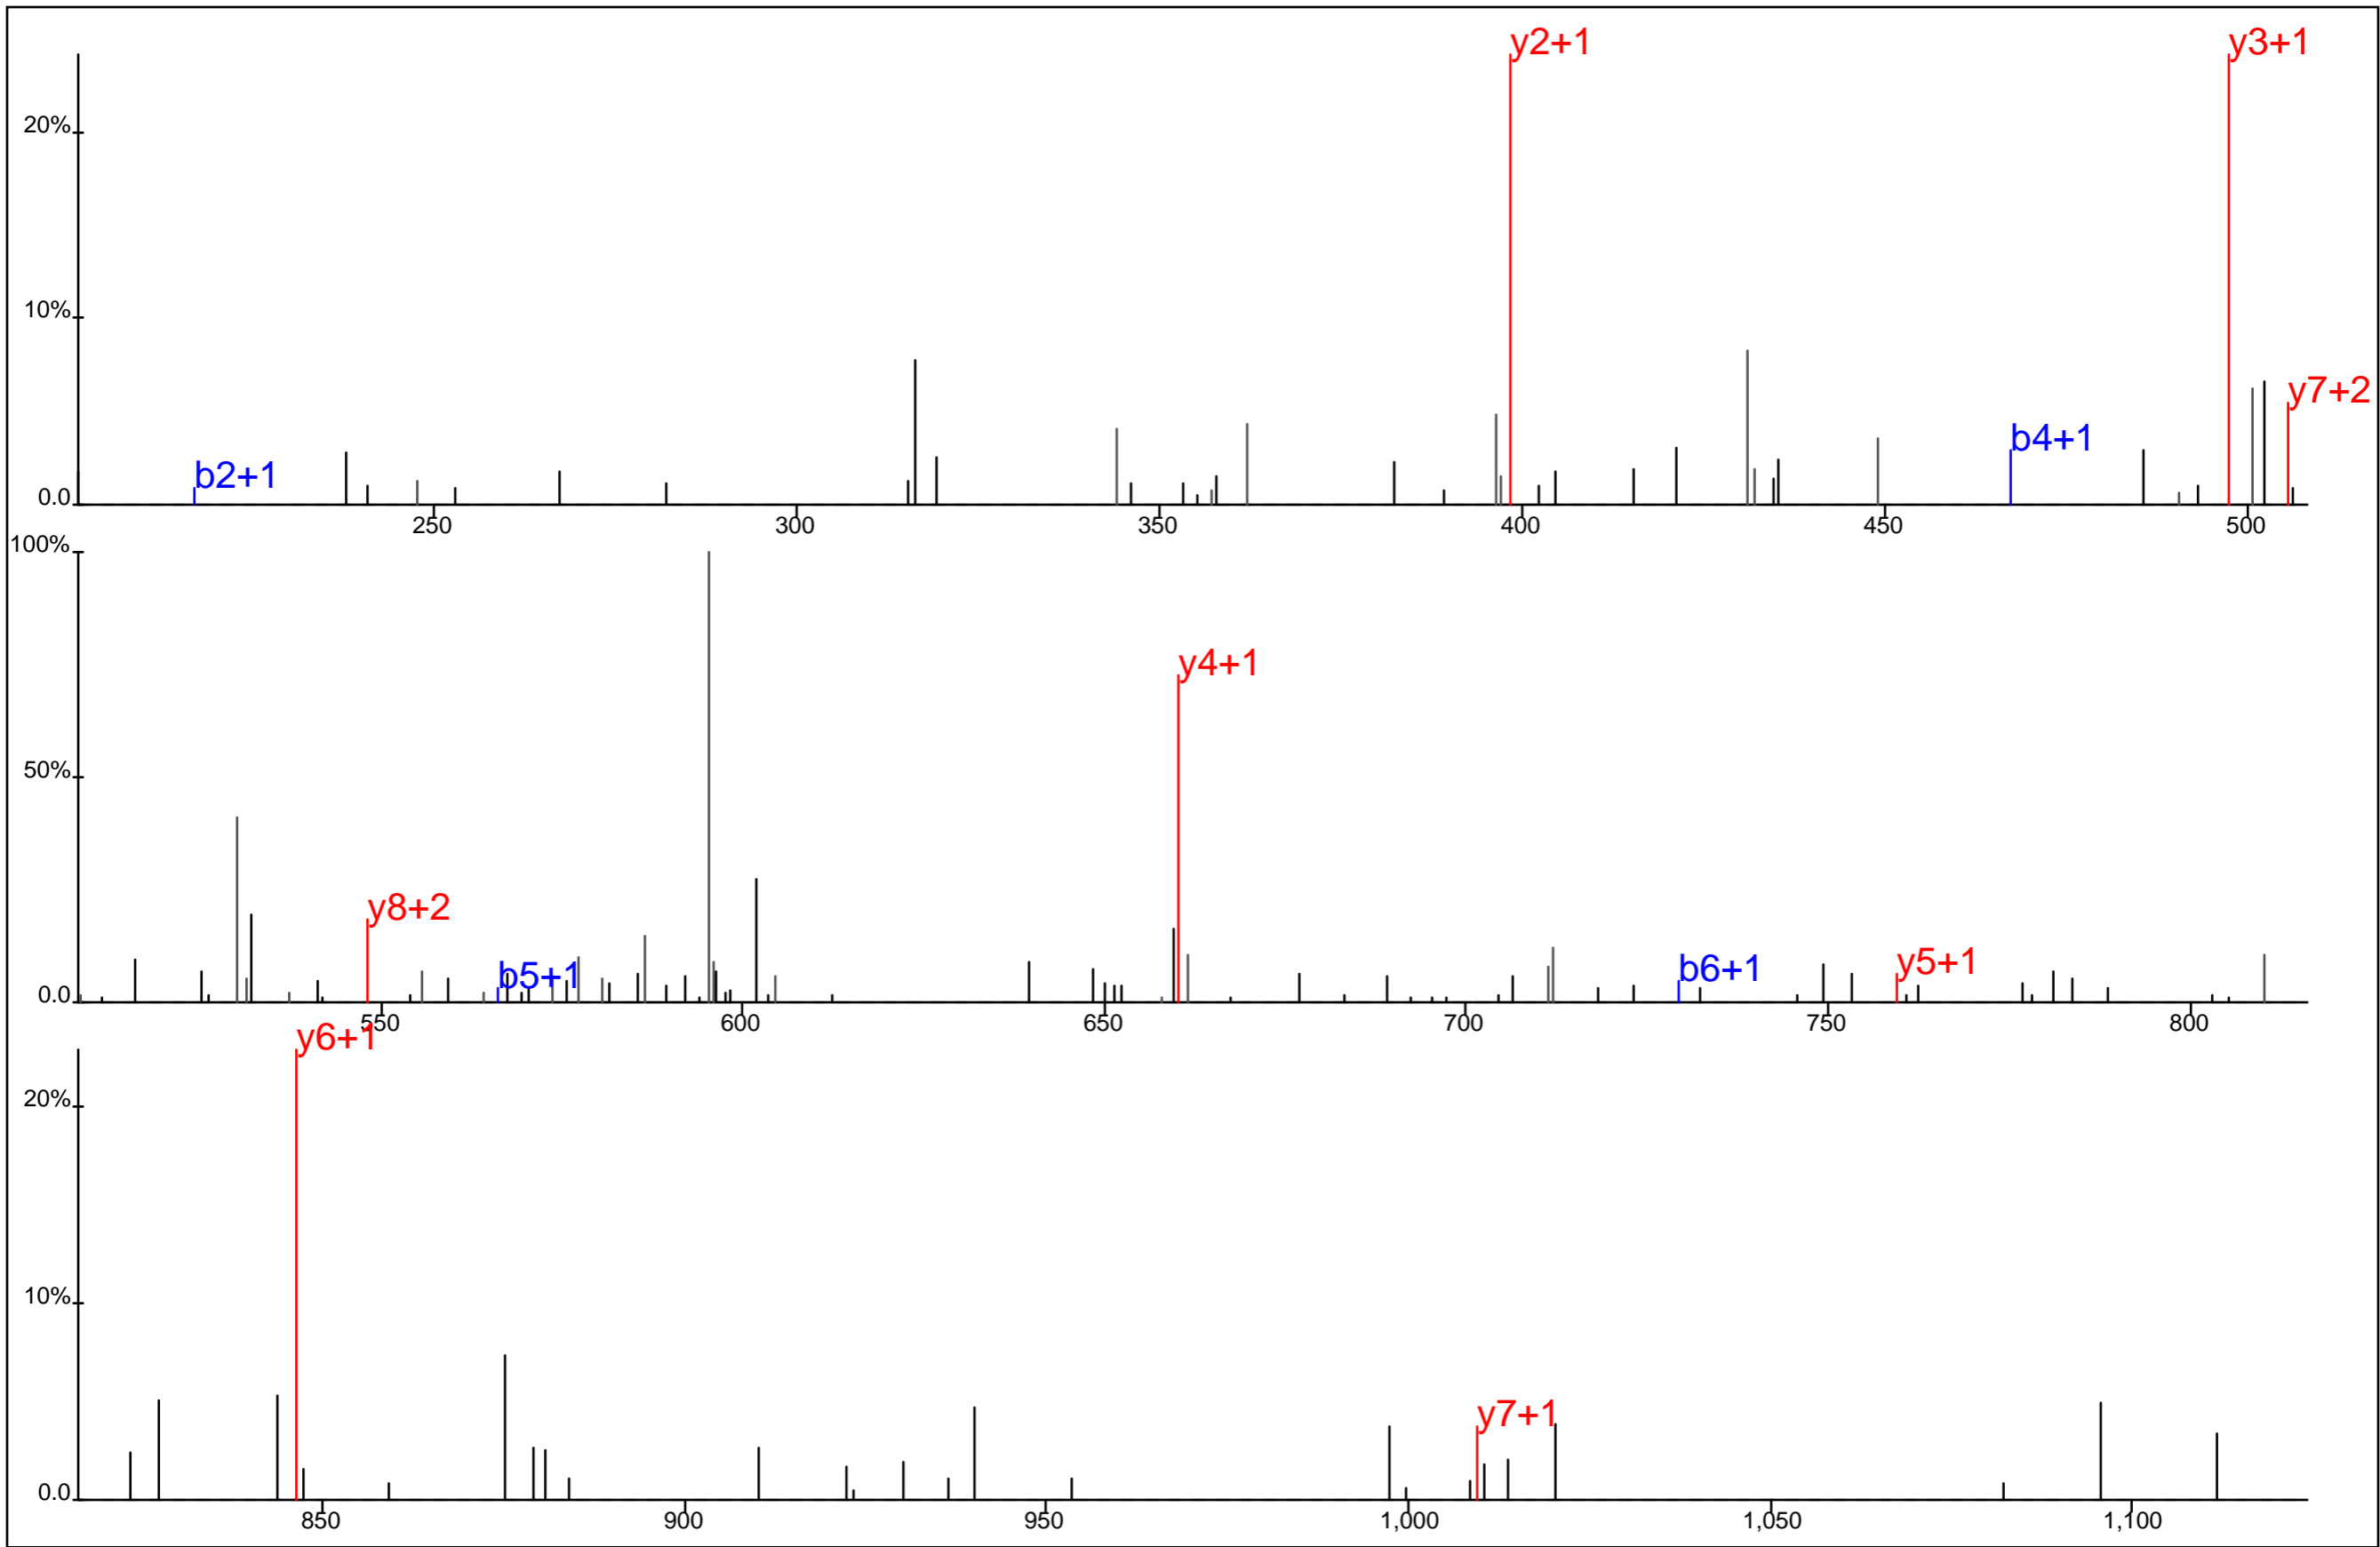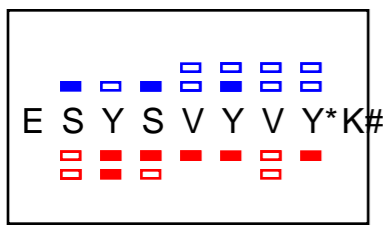

Protein Name: Histone H2B  
 gi Accession: 1568557  
 Precursor Mass: 613.2678+2  
 Delta Mass: 1.296 ppm  
 XCorr: 17.28



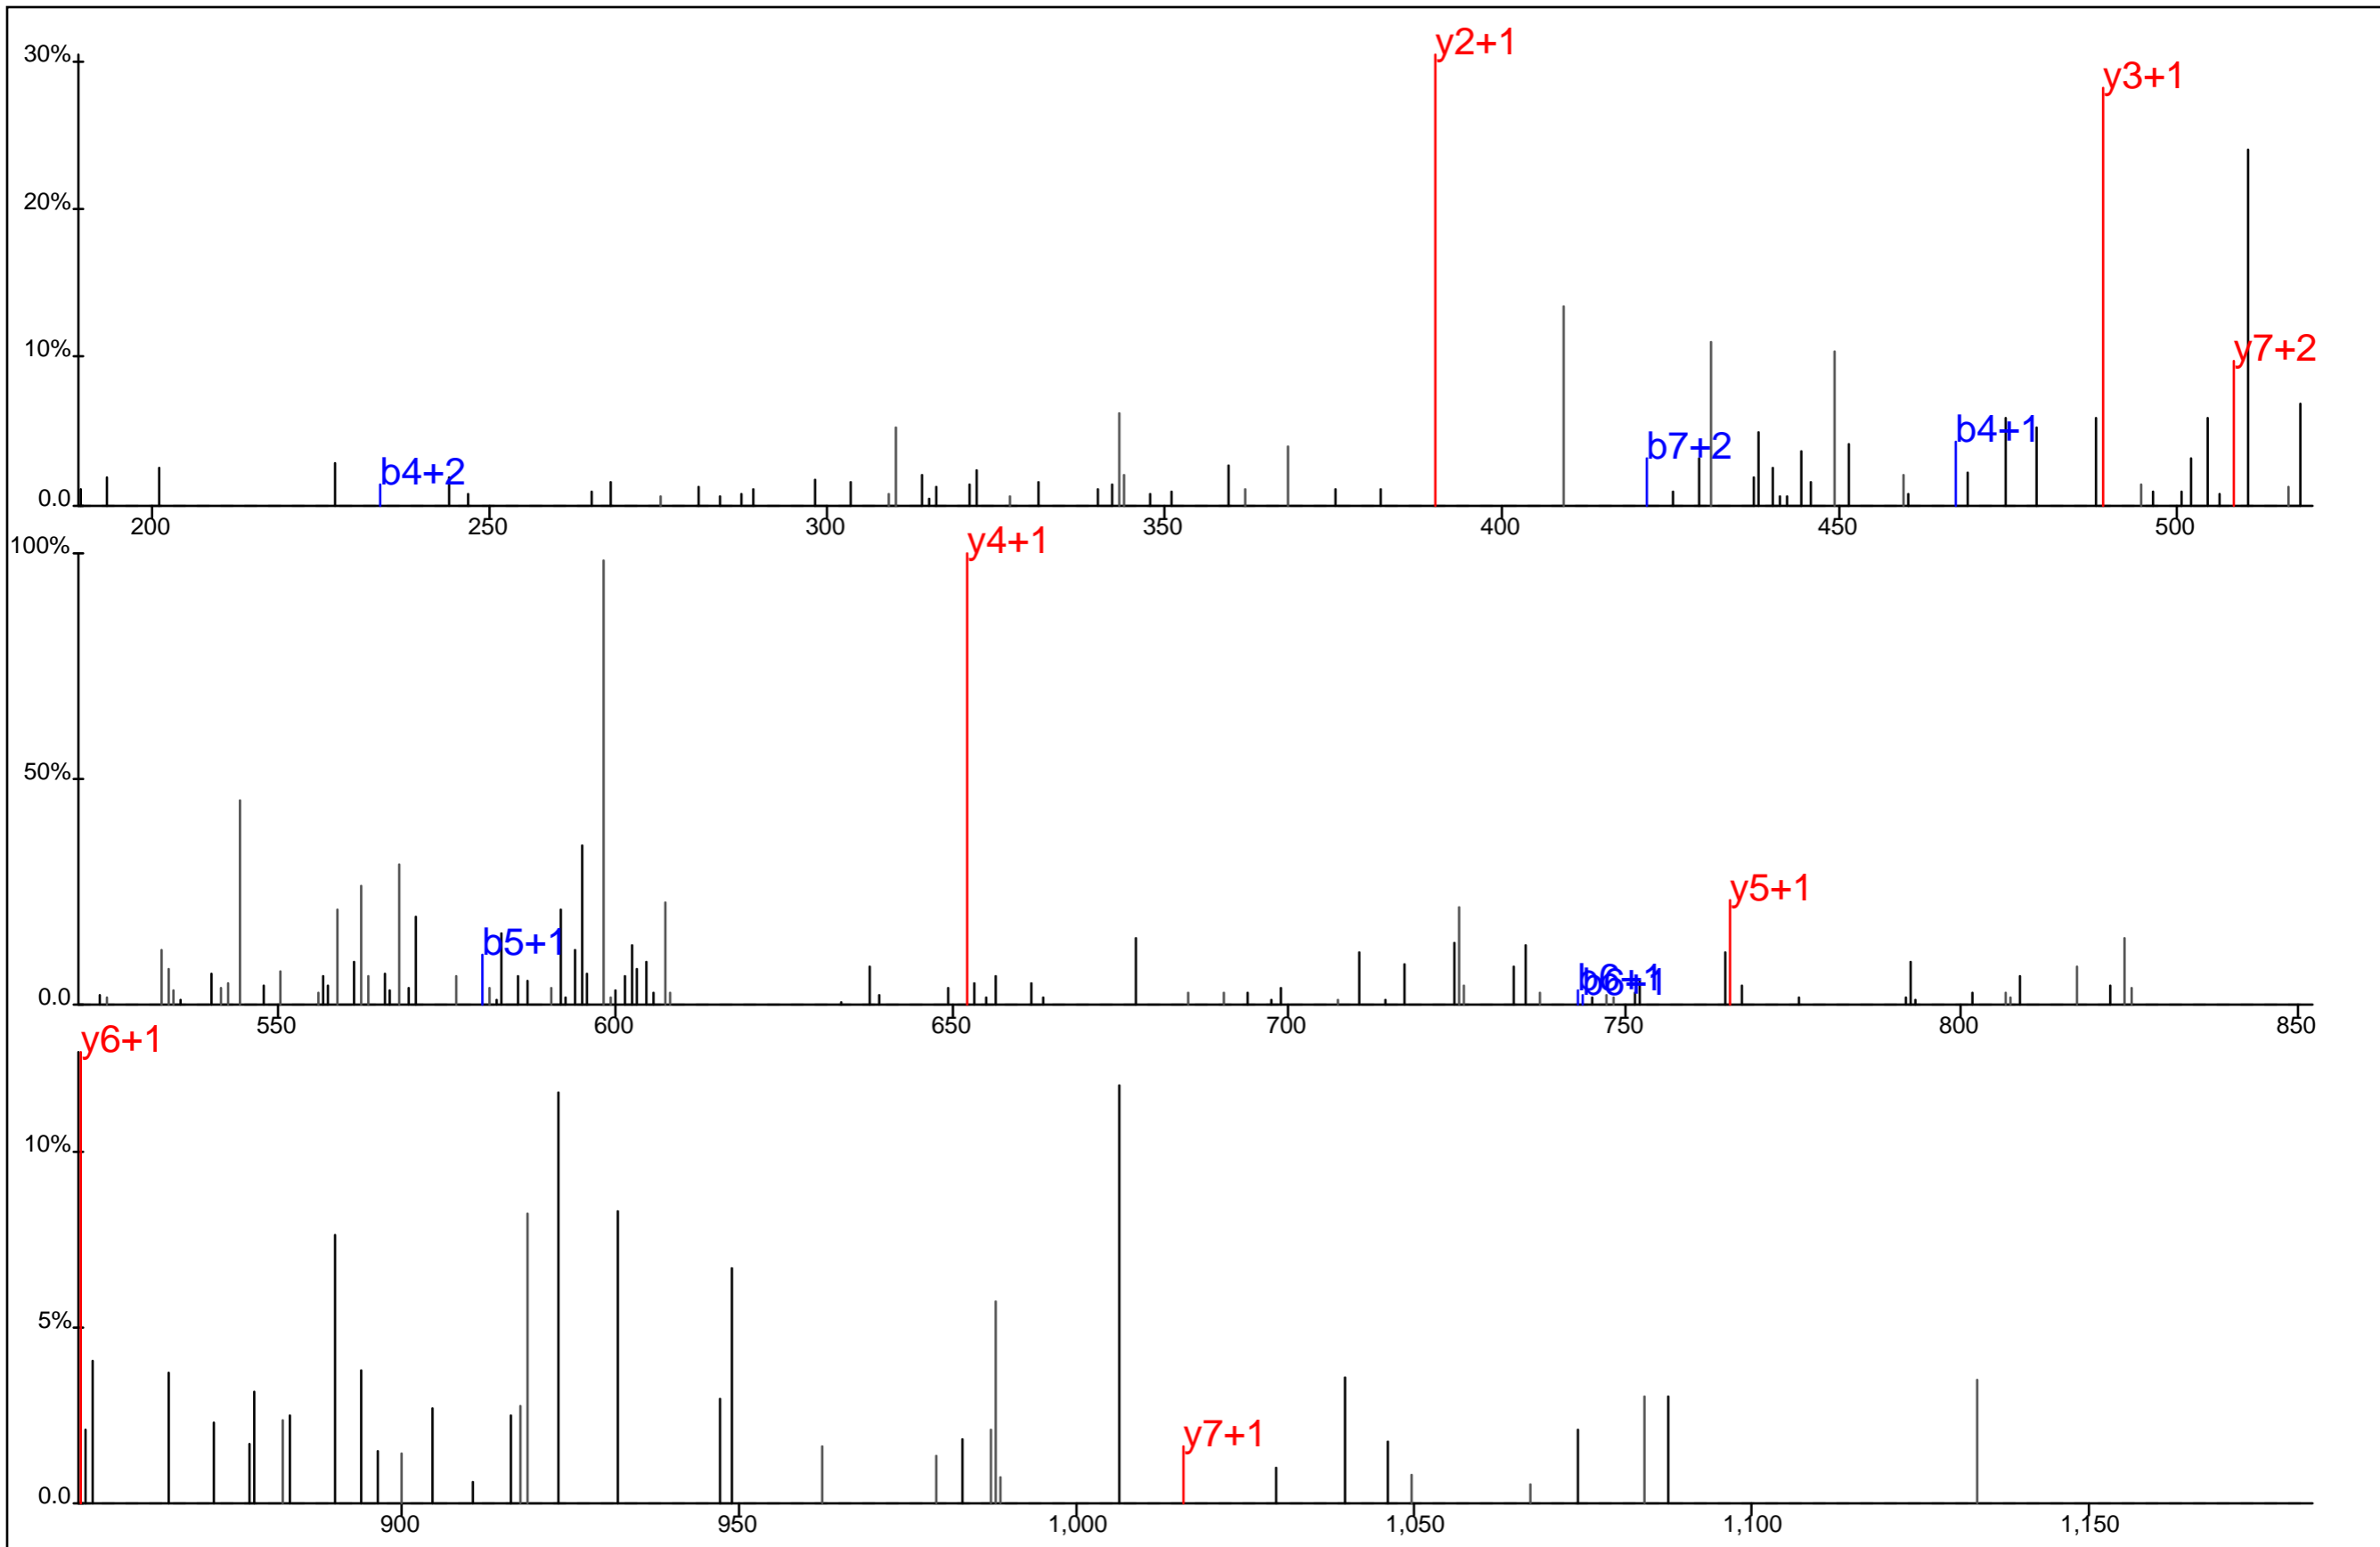


  
 E S Y S I Y V Y\*K

Protein Name: Histone H2B  
 gi Accession: 31979  
 Precursor Mass: 616.2685+2  
 Delta Mass: 1.216 ppm  
 XCorr: 12.27

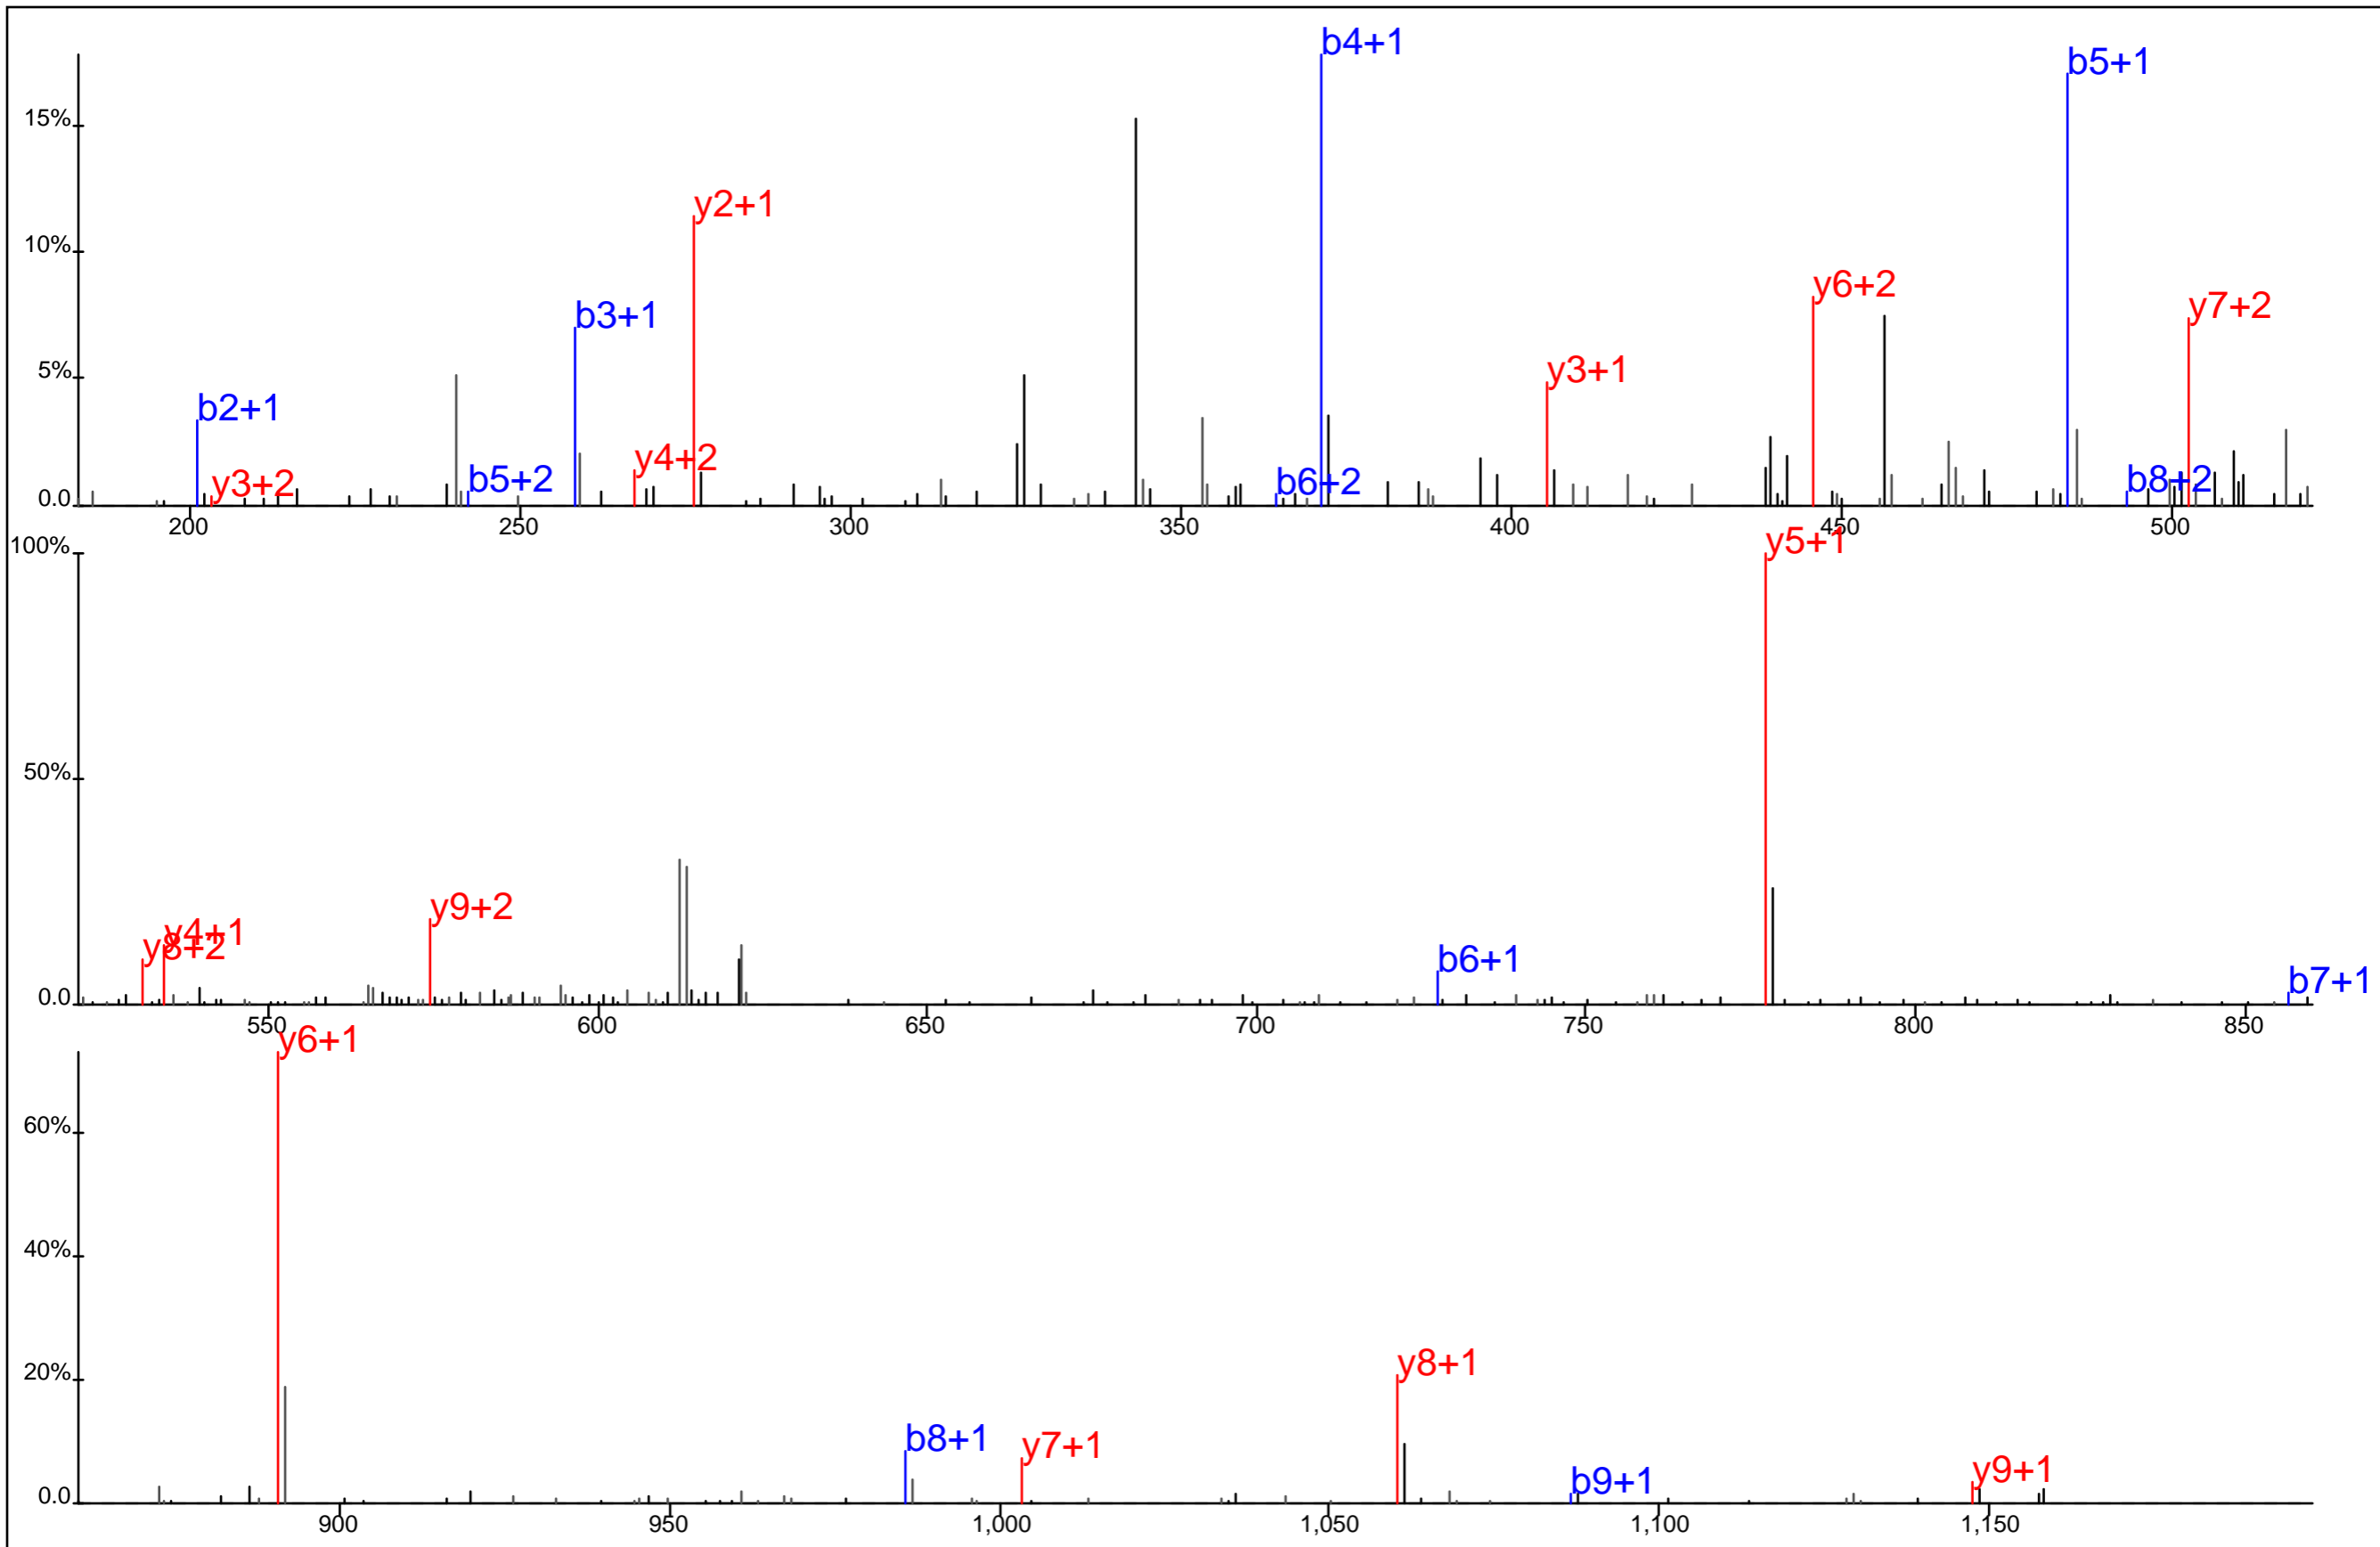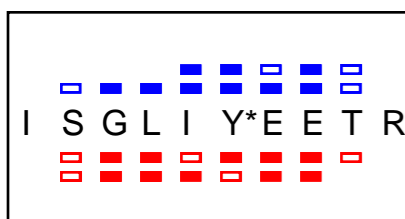

Protein Name: Histone H4  
 gi Accession: 4504301  
 Precursor Mass: 630.7993+2  
 Delta Mass: 3.259 ppm  
 XCorr: 51.47

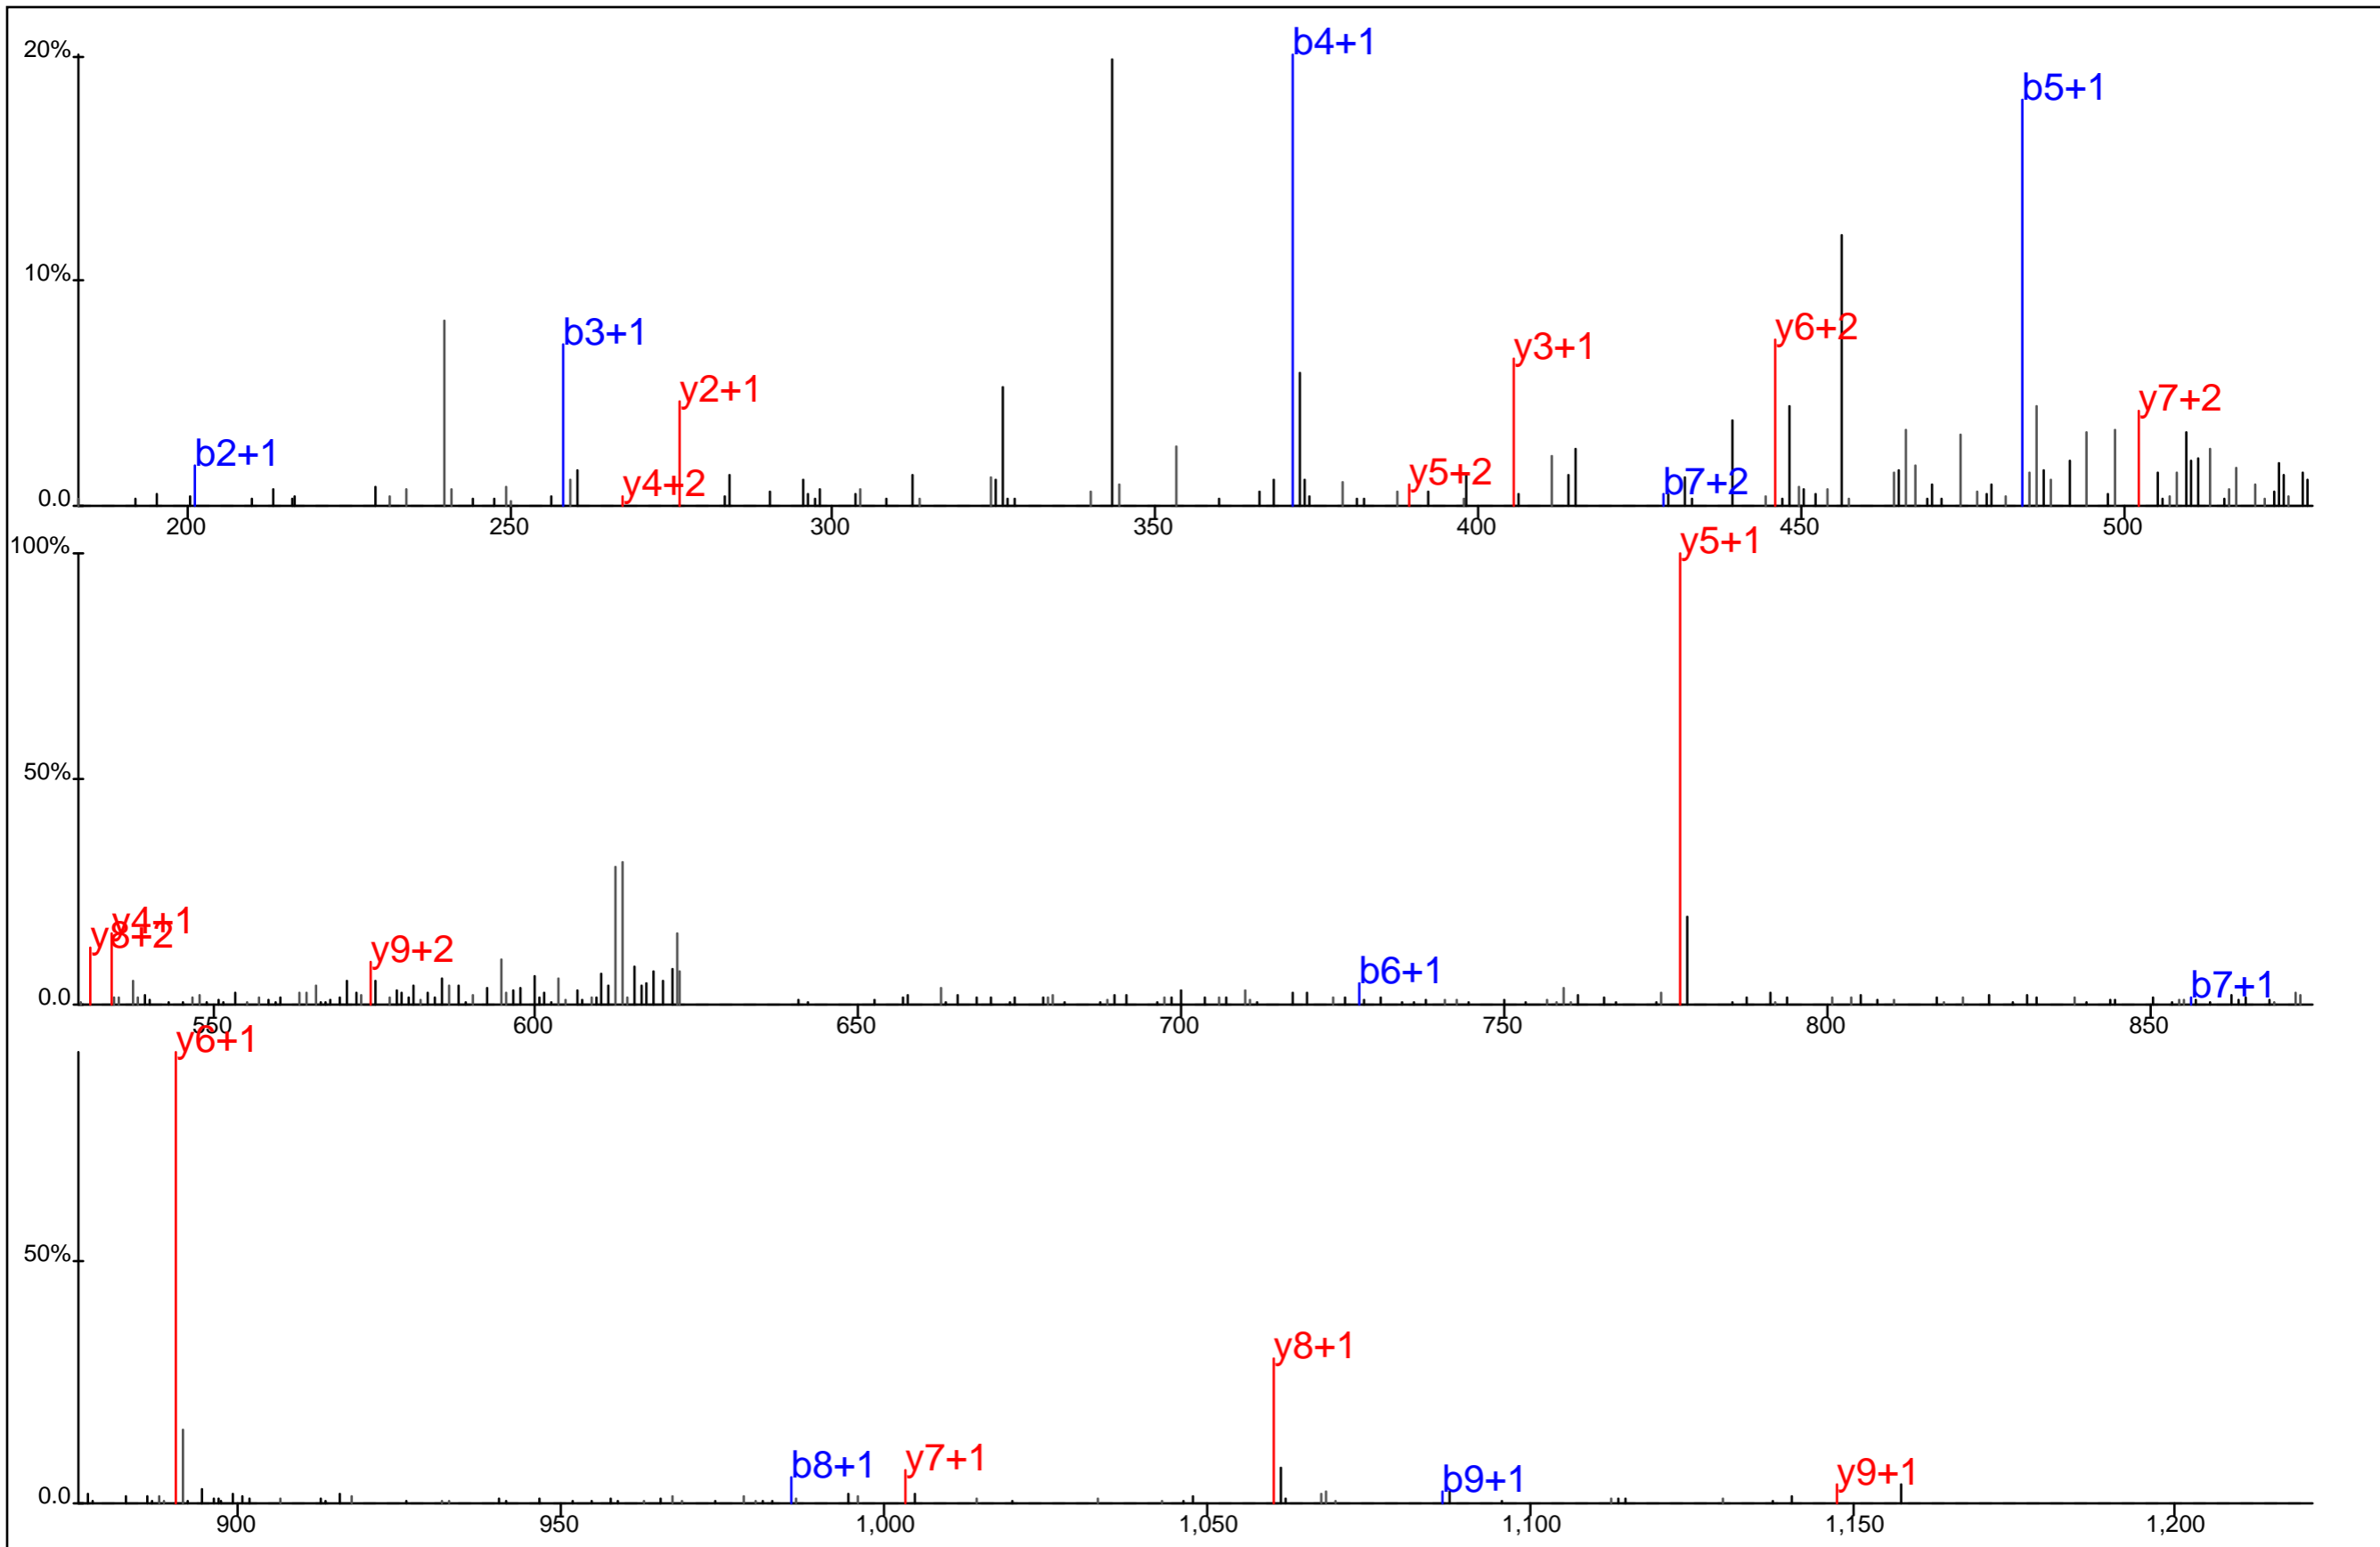

▢ ▢ ▢ ▢ ▢ ▢ ▢ ▢  
▢ ▢ ▢ ▢ ▢ ▢ ▢ ▢  
**I S G L I Y\* E E T R**

Protein Name: Histone H4  
 gi Accession: 4504301  
 Precursor Mass: 630.7957+2  
 Delta Mass: 2.358 ppm  
 XCorr: 57.77

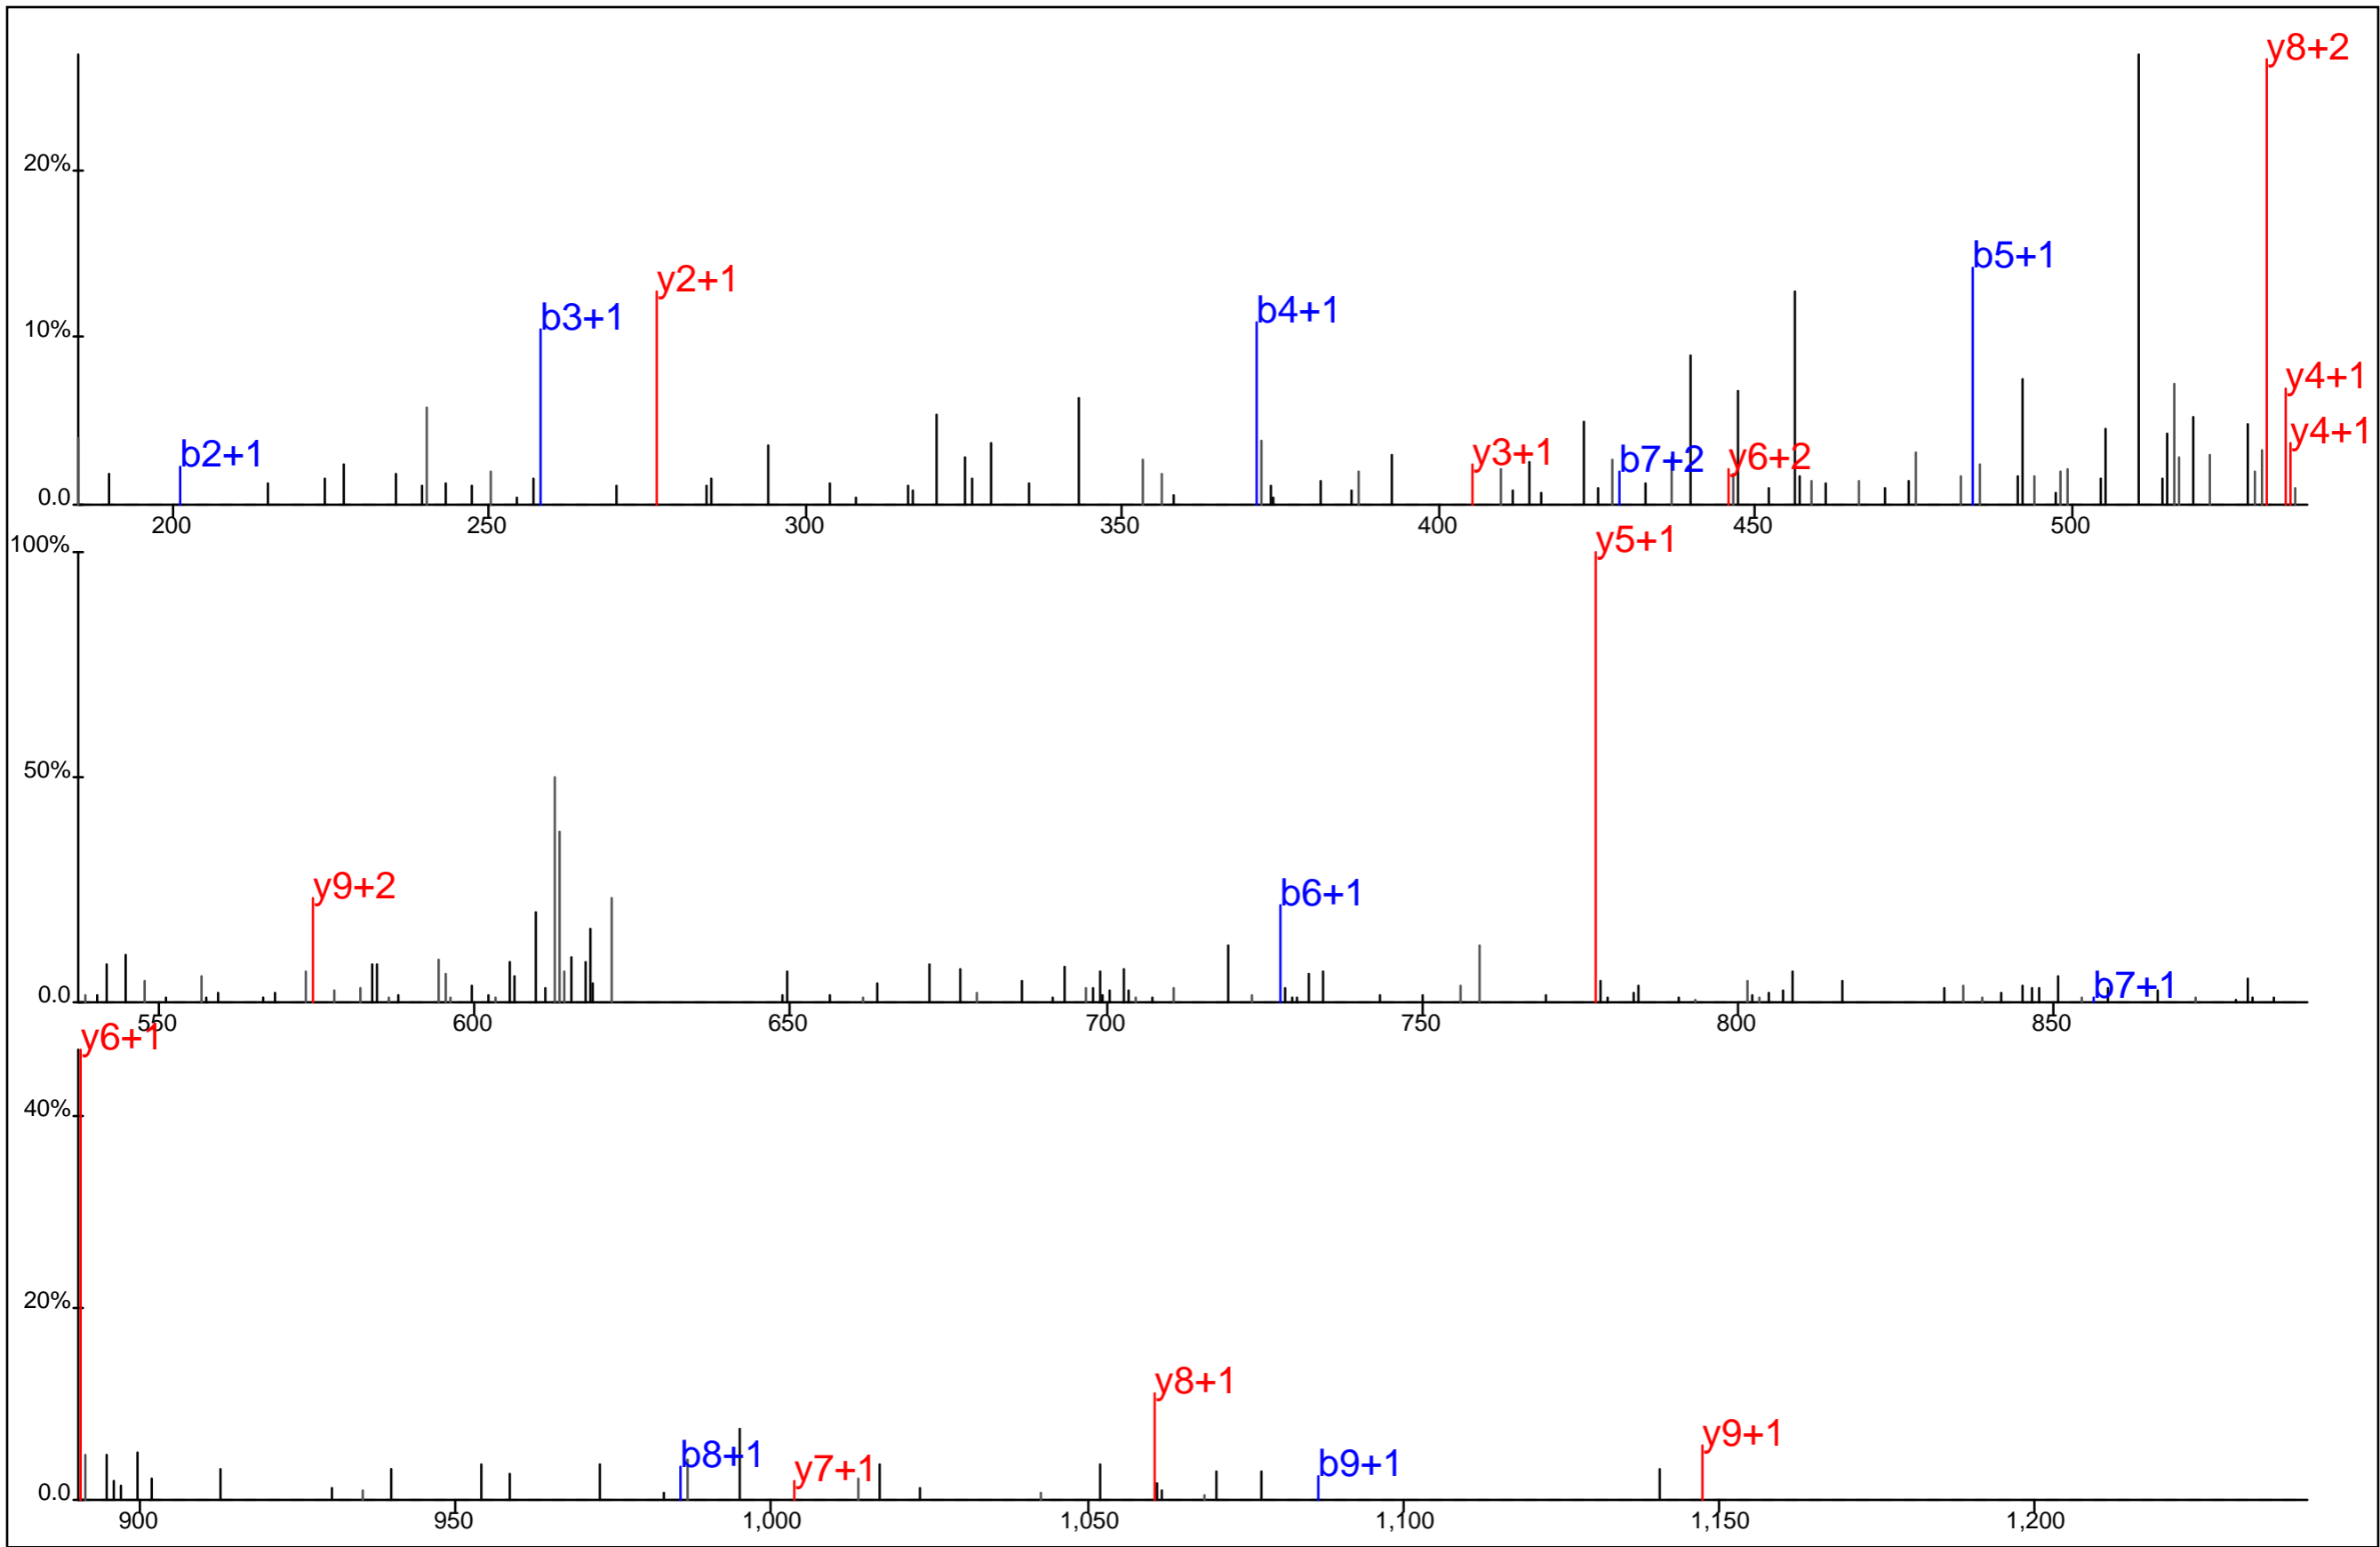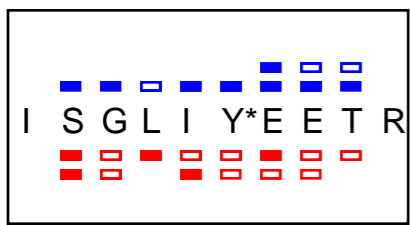

Protein Name: Histone H4  
 gi Accession: 4504301  
 Precursor Mass: 630.7954+2  
 Delta Mass: 2.842 ppm  
 XCorr: 37.44

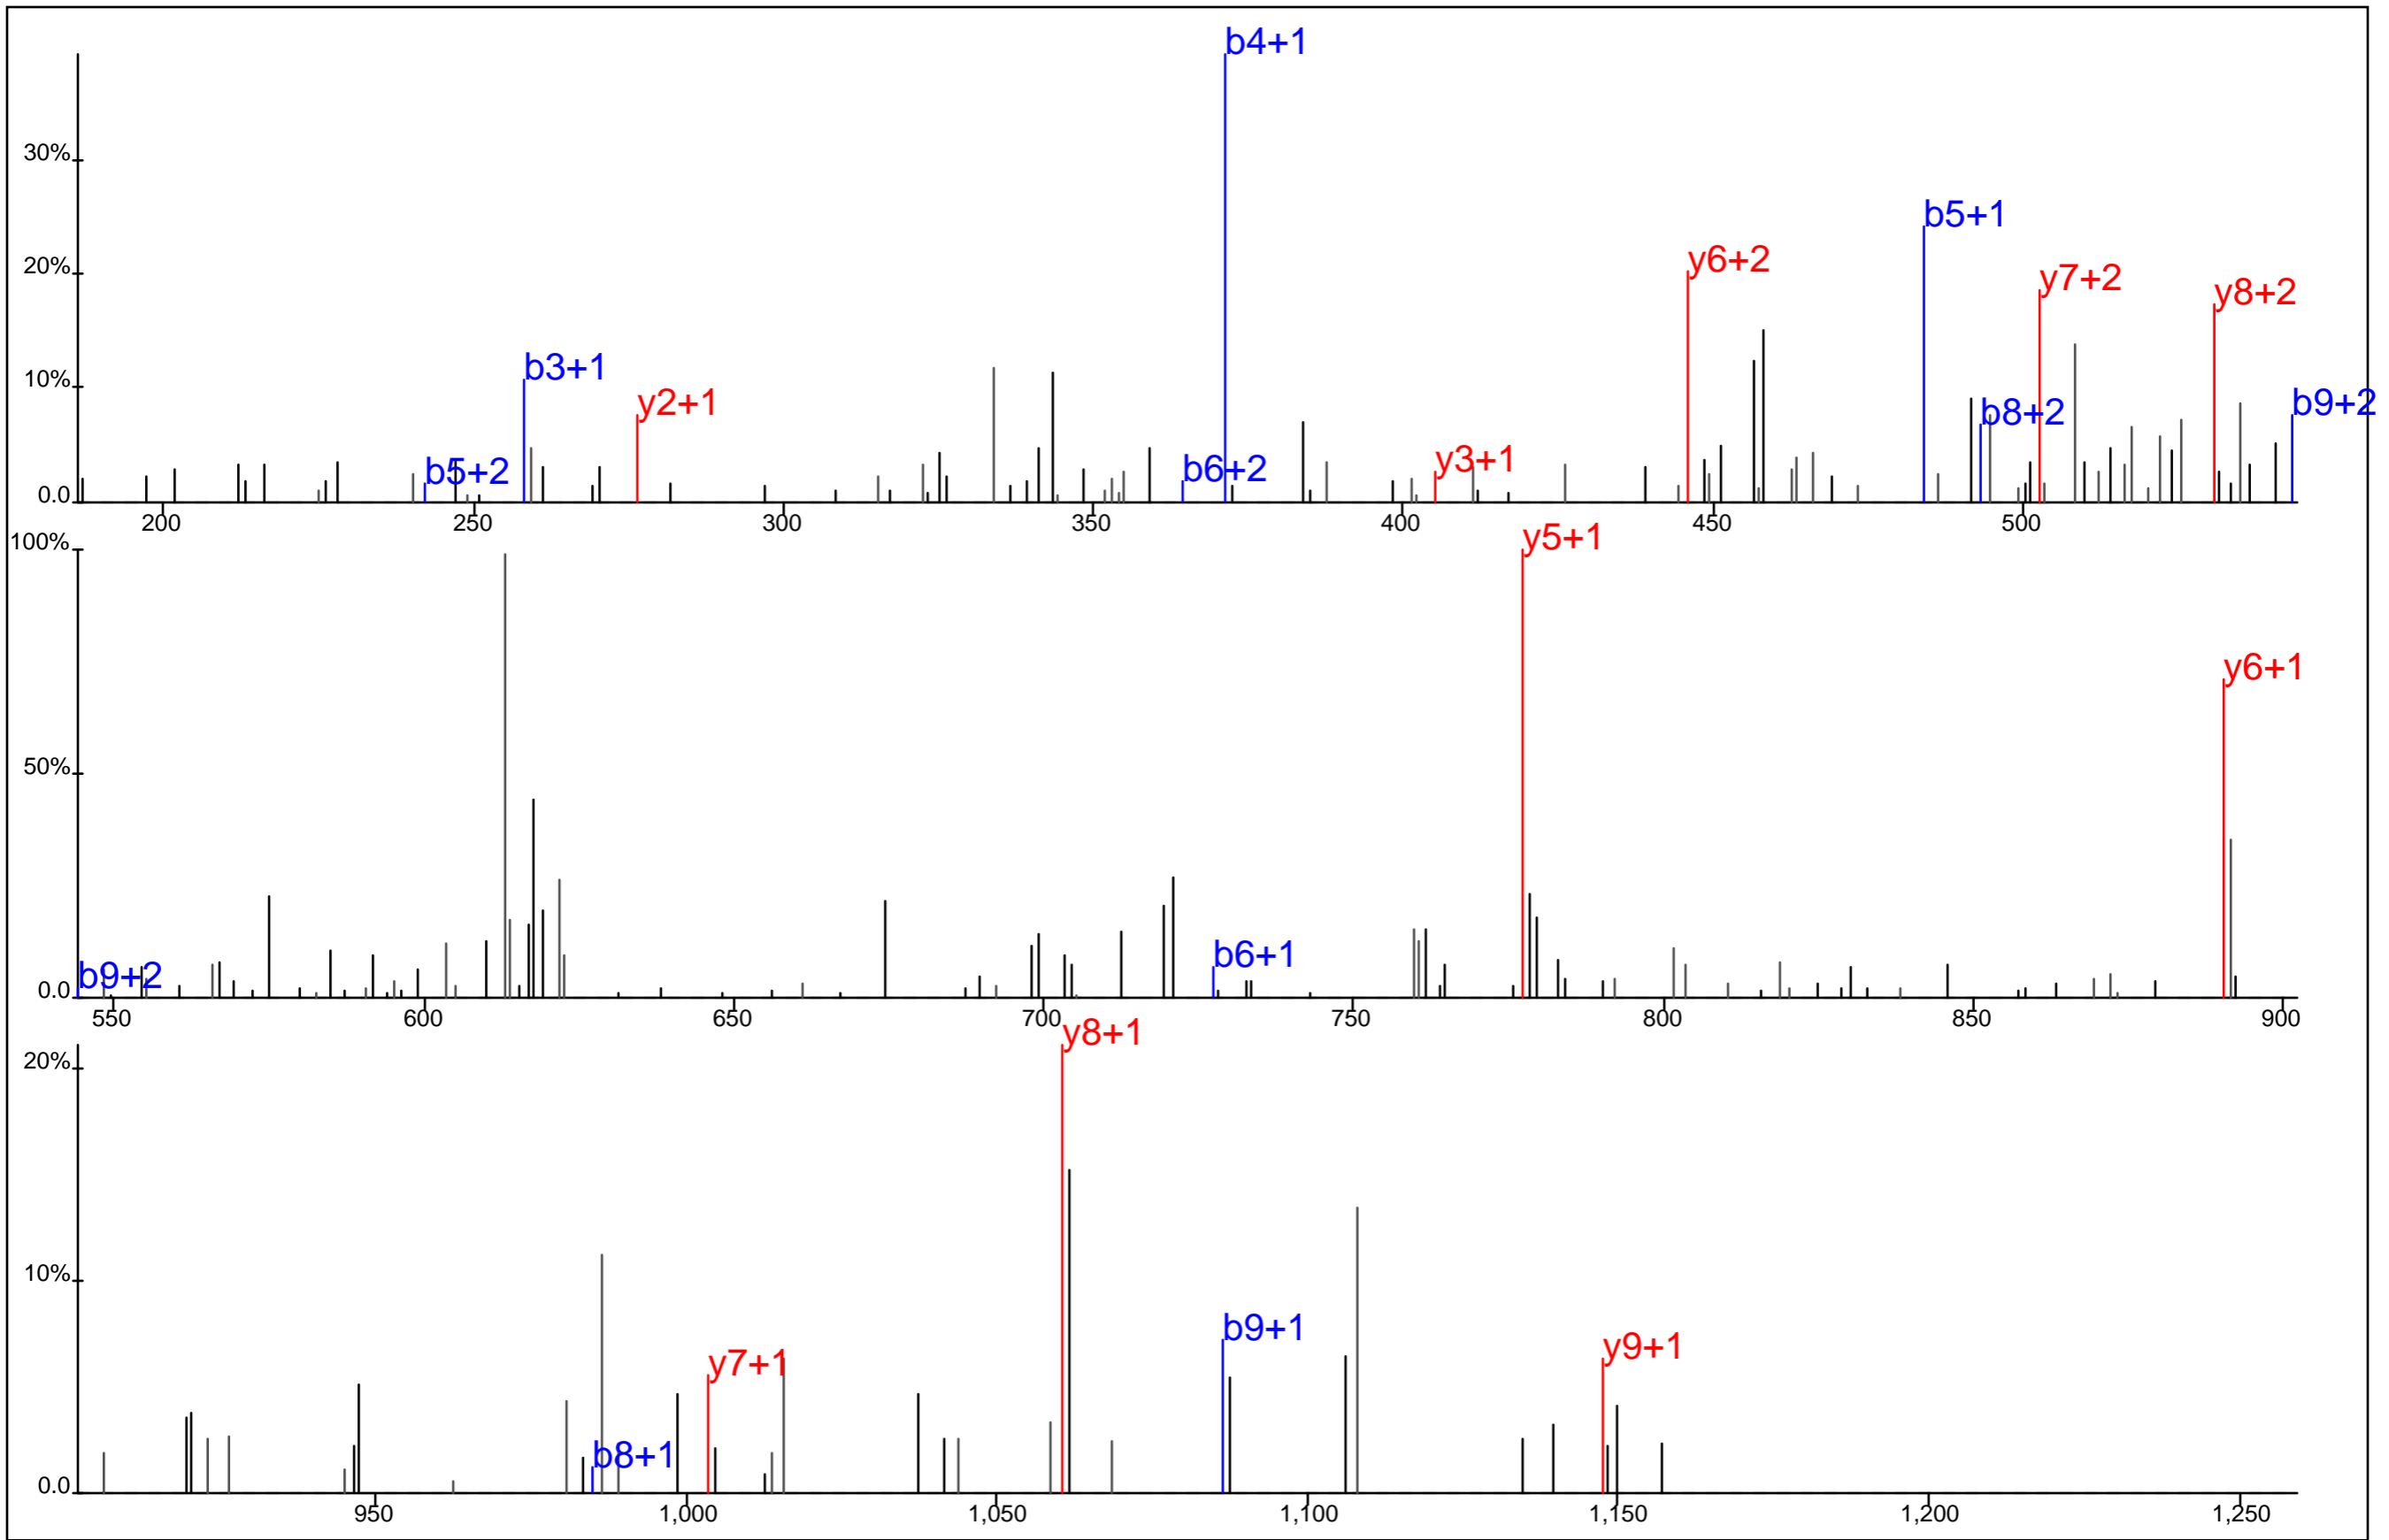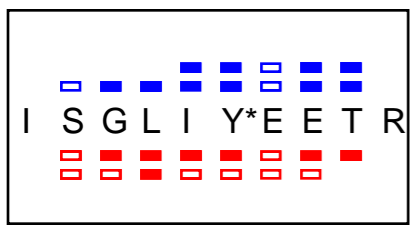

Protein Name: Histone H4  
 gi Accession: 4504301  
 Precursor Mass: 630.8008+2  
 Delta Mass: 5.686 ppm  
 XCorr: 26.68

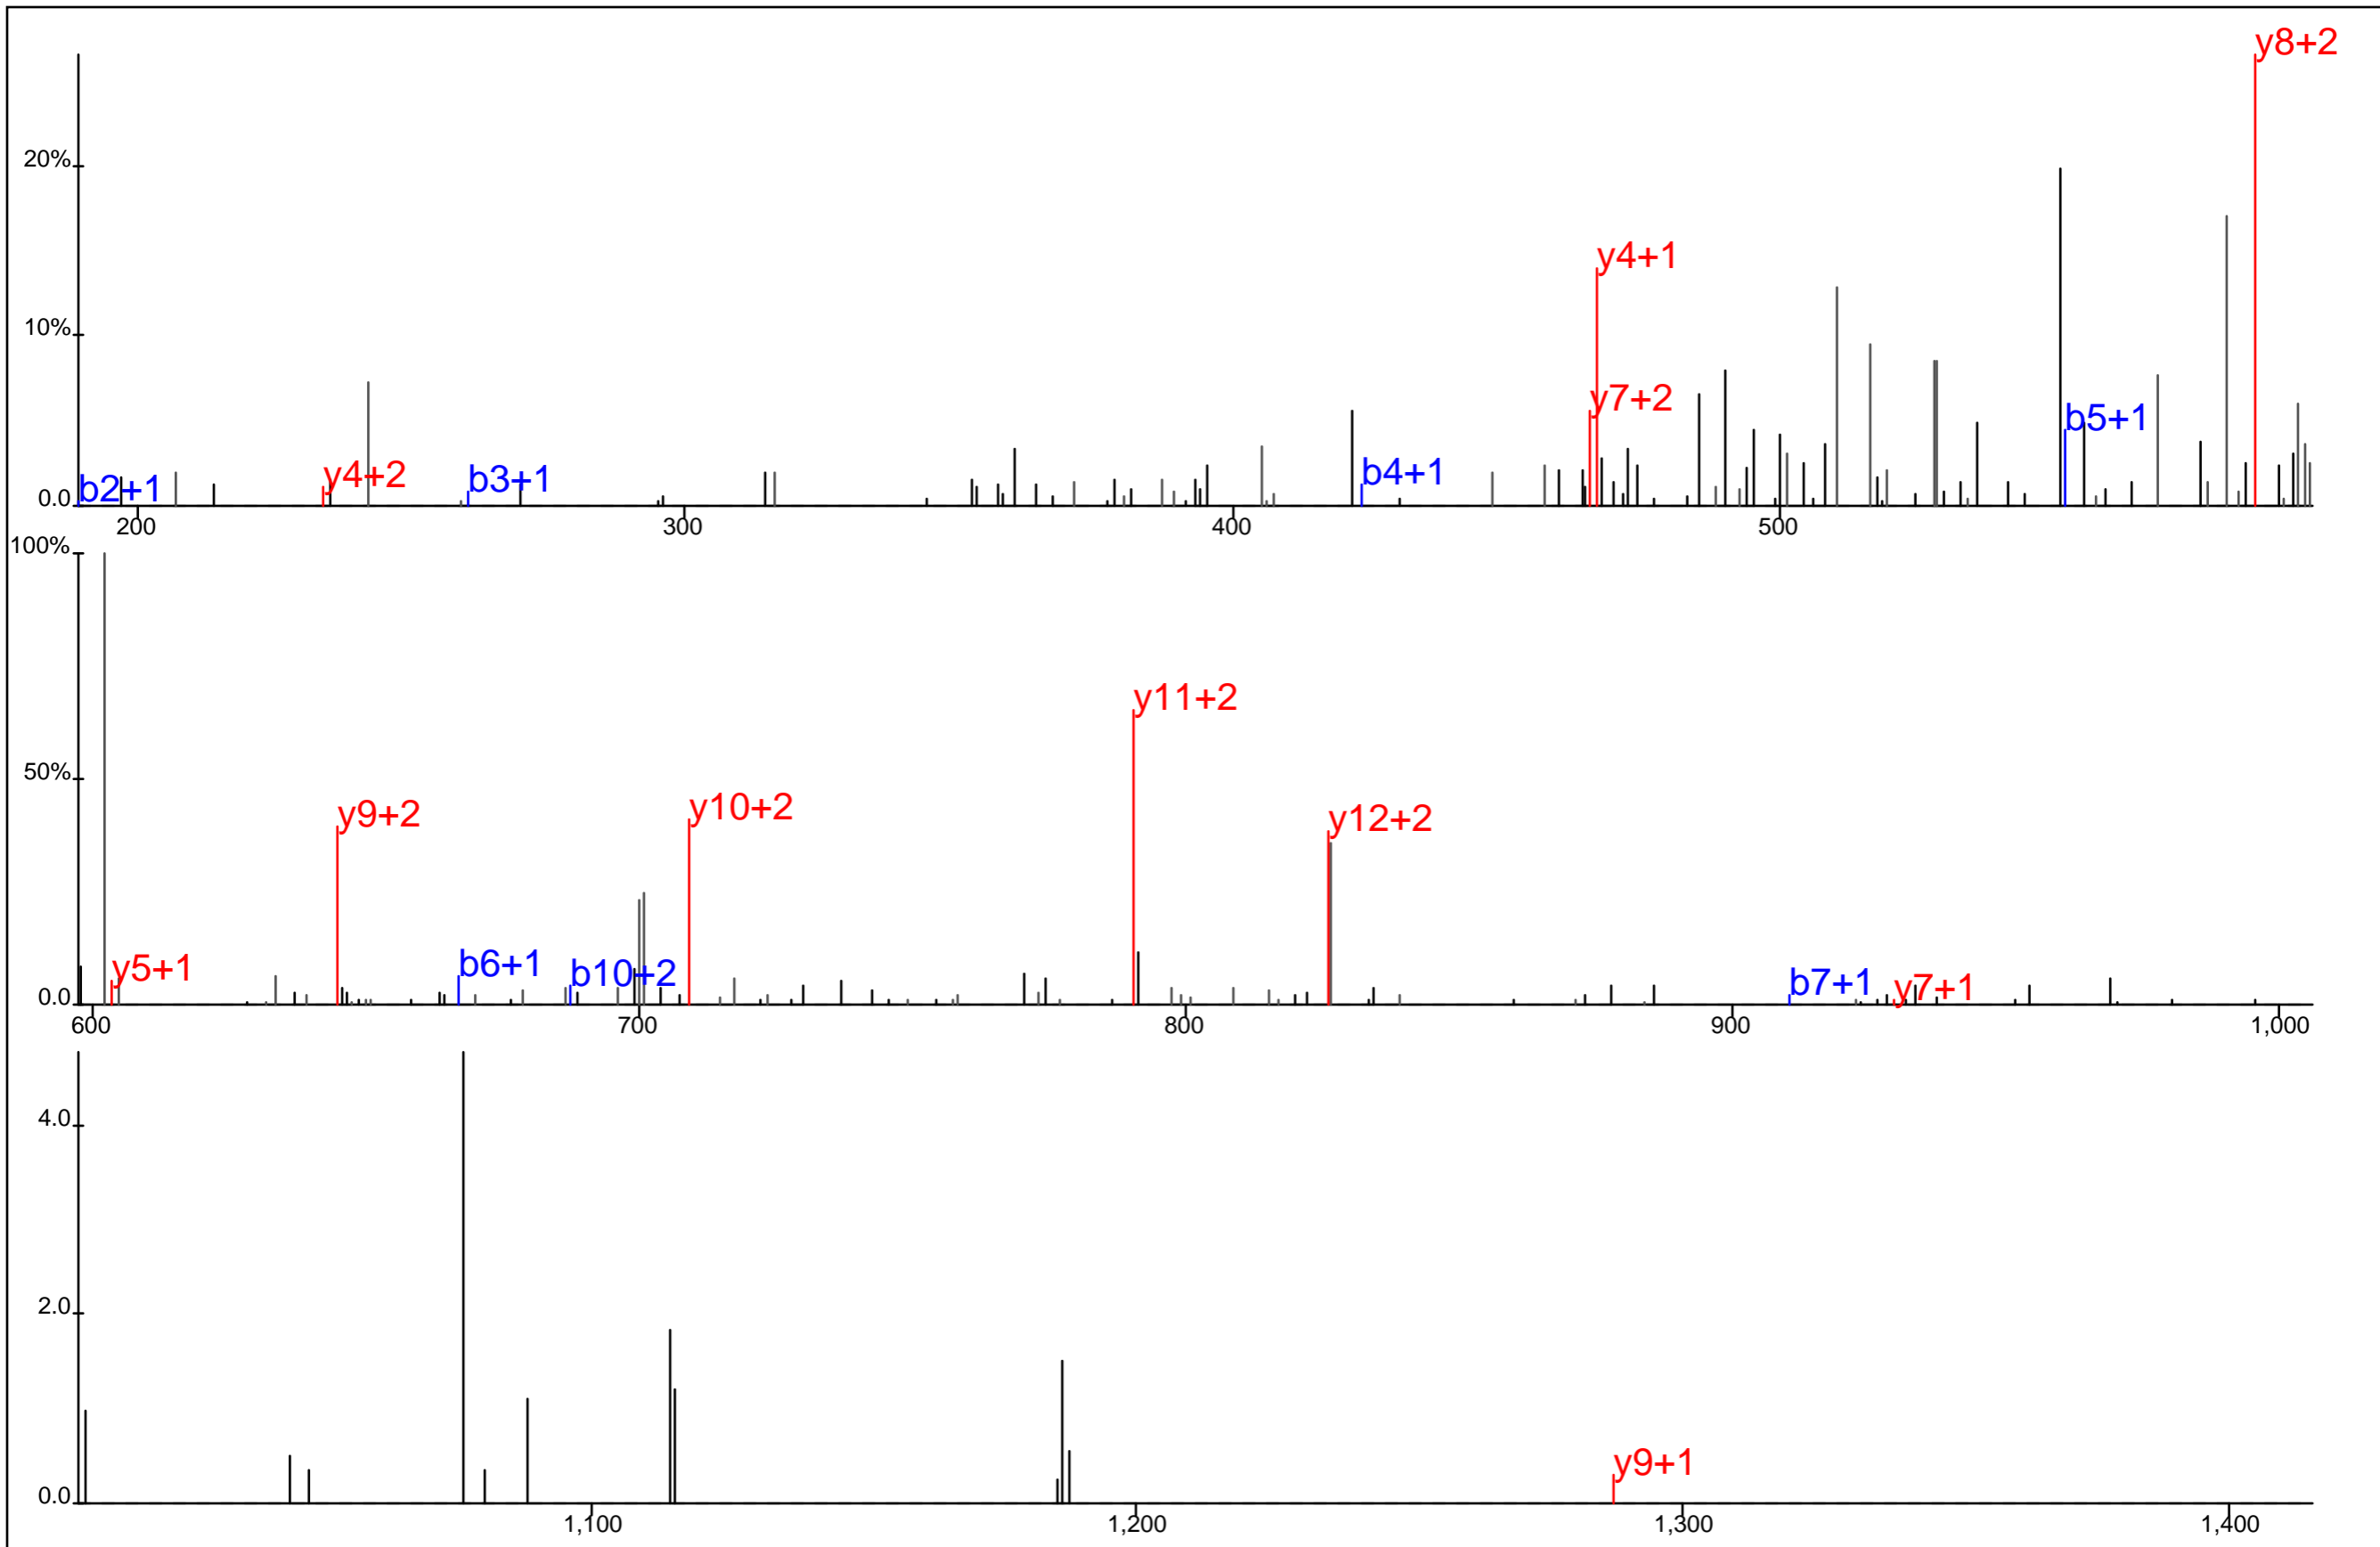

S T A Y E D Y\*Y Y H P P R

Protein Name: hnRNP H3  
 gi Accession: 5031755  
 Precursor Mass: 613.5892+3  
 Delta Mass: 5.998 ppm  
 XCorr: 16.83

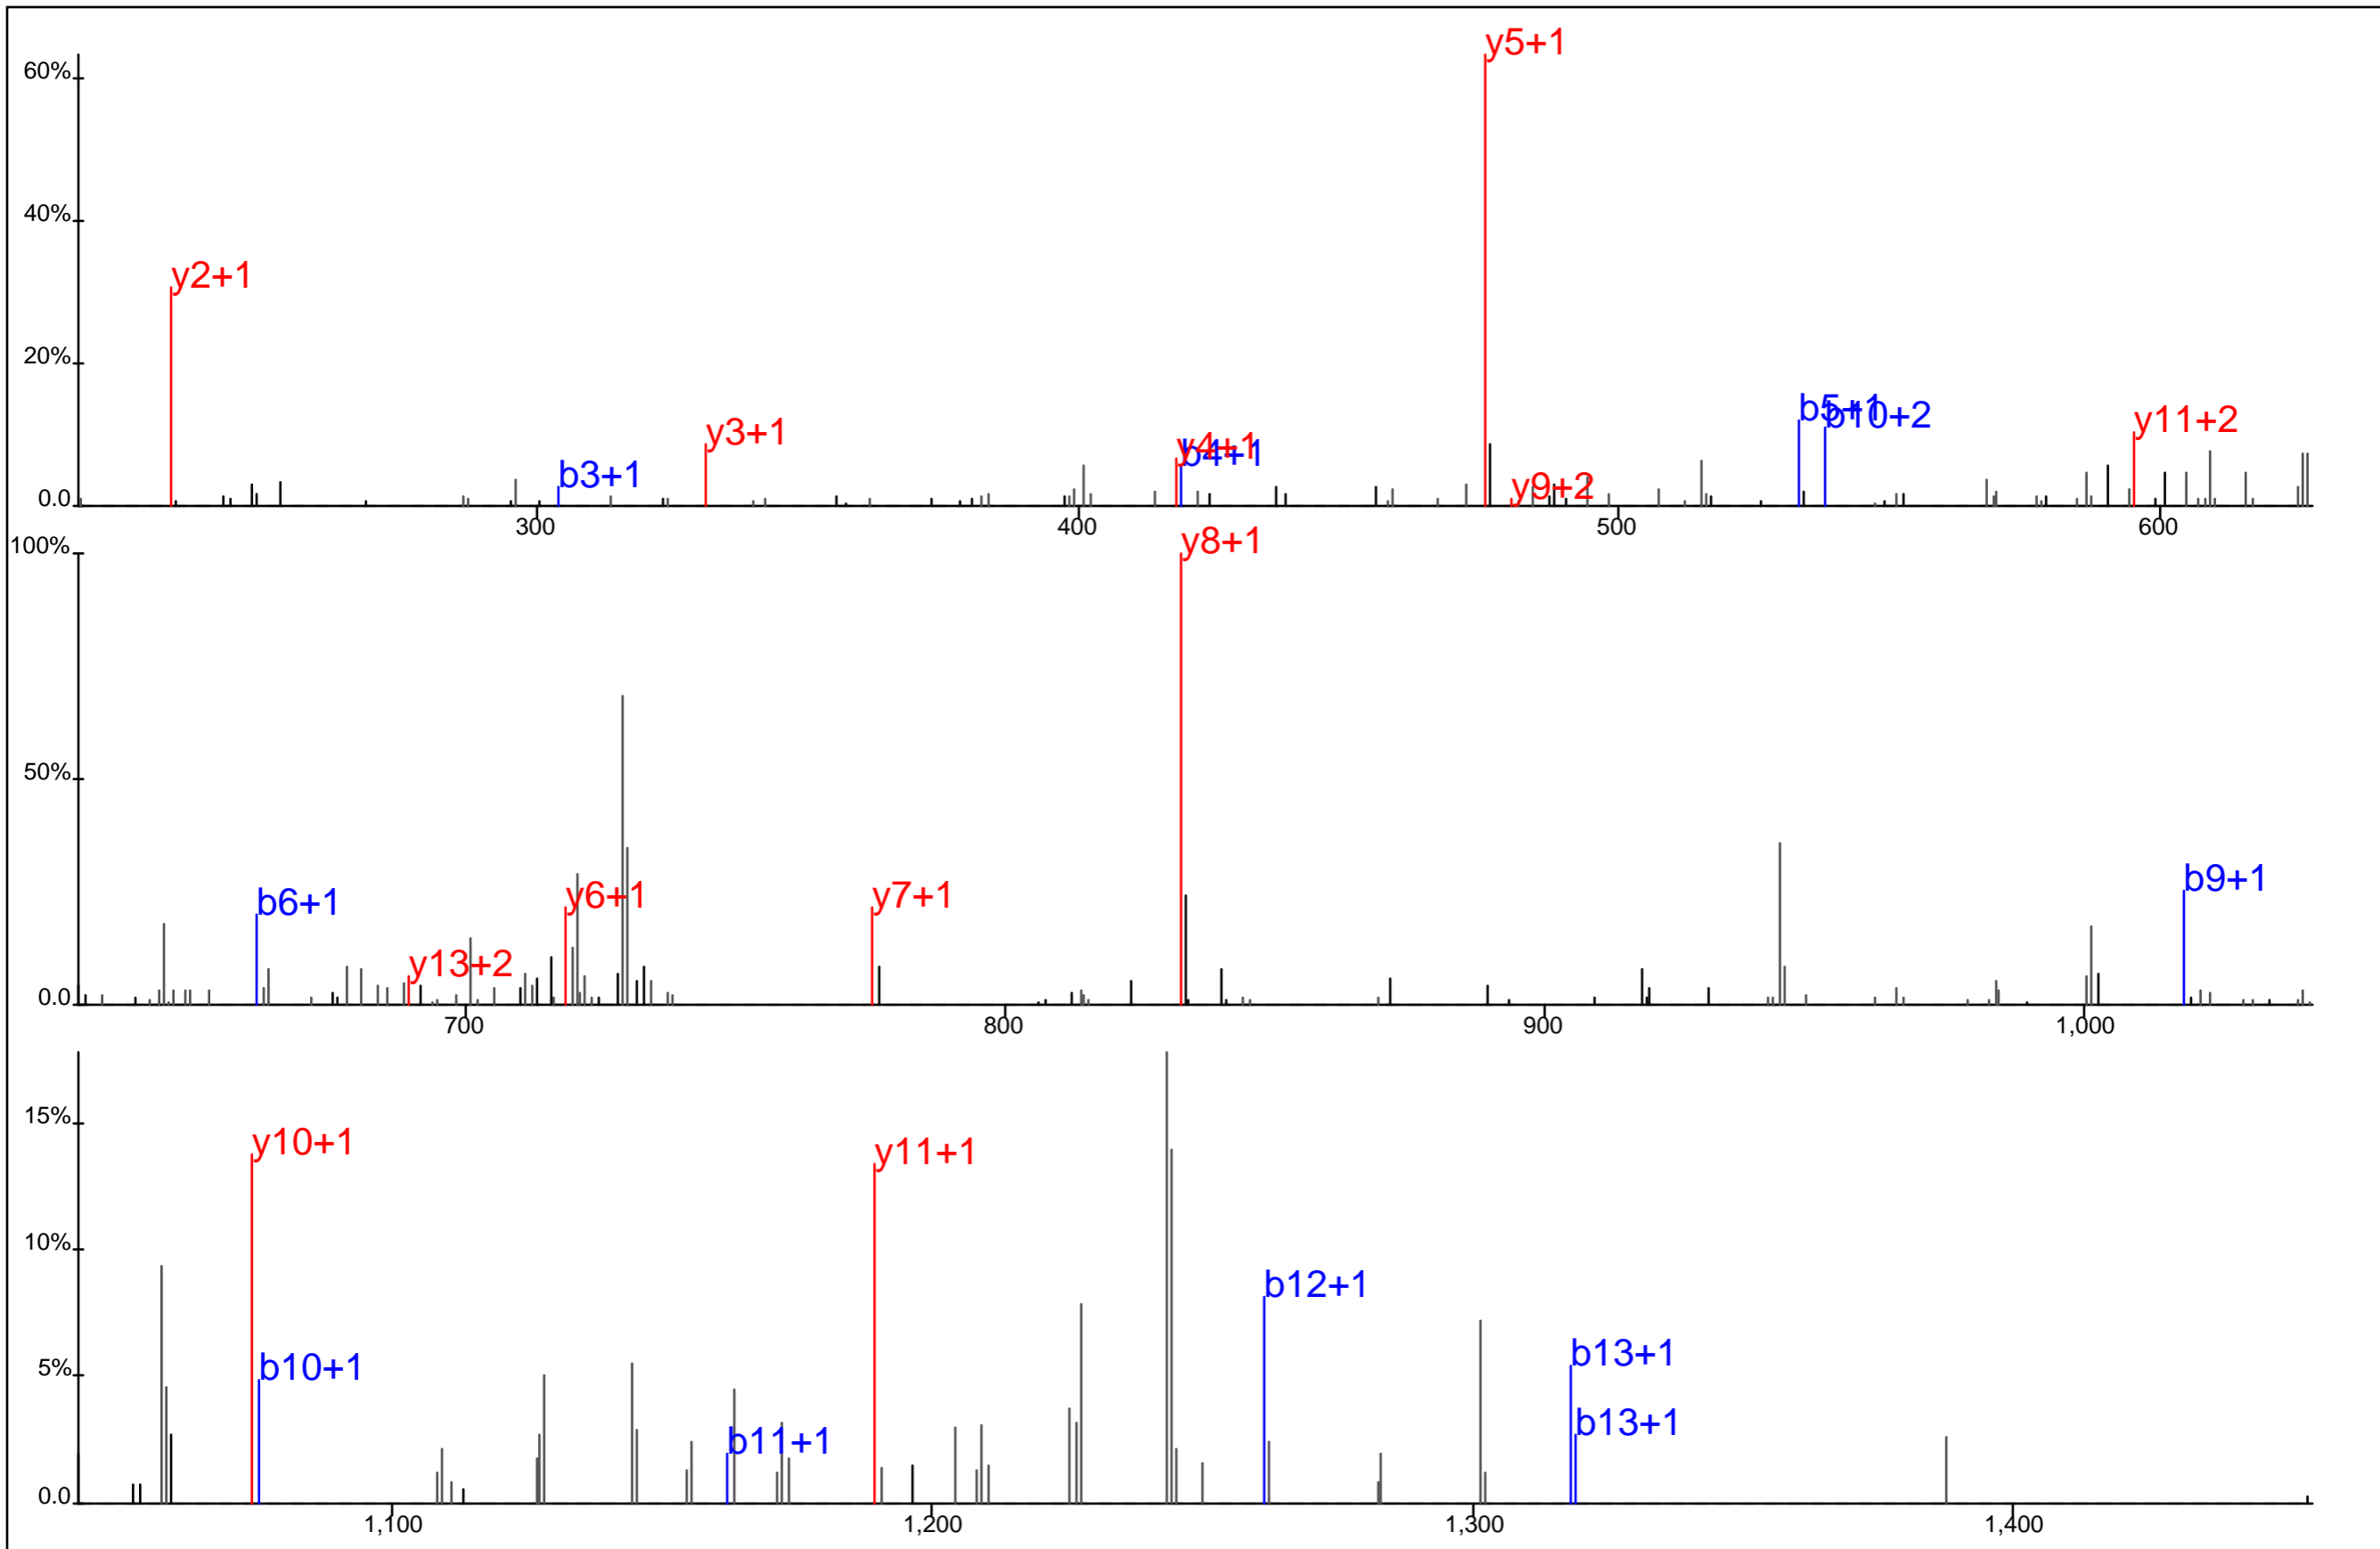

D G M D N Q G G Y\*G S V G R

Red dashed boxes highlight the sequence: D G M D N Q G G Y\*G S V G R

Protein Name: hnRNP H3  
 gi Accession: 73952775  
 Precursor Mass: 746.7856+2  
 Delta Mass: 7.791 ppm  
 XCorr: 61.63

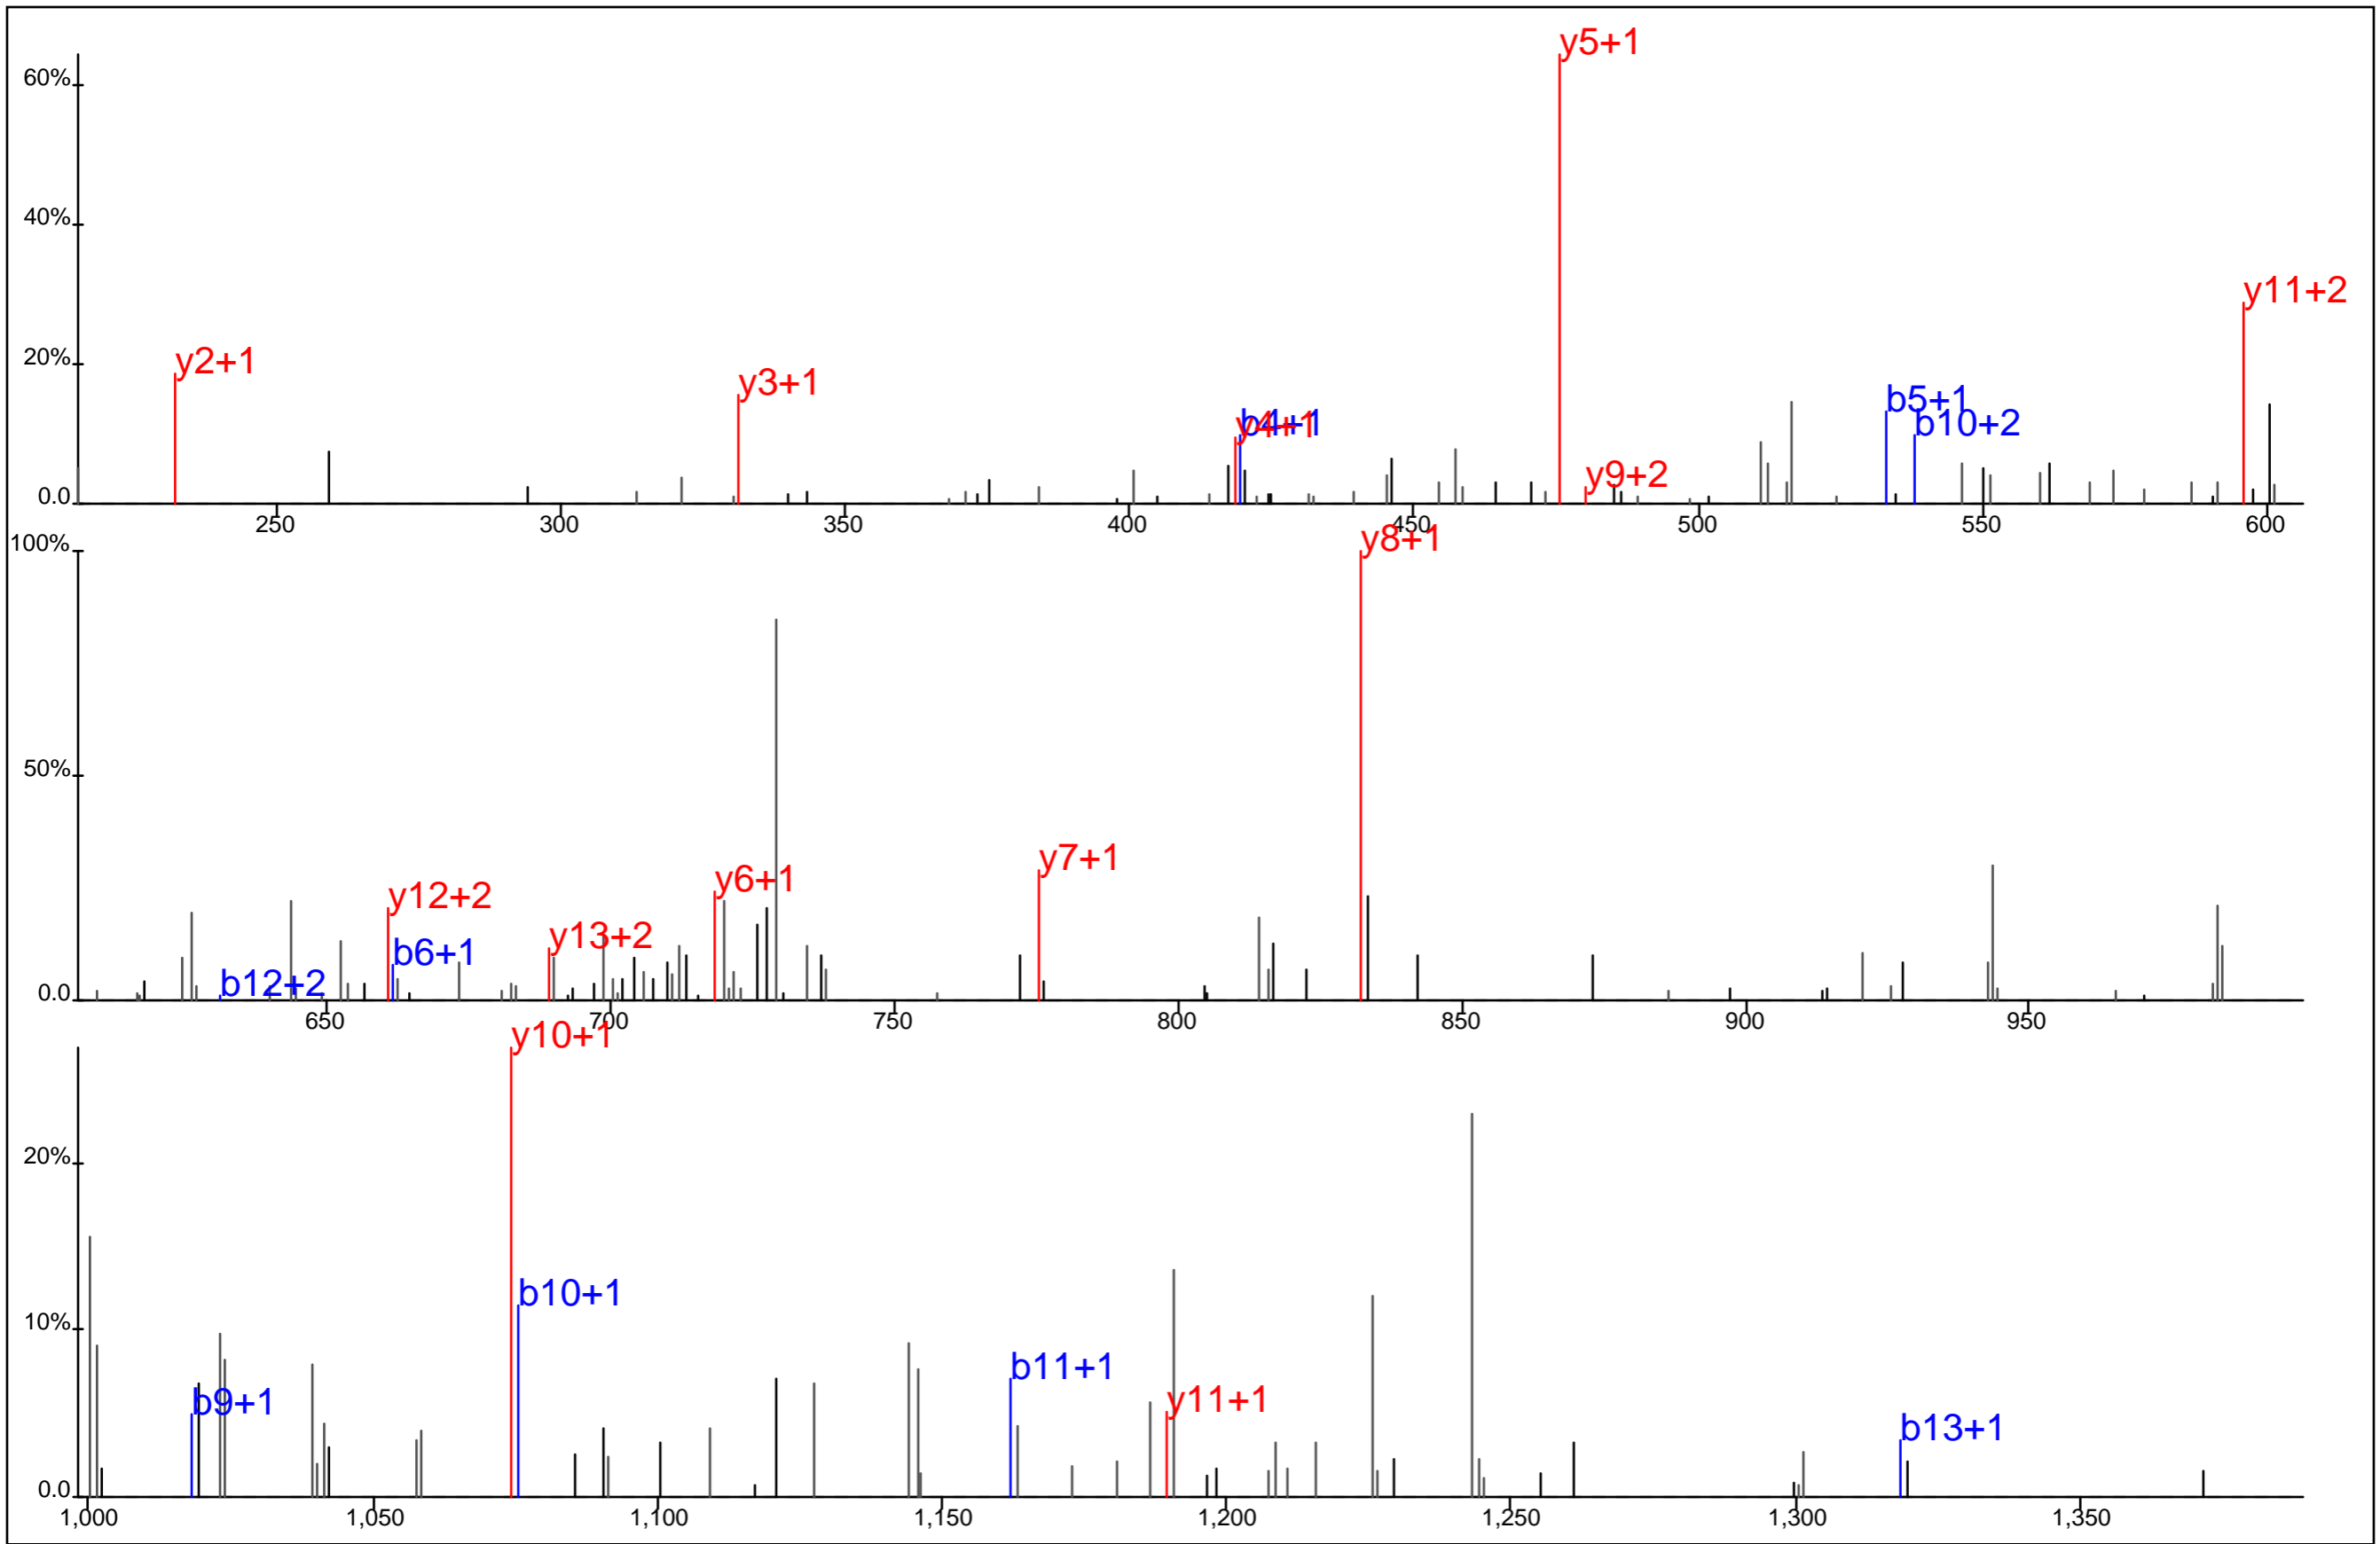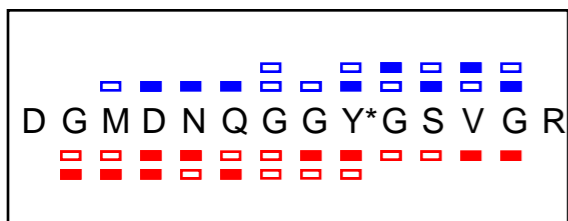

Protein Name: hnRNP H3  
 gi Accession: 73952775  
 Precursor Mass: 746.7826+2  
 Delta Mass: 3.784 ppm  
 XCorr: 51.19



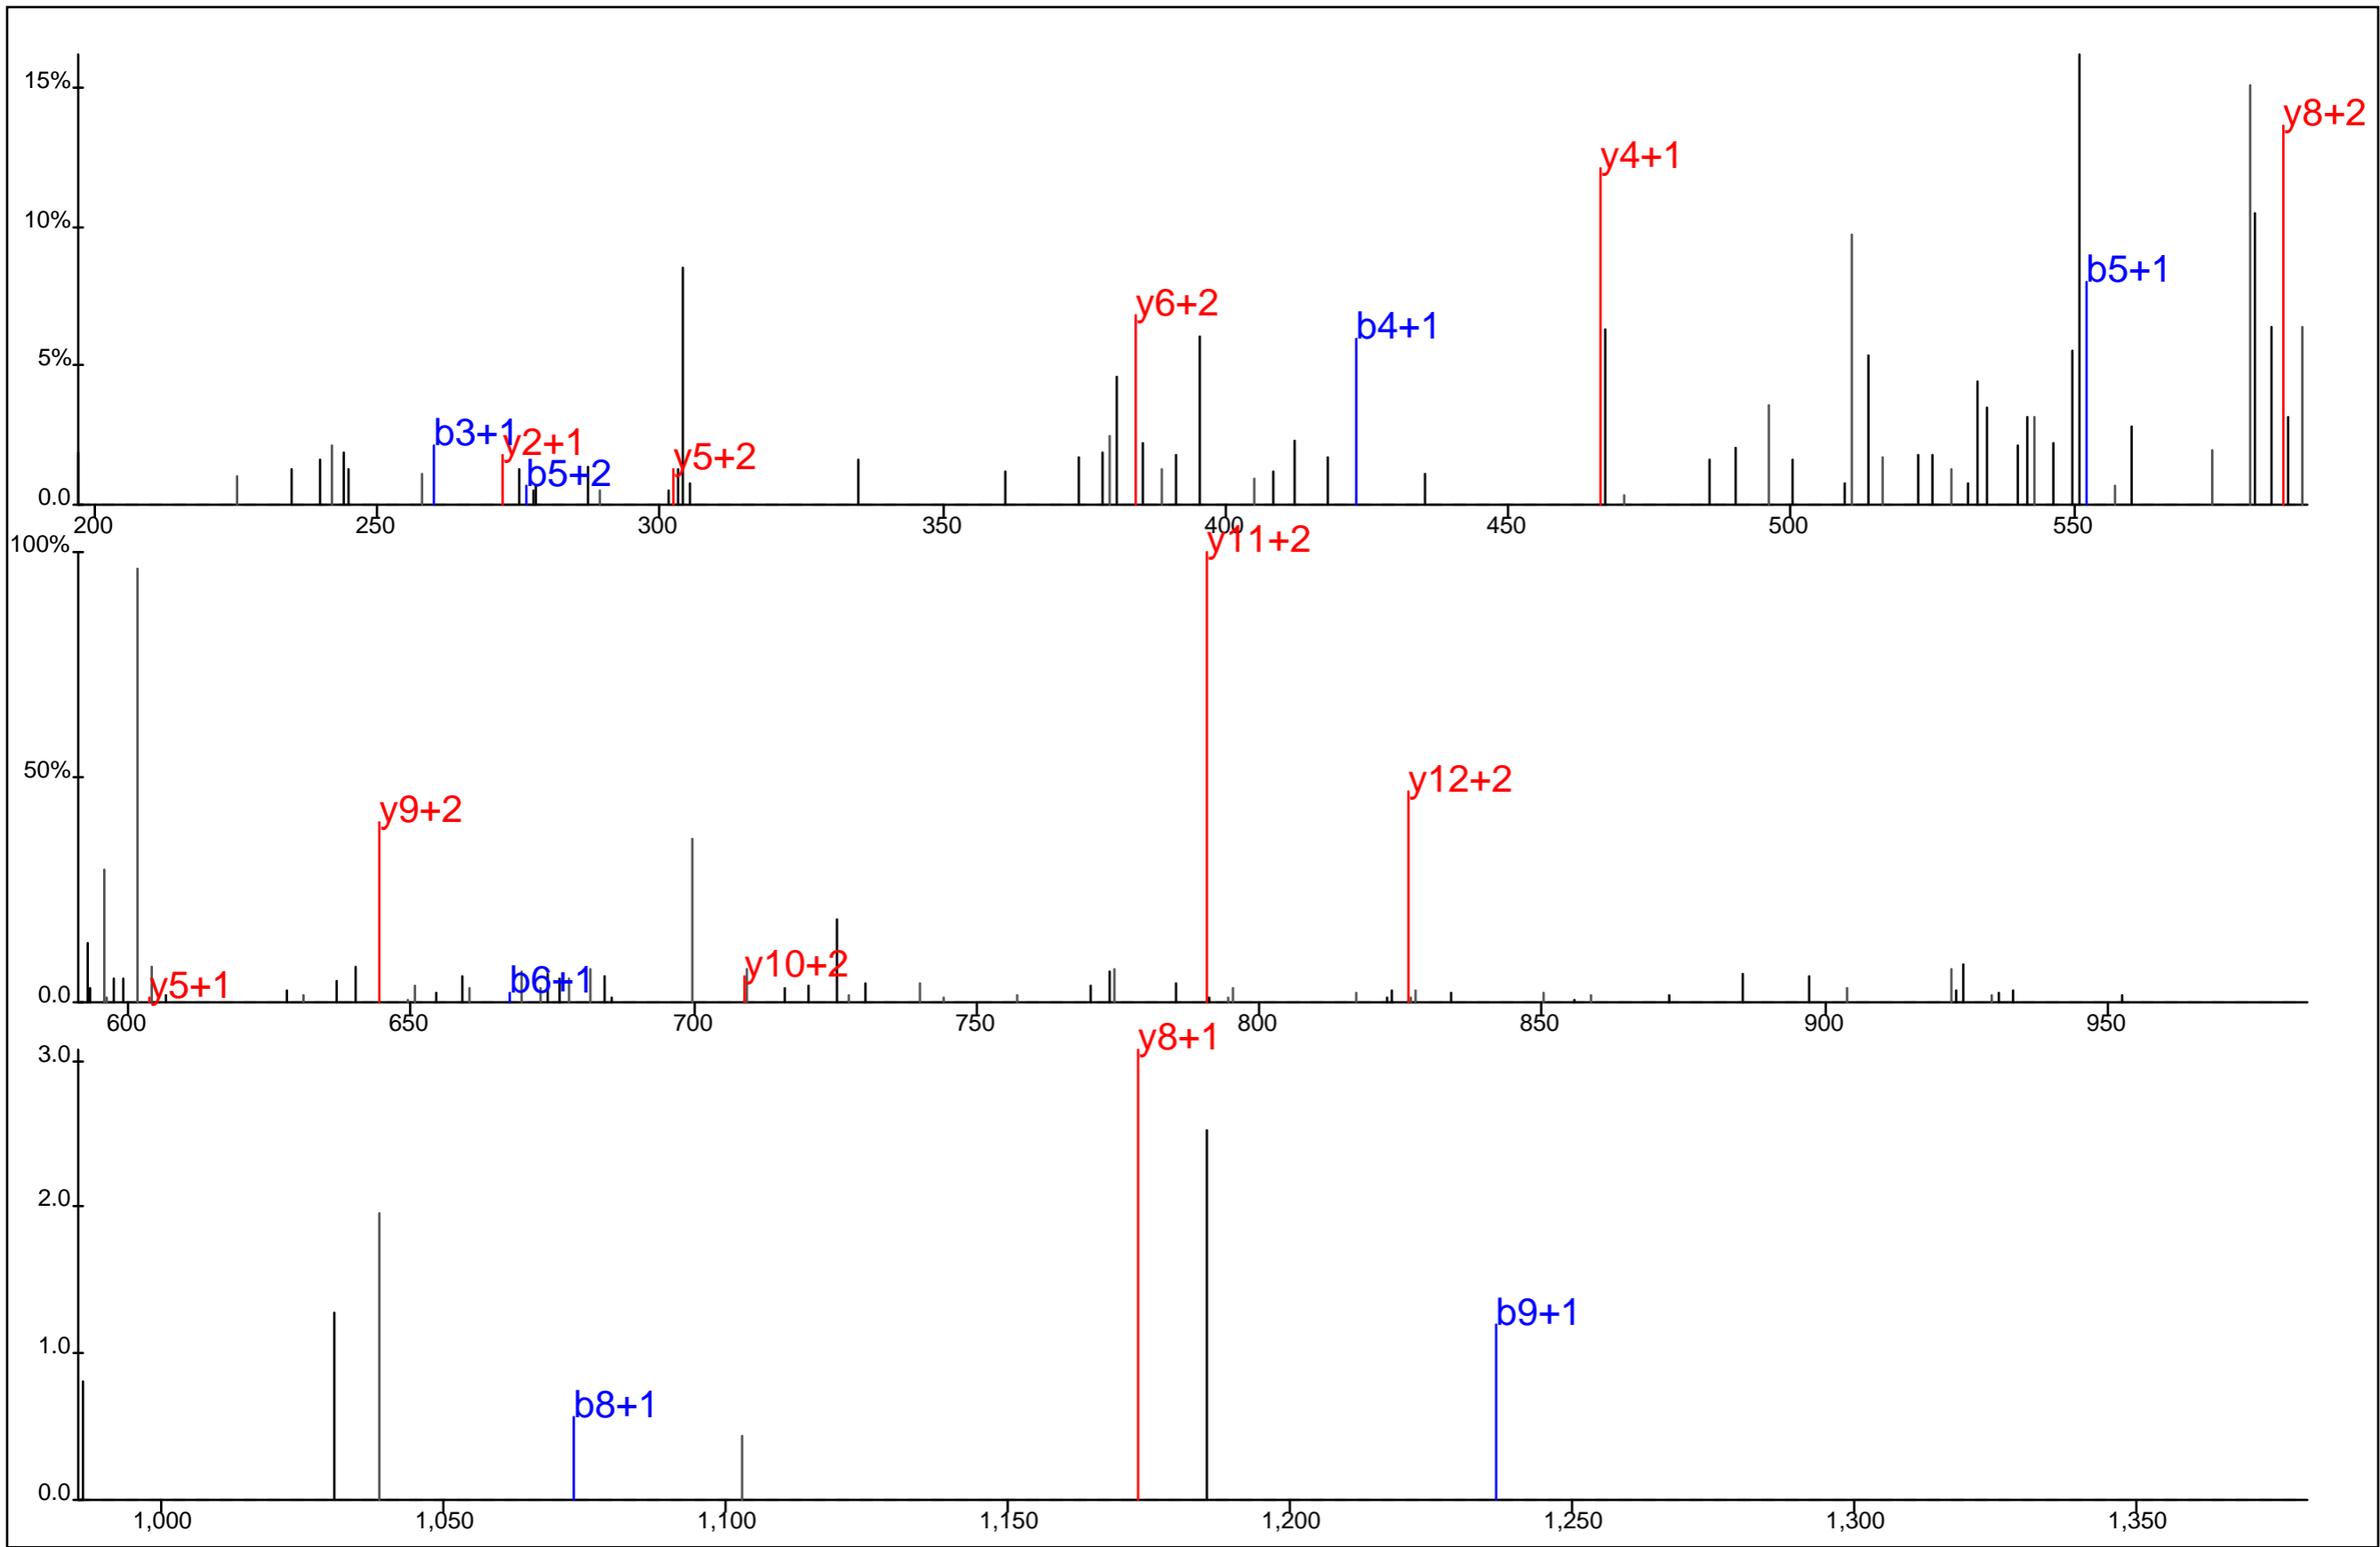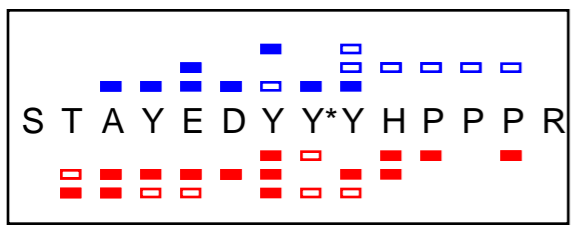

Protein Name: hnRNP H3  
 gi Accession: 5031755  
 Precursor Mass: 613.5883+3  
 Delta Mass: 4.501 ppm  
 XCorr: 13.04

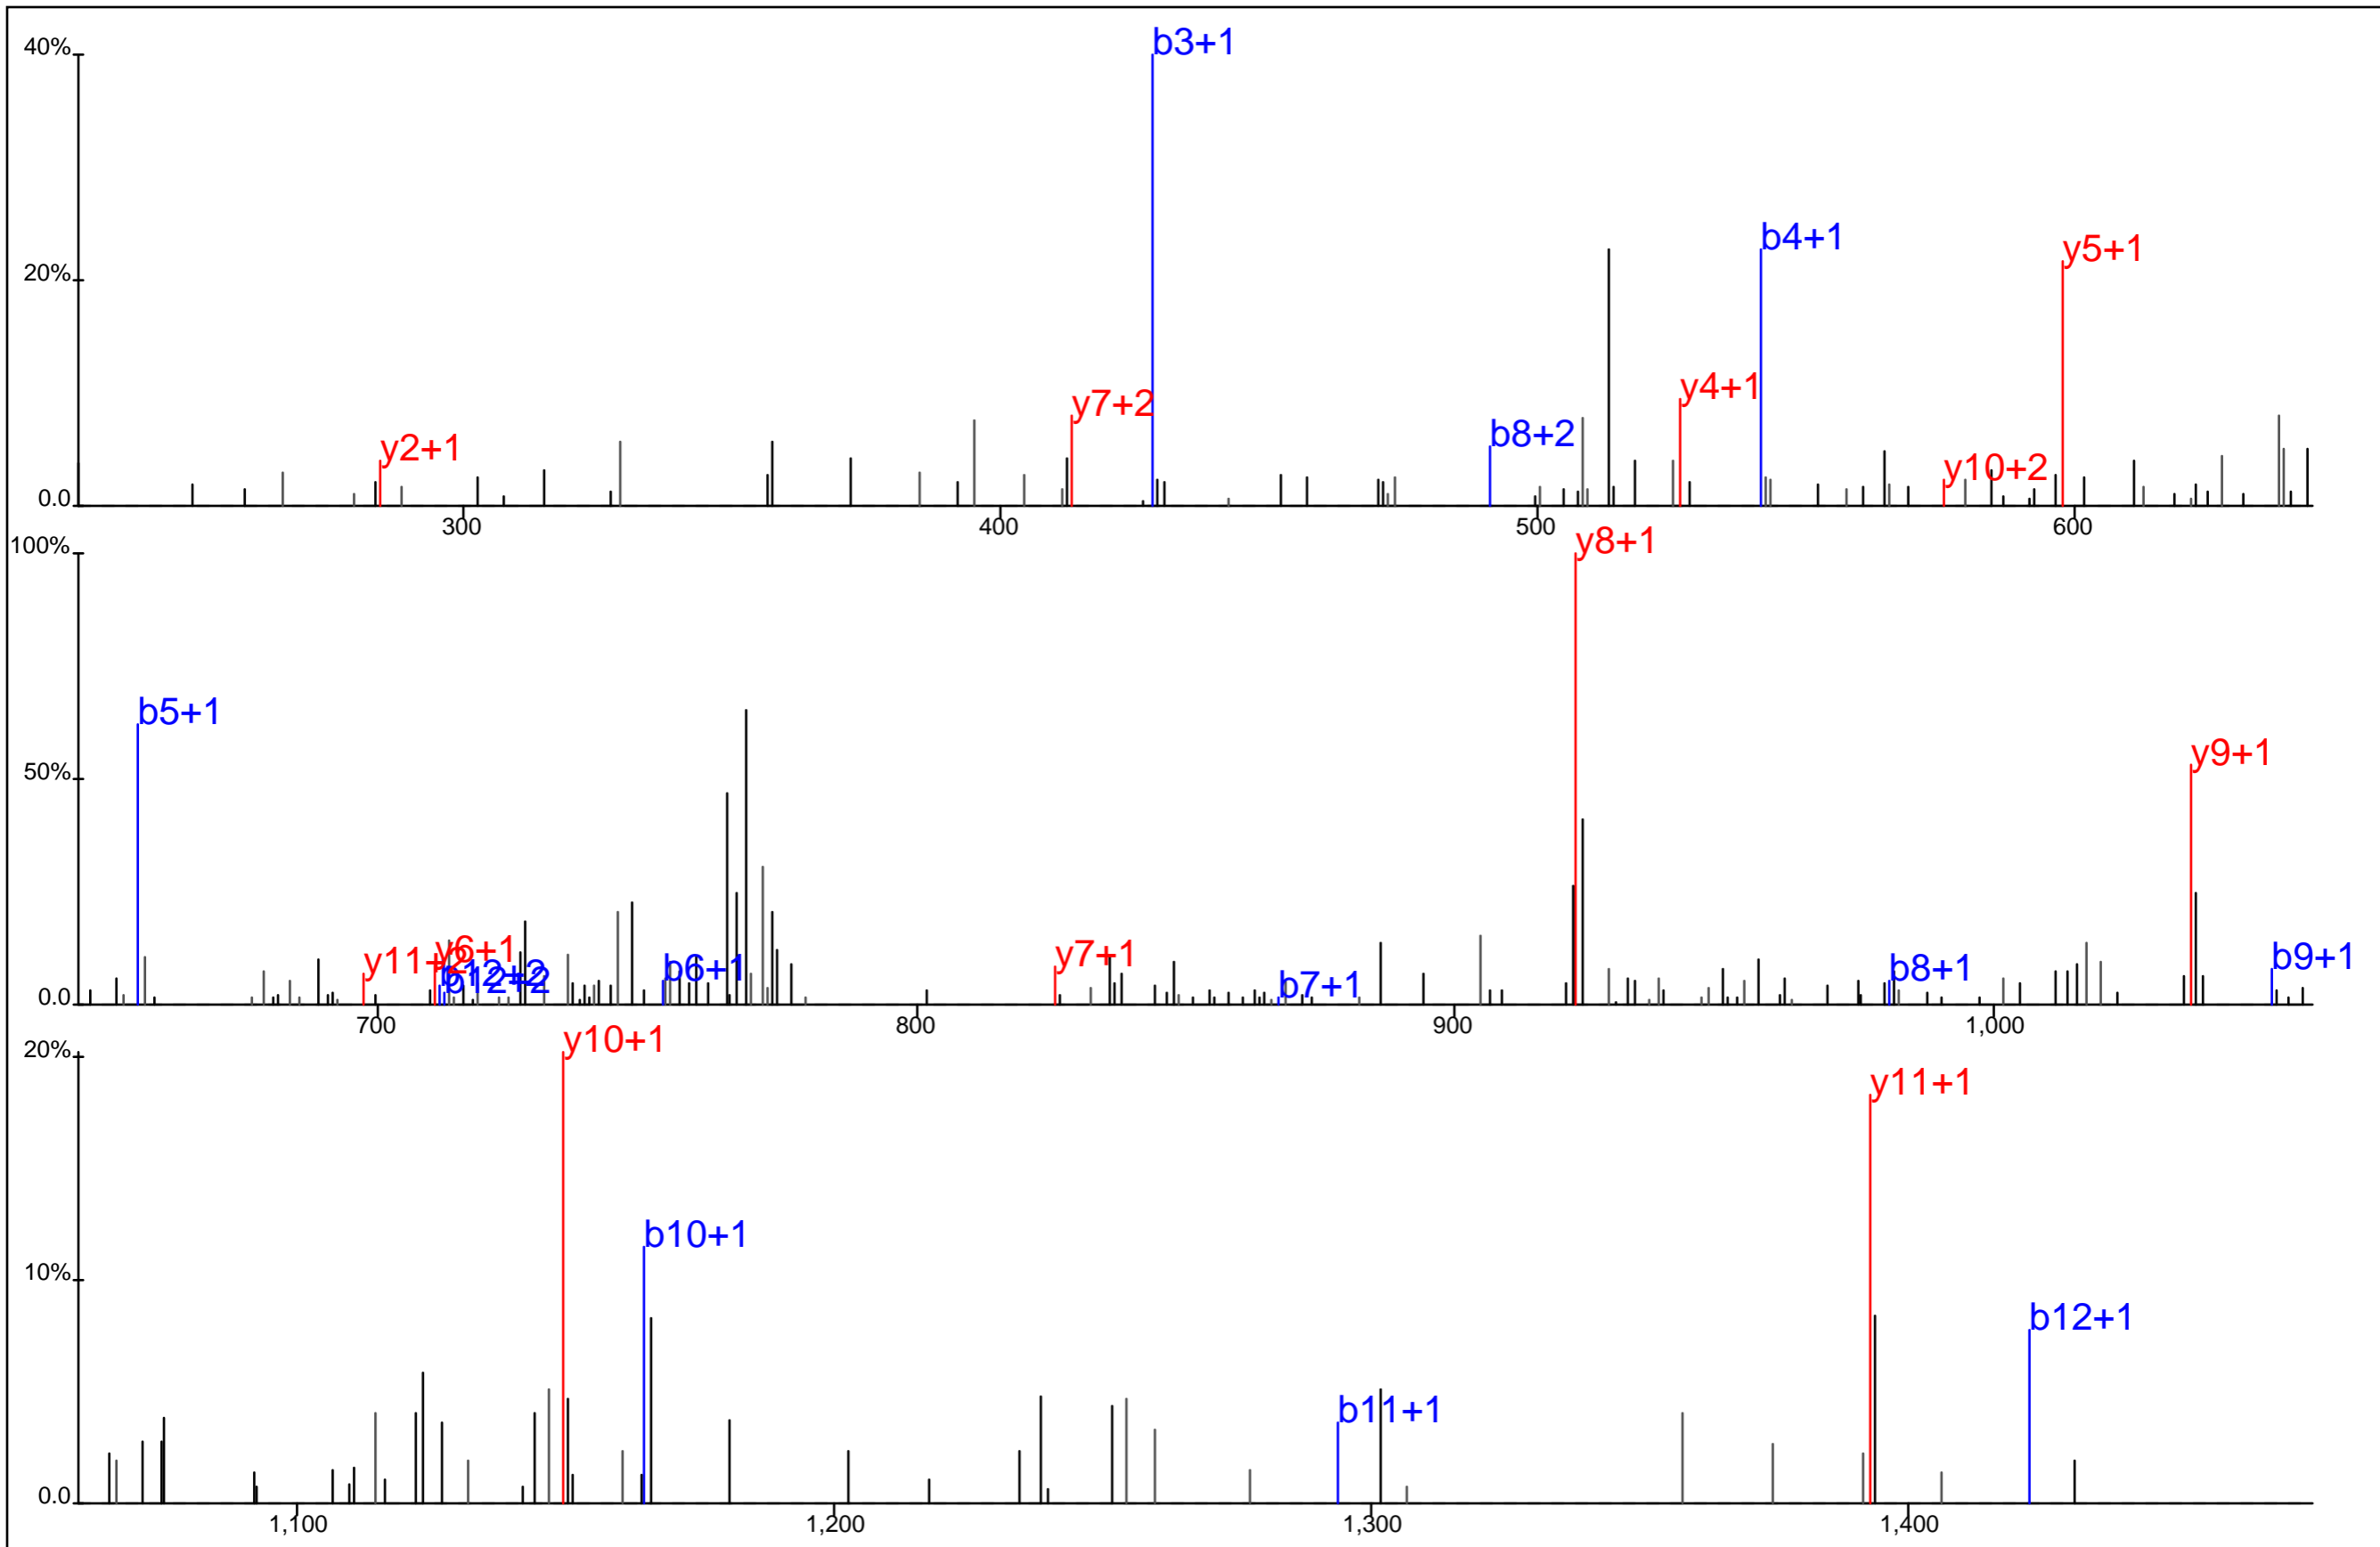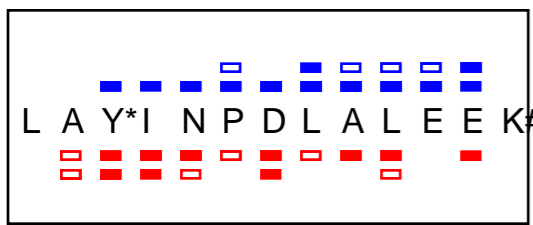

Protein Name: HOP  
 gi Accession: 5803181  
 Precursor Mass: 788.8940+2  
 Delta Mass: 3.664 ppm  
 XCorr: 41.66

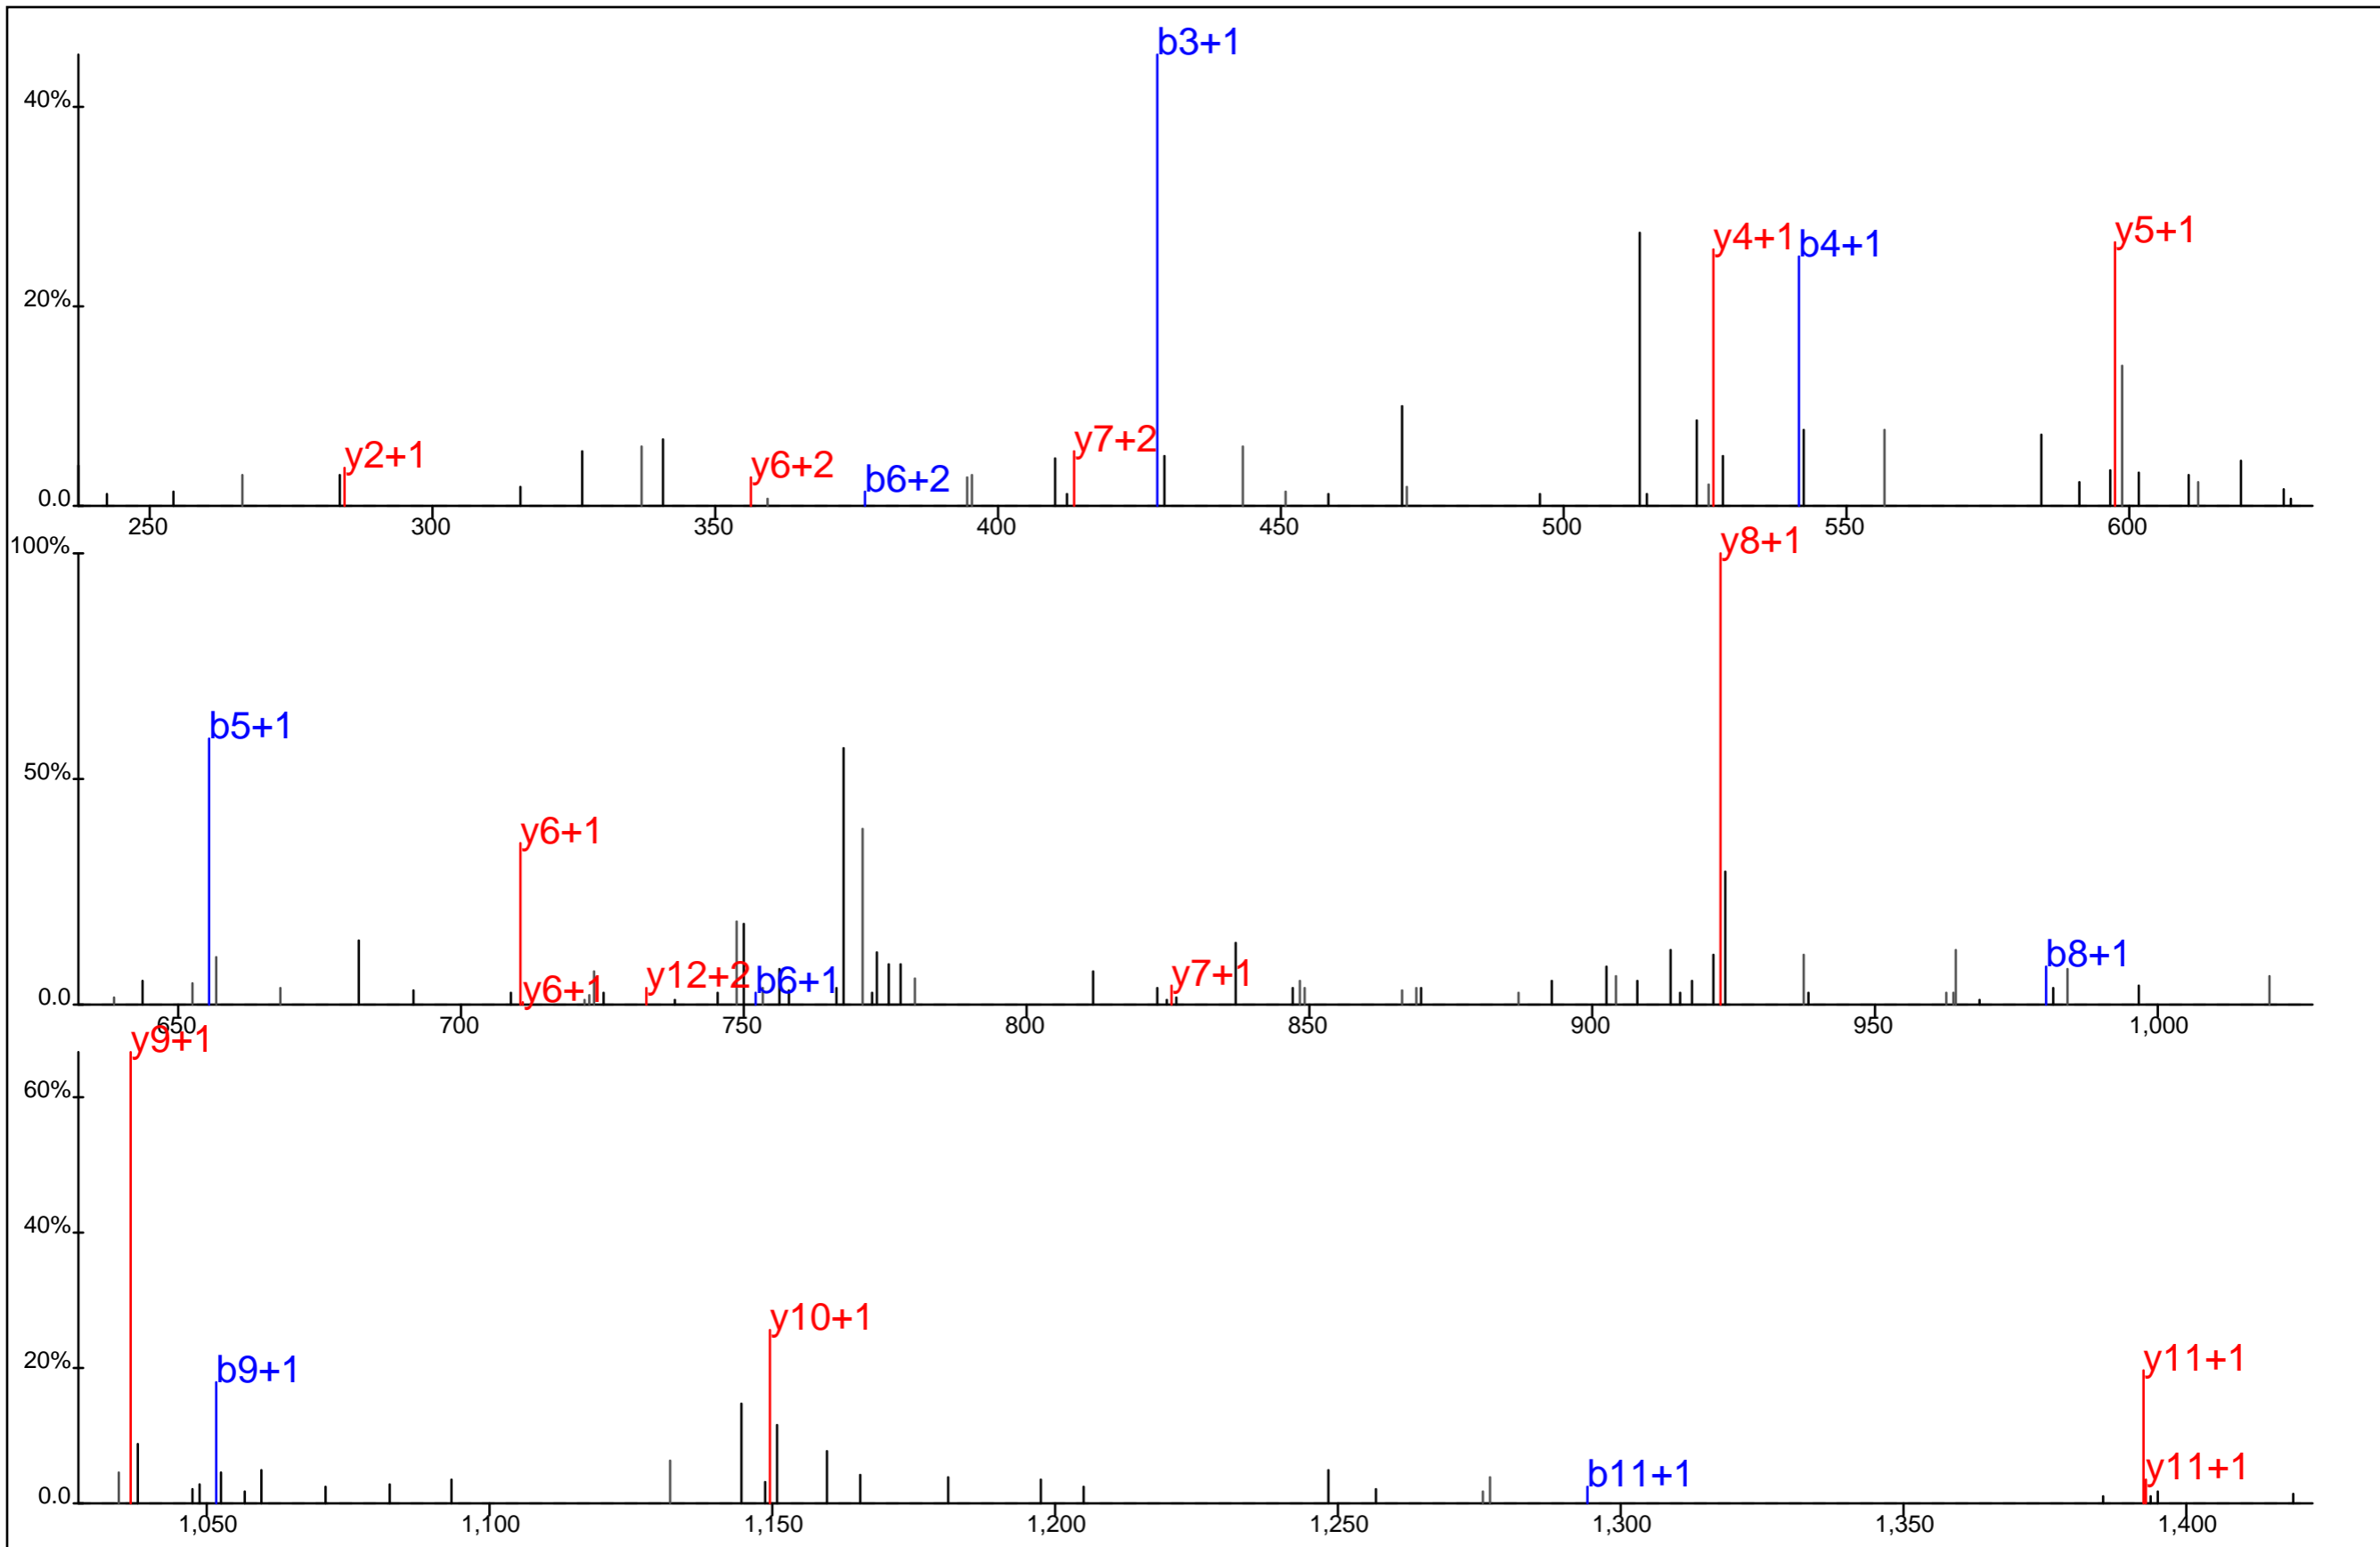

■ ■ ■ ■ ■ ■ ■ ■ ■ ■  
 L A Y\* I N P D L A L E E K#  
□ □ □ □ □ □ □ □ □ □

Protein Name: HOP  
 gi Accession: 5803181  
 Precursor Mass: 788.8946+2  
 Delta Mass: 4.438 ppm  
 XCorr: 48.39

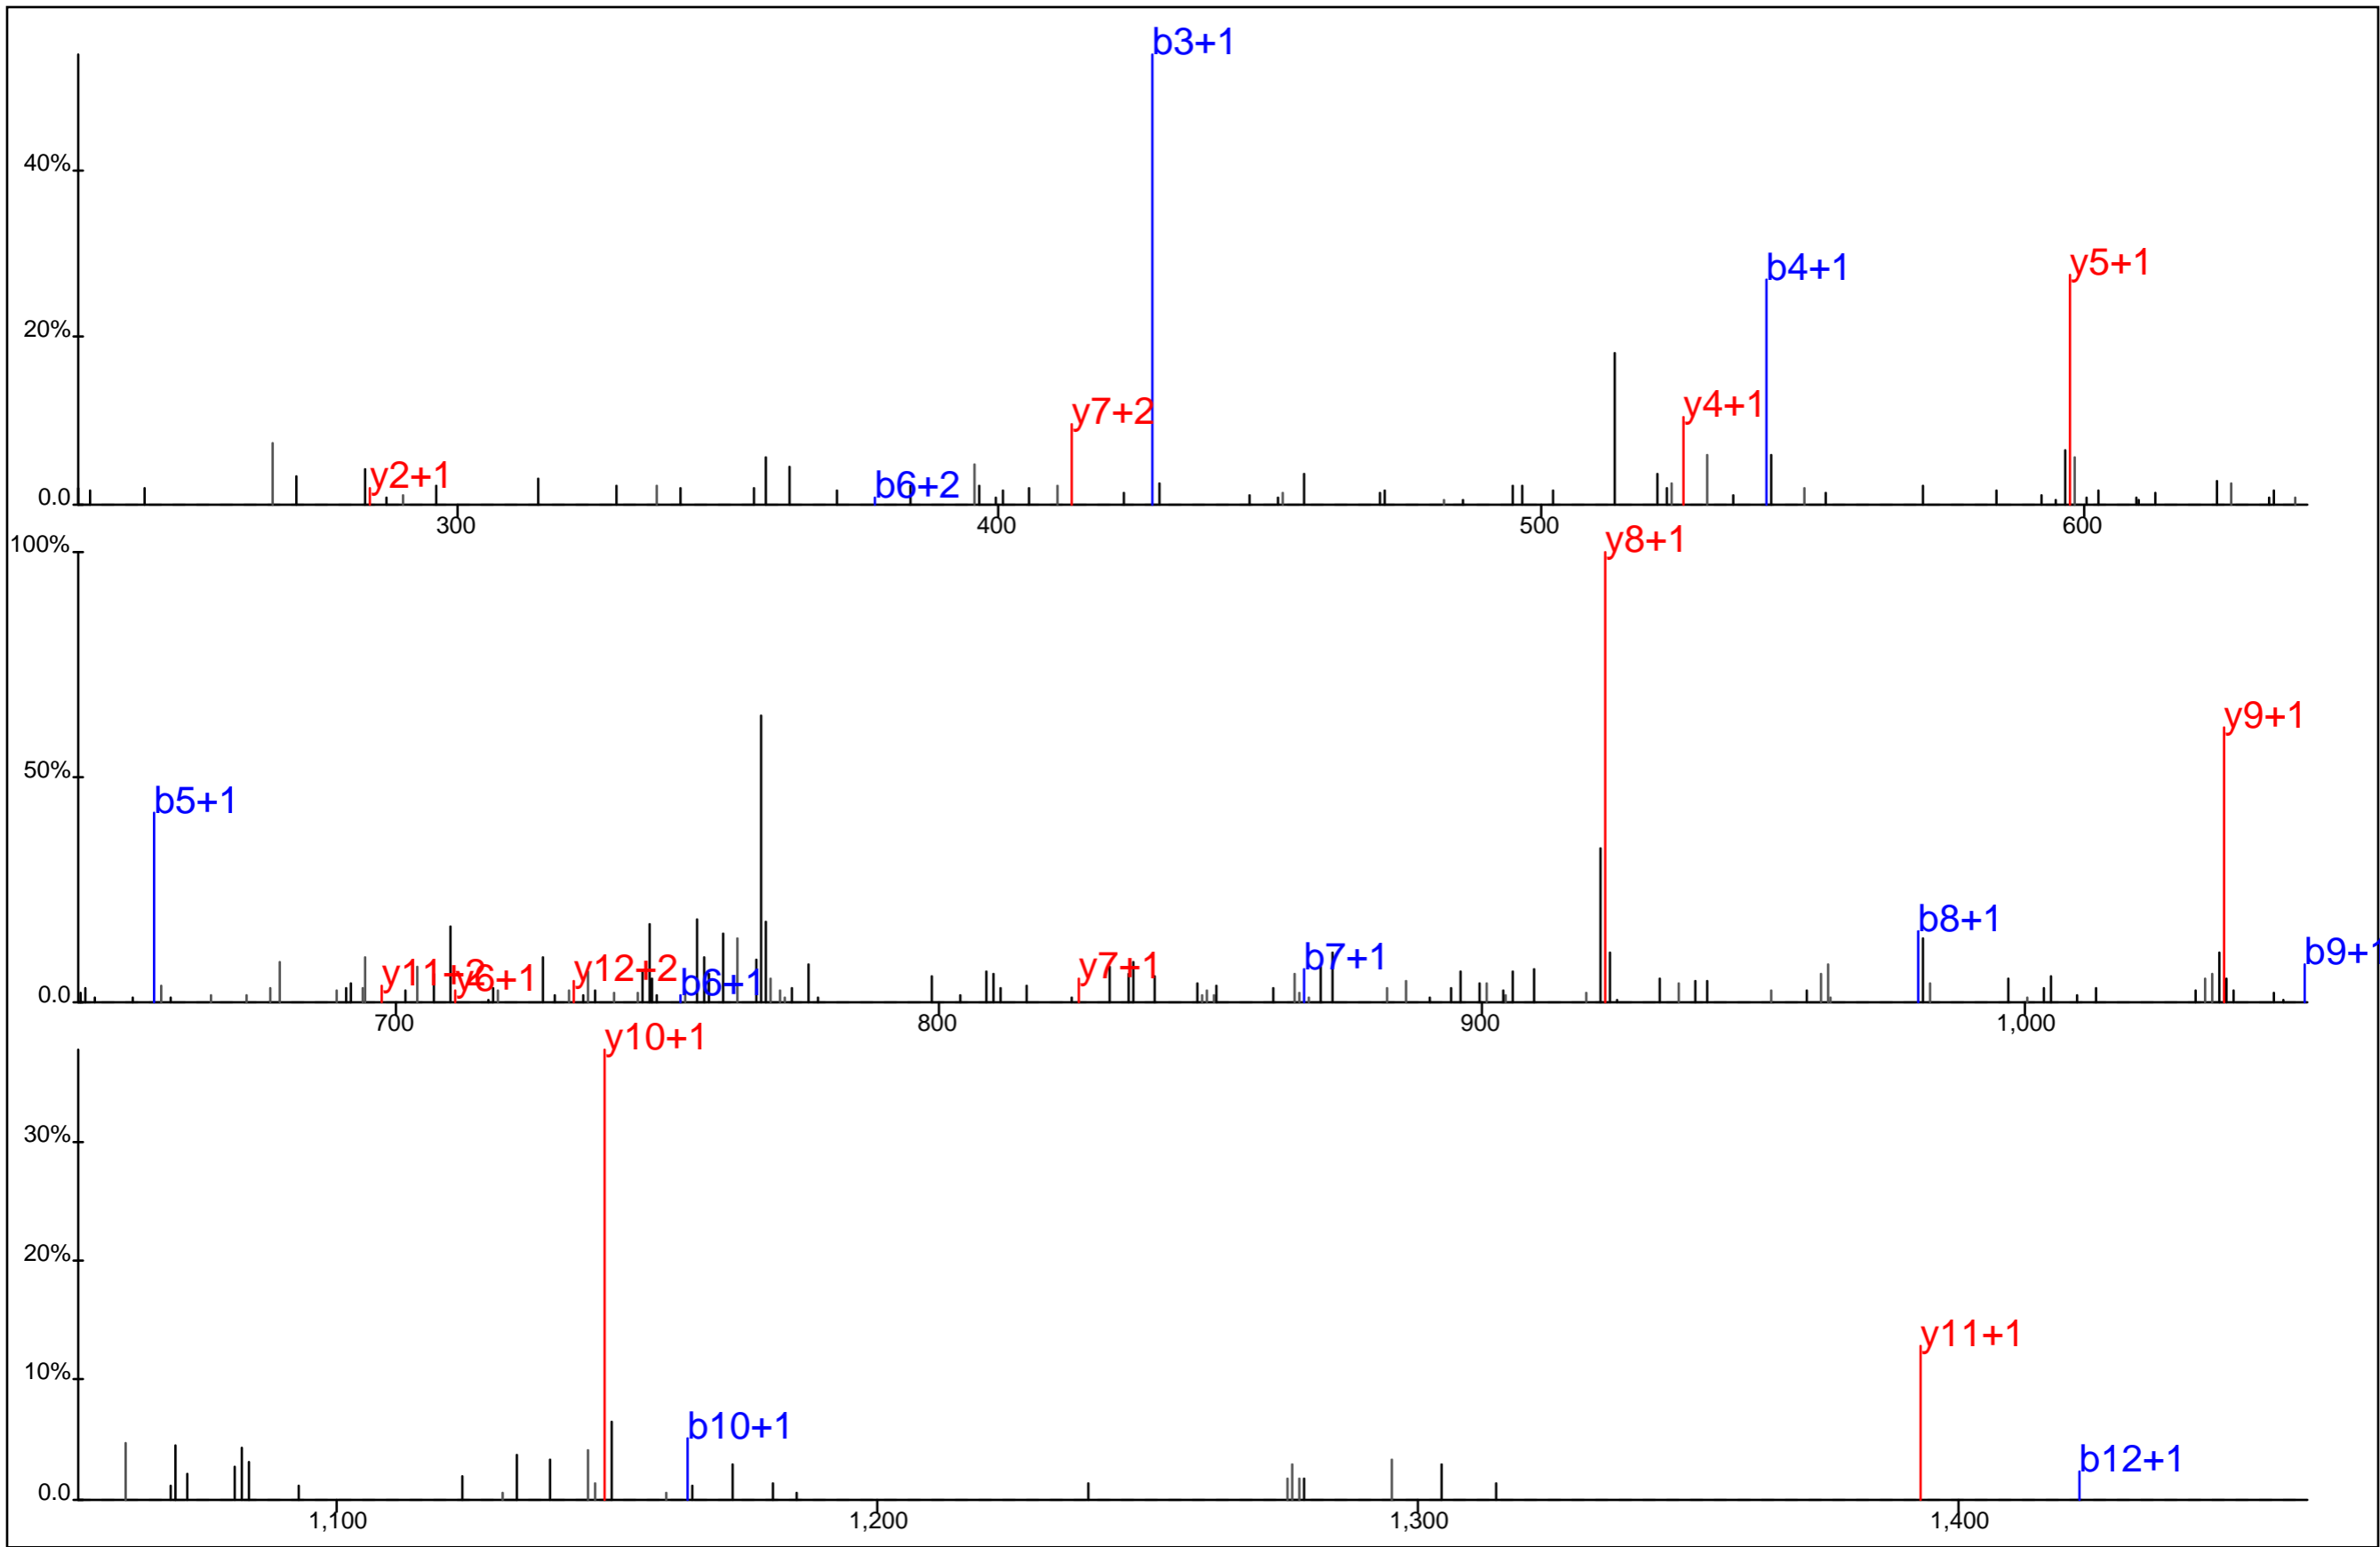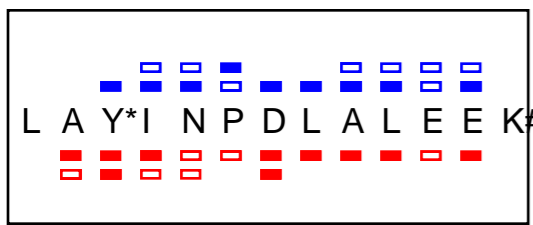

Protein Name: HOP  
 gi Accession: 5803181  
 Precursor Mass: 788.8952+2  
 Delta Mass: 5.212 ppm  
 XCorr: 48.71

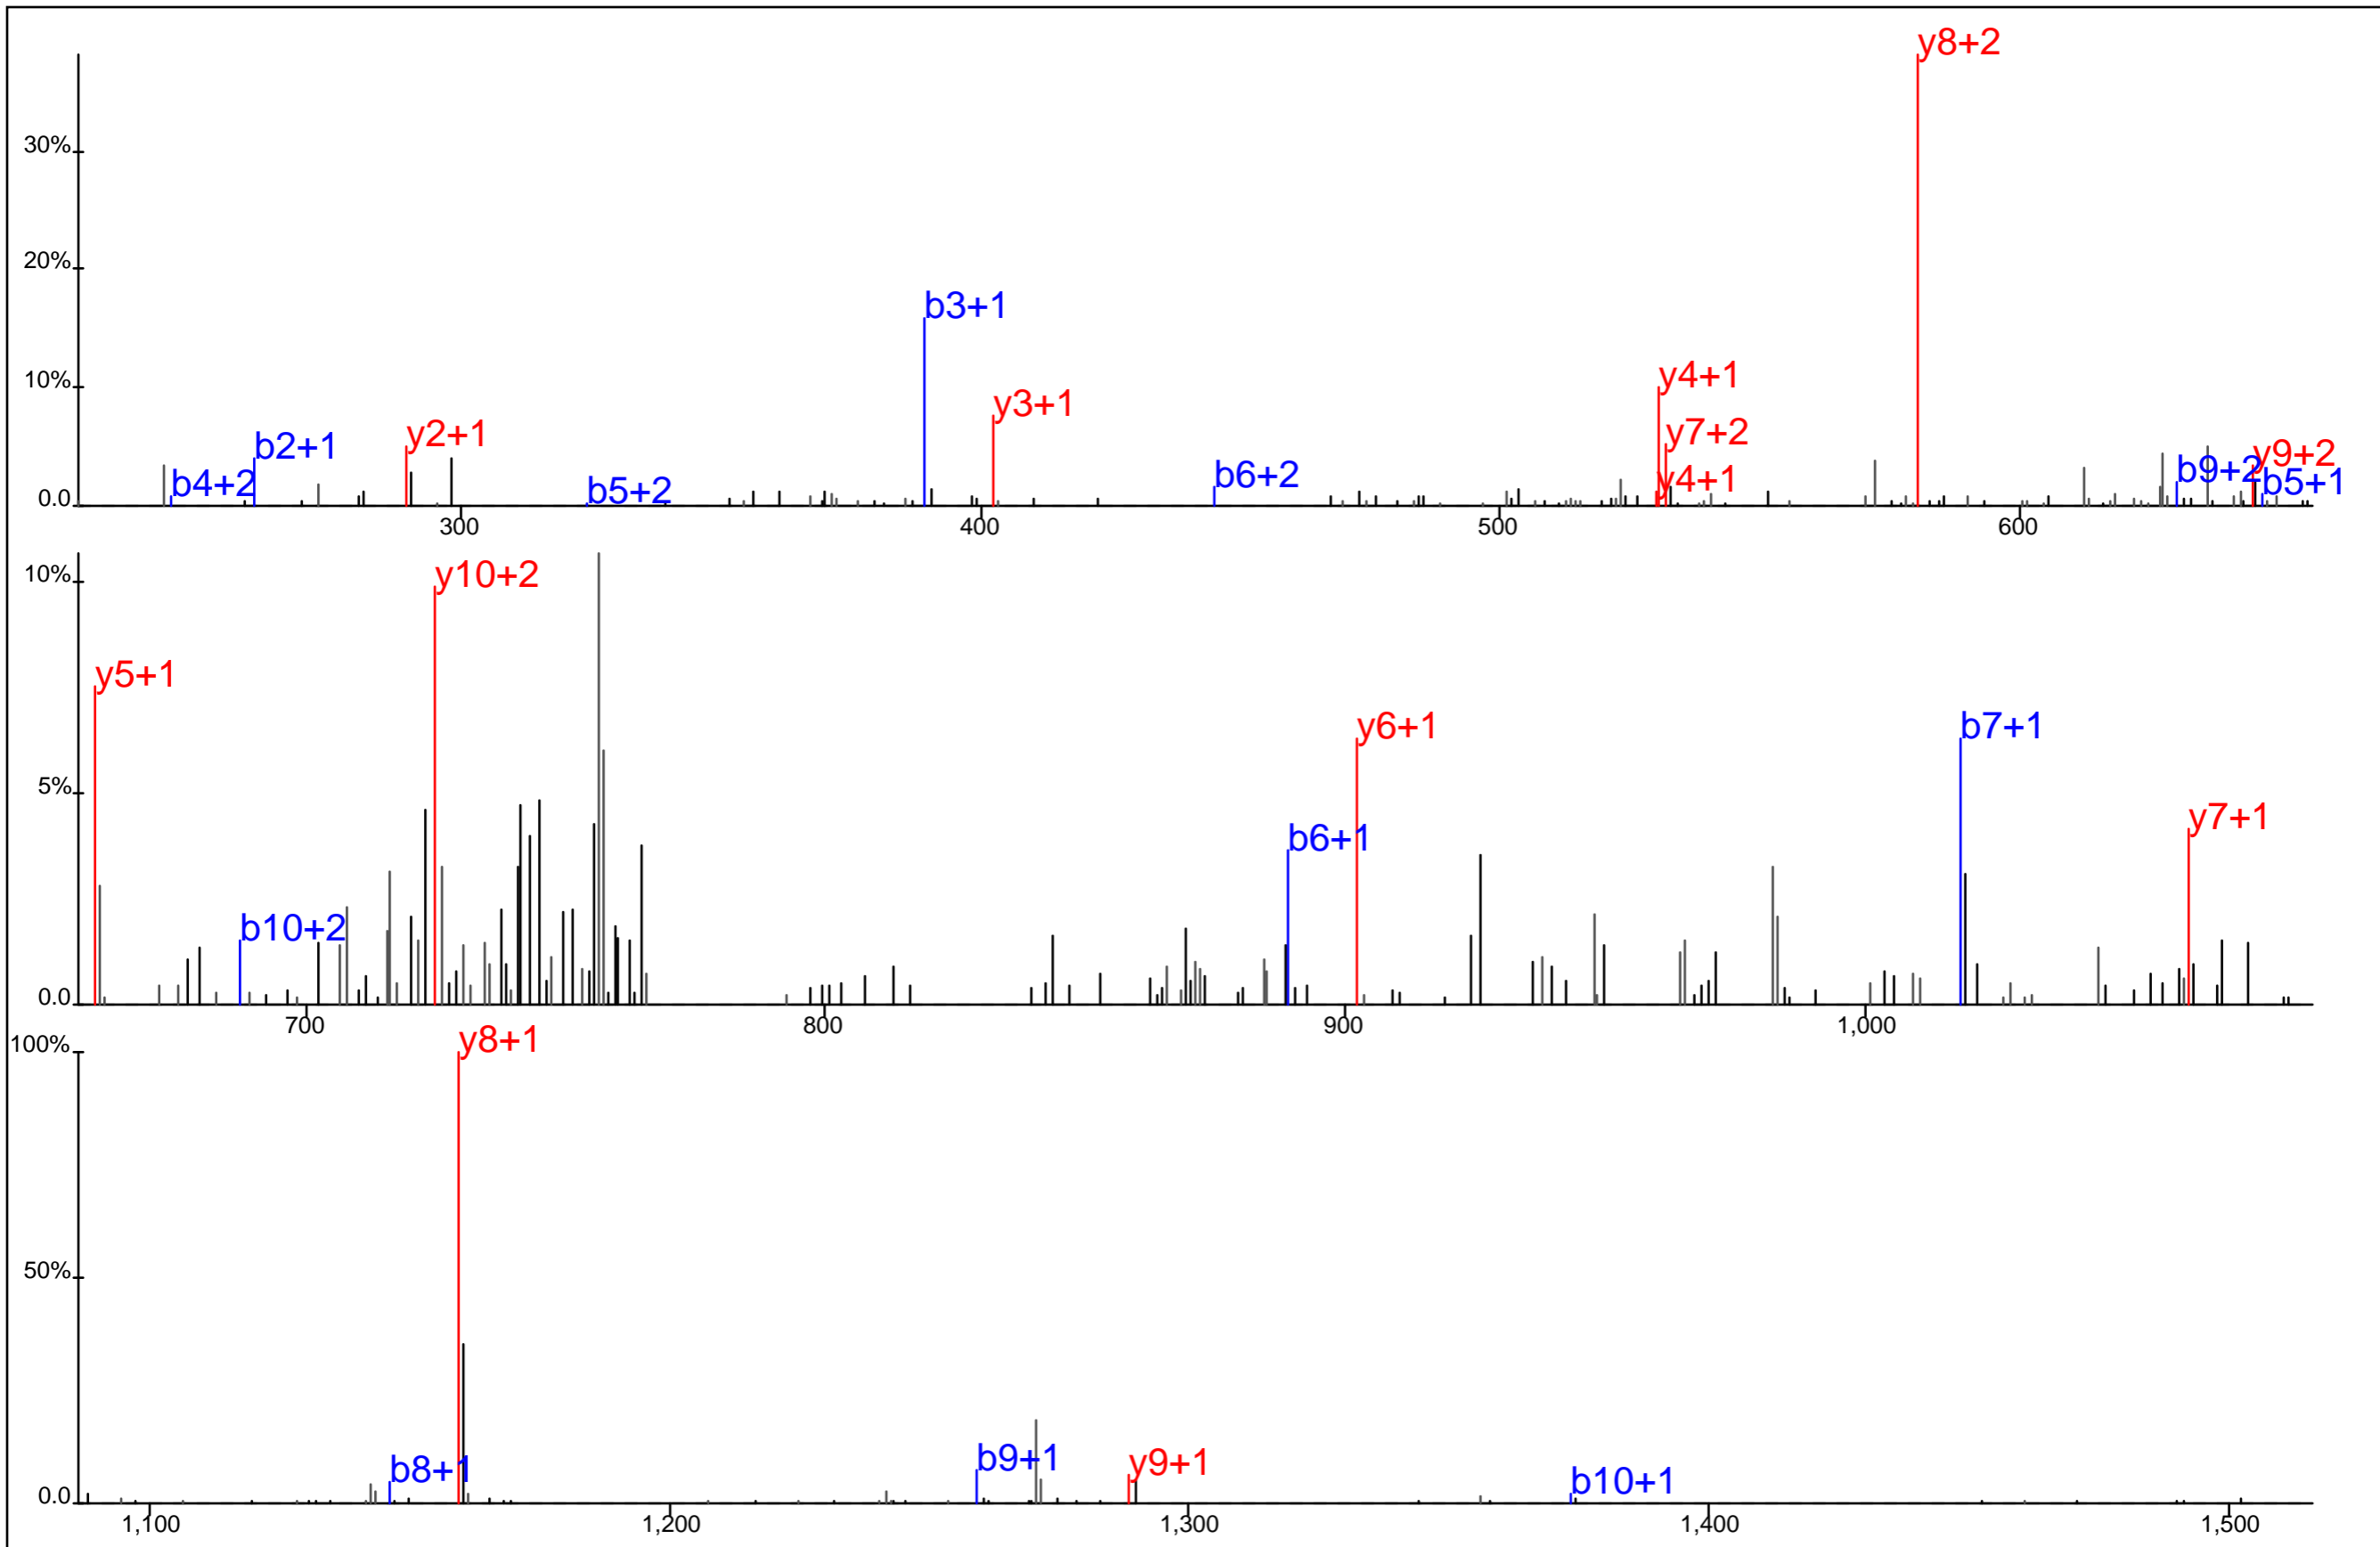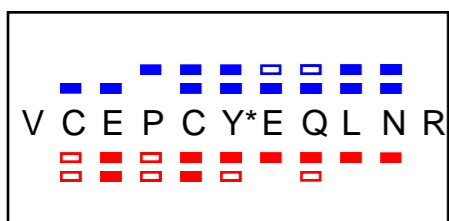

Protein Name: Hrs  
 gi Accession: 4758528  
 Precursor Mass: 774.3078+2  
 Delta Mass: 4.199 ppm  
 XCorr: 56.14

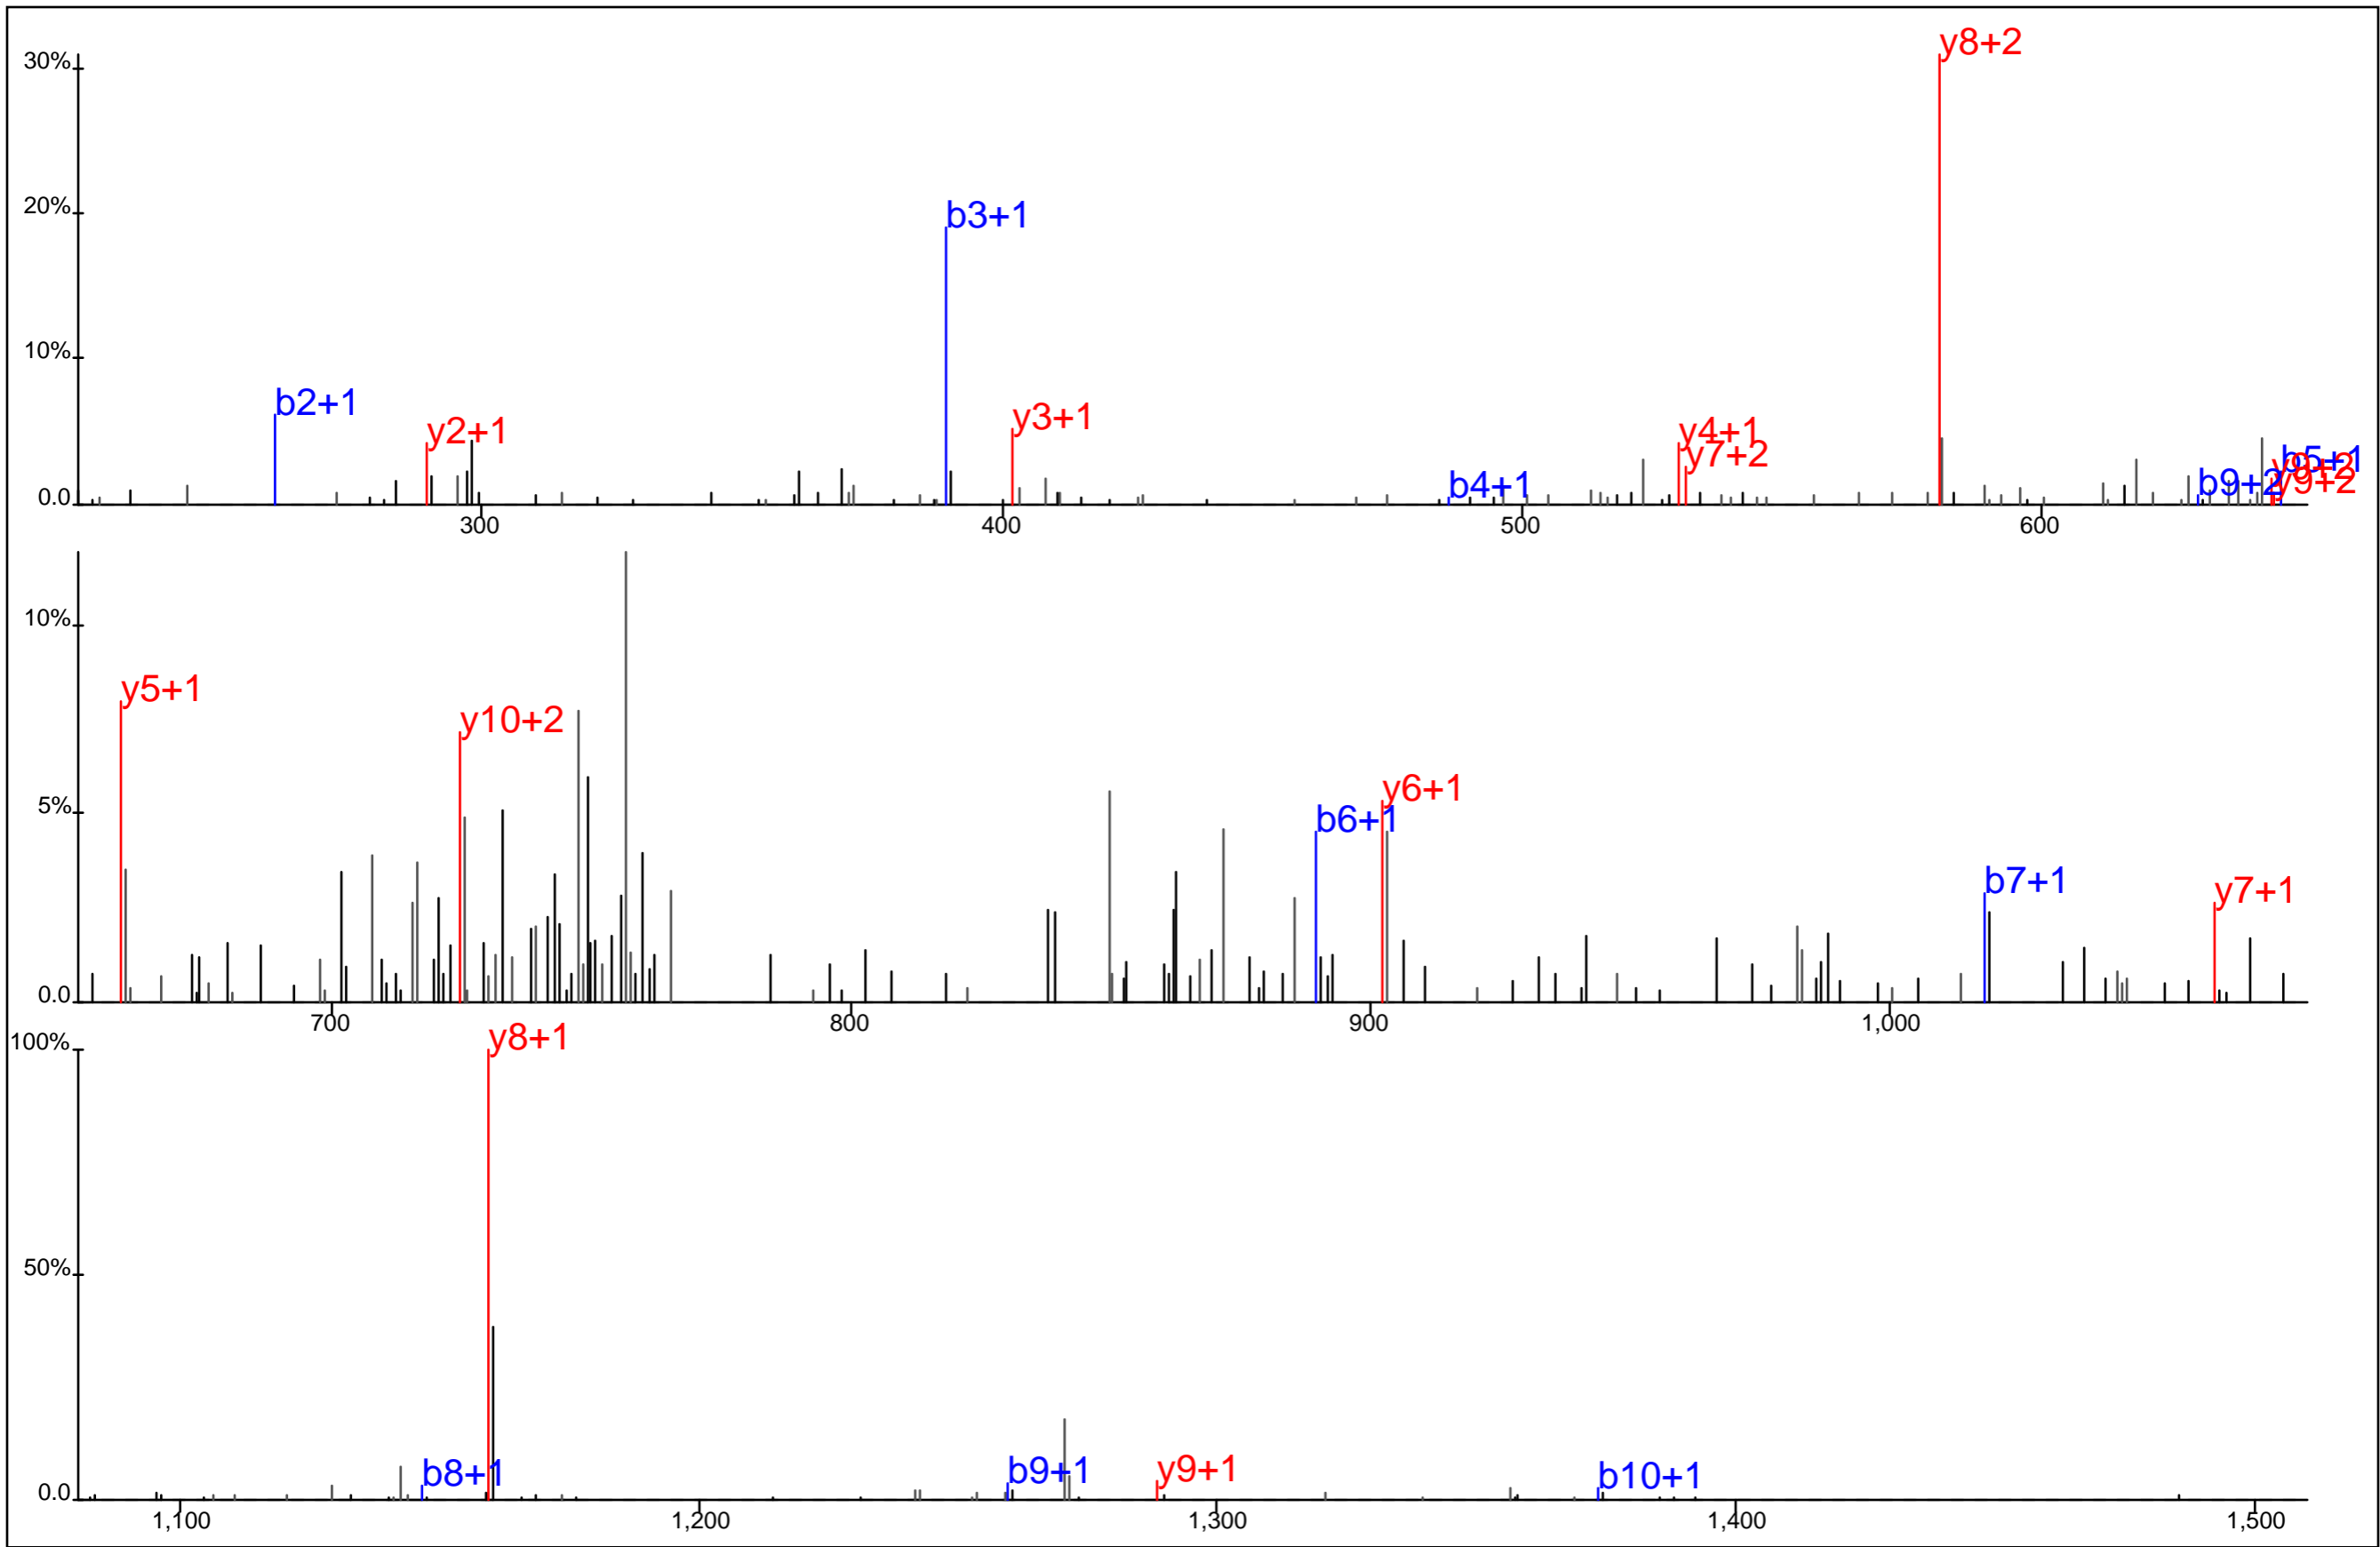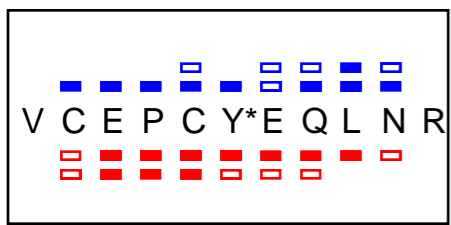

Protein Name: Hrs  
 gi Accession: 4758528  
 Precursor Mass: 774.3096+2  
 Delta Mass: 6.486 ppm  
 XCorr: 45.98

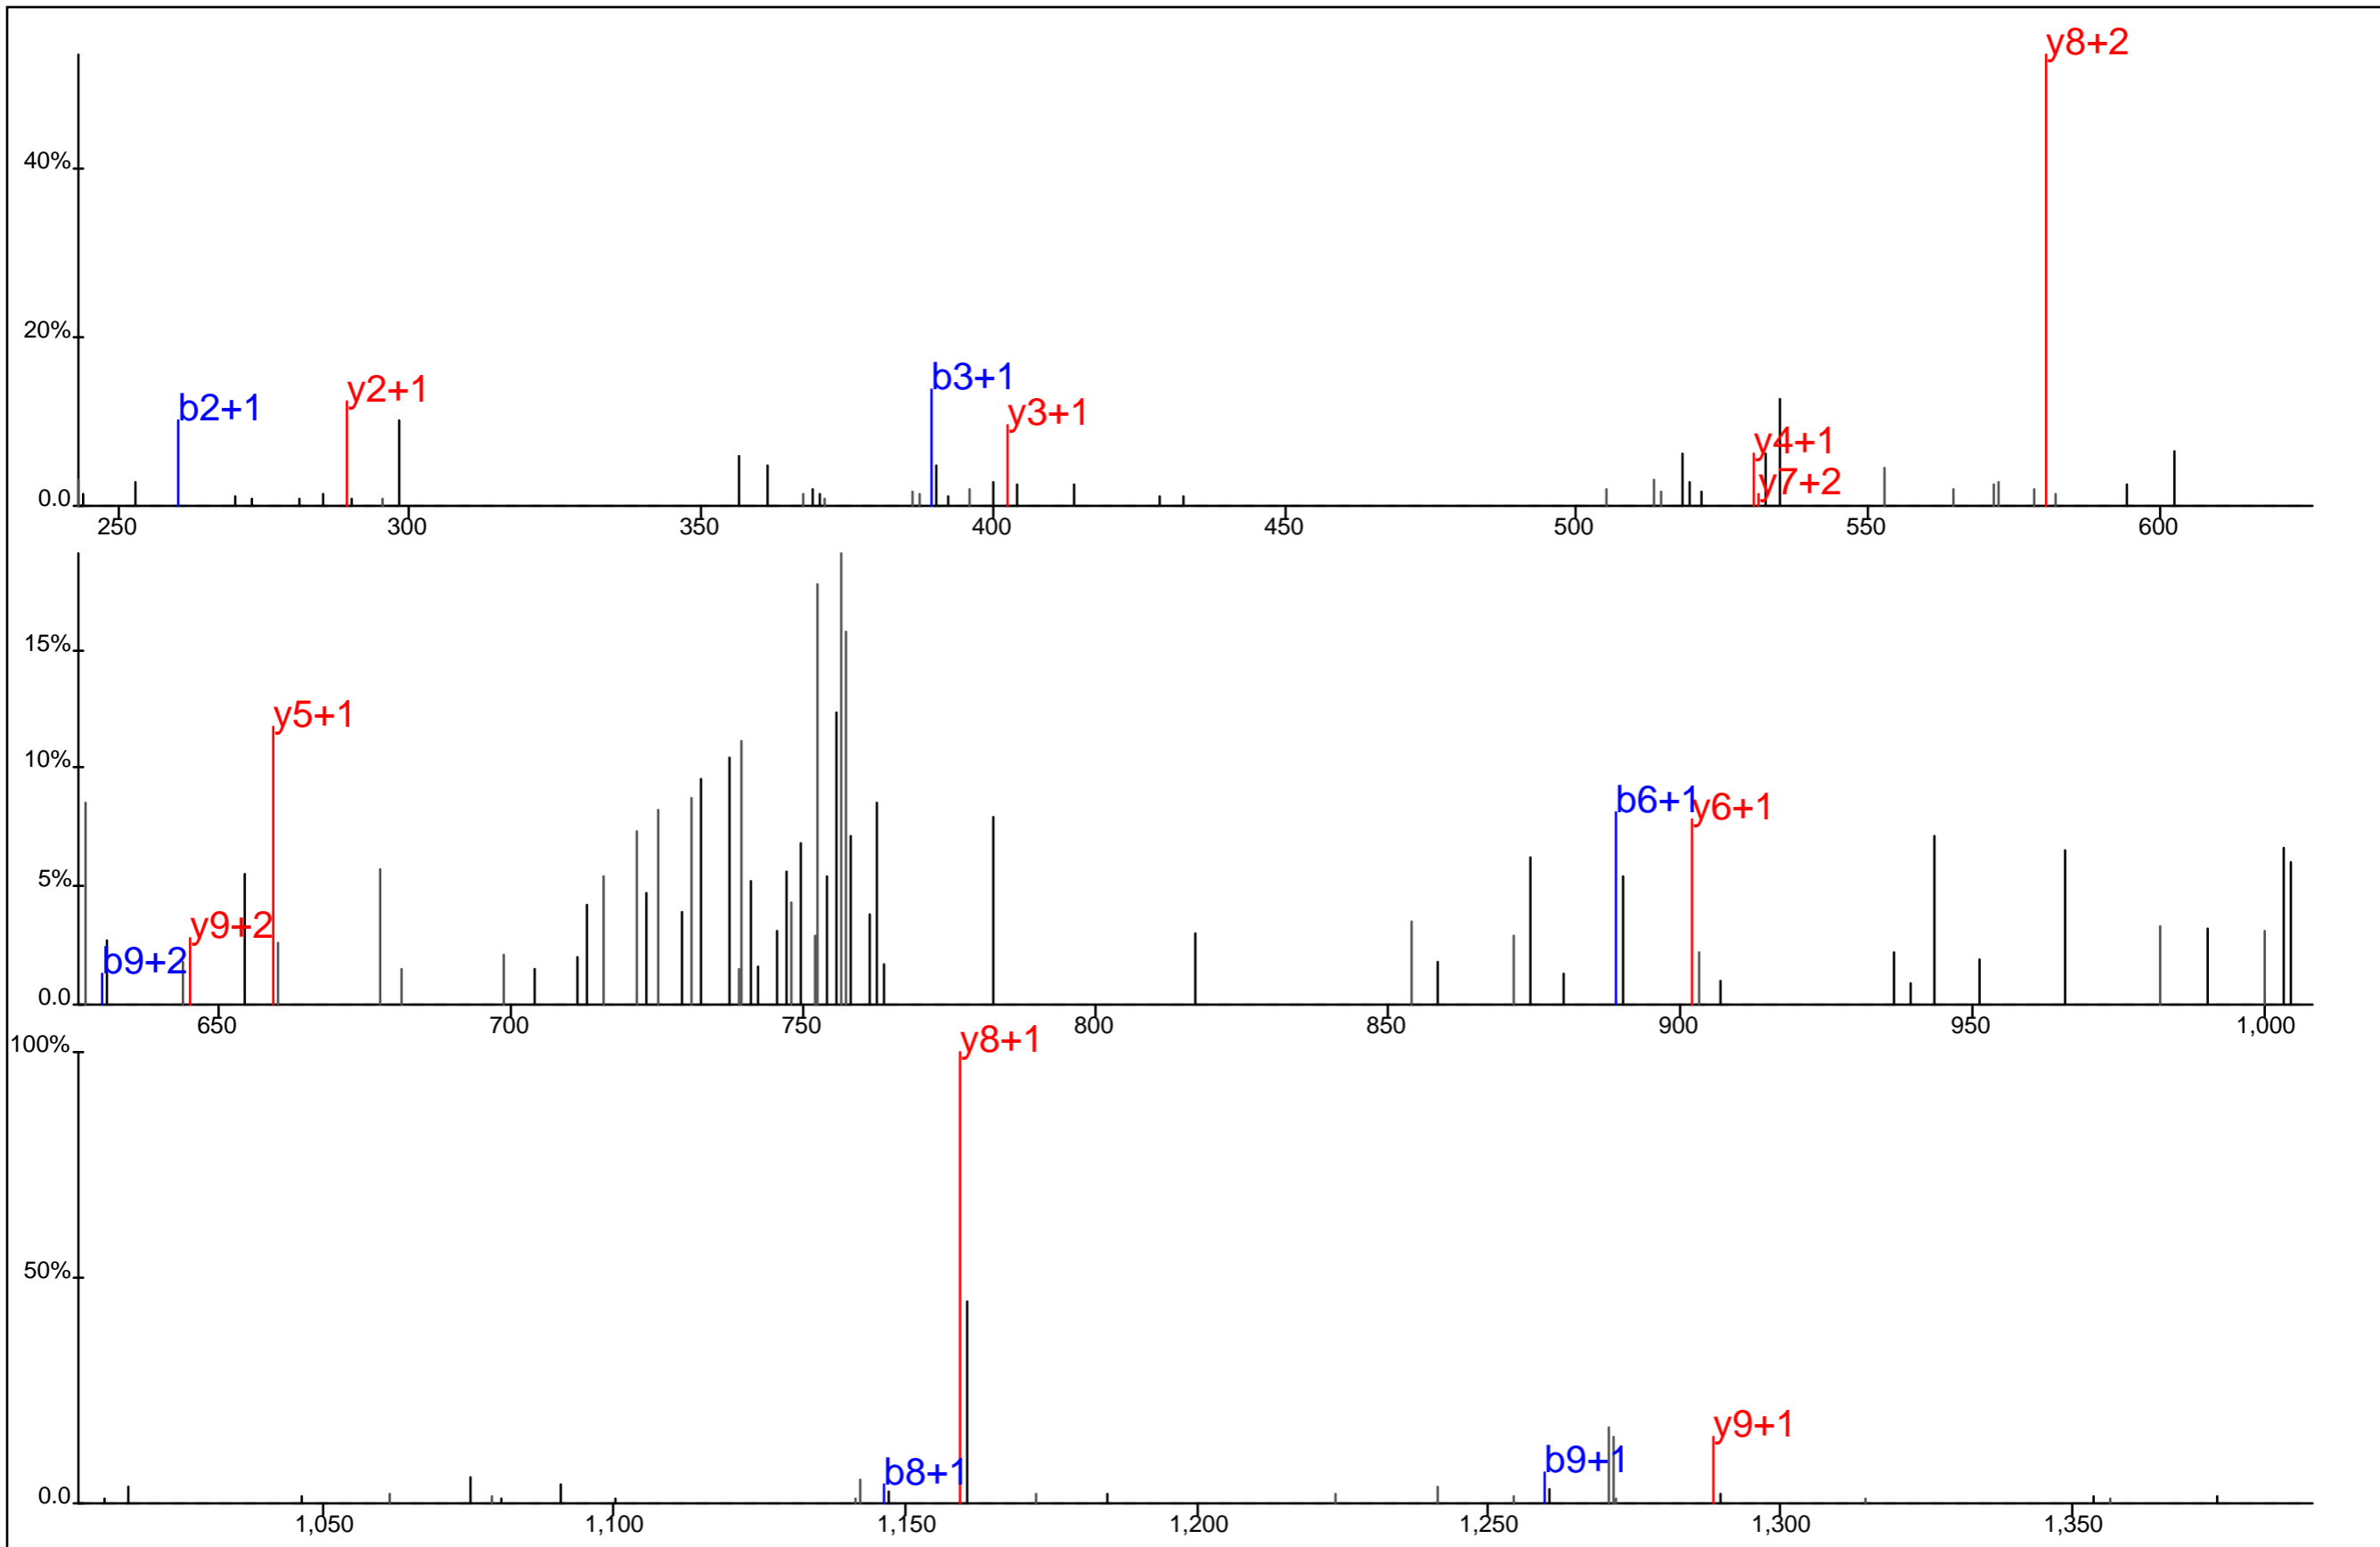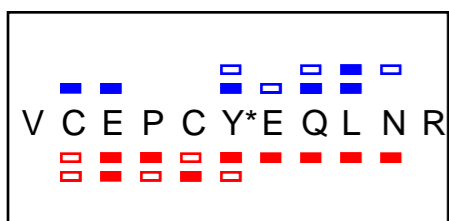

Protein Name: Hrs  
 gi Accession: 4758528  
 Precursor Mass: 774.3051+2  
 Delta Mass: 0.651 ppm  
 XCorr: 27.09

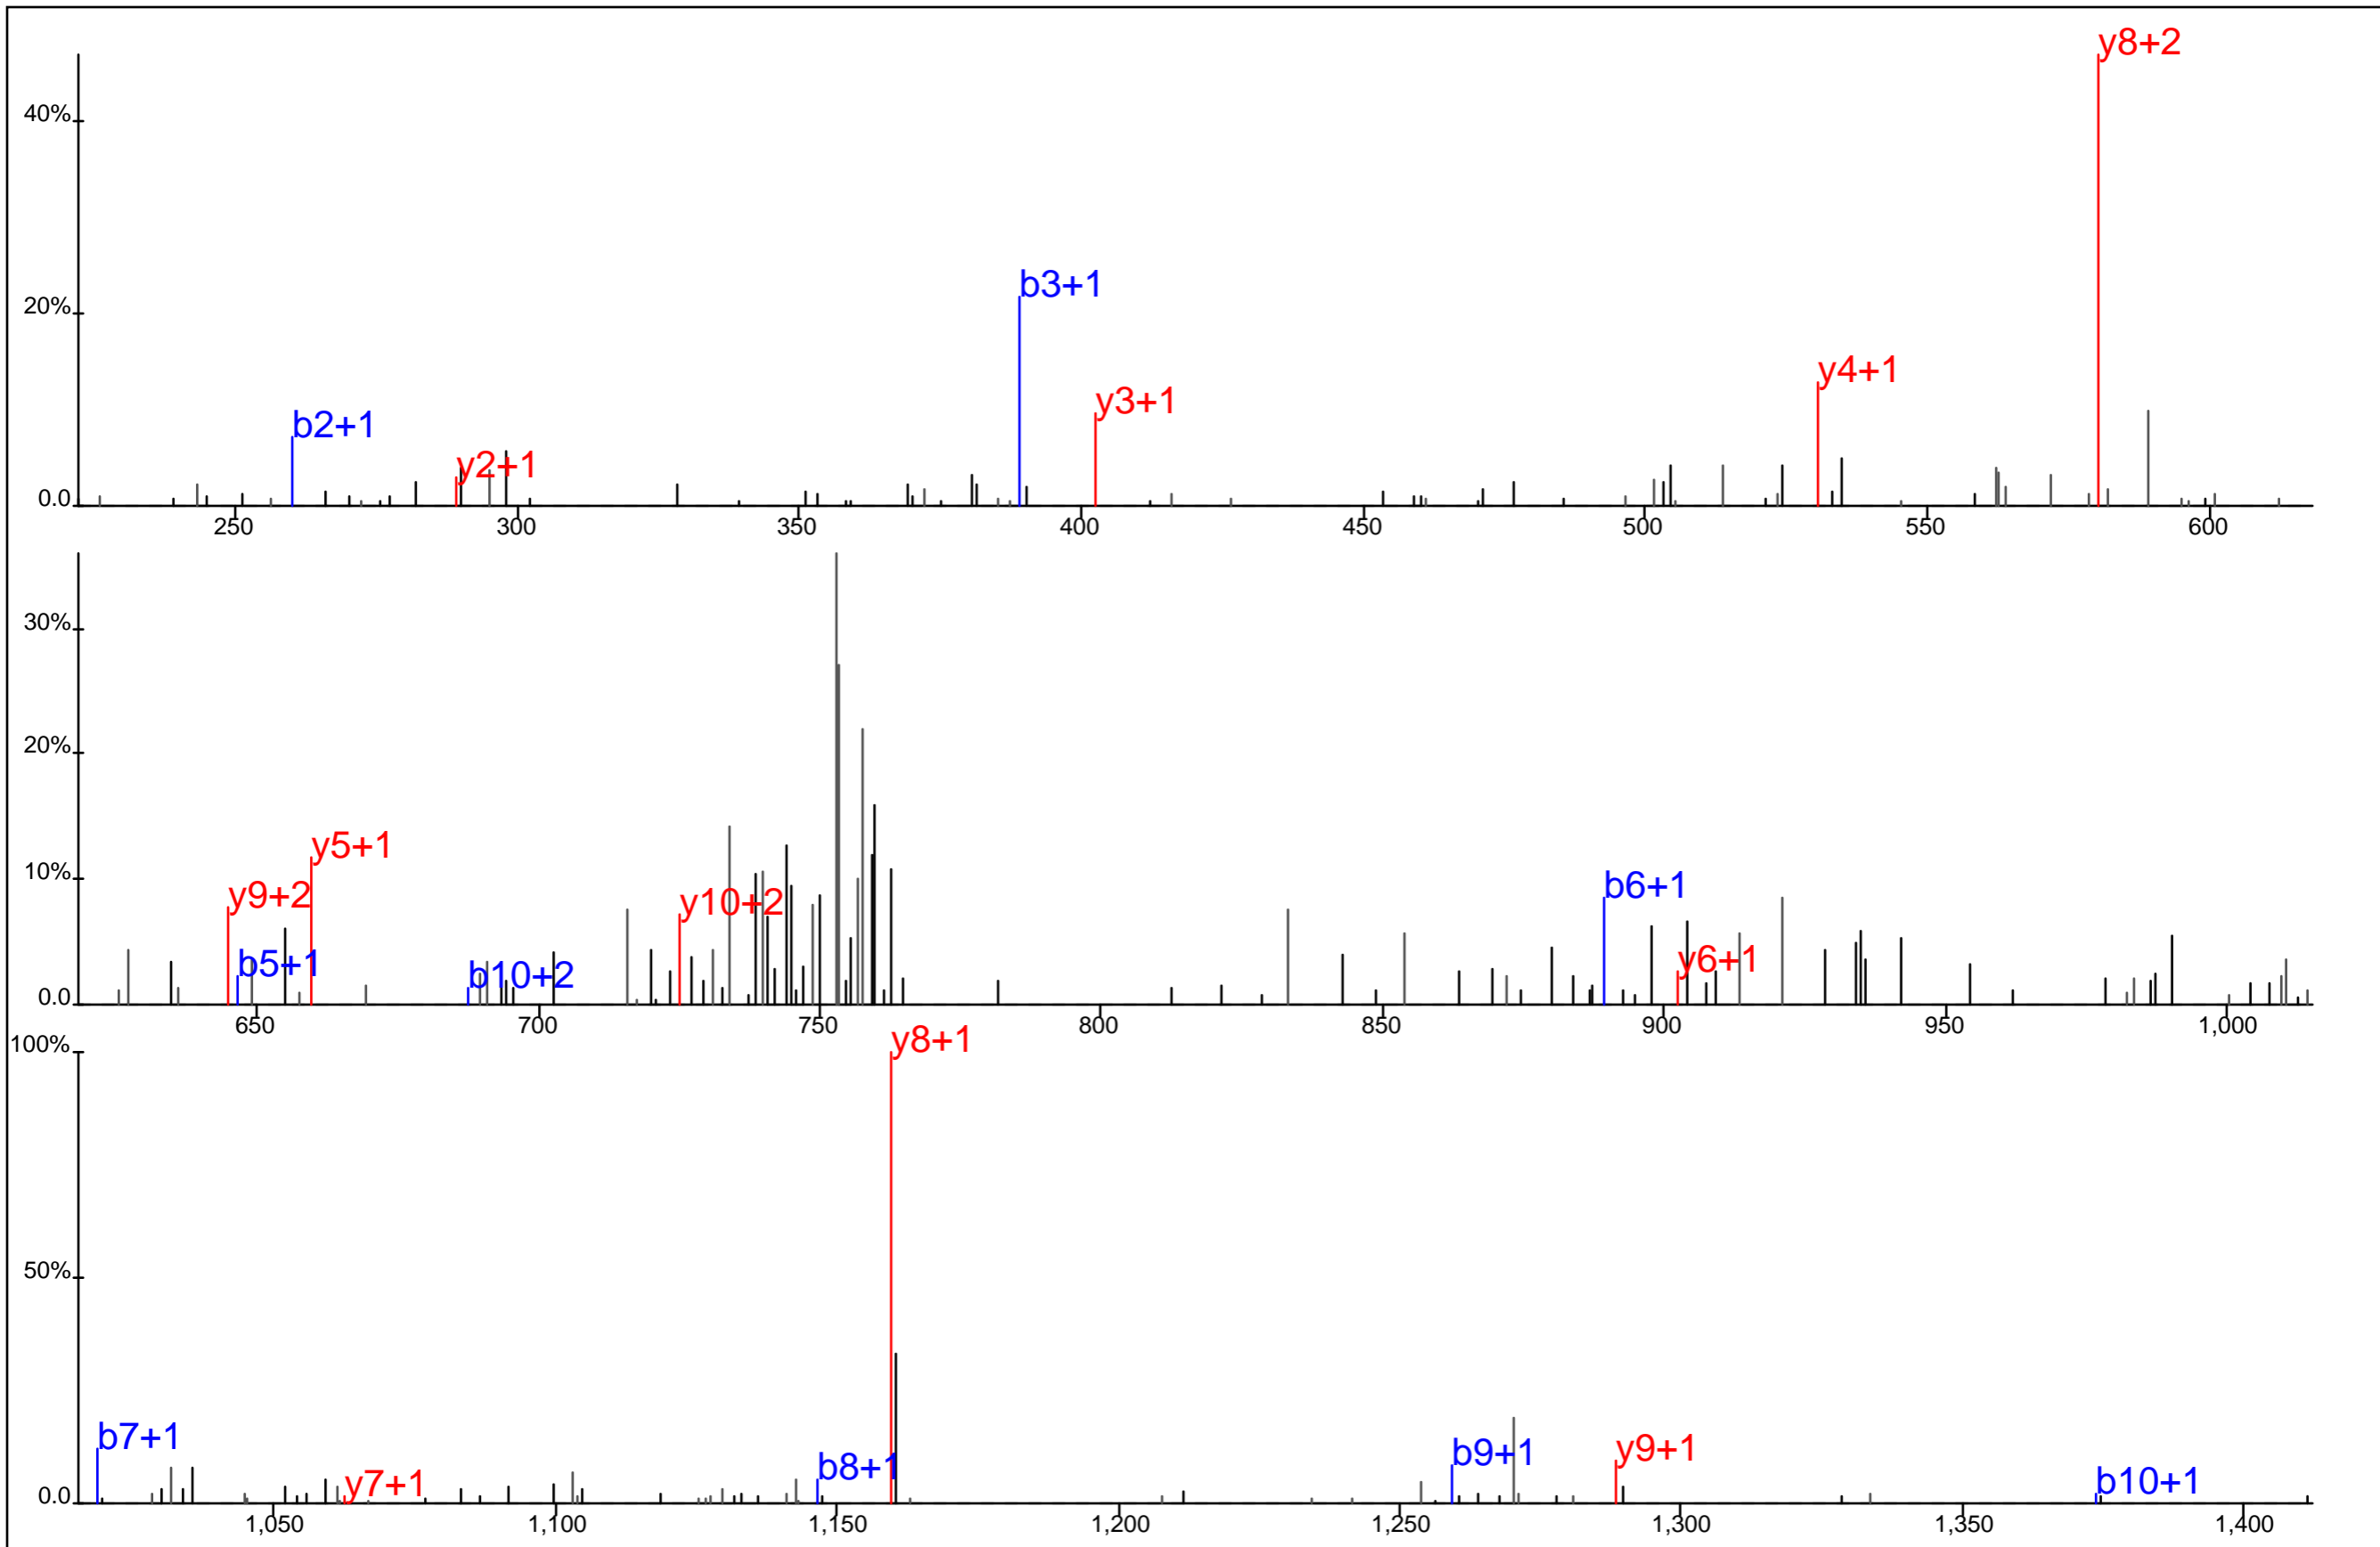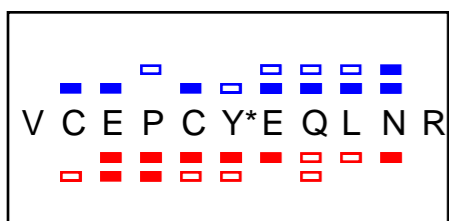

Protein Name: Hrs  
 gi Accession: 4758528  
 Precursor Mass: 774.3082+2  
 Delta Mass: 4.677 ppm  
 XCorr: 27.5



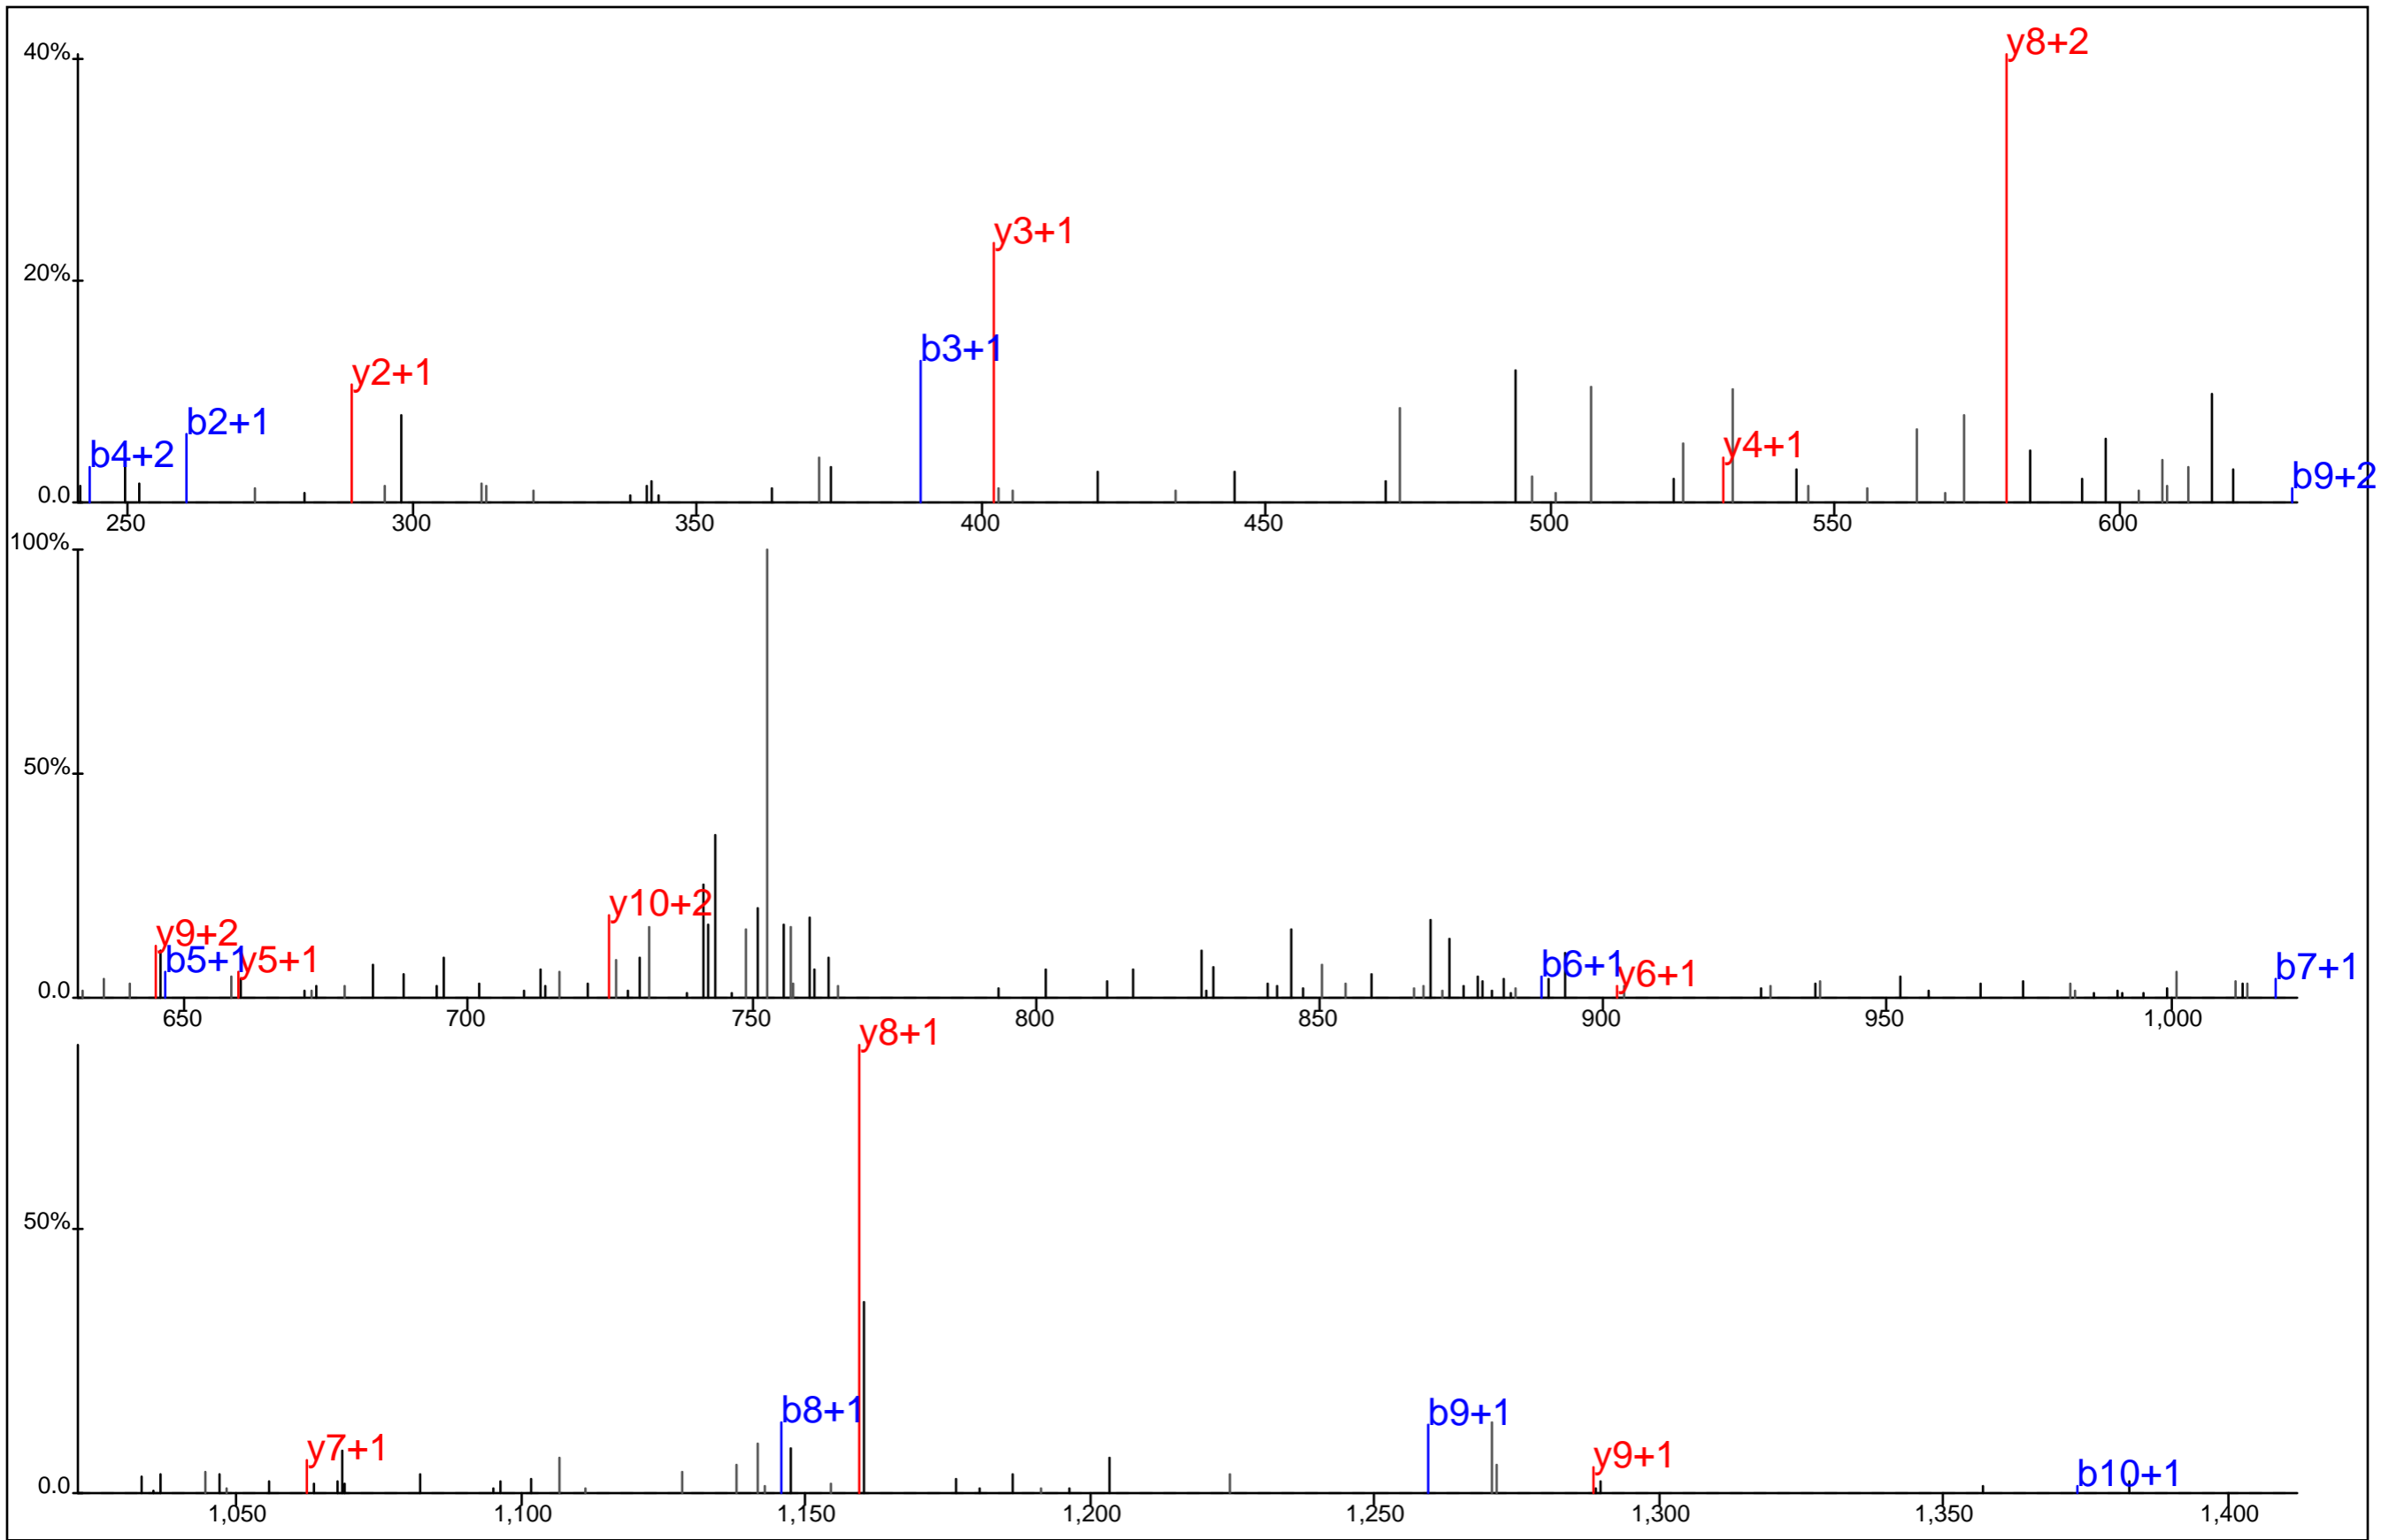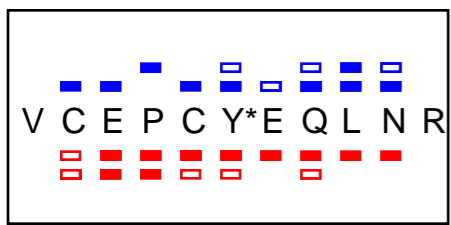

Protein Name: Hrs  
 gi Accession: 4758528  
 Precursor Mass: 774.3052+2  
 Delta Mass: 0.806 ppm  
 XCorr: 18.08

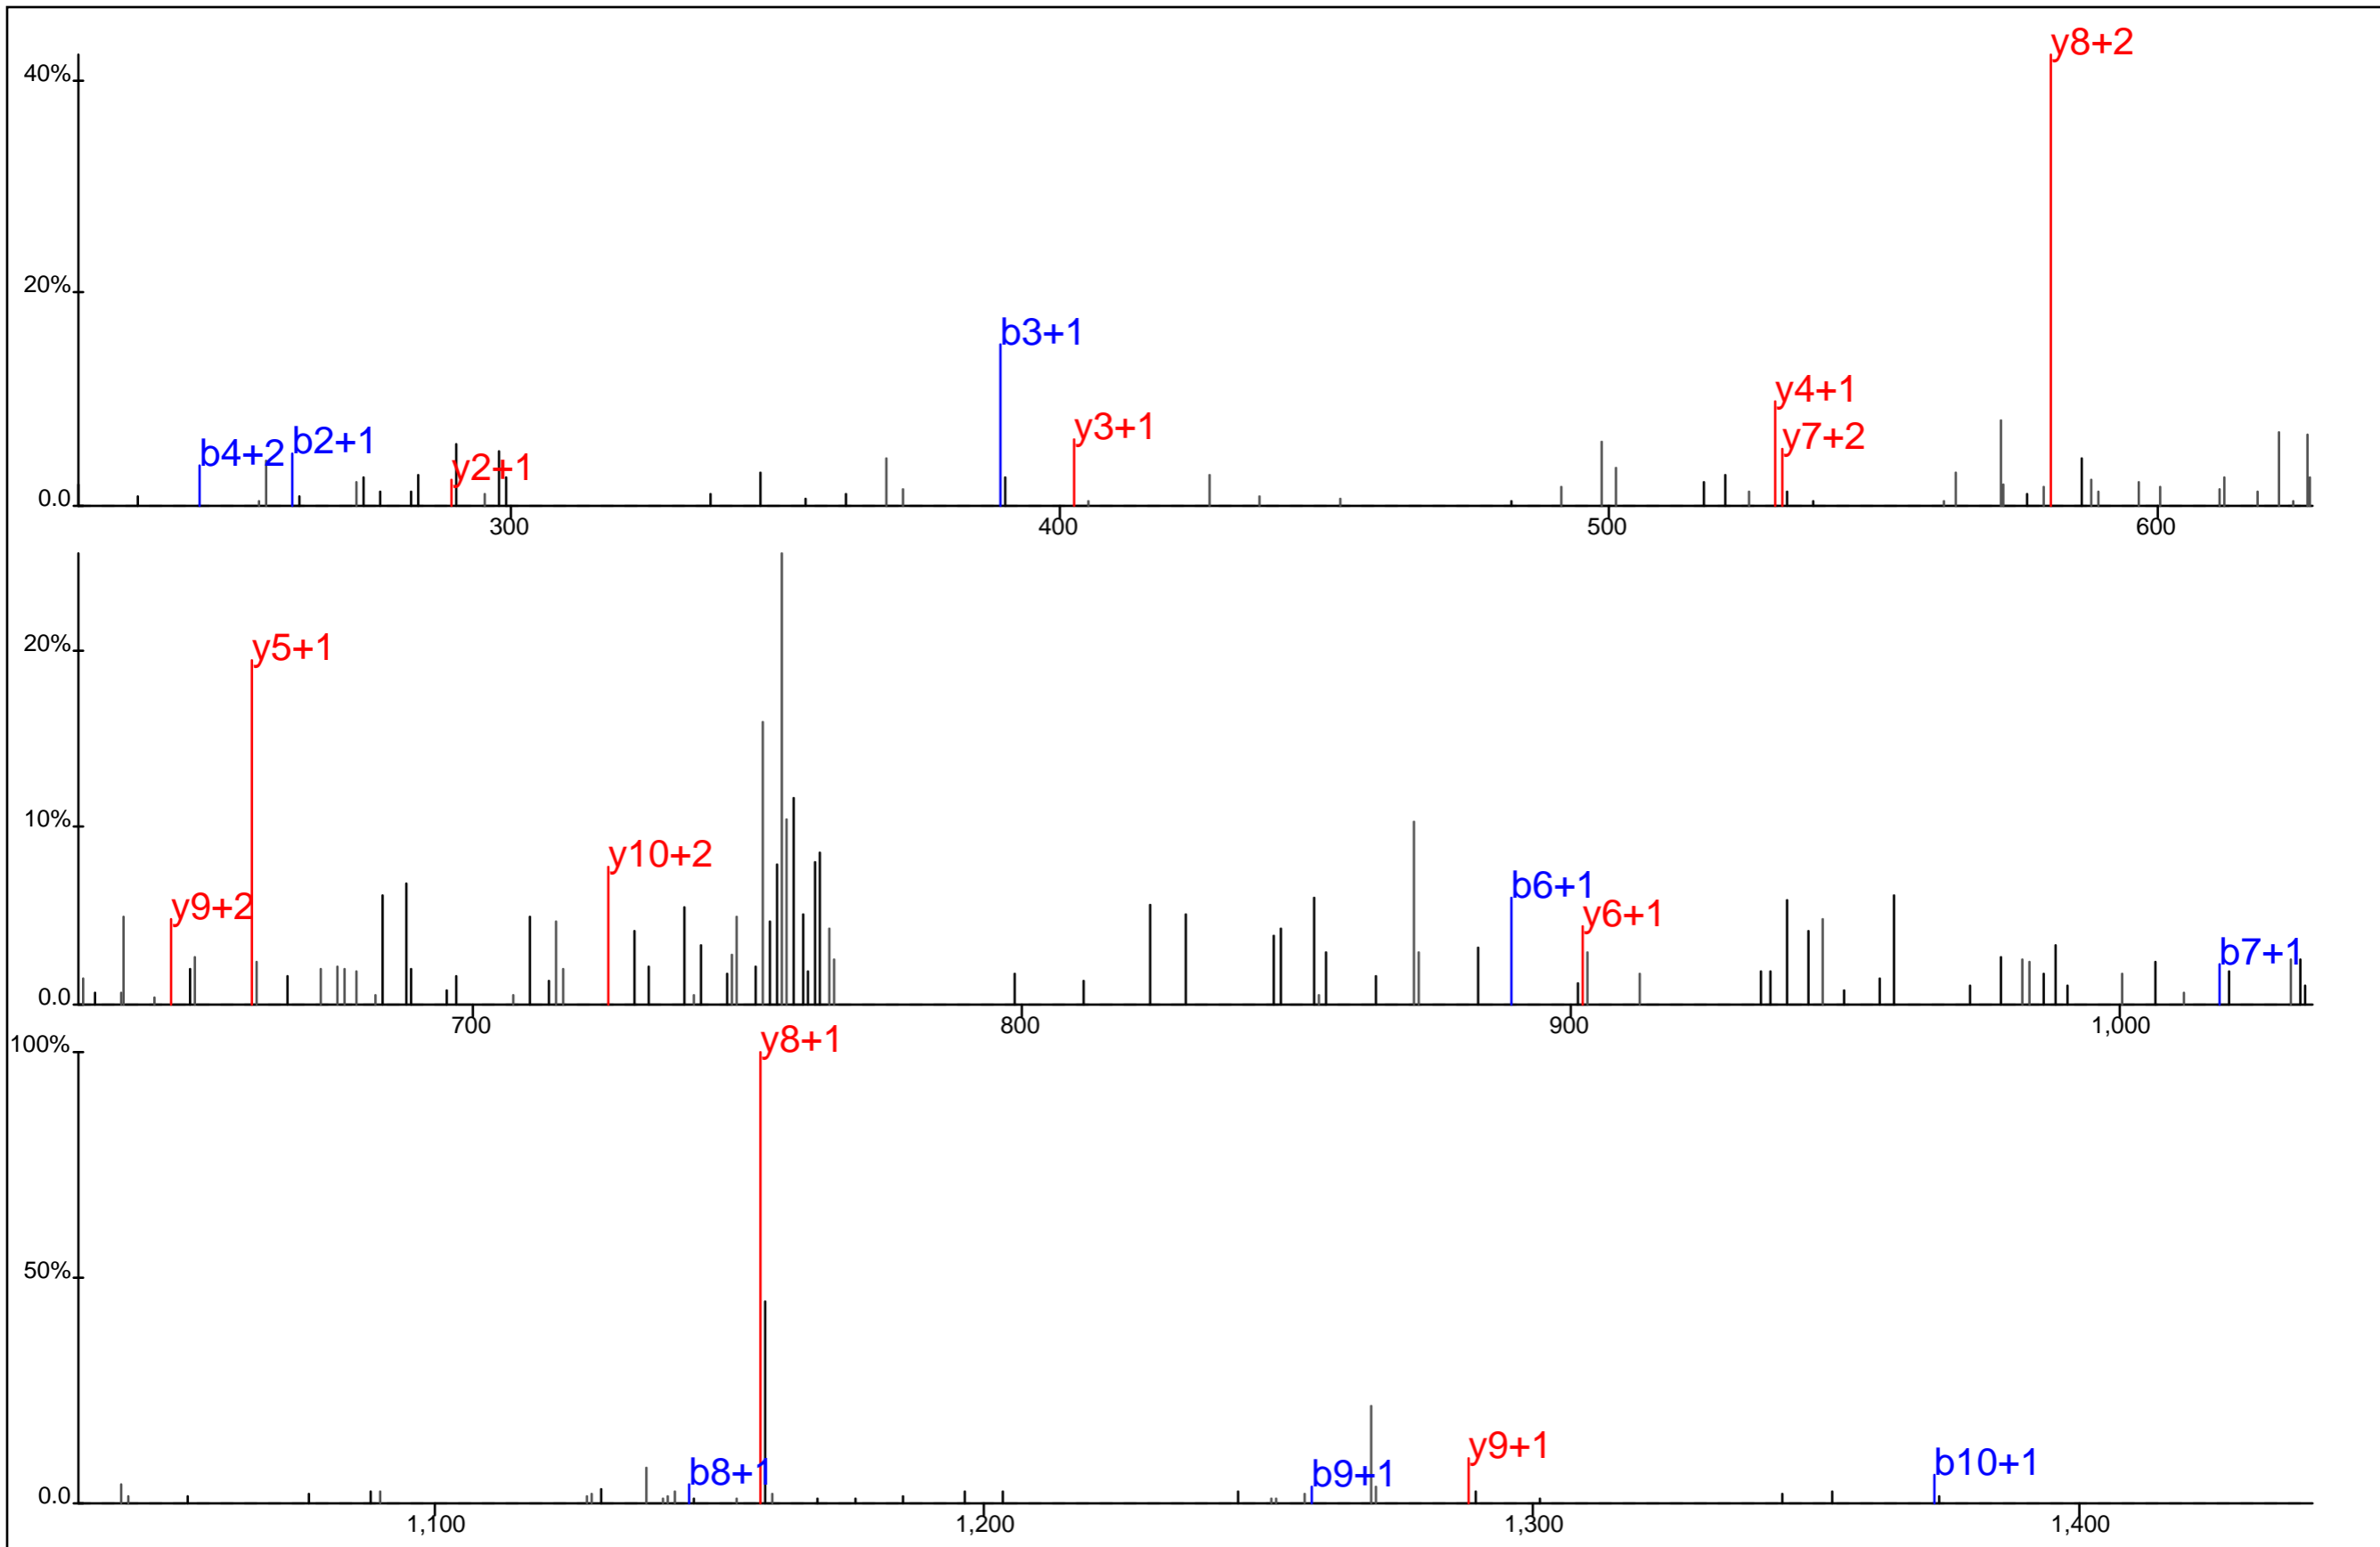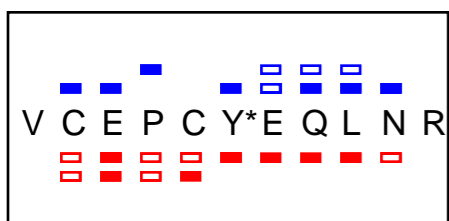

Protein Name: Hrs  
 gi Accession: 4758528  
 Precursor Mass: 774.3076+2  
 Delta Mass: 3.889 ppm  
 XCorr: 20.73





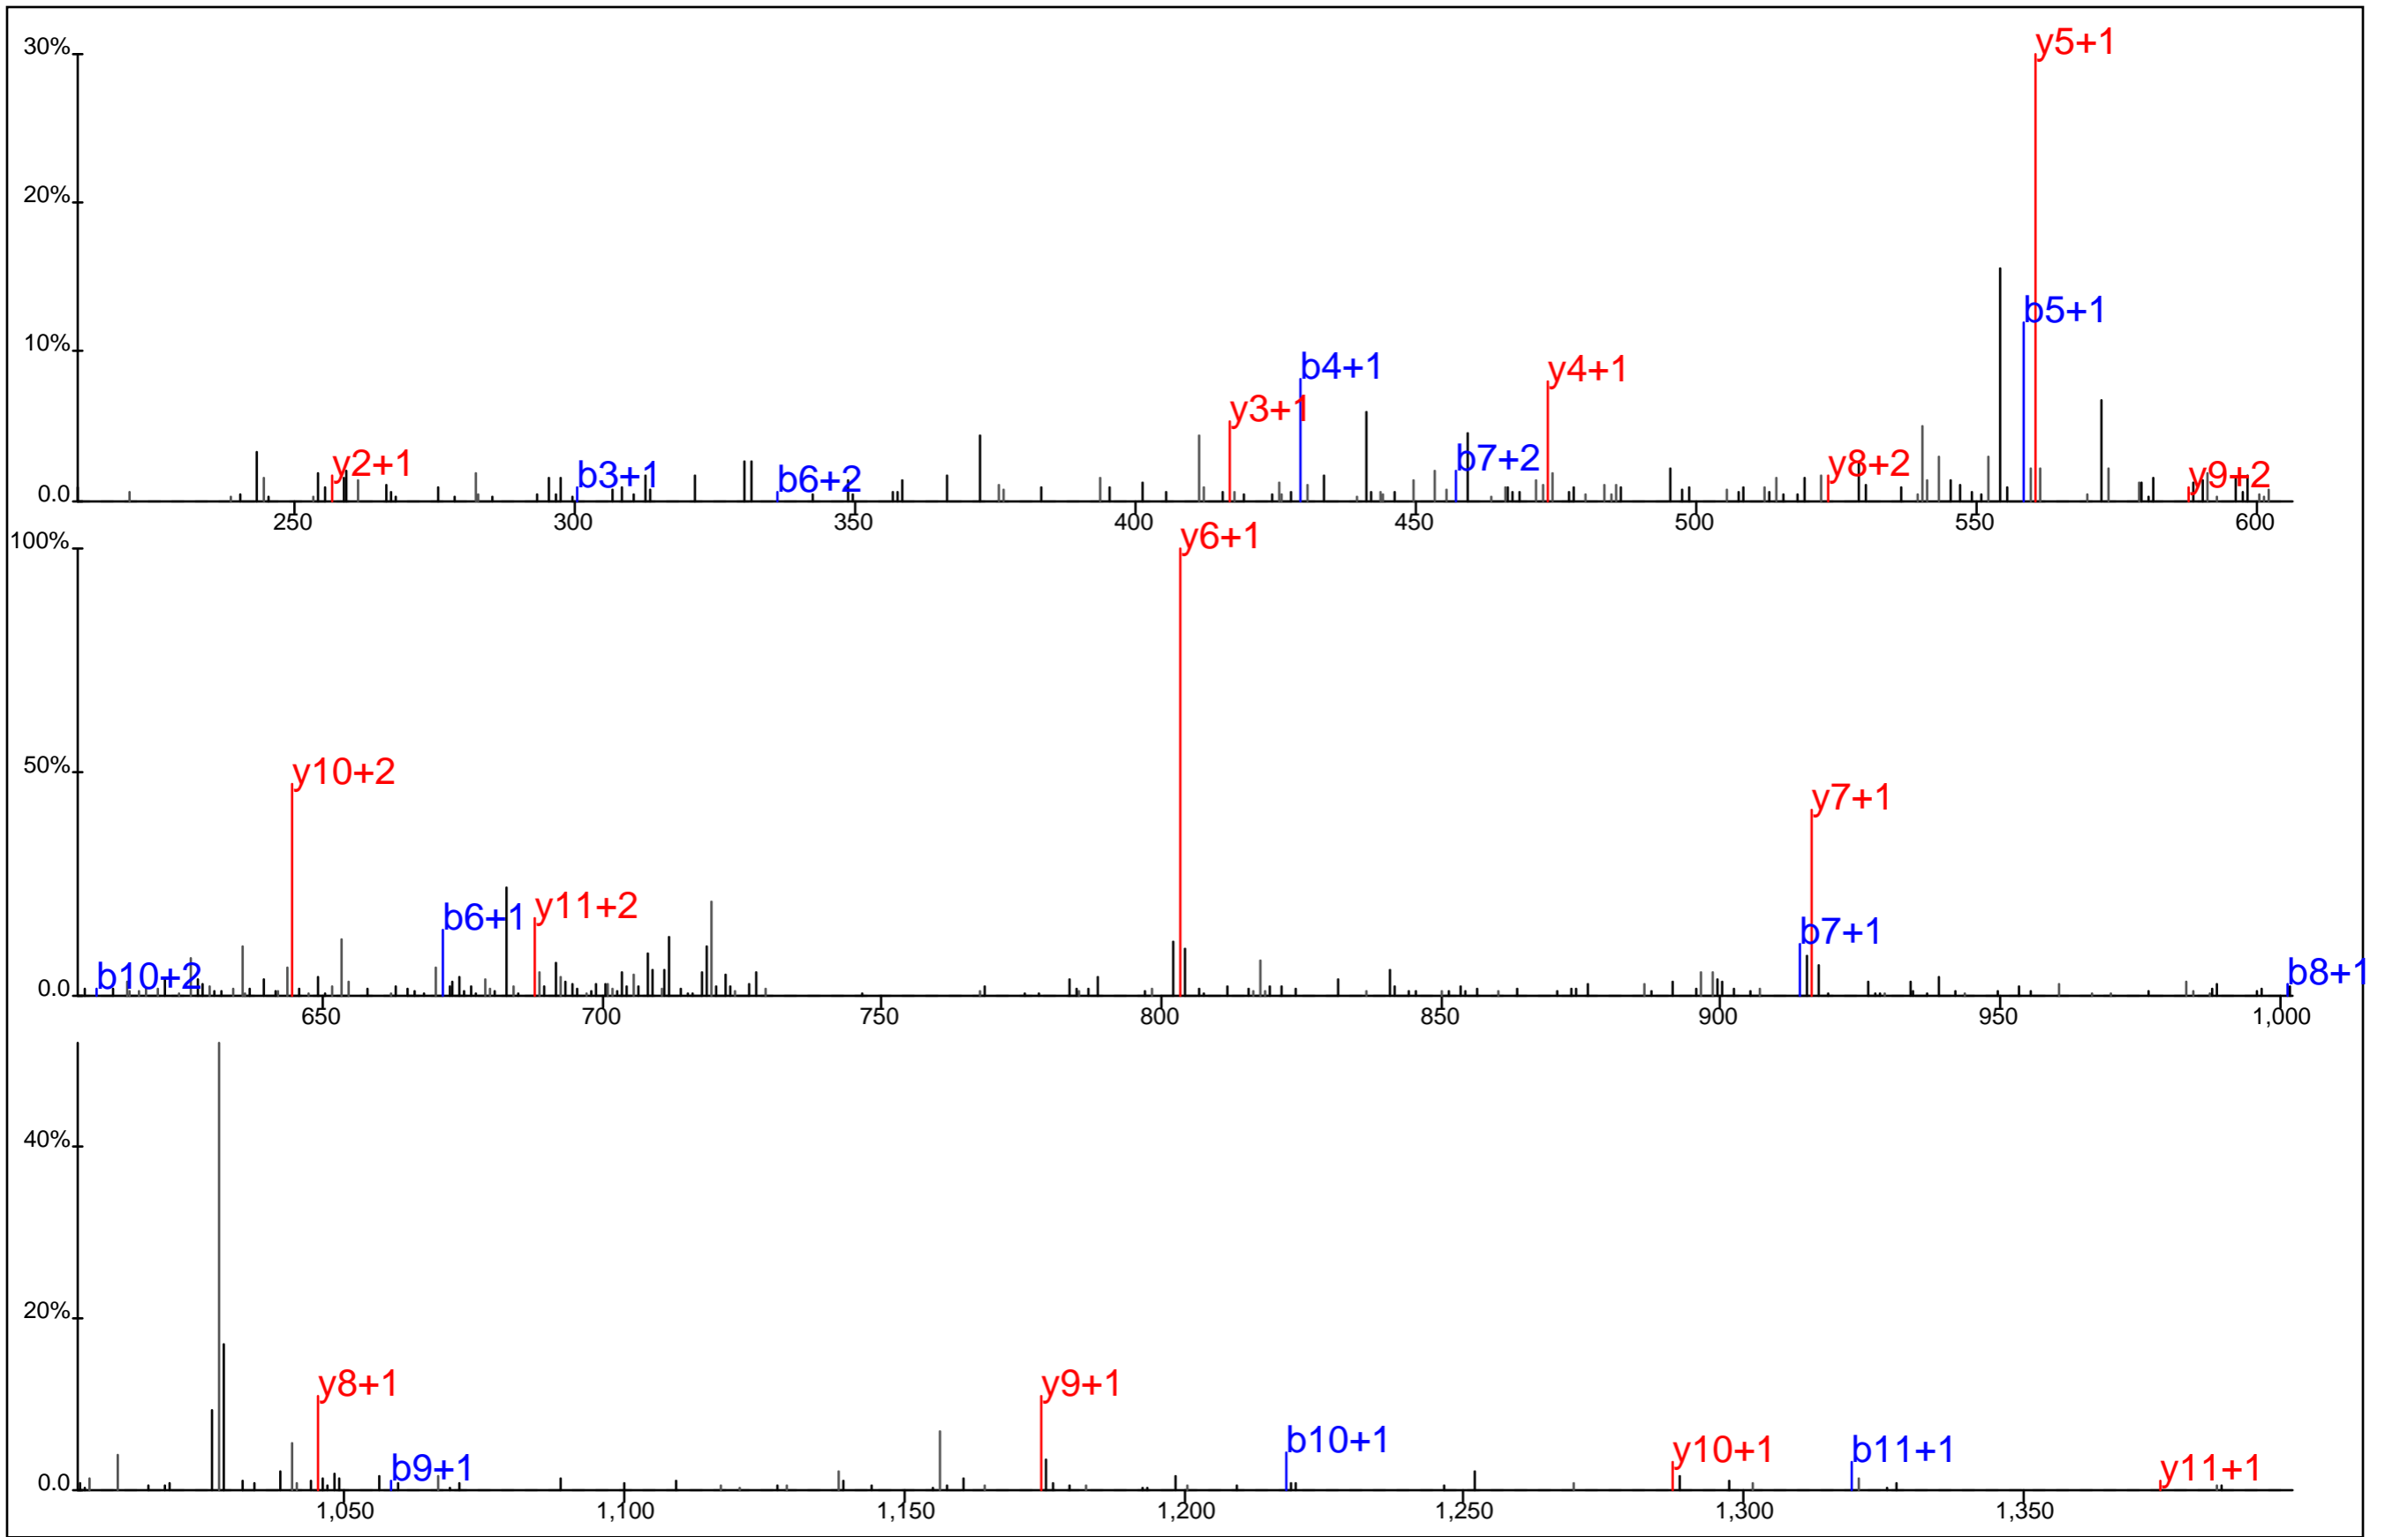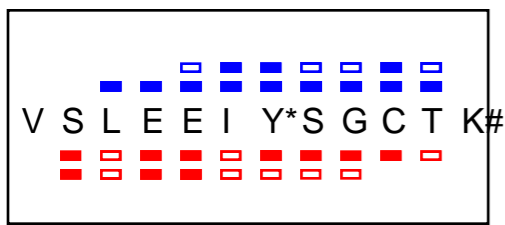

Protein Name: HSP40  
 gi Accession: 5453690  
 Precursor Mass: 737.3297+2  
 Delta Mass: 6.656 ppm  
 XCorr: 53.15

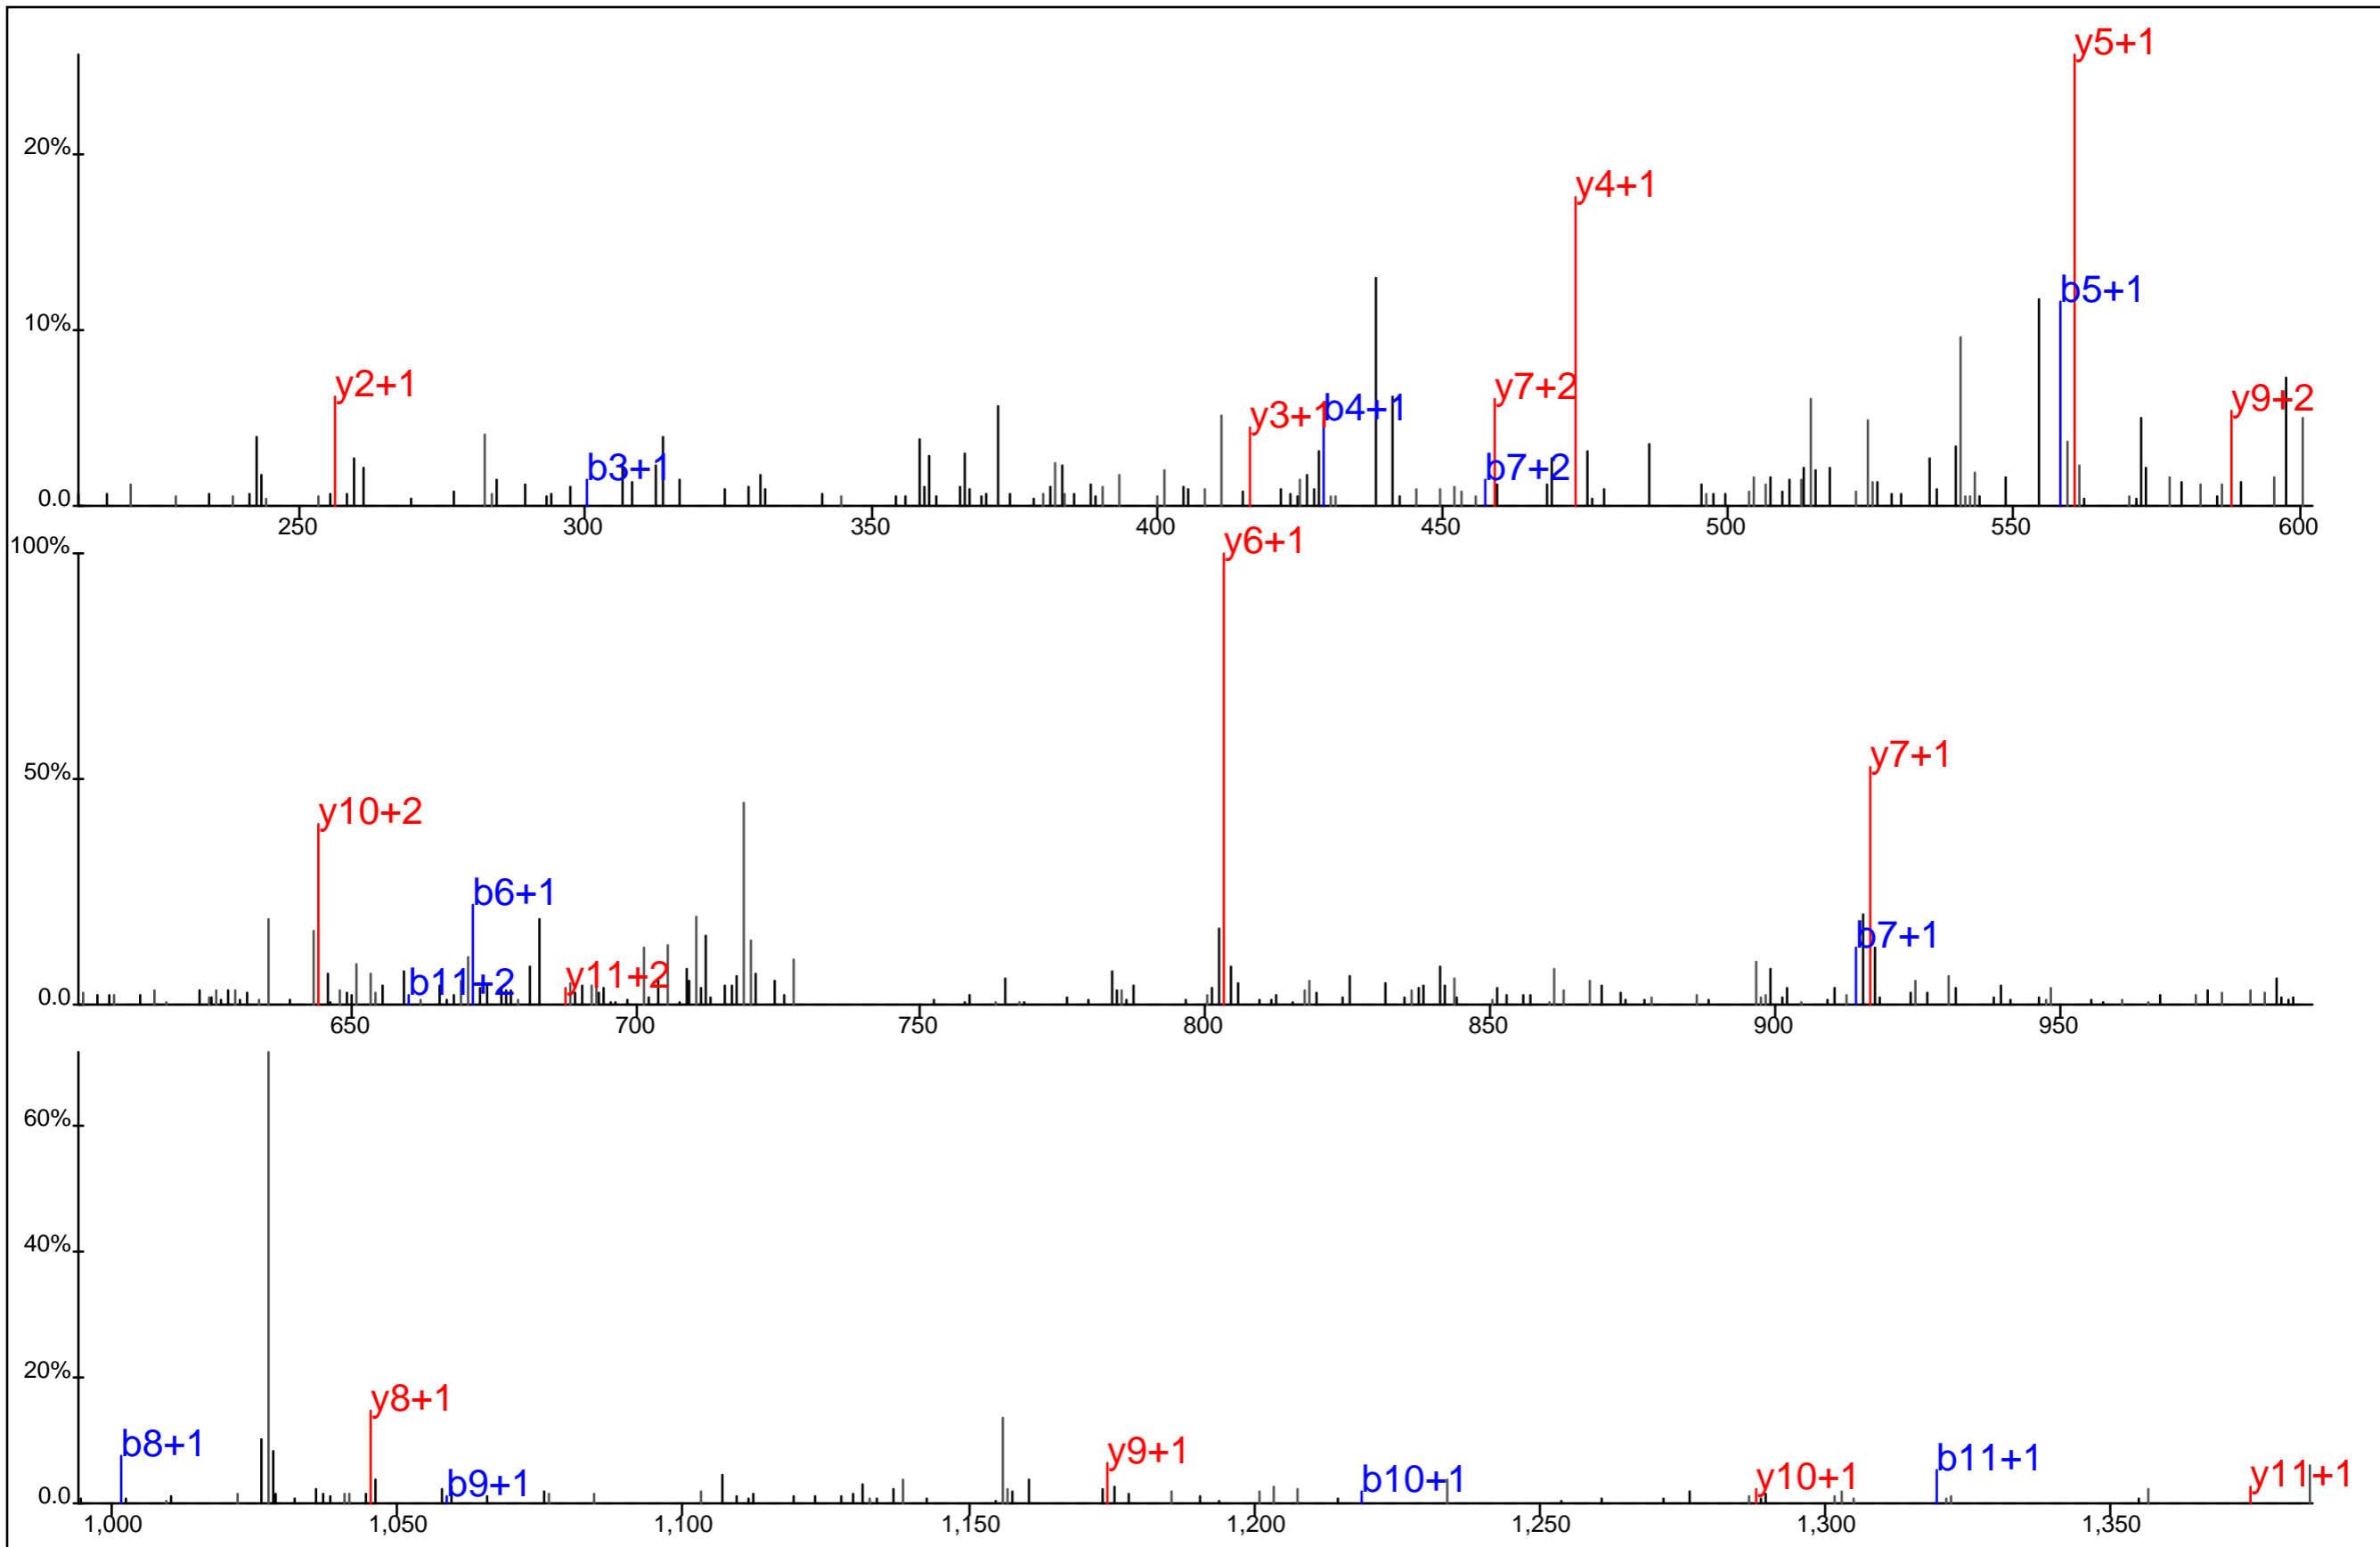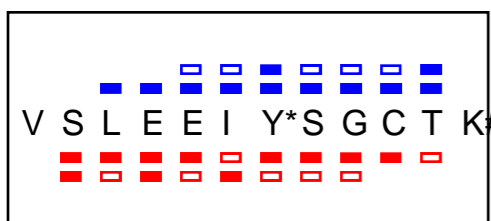

Protein Name: HSP40  
 gi Accession: 5453690  
 Precursor Mass: 737.3281+2  
 Delta Mass: 4.498 ppm  
 XCorr: 54.6

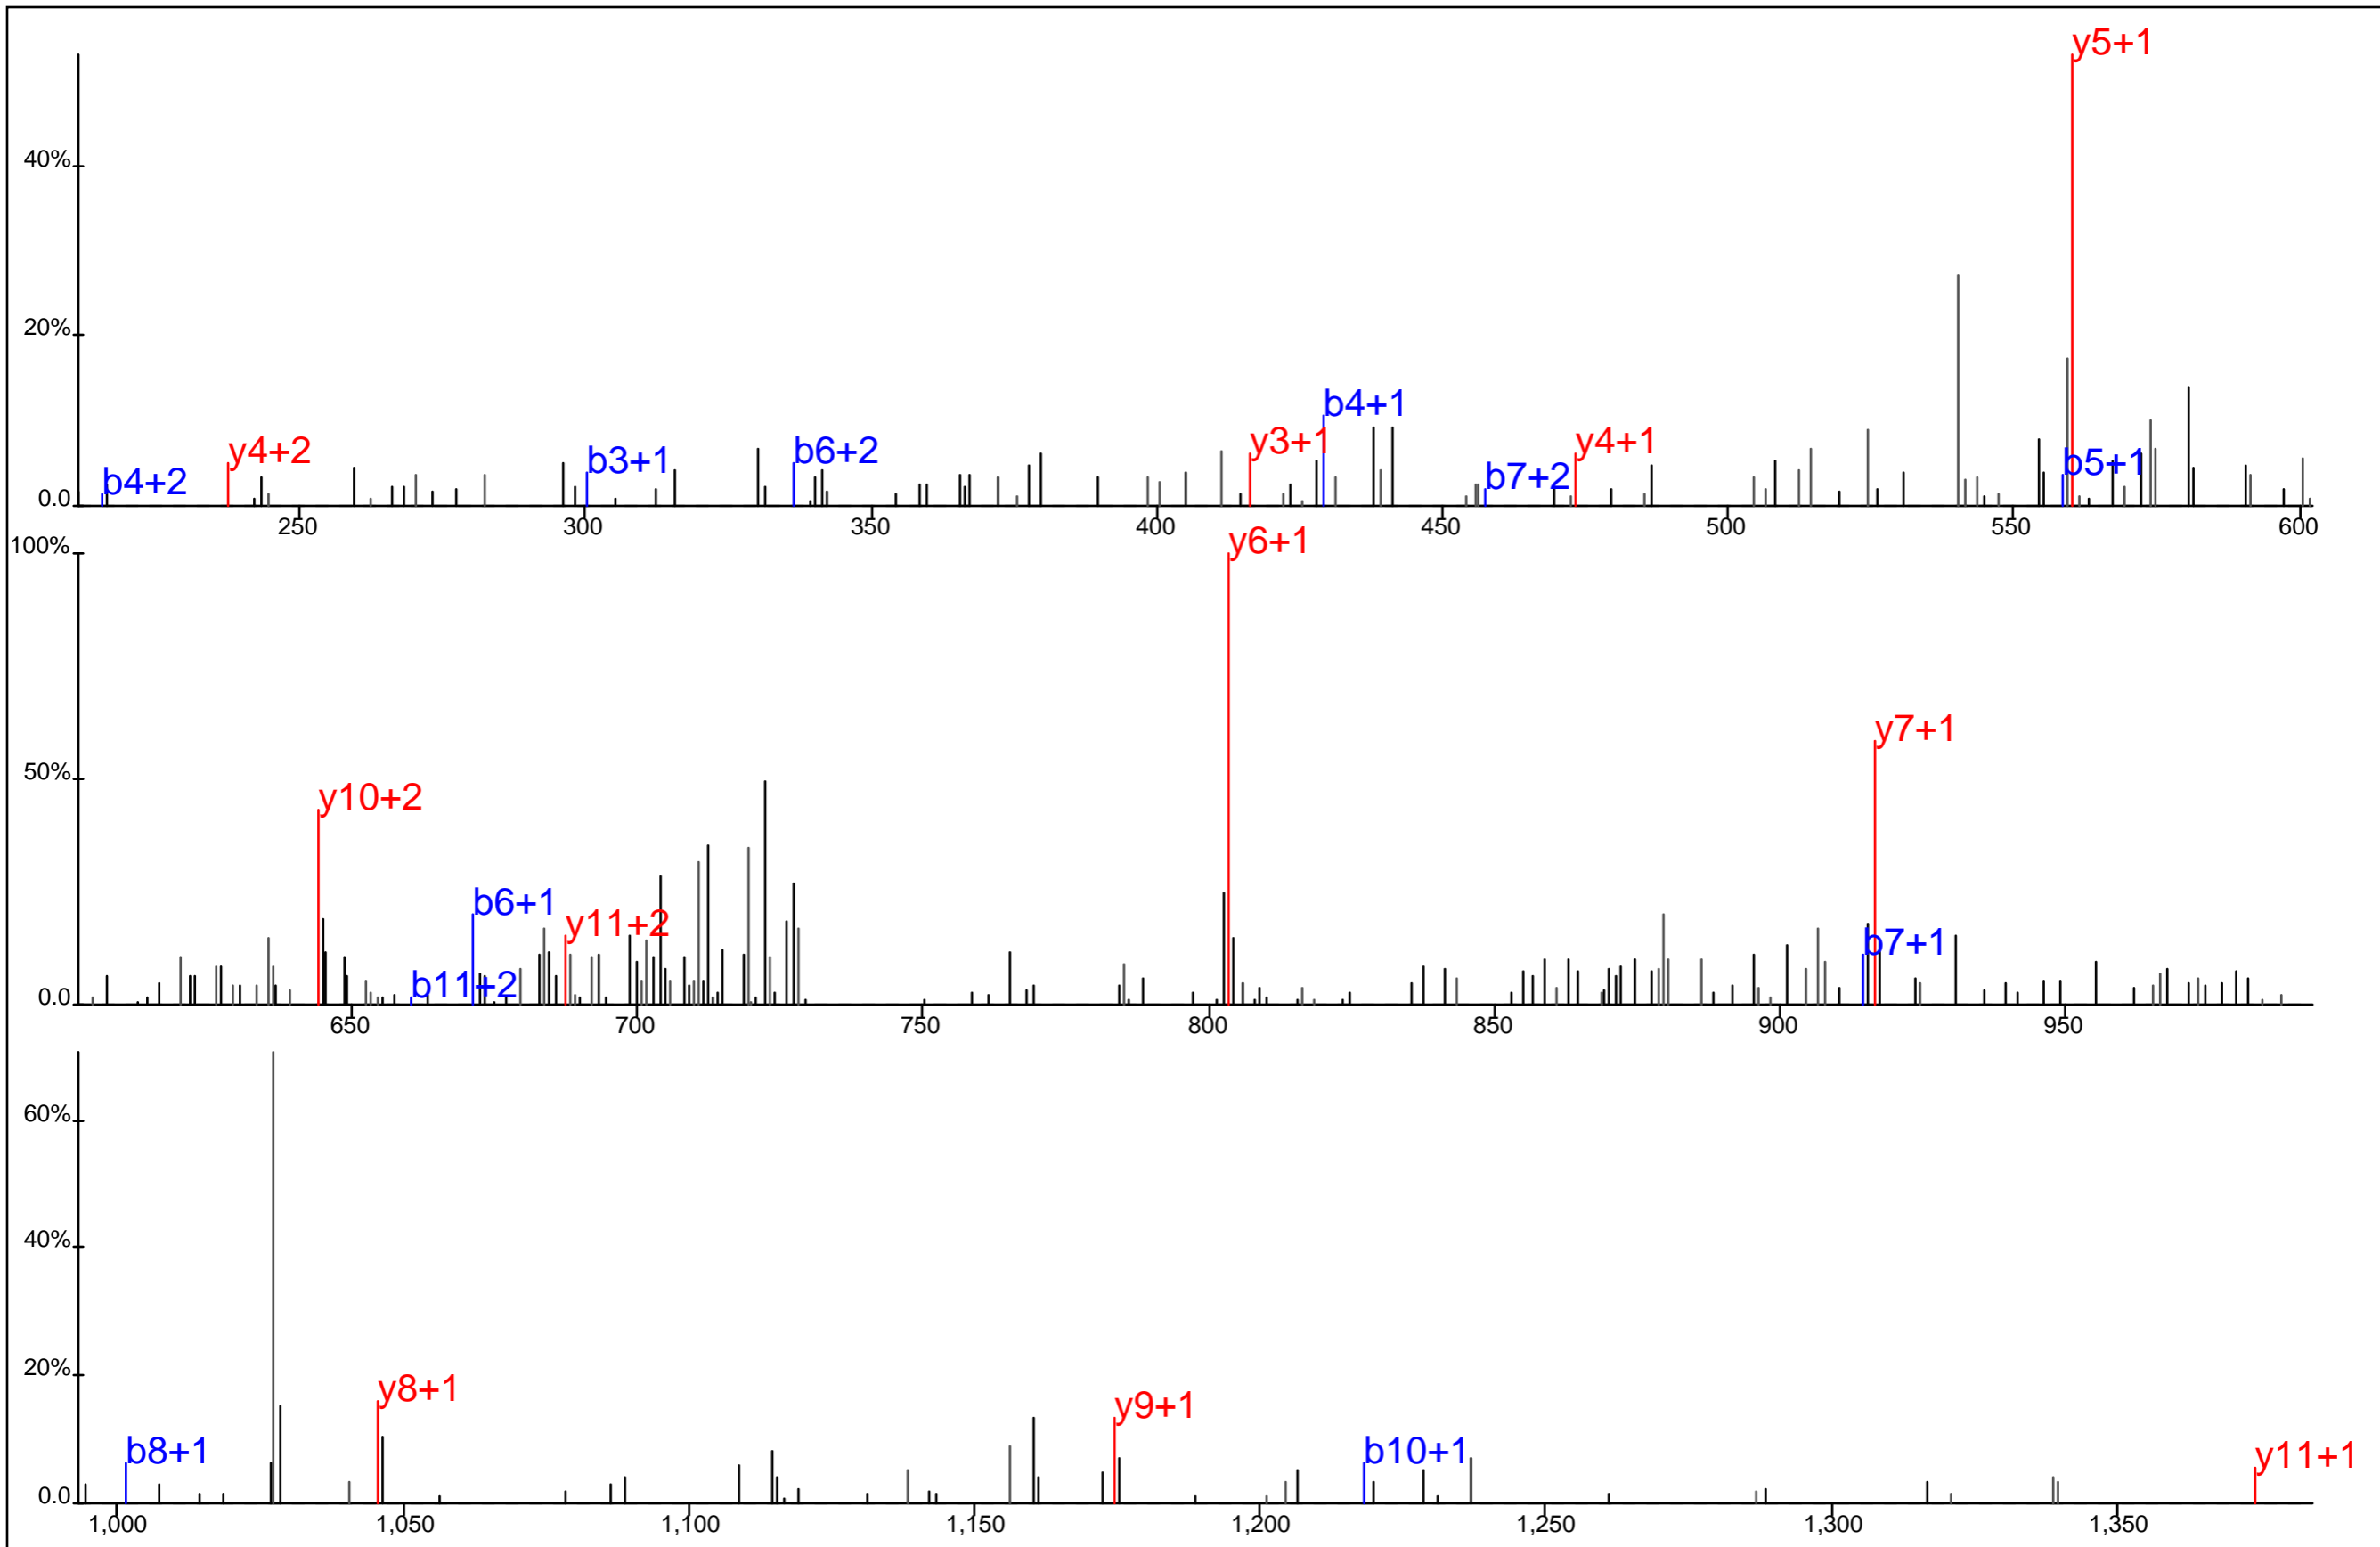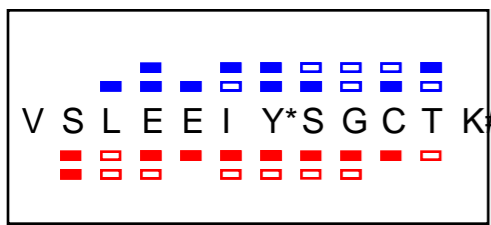

Protein Name: HSP40  
 gi Accession: 5453690  
 Precursor Mass: 737.3303+2  
 Delta Mass: 7.483 ppm  
 XCorr: 29.57





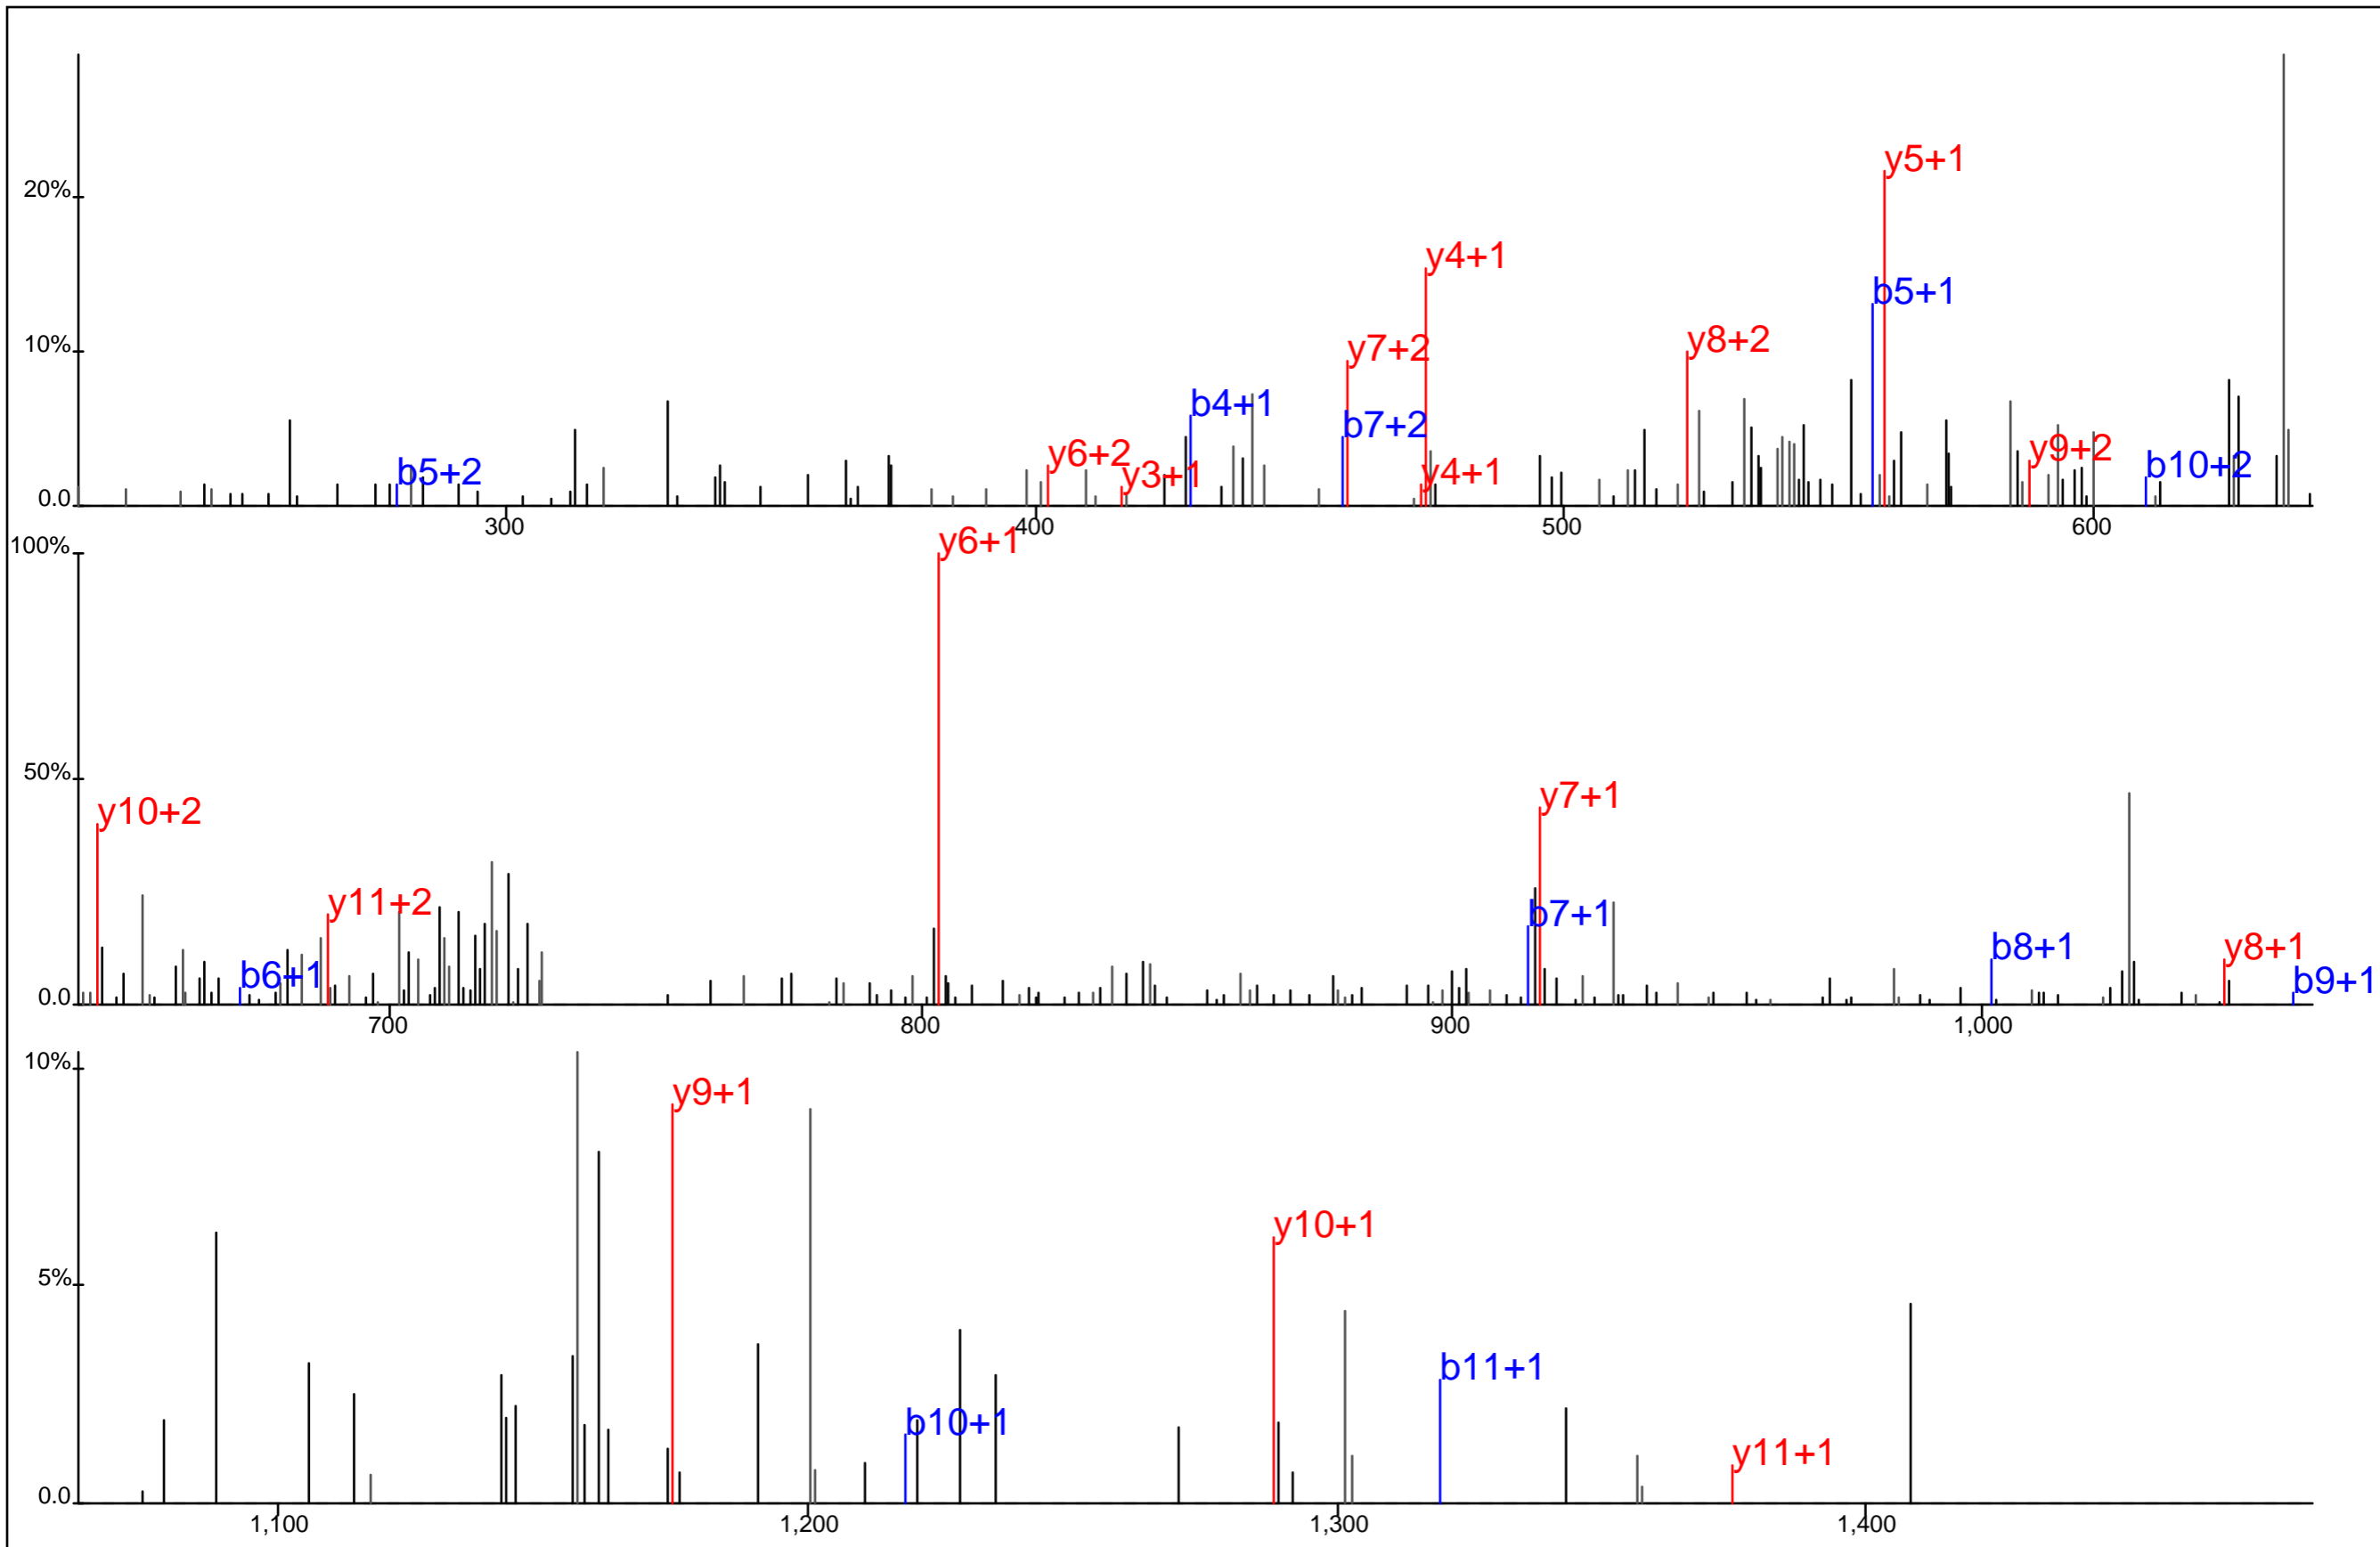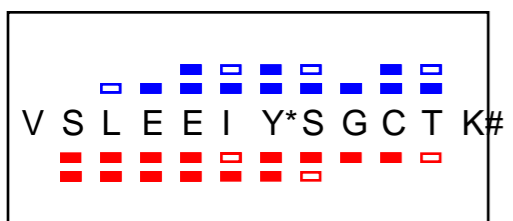

Protein Name: HSP40  
 gi Accession: 5453690  
 Precursor Mass: 737.3279+2  
 Delta Mass: 4.253 ppm  
 XCorr: 47.7

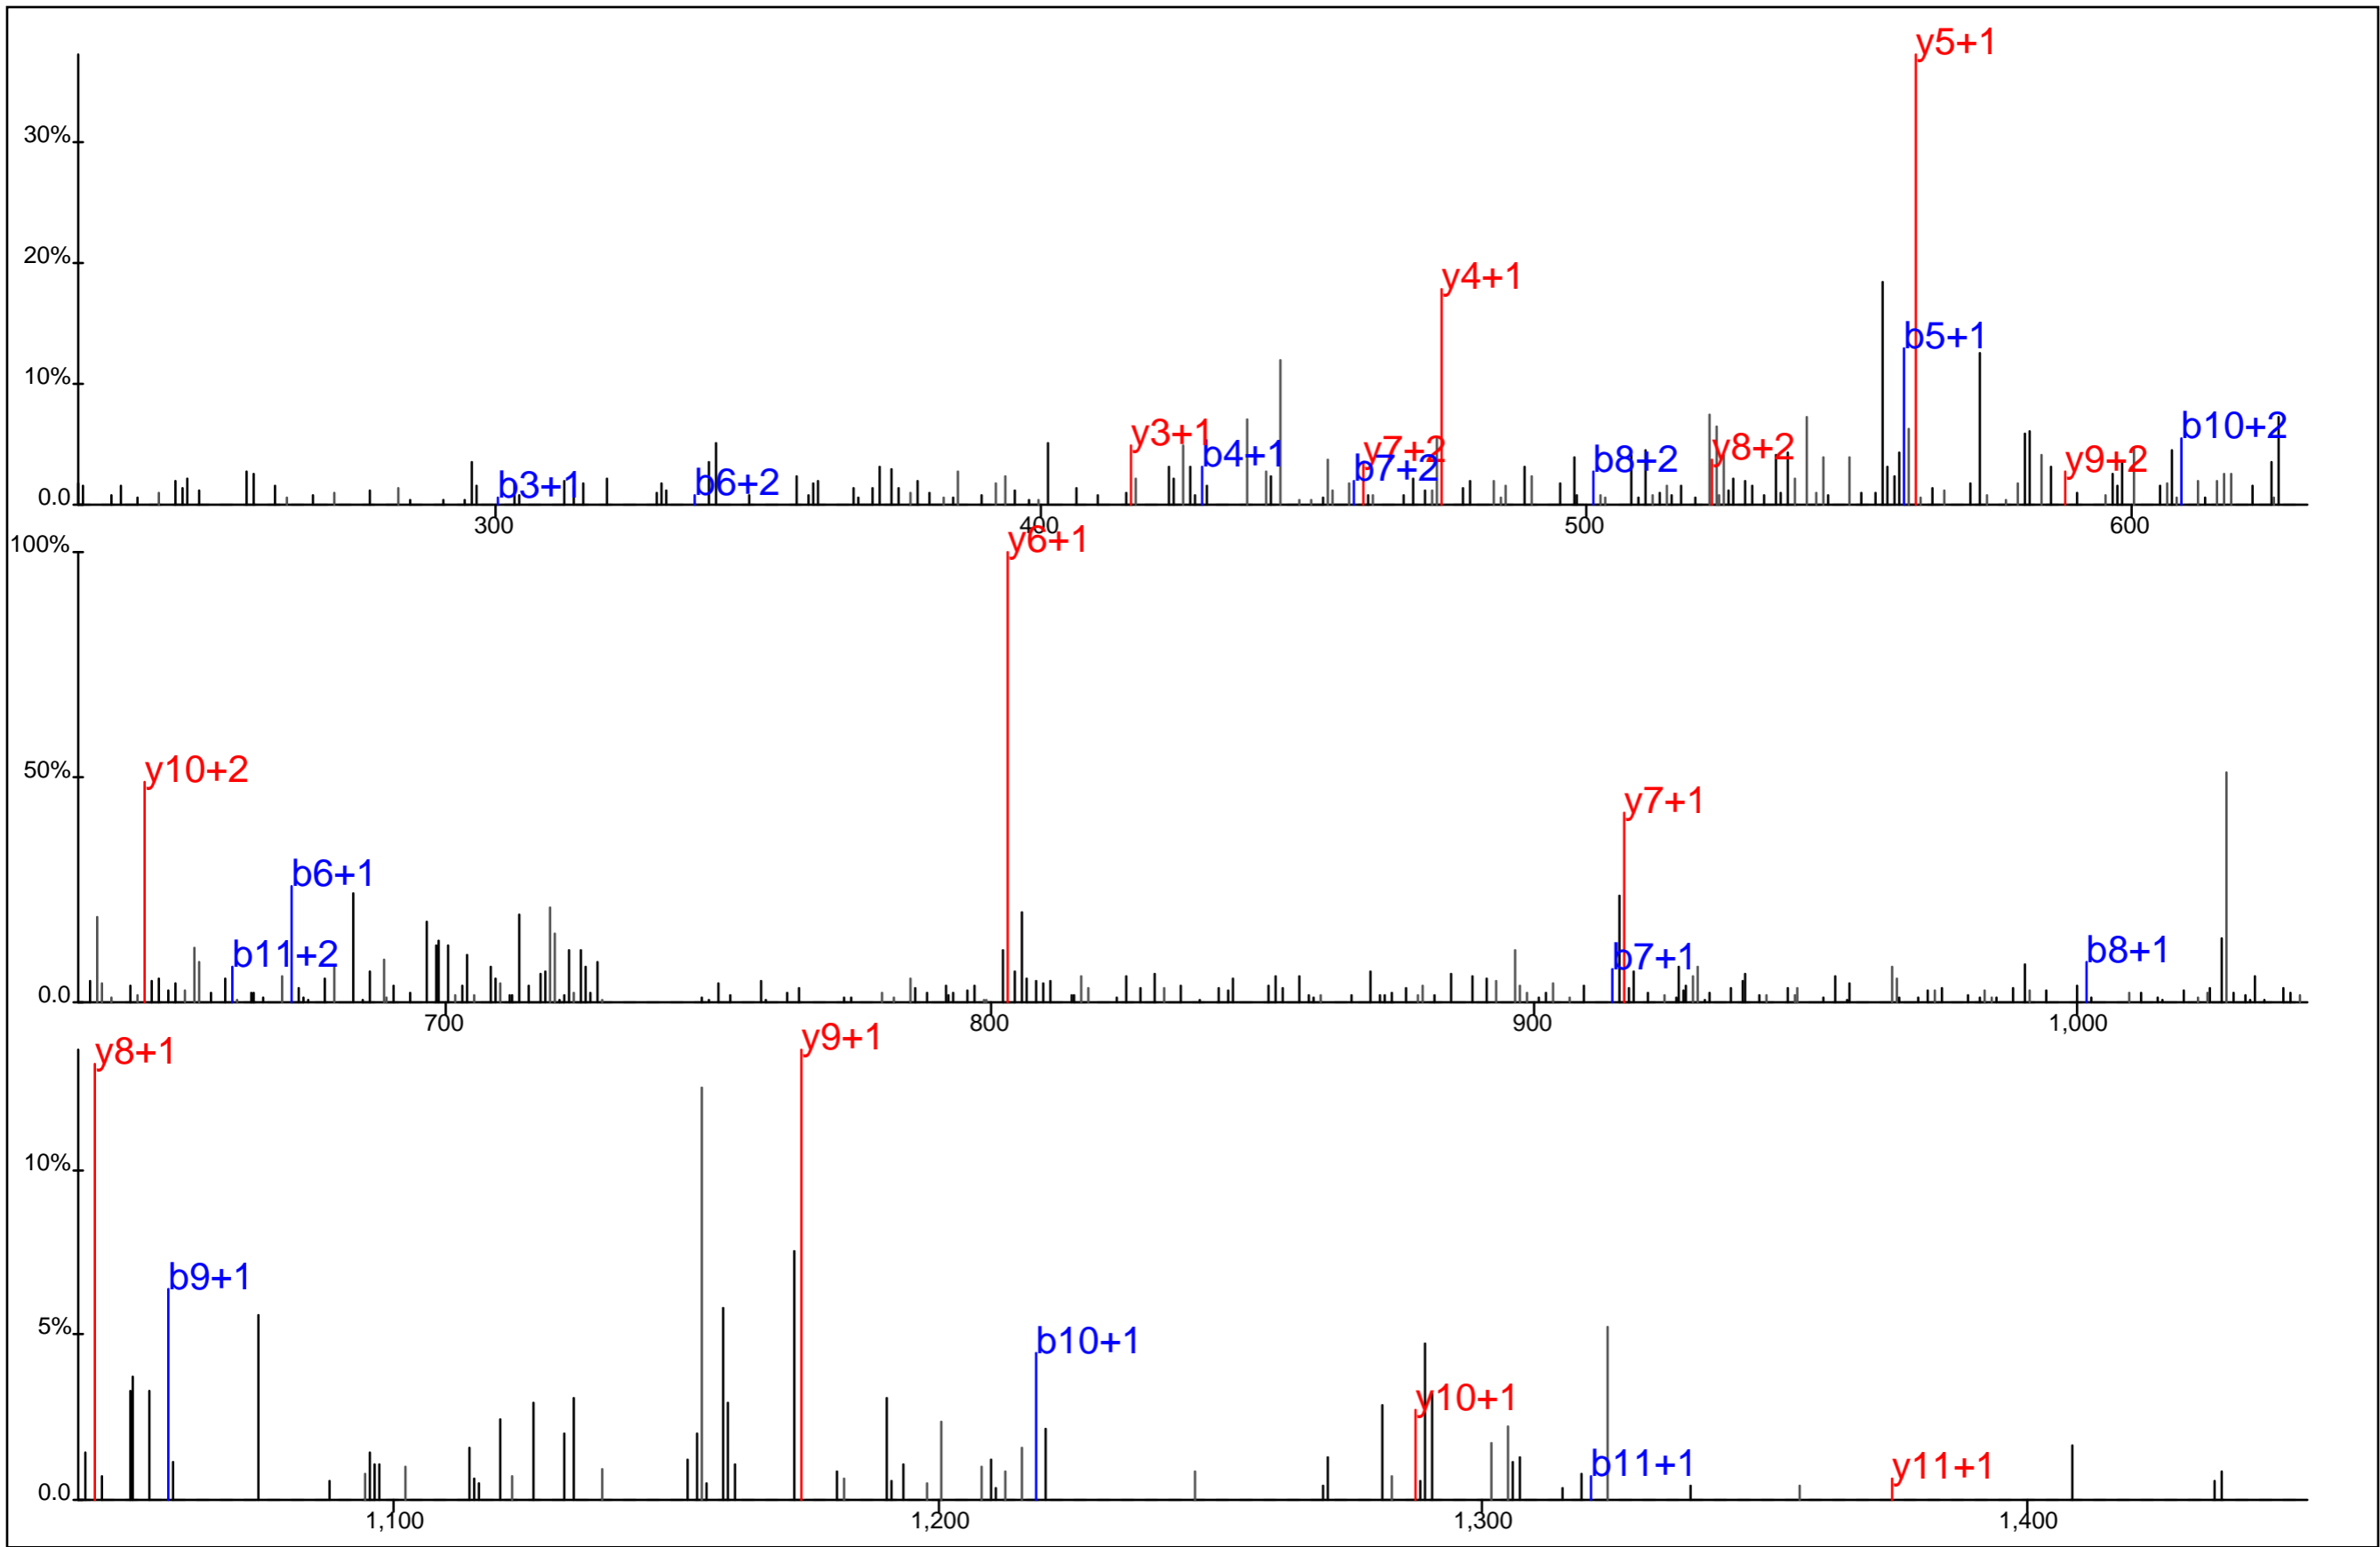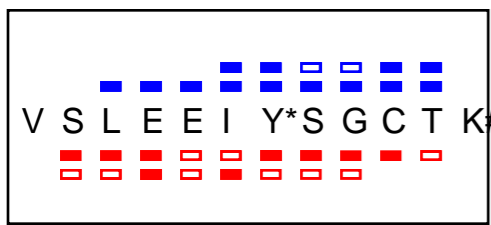

Protein Name: HSP40  
 gi Accession: 5453690  
 Precursor Mass: 737.3278+2  
 Delta Mass: 4.165 ppm  
 XCorr: 34.91

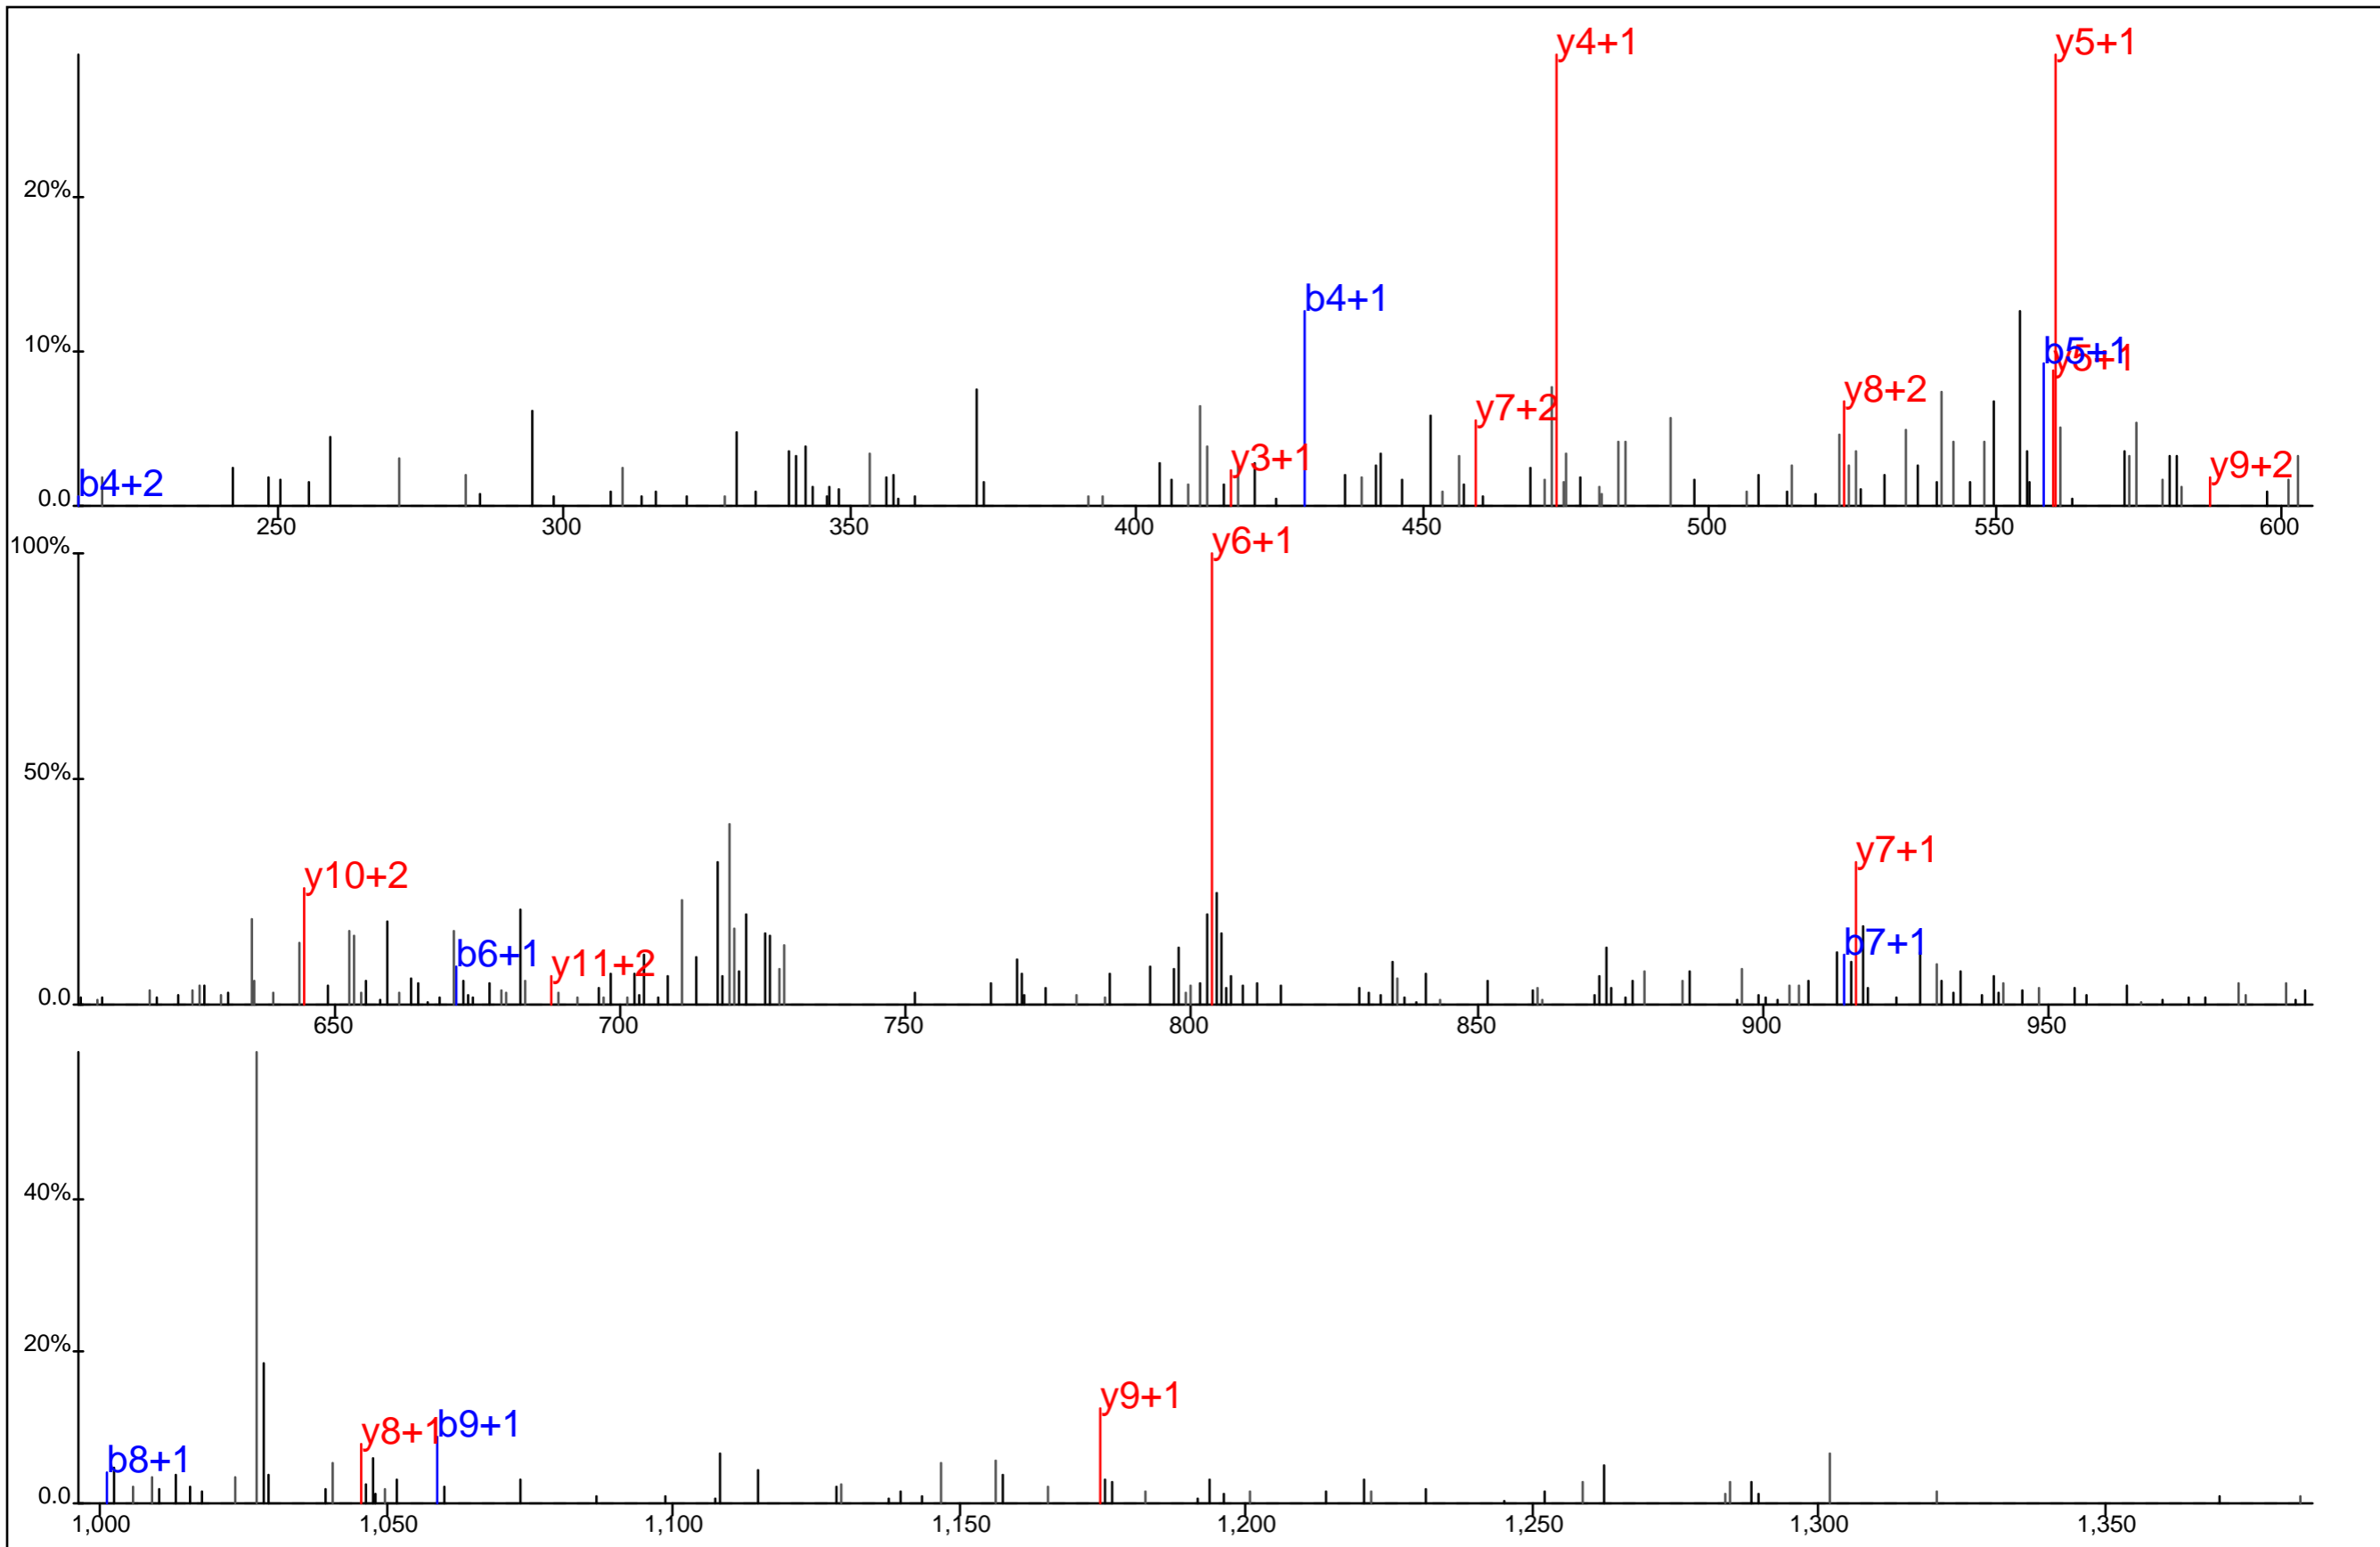

V S L E E I Y\* S G C T K#

Protein Name: HSP40  
 gi Accession: 5453690  
 Precursor Mass: 737.3281+2  
 Delta Mass: 4.579 ppm  
 XCorr: 24.28

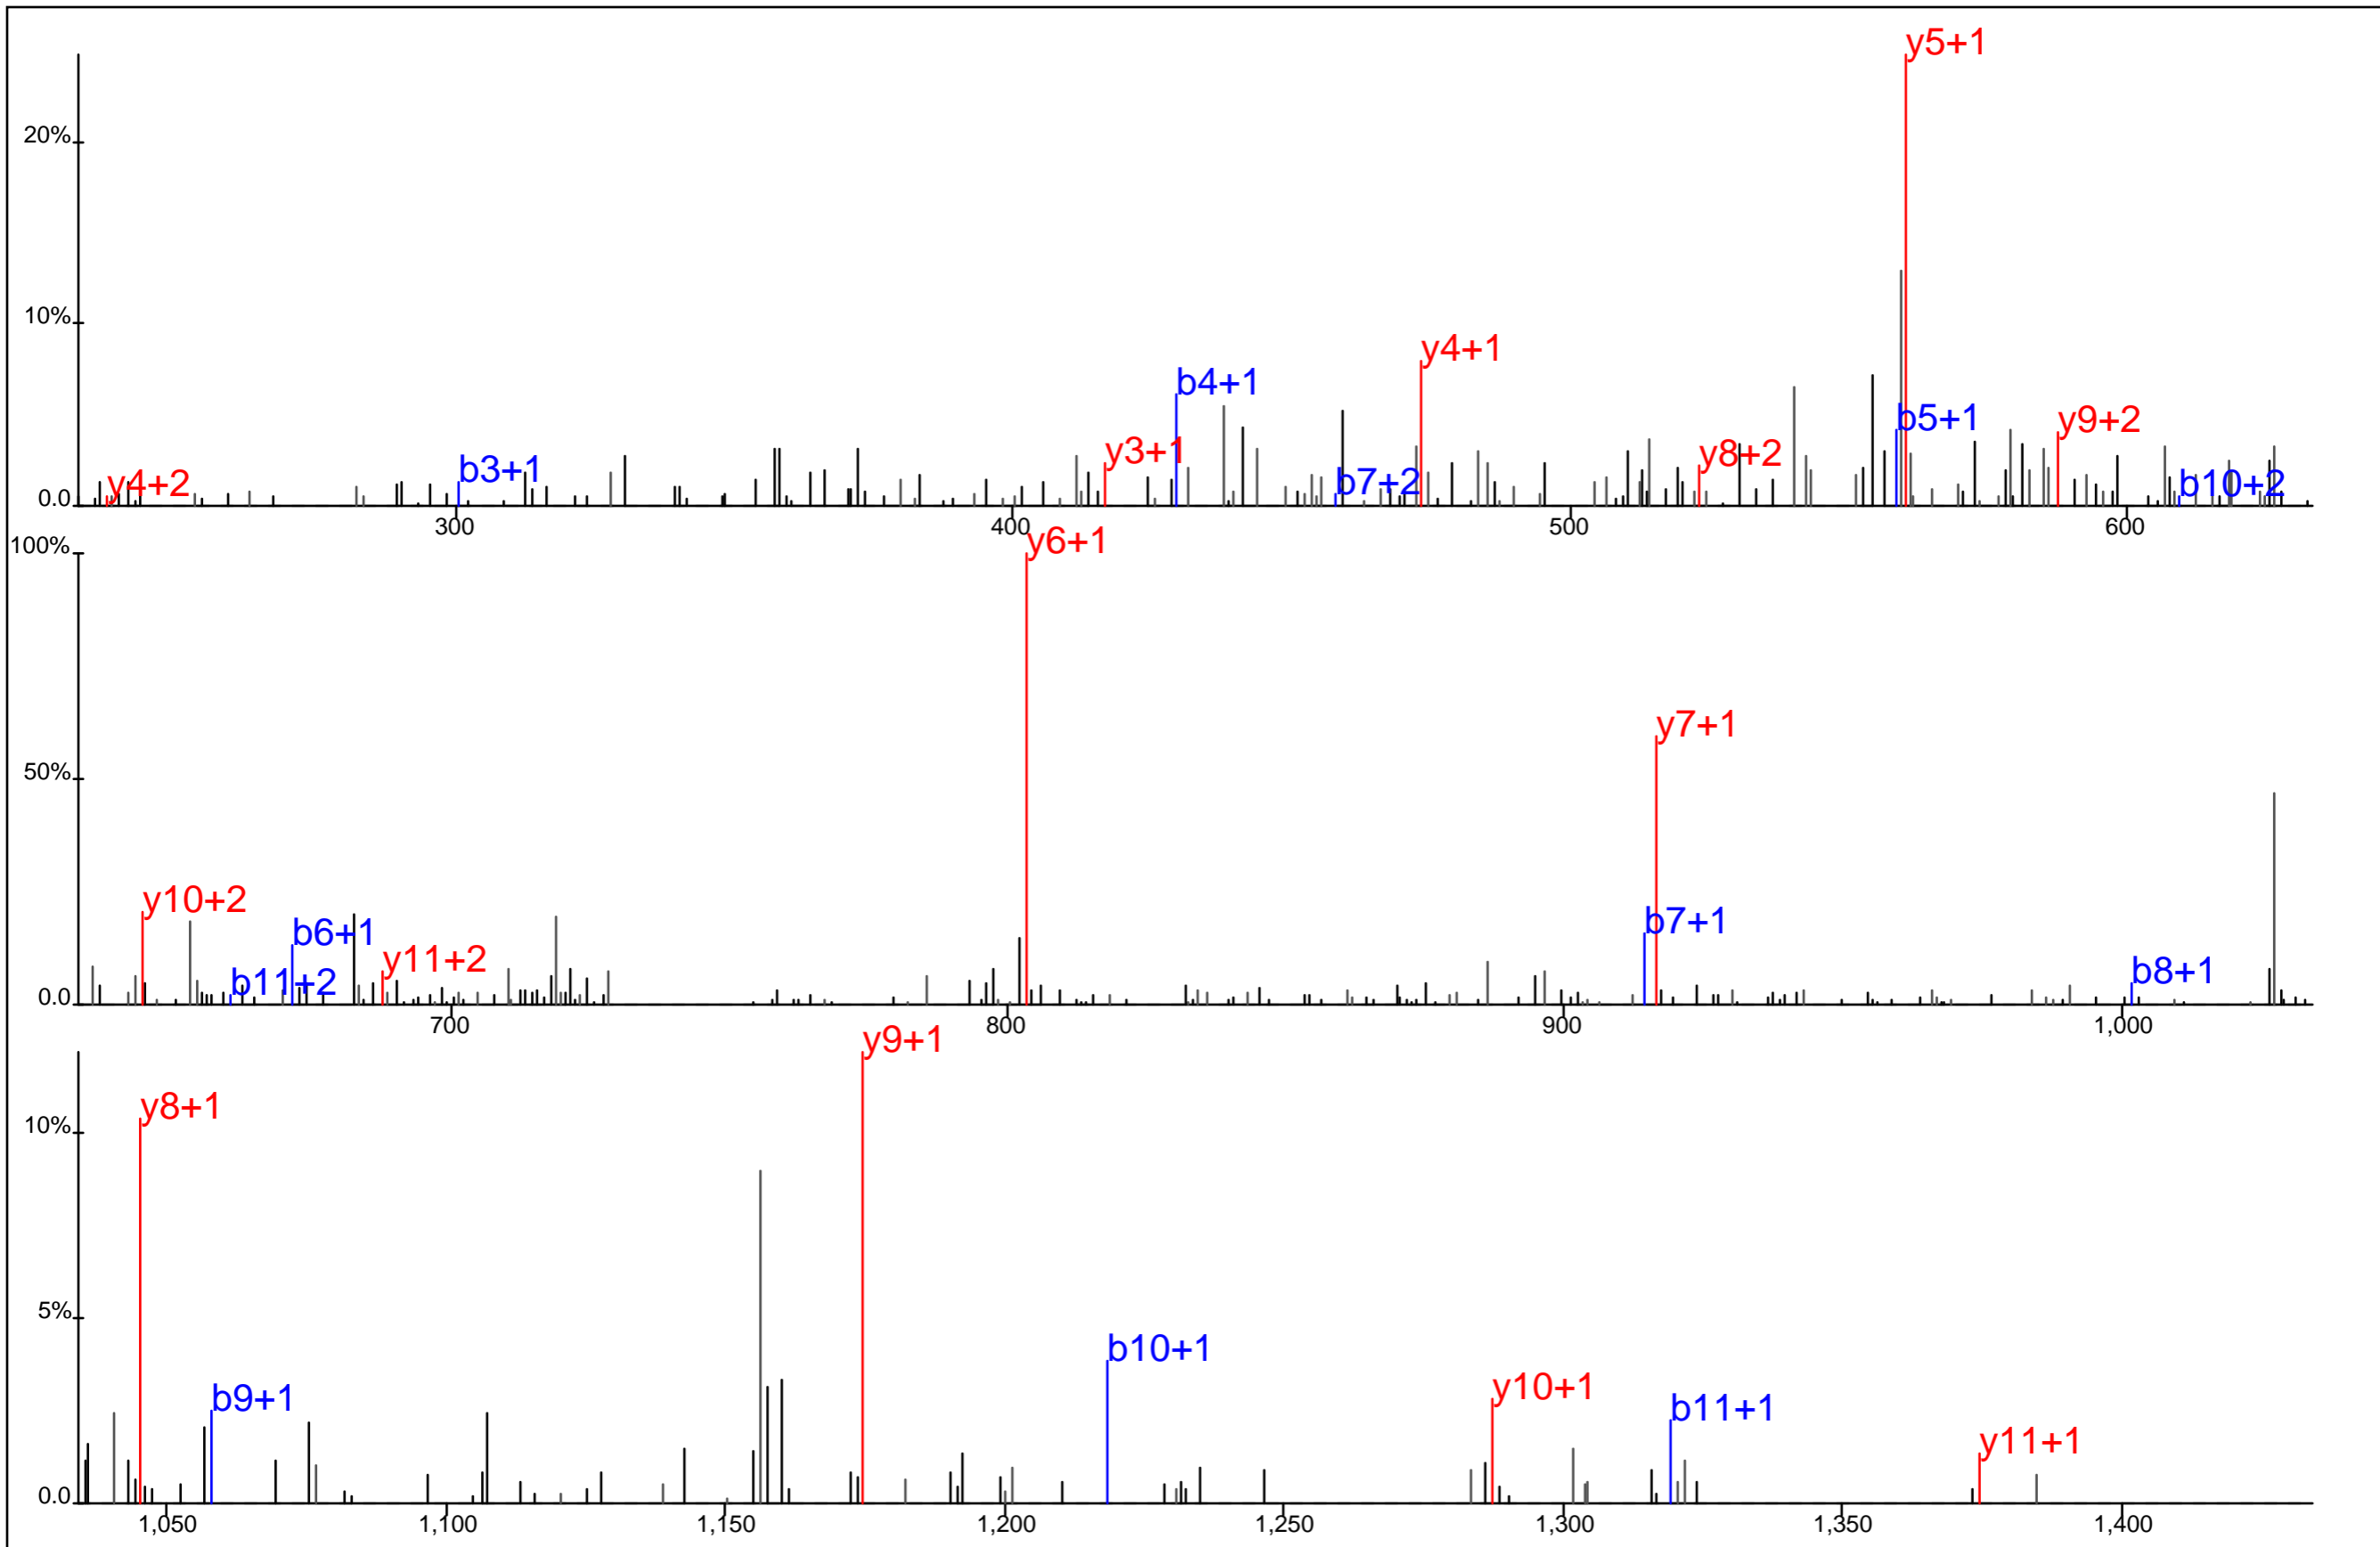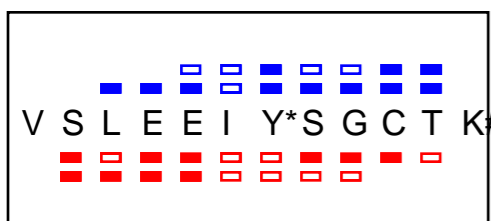

Protein Name: HSP40  
 gi Accession: 5453690  
 Precursor Mass: 737.3375+2  
 Delta Mass: 17.255 ppm  
 XCorr: 63.85

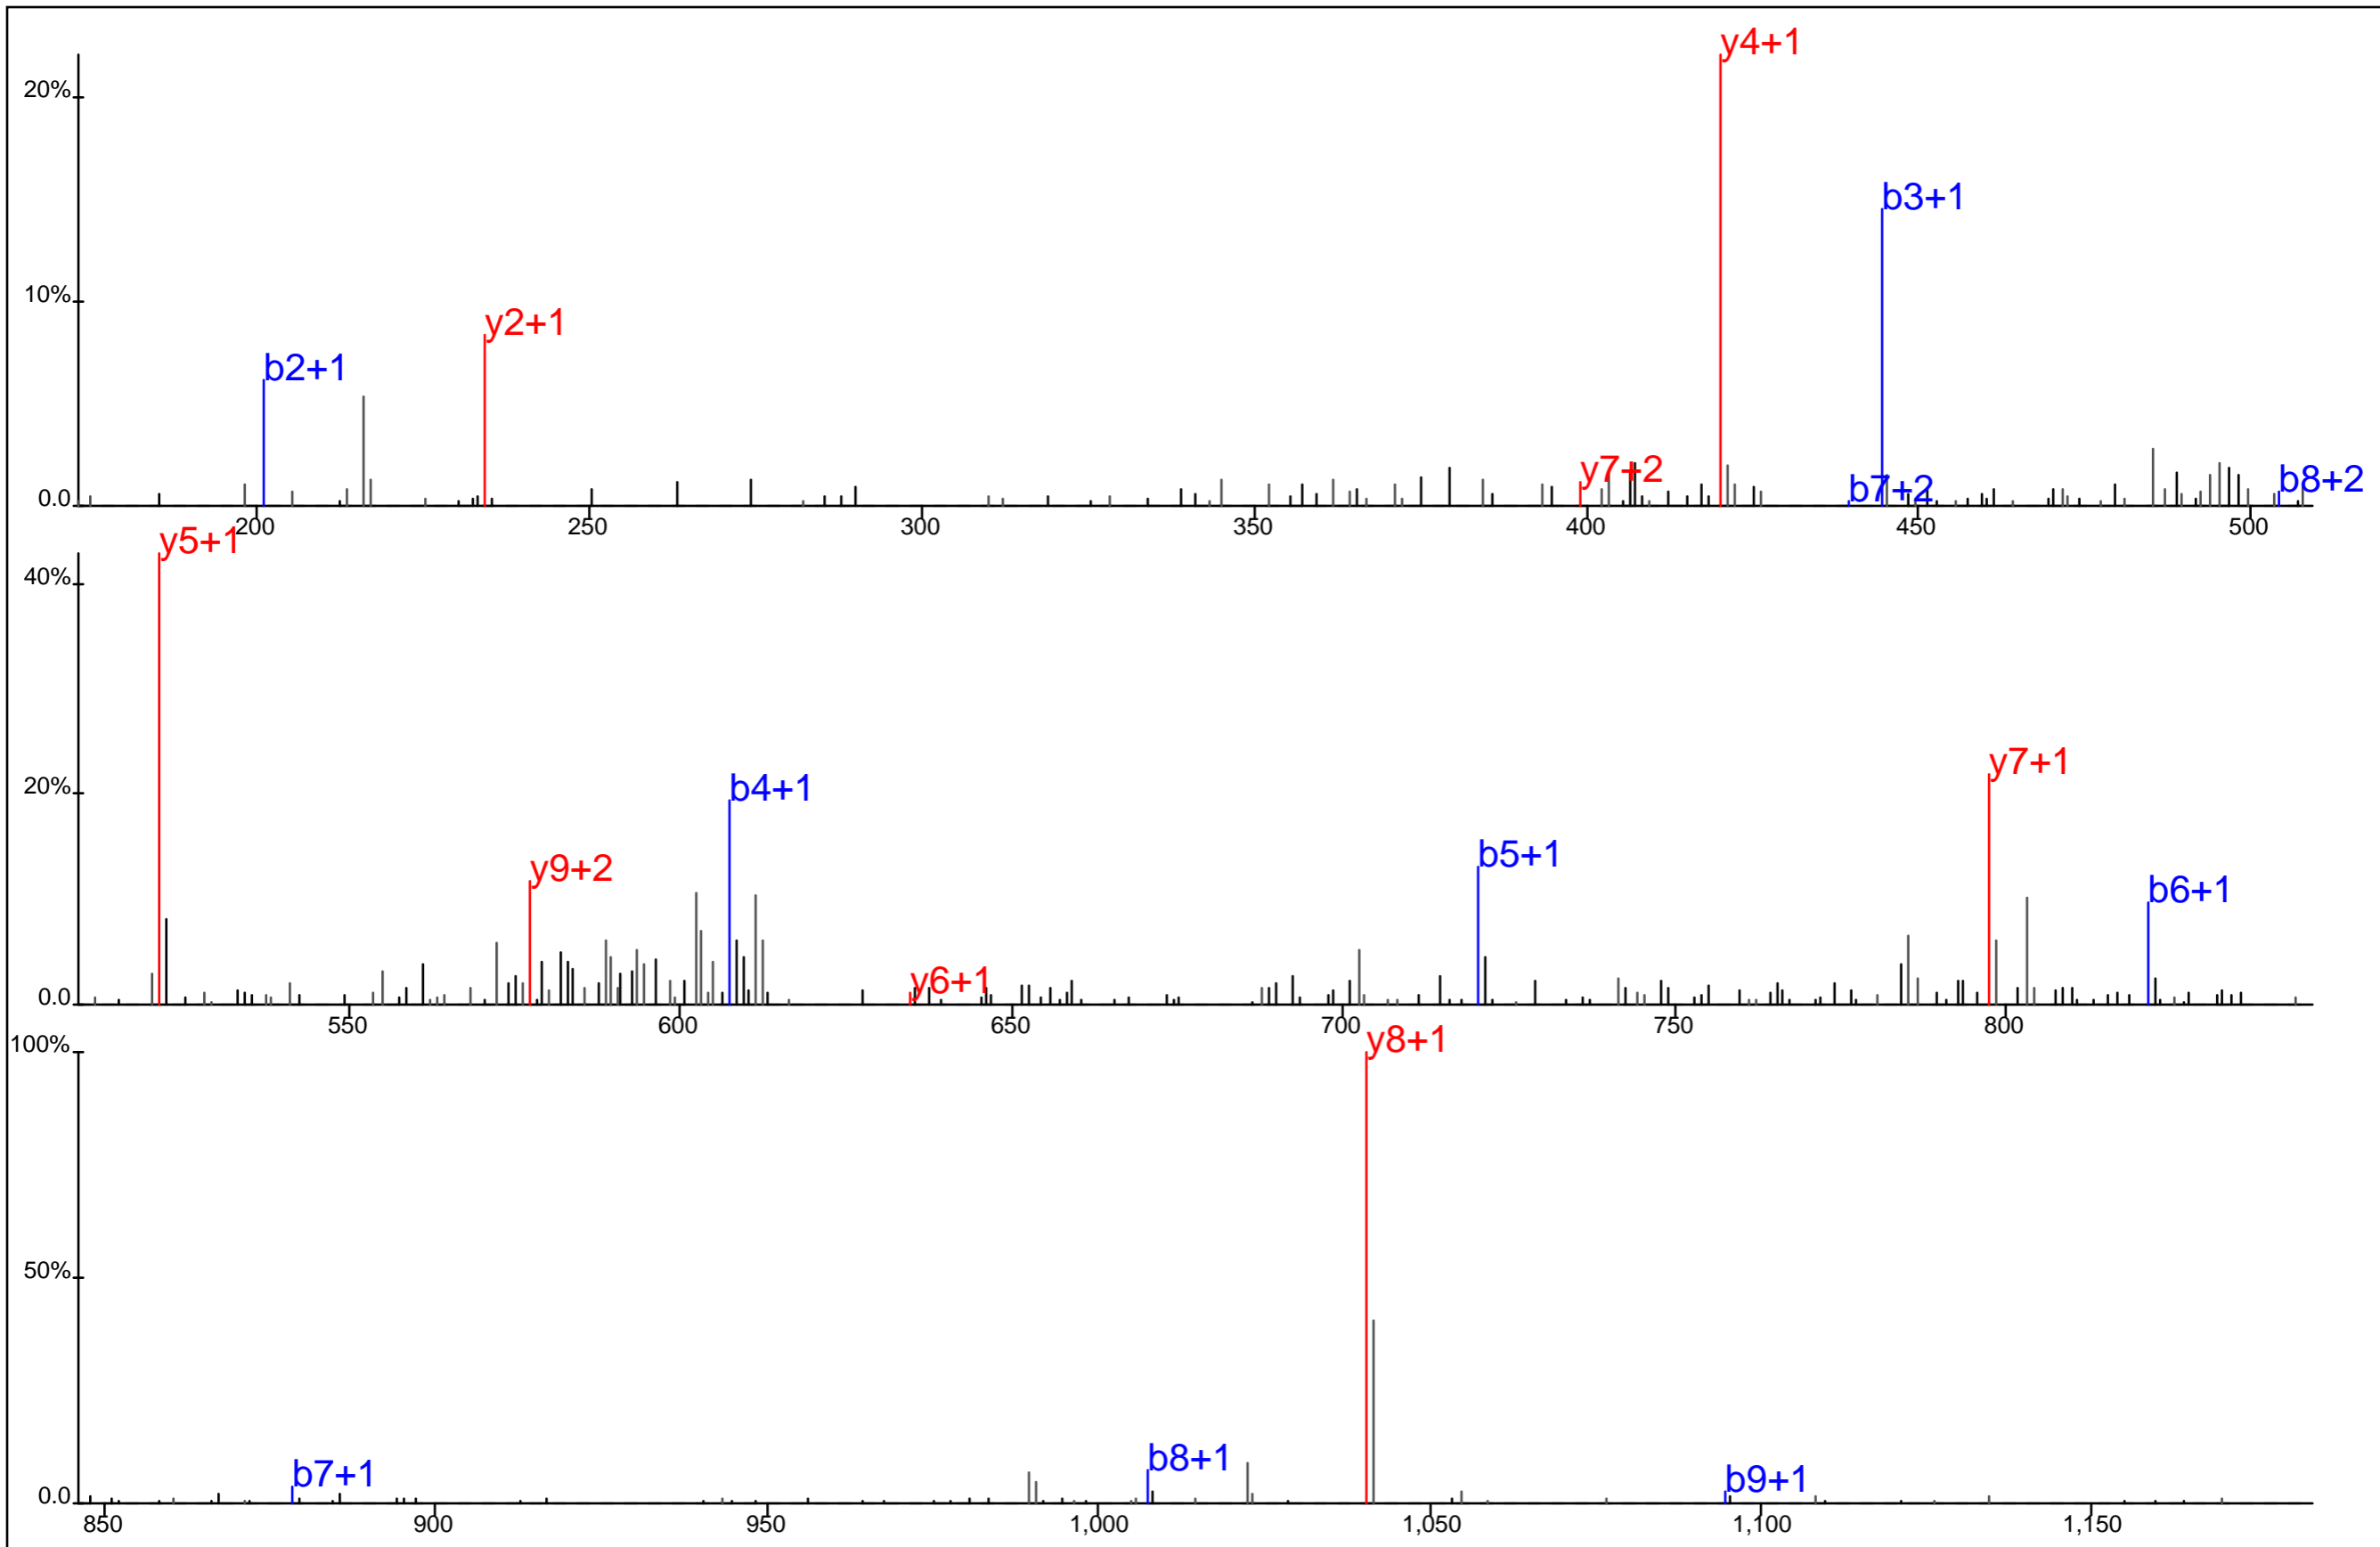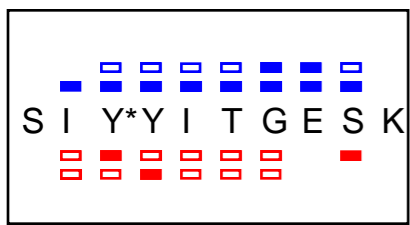

Protein Name: HSP90B  
 gi Accession: 20149594  
 Precursor Mass: 620.7792+2  
 Delta Mass: 1.224 ppm  
 XCorr: 50.67

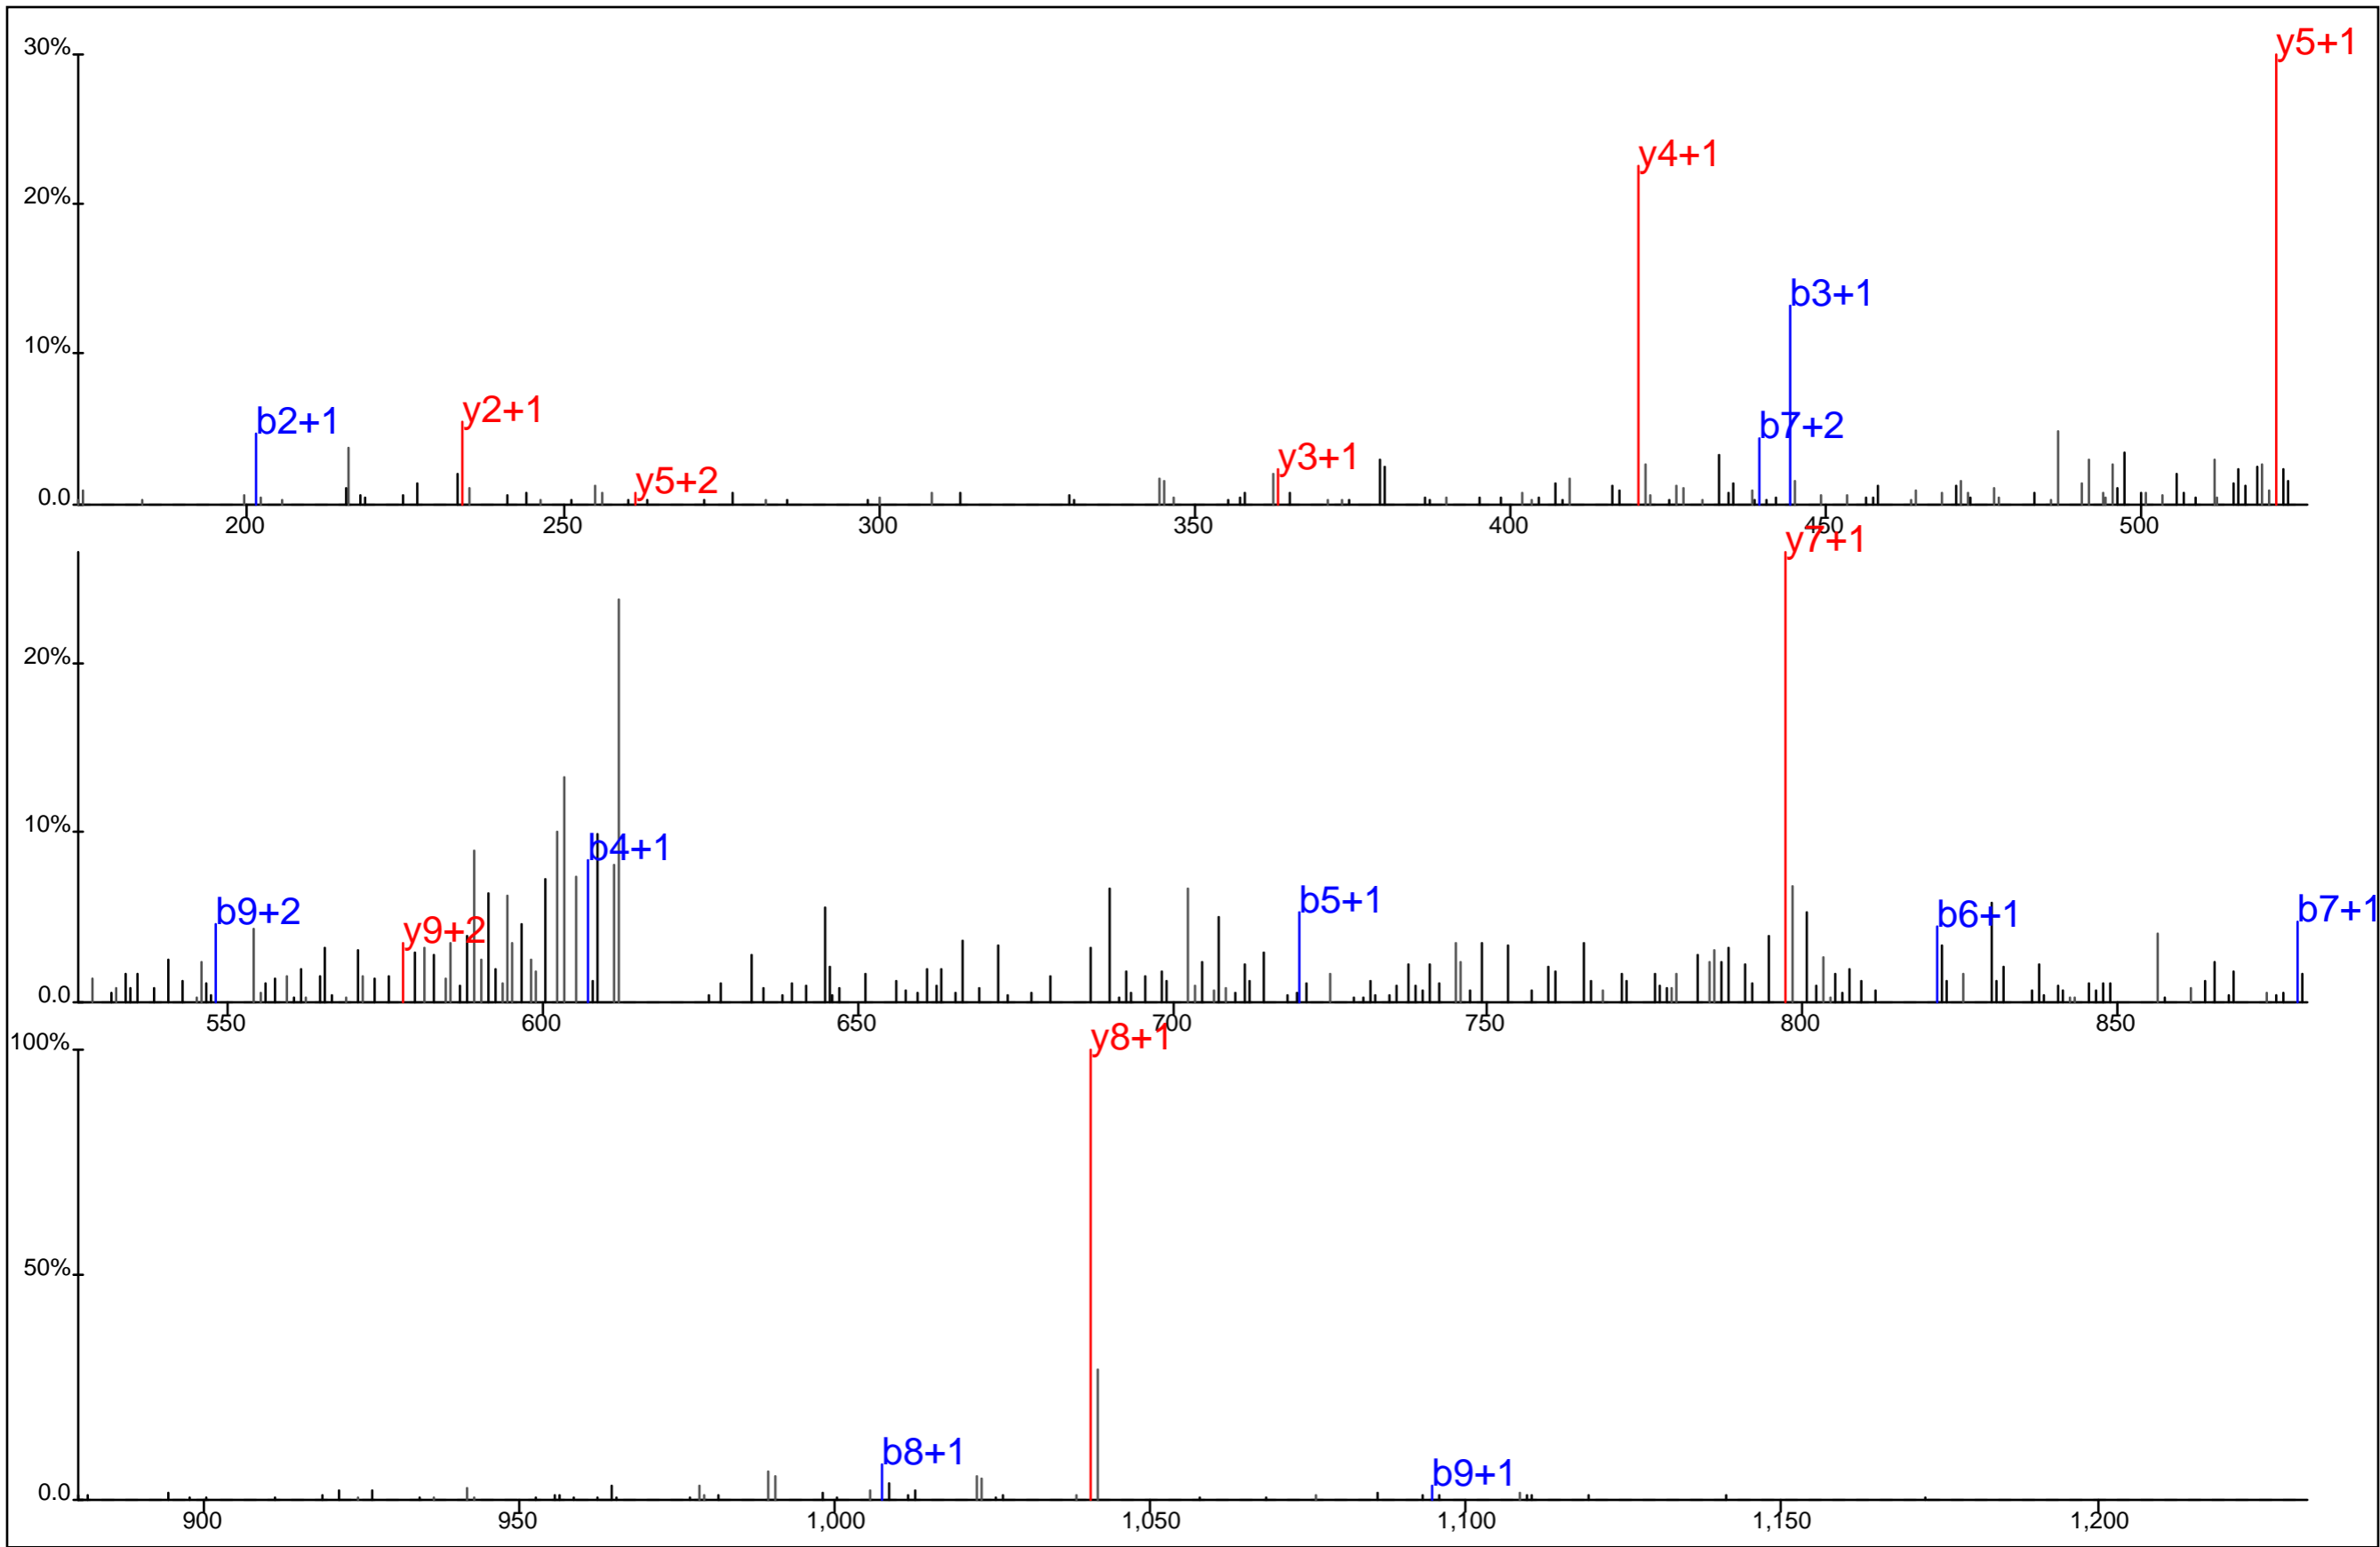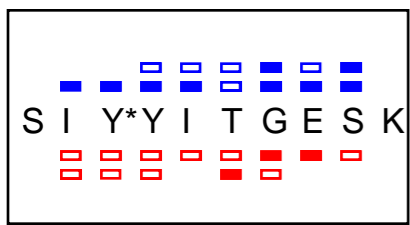

Protein Name: HSP90B  
 gi Accession: 20149594  
 Precursor Mass: 620.7800+2  
 Delta Mass: 2.401 ppm  
 XCorr: 54.27

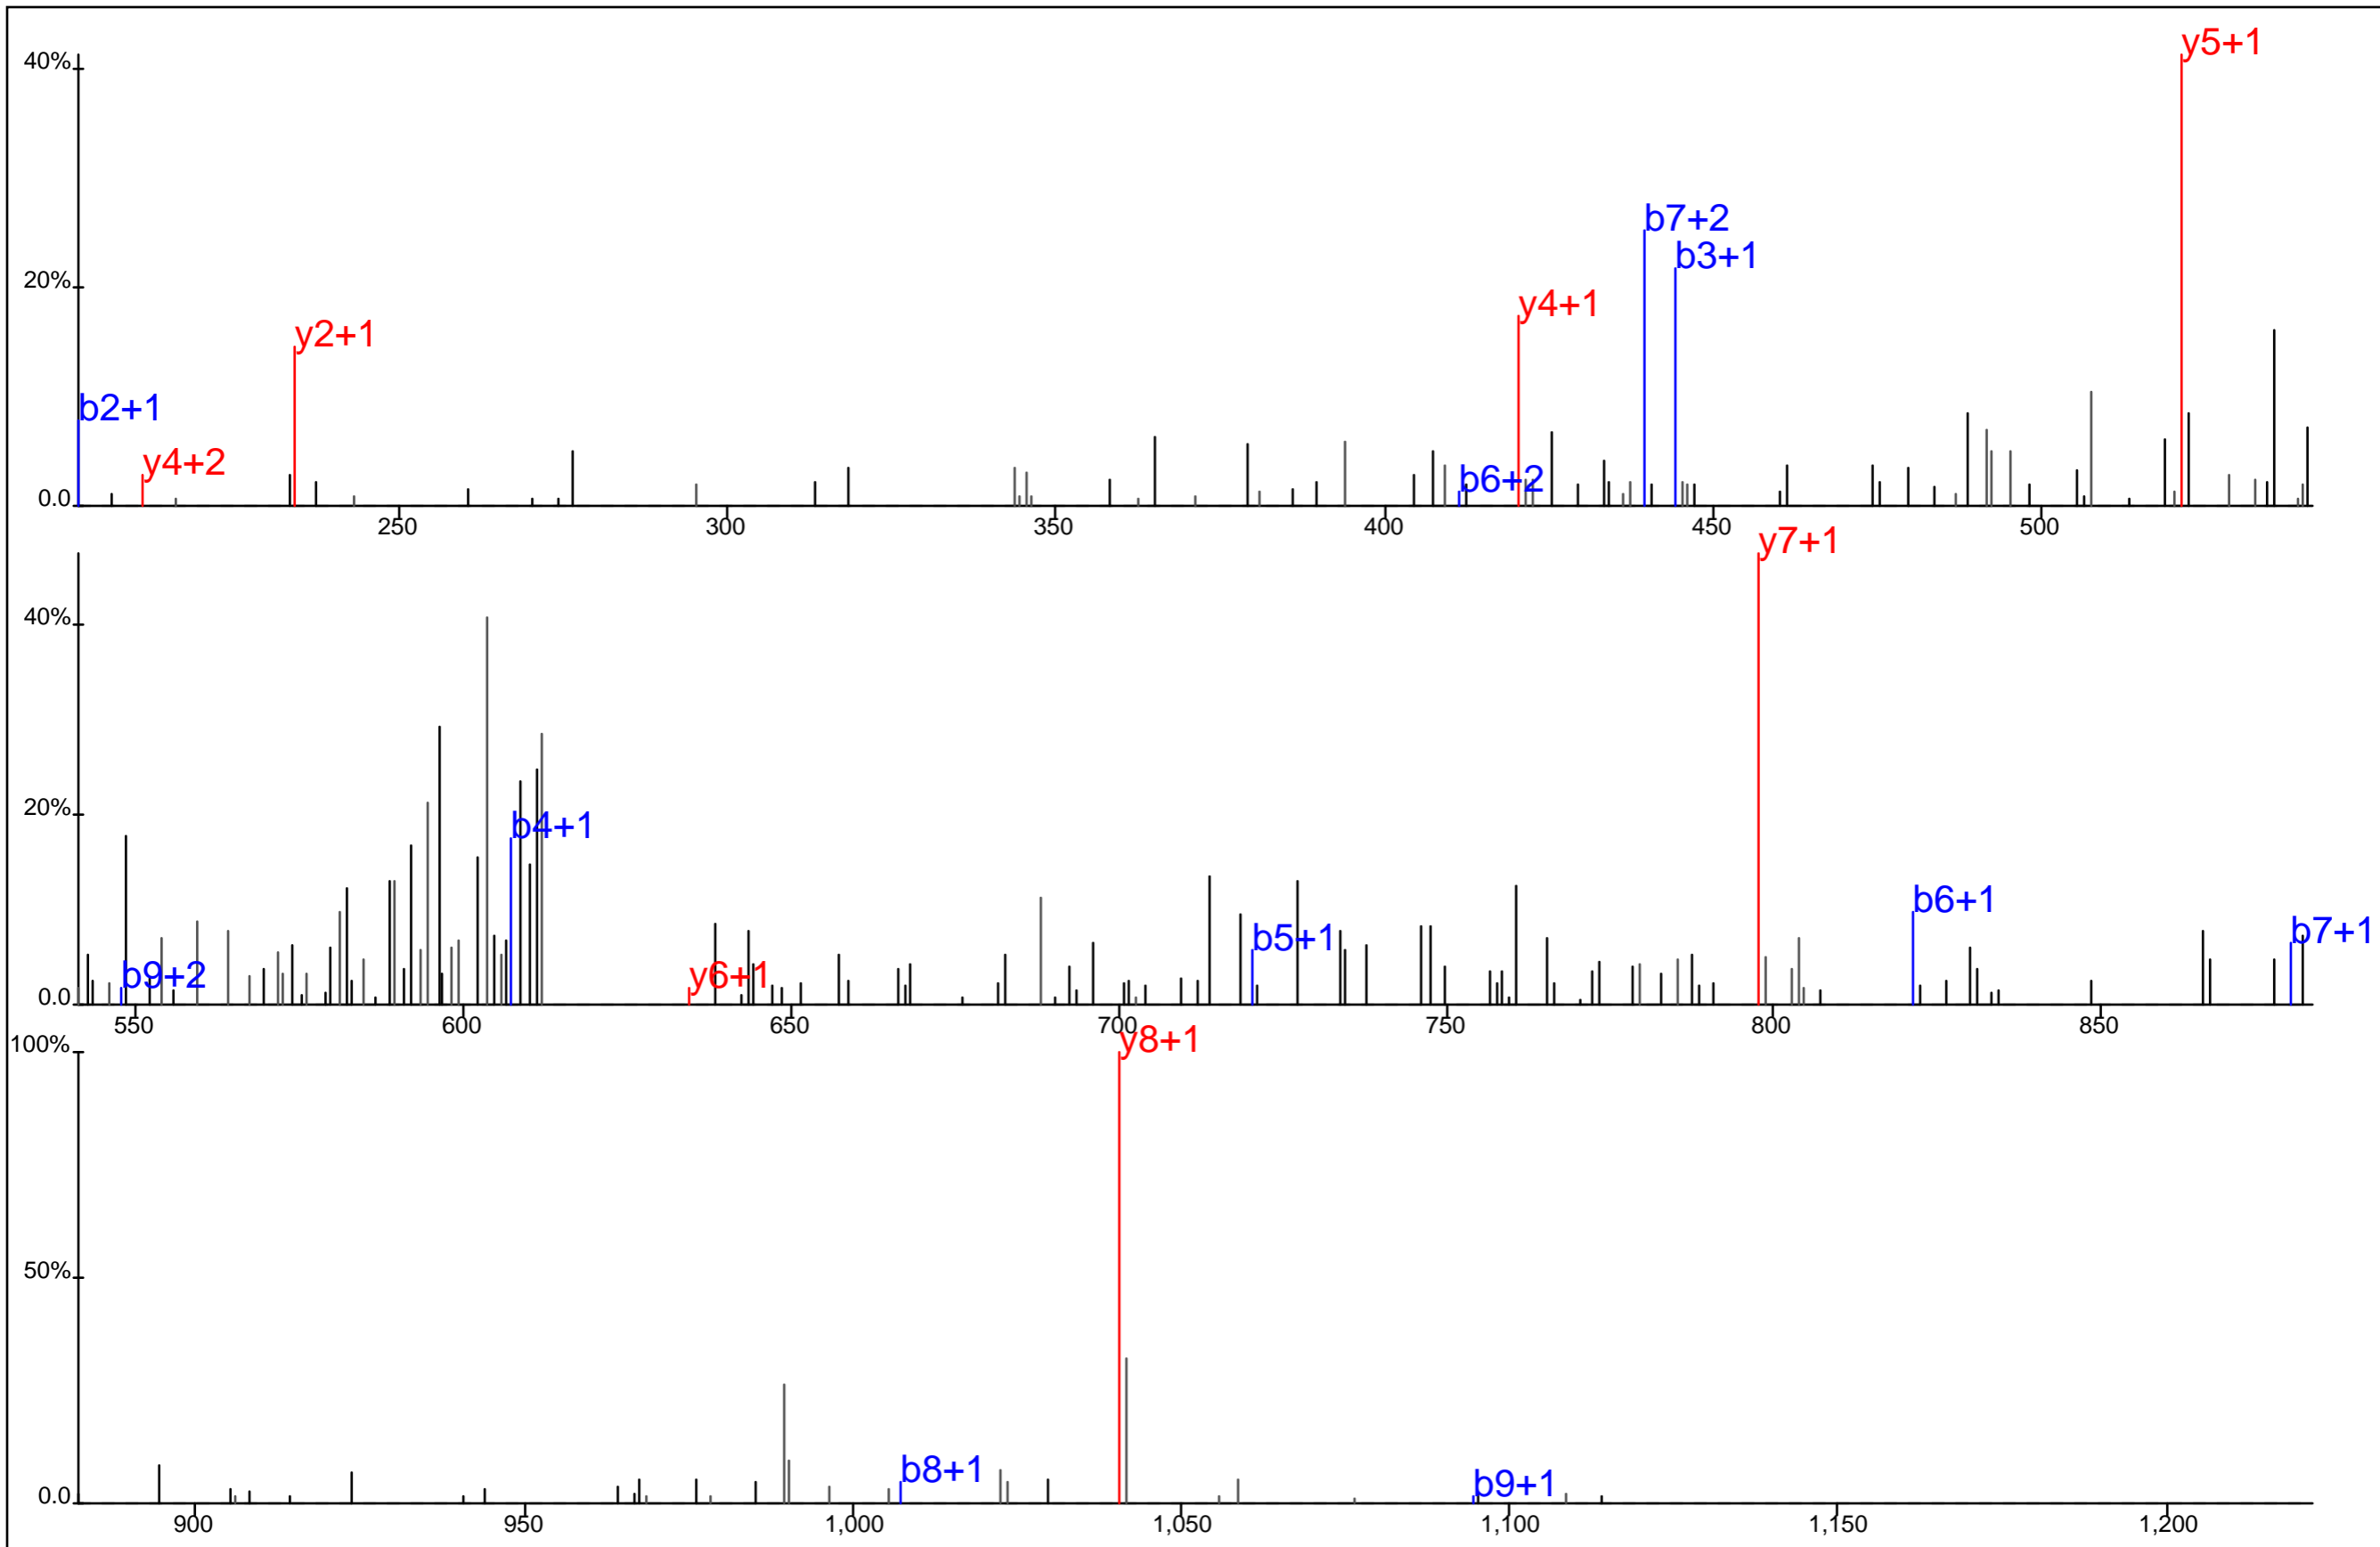

S I Y\*Y I T G E S K

Protein Name: HSP90B  
 gi Accession: 20149594  
 Precursor Mass: 620.7798+2  
 Delta Mass: 2.207 ppm  
 XCorr: 18.77

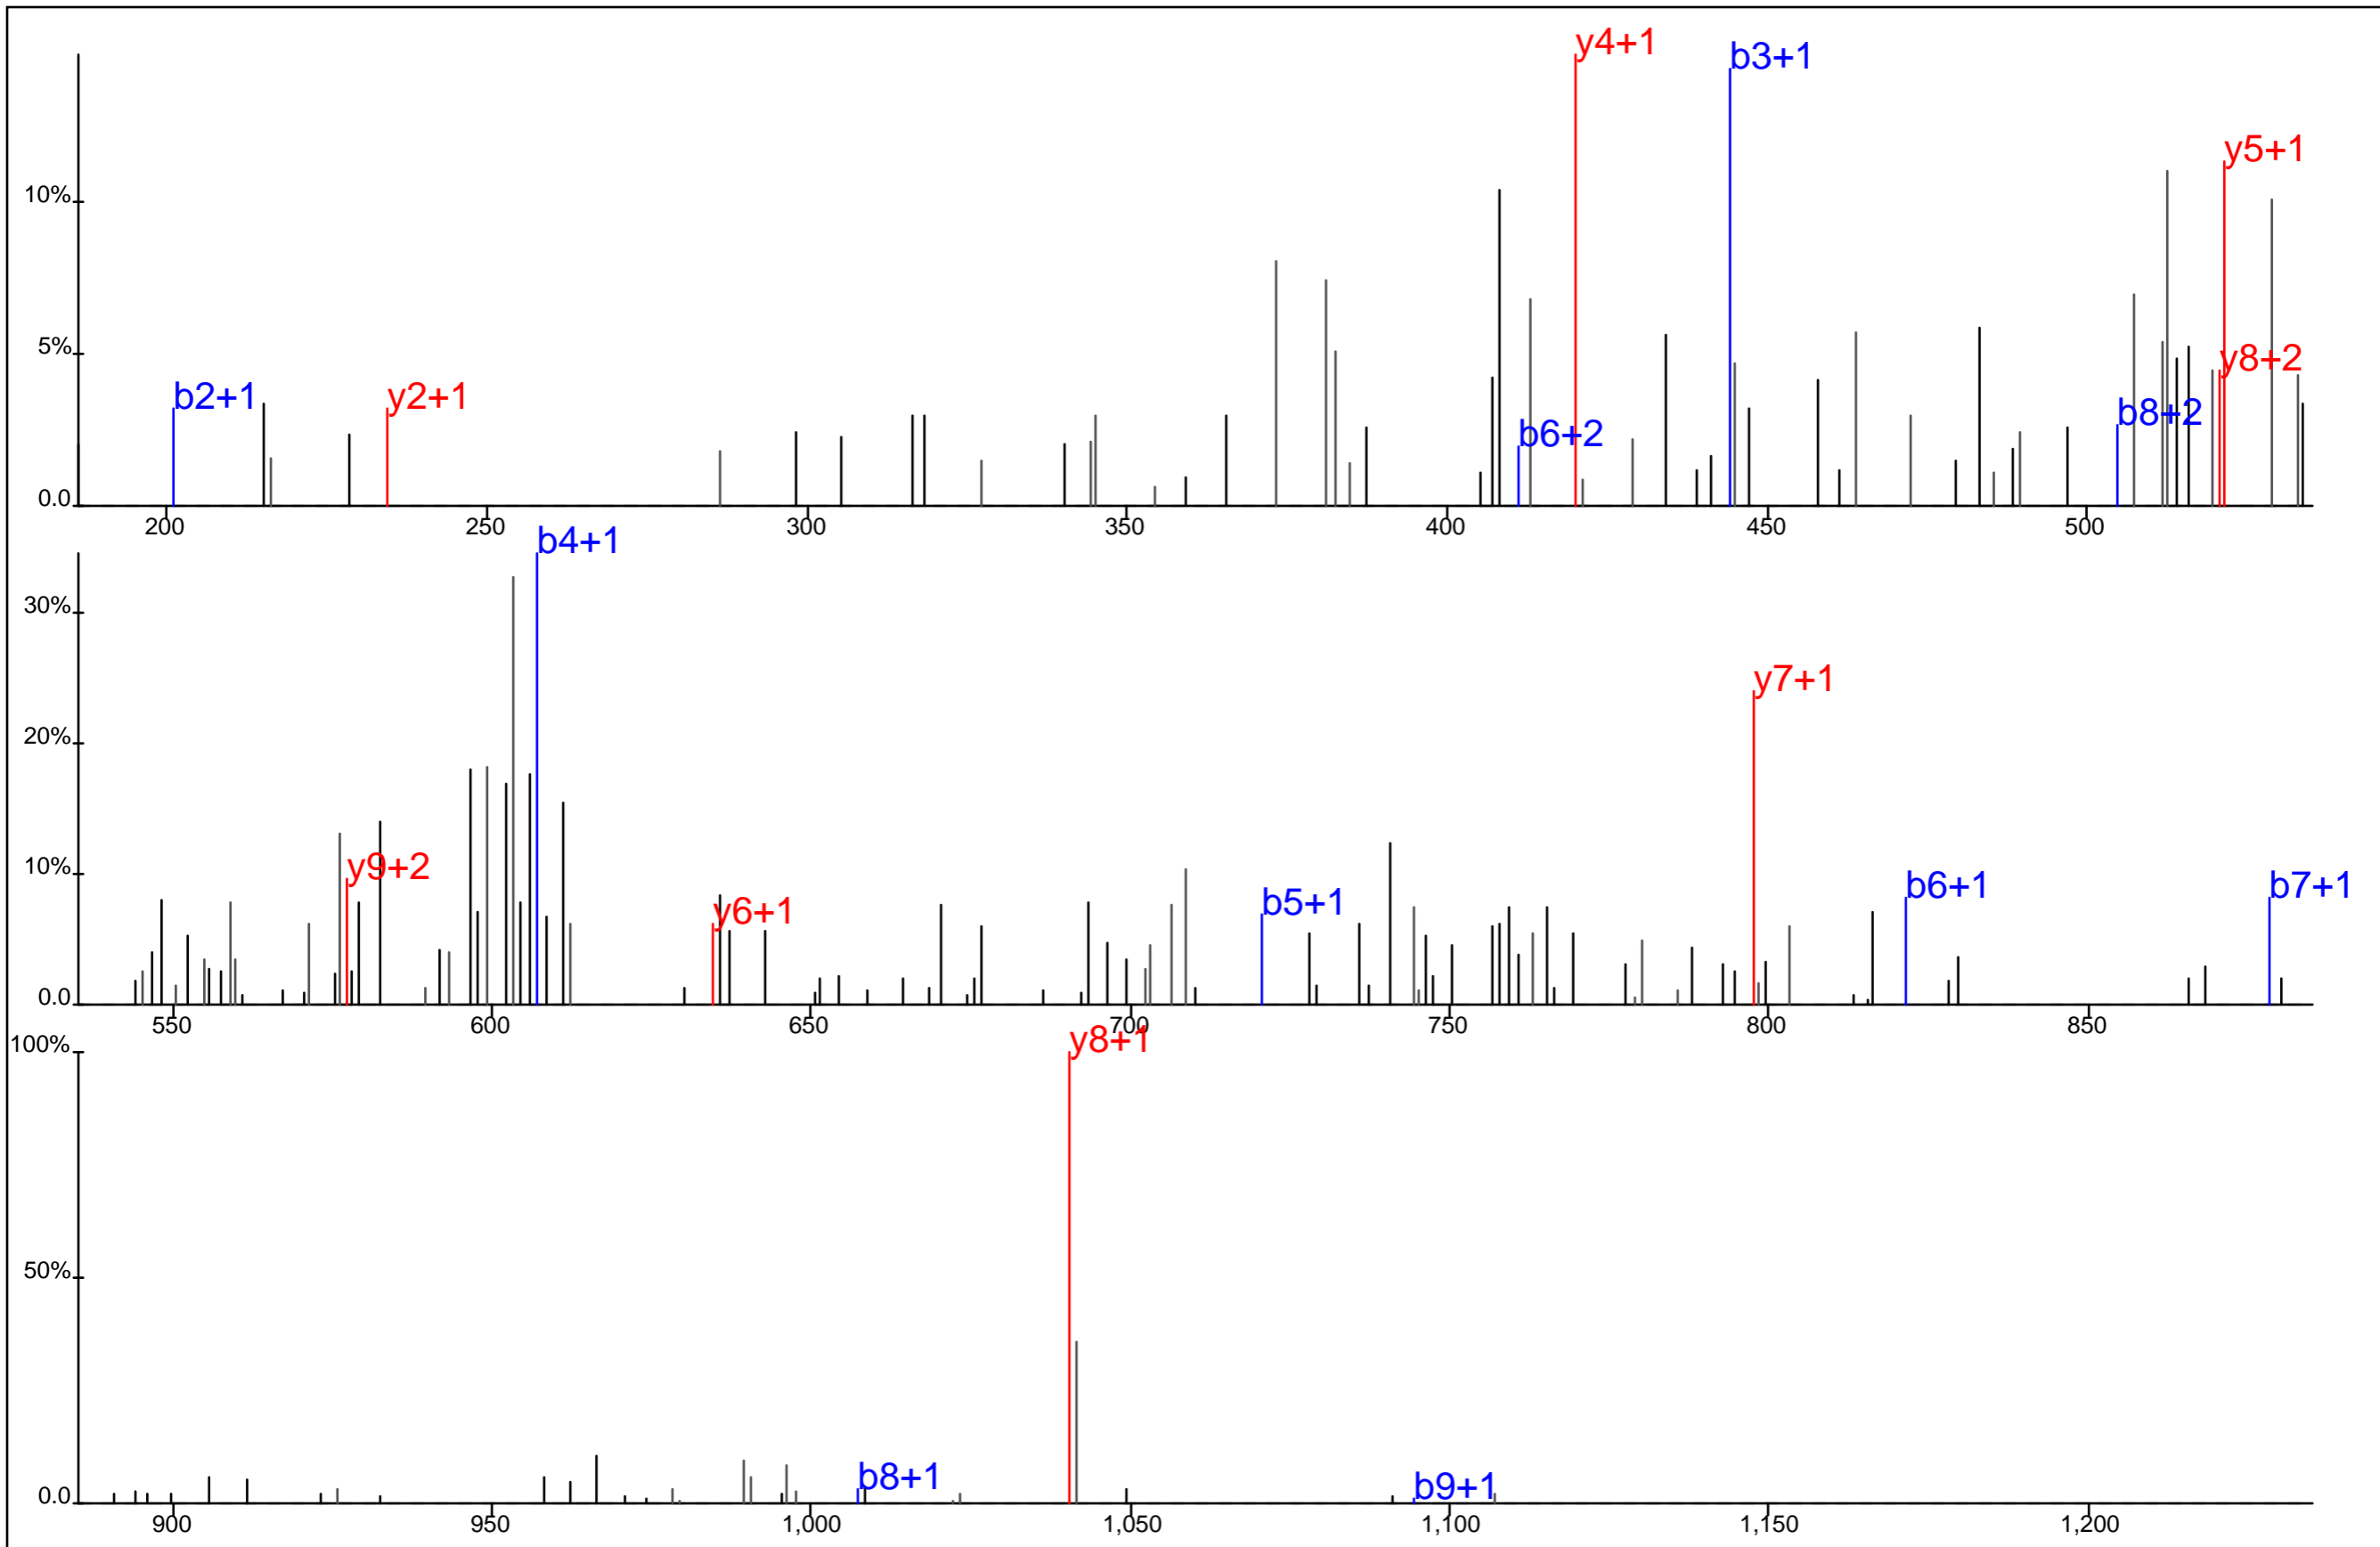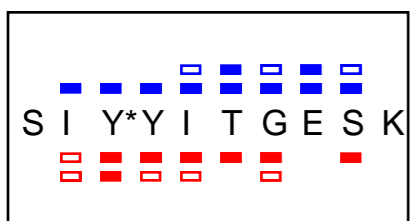

Protein Name: HSP90B  
 gi Accession: 20149594  
 Precursor Mass: 620.7740+2  
 Delta Mass: 7.144 ppm  
 XCorr: 29.49



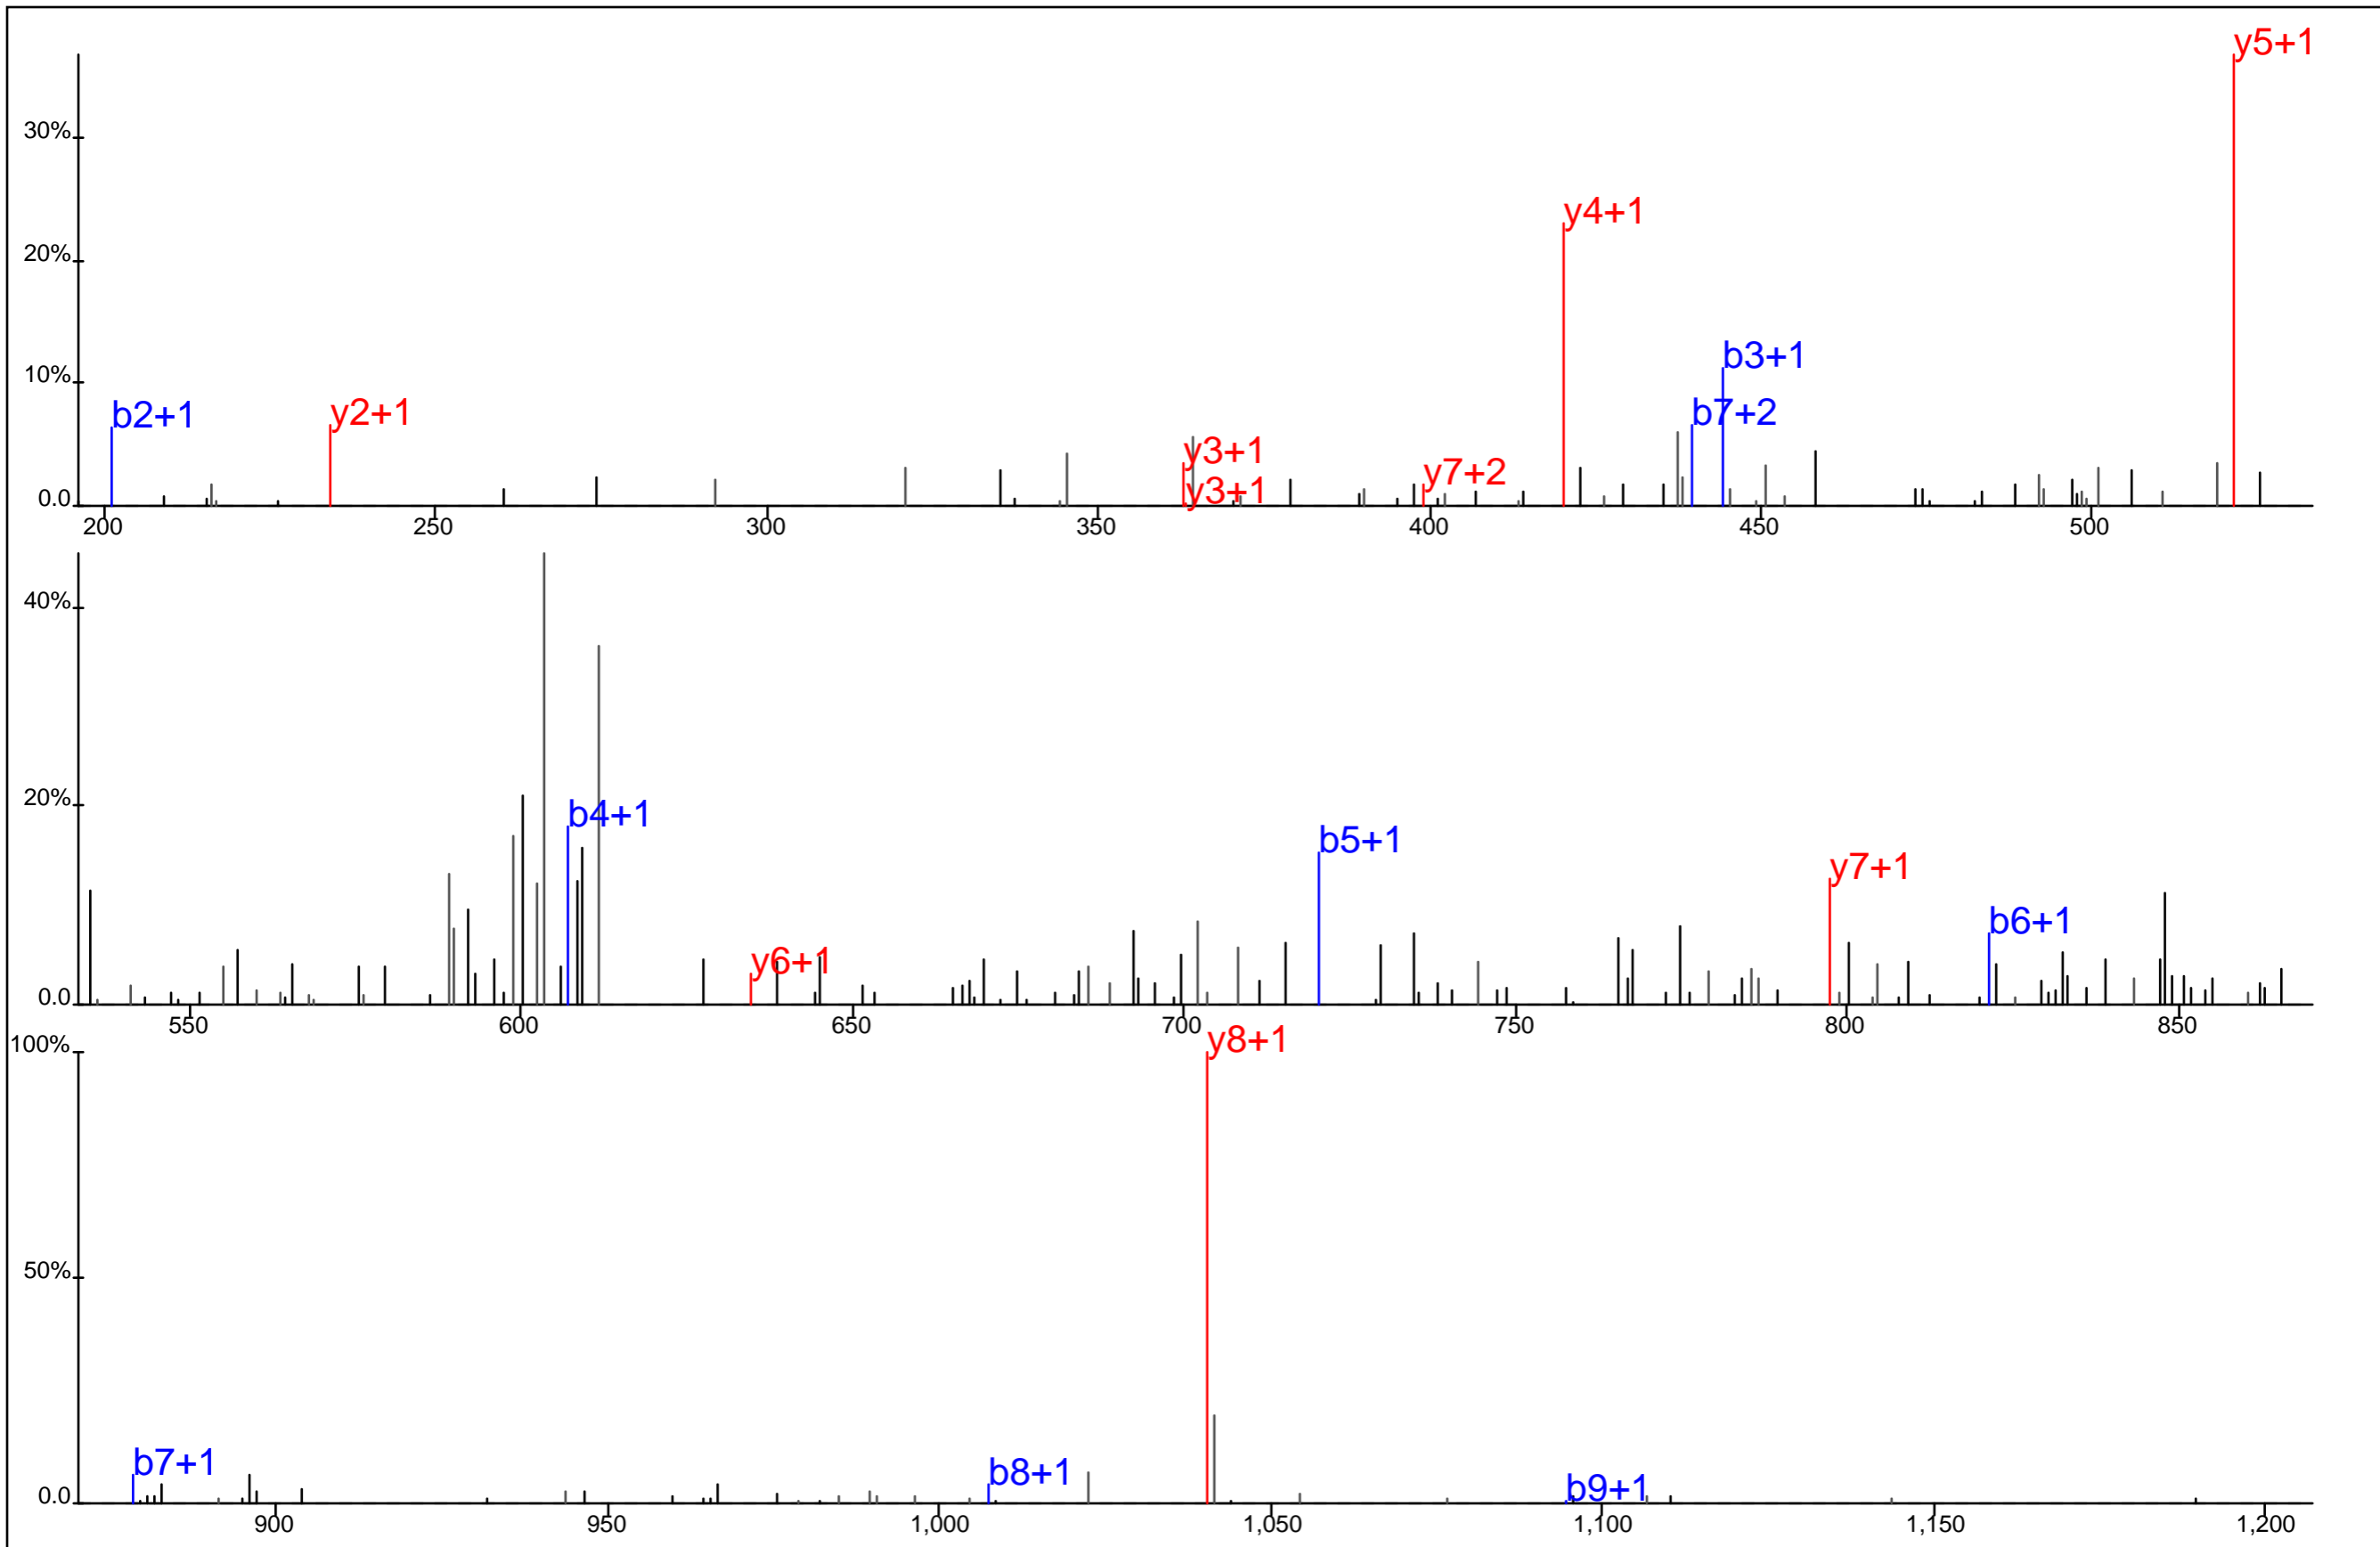

■ ■ ■ ■ ■ ■ ■ ■  
 S I Y\*Y I T G E S K  
□ □ □ □ □ □ □ □

Protein Name: HSP90B  
 gi Accession: 20149594  
 Precursor Mass: 620.7787+2  
 Delta Mass: 0.337 ppm  
 XCorr: 30.45

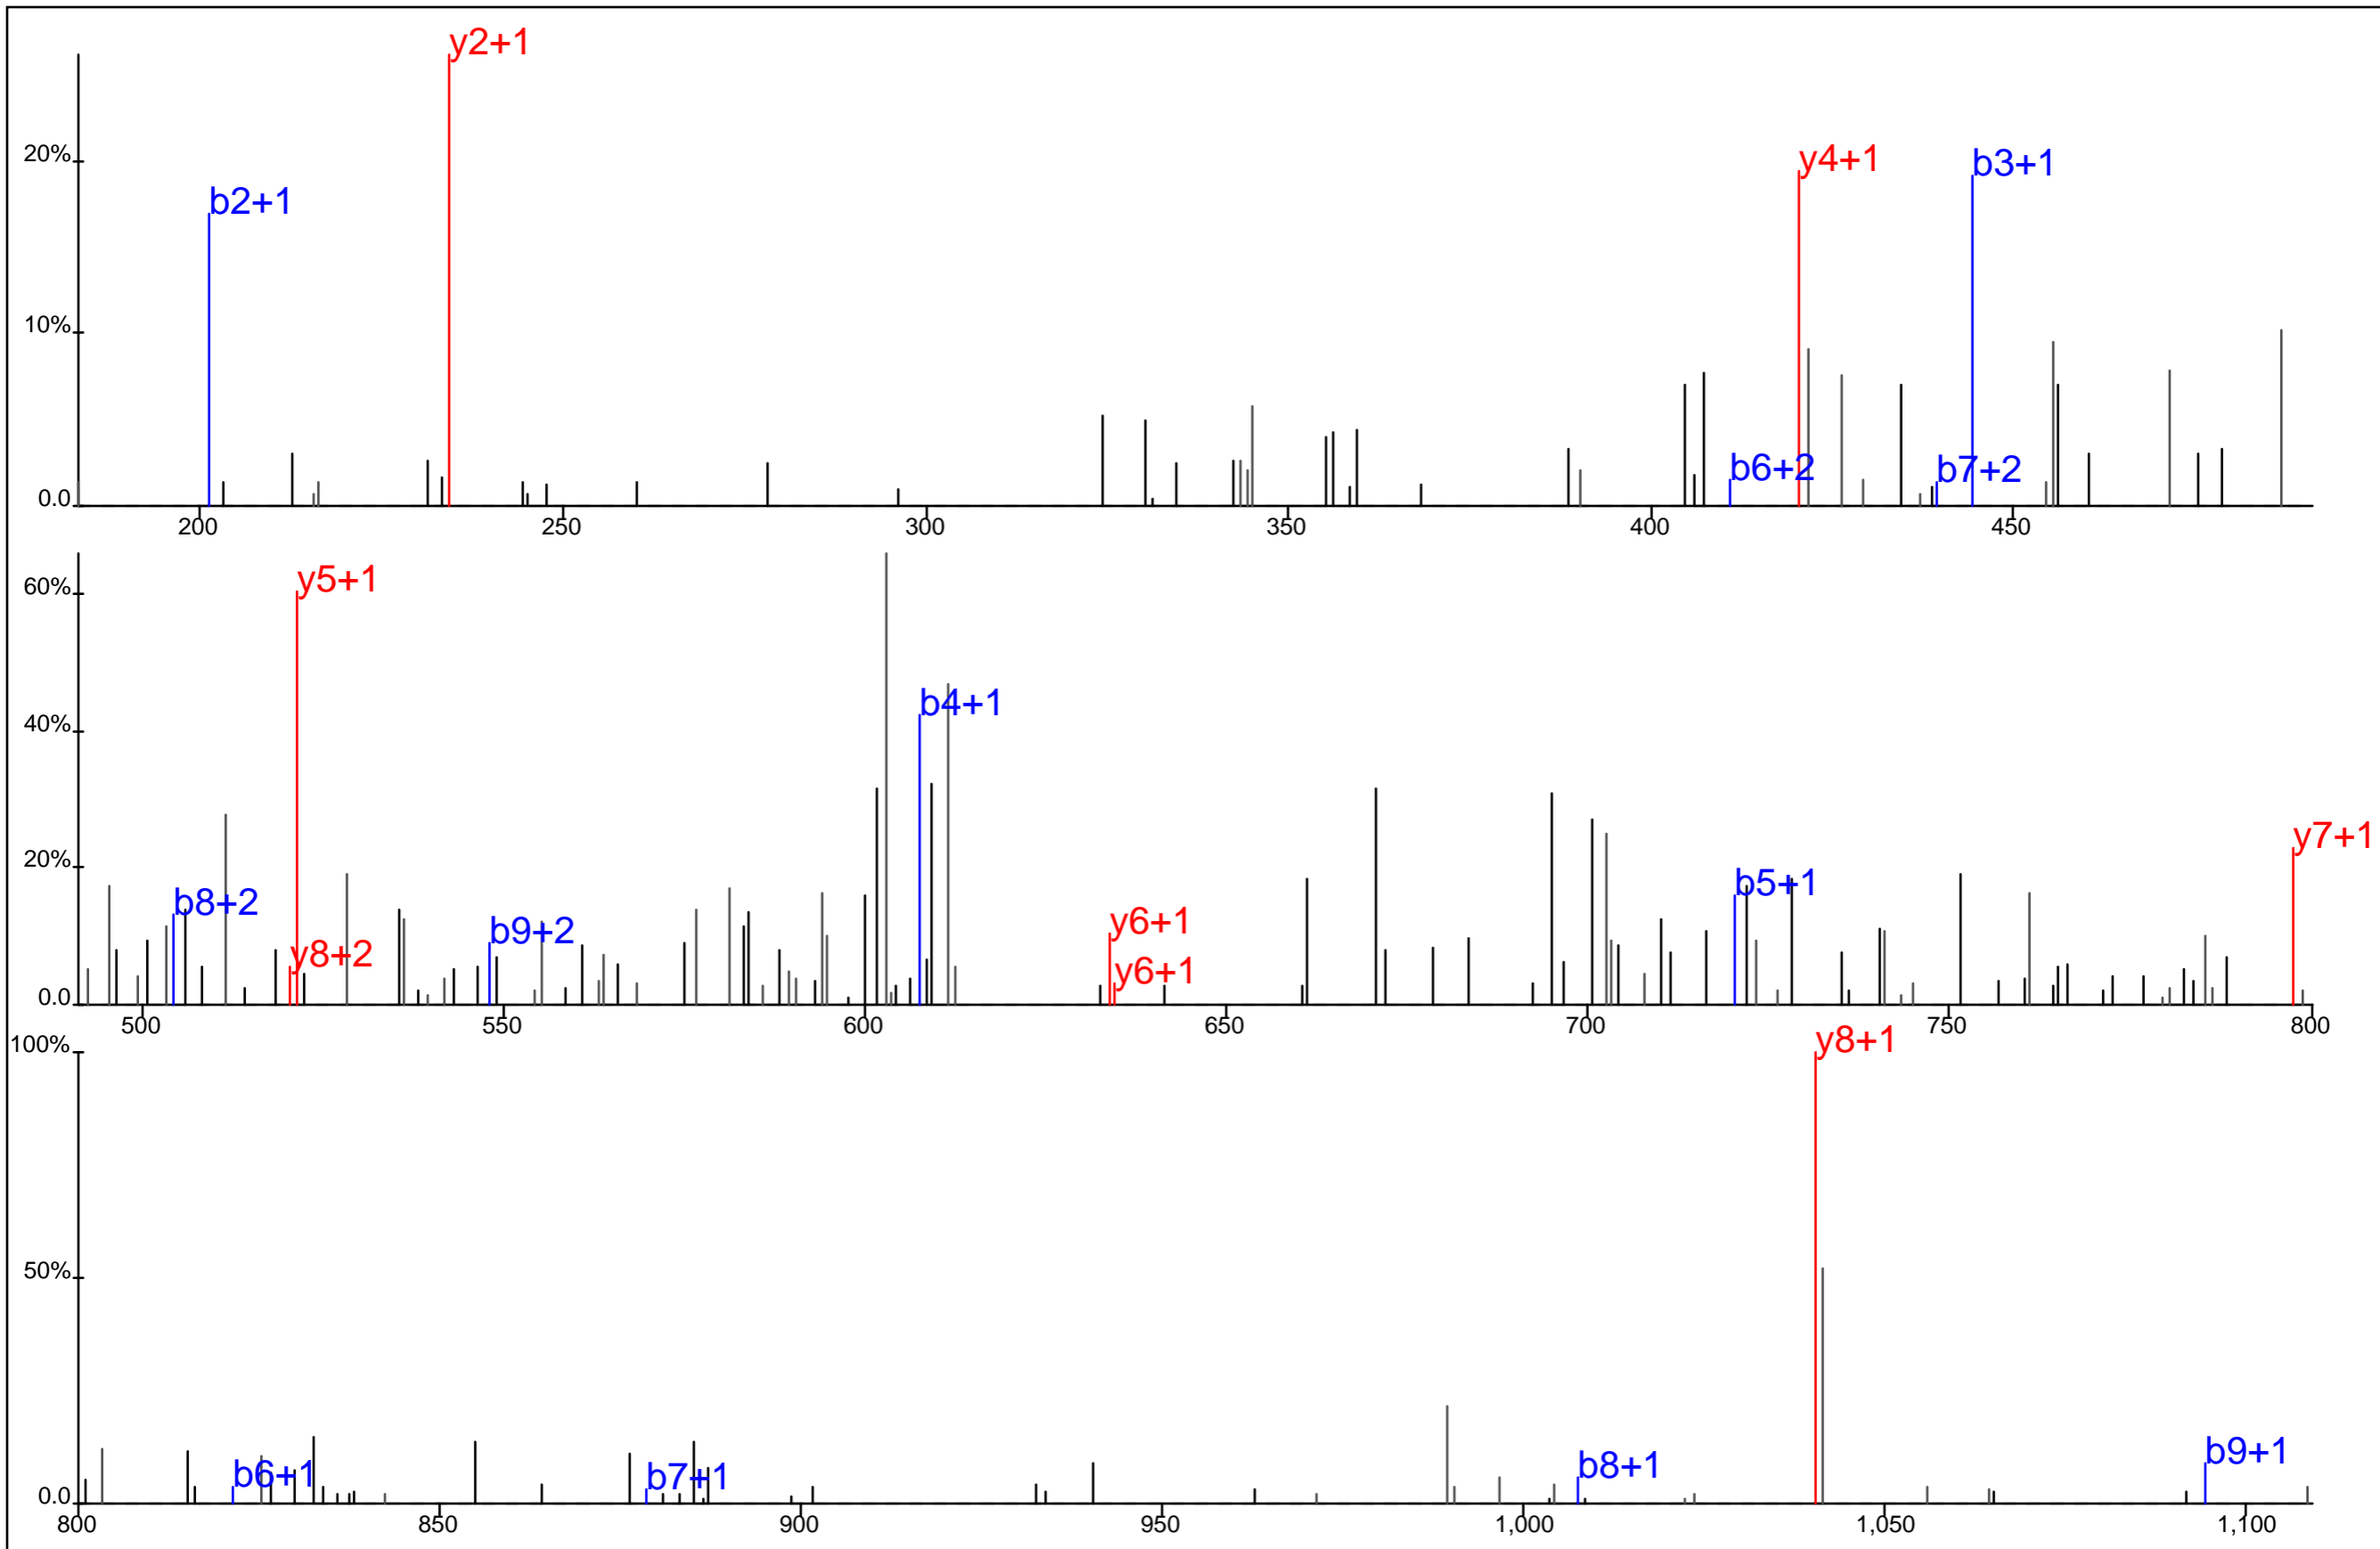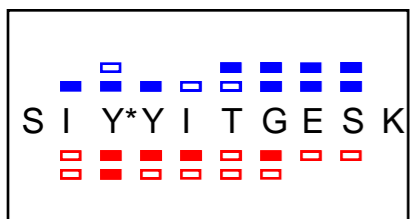

Protein Name: HSP90B  
 gi Accession: 20149594  
 Precursor Mass: 620.7789+2  
 Delta Mass: 0.627 ppm  
 XCorr: 29.74

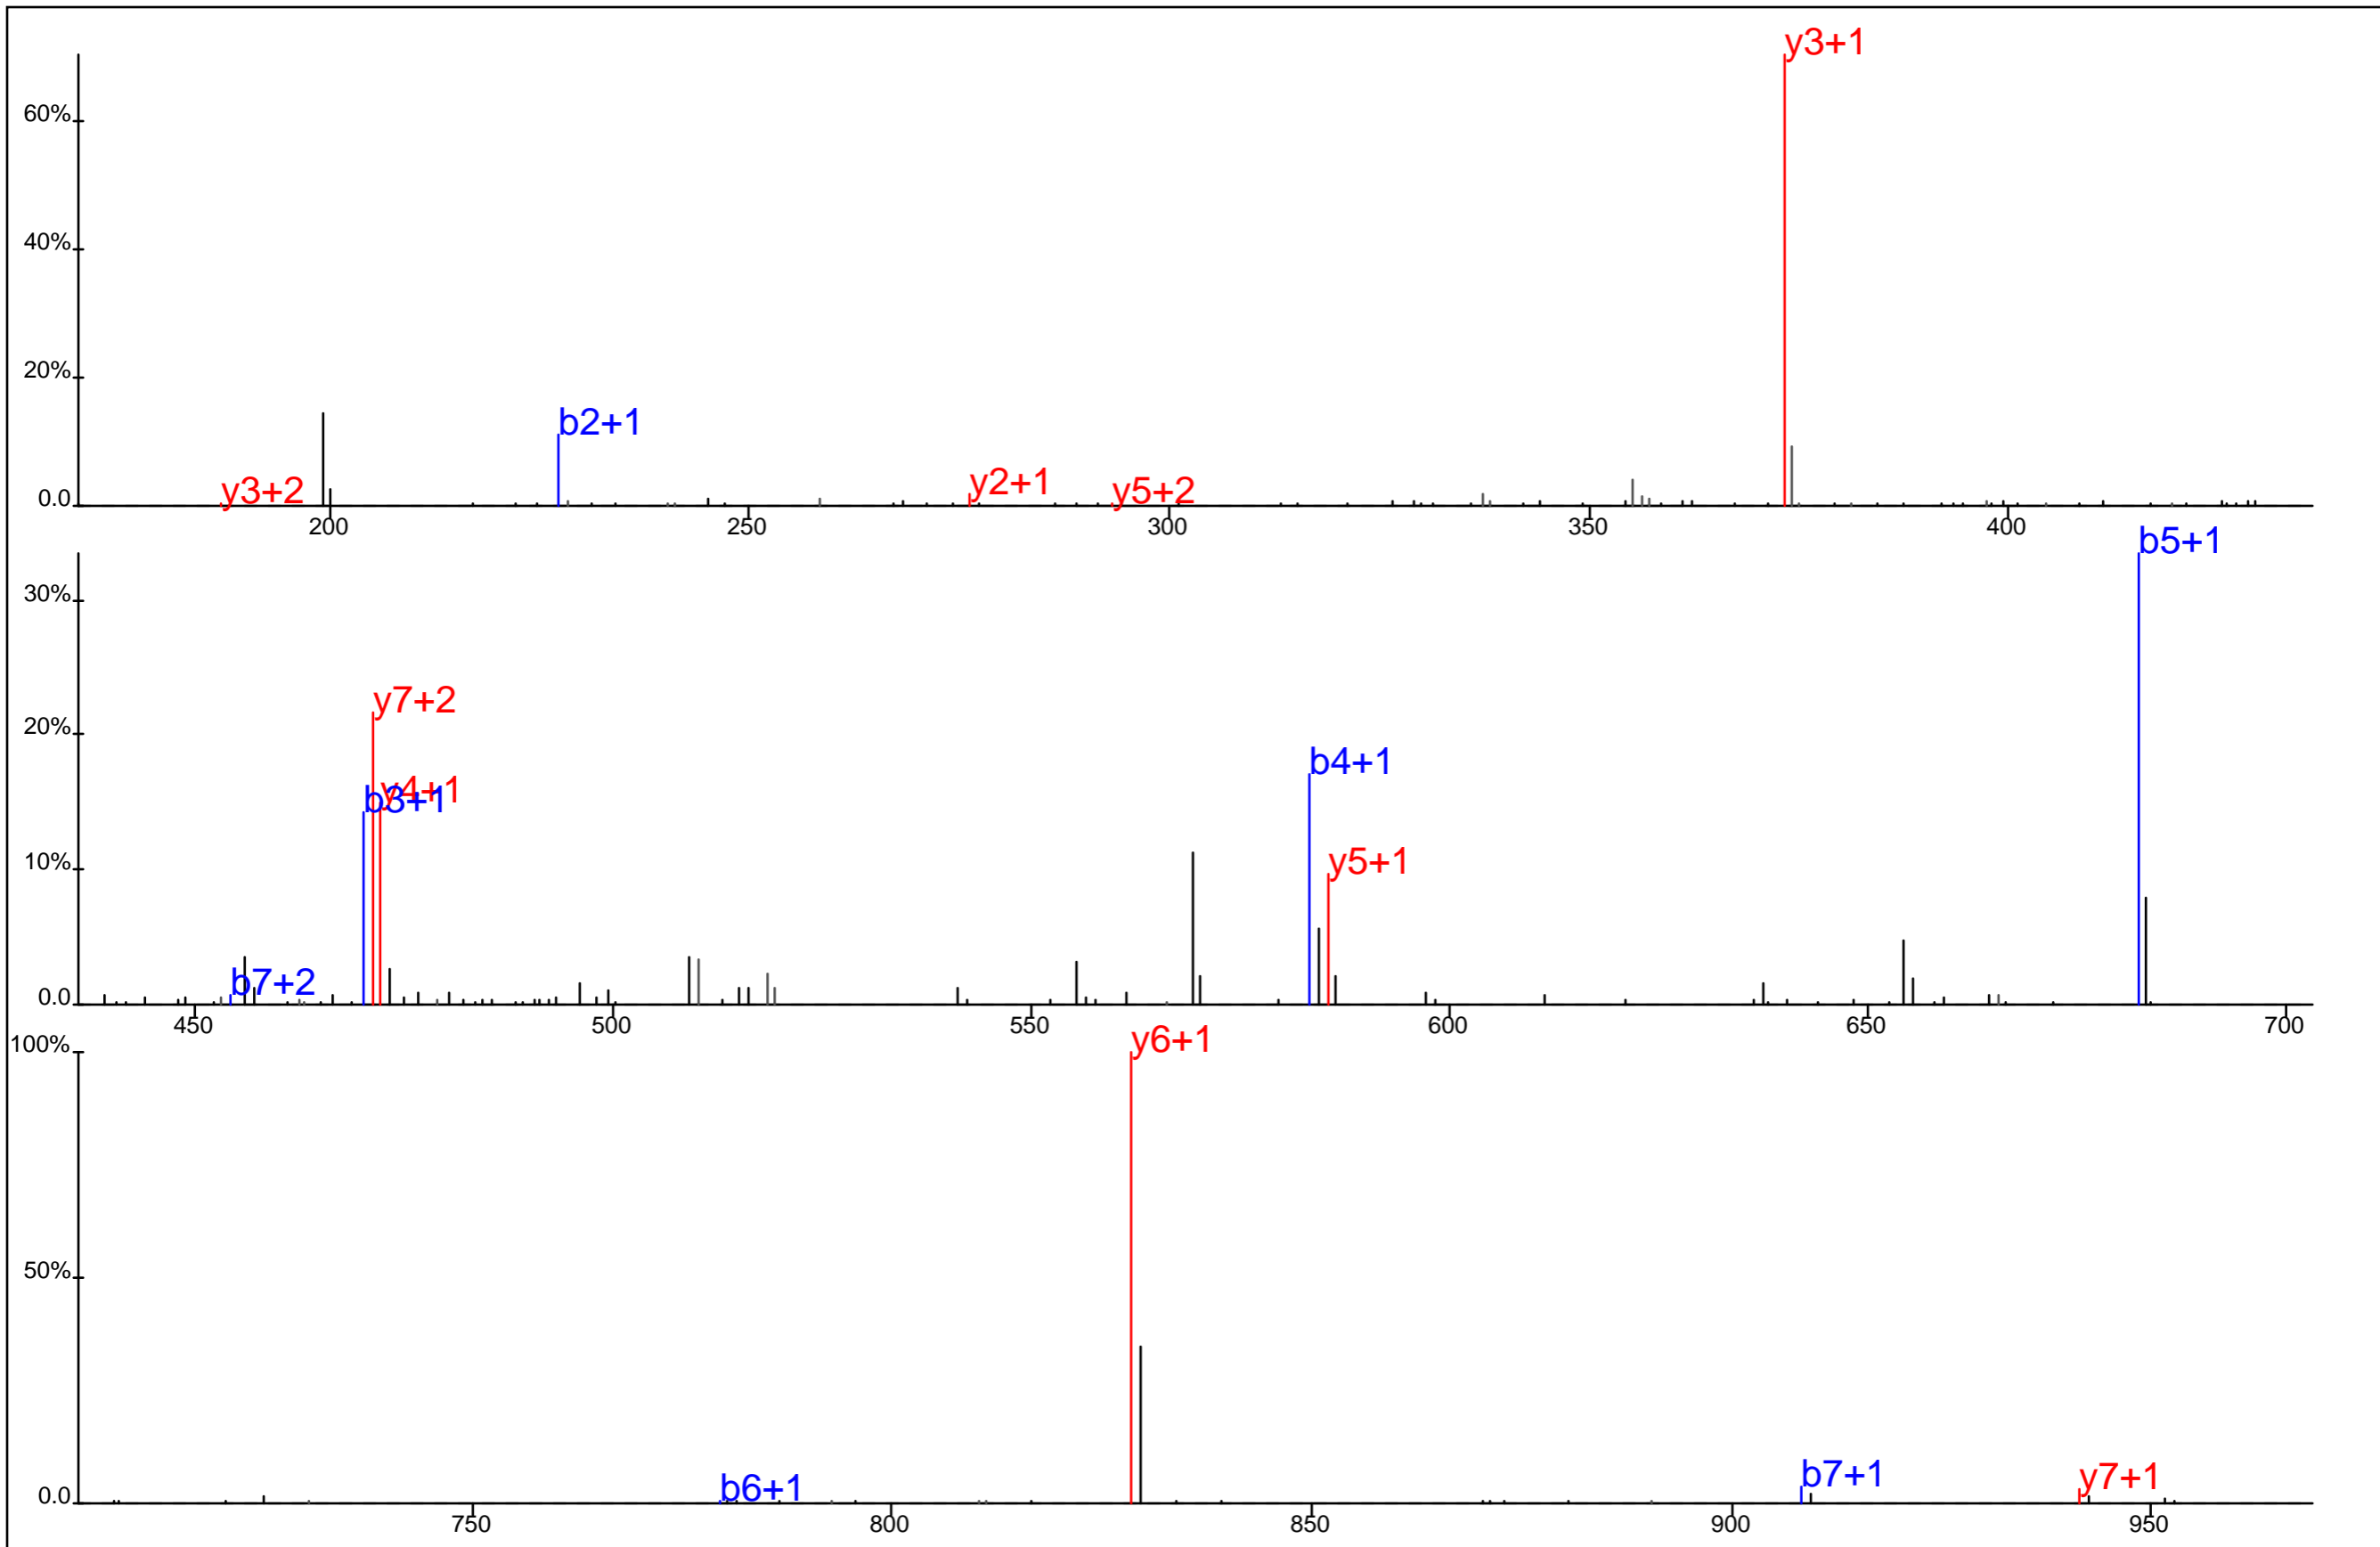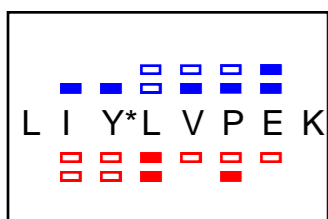

Protein Name: Intersectin 2  
 gi Accession: 10432747  
 Precursor Mass: 527.7842+2  
 Delta Mass: 2.663 ppm  
 XCorr: 52.29

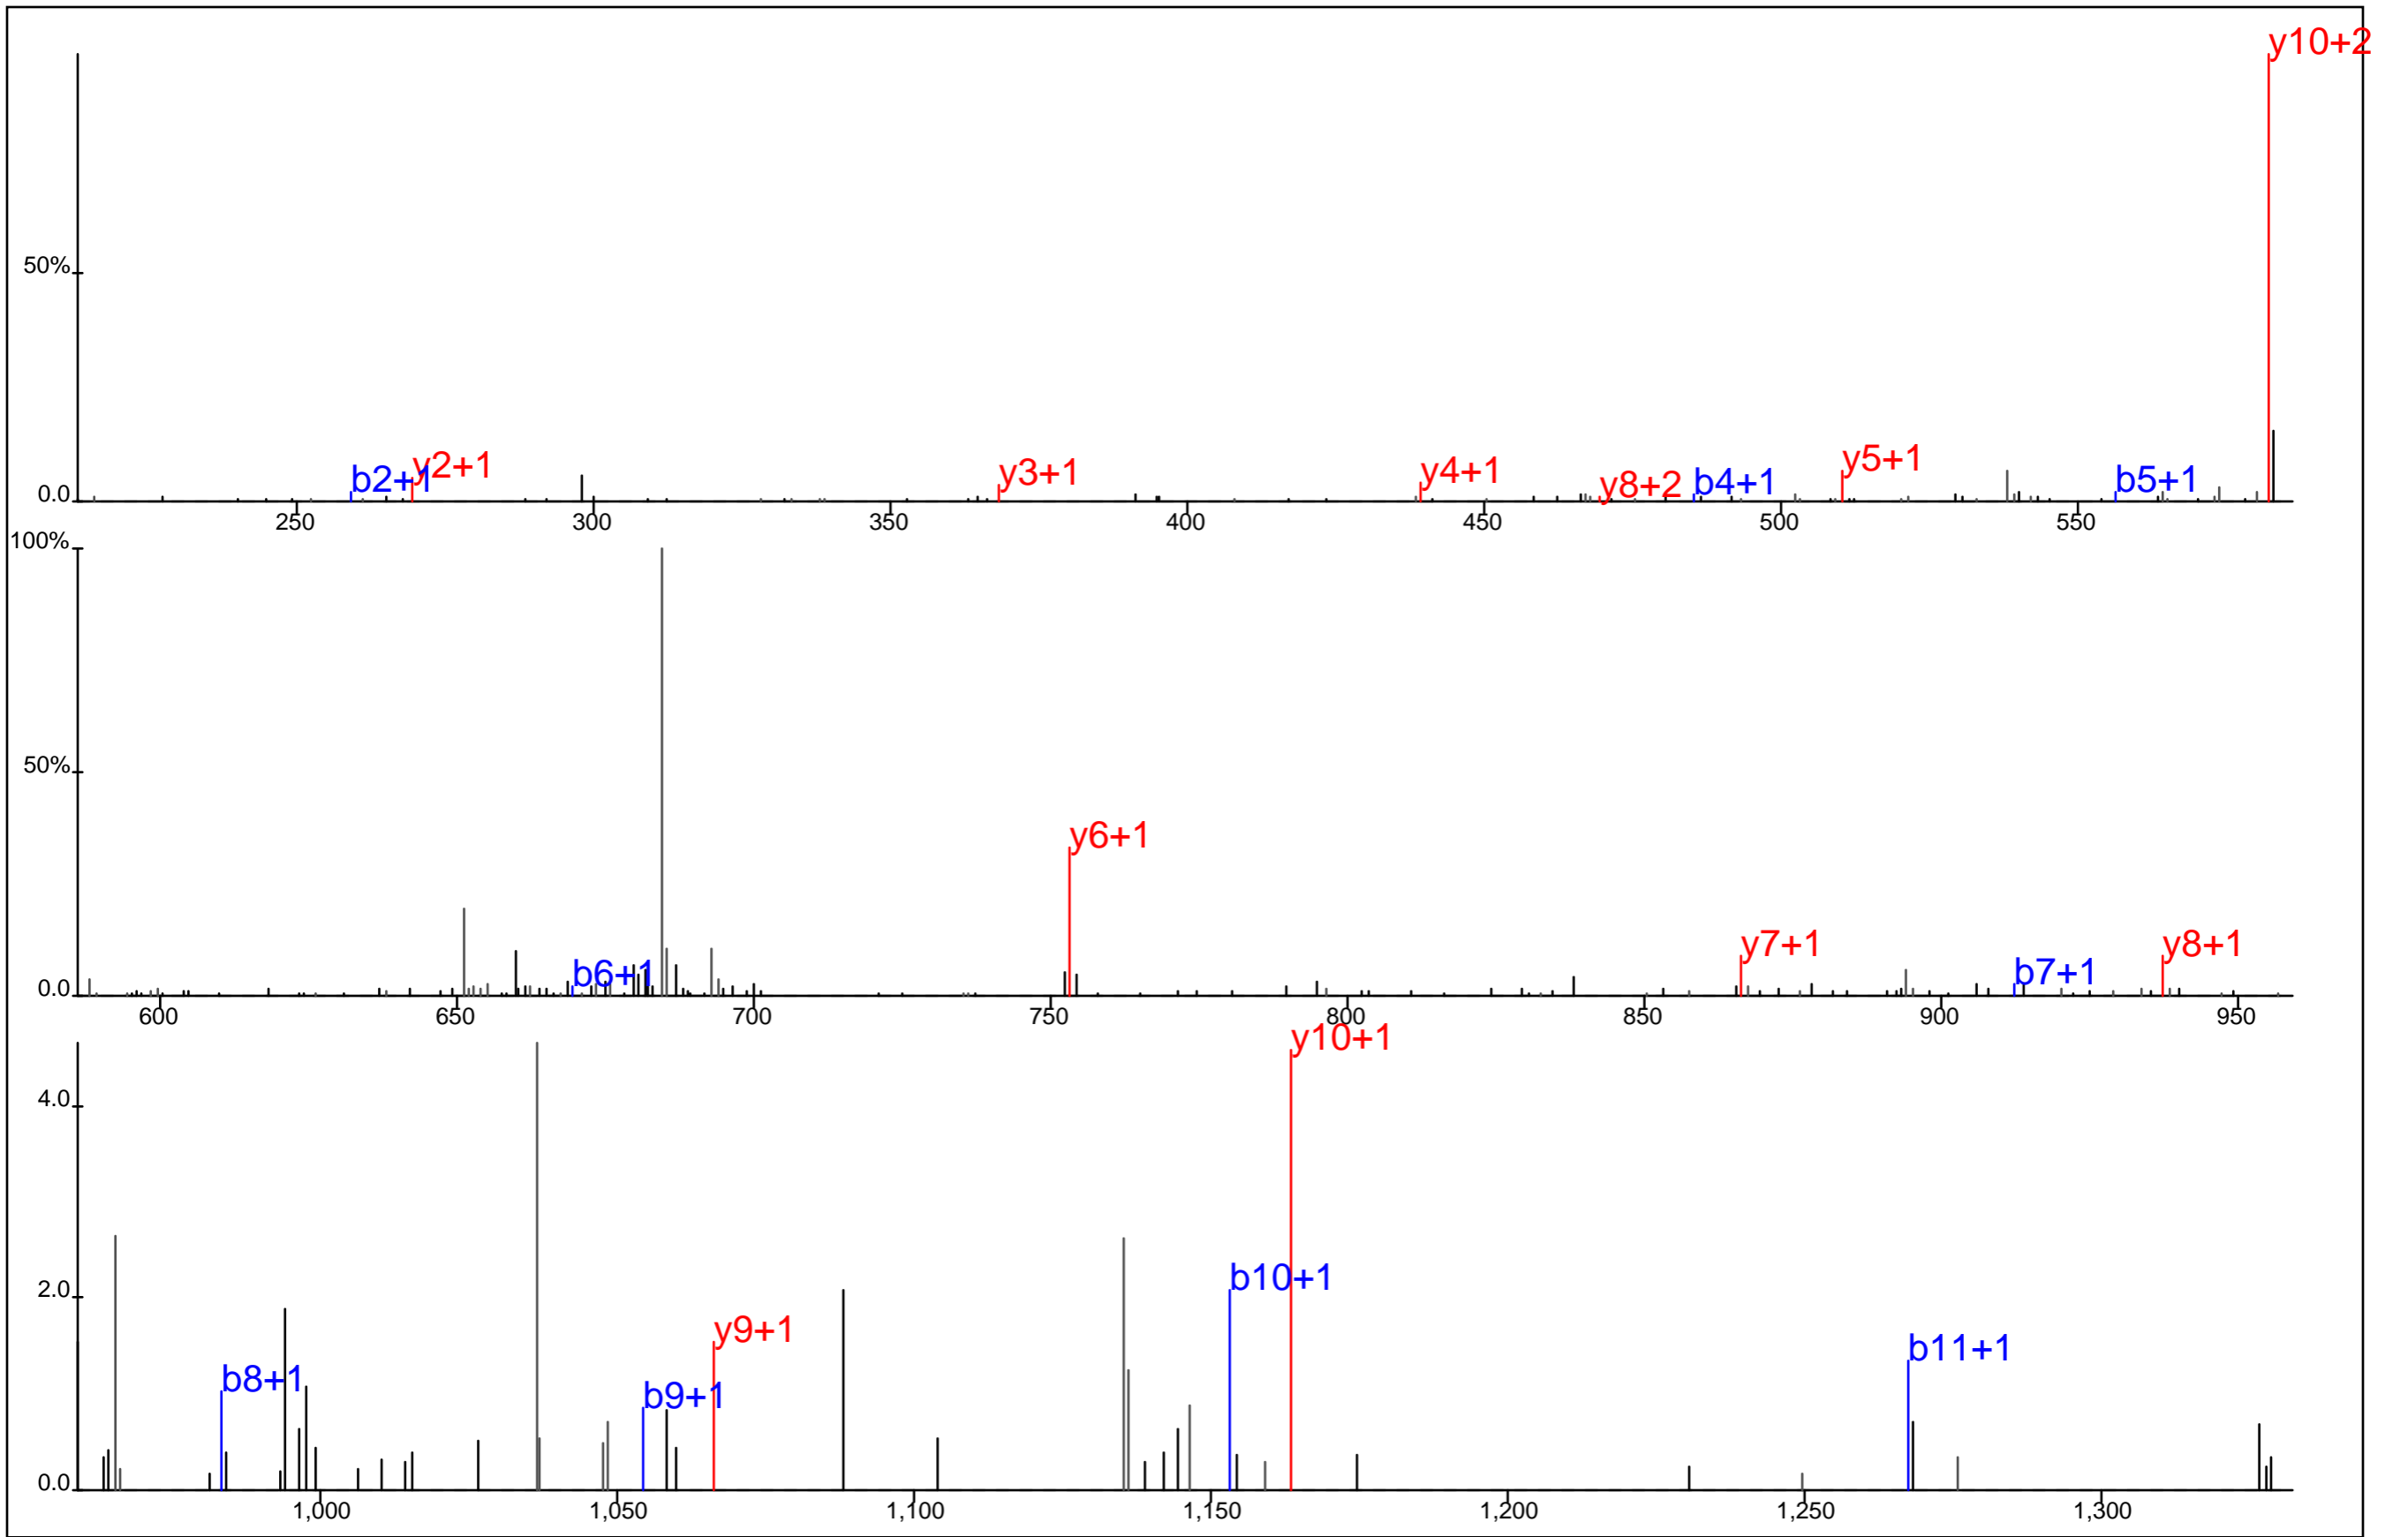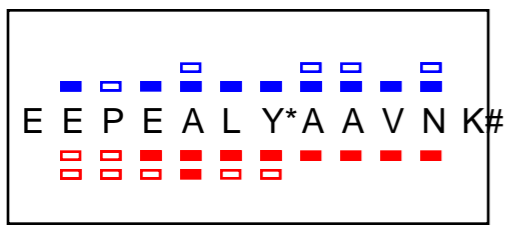

Protein Name: Intersectin 2  
 gi Accession: 6330911  
 Precursor Mass: 711.3283+2  
 Delta Mass: 3.825 ppm  
 XCorr: 56.54

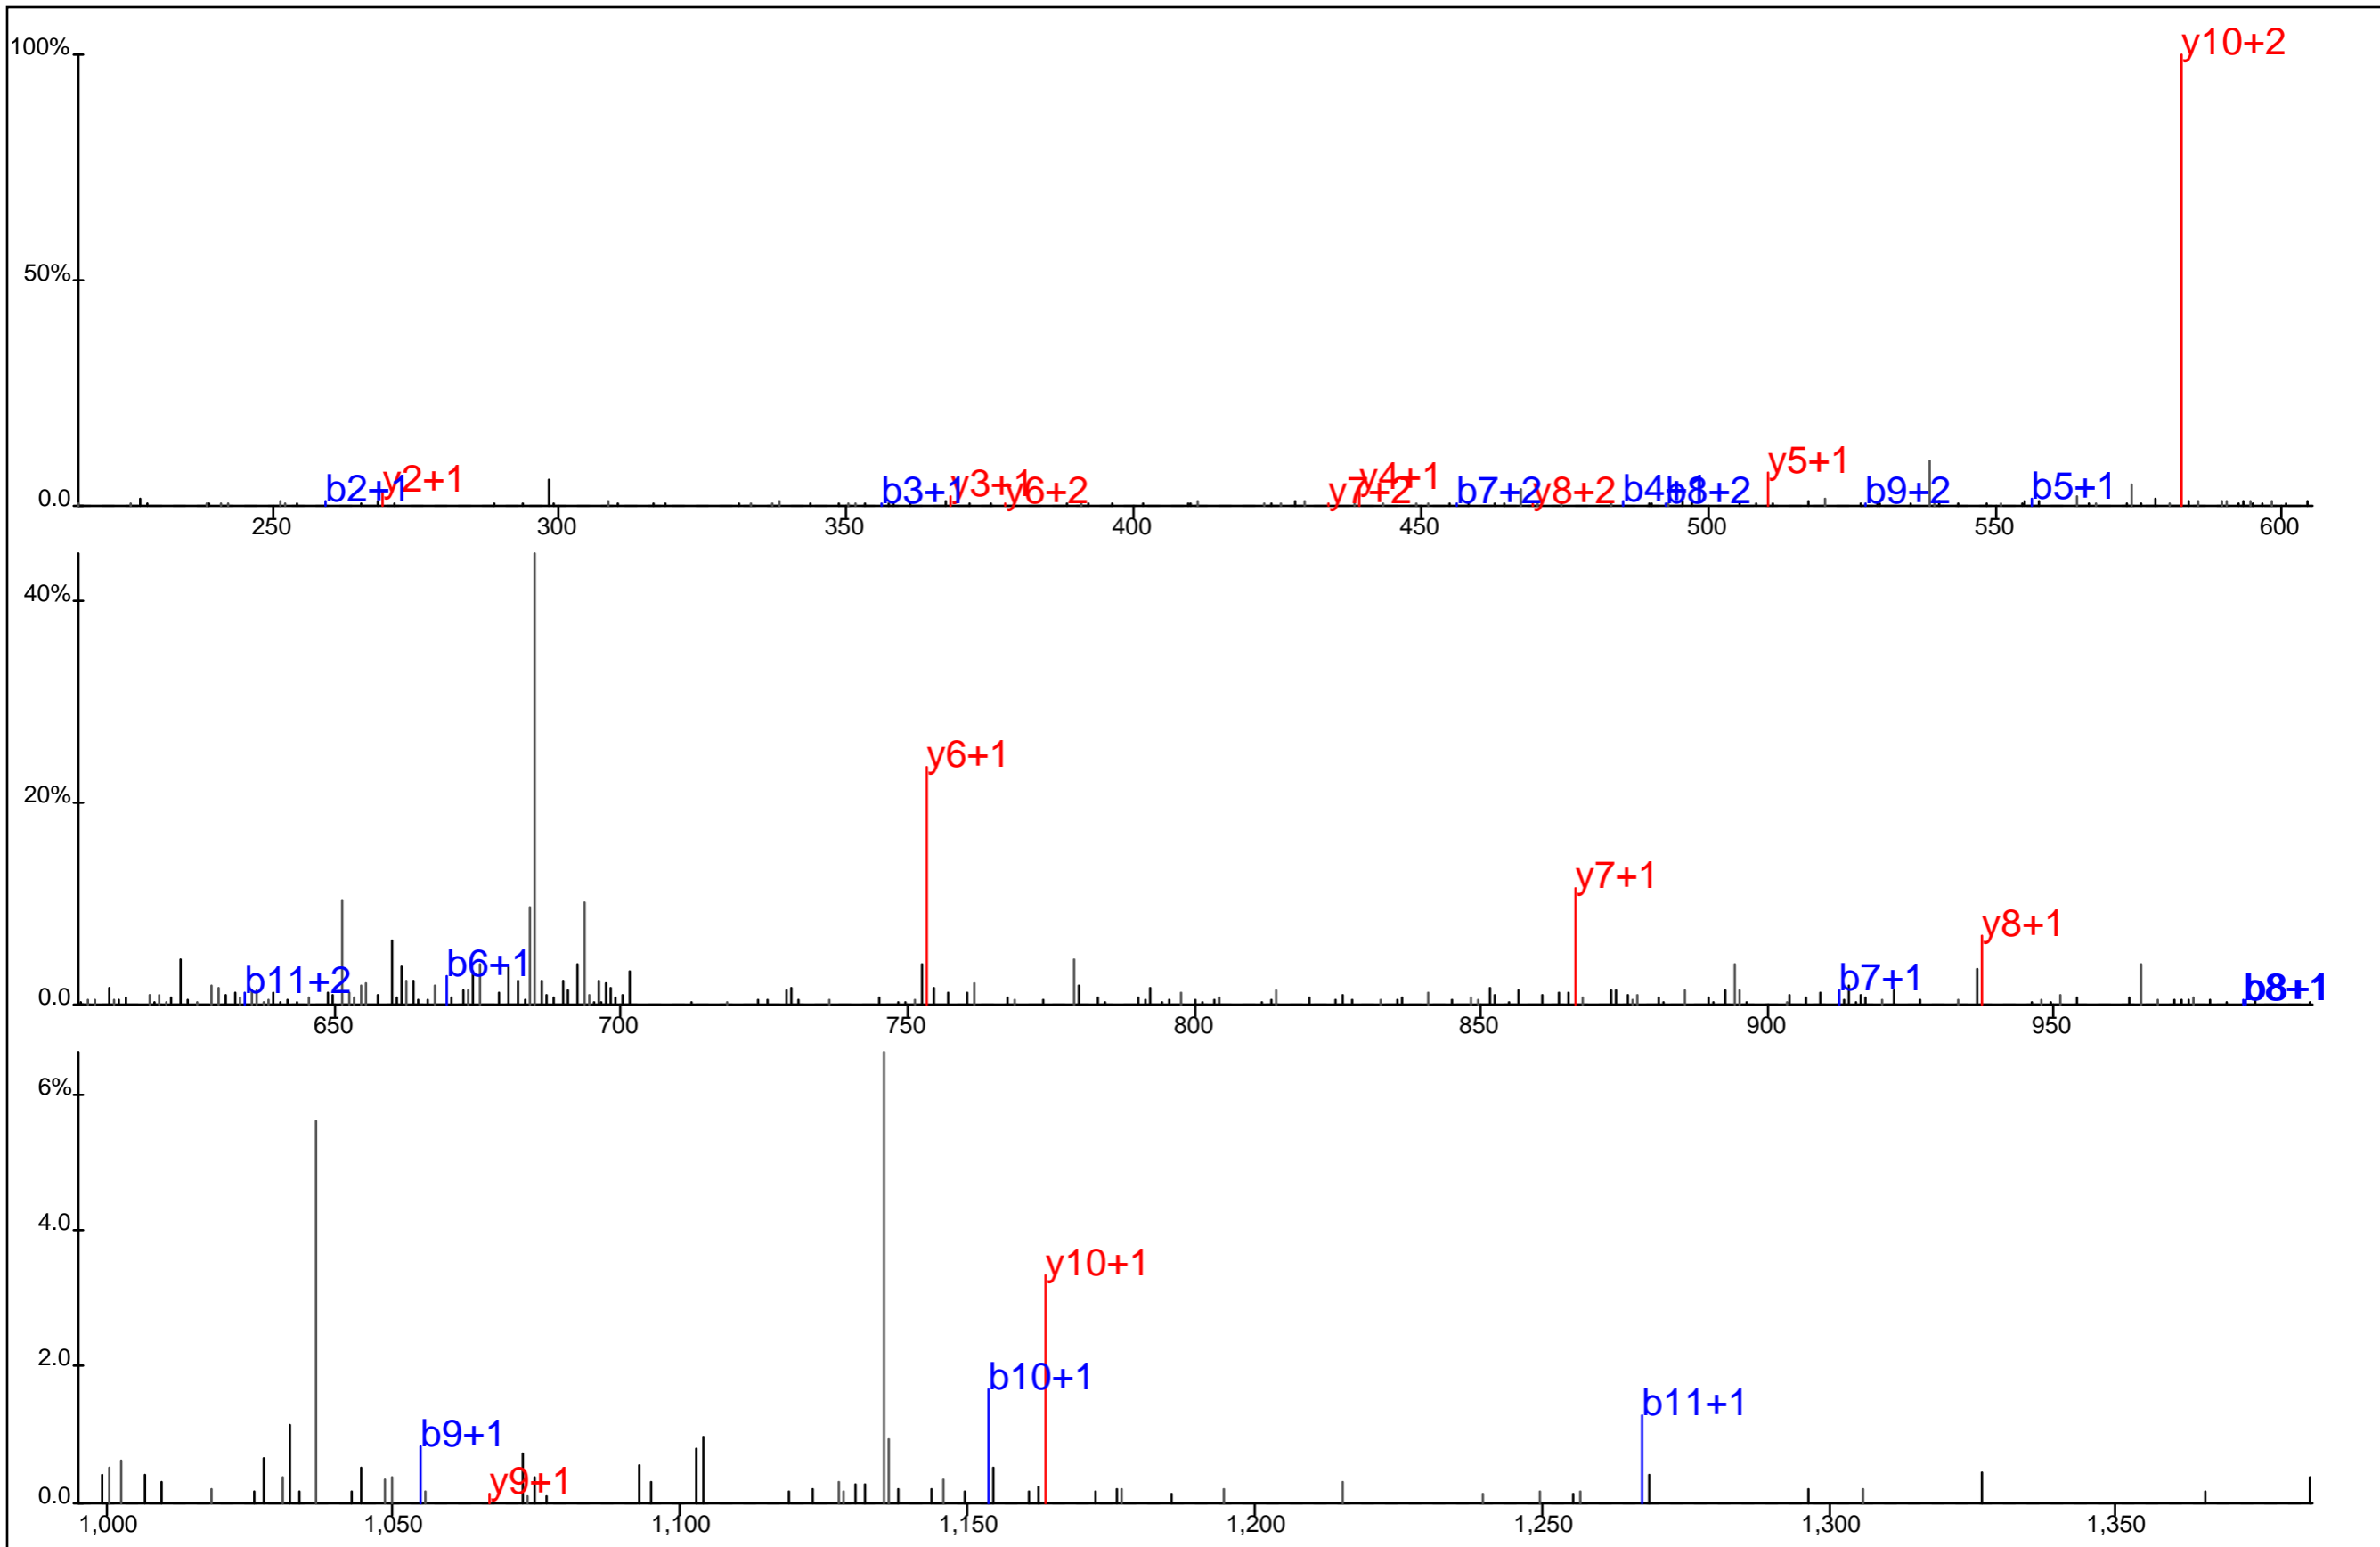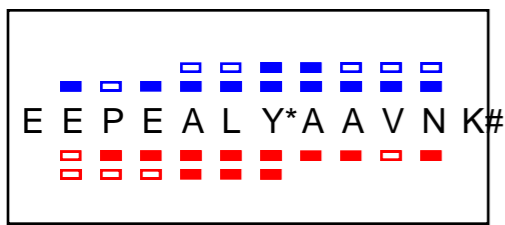

Protein Name: Intersectin 2  
 gi Accession: 6330911  
 Precursor Mass: 711.3293+2  
 Delta Mass: 5.197 ppm  
 XCorr: 47.36

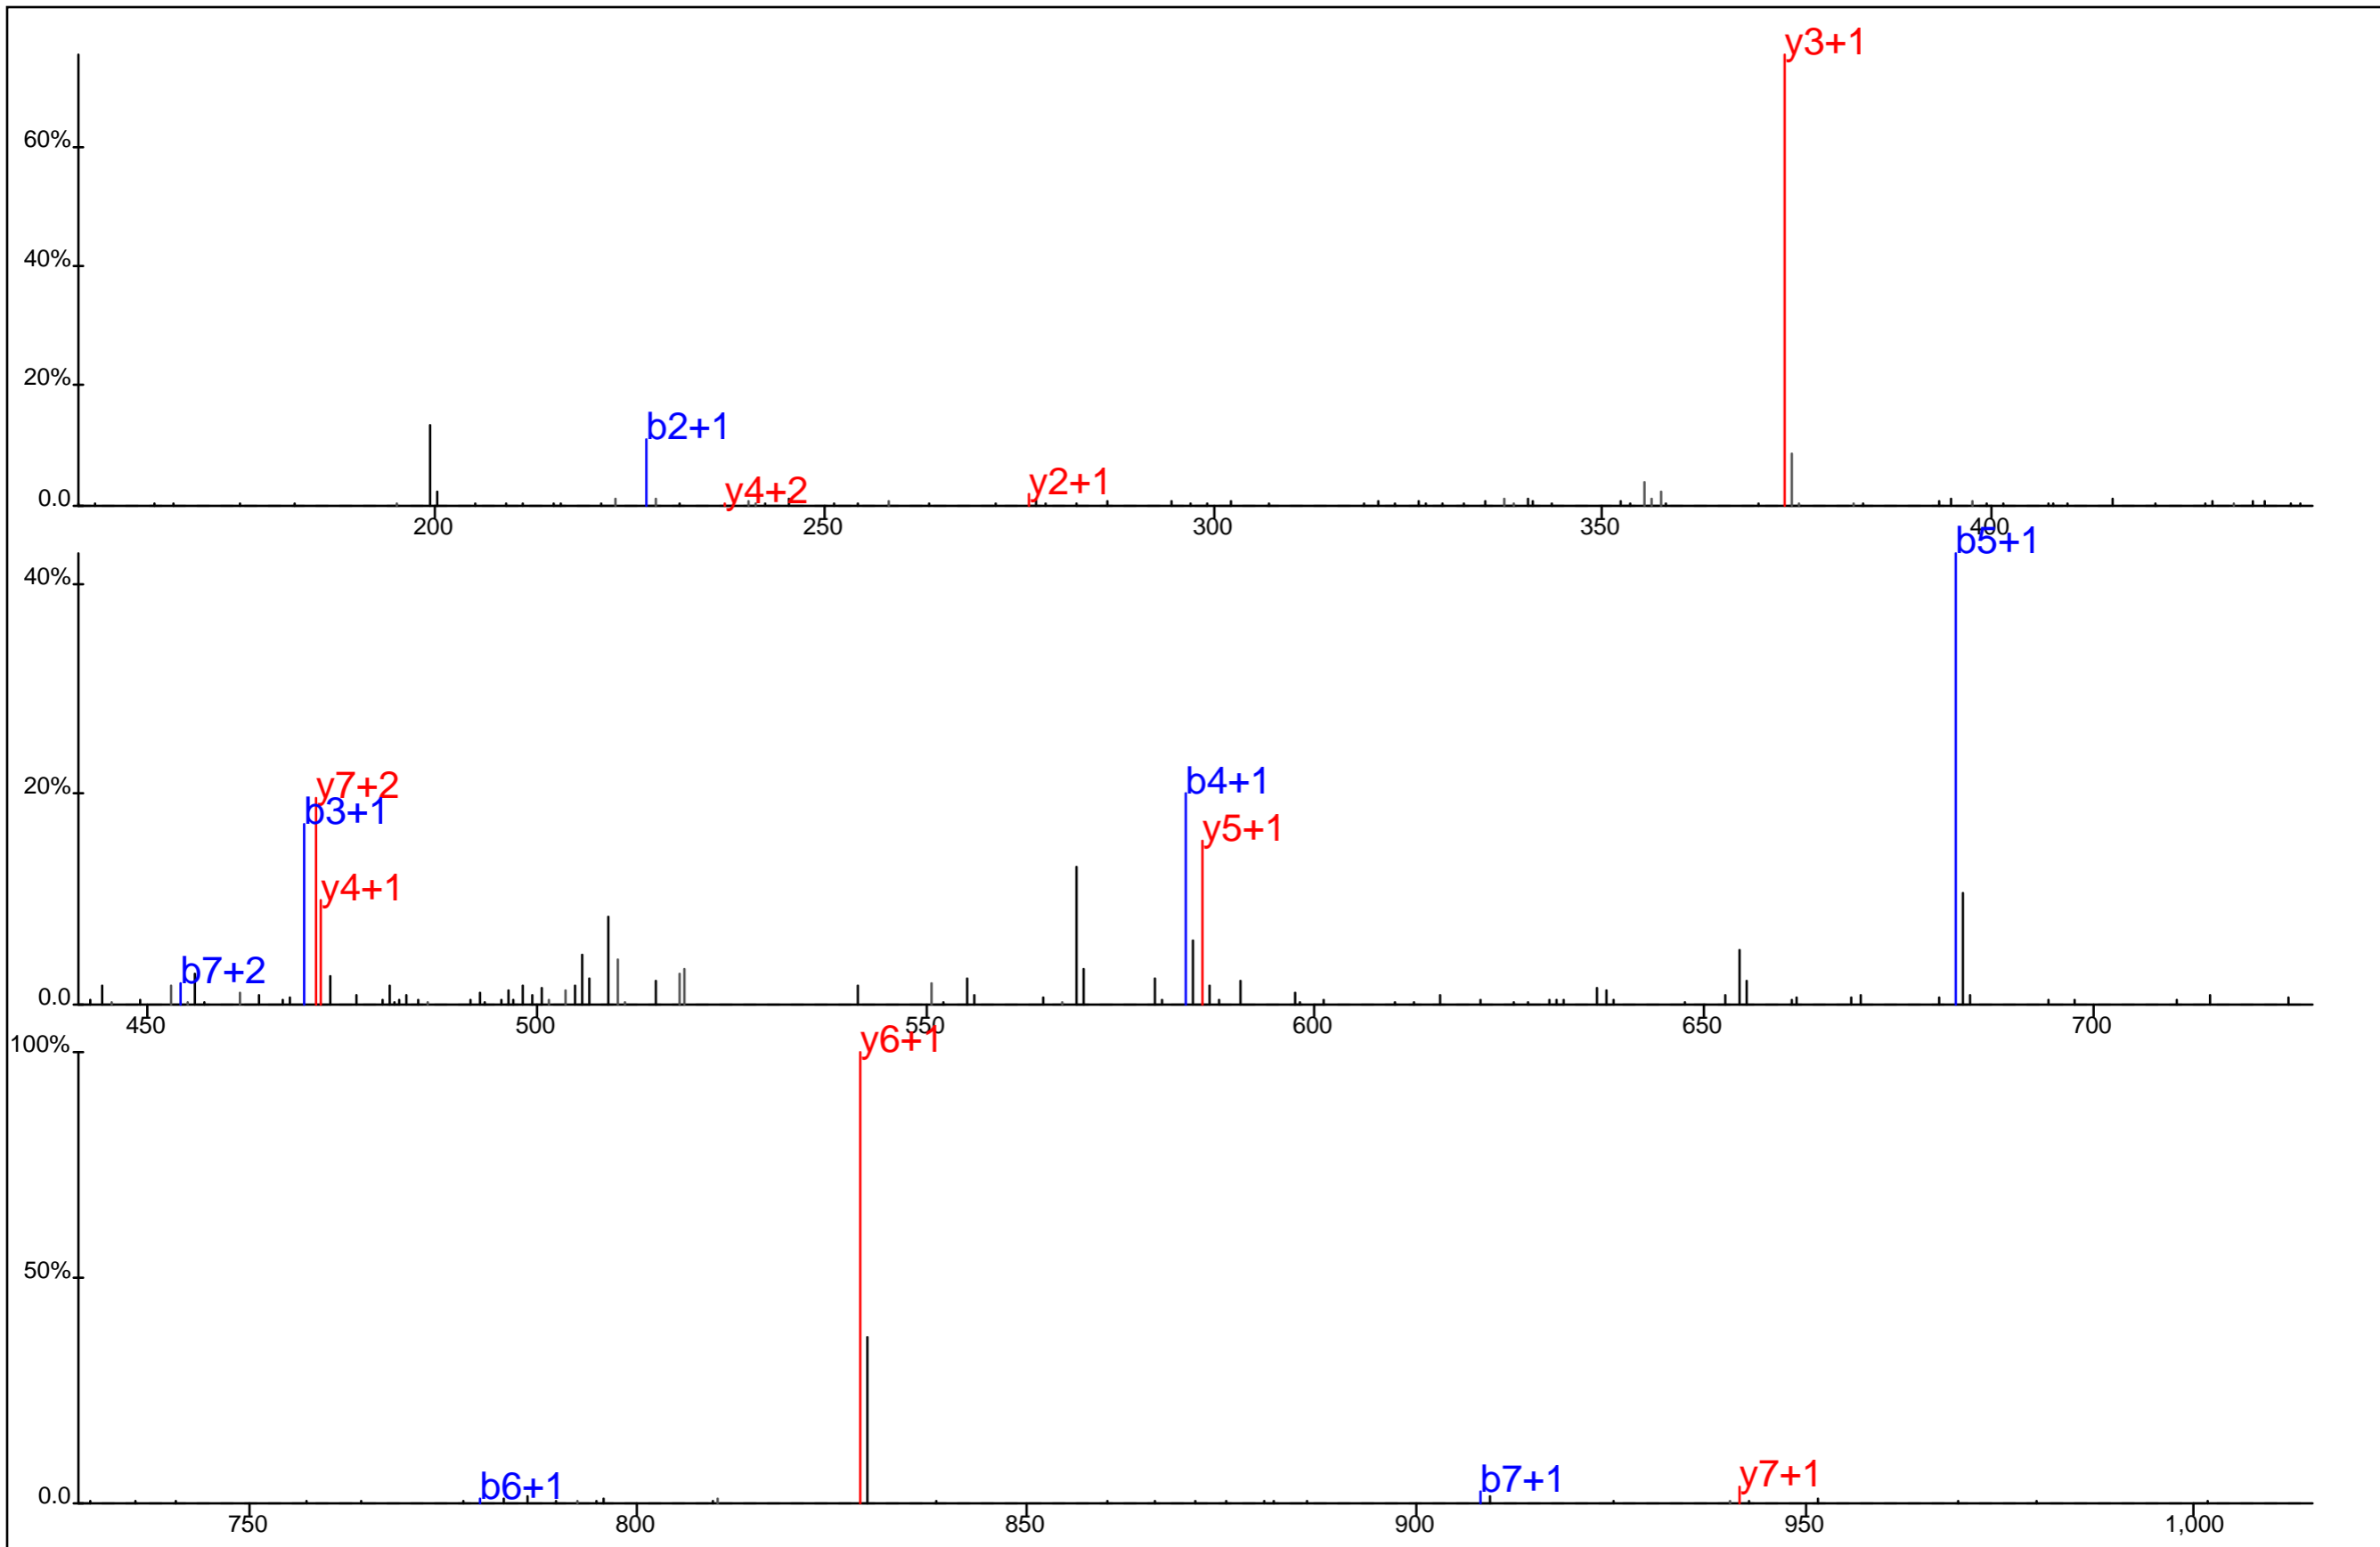

**L I Y\* L V P E K**

Protein Name: Intersectin 2  
 gi Accession: 10432747  
 Precursor Mass: 527.7842+2  
 Delta Mass: 2.549 ppm  
 XCorr: 39.28

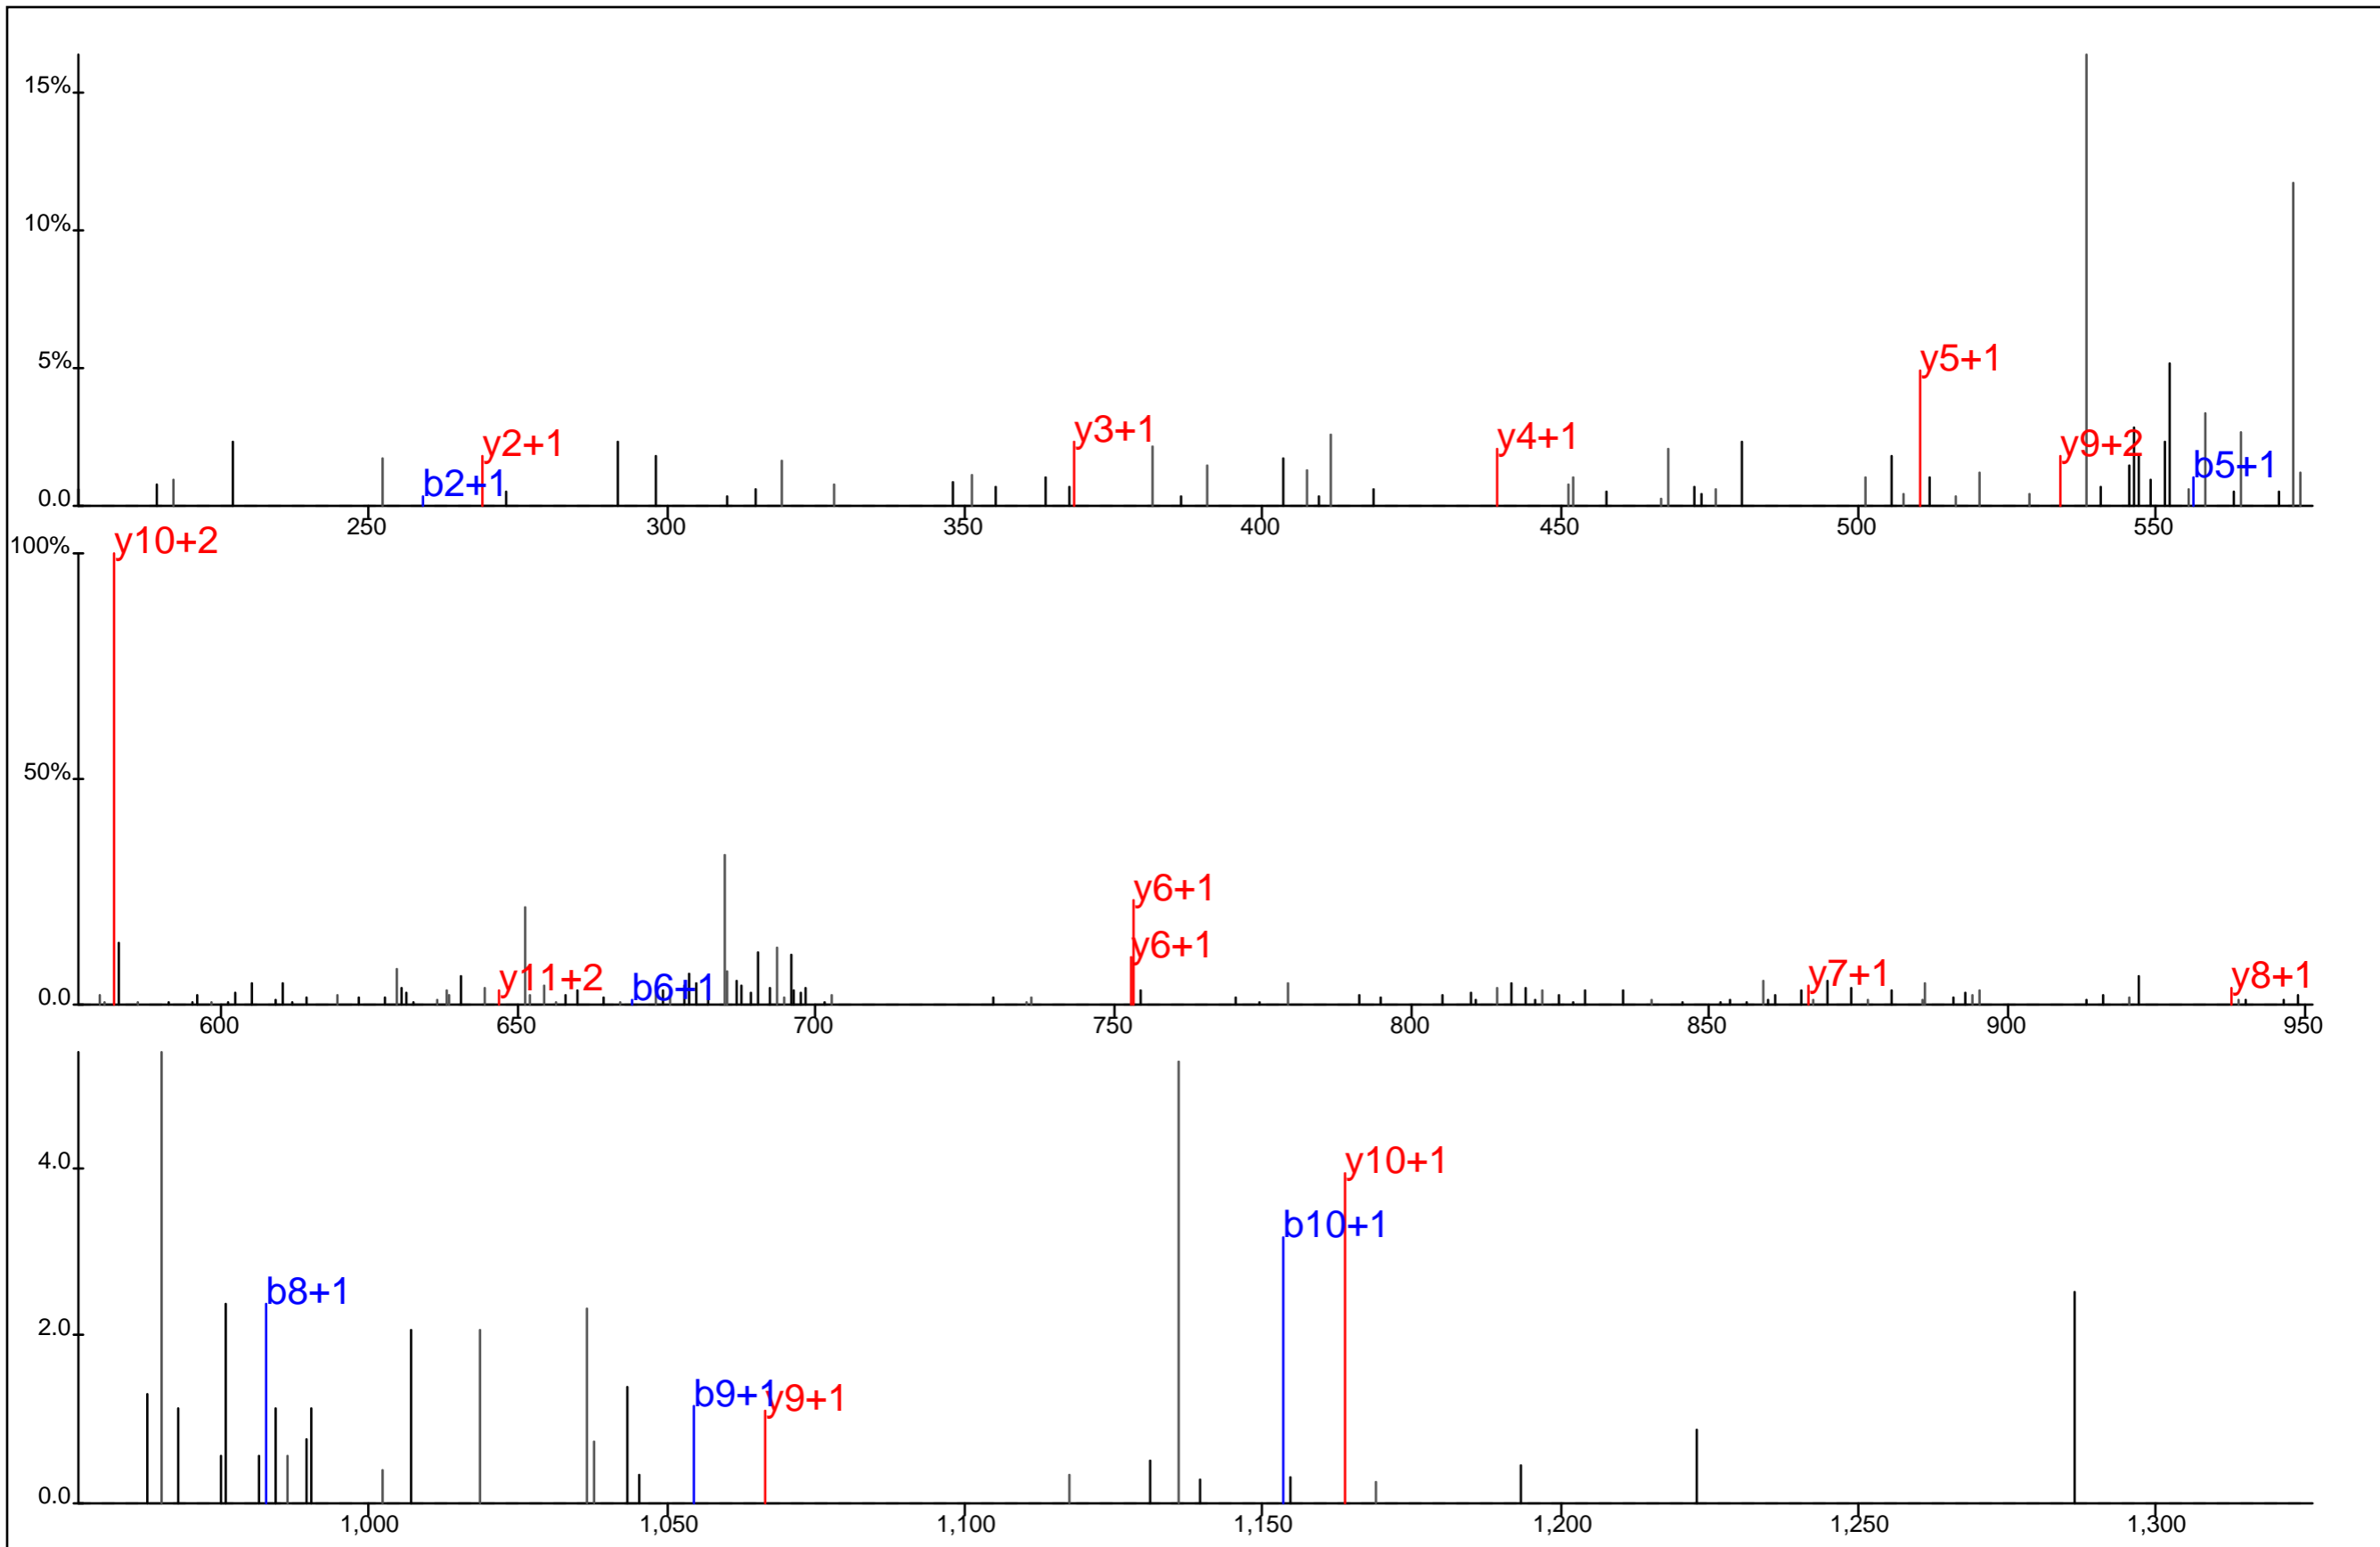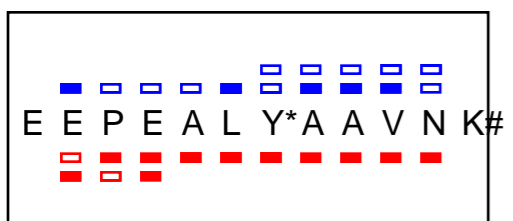

Protein Name: Intersectin 2  
 gi Accession: 6330911  
 Precursor Mass: 711.3286+2  
 Delta Mass: 4.254 ppm  
 XCorr: 38.92

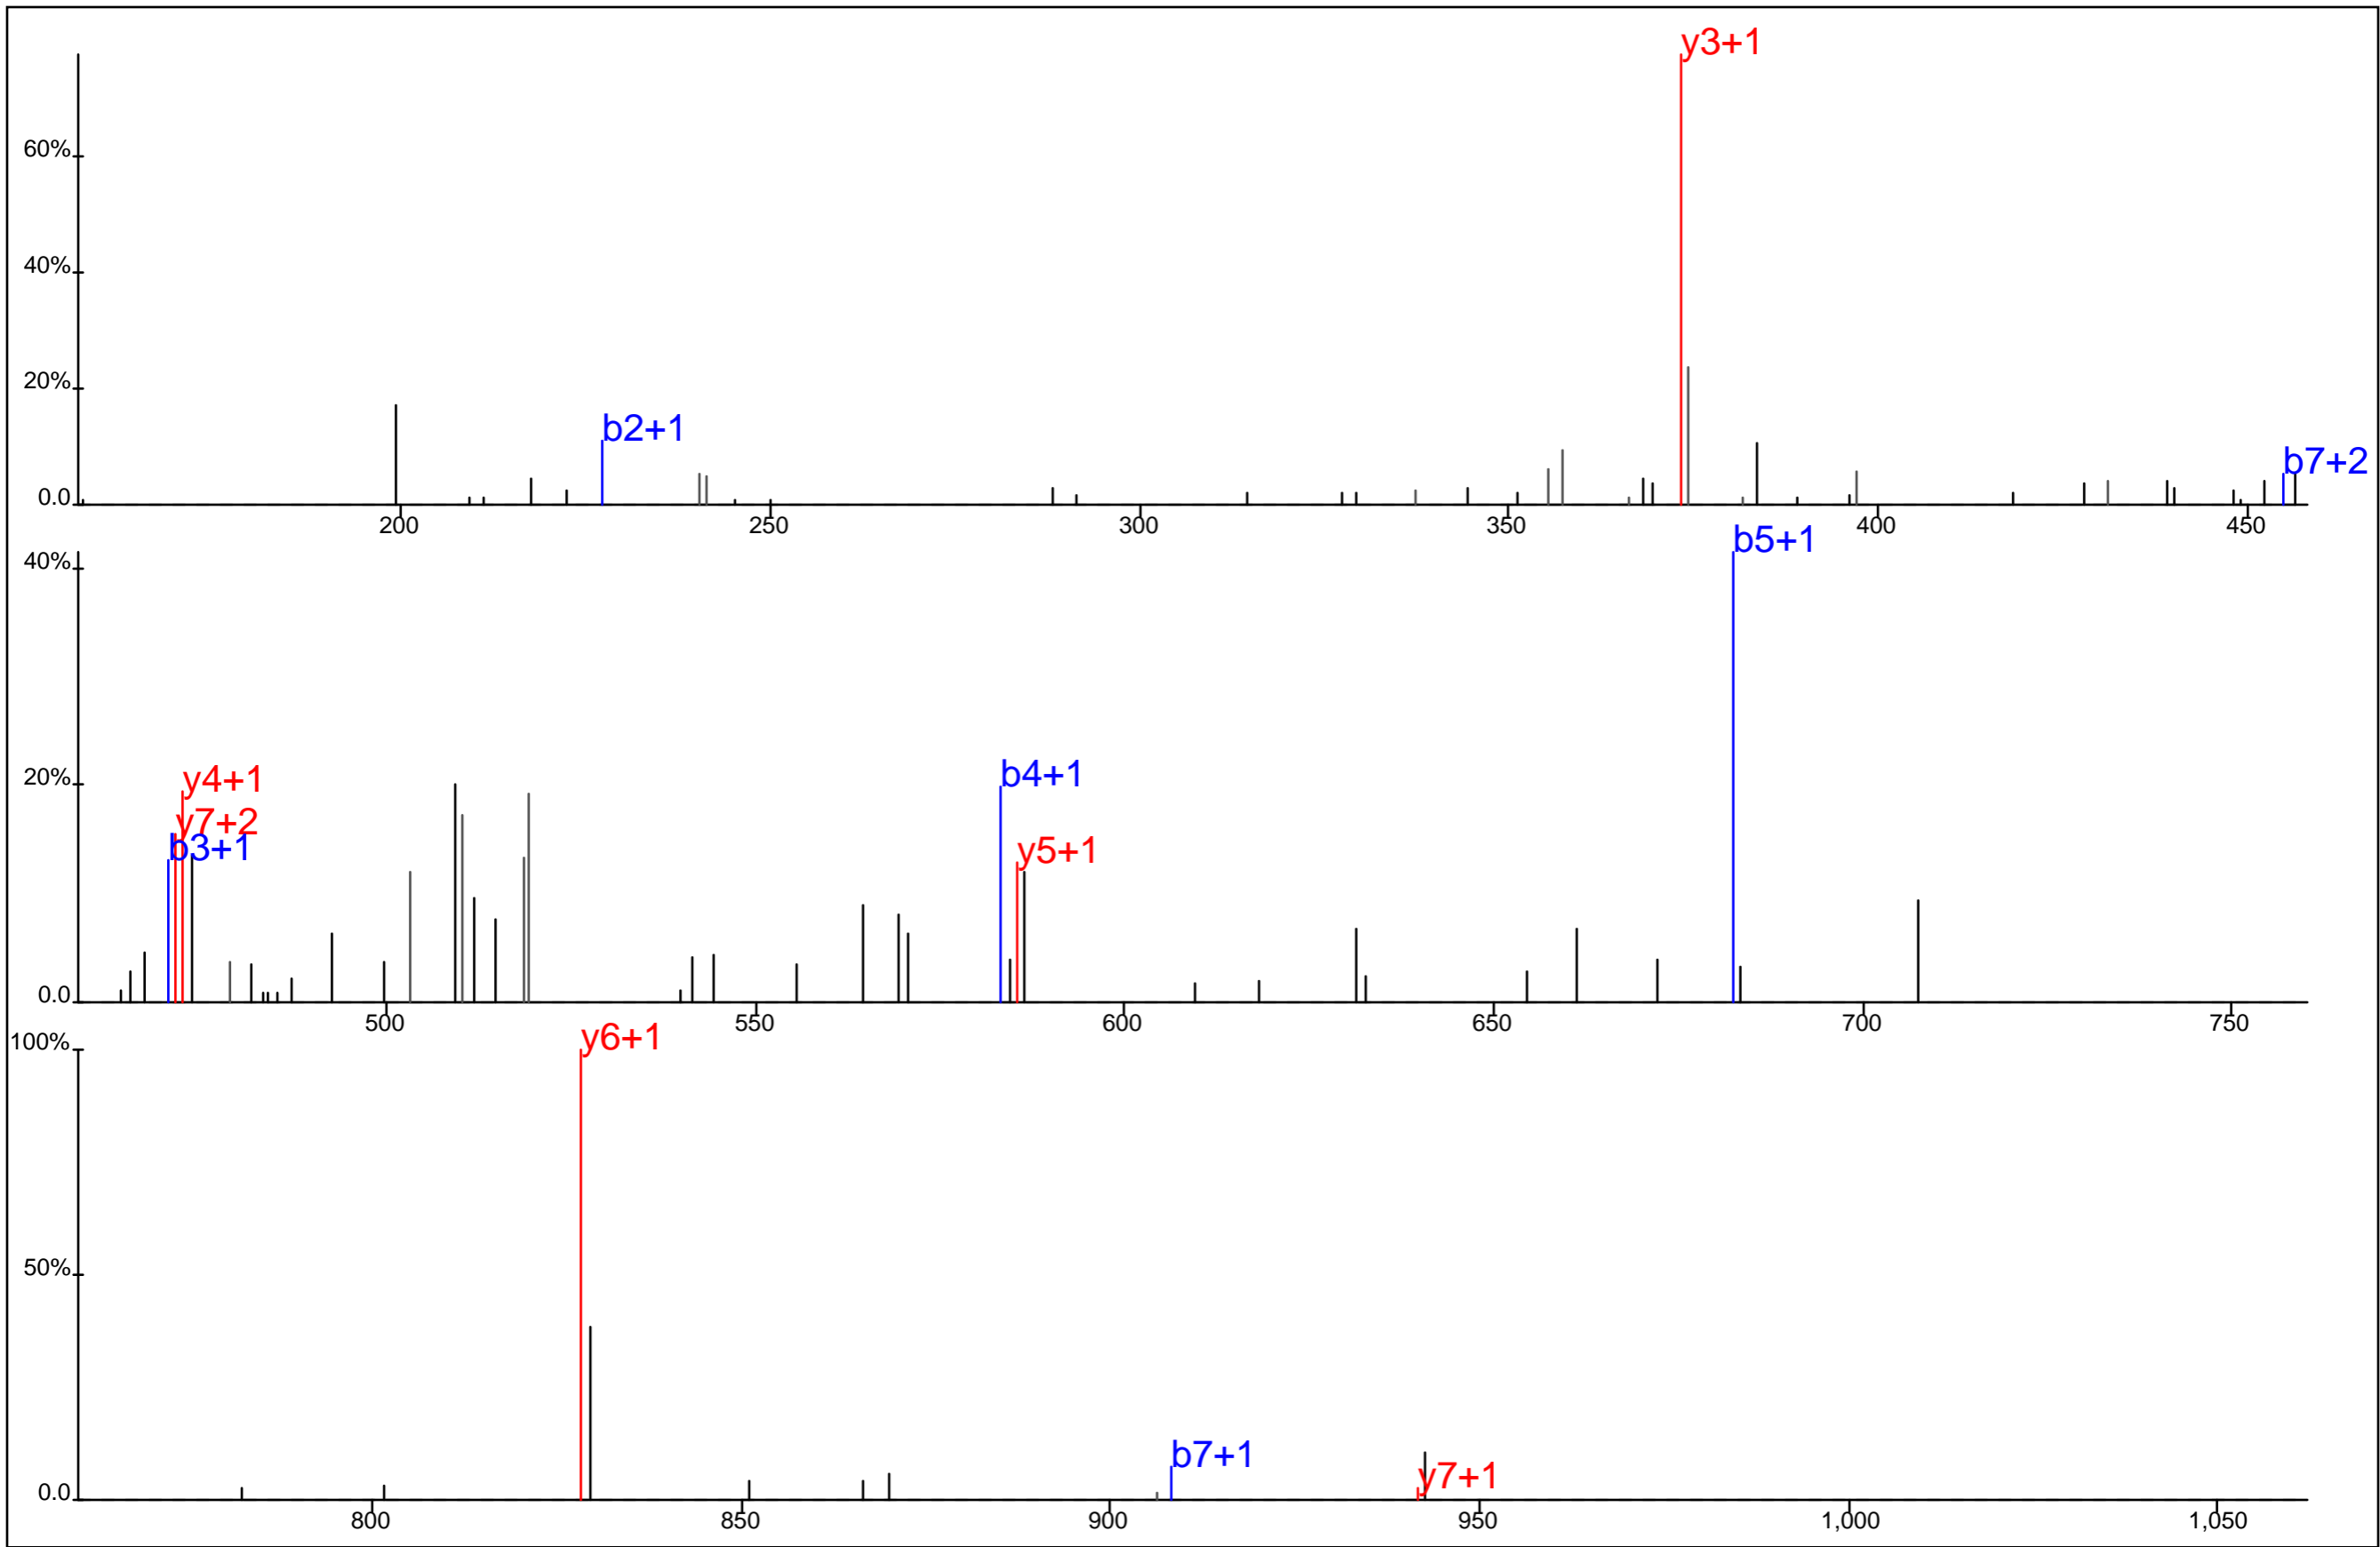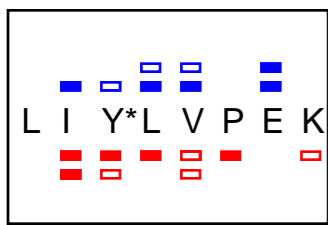

Protein Name: Intersectin 2  
 gi Accession: 10432747  
 Precursor Mass: 527.7849+2  
 Delta Mass: 3.829 ppm  
 XCorr: 25.14





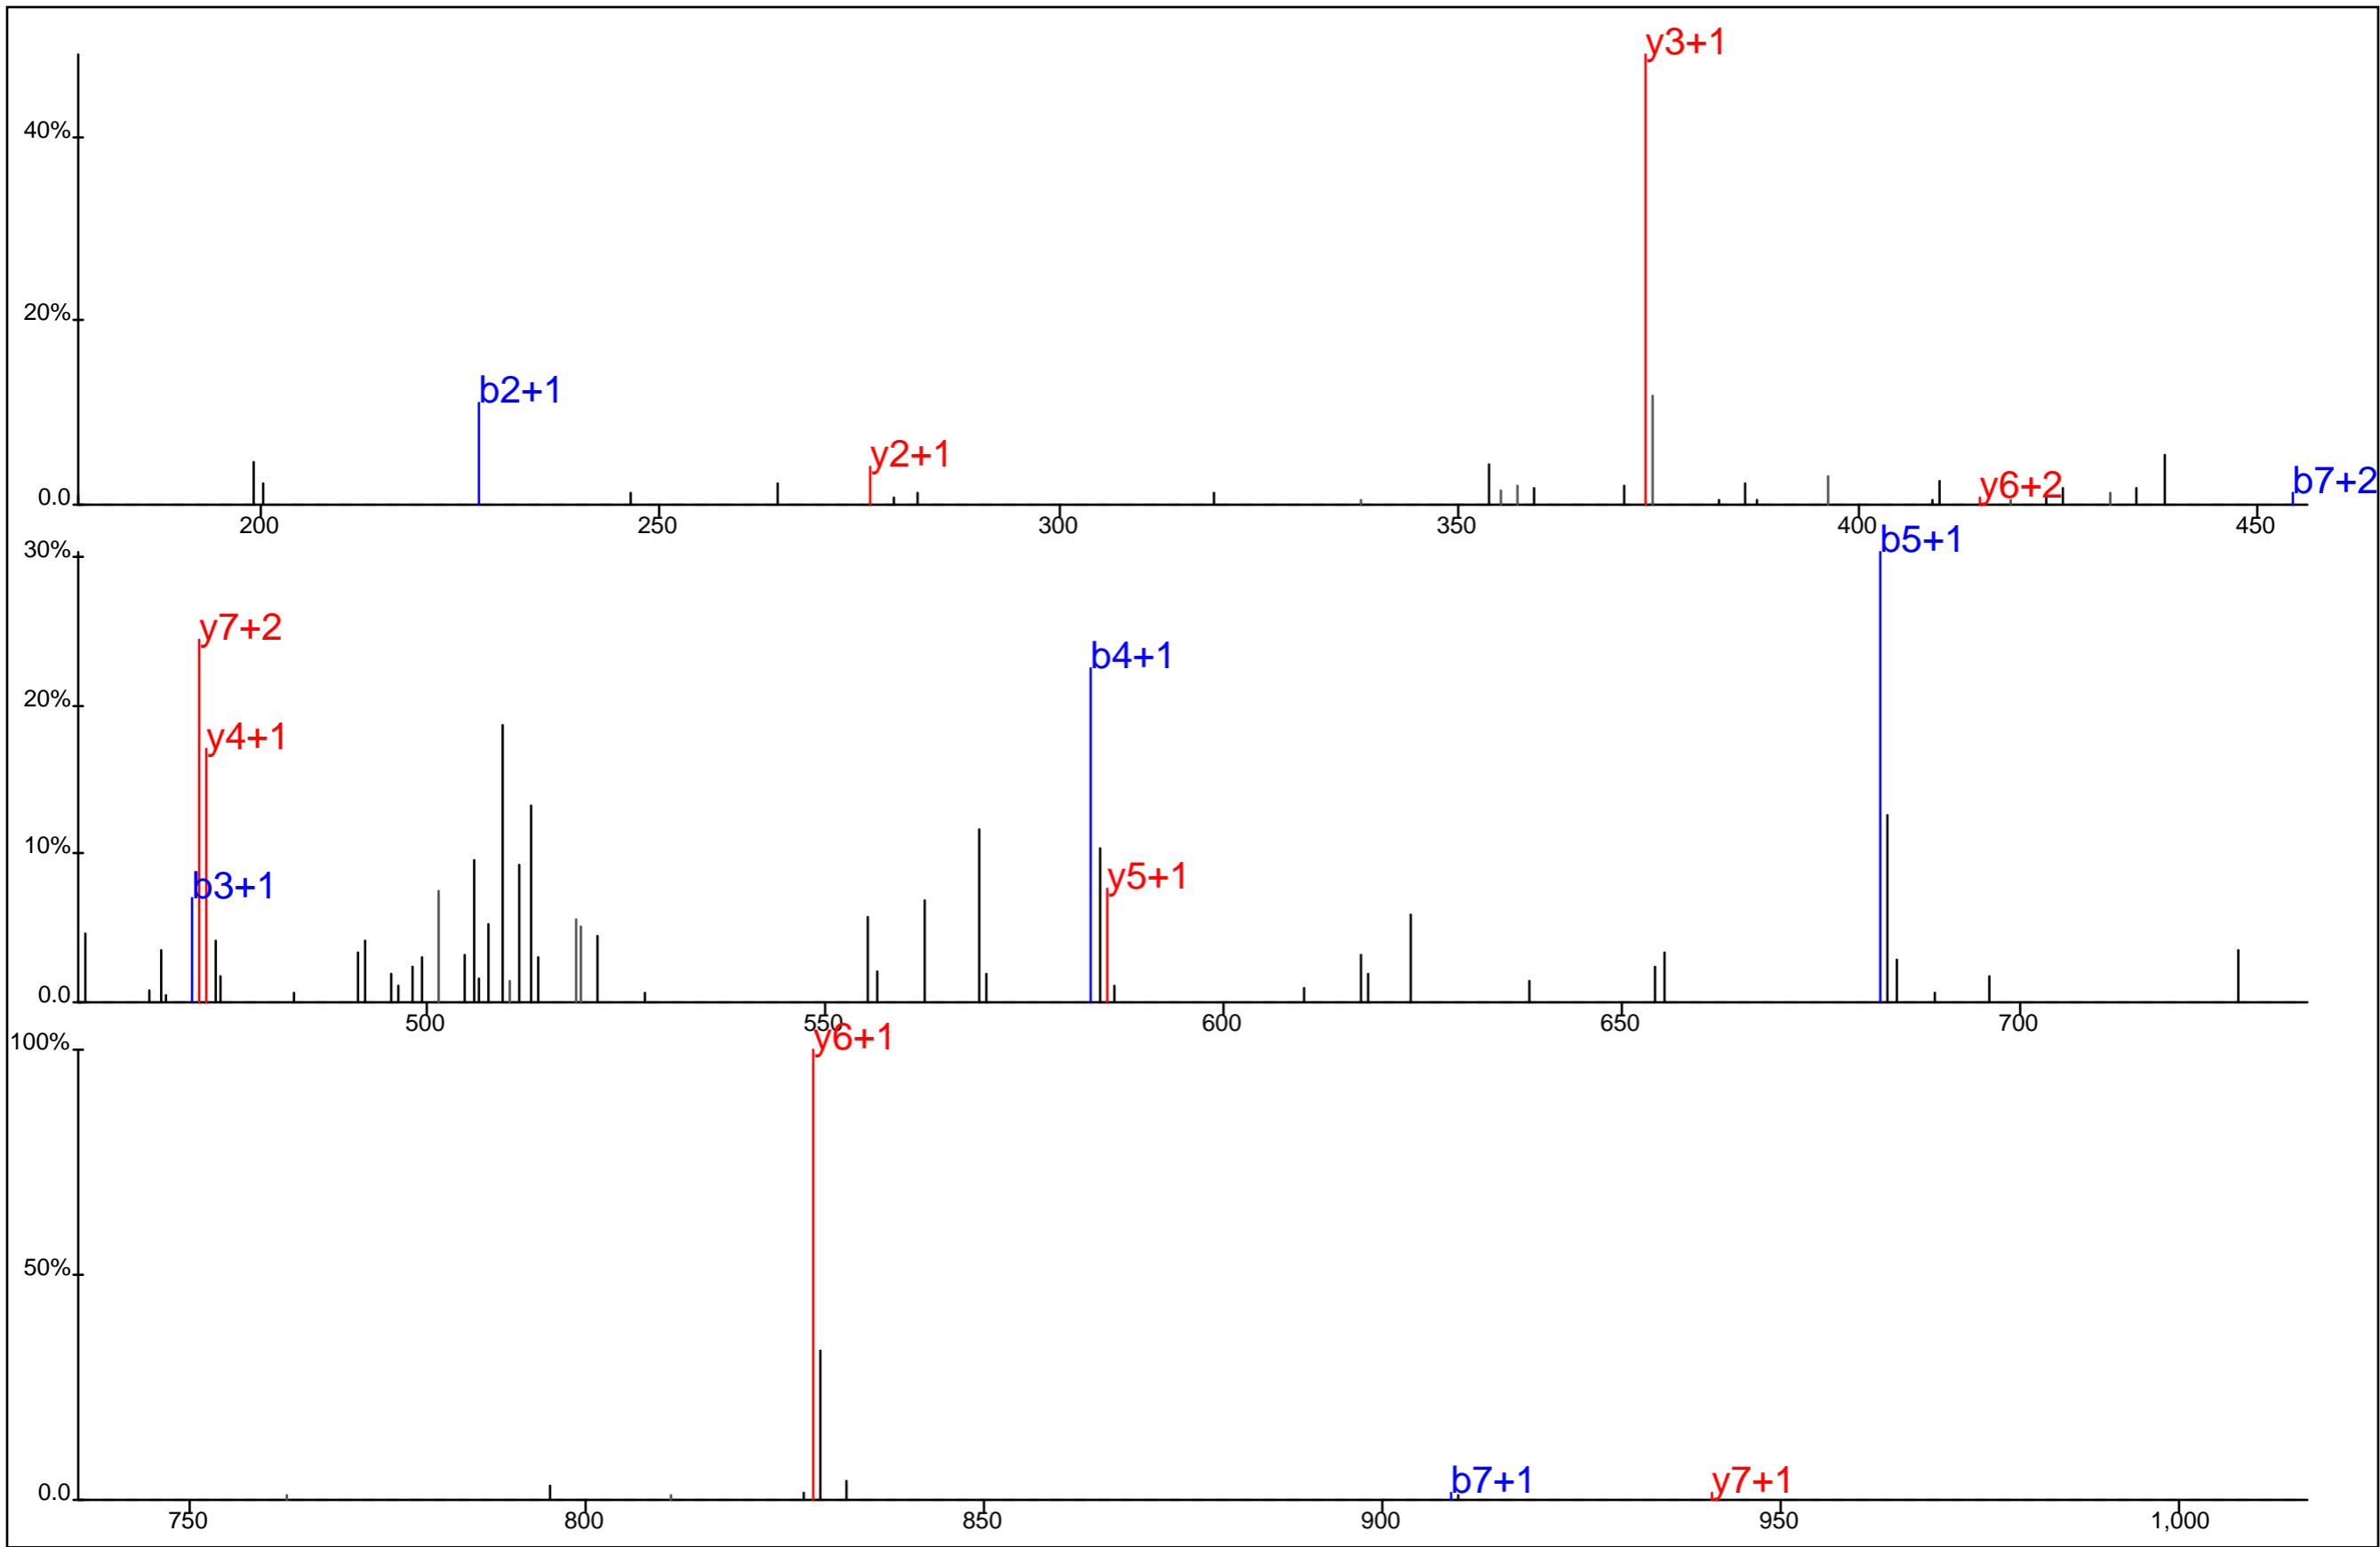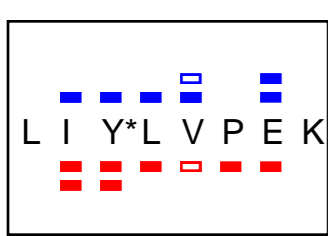

Protein Name: Intersectin 2  
 gi Accession: 10432747  
 Precursor Mass: 527.7840+2  
 Delta Mass: 2.208 ppm  
 XCorr: 35.31

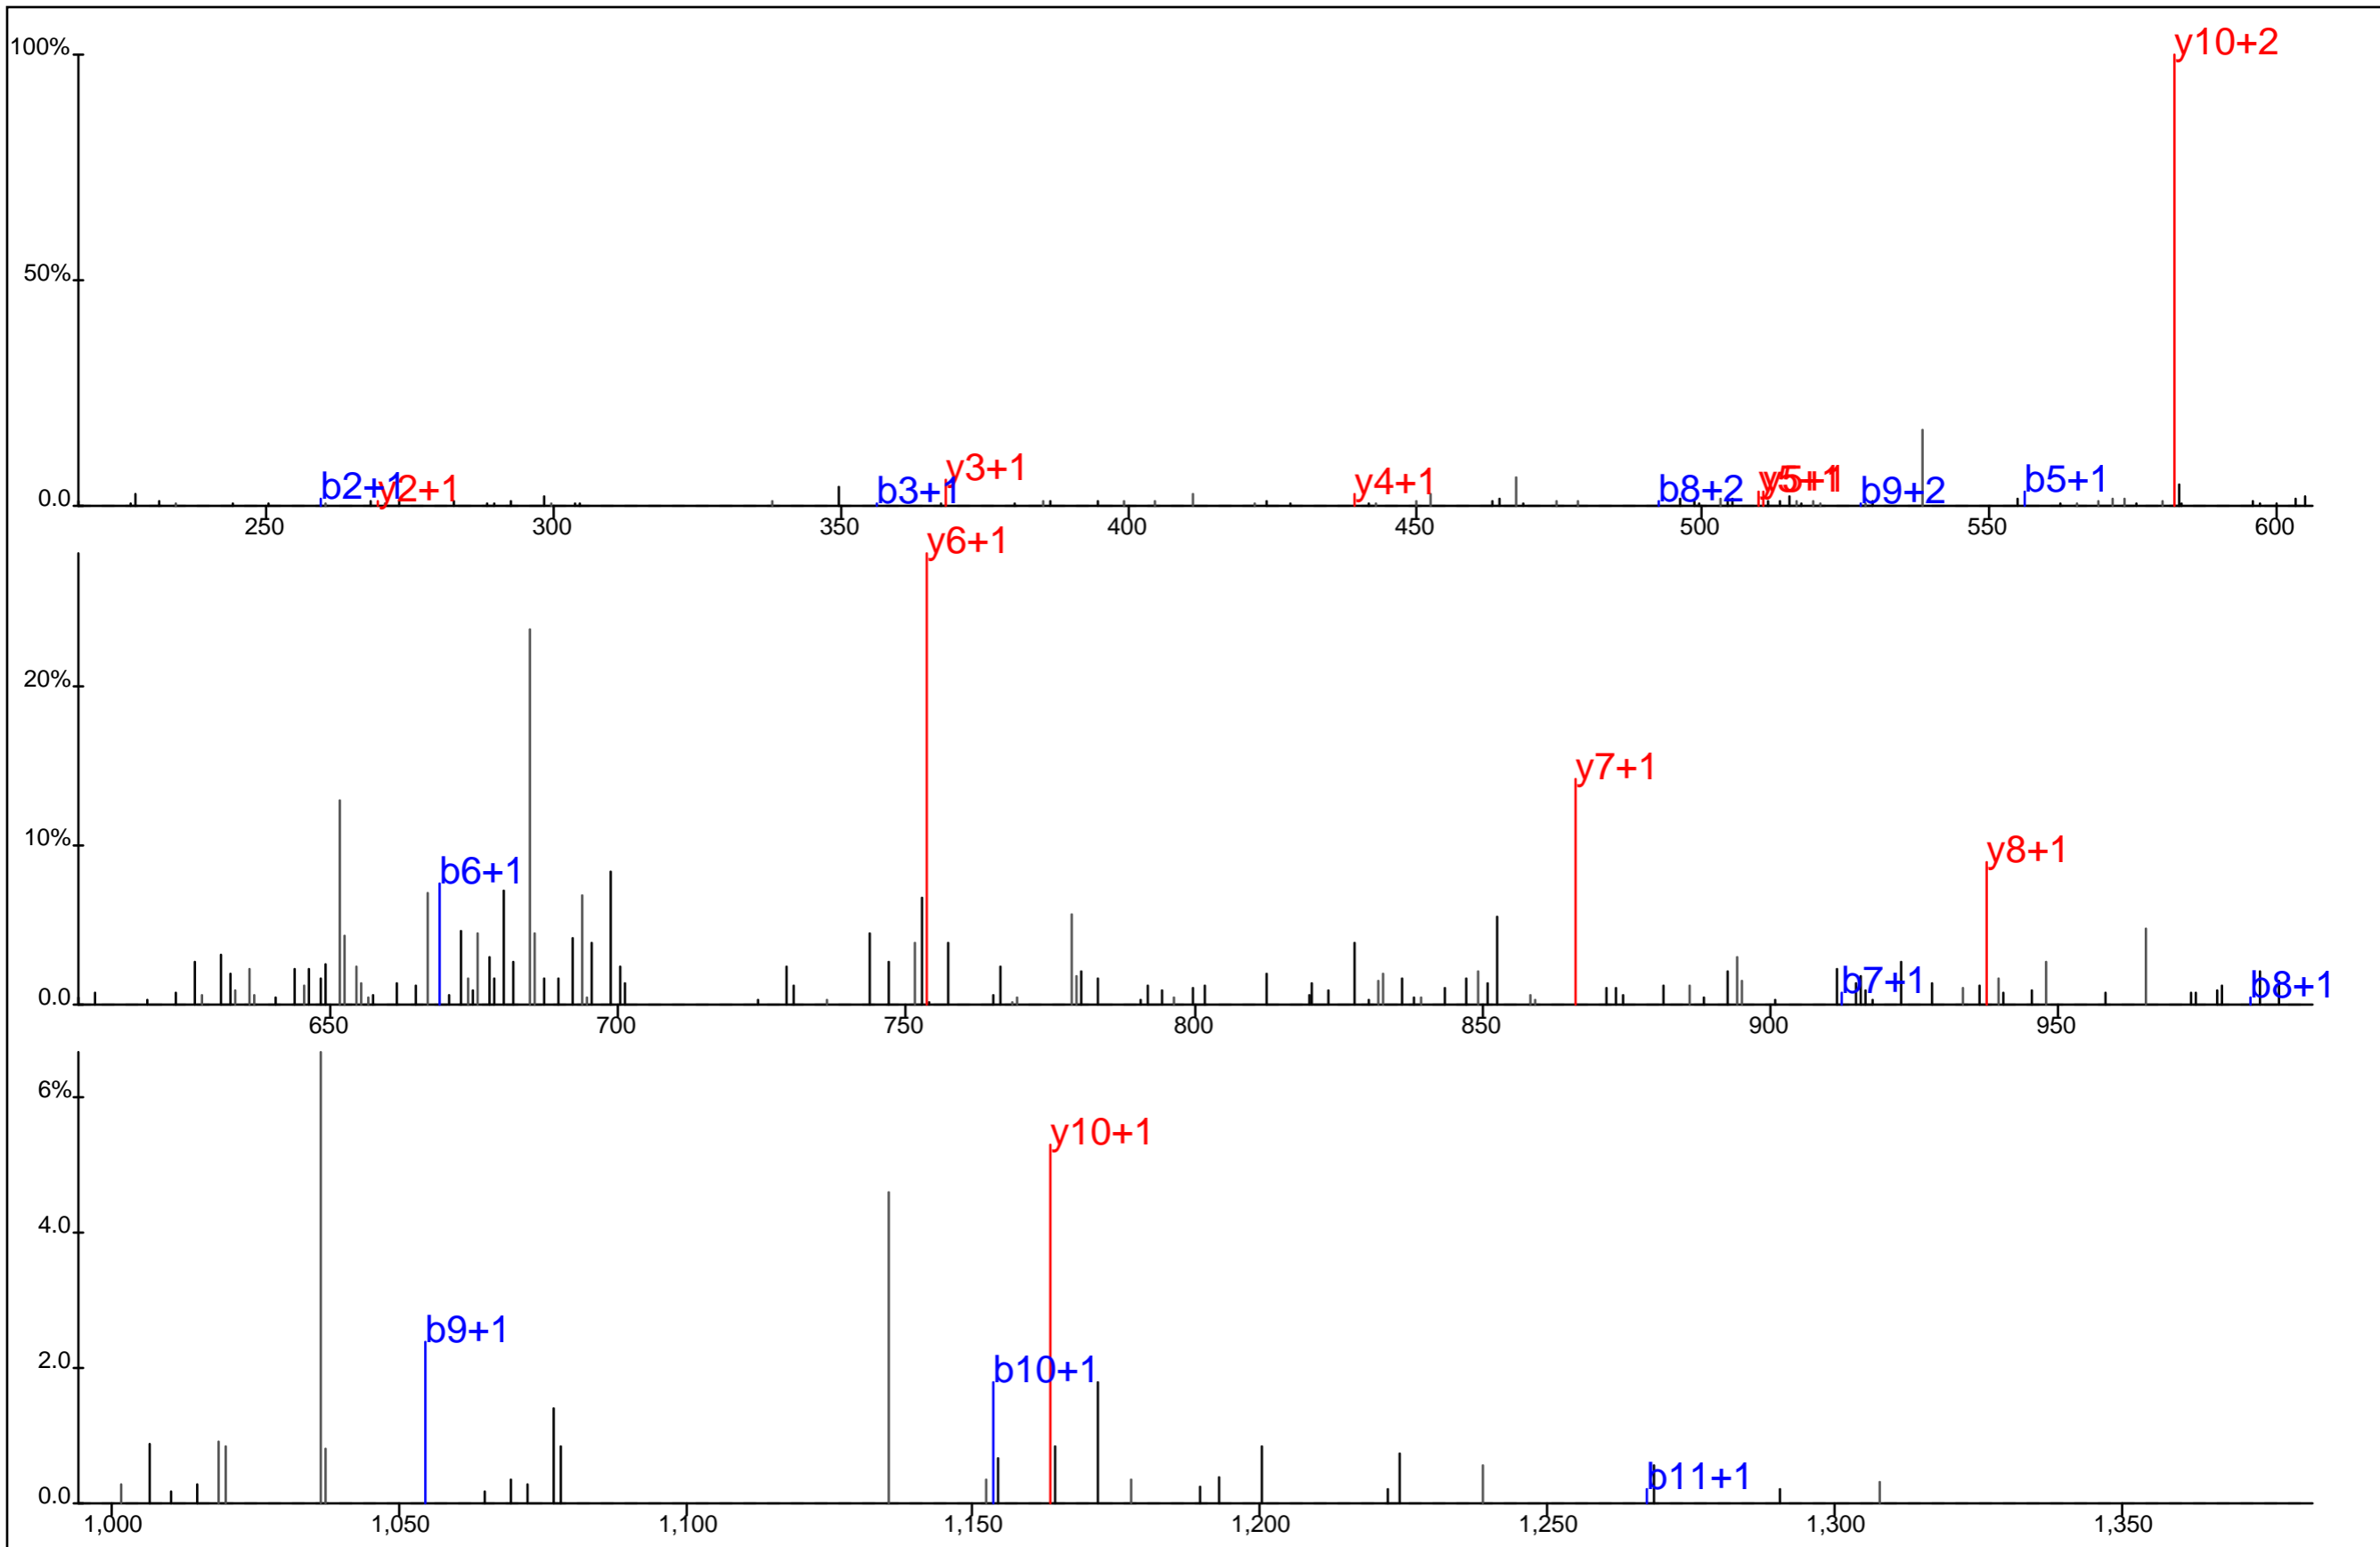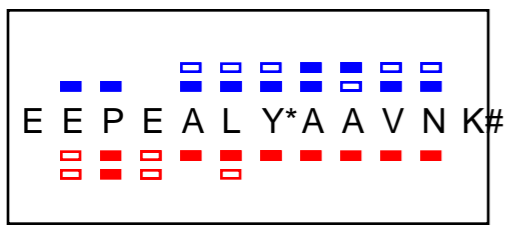

Protein Name: Intersectin 2  
 gi Accession: 6330911  
 Precursor Mass: 711.3284+2  
 Delta Mass: 3.994 ppm  
 XCorr: 41.08

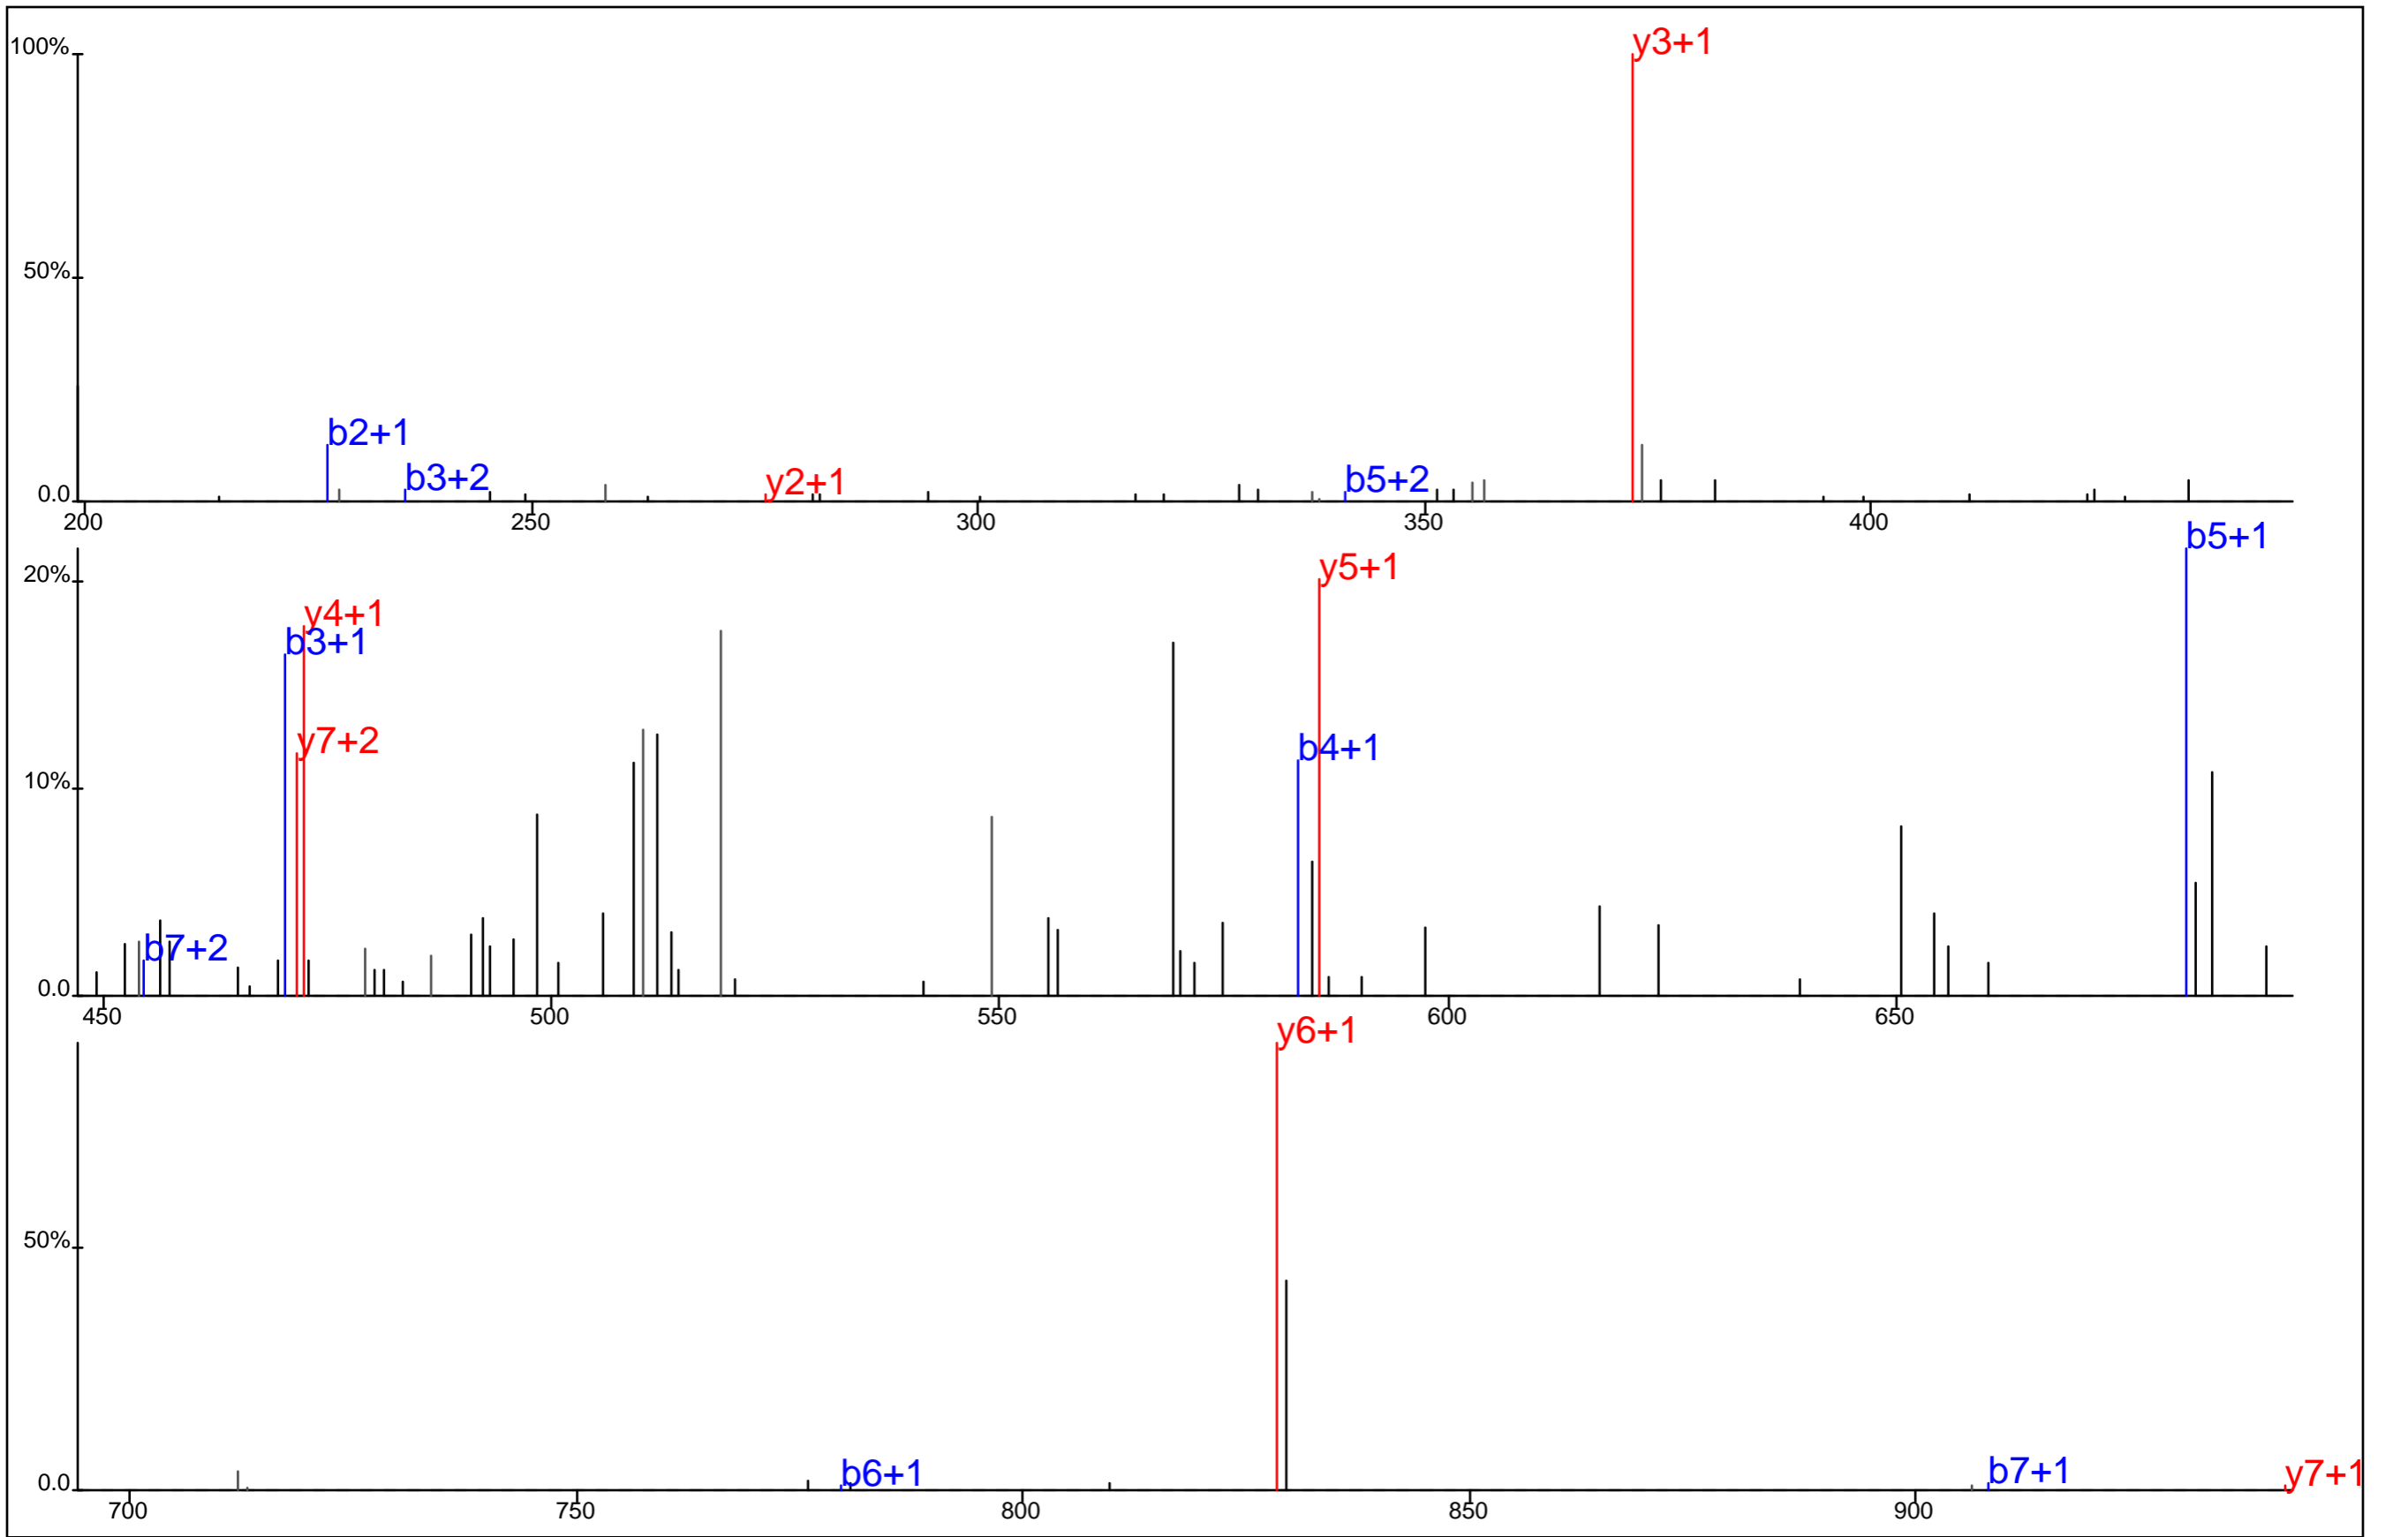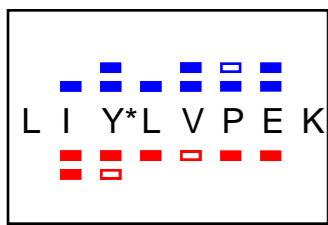

Protein Name: Intersectin 2  
 gi Accession: 10432747  
 Precursor Mass: 527.7855+2  
 Delta Mass: 5.100 ppm  
 XCorr: 34.64

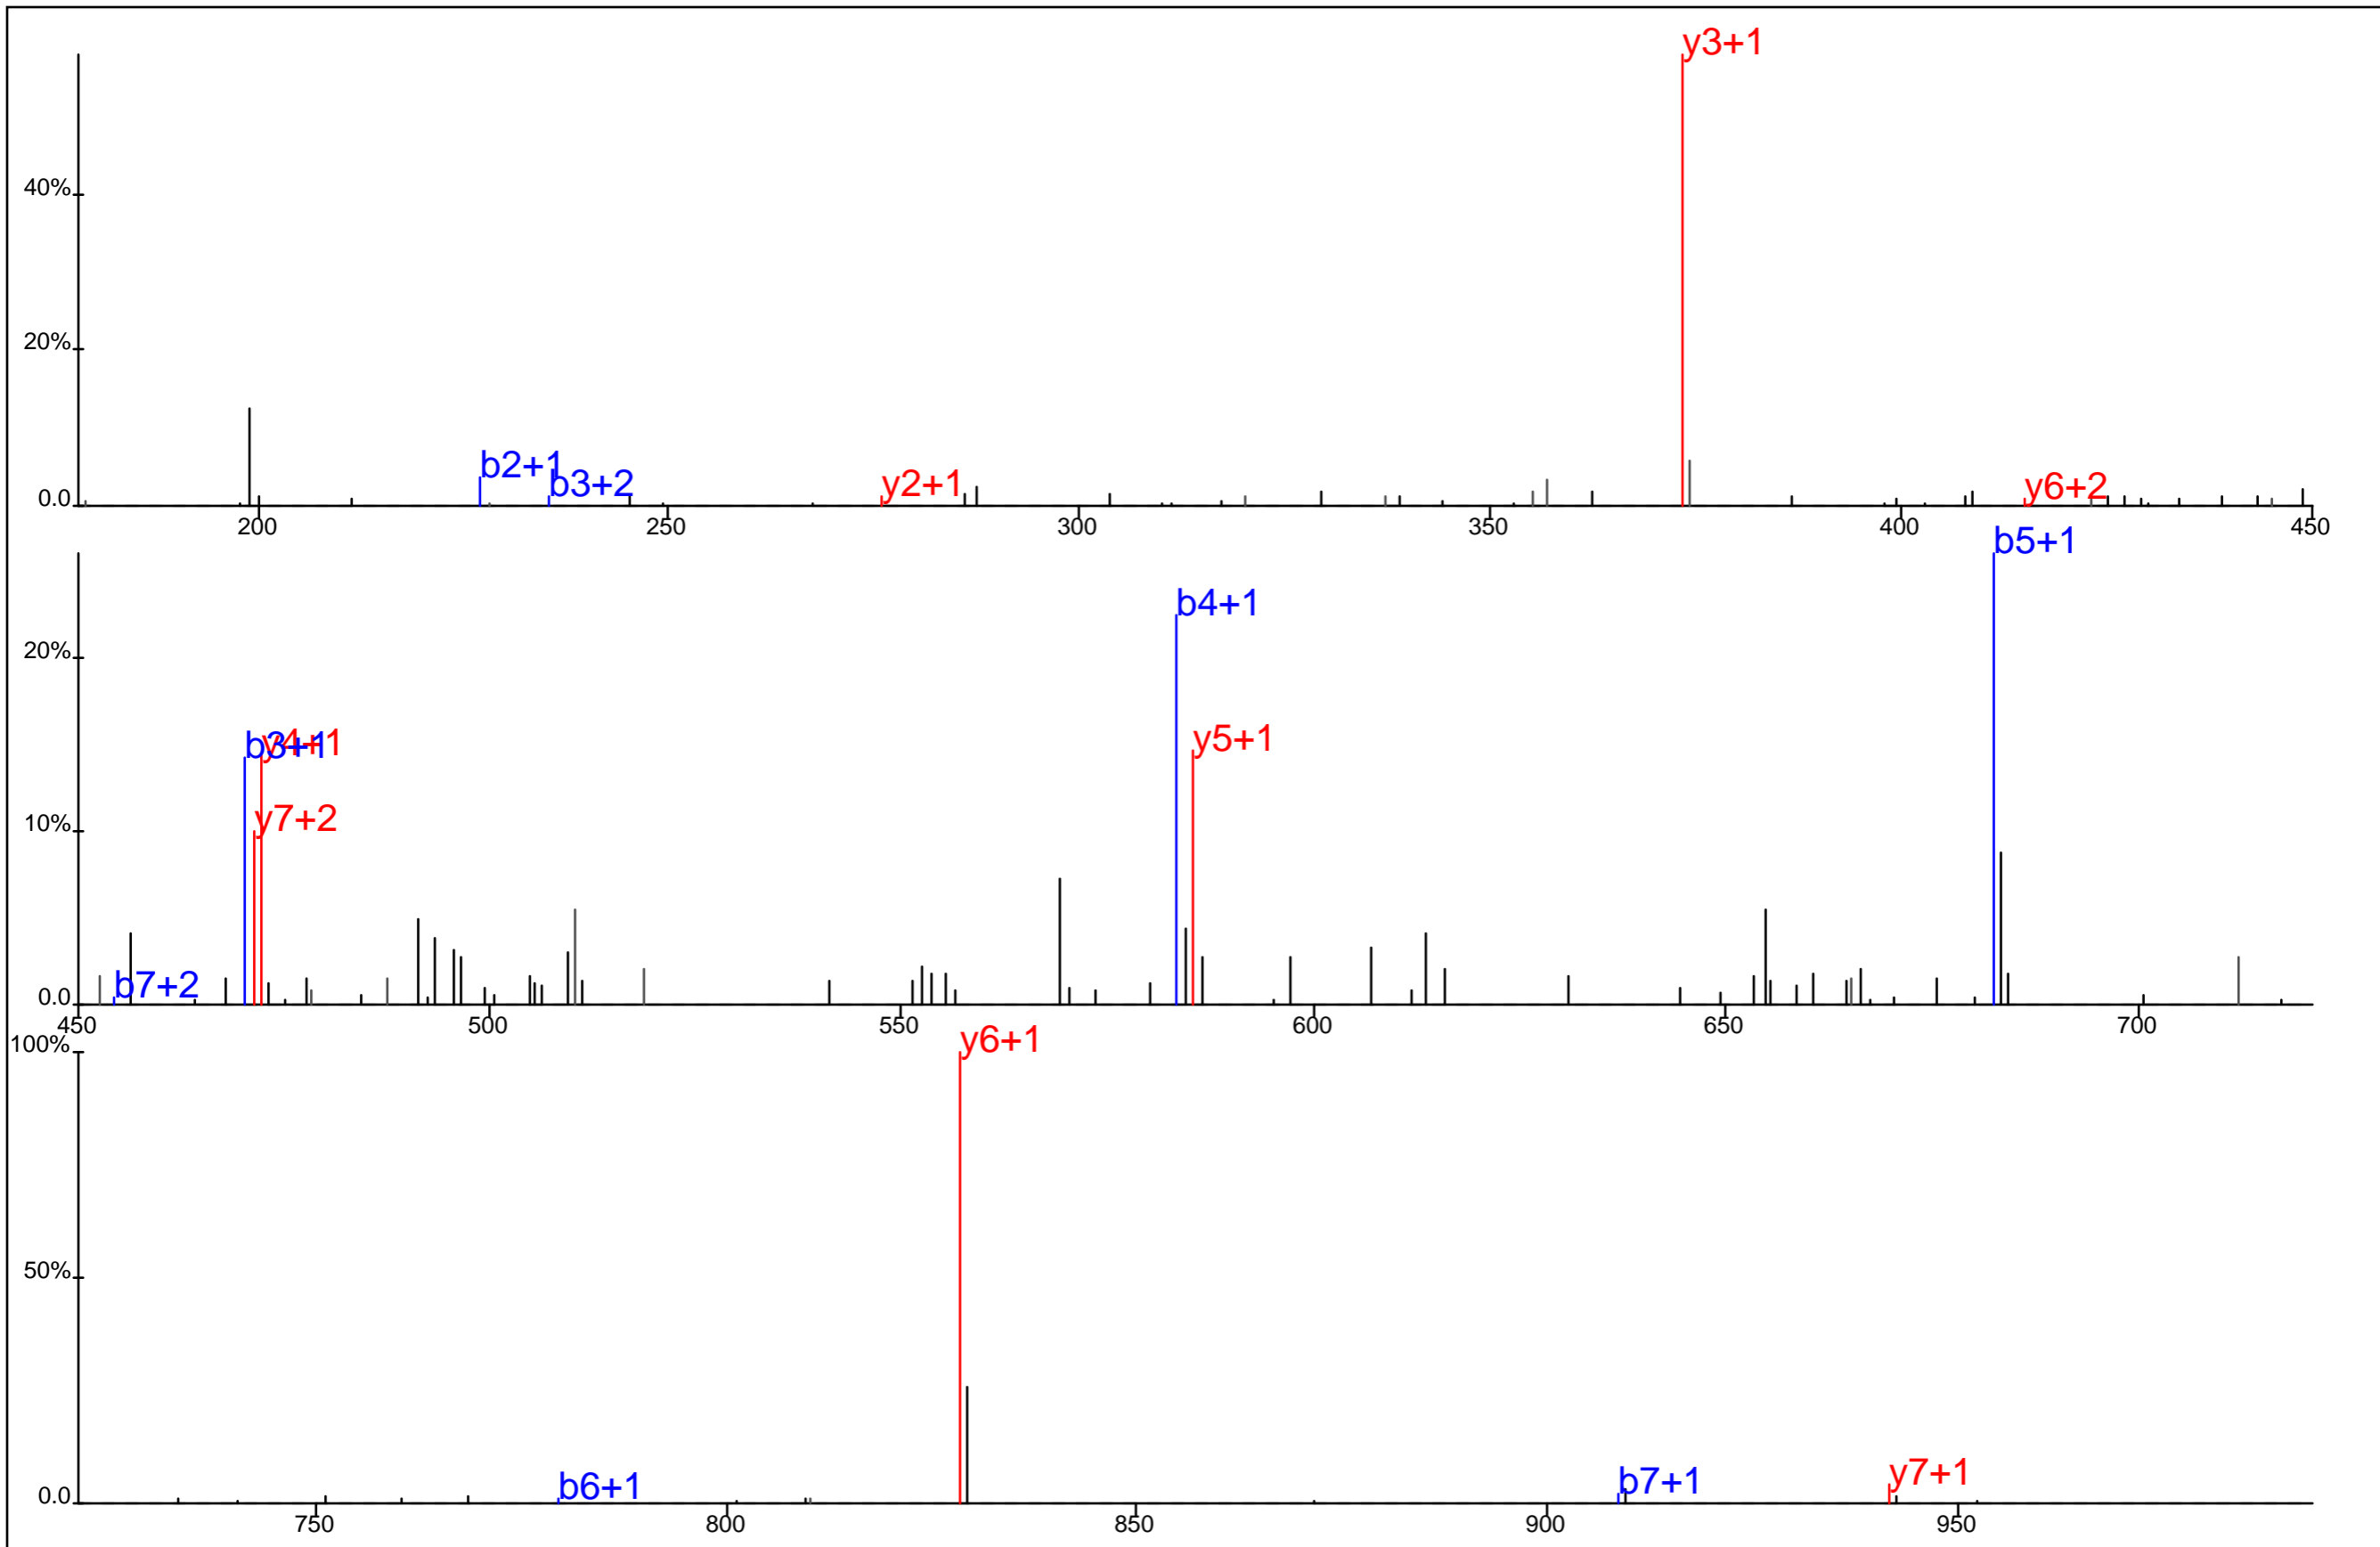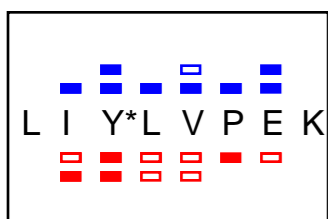

Protein Name: Intersectin 2  
 gi Accession: 10432747  
 Precursor Mass: 527.7848+2  
 Delta Mass: 3.706 ppm  
 XCorr: 35.88

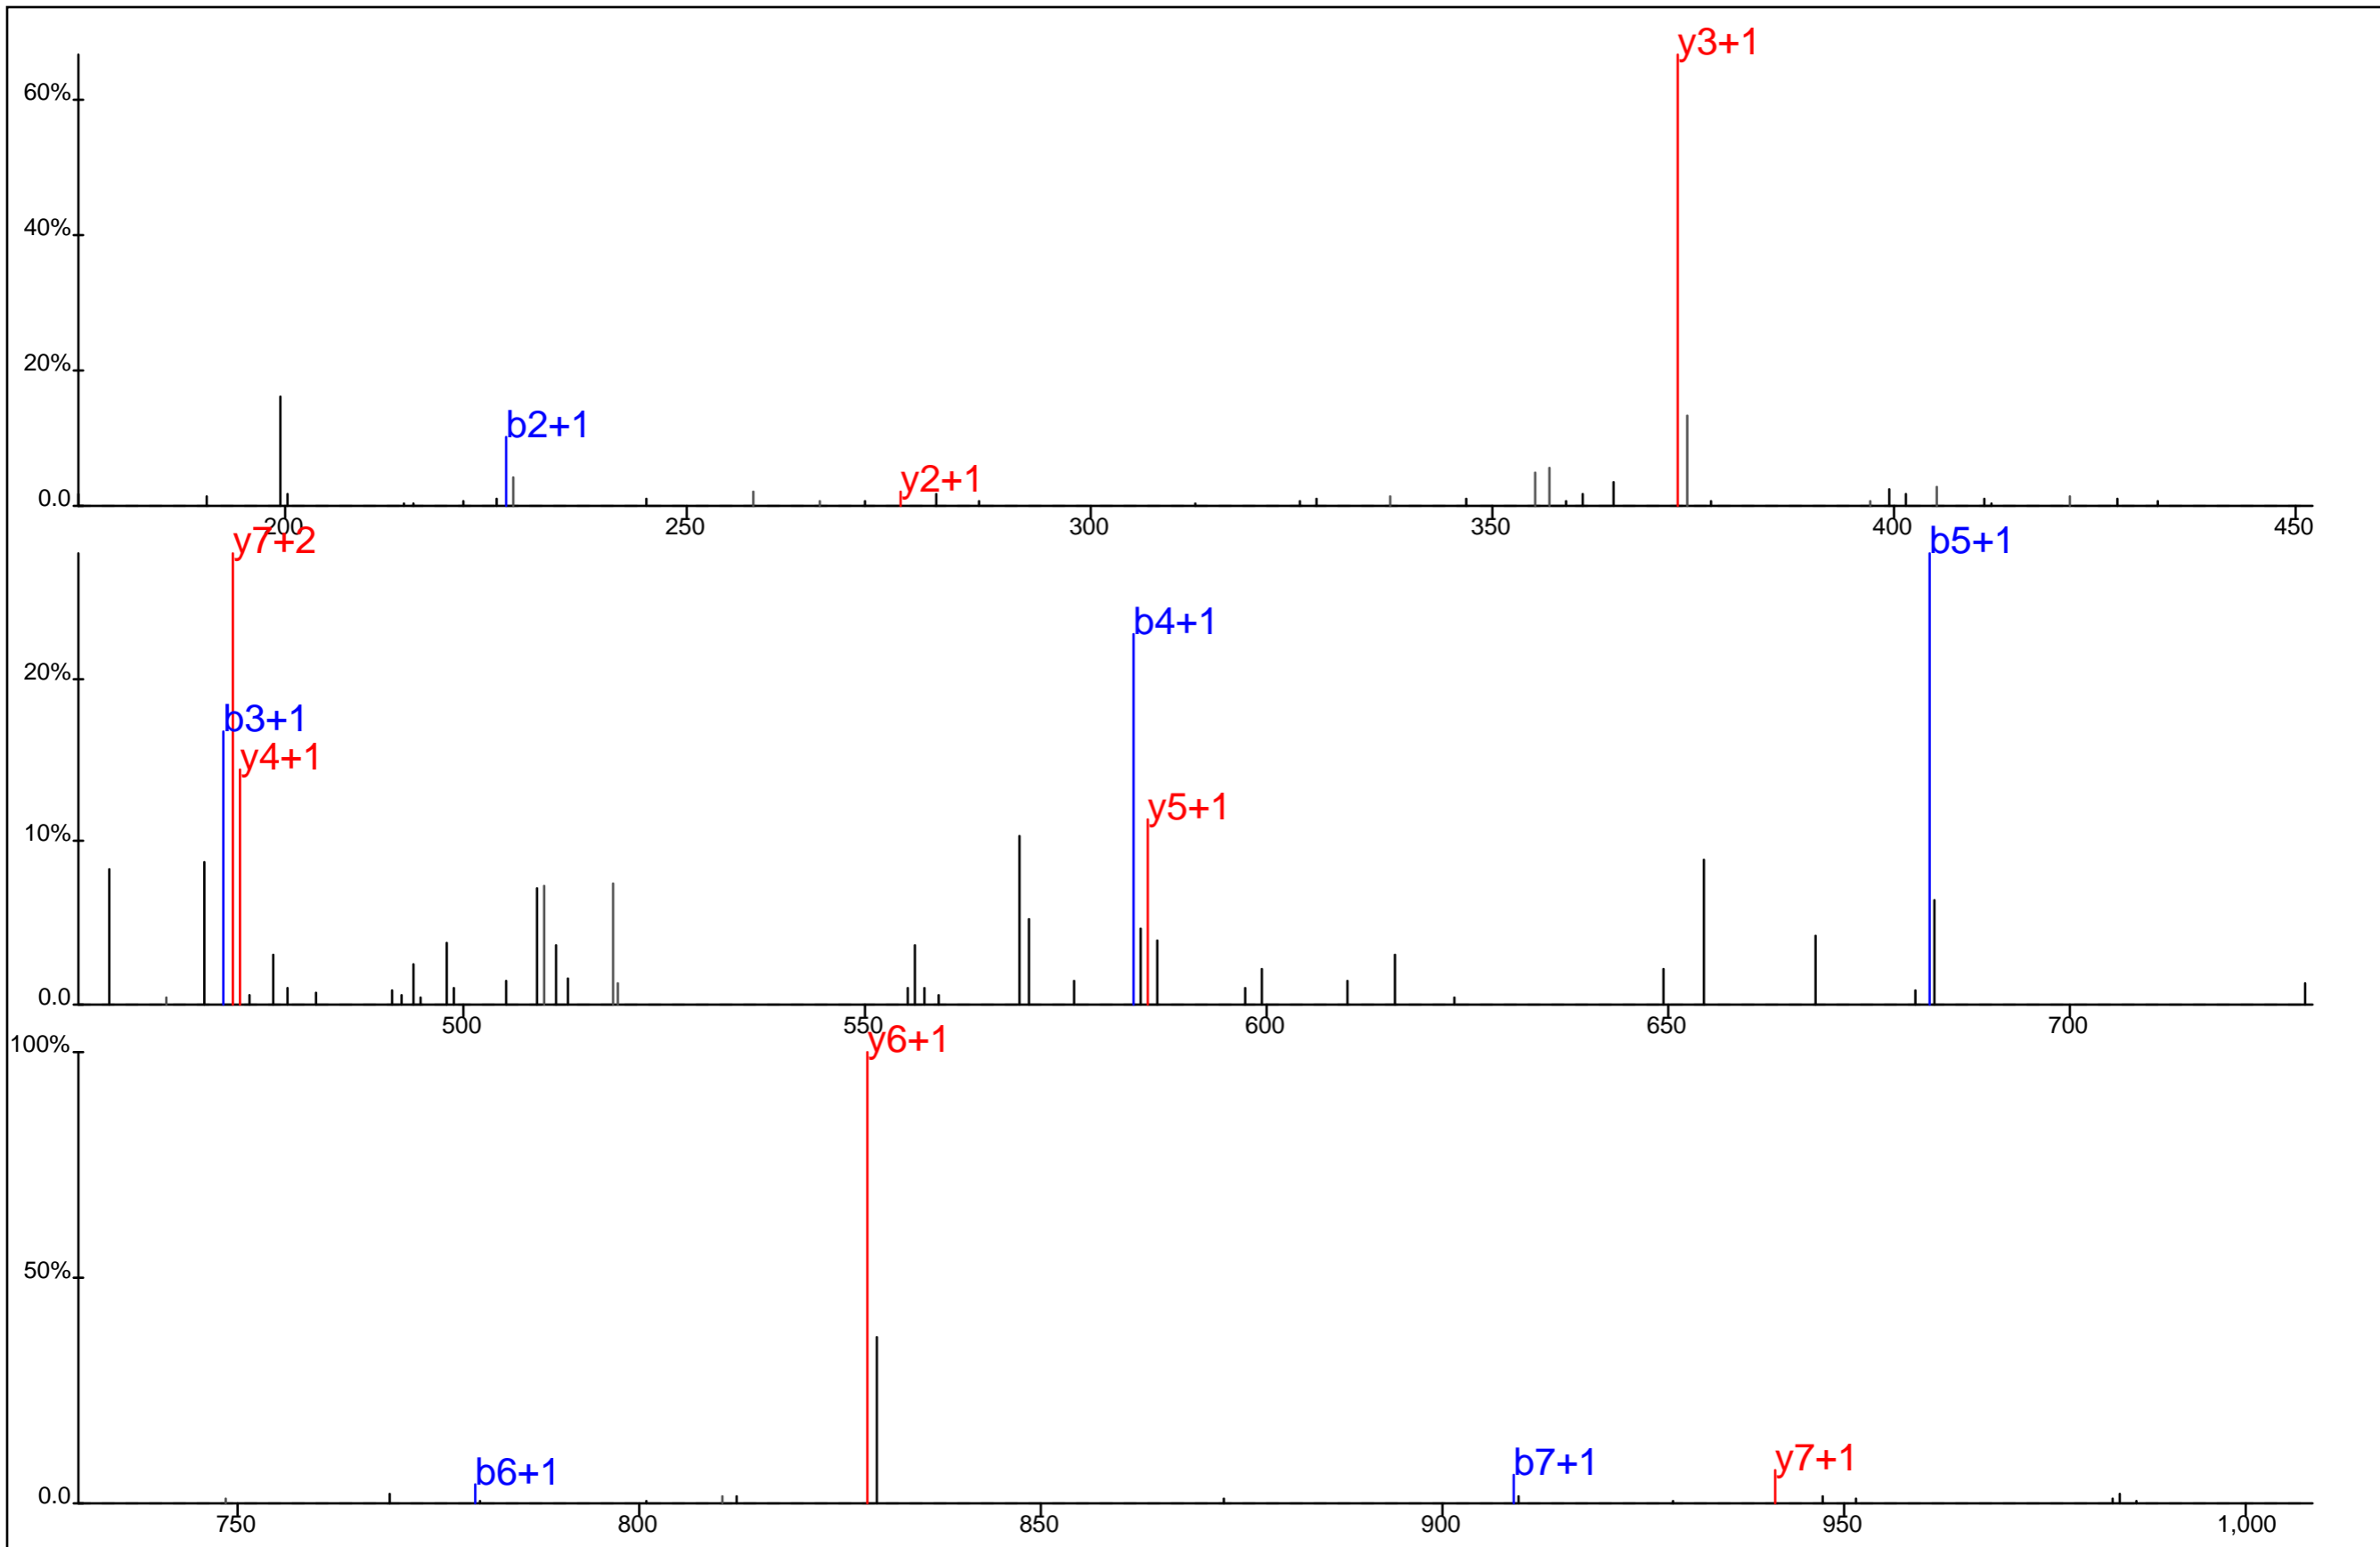

■ ■ ■ ■ ■  
 L I Y\* L V P E K  
□ □ □ □ □

Protein Name: Intersectin 2  
 gi Accession: 10432747  
 Precursor Mass: 527.7848+2  
 Delta Mass: 3.706 ppm  
 XCorr: 38.04

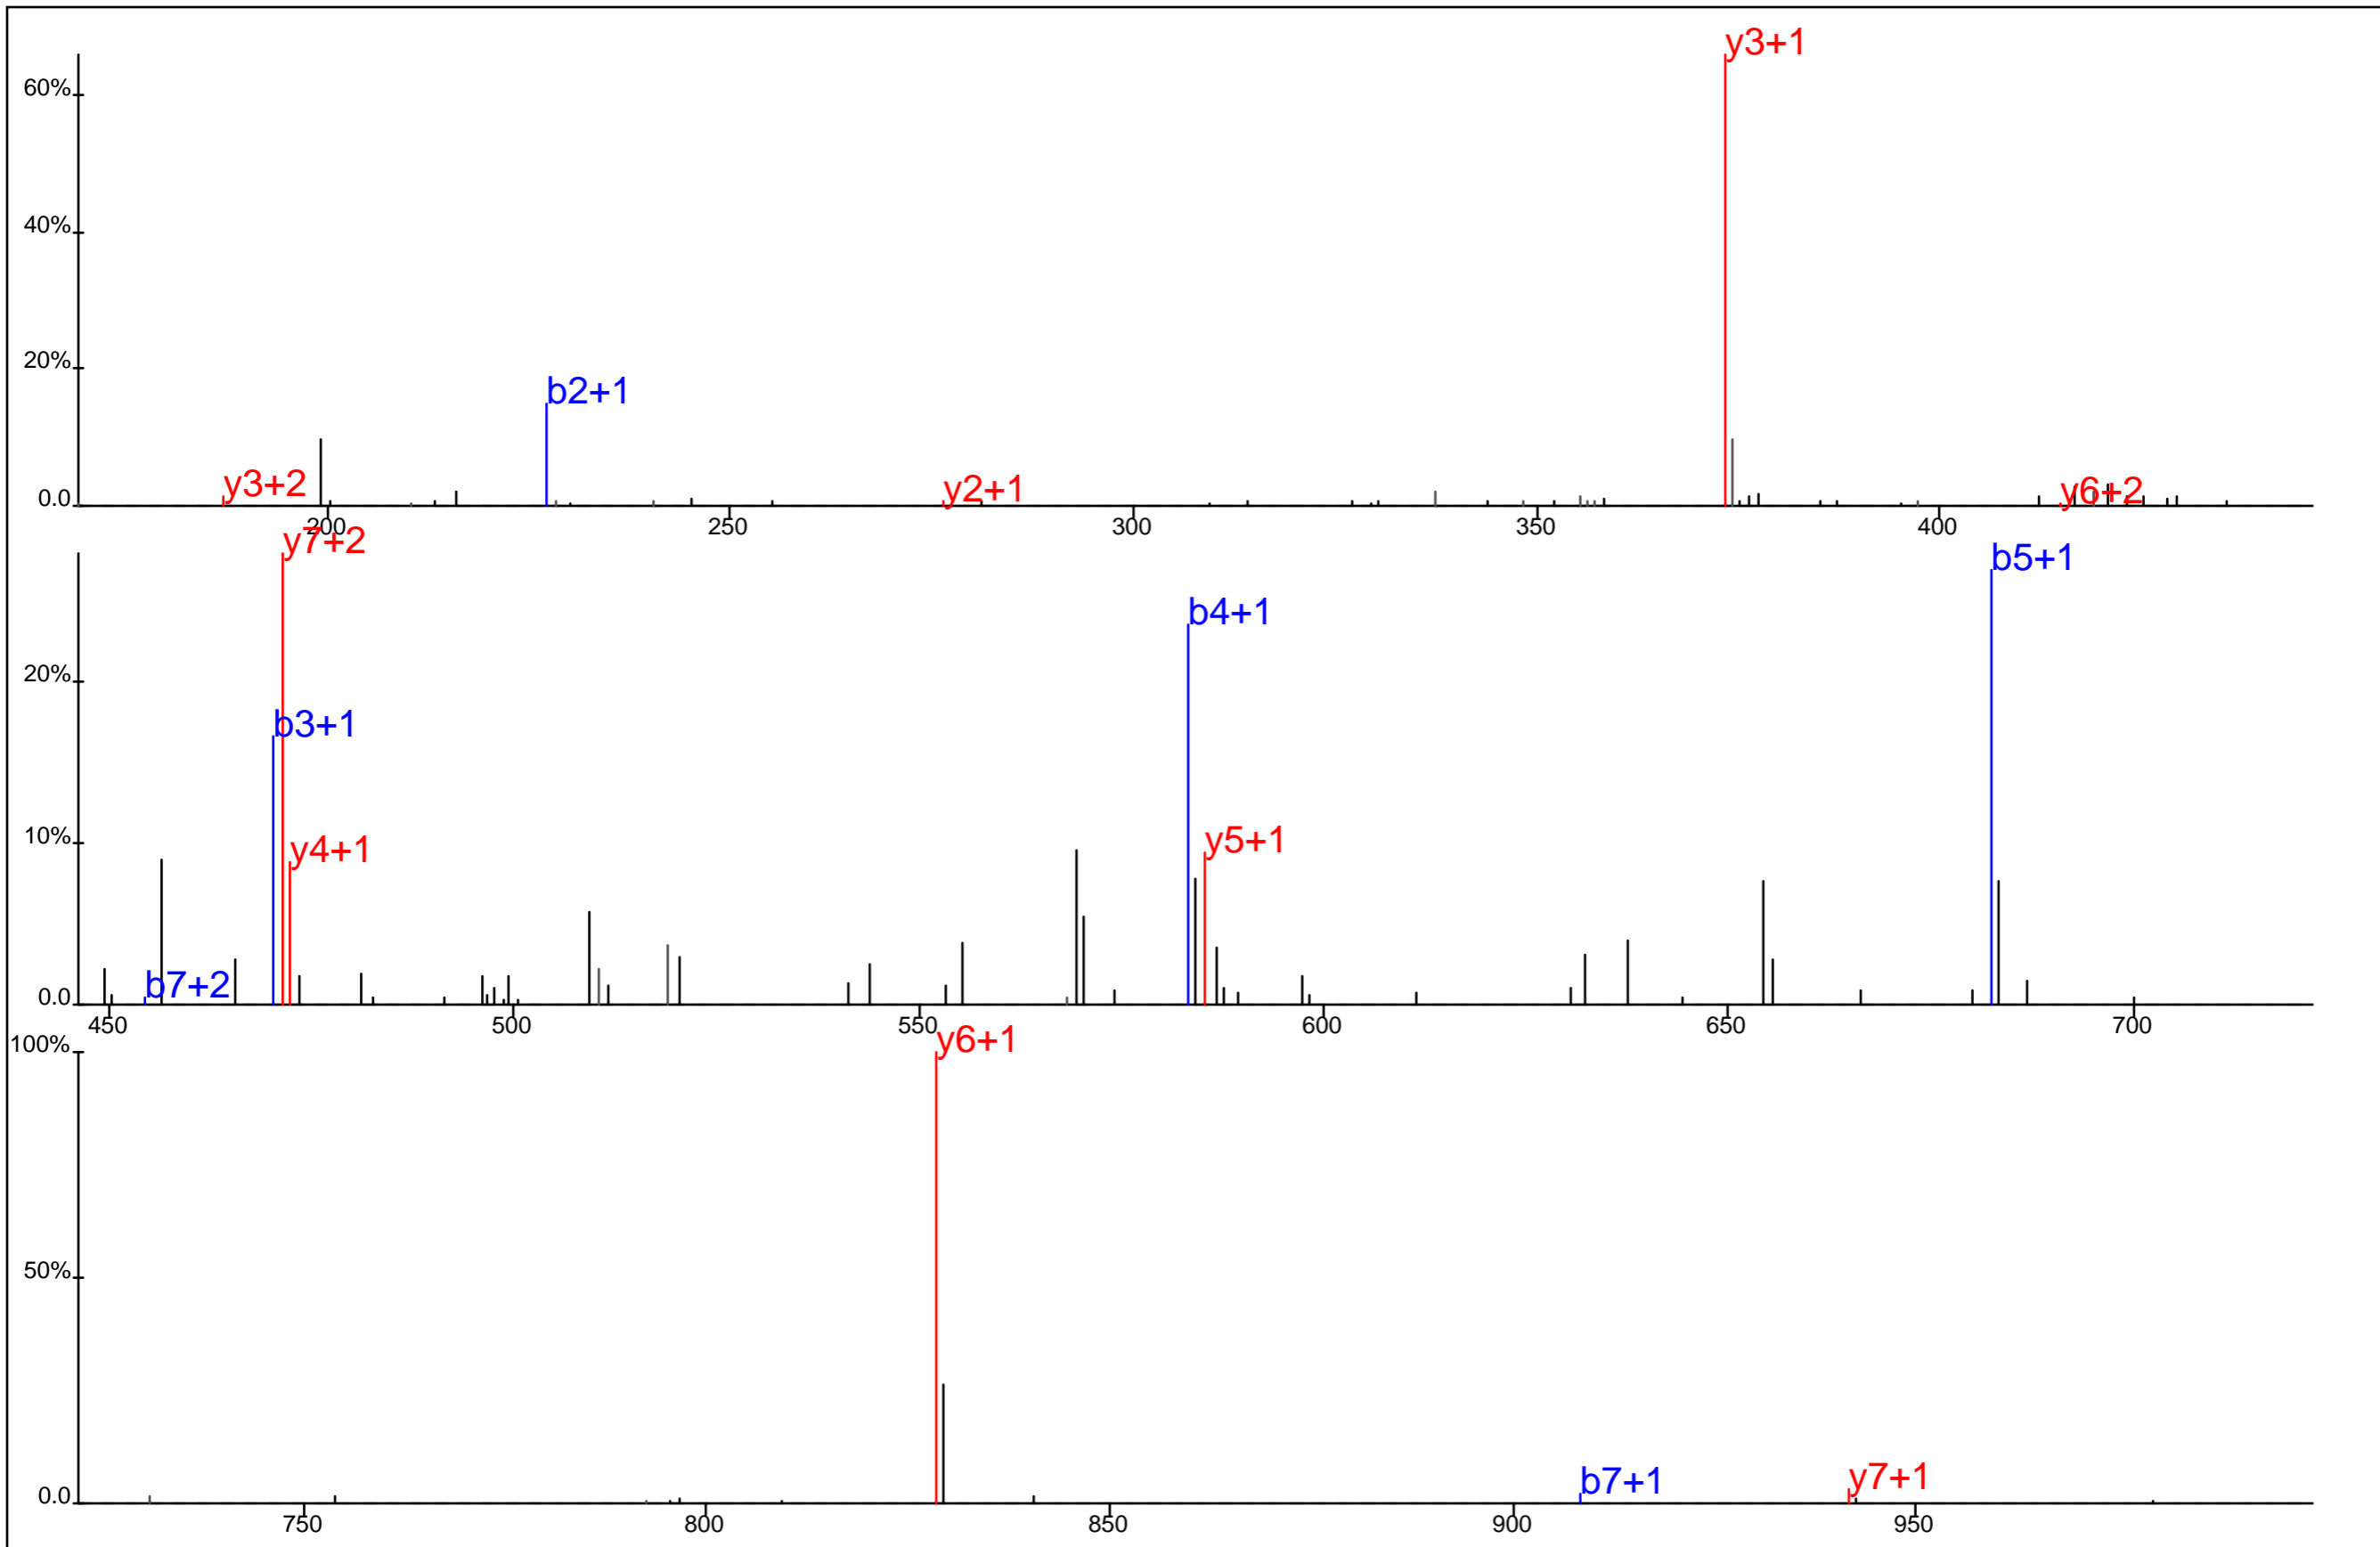

**L I Y\* L V P E K**

Protein Name: Intersectin 2  
 gi Accession: 10432747  
 Precursor Mass: 527.7850+2  
 Delta Mass: 4.170 ppm  
 XCorr: 28.67





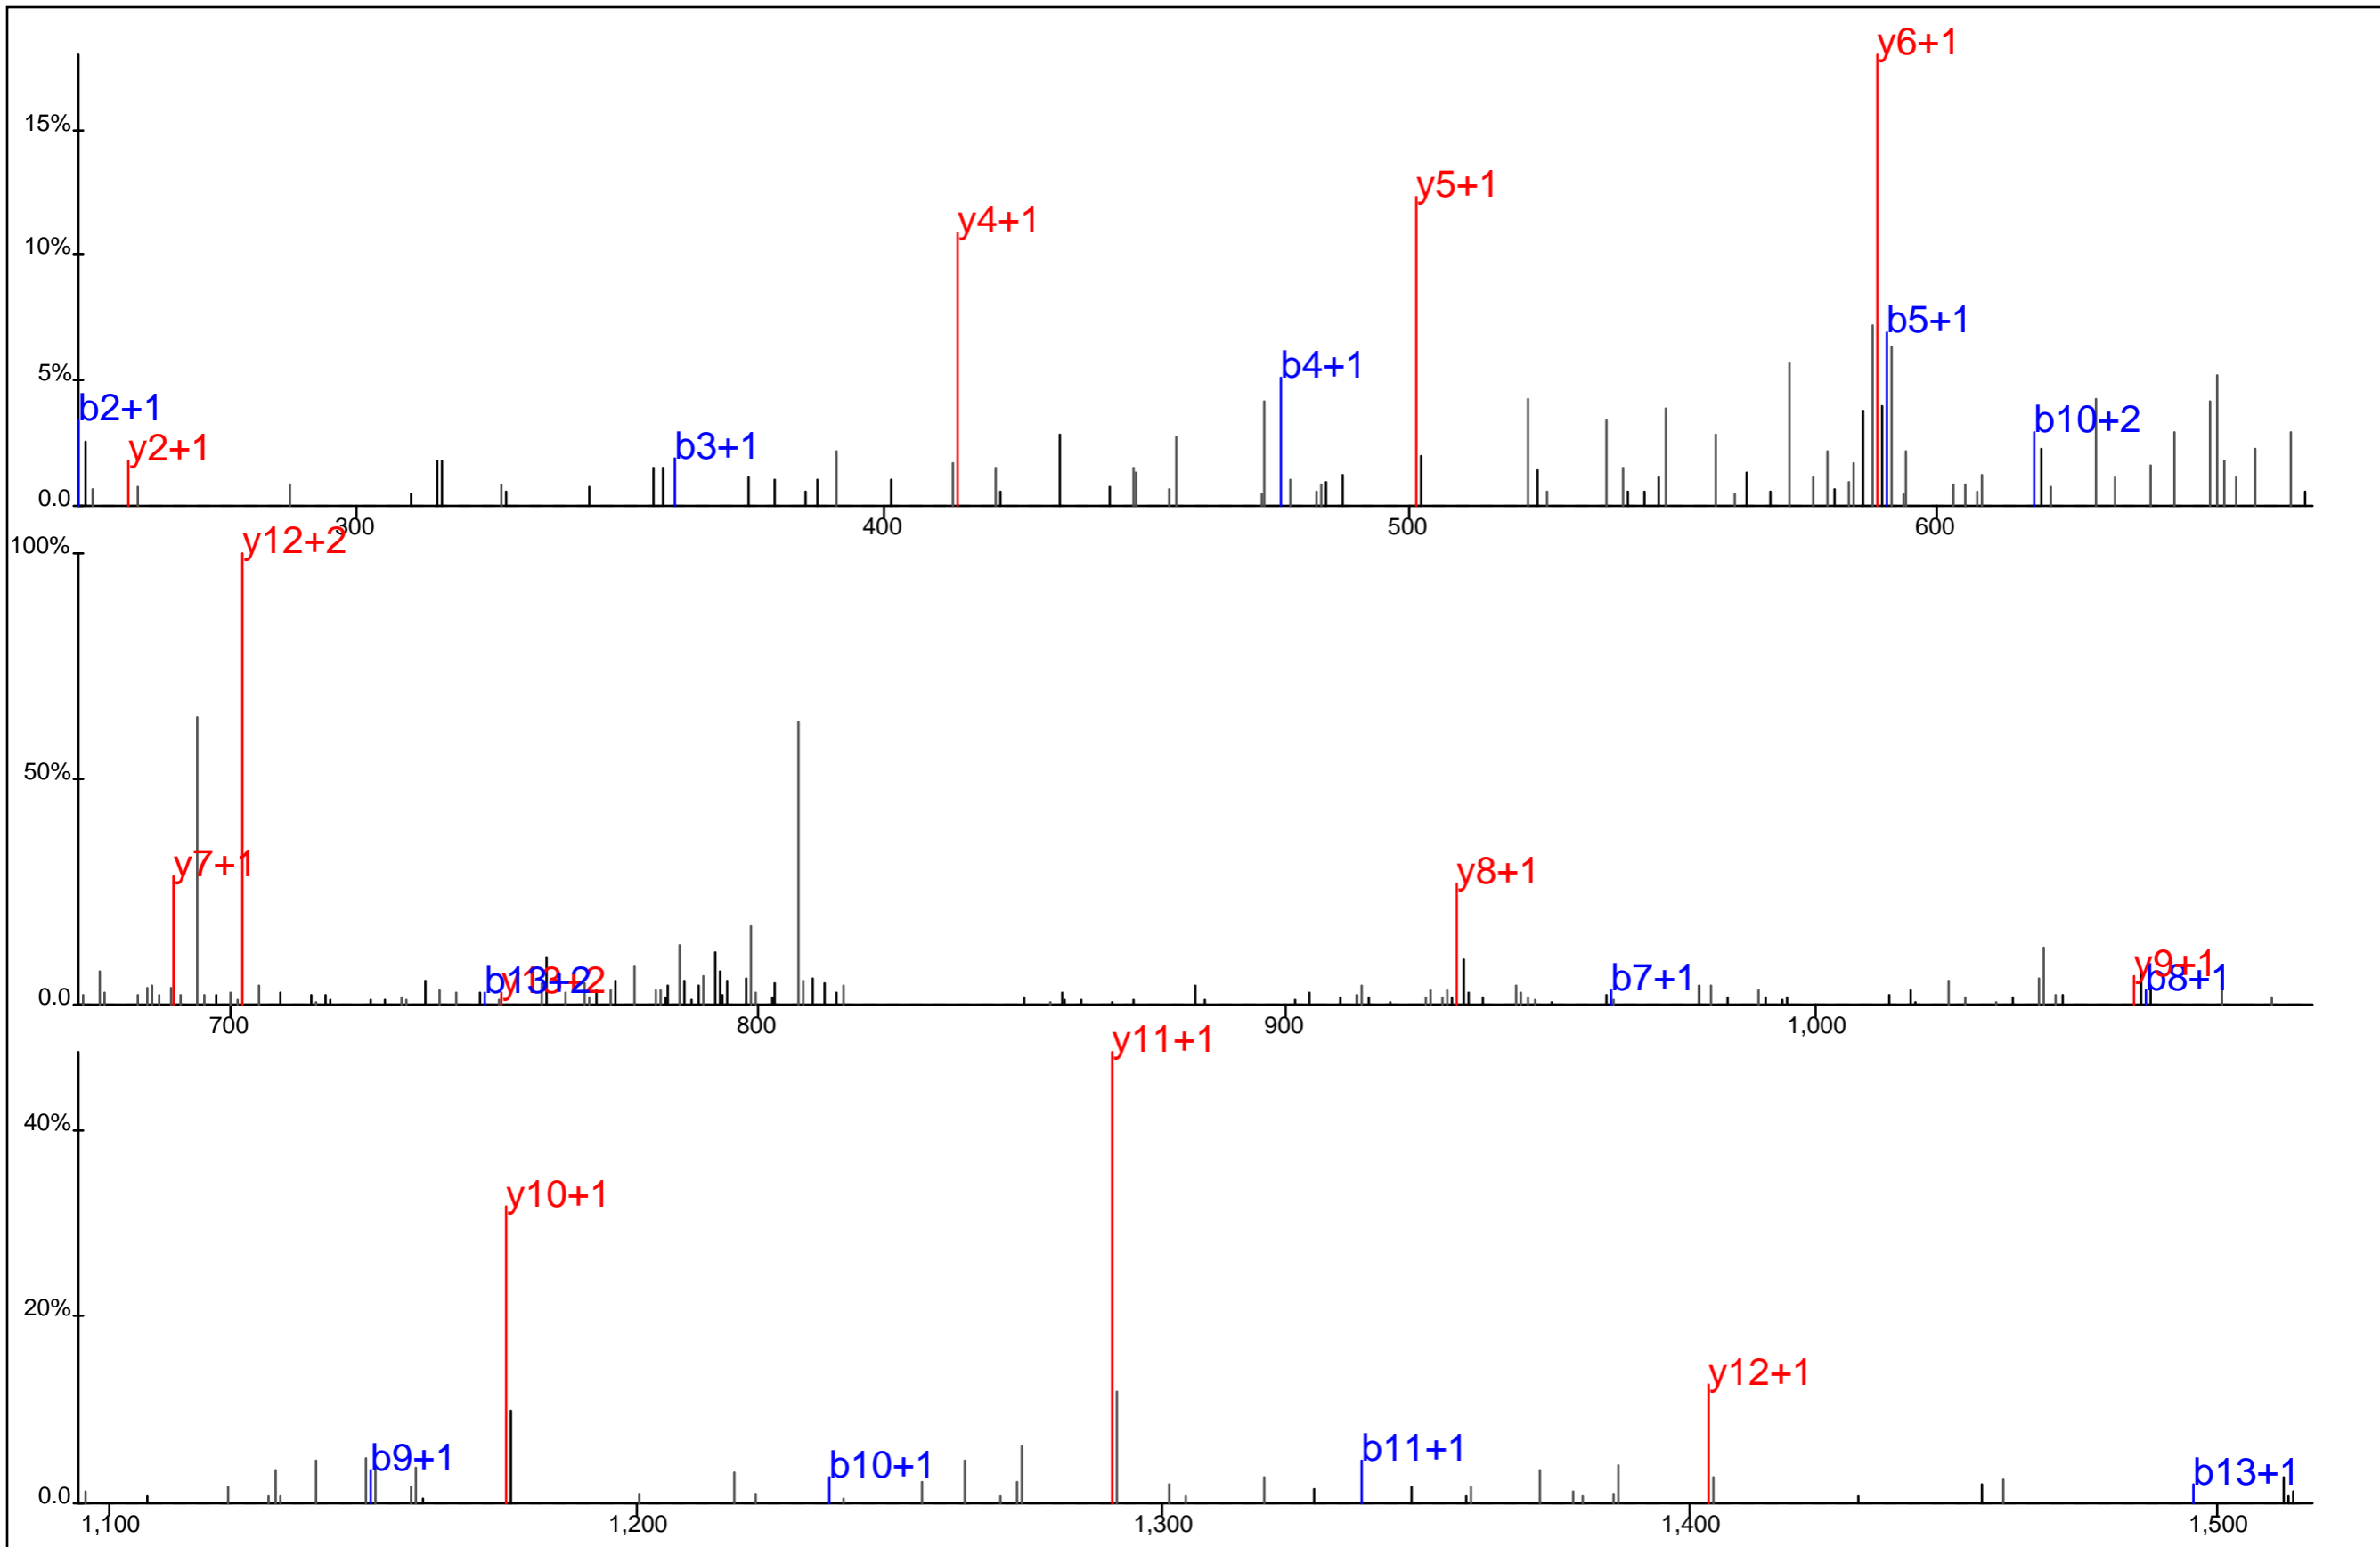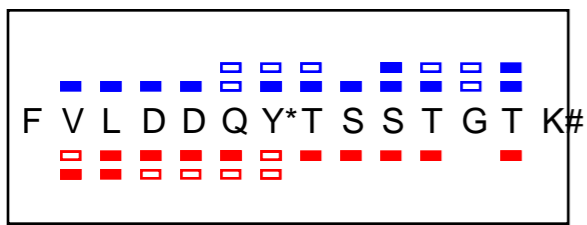

Protein Name: ITK  
 gi Accession: 15718680  
 Precursor Mass: 825.3697+2  
 Delta Mass: 8.188 ppm  
 XCorr: 67.22

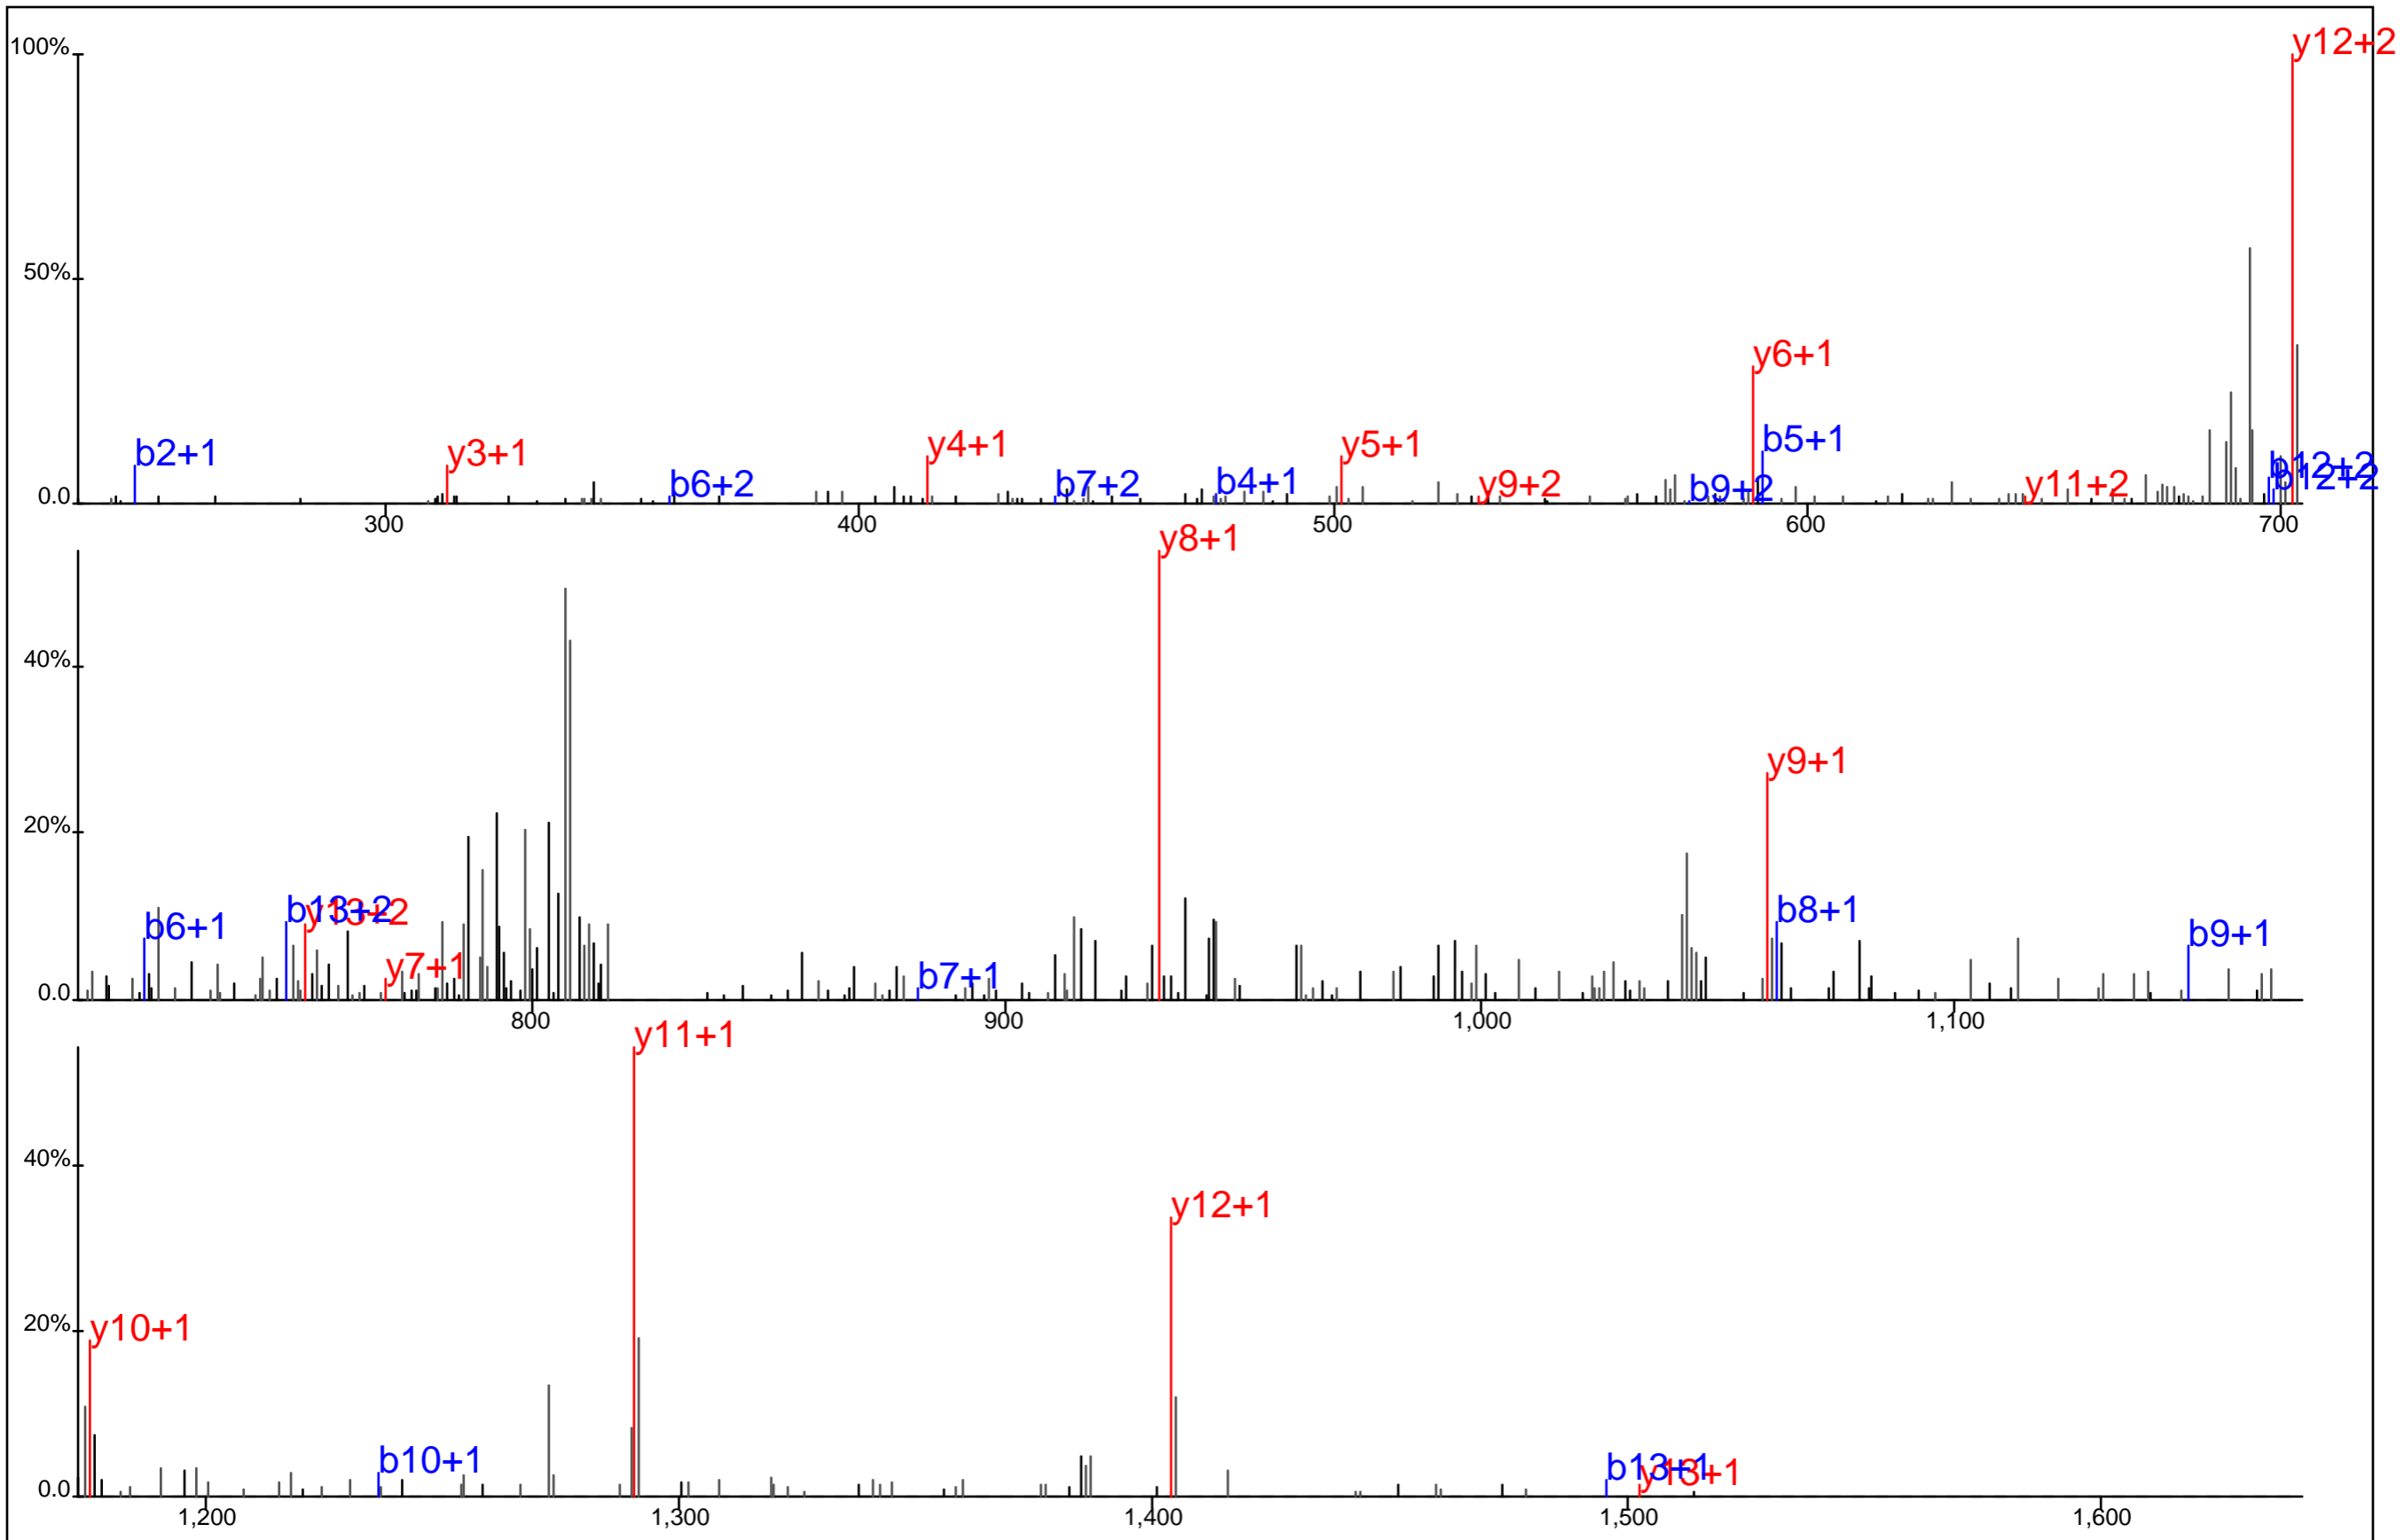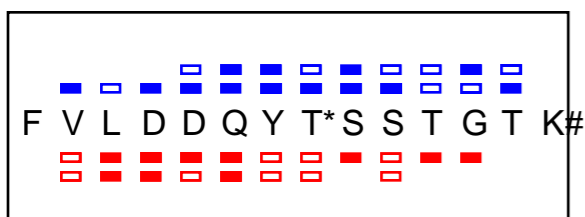

Protein Name: ITK  
 gi Accession: 15718680  
 Precursor Mass: 825.3649+2  
 Delta Mass: 2.417 ppm  
 XCorr: 73.66

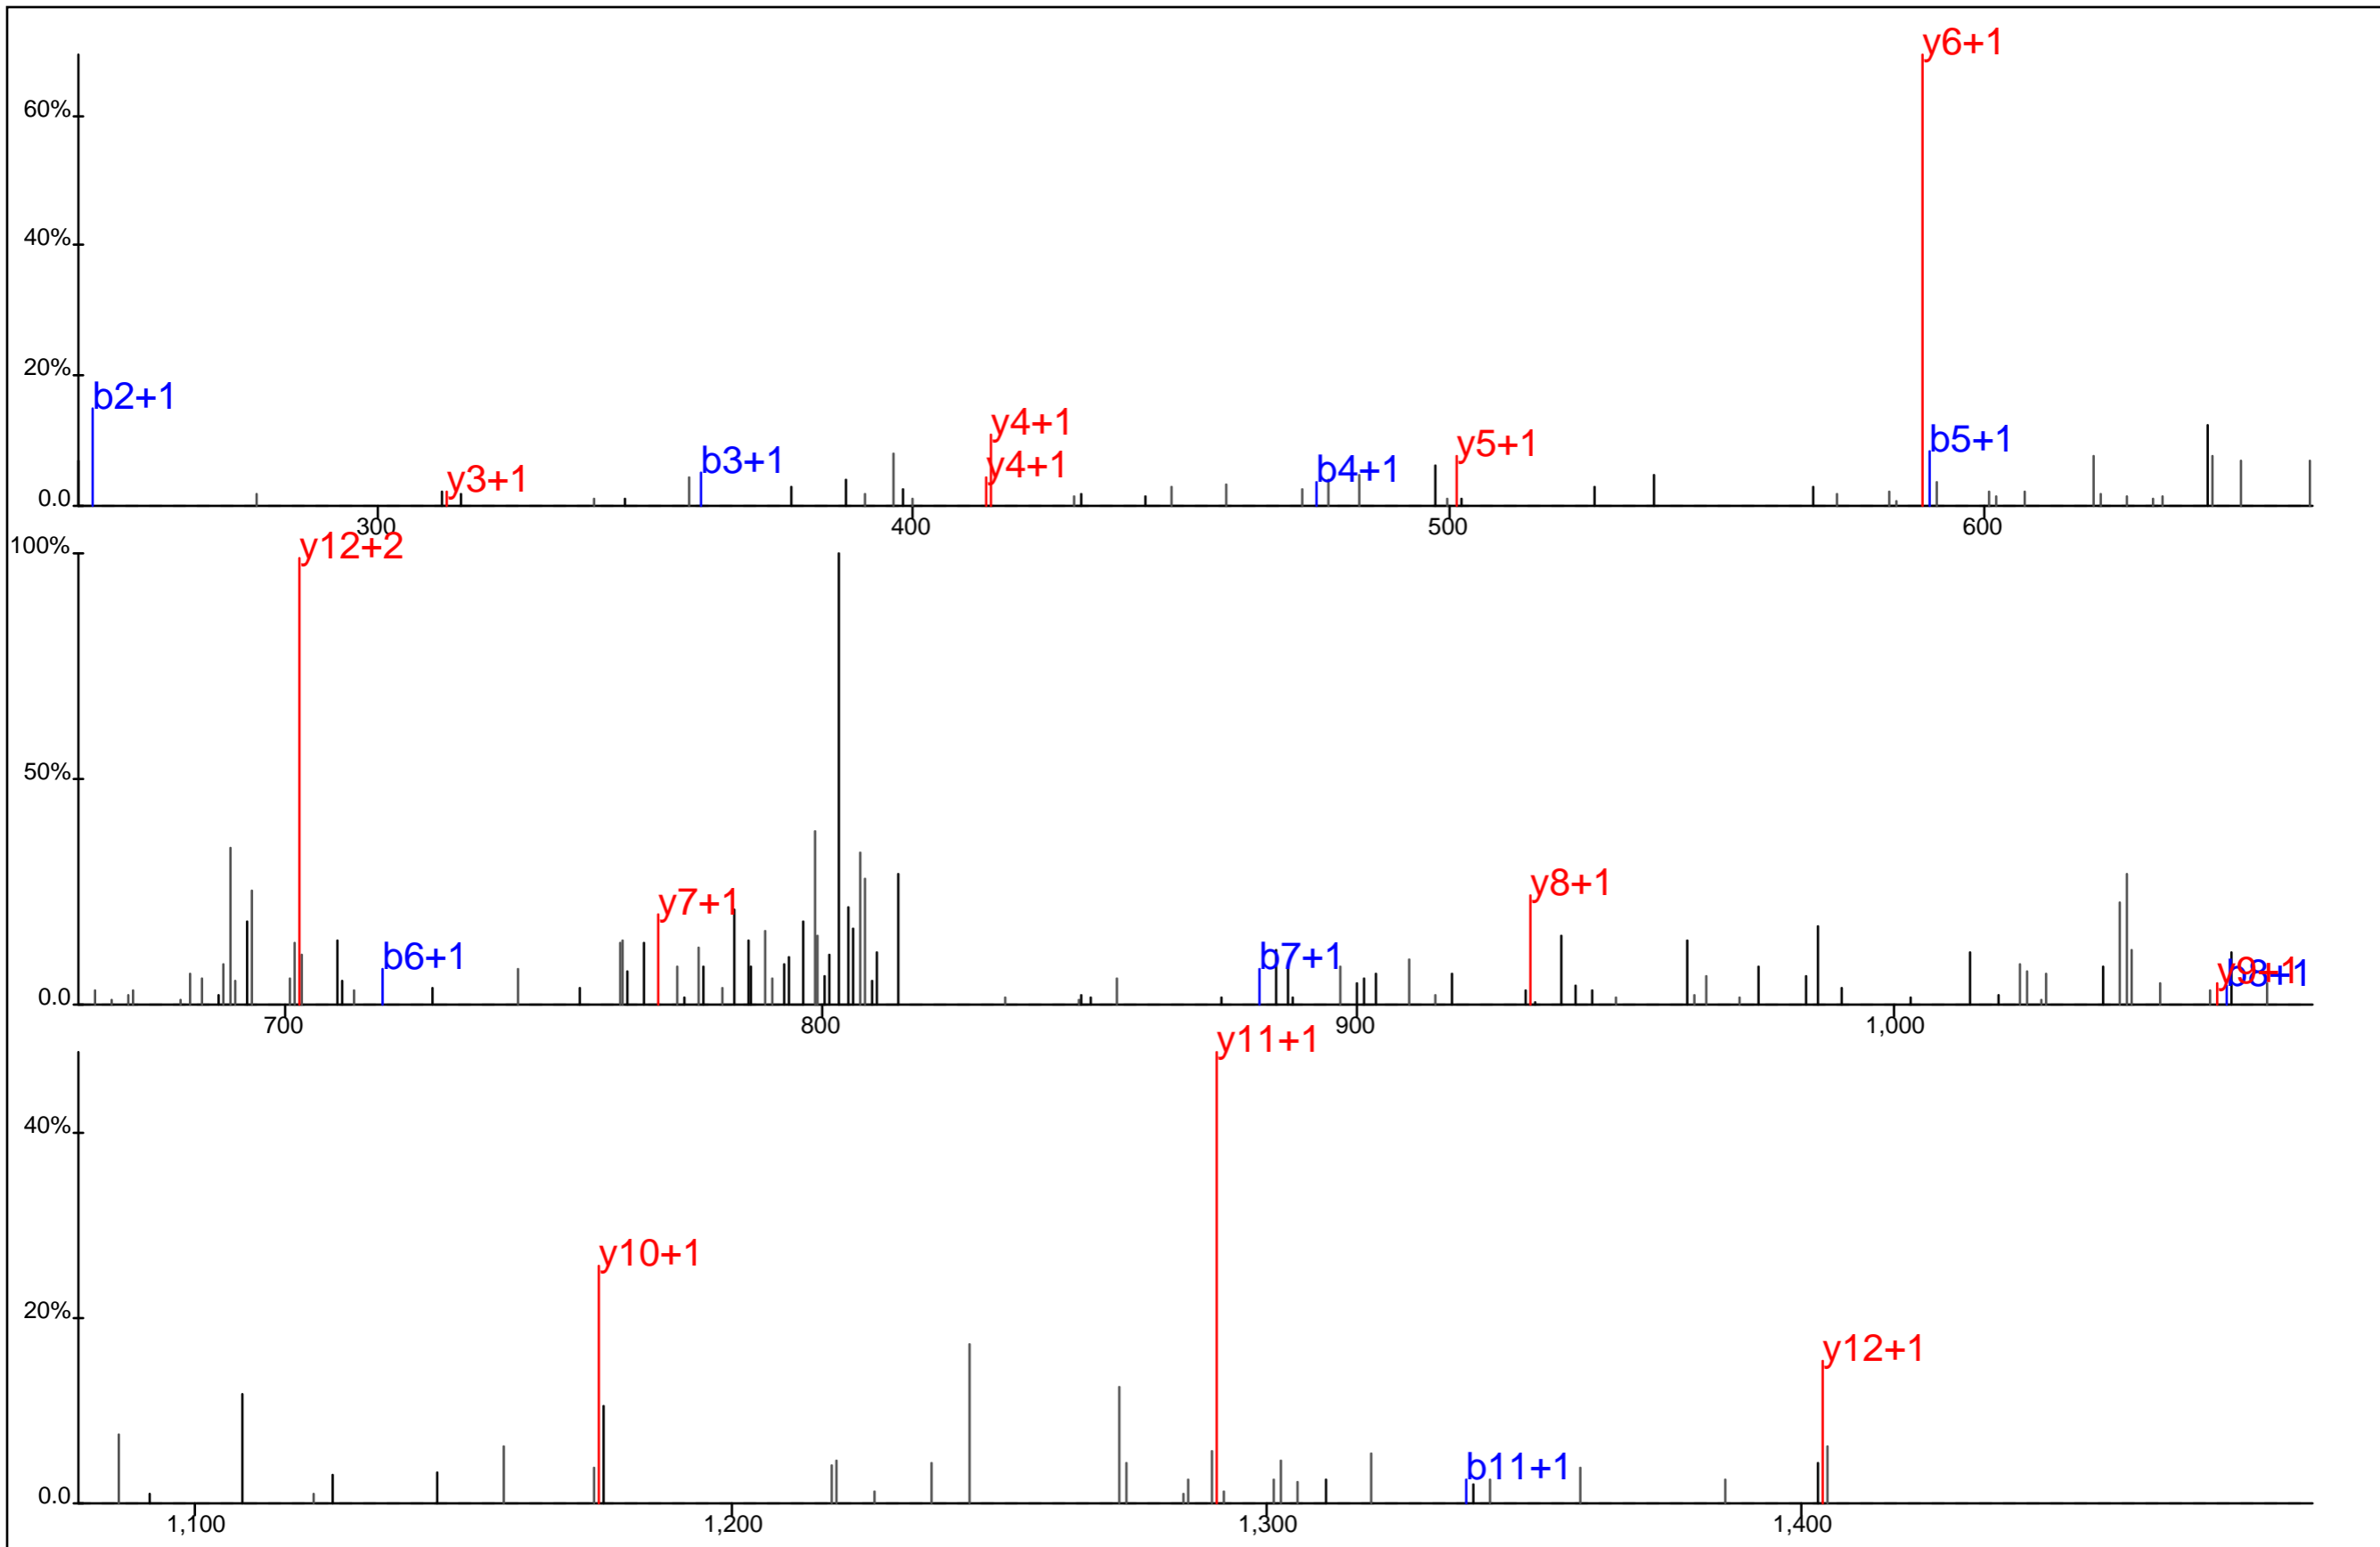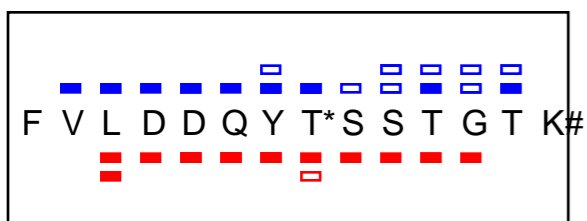

Protein Name: ITK  
 gi Accession: 15718680  
 Precursor Mass: 825.3656+2  
 Delta Mass: 3.230 ppm  
 XCorr: 61.35

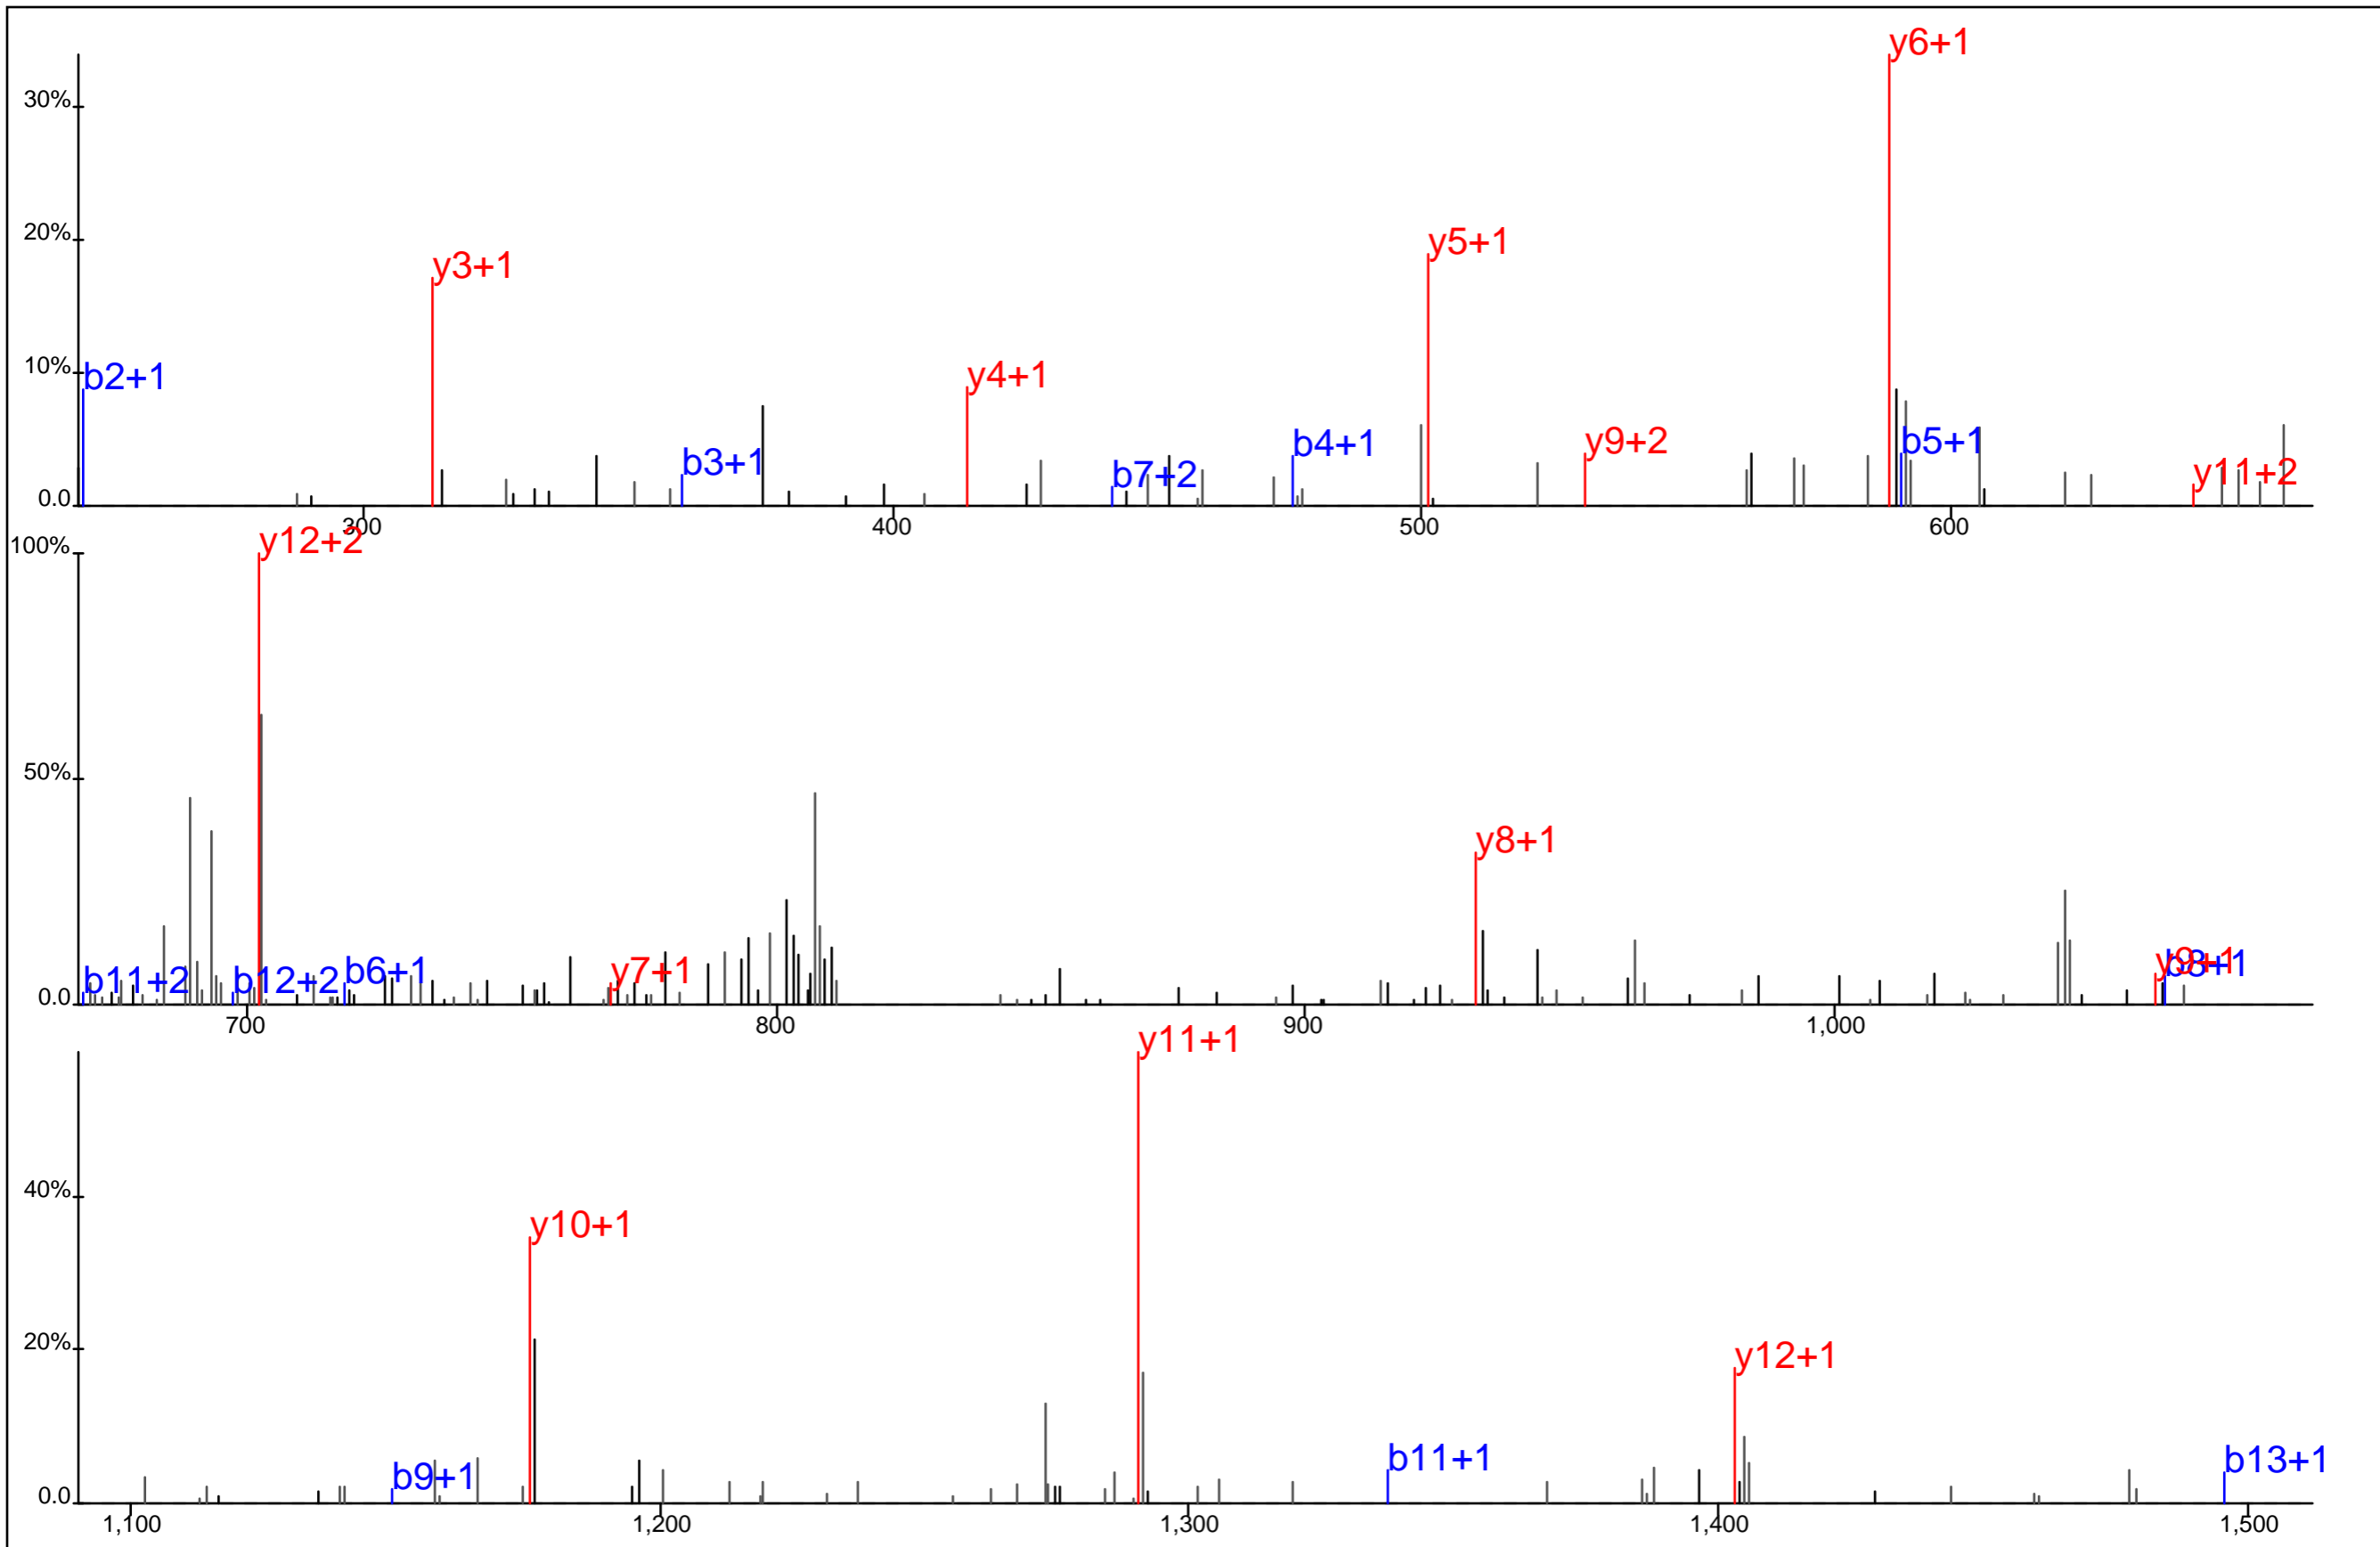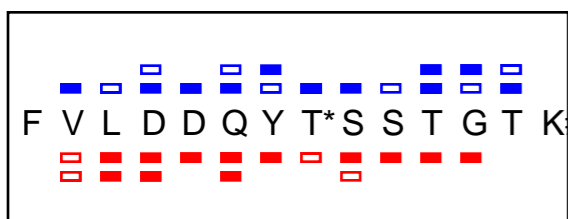

Protein Name: ITK  
 gi Accession: 15718680  
 Precursor Mass: 825.3668+2  
 Delta Mass: 4.715 ppm  
 XCorr: 82.47

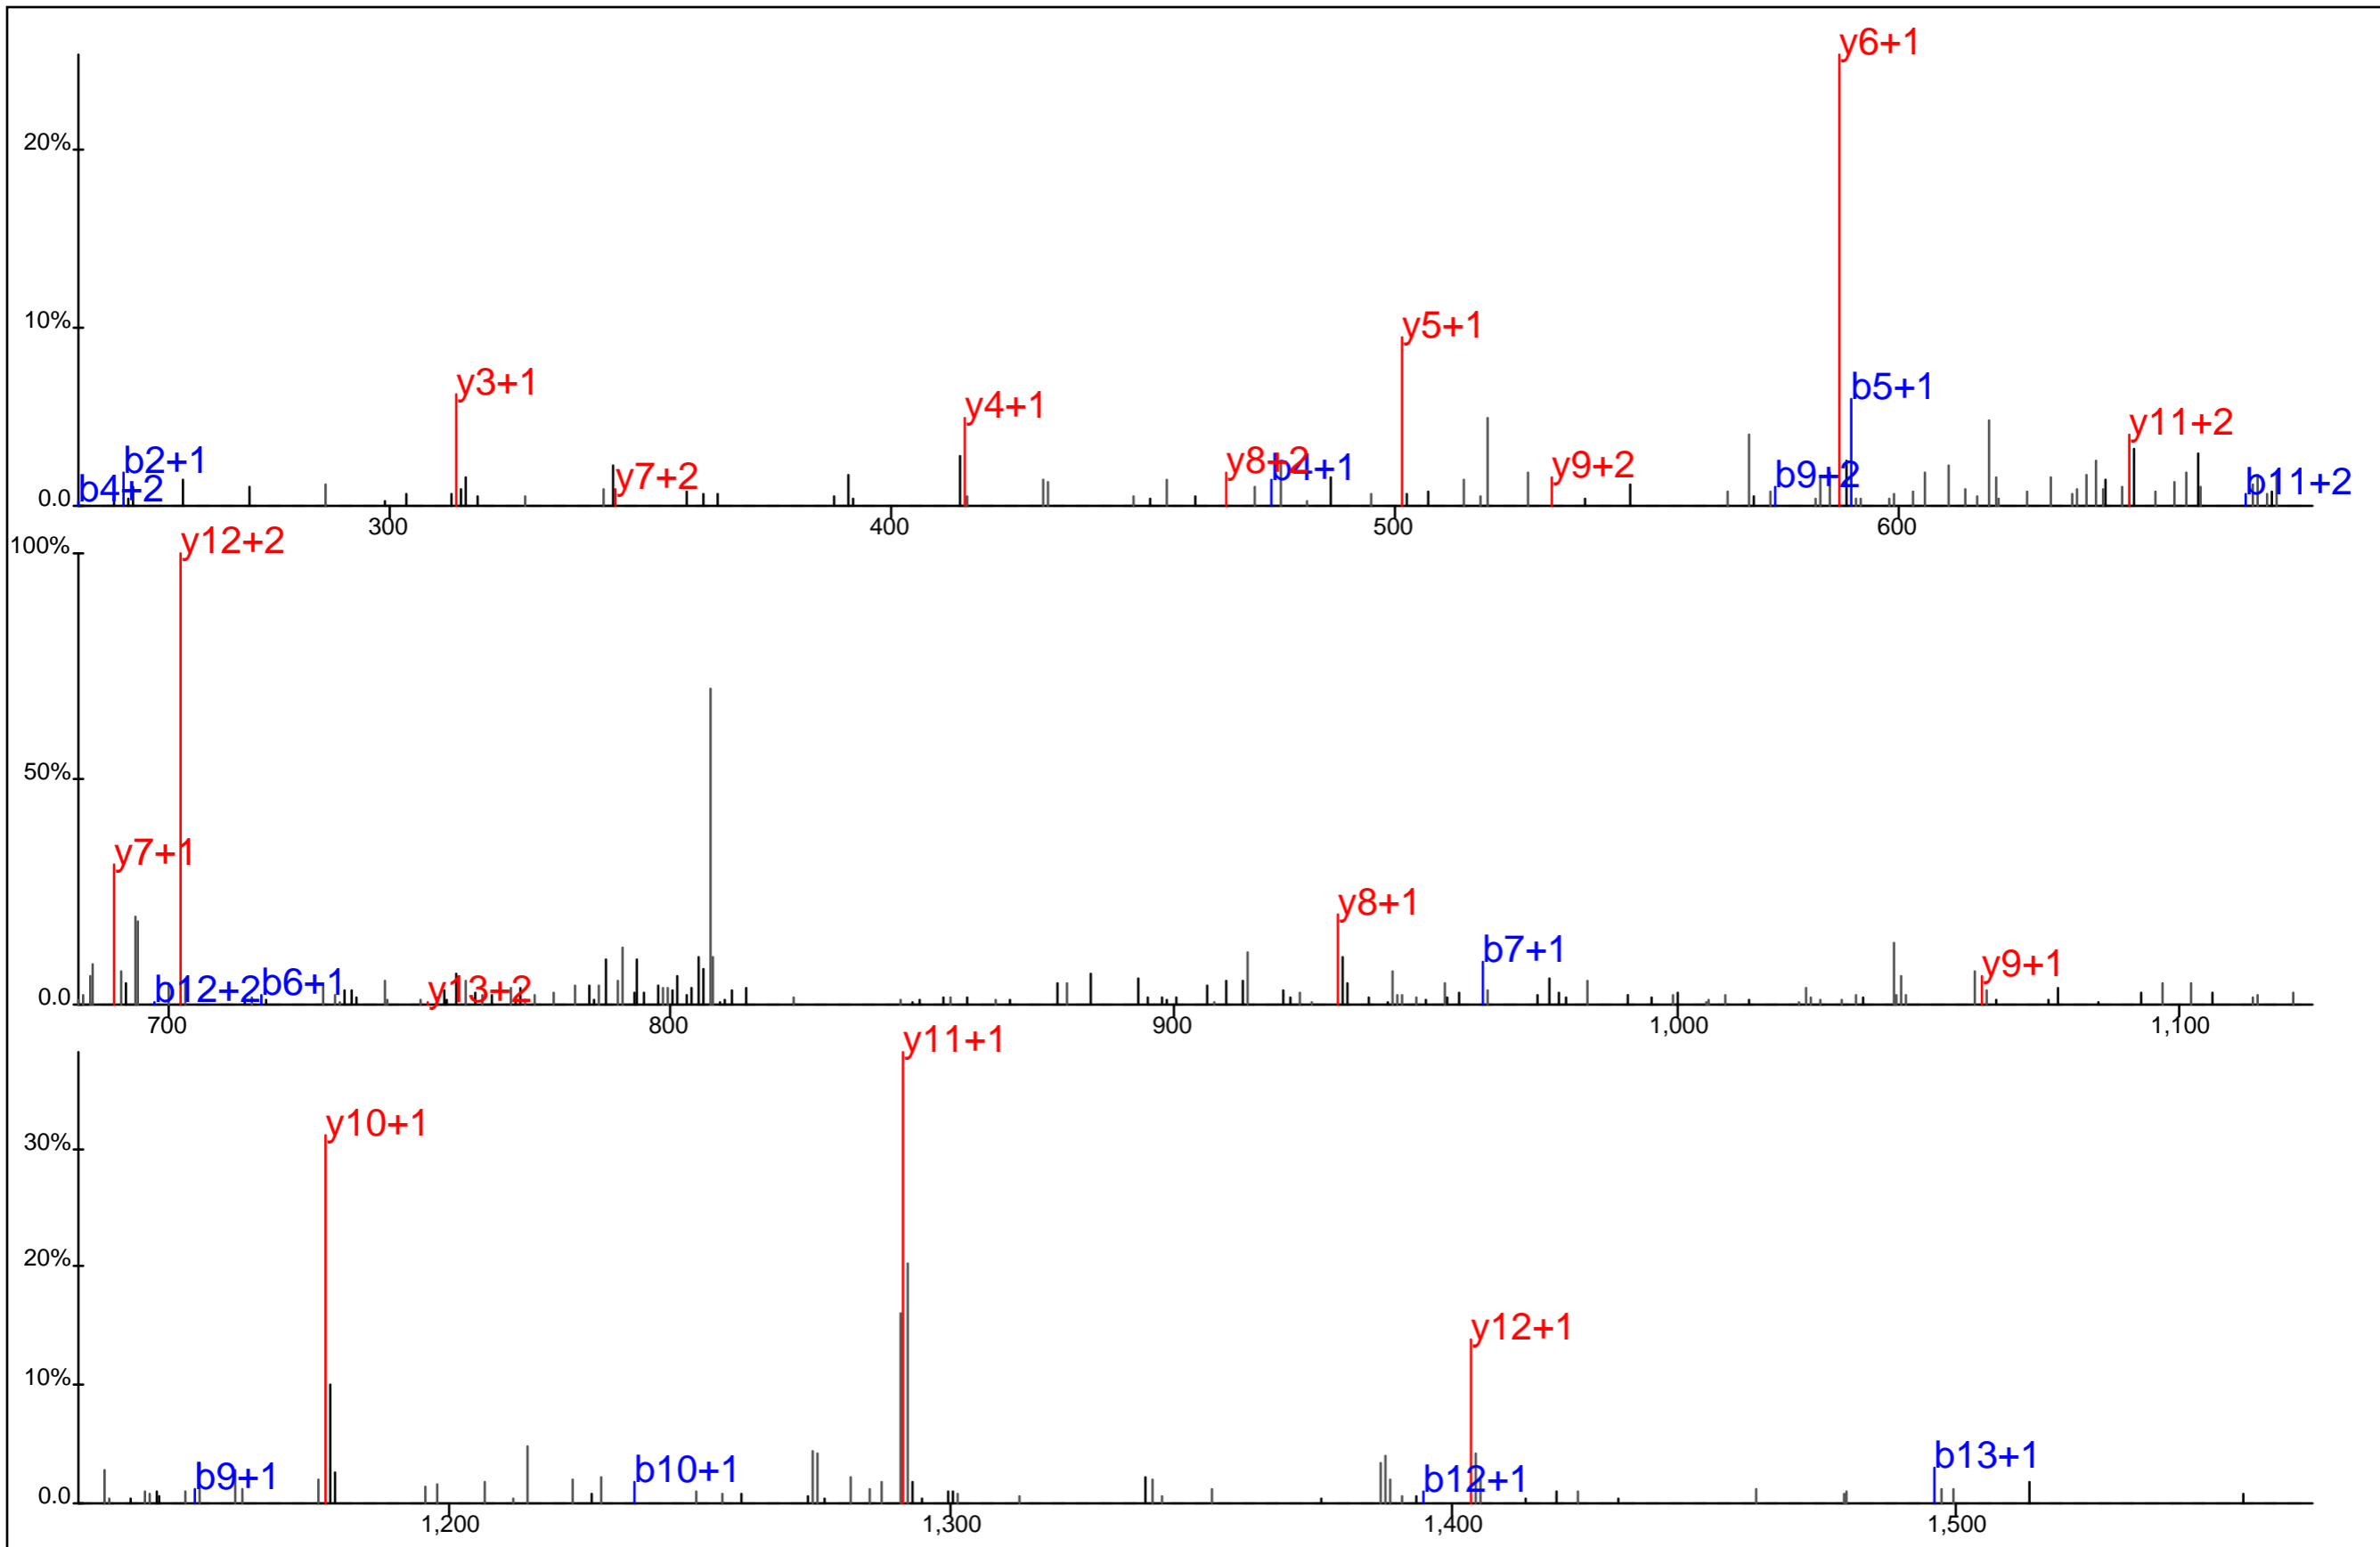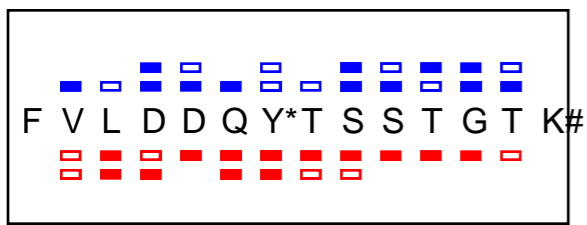

Protein Name: ITK  
 gi Accession: 15718680  
 Precursor Mass: 825.3655+2  
 Delta Mass: 3.157 ppm  
 XCorr: 75.54

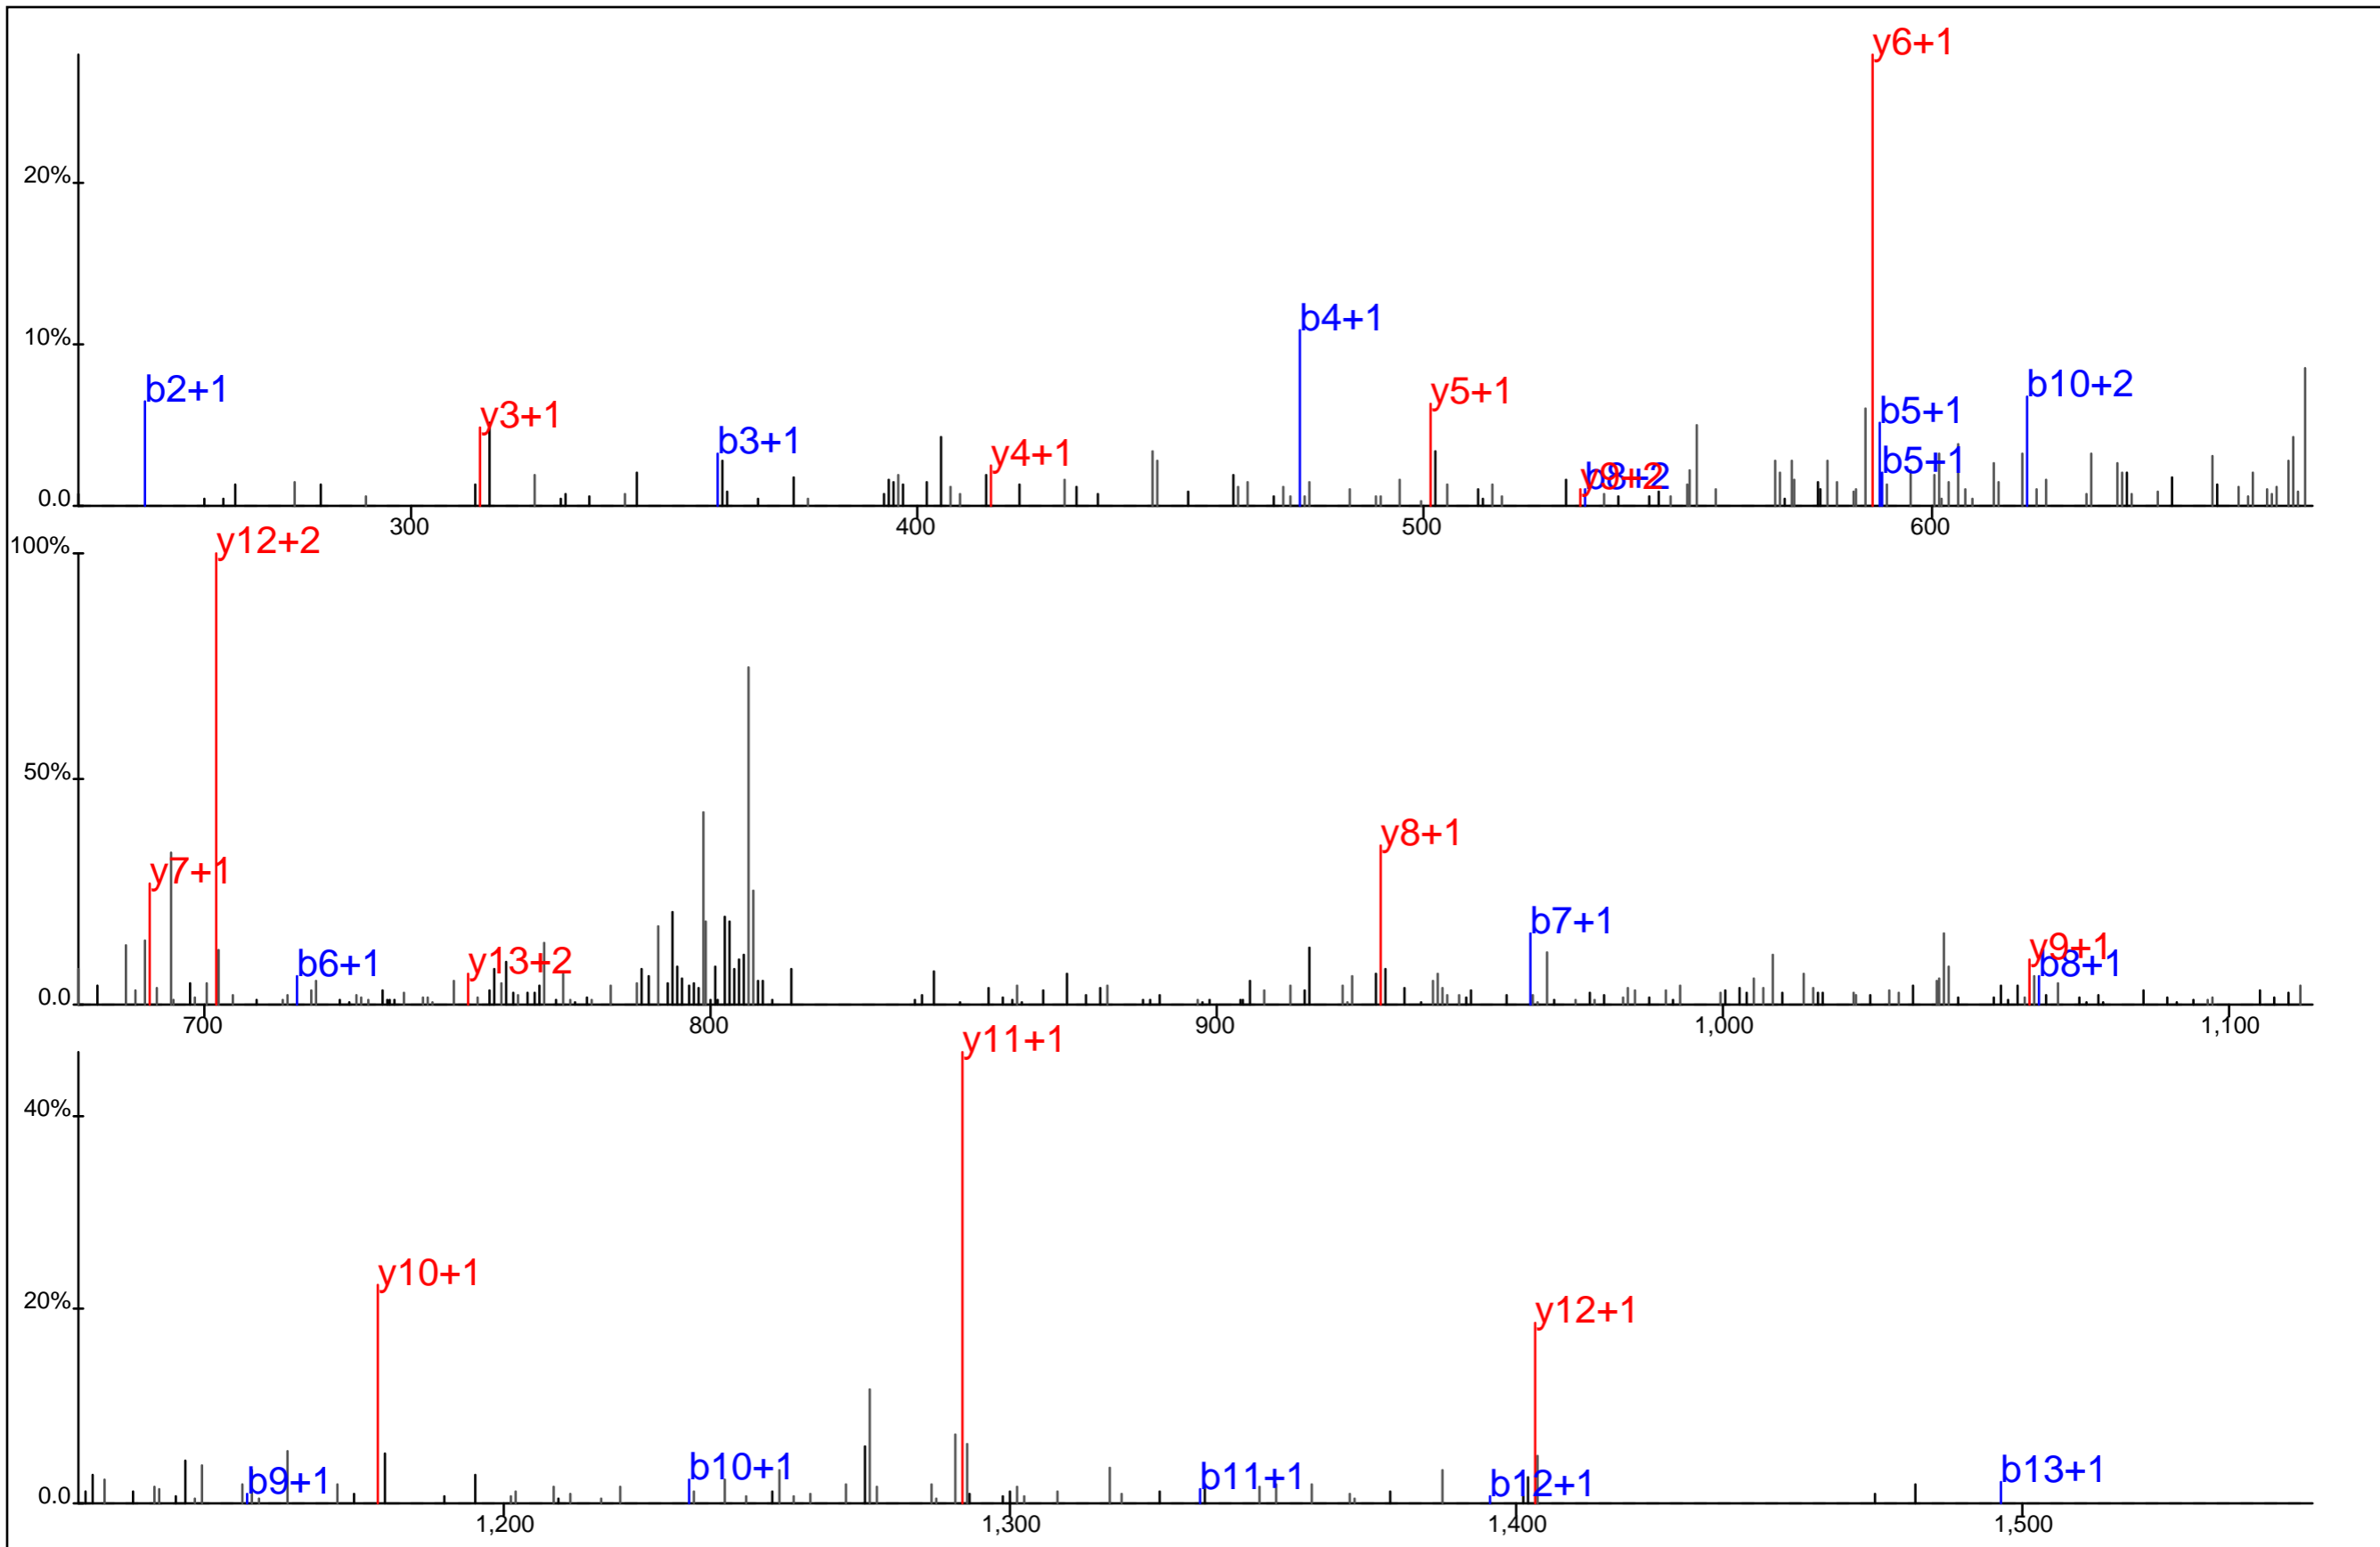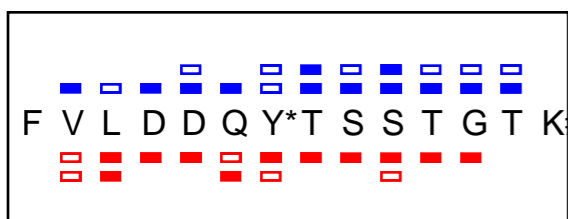

Protein Name: ITK  
 gi Accession: 15718680  
 Precursor Mass: 825.3705+2  
 Delta Mass: 9.225 ppm  
 XCorr: 53.19

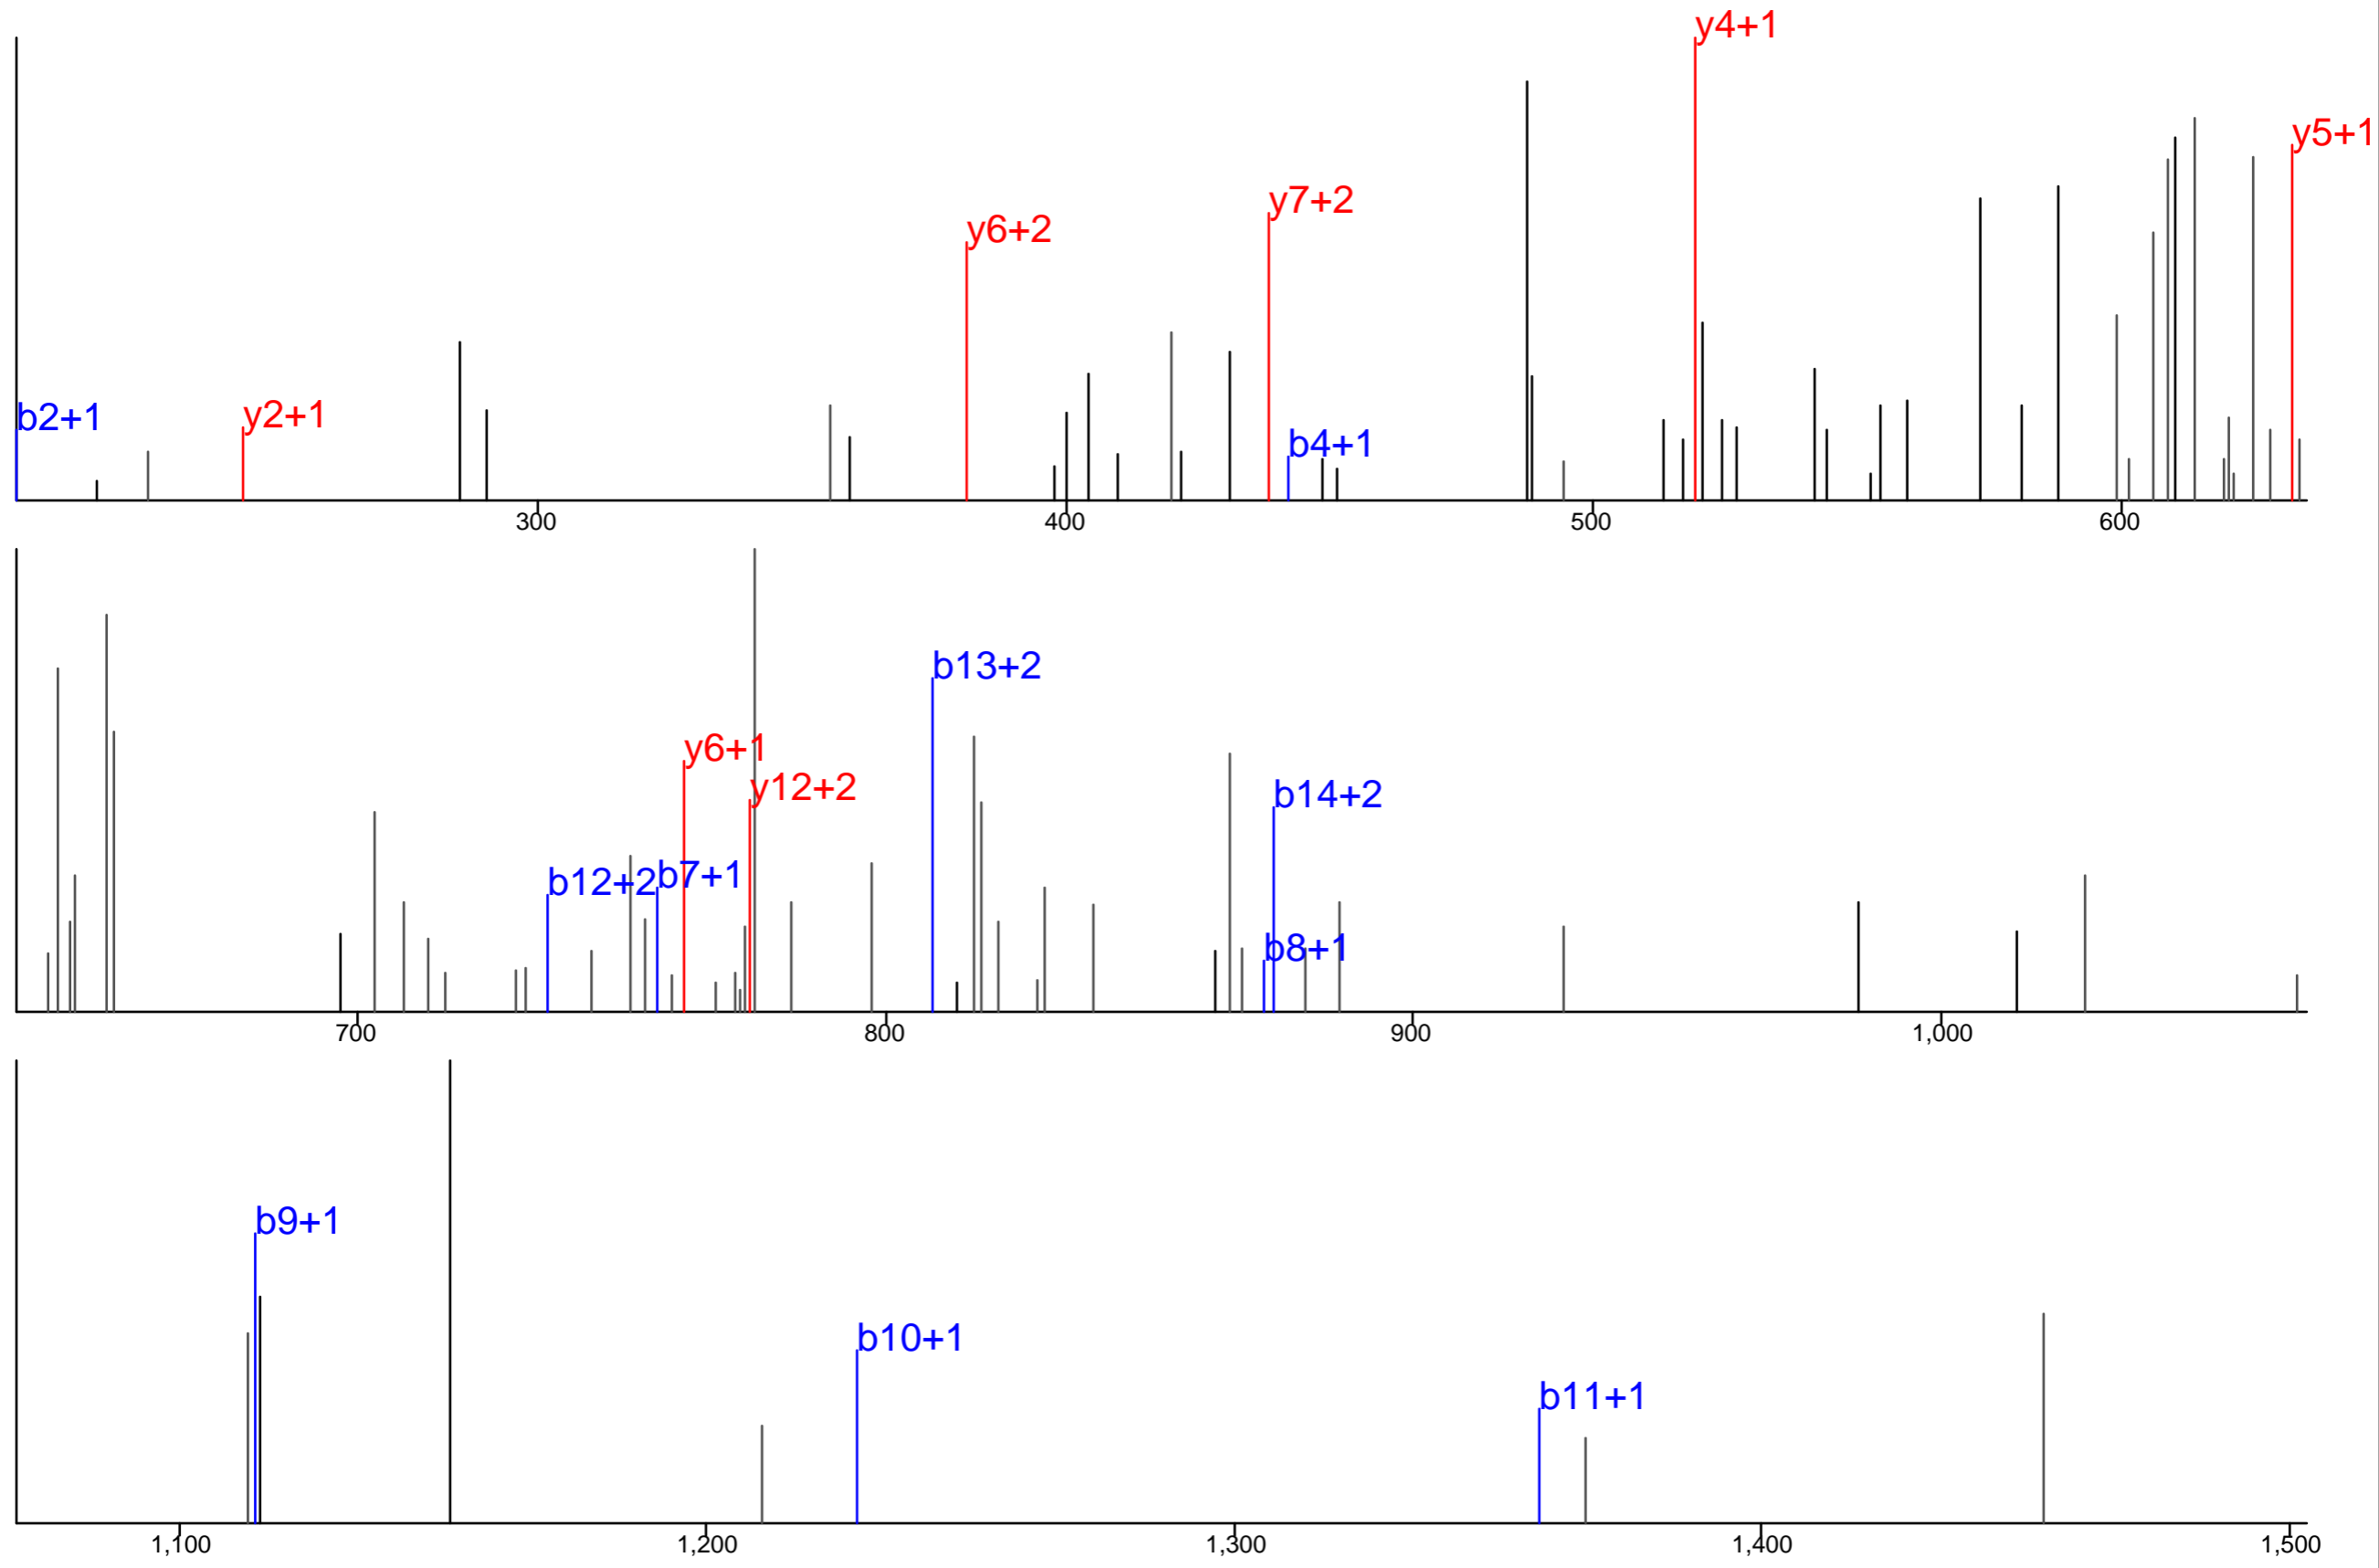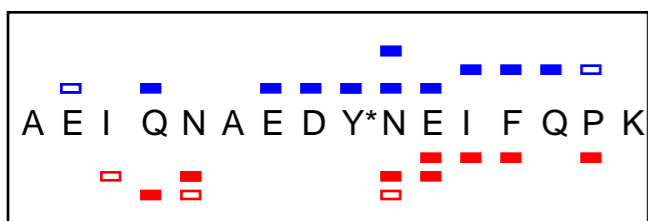

Protein Name: Katanin p80  
 gi Accession: 83779014  
 Precursor Mass: 663.6298+3  
 Delta Mass: 5.651 ppm  
 XCorr: 13.38

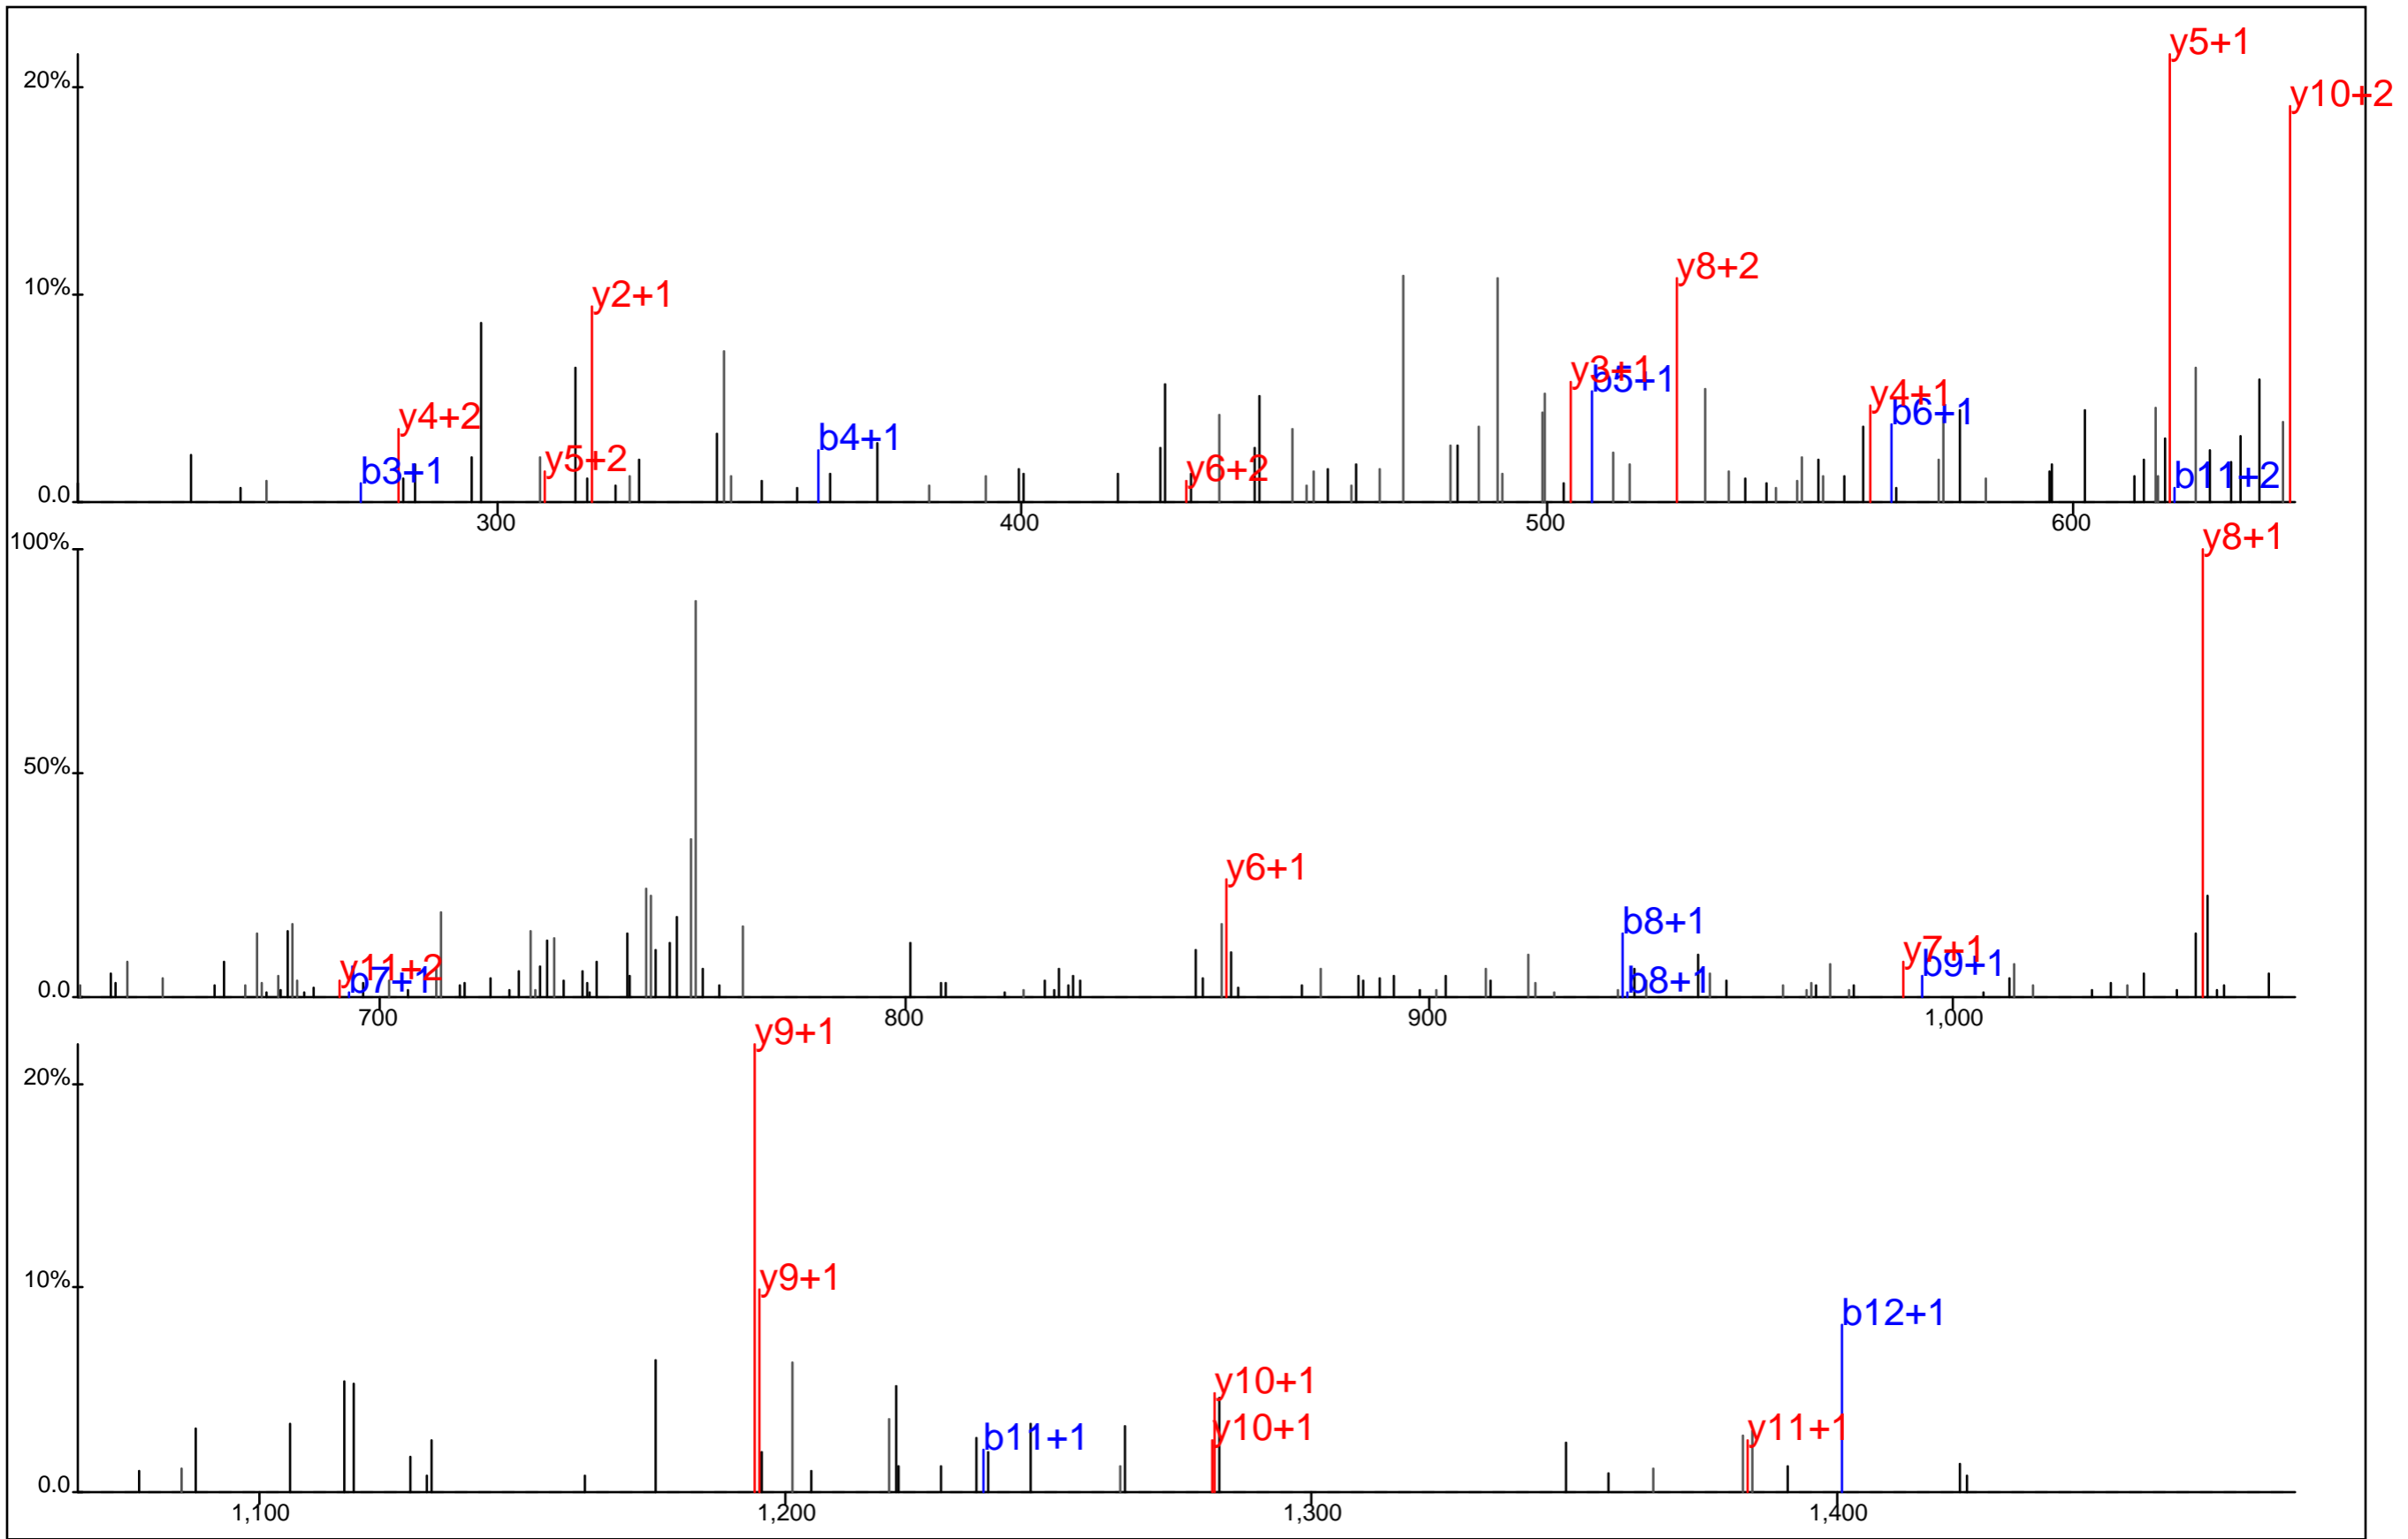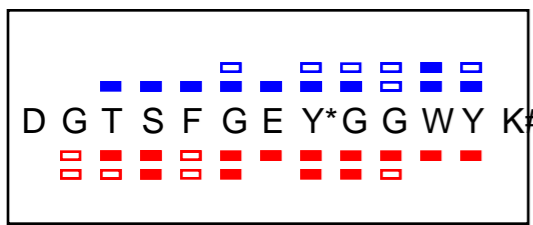

Protein Name: Kinesin 2  
 gi Accession: 585363  
 Precursor Mass: 777.8082+2  
 Delta Mass: 4.090 ppm  
 XCorr: 55.88



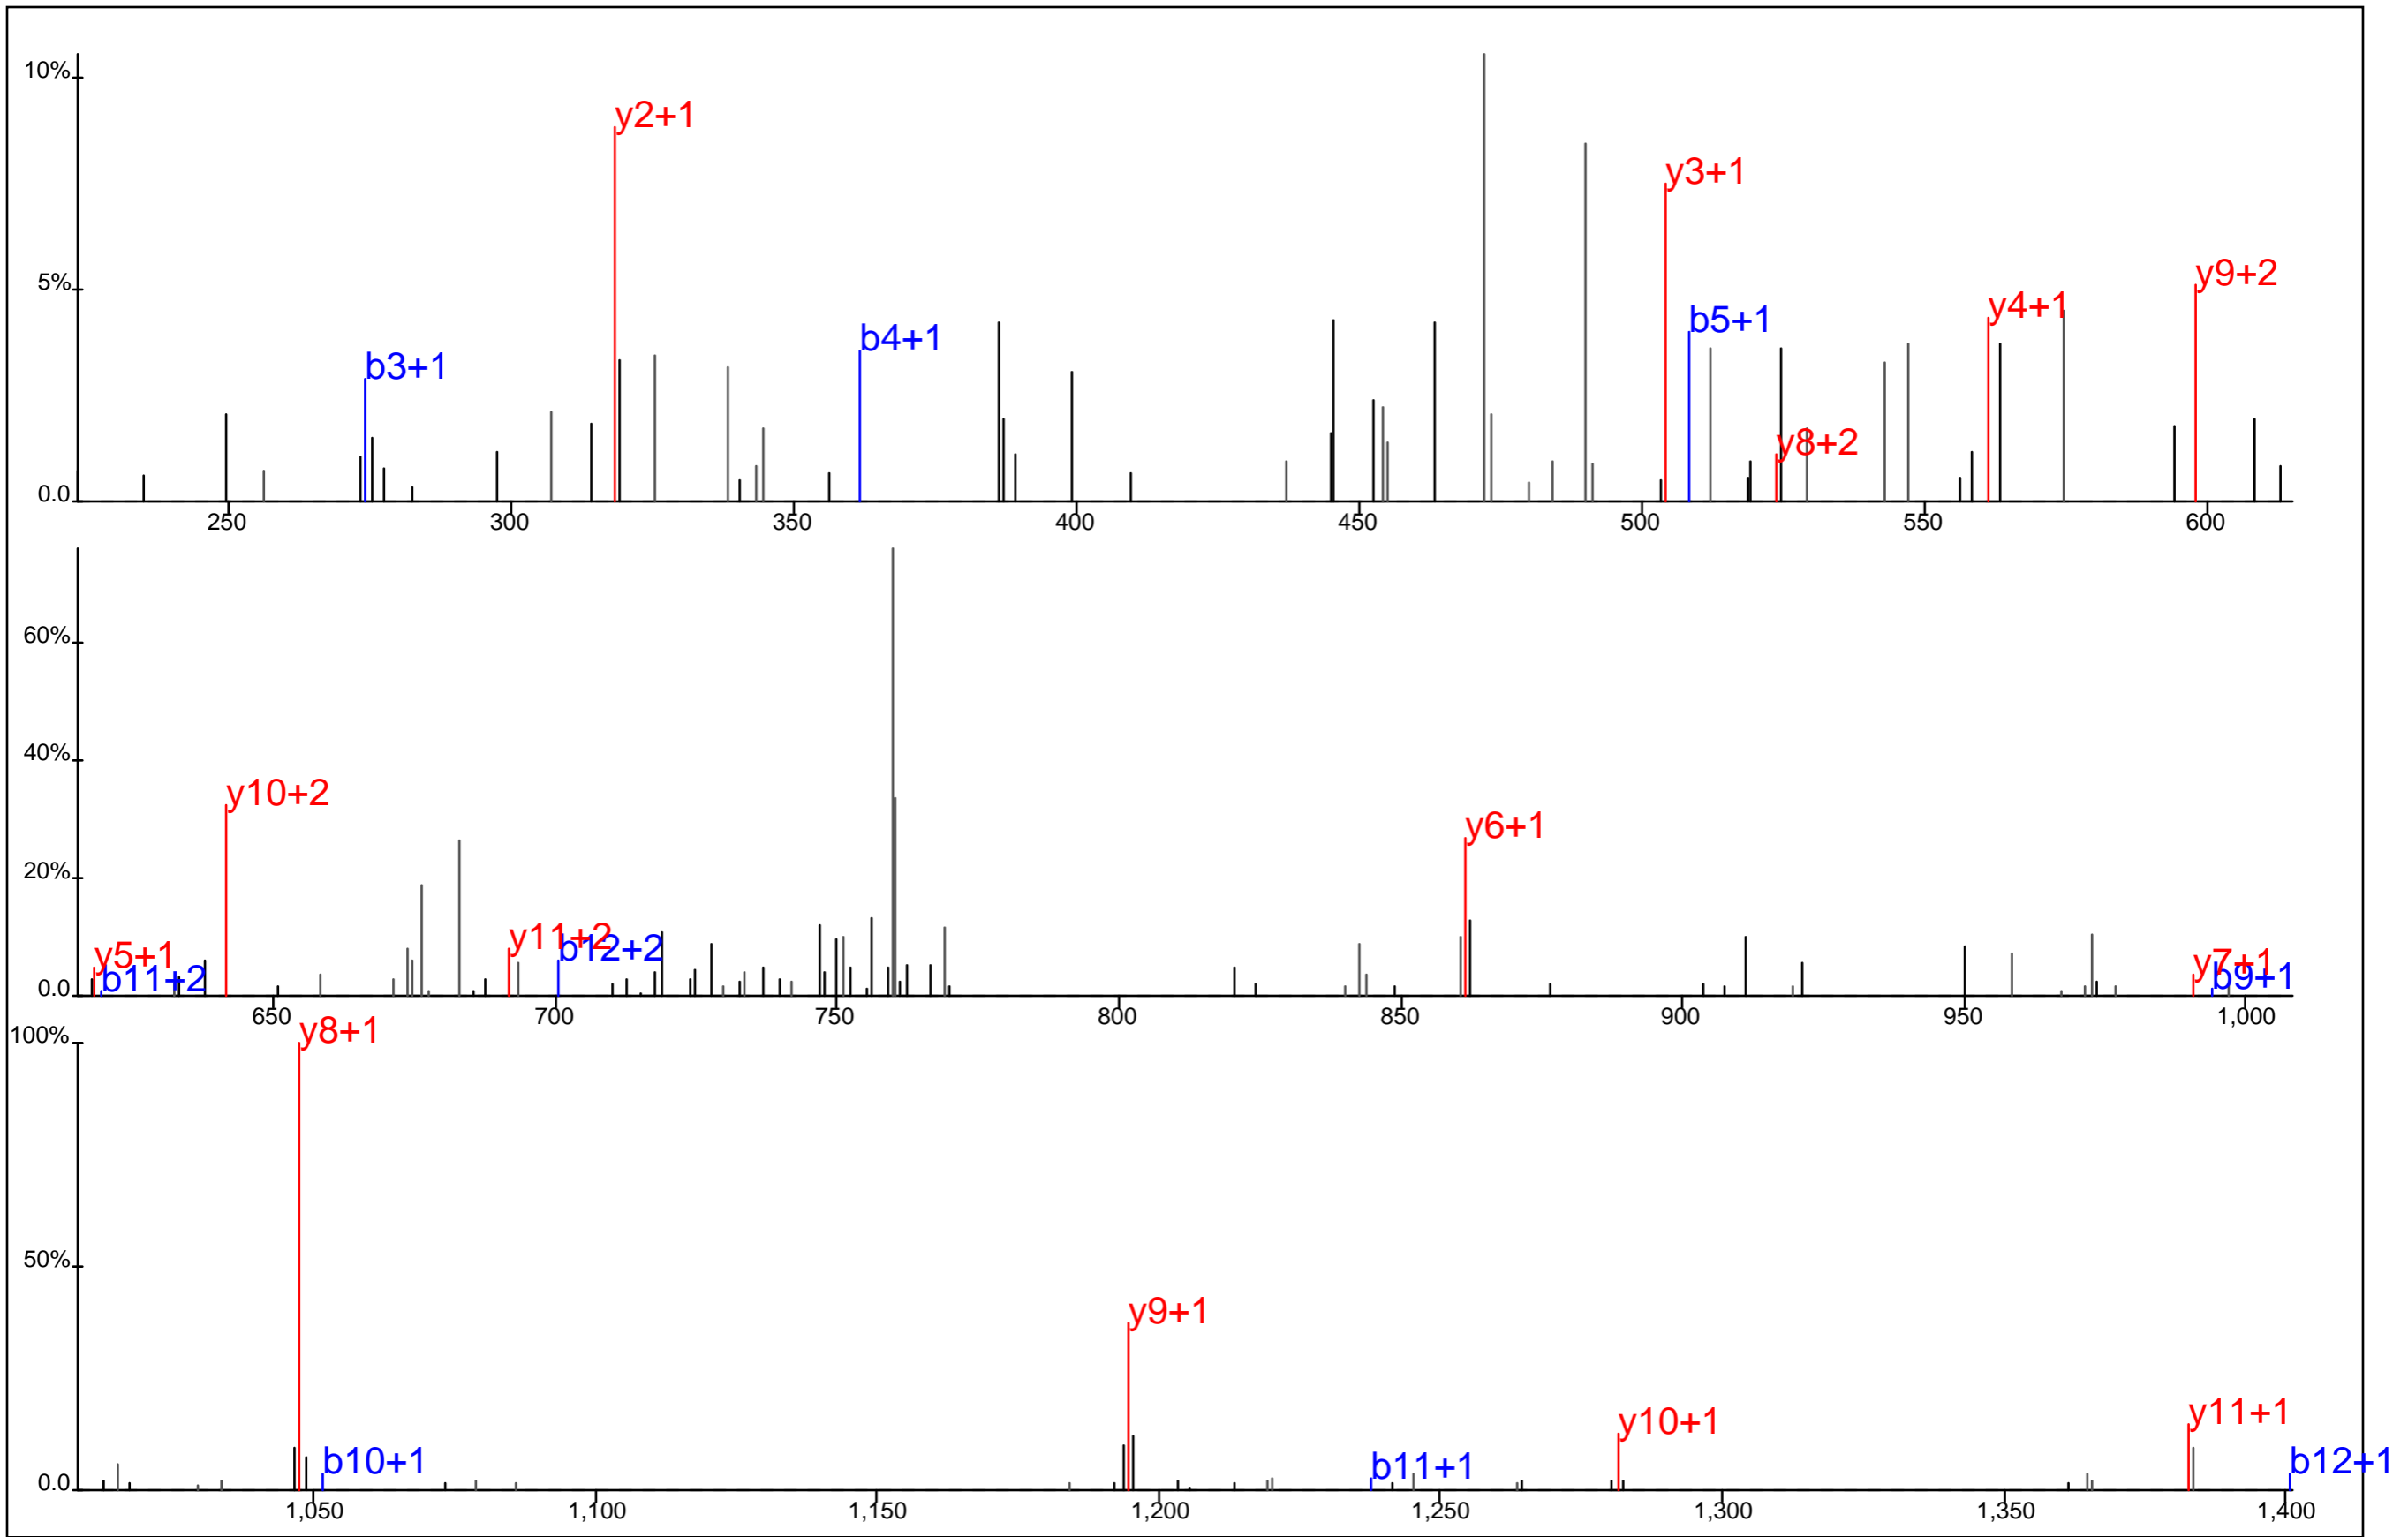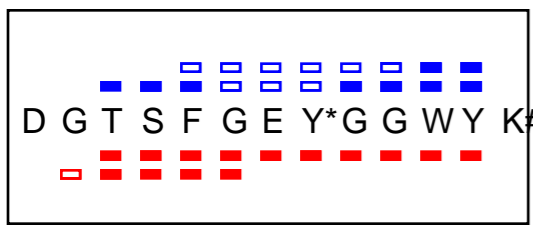

Protein Name: Kinesin 2  
 gi Accession: 585363  
 Precursor Mass: 777.8070+2  
 Delta Mass: 2.520 ppm  
 XCorr: 55.42

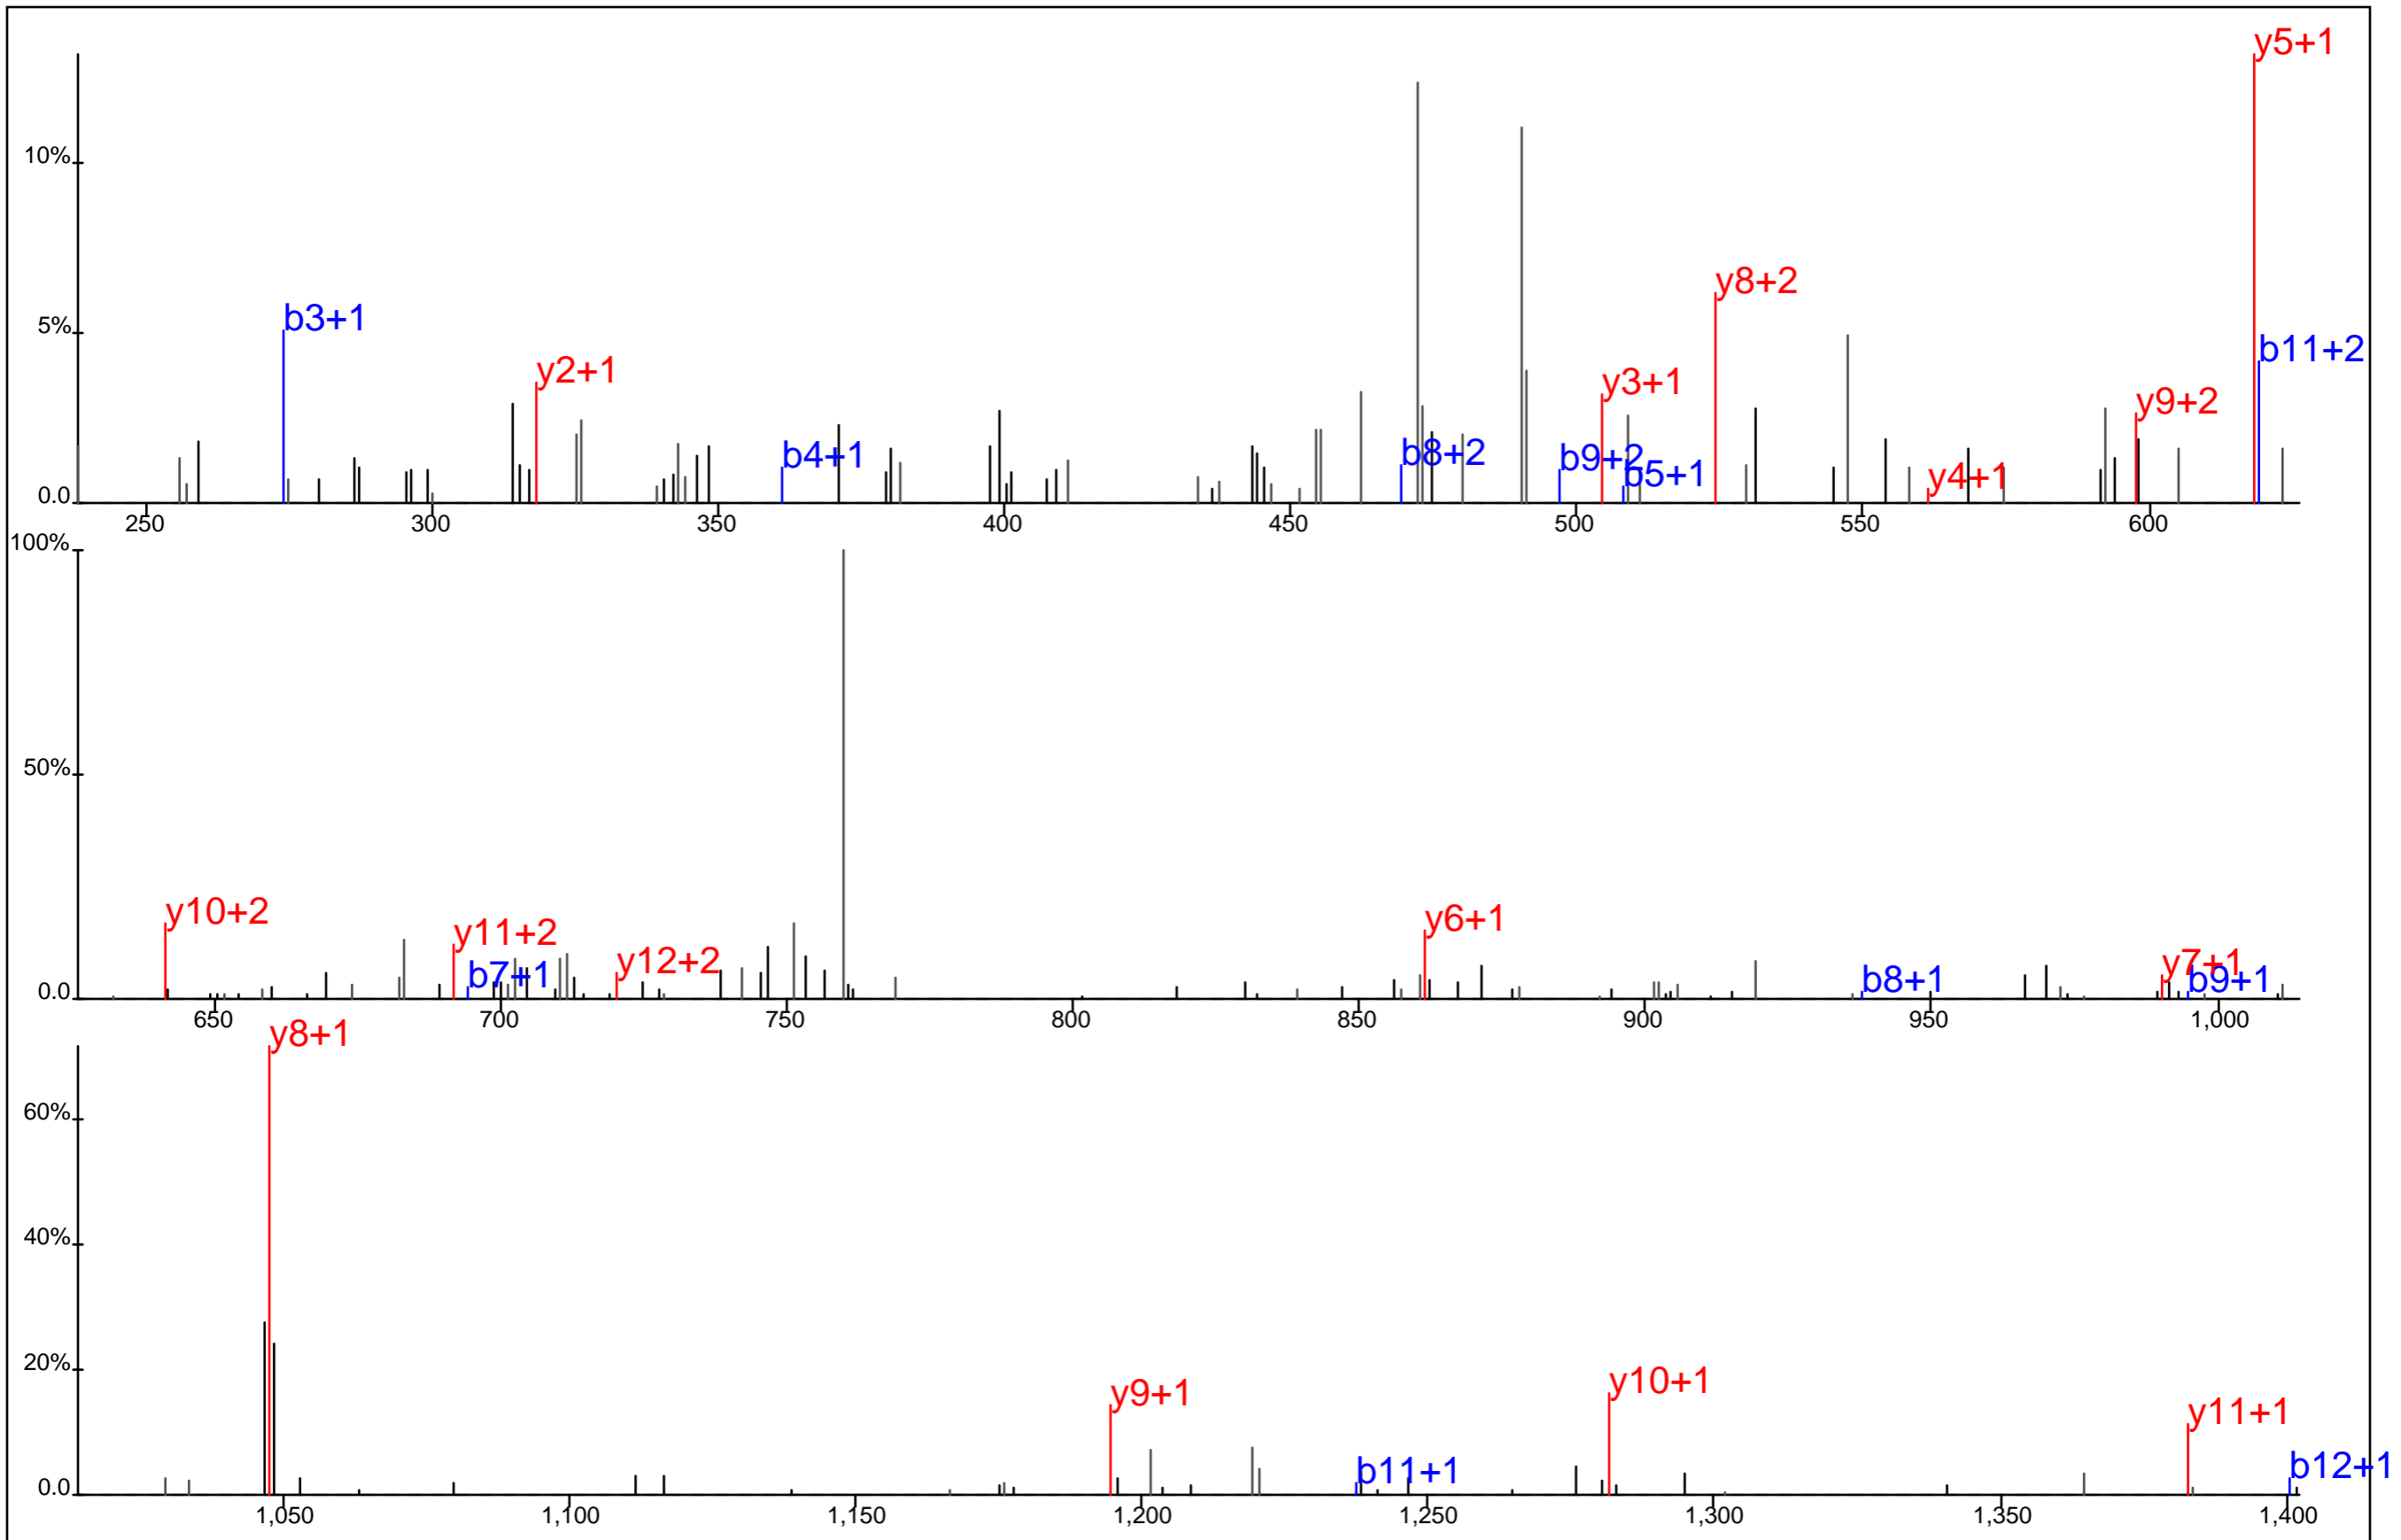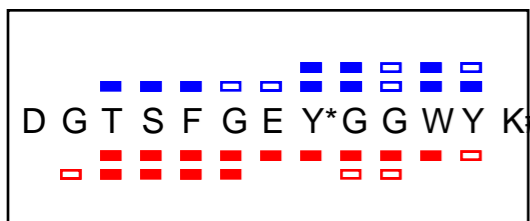

Protein Name: Kinesin 2  
 gi Accession: 585363  
 Precursor Mass: 777.8090+2  
 Delta Mass: 5.029 ppm  
 XCorr: 48.1

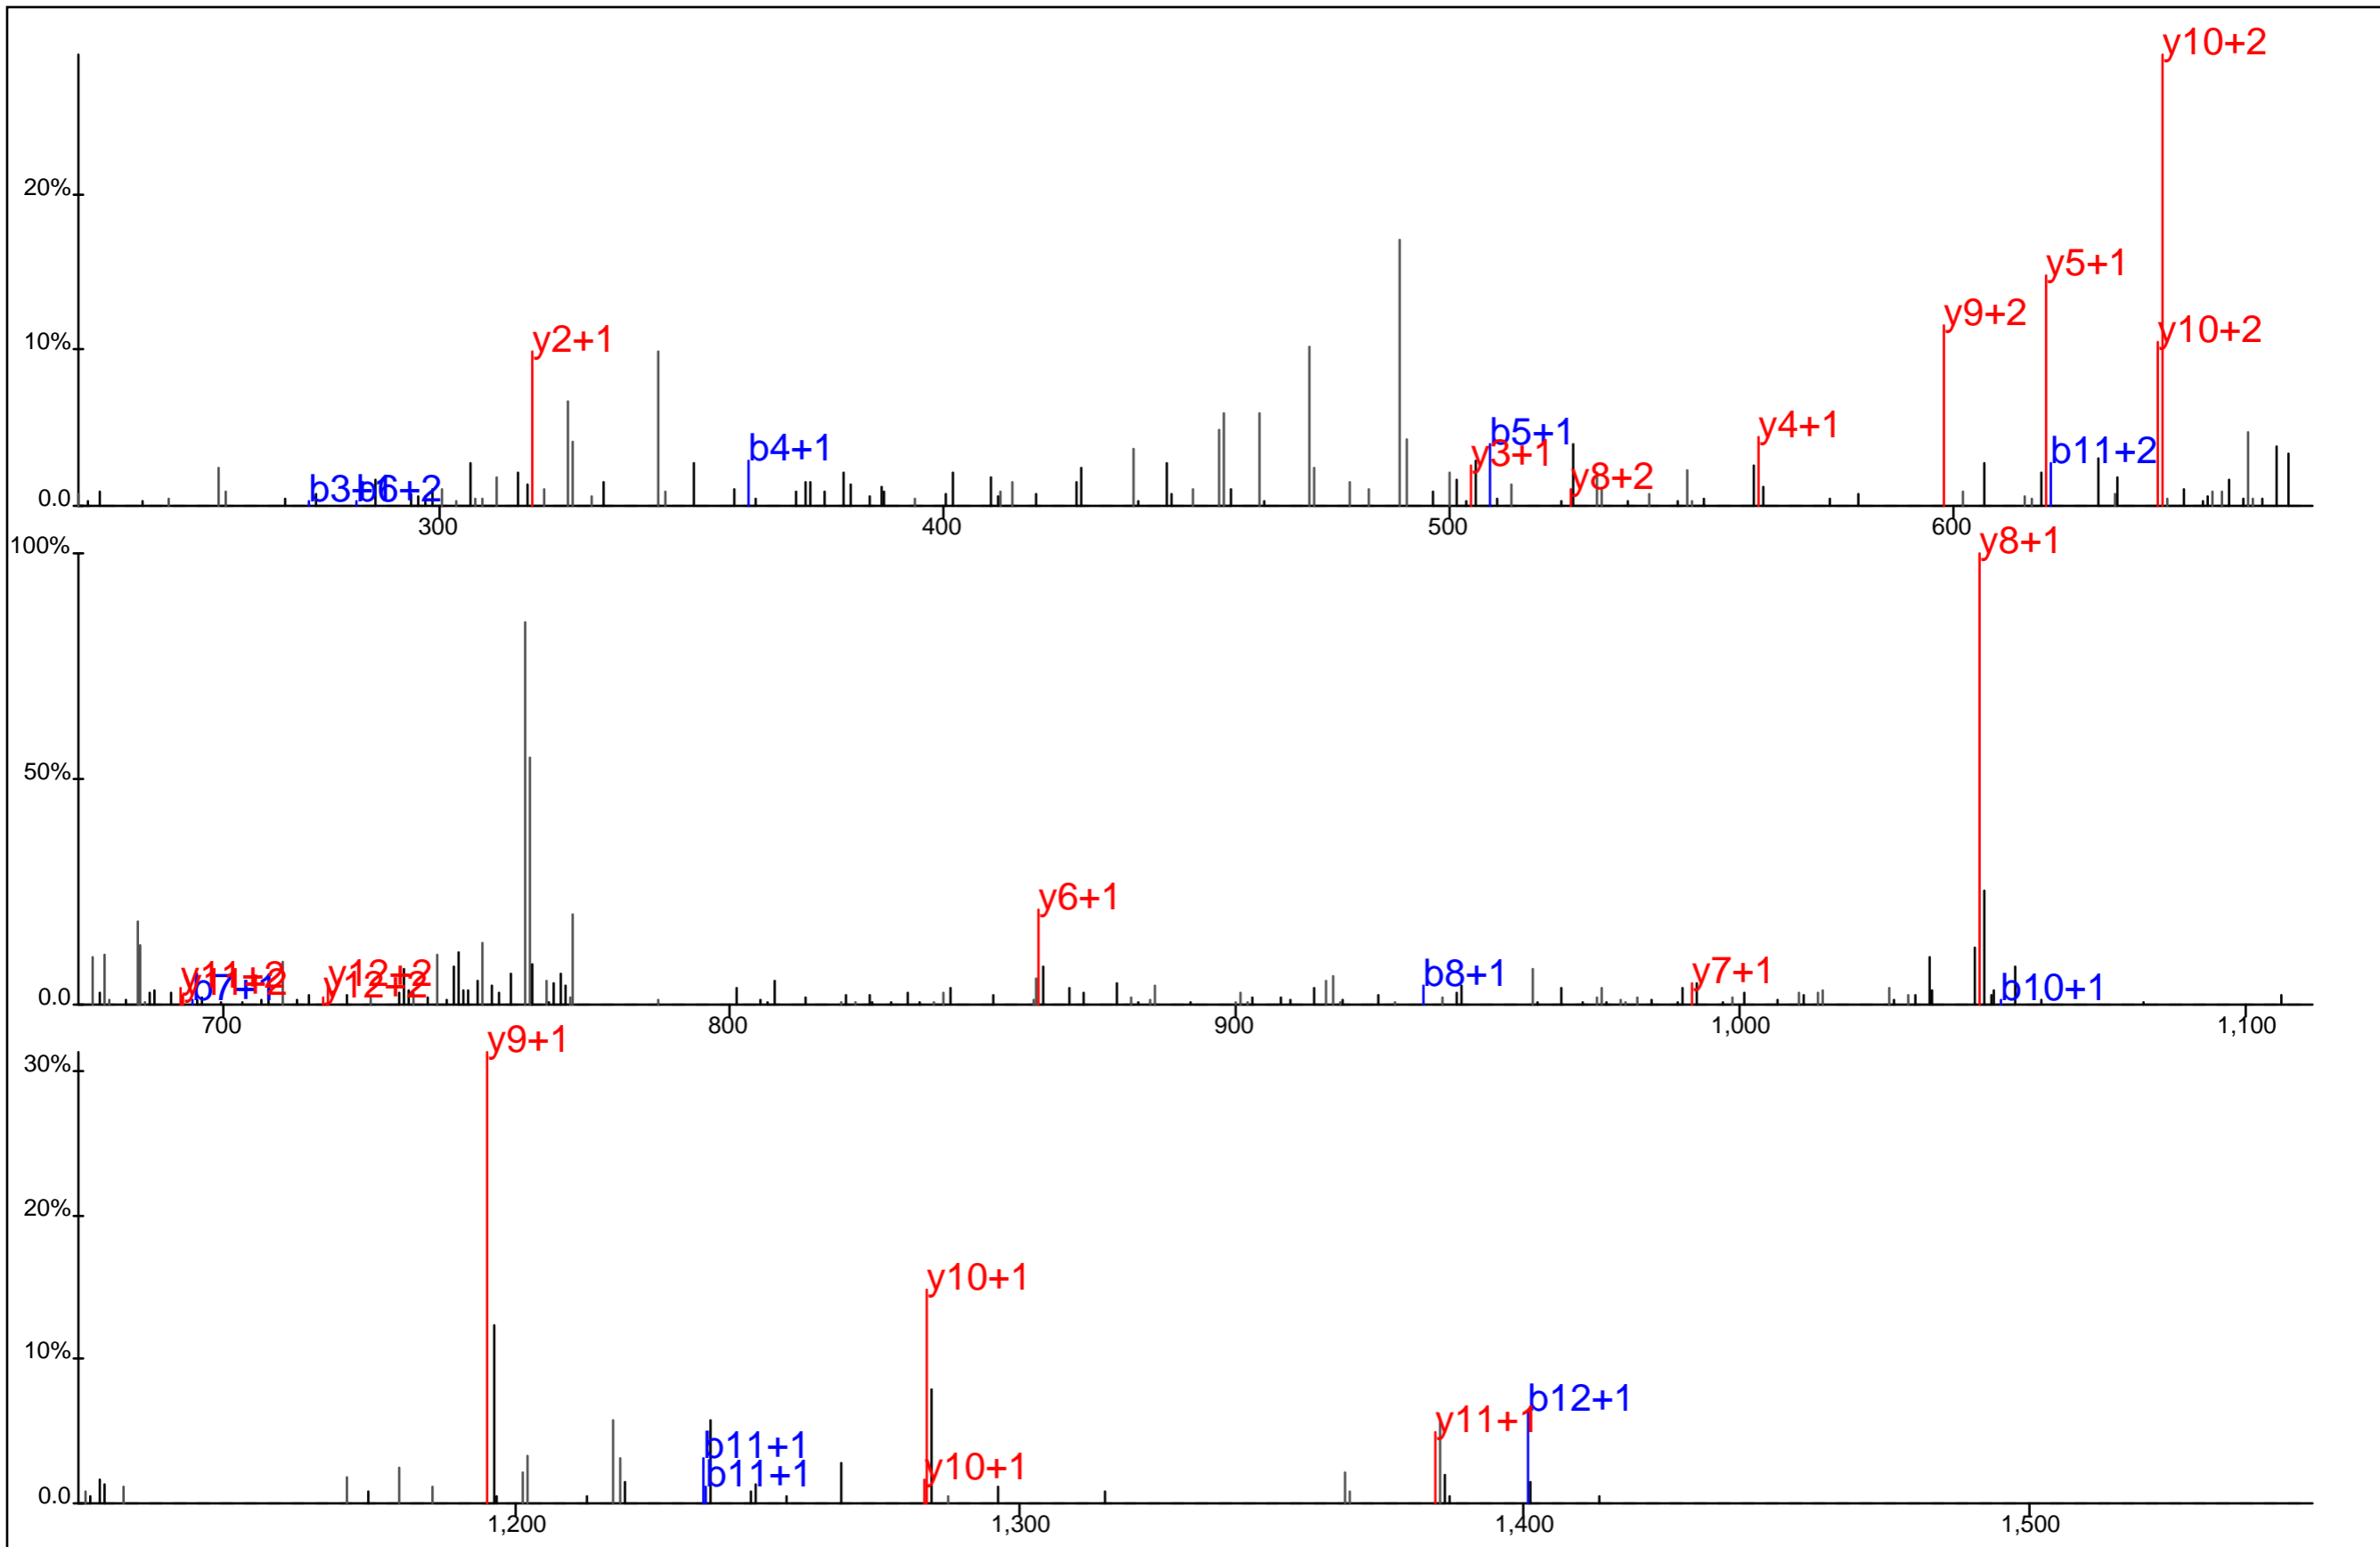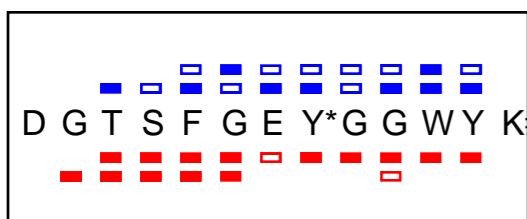

Protein Name: Kinesin 2  
 gi Accession: 585363  
 Precursor Mass: 777.8073+2  
 Delta Mass: 2.835 ppm  
 XCorr: 60.55

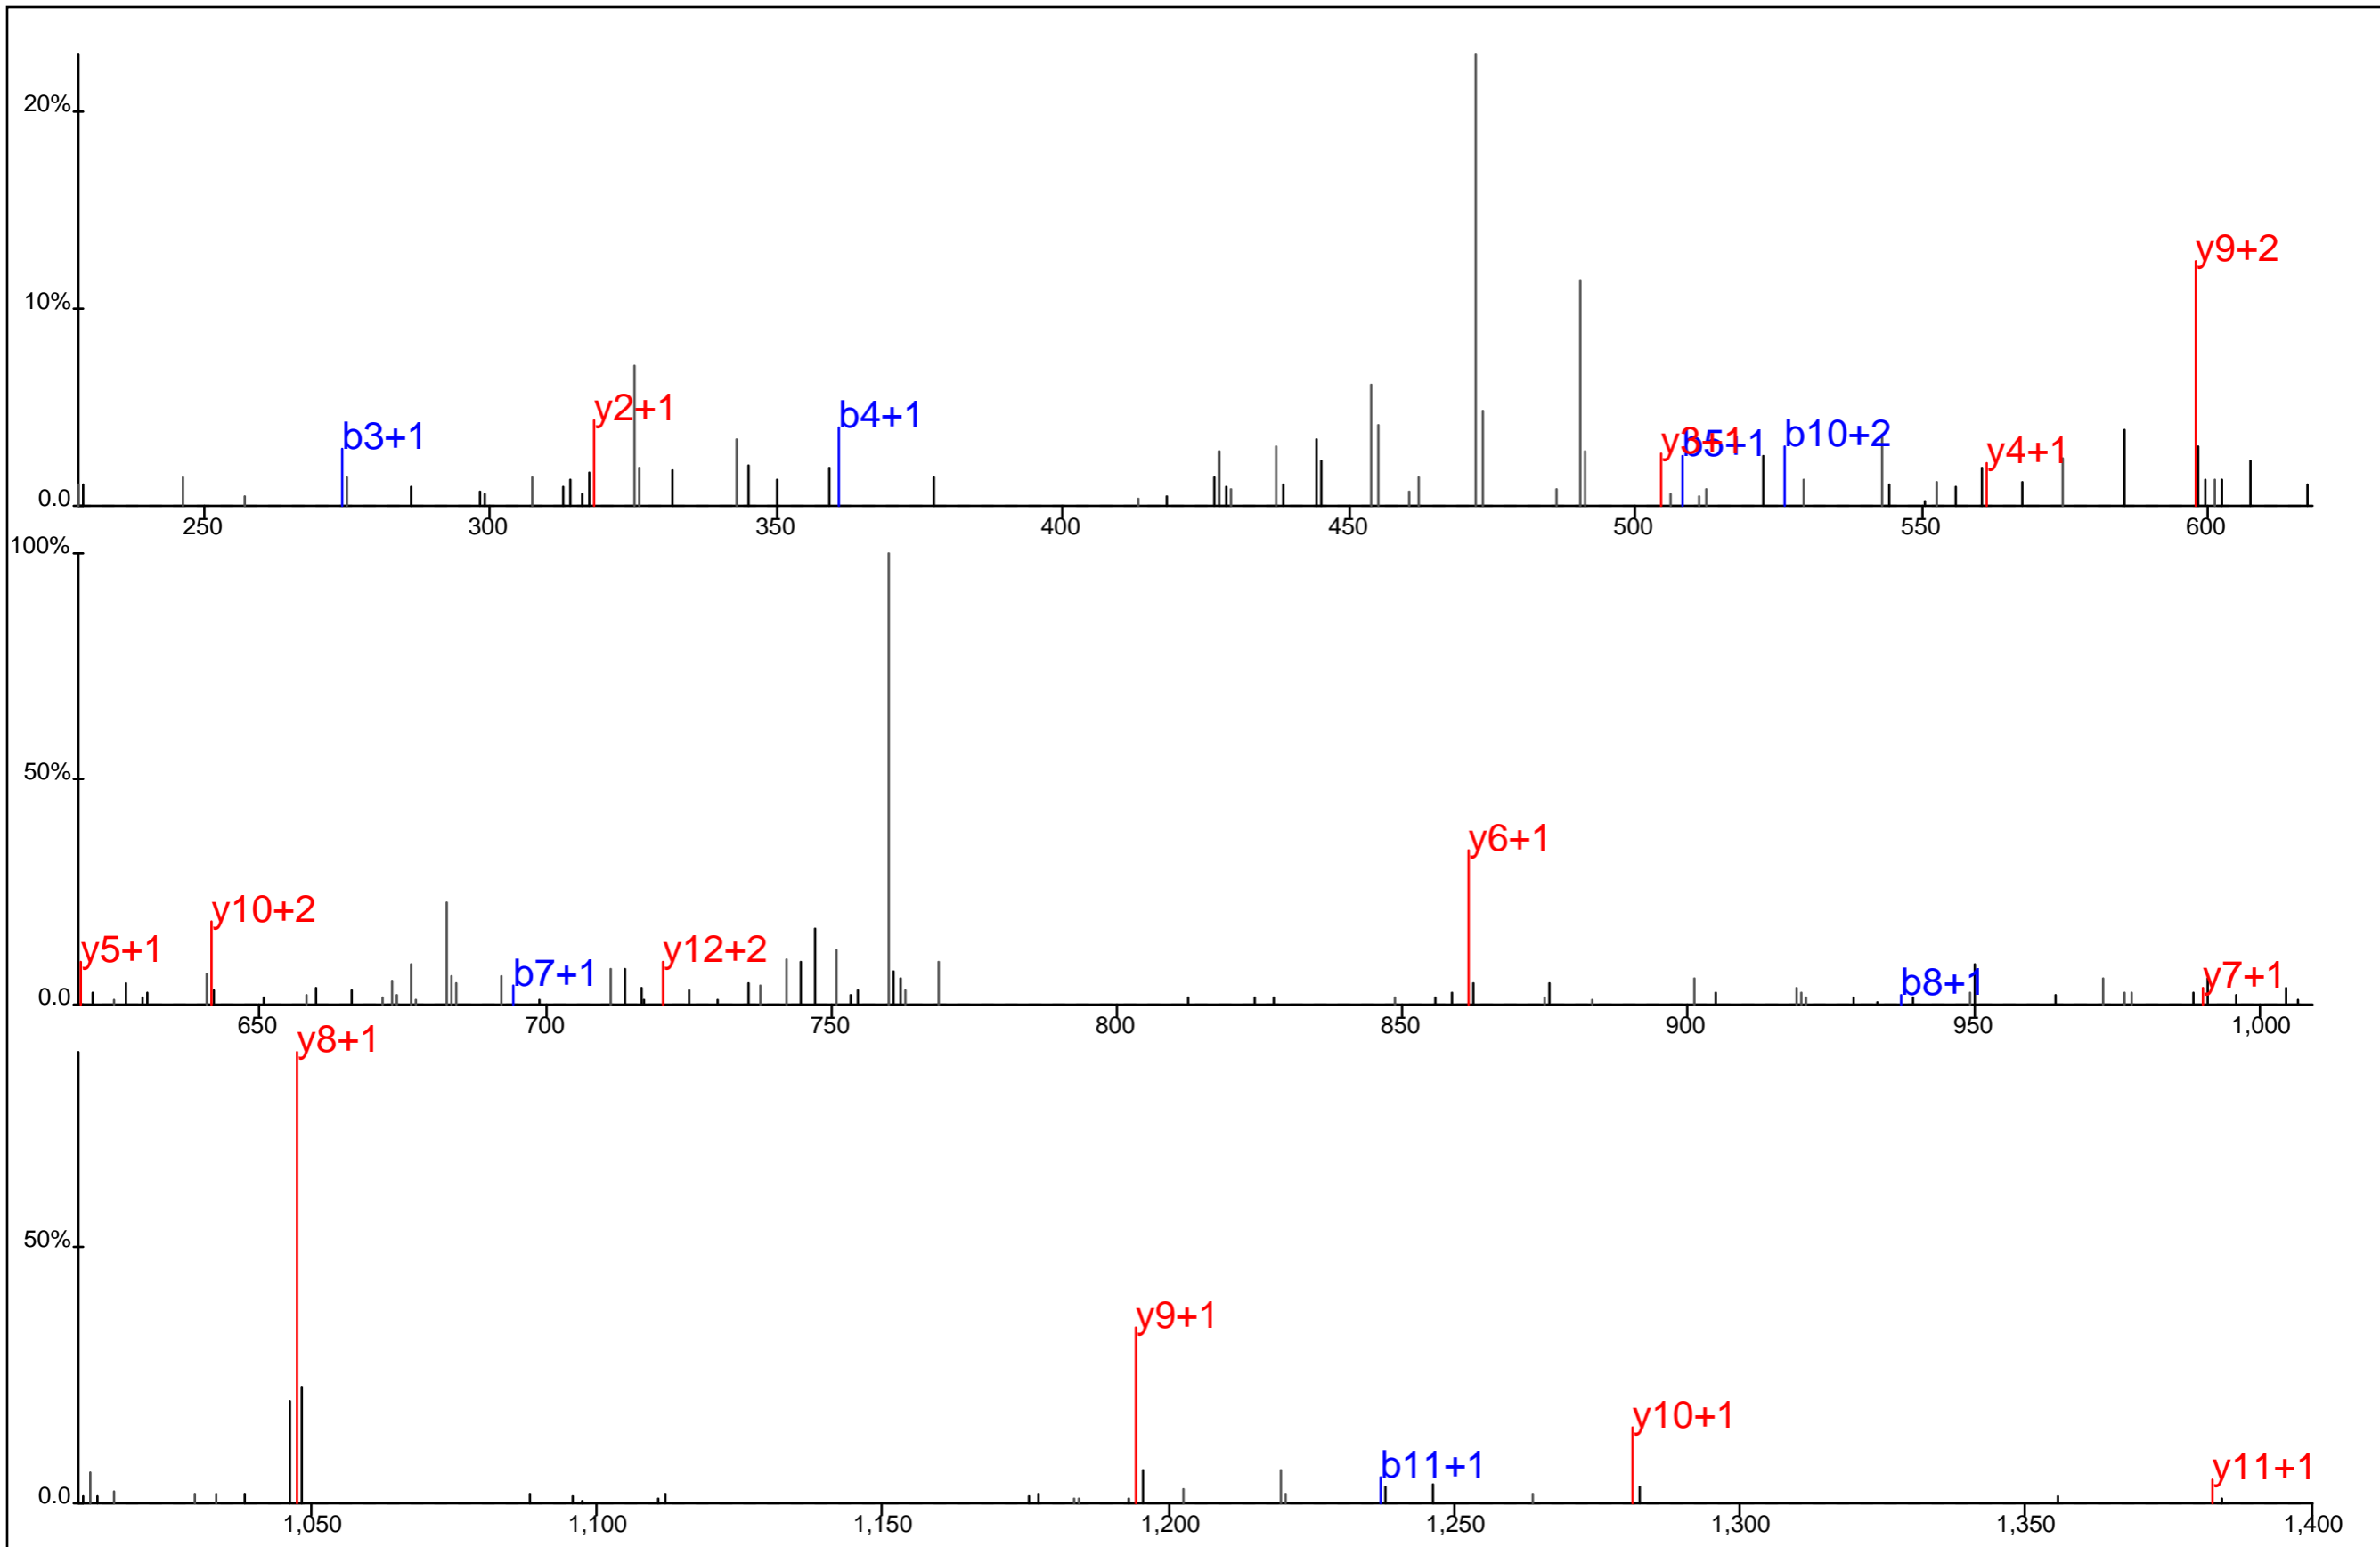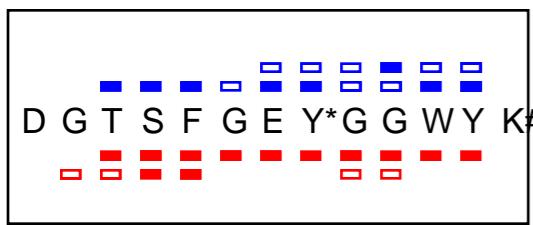

Protein Name: Kinesin 2  
 gi Accession: 585363  
 Precursor Mass: 777.8087+2  
 Delta Mass: 4.720 ppm  
 XCorr: 46.69

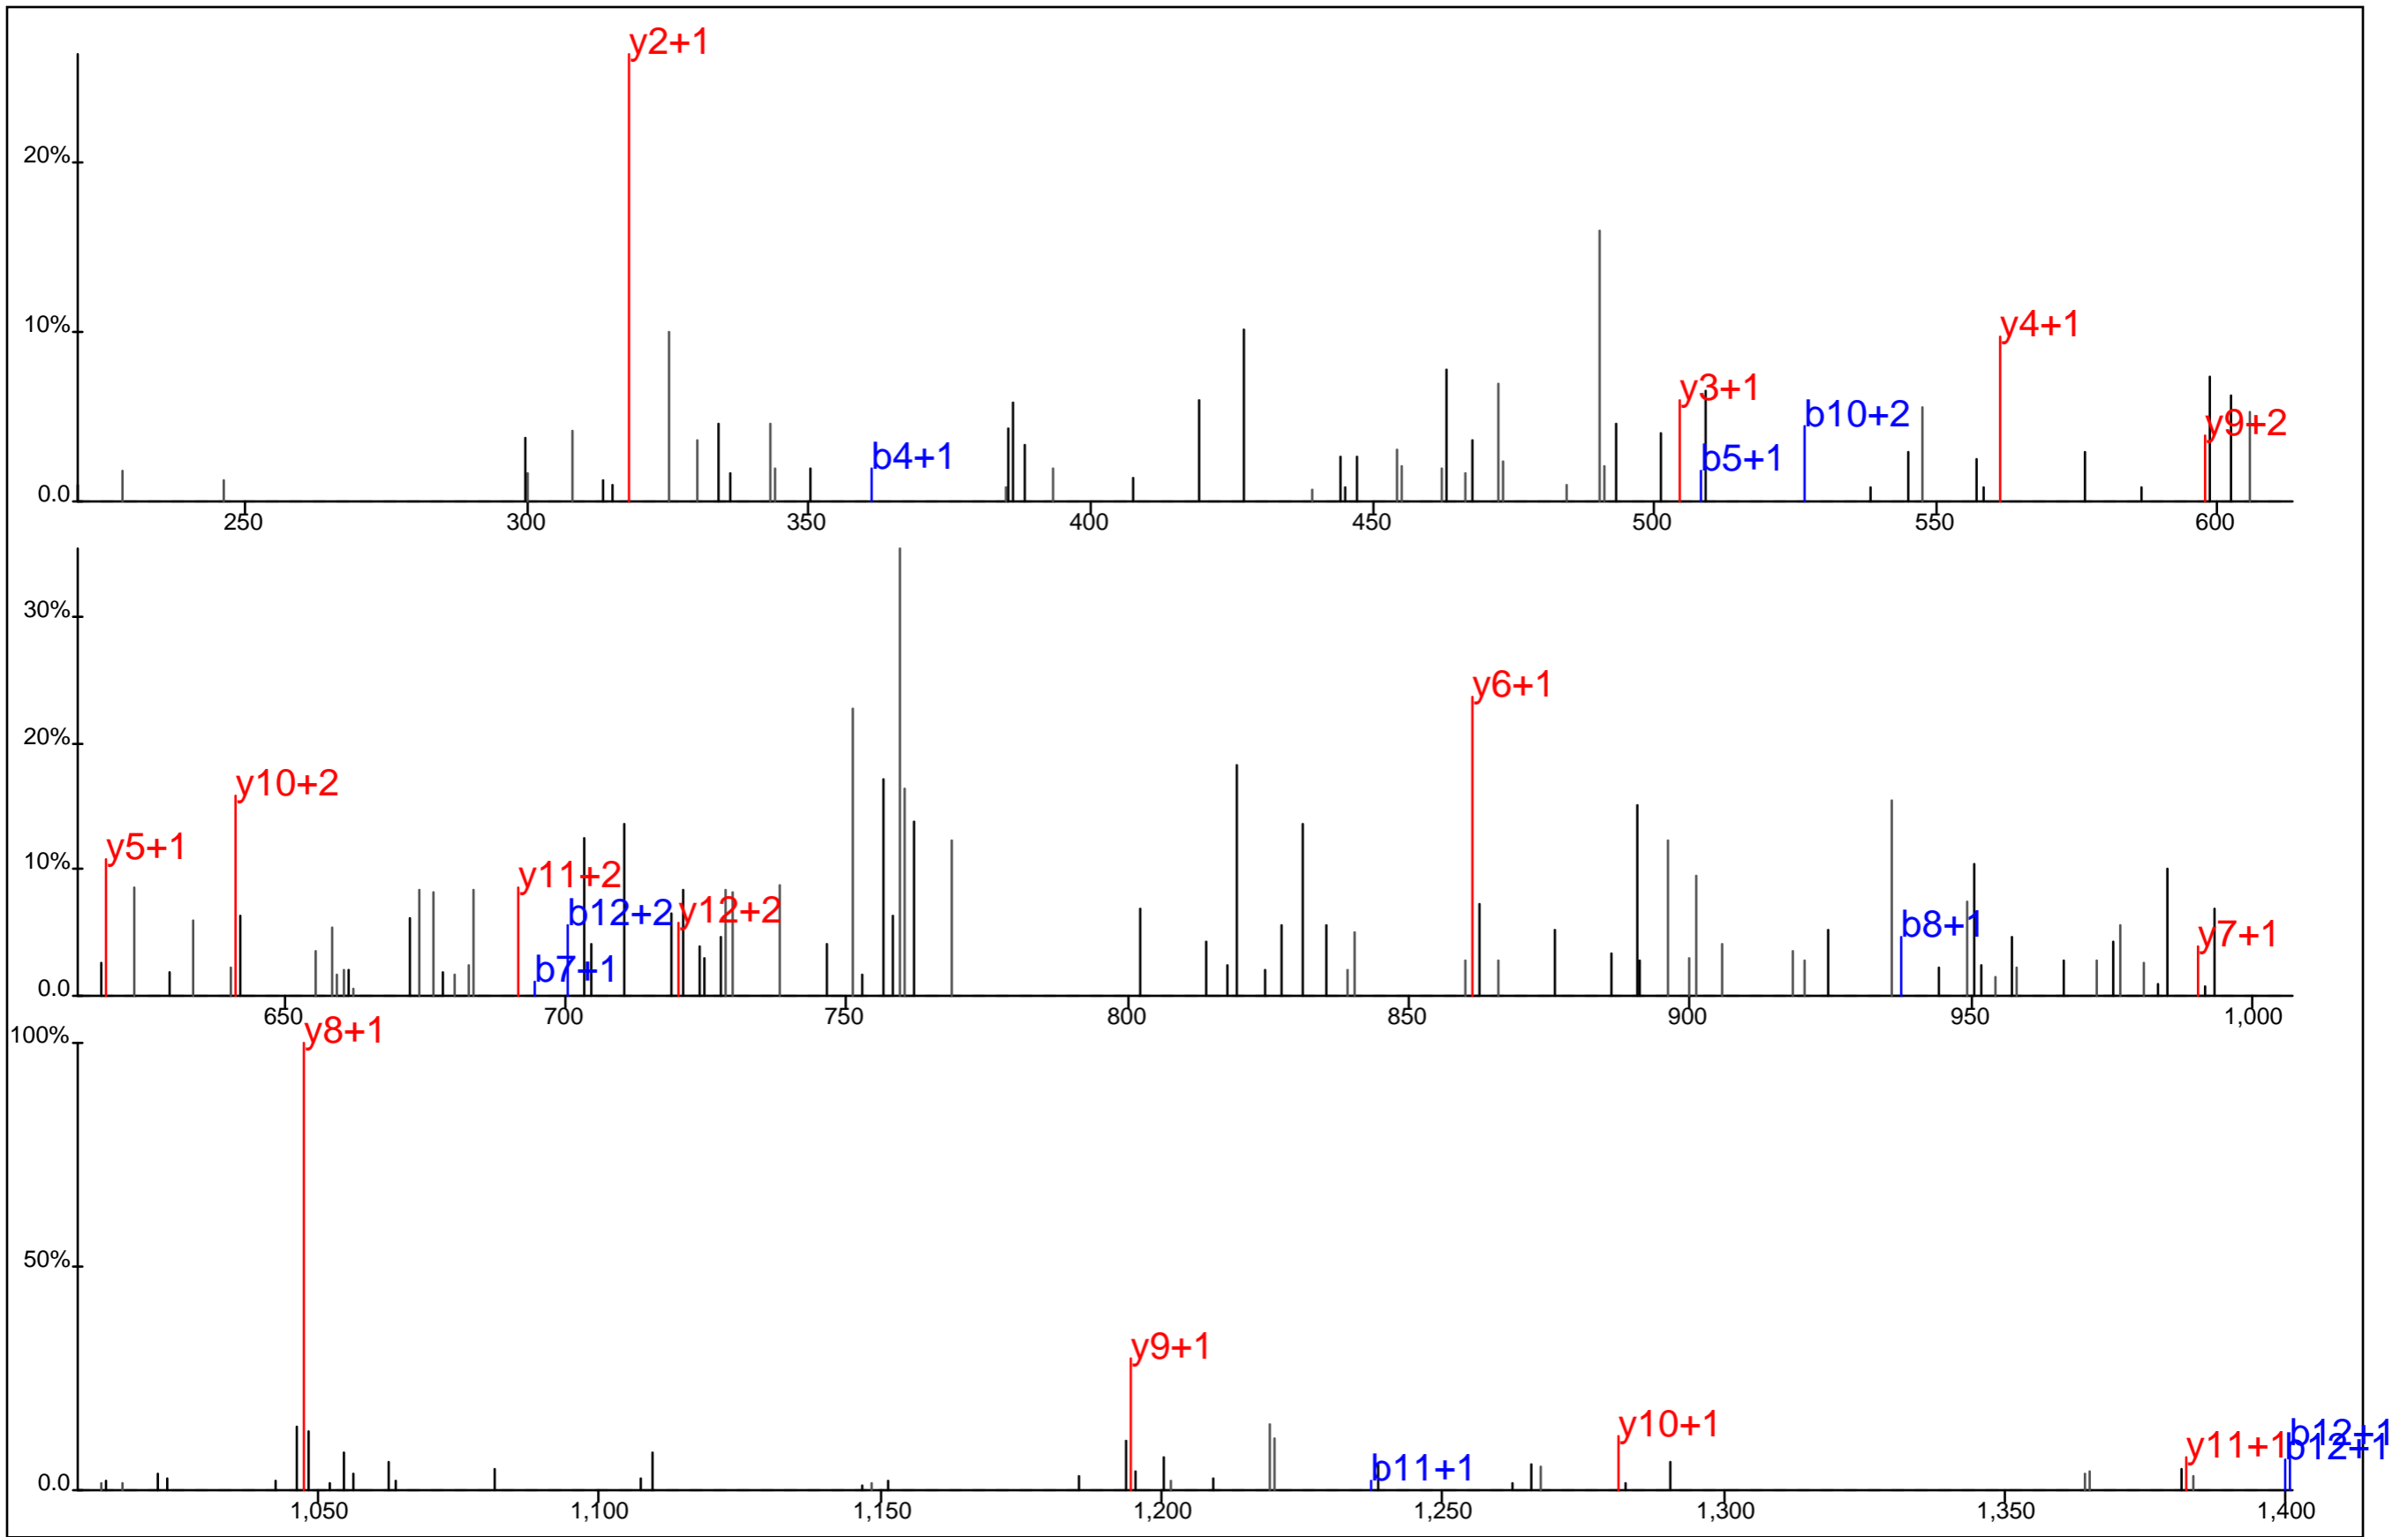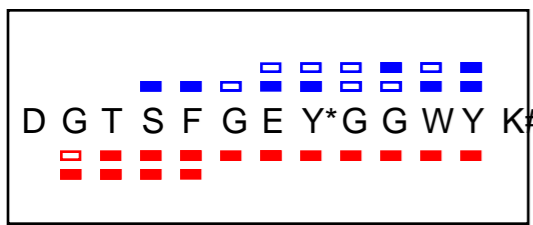

Protein Name: Kinesin 2  
 gi Accession: 585363  
 Precursor Mass: 777.8084+2  
 Delta Mass: 4.321 ppm  
 XCorr: 36.71

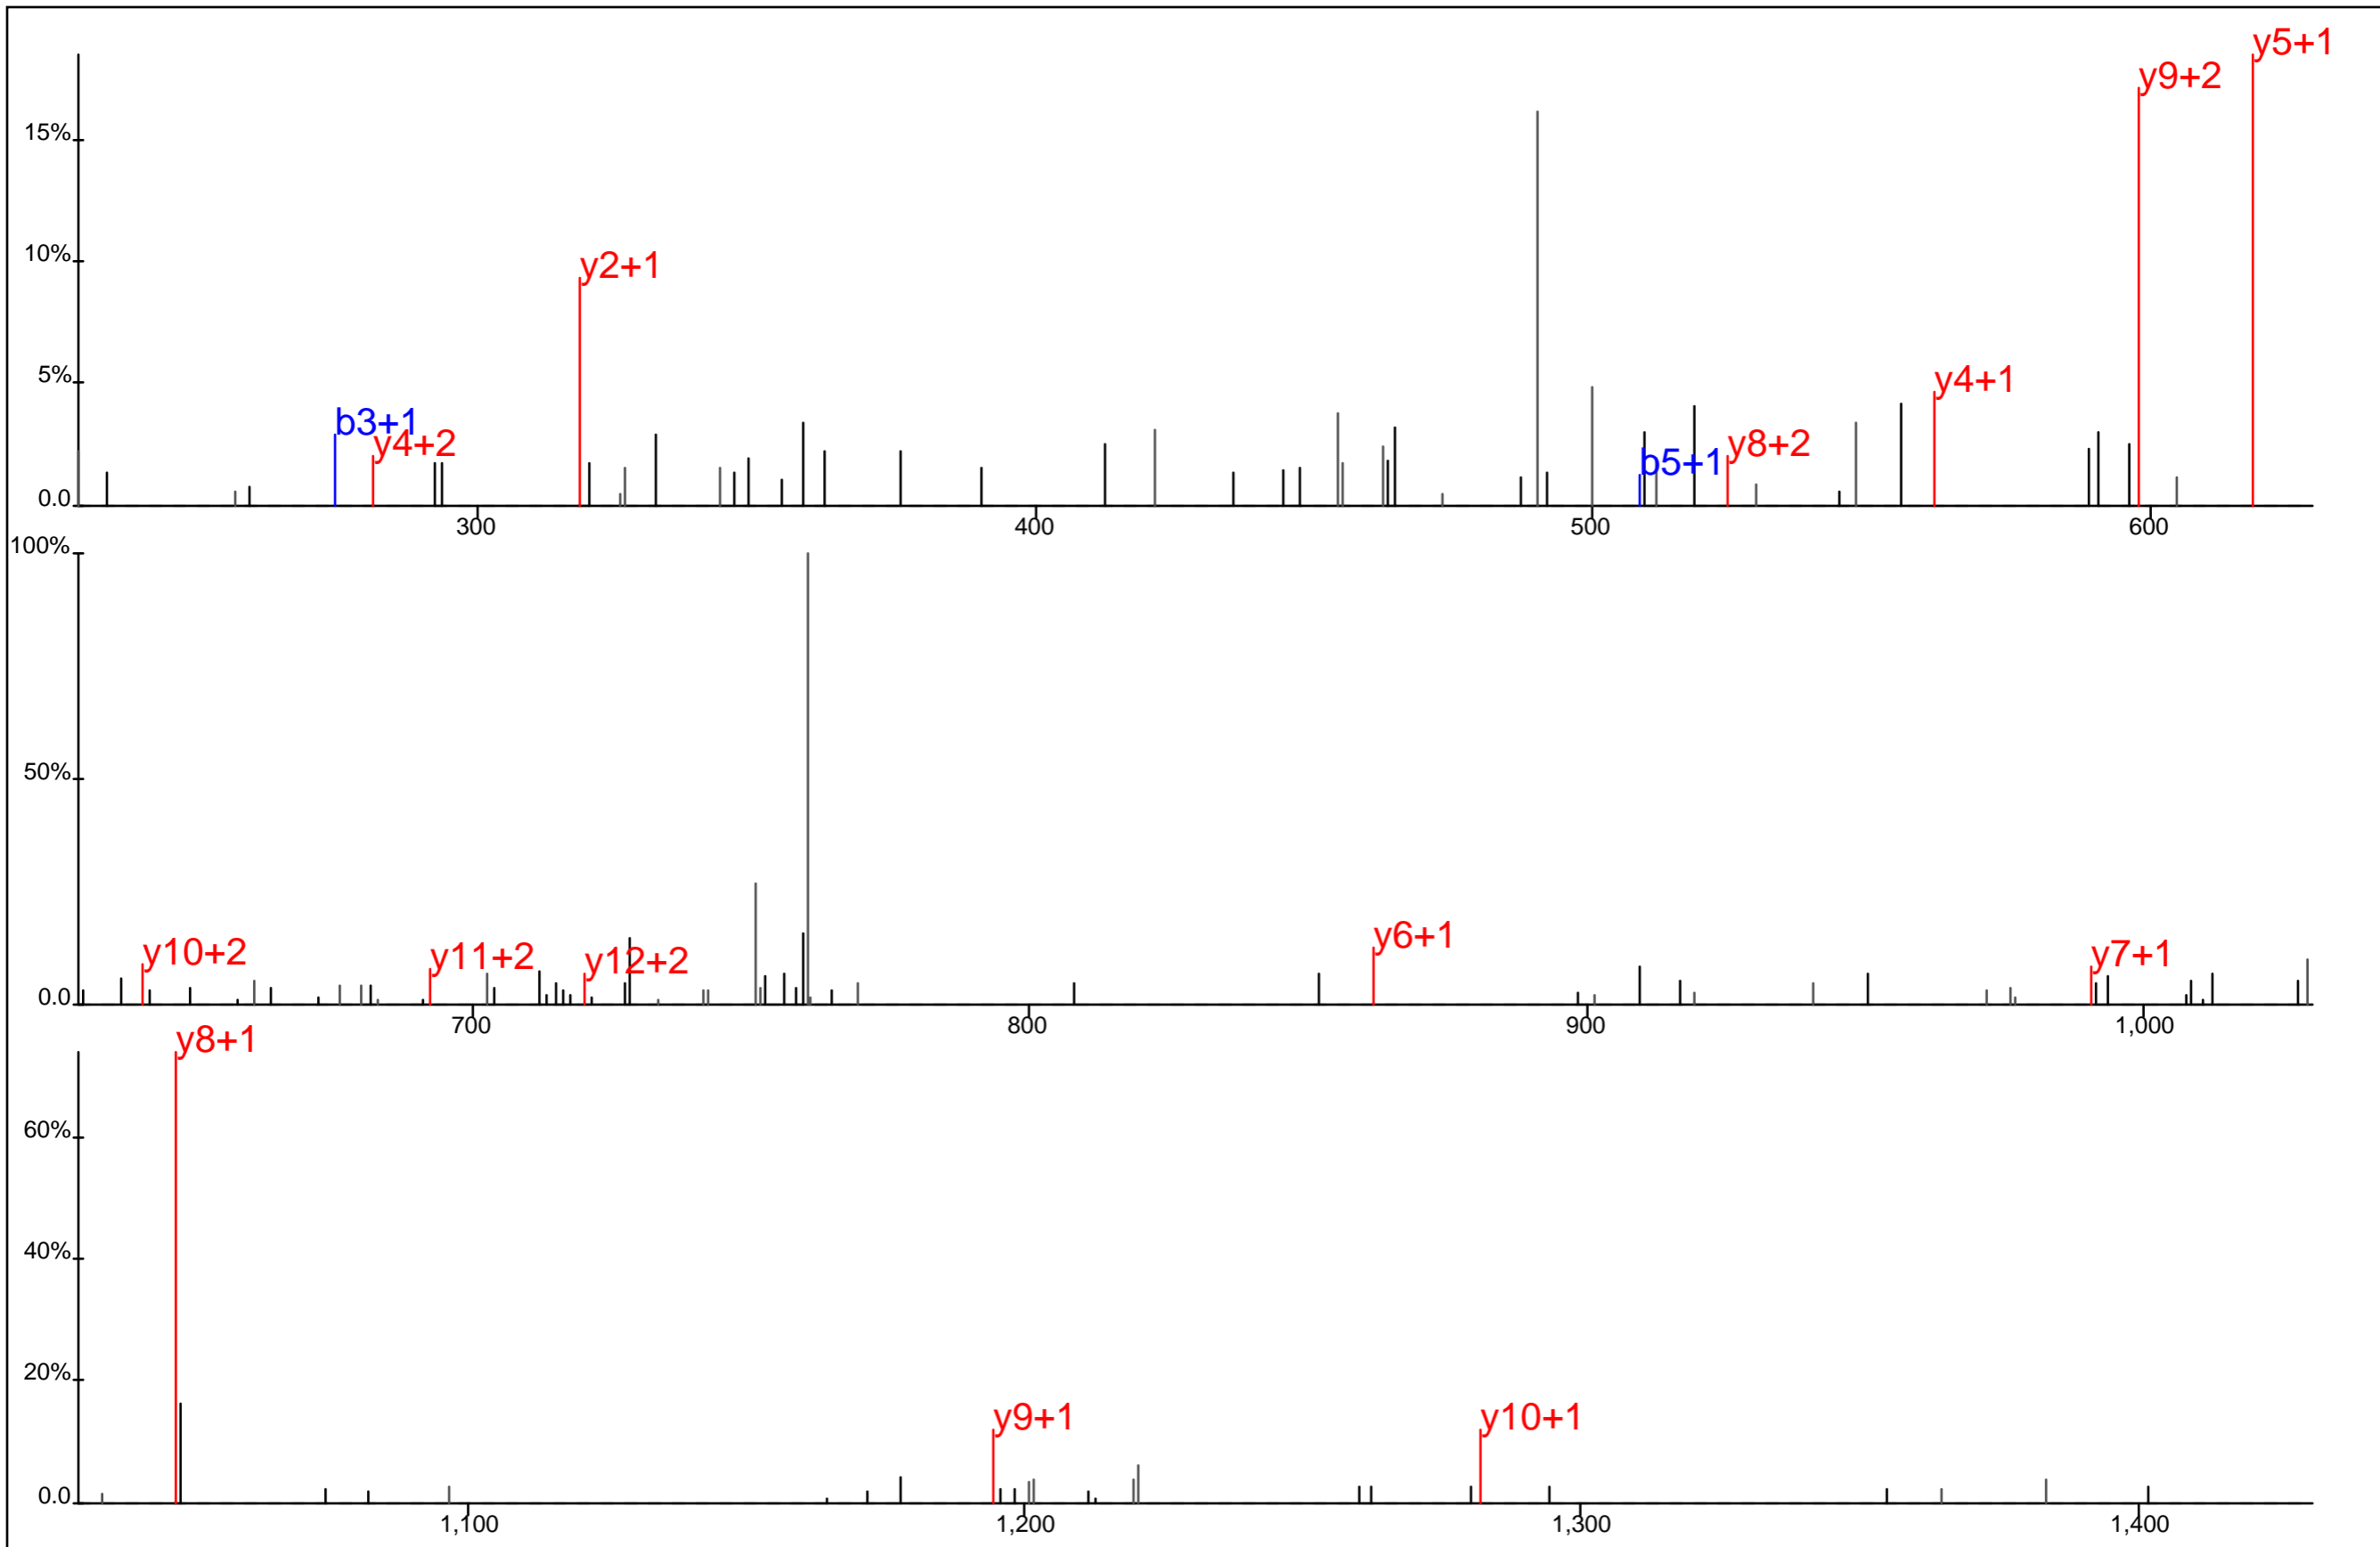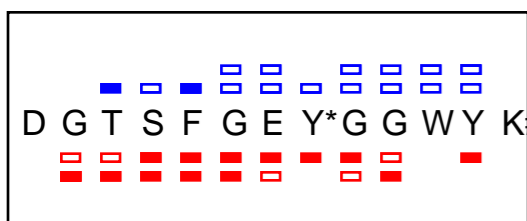

Protein Name: Kinesin 2  
 gi Accession: 585363  
 Precursor Mass: 777.8083+2  
 Delta Mass: 4.167 ppm  
 XCorr: 42.92

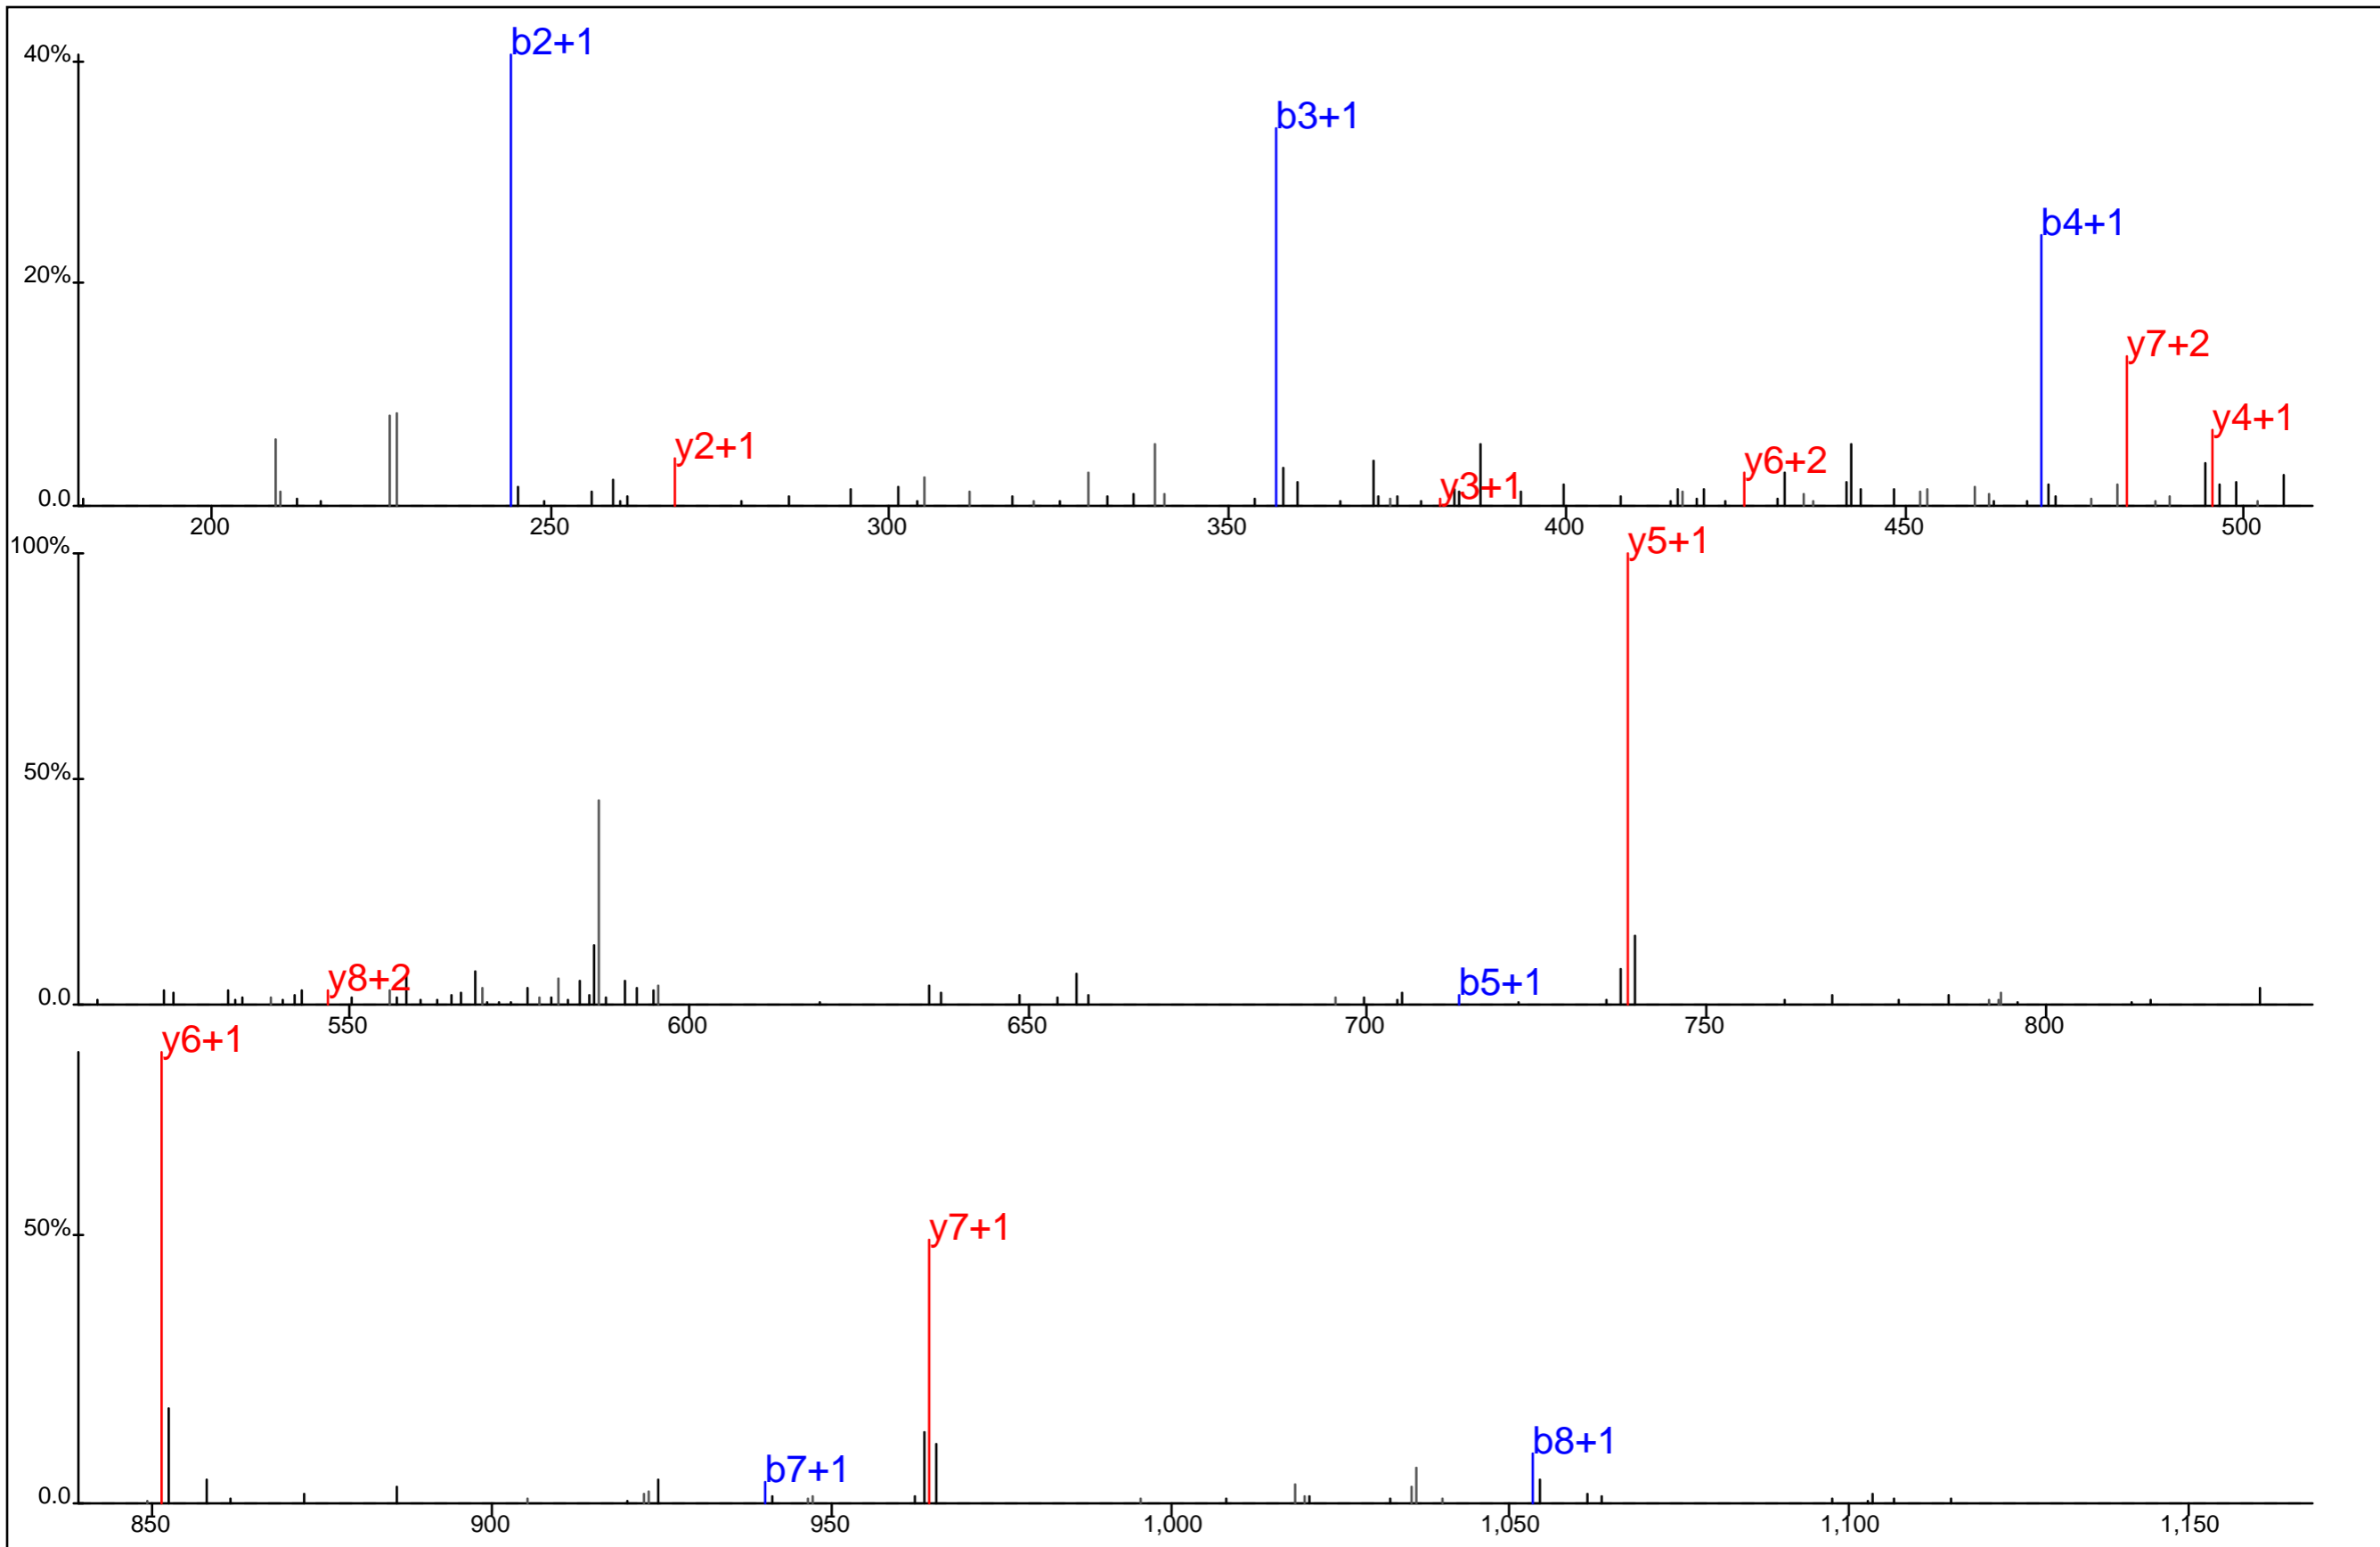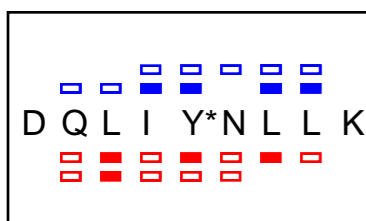

Protein Name: Lactate dehydrogenase A  
 gi Accession: 13786849  
 Precursor Mass: 604.3151+2  
 Delta Mass: 1.325 ppm  
 XCorr: 2.4272

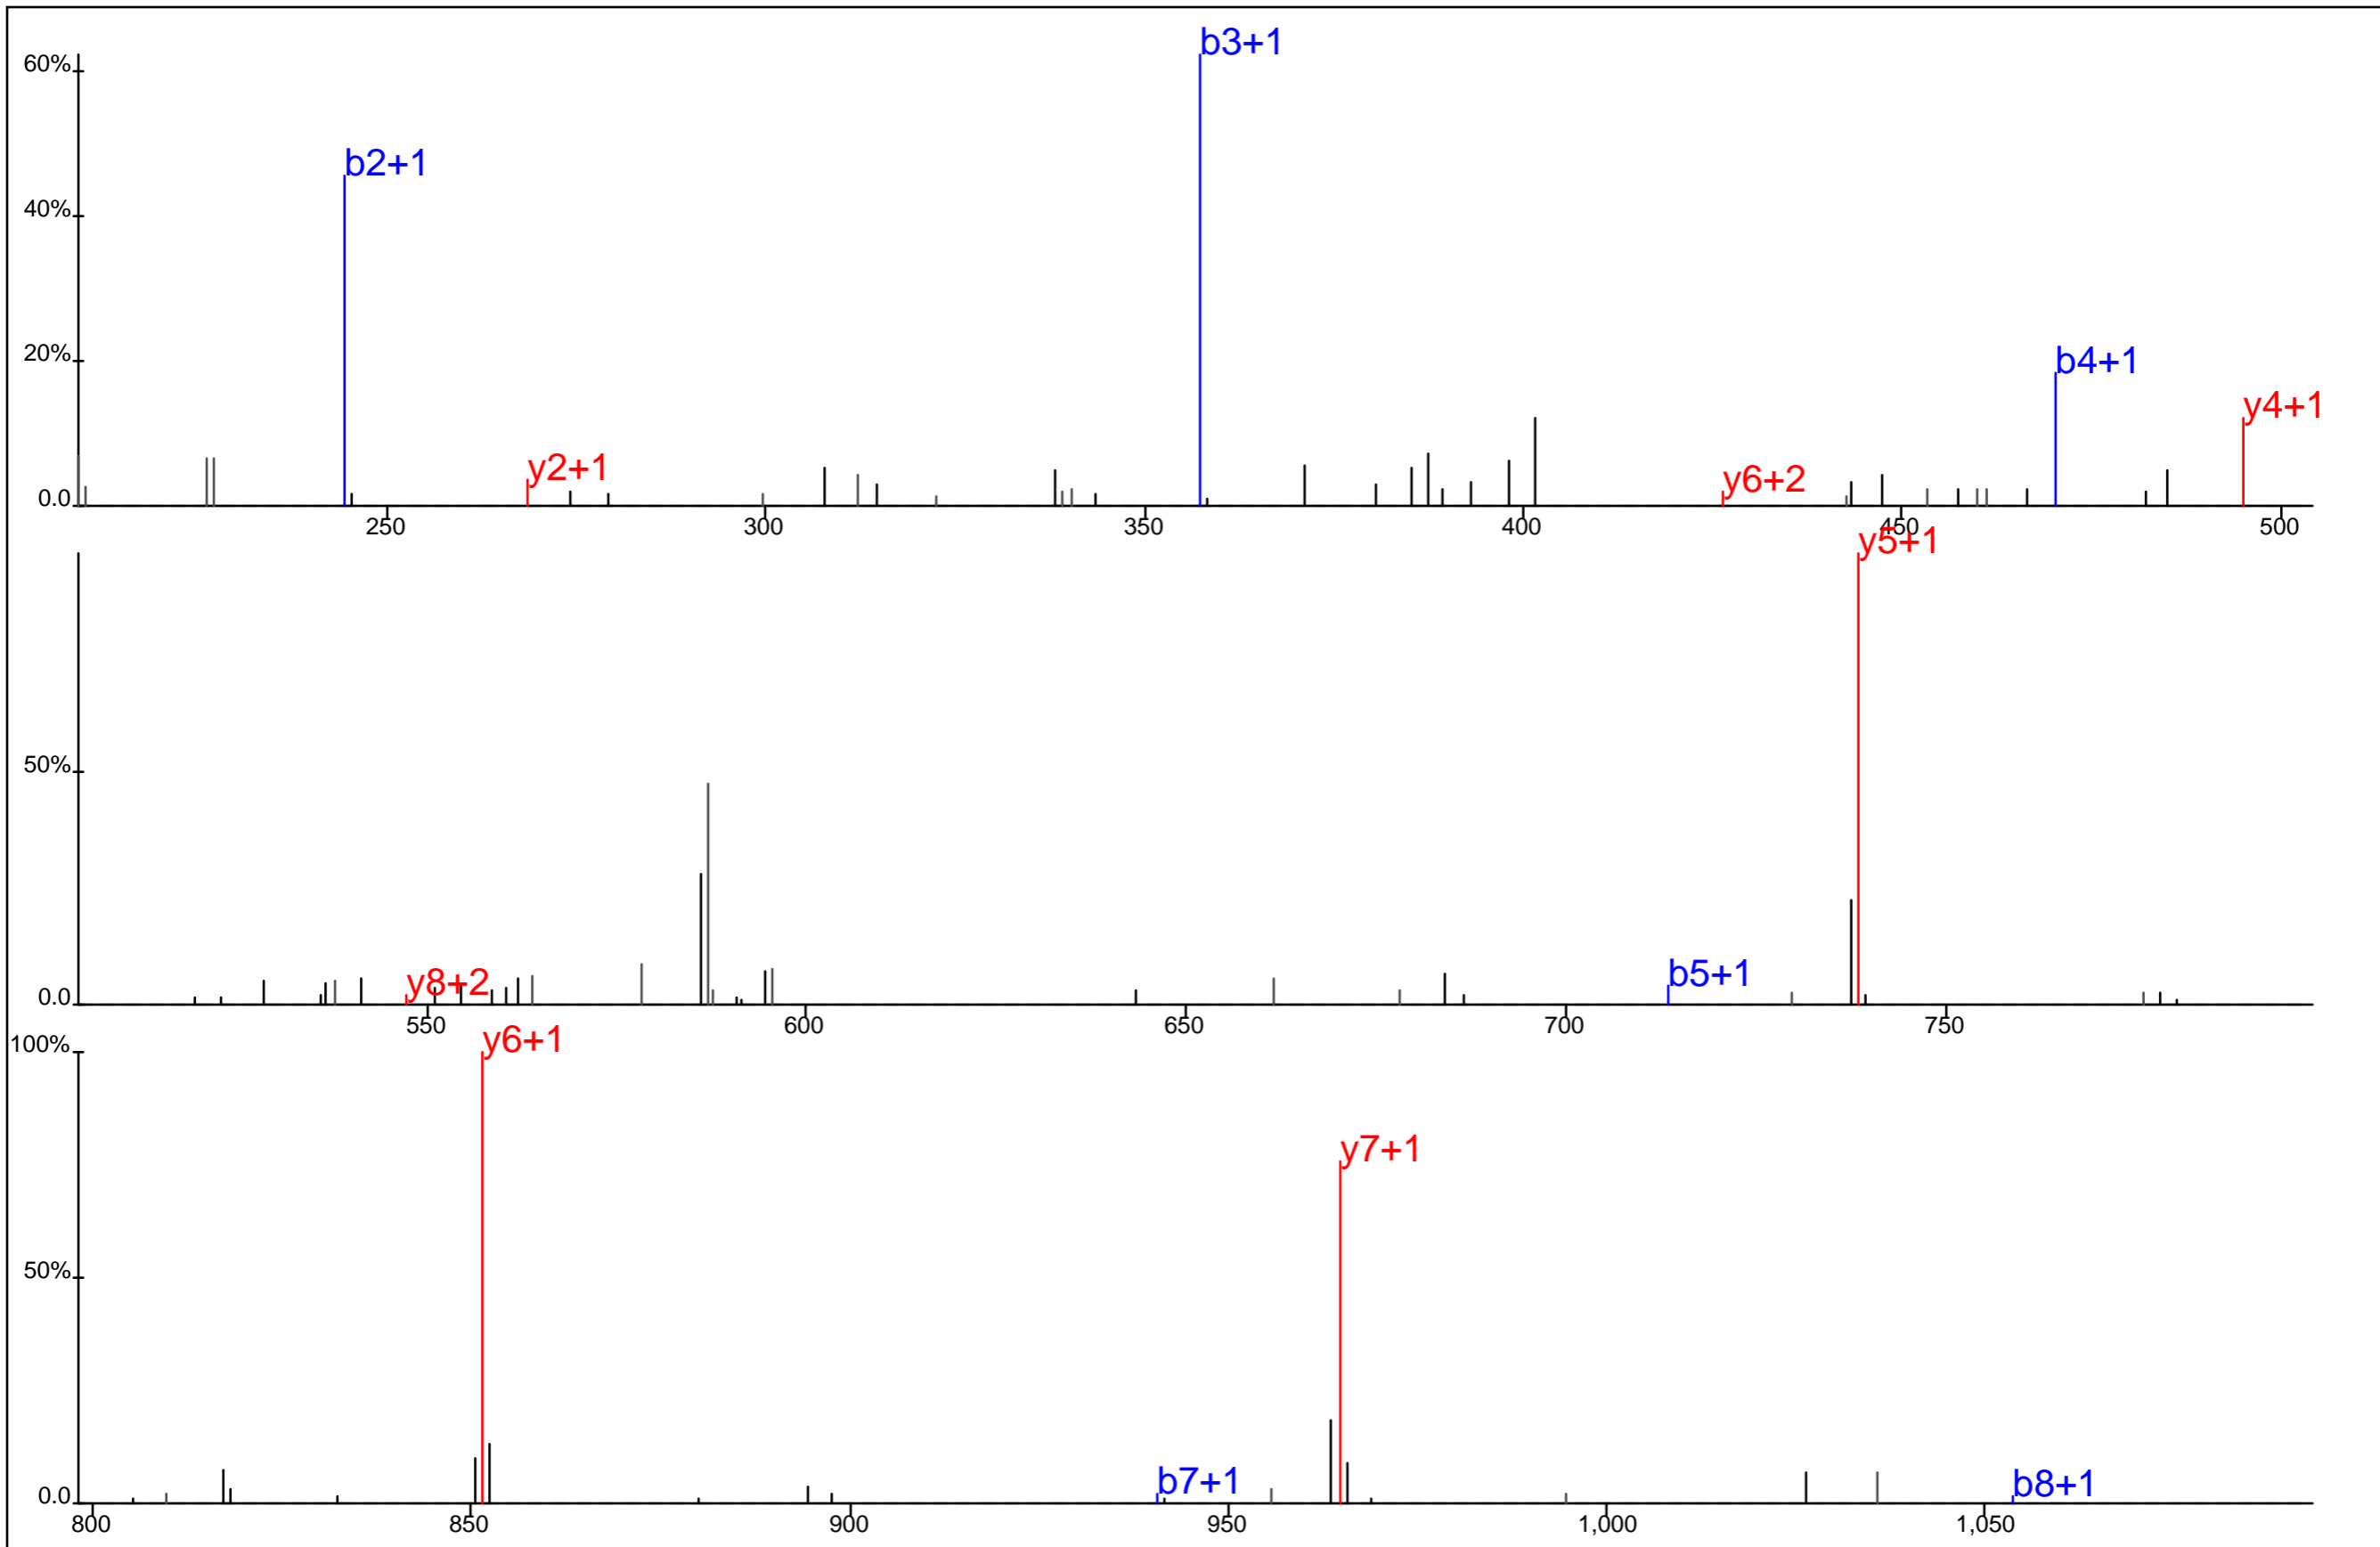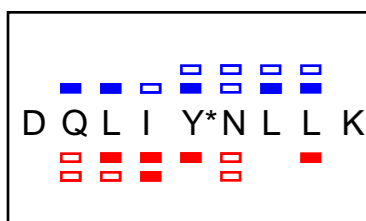

Protein Name: Lactate dehydrogenase A  
 gi Accession: 13786849  
 Precursor Mass: 604.3182+2  
 Delta Mass: 6.484 ppm  
 XCorr: 2.0919



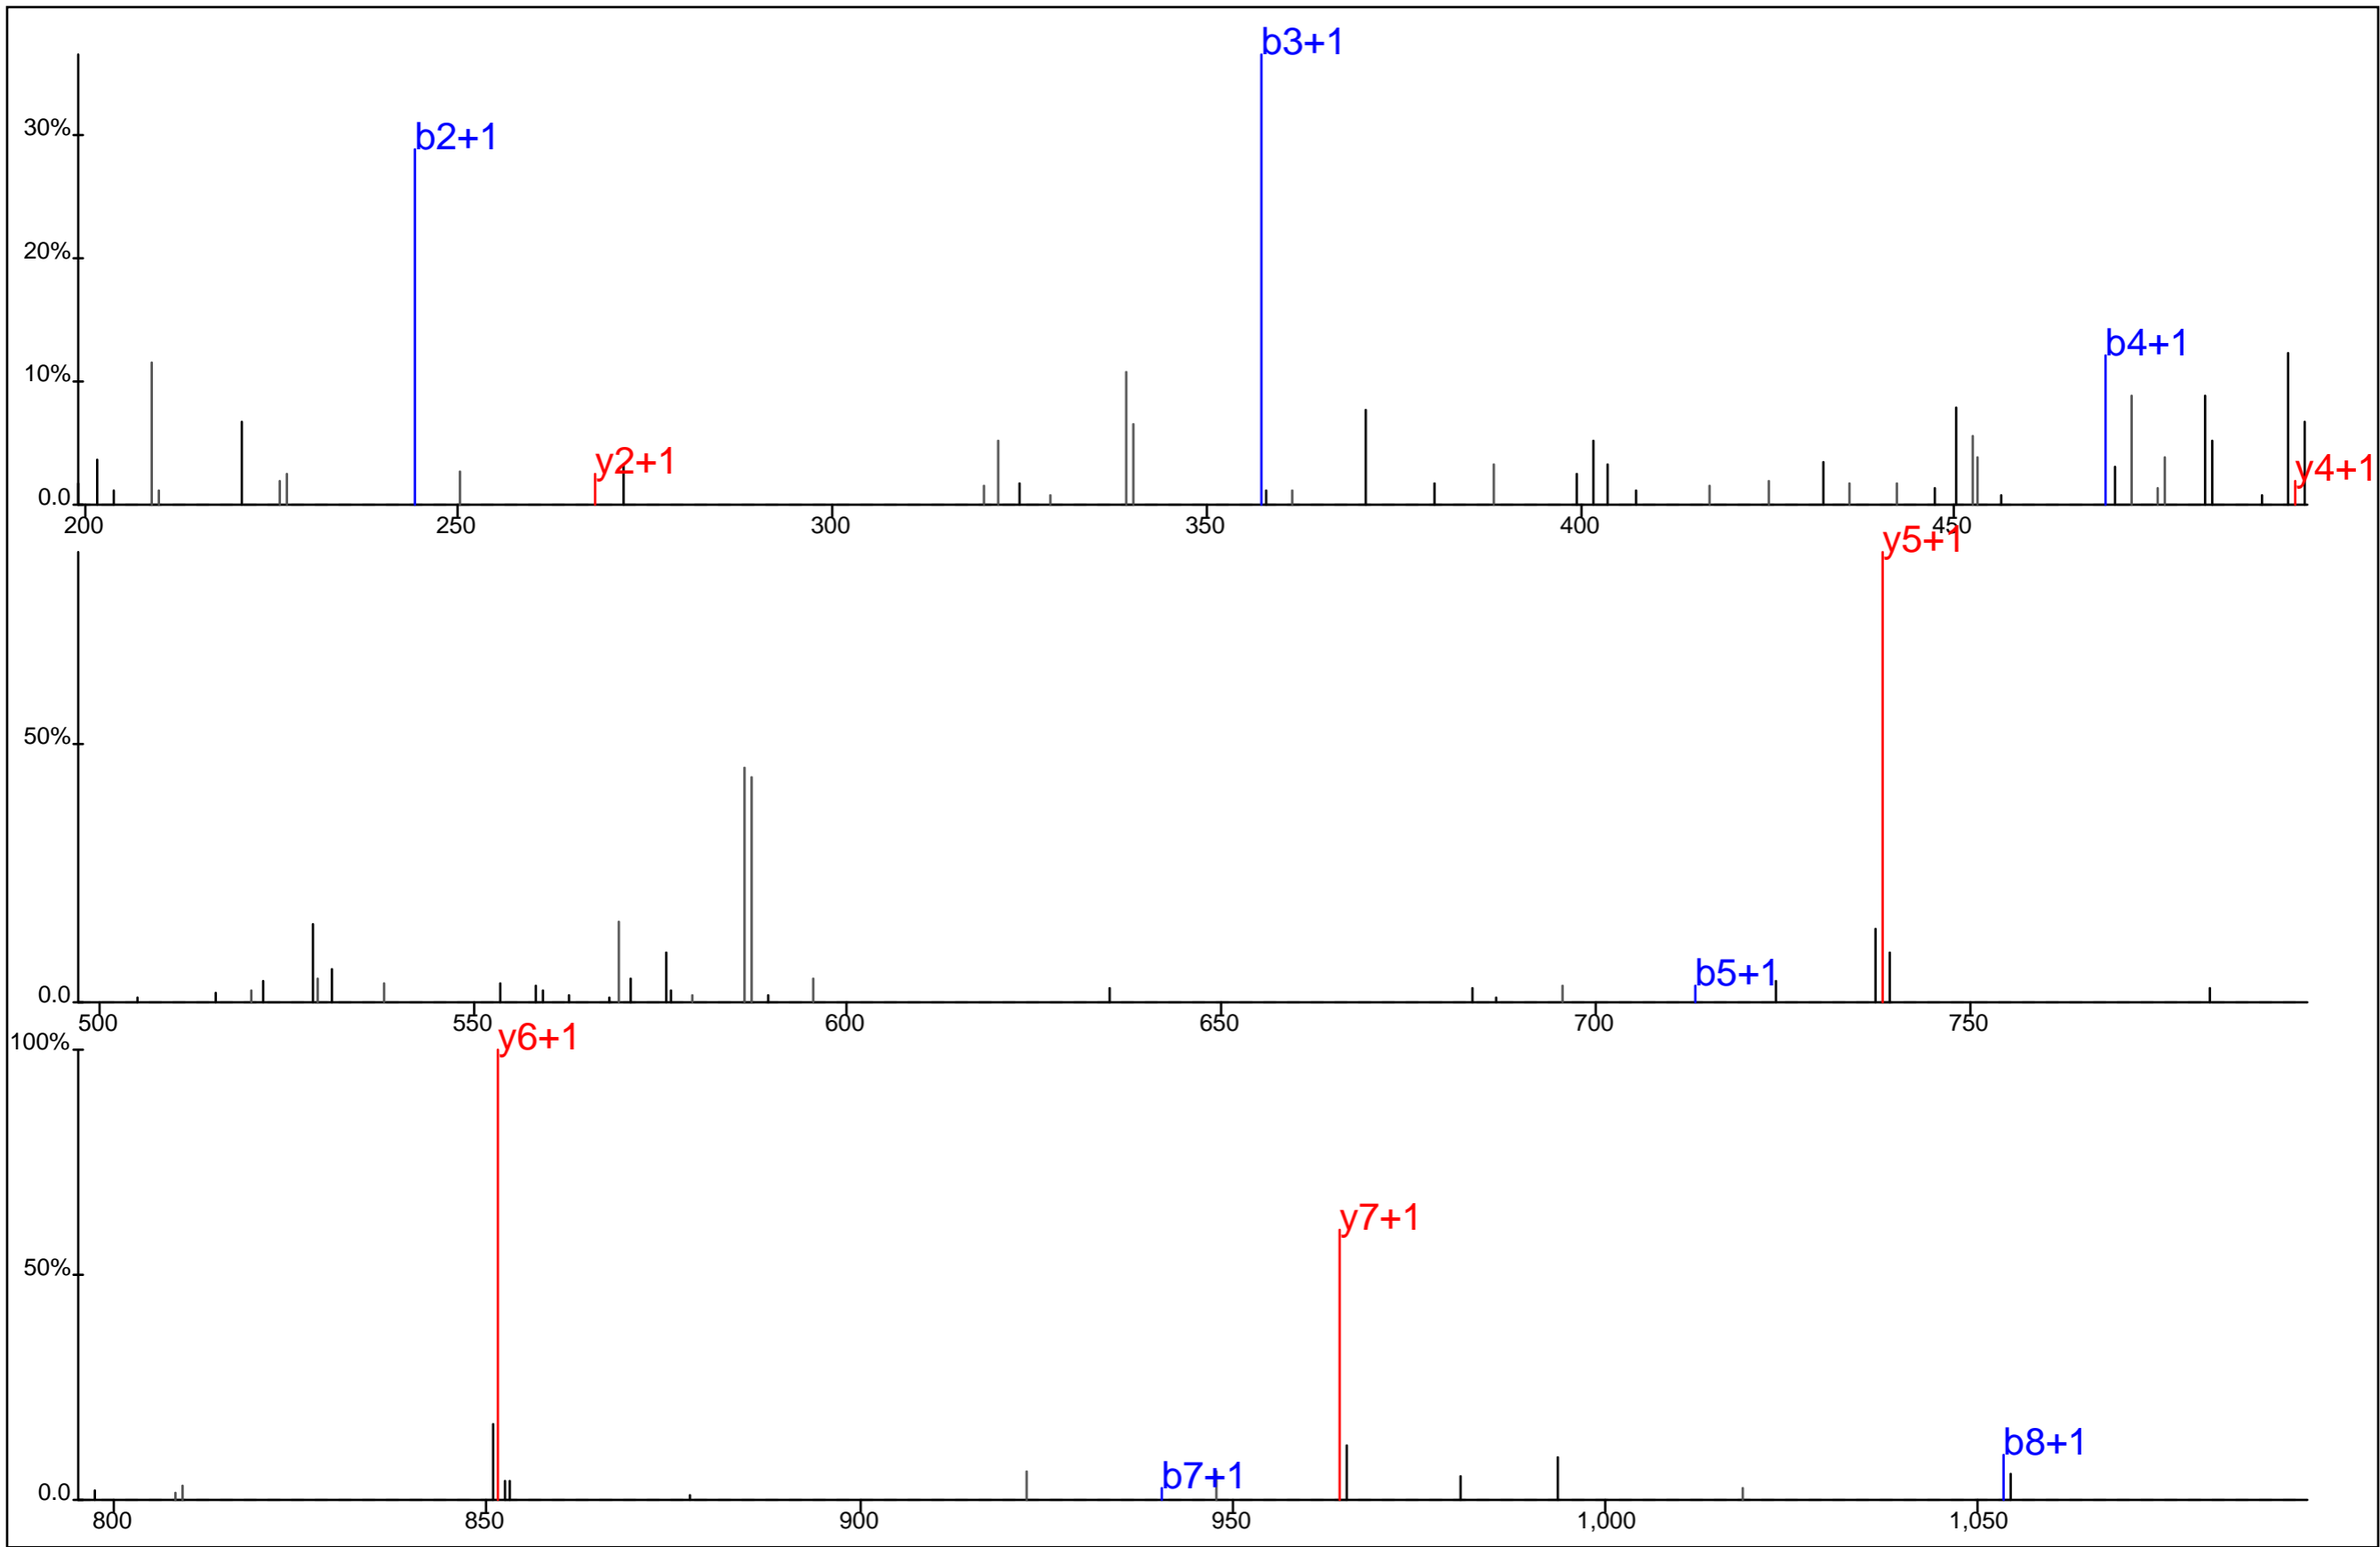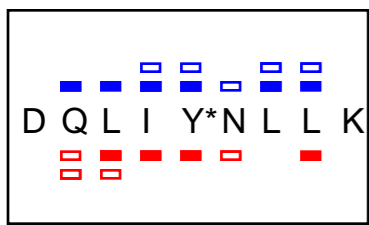

Protein Name: Lactate dehydrogenase A  
 gi Accession: 13786849  
 Precursor Mass: 604.3164+2  
 Delta Mass: 3.453 ppm  
 XCorr: 2.3977

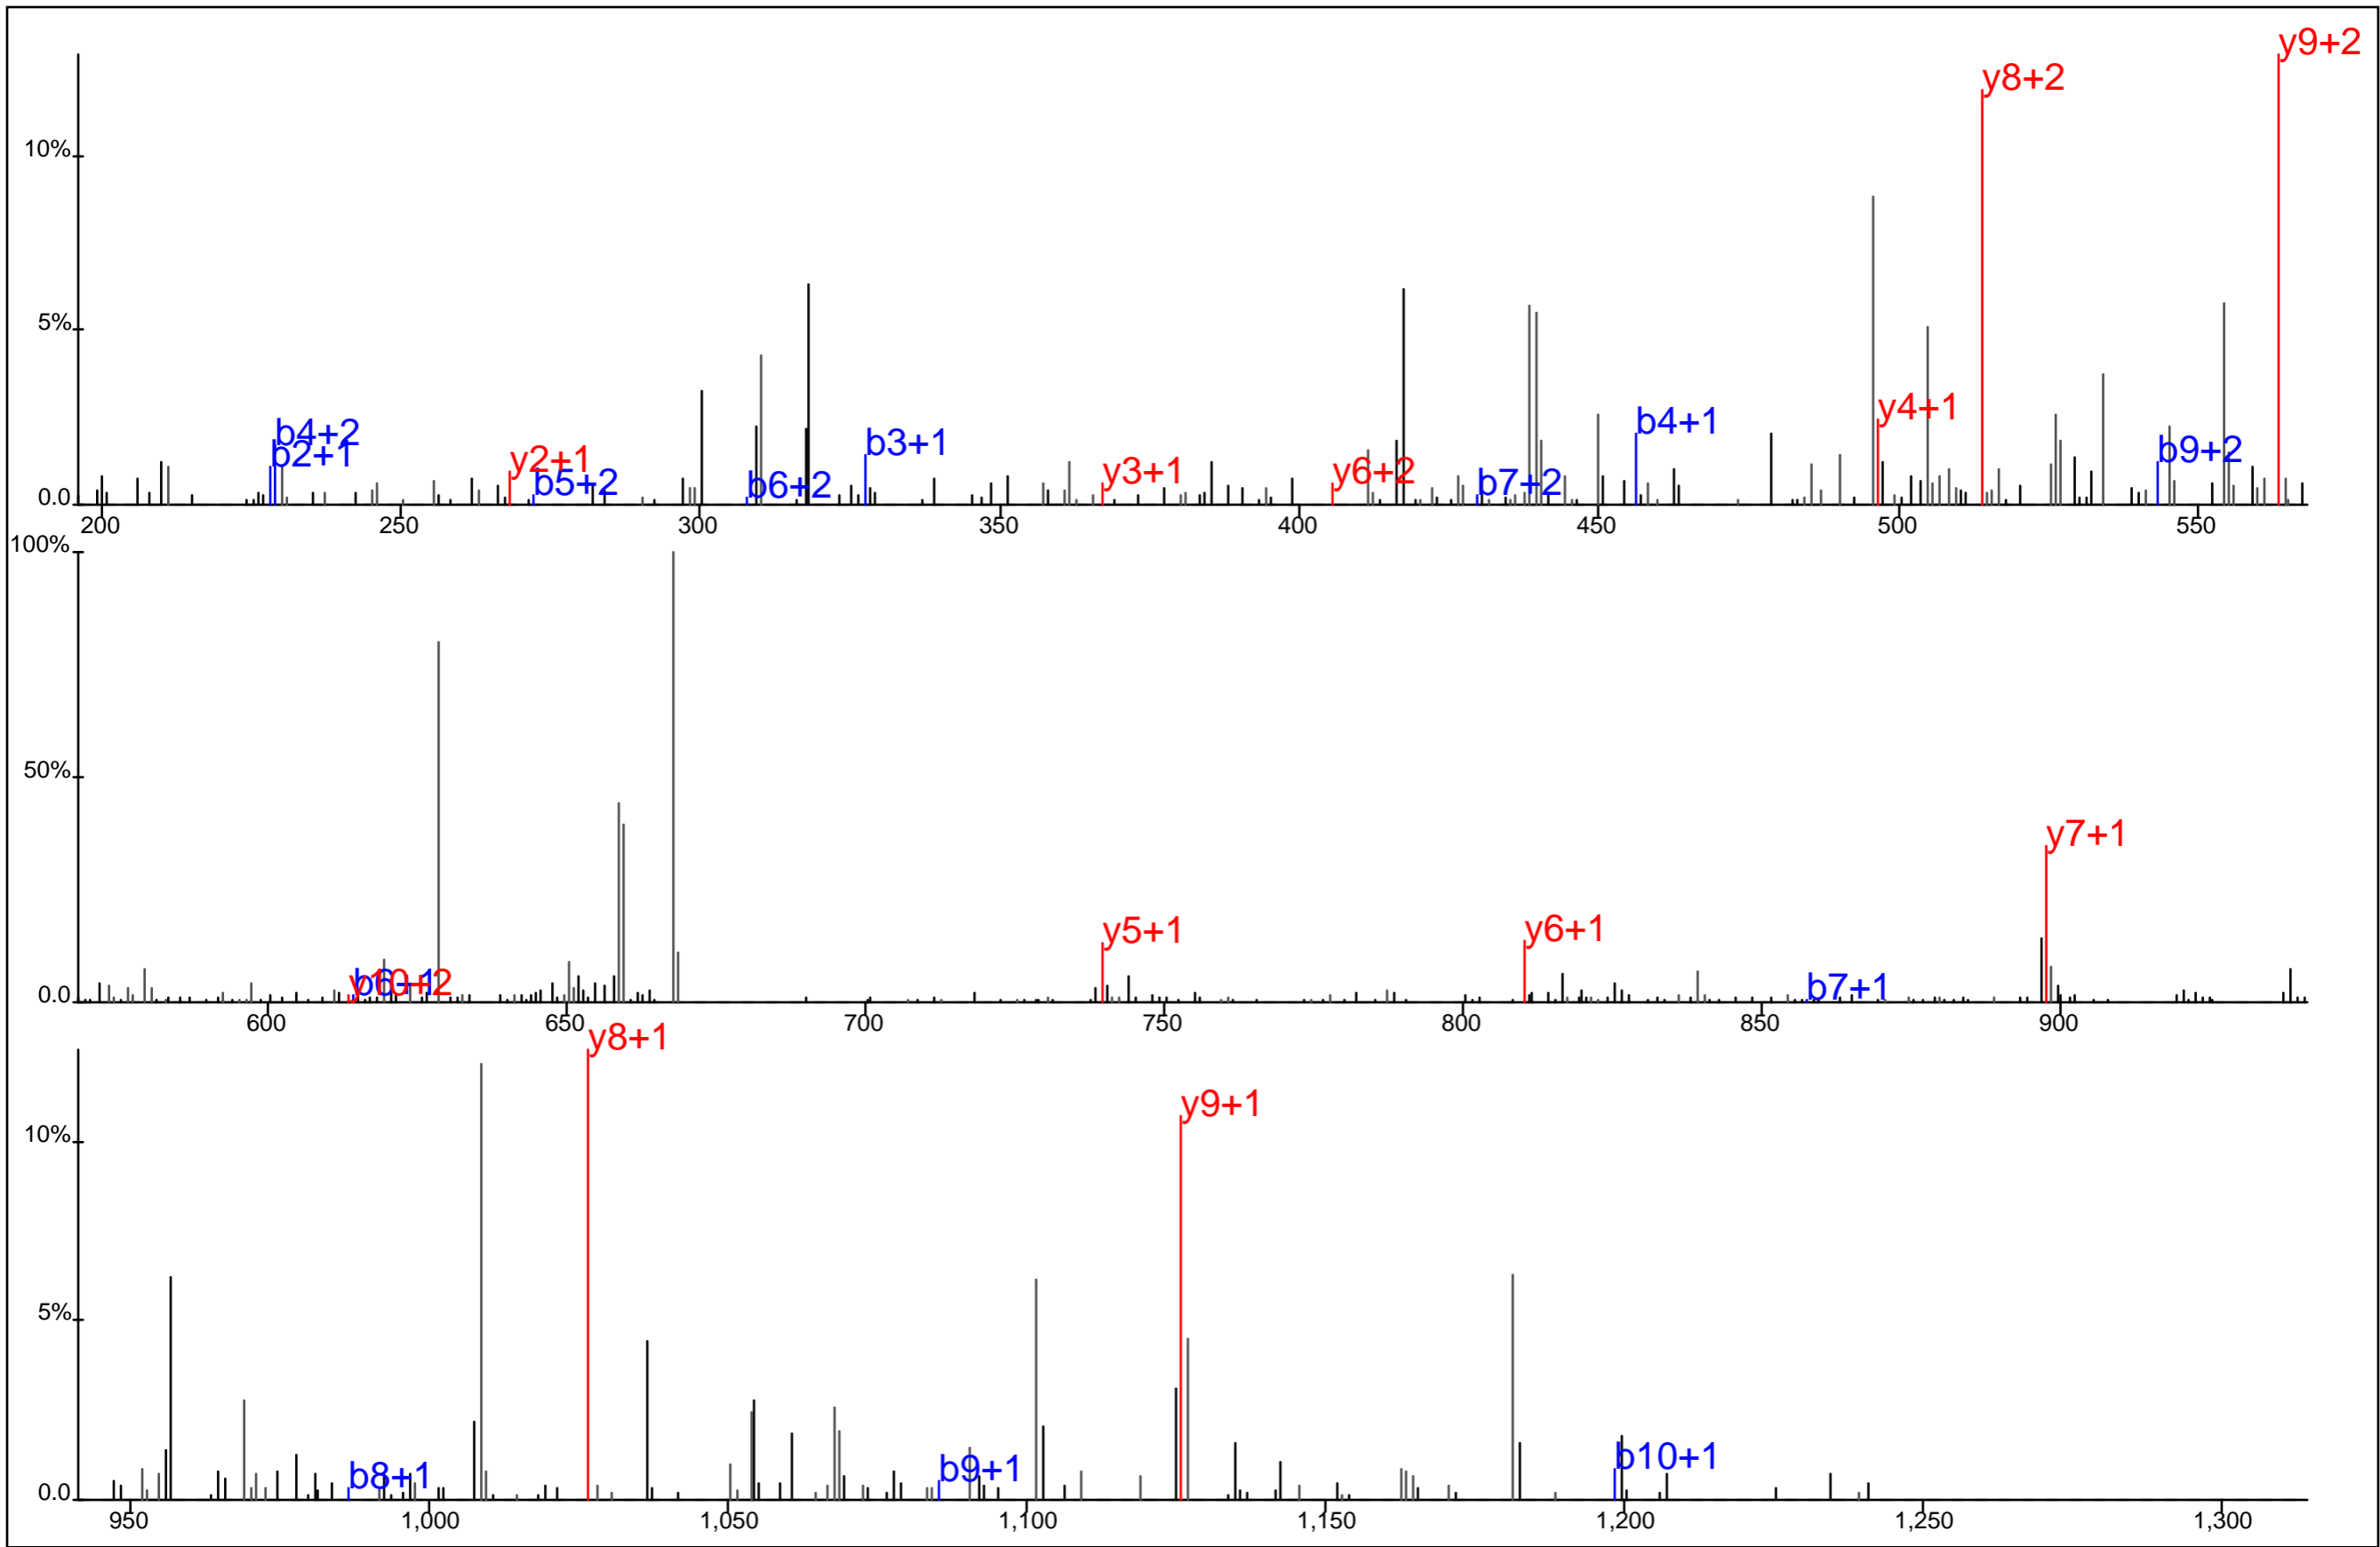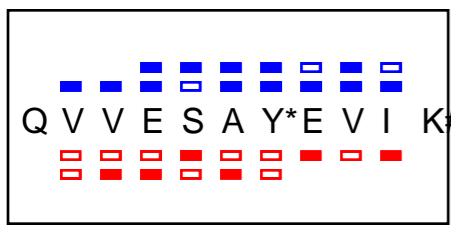

Protein Name: Lactate dehydrogenase A  
 gi Accession: 13786849  
 Precursor Mass: 676.8355+2  
 Delta Mass: 3.606 ppm  
 XCorr: 25.49

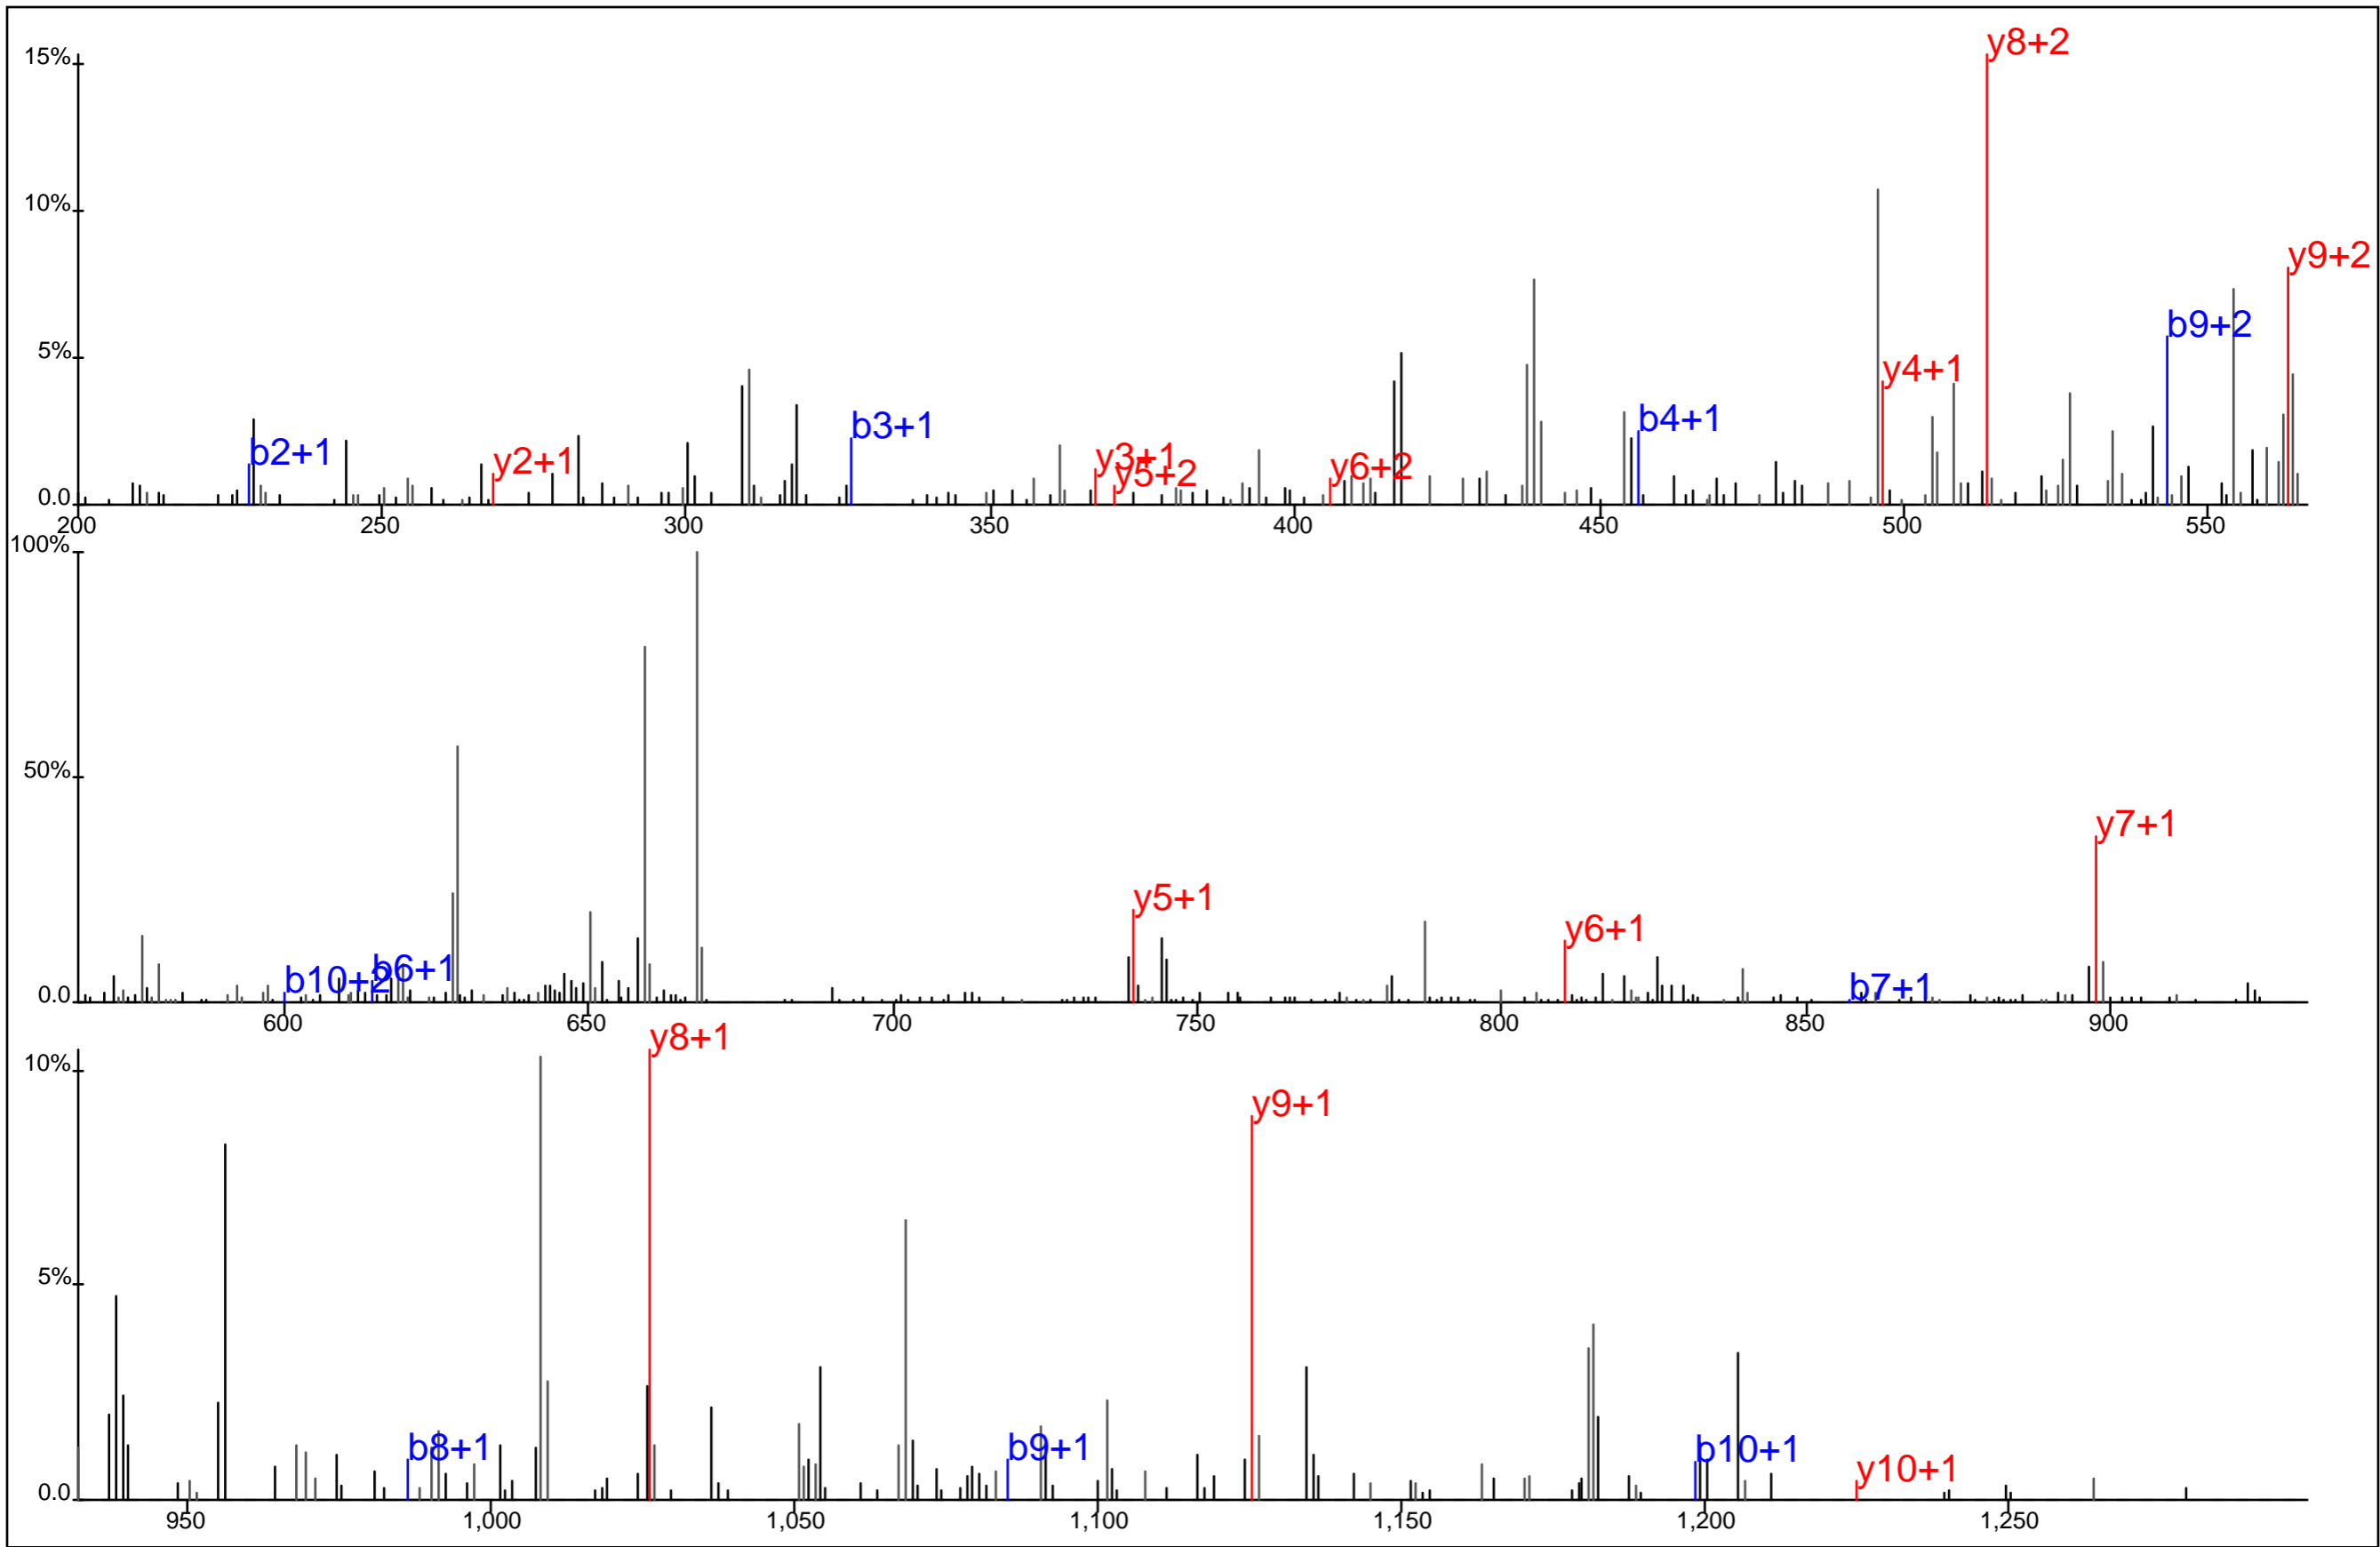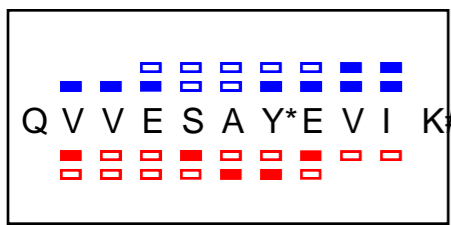

Protein Name: Lactate dehydrogenase A  
 gi Accession: 13786849  
 Precursor Mass: 676.8353+2  
 Delta Mass: 3.251 ppm  
 XCorr: 31.22

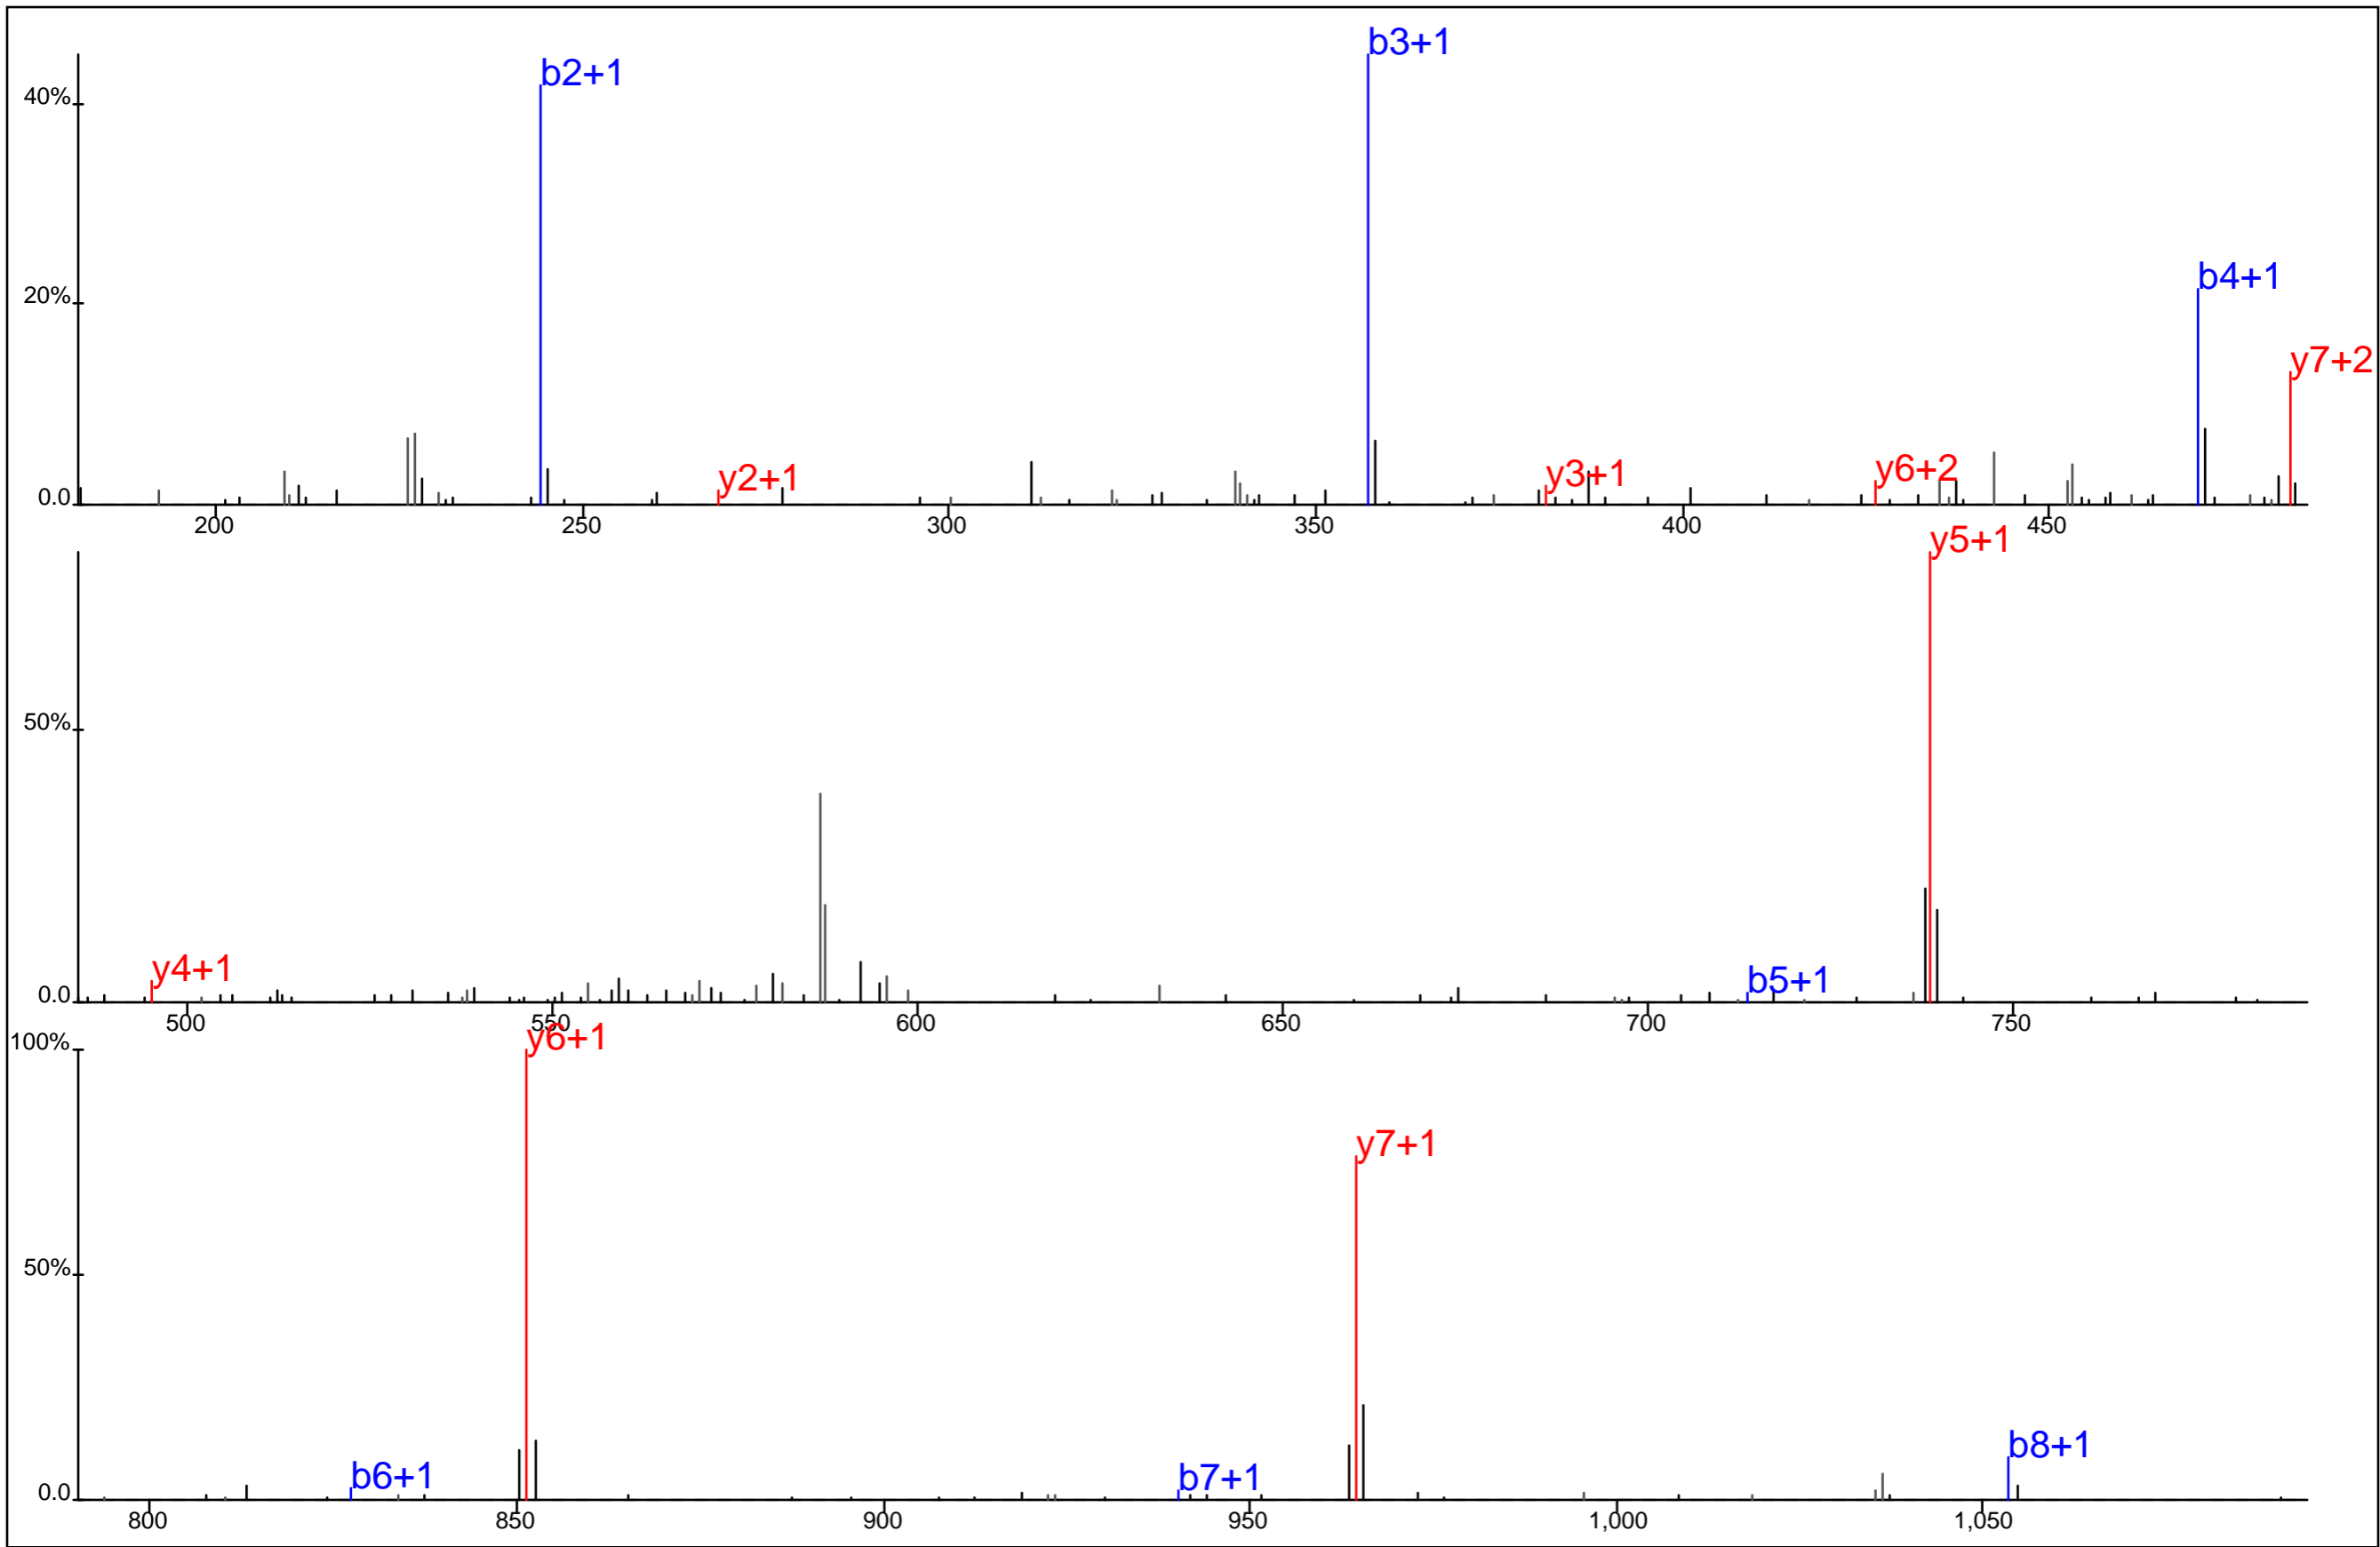

▢ ▢ ▢ ▢ ▢ ▢  
▢ ▢ ▢ ▢ ▢ ▢

D Q L I Y\* N L L K#

Protein Name: Lactate dehydrogenase A  
 gi Accession: 13786849  
 Precursor Mass: 604.3173+2  
 Delta Mass: 5.000 ppm  
 XCorr: 33.69

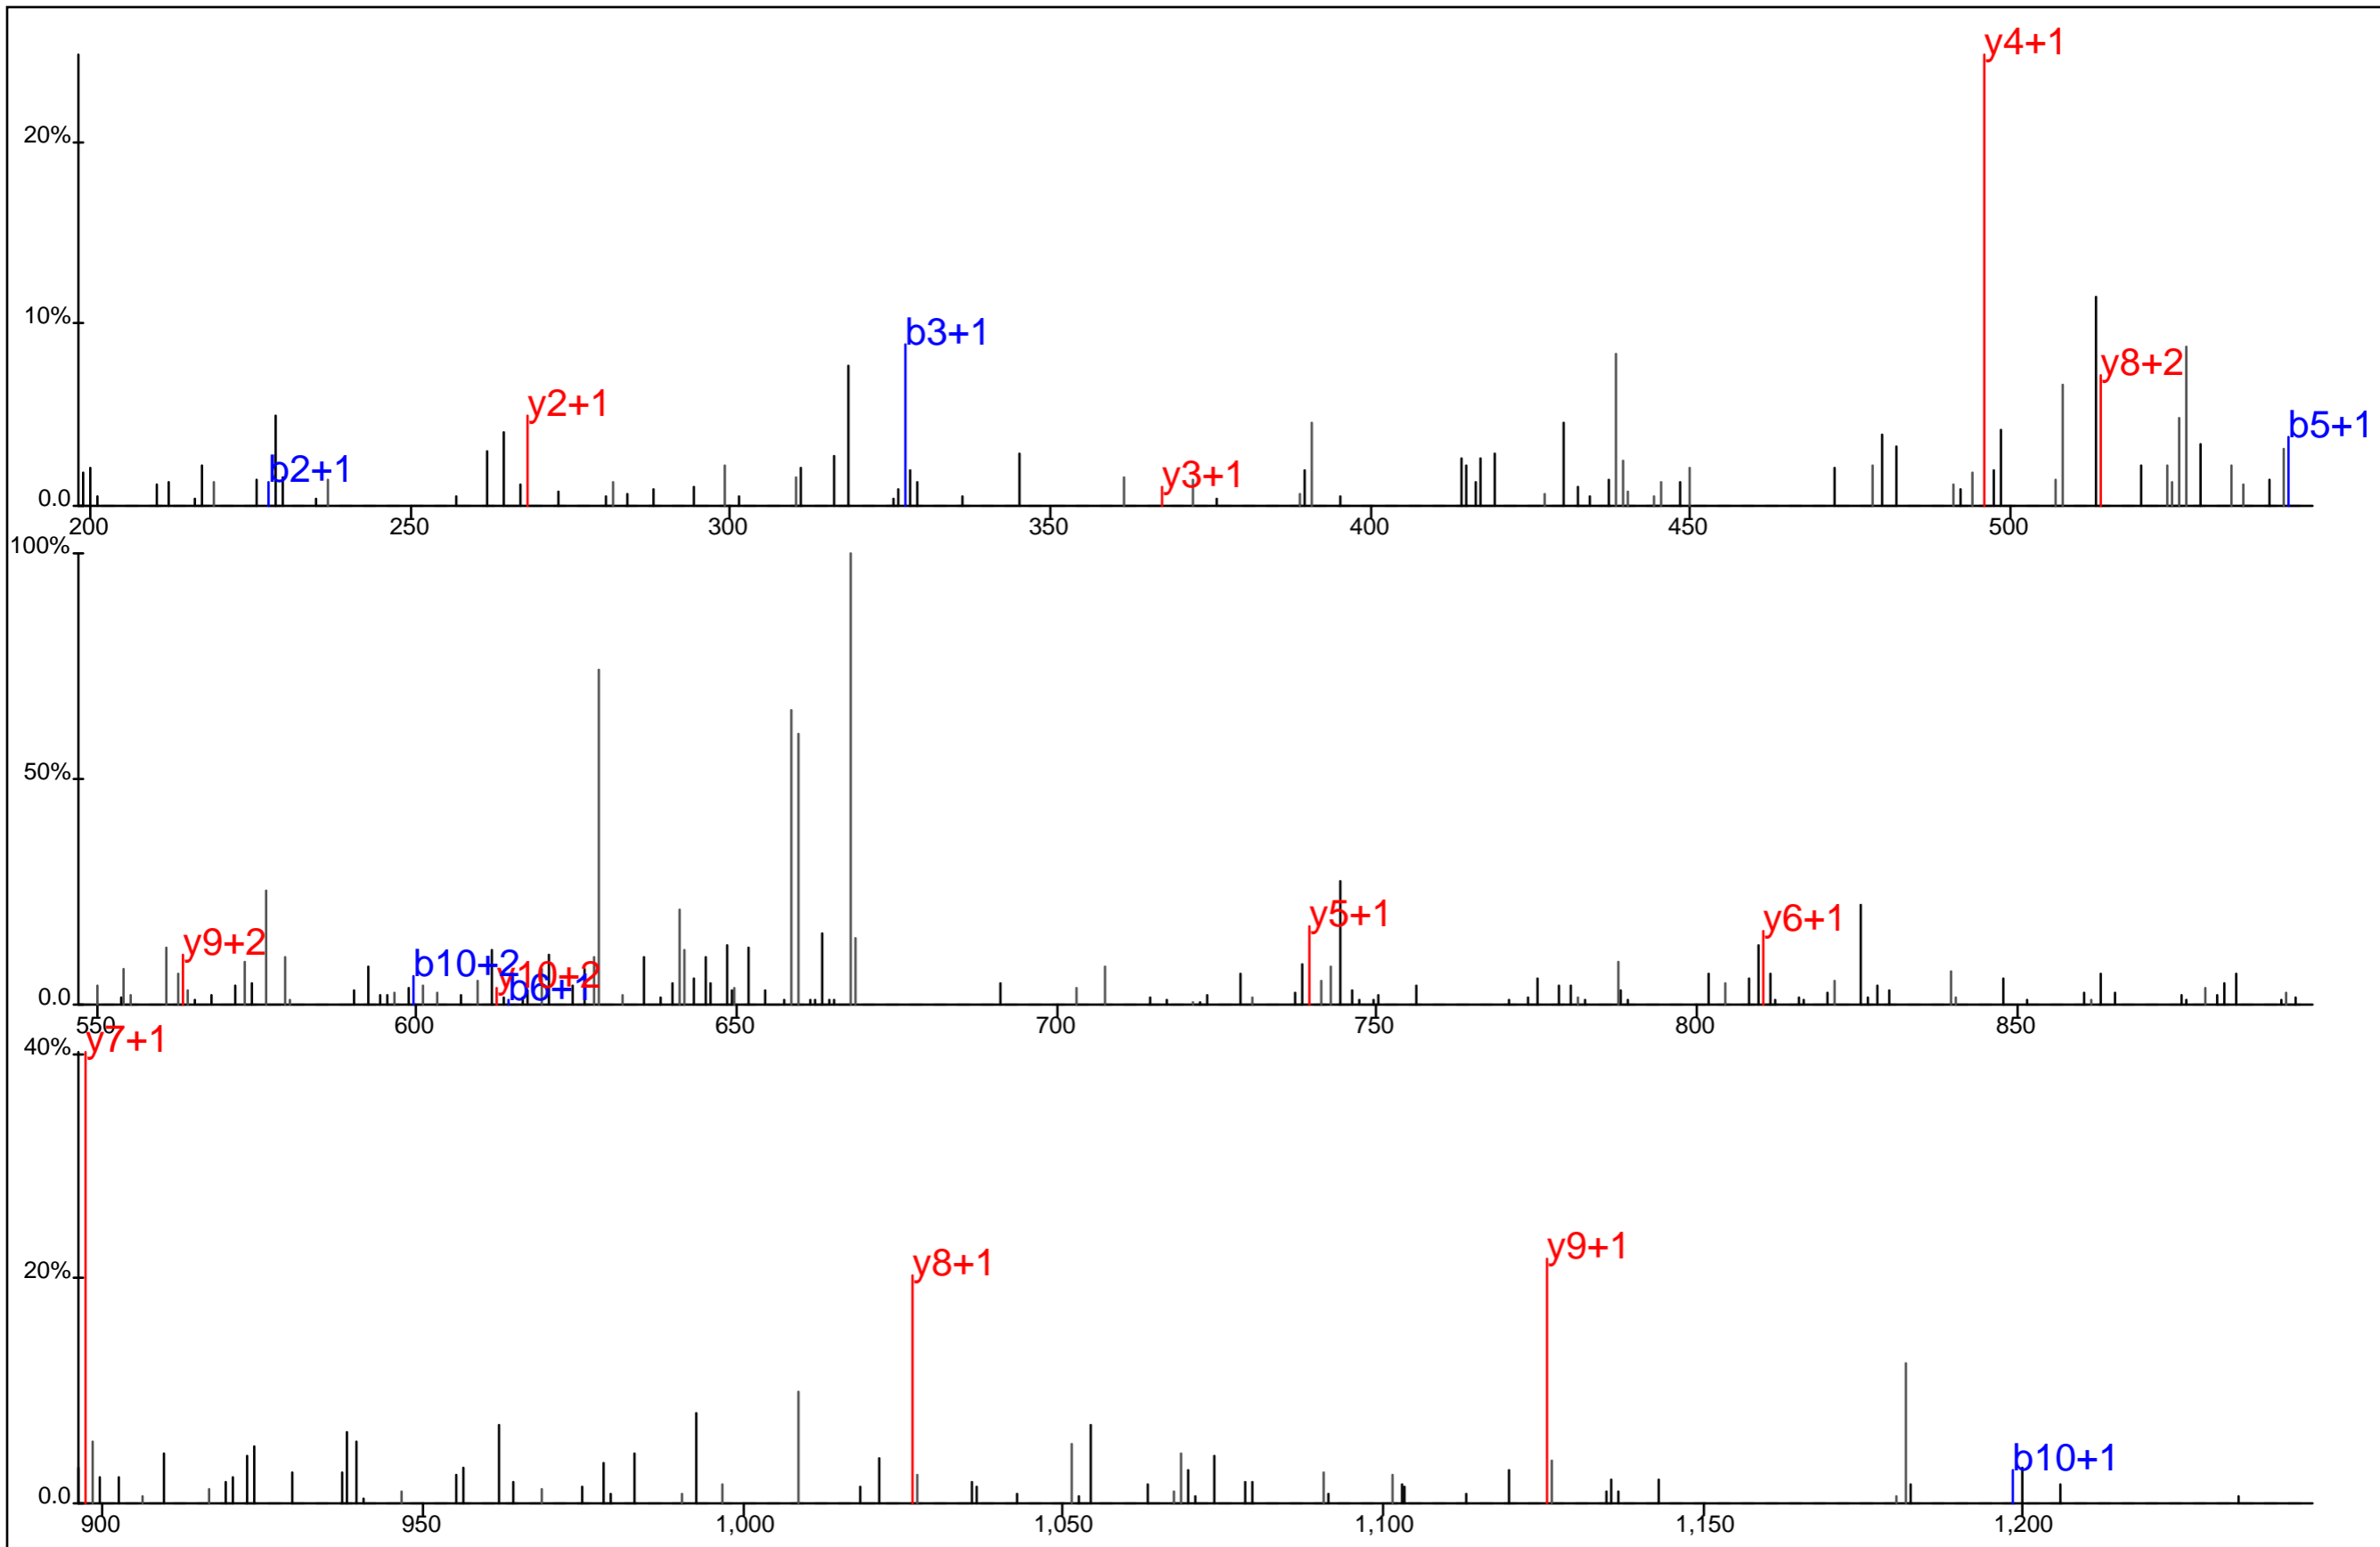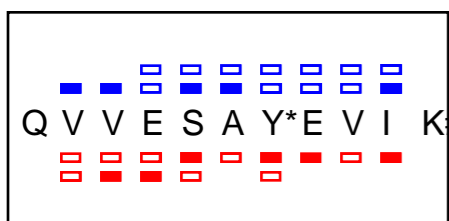

Protein Name: Lactate dehydrogenase A  
 gi Accession: 13786849  
 Precursor Mass: 676.8362+2  
 Delta Mass: 4.693 ppm  
 XCorr: 23.07

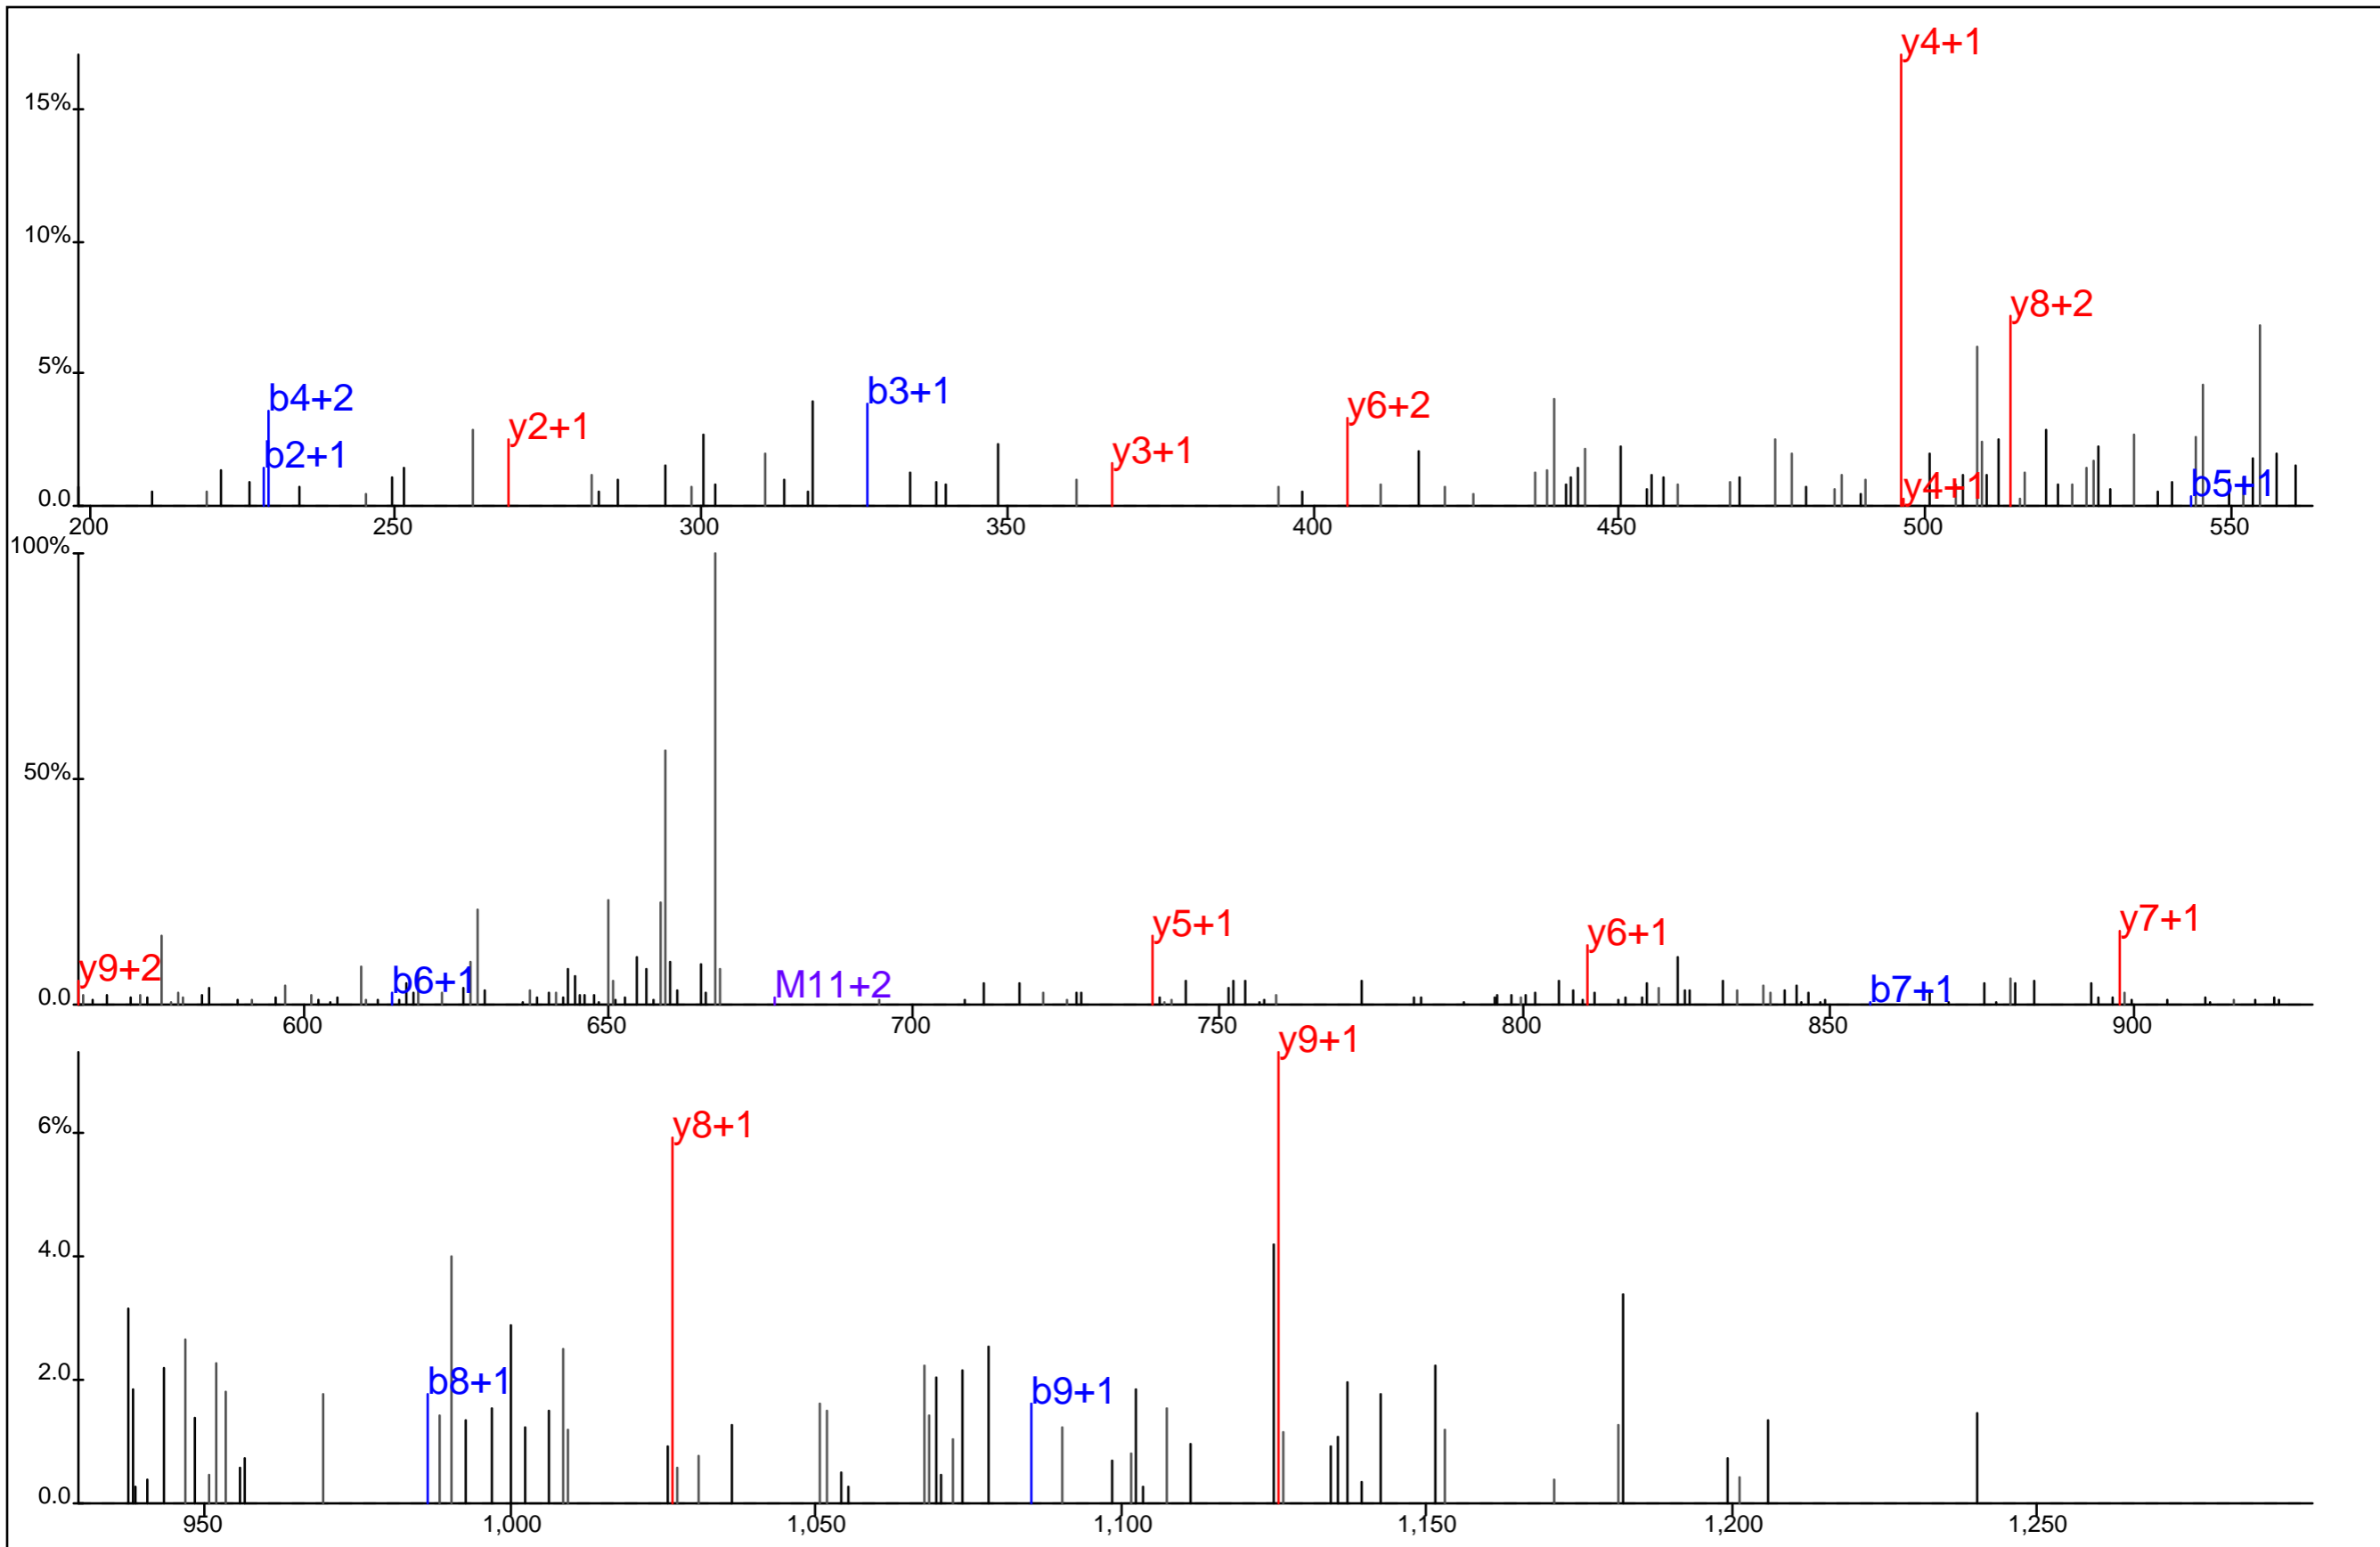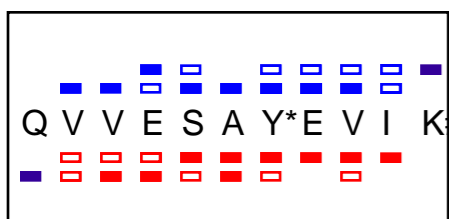

Protein Name: Lactate dehydrogenase A  
 gi Accession: 13786849  
 Precursor Mass: 676.8363+2  
 Delta Mass: 4.782 ppm  
 XCorr: 27.79

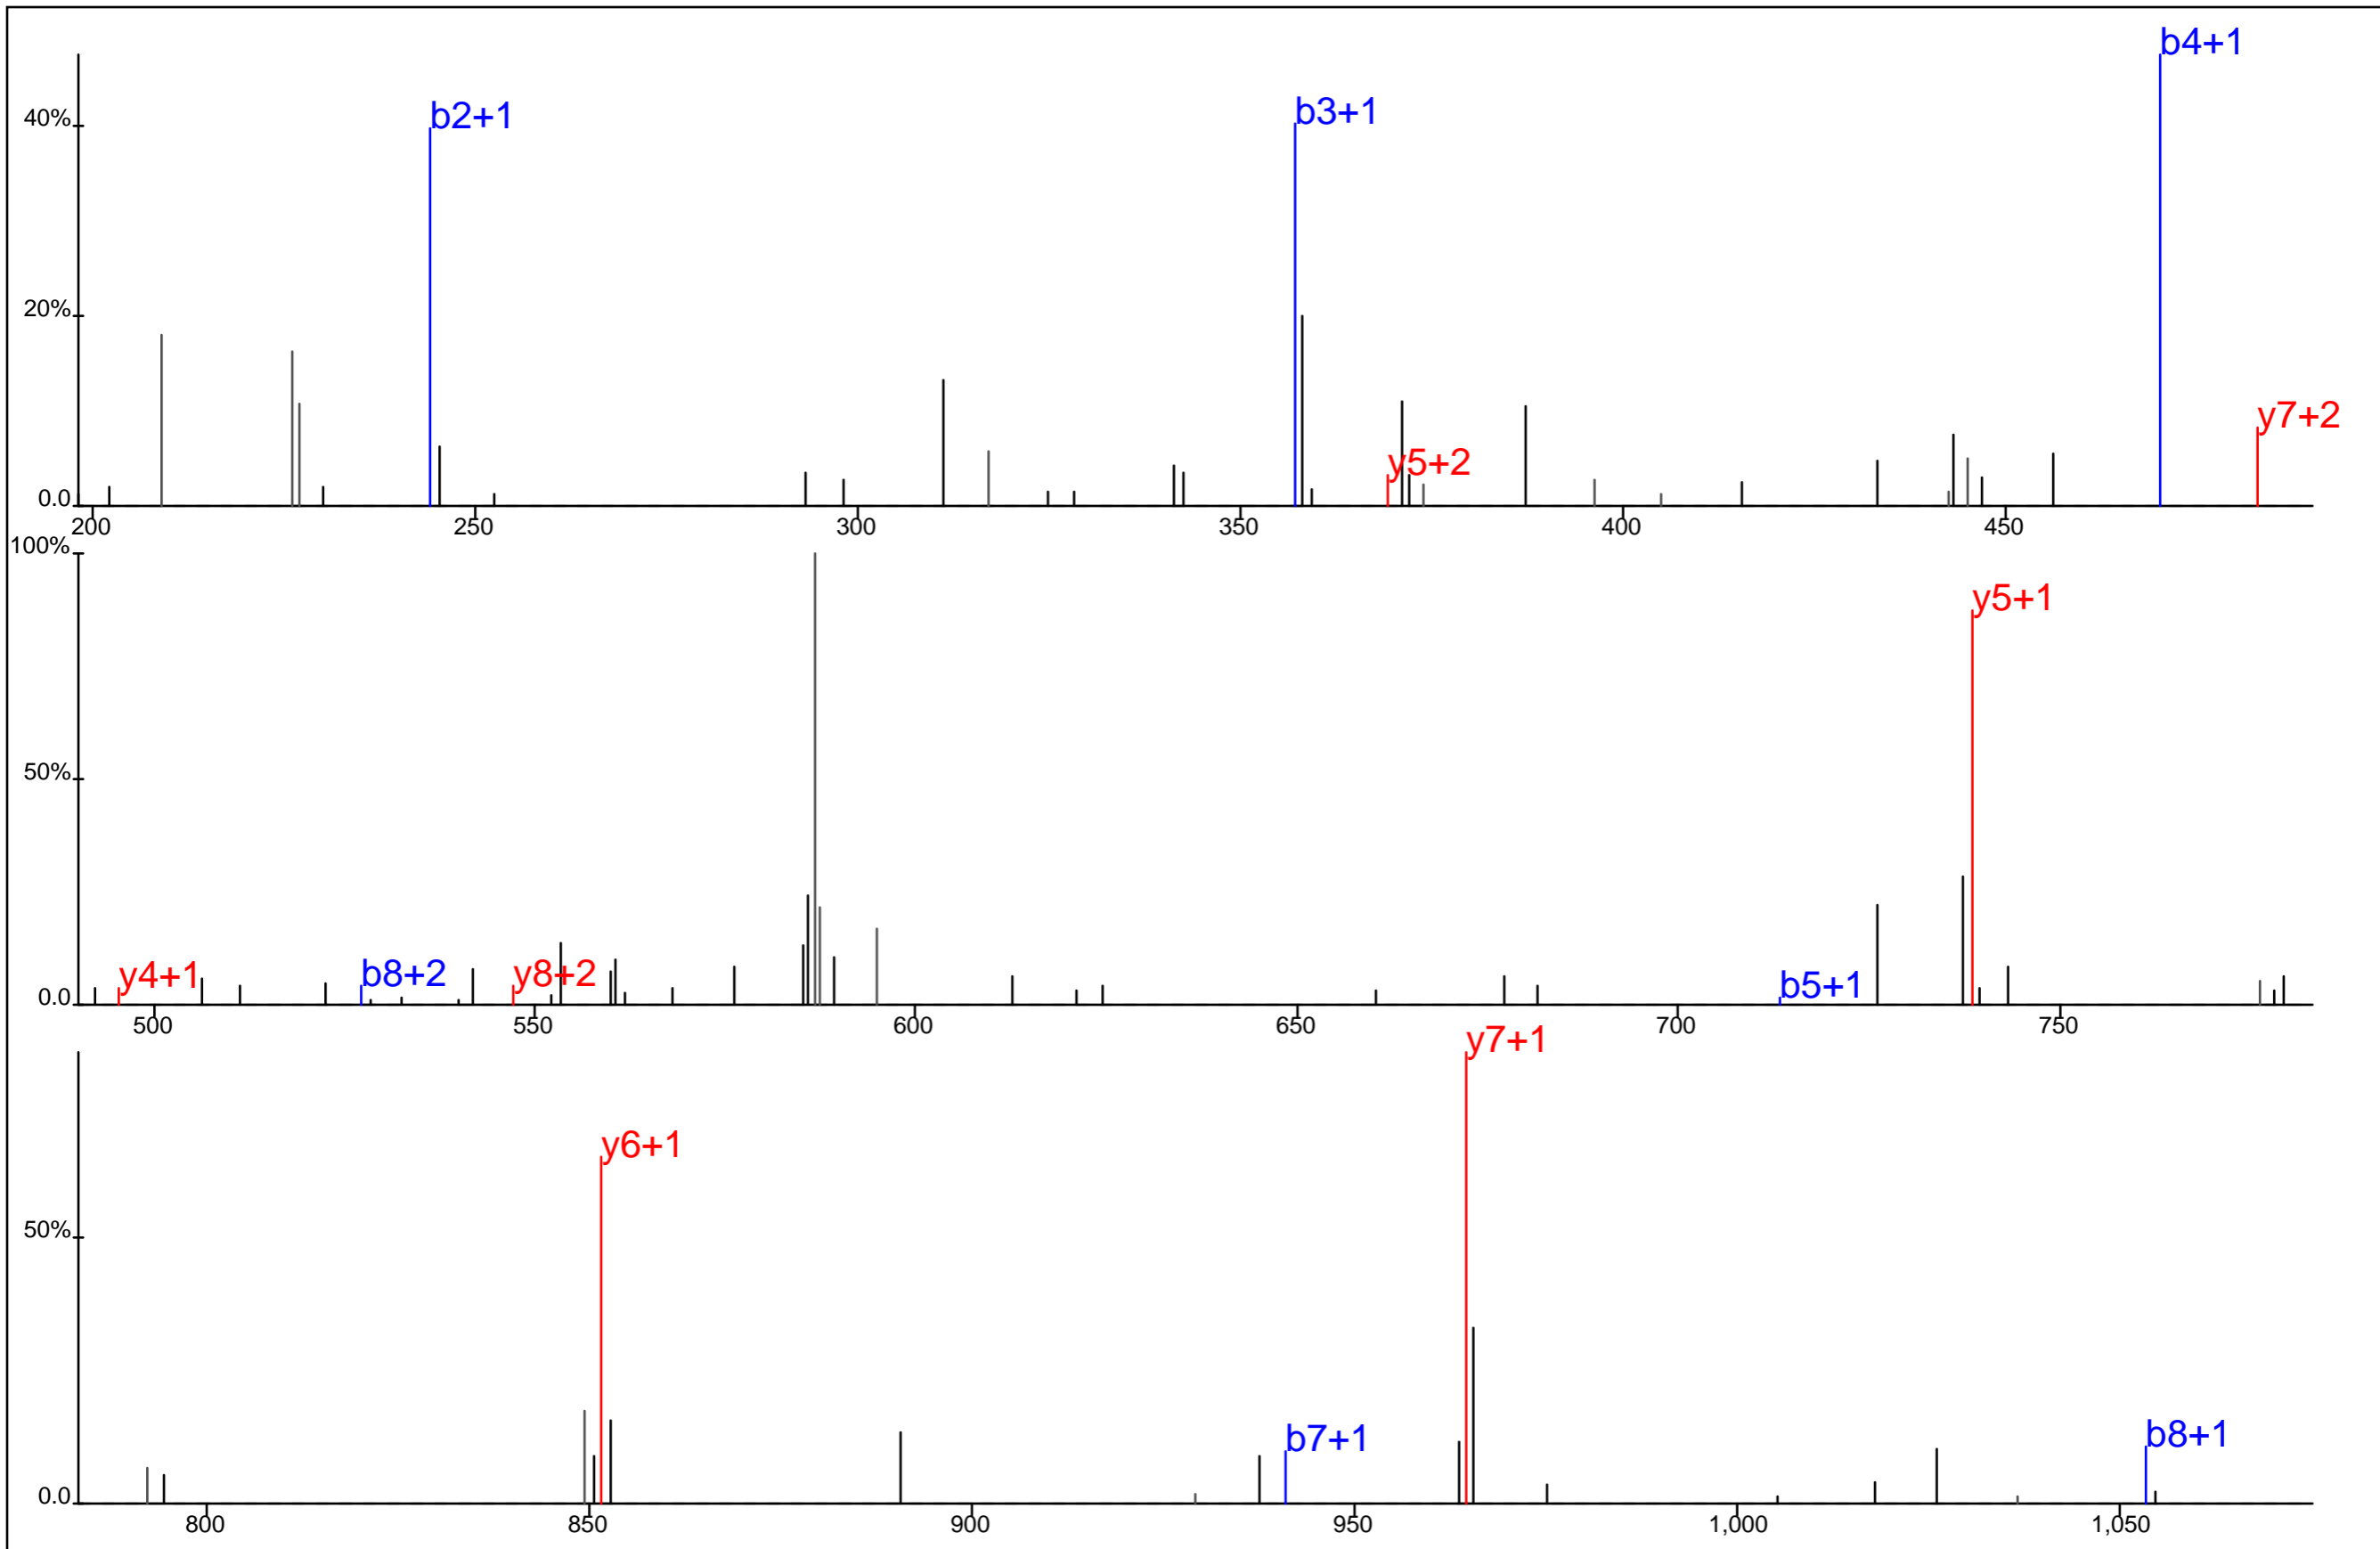

D Q L I Y\* N L L K#

Protein Name: Lactate dehydrogenase A  
 gi Accession: 13786849  
 Precursor Mass: 604.3160+2  
 Delta Mass: 2.772 ppm  
 XCorr: 32.29

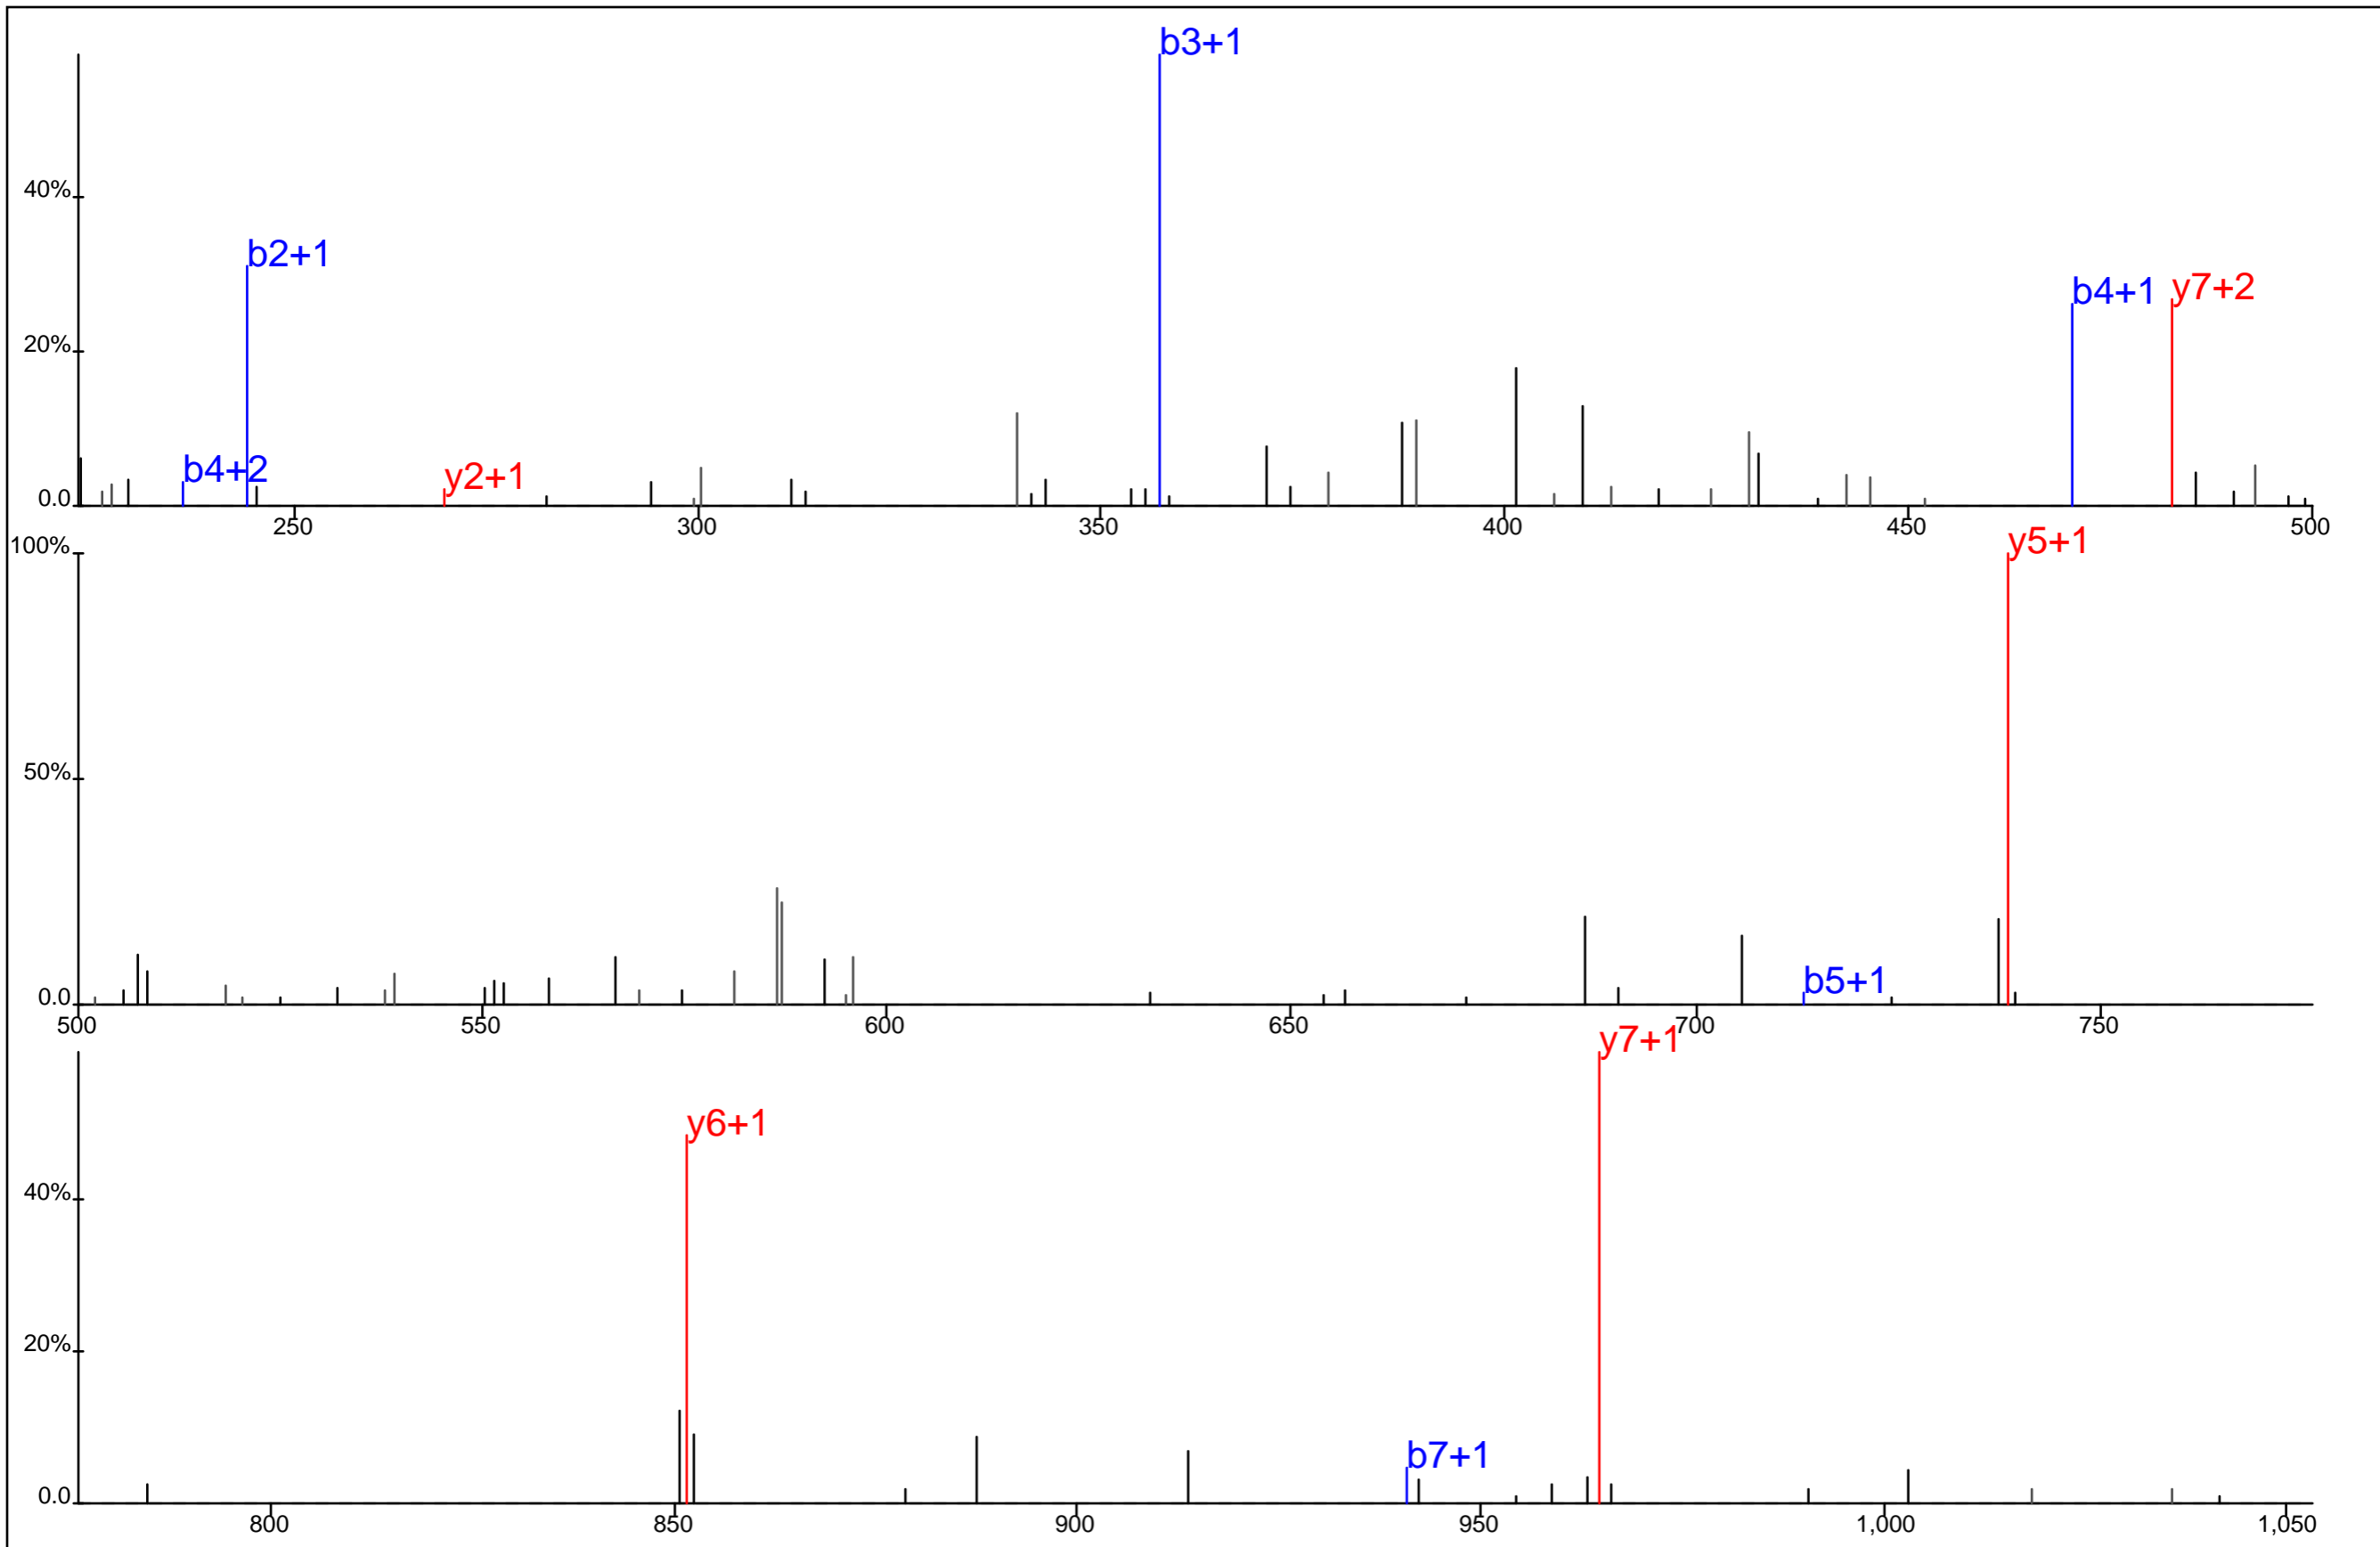

D Q L I Y\* N L L K#

Protein Name: Lactate dehydrogenase A  
 gi Accession: 13786849  
 Precursor Mass: 604.3247+2  
 Delta Mass: 17.231 ppm  
 XCorr: 30.76



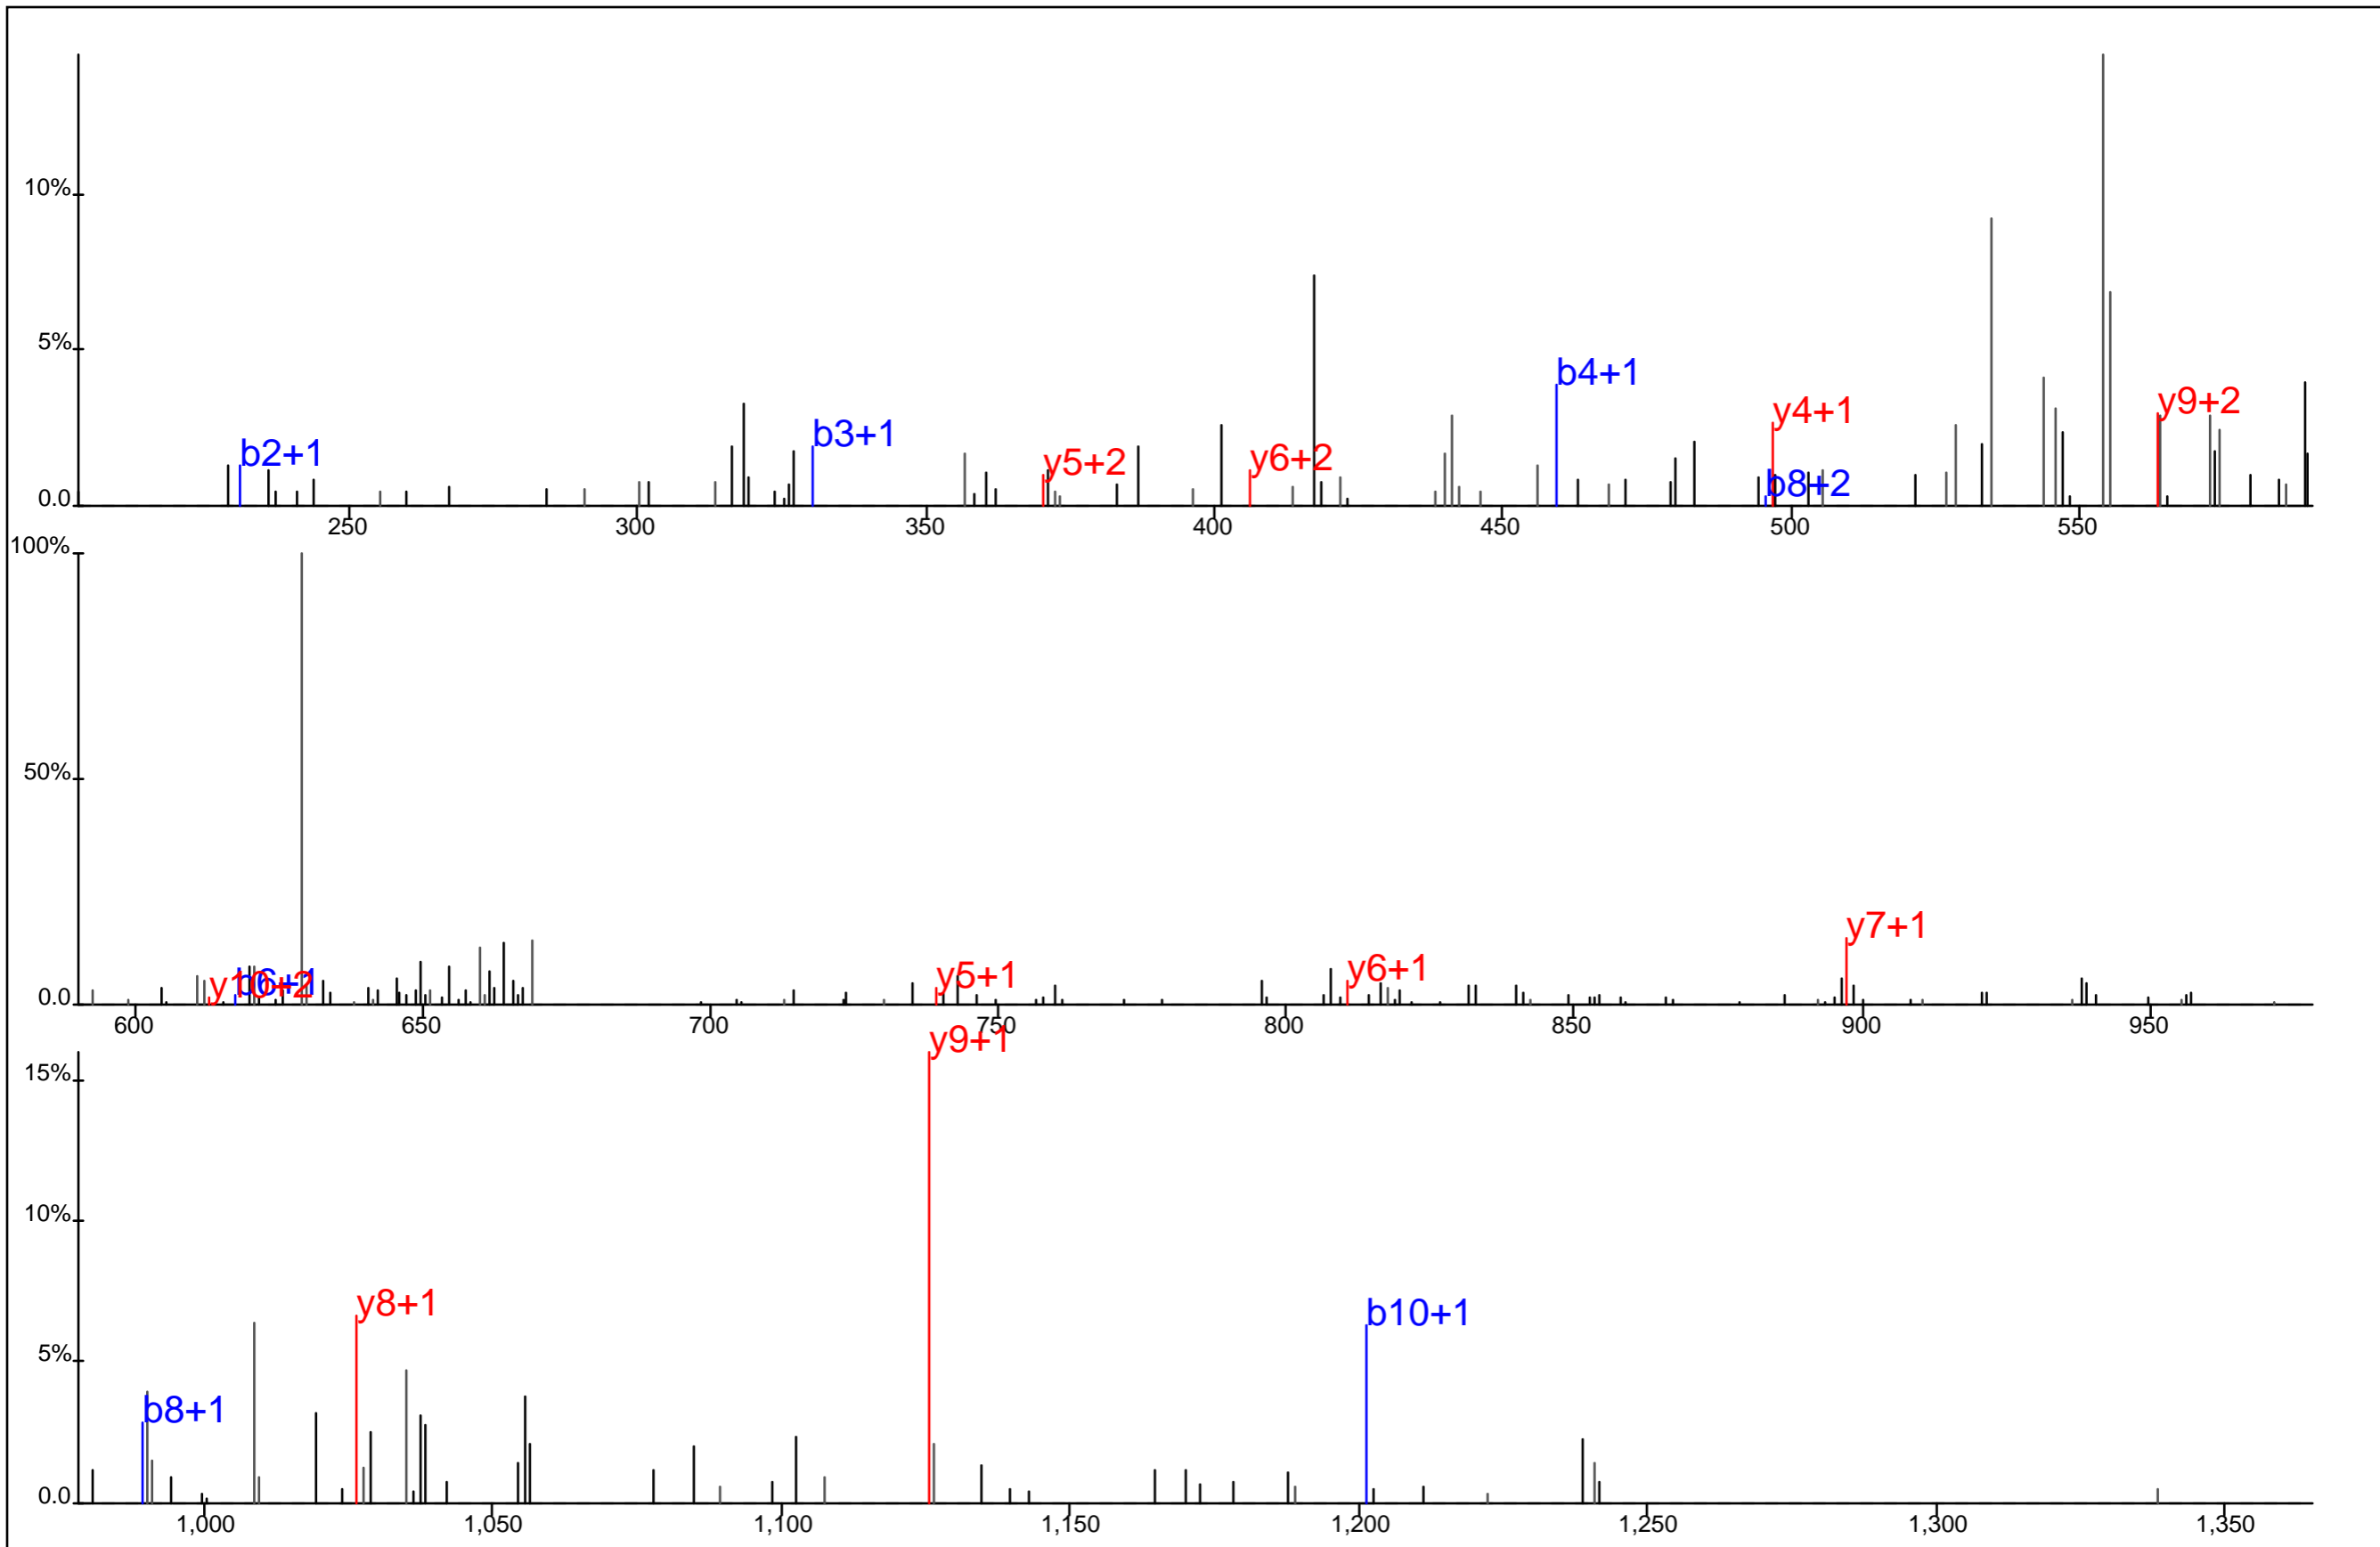

MVVESAY\*EVIK#

Protein Name: Lactate dehydrogenase B  
 gi Accession: 13786847  
 Precursor Mass: 678.3270+2  
 Delta Mass: 4.439 ppm  
 XCorr: 17.5

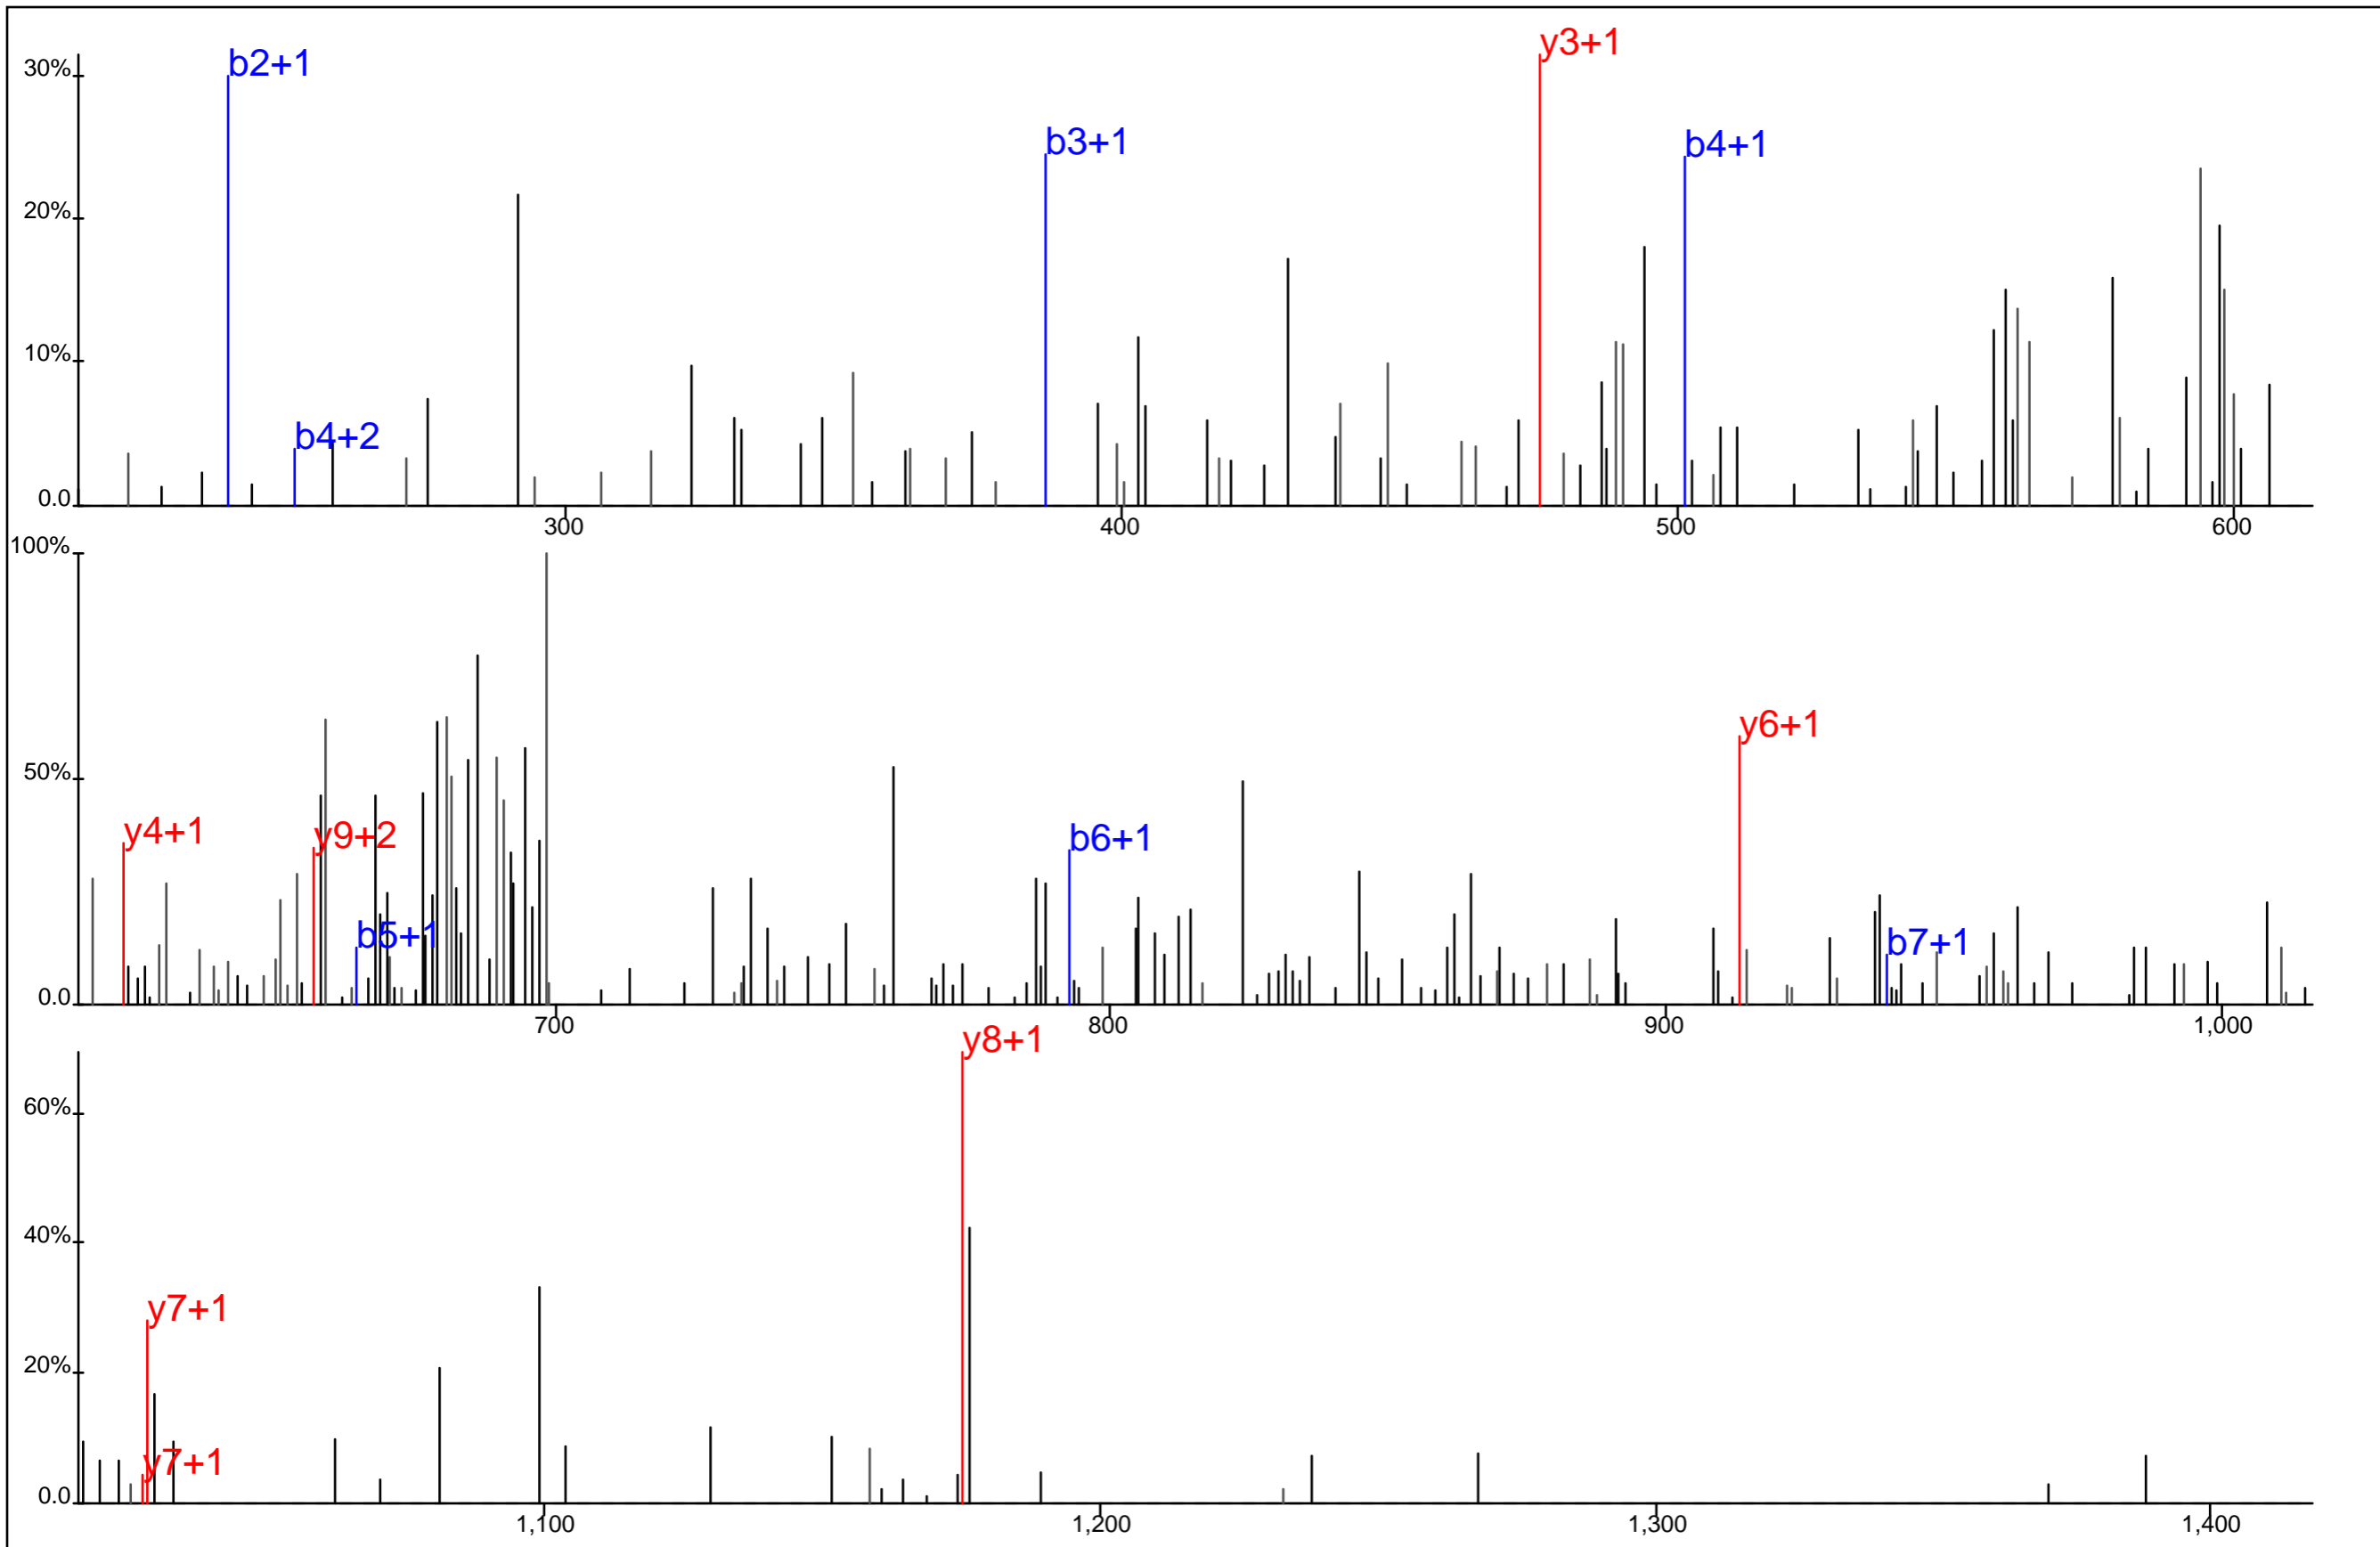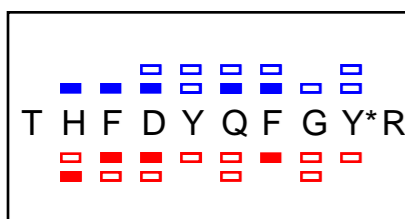

Protein Name: LARP  
 gi Accession: 3882183  
 Precursor Mass: 707.2899+2  
 Delta Mass: 7.229 ppm  
 XCorr: 11.39

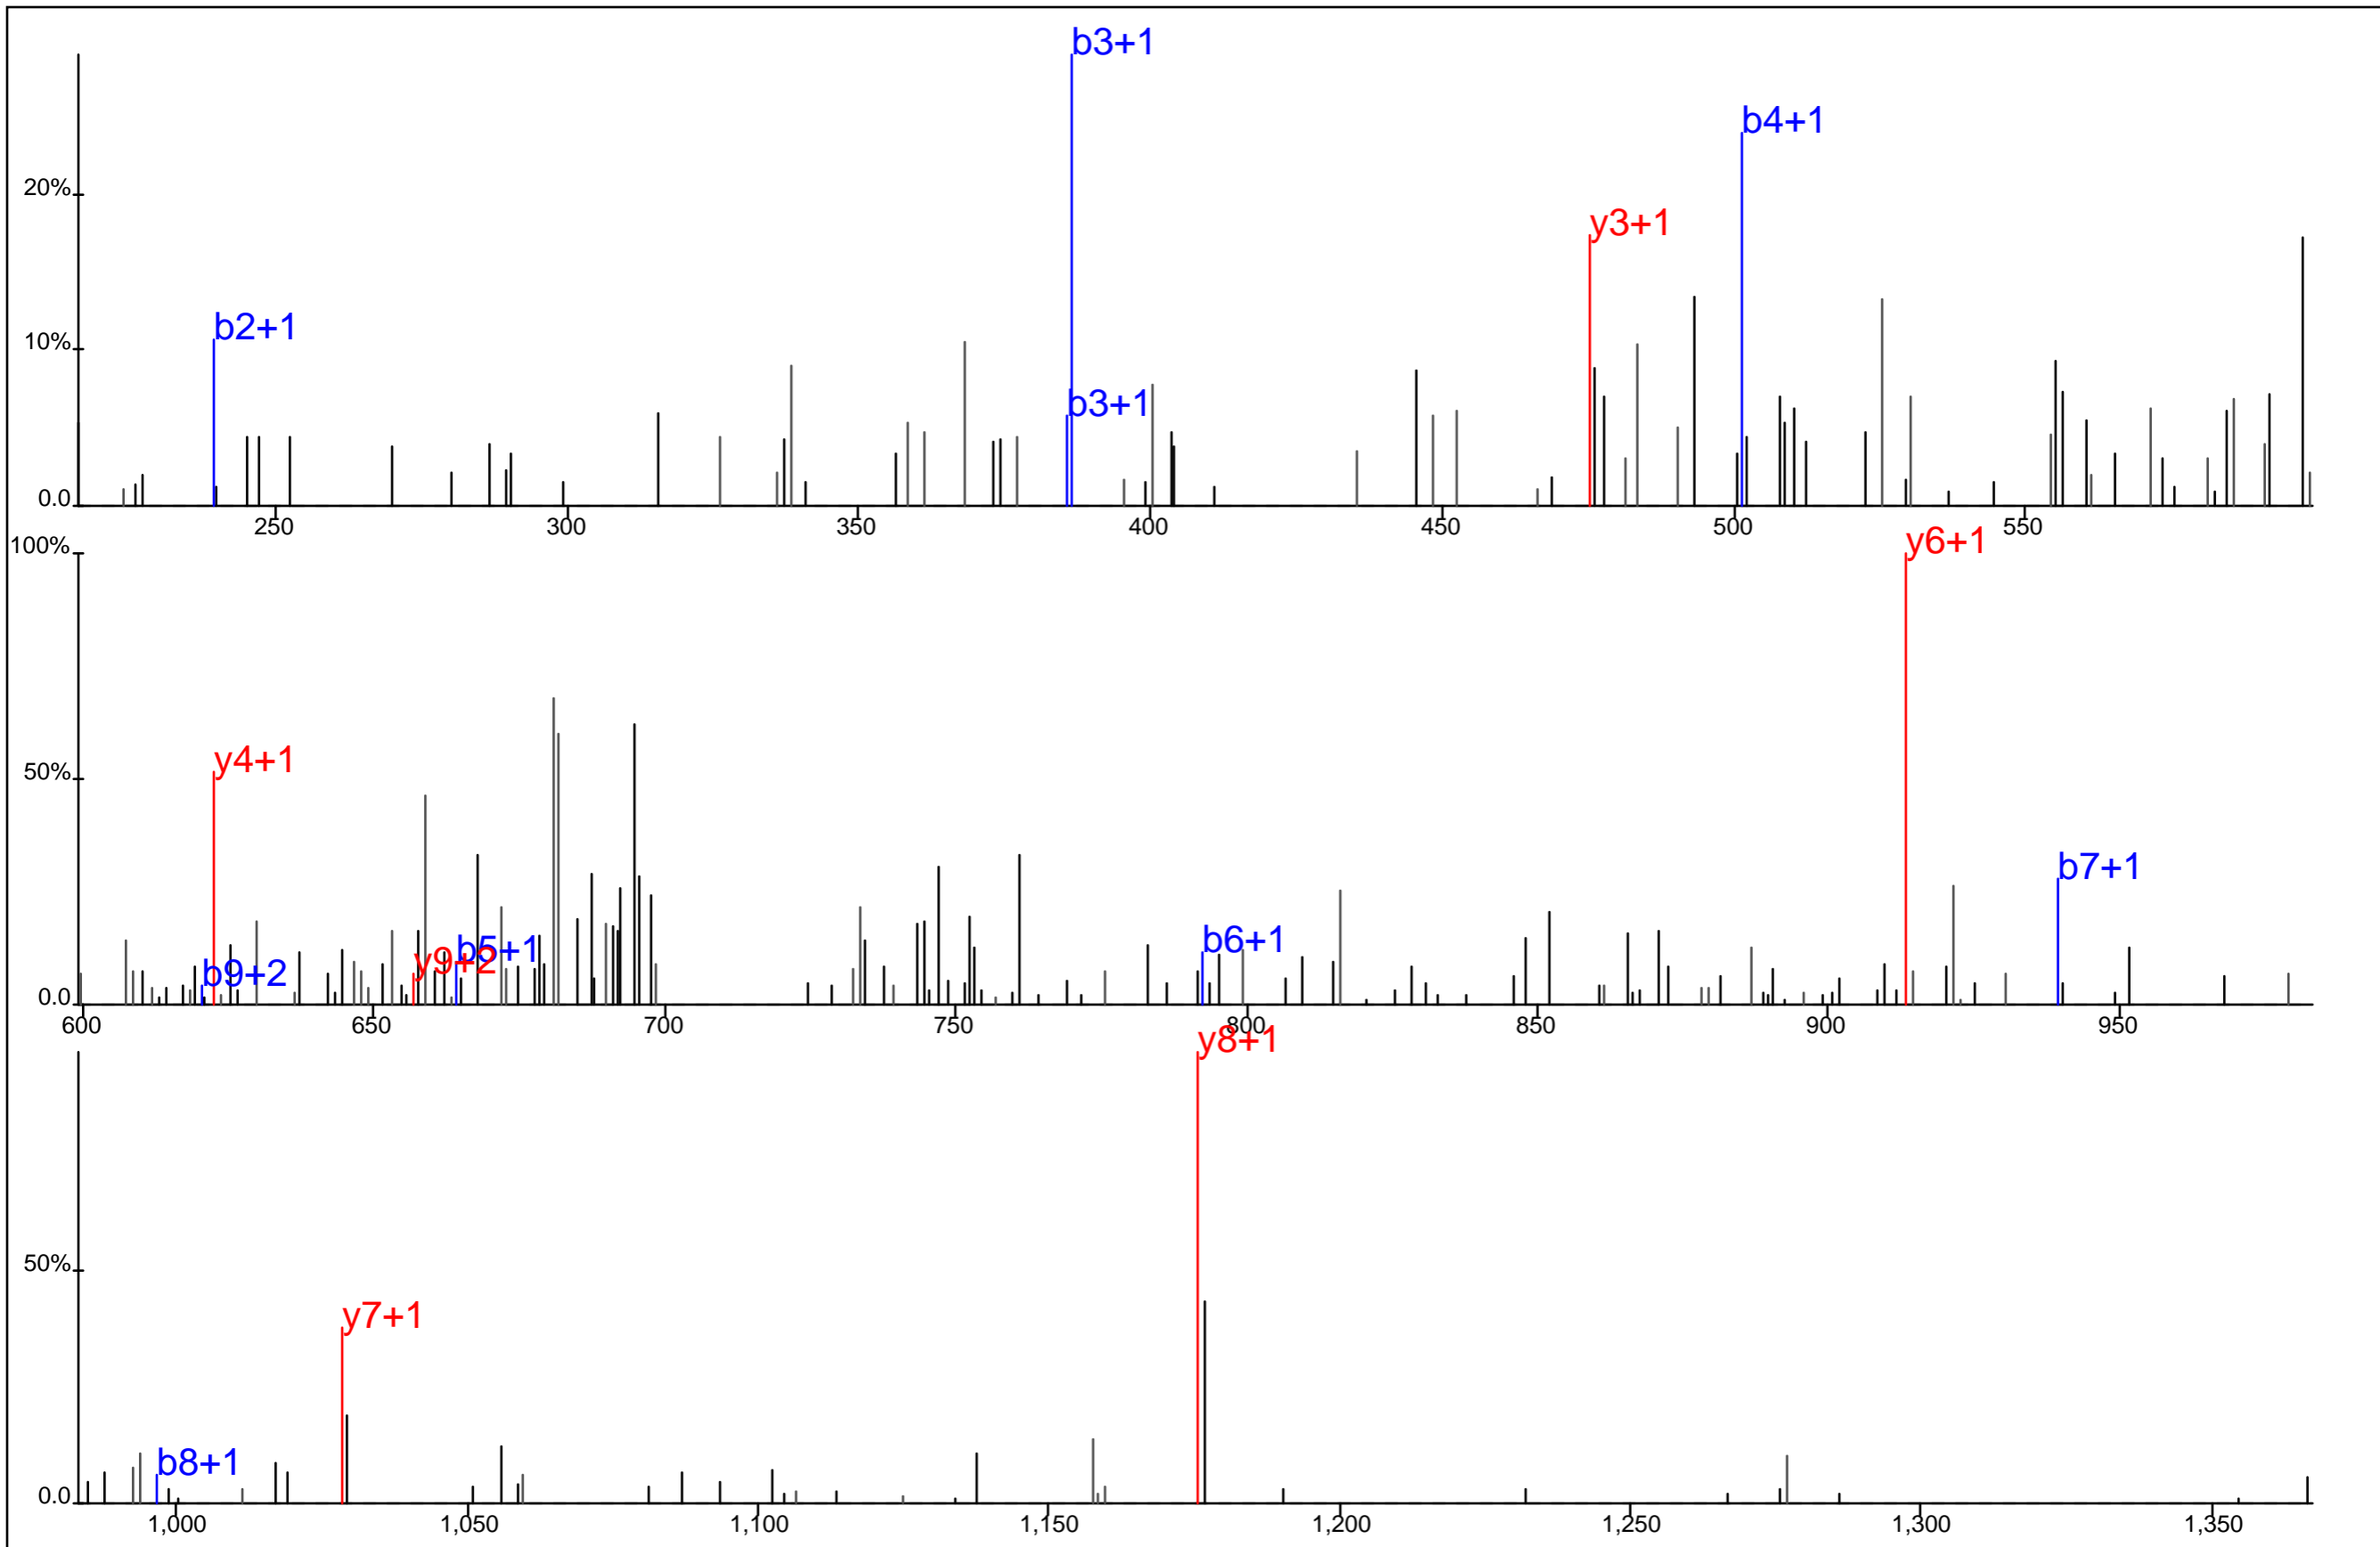

■ ■ ■ ■ ■ ■ ■ ■  
 T H F D Y Q F G Y\* R  
□ □ □ □ □ □ □ □

Protein Name: LARP  
 gi Accession: 3882183  
 Precursor Mass: 707.2882+2  
 Delta Mass: 4.809 ppm  
 XCorr: 17.74

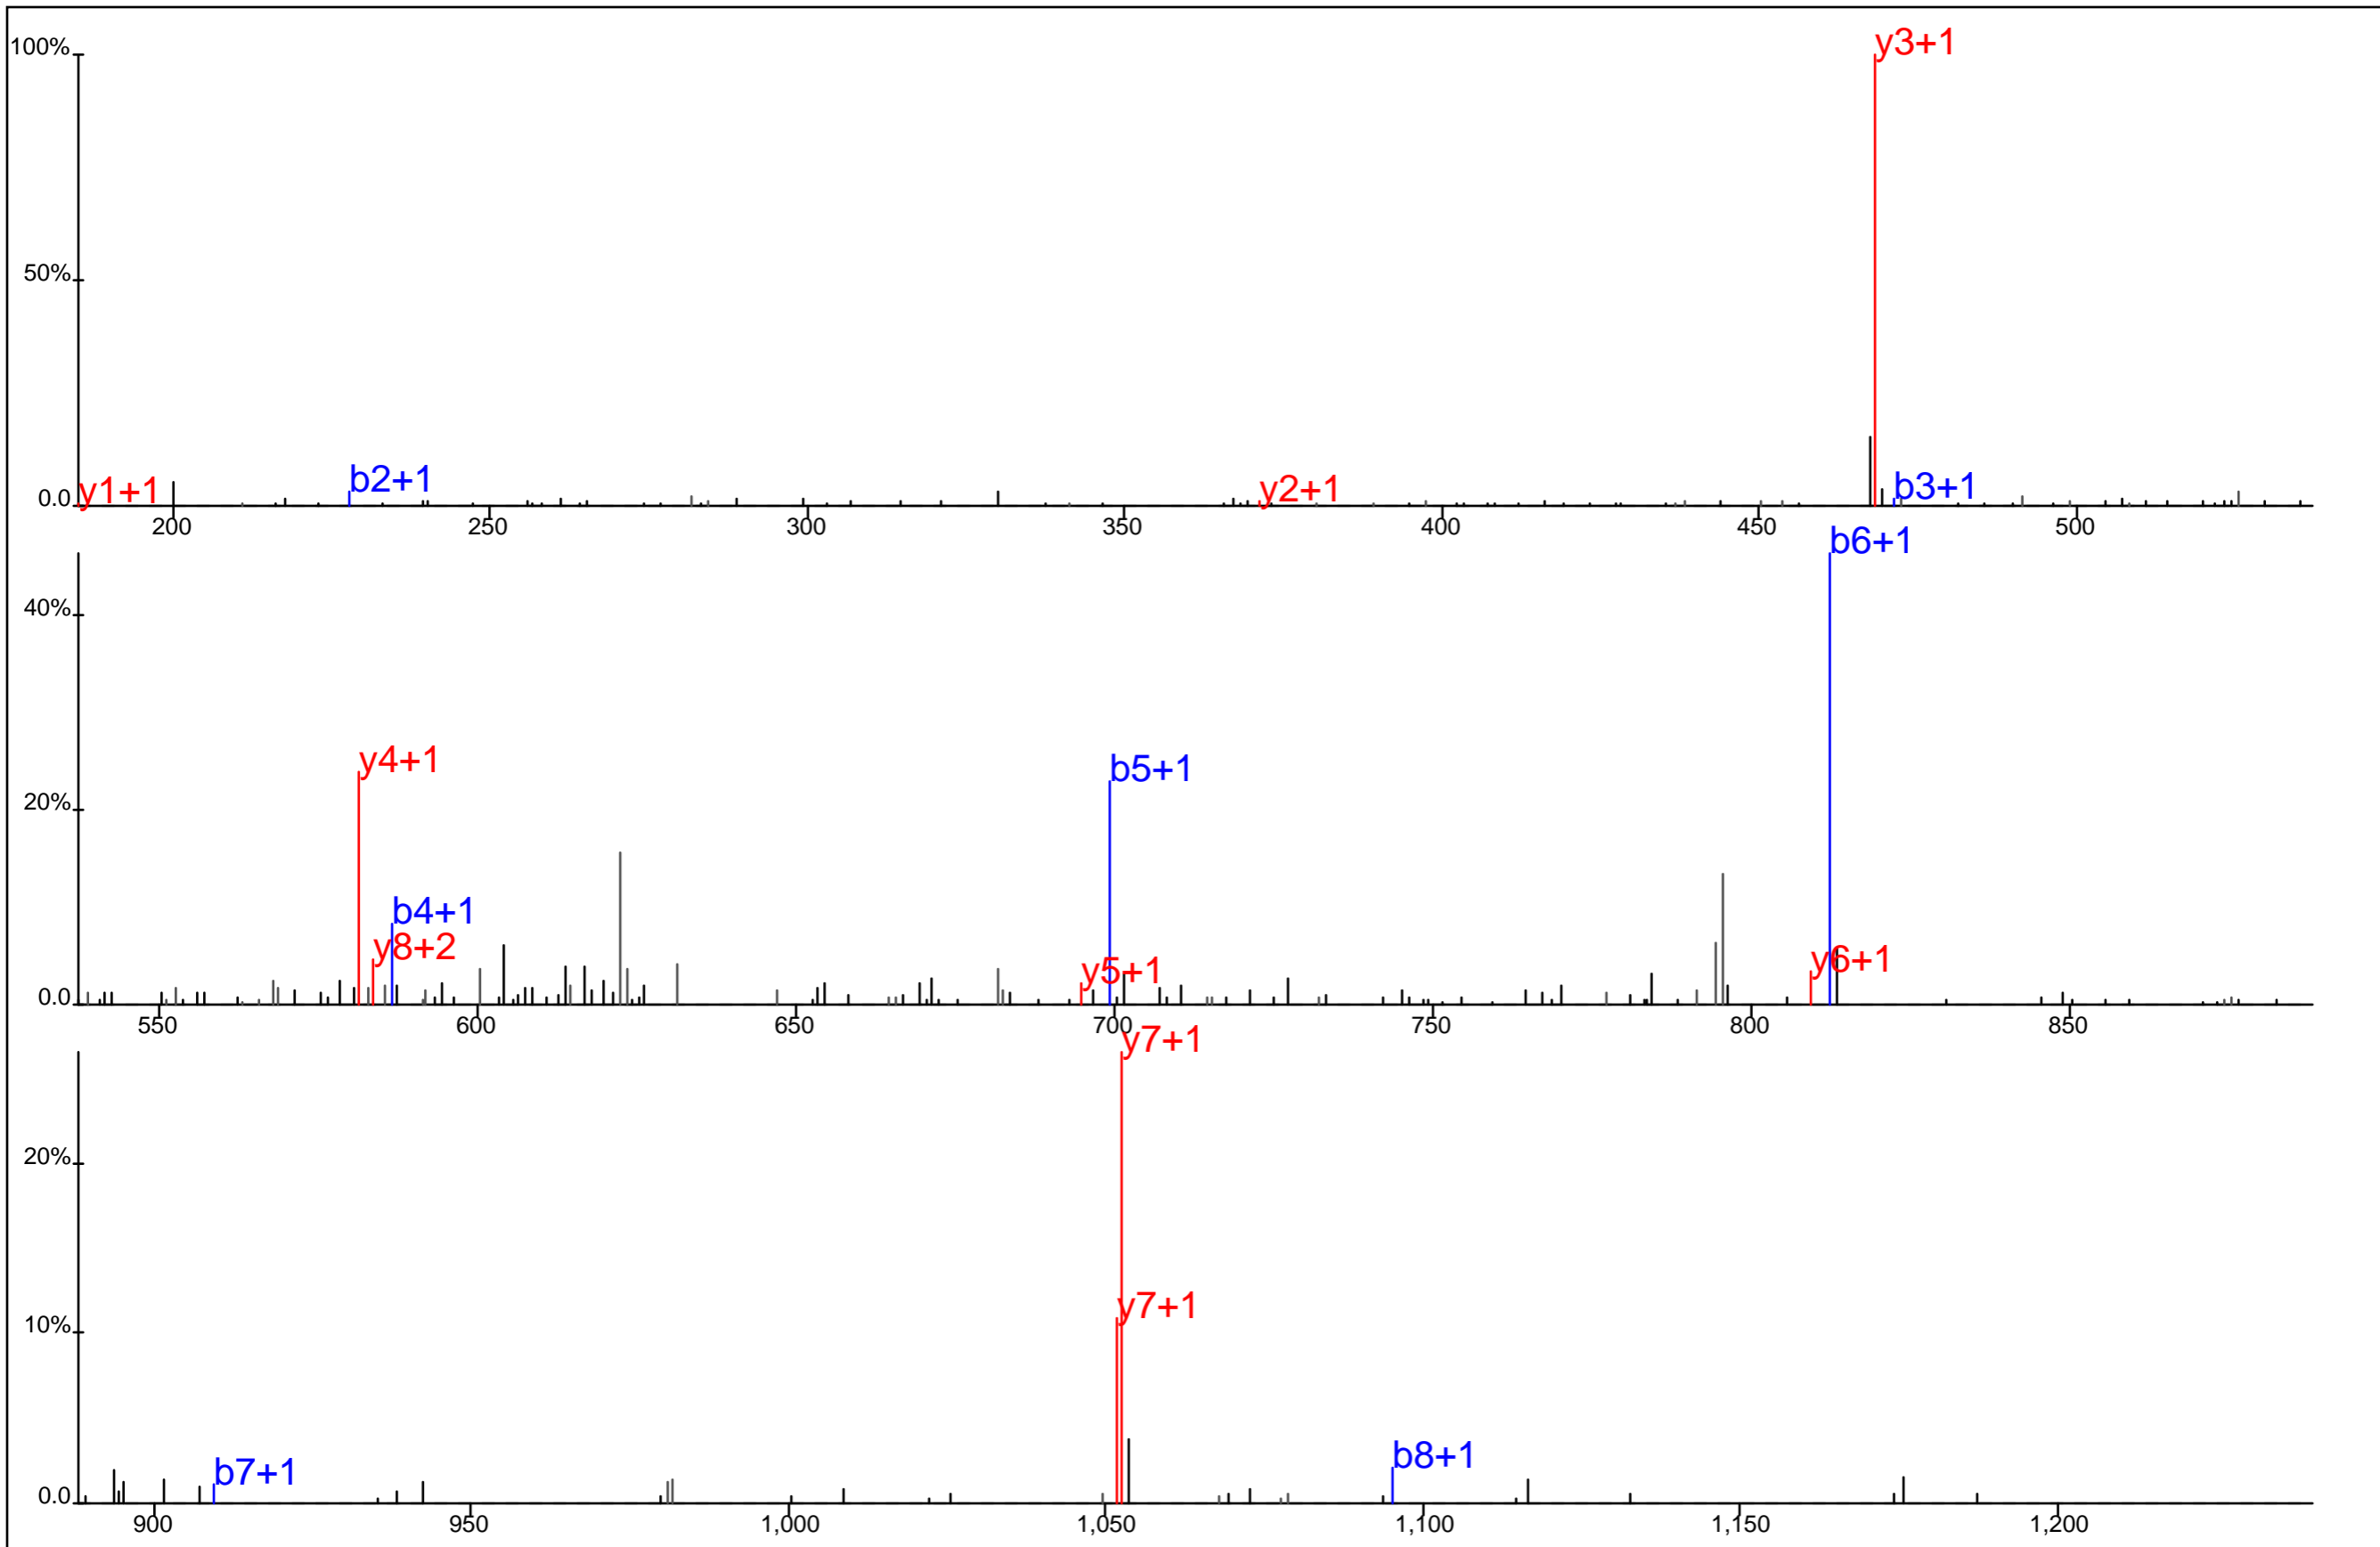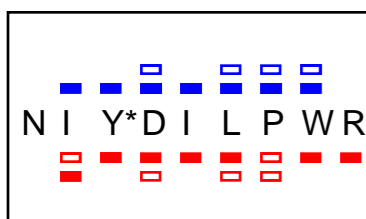

Protein Name: LAX  
 gi Accession: 7020372  
 Precursor Mass: 640.3111+2  
 Delta Mass: 3.048 ppm  
 XCorr: 2.3089

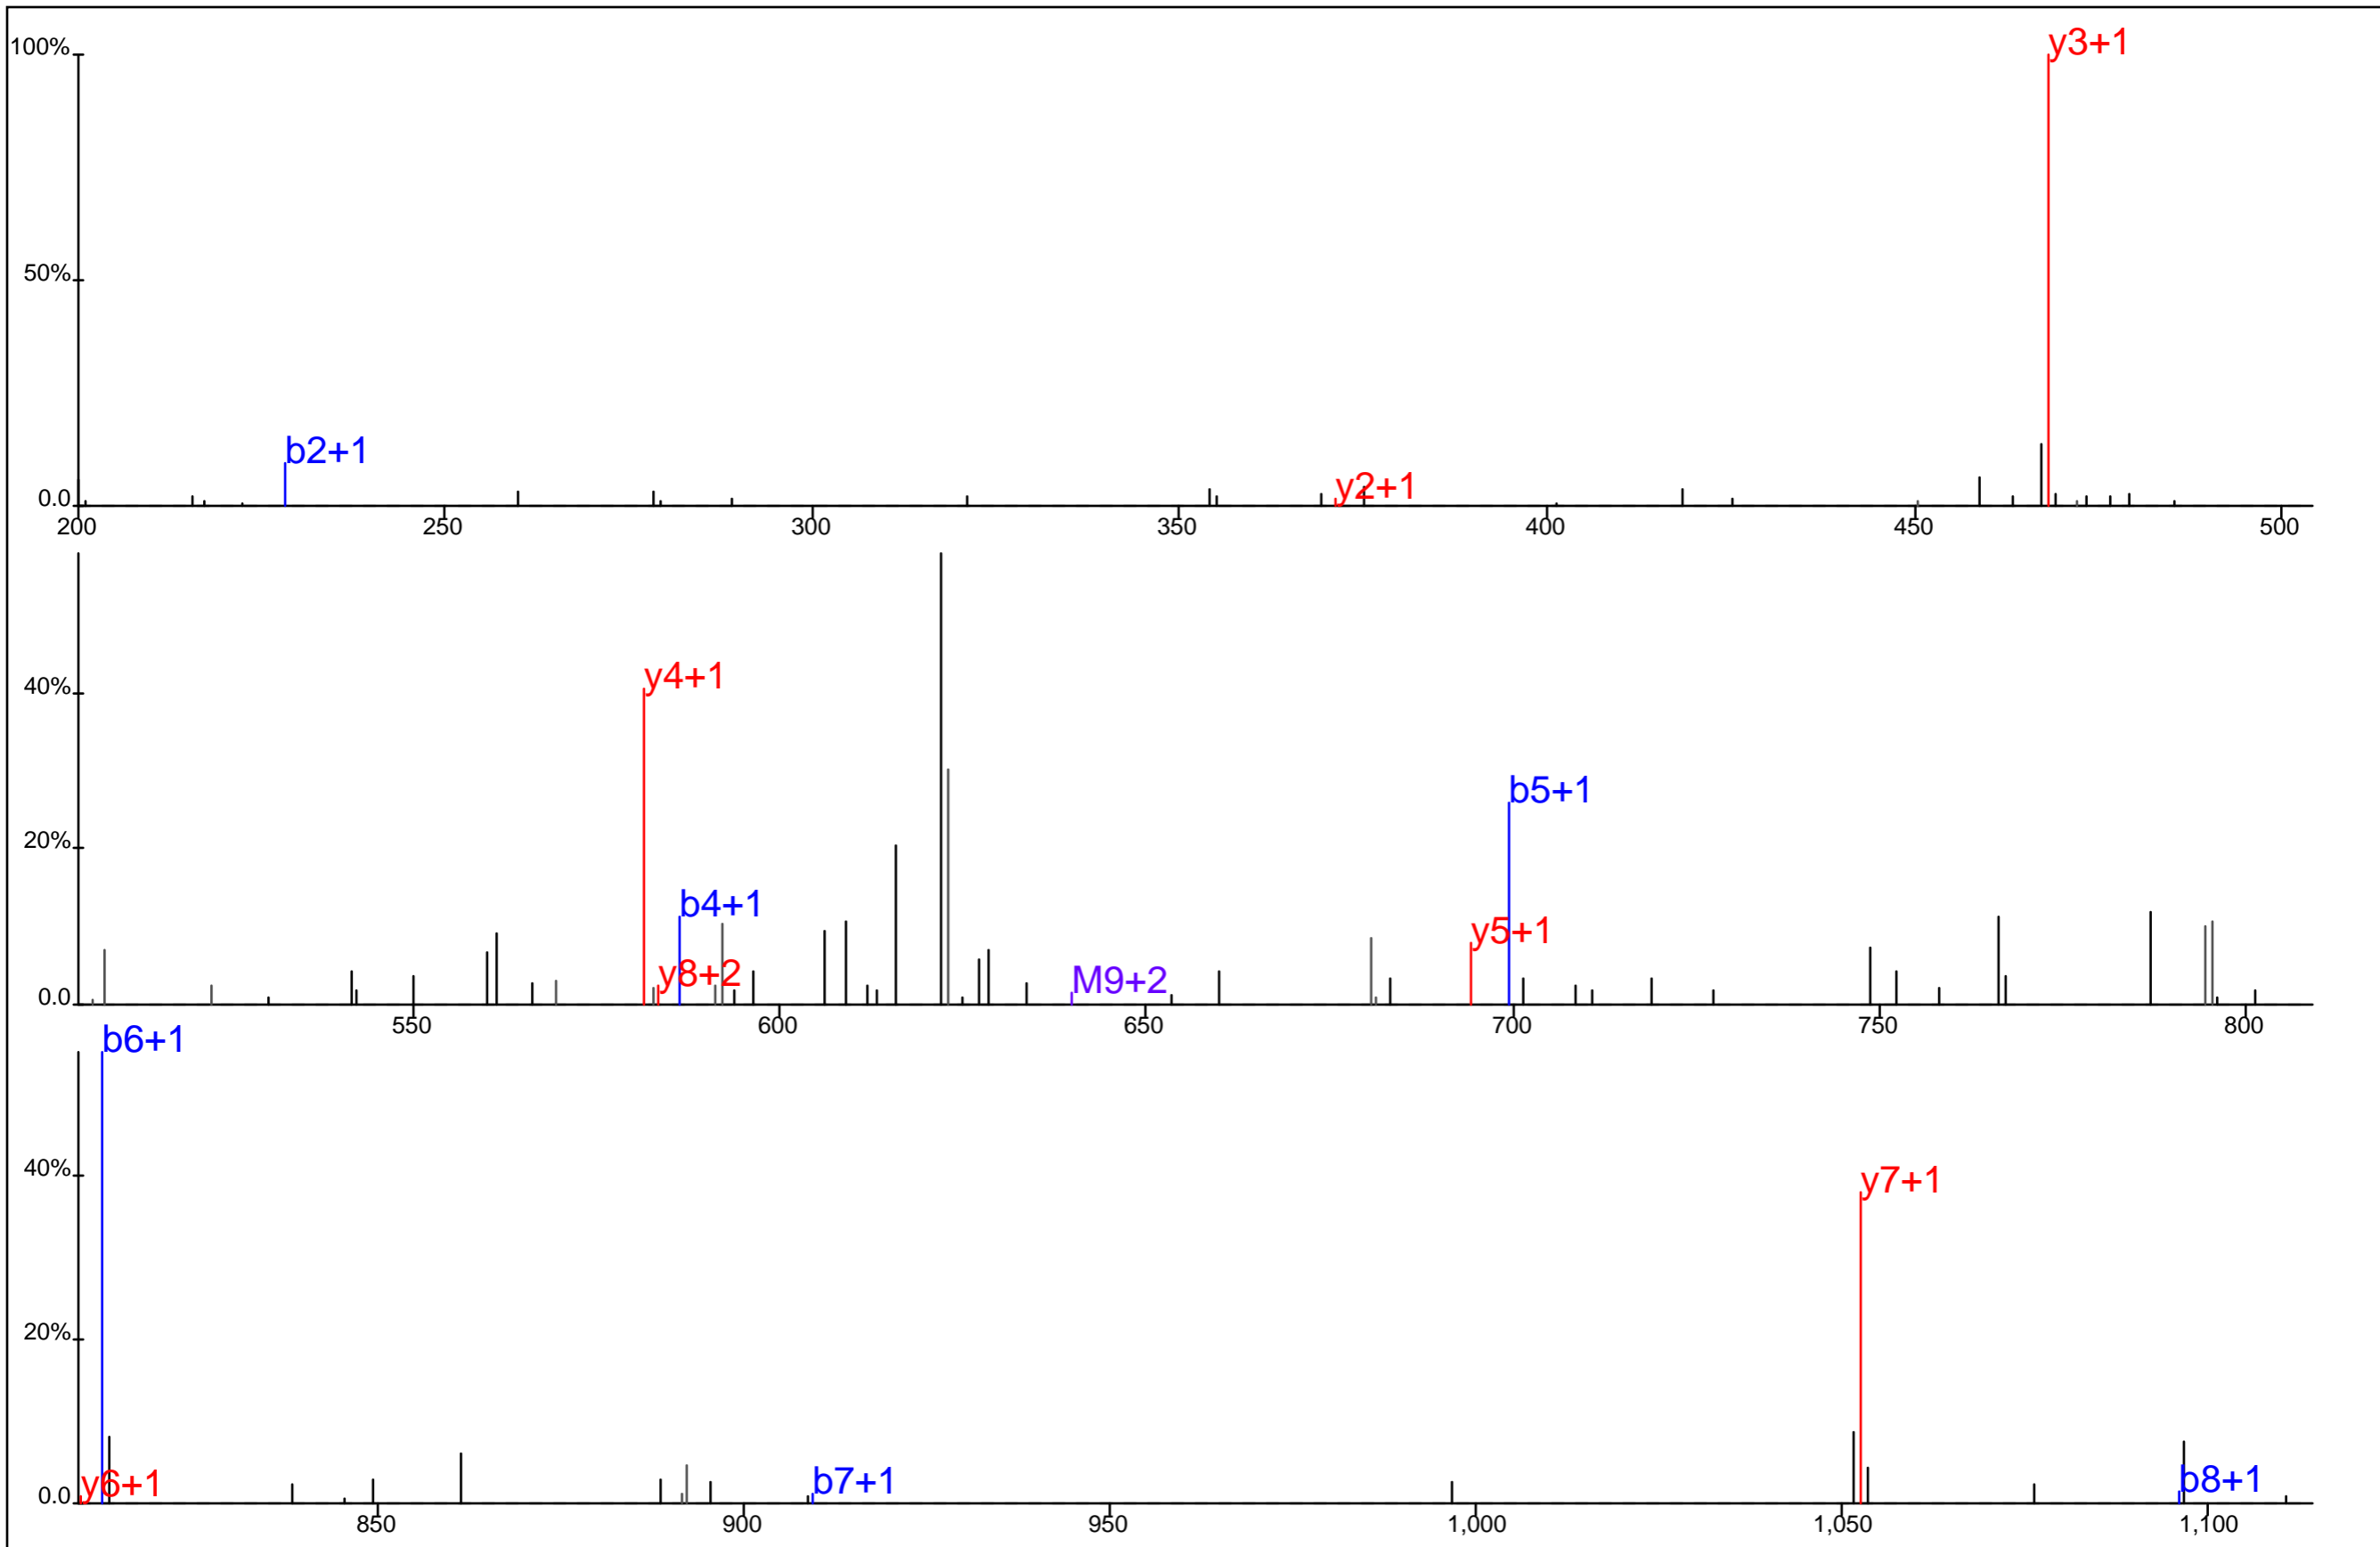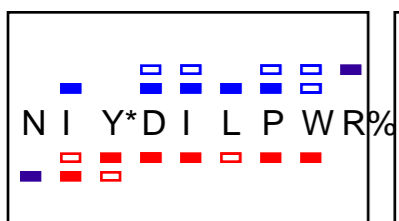

Protein Name: LAX  
 gi Accession: 7020372  
 Precursor Mass: 640.3109+2  
 Delta Mass: 2.781 ppm  
 XCorr: 19.94

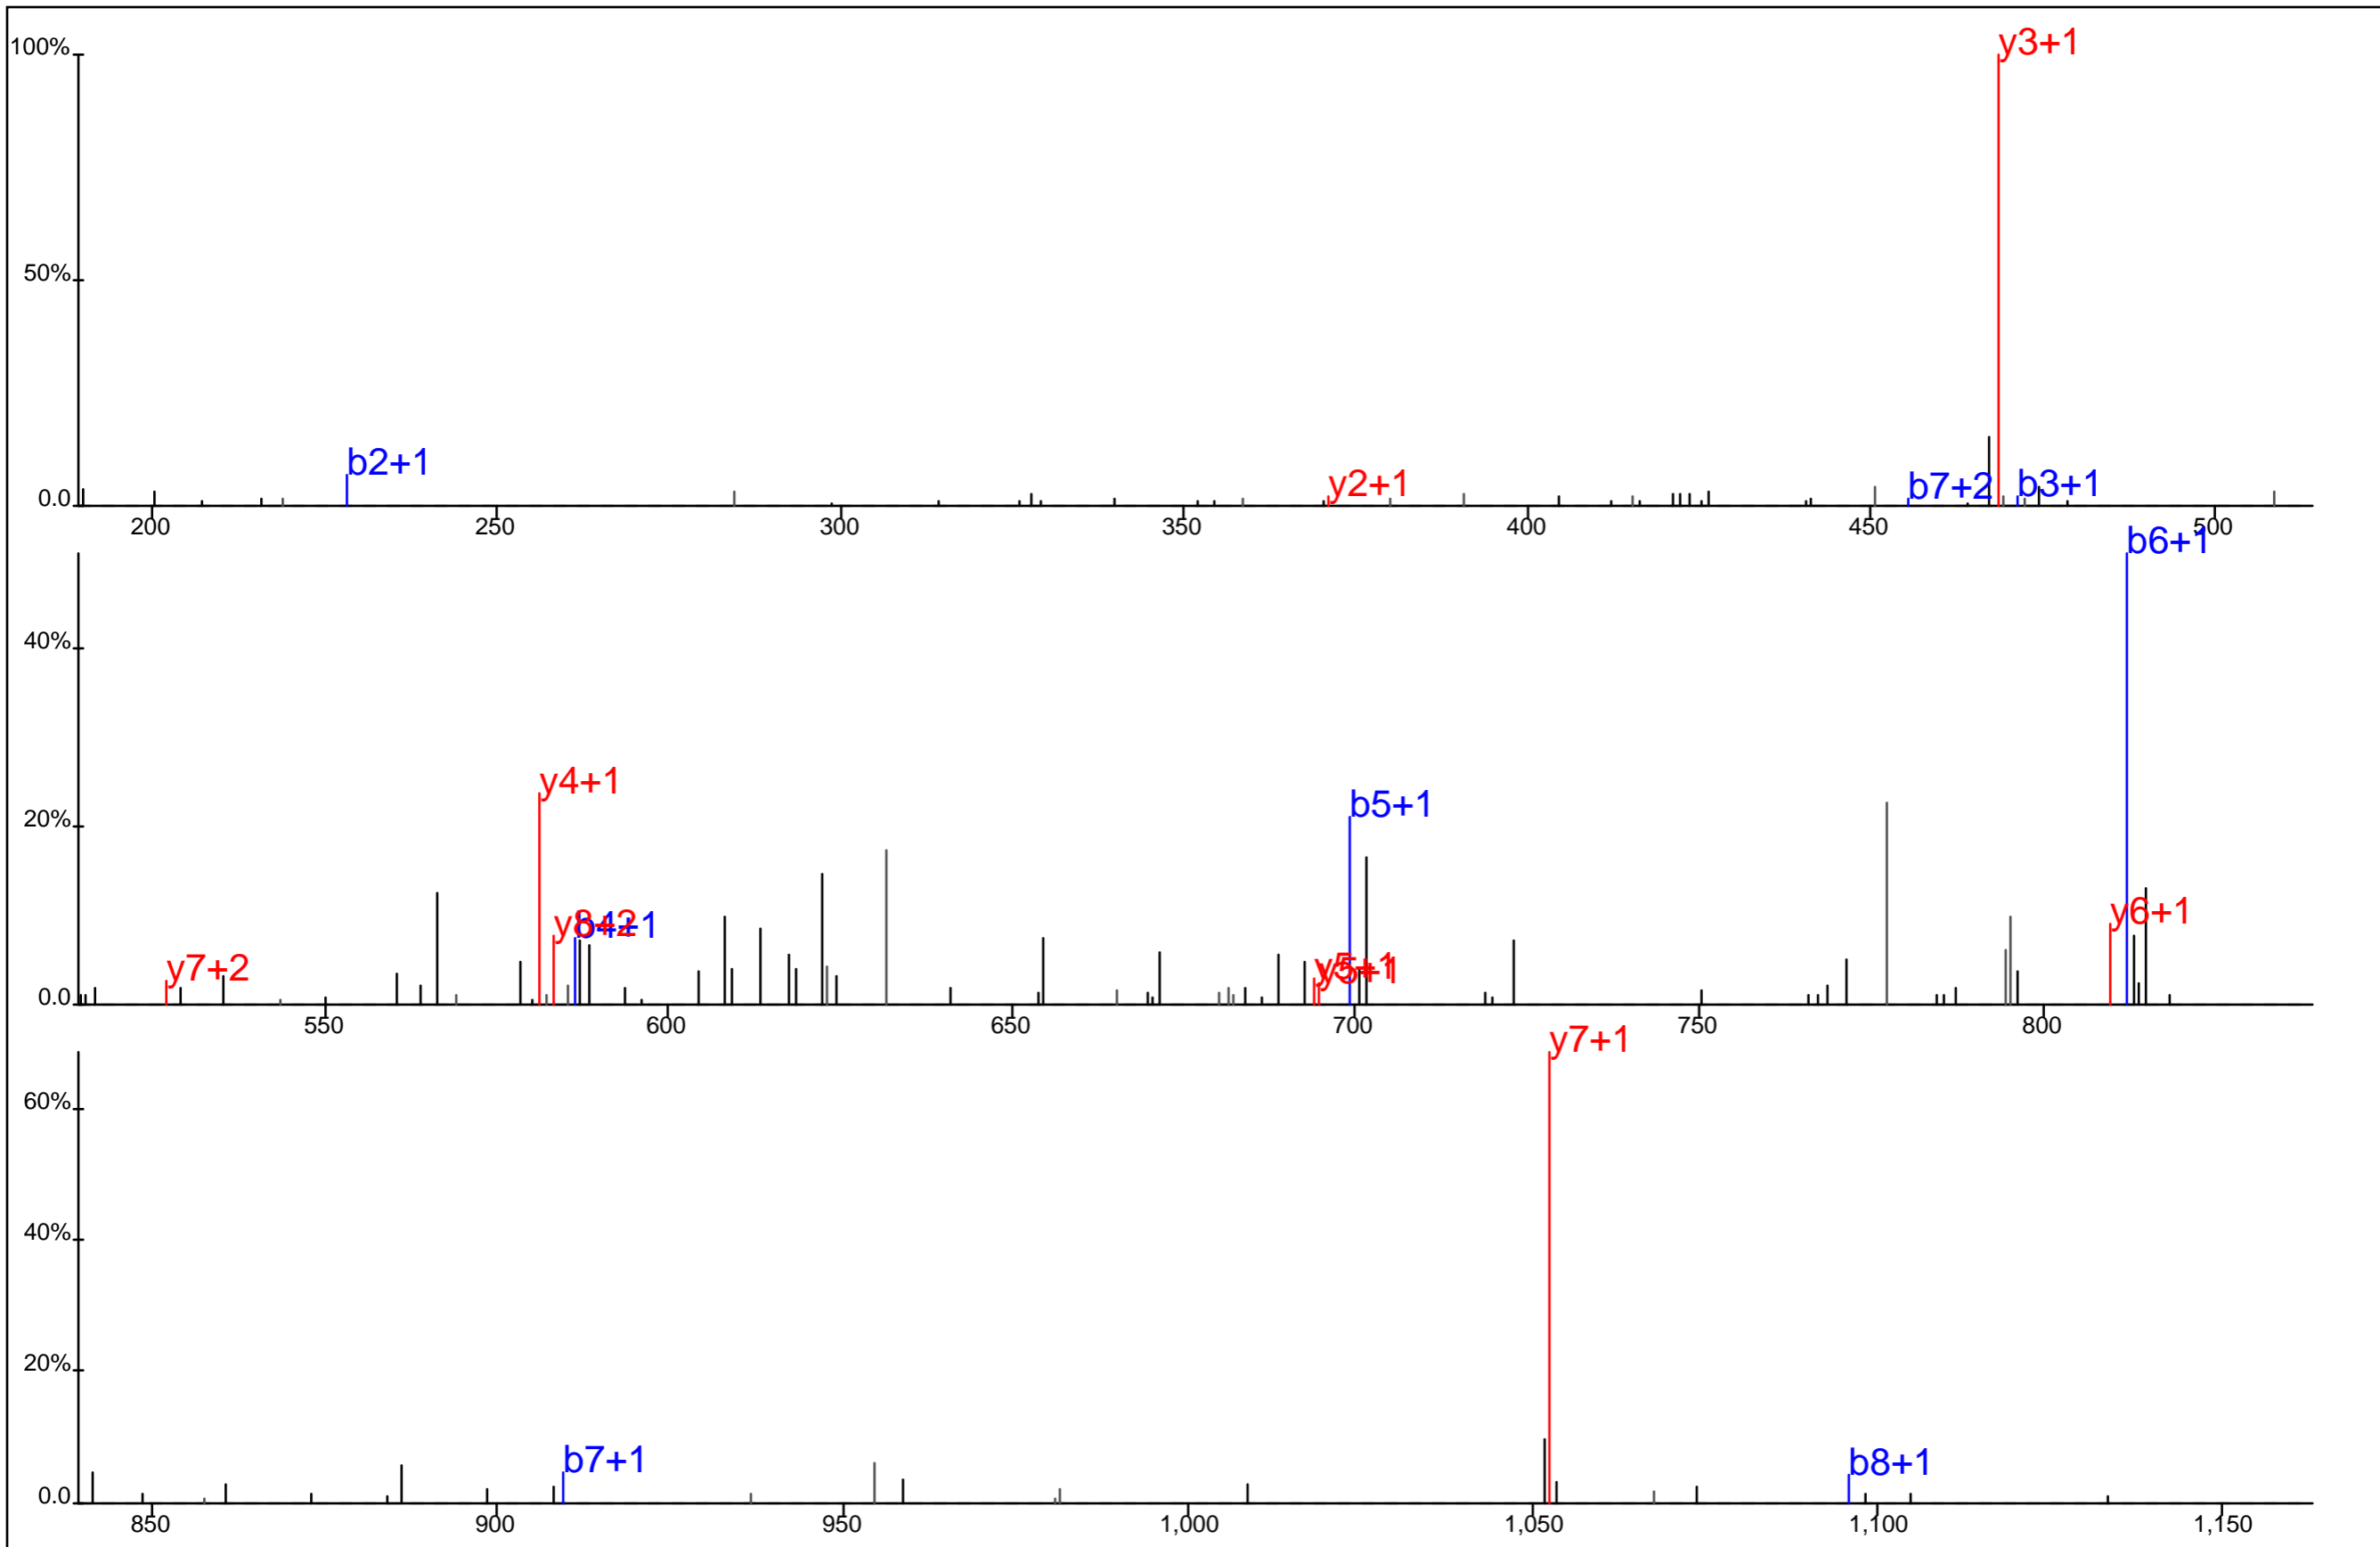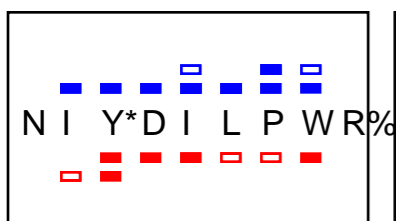

Protein Name: LAX  
 gi Accession: 7020372  
 Precursor Mass: 640.3125+2  
 Delta Mass: 5.258 ppm  
 XCorr: 26.54

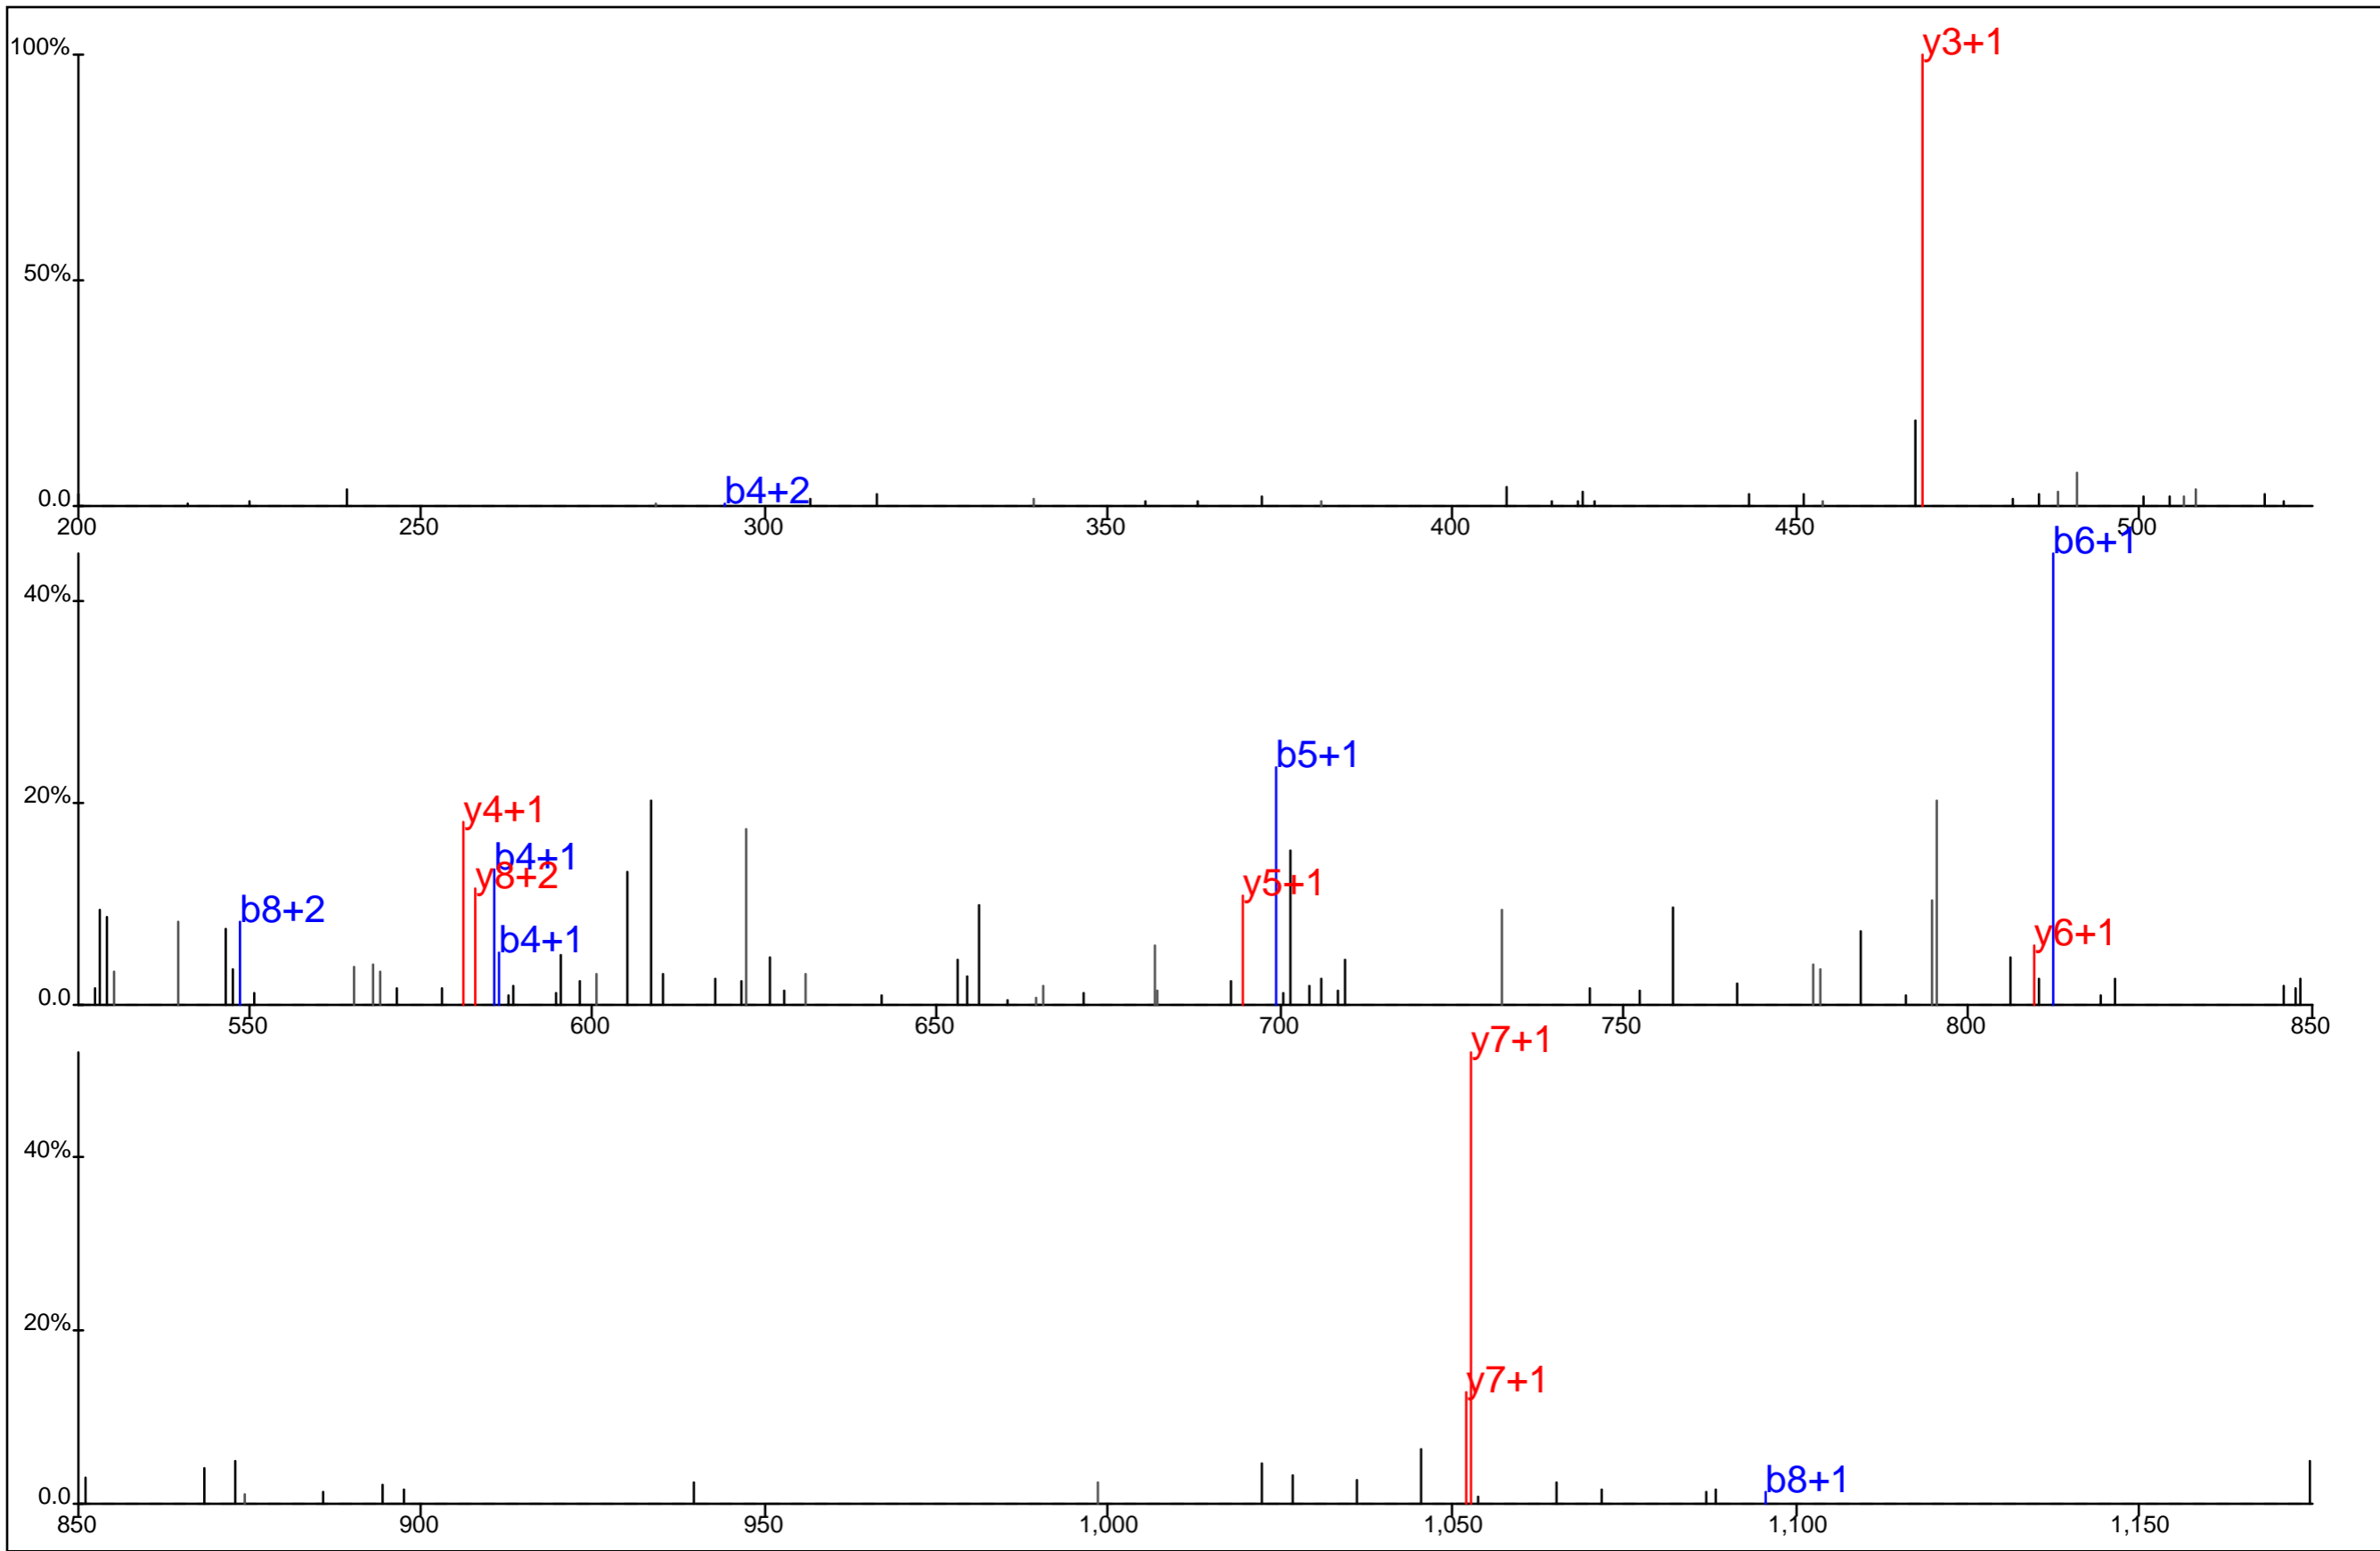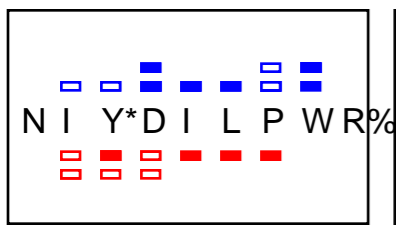

Protein Name: LAX  
 gi Accession: 7020372  
 Precursor Mass: 640.3115+2  
 Delta Mass: 3.640 ppm  
 XCorr: 16.86

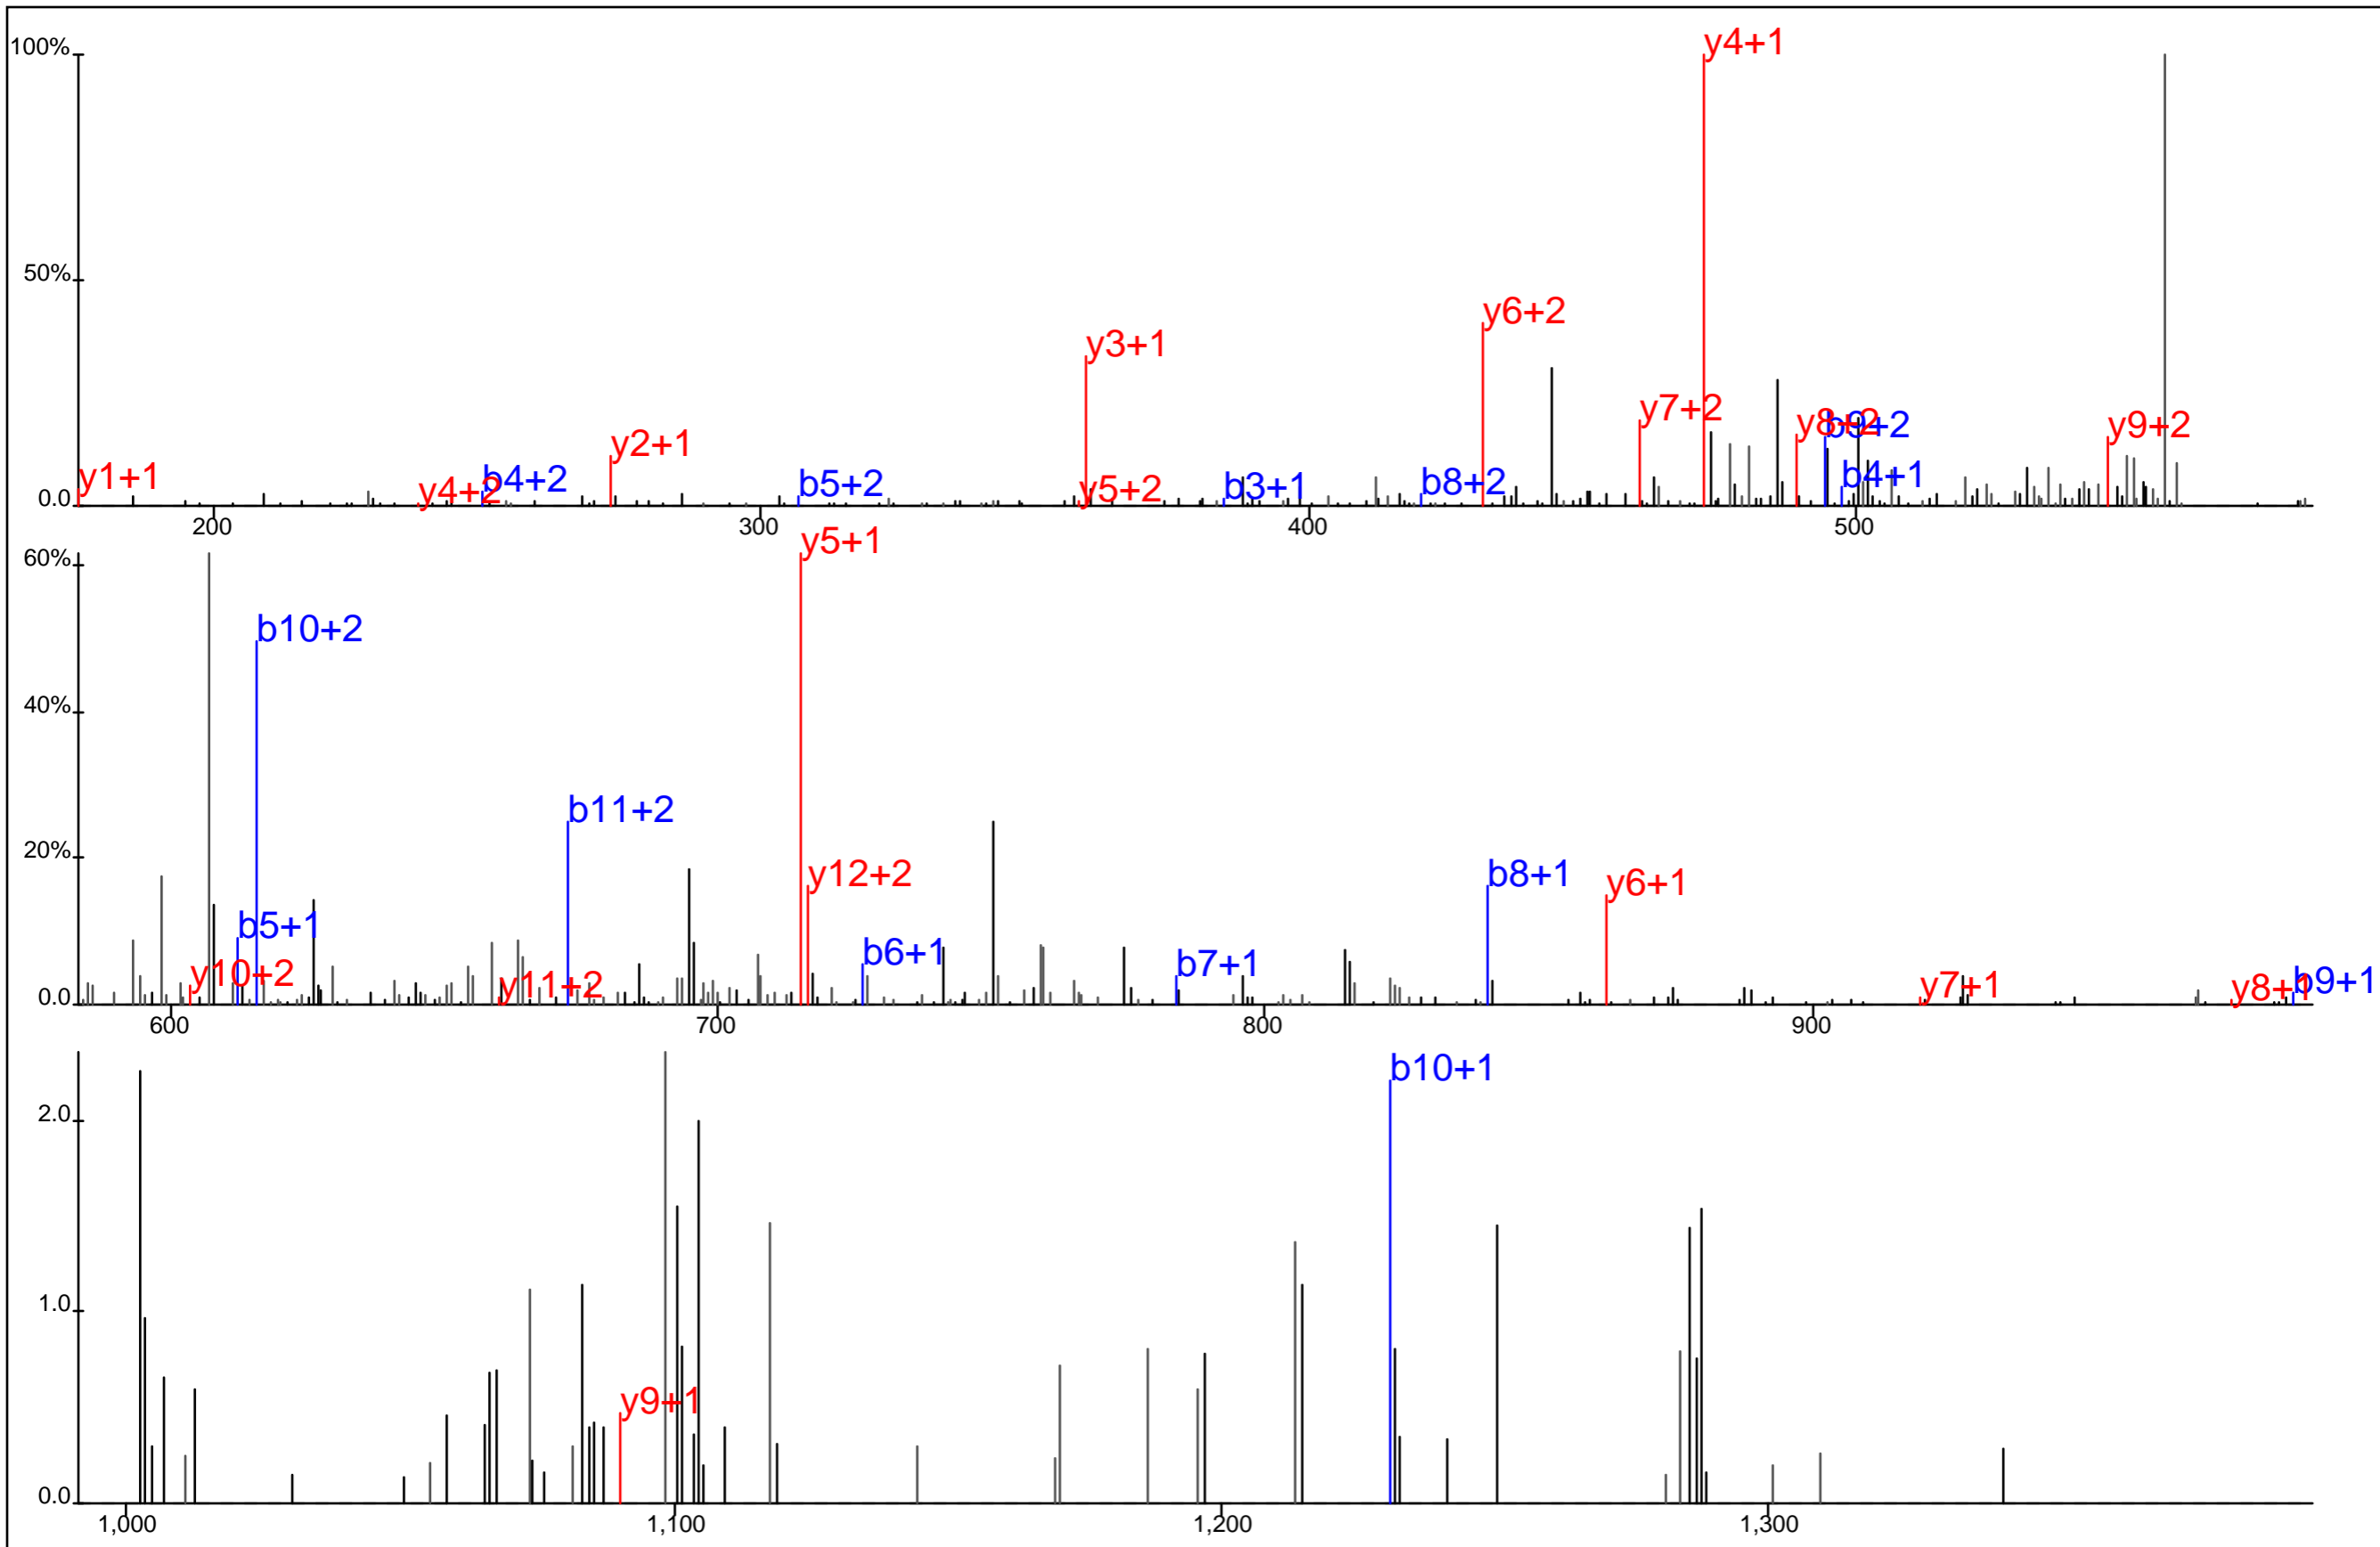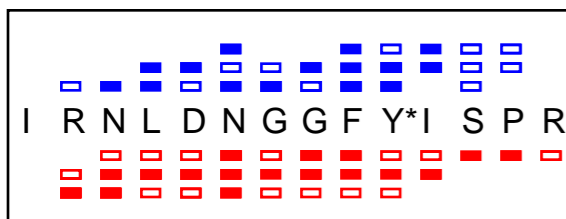

Protein Name: Lck  
 gi Accession: 6984209  
 Precursor Mass: 567.9431+3  
 Delta Mass: 2.226 ppm  
 XCorr: 26.35



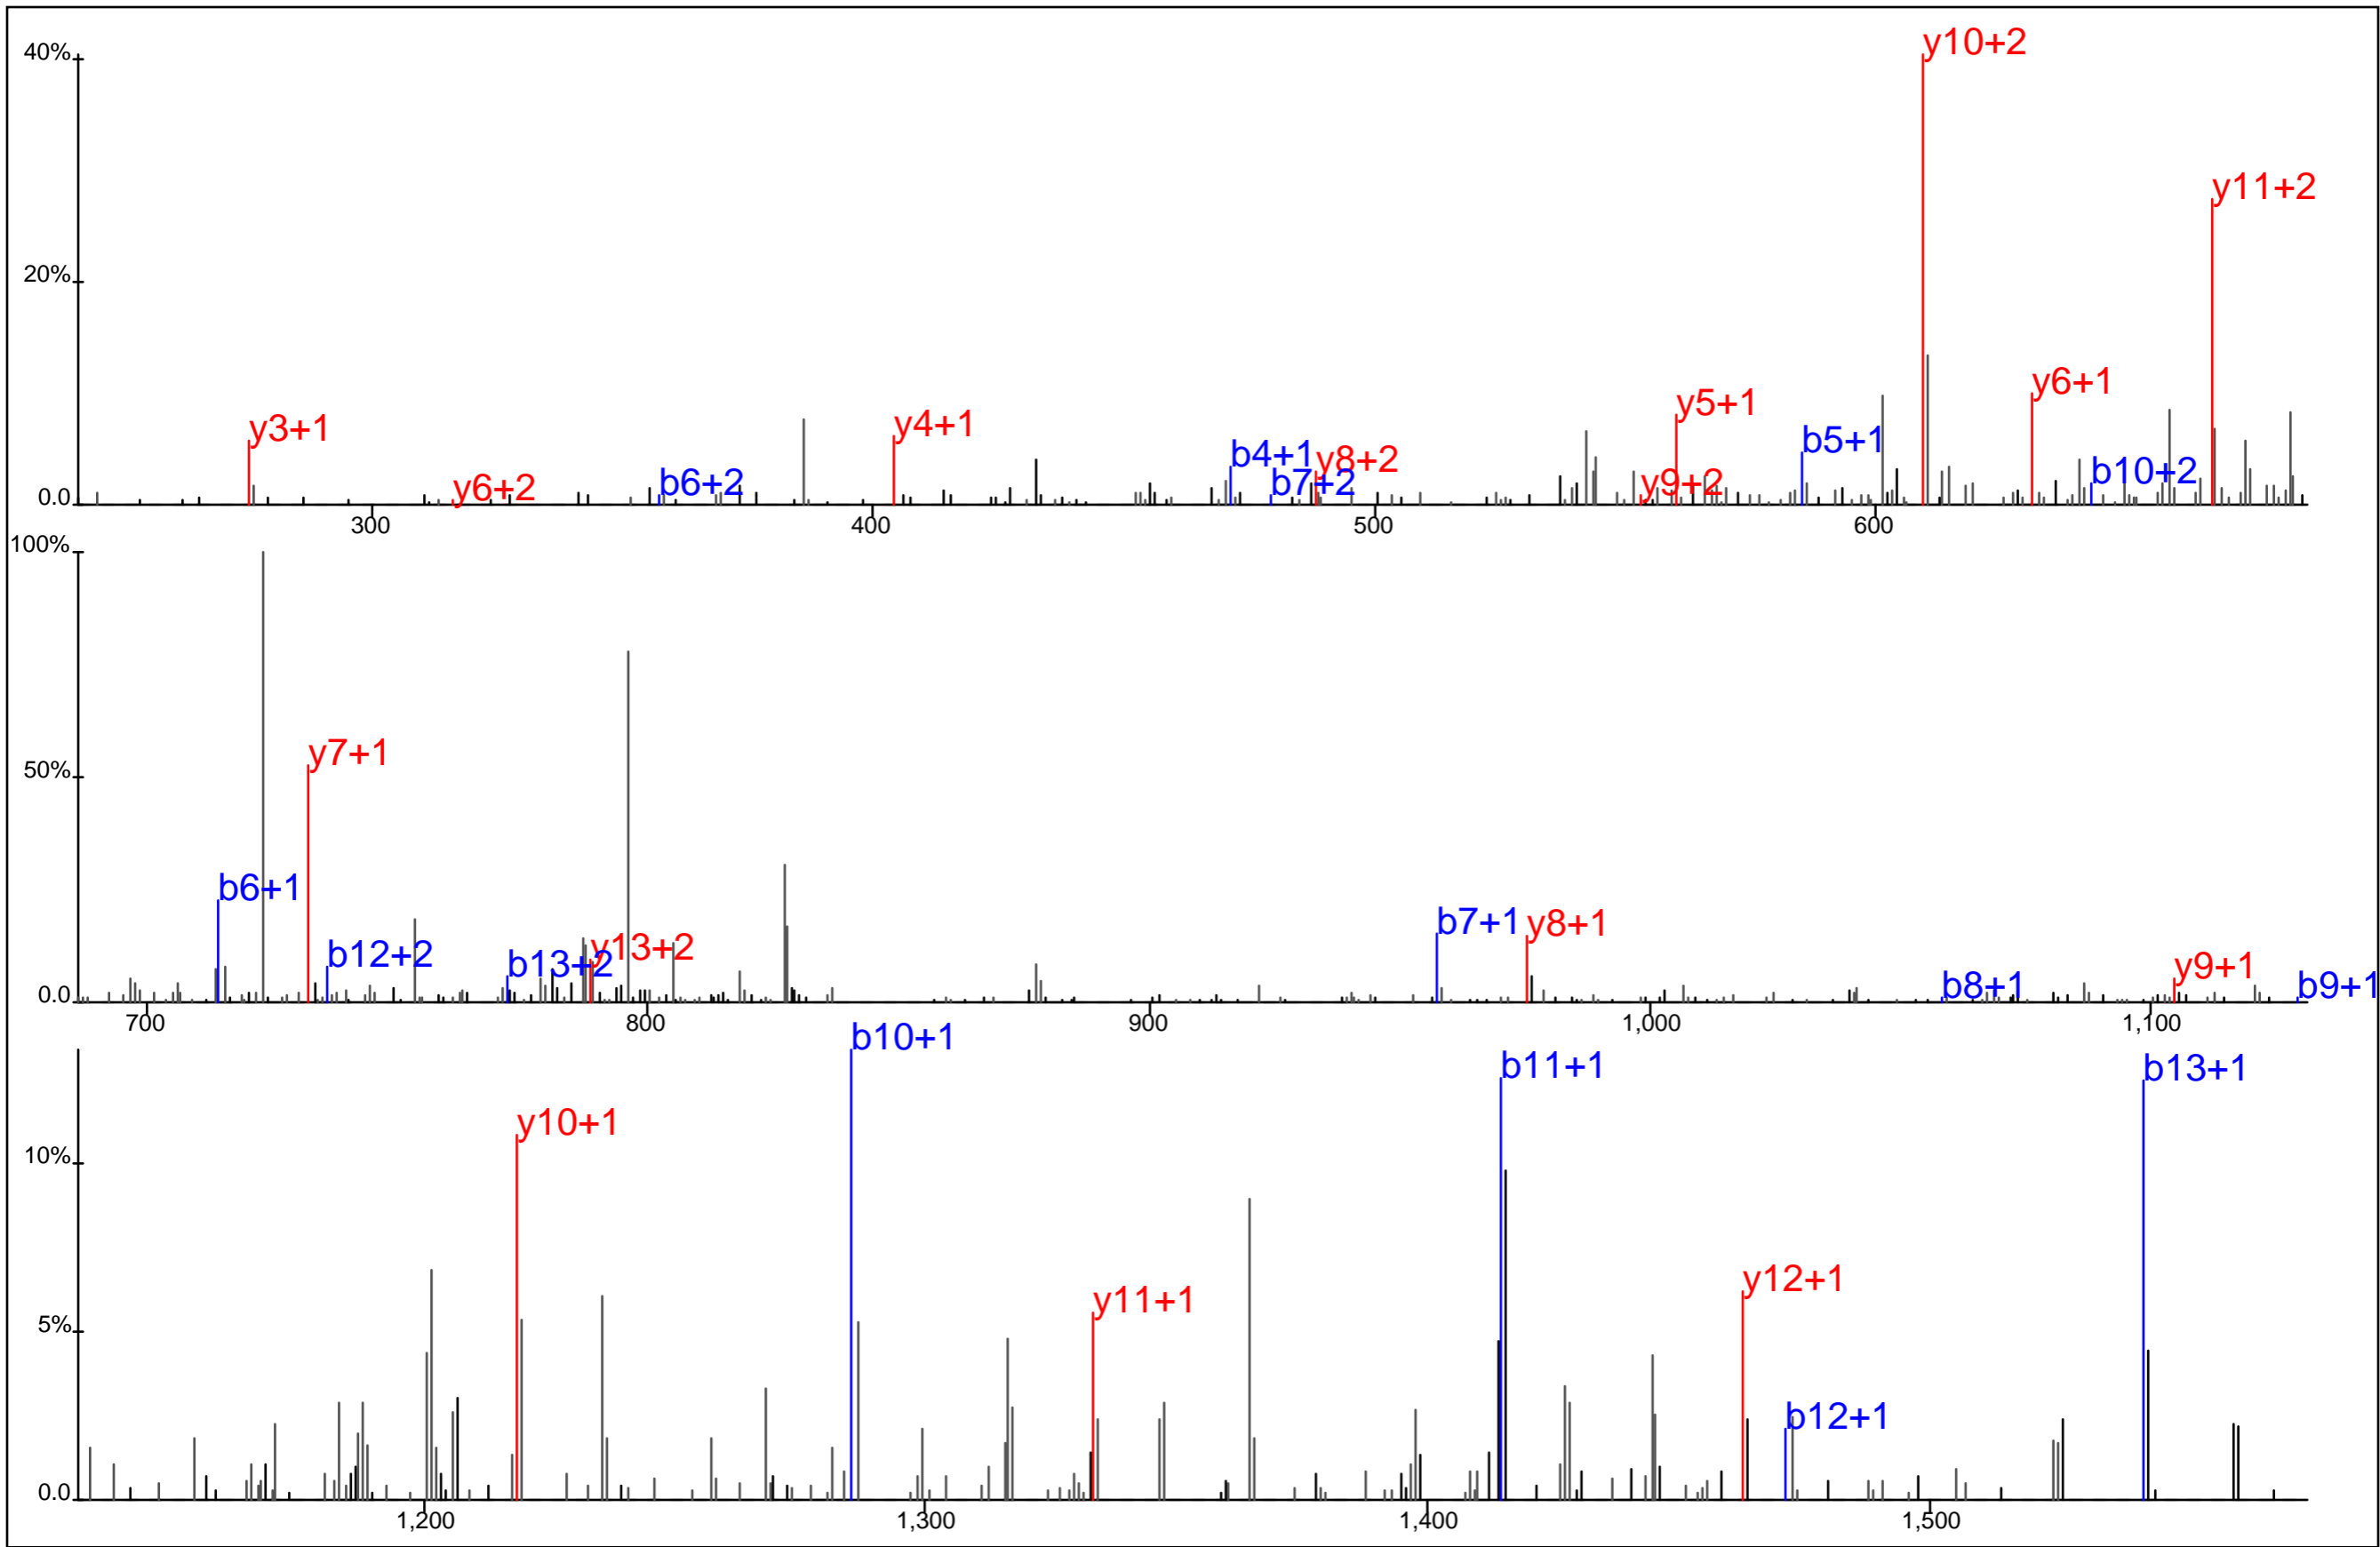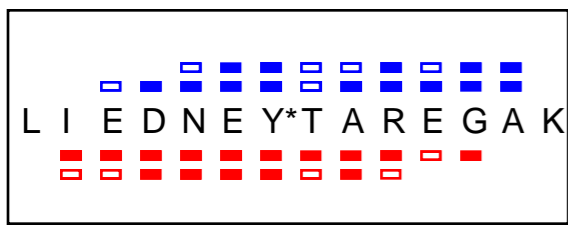

Protein Name: Lck  
 gi Accession: 6984209  
 Precursor Mass: 844.8851+2  
 Delta Mass: 6.033 ppm  
 XCorr: 56.9

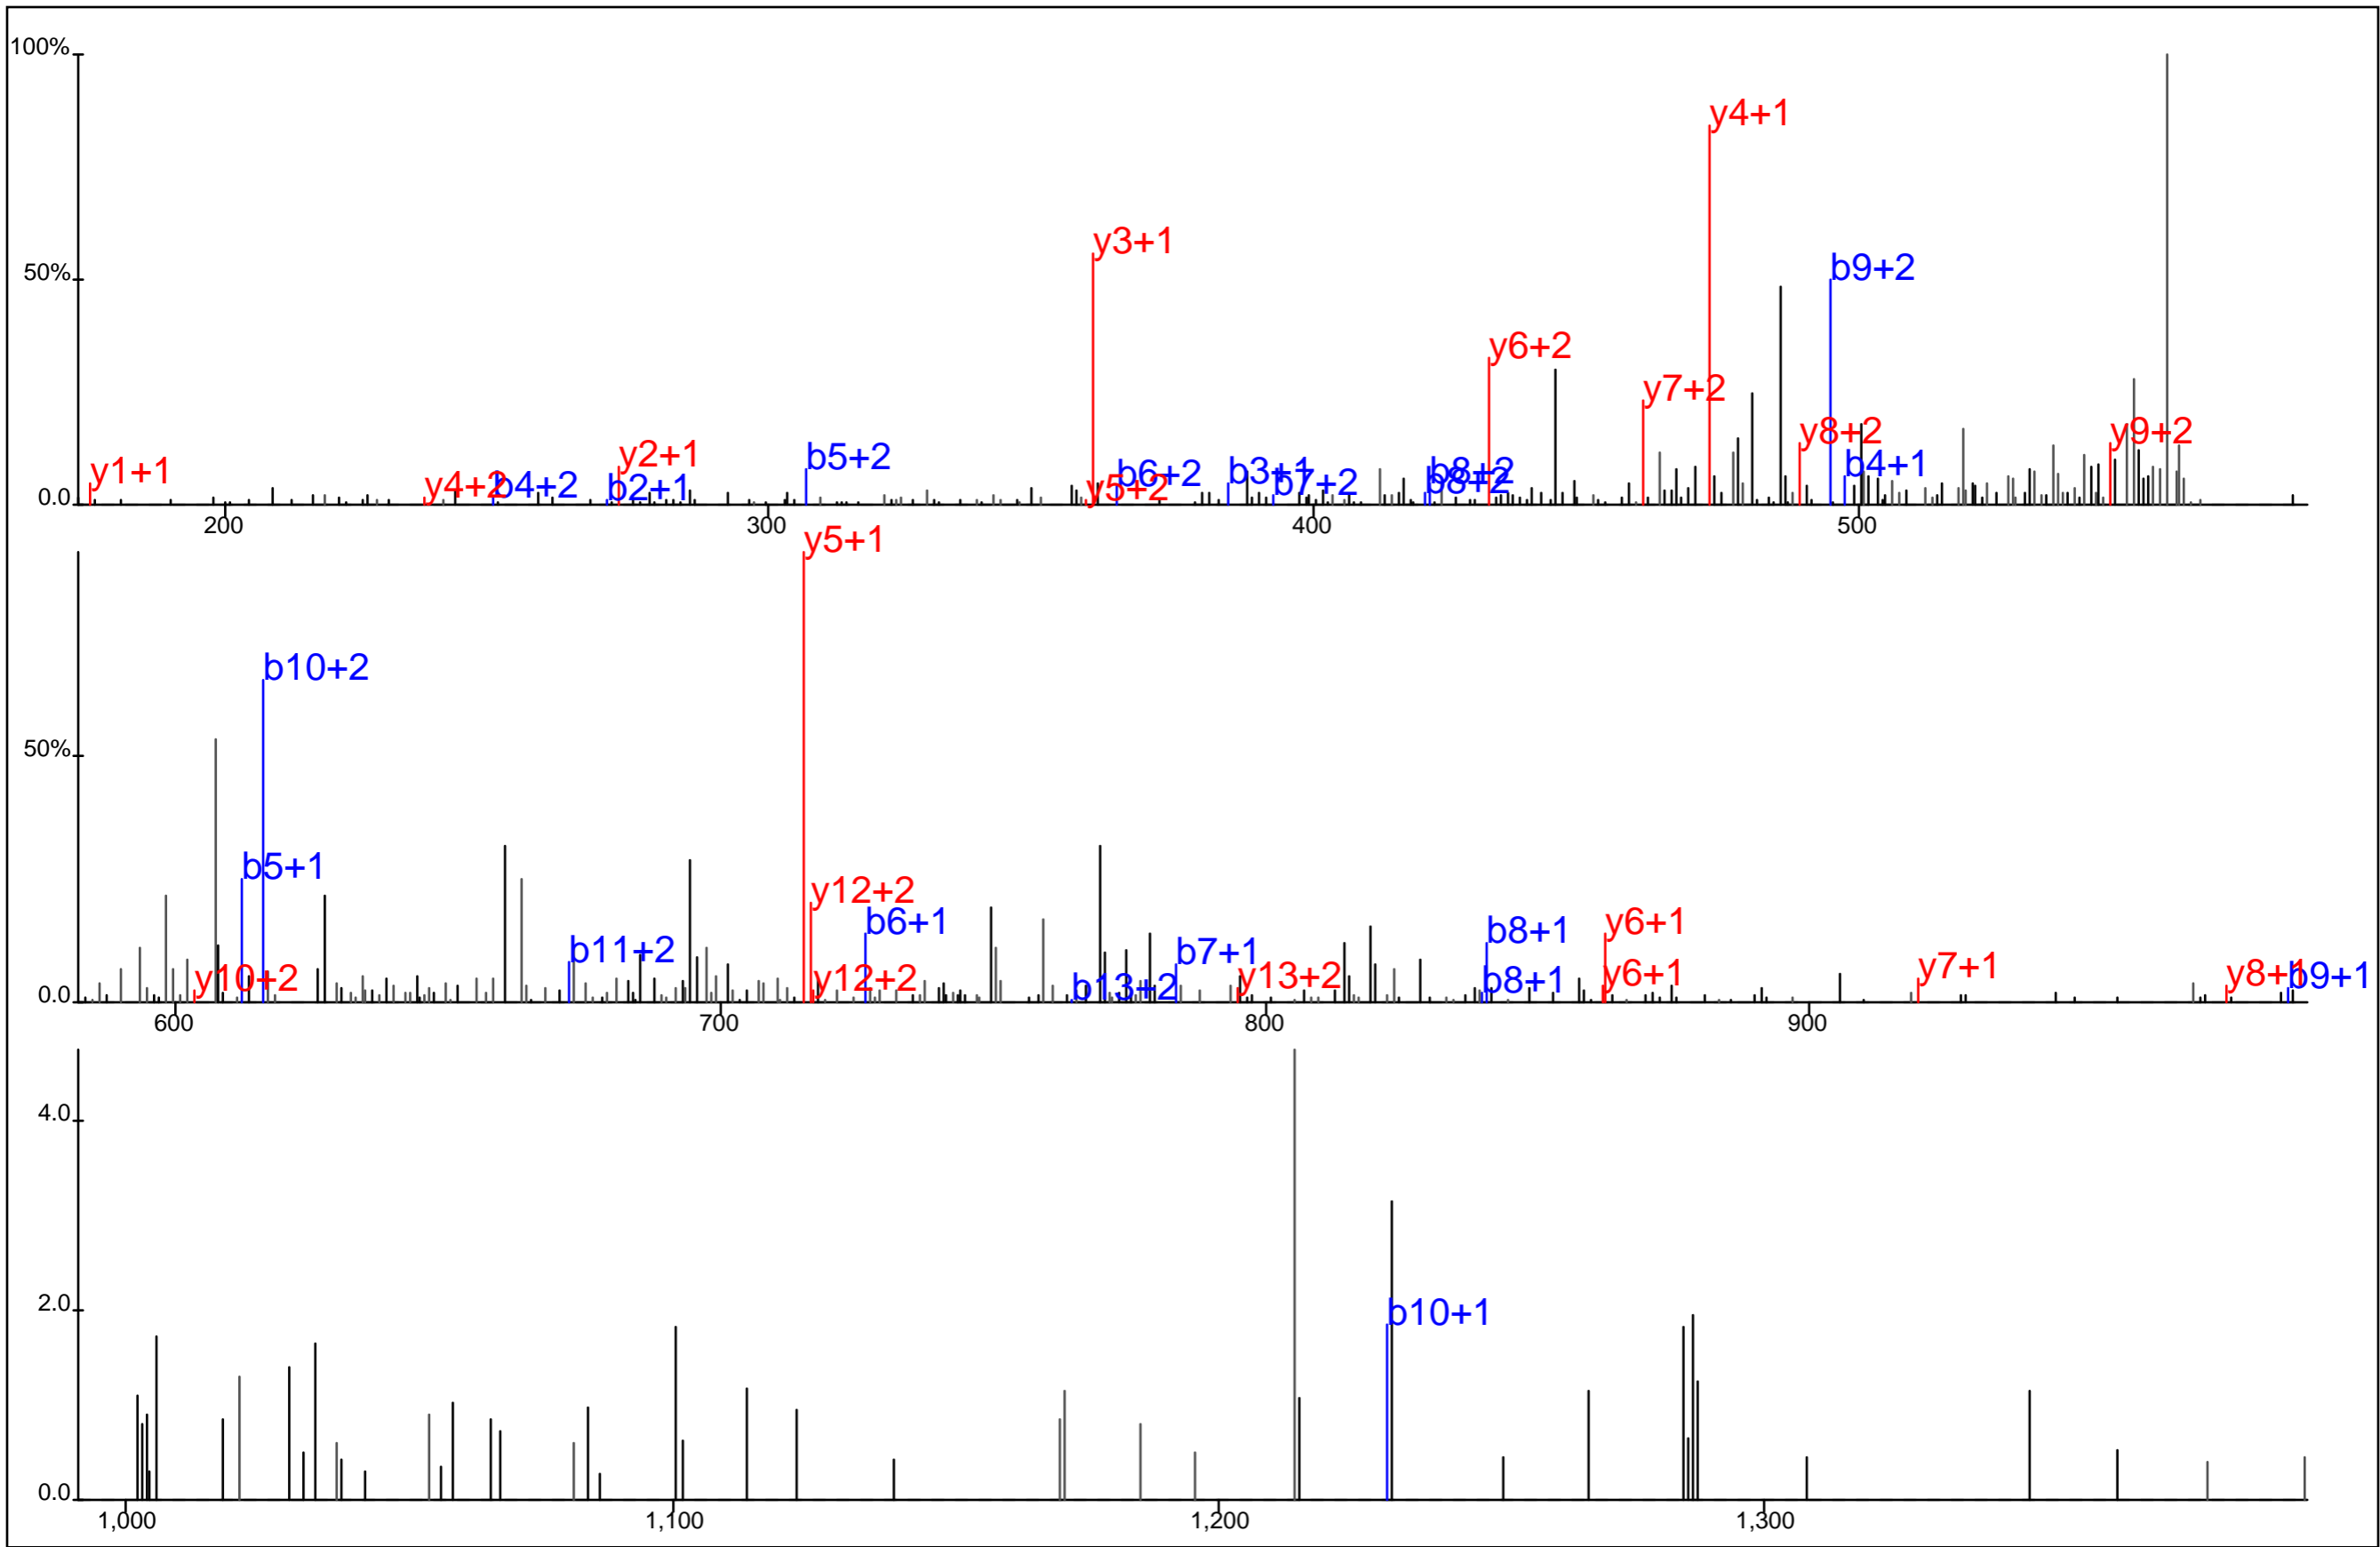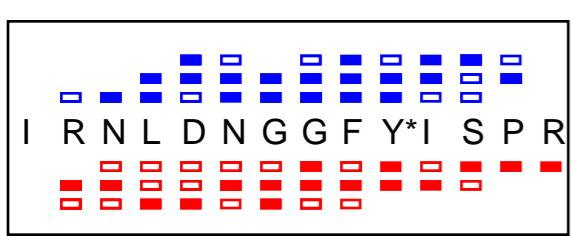

Protein Name: Lck  
 gi Accession: 6984209  
 Precursor Mass: 567.9437+3  
 Delta Mass: 3.301 ppm  
 XCorr: 38.94



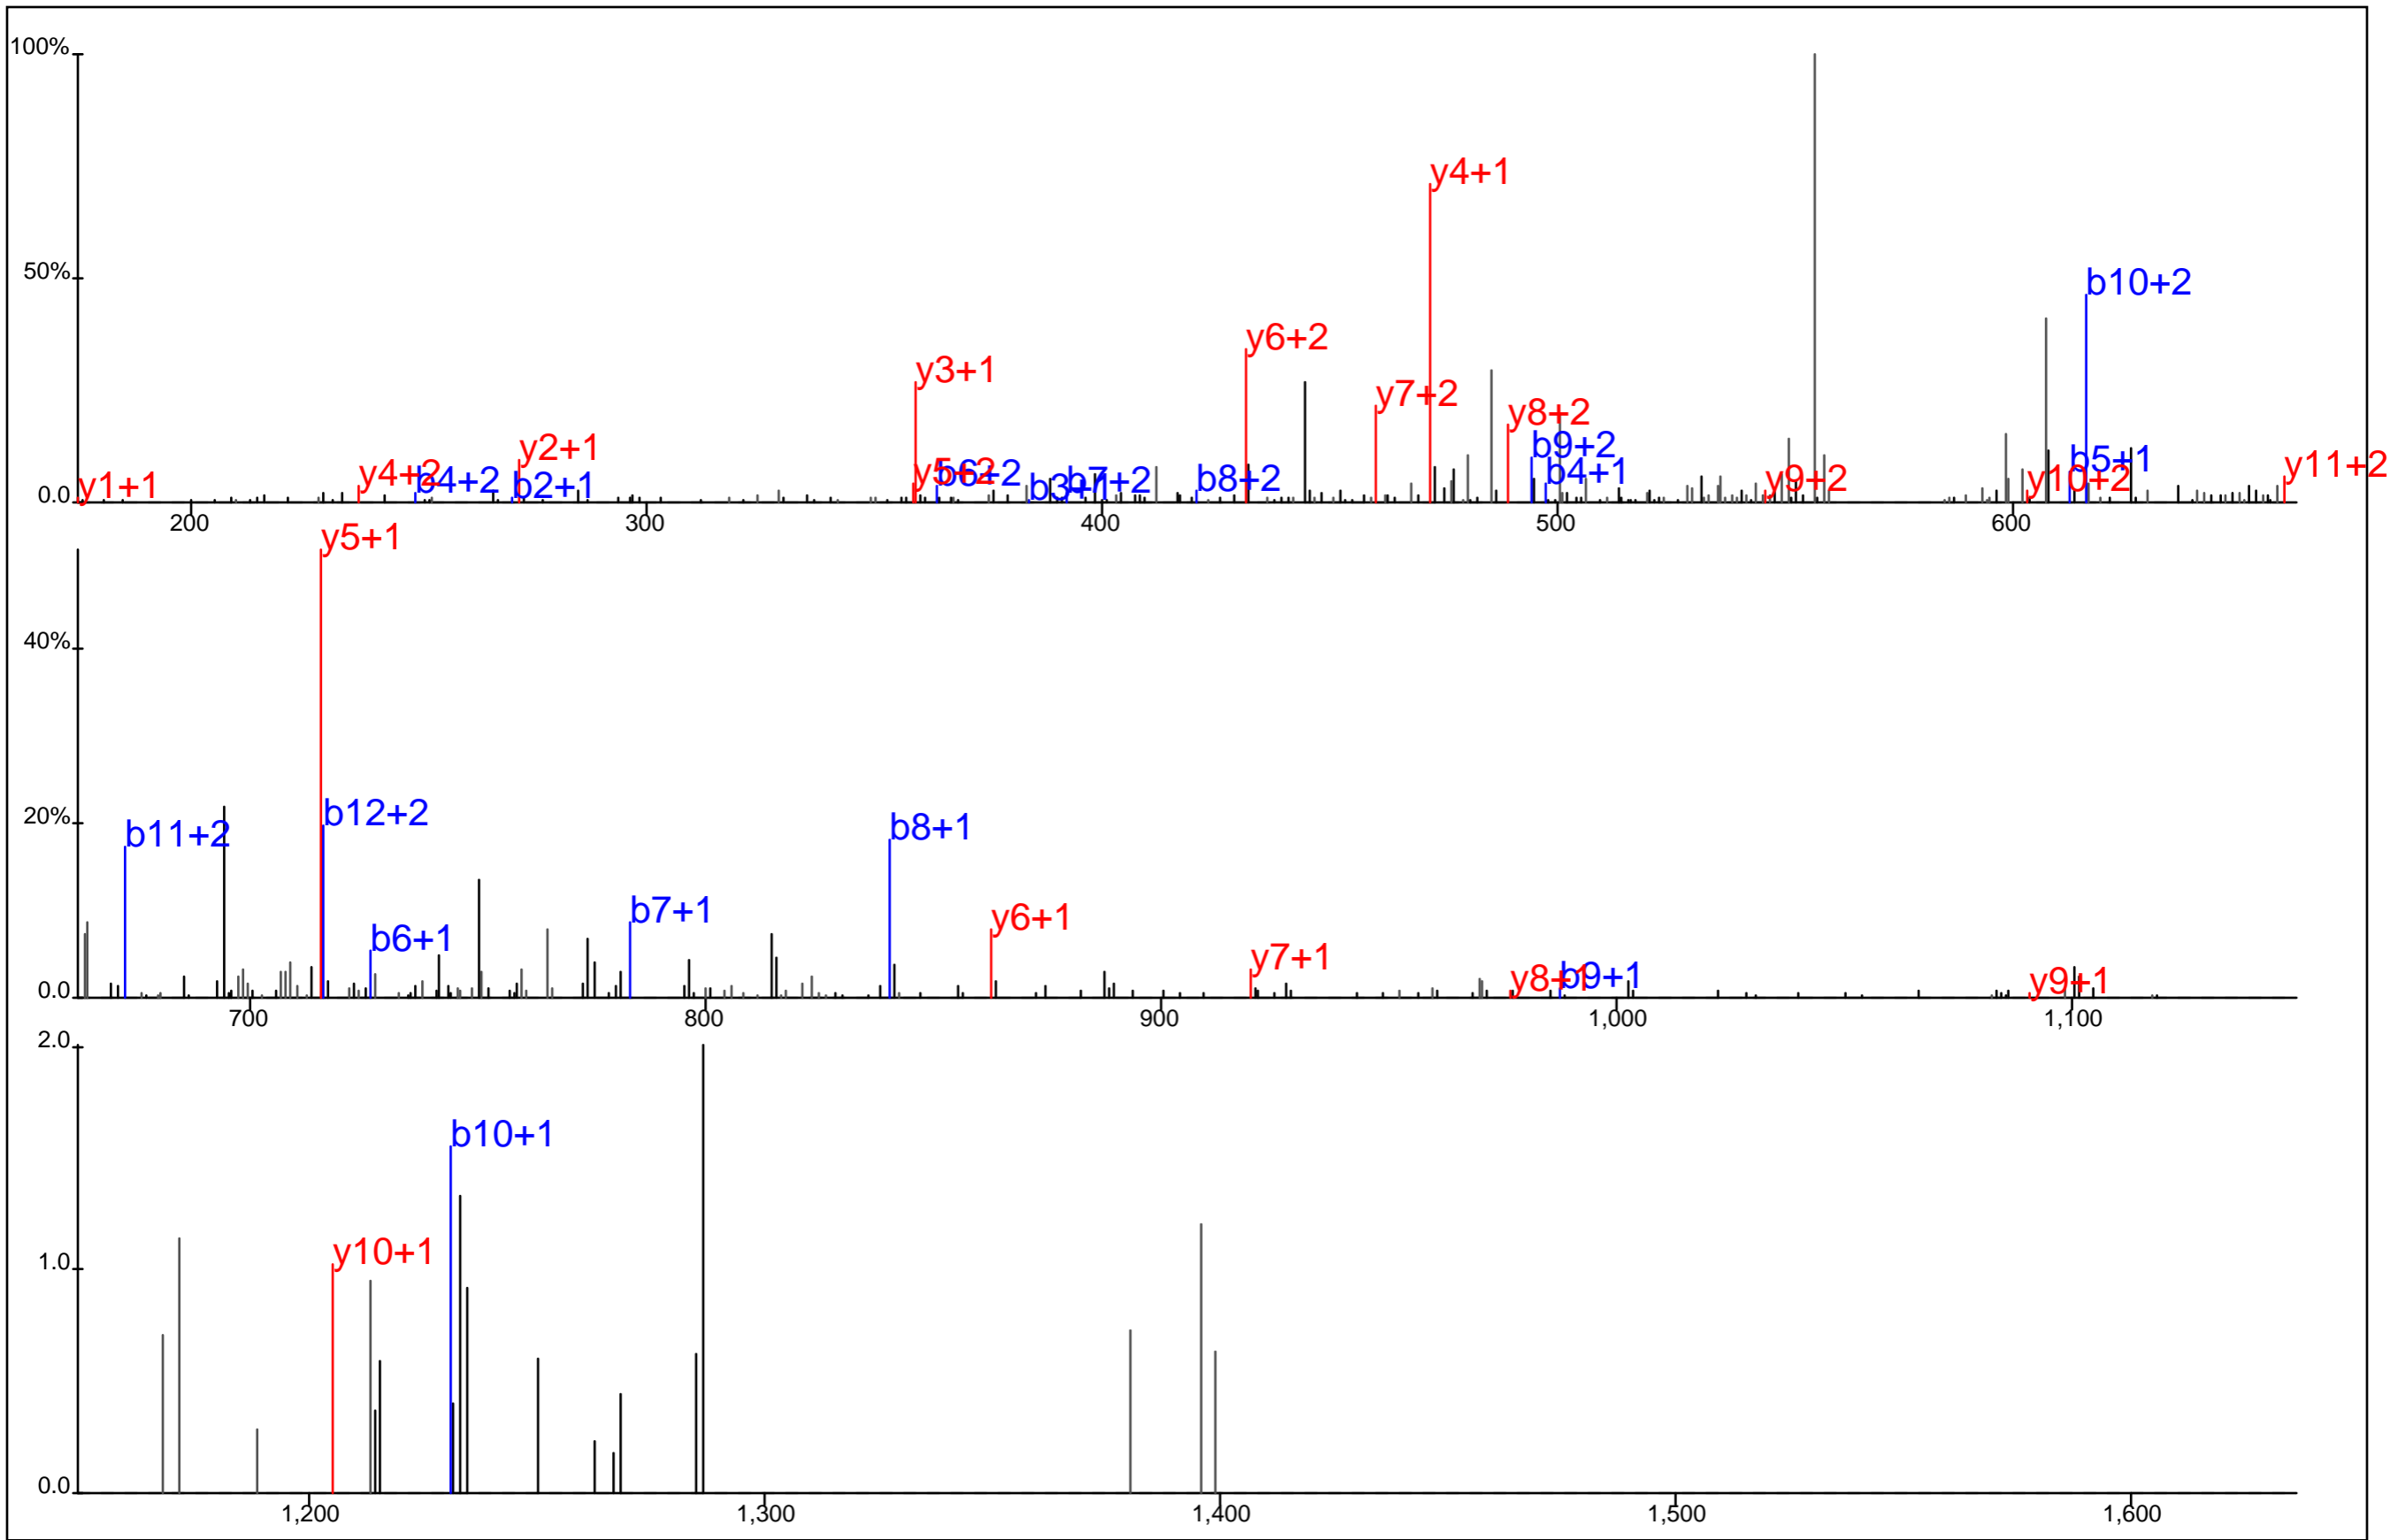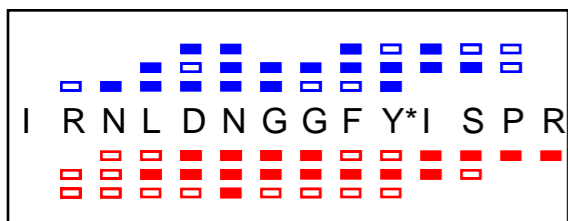

Protein Name: Lck  
 gi Accession: 6984209  
 Precursor Mass: 567.9431+3  
 Delta Mass: 2.226 ppm  
 XCorr: 32.9

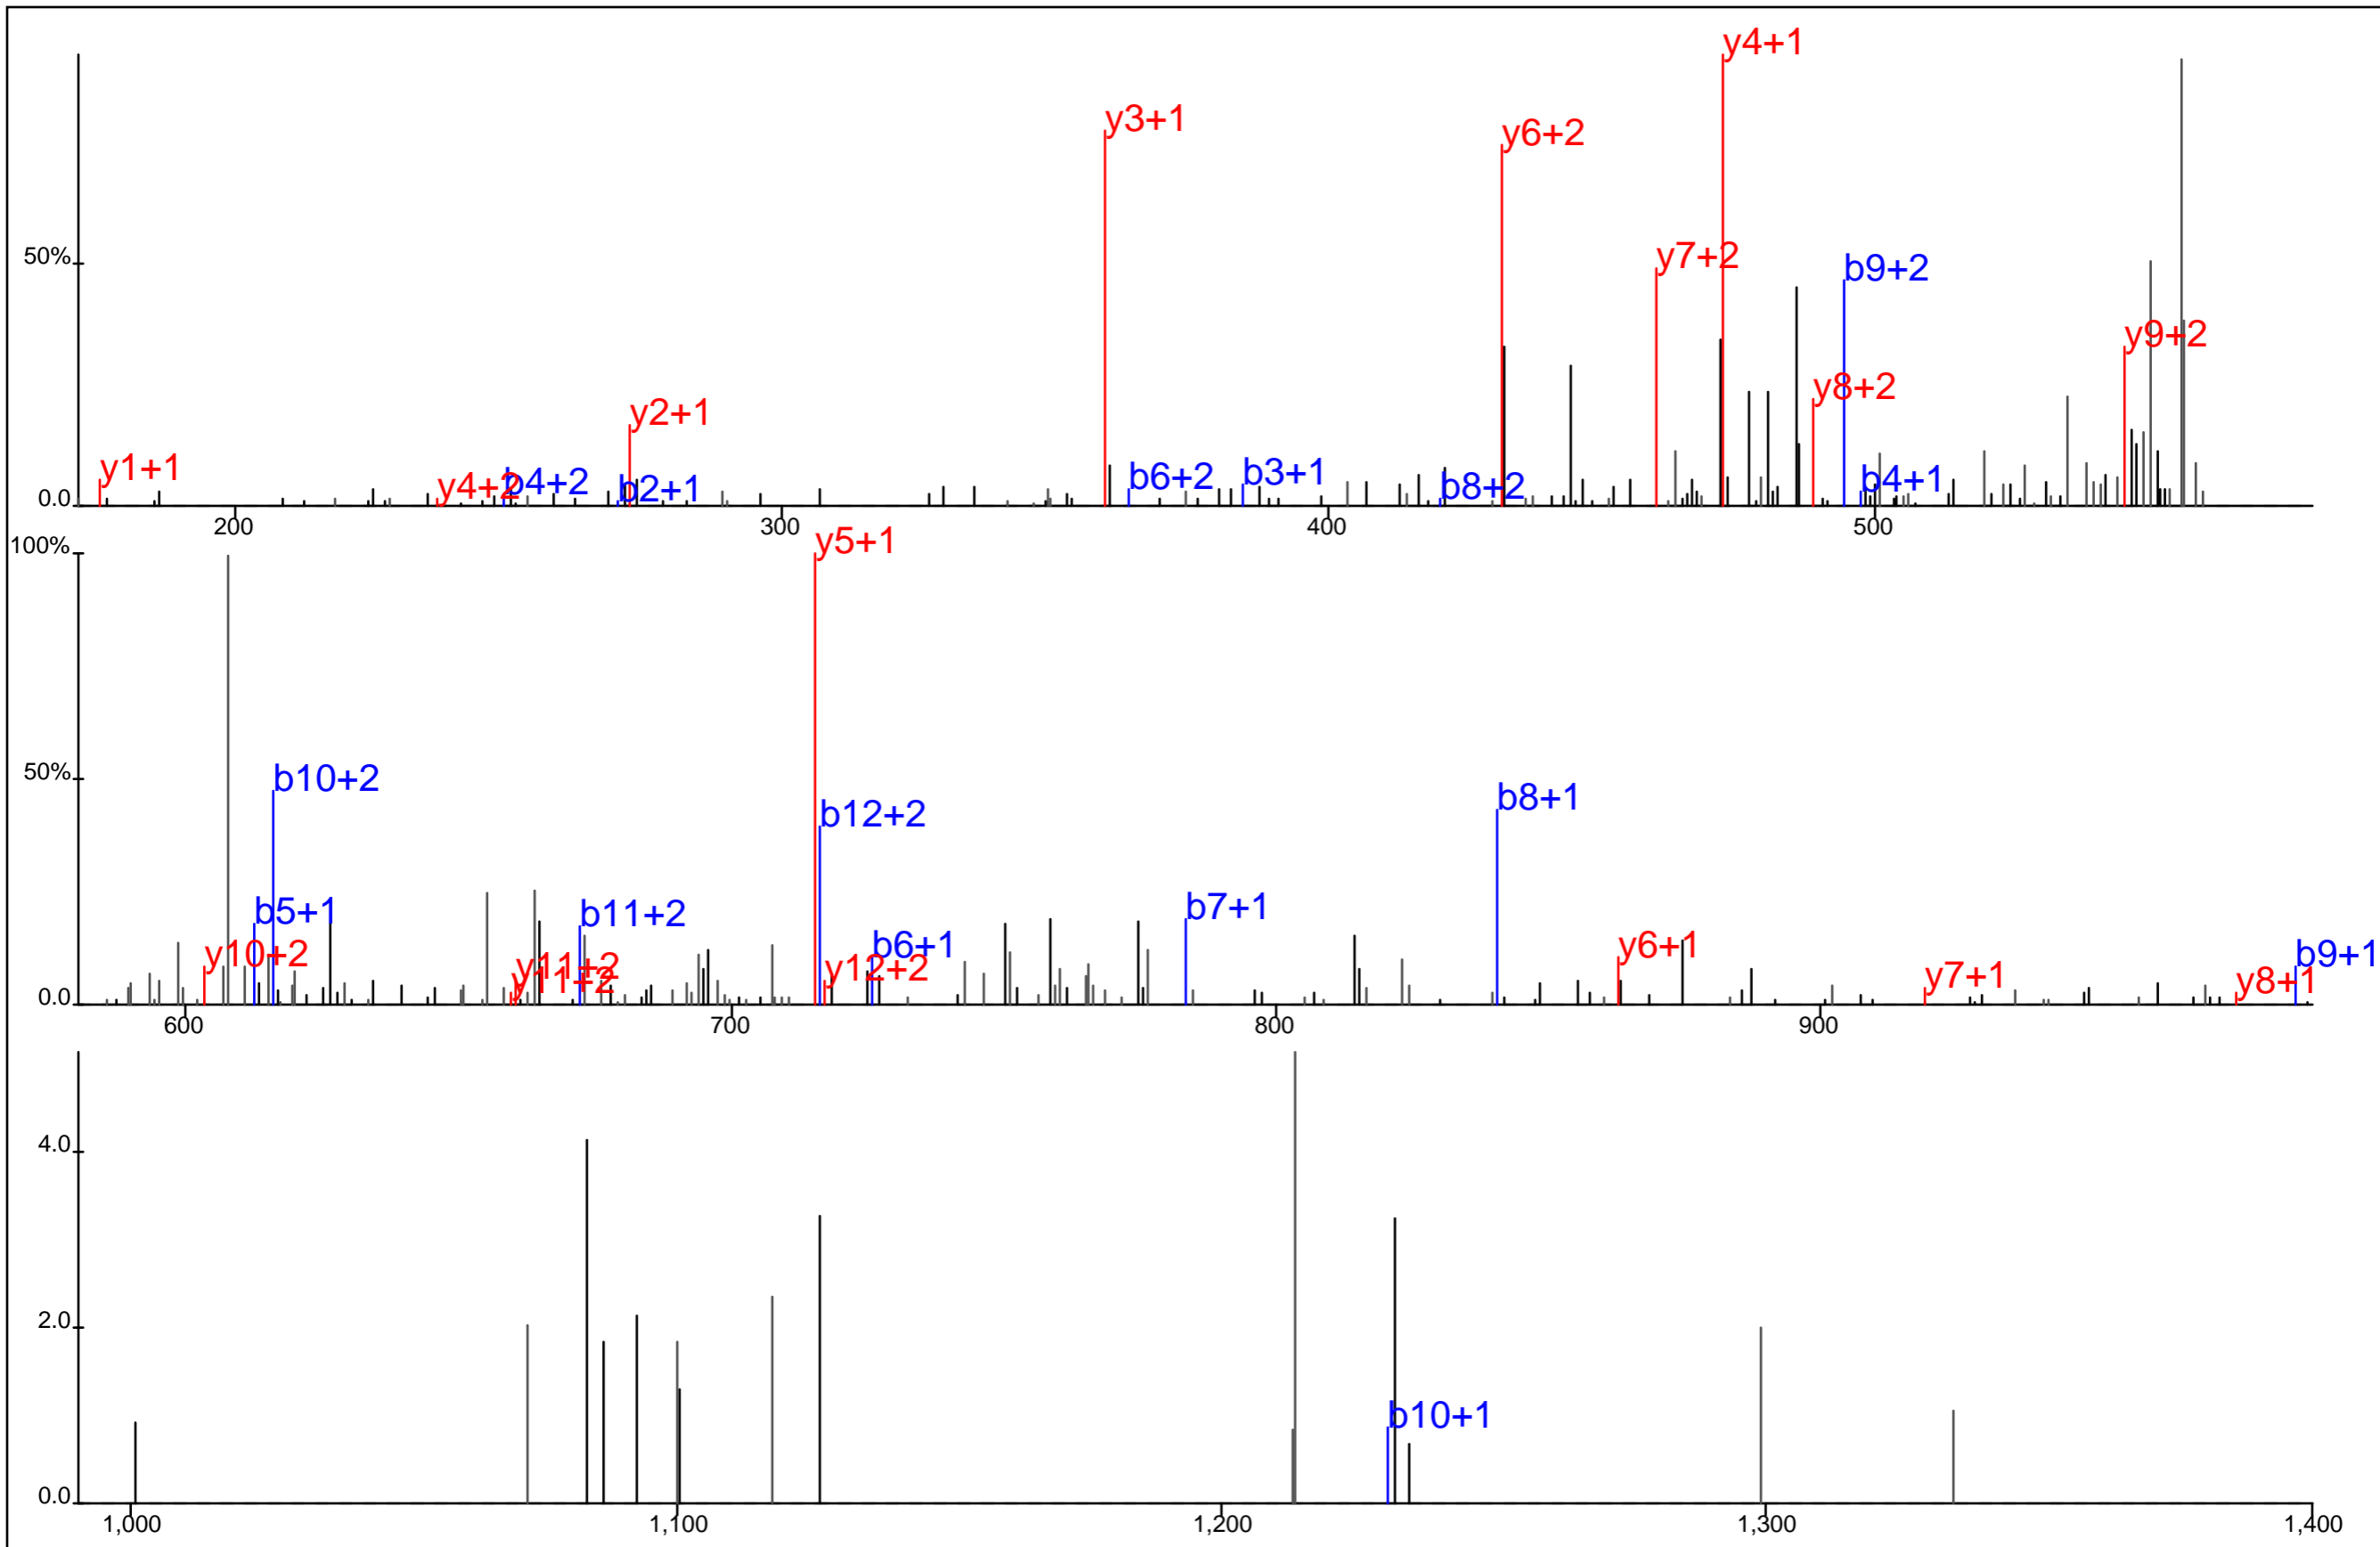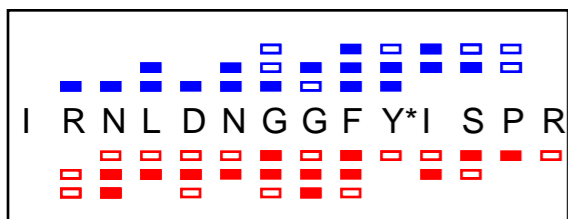

Protein Name: Lck  
 gi Accession: 6984209  
 Precursor Mass: 567.9438+3  
 Delta Mass: 3.624 ppm  
 XCorr: 31.23

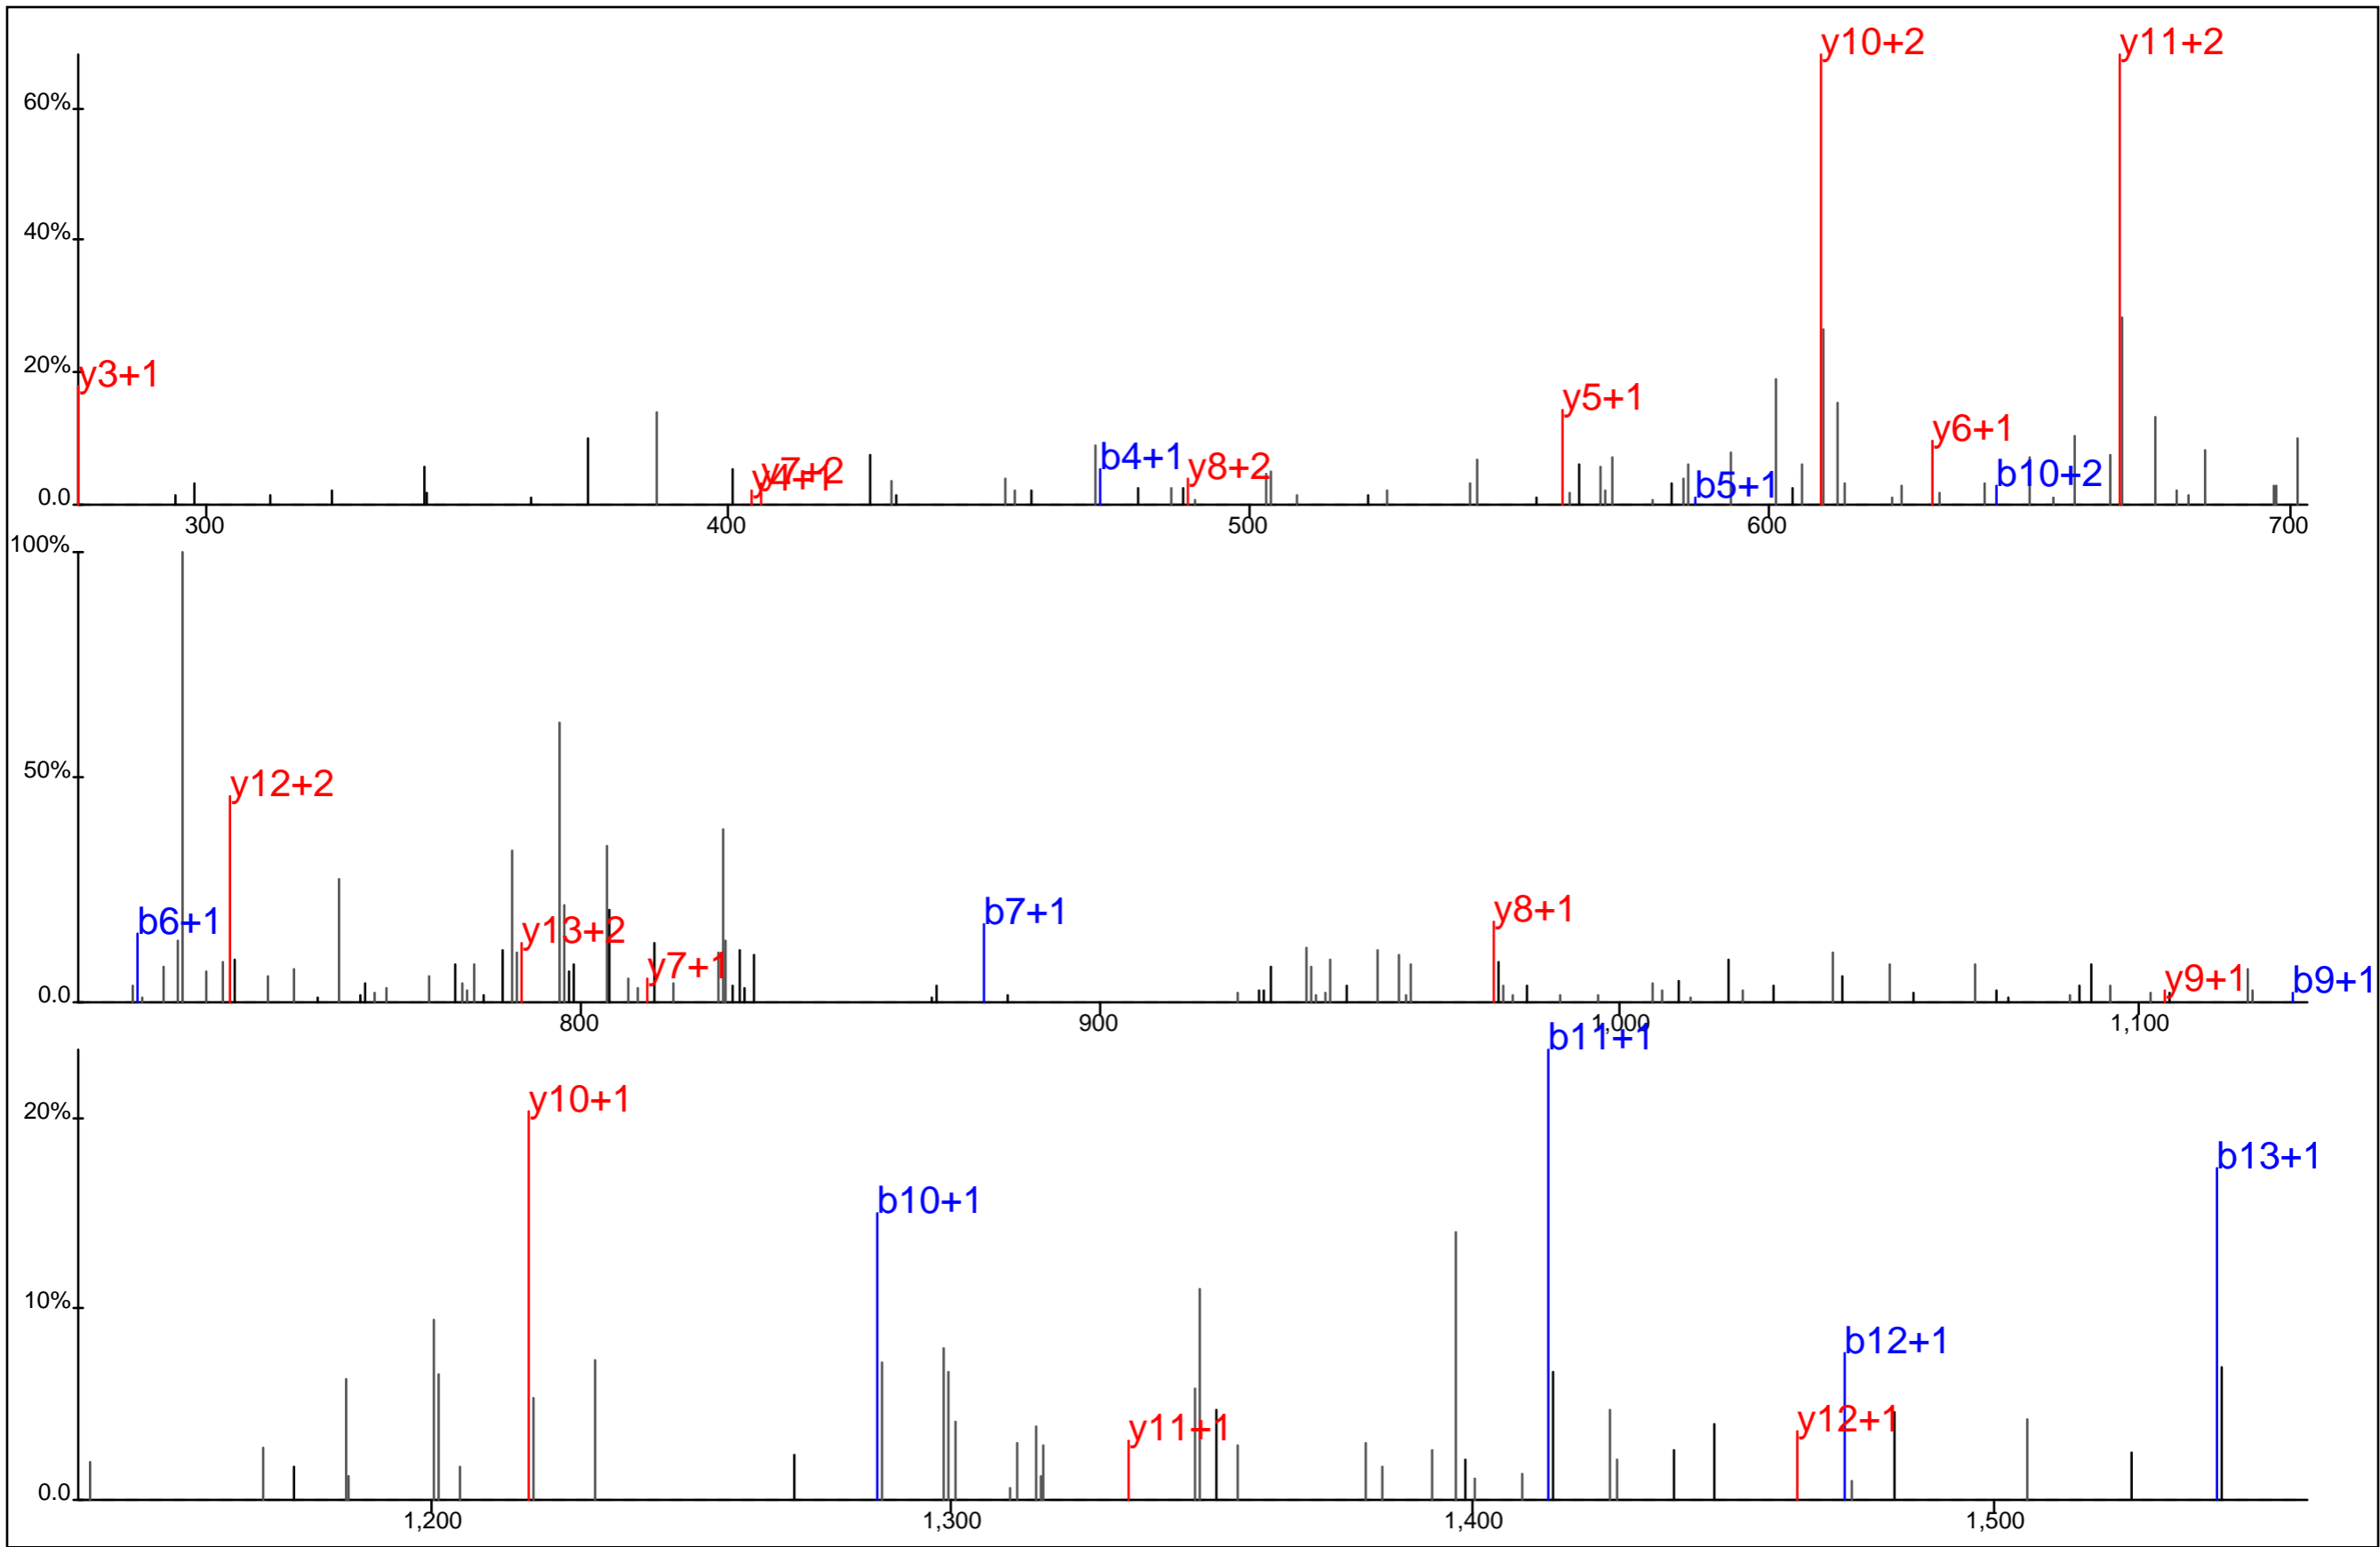

■ ■  
 L I E D N E Y T\* A R E G A K  
■ ■ ■ ■ ■ ■ ■ ■ ■ ■

Protein Name: Lck  
 gi Accession: 6984209  
 Precursor Mass: 844.8839+2  
 Delta Mass: 4.588 ppm  
 XCorr: 36.51

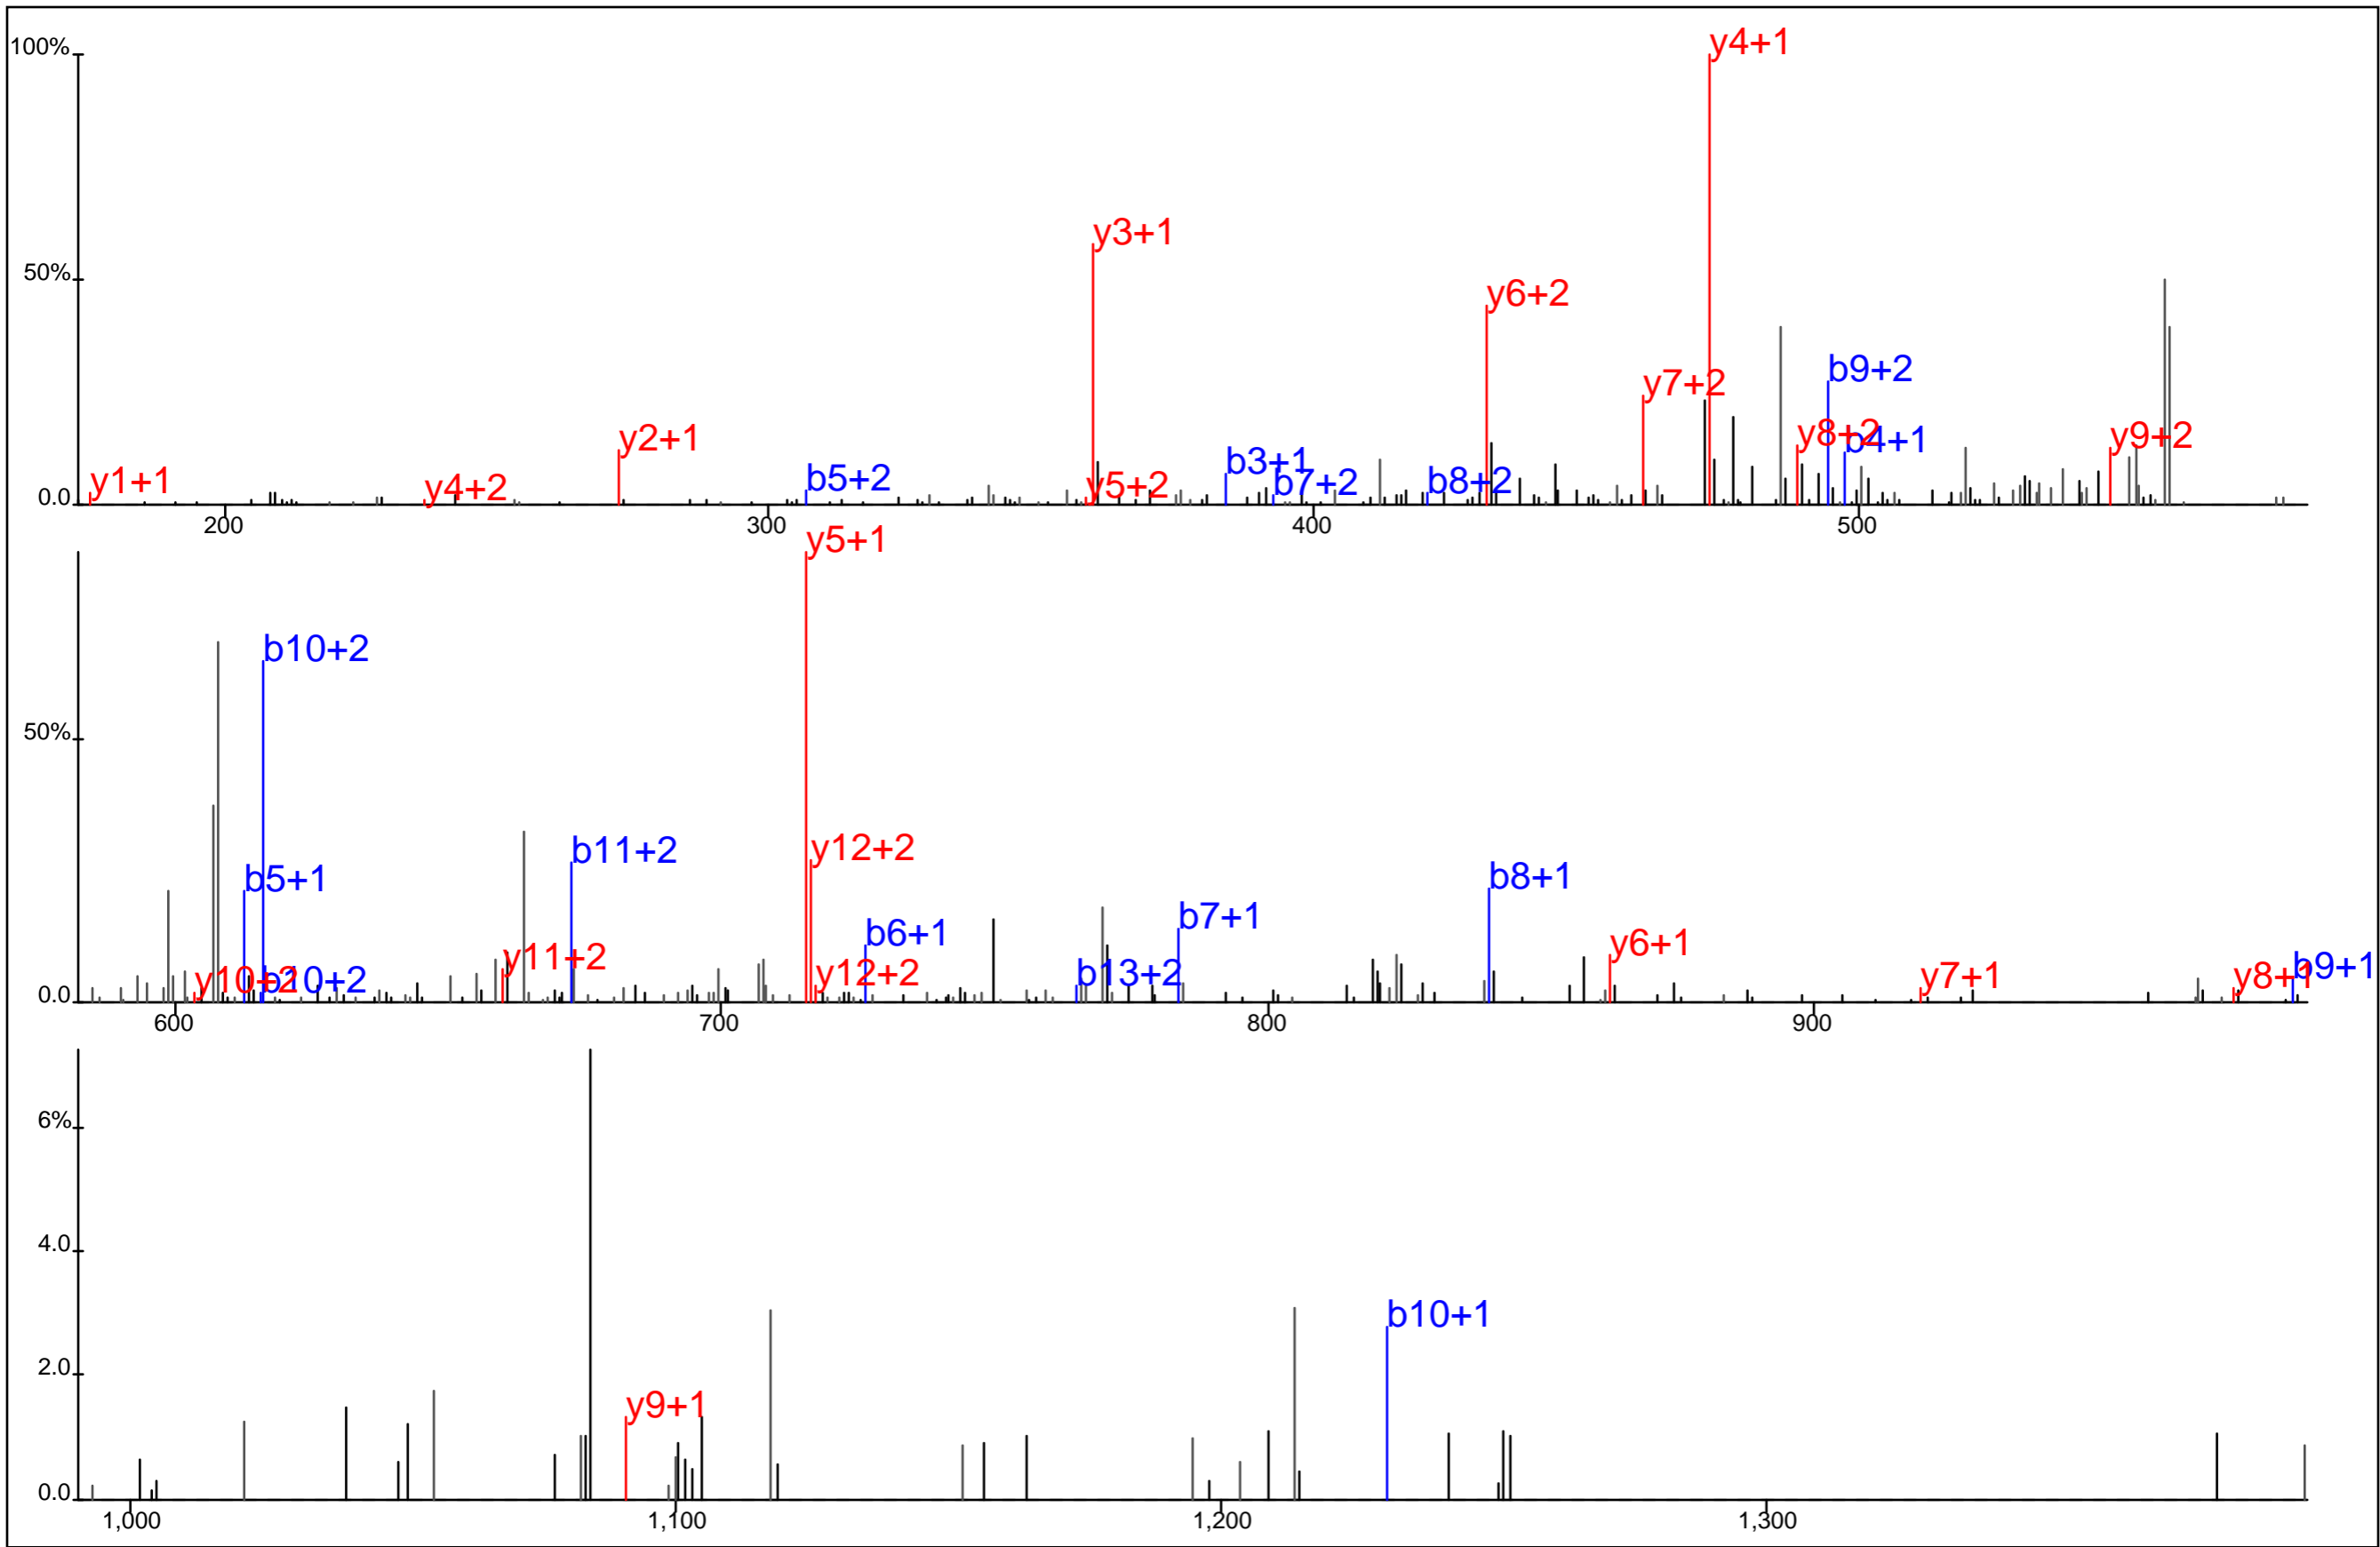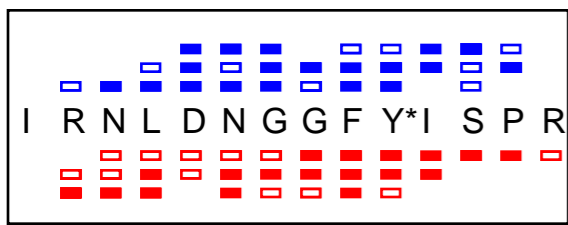

Protein Name: Lck  
 gi Accession: 6984209  
 Precursor Mass: 567.9427+3  
 Delta Mass: 1.579 ppm  
 XCorr: 50.18

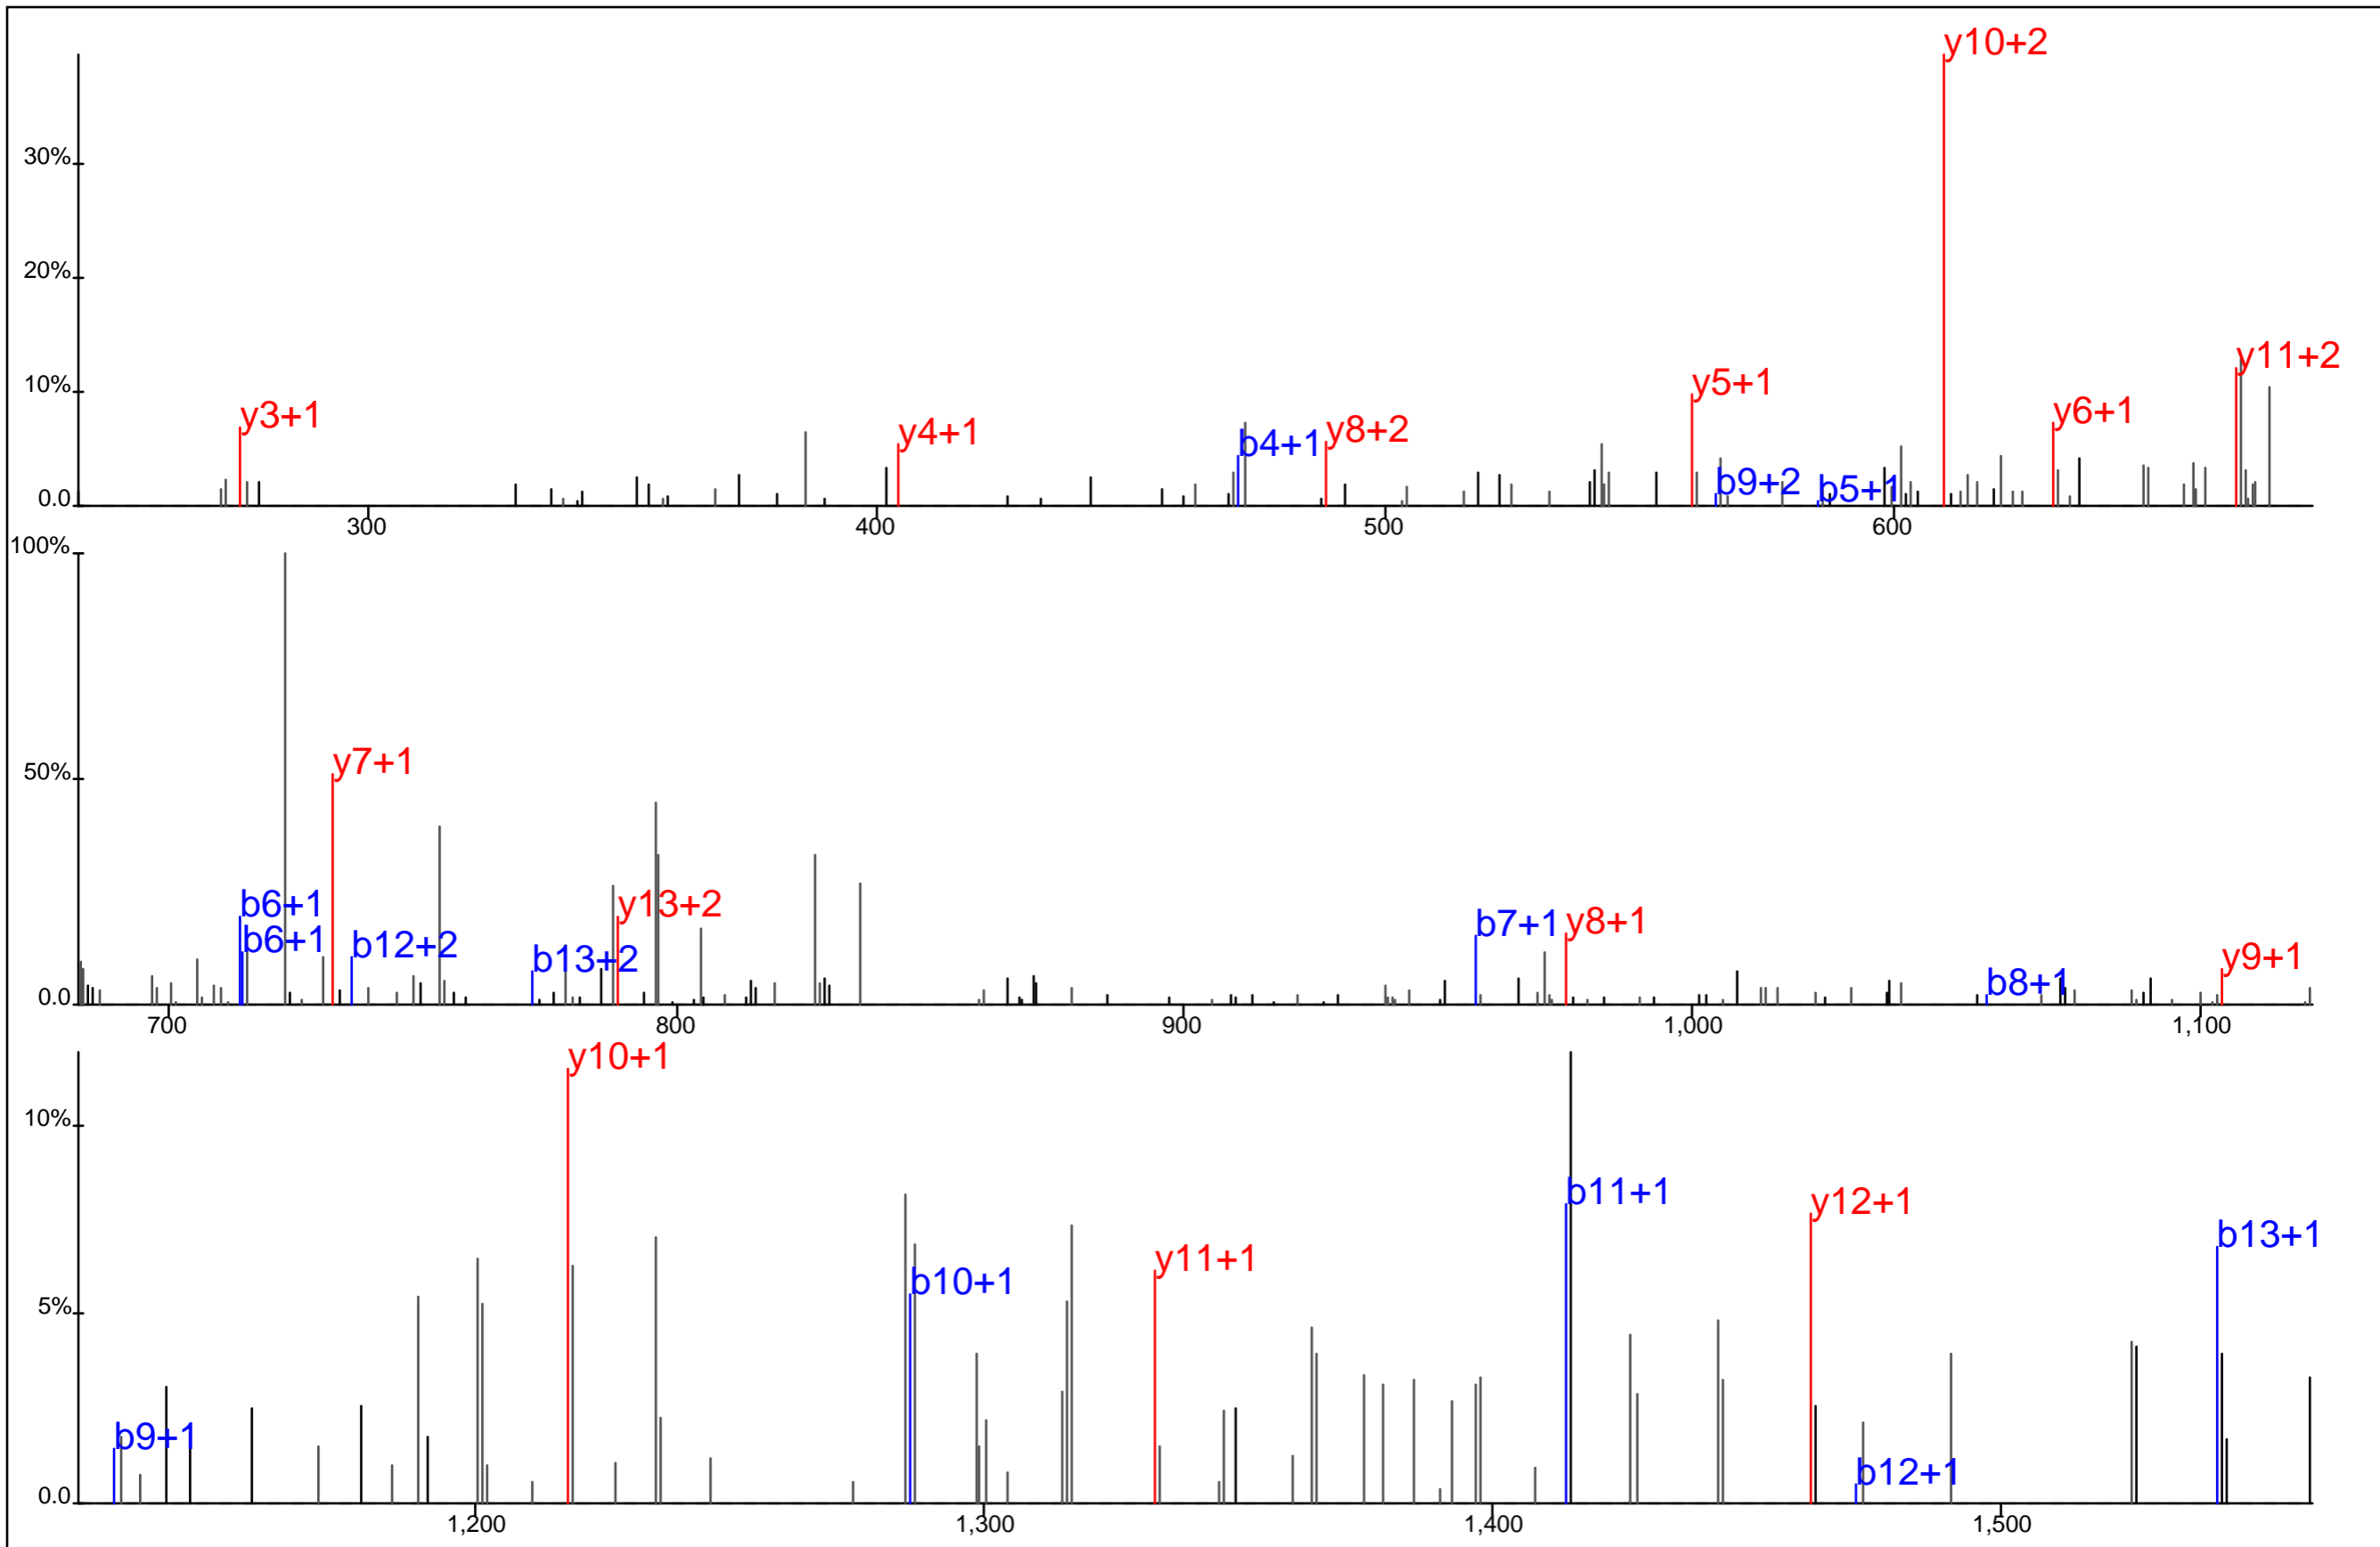

LIEDNEY\*TAREGAK  
 [Red dashed boxes highlight the sequence: L I E D N E Y\* T A R E G A K]

Protein Name: Lck  
 gi Accession: 6984209  
 Precursor Mass: 844.8841+2  
 Delta Mass: 4.878 ppm  
 XCorr: 49.52



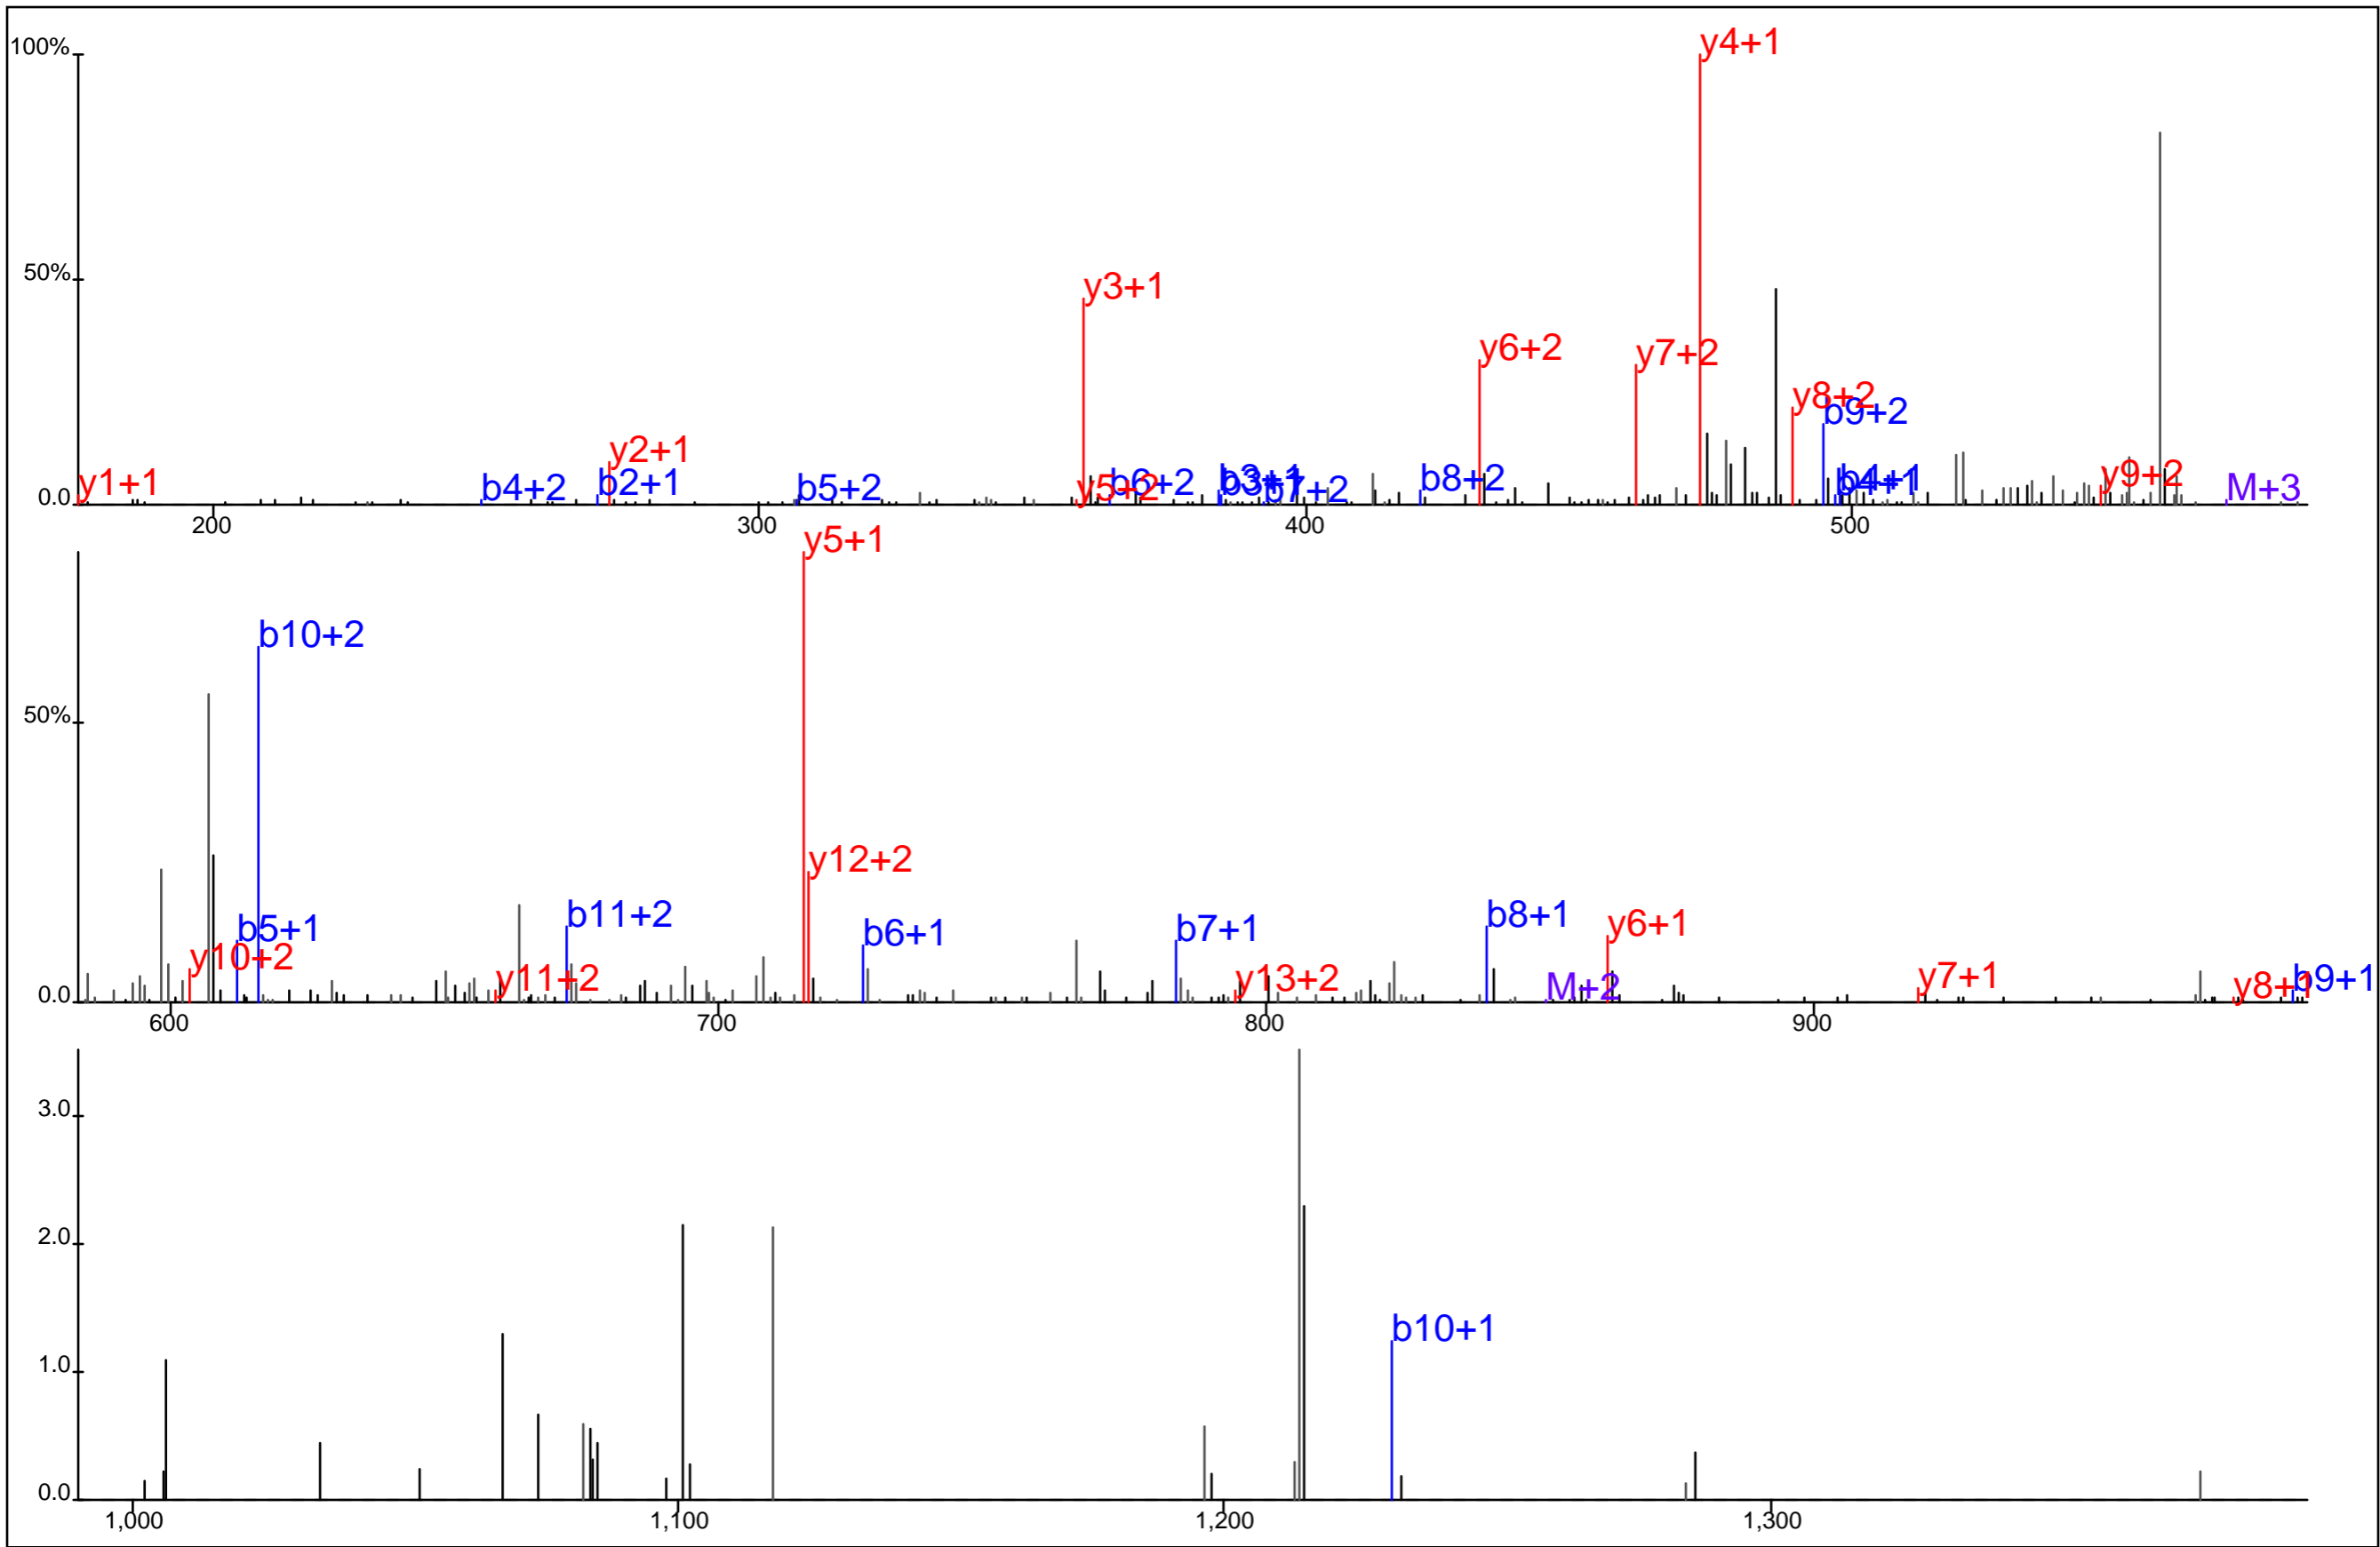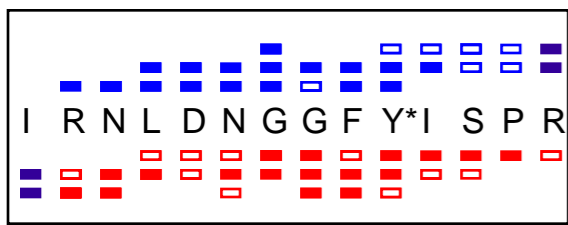

Protein Name: Lck  
 gi Accession: 6984209  
 Precursor Mass: 567.9429+3  
 Delta Mass: 1.903 ppm  
 XCorr: 41.14



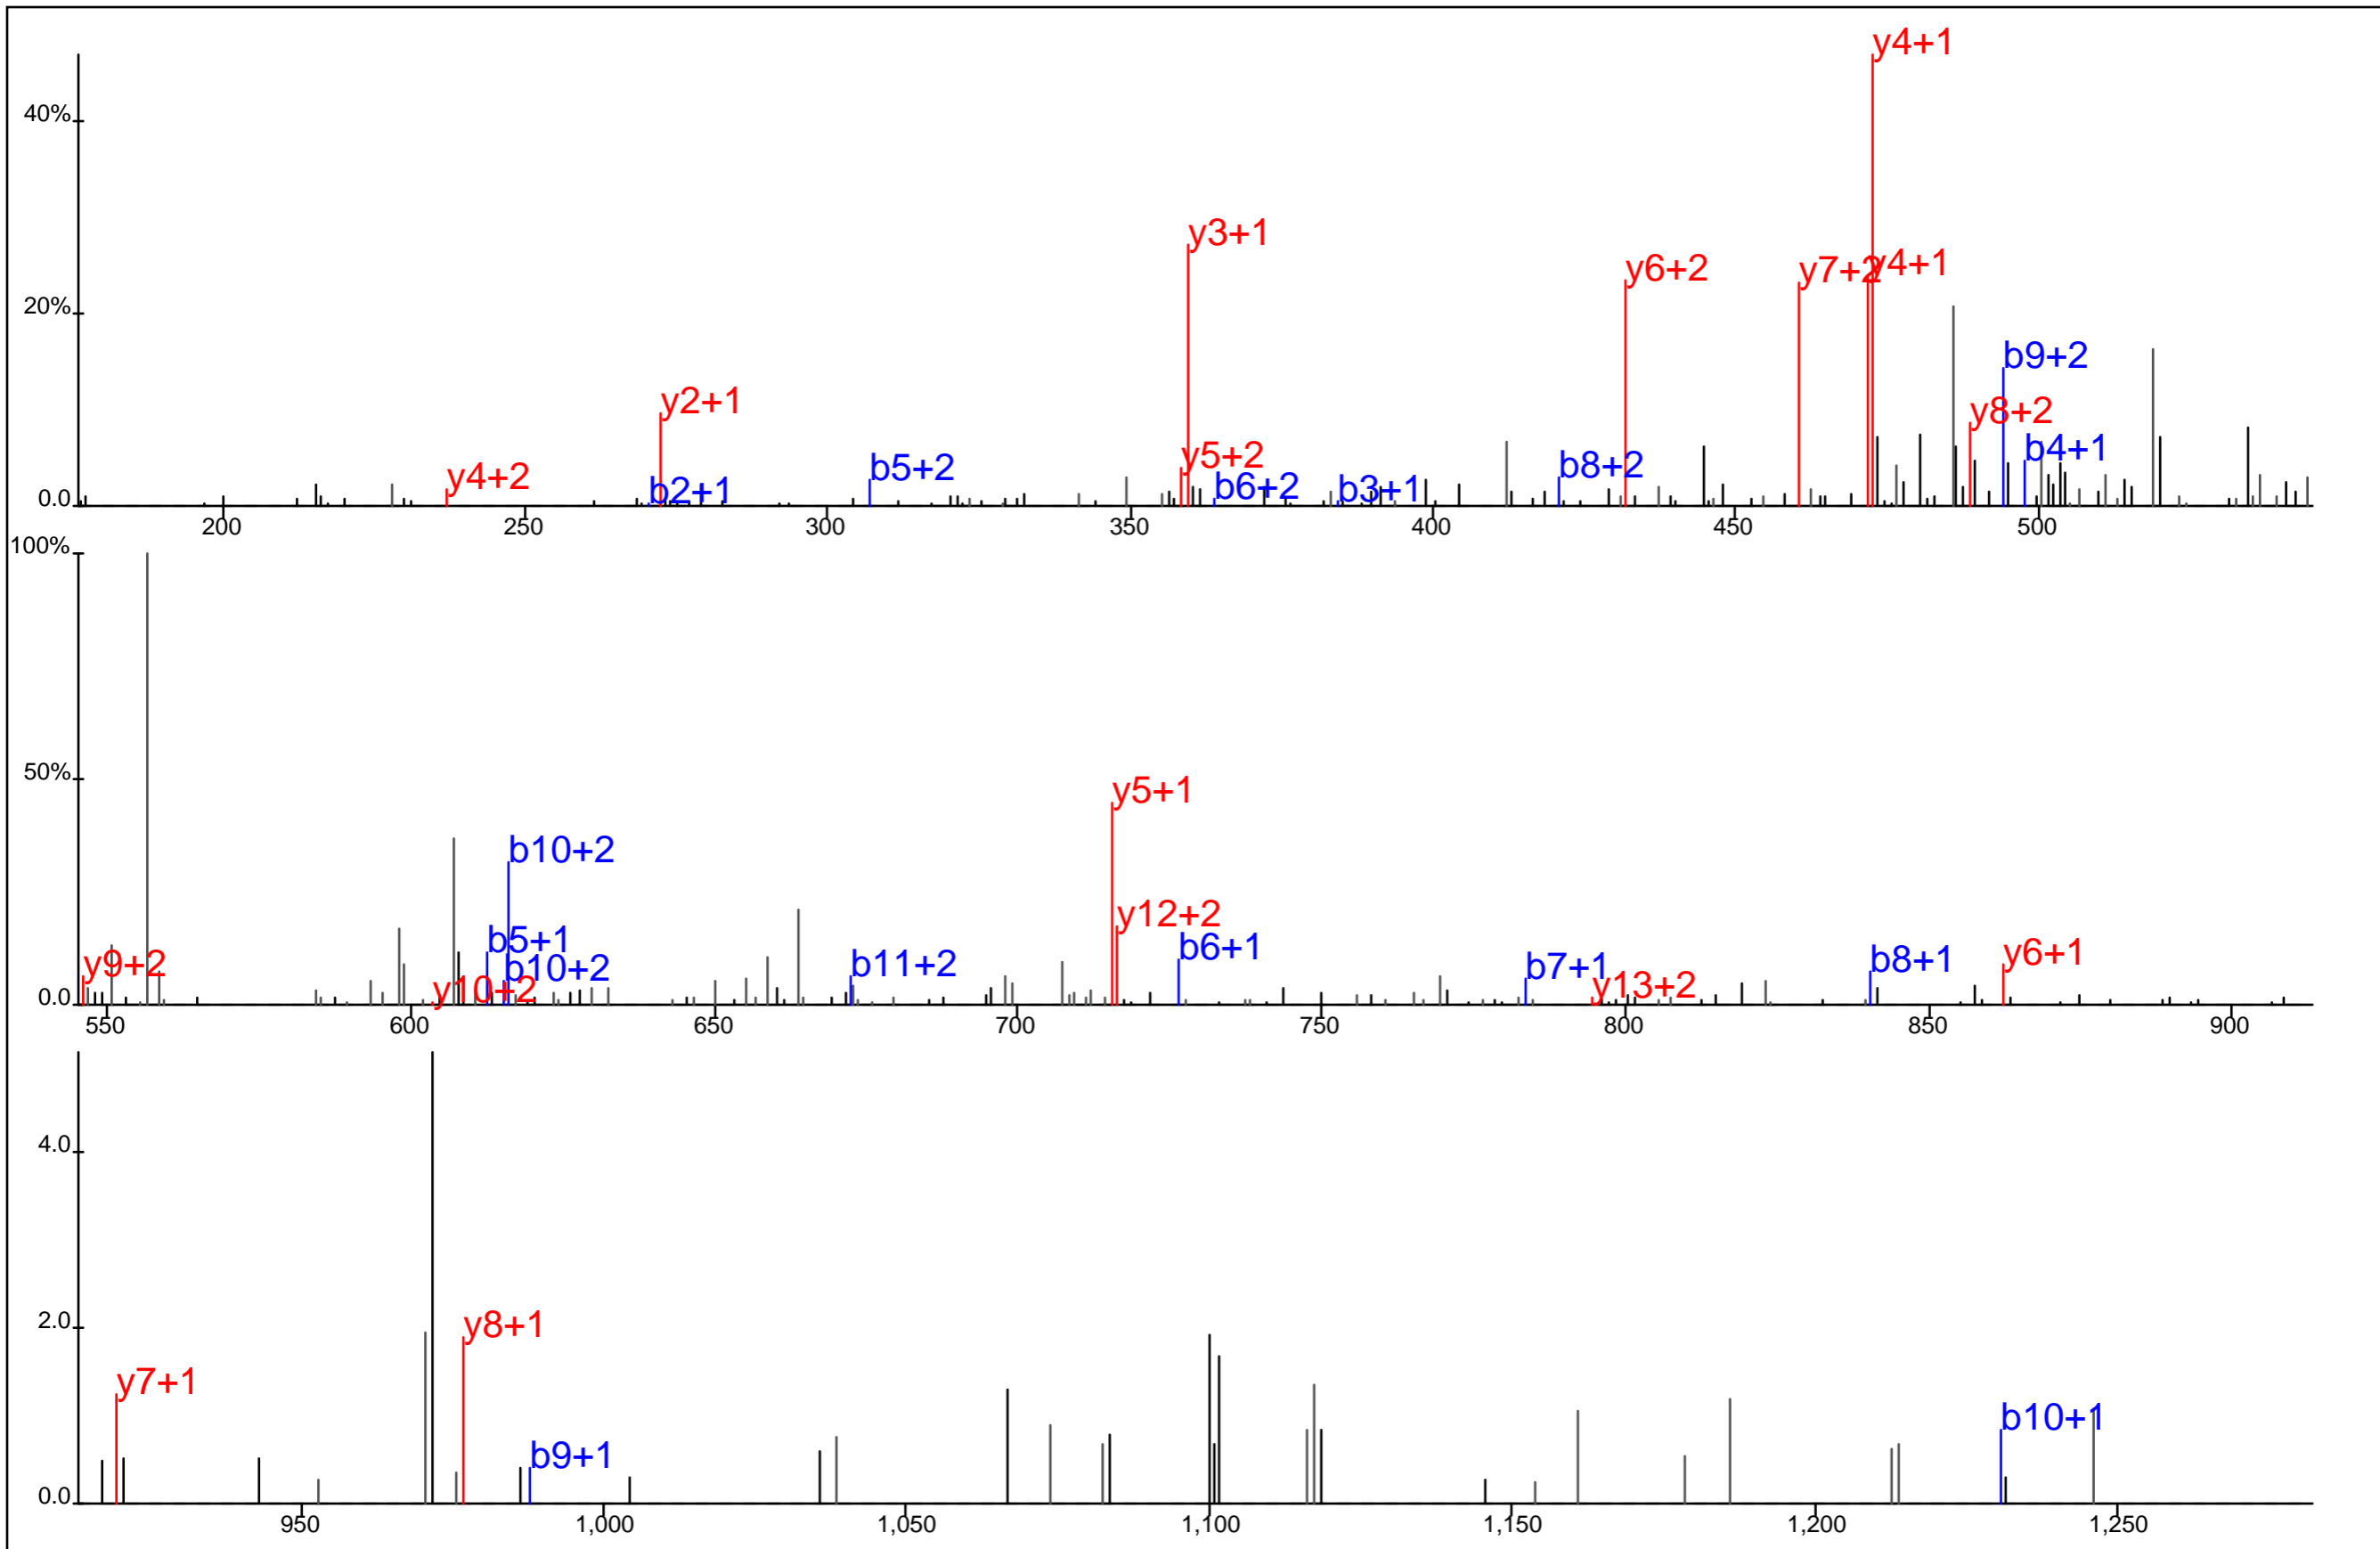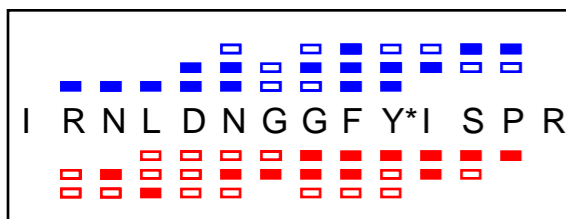

Protein Name: Lck  
 gi Accession: 6984209  
 Precursor Mass: 567.9418+3  
 Delta Mass: 0.036 ppm  
 XCorr: 41.23



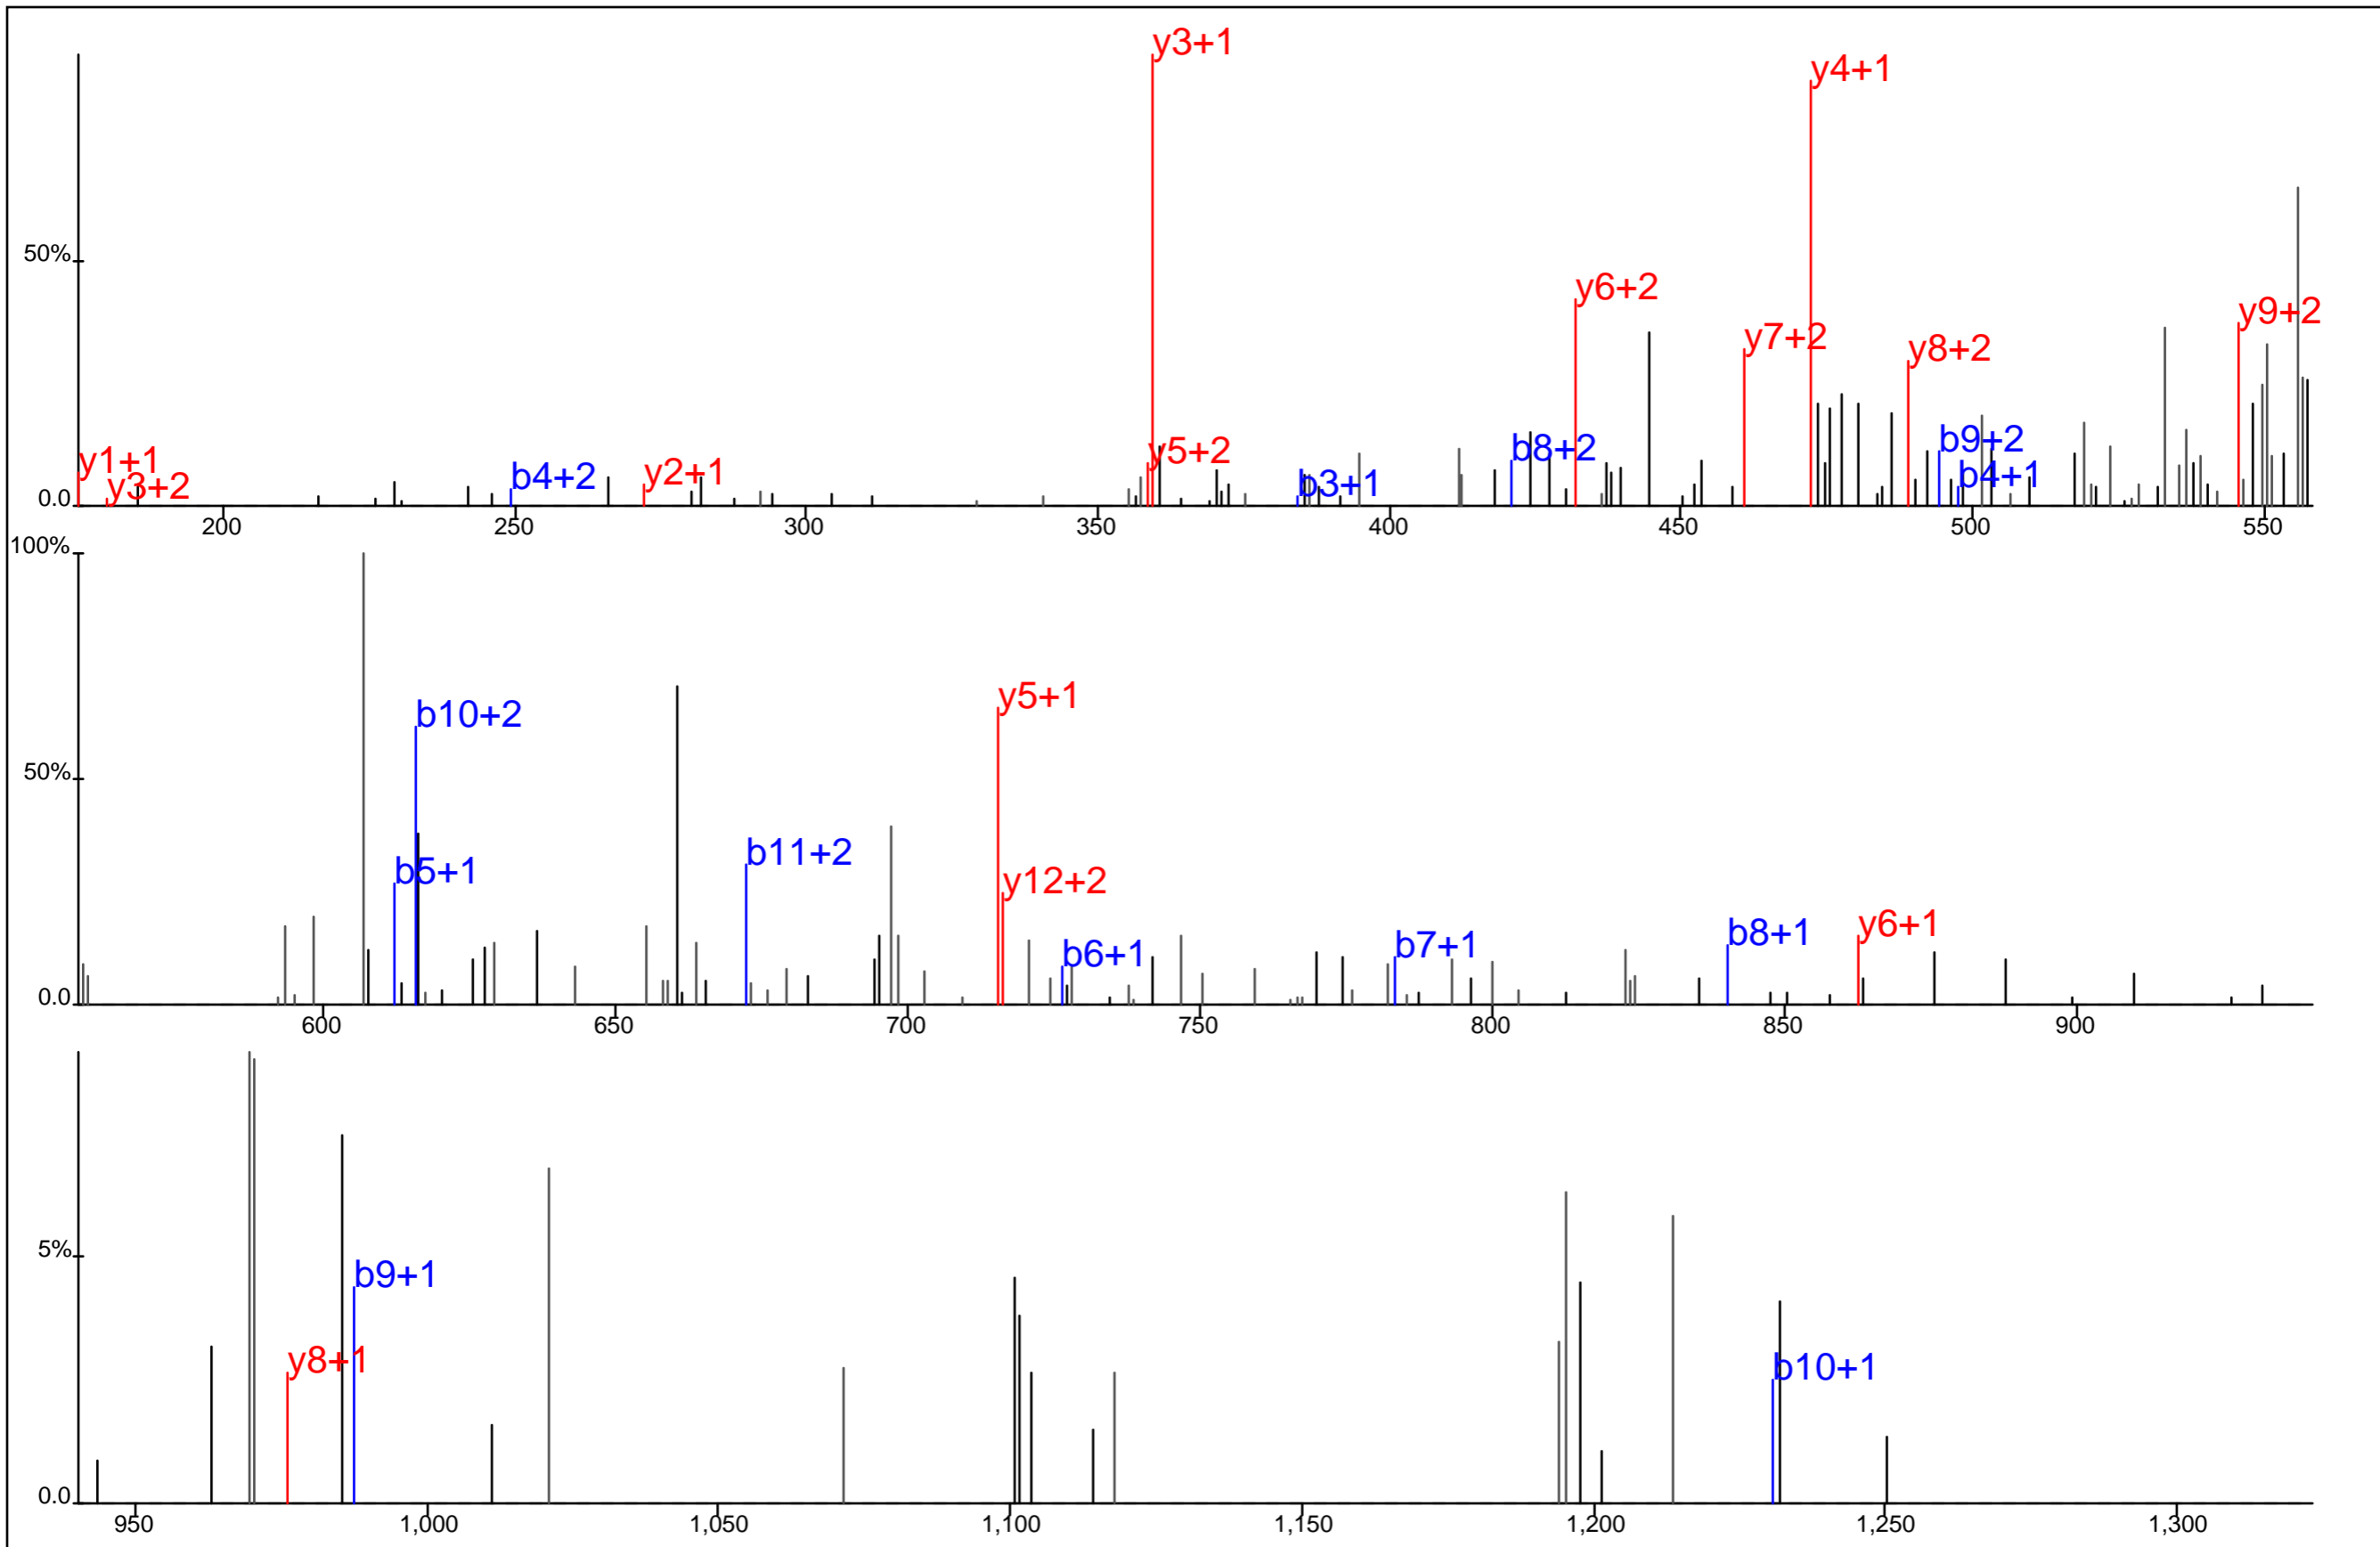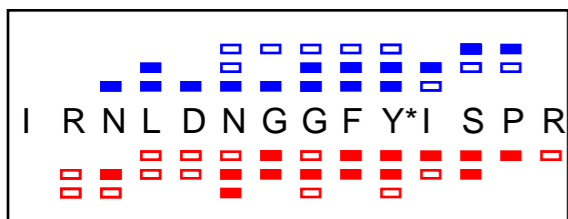

Protein Name: Lck  
 gi Accession: 6984209  
 Precursor Mass: 567.9468+3  
 Delta Mass: 8.895 ppm  
 XCorr: 31.05



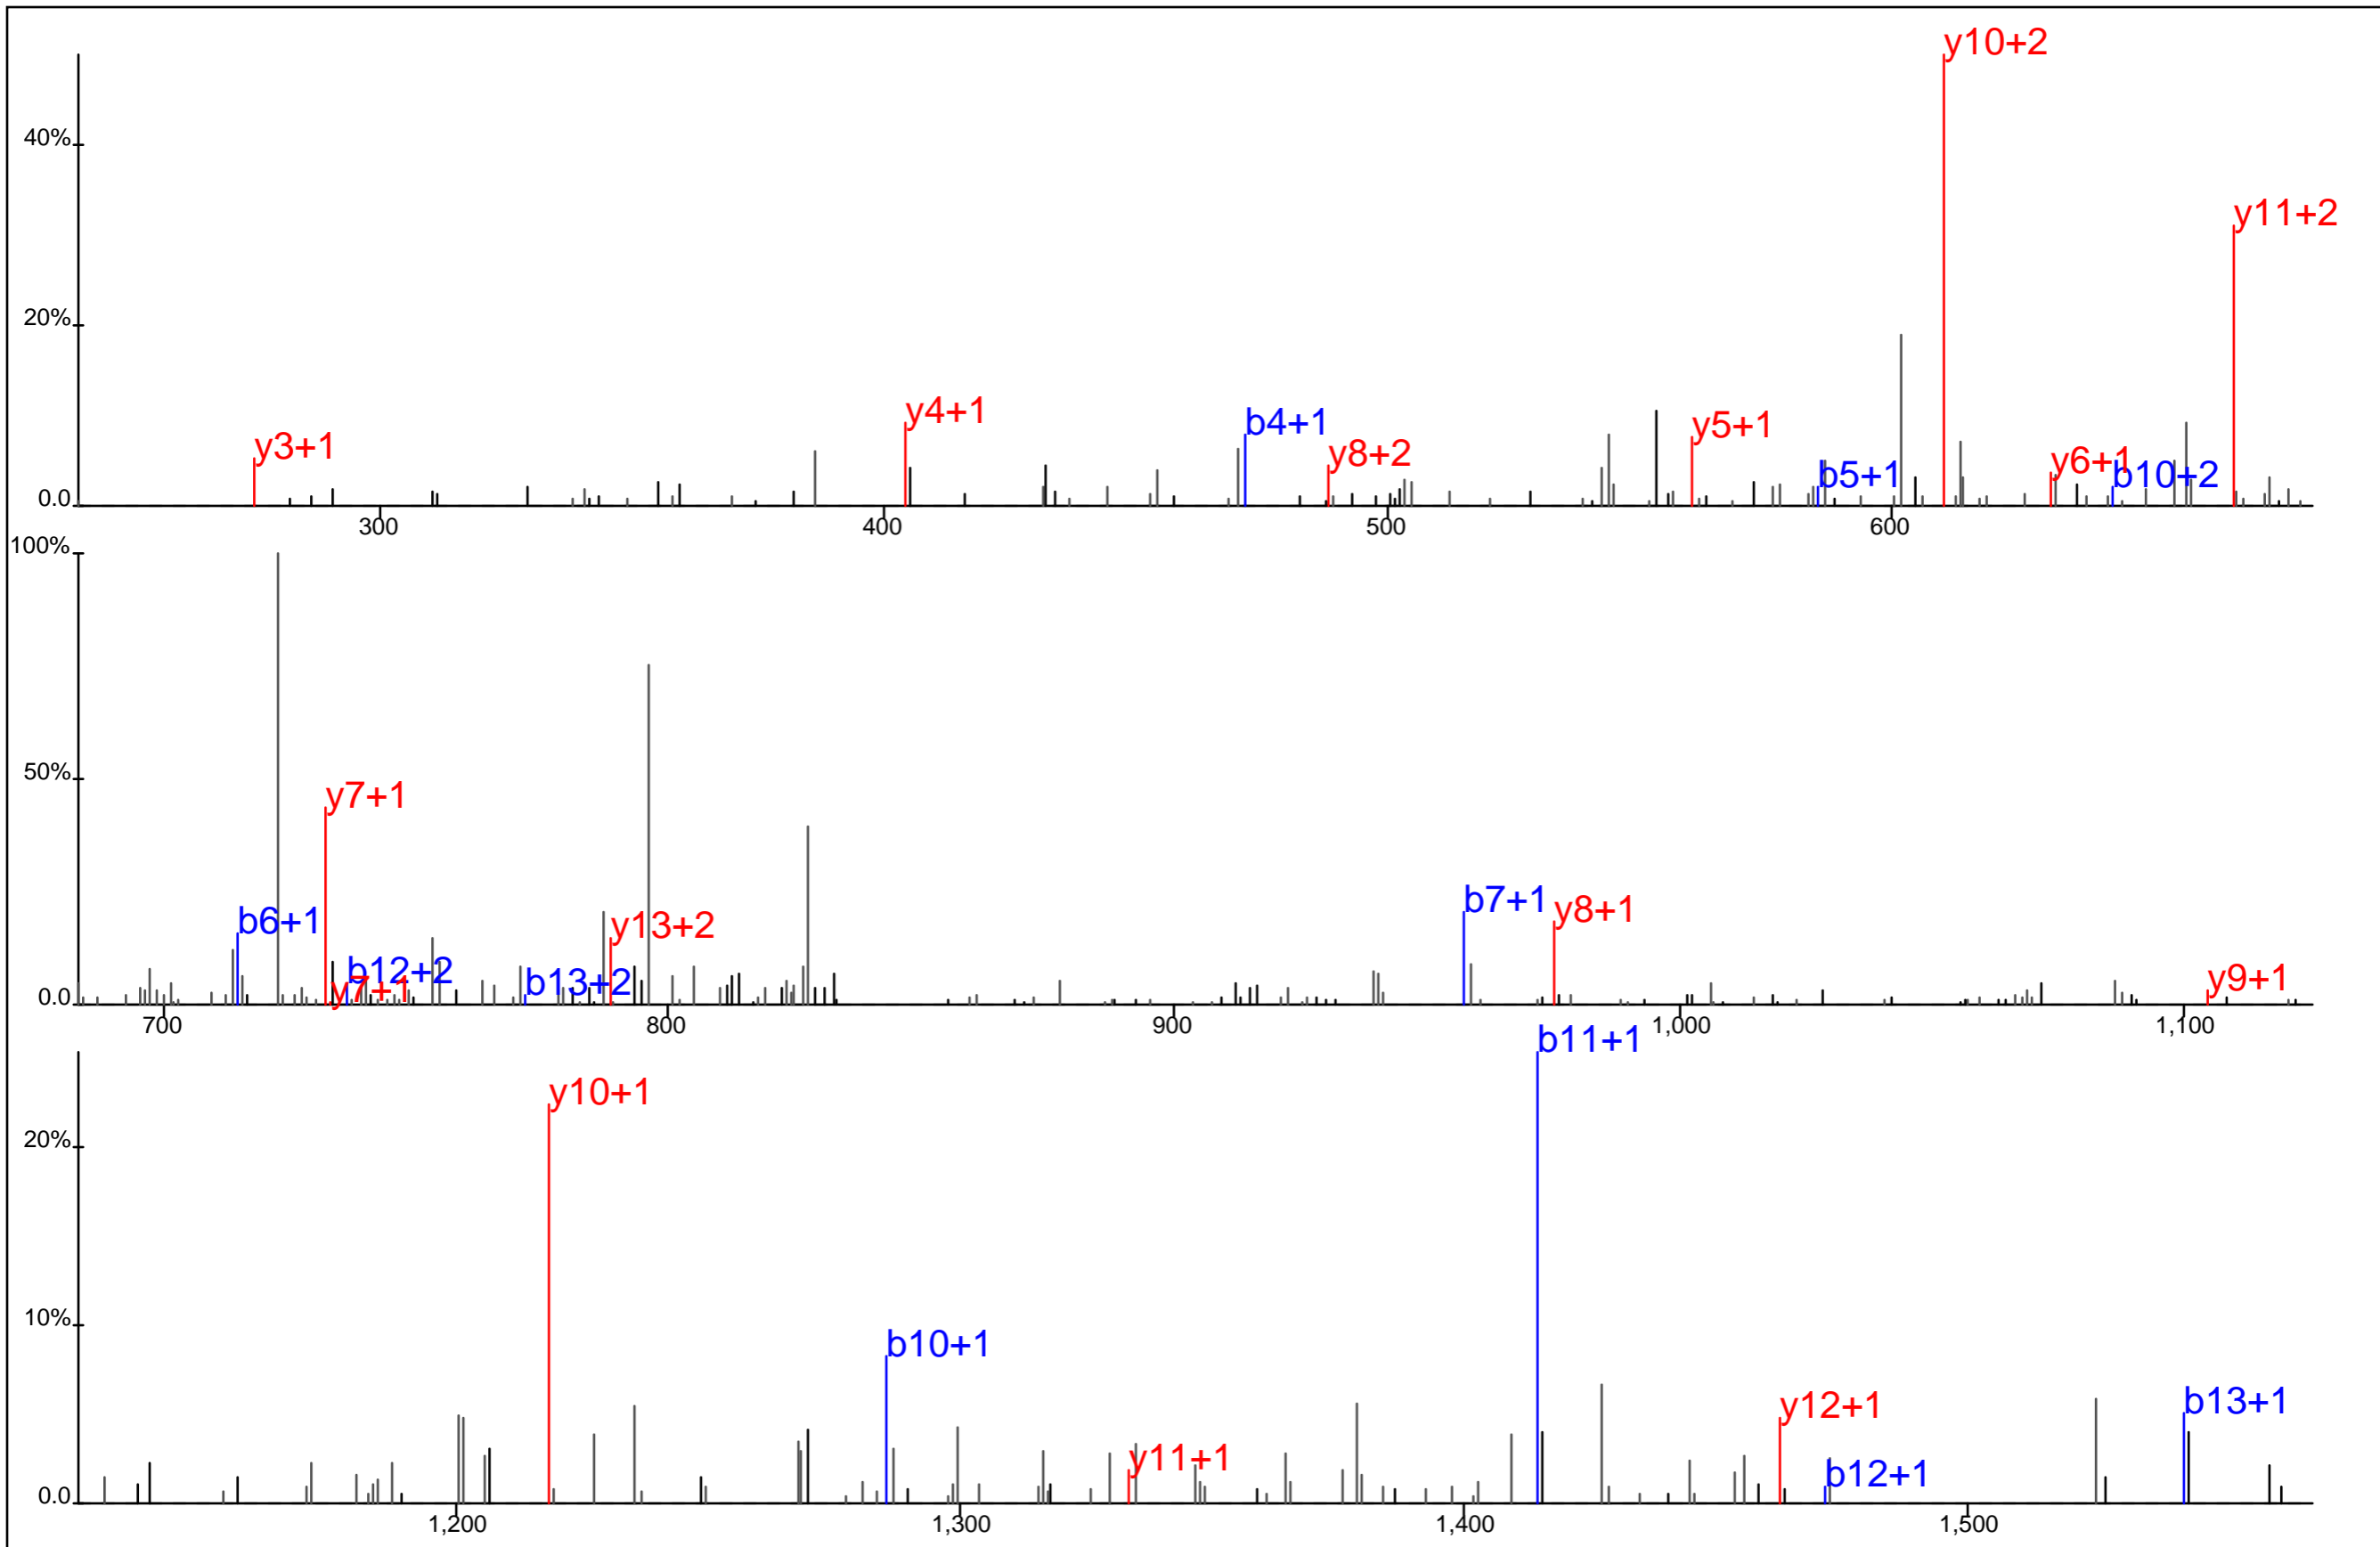

□ □ □ □ □ □ □ □ □ □  
 L I E D N E Y\* T A R E G A K  
□ □ □ □ □ □ □ □ □ □

Protein Name: Lck  
 gi Accession: 6984209  
 Precursor Mass: 844.8790+2  
 Delta Mass: 1.120 ppm  
 XCorr: 37.23

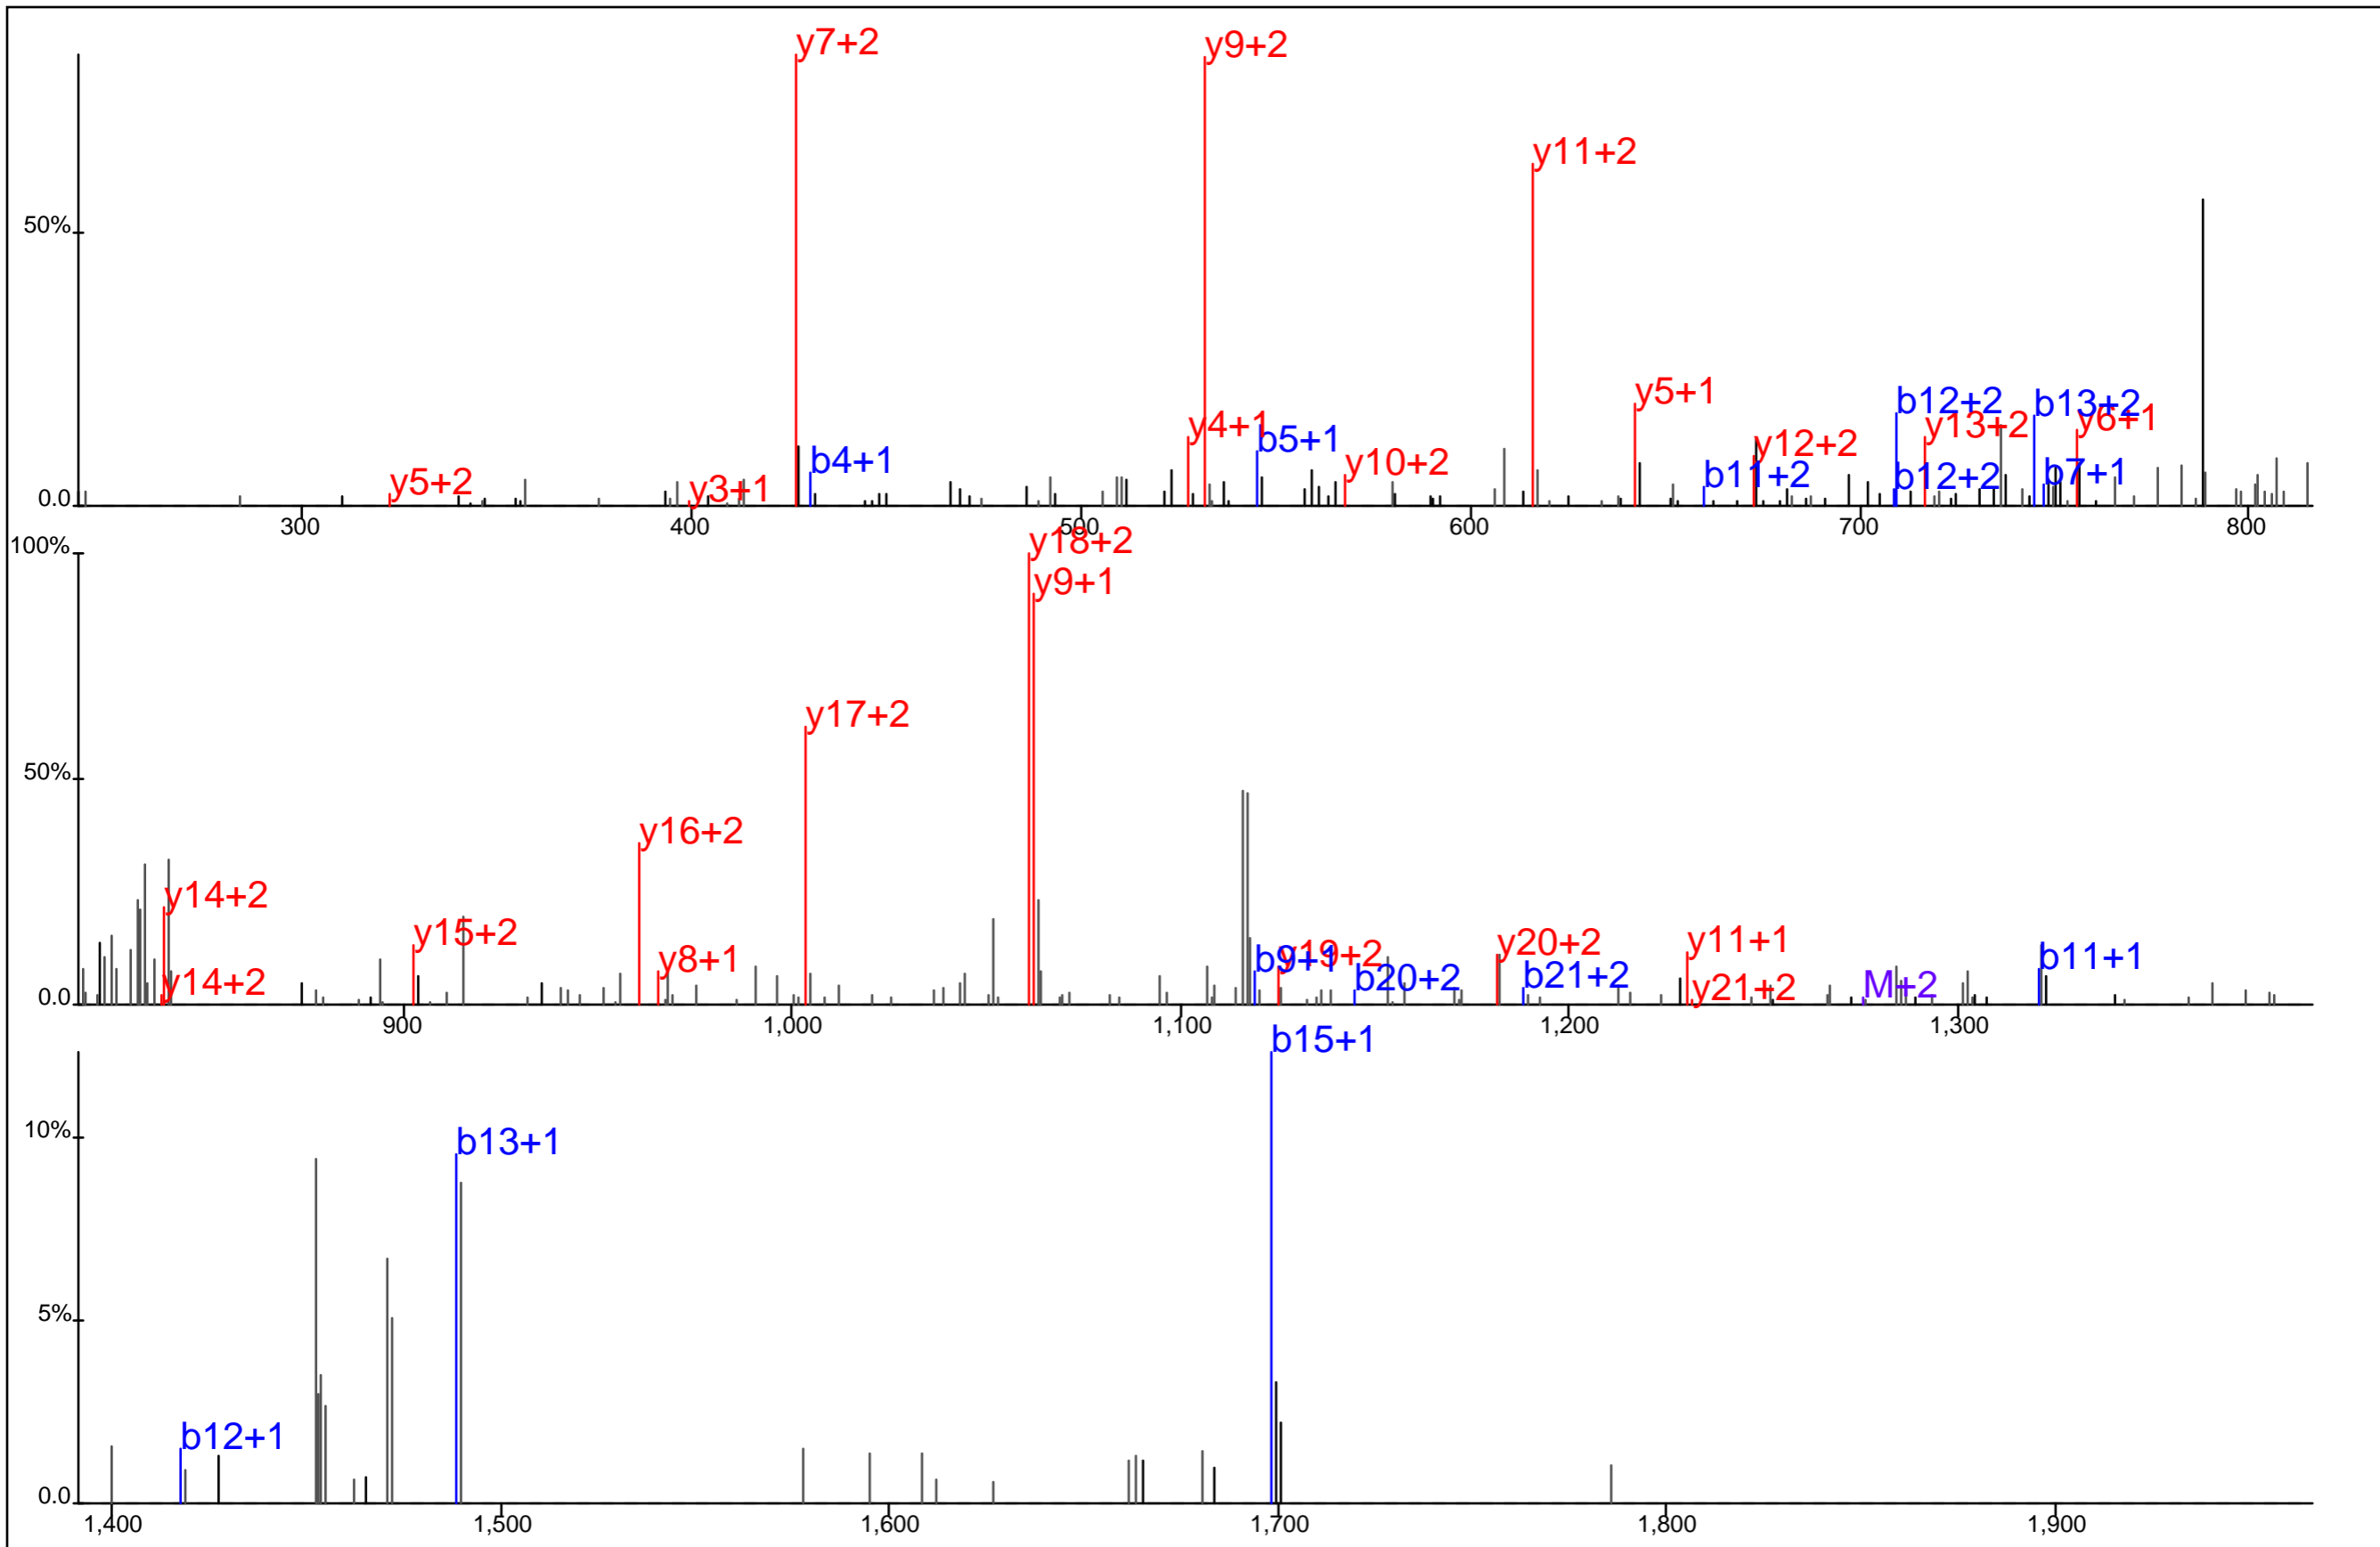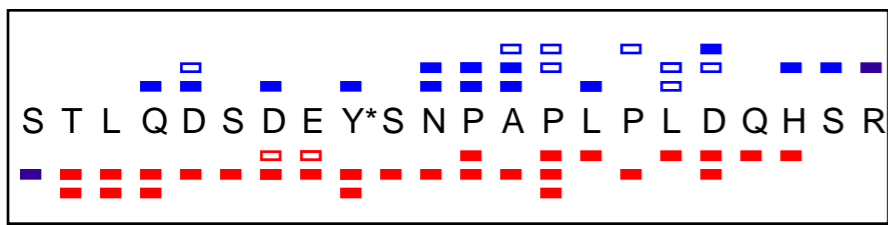

Protein Name: Leupaxin  
 gi Accession: 4758670  
 Precursor Mass: 850.7117+3  
 Delta Mass: 2.380 ppm  
 XCorr: 57.24



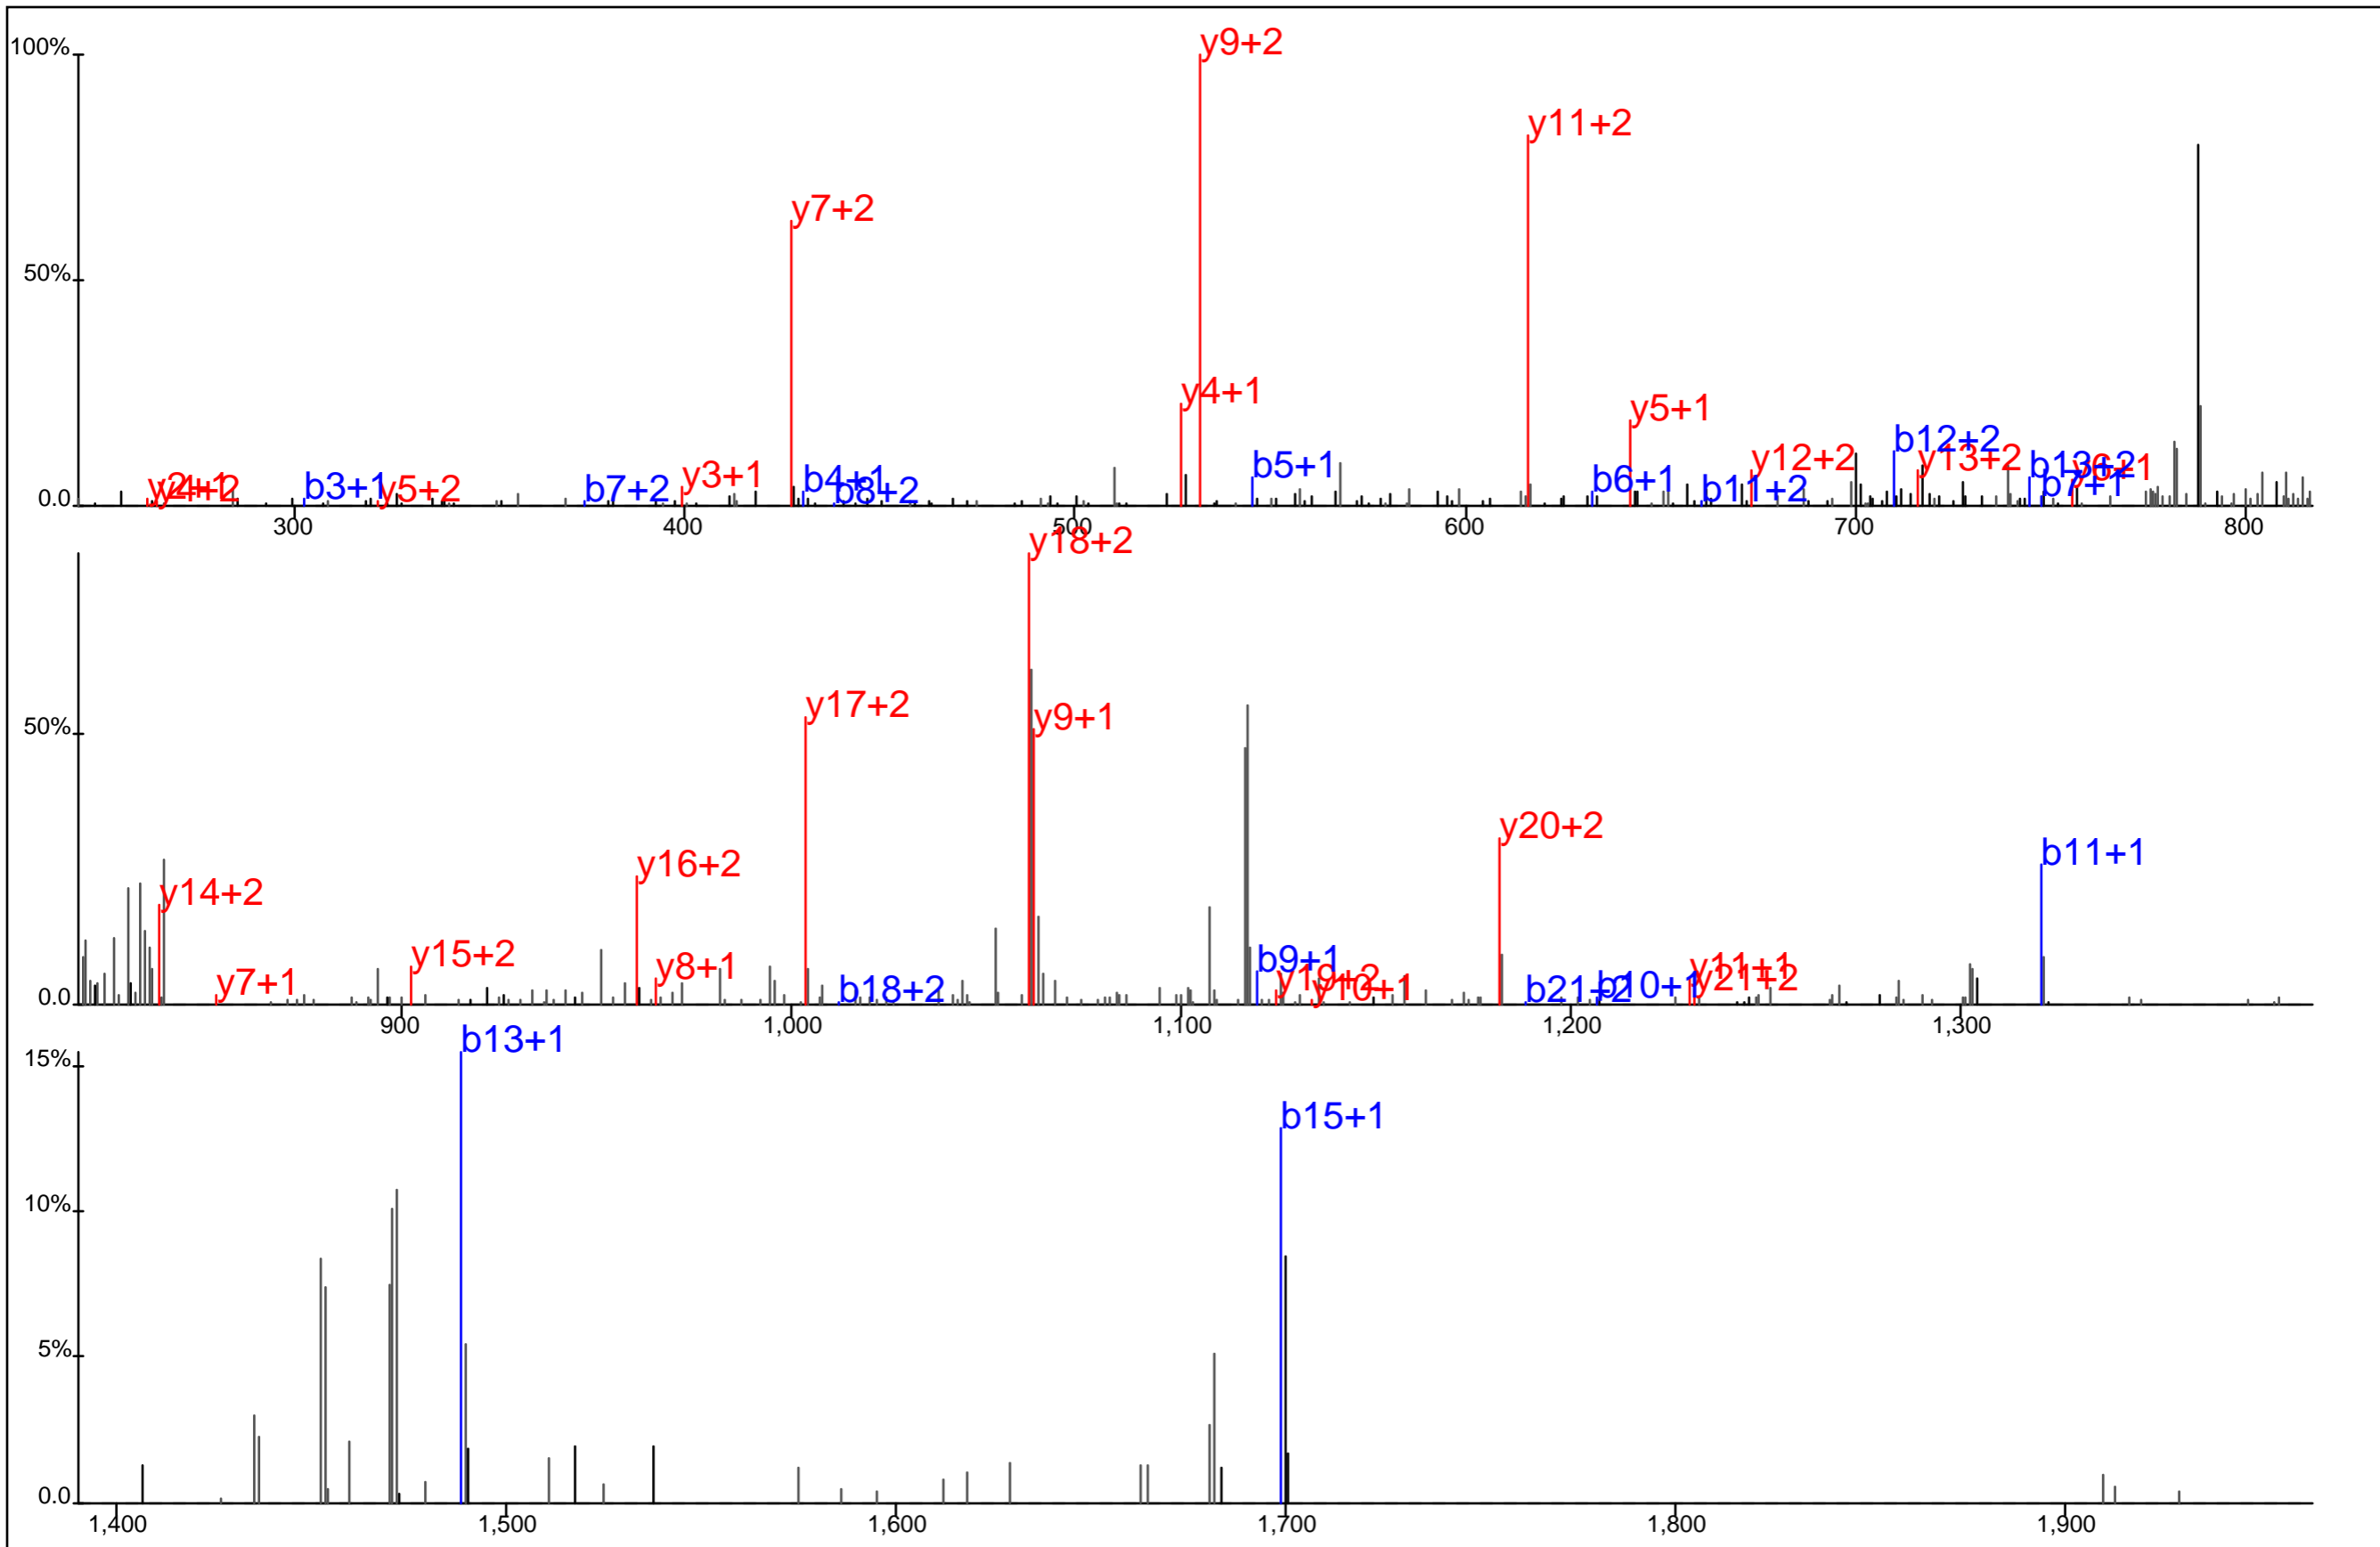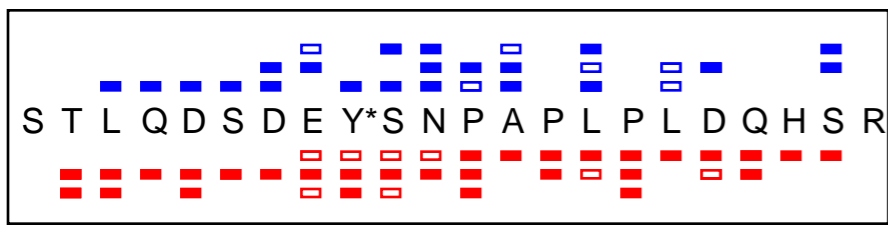

Protein Name: Leupaxin  
 gi Accession: 4758670  
 Precursor Mass: 850.7110+3  
 Delta Mass: 1.587 ppm  
 XCorr: 52.91

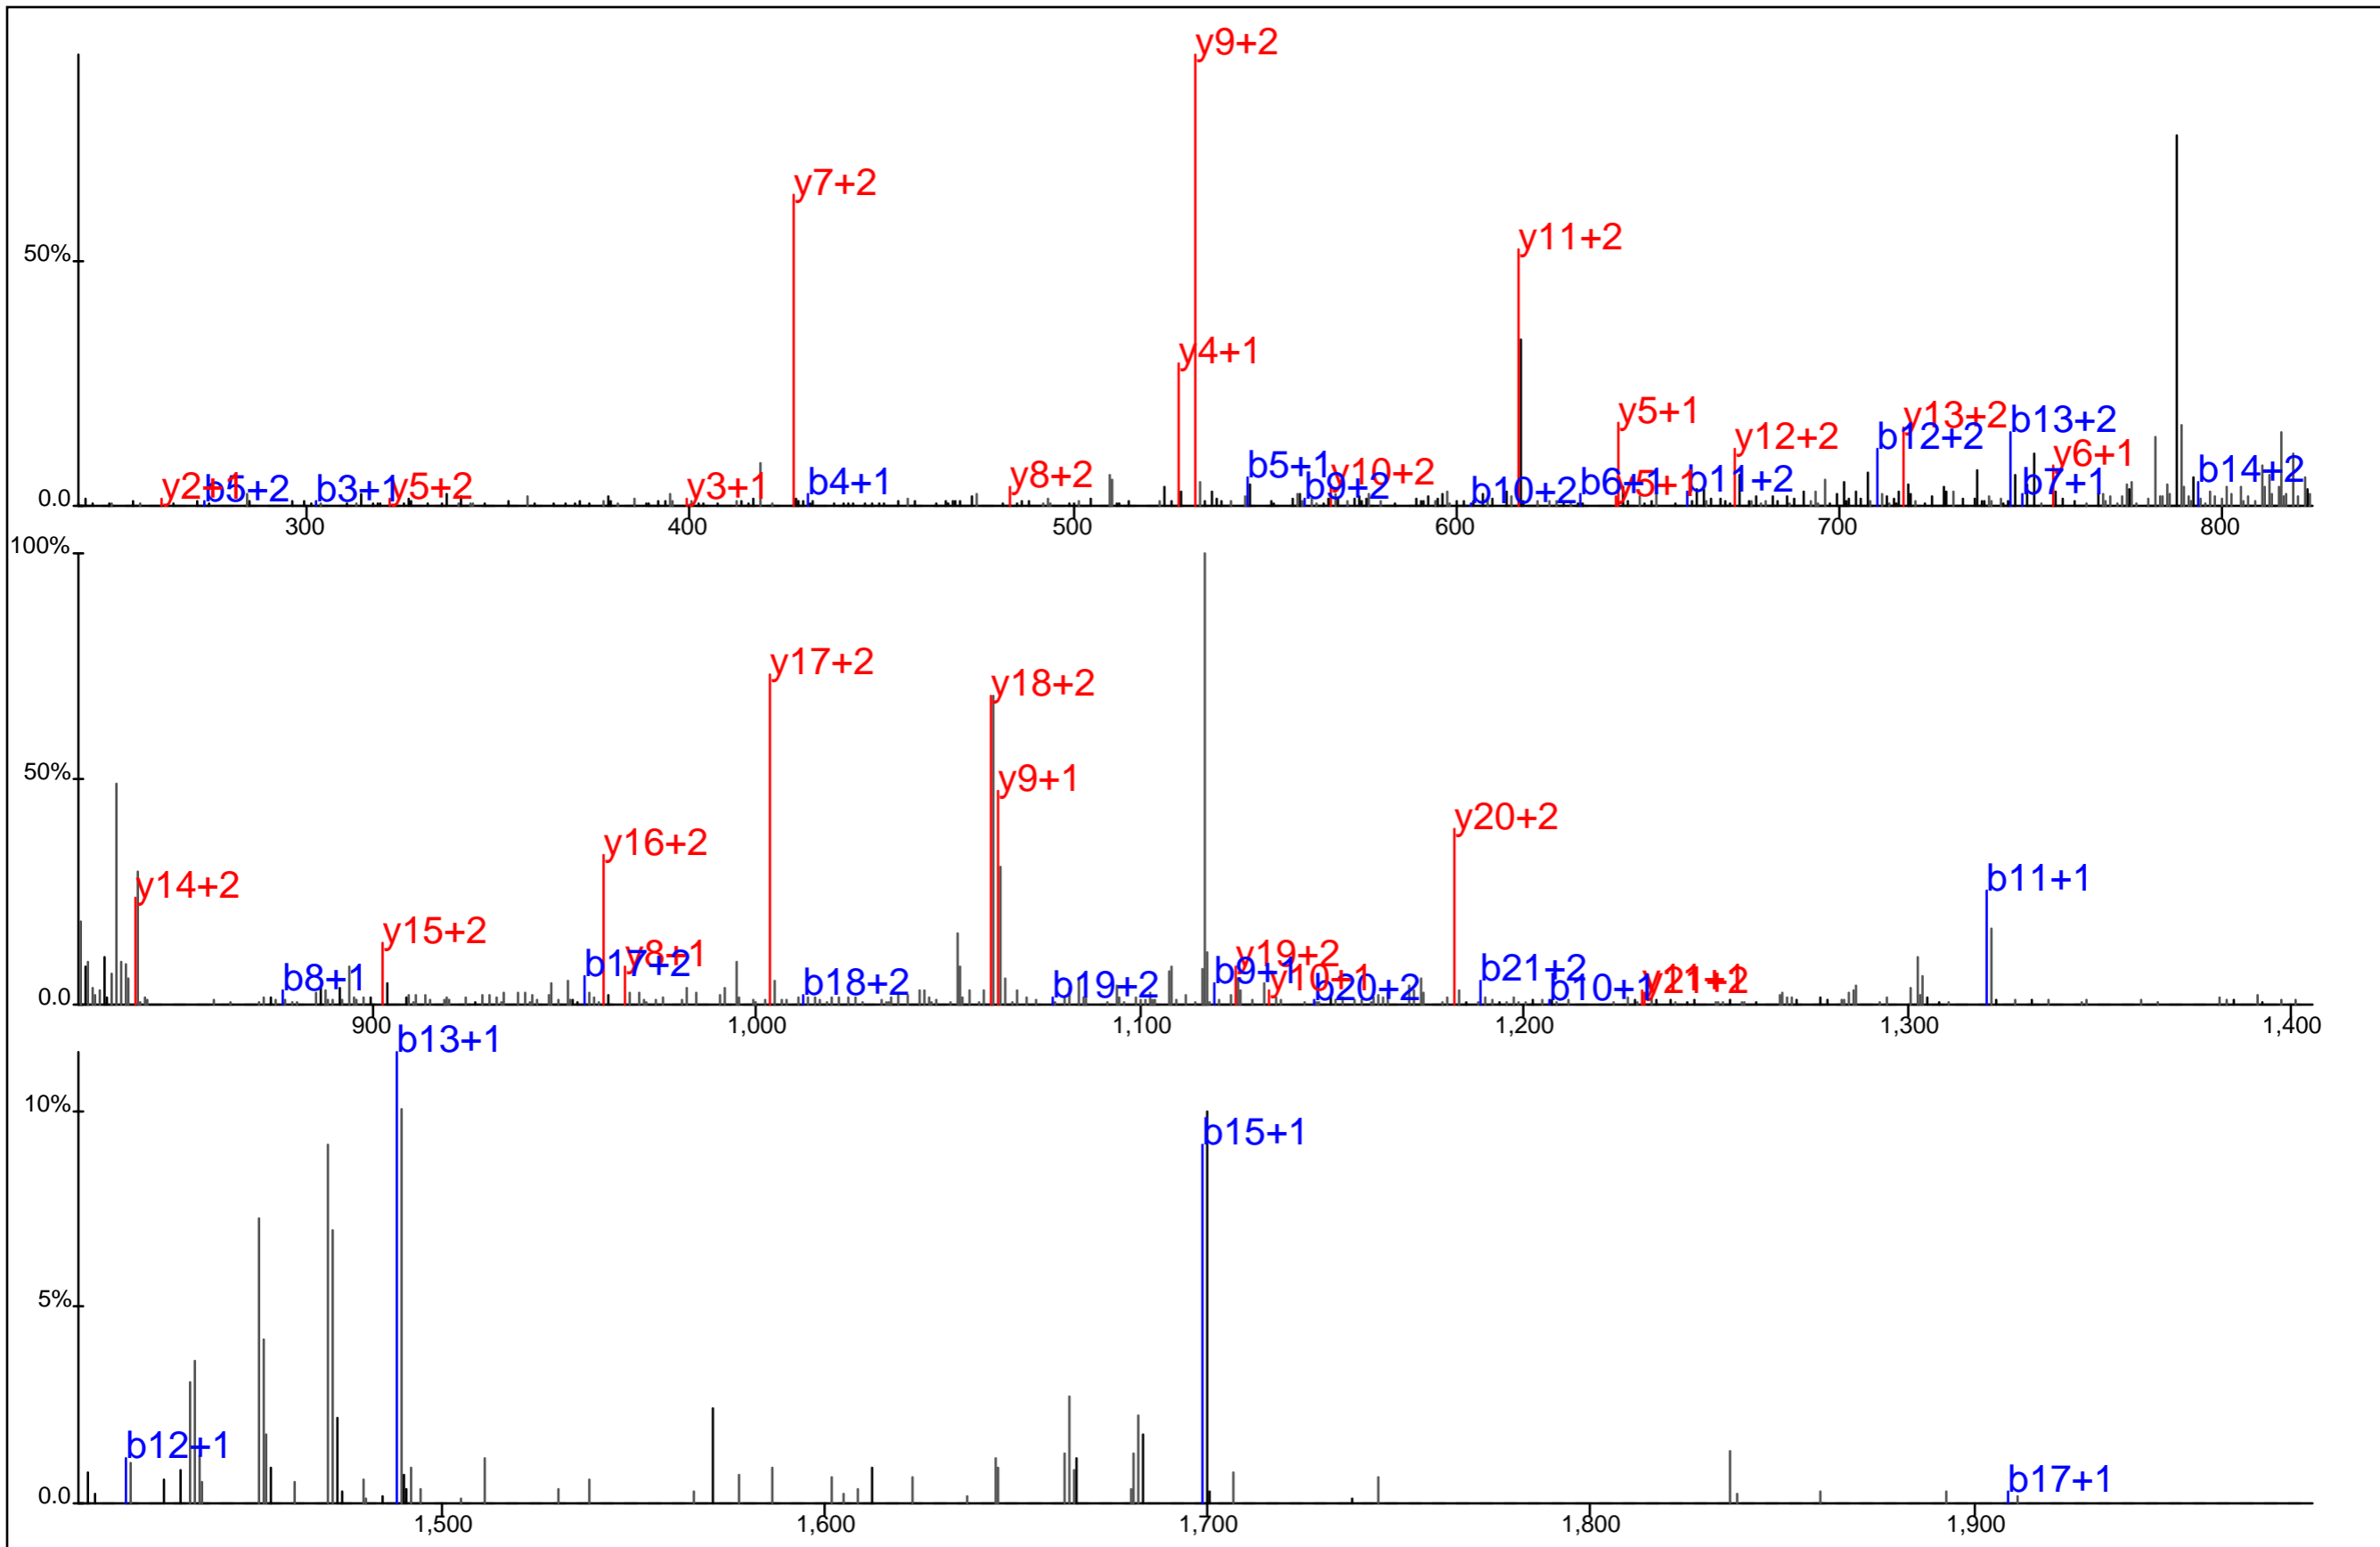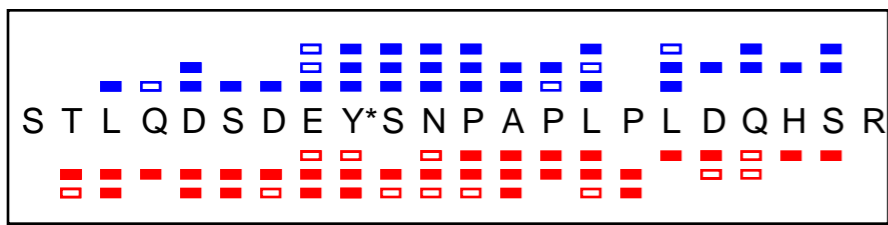

Protein Name: Leupaxin  
 gi Accession: 4758670  
 Precursor Mass: 850.7090+3  
 Delta Mass: 0.711 ppm  
 XCorr: 79.51

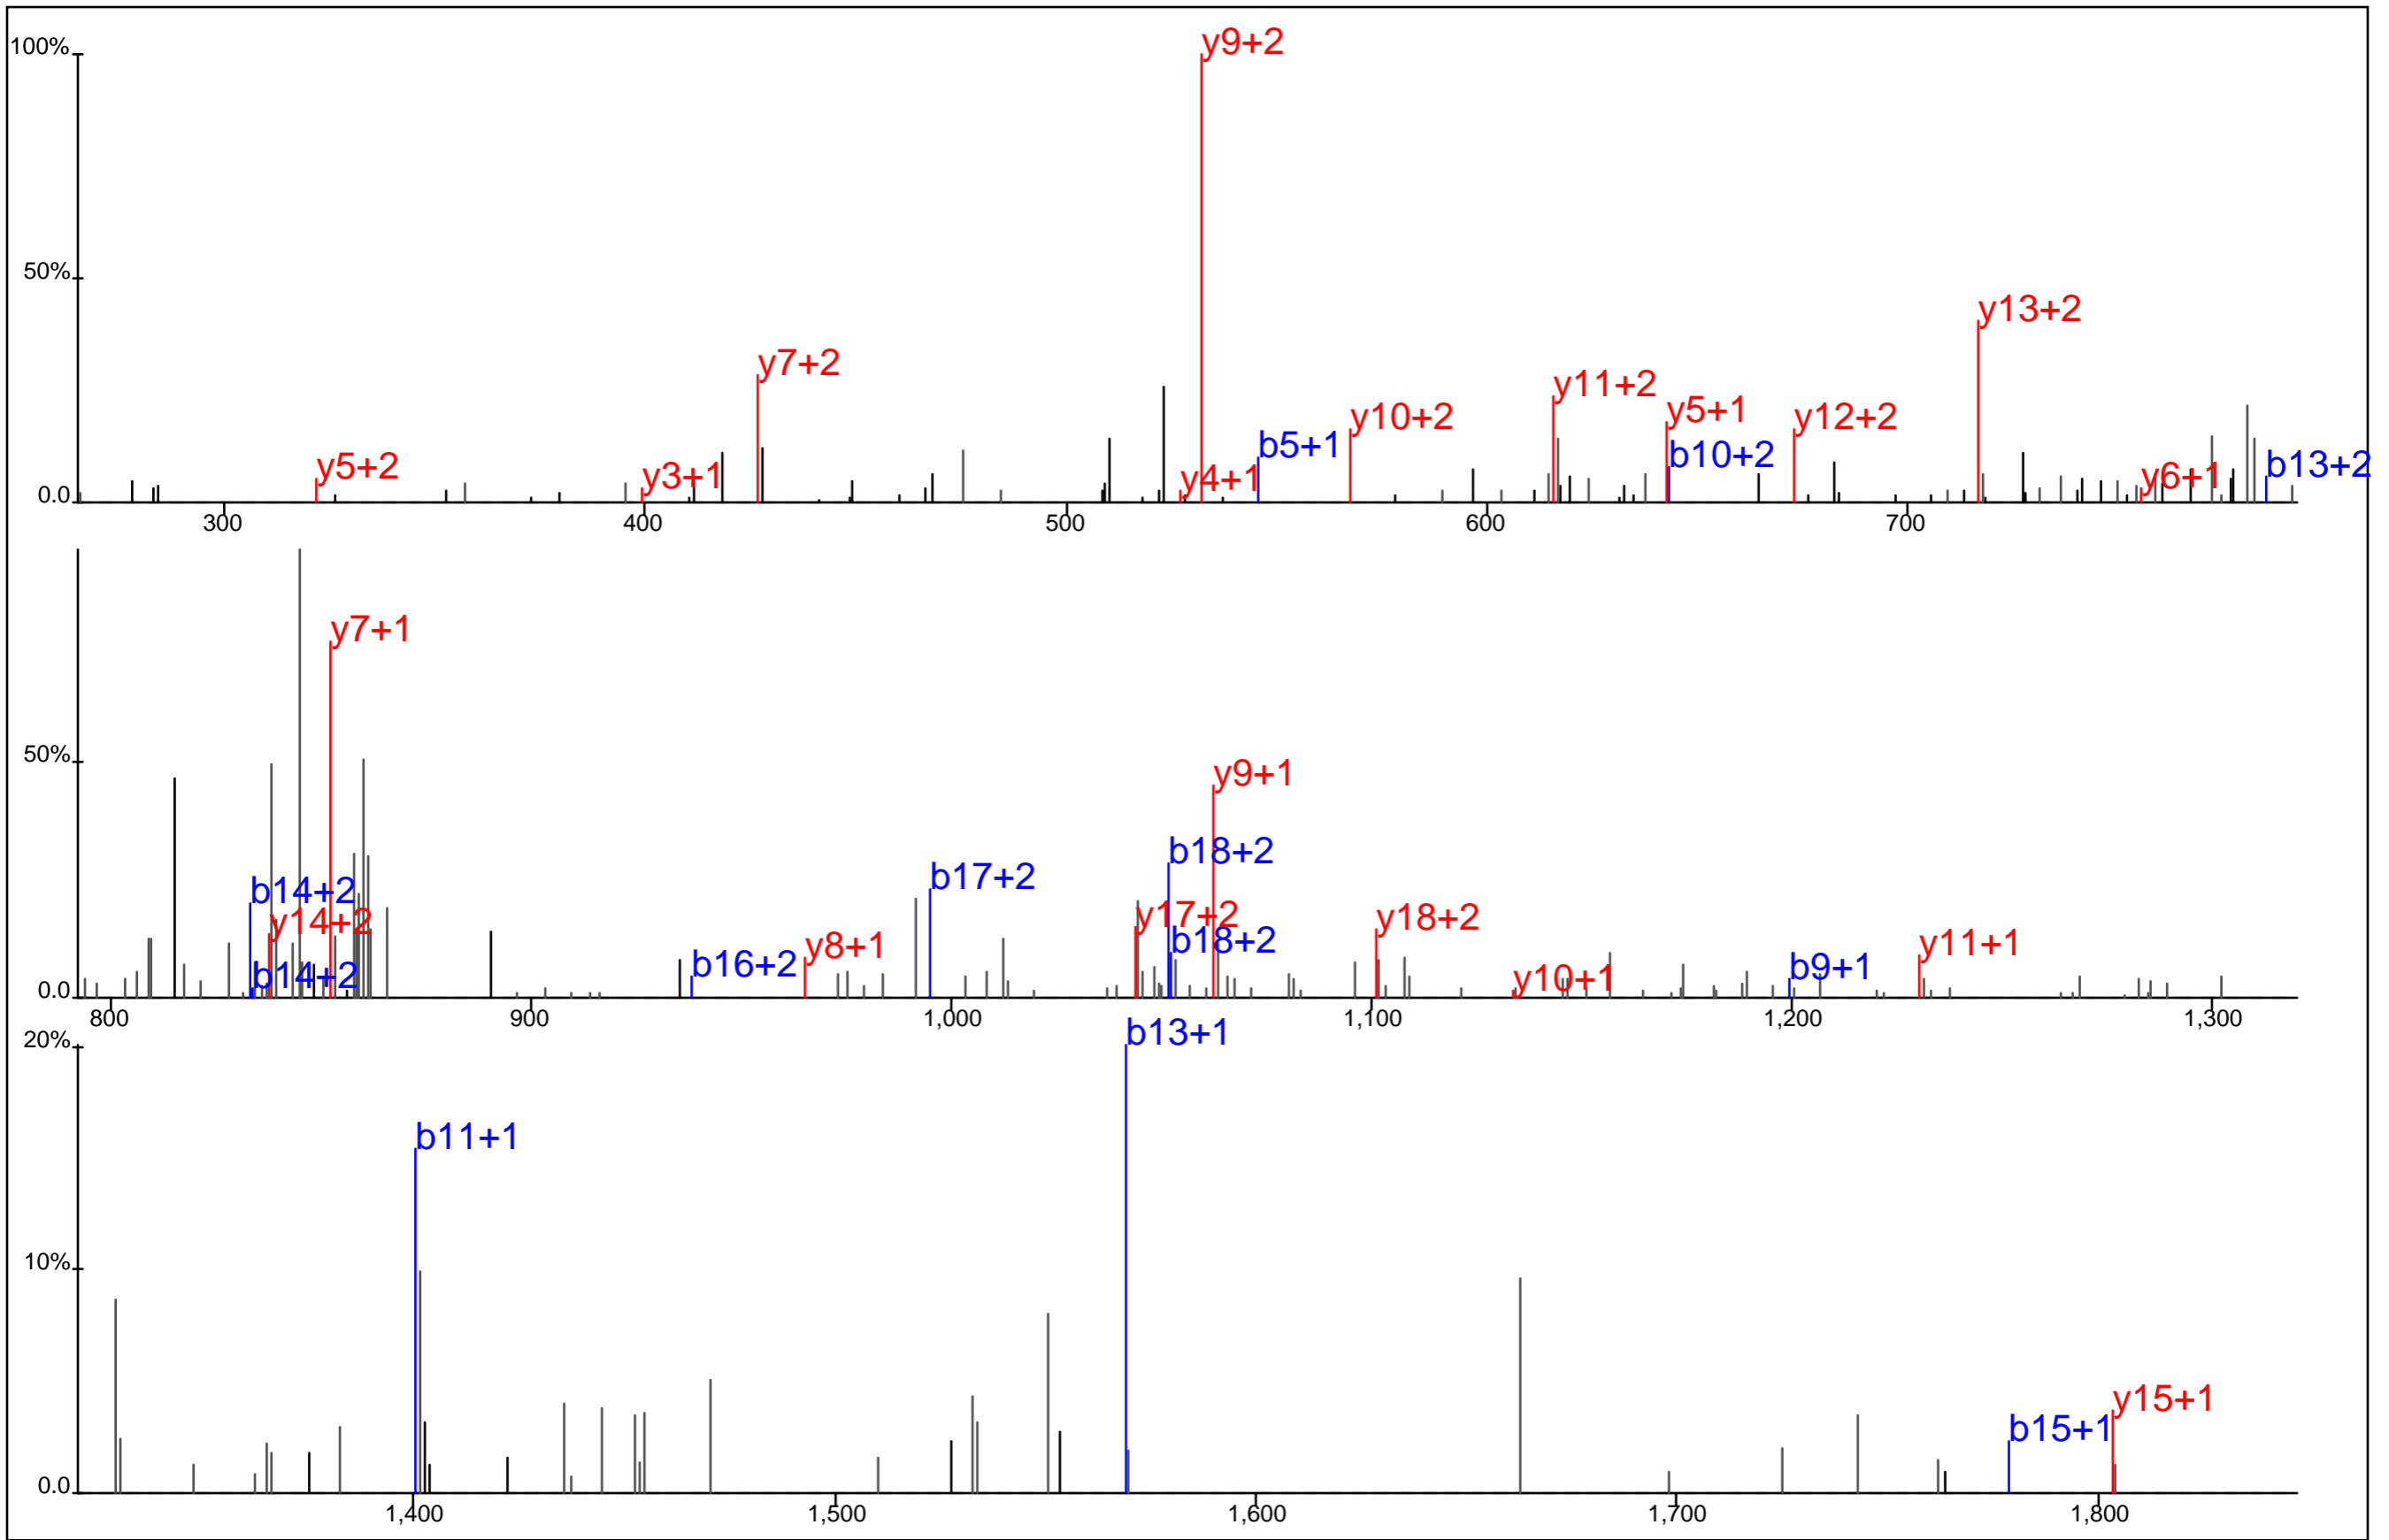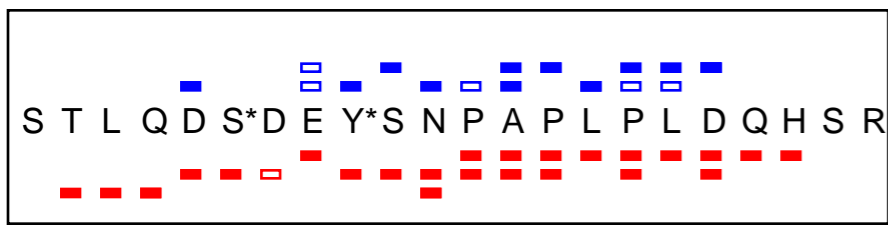

Protein Name: Leupaxin  
 gi Accession: 4758670  
 Precursor Mass: 877.3809+3  
 Delta Mass: 18.056 ppm  
 XCorr: 41.89

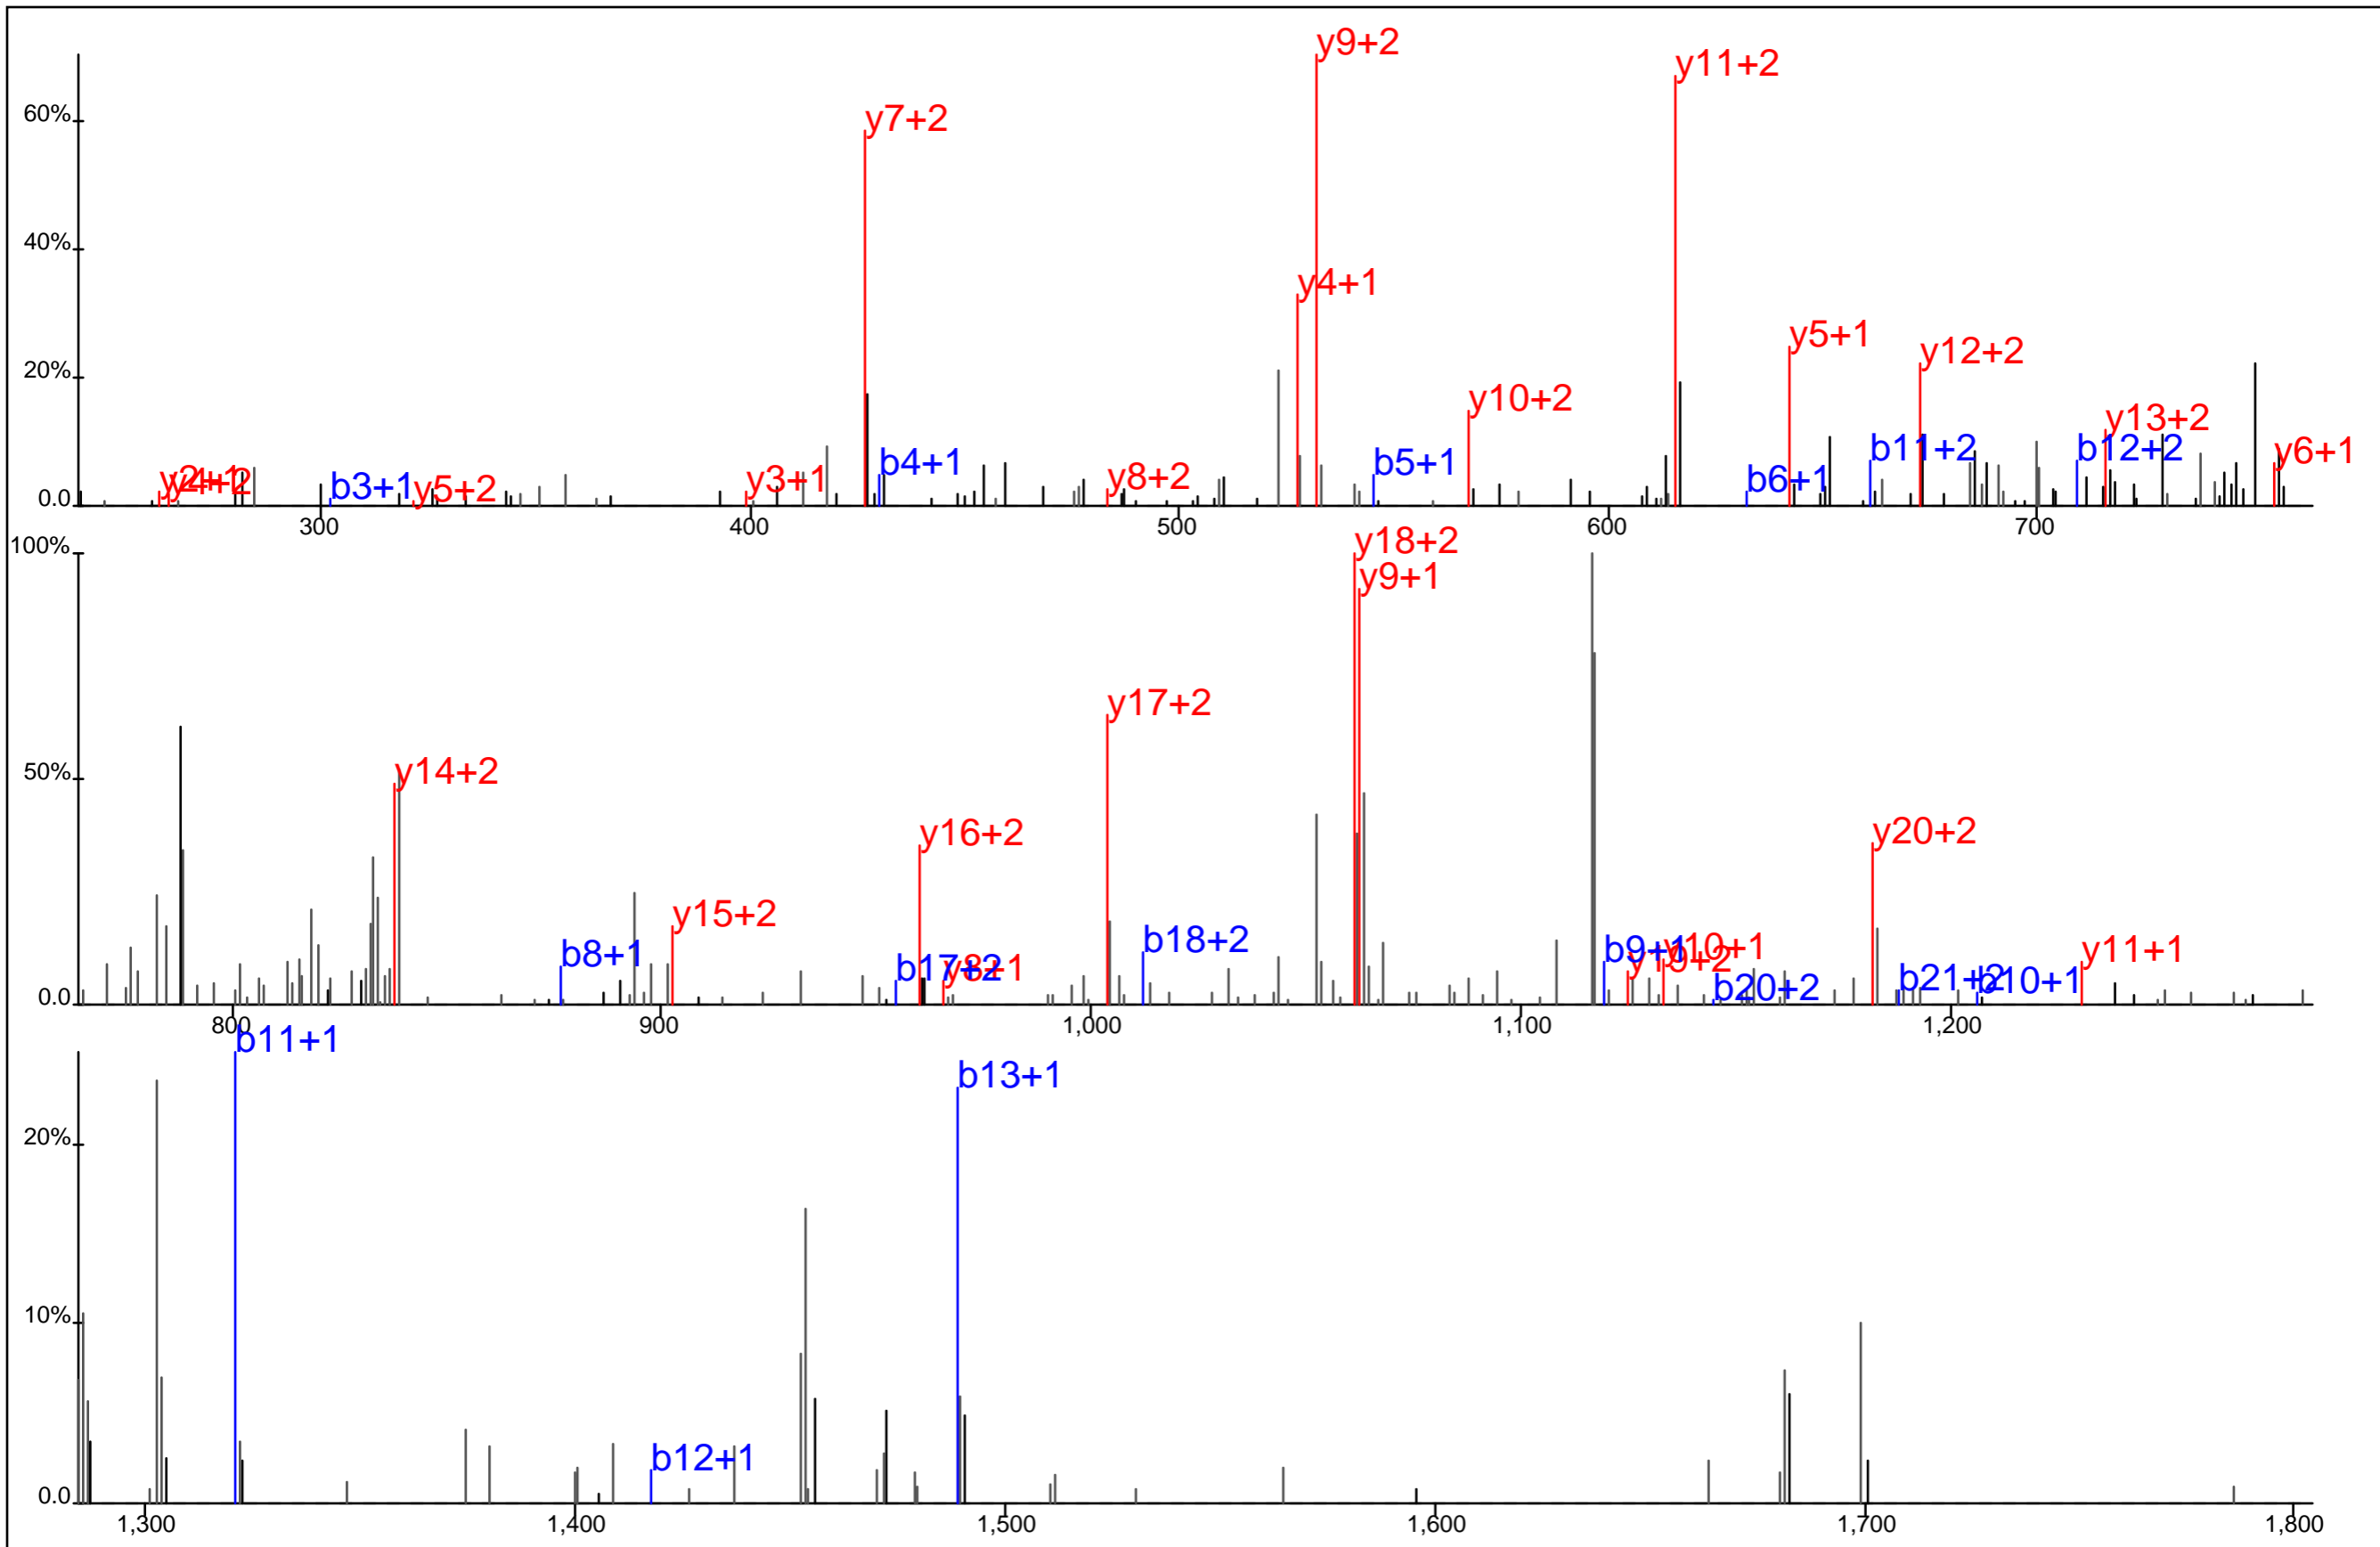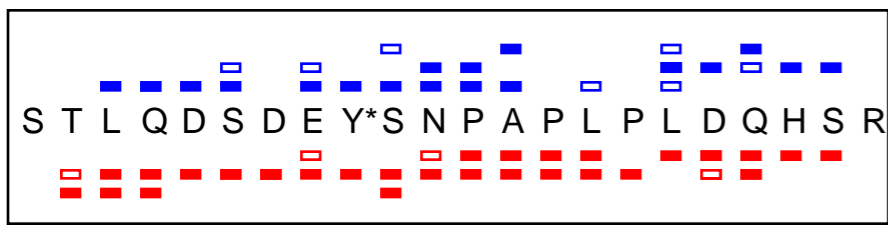

Protein Name: Leupaxin  
 gi Accession: 4758670  
 Precursor Mass: 850.7125+3  
 Delta Mass: 3.383 ppm  
 XCorr: 59.34

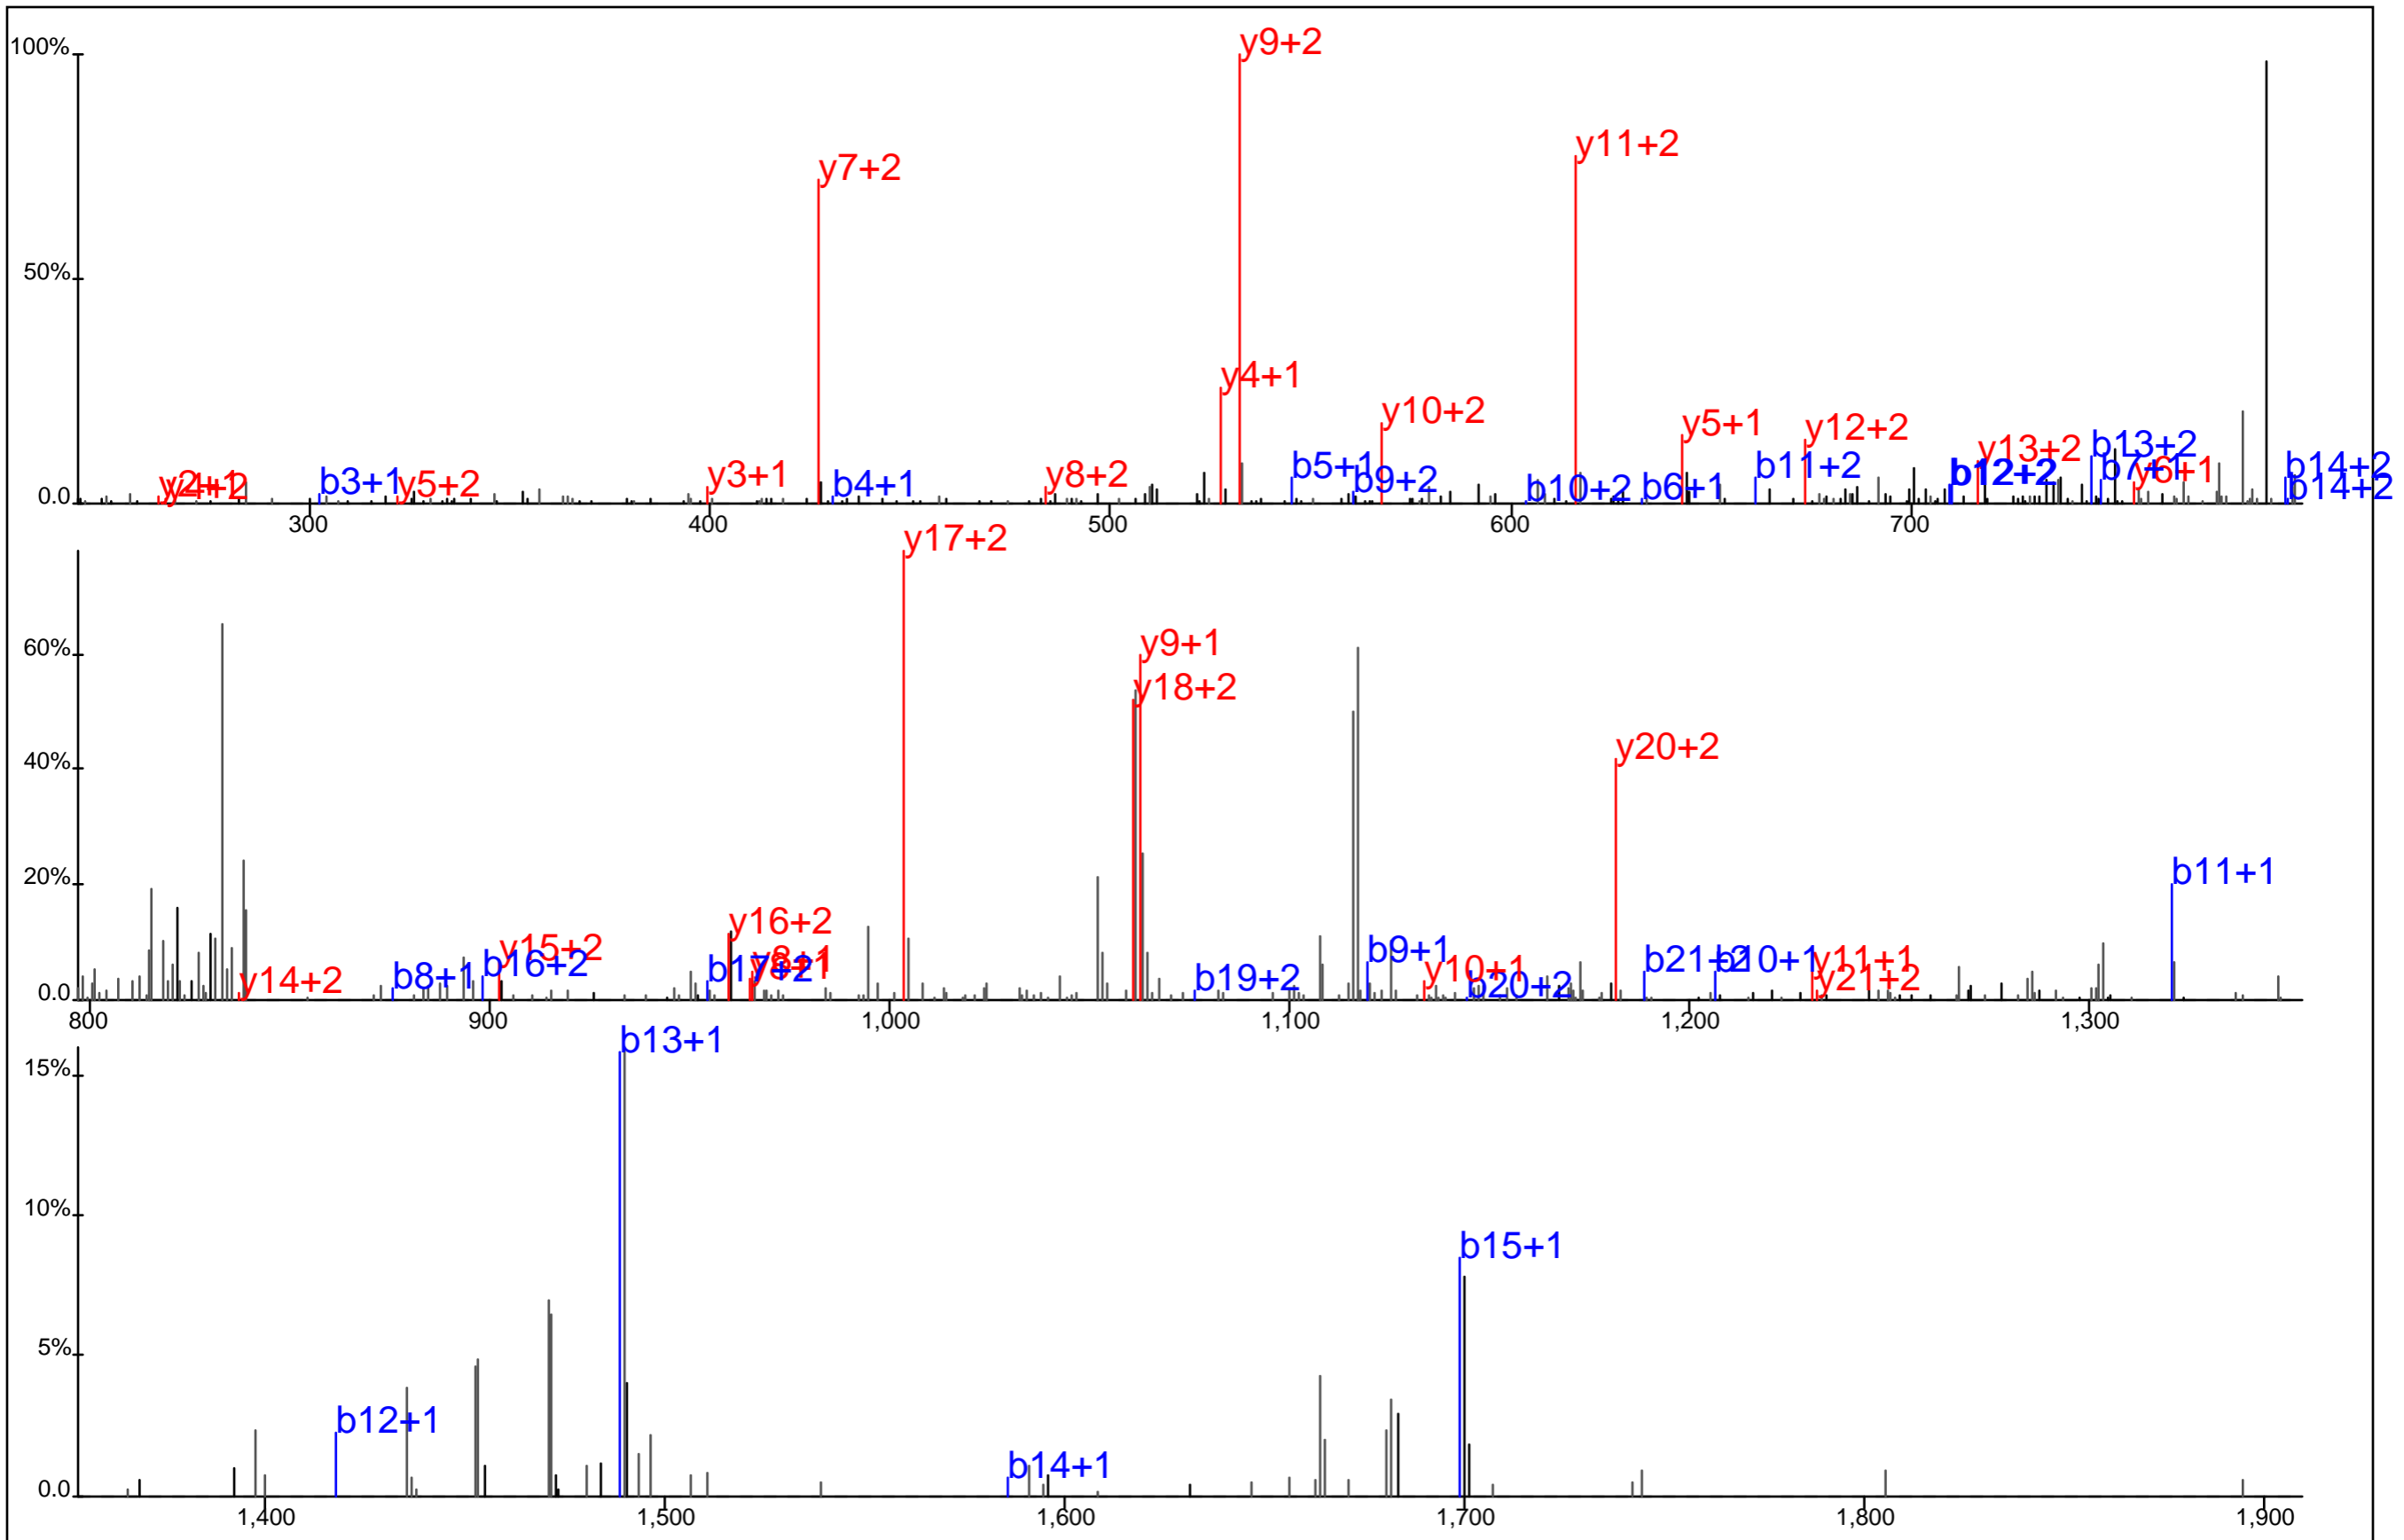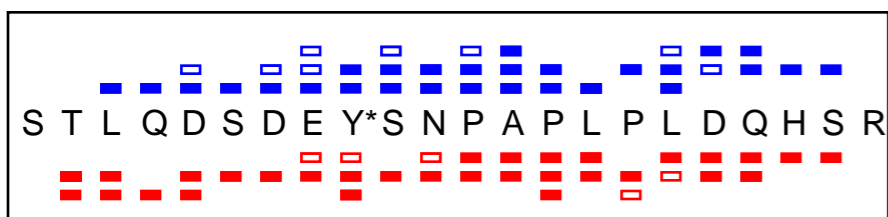

Protein Name: Leupaxin  
 gi Accession: 4758670  
 Precursor Mass: 850.7141+3  
 Delta Mass: 5.180 ppm  
 XCorr: 58.69

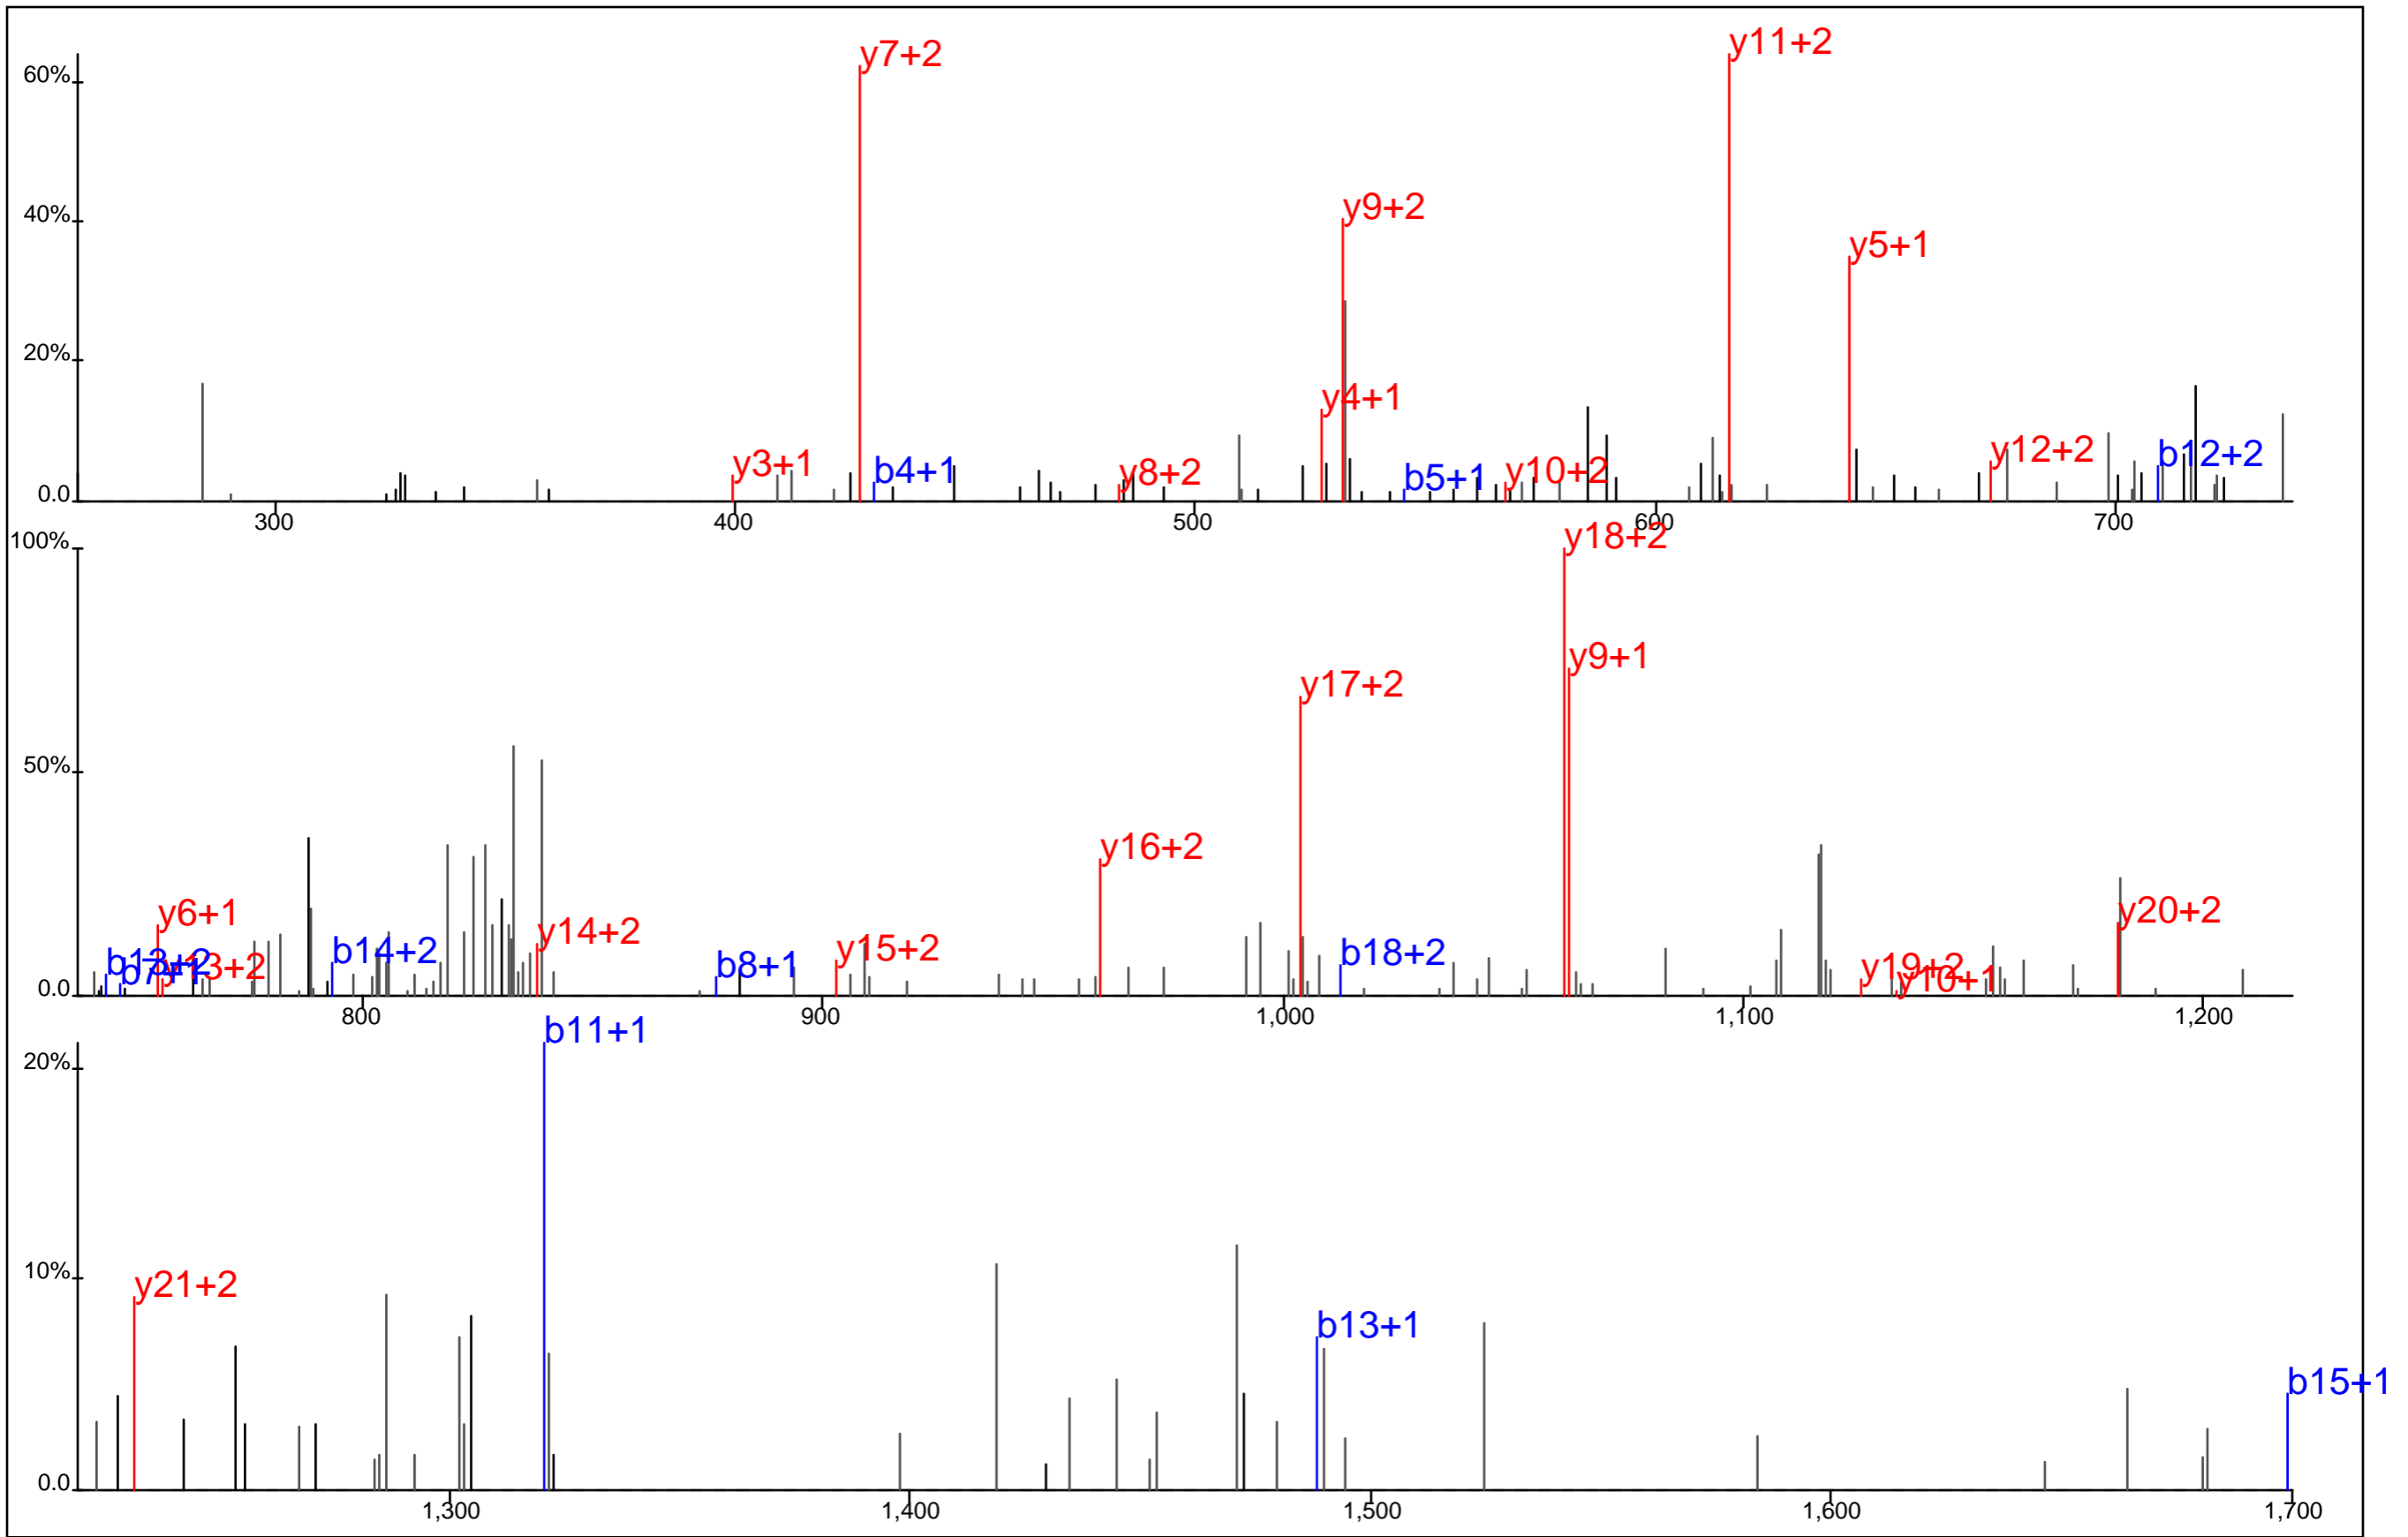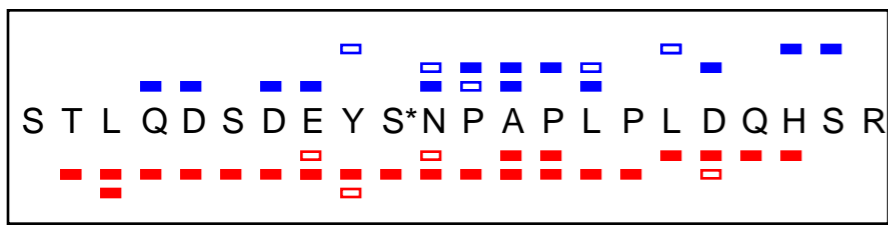

Protein Name: Leupaxin  
 gi Accession: 4758670  
 Precursor Mass: 850.7123+3  
 Delta Mass: 3.168 ppm  
 XCorr: 40.19

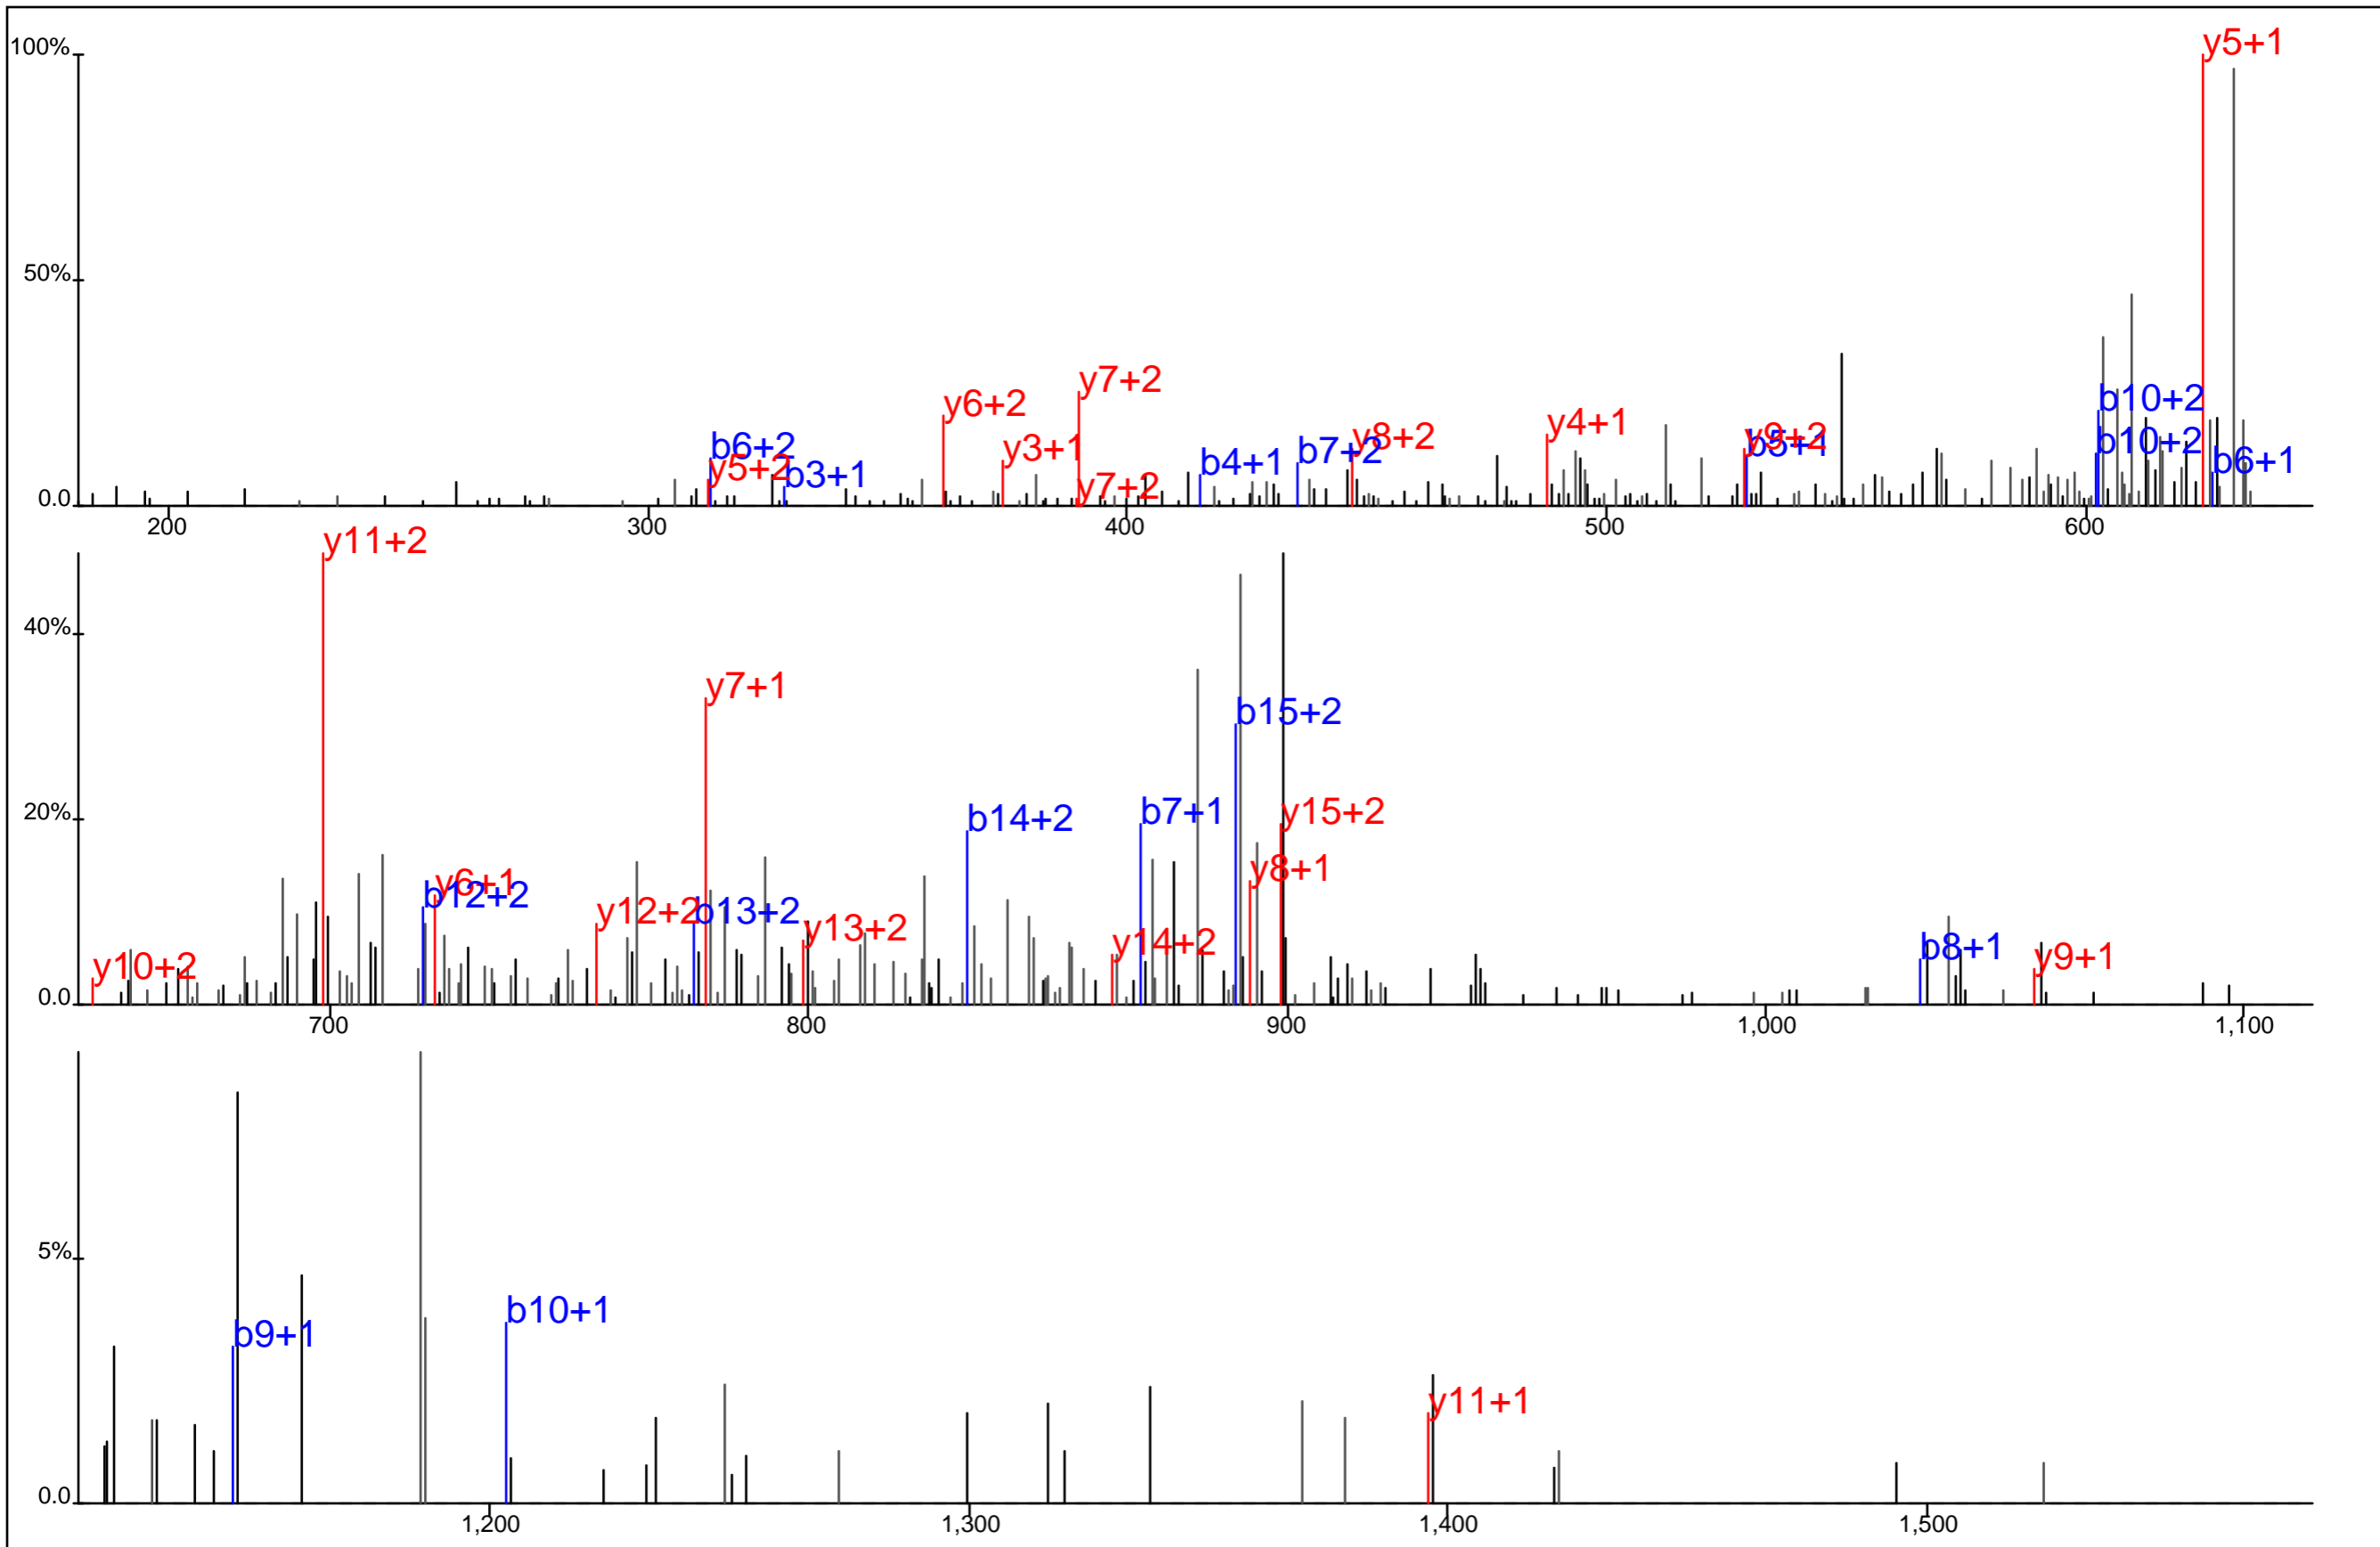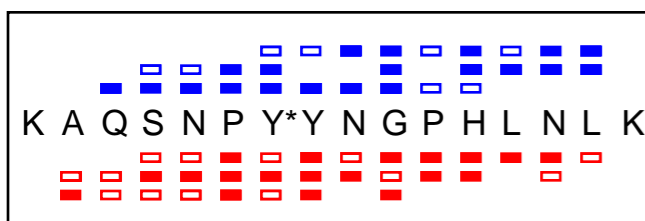

Protein Name: LIM domain only 7  
 gi Accession: 20521678  
 Precursor Mass: 641.9772+3  
 Delta Mass: 2.977 ppm  
 XCorr: 30.44

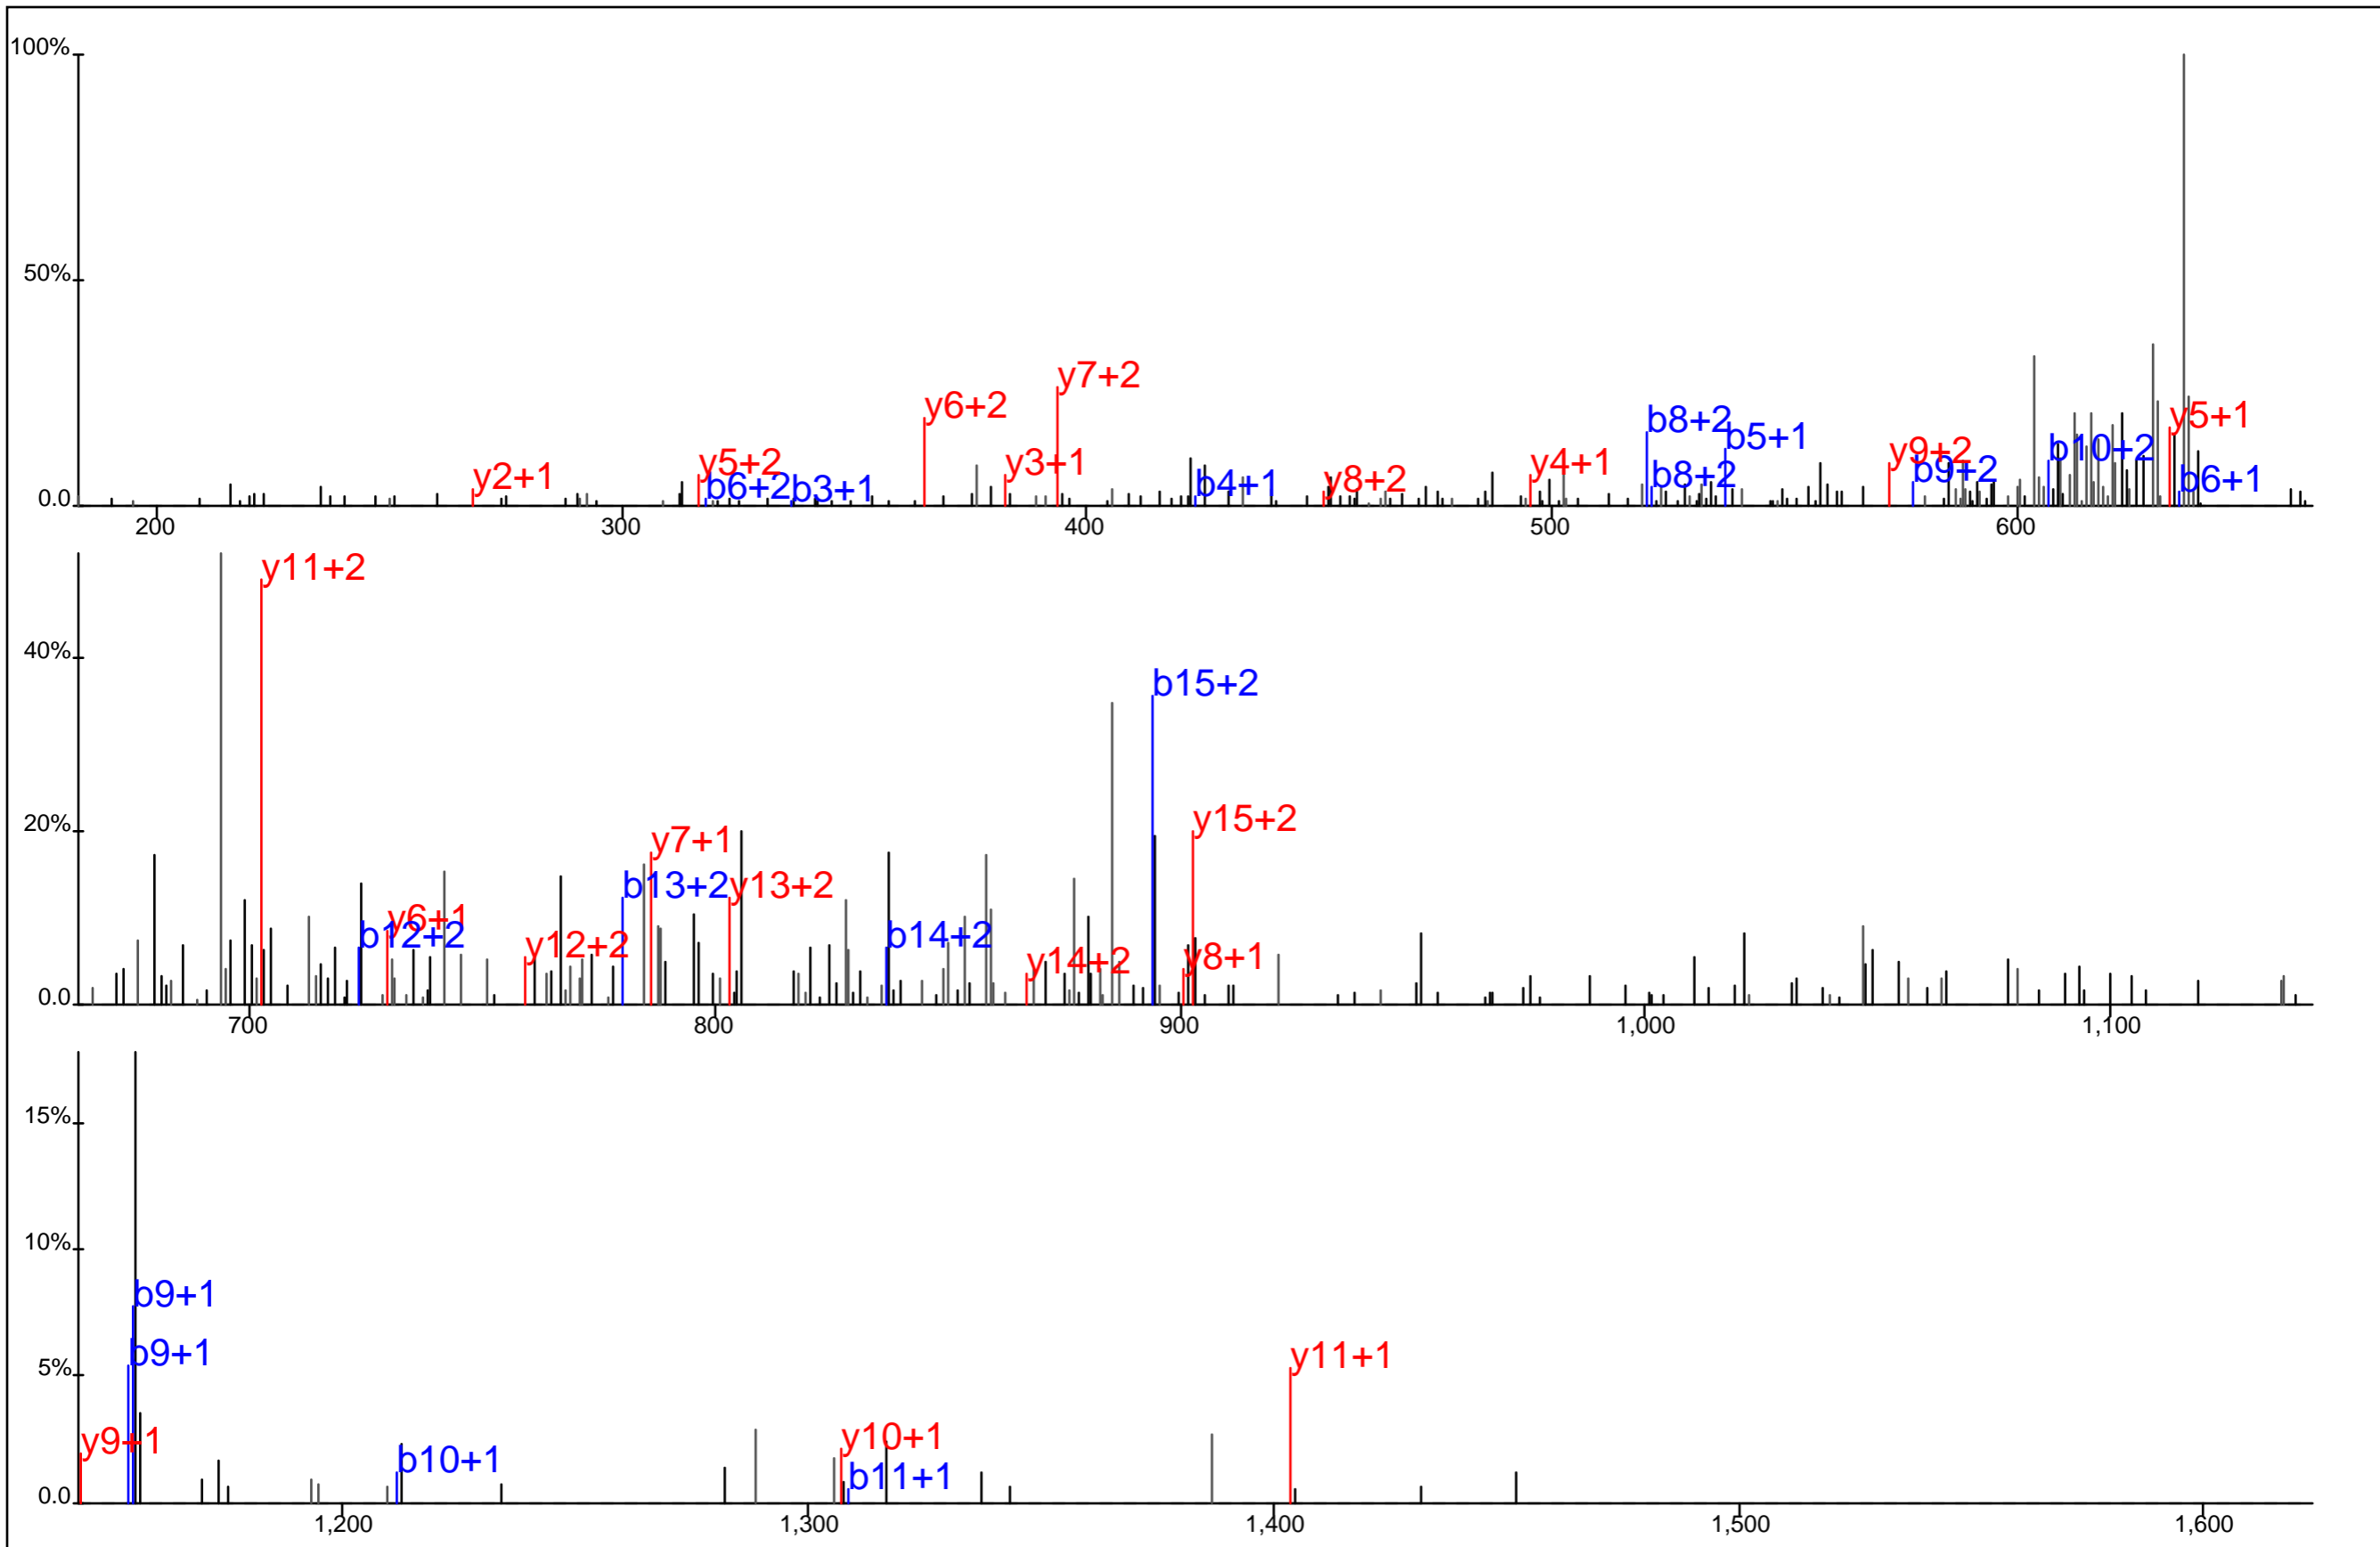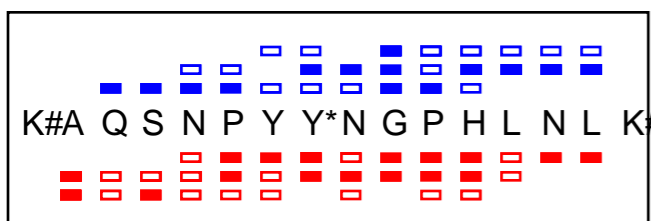

Protein Name: LIM domain only 7  
 gi Accession: 20521678  
 Precursor Mass: 647.3226+3  
 Delta Mass: 7.056 ppm  
 XCorr: 22.68



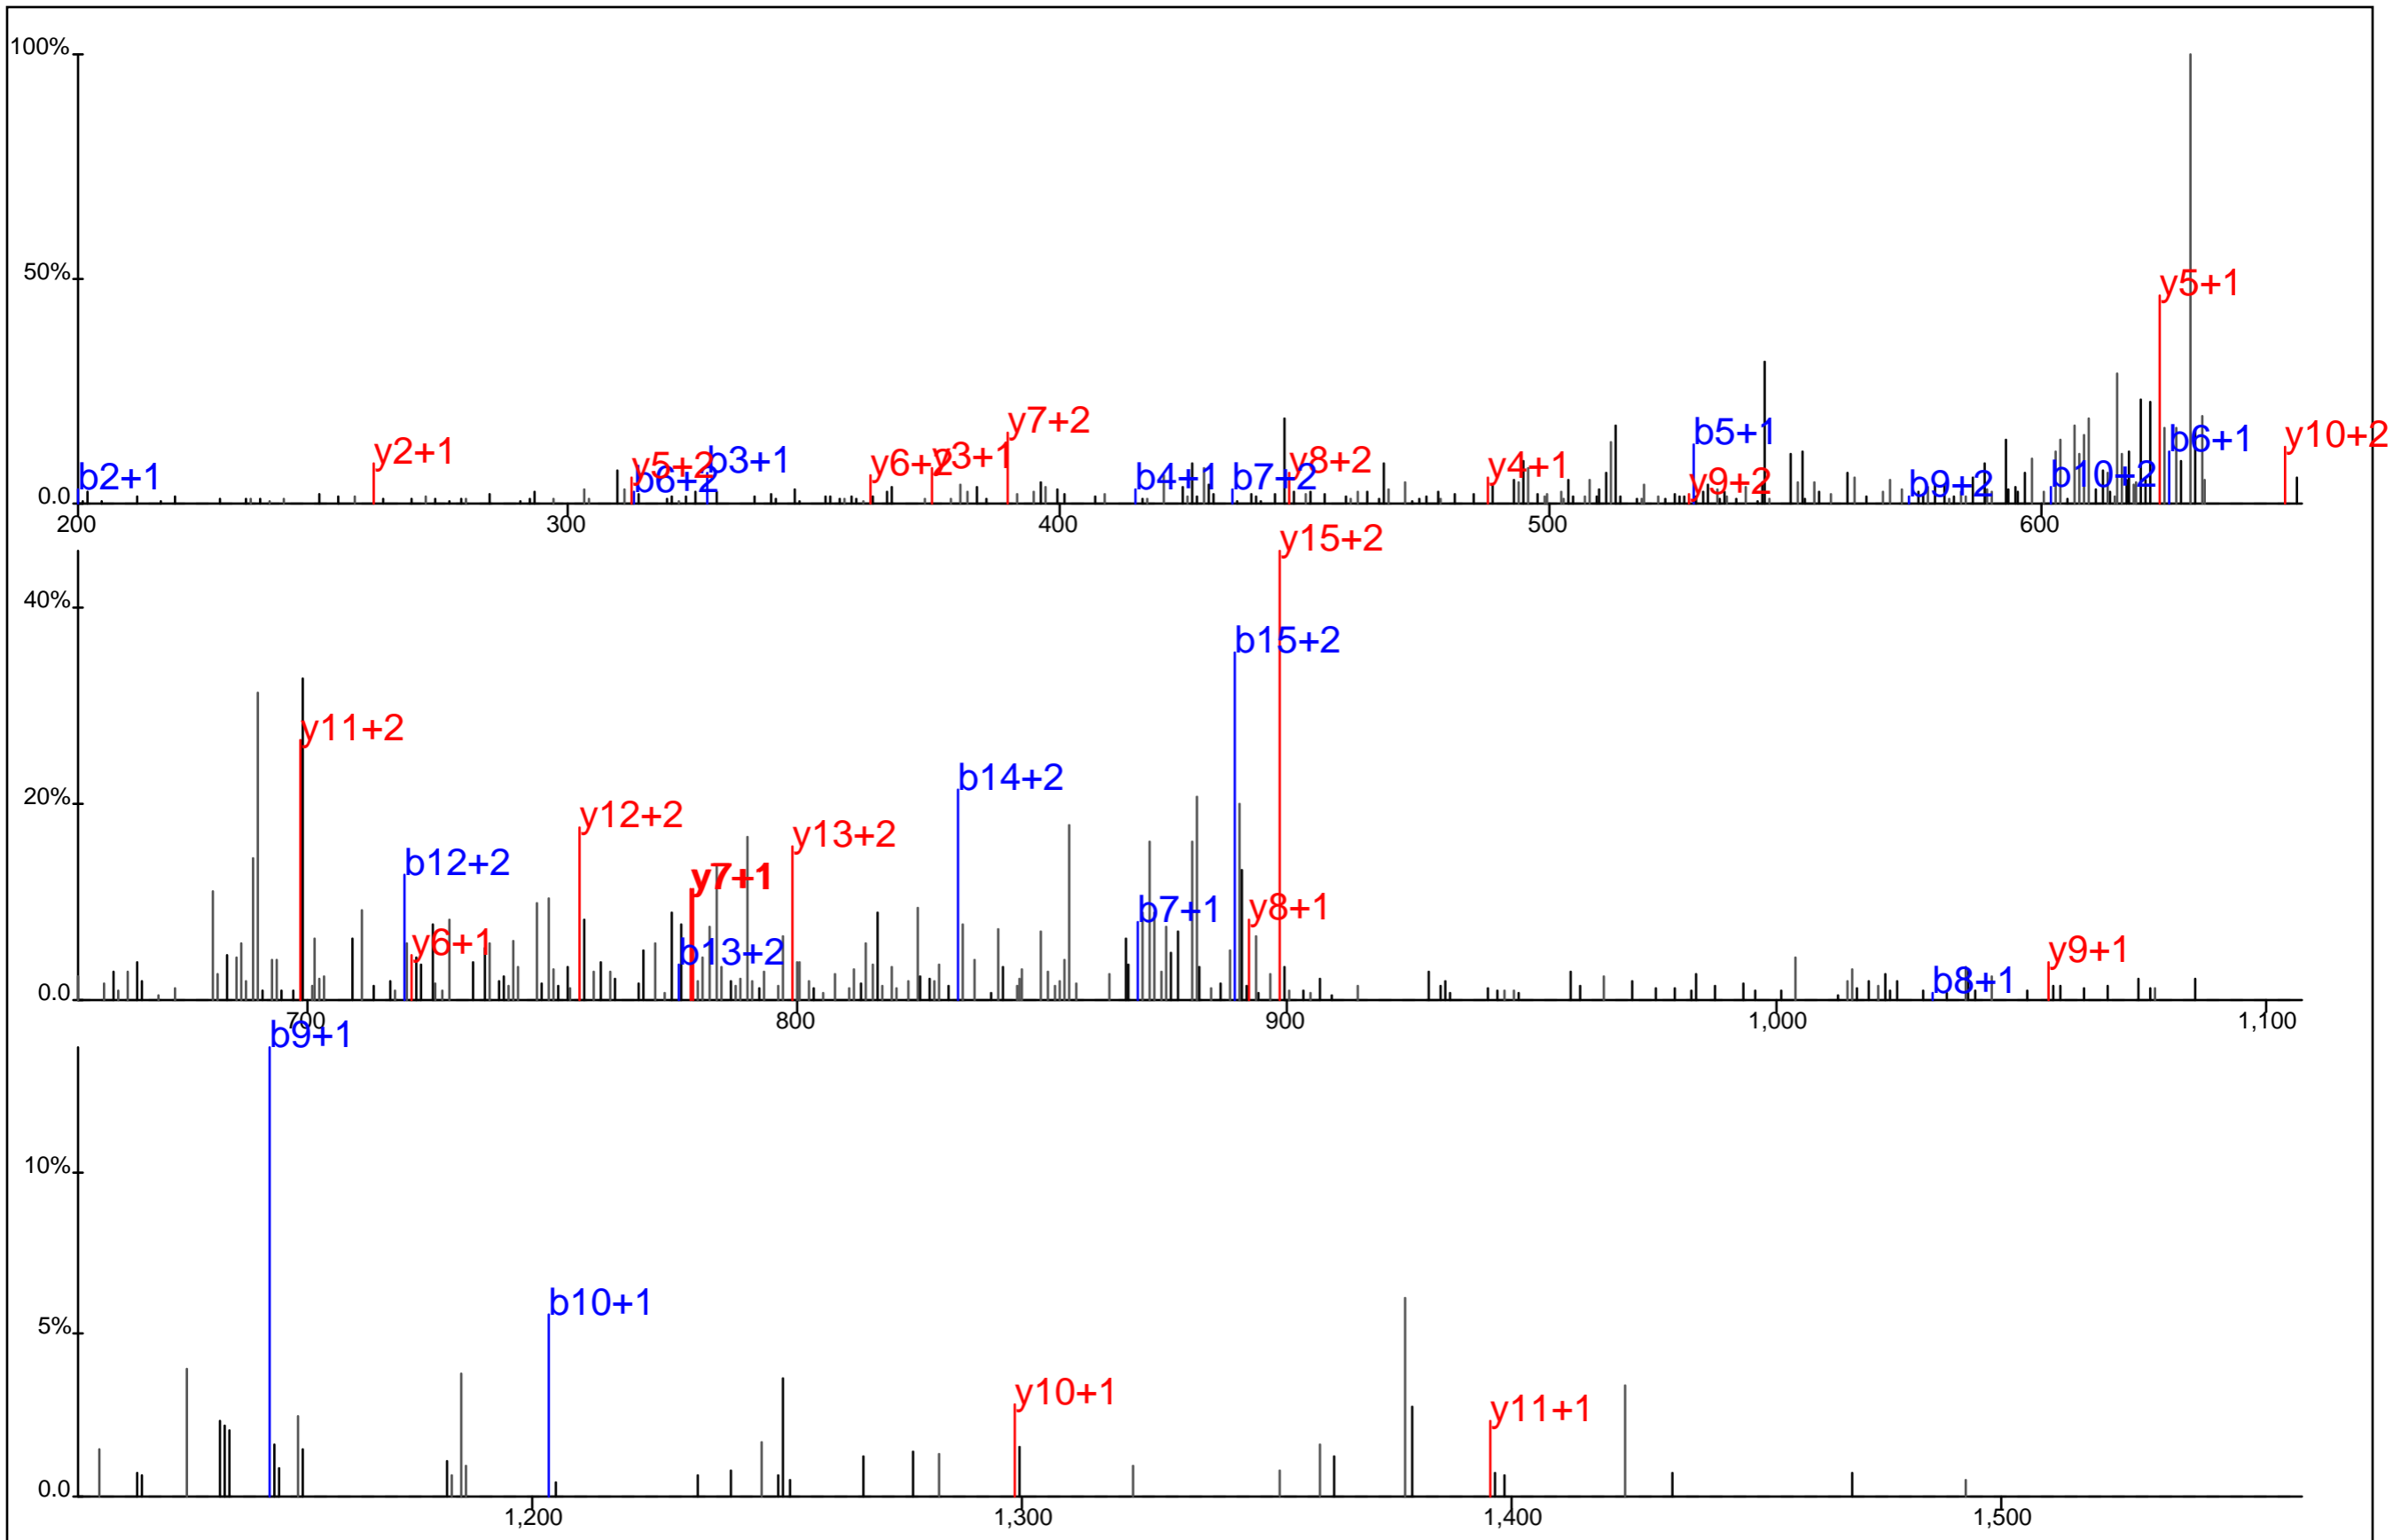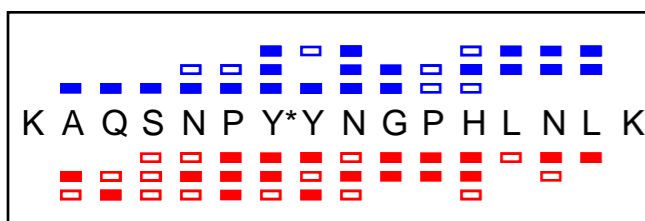

Protein Name: LIM domain only 7  
 gi Accession: 20521678  
 Precursor Mass: 641.9778+3  
 Delta Mass: 3.928 ppm  
 XCorr: 33.12

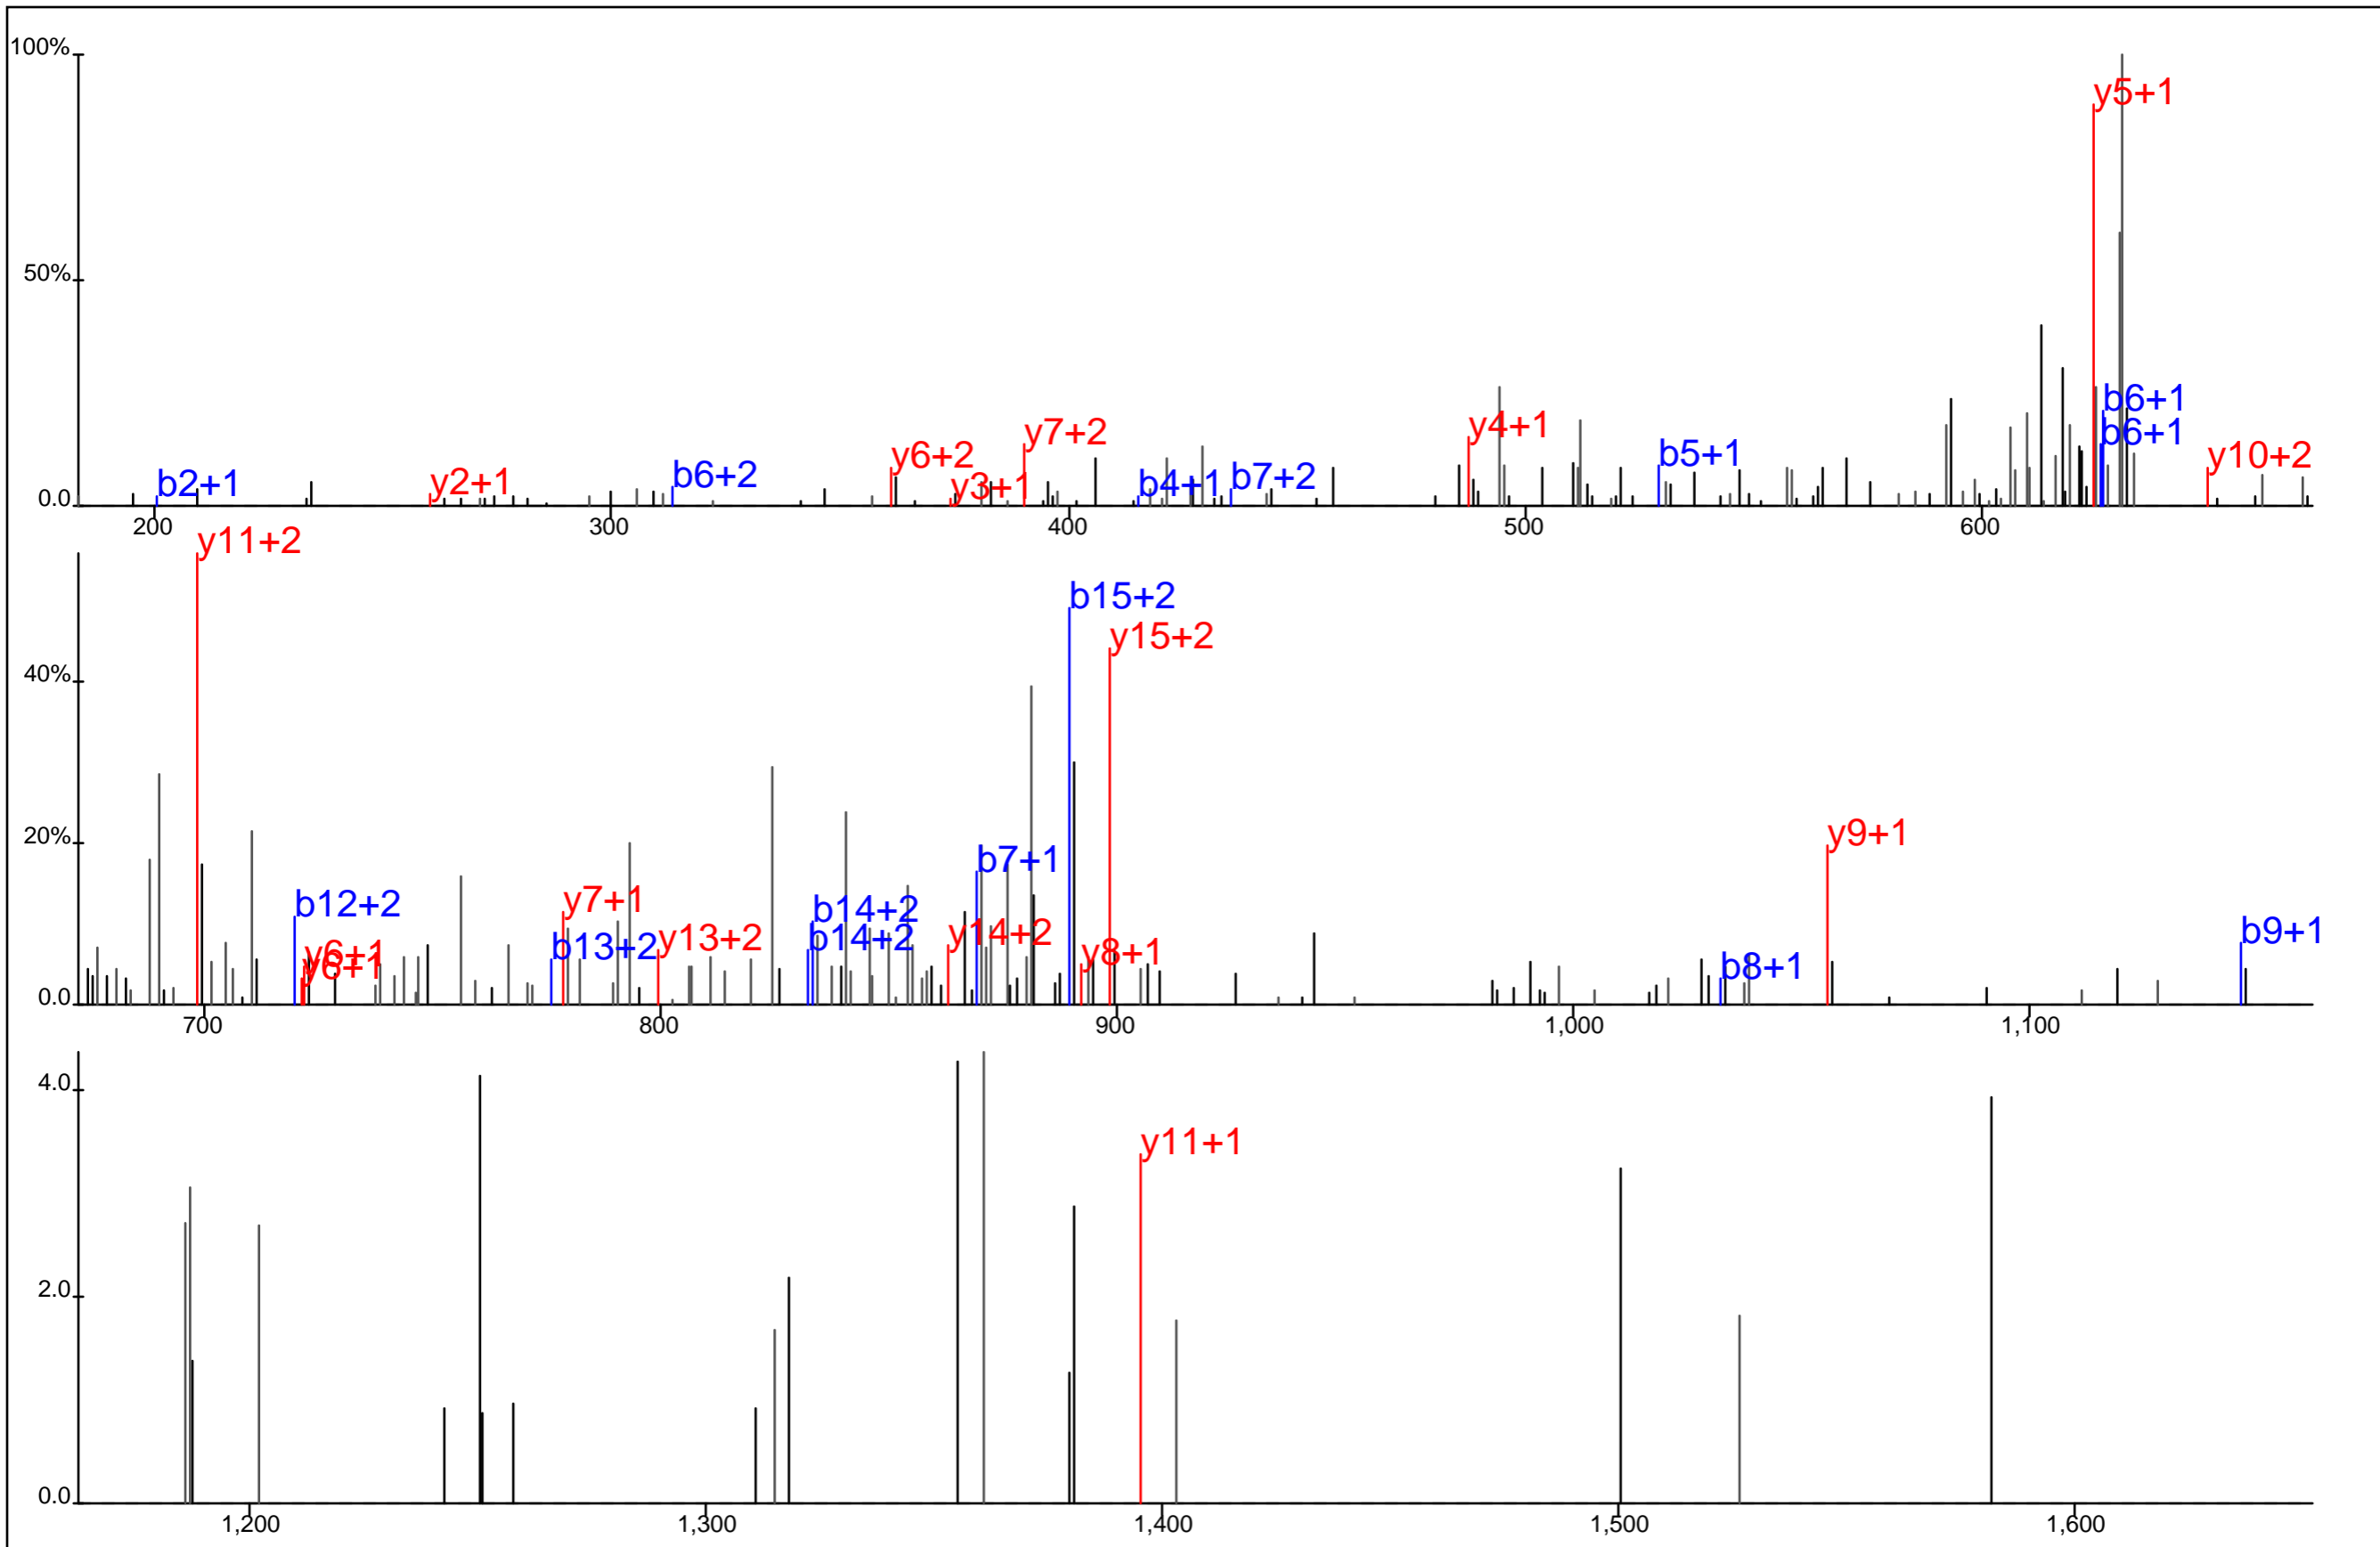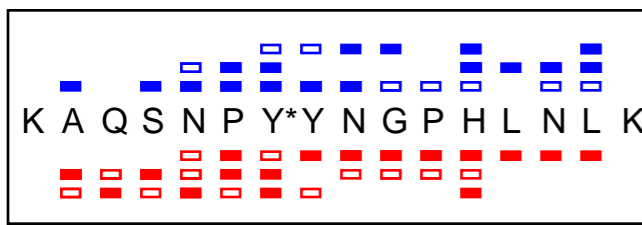

Protein Name: LIM domain only 7  
 gi Accession: 20521678  
 Precursor Mass: 641.9758+3  
 Delta Mass: 0.883 ppm  
 XCorr: 15.29

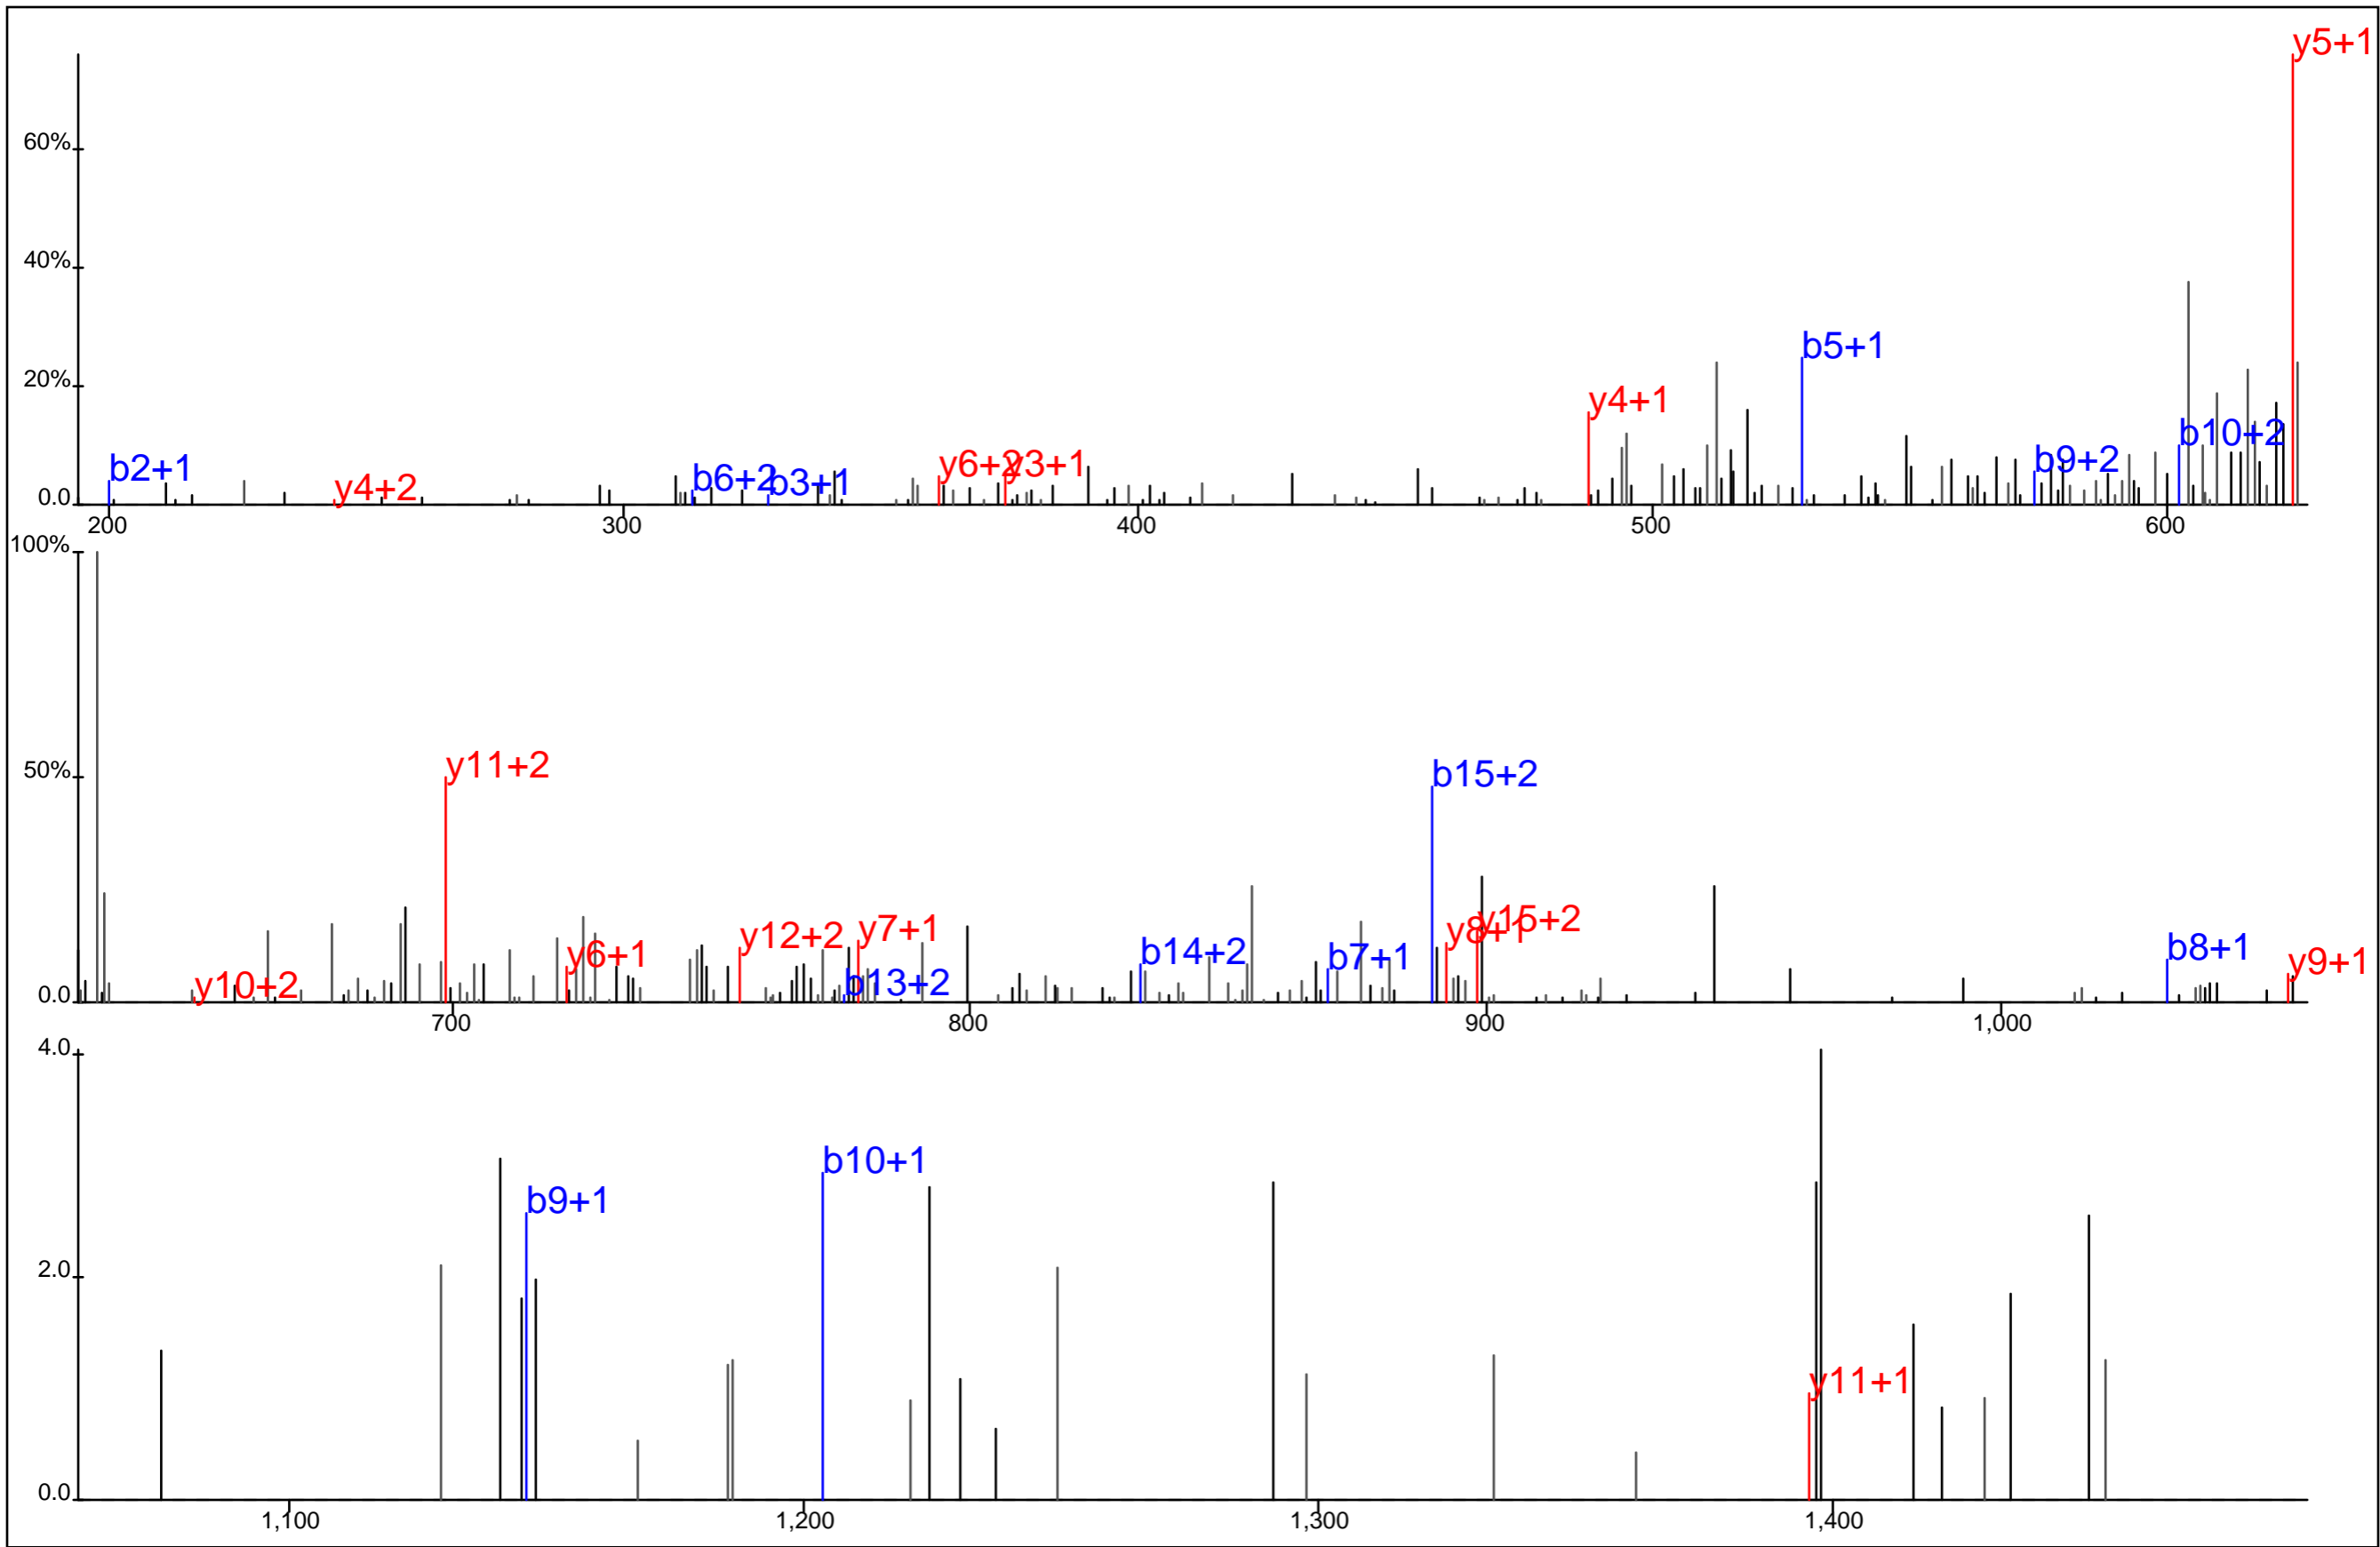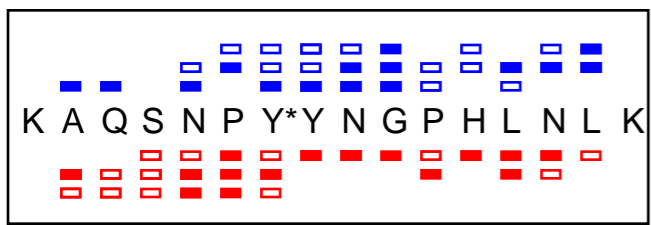

Protein Name: LIM domain only 7  
 gi Accession: 20521678  
 Precursor Mass: 641.9765+3  
 Delta Mass: 1.928 ppm  
 XCorr: 19.8

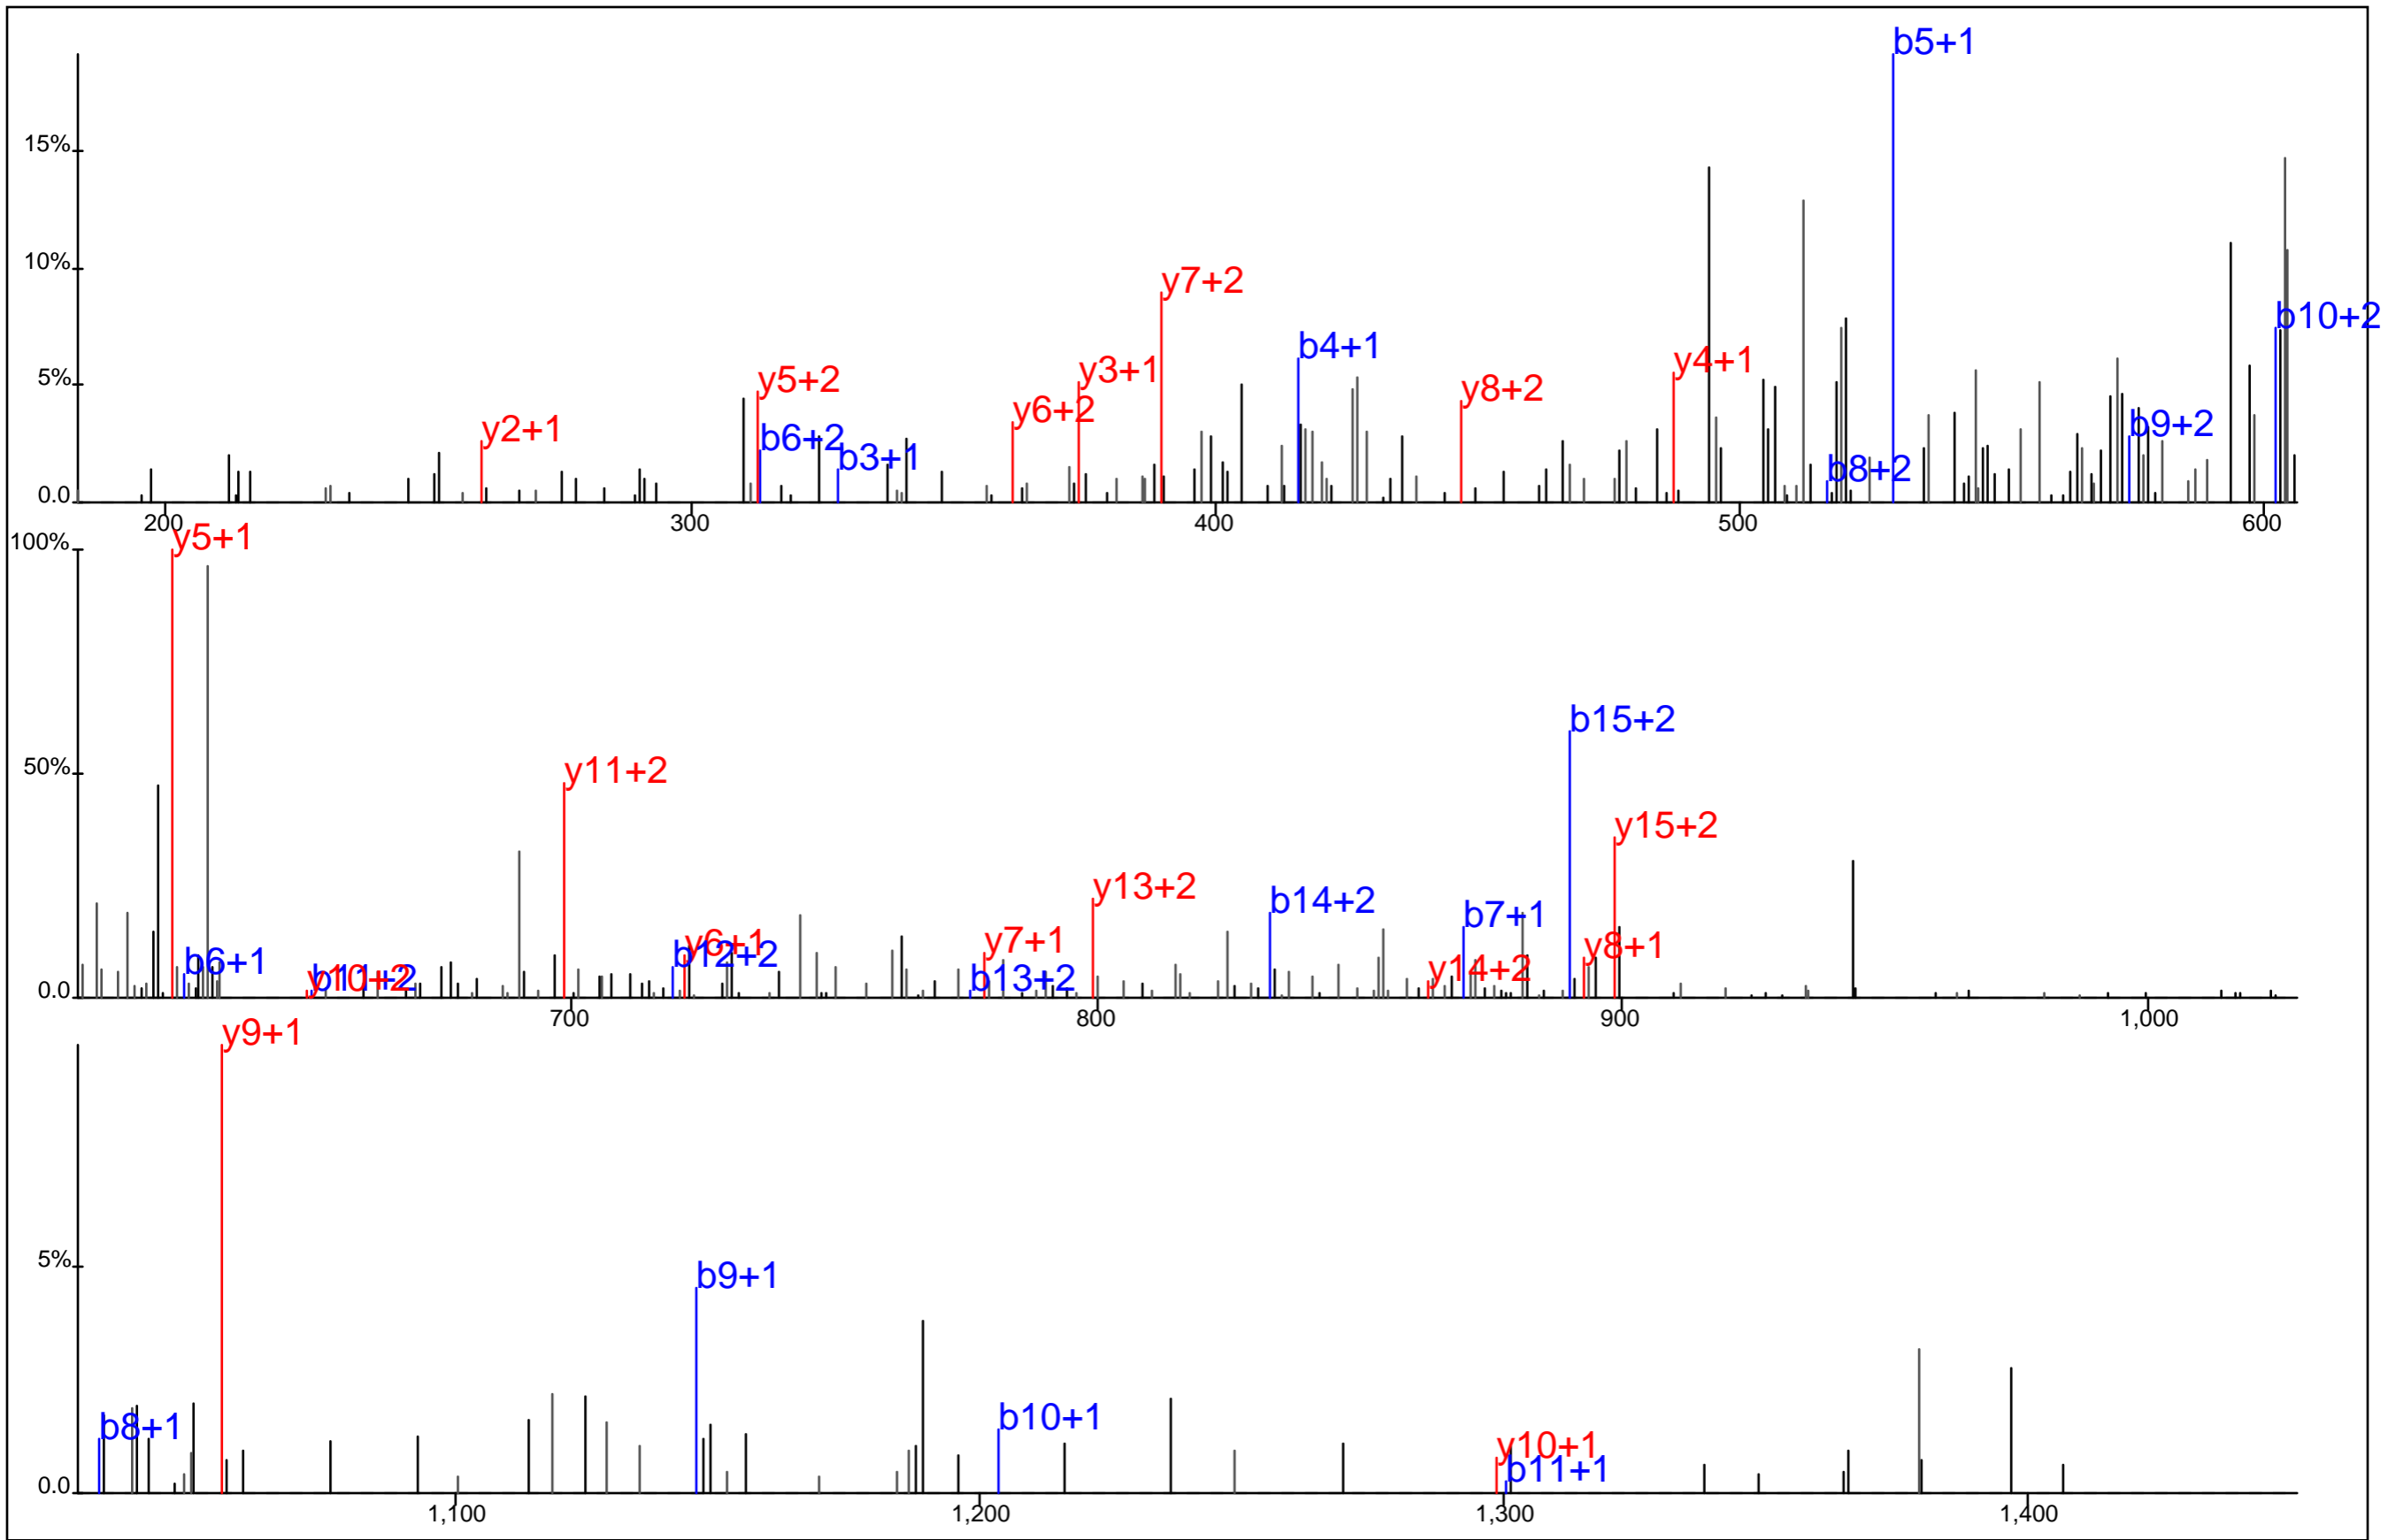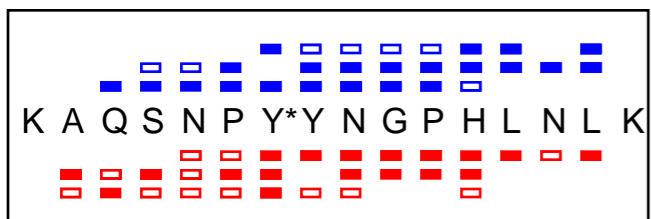

Protein Name: LIM domain only 7  
 gi Accession: 20521678  
 Precursor Mass: 641.9761+3  
 Delta Mass: 1.262 ppm  
 XCorr: 31.92

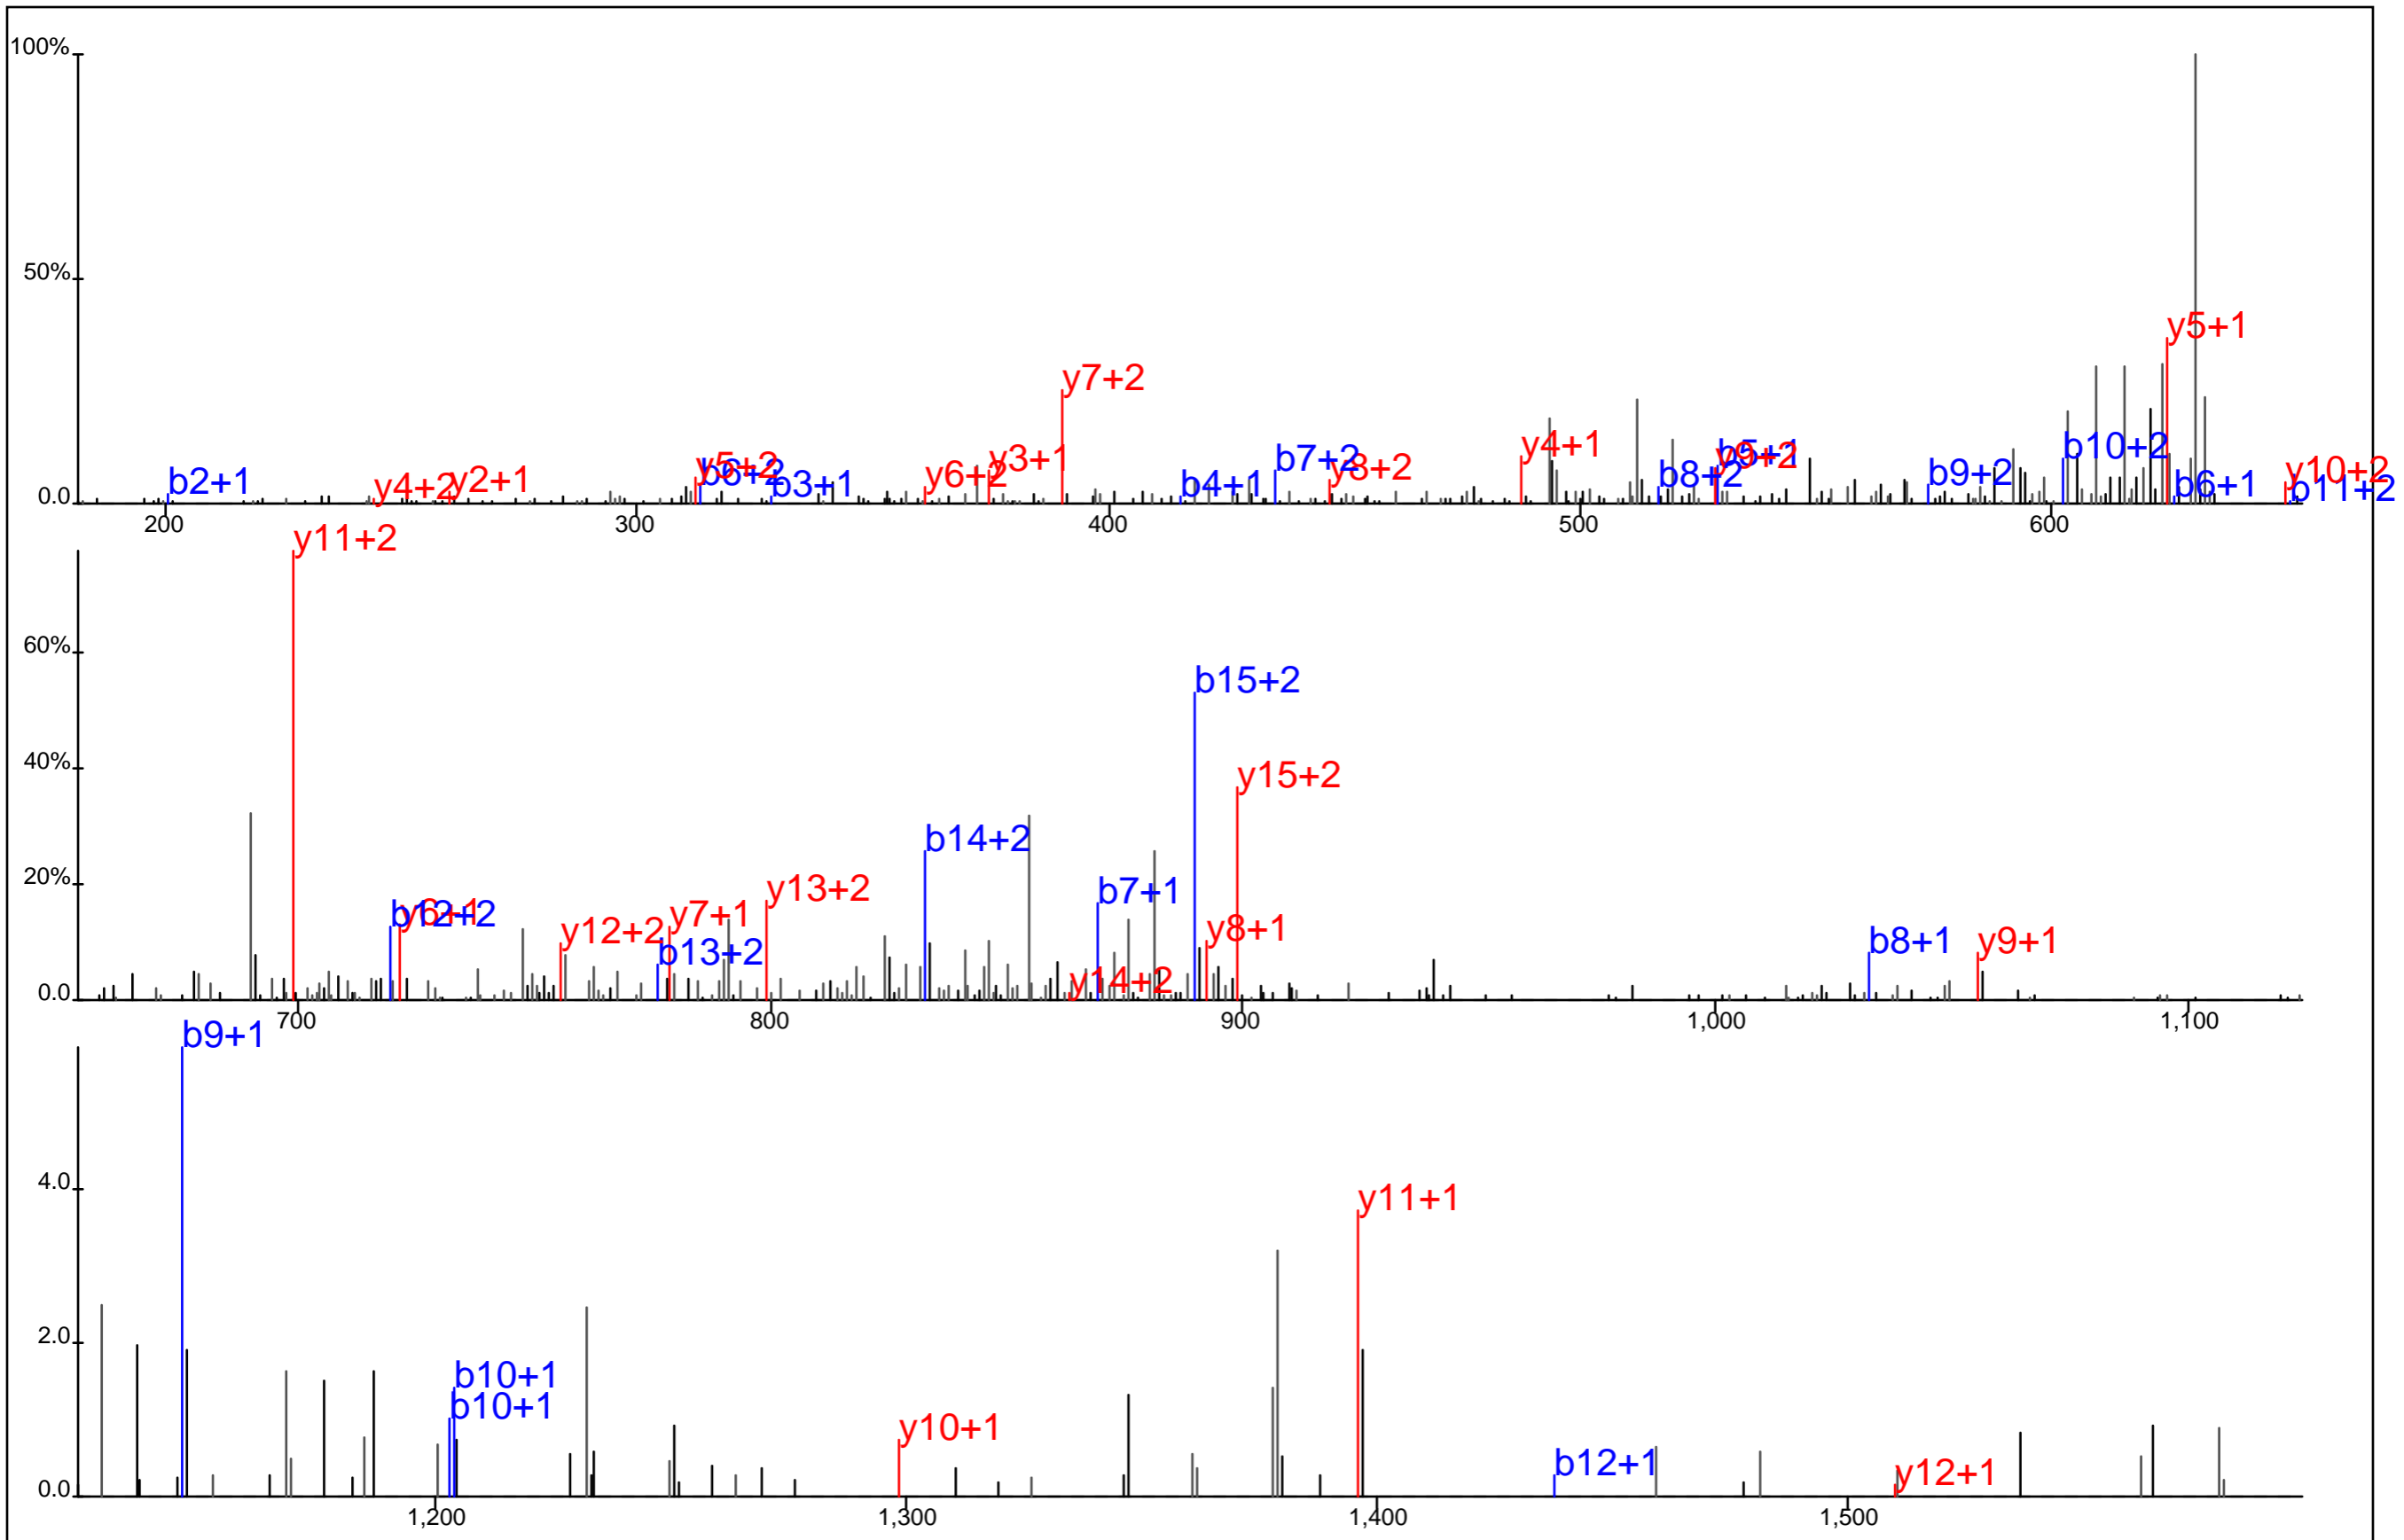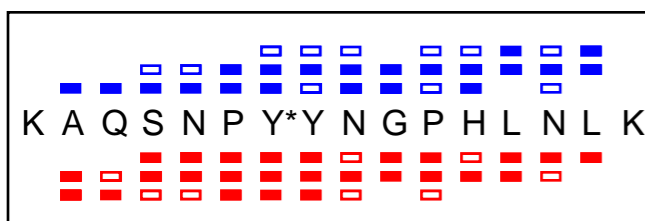

Protein Name: LIM domain only 7  
 gi Accession: 20521678  
 Precursor Mass: 641.9758+3  
 Delta Mass: 0.783 ppm  
 XCorr: 65.79

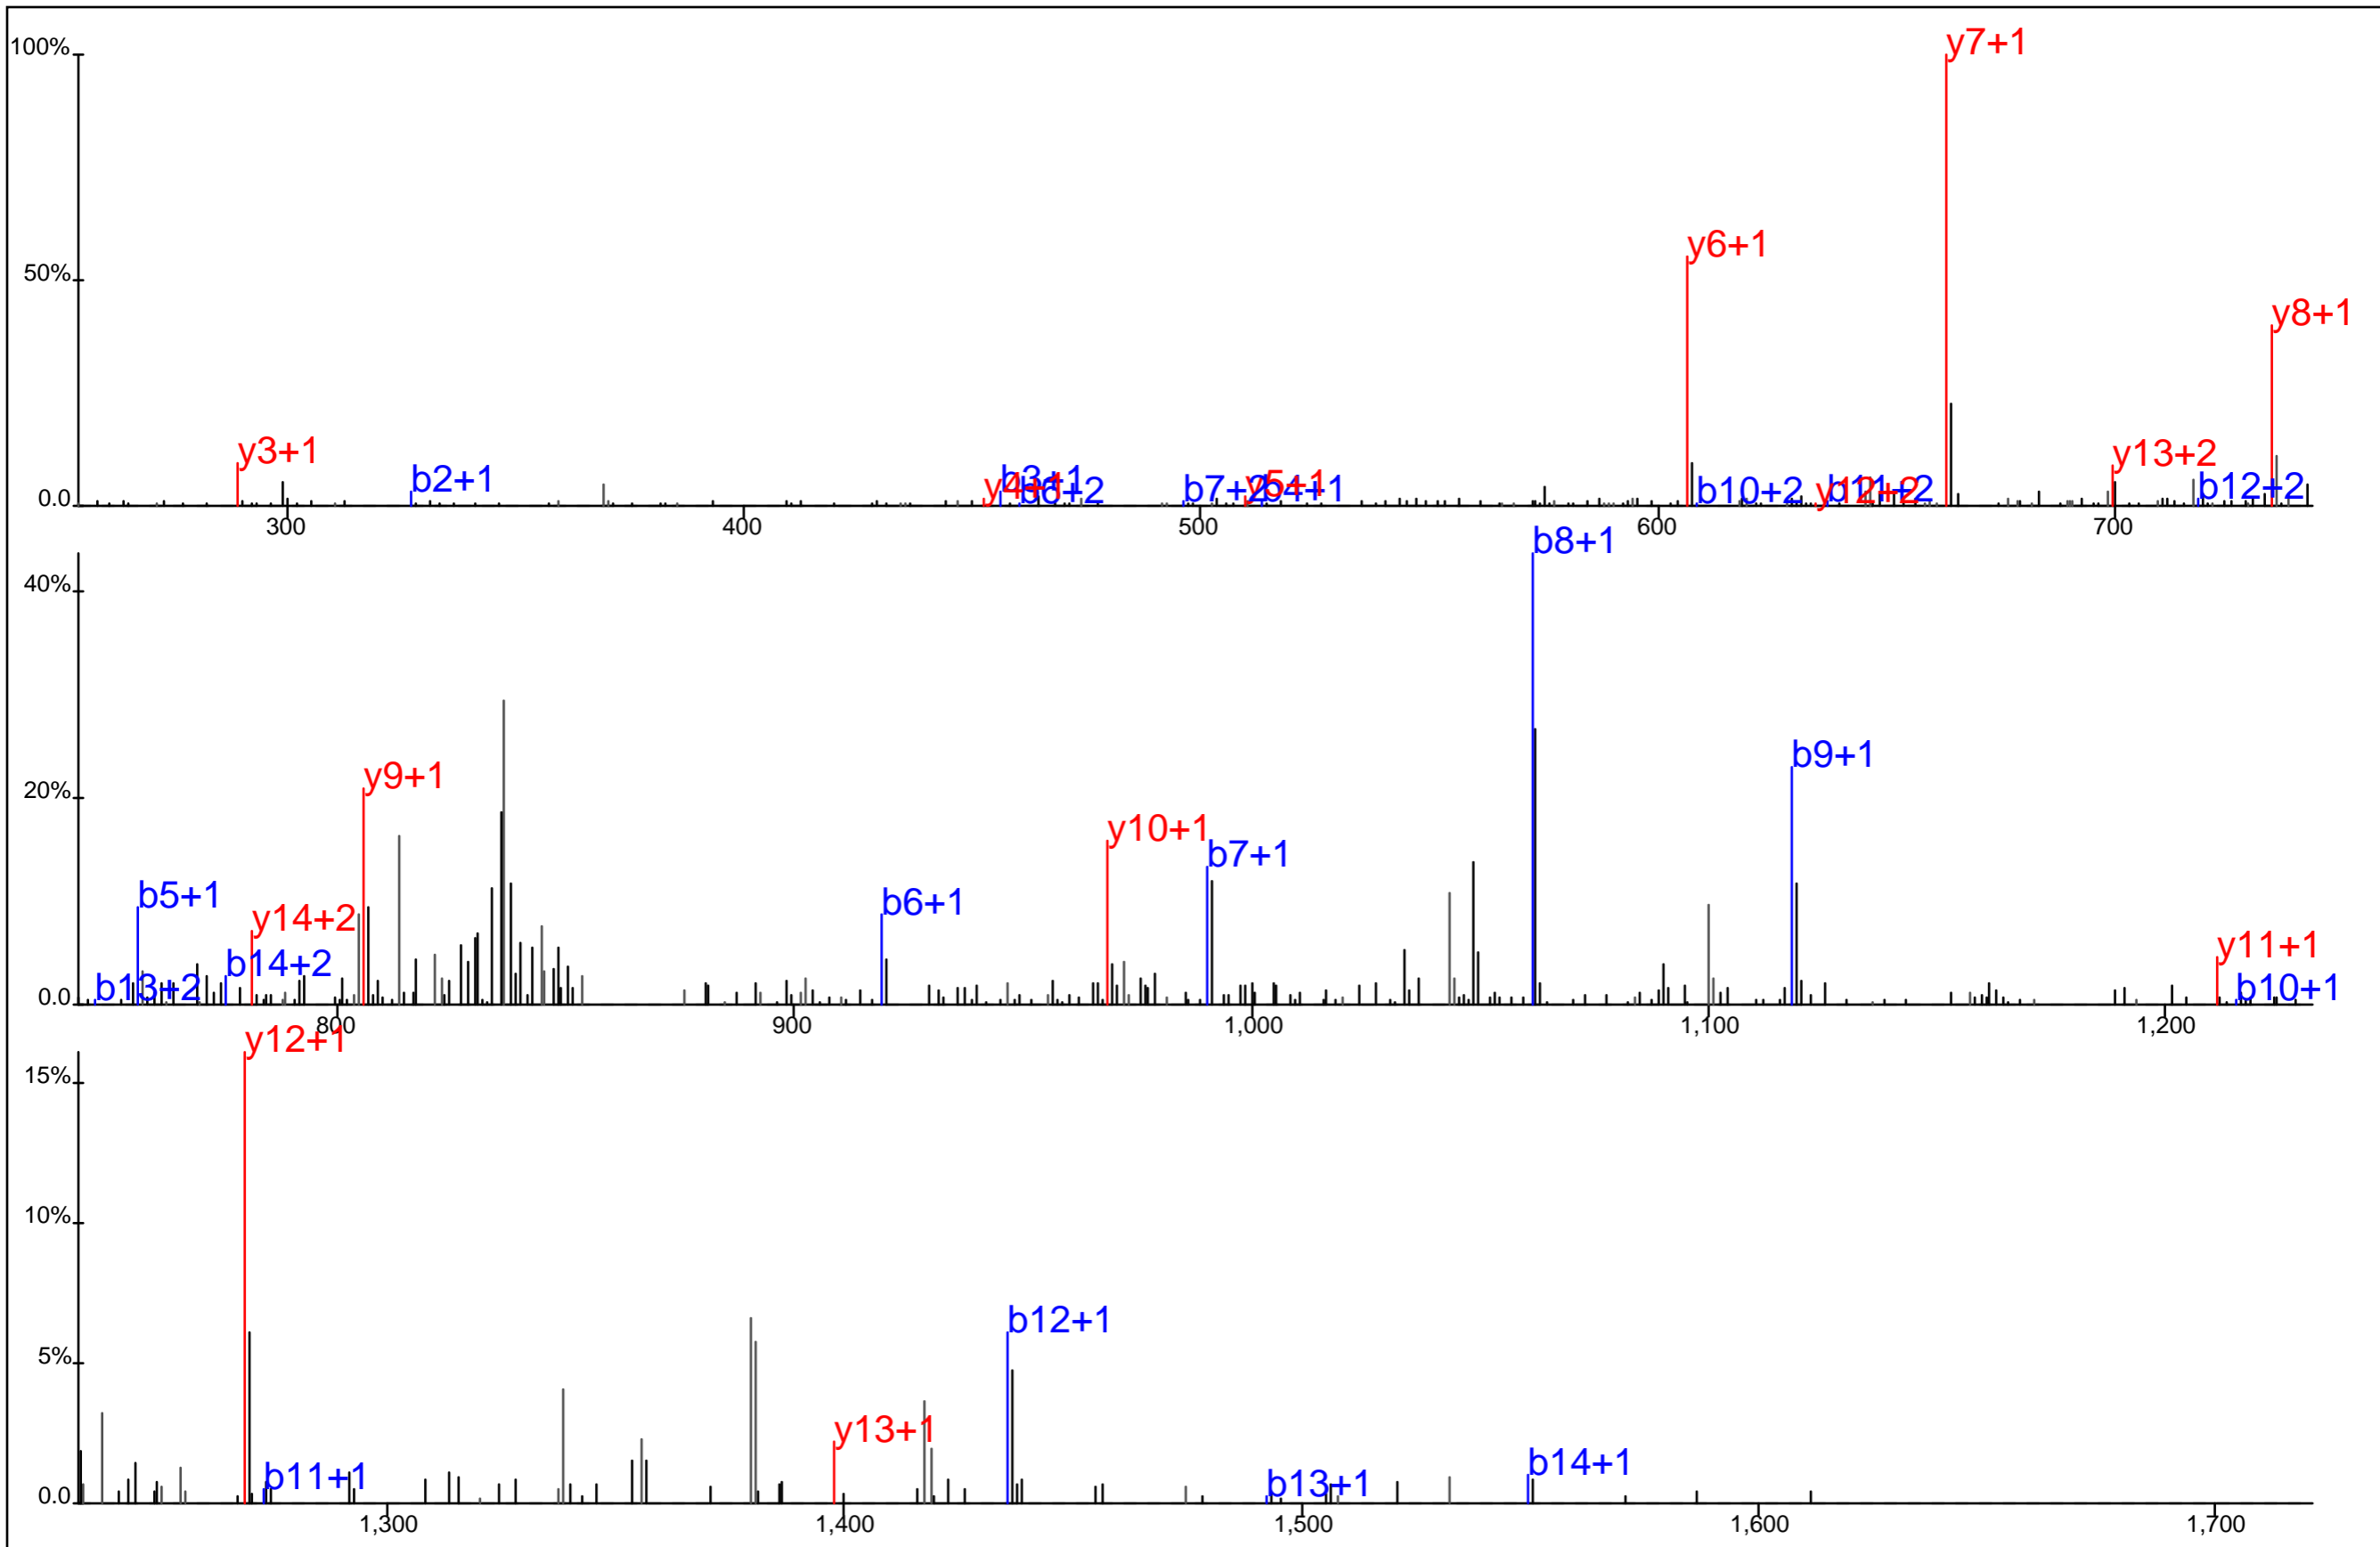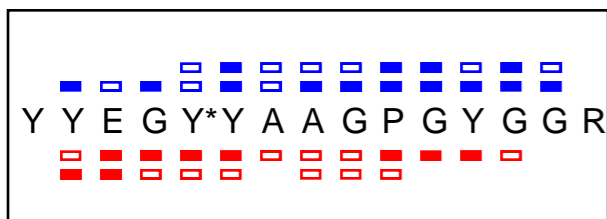

Protein Name: LPP  
 gi Accession: 5031887  
 Precursor Mass: 862.3428+2  
 Delta Mass: 0.309 ppm  
 XCorr: 67.94

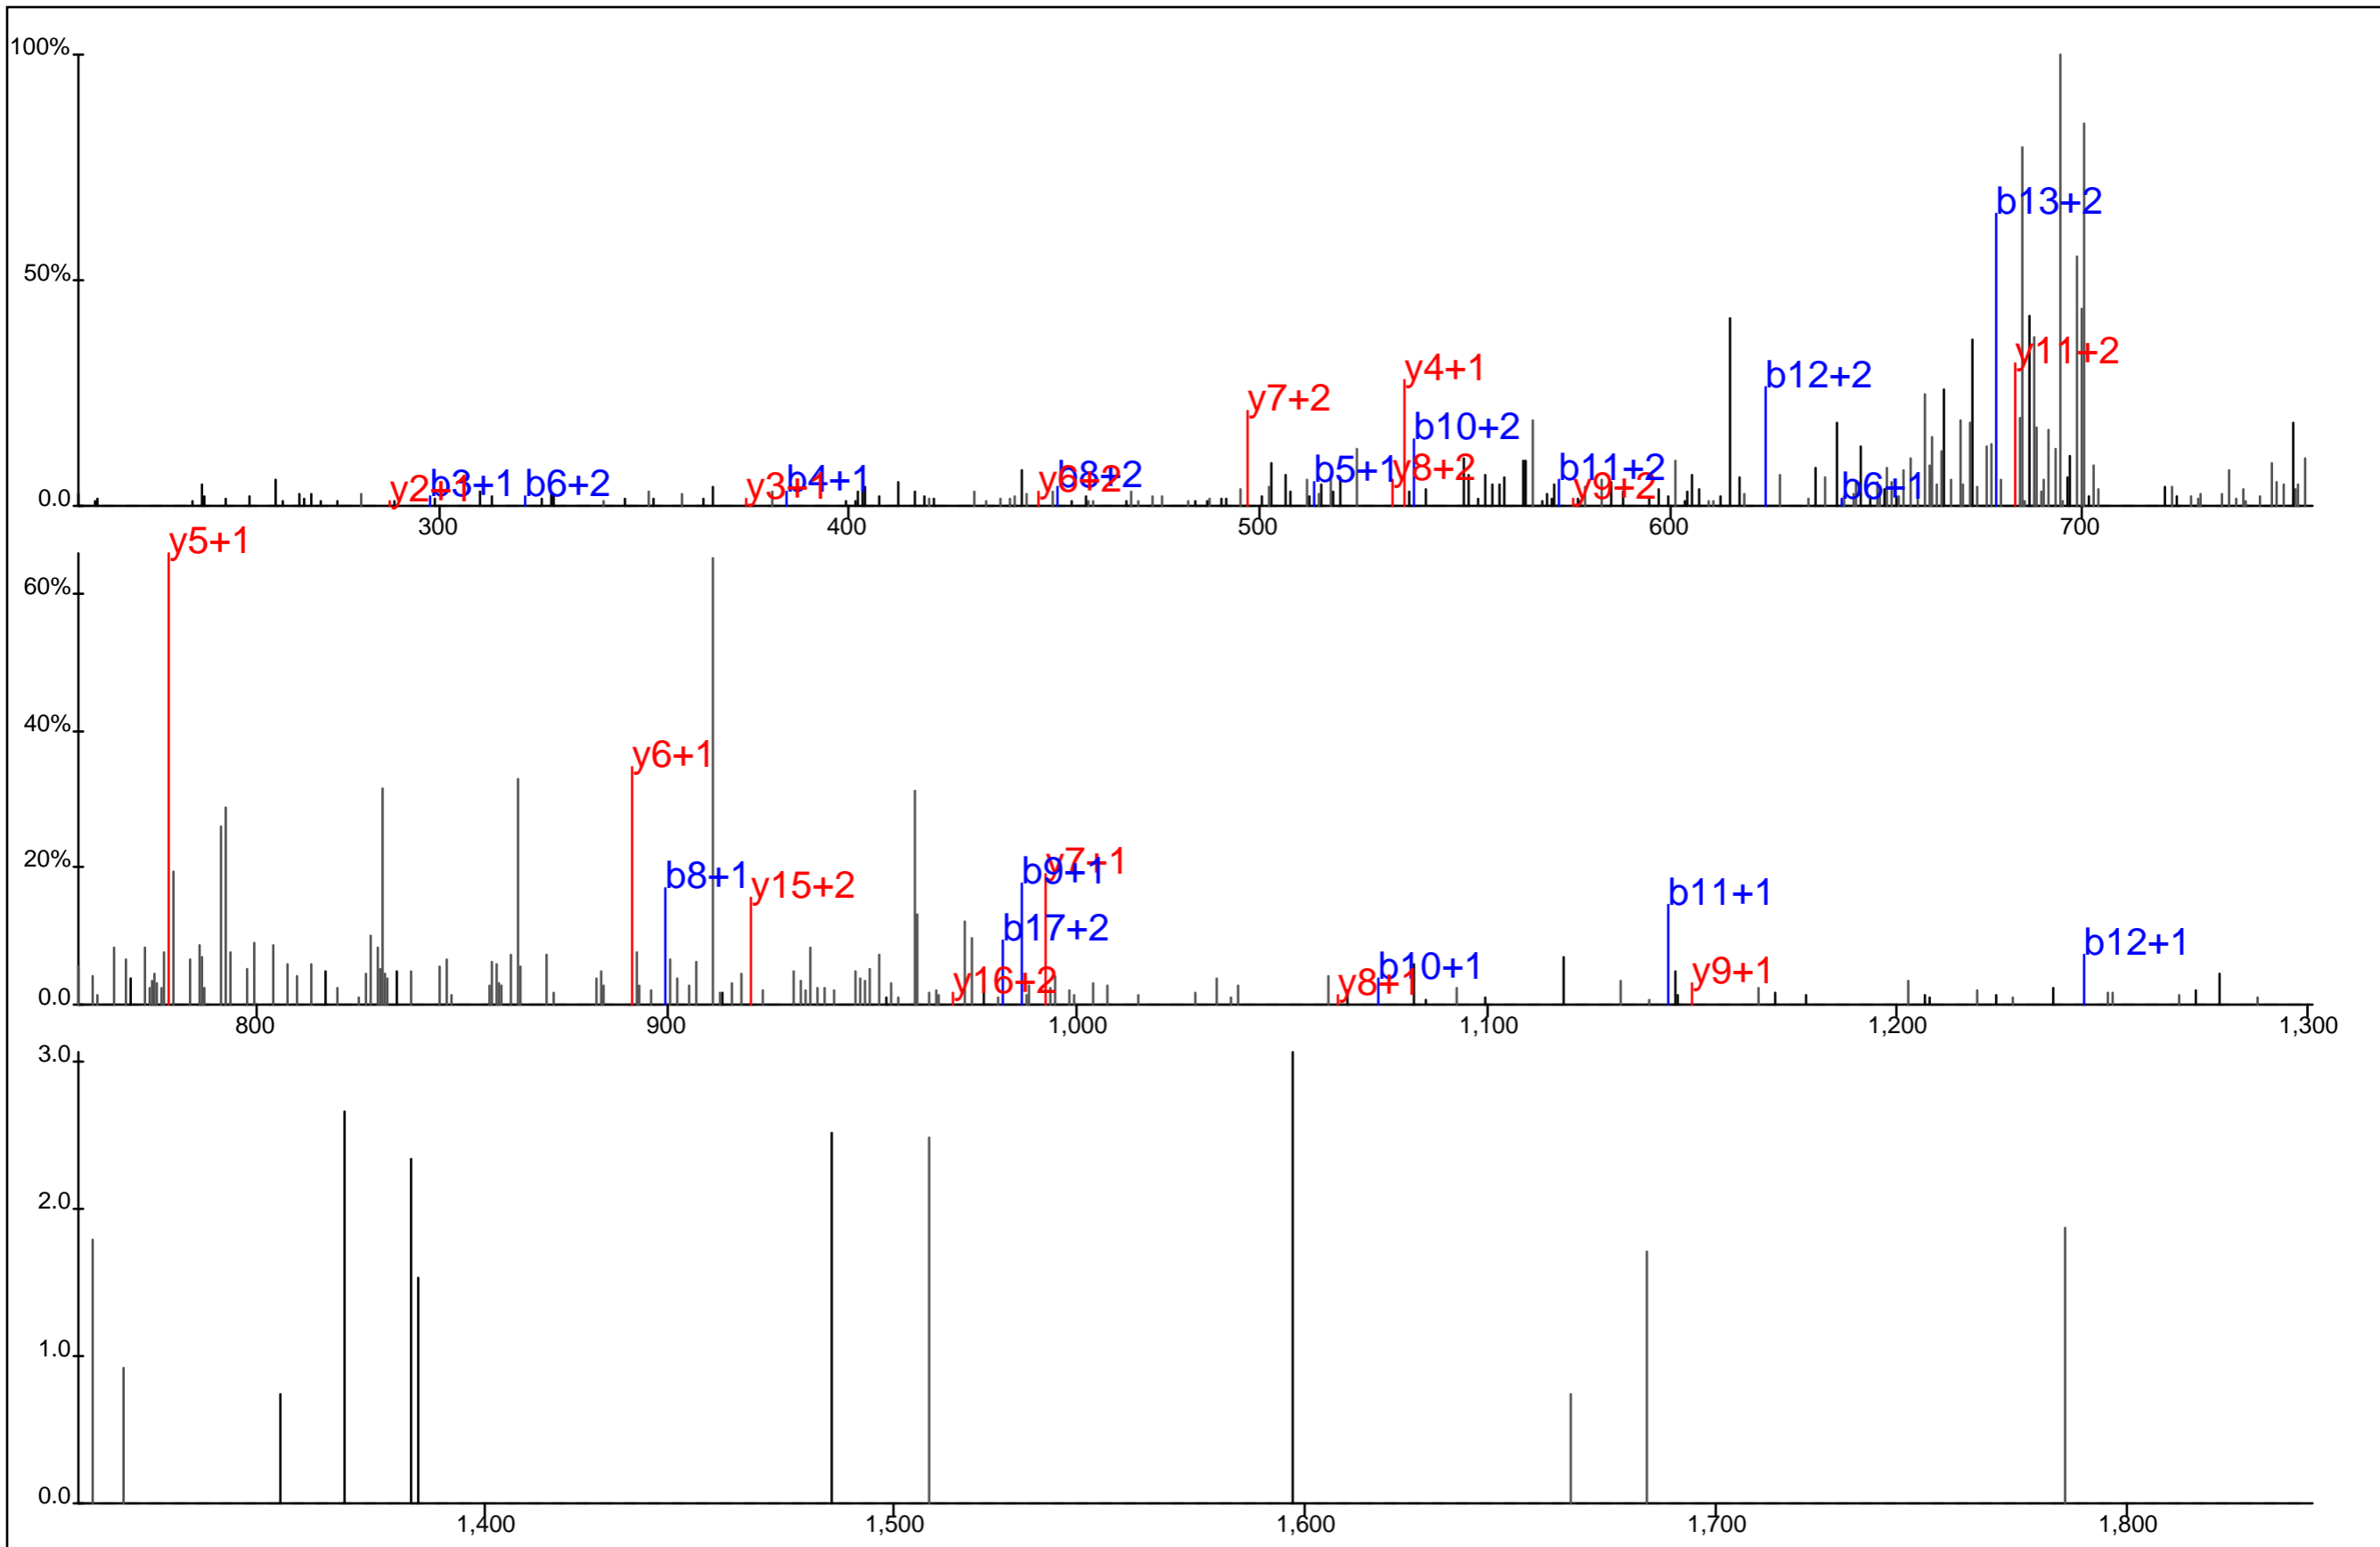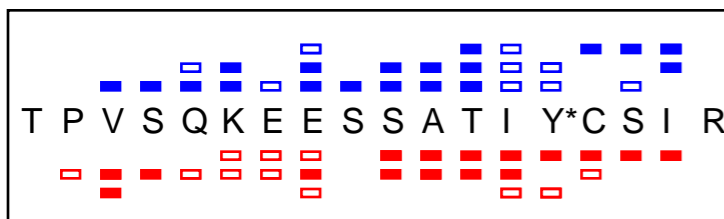

Protein Name: Lymphocyte antigen 9  
 gi Accession: 55925578  
 Precursor Mass: 712.6615+3  
 Delta Mass: 0.982 ppm  
 XCorr: 12.68

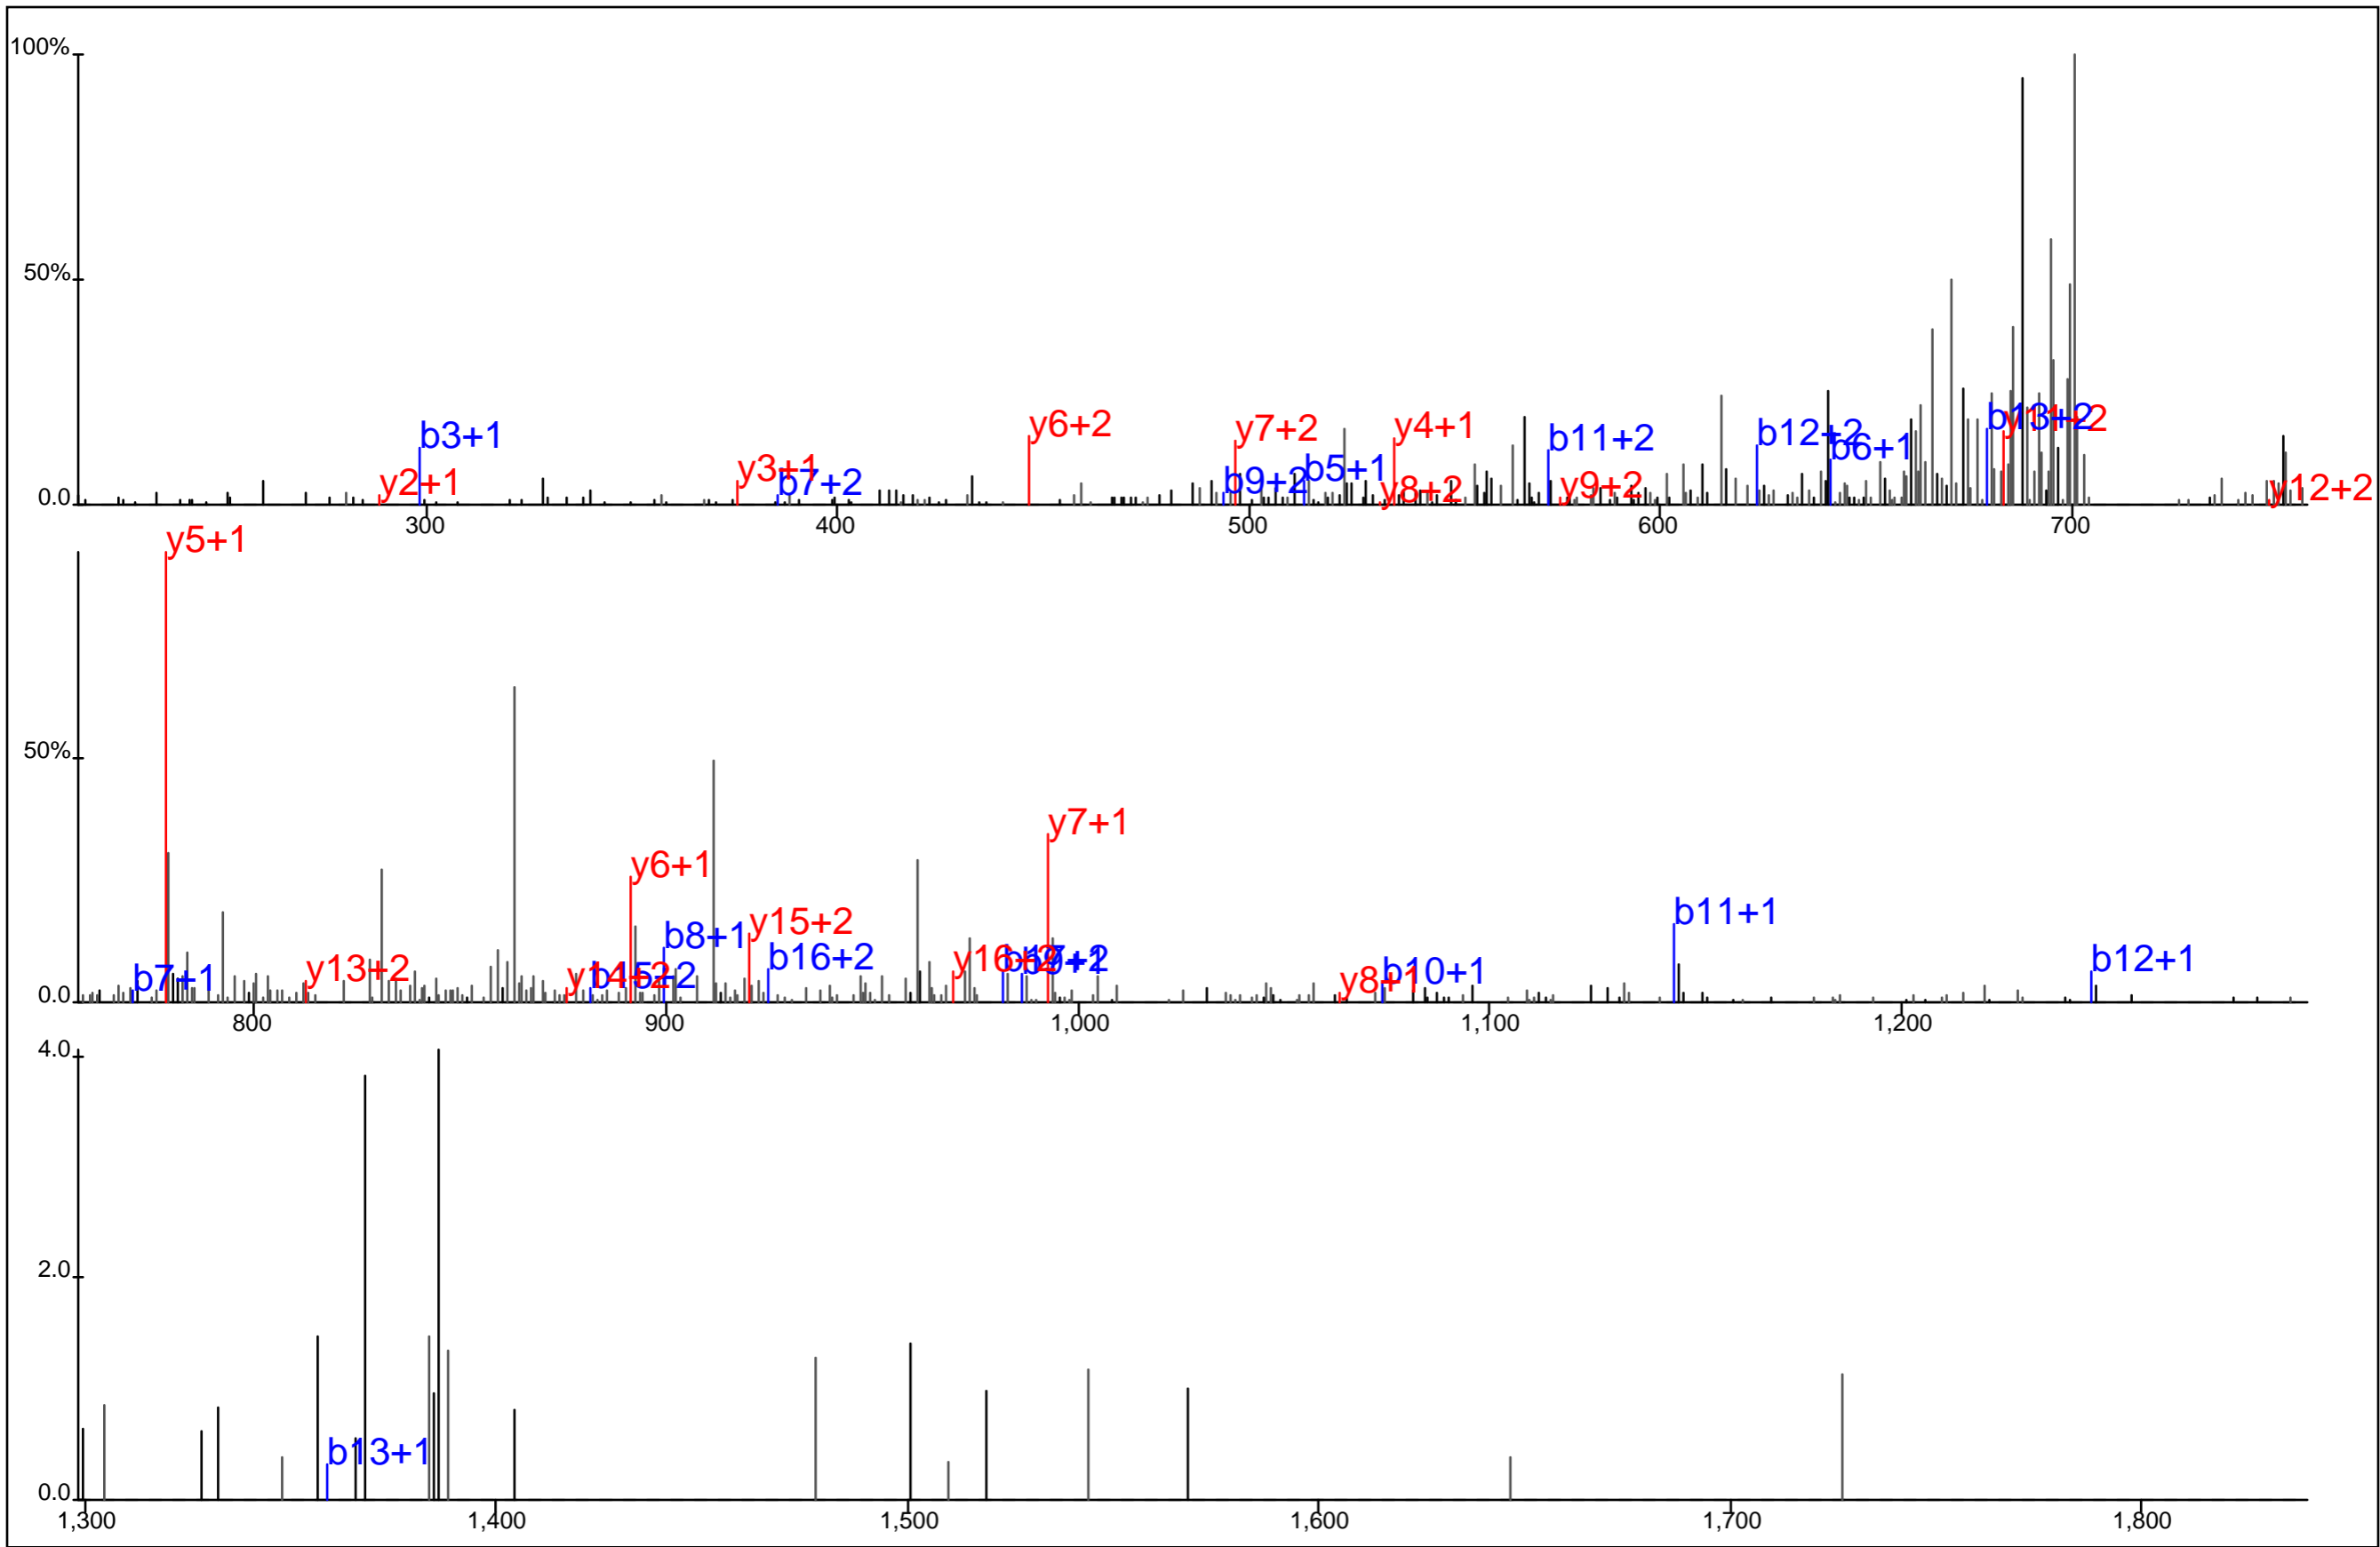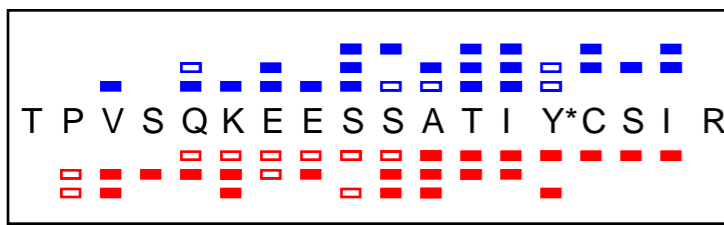

Protein Name: Lymphocyte antigen 9  
 gi Accession: 55925578  
 Precursor Mass: 712.6630+3  
 Delta Mass: 3.042 ppm  
 XCorr: 16.97



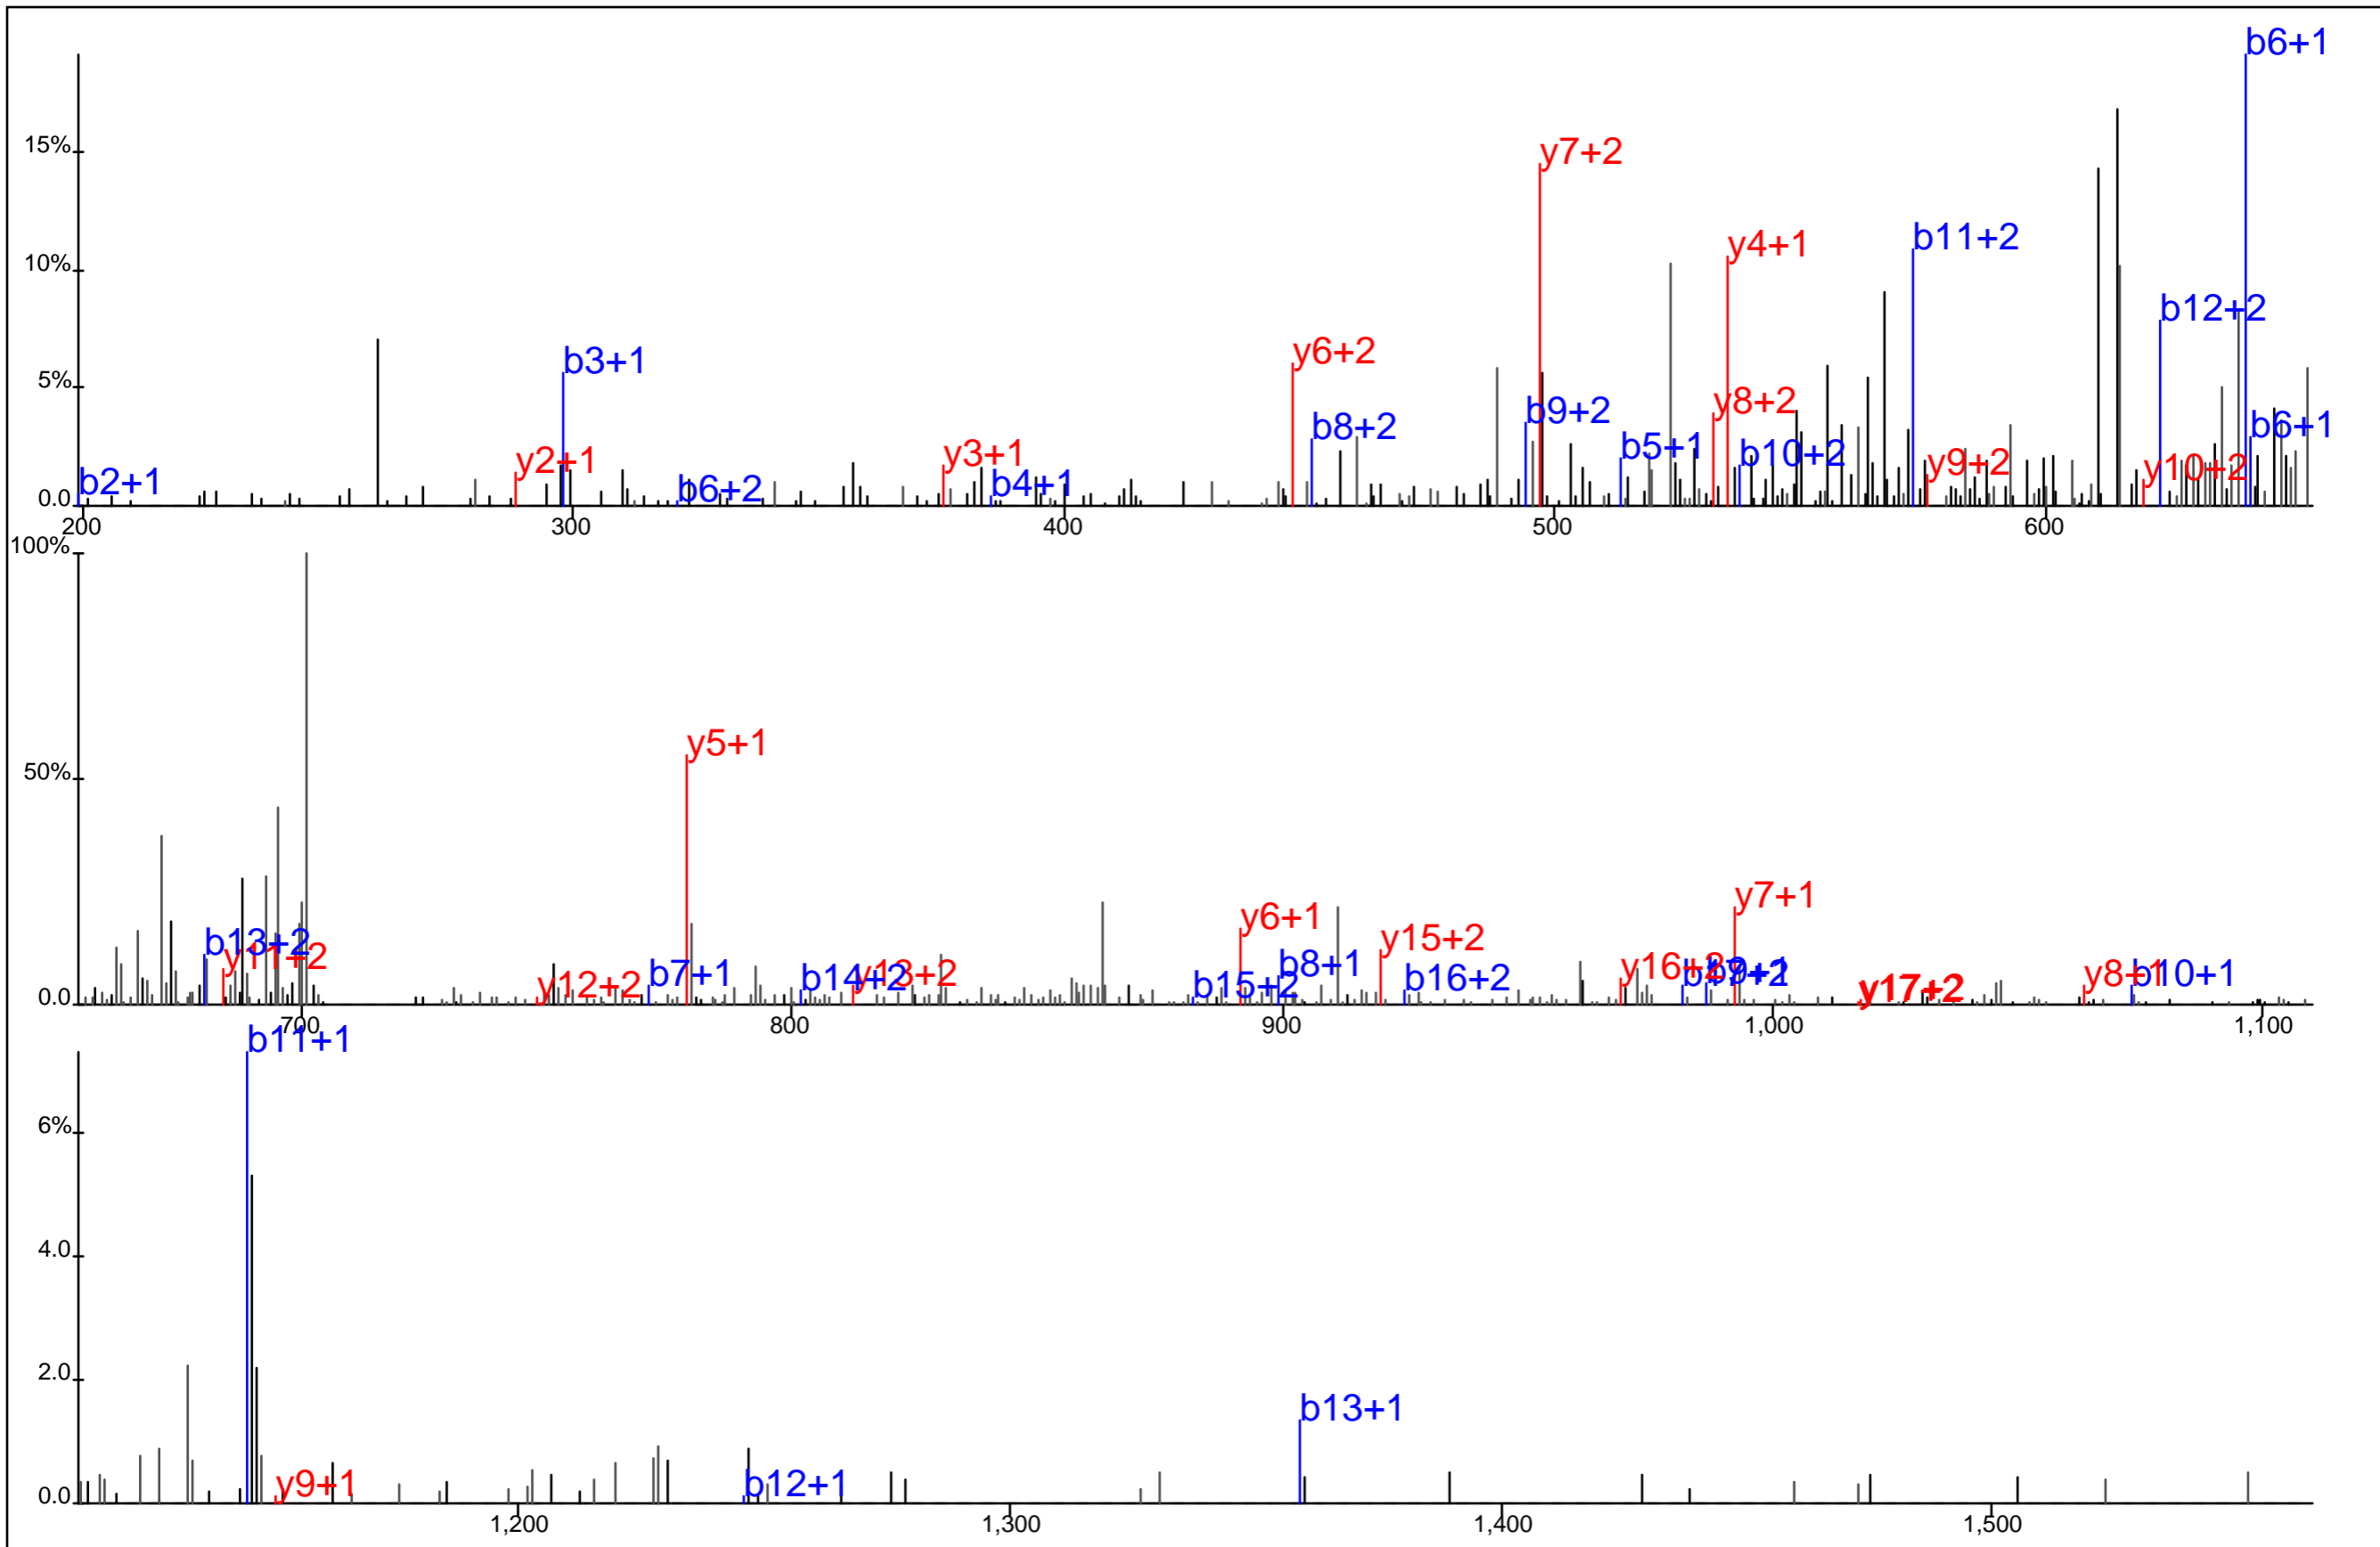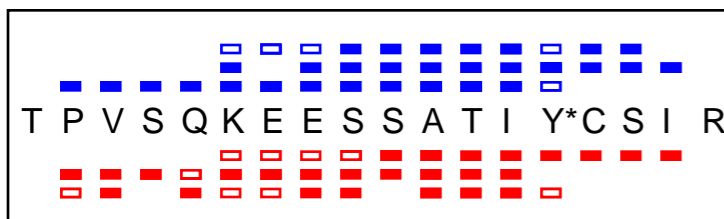

Protein Name: Lymphocyte antigen 9  
 gi Accession: 55925578  
 Precursor Mass: 712.6625+3  
 Delta Mass: 2.354 ppm  
 XCorr: 23.54

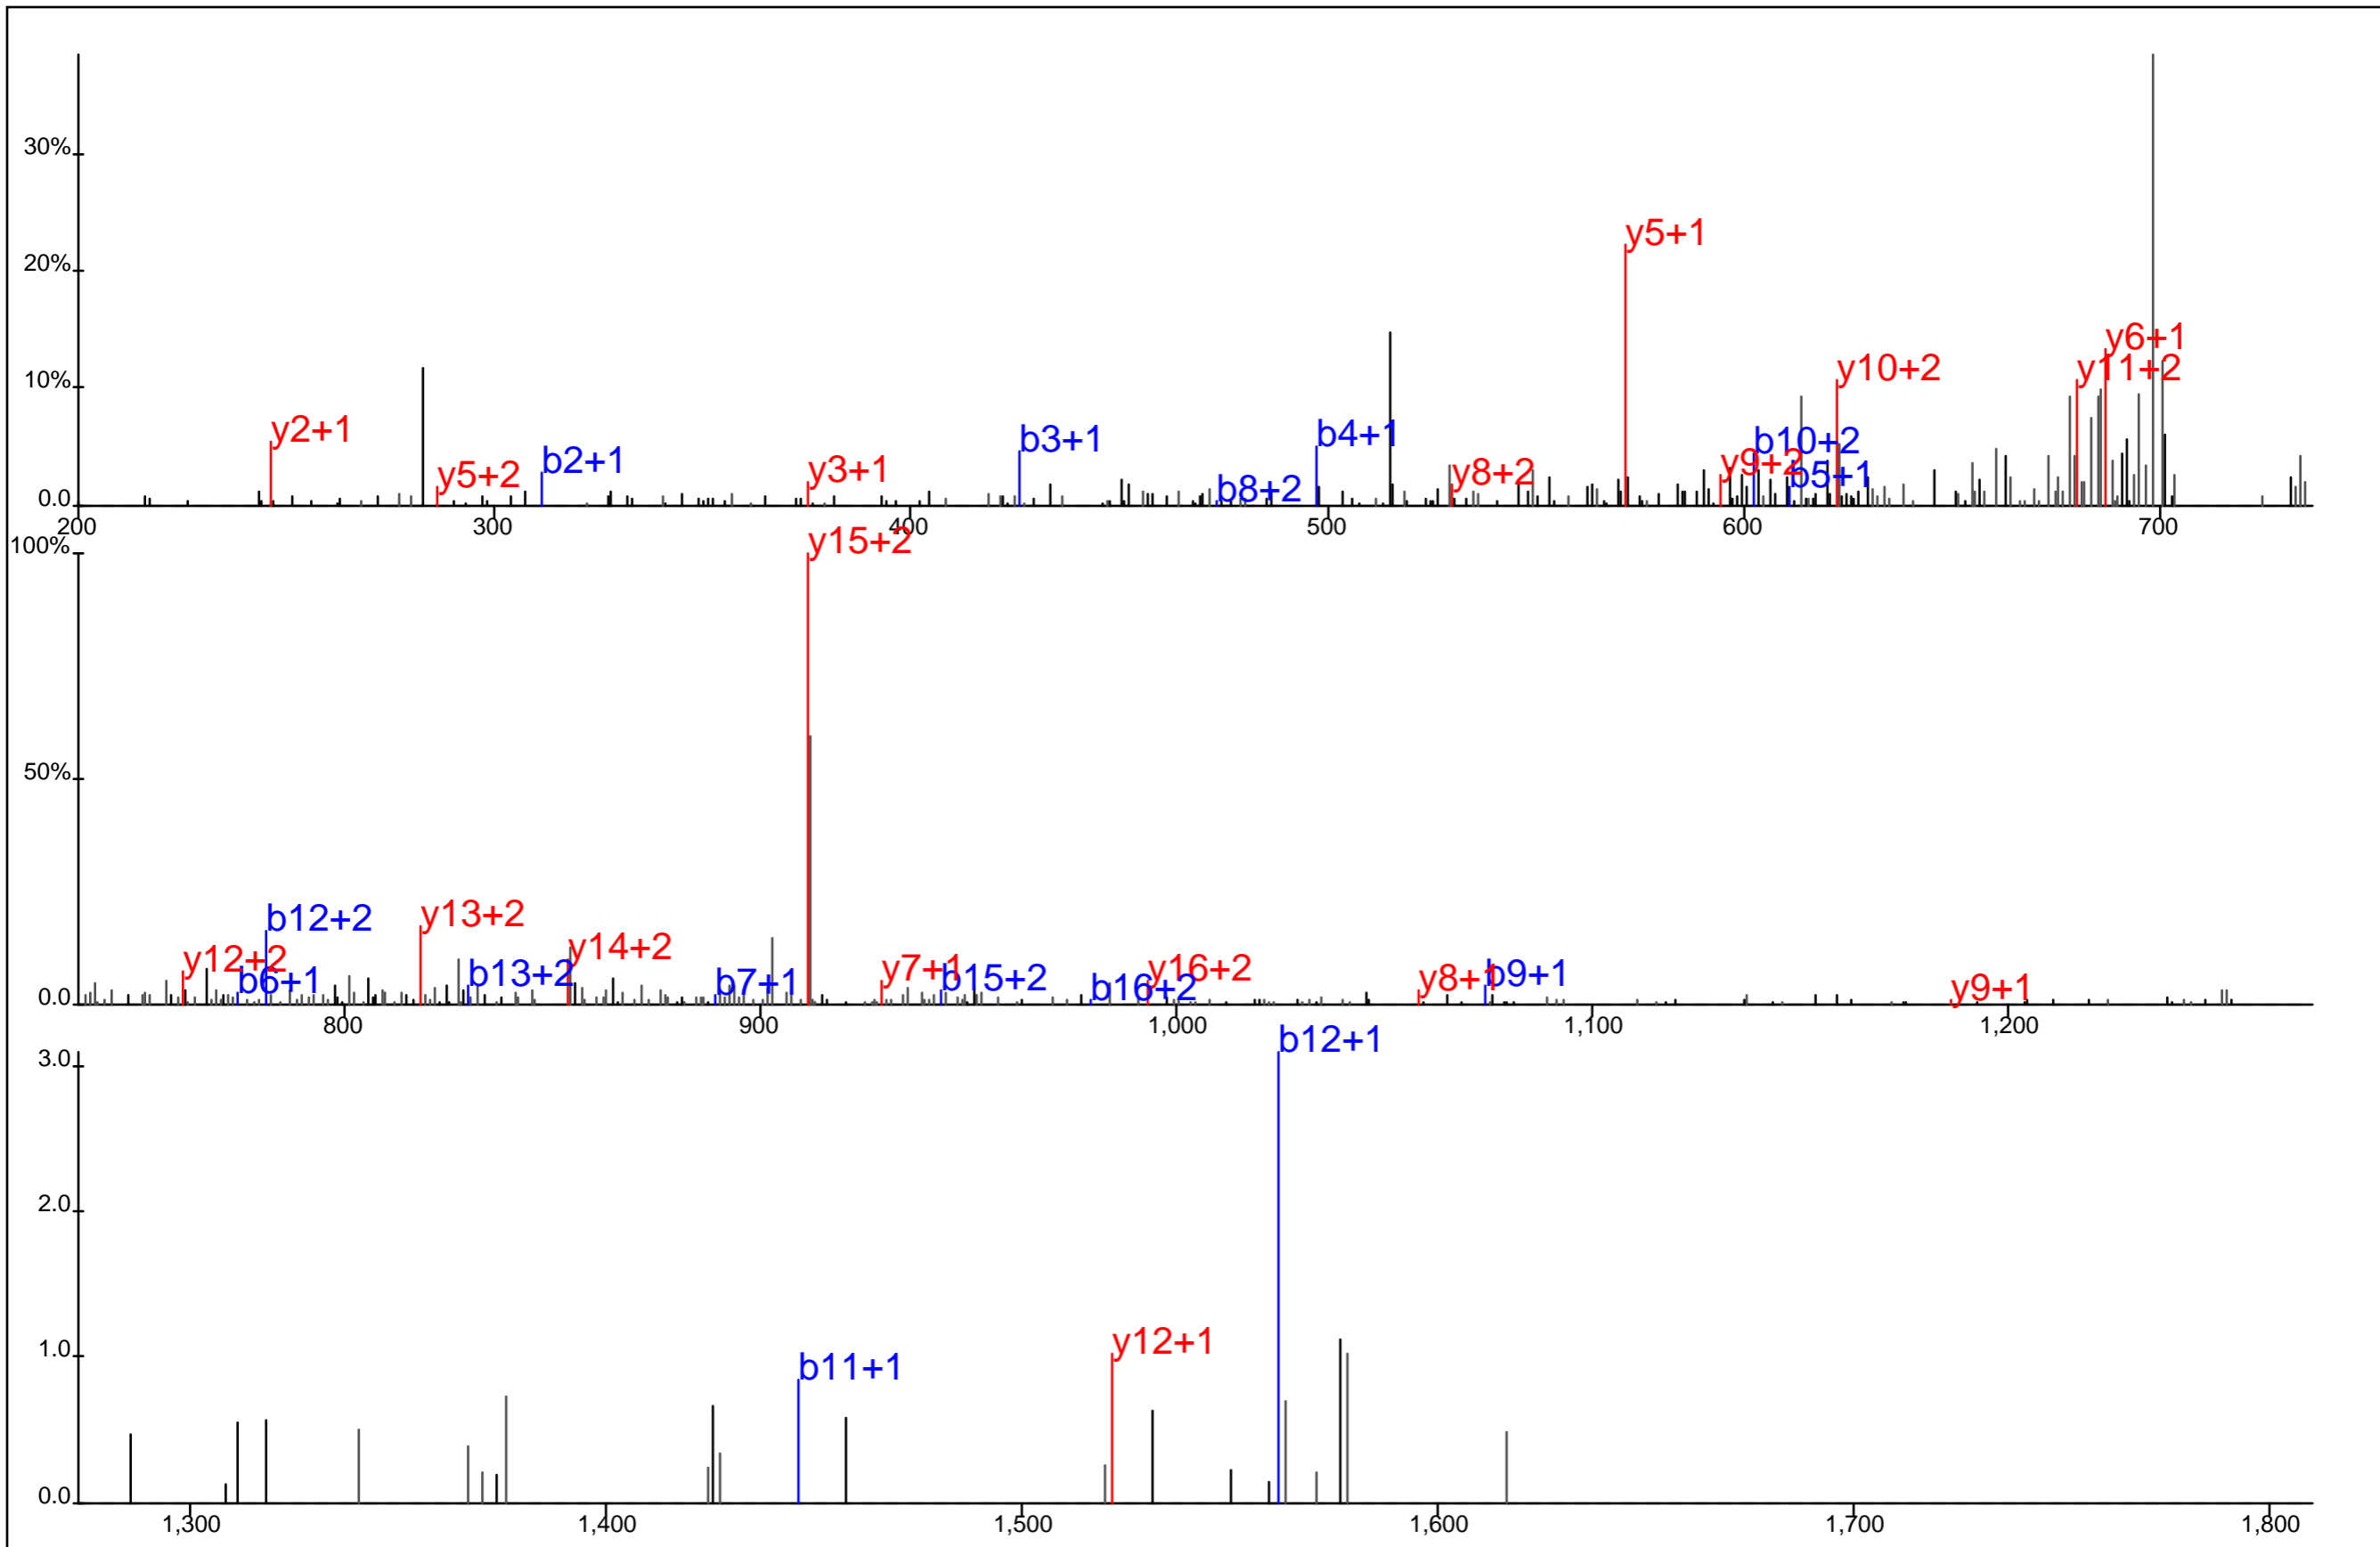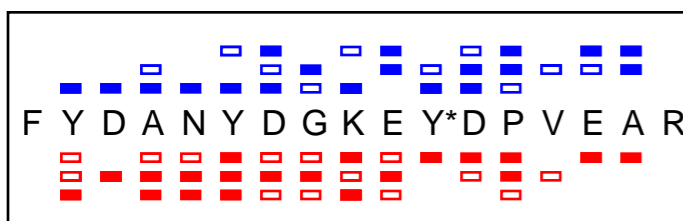

Protein Name: MAPRE2  
 gi Accession: 10346135  
 Precursor Mass: 711.2906+3  
 Delta Mass: 3.383 ppm  
 XCorr: 39.68

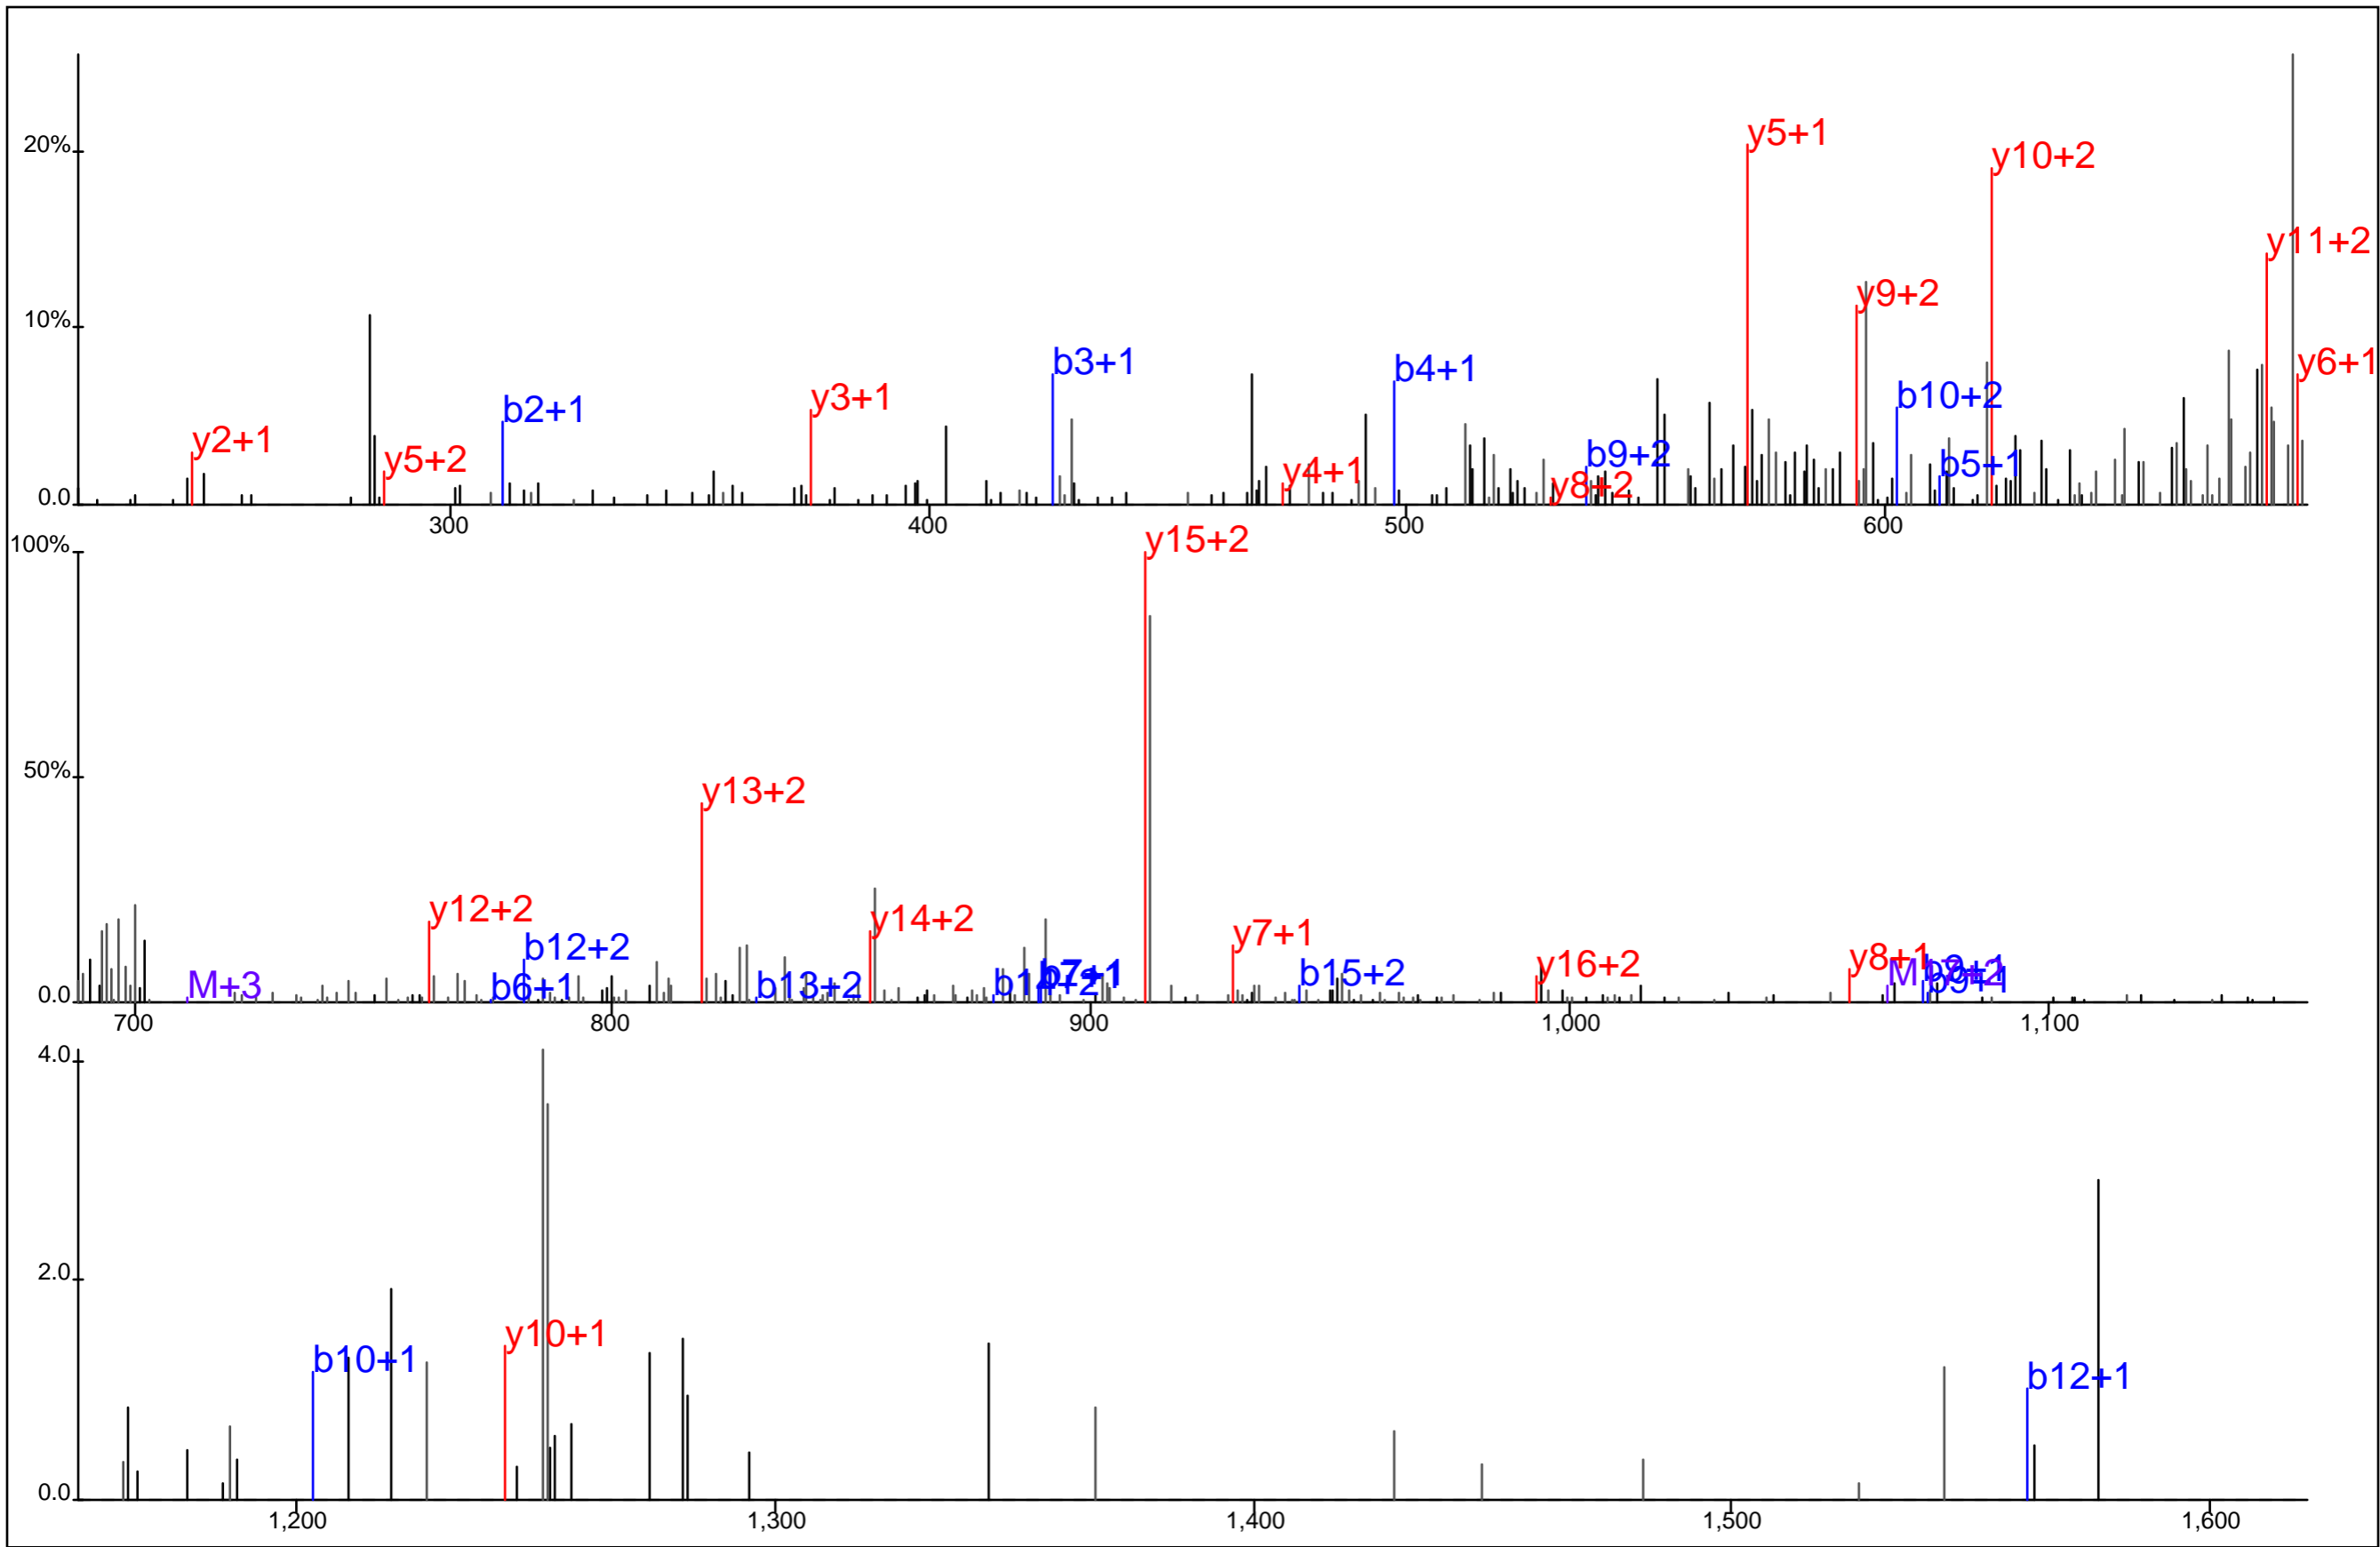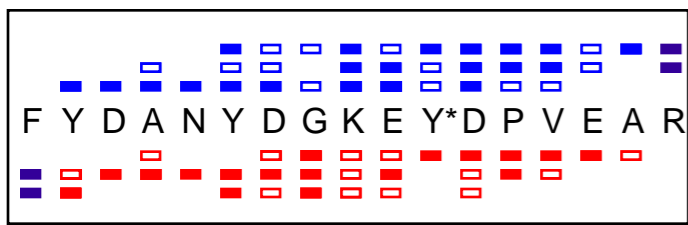

Protein Name: MAPRE2  
 gi Accession: 10346135  
 Precursor Mass: 711.2963+3  
 Delta Mass: 4.605 ppm  
 XCorr: 30.98

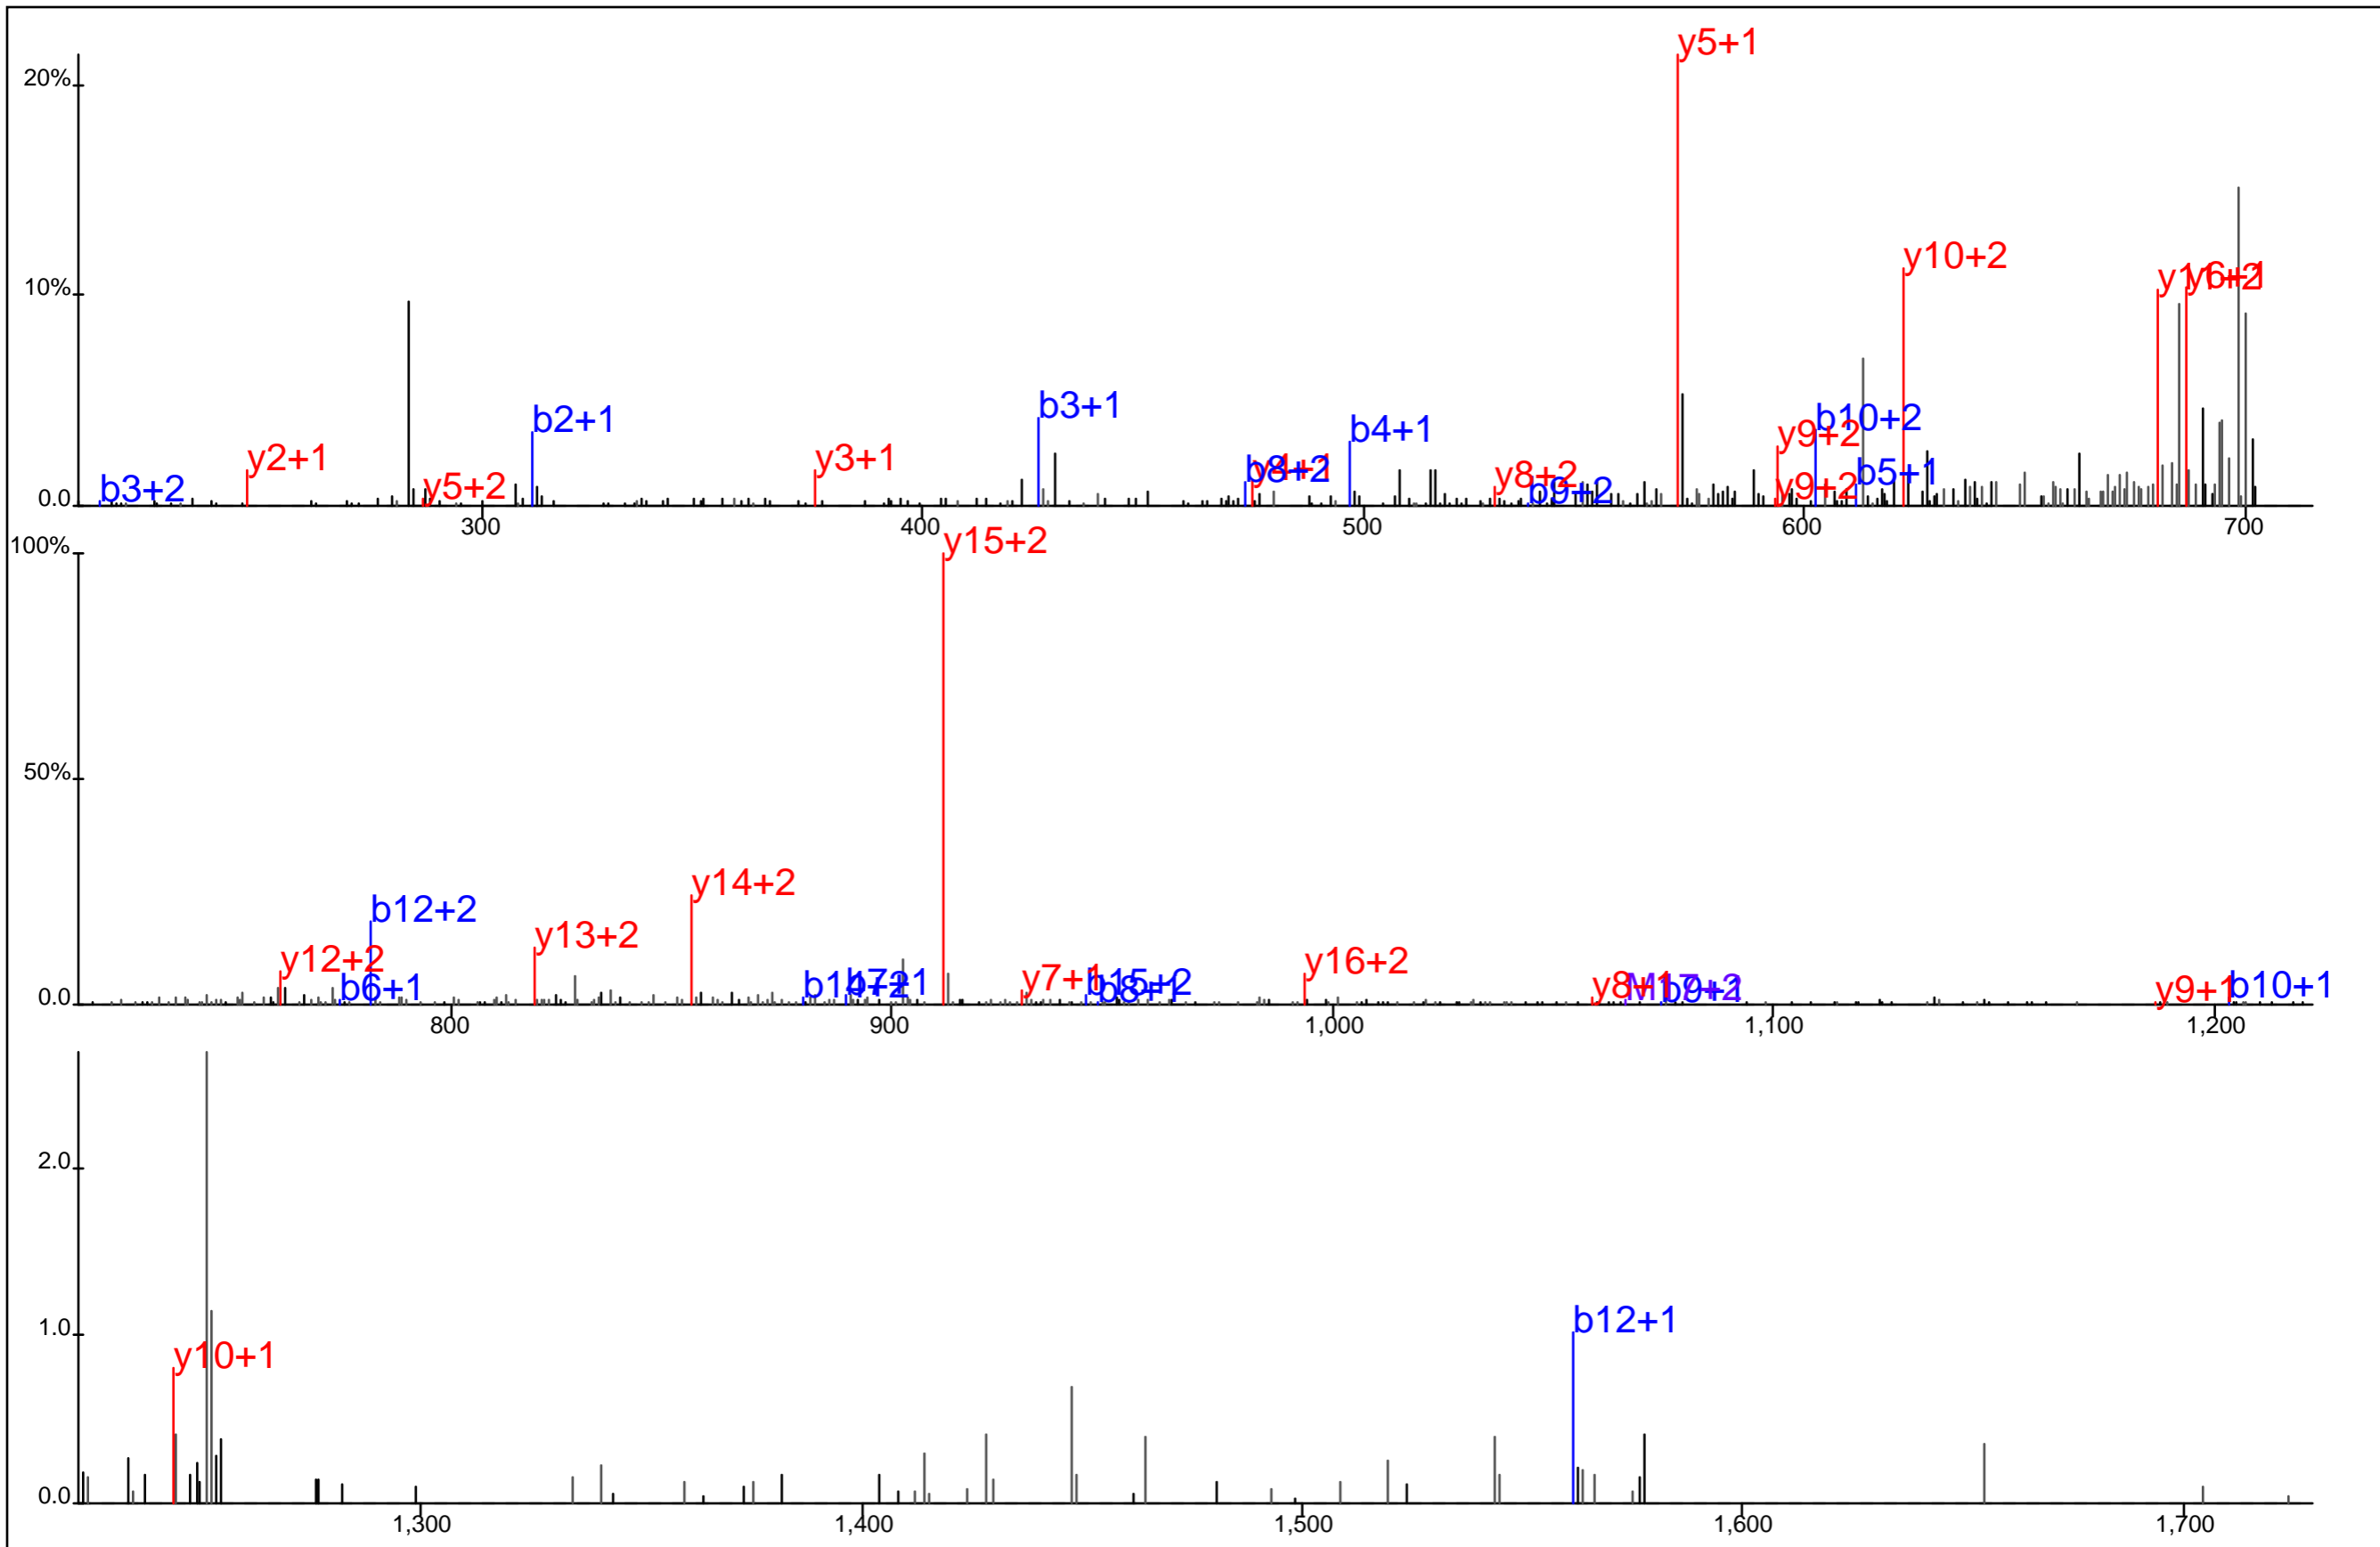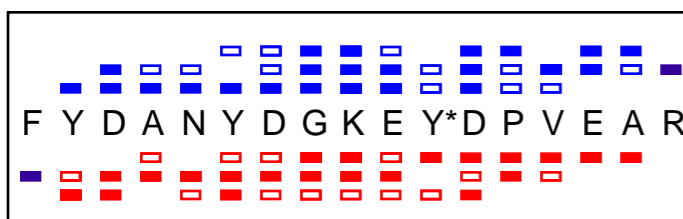

Protein Name: MAPRE2  
 gi Accession: 10346135  
 Precursor Mass: 711.2994+3  
 Delta Mass: 8.986 ppm  
 XCorr: 44.42

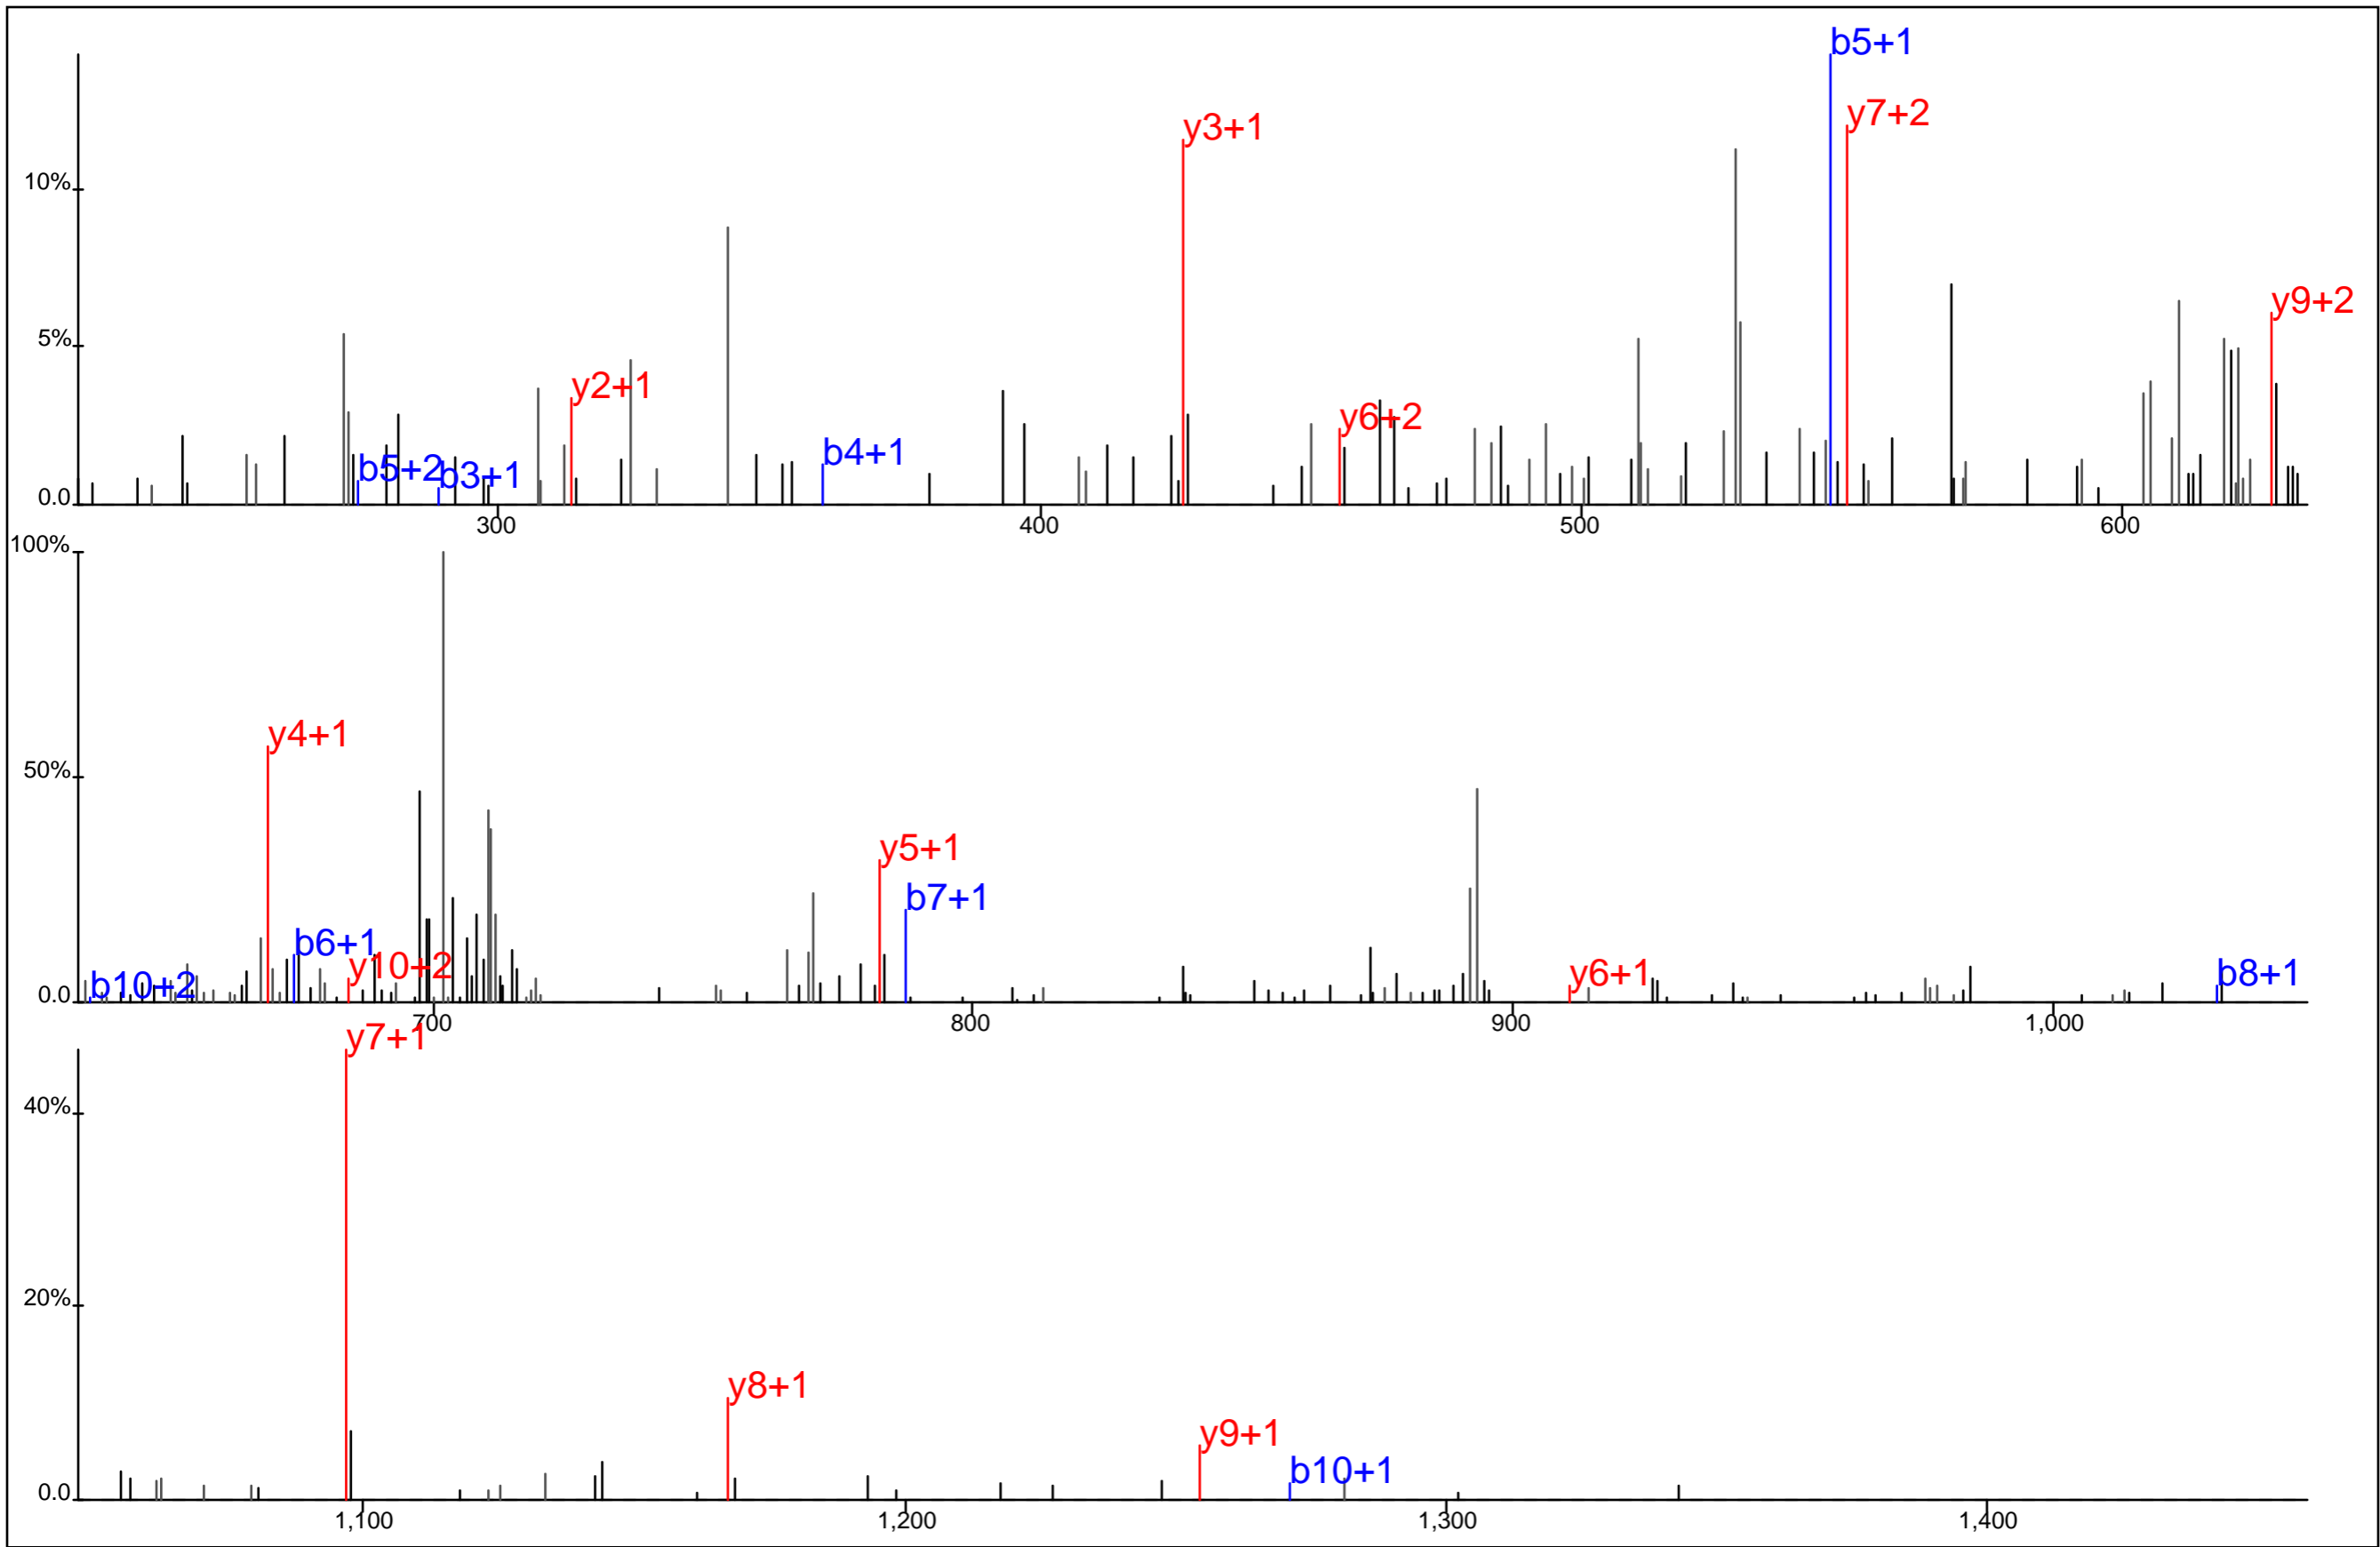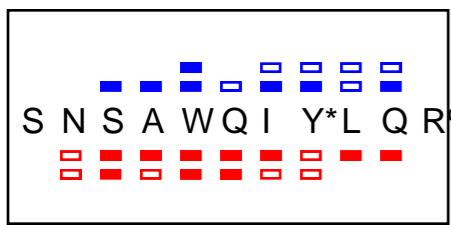

Protein Name: MEKKK6  
 gi Accession: 29427834  
 Precursor Mass: 728.3374+2  
 Delta Mass: 1.366 ppm  
 XCorr: 29.02

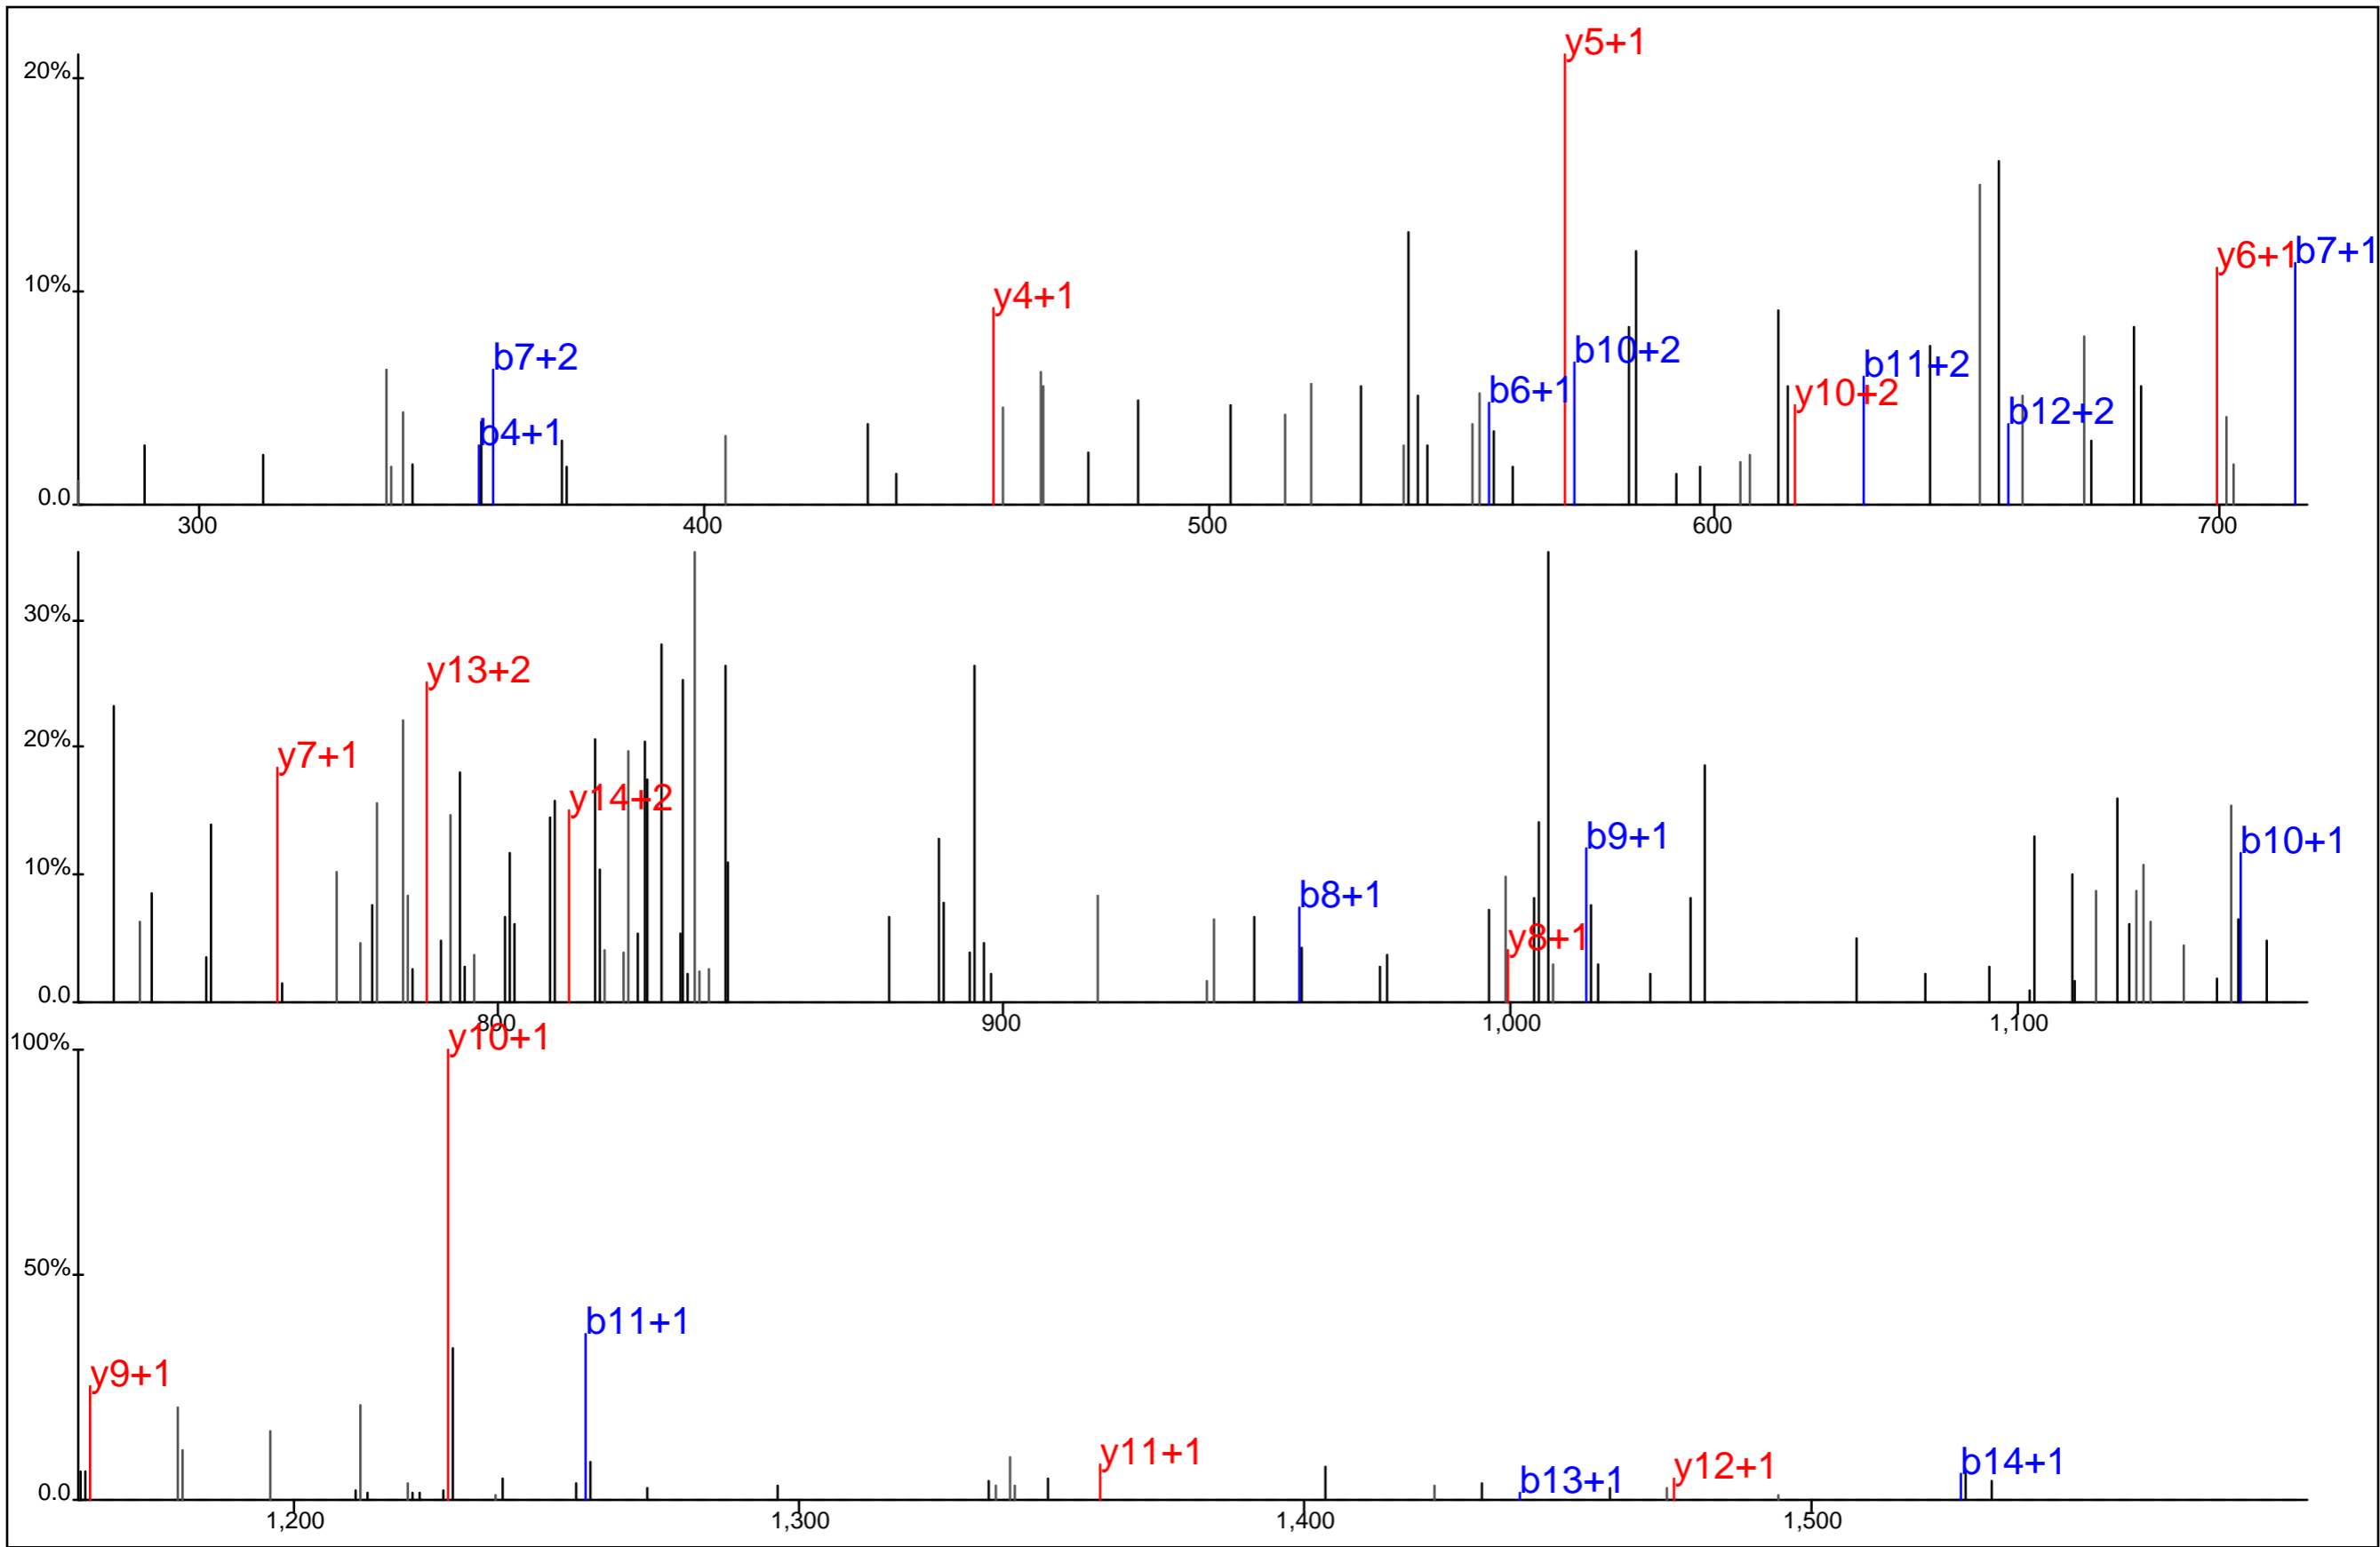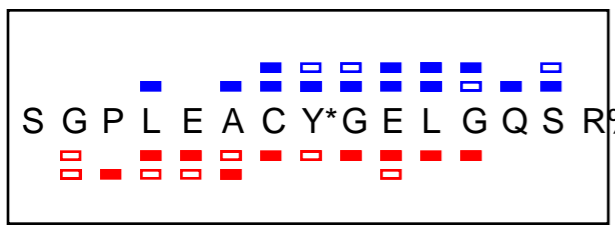

Protein Name: Myotubularin related protein 10  
 gi Accession: 124028527  
 Precursor Mass: 857.3614+2  
 Delta Mass: 1.297 ppm  
 XCorr: 31.21



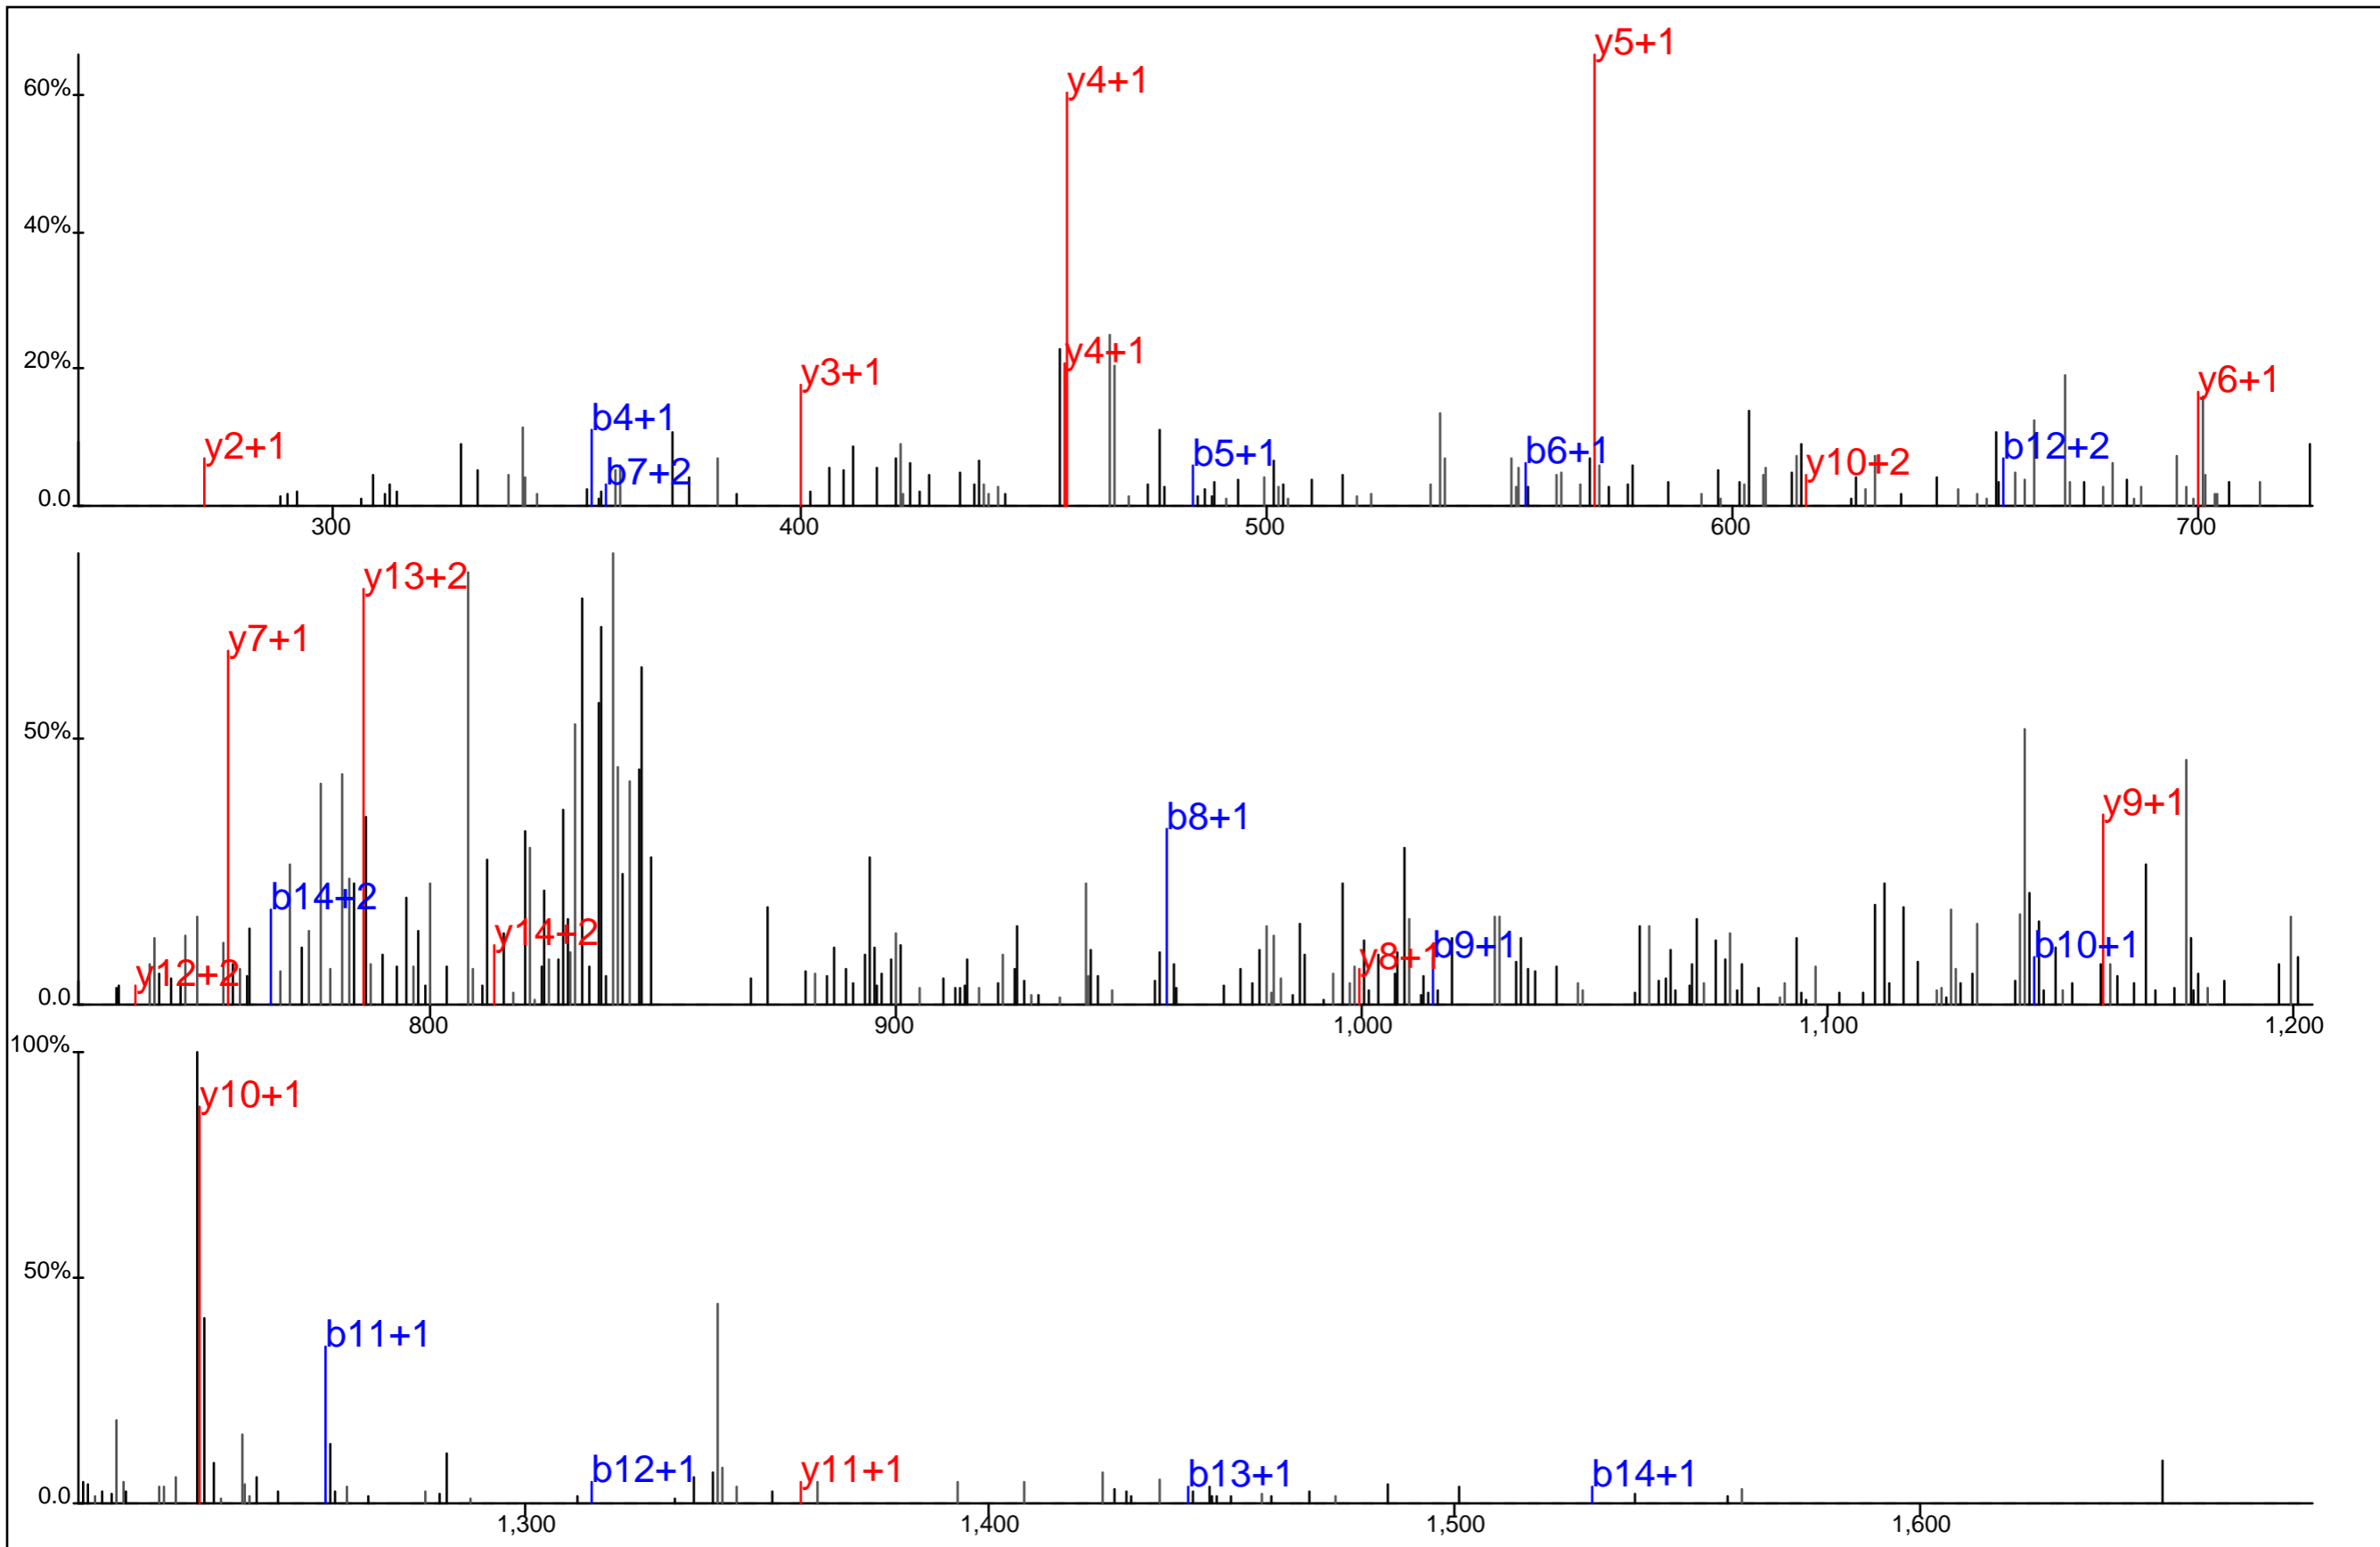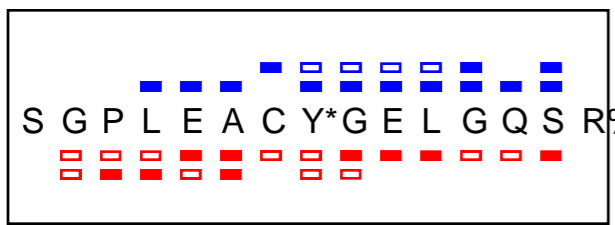

Protein Name: Myotubularin related protein 10  
 gi Accession: 124028527  
 Precursor Mass: 857.3616+2  
 Delta Mass: 1.011 ppm  
 XCorr: 24.65



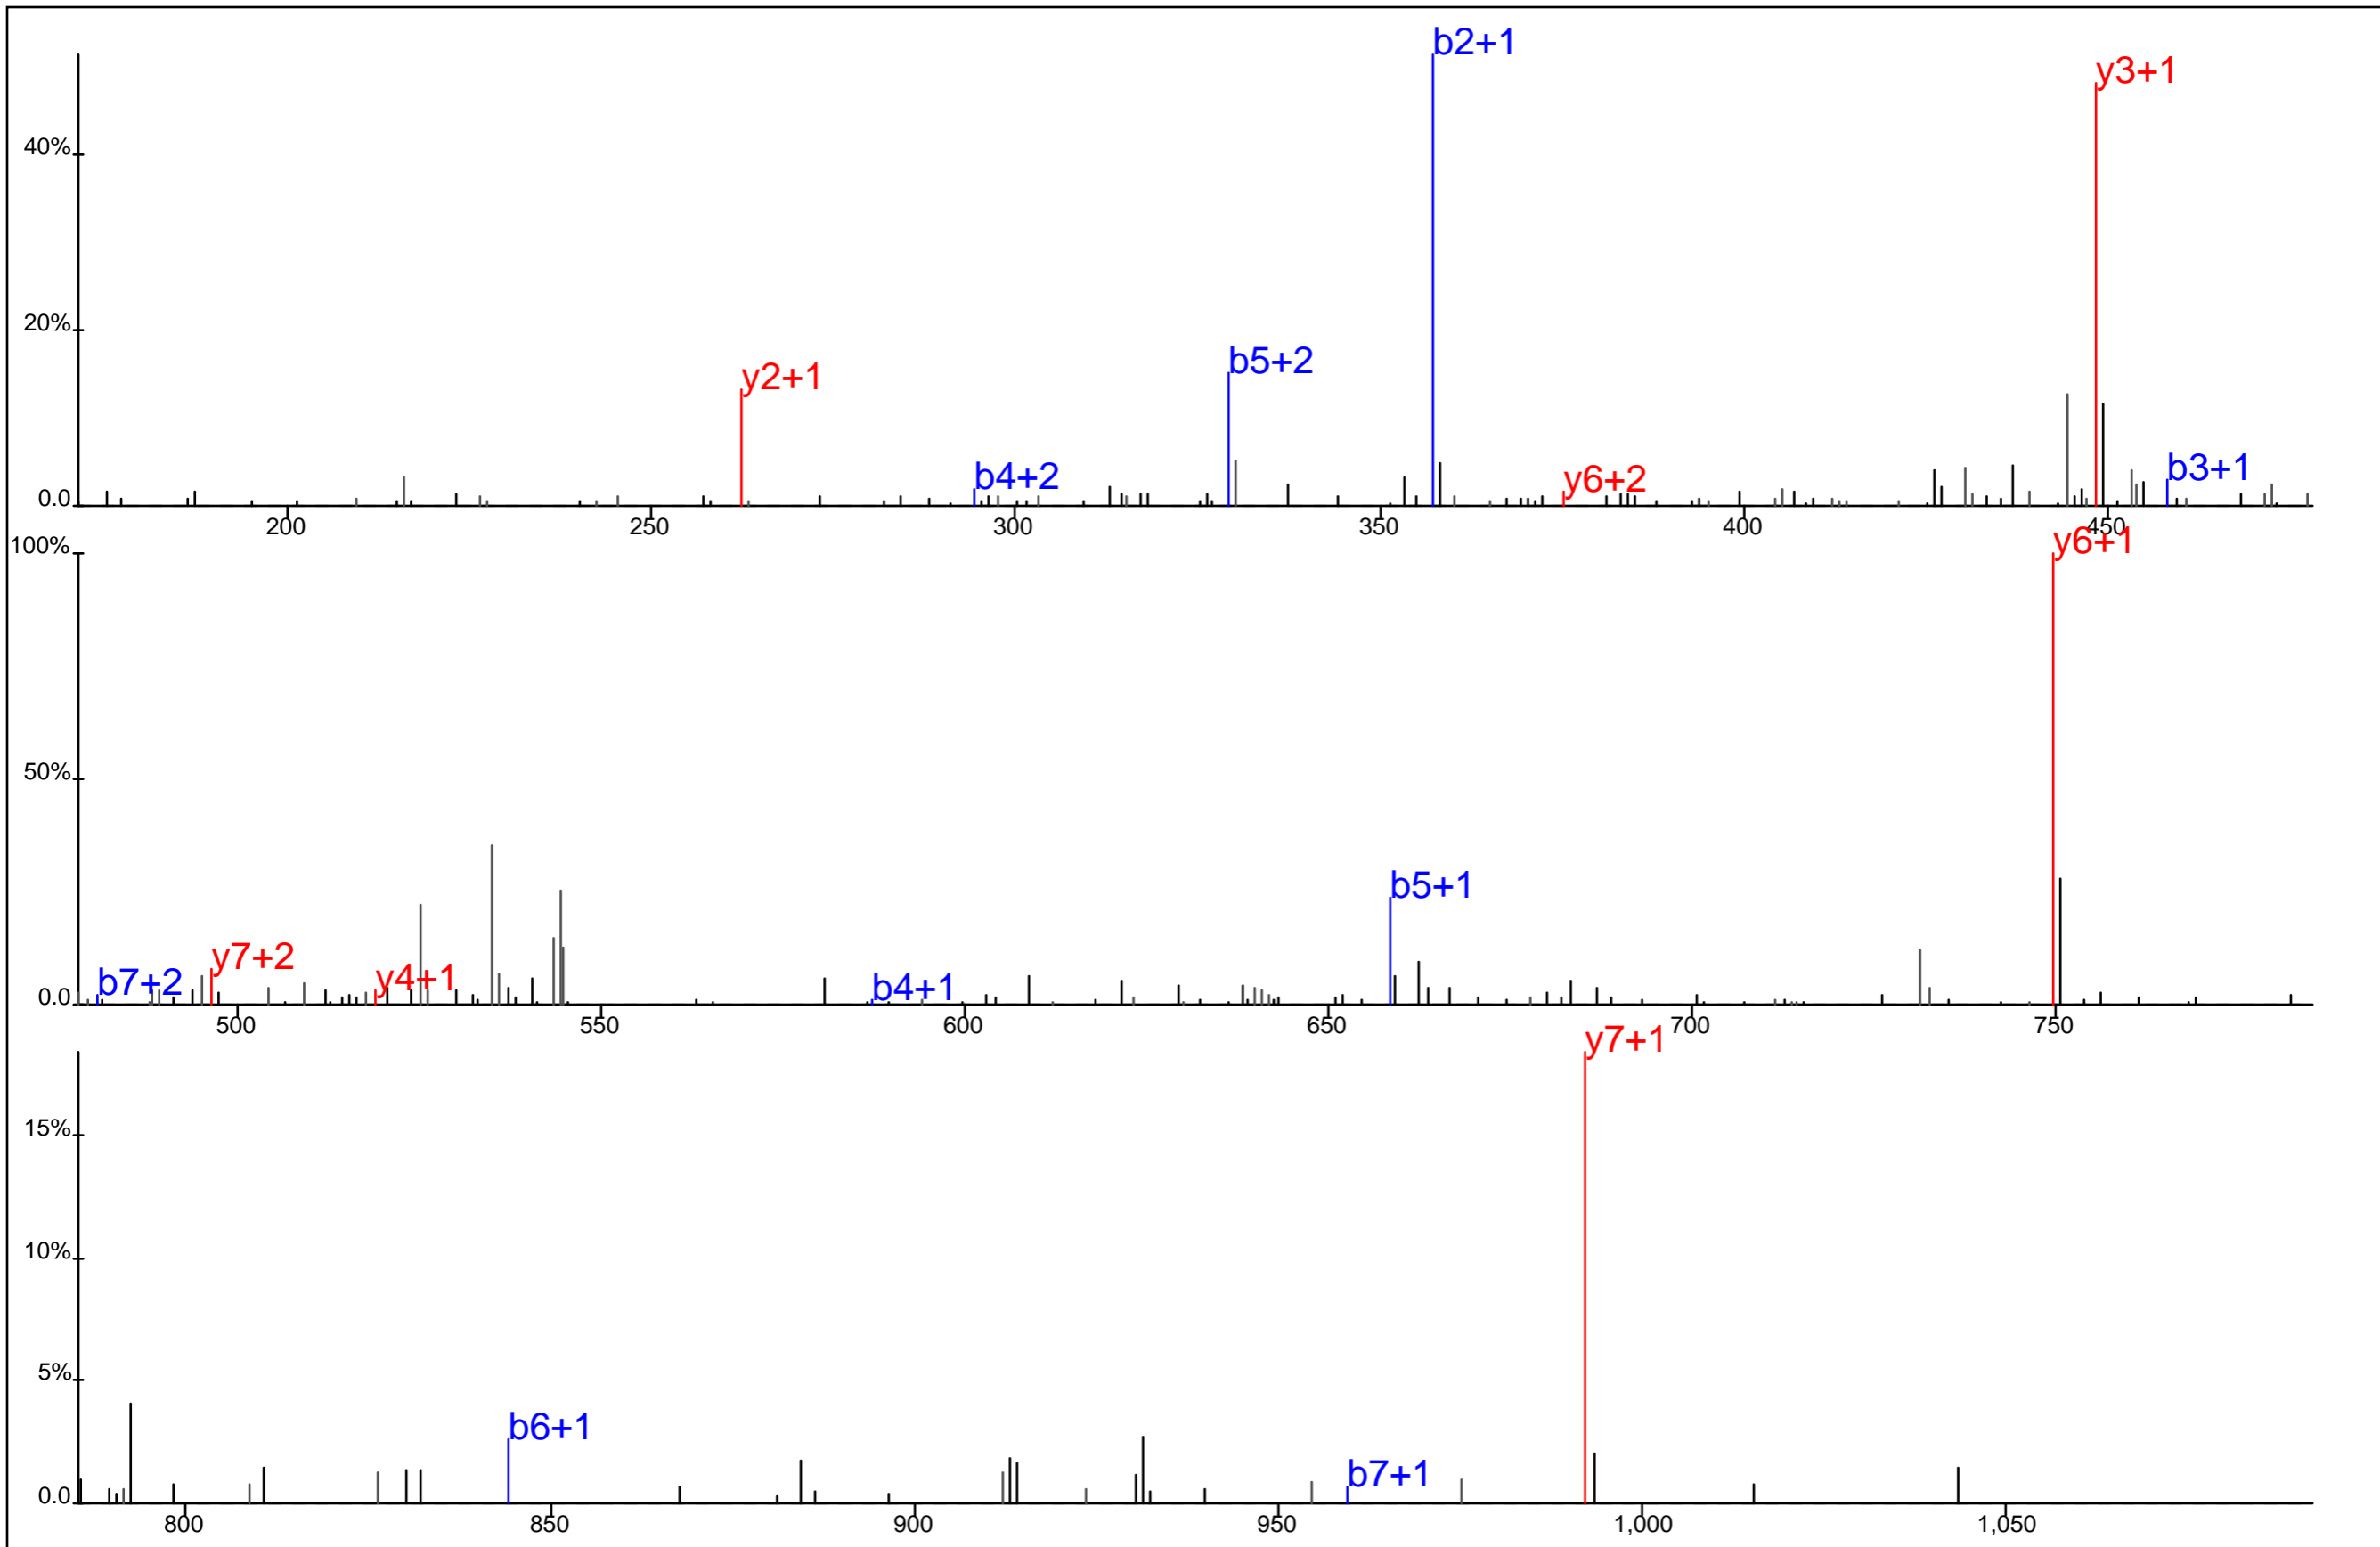

L Y\* T E A W D K

Protein Name: Nebulin  
 gi Accession: 19856971  
 Precursor Mass: 553.2411+2  
 Delta Mass: 13.350 ppm  
 XCorr: 27.28

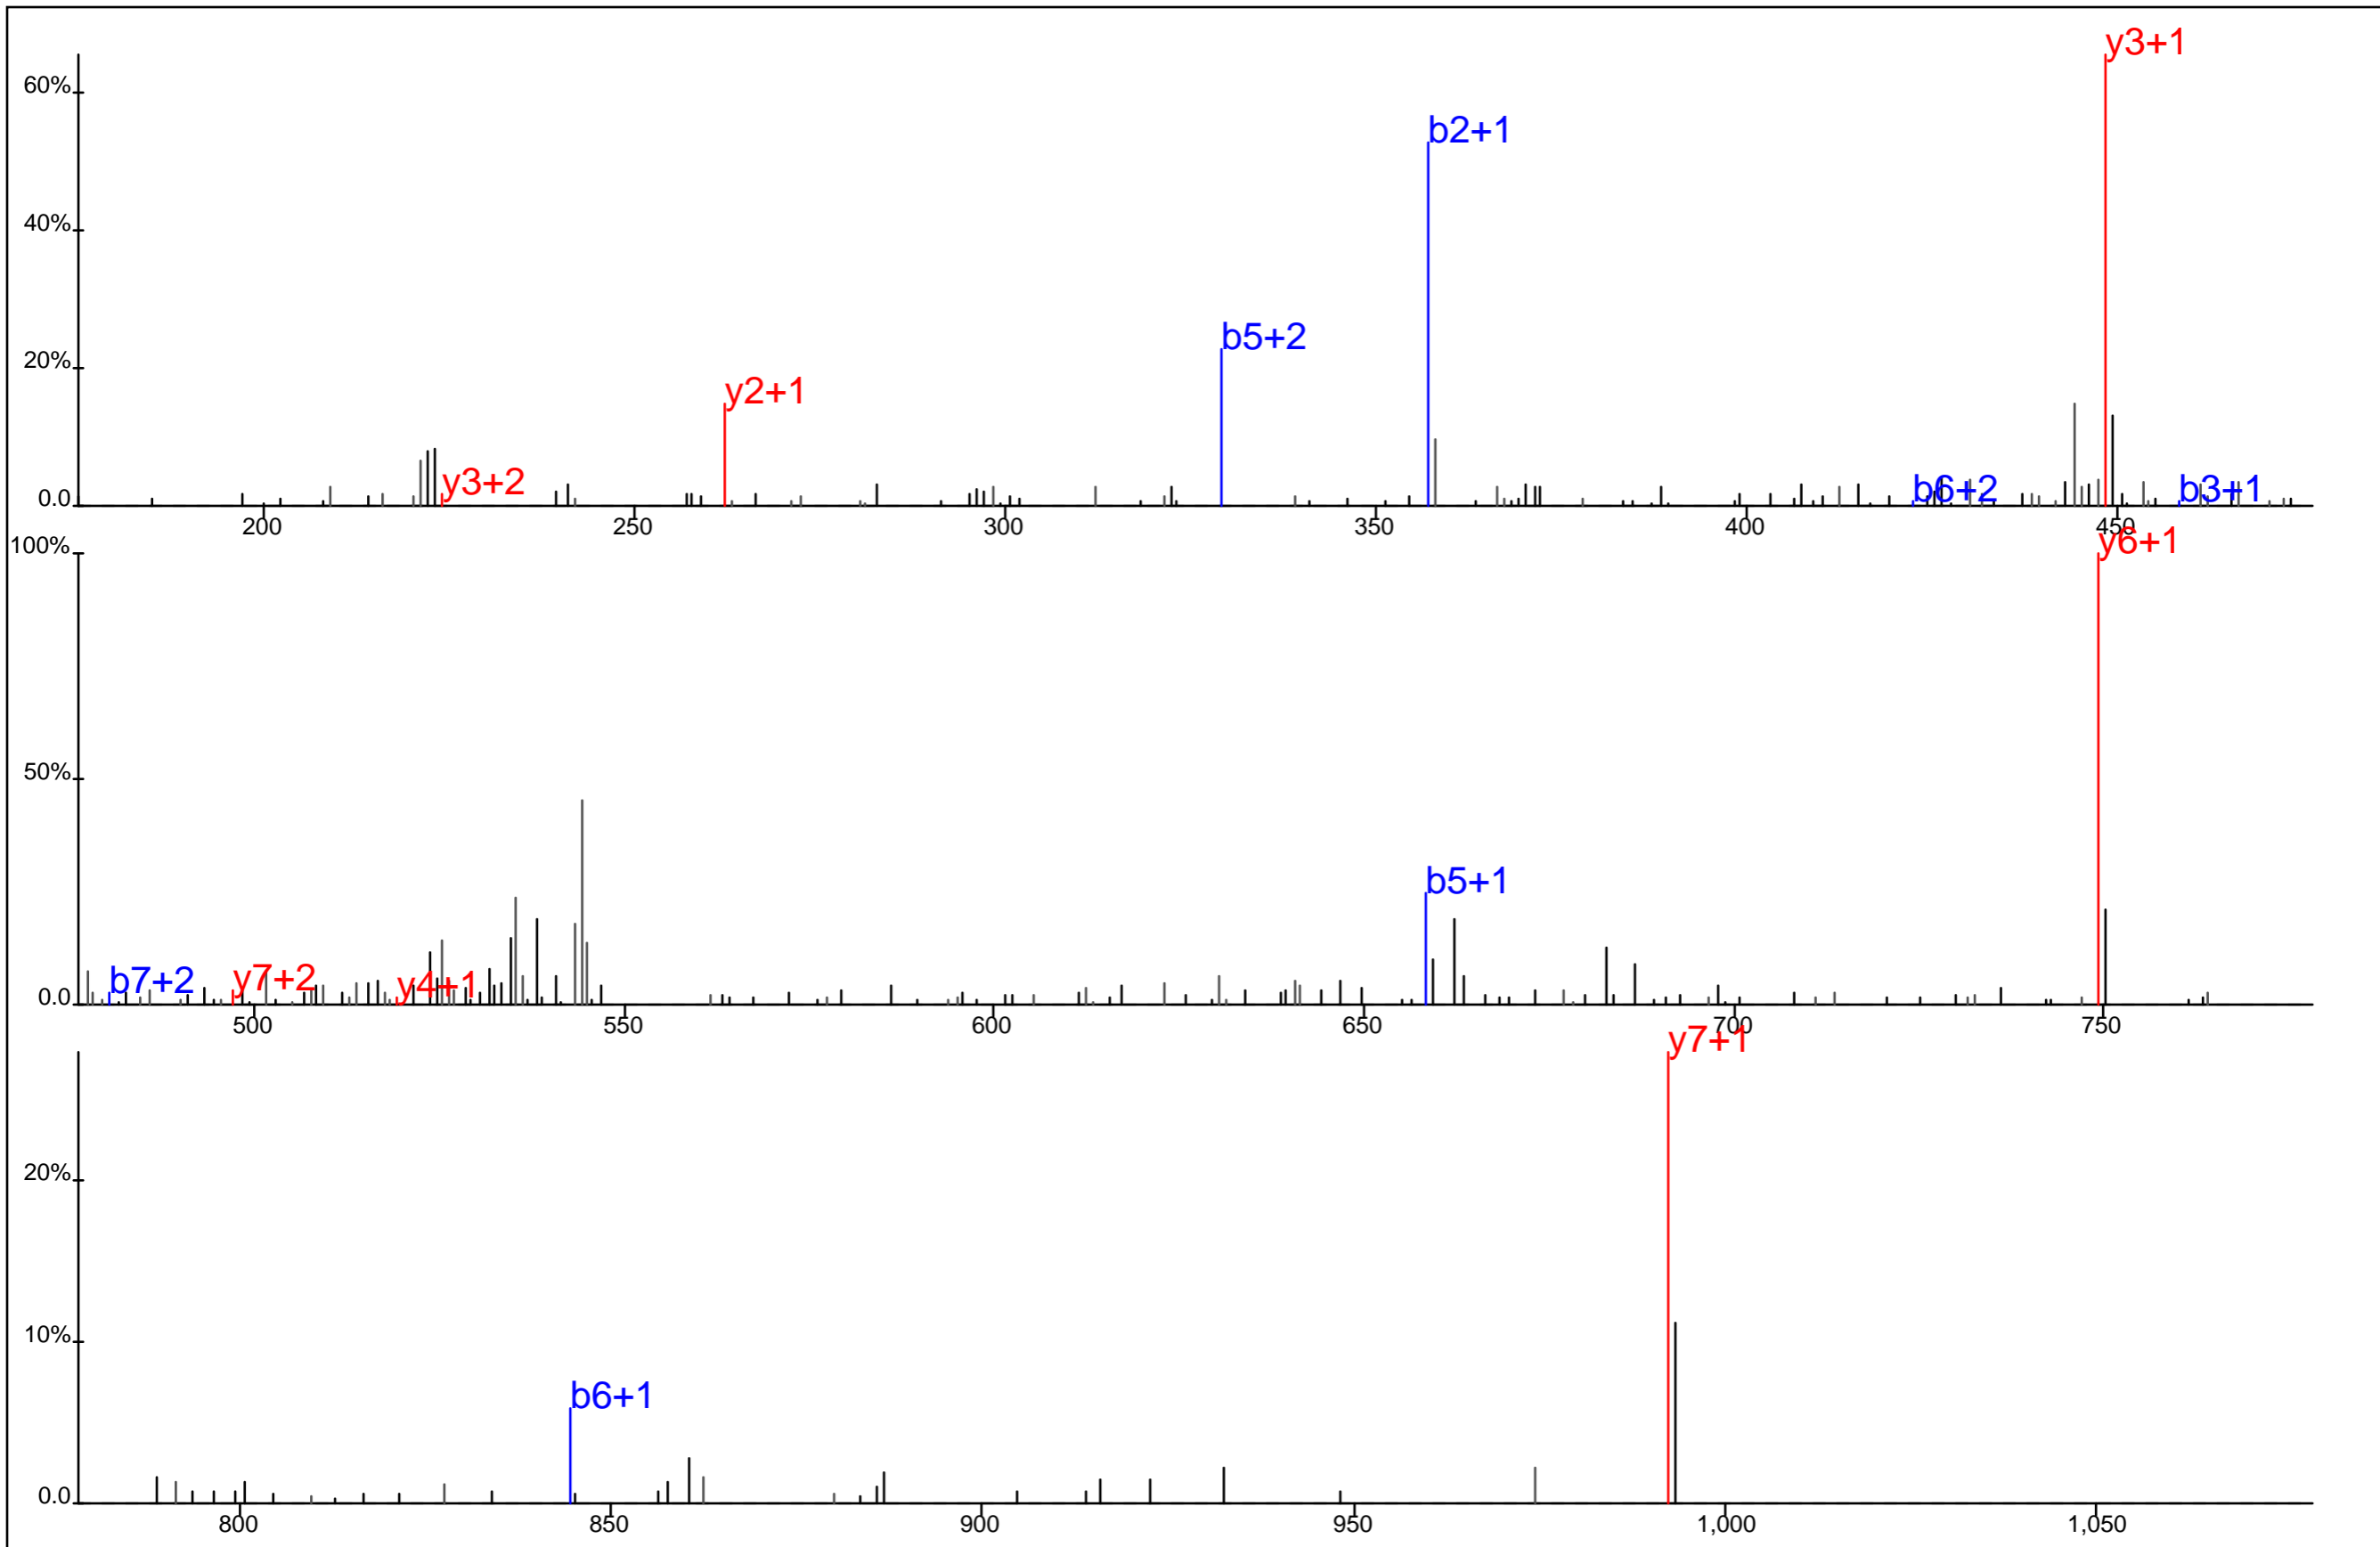

**L Y\*T E A W D K**

Protein Name: Nebulin  
 gi Accession: 19856971  
 Precursor Mass: 553.2424+2  
 Delta Mass: 15.783 ppm  
 XCorr: 33.1

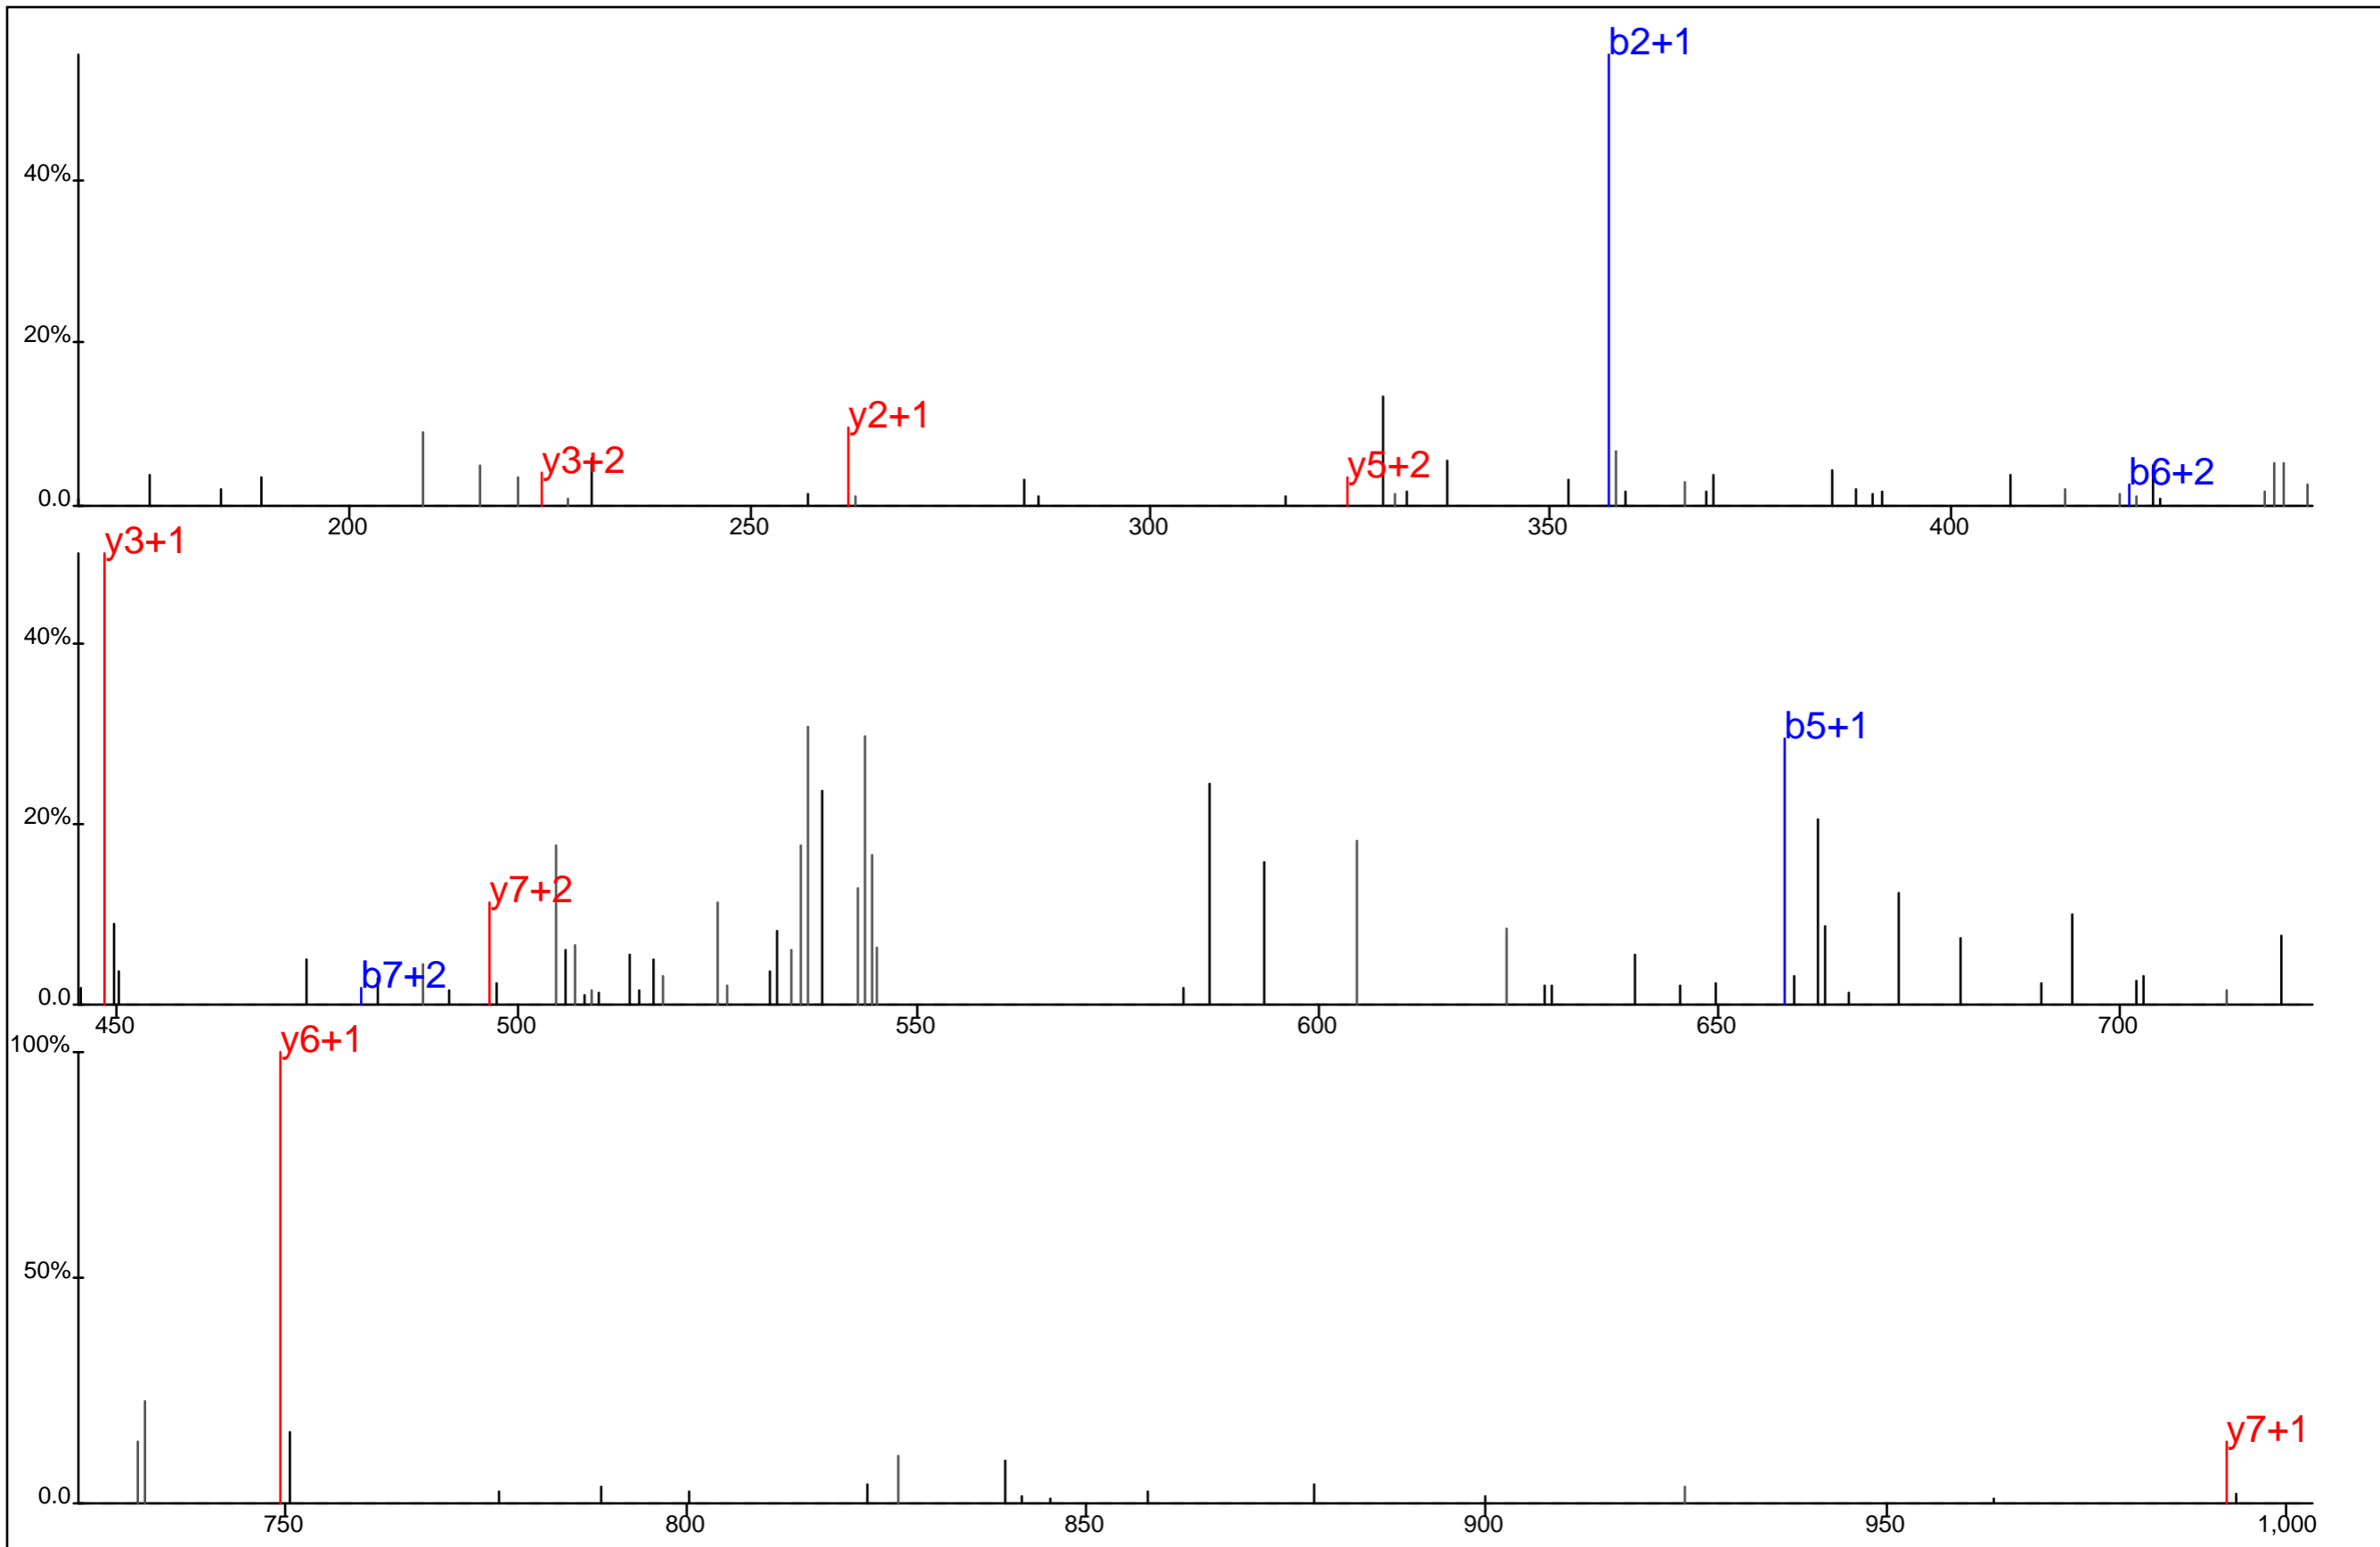

**L Y\* T E A W D K**

Protein Name: Nebulin  
 gi Accession: 19856971  
 Precursor Mass: 553.2430+2  
 Delta Mass: 16.887 ppm  
 XCorr: 32.21

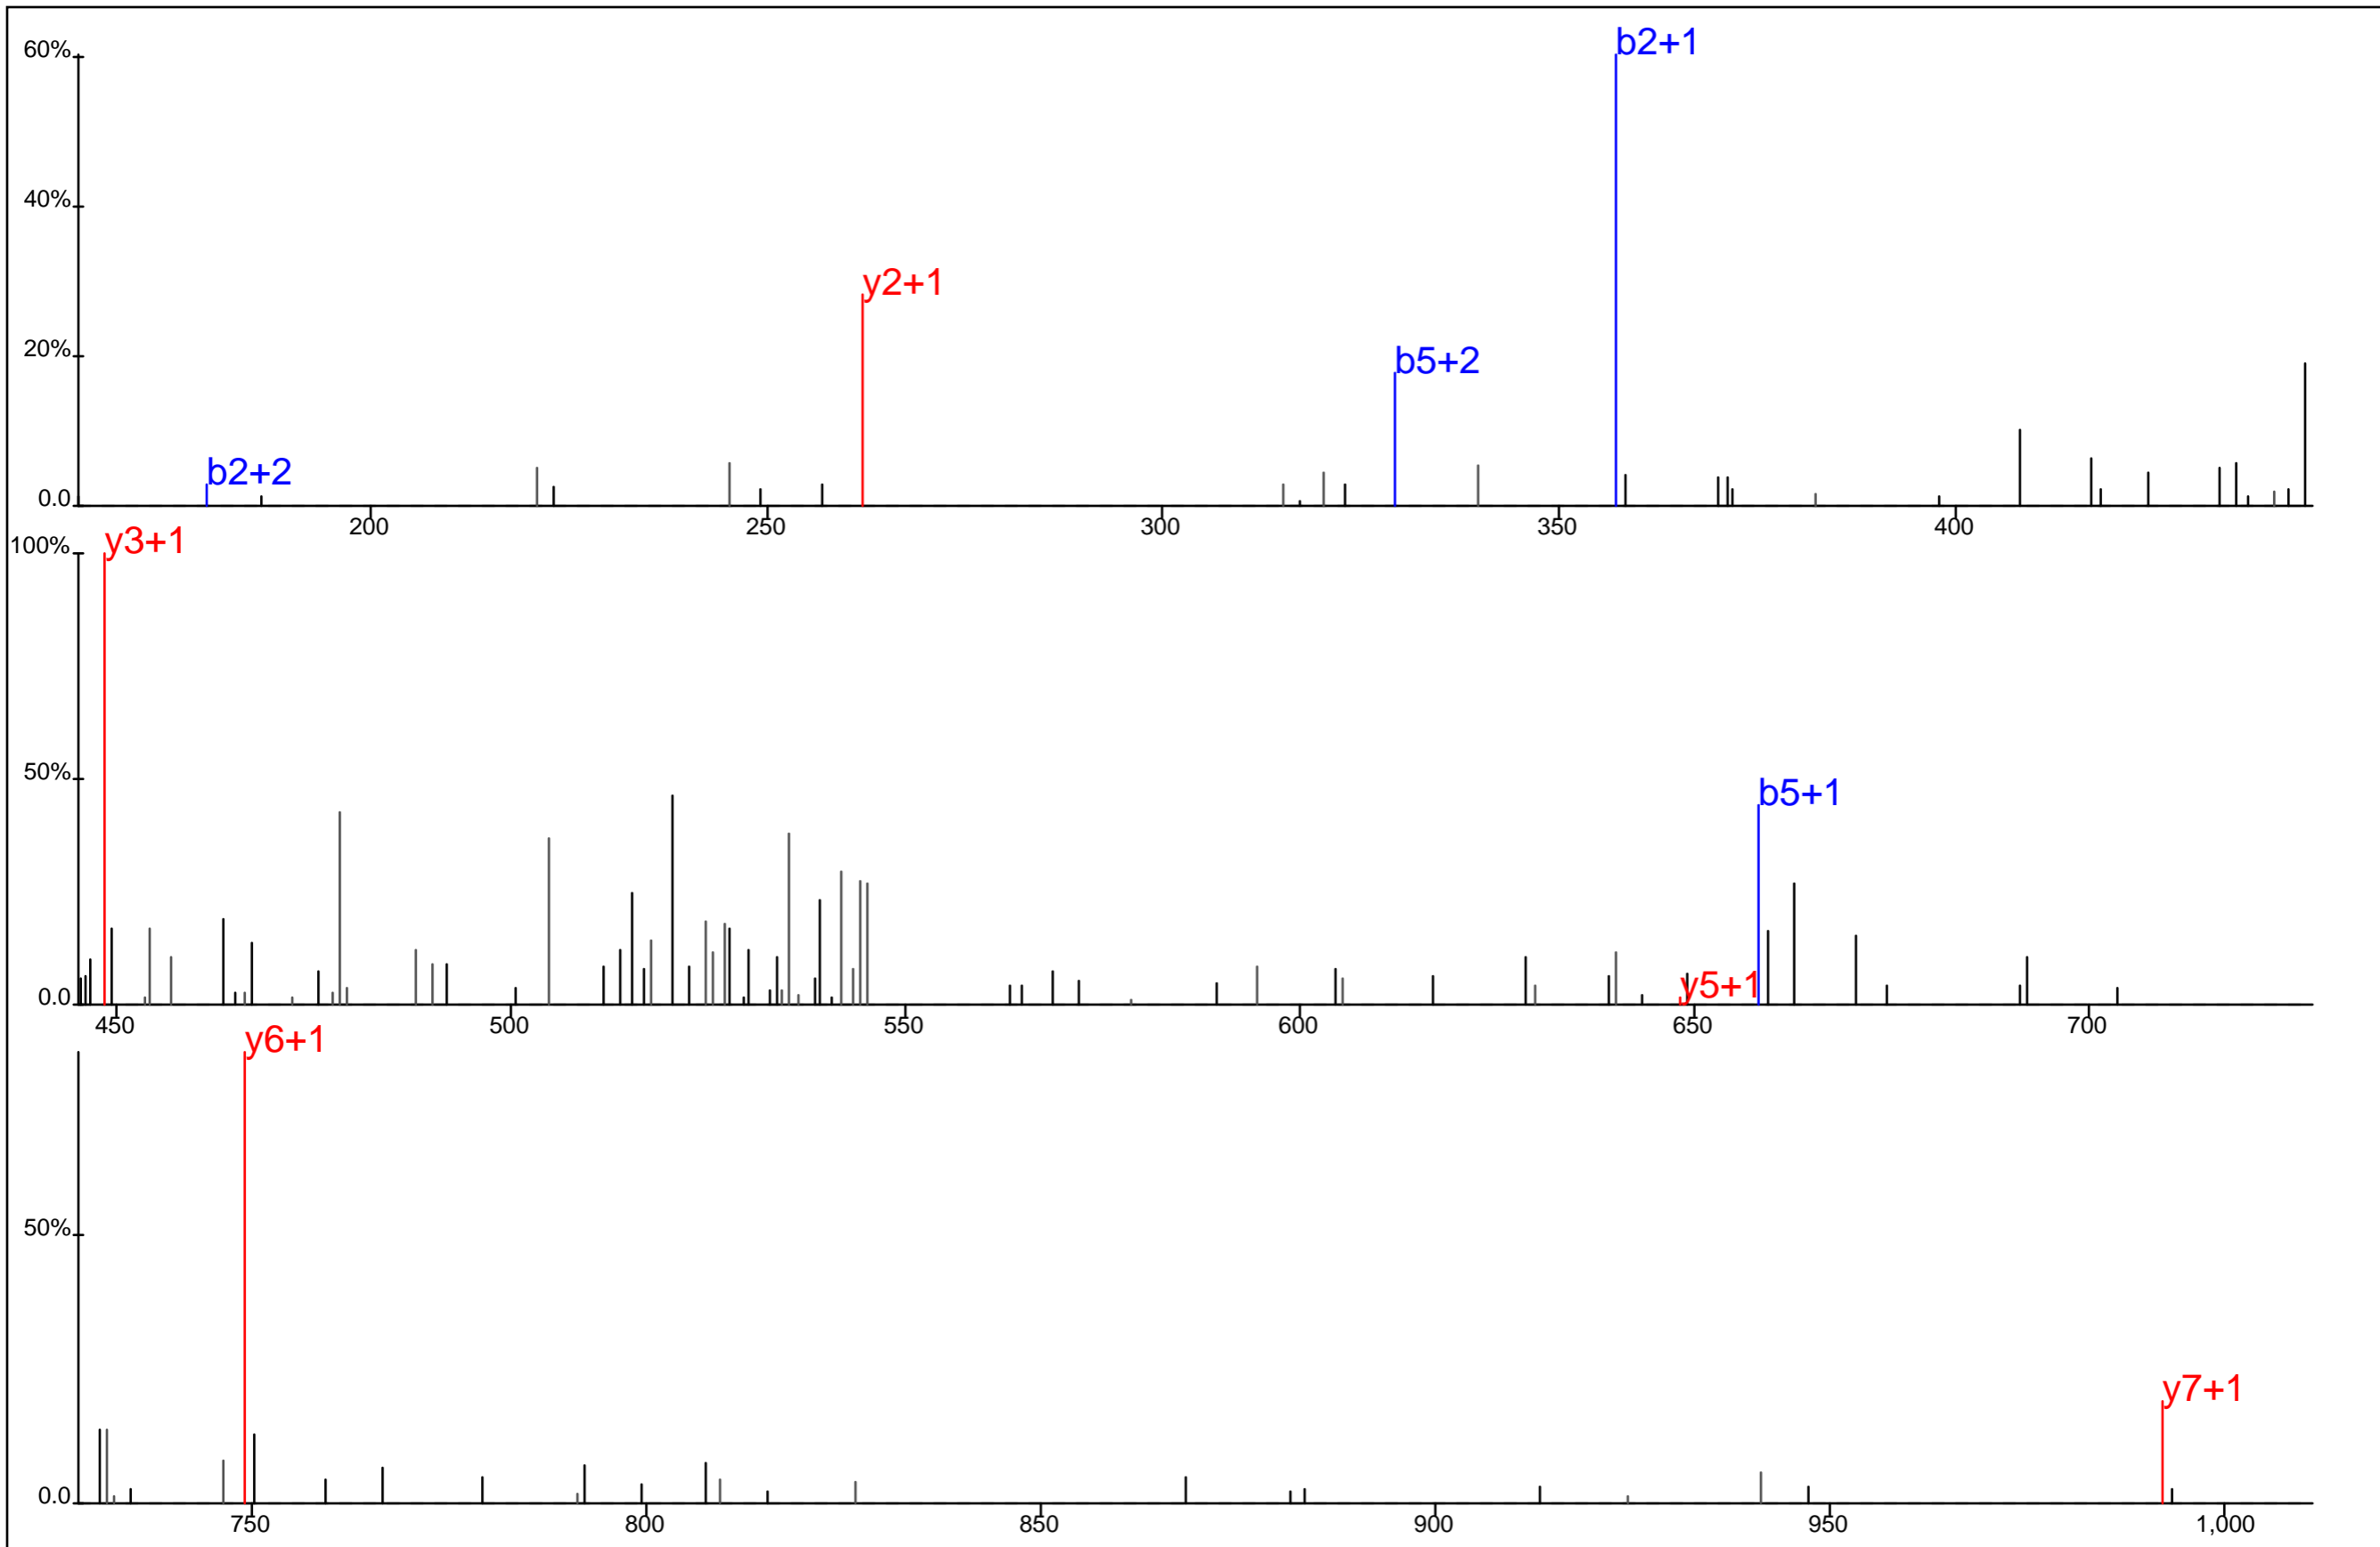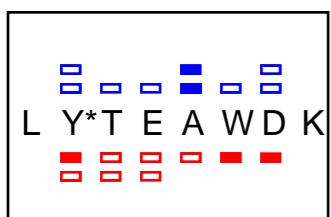

Protein Name: Nebulin  
 gi Accession: 19856971  
 Precursor Mass: 553.2419+2  
 Delta Mass: 14.788 ppm  
 XCorr: 28.28

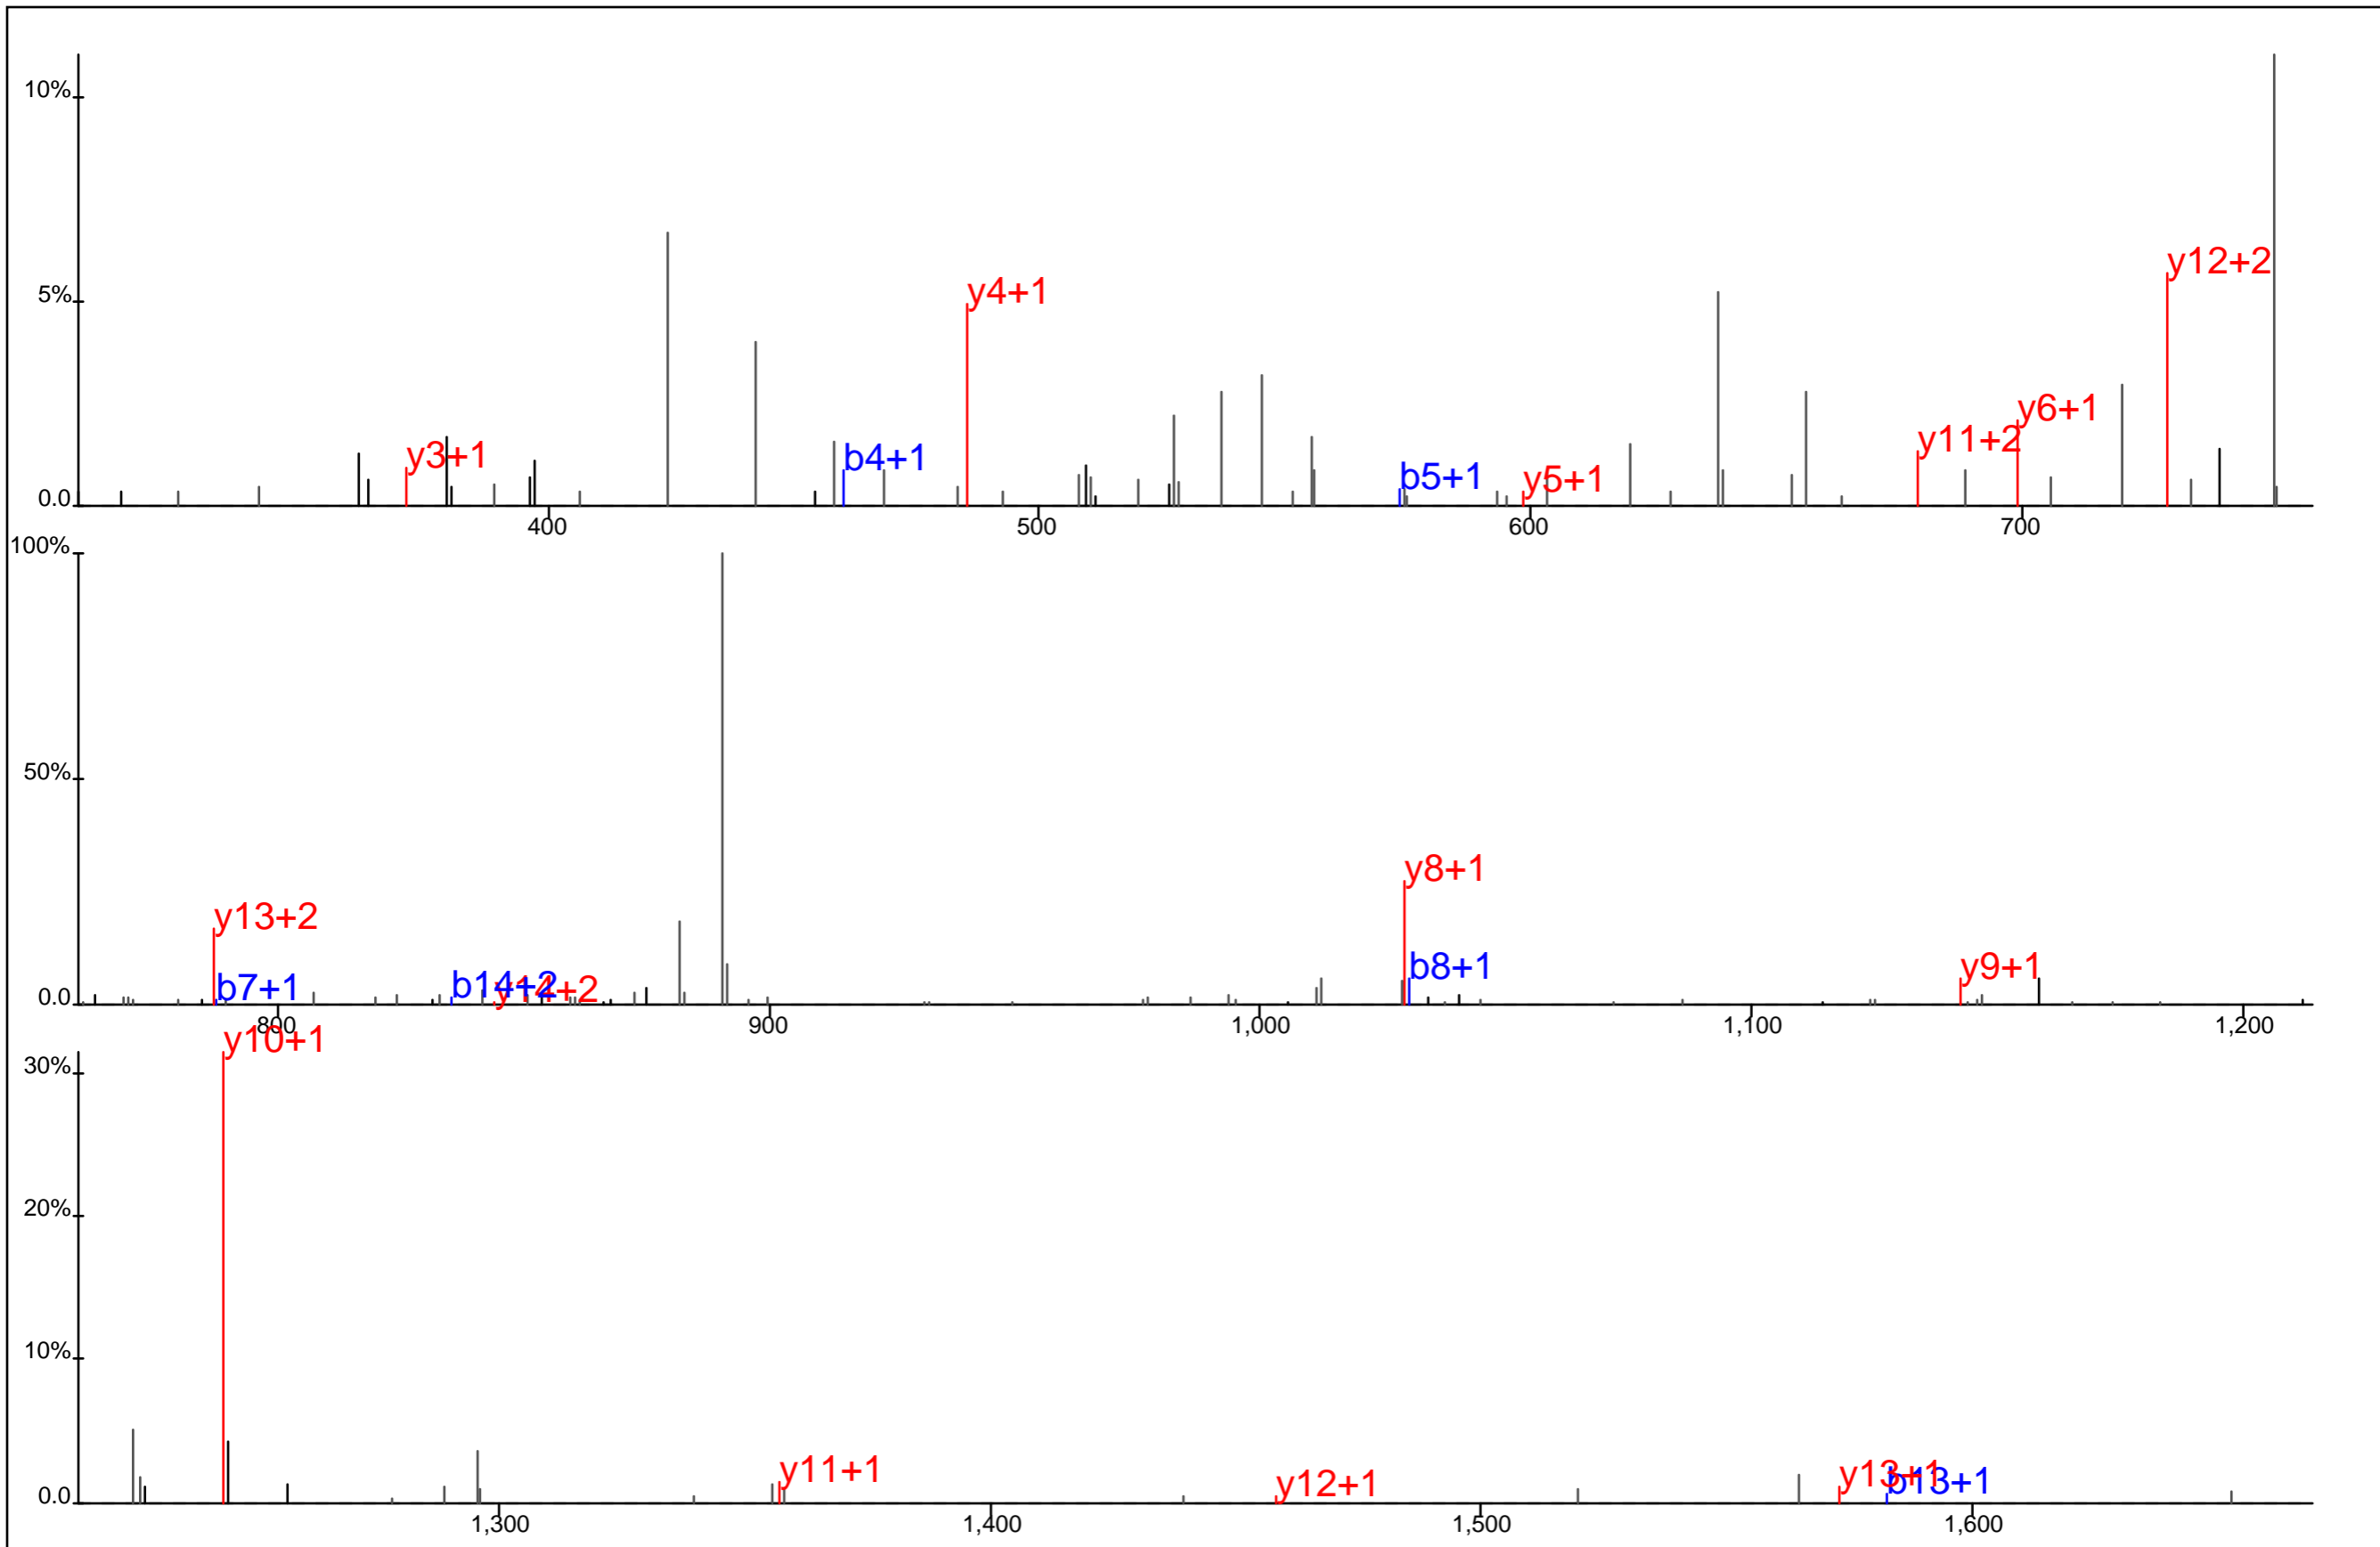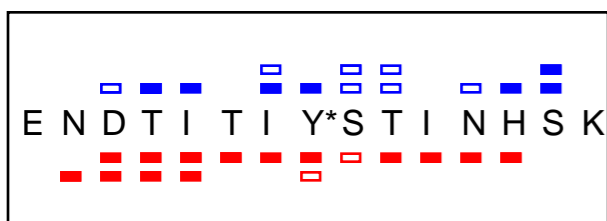

Protein Name: NTBA  
 gi Accession: 15384843  
 Precursor Mass: 908.4153+2  
 Delta Mass: 4.069 ppm  
 XCorr: 51.91

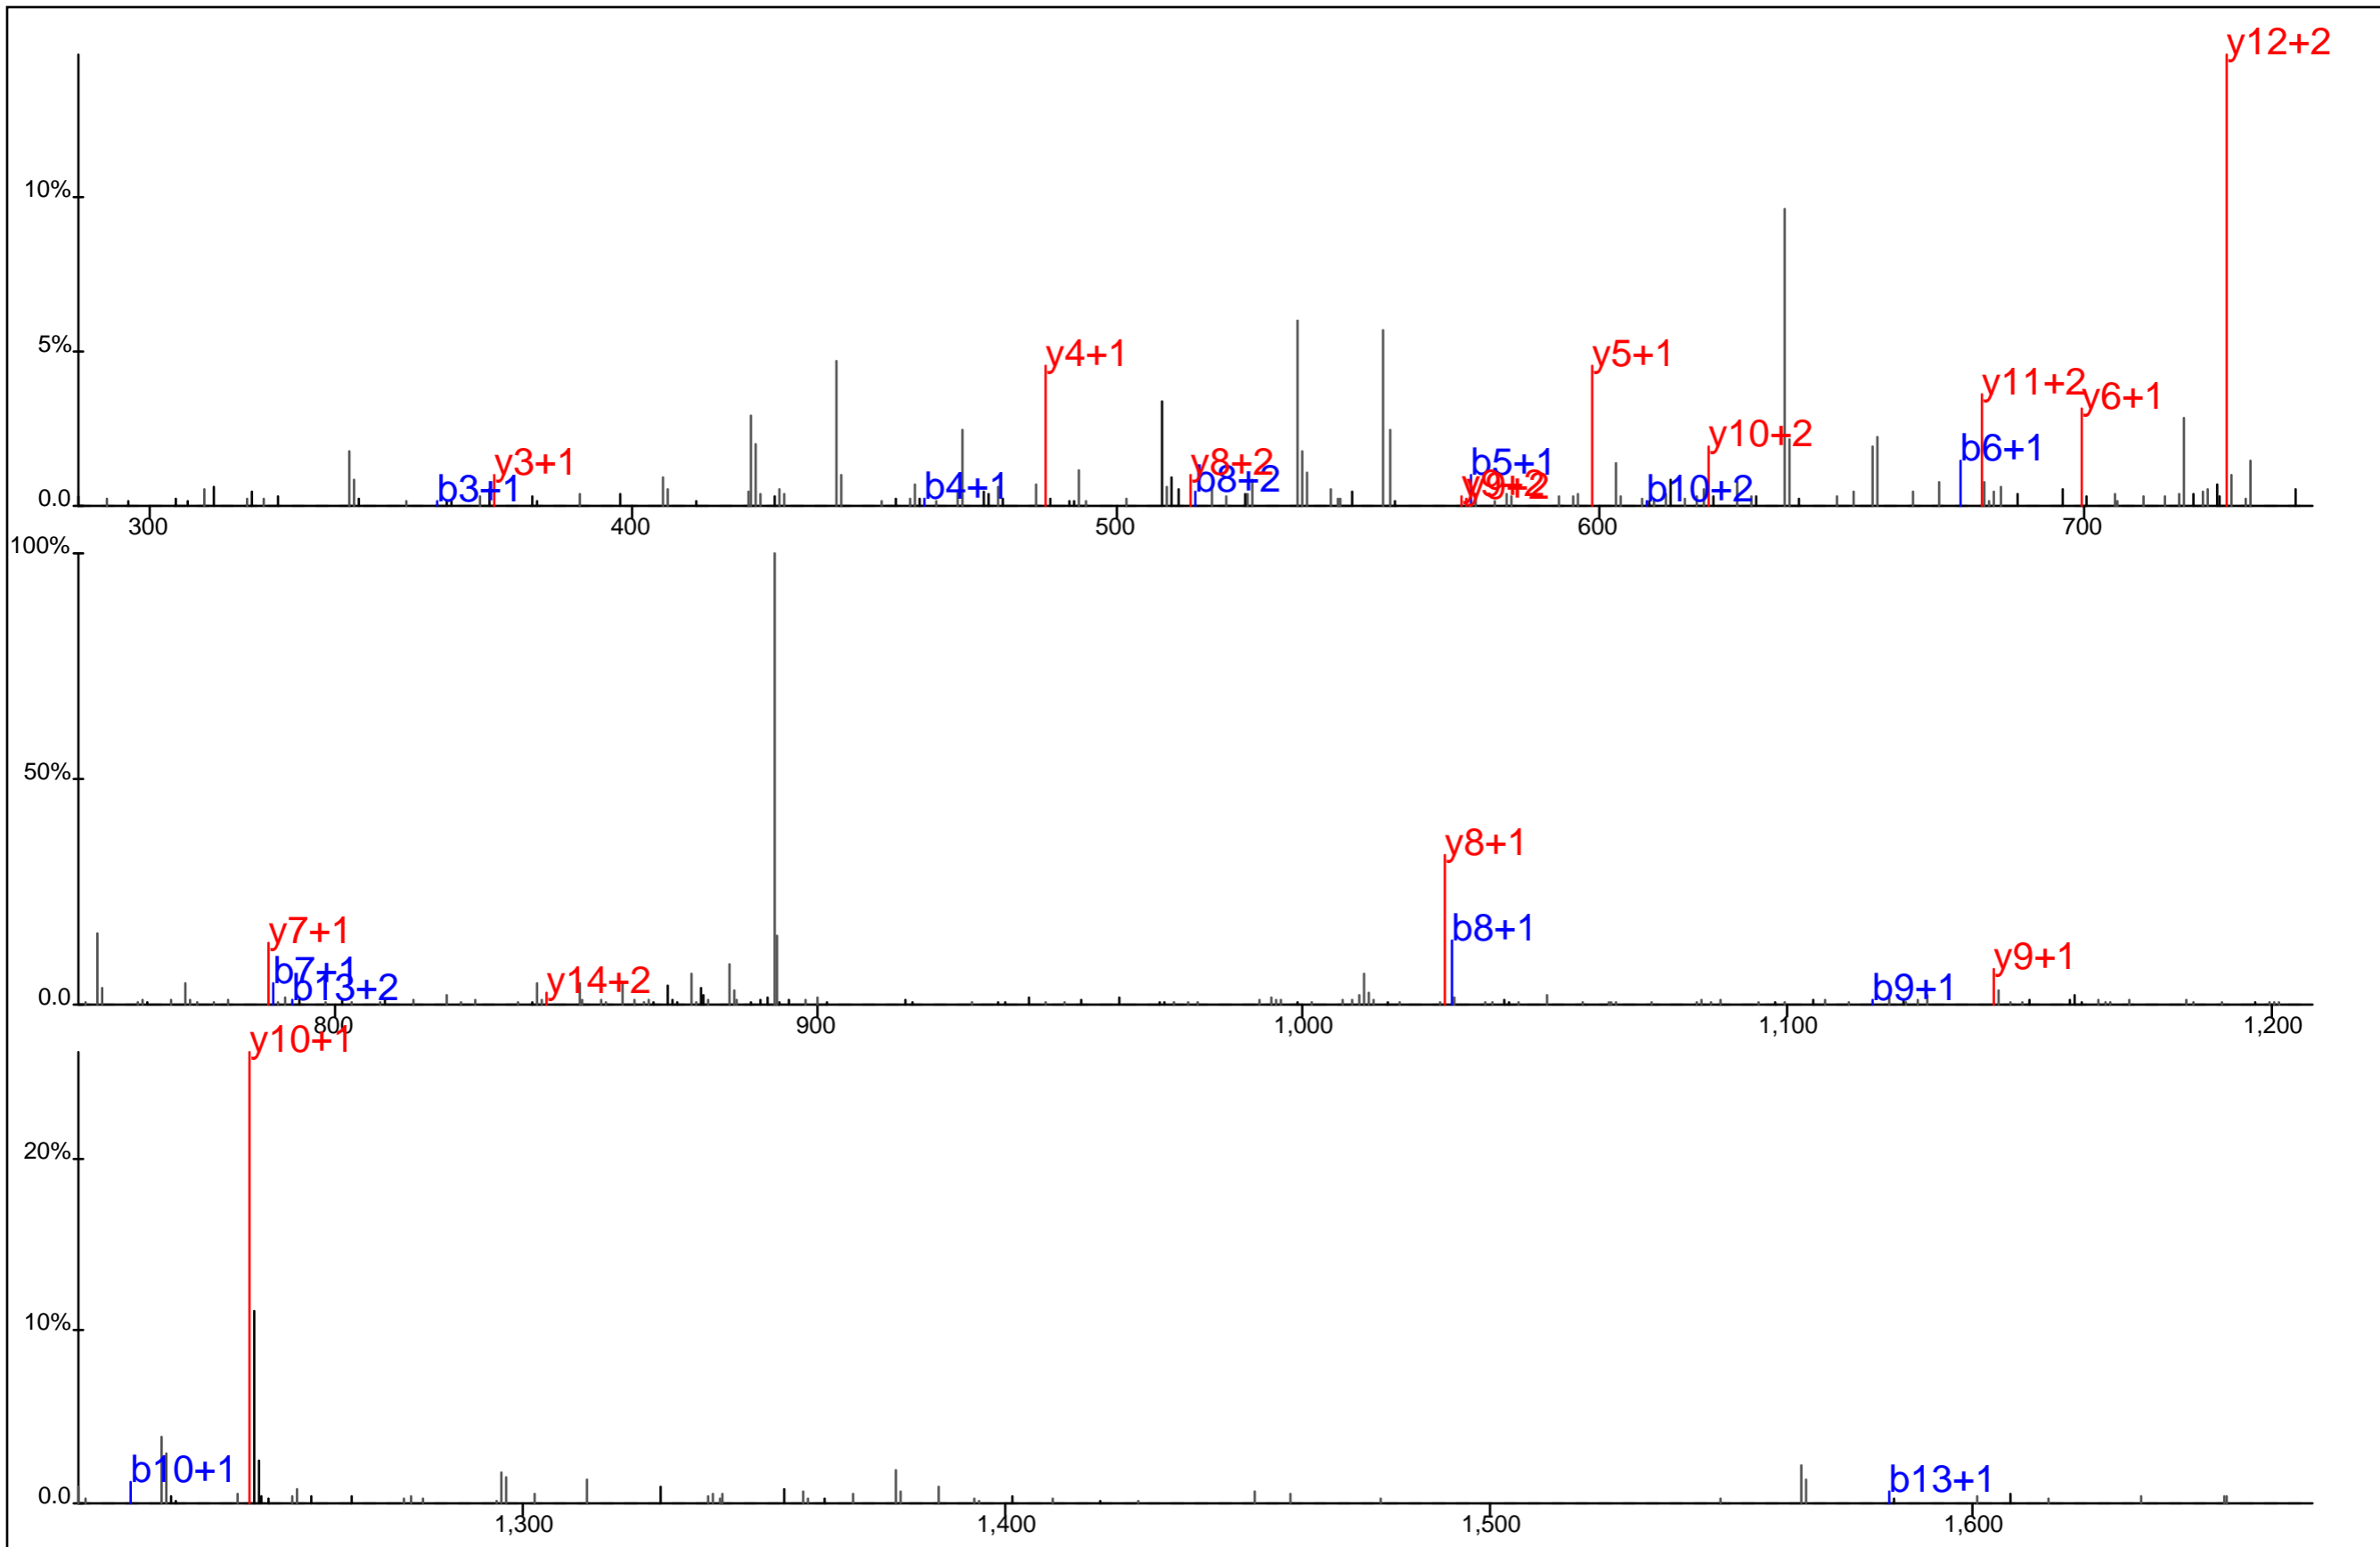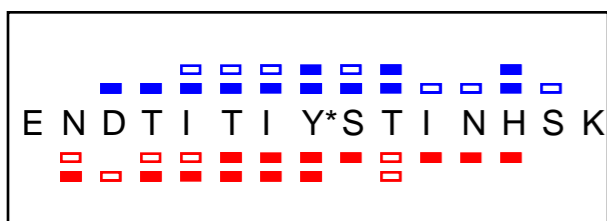

Protein Name: NTBA  
 gi Accession: 15384843  
 Precursor Mass: 908.4108+2  
 Delta Mass: 0.904 ppm  
 XCorr: 33.75

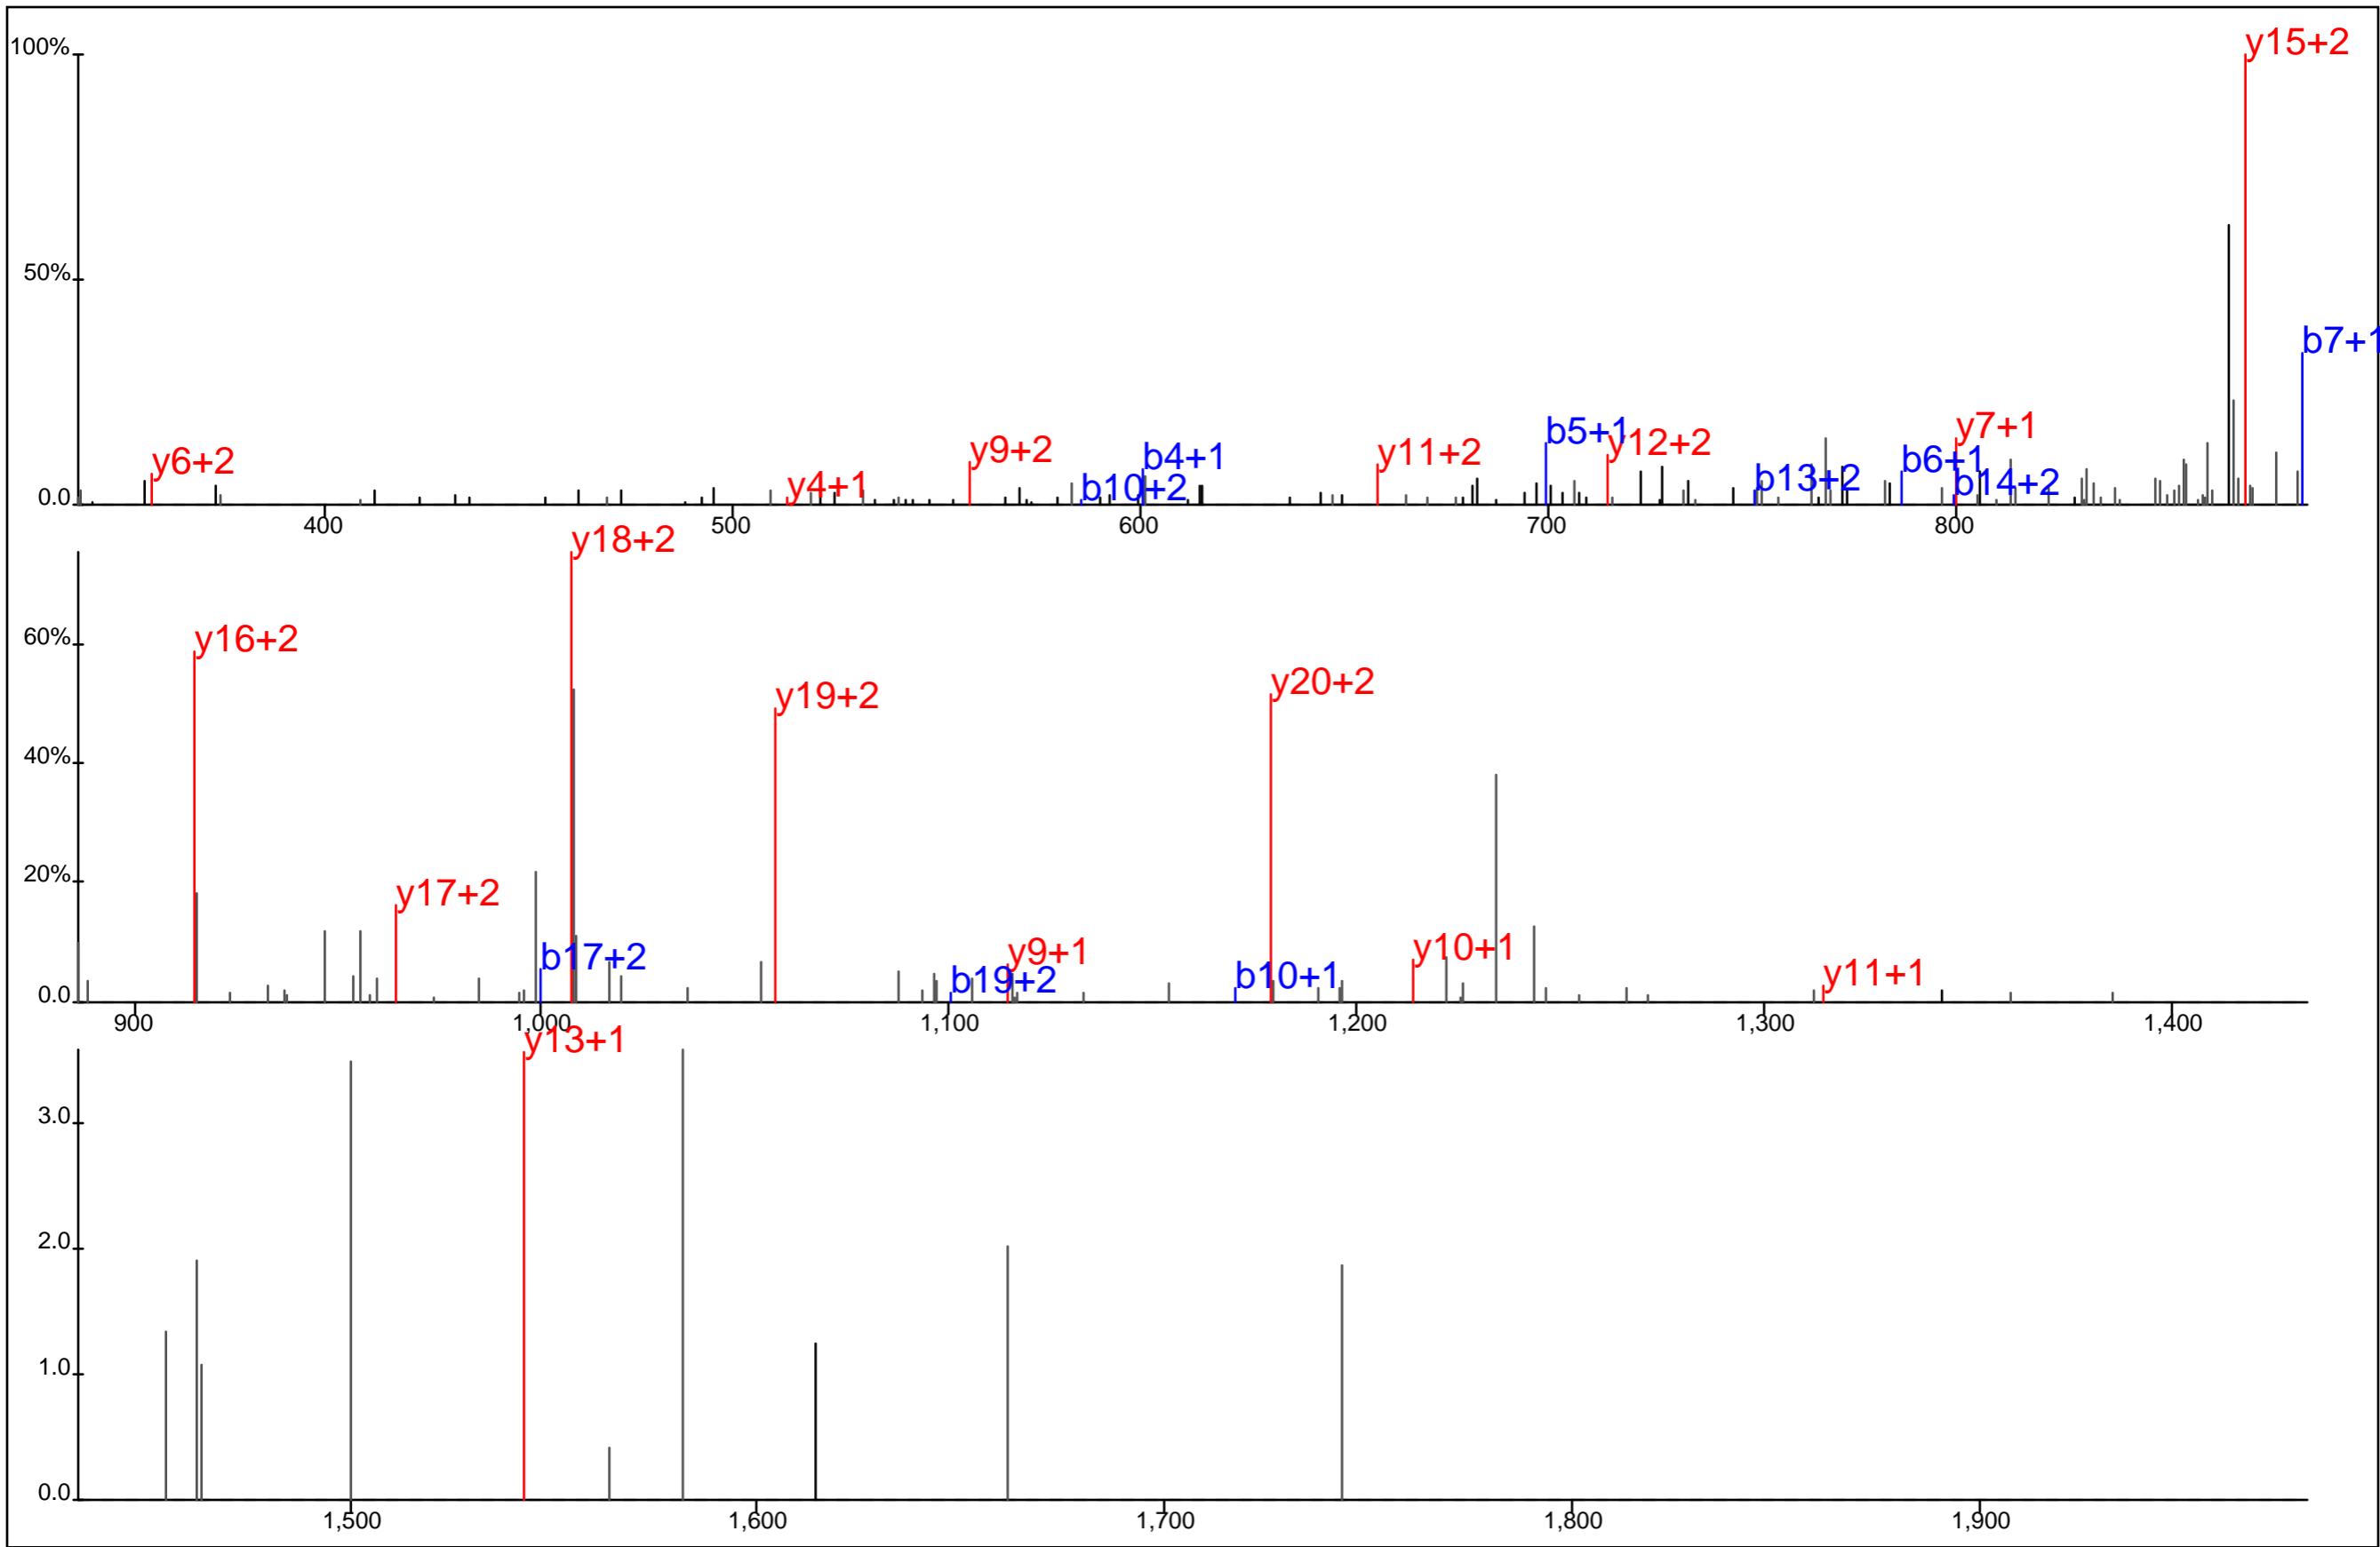

N L E Y\* V S V S P T N N T V Y\* A S V T H S N R

Protein Name: NTBA  
 gi Accession: 15384843  
 Precursor Mass: 904.7297+3  
 Delta Mass: 1.640 ppm  
 XCorr: 44.59

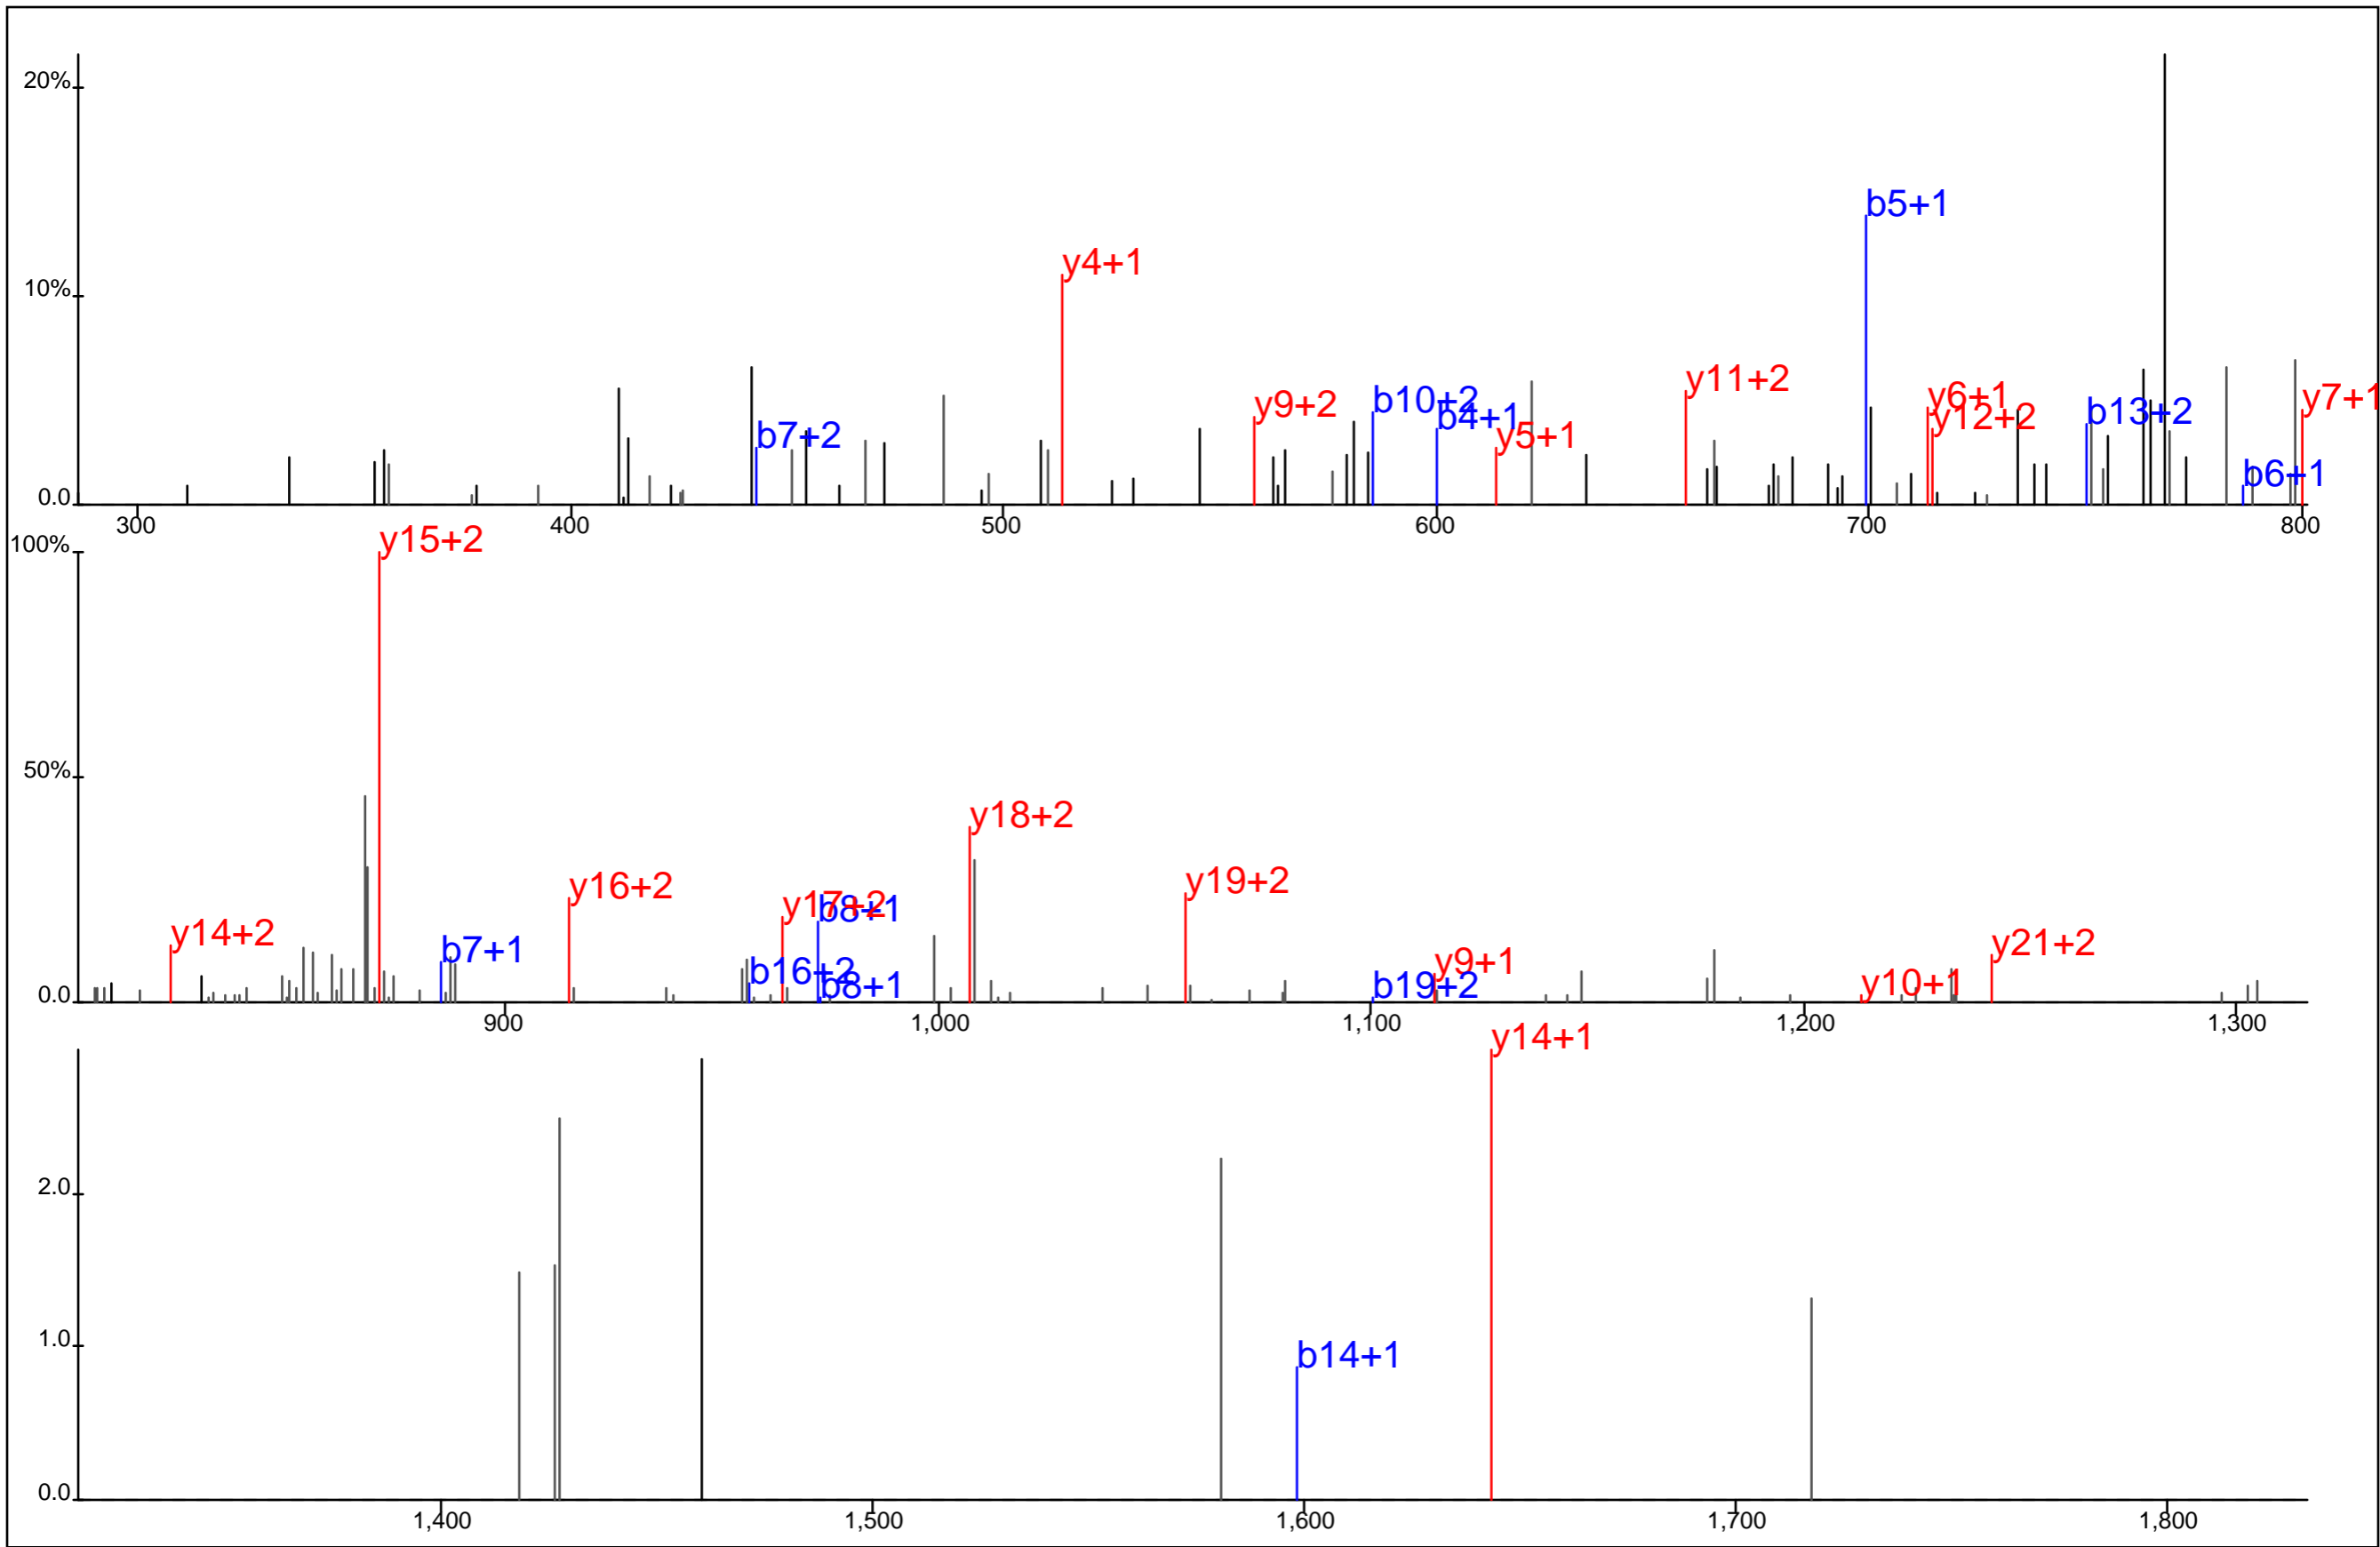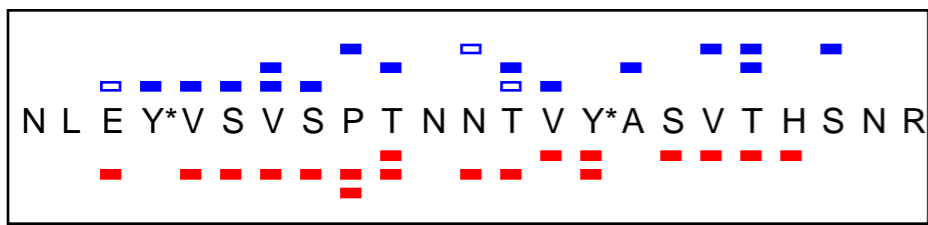

Protein Name: NTBA  
 gi Accession: 15384843  
 Precursor Mass: 904.7270+3  
 Delta Mass: 1.398 ppm  
 XCorr: 45.05





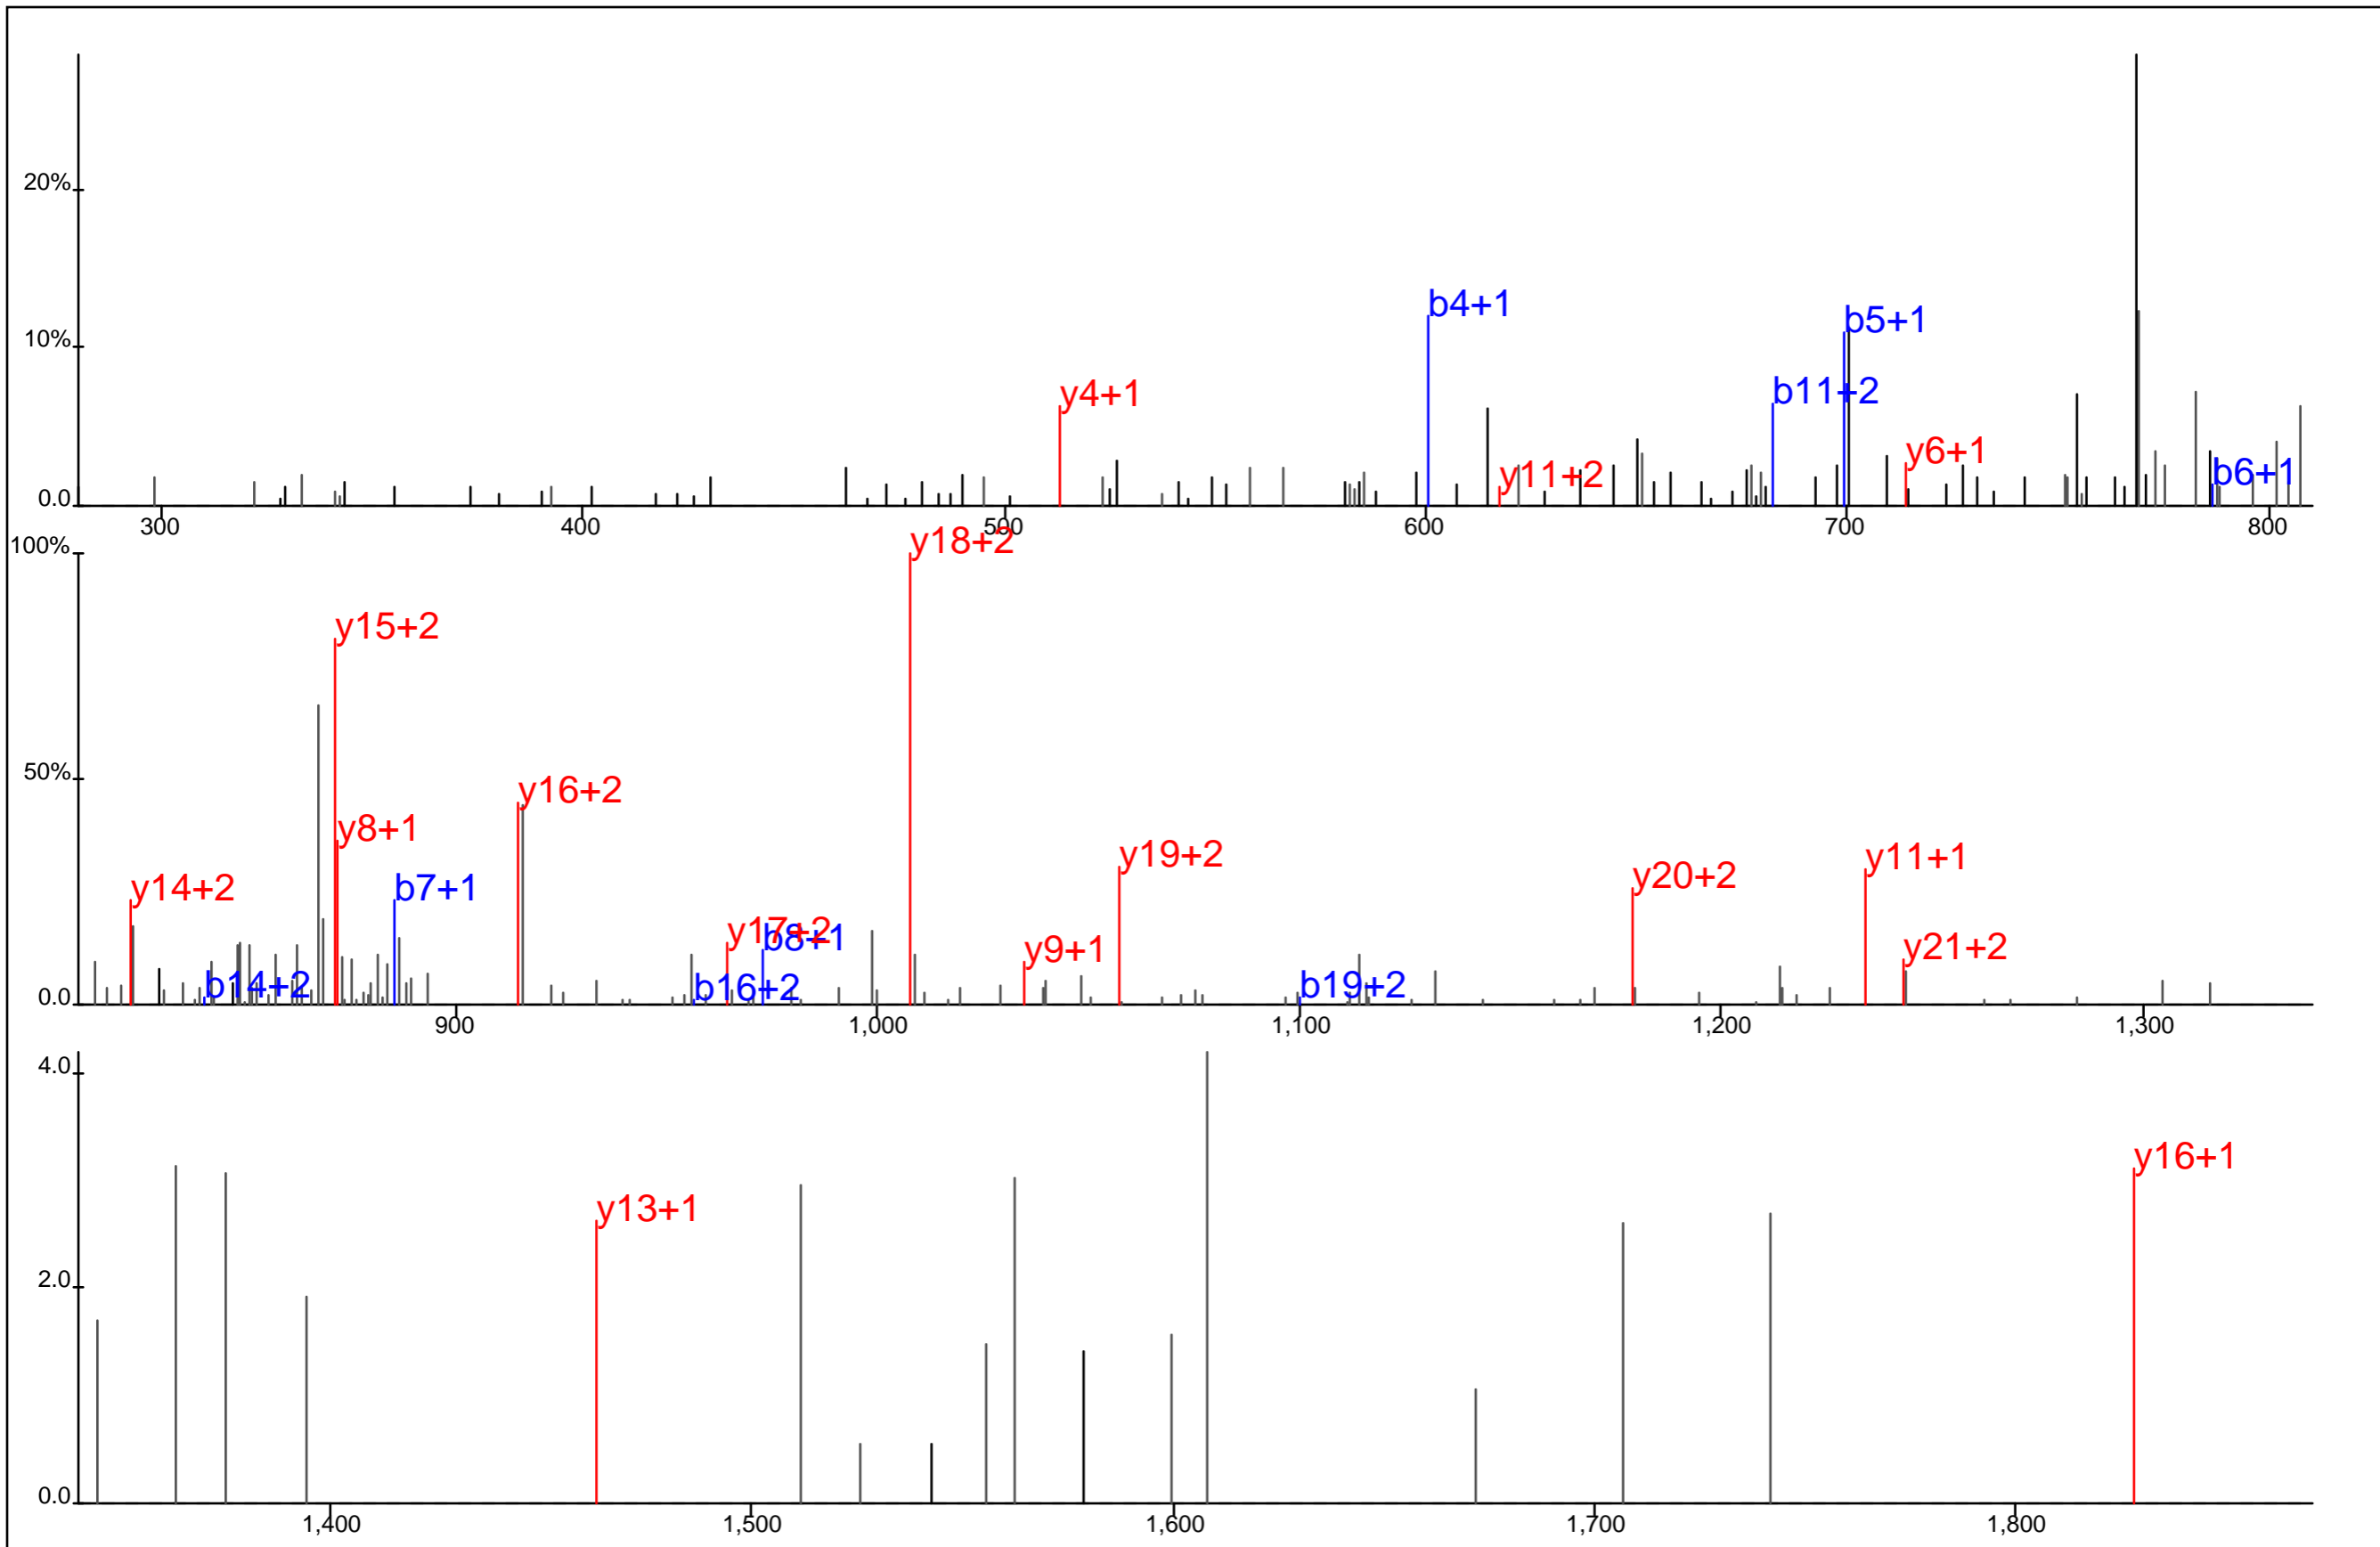

N L E Y\*V S V S P T\* N N T V Y A S V T H S N R  
 (Blue dashed boxes highlight residues Y, V, S, V, S, P, T, N, N, T, V, Y, A, S, V, T, H, S, N, R. Red dashed boxes highlight residues Y, V, S, V, S, P, T, N, N, T, V, Y, A, S, V, T, H, S, N, R.)

Protein Name: NTBA  
 gi Accession: 15384843  
 Precursor Mass: 904.7325+3  
 Delta Mass: 4.745 ppm  
 XCorr: 37.69

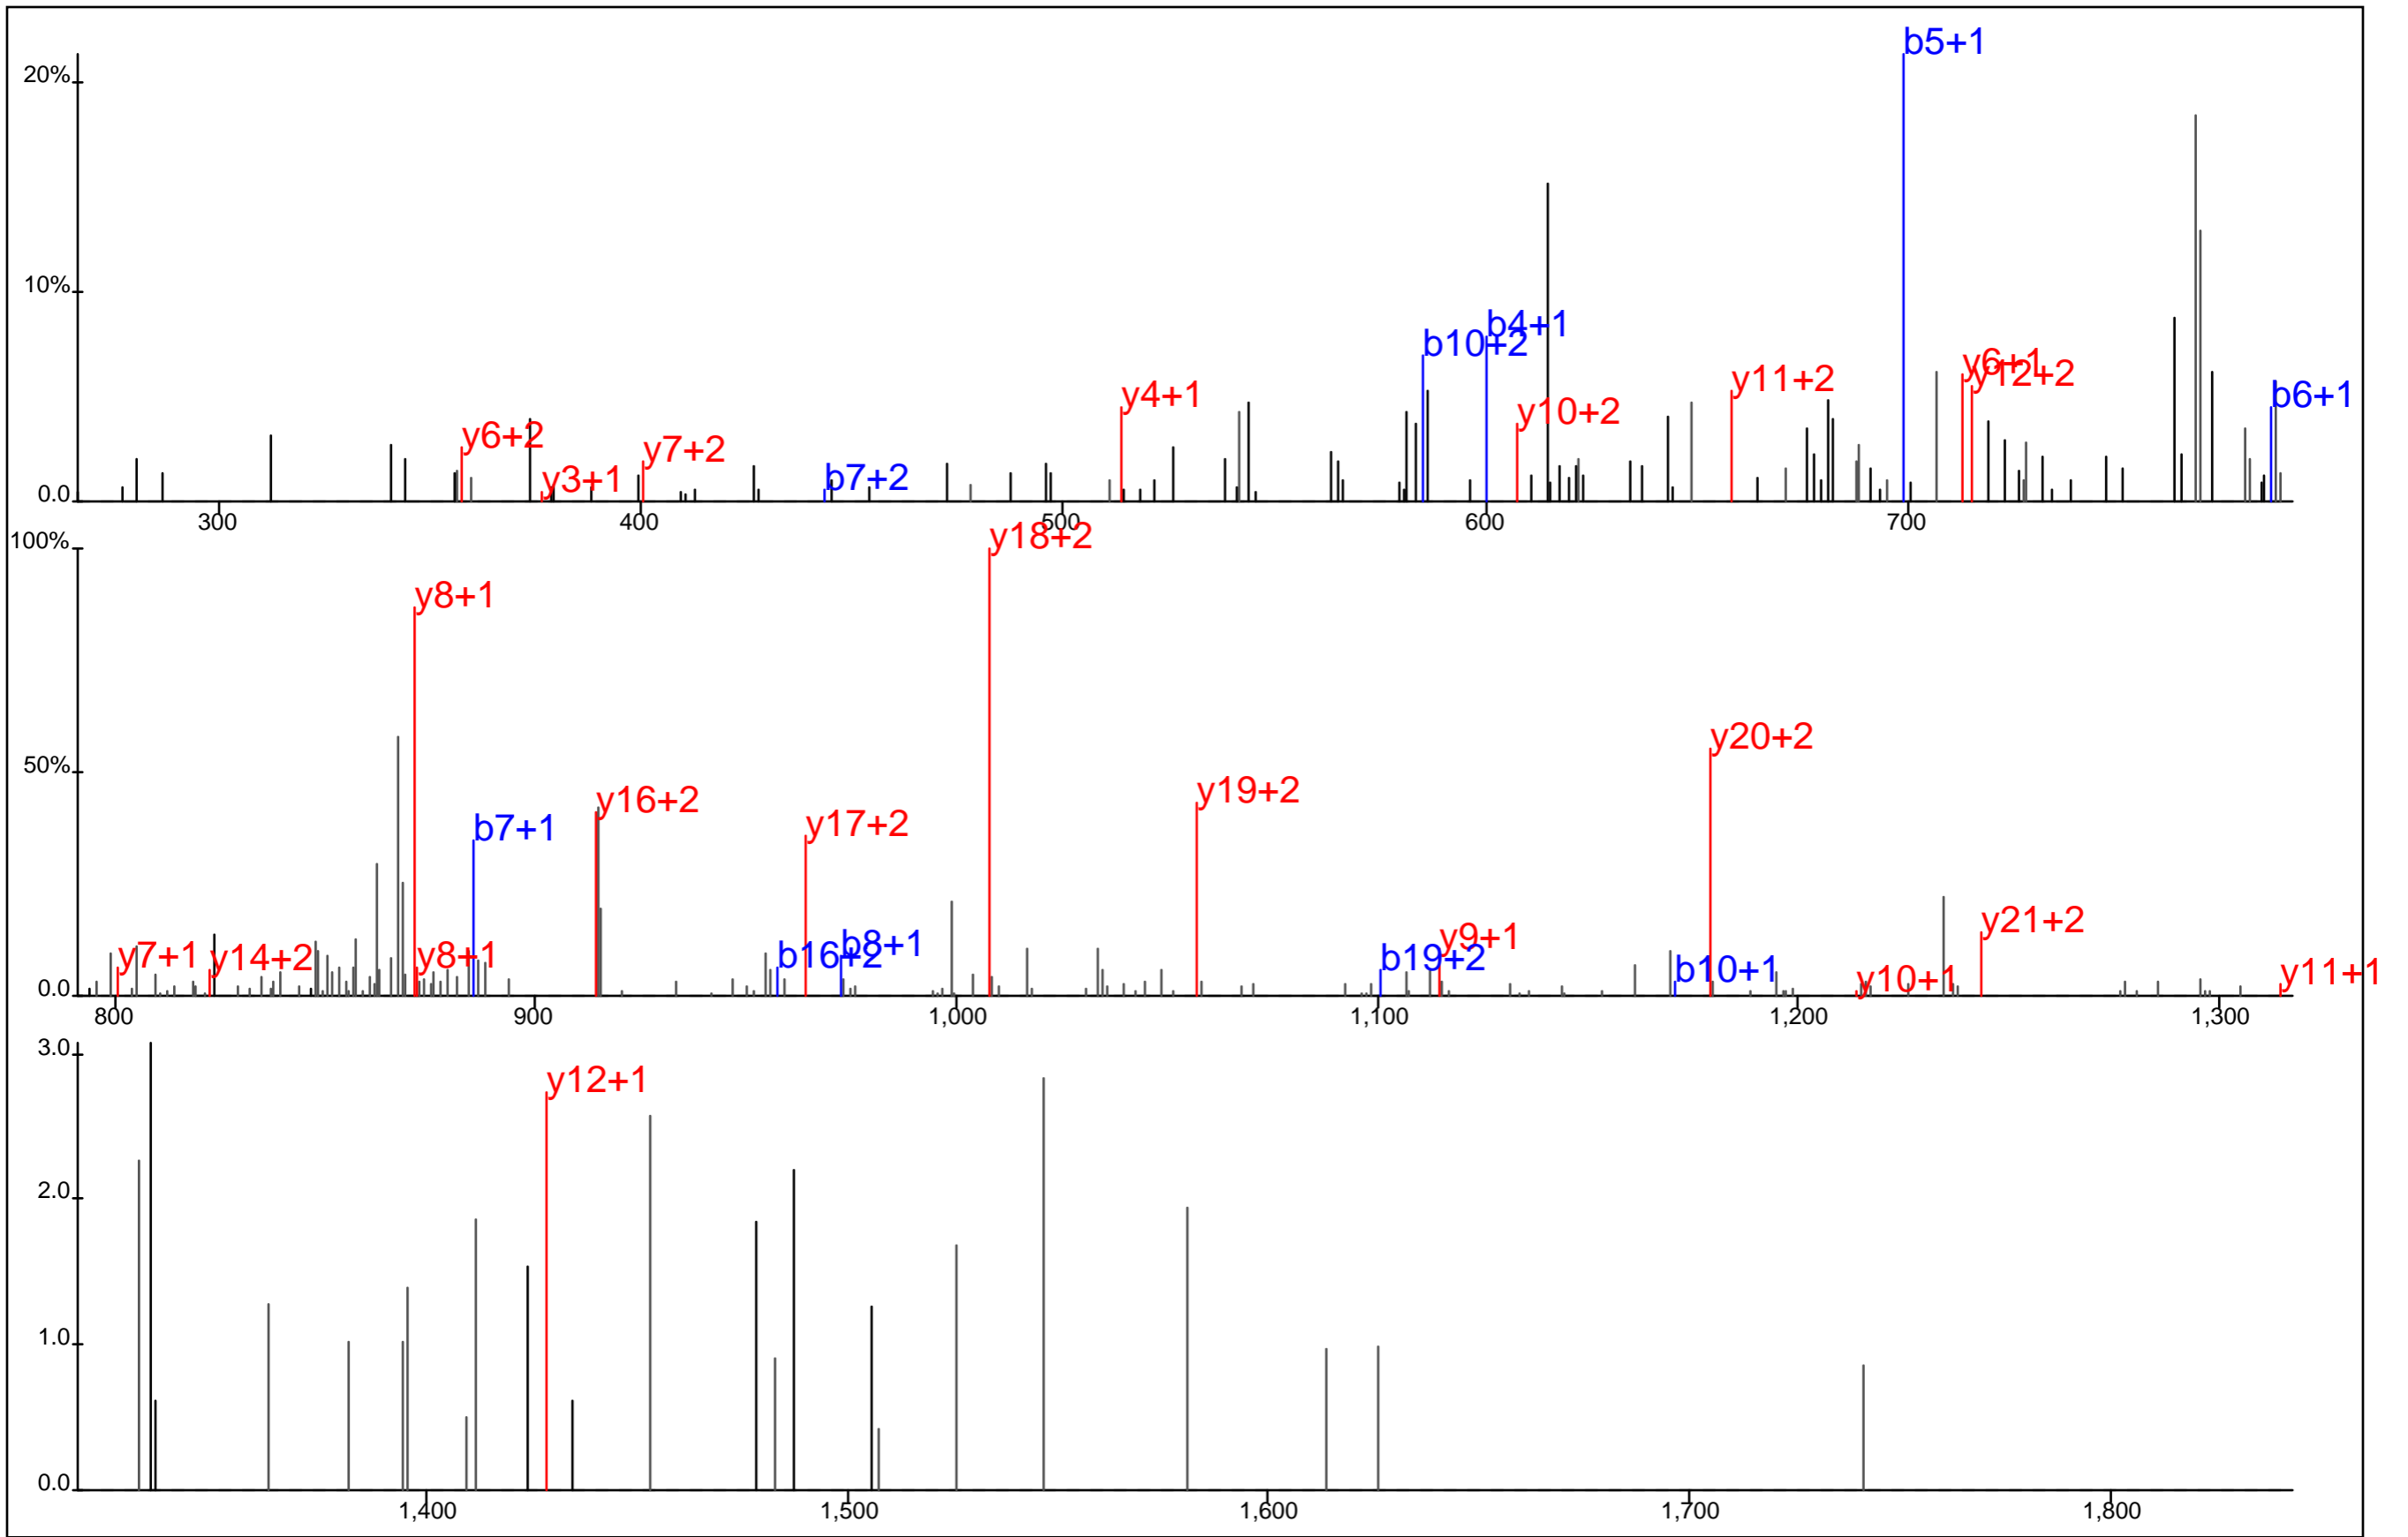

■ ■  
 N L E Y\*V S V S P T N N T V Y\*A S V T H S N R  
■

Protein Name: NTBA  
 gi Accession: 15384843  
 Precursor Mass: 904.7280+3  
 Delta Mass: 0.252 ppm  
 XCorr: 49.13

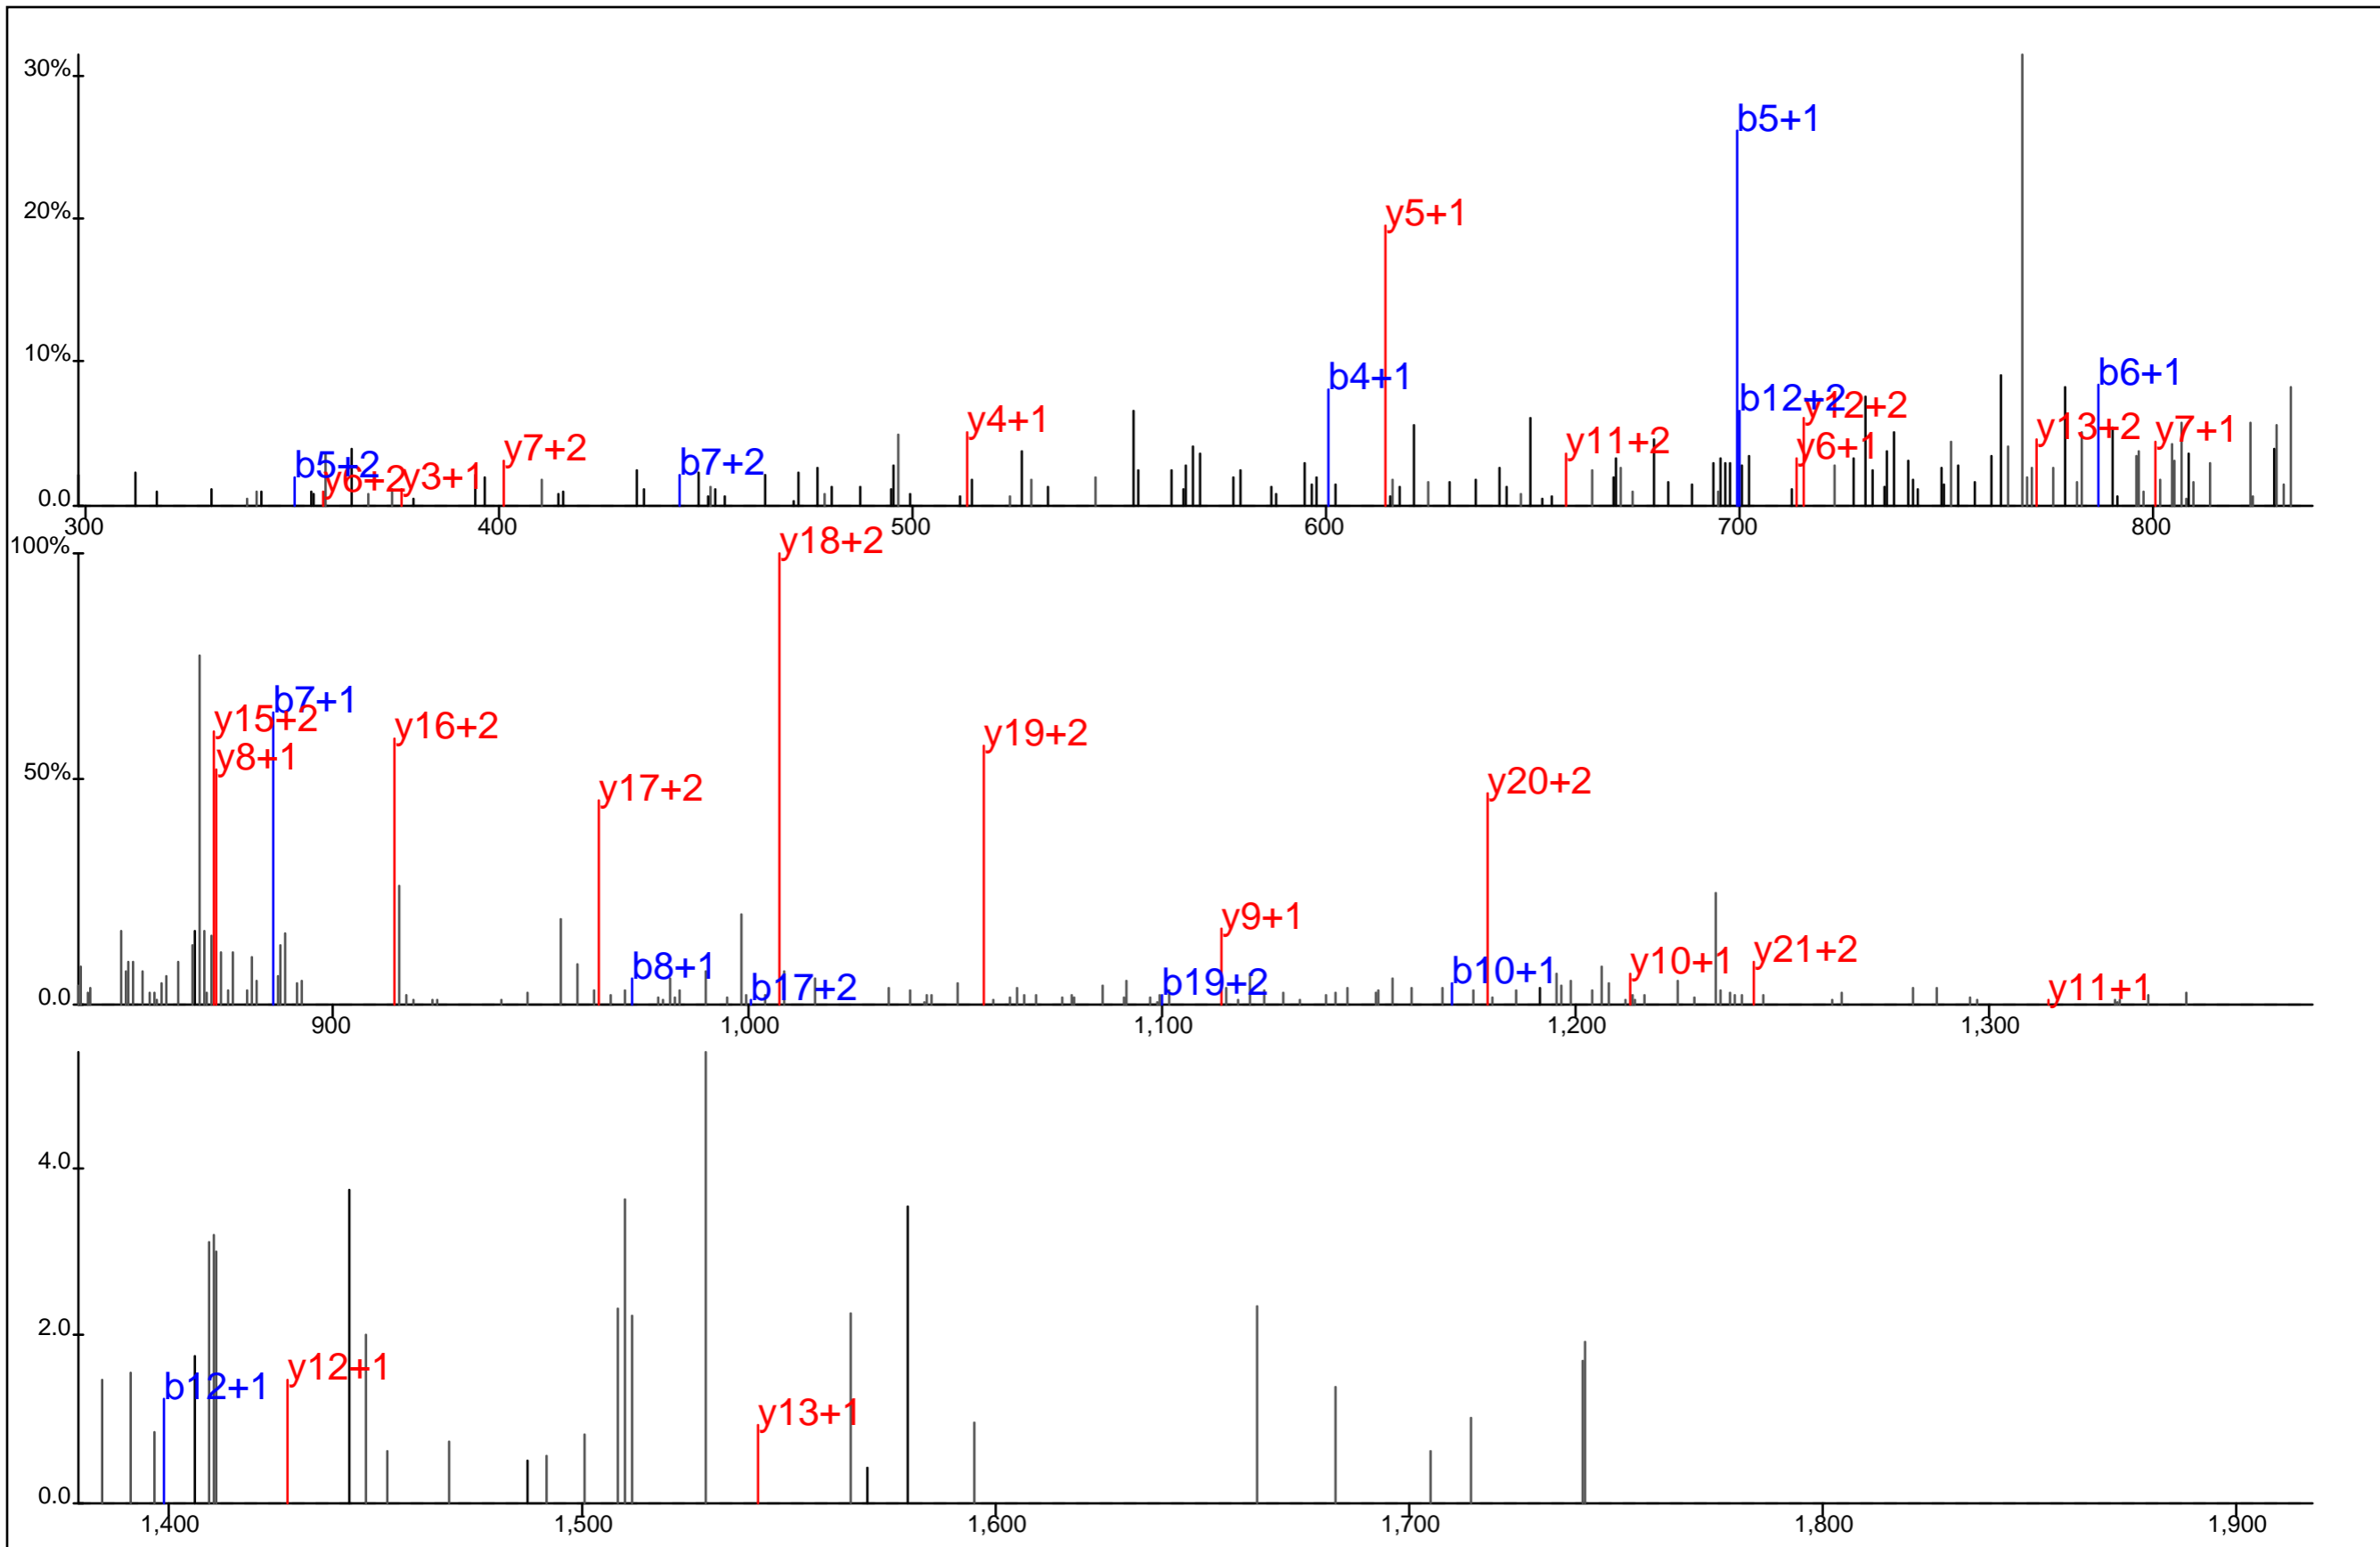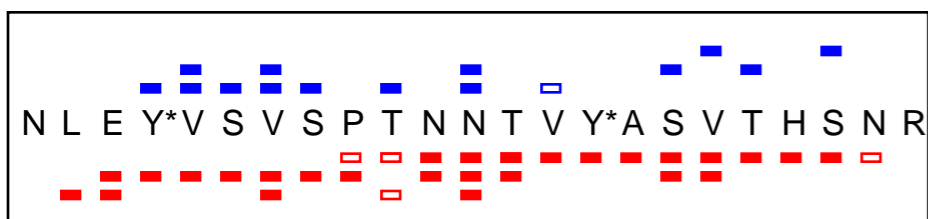

Protein Name: NTBA  
 gi Accession: 15384843  
 Precursor Mass: 904.7315+3  
 Delta Mass: 3.597 ppm  
 XCorr: 42.89

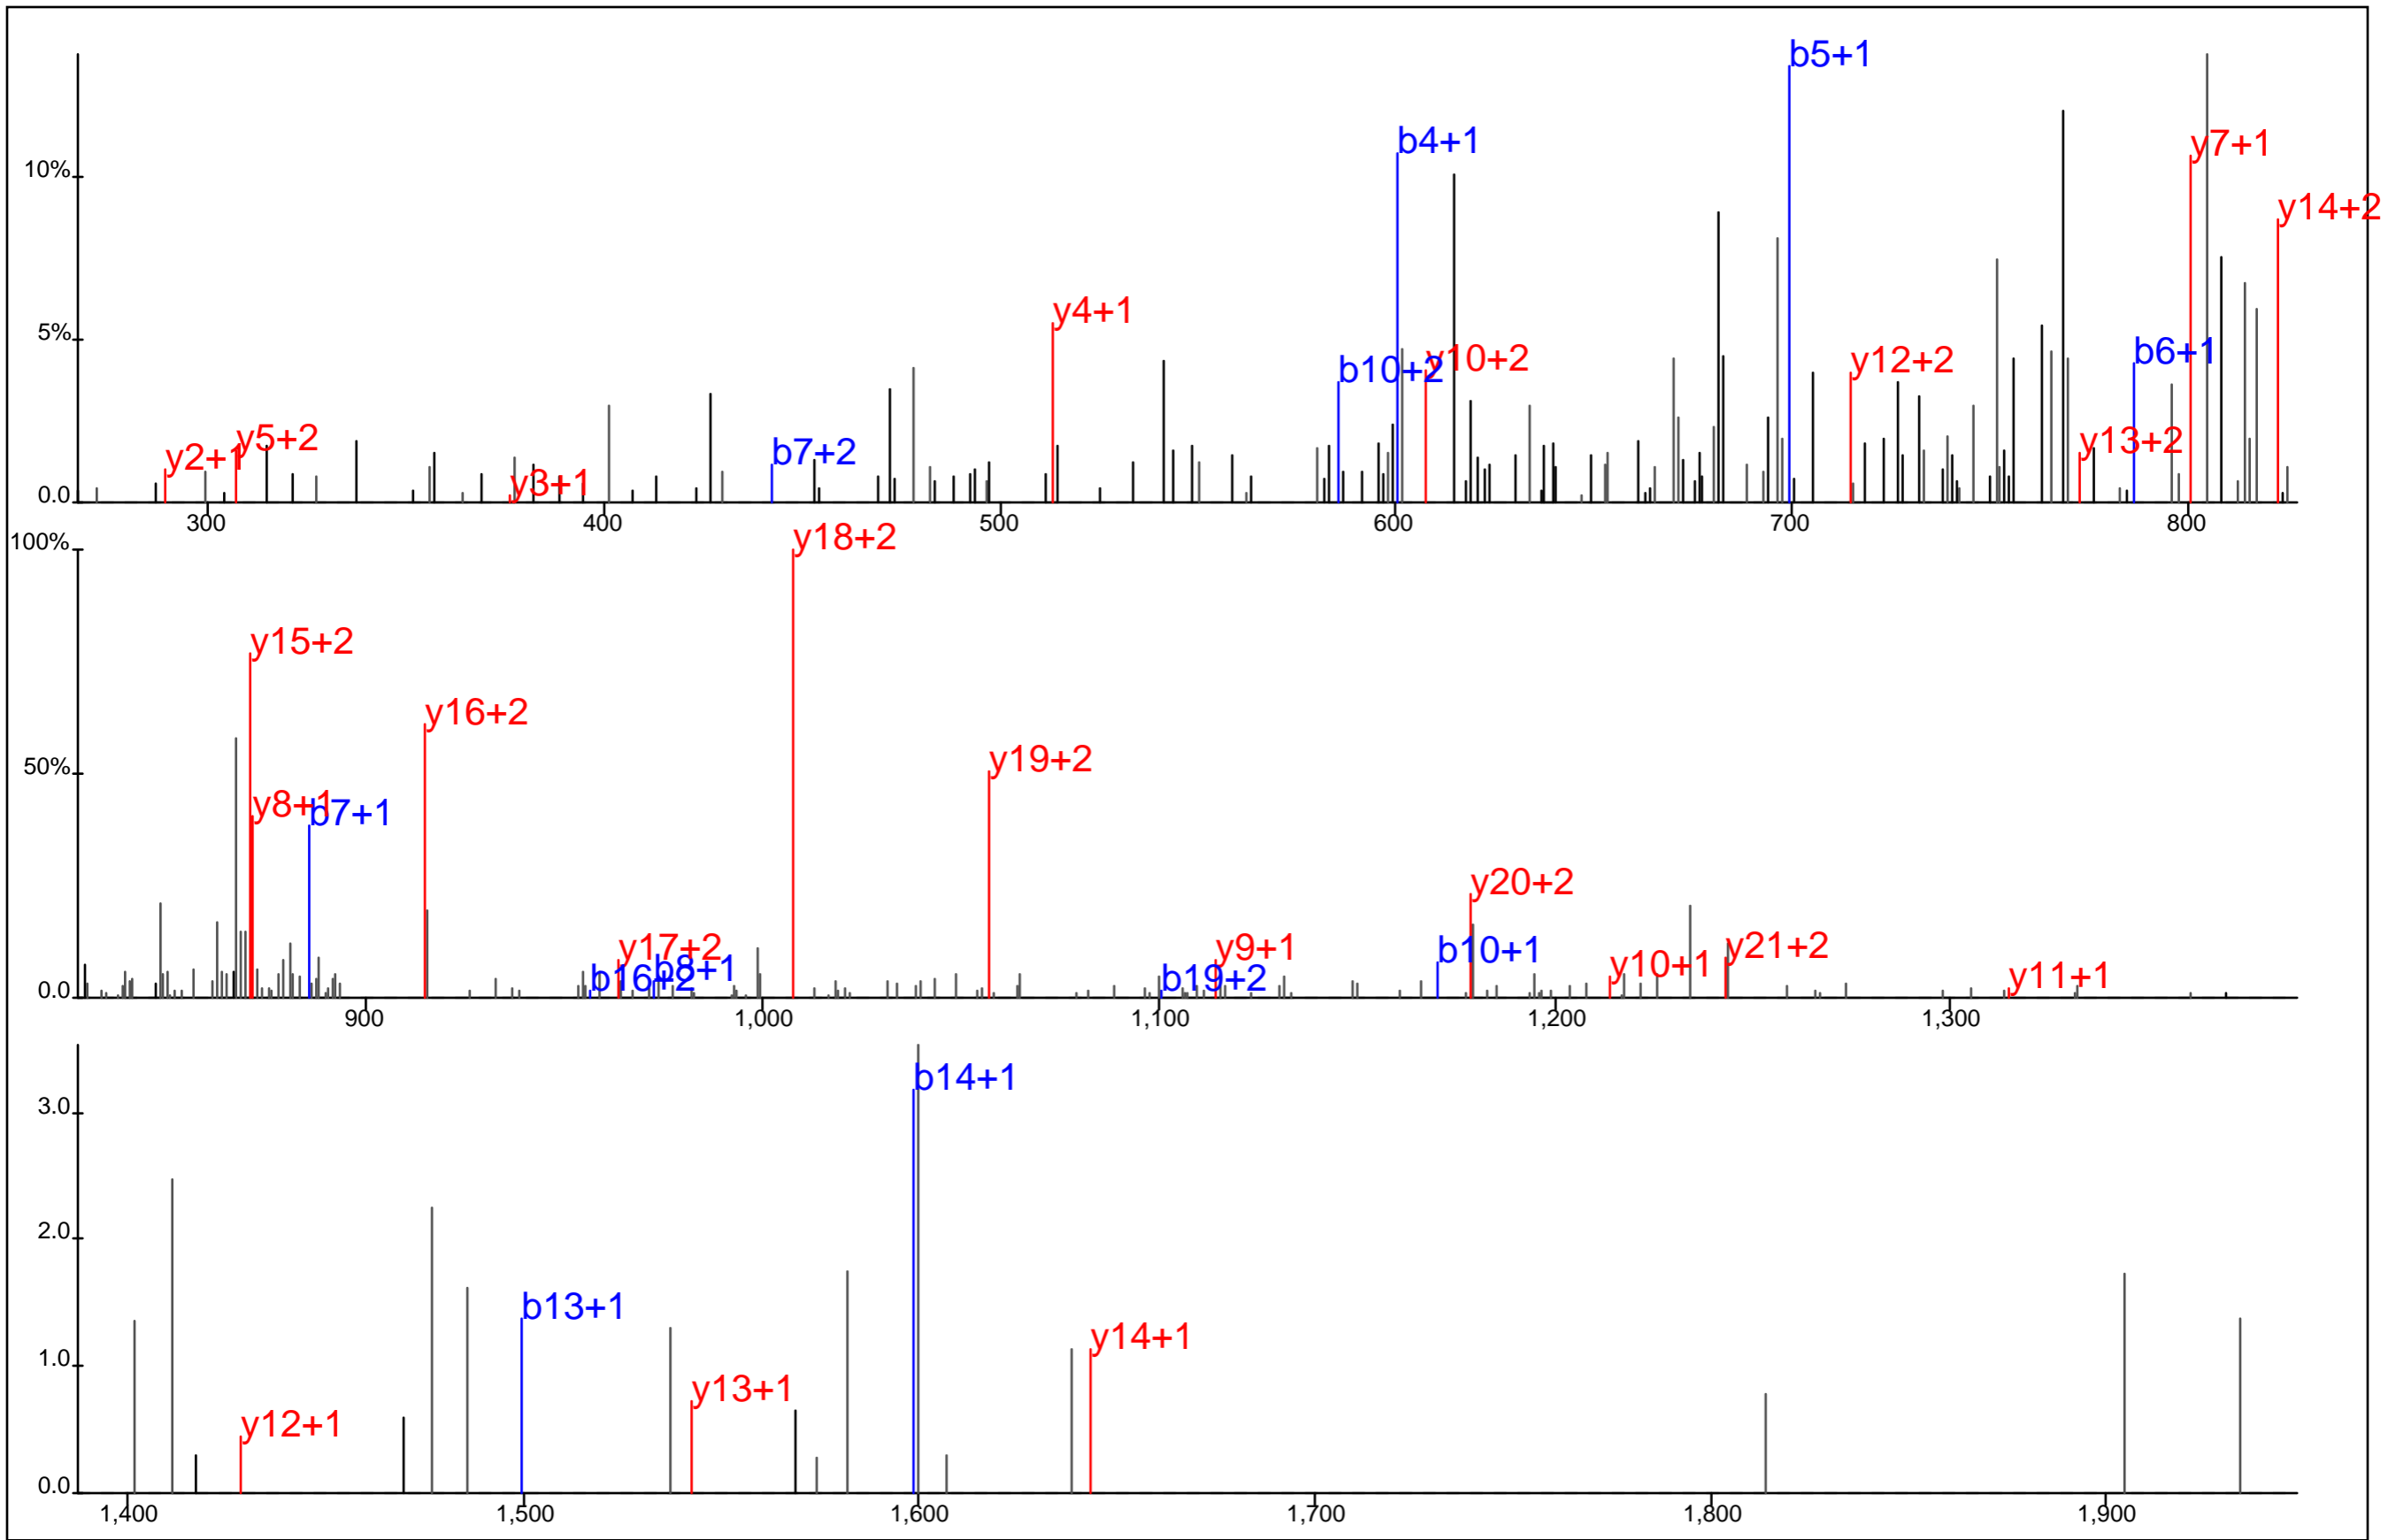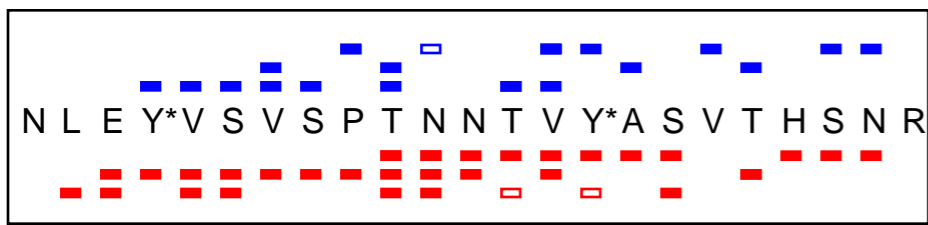

Protein Name: NTBA  
 gi Accession: 15384843  
 Precursor Mass: 904.7294+3  
 Delta Mass: 1.235 ppm  
 XCorr: 58.01



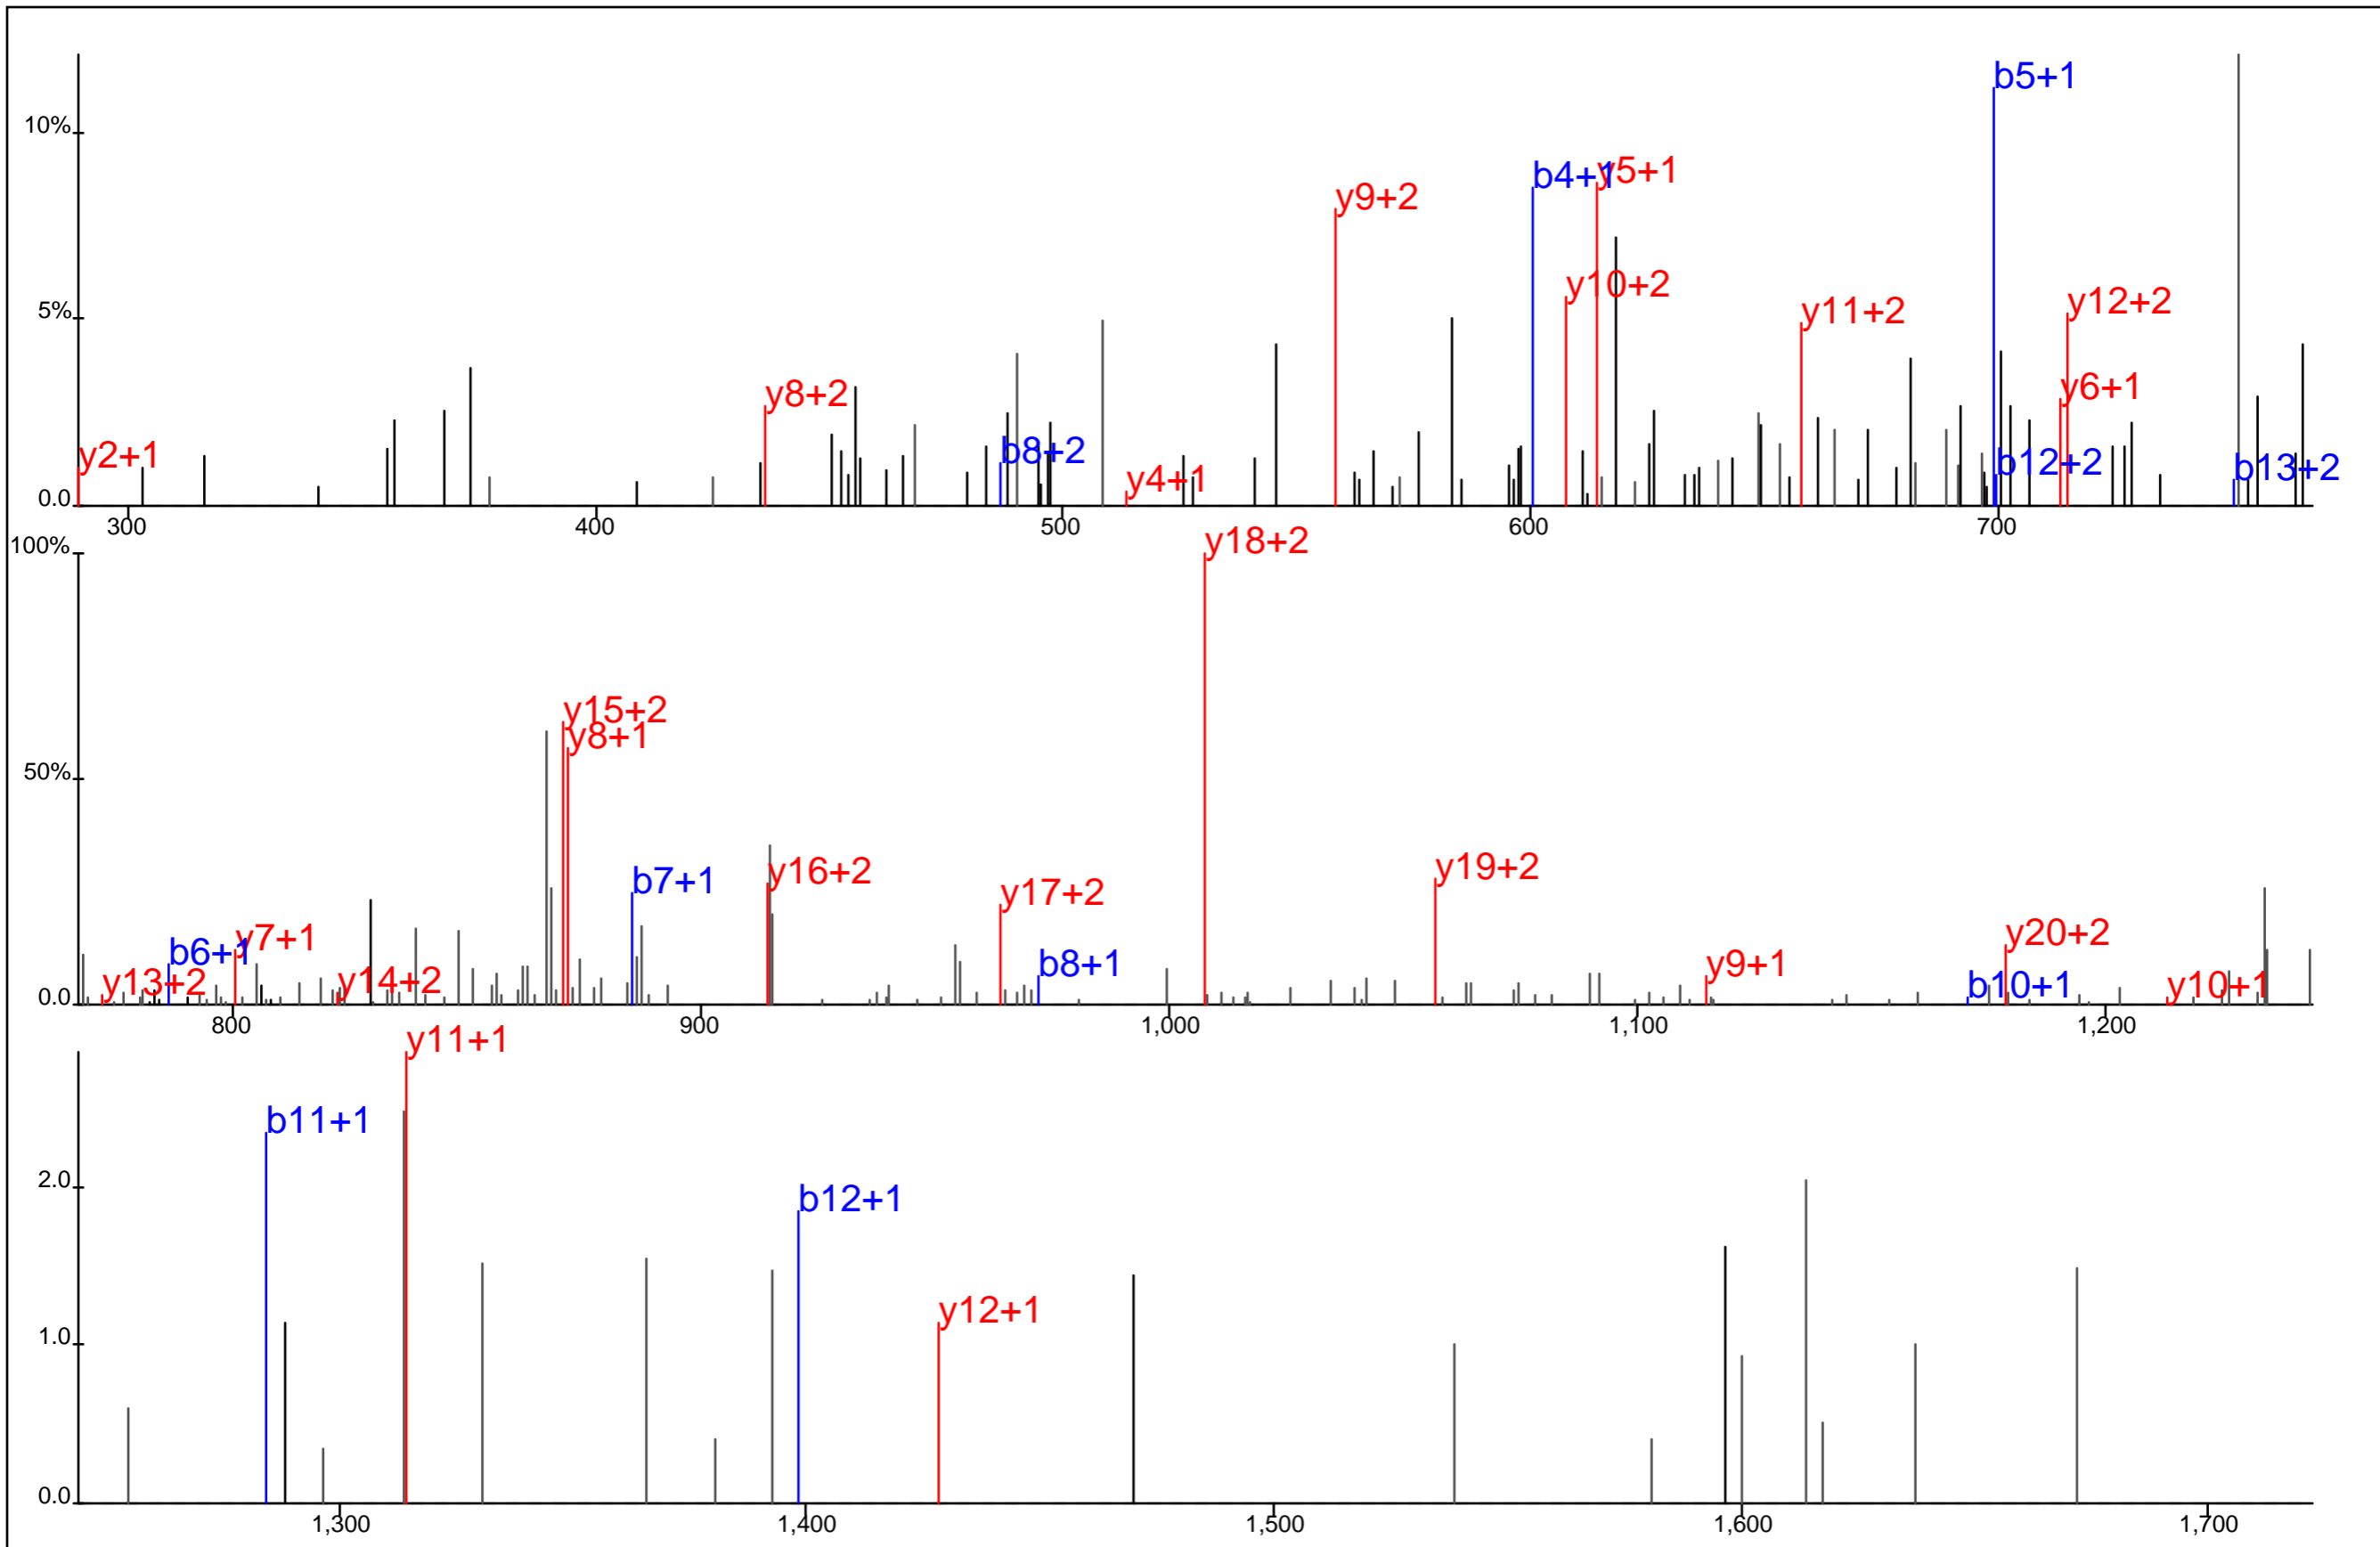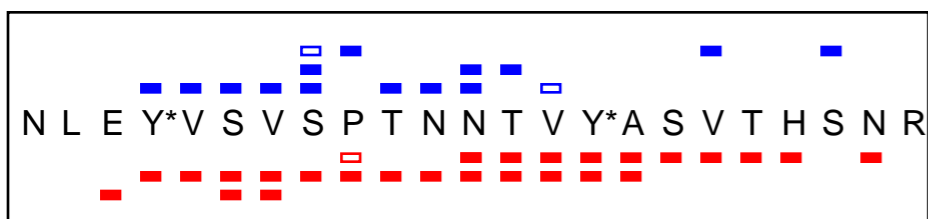

Protein Name: NTBA  
 gi Accession: 15384843  
 Precursor Mass: 904.7315+3  
 Delta Mass: 3.597 ppm  
 XCorr: 56.27

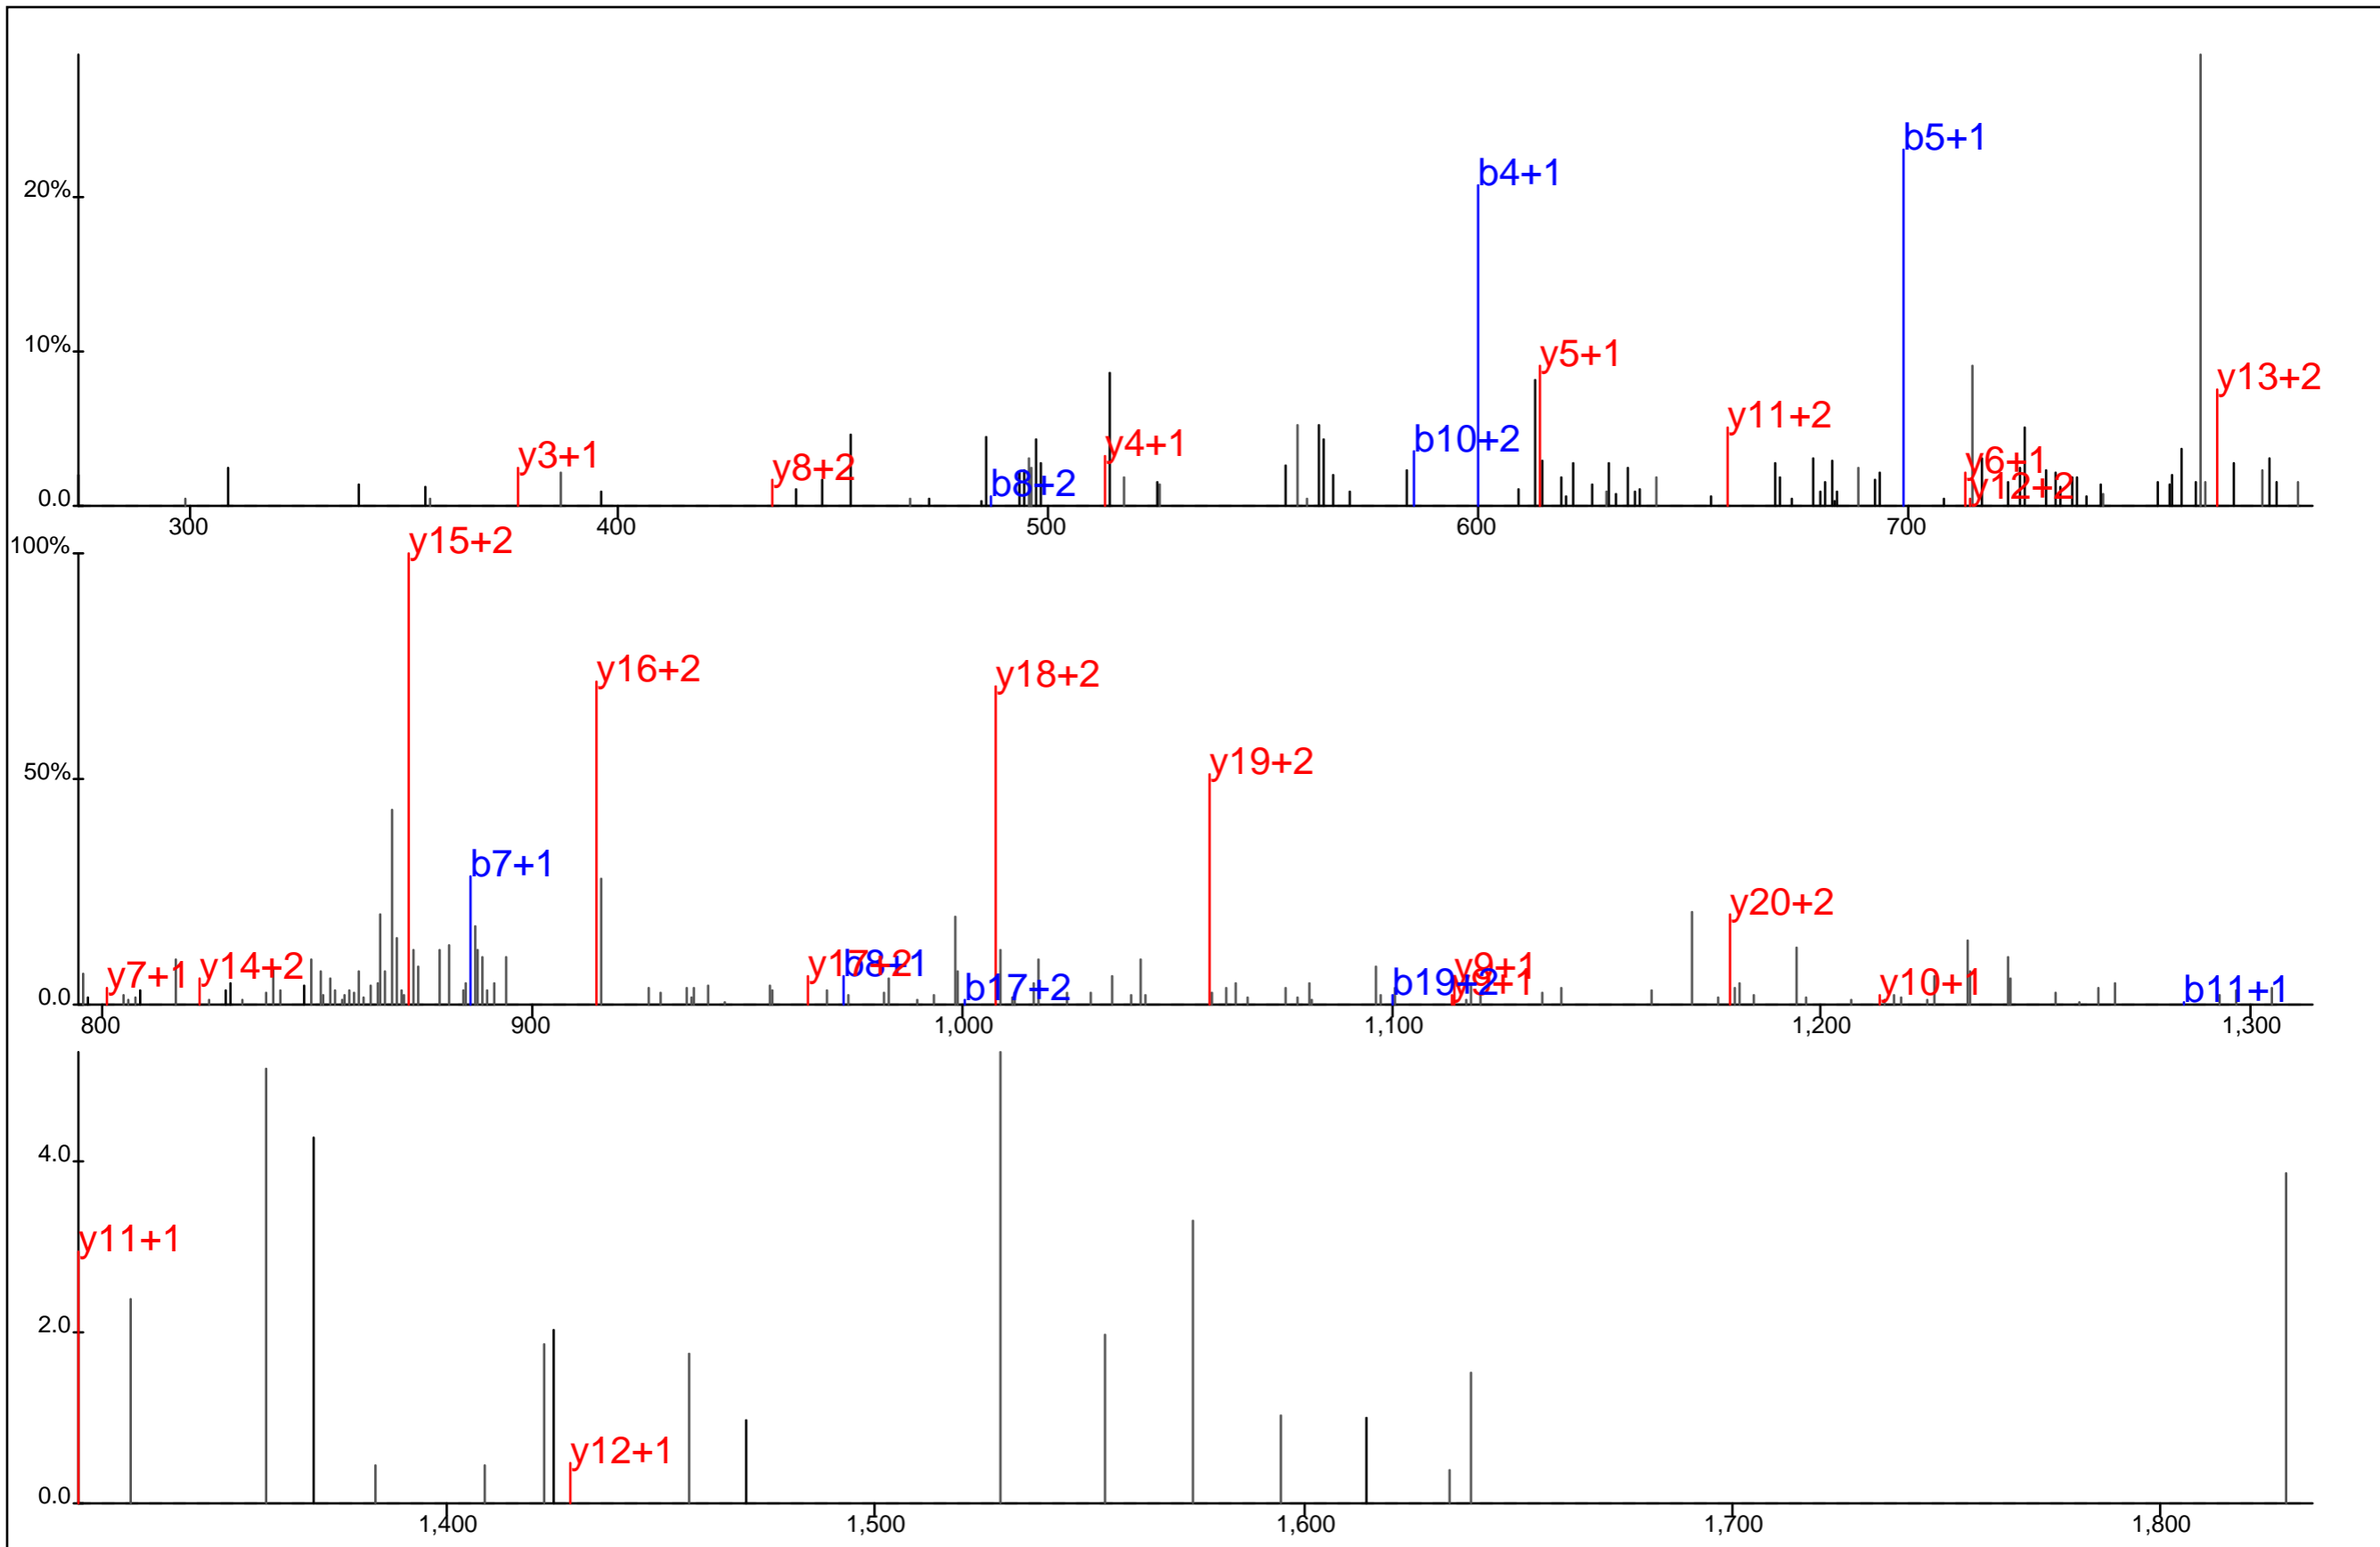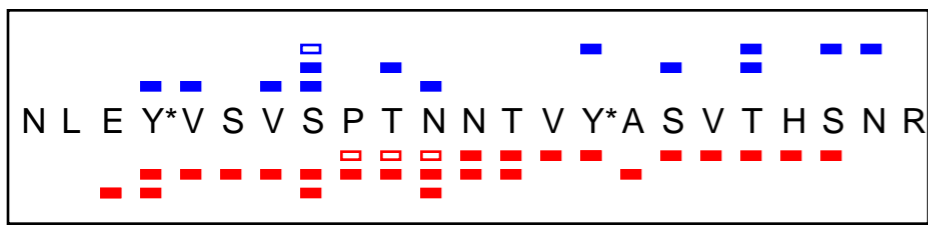

Protein Name: NTBA  
 gi Accession: 15384843  
 Precursor Mass: 904.7326+3  
 Delta Mass: 4.811 ppm  
 XCorr: 26.32



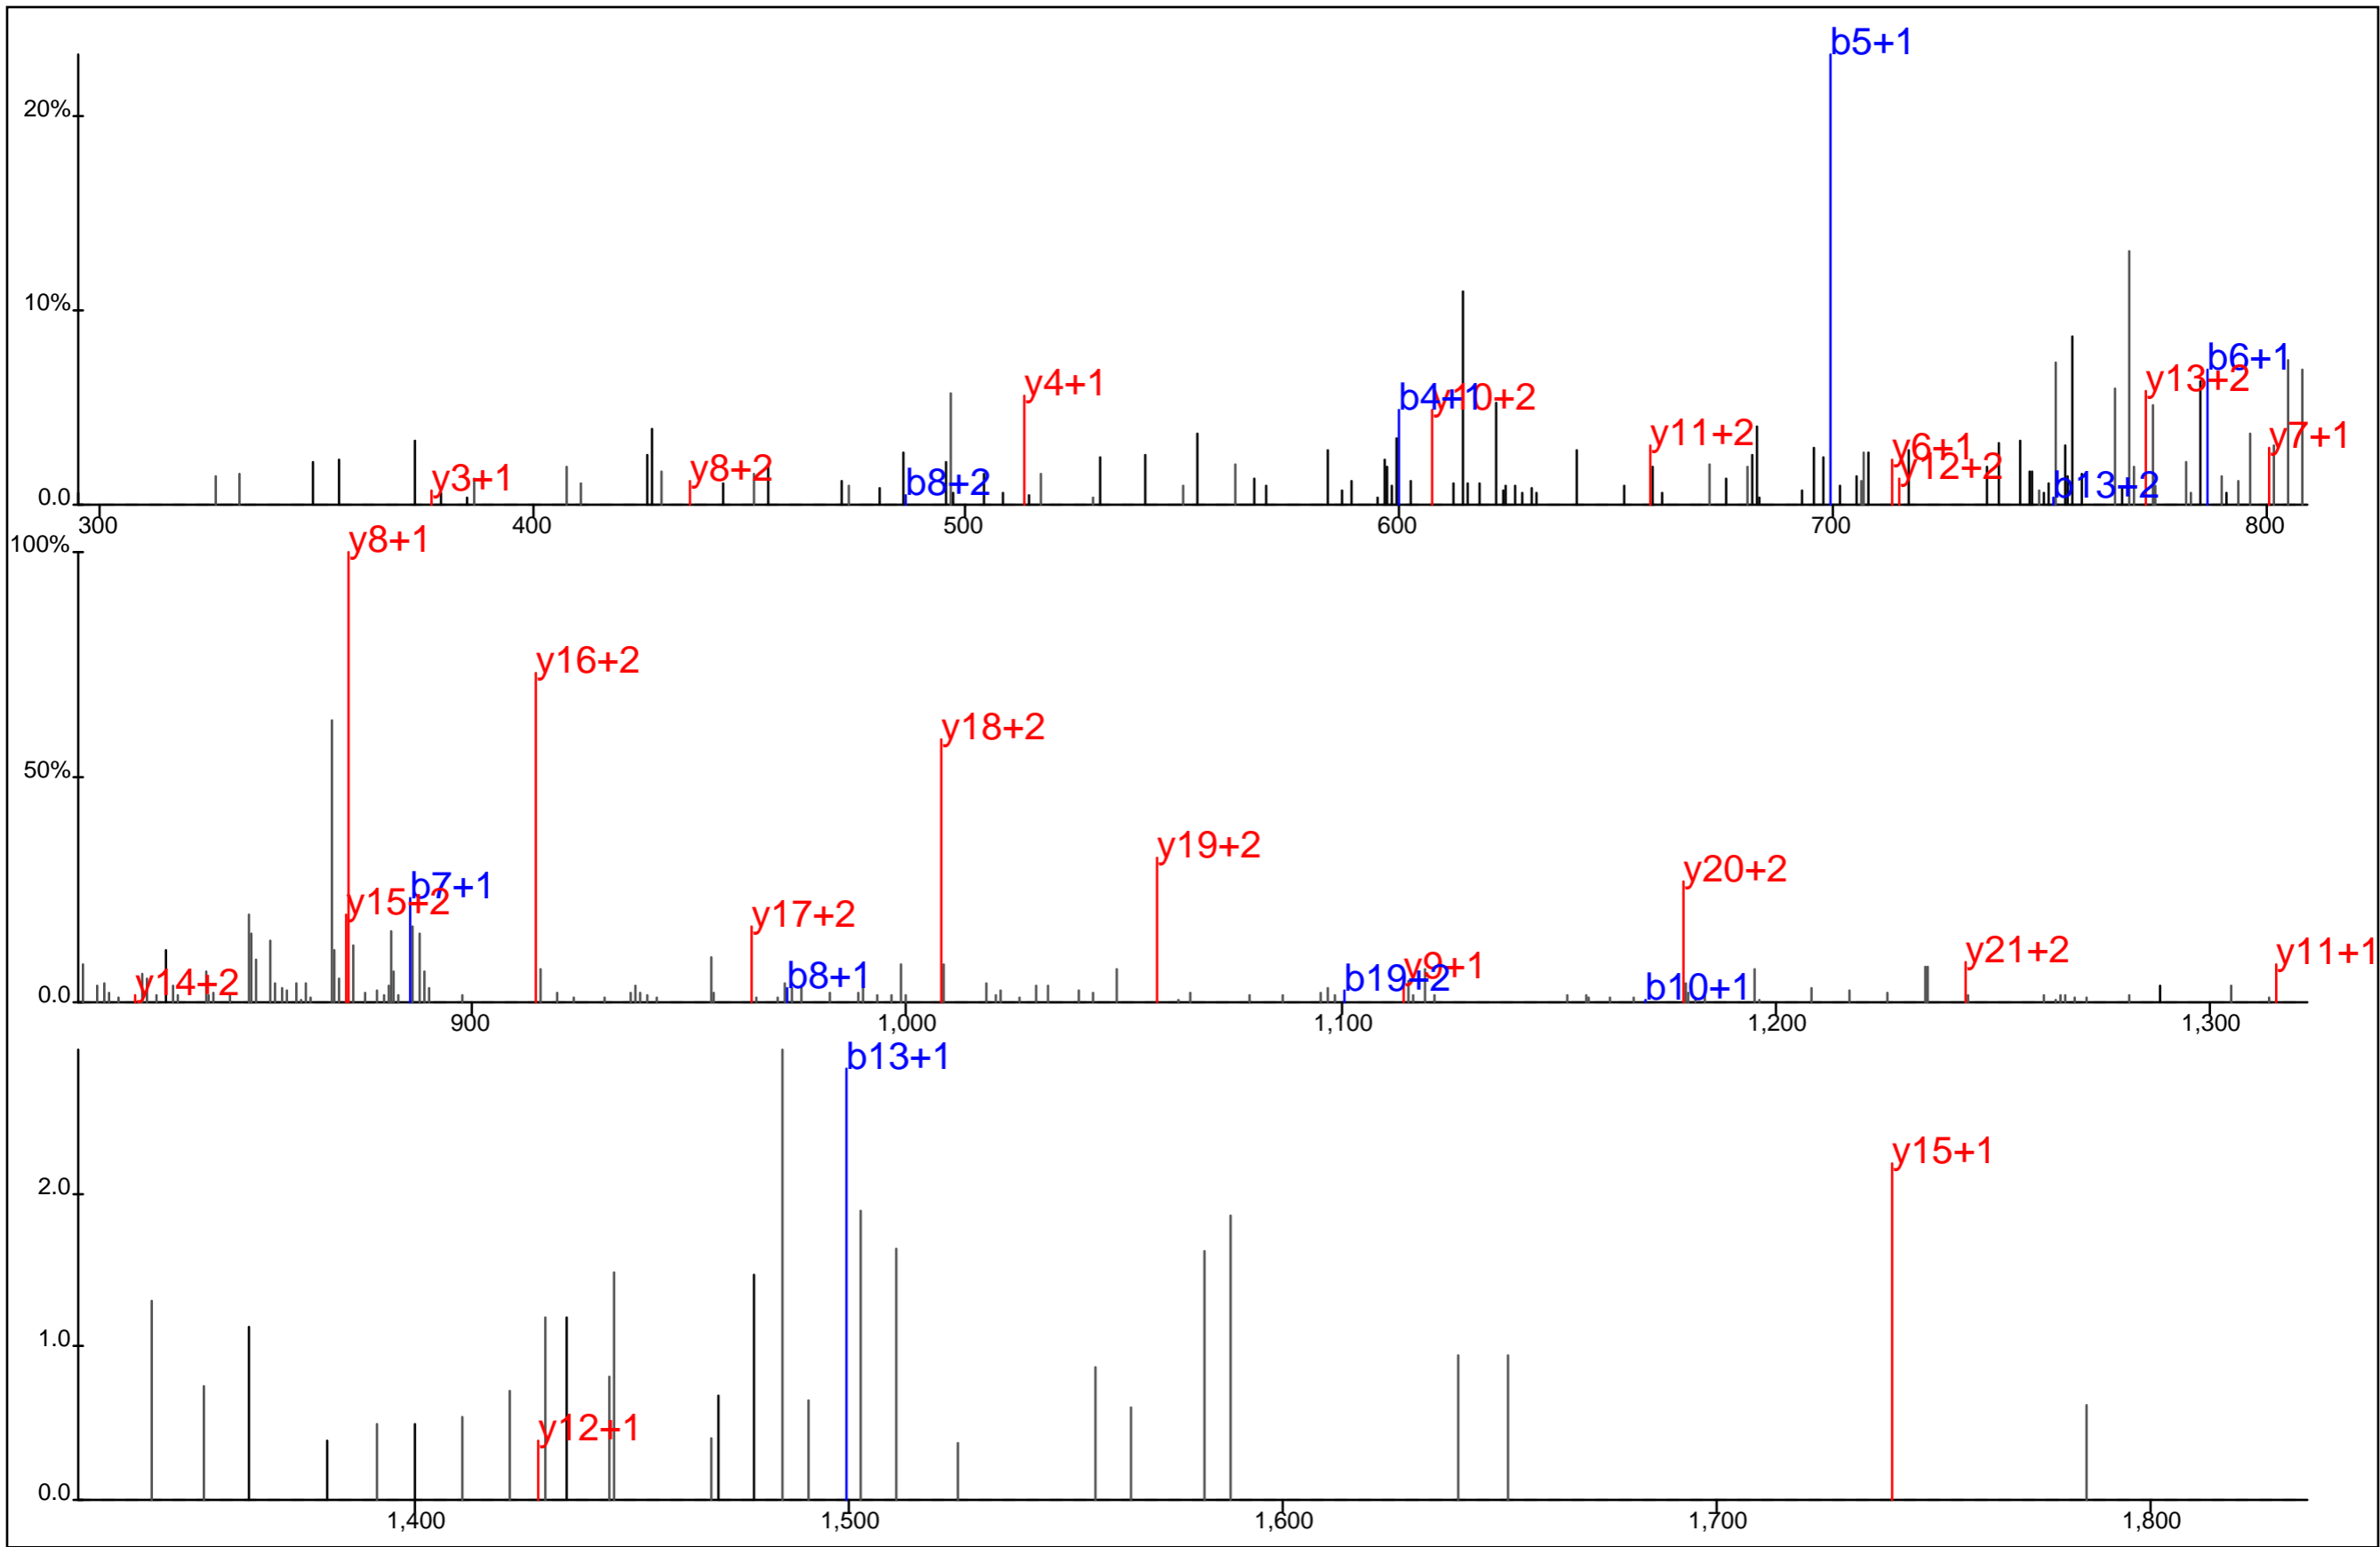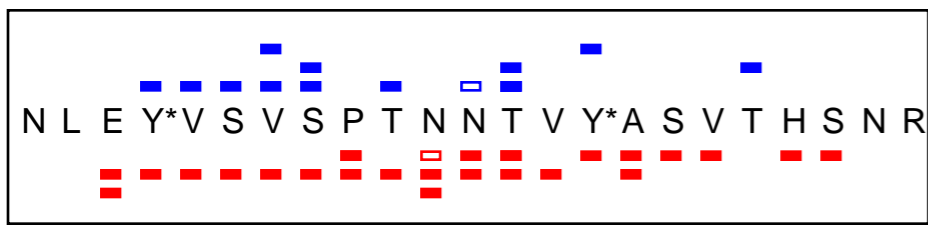

Protein Name: NTBA  
 gi Accession: 15384843  
 Precursor Mass: 904.7312+3  
 Delta Mass: 3.259 ppm  
 XCorr: 39.91

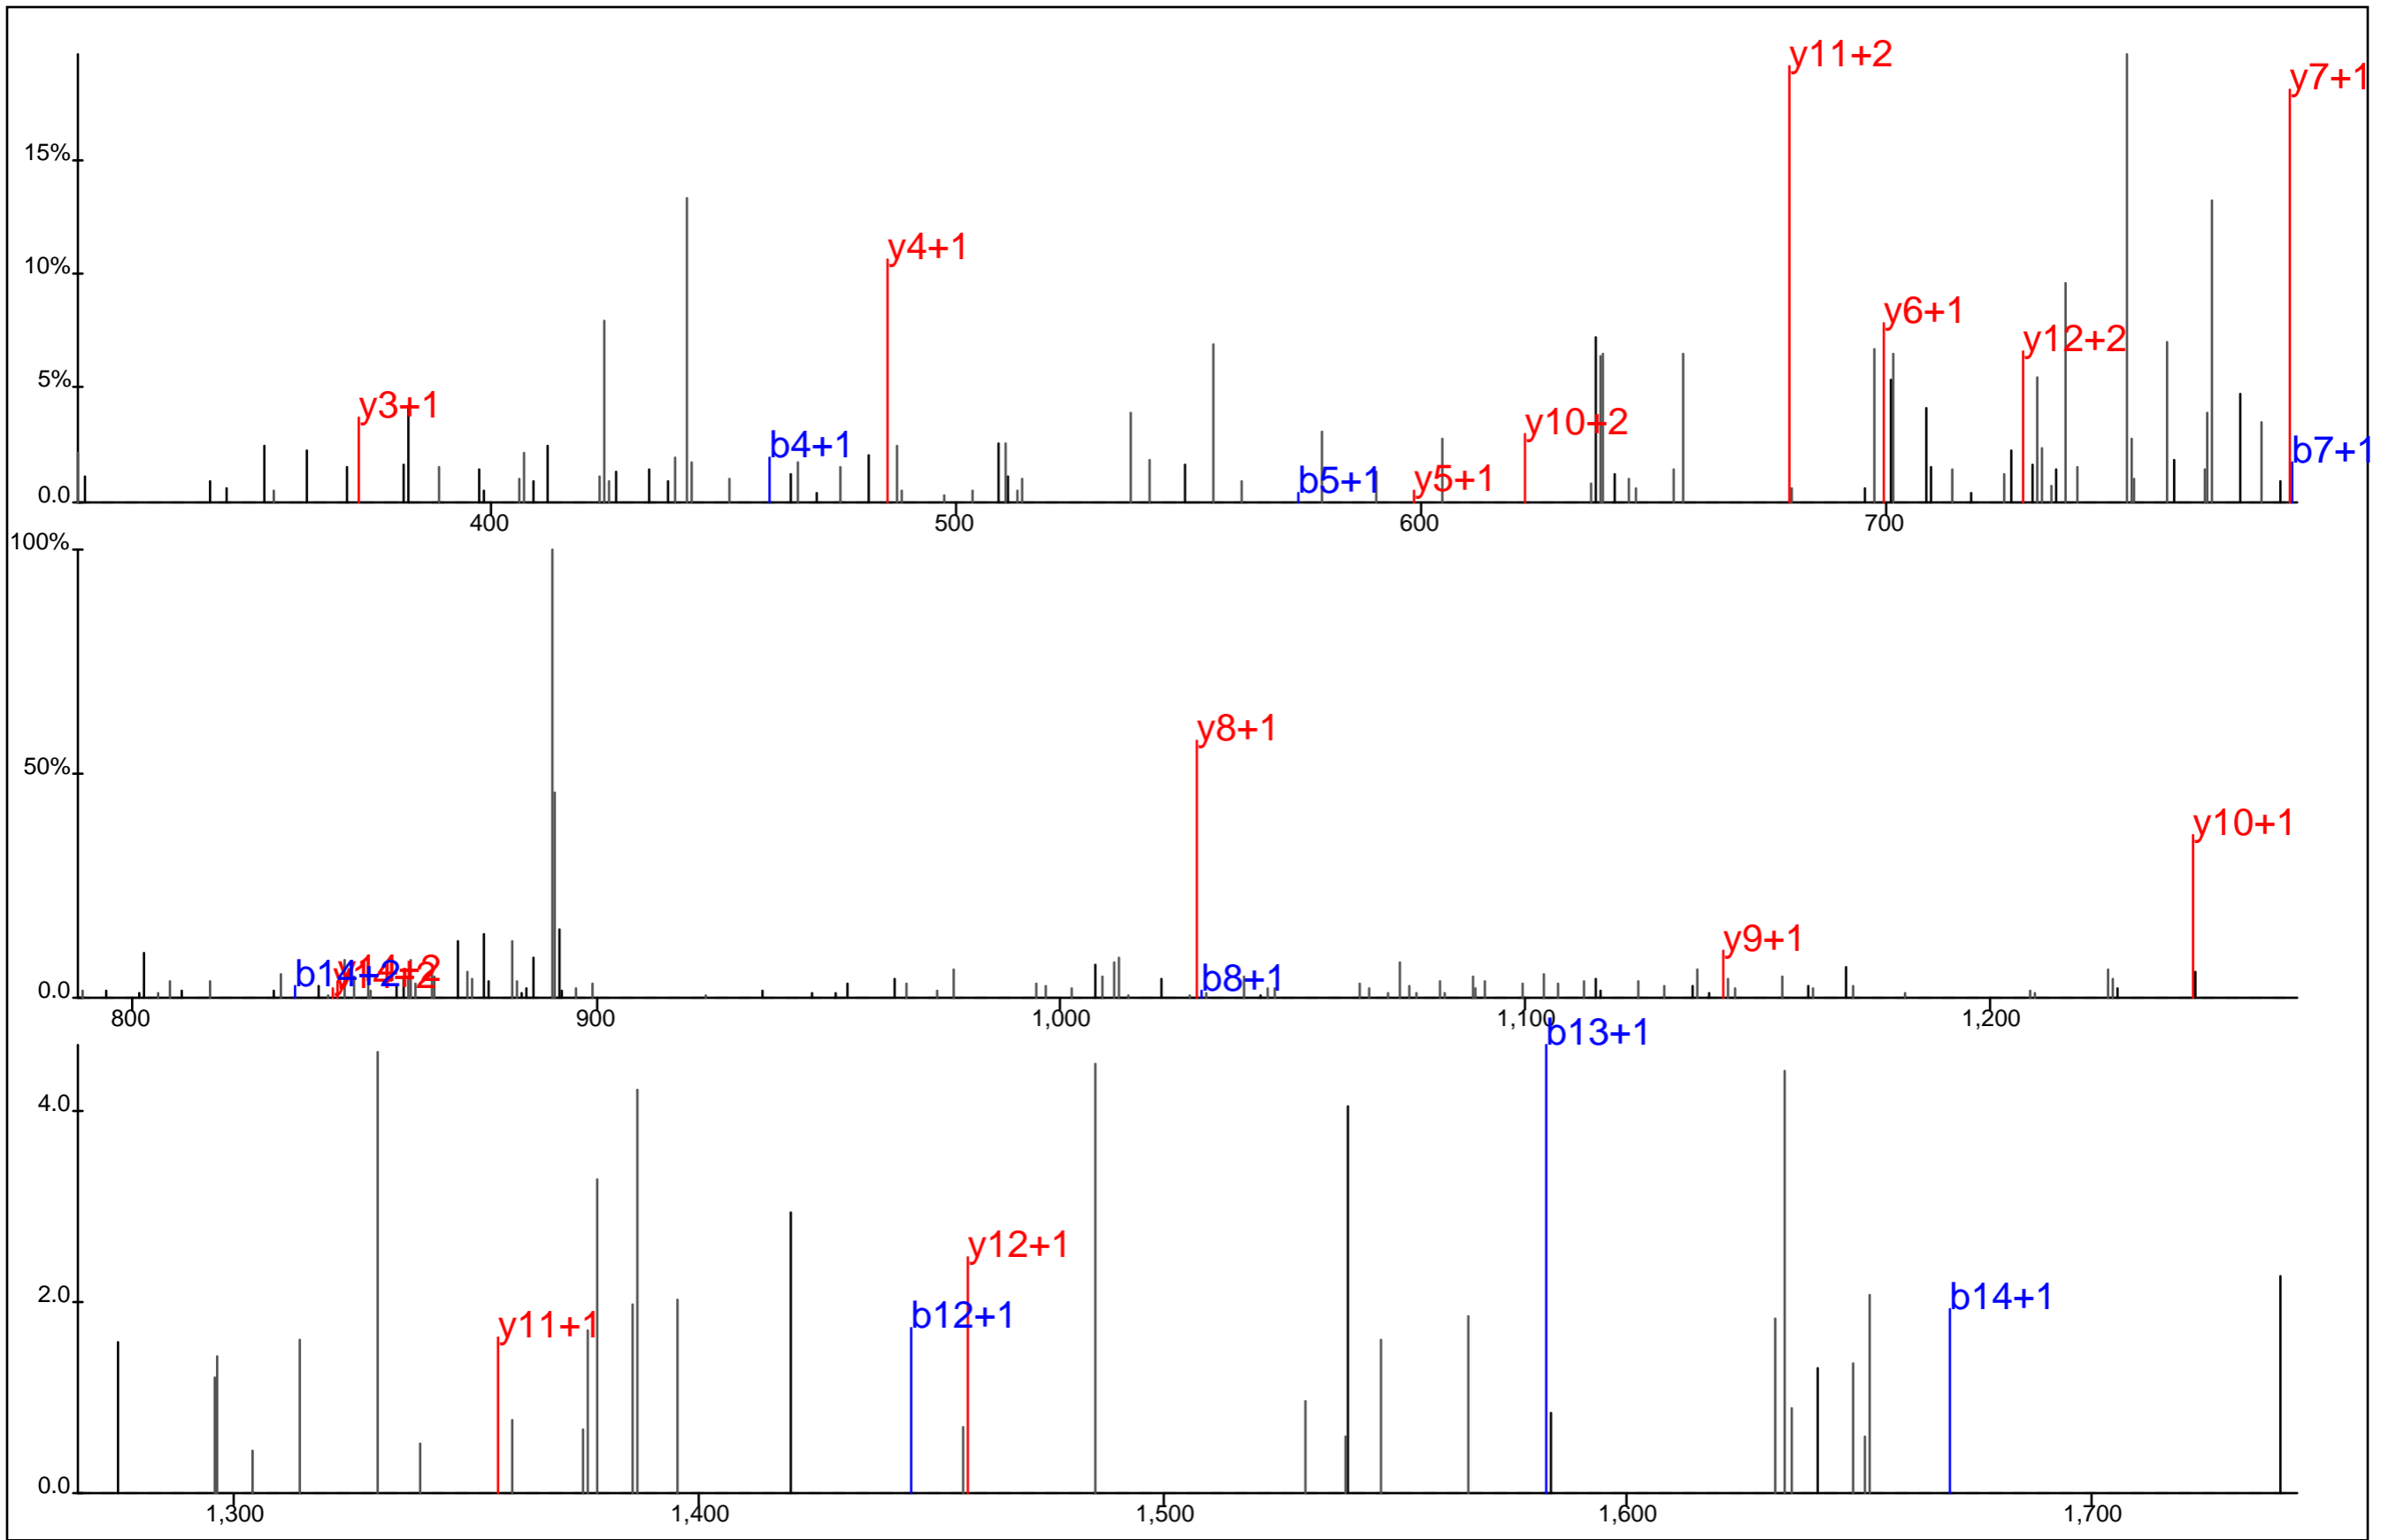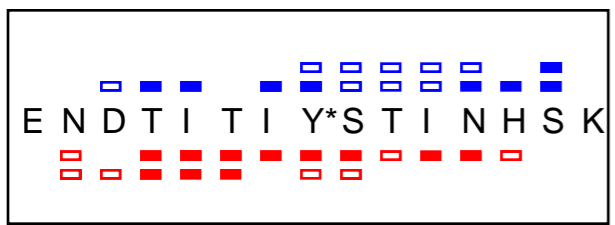

Protein Name: NTBA  
 gi Accession: 15384843  
 Precursor Mass: 908.4136+2  
 Delta Mass: 2.185 ppm  
 XCorr: 27.13

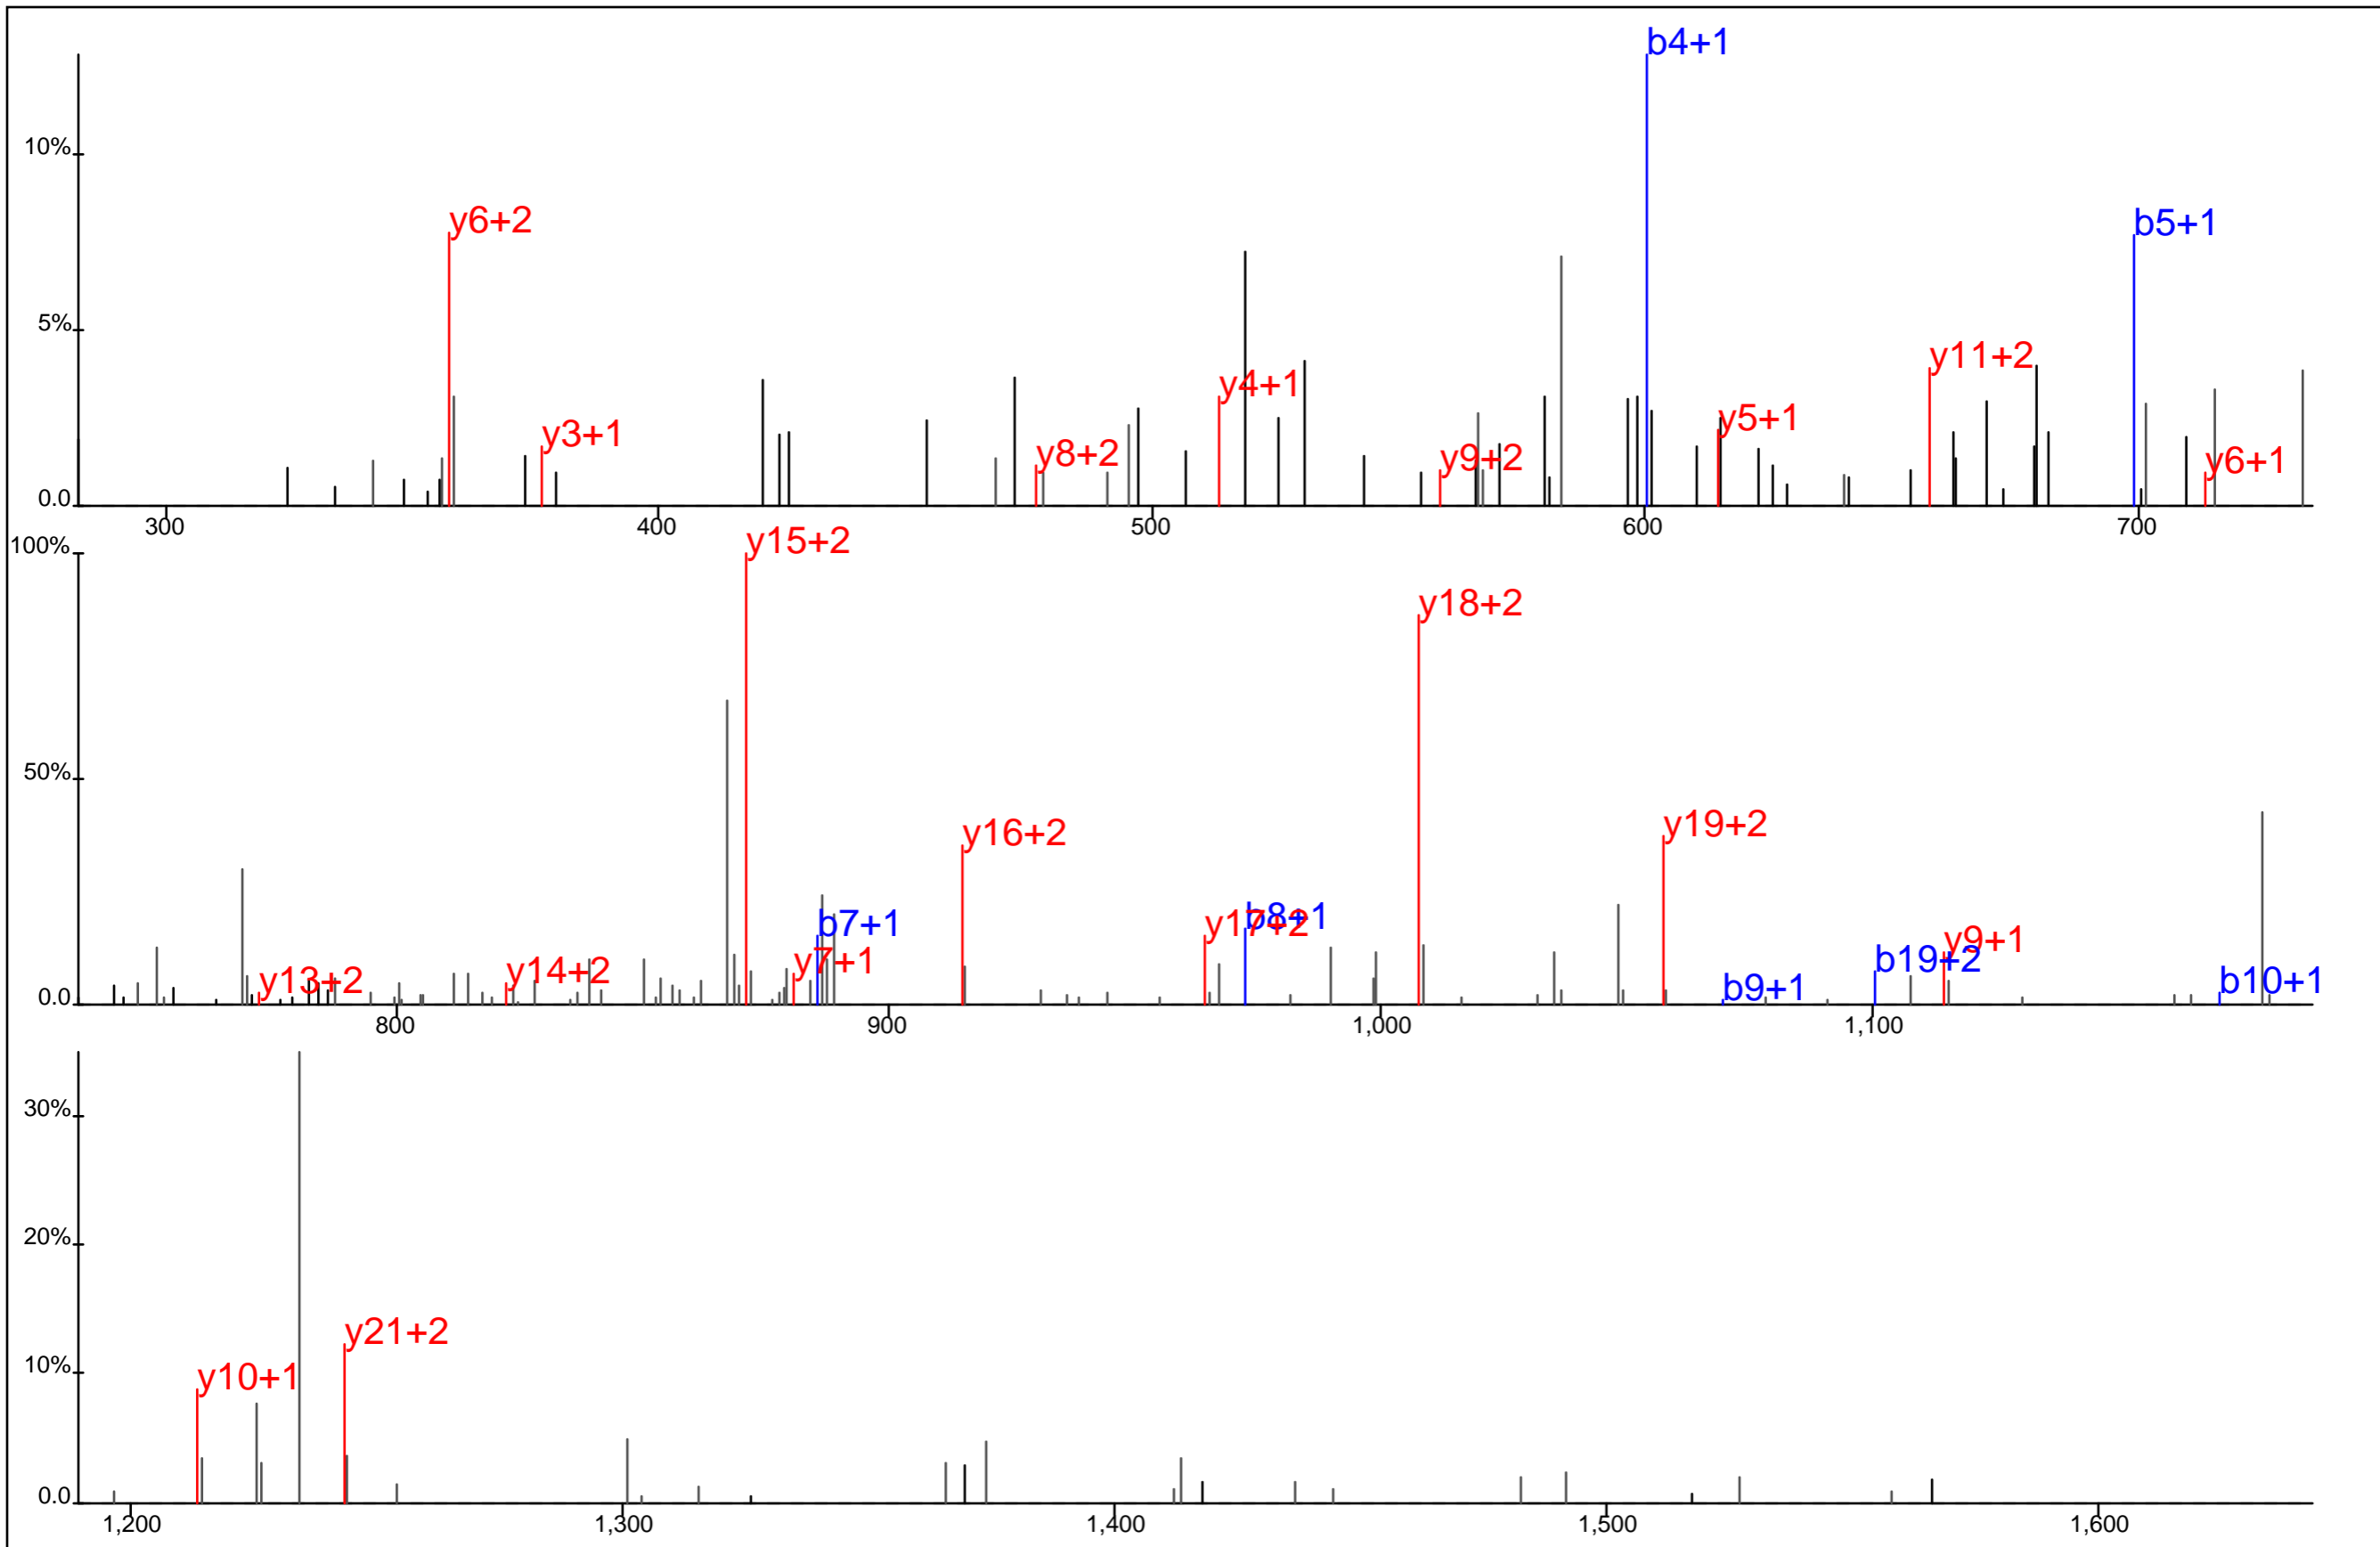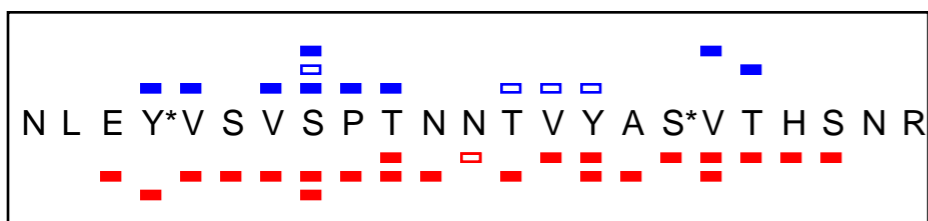

Protein Name: NTBA  
 gi Accession: 15384843  
 Precursor Mass: 904.7255+3  
 Delta Mass: 3.087 ppm  
 XCorr: 31.09

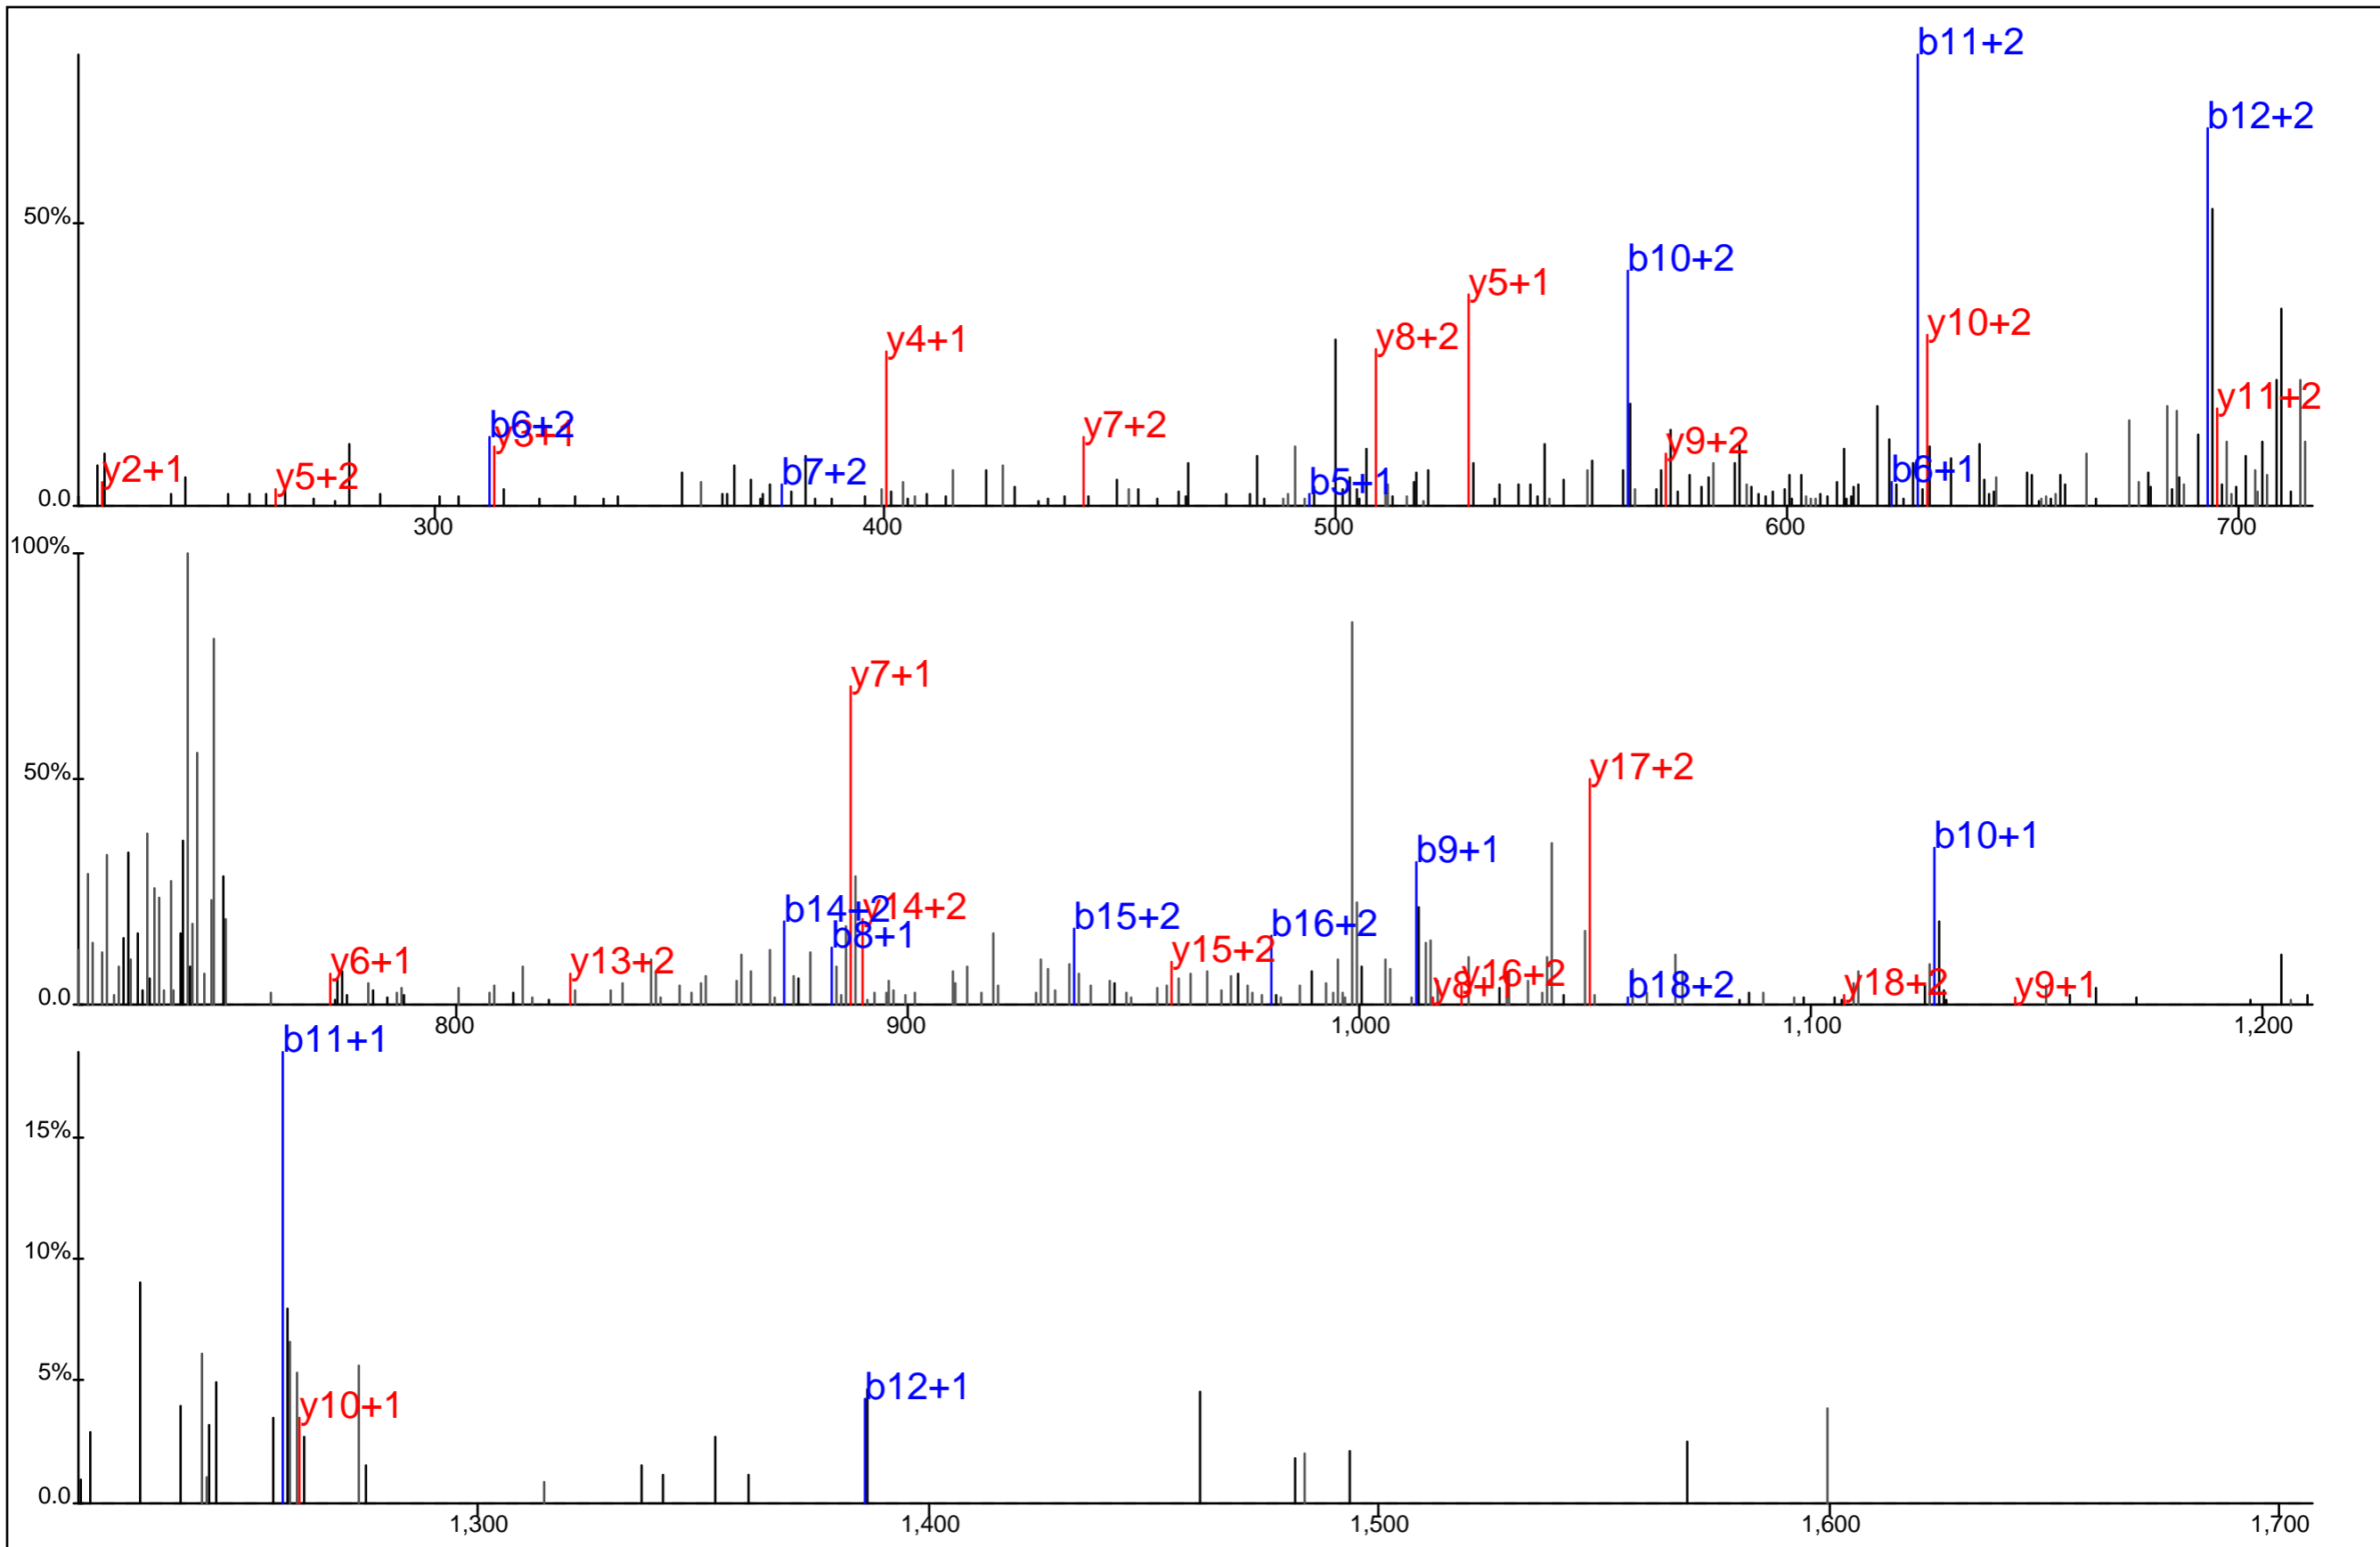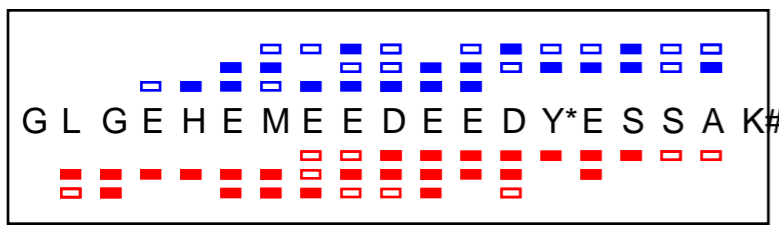

Protein Name: Oxytocinase  
 gi Accession: 2209276  
 Precursor Mass: 757.9517+3  
 Delta Mass: 1.857 ppm  
 XCorr: 23.7

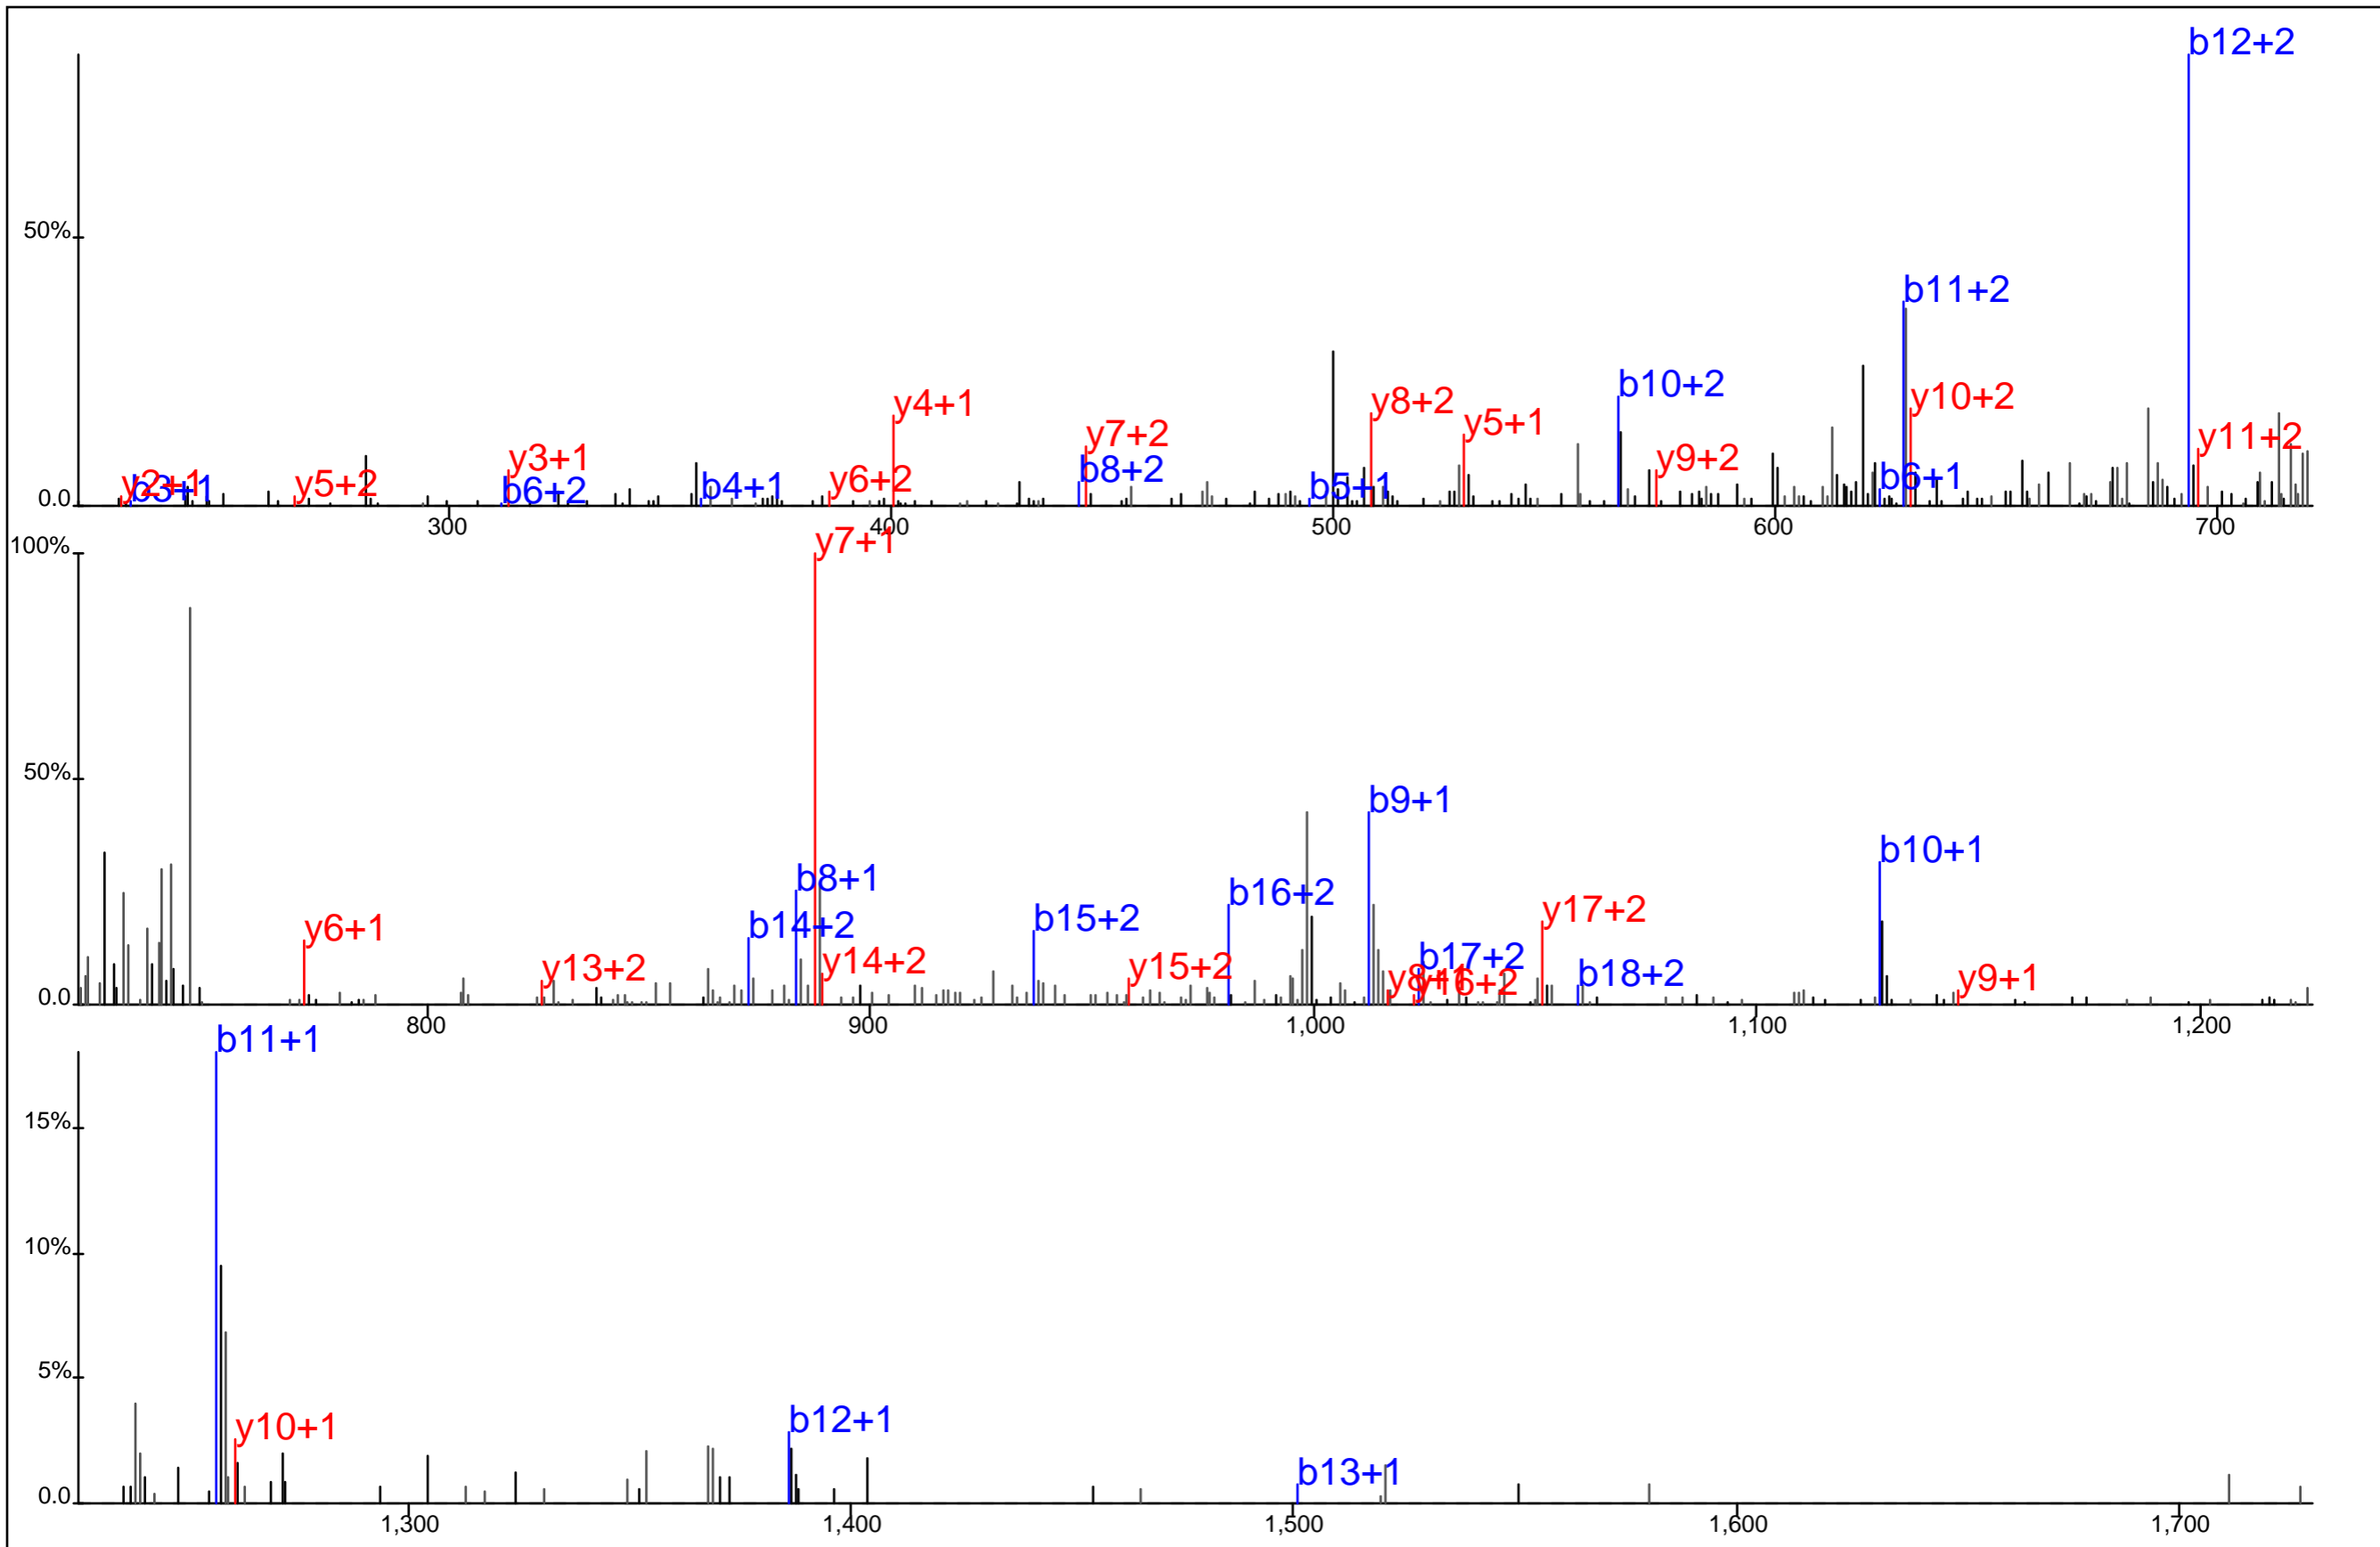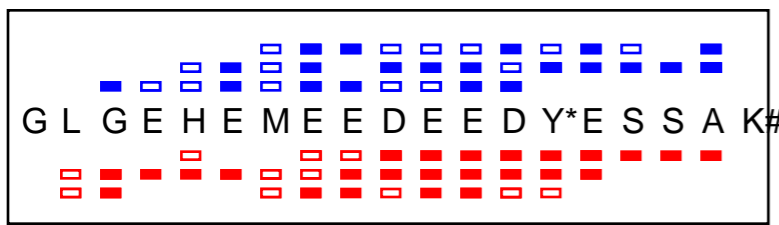

Protein Name: Oxytocinase  
 gi Accession: 2209276  
 Precursor Mass: 757.9517+3  
 Delta Mass: 1.857 ppm  
 XCorr: 41.06

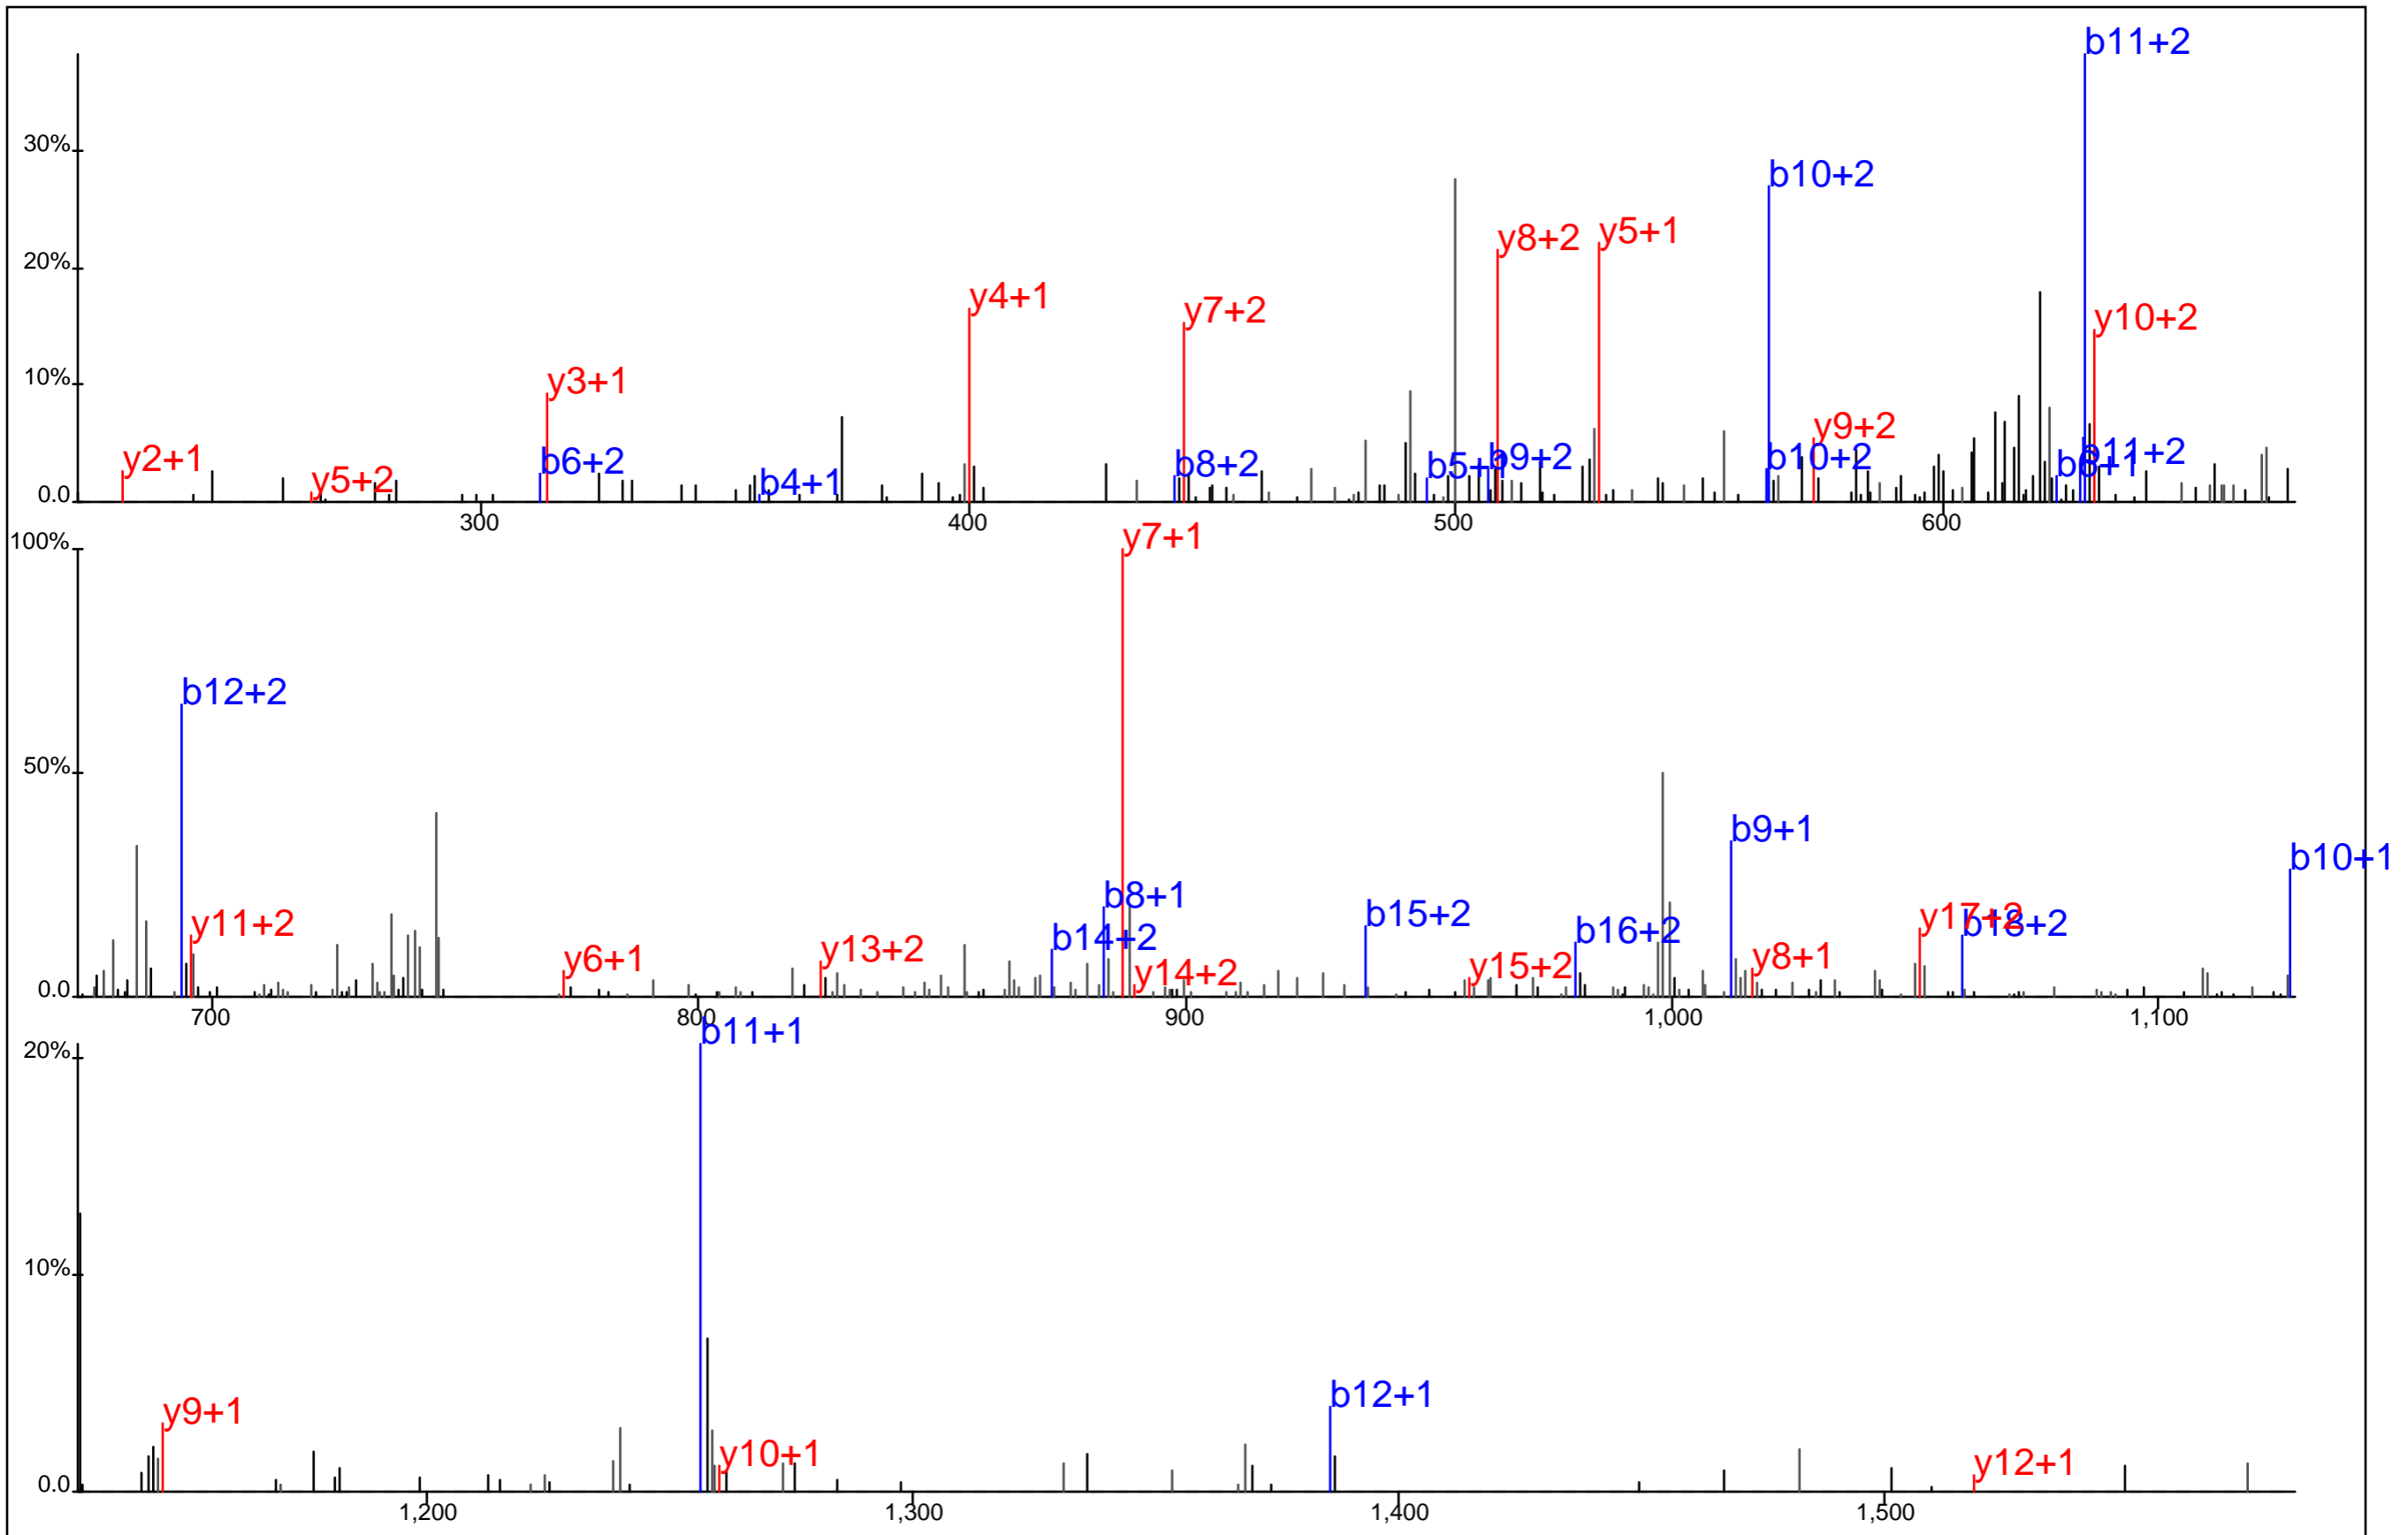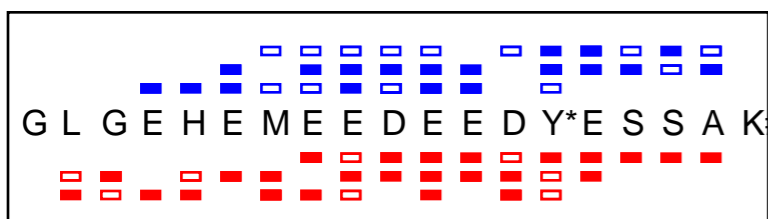

Protein Name: Oxytocinase  
 gi Accession: 2209276  
 Precursor Mass: 757.9510+3  
 Delta Mass: 1.052 ppm  
 XCorr: 36.24

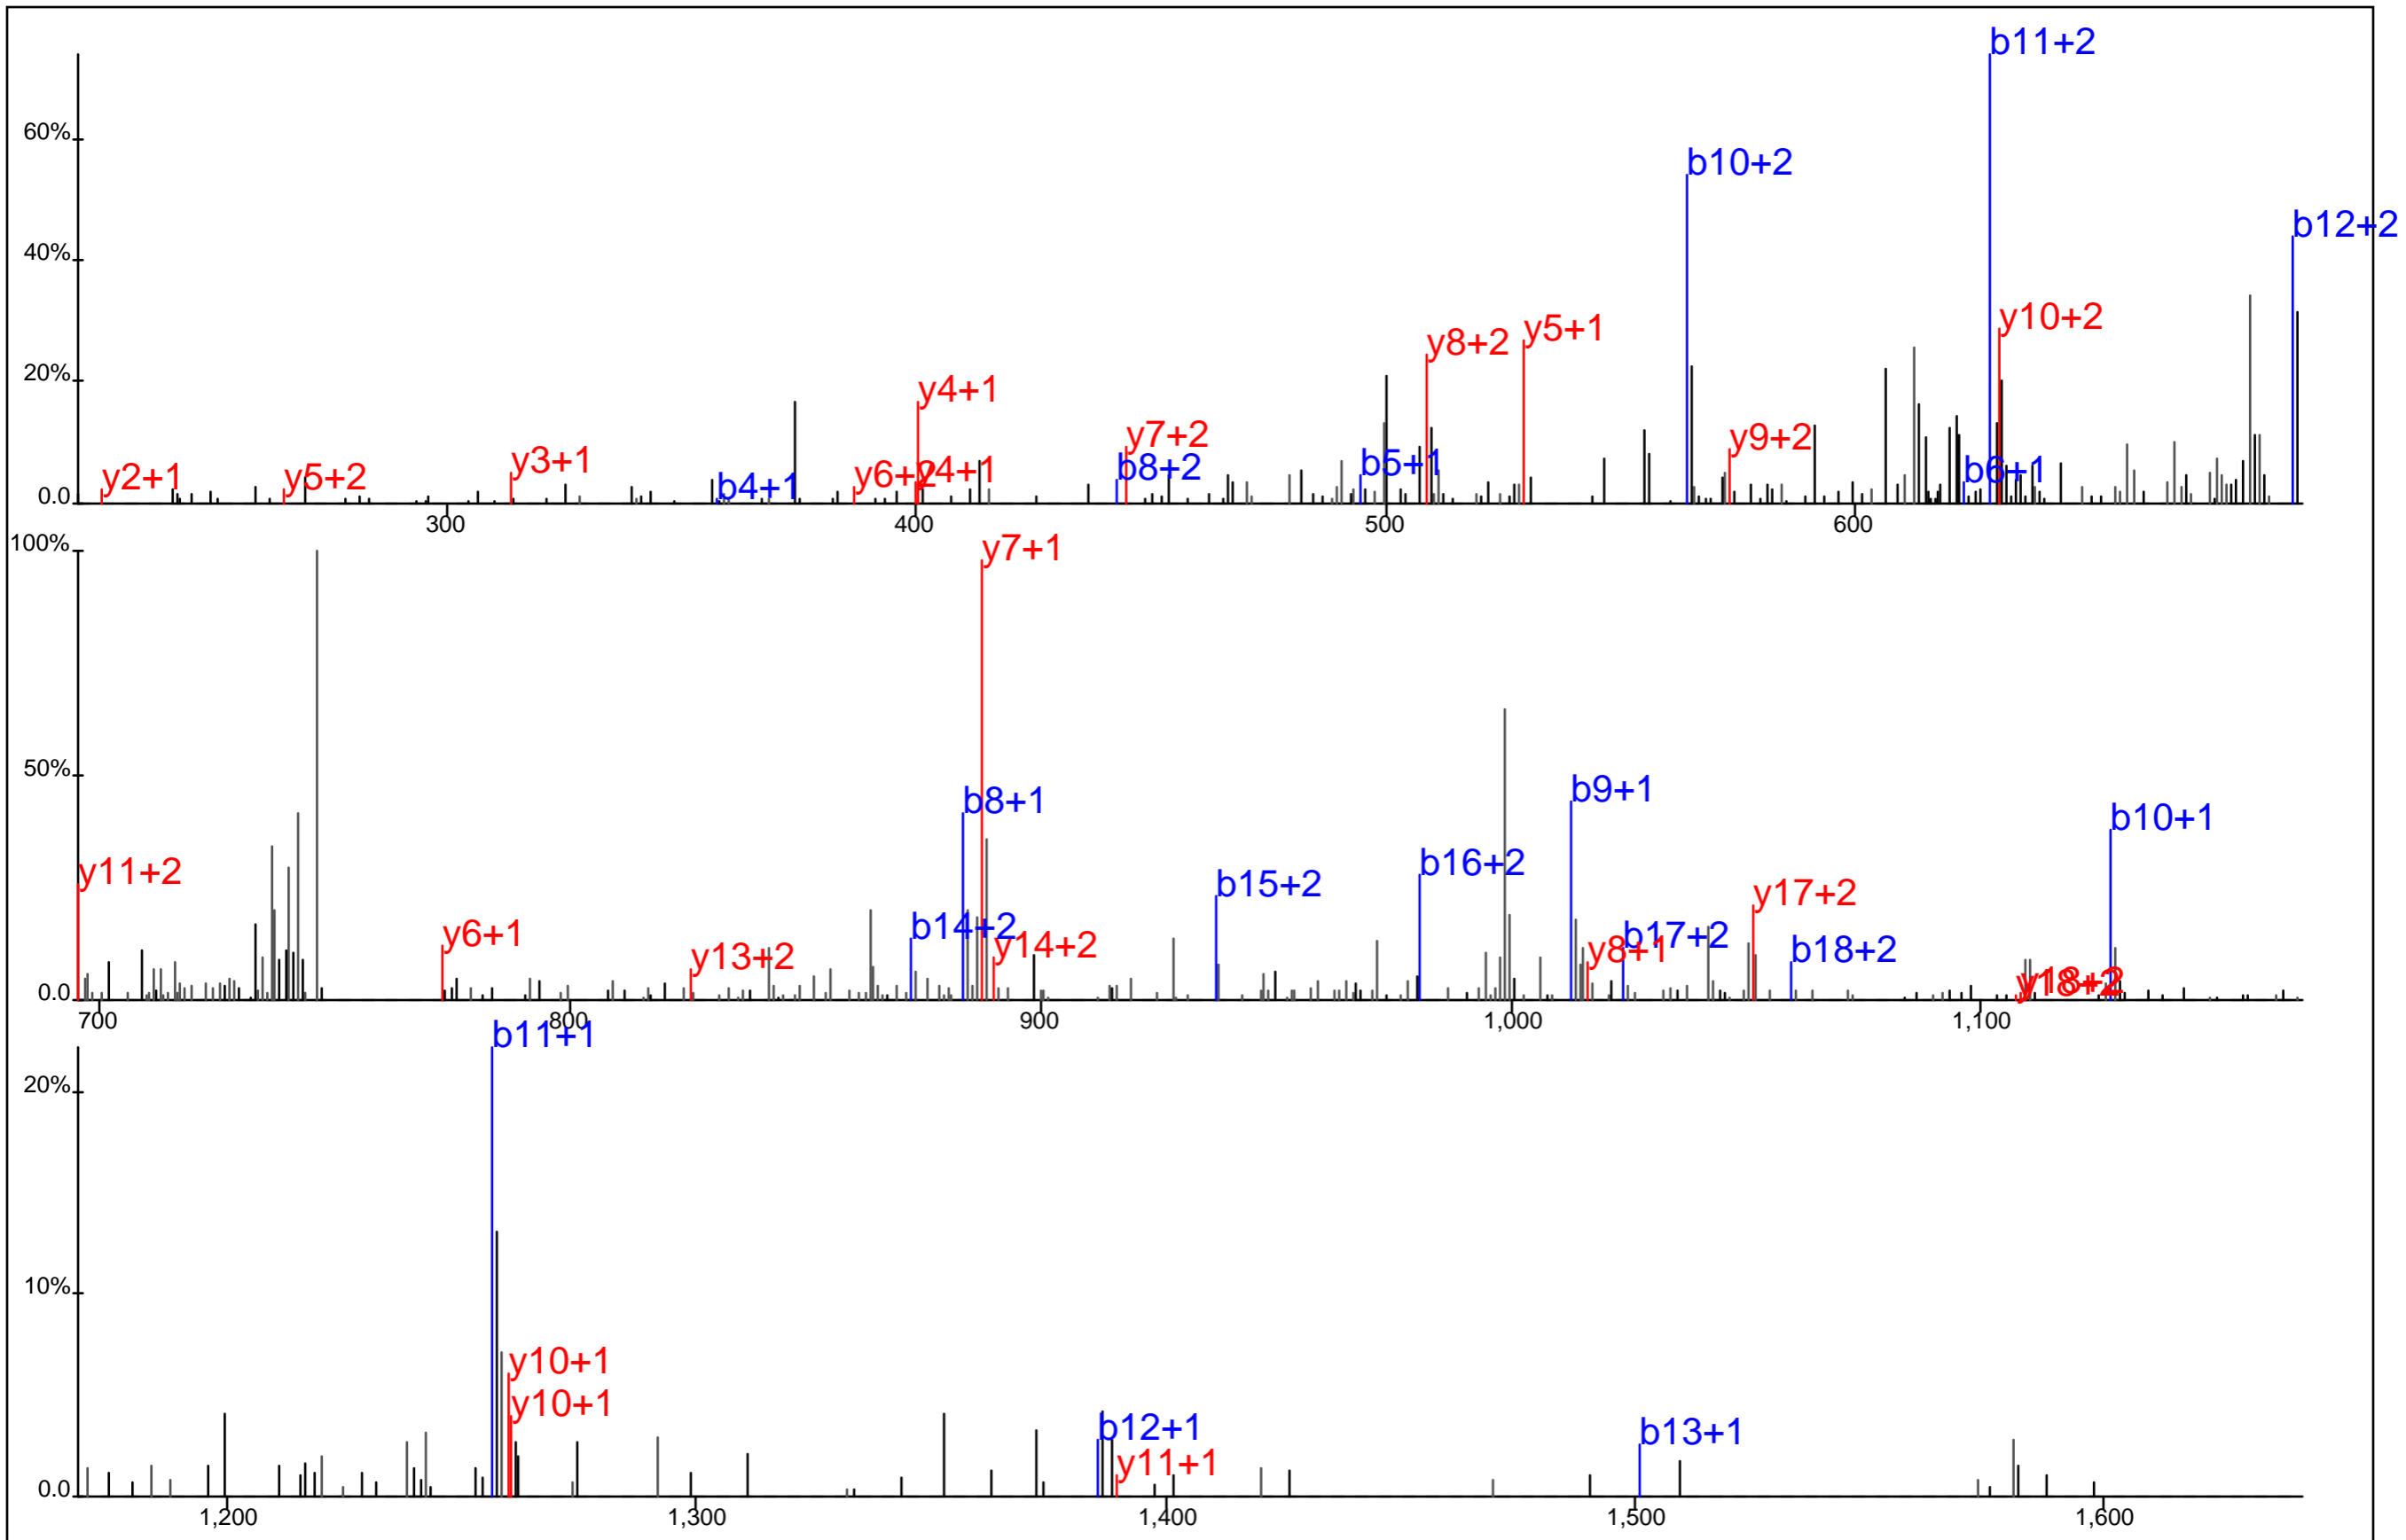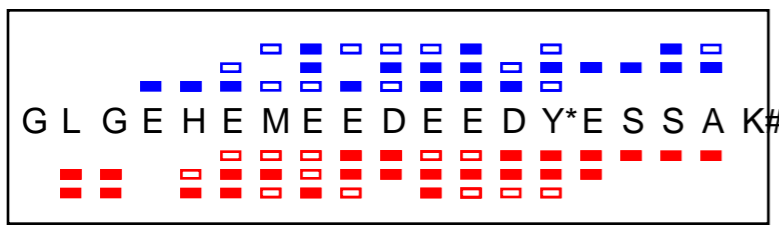

Protein Name: Oxytocinase  
 gi Accession: 2209276  
 Precursor Mass: 757.9517+3  
 Delta Mass: 1.857 ppm  
 XCorr: 34.79

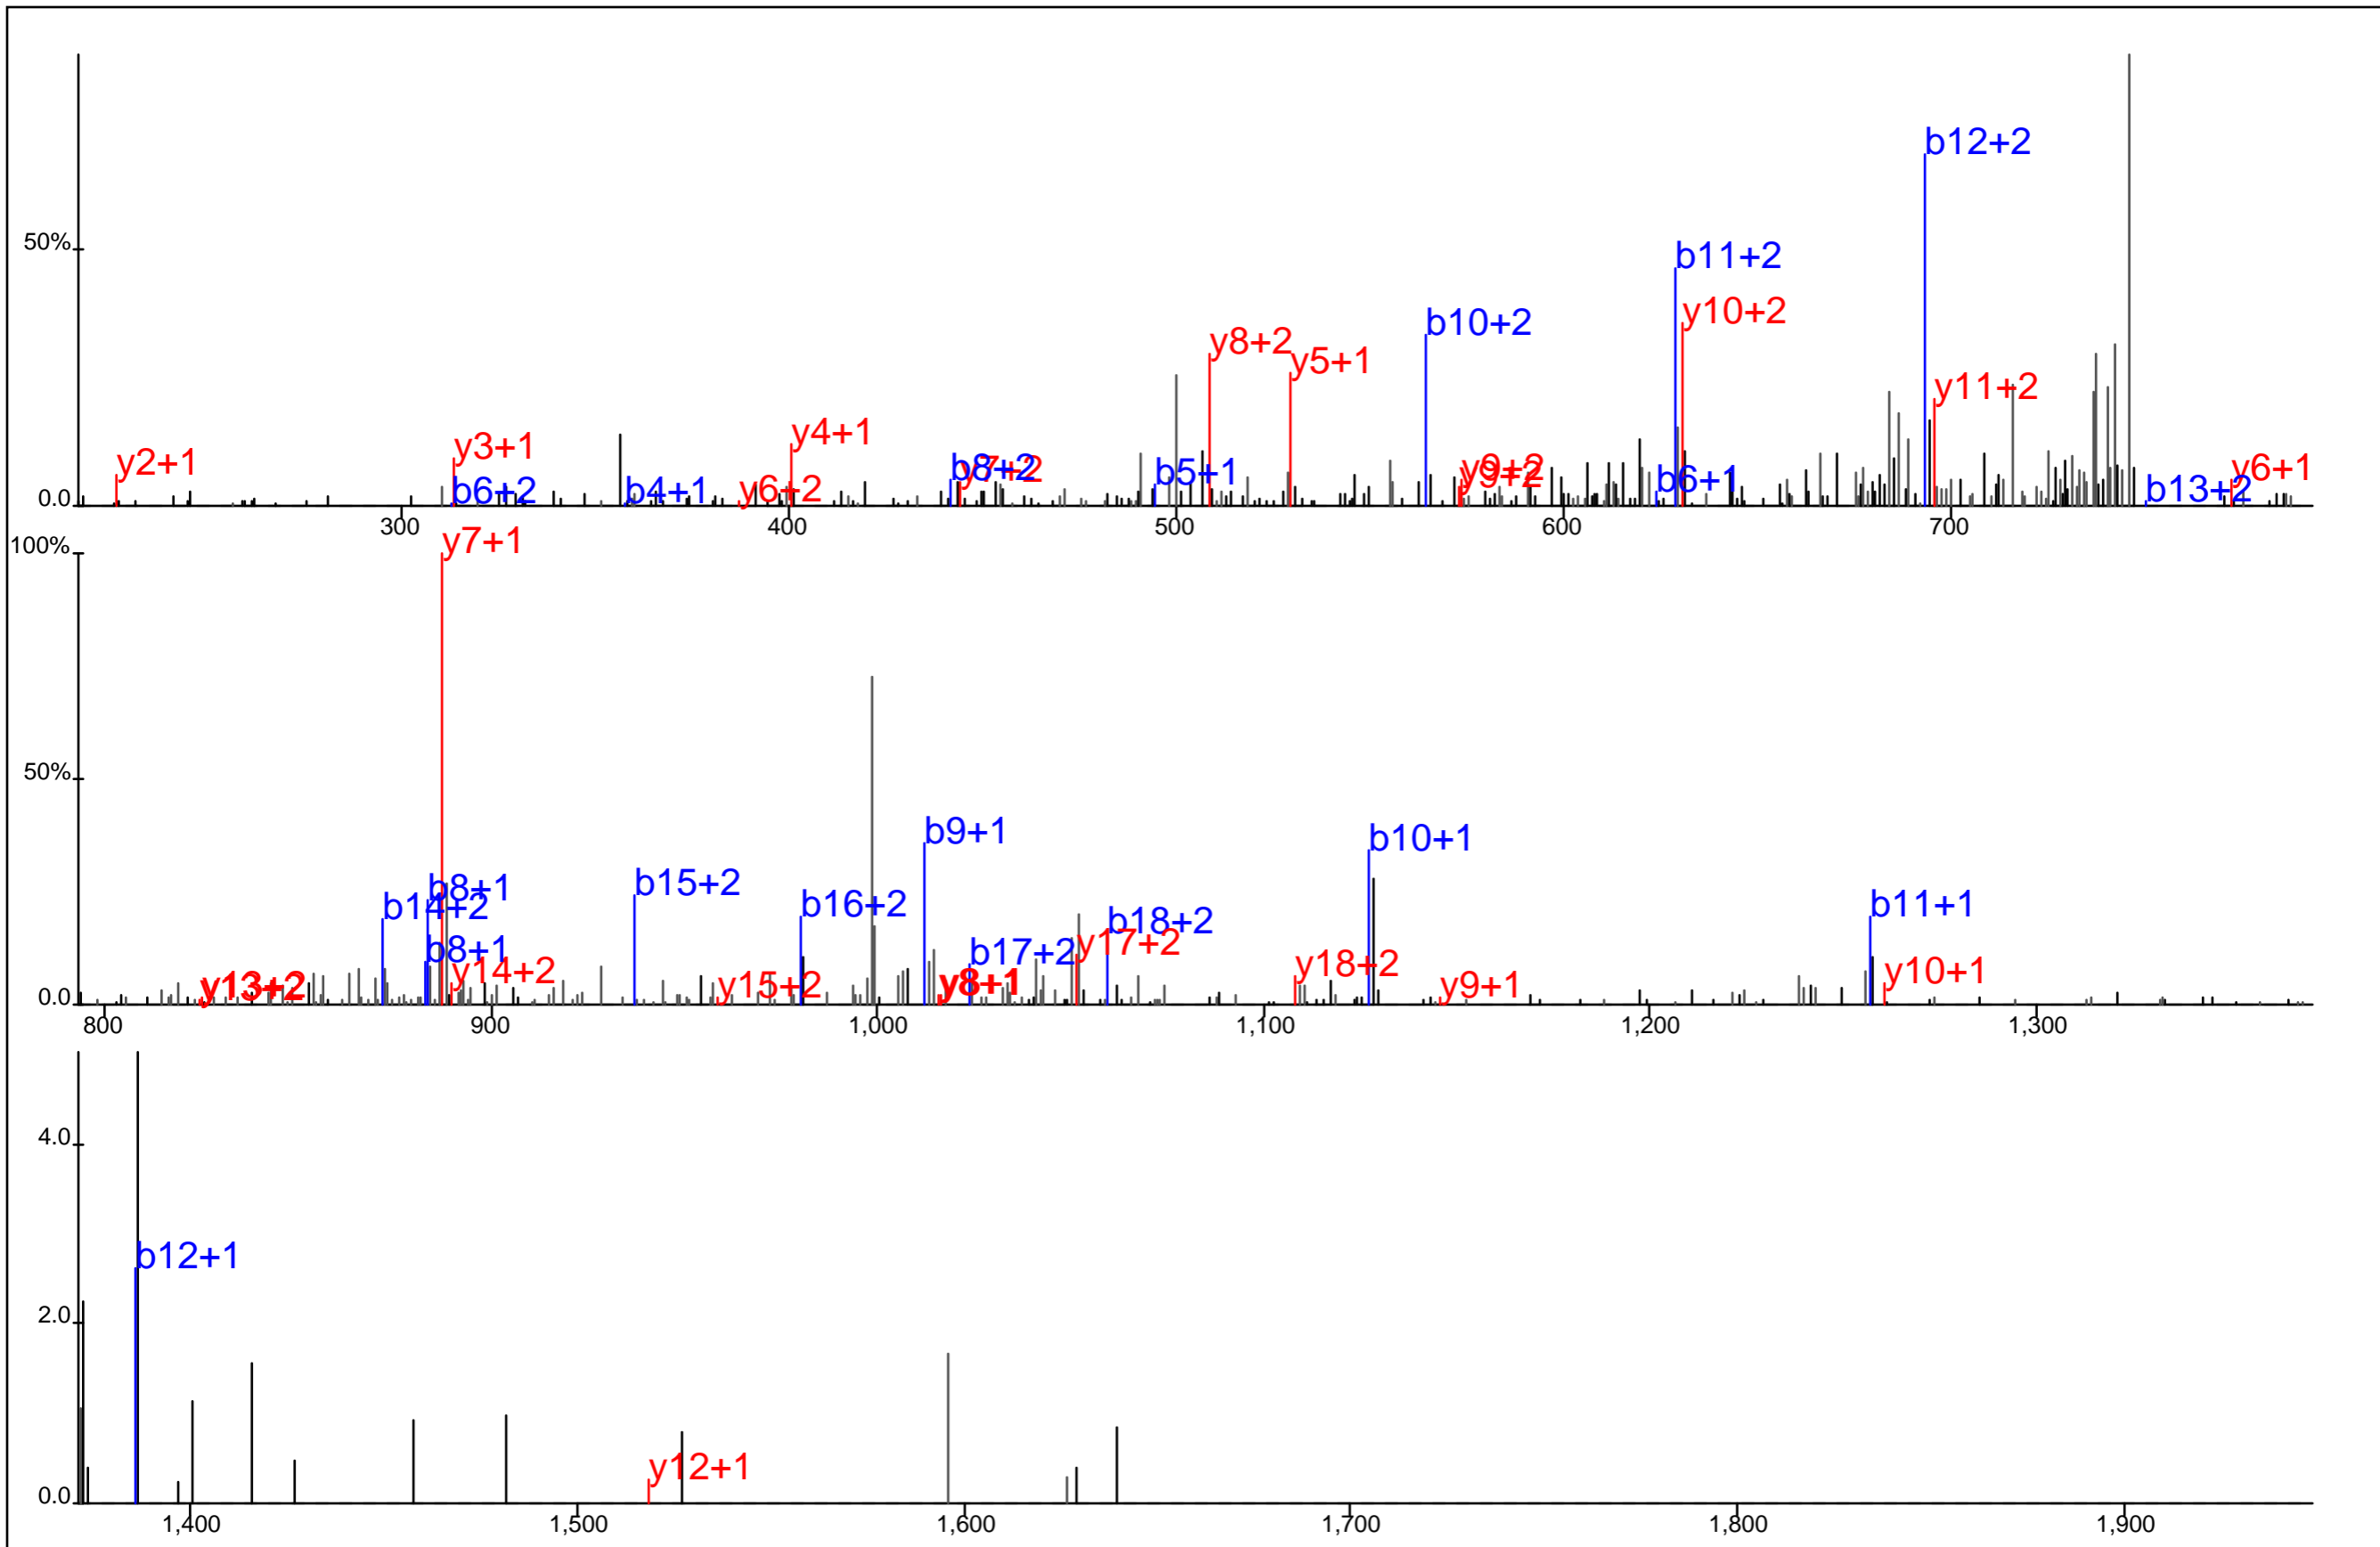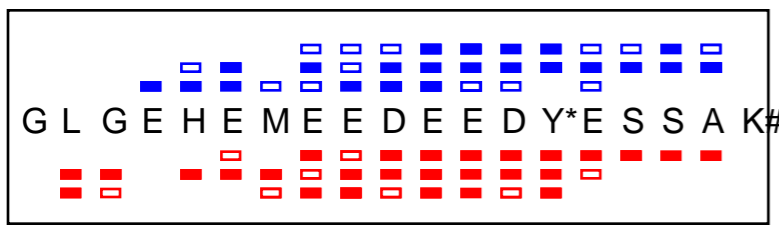

Protein Name: Oxytocinase  
 gi Accession: 2209276  
 Precursor Mass: 757.9498+3  
 Delta Mass: 0.644 ppm  
 XCorr: 39.57



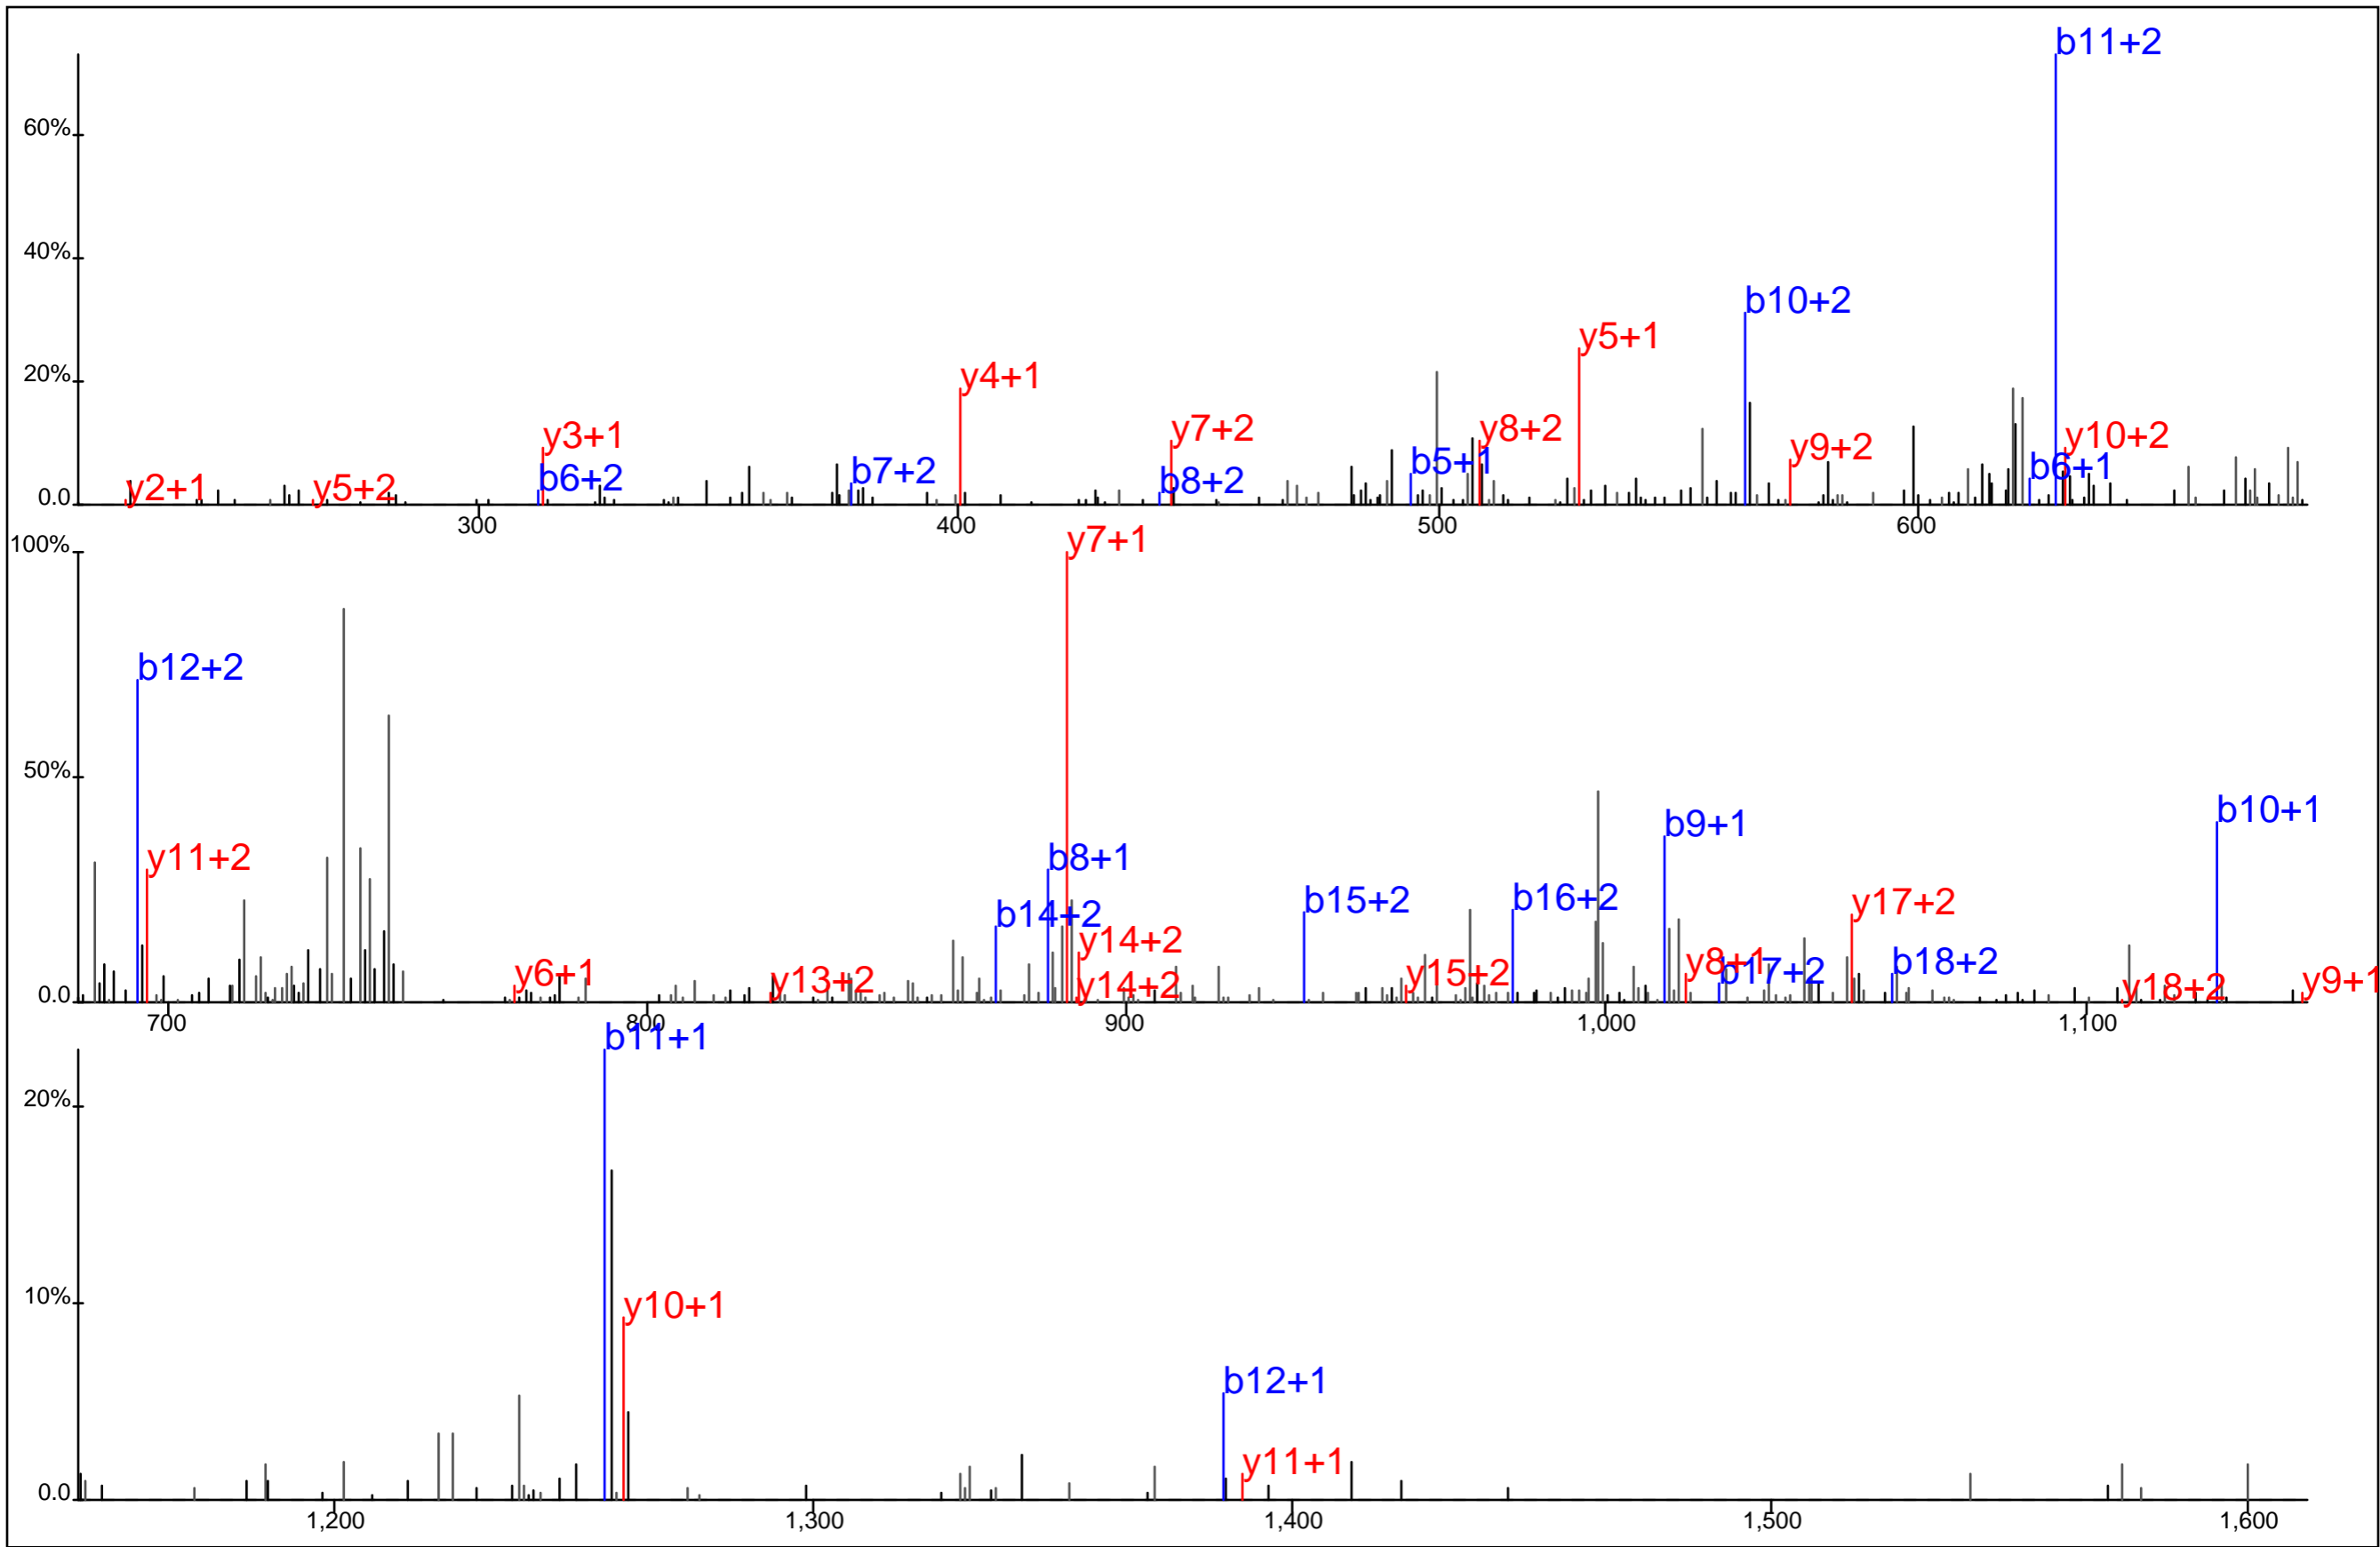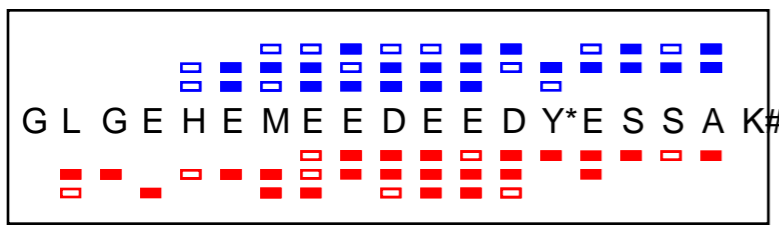

Protein Name: Oxytocinase  
 gi Accession: 2209276  
 Precursor Mass: 757.9545+3  
 Delta Mass: 5.562 ppm  
 XCorr: 33.76

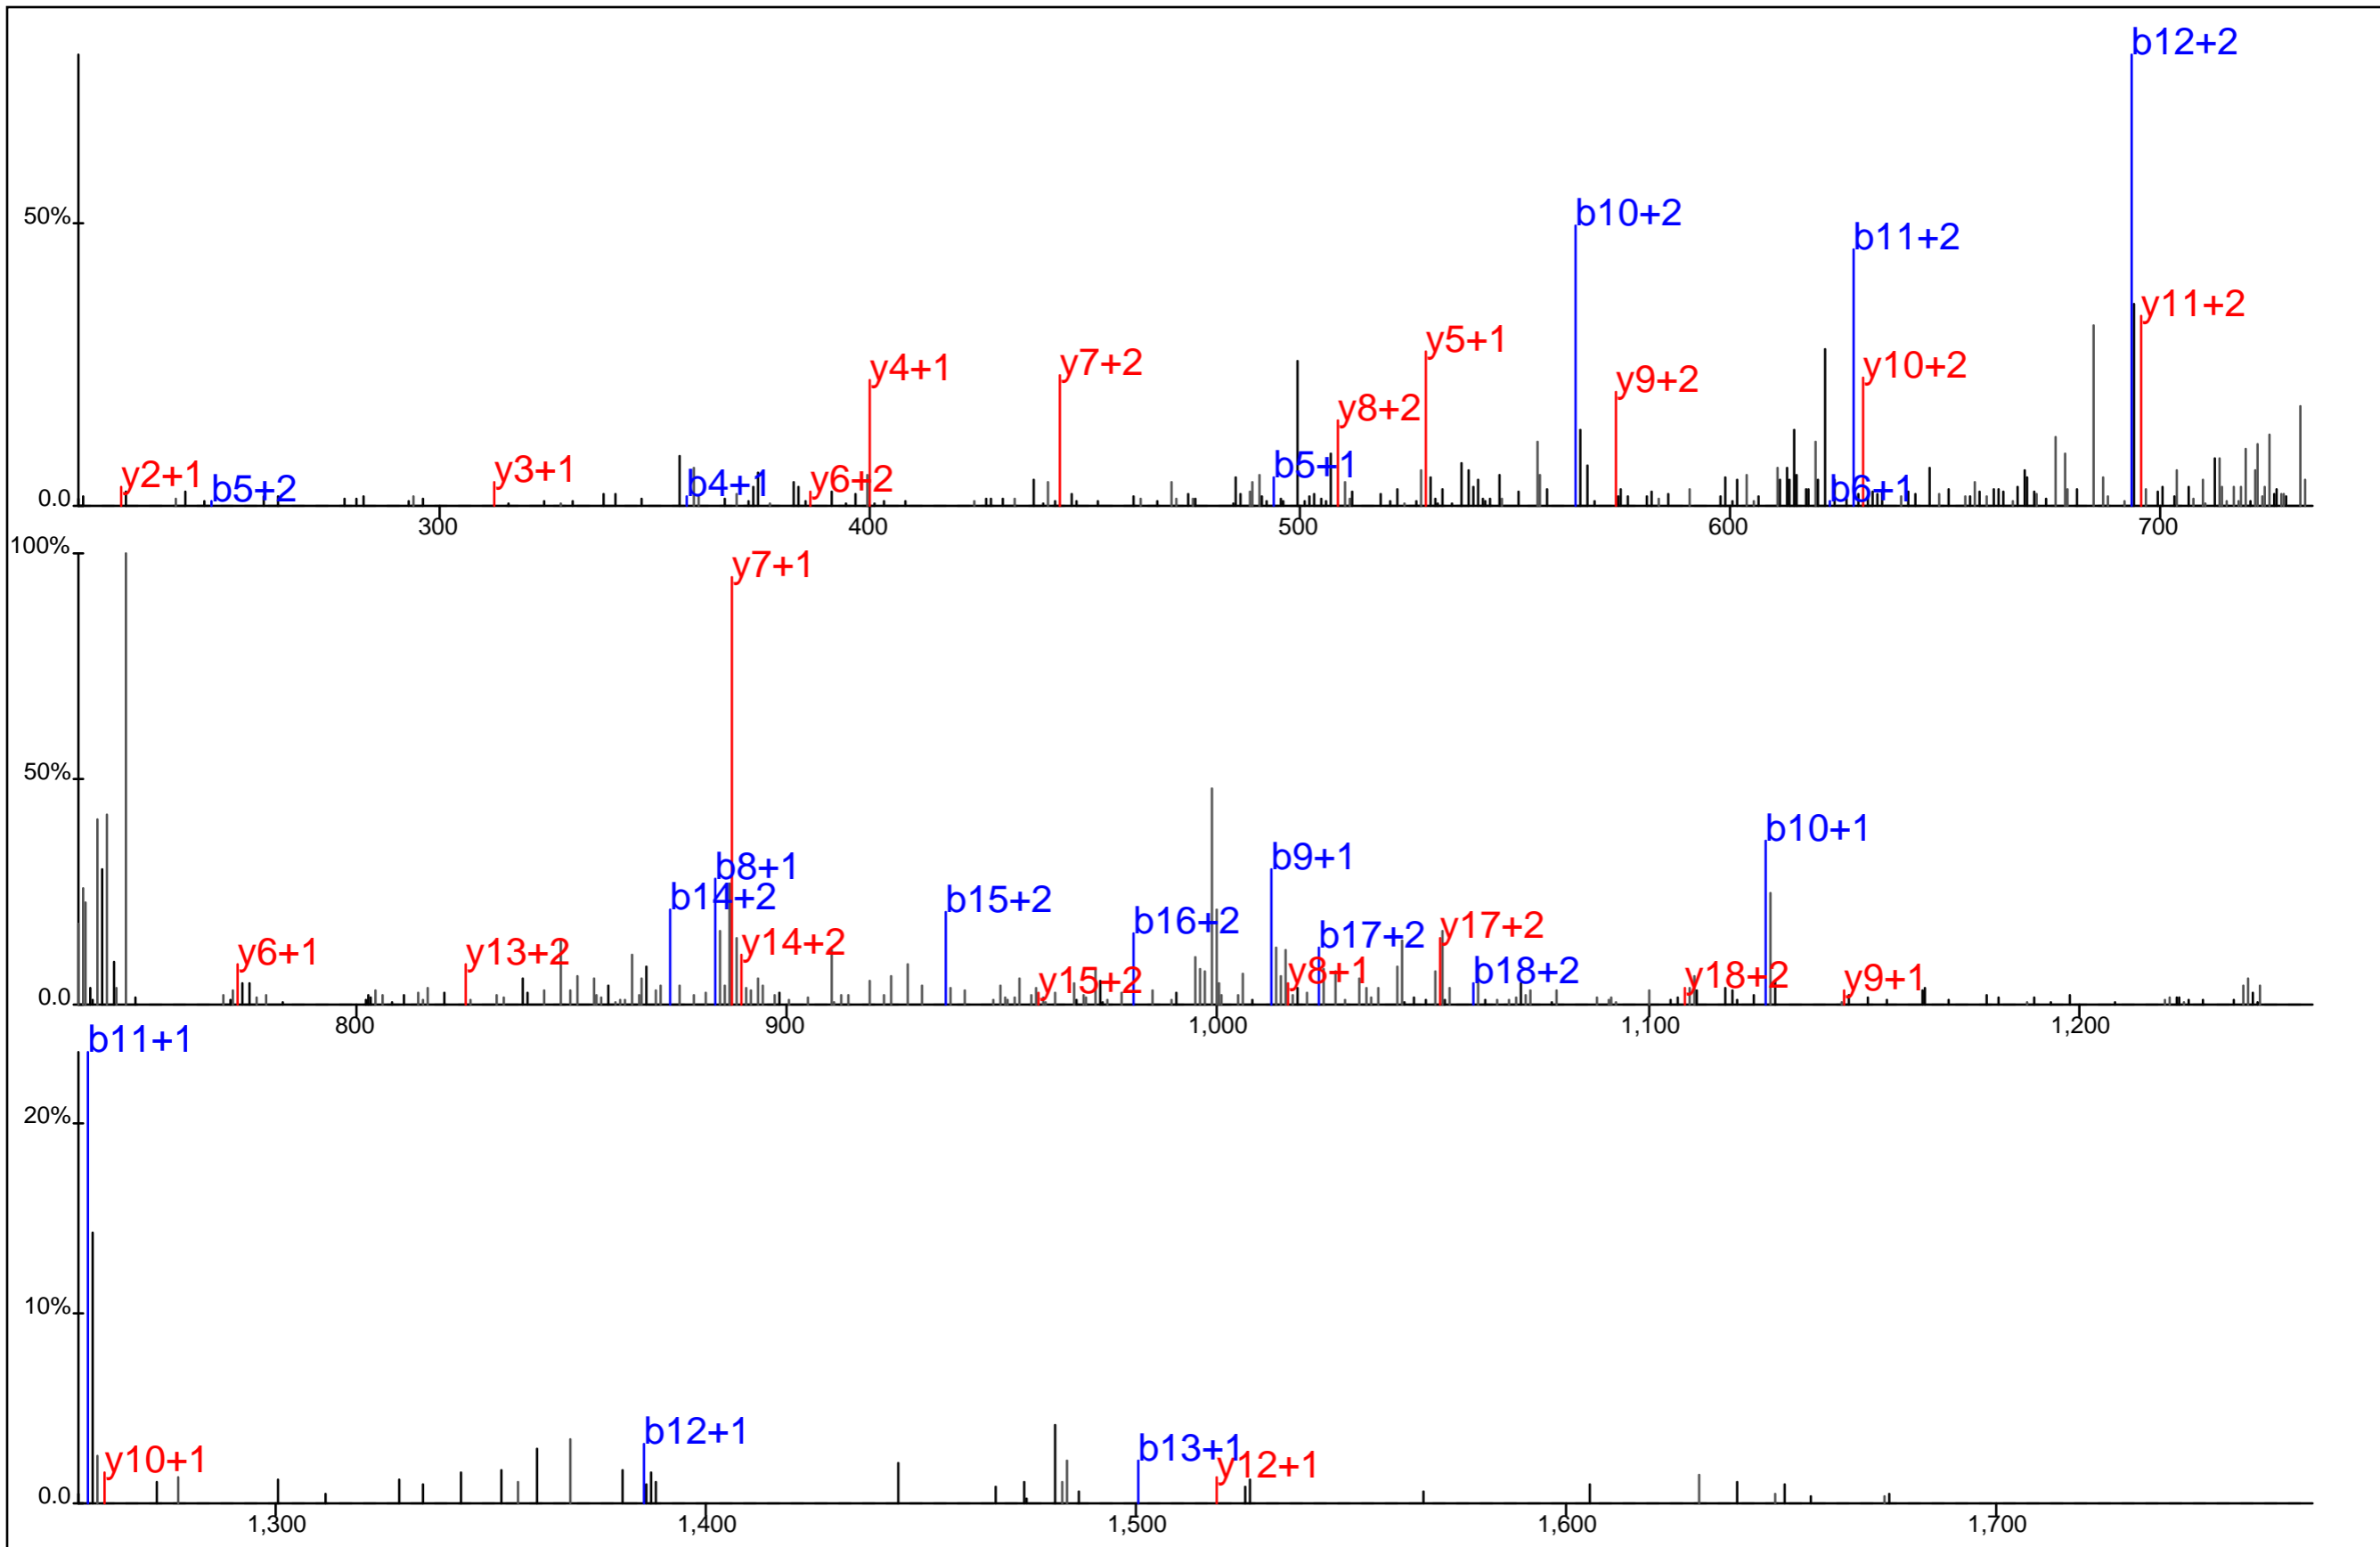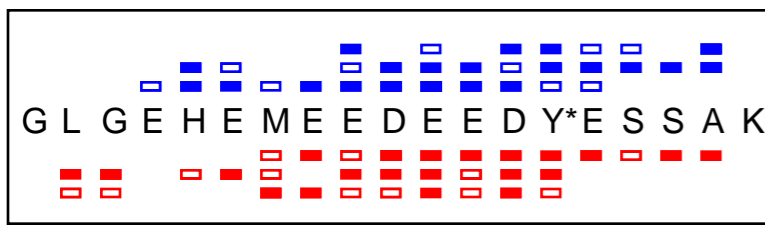

Protein Name: Oxytocinase  
 gi Accession: 2209276  
 Precursor Mass: 757.9529+3  
 Delta Mass: 3.468 ppm  
 XCorr: 43.18



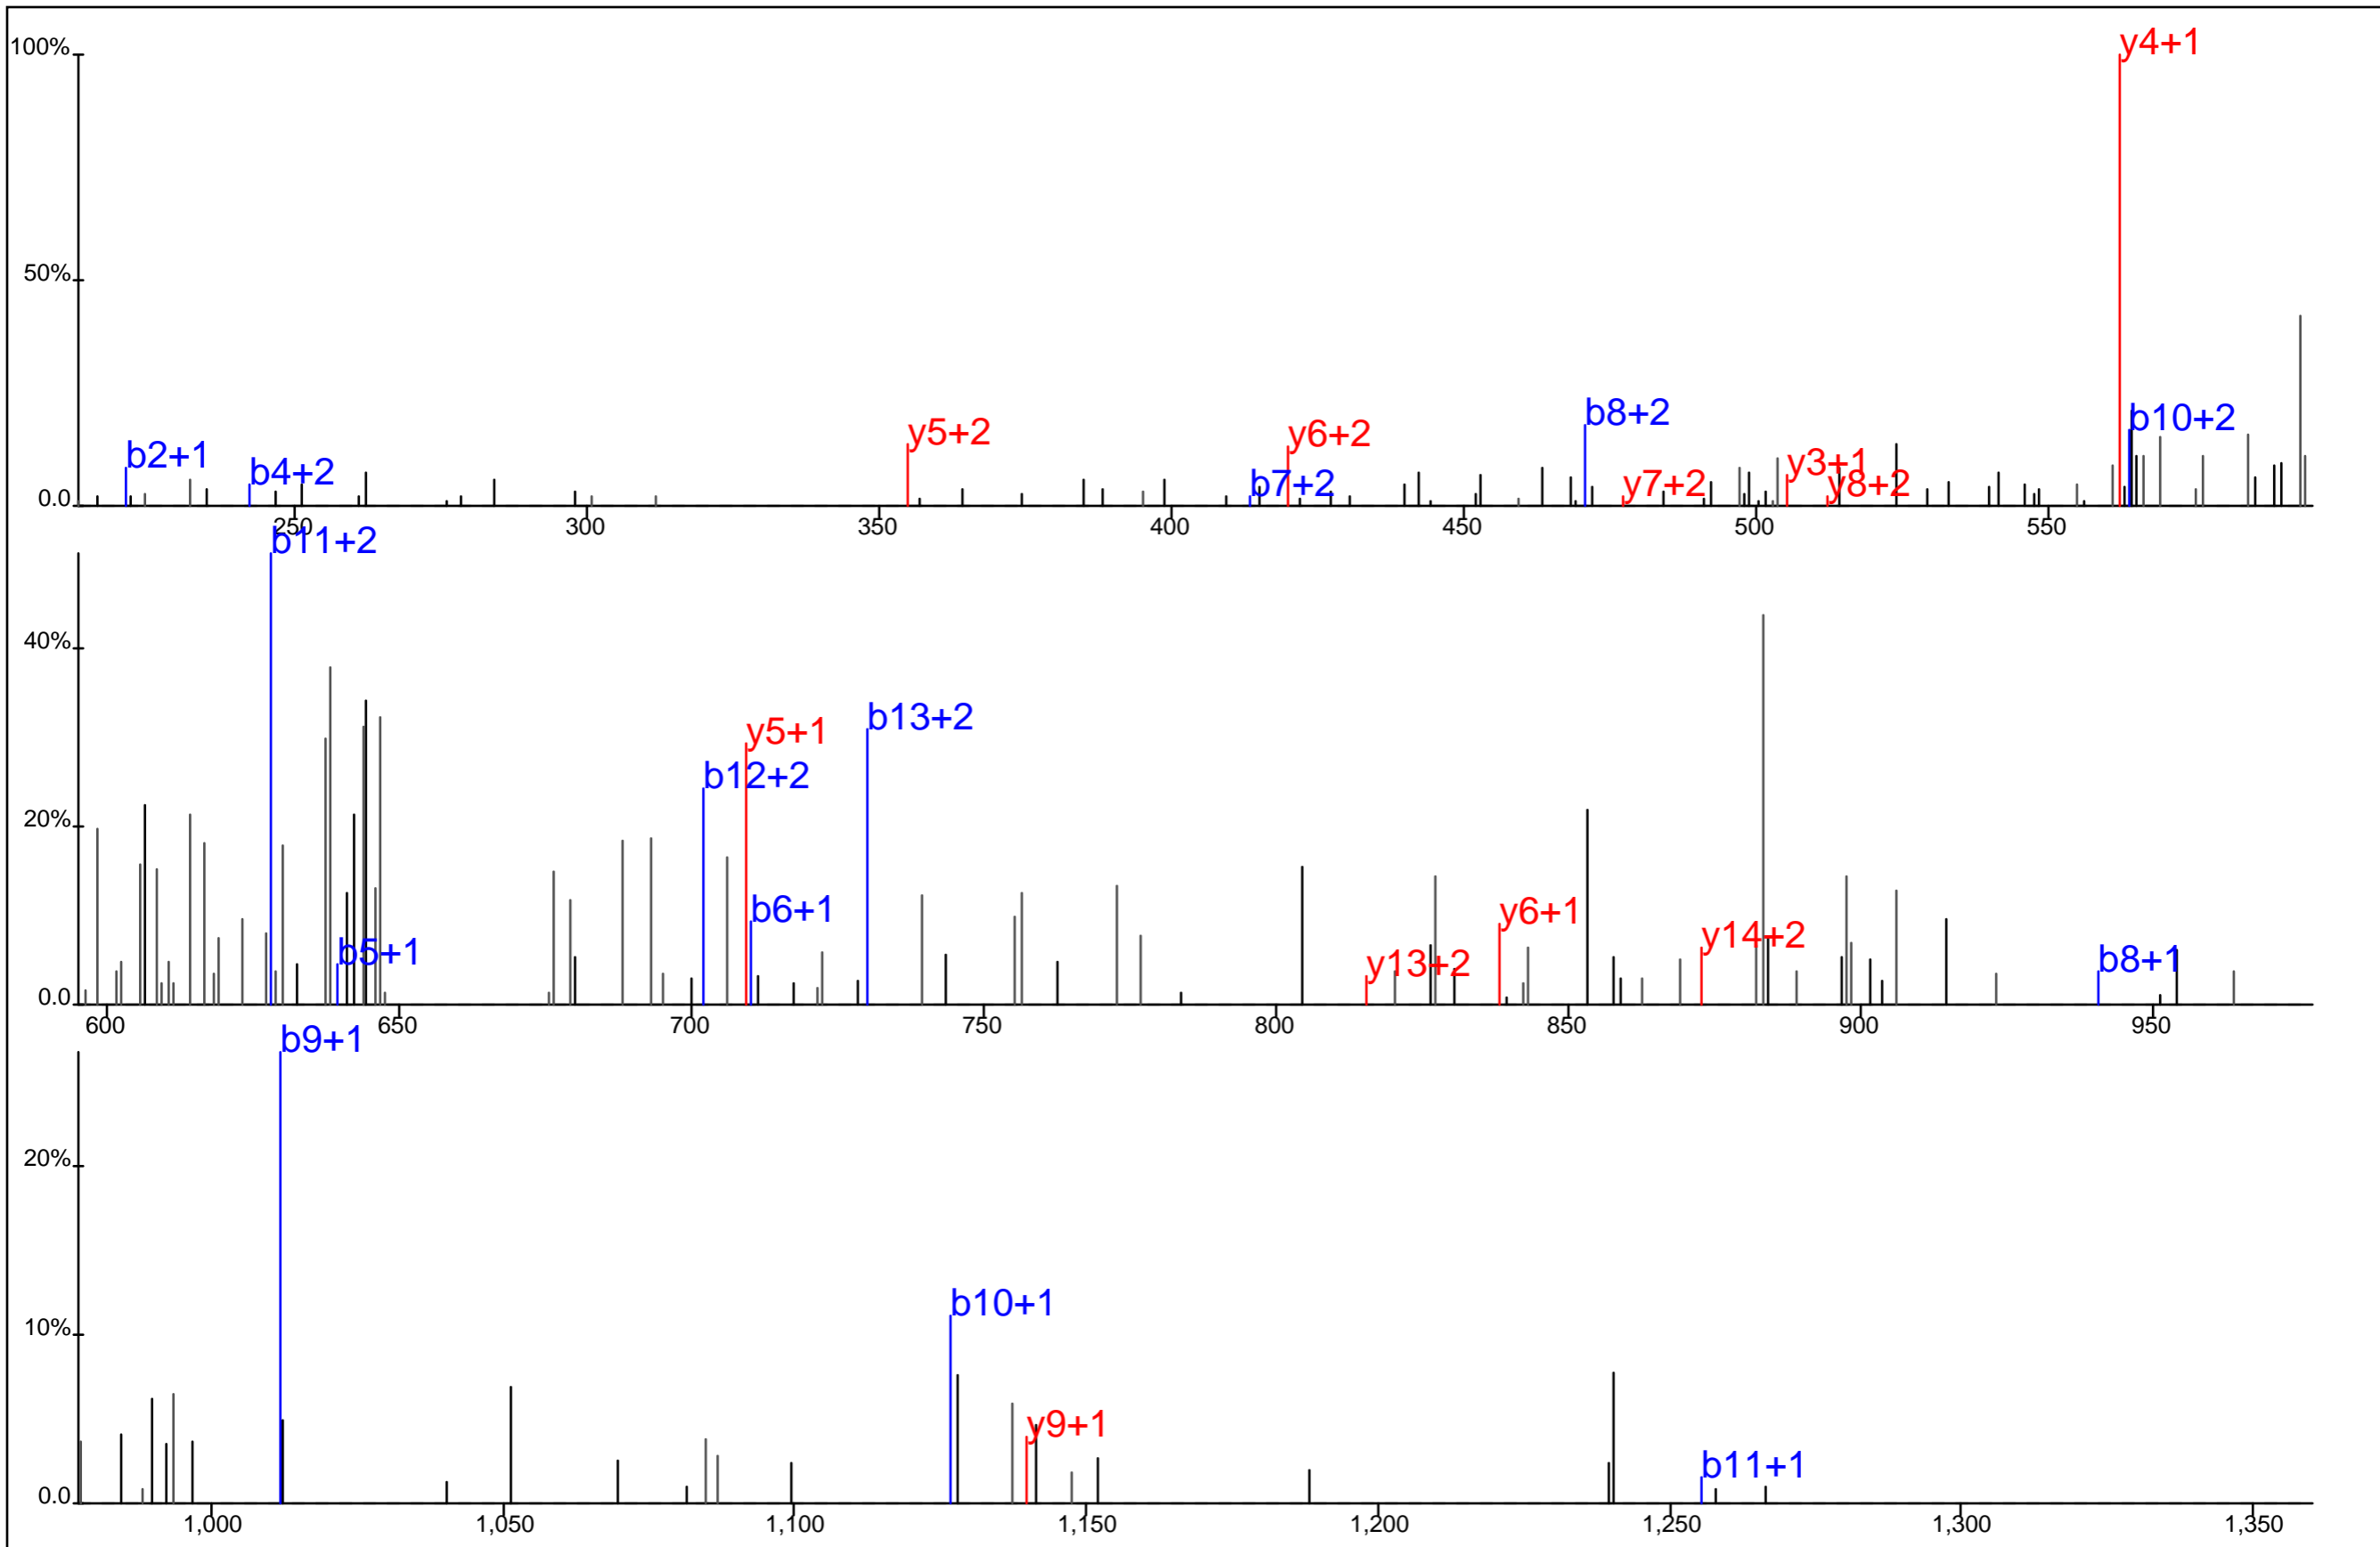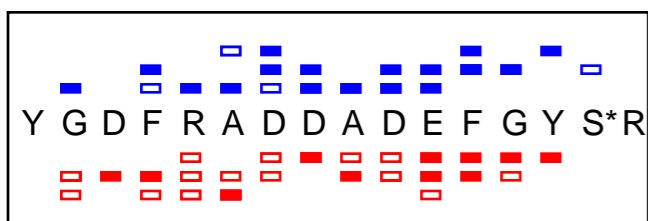

Protein Name: p100 coactivator  
 gi Accession: 77404397  
 Precursor Mass: 655.2579+3  
 Delta Mass: 5.005 ppm  
 XCorr: 20.59

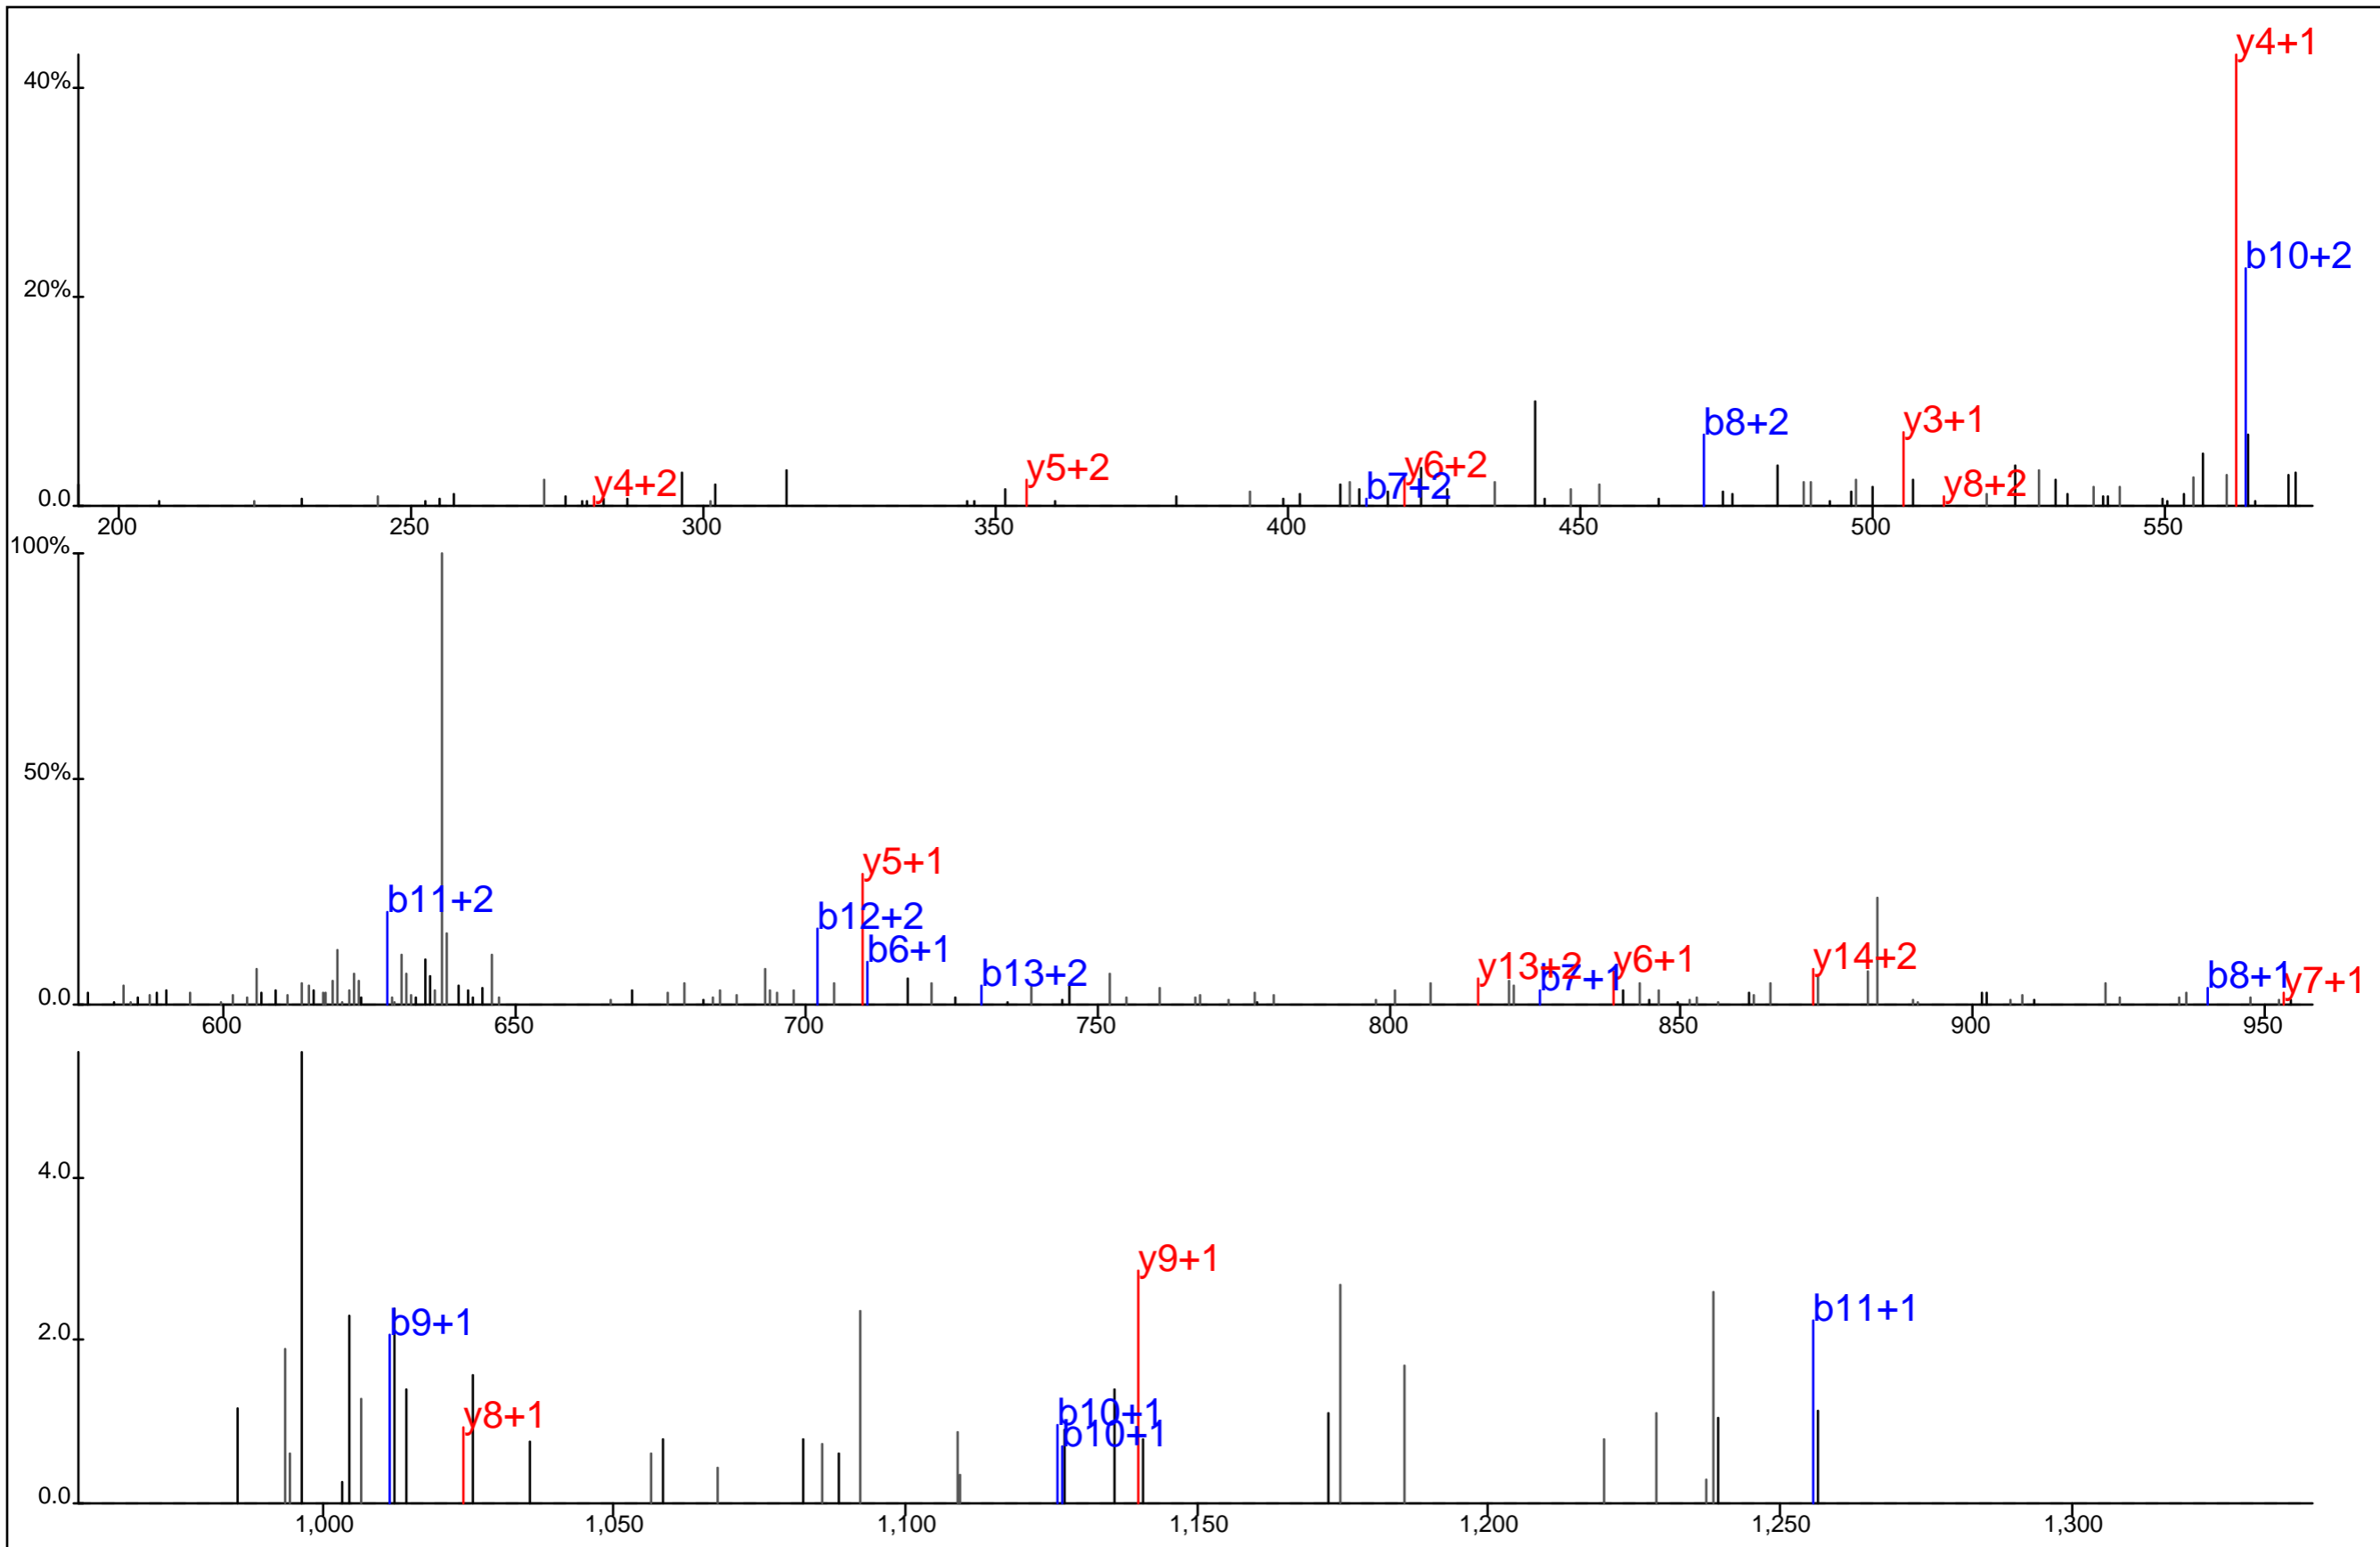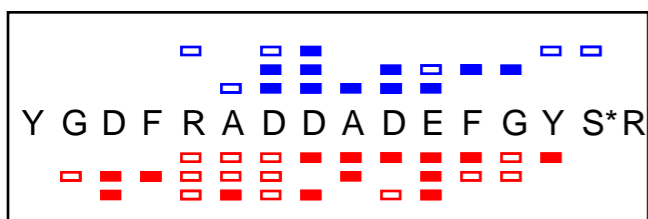

Protein Name: p100 coactivator  
 gi Accession: 77404397  
 Precursor Mass: 655.2560+3  
 Delta Mass: 2.113 ppm  
 XCorr: 19.8

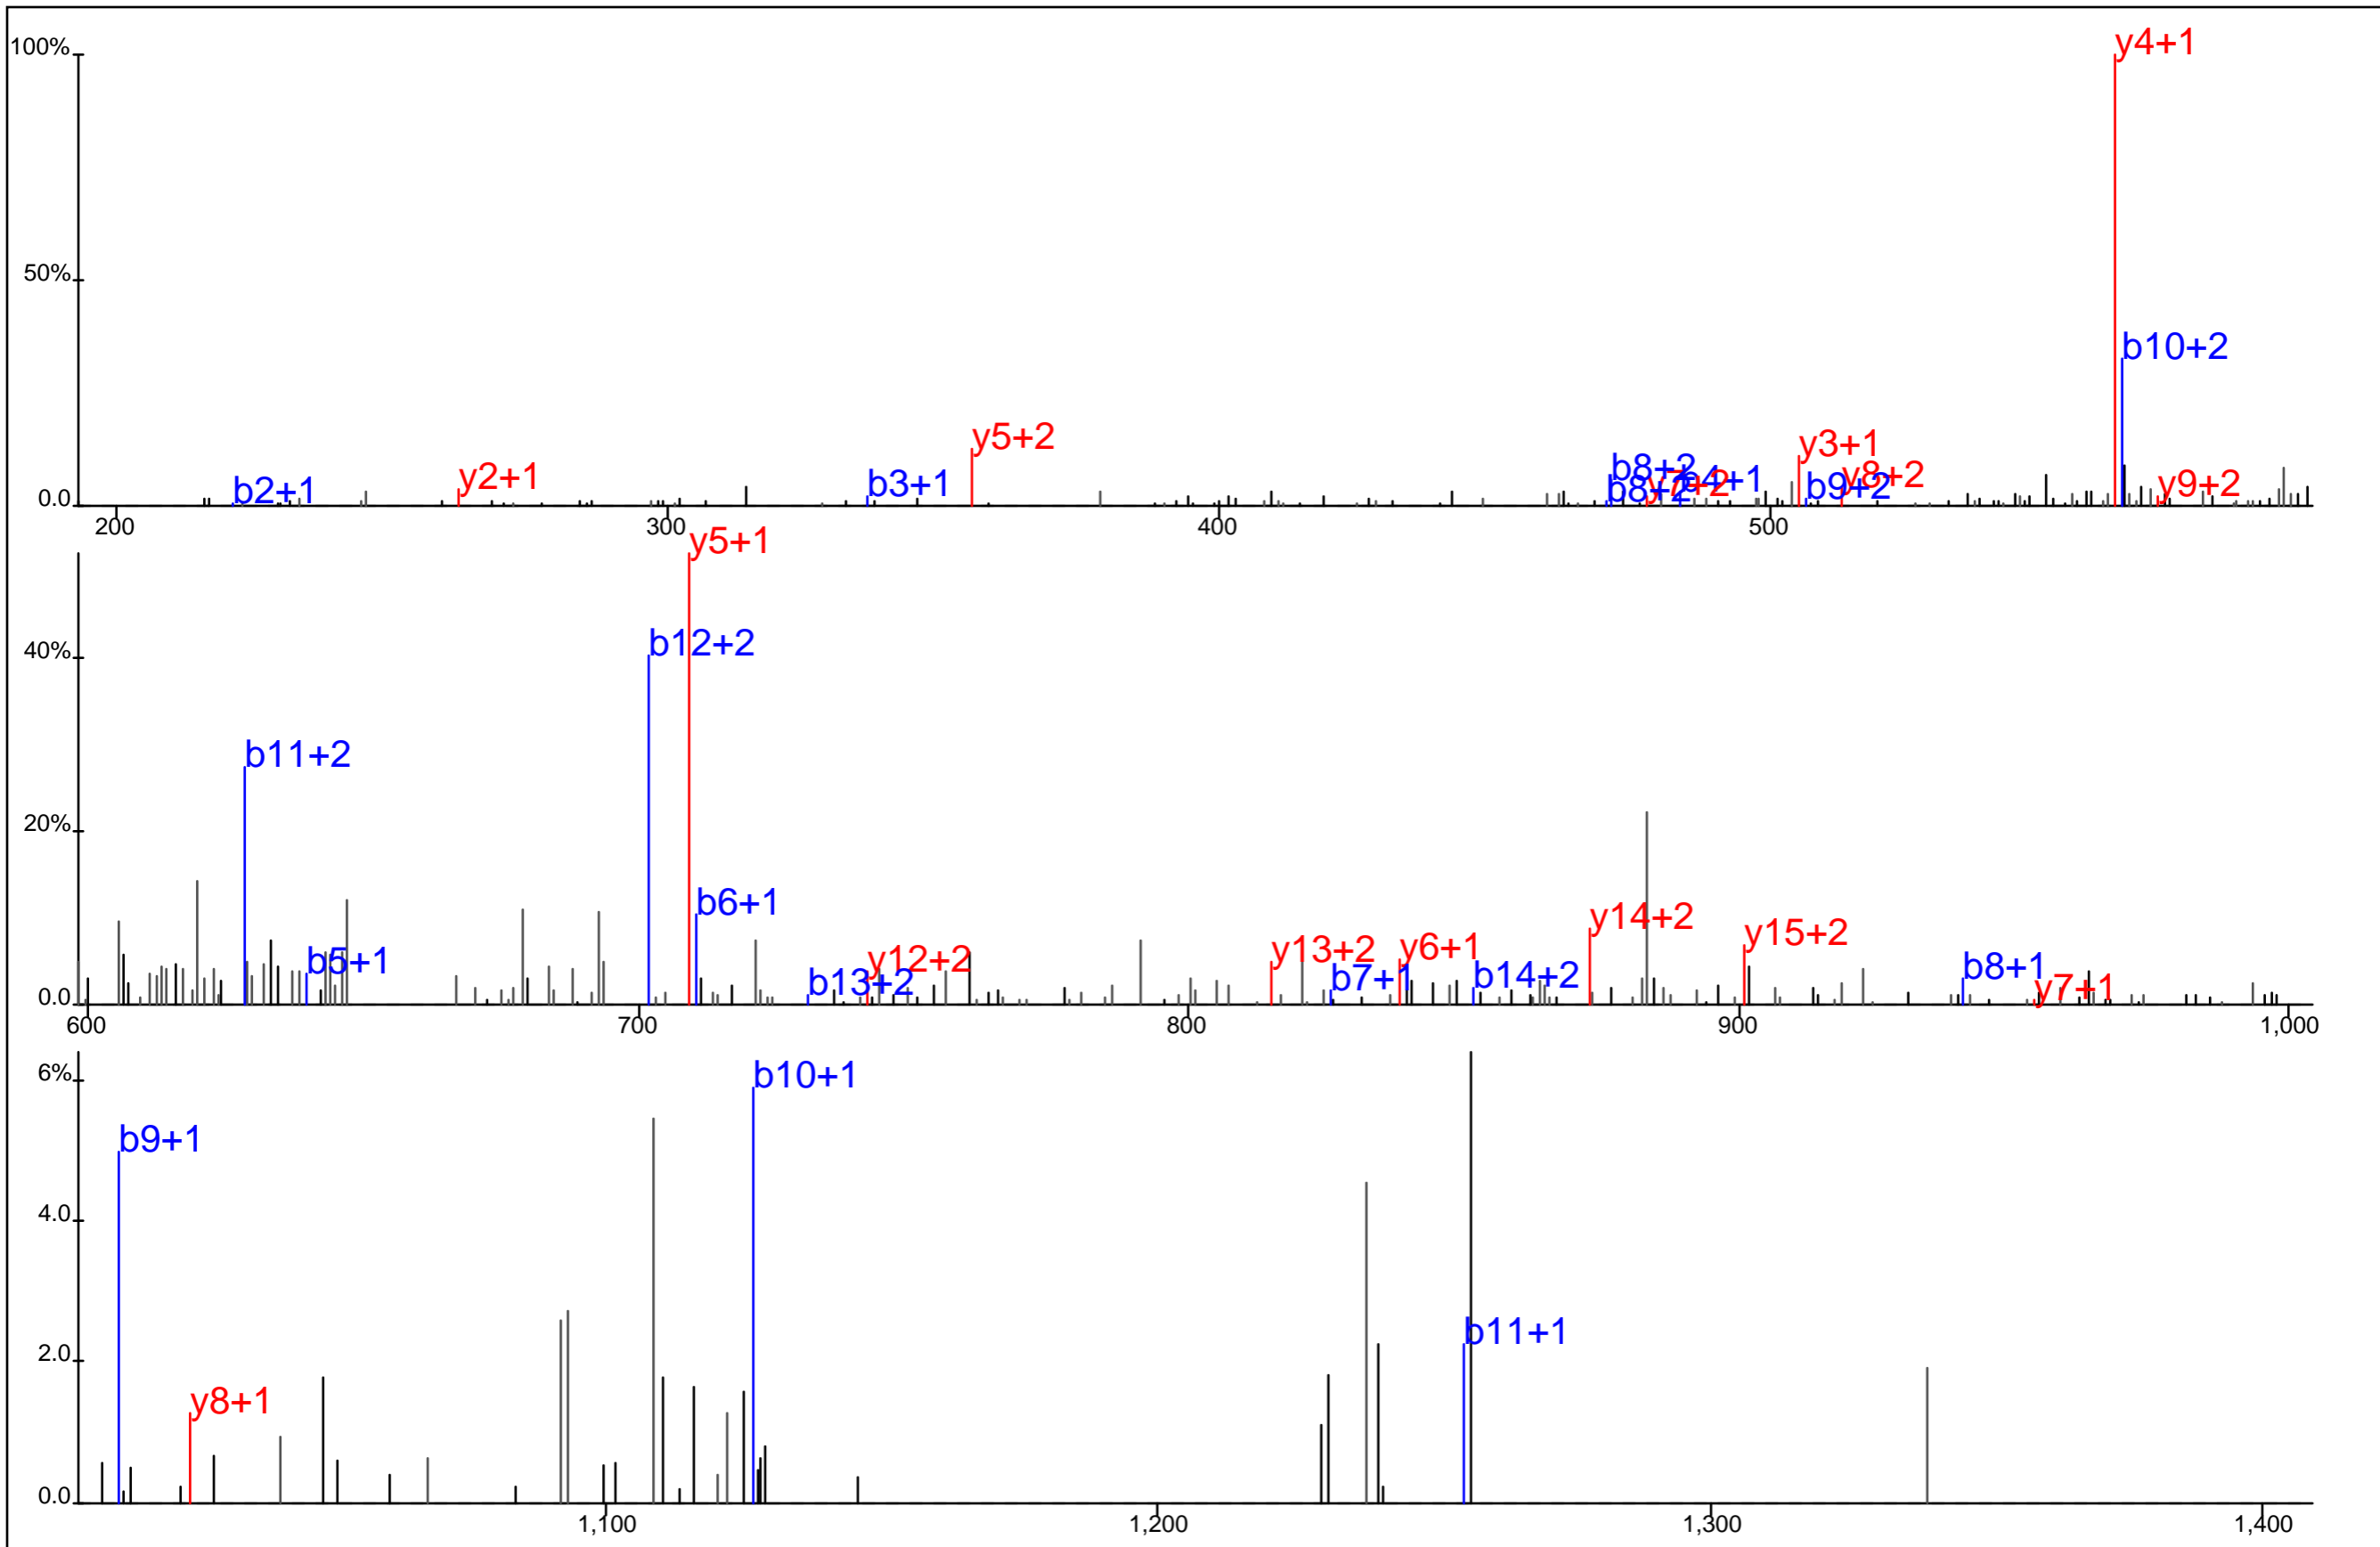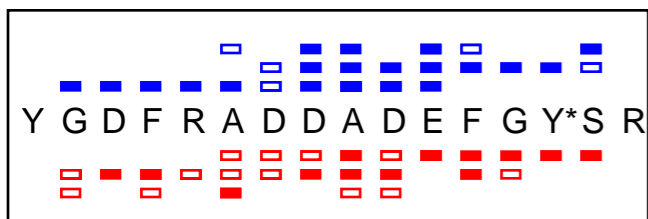

Protein Name: p100 coactivator  
 gi Accession: 77404397  
 Precursor Mass: 655.2556+3  
 Delta Mass: 1.460 ppm  
 XCorr: 33.32

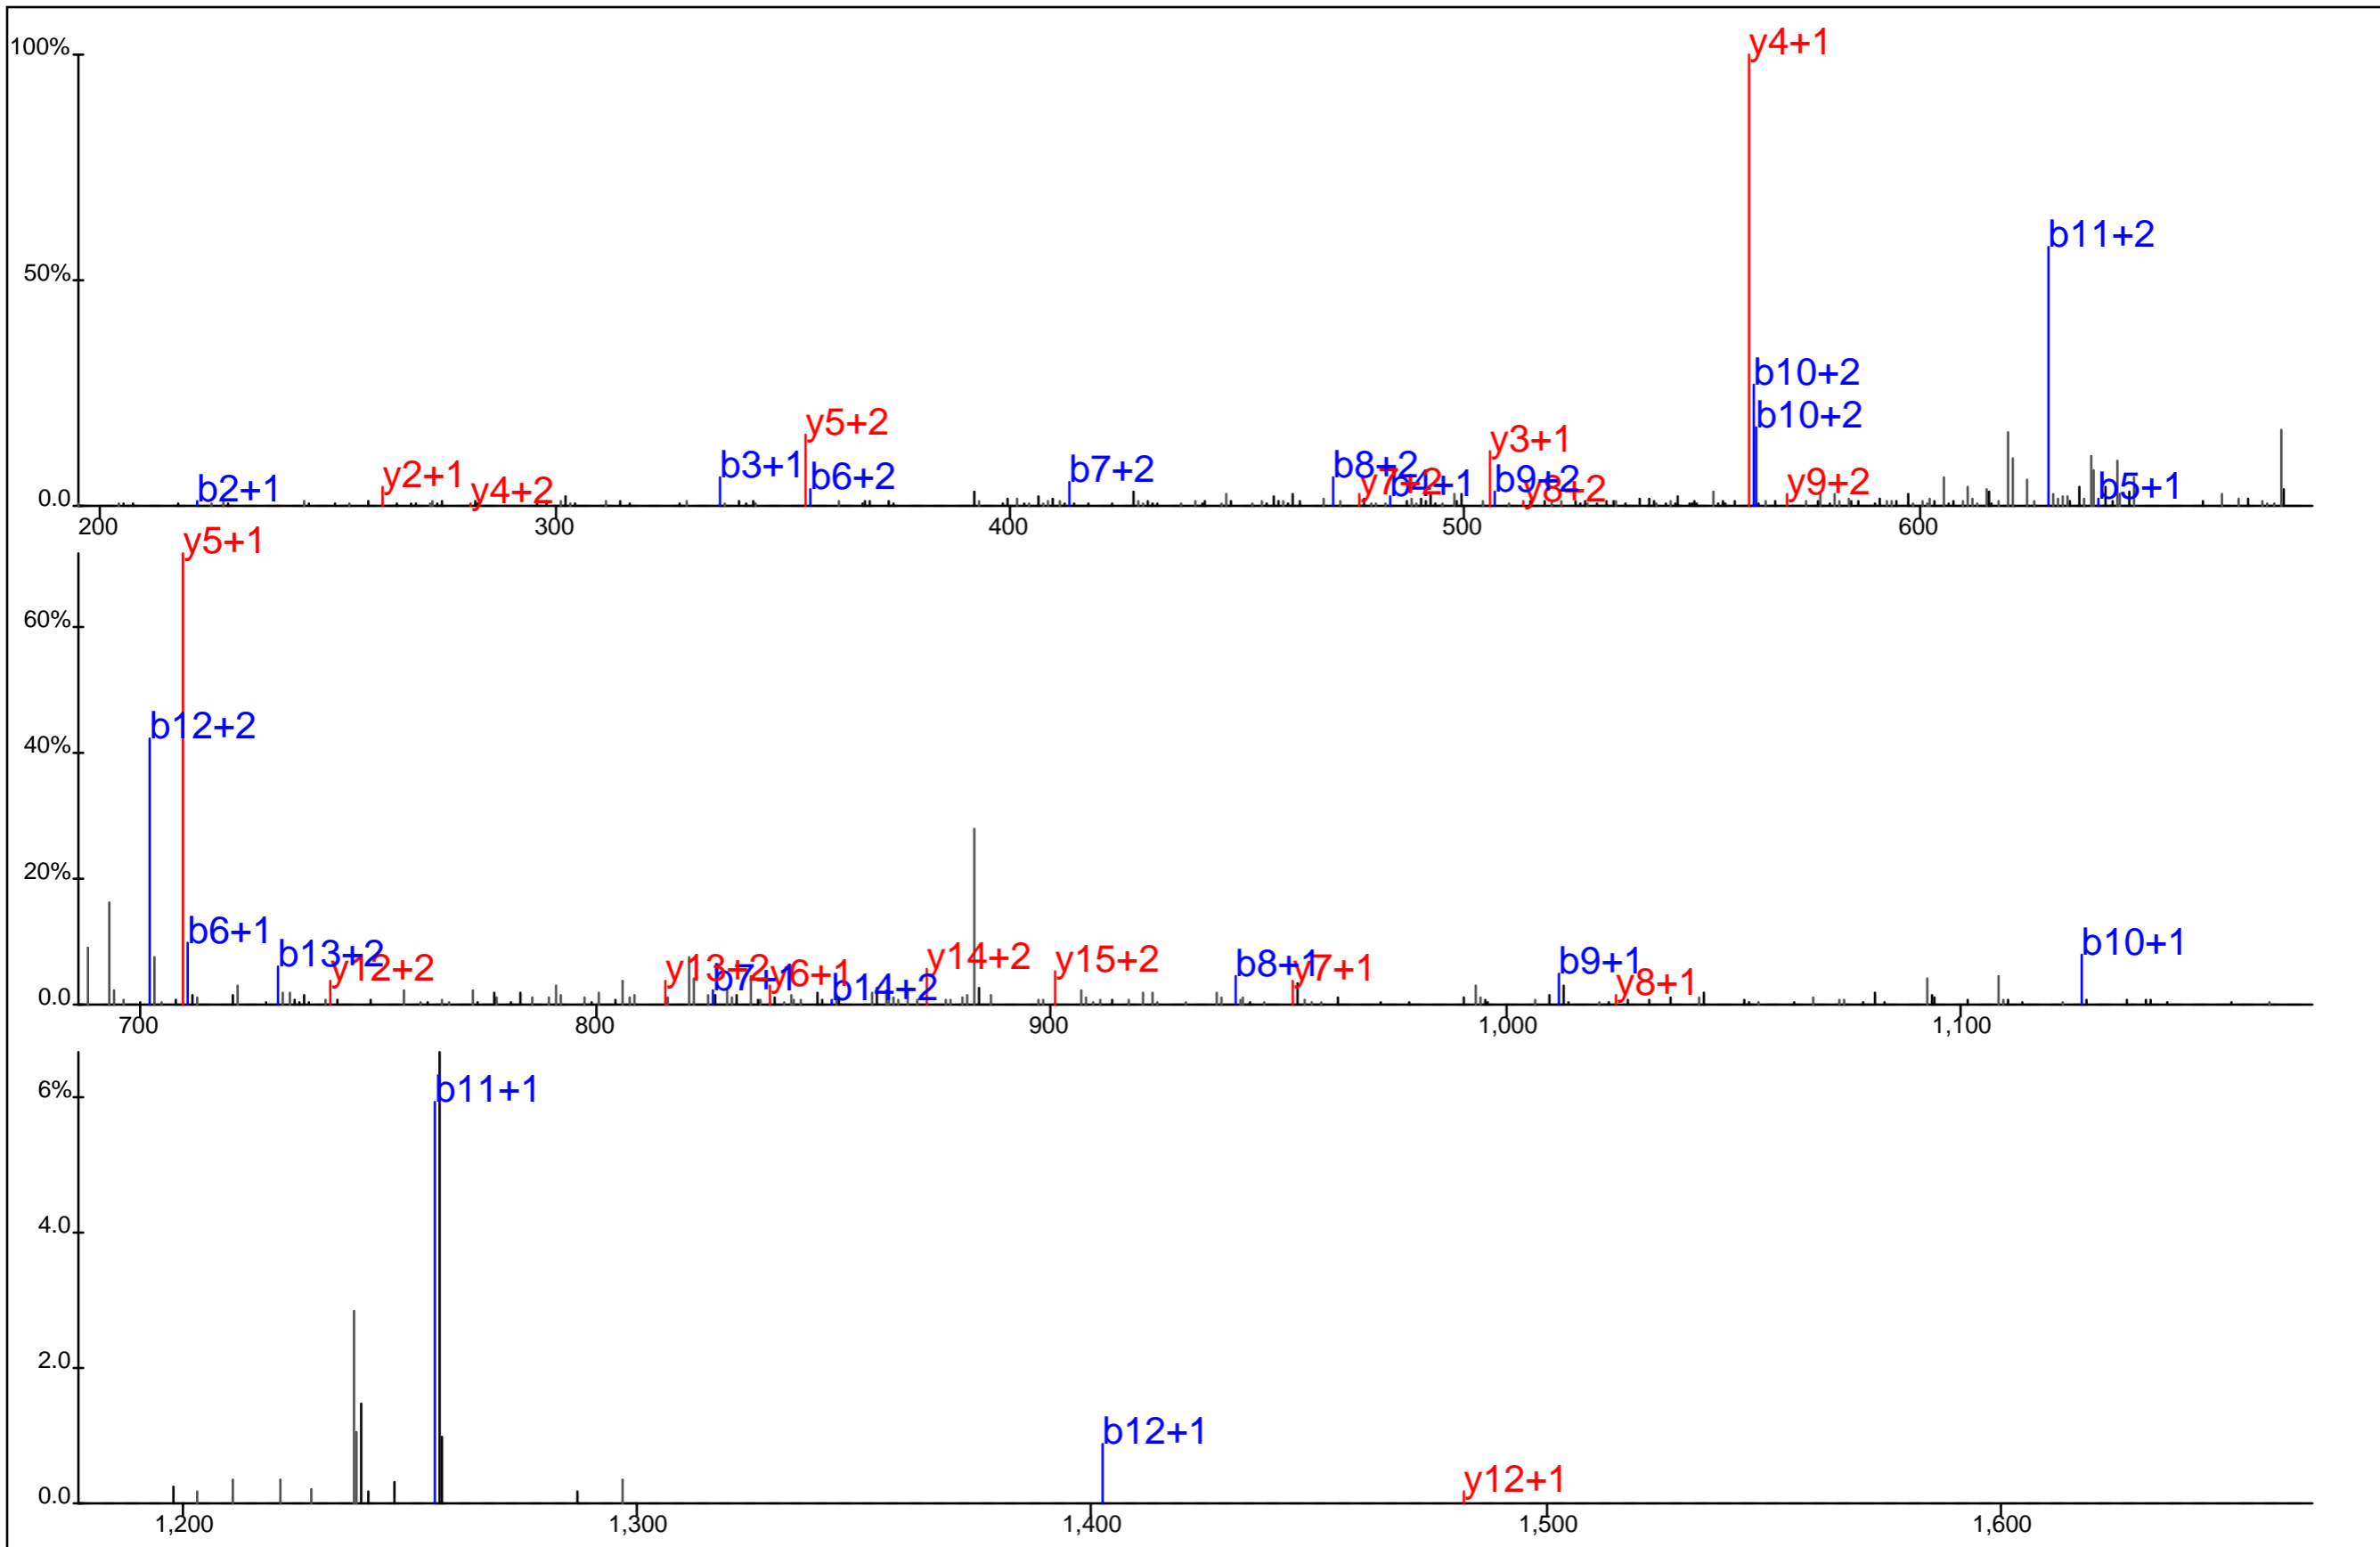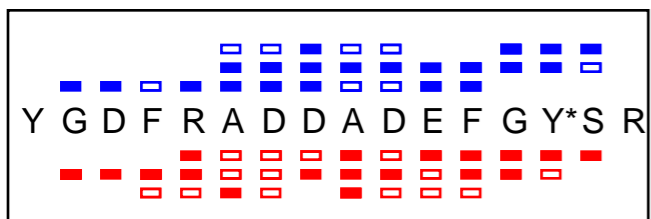

Protein Name: p100 coactivator  
 gi Accession: 77404397  
 Precursor Mass: 655.2578+3  
 Delta Mass: 4.725 ppm  
 XCorr: 46.61

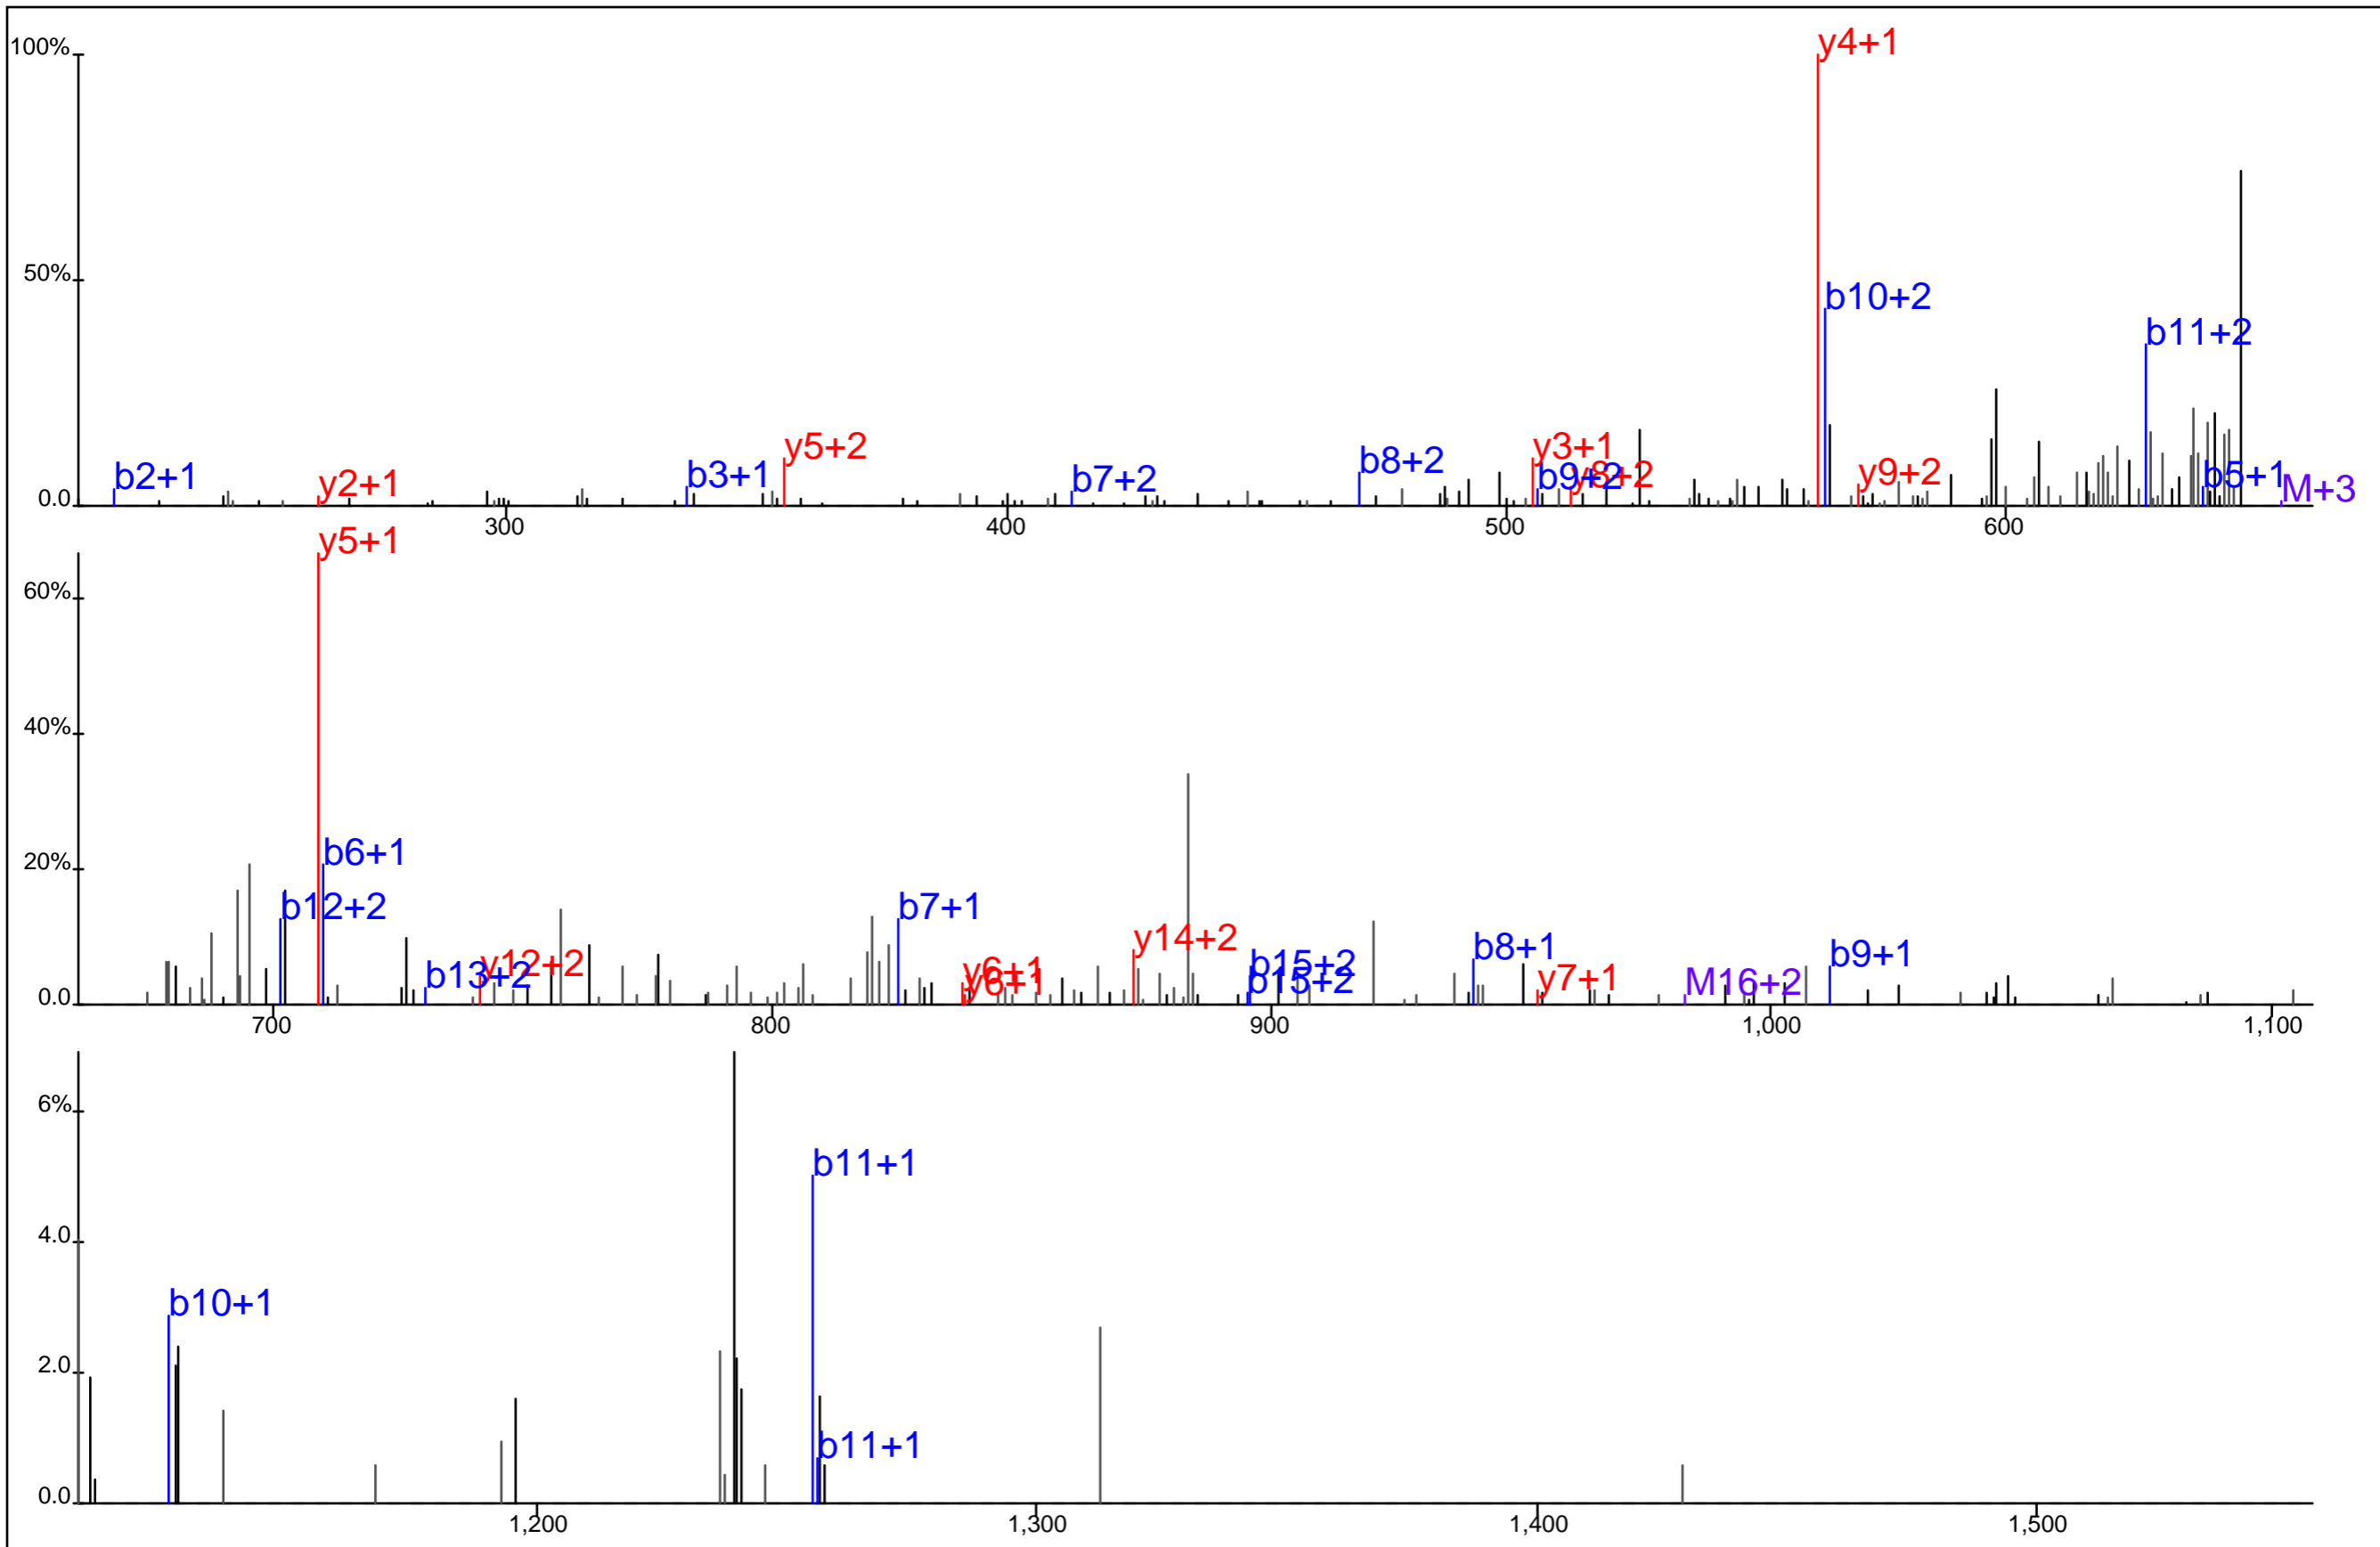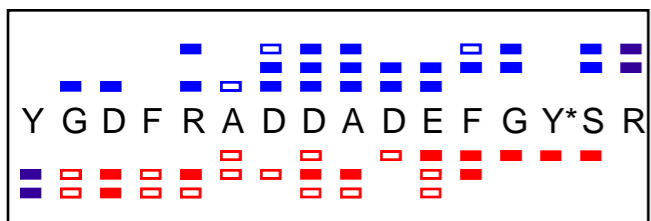

Protein Name: p100 coactivator  
 gi Accession: 77404397  
 Precursor Mass: 655.2559+3  
 Delta Mass: 1.832 ppm  
 XCorr: 30.01



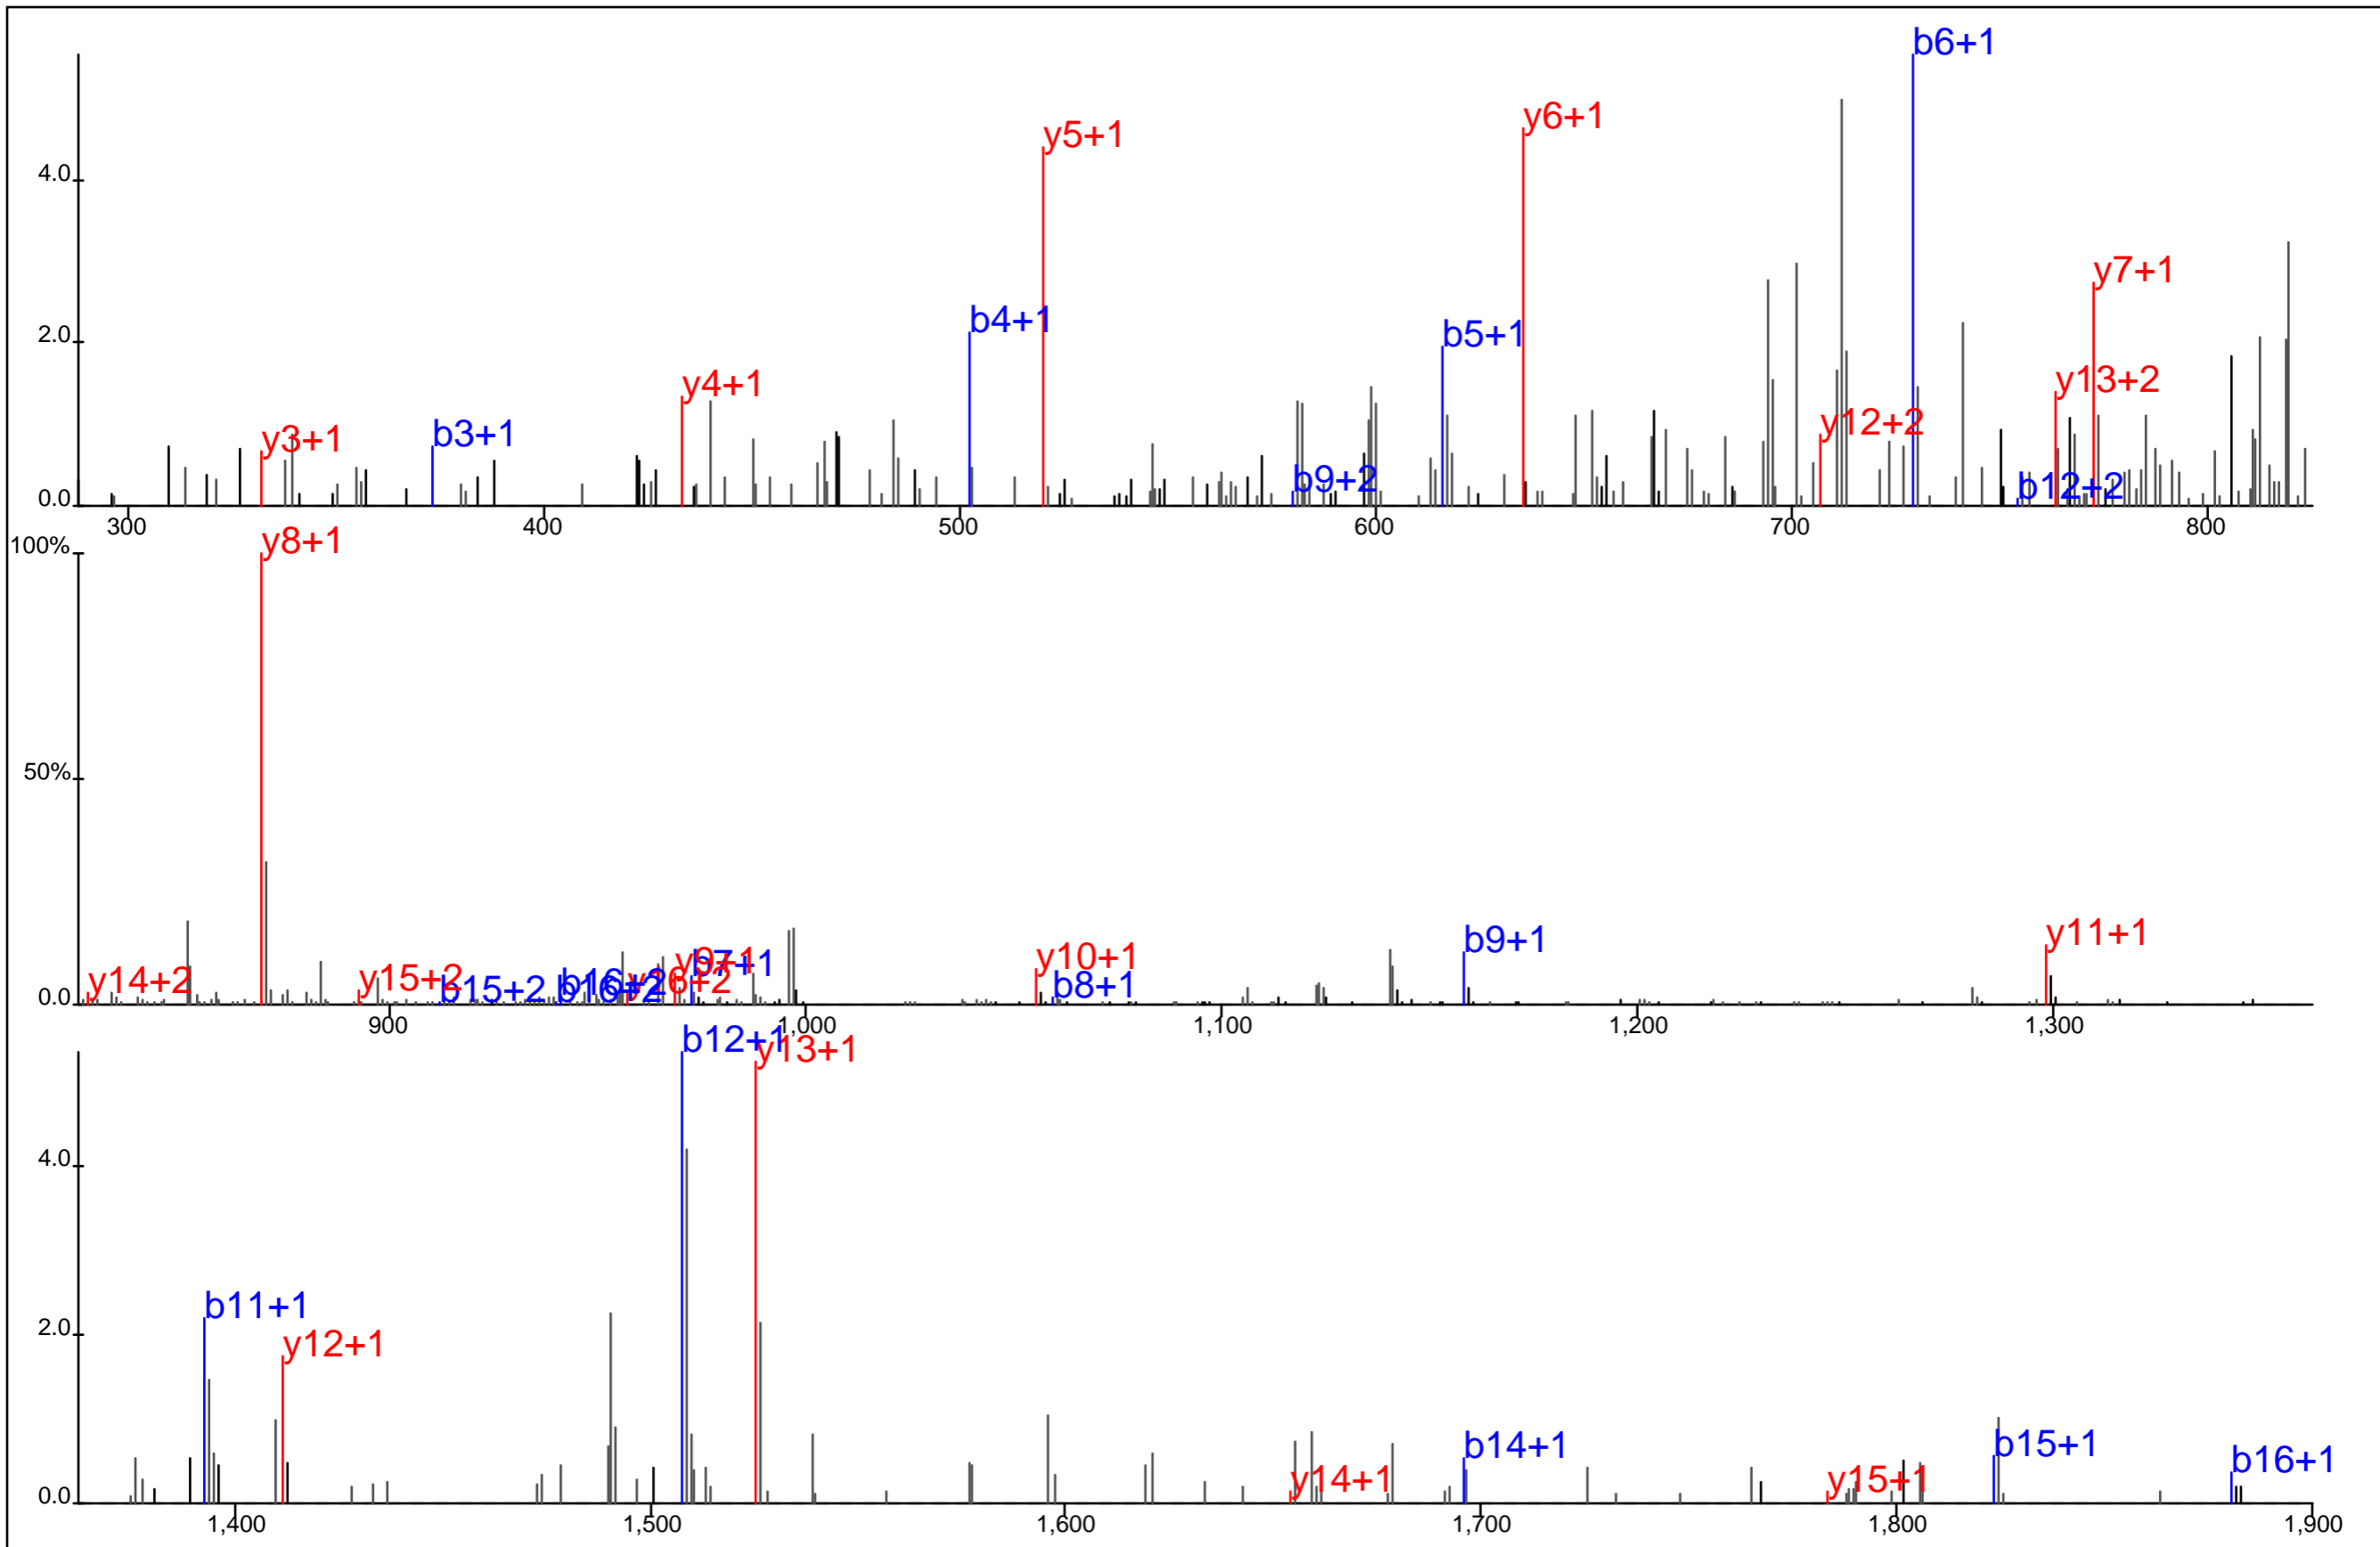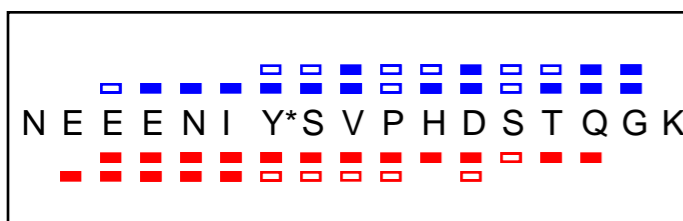

Protein Name: p190 RhoGAP  
 gi Accession: 150417981  
 Precursor Mass: 1,013.9269+2  
 Delta Mass: 3.719 ppm  
 XCorr: 55.88

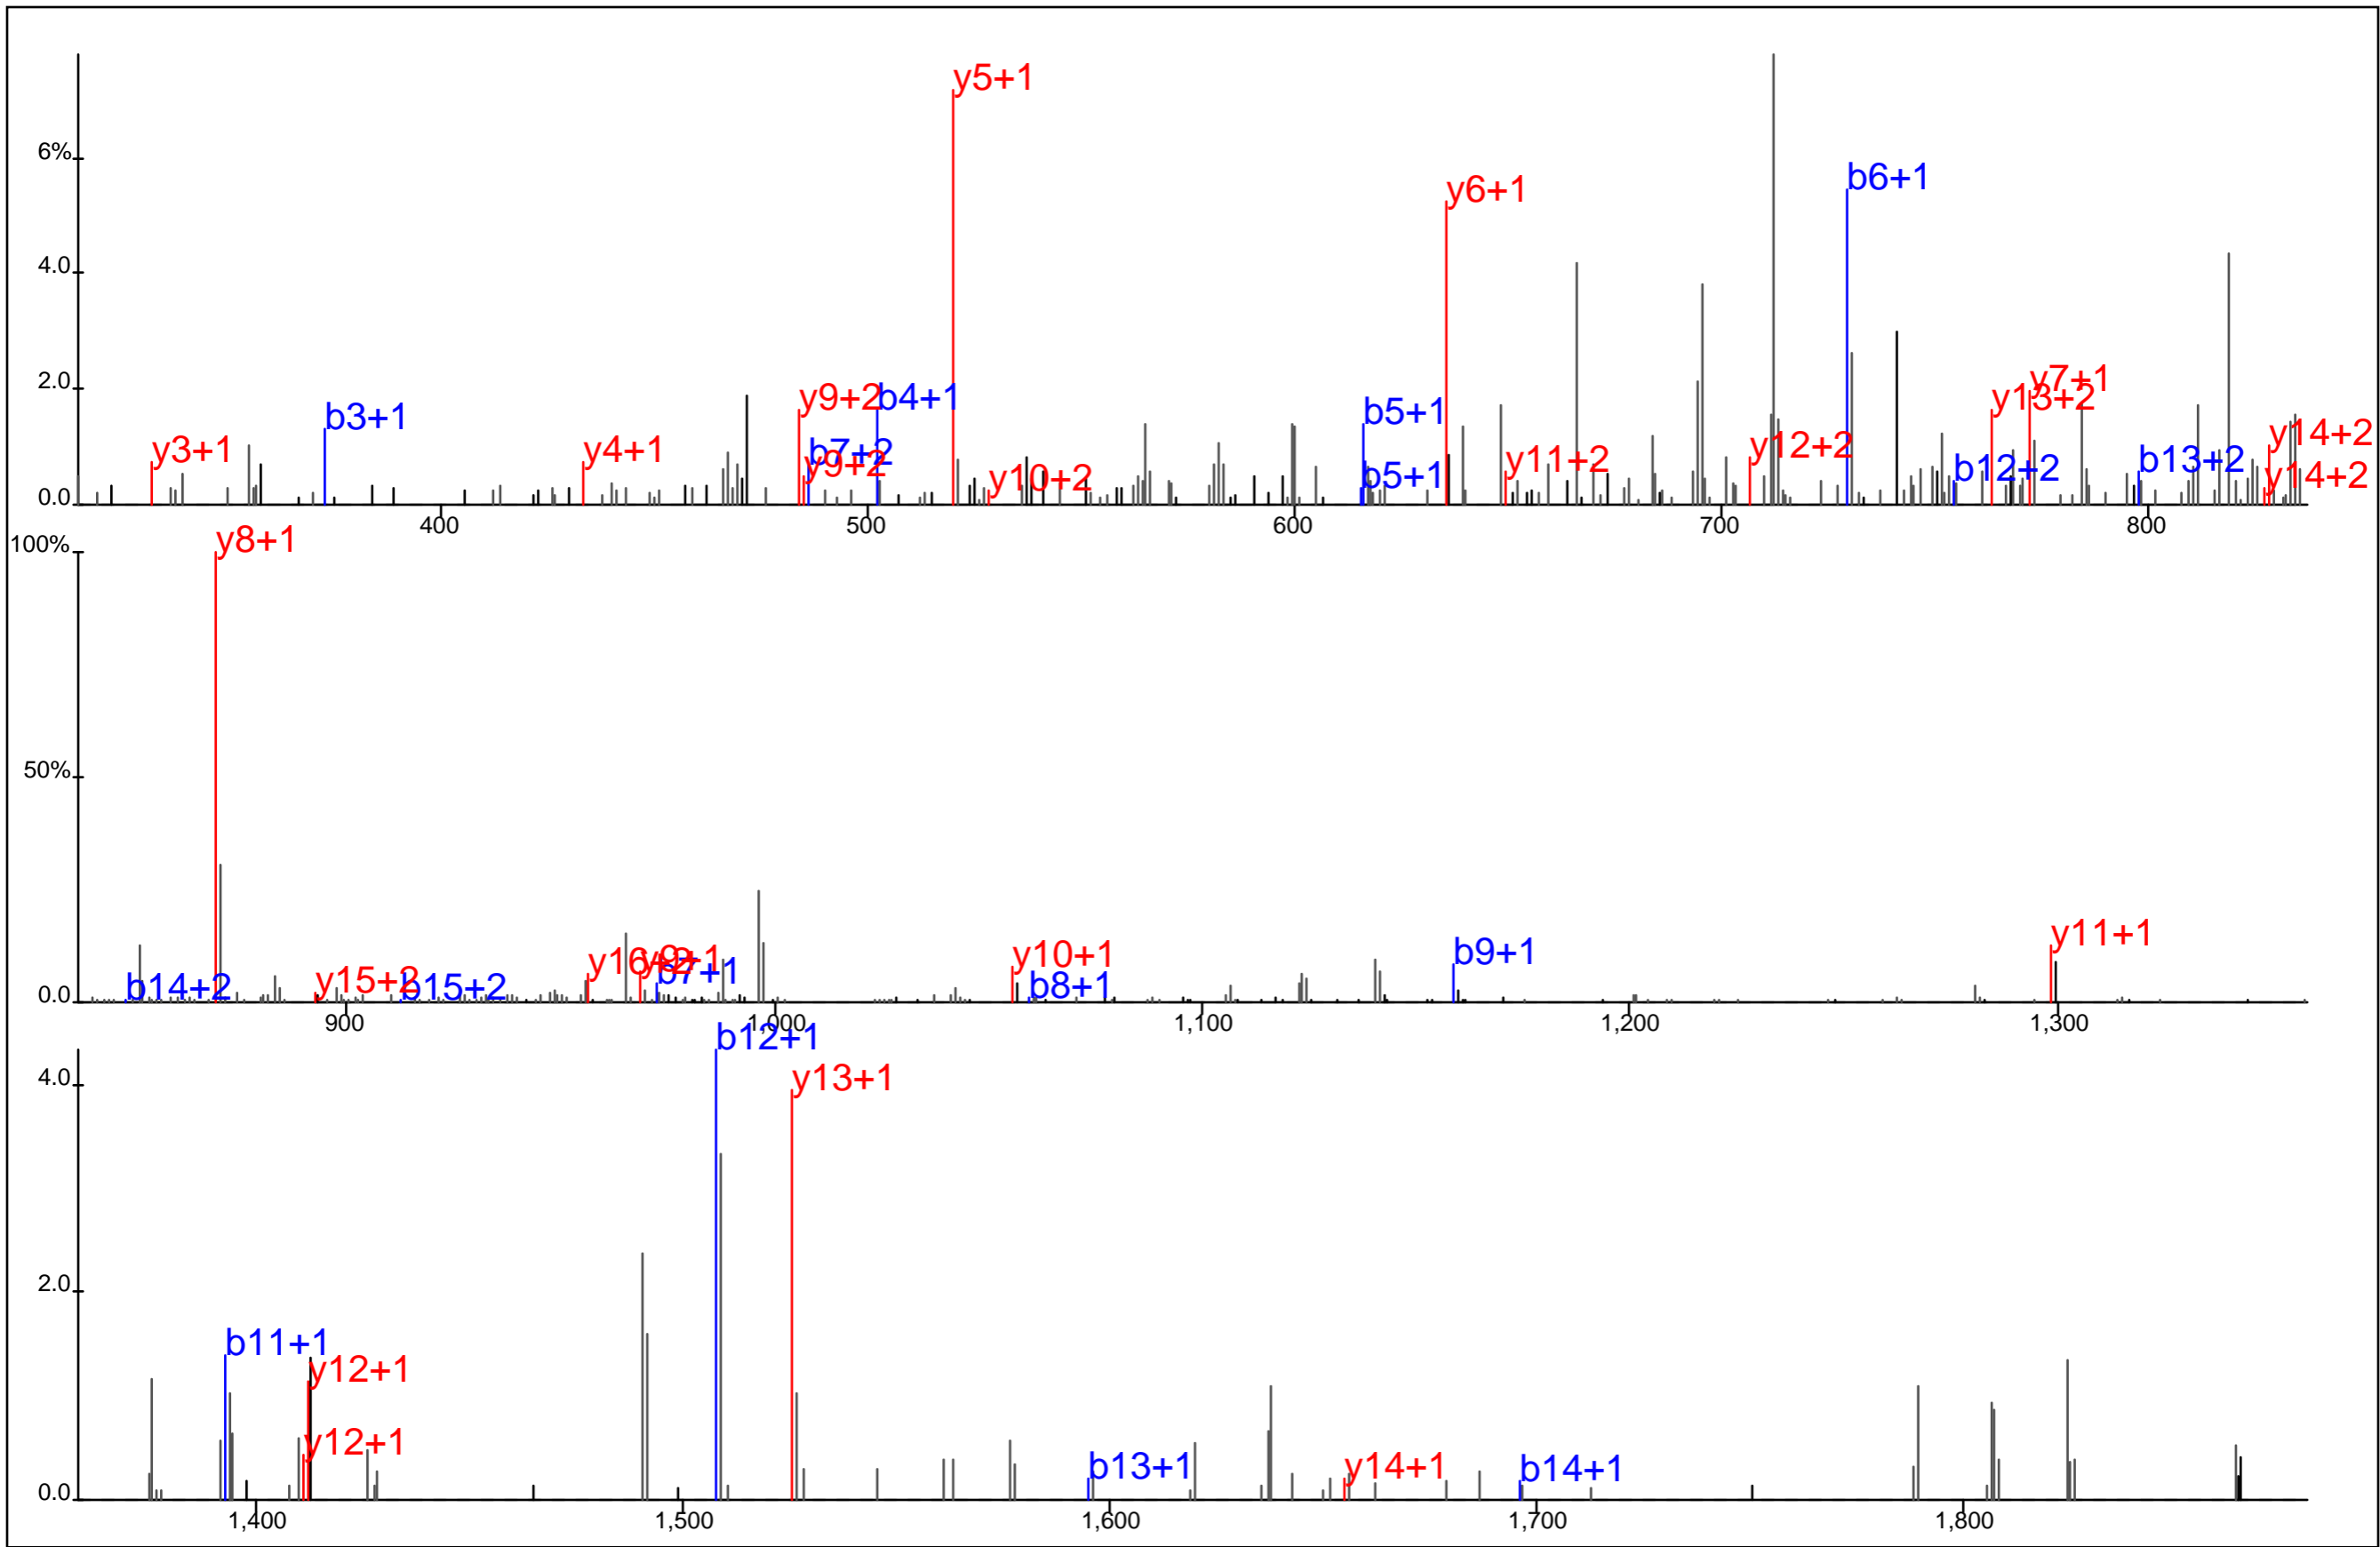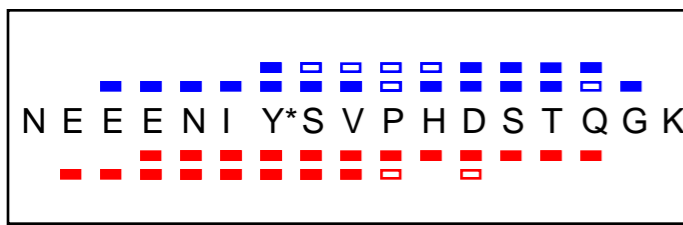

Protein Name: p190 RhoGAP  
 gi Accession: 150417981  
 Precursor Mass: 1,013.9238+2  
 Delta Mass: 0.709 ppm  
 XCorr: 51.84

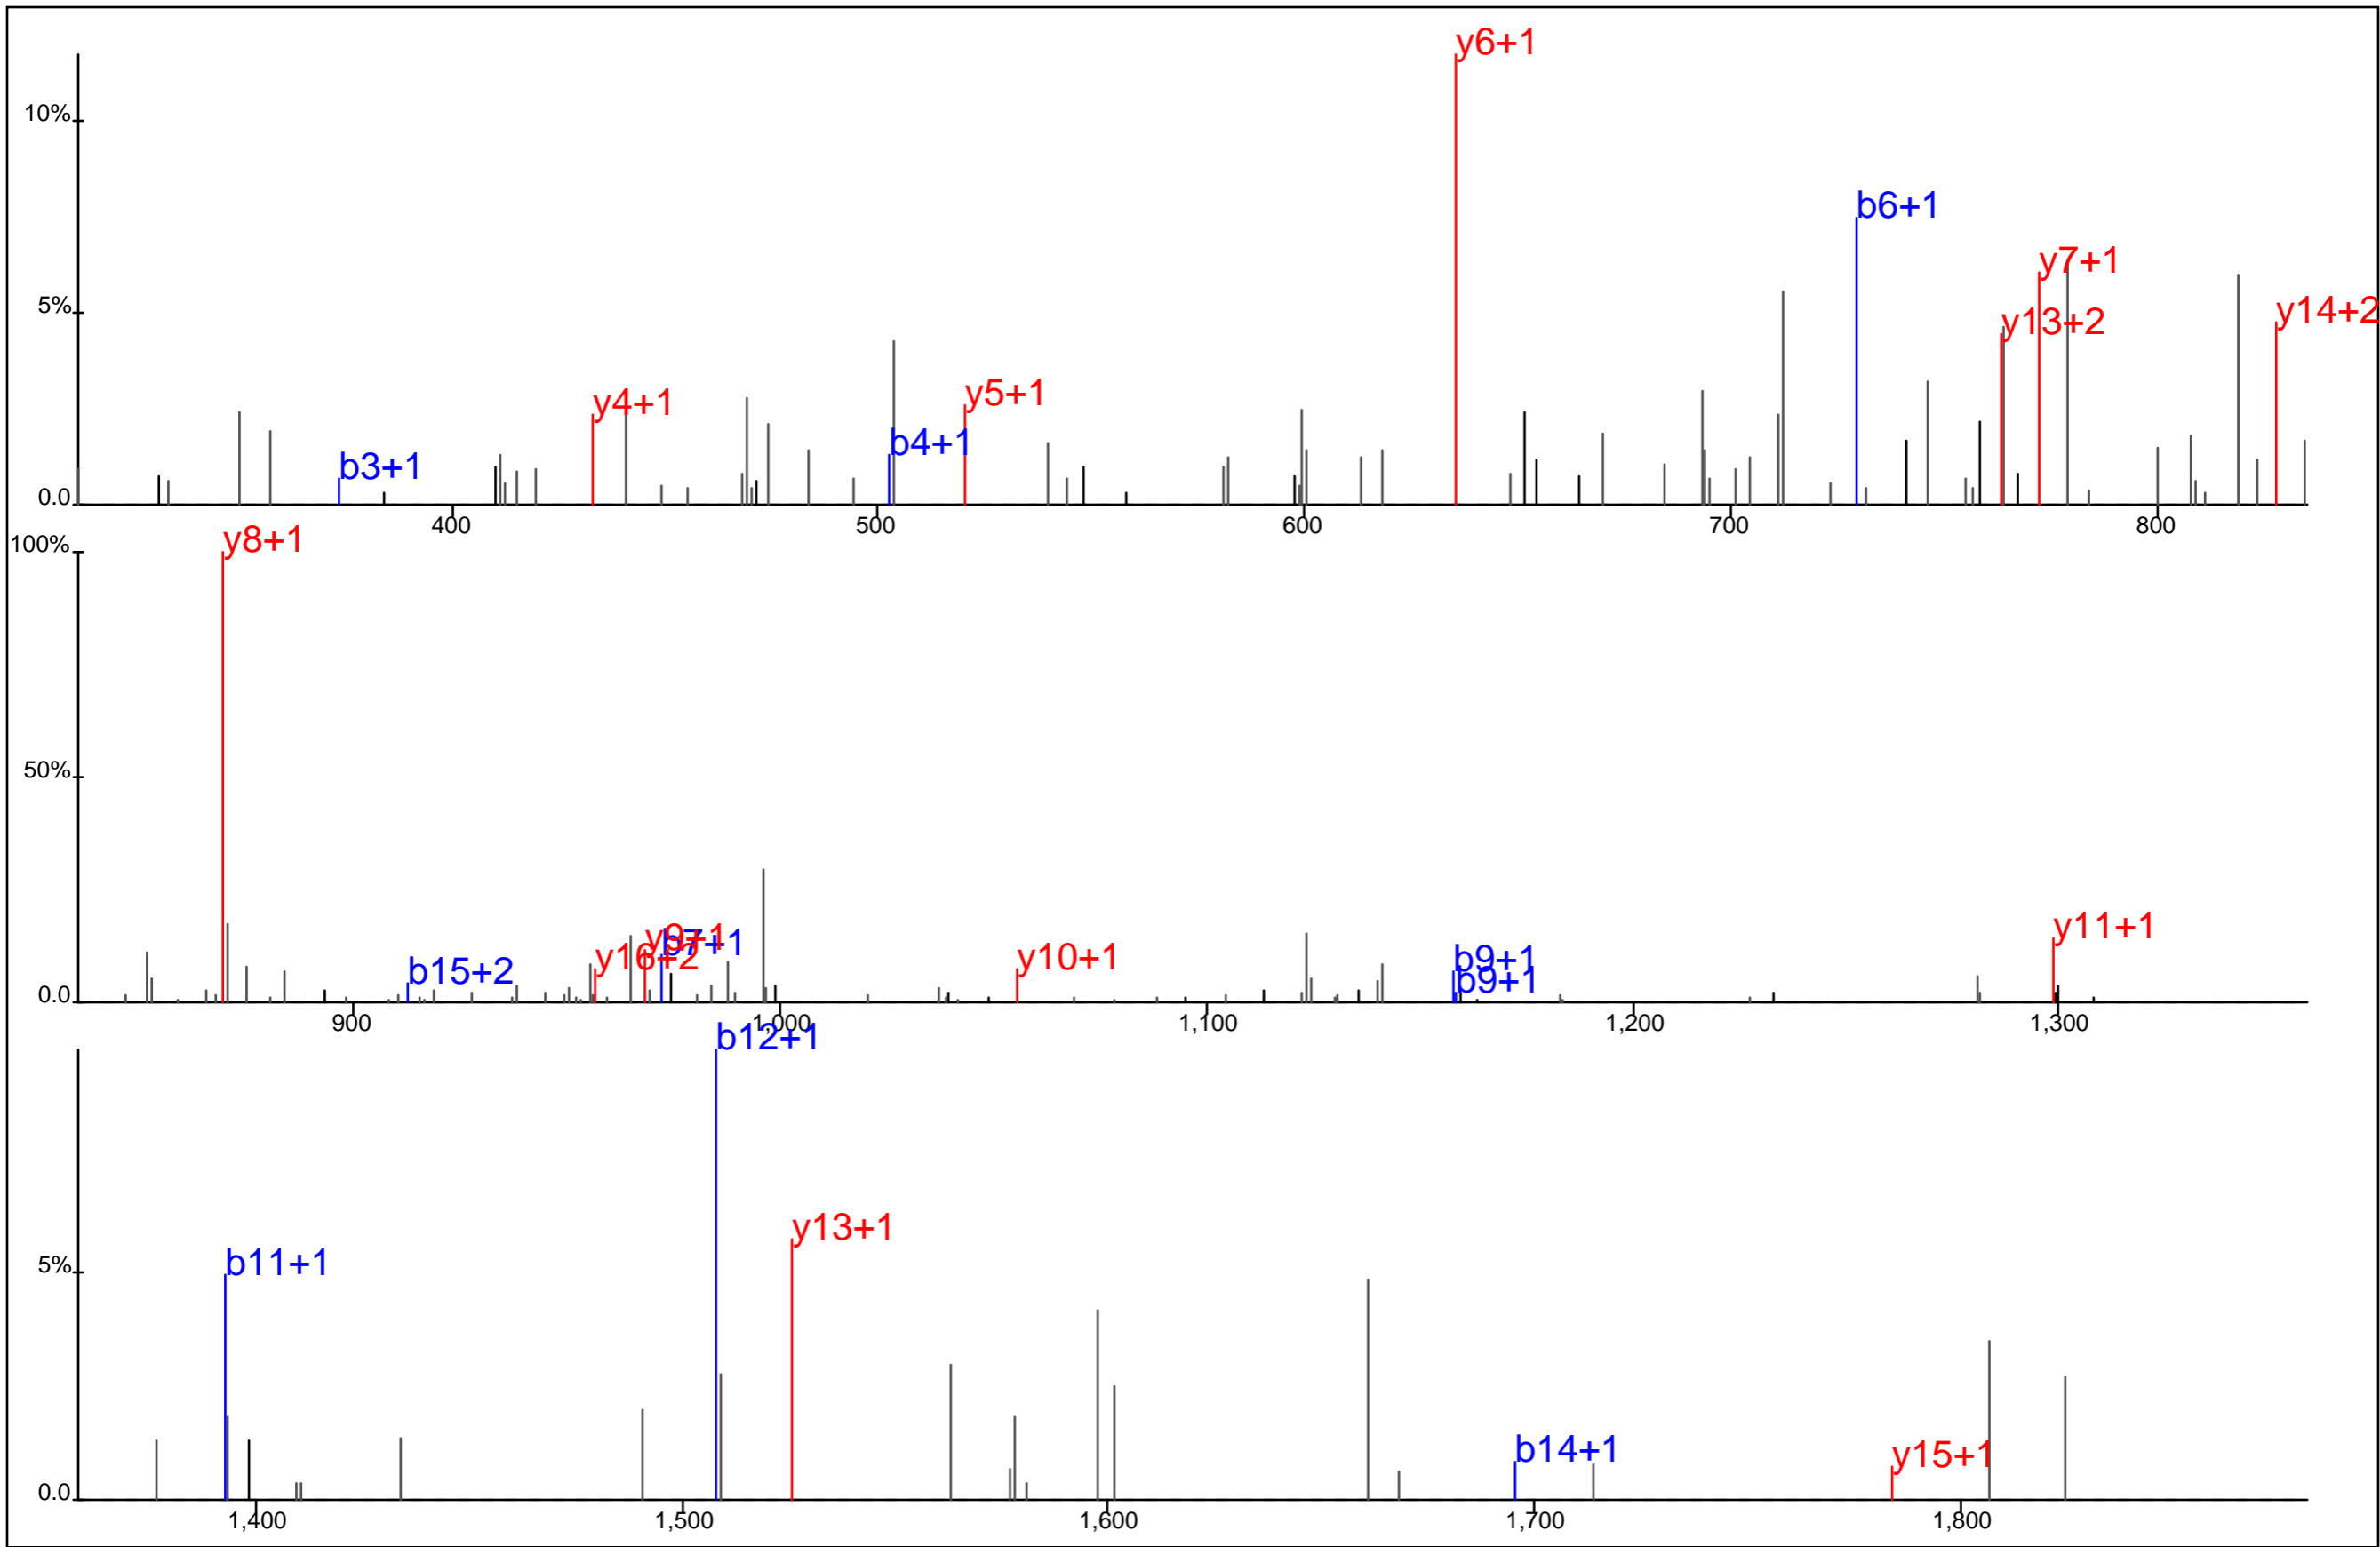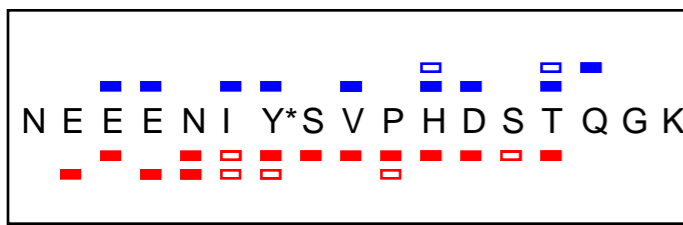

Protein Name: p190 RhoGAP  
 gi Accession: 150417981  
 Precursor Mass: 1,013.9258+2  
 Delta Mass: 2.698 ppm  
 XCorr: 48.81



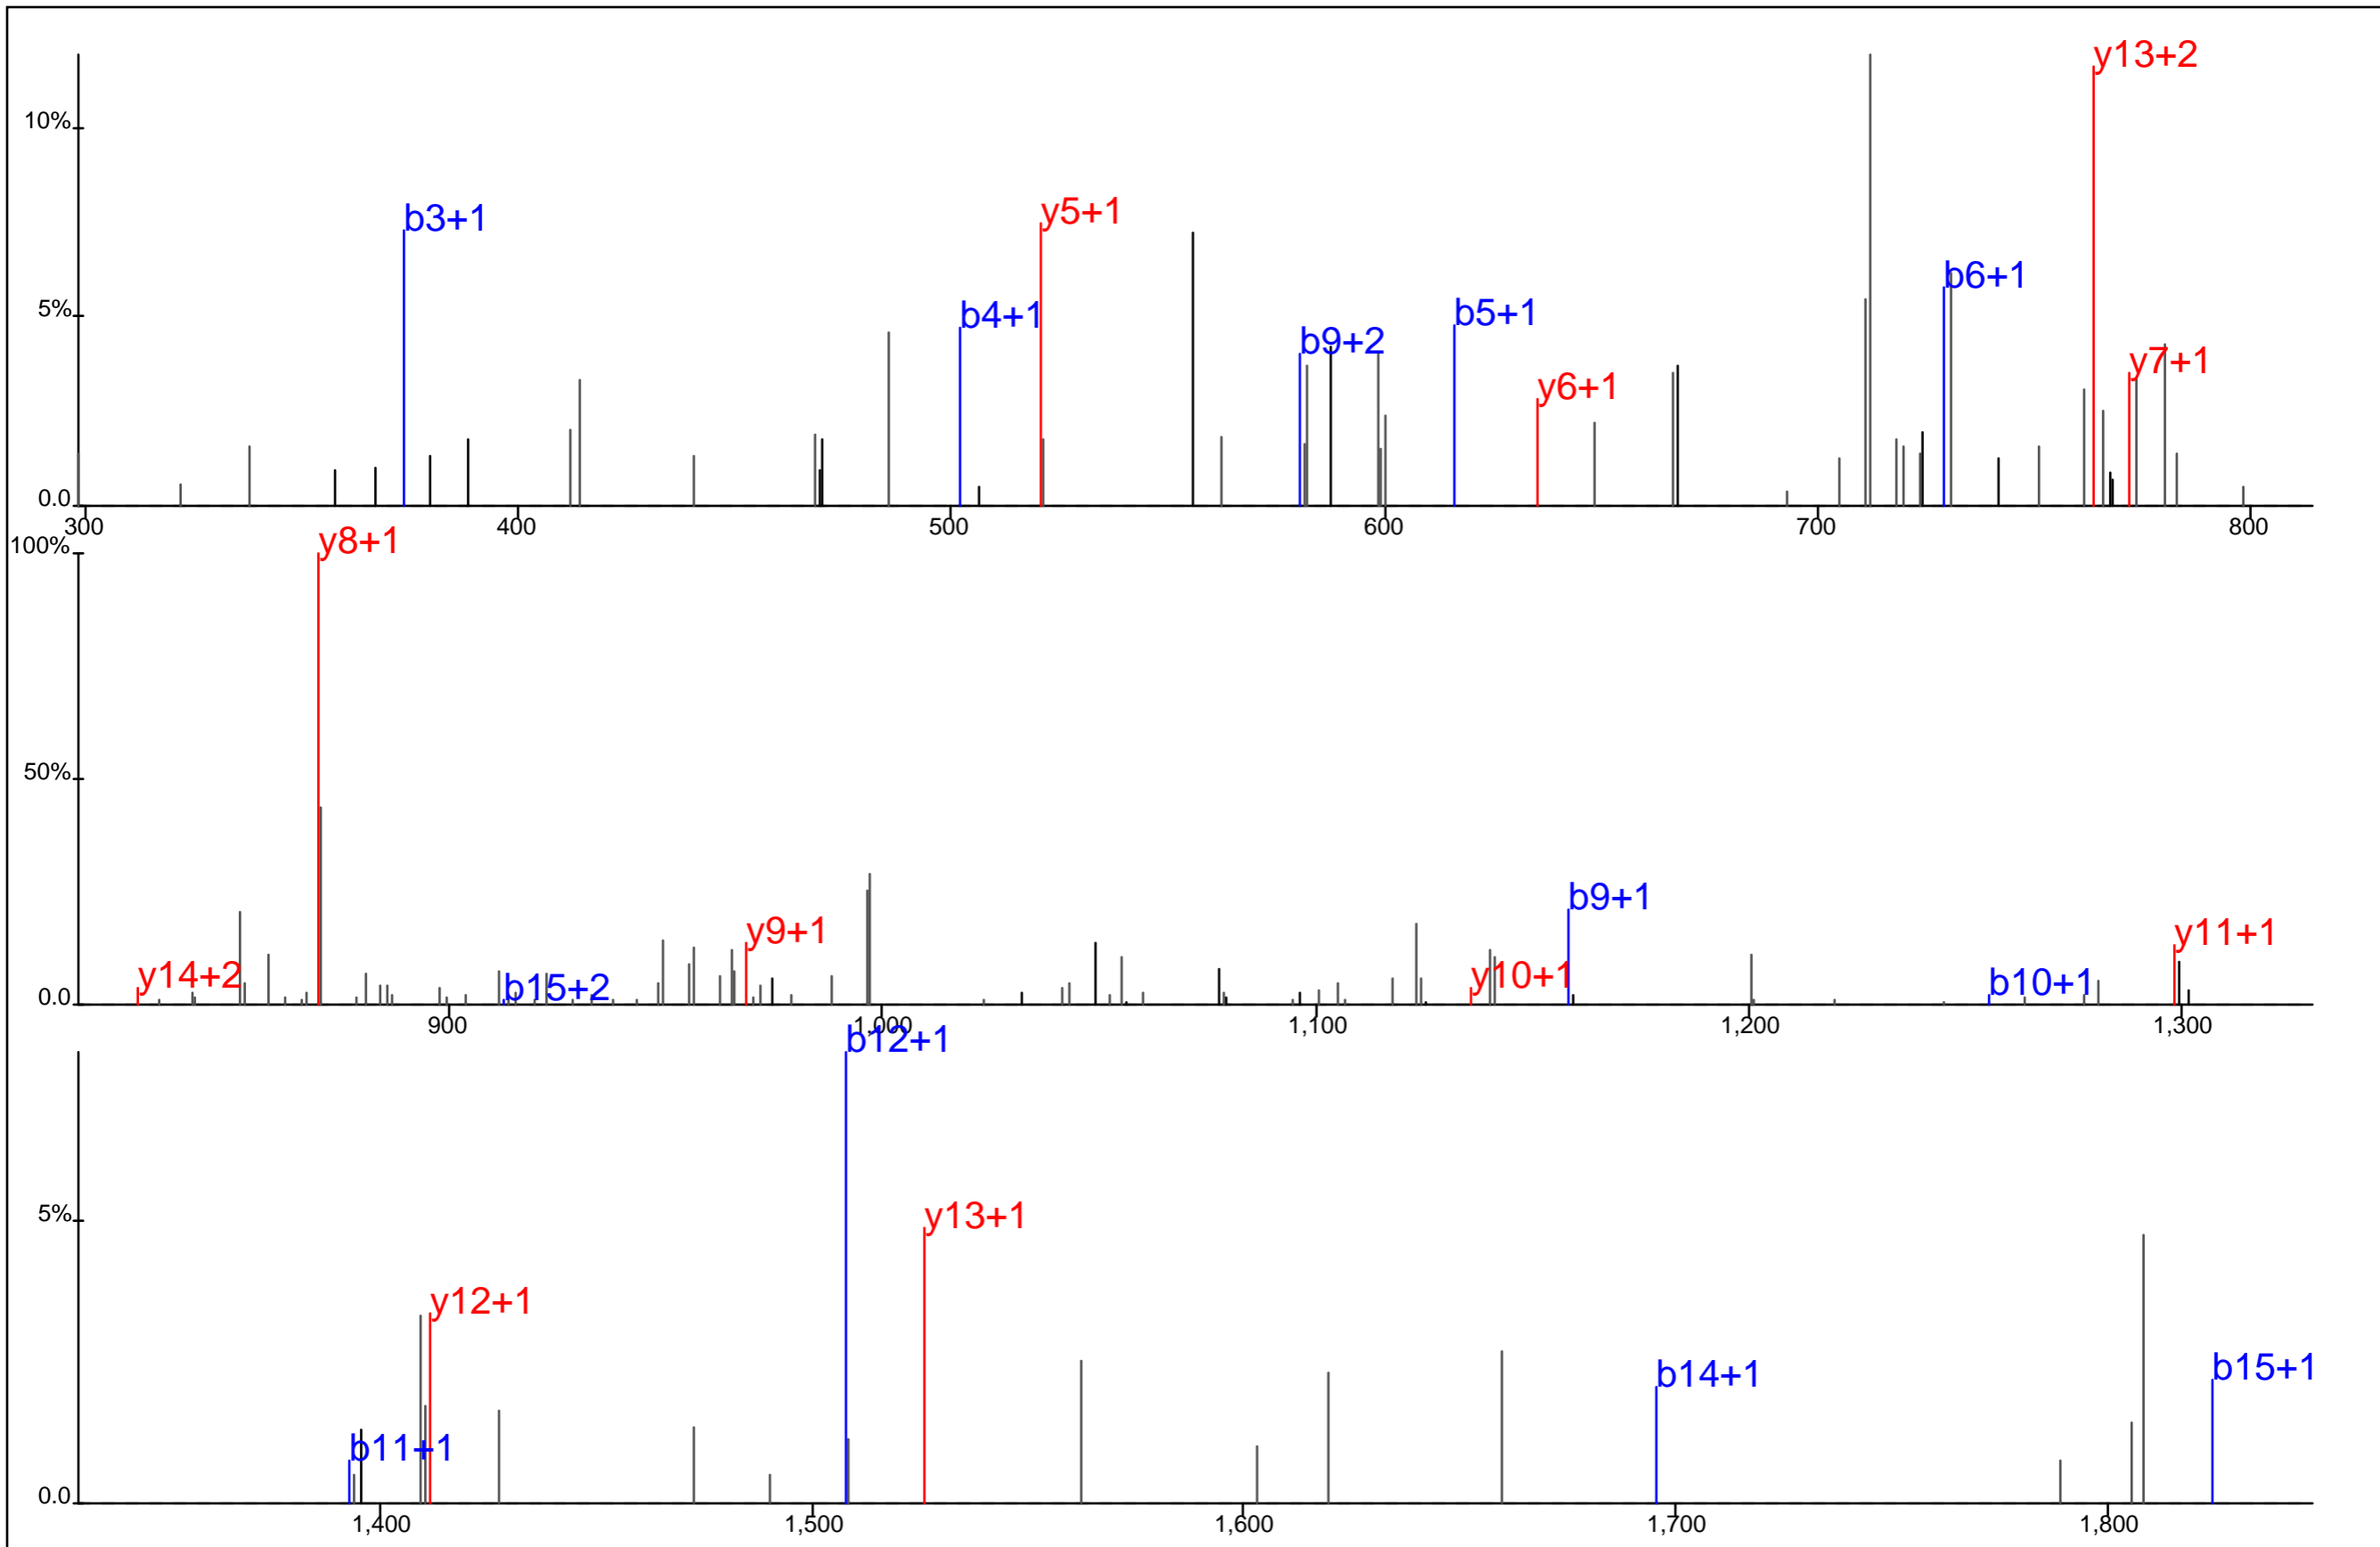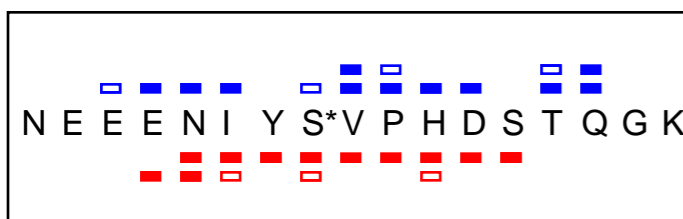

Protein Name: p190 RhoGAP  
 gi Accession: 150417981  
 Precursor Mass: 1,013.9256+2  
 Delta Mass: 2.456 ppm  
 XCorr: 39.79

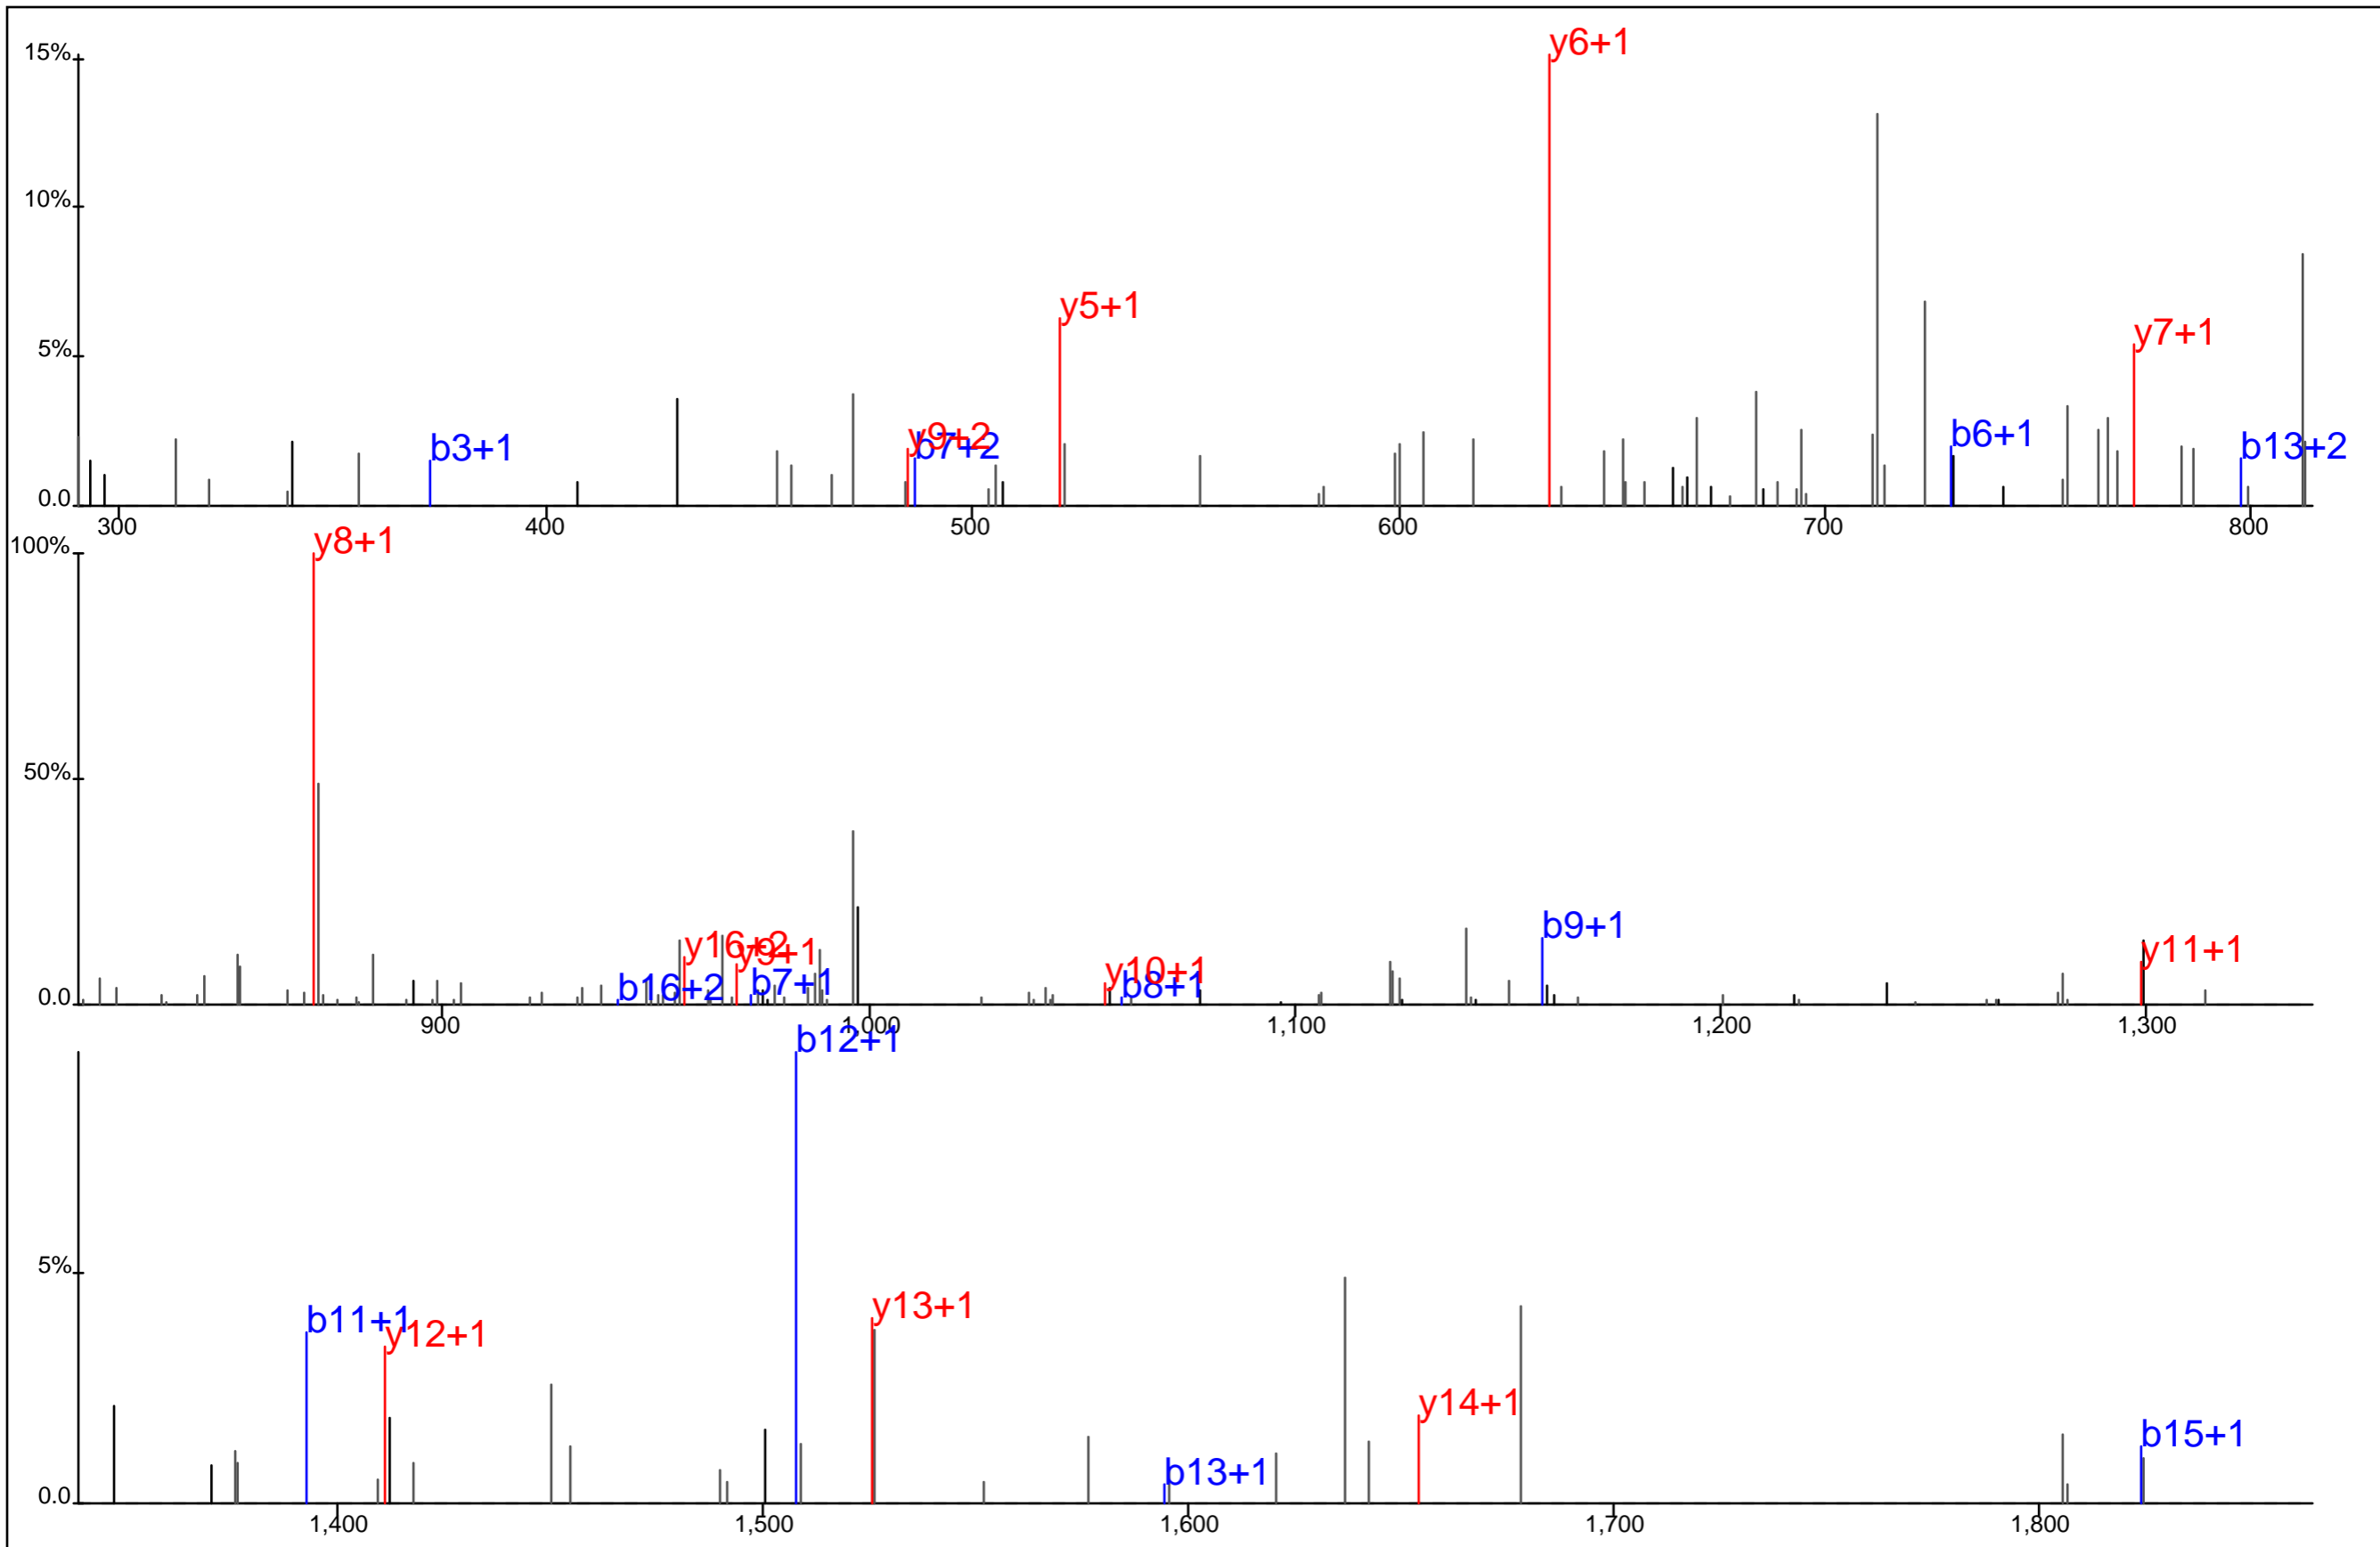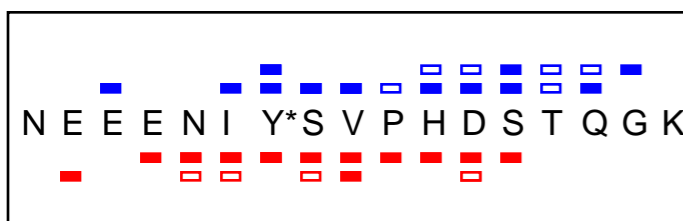

Protein Name: p190 RhoGAP  
 gi Accession: 150417981  
 Precursor Mass: 1,013.9269+2  
 Delta Mass: 3.783 ppm  
 XCorr: 44.54







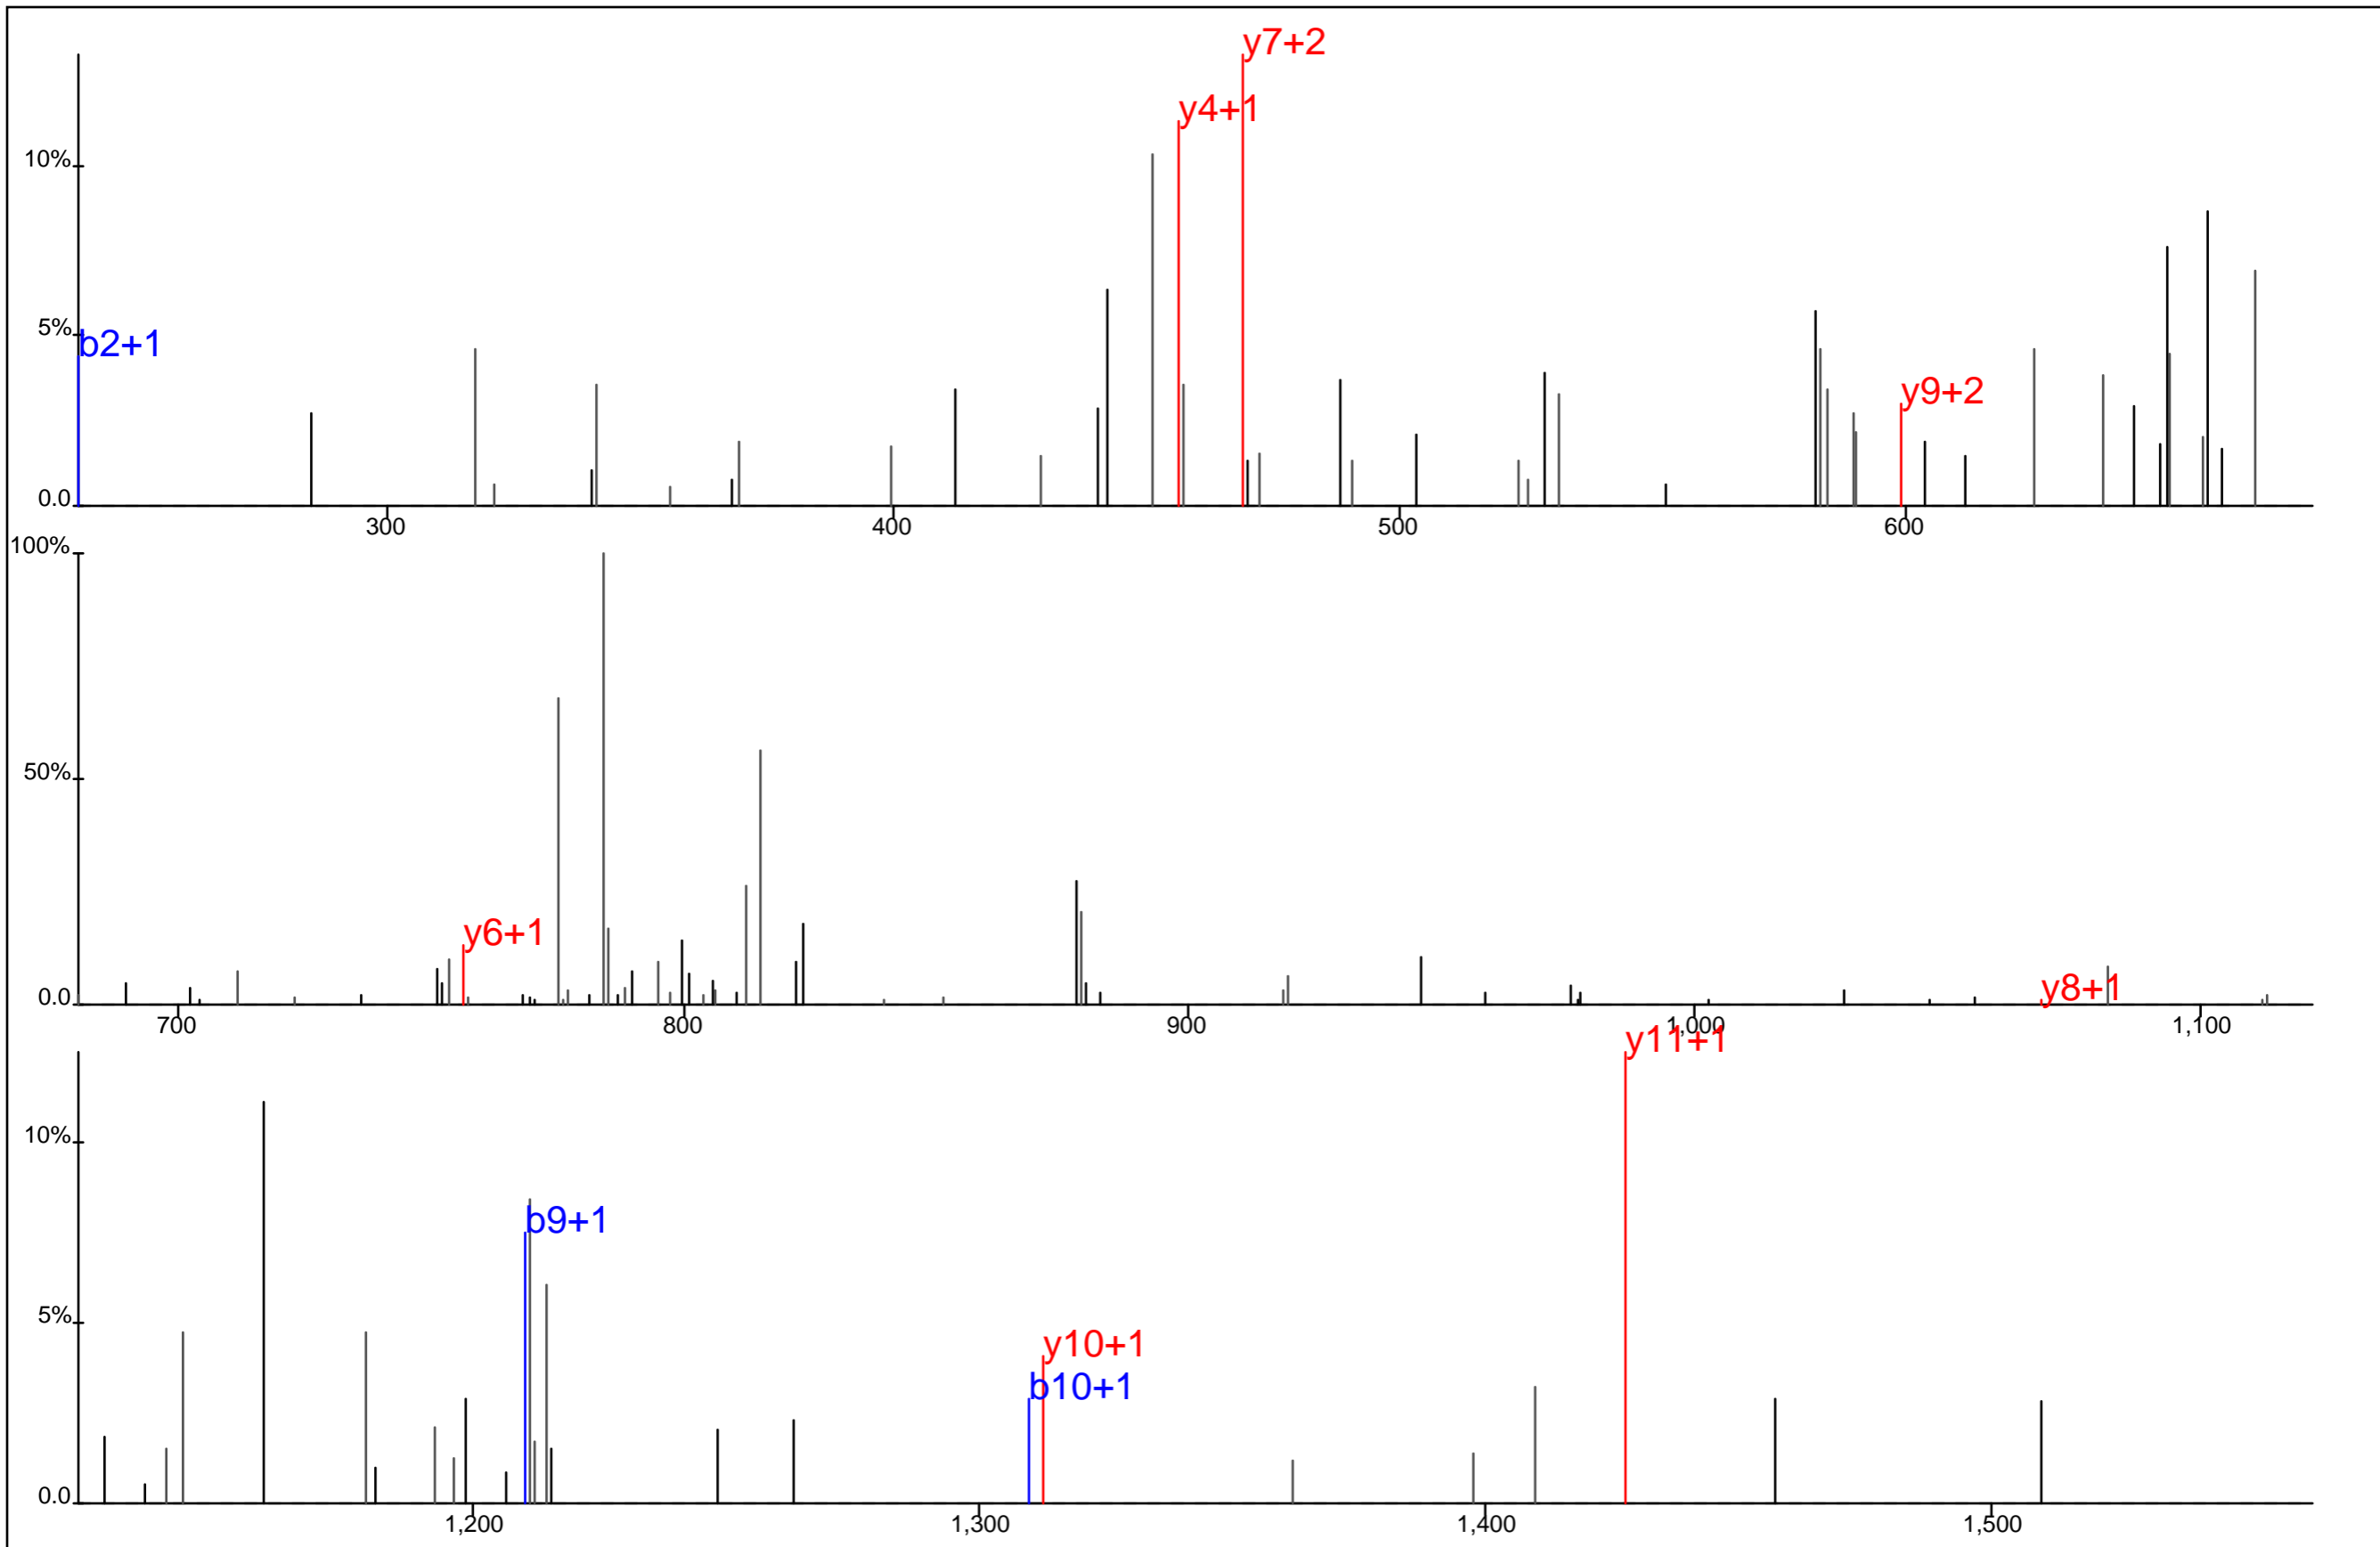

■ □  
 HTDDEMT\*GYVA TR#  
□ □ □ □ □ □ □

Protein Name: p38  
 gi Accession: 20986514  
 Precursor Mass: 833.3024+2  
 Delta Mass: 5.085 ppm  
 XCorr: 2.4166

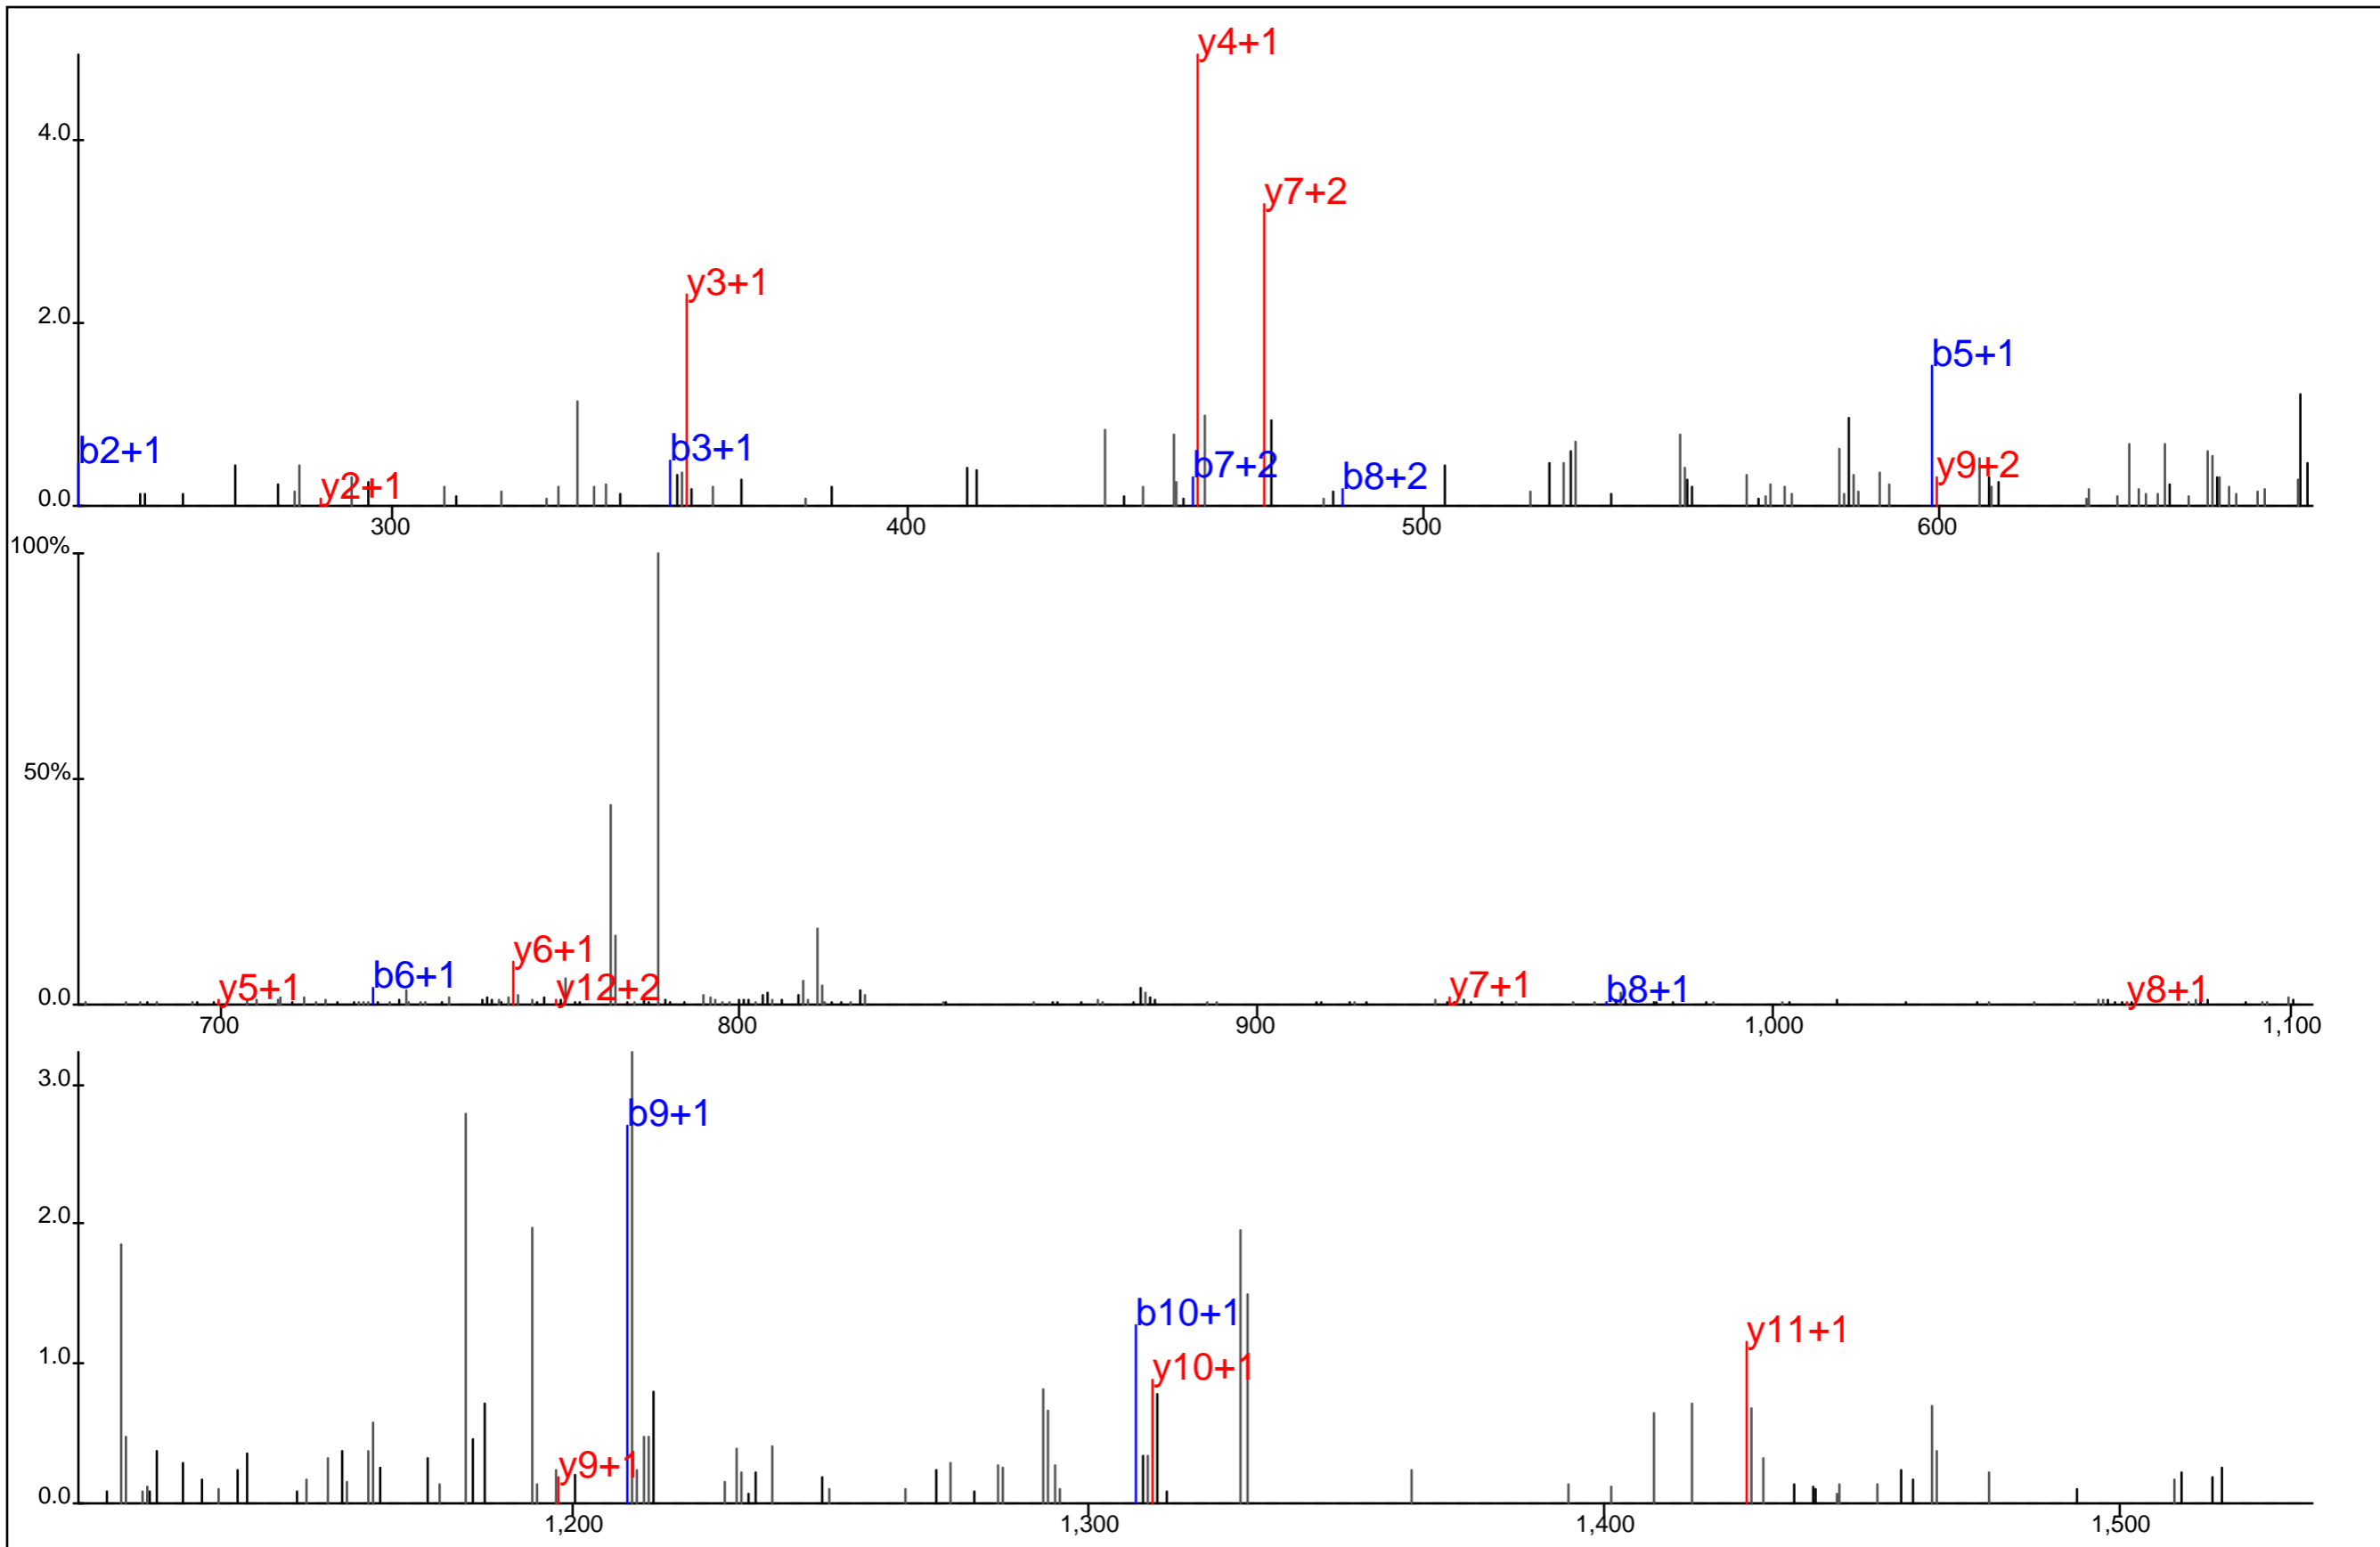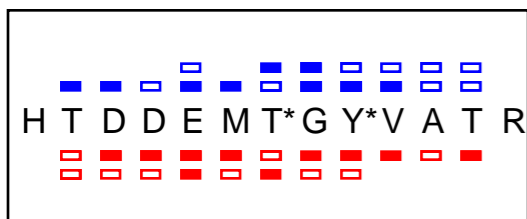

Protein Name: p38  
 gi Accession: 20986514  
 Precursor Mass: 833.3026+2  
 Delta Mass: 5.306 ppm  
 XCorr: 38.51

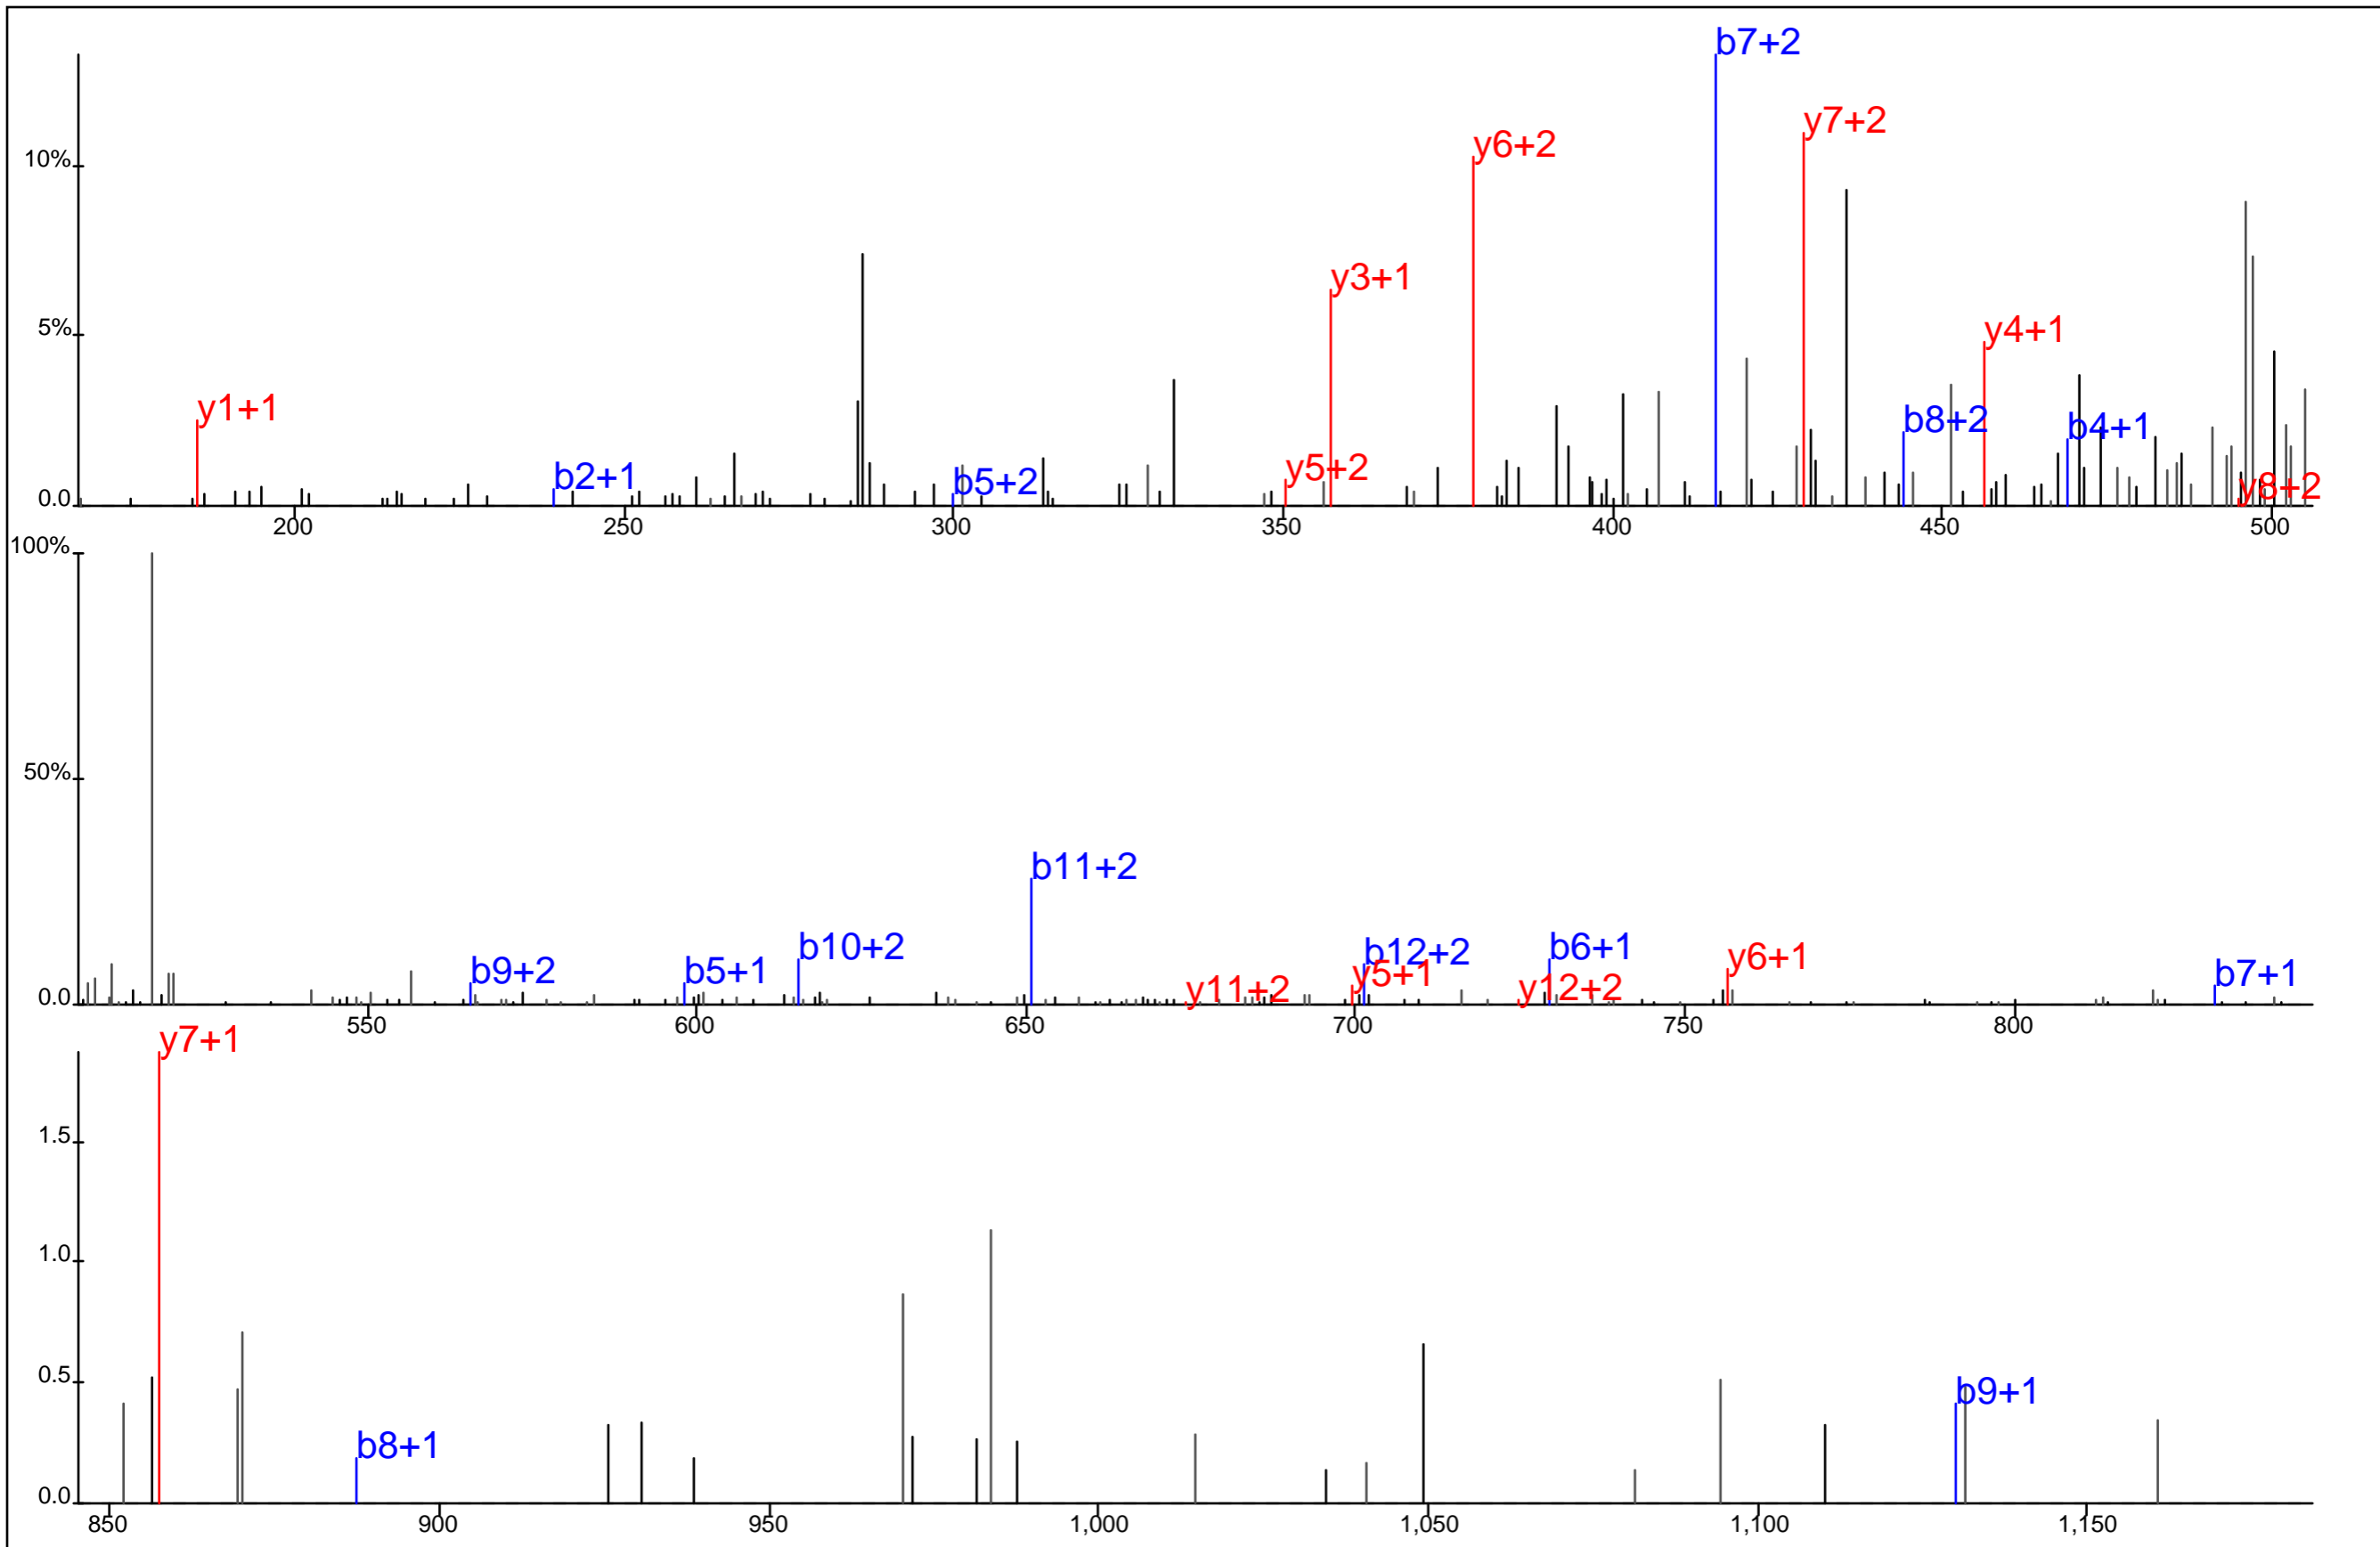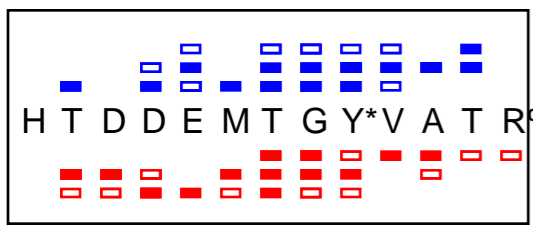

Protein Name: p38  
 gi Accession: 20986514  
 Precursor Mass: 529.2141+3  
 Delta Mass: 3.153 ppm  
 XCorr: 27.95

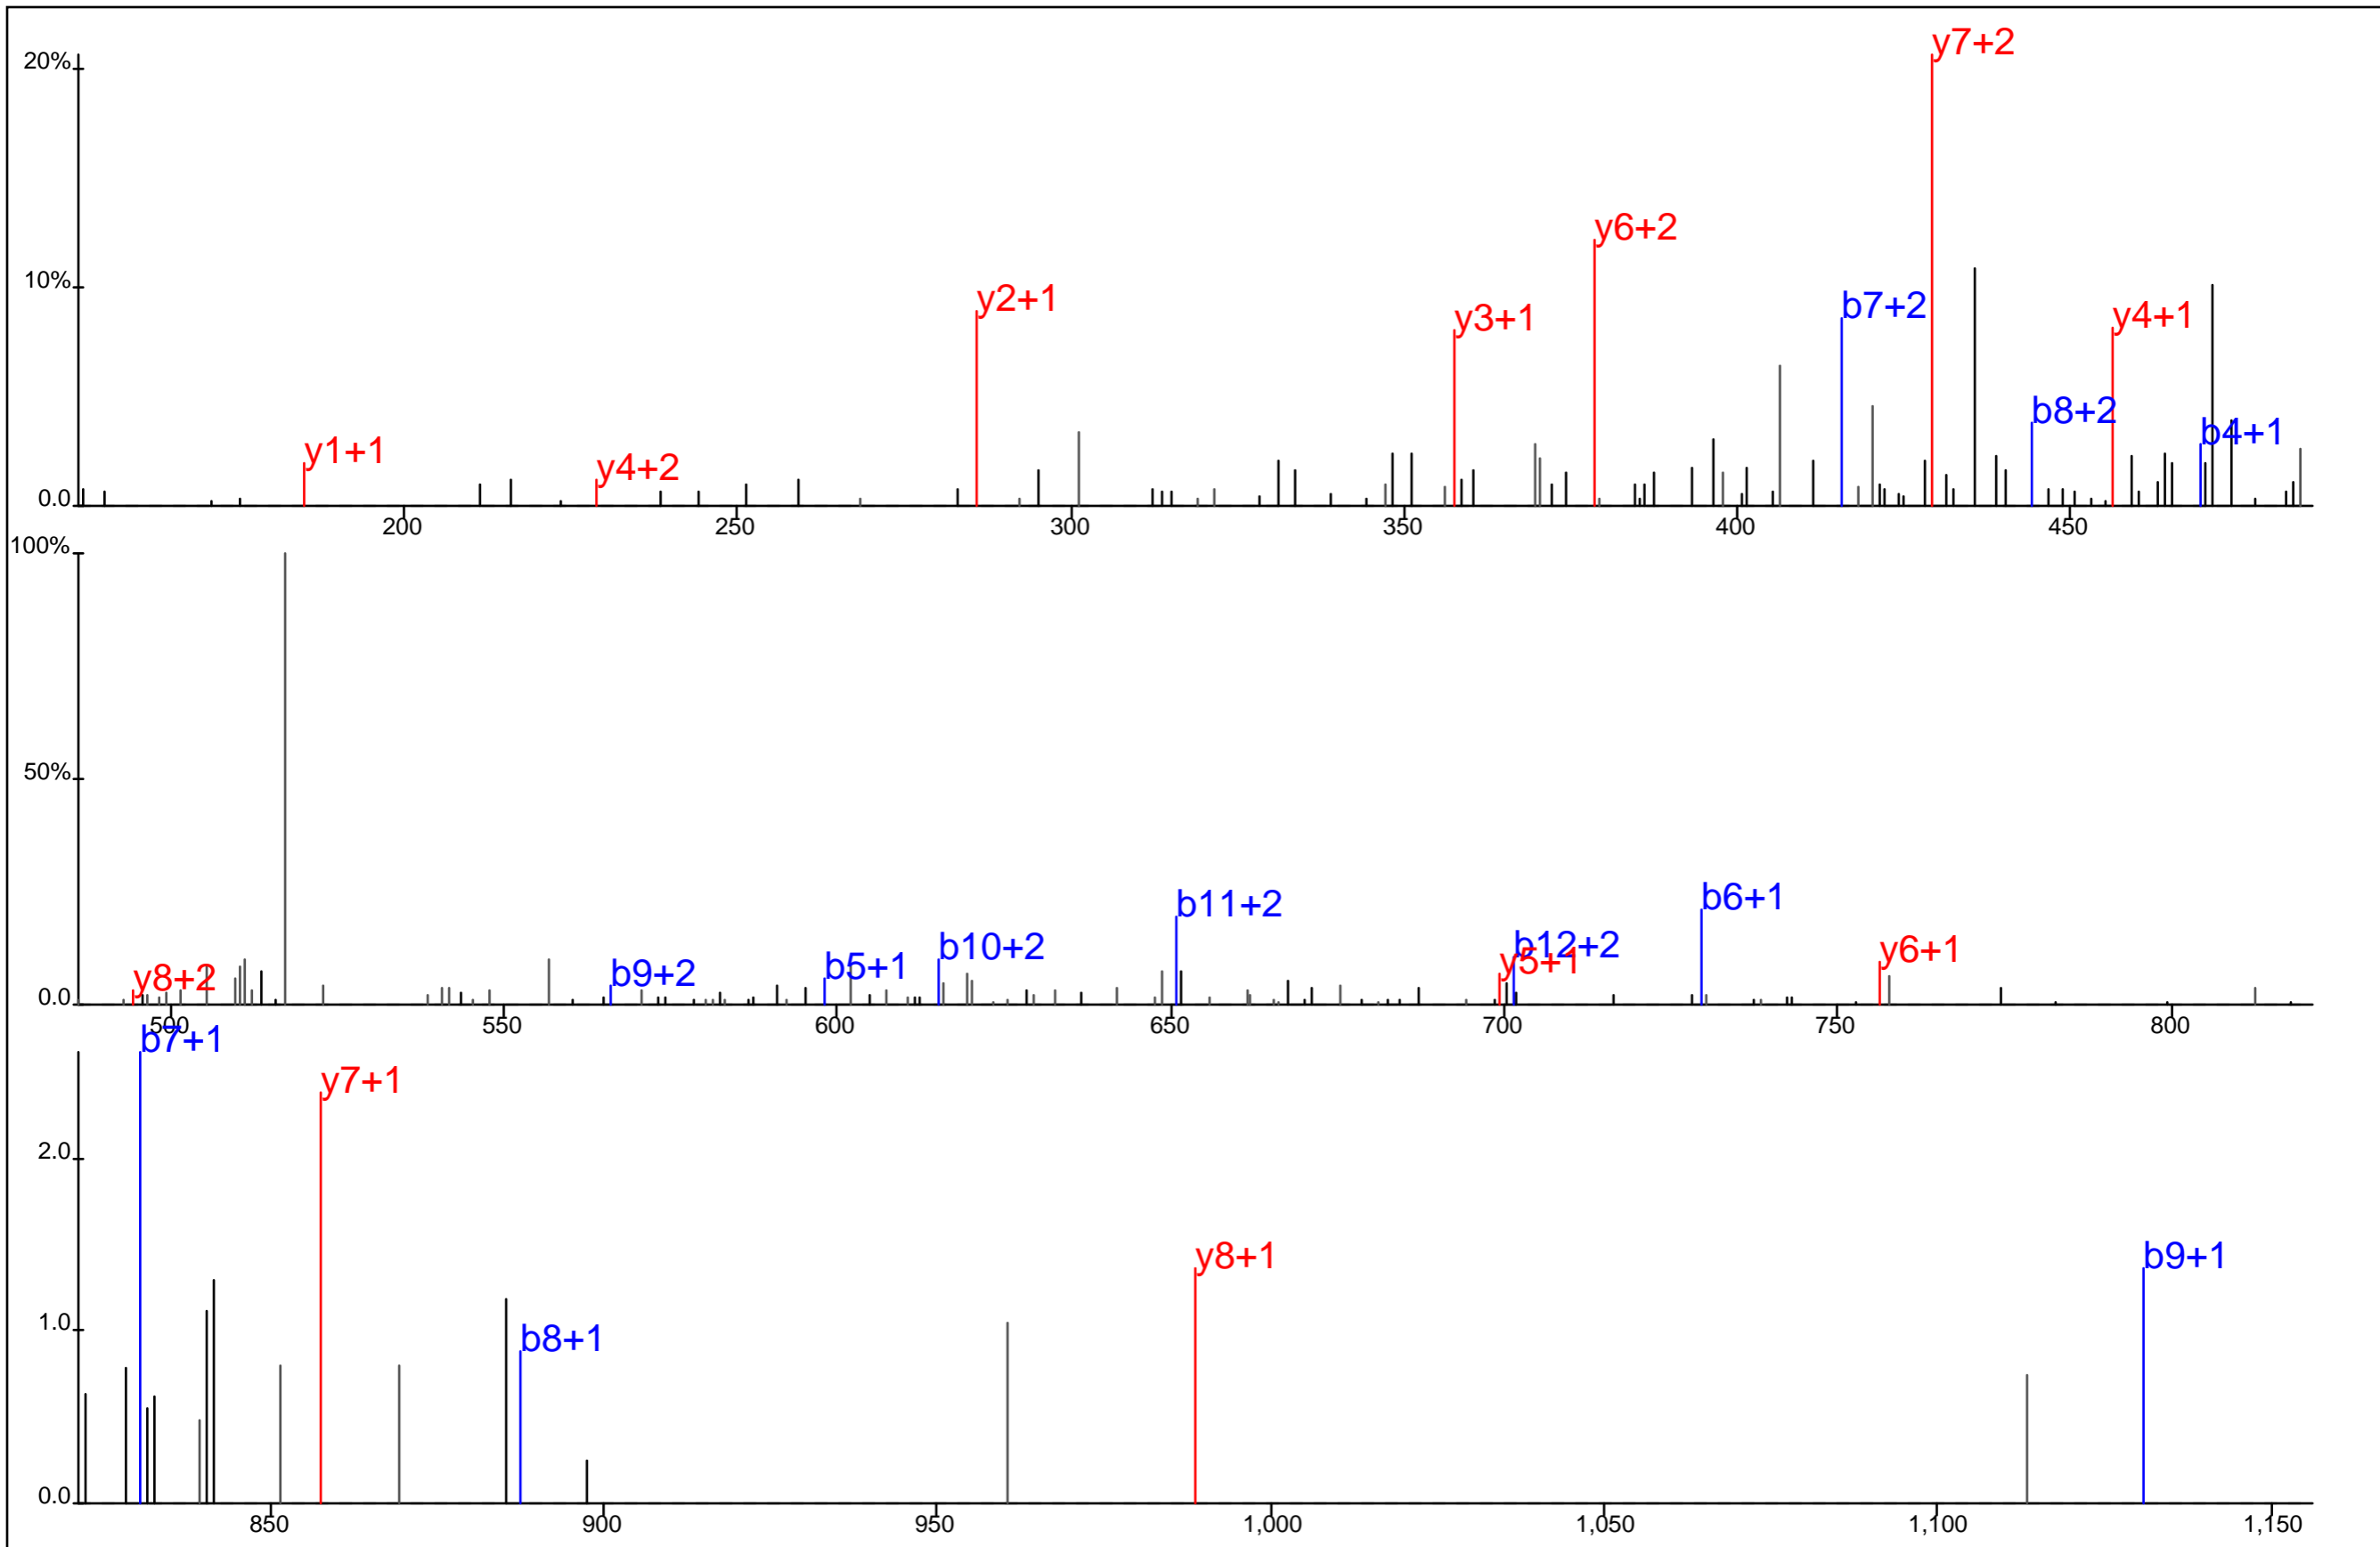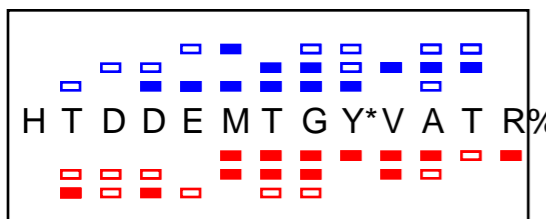

Protein Name: p38  
 gi Accession: 20986514  
 Precursor Mass: 529.2133+3  
 Delta Mass: 1.537 ppm  
 XCorr: 38.9

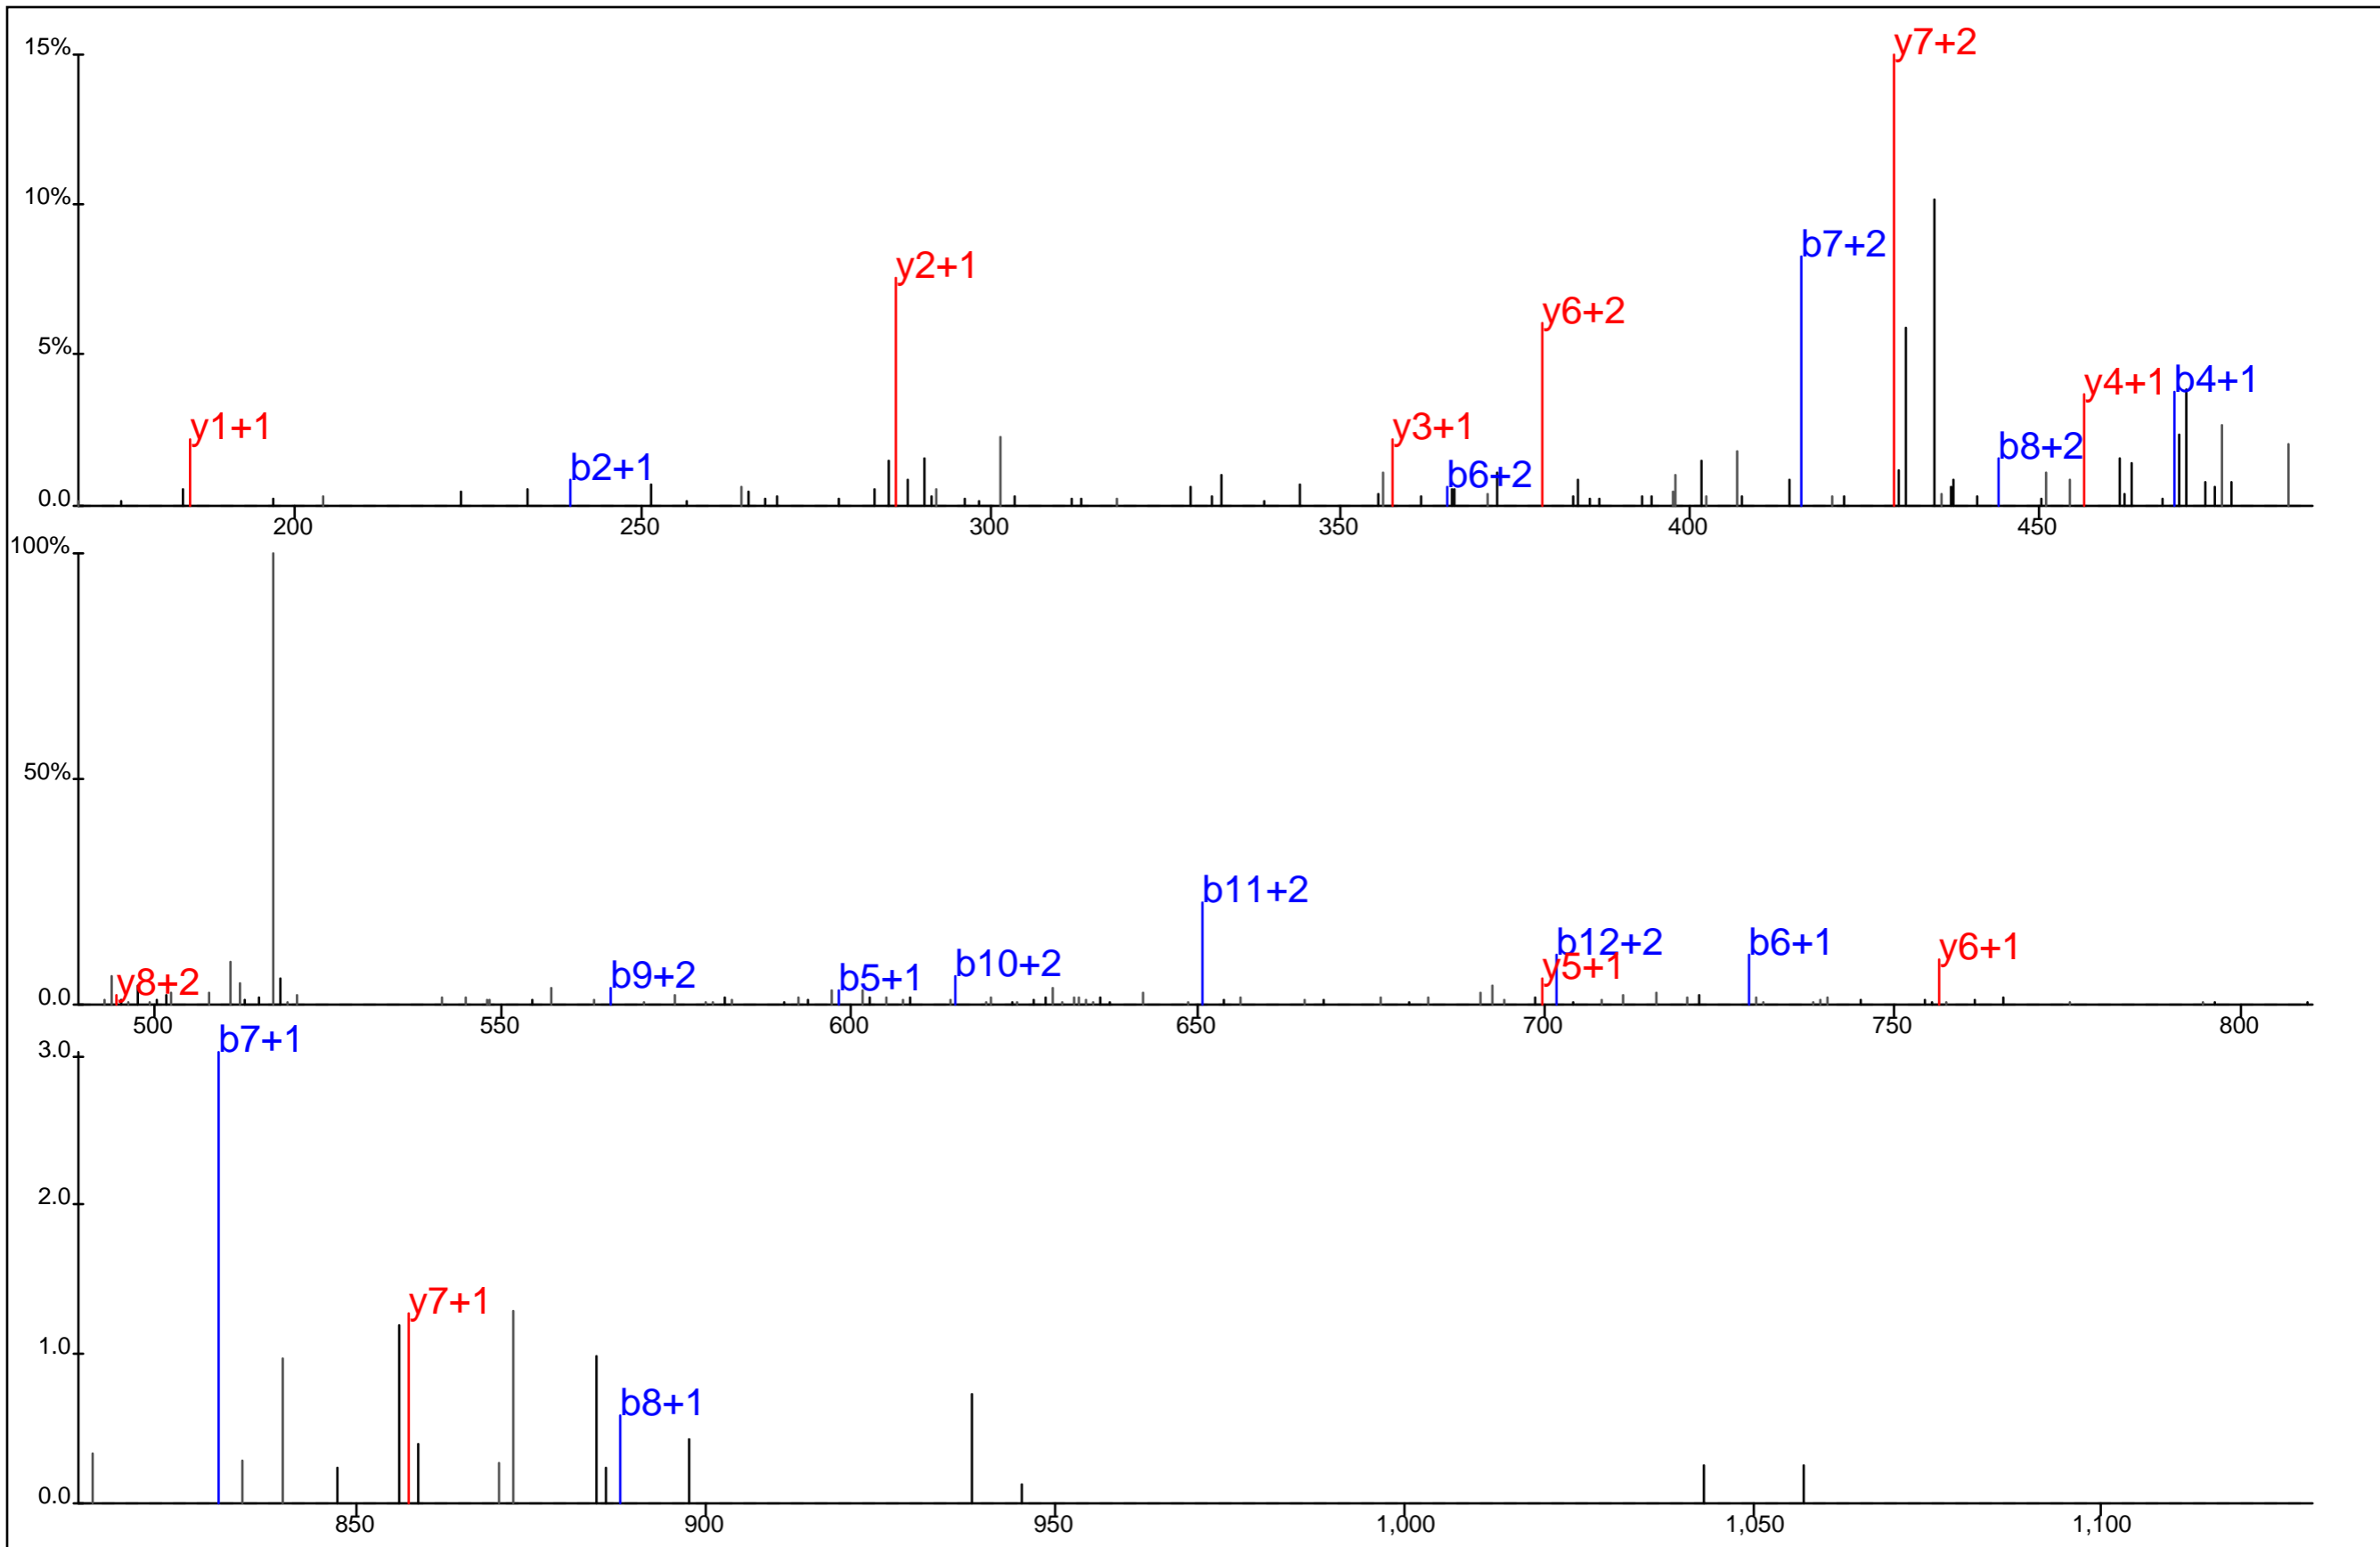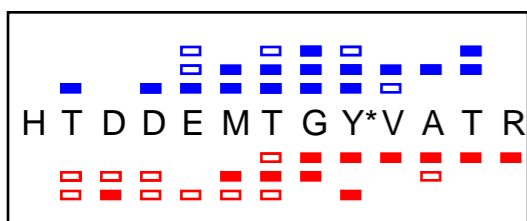

Protein Name: p38  
 gi Accession: 20986514  
 Precursor Mass: 529.2169+3  
 Delta Mass: 8.348 ppm  
 XCorr: 31.94

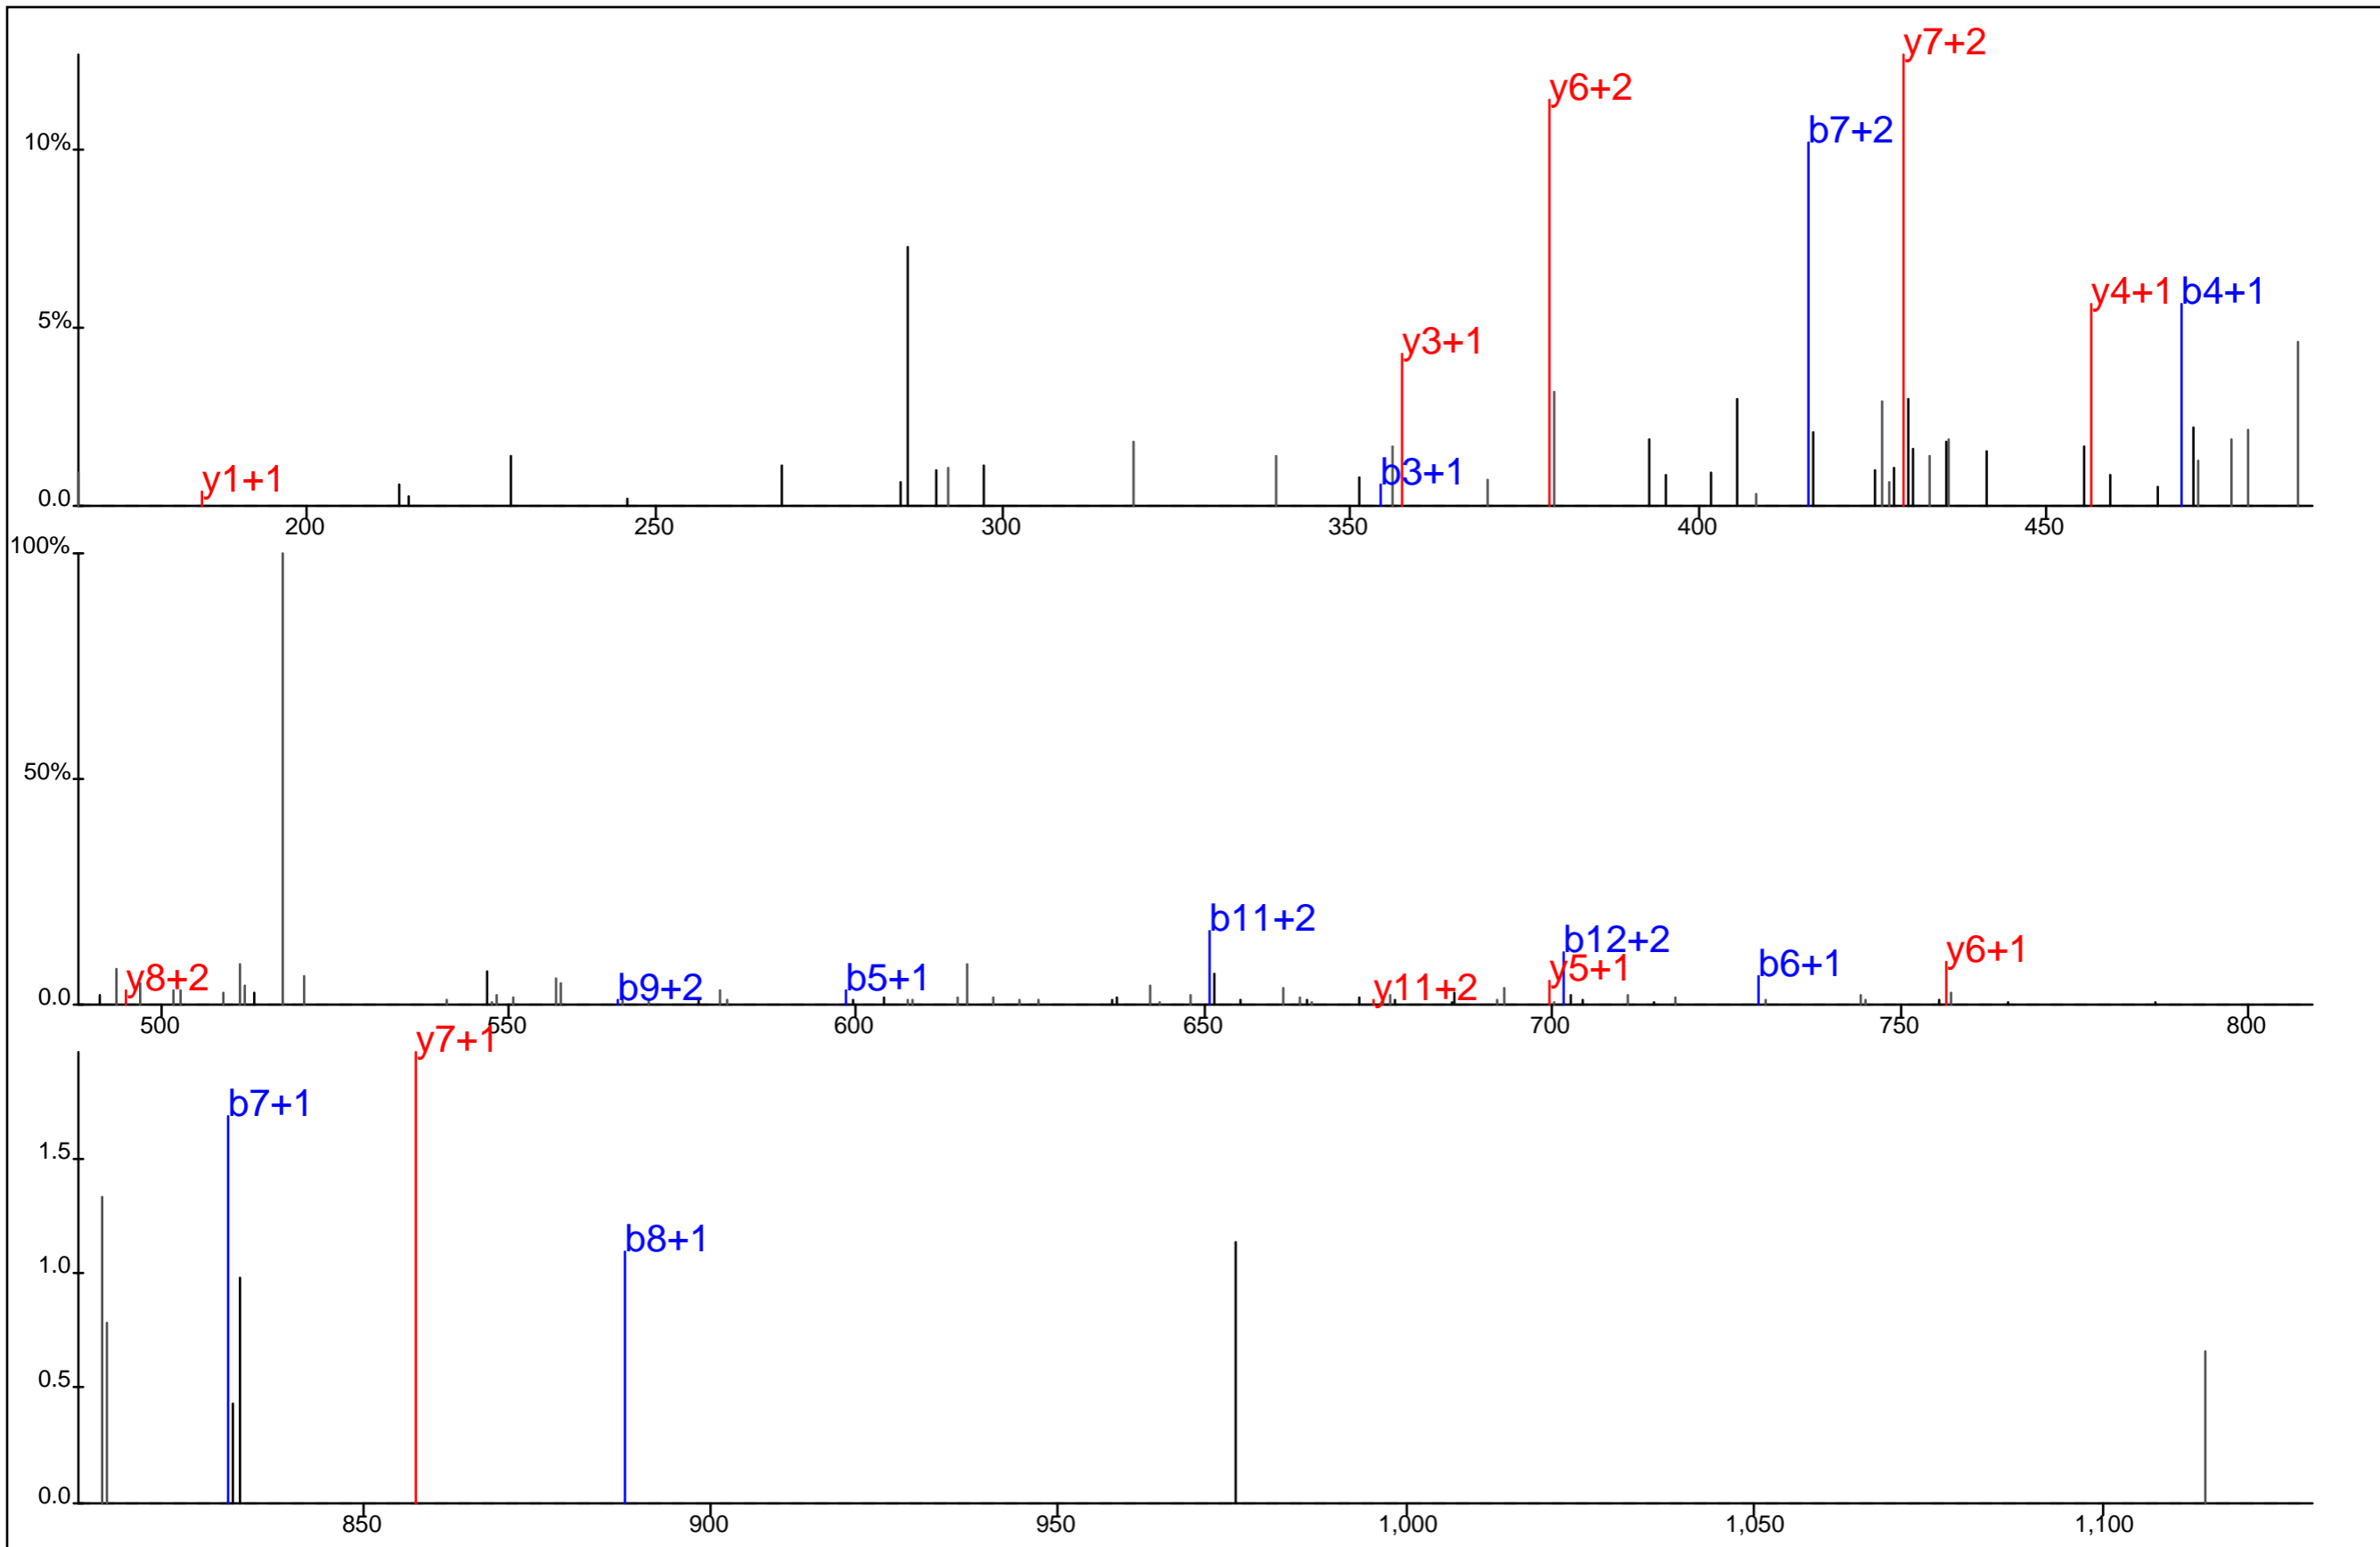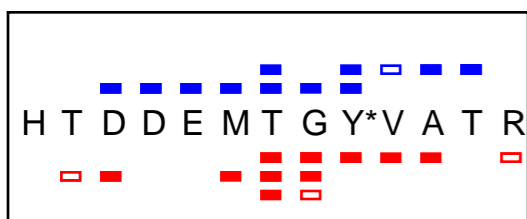

Protein Name: p38  
 gi Accession: 20986514  
 Precursor Mass: 529.2137+3  
 Delta Mass: 2.458 ppm  
 XCorr: 37.37

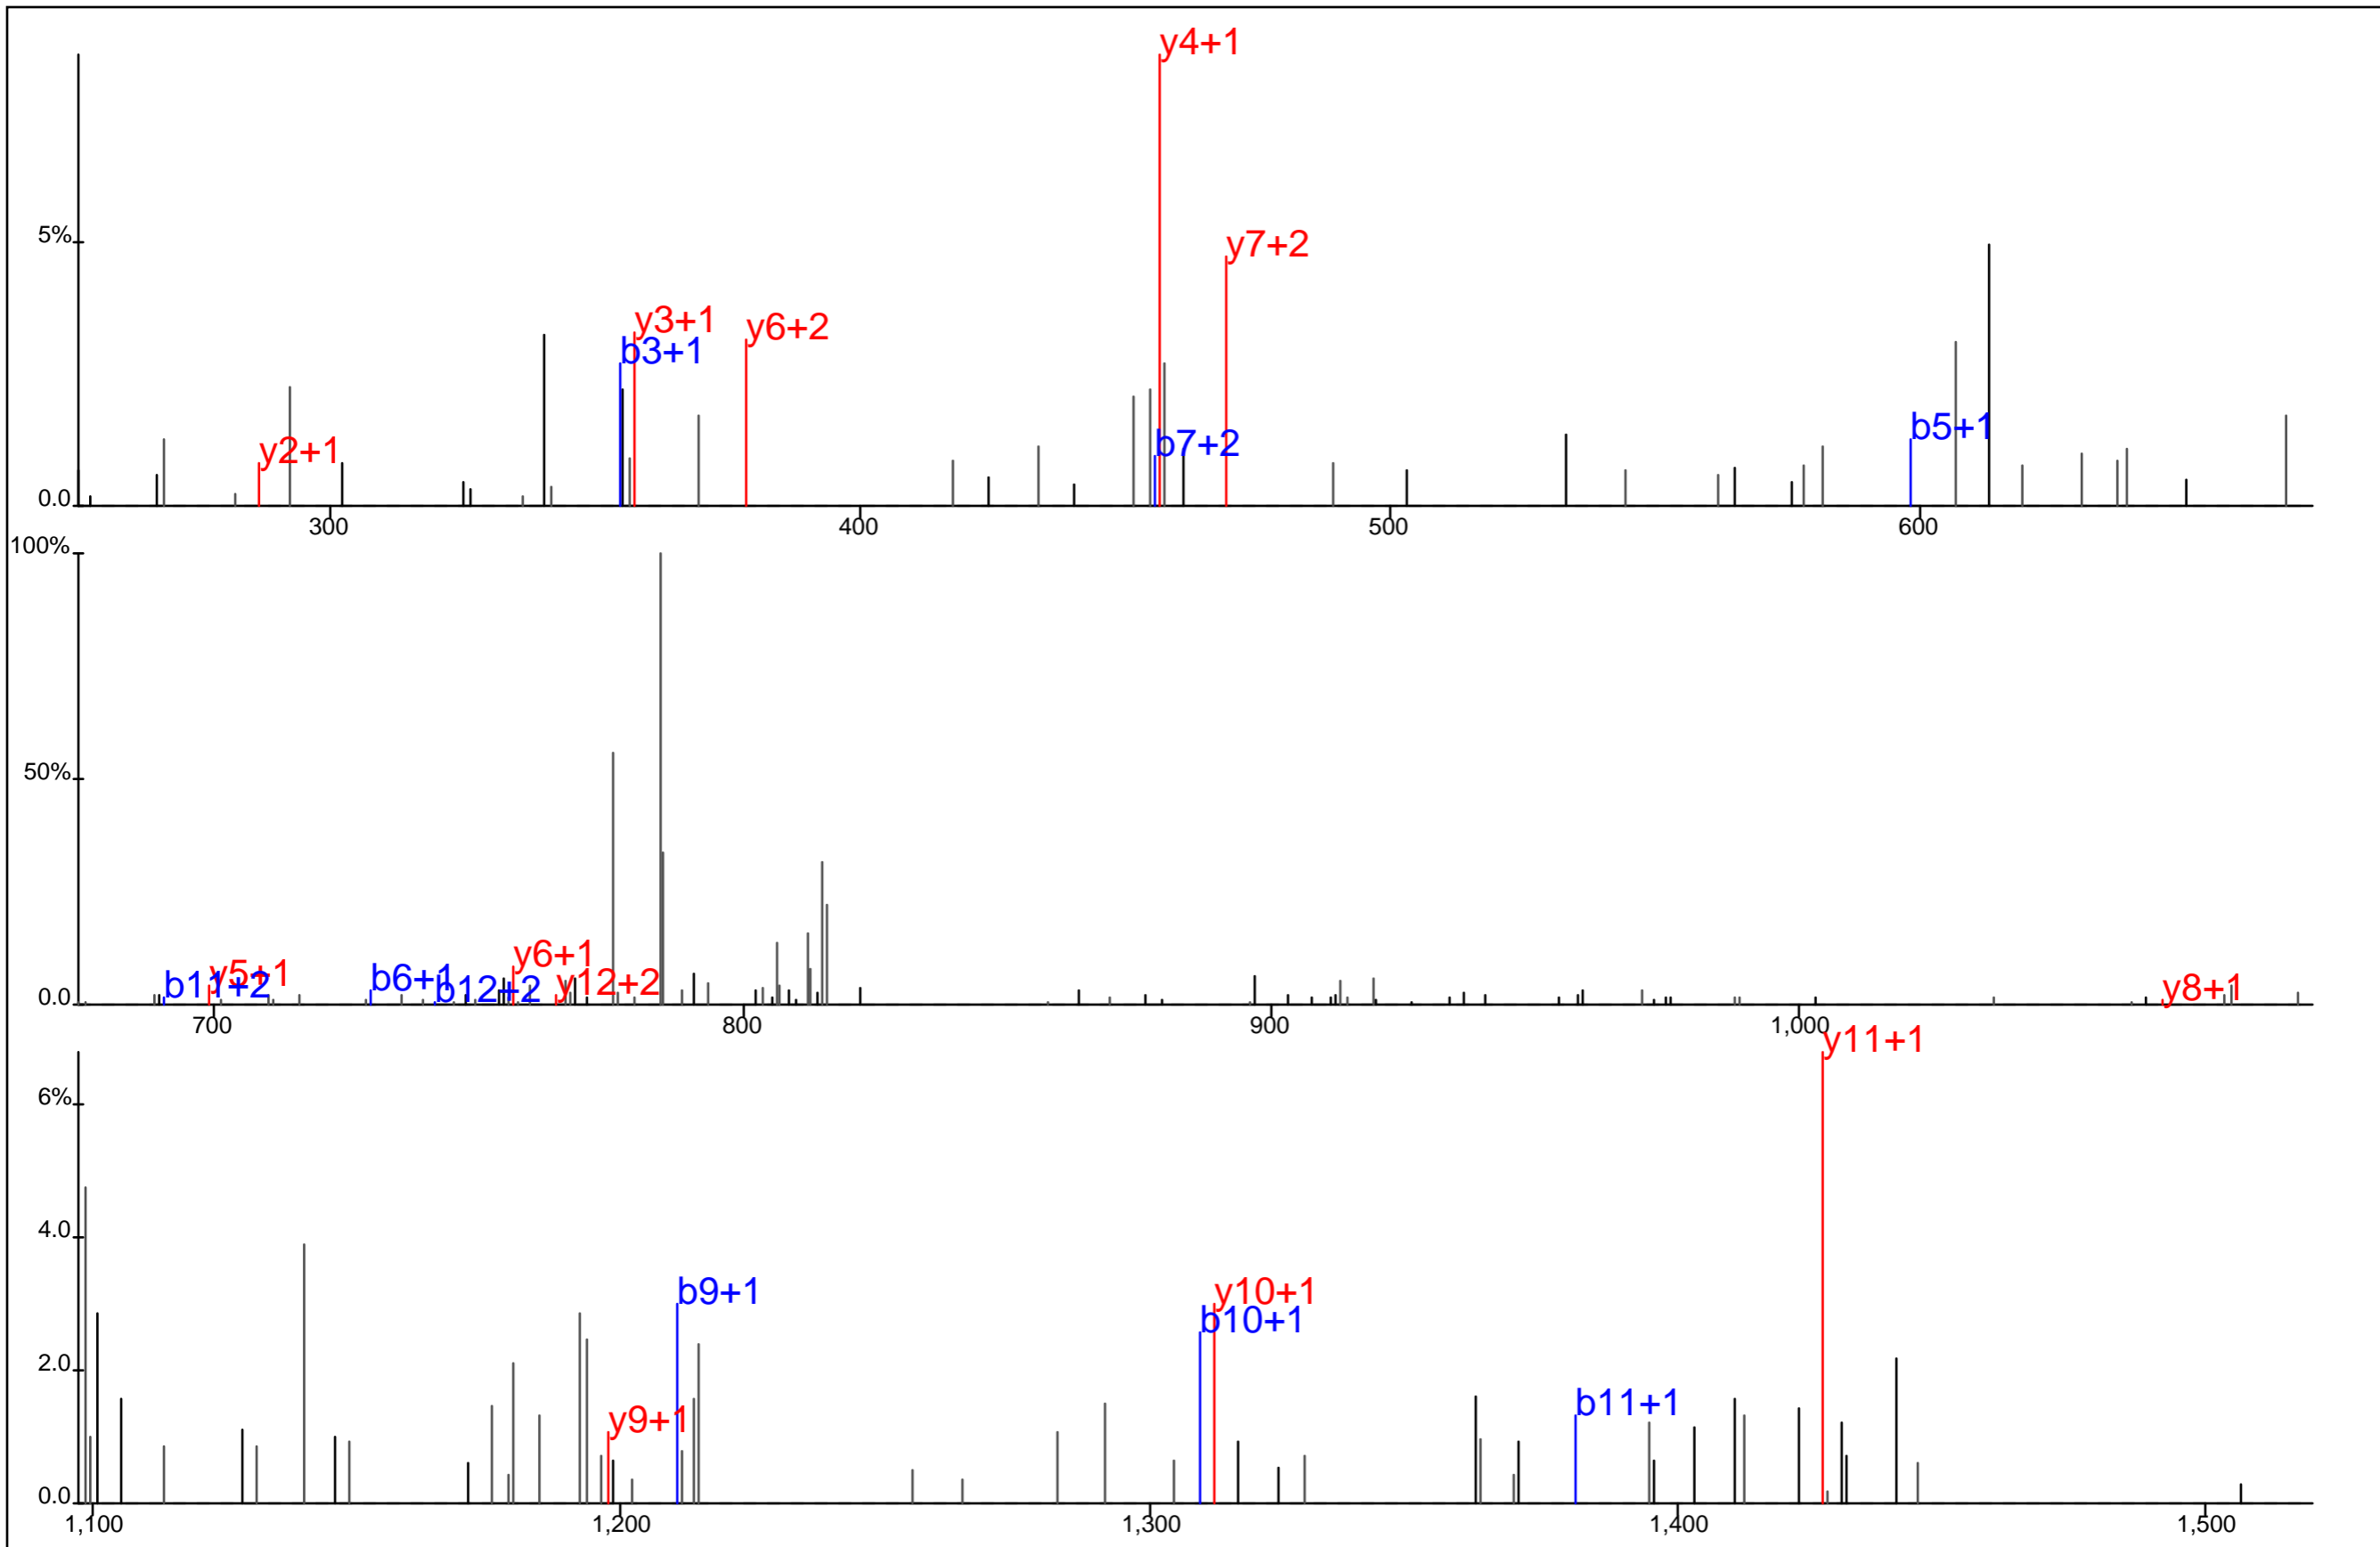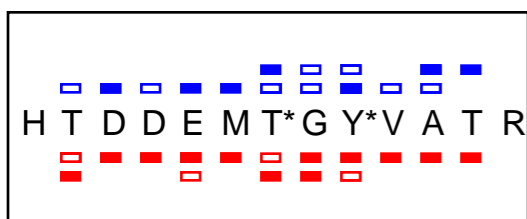

Protein Name: p38  
 gi Accession: 20986514  
 Precursor Mass: 833.3027+2  
 Delta Mass: 5.450 ppm  
 XCorr: 25.31

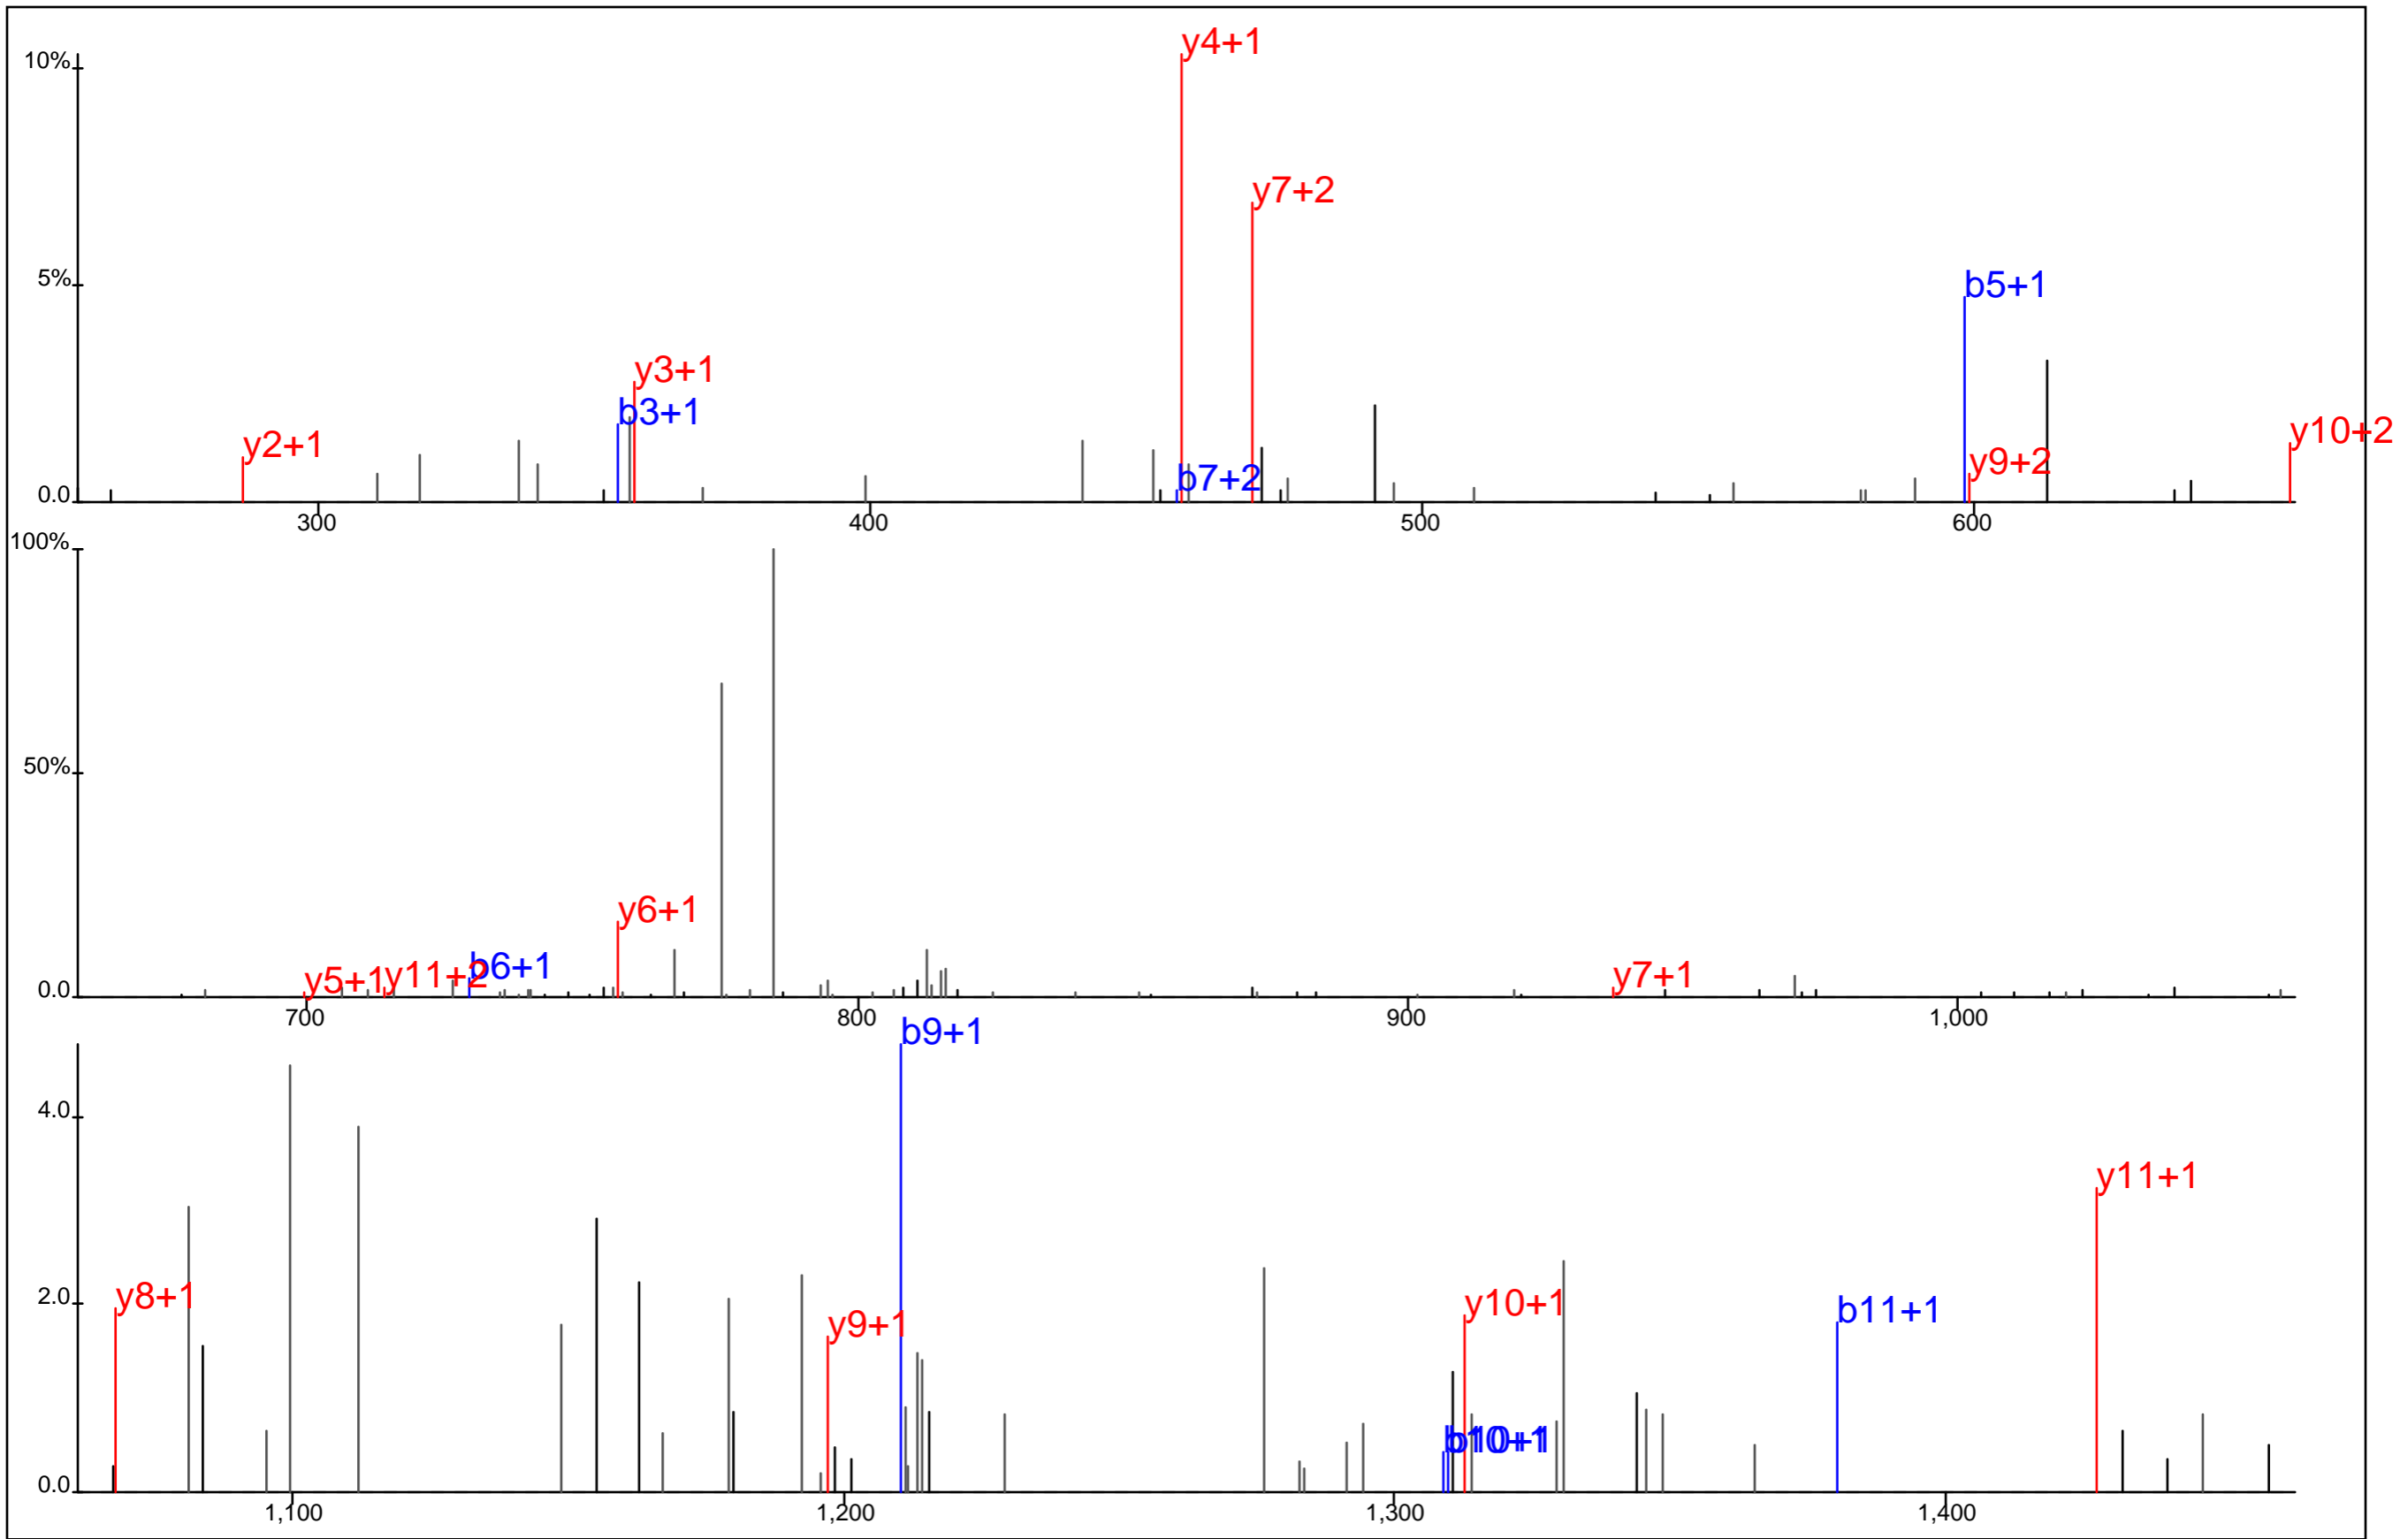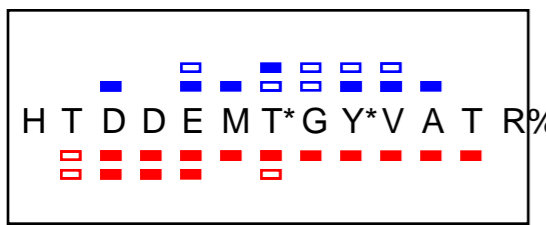

Protein Name: p38  
 gi Accession: 20986514  
 Precursor Mass: 833.3033+2  
 Delta Mass: 6.111 ppm  
 XCorr: 37.72



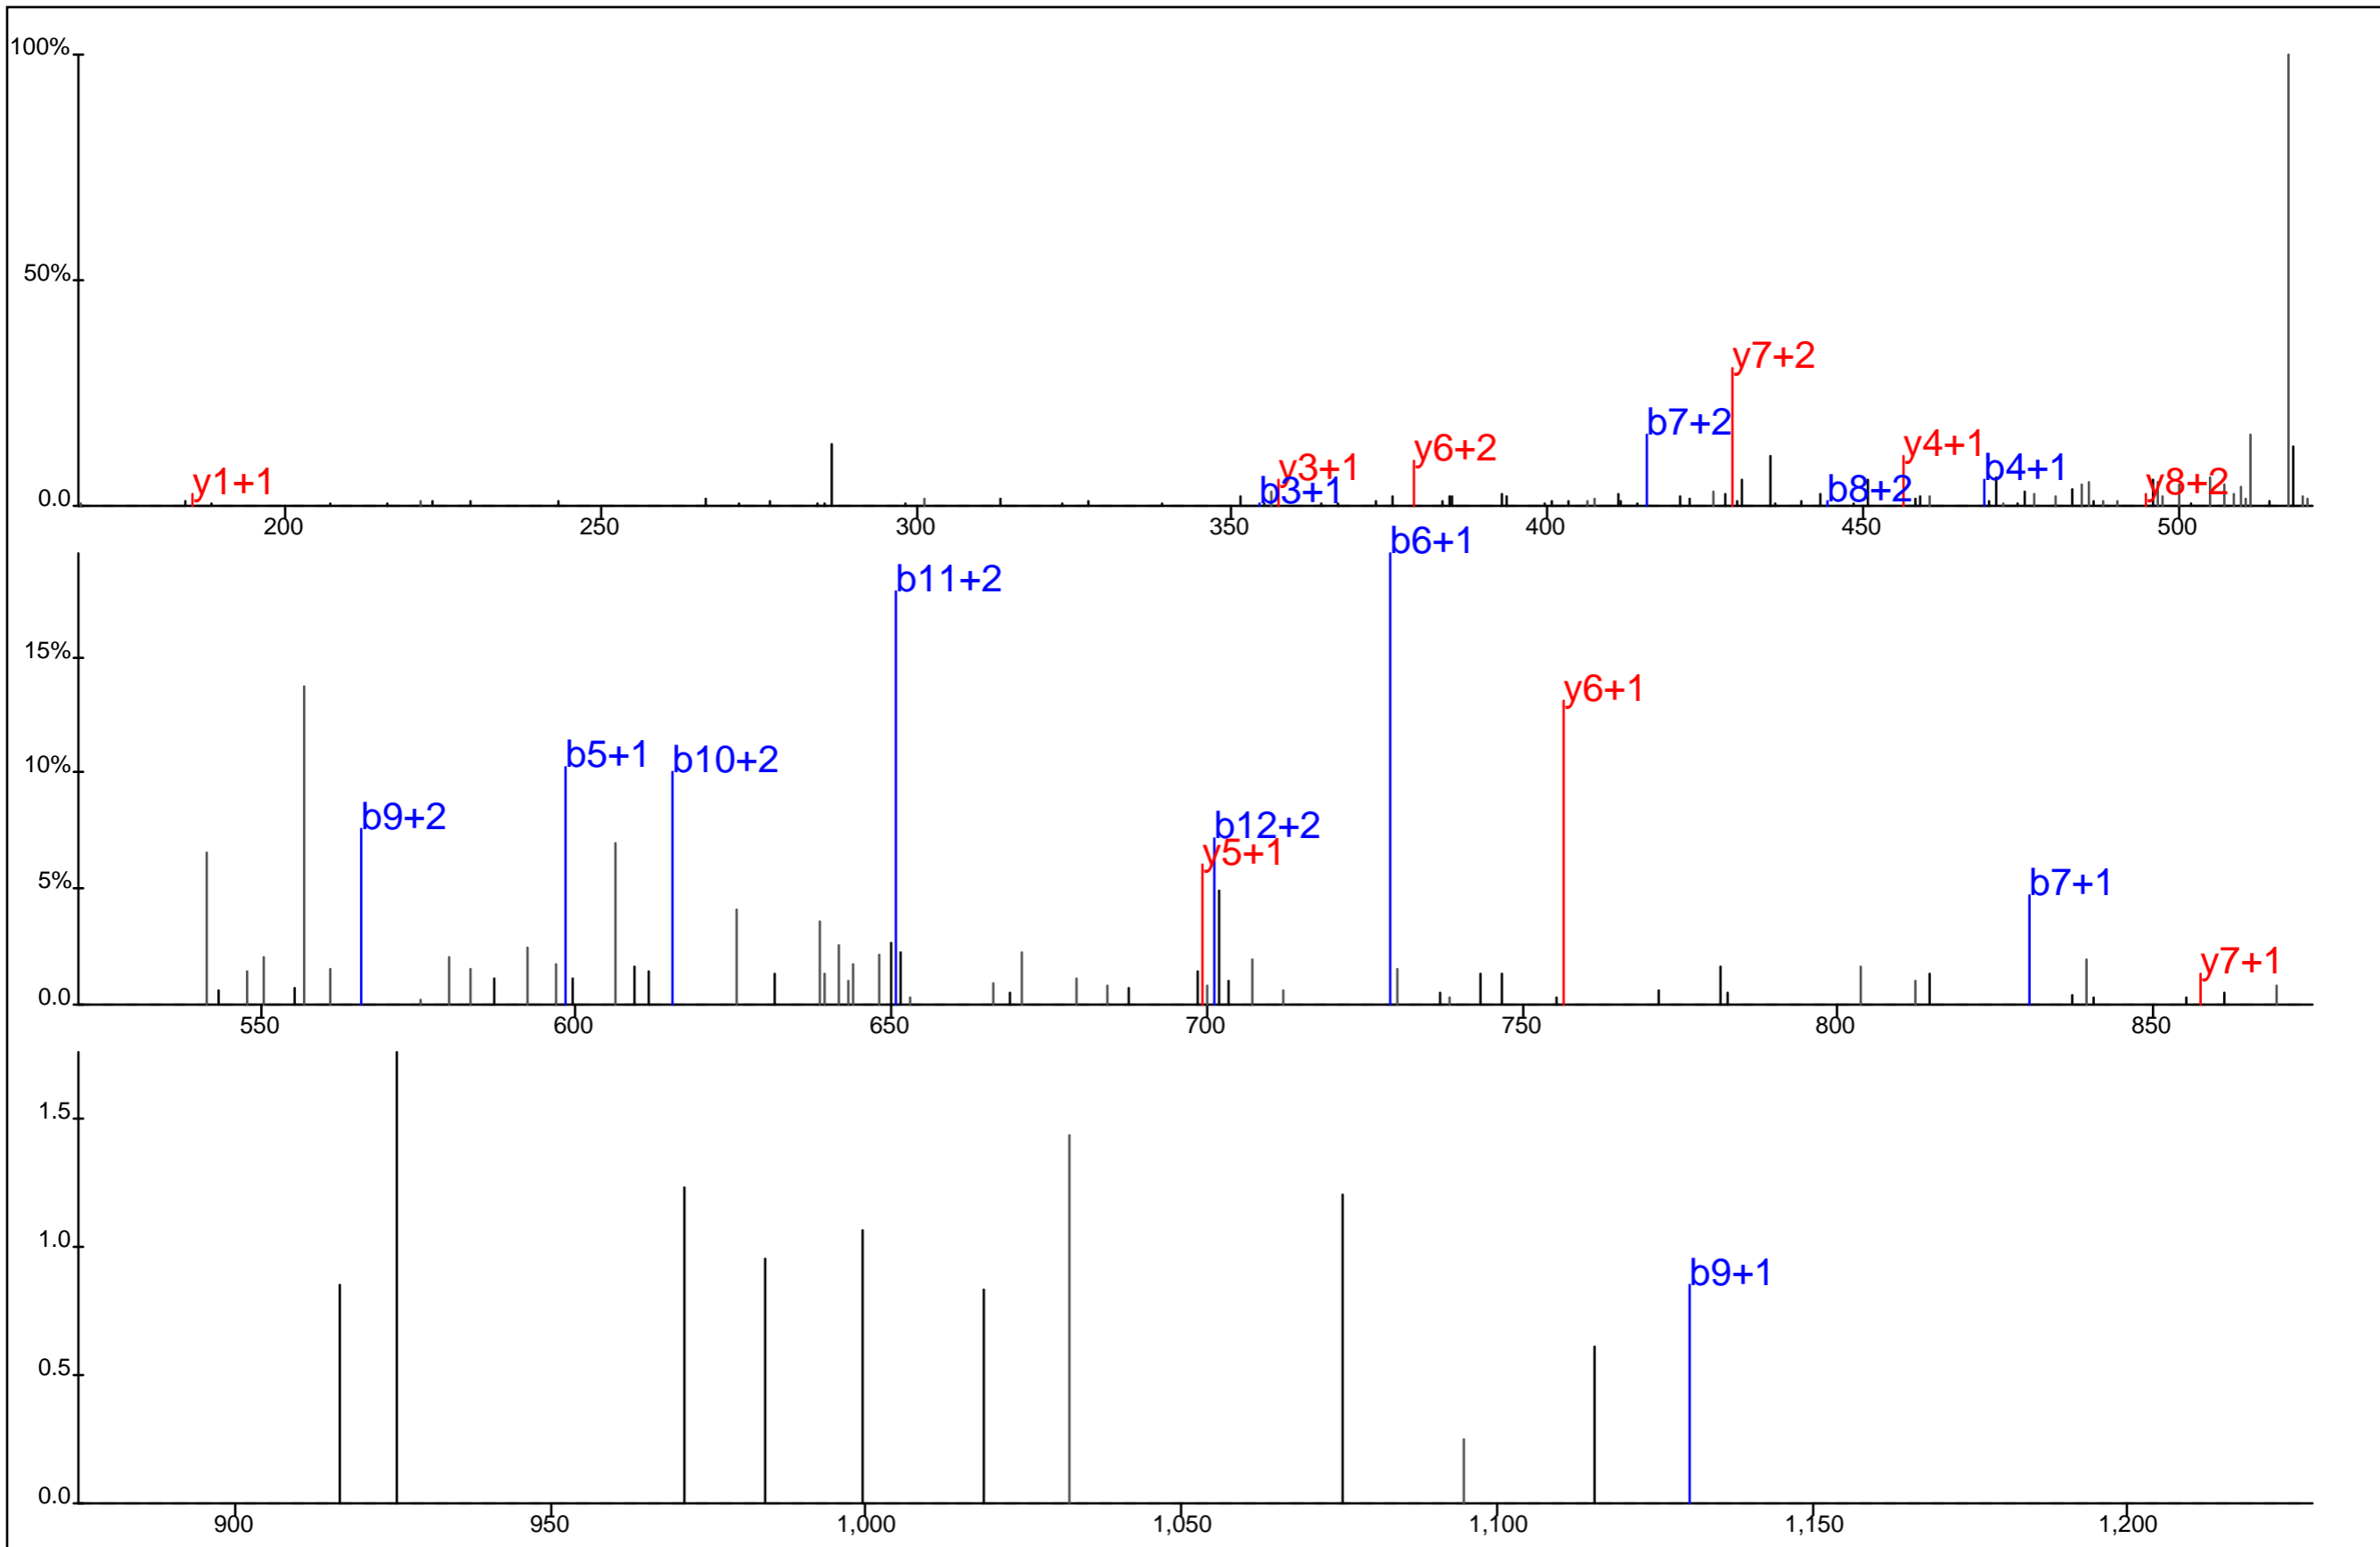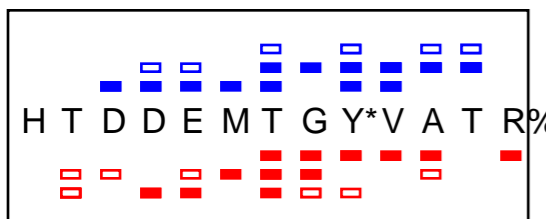

Protein Name: p38  
 gi Accession: 20986514  
 Precursor Mass: 529.2147+3  
 Delta Mass: 4.193 ppm  
 XCorr: 31.47

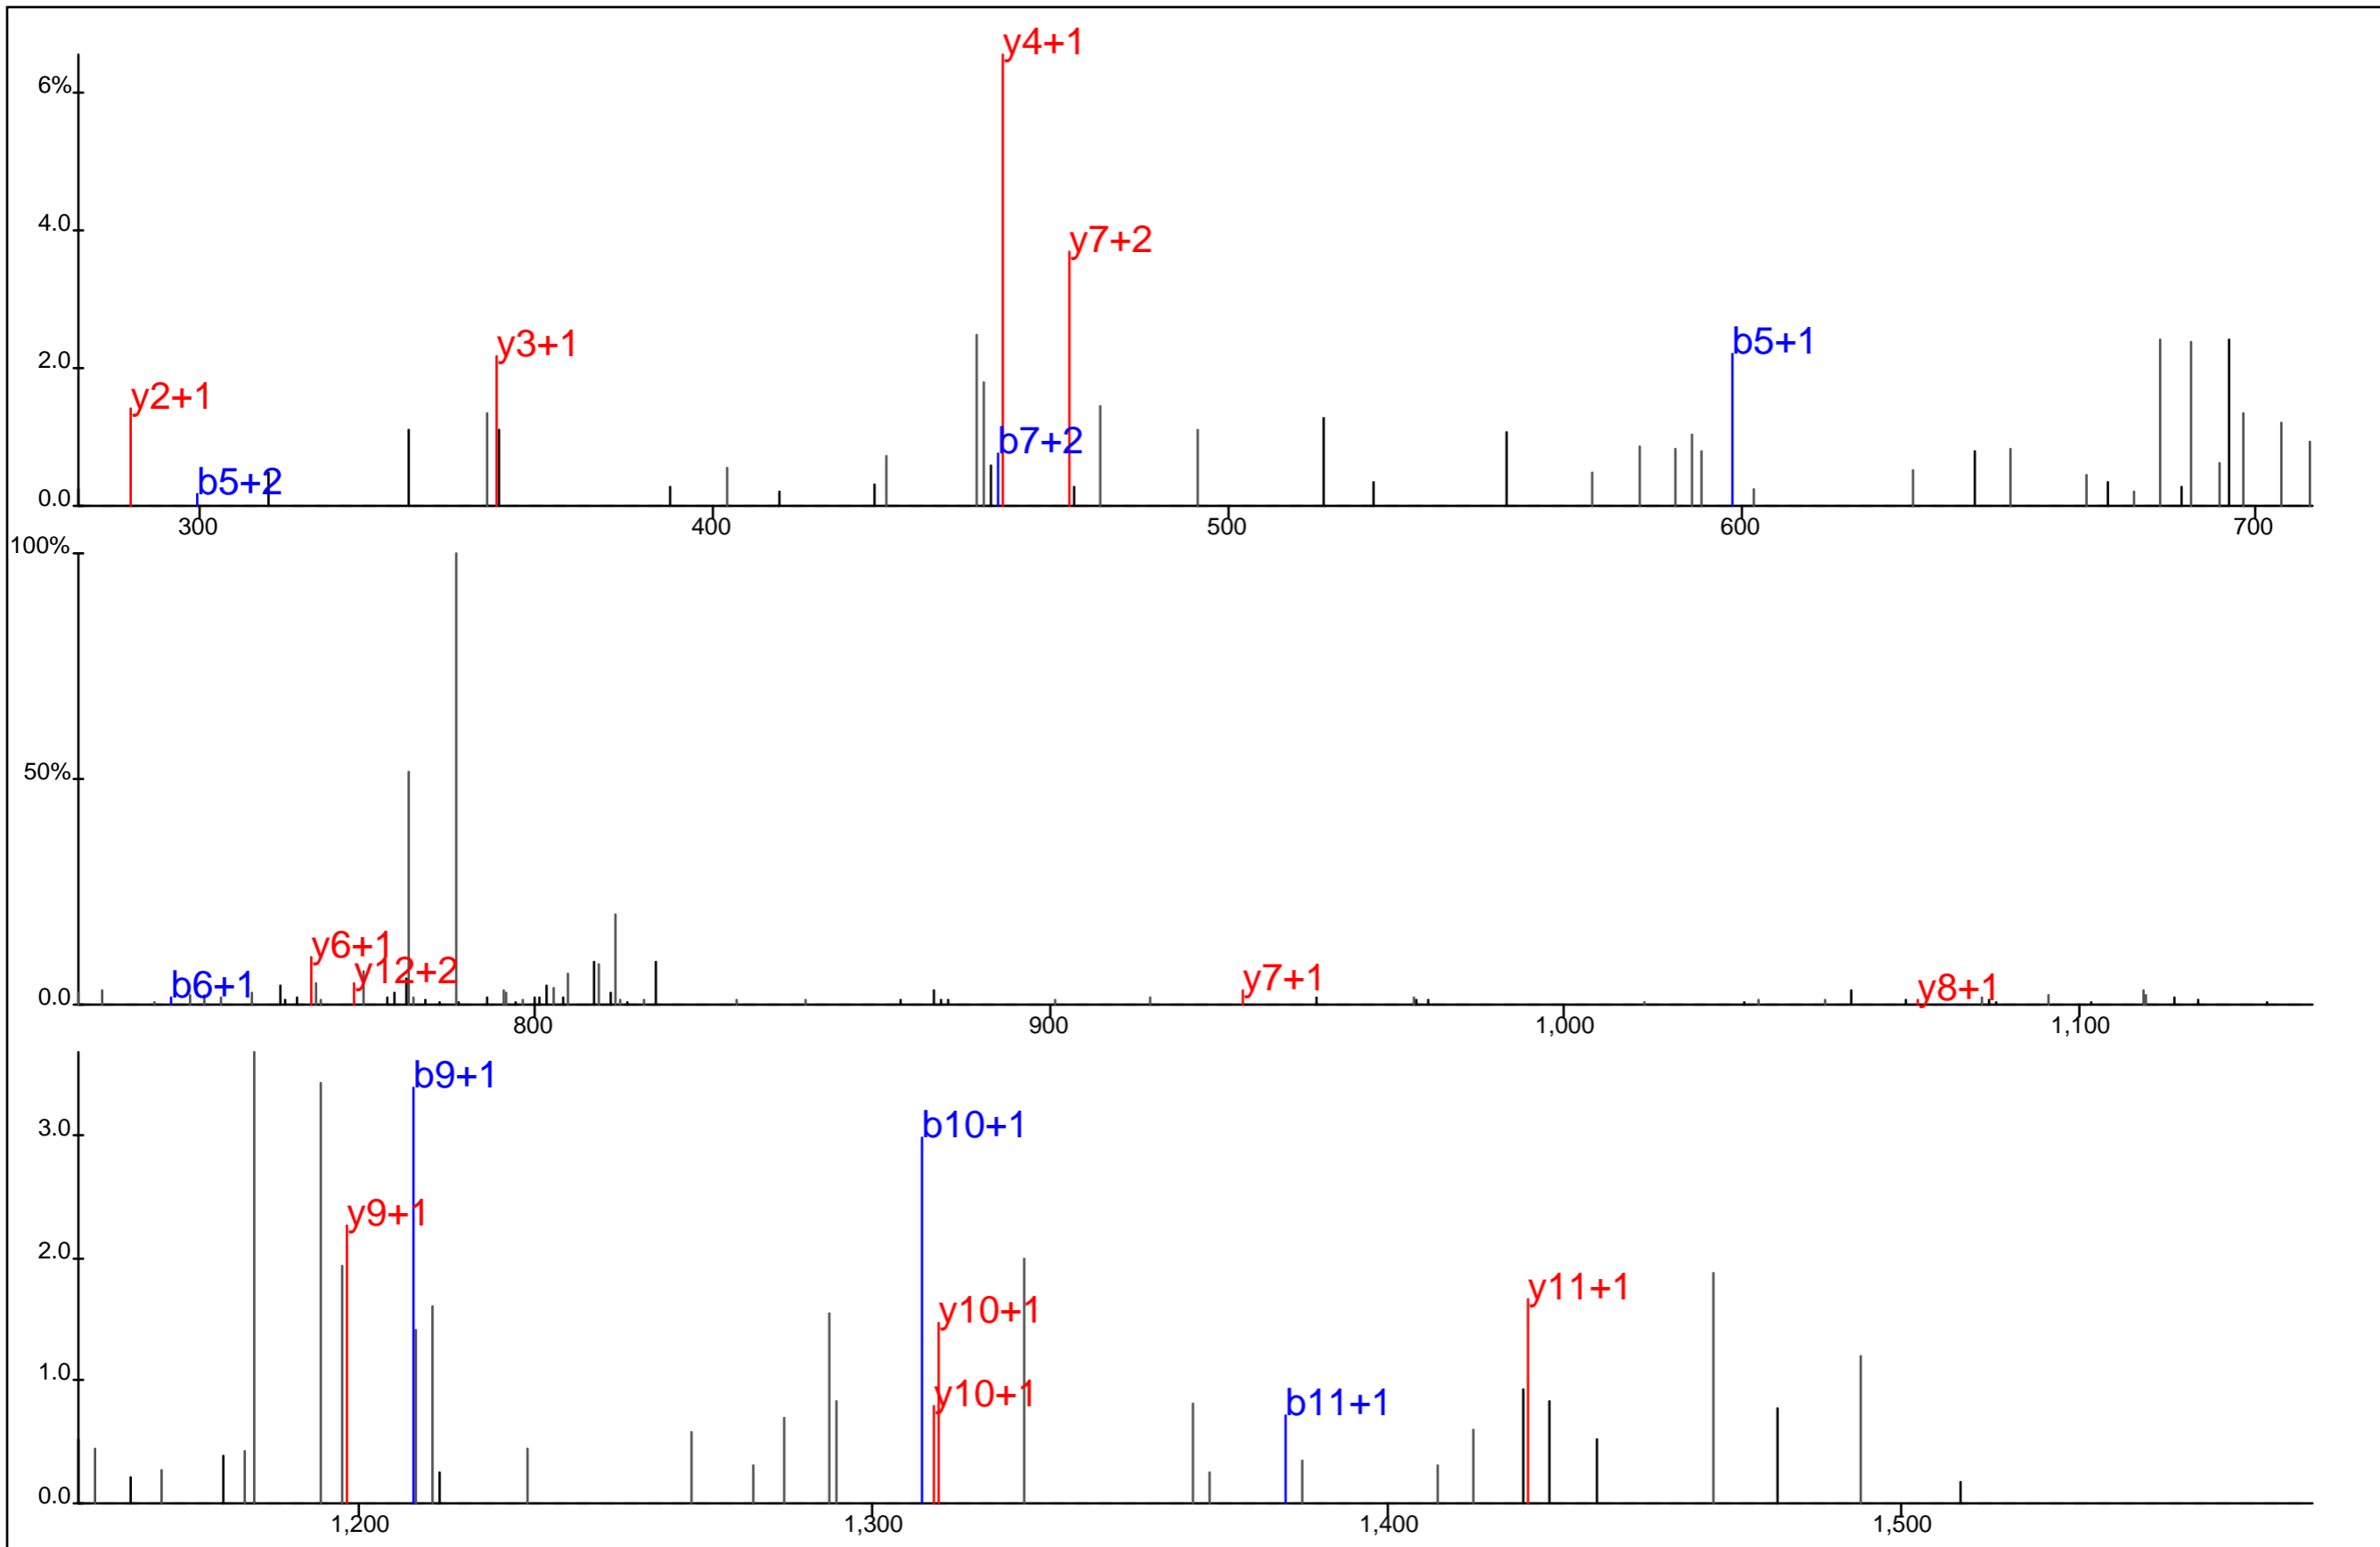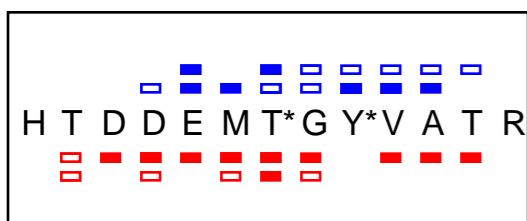

Protein Name: p38  
 gi Accession: 20986514  
 Precursor Mass: 833.3044+2  
 Delta Mass: 7.432 ppm  
 XCorr: 43.78

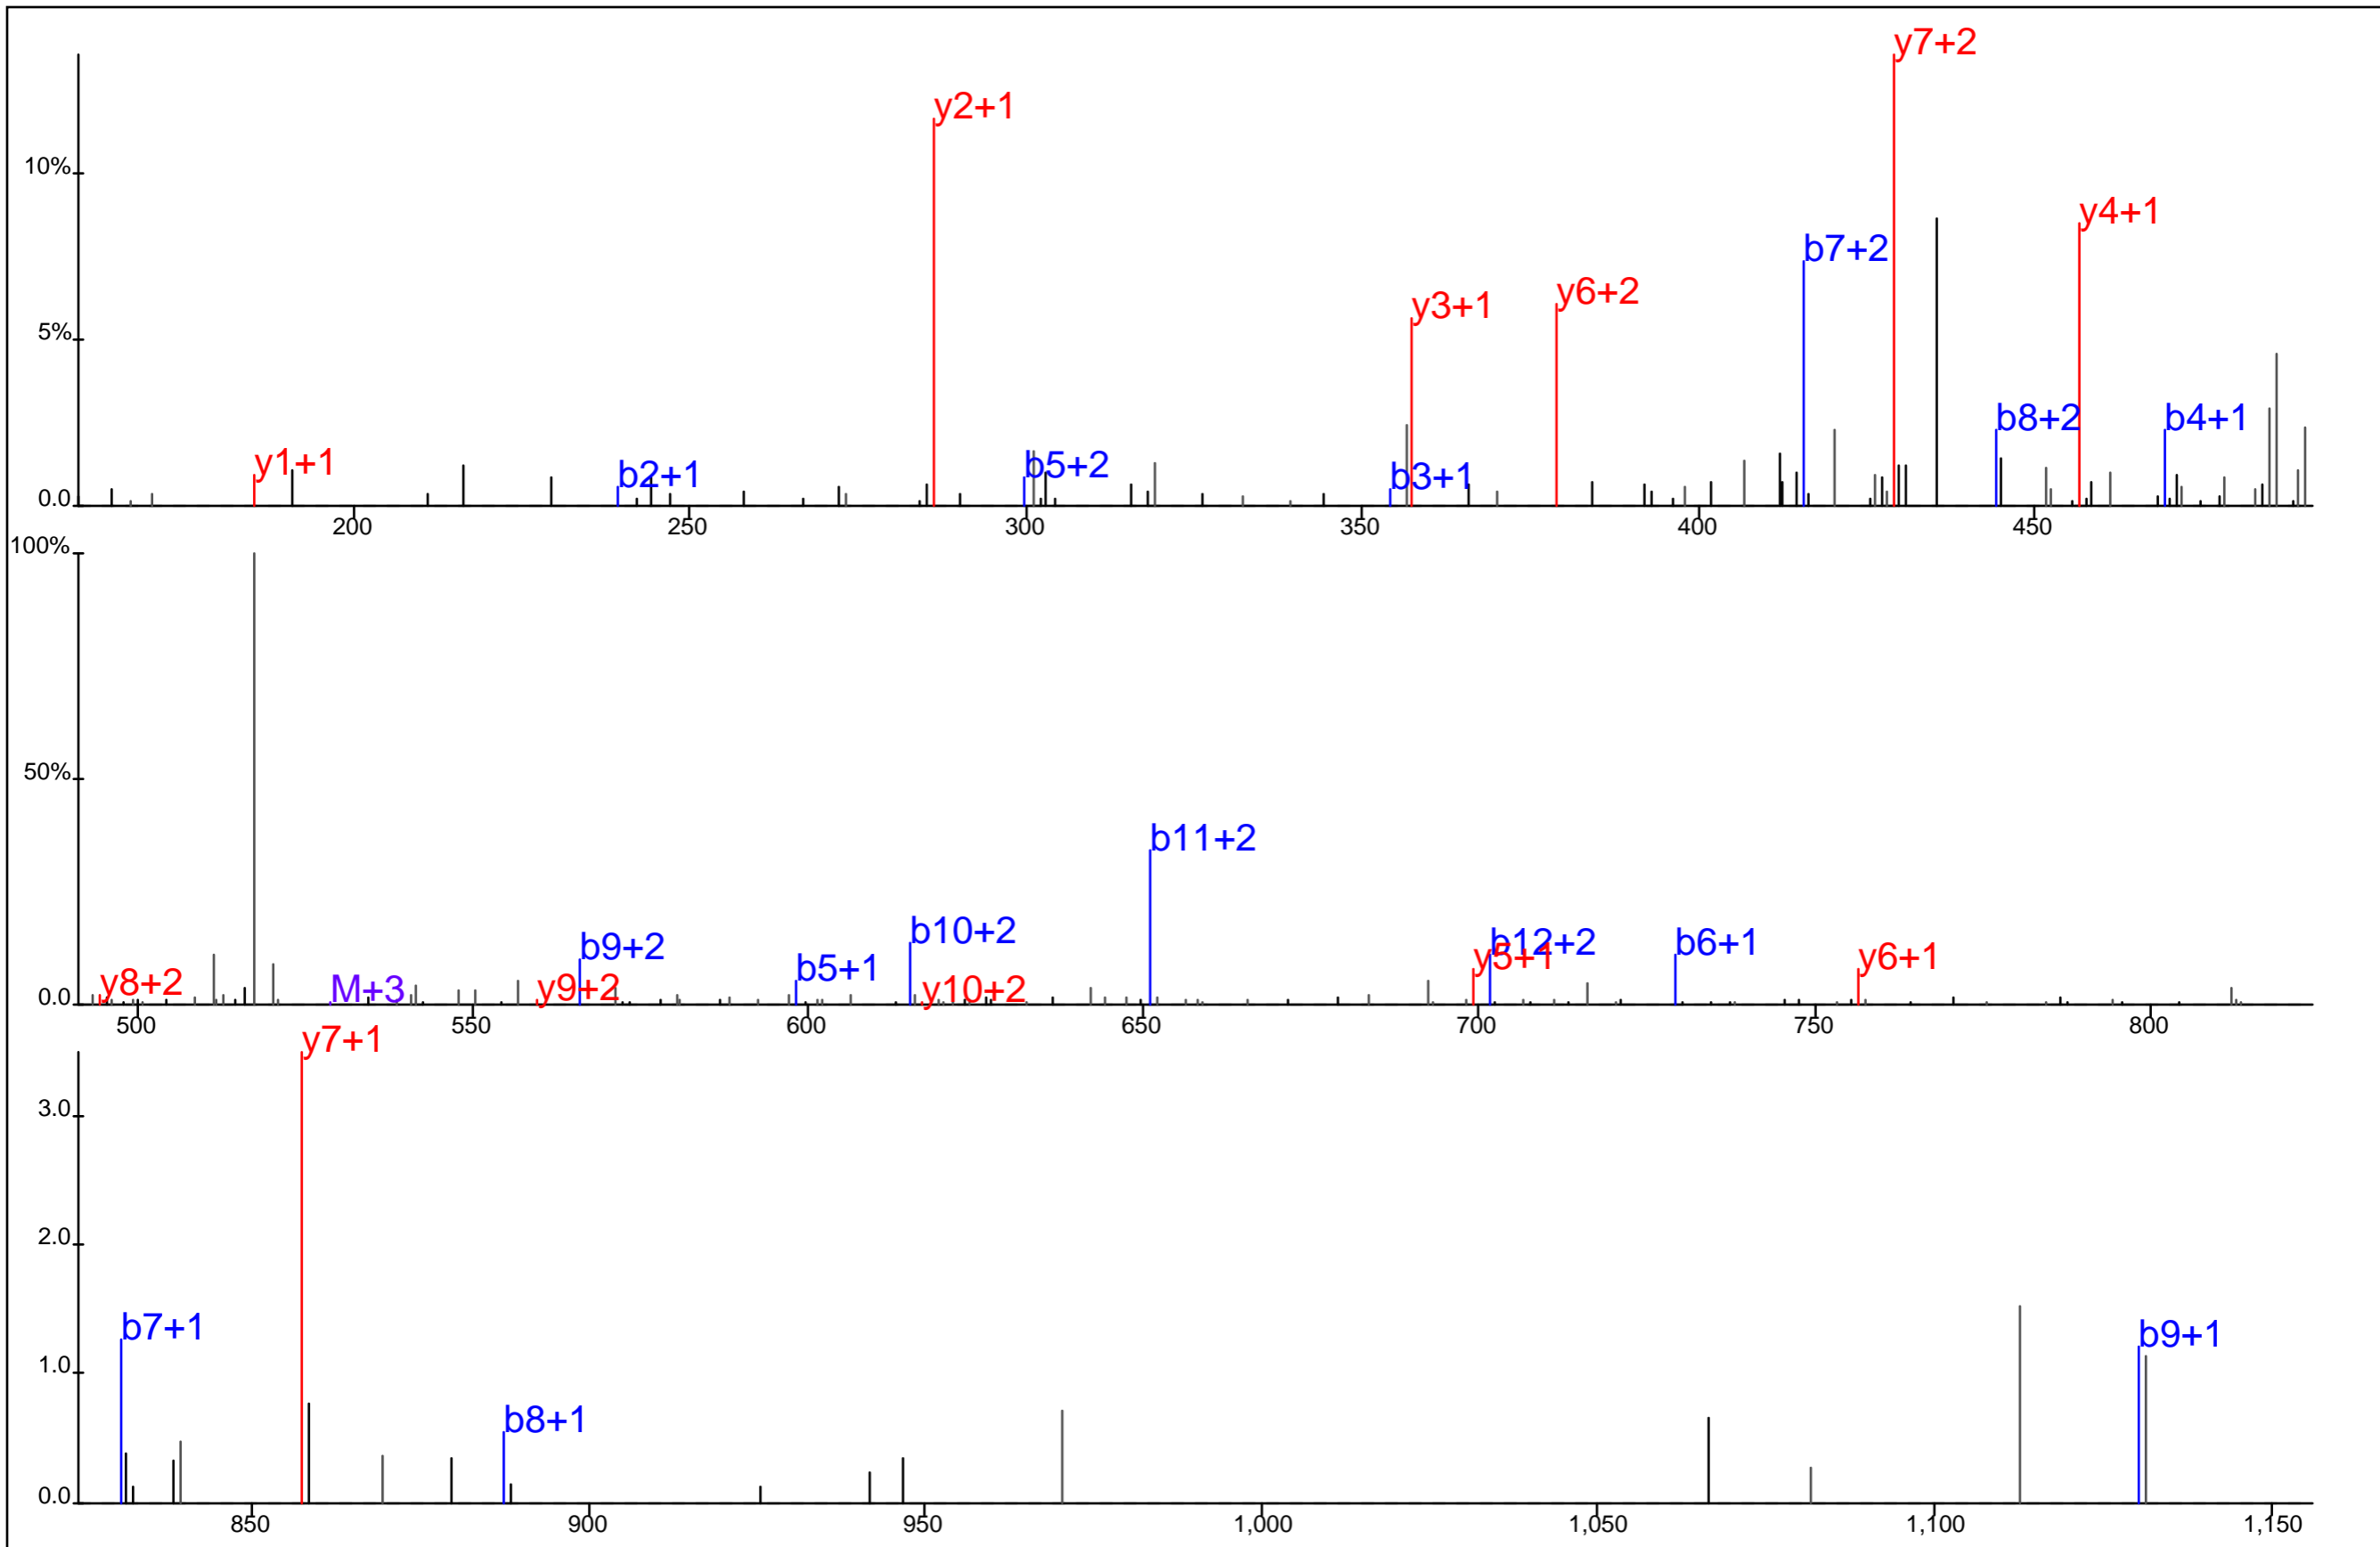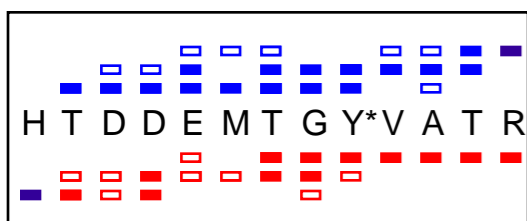

Protein Name: p38  
 gi Accession: 20986514  
 Precursor Mass: 529.2163+3  
 Delta Mass: 7.308 ppm  
 XCorr: 38.62

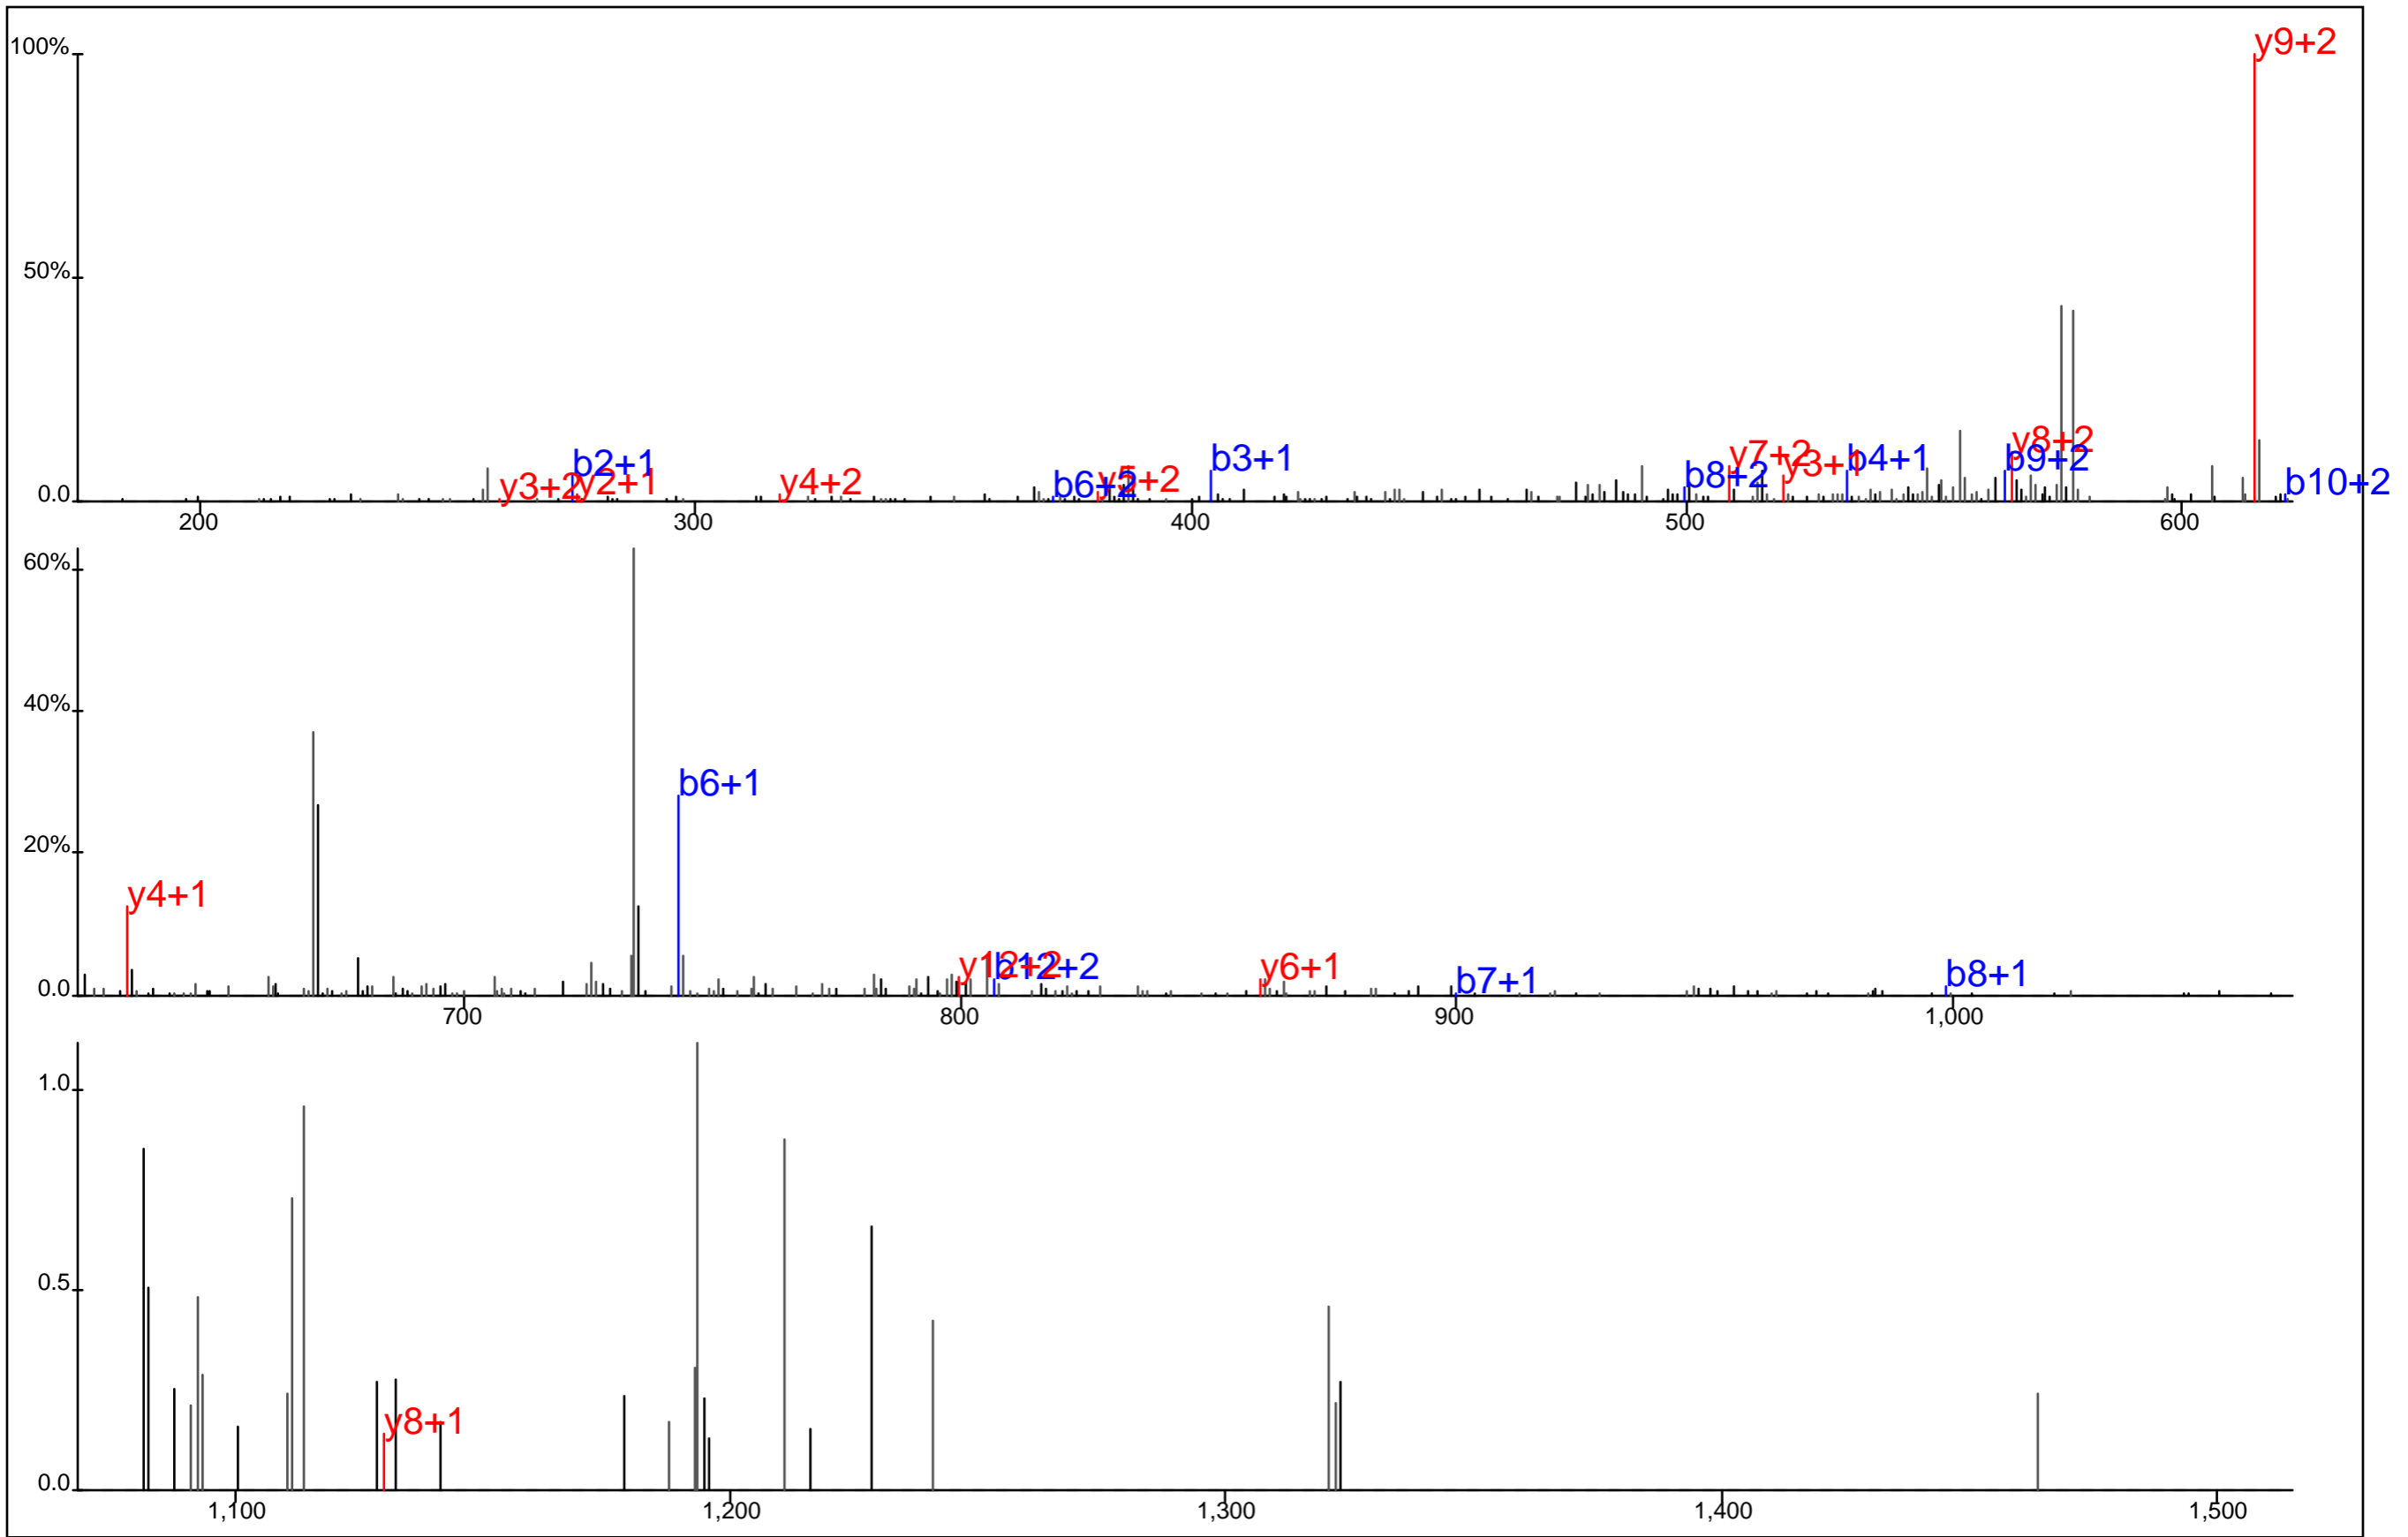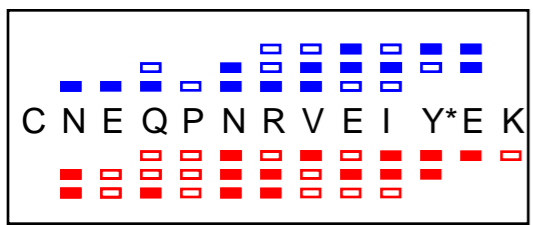

Protein Name: p53 inducible protein  
 gi Accession: 559703  
 Precursor Mass: 586.9229+3  
 Delta Mass: 1.347 ppm  
 XCorr: 16.54

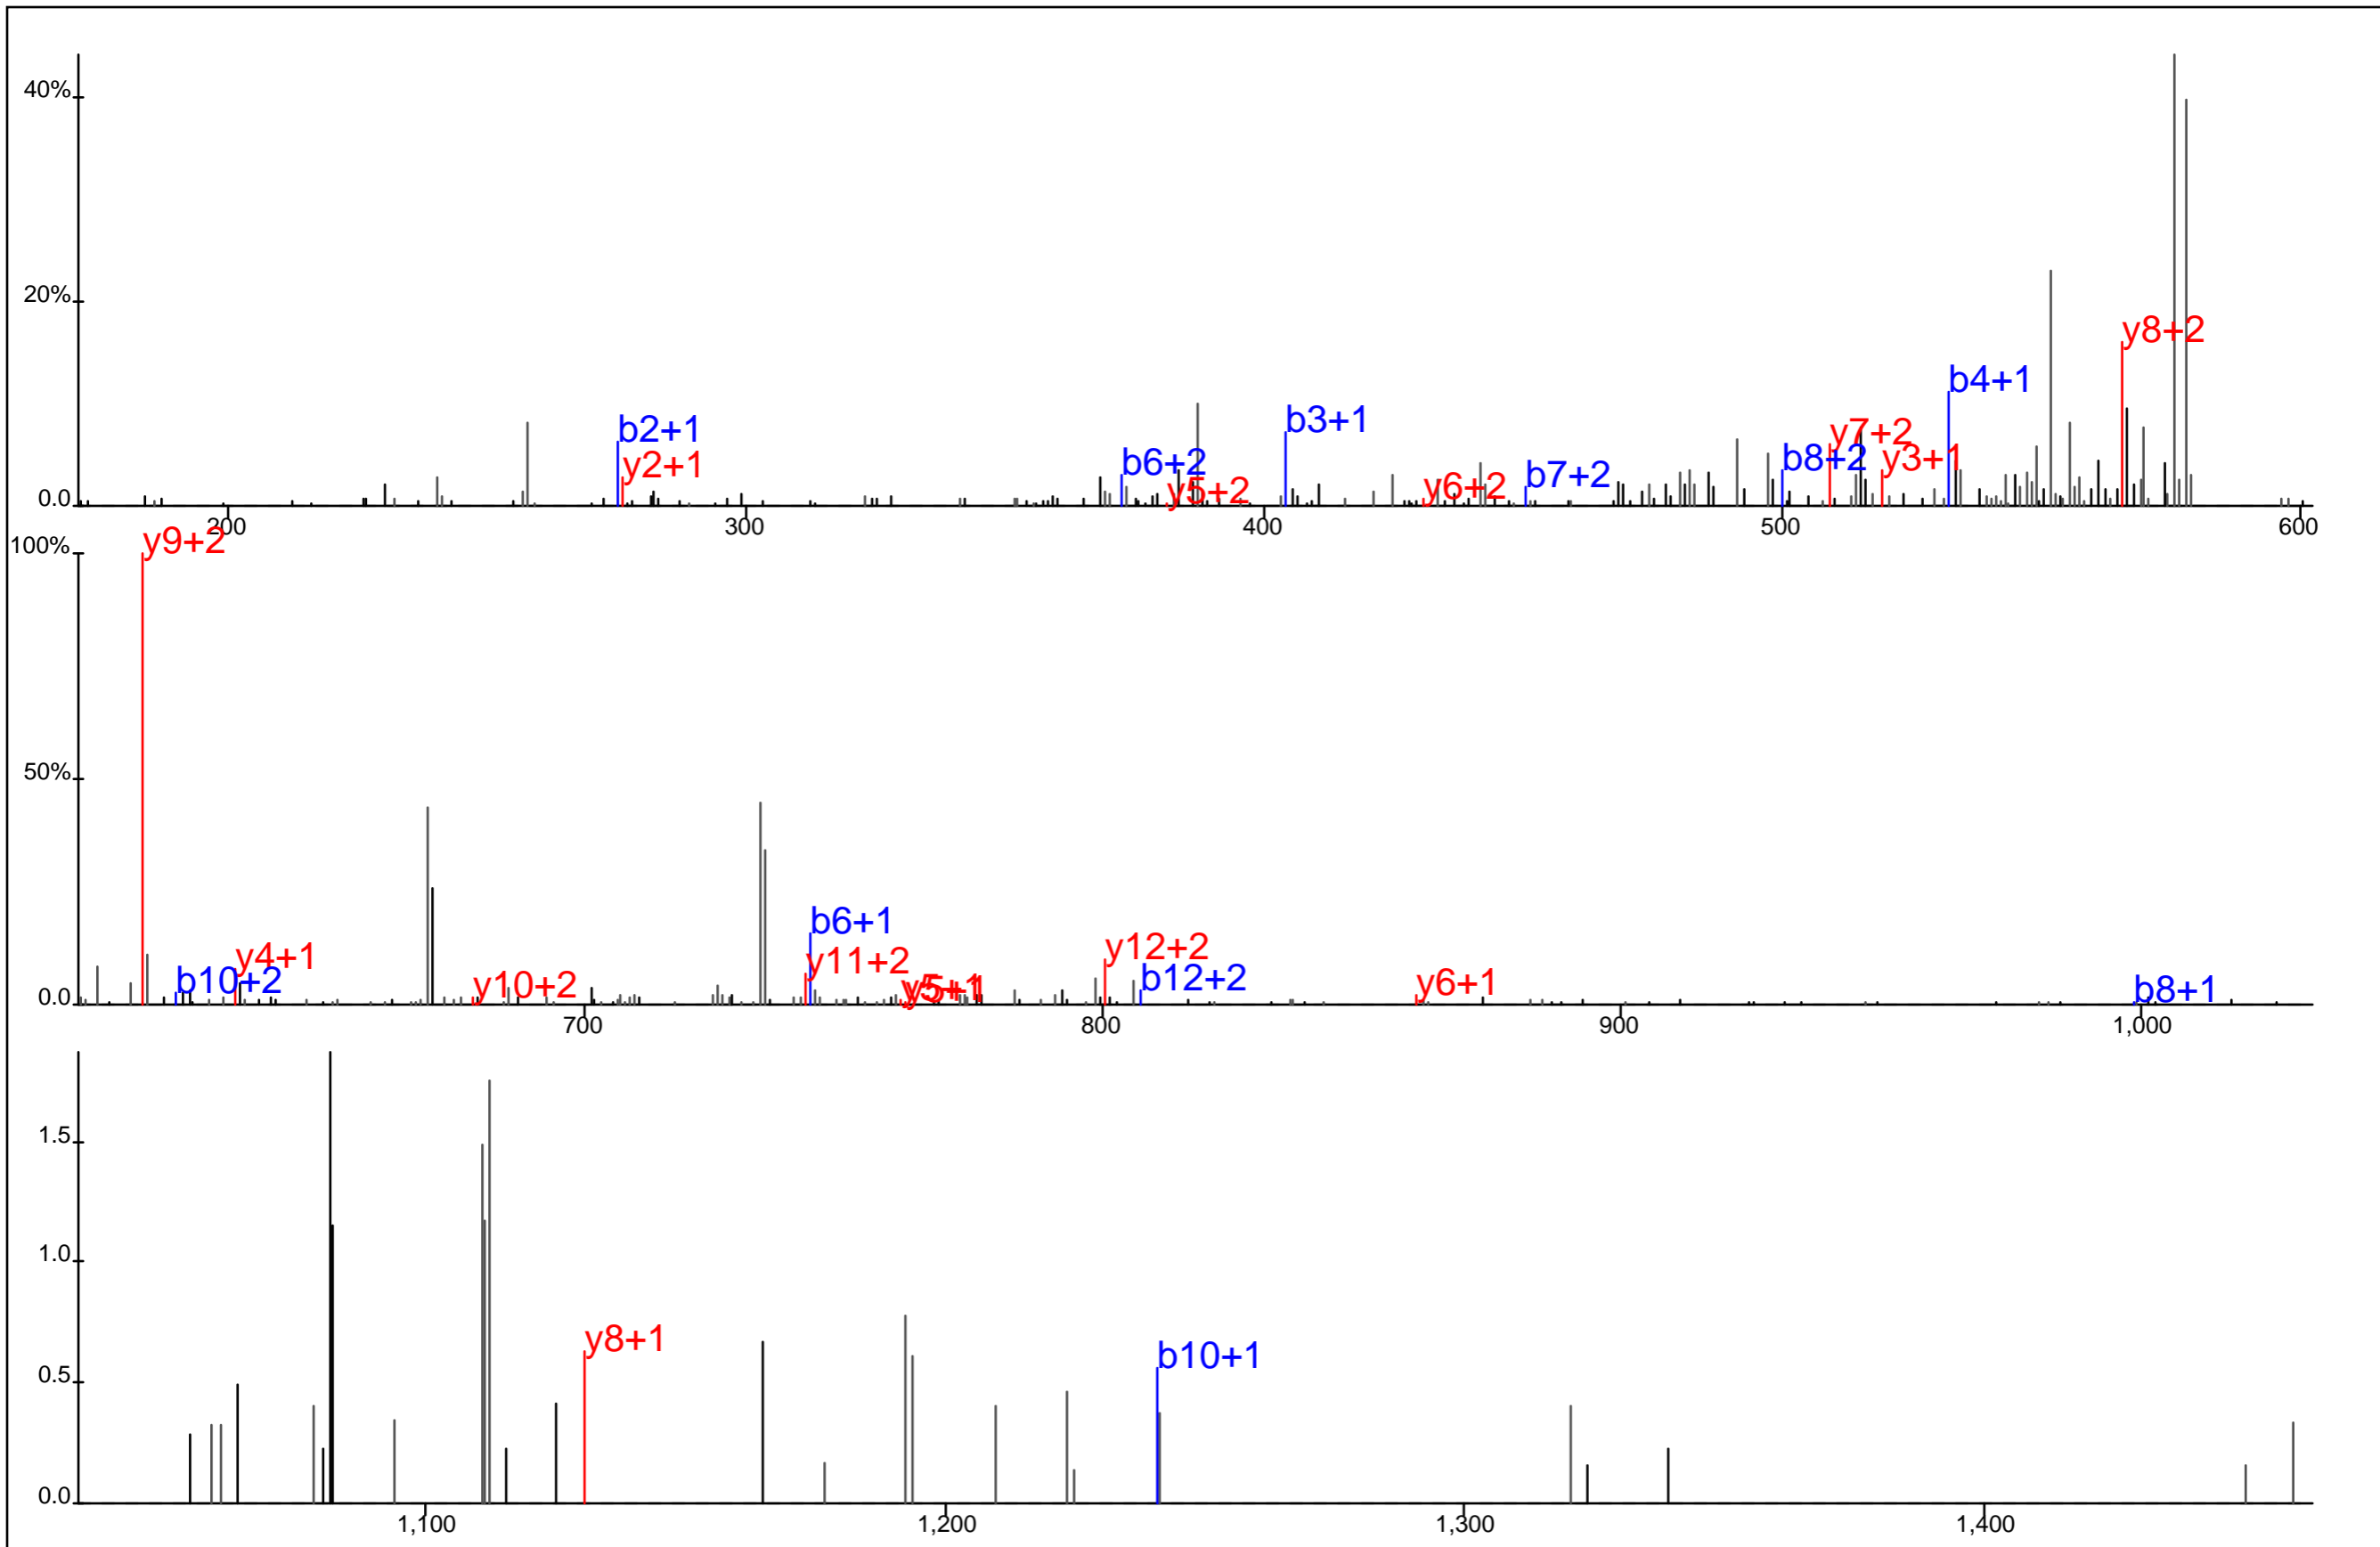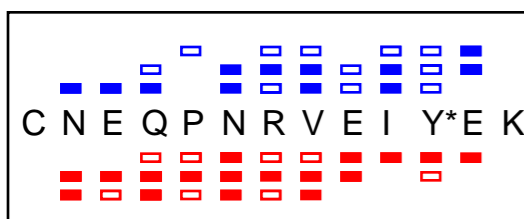

Protein Name: p53 inducible protein  
 gi Accession: 559703  
 Precursor Mass: 586.9237+3  
 Delta Mass: 2.802 ppm  
 XCorr: 14.62

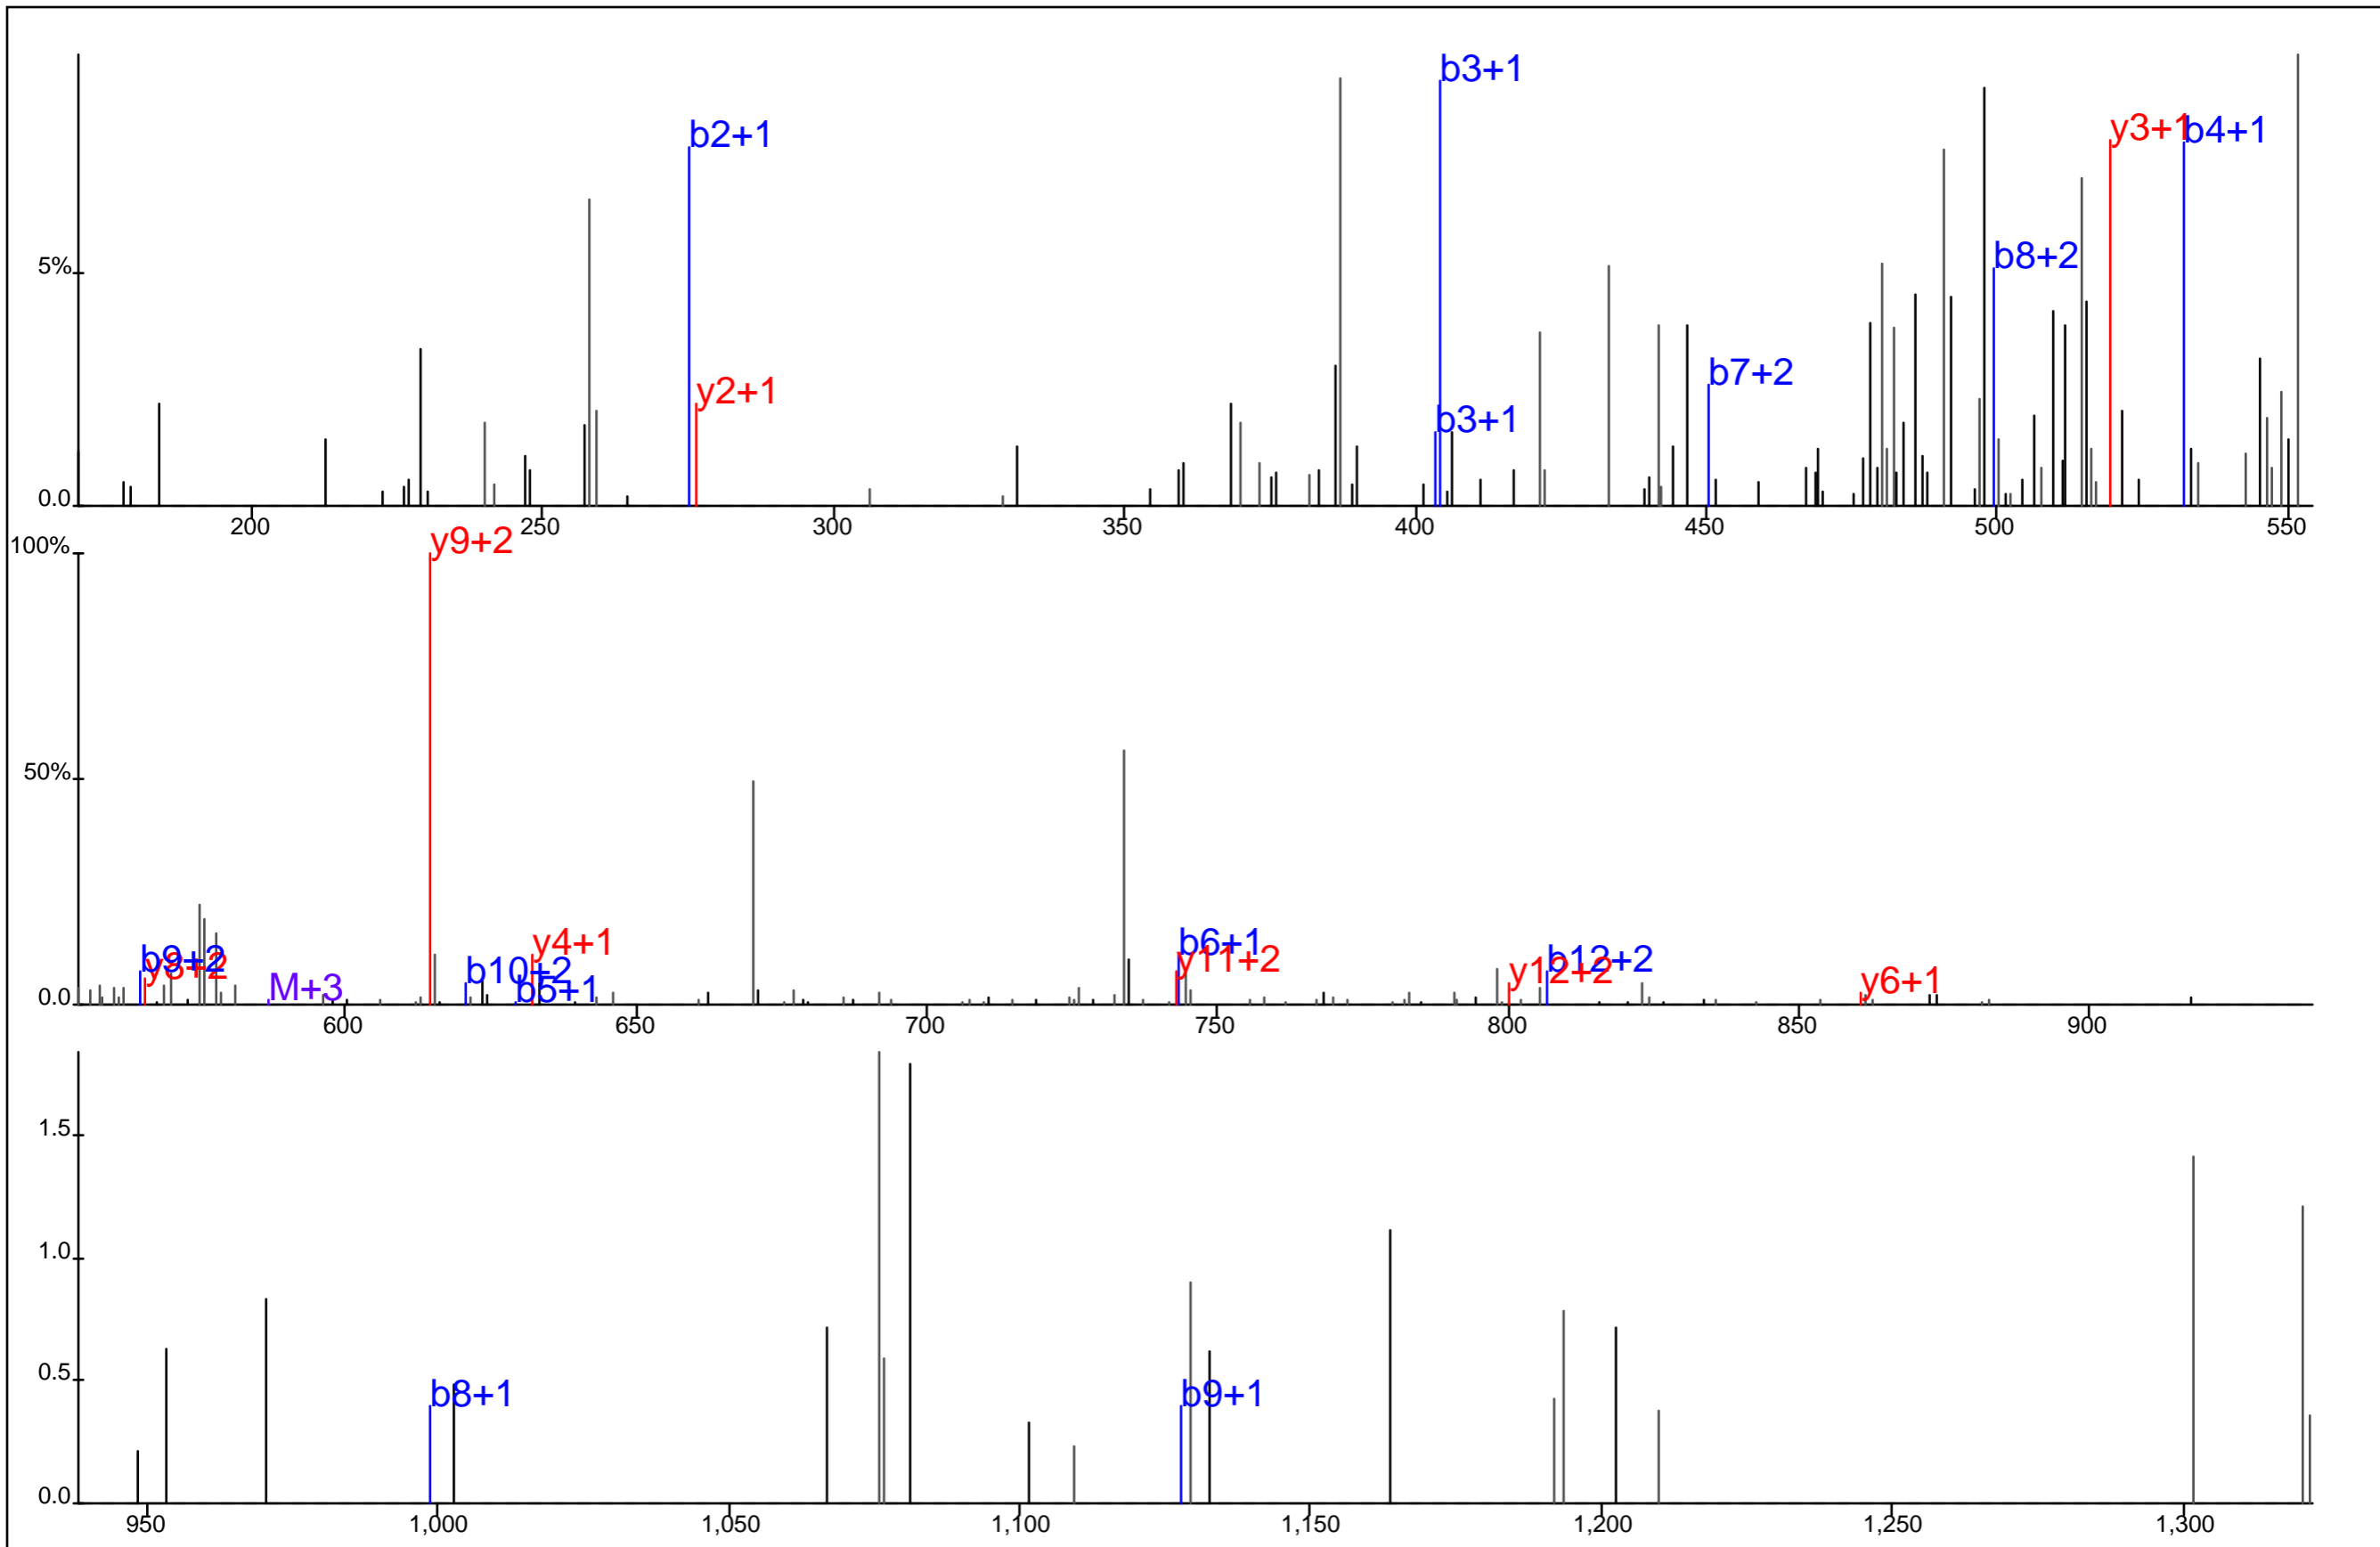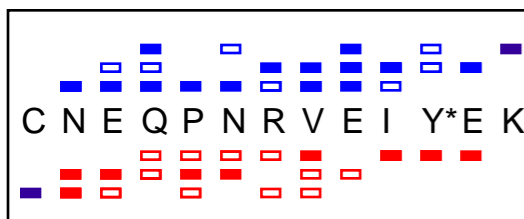

Protein Name: p53 inducible protein  
 gi Accession: 559703  
 Precursor Mass: 586.9237+3  
 Delta Mass: 2.802 ppm  
 XCorr: 26.37

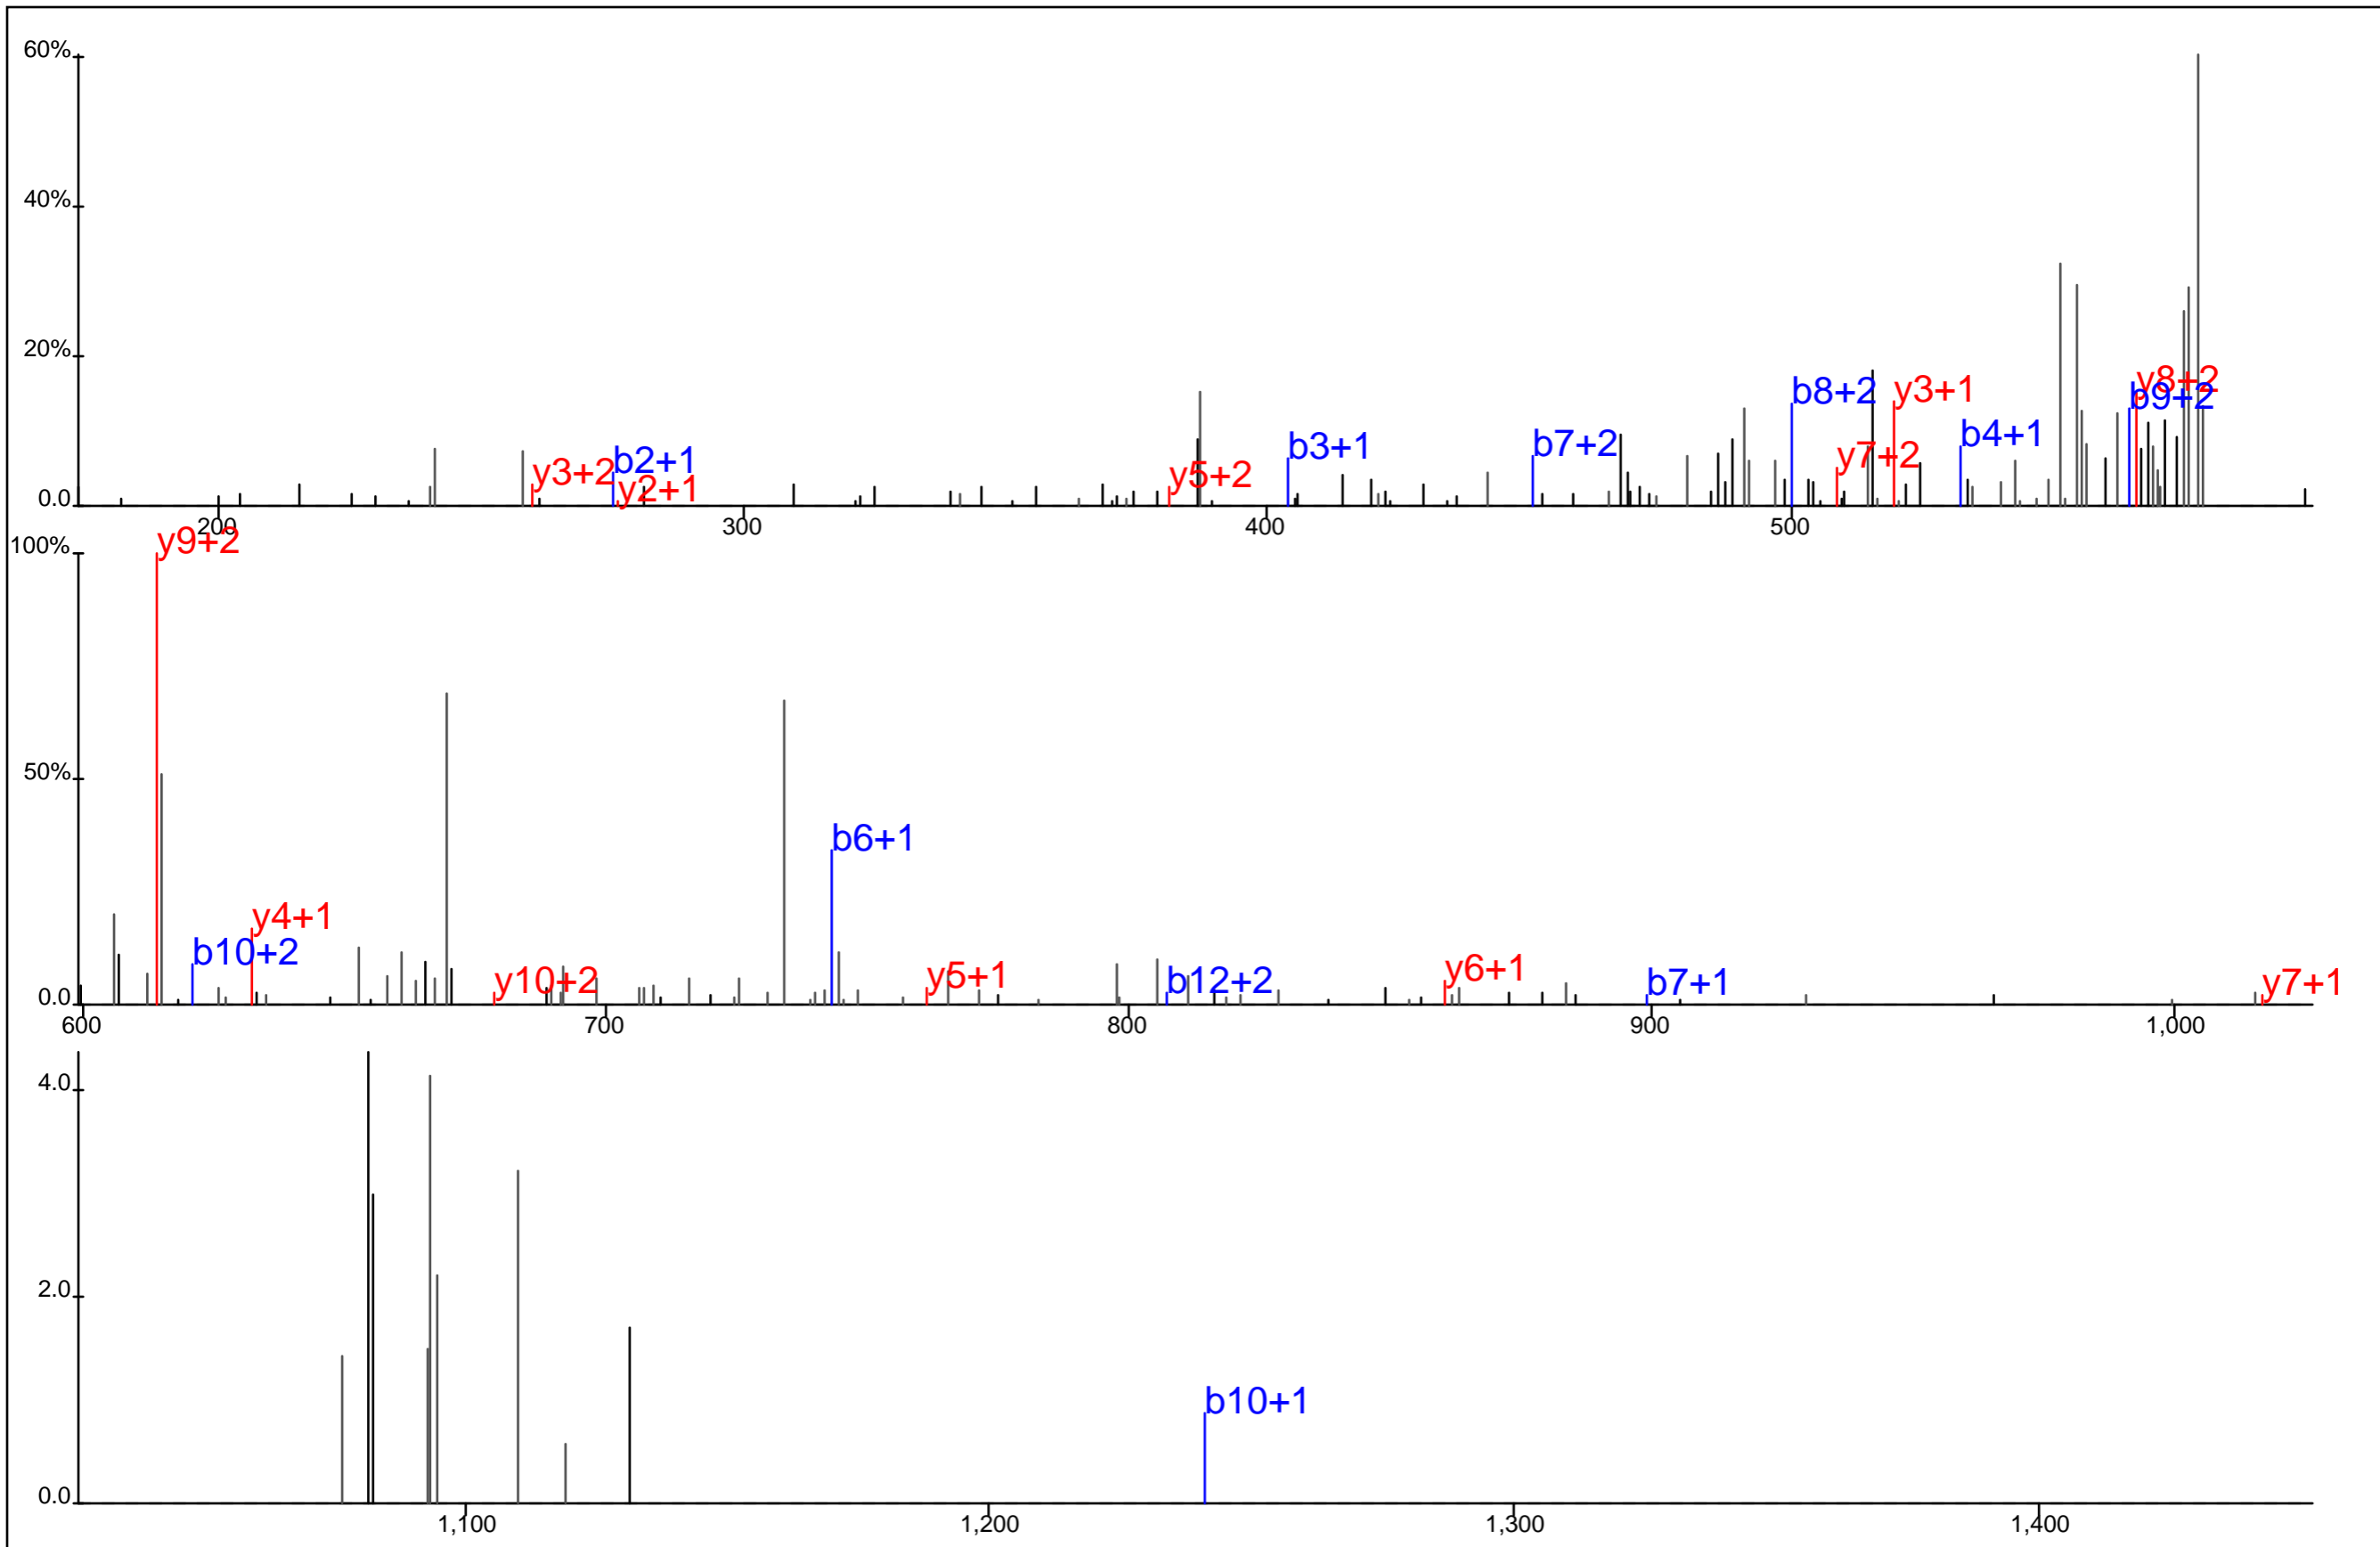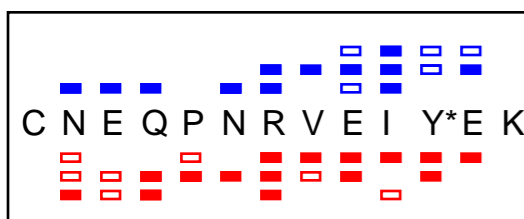

Protein Name: p53 inducible protein  
 gi Accession: 559703  
 Precursor Mass: 586.9244+3  
 Delta Mass: 3.950 ppm  
 XCorr: 15.45

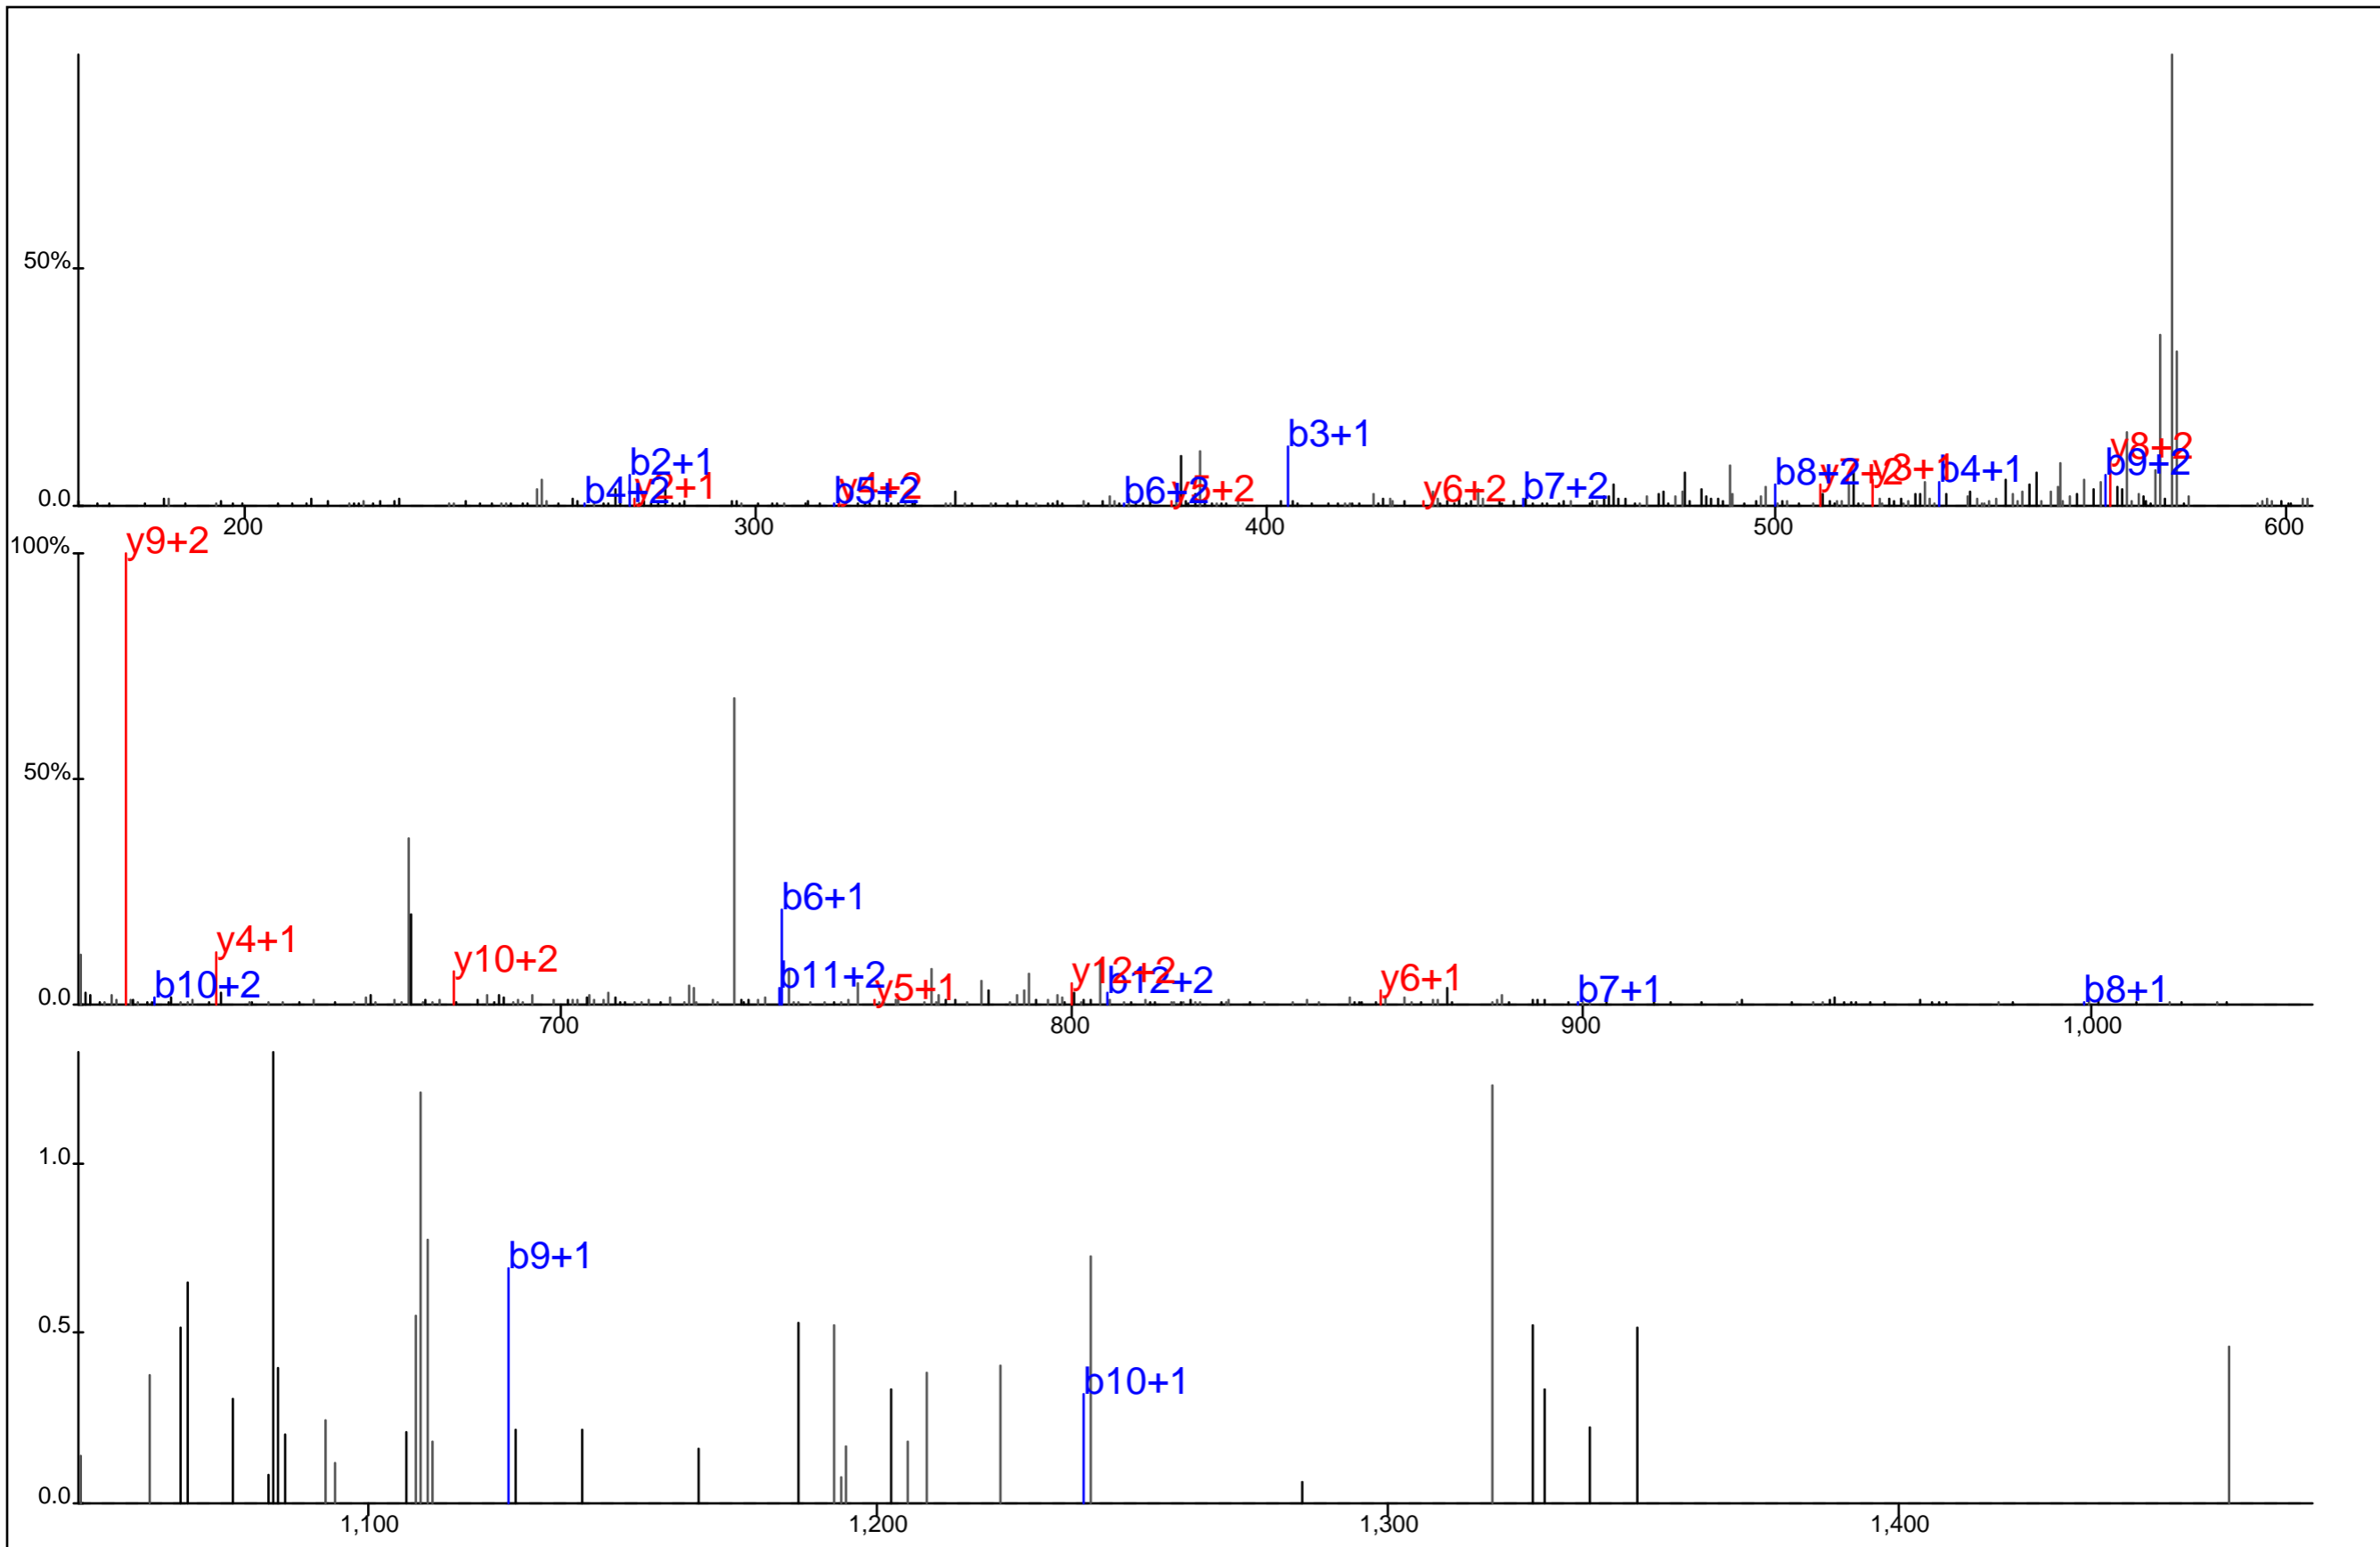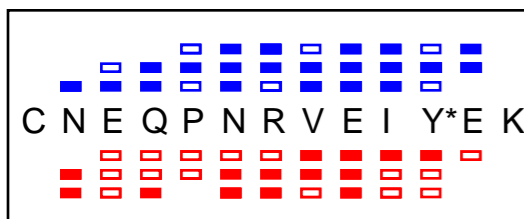

Protein Name: p53 inducible protein  
 gi Accession: 559703  
 Precursor Mass: 586.9232+3  
 Delta Mass: 1.971 ppm  
 XCorr: 16.46



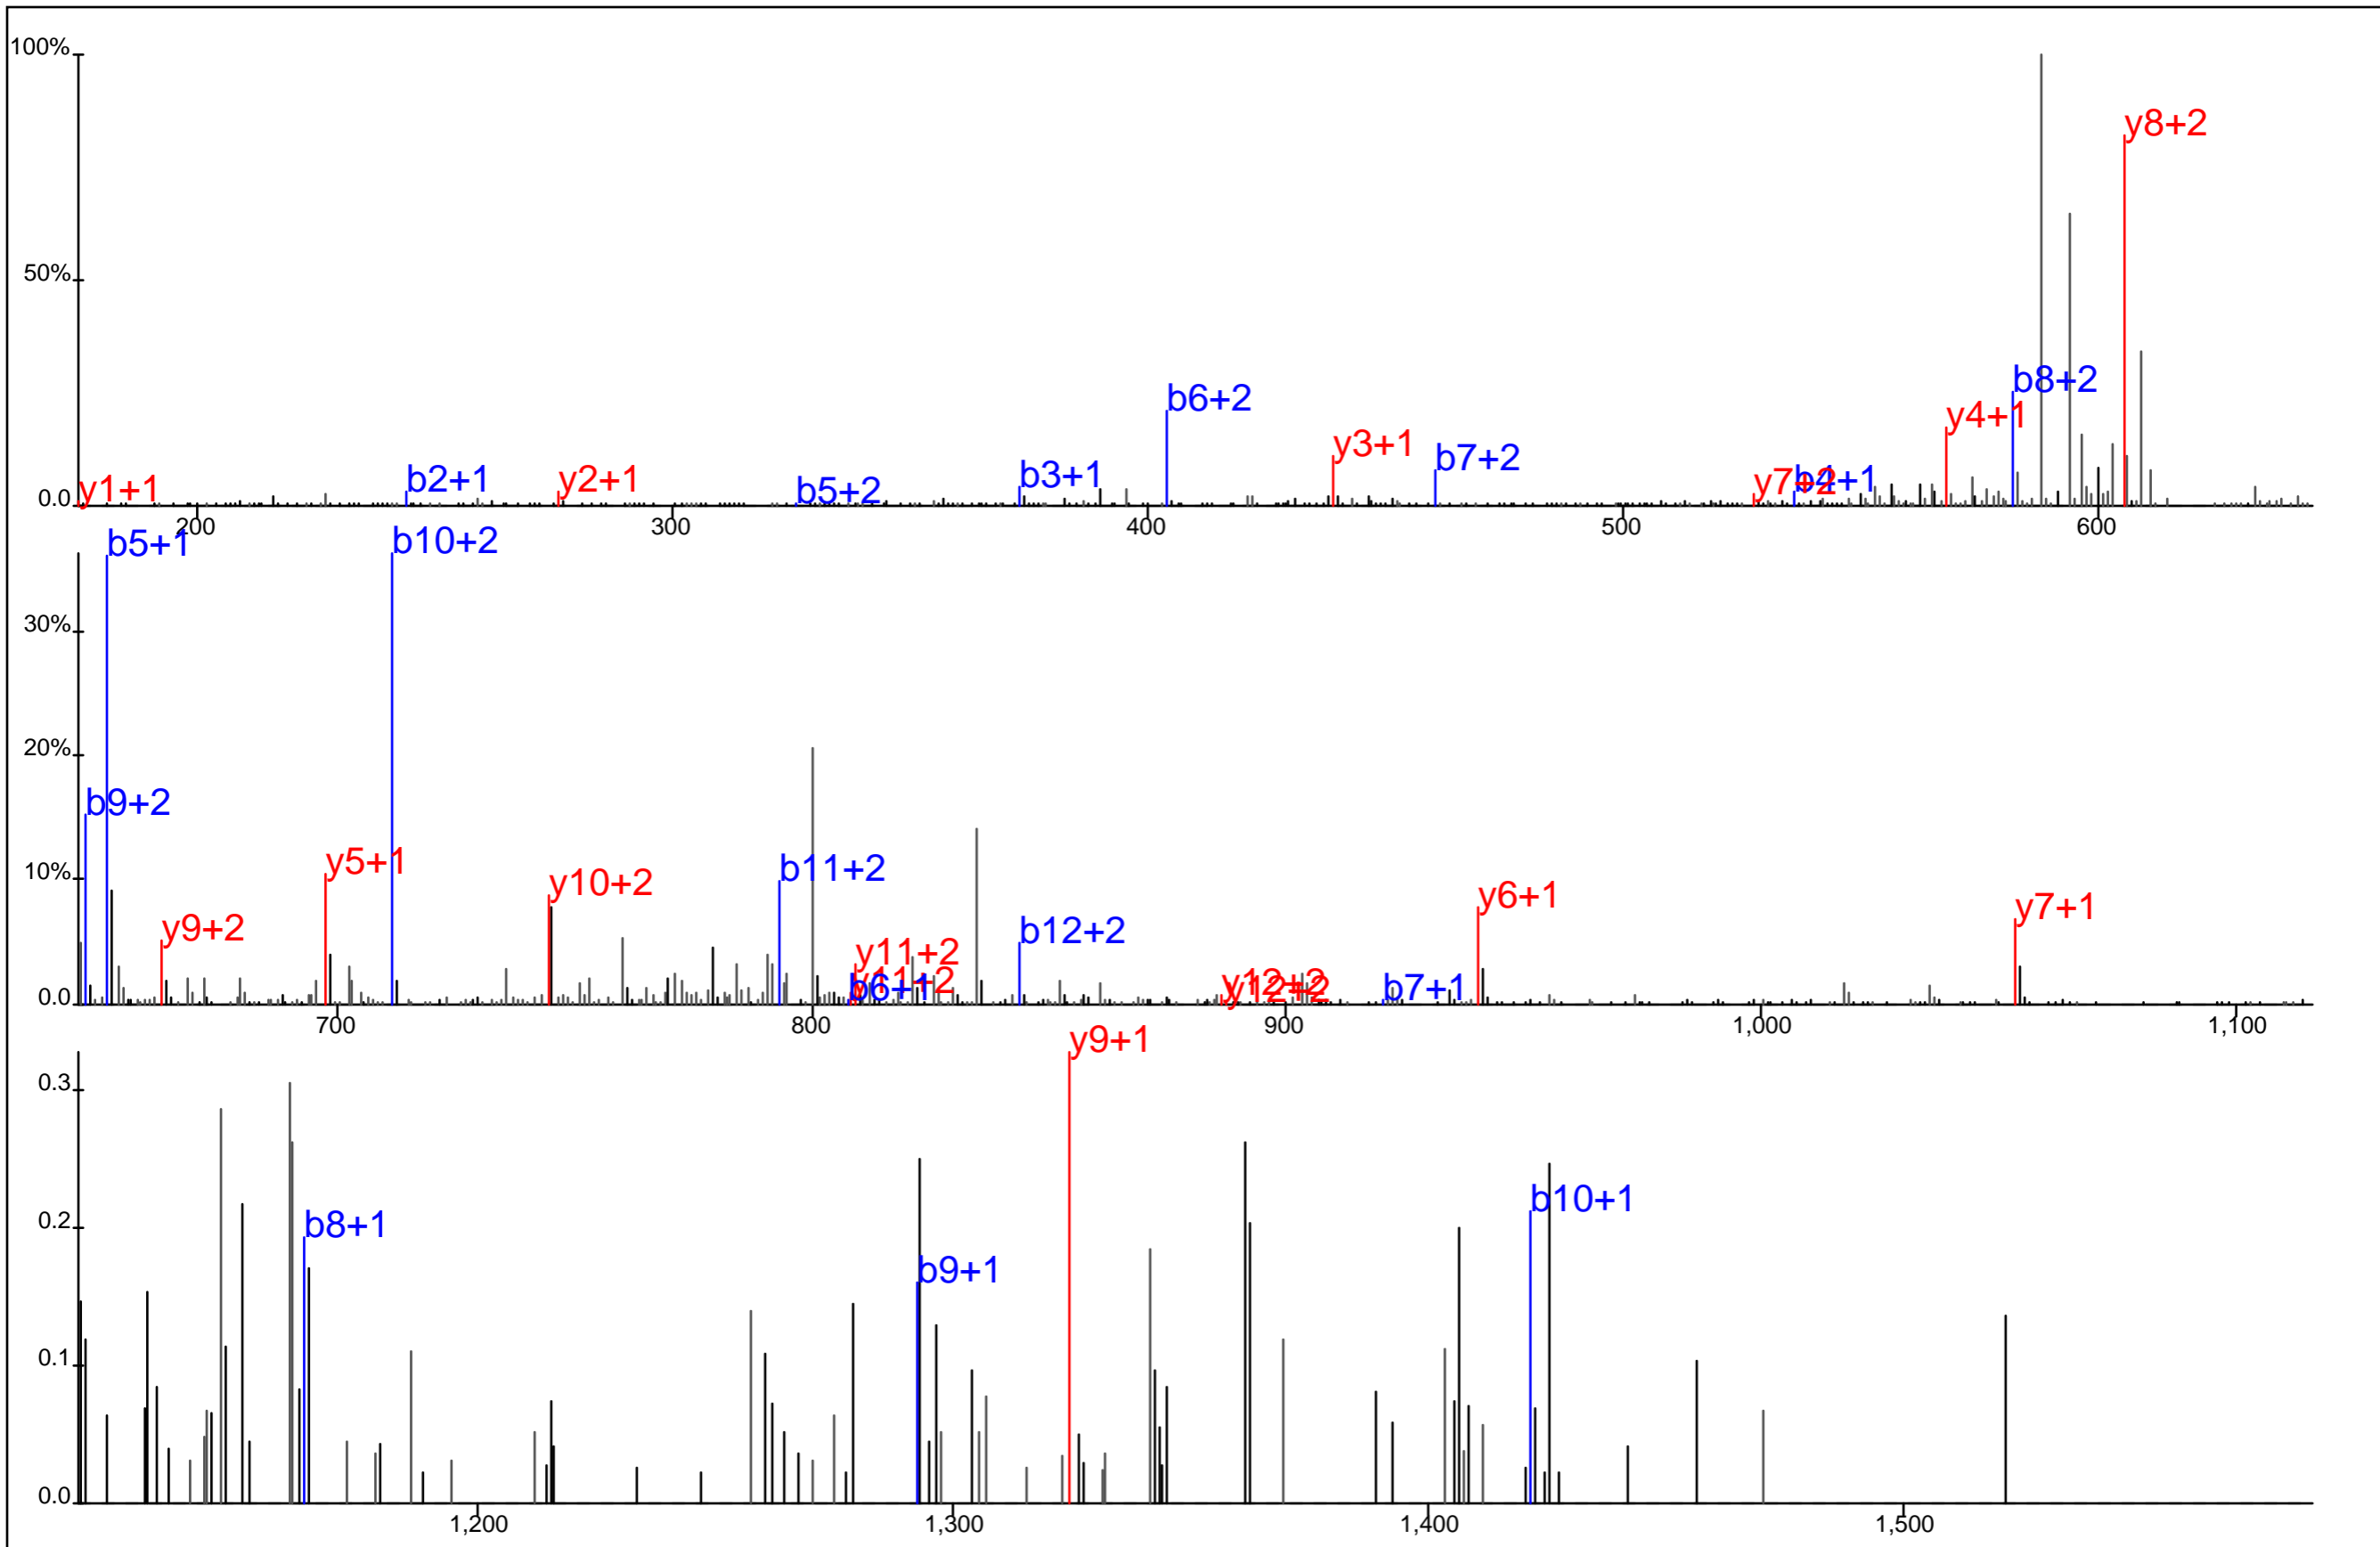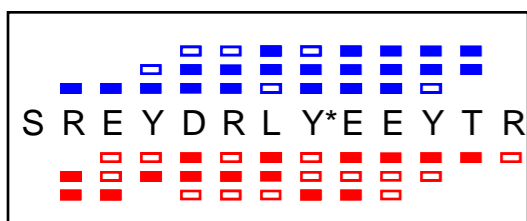

Protein Name: p85 alpha  
 gi Accession: 32455250  
 Precursor Mass: 620.6049+3  
 Delta Mass: 2.301 ppm  
 XCorr: 37.5

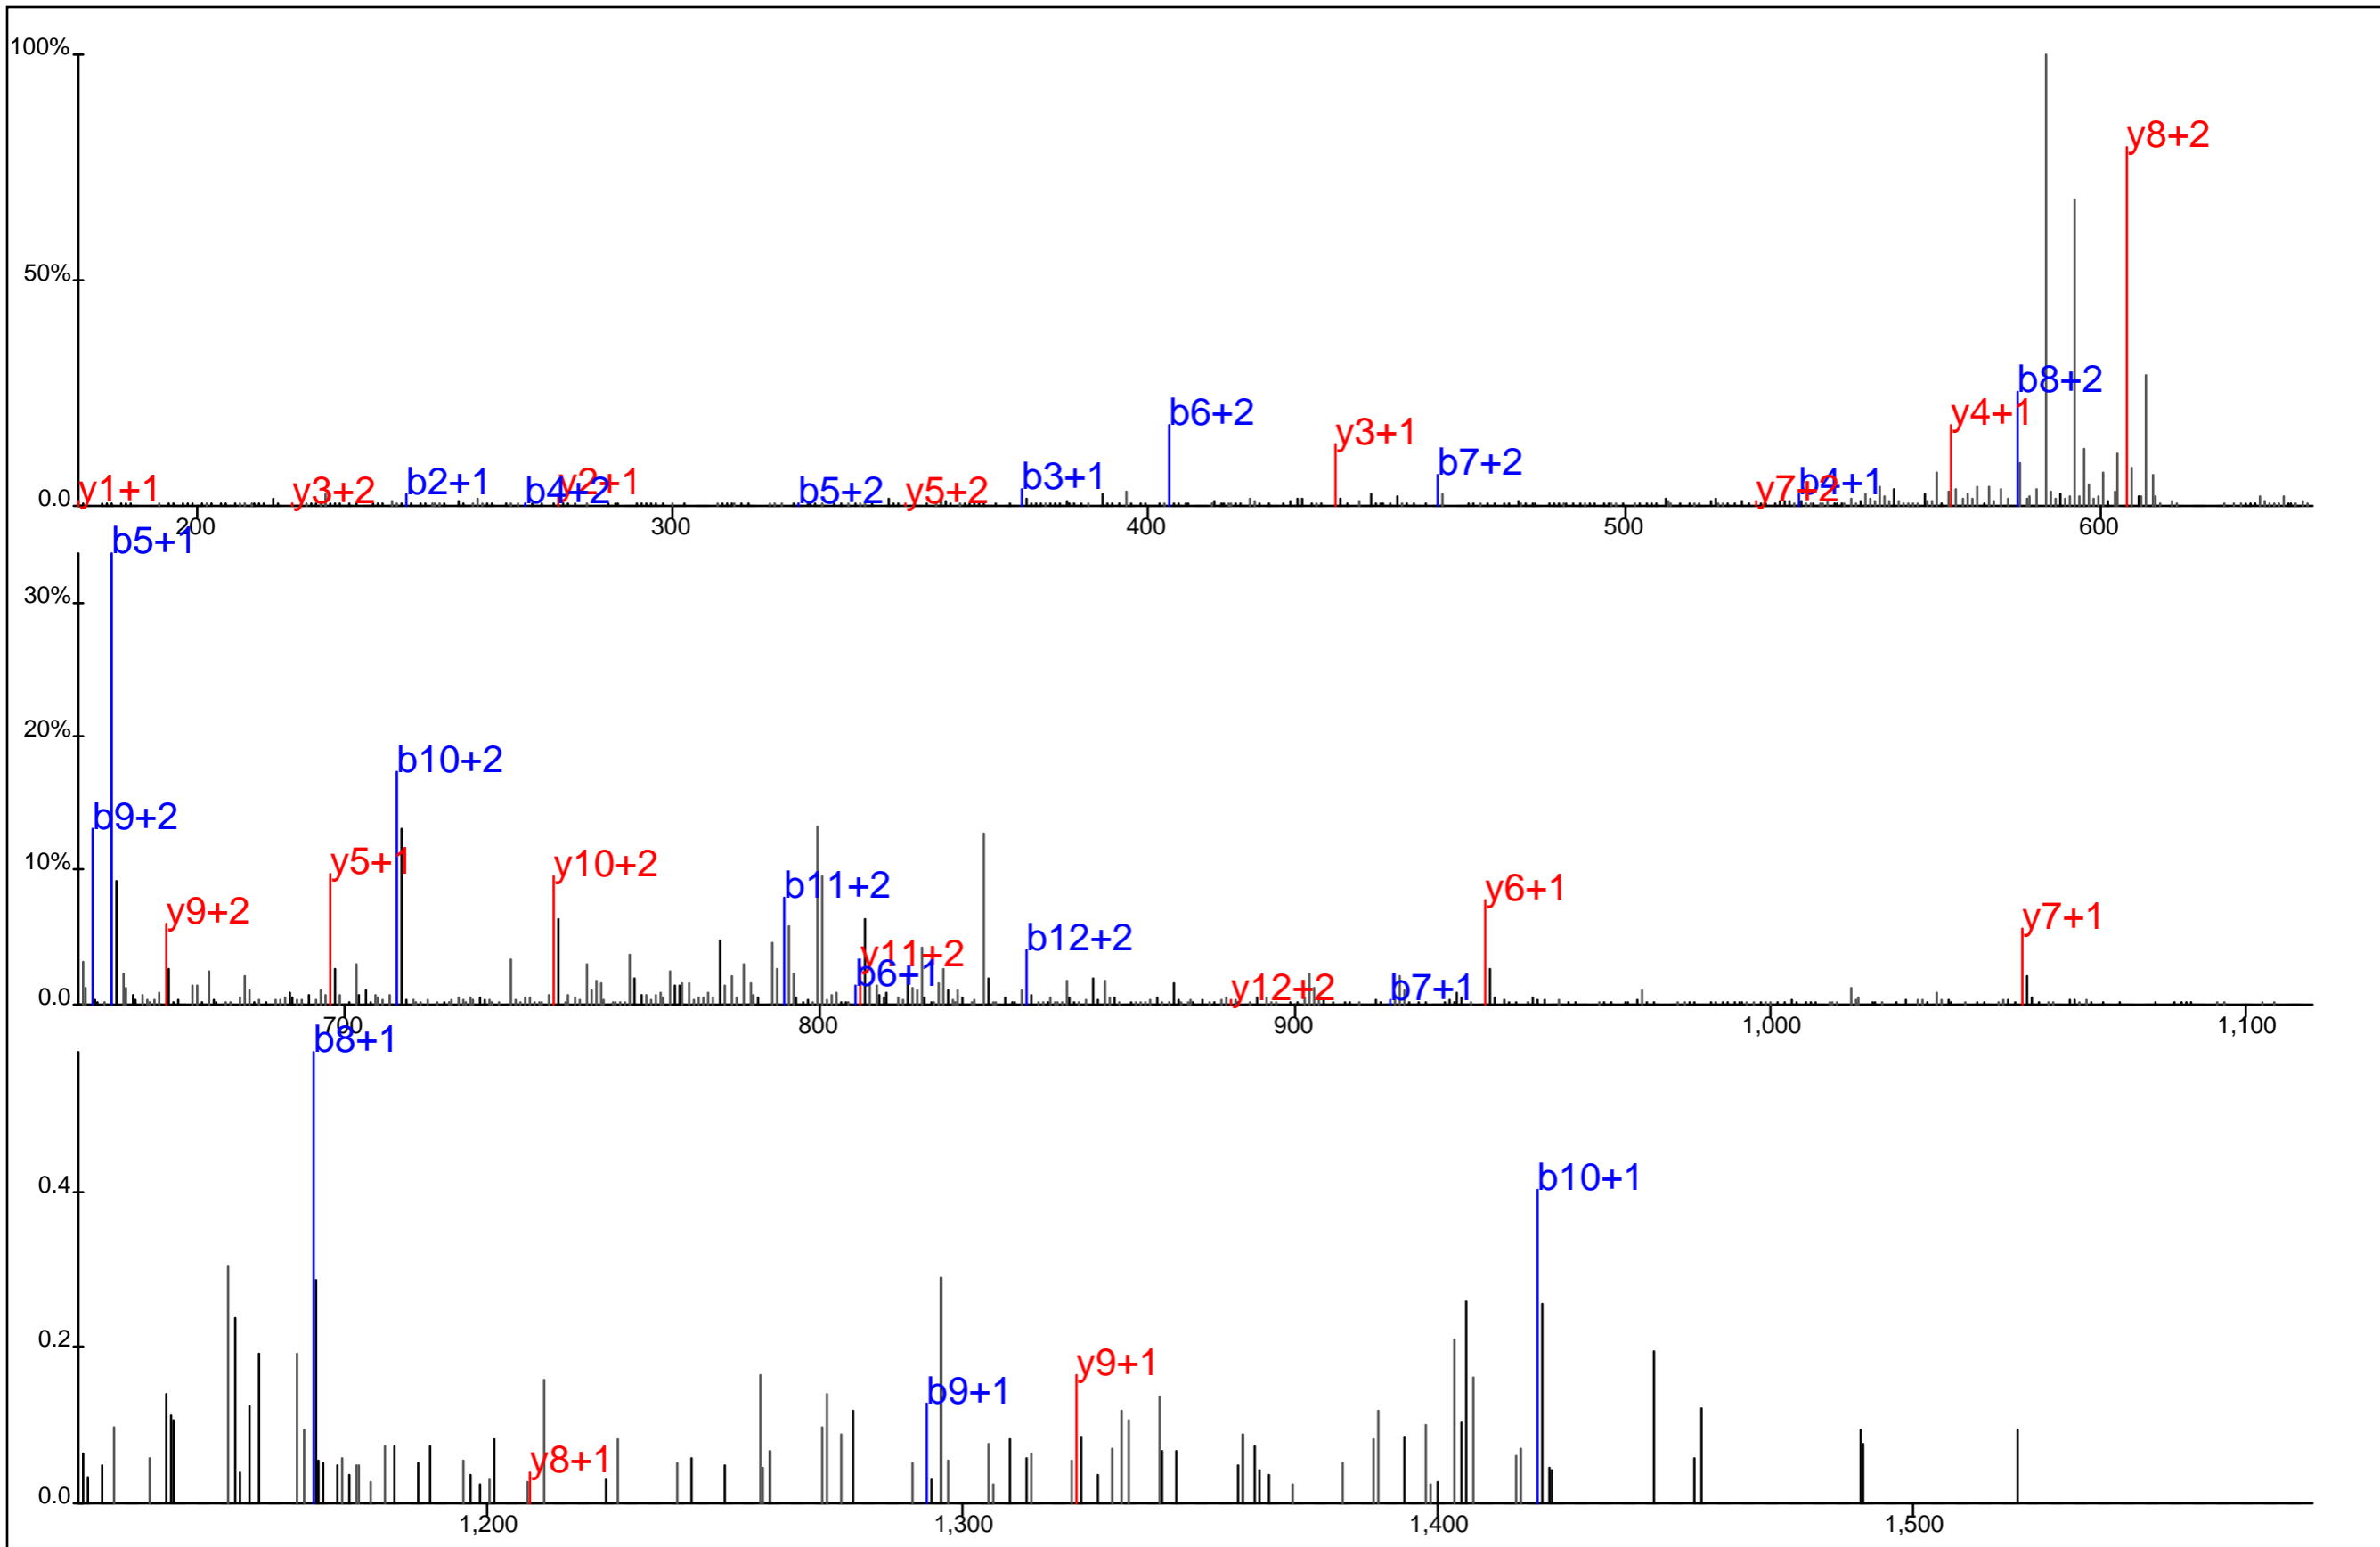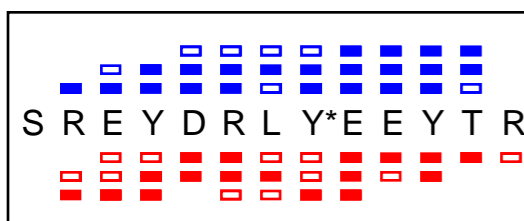

Protein Name: p85 alpha  
 gi Accession: 32455250  
 Precursor Mass: 620.6056+3  
 Delta Mass: 3.382 ppm  
 XCorr: 38.12

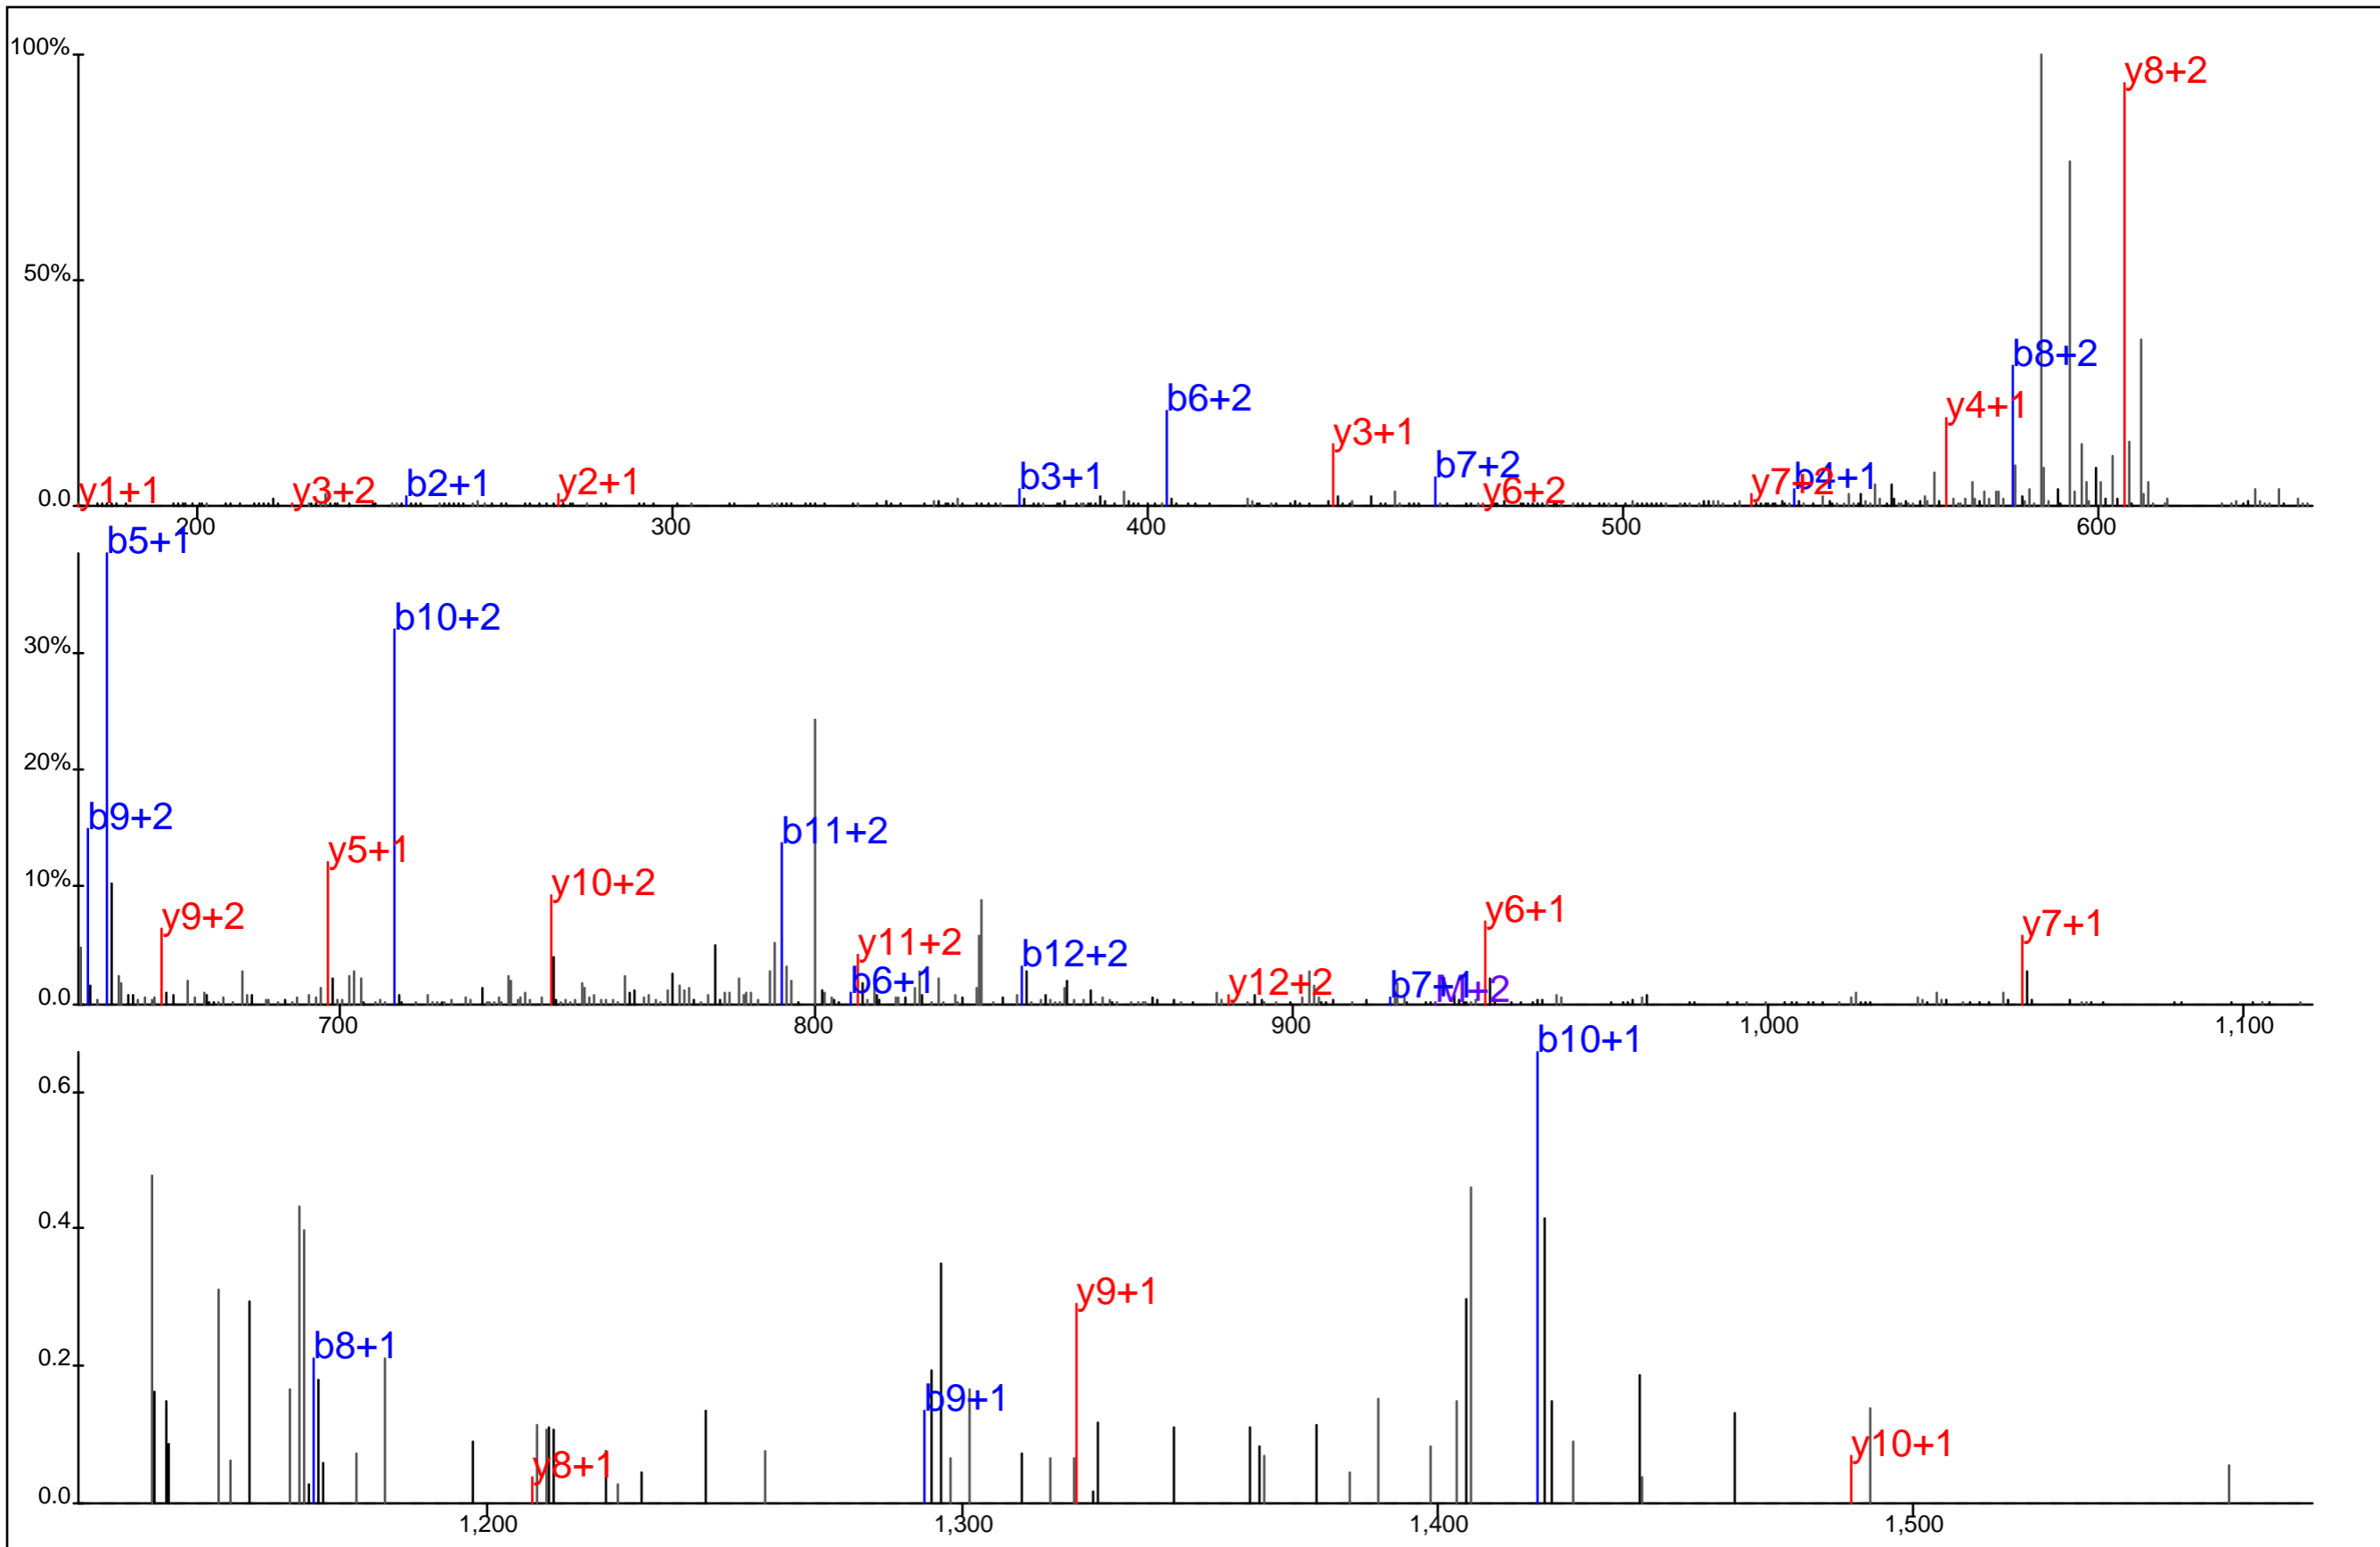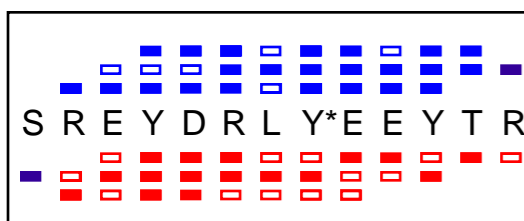

Protein Name: p85 alpha  
 gi Accession: 32455250  
 Precursor Mass: 620.6044+3  
 Delta Mass: 1.510 ppm  
 XCorr: 47.19

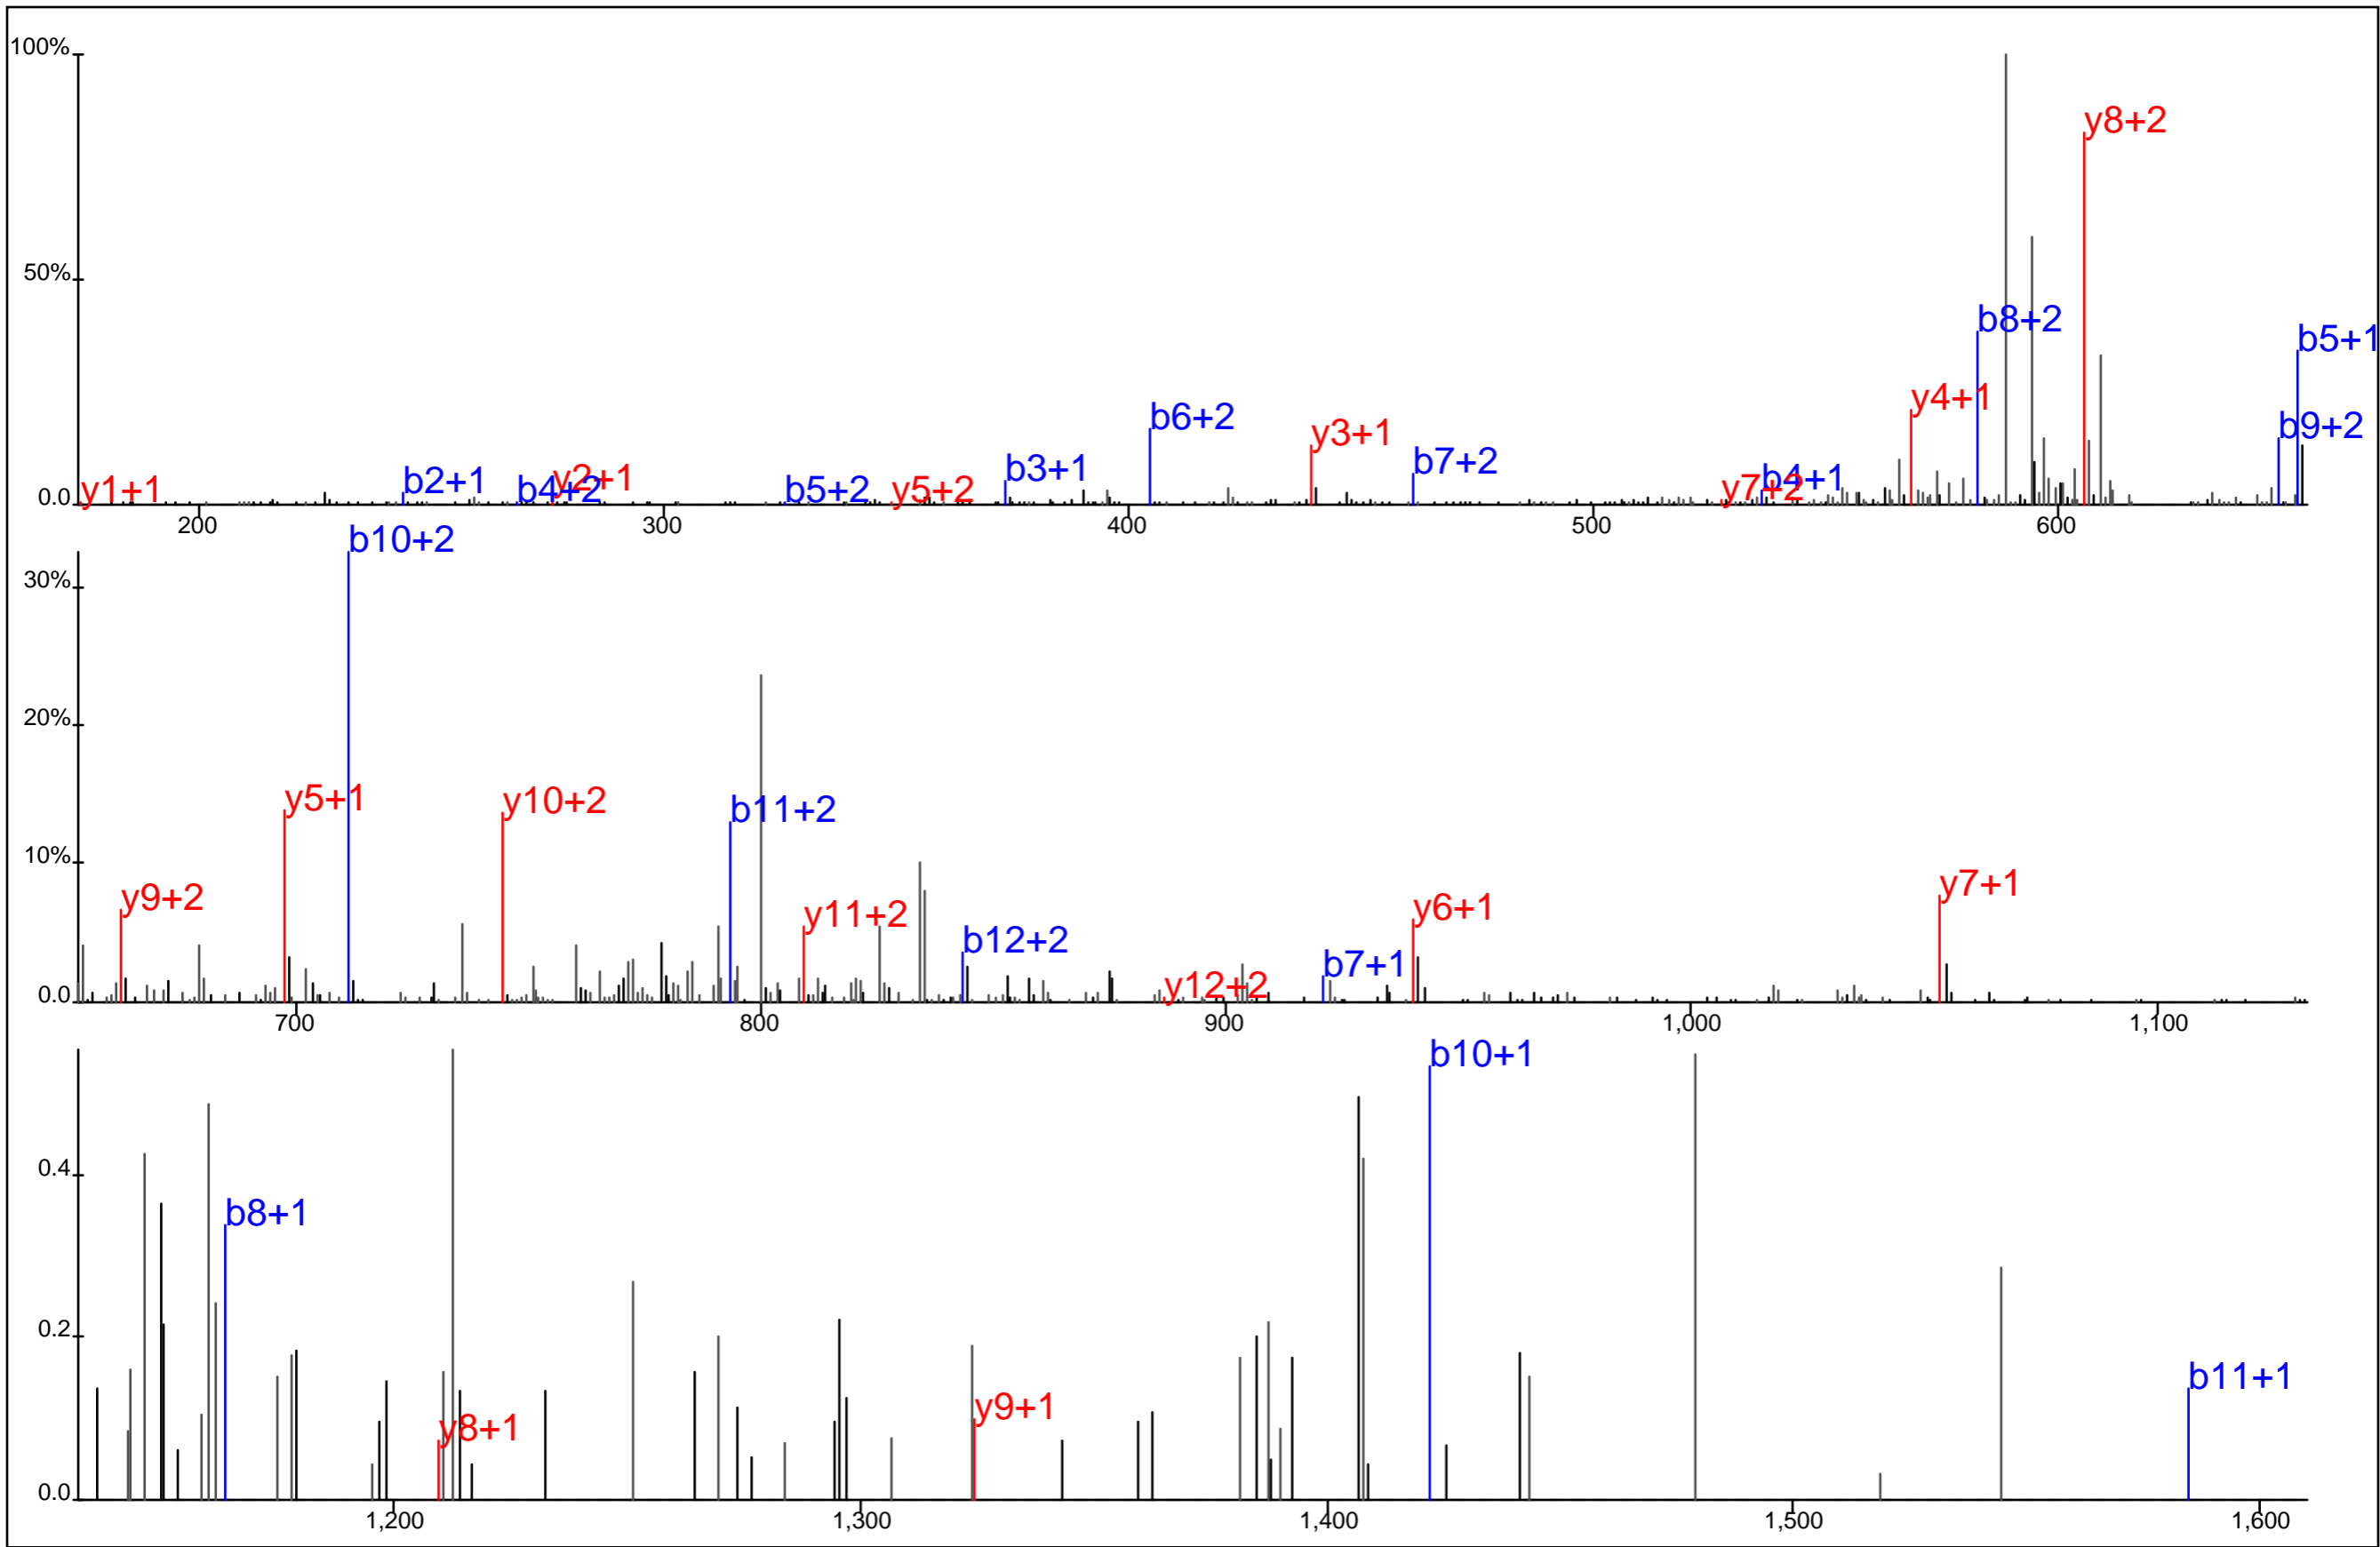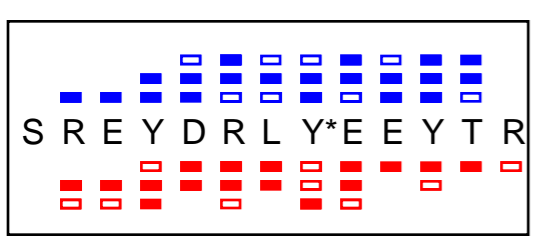

Protein Name: p85 alpha  
 gi Accession: 32455250  
 Precursor Mass: 620.6035+3  
 Delta Mass: 0.031 ppm  
 XCorr: 33.11

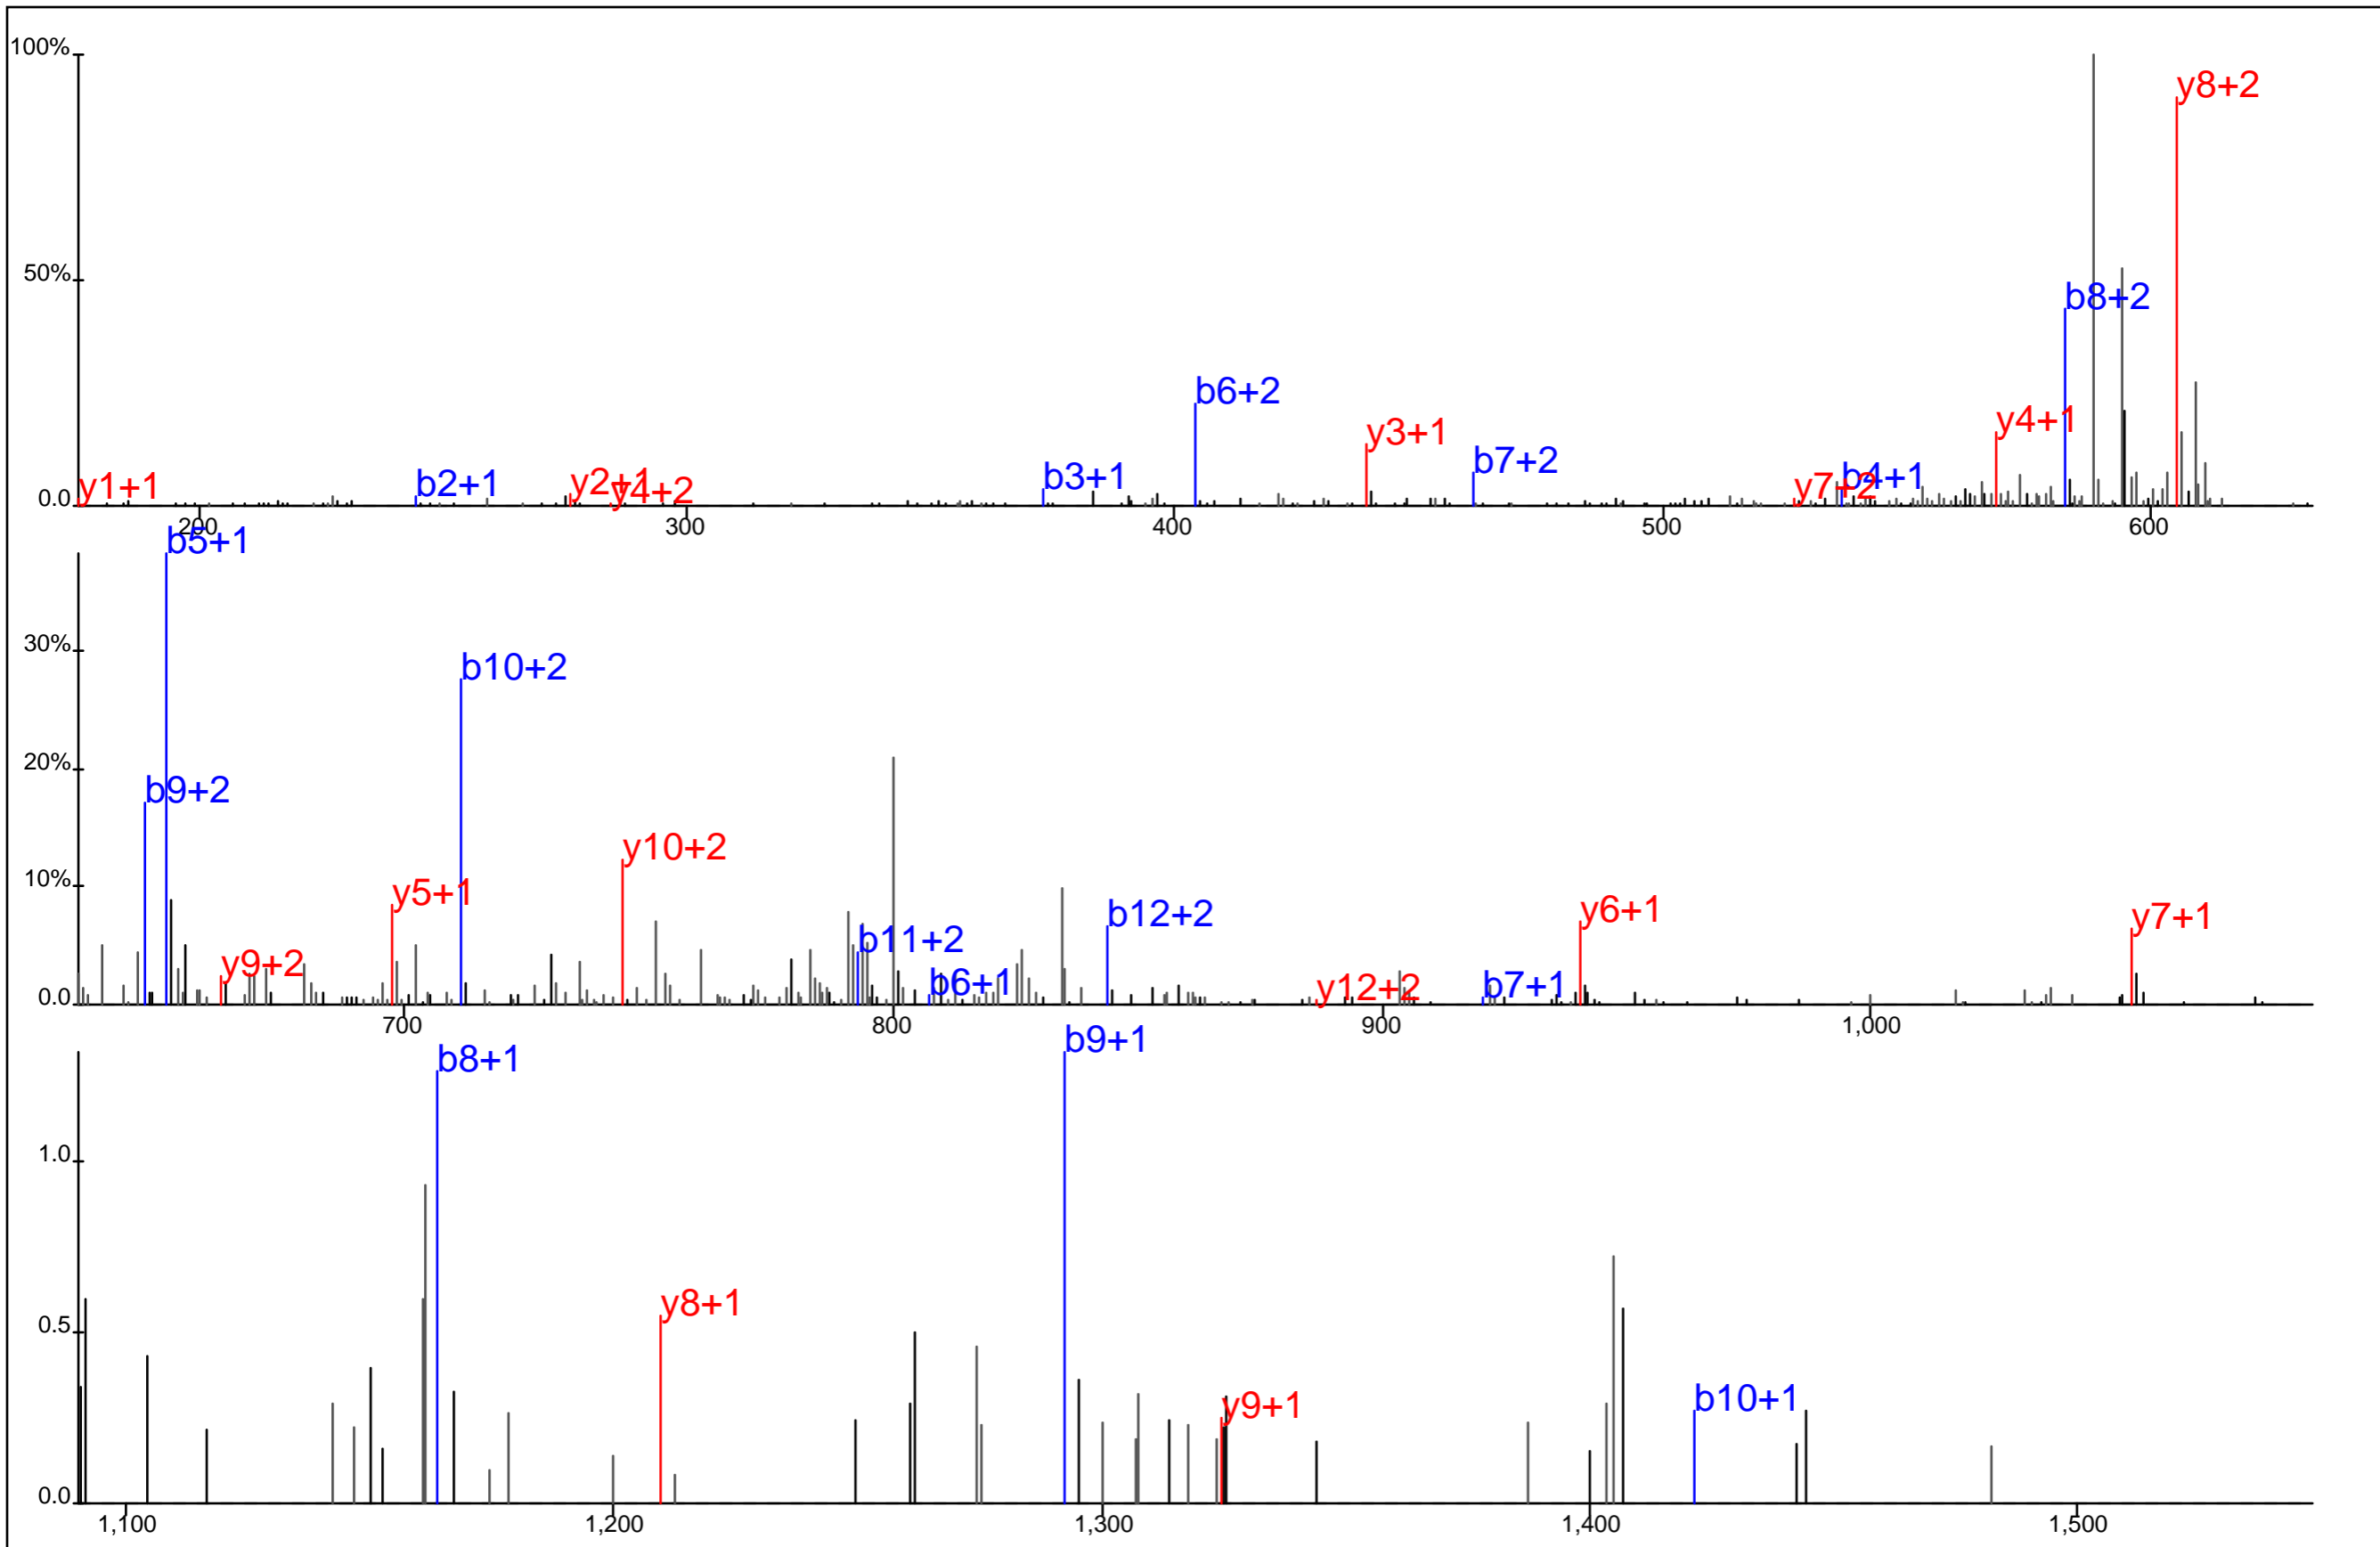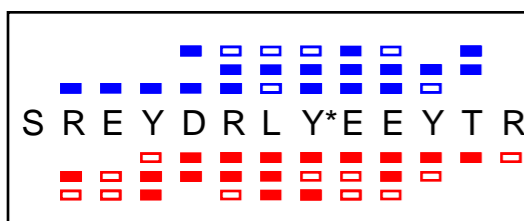

Protein Name: p85 alpha  
 gi Accession: 32455250  
 Precursor Mass: 620.6061+3  
 Delta Mass: 4.269 ppm  
 XCorr: 41.5

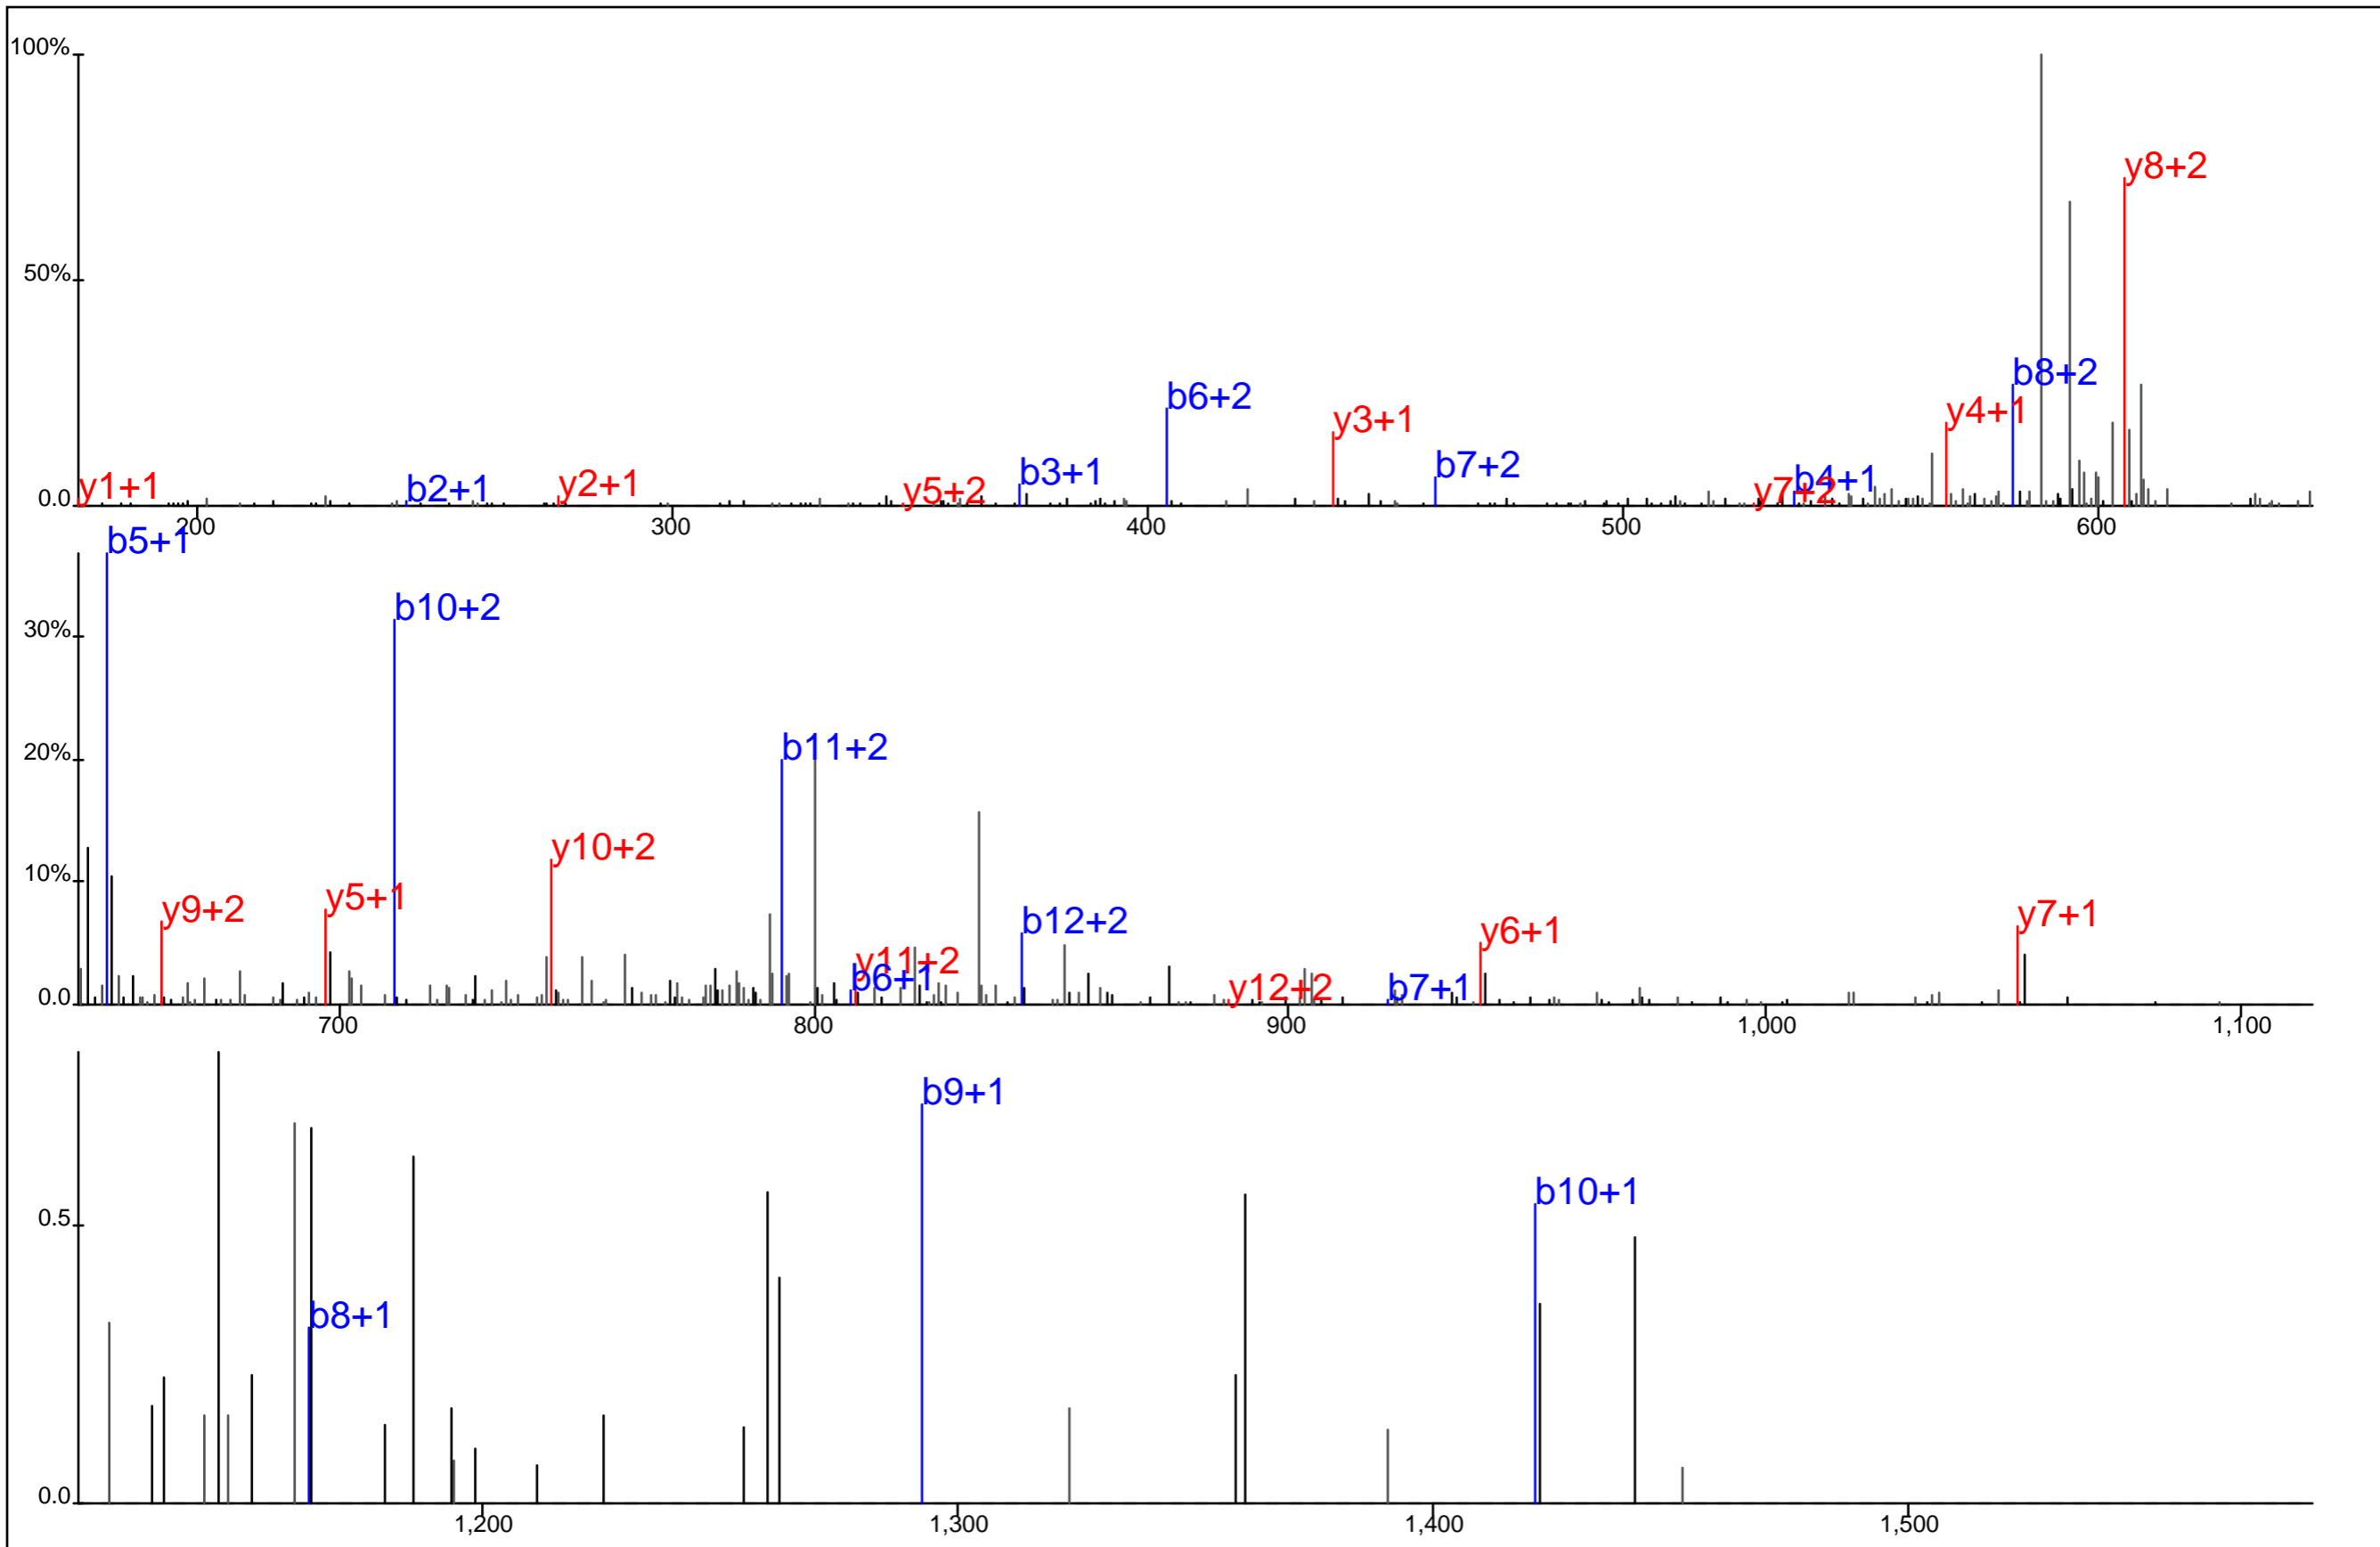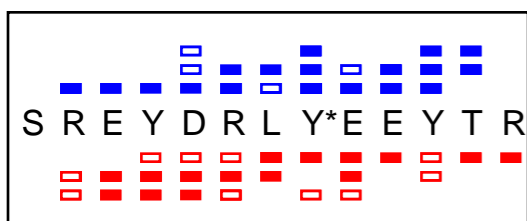

Protein Name: p85 alpha  
 gi Accession: 32455250  
 Precursor Mass: 620.6047+3  
 Delta Mass: 2.004 ppm  
 XCorr: 30.26

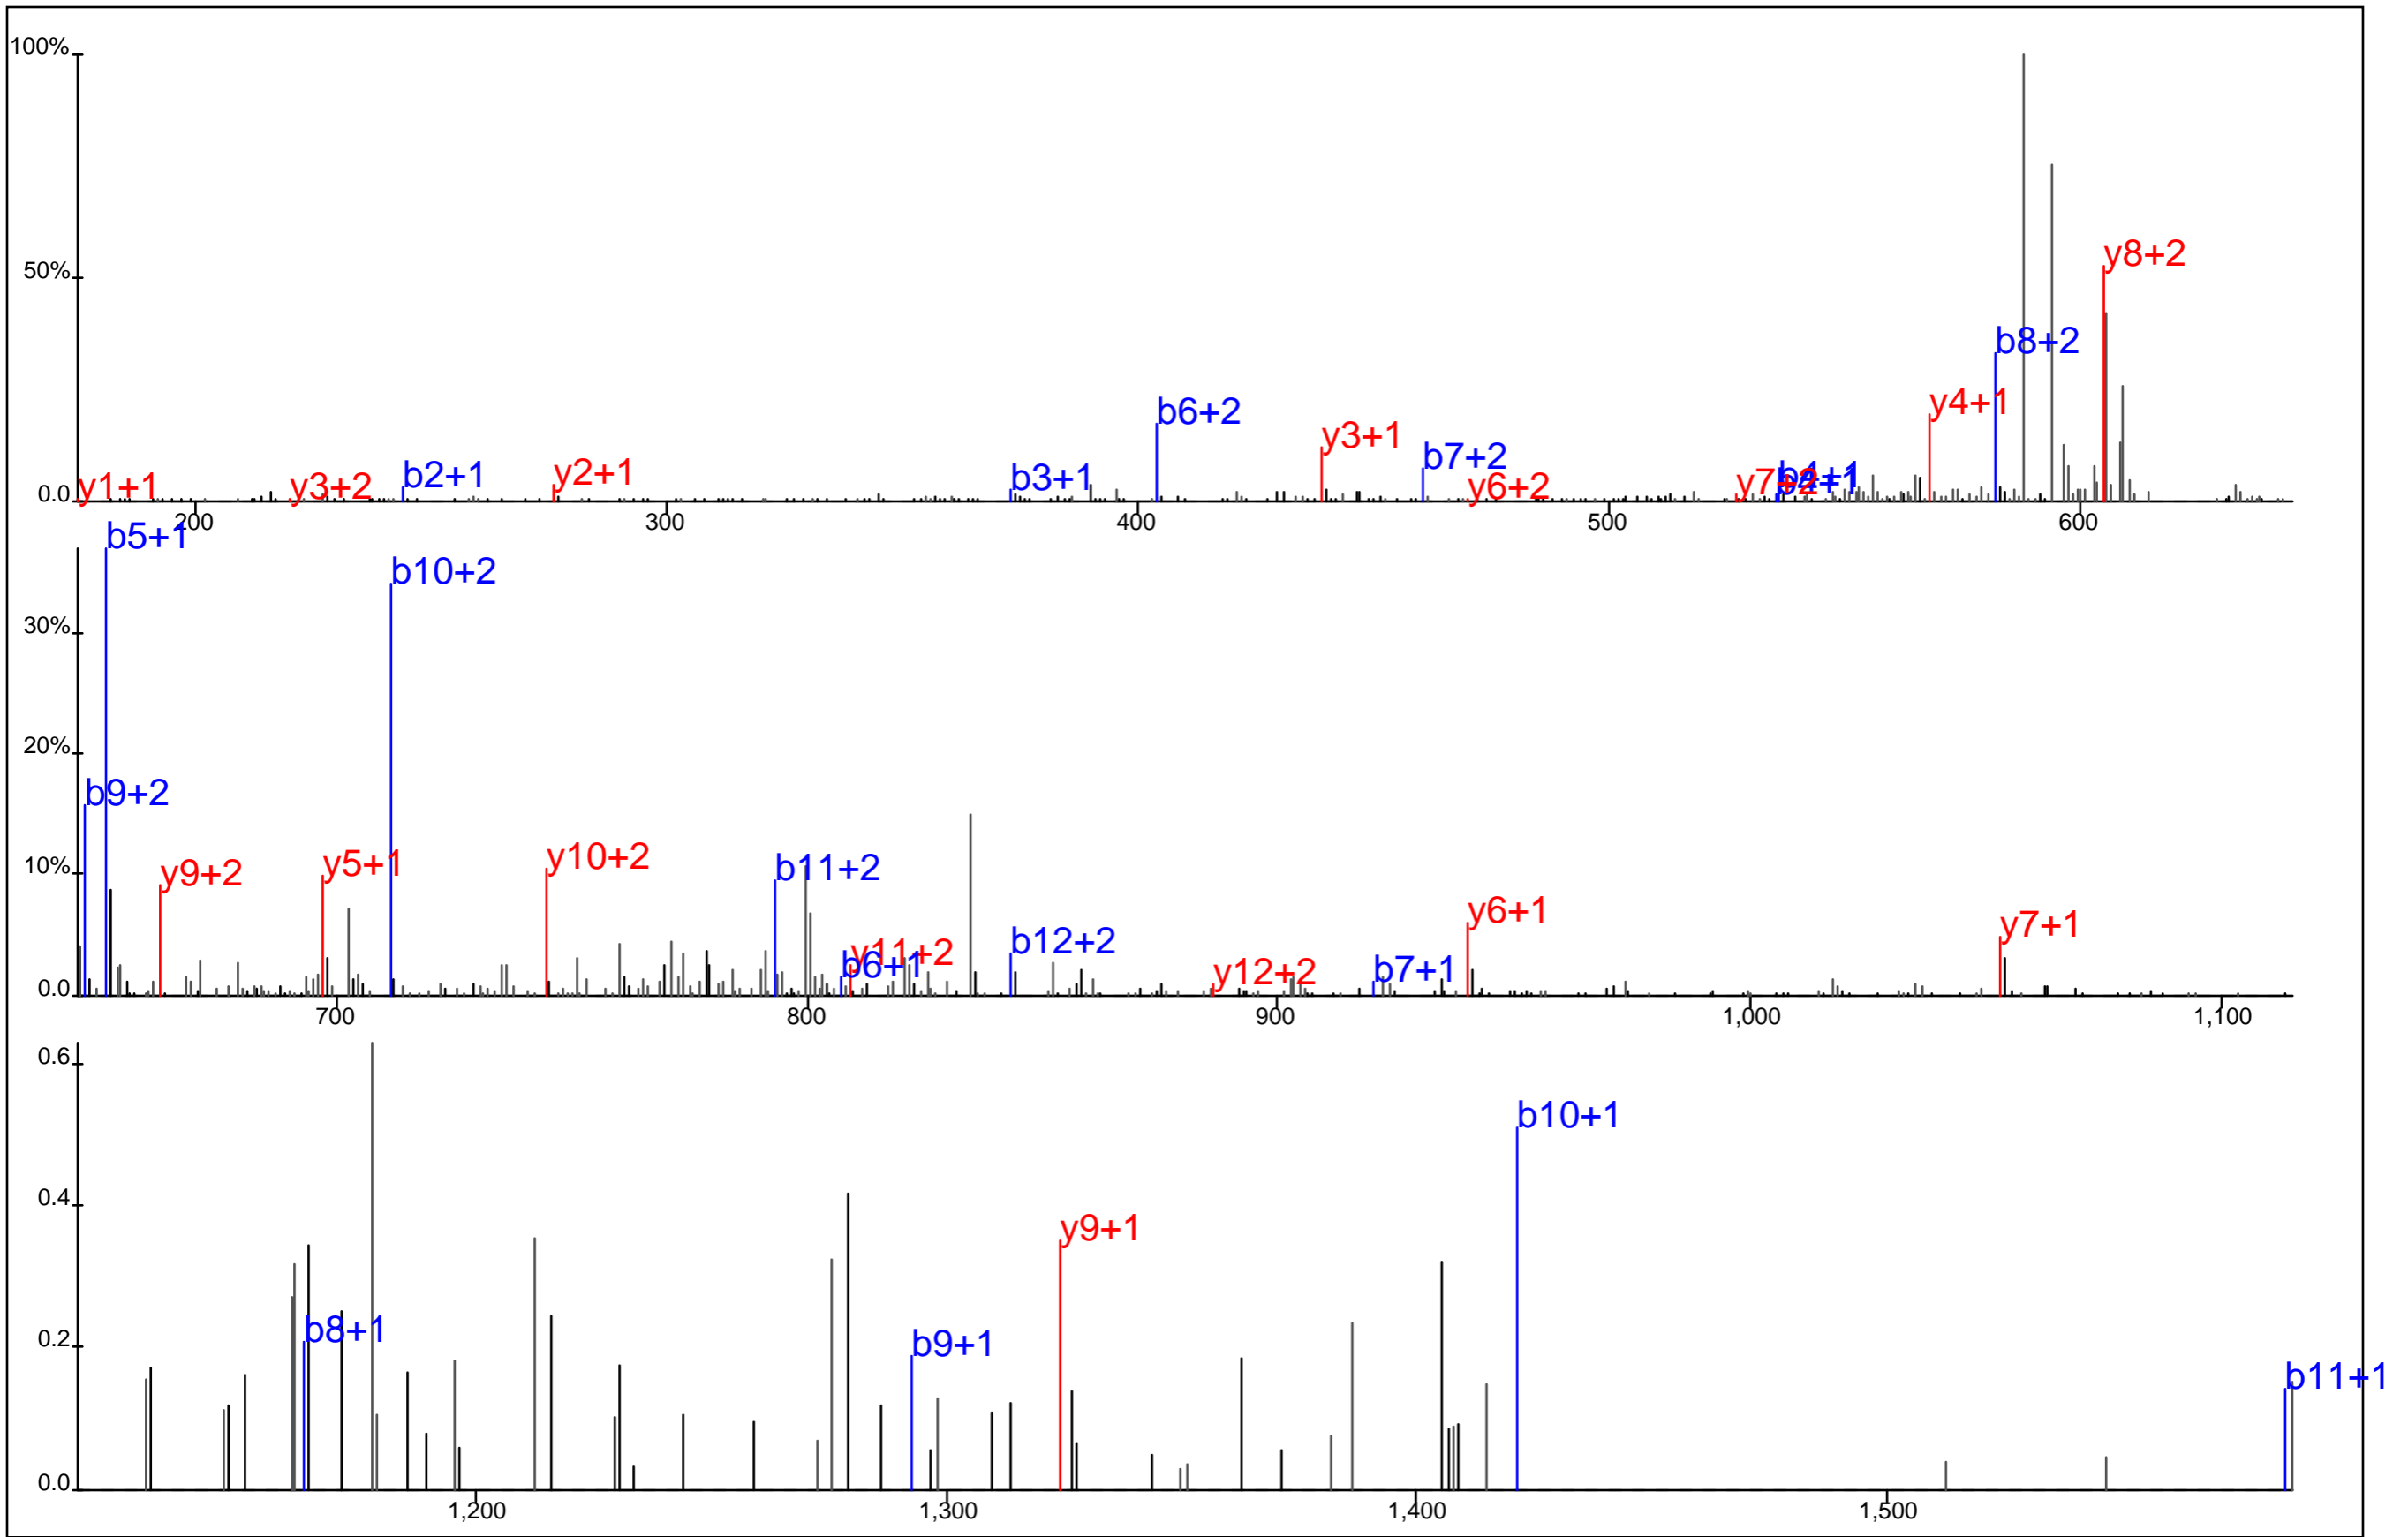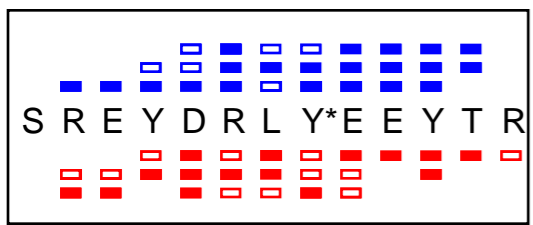

Protein Name: p85 alpha  
 gi Accession: 32455250  
 Precursor Mass: 620.6044+3  
 Delta Mass: 1.414 ppm  
 XCorr: 30.5

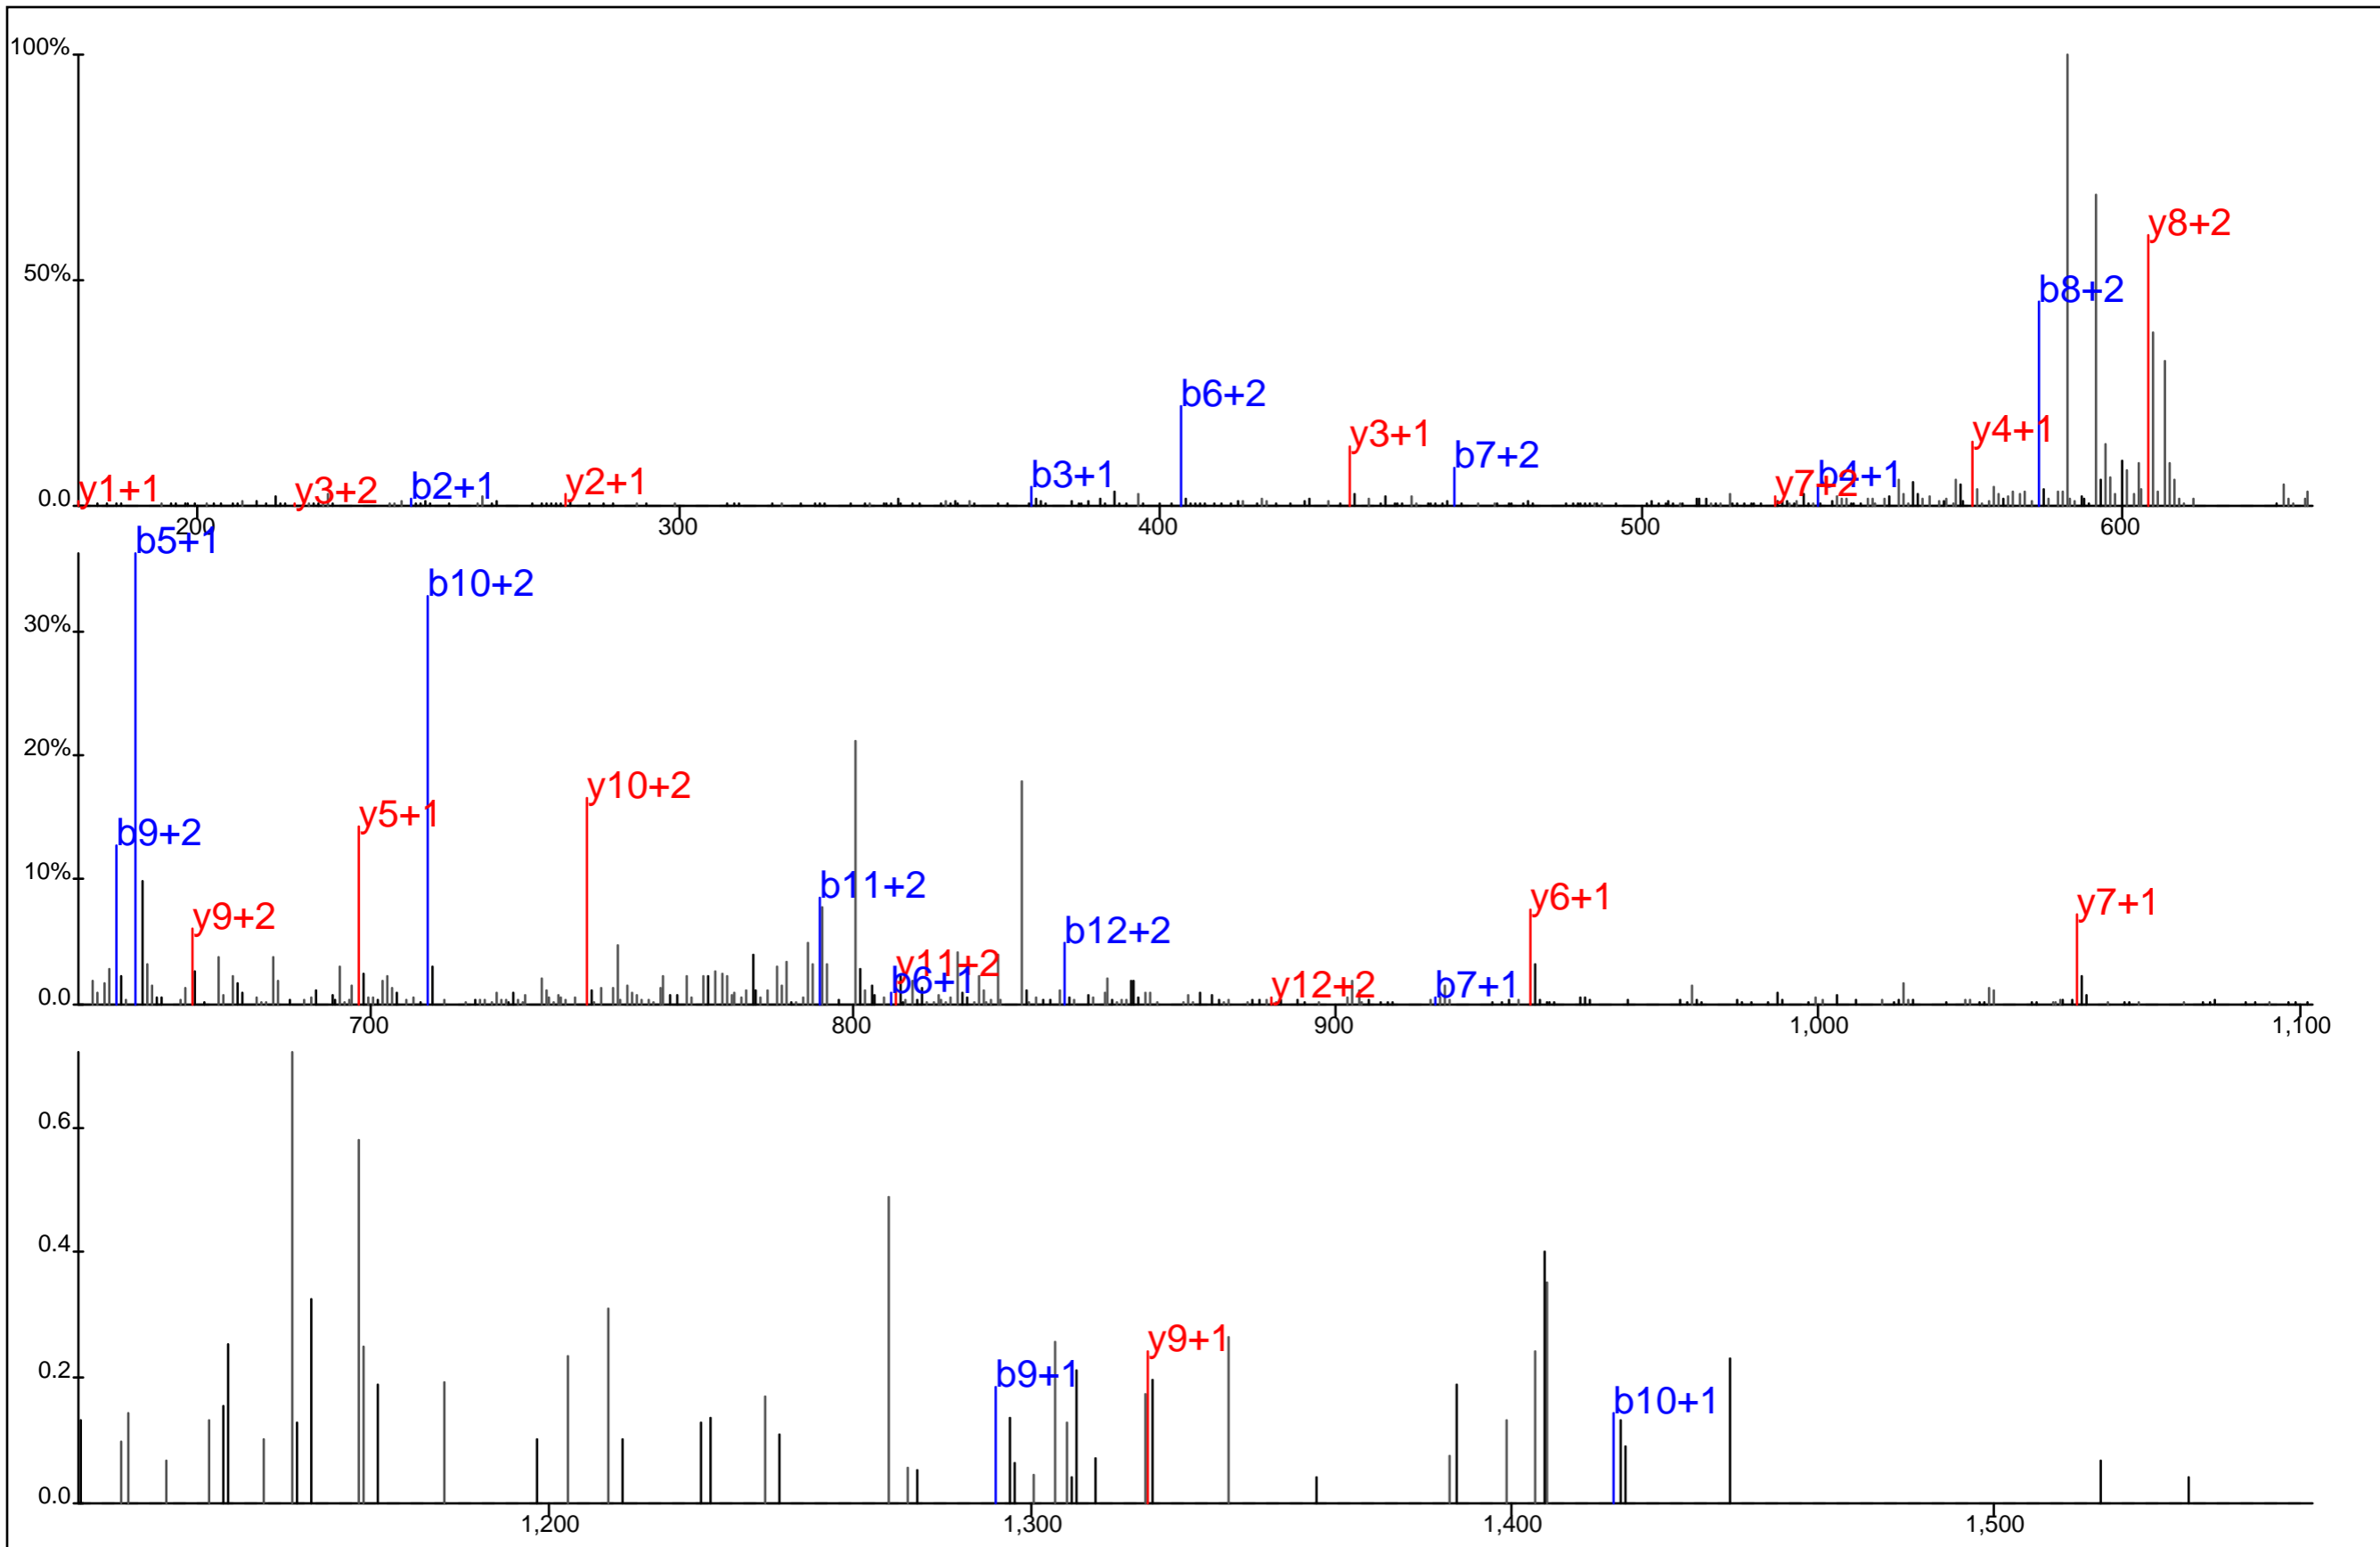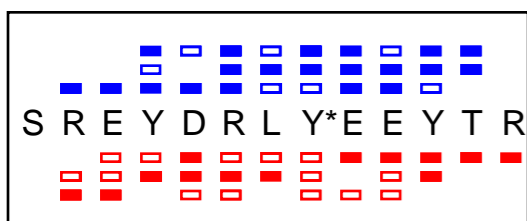

Protein Name: p85 alpha  
 gi Accession: 32455250  
 Precursor Mass: 620.6046+3  
 Delta Mass: 1.709 ppm  
 XCorr: 30.58









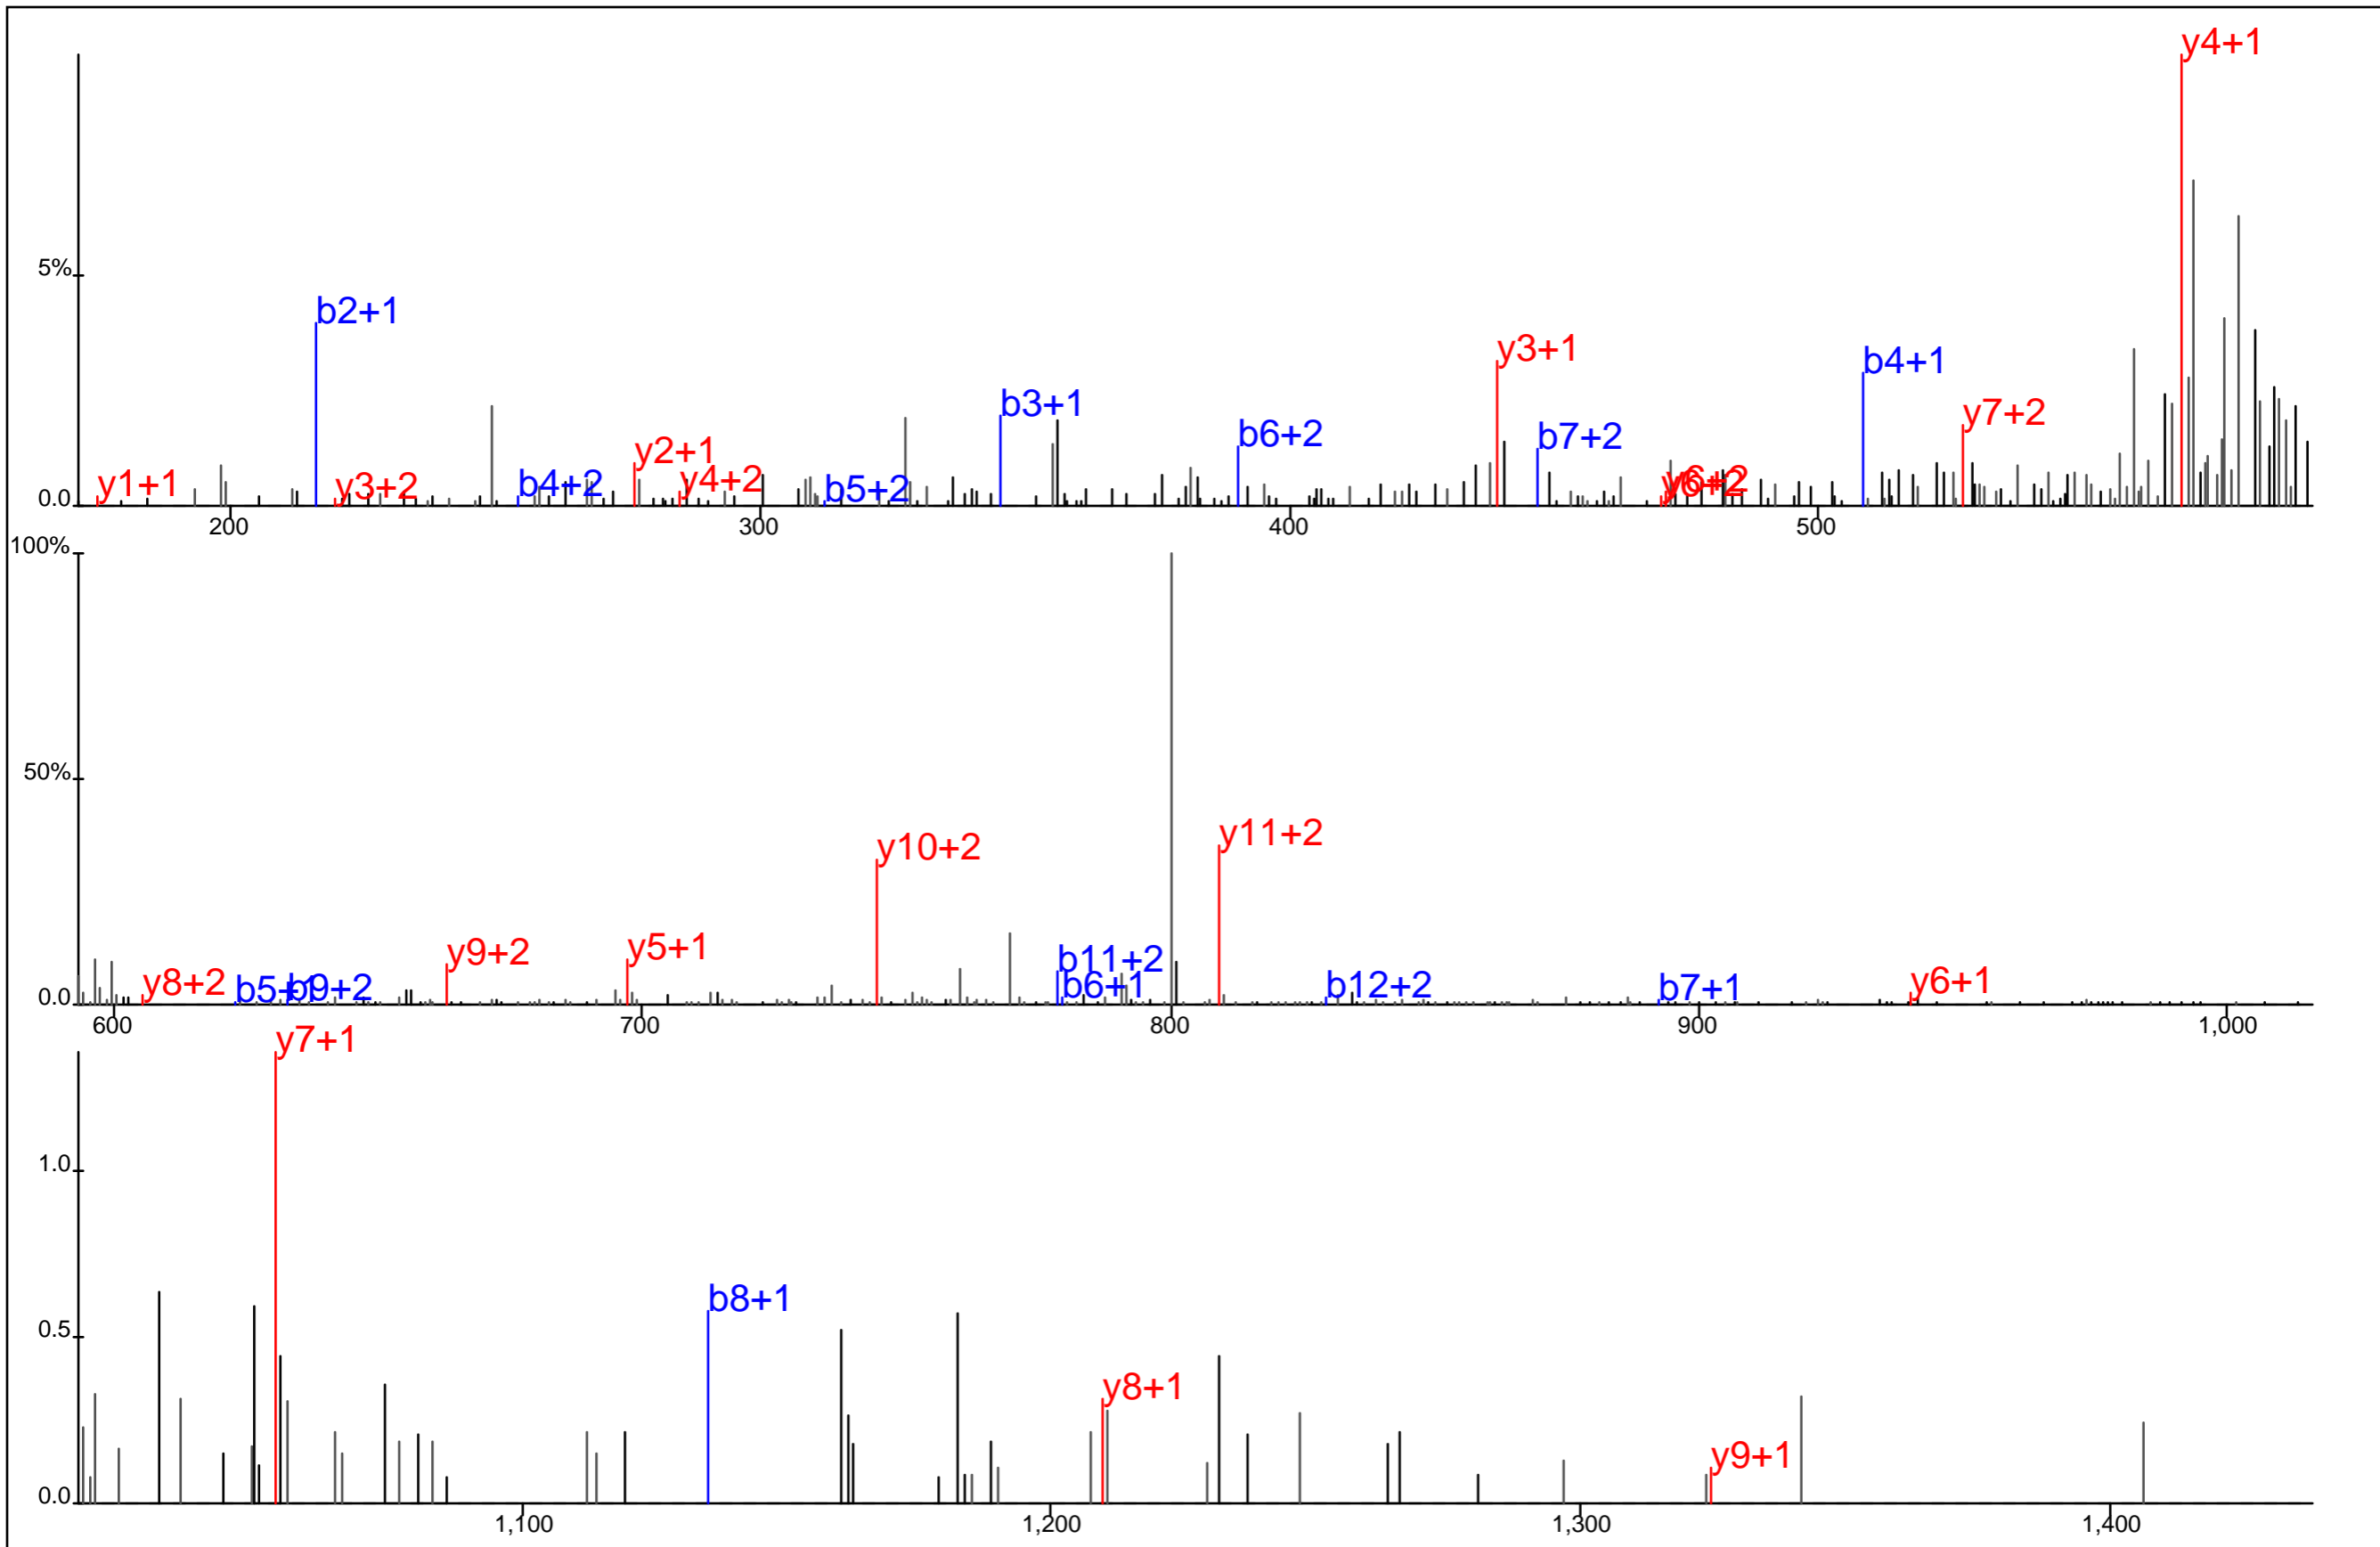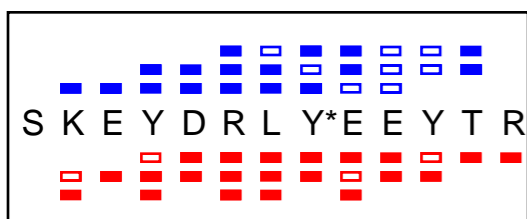

Protein Name: p85 gamma  
 gi Accession: 12643788  
 Precursor Mass: 611.2702+3  
 Delta Mass: 3.422 ppm  
 XCorr: 34.32

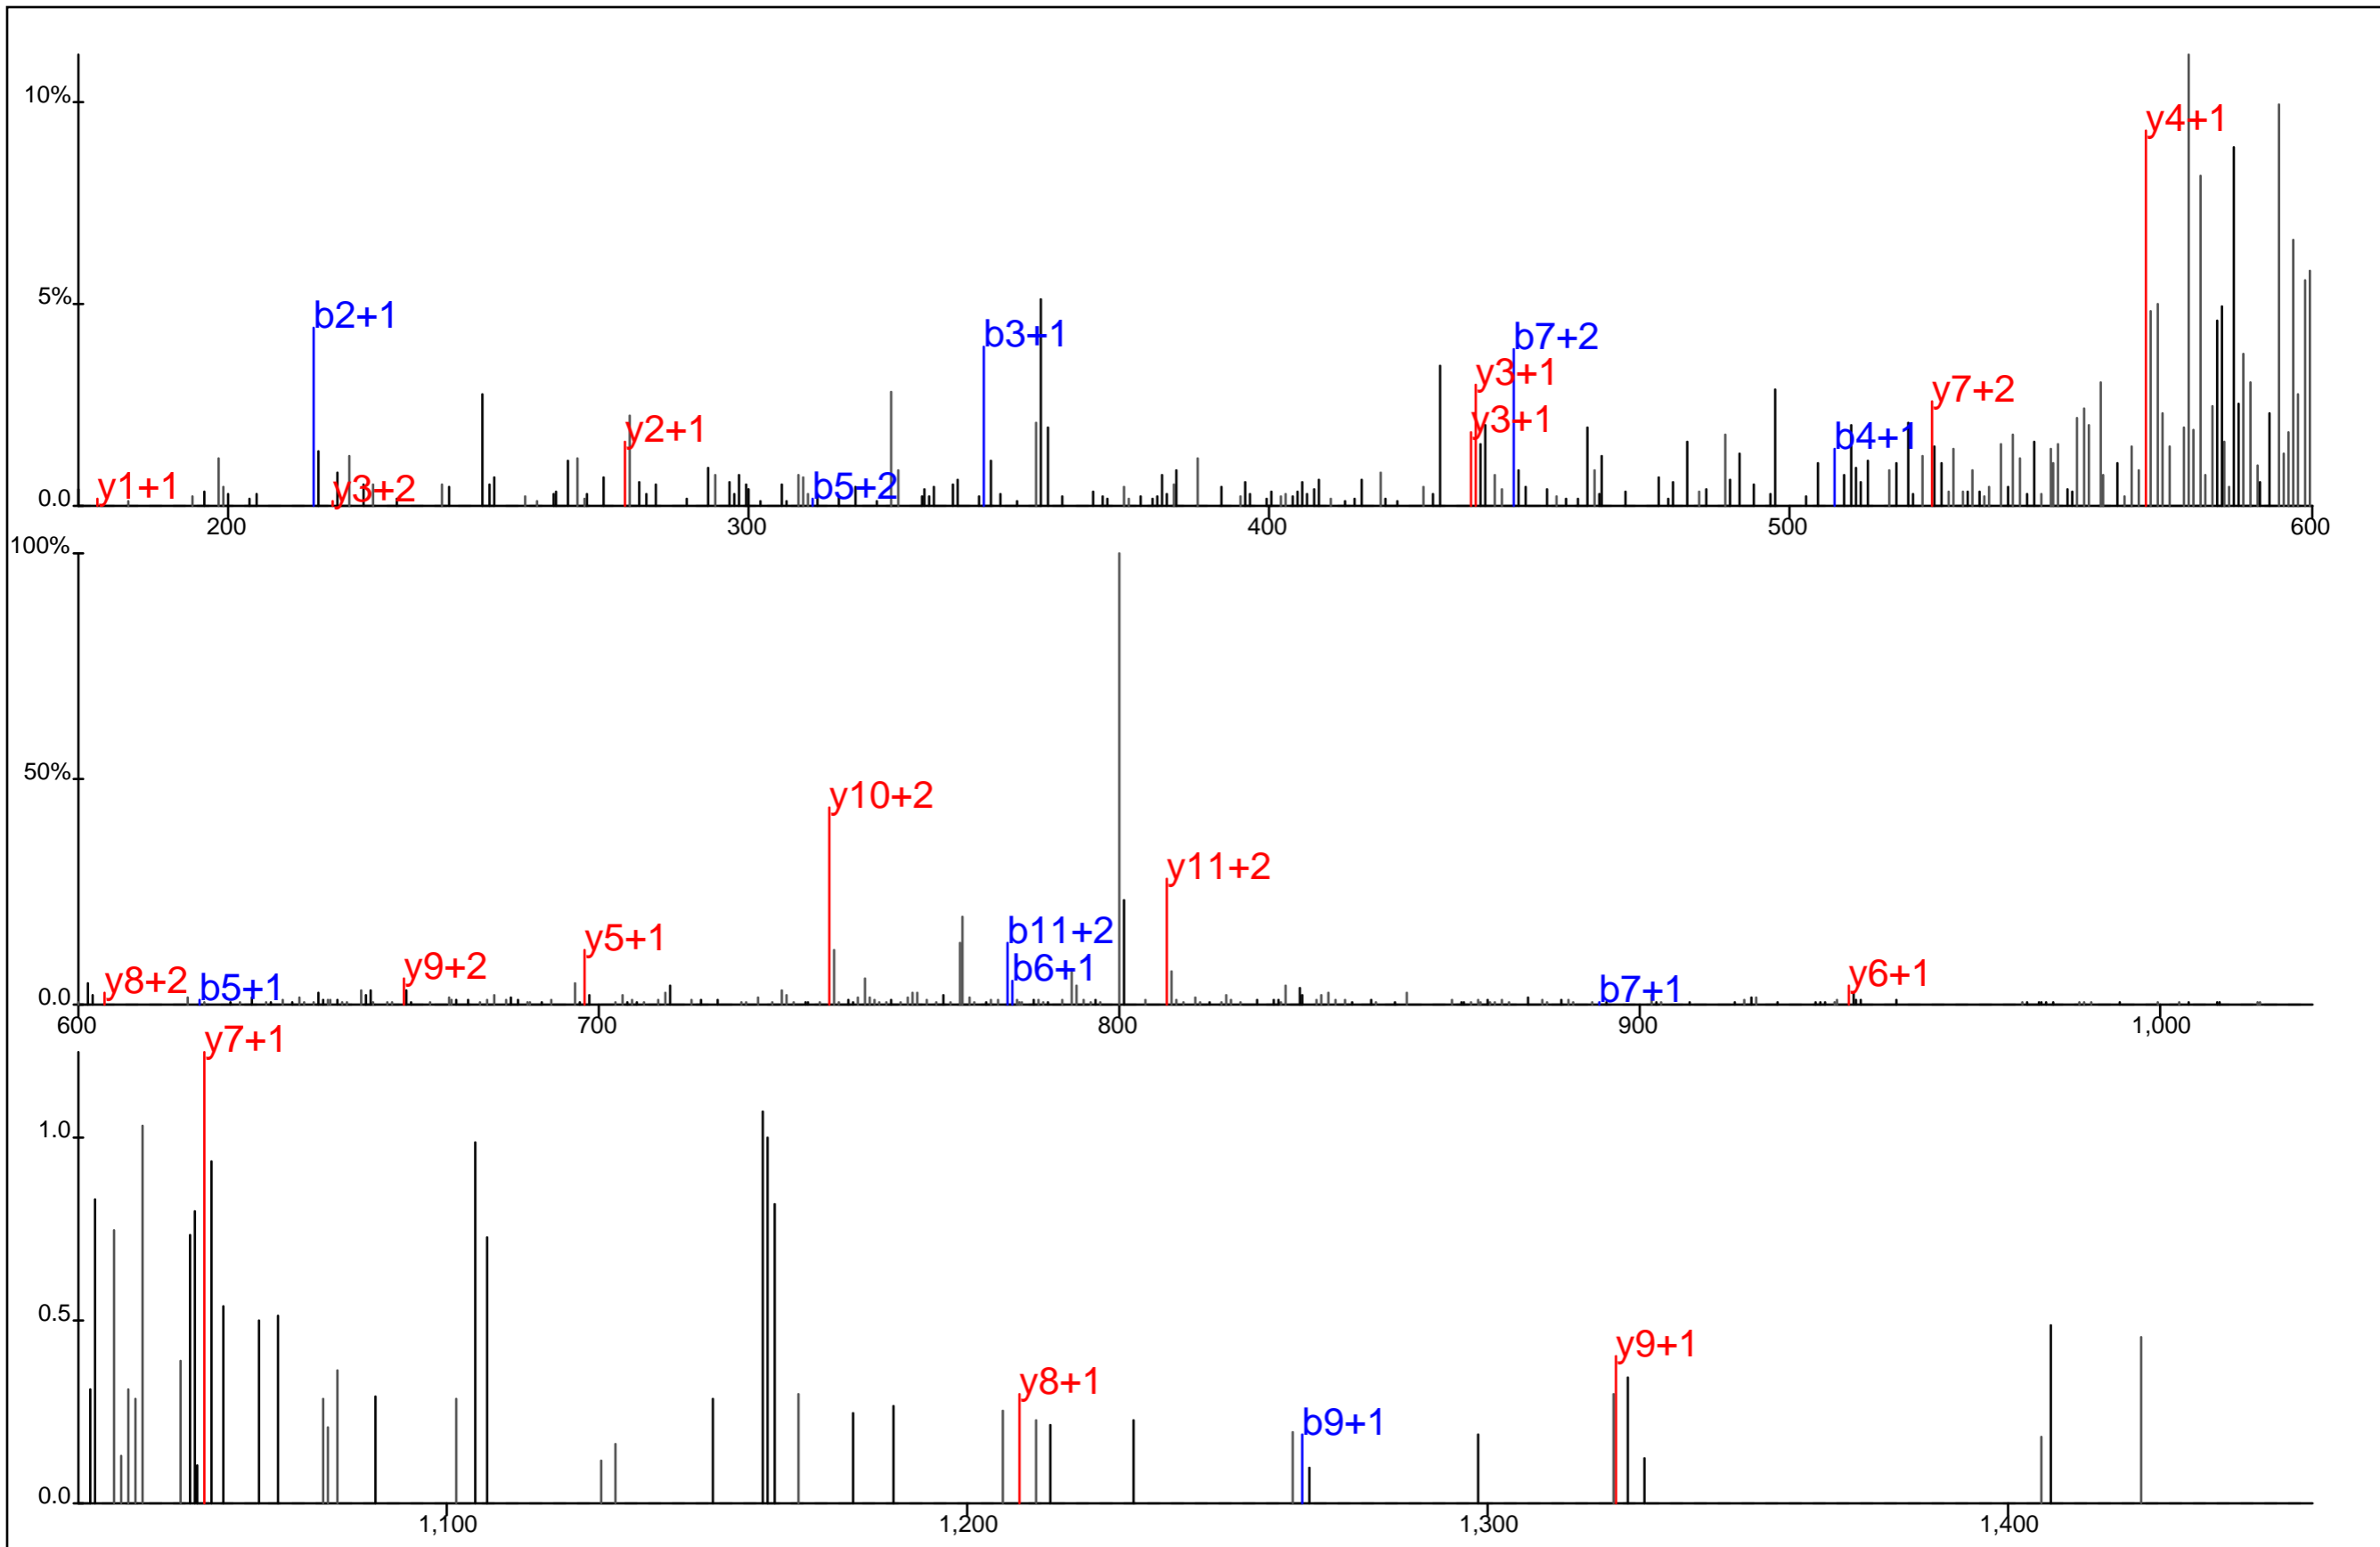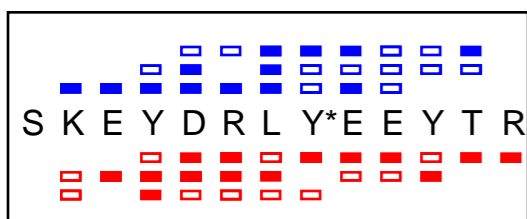

Protein Name: p85 gamma  
 gi Accession: 12643788  
 Precursor Mass: 611.2681+3  
 Delta Mass: 0.073 ppm  
 XCorr: 24.09

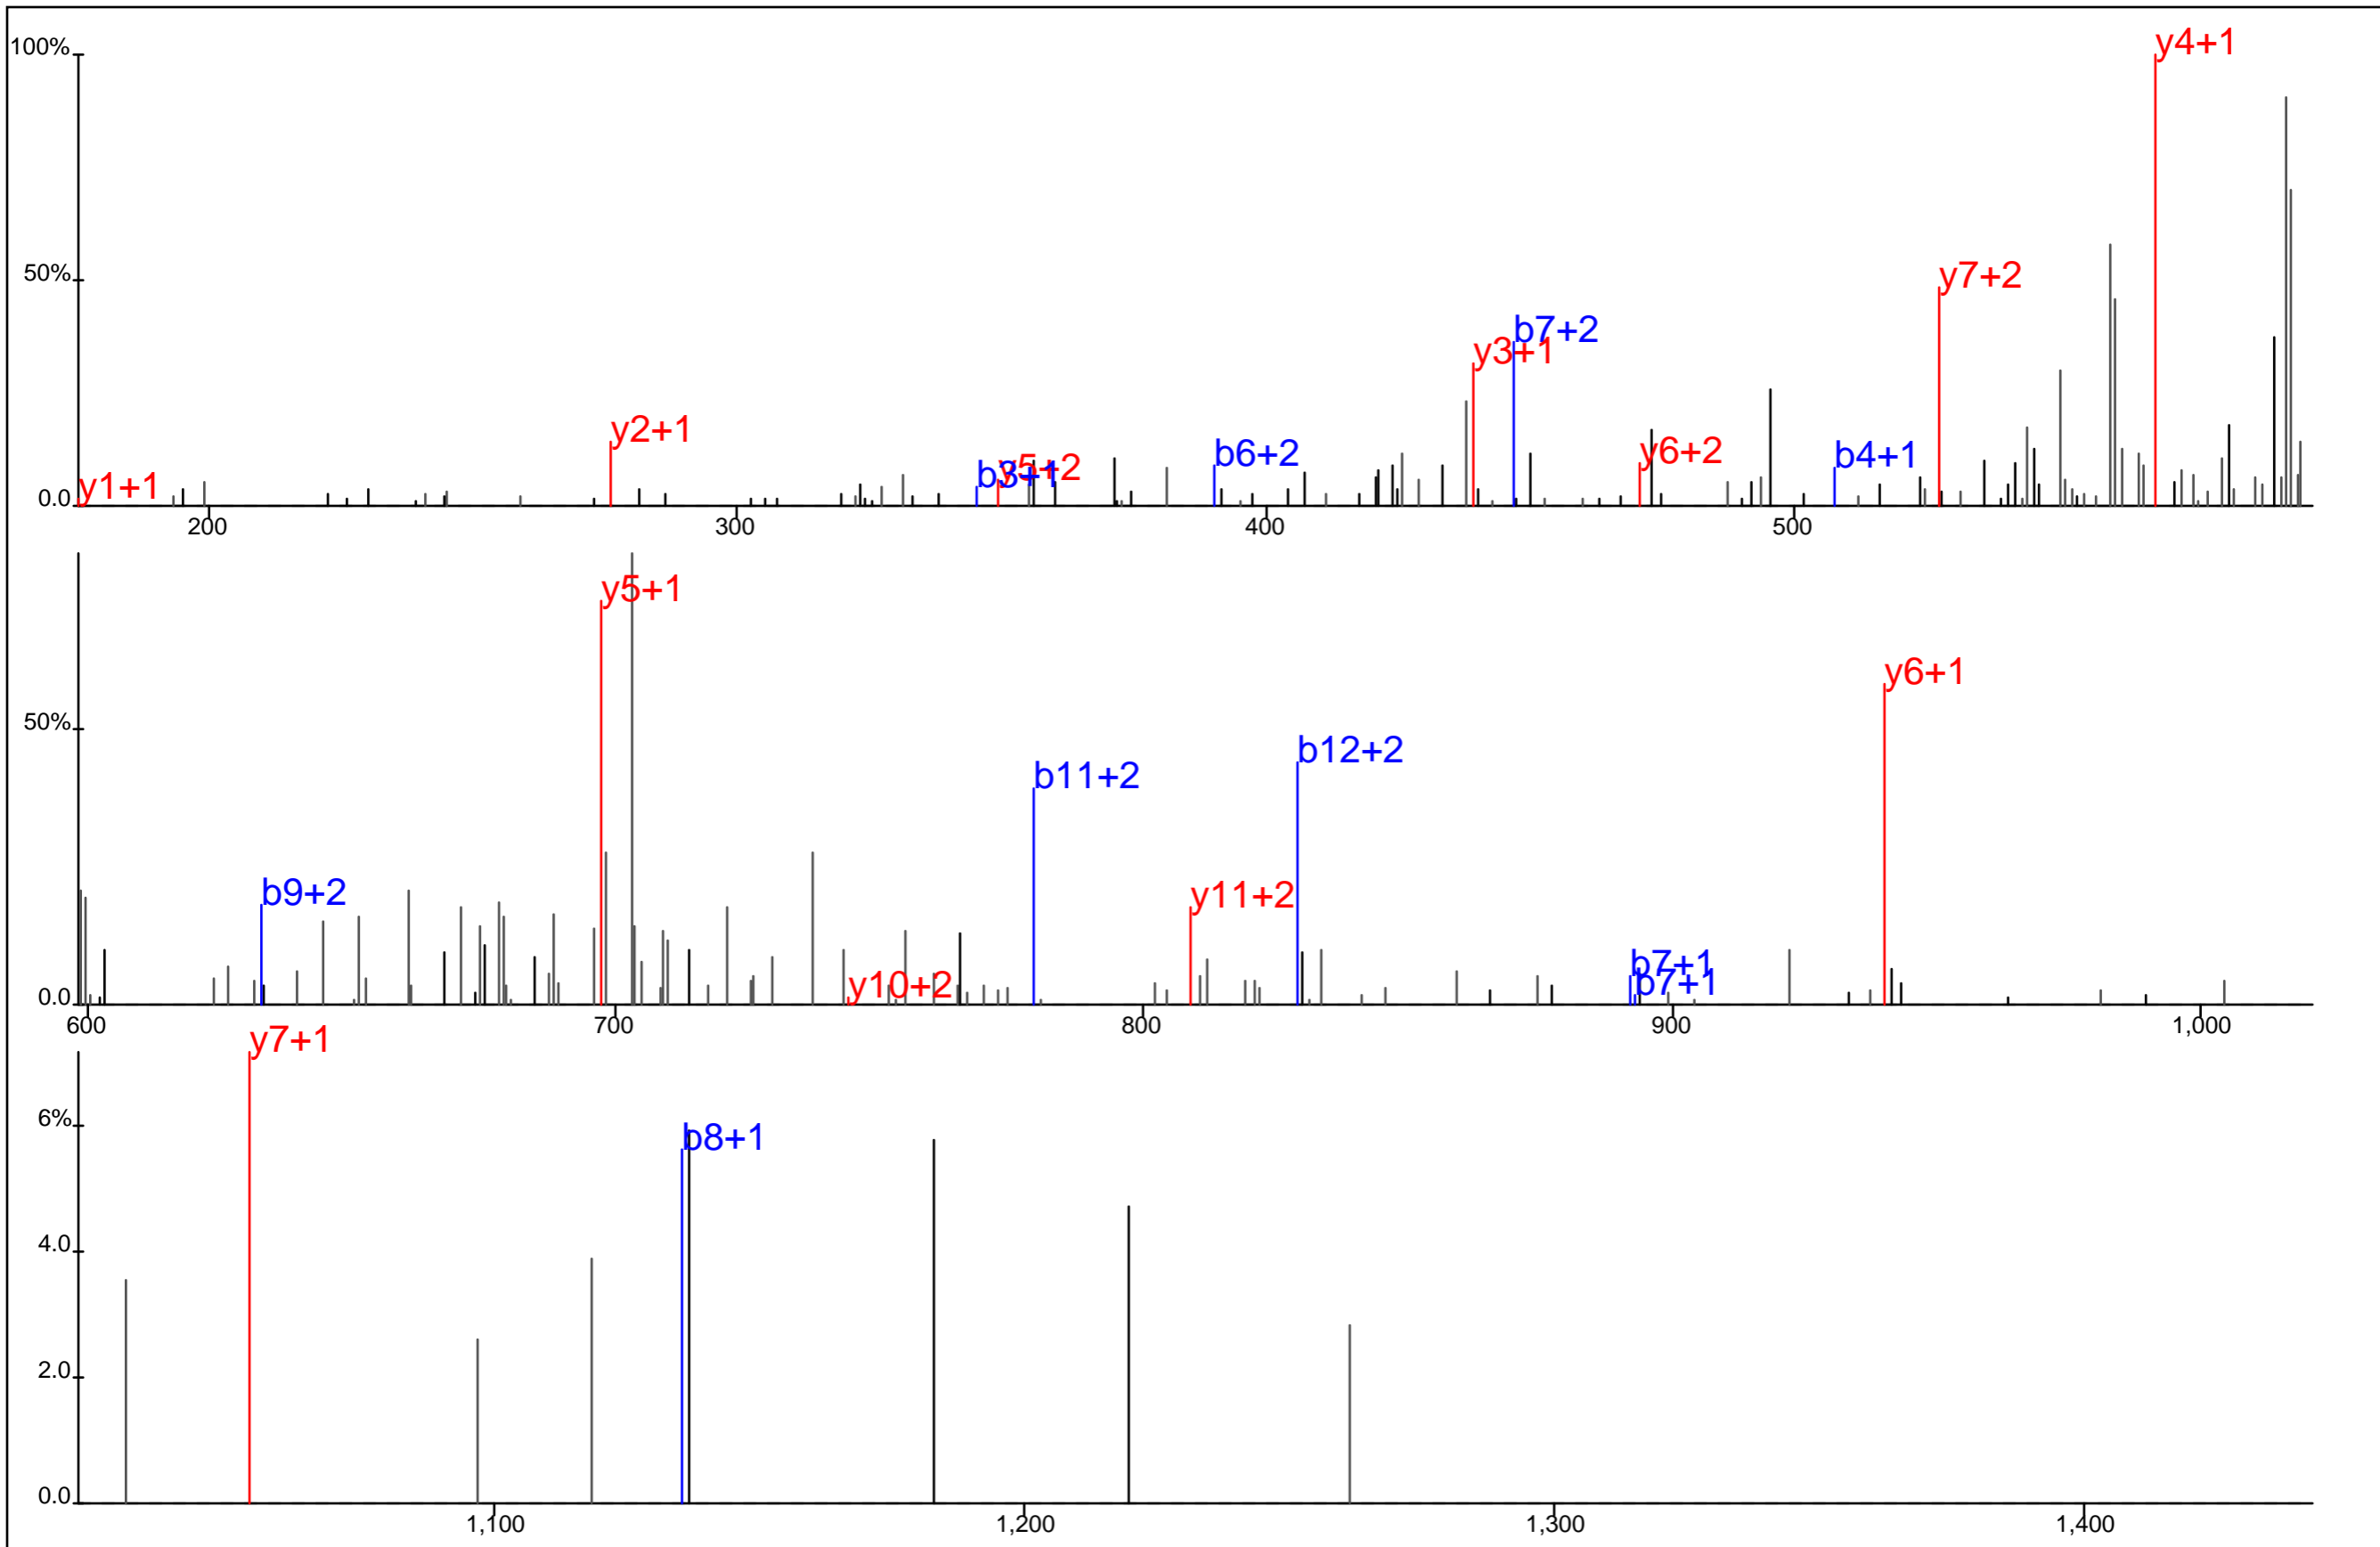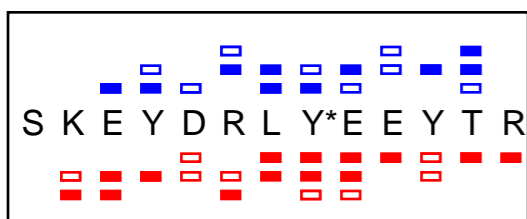

Protein Name: p85 gamma  
 gi Accession: 12643788  
 Precursor Mass: 611.2580+3  
 Delta Mass: 16.570 ppm  
 XCorr: 28.54

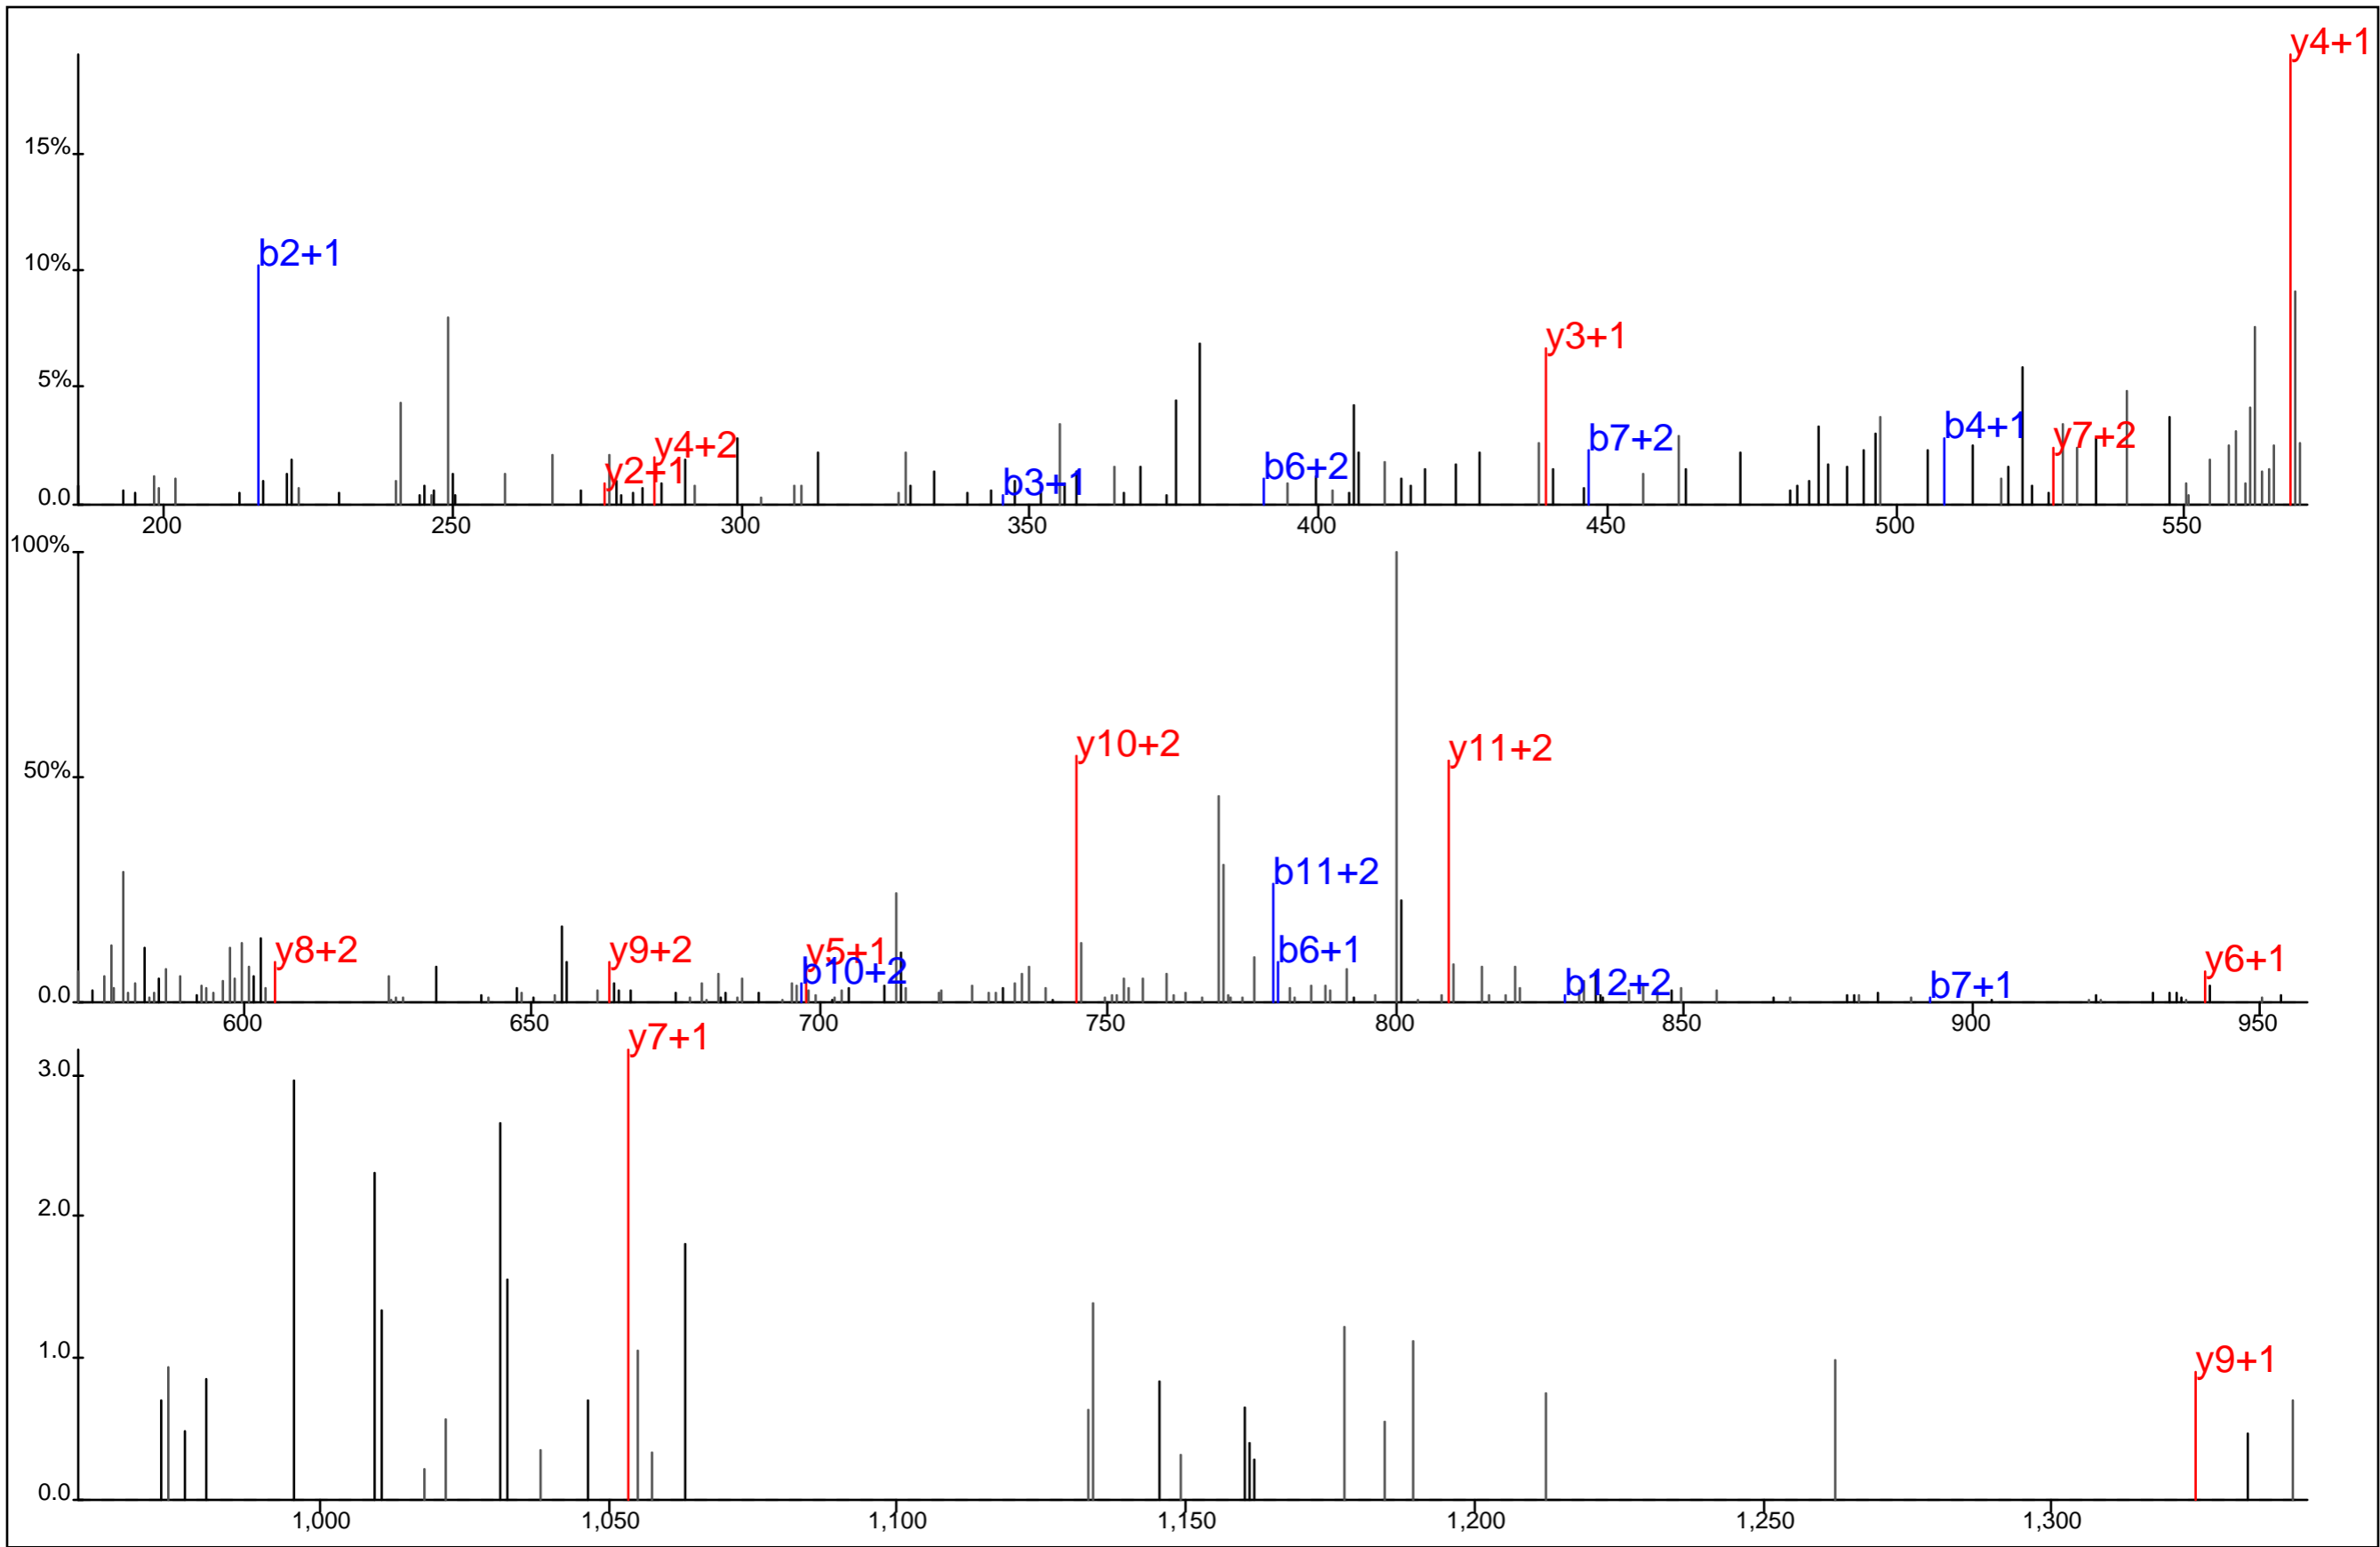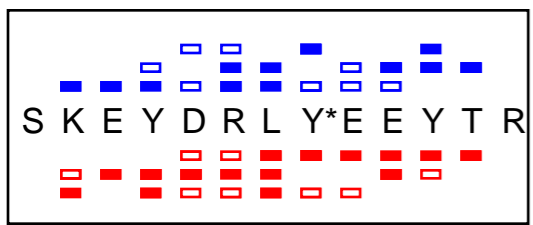

Protein Name: p85 gamma  
 gi Accession: 12643788  
 Precursor Mass: 611.2683+3  
 Delta Mass: 0.327 ppm  
 XCorr: 14.1

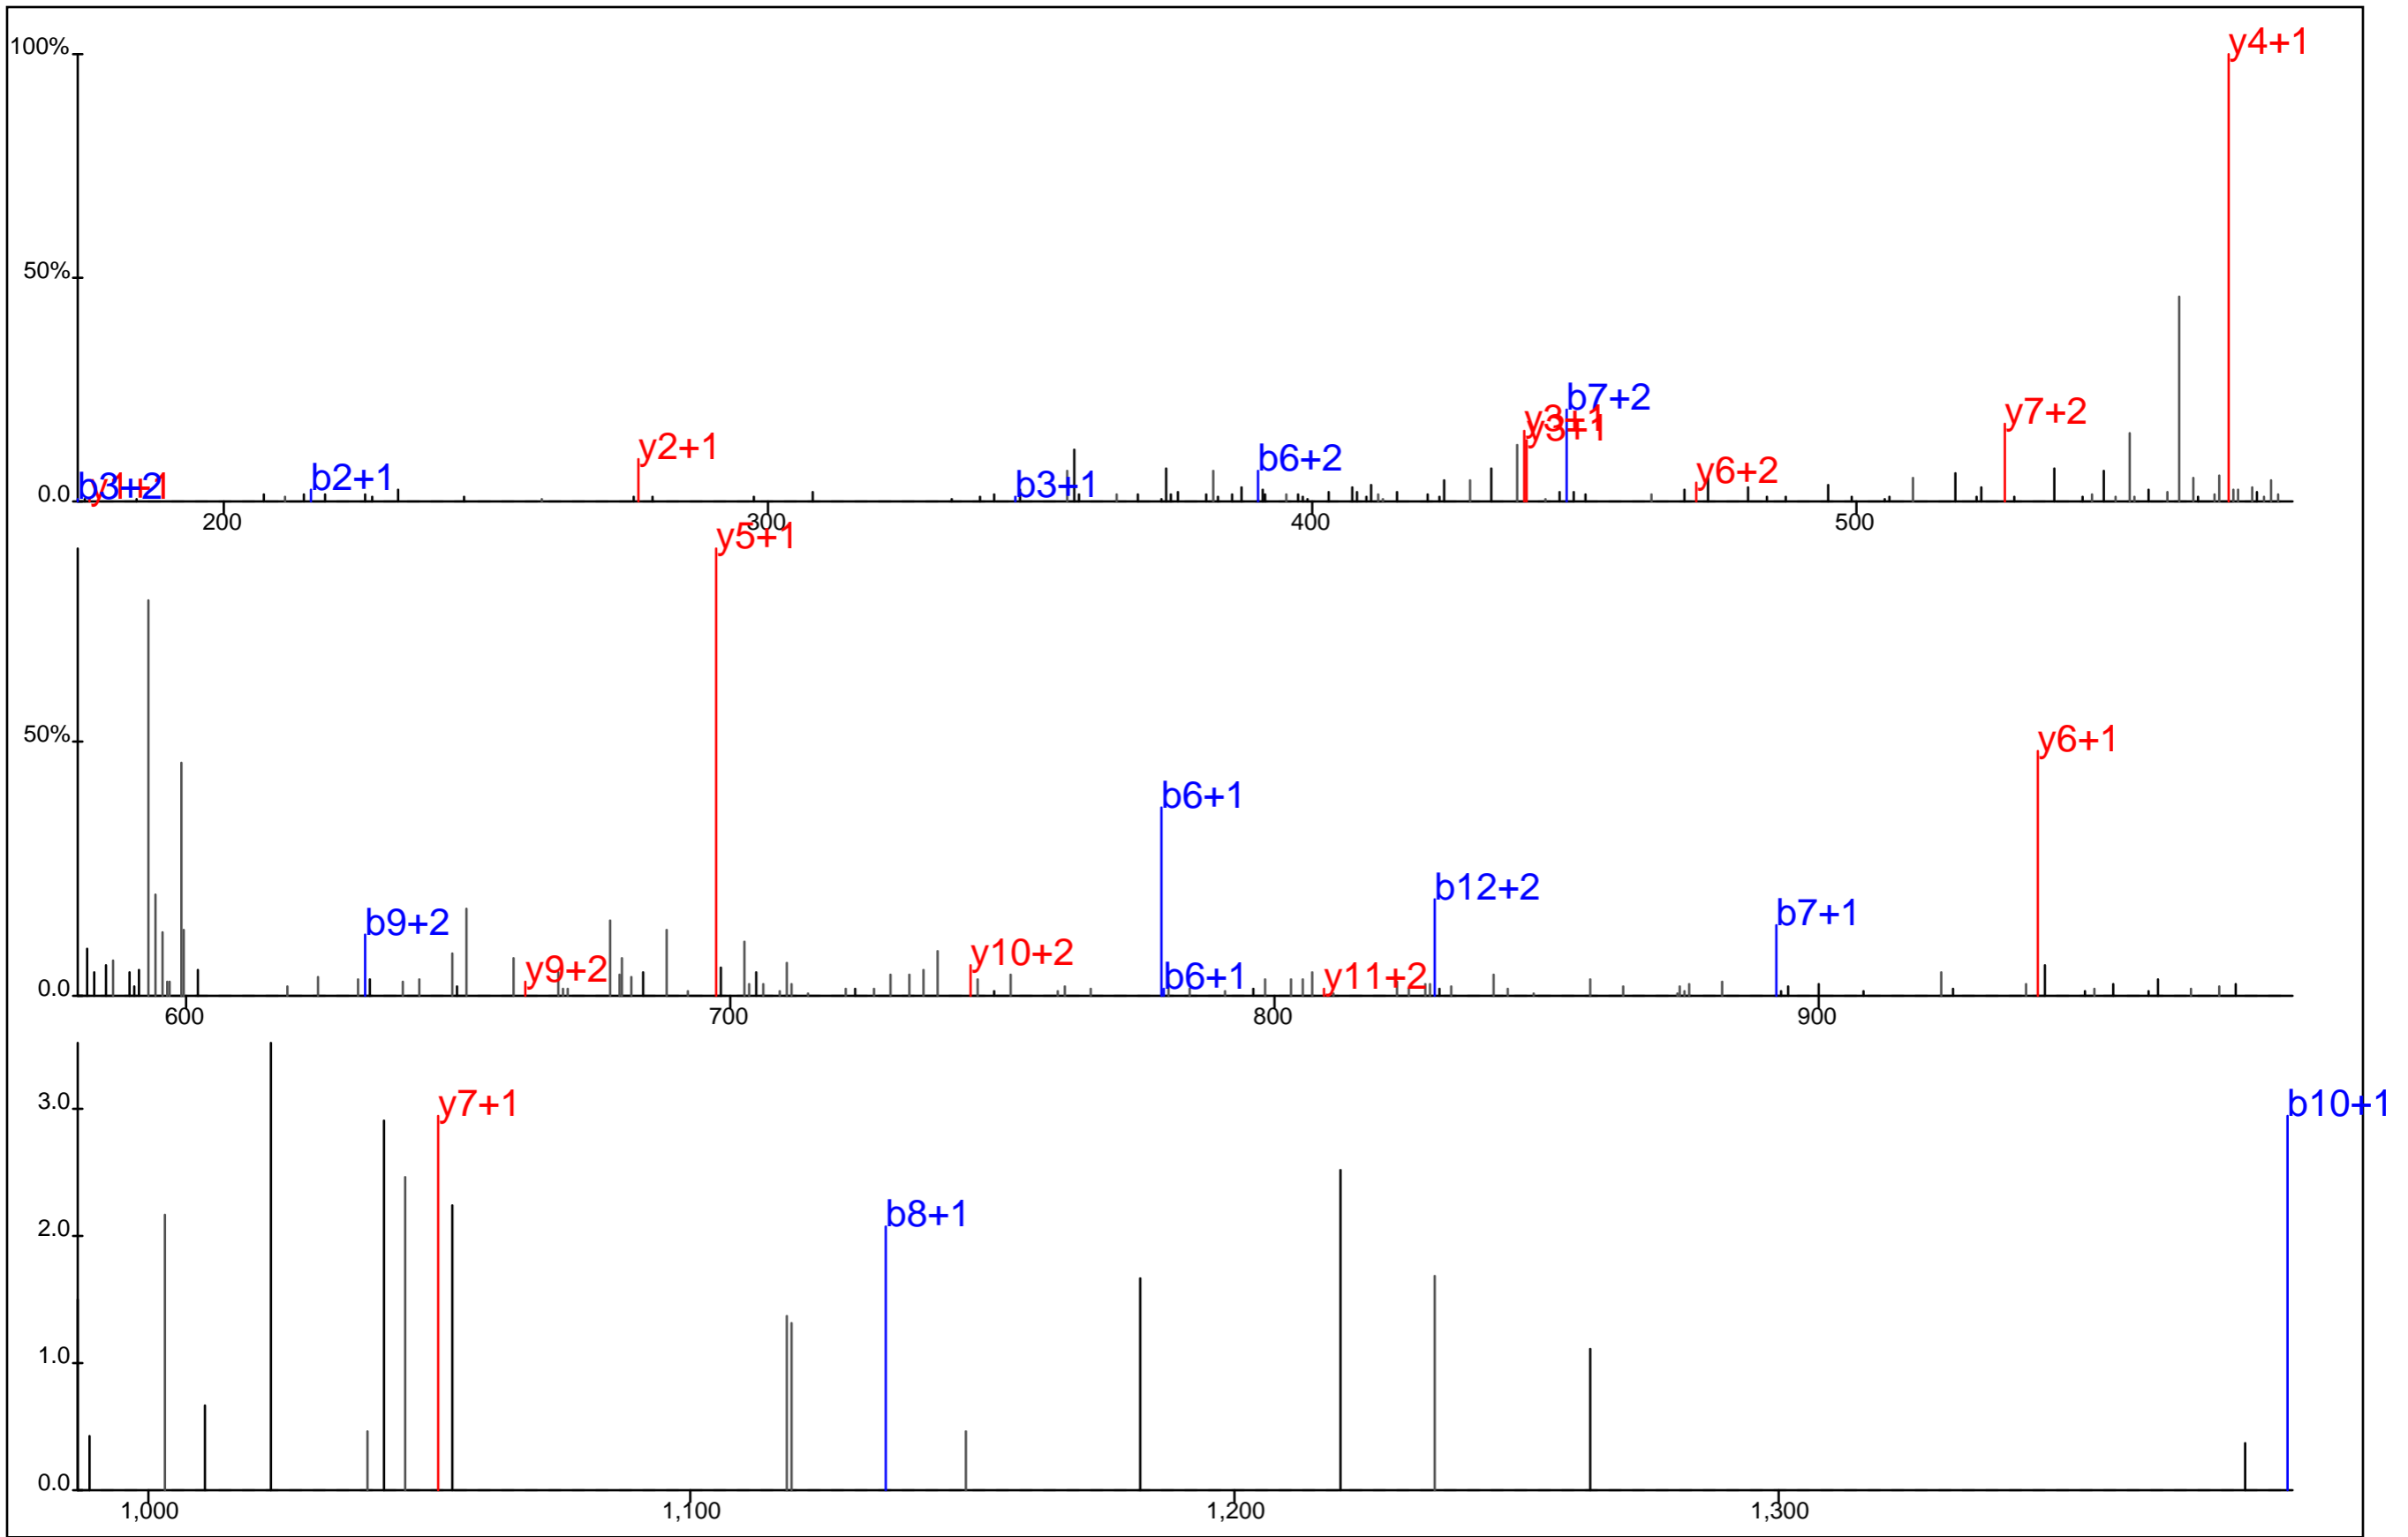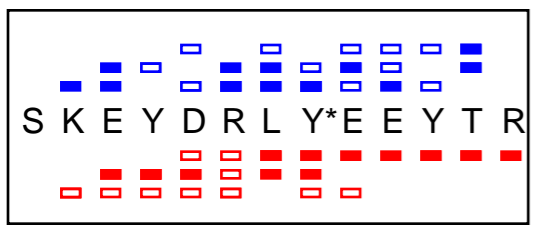

Protein Name: p85 gamma  
 gi Accession: 12643788  
 Precursor Mass: 611.2583+3  
 Delta Mass: 16.067 ppm  
 XCorr: 33.12





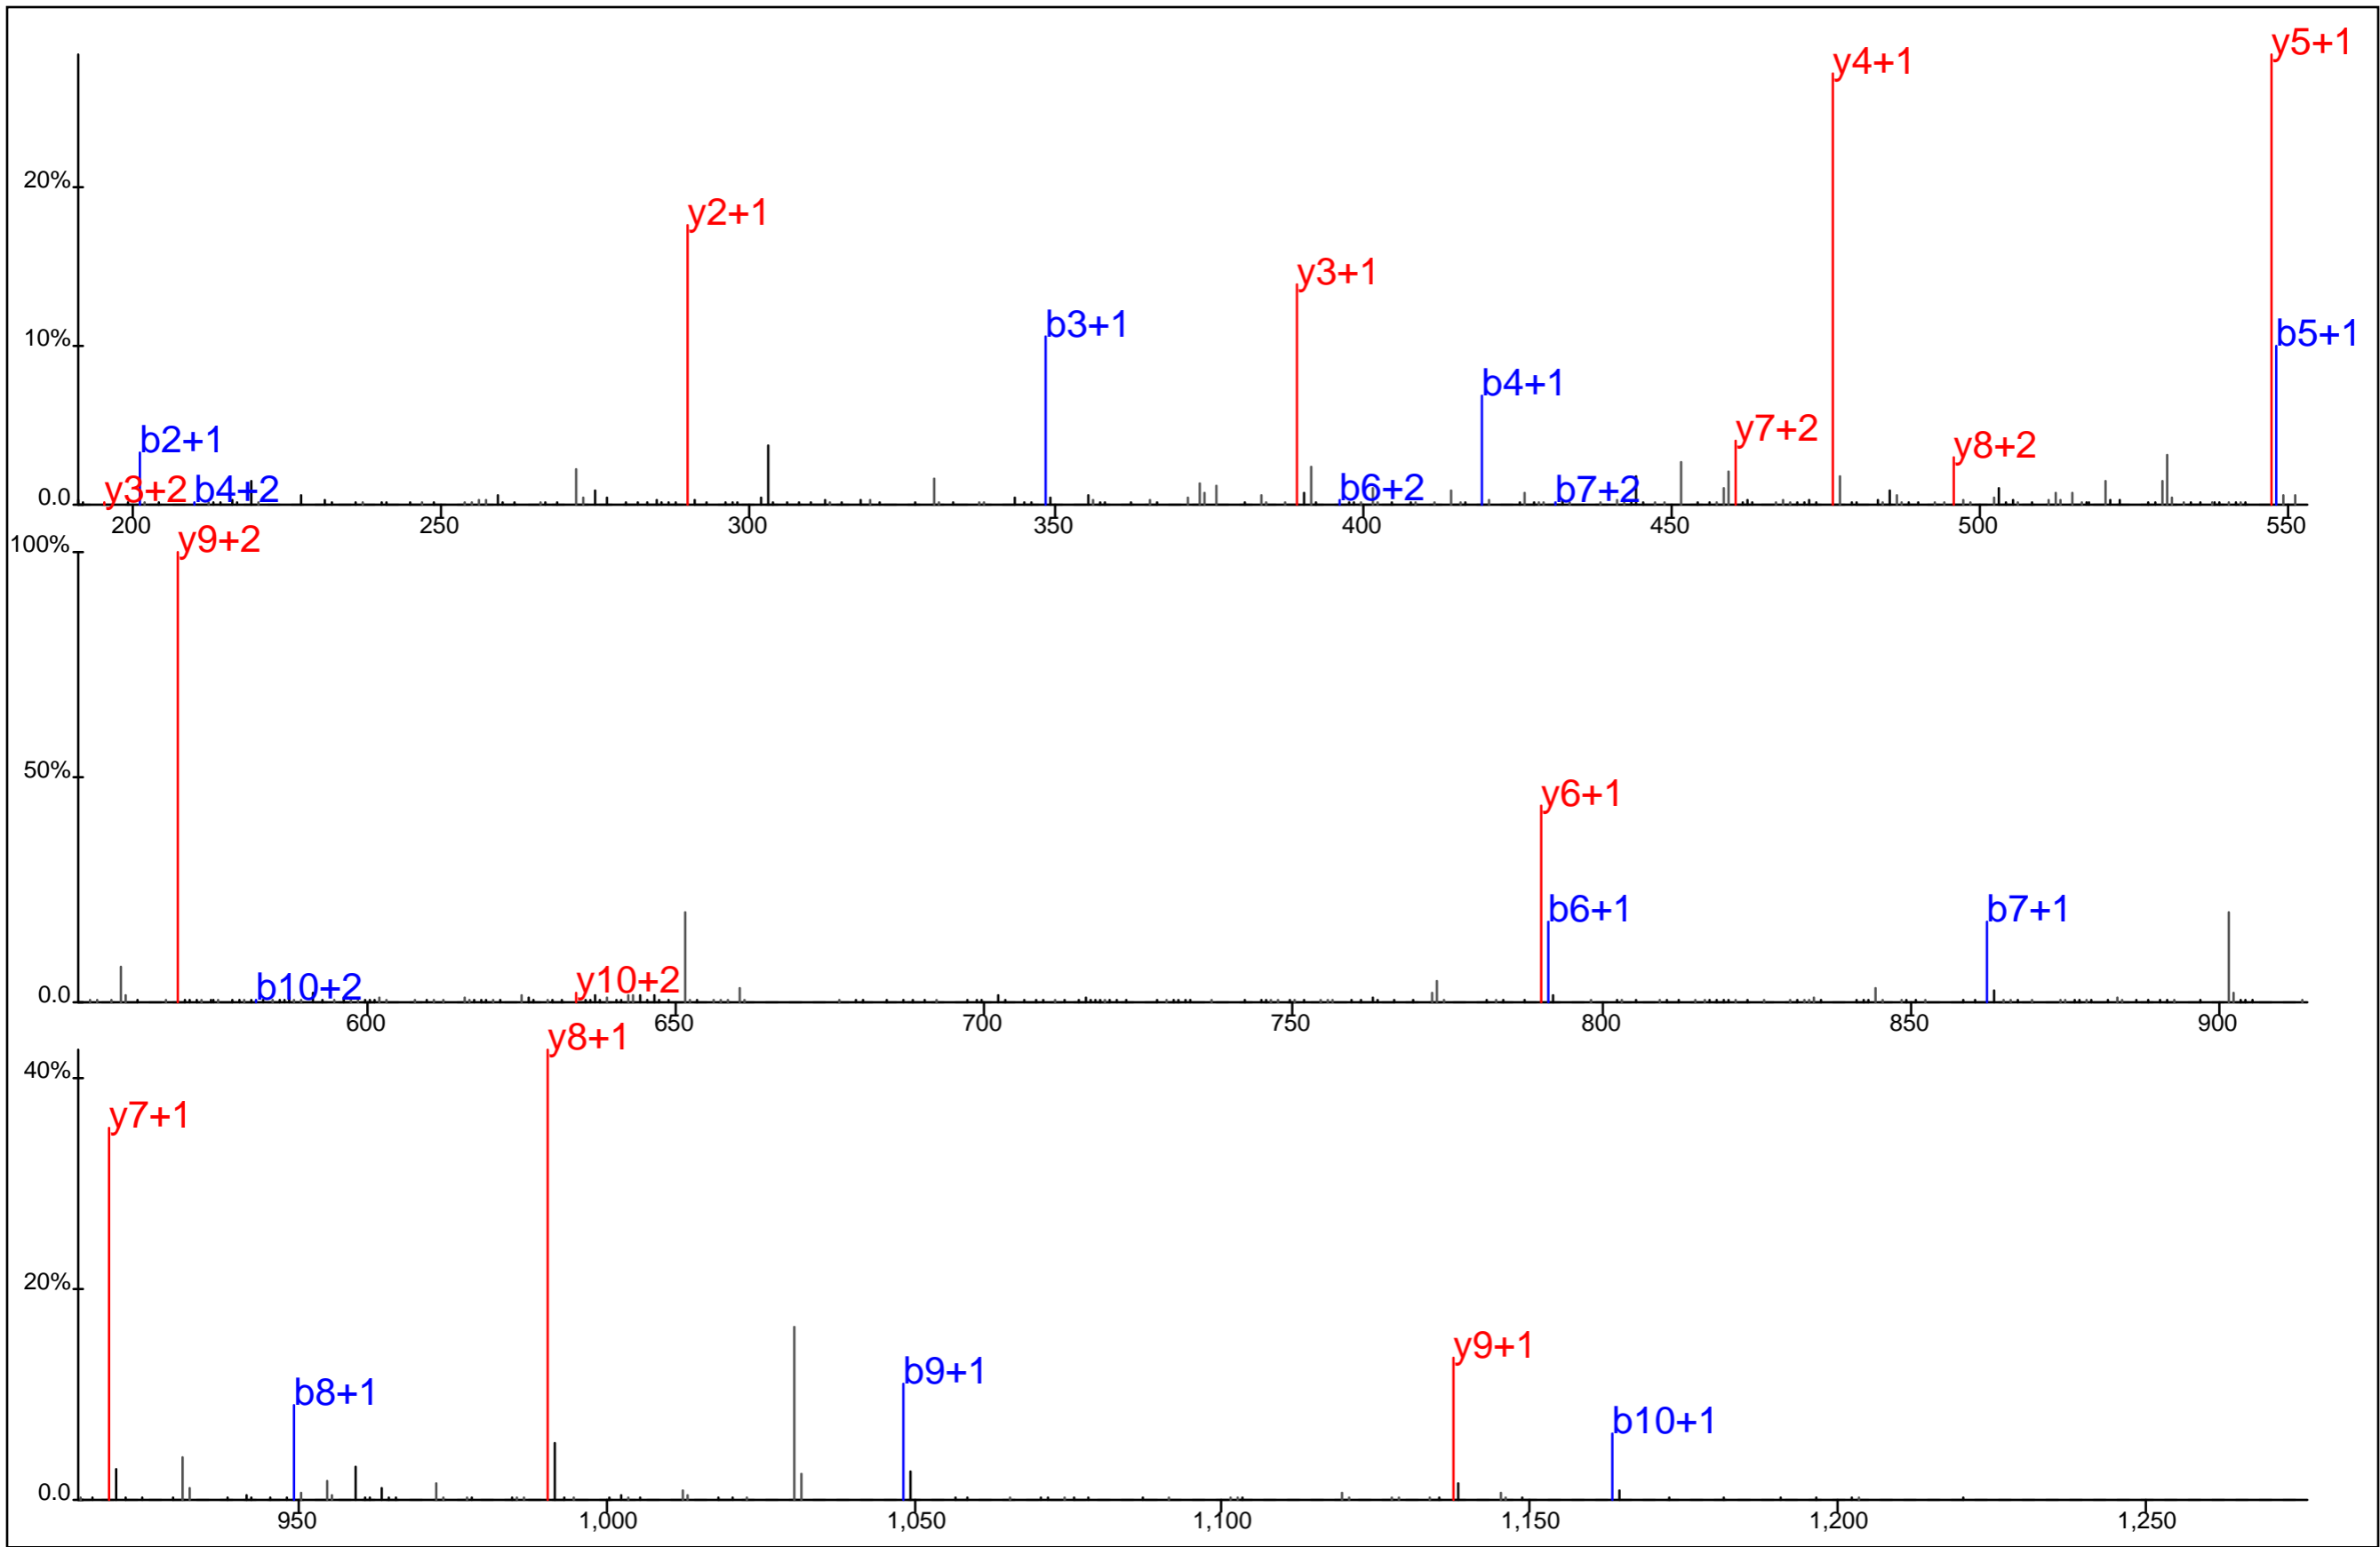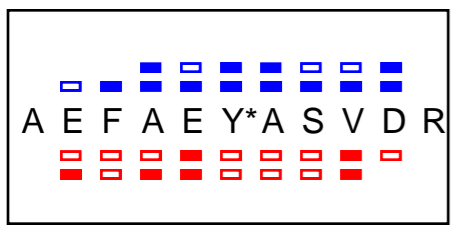

Protein Name: PAG  
 gi Accession: 7020925  
 Precursor Mass: 669.2740+2  
 Delta Mass: 0.061 ppm  
 XCorr: 77.31

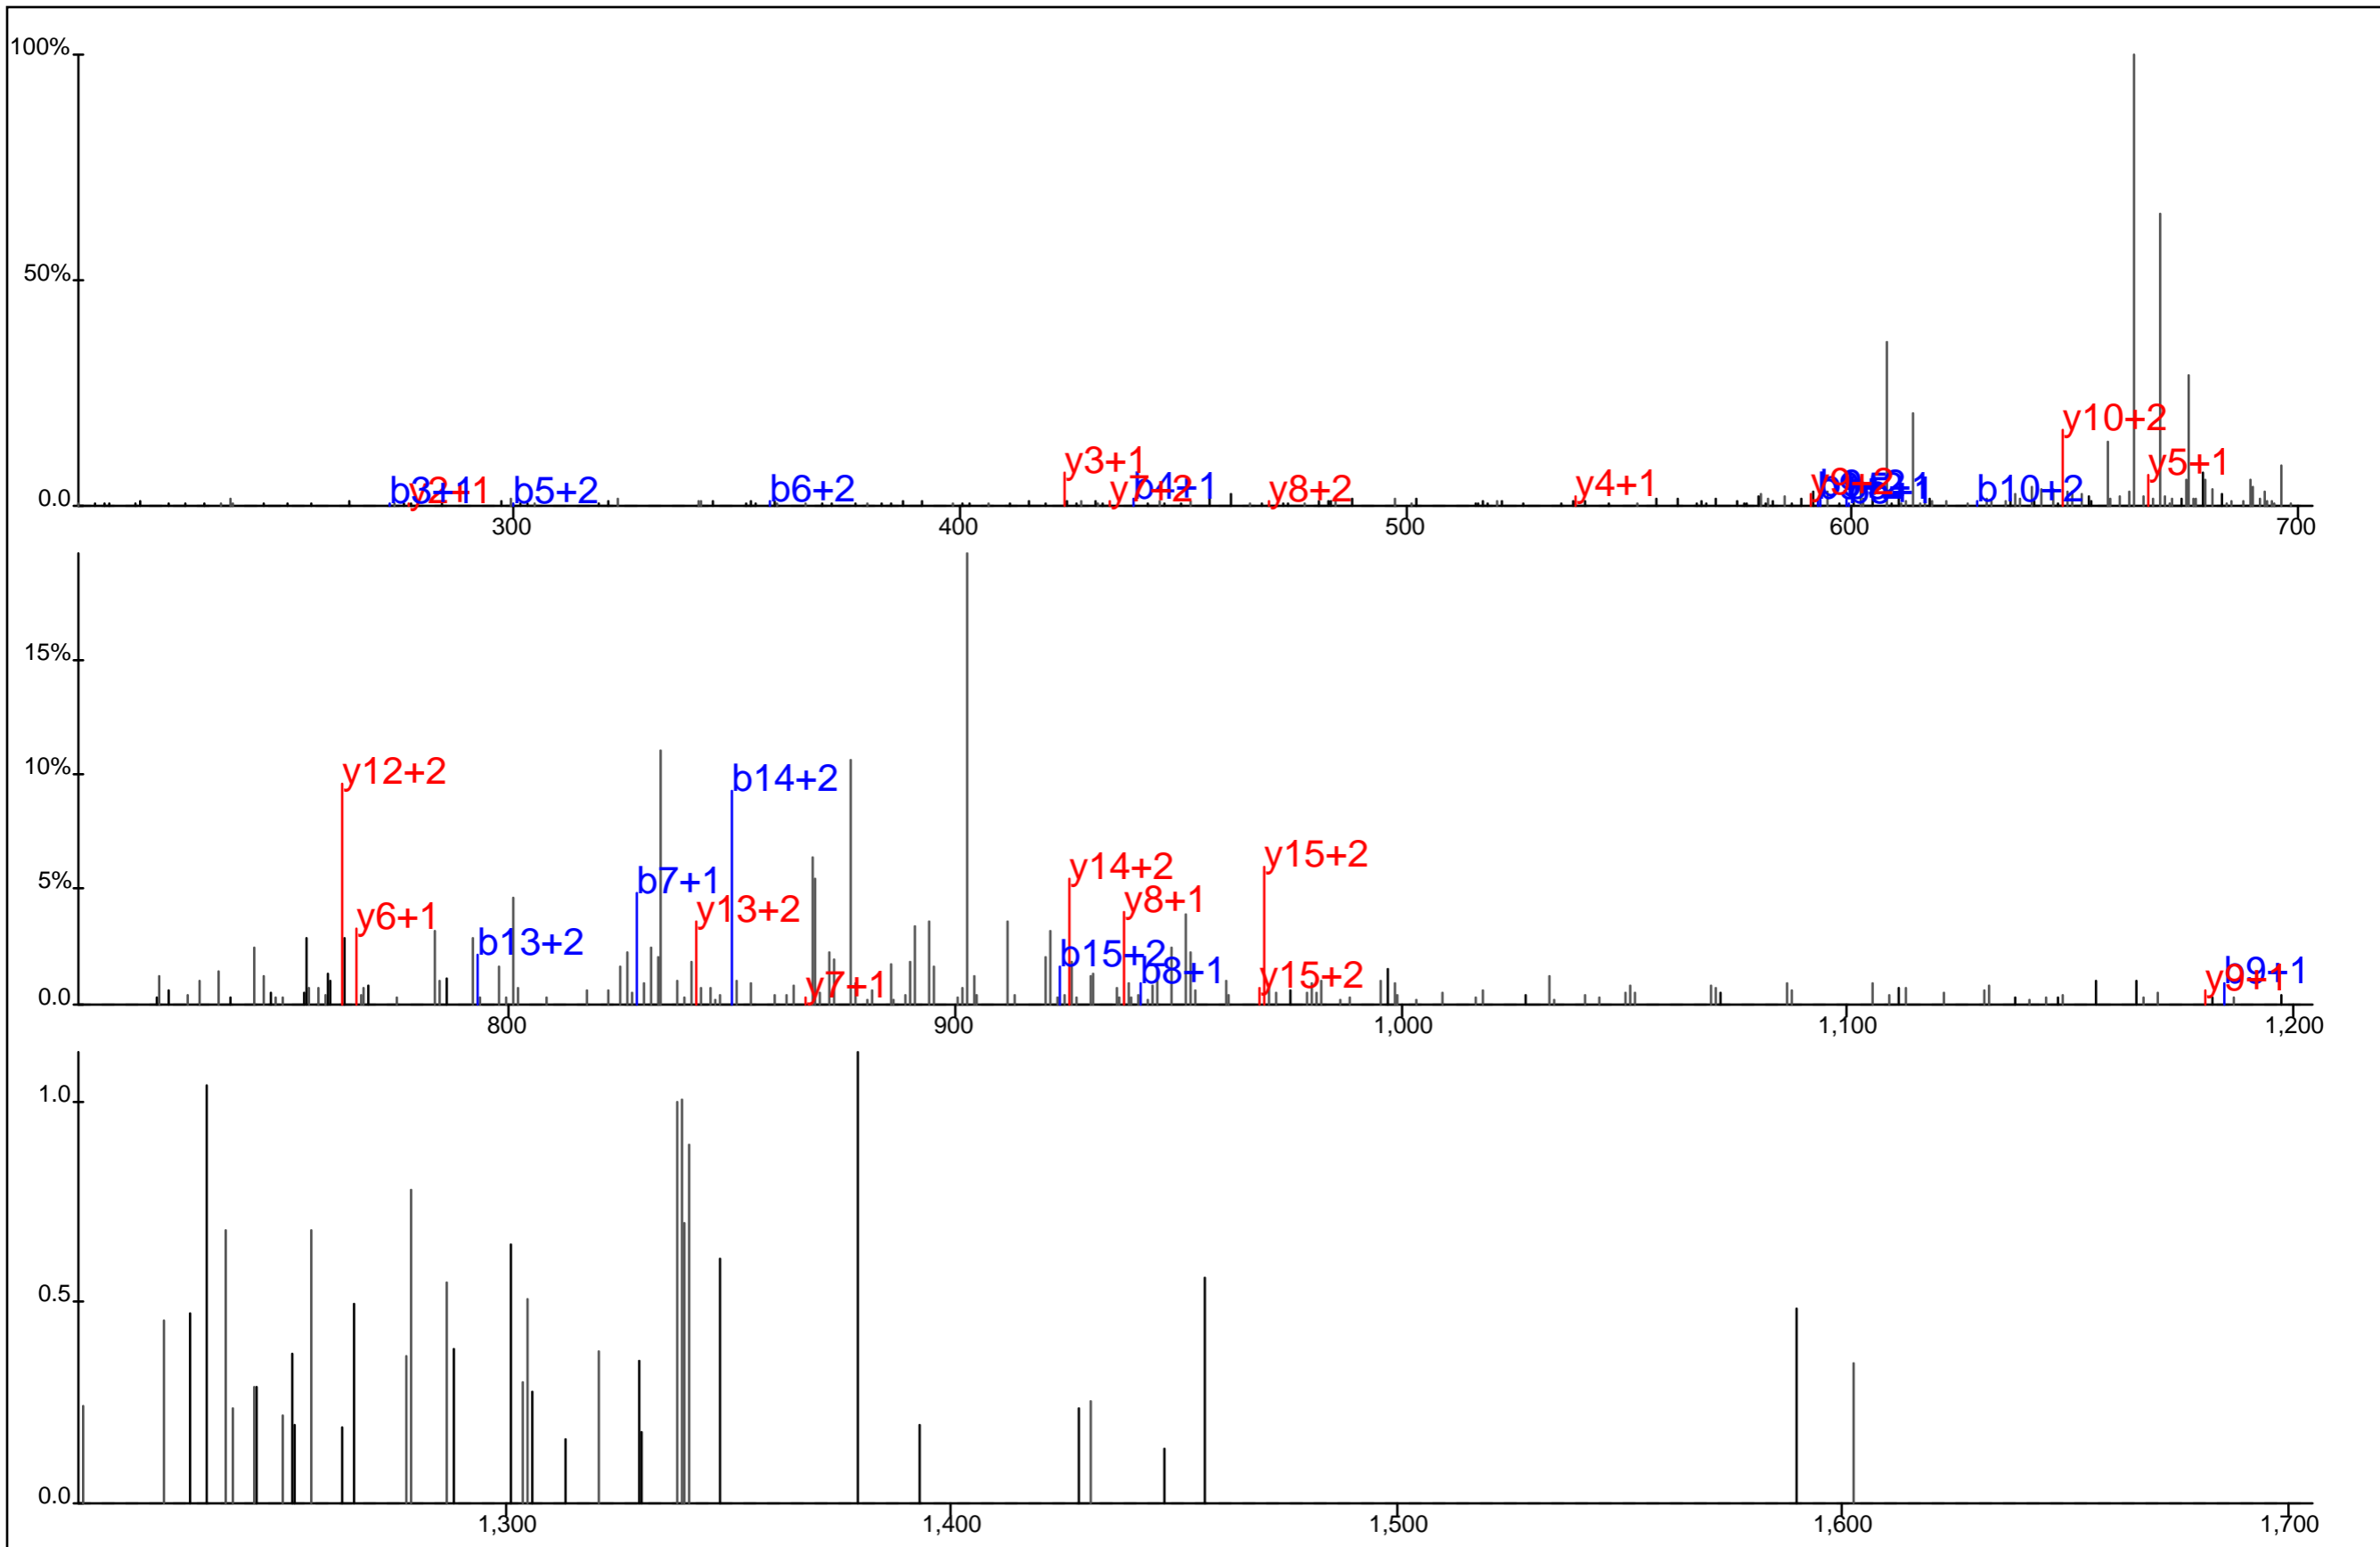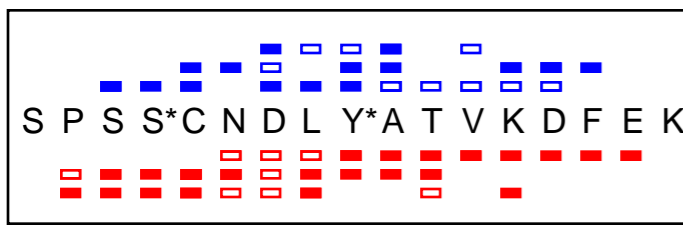

Protein Name: PAG  
 gi Accession: 7020925  
 Precursor Mass: 707.6201+3  
 Delta Mass: 8.156 ppm  
 XCorr: 16.72

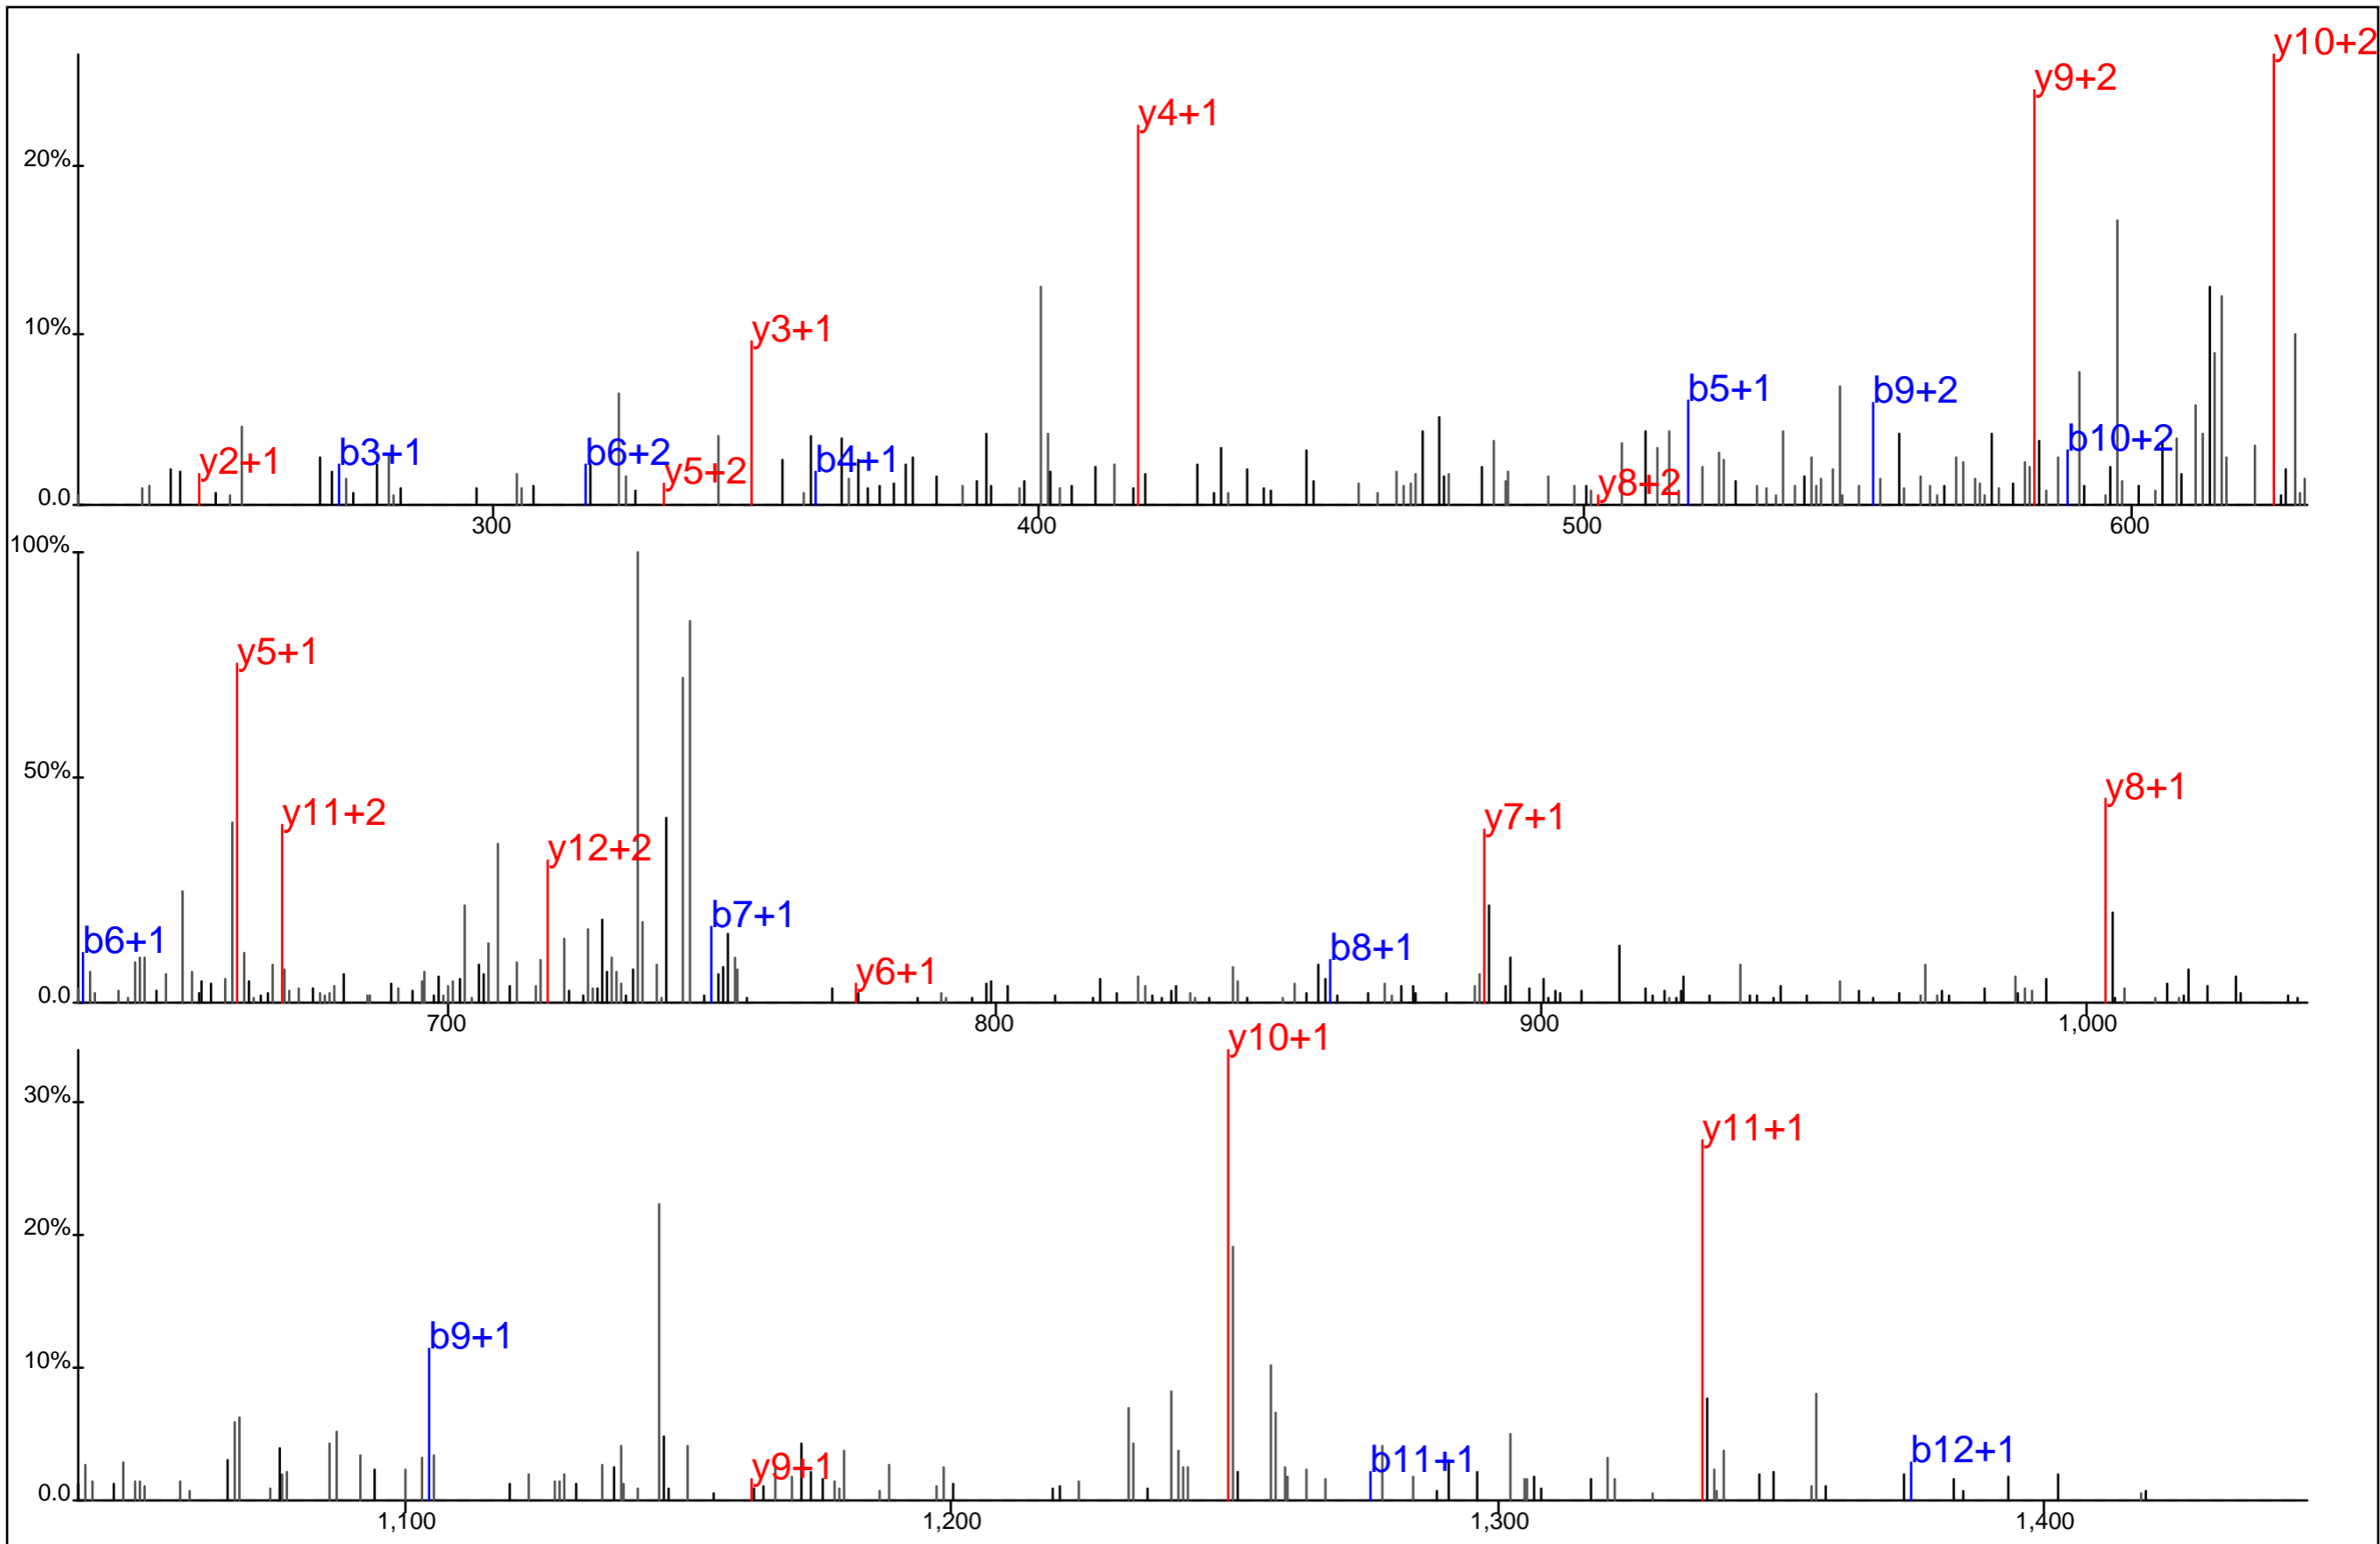

■ ■ ■ ■ ■ ■ ■ ■ ■ ■  
 S P S S C N D L Y\* A T V K  
□ □ □ □ □ □ □ □ □ □

Protein Name: PAG  
 gi Accession: 7020925  
 Precursor Mass: 761.3204+2  
 Delta Mass: 2.963 ppm  
 XCorr: 38.85

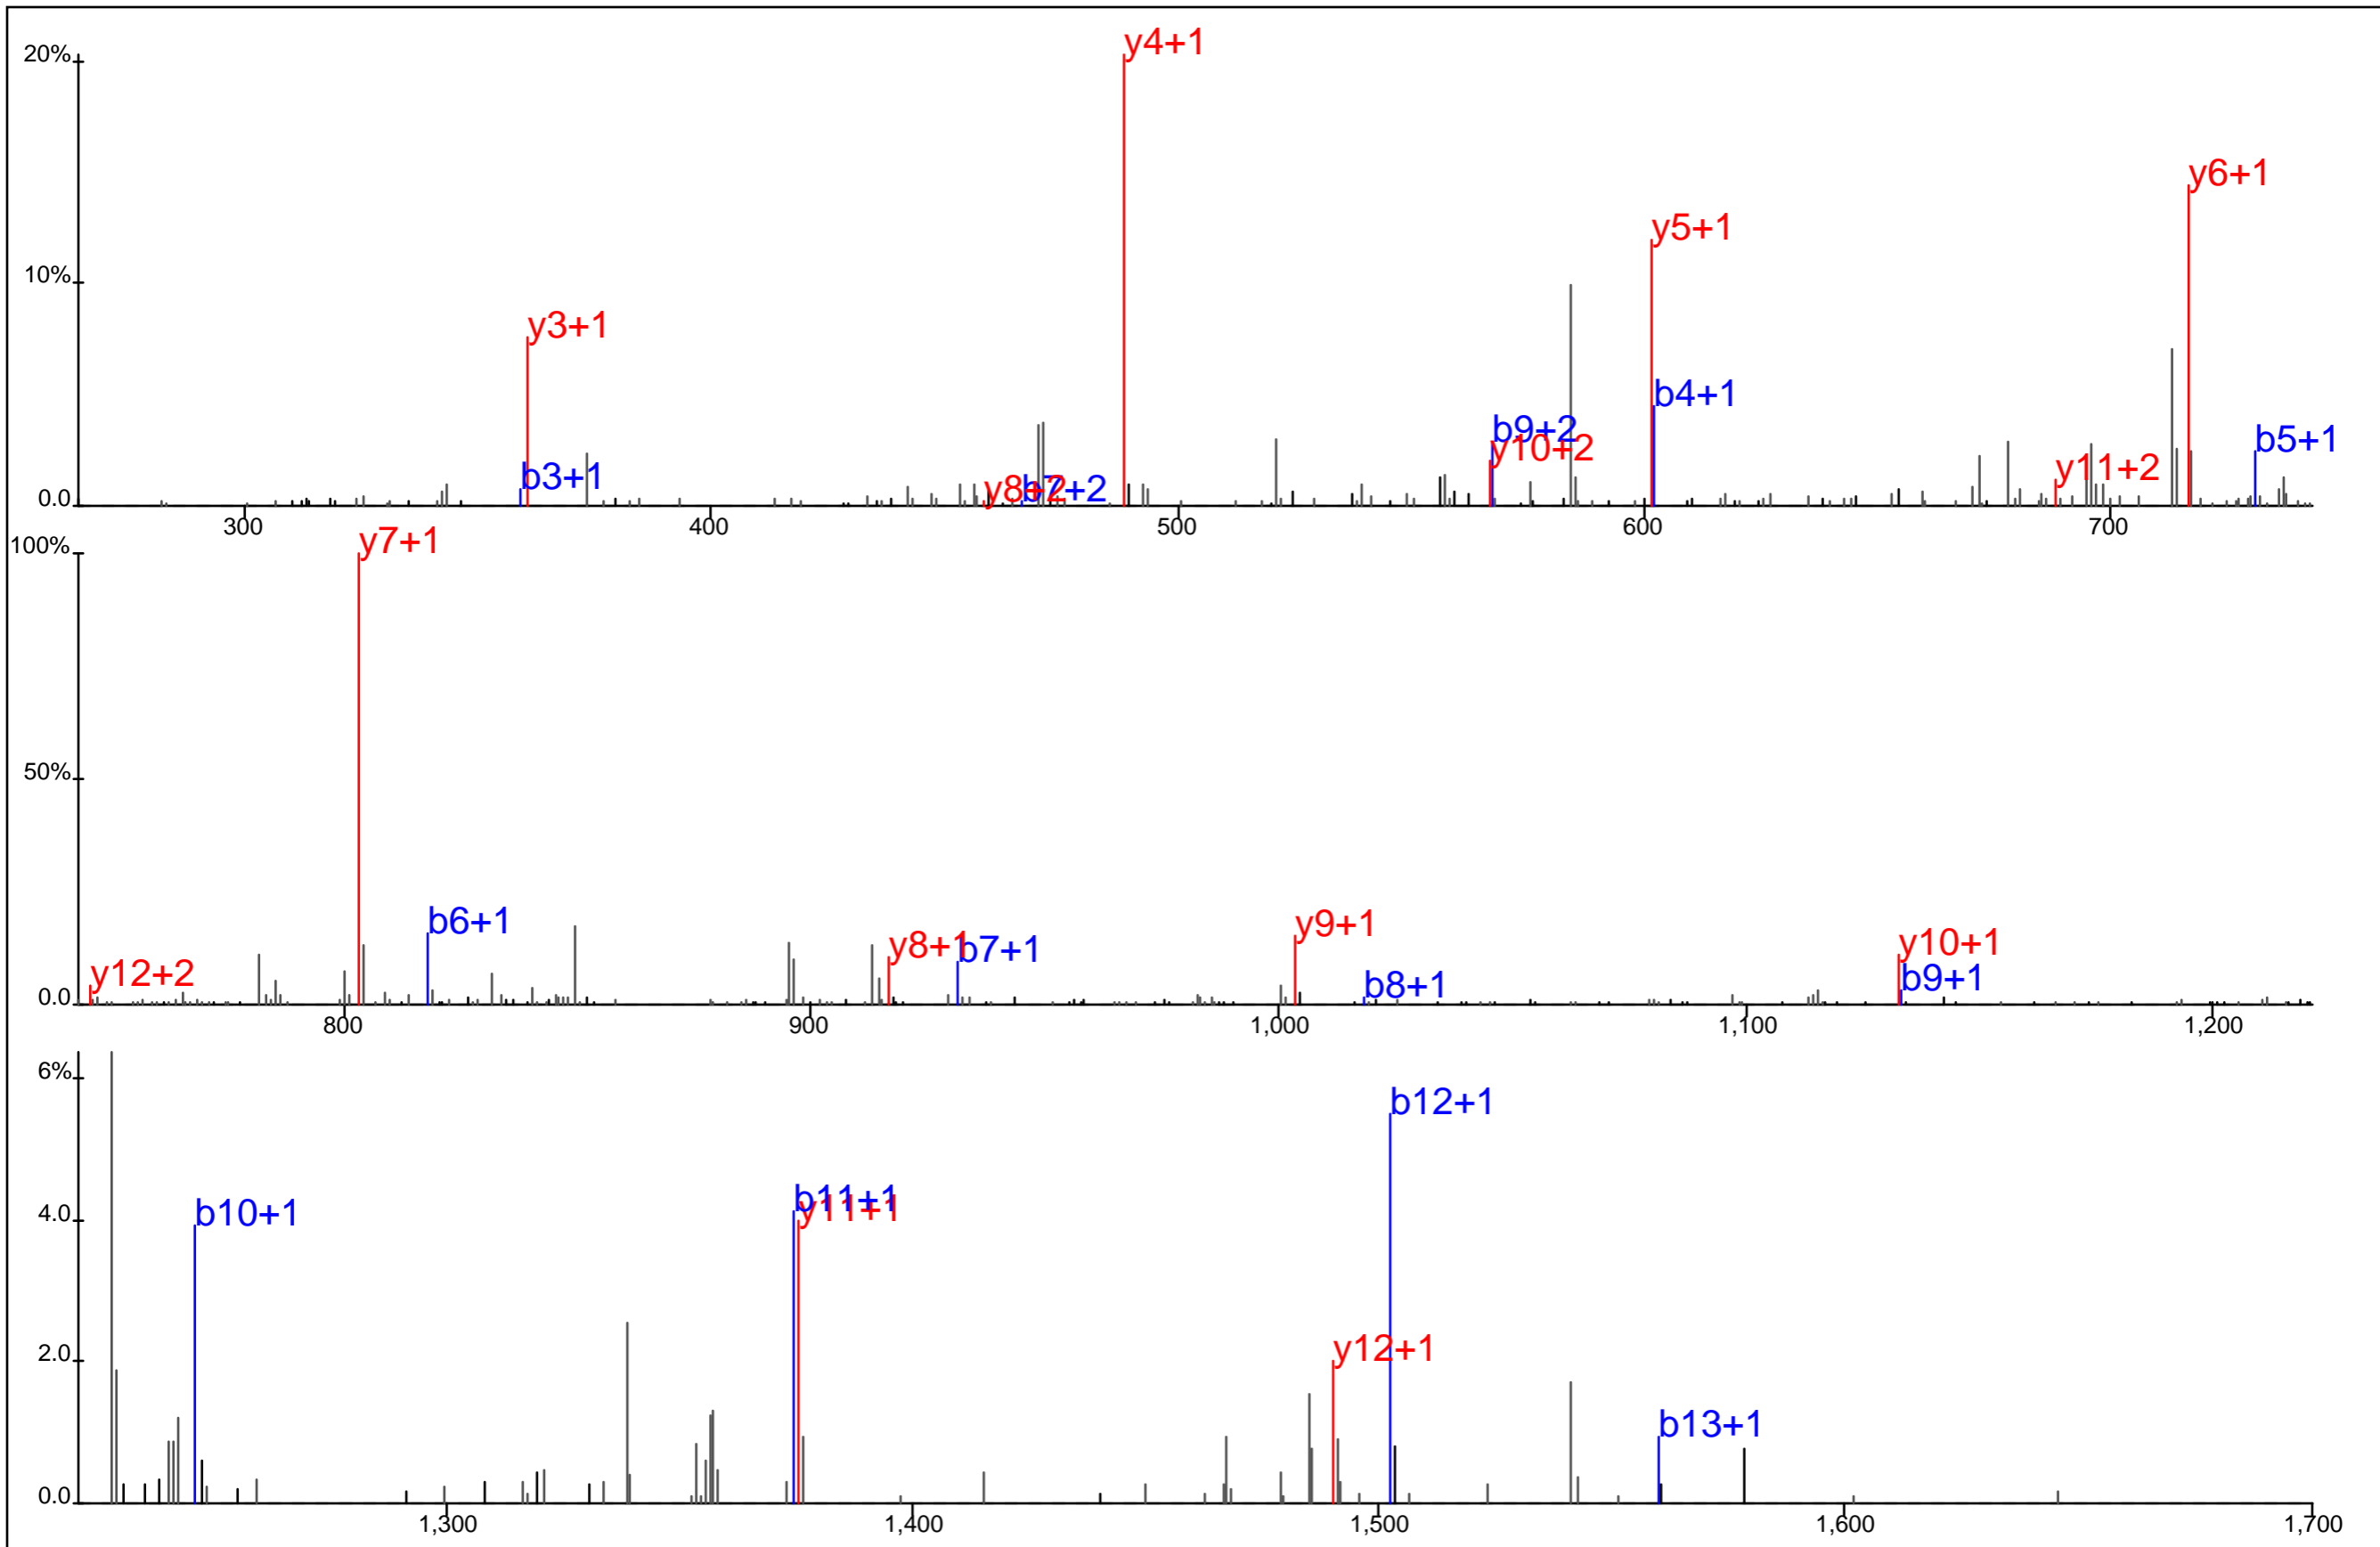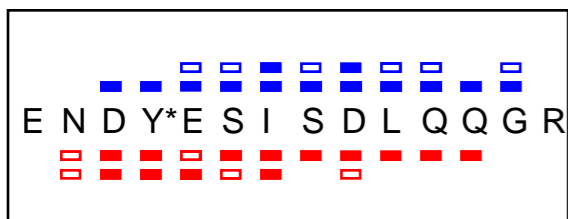

Protein Name: PAG  
 gi Accession: 7020925  
 Precursor Mass: 867.3557+2  
 Delta Mass: 1.527 ppm  
 XCorr: 72.23

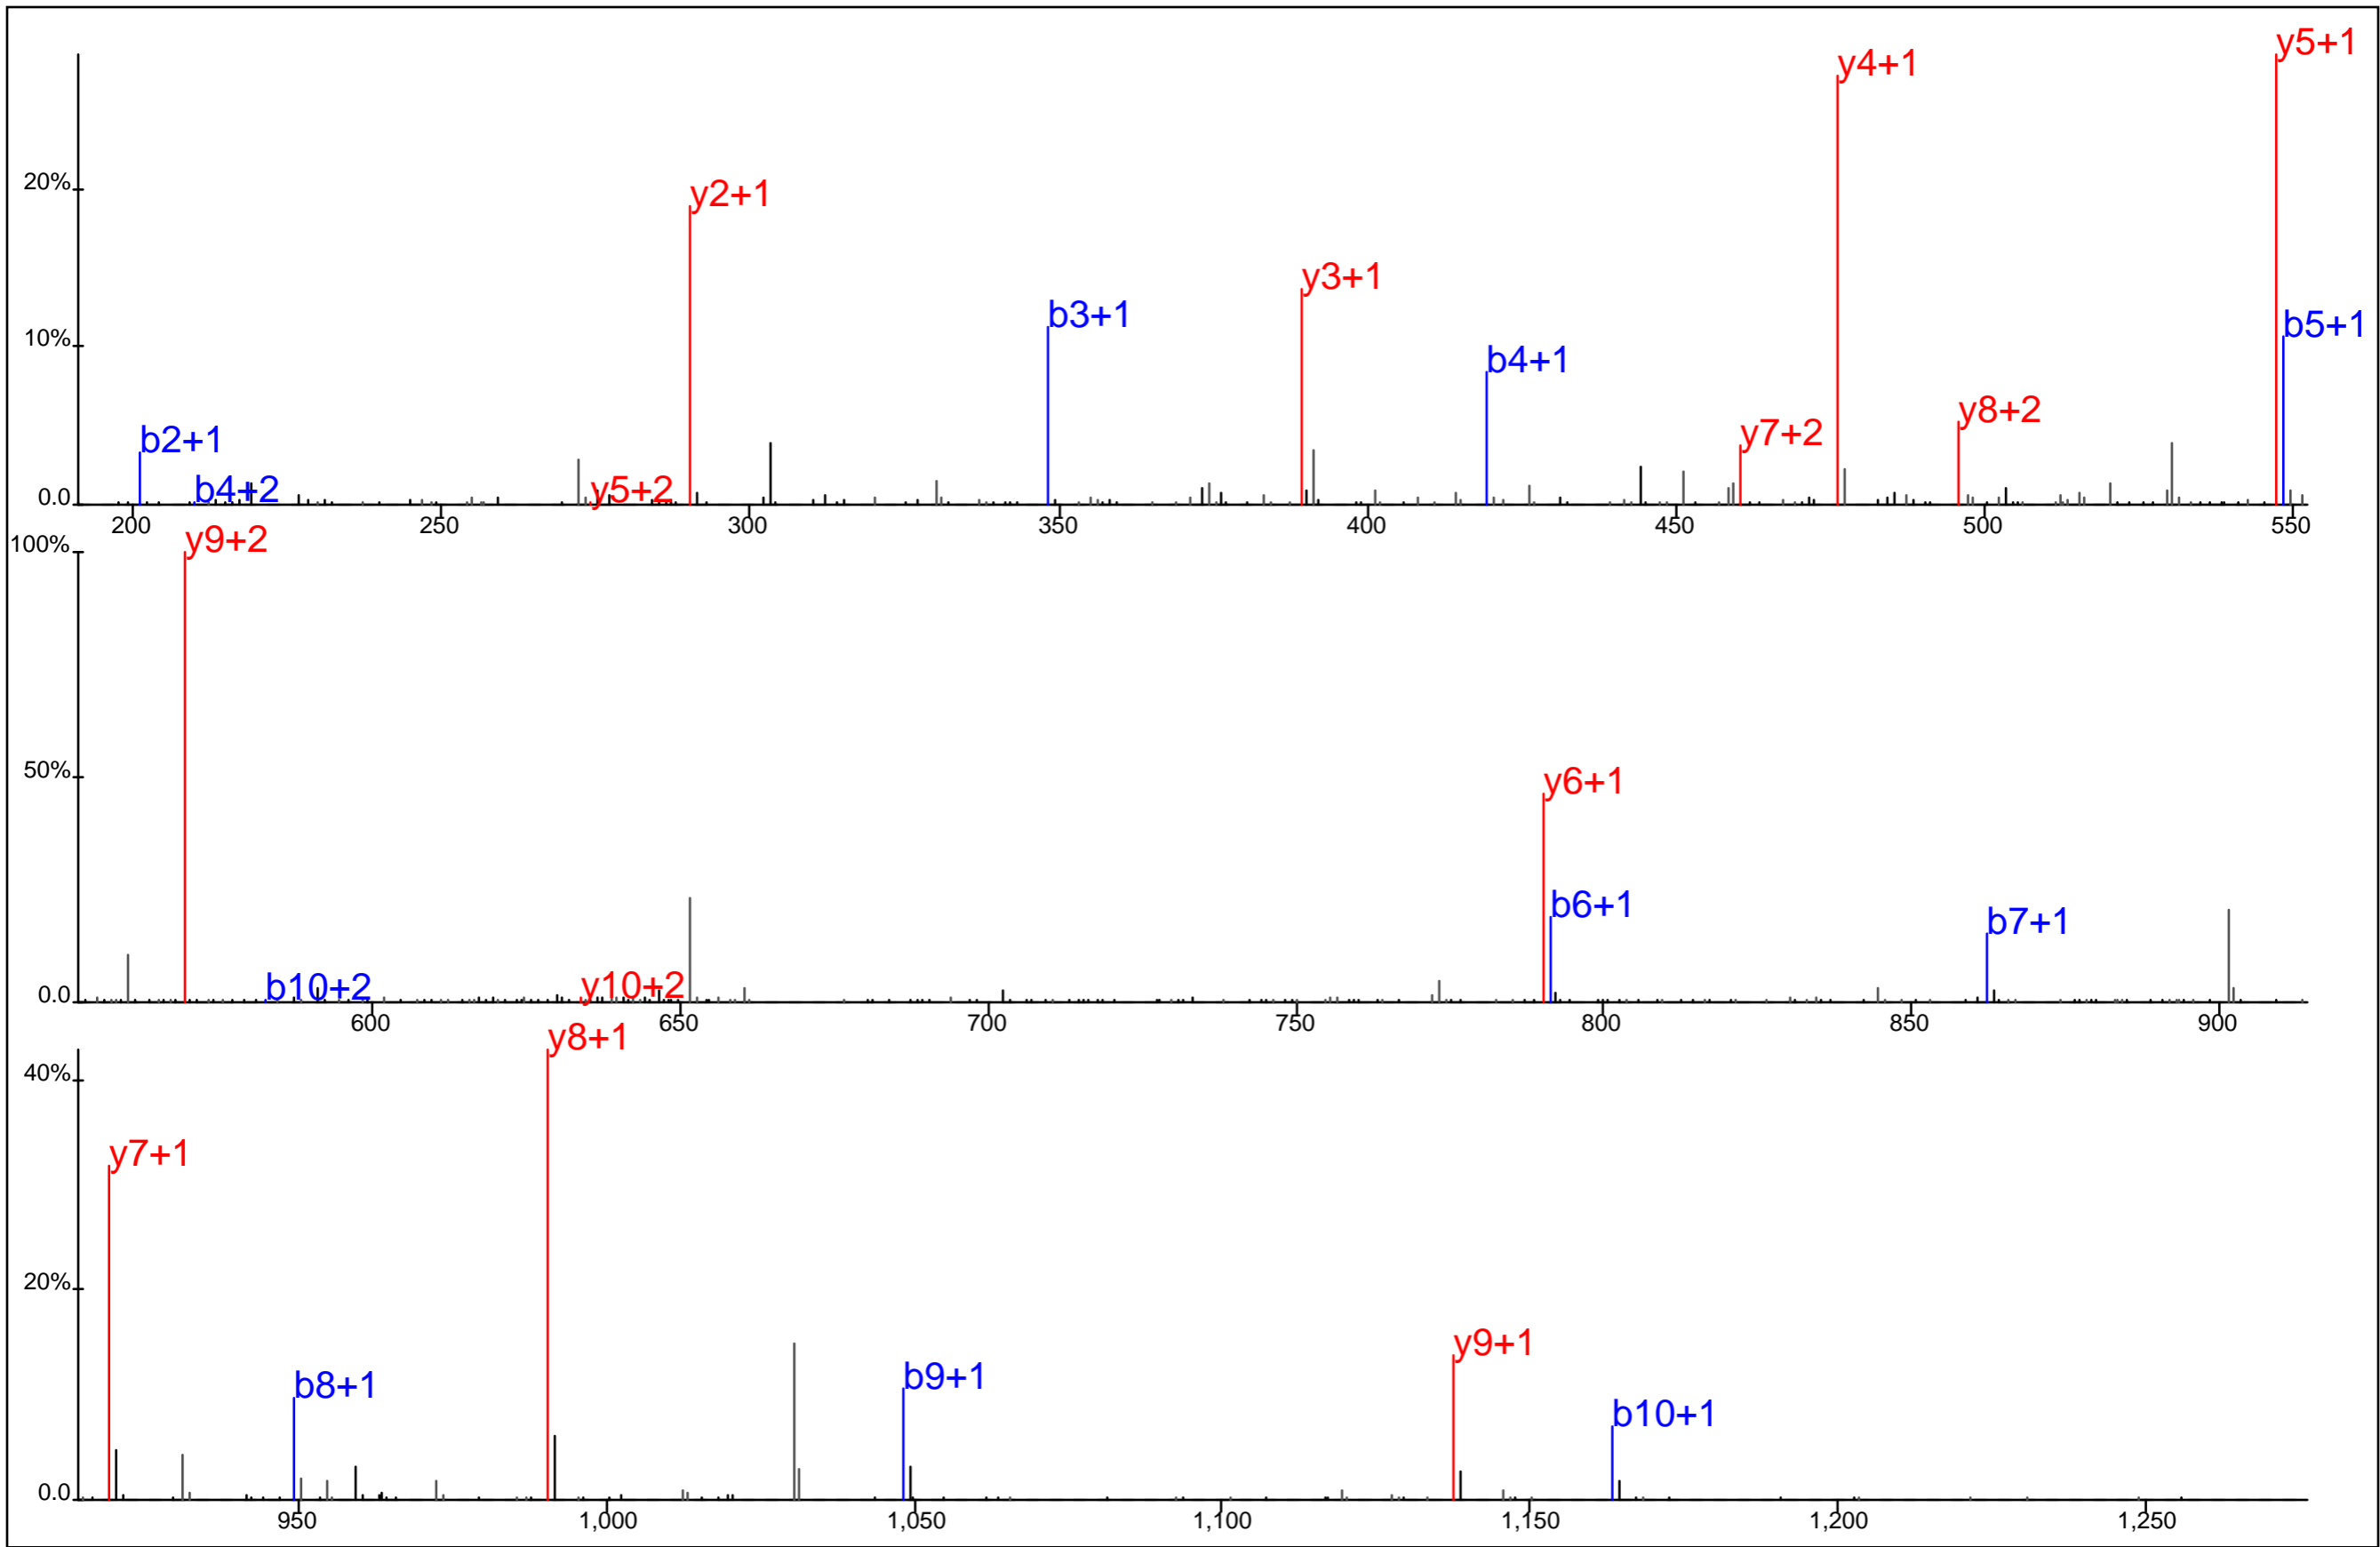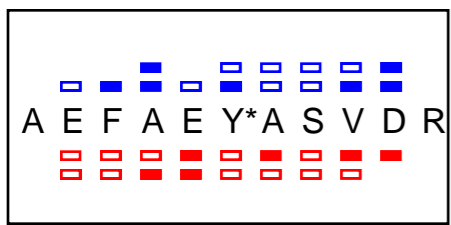

Protein Name: PAG  
 gi Accession: 7020925  
 Precursor Mass: 669.2745+2  
 Delta Mass: 0.574 ppm  
 XCorr: 81.32

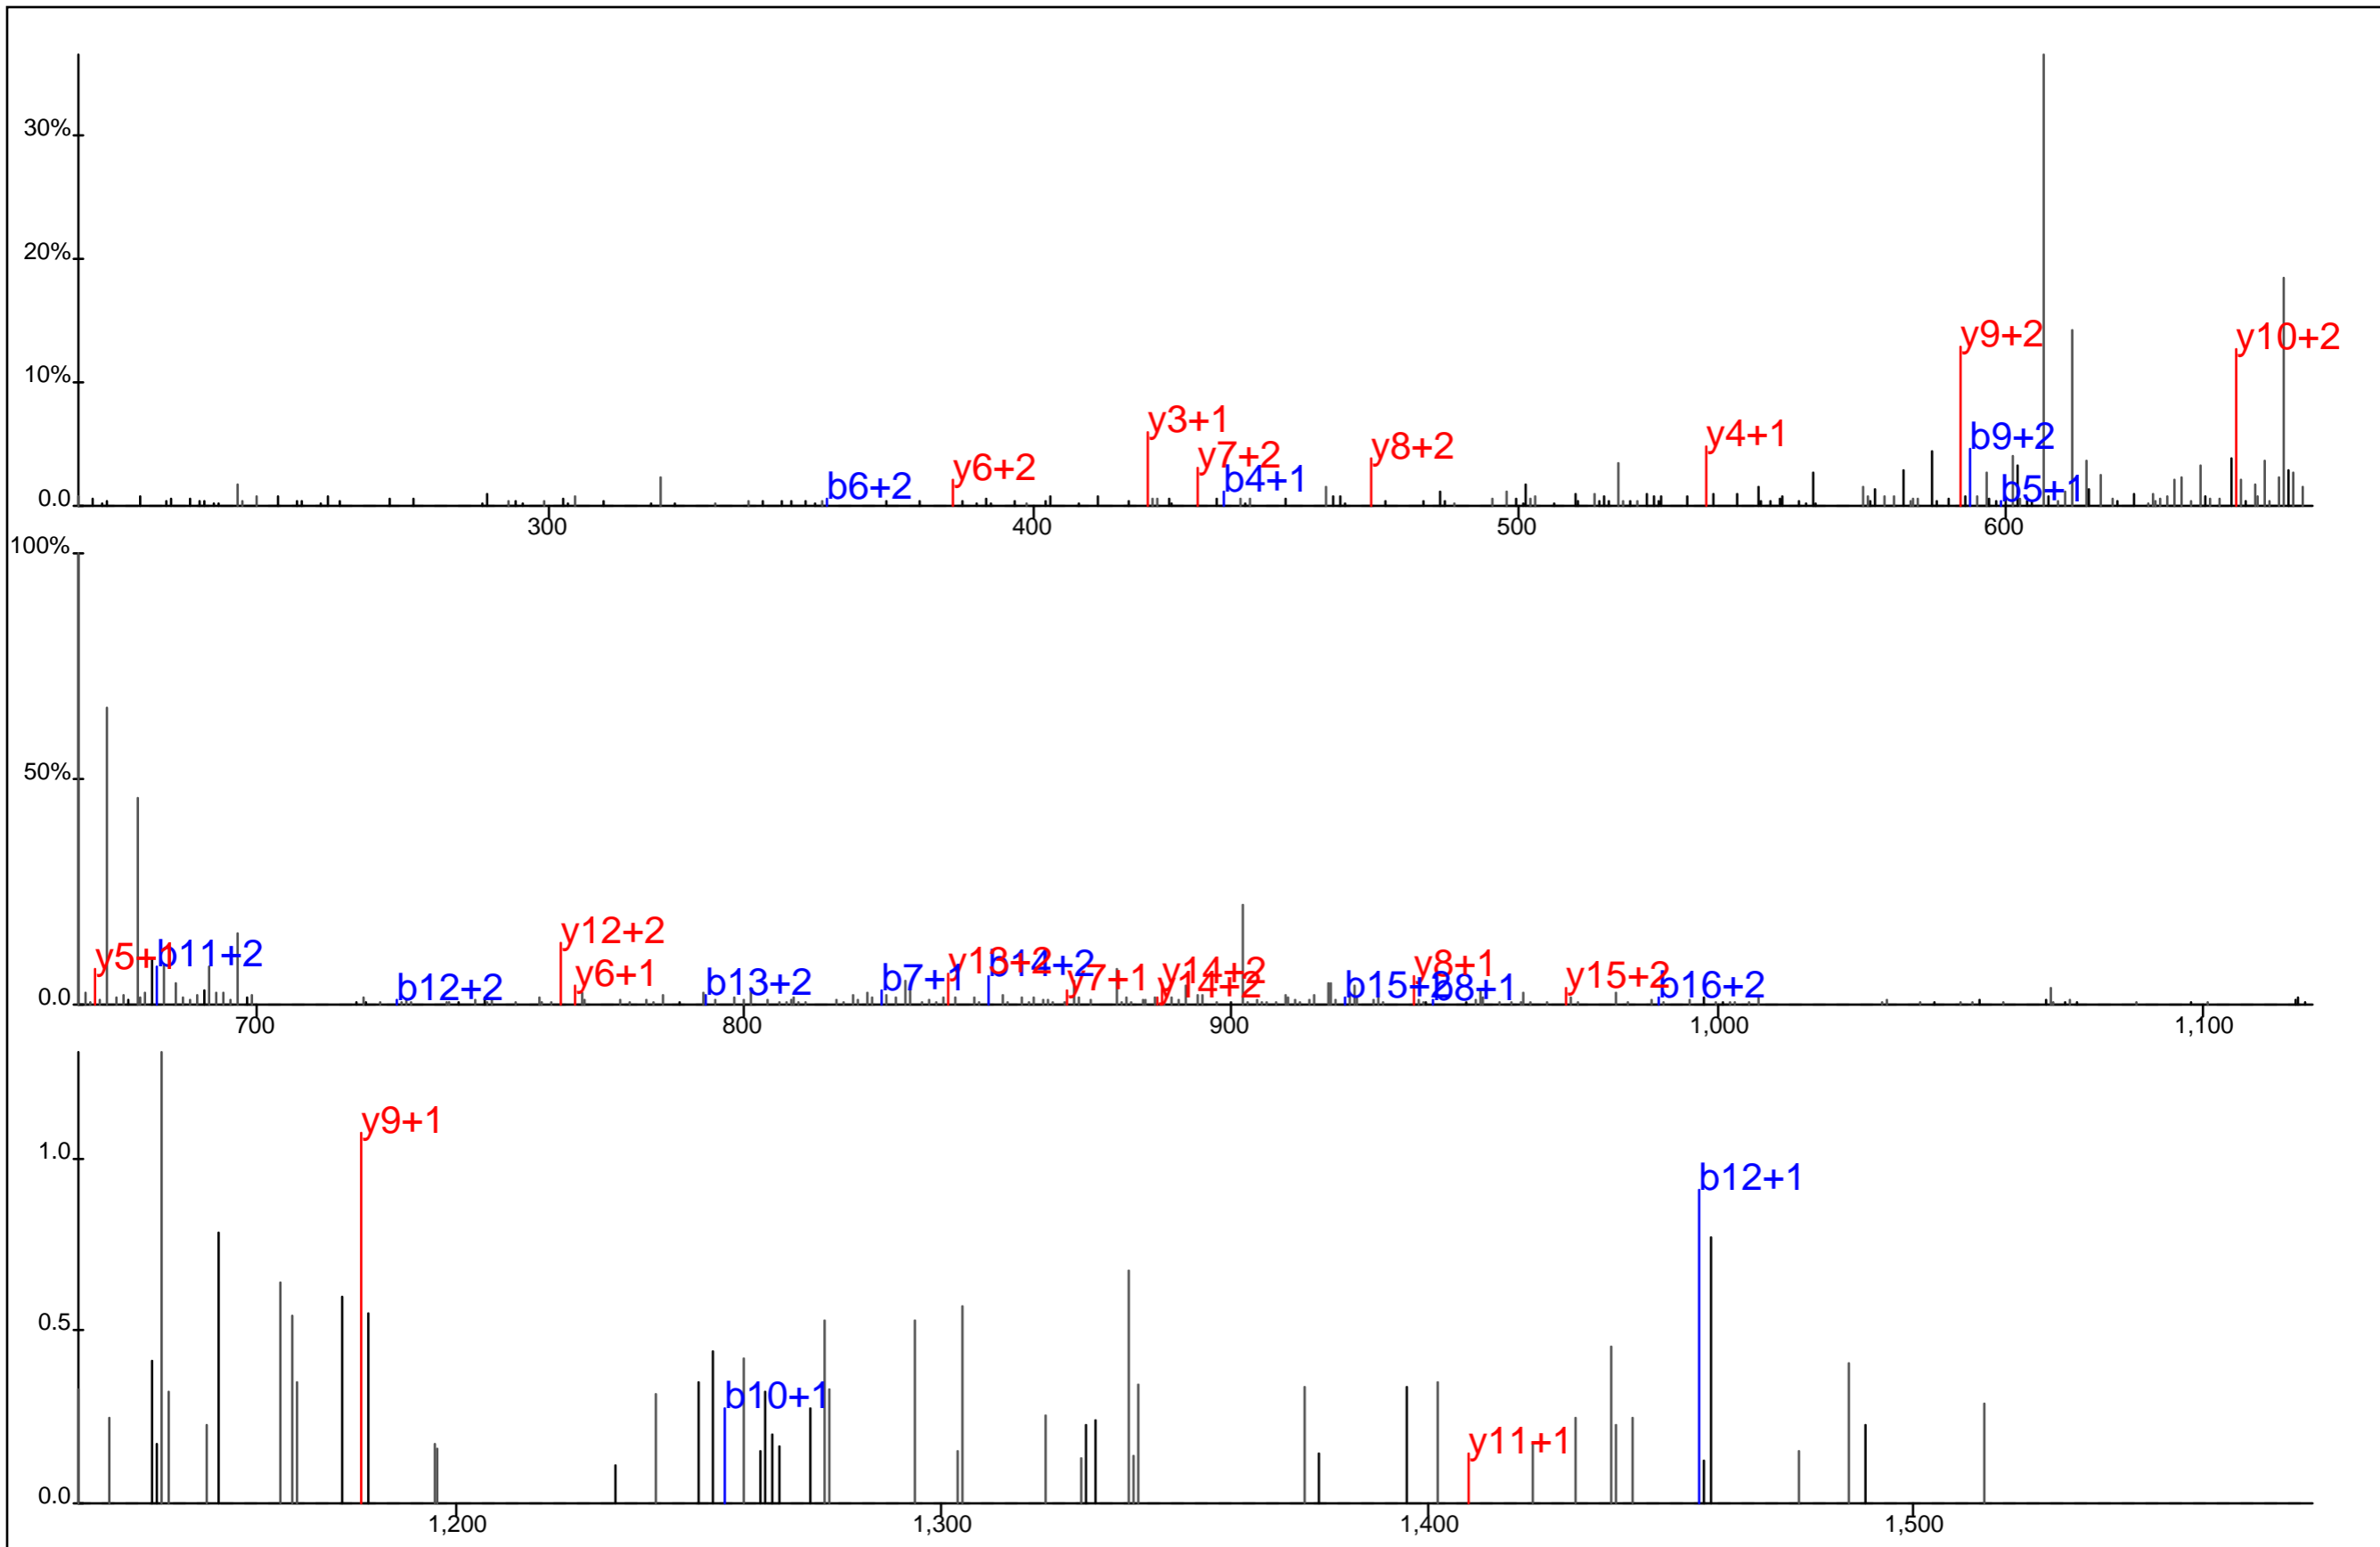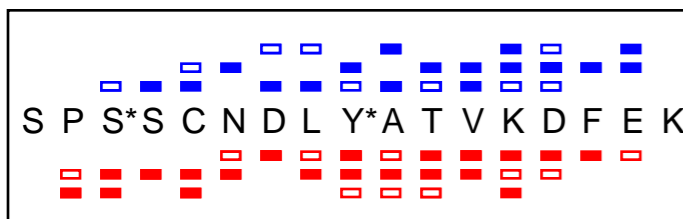

Protein Name: PAG  
 gi Accession: 7020925  
 Precursor Mass: 707.6172+3  
 Delta Mass: 4.096 ppm  
 XCorr: 26.71

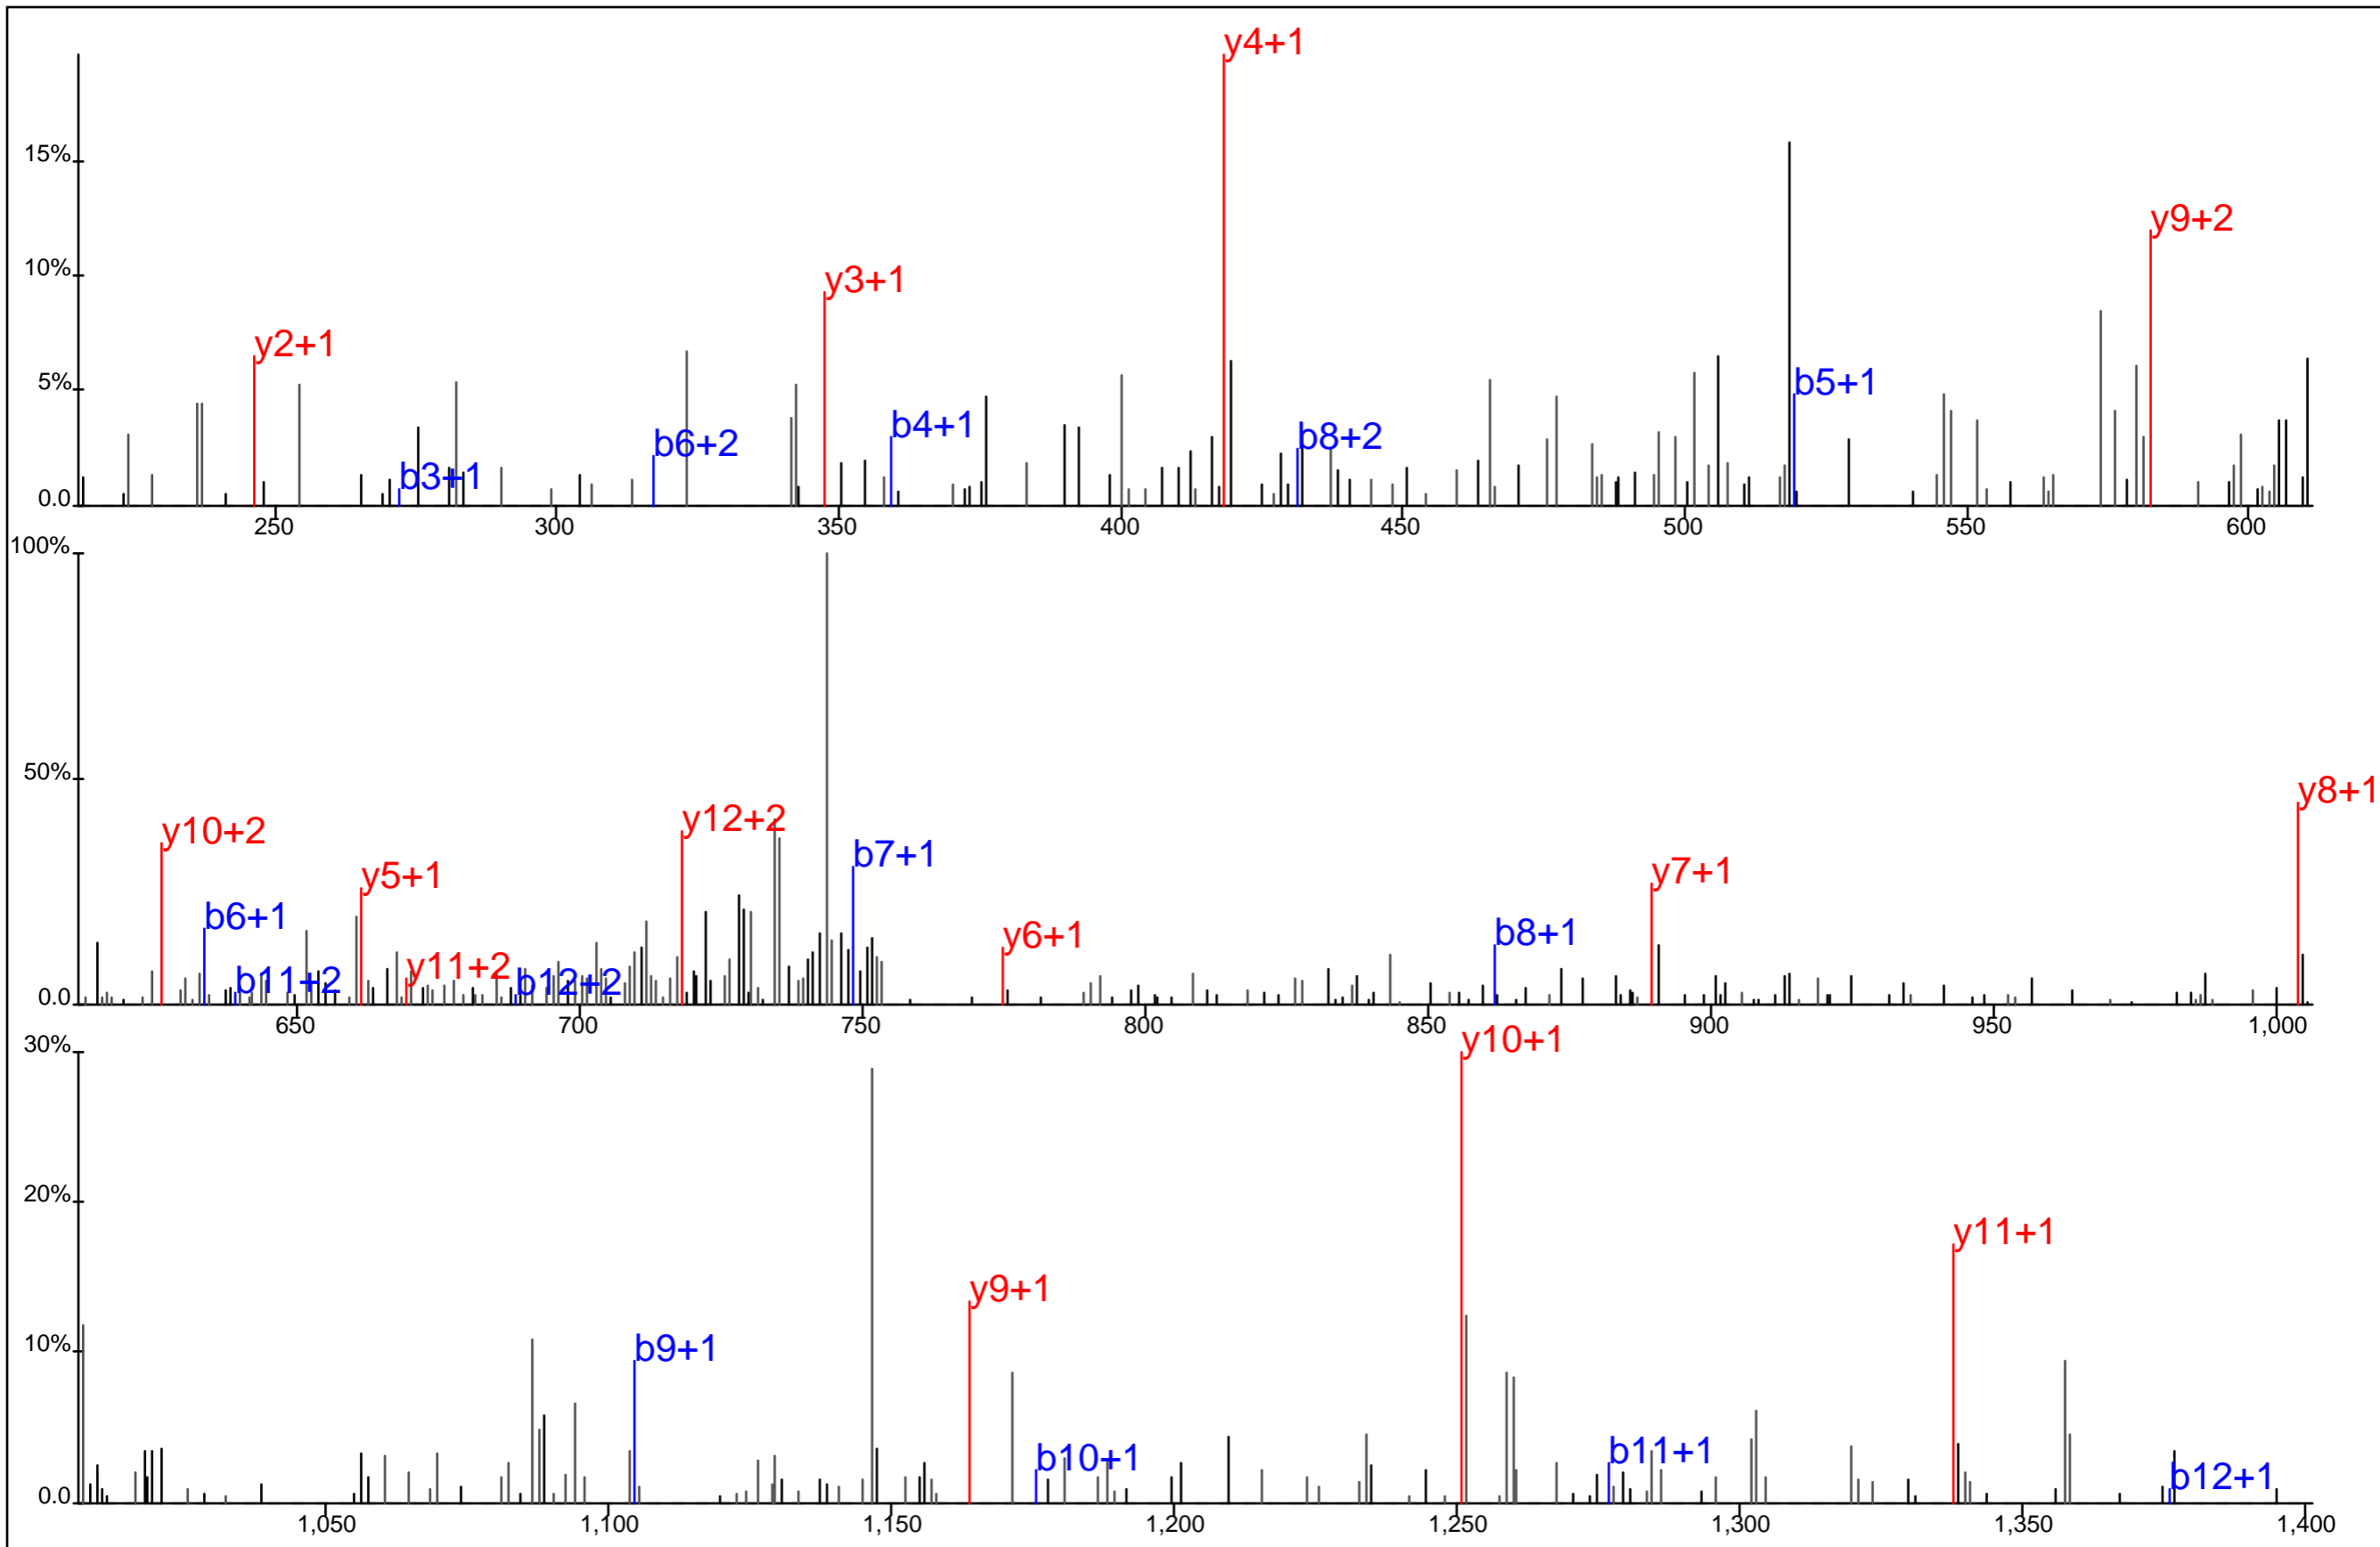

■ ■ ■ ■ ■ ■ ■ ■ ■ ■  
 S P S S C N D L Y\* A T V K  
□ □ □ □ □ □ □ □ □ □

Protein Name: PAG  
 gi Accession: 7020925  
 Precursor Mass: 761.3217+2  
 Delta Mass: 4.566 ppm  
 XCorr: 61.17





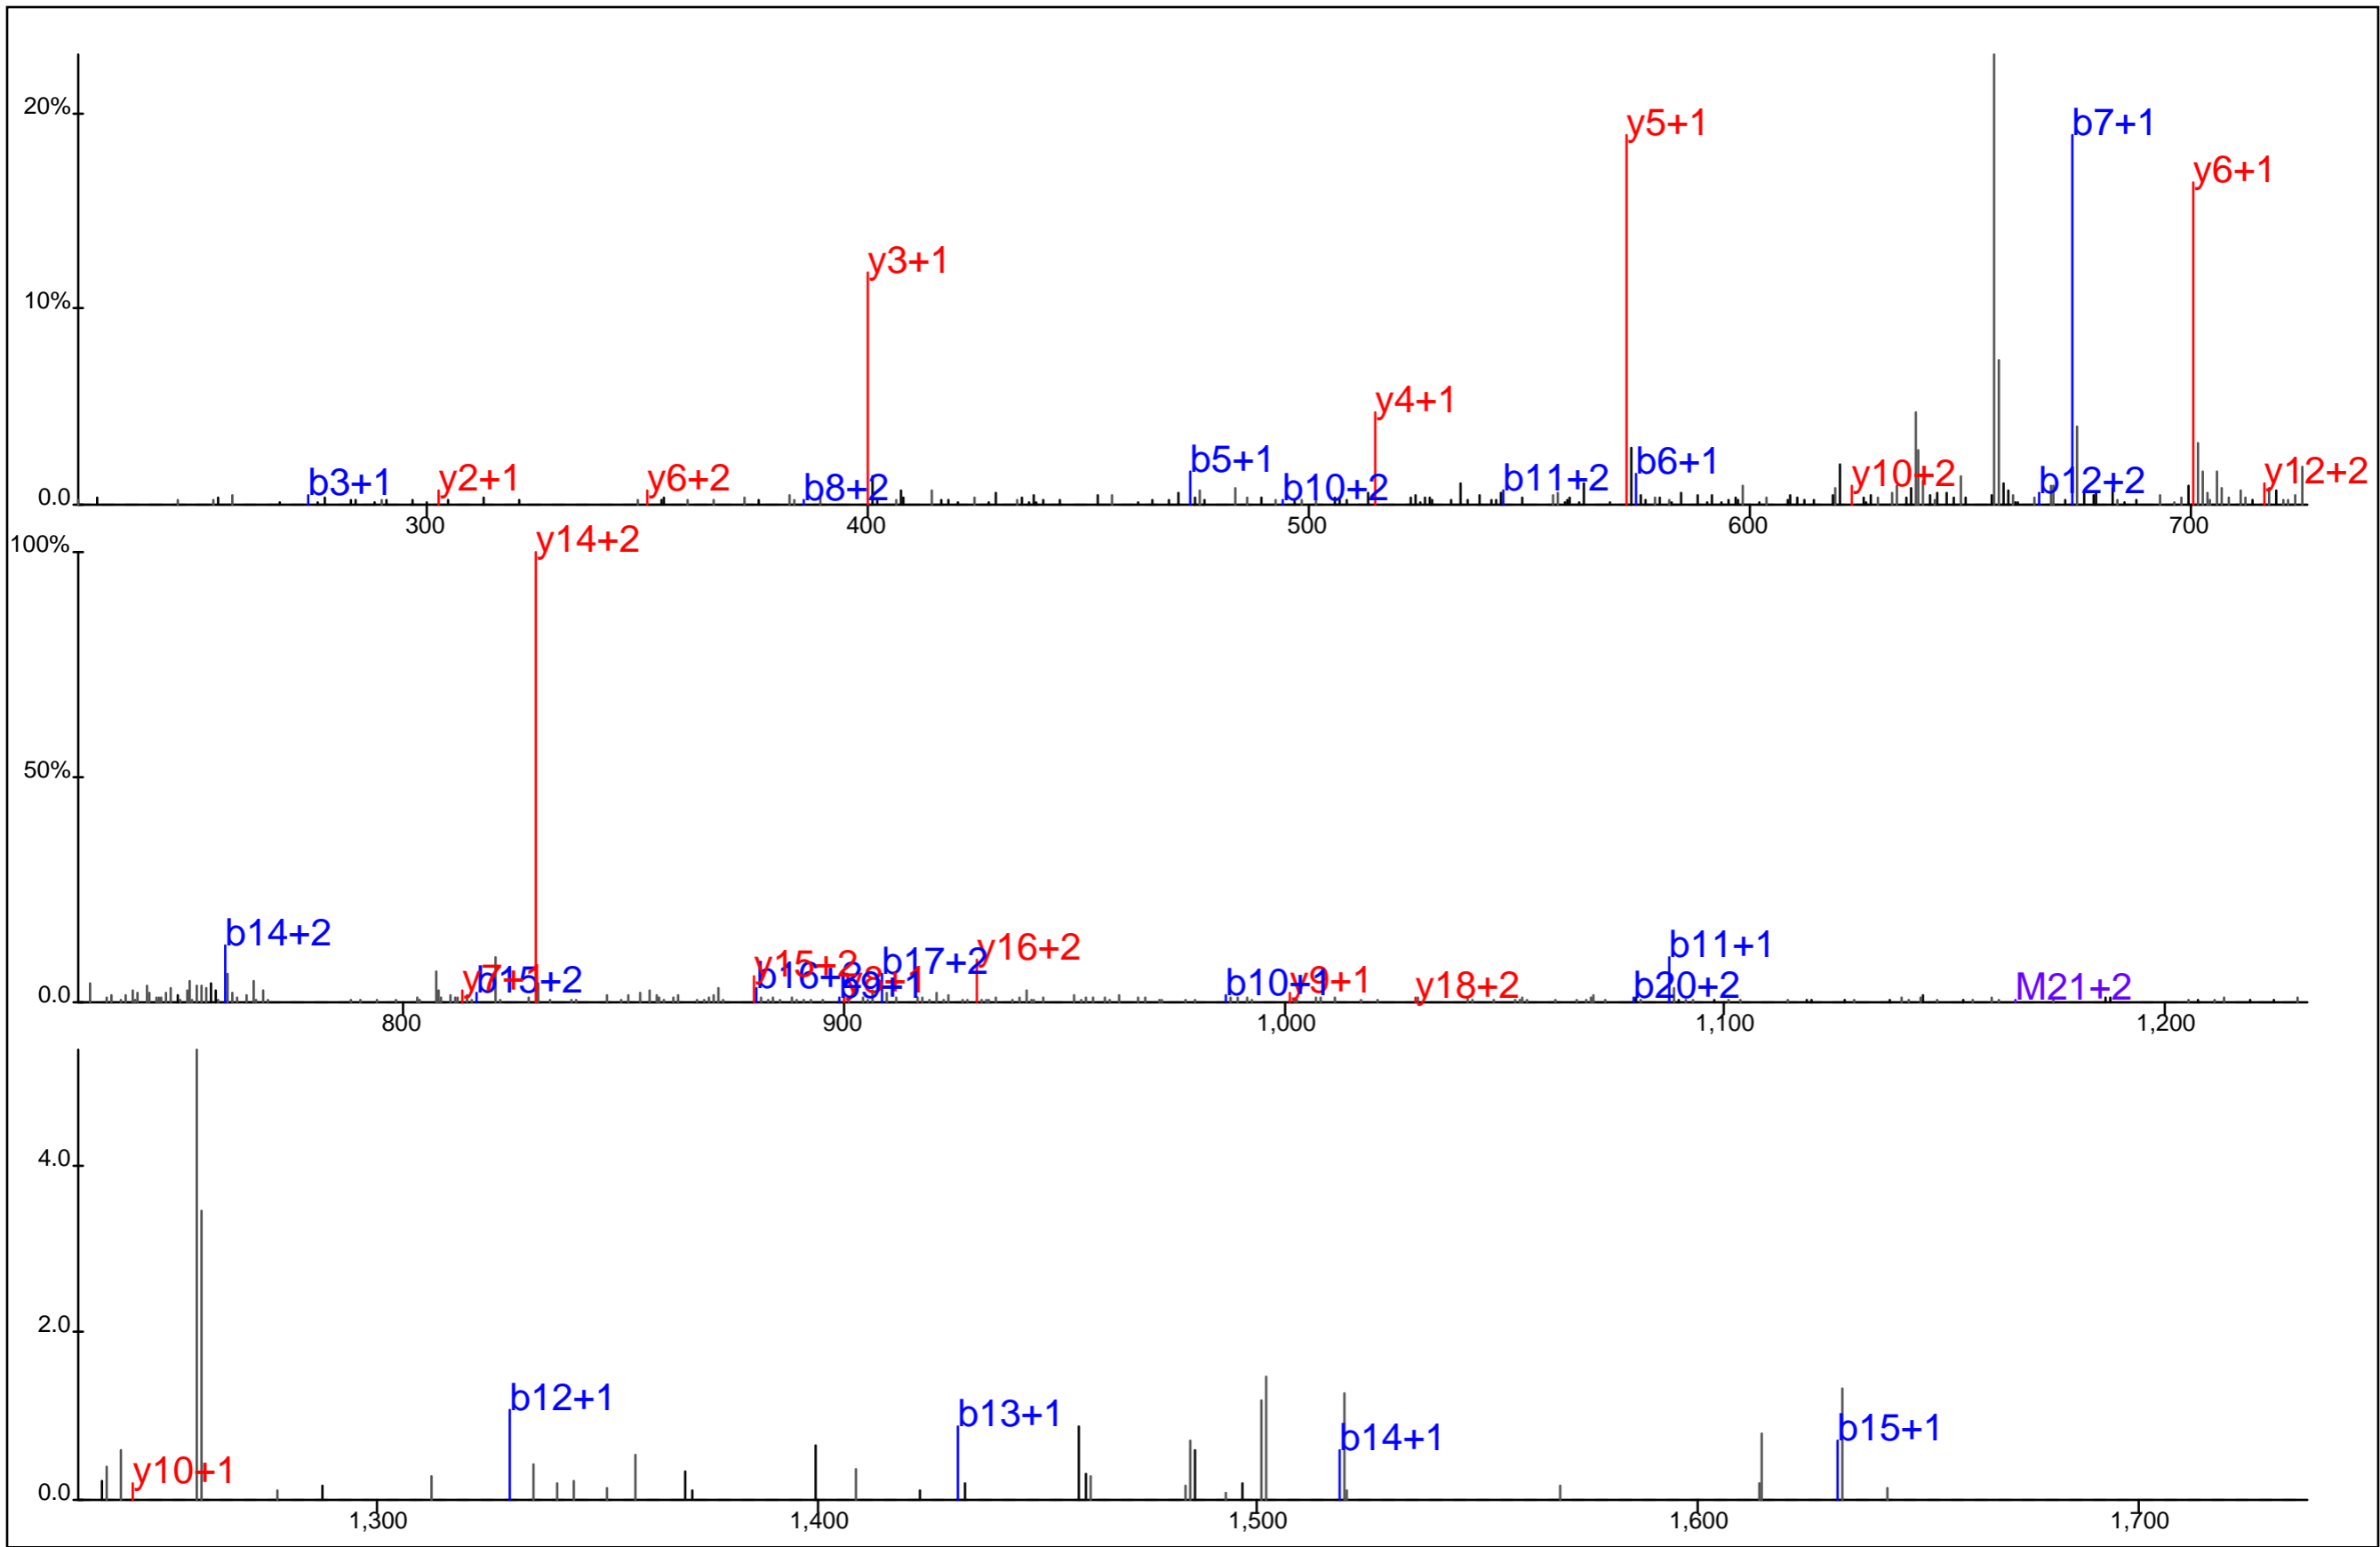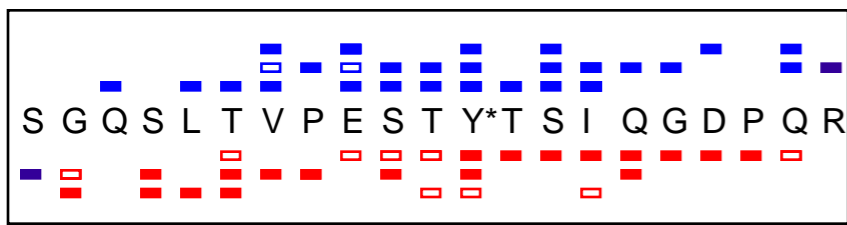

Protein Name: PAG  
 gi Accession: 7020925  
 Precursor Mass: 777.6895+3  
 Delta Mass: 1.621 ppm  
 XCorr: 35.28

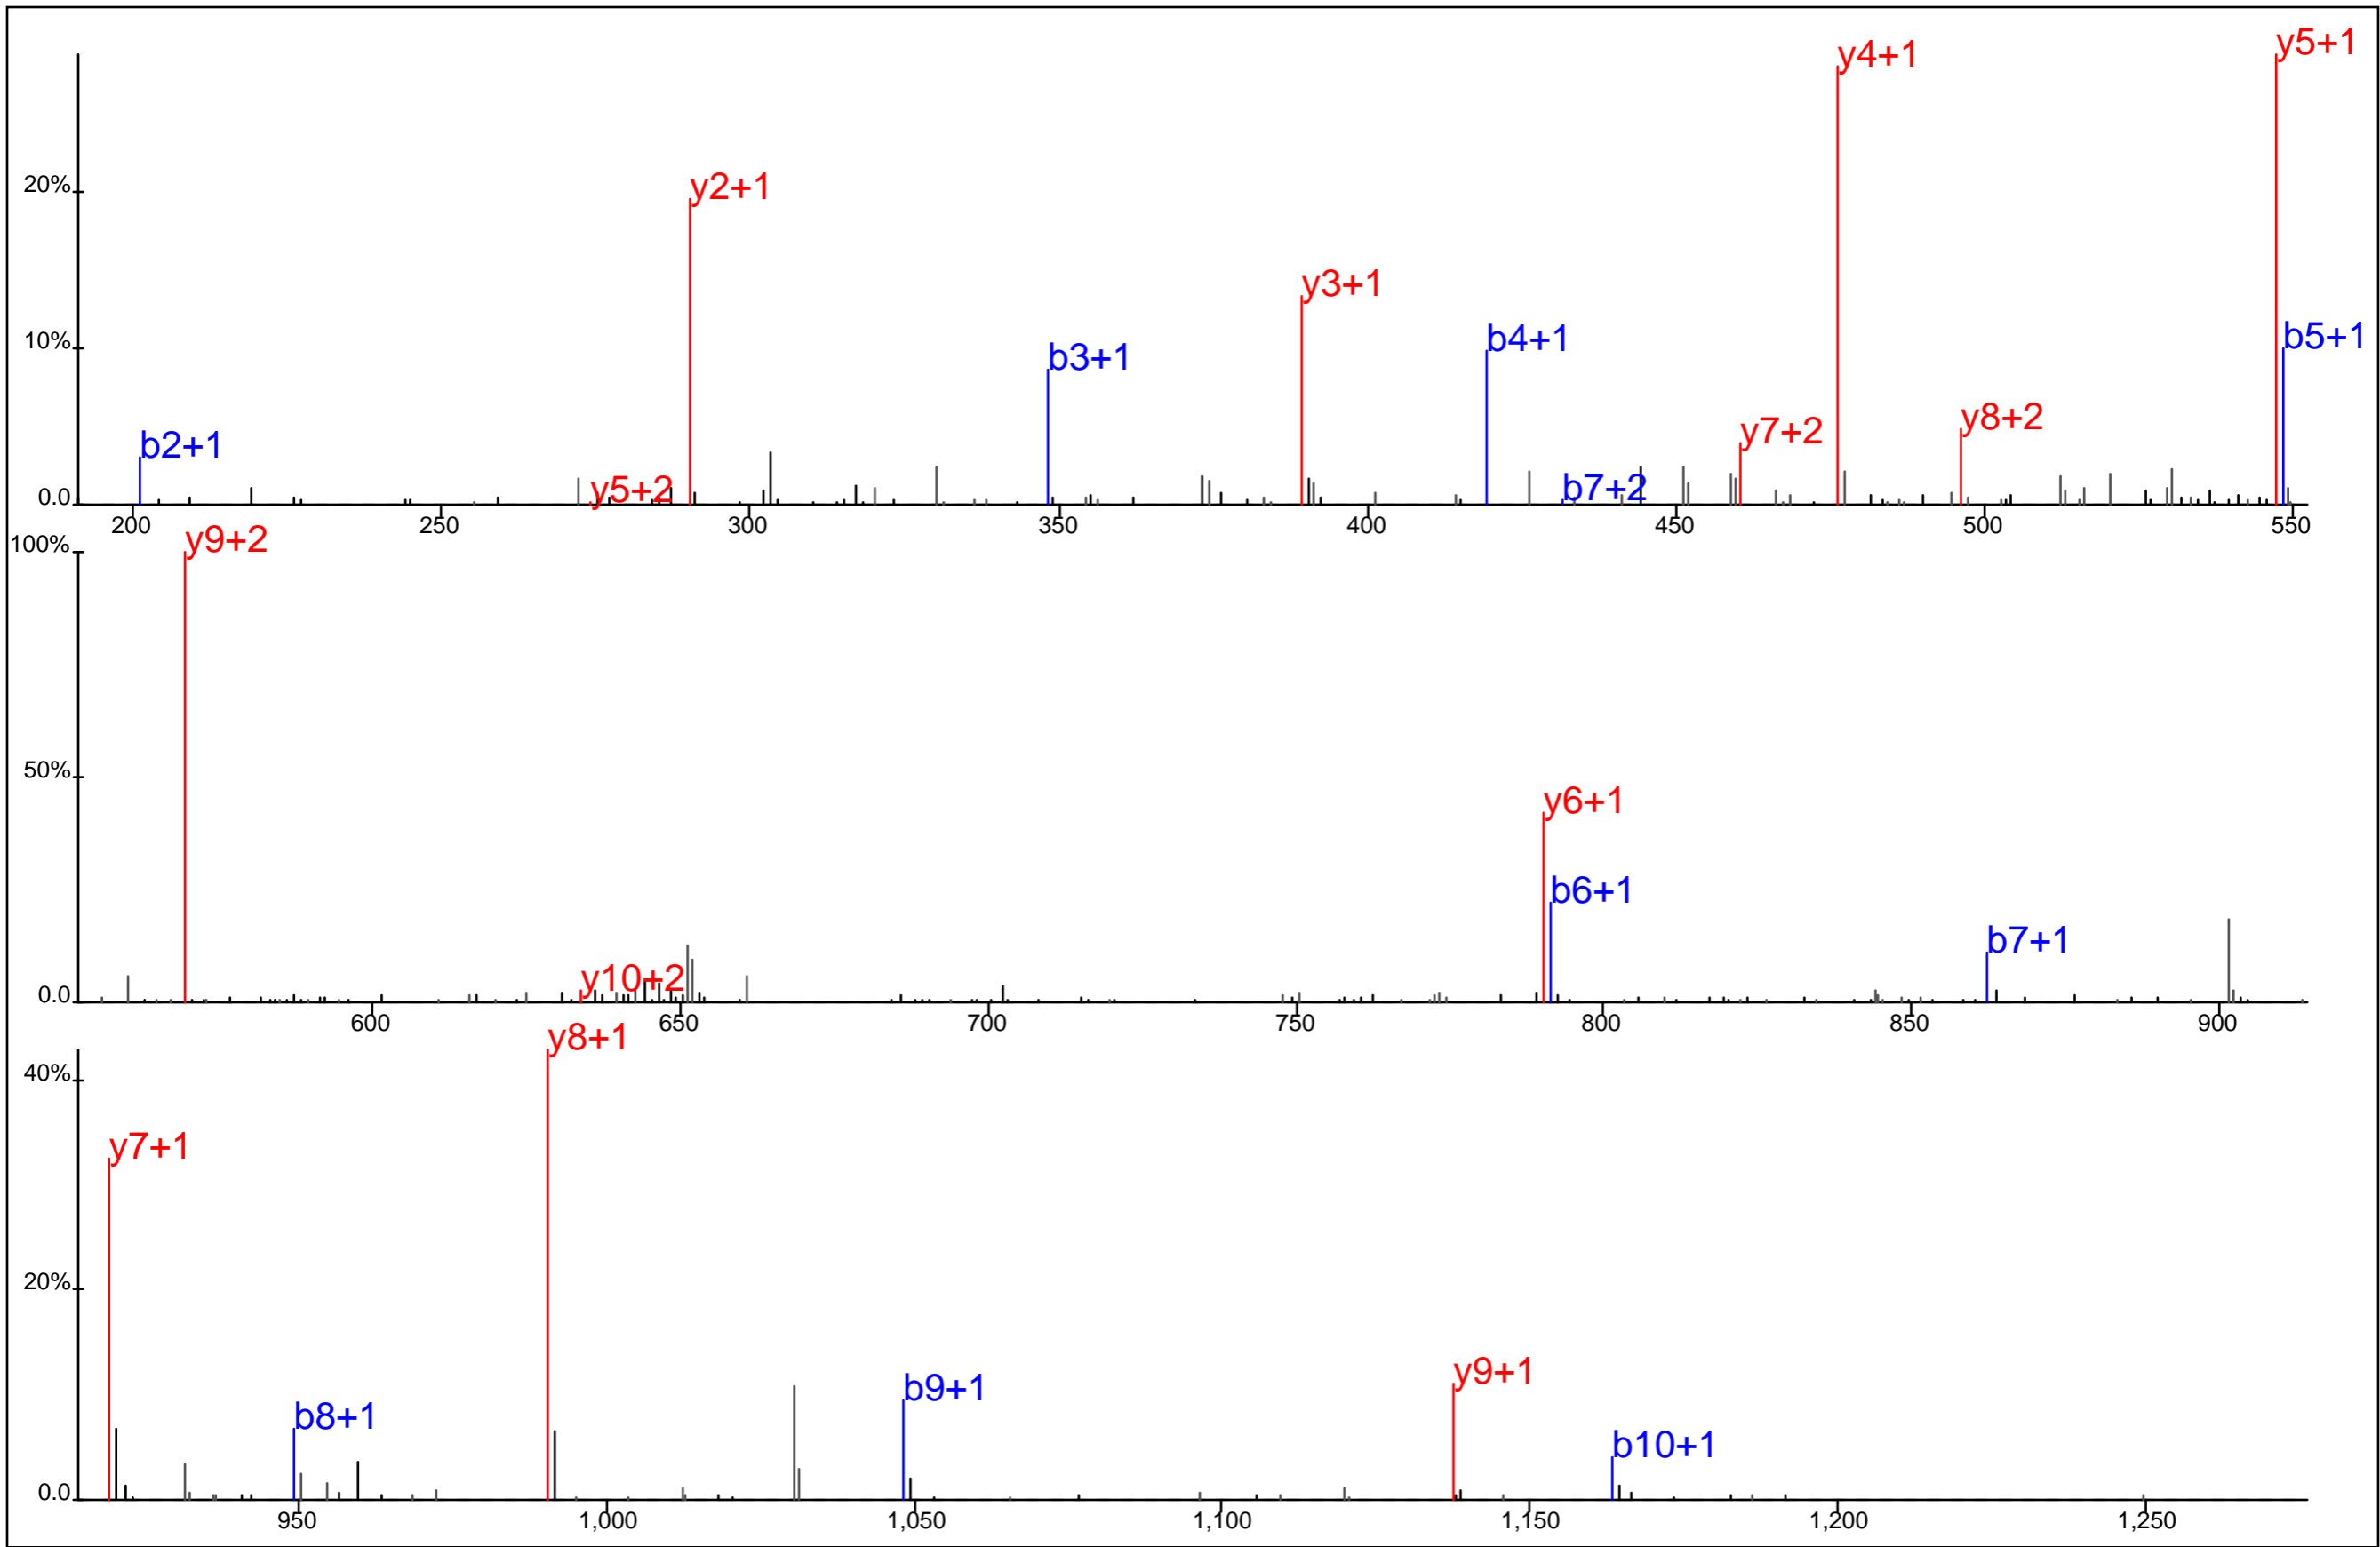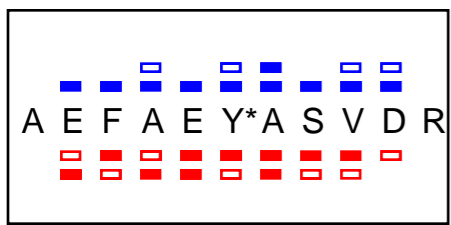

Protein Name: PAG  
 gi Accession: 7020925  
 Precursor Mass: 669.2748+2  
 Delta Mass: 1.127 ppm  
 XCorr: 77.03

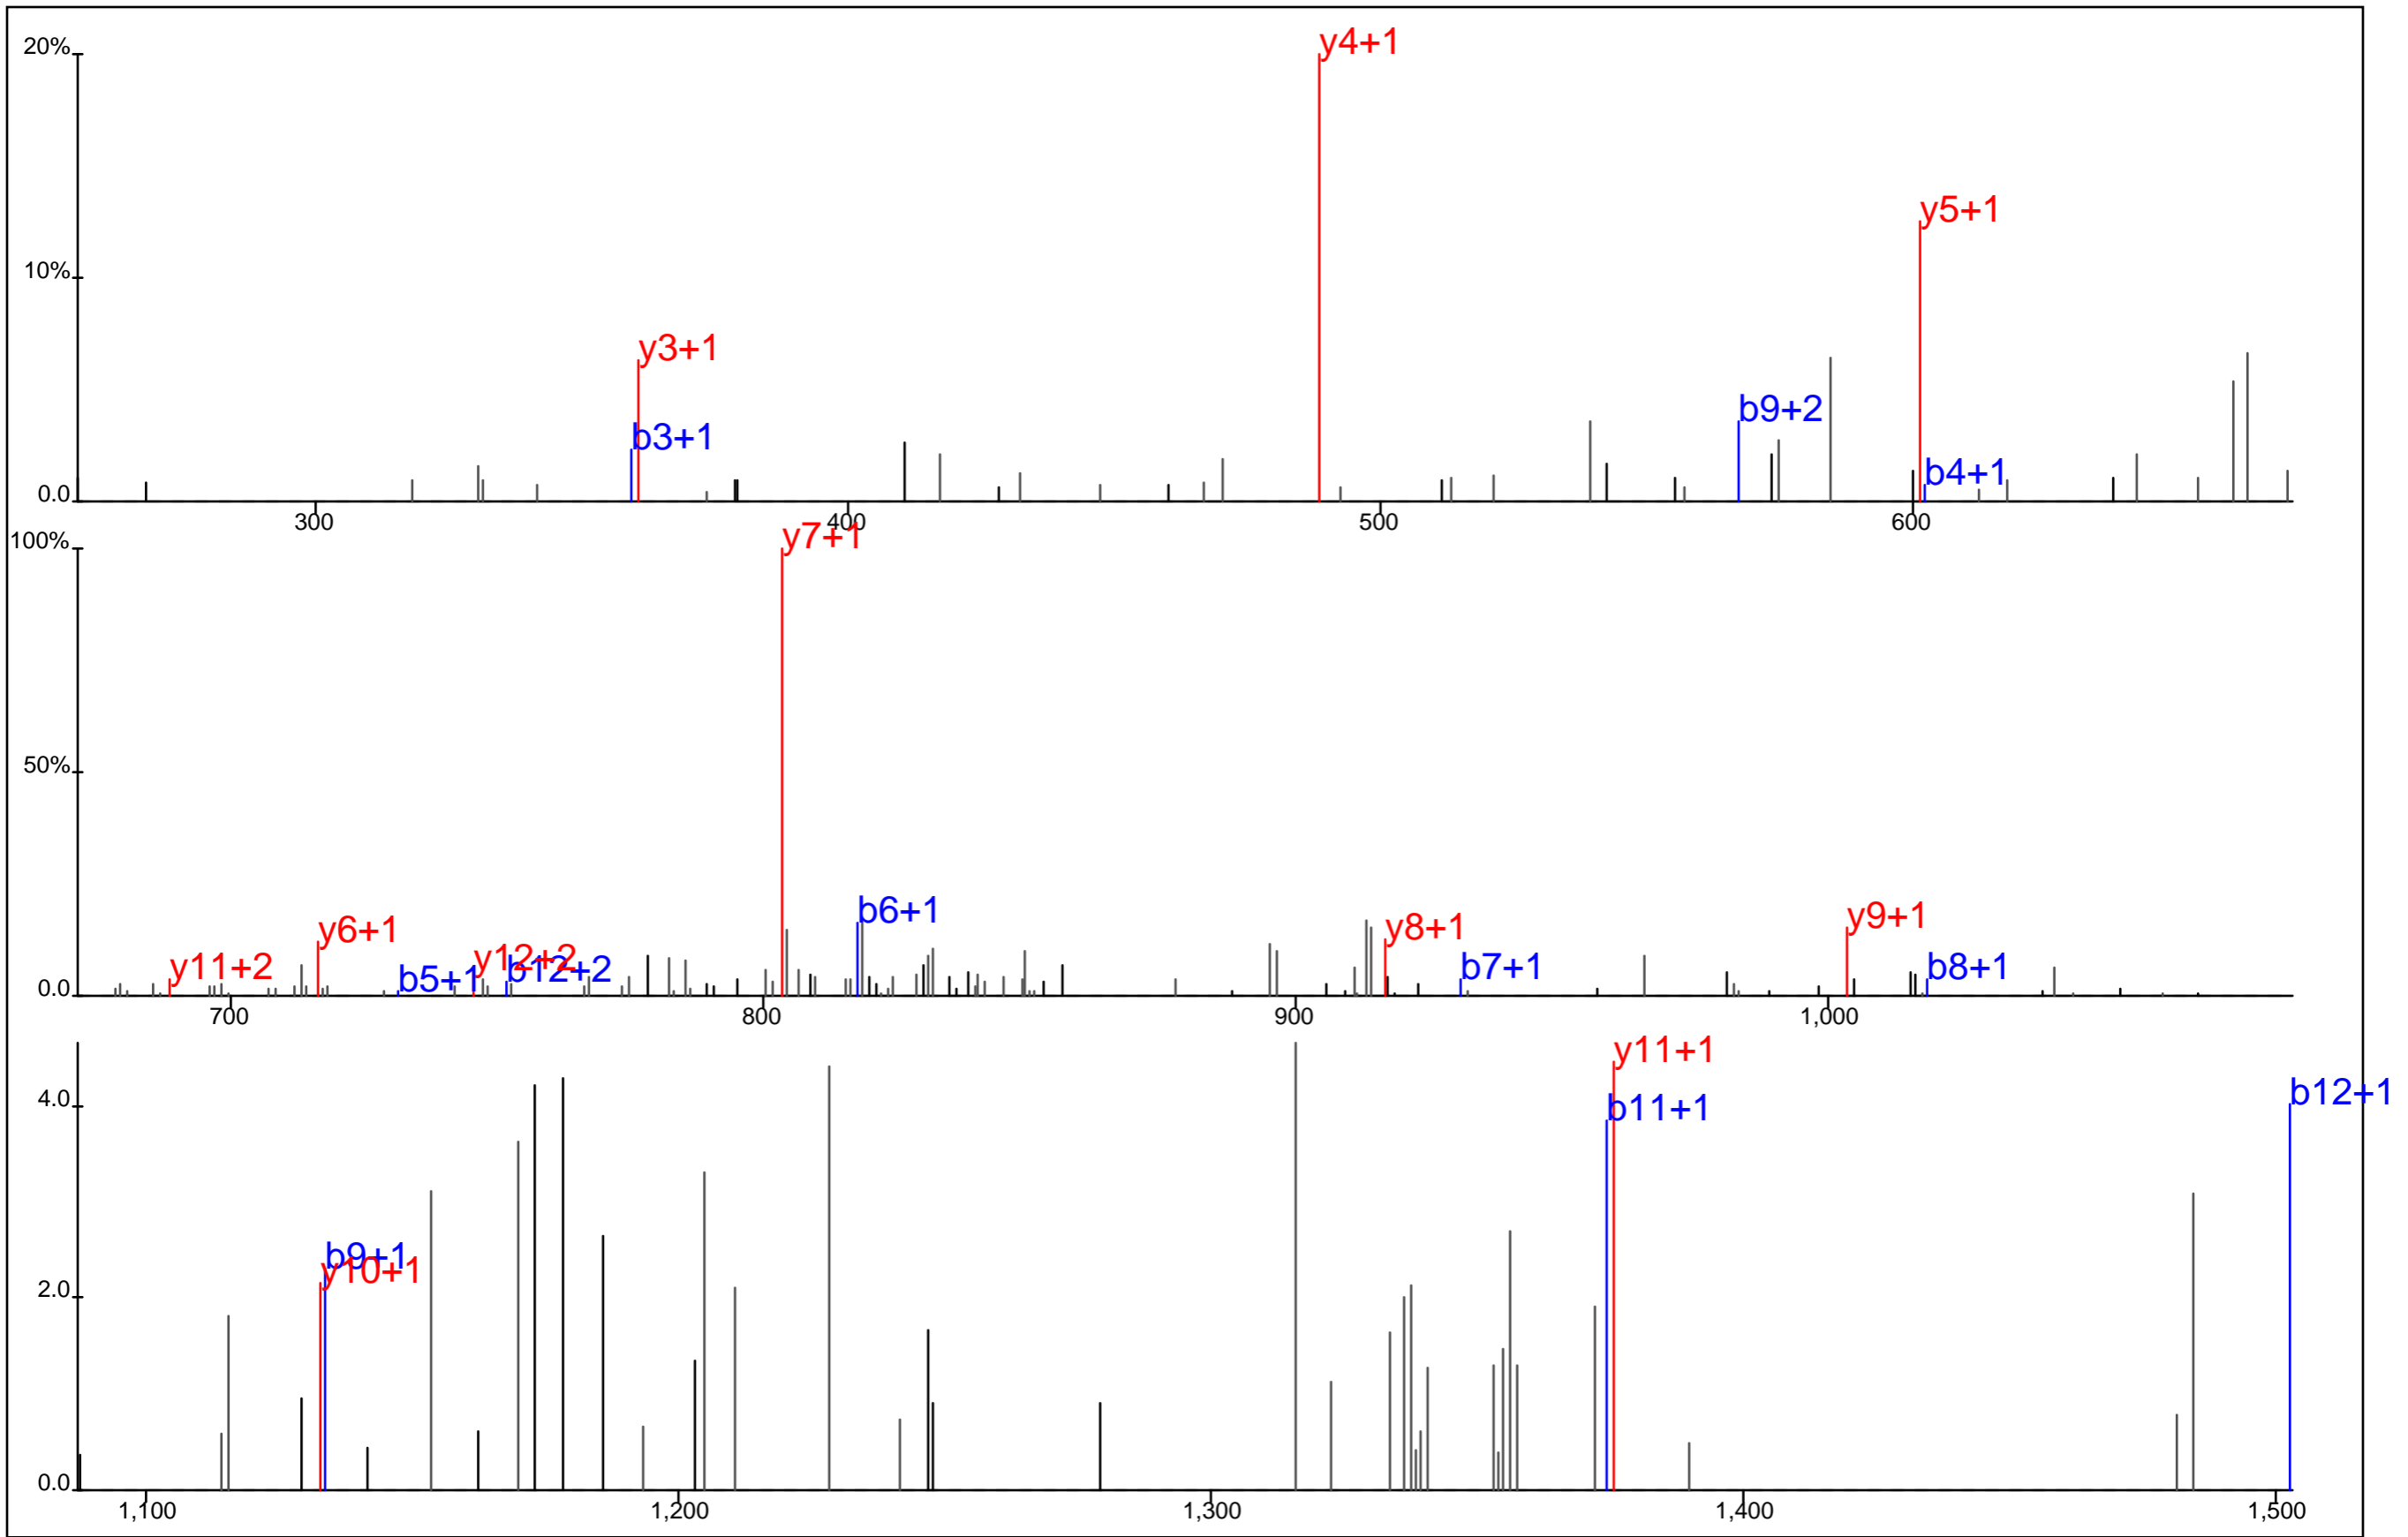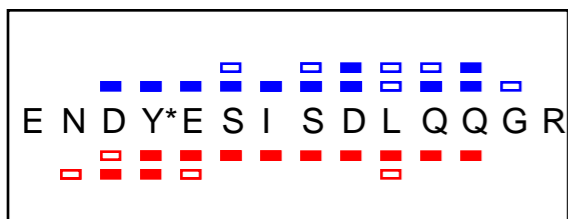

Protein Name: PAG  
 gi Accession: 7020925  
 Precursor Mass: 867.3591+2  
 Delta Mass: 5.467 ppm  
 XCorr: 51.08

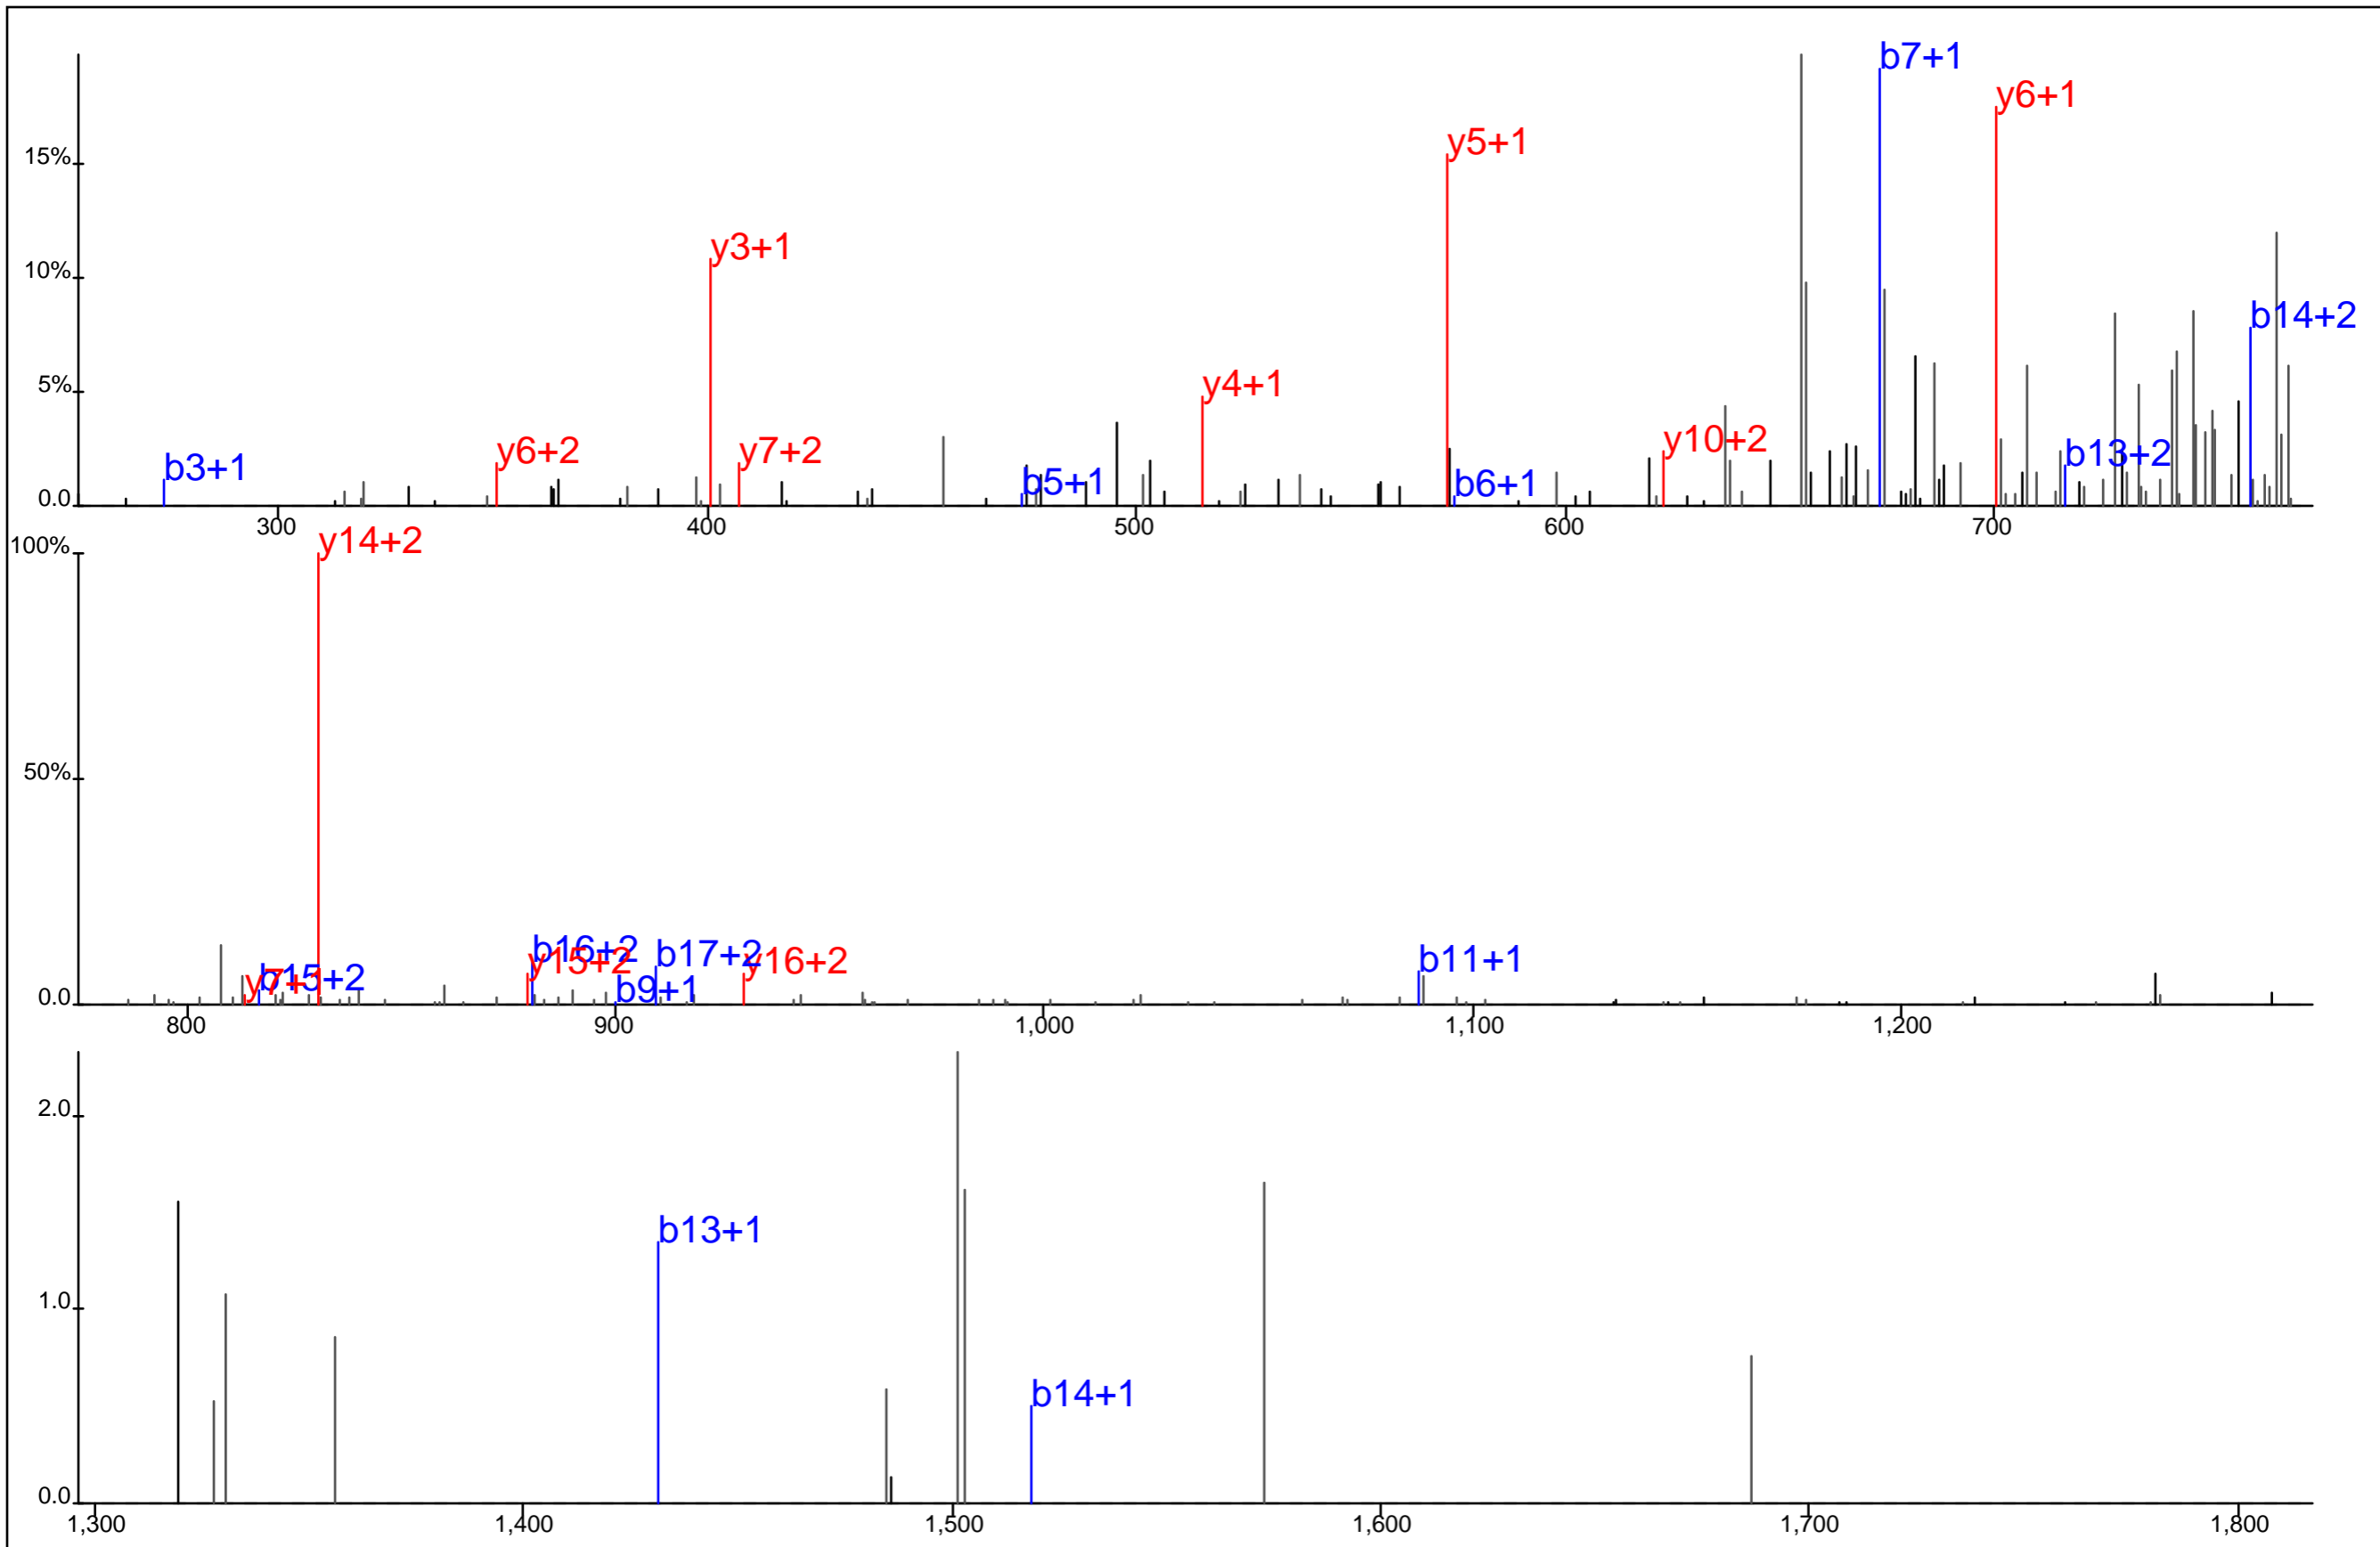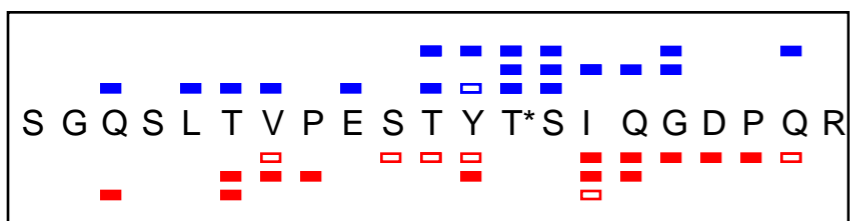

Protein Name: PAG  
 gi Accession: 7020925  
 Precursor Mass: 777.6898+3  
 Delta Mass: 2.011 ppm  
 XCorr: 28.85

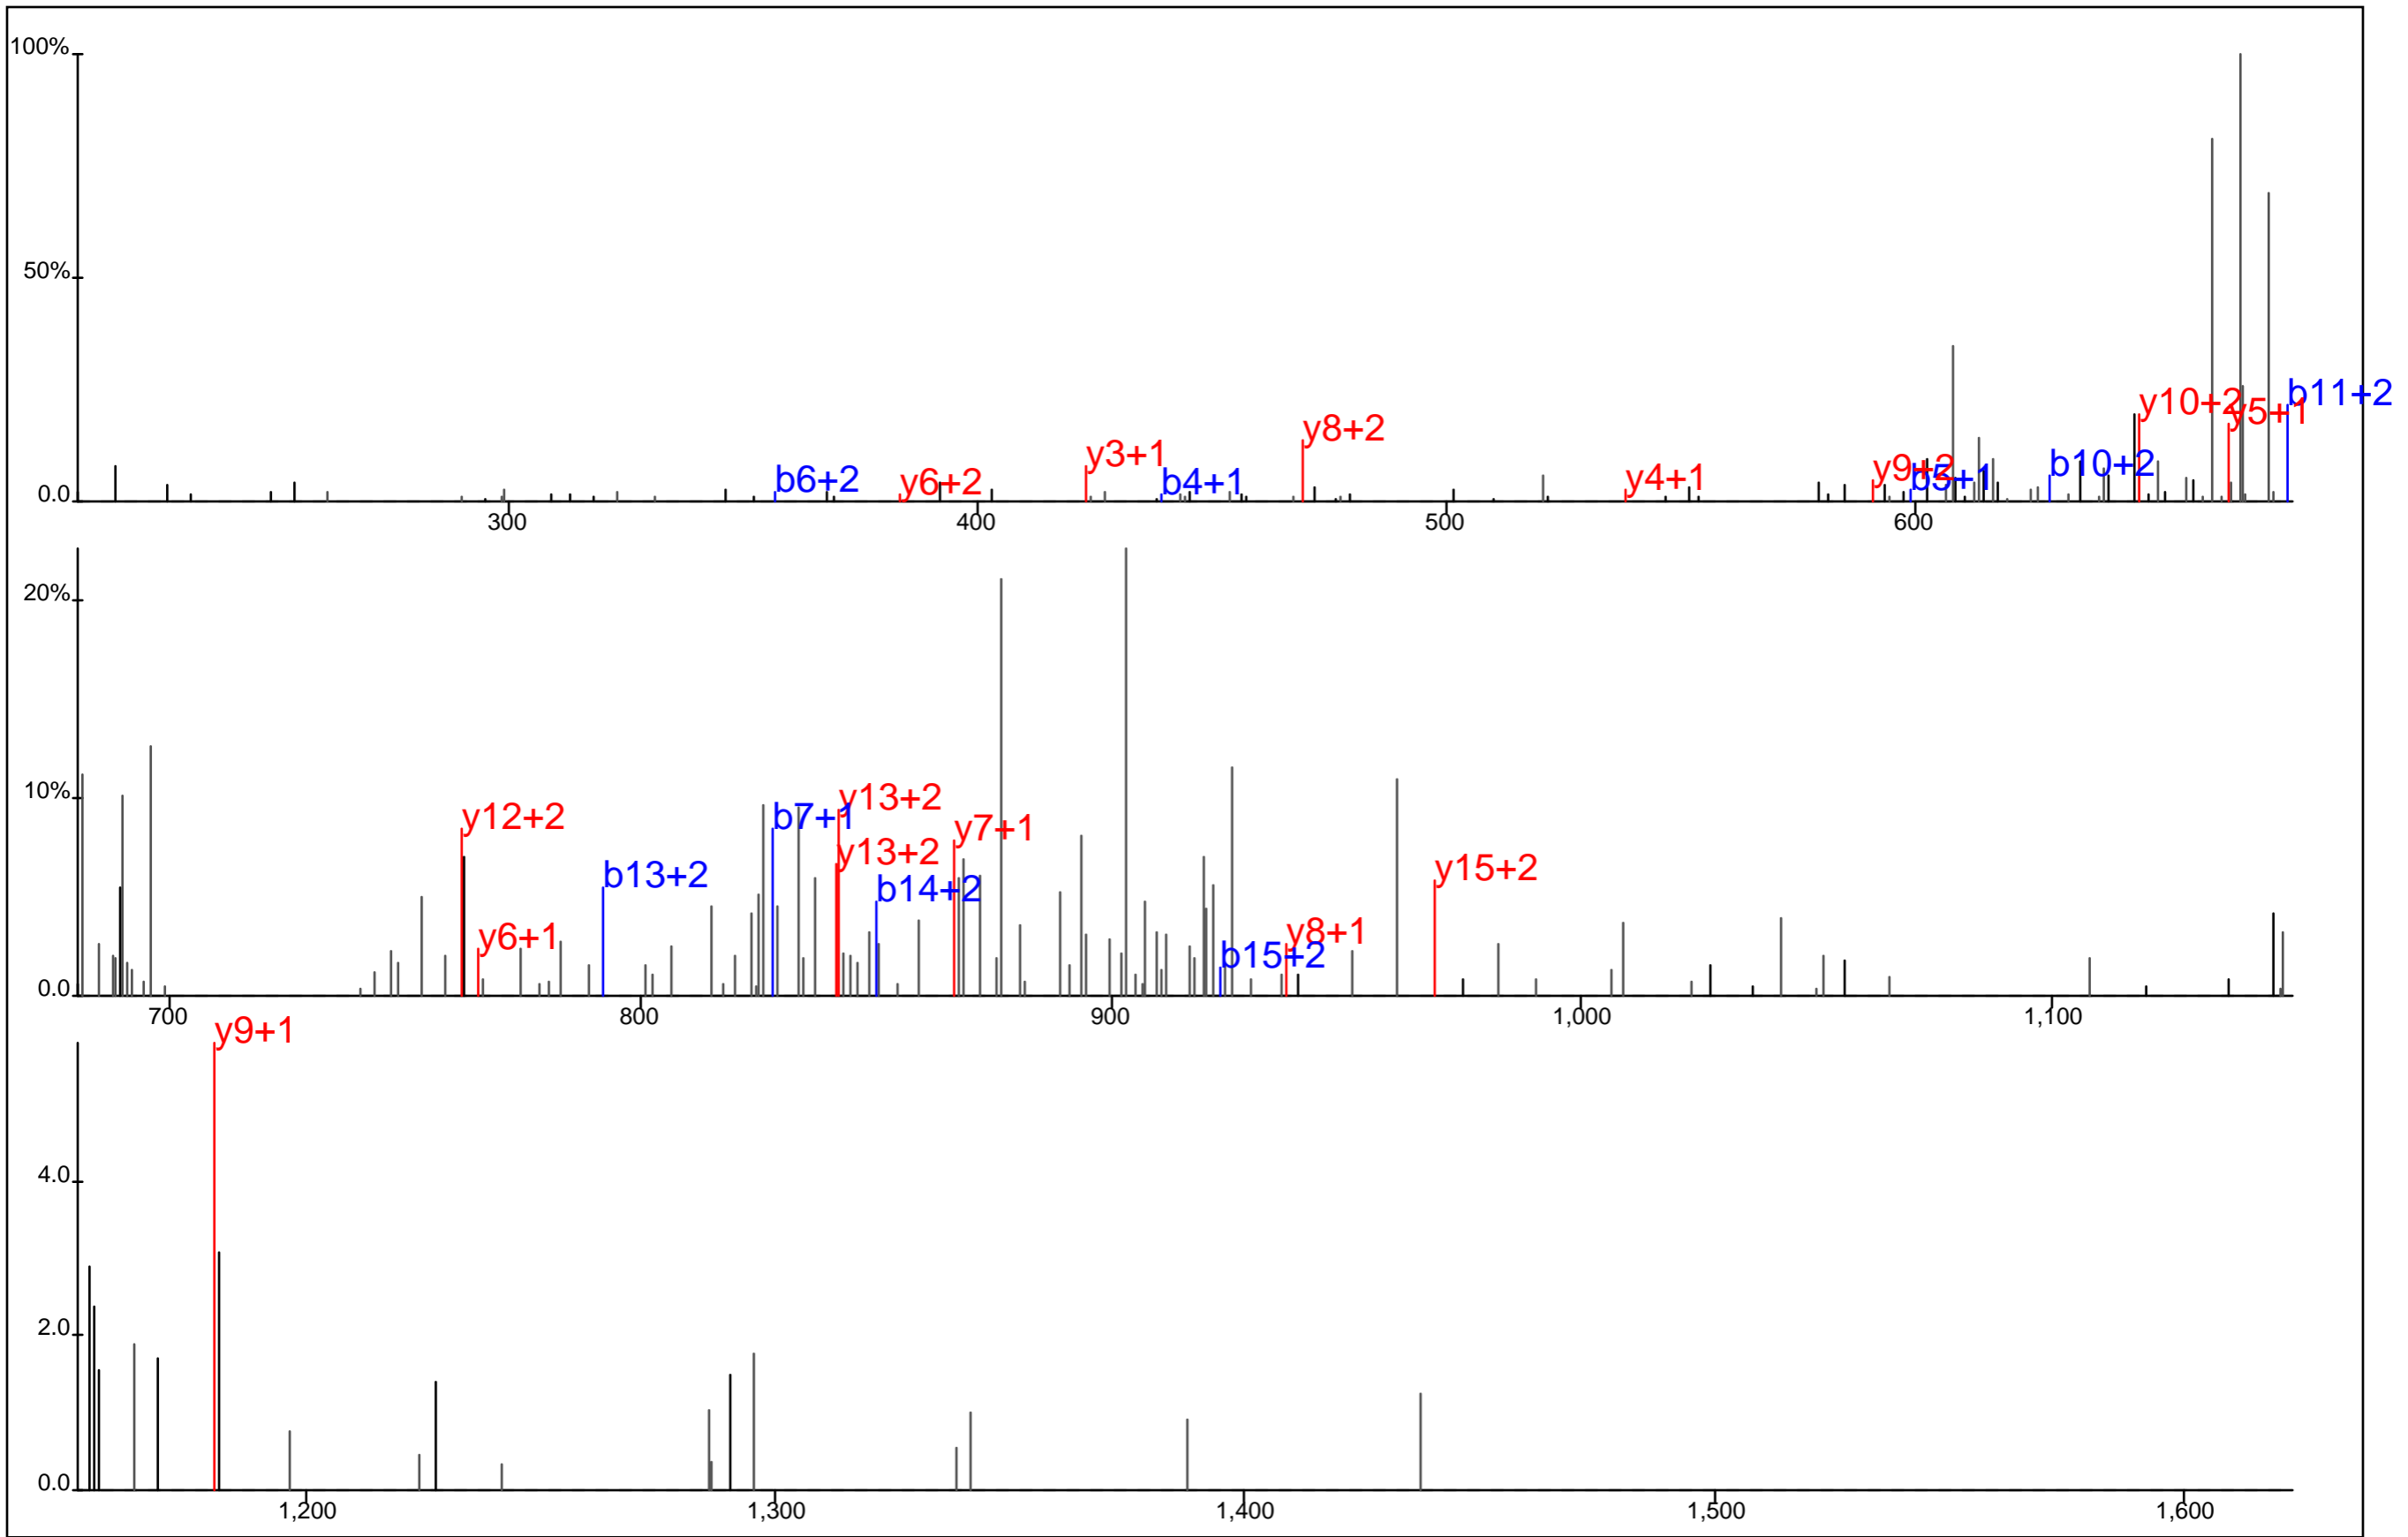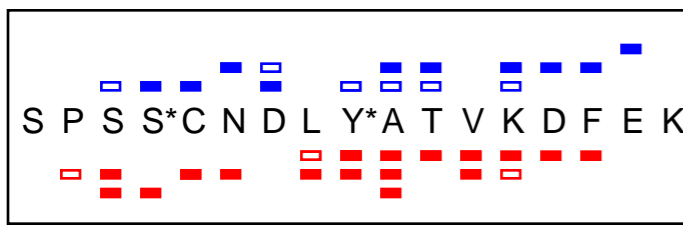

Protein Name: PAG  
 gi Accession: 7020925  
 Precursor Mass: 707.6161+3  
 Delta Mass: 2.540 ppm  
 XCorr: 14.43

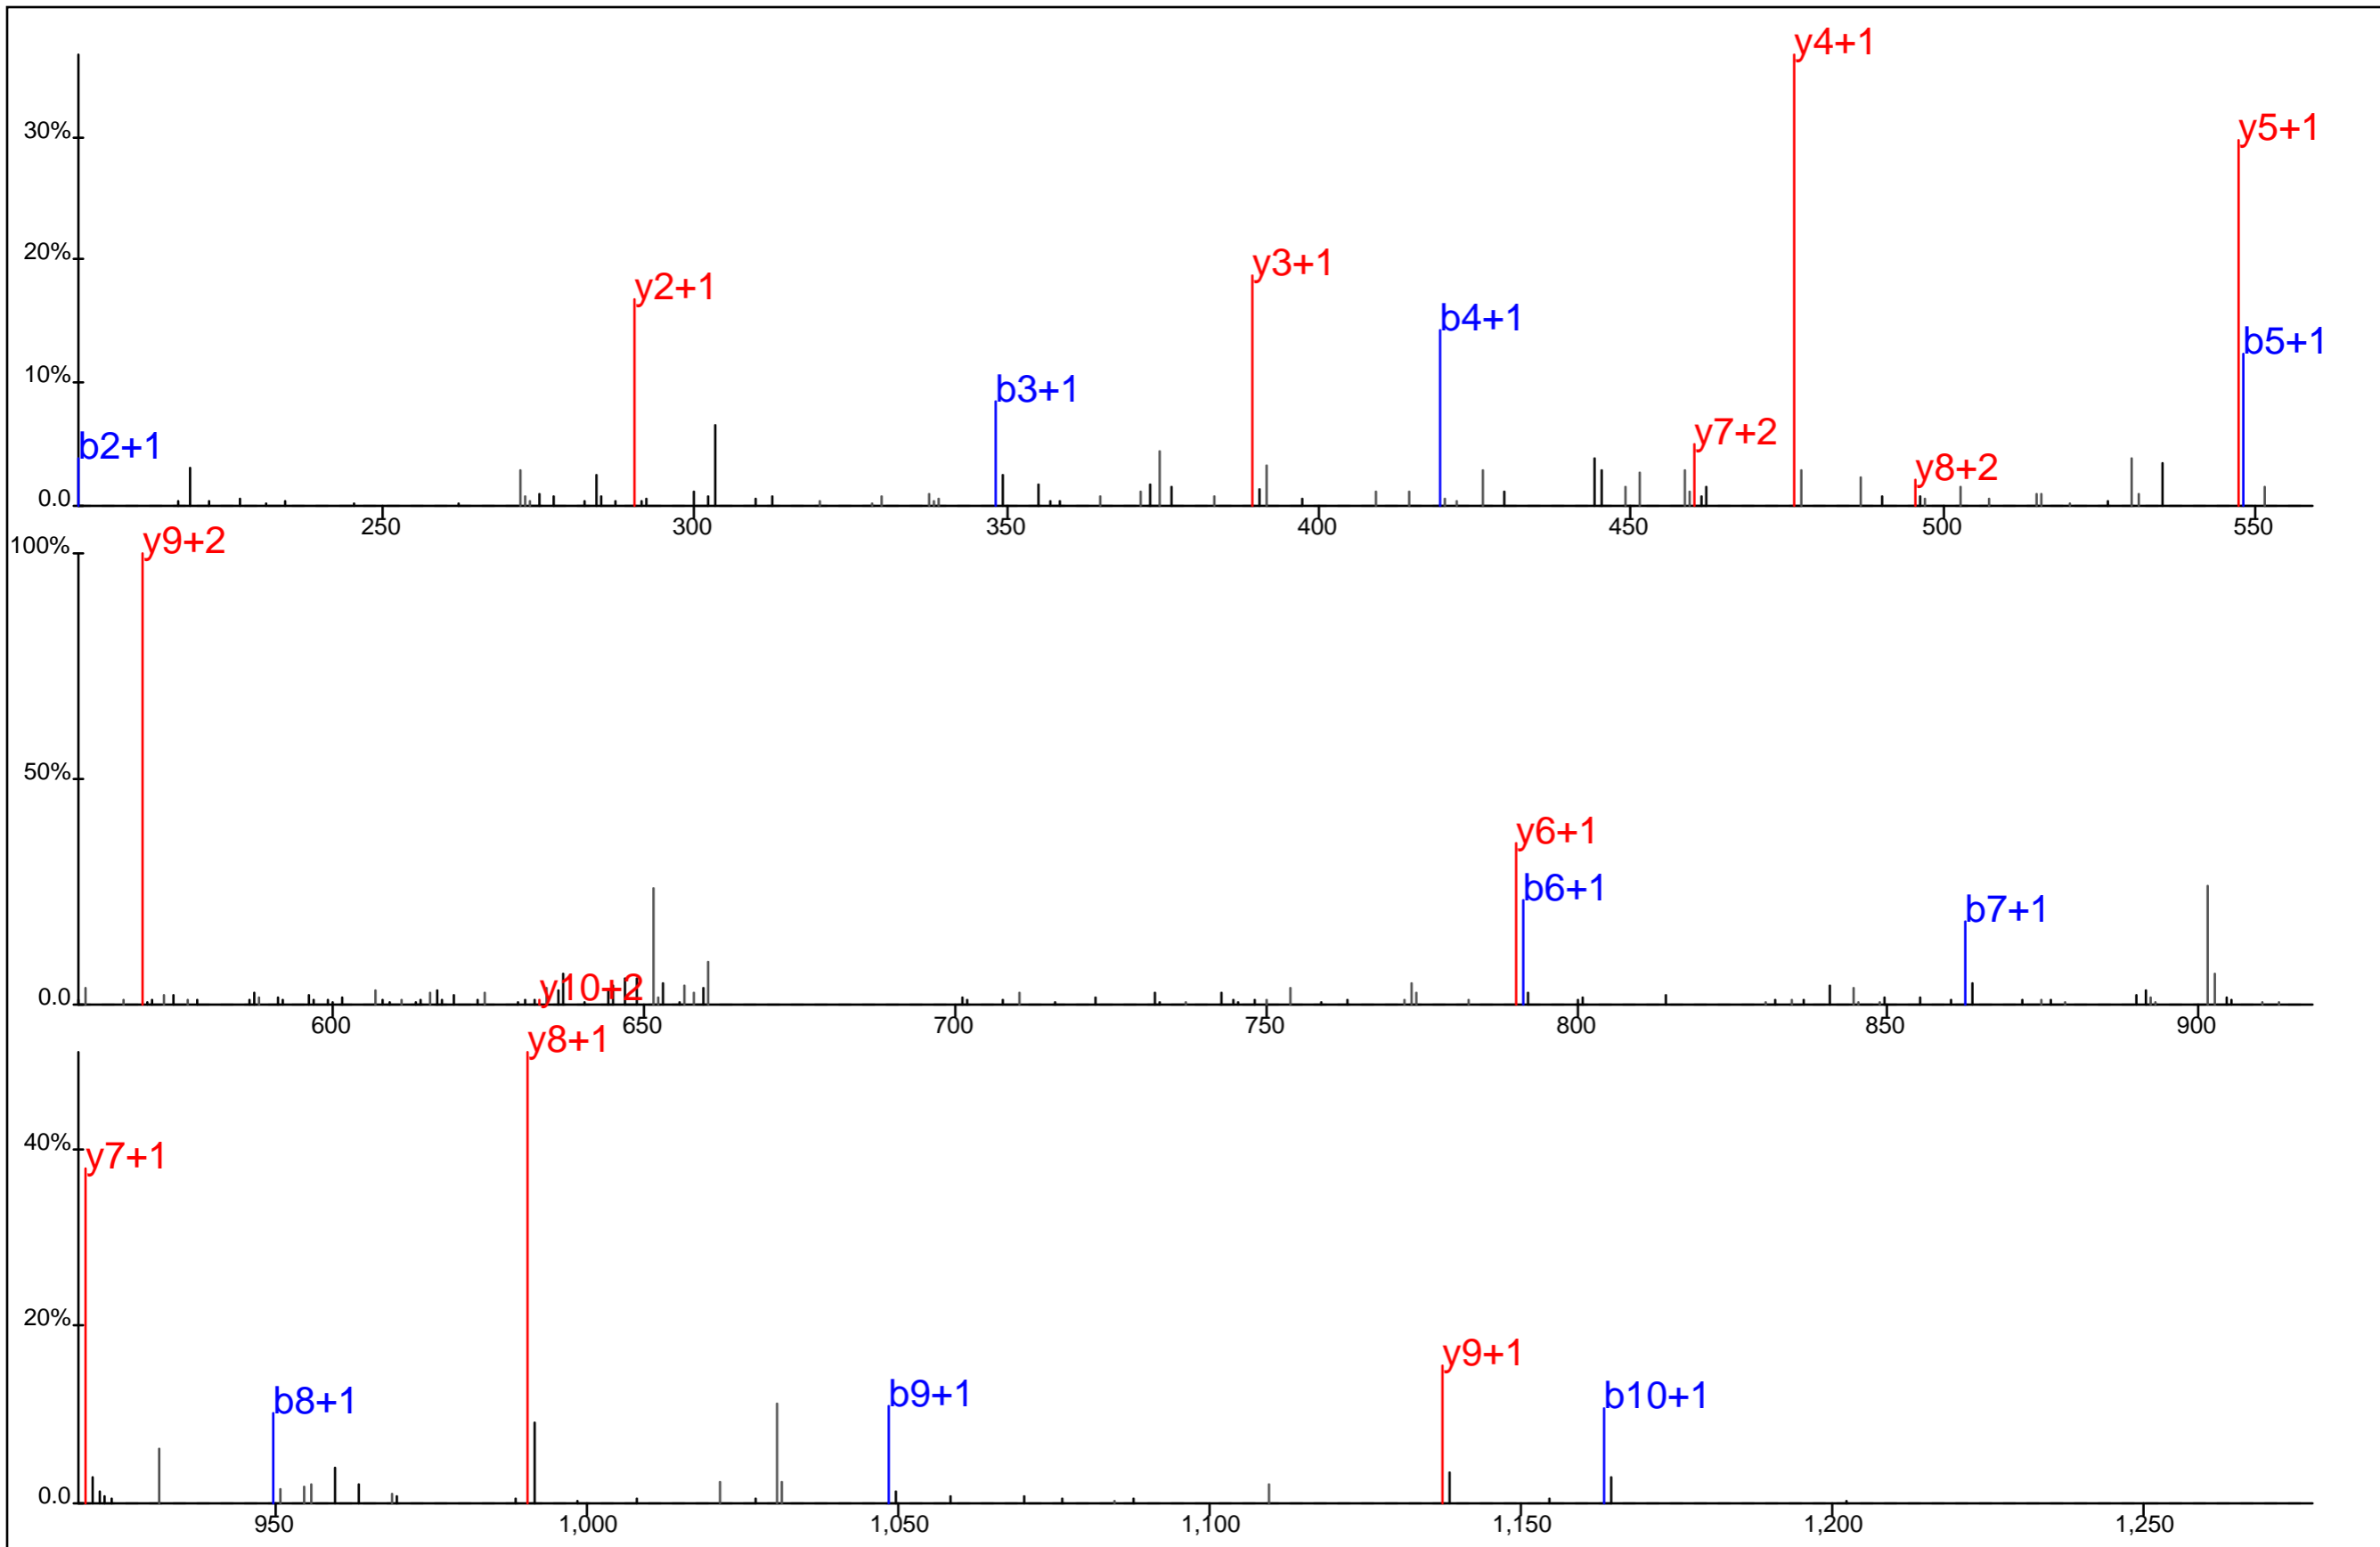

■ ■ ■ ■ ■ ■ ■ ■  
 A E F A E Y\* A S V D R  
□ □ □ □ □ □ □ □

Protein Name: PAG  
 gi Accession: 7020925  
 Precursor Mass: 669.2755+2  
 Delta Mass: 2.129 ppm  
 XCorr: 73.14

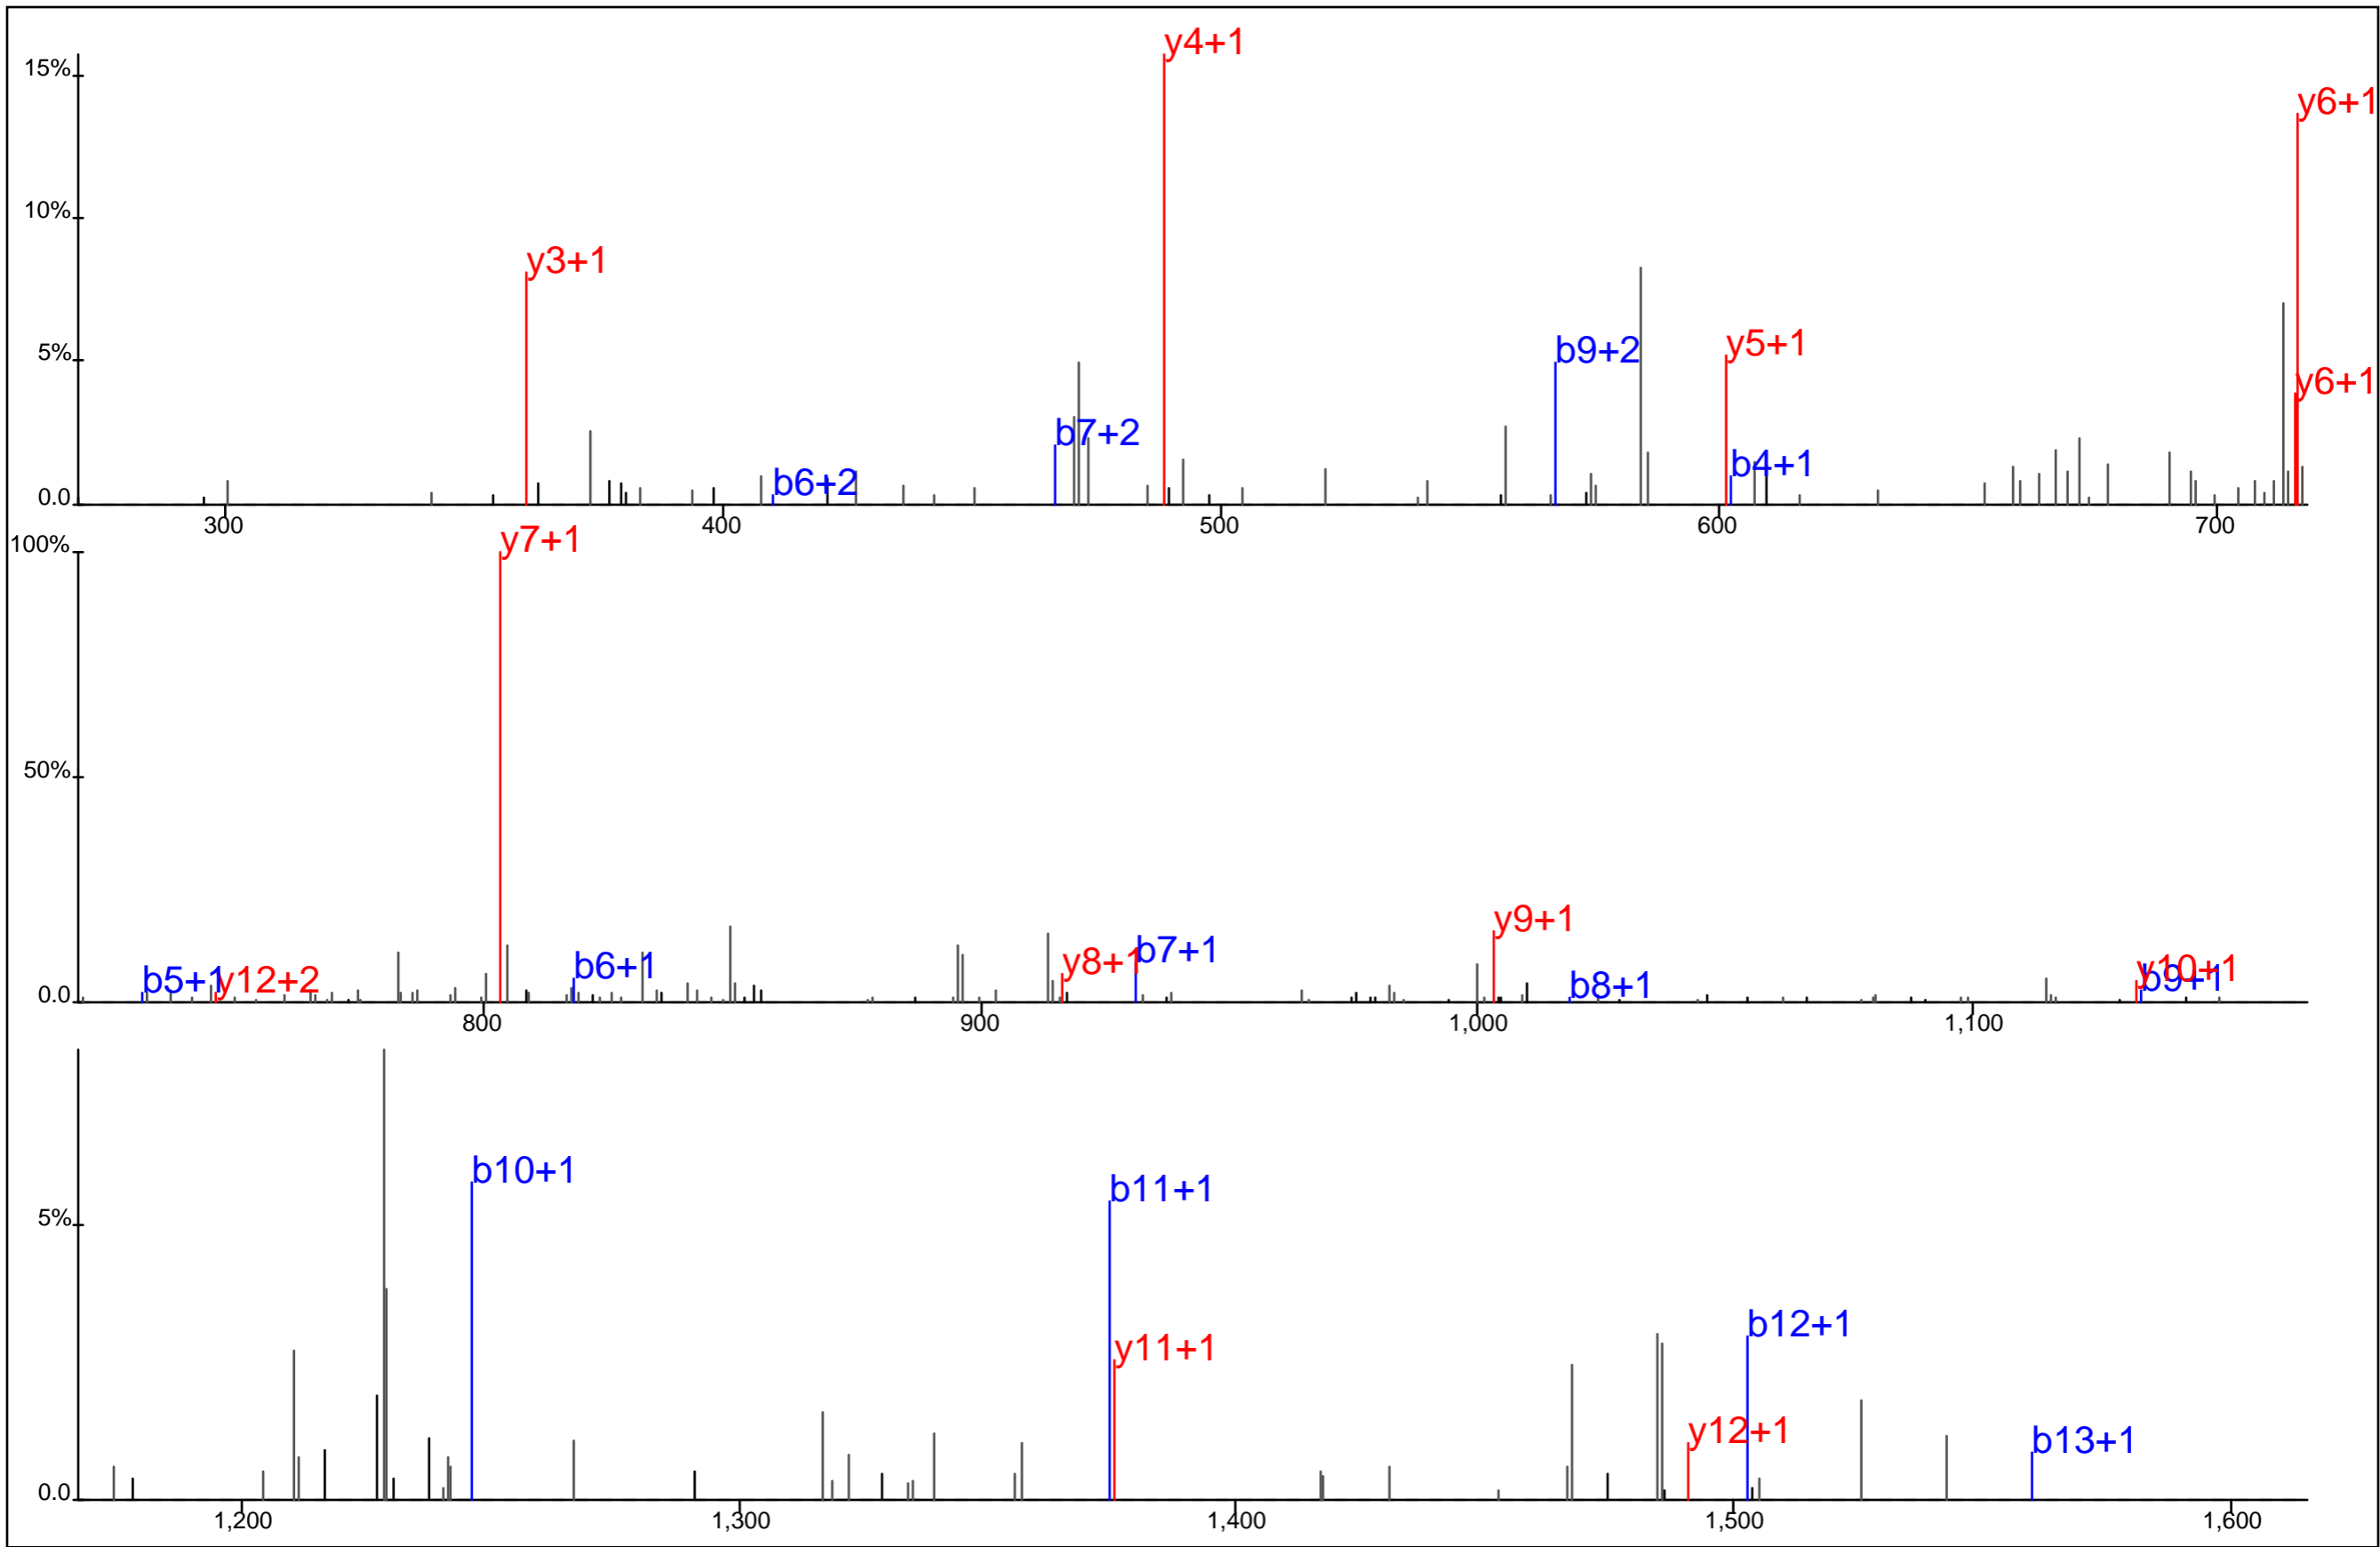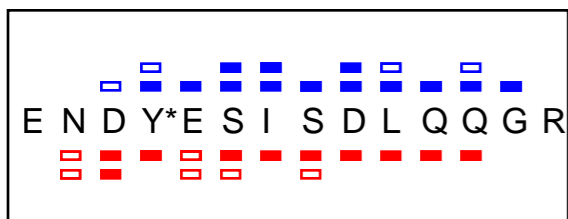

Protein Name: PAG  
 gi Accession: 7020925  
 Precursor Mass: 867.3560+2  
 Delta Mass: 1.879 ppm  
 XCorr: 60.34



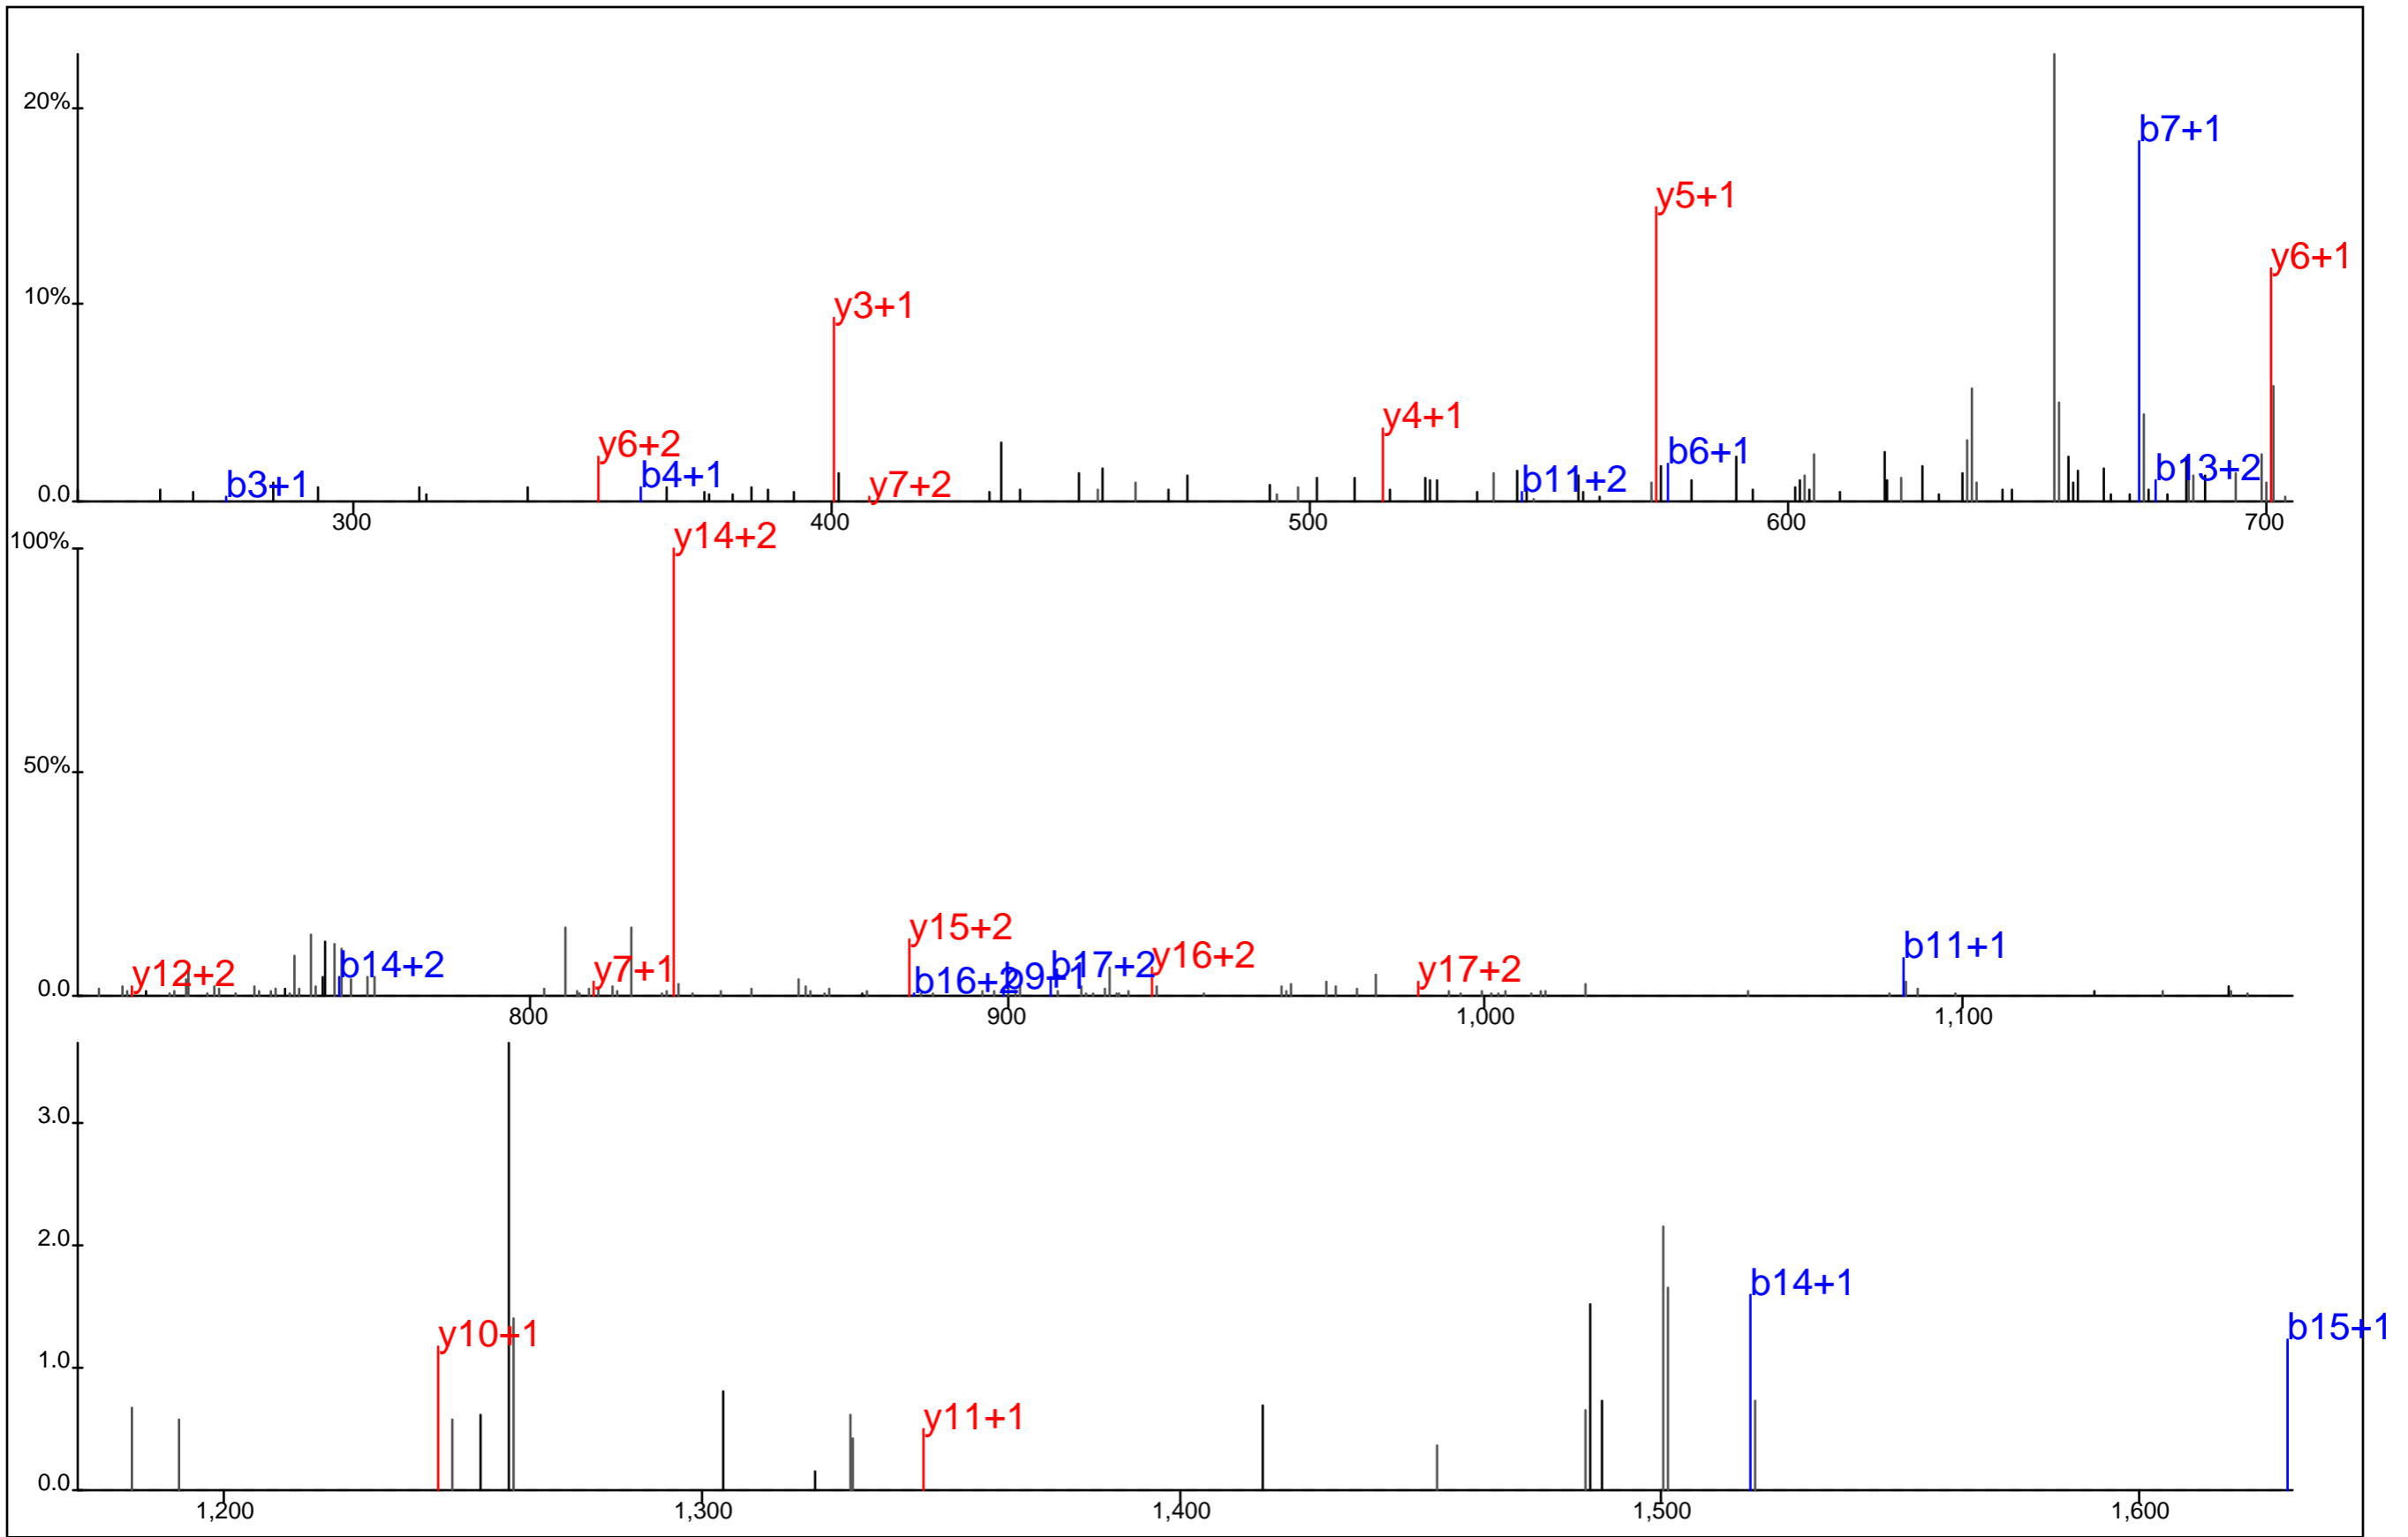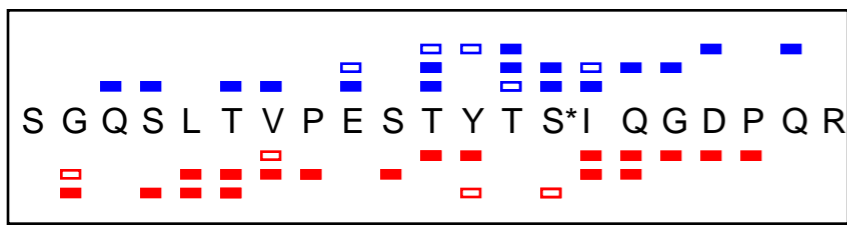

Protein Name: PAG  
 gi Accession: 7020925  
 Precursor Mass: 777.6909+3  
 Delta Mass: 3.504 ppm  
 XCorr: 37.97

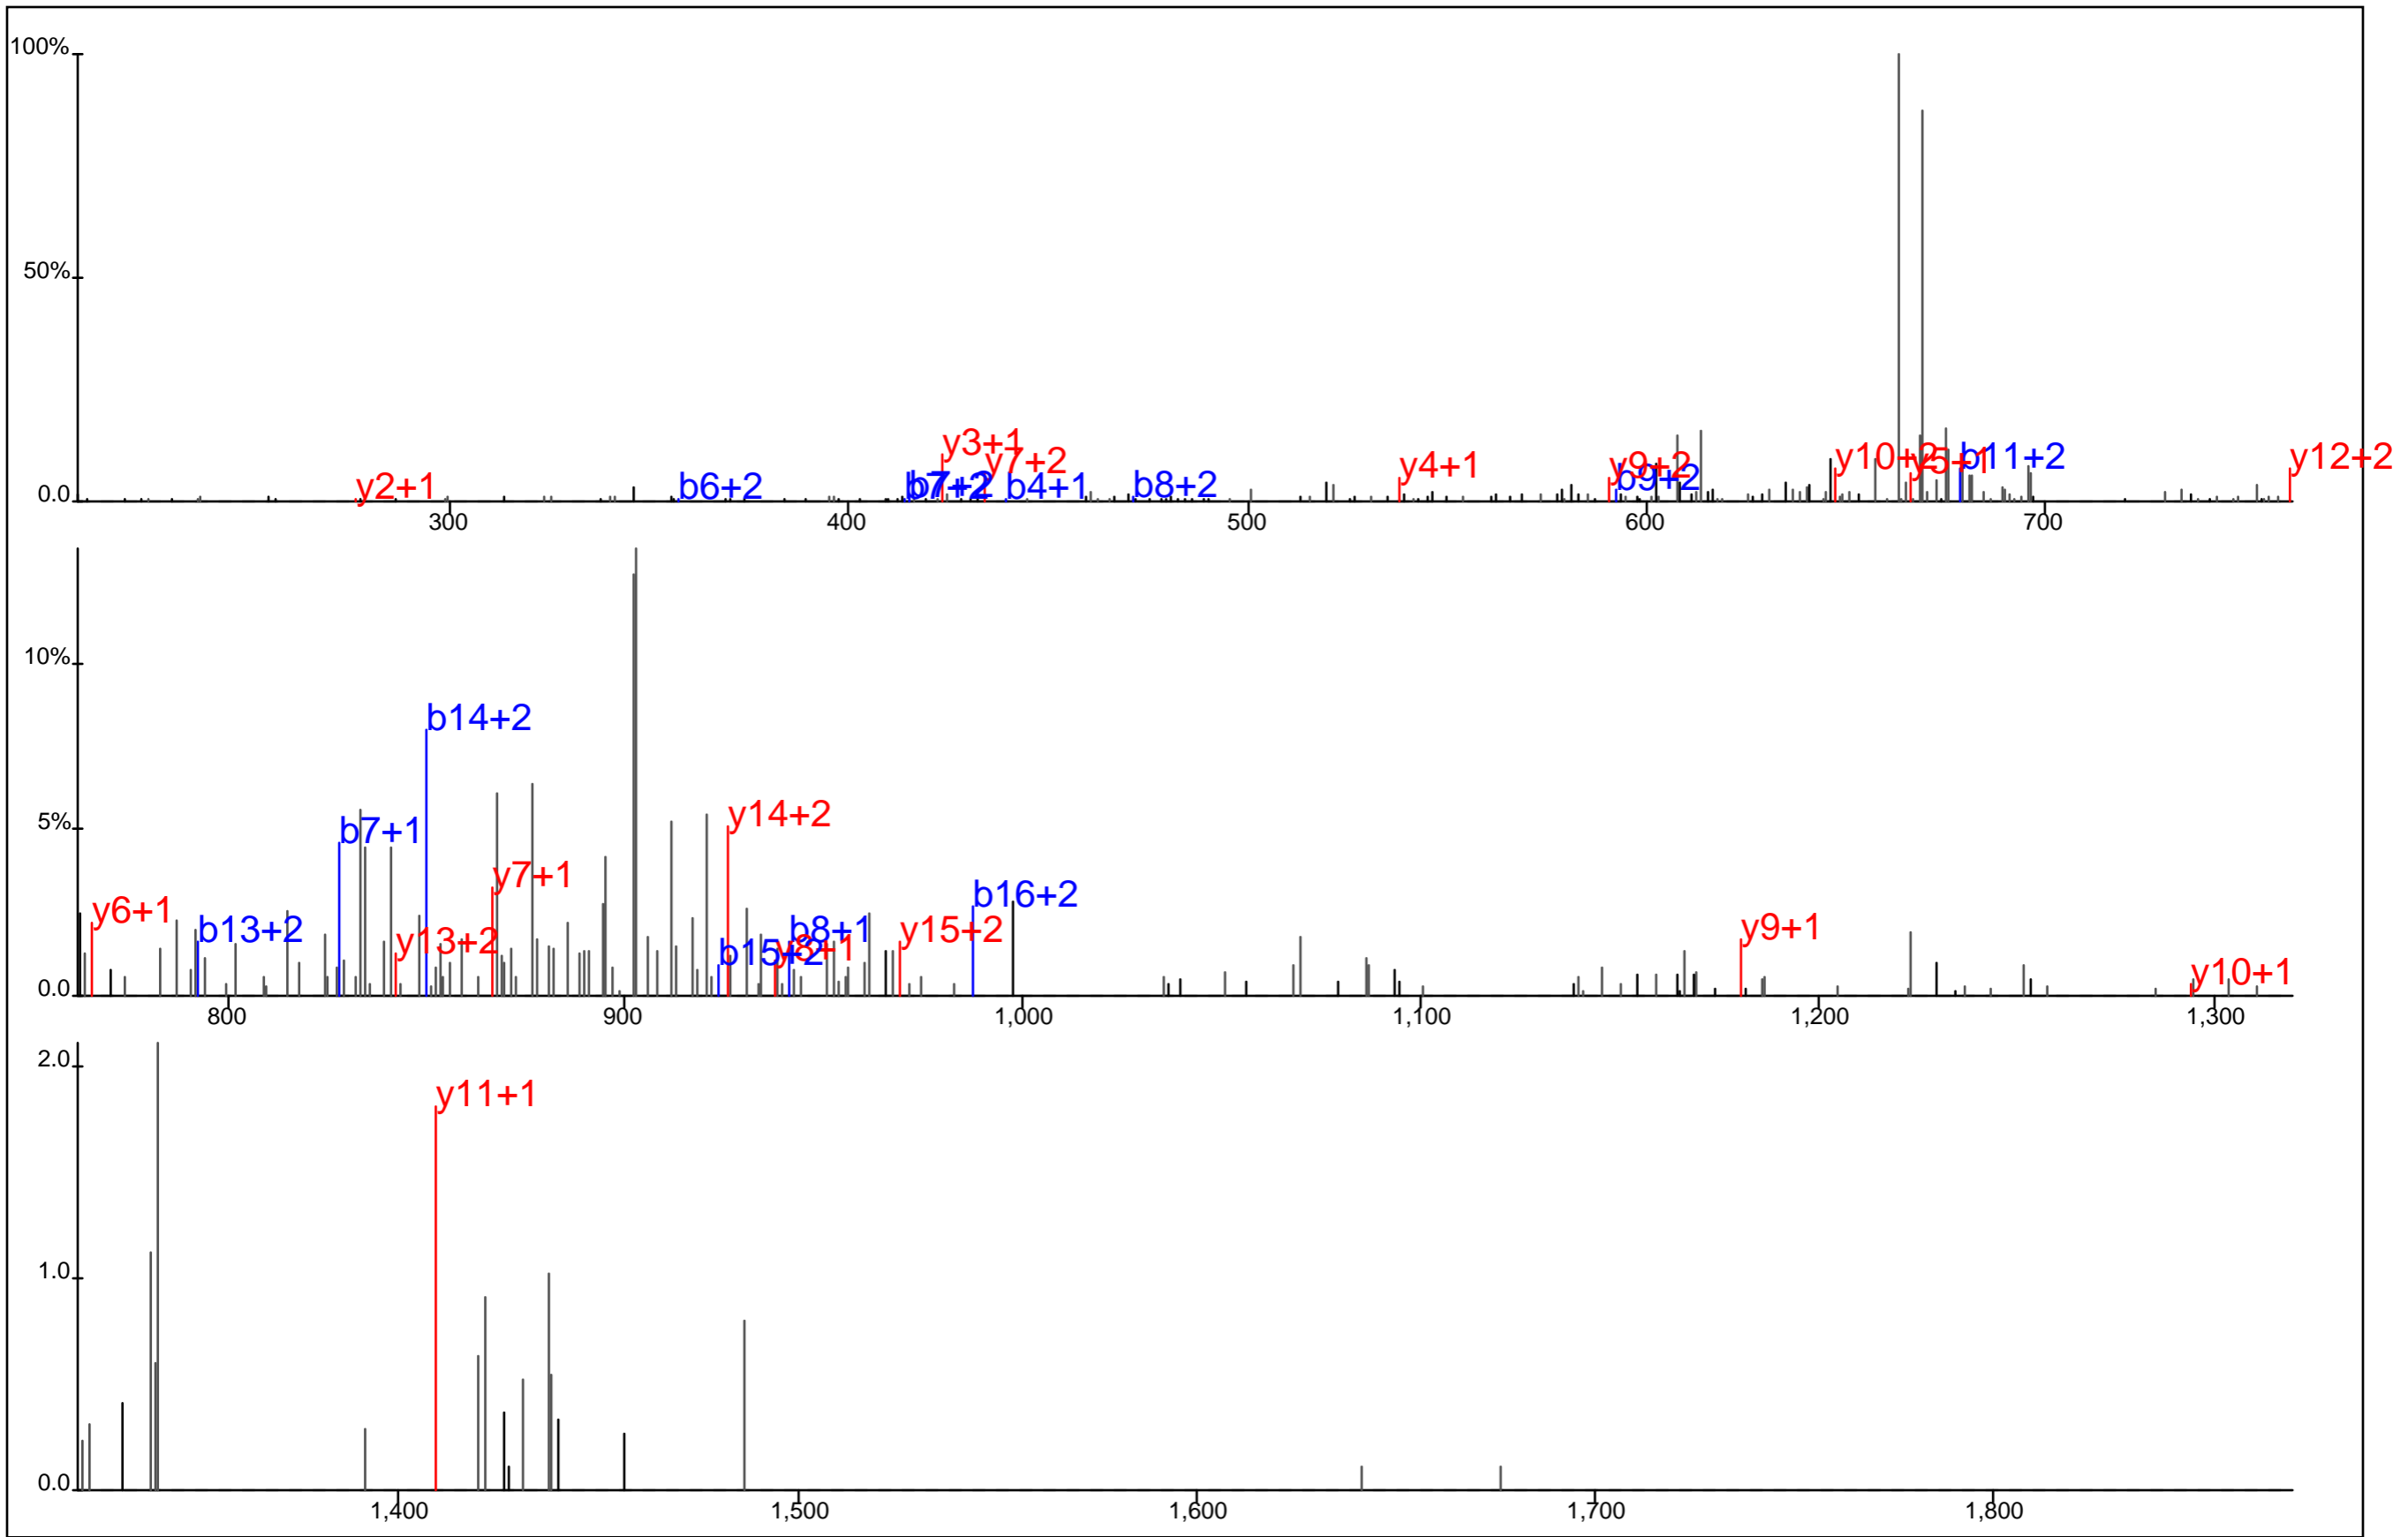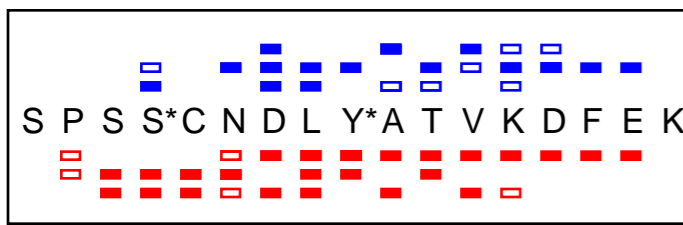

Protein Name: PAG  
 gi Accession: 7020925  
 Precursor Mass: 707.6174+3  
 Delta Mass: 4.441 ppm  
 XCorr: 15.58



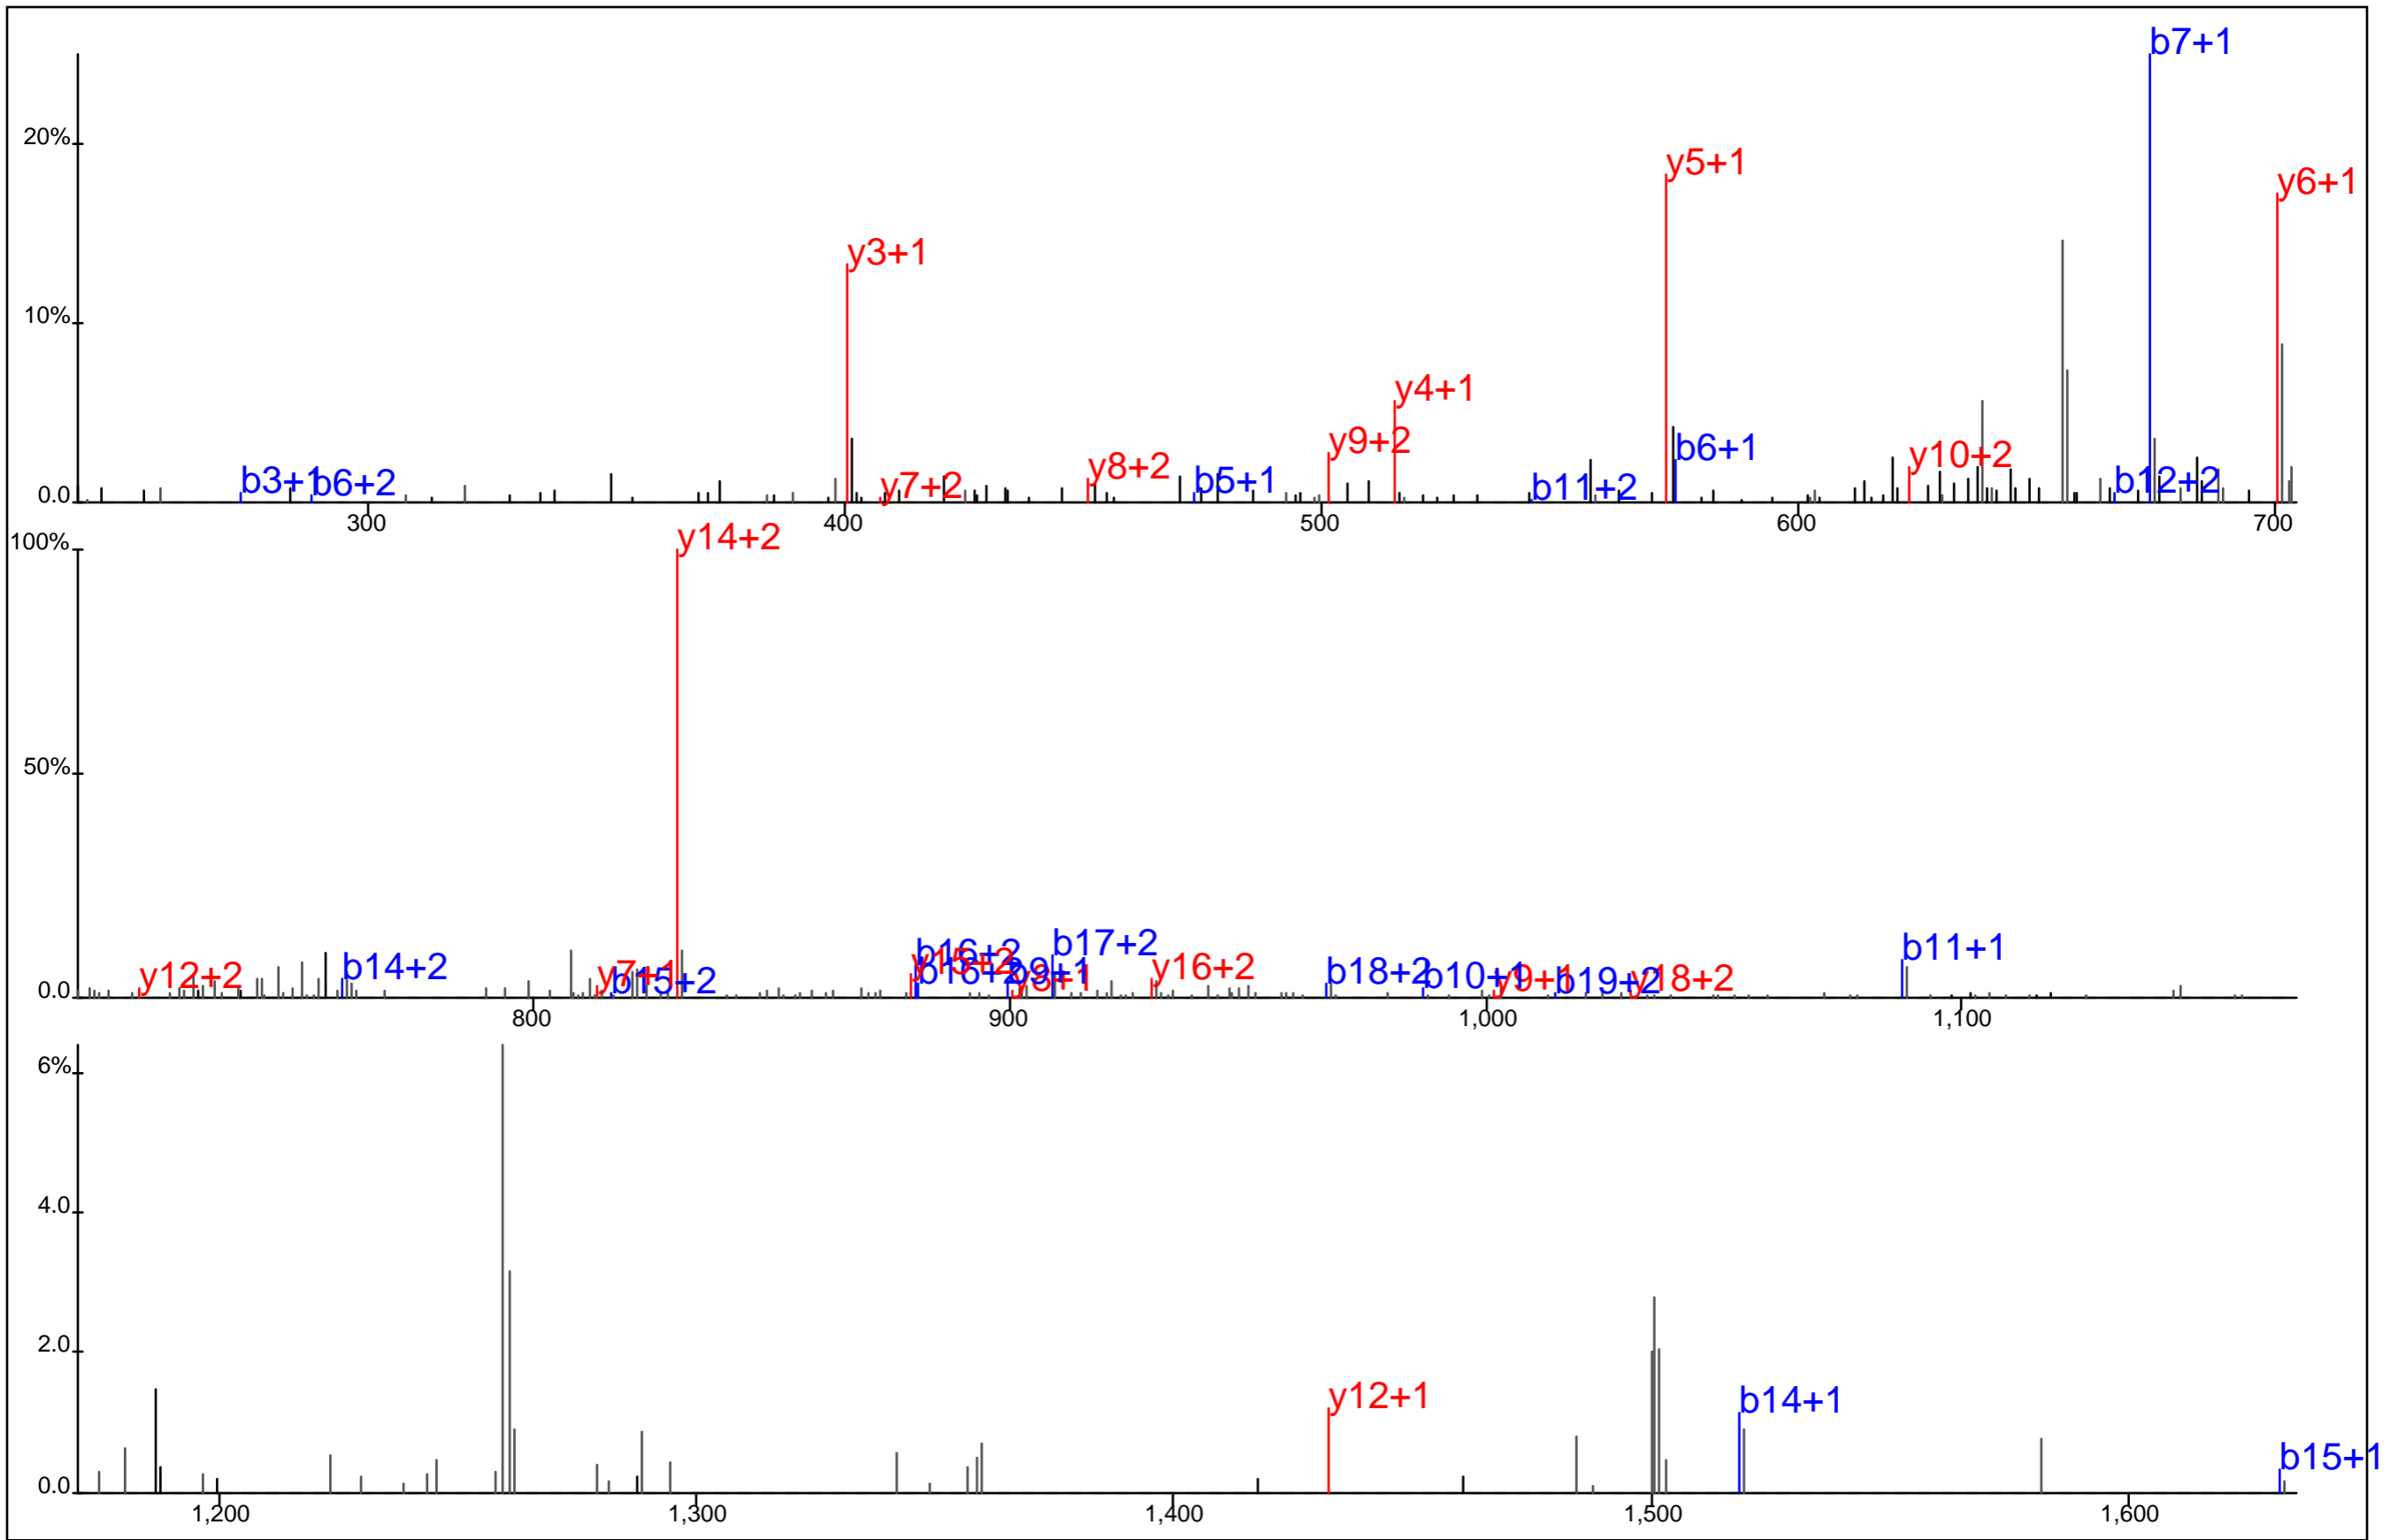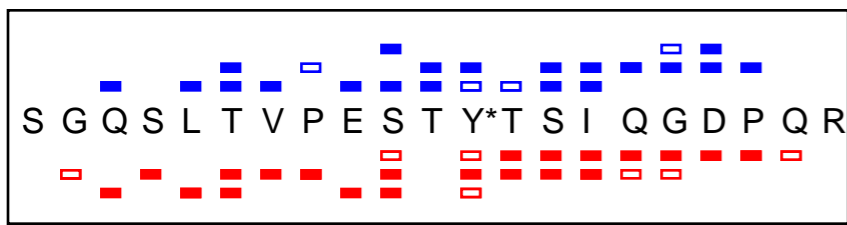

Protein Name: PAG  
 gi Accession: 7020925  
 Precursor Mass: 777.6907+3  
 Delta Mass: 3.268 ppm  
 XCorr: 24.64

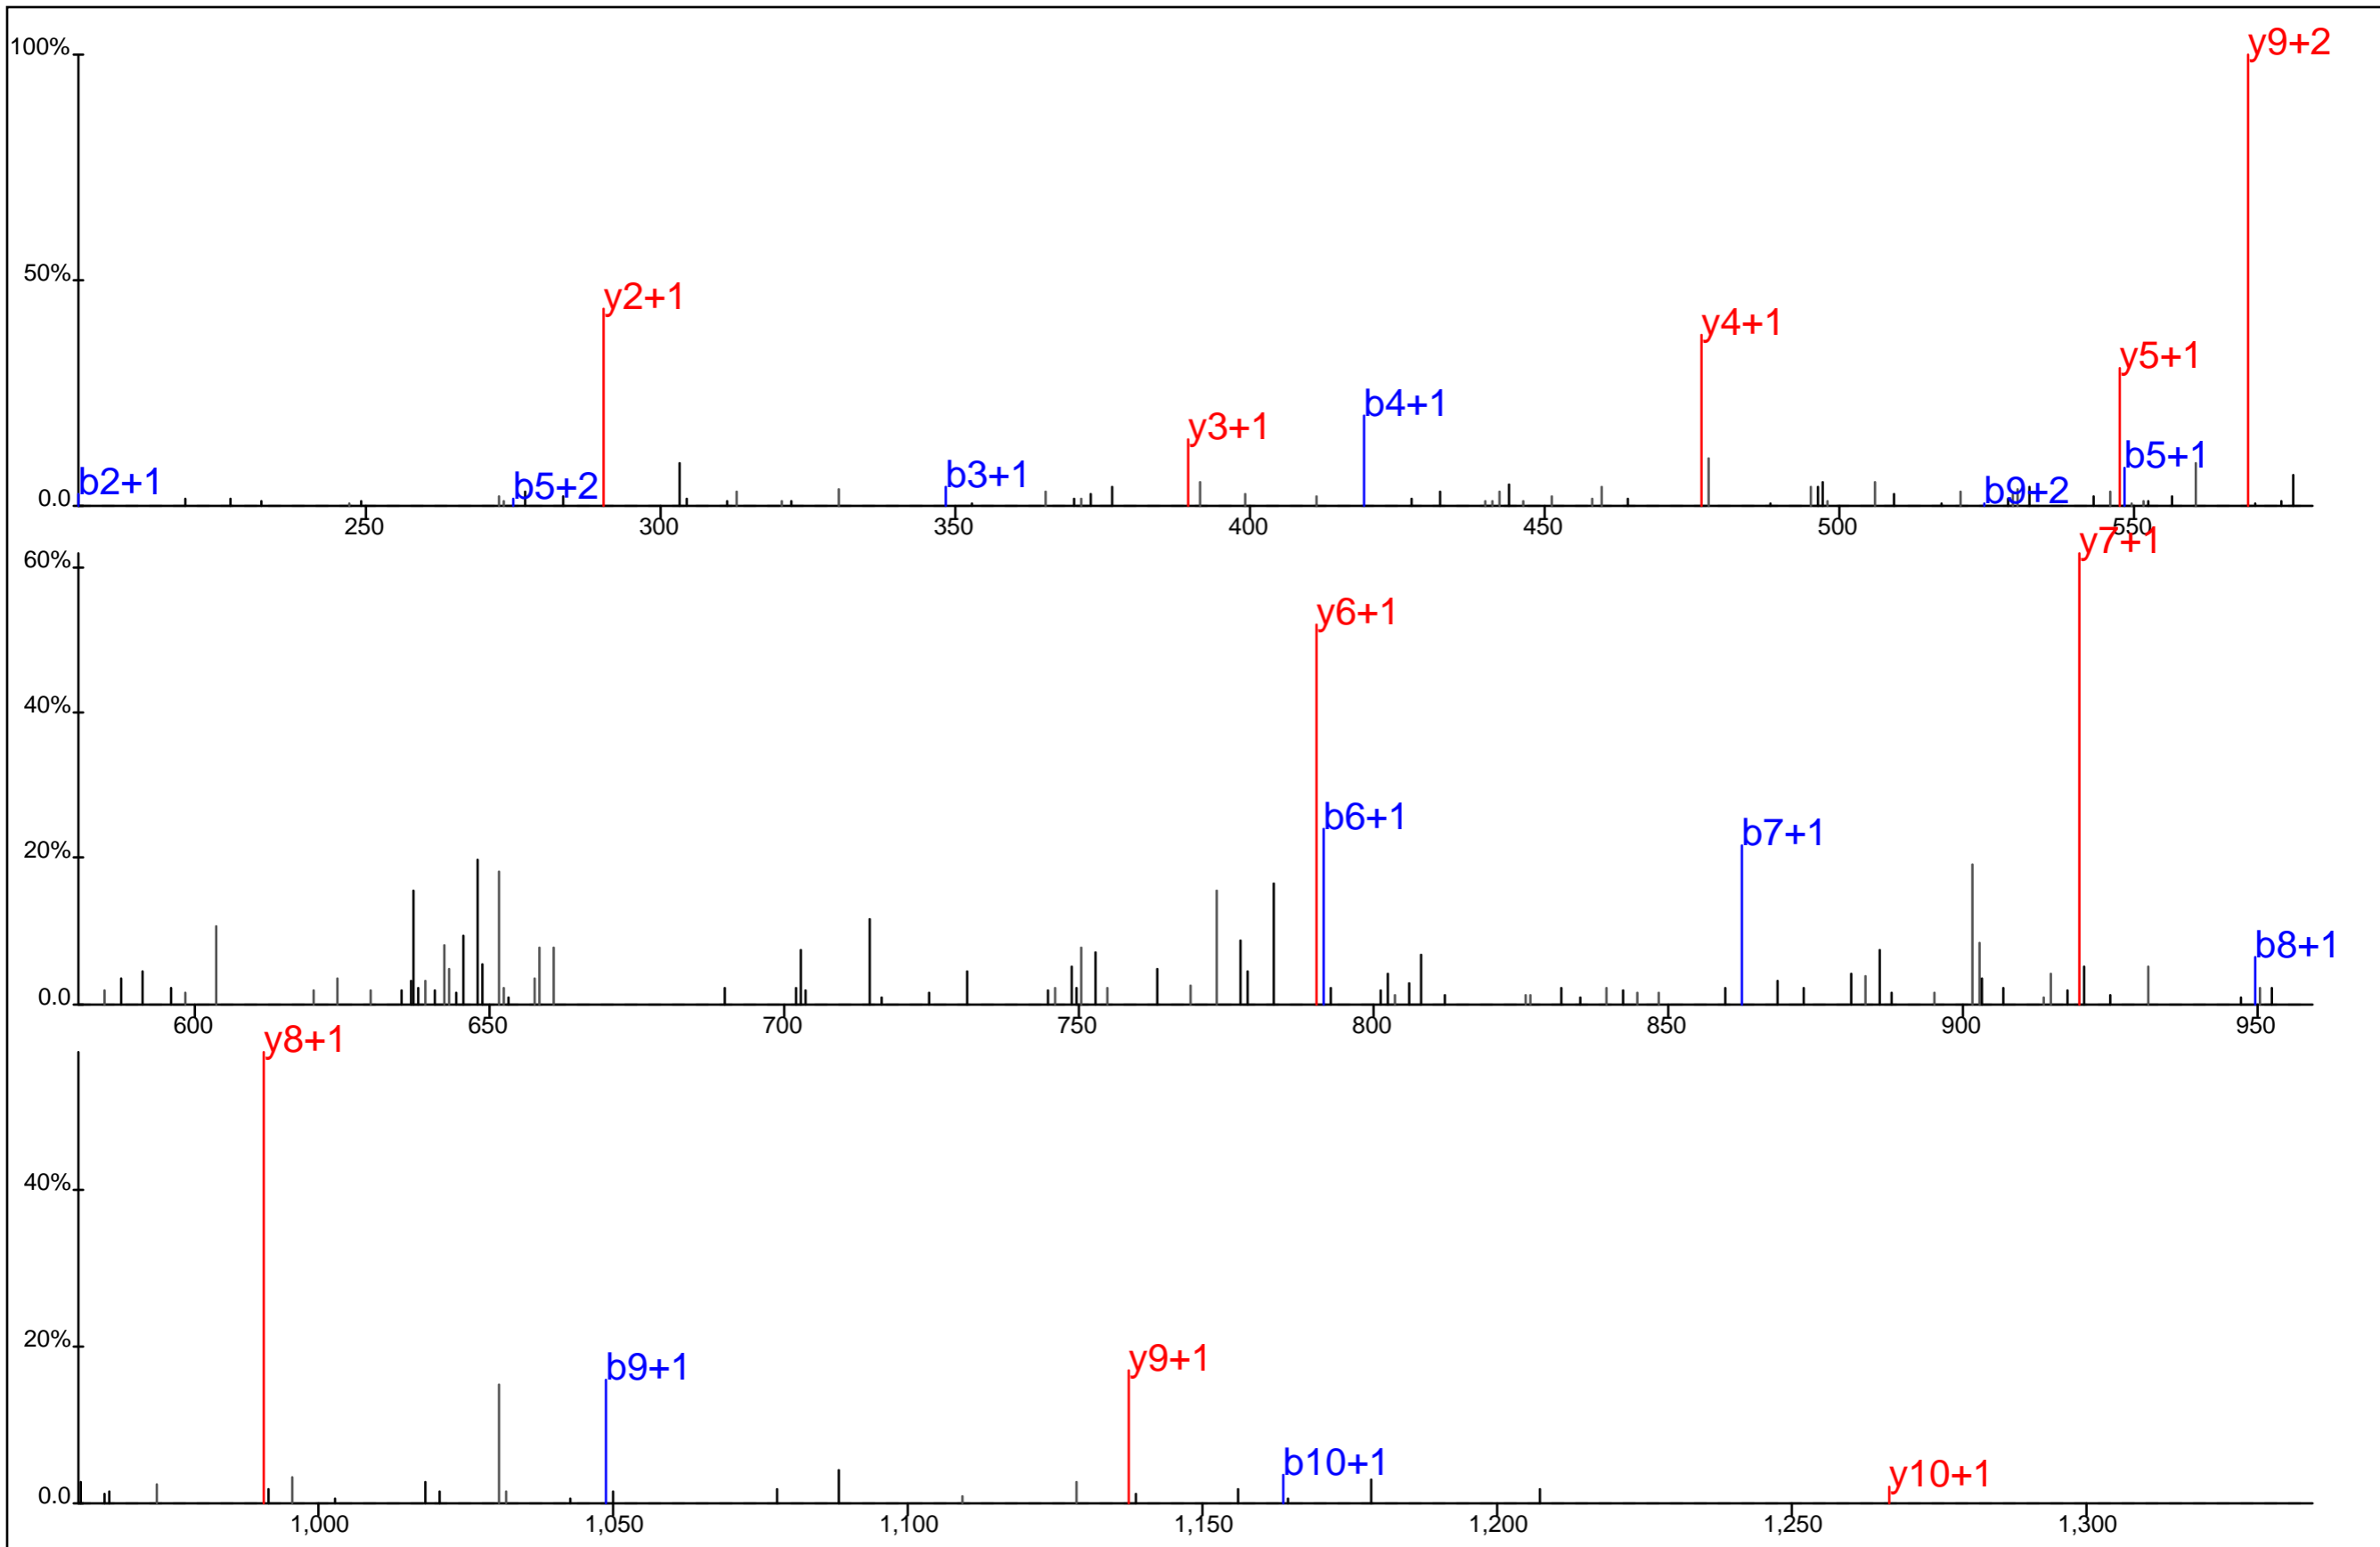

■ ■ ■ ■ ■ ■ ■ ■  
■ ■ ■ ■ ■ ■ ■ ■  
A E F A E Y\* A S V D R

Protein Name: PAG  
gi Accession: 7020925  
Precursor Mass: 669.2756+2  
Delta Mass: 2.219 ppm  
XCorr: 76.29

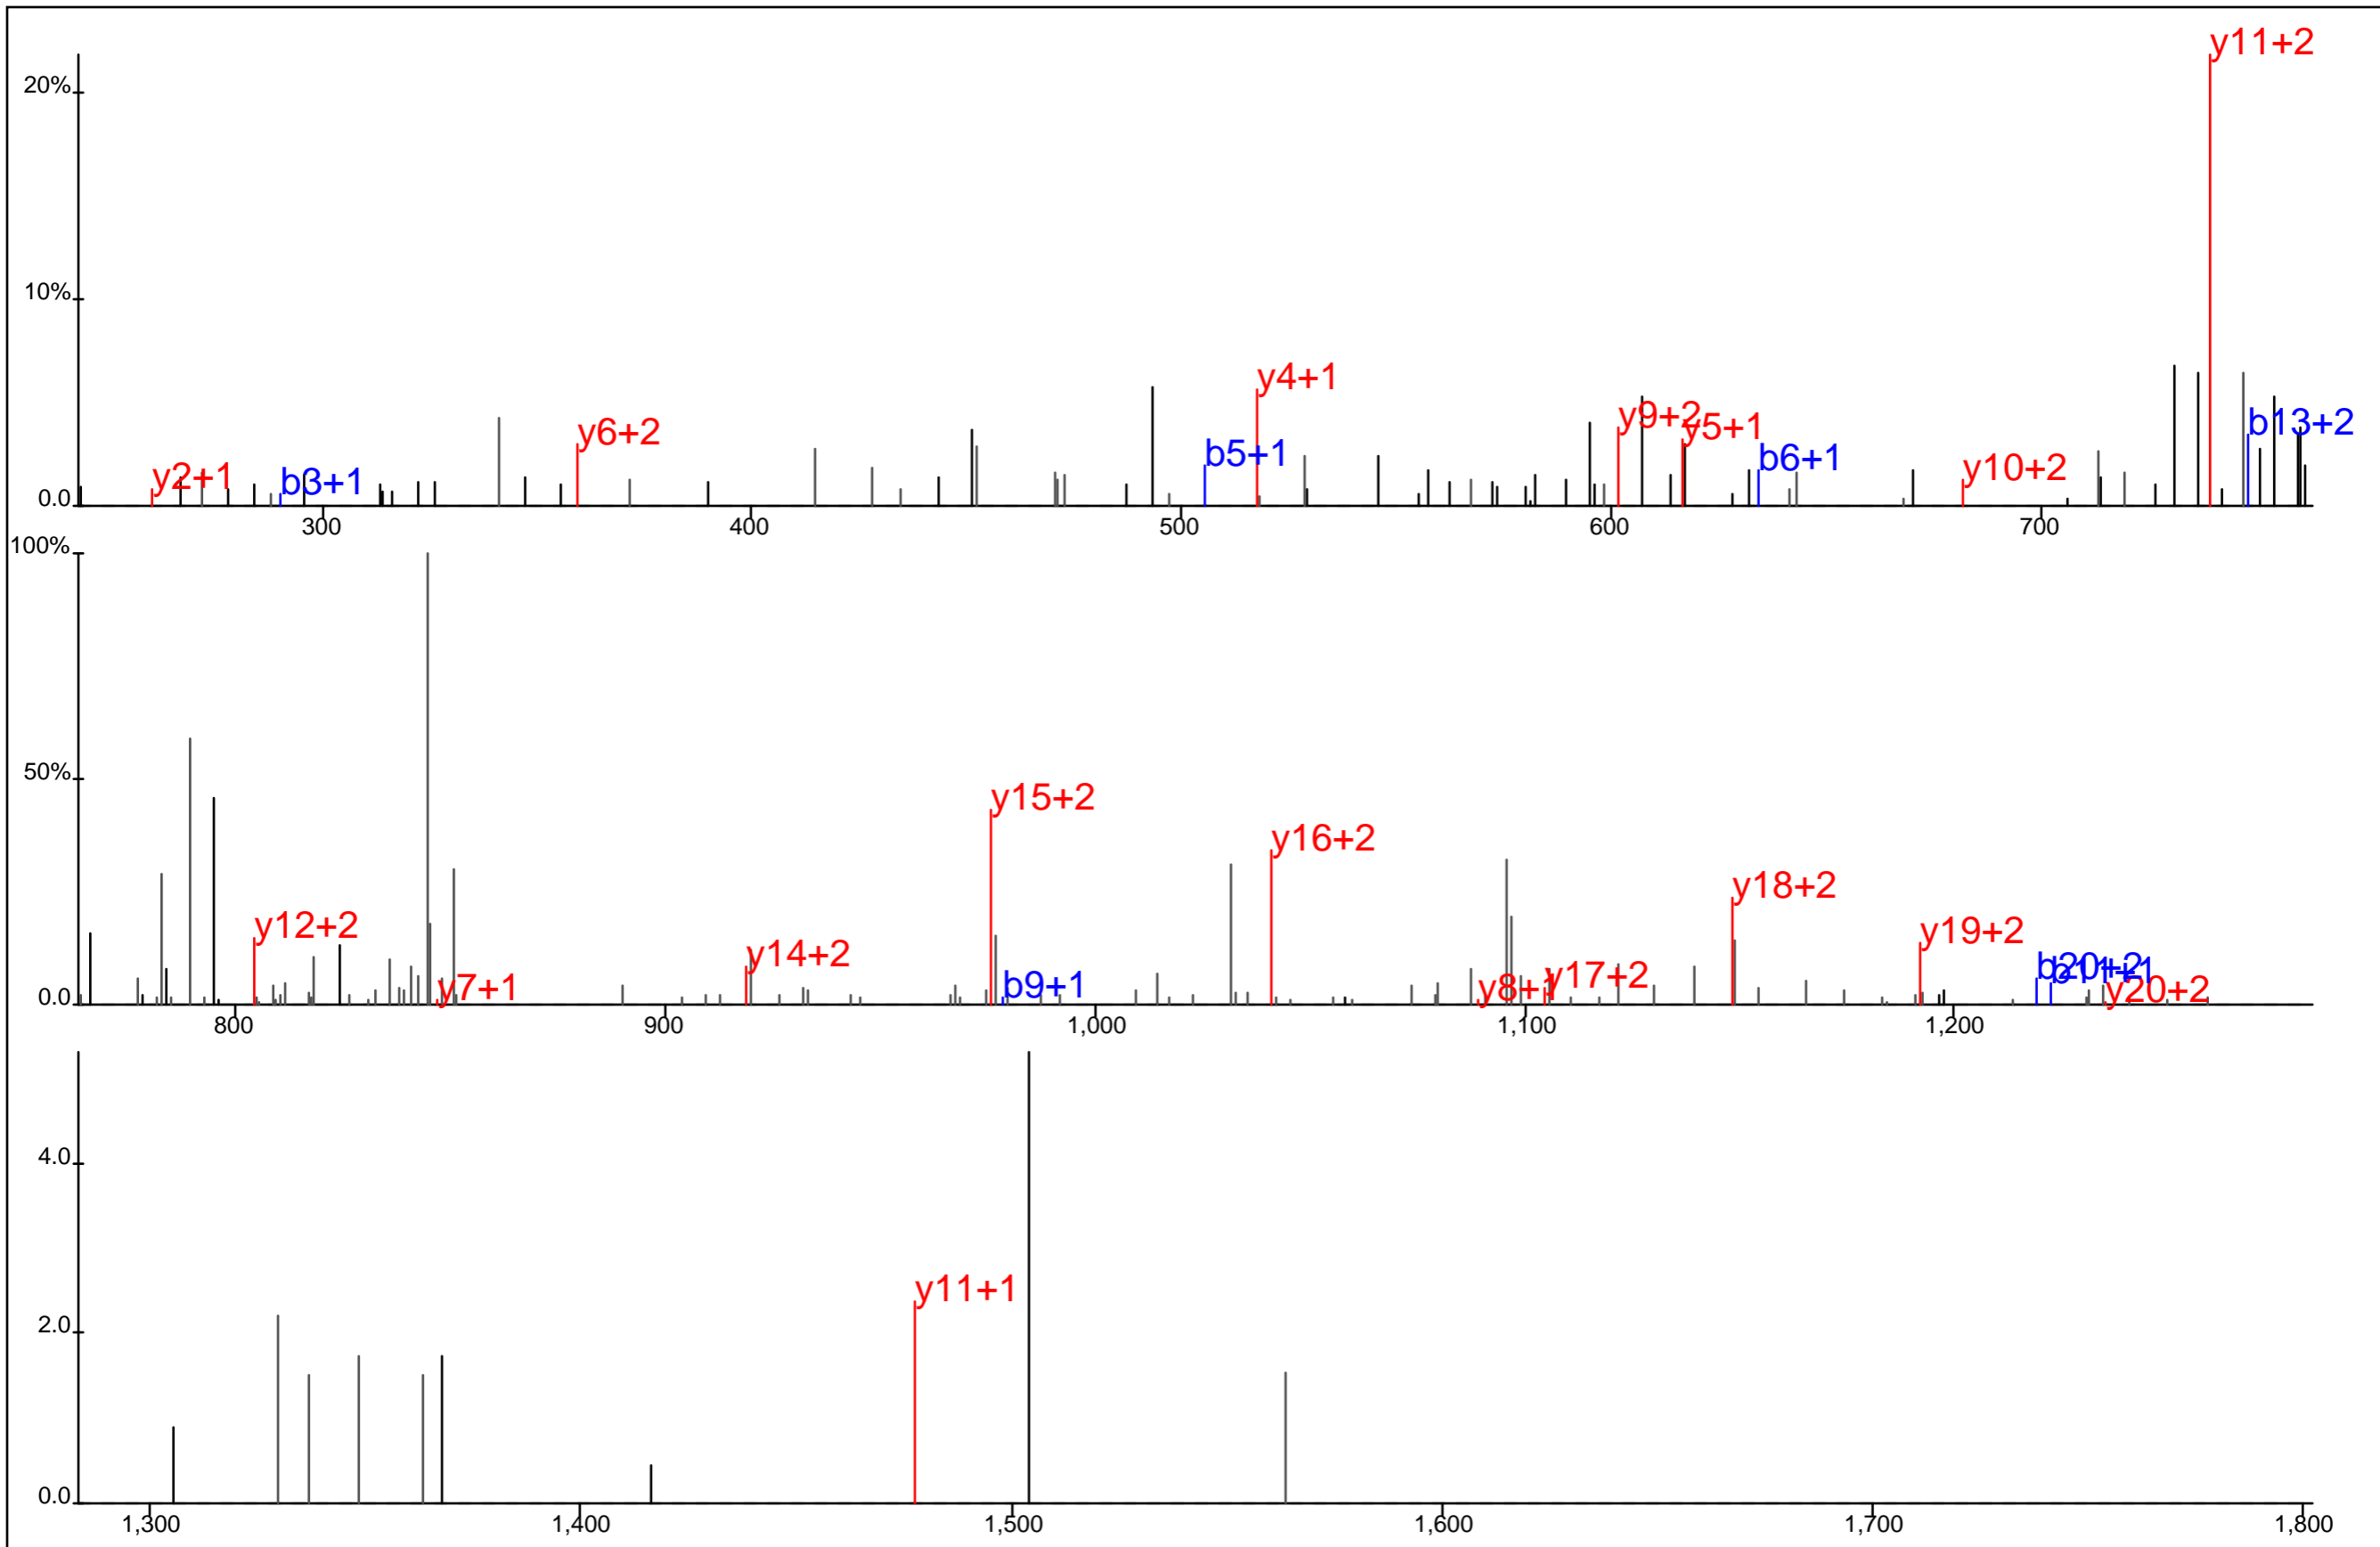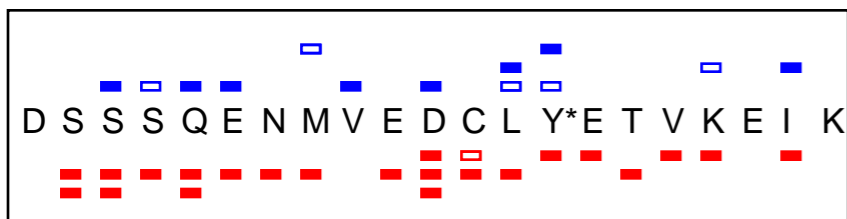

Protein Name: PAG  
 gi Accession: 7020925  
 Precursor Mass: 862.0295+3  
 Delta Mass: 3.456 ppm  
 XCorr: 24.74

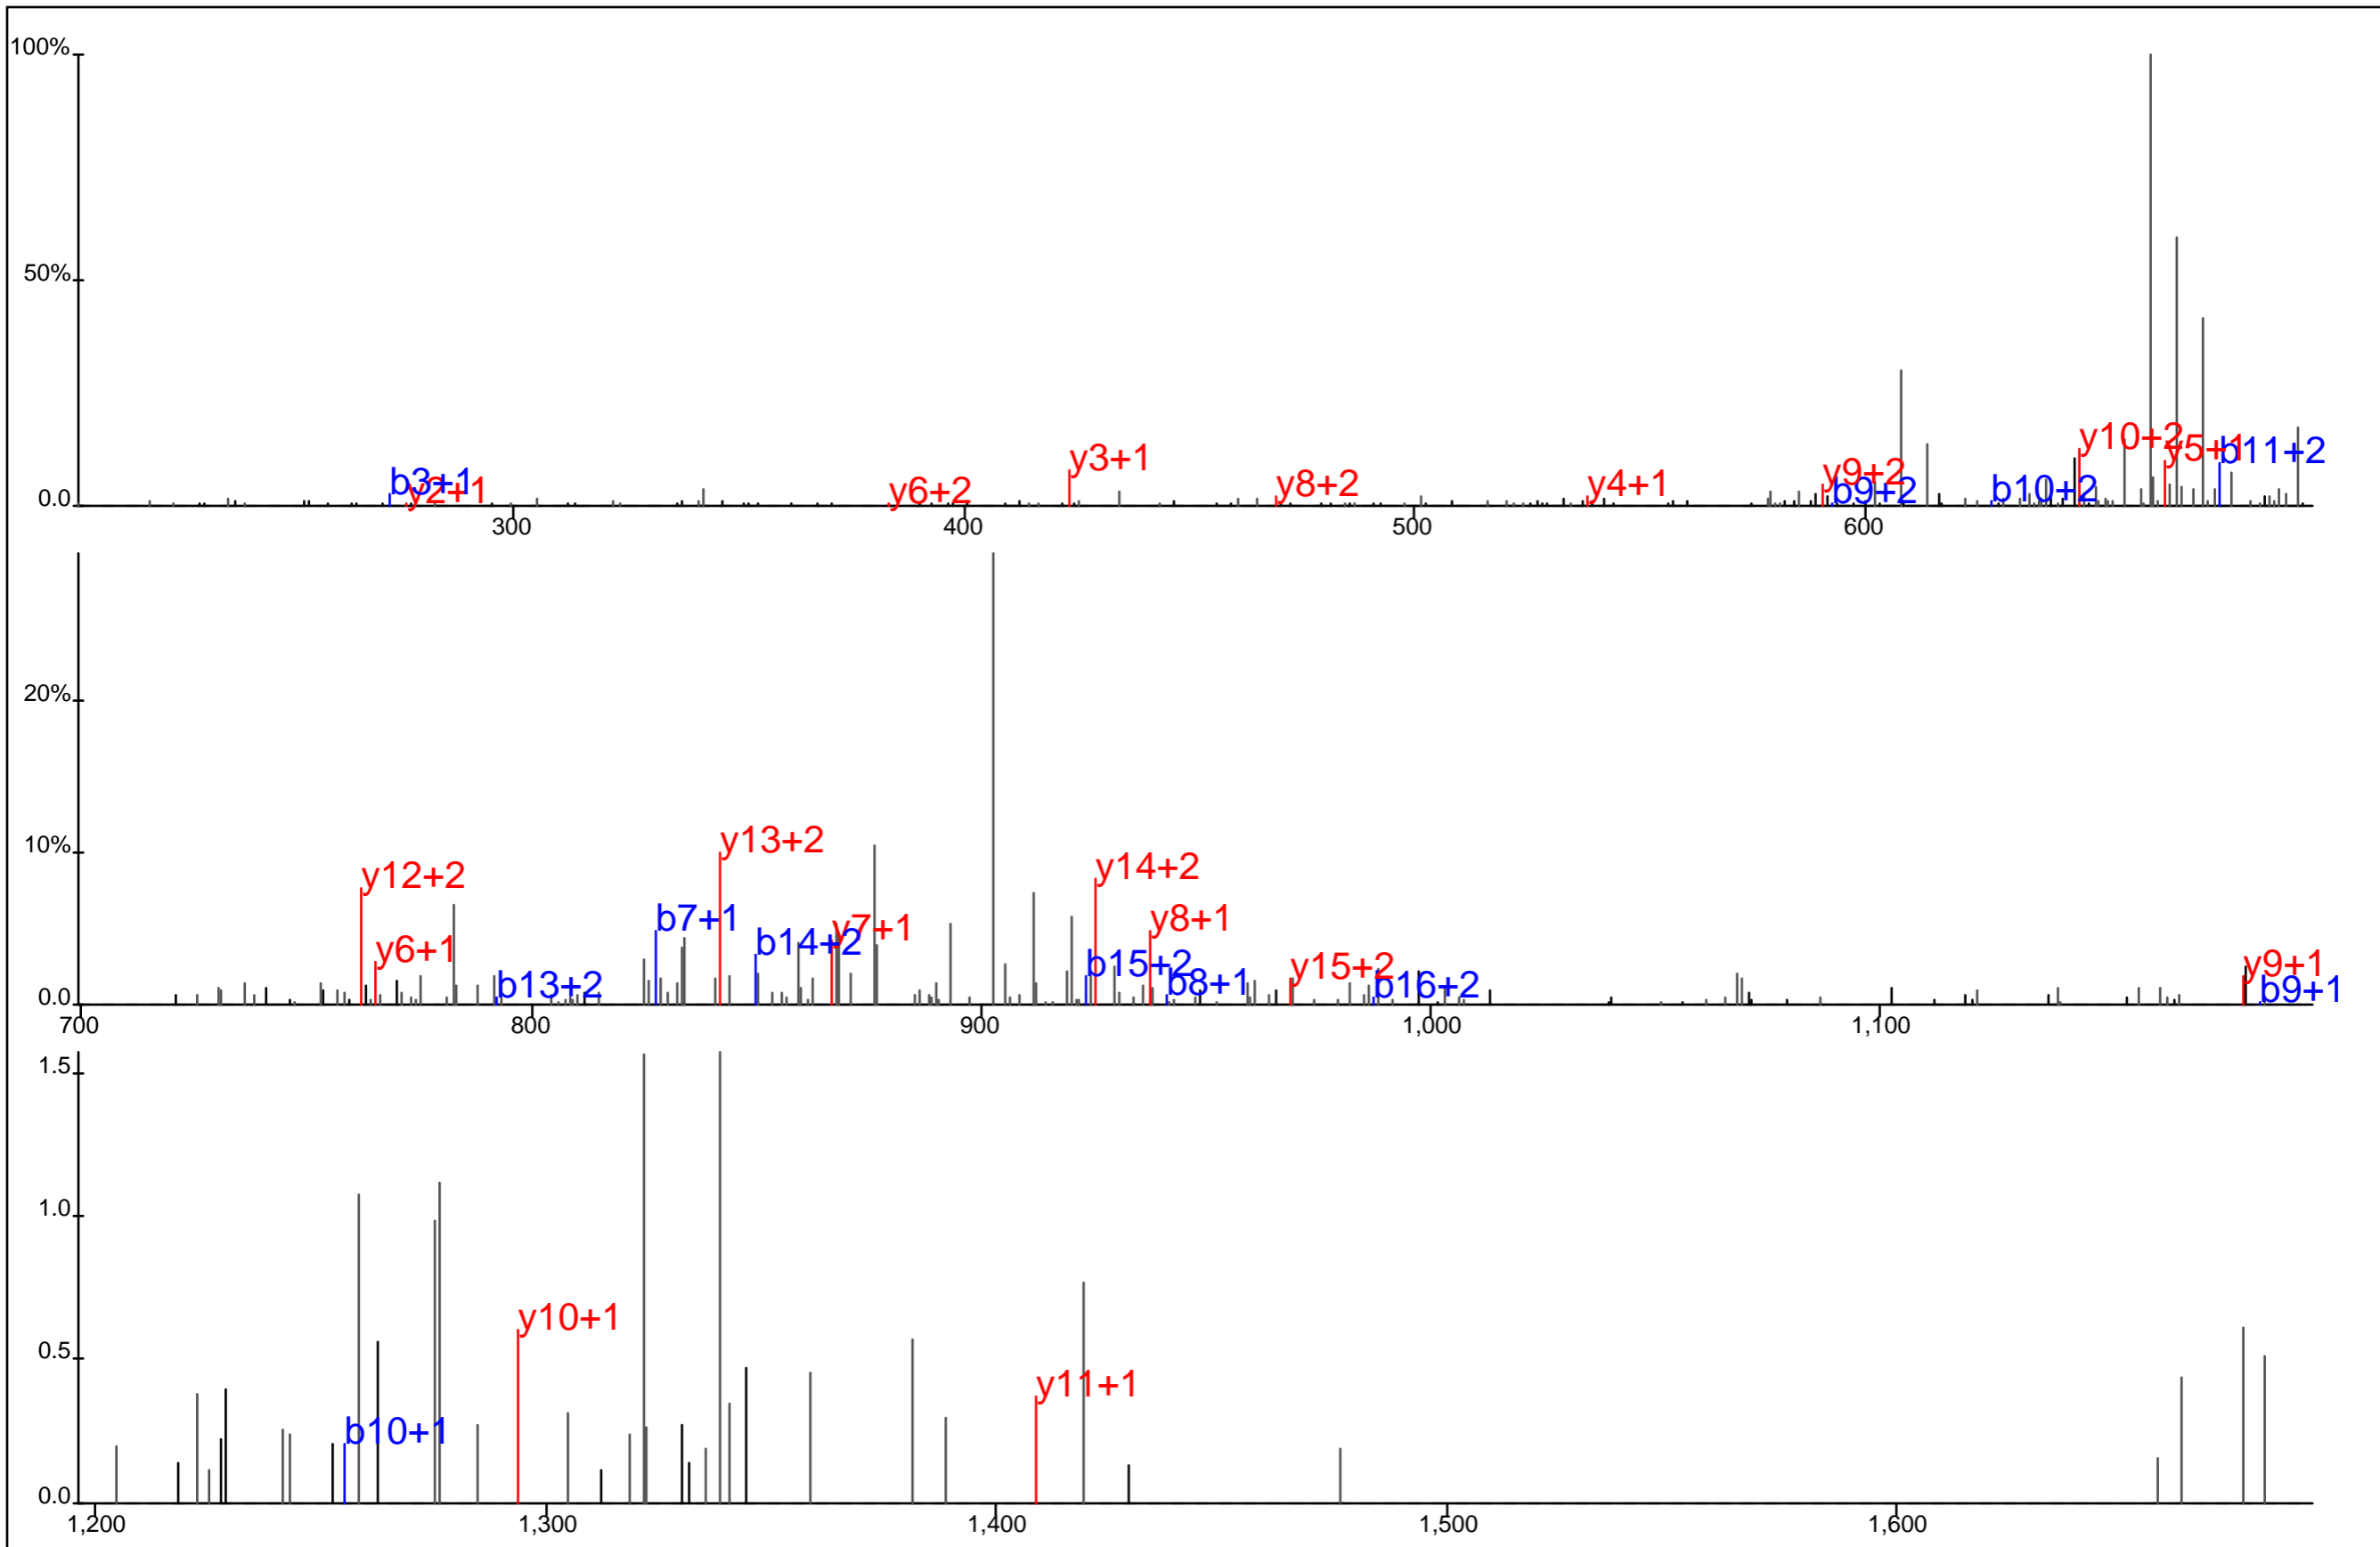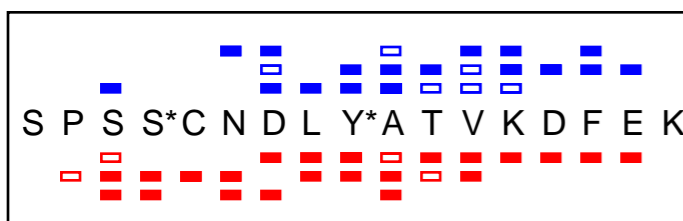

Protein Name: PAG  
 gi Accession: 7020925  
 Precursor Mass: 707.6157+3  
 Delta Mass: 1.937 ppm  
 XCorr: 32.04

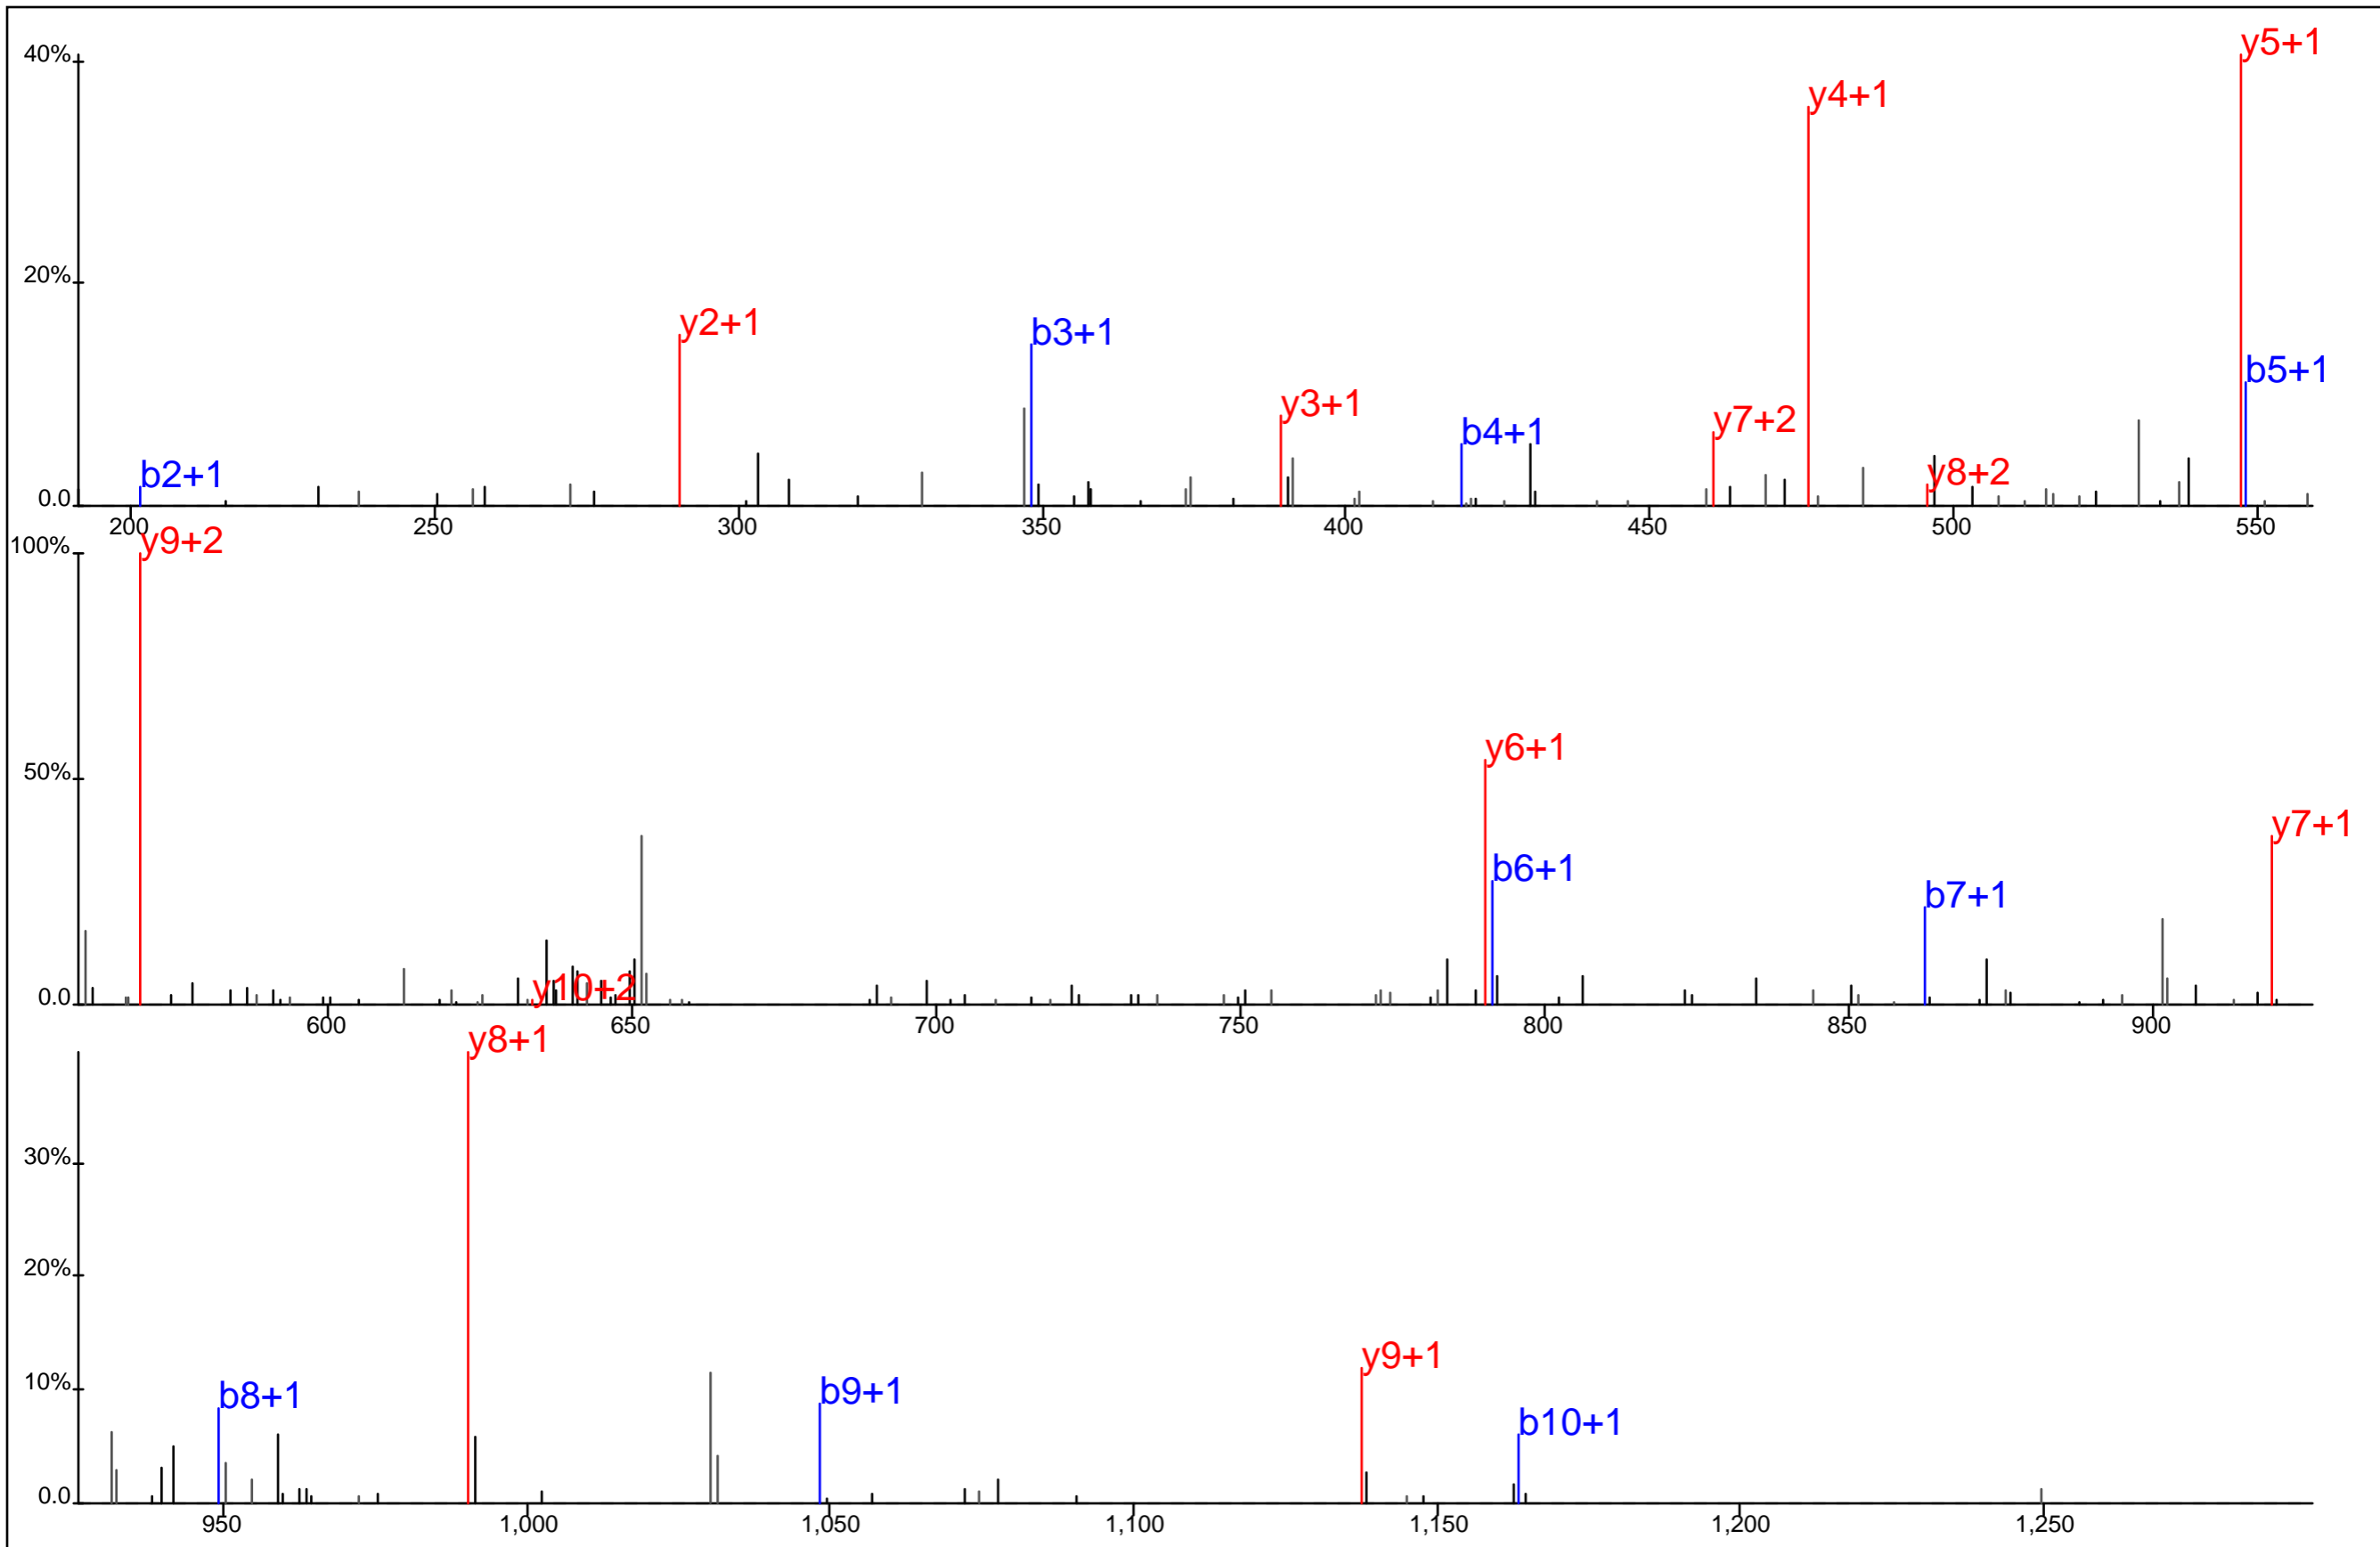

■ ■ ■ ■ ■ ■ ■ ■ ■ ■  
 A E F A E Y\* A S V D R  
□ □ □ □ □ □ □ □

Protein Name: PAG  
 gi Accession: 7020925  
 Precursor Mass: 669.2742+2  
 Delta Mass: 0.215 ppm  
 XCorr: 61.36



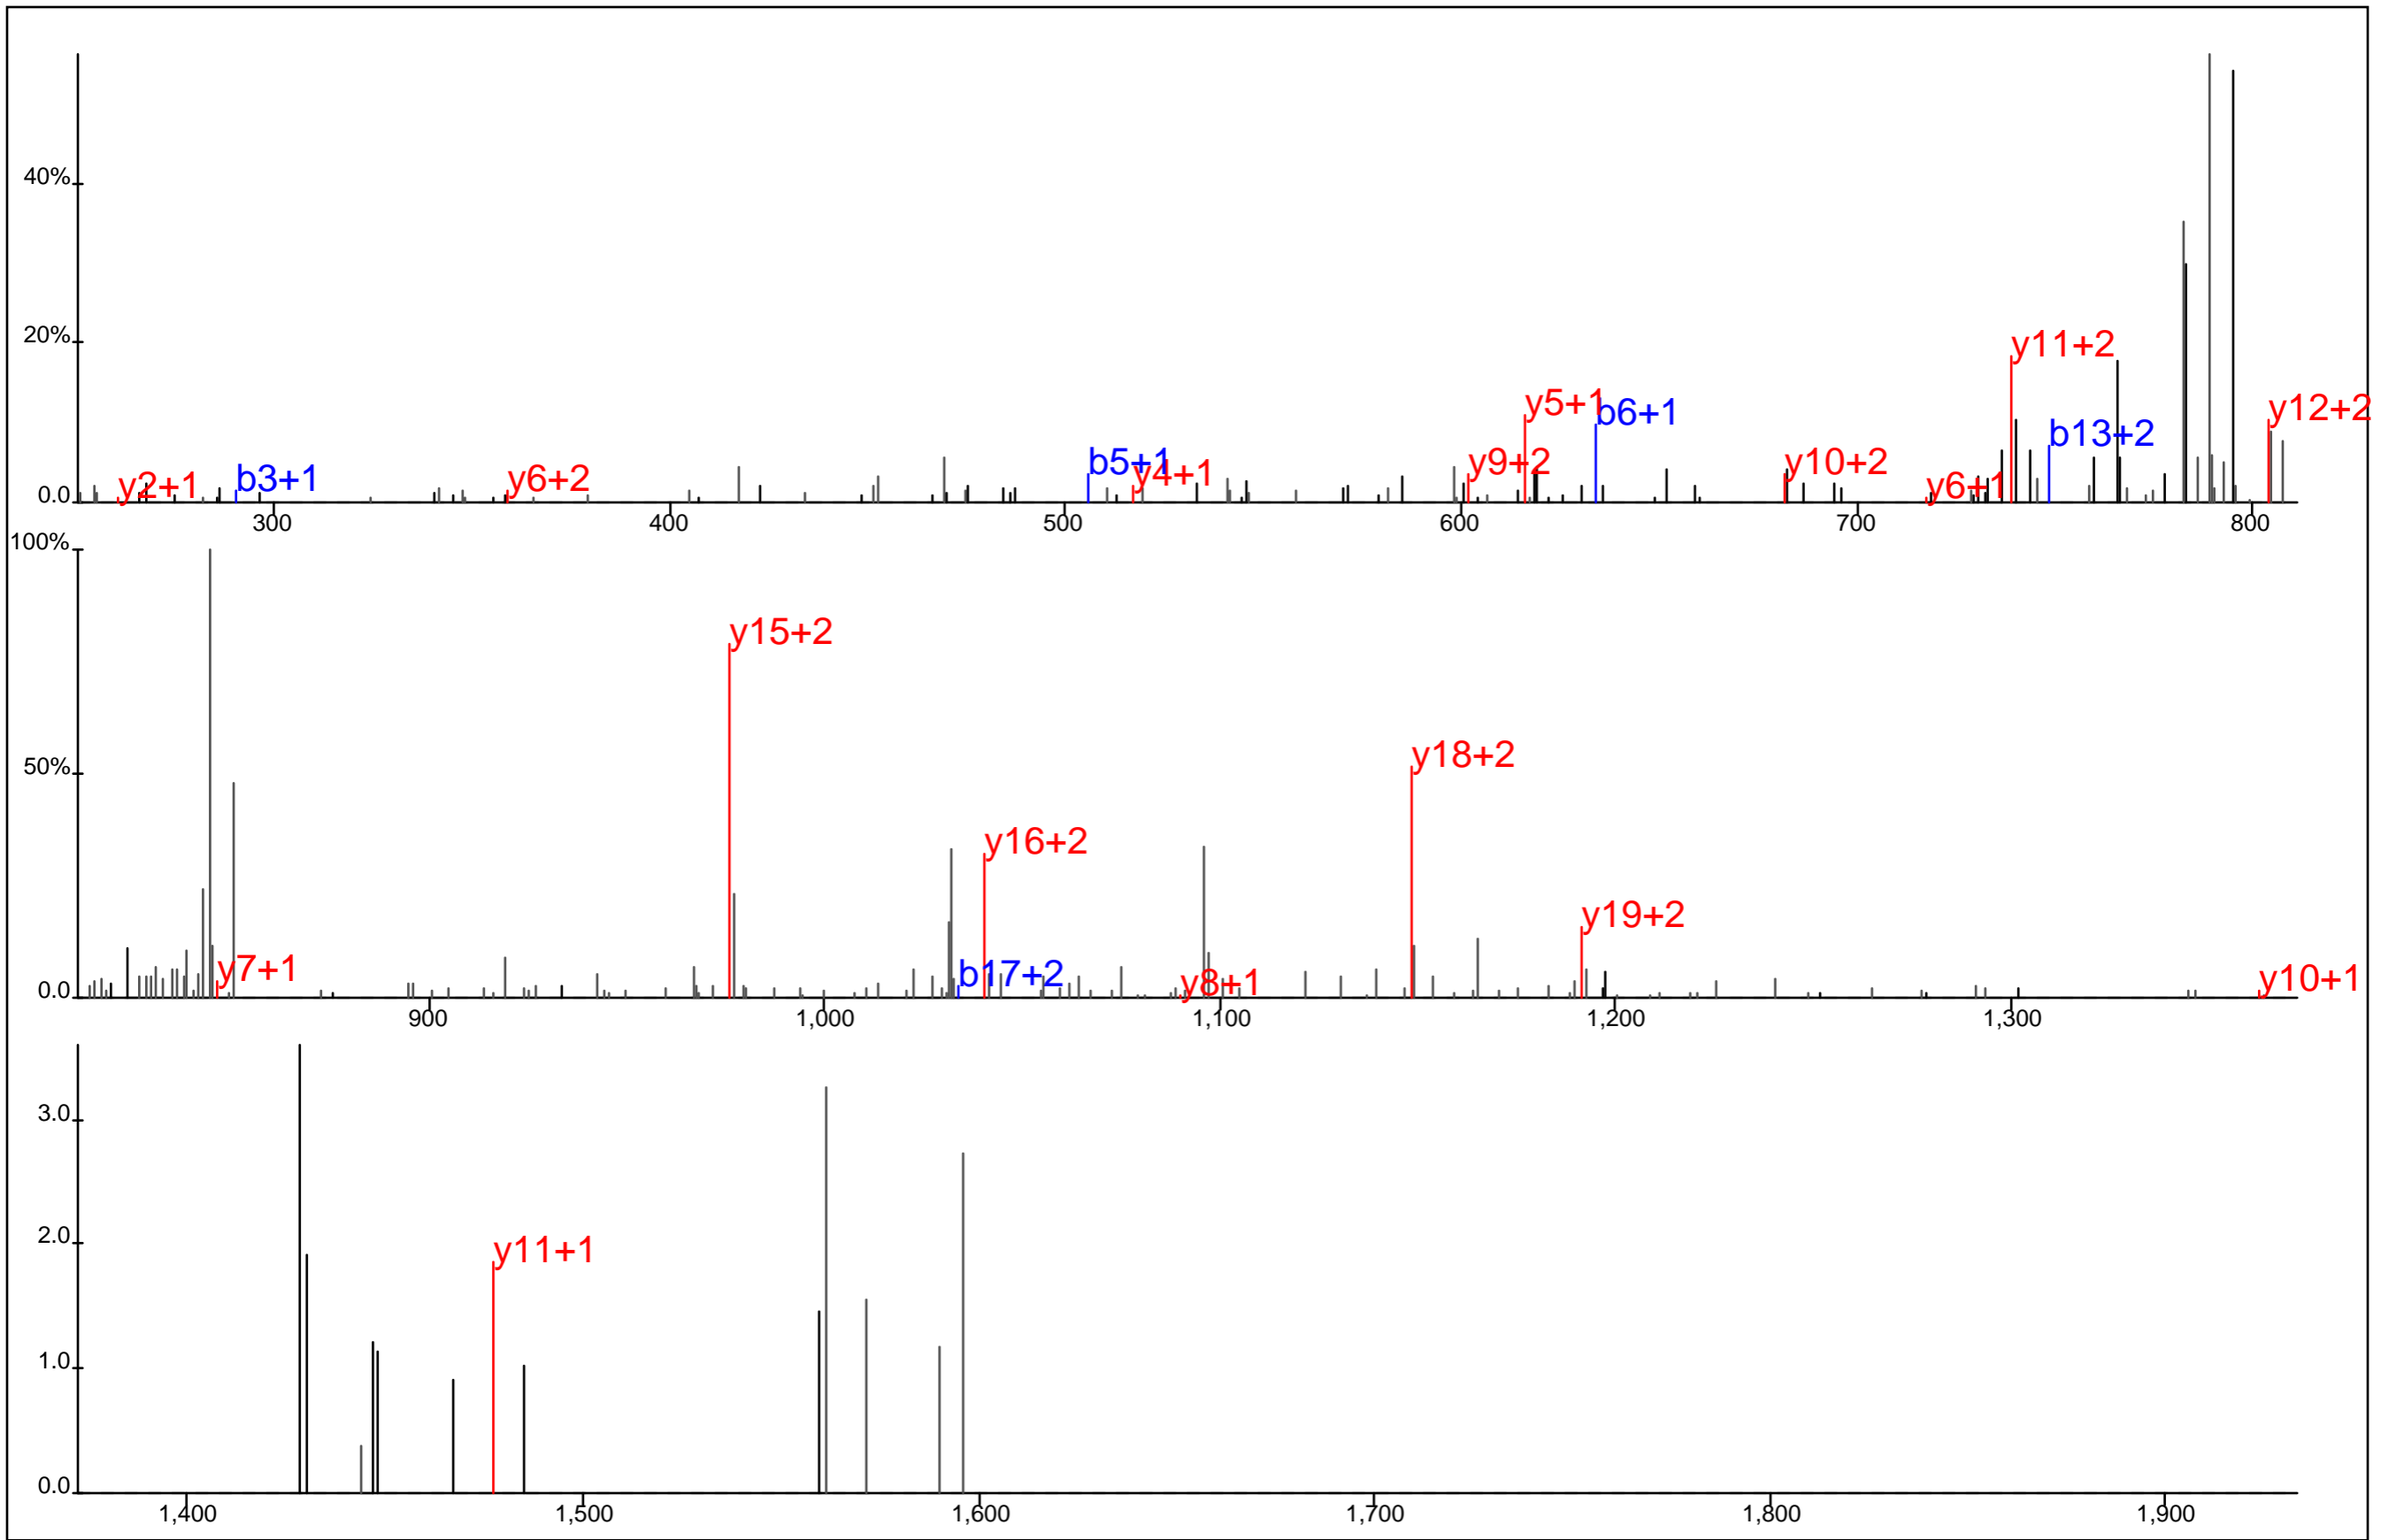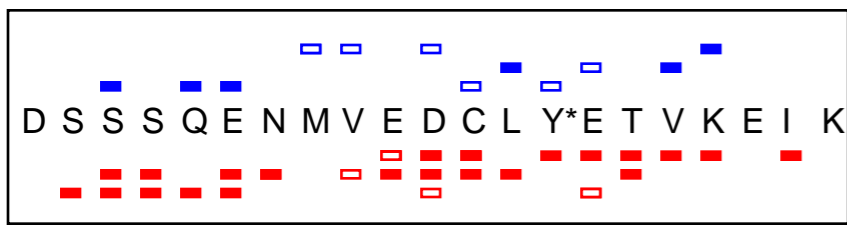

Protein Name: PAG  
 gi Accession: 7020925  
 Precursor Mass: 862.0330+3  
 Delta Mass: 0.584 ppm  
 XCorr: 16.55

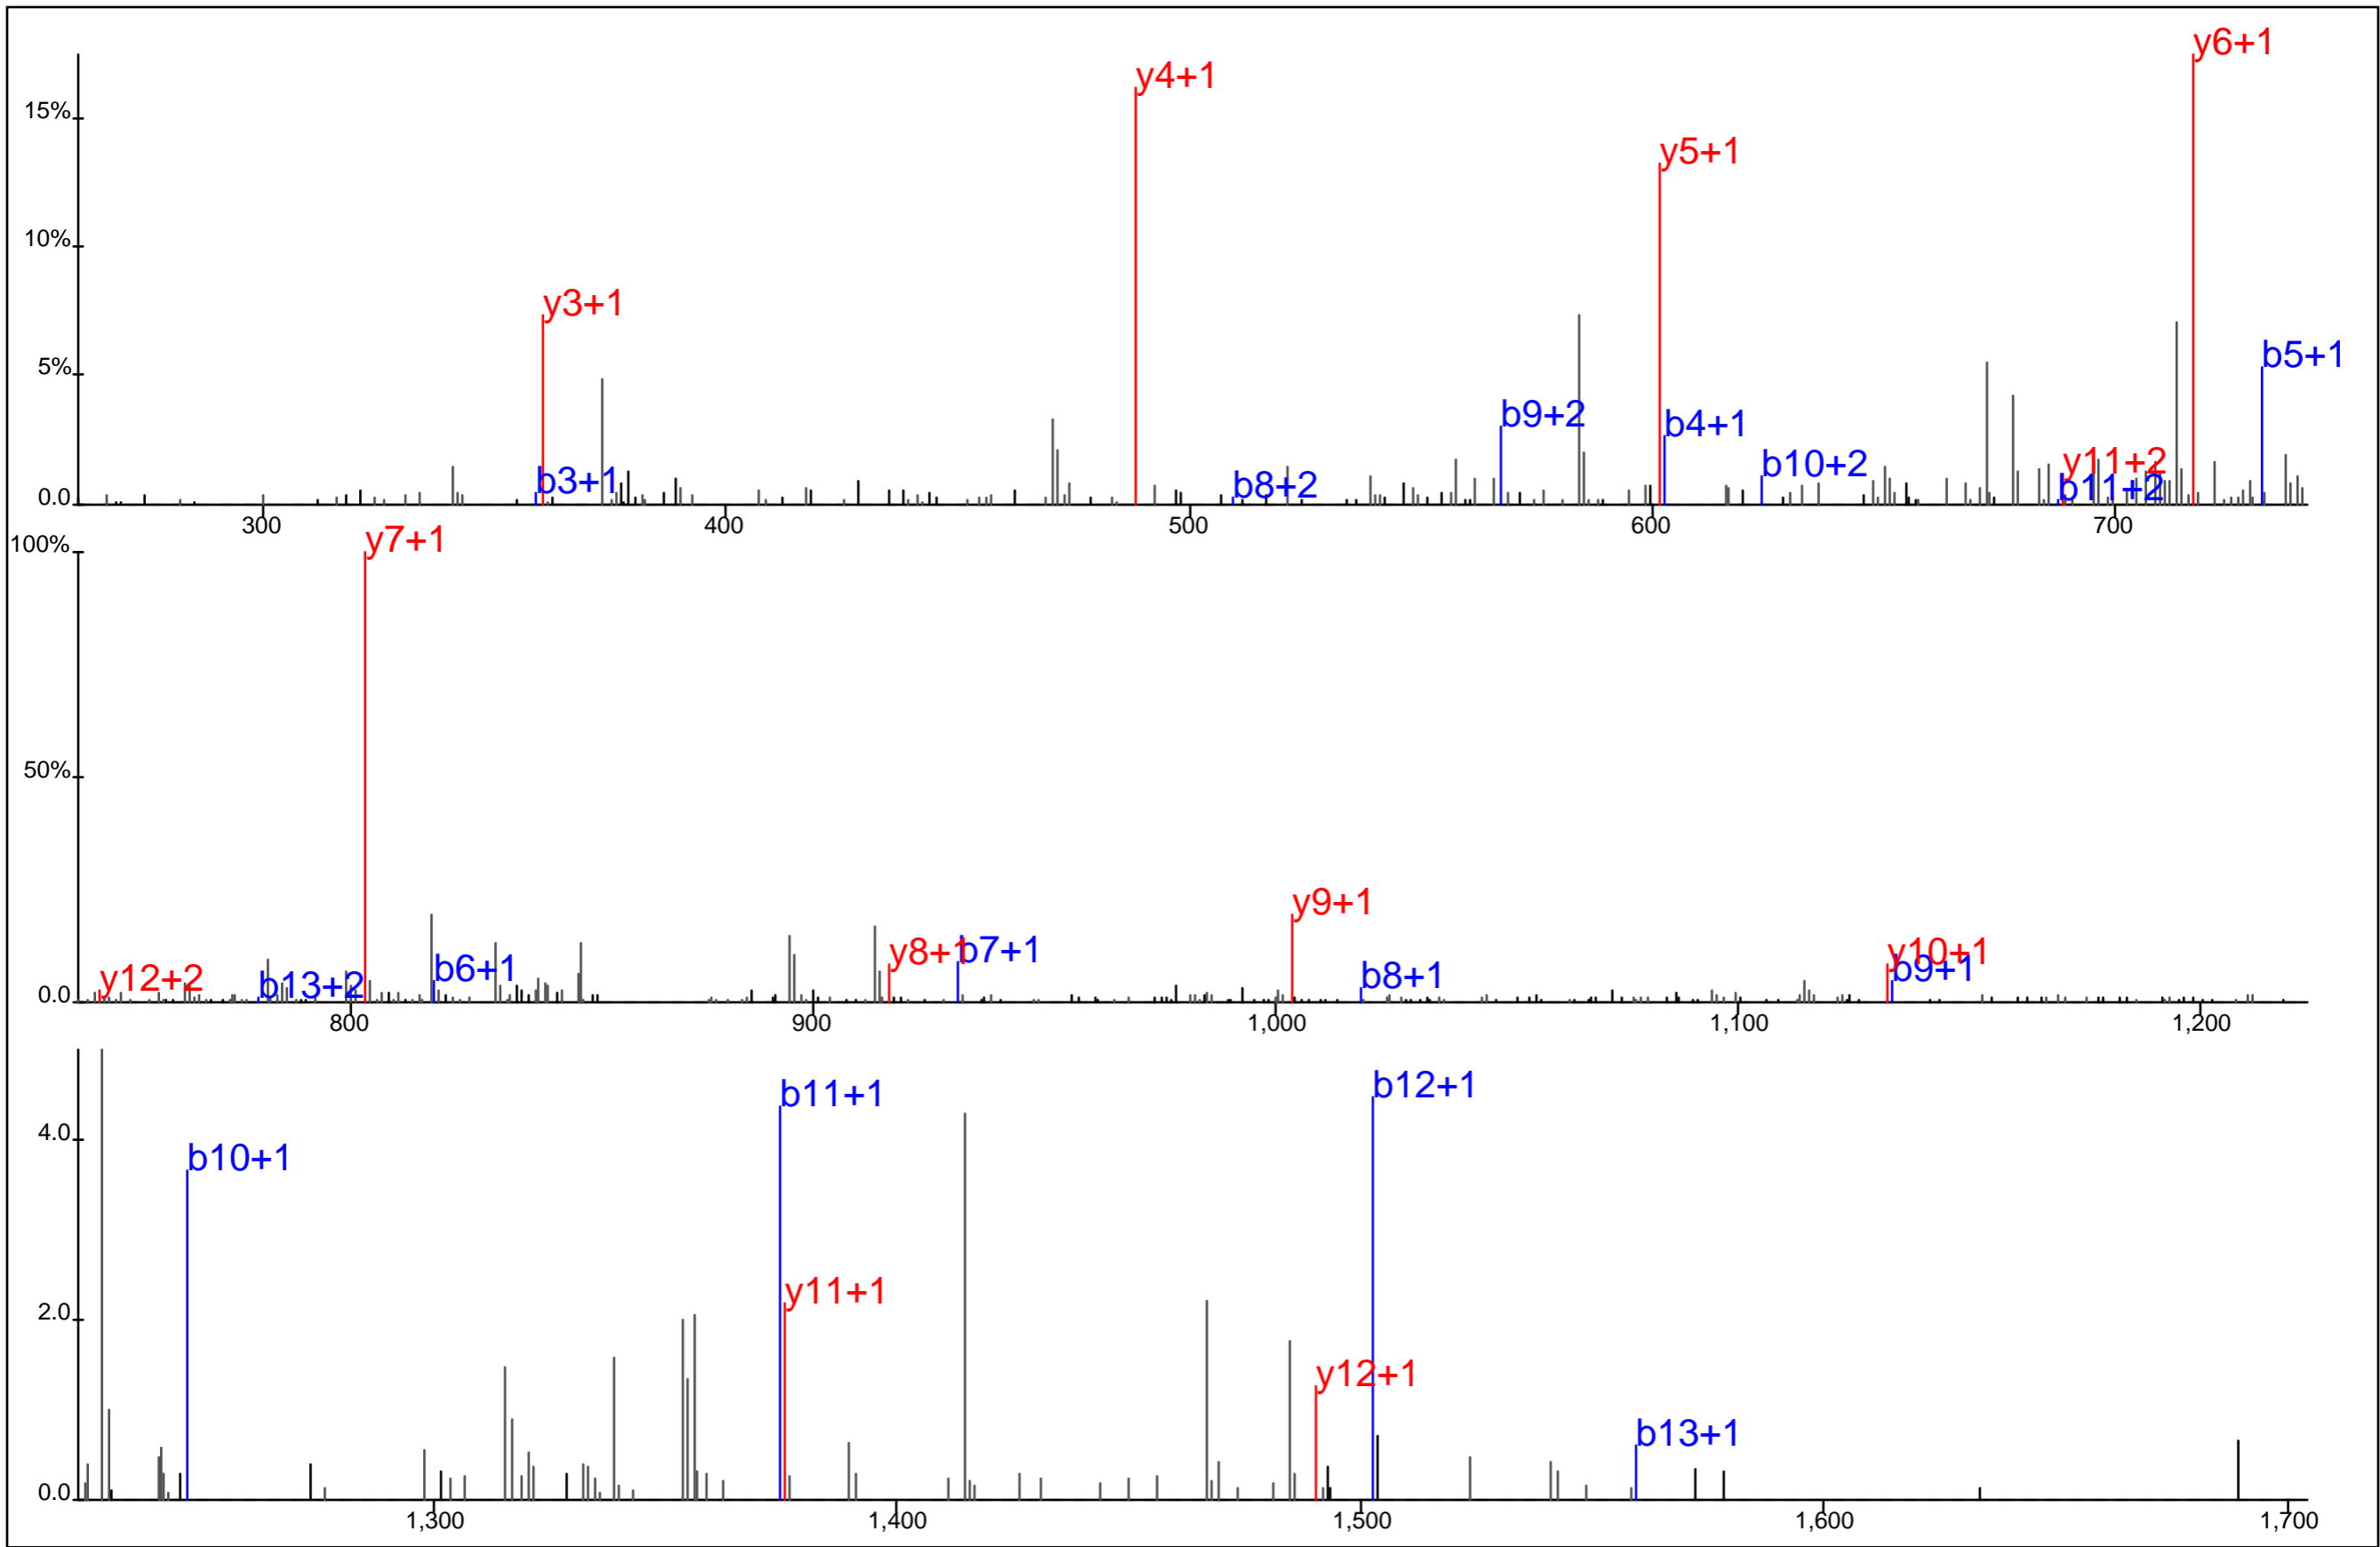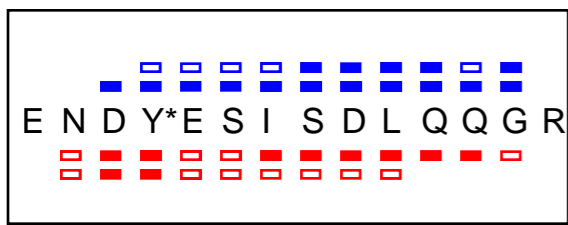

Protein Name: PAG  
 gi Accession: 7020925  
 Precursor Mass: 867.3558+2  
 Delta Mass: 1.666 ppm  
 XCorr: 57.99

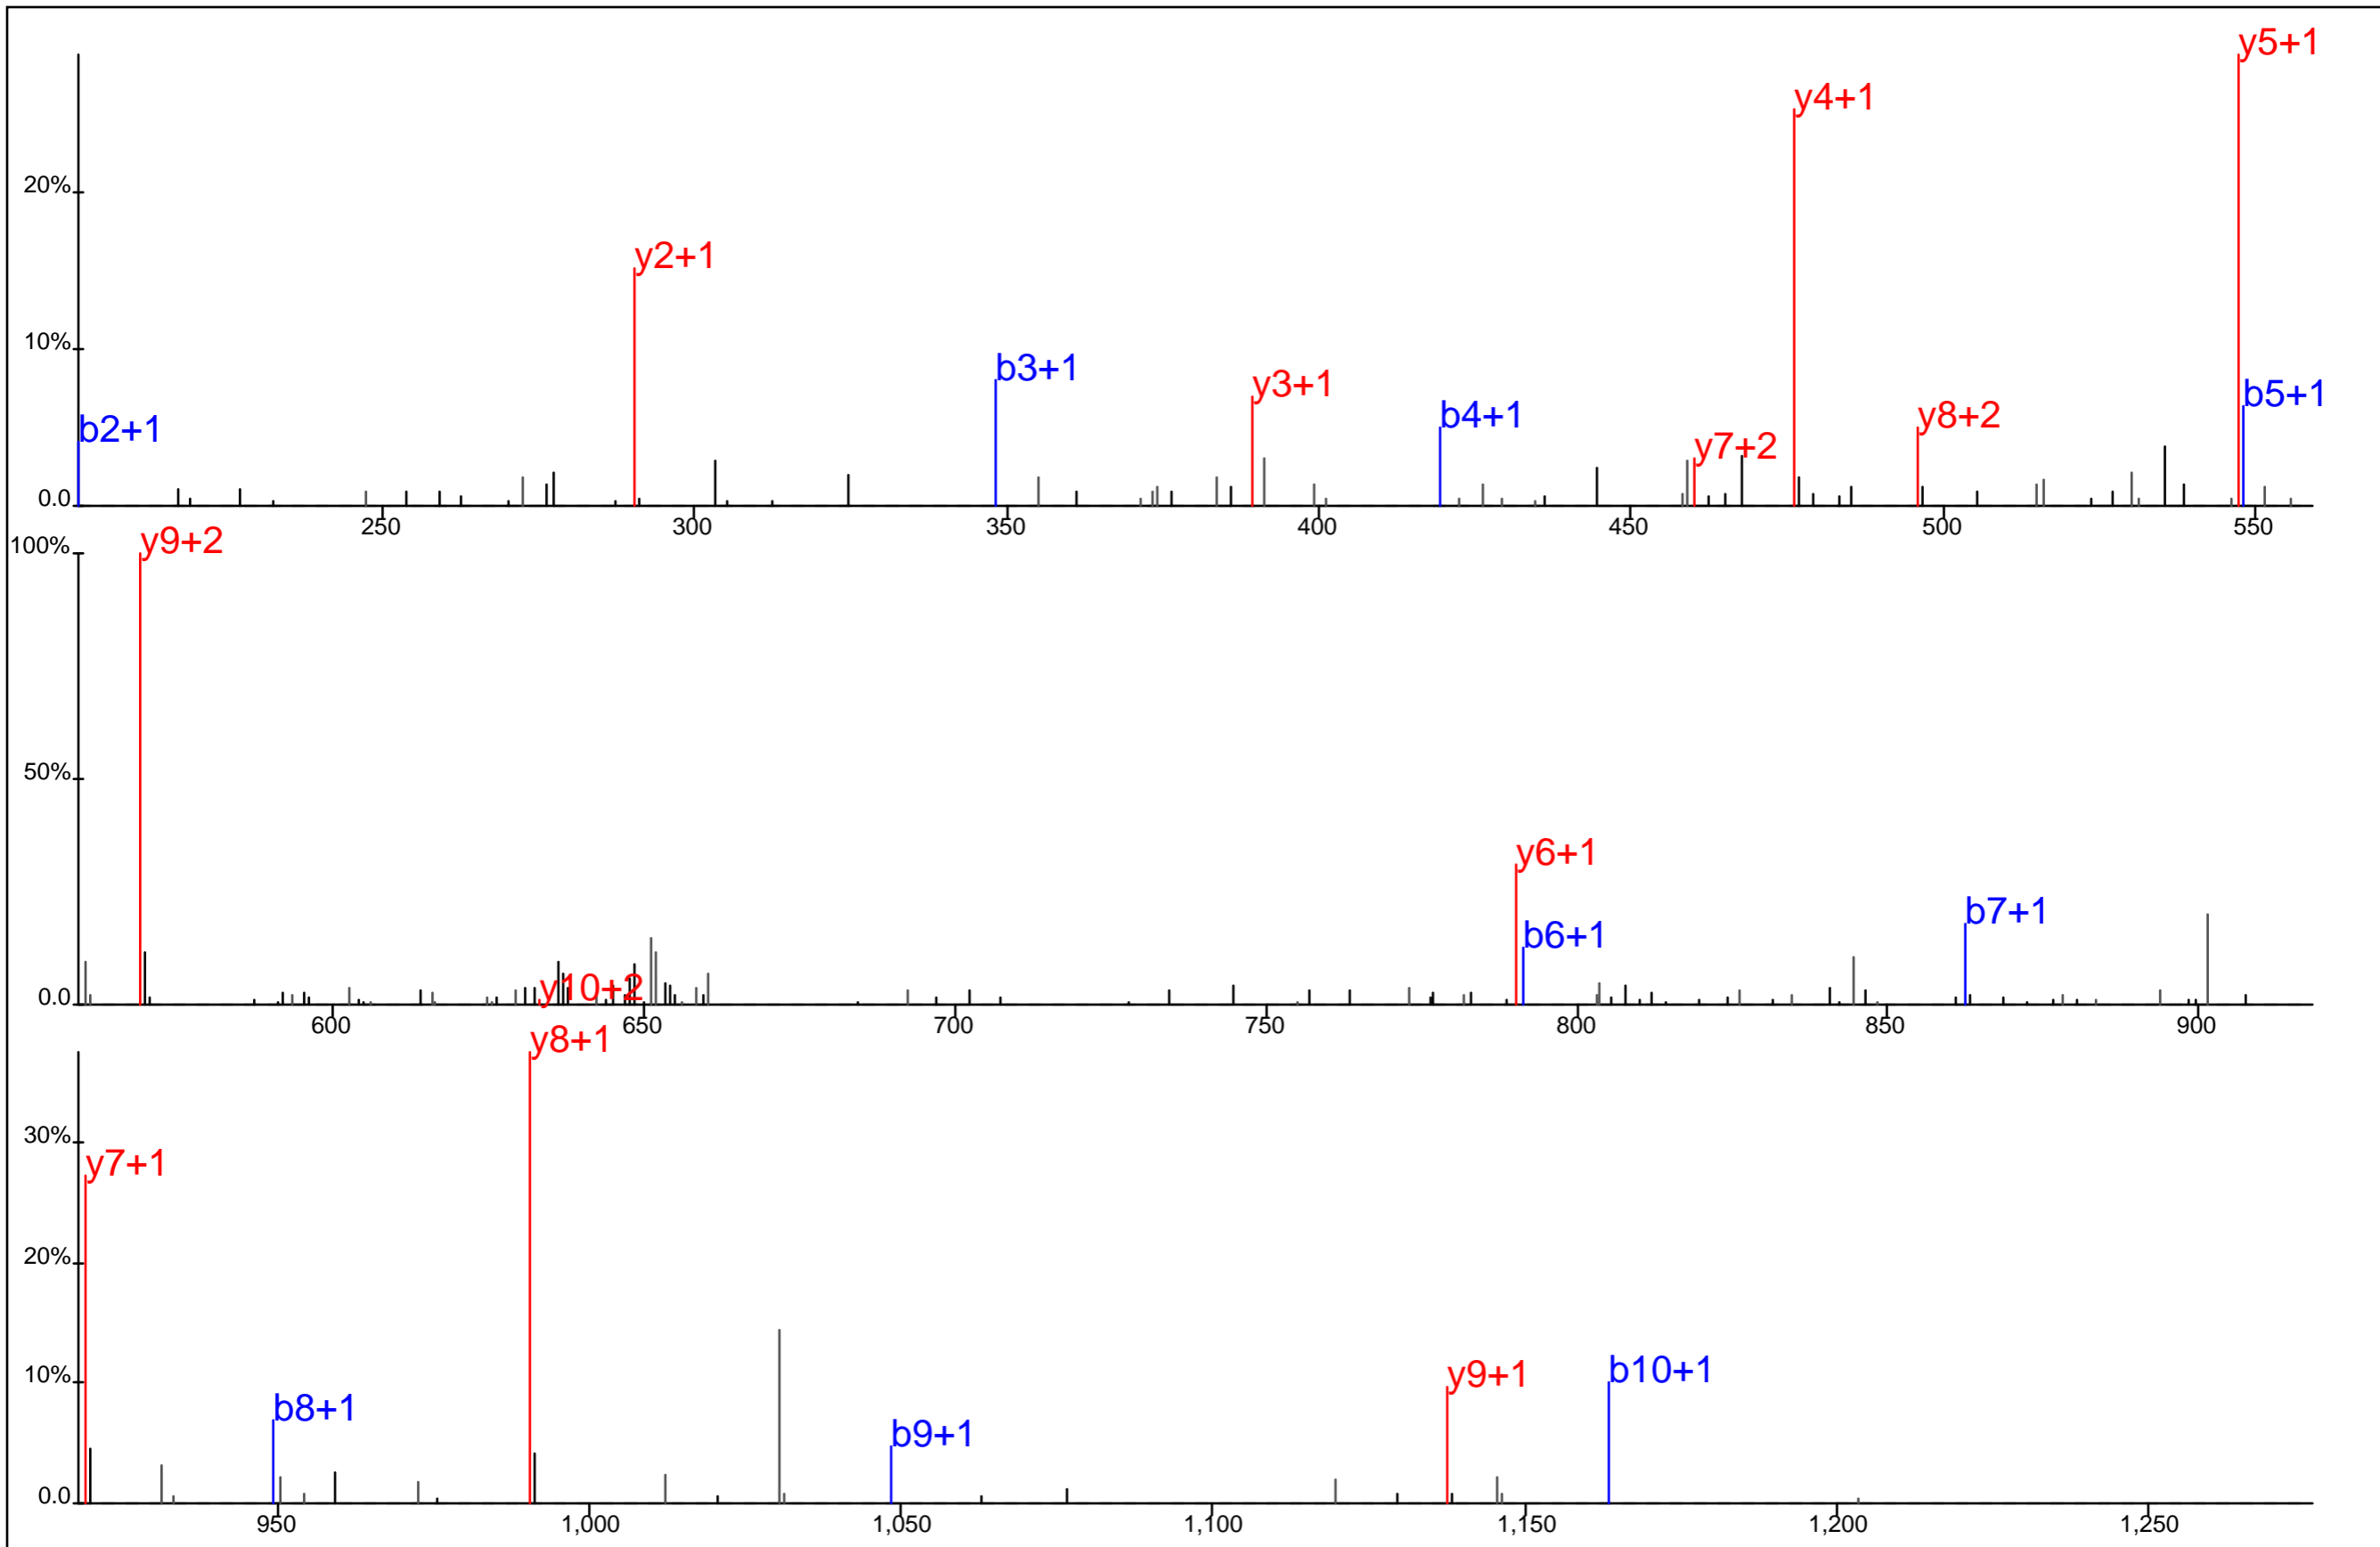

A E F A E Y\* A S V D R

Protein Name: PAG  
 gi Accession: 7020925  
 Precursor Mass: 669.2758+2  
 Delta Mass: 2.585 ppm  
 XCorr: 76.54

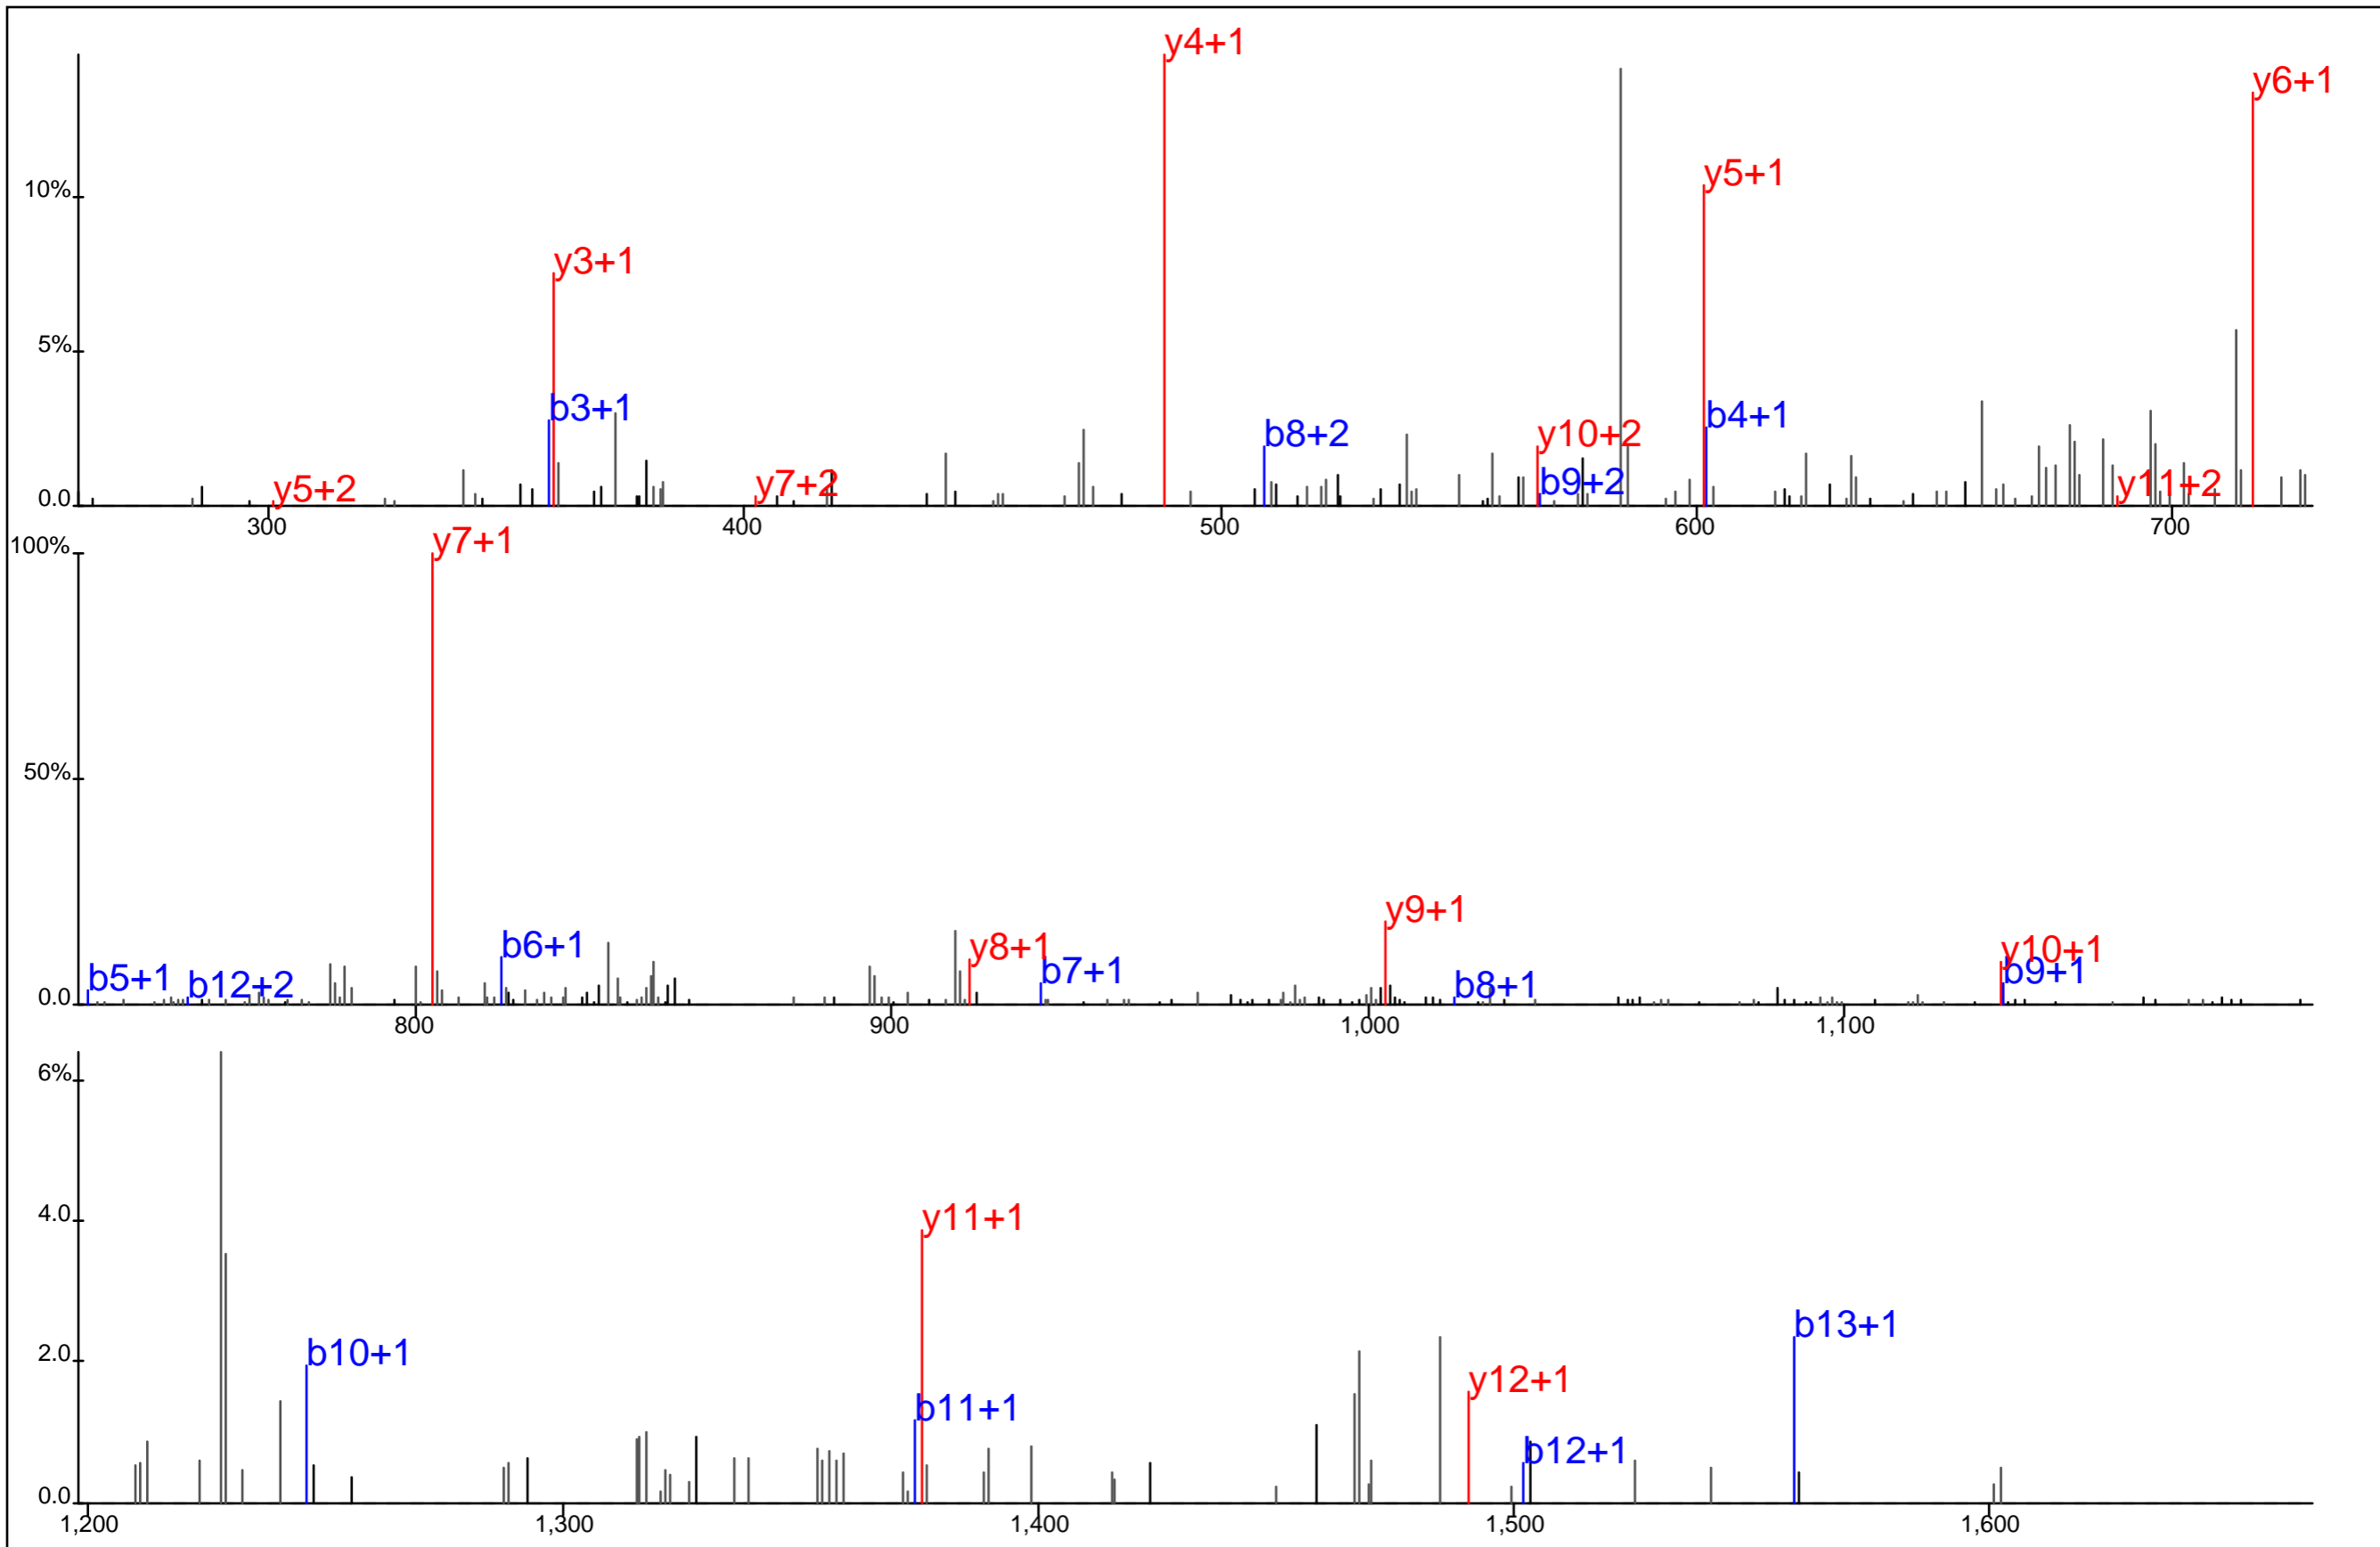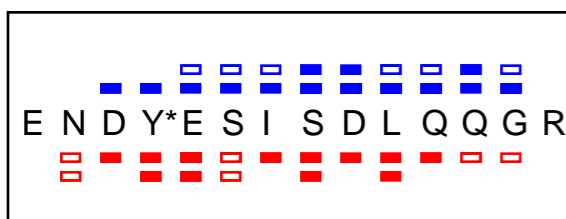

Protein Name: PAG  
 gi Accession: 7020925  
 Precursor Mass: 867.3643+2  
 Delta Mass: 11.454 ppm  
 XCorr: 67.04

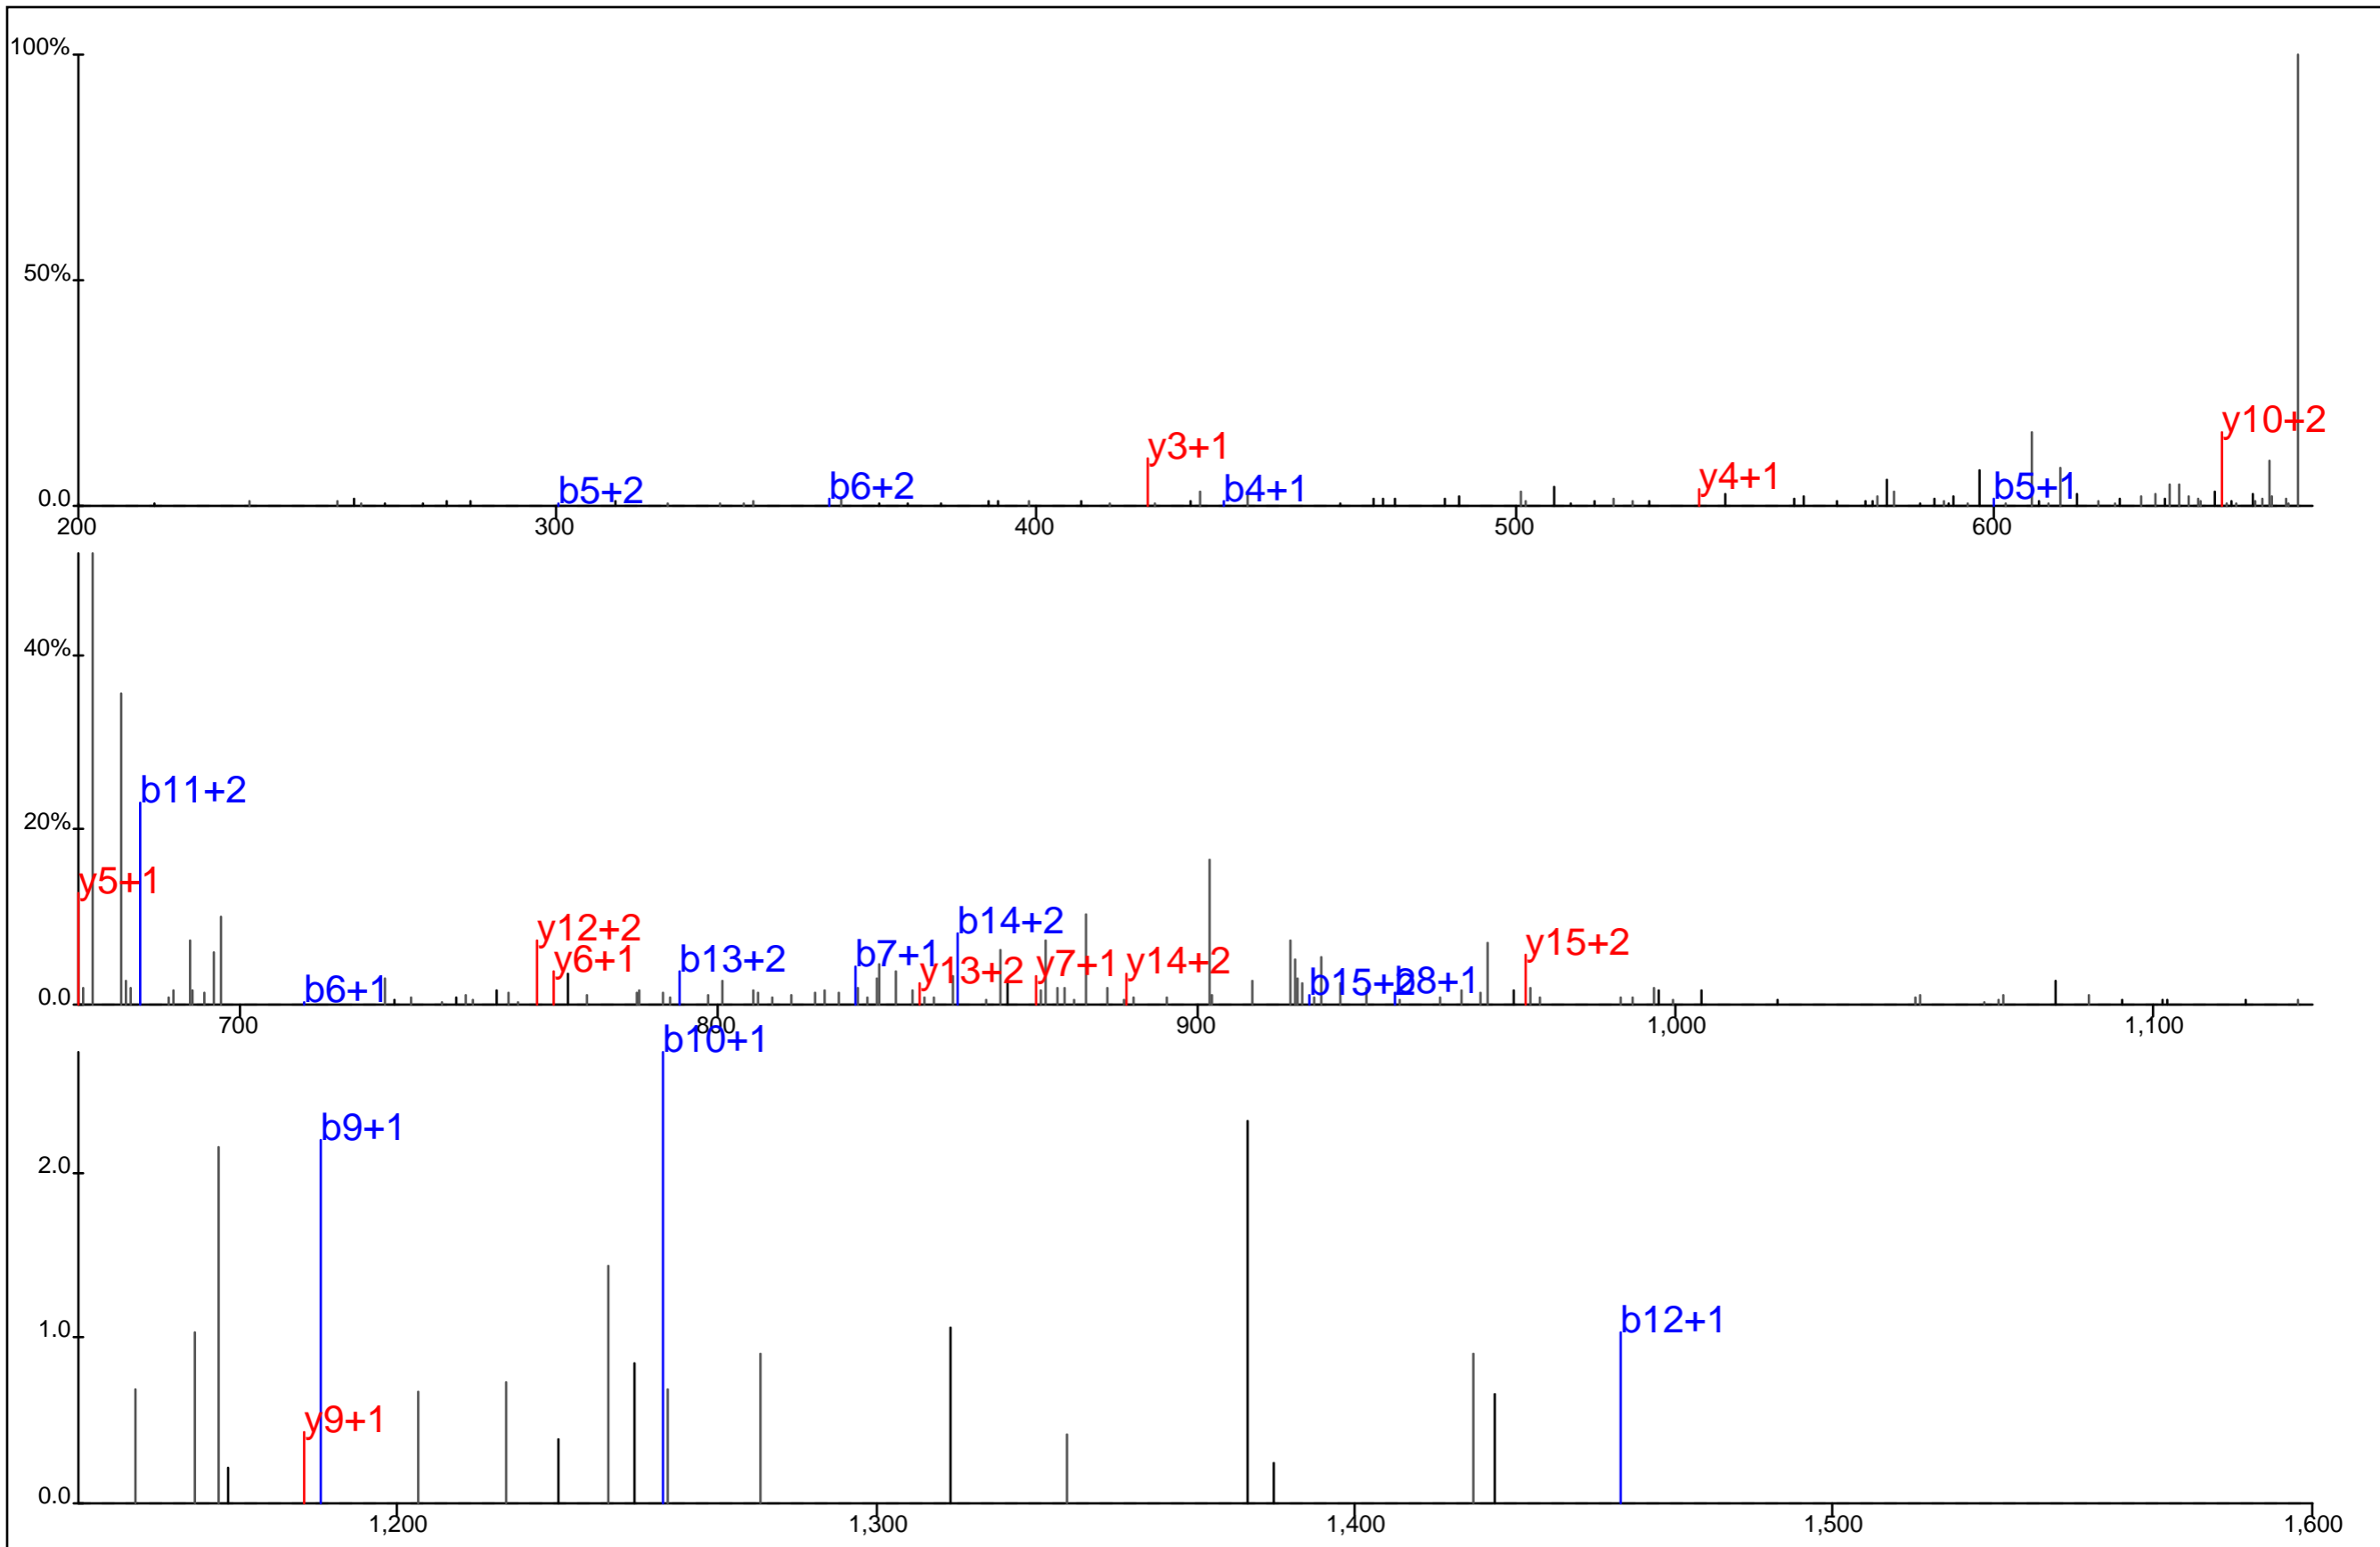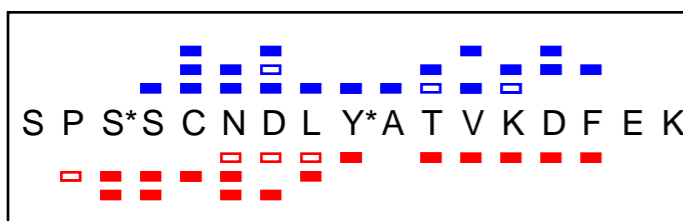

Protein Name: PAG  
 gi Accession: 7020925  
 Precursor Mass: 707.6154+3  
 Delta Mass: 1.507 ppm  
 XCorr: 23.16









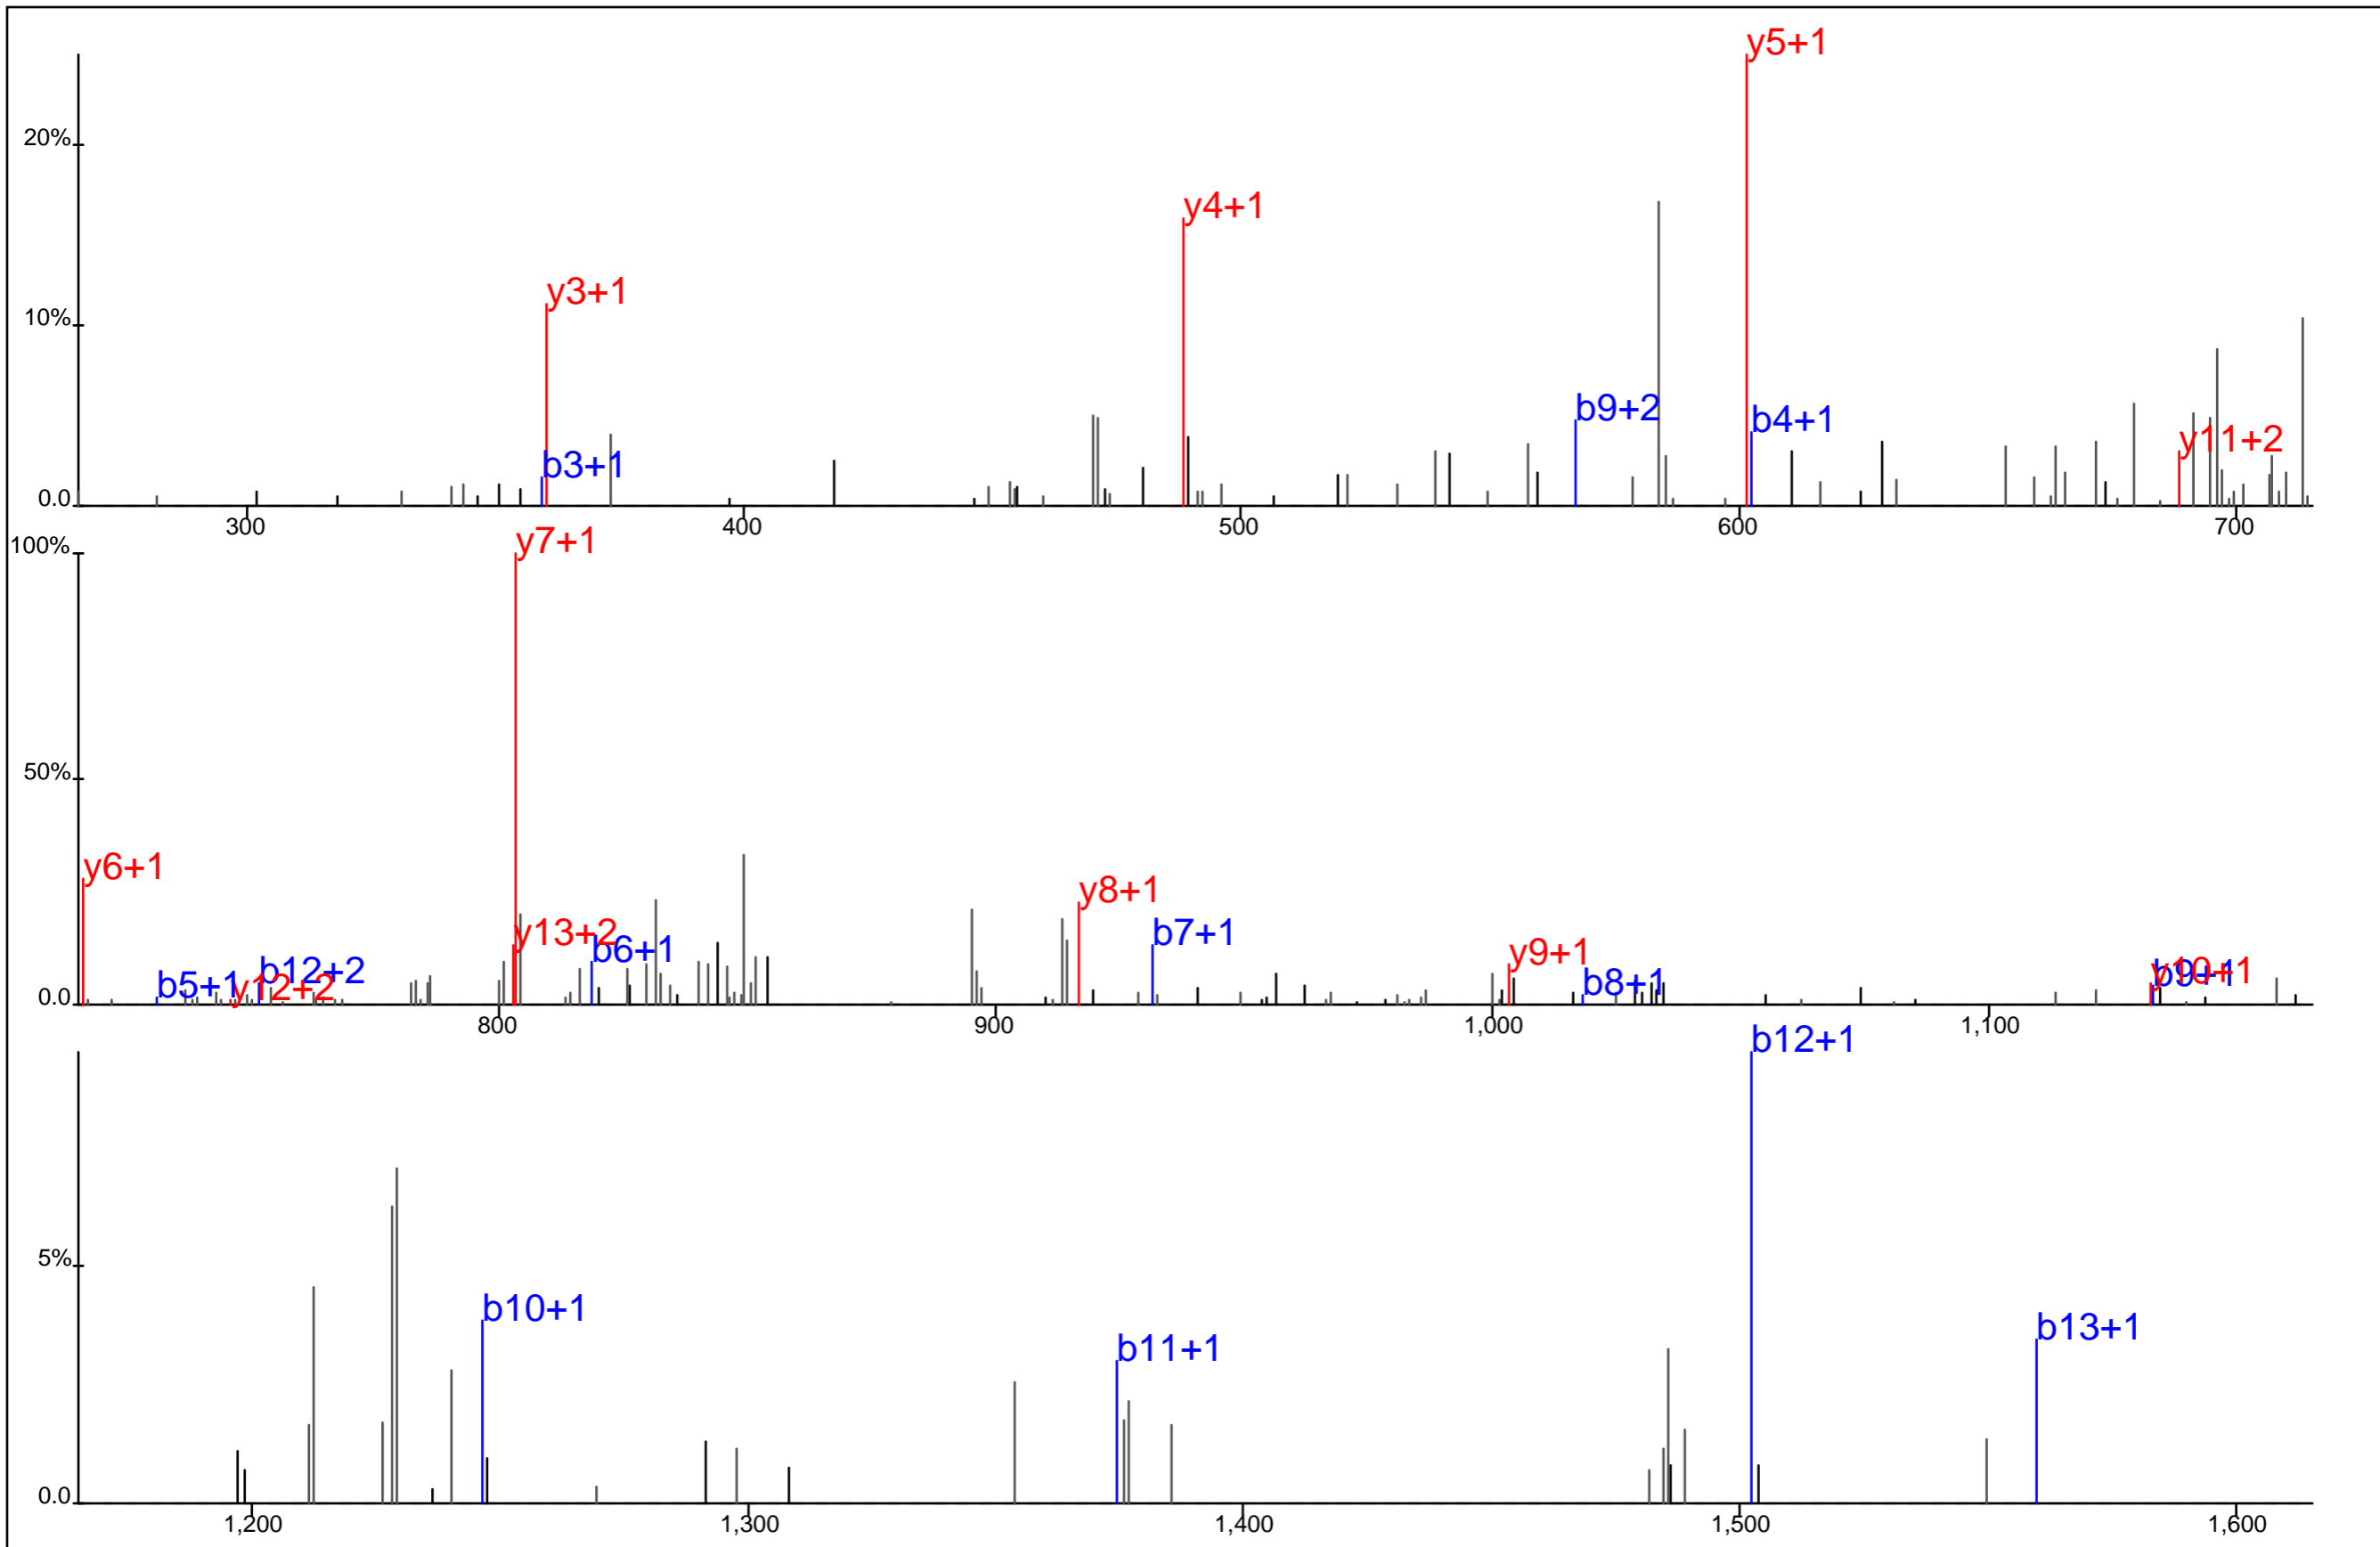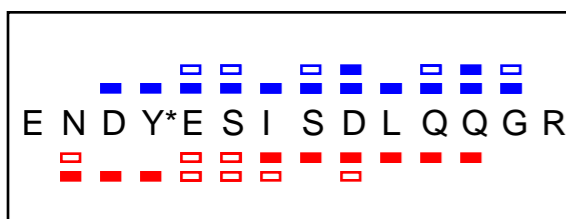

Protein Name: PAG  
 gi Accession: 7020925  
 Precursor Mass: 867.3593+2  
 Delta Mass: 5.680 ppm  
 XCorr: 54.8

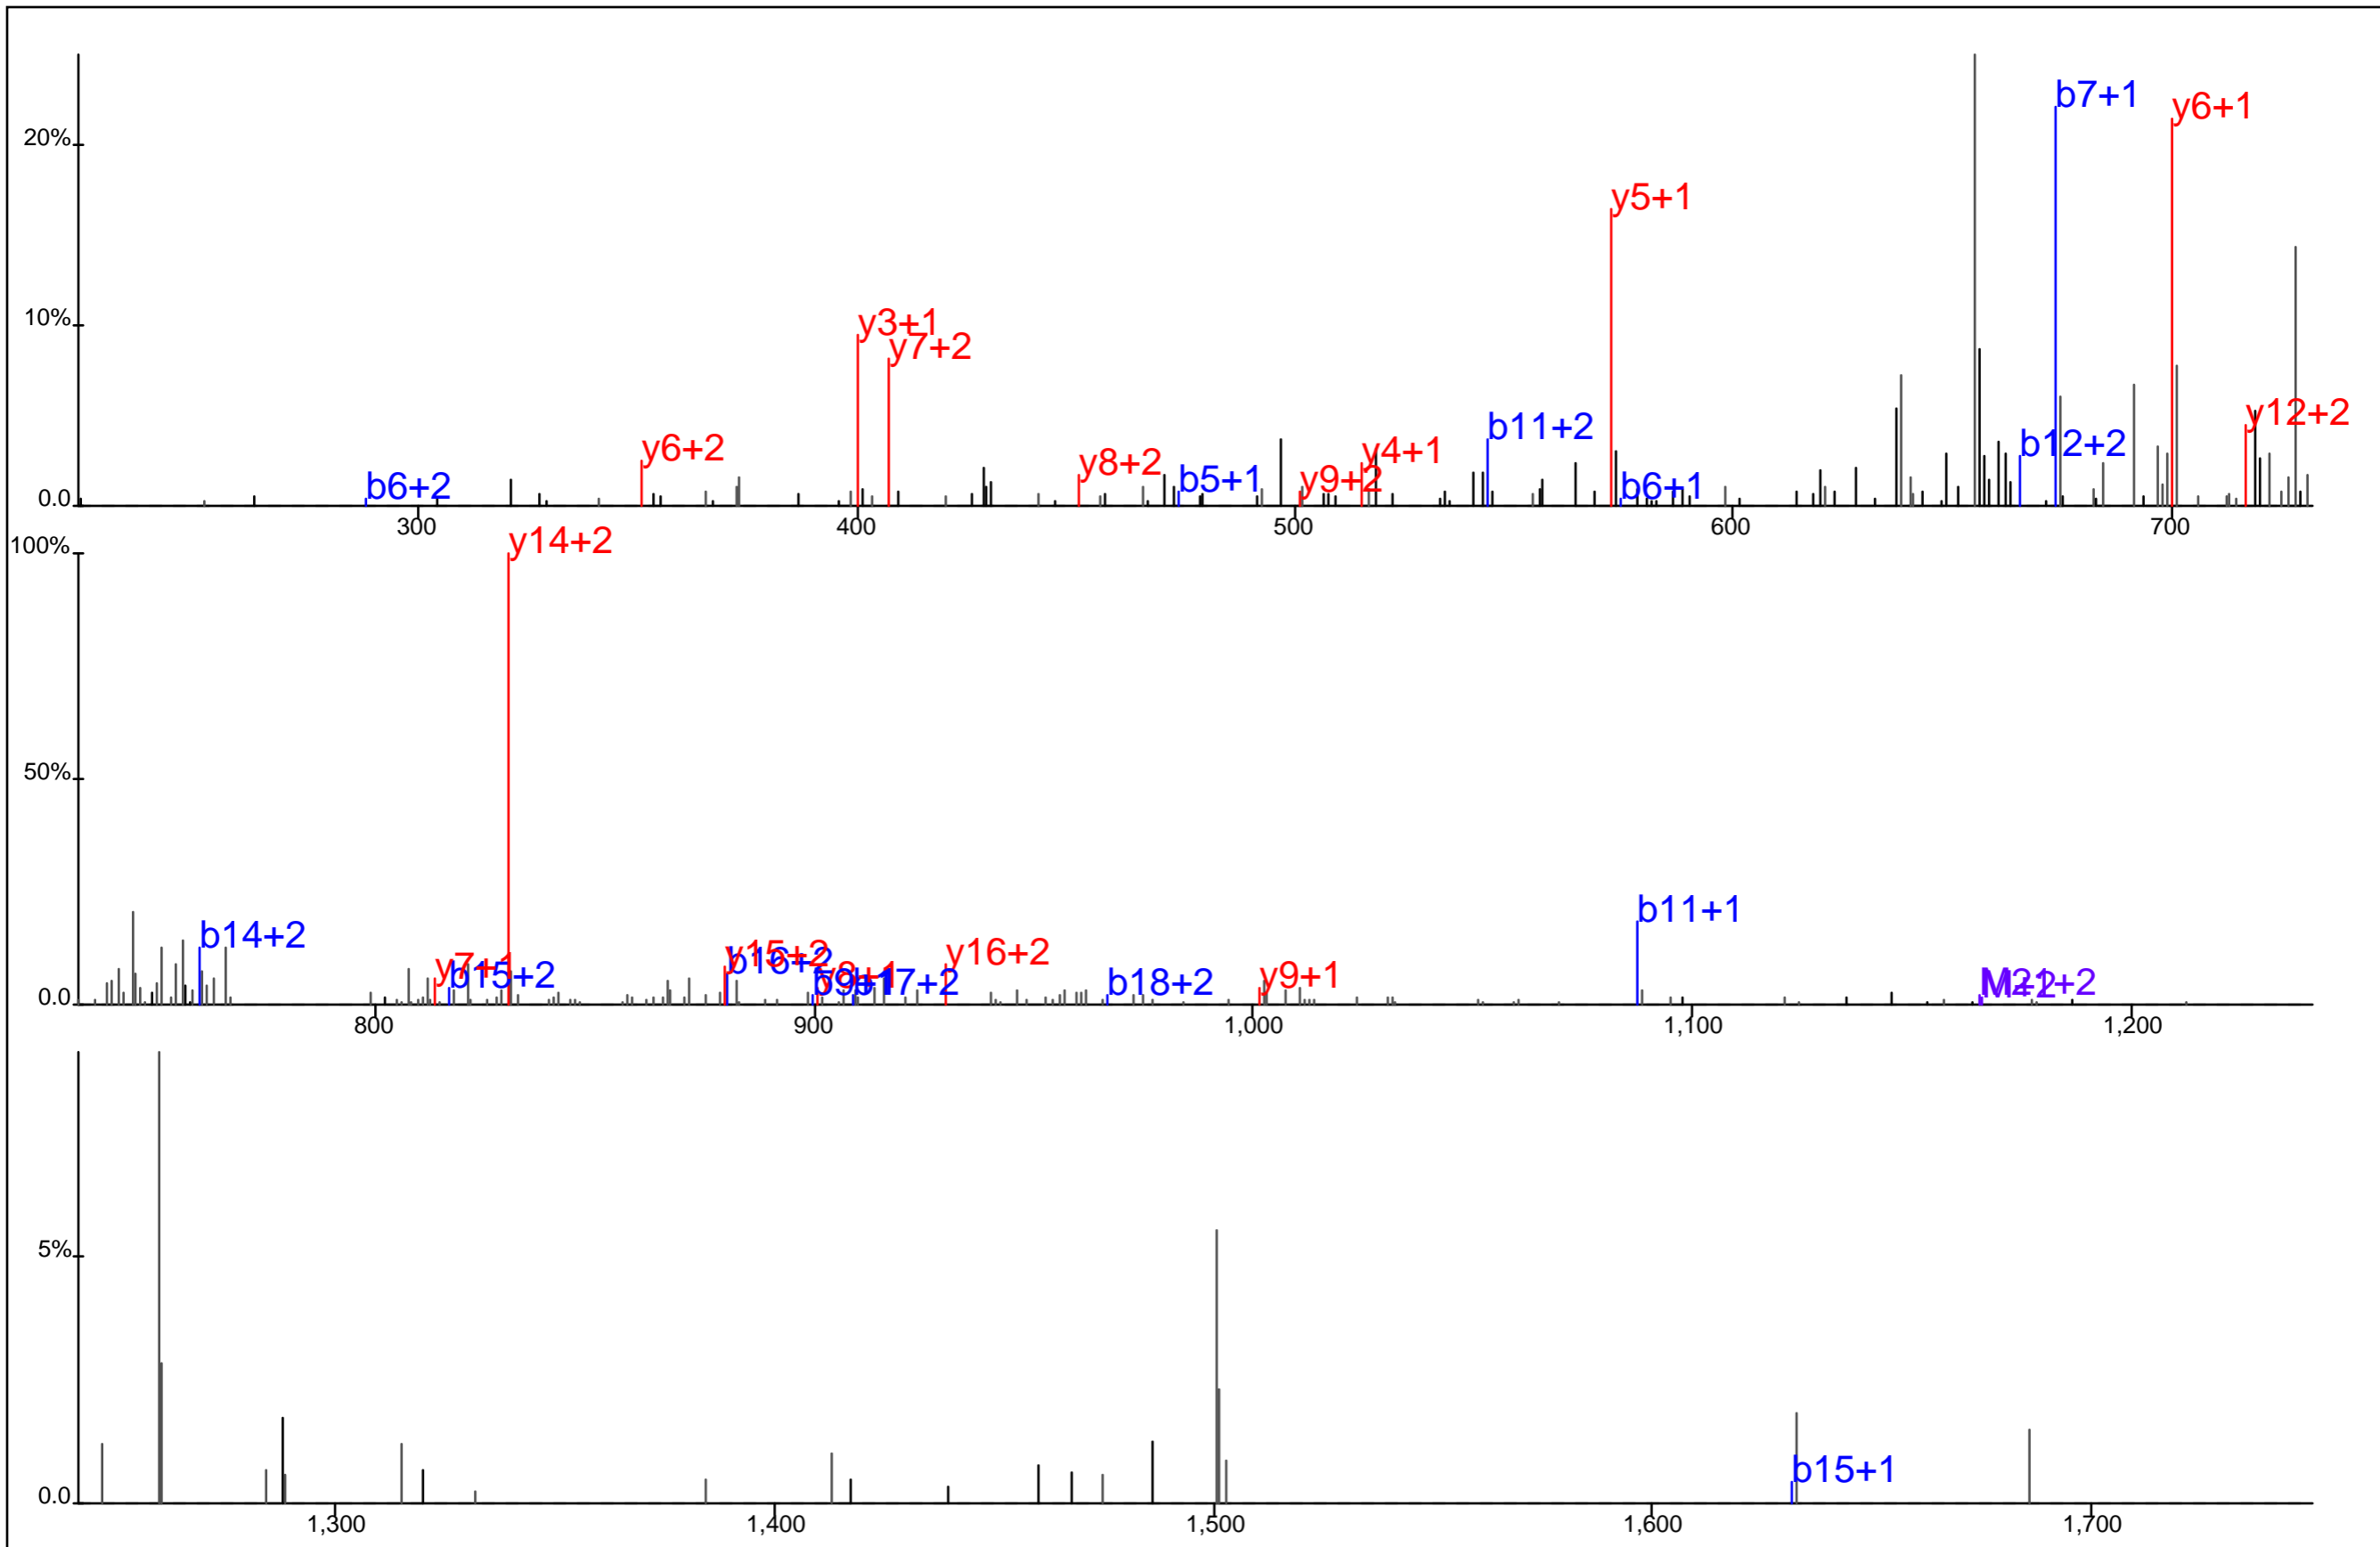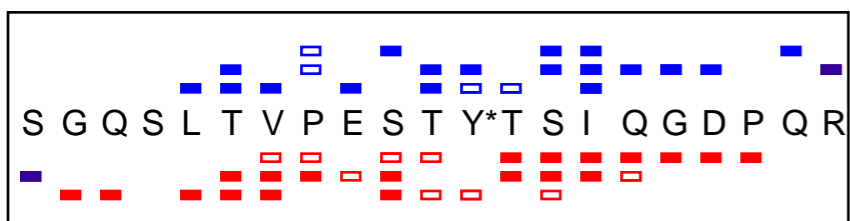

Protein Name: PAG  
 gi Accession: 7020925  
 Precursor Mass: 777.6894+3  
 Delta Mass: 1.540 ppm  
 XCorr: 25.17

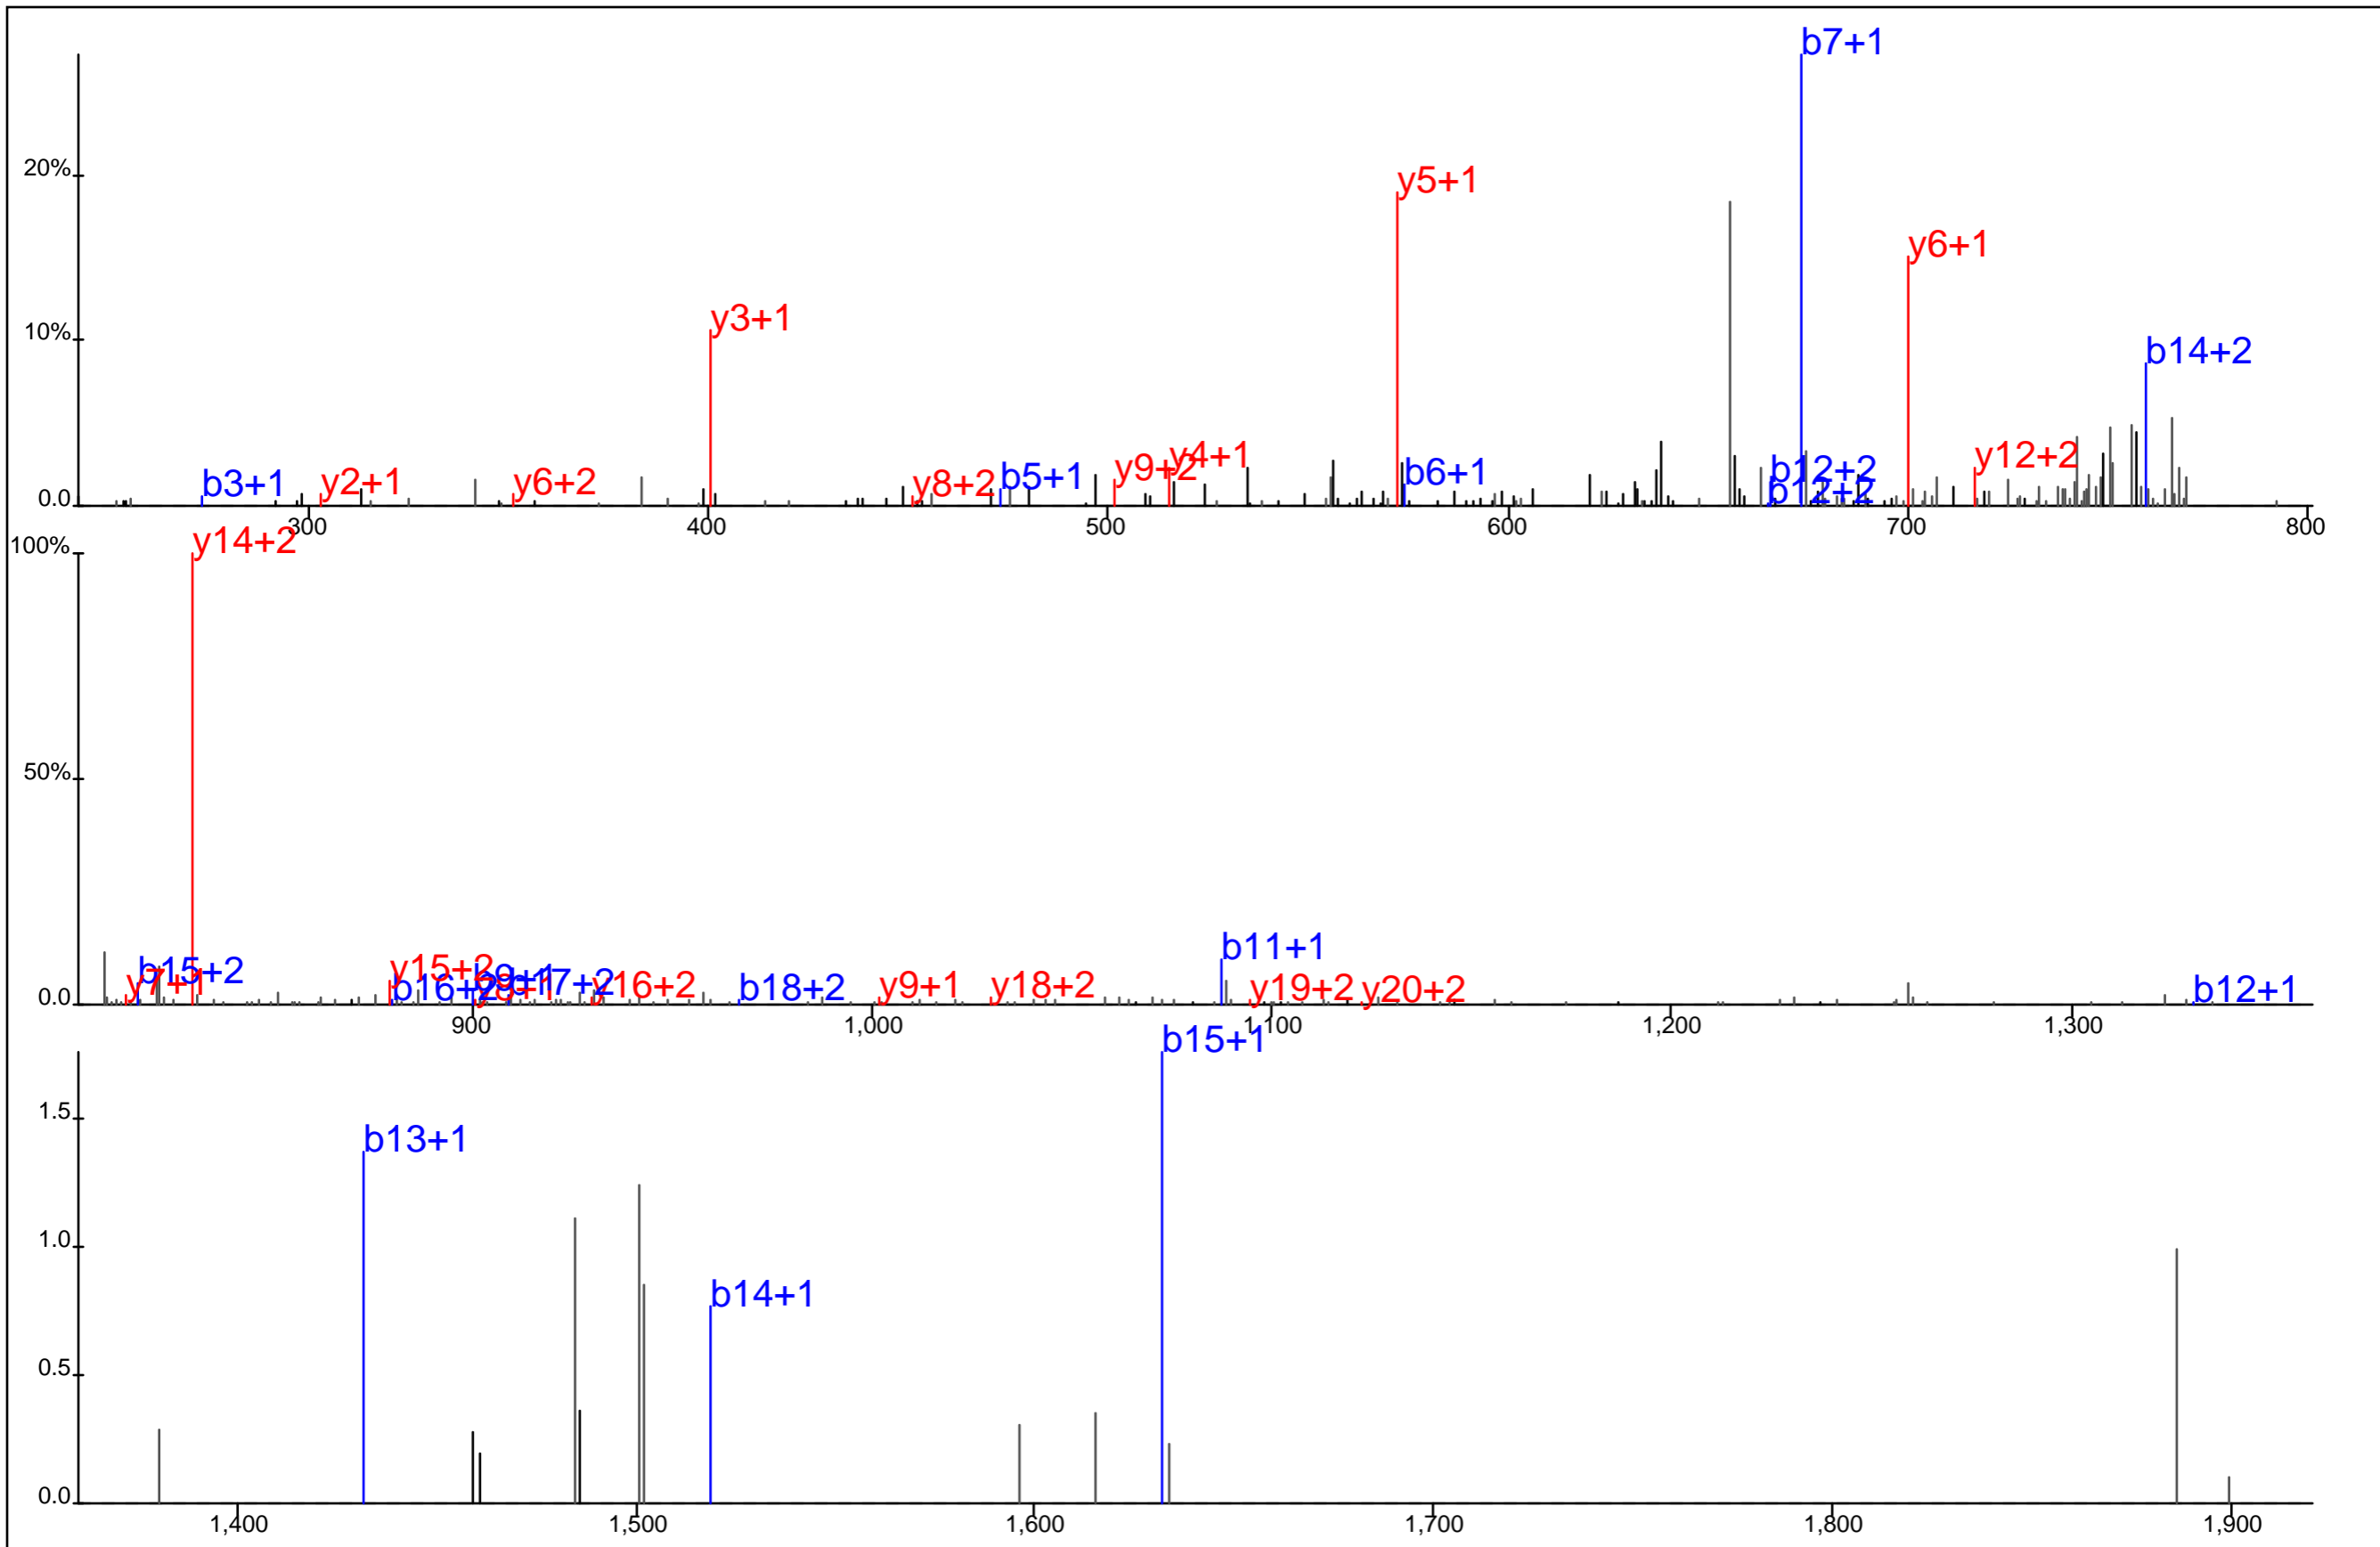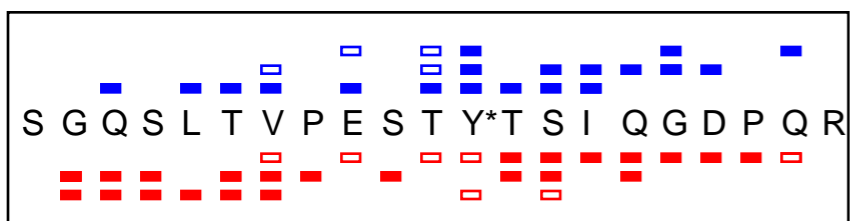

Protein Name: PAG  
 gi Accession: 7020925  
 Precursor Mass: 777.6923+3  
 Delta Mass: 5.233 ppm  
 XCorr: 39.34

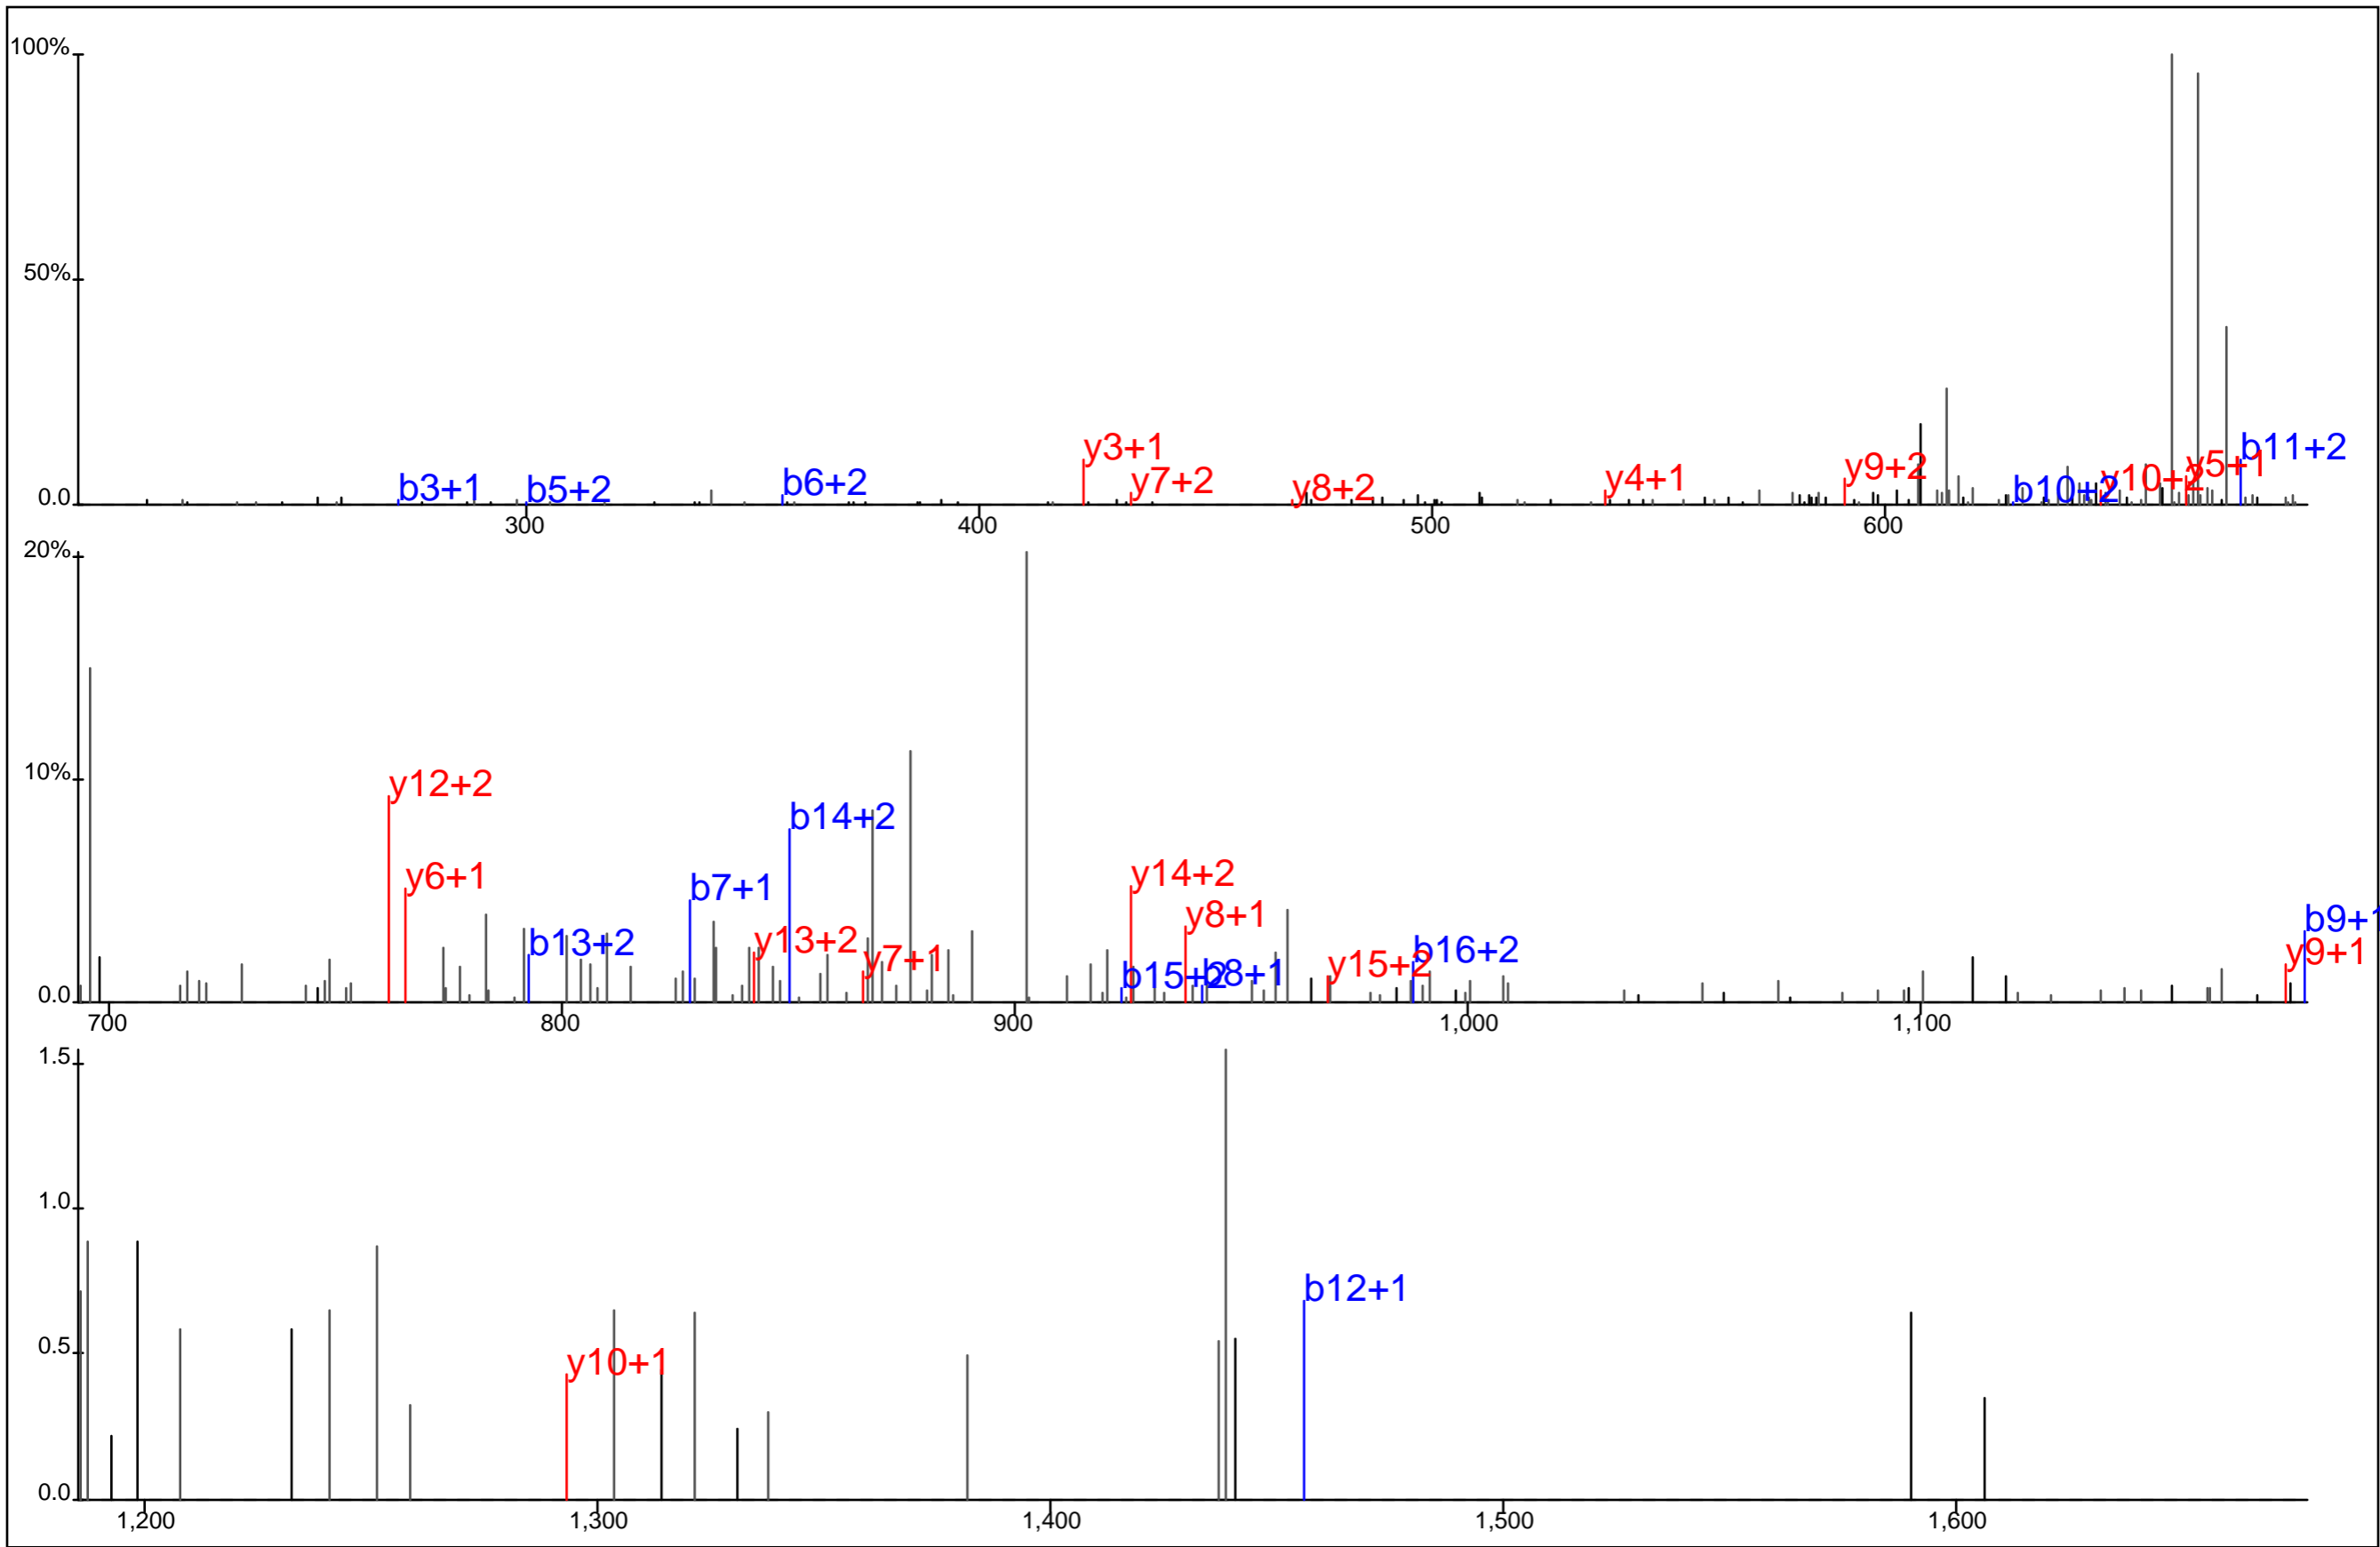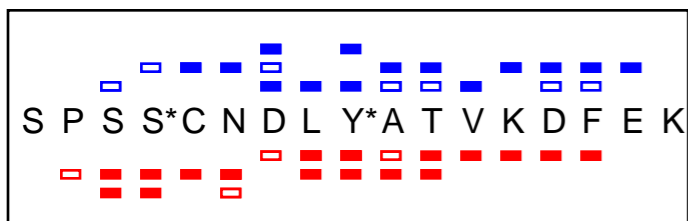

Protein Name: PAG  
 gi Accession: 7020925  
 Precursor Mass: 707.6193+3  
 Delta Mass: 7.119 ppm  
 XCorr: 17.4

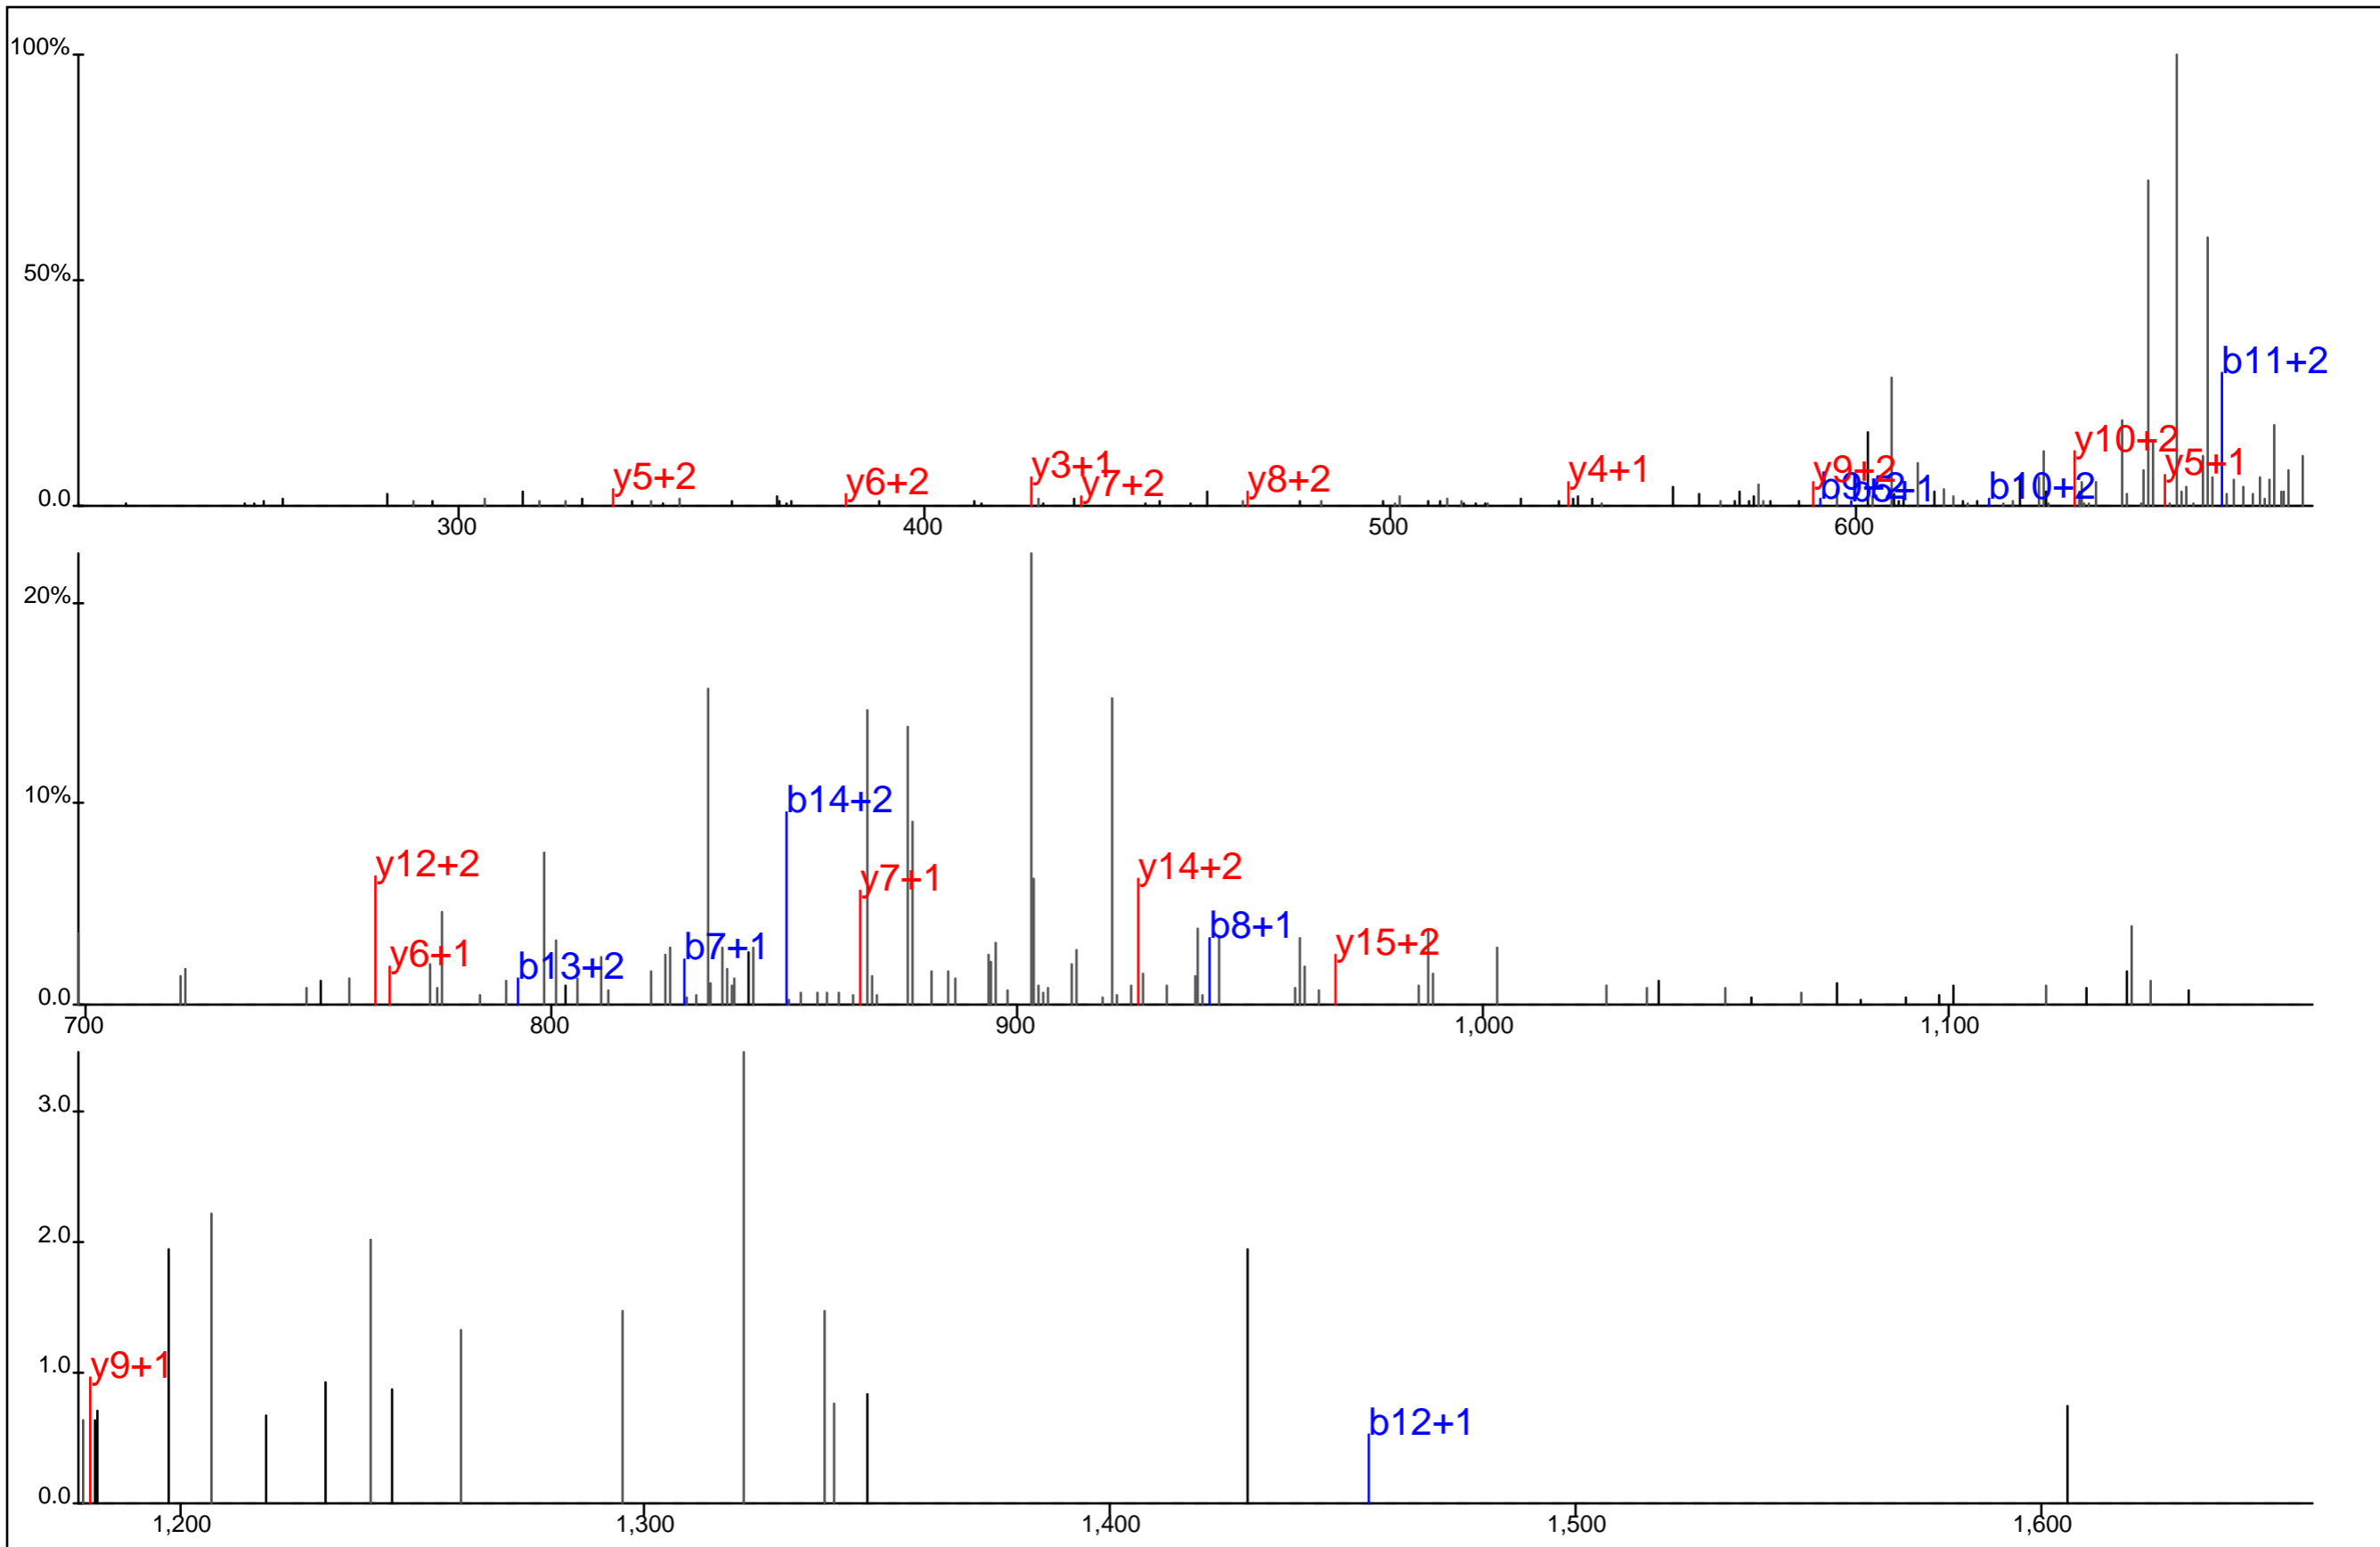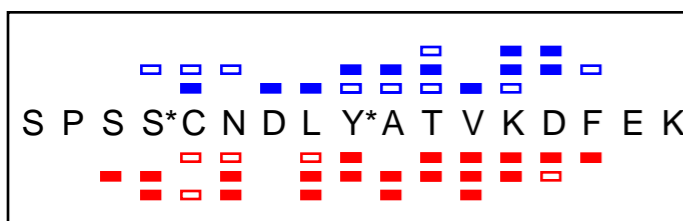

Protein Name: PAG  
 gi Accession: 7020925  
 Precursor Mass: 707.6157+3  
 Delta Mass: 1.937 ppm  
 XCorr: 12.85

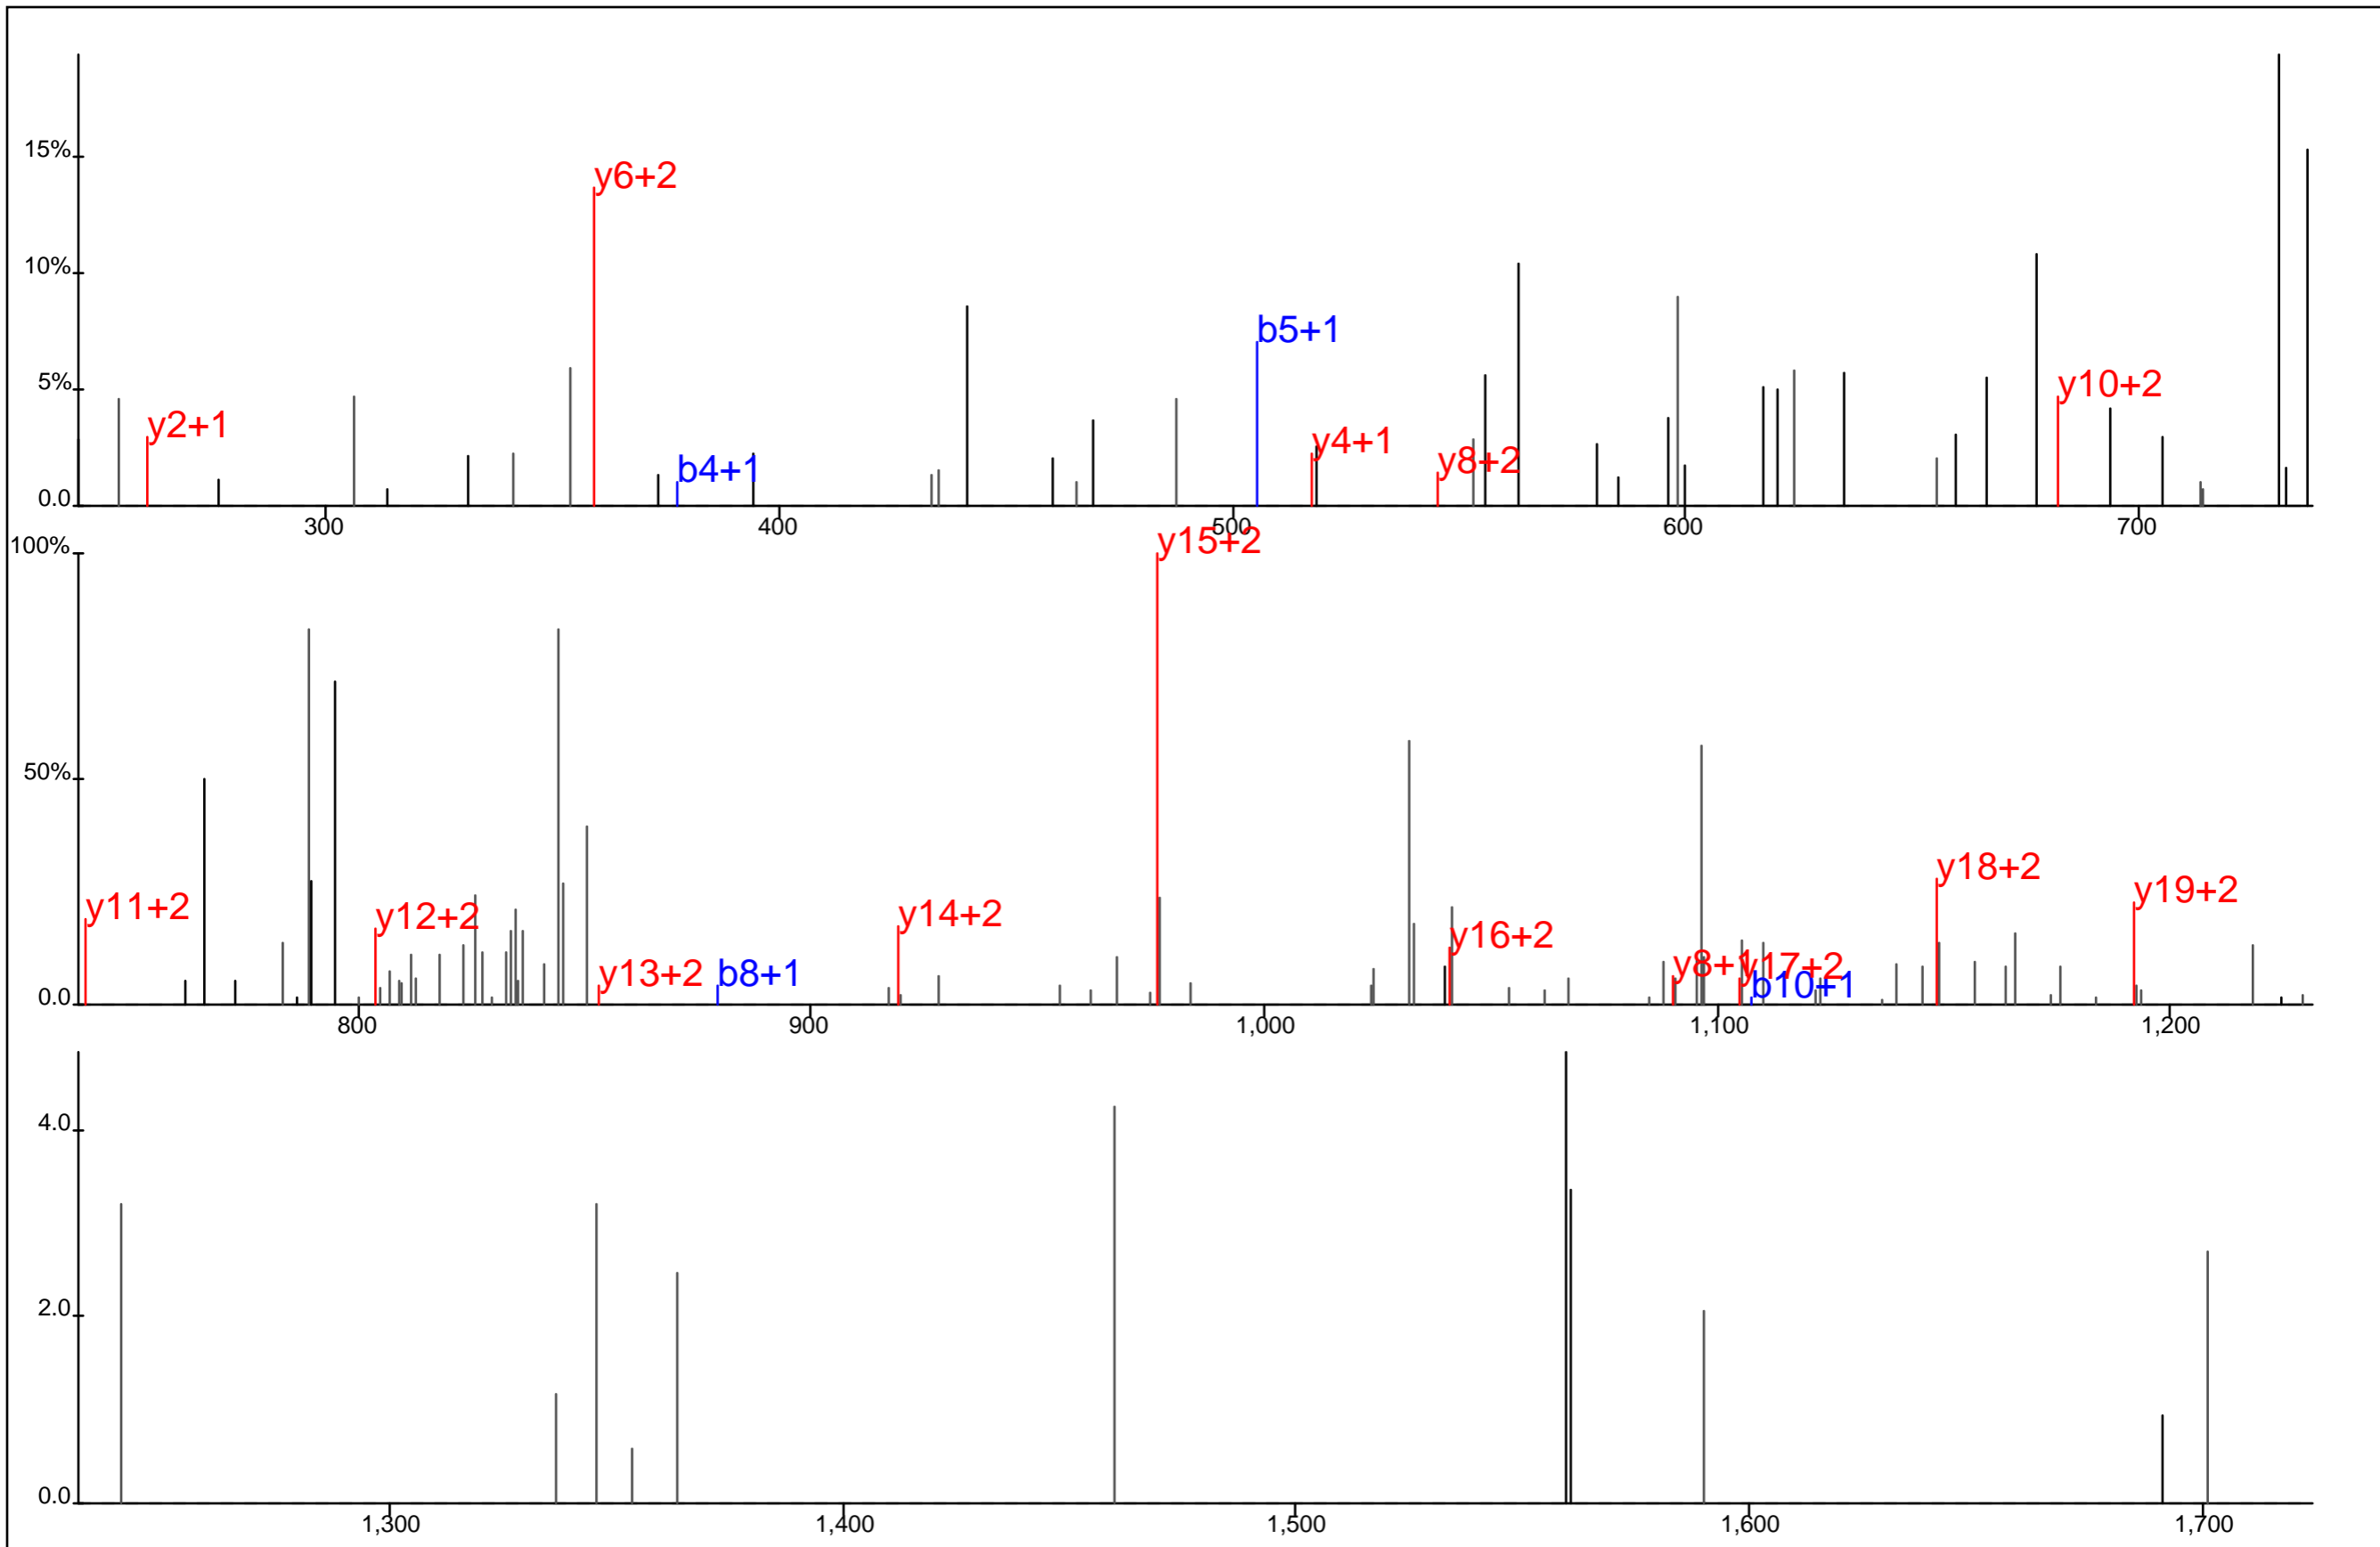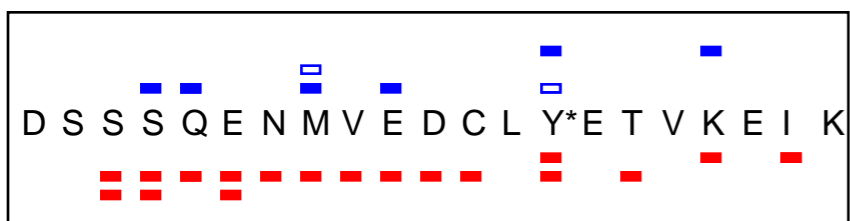

Protein Name: PAG  
 gi Accession: 7020925  
 Precursor Mass: 862.0314+3  
 Delta Mass: 1.258 ppm  
 XCorr: 23.7

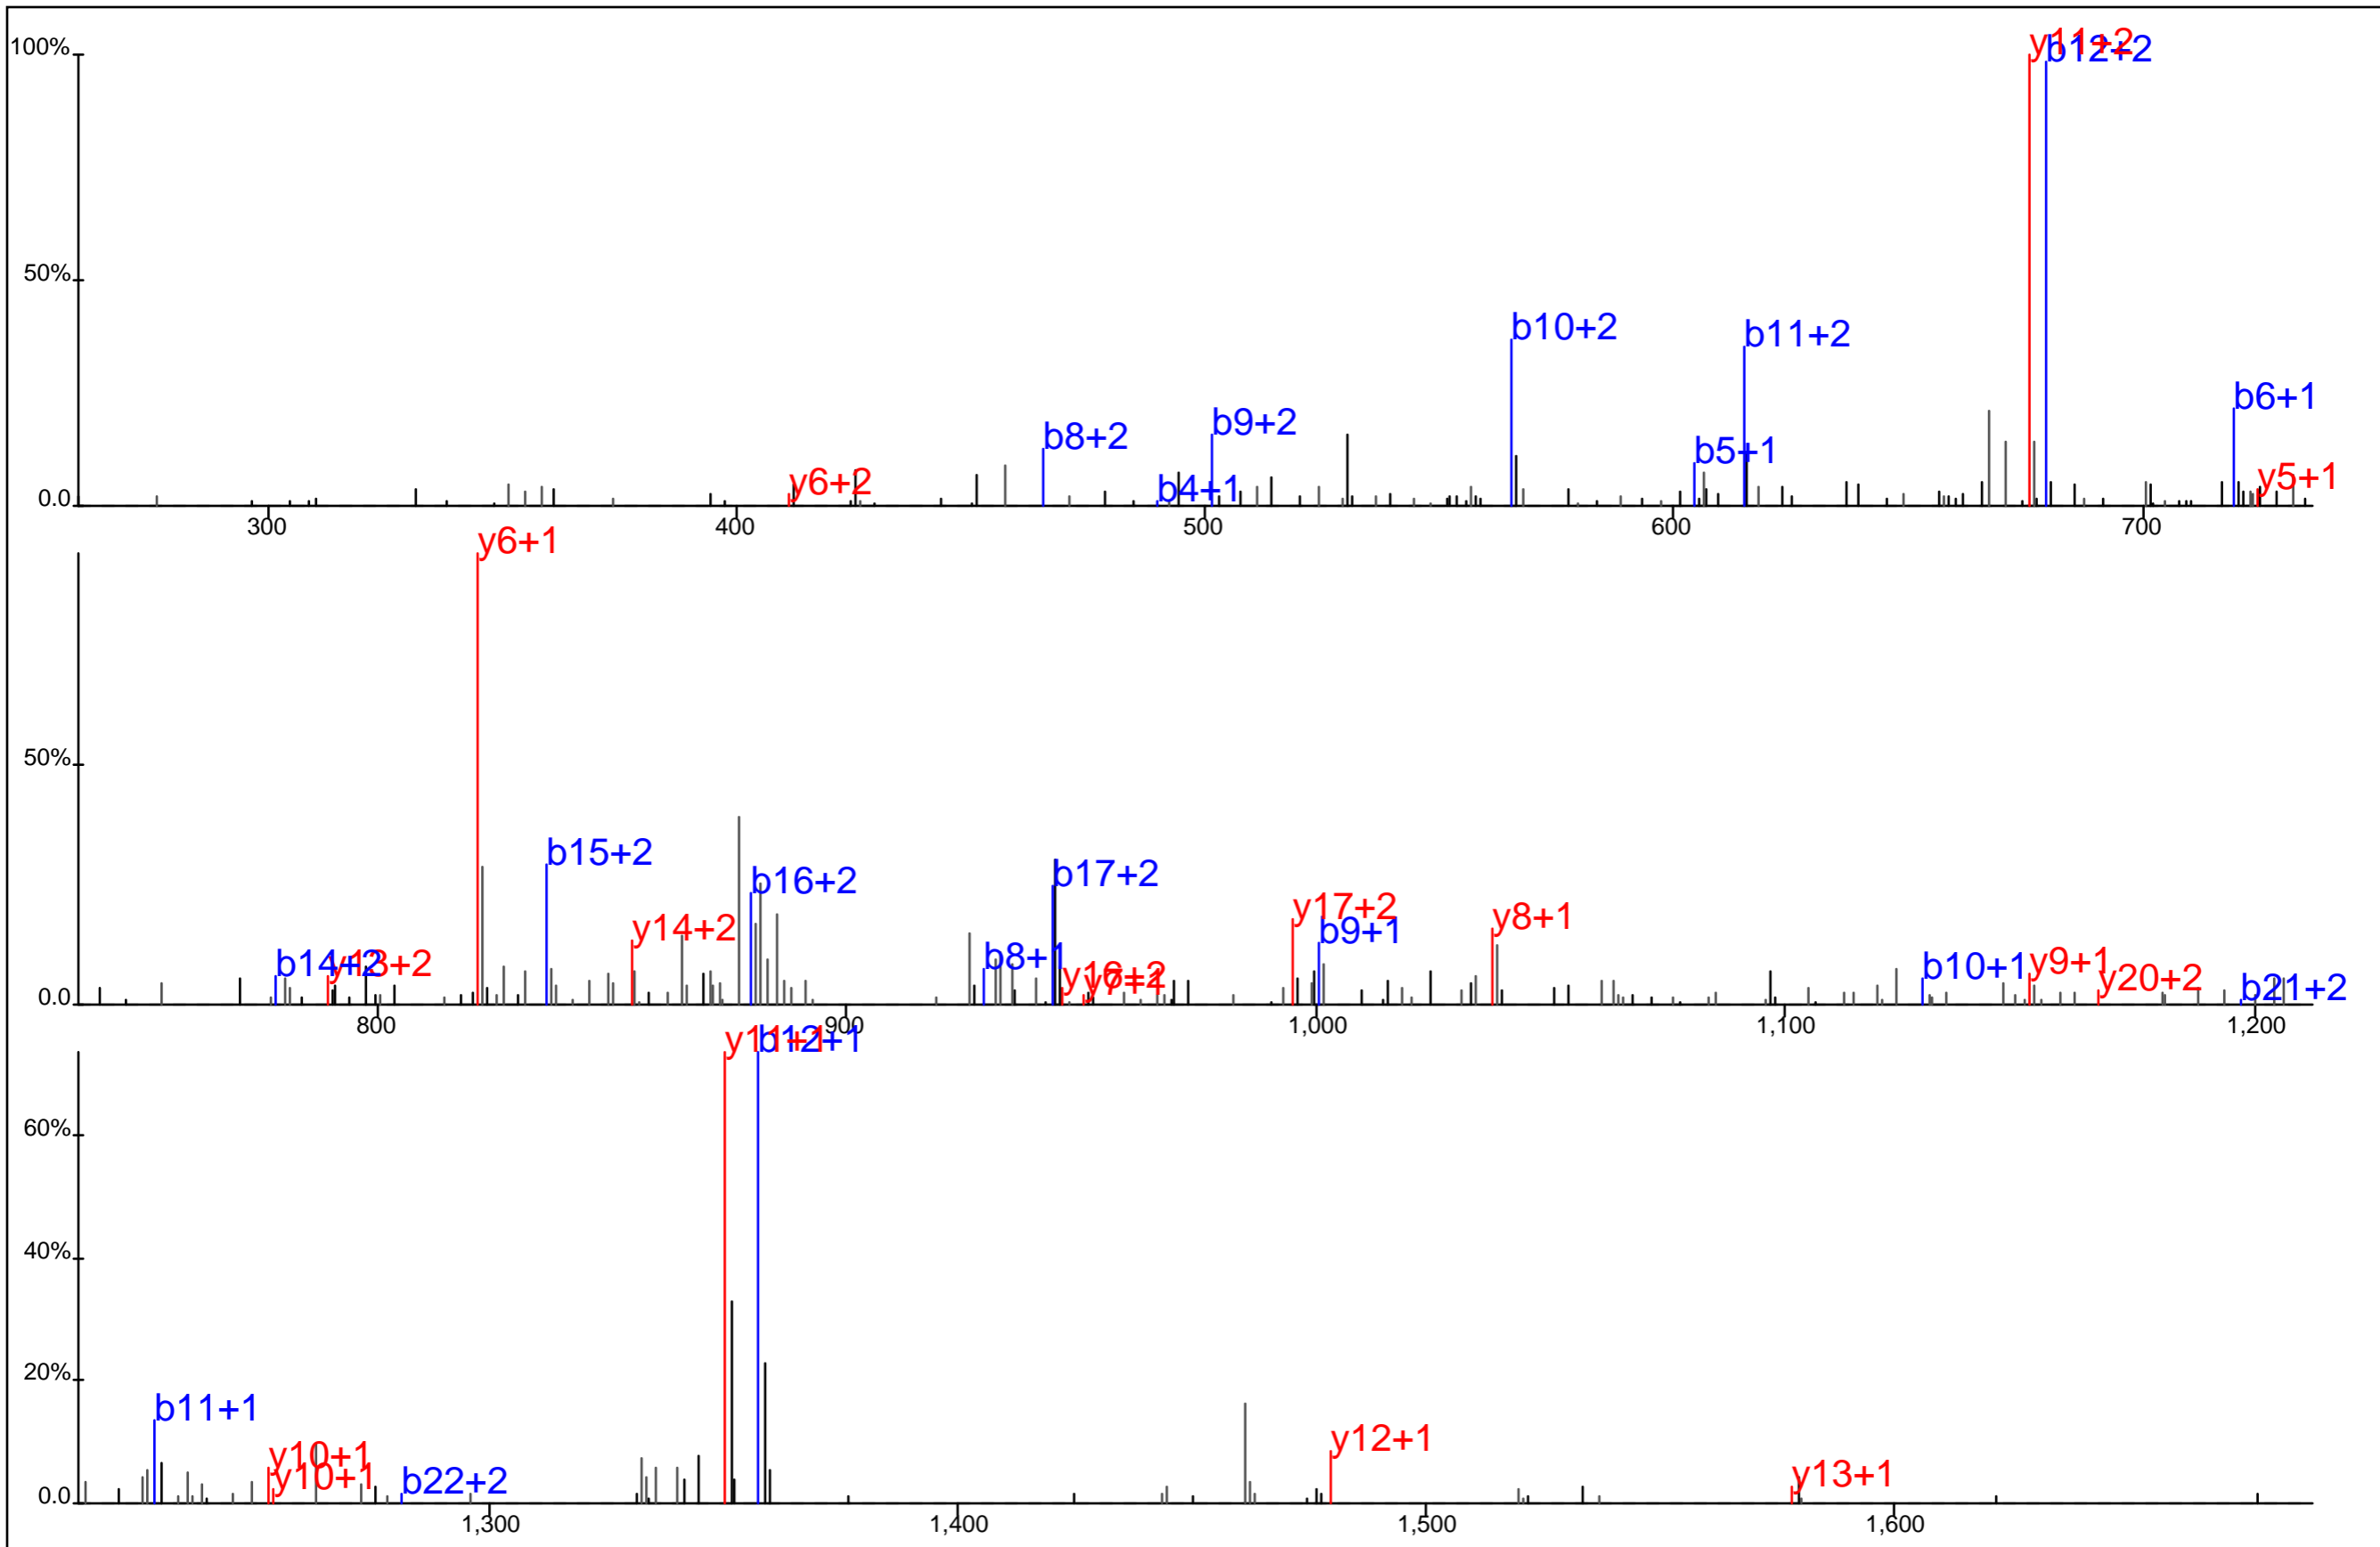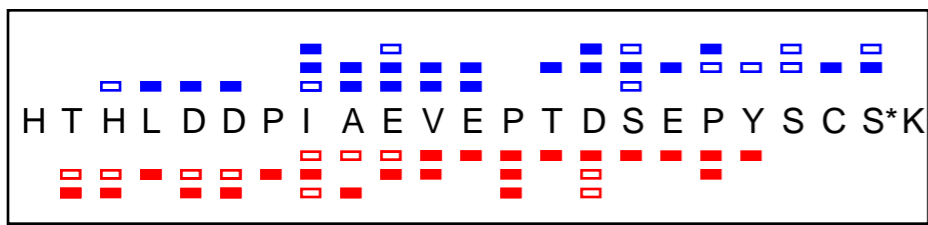

Protein Name: PDZ-GEF2  
 gi Accession: 34395686  
 Precursor Mass: 903.0483+3  
 Delta Mass: 2.718 ppm  
 XCorr: 32.73

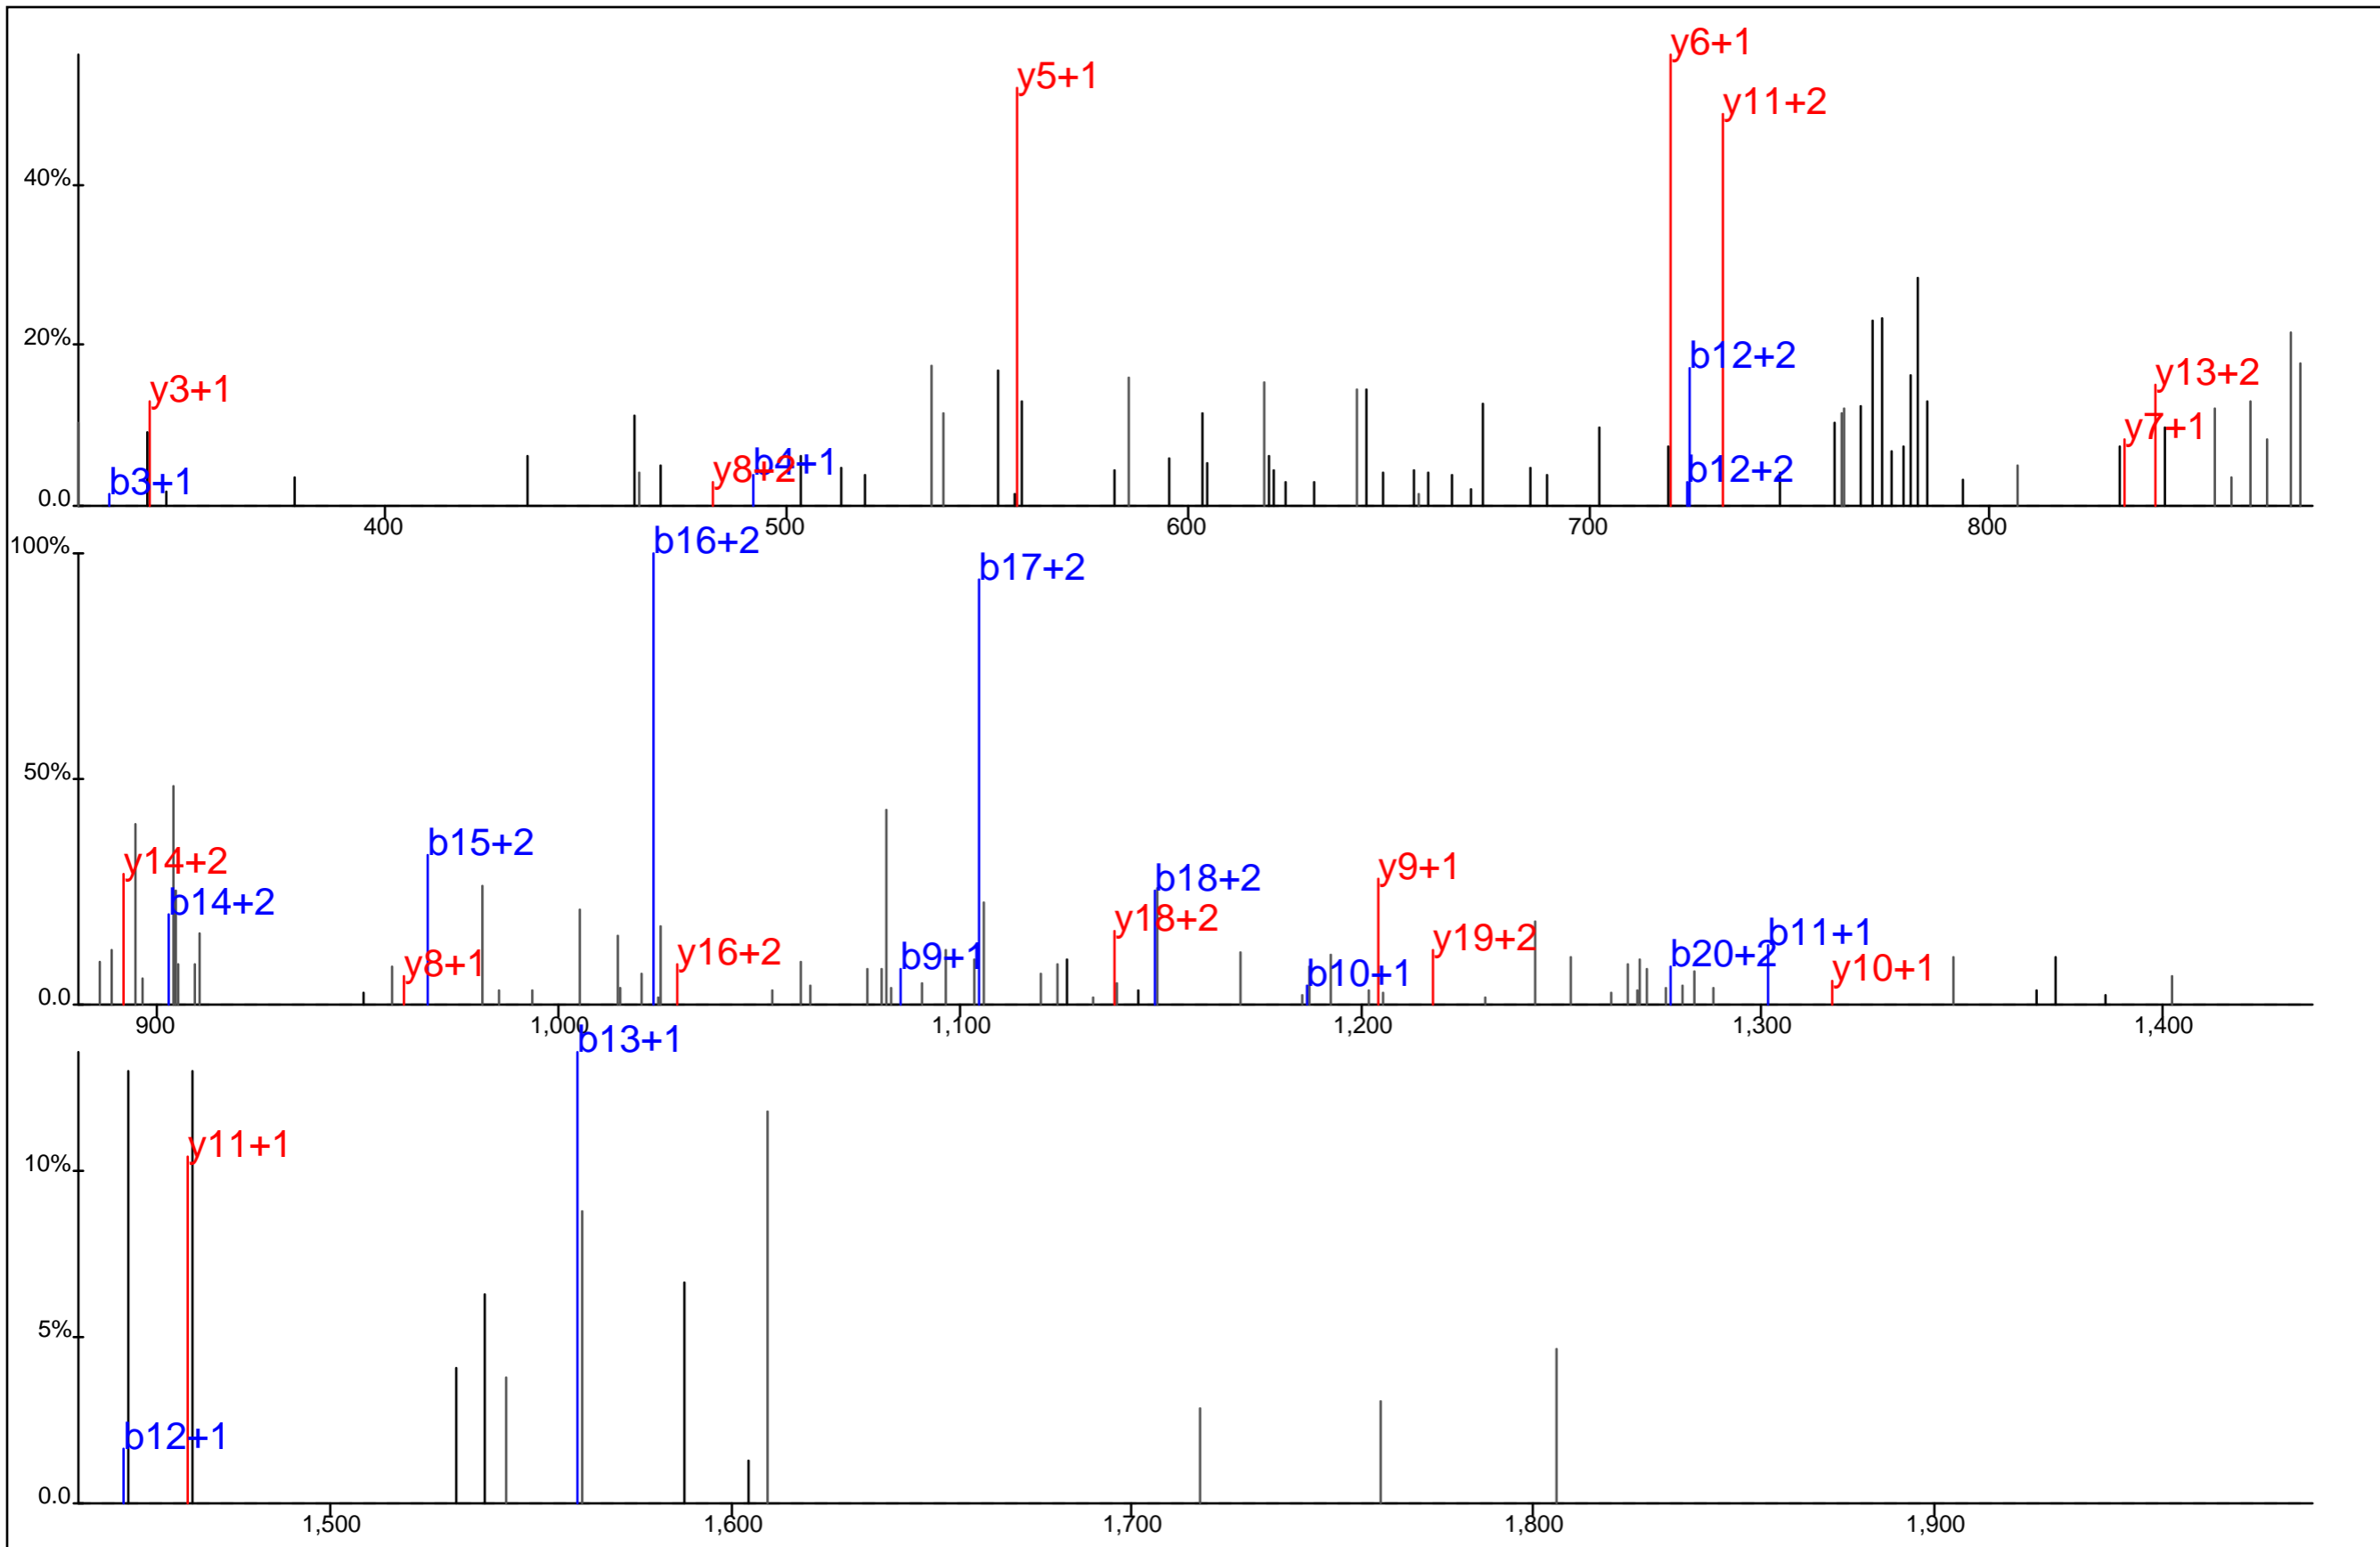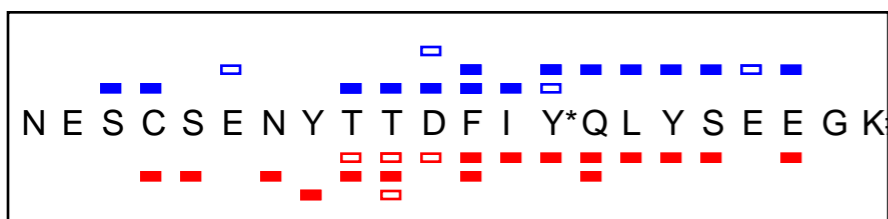

Protein Name: Phosphofruktokinase 1  
 gi Accession: 11321601  
 Precursor Mass: 922.3748+3  
 Delta Mass: 1.656 ppm  
 XCorr: 26.63



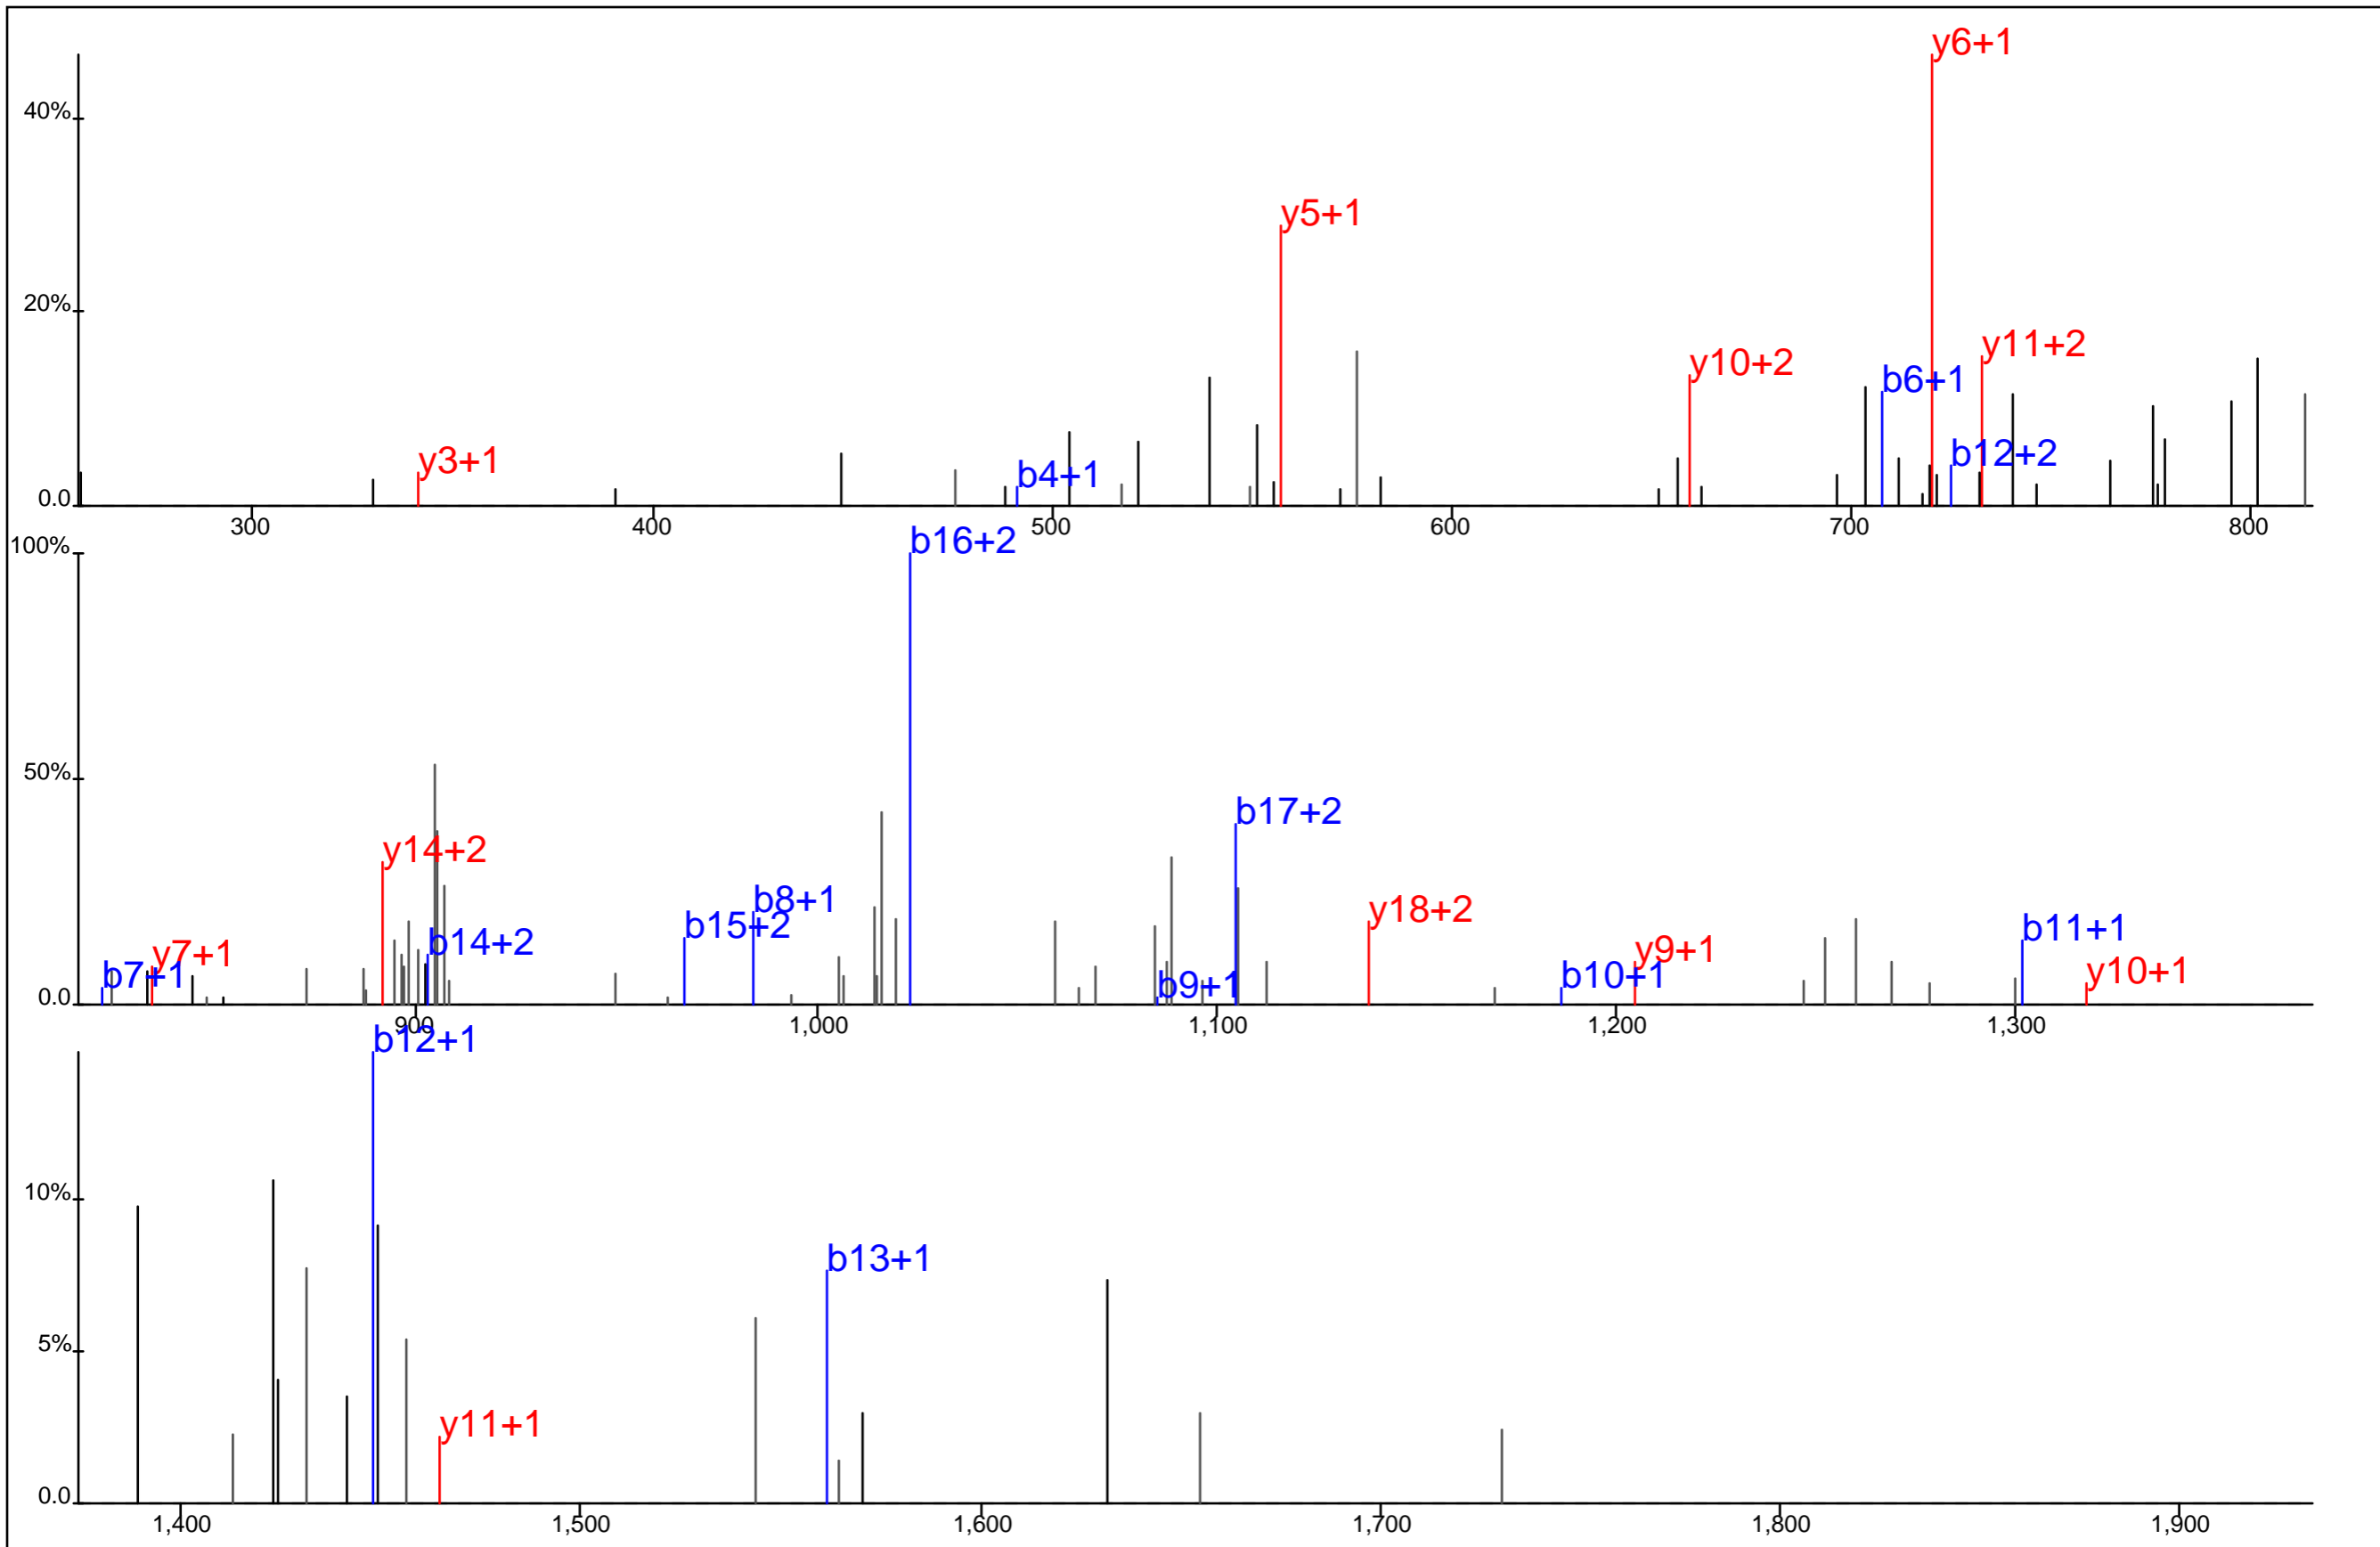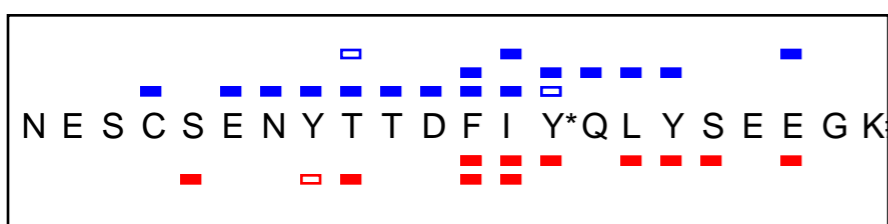

Protein Name: Phosphofructokinase 1  
 gi Accession: 11321601  
 Precursor Mass: 922.3763+3  
 Delta Mass: 3.312 ppm  
 XCorr: 19.91

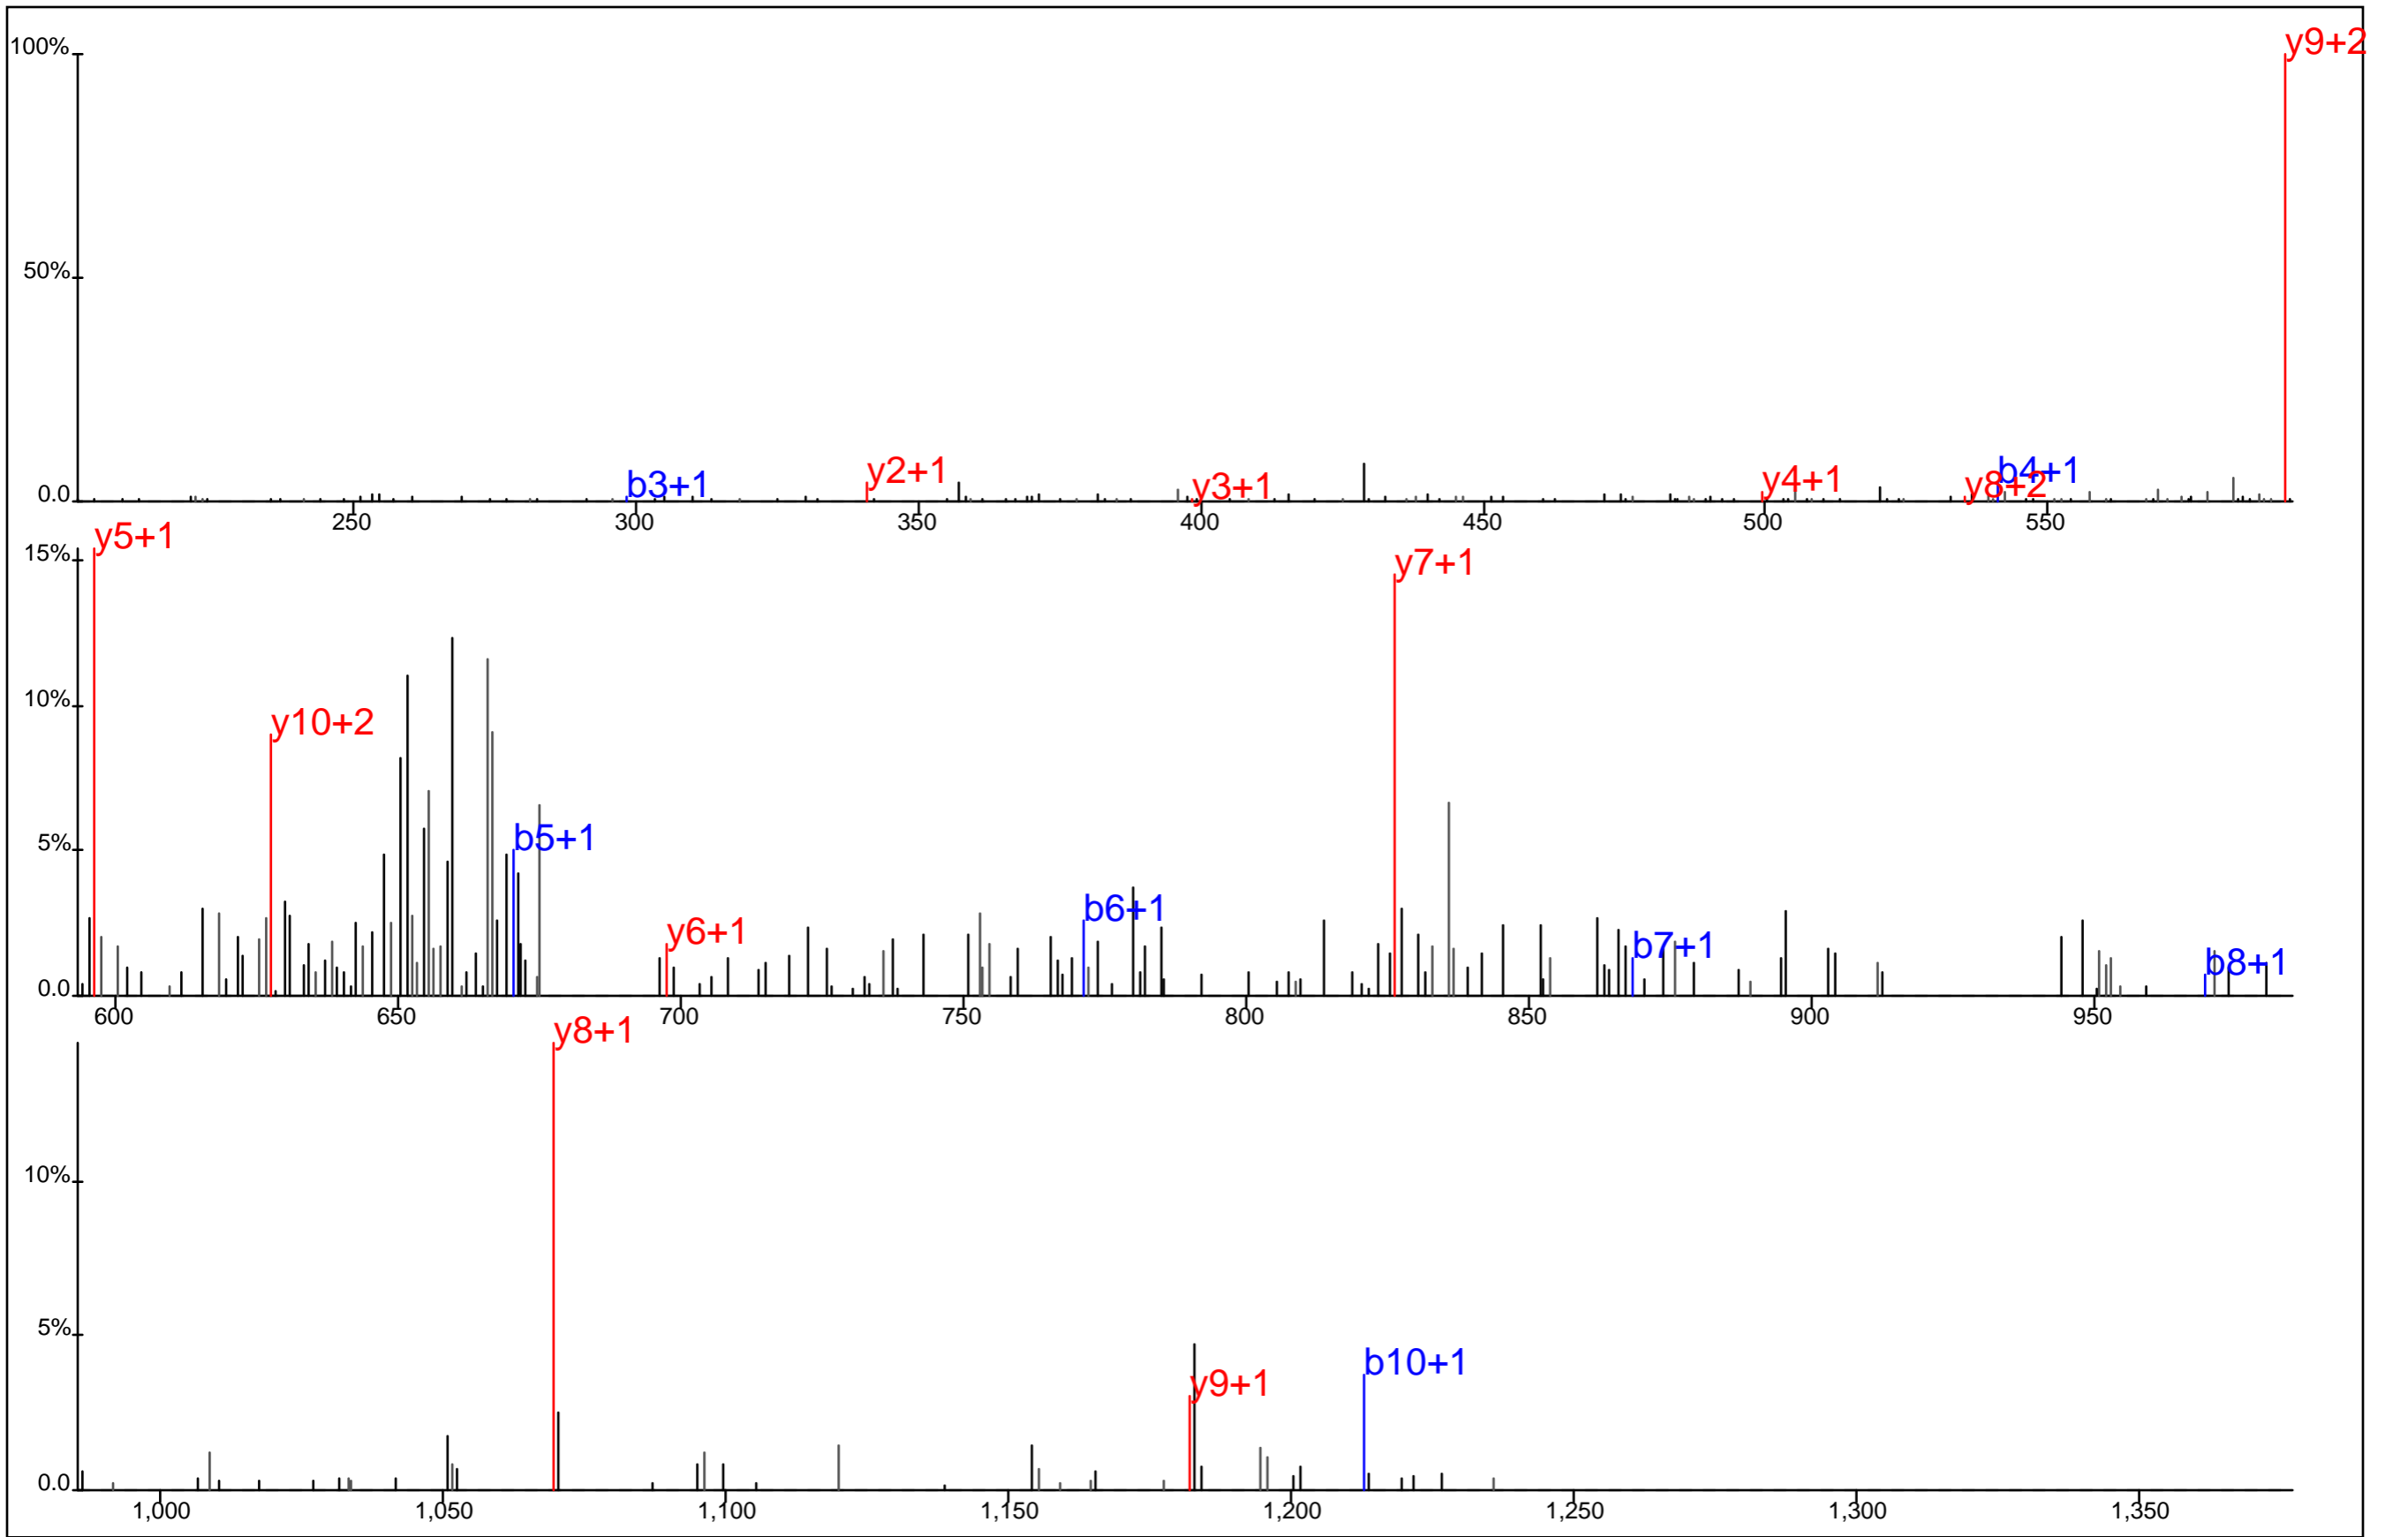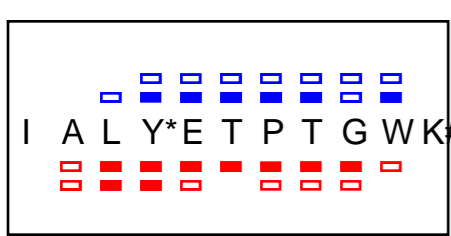

Protein Name: Phosphoglucomutase 1  
 gi Accession: 21361621  
 Precursor Mass: 683.8325+2  
 Delta Mass: 3.116 ppm  
 XCorr: 21.43

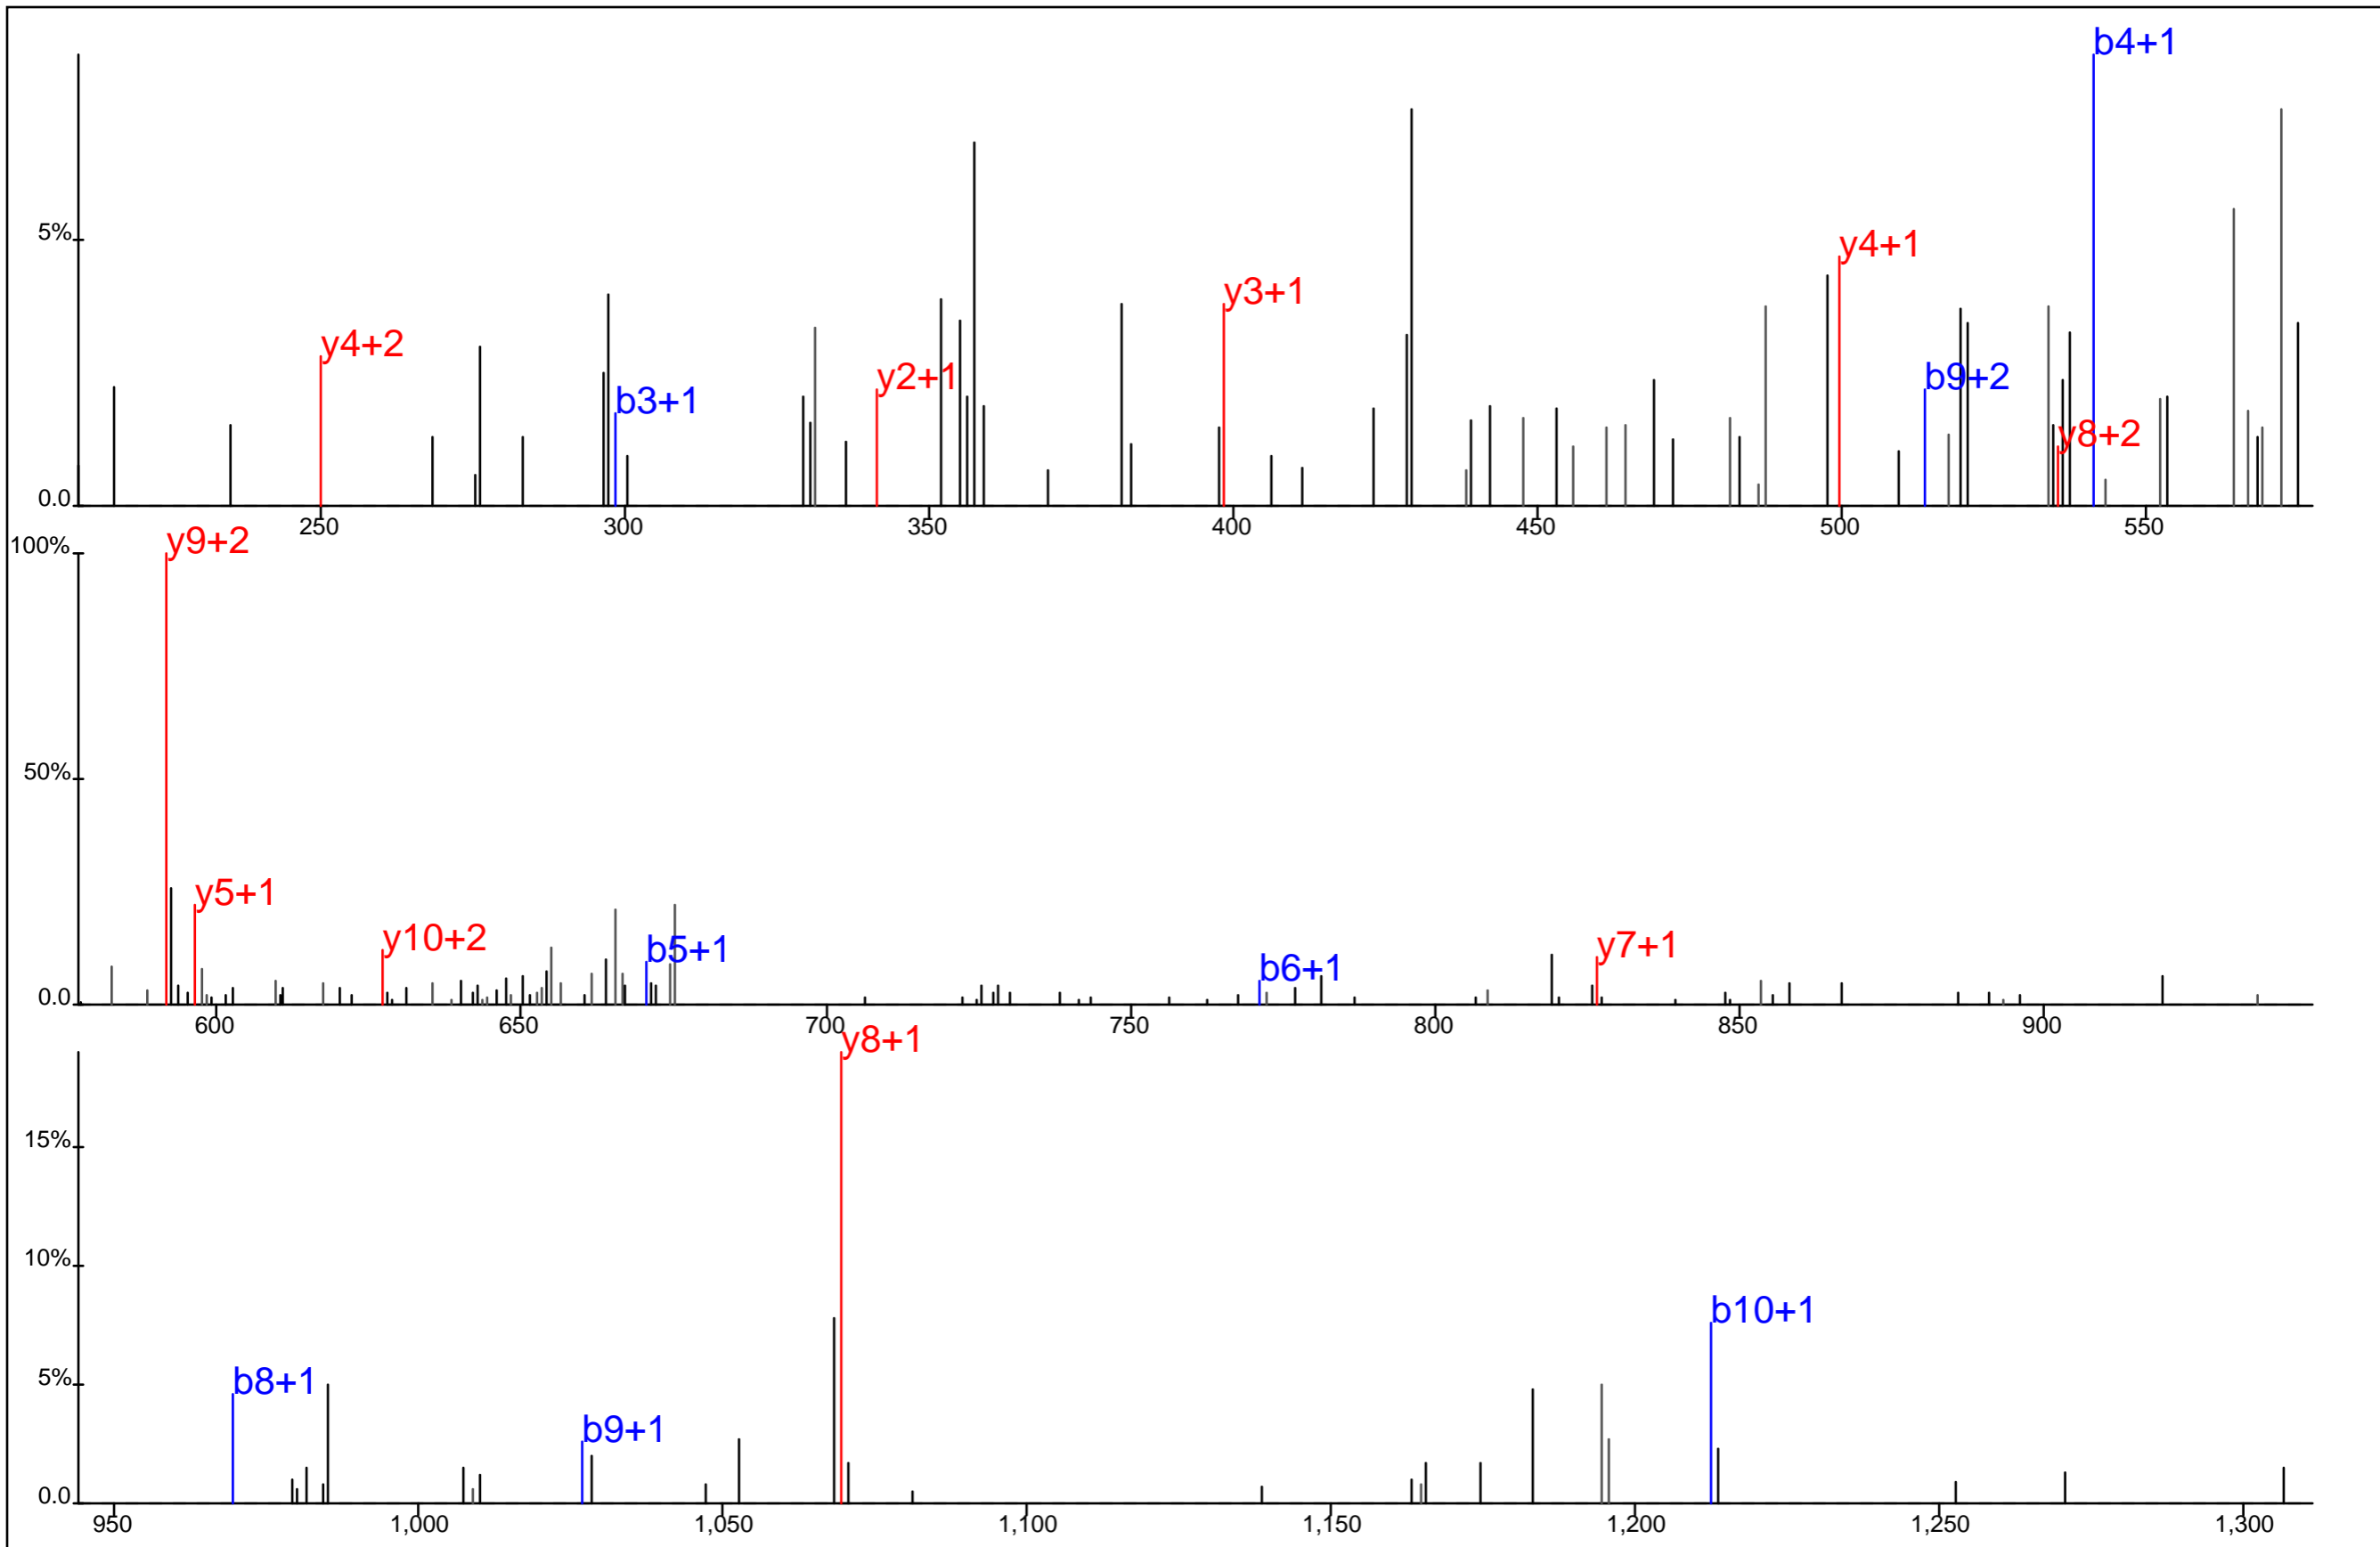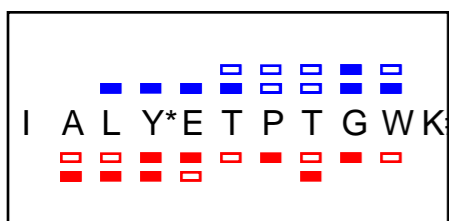

Protein Name: Phosphoglucomutase 1  
 gi Accession: 21361621  
 Precursor Mass: 683.8359+2  
 Delta Mass: 8.208 ppm  
 XCorr: 27.94

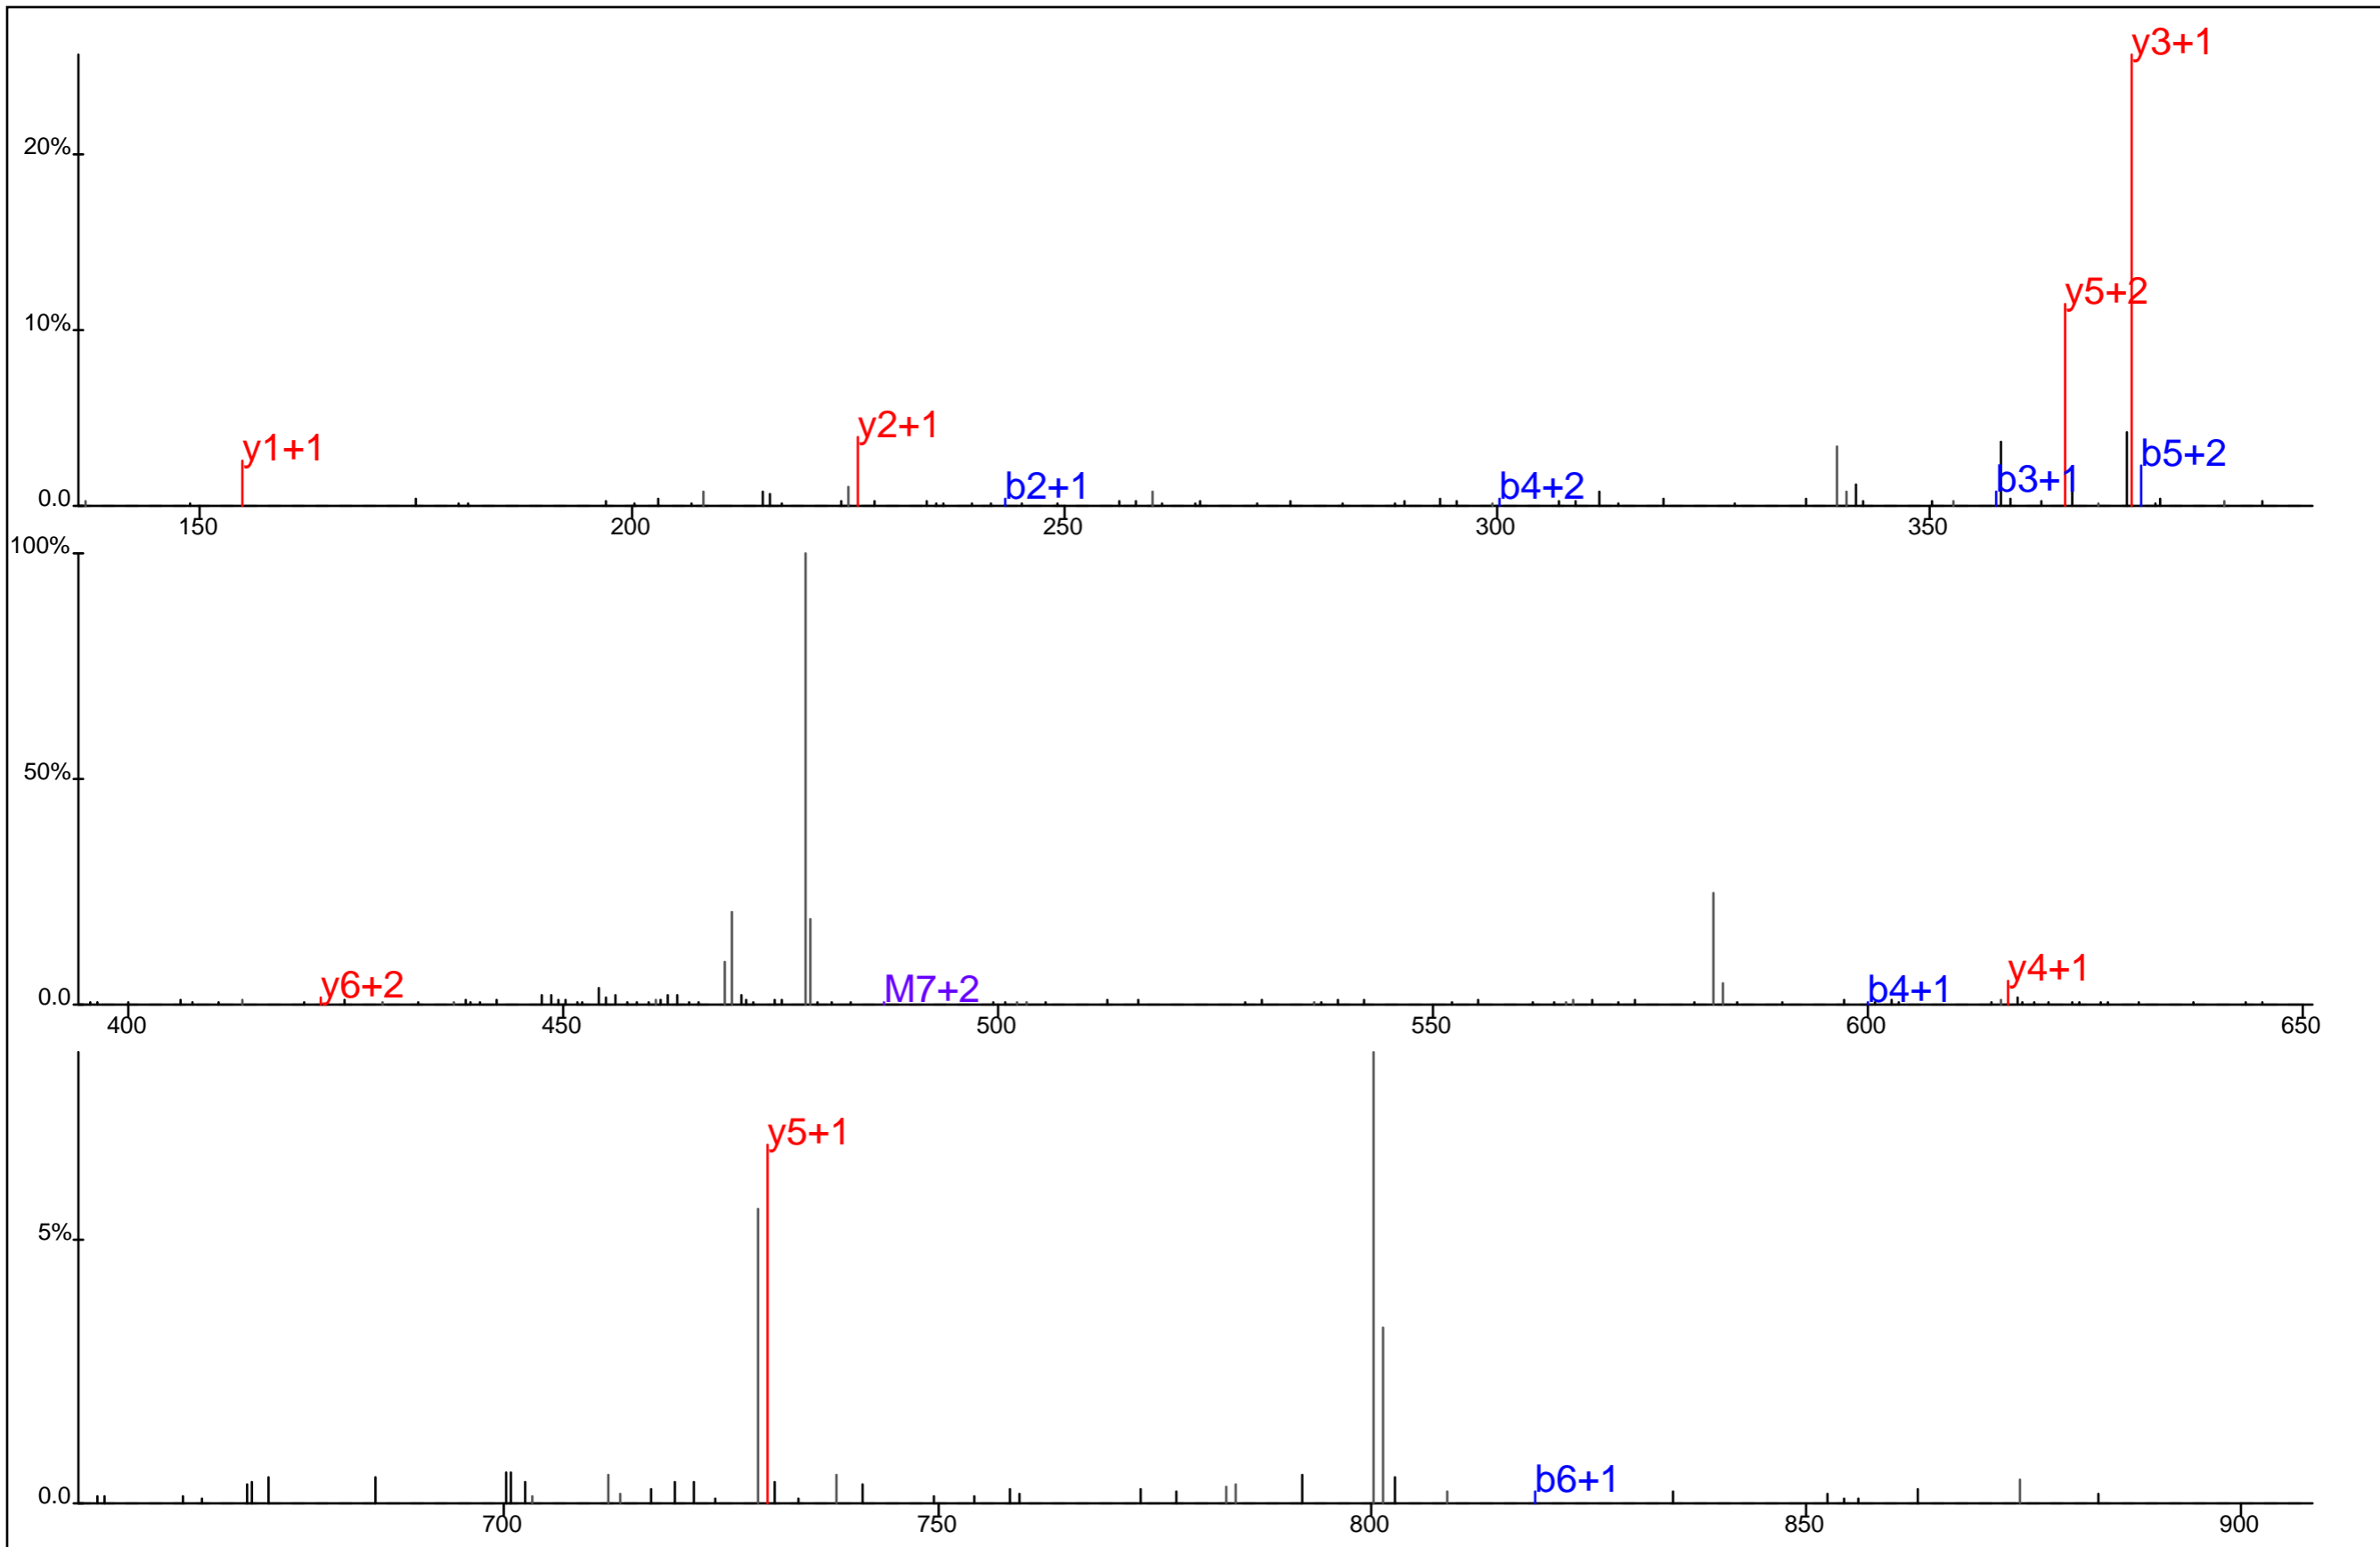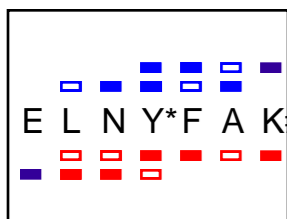

Protein Name: Phosphoglycerate kinase 1  
 gi Accession: 4505763  
 Precursor Mass: 486.7203+2  
 Delta Mass: 1.705 ppm  
 XCorr: 25.65

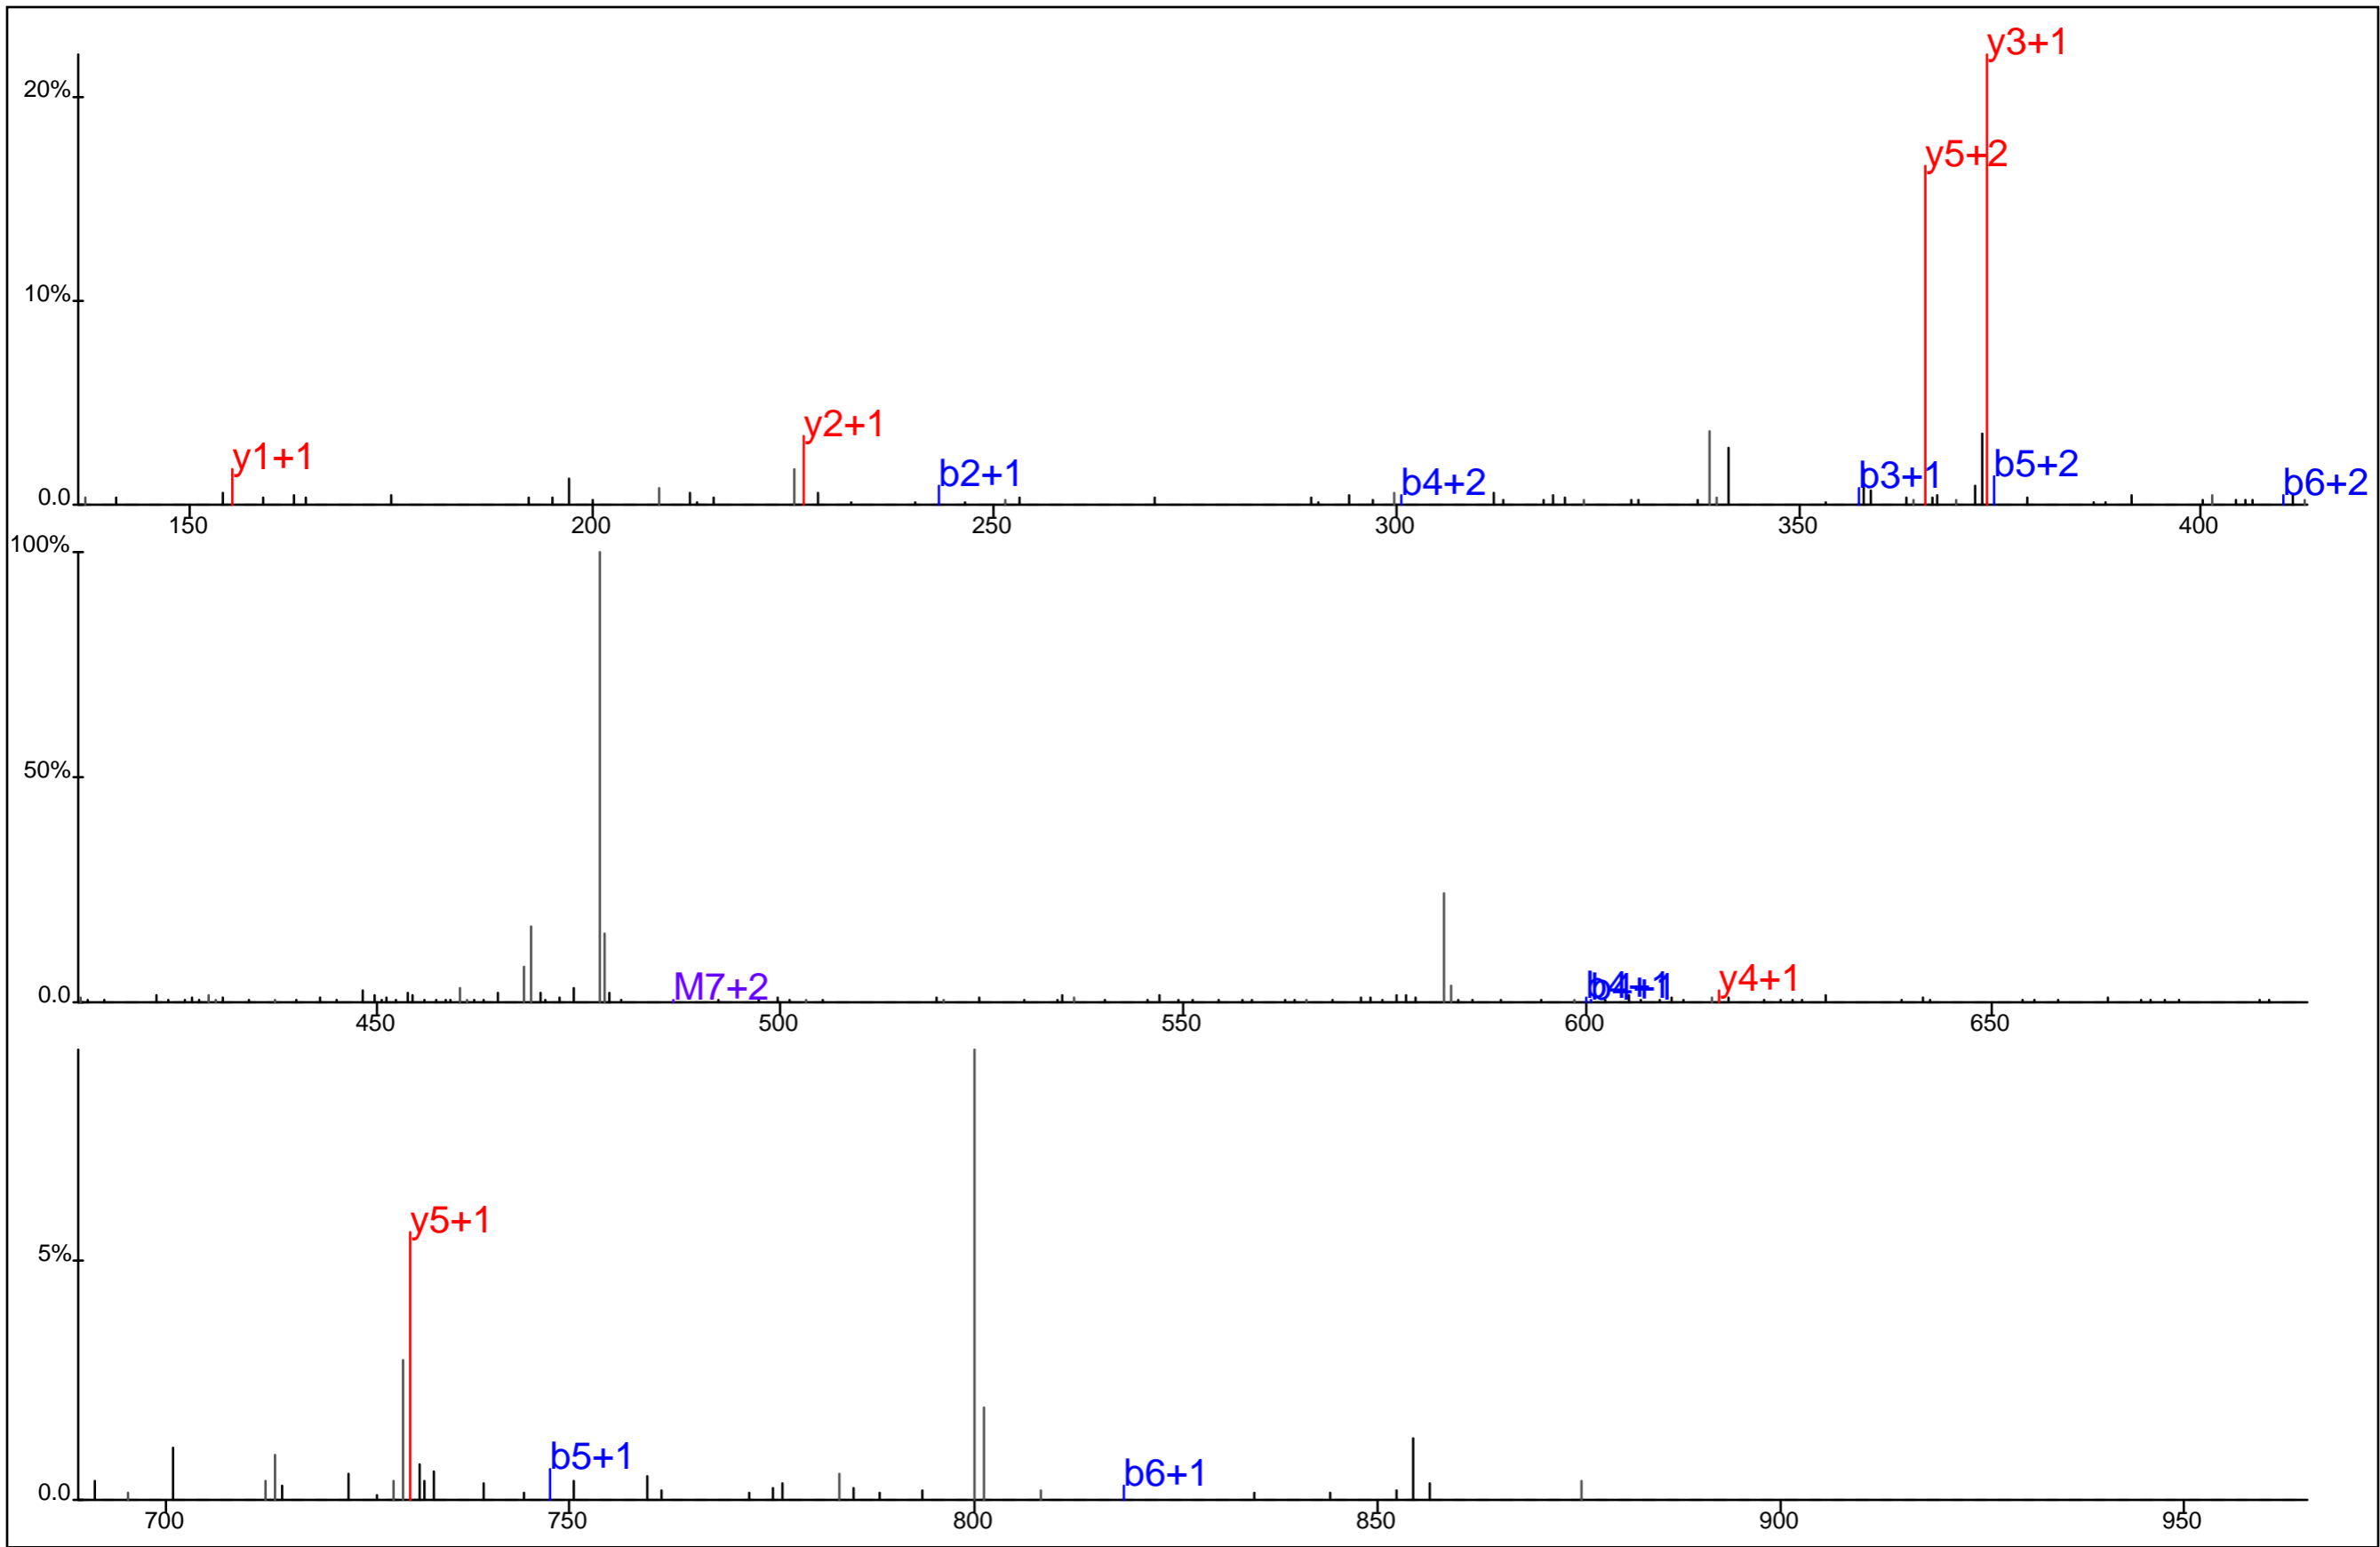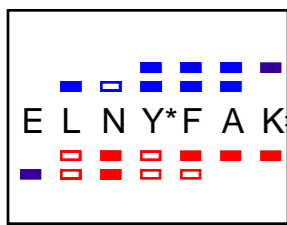

Protein Name: Phosphoglycerate kinase 1  
 gi Accession: 4505763  
 Precursor Mass: 486.7213+2  
 Delta Mass: 3.649 ppm  
 XCorr: 38.17

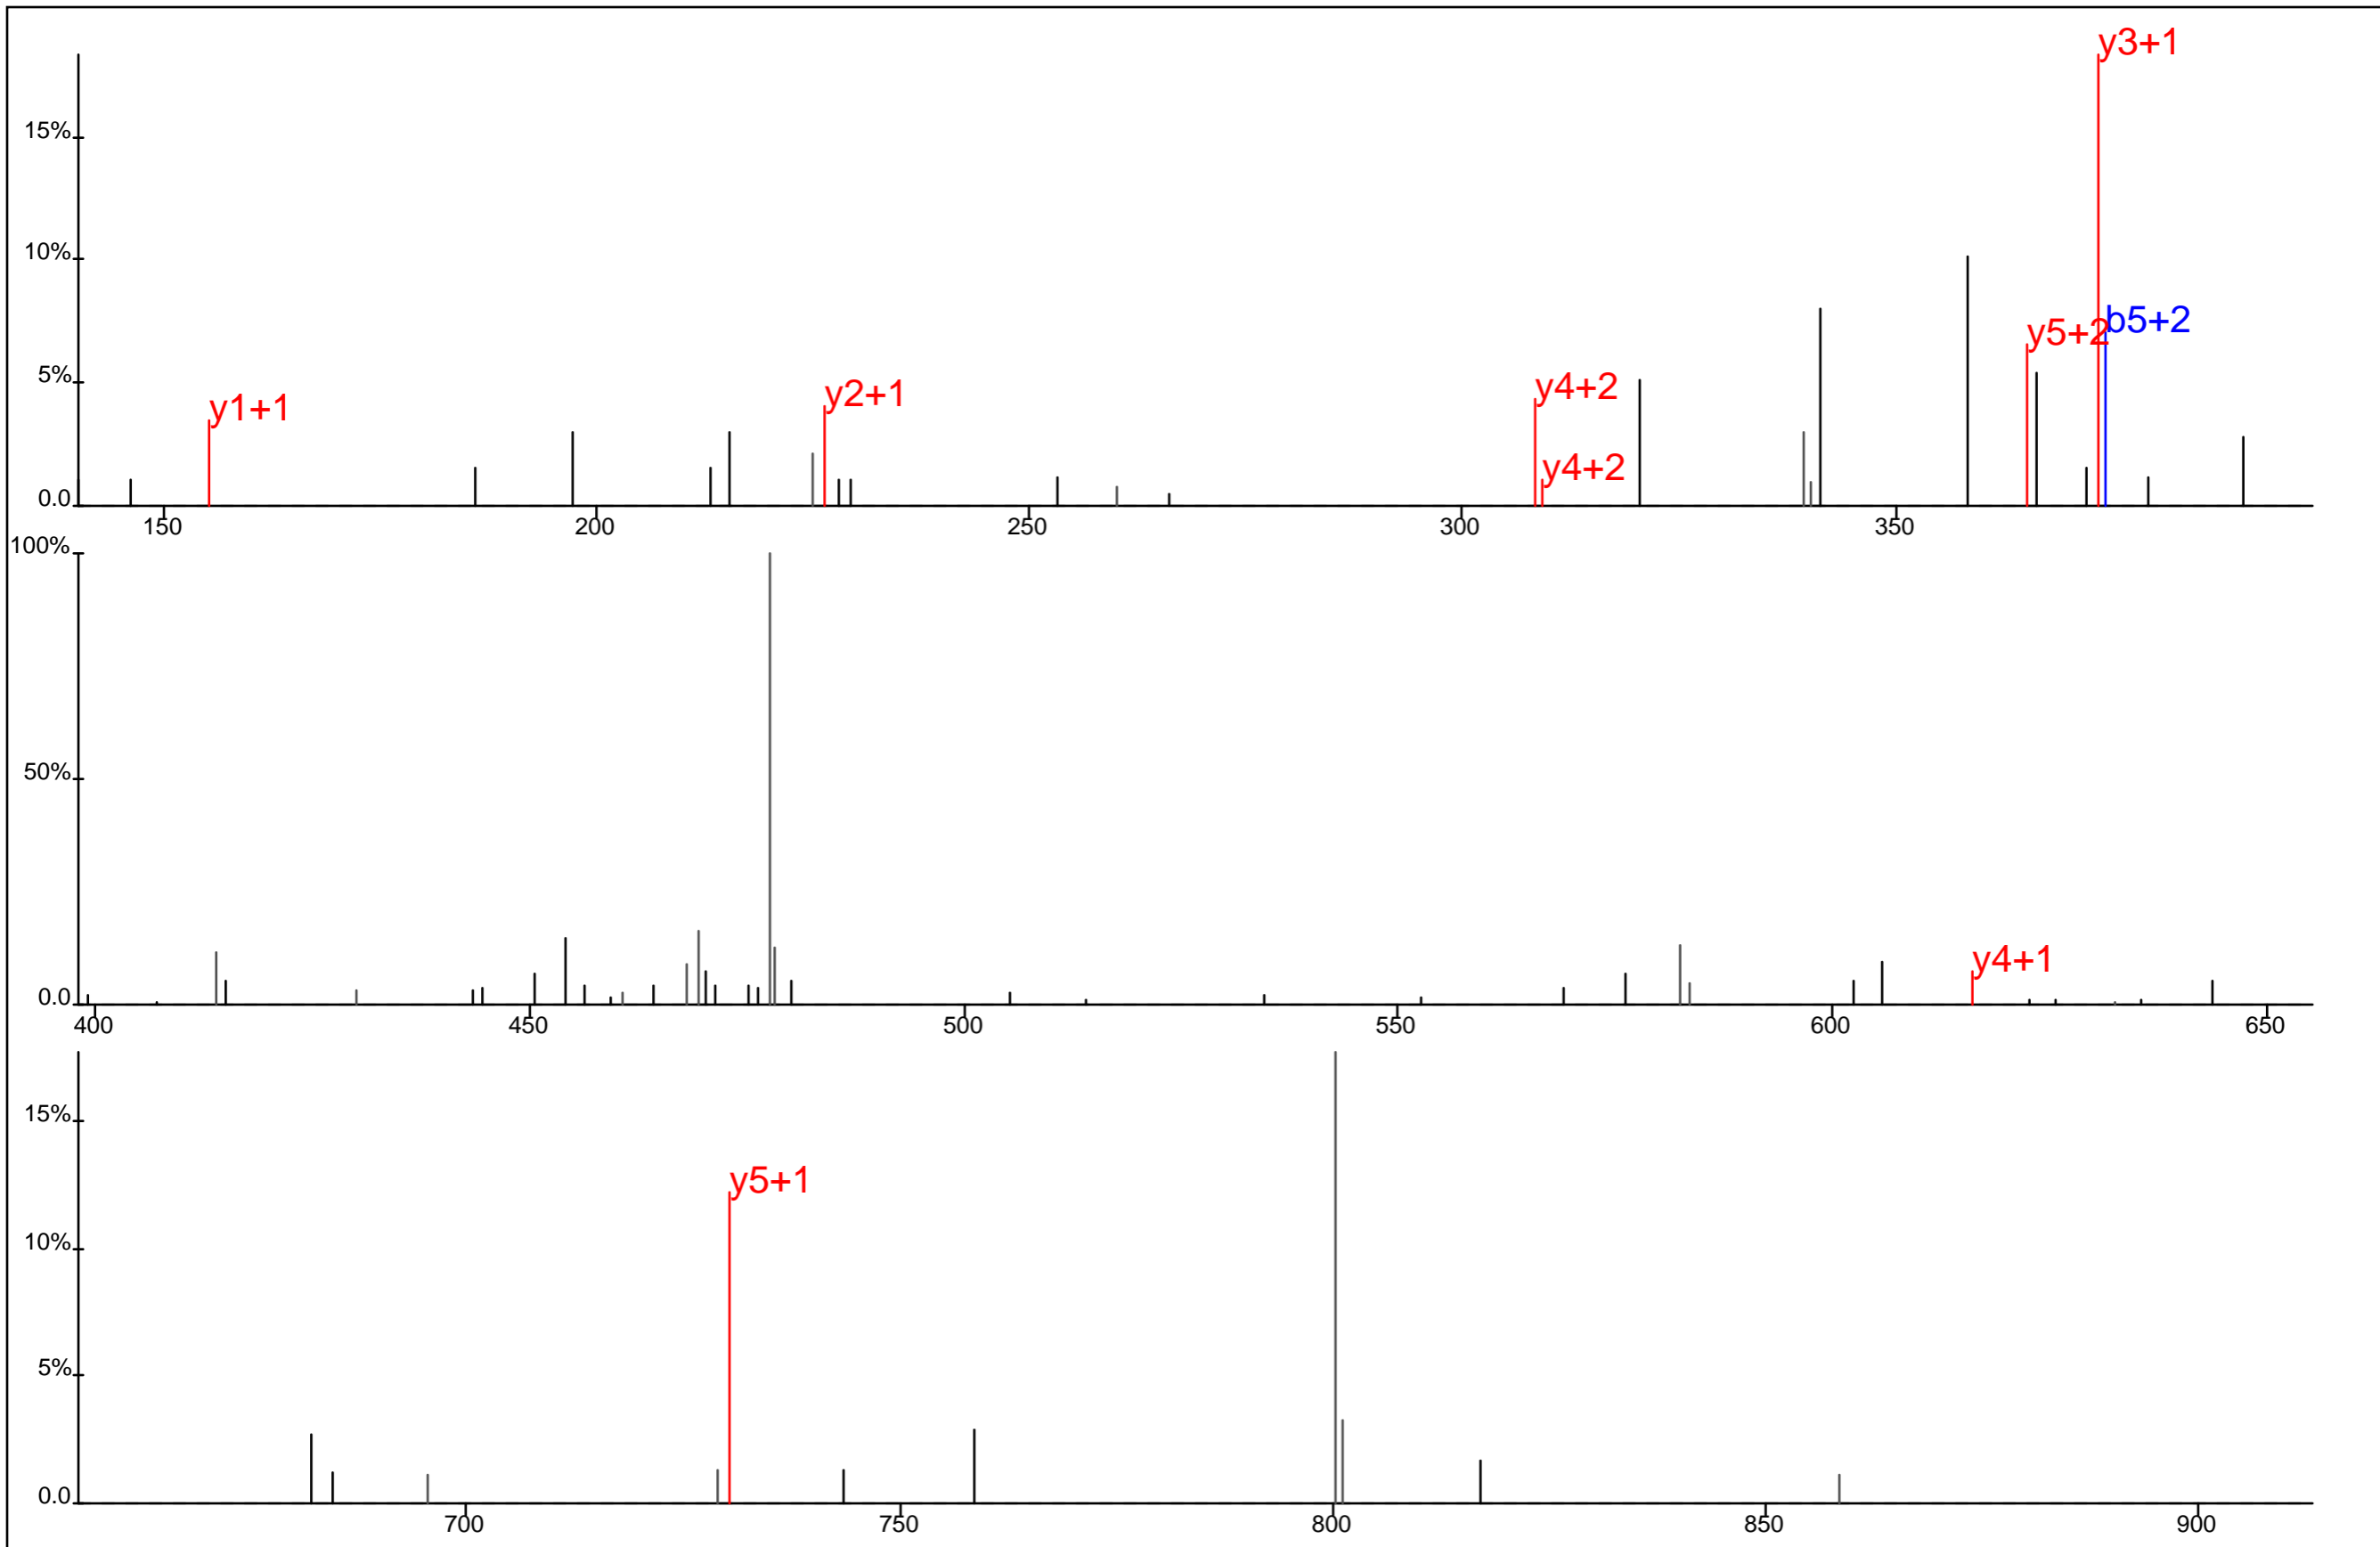

□ □ □ □ □  
 E L N Y\*F A K#  
□ □ □ □ □

Protein Name: Phosphoglycerate kinase 1  
 gi Accession: 4505763  
 Precursor Mass: 486.7208+2  
 Delta Mass: 2.579 ppm  
 XCorr: 19.19

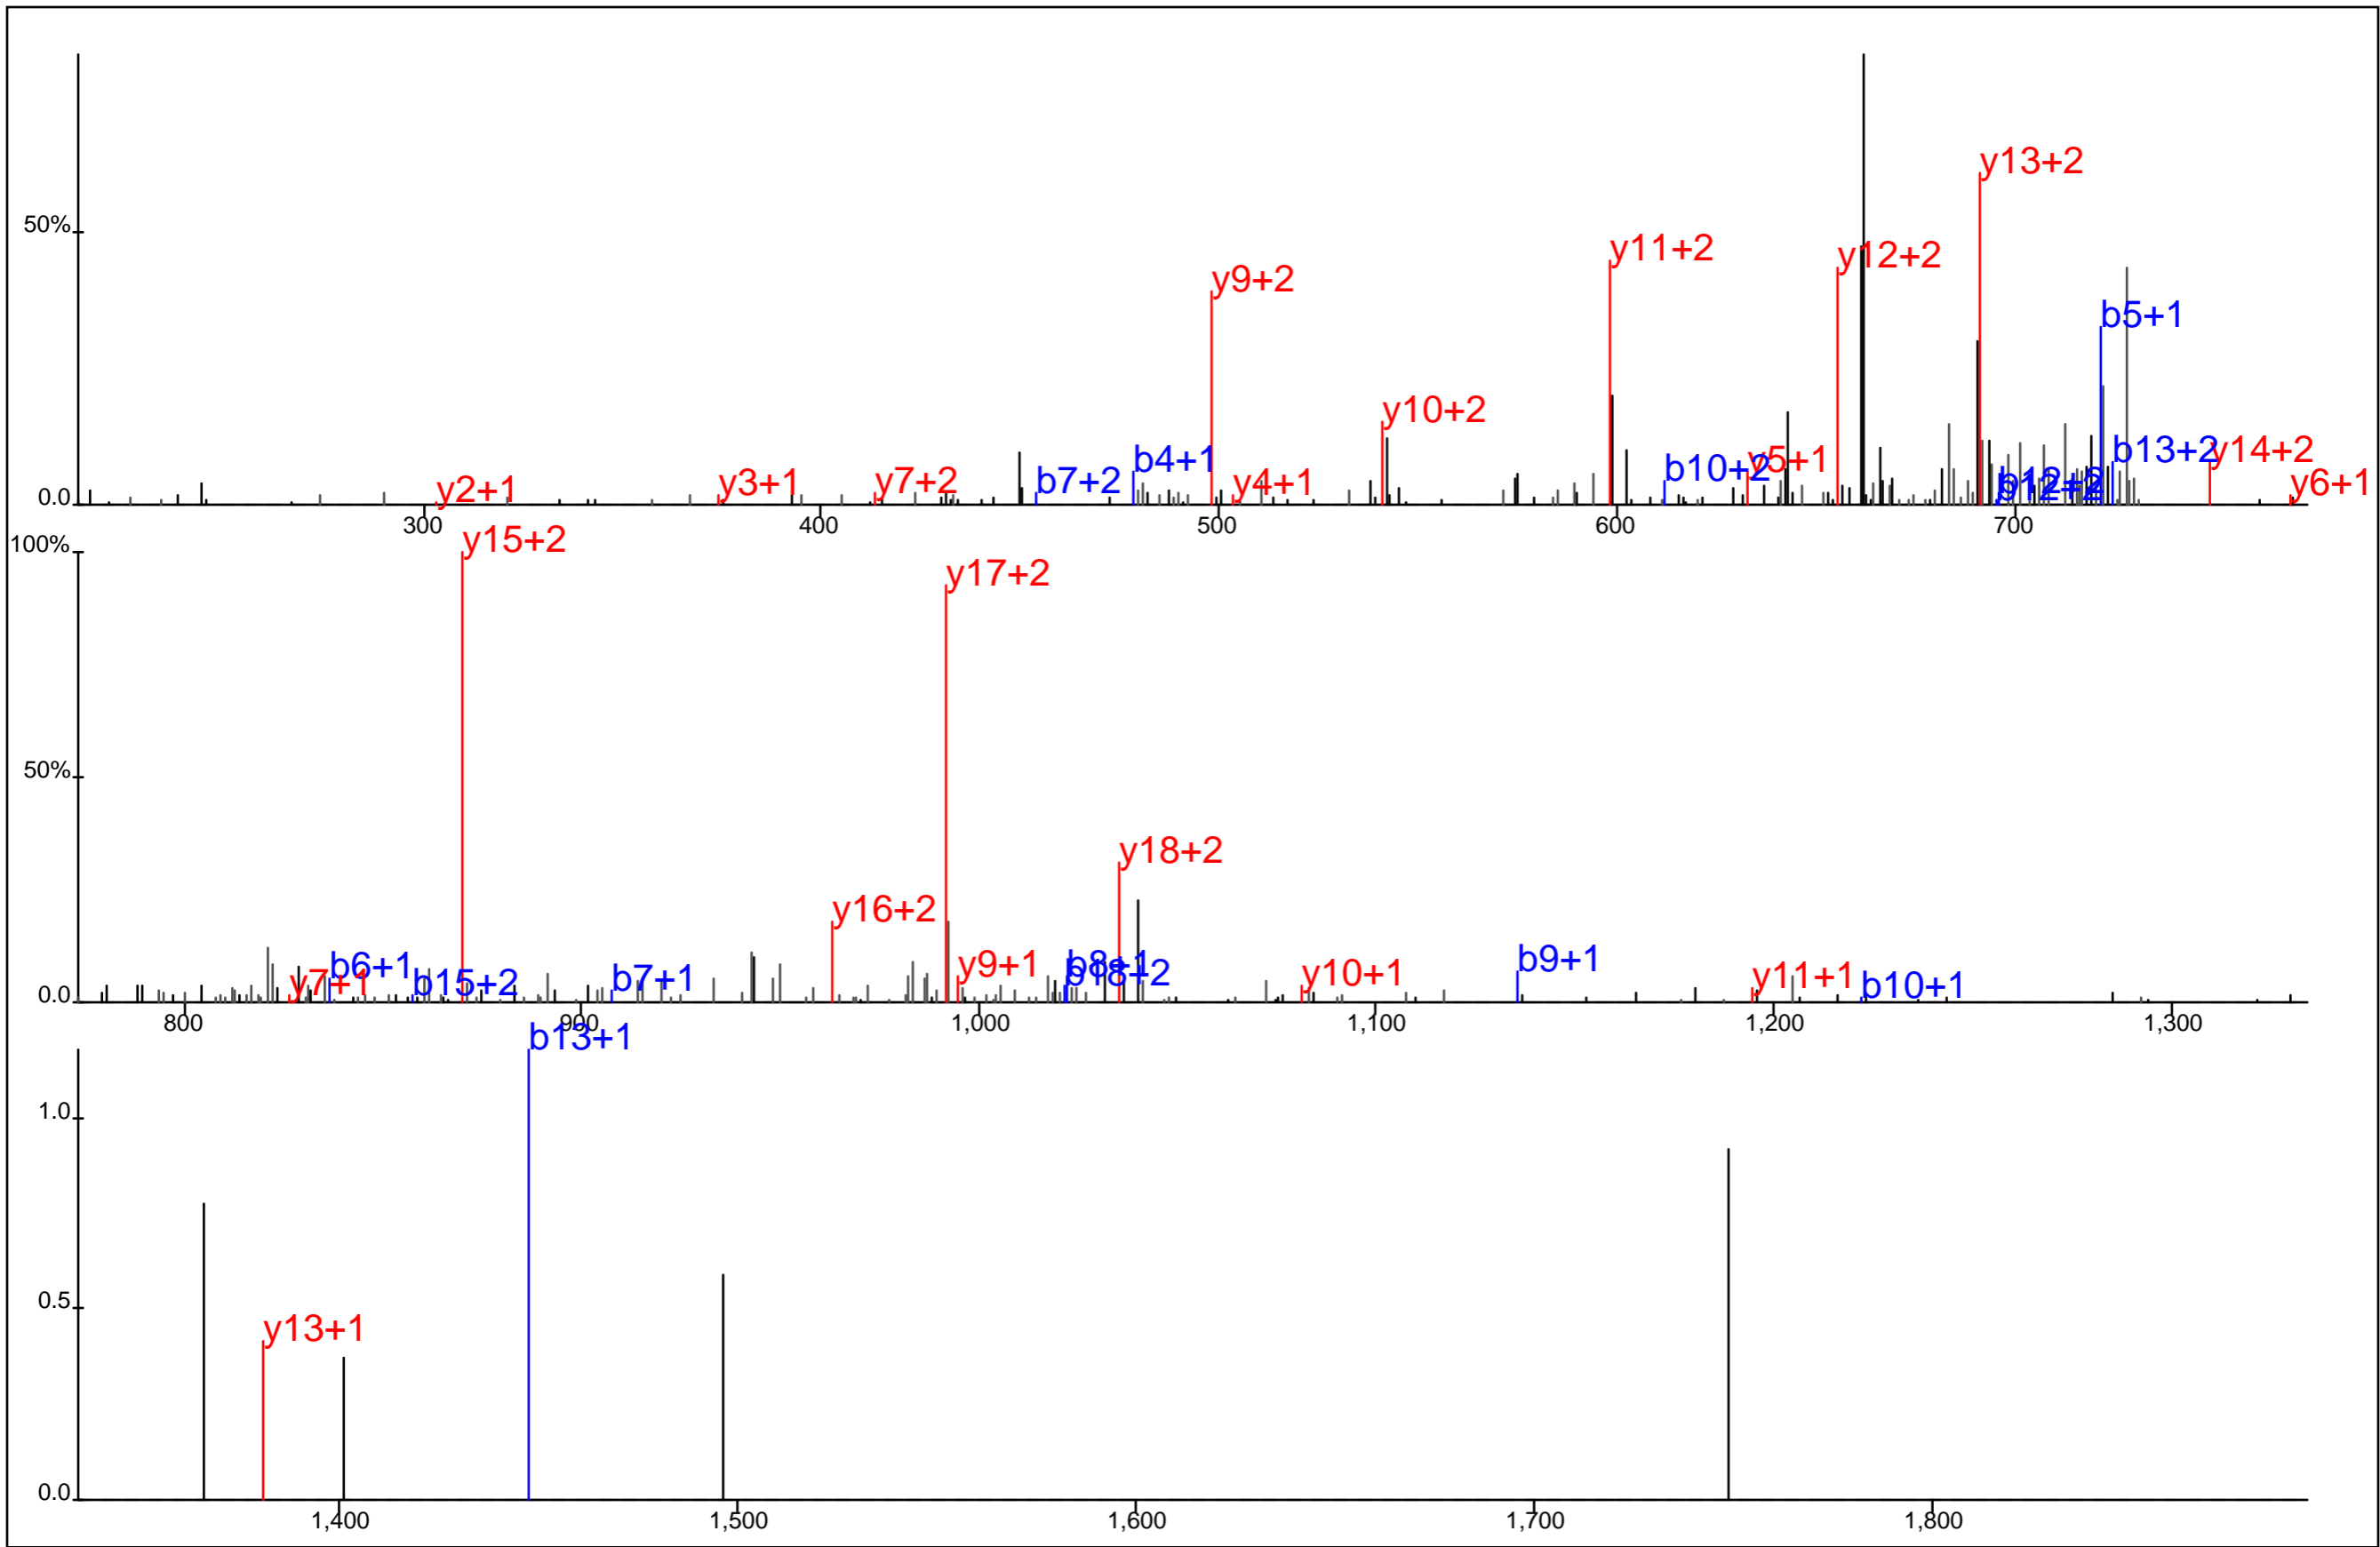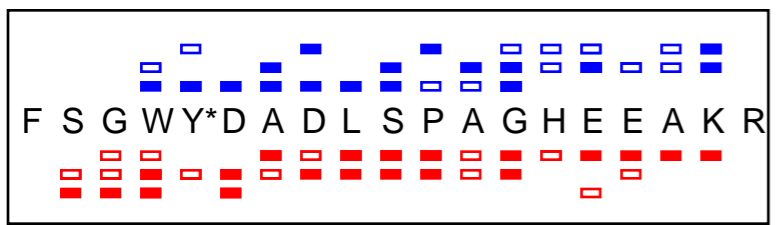

Protein Name: Phosphoglycerate mutase 1  
 gi Accession: 4505753  
 Precursor Mass: 739.3228+3  
 Delta Mass: 4.196 ppm  
 XCorr: 32.73

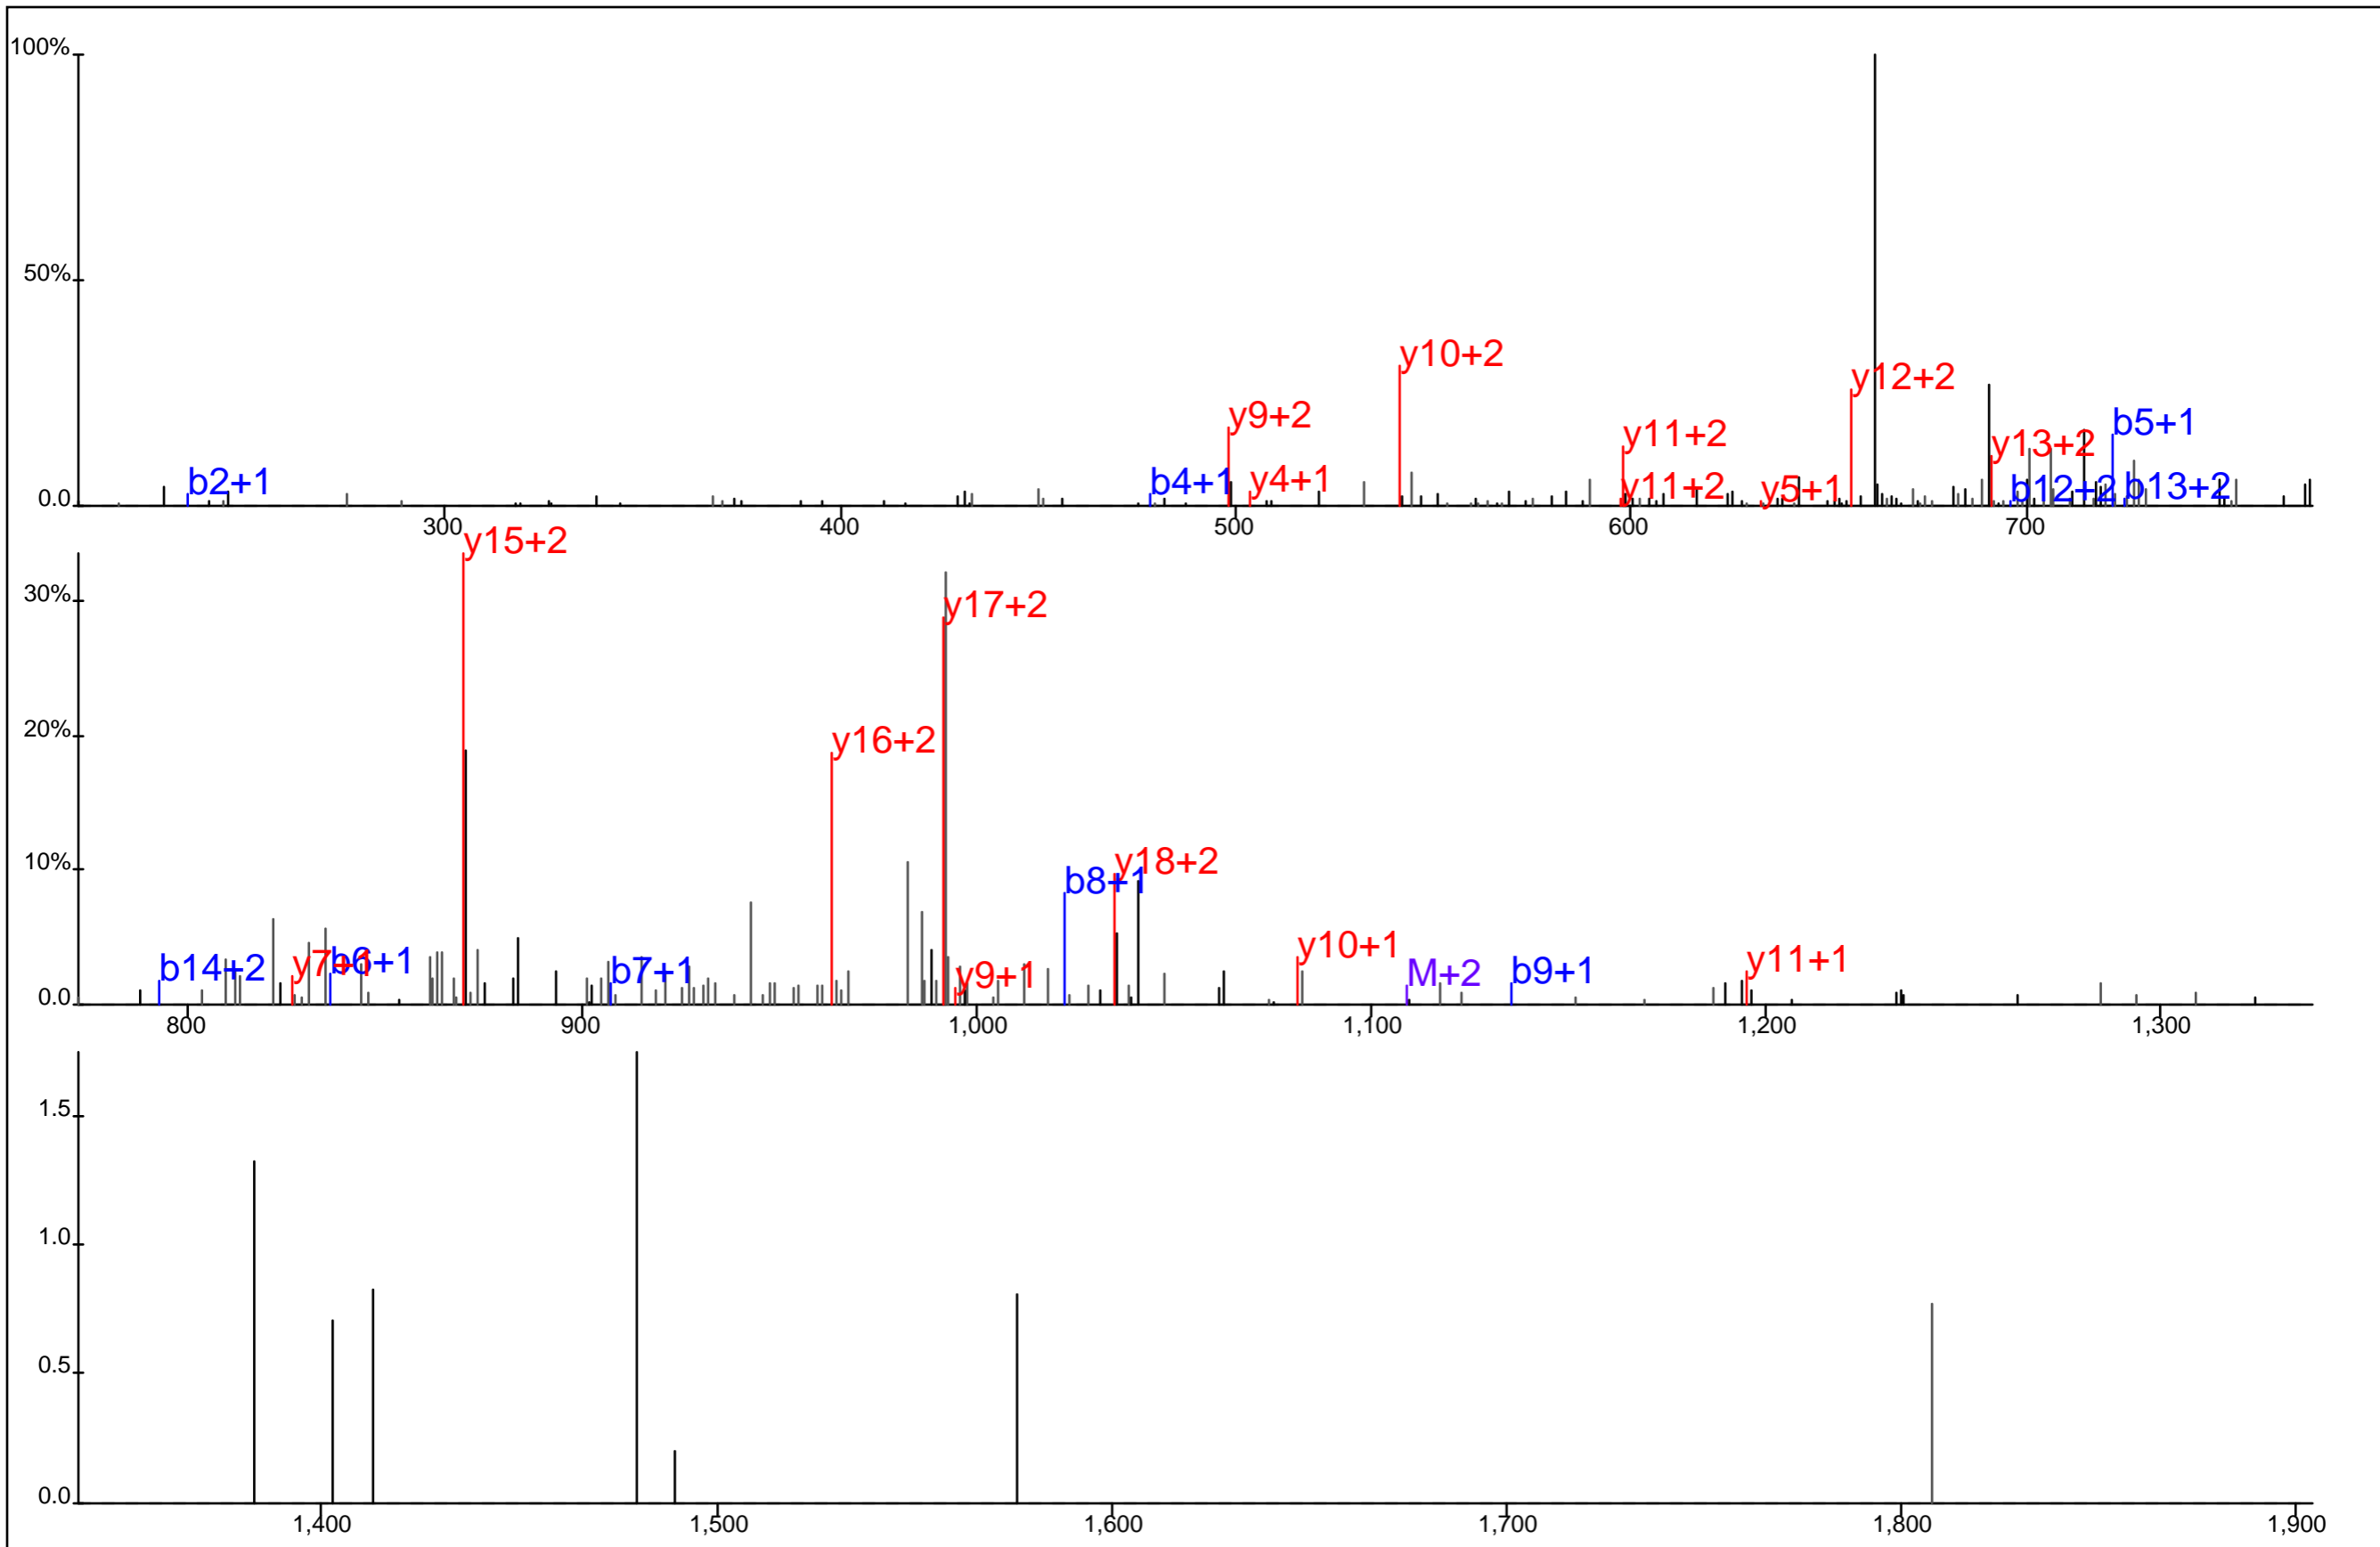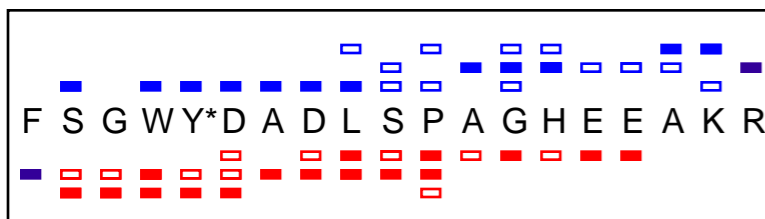

Protein Name: Phosphoglycerate mutase 1  
 gi Accession: 4505753  
 Precursor Mass: 739.3230+3  
 Delta Mass: 4.525 ppm  
 XCorr: 27.44



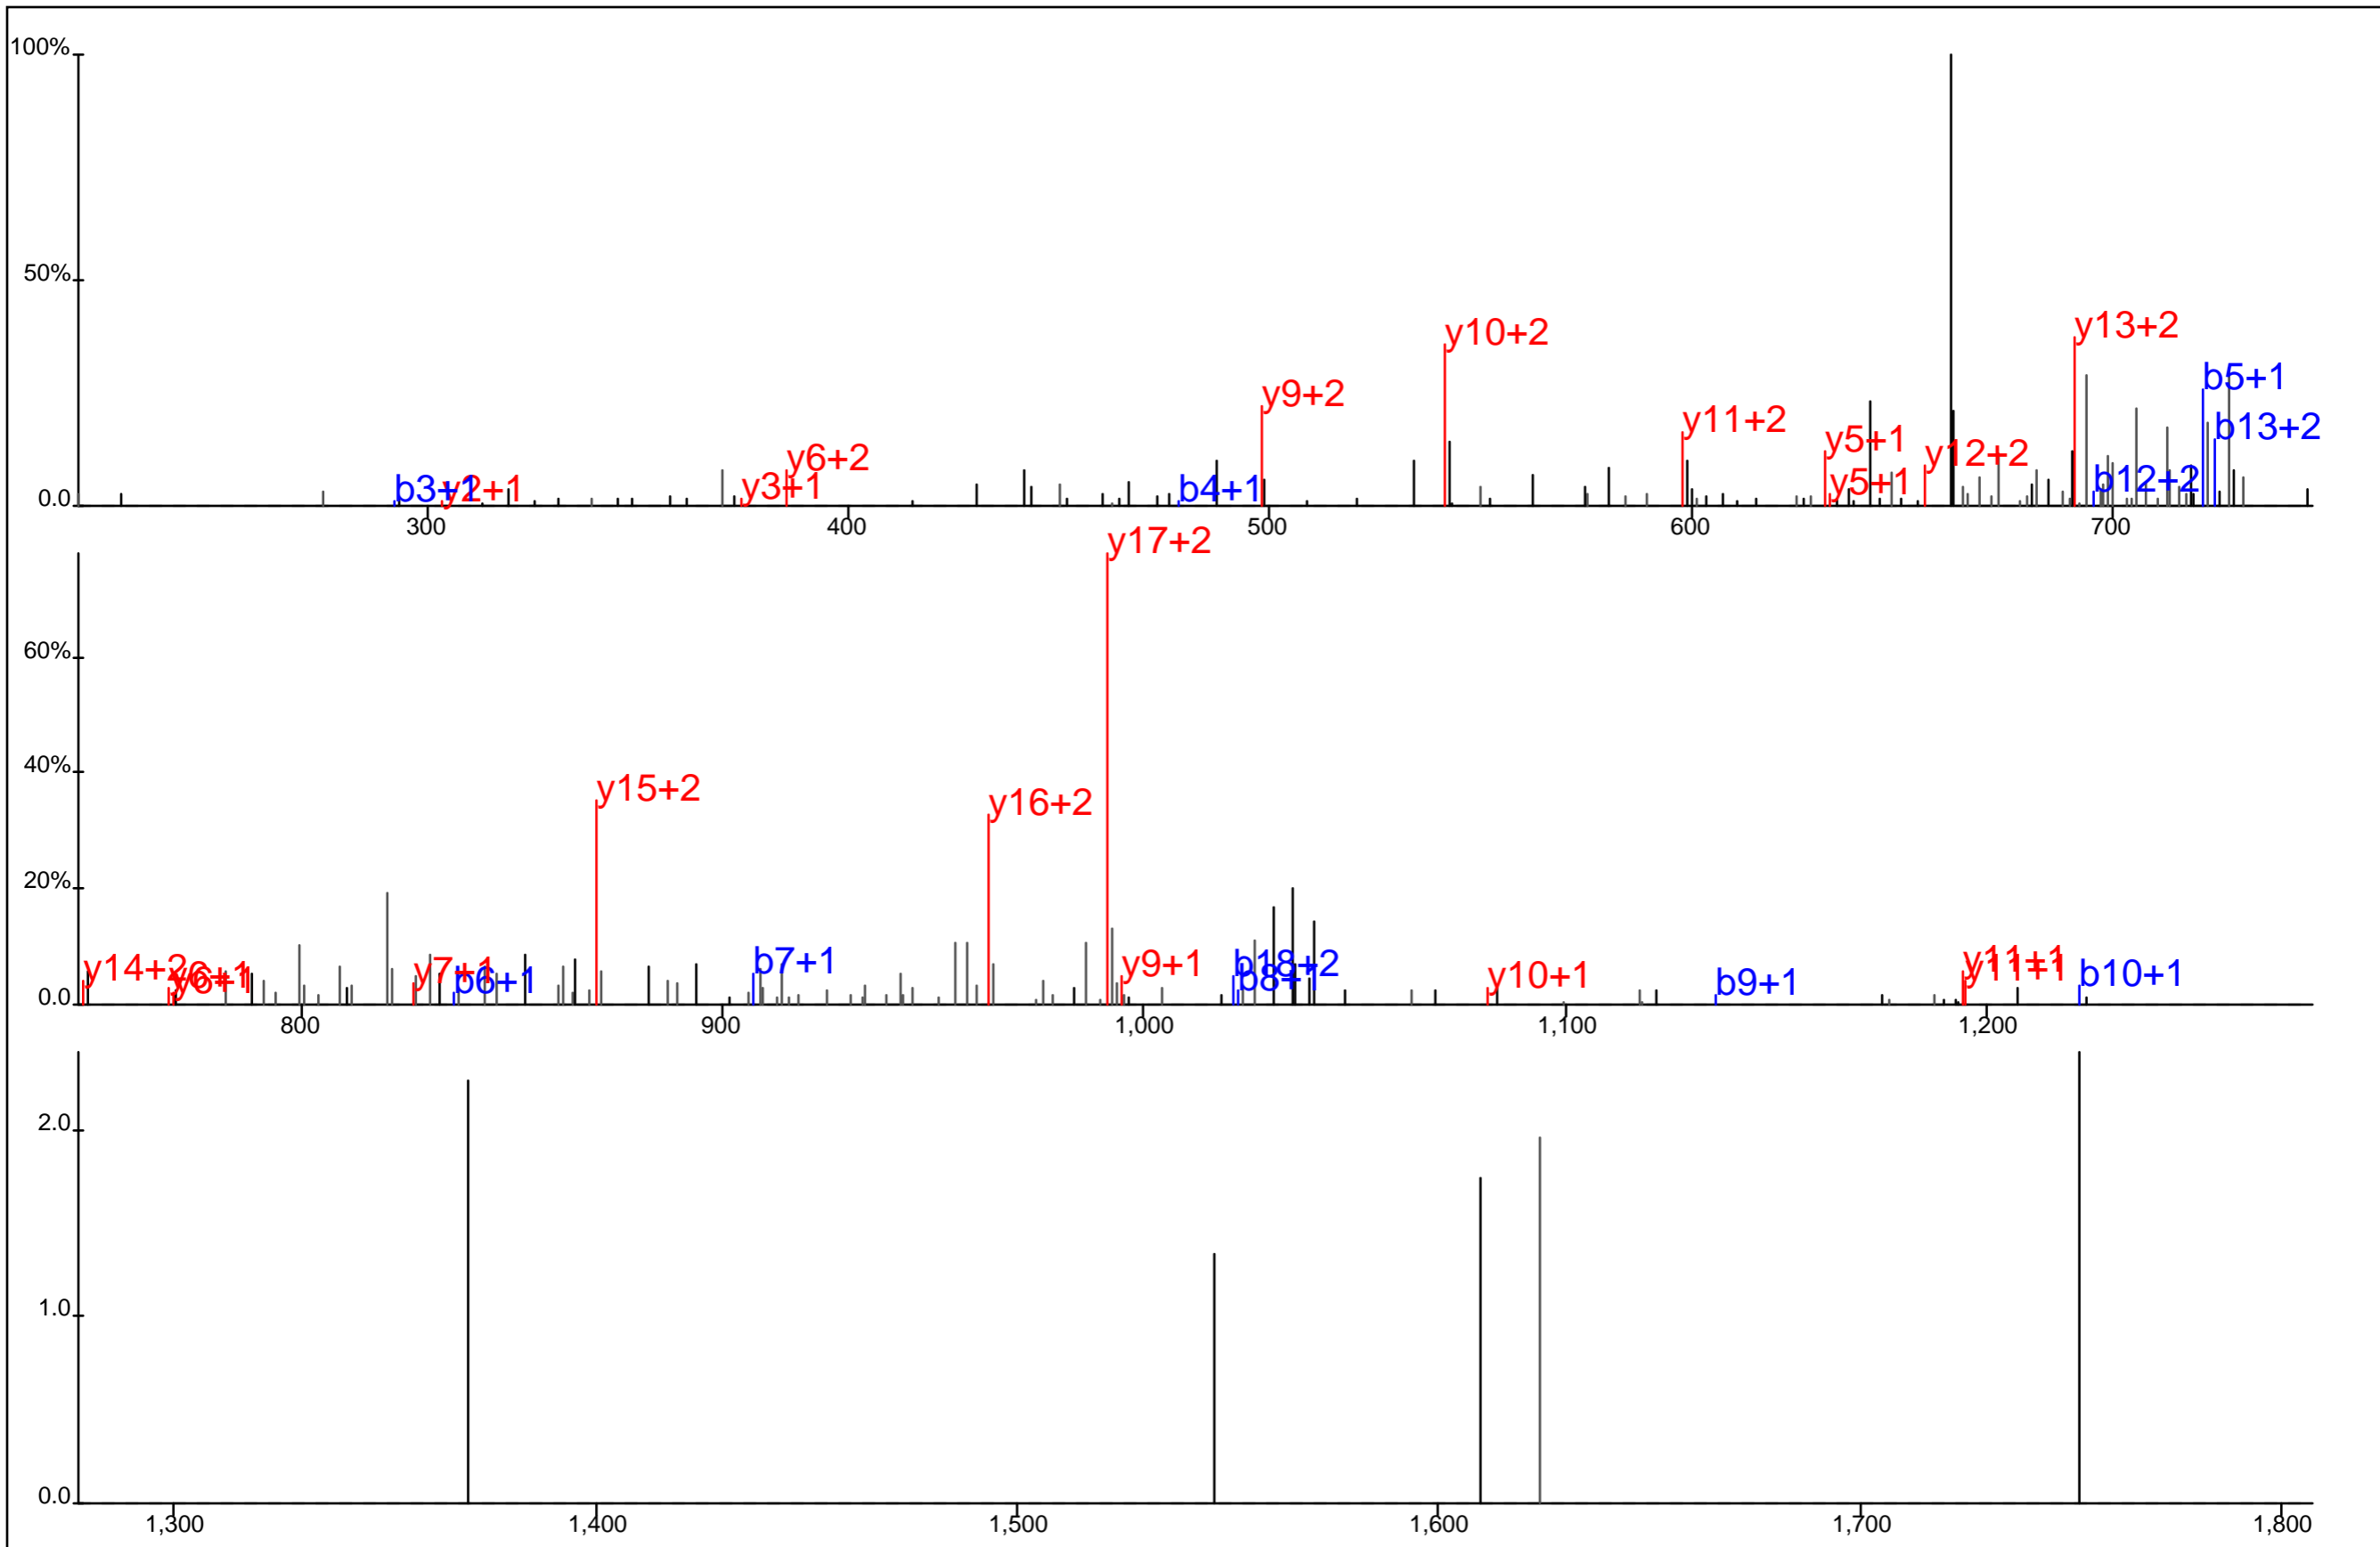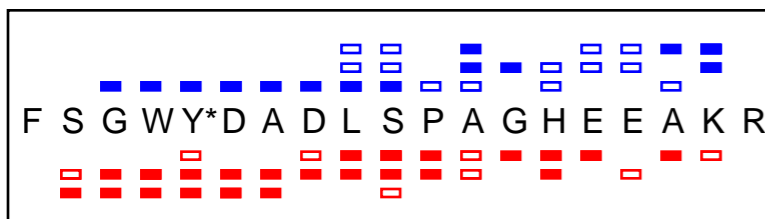

Protein Name: Phosphoglycerate mutase 1  
 gi Accession: 4505753  
 Precursor Mass: 739.3218+3  
 Delta Mass: 2.954 ppm  
 XCorr: 29.82

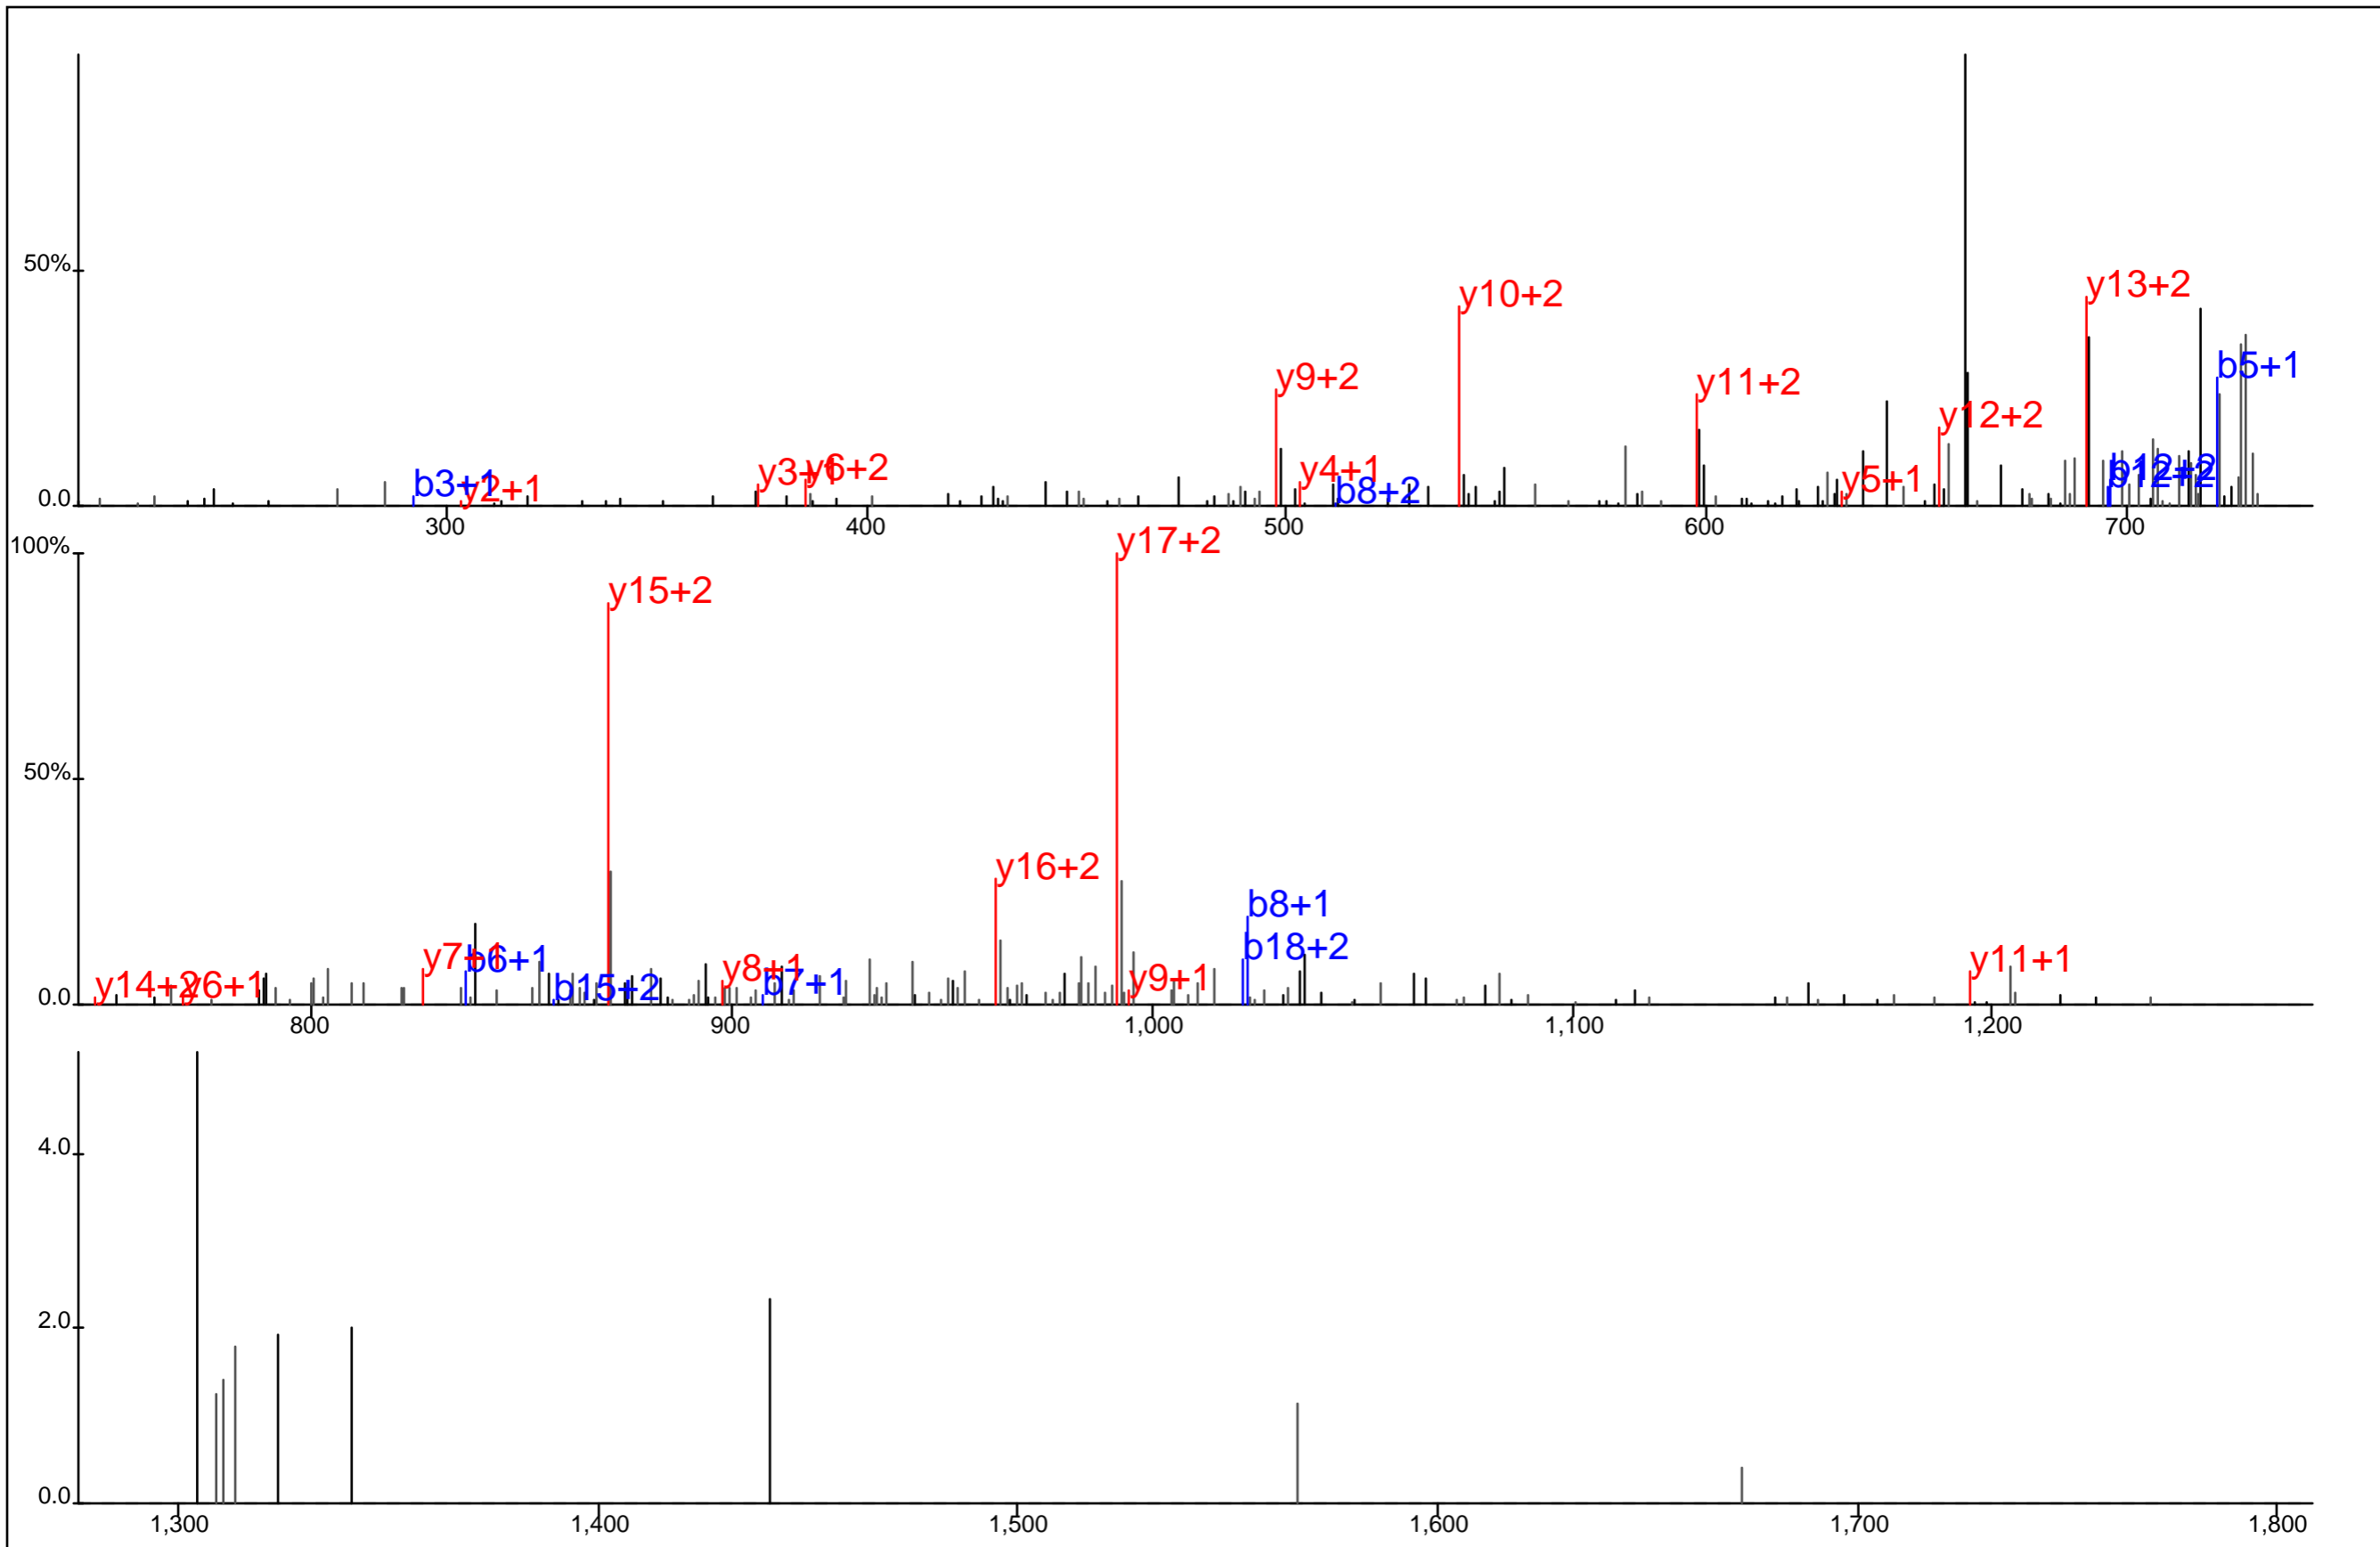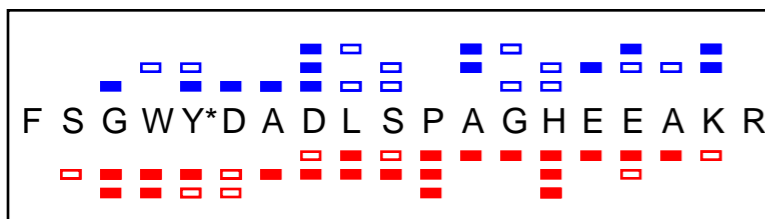

Protein Name: Phosphoglycerate mutase 1  
 gi Accession: 4505753  
 Precursor Mass: 739.3221+3  
 Delta Mass: 3.370 ppm  
 XCorr: 30.08

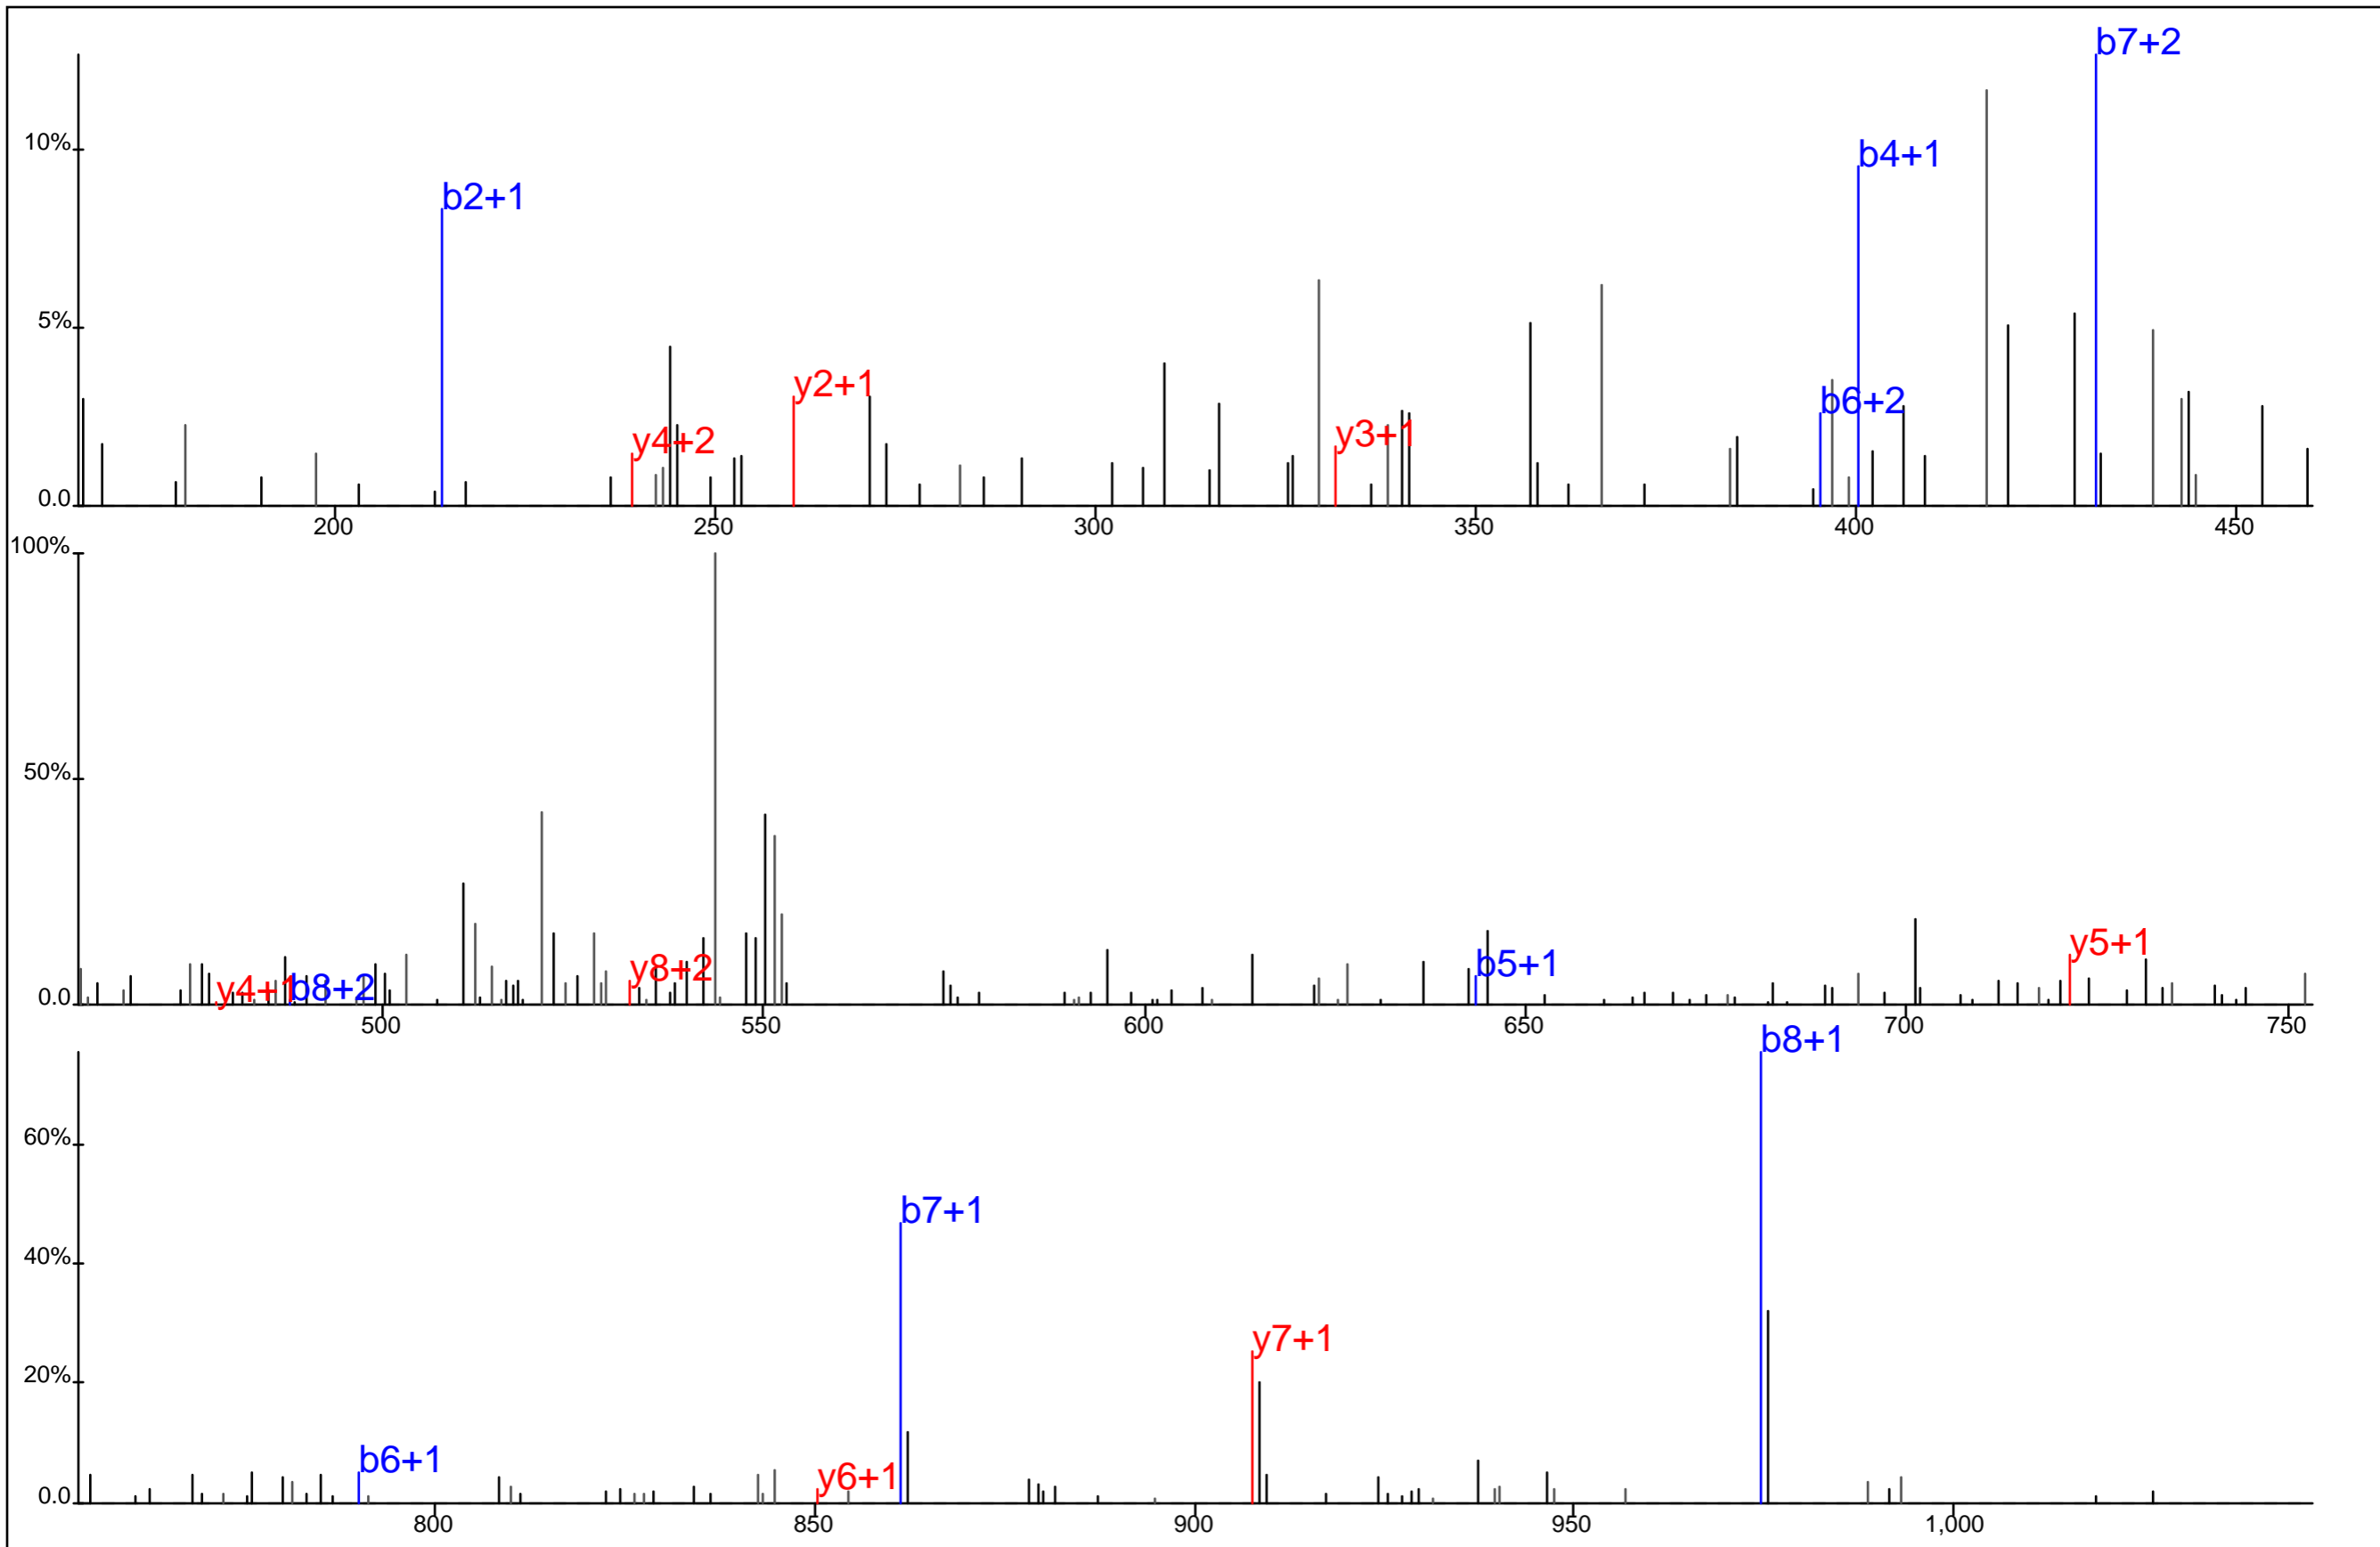

G R G E Y\* F A I K

Protein Name: PKC delta  
 gi Accession: 520587  
 Precursor Mass: 560.7632+2  
 Delta Mass: 0.464 ppm  
 XCorr: 2.3054



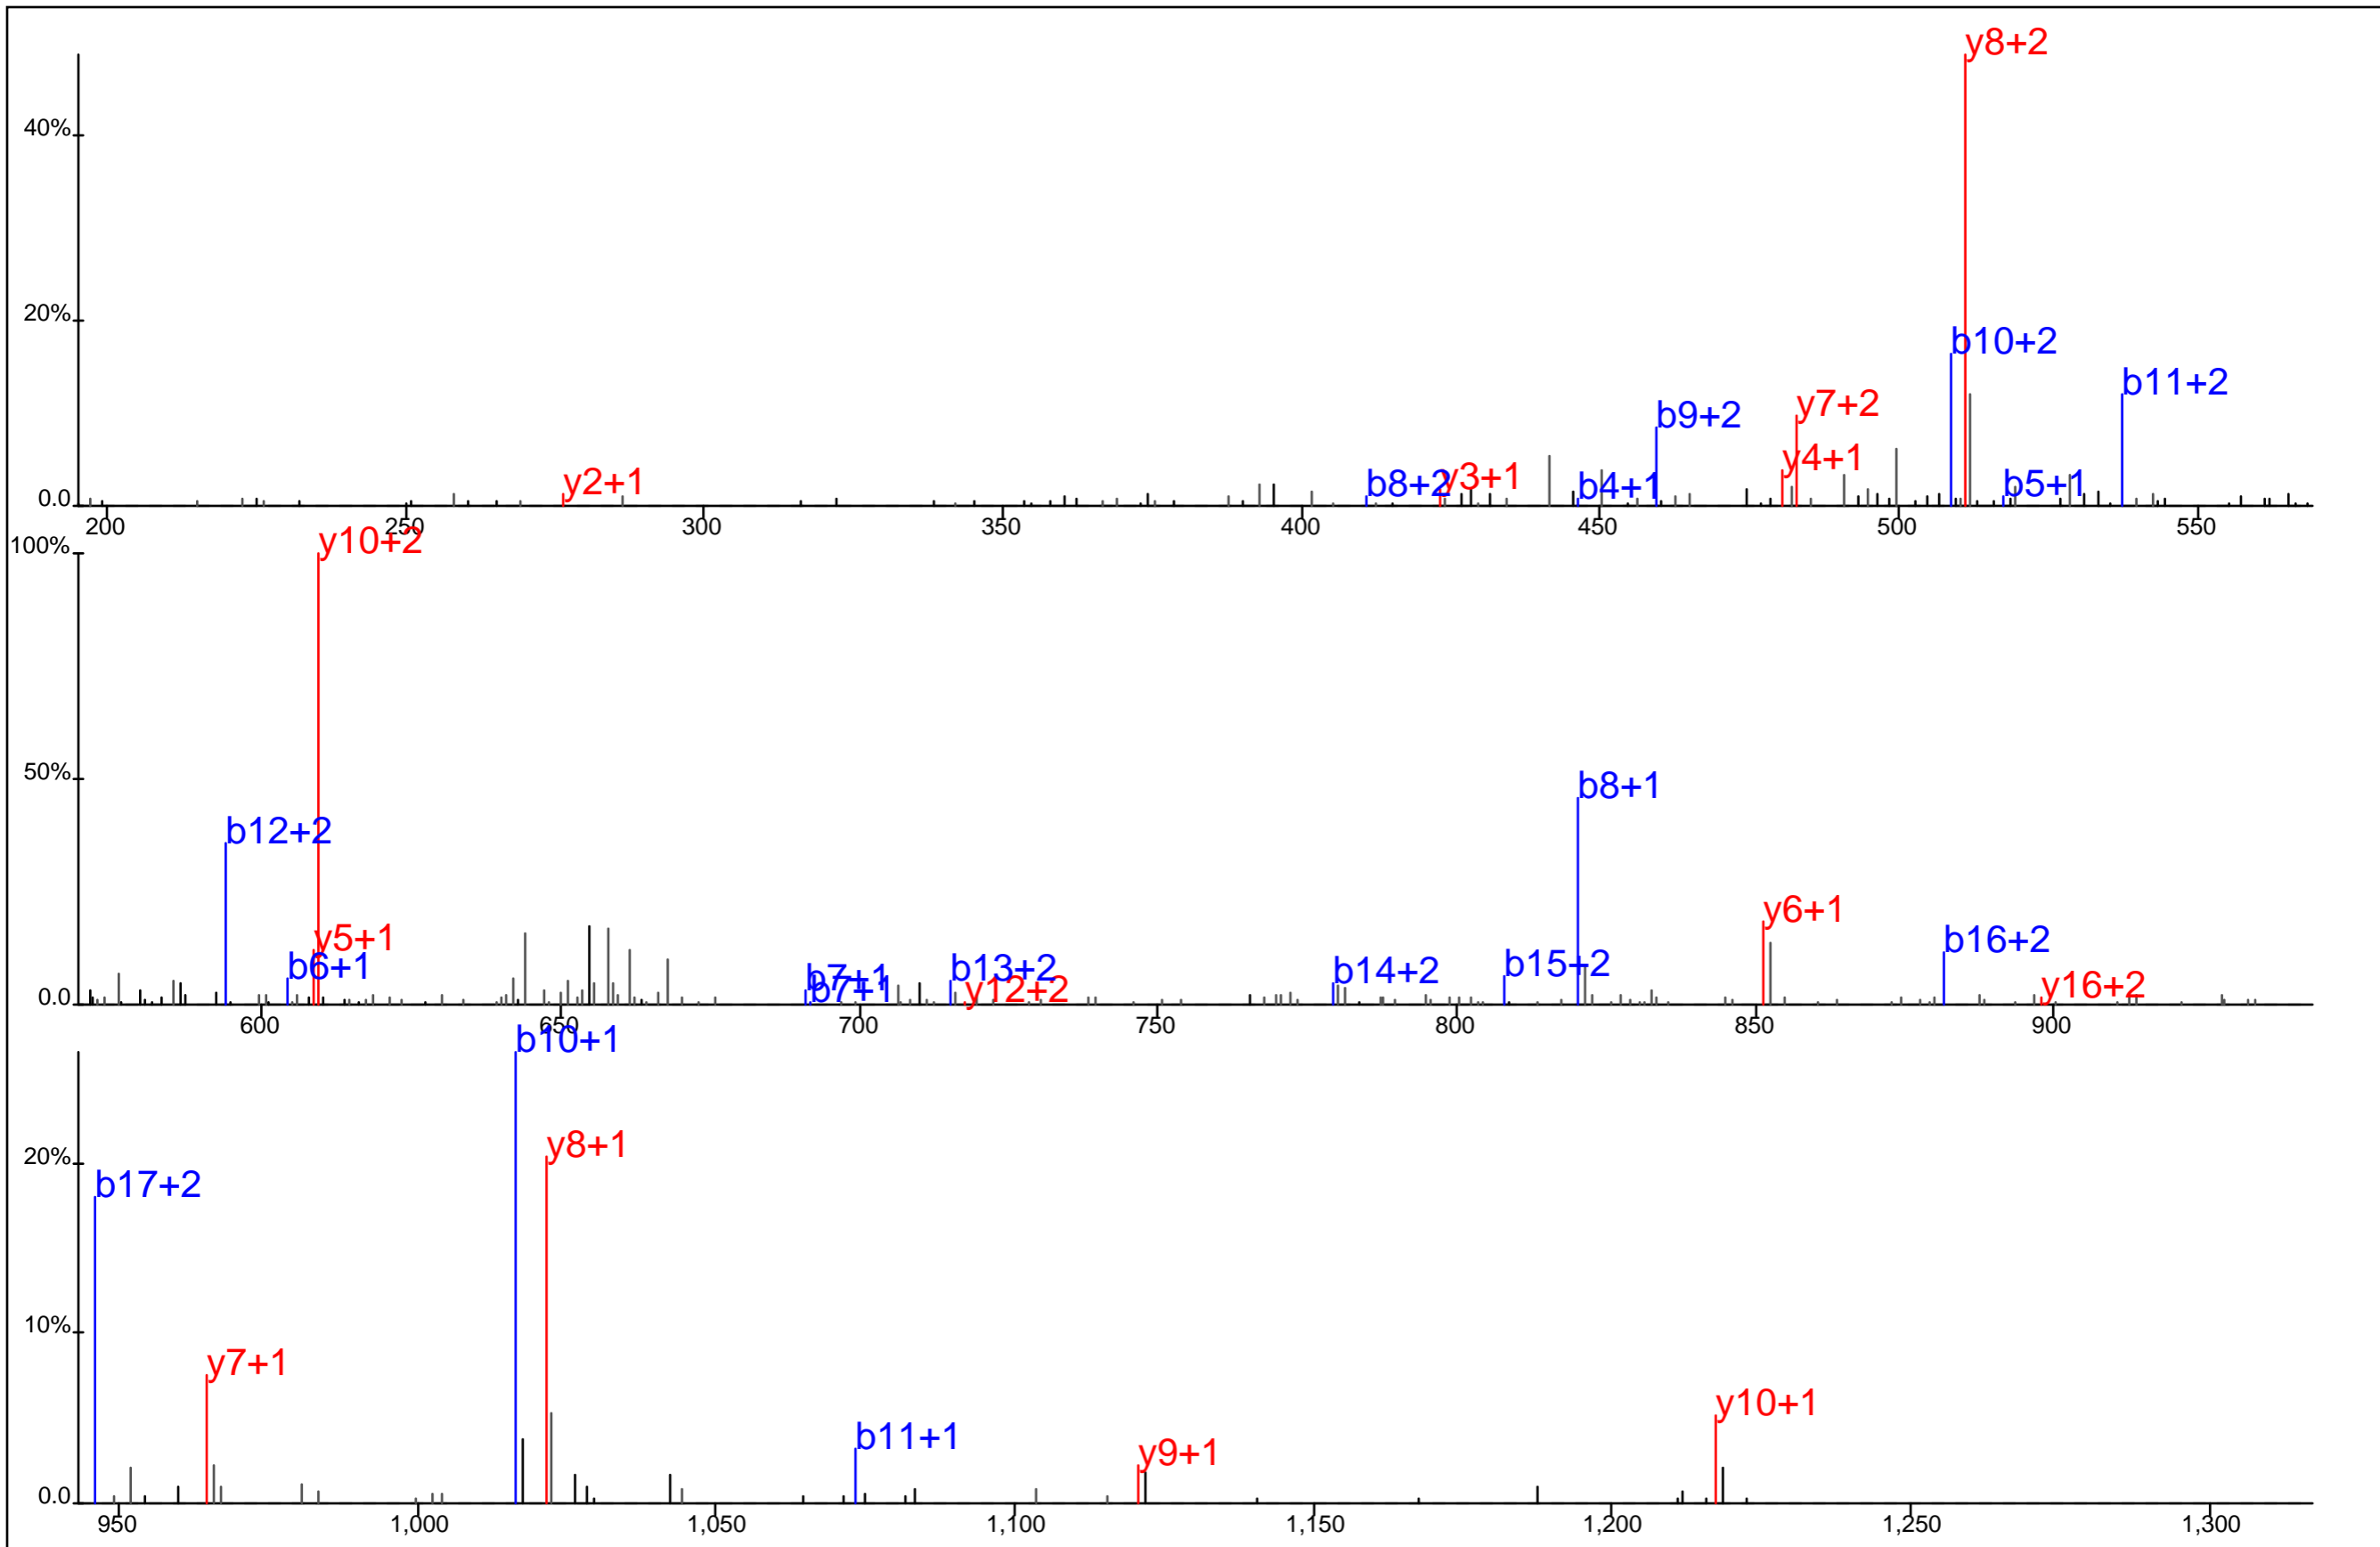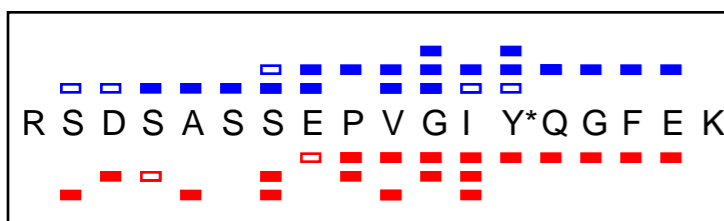

Protein Name: PKC delta  
 gi Accession: 520587  
 Precursor Mass: 679.6400+3  
 Delta Mass: 4.624 ppm  
 XCorr: 46.23

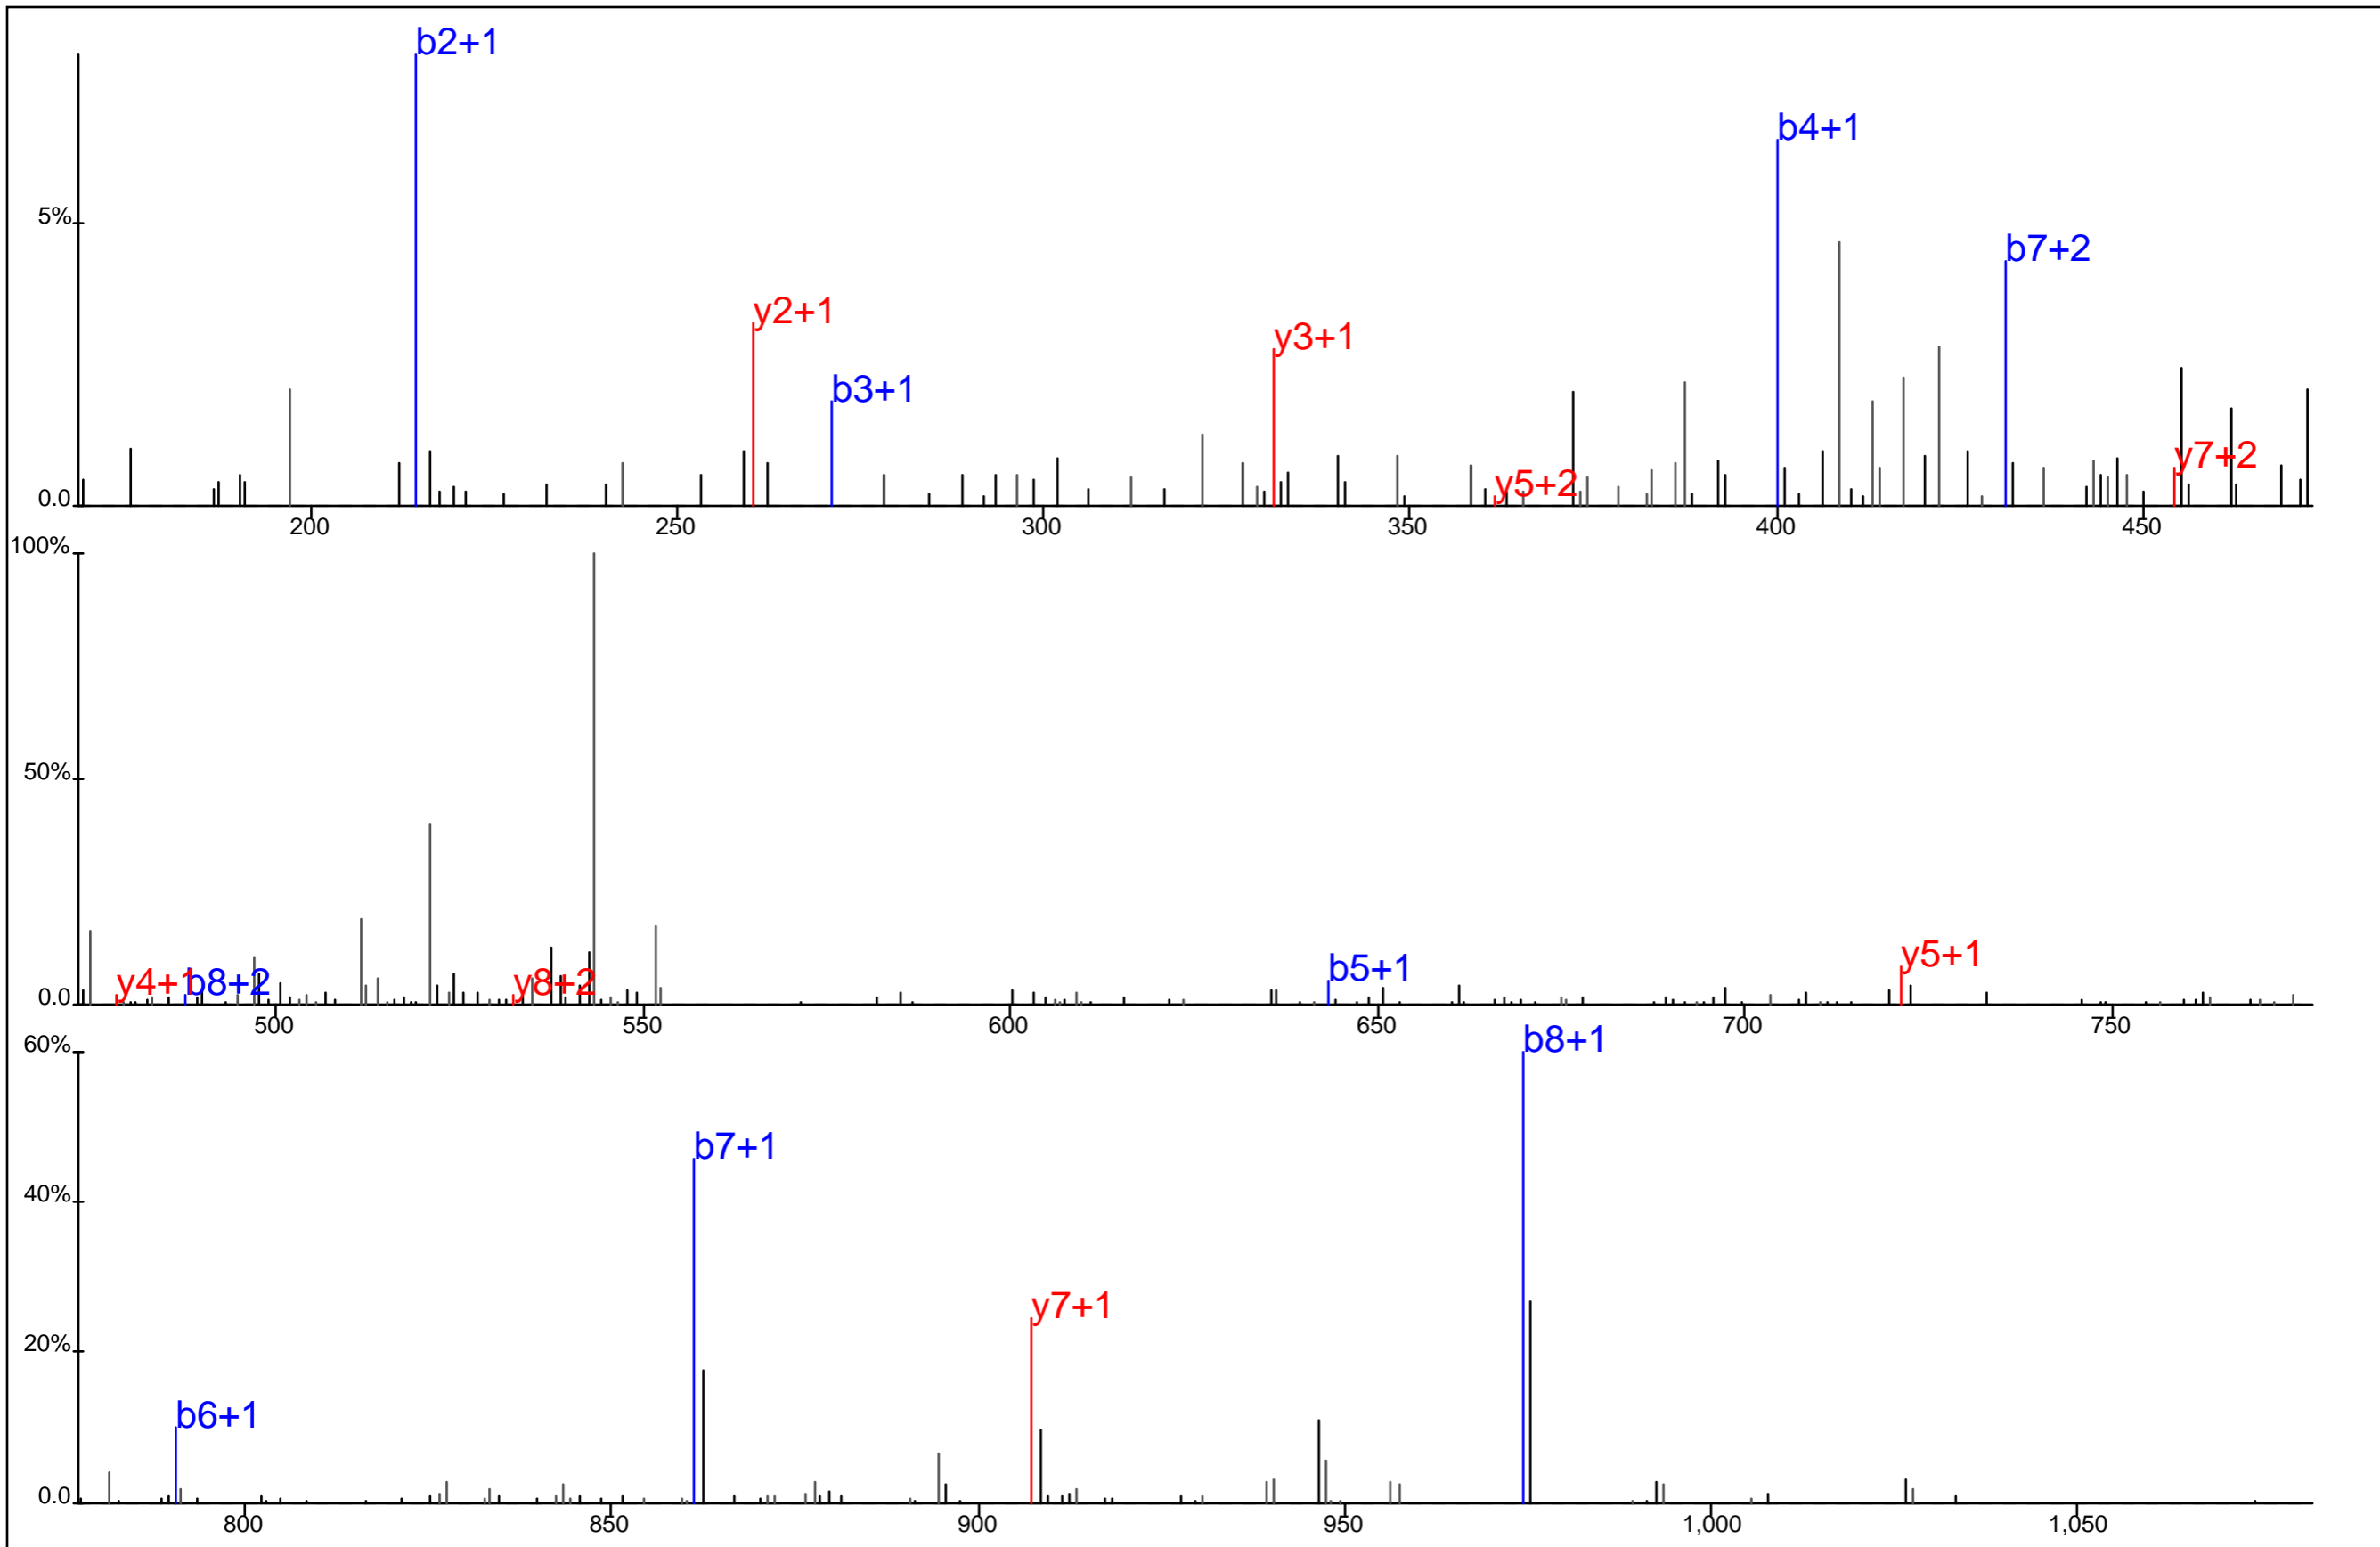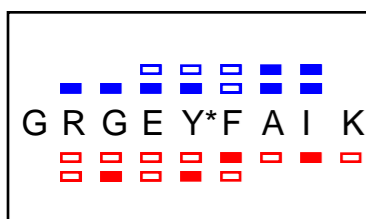

Protein Name: PKC delta  
 gi Accession: 520587  
 Precursor Mass: 560.7645+2  
 Delta Mass: 2.783 ppm  
 XCorr: 43.49

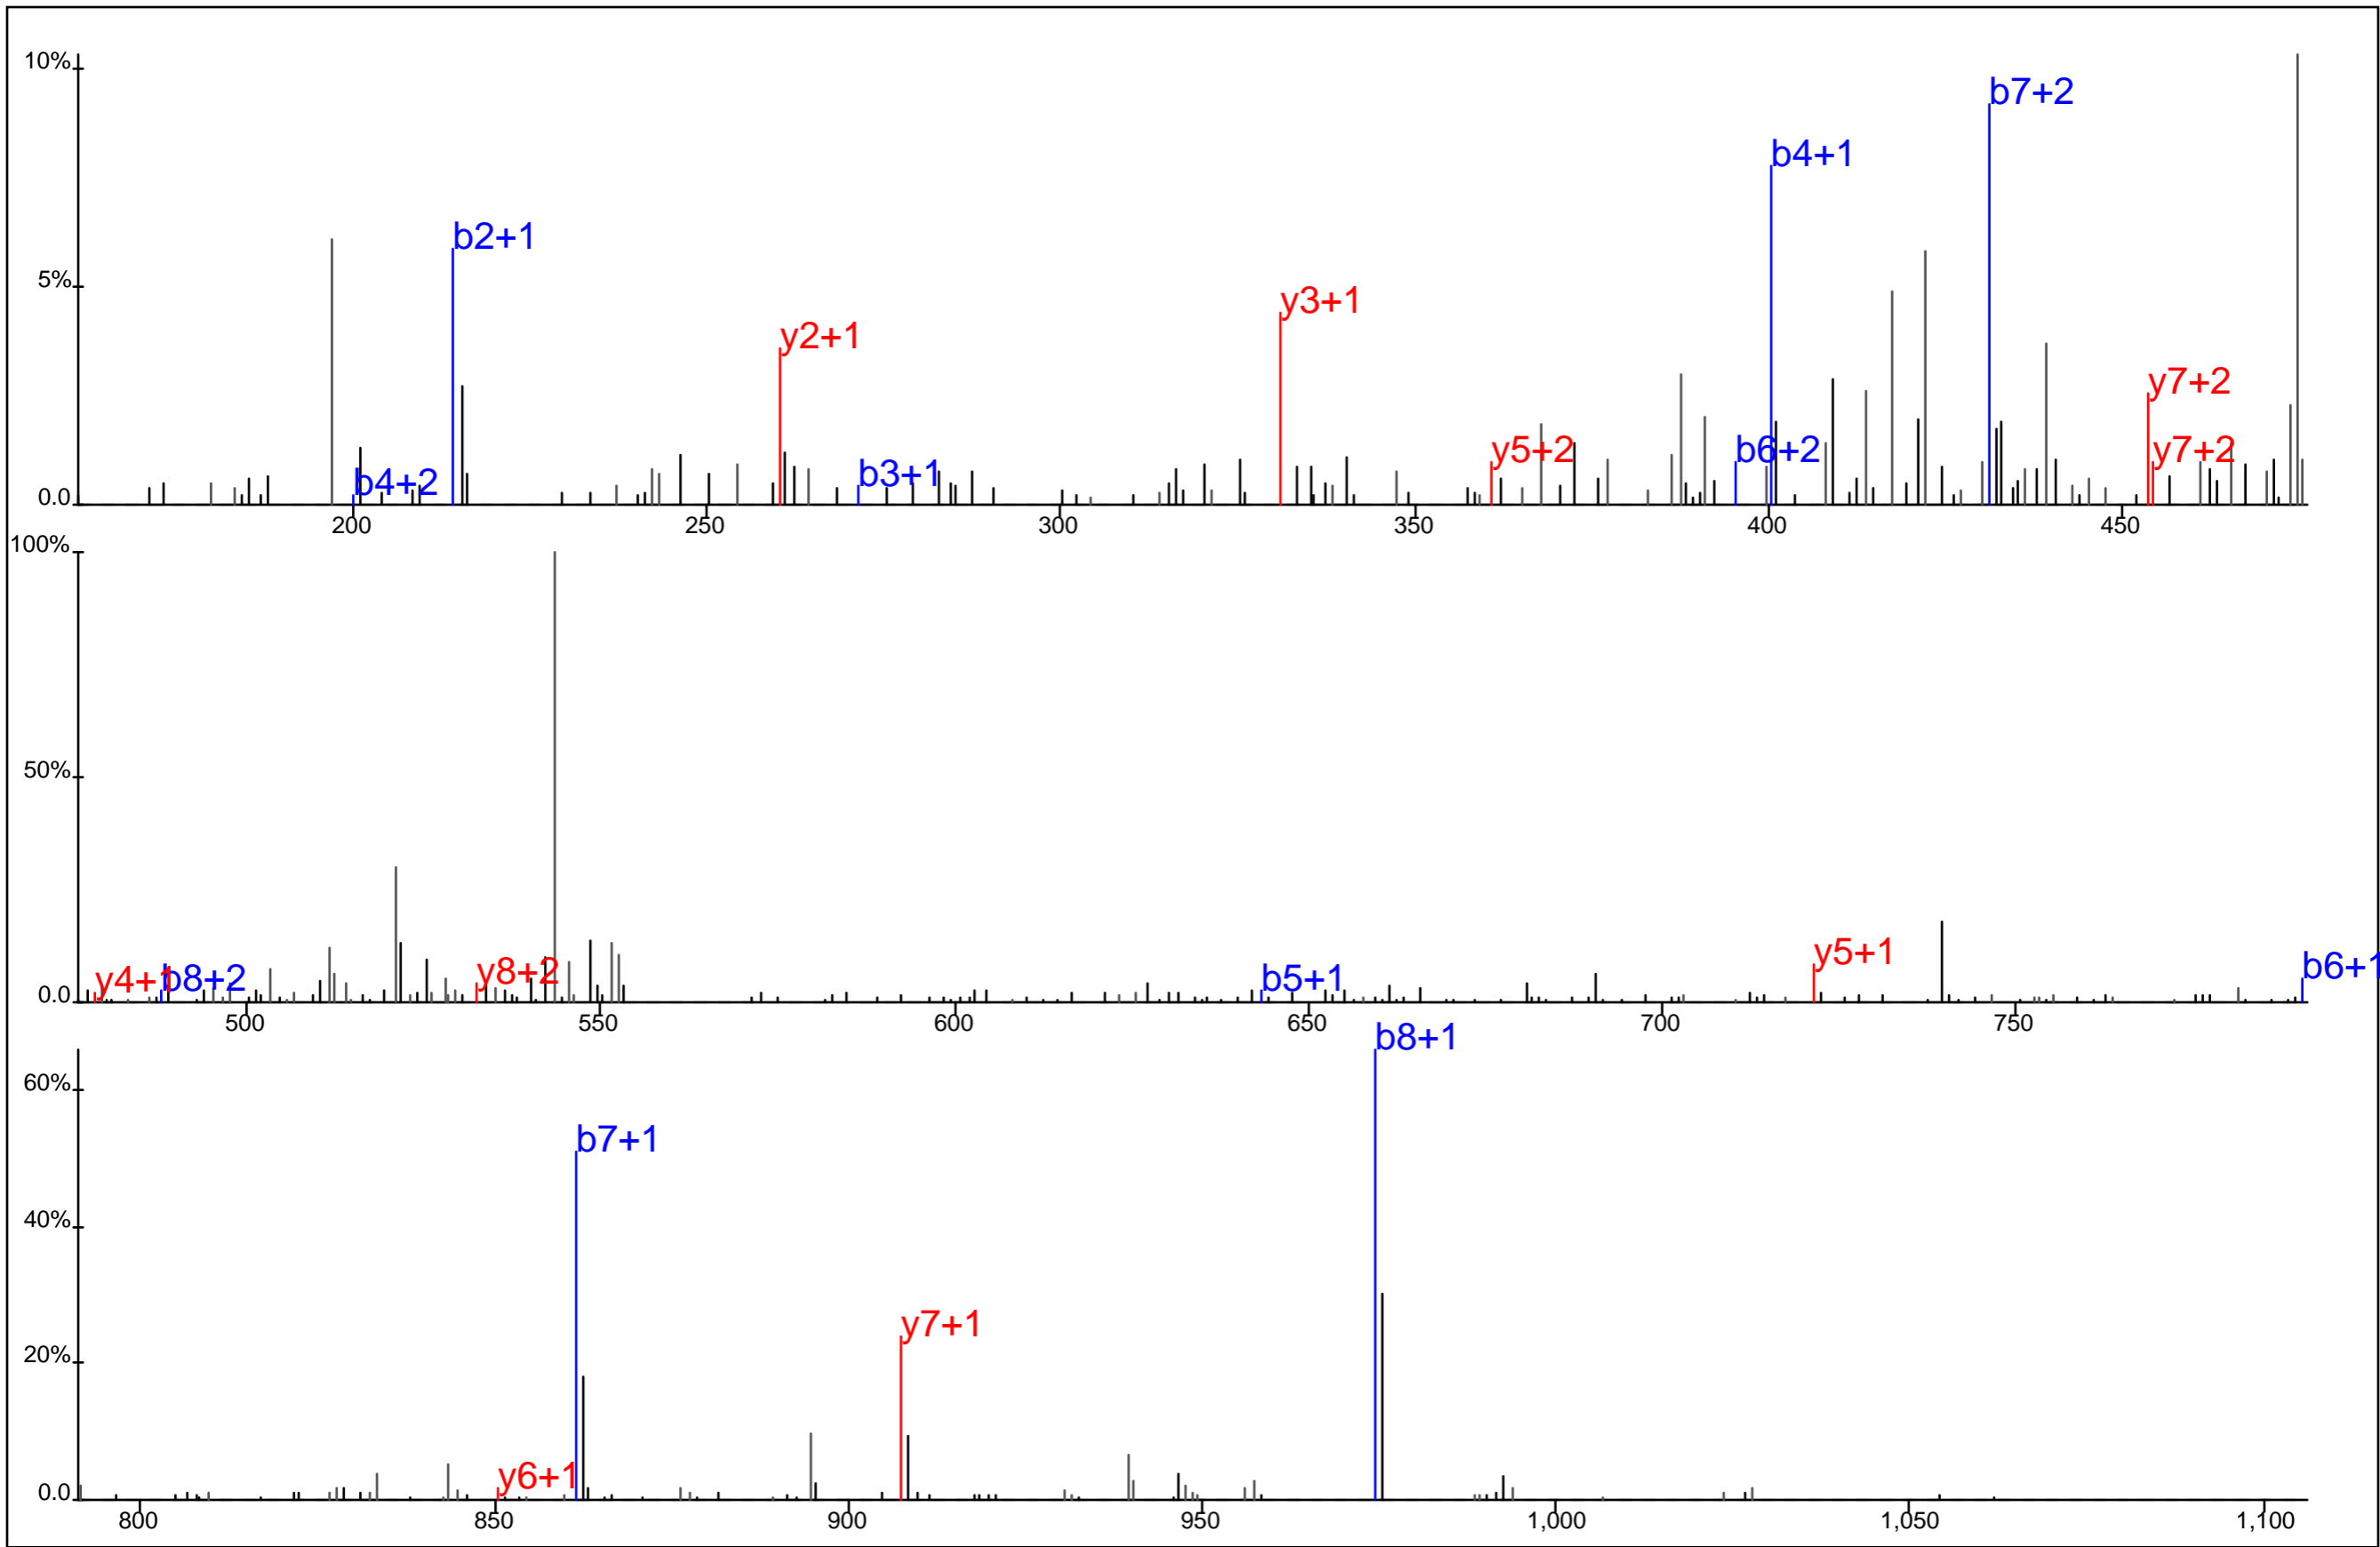

▢ ▢ ▢ ▢ ▢ ▢ ▢ ▢  
**G R G E Y\* F A I K**  
▢ ▢ ▢ ▢ ▢ ▢ ▢ ▢

Protein Name: PKC delta  
 gi Accession: 520587  
 Precursor Mass: 560.7654+2  
 Delta Mass: 4.416 ppm  
 XCorr: 38.8

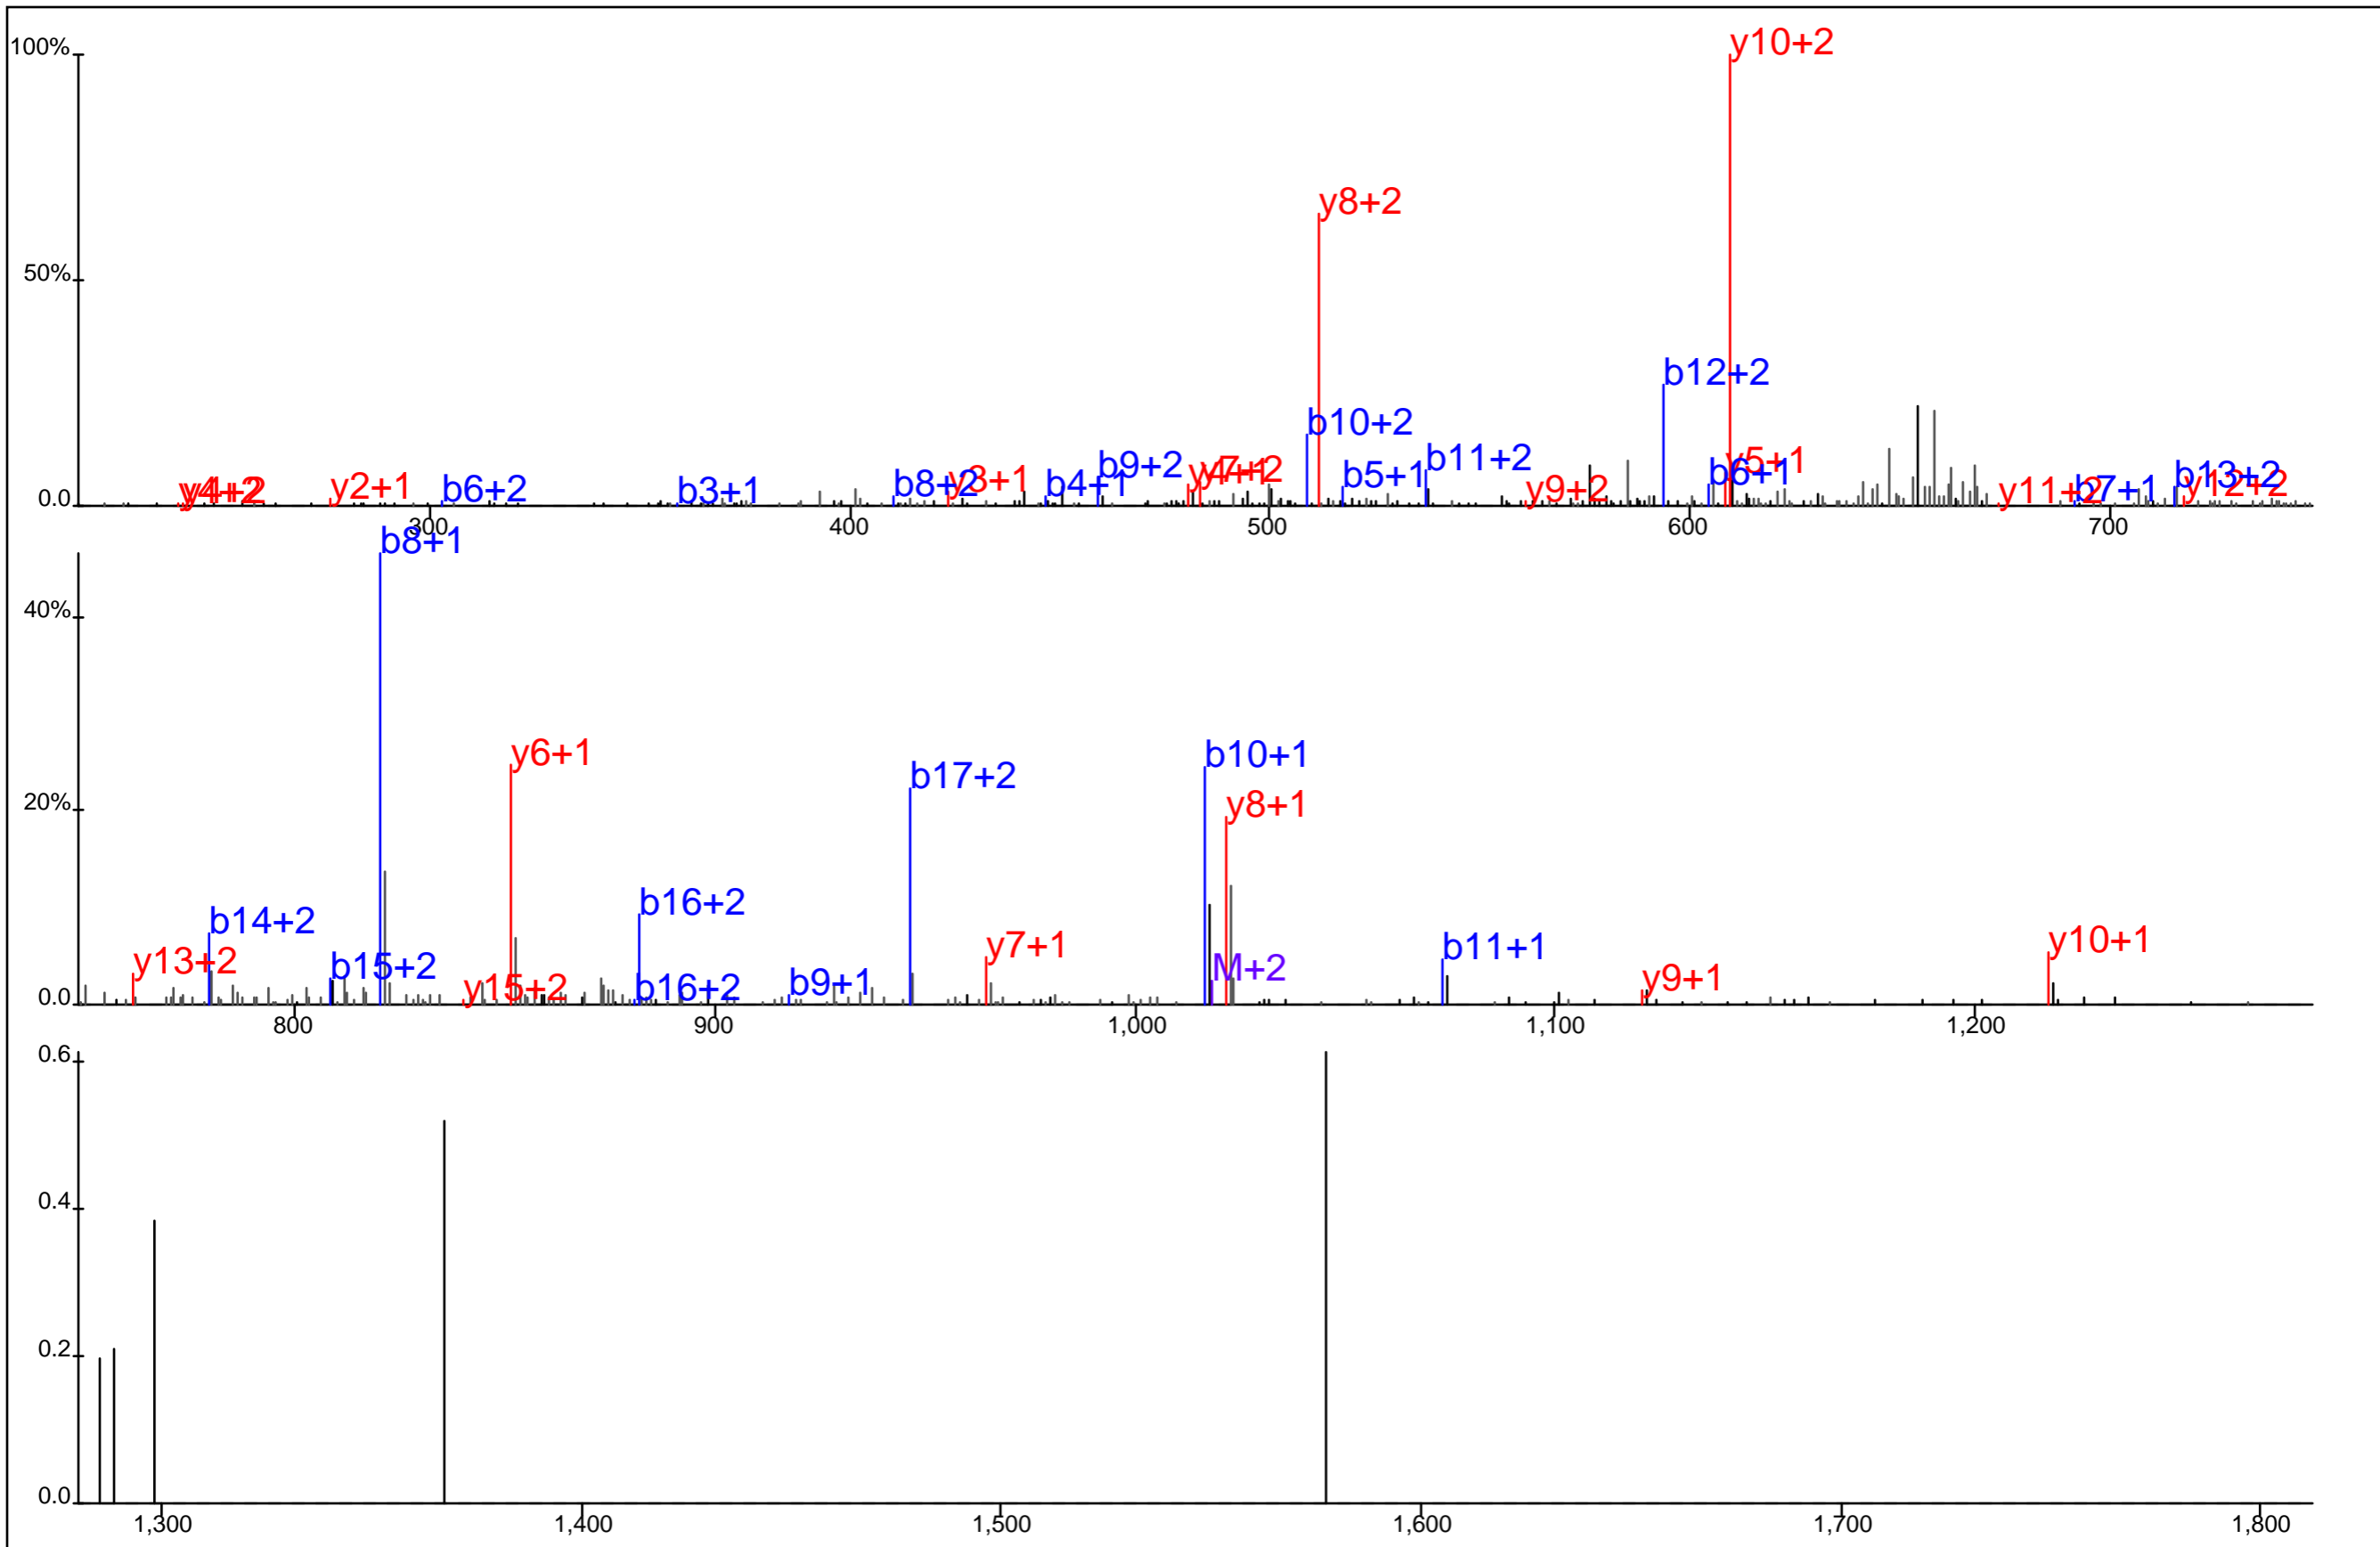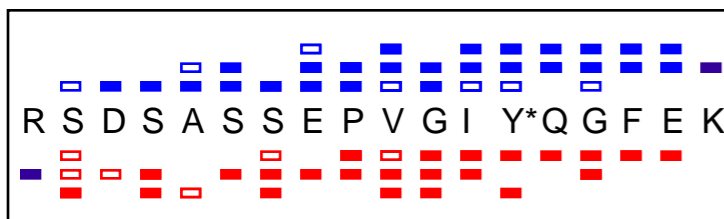

Protein Name: PKC delta  
 gi Accession: 520587  
 Precursor Mass: 679.6387+3  
 Delta Mass: 2.738 ppm  
 XCorr: 48.82



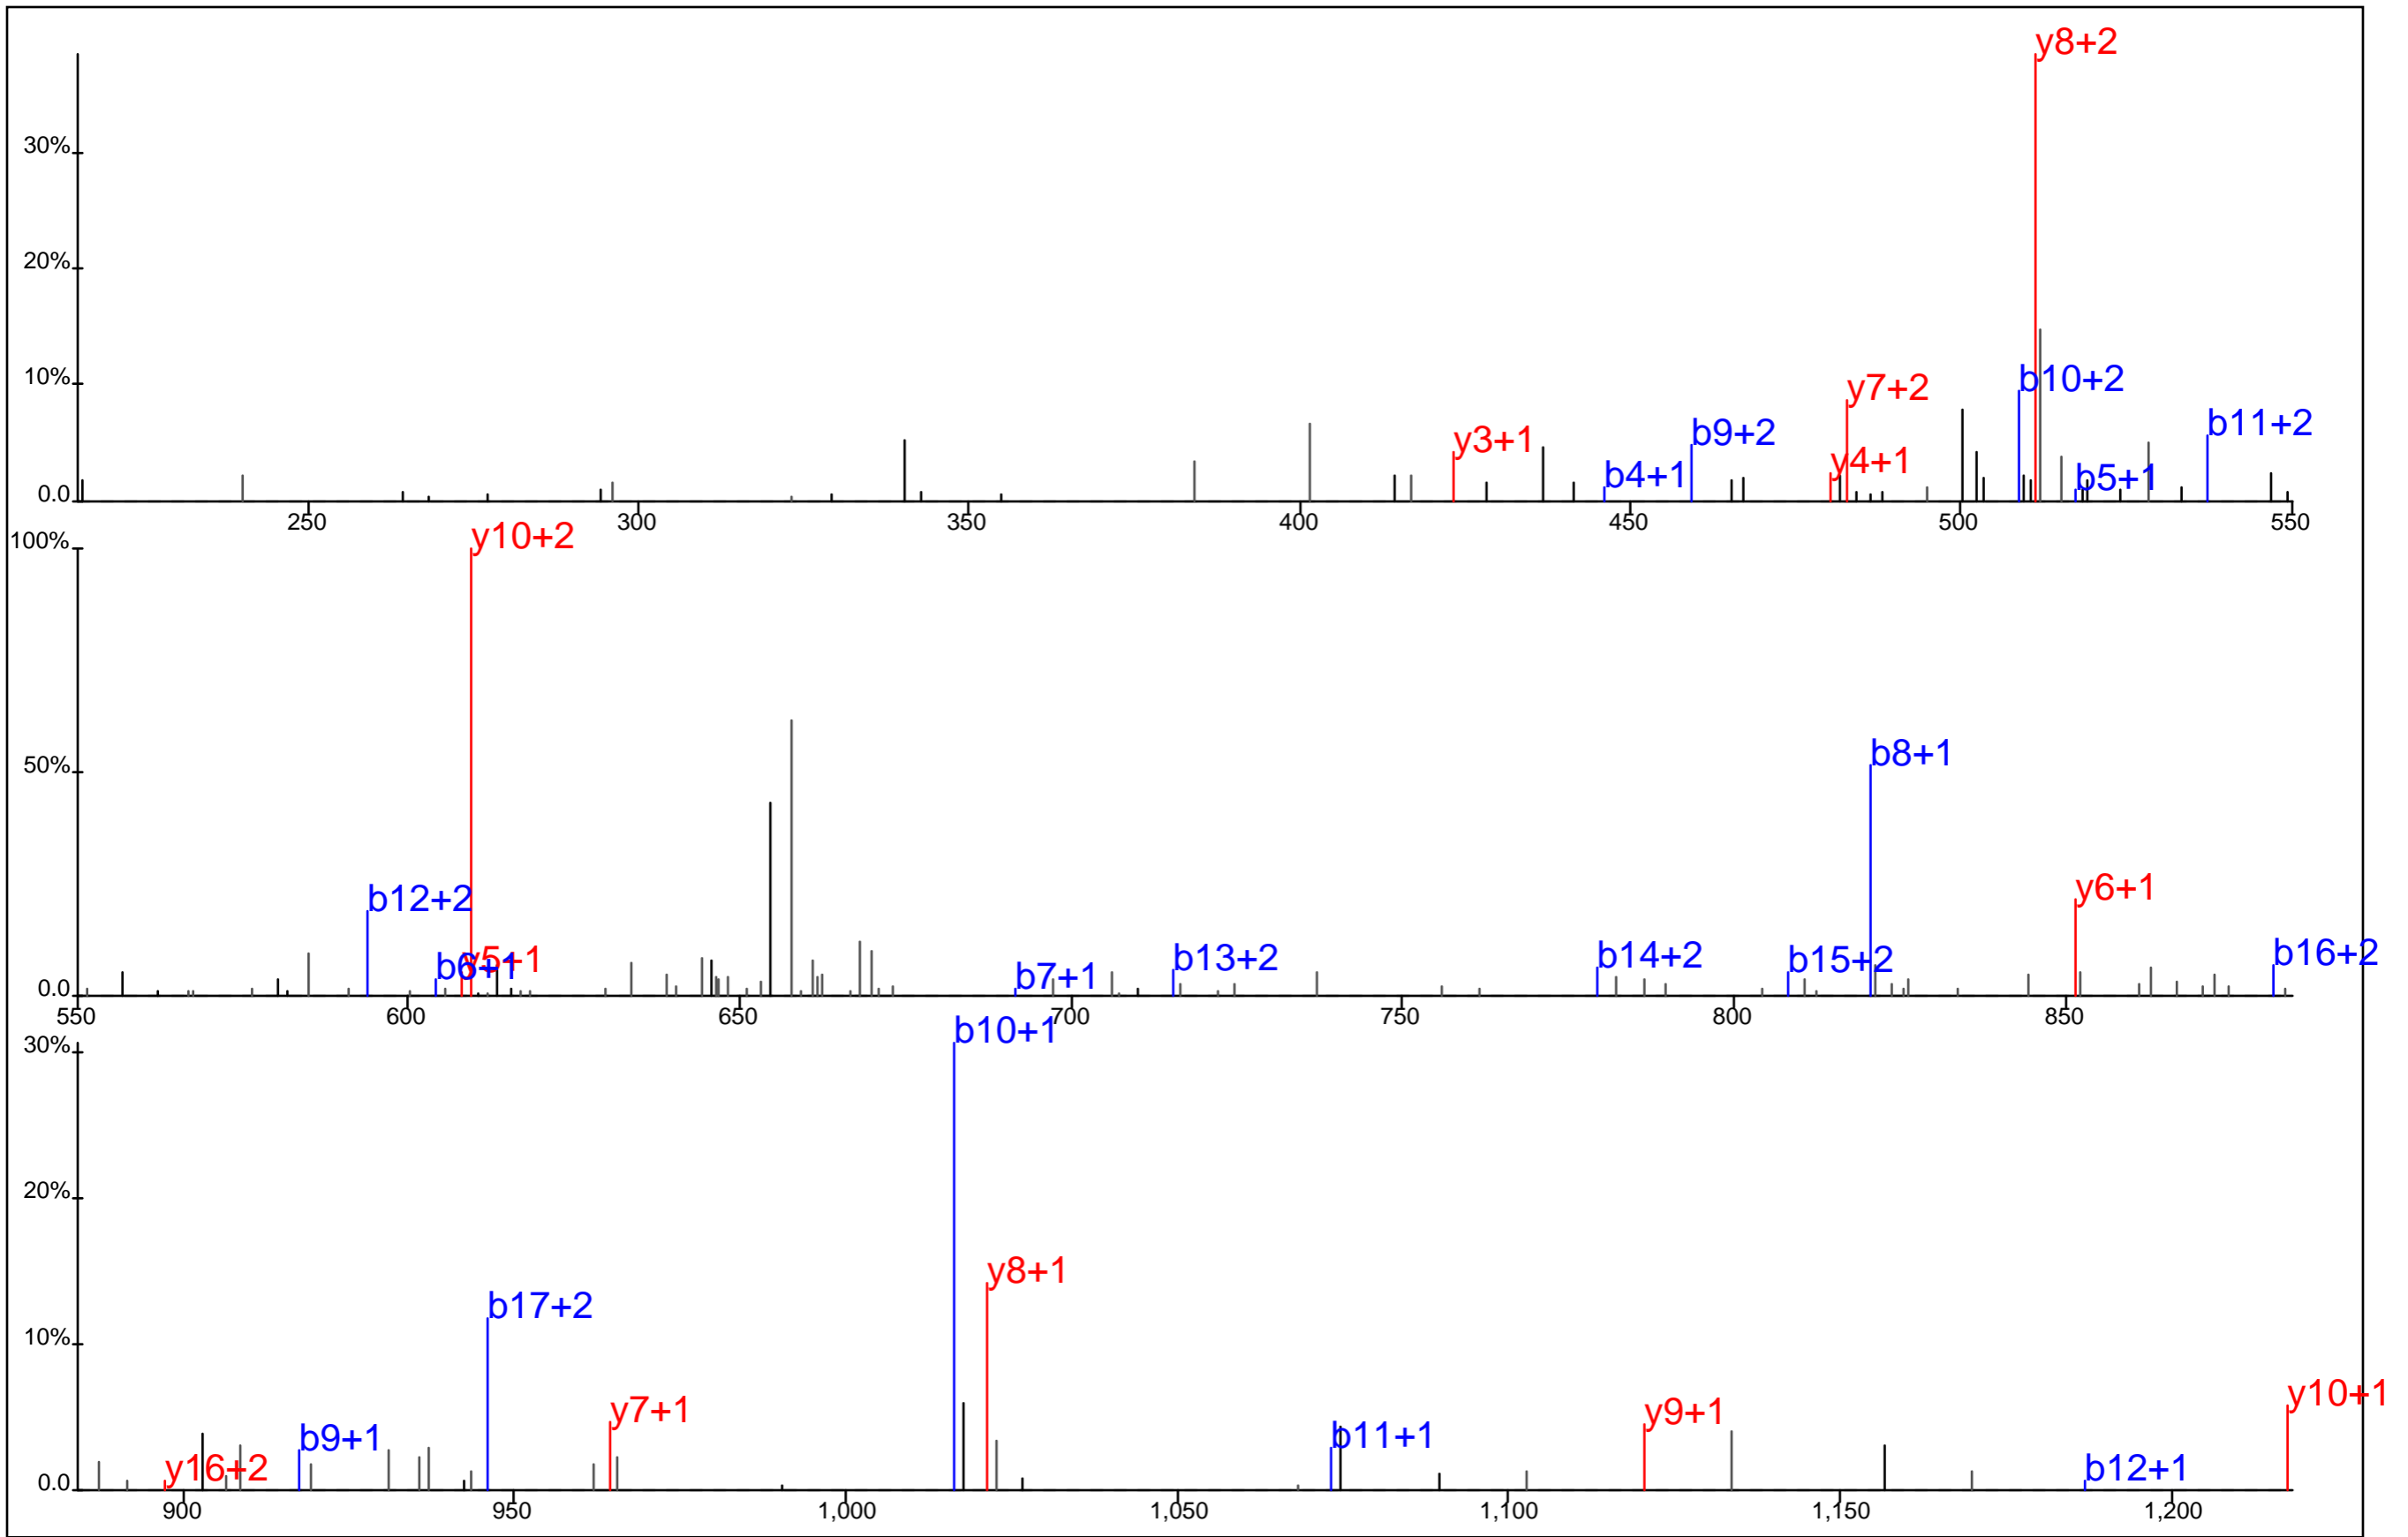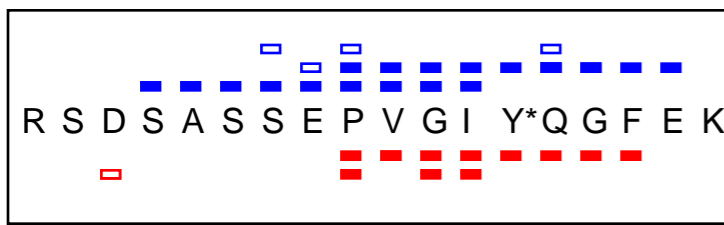

Protein Name: PKC delta  
 gi Accession: 520587  
 Precursor Mass: 679.6389+3  
 Delta Mass: 3.004 ppm  
 XCorr: 30.63

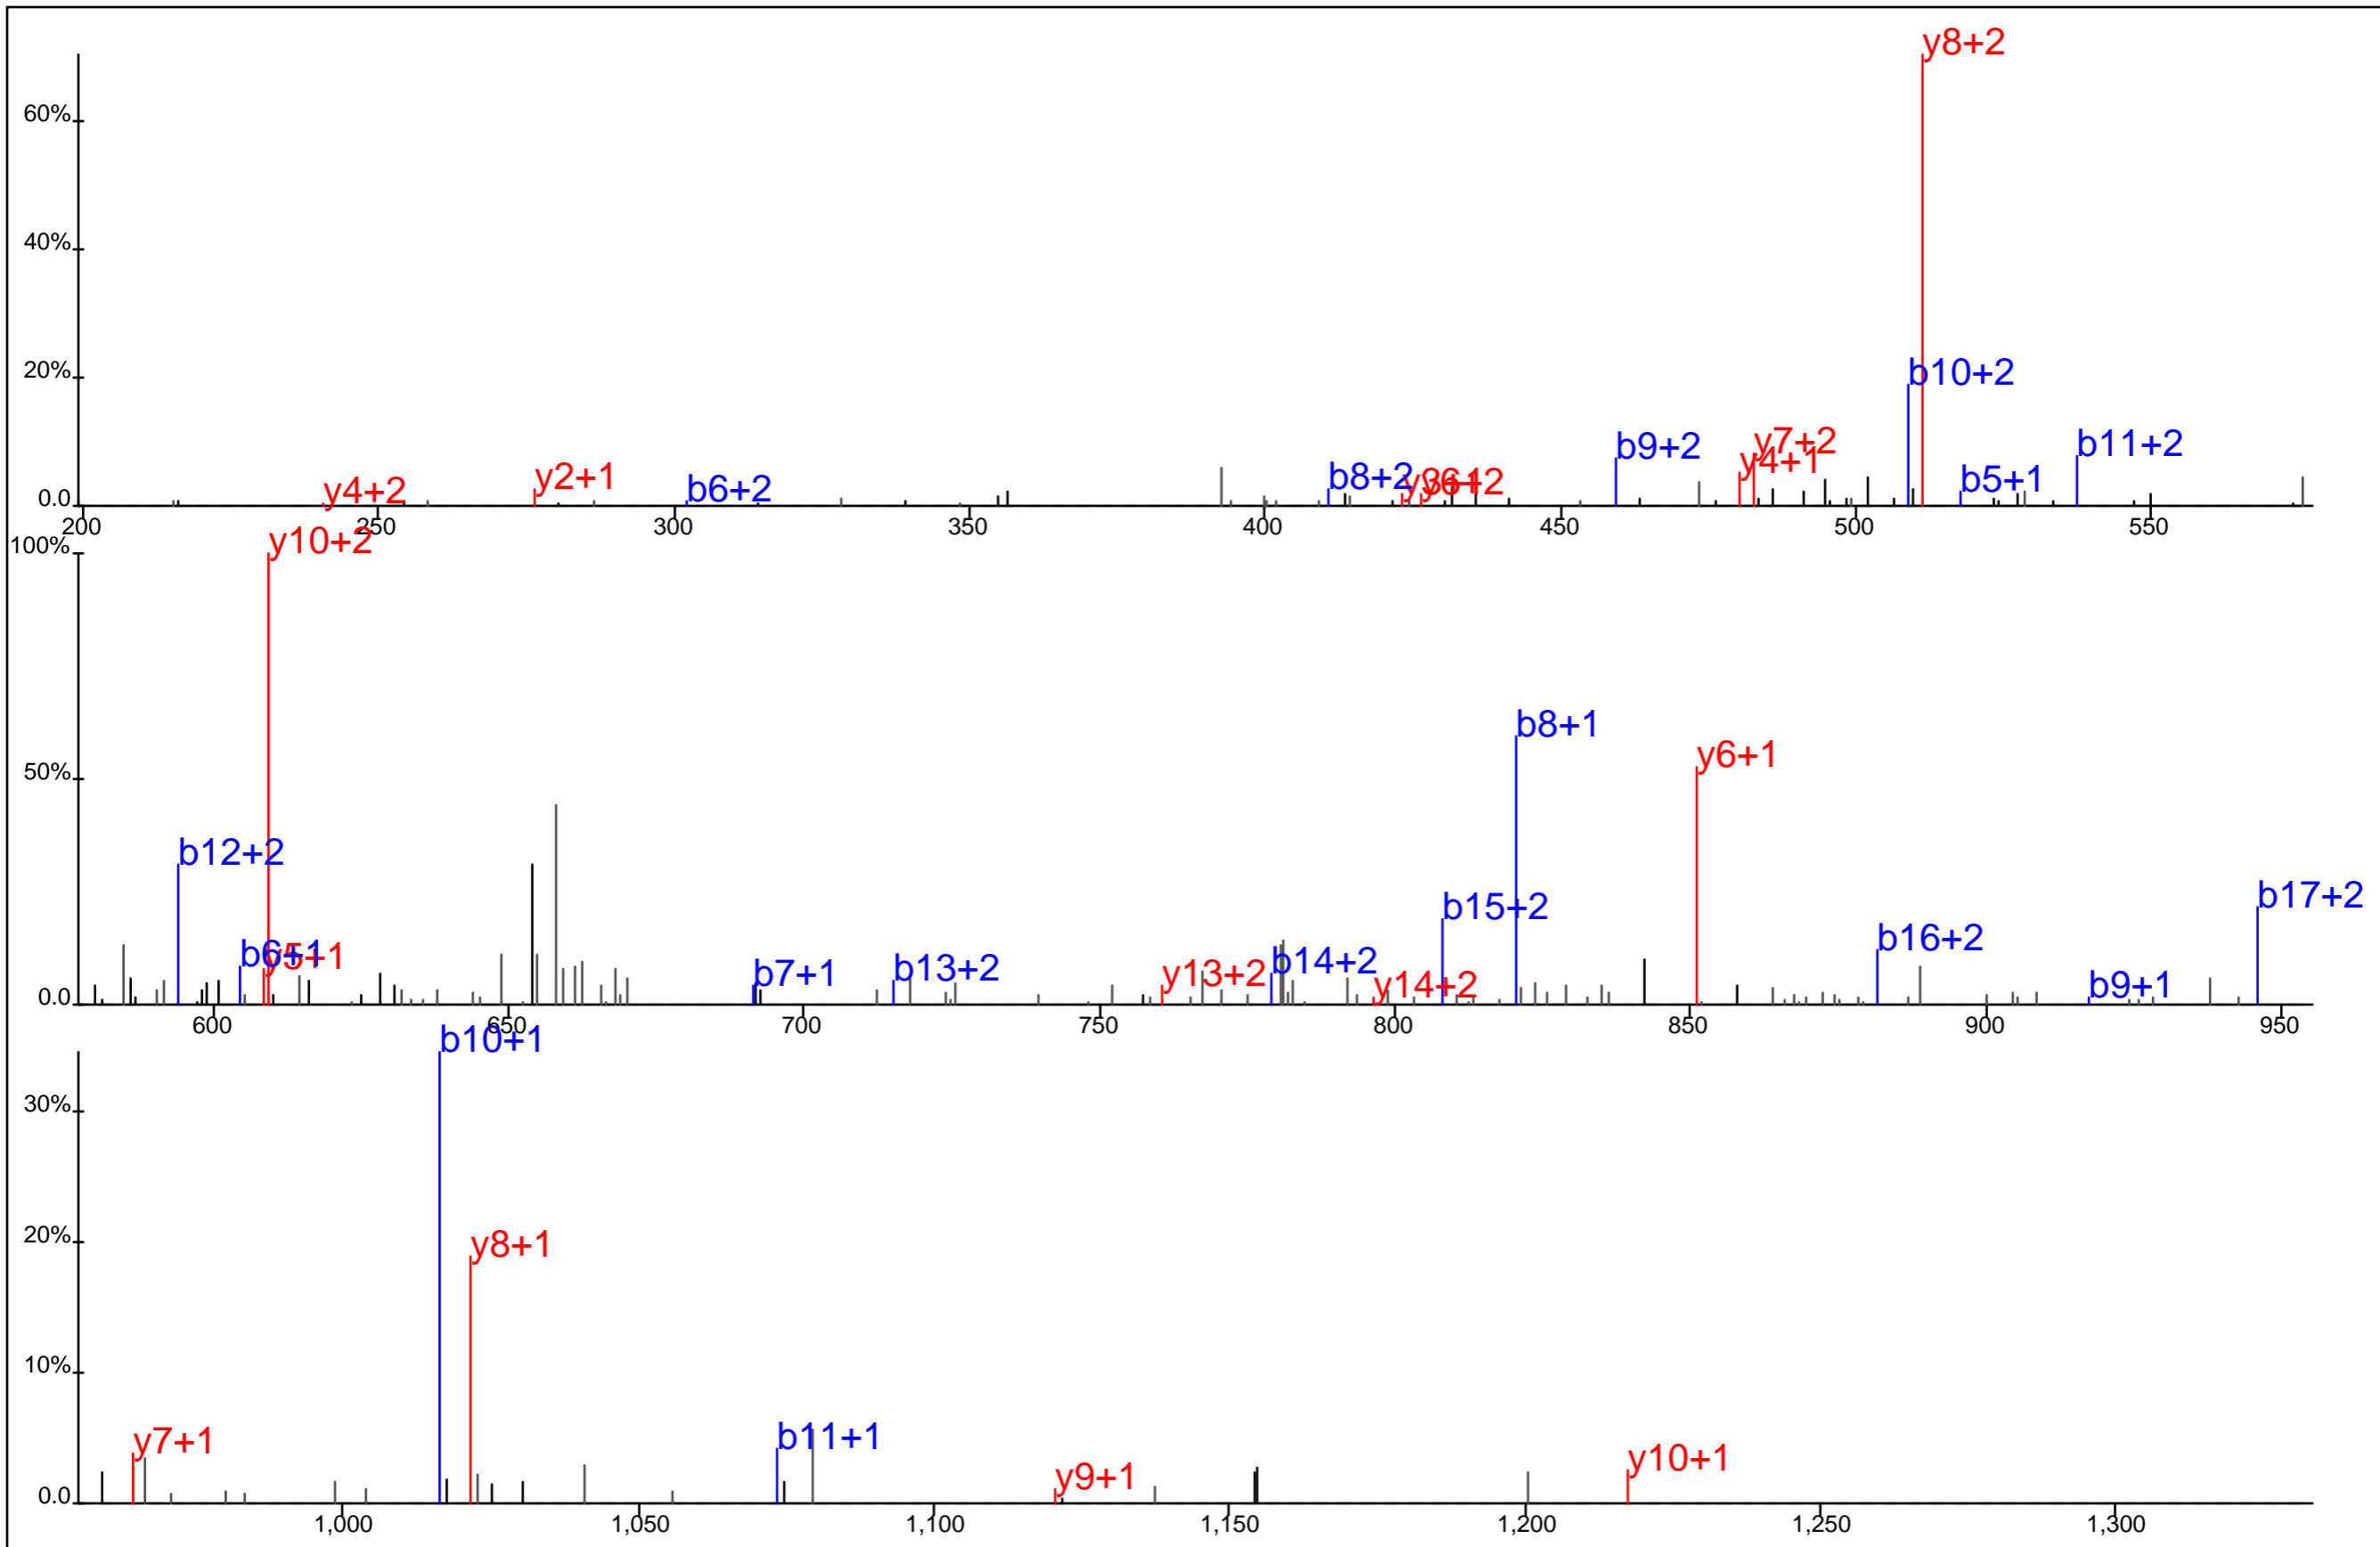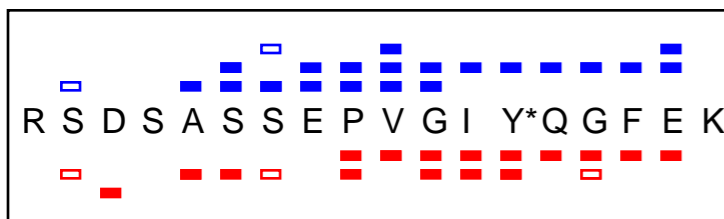

Protein Name: PKC delta  
 gi Accession: 520587  
 Precursor Mass: 679.6389+3  
 Delta Mass: 3.004 ppm  
 XCorr: 47.73

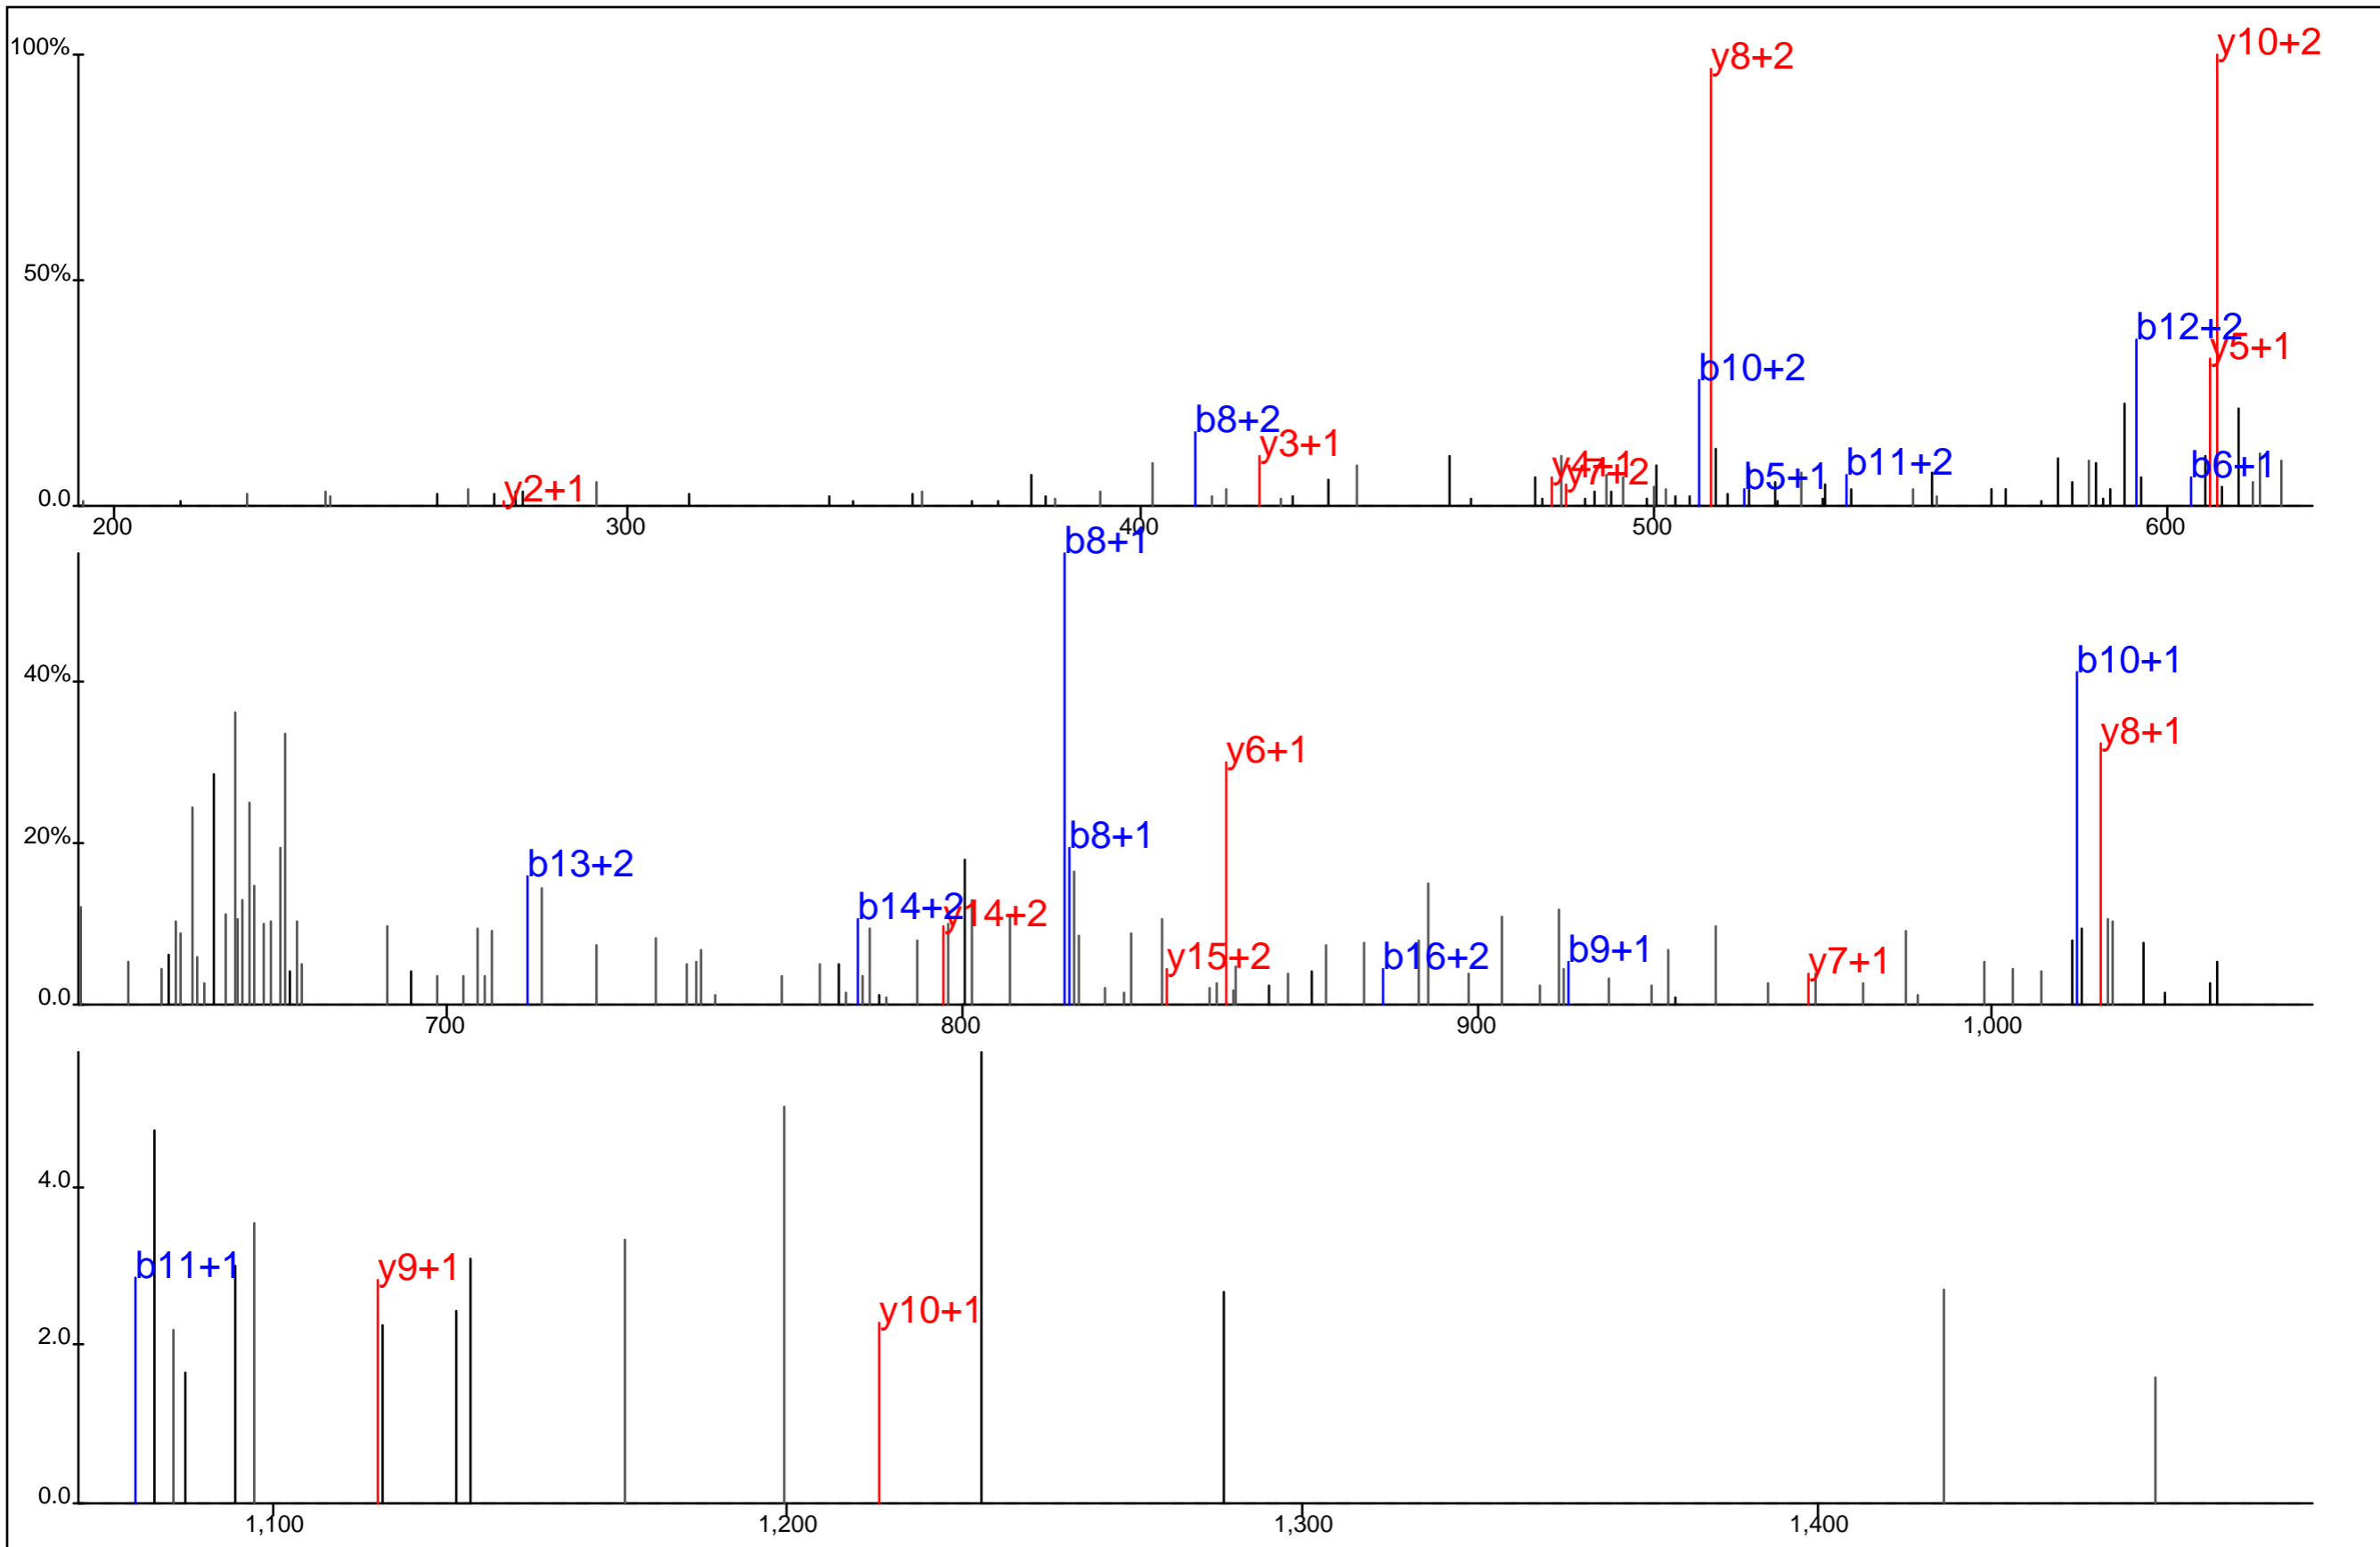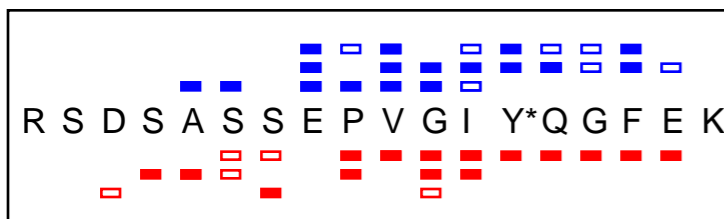

Protein Name: PKC delta  
 gi Accession: 520587  
 Precursor Mass: 679.6421+3  
 Delta Mass: 7.683 ppm  
 XCorr: 18.05

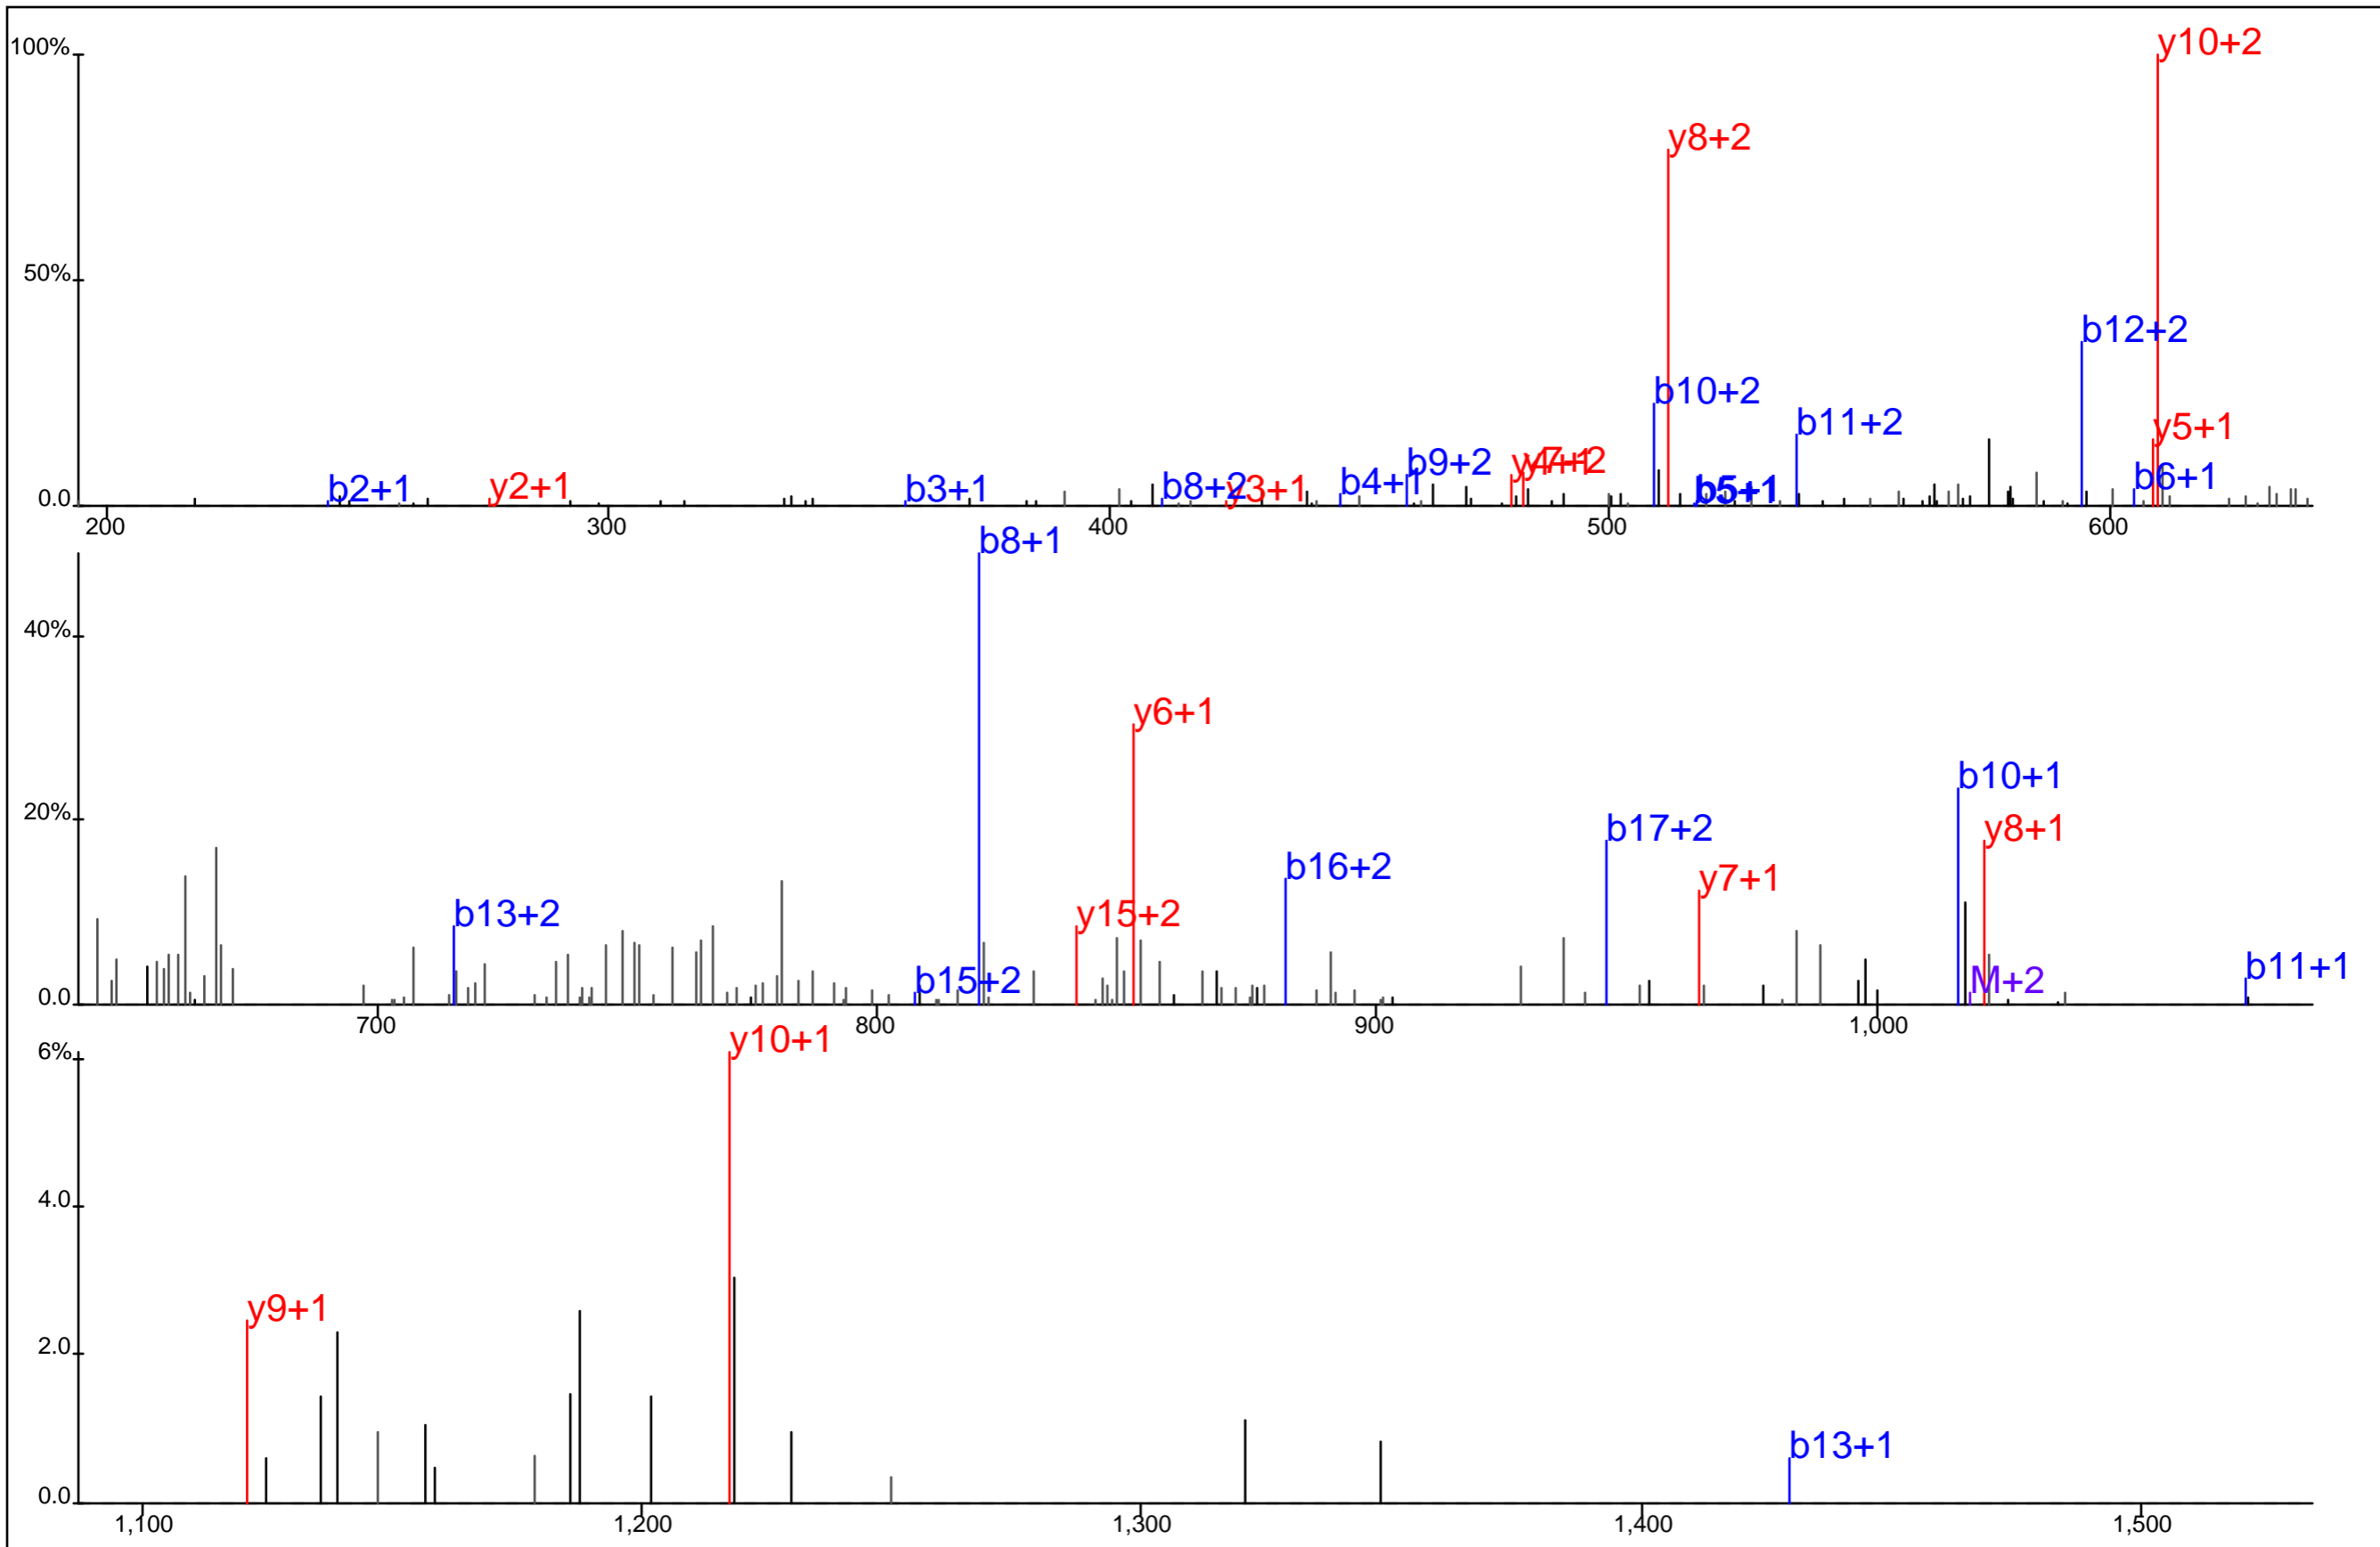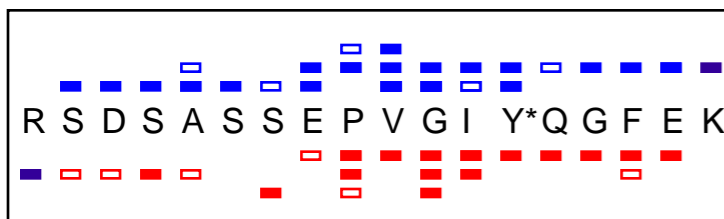

Protein Name: PKC delta  
 gi Accession: 520587  
 Precursor Mass: 679.6396+3  
 Delta Mass: 4.083 ppm  
 XCorr: 41.46

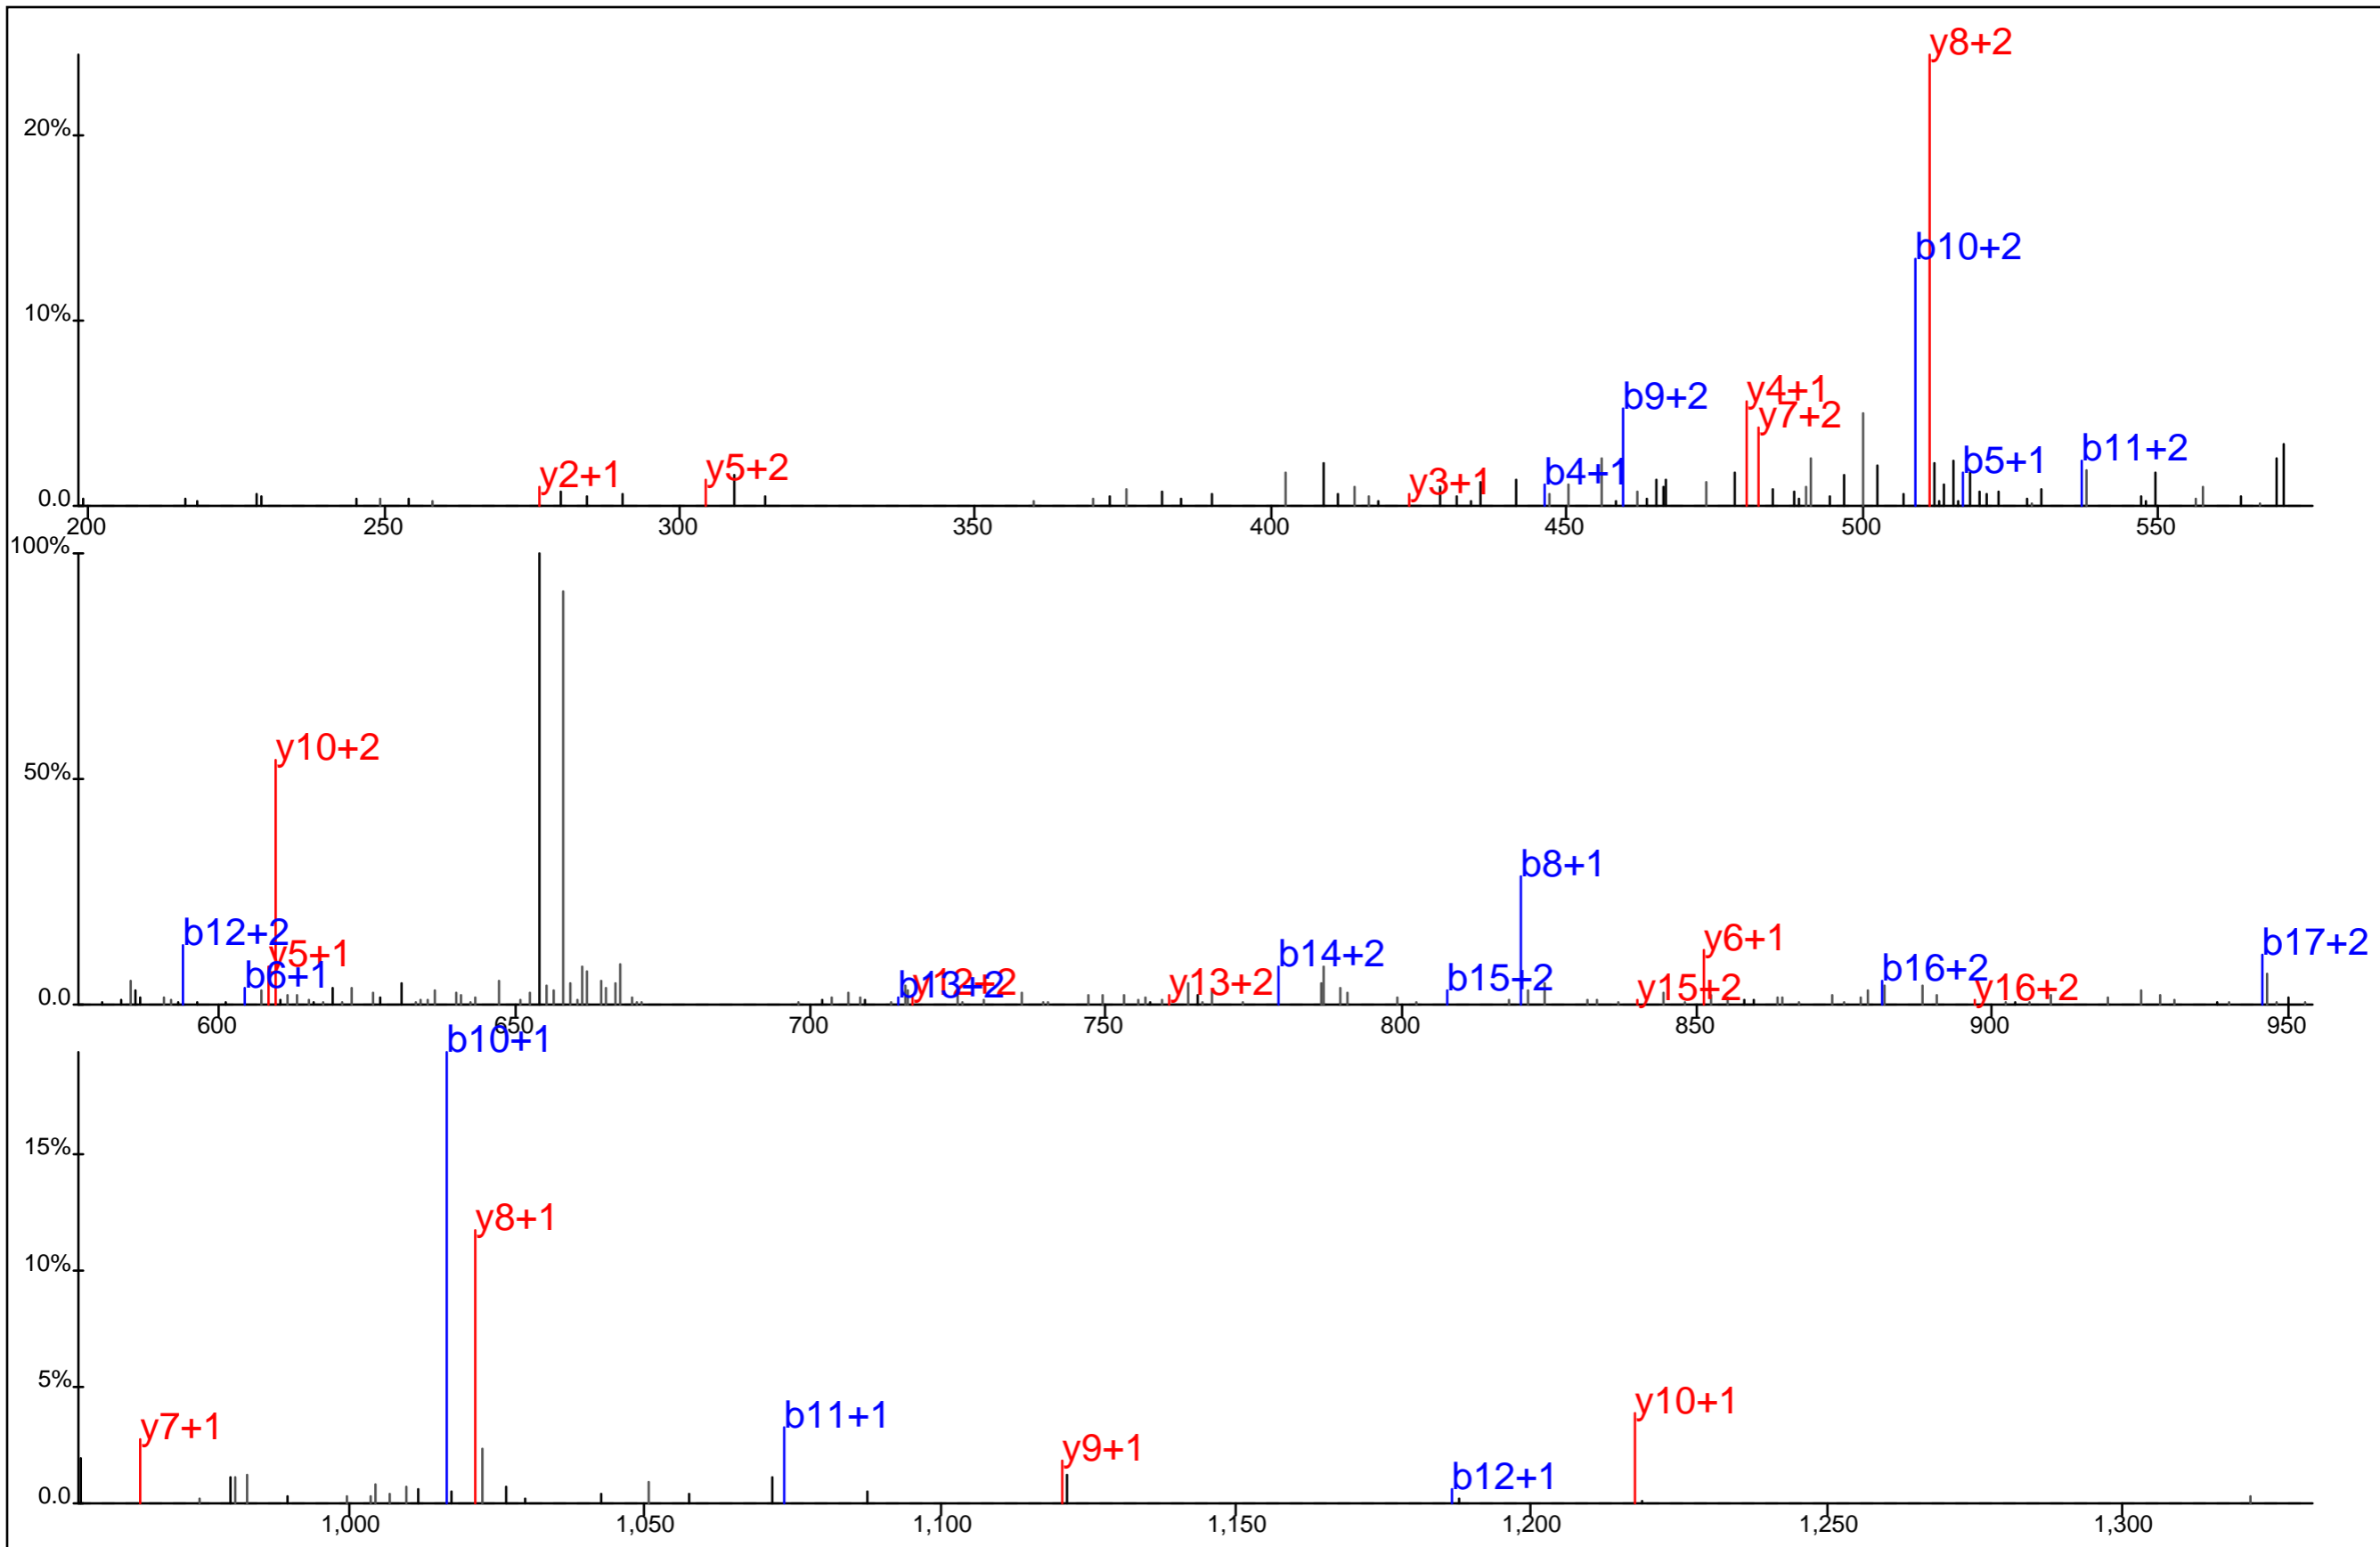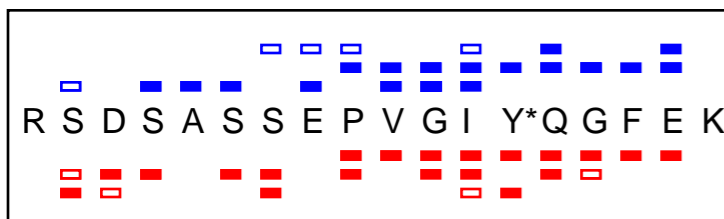

Protein Name: PKC delta  
 gi Accession: 520587  
 Precursor Mass: 679.6384+3  
 Delta Mass: 2.286 ppm  
 XCorr: 33.69

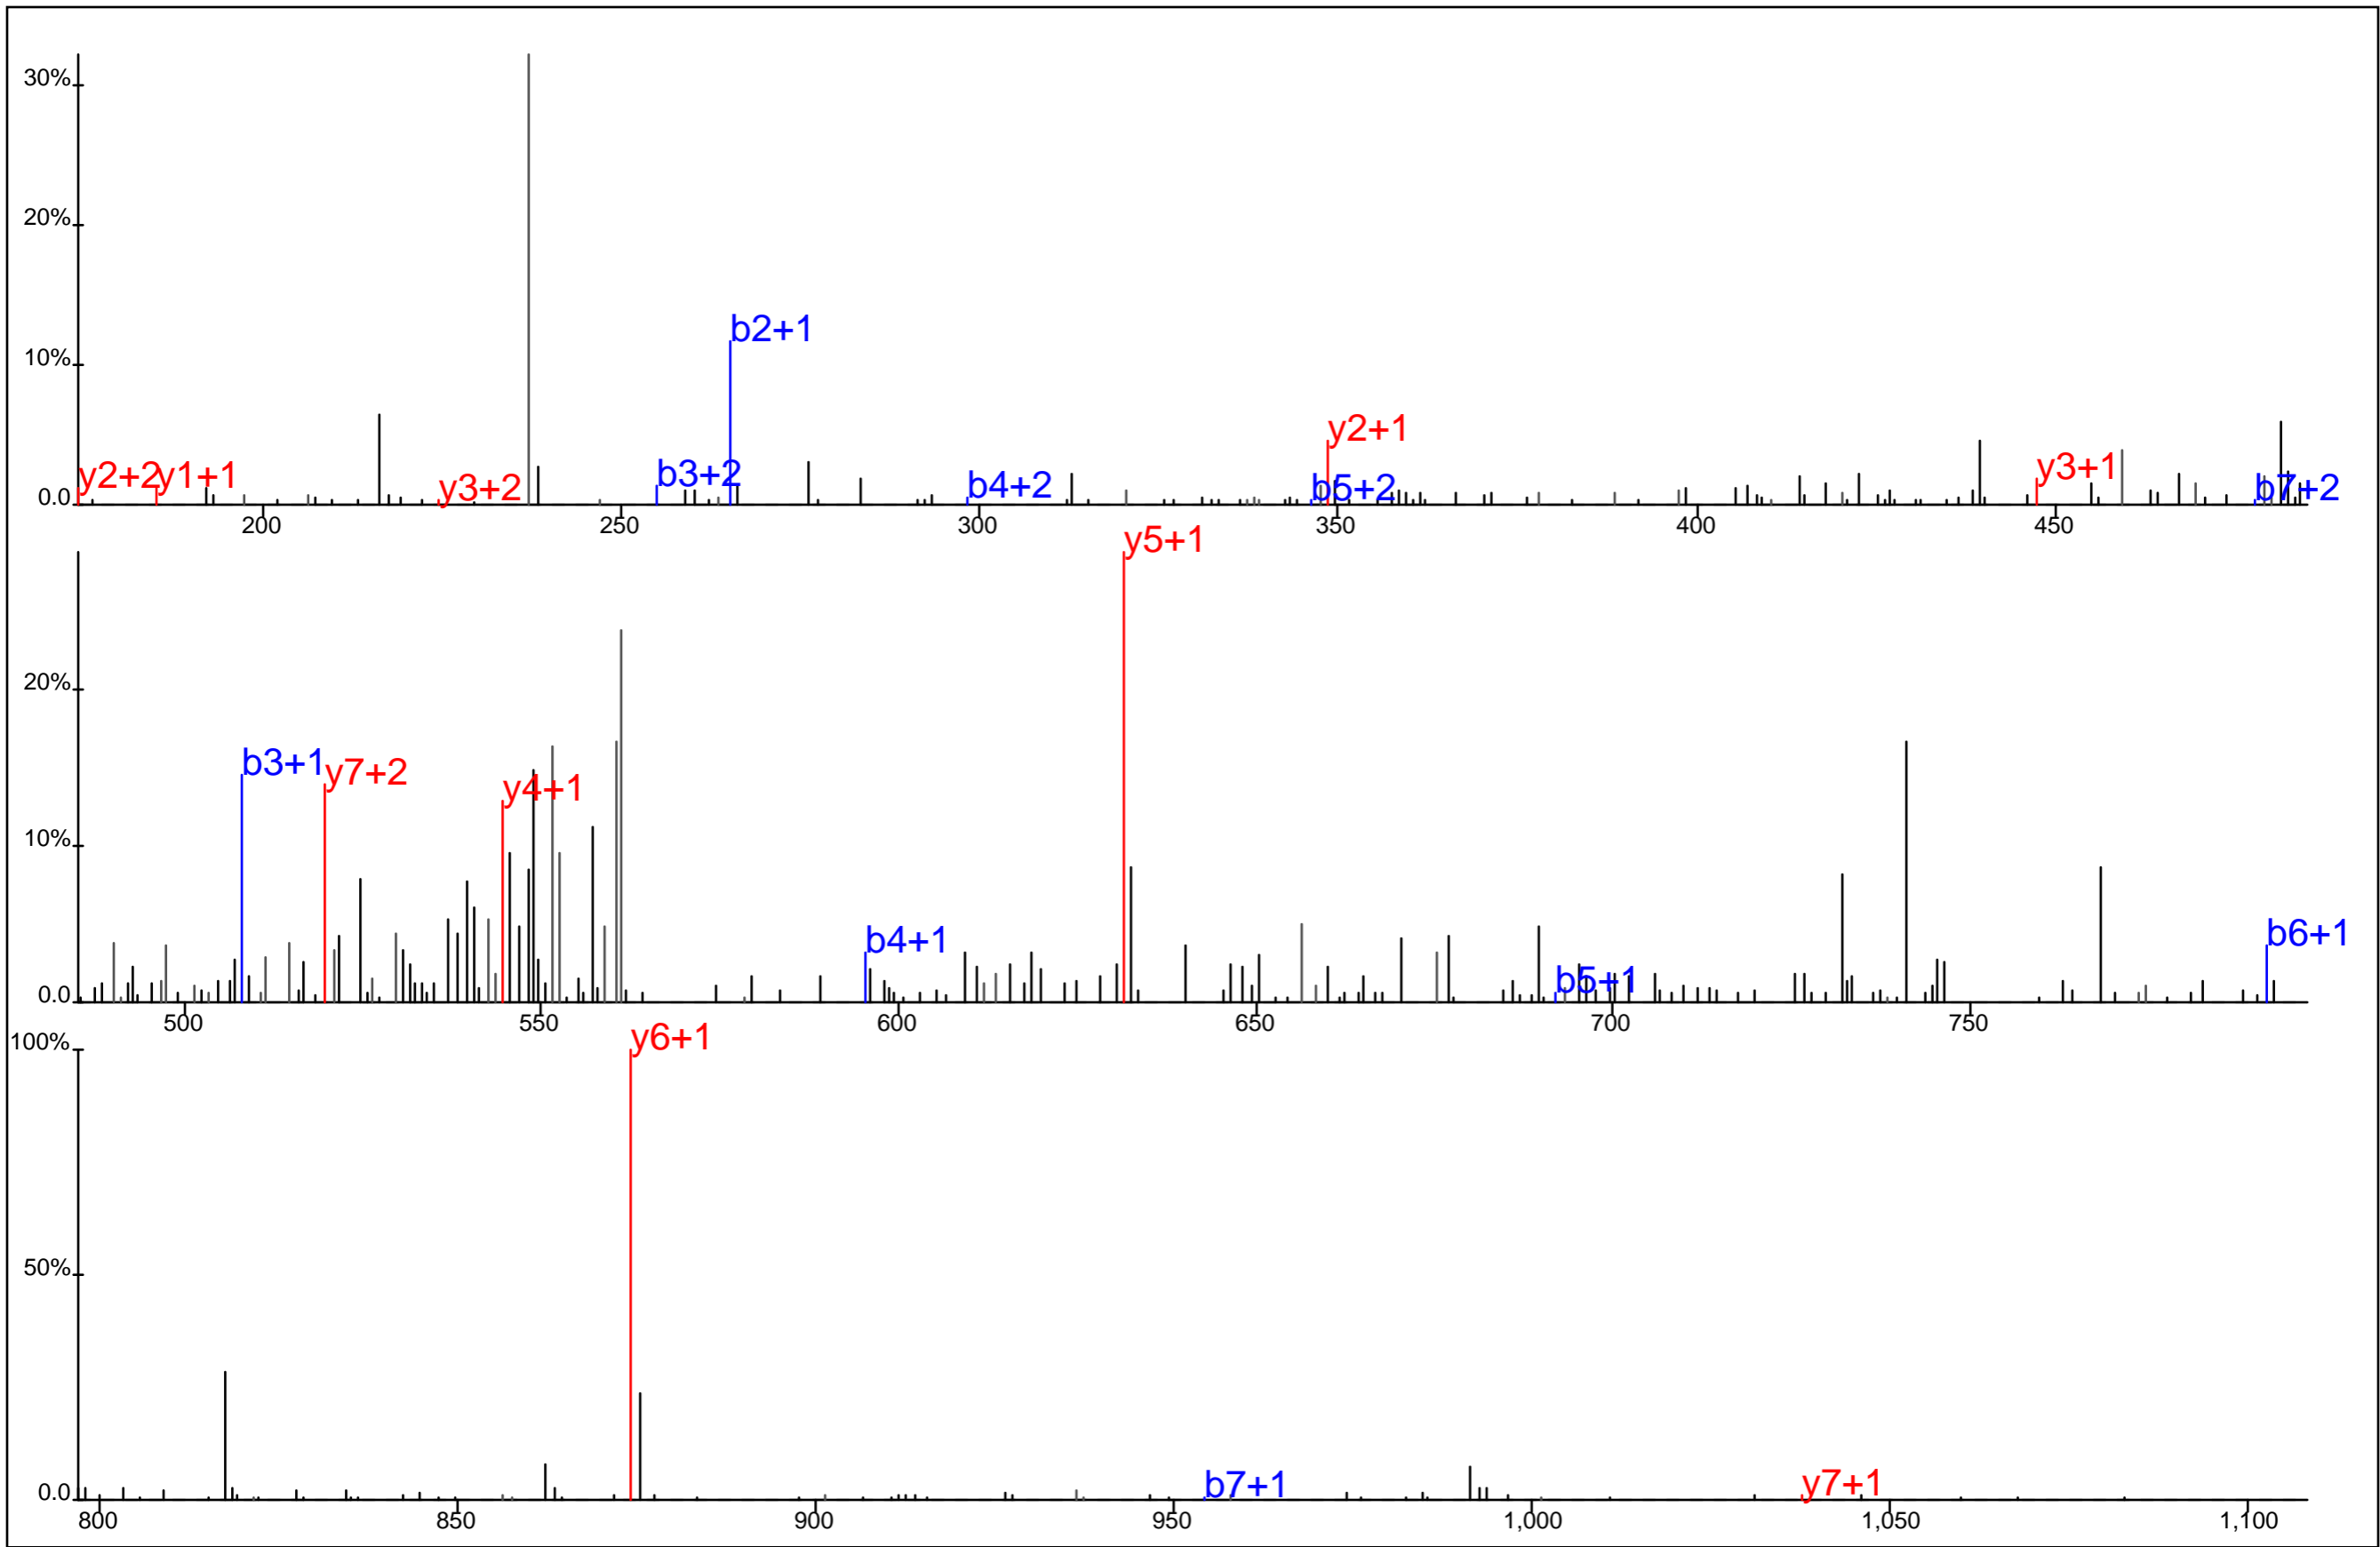

**T Y Y\* S P V Y R**%

Protein Name: Plakophilin 4  
 gi Accession: 20139104  
 Precursor Mass: 569.7484+2  
 Delta Mass: 4.416 ppm  
 XCorr: 17.96

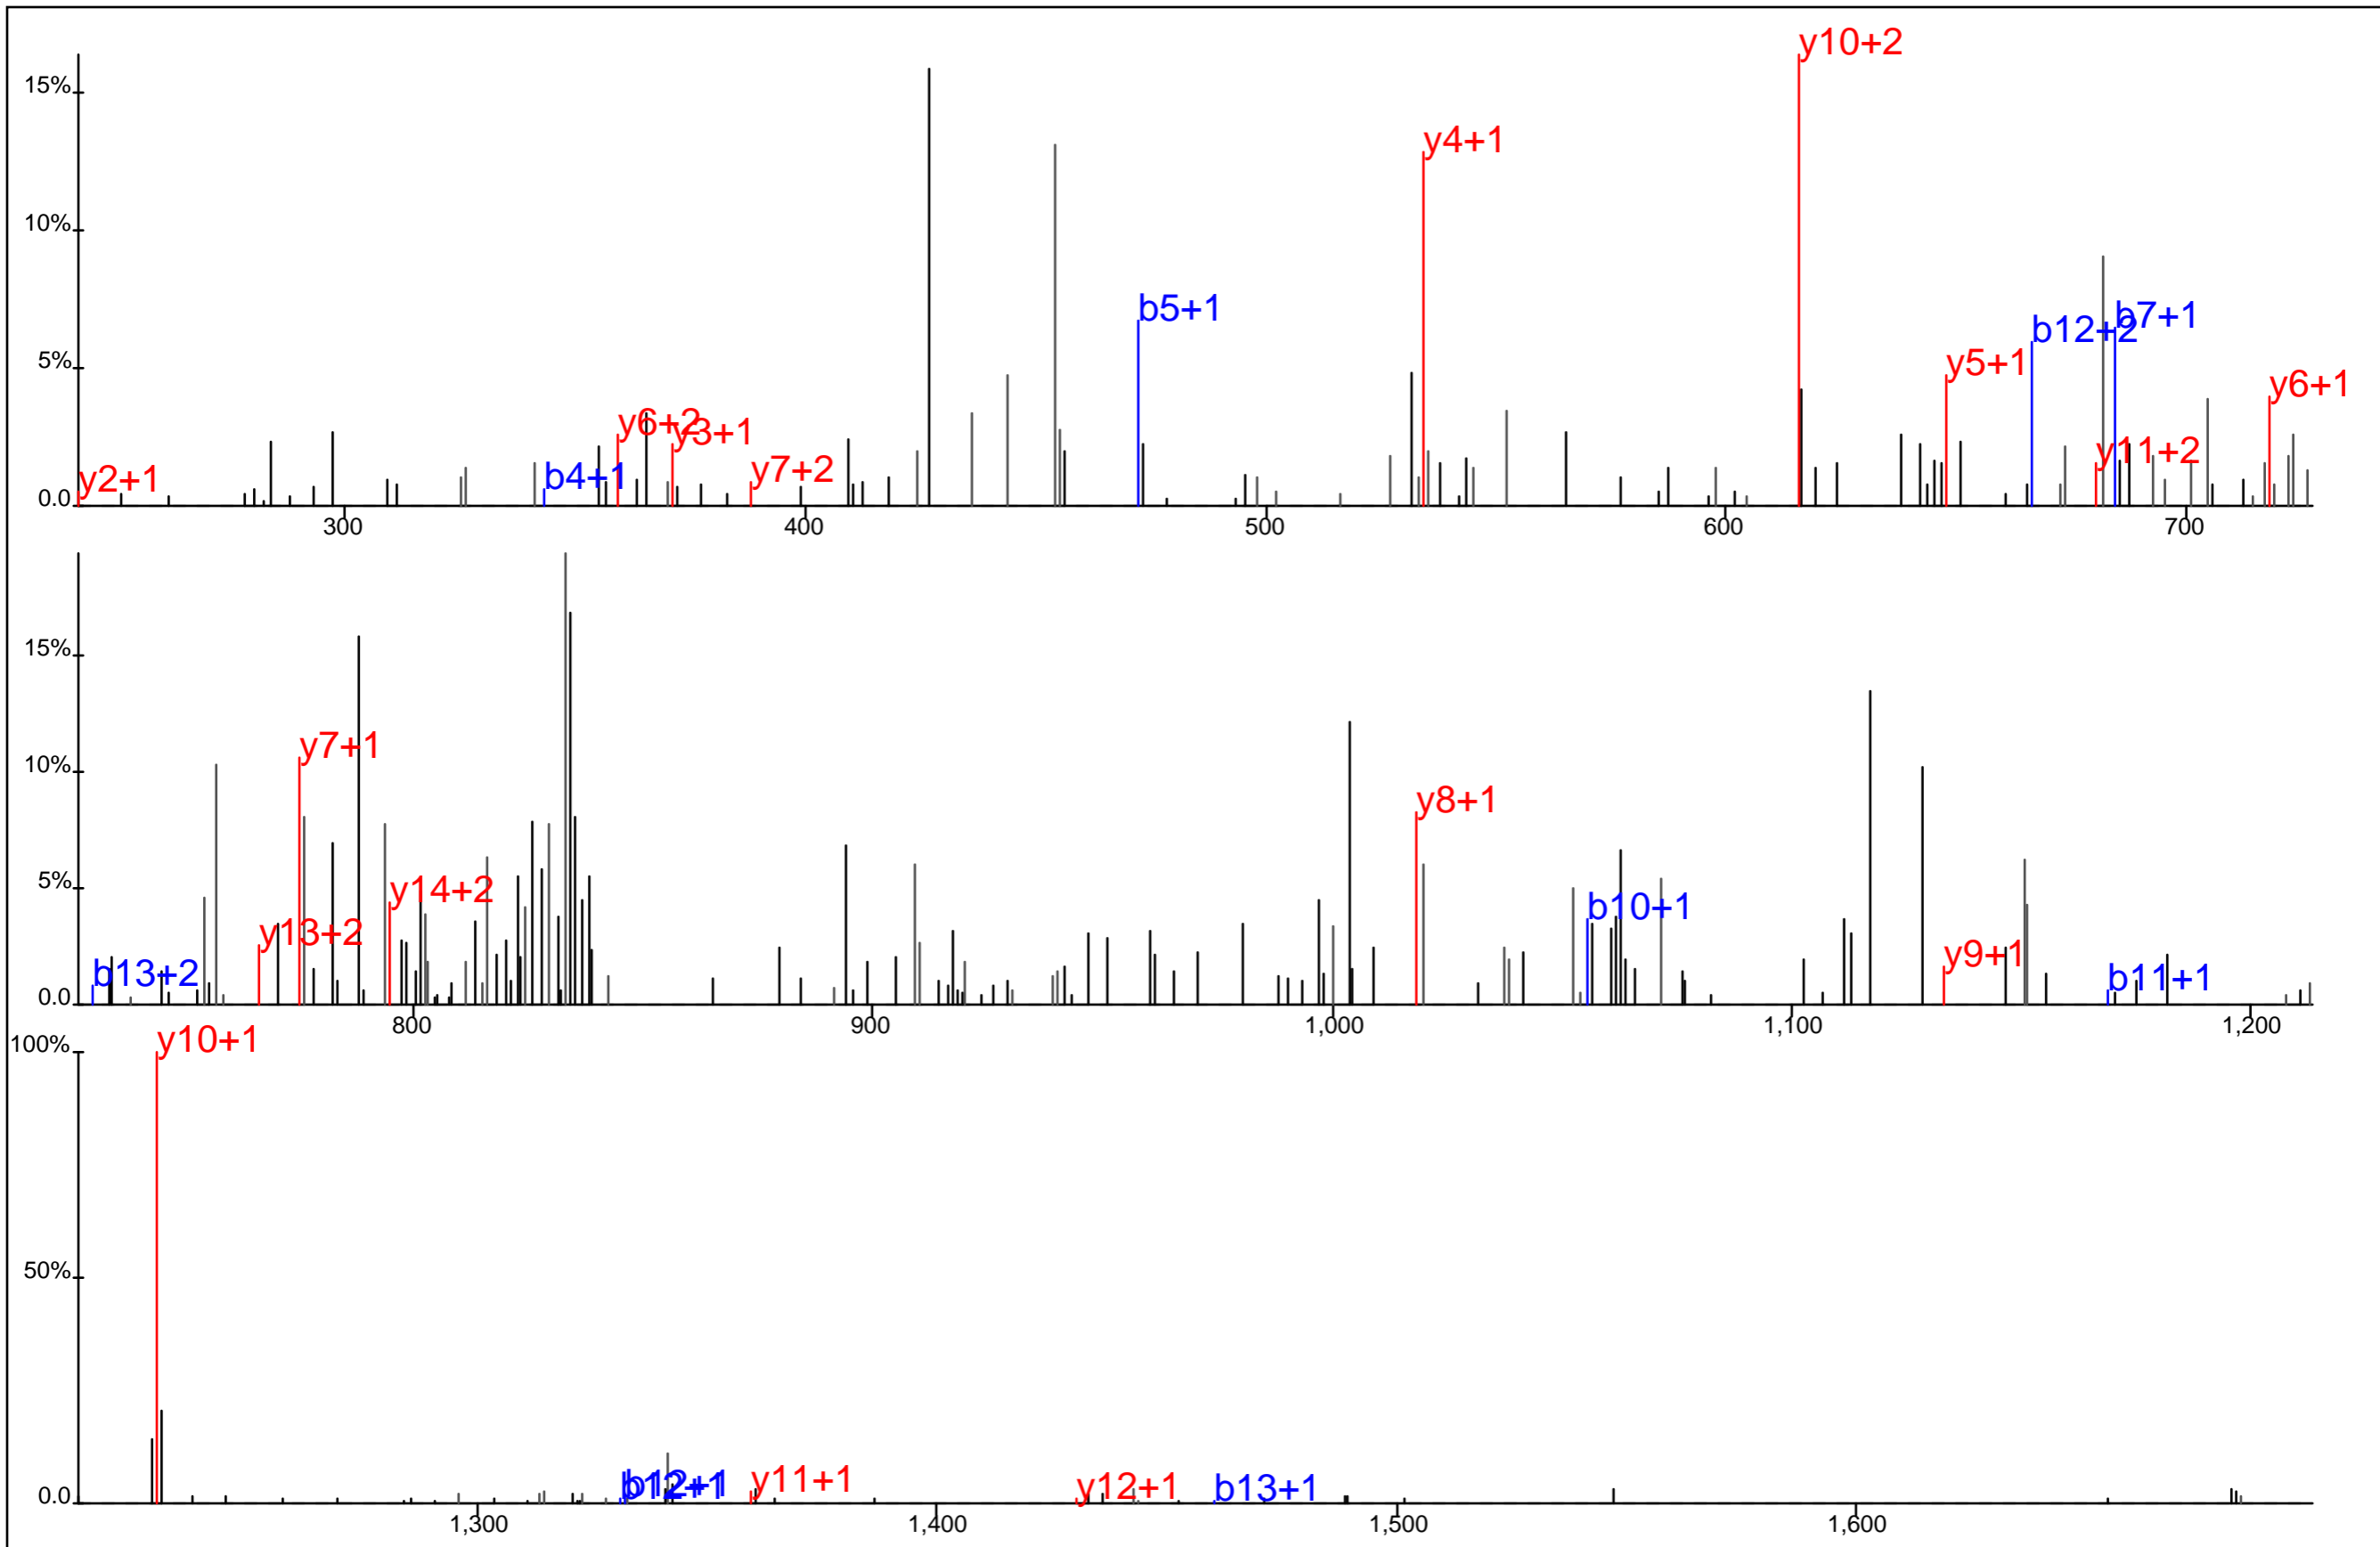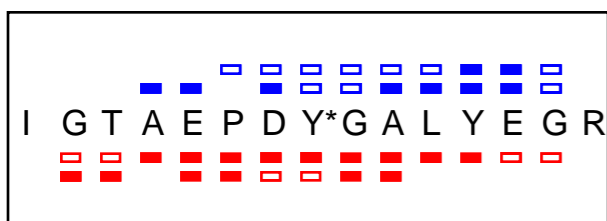

Protein Name: PLC gamma 1  
 gi Accession: 33598946  
 Precursor Mass: 851.3807+2  
 Delta Mass: 8.567 ppm  
 XCorr: 22.0

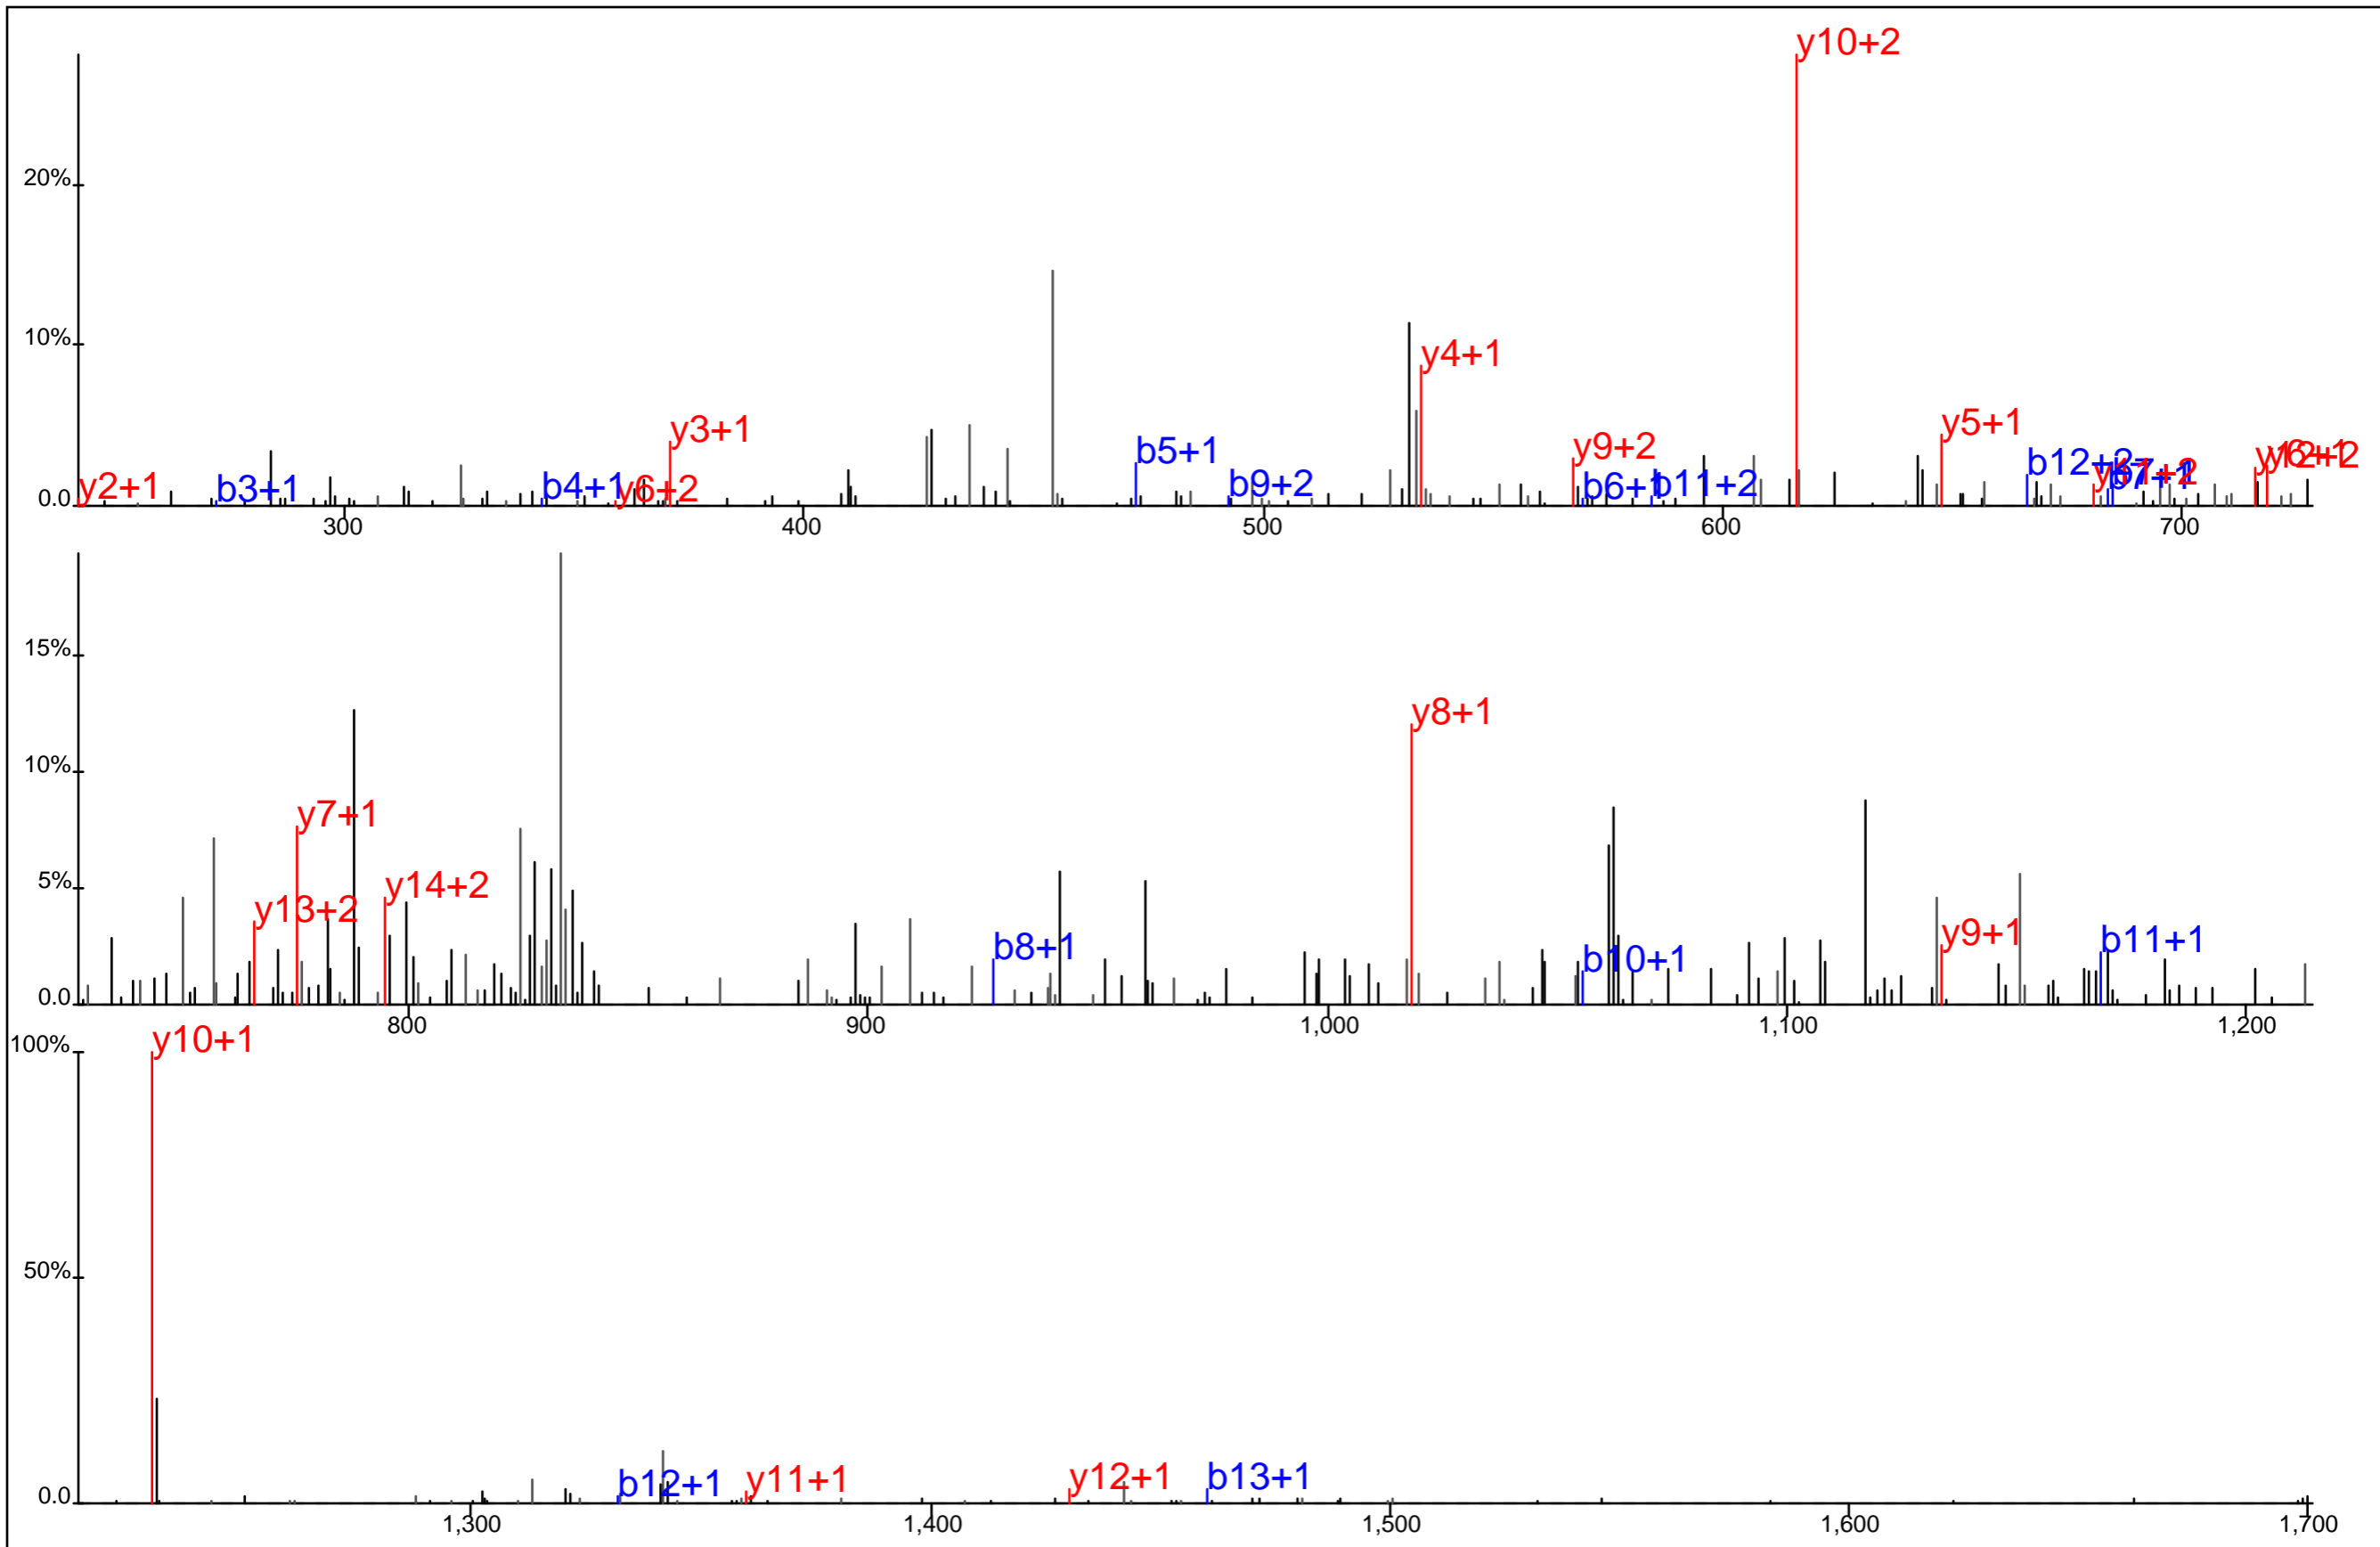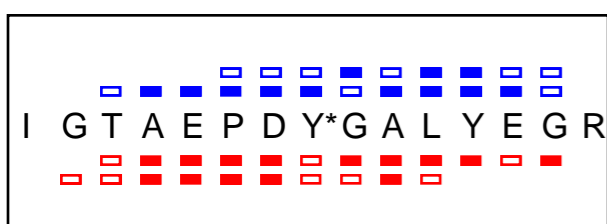

Protein Name: PLC gamma 1  
 gi Accession: 33598946  
 Precursor Mass: 851.3776+2  
 Delta Mass: 4.976 ppm  
 XCorr: 31.62



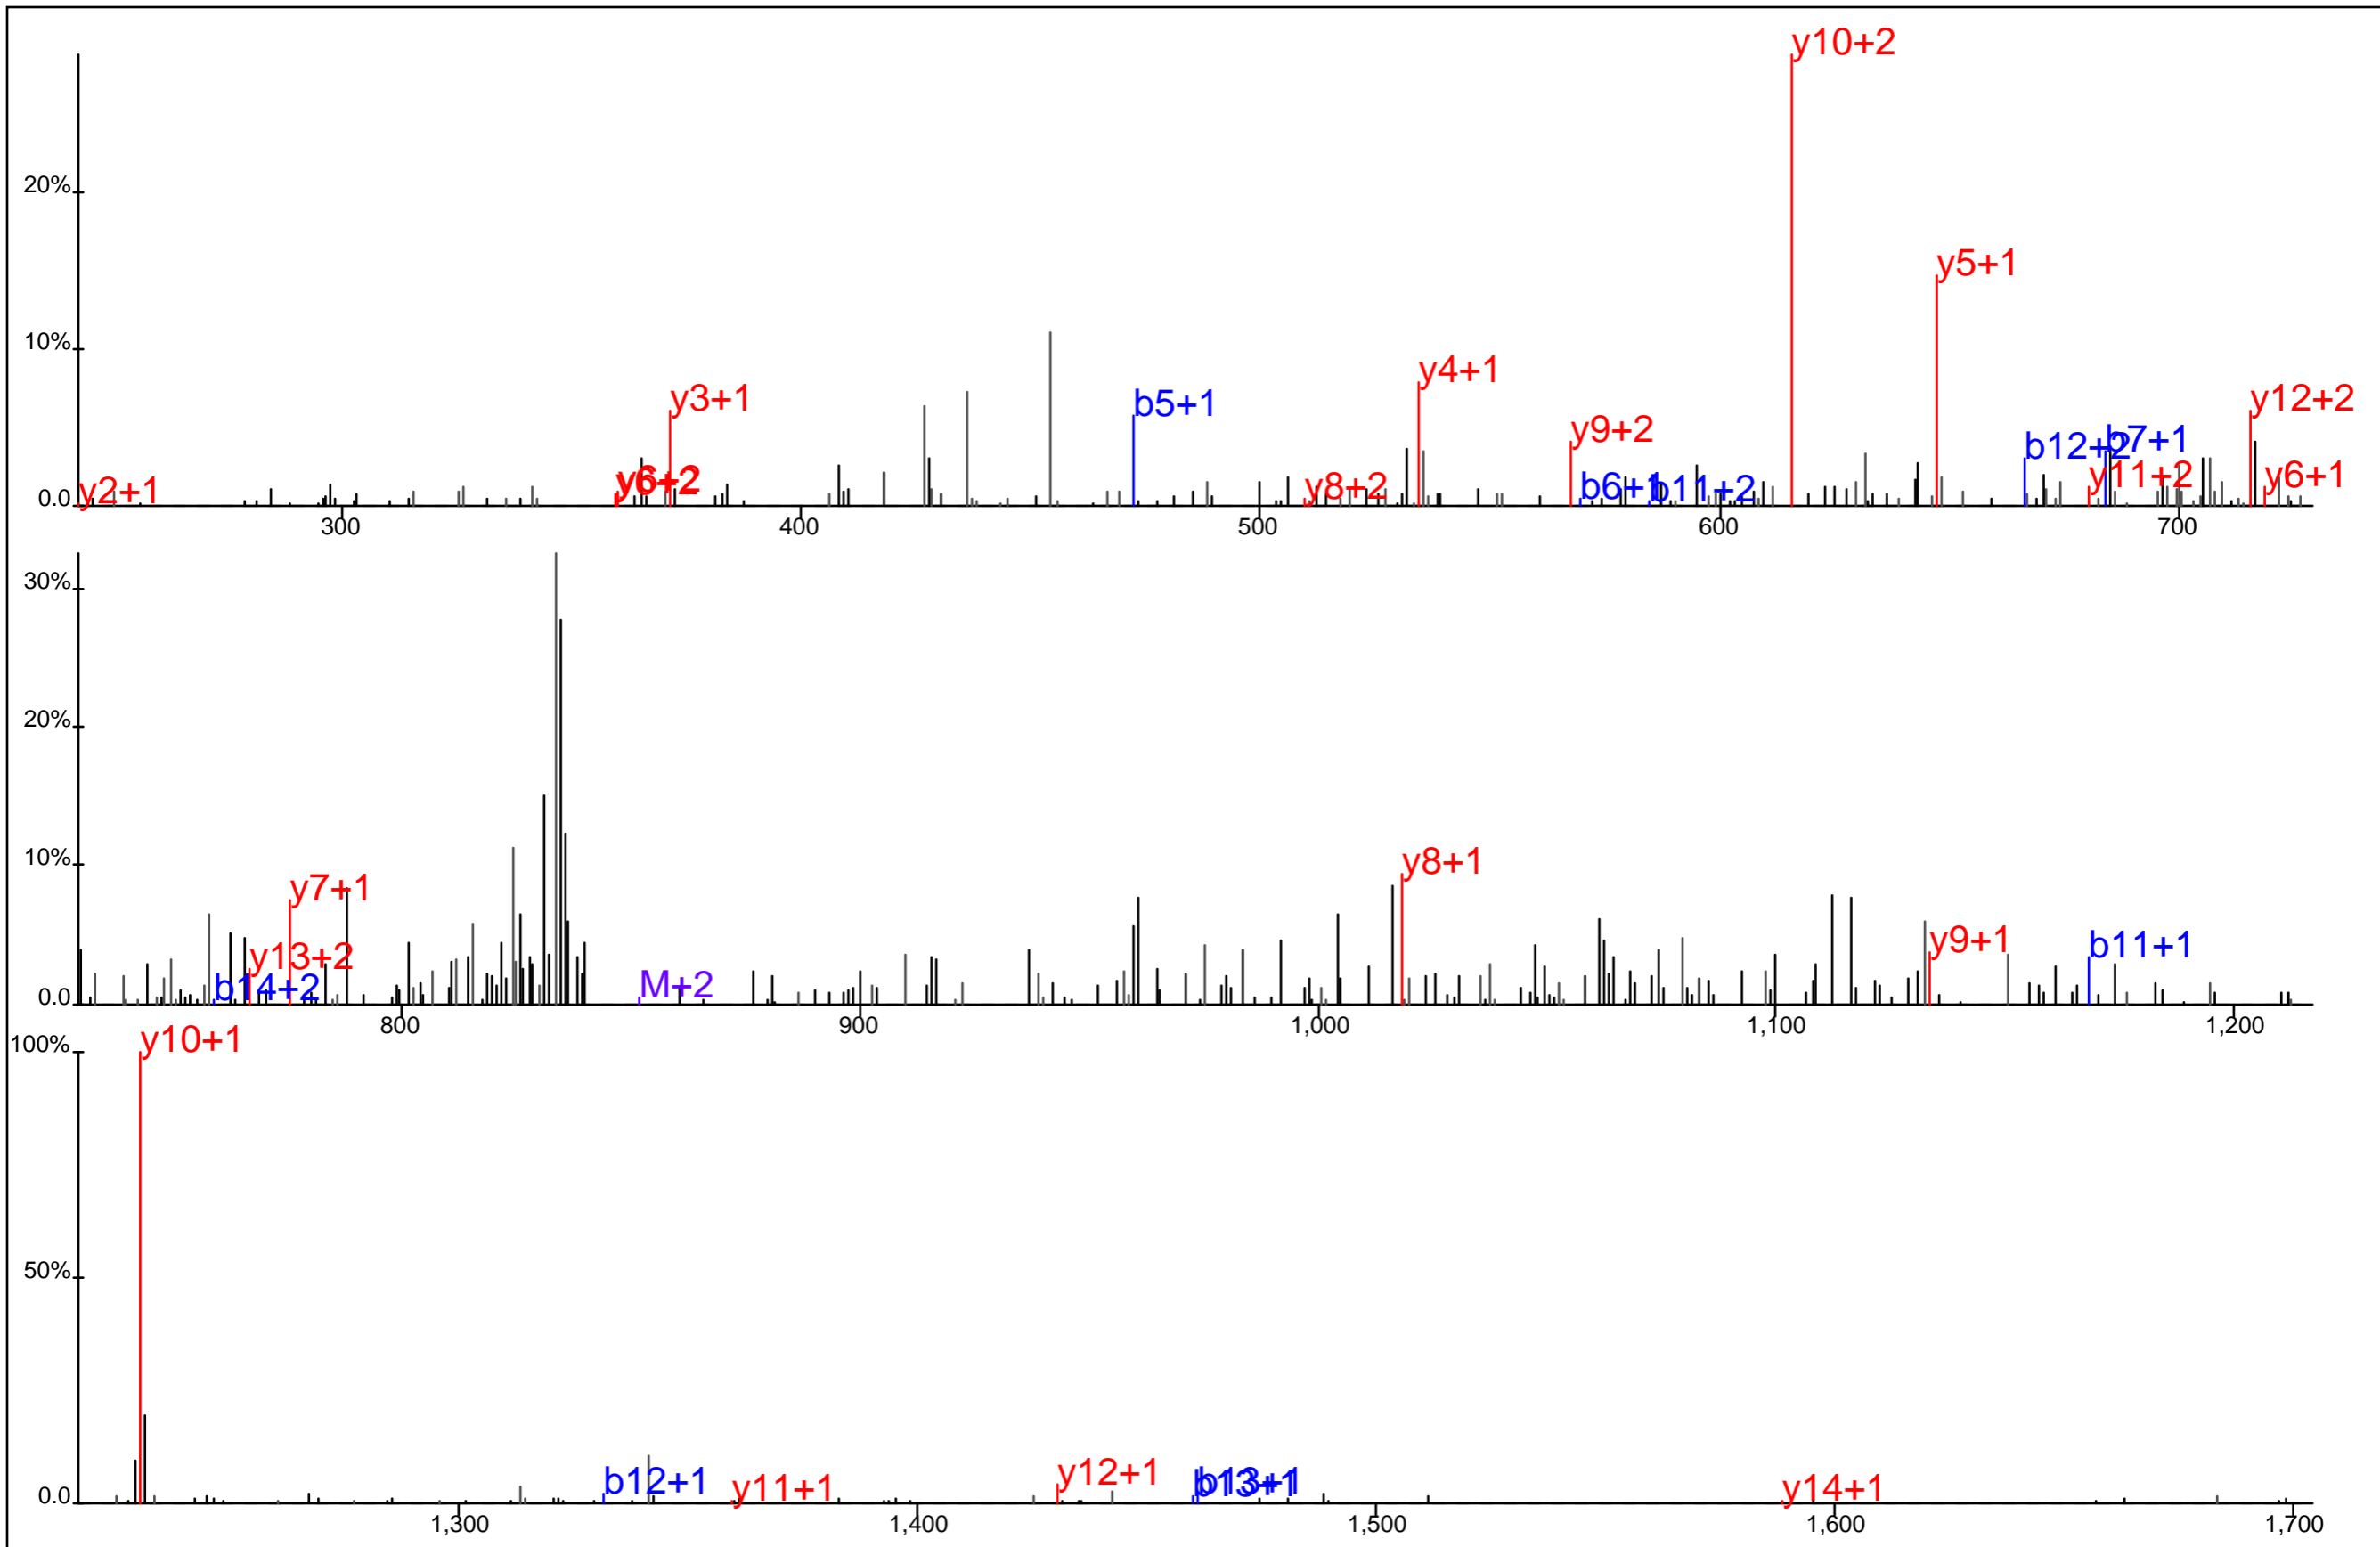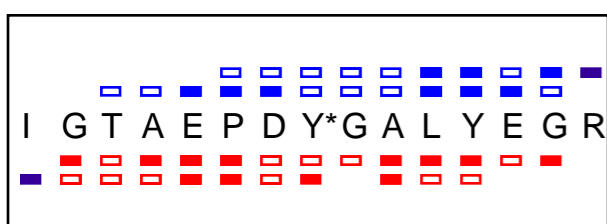

Protein Name: PLC gamma 1  
 gi Accession: 33598946  
 Precursor Mass: 851.3720+2  
 Delta Mass: 1.623 ppm  
 XCorr: 28.45

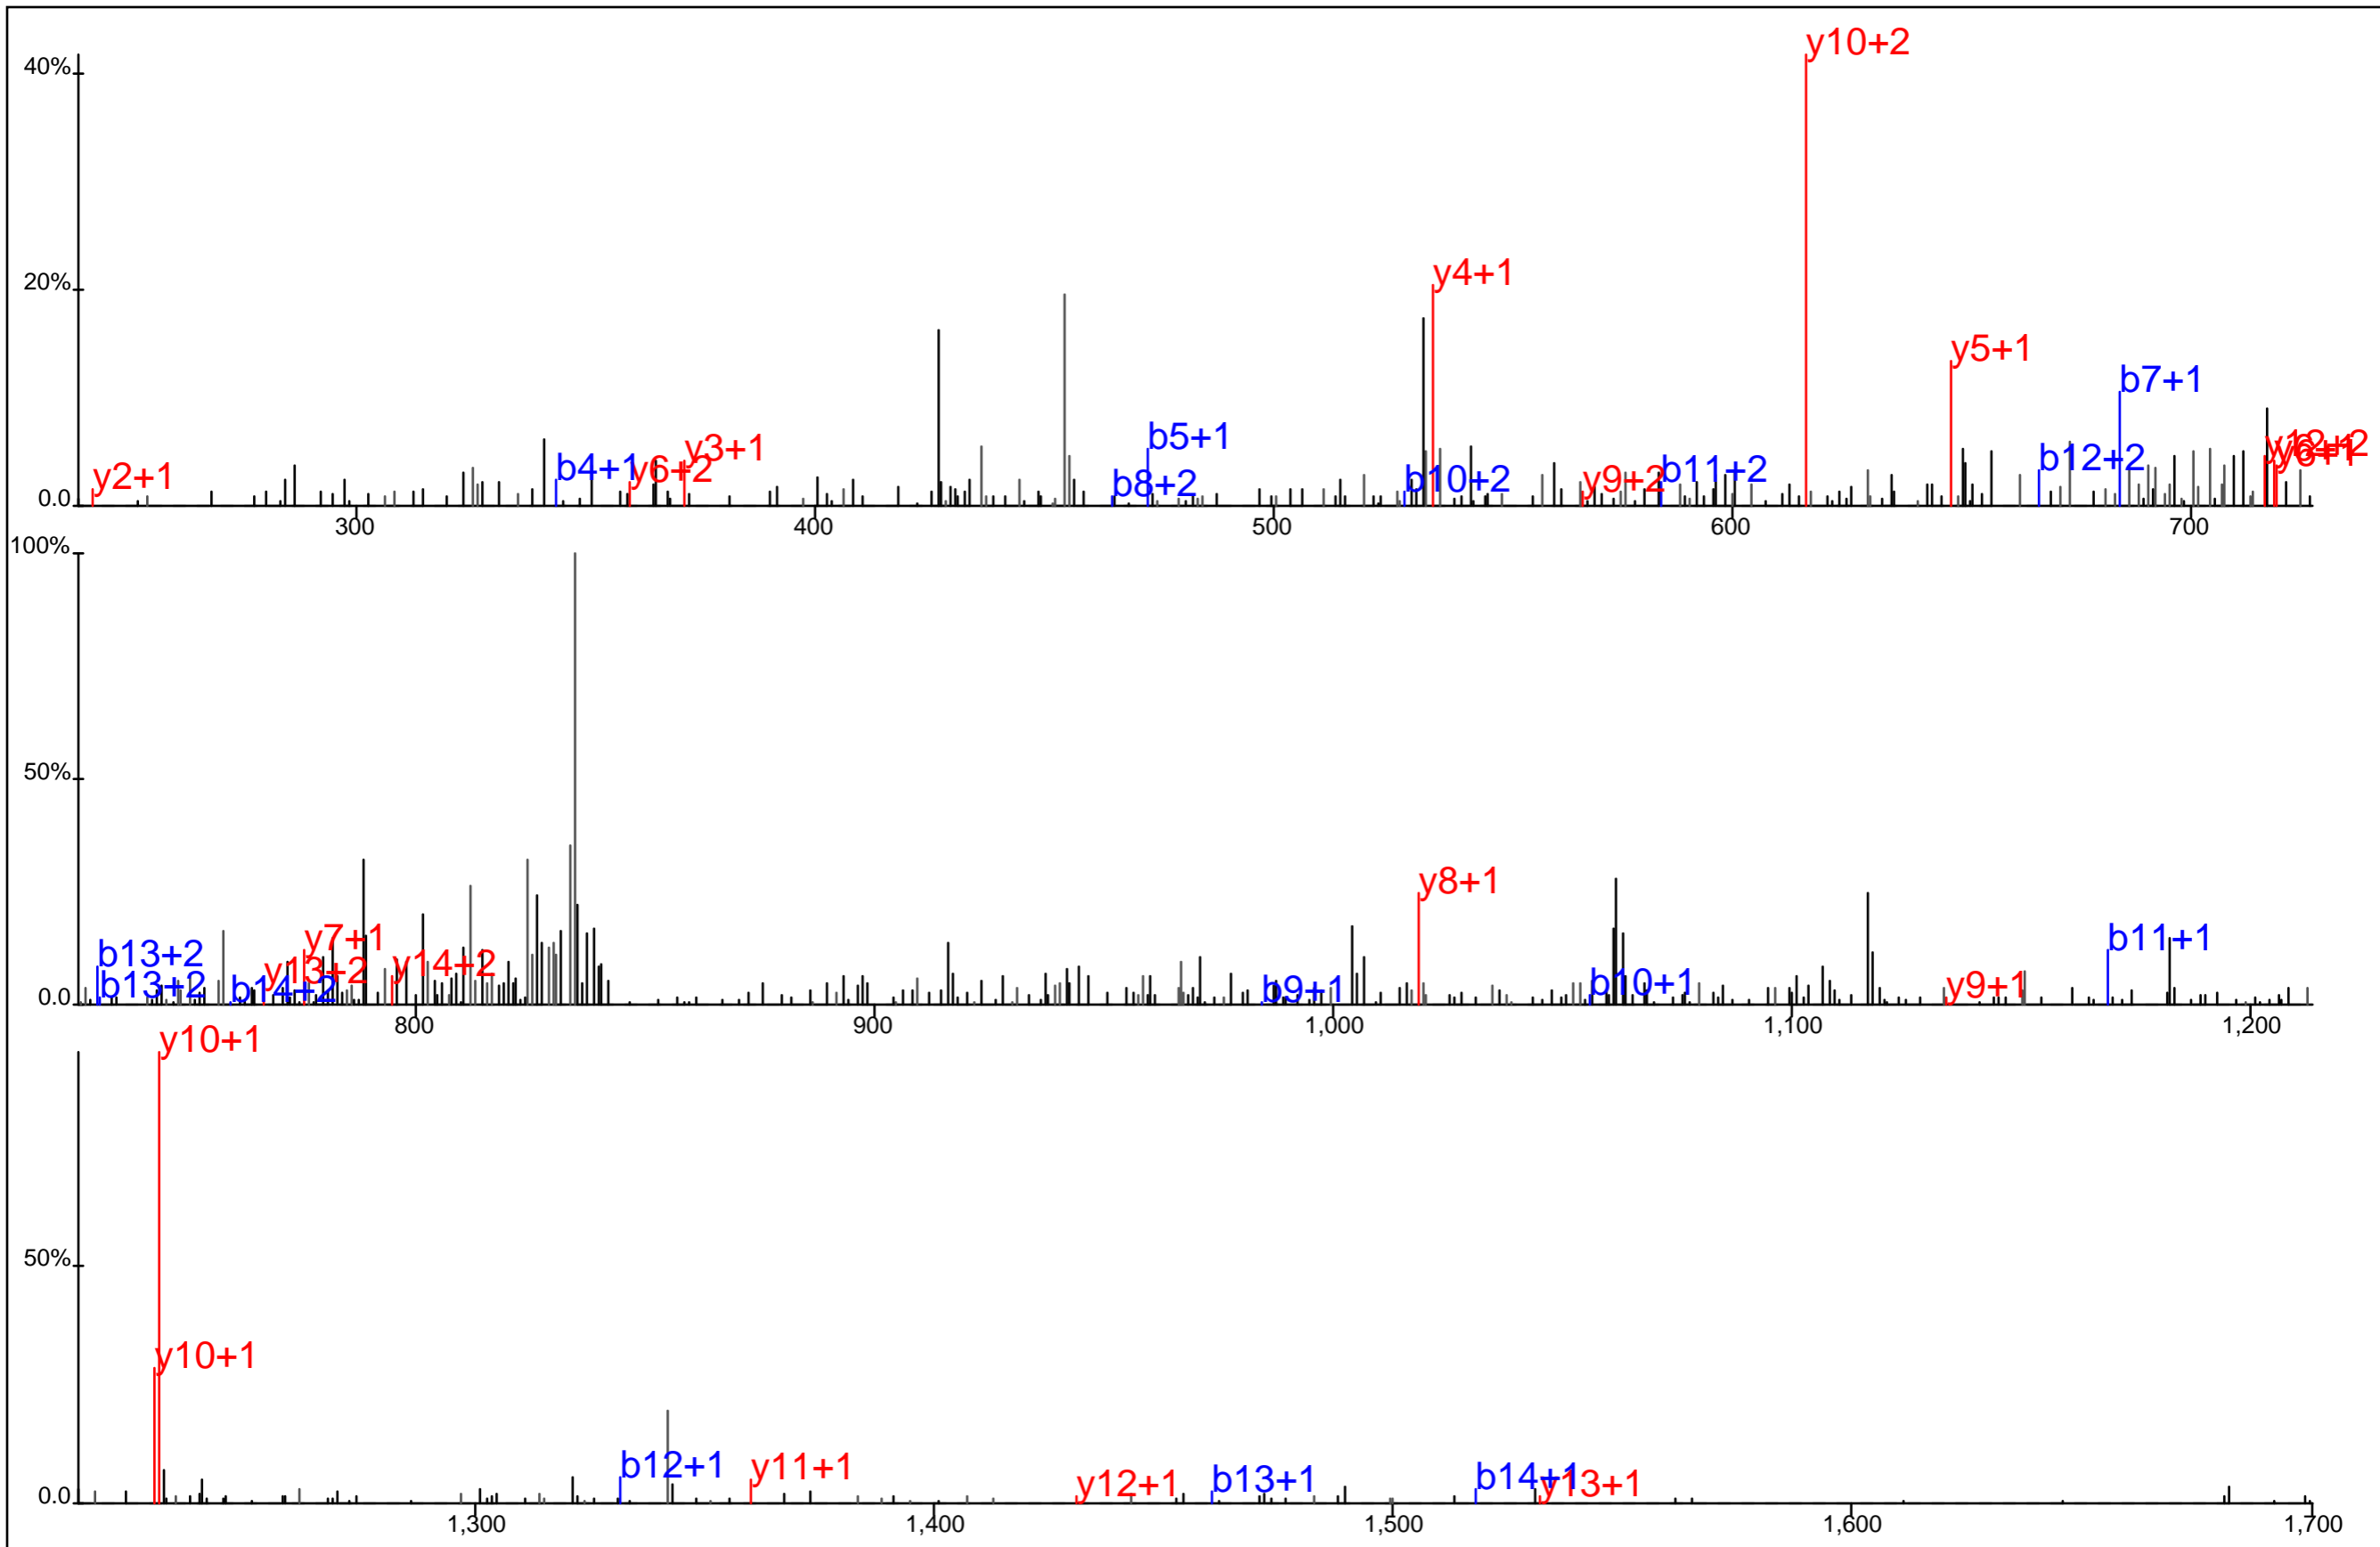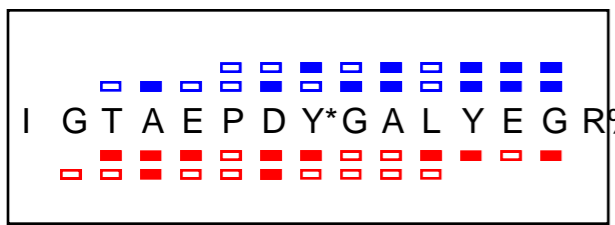

Protein Name: PLC gamma 1  
 gi Accession: 33598946  
 Precursor Mass: 851.3795+2  
 Delta Mass: 7.127 ppm  
 XCorr: 19.87

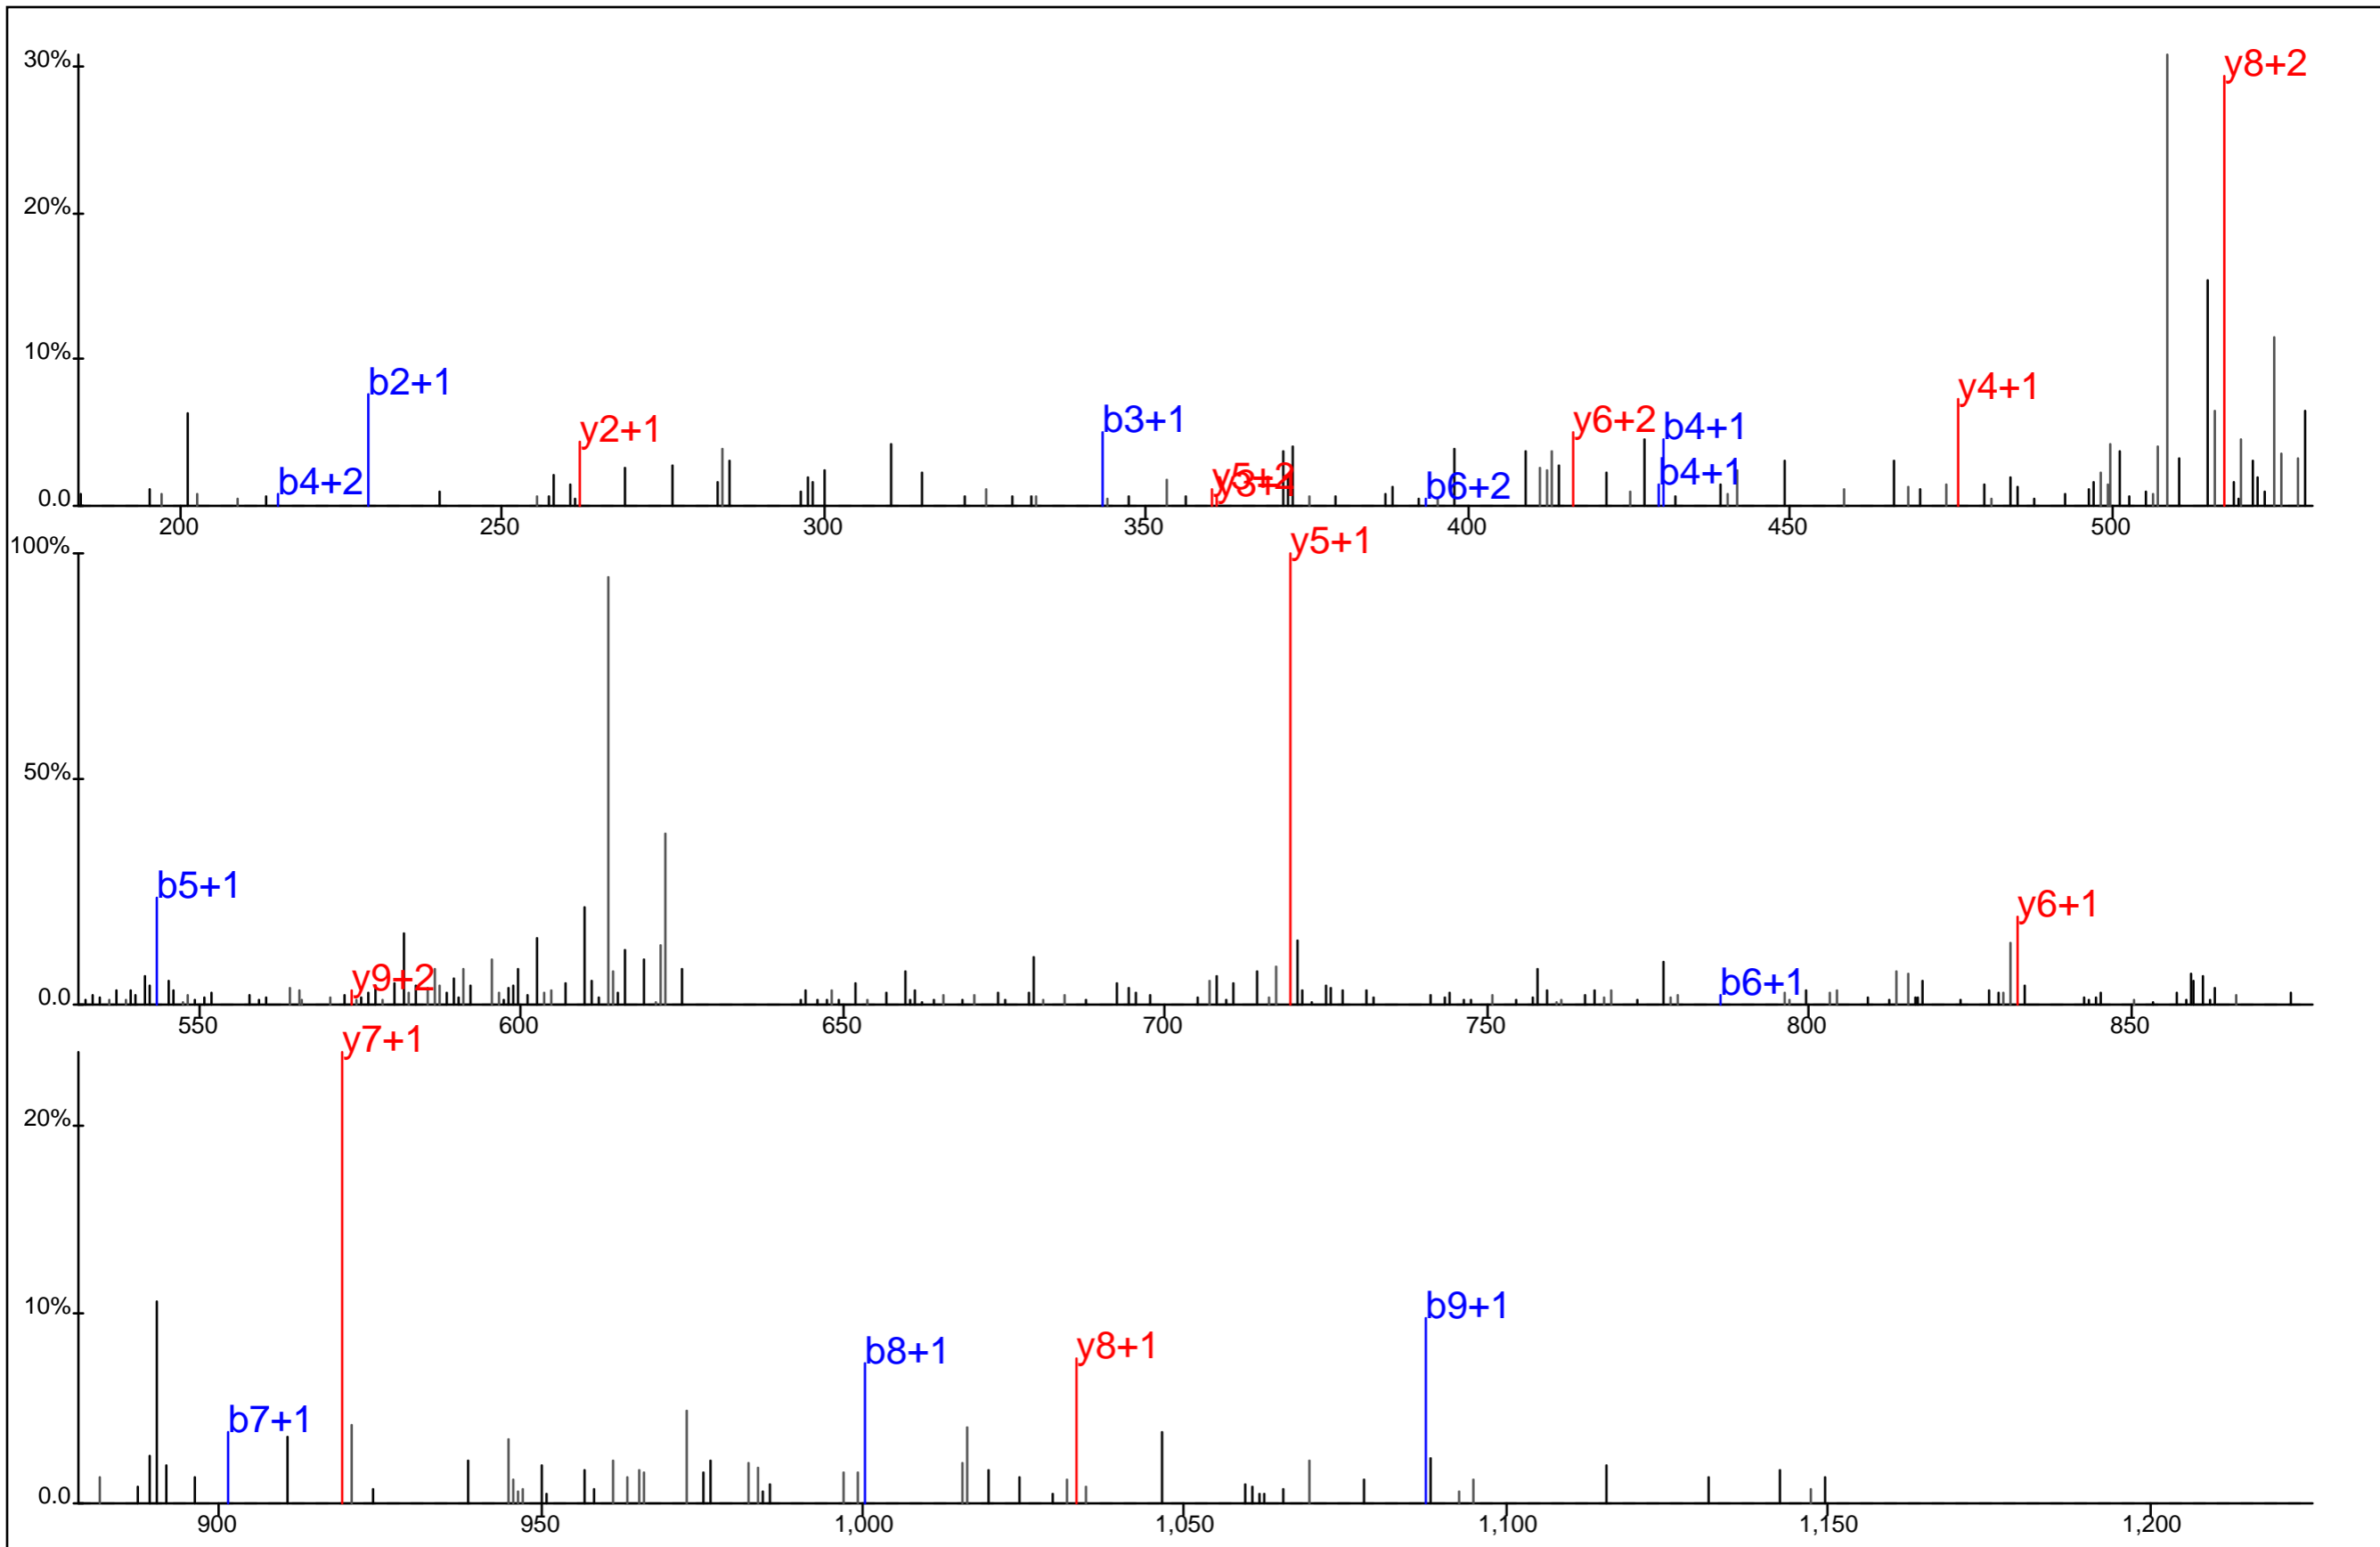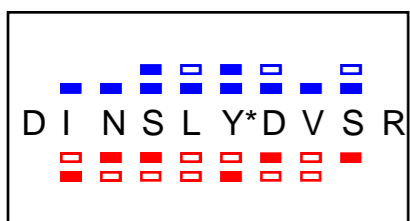

Protein Name: PLC gamma 2  
 gi Accession: 14043155  
 Precursor Mass: 631.2790+2  
 Delta Mass: 3.732 ppm  
 XCorr: 46.6

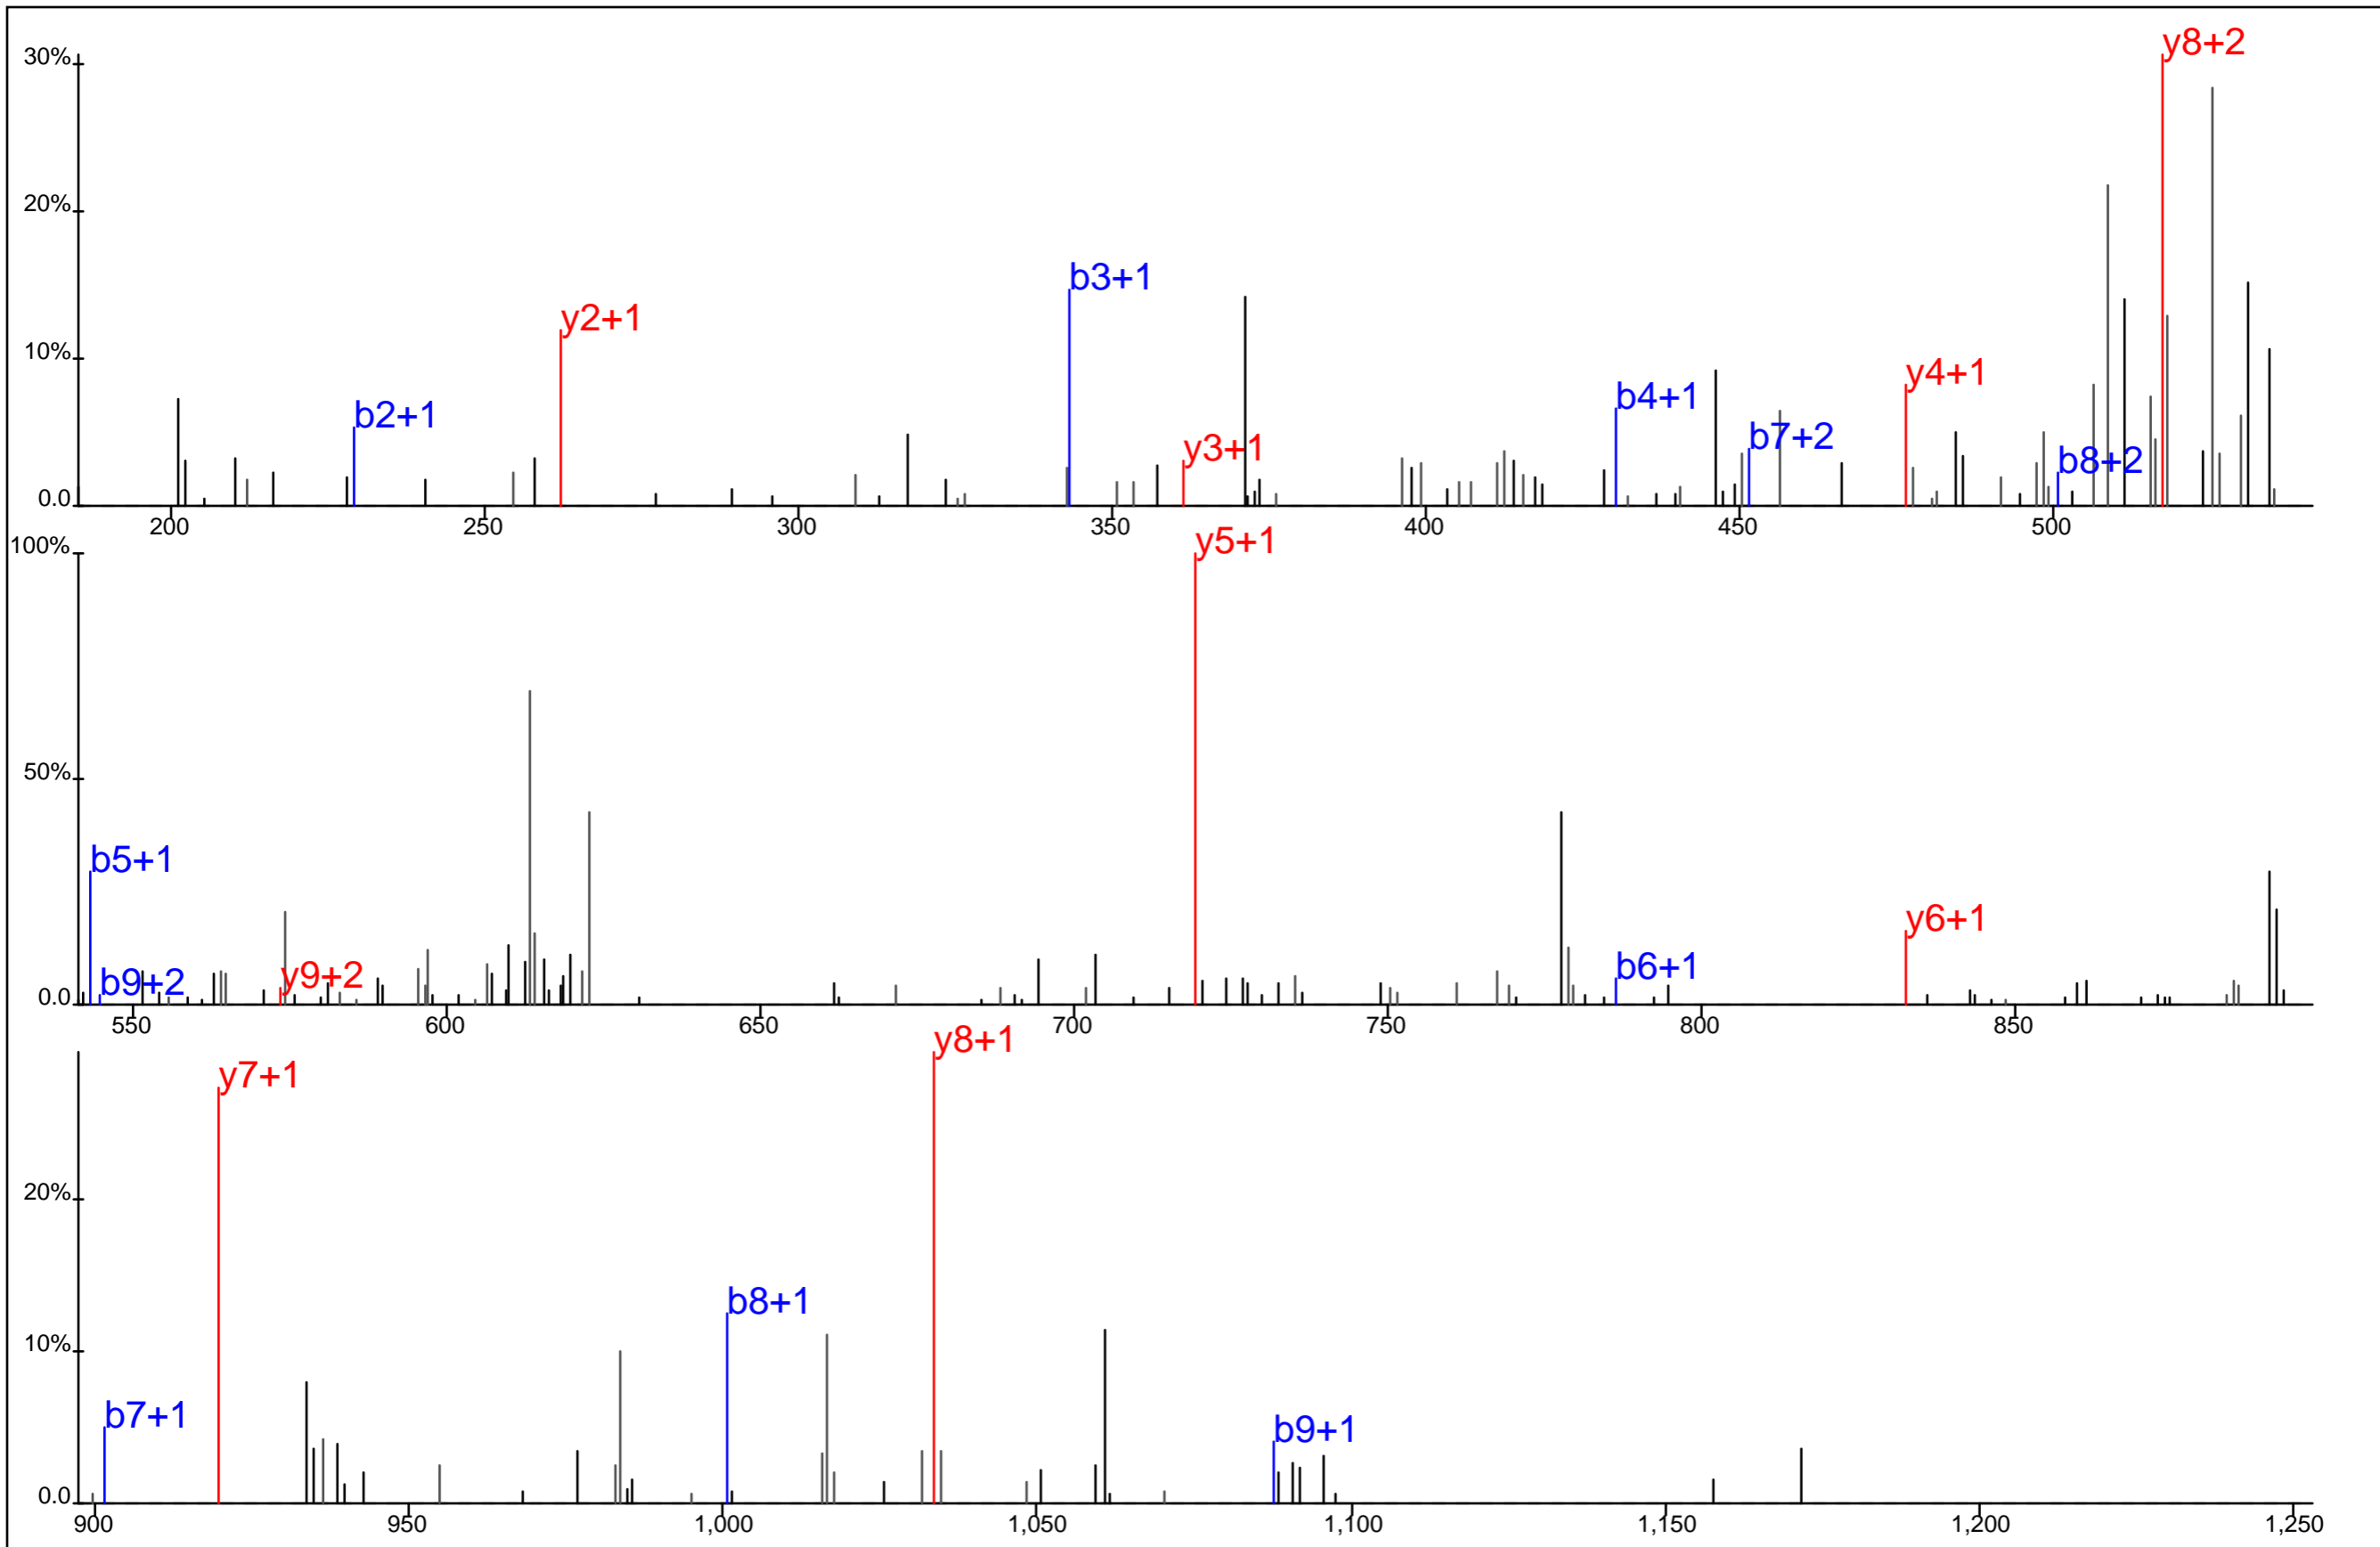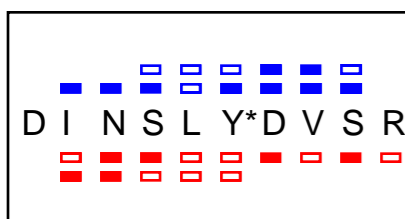

Protein Name: PLC gamma 2  
 gi Accession: 14043155  
 Precursor Mass: 631.2806+2  
 Delta Mass: 6.245 ppm  
 XCorr: 42.49

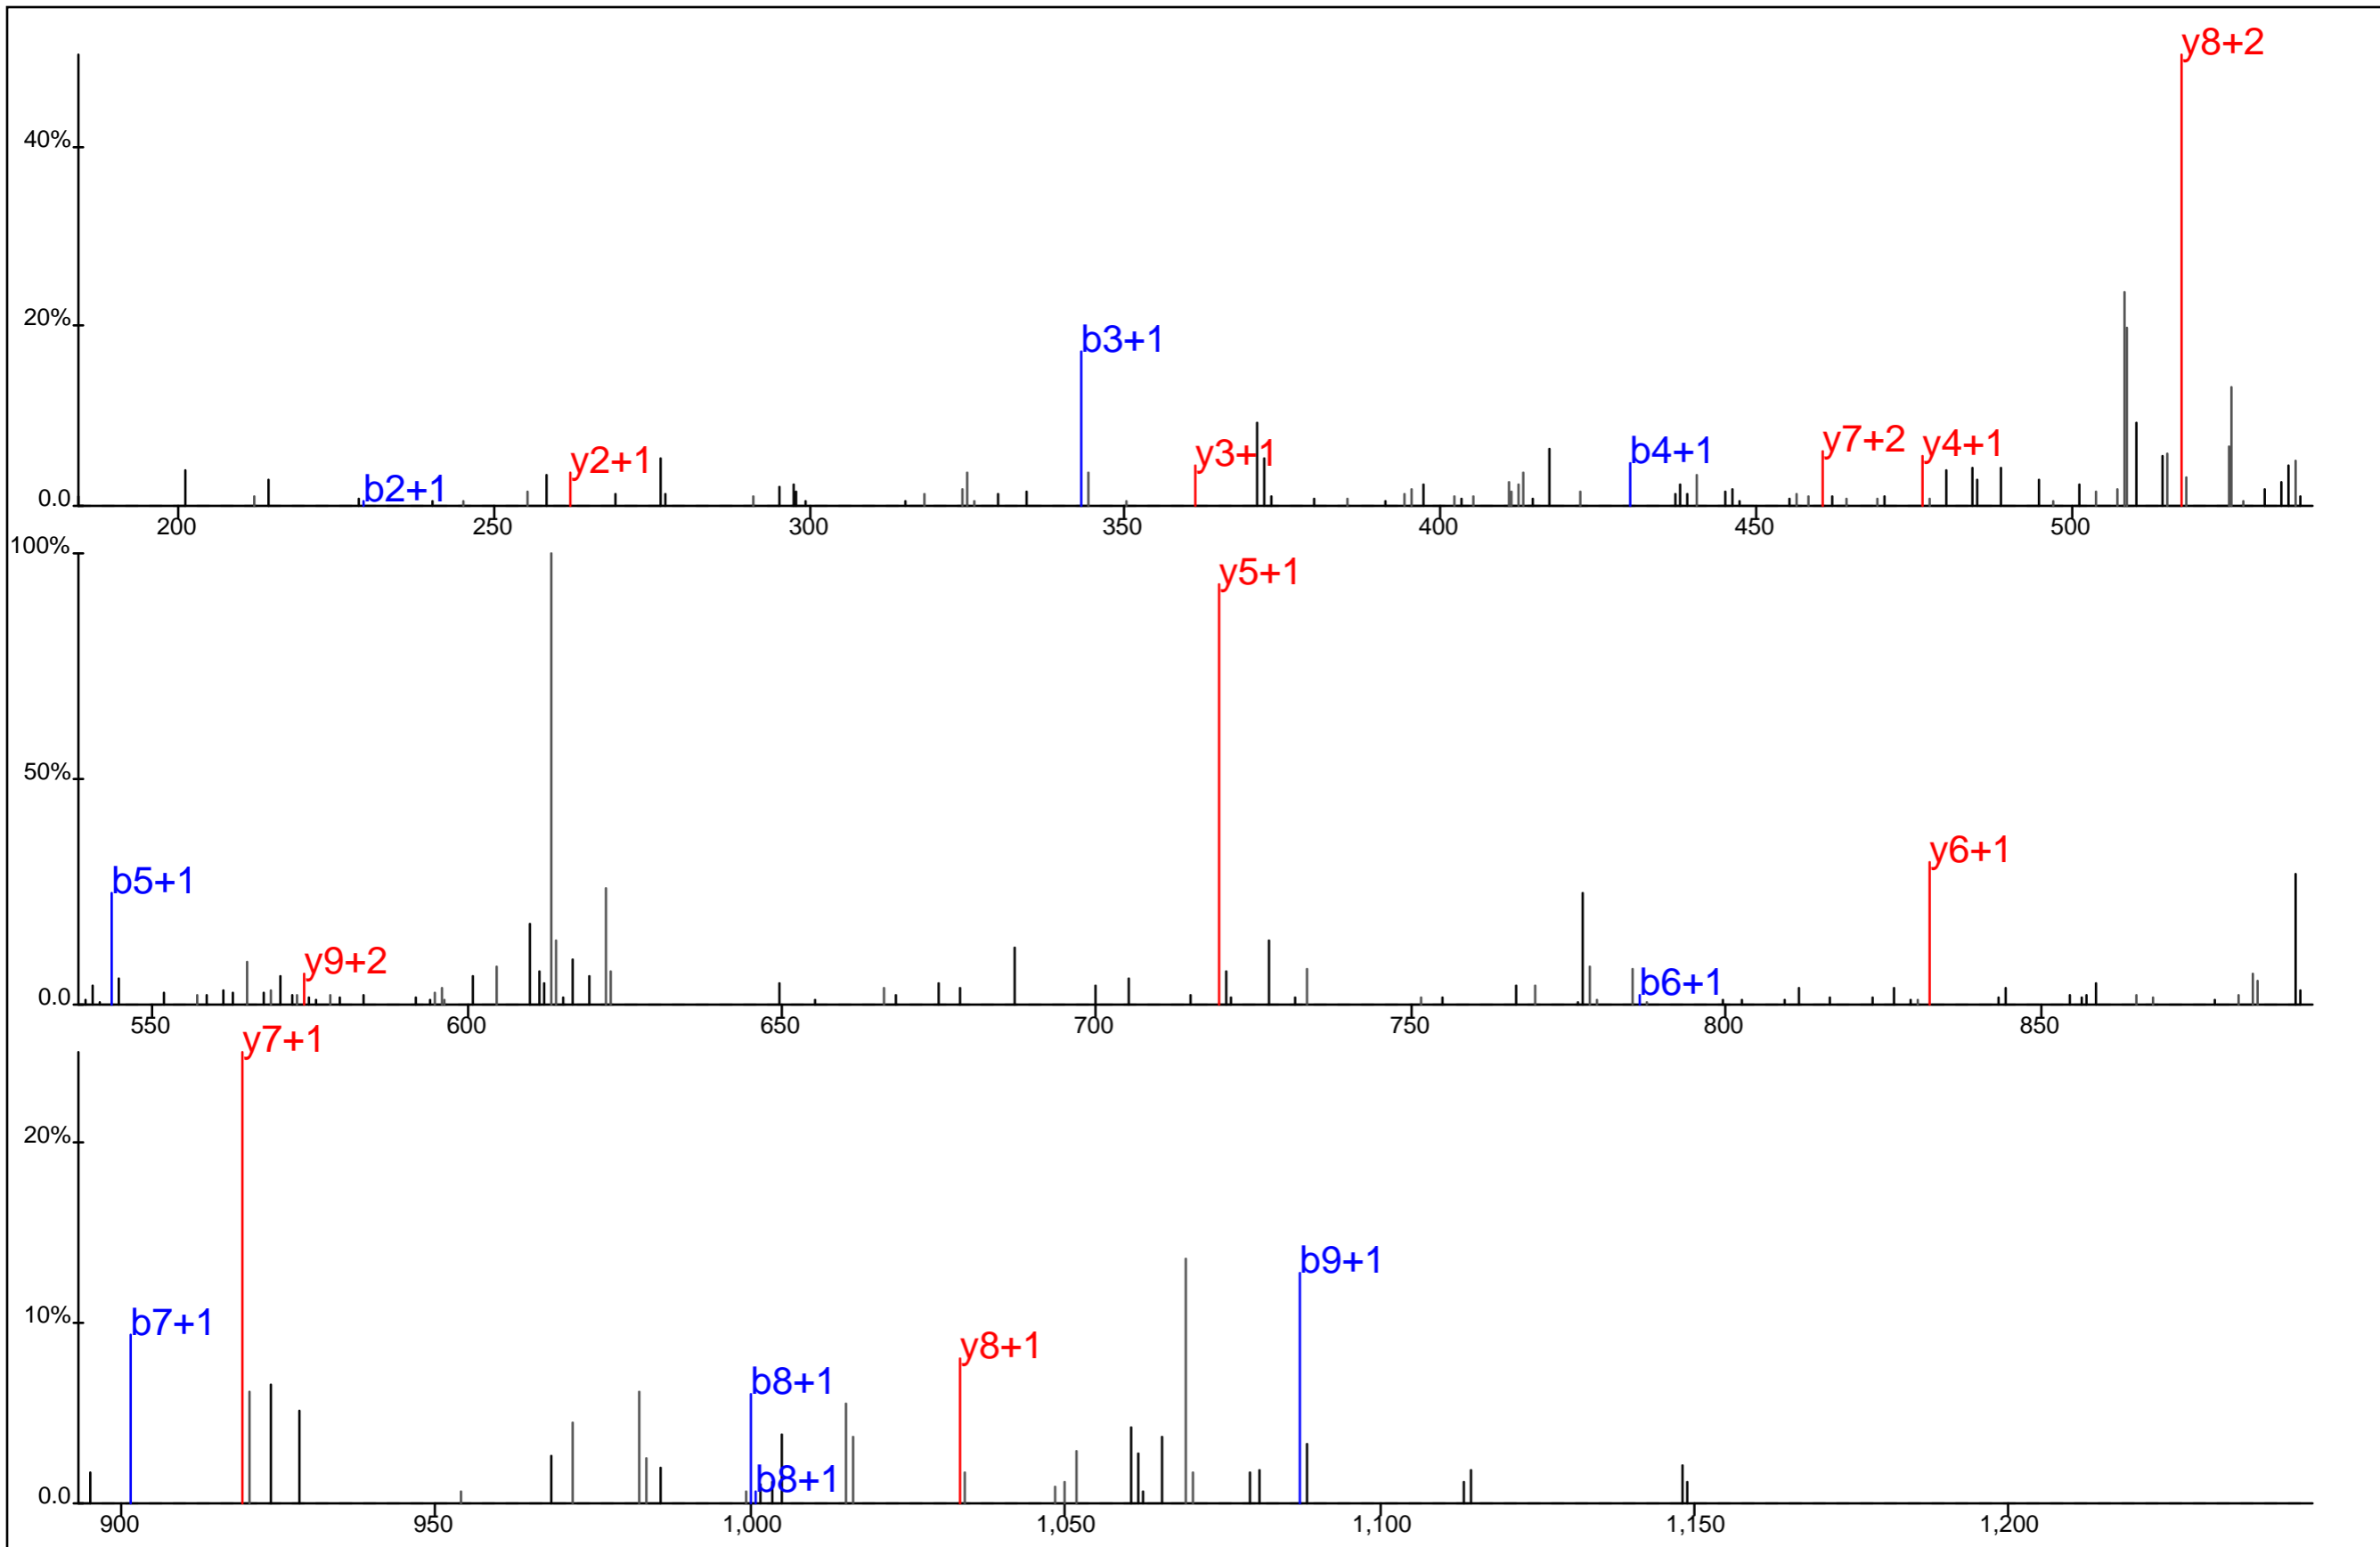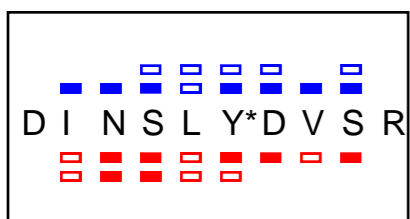

Protein Name: PLC gamma 2  
 gi Accession: 14043155  
 Precursor Mass: 631.2797+2  
 Delta Mass: 4.794 ppm  
 XCorr: 39.64

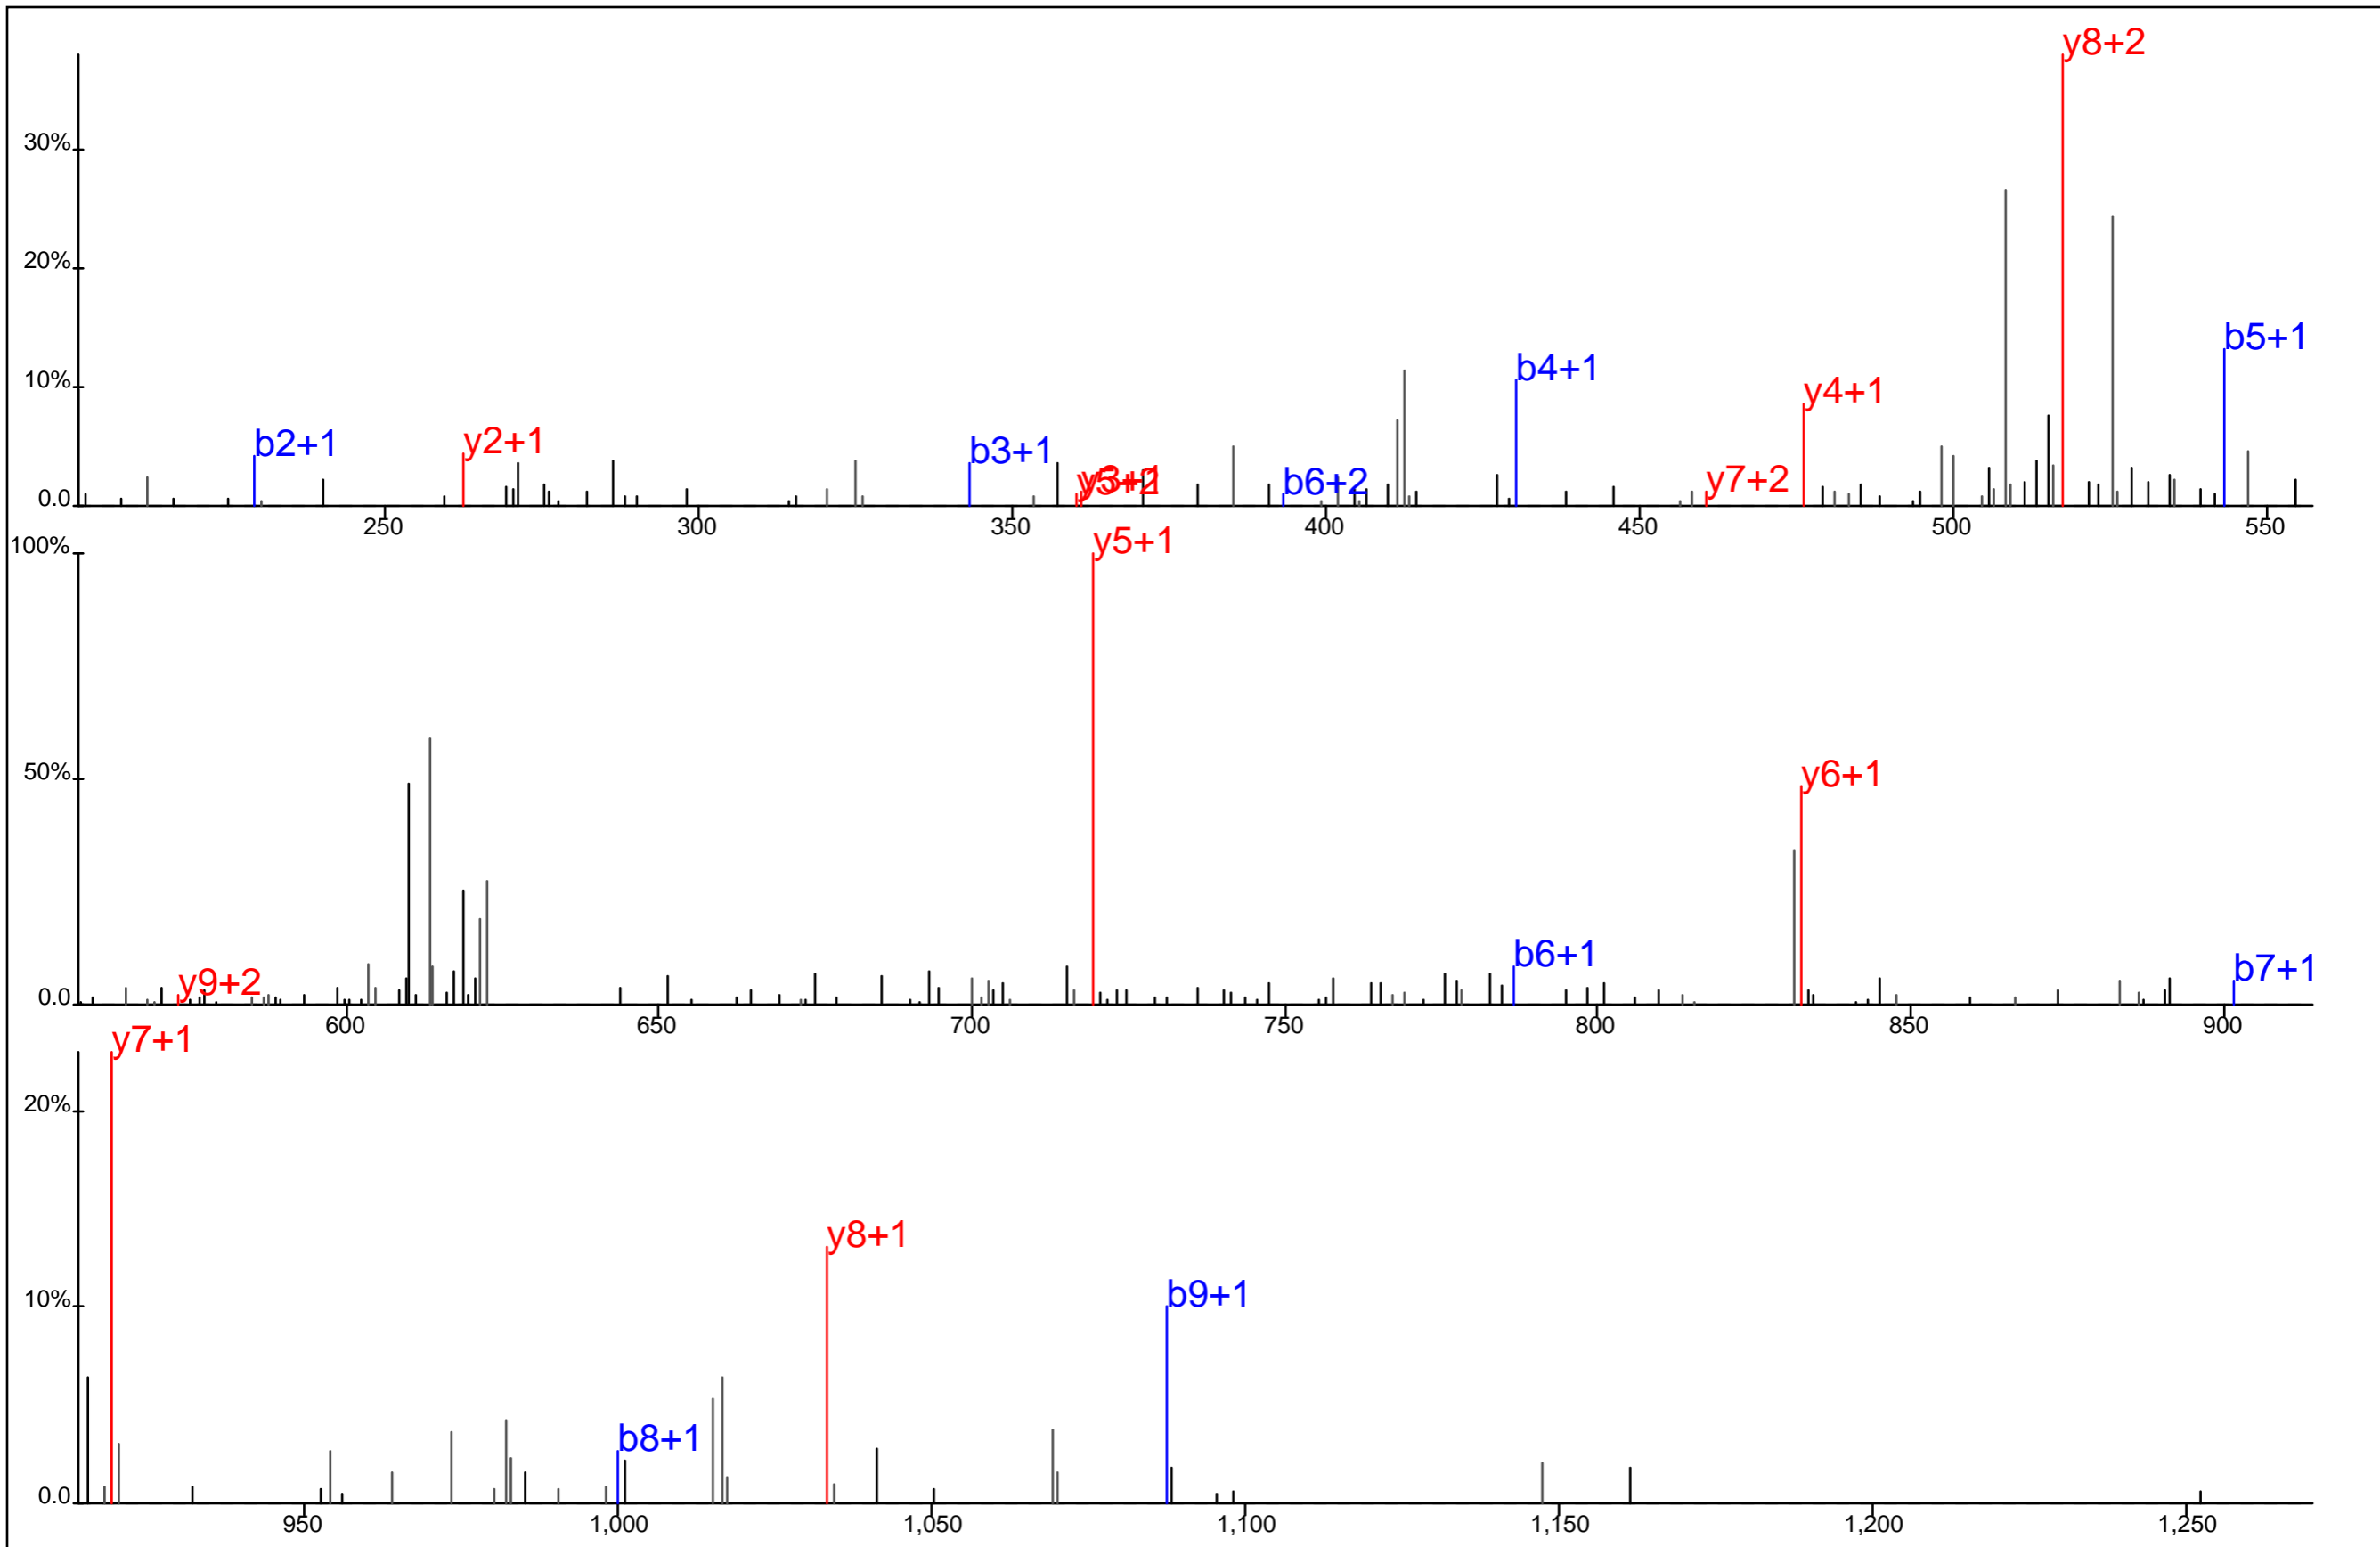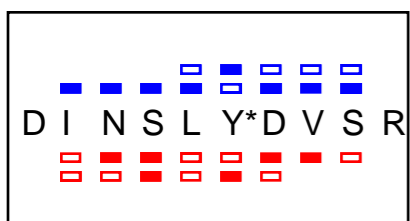

Protein Name: PLC gamma 2  
 gi Accession: 14043155  
 Precursor Mass: 631.2781+2  
 Delta Mass: 2.281 ppm  
 XCorr: 41.67

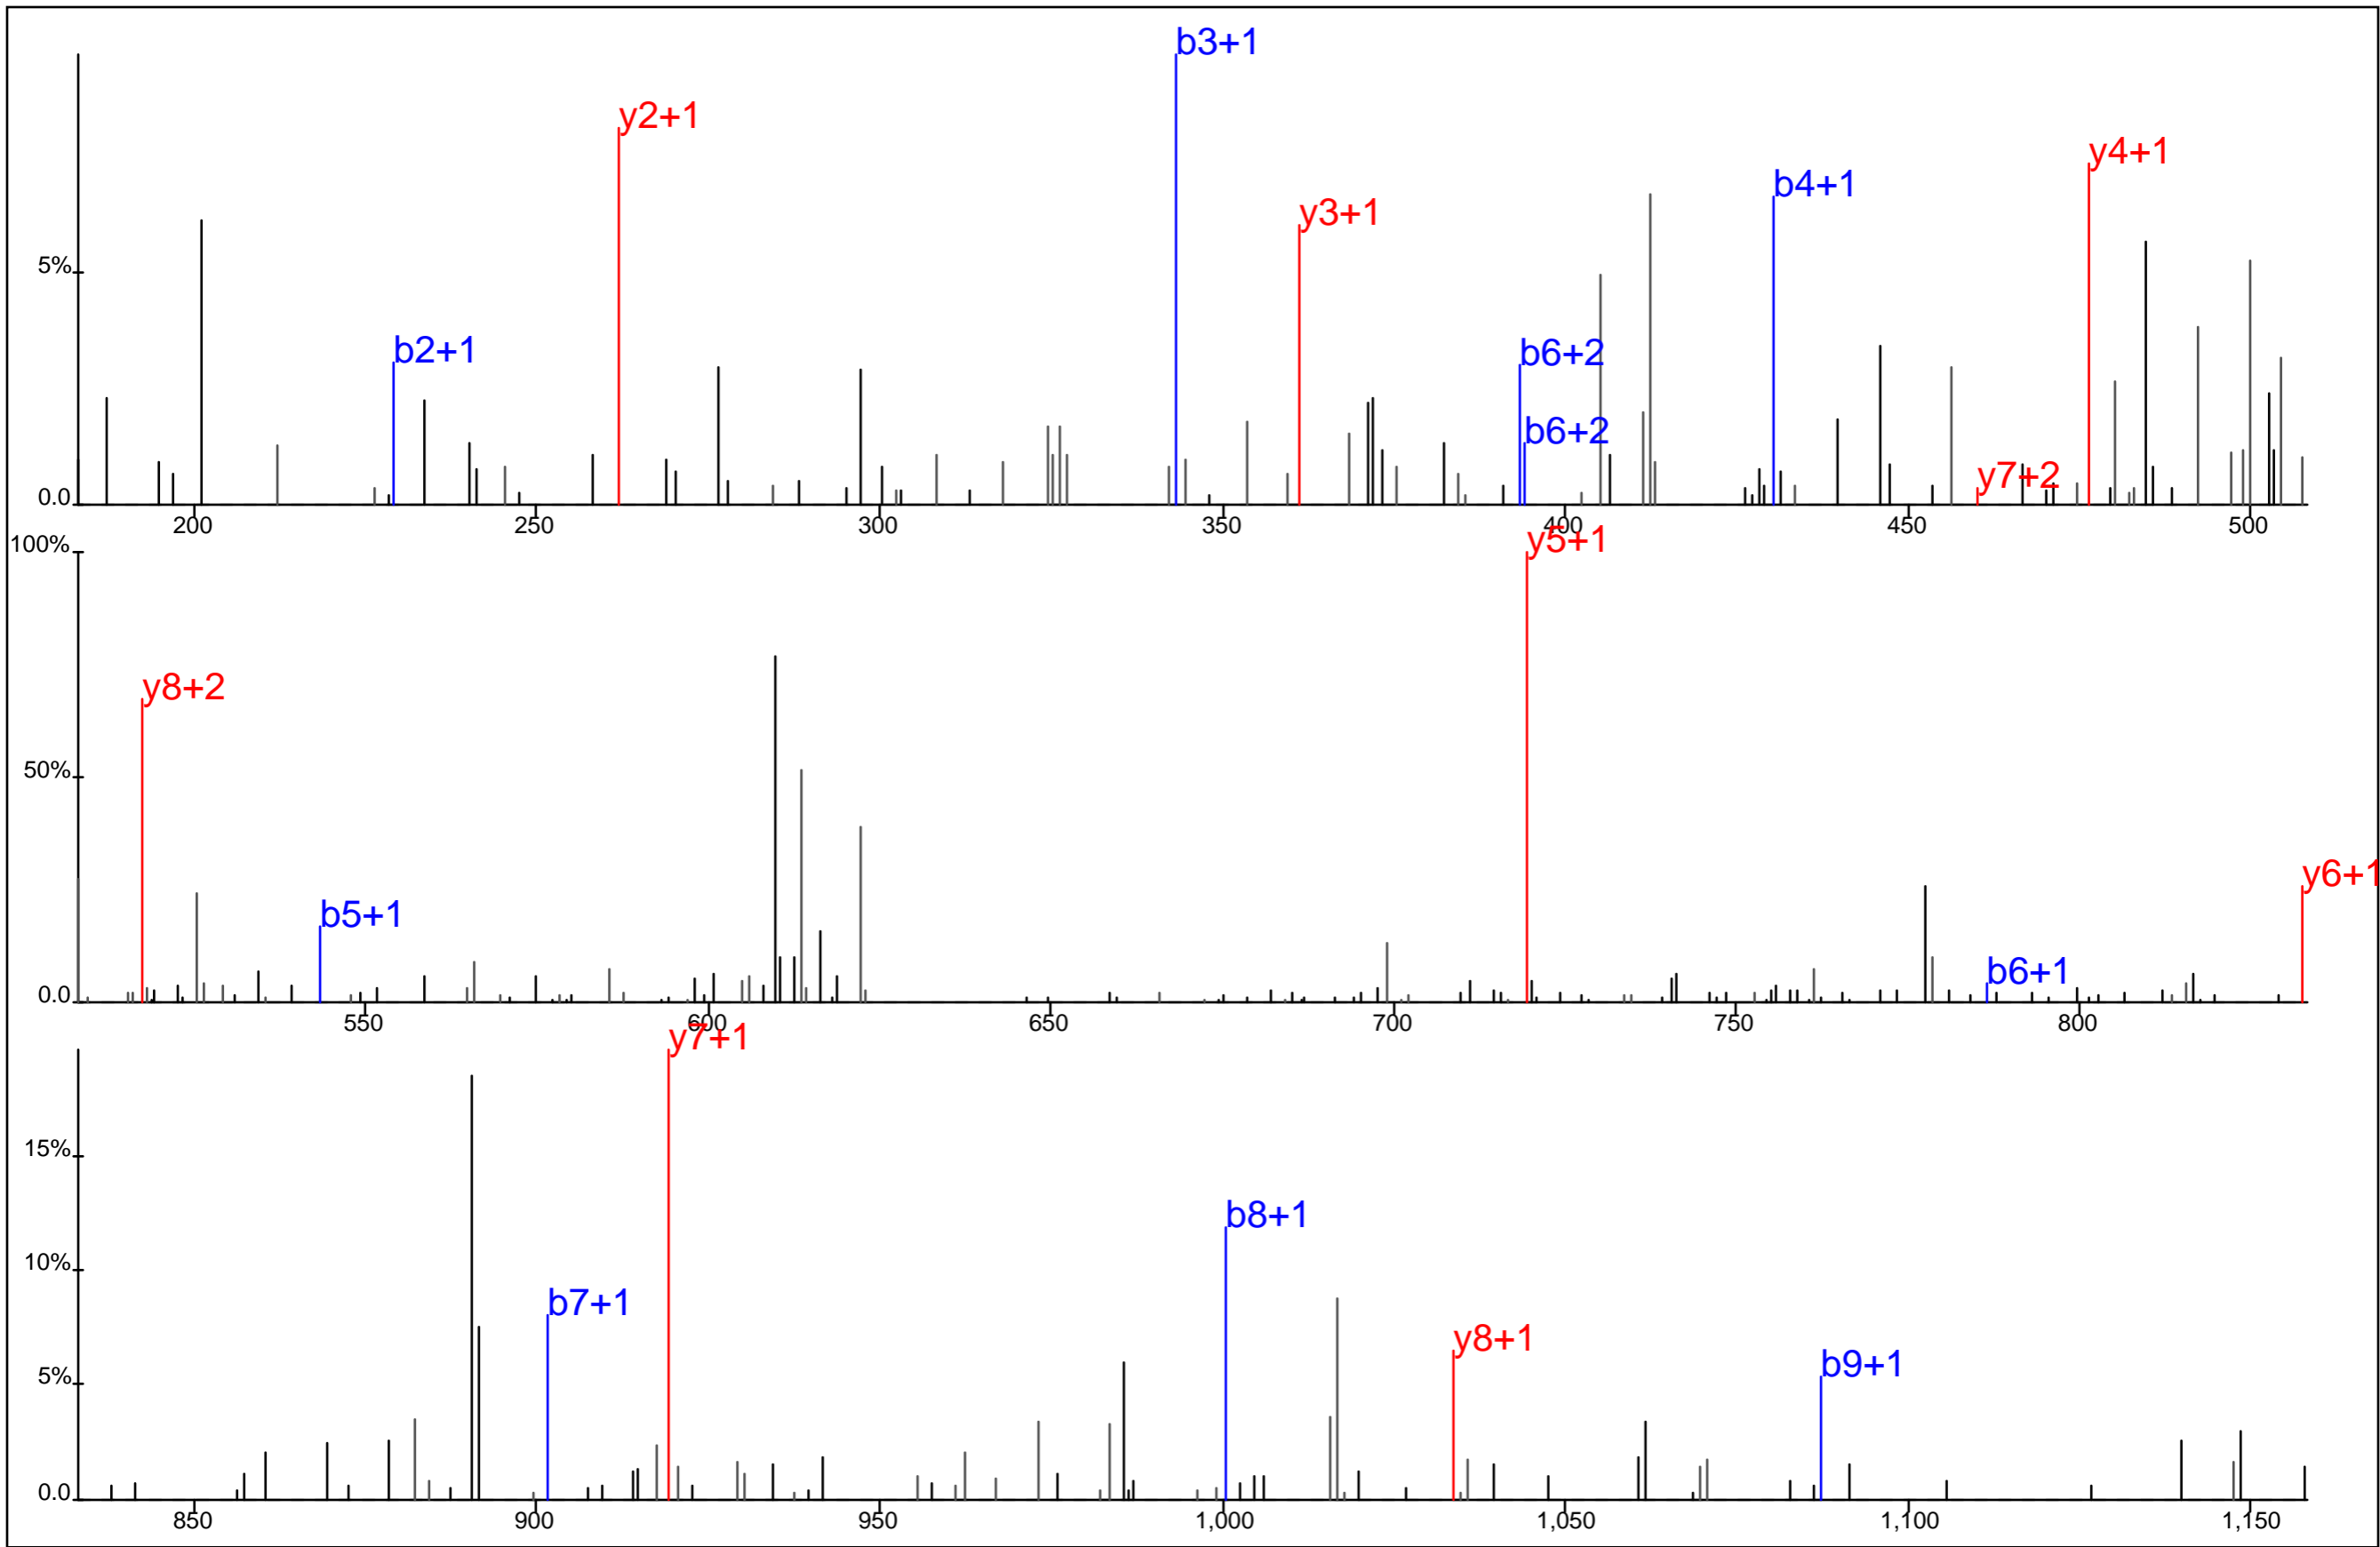

■ ■ ■ ■ ■ ■ ■ ■  
 D I N S L Y\* D V S R  
■ ■ ■ ■ ■ ■ ■ ■

Protein Name: PLC gamma 2  
 gi Accession: 14043155  
 Precursor Mass: 631.2774+2  
 Delta Mass: 1.211 ppm  
 XCorr: 51.71

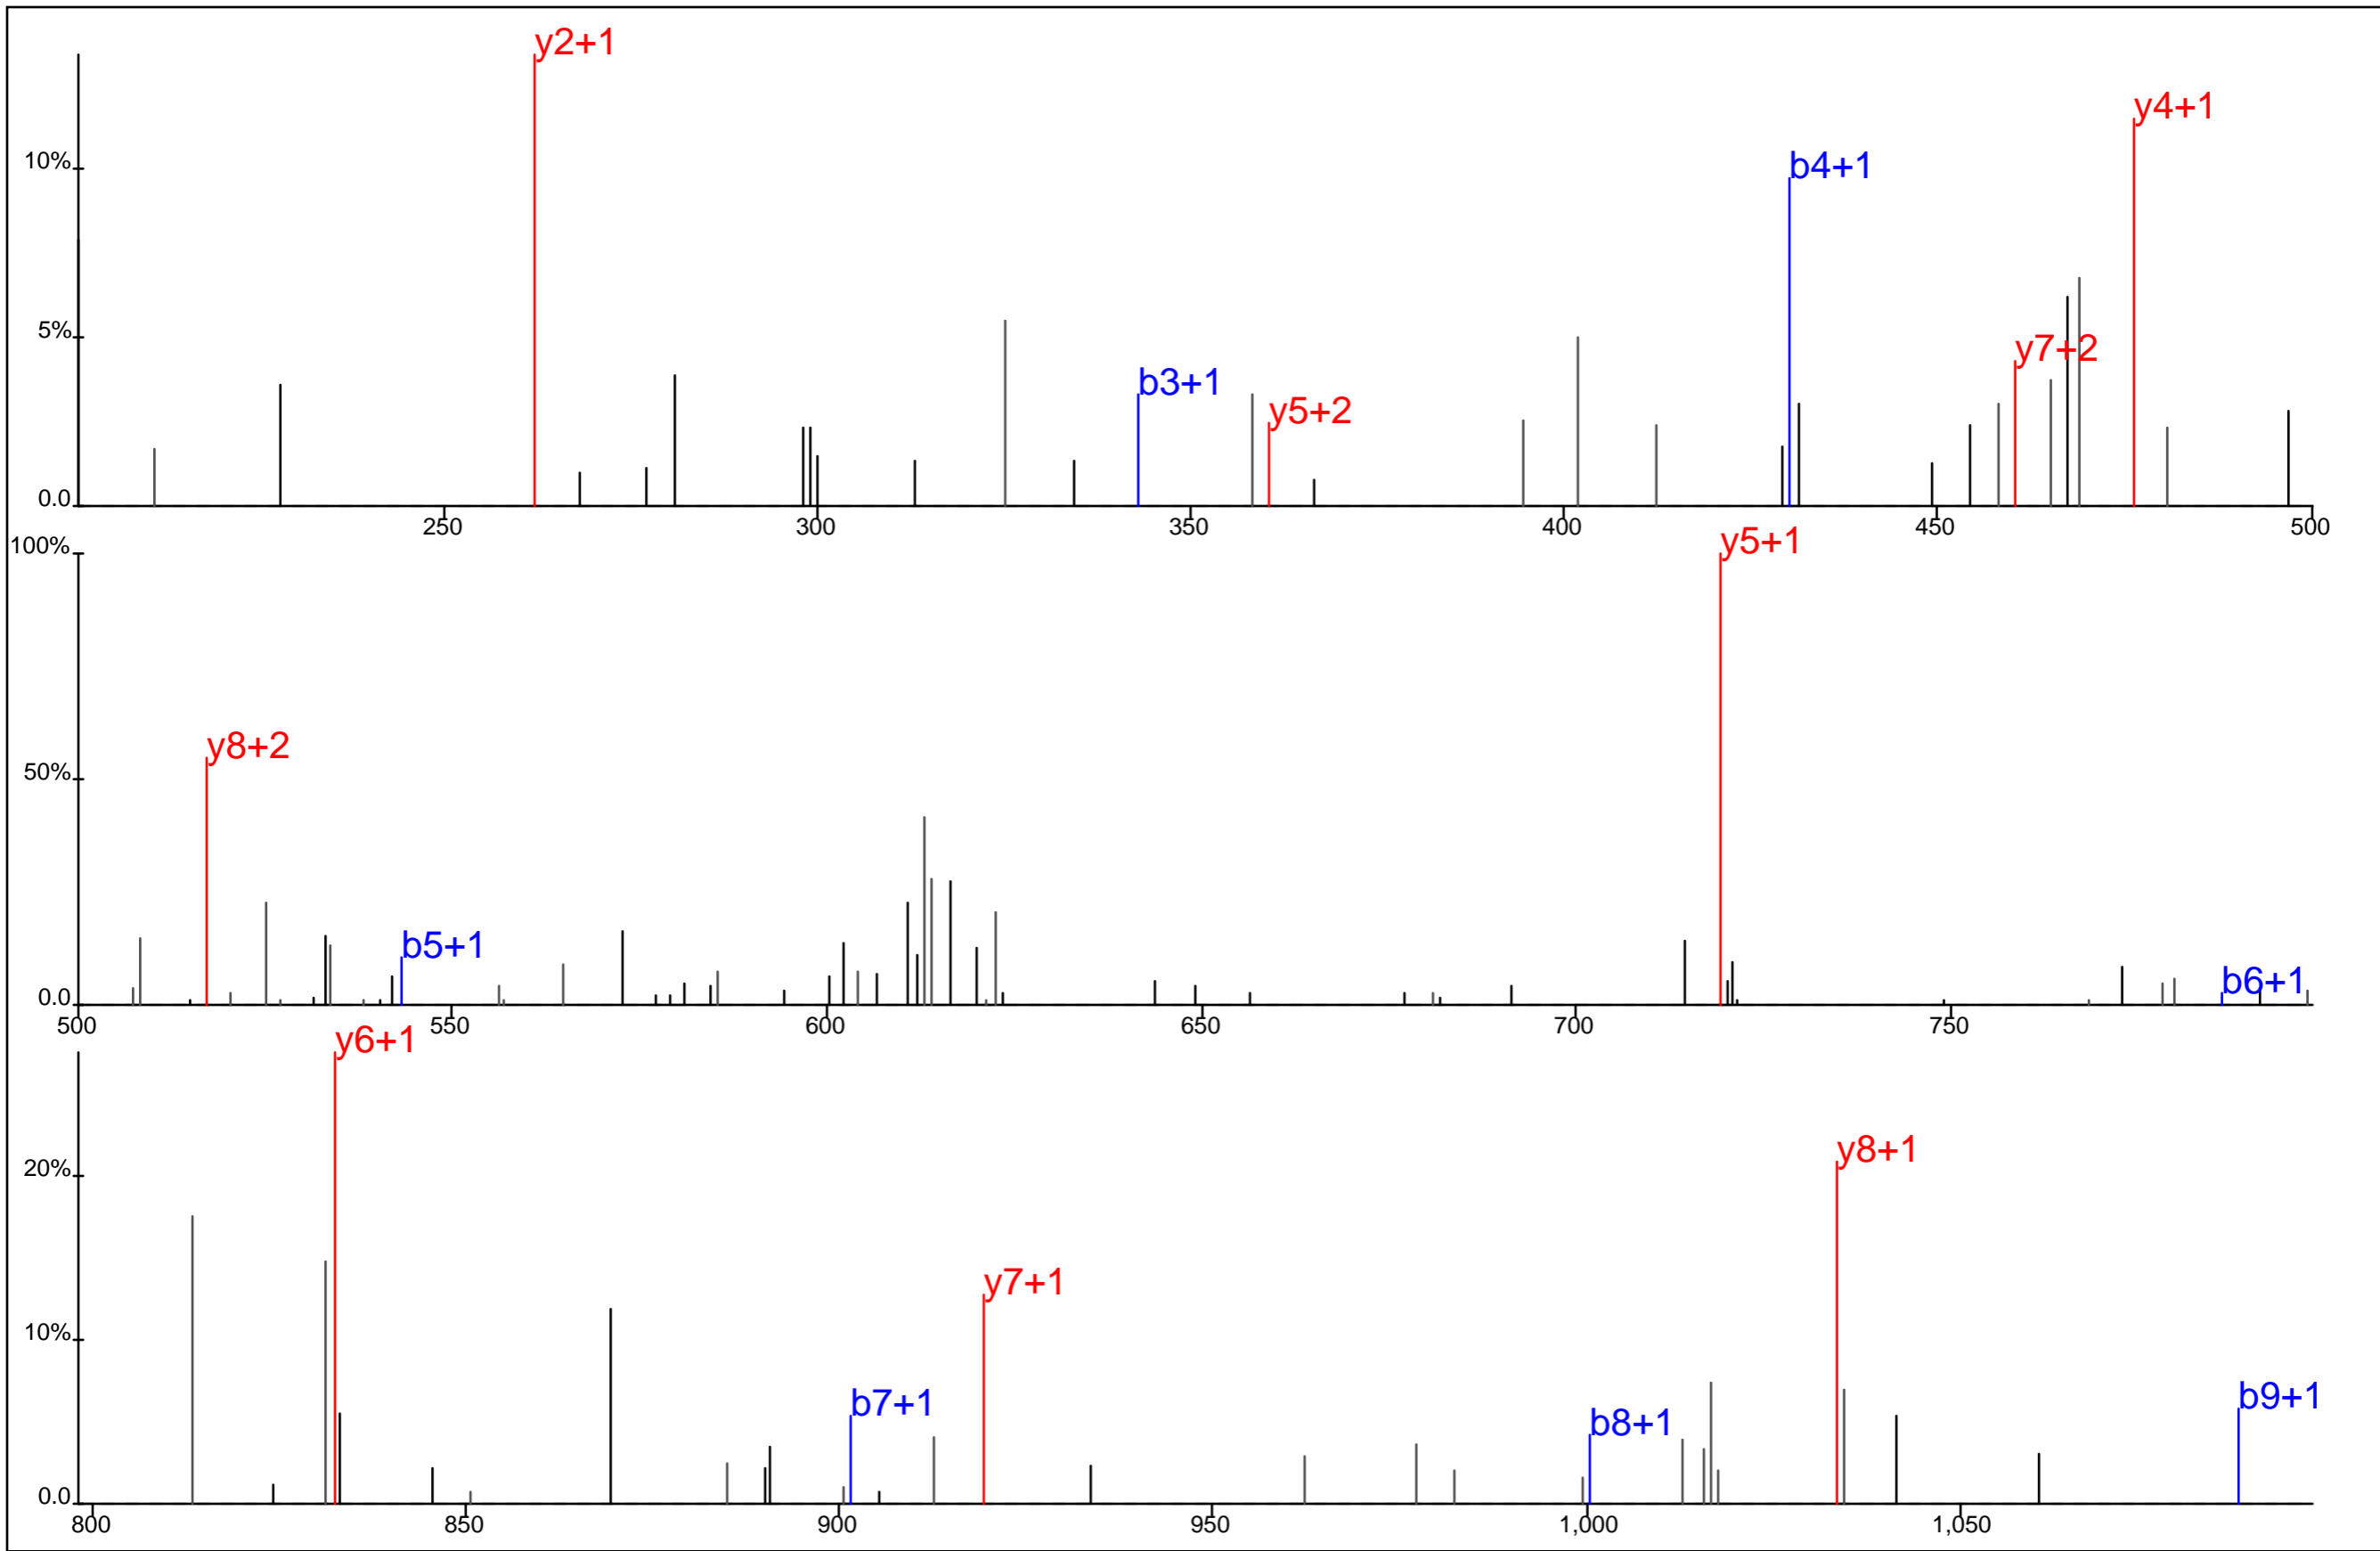

□ □ □ □ □ □ □ □  
 D I N S L Y\* D V S R  
□ □ □ □ □ □ □

Protein Name: PLC gamma 2  
 gi Accession: 14043155  
 Precursor Mass: 631.2792+2  
 Delta Mass: 4.120 ppm  
 XCorr: 45.77



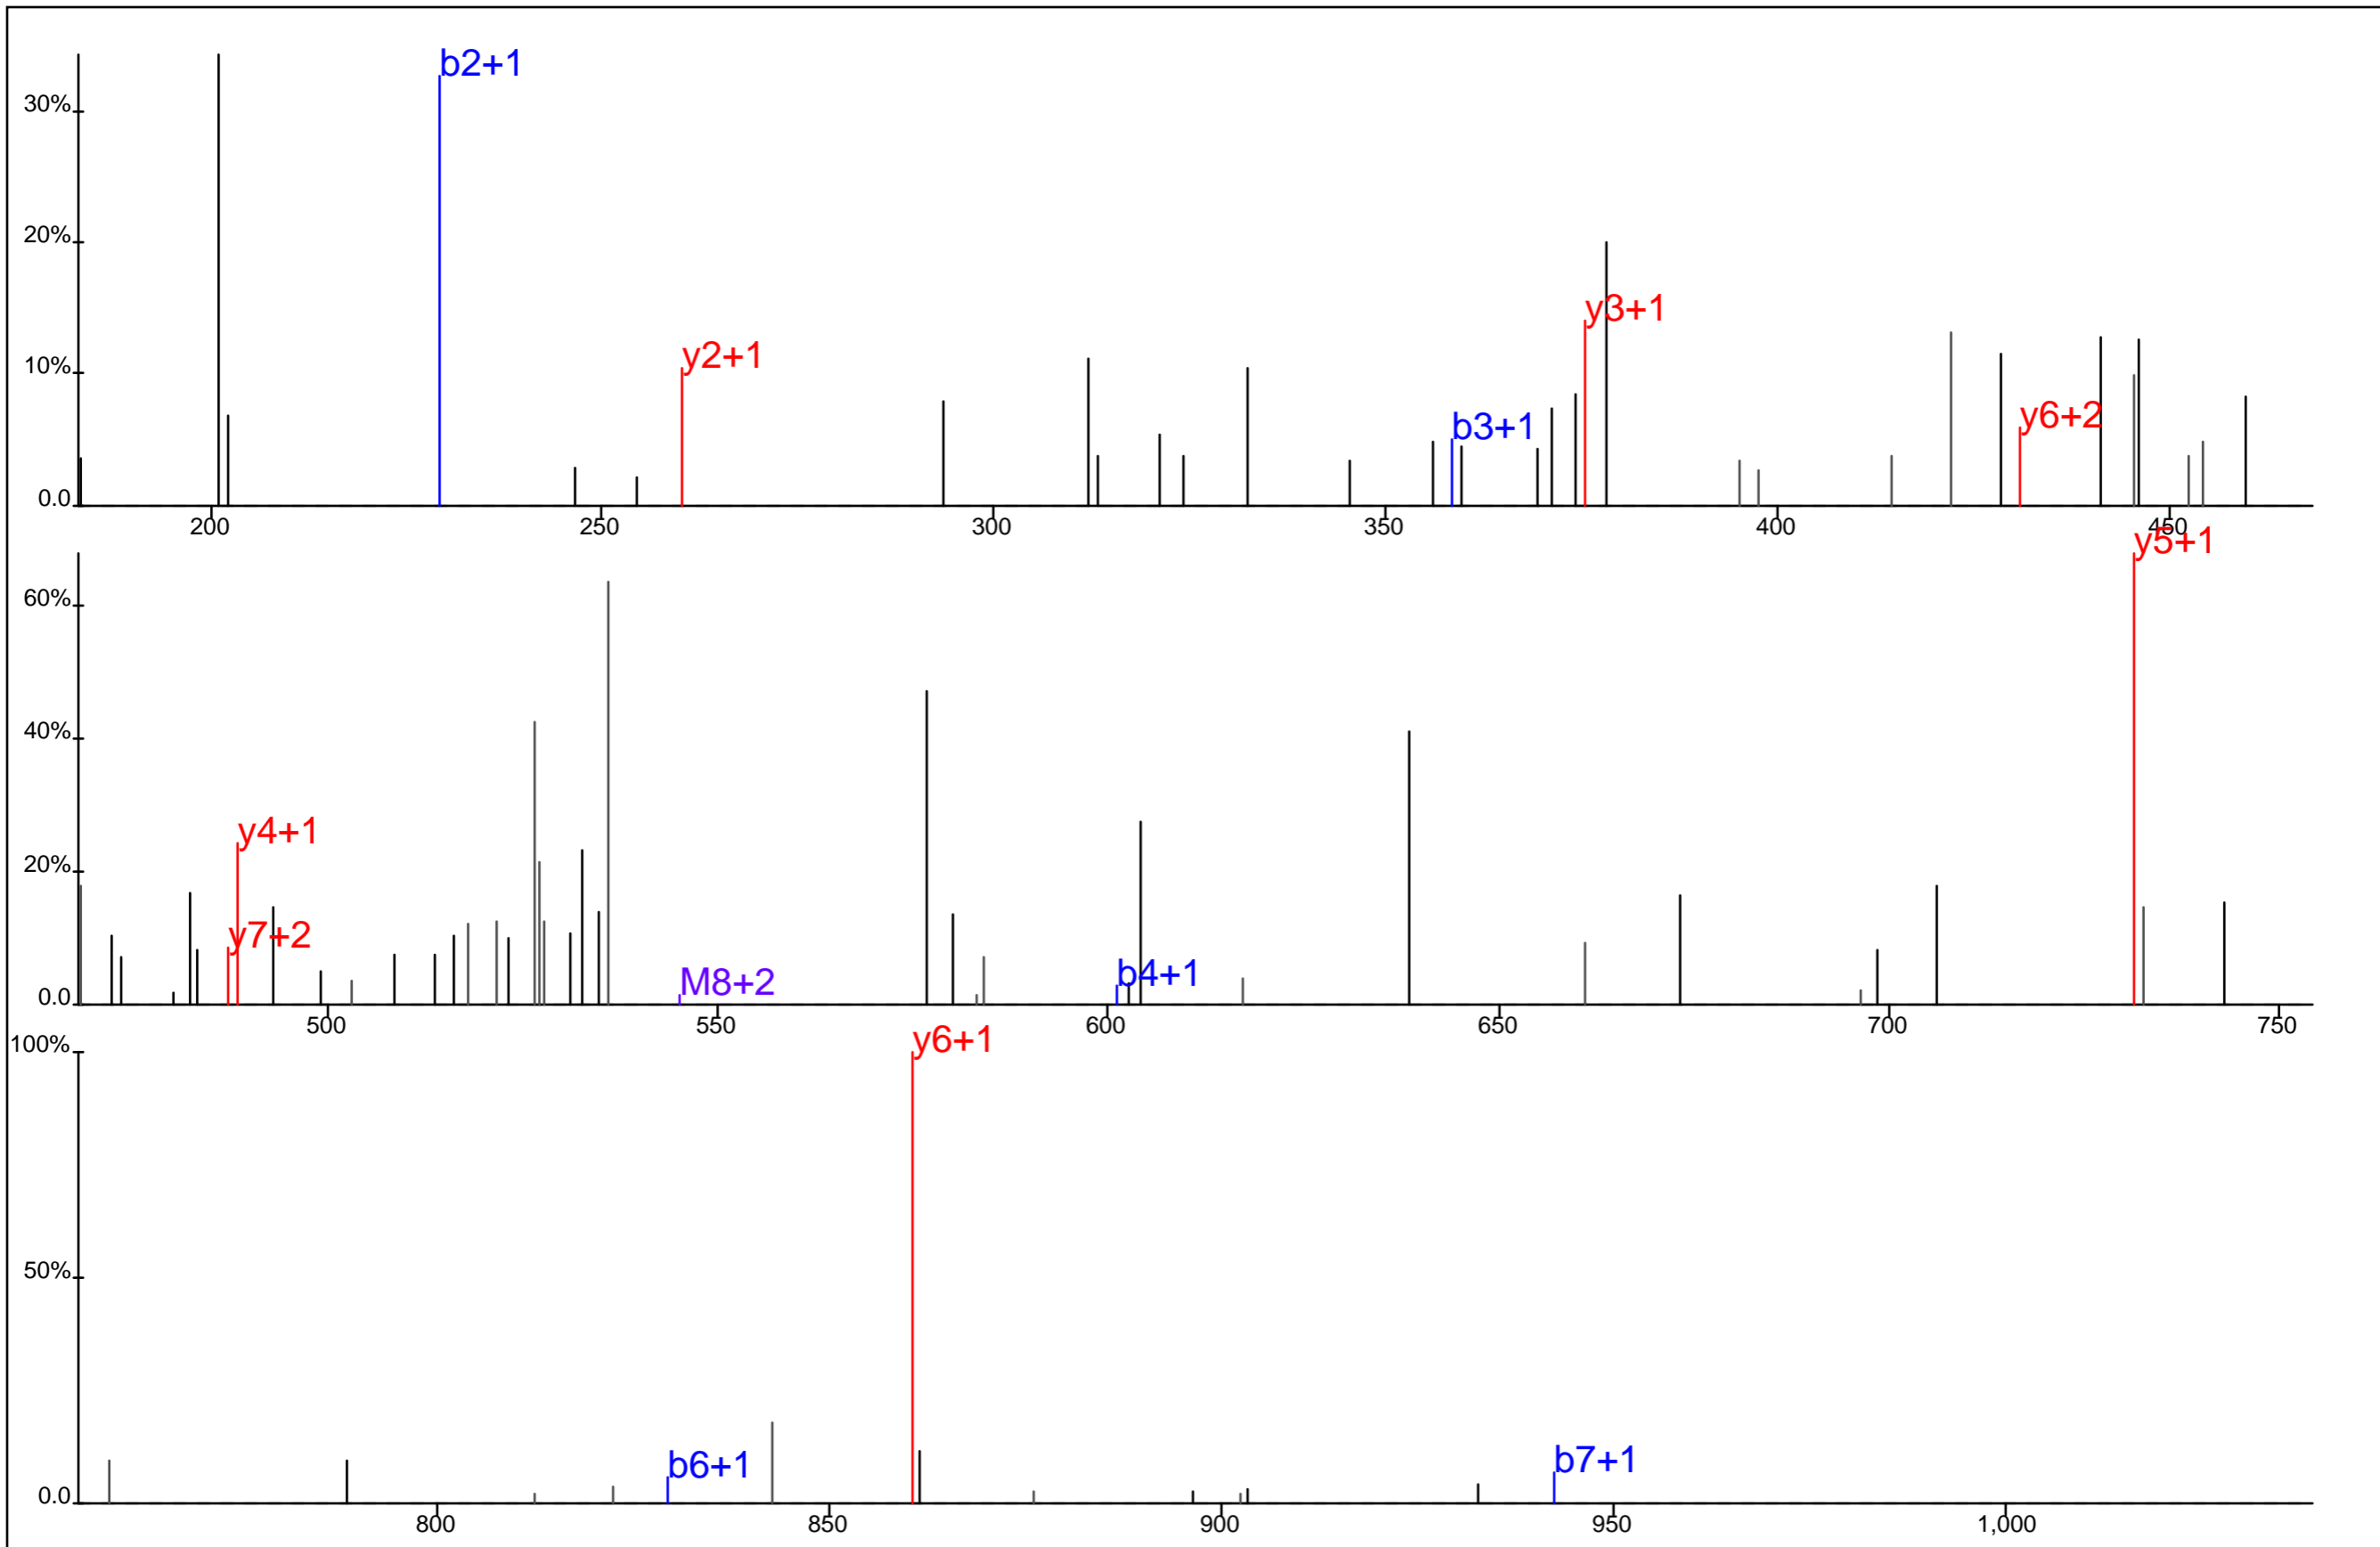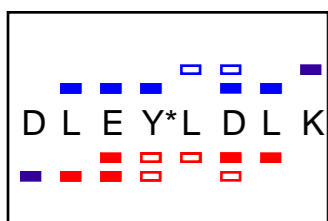

Protein Name: PLEKHA7  
 gi Accession: 27693901  
 Precursor Mass: 544.7493+2  
 Delta Mass: 0.255 ppm  
 XCorr: 16.44

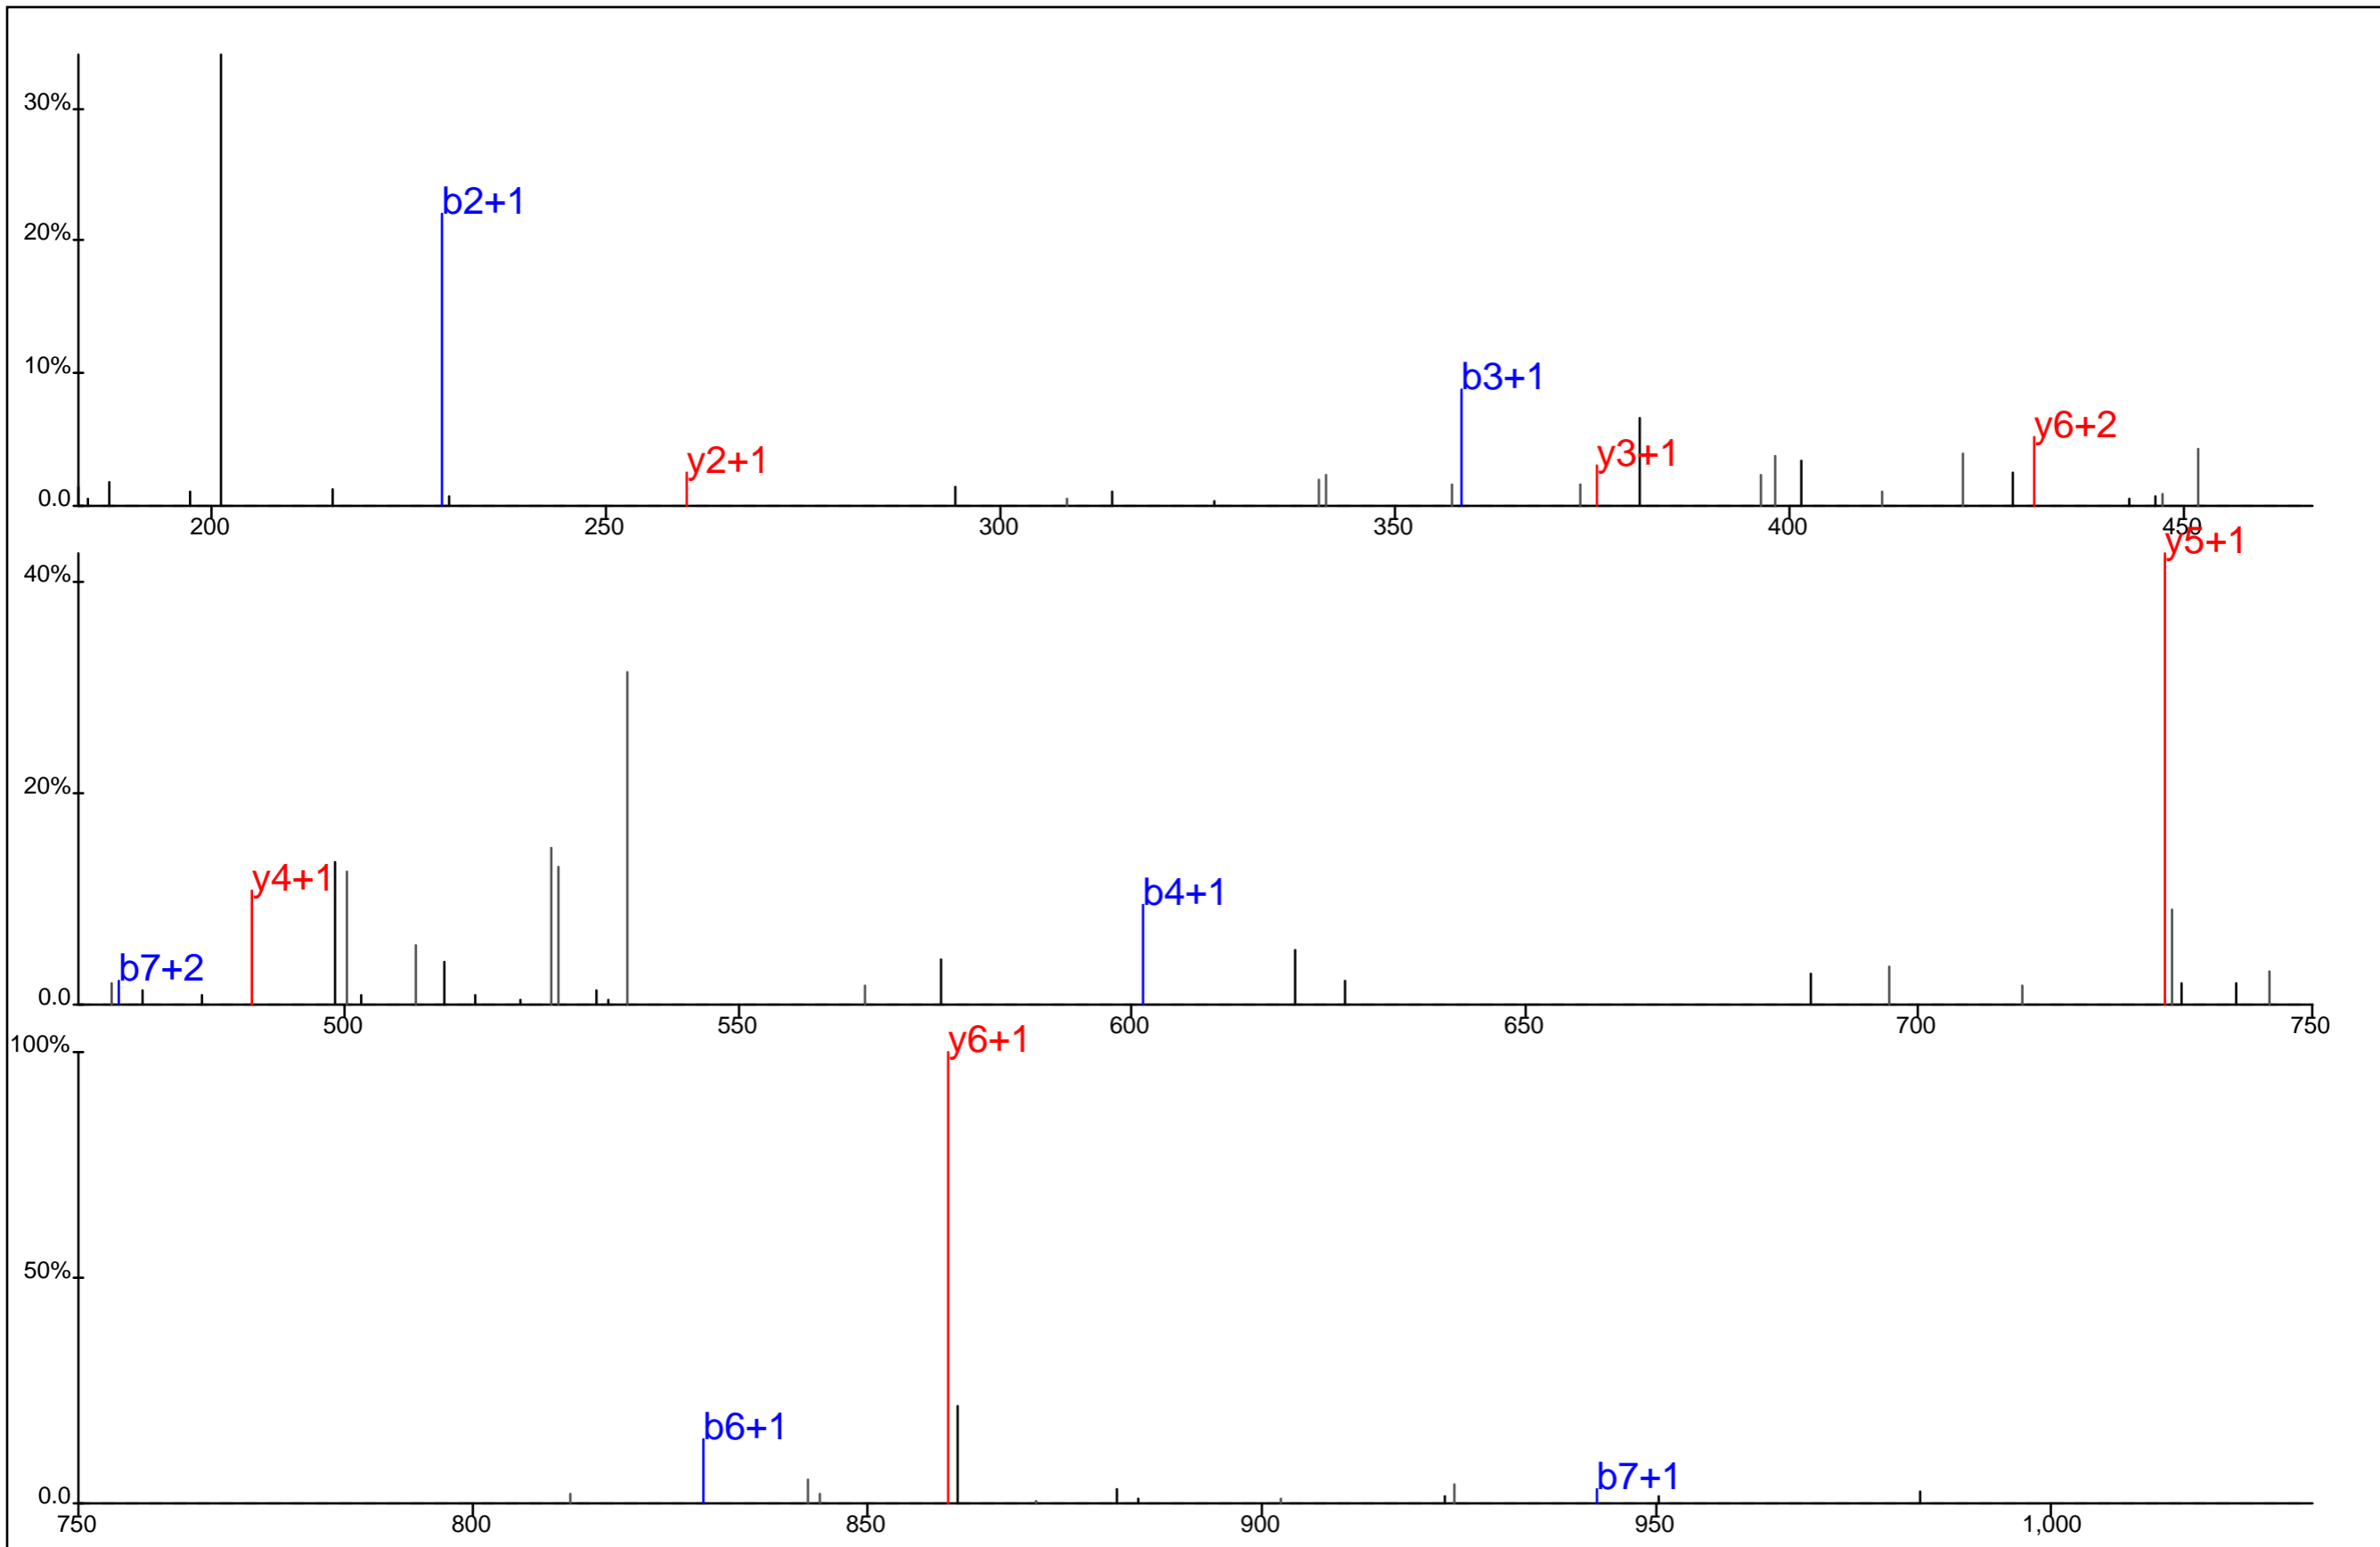

D L E Y\* L D L K

Protein Name: PLEKHA7  
 gi Accession: 27693901  
 Precursor Mass: 544.7501+2  
 Delta Mass: 1.606 ppm  
 XCorr: 27.93

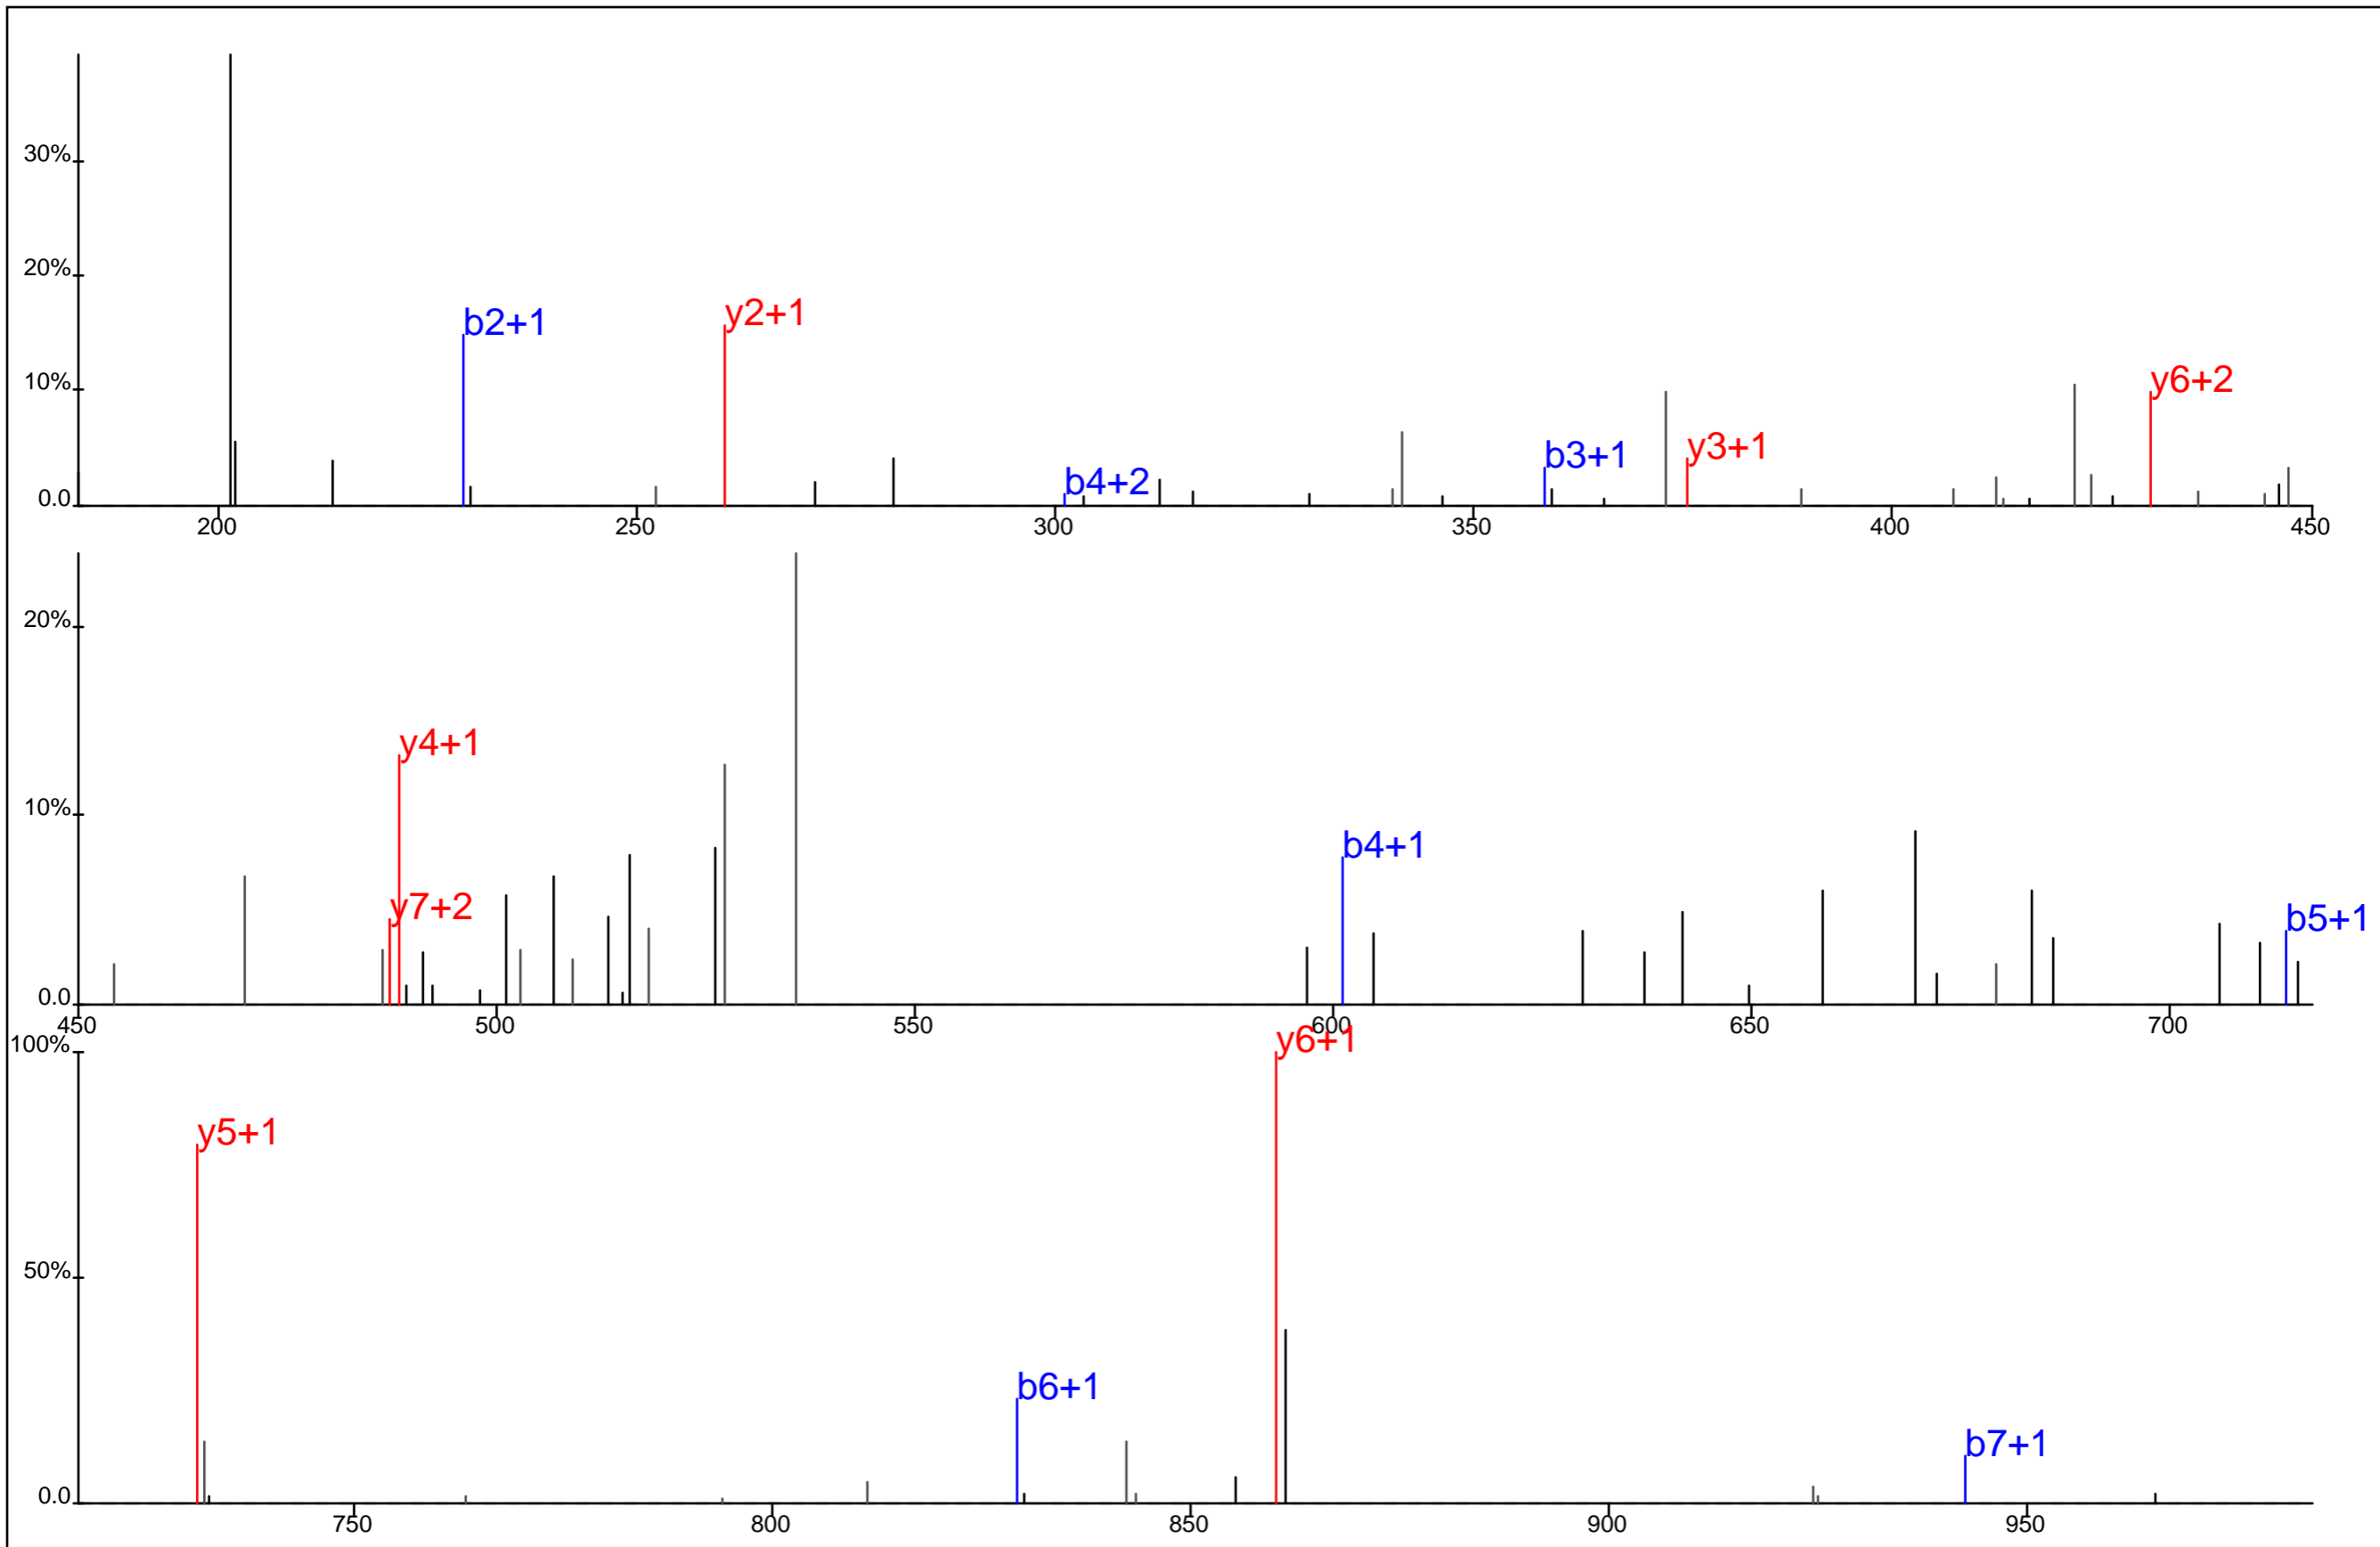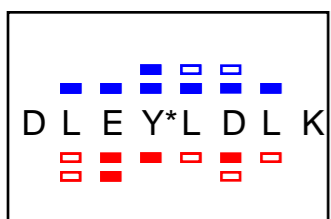

Protein Name: PLEKHA7  
 gi Accession: 27693901  
 Precursor Mass: 544.7486+2  
 Delta Mass: 1.086 ppm  
 XCorr: 28.84

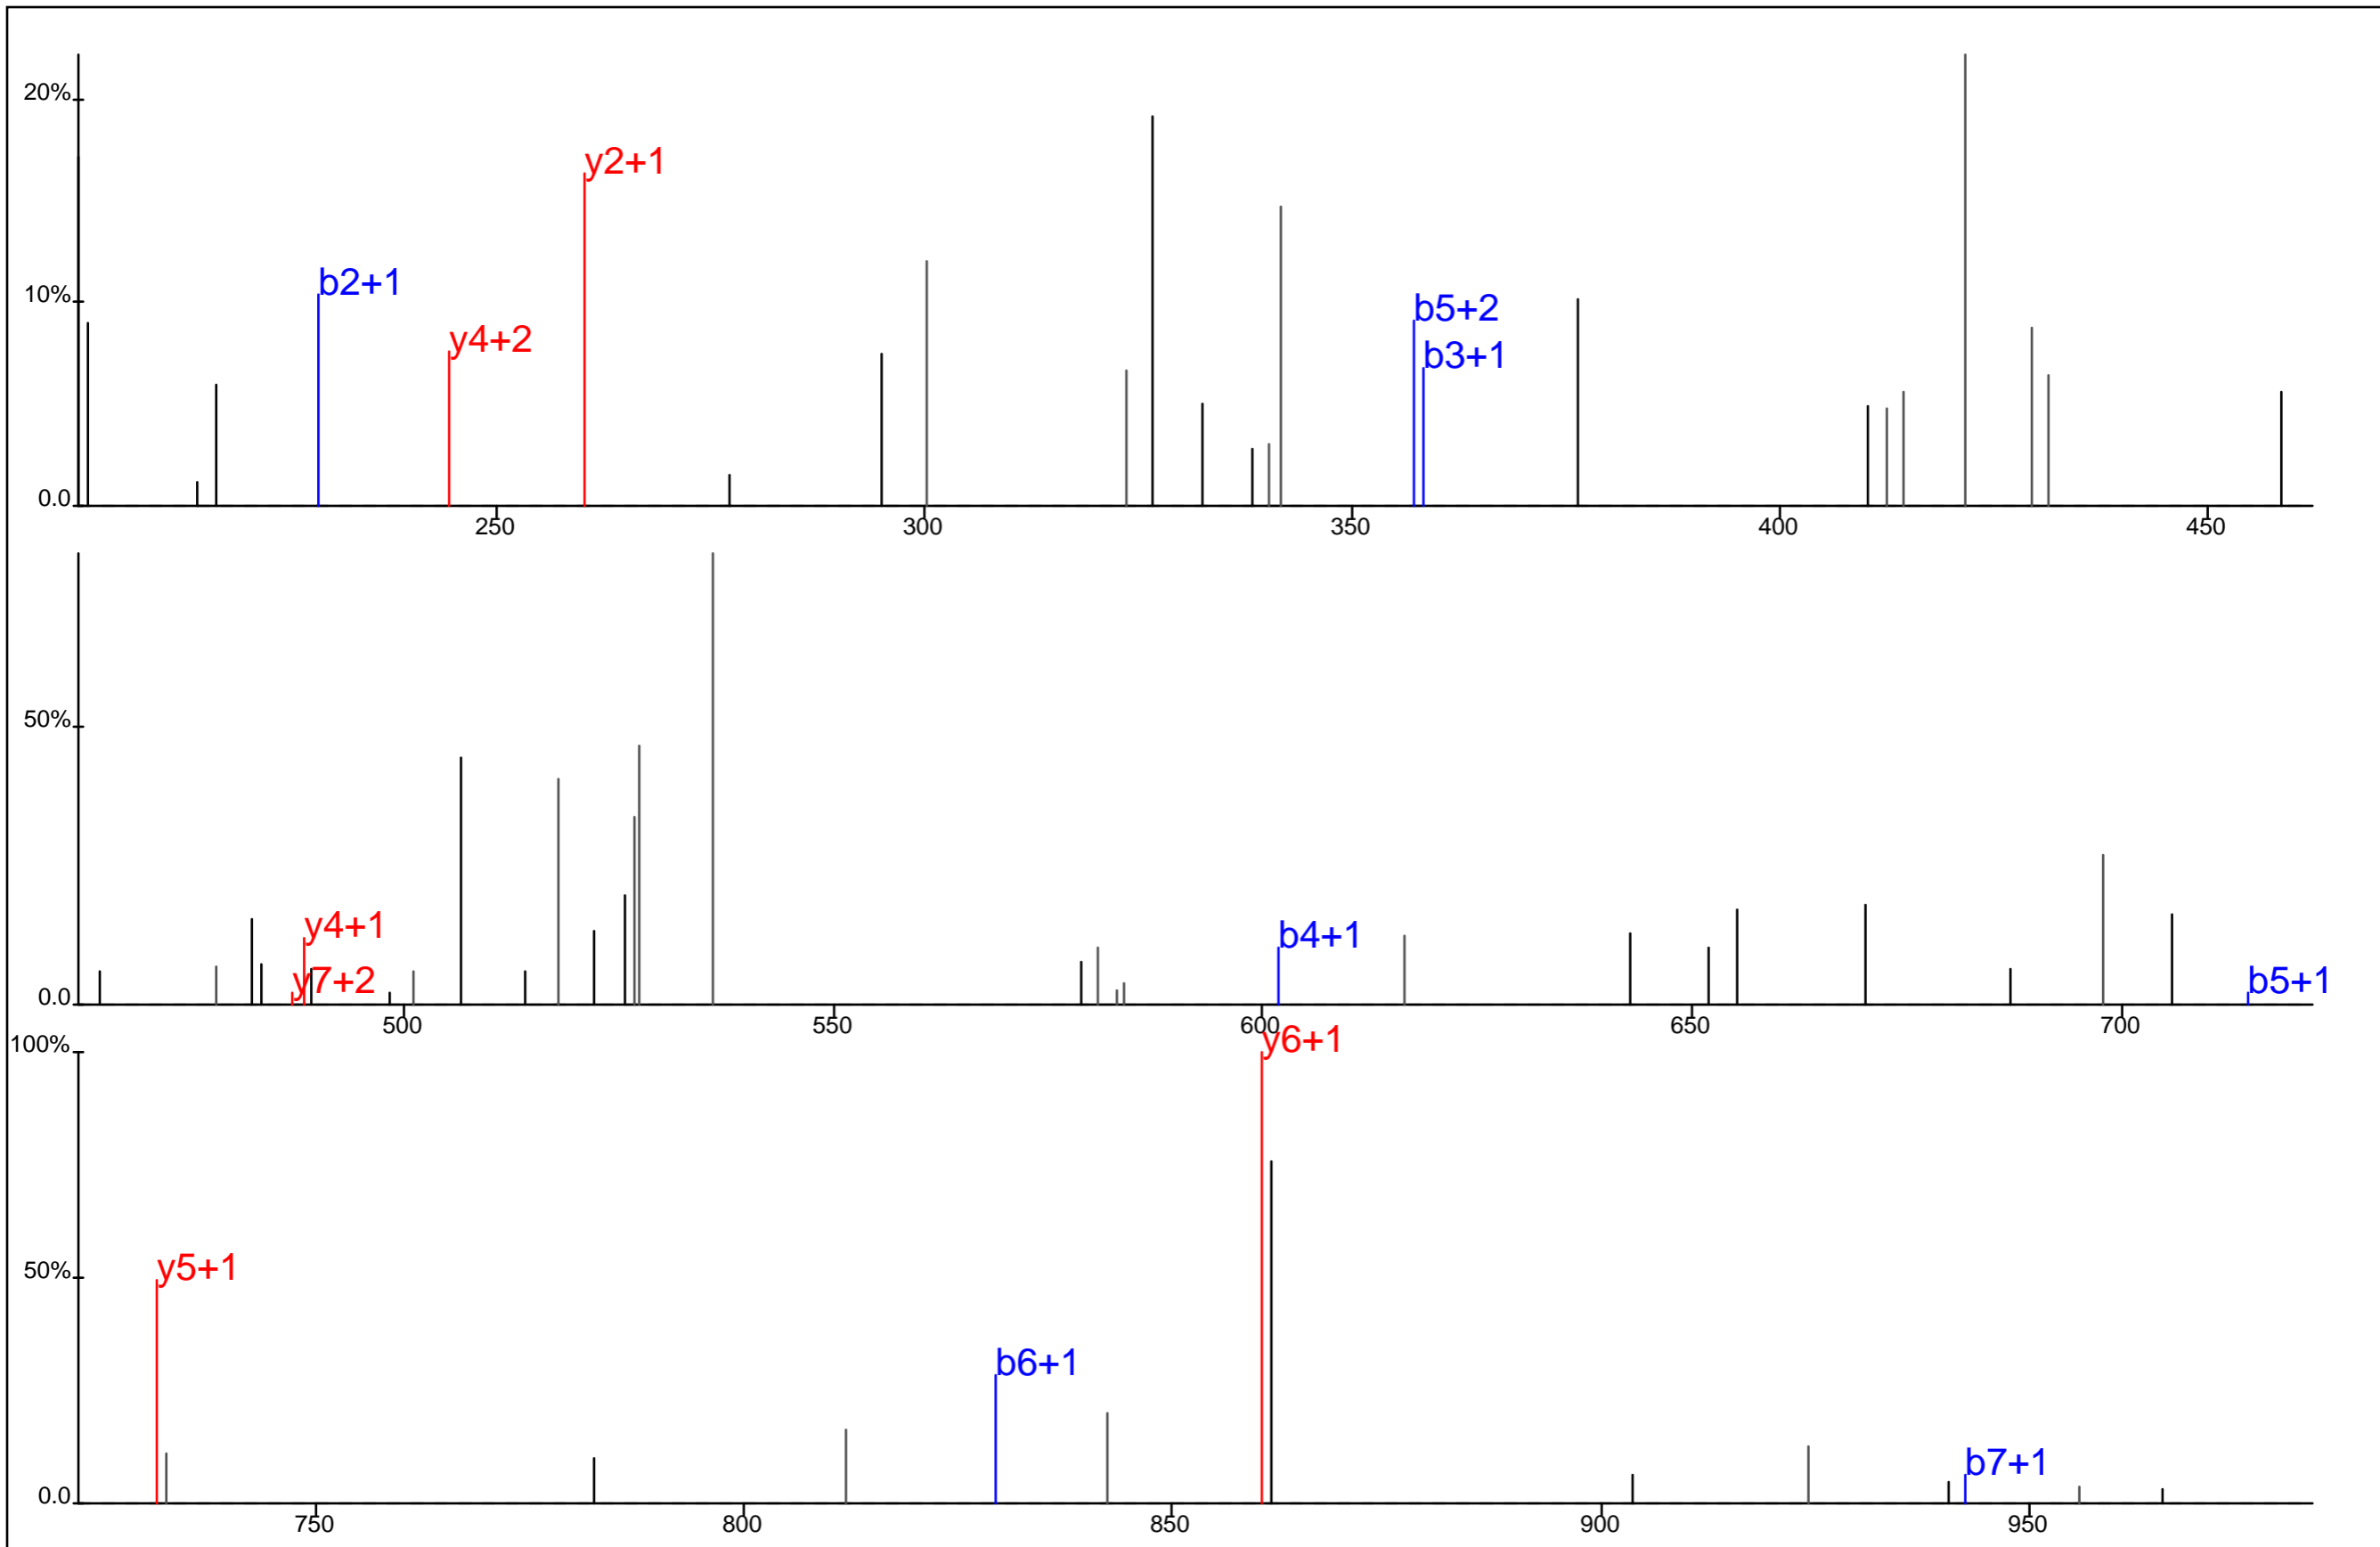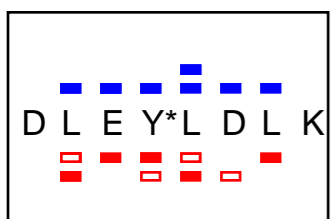

Protein Name: PLEKHA7  
 gi Accession: 27693901  
 Precursor Mass: 544.7512+2  
 Delta Mass: 3.618 ppm  
 XCorr: 23.02



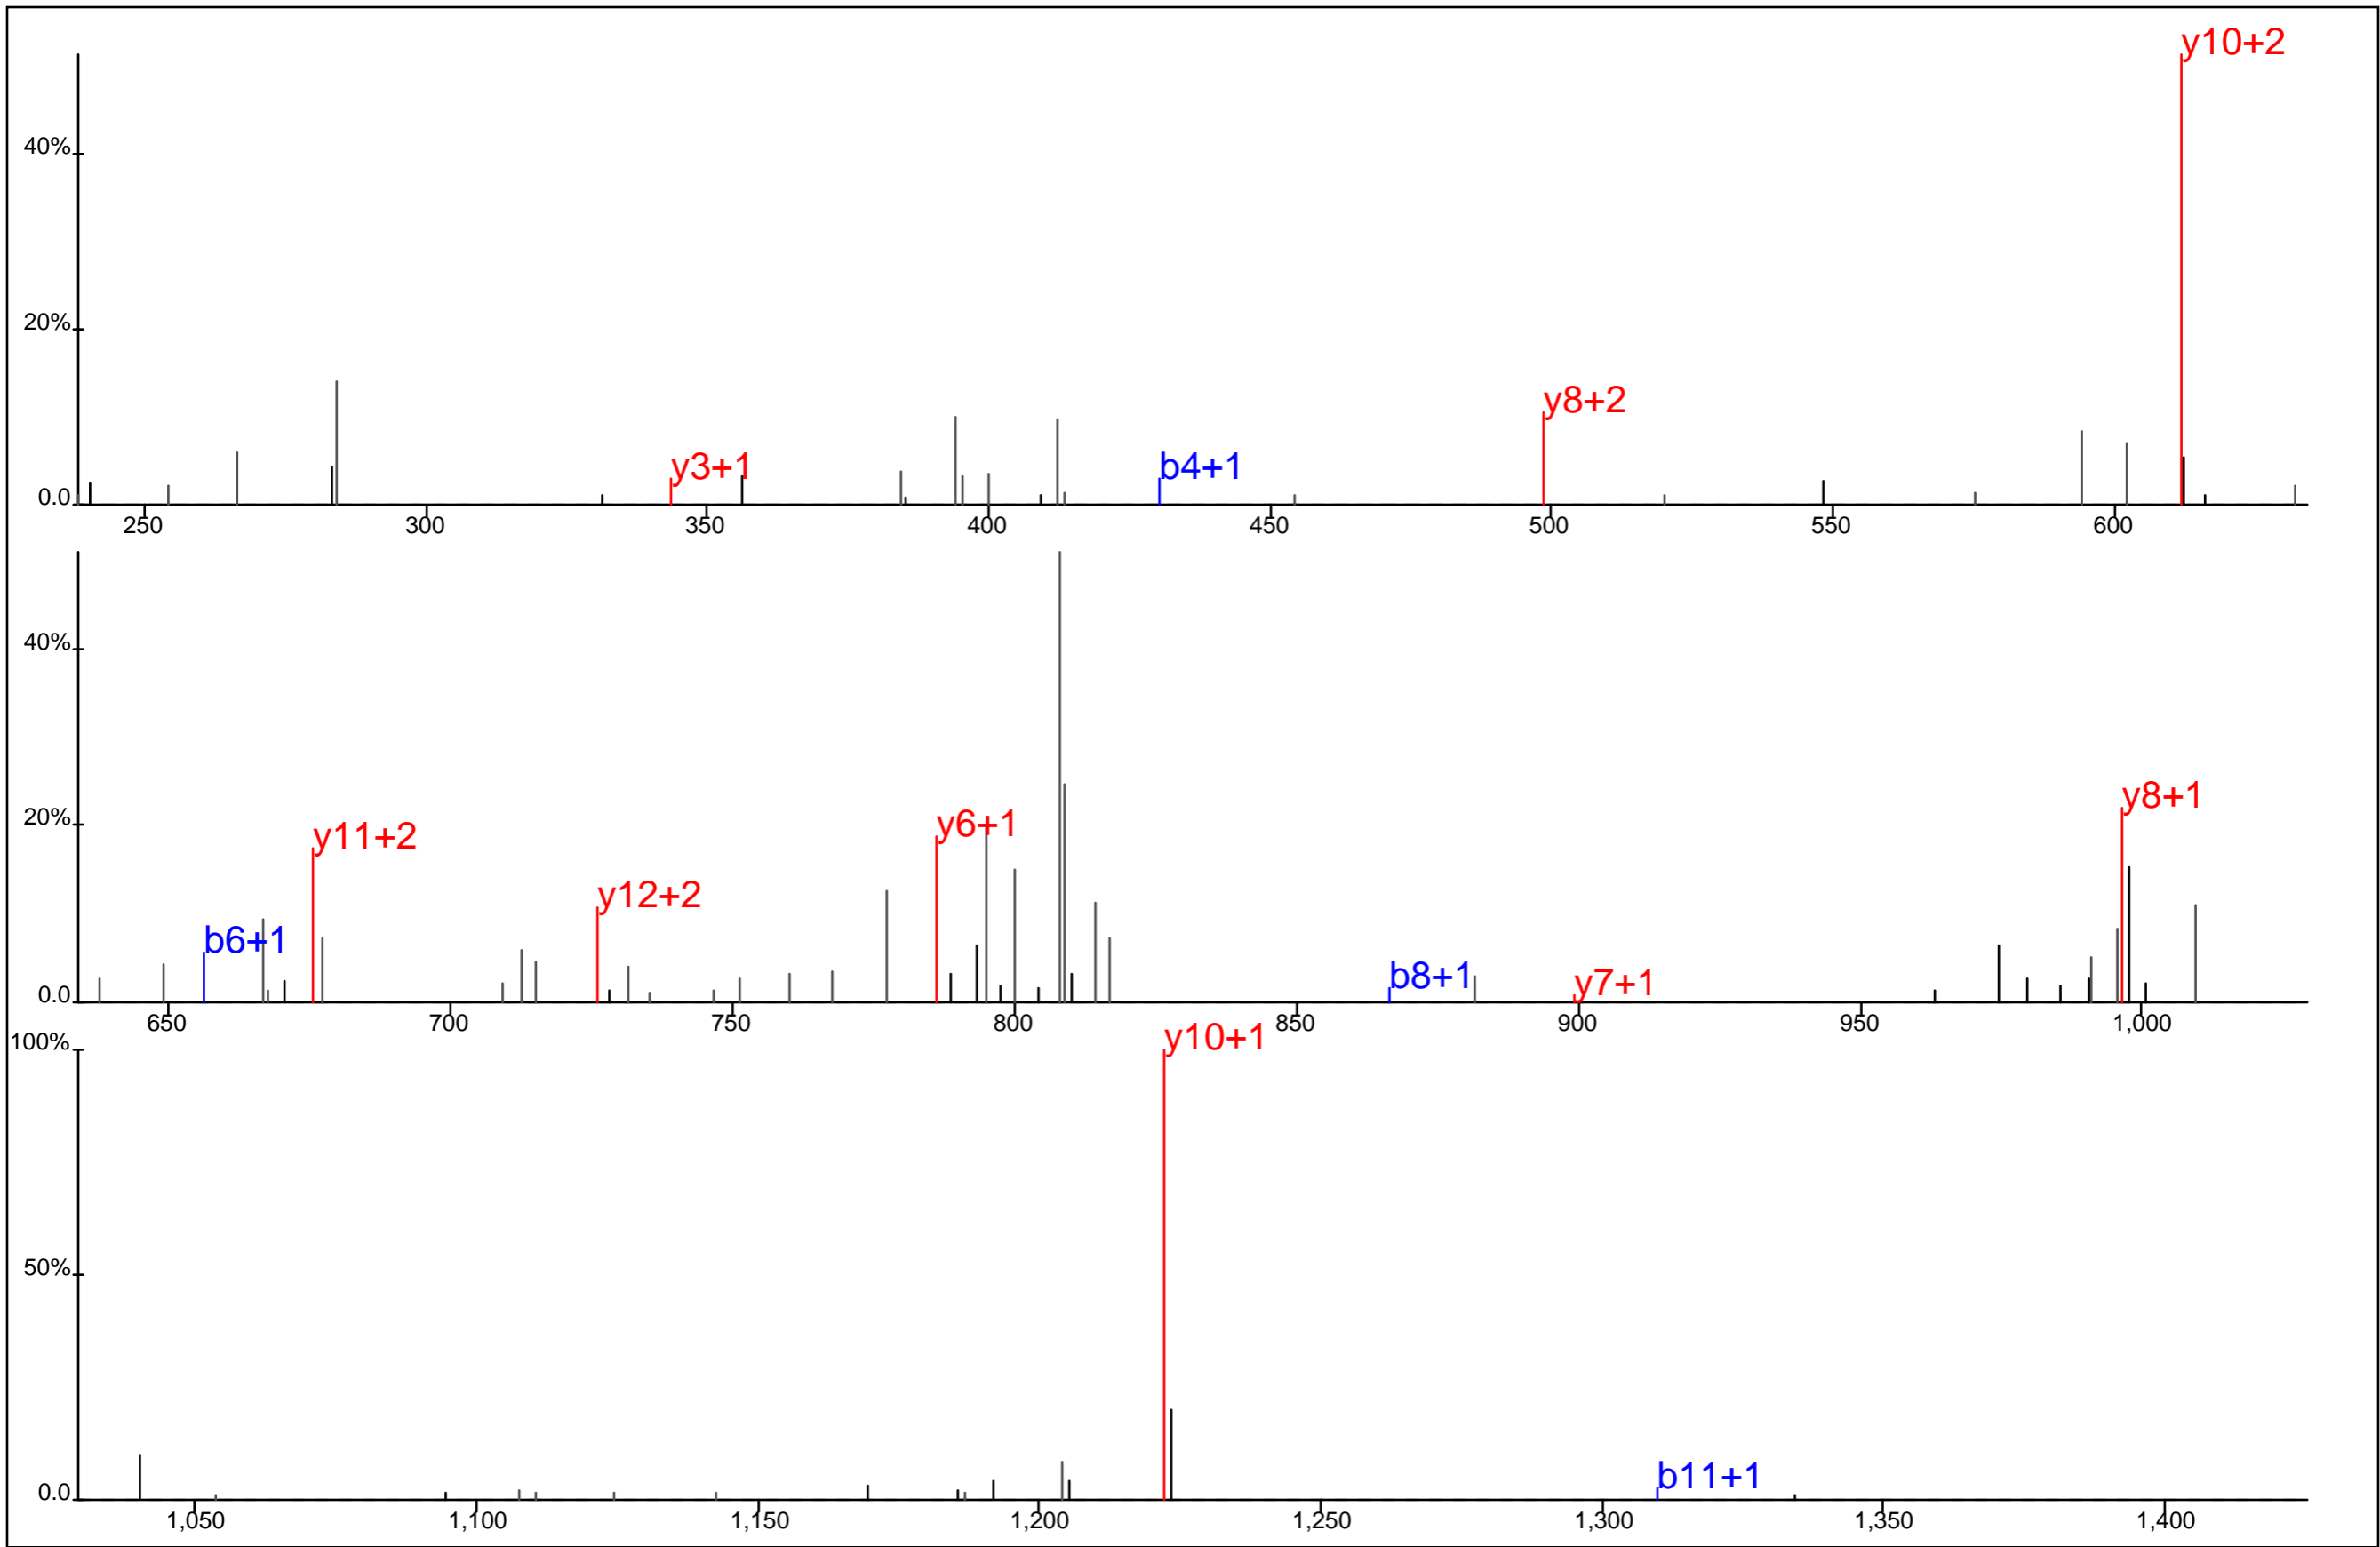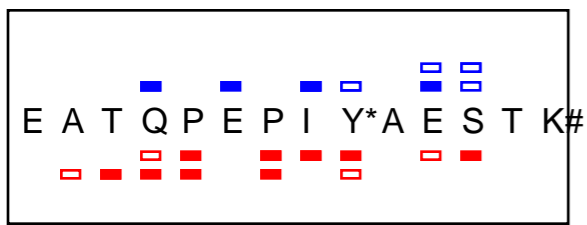

Protein Name: Pragmin  
 gi Accession: 157909822  
 Precursor Mass: 826.3696+2  
 Delta Mass: 1.339 ppm  
 XCorr: 20.39

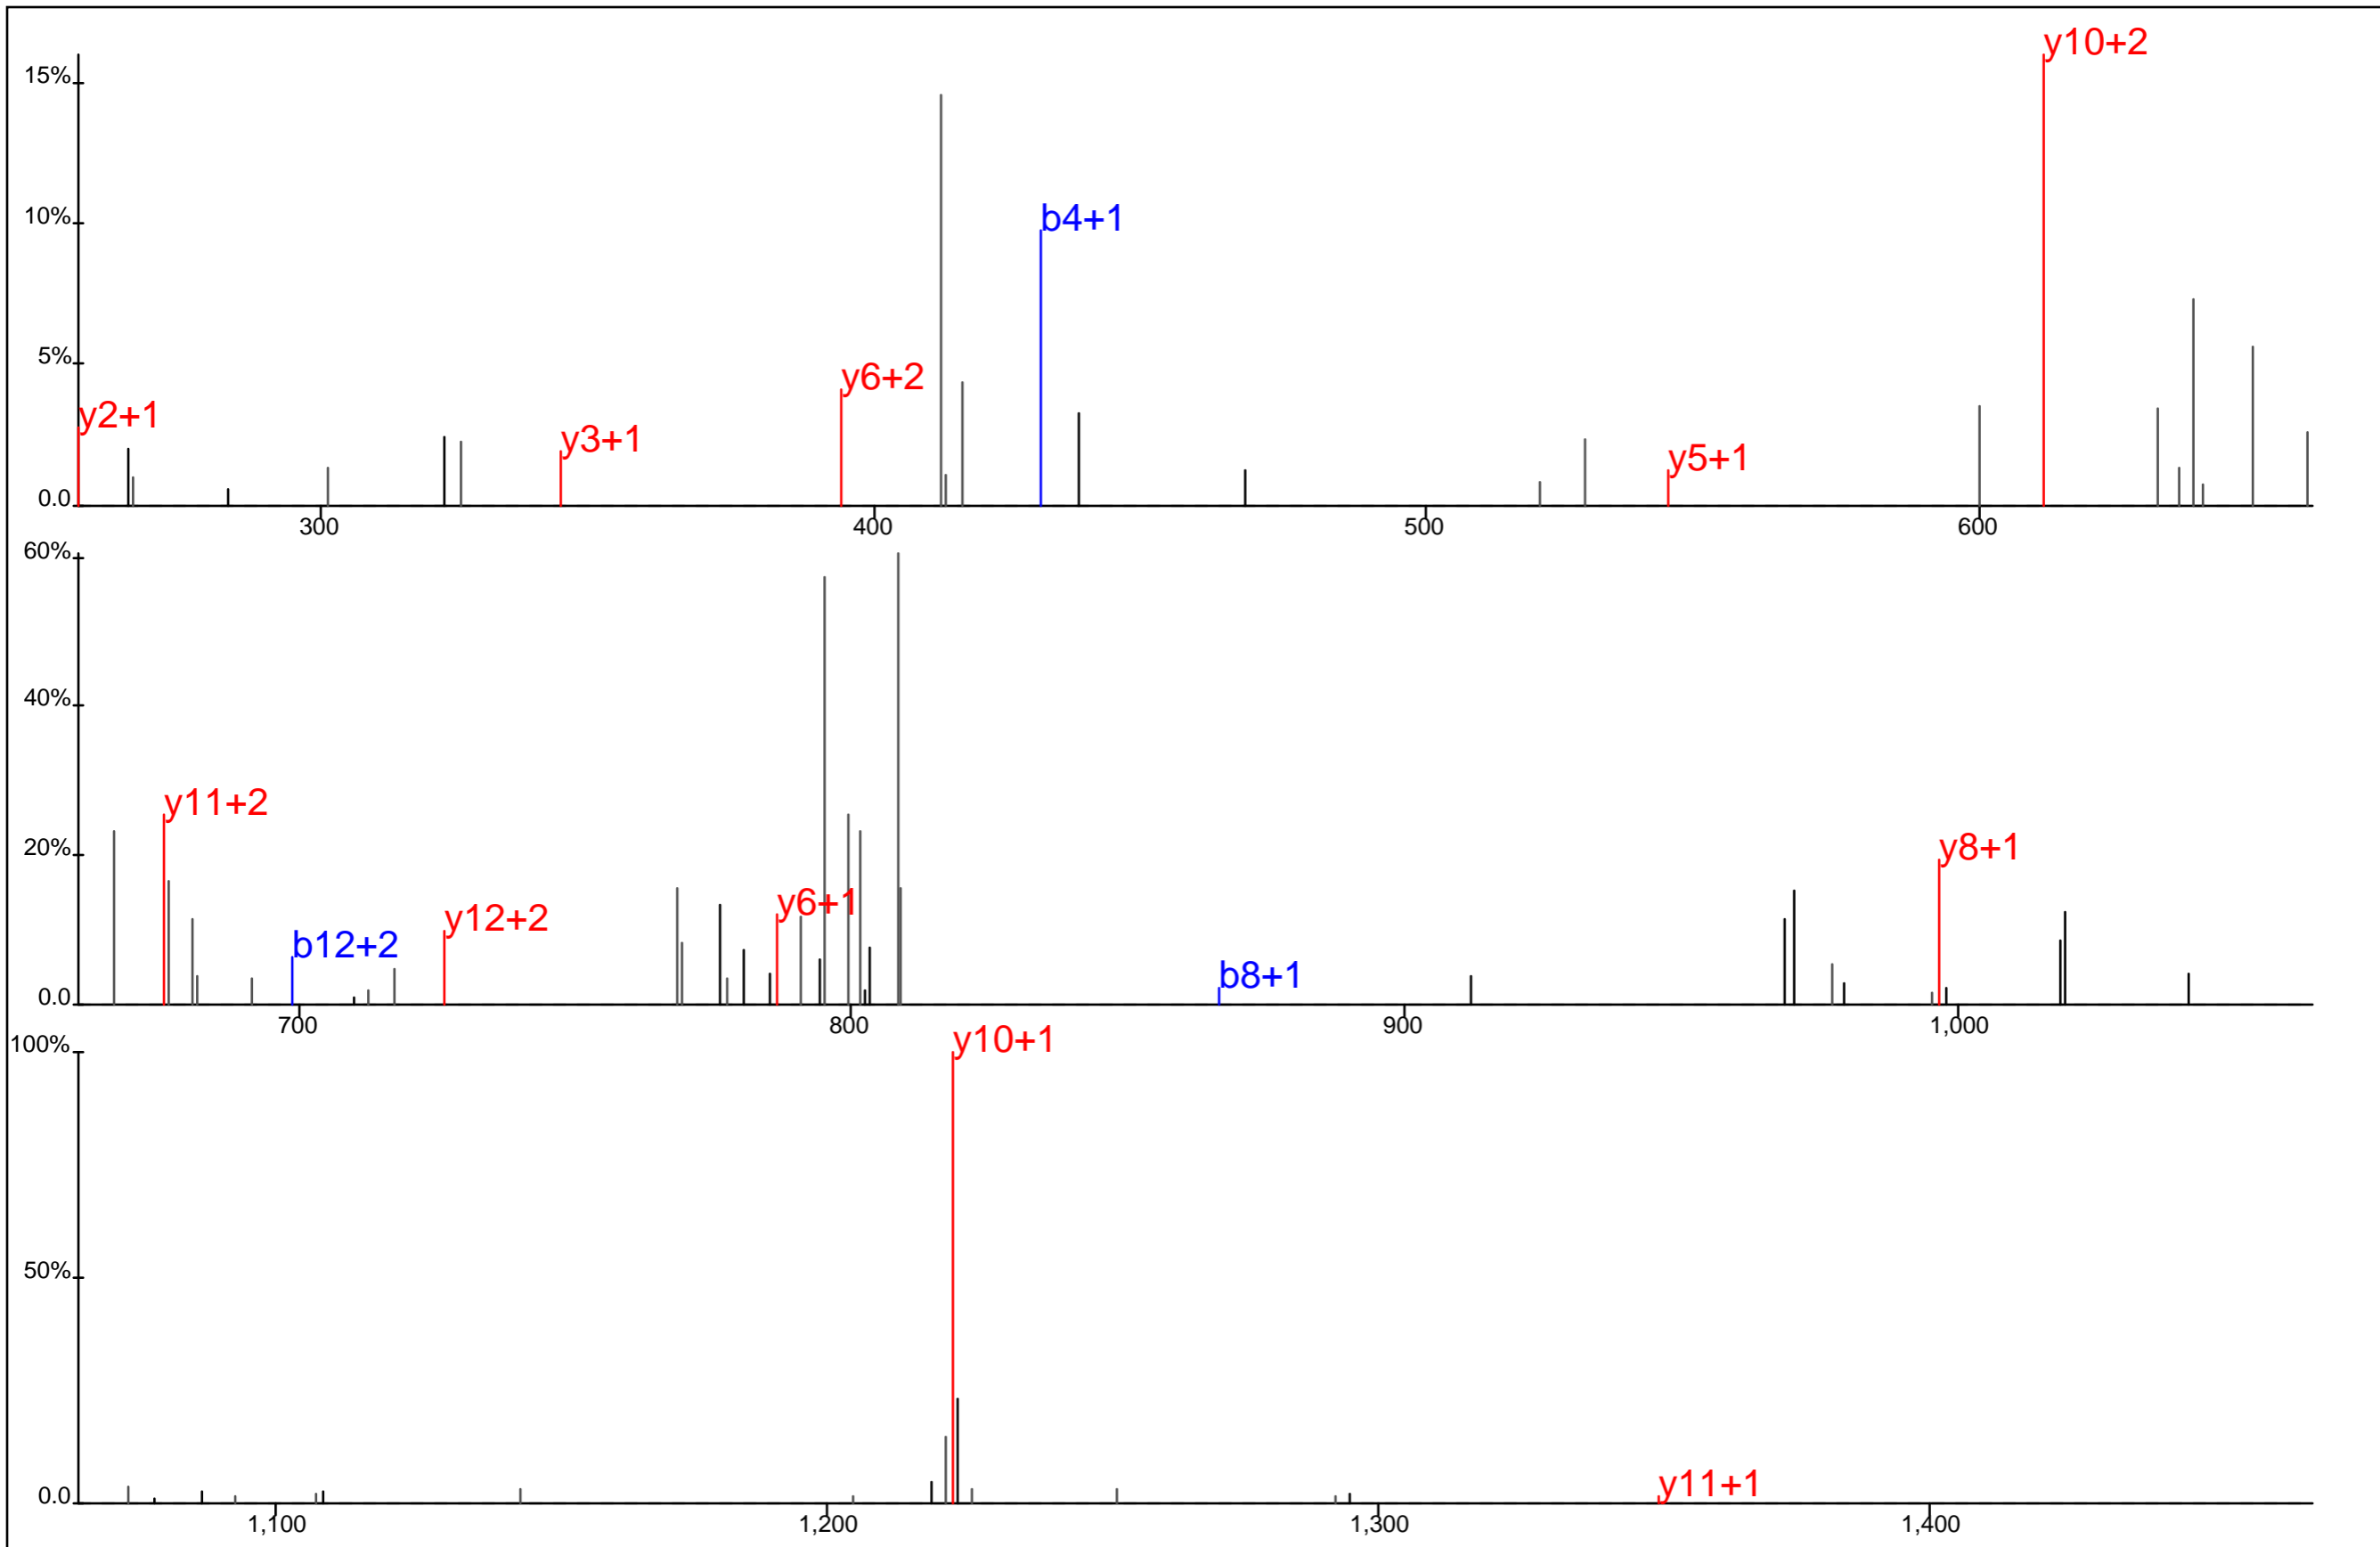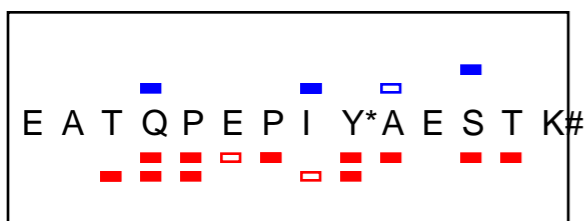

Protein Name: Pragmin  
 gi Accession: 157909822  
 Precursor Mass: 826.3690+2  
 Delta Mass: 2.150 ppm  
 XCorr: 17.84

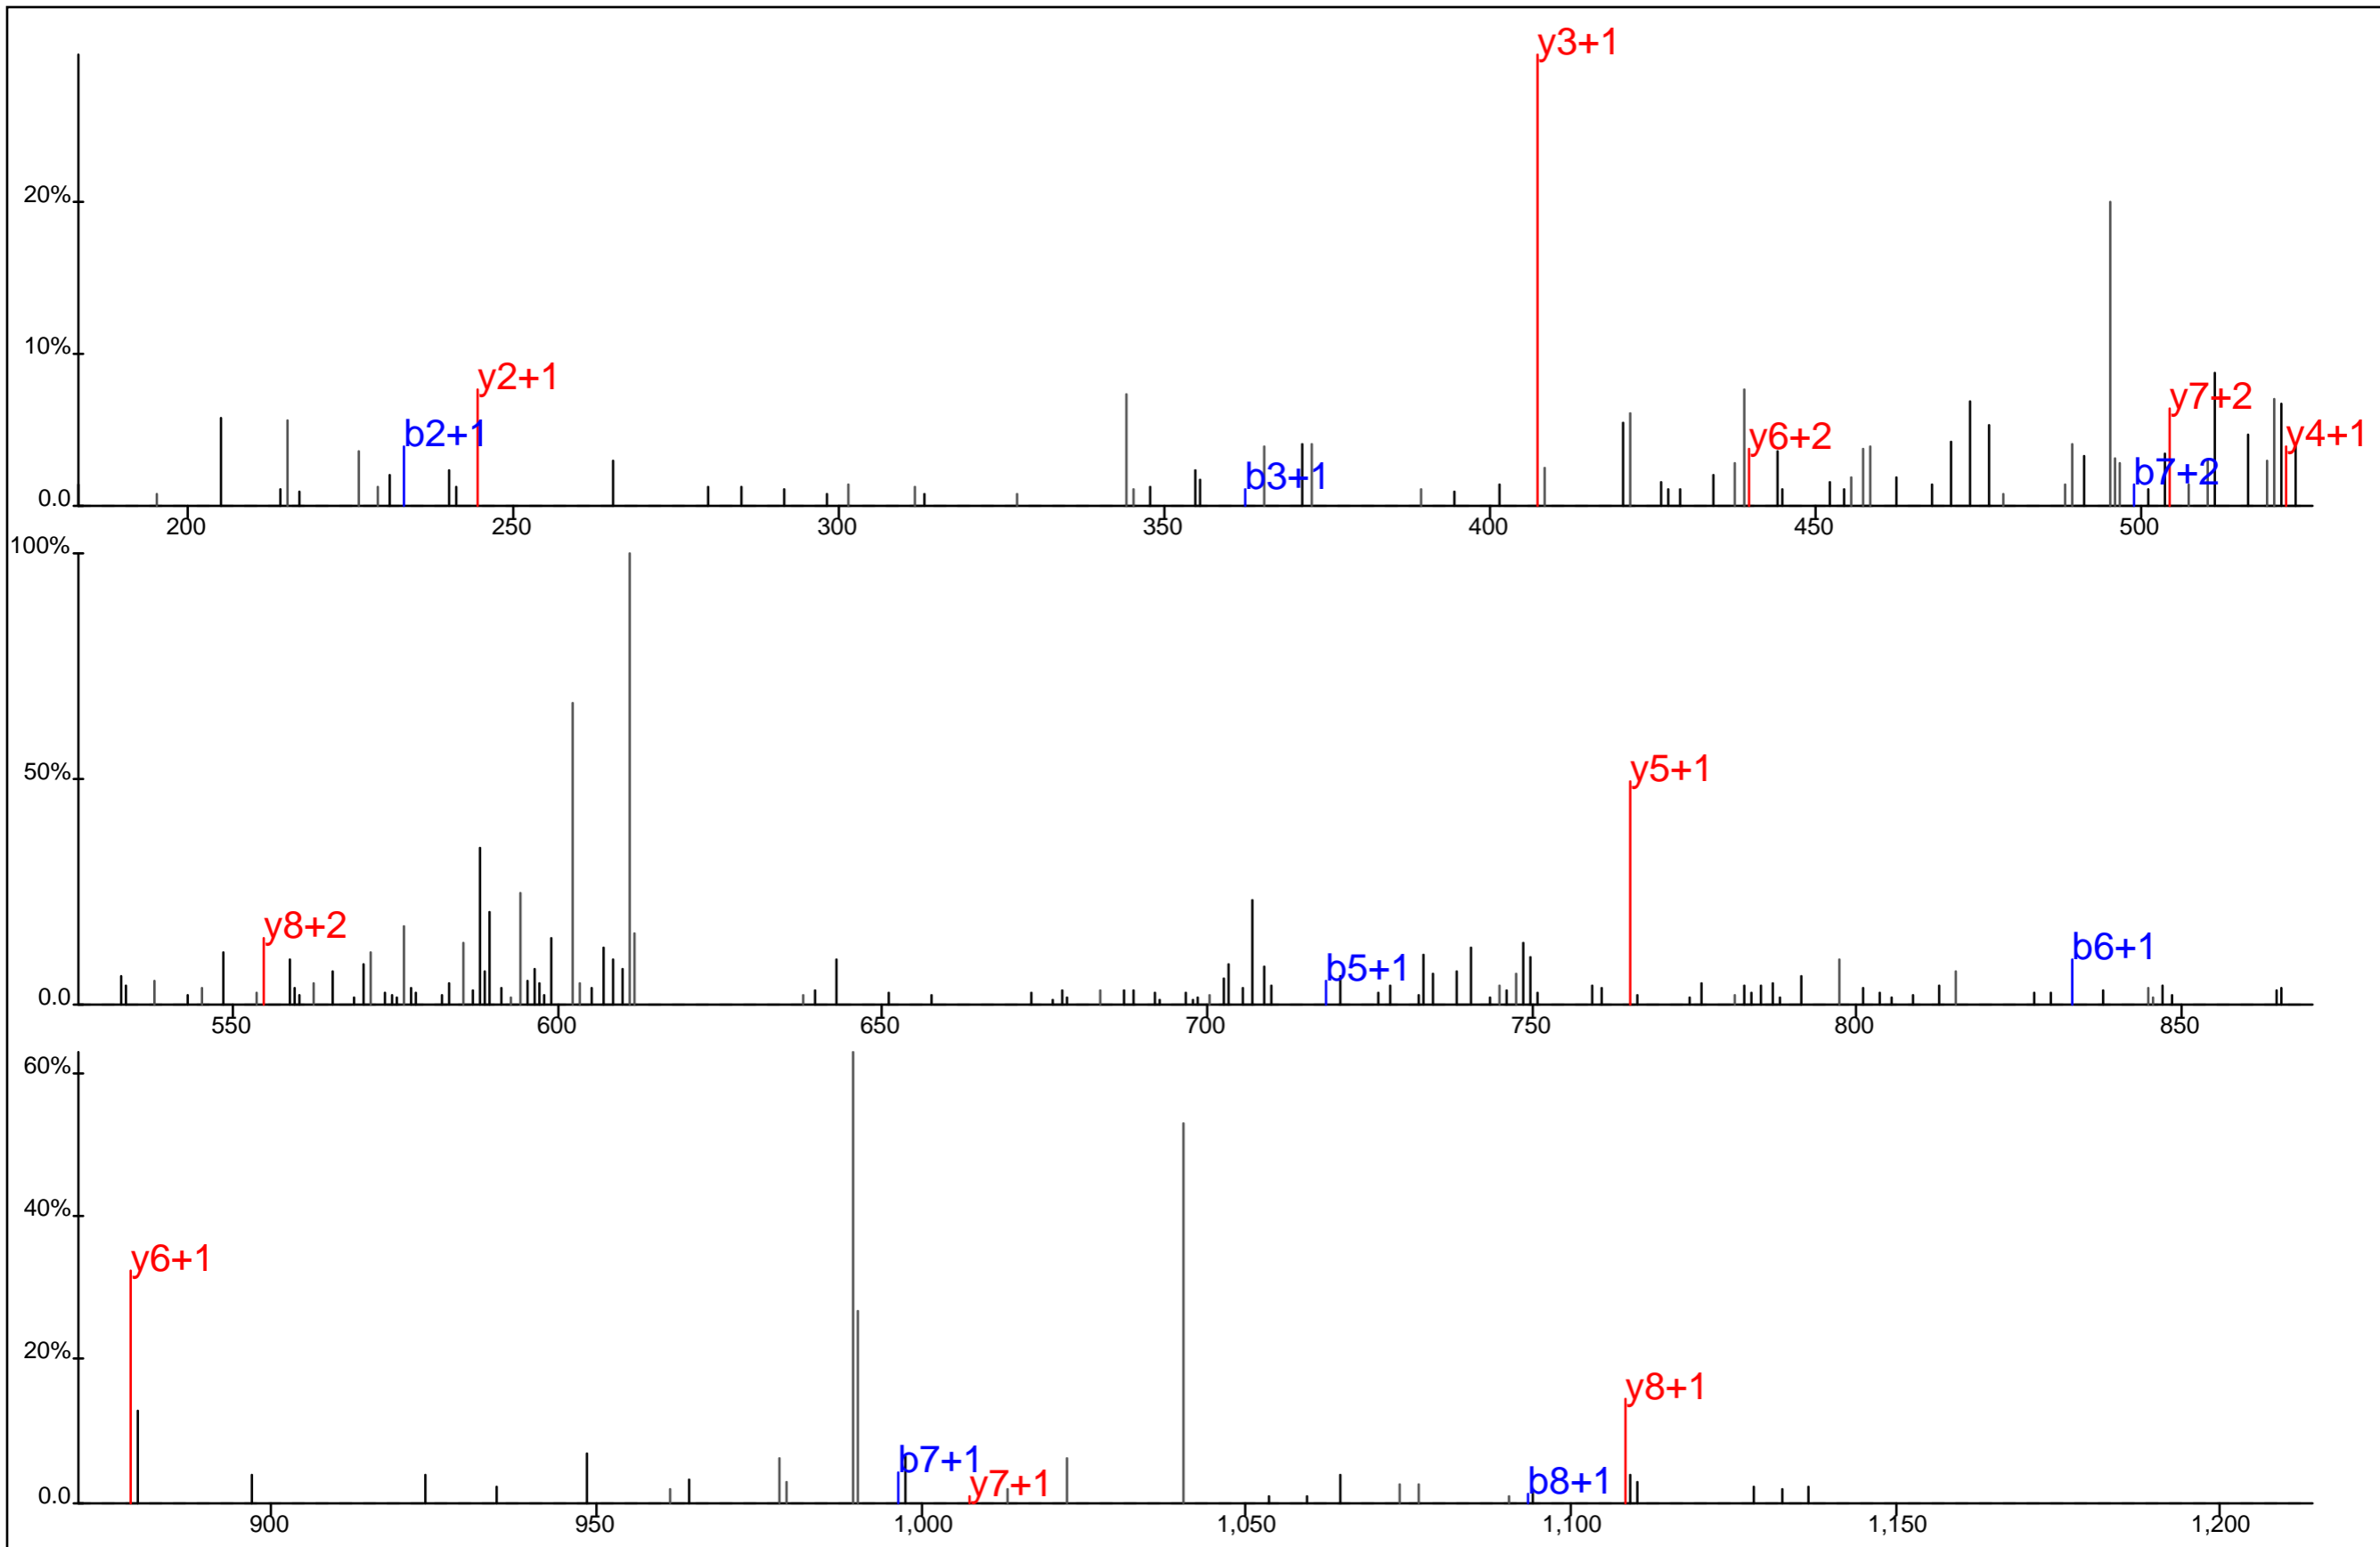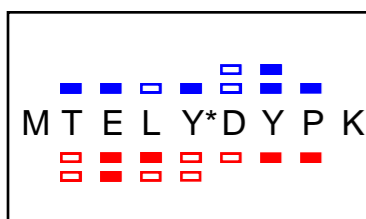

Protein Name: Prolyl endopeptidase  
 gi Accession: 1346769  
 Precursor Mass: 620.2563+2  
 Delta Mass: 4.145 ppm  
 XCorr: 34.37



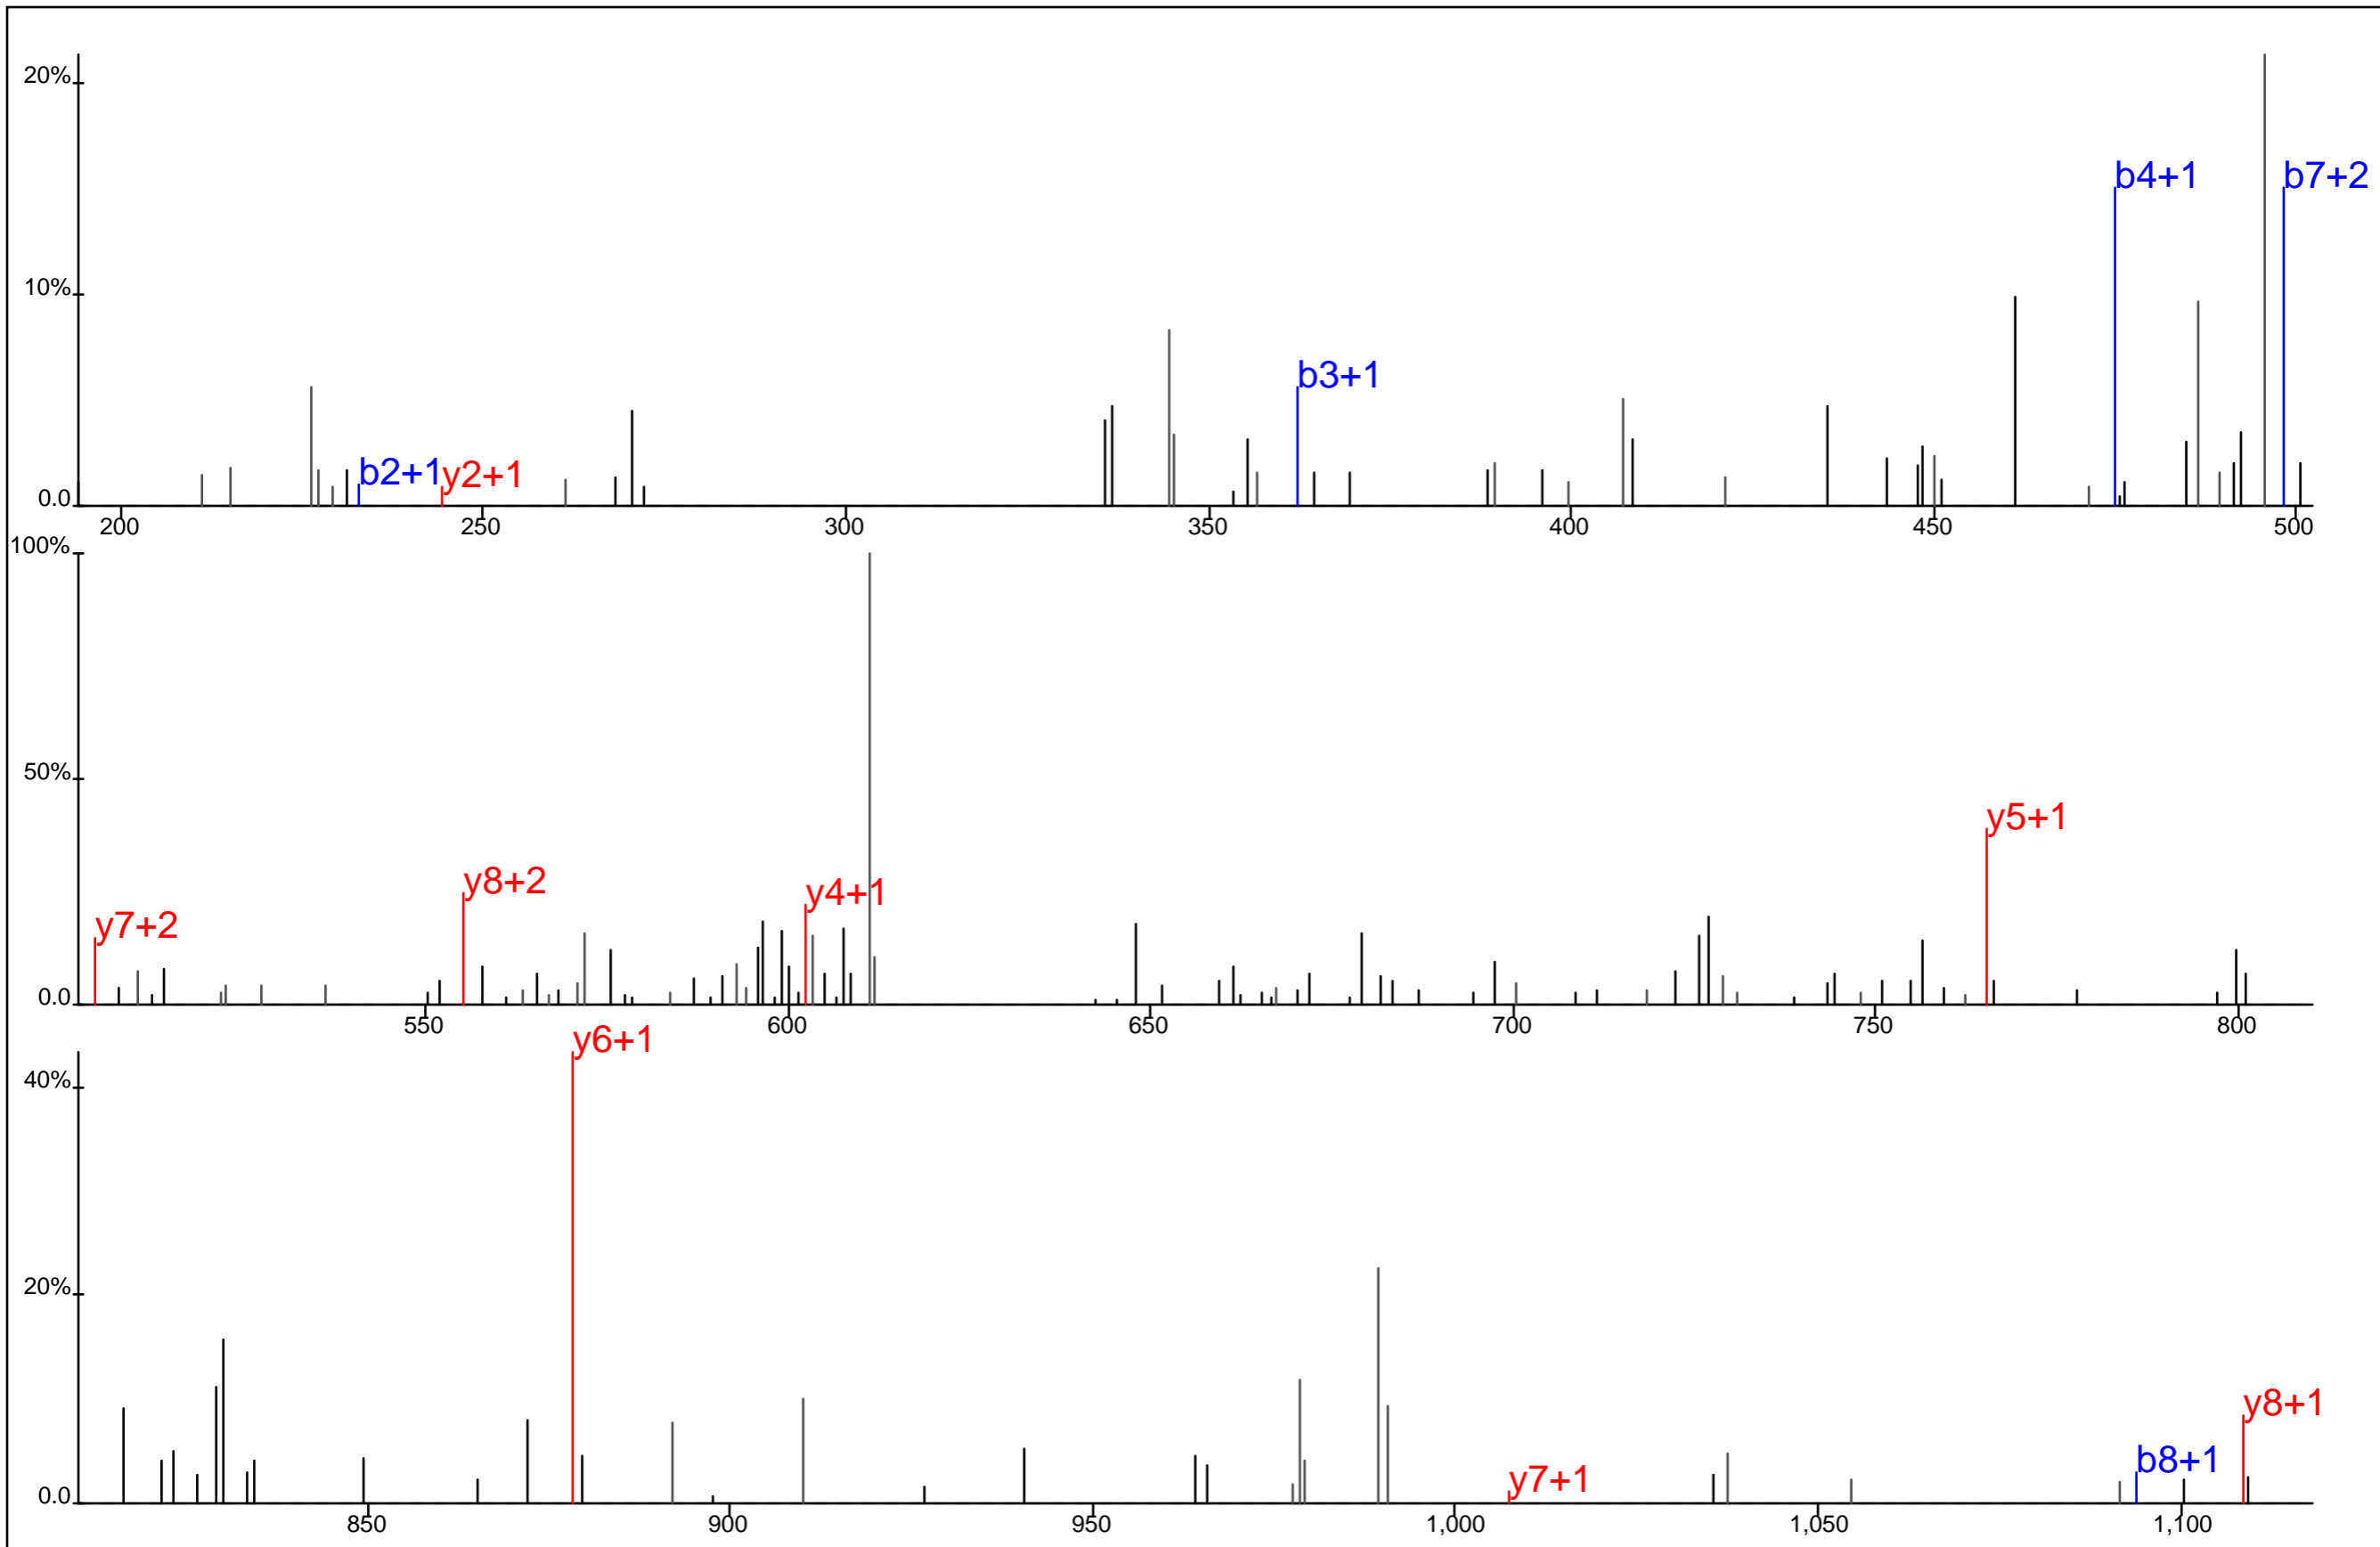

■ ■ ■ ■ ■ ■ ■ ■  
 M T E L Y D Y\* P K  
■ ■ ■ ■ ■ ■ ■ ■

Protein Name: Prolyl endopeptidase  
 gi Accession: 1346769  
 Precursor Mass: 620.2567+2  
 Delta Mass: 4.637 ppm  
 XCorr: 19.97

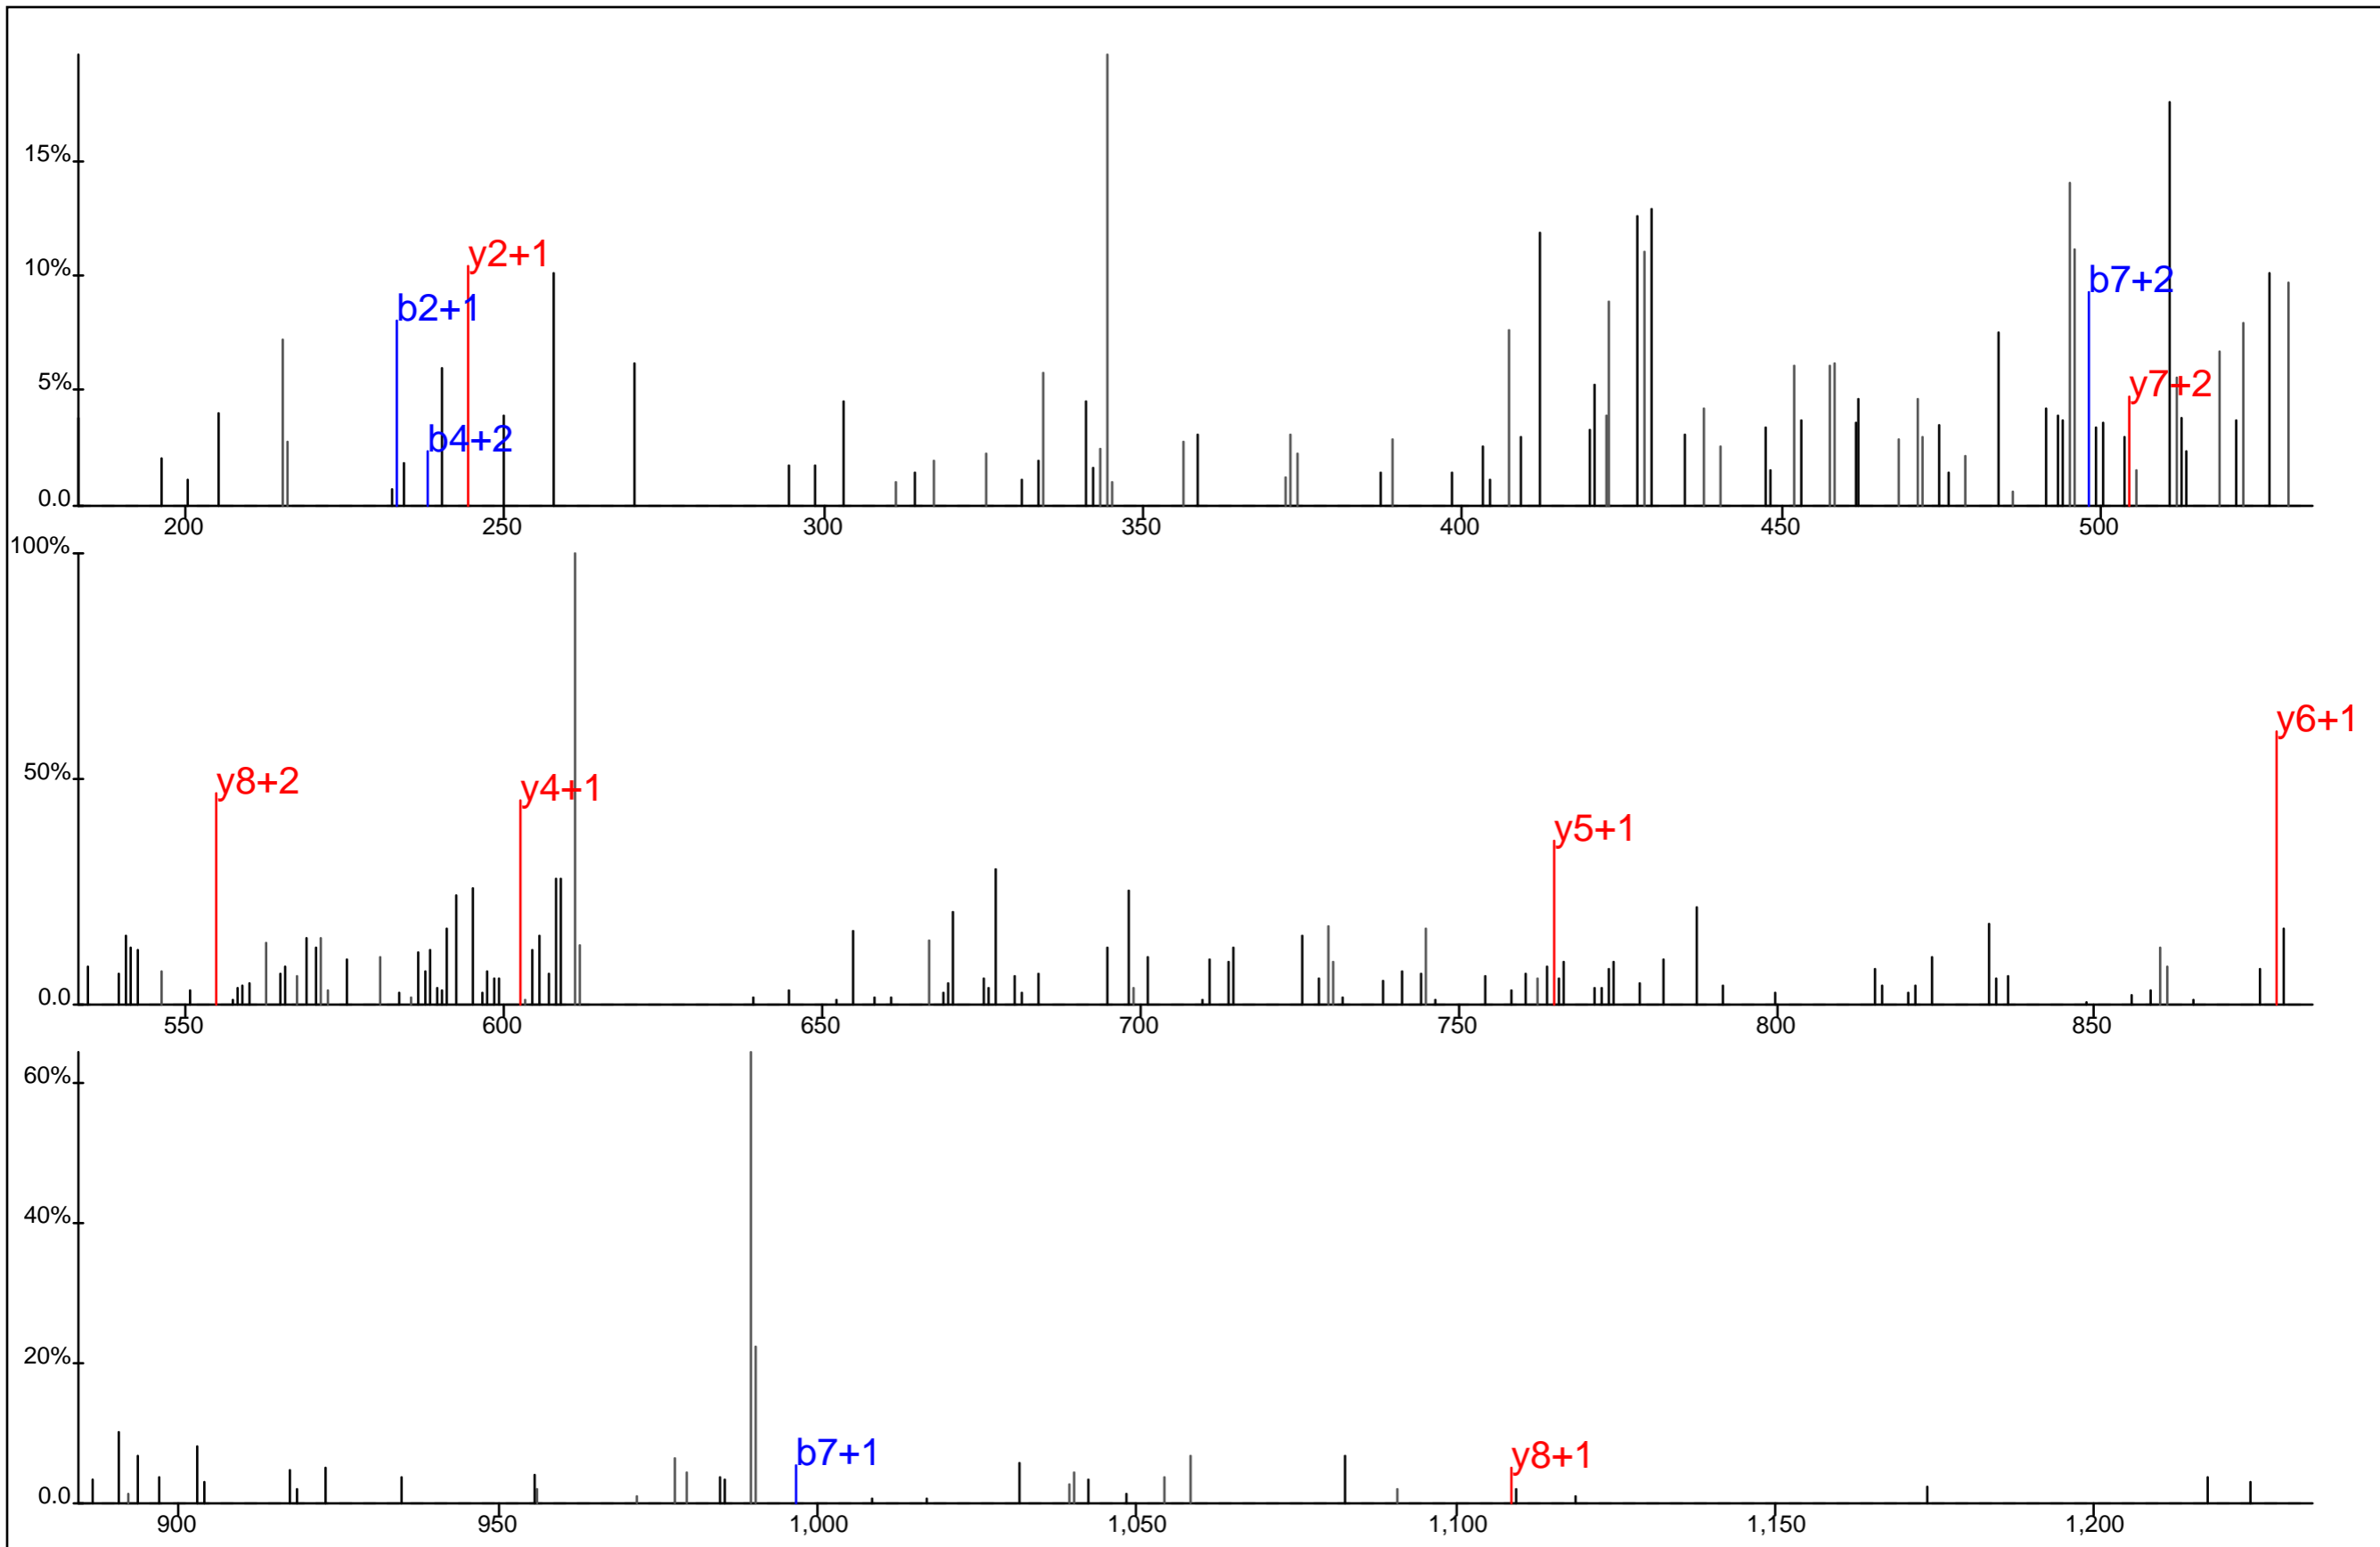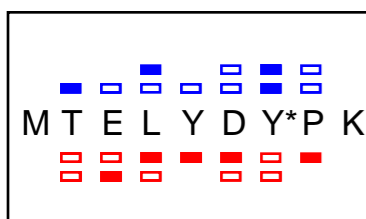

Protein Name: Prolyl endopeptidase  
 gi Accession: 1346769  
 Precursor Mass: 620.2546+2  
 Delta Mass: 1.386 ppm  
 XCorr: 21.2

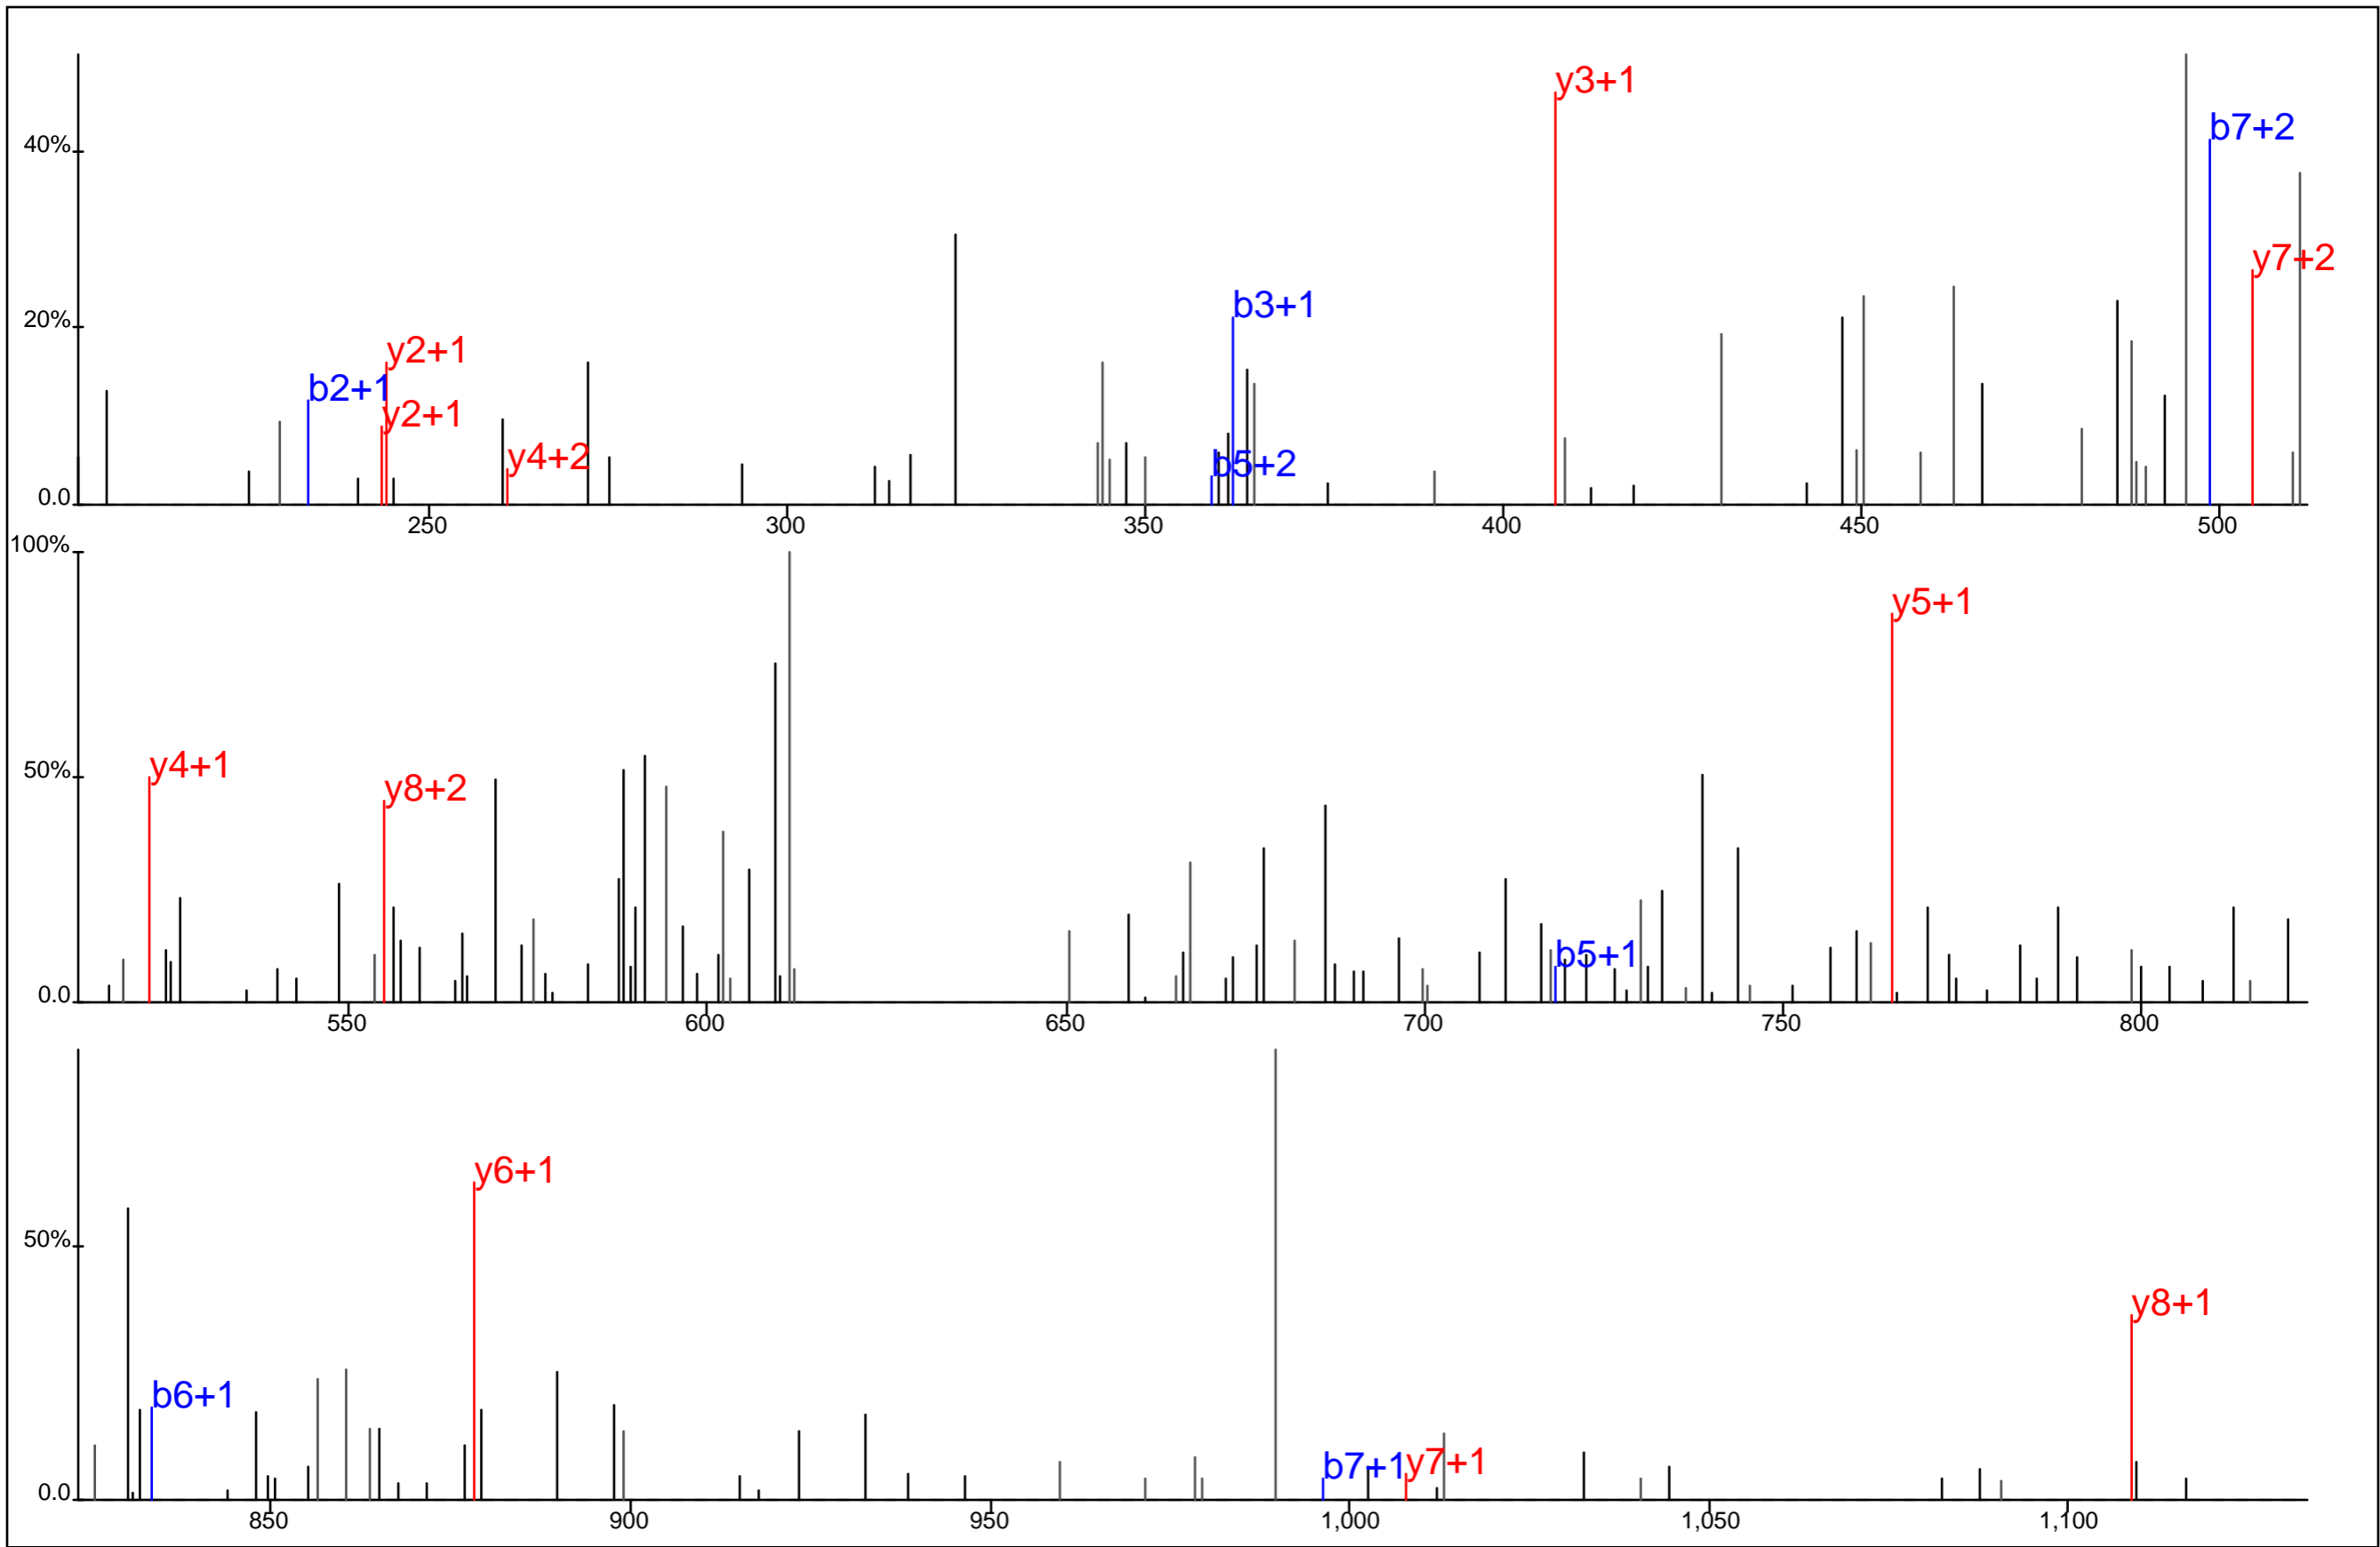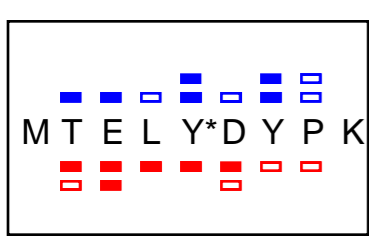

Protein Name: Prolyl endopeptidase  
 gi Accession: 1346769  
 Precursor Mass: 620.2591+2  
 Delta Mass: 8.574 ppm  
 XCorr: 20.77

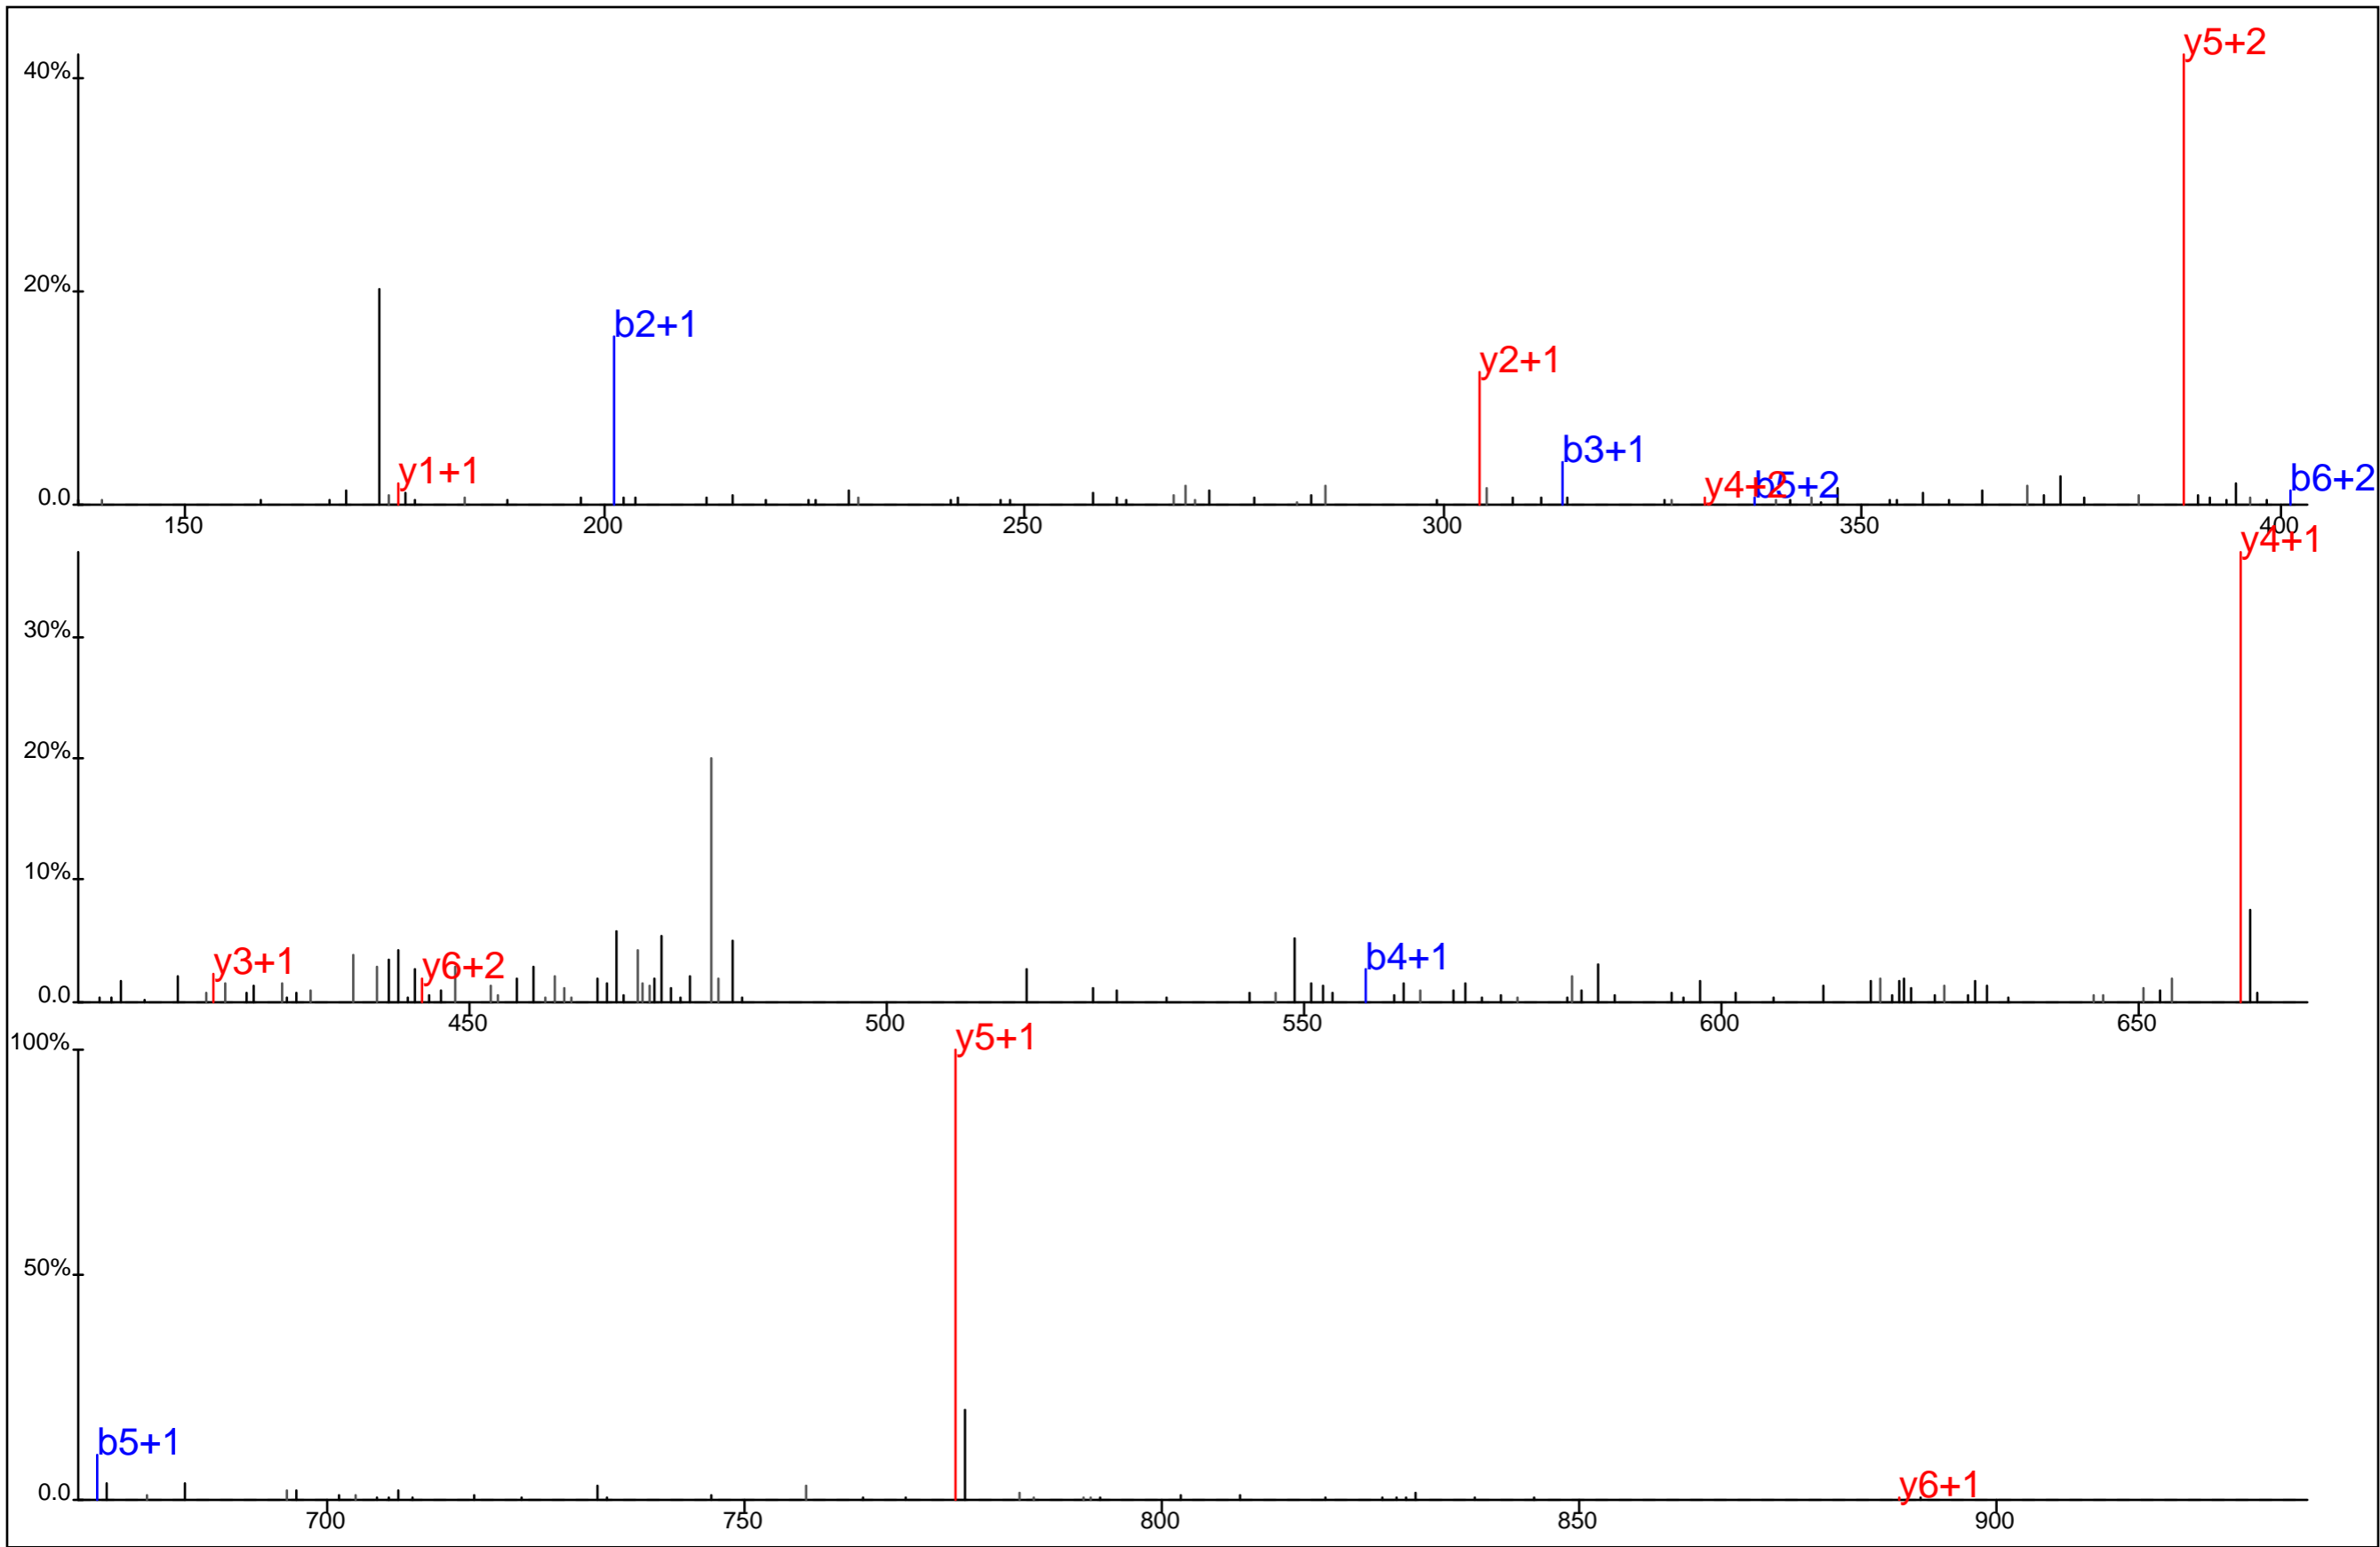

S I L Y\* D E R

Protein Name: Proteasome subunit C3  
 gi Accession: 4506181  
 Precursor Mass: 488.2155+2  
 Delta Mass: 5.678 ppm  
 XCorr: 32.87

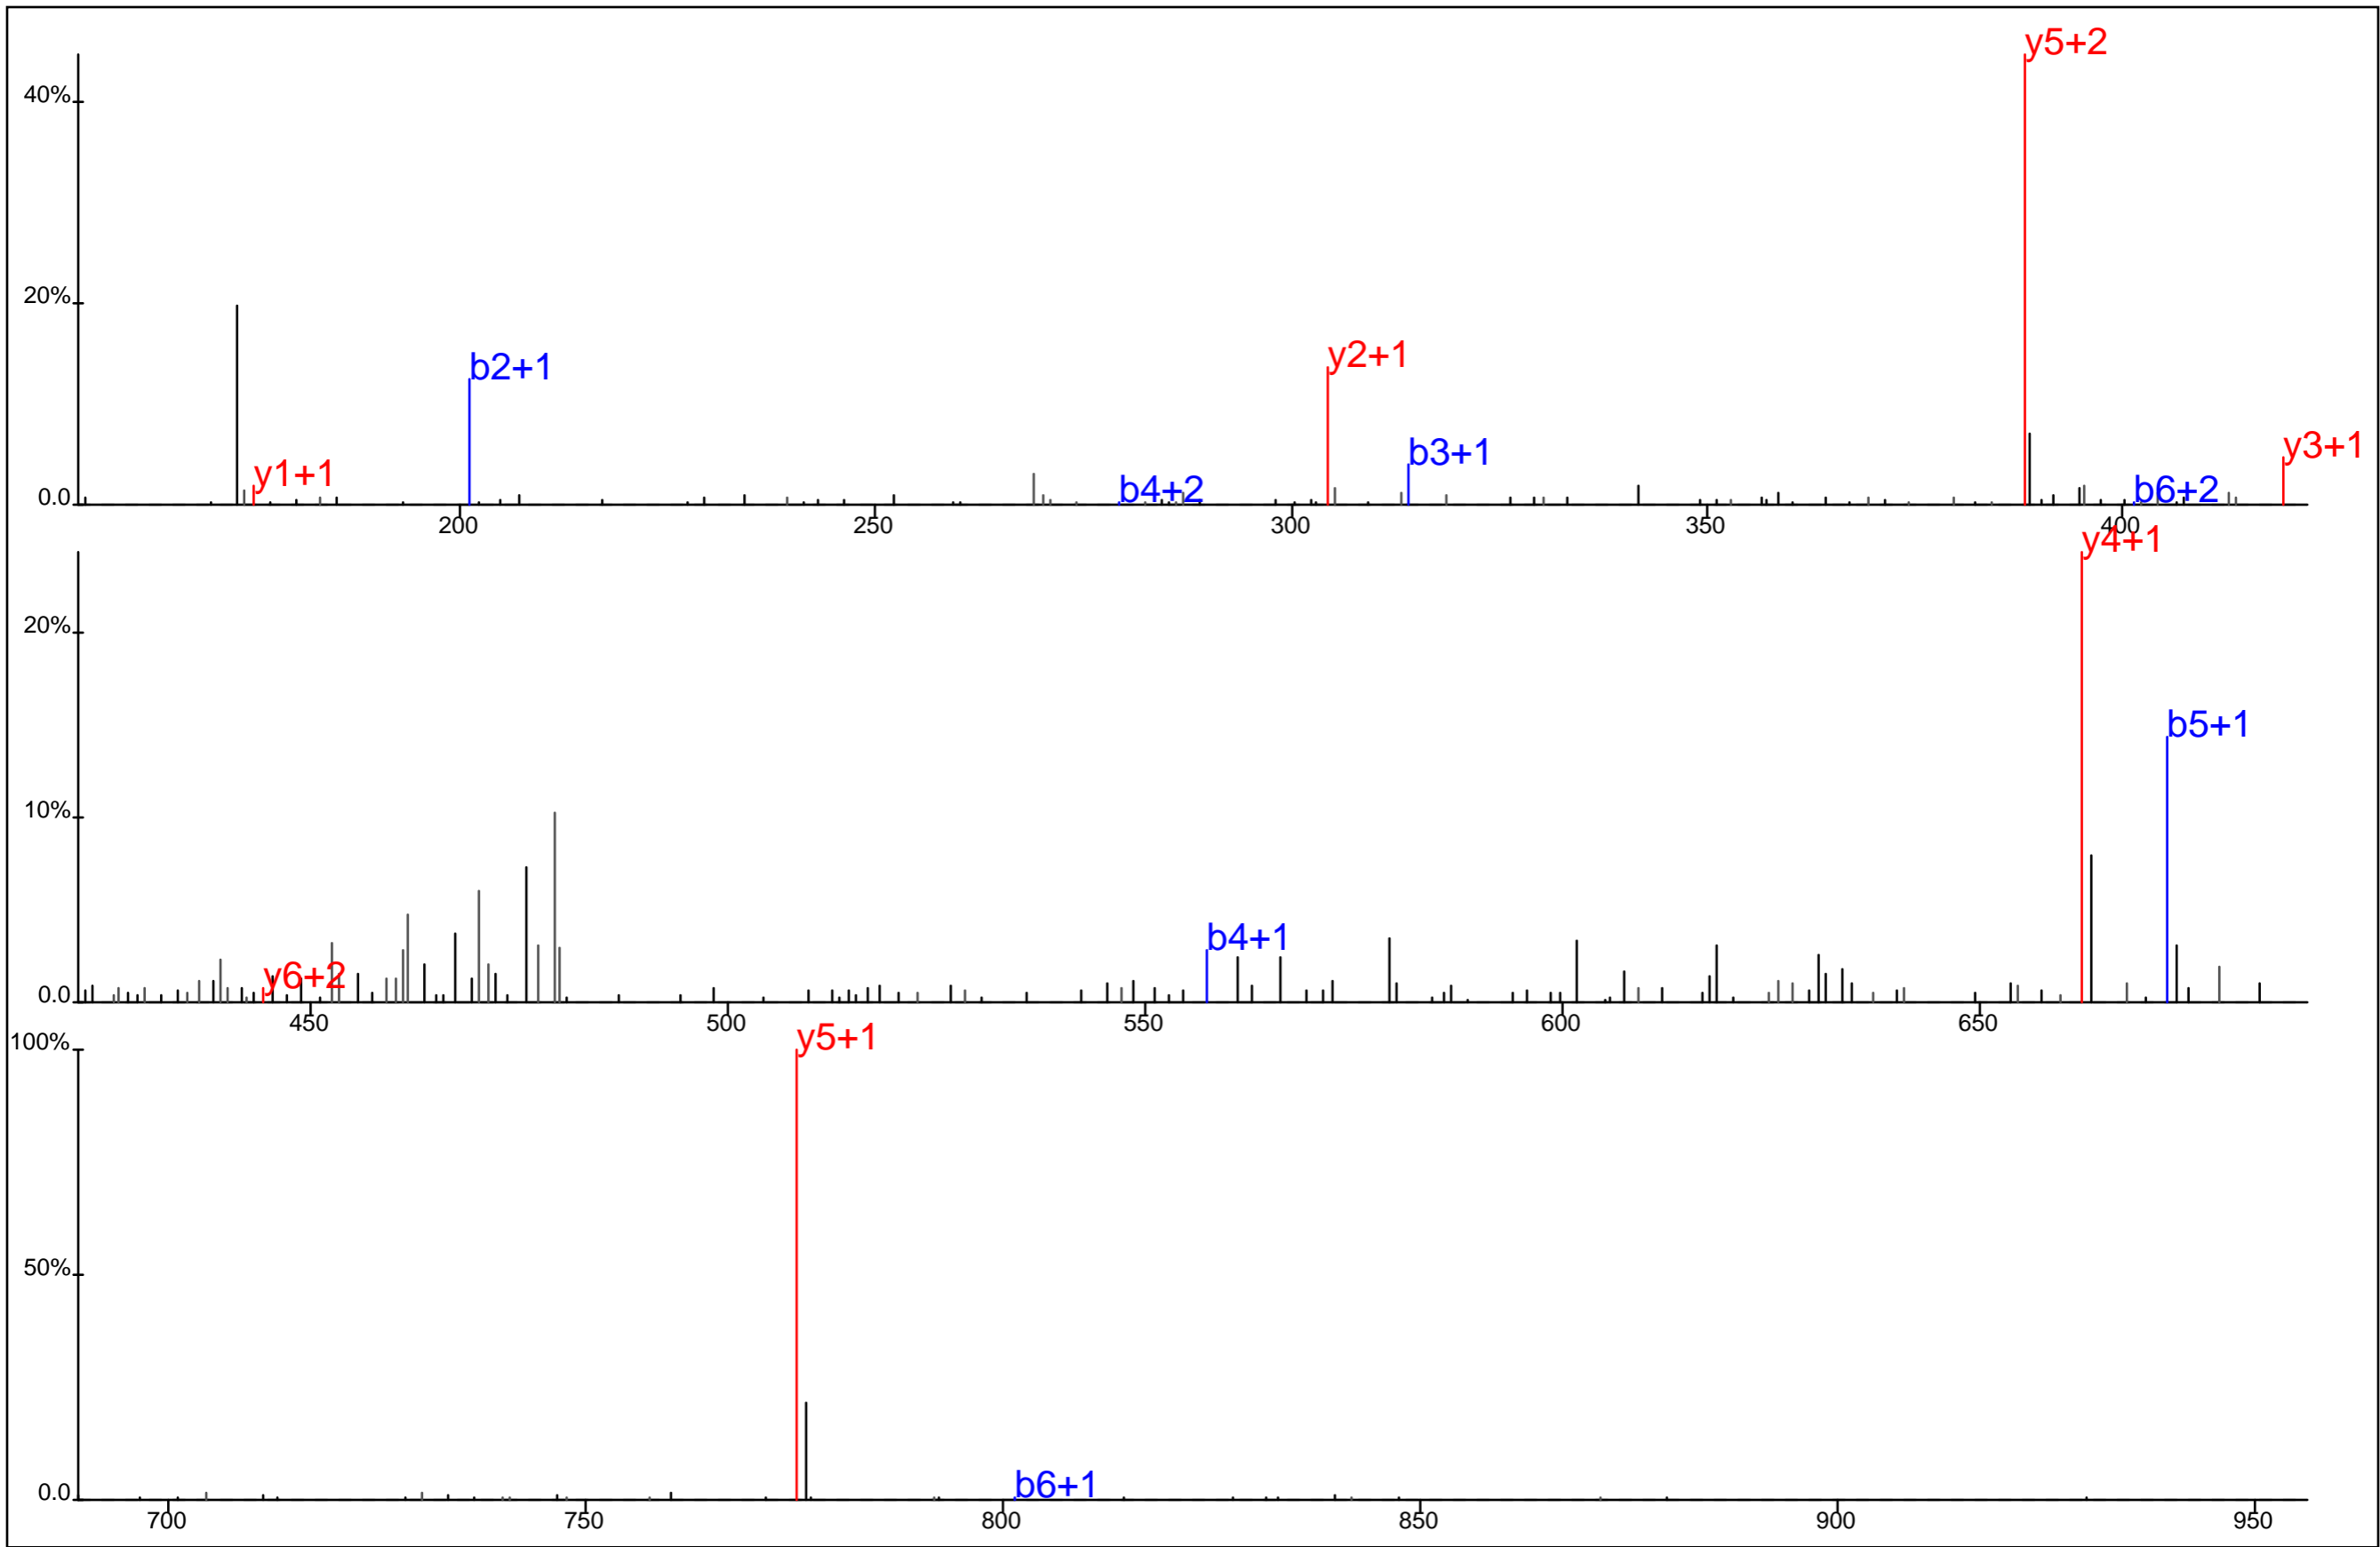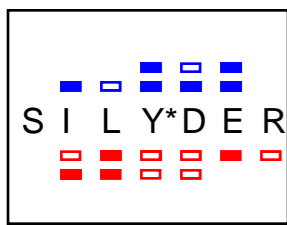

Protein Name: Proteasome subunit C3  
 gi Accession: 4506181  
 Precursor Mass: 488.2148+2  
 Delta Mass: 4.058 ppm  
 XCorr: 25.44

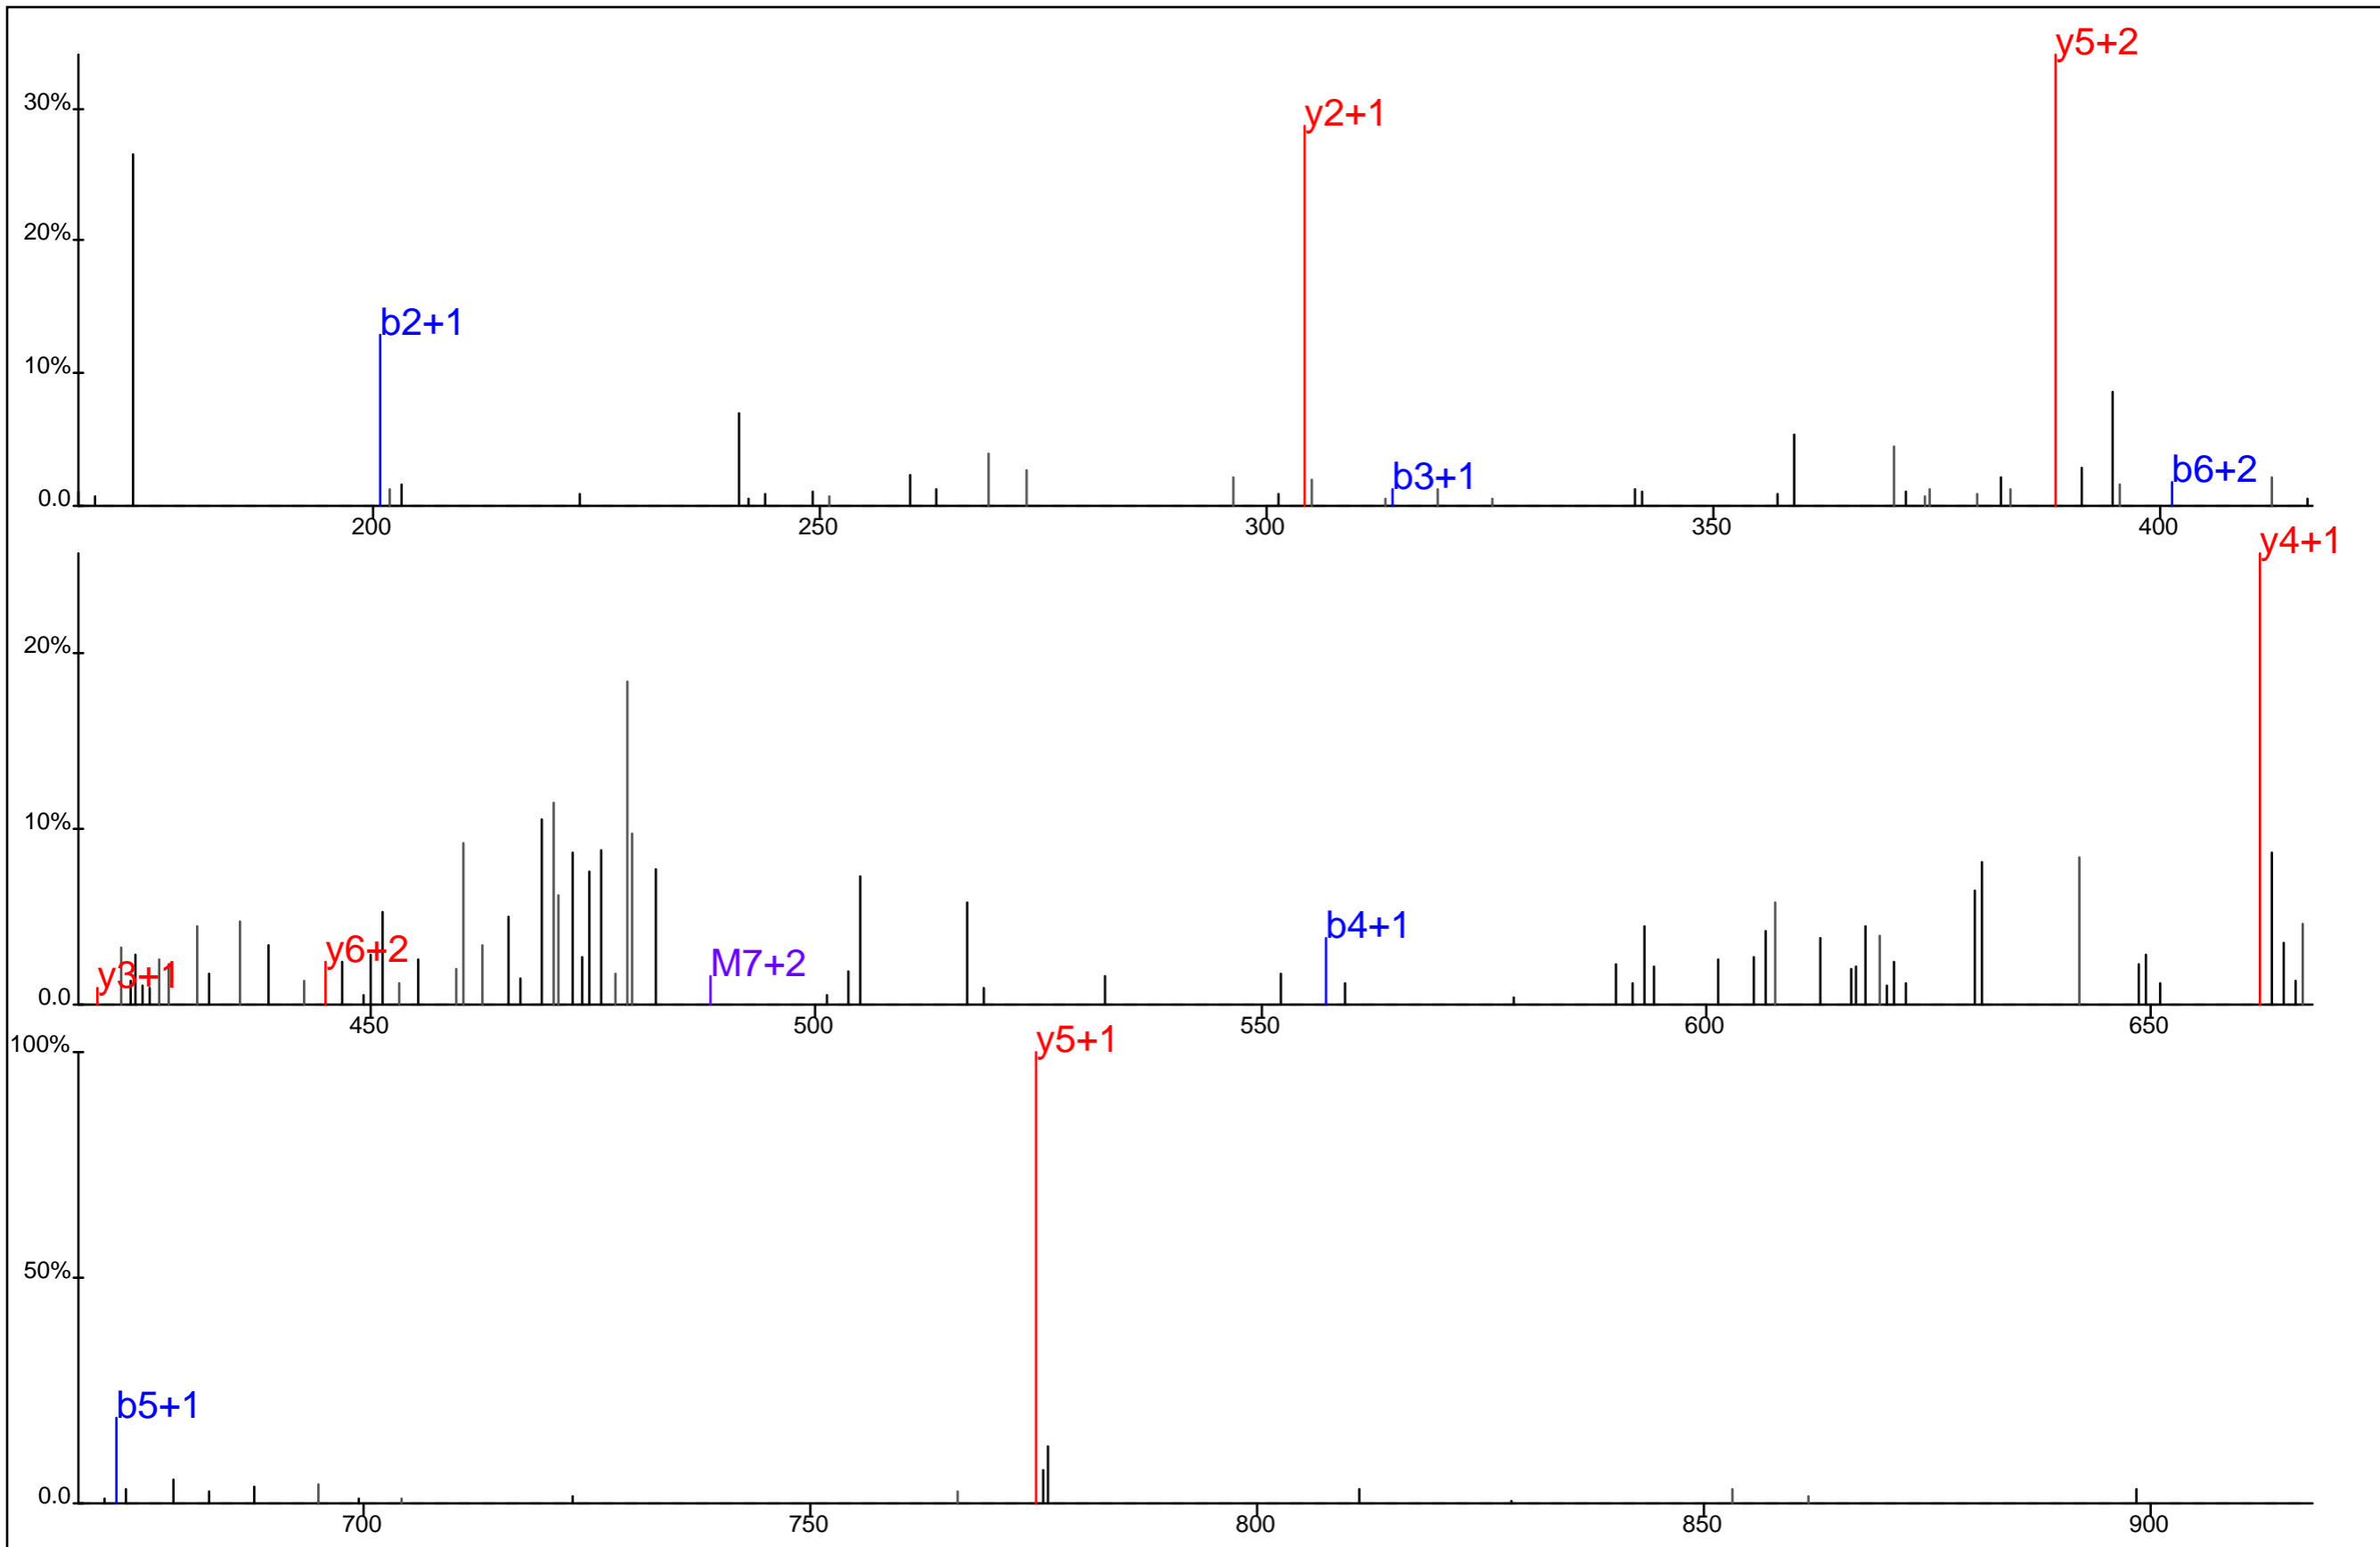

**S I L Y\* D E R**

Protein Name: Proteasome subunit C3  
 gi Accession: 4506181  
 Precursor Mass: 488.2140+2  
 Delta Mass: 2.551 ppm  
 XCorr: 15.06

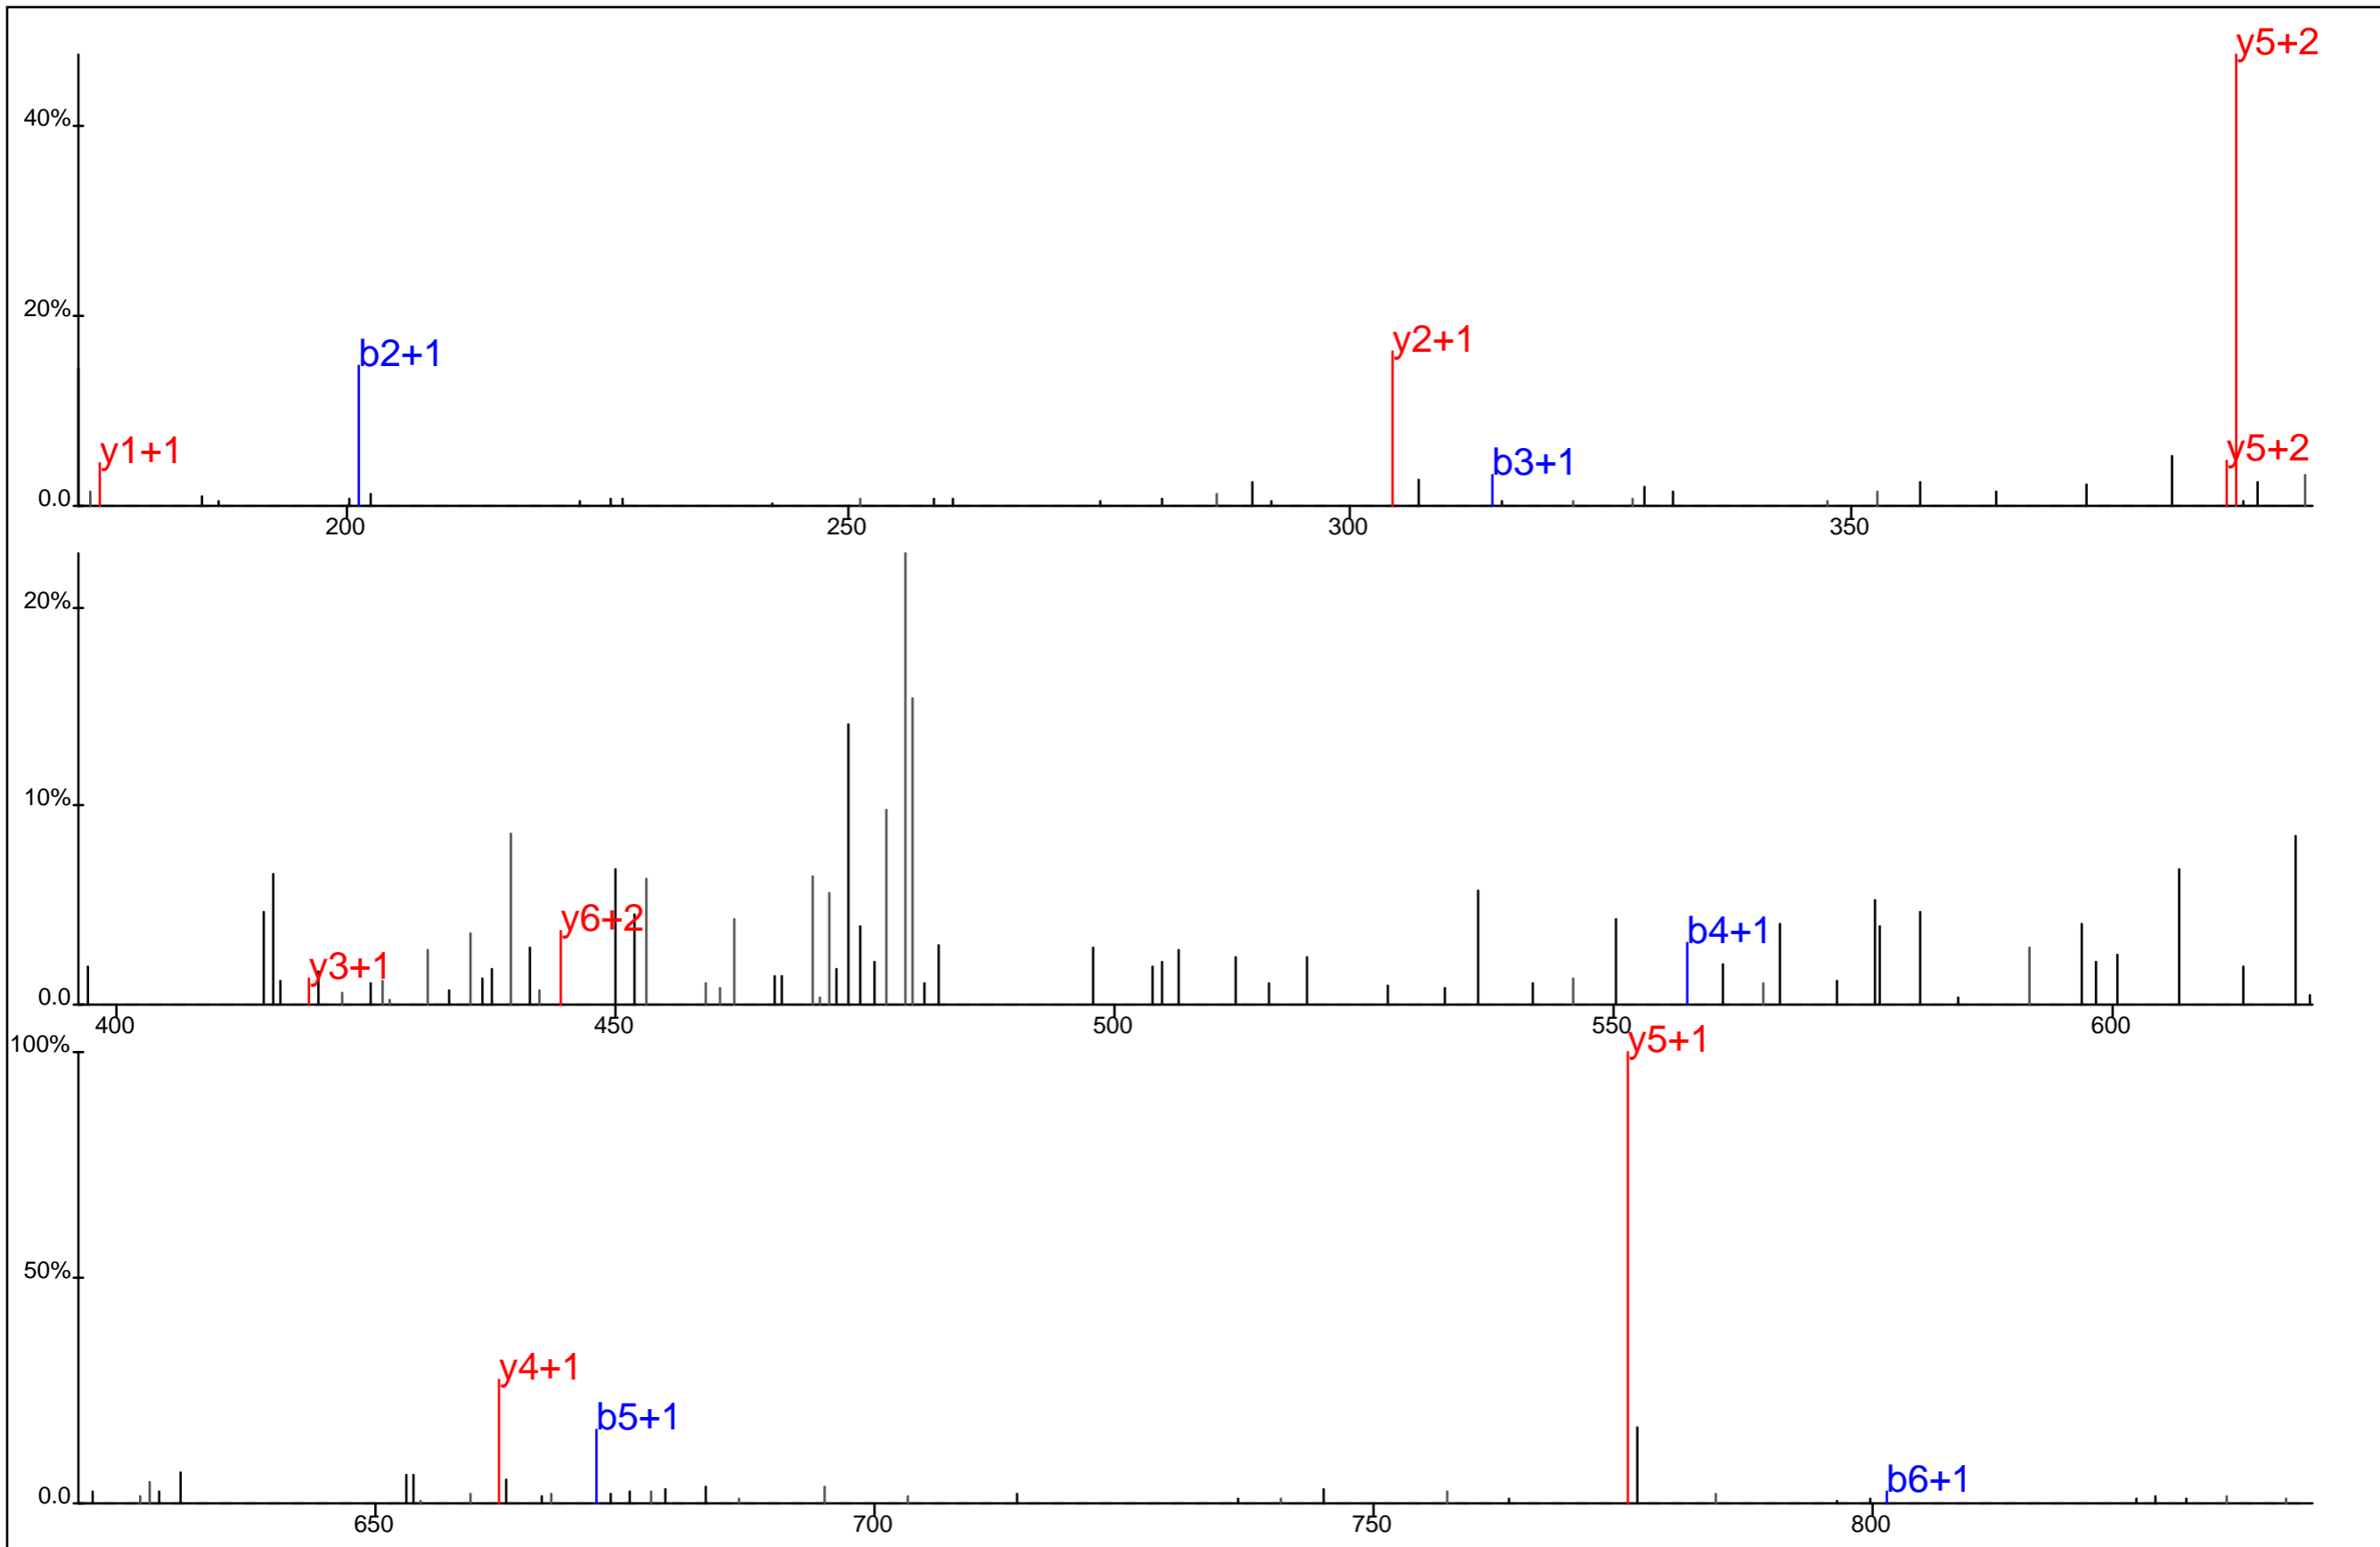

■ ■ ■ ■ ■  
 S I L Y\* D E R  
□ □ □ □ □

Protein Name: Proteasome subunit C3  
 gi Accession: 4506181  
 Precursor Mass: 488.2141+2  
 Delta Mass: 2.612 ppm  
 XCorr: 19.76

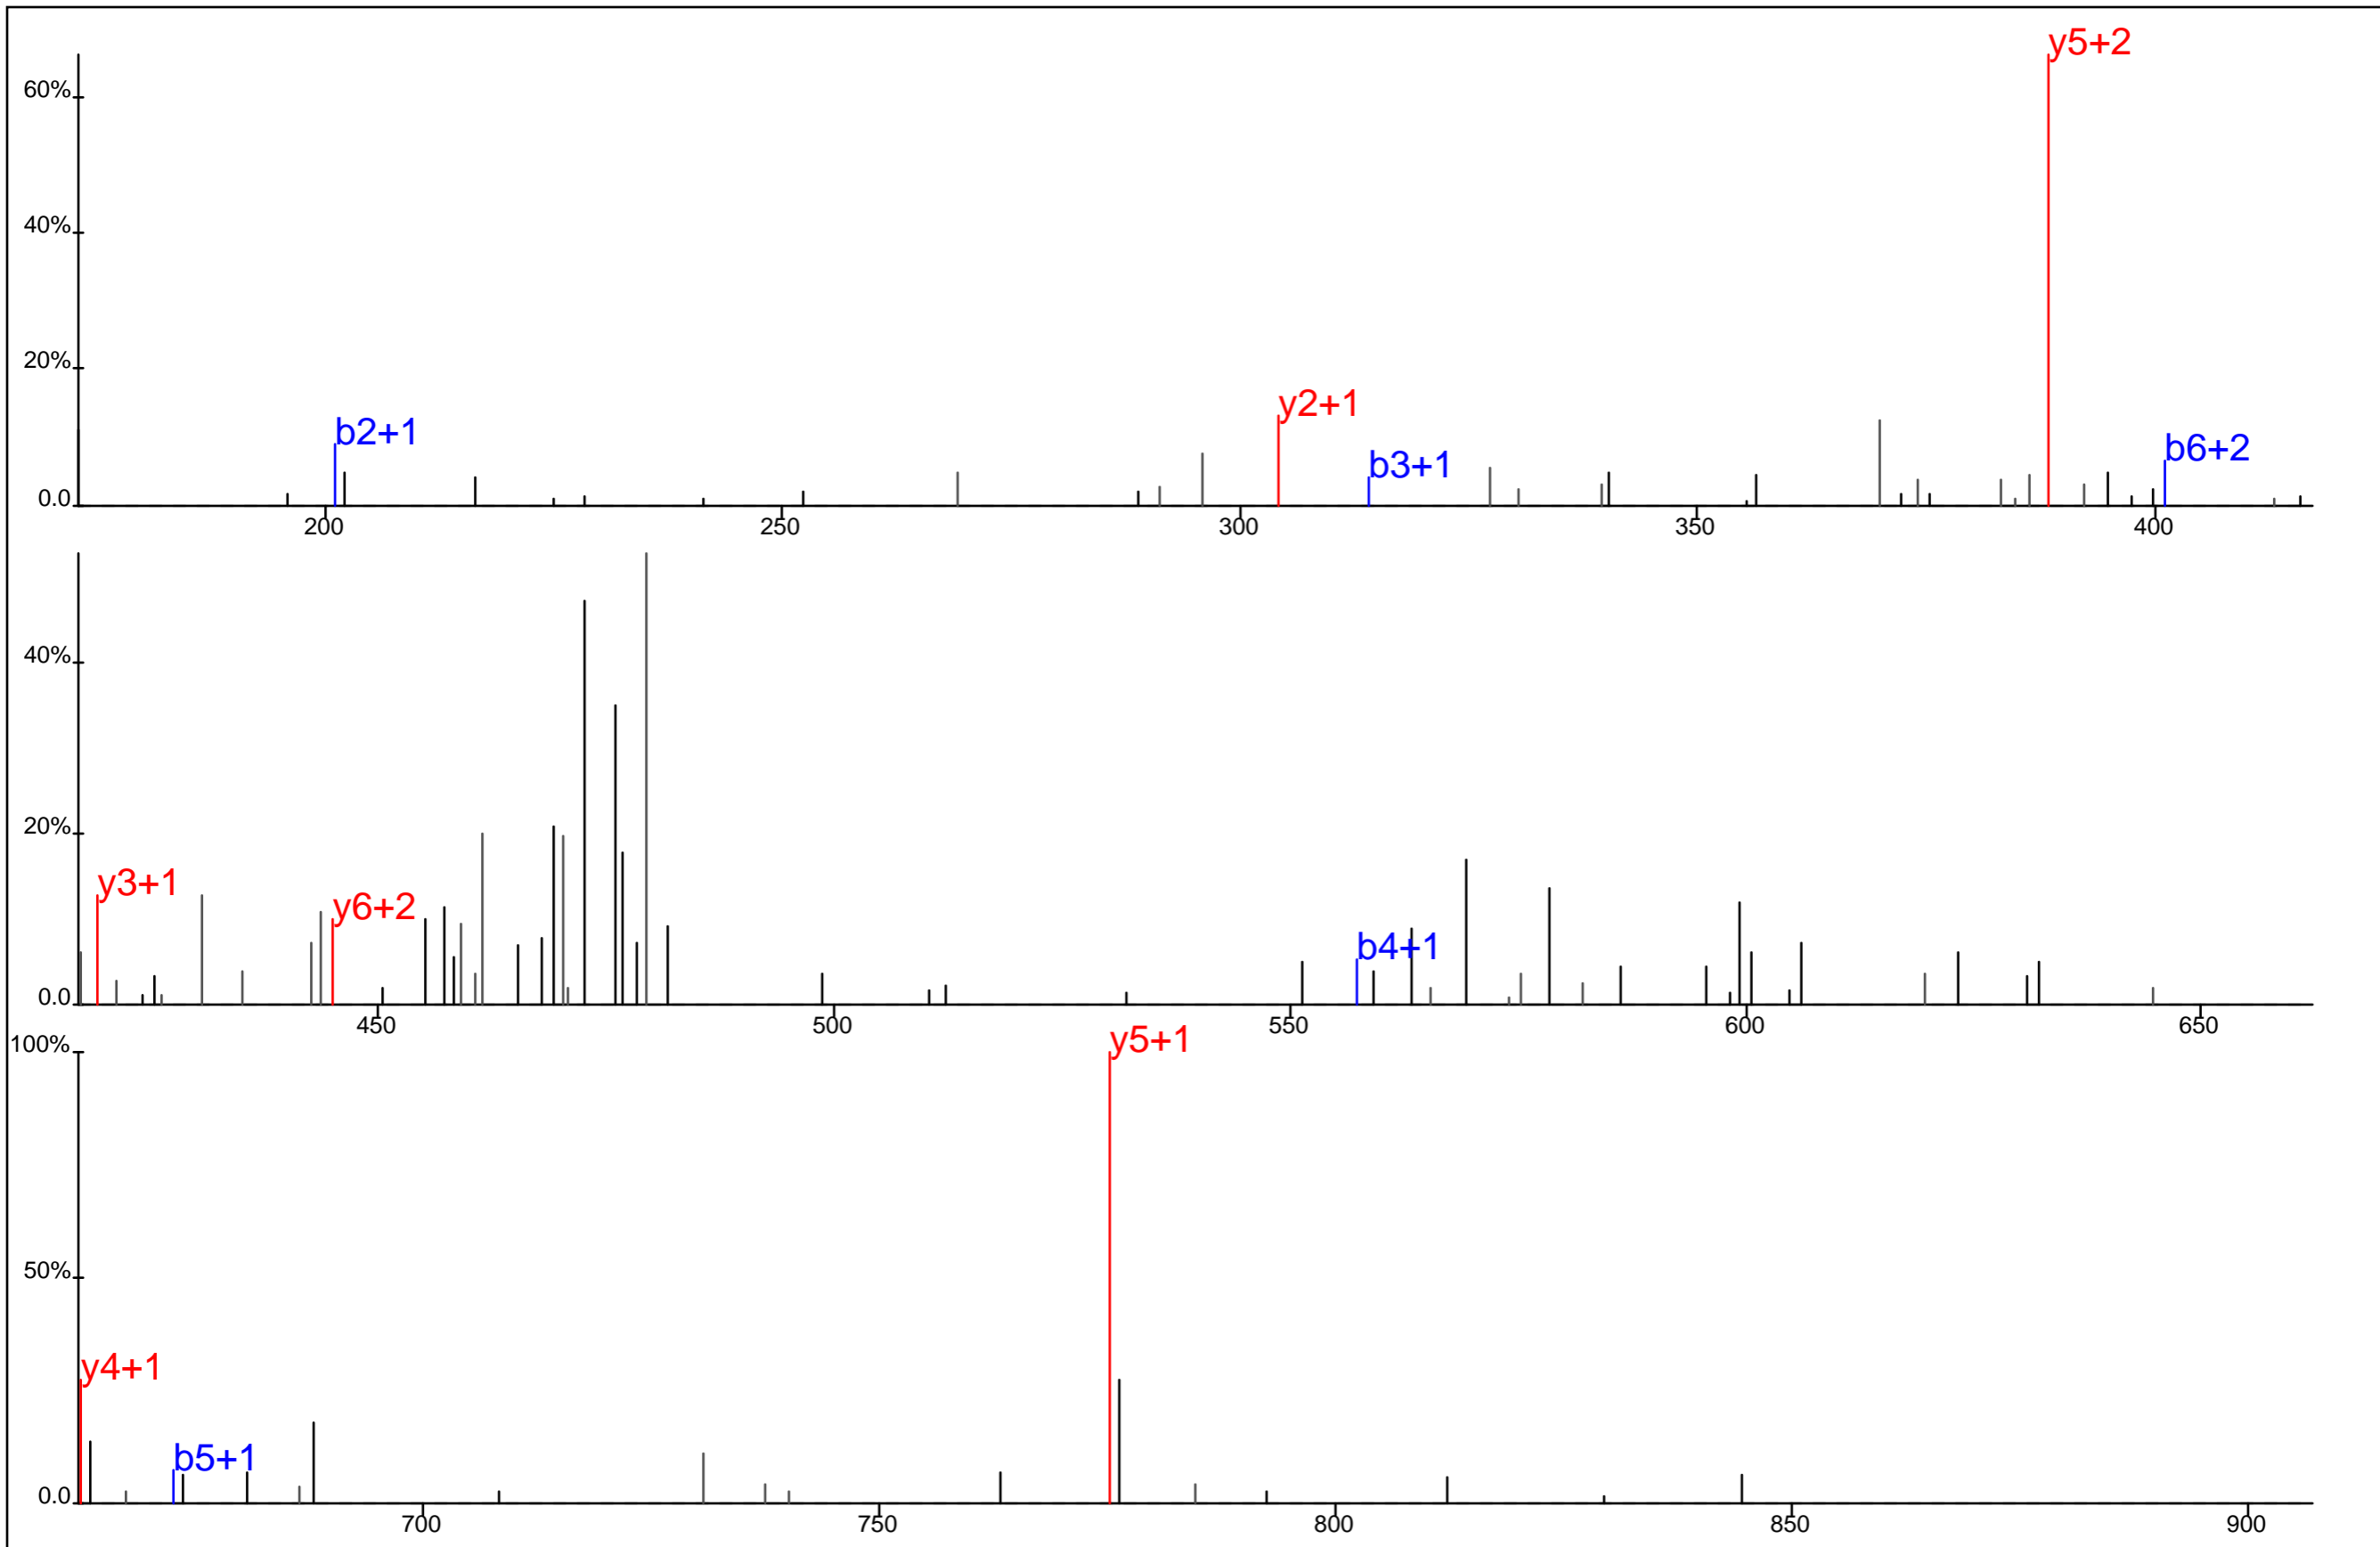

S I L Y\* D E R

Protein Name: Proteasome subunit C3  
 gi Accession: 4506181  
 Precursor Mass: 488.2148+2  
 Delta Mass: 4.242 ppm  
 XCorr: 13.92



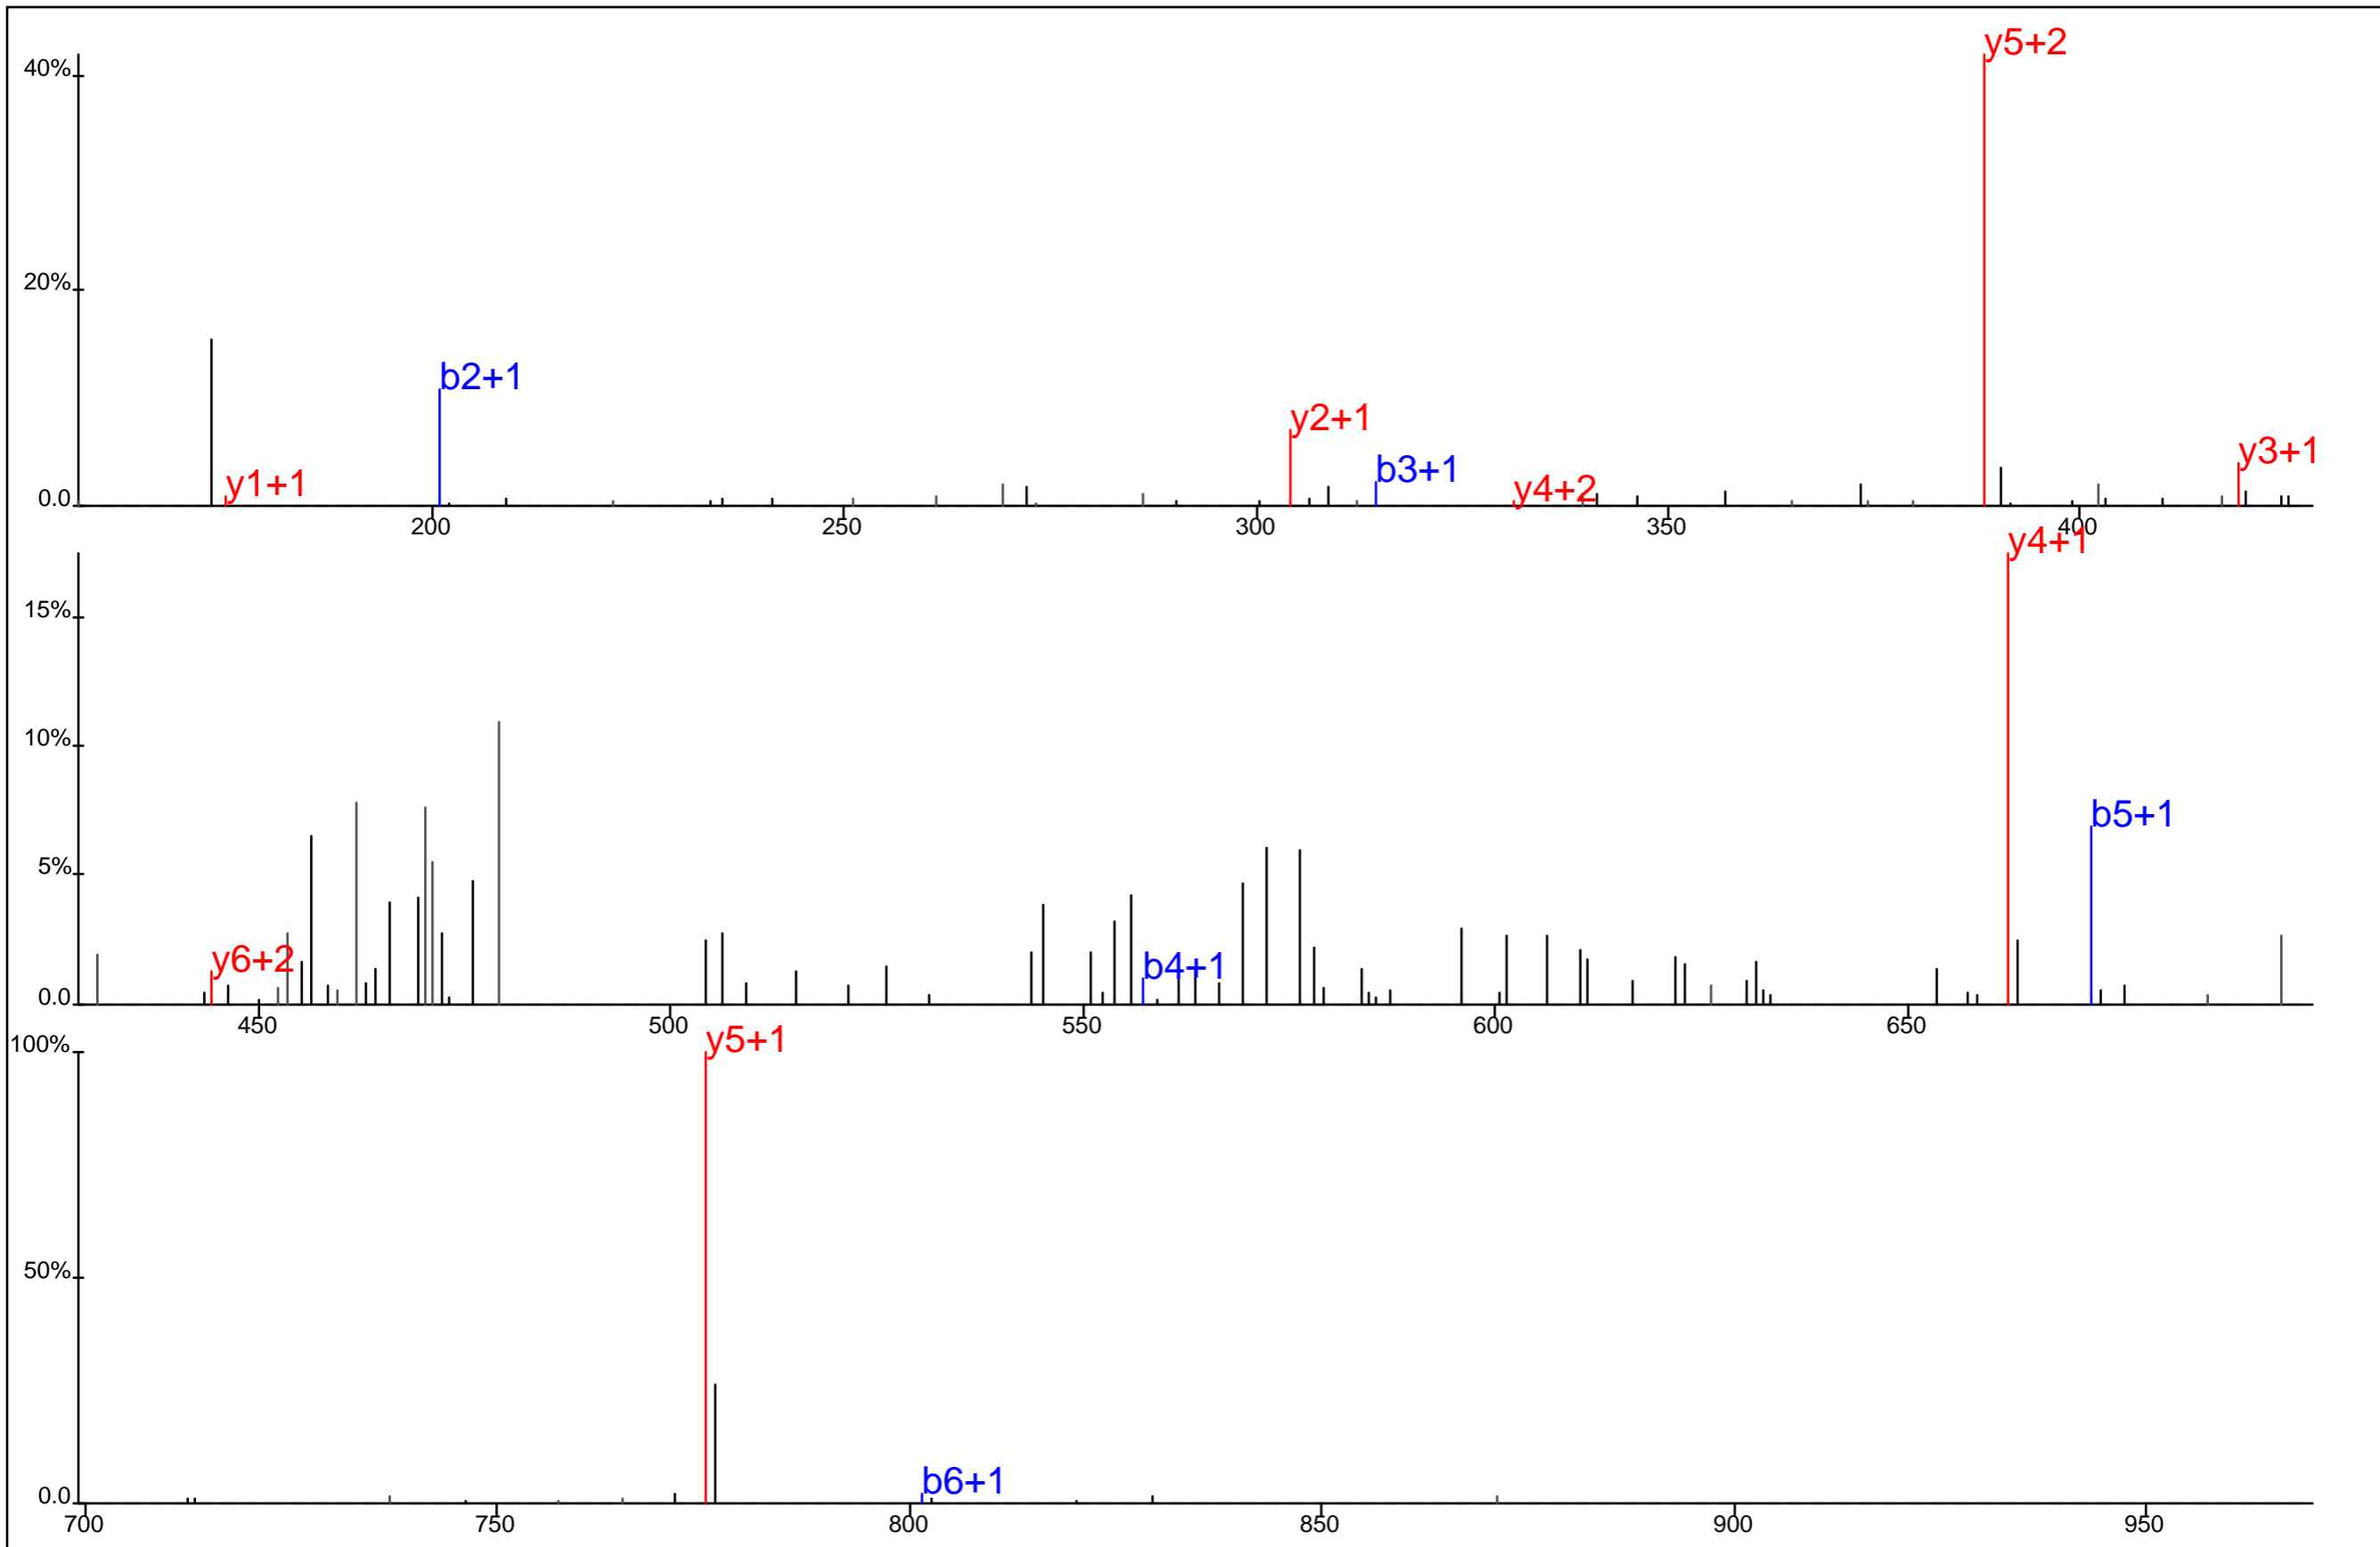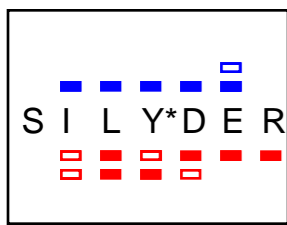

Protein Name: Proteasome subunit C3  
 gi Accession: 4506181  
 Precursor Mass: 488.2149+2  
 Delta Mass: 4.304 ppm  
 XCorr: 28.62





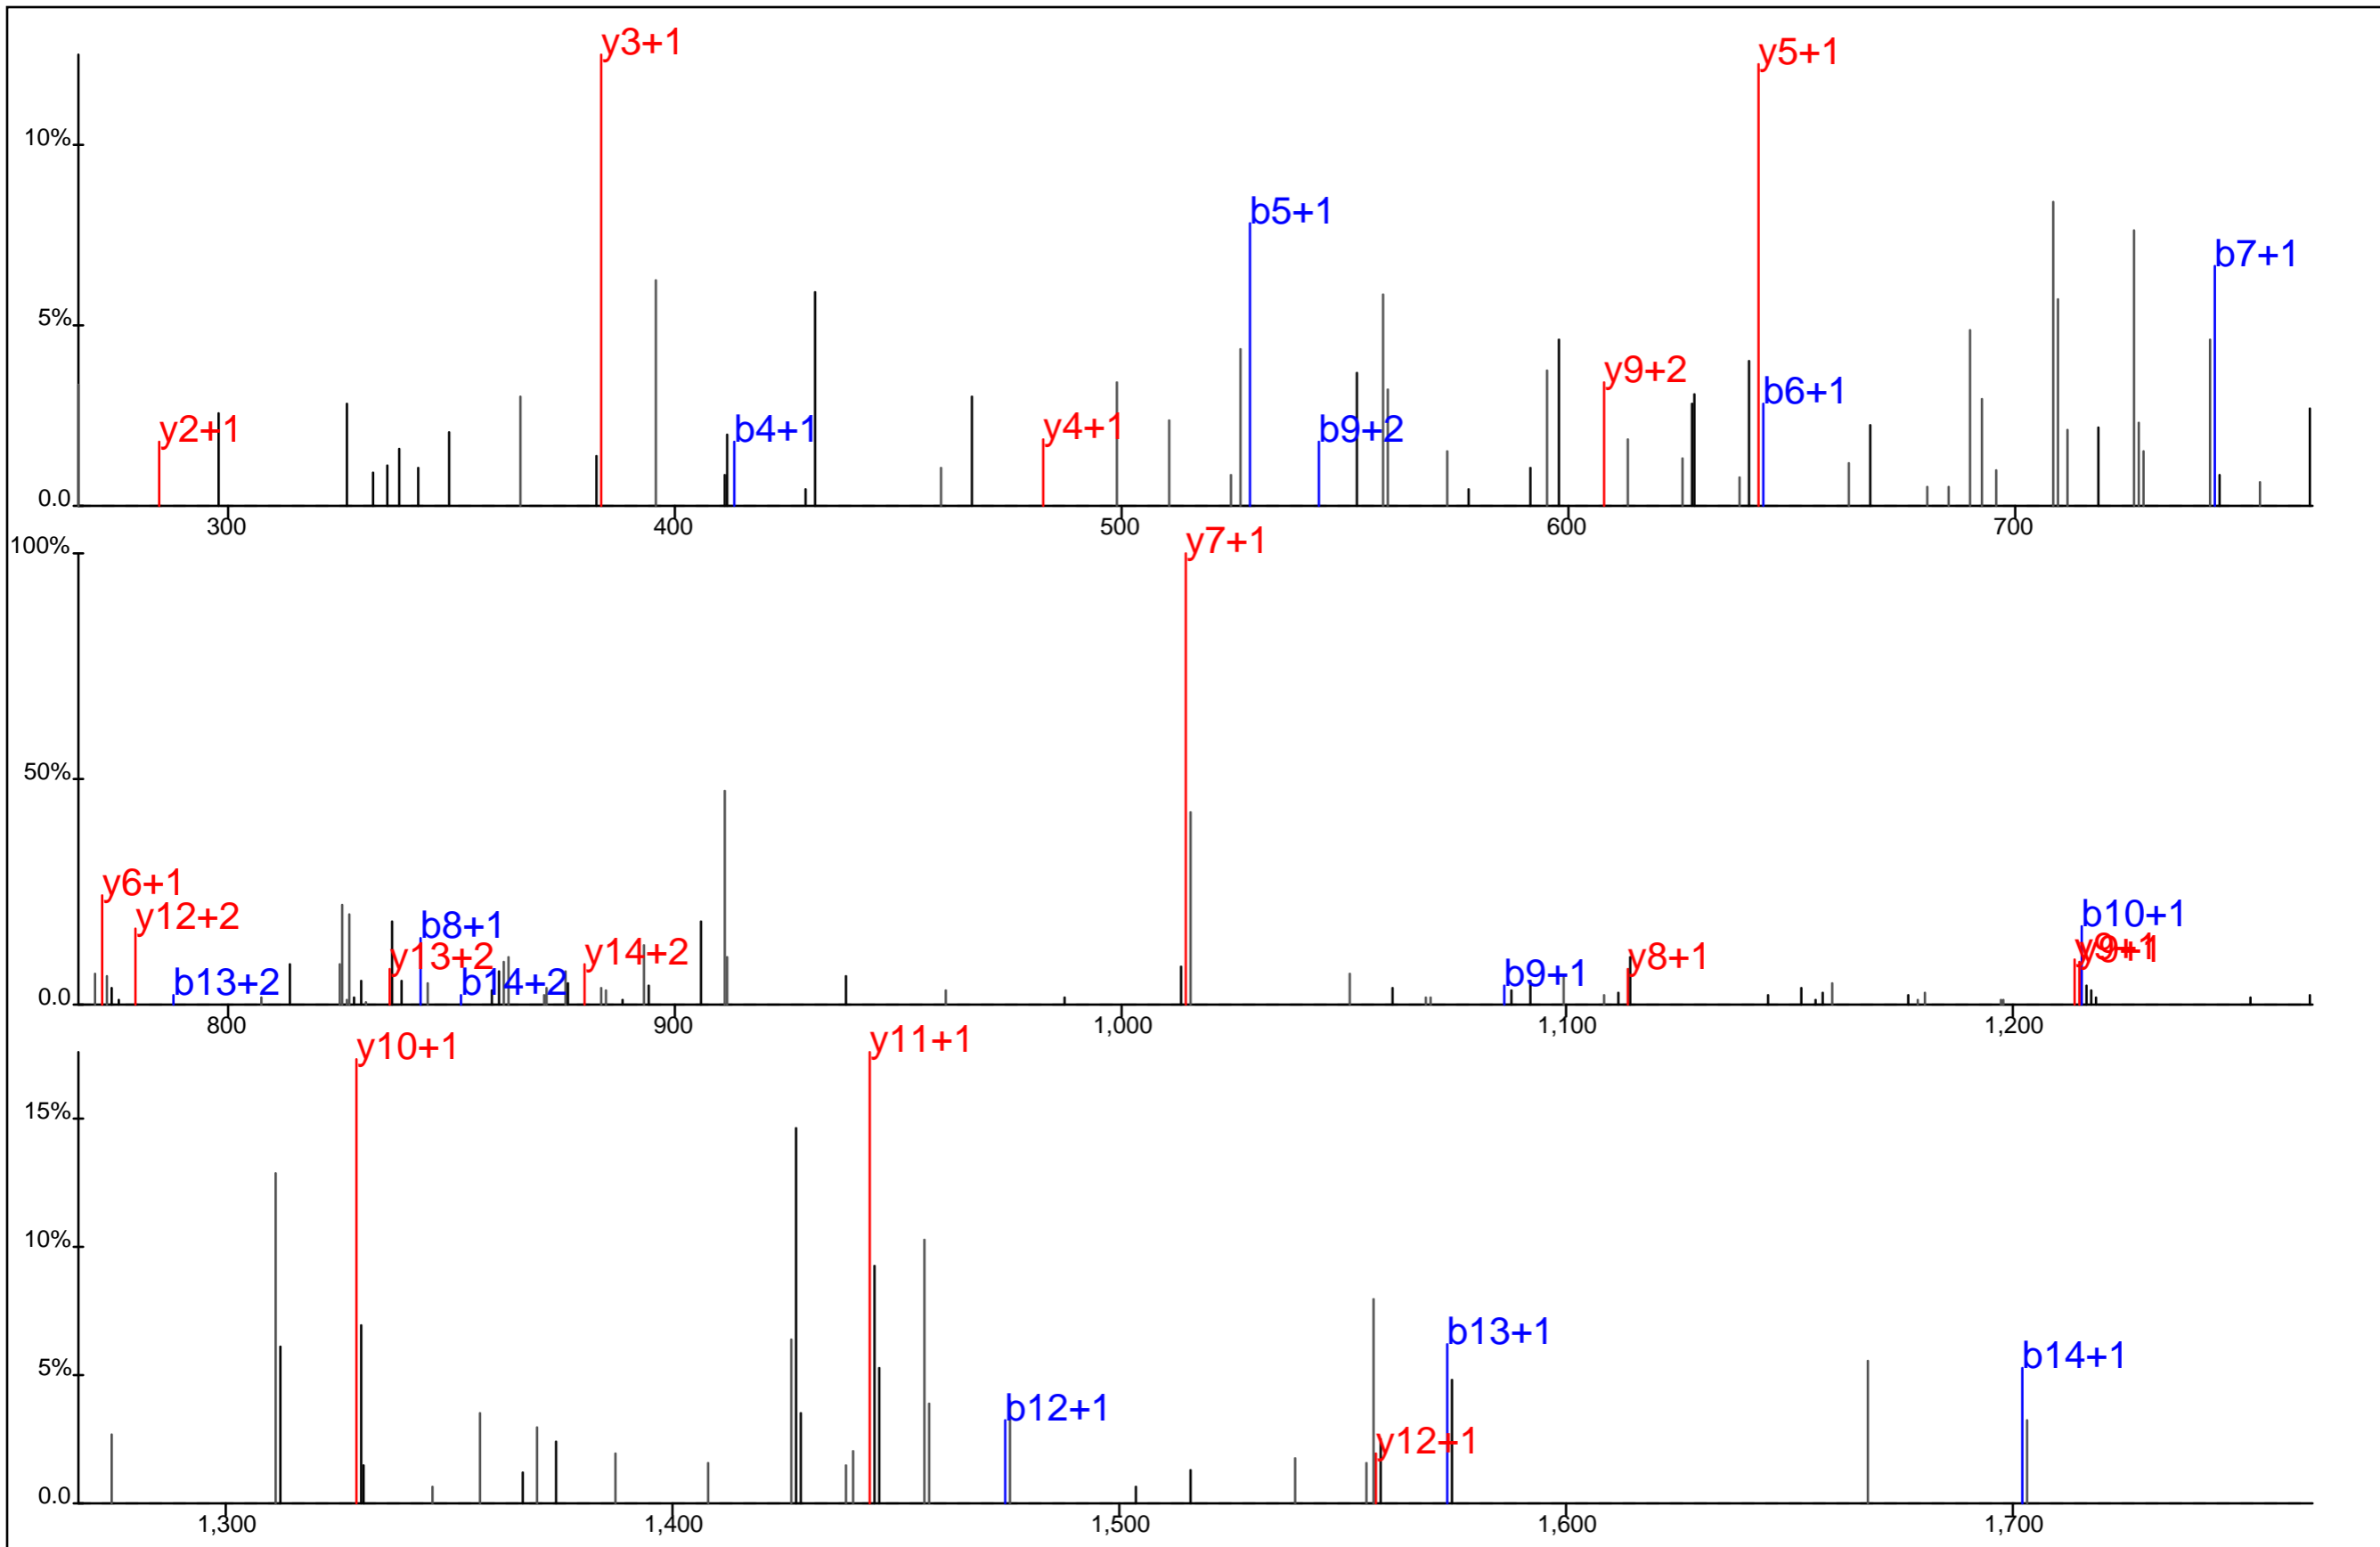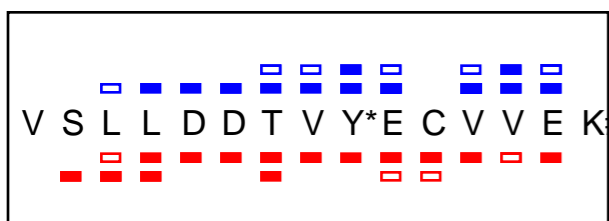

Protein Name: Protein 4.1R  
 gi Accession: 42716291  
 Precursor Mass: 928.9300+2  
 Delta Mass: 2.600 ppm  
 XCorr: 48.43

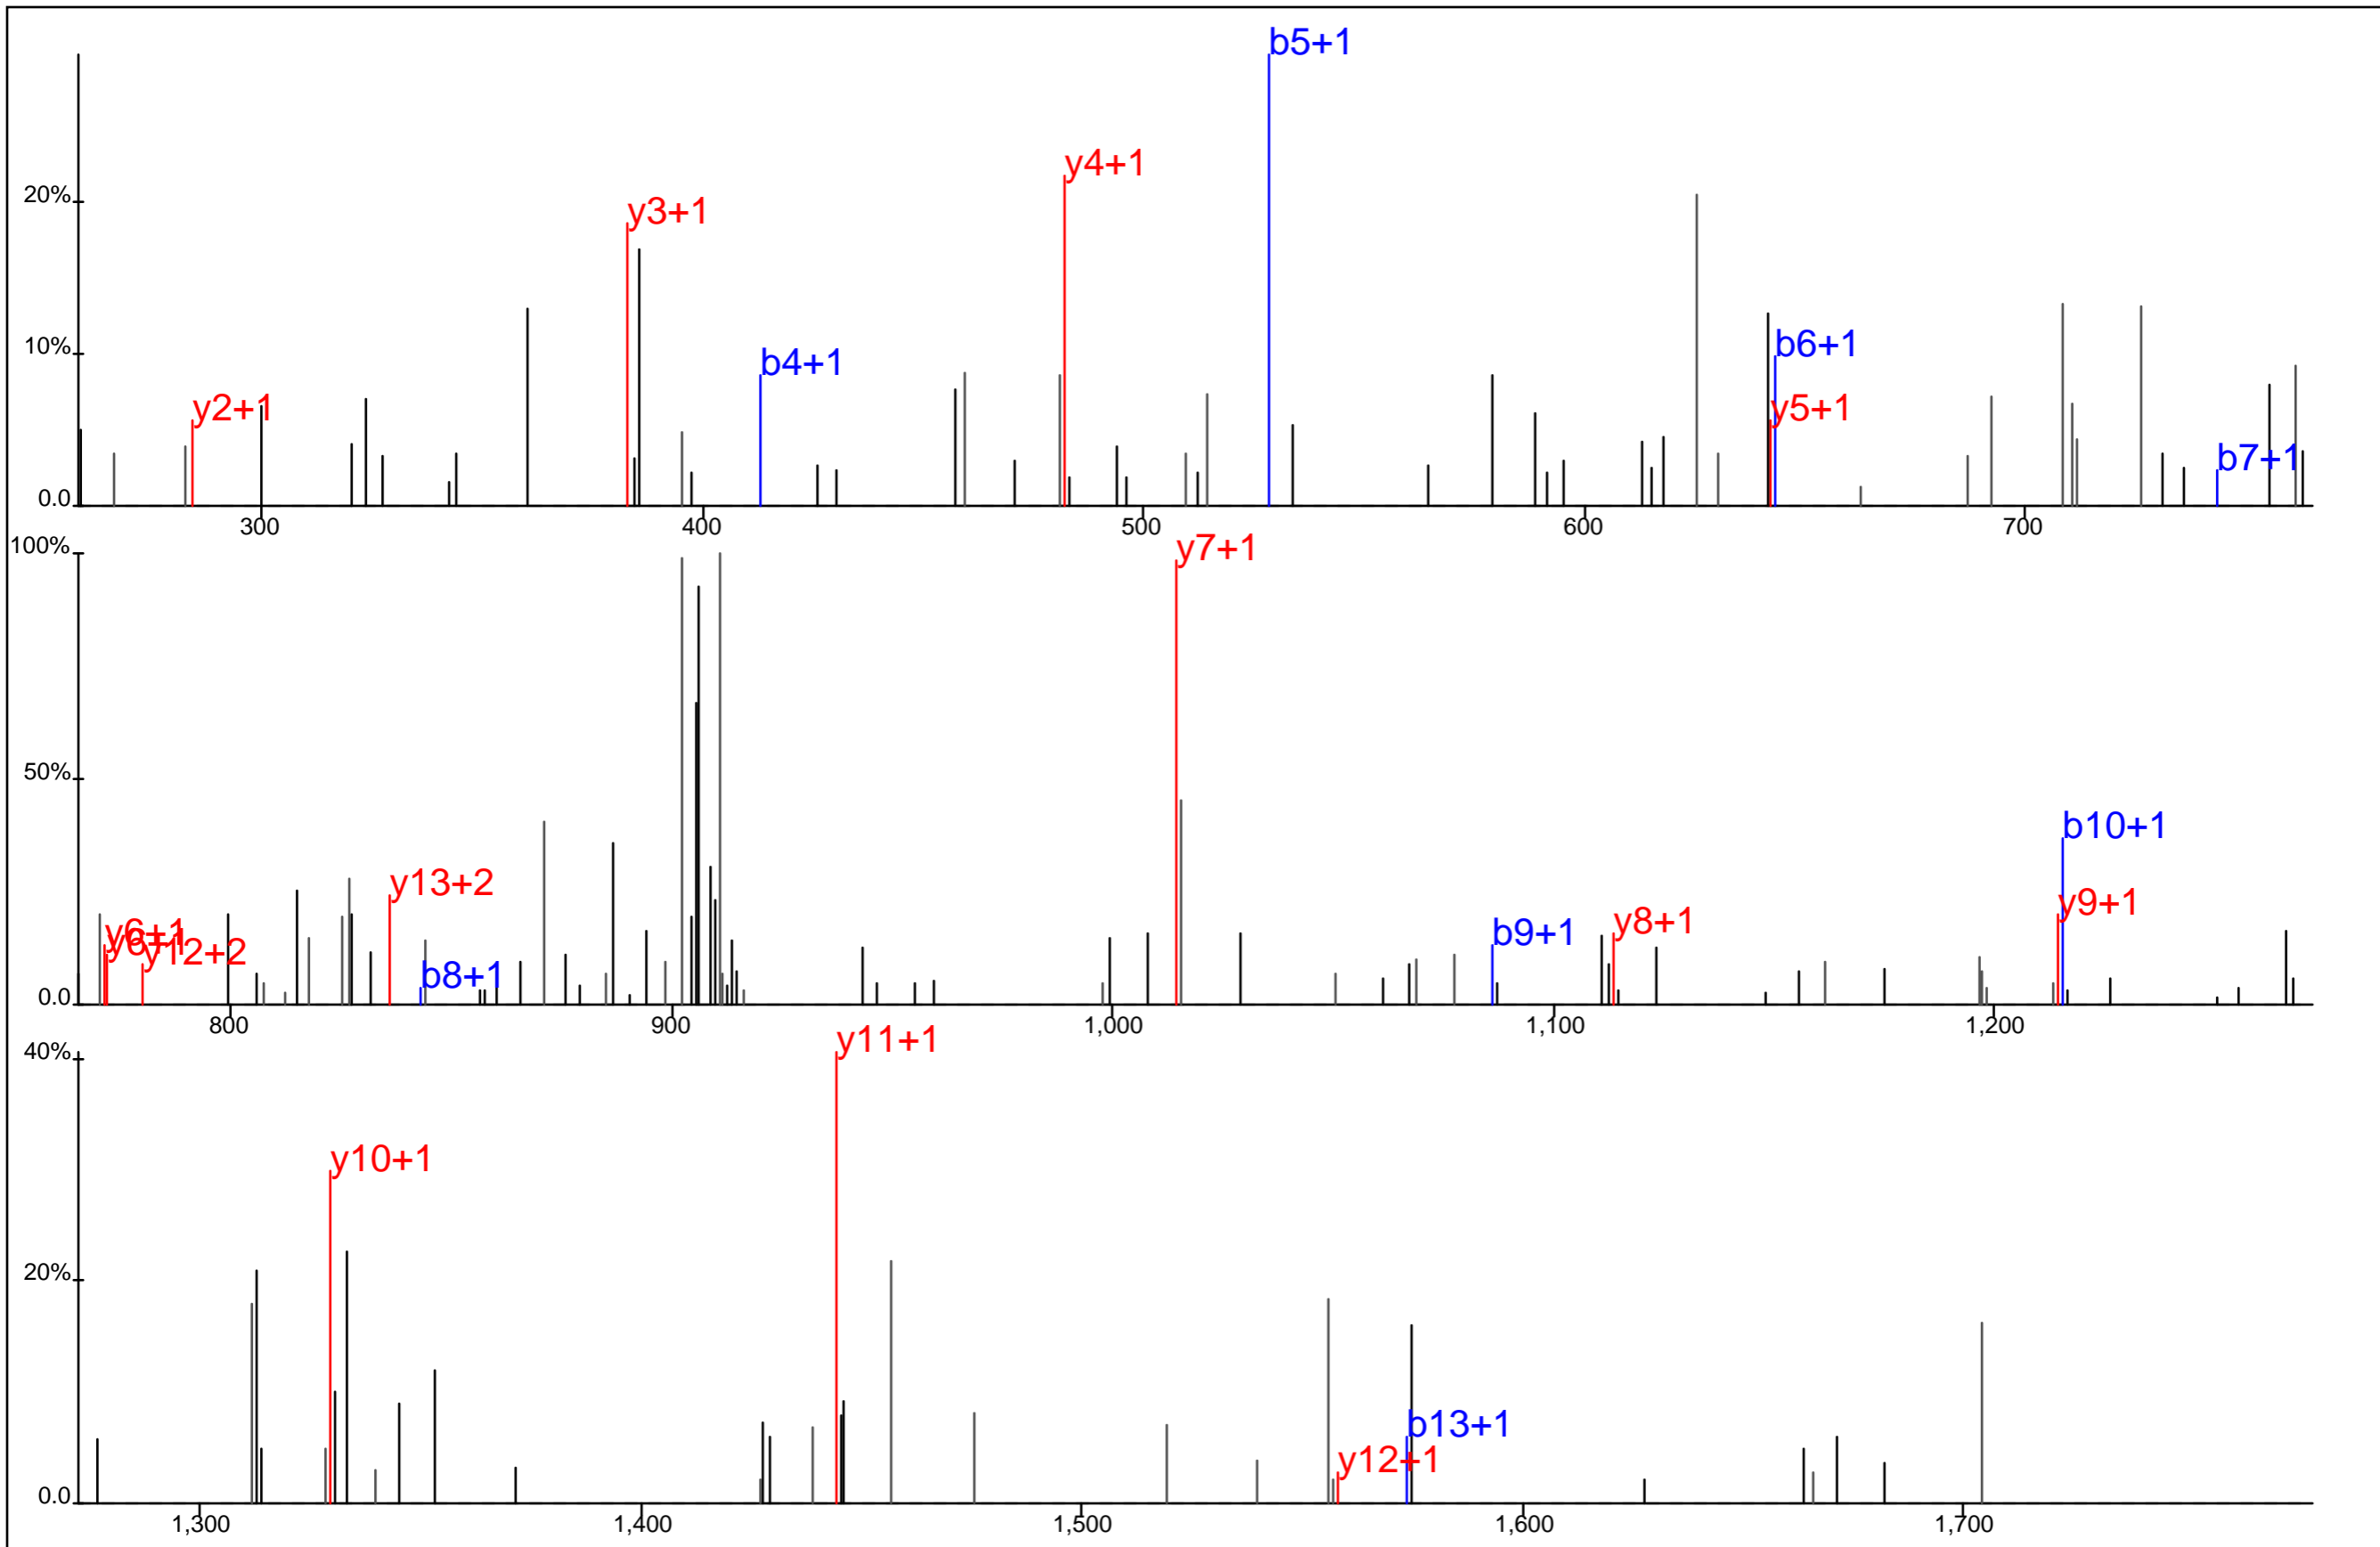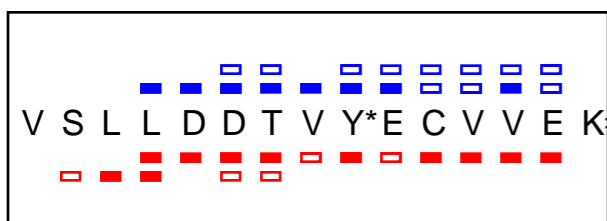

Protein Name: Protein 4.1R  
 gi Accession: 42716291  
 Precursor Mass: 928.9376+2  
 Delta Mass: 10.818 ppm  
 XCorr: 36.24



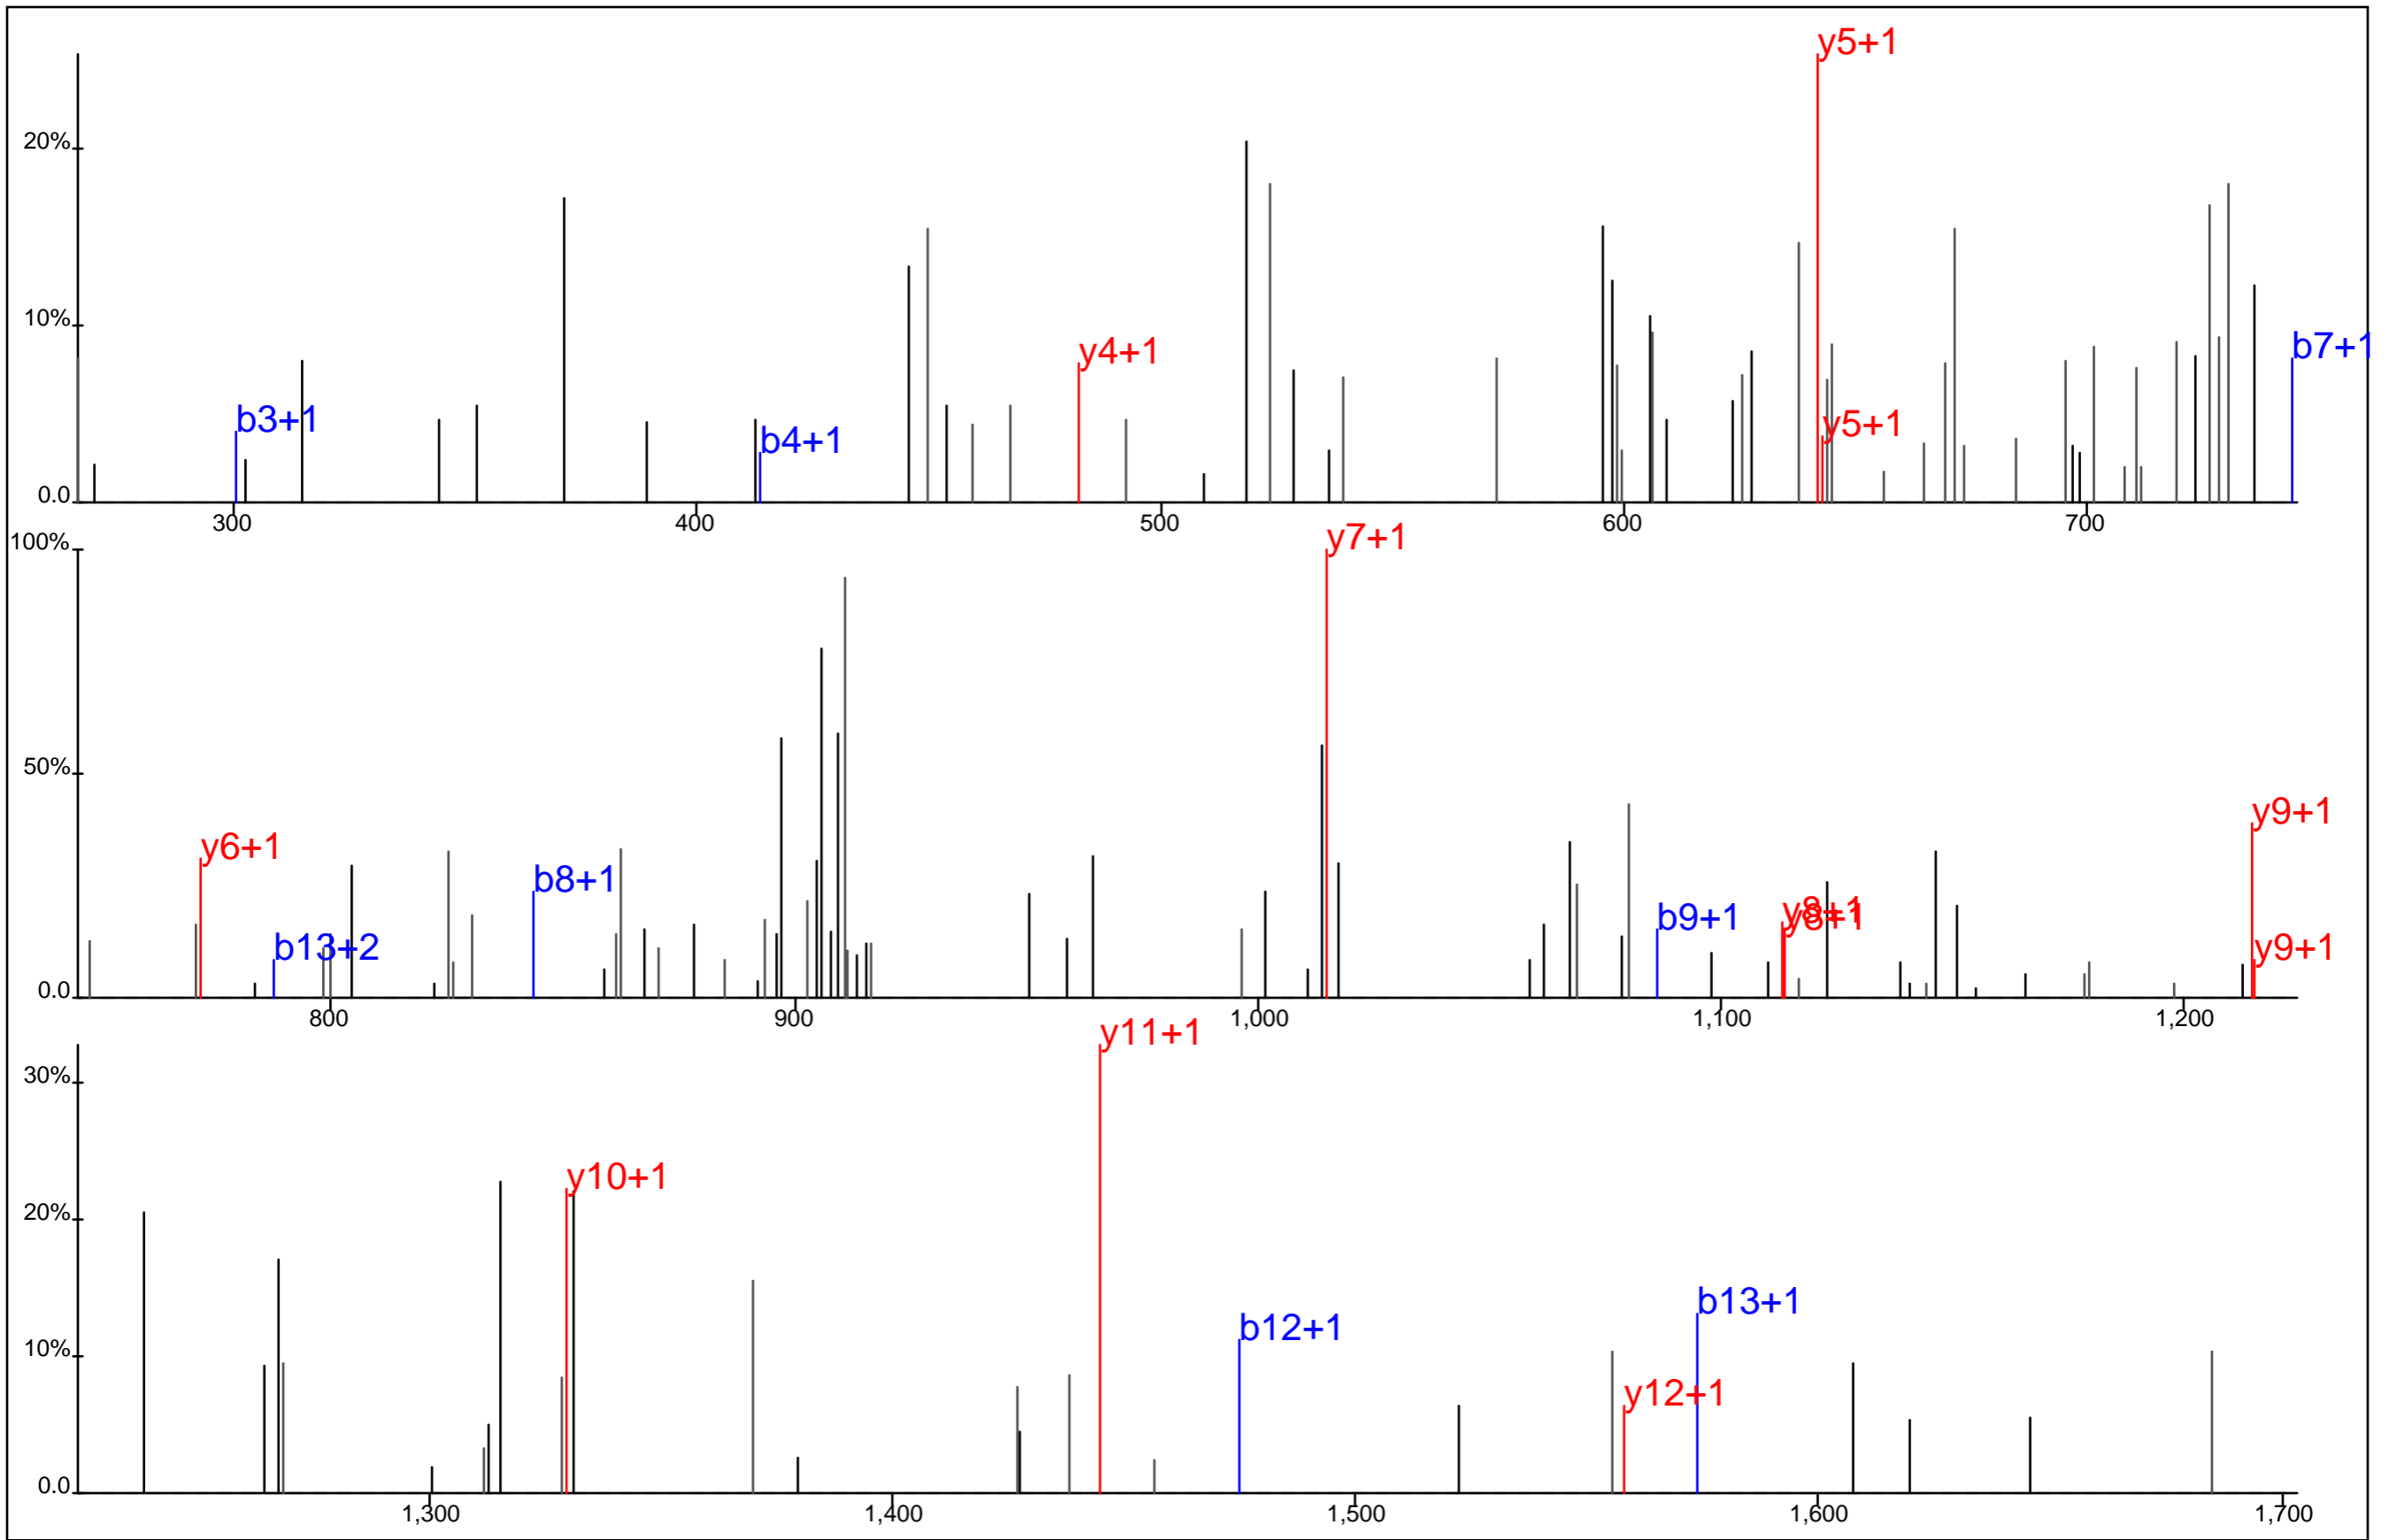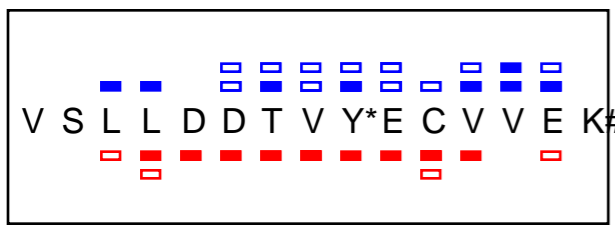

Protein Name: Protein 4.1R  
 gi Accession: 42716291  
 Precursor Mass: 928.9272+2  
 Delta Mass: 0.427 ppm  
 XCorr: 28.64

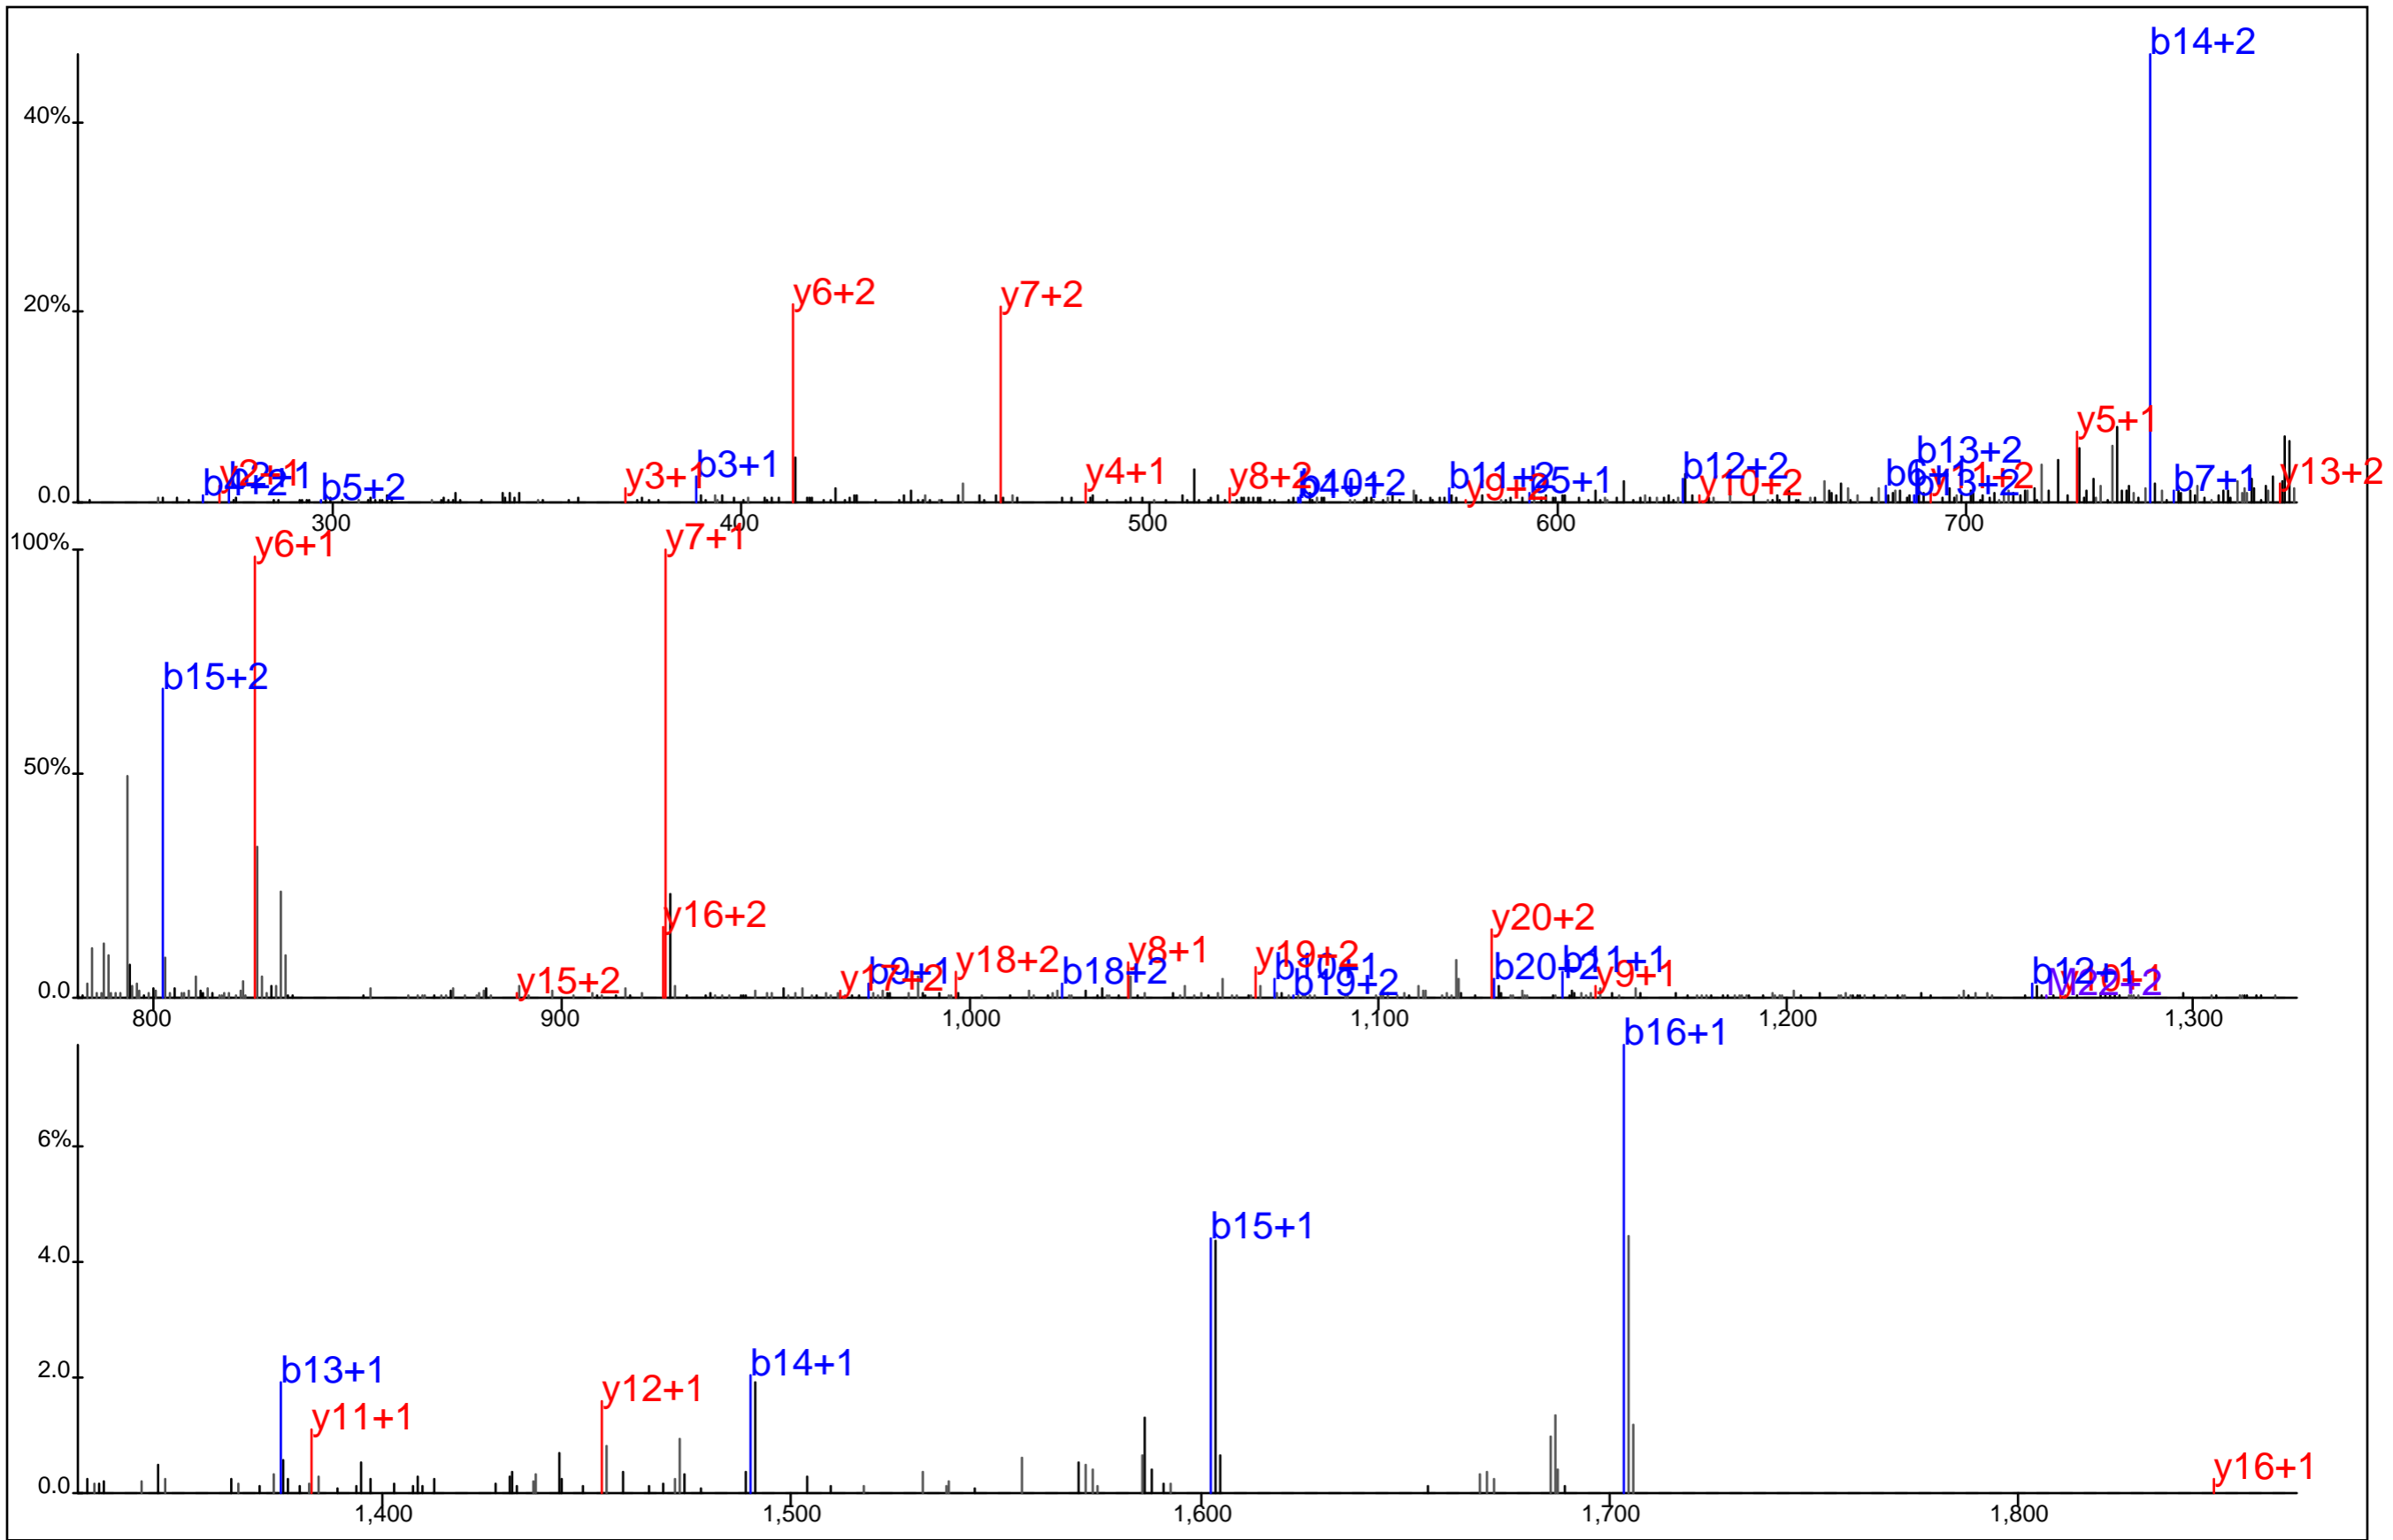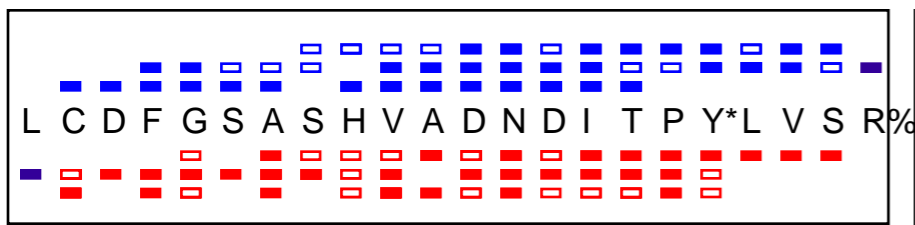

Protein Name: PRP4 kinase  
 gi Accession: 3043596  
 Precursor Mass: 843.0456+3  
 Delta Mass: 0.941 ppm  
 XCorr: 67.52



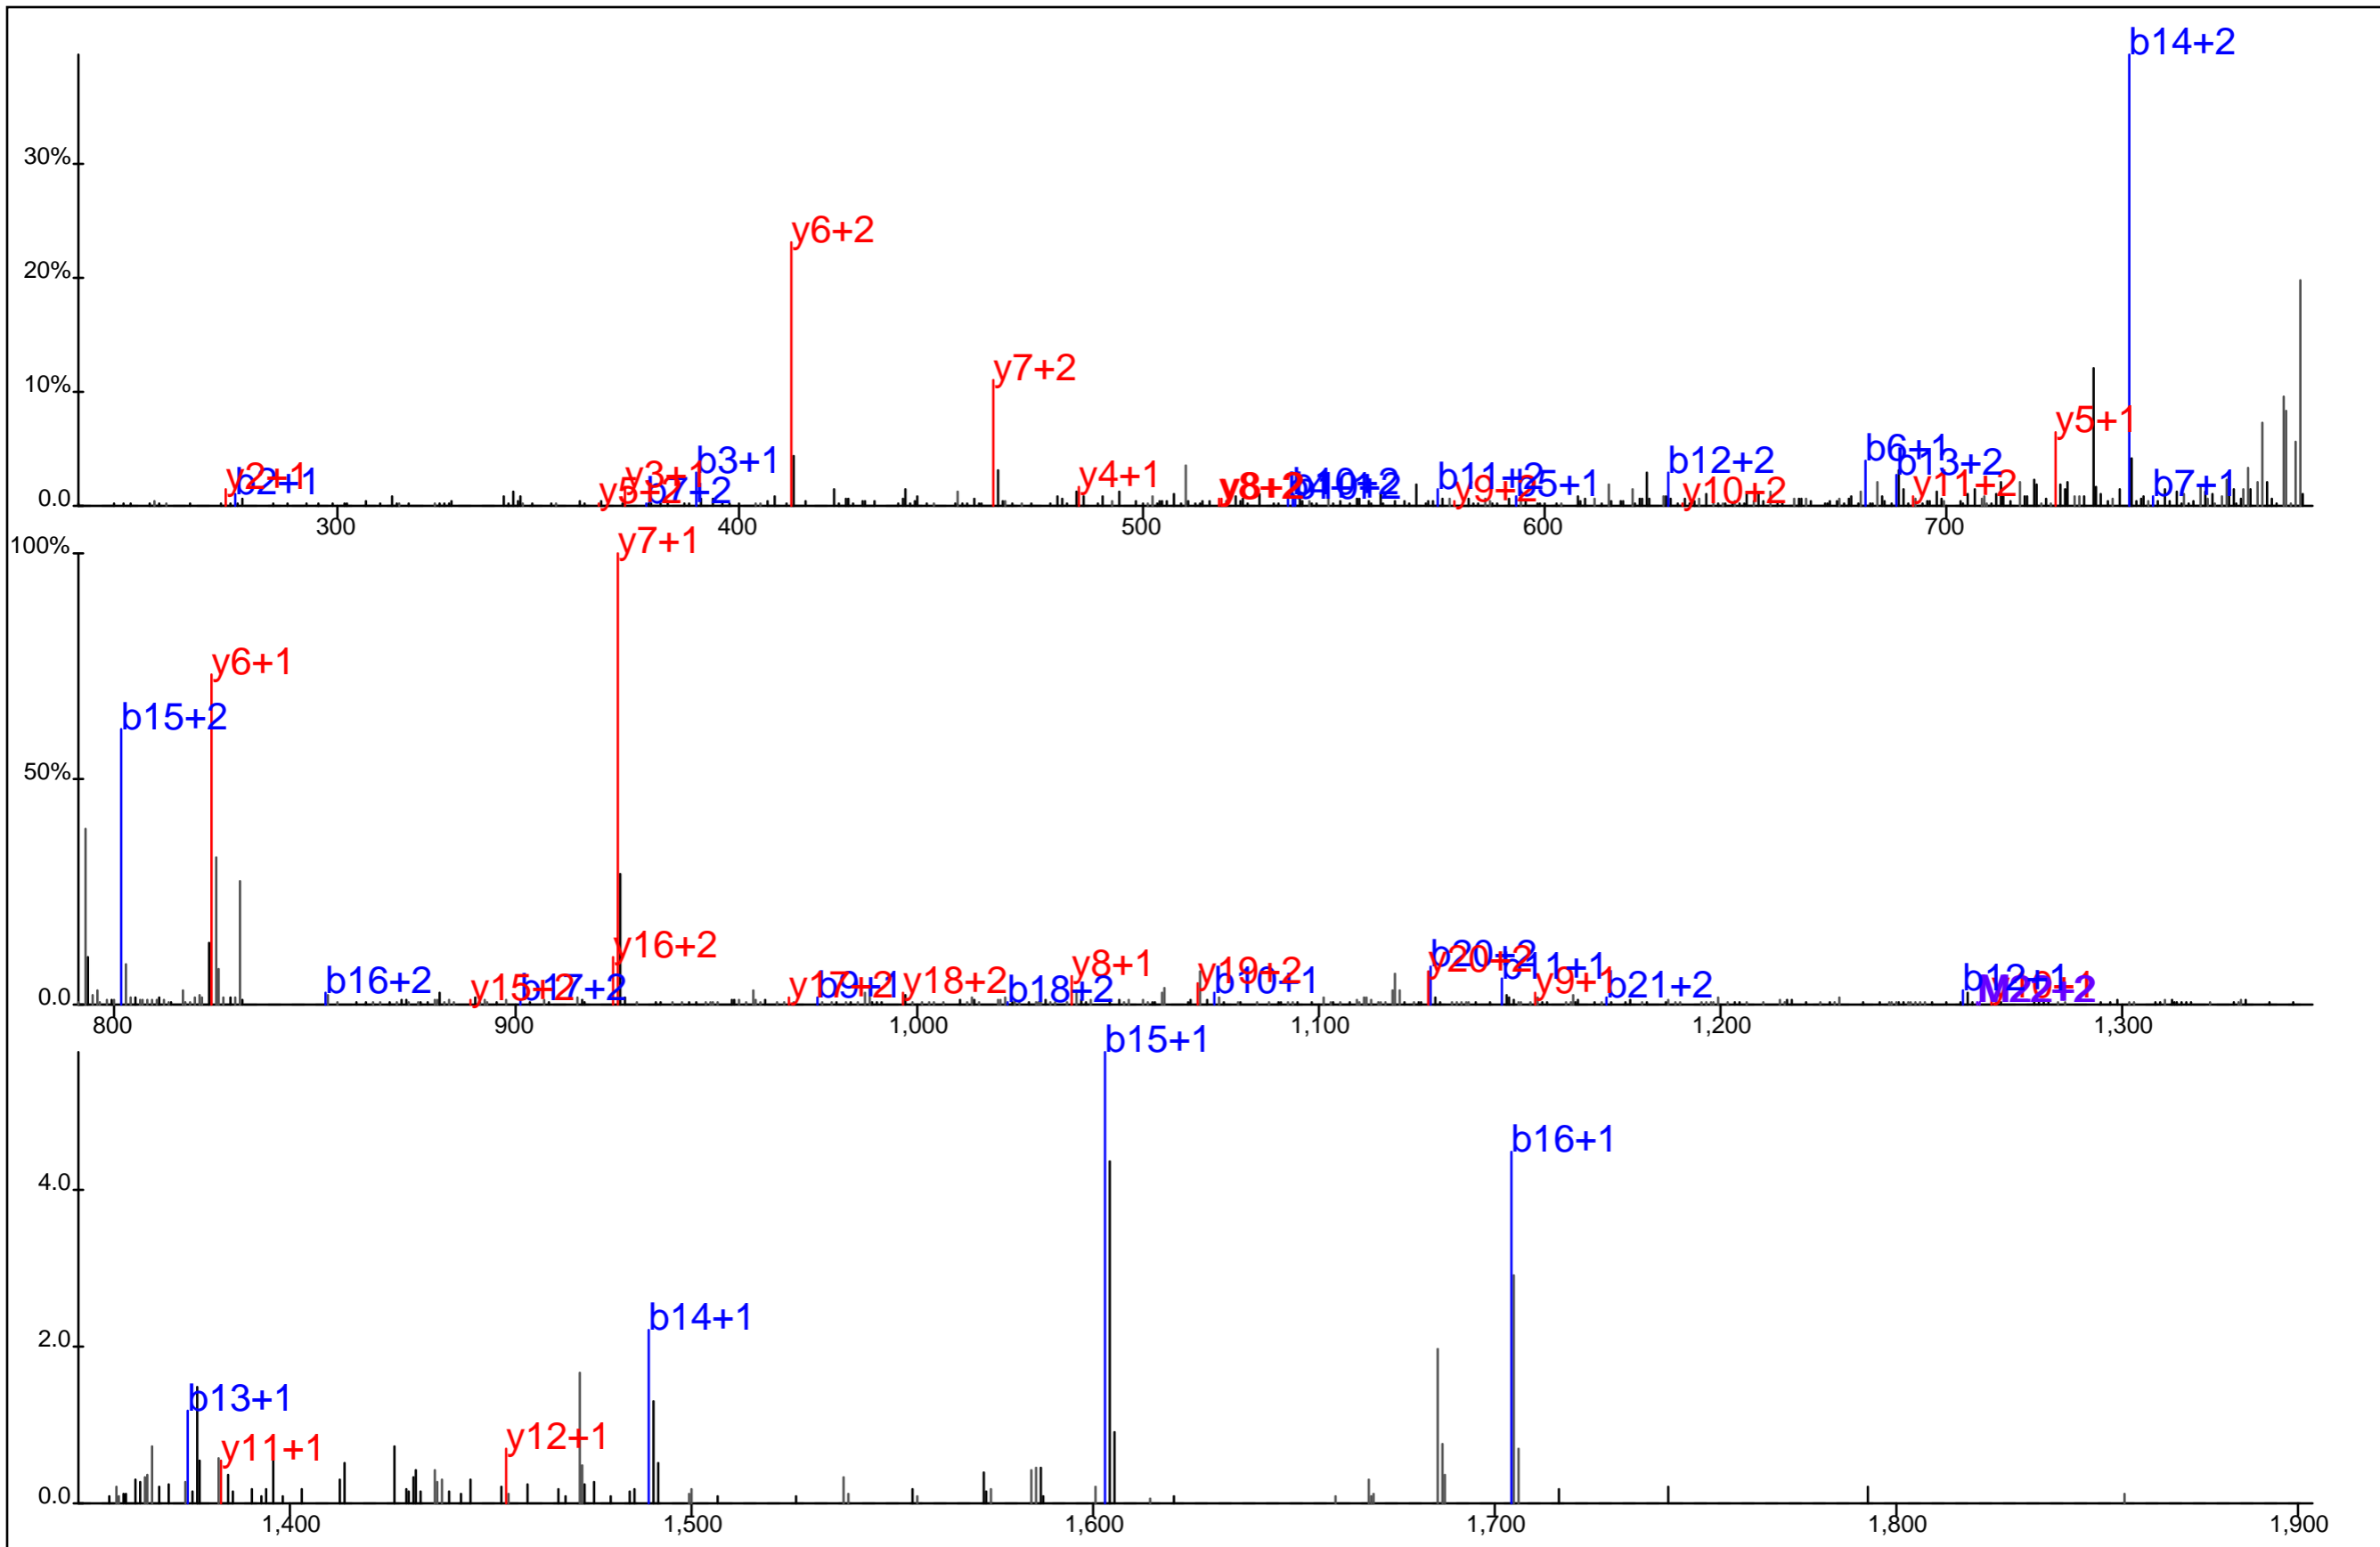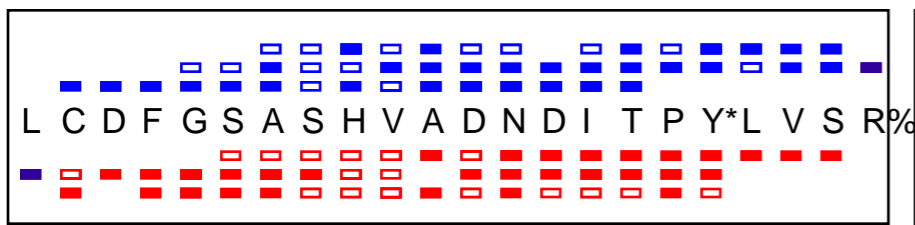

Protein Name: PRP4 kinase  
 gi Accession: 3043596  
 Precursor Mass: 843.0478+3  
 Delta Mass: 3.549 ppm  
 XCorr: 60.67

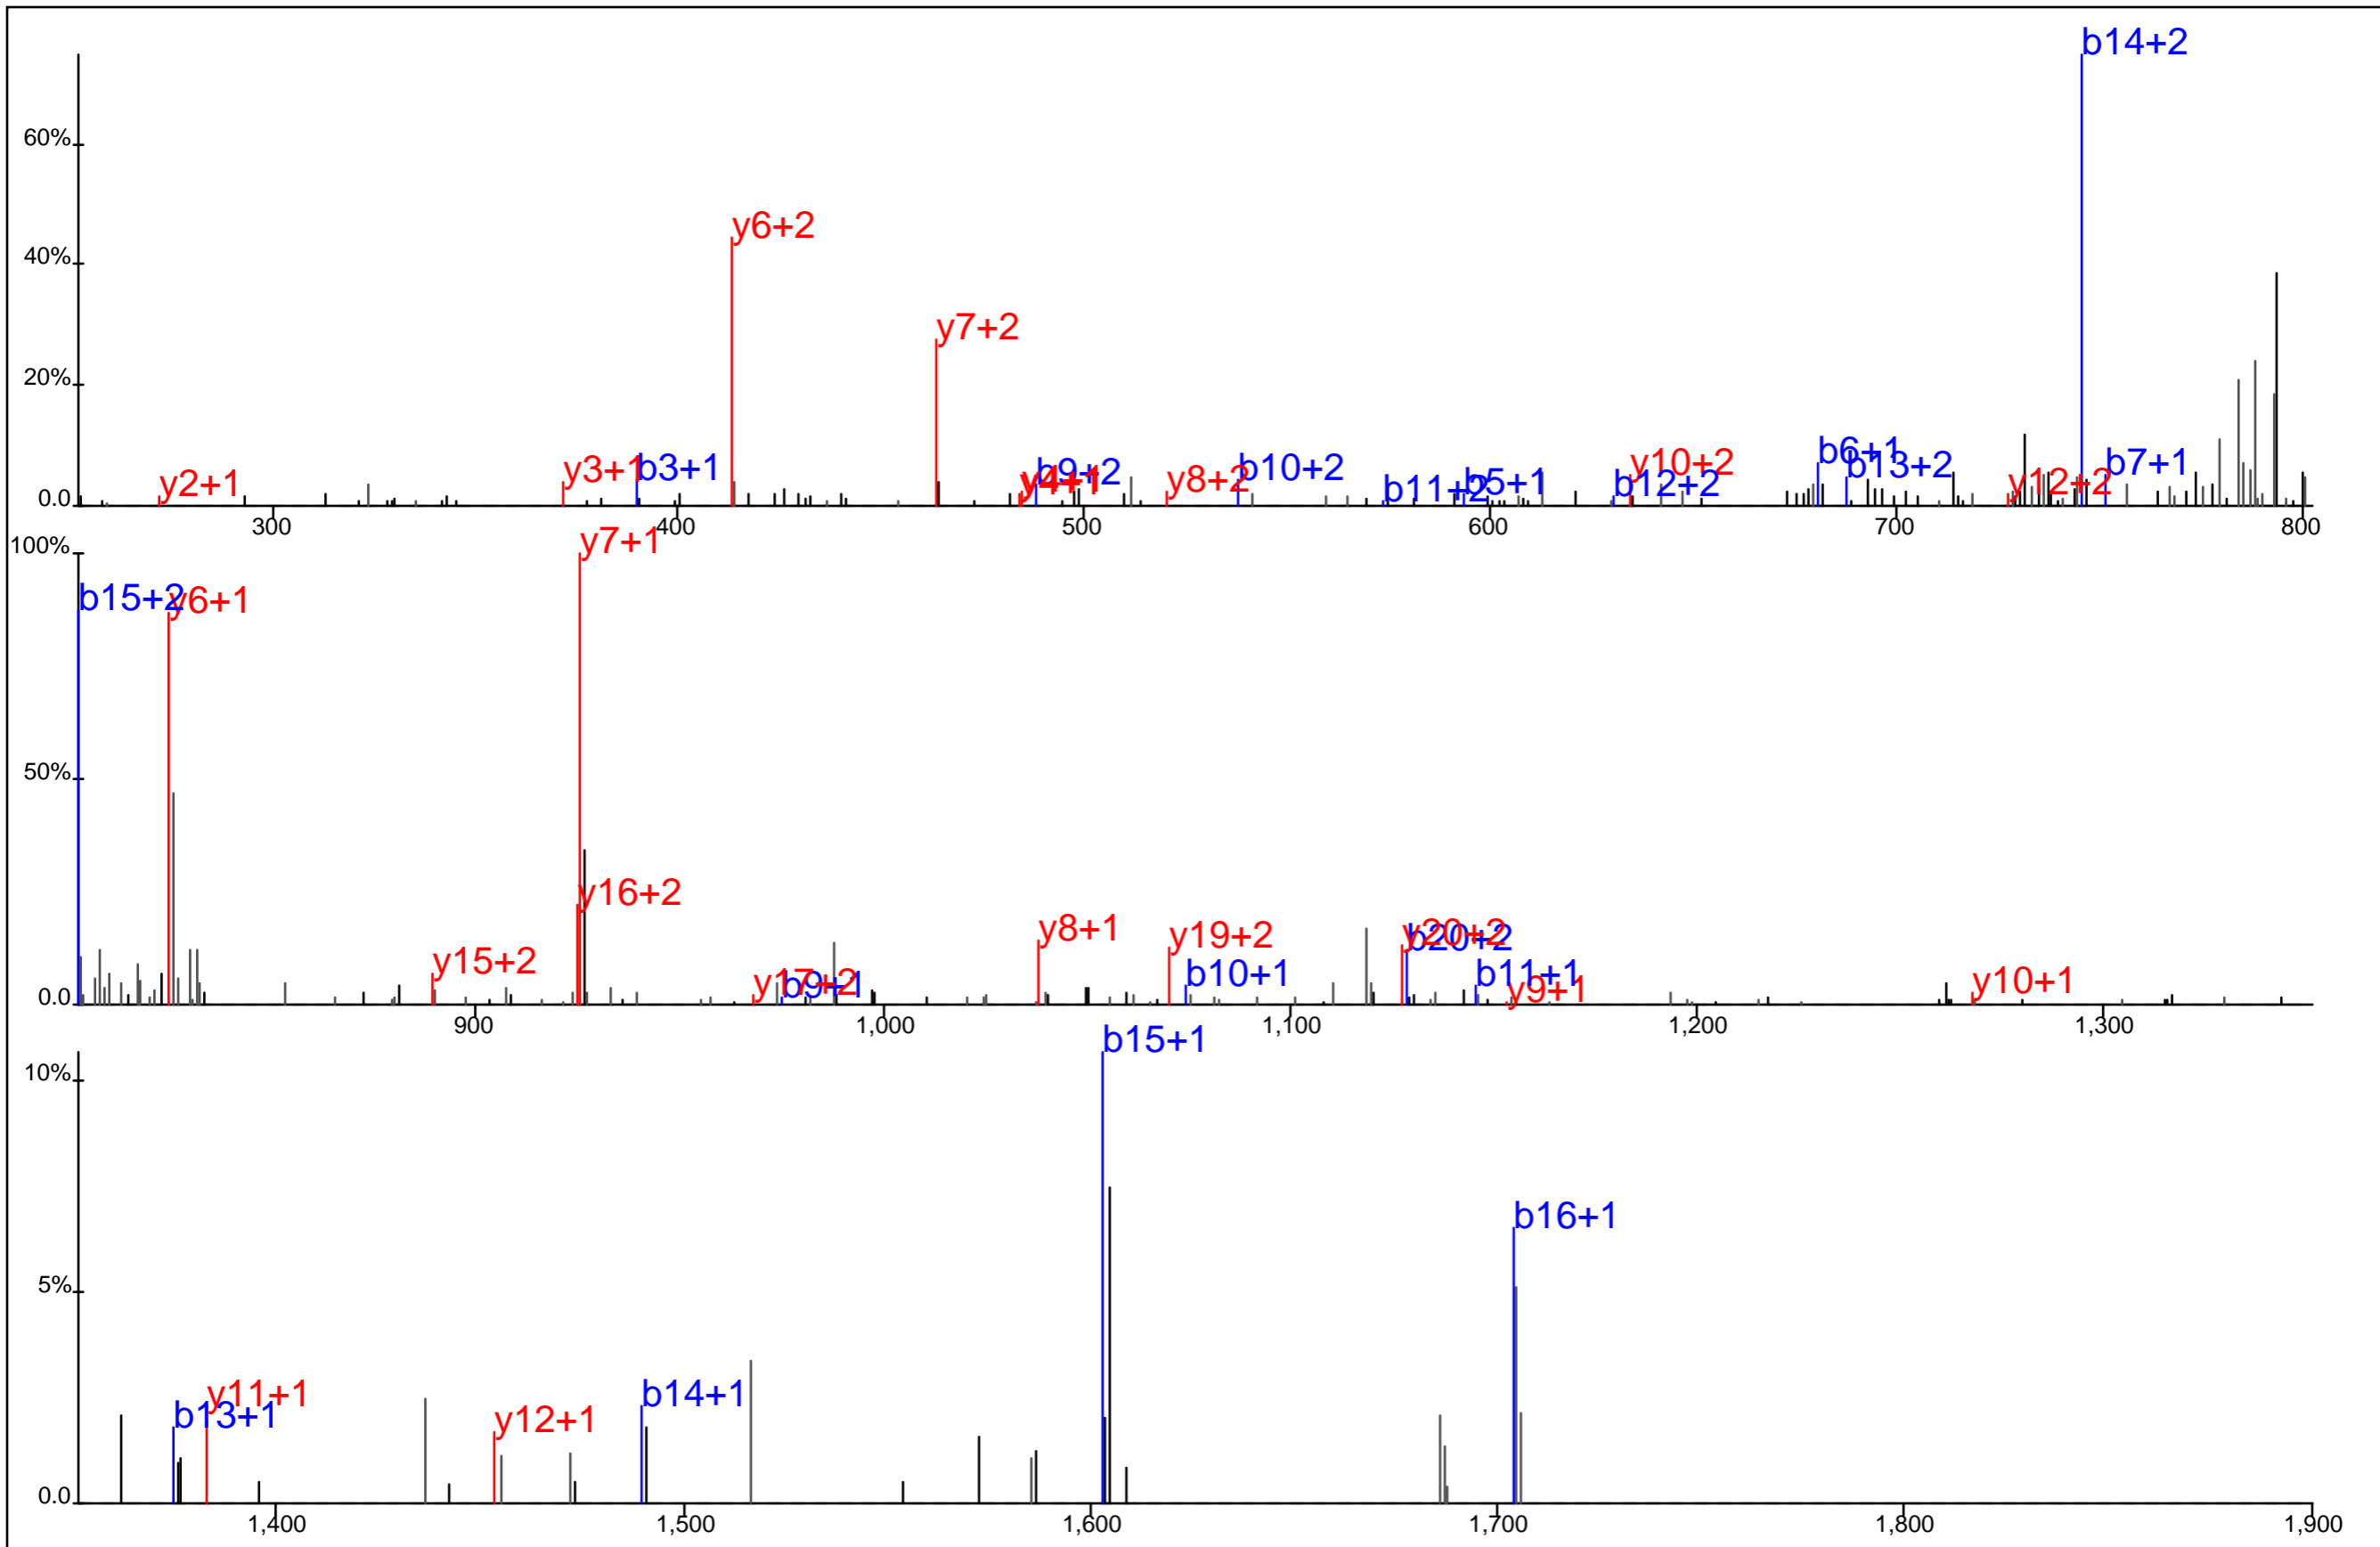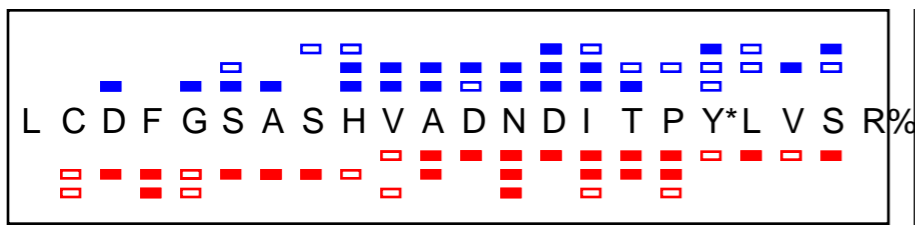

Protein Name: PRP4 kinase  
 gi Accession: 3043596  
 Precursor Mass: 843.0500+3  
 Delta Mass: 6.227 ppm  
 XCorr: 40.3

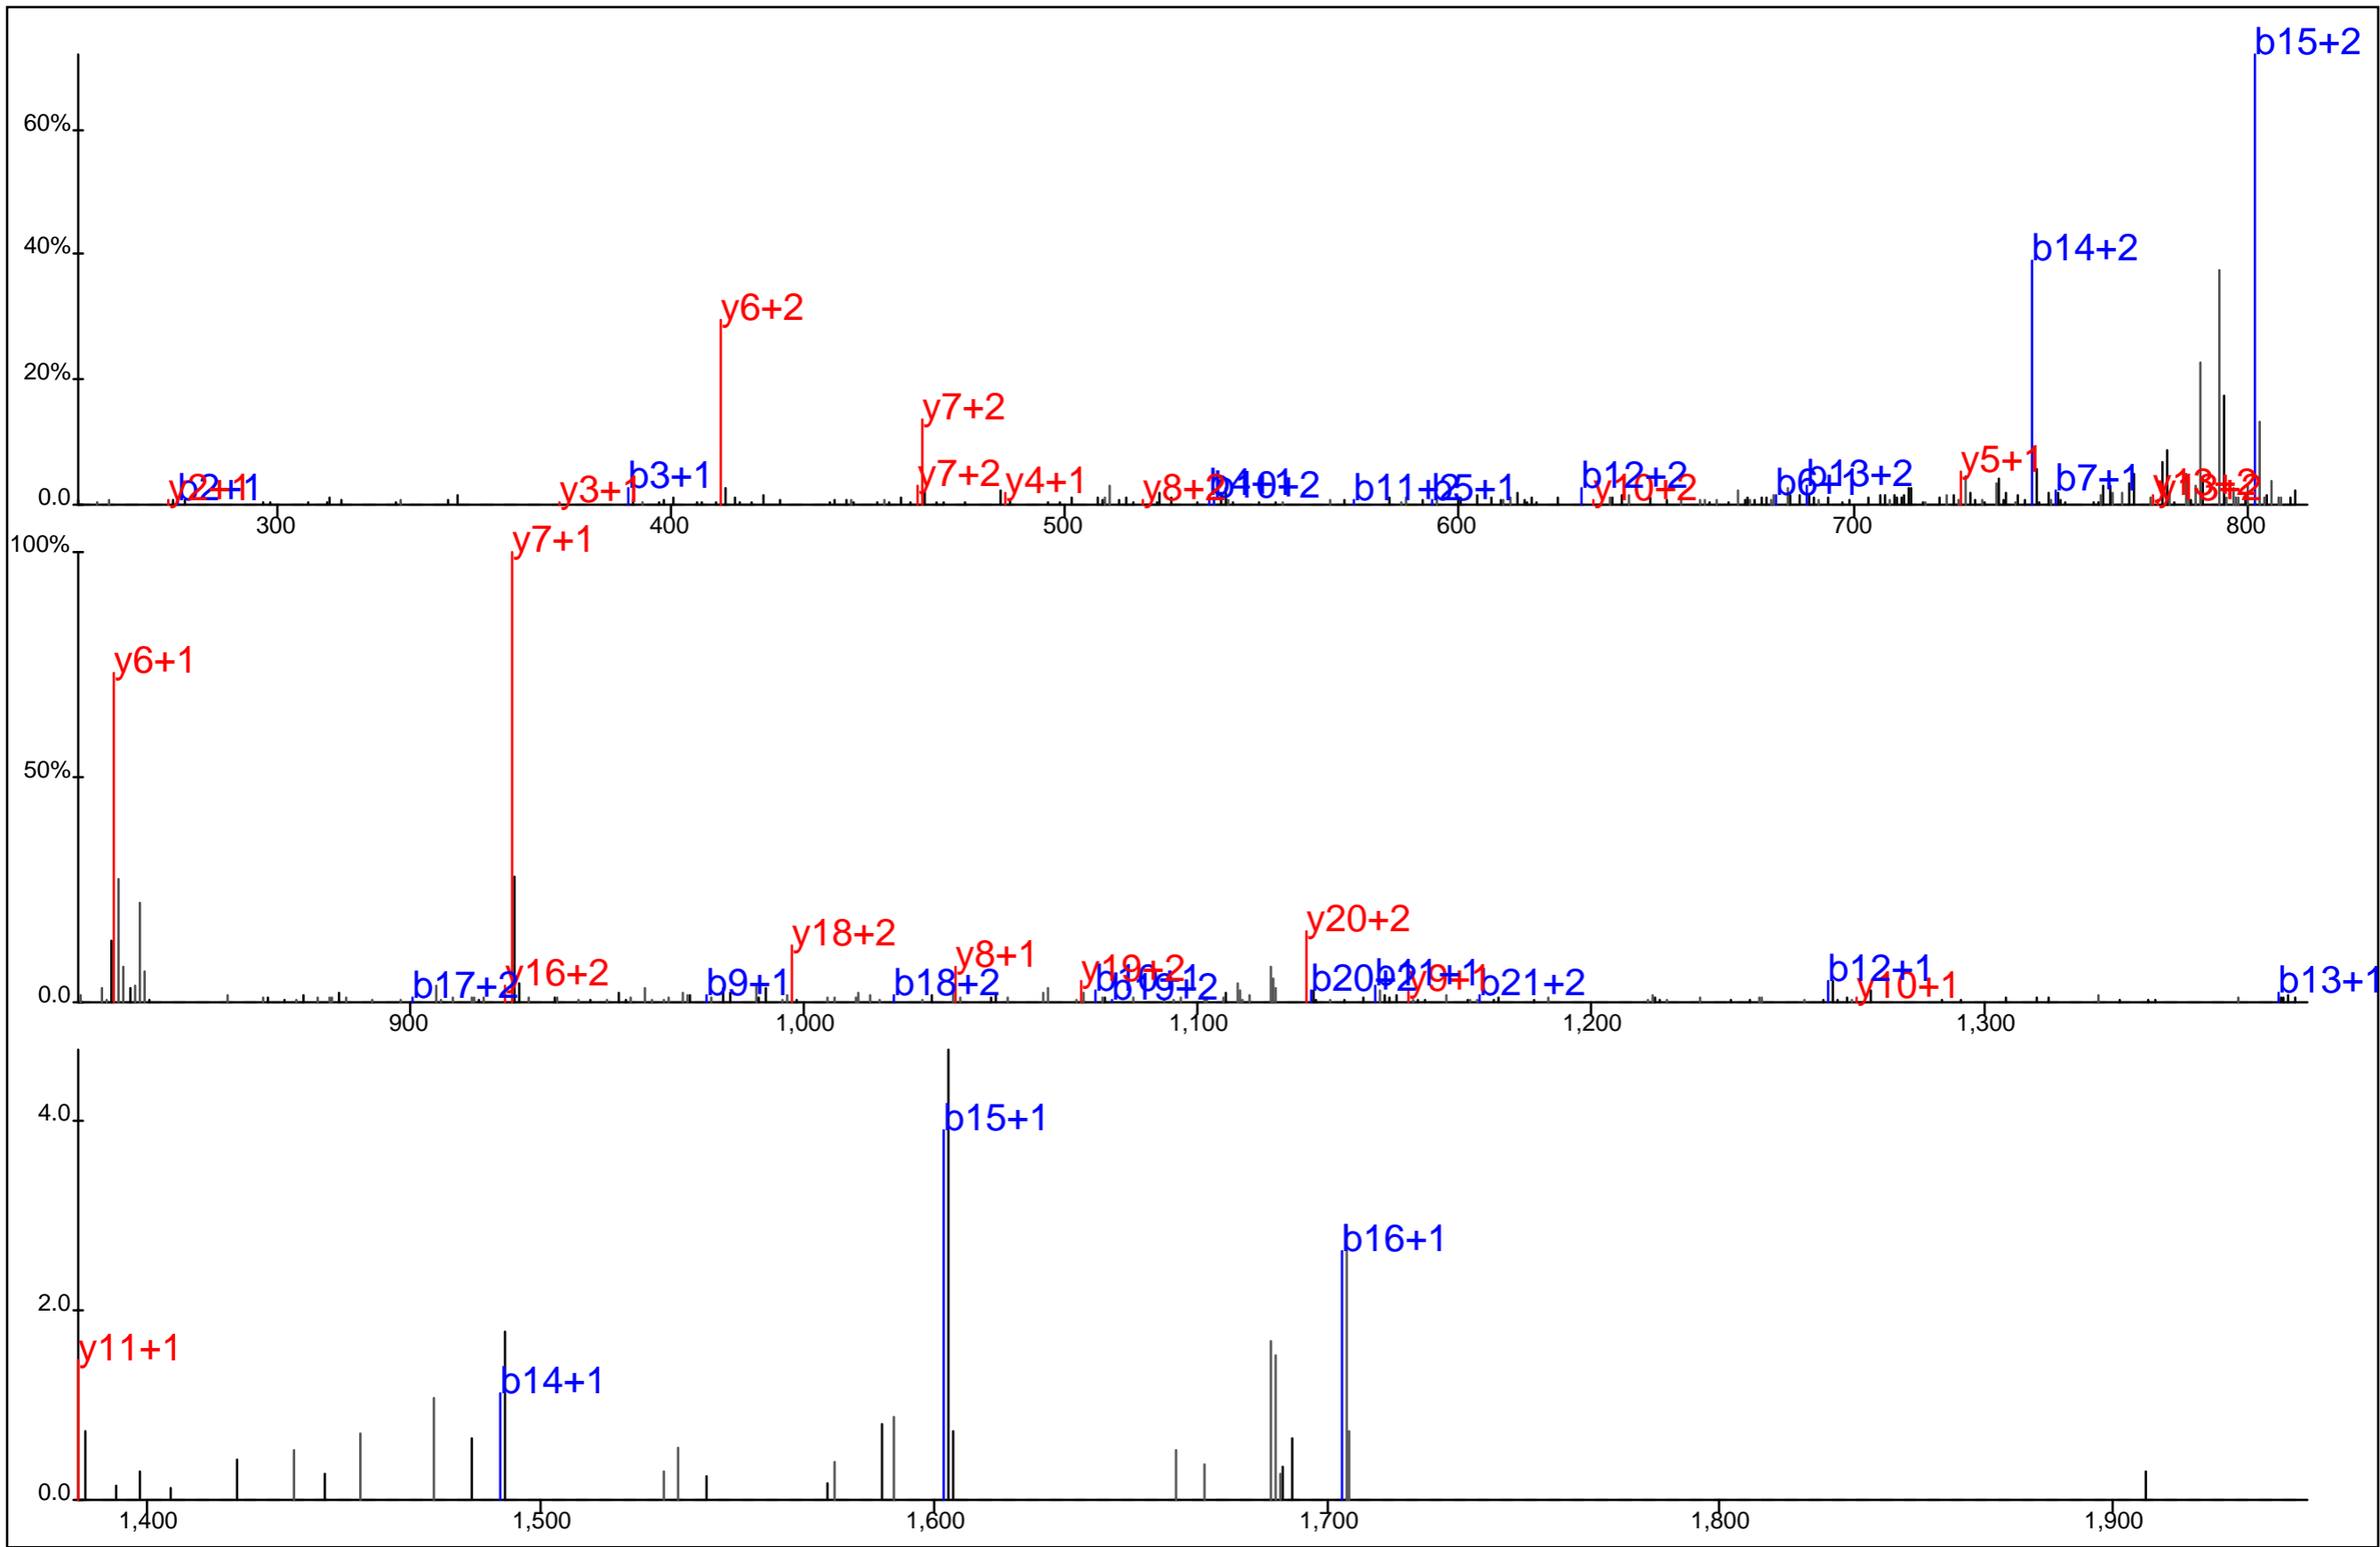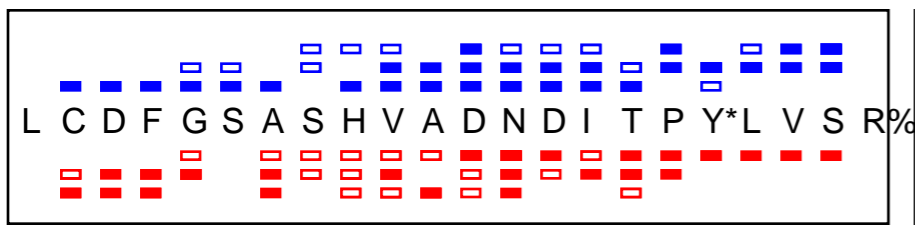

Protein Name: PRP4 kinase  
 gi Accession: 3043596  
 Precursor Mass: 843.0464+3  
 Delta Mass: 1.882 ppm  
 XCorr: 31.97

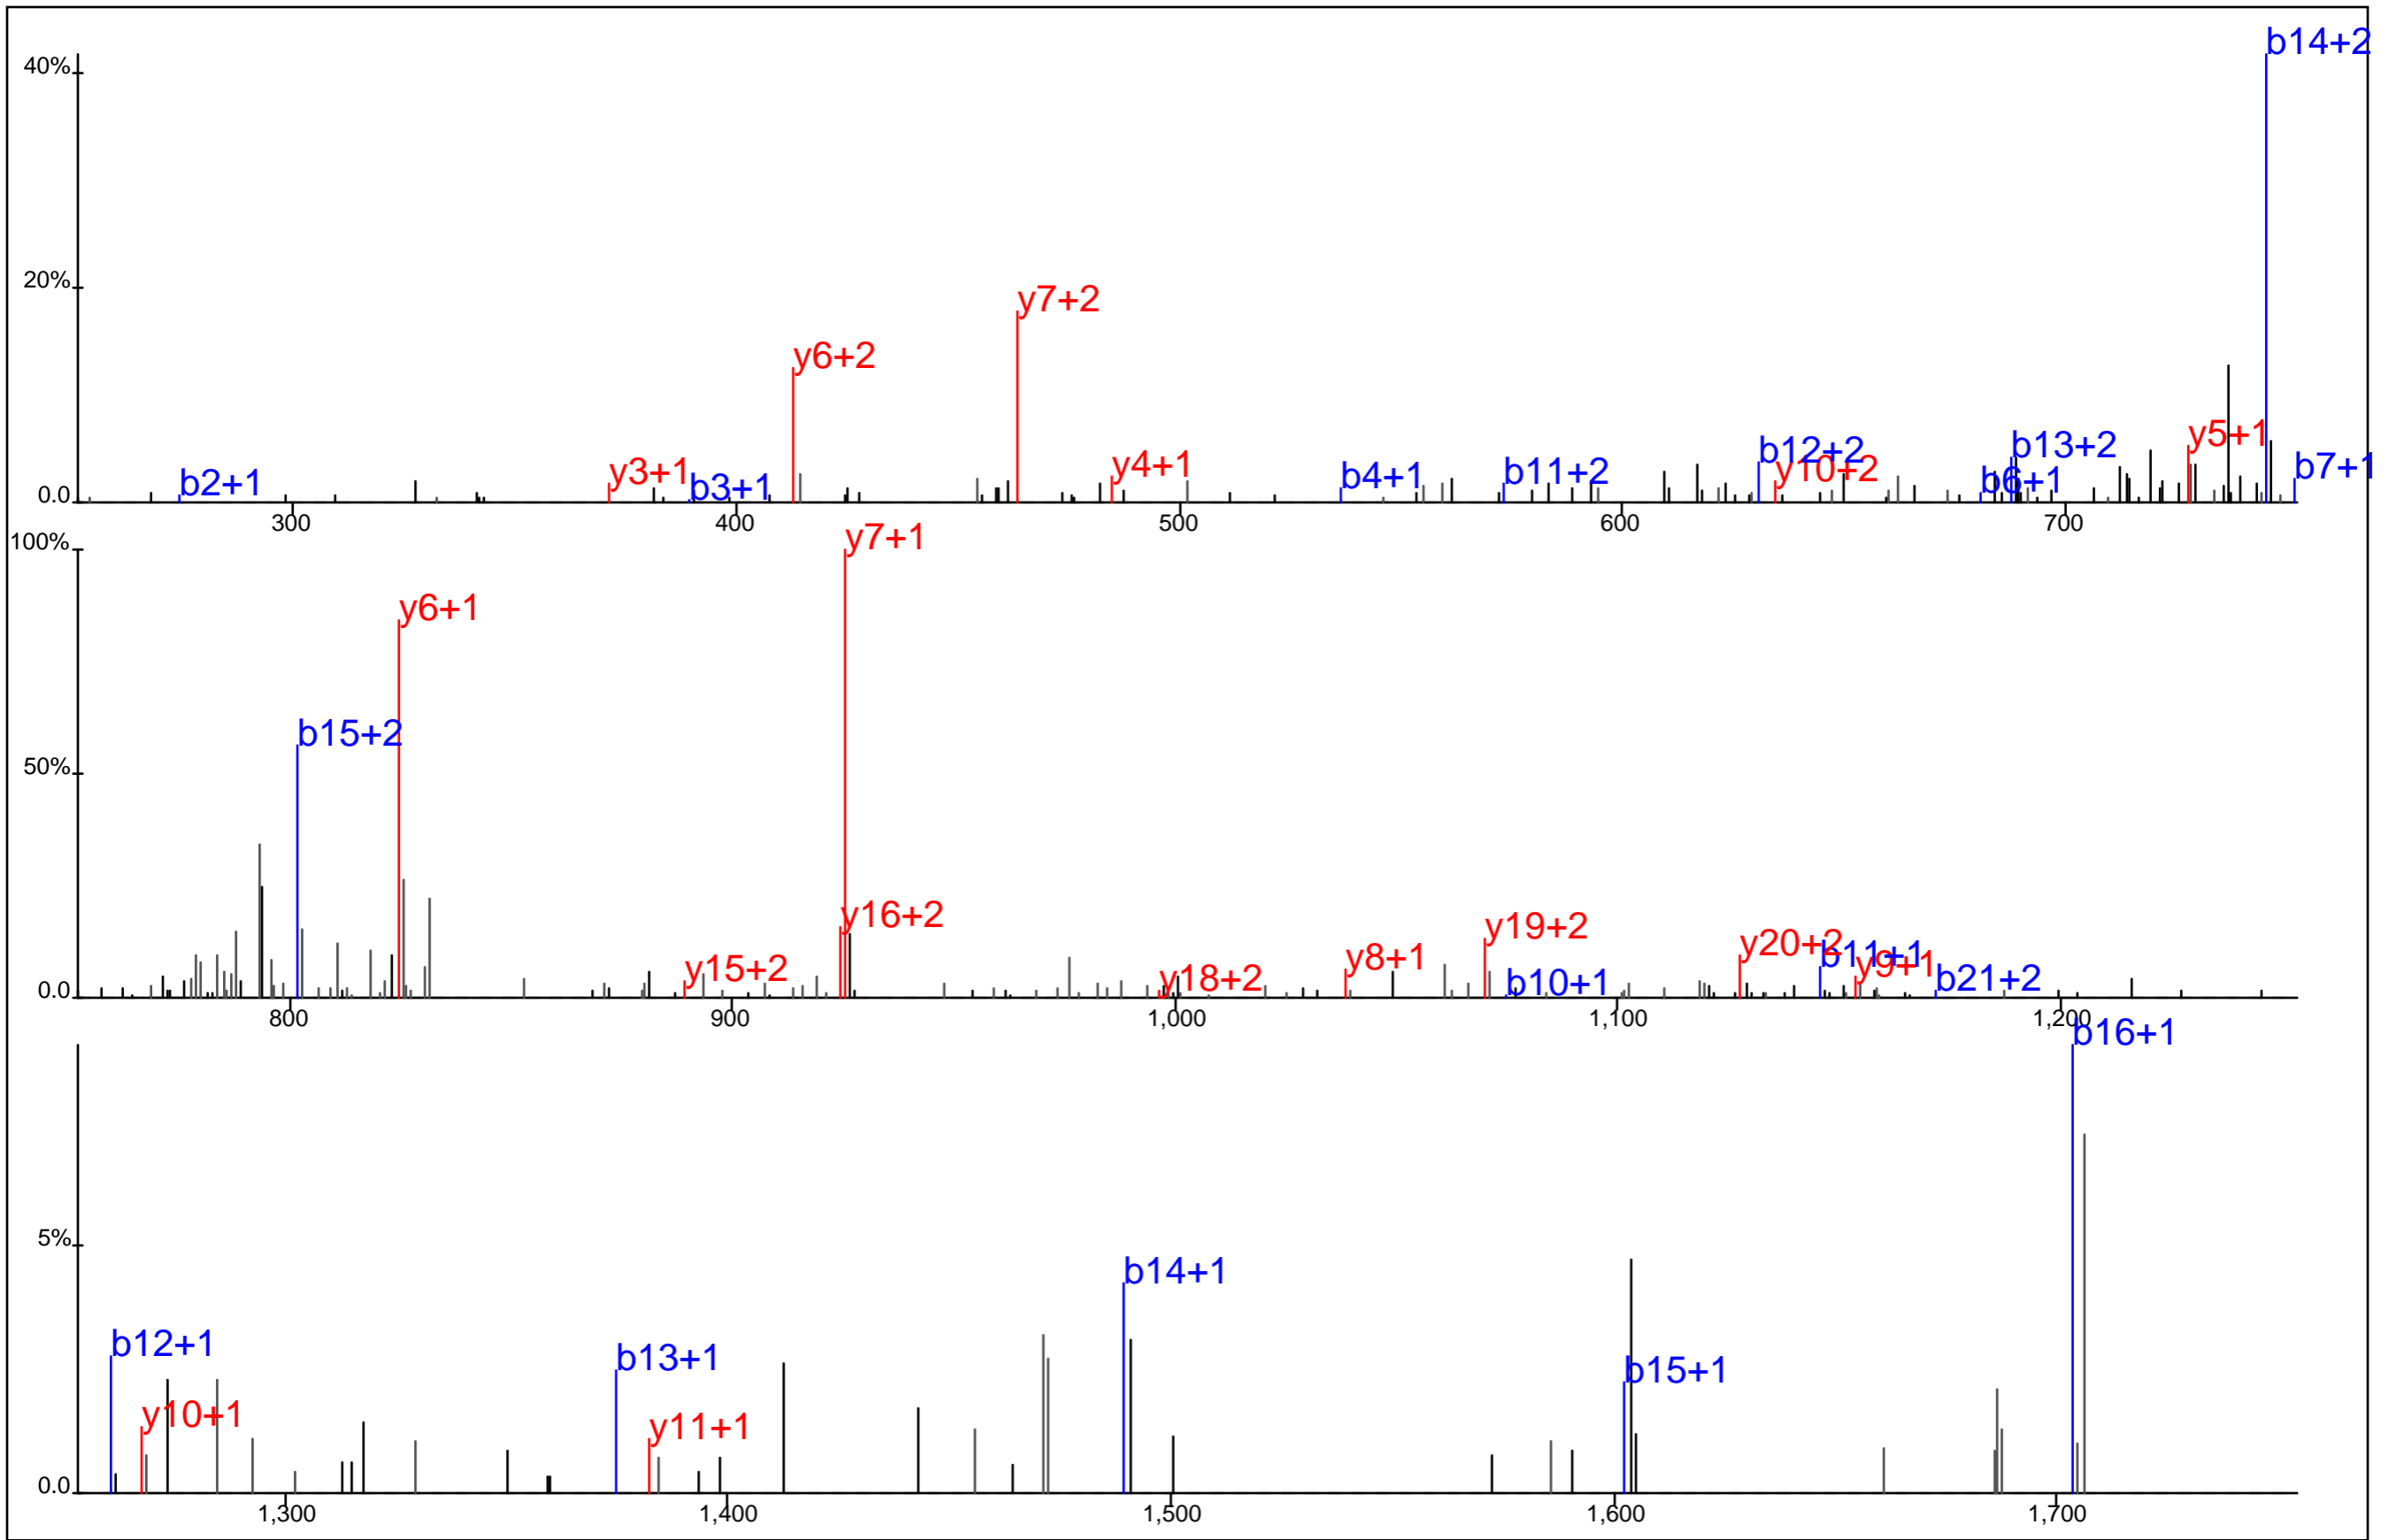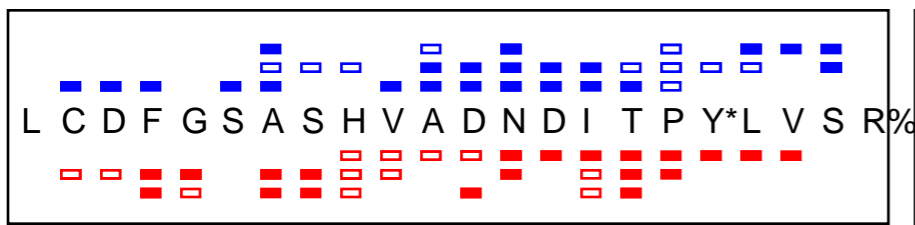

Protein Name: PRP4 kinase  
 gi Accession: 3043596  
 Precursor Mass: 843.0492+3  
 Delta Mass: 5.215 ppm  
 XCorr: 34.05

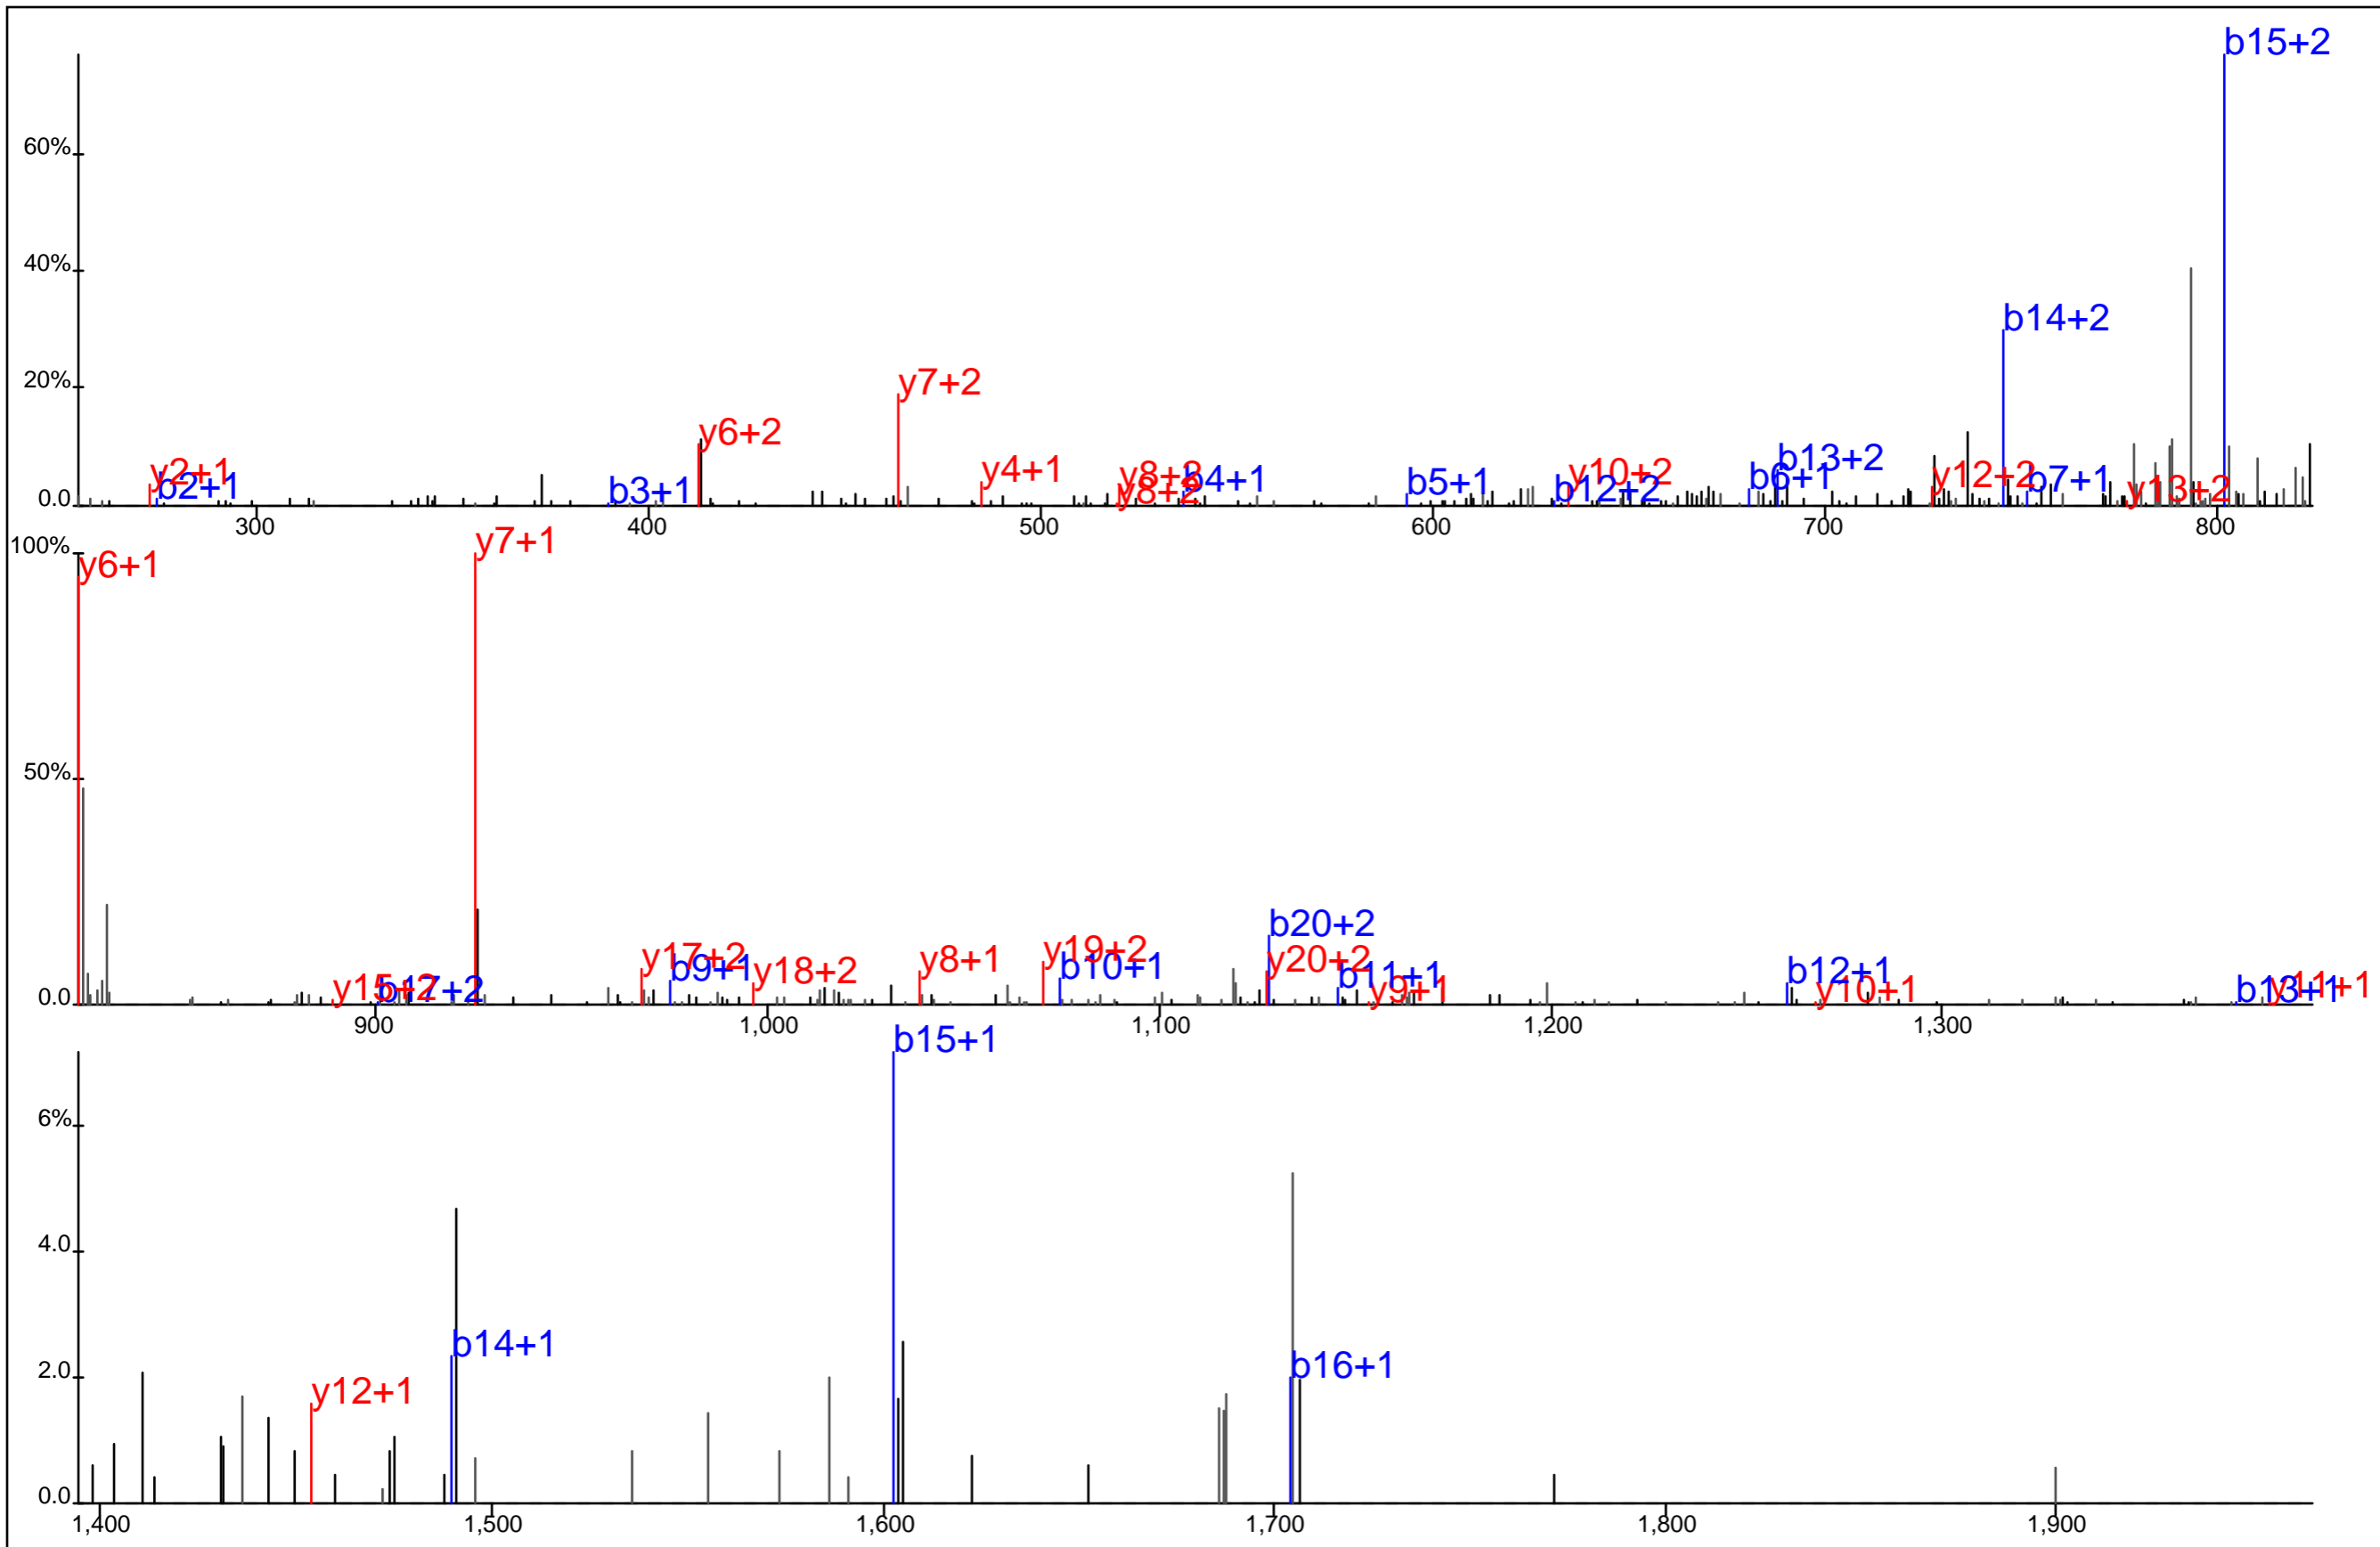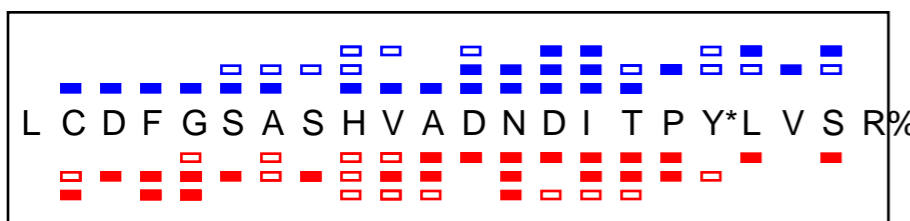

Protein Name: PRP4 kinase  
 gi Accession: 3043596  
 Precursor Mass: 843.0477+3  
 Delta Mass: 3.402 ppm  
 XCorr: 42.52

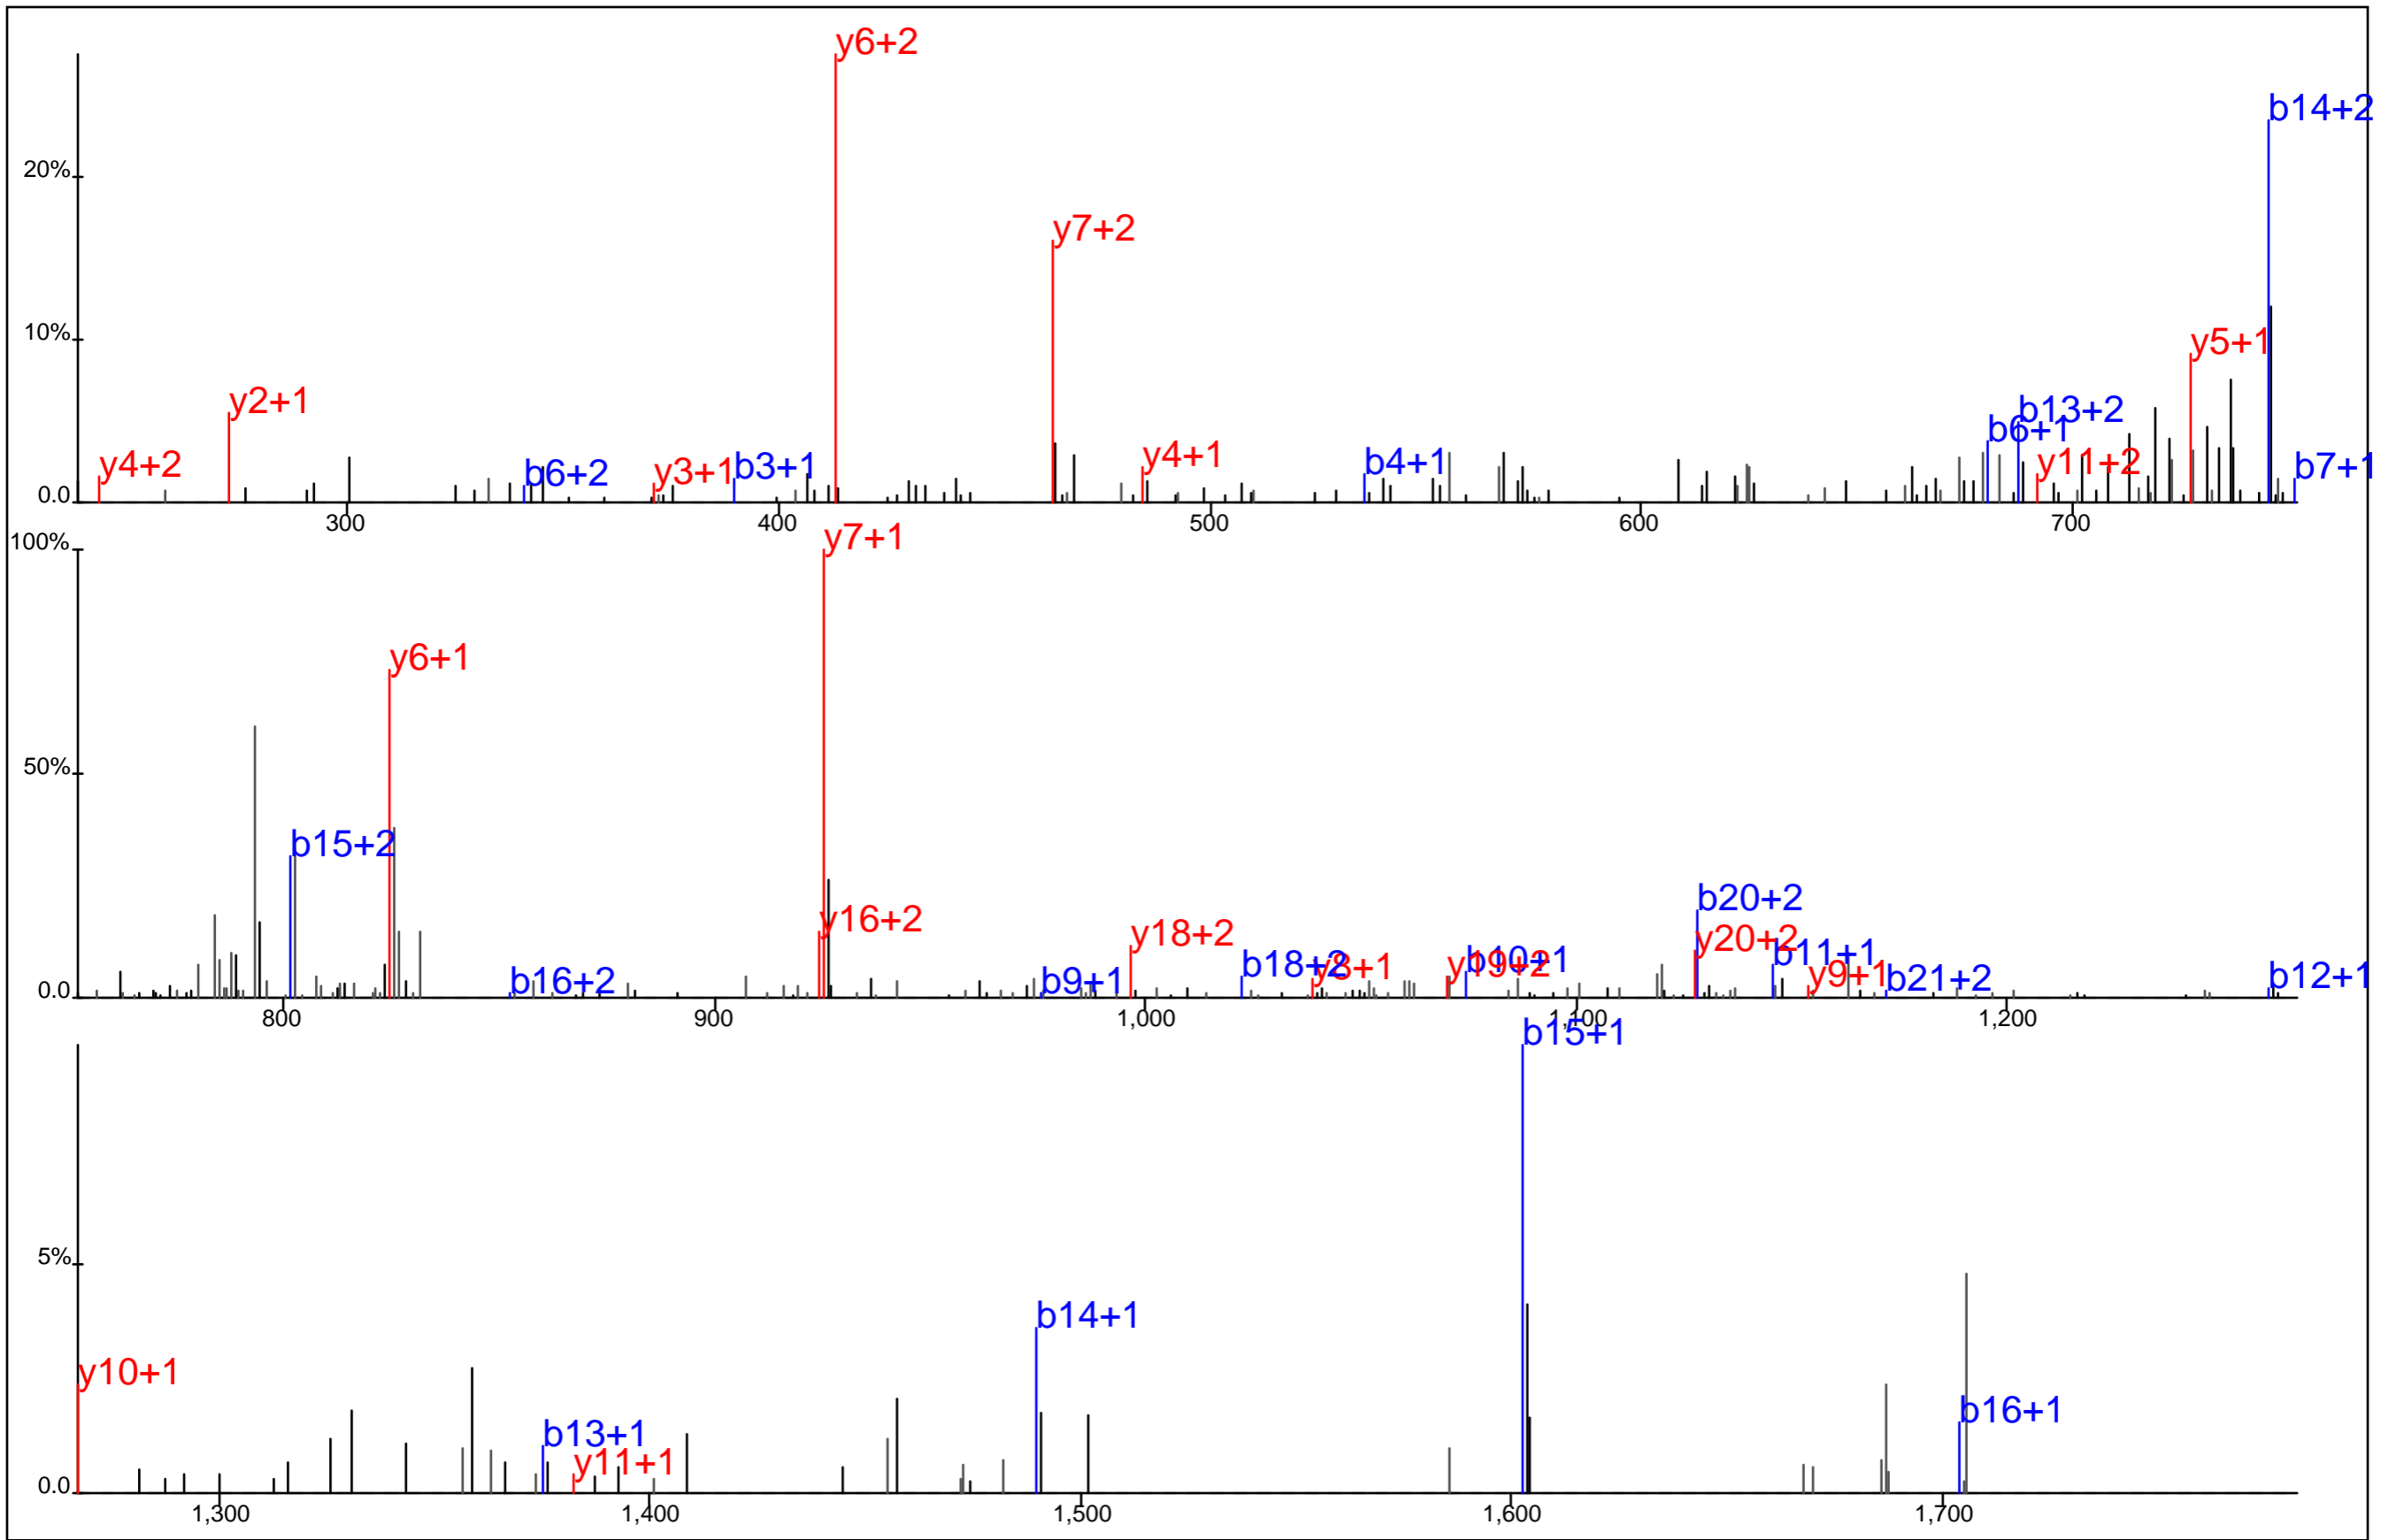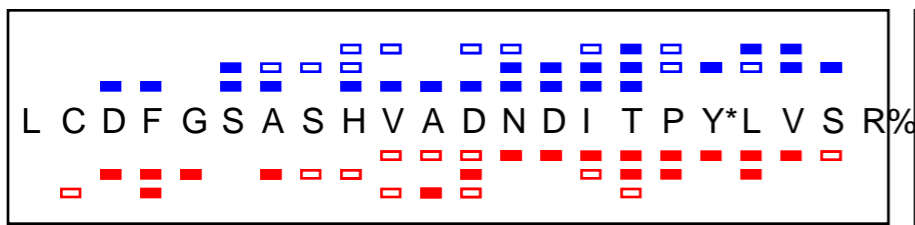

Protein Name: PRP4 kinase  
 gi Accession: 3043596  
 Precursor Mass: 843.0491+3  
 Delta Mass: 5.143 ppm  
 XCorr: 41.58

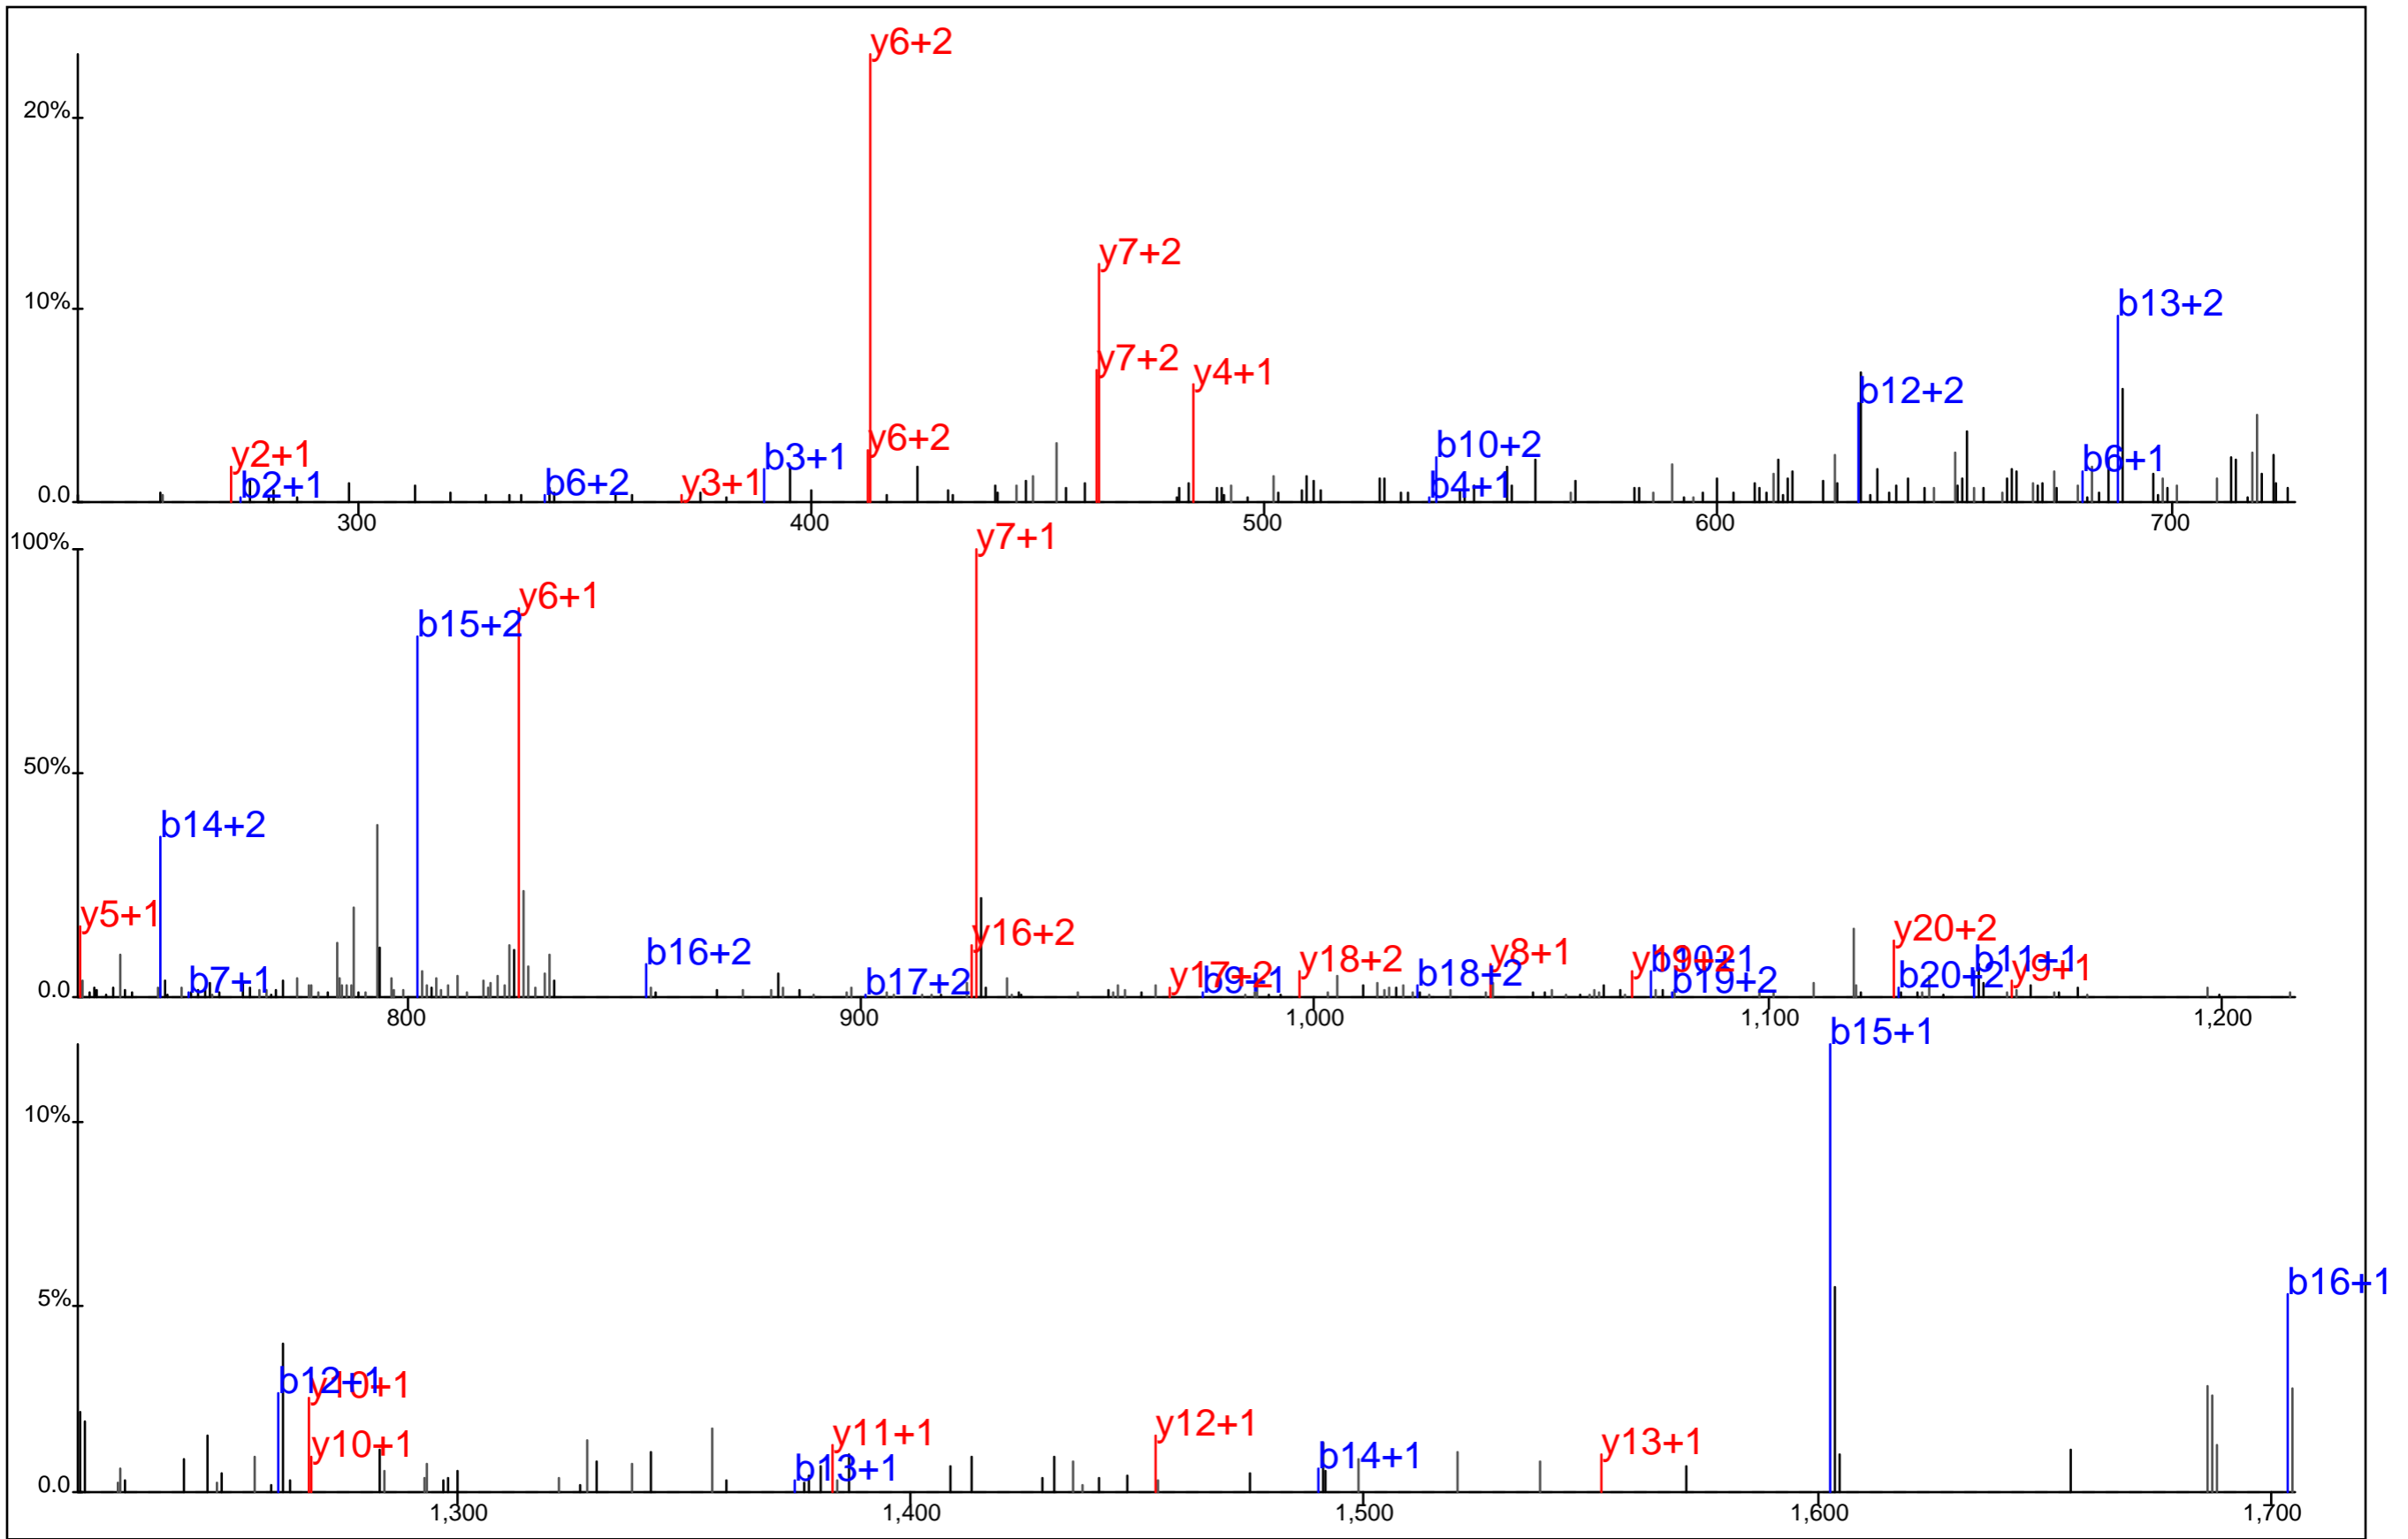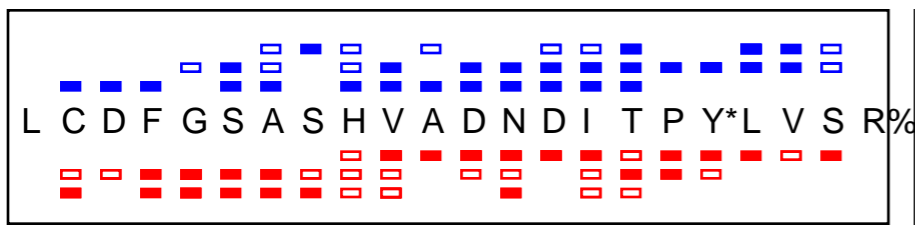

Protein Name: PRP4 kinase  
 gi Accession: 3043596  
 Precursor Mass: 843.0460+3  
 Delta Mass: 1.377 ppm  
 XCorr: 72.65

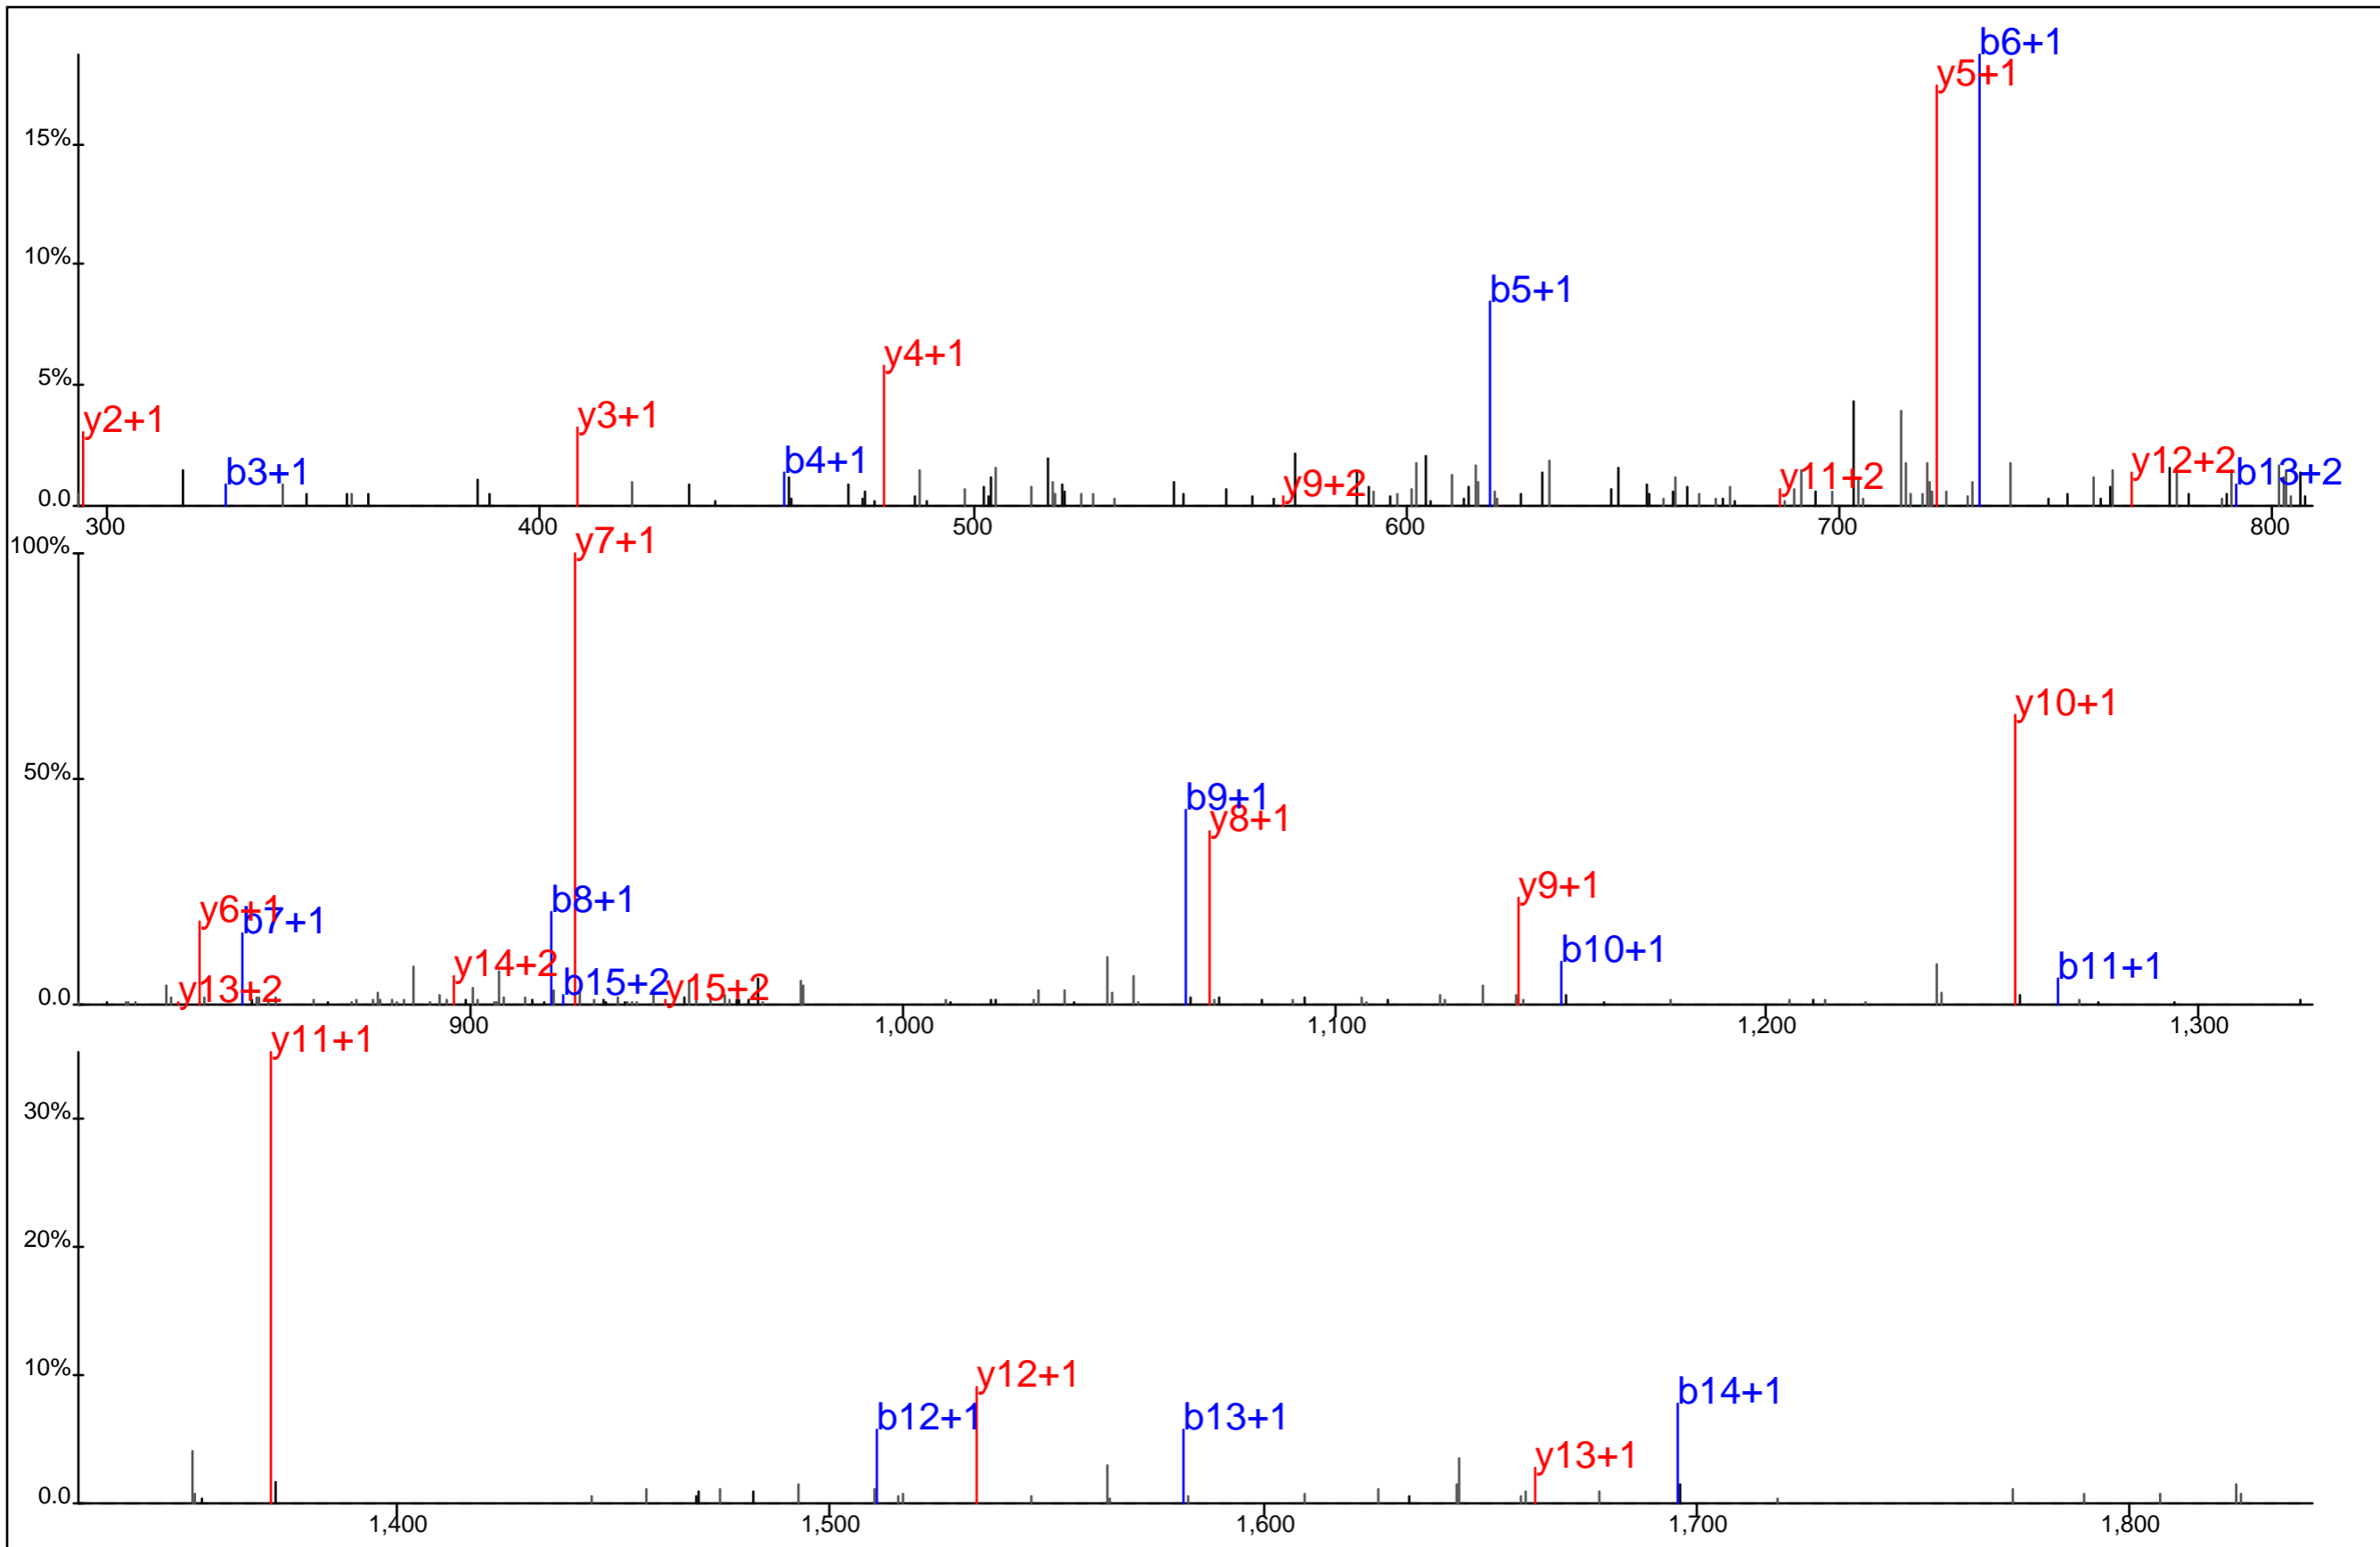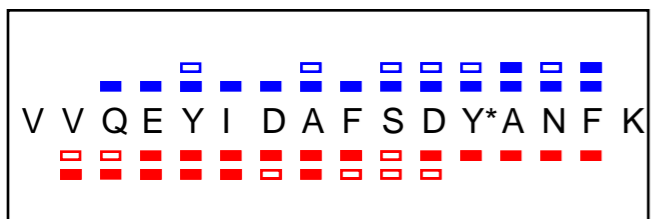

Protein Name: PTPalpha  
 gi Accession: 32067  
 Precursor Mass: 994.9461+2  
 Delta Mass: 8.652 ppm  
 XCorr: 107.15



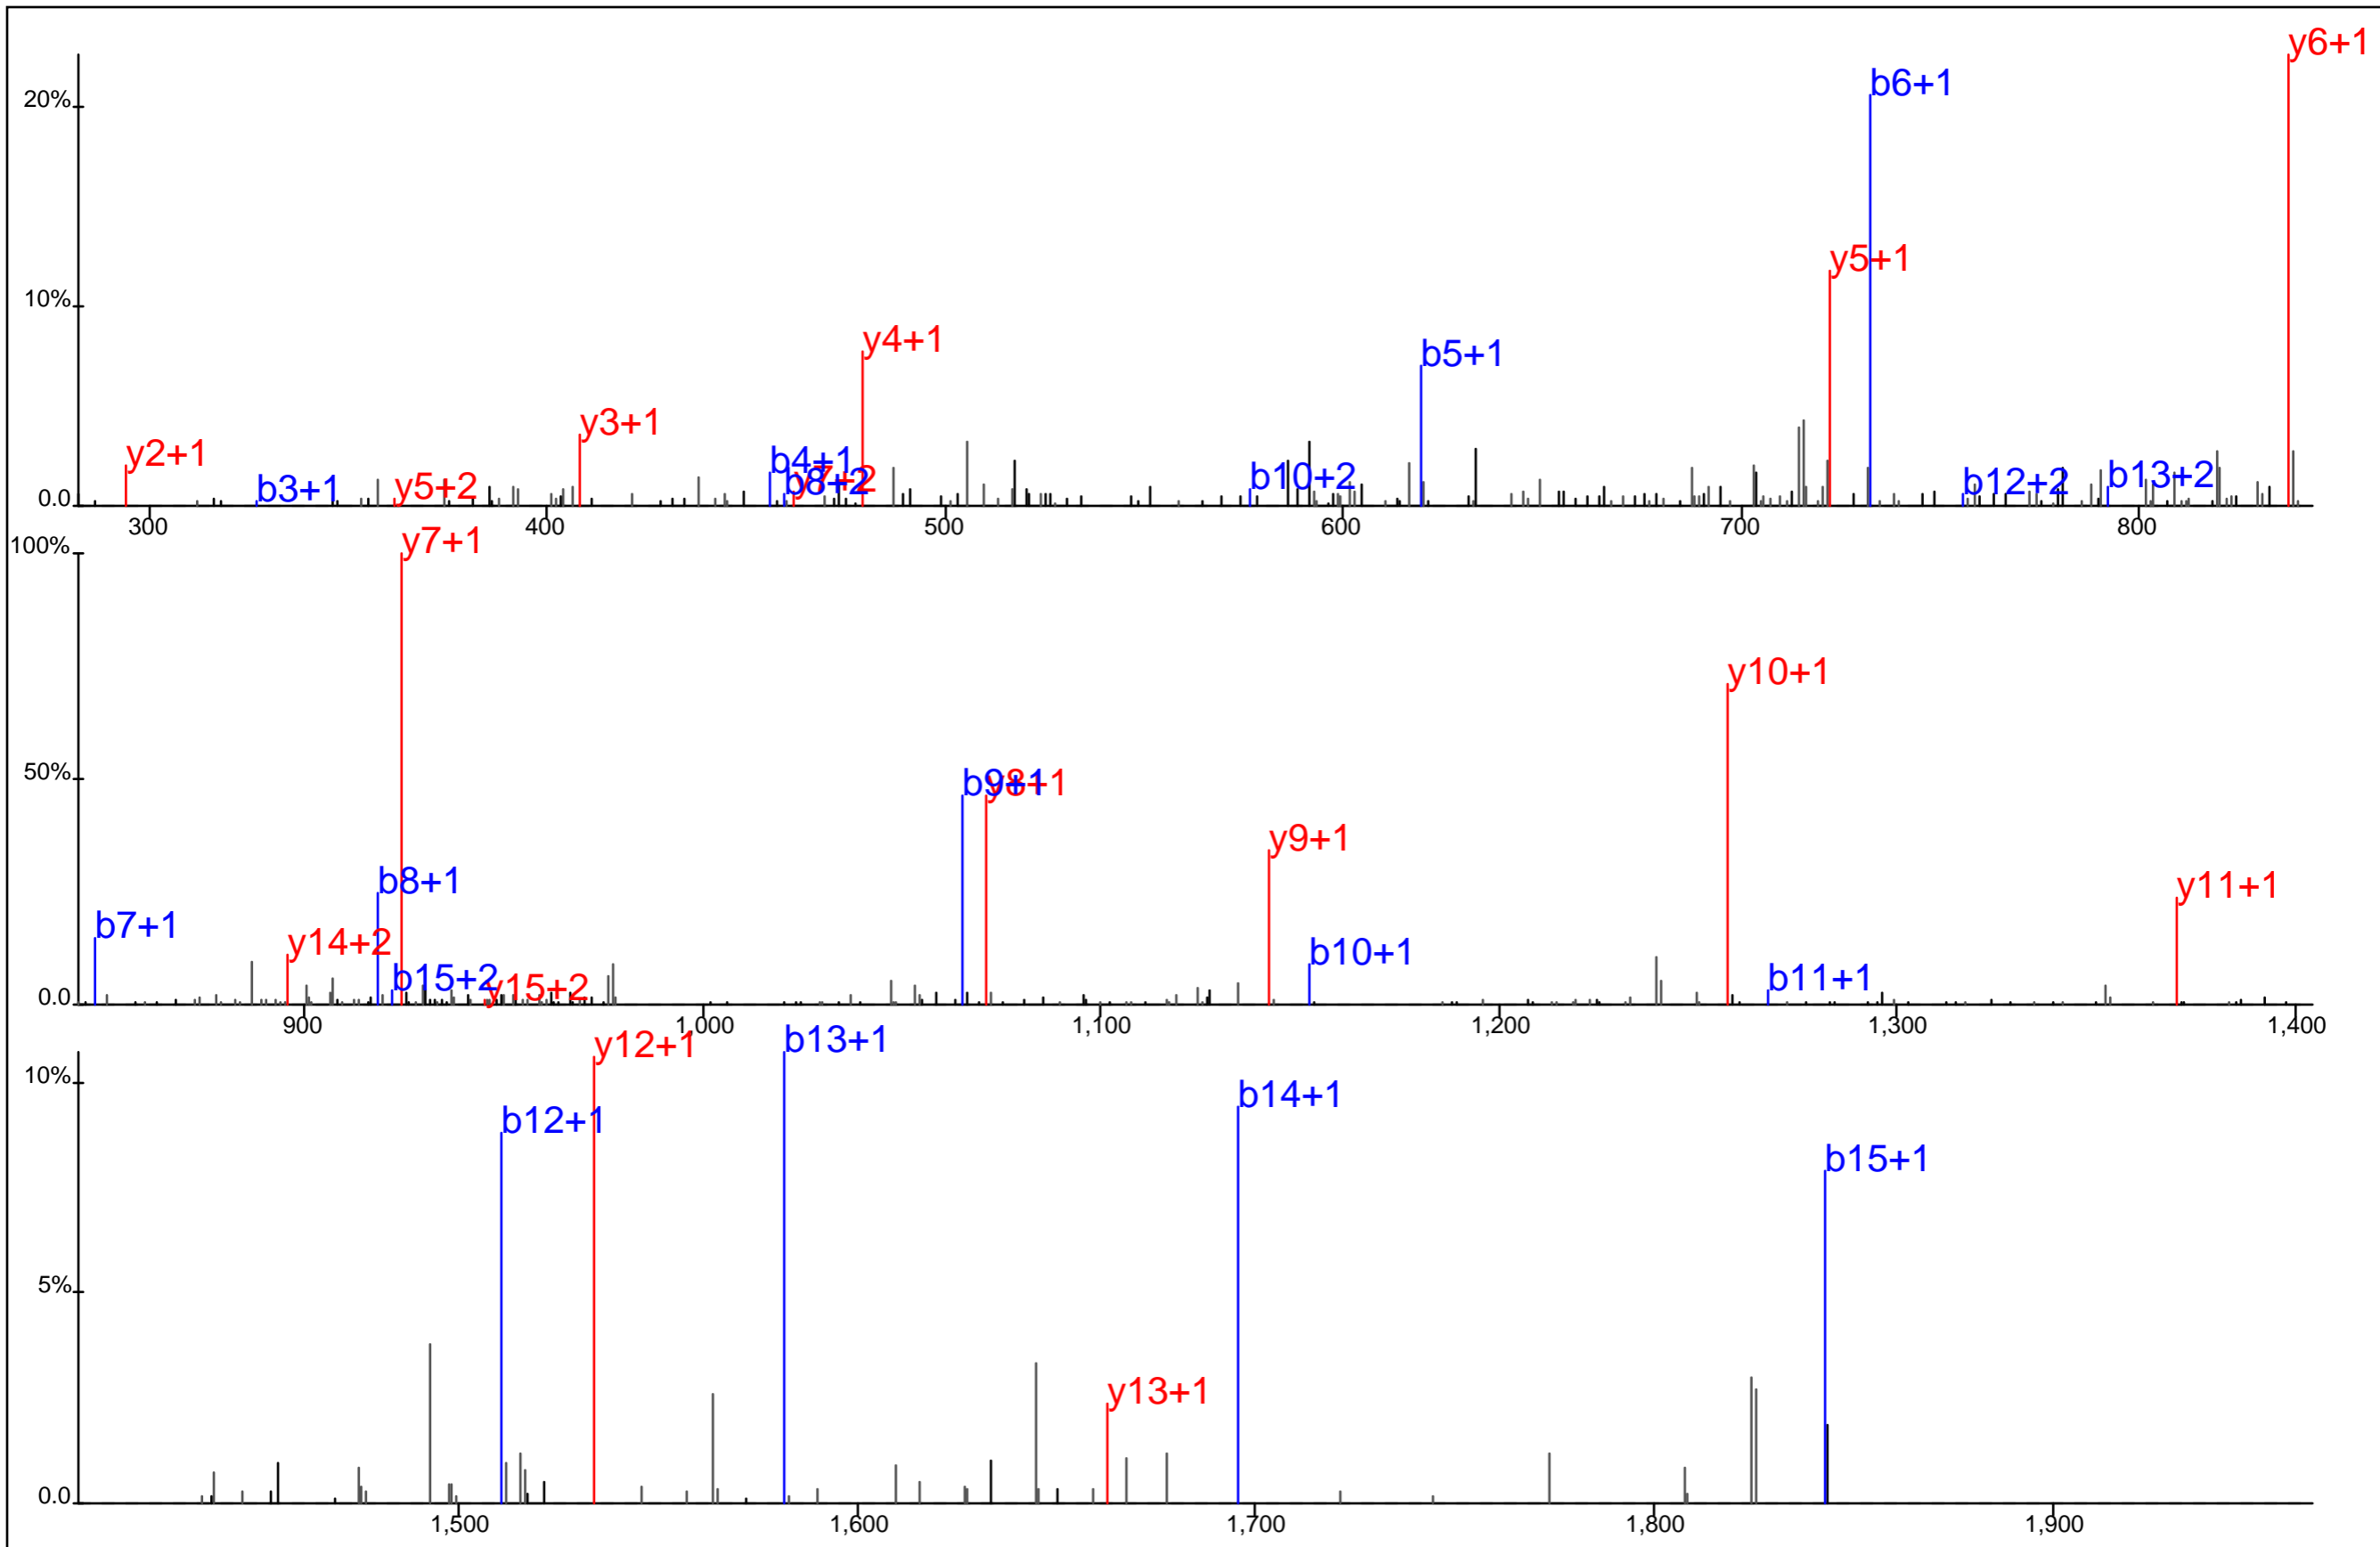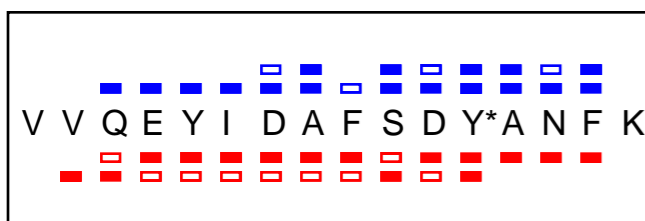

Protein Name: PTPalpha  
 gi Accession: 32067  
 Precursor Mass: 994.9412+2  
 Delta Mass: 3.679 ppm  
 XCorr: 104.29

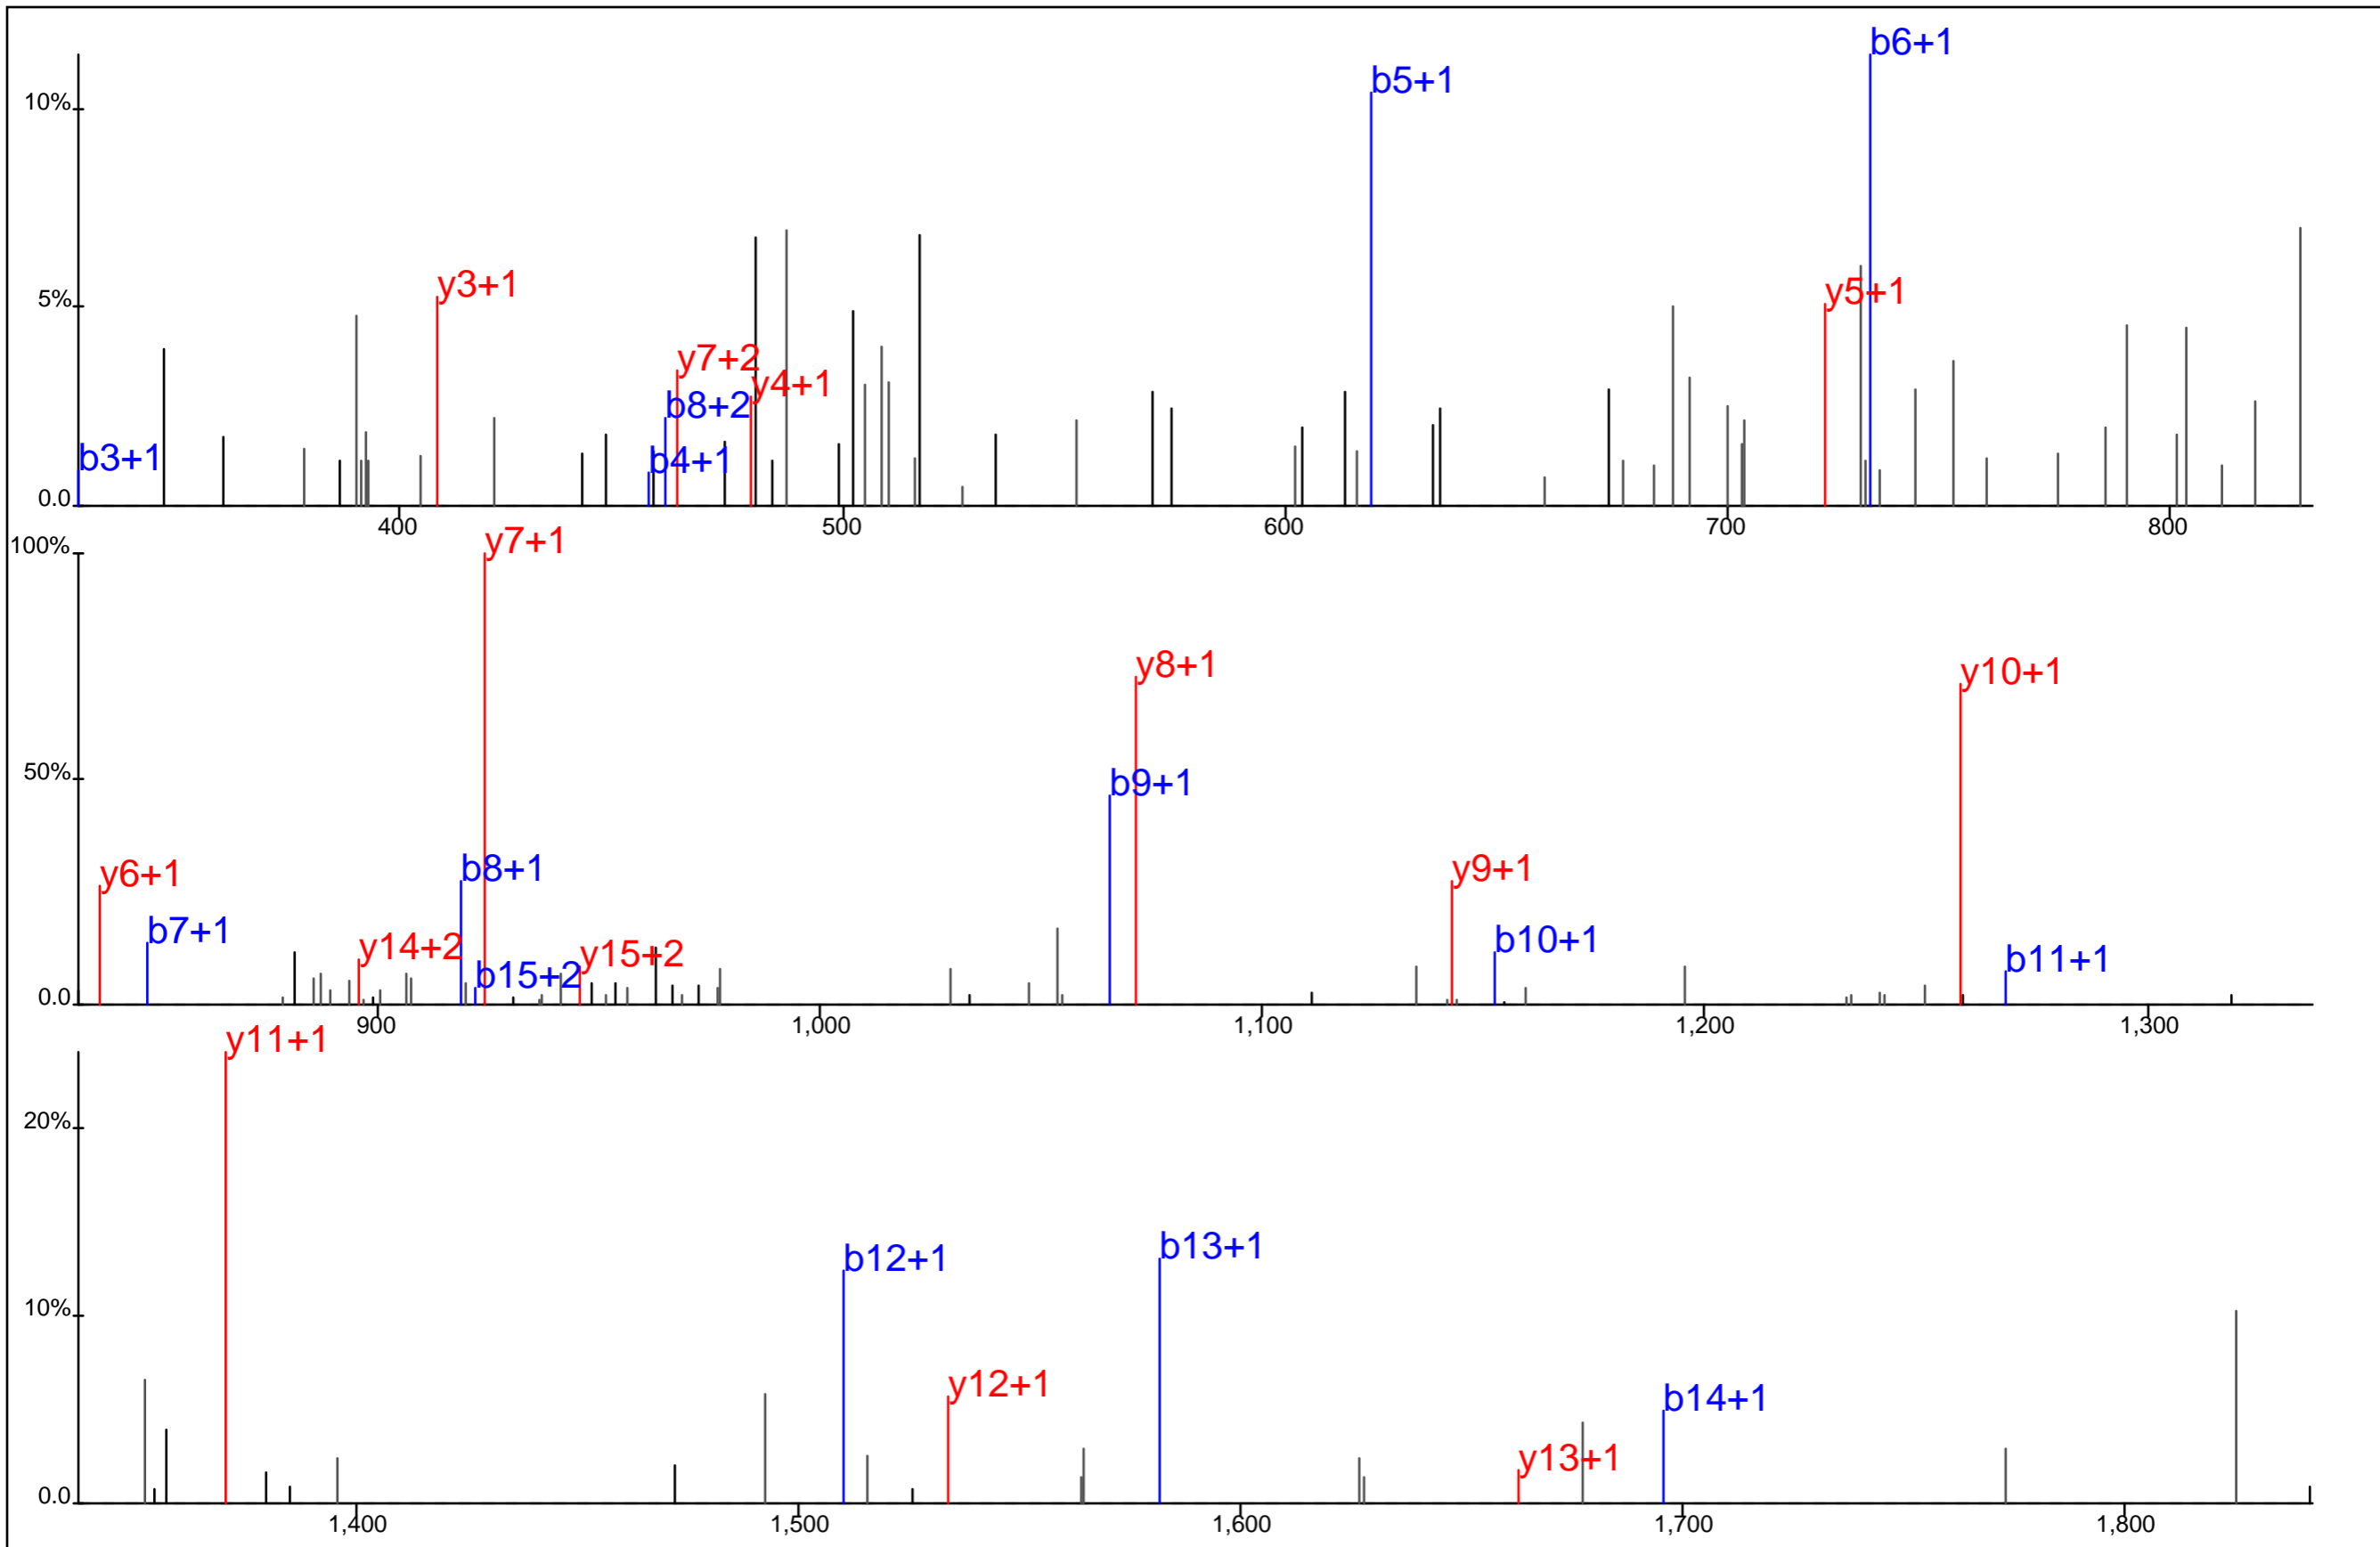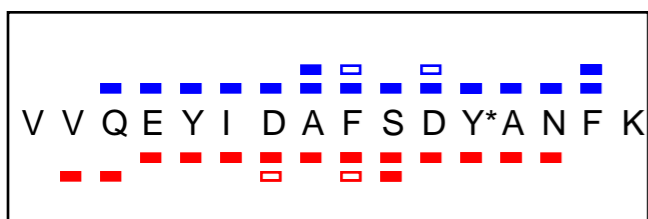

Protein Name: PTPalpha  
 gi Accession: 32067  
 Precursor Mass: 994.9415+2  
 Delta Mass: 3.986 ppm  
 XCorr: 79.4

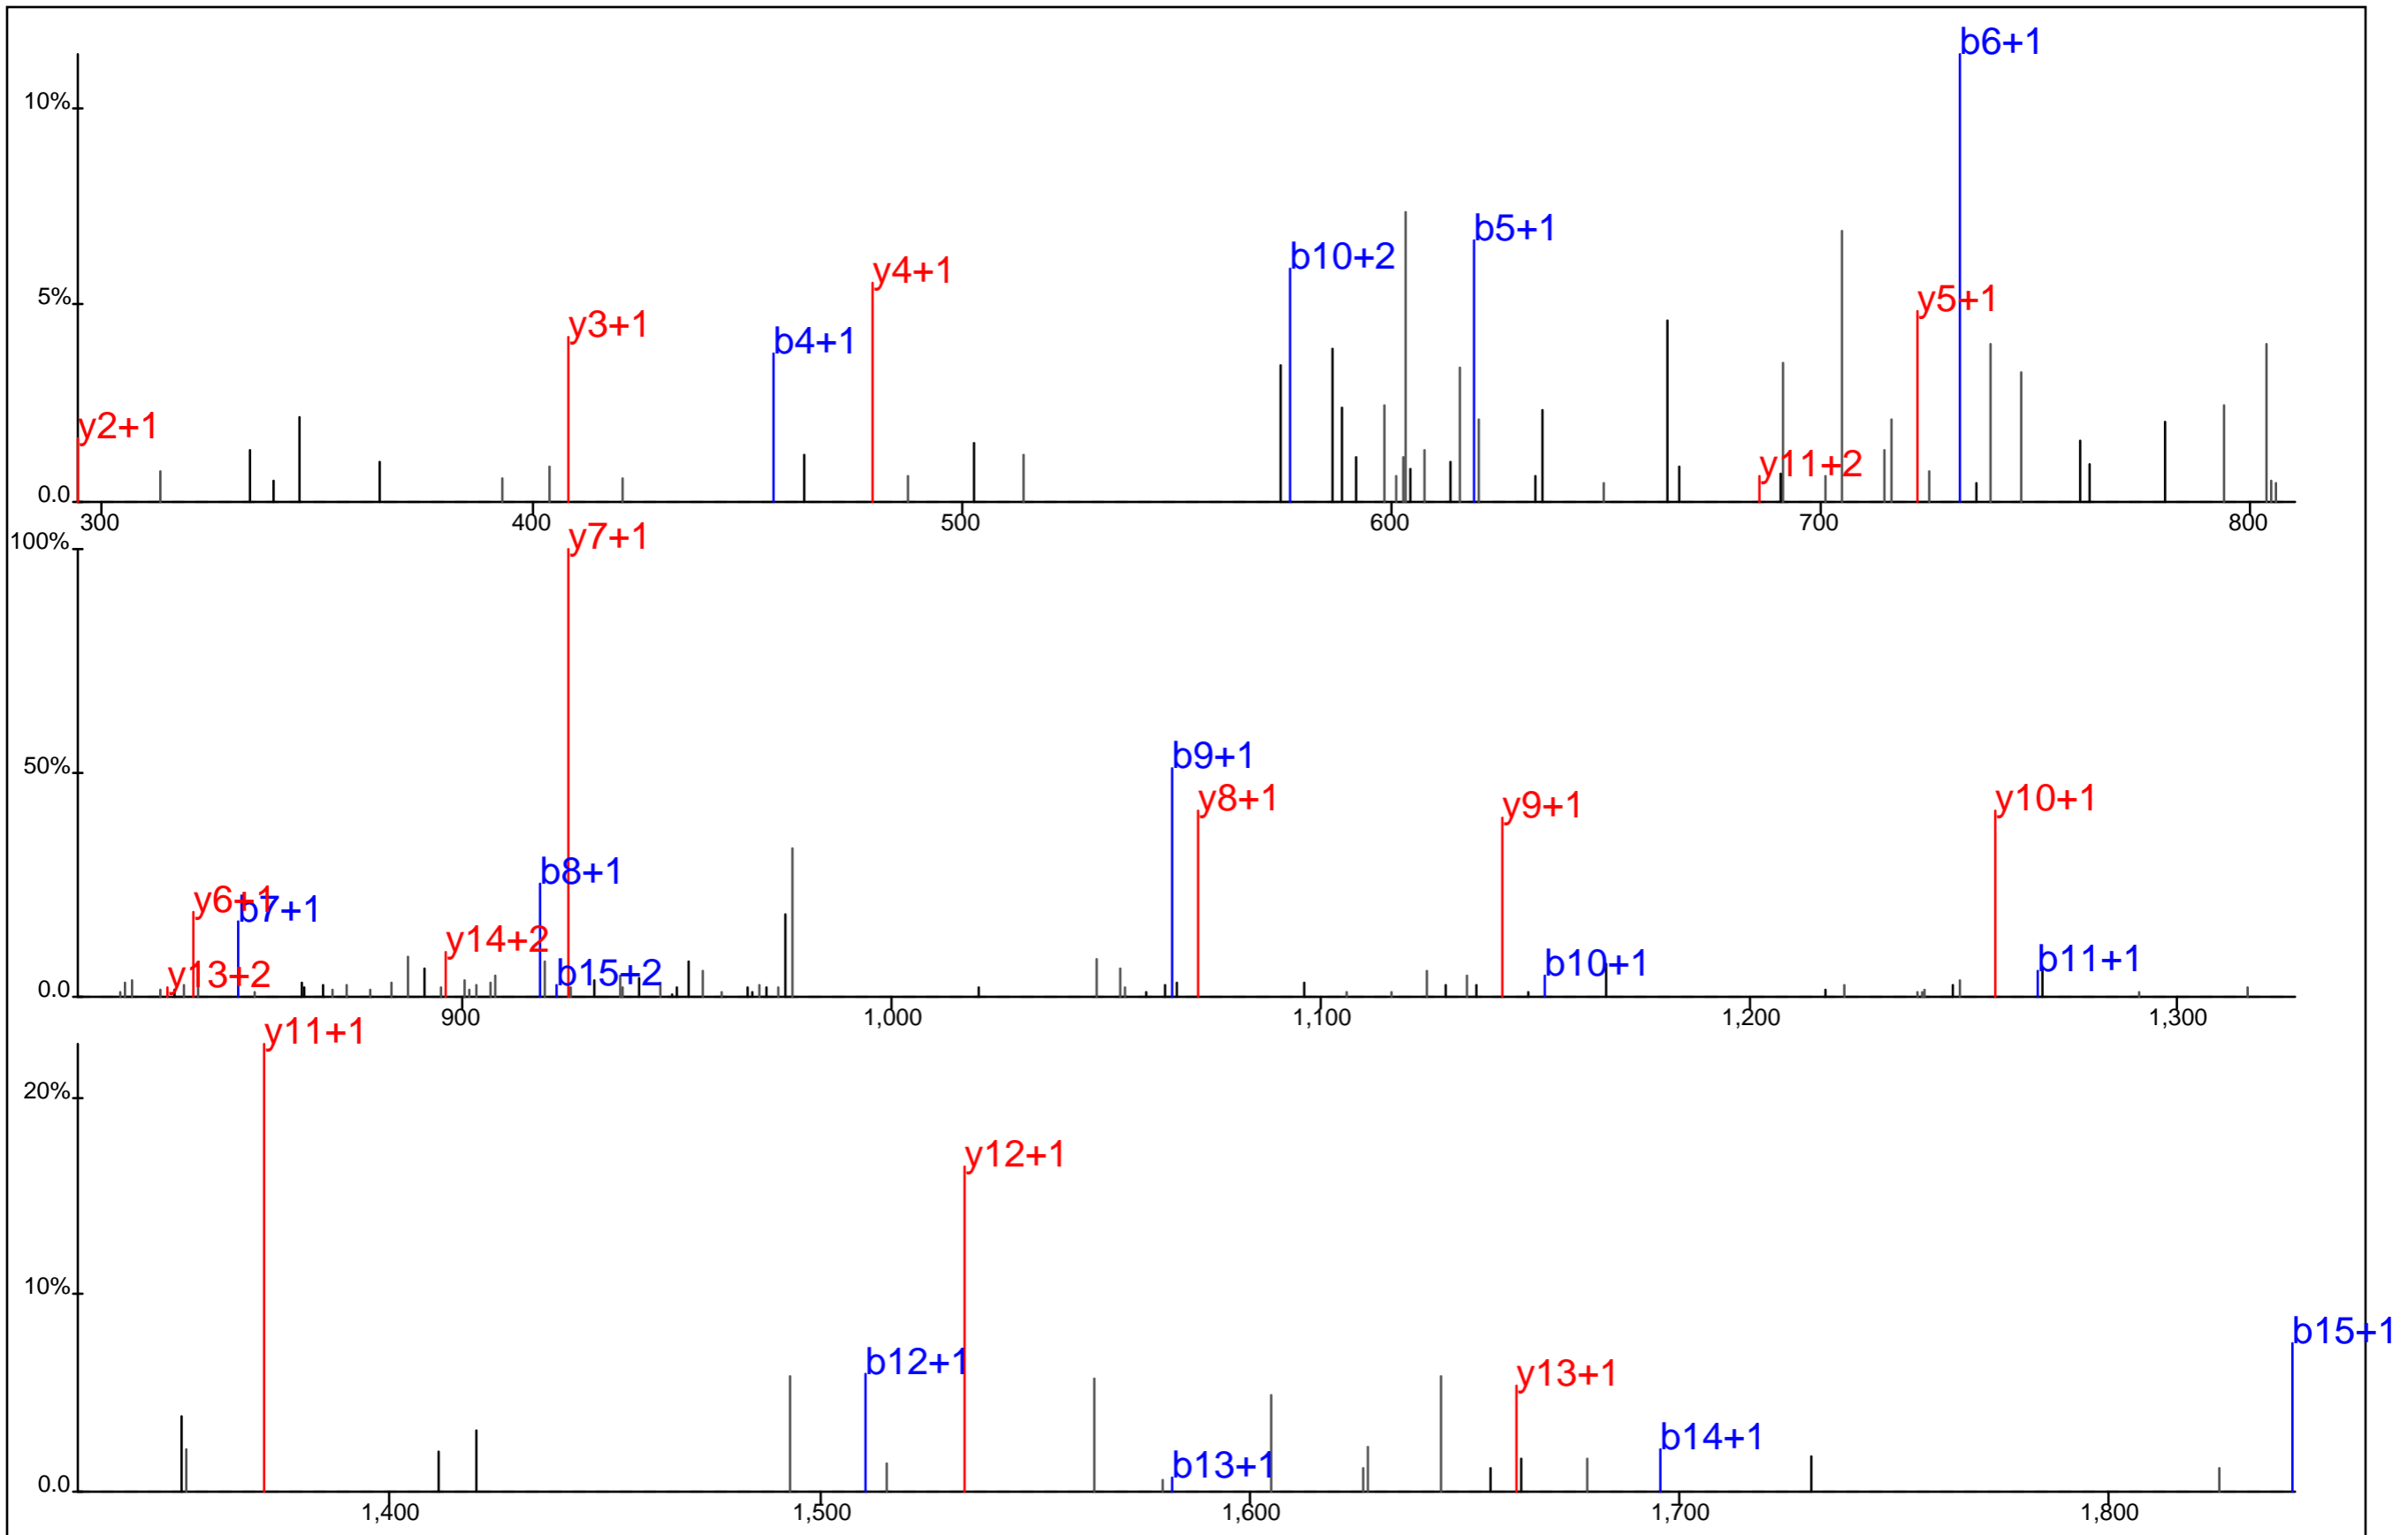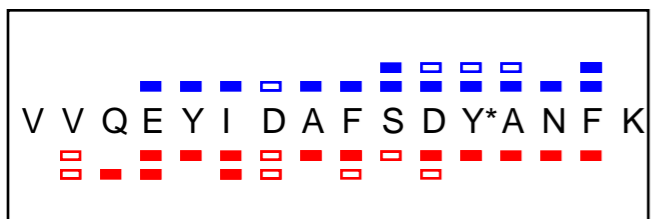

Protein Name: PTPalpha  
 gi Accession: 32067  
 Precursor Mass: 994.9426+2  
 Delta Mass: 5.092 ppm  
 XCorr: 86.83

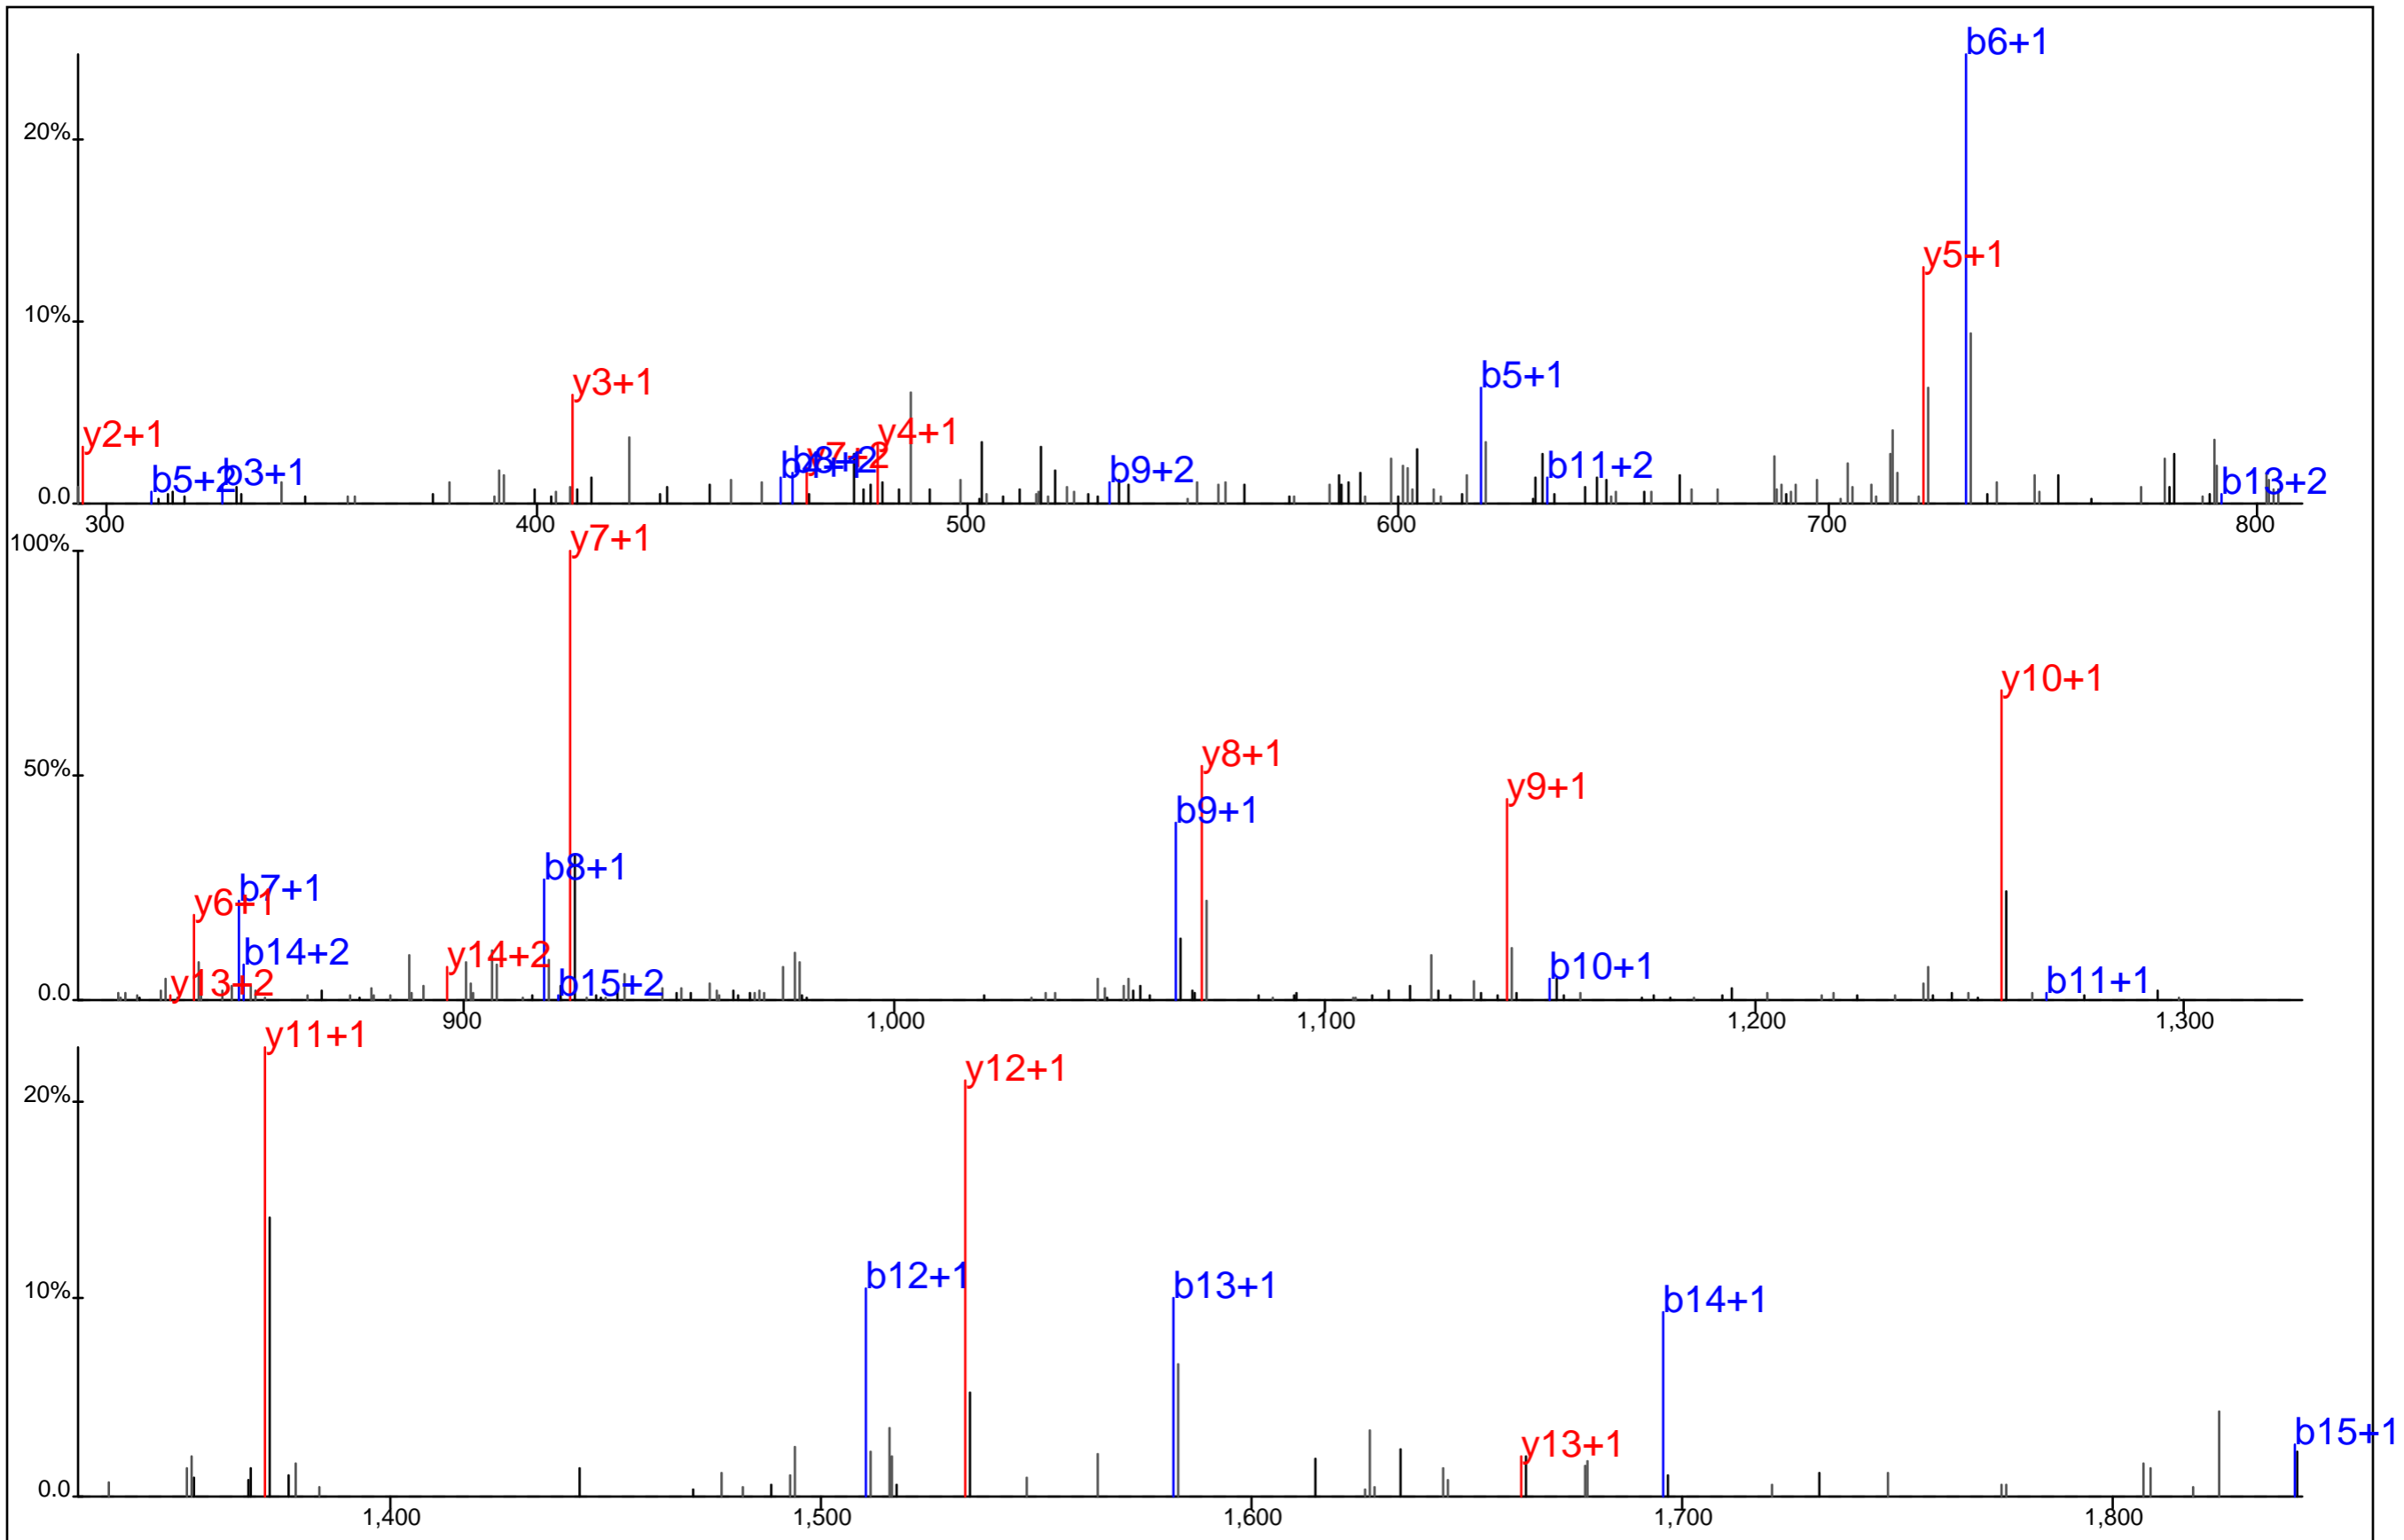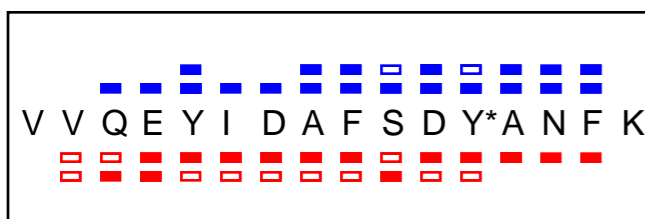

Protein Name: PTPalpha  
 gi Accession: 32067  
 Precursor Mass: 994.9473+2  
 Delta Mass: 9.814 ppm  
 XCorr: 70.5



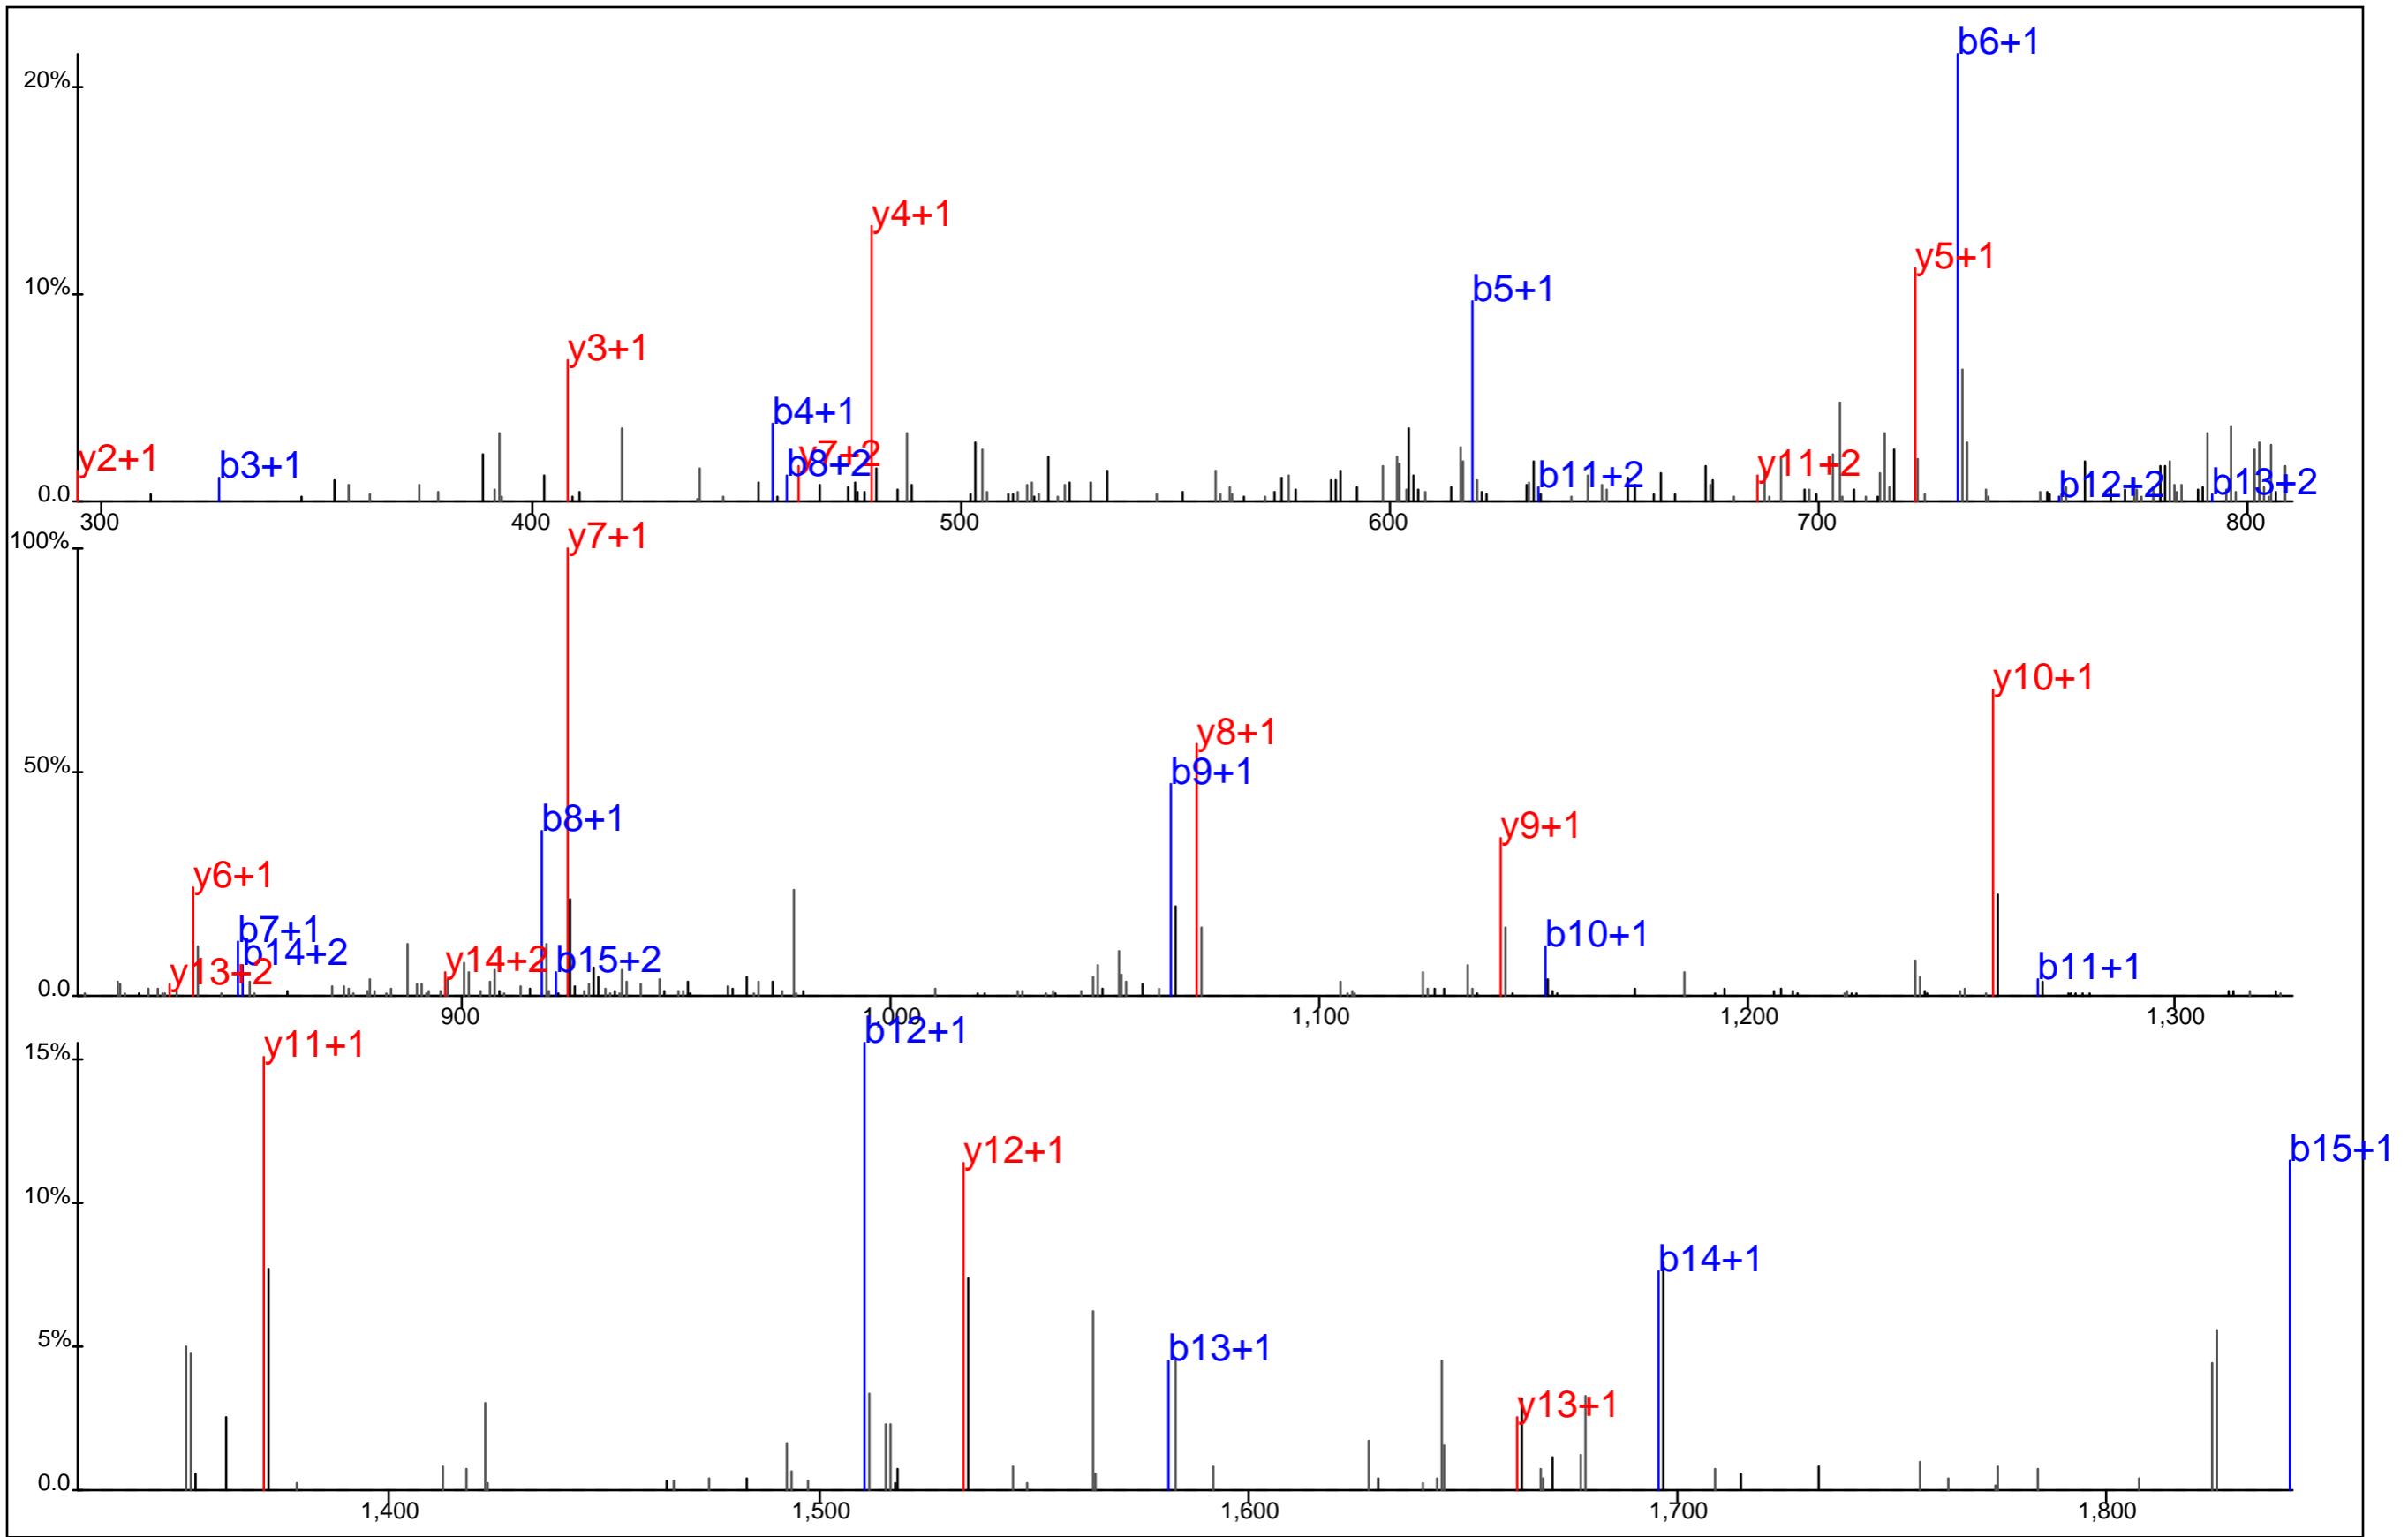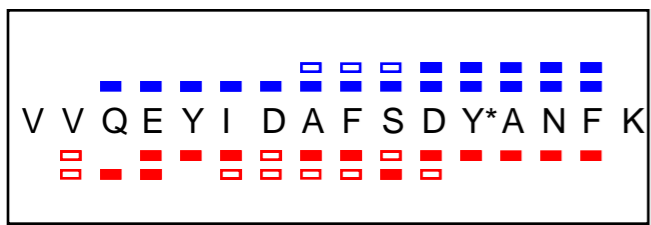

Protein Name: PTPalpha  
 gi Accession: 32067  
 Precursor Mass: 994.9417+2  
 Delta Mass: 4.167 ppm  
 XCorr: 73.84

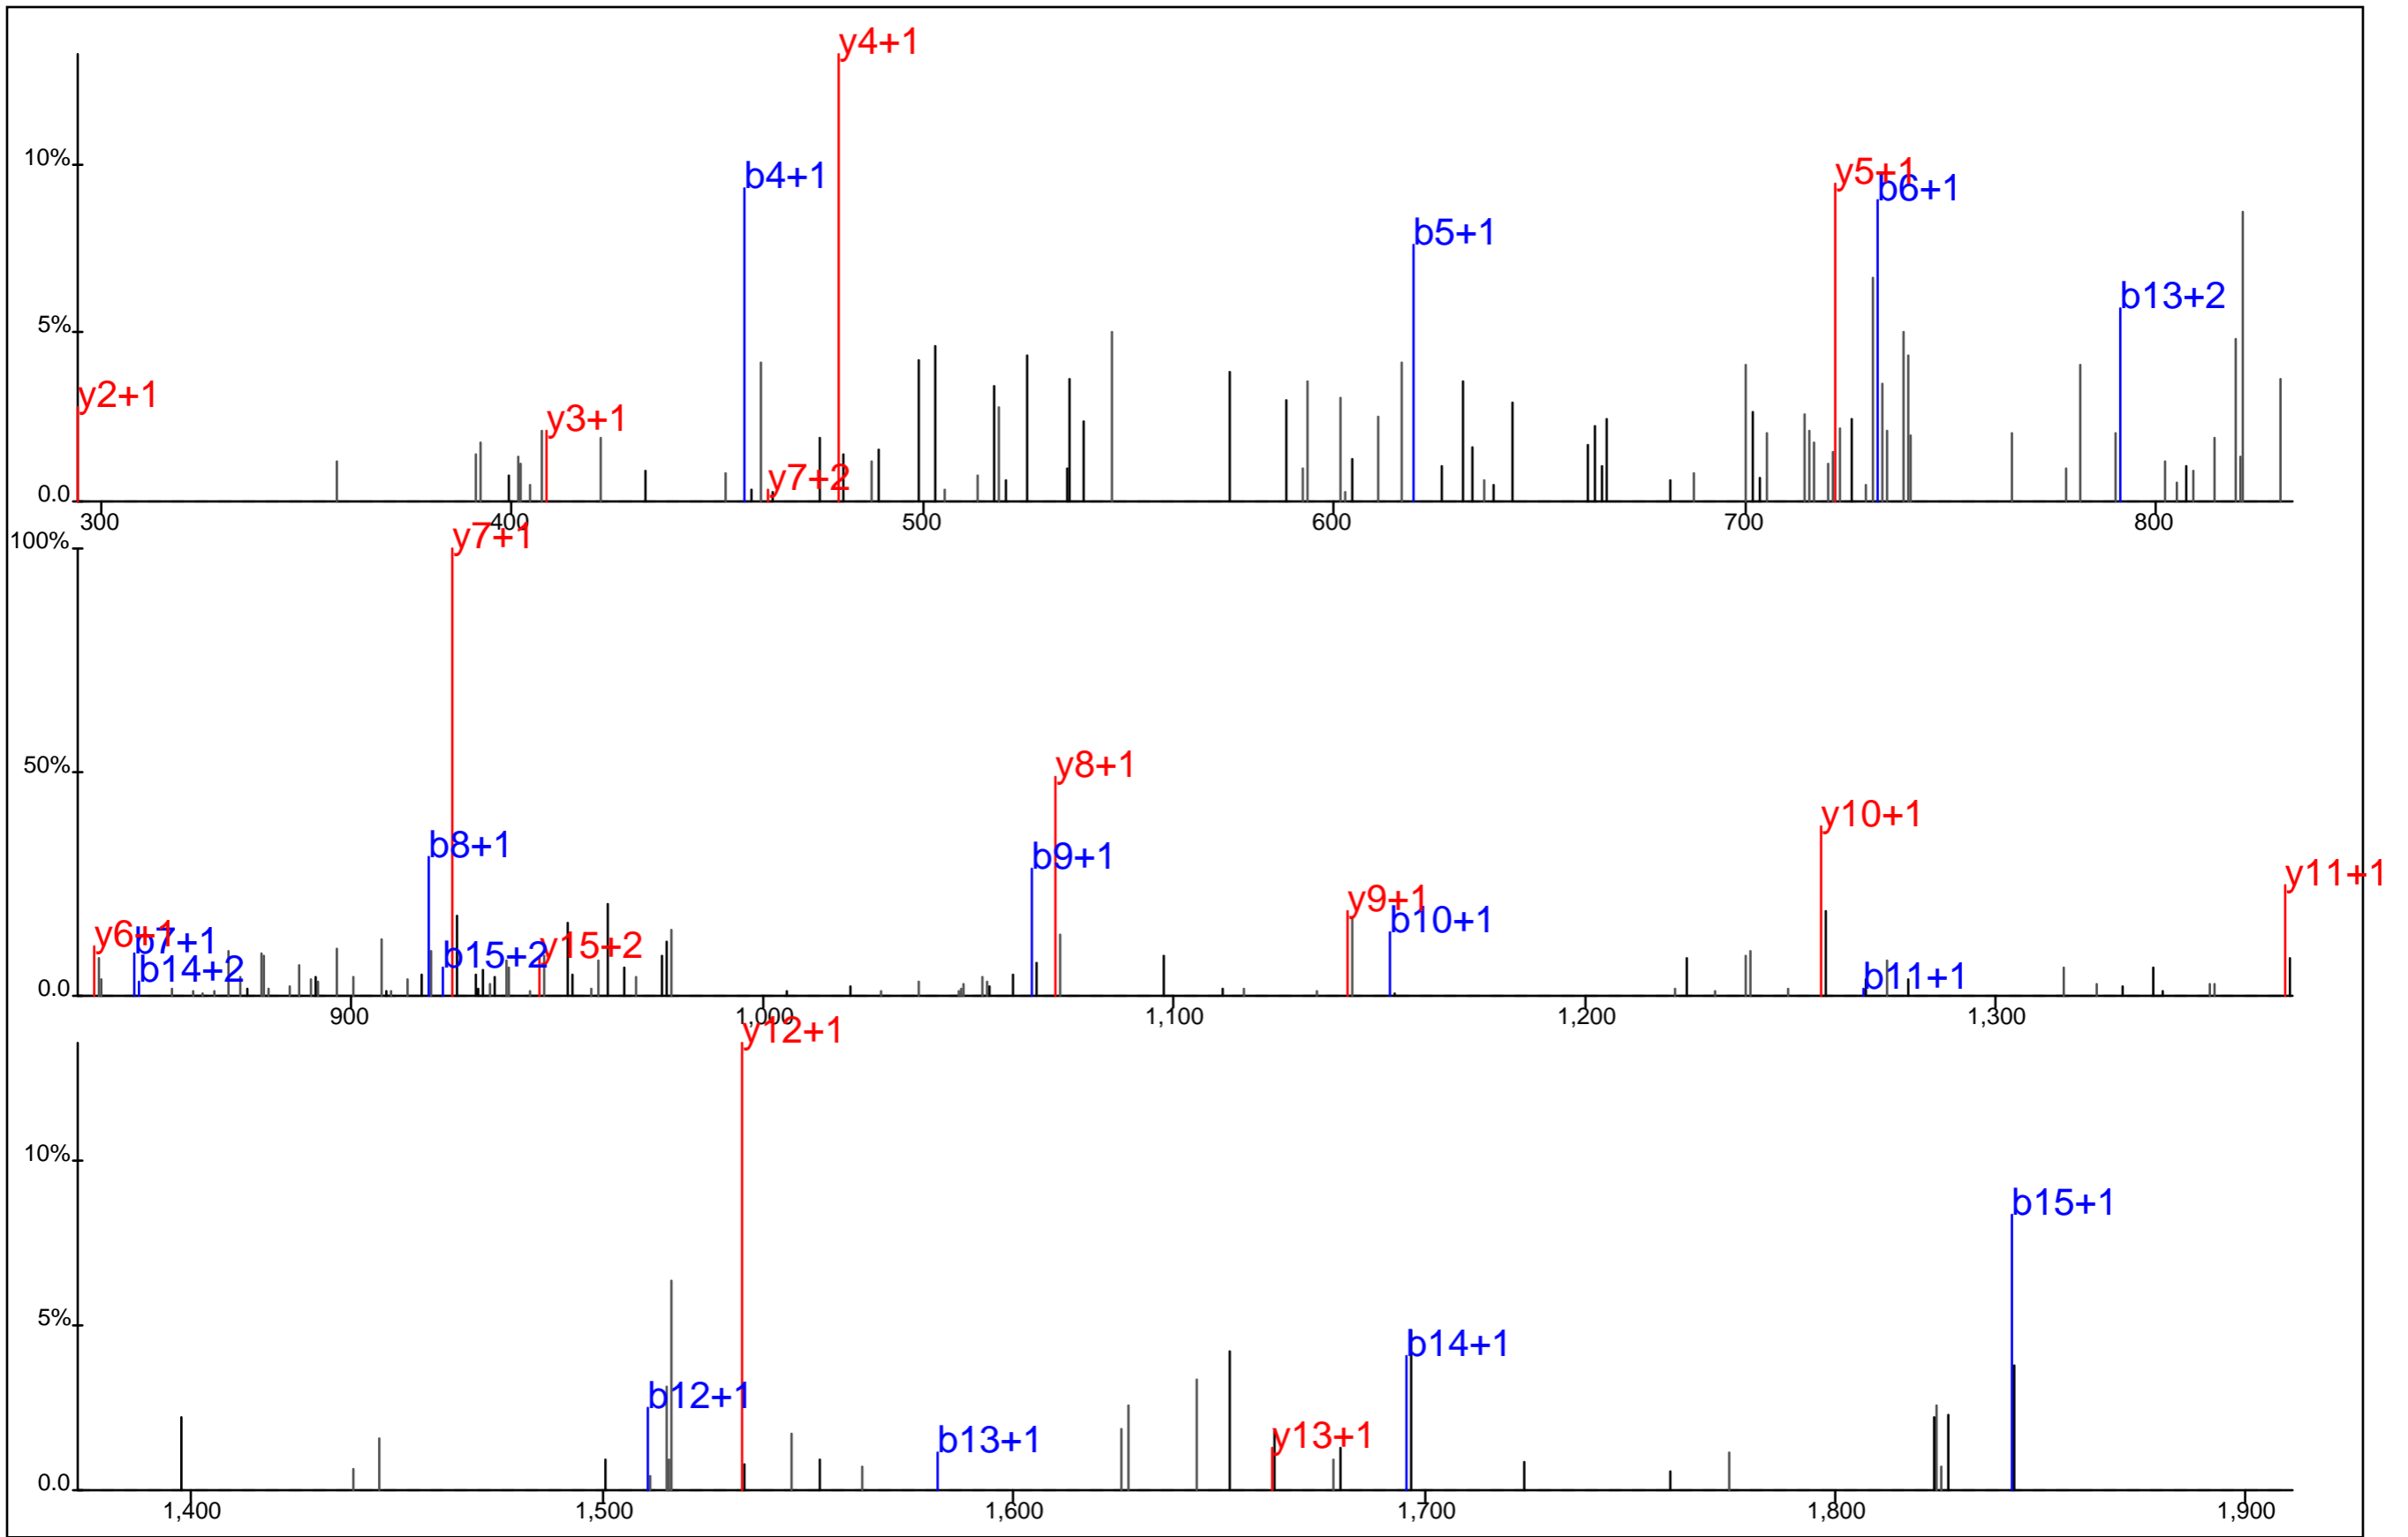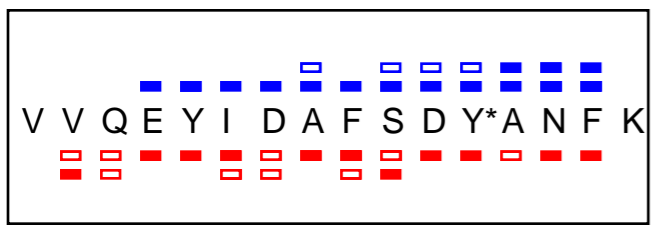

Protein Name: PTPalpha  
 gi Accession: 32067  
 Precursor Mass: 994.9427+2  
 Delta Mass: 5.273 ppm  
 XCorr: 78.23

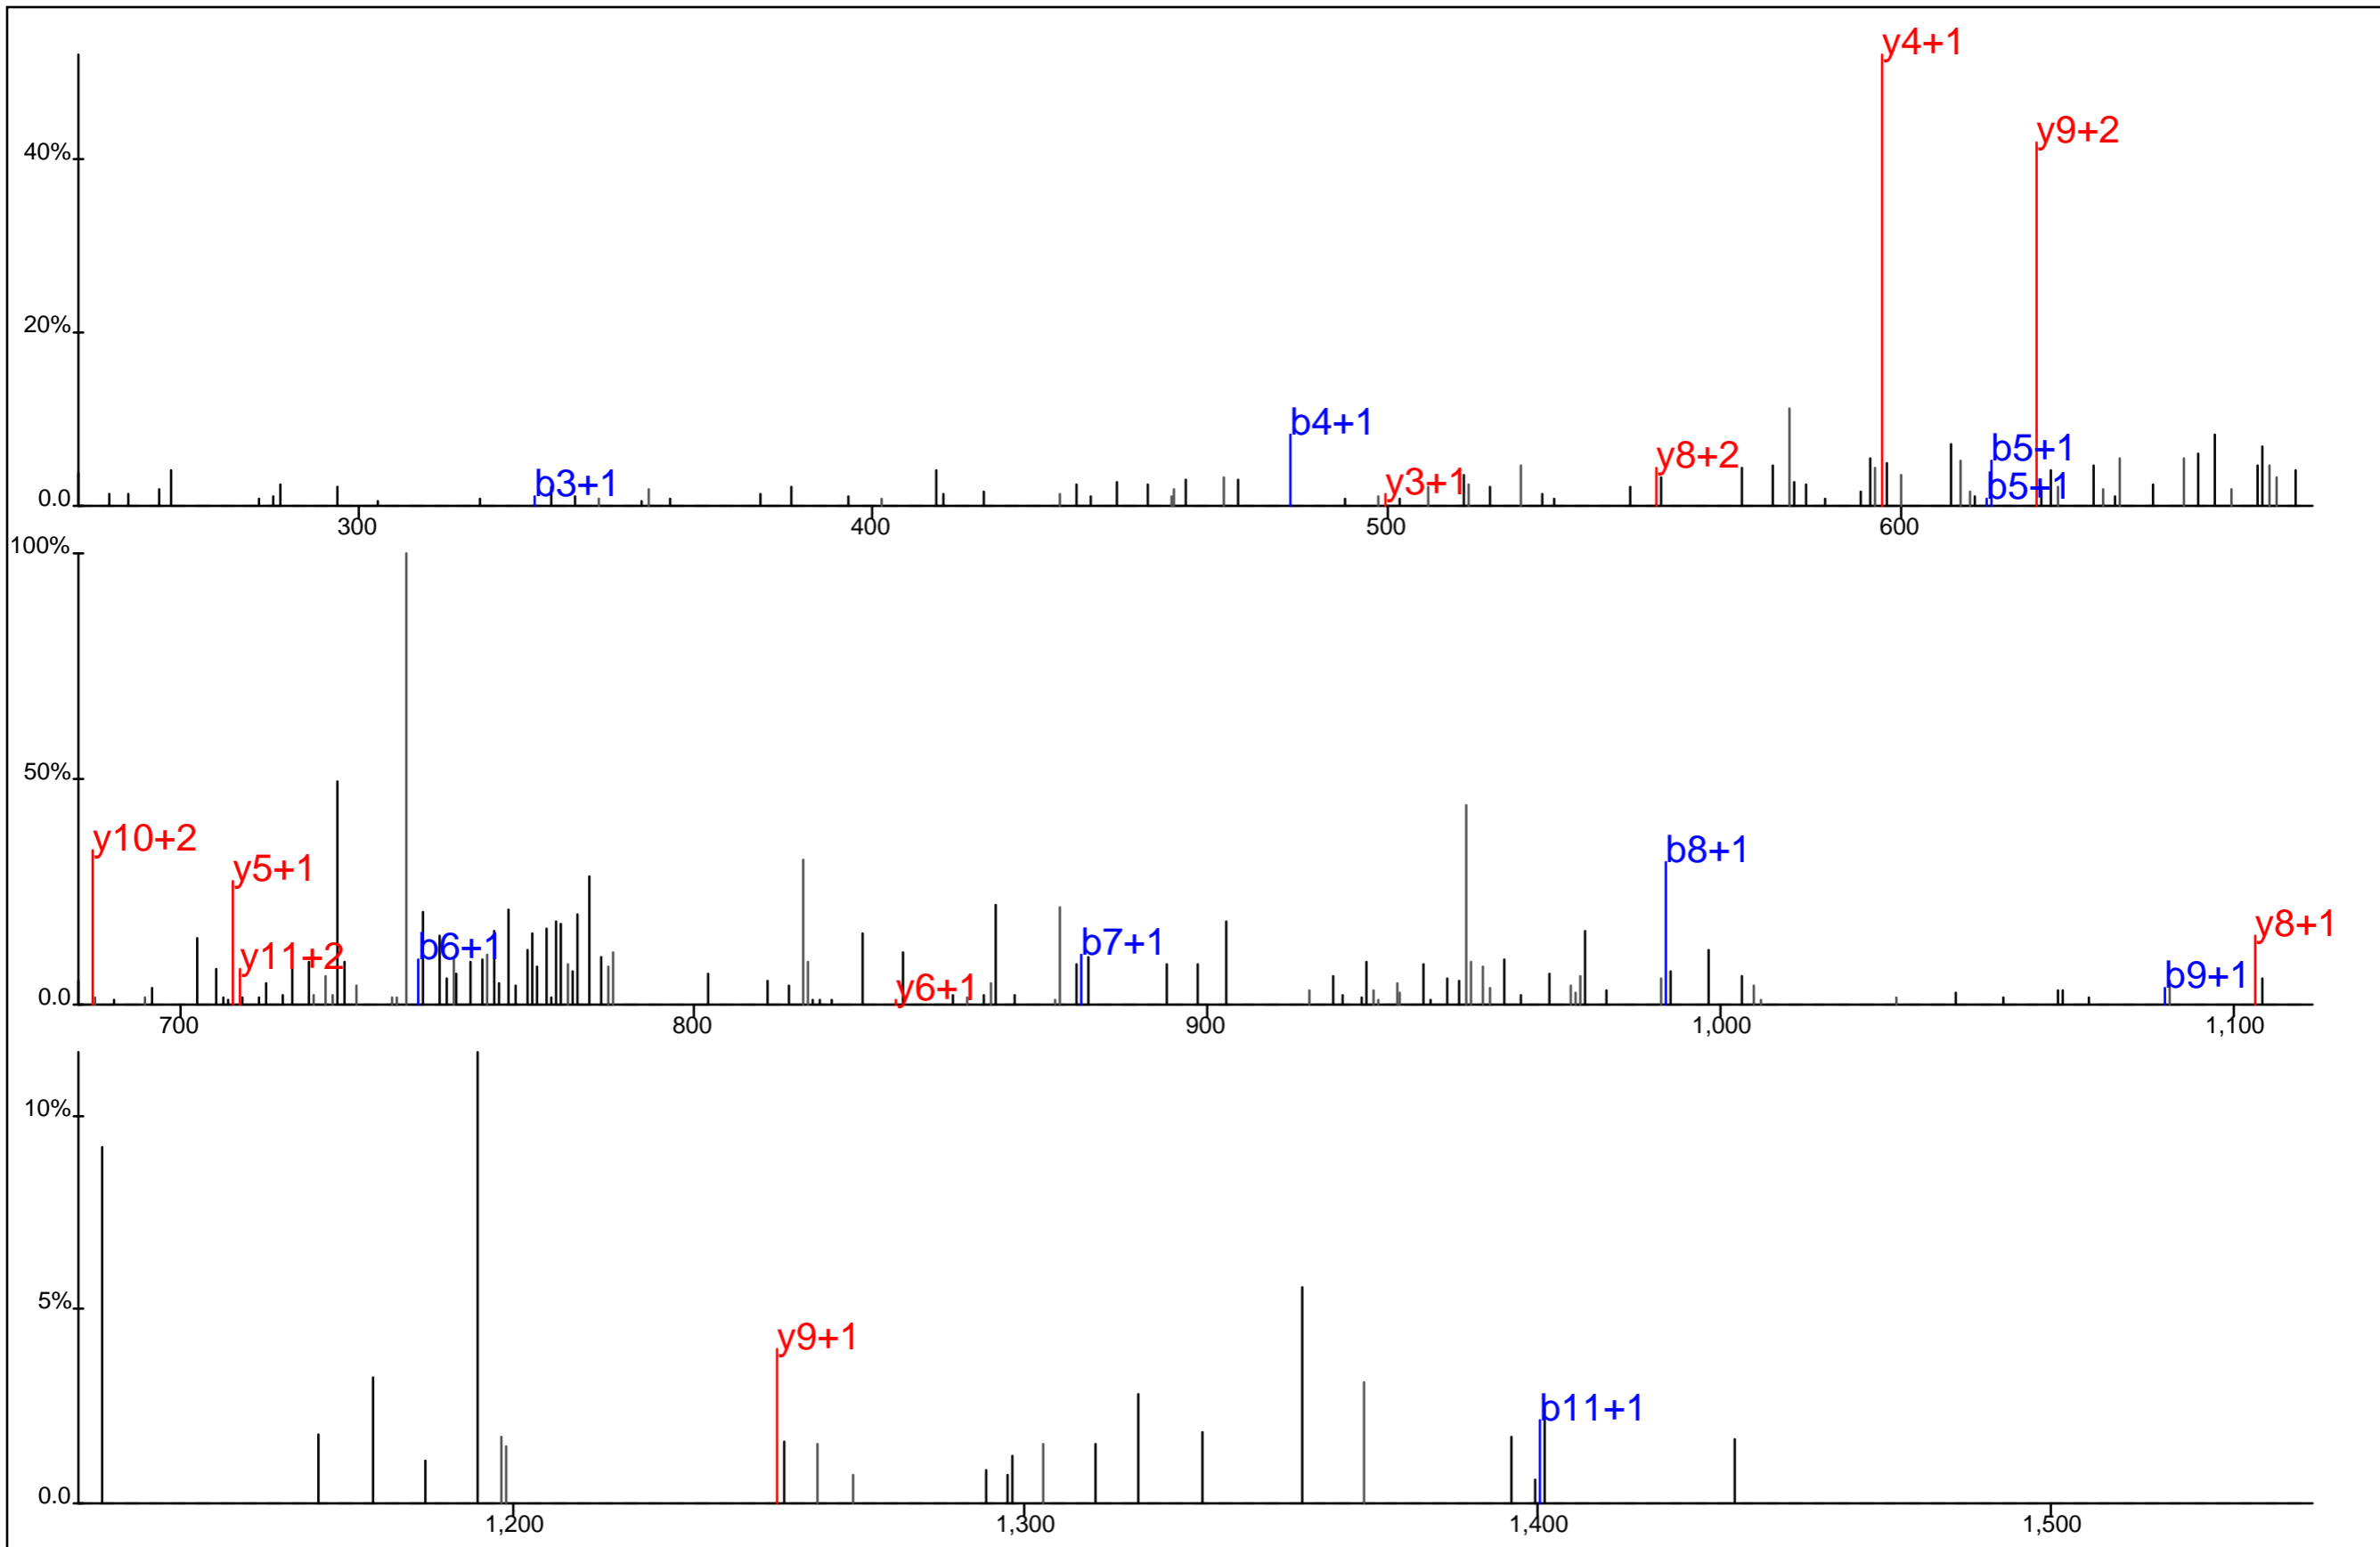

■ ■ ■ ■ ■ ■ ■ ■  
 Y G L F K ~~E~~ E N P Y\* A R#  
□ □ □ □ □ □ □ □ □

Protein Name: PTTG binding factor  
 gi Accession: 4757886  
 Precursor Mass: 792.8698+2  
 Delta Mass: 6.897 ppm  
 XCorr: 2.4431



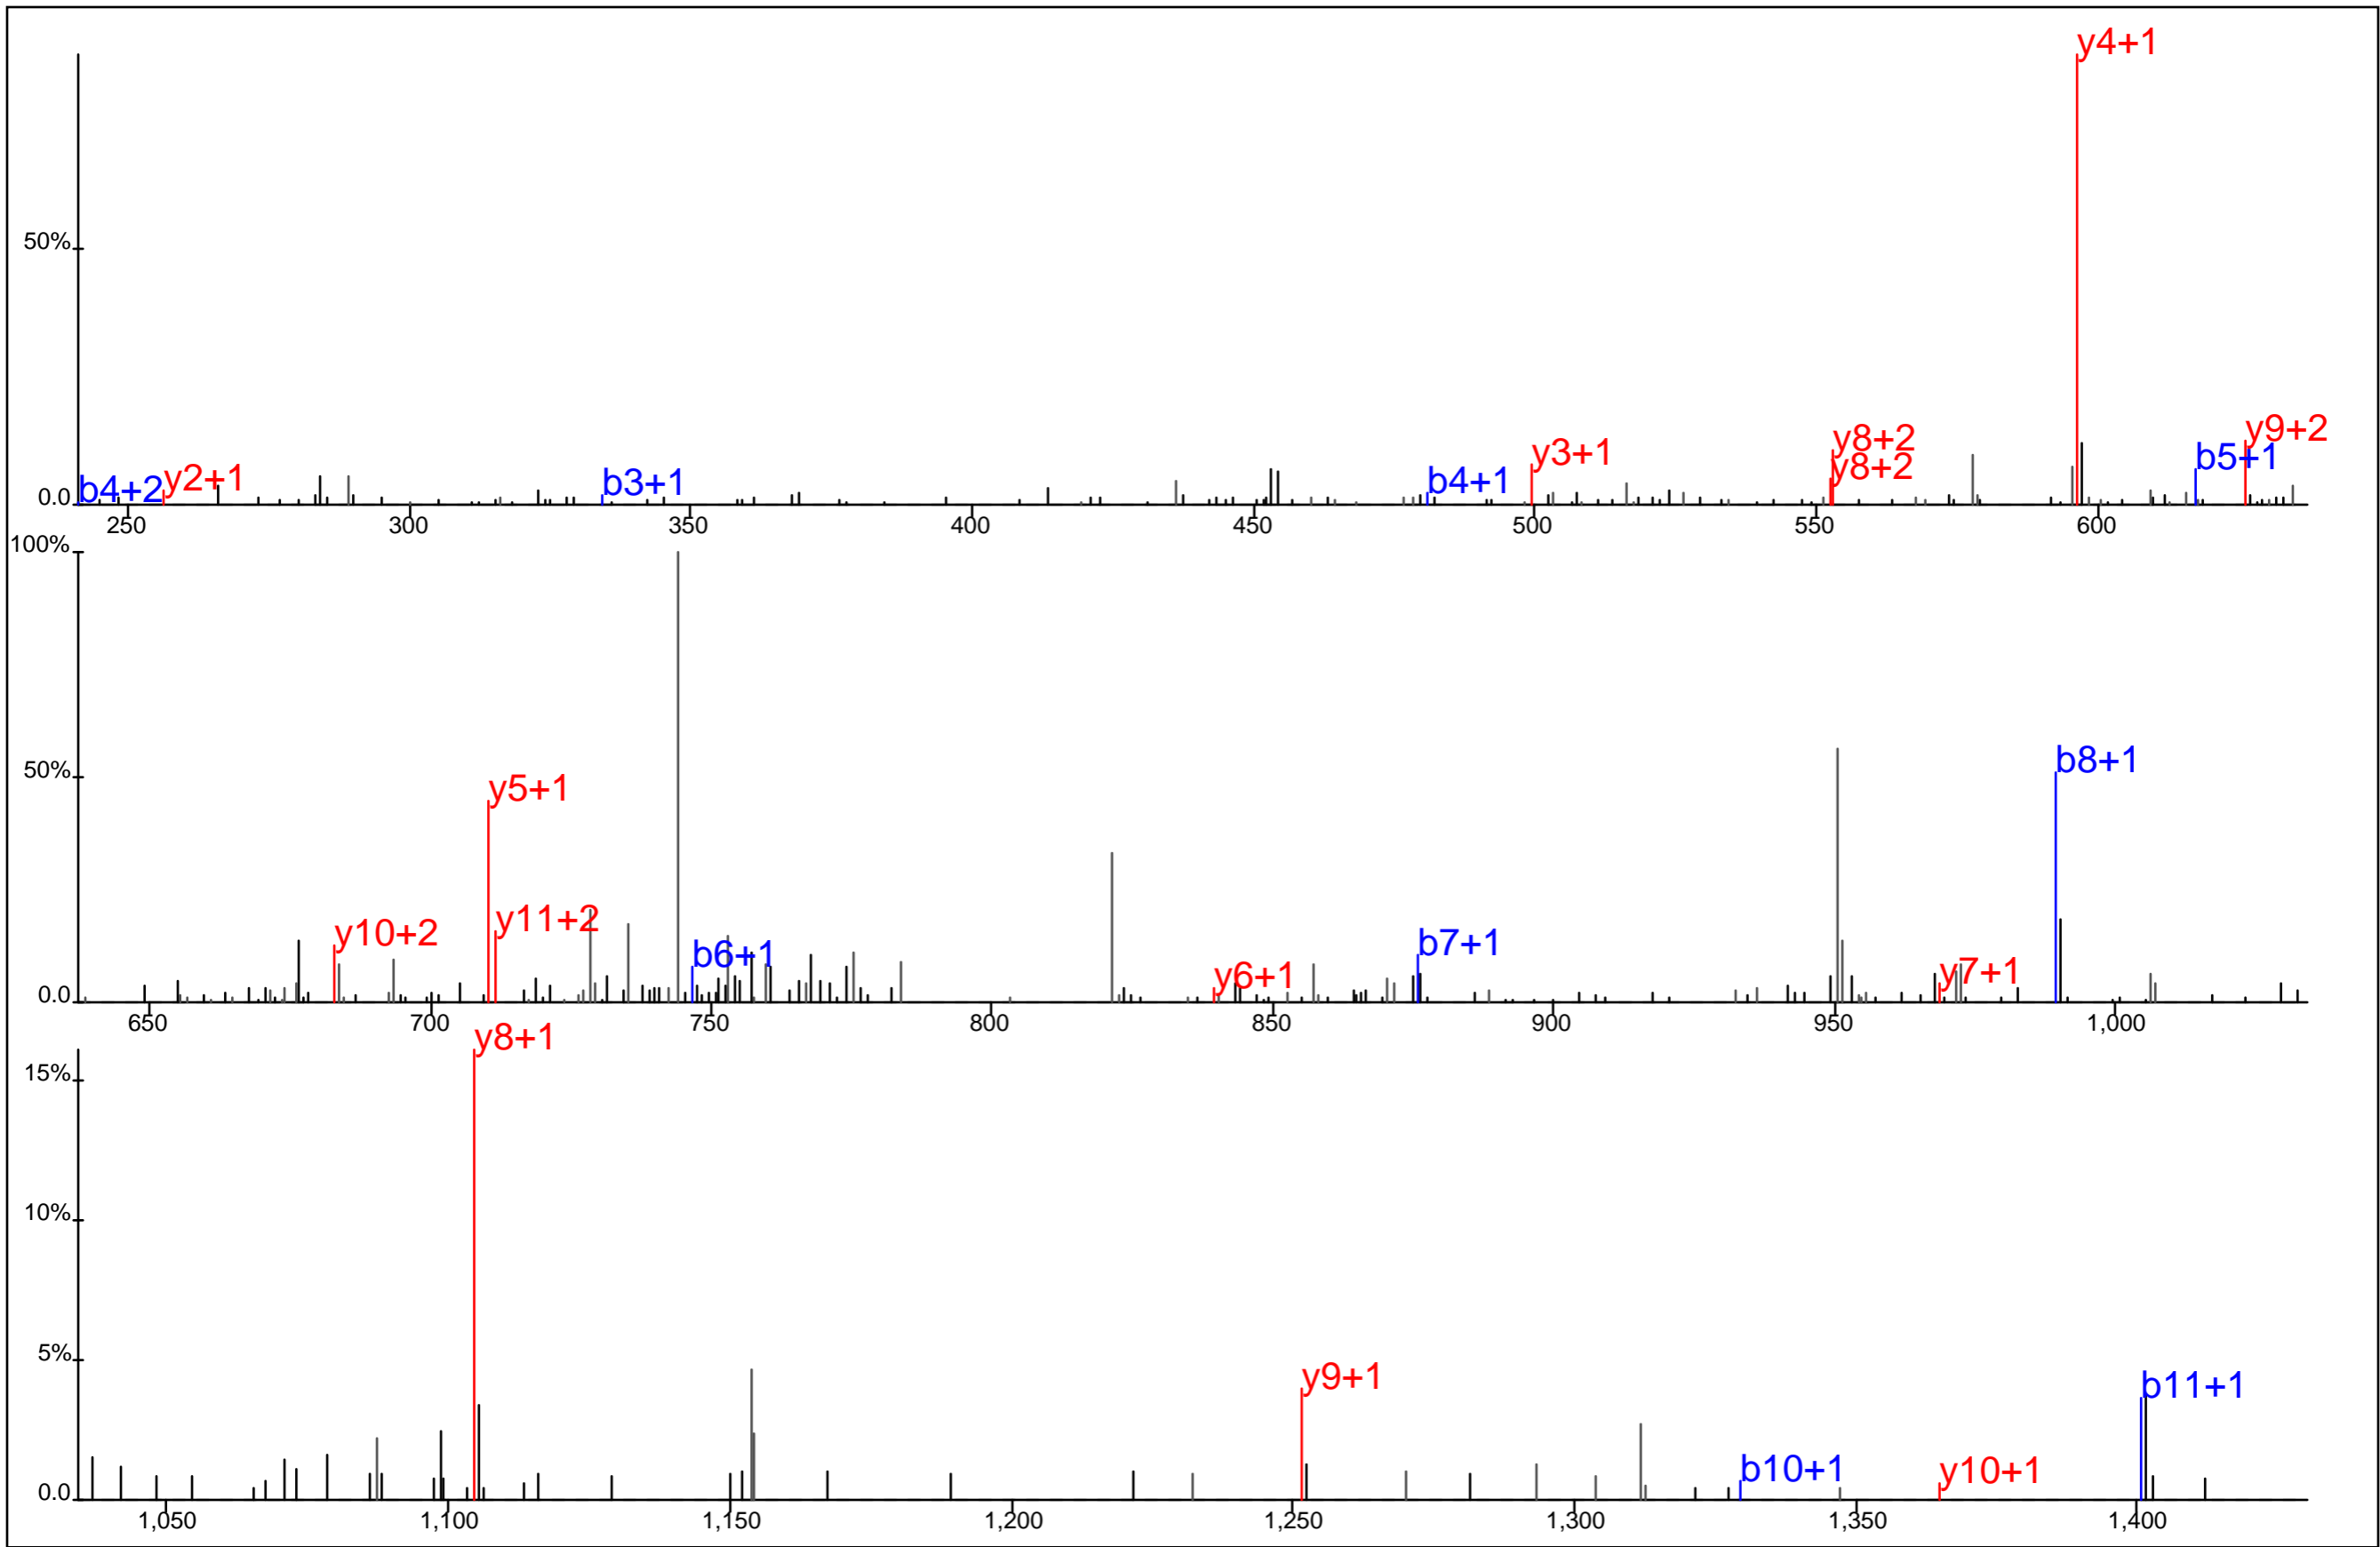

|    |   |   |   |   |    |   |   |   |     |
|----|---|---|---|---|----|---|---|---|-----|
|    | ■ | ■ | ■ | ■ | ■  | ■ | ■ | ■ |     |
| Y  | G | L | F | K | #E | E | N | P | Y*A |
| R% | ■ | ■ | ■ | ■ | ■  | ■ | ■ | ■ | ■   |

Protein Name: PTTG binding factor  
 gi Accession: 4757886  
 Precursor Mass: 792.8666+2  
 Delta Mass: 2.914 ppm  
 XCorr: 23.49

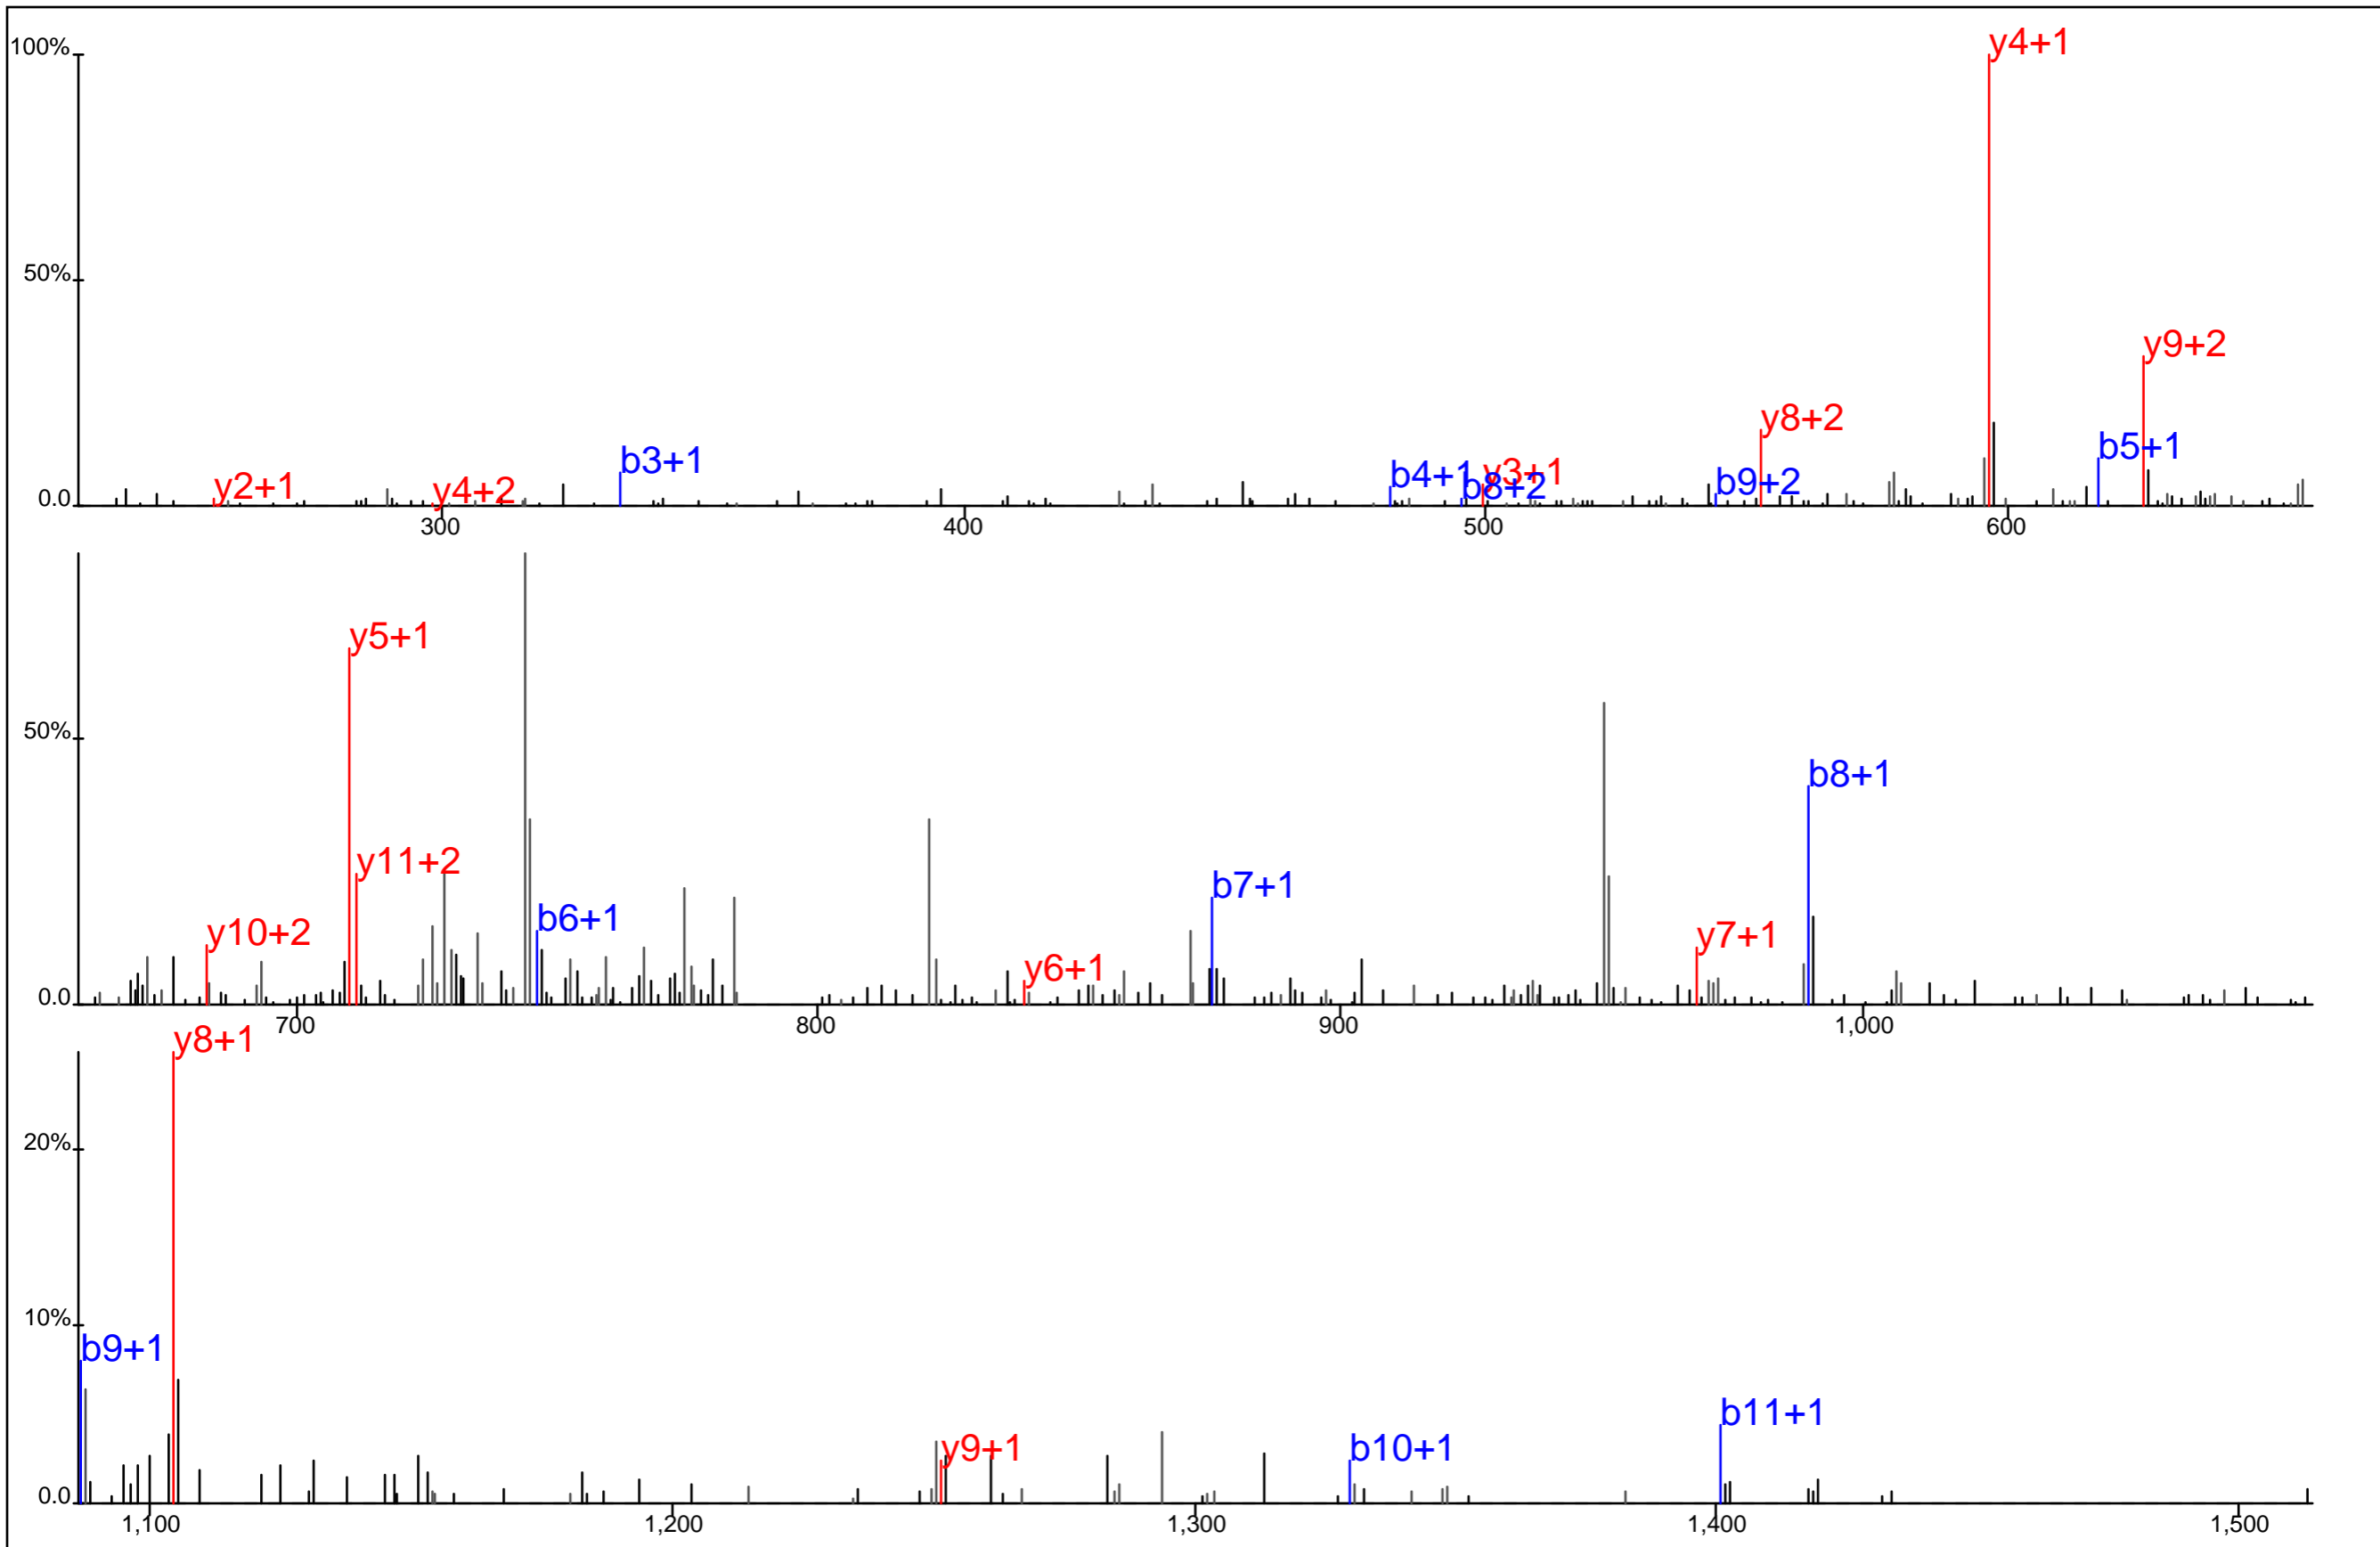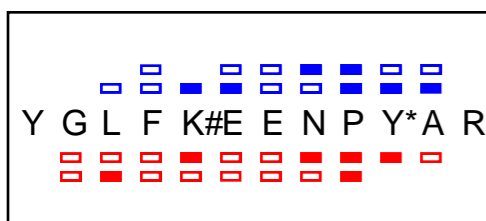

Protein Name: PTTG binding factor  
 gi Accession: 4757886  
 Precursor Mass: 792.8670+2  
 Delta Mass: 3.450 ppm  
 XCorr: 28.52

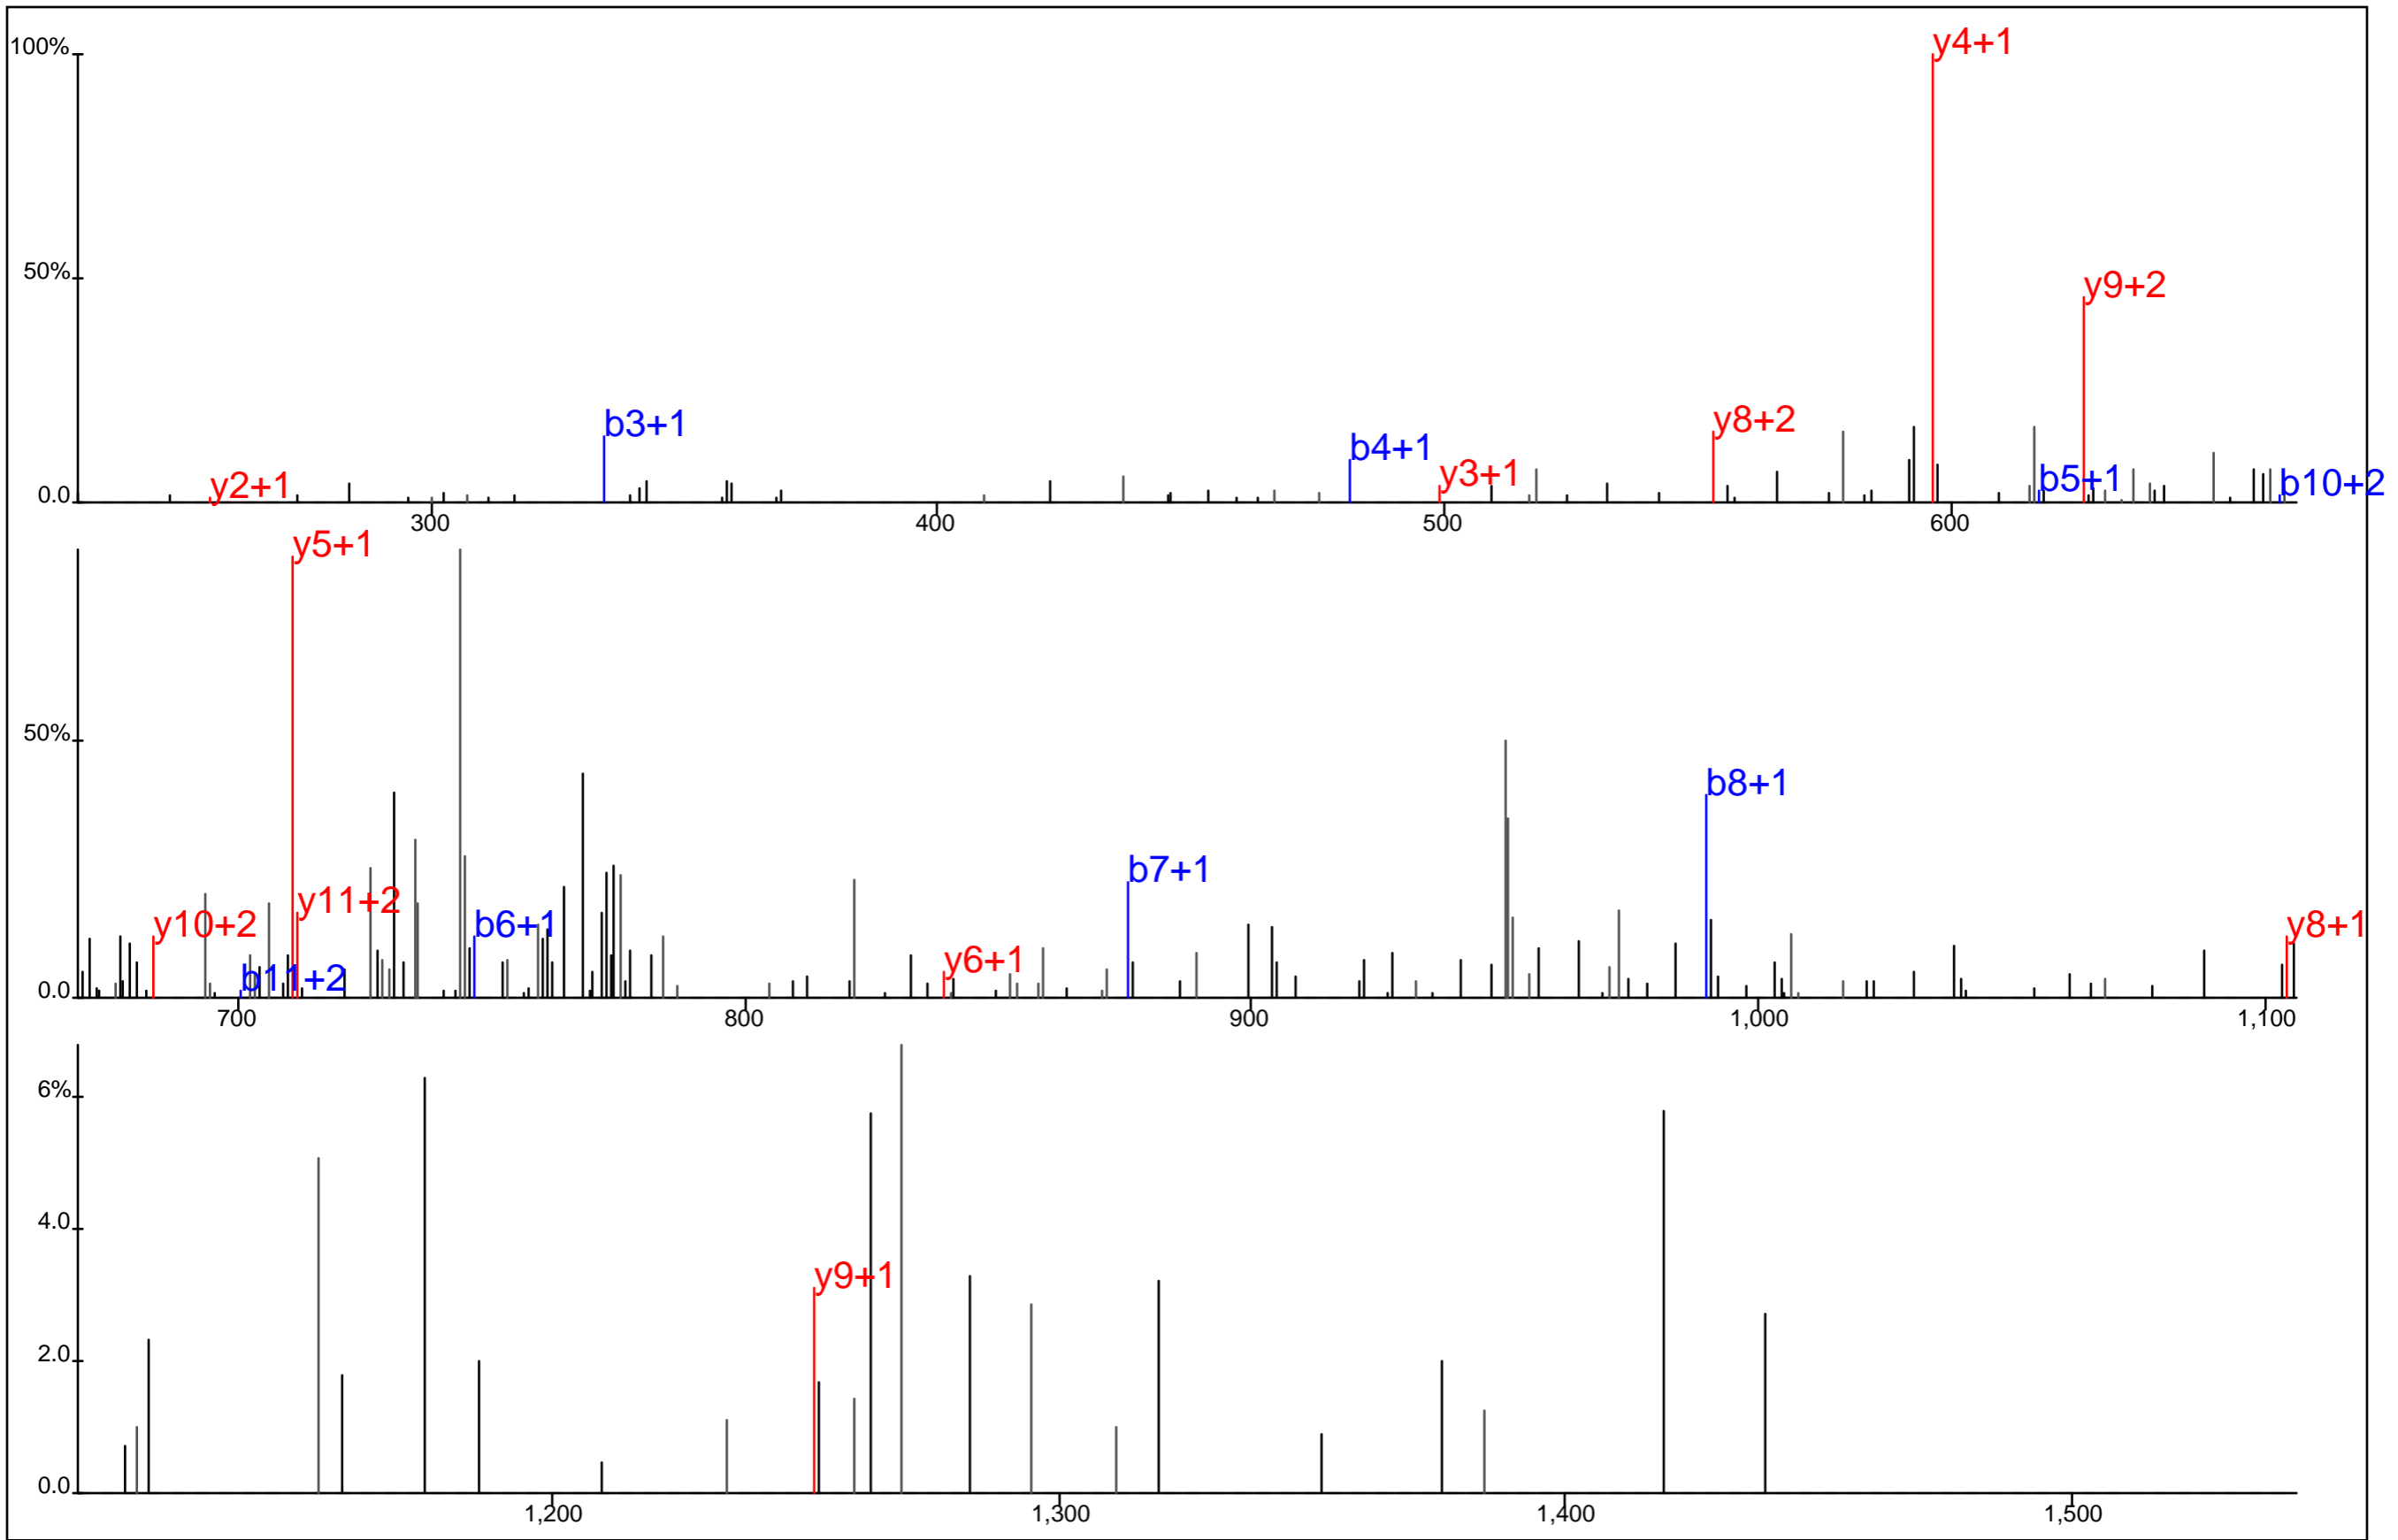

|    |   |   |   |   |    |   |   |   |     |
|----|---|---|---|---|----|---|---|---|-----|
|    |   |   |   |   |    |   |   |   |     |
| Y  | G | L | F | K | #E | E | N | P | Y*A |
| R% |   |   |   |   |    |   |   |   |     |

Protein Name: PTTG binding factor  
 gi Accession: 4757886  
 Precursor Mass: 792.8685+2  
 Delta Mass: 5.299 ppm  
 XCorr: 10.95

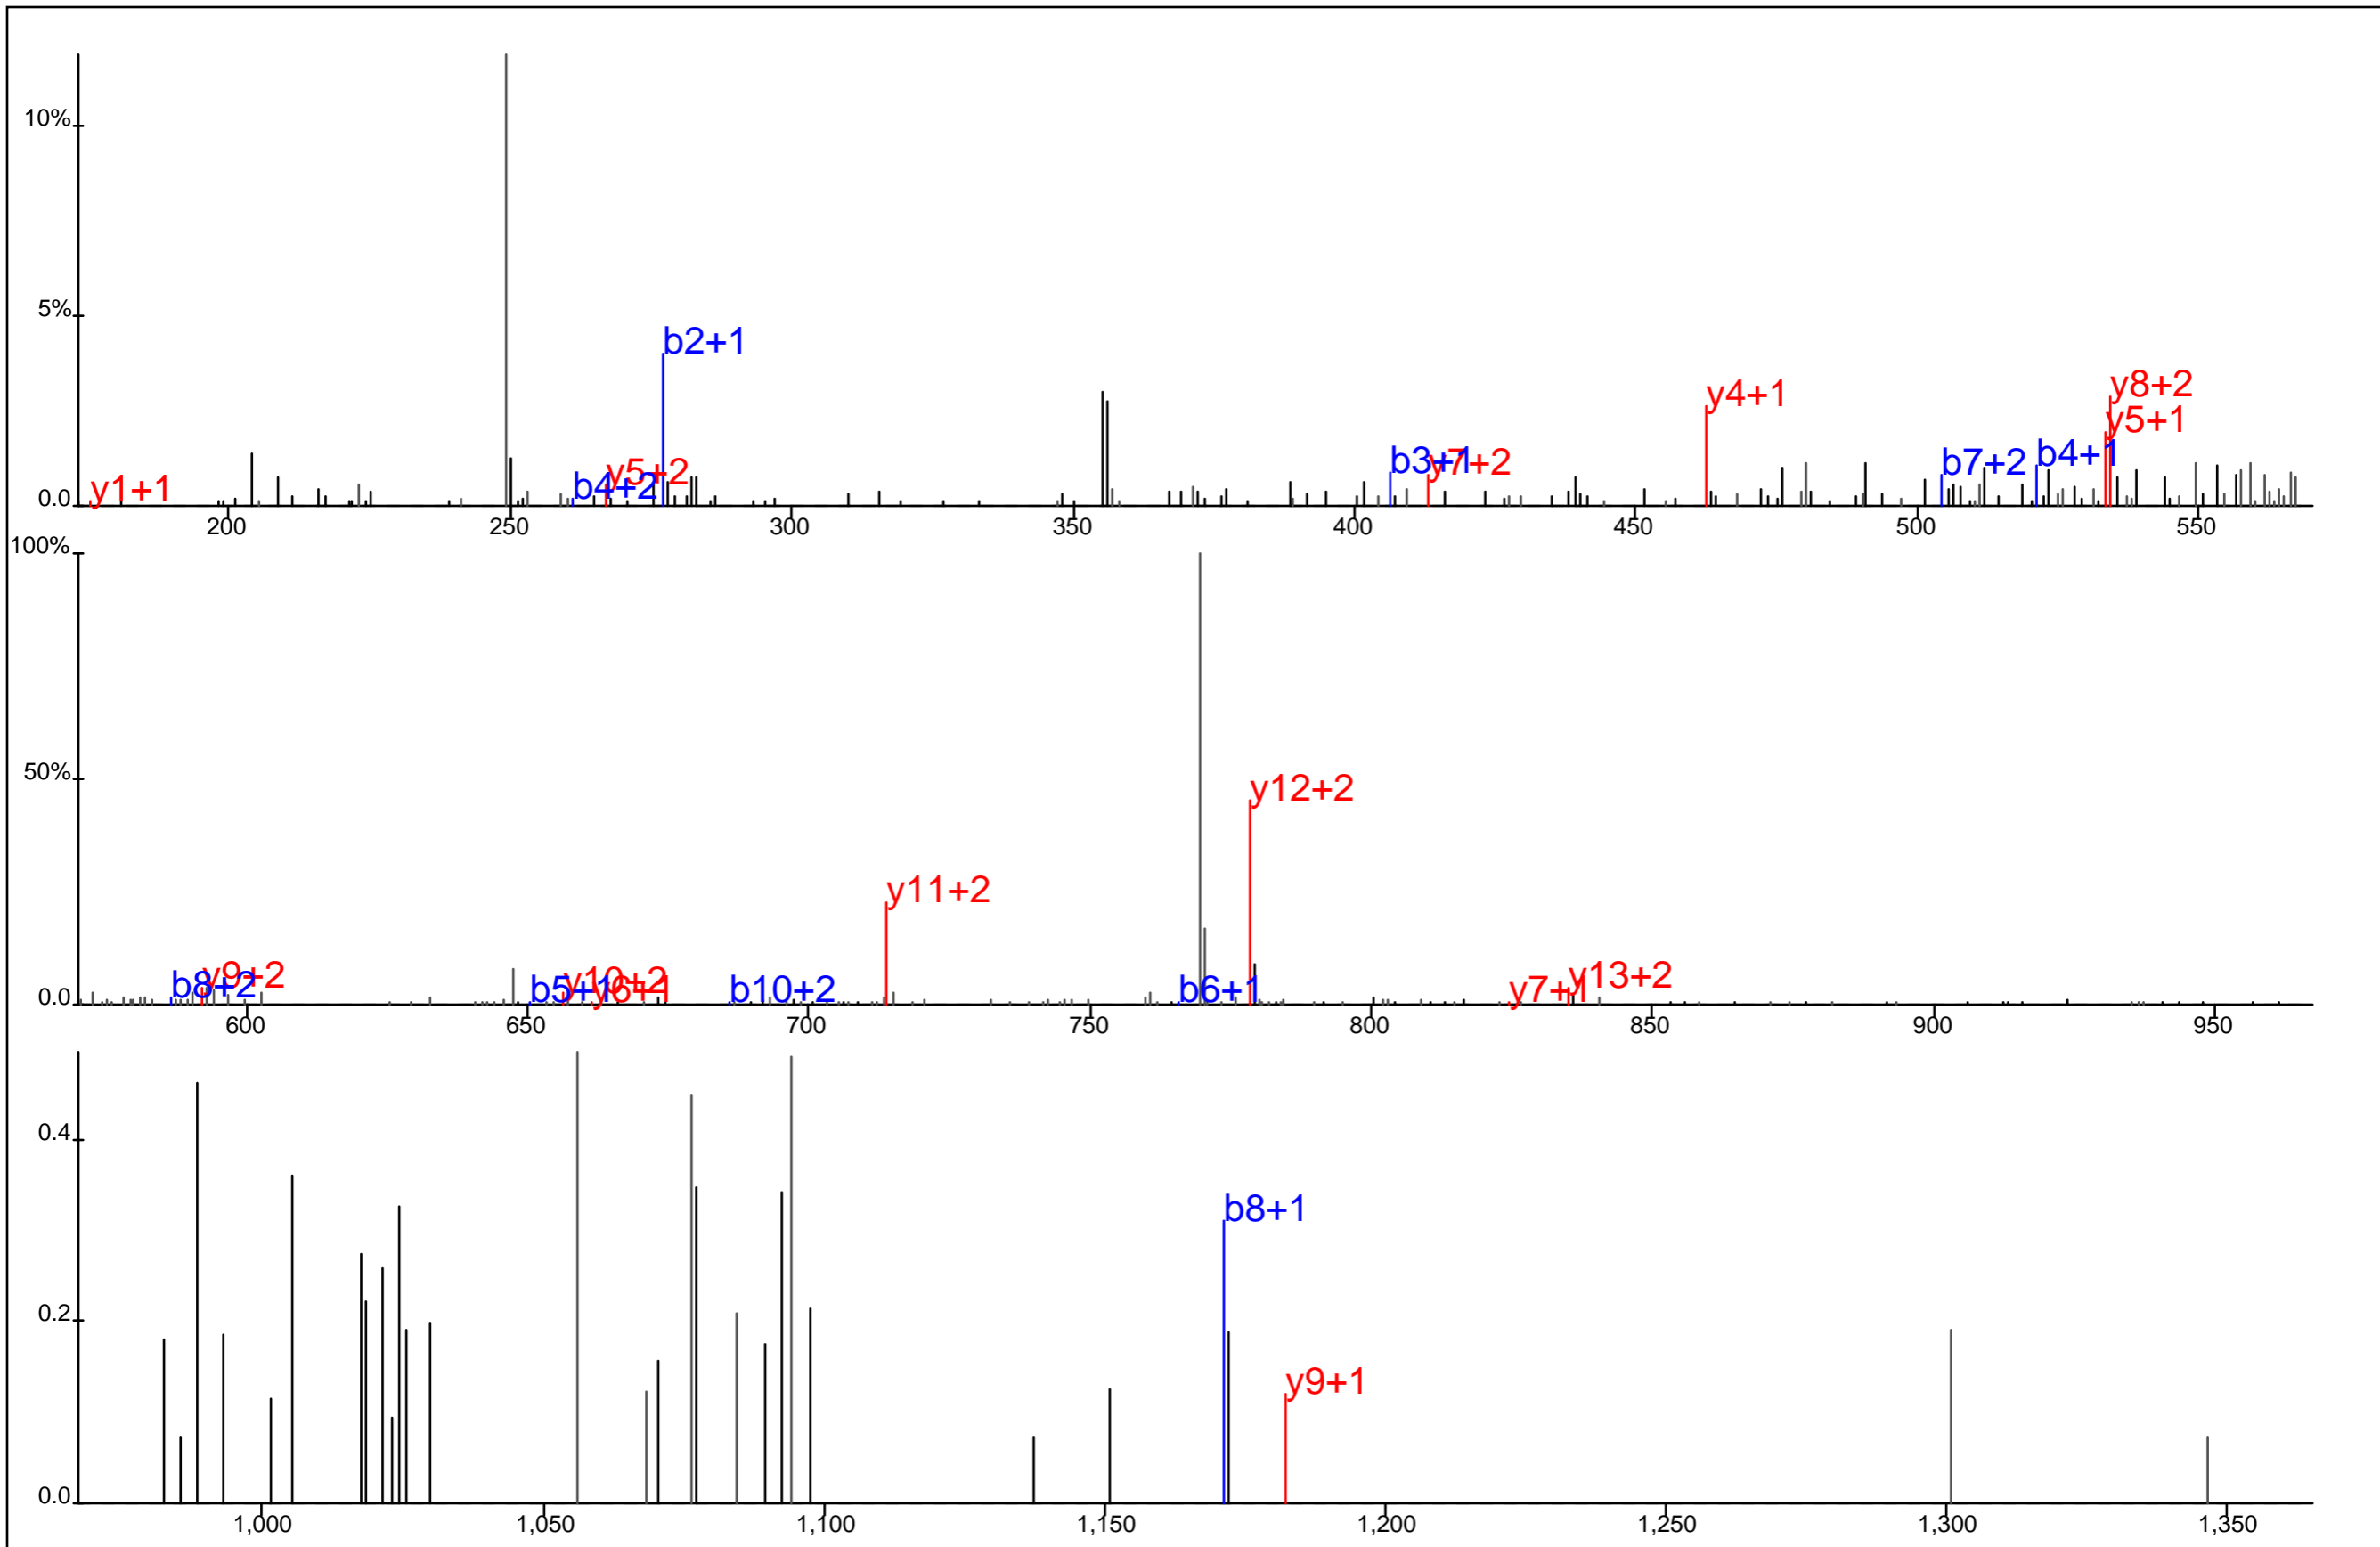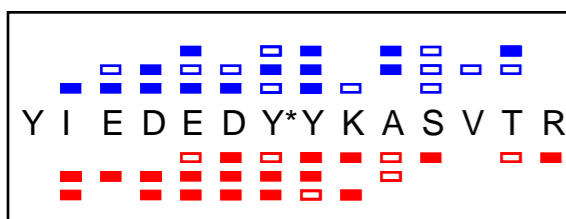

Protein Name: PYK2  
 gi Accession: 1082034  
 Precursor Mass: 611.2634+3  
 Delta Mass: 1.645 ppm  
 XCorr: 22.85

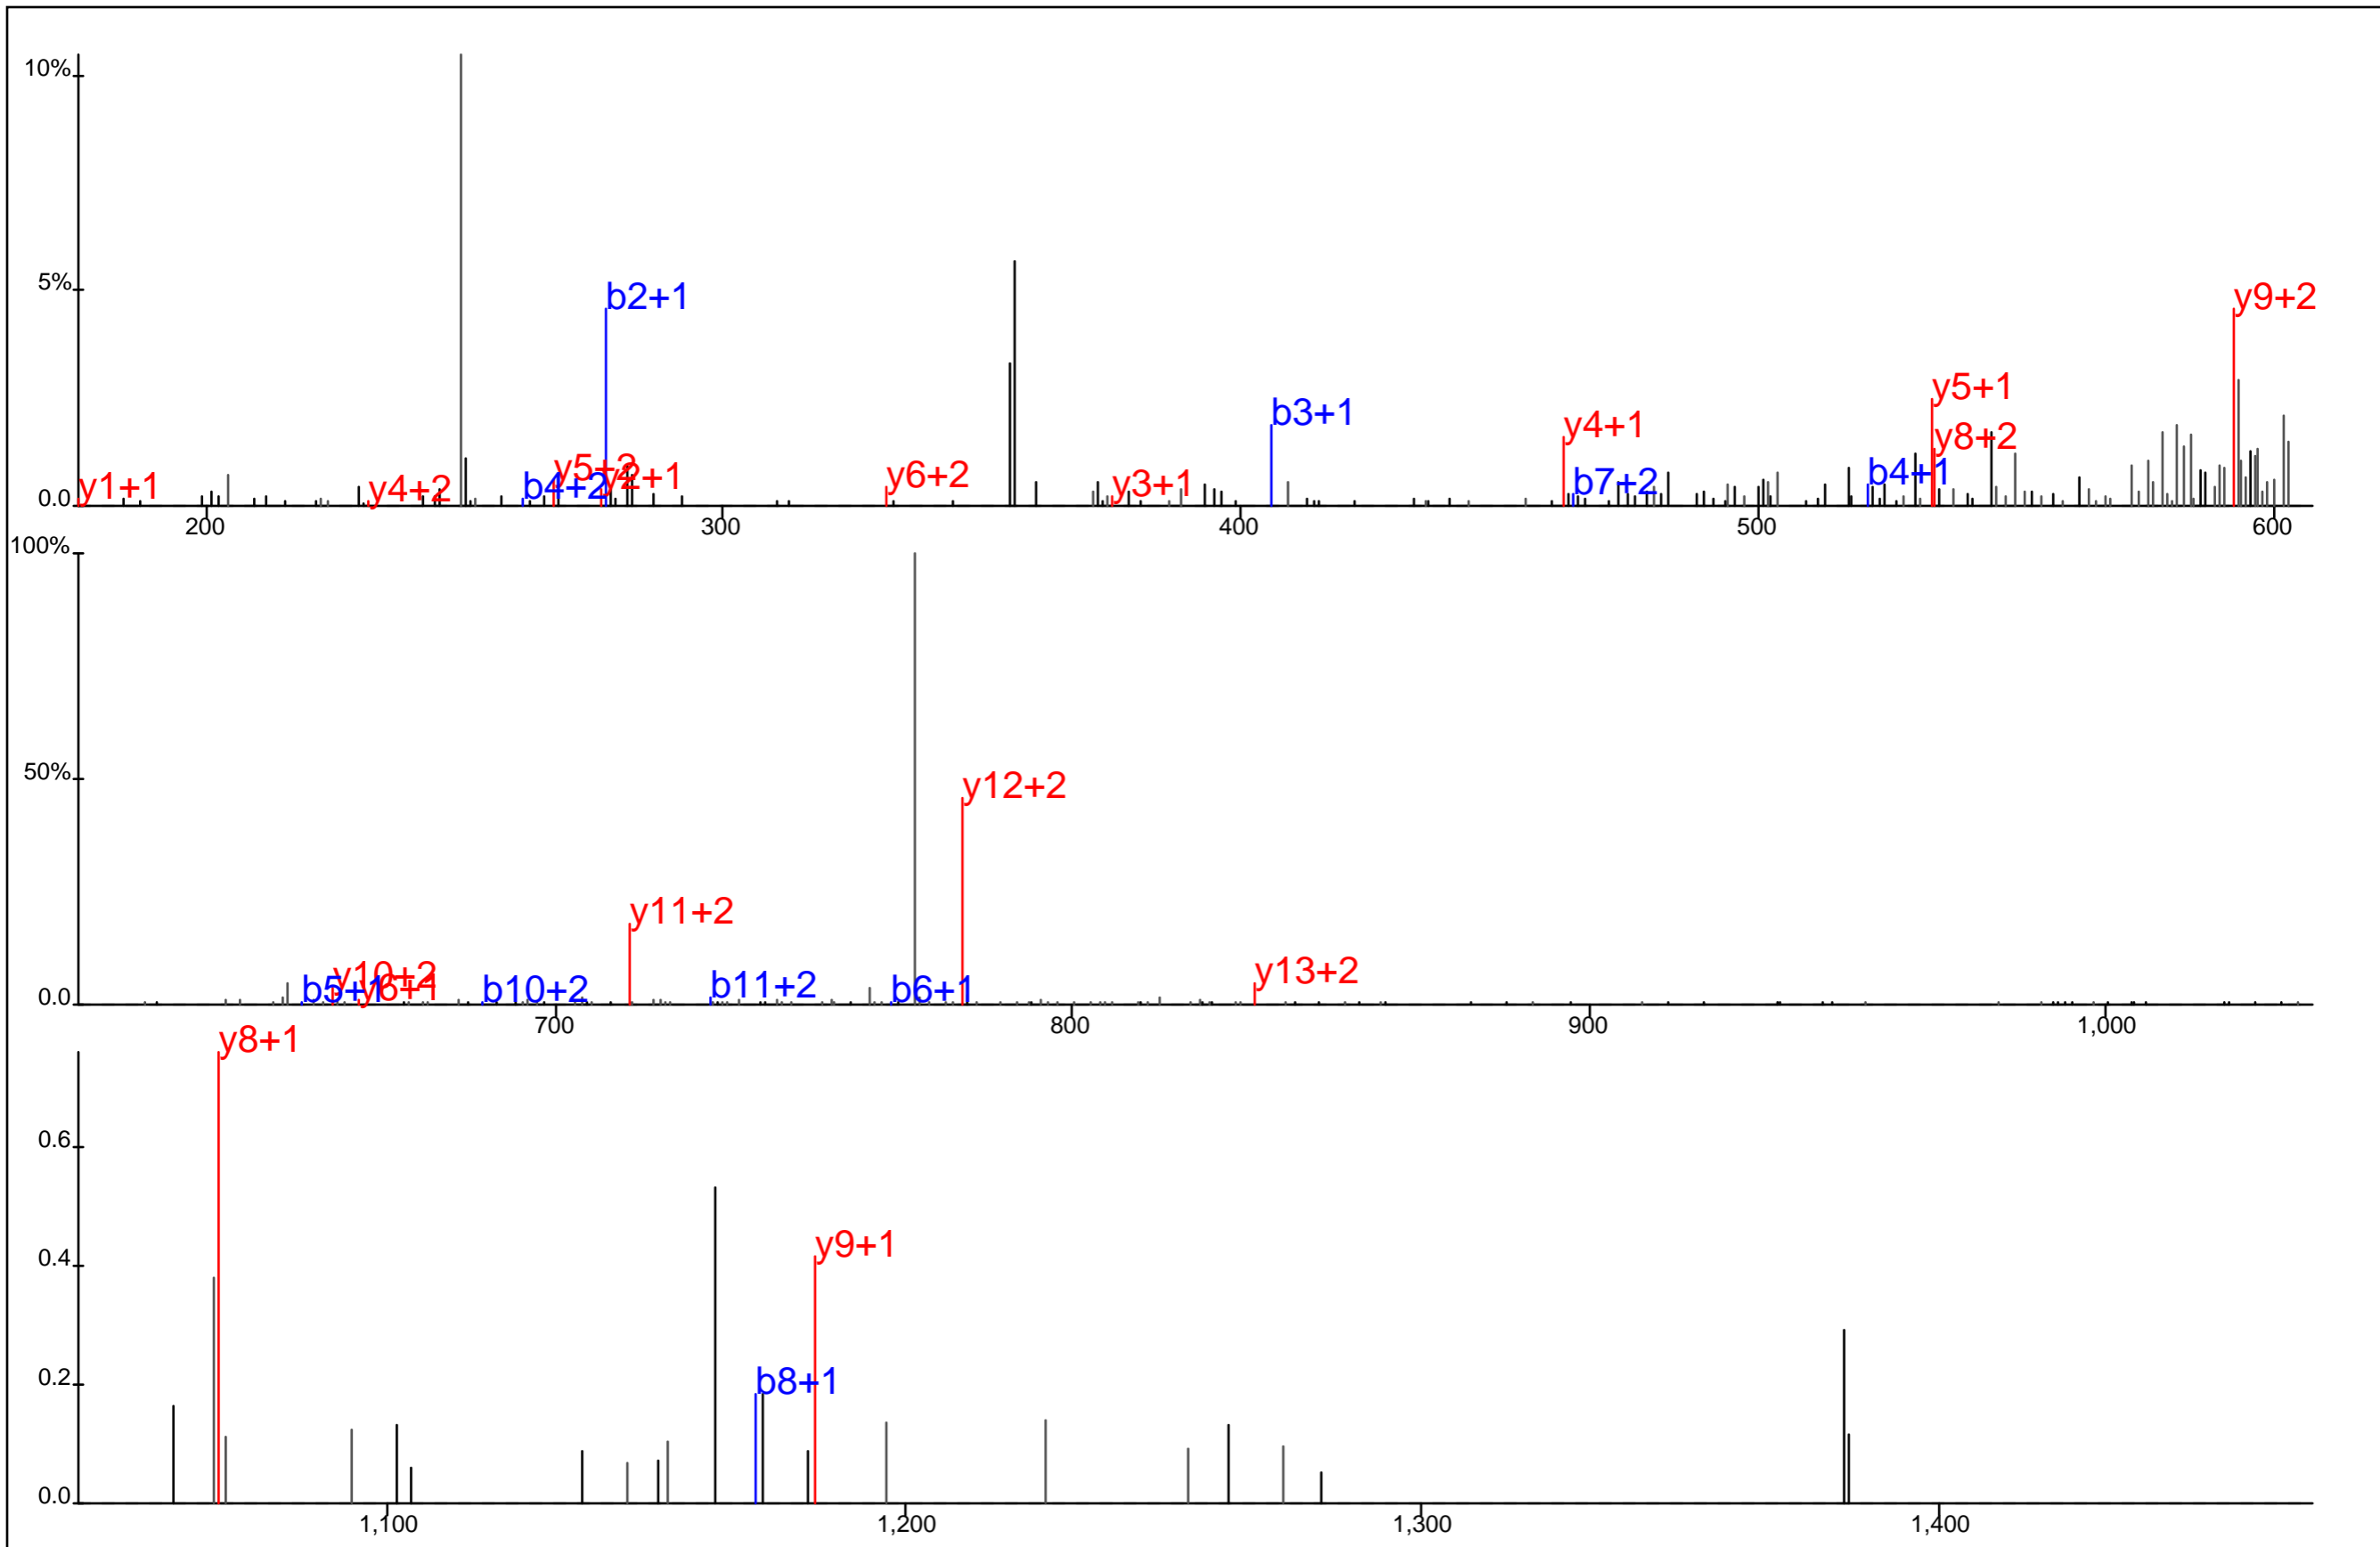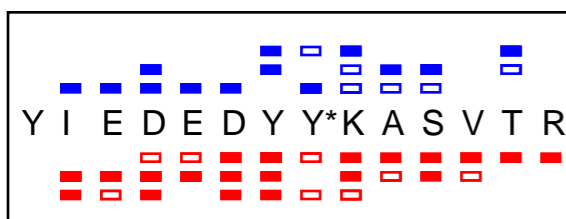

Protein Name: PYK2  
 gi Accession: 1082034  
 Precursor Mass: 611.2679+3  
 Delta Mass: 5.753 ppm  
 XCorr: 24.78

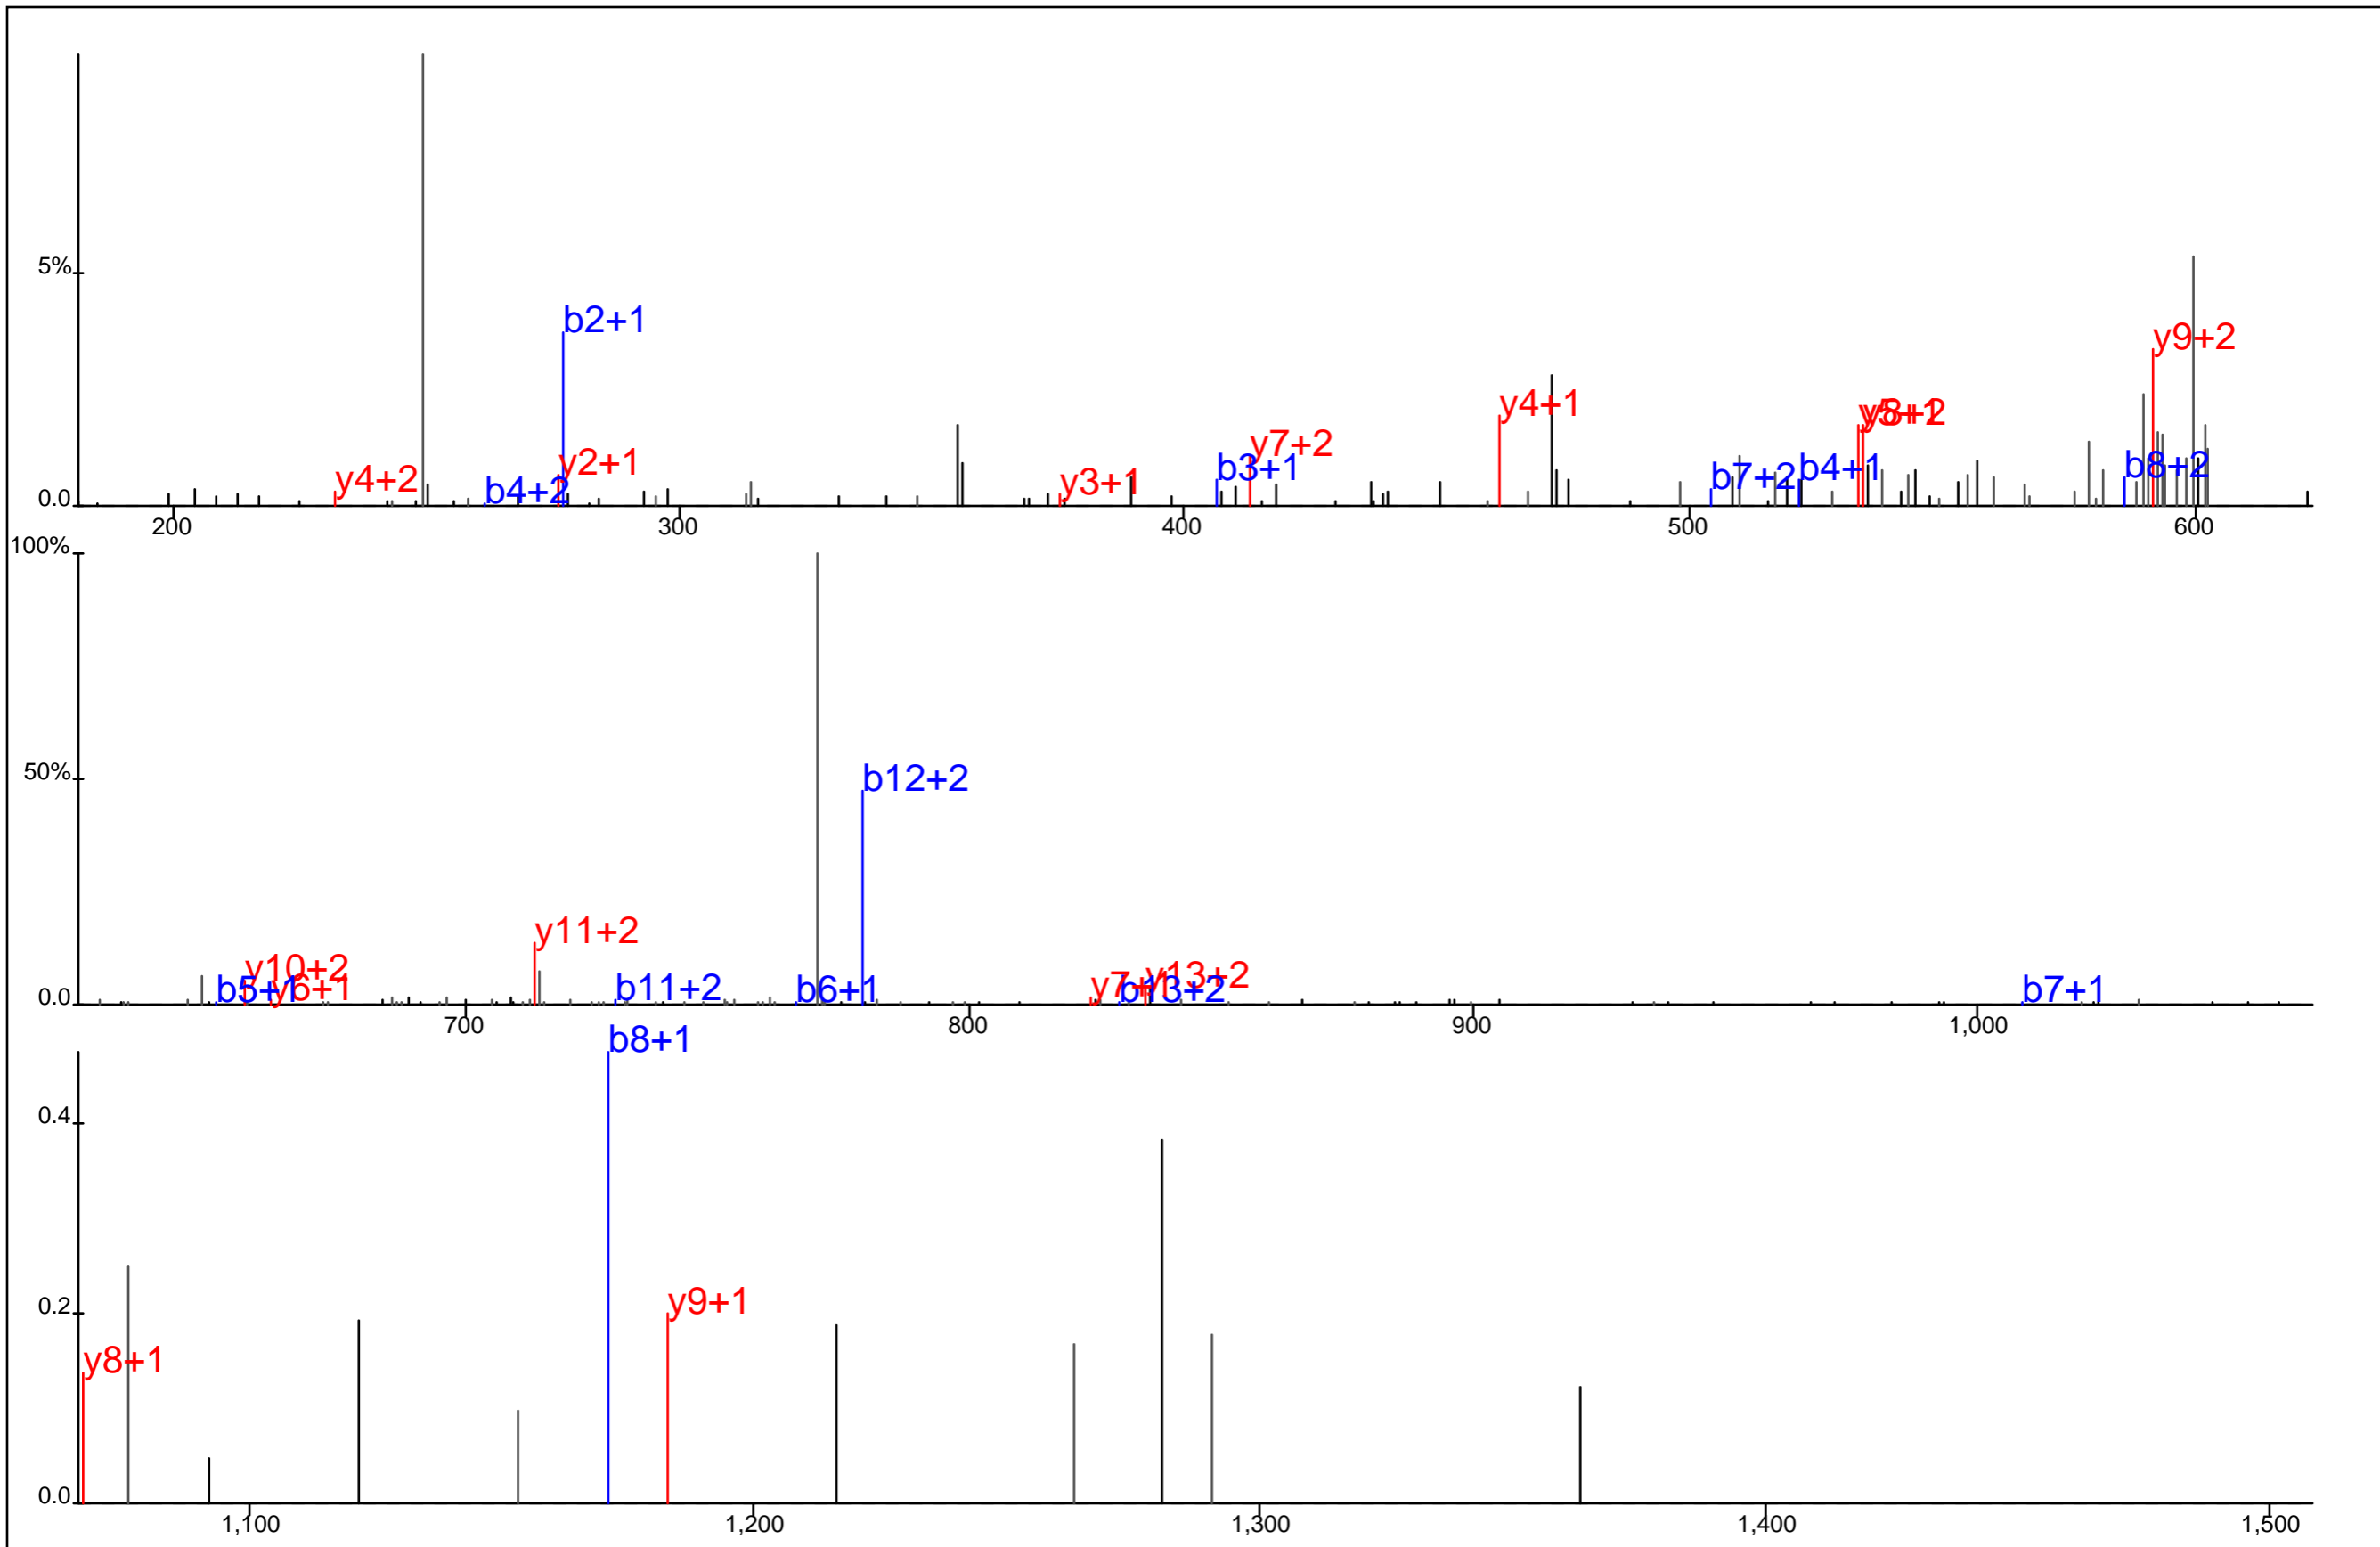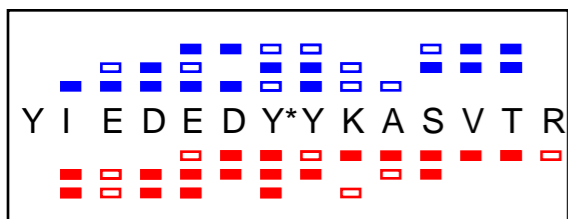

Protein Name: PYK2  
 gi Accession: 1082034  
 Precursor Mass: 611.2664+3  
 Delta Mass: 3.252 ppm  
 XCorr: 33.63

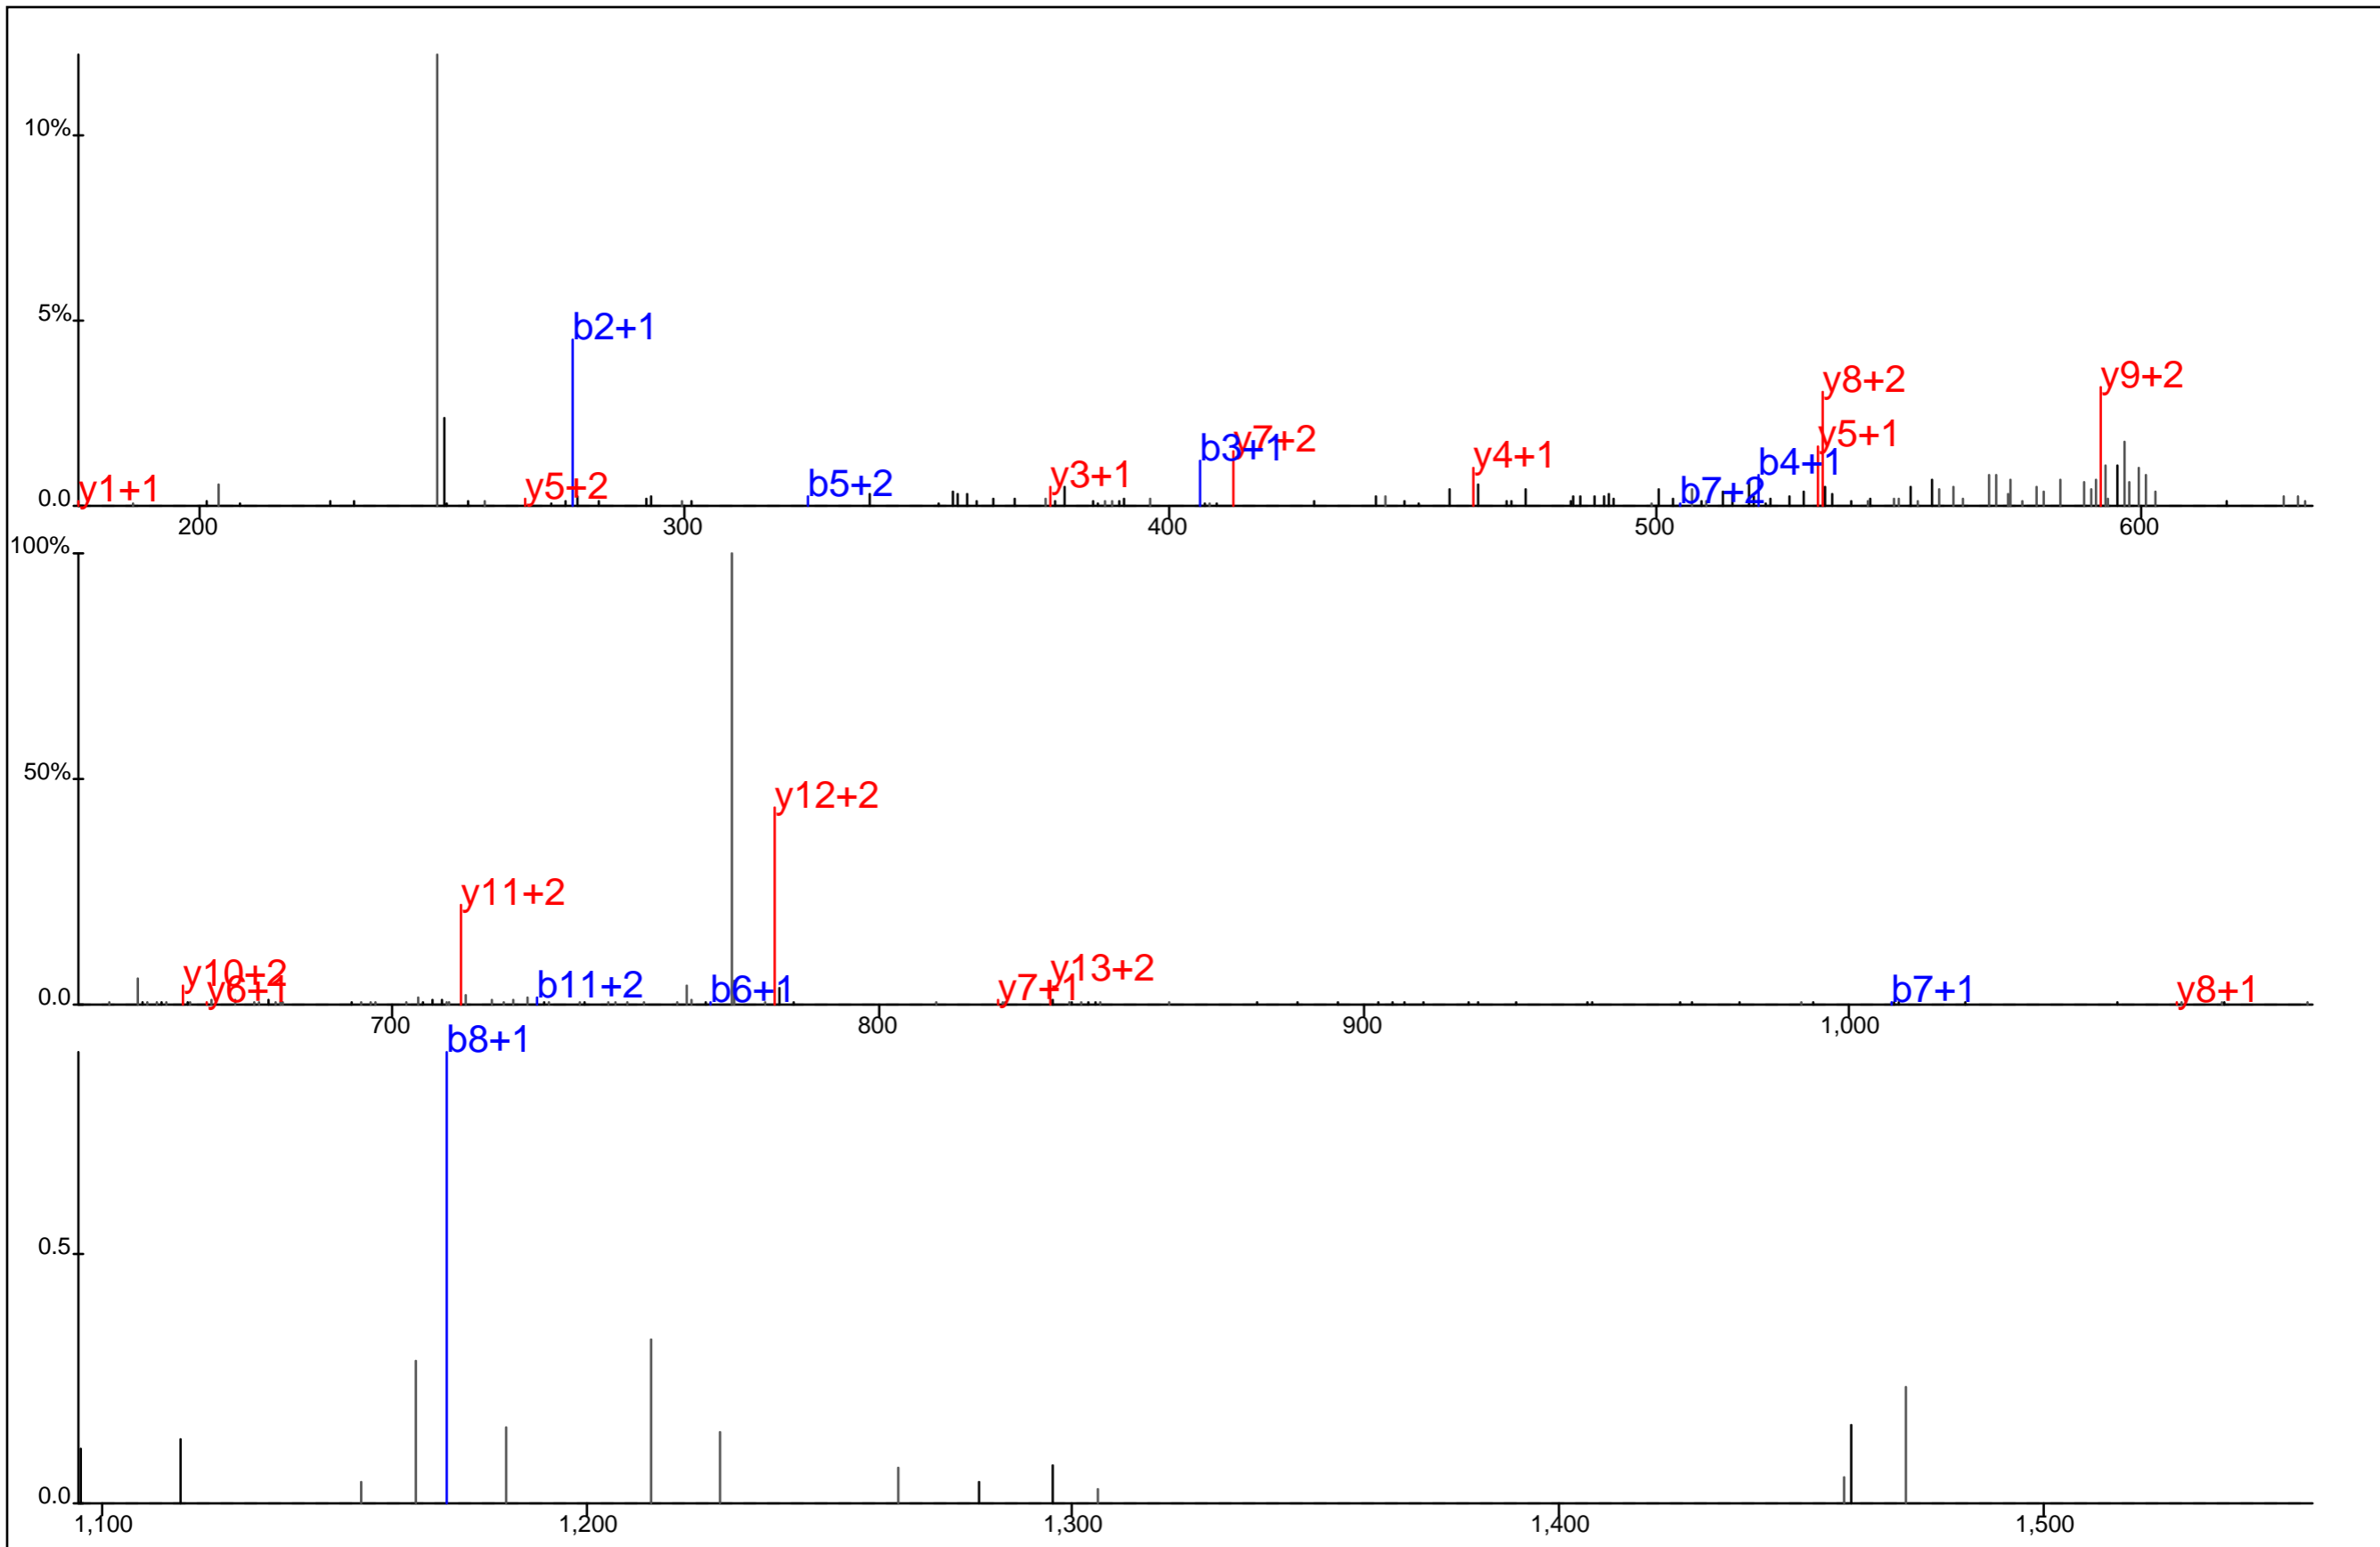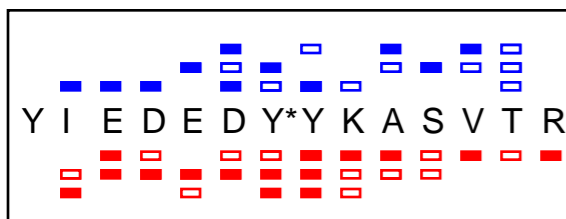

Protein Name: PYK2  
 gi Accession: 1082034  
 Precursor Mass: 611.2653+3  
 Delta Mass: 1.451 ppm  
 XCorr: 33.77

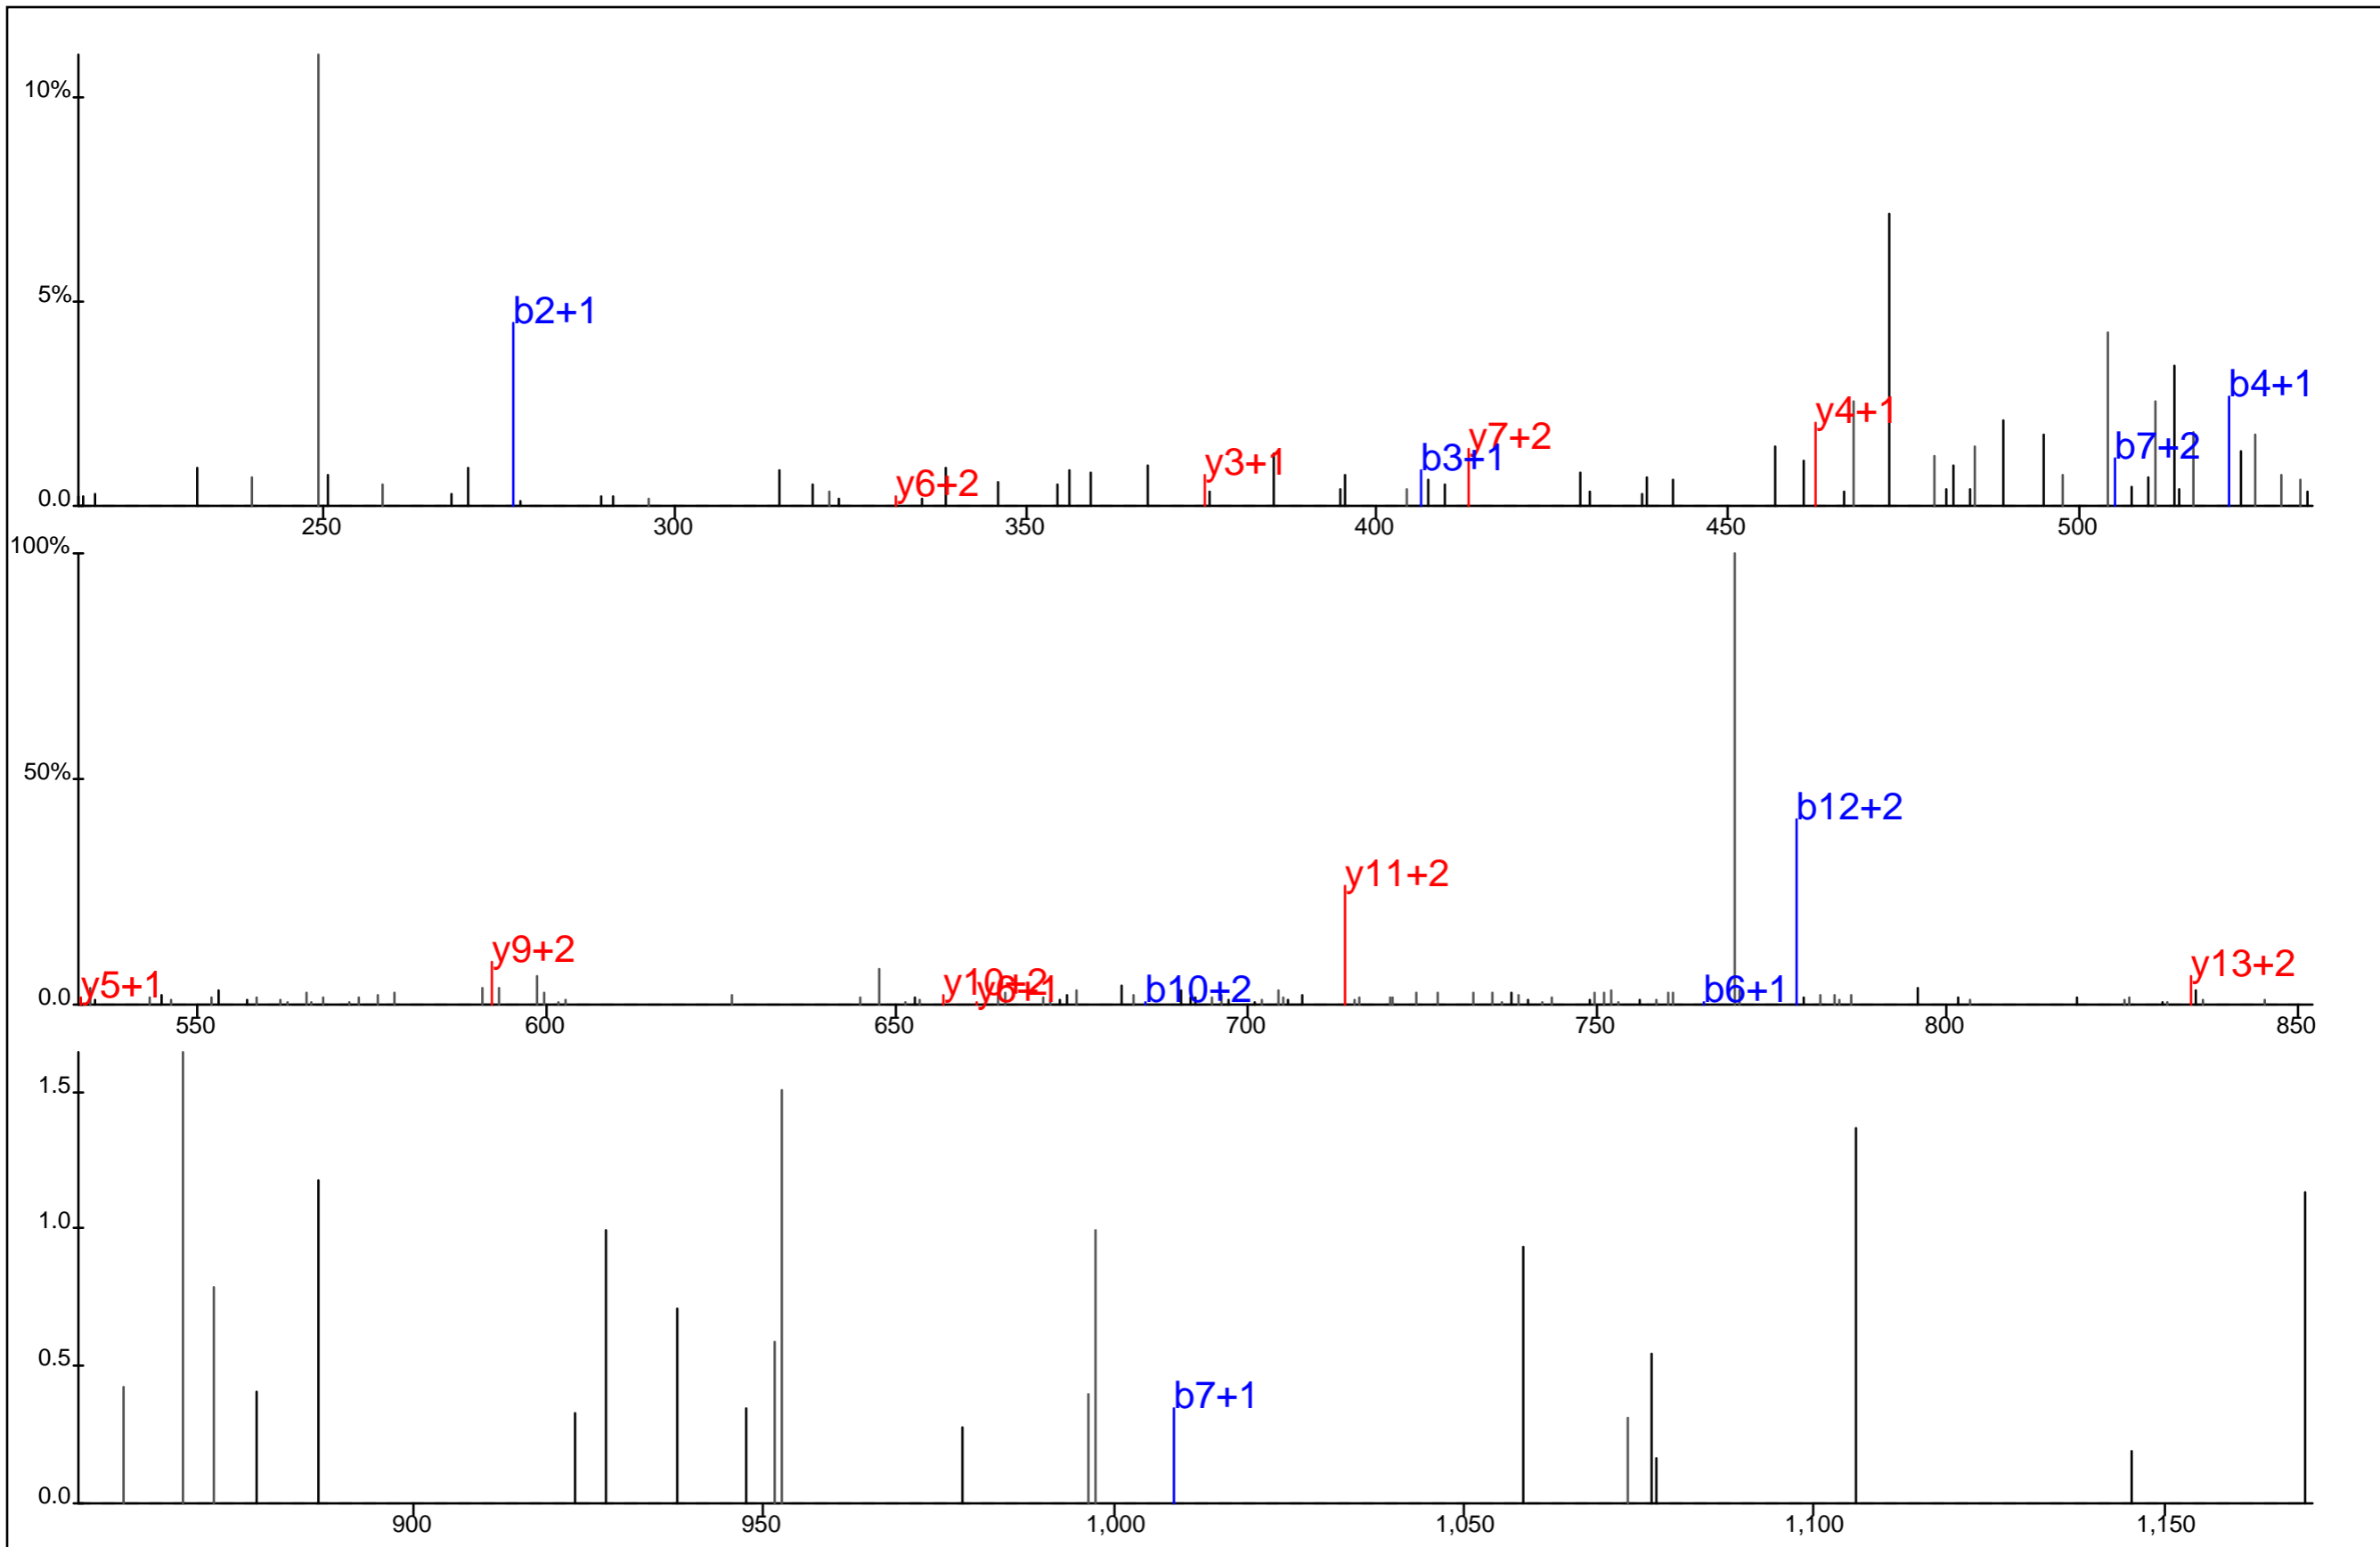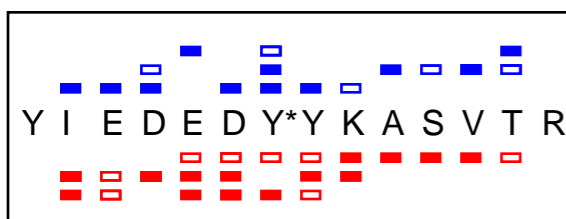

Protein Name: PYK2  
 gi Accession: 1082034  
 Precursor Mass: 611.2657+3  
 Delta Mass: 2.150 ppm  
 XCorr: 19.16



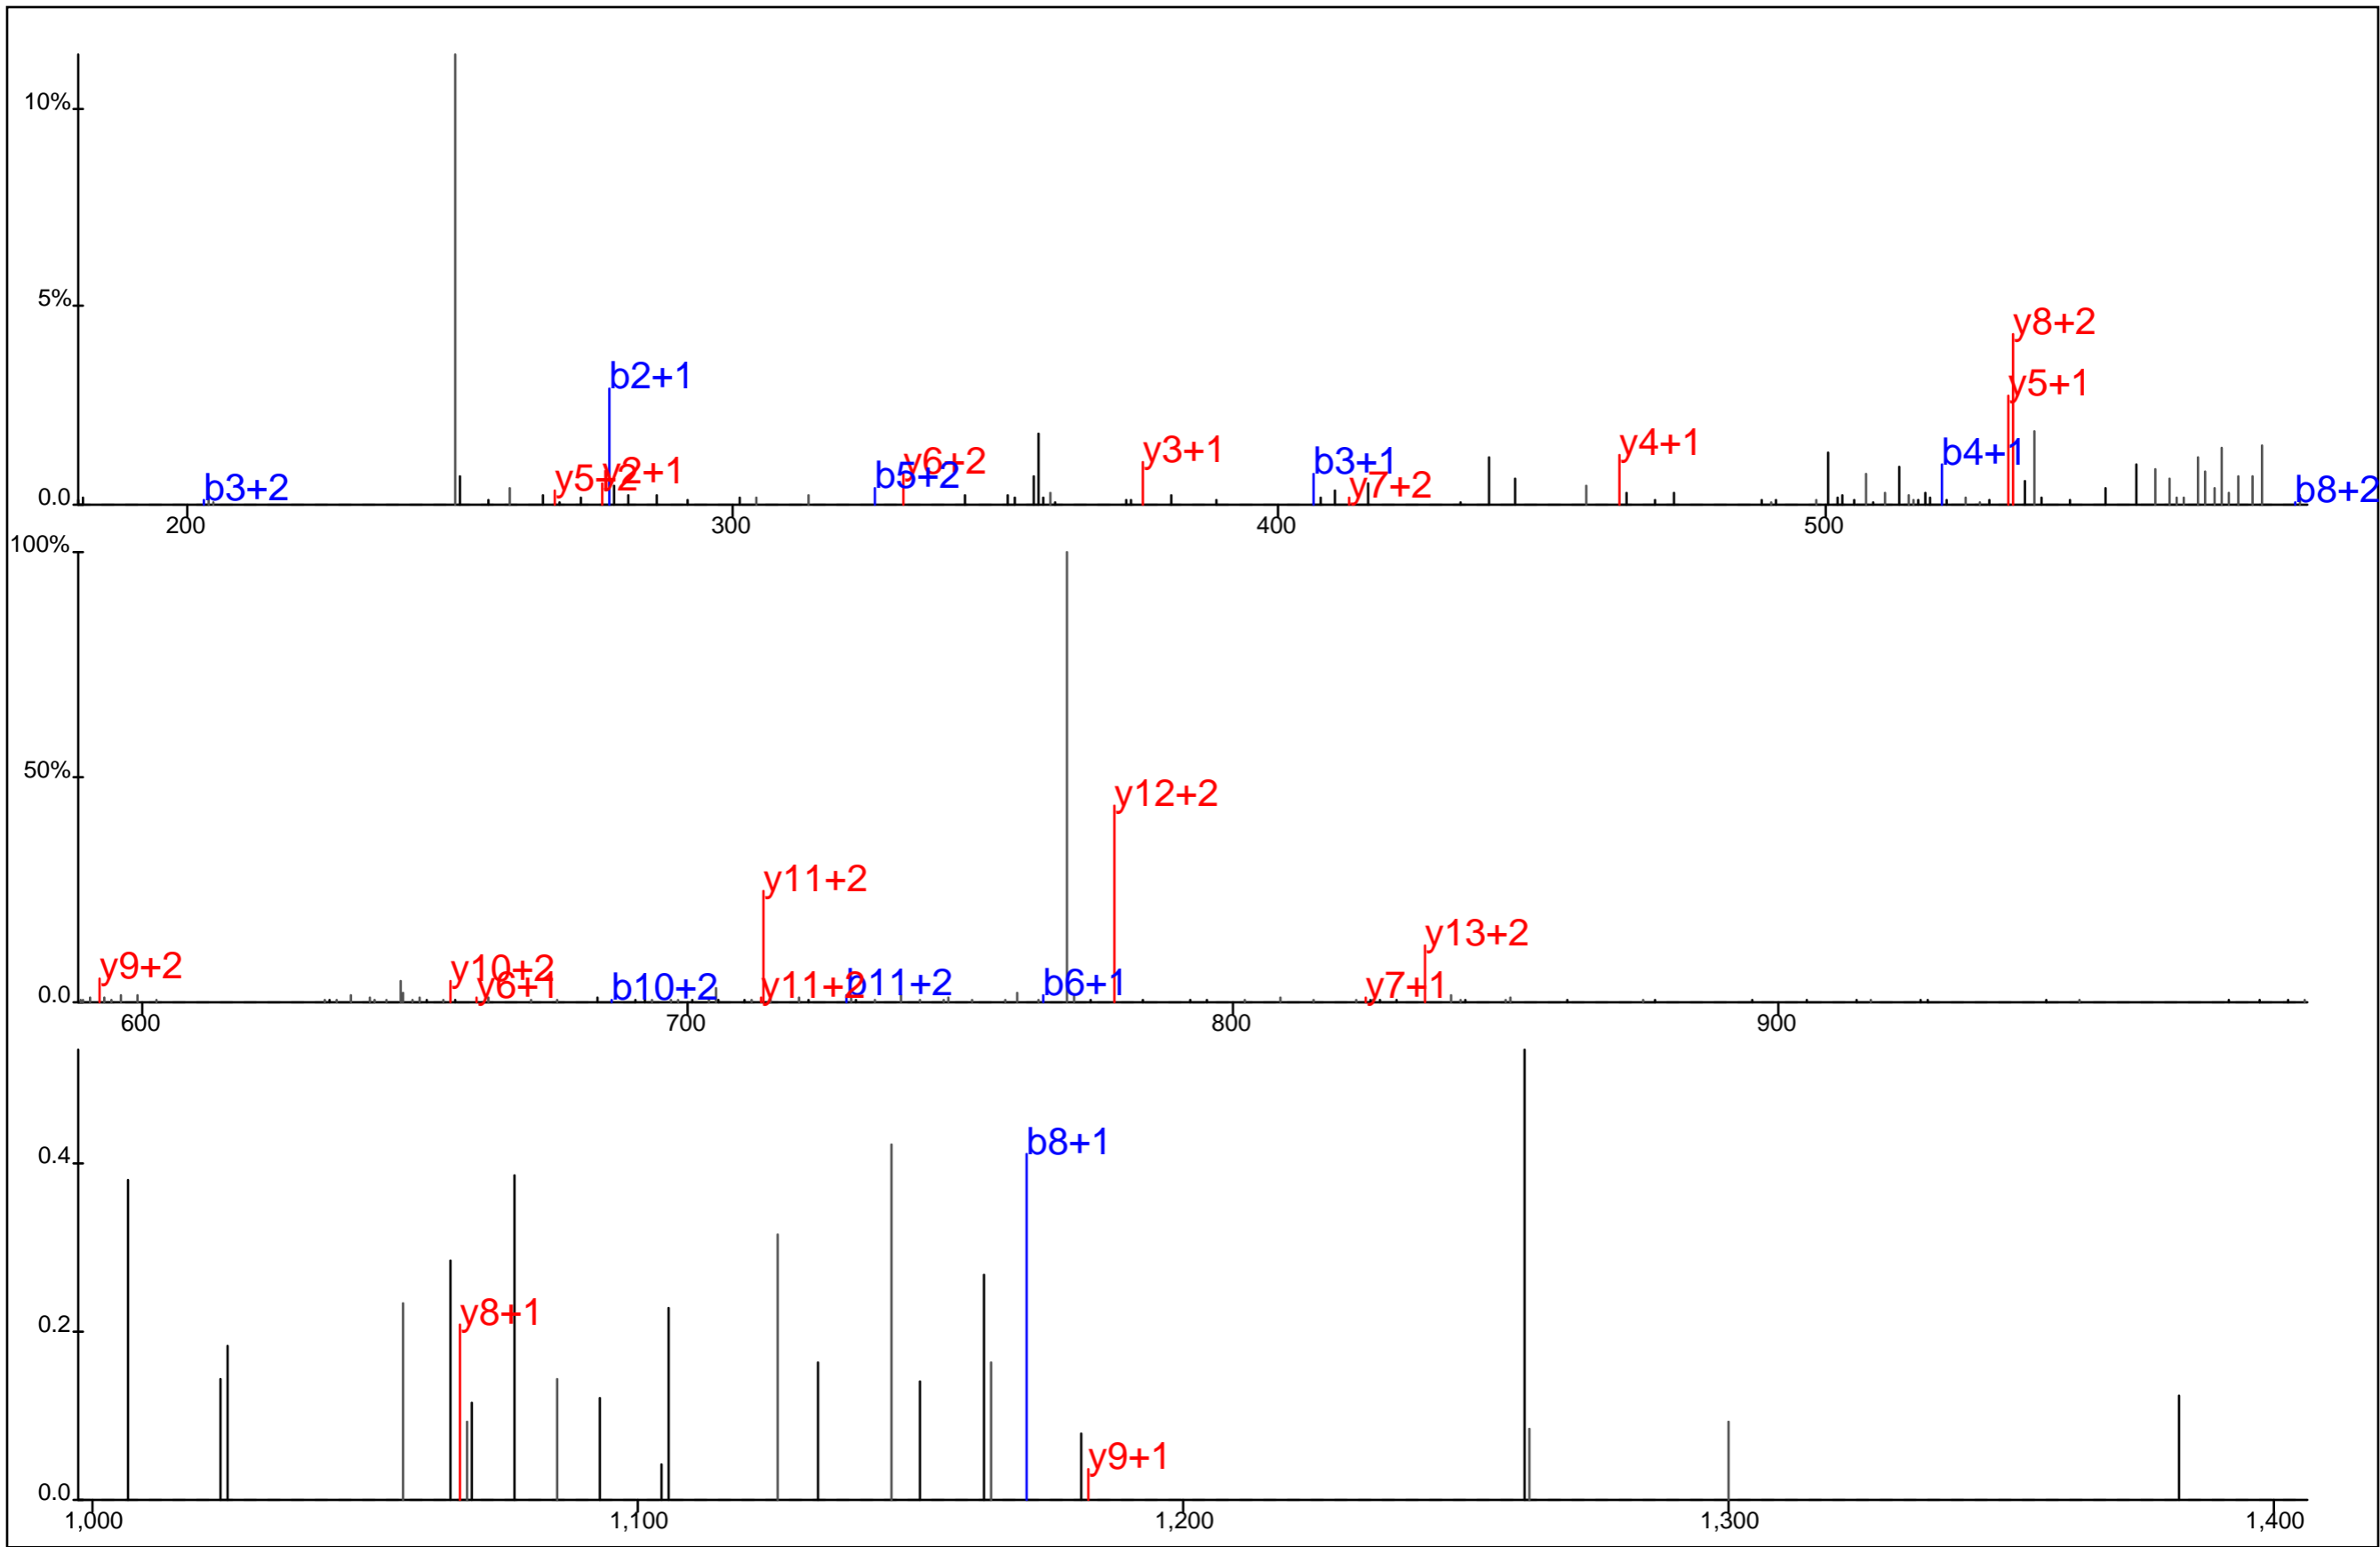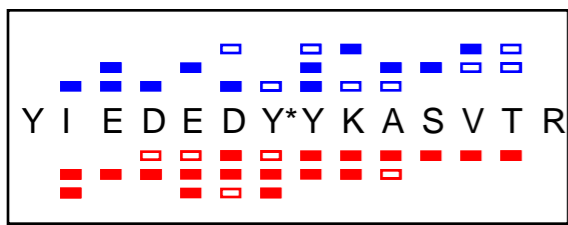

Protein Name: PYK2  
 gi Accession: 1082034  
 Precursor Mass: 611.2683+3  
 Delta Mass: 6.452 ppm  
 XCorr: 37.6

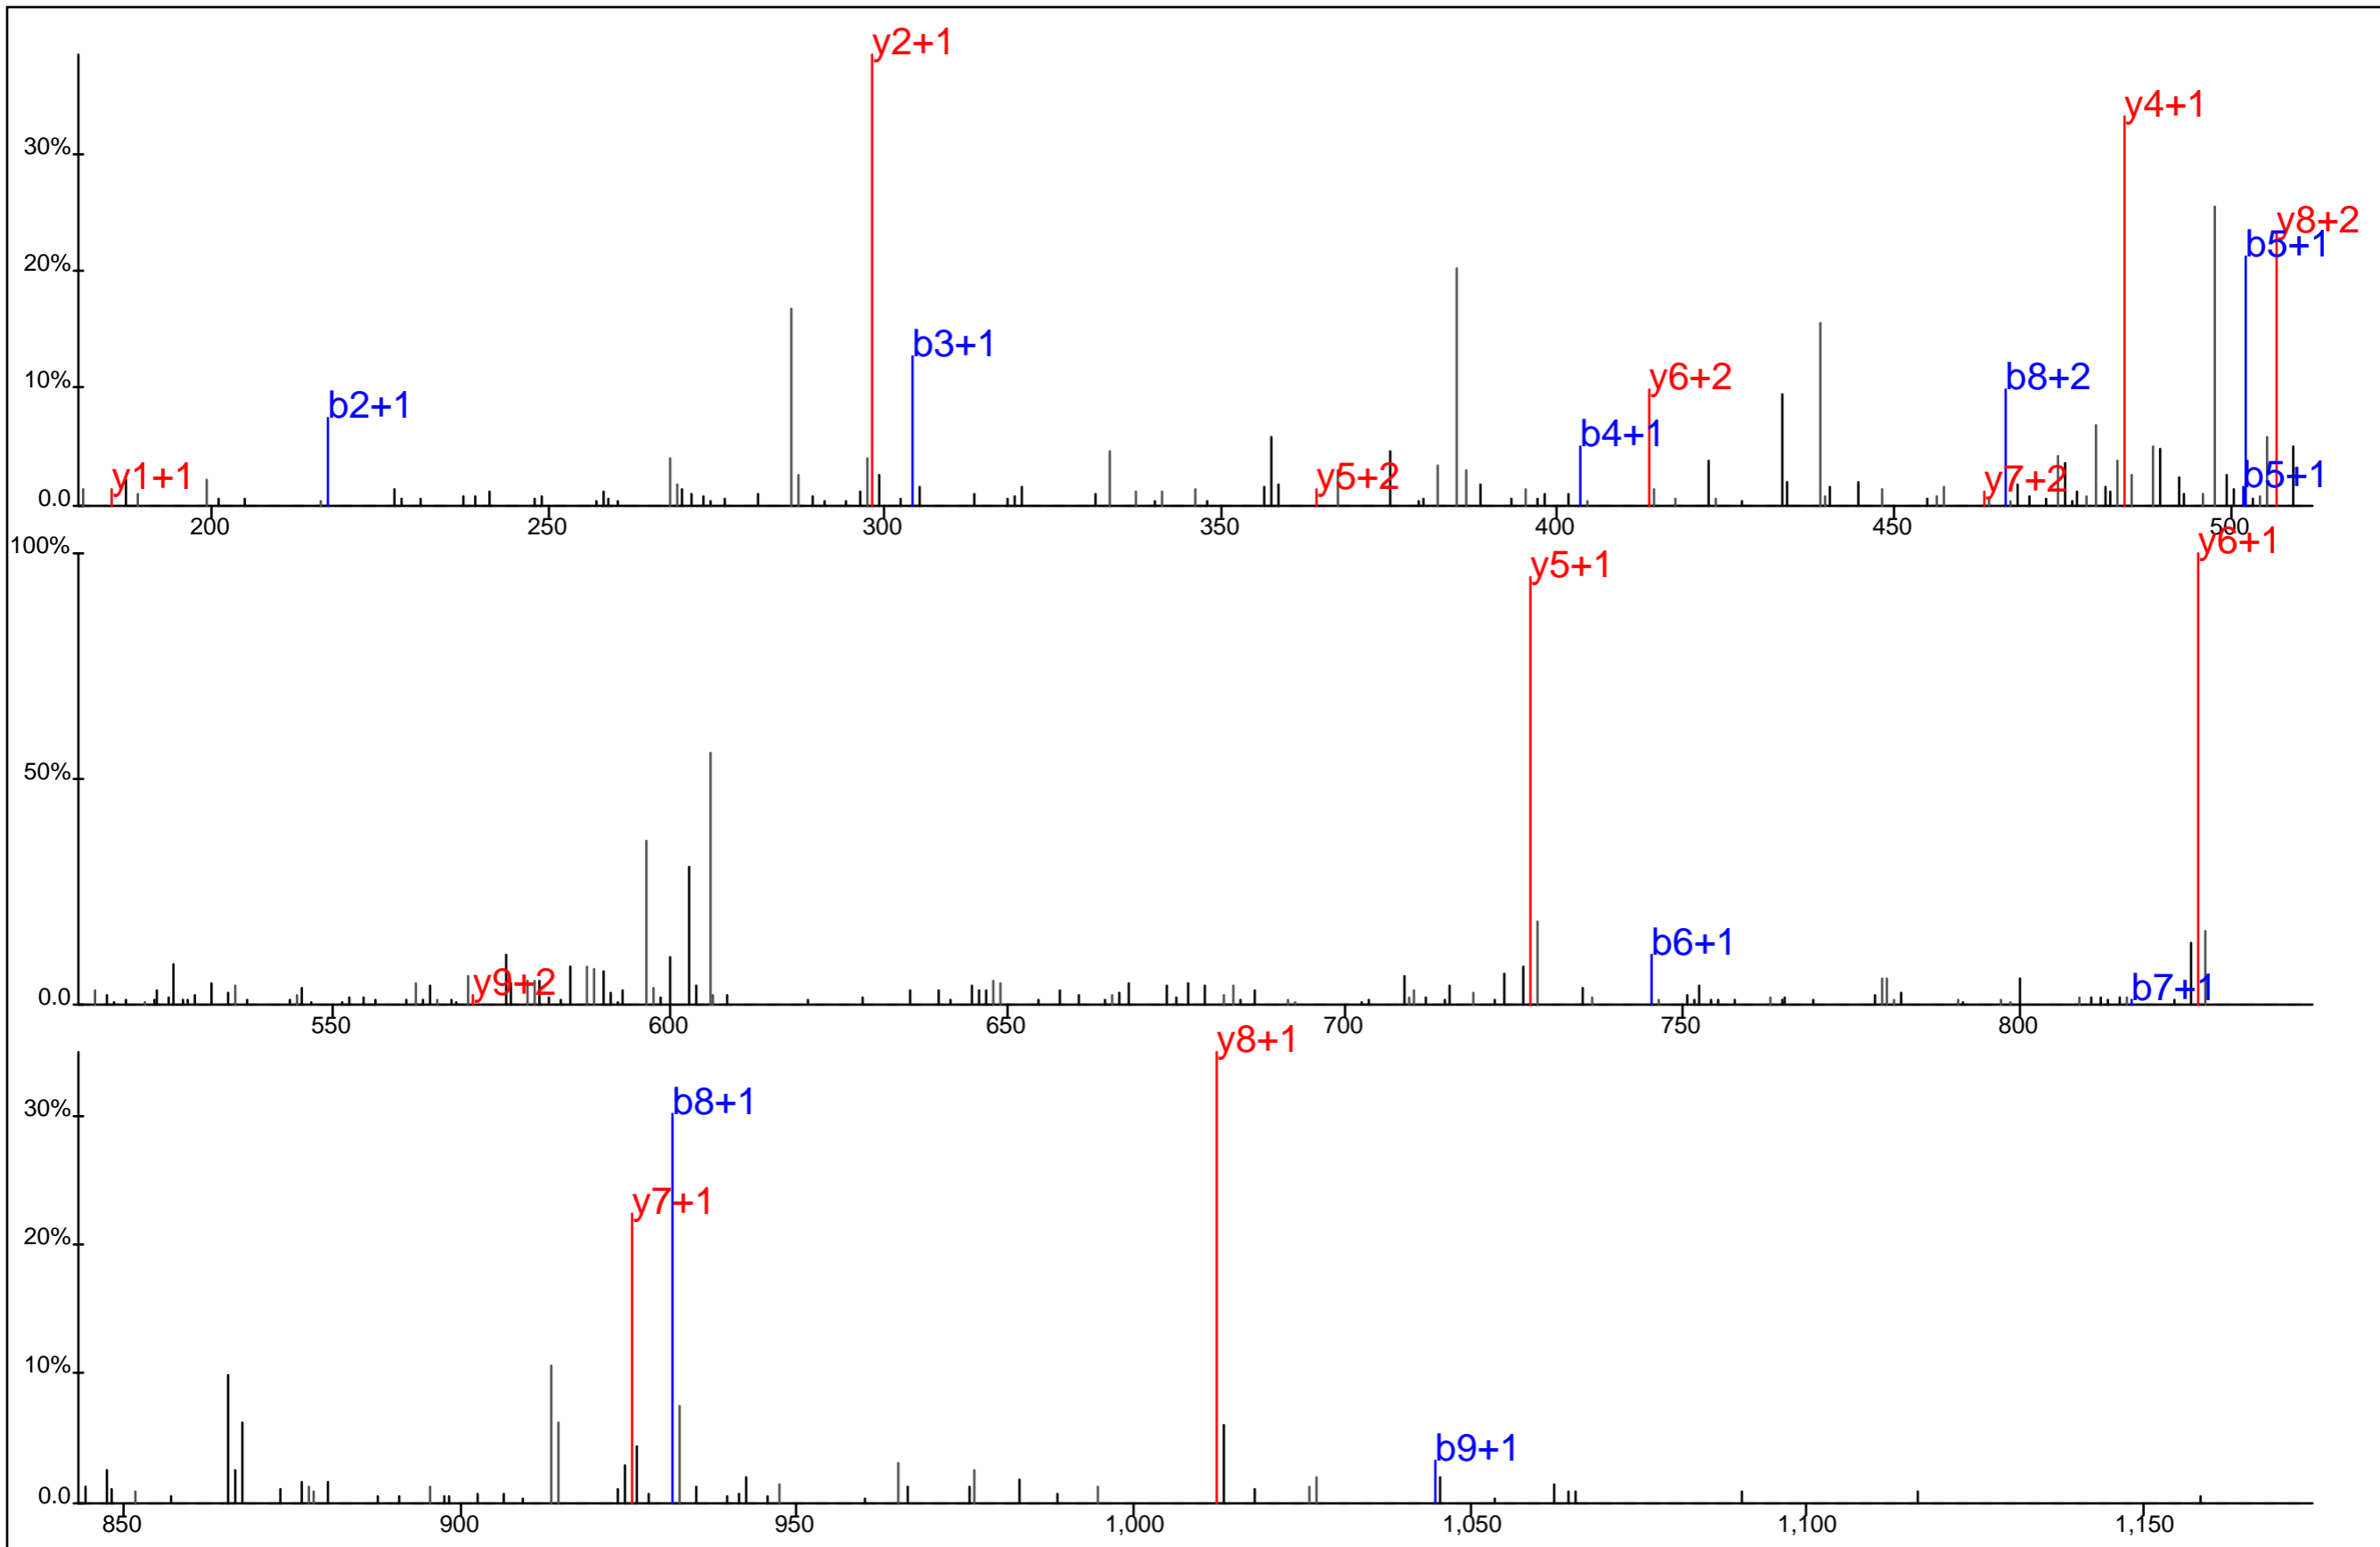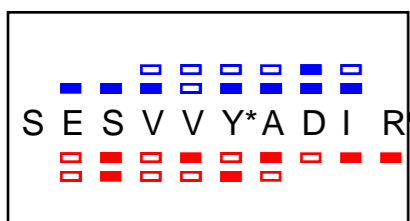

Protein Name: PZR  
 gi Accession: 5901563  
 Precursor Mass: 614.7800+2  
 Delta Mass: 3.515 ppm  
 XCorr: 46.48

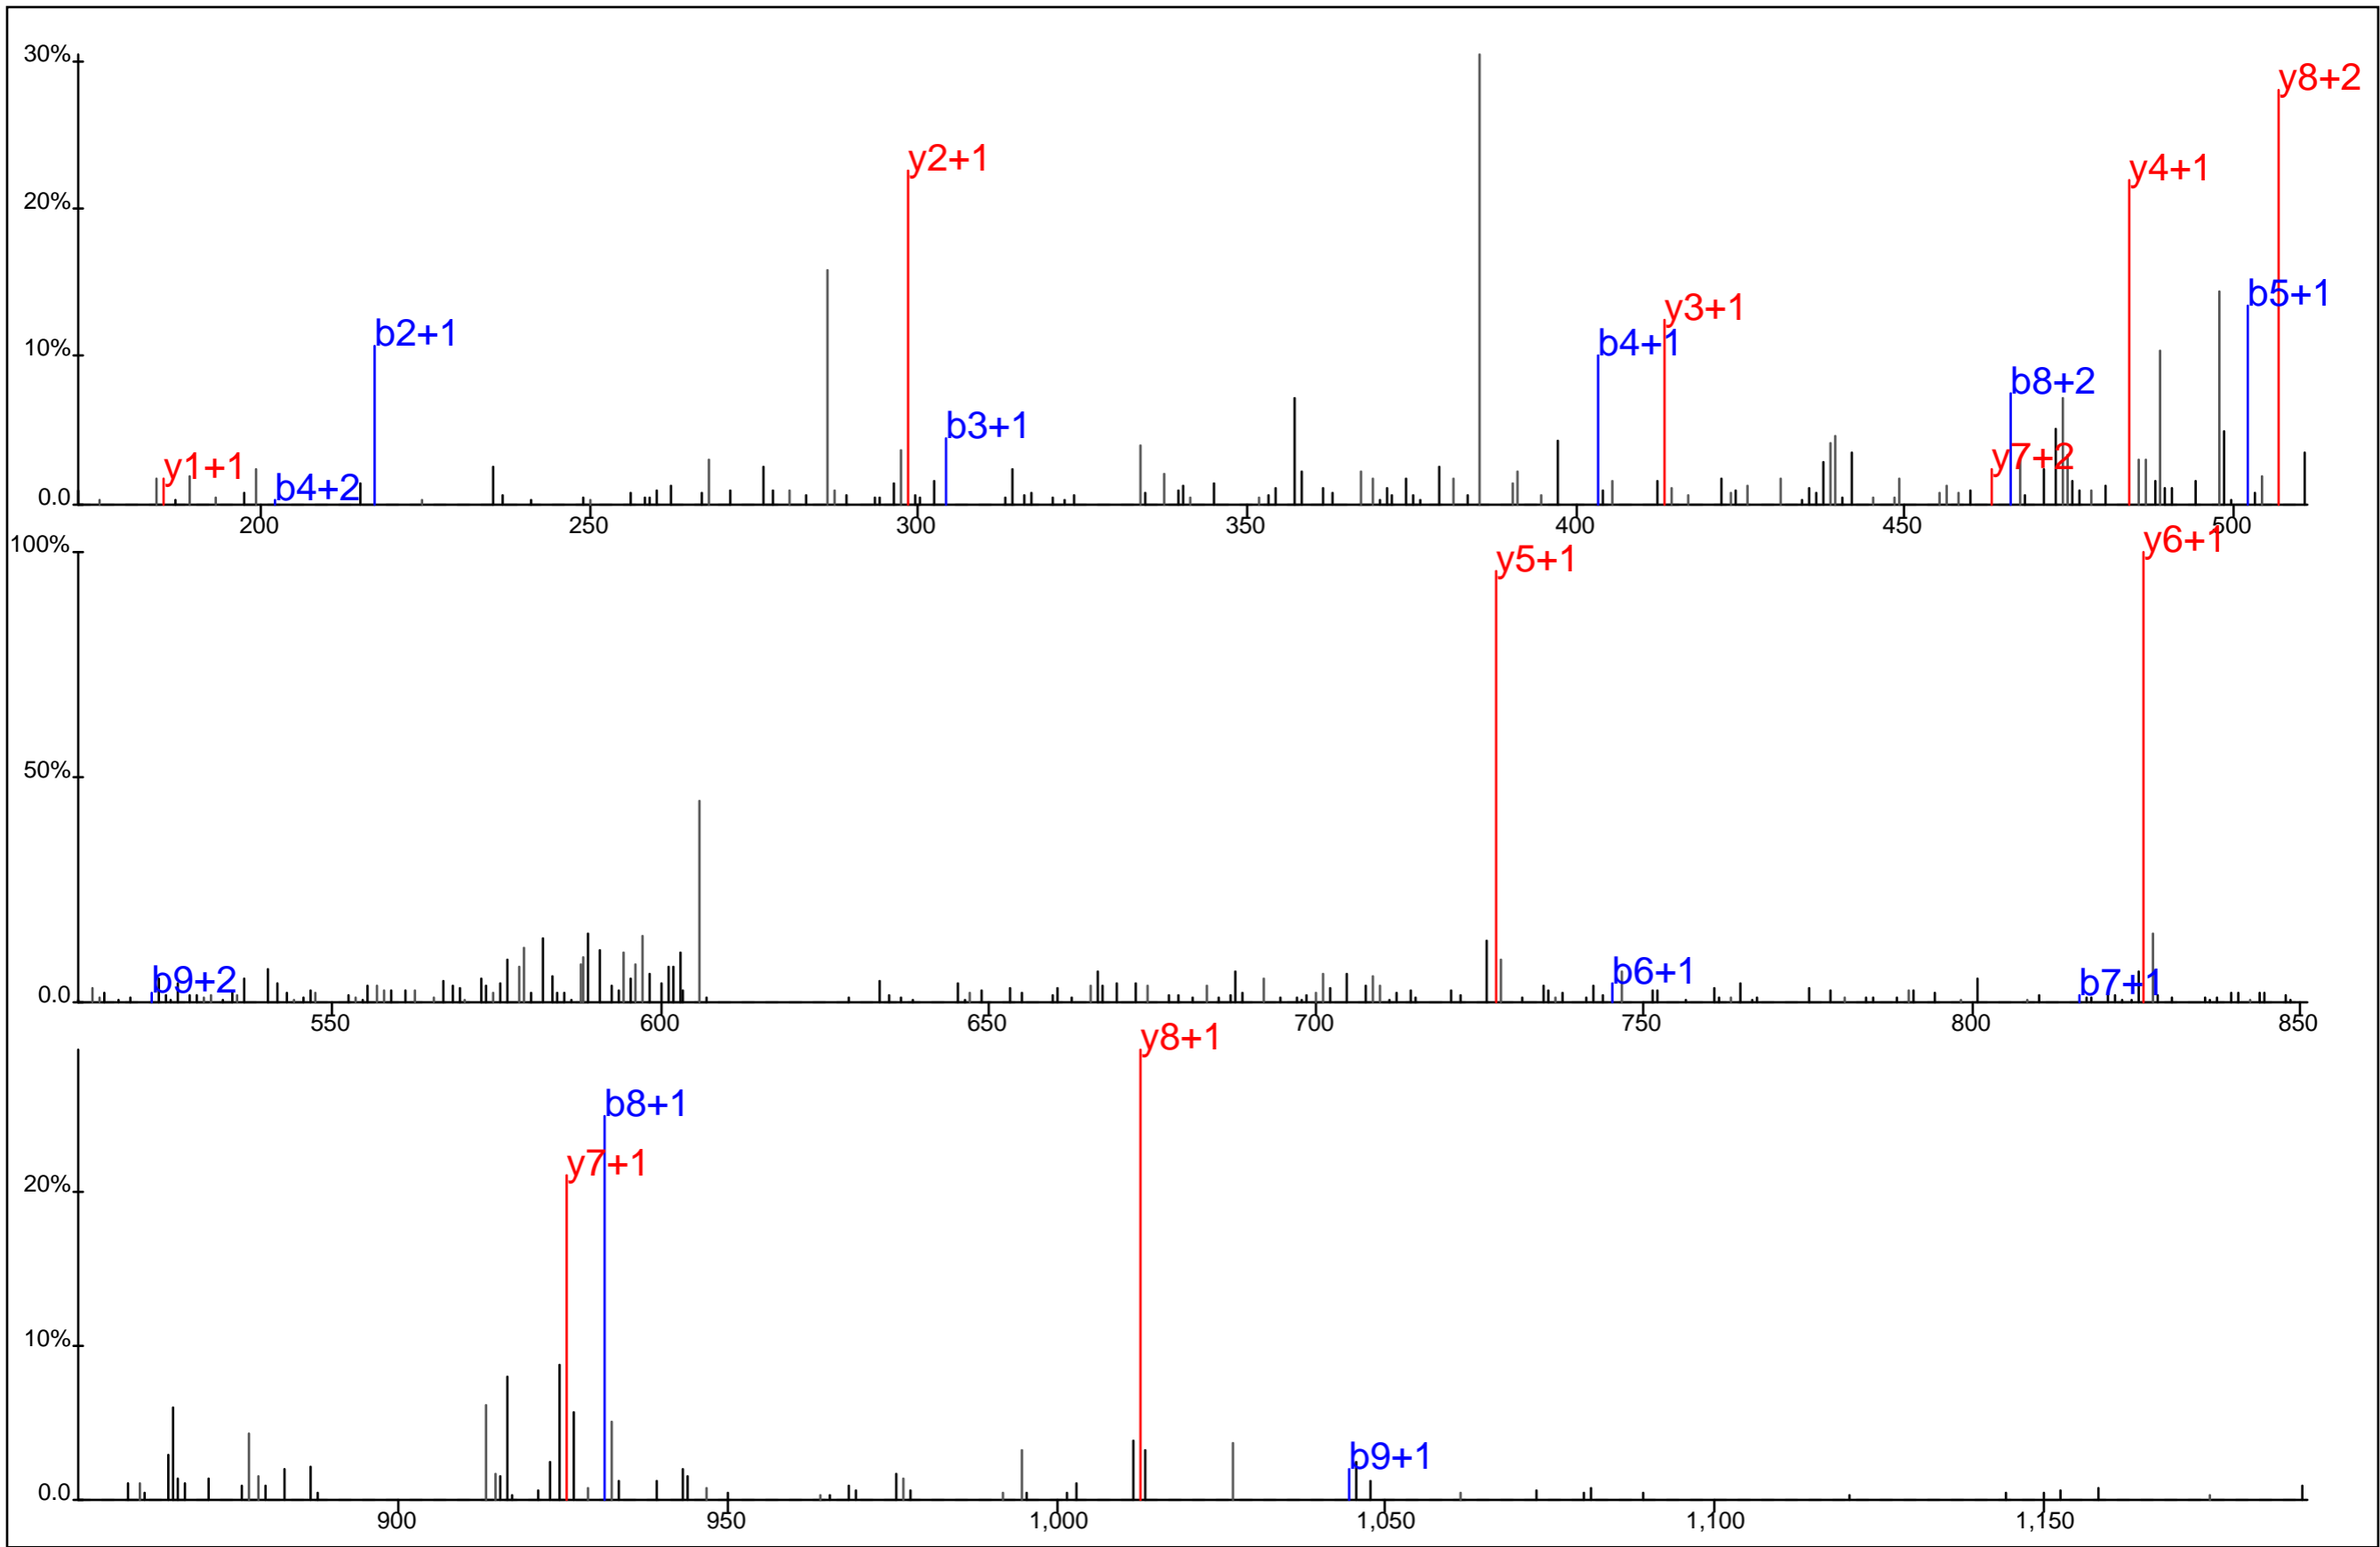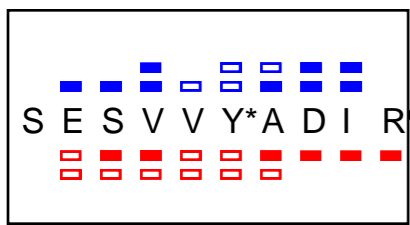

Protein Name: PZR  
 gi Accession: 5901563  
 Precursor Mass: 614.7802+2  
 Delta Mass: 3.816 ppm  
 XCorr: 46.89

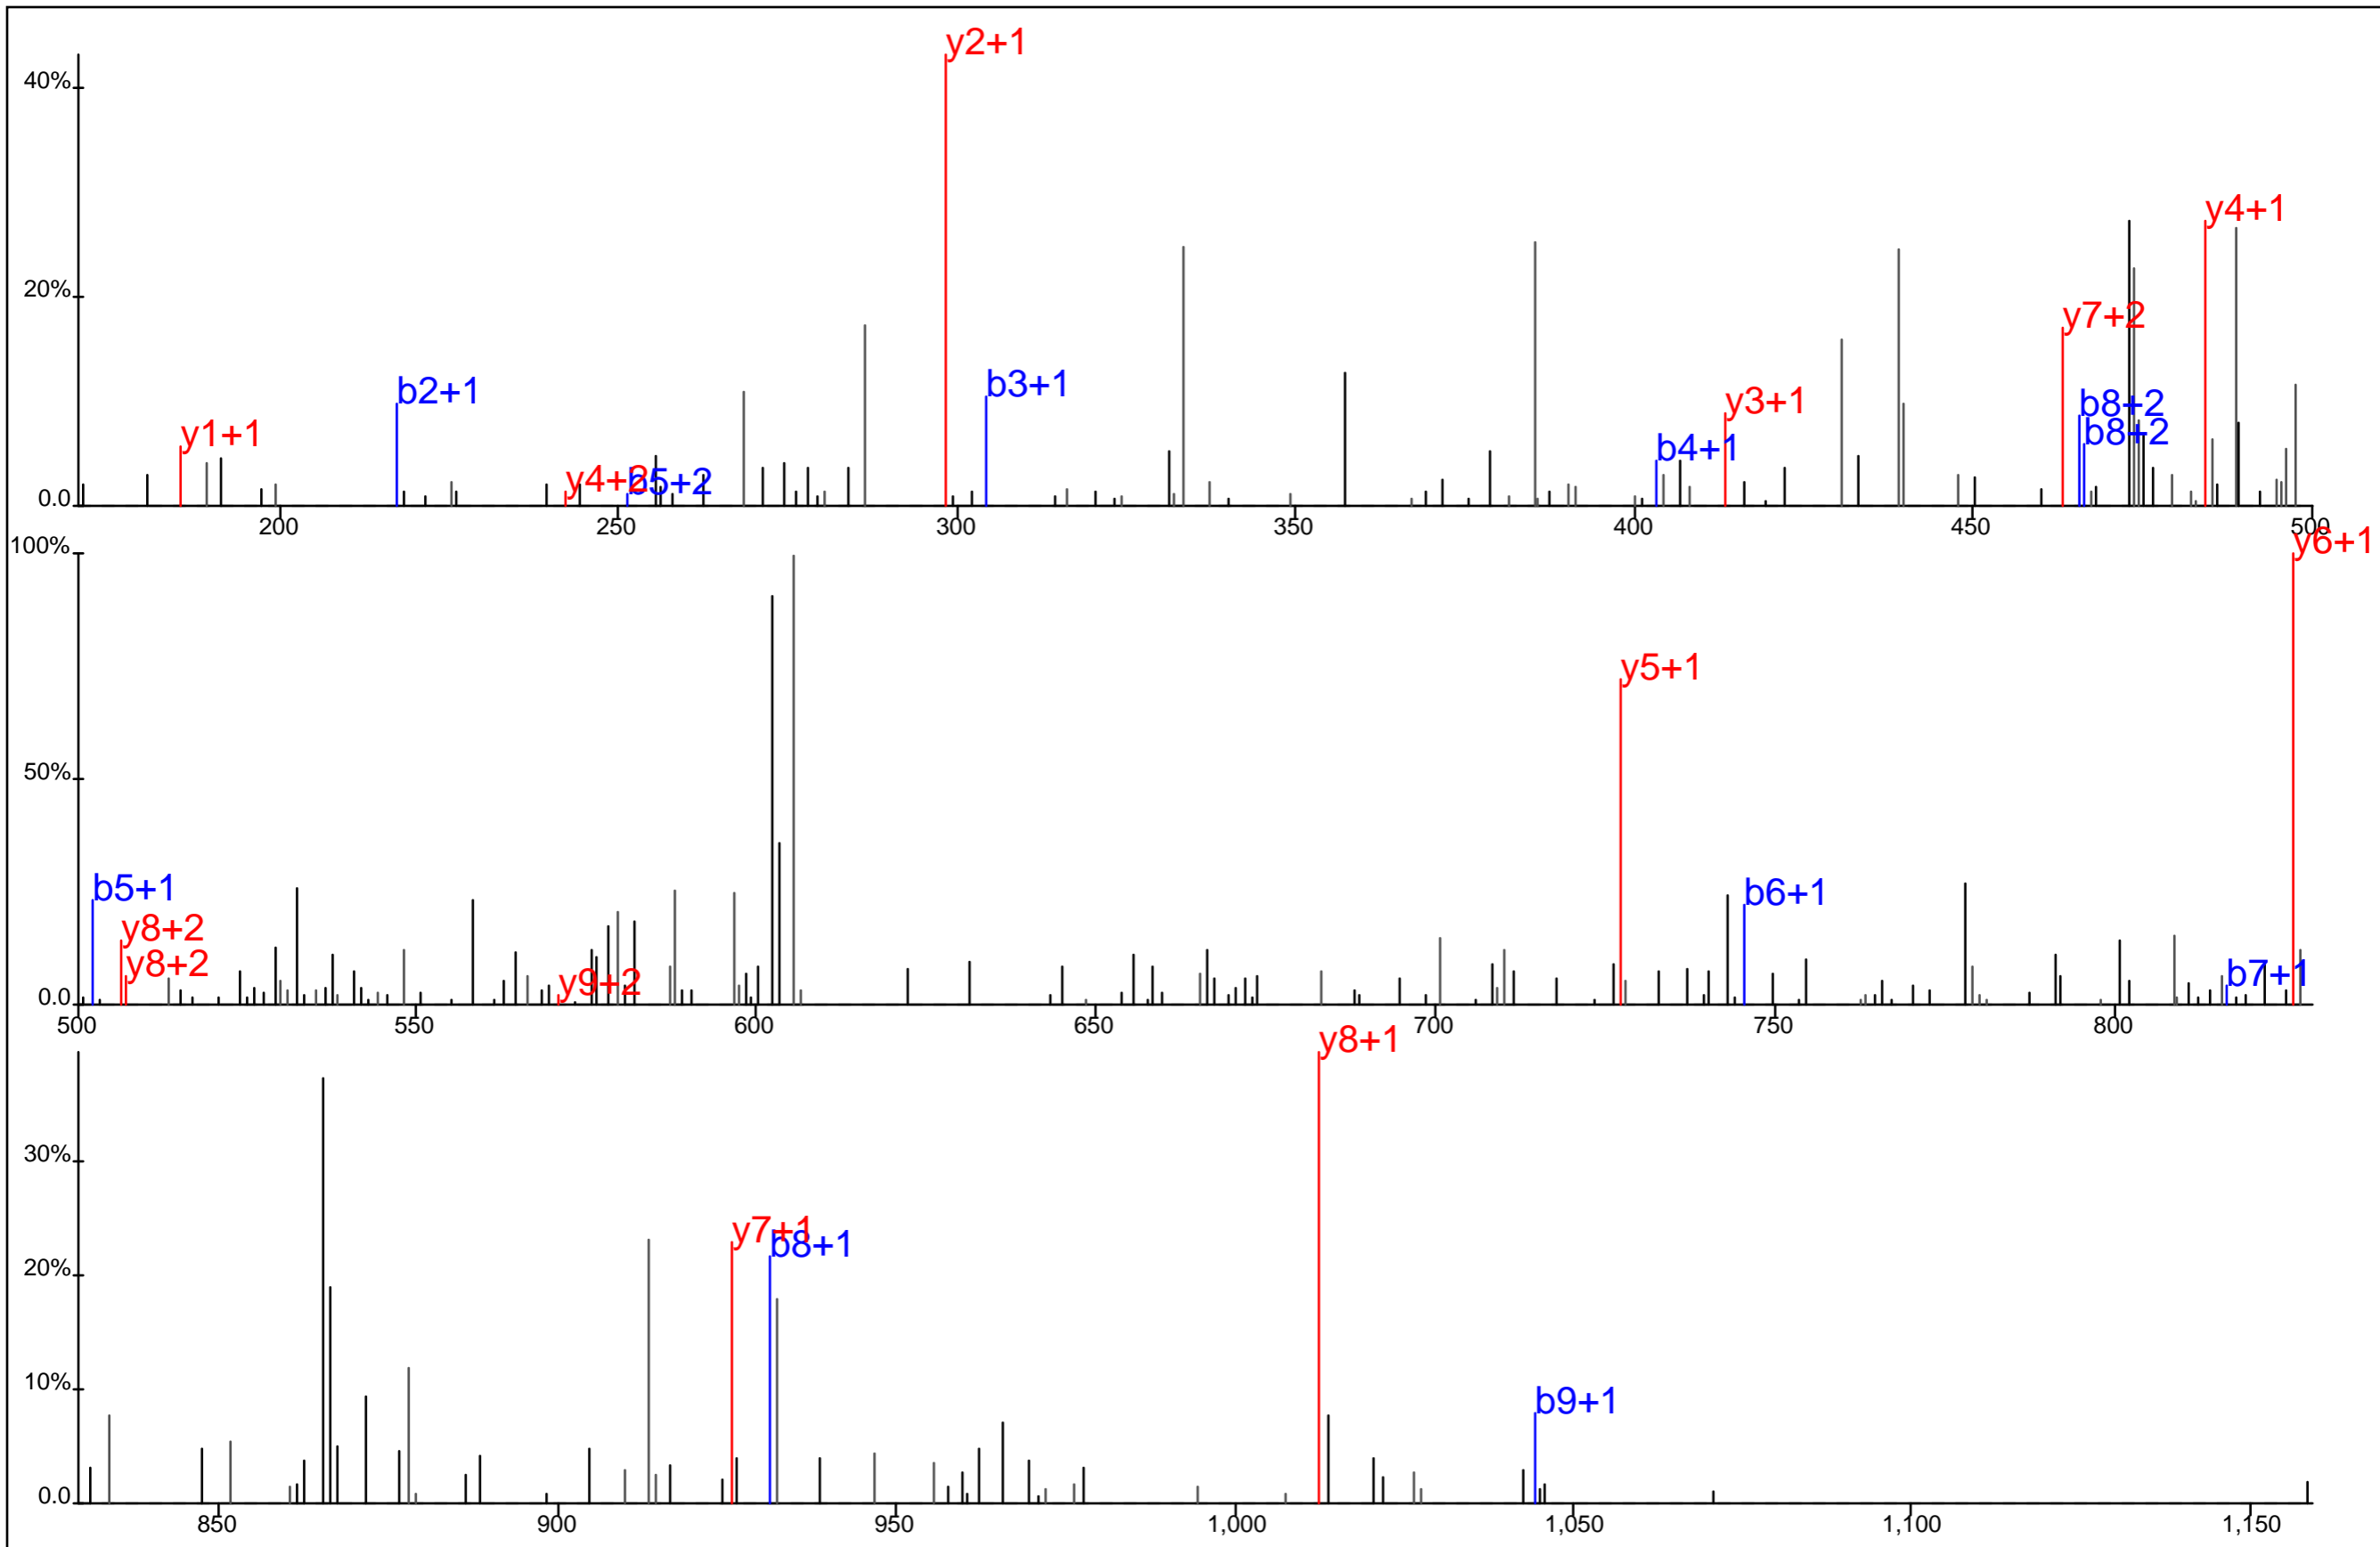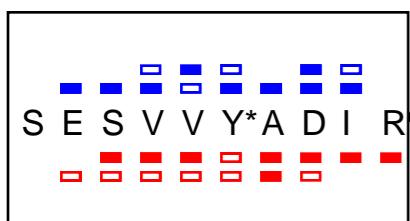

Protein Name: PZR  
 gi Accession: 5901563  
 Precursor Mass: 614.7803+2  
 Delta Mass: 4.011 ppm  
 XCorr: 39.08

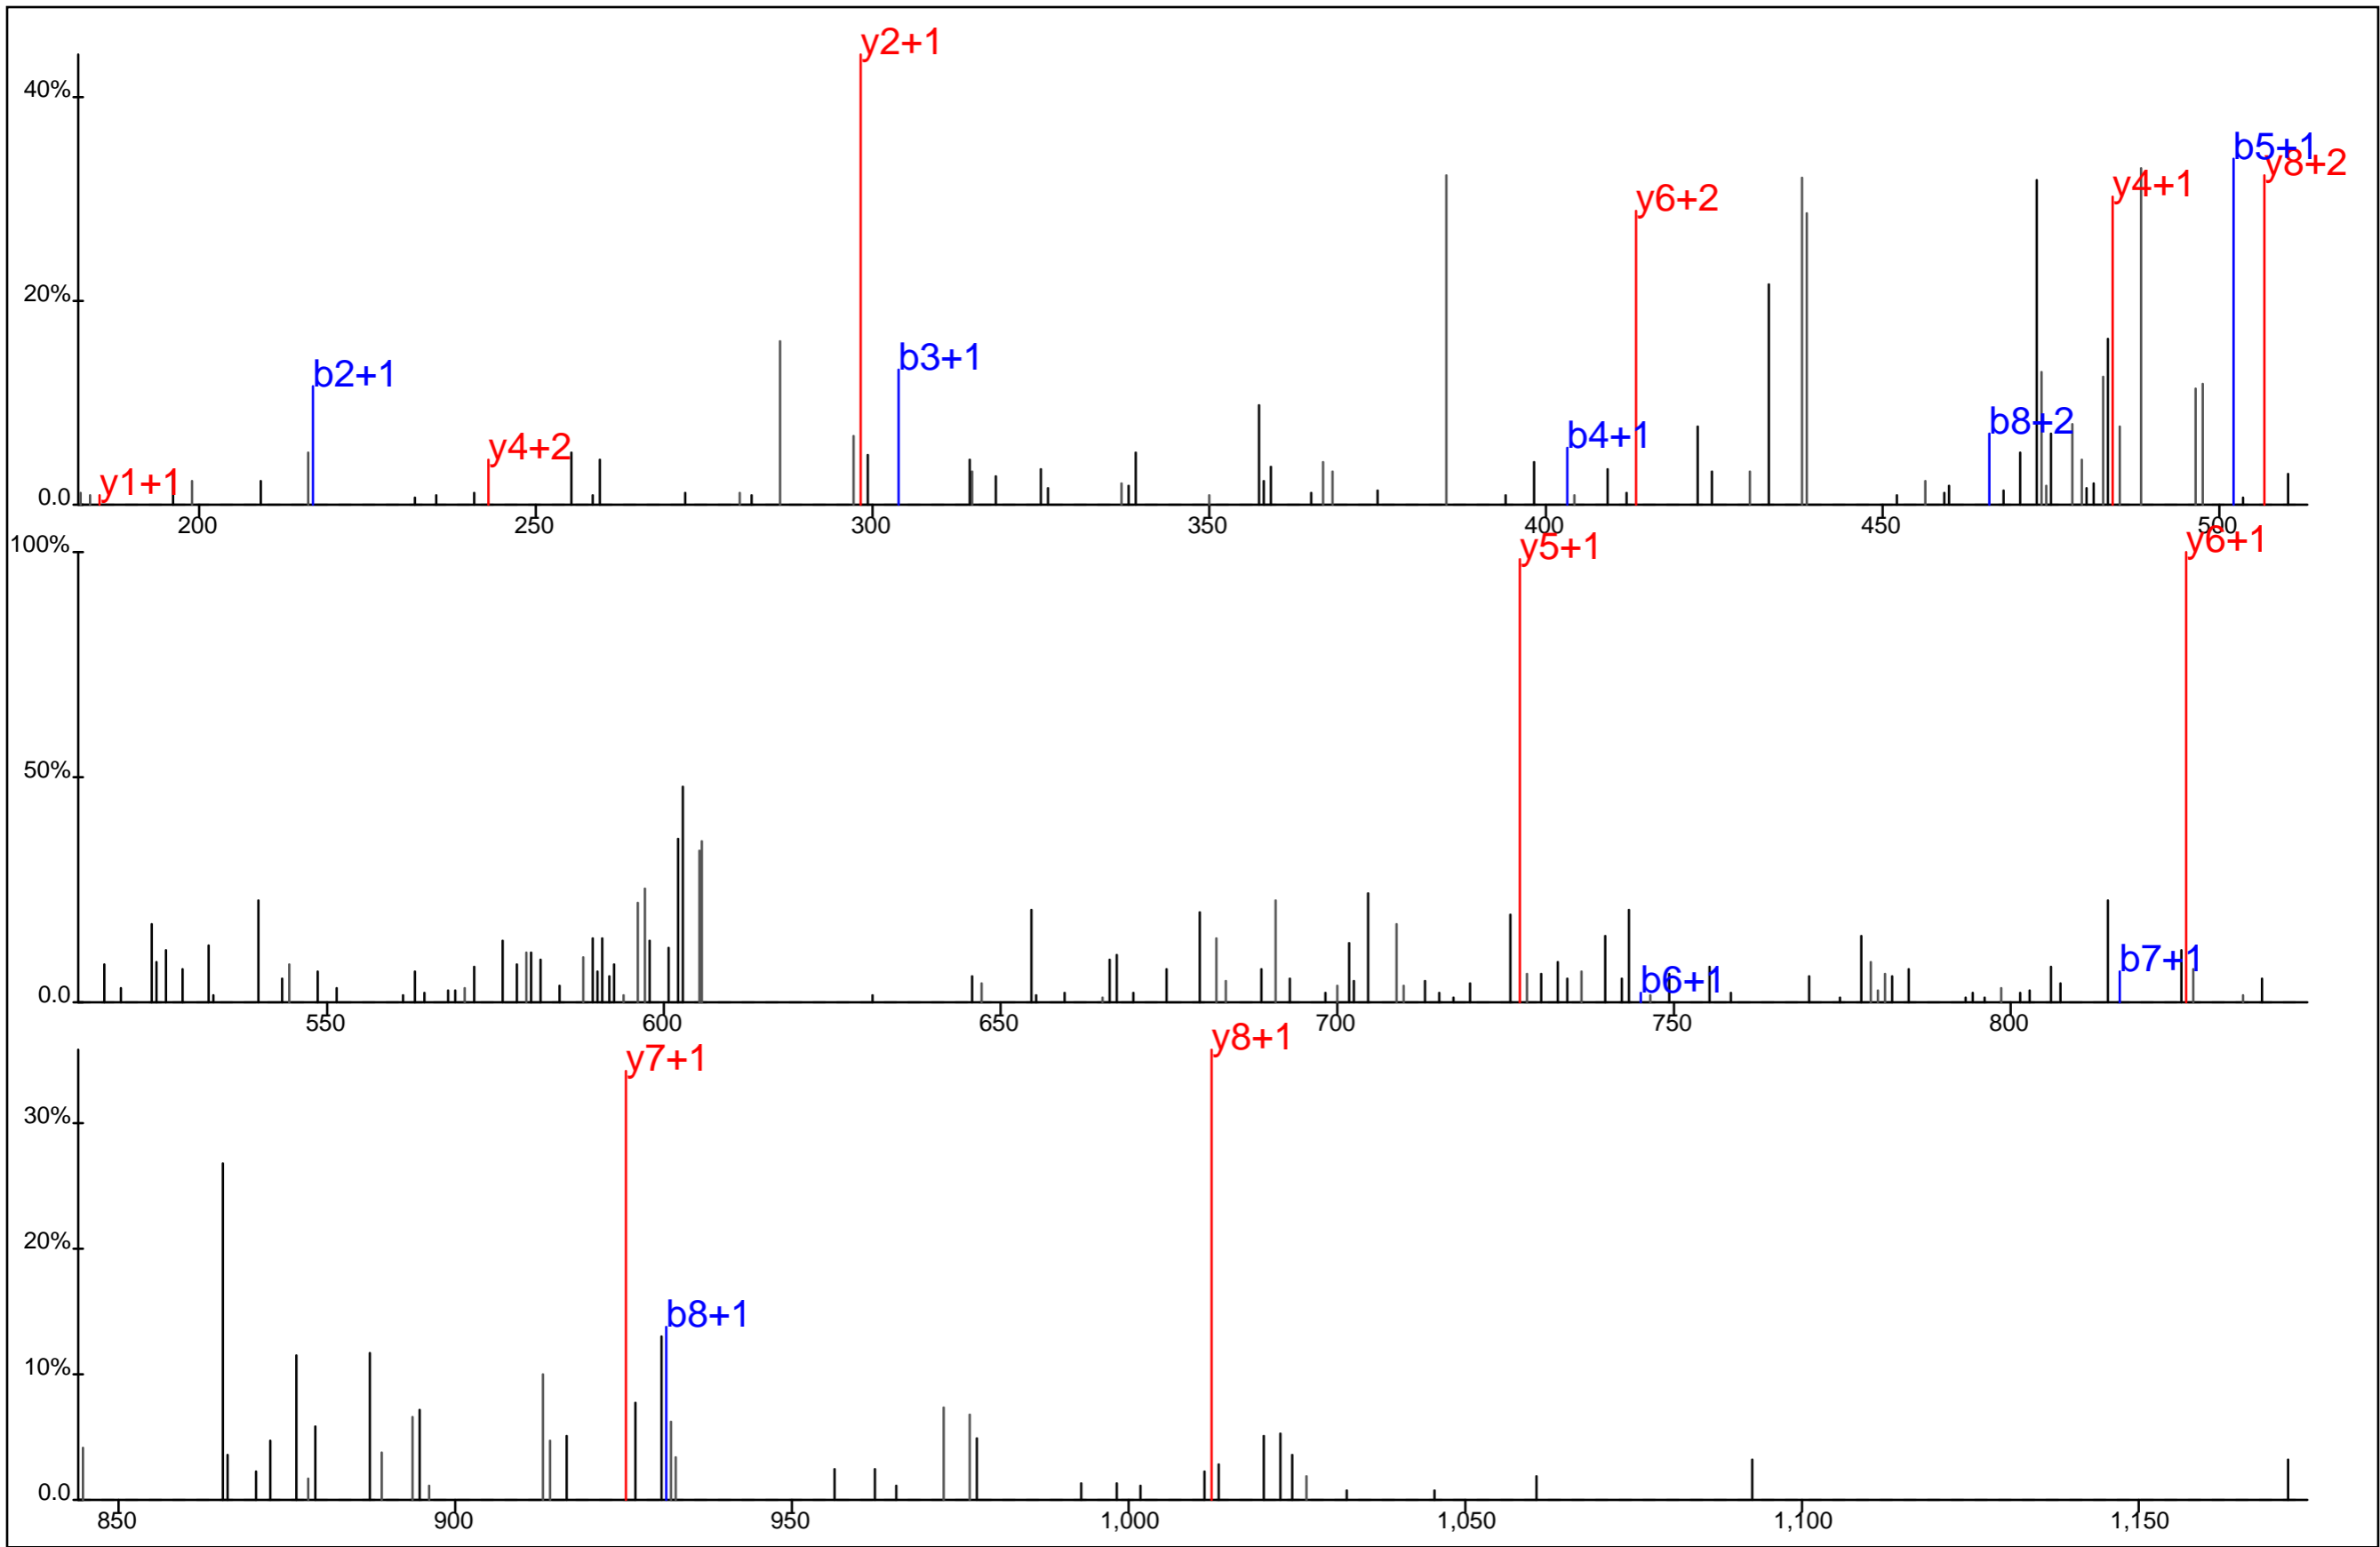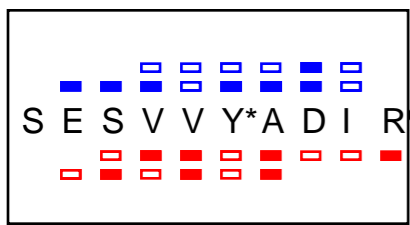

Protein Name: PZR  
 gi Accession: 5901563  
 Precursor Mass: 614.7784+2  
 Delta Mass: 0.934 ppm  
 XCorr: 36.55

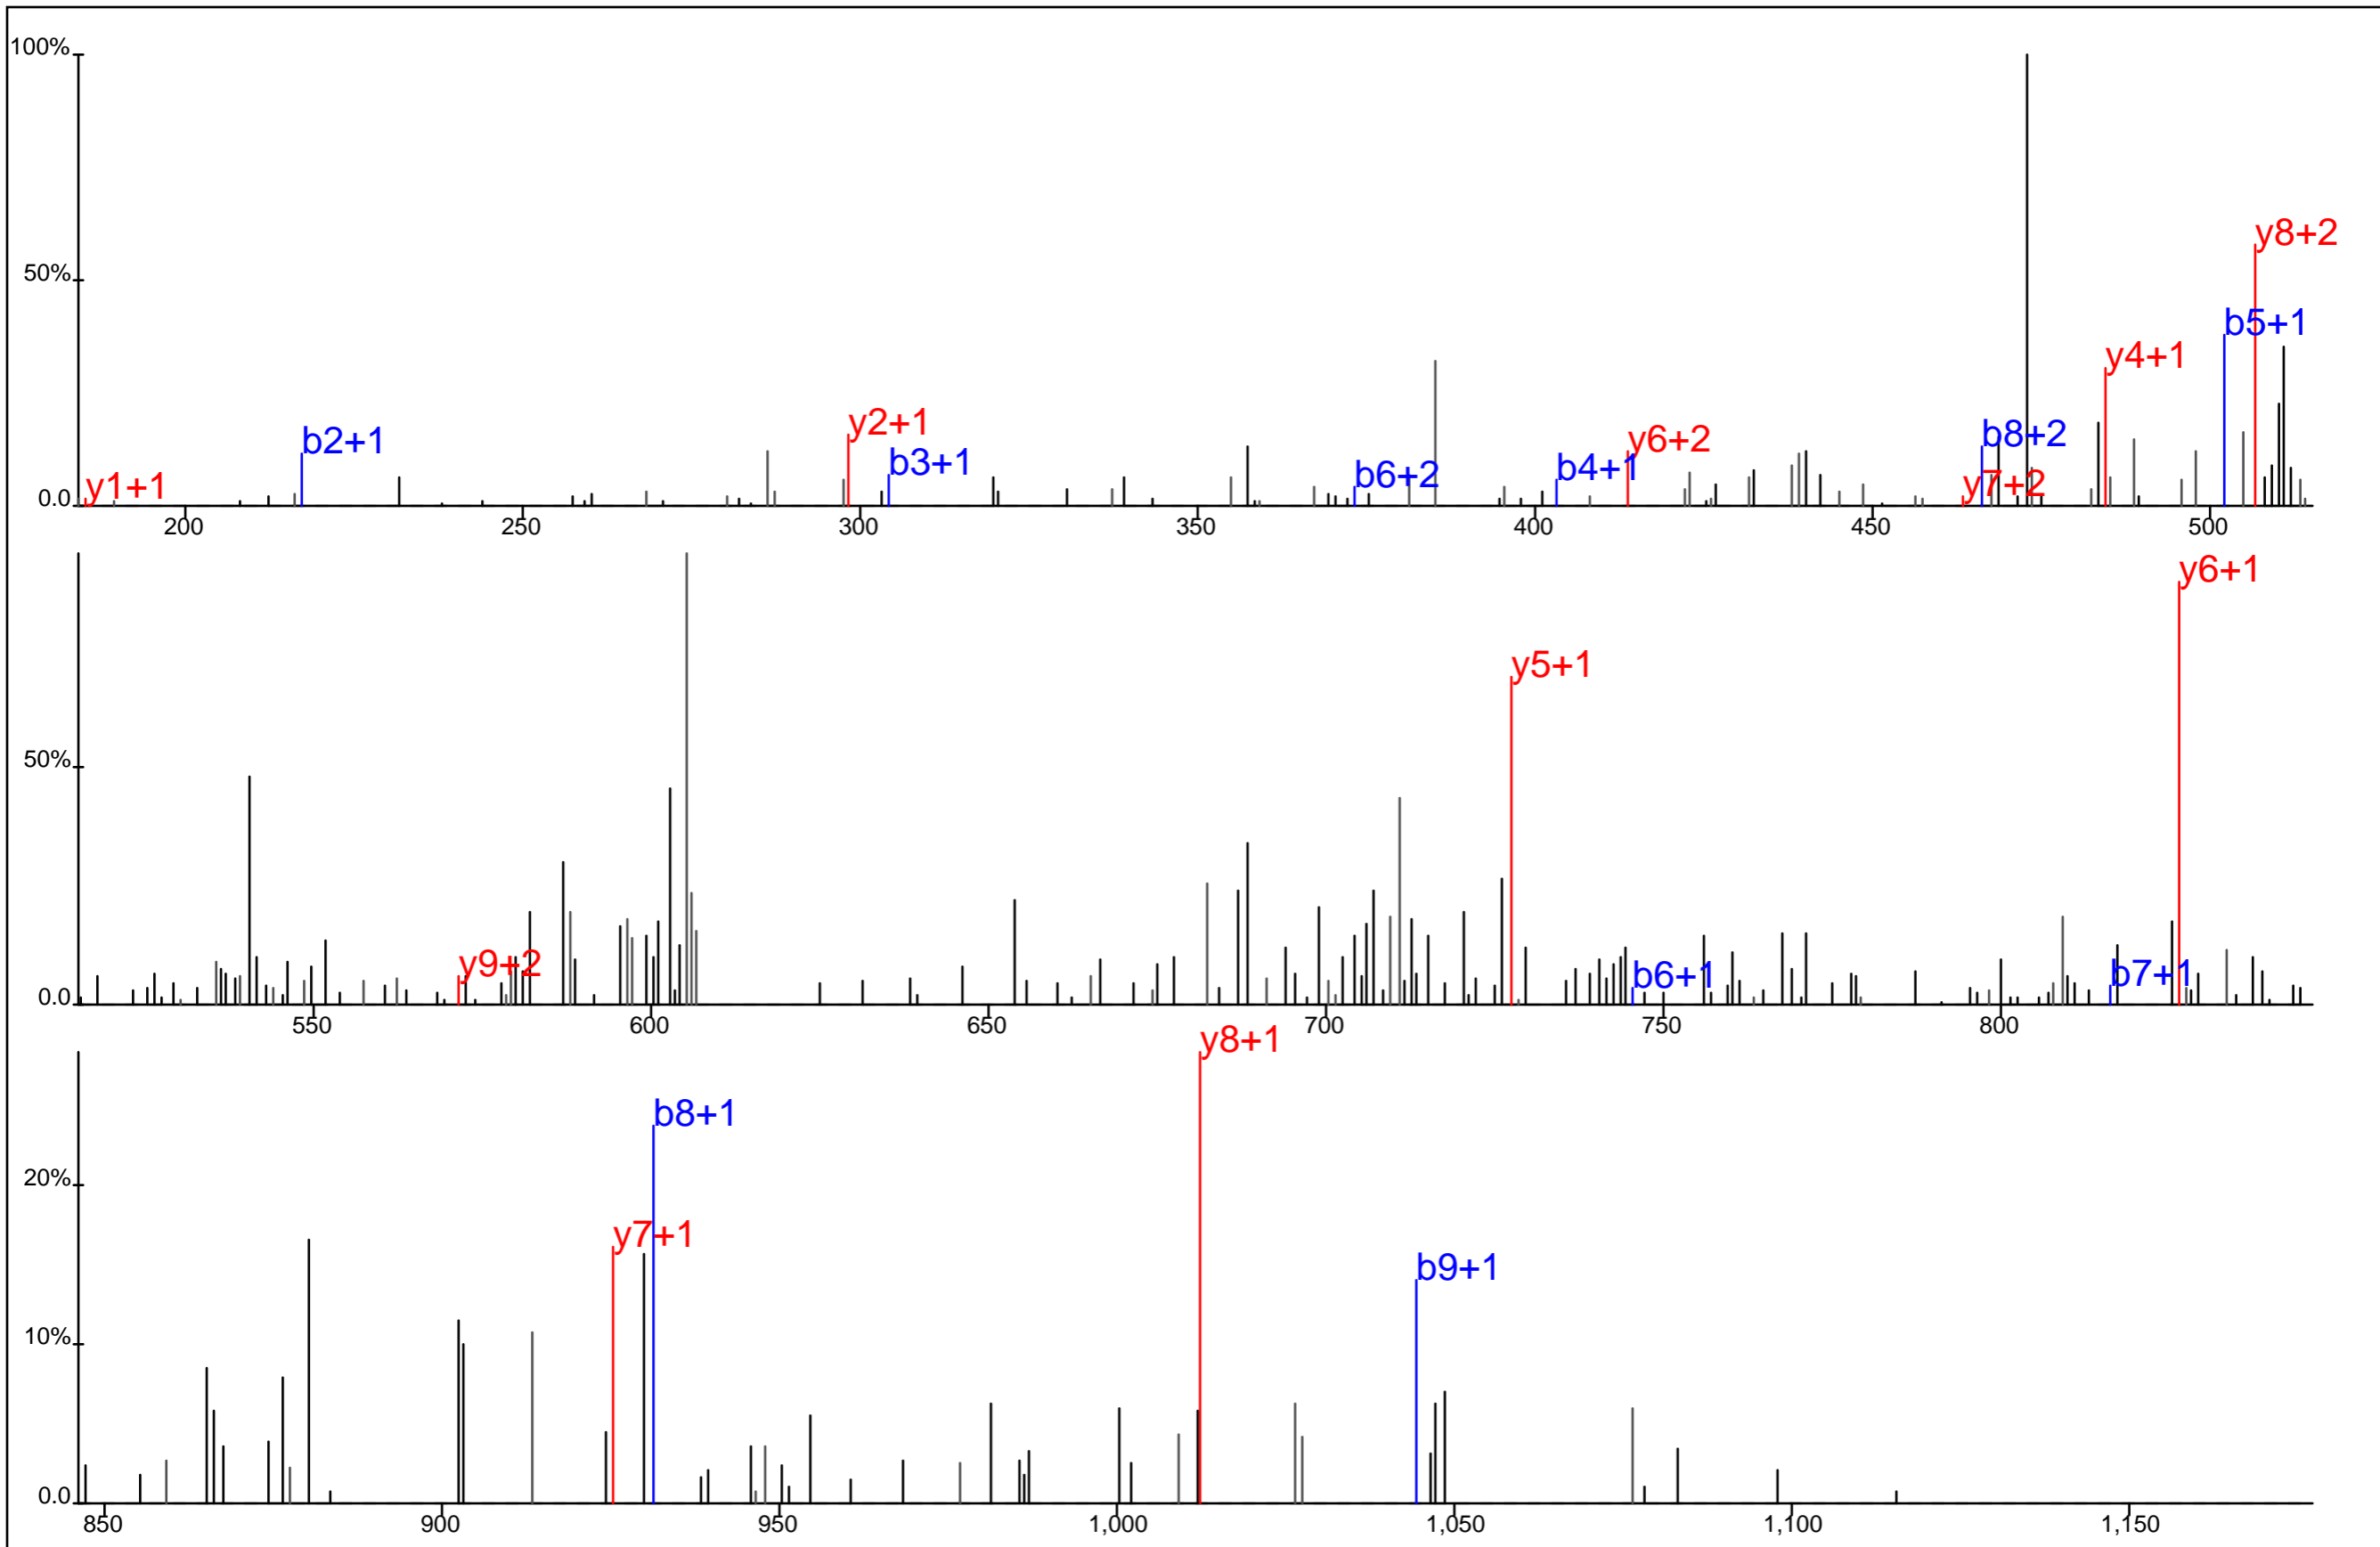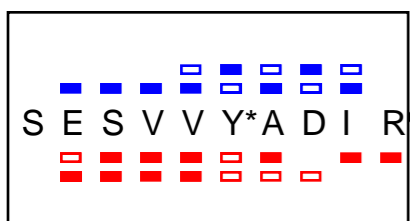

Protein Name: PZR  
 gi Accession: 5901563  
 Precursor Mass: 614.7784+2  
 Delta Mass: 0.934 ppm  
 XCorr: 24.27

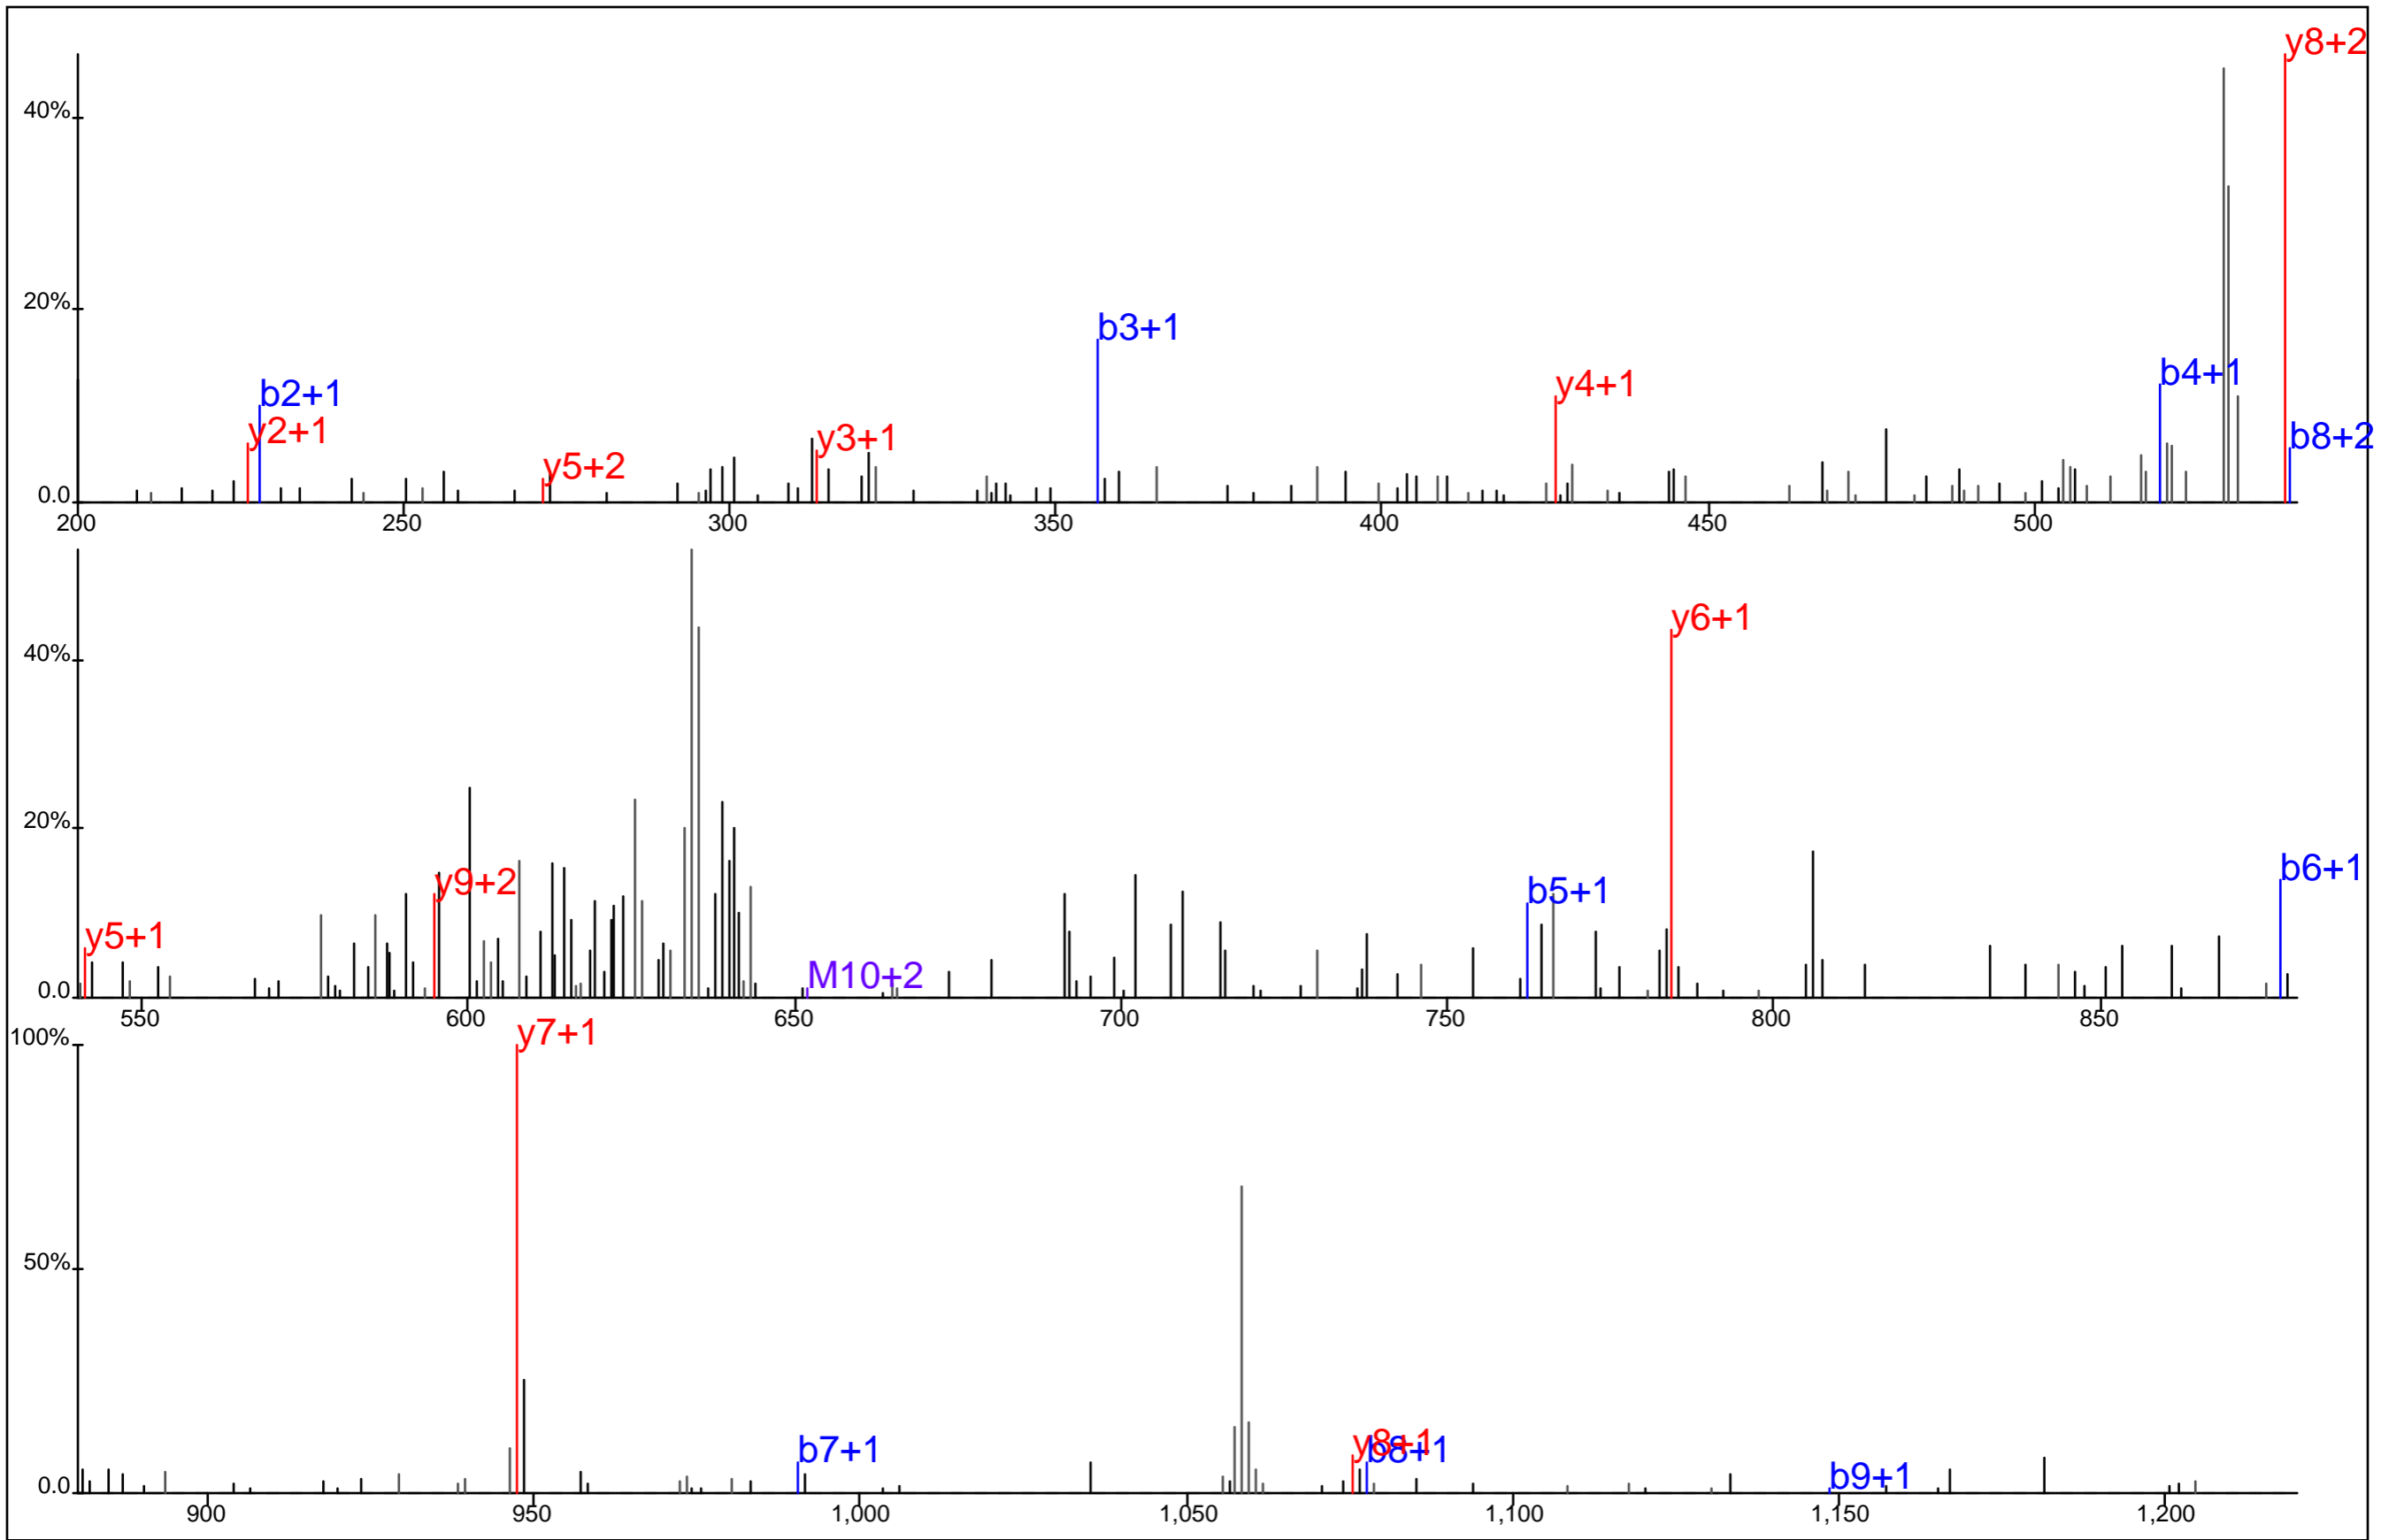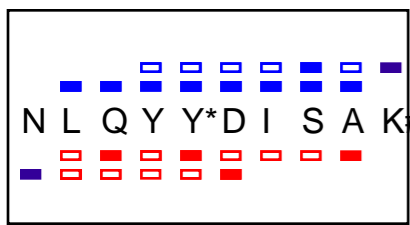

Protein Name: Ran GTPase  
 gi Accession: 21104432  
 Precursor Mass: 651.8004+2  
 Delta Mass: 6.048 ppm  
 XCorr: 26.47

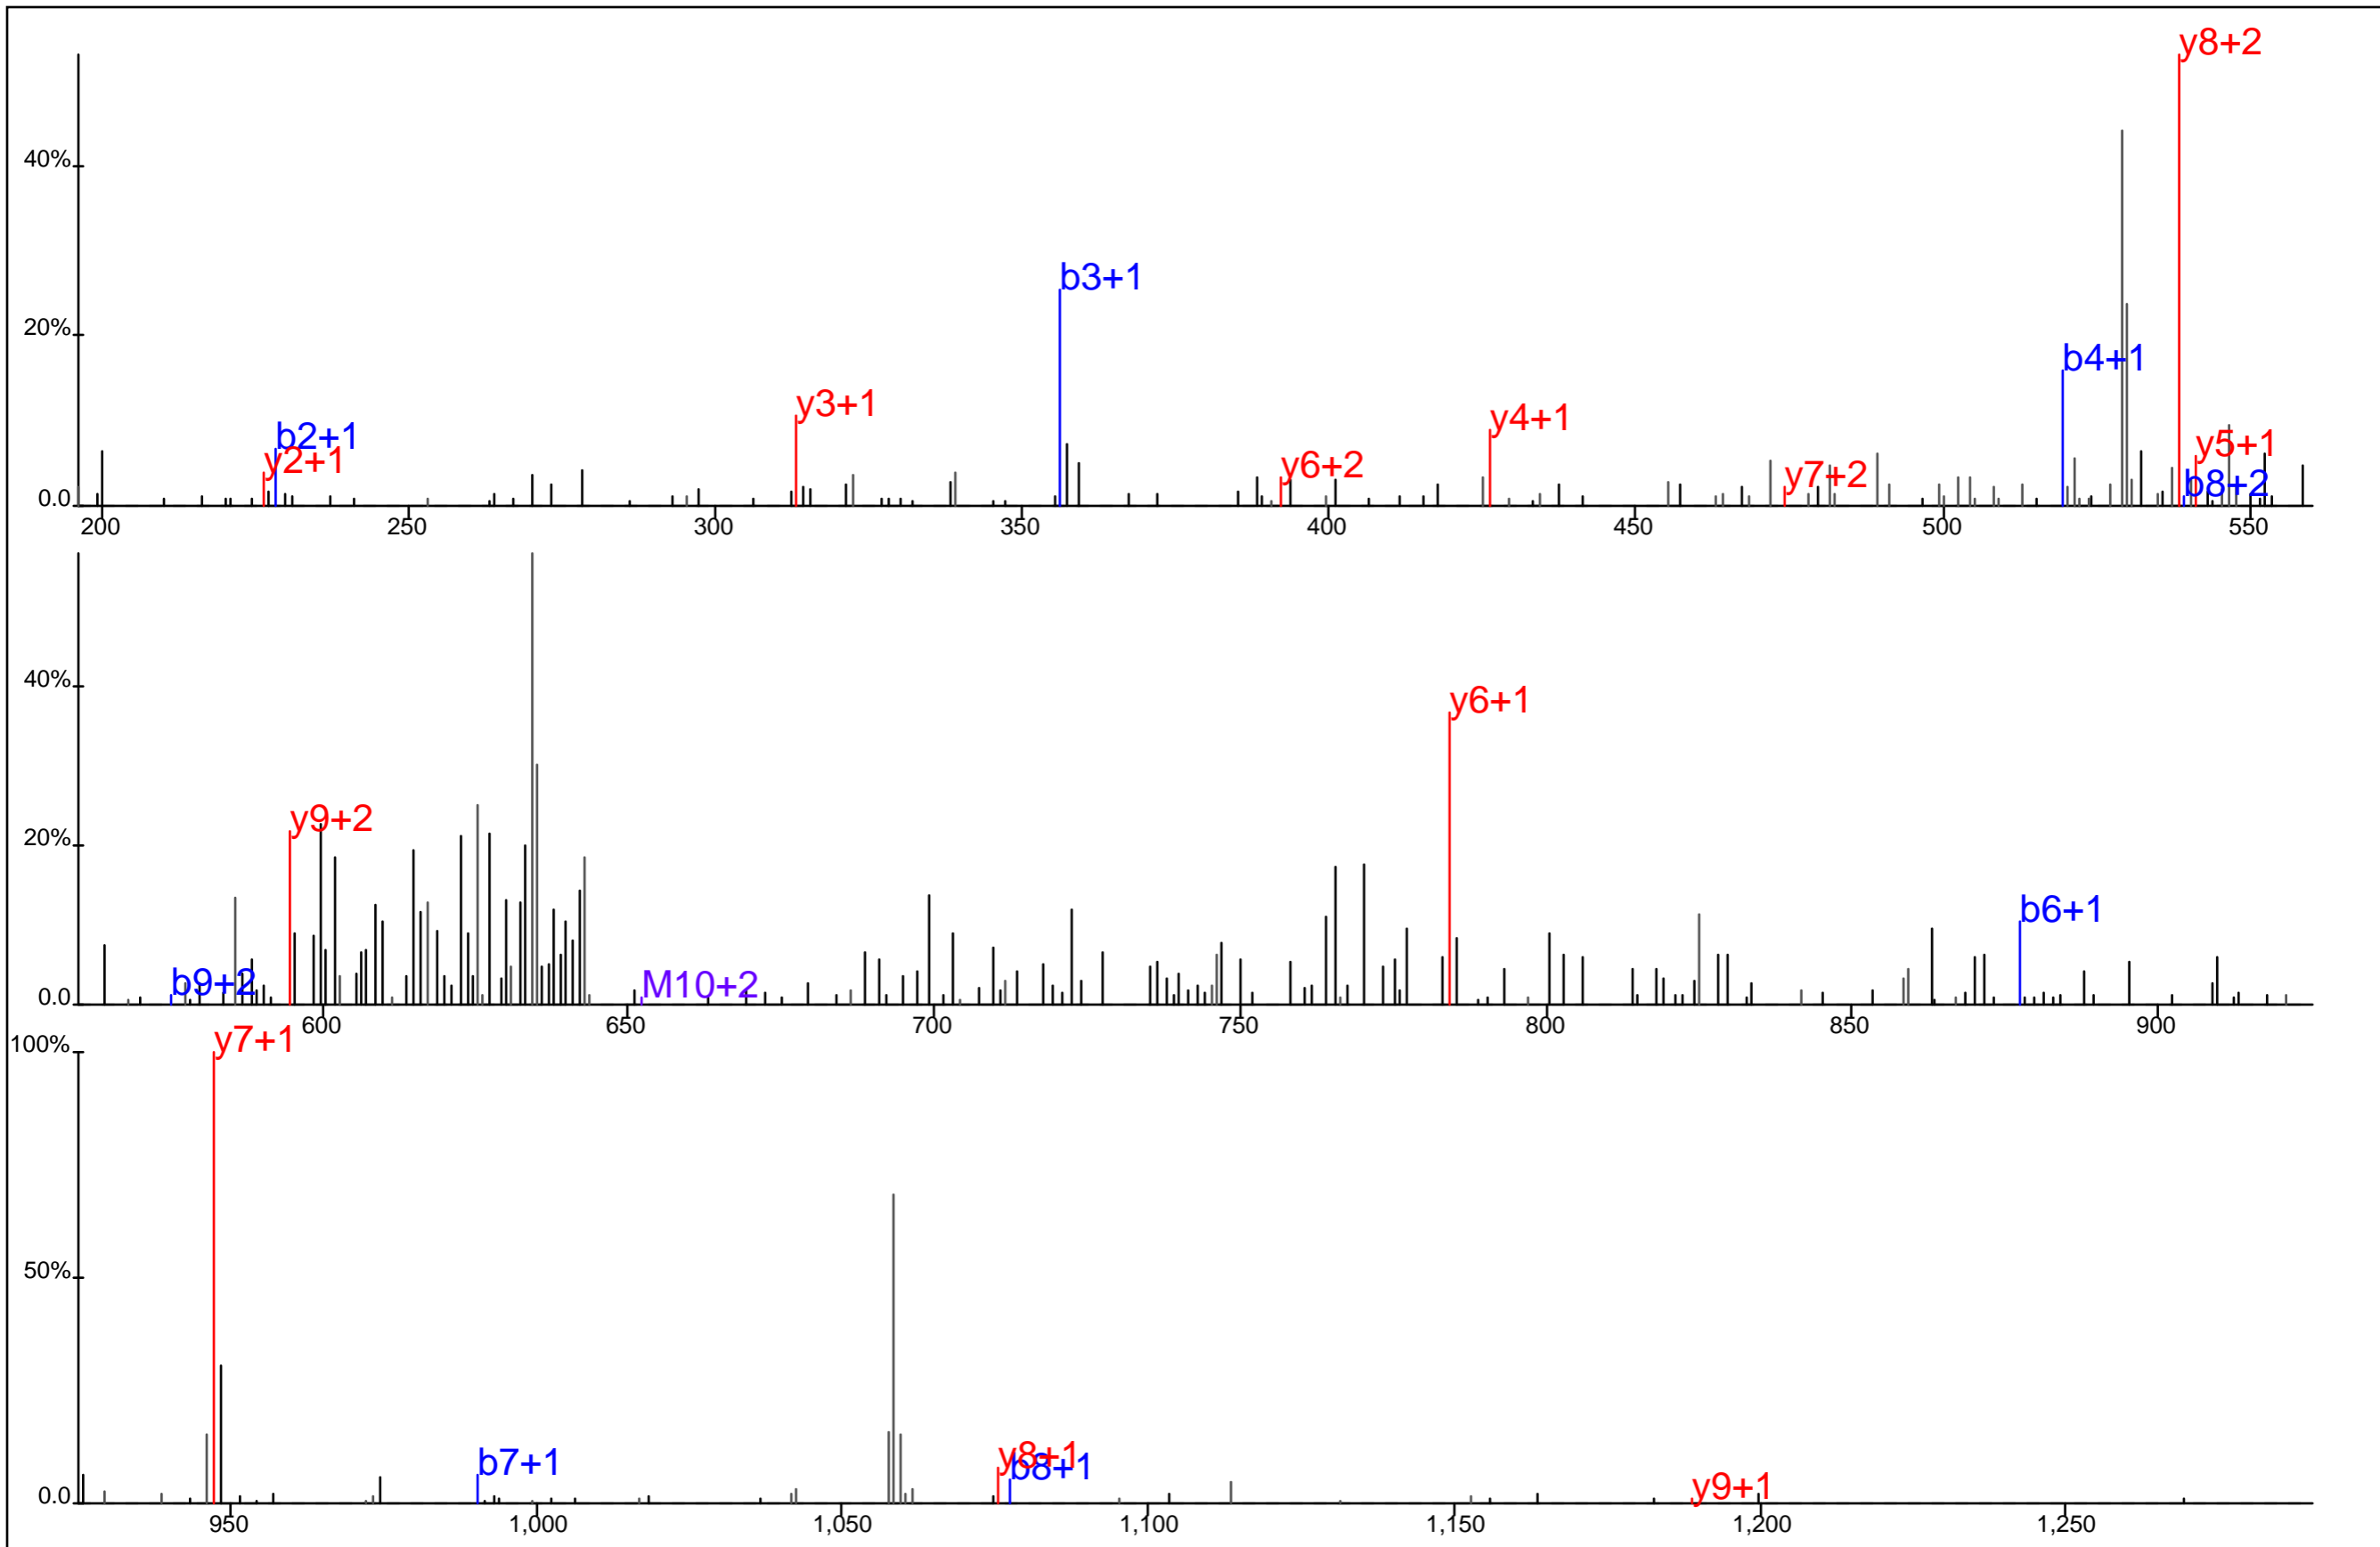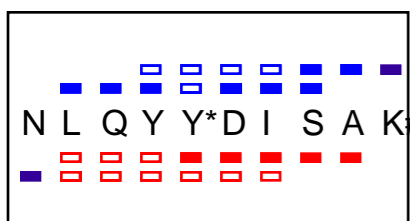

Protein Name: Ran GTPase  
 gi Accession: 21104432  
 Precursor Mass: 651.7973+2  
 Delta Mass: 1.273 ppm  
 XCorr: 27.02



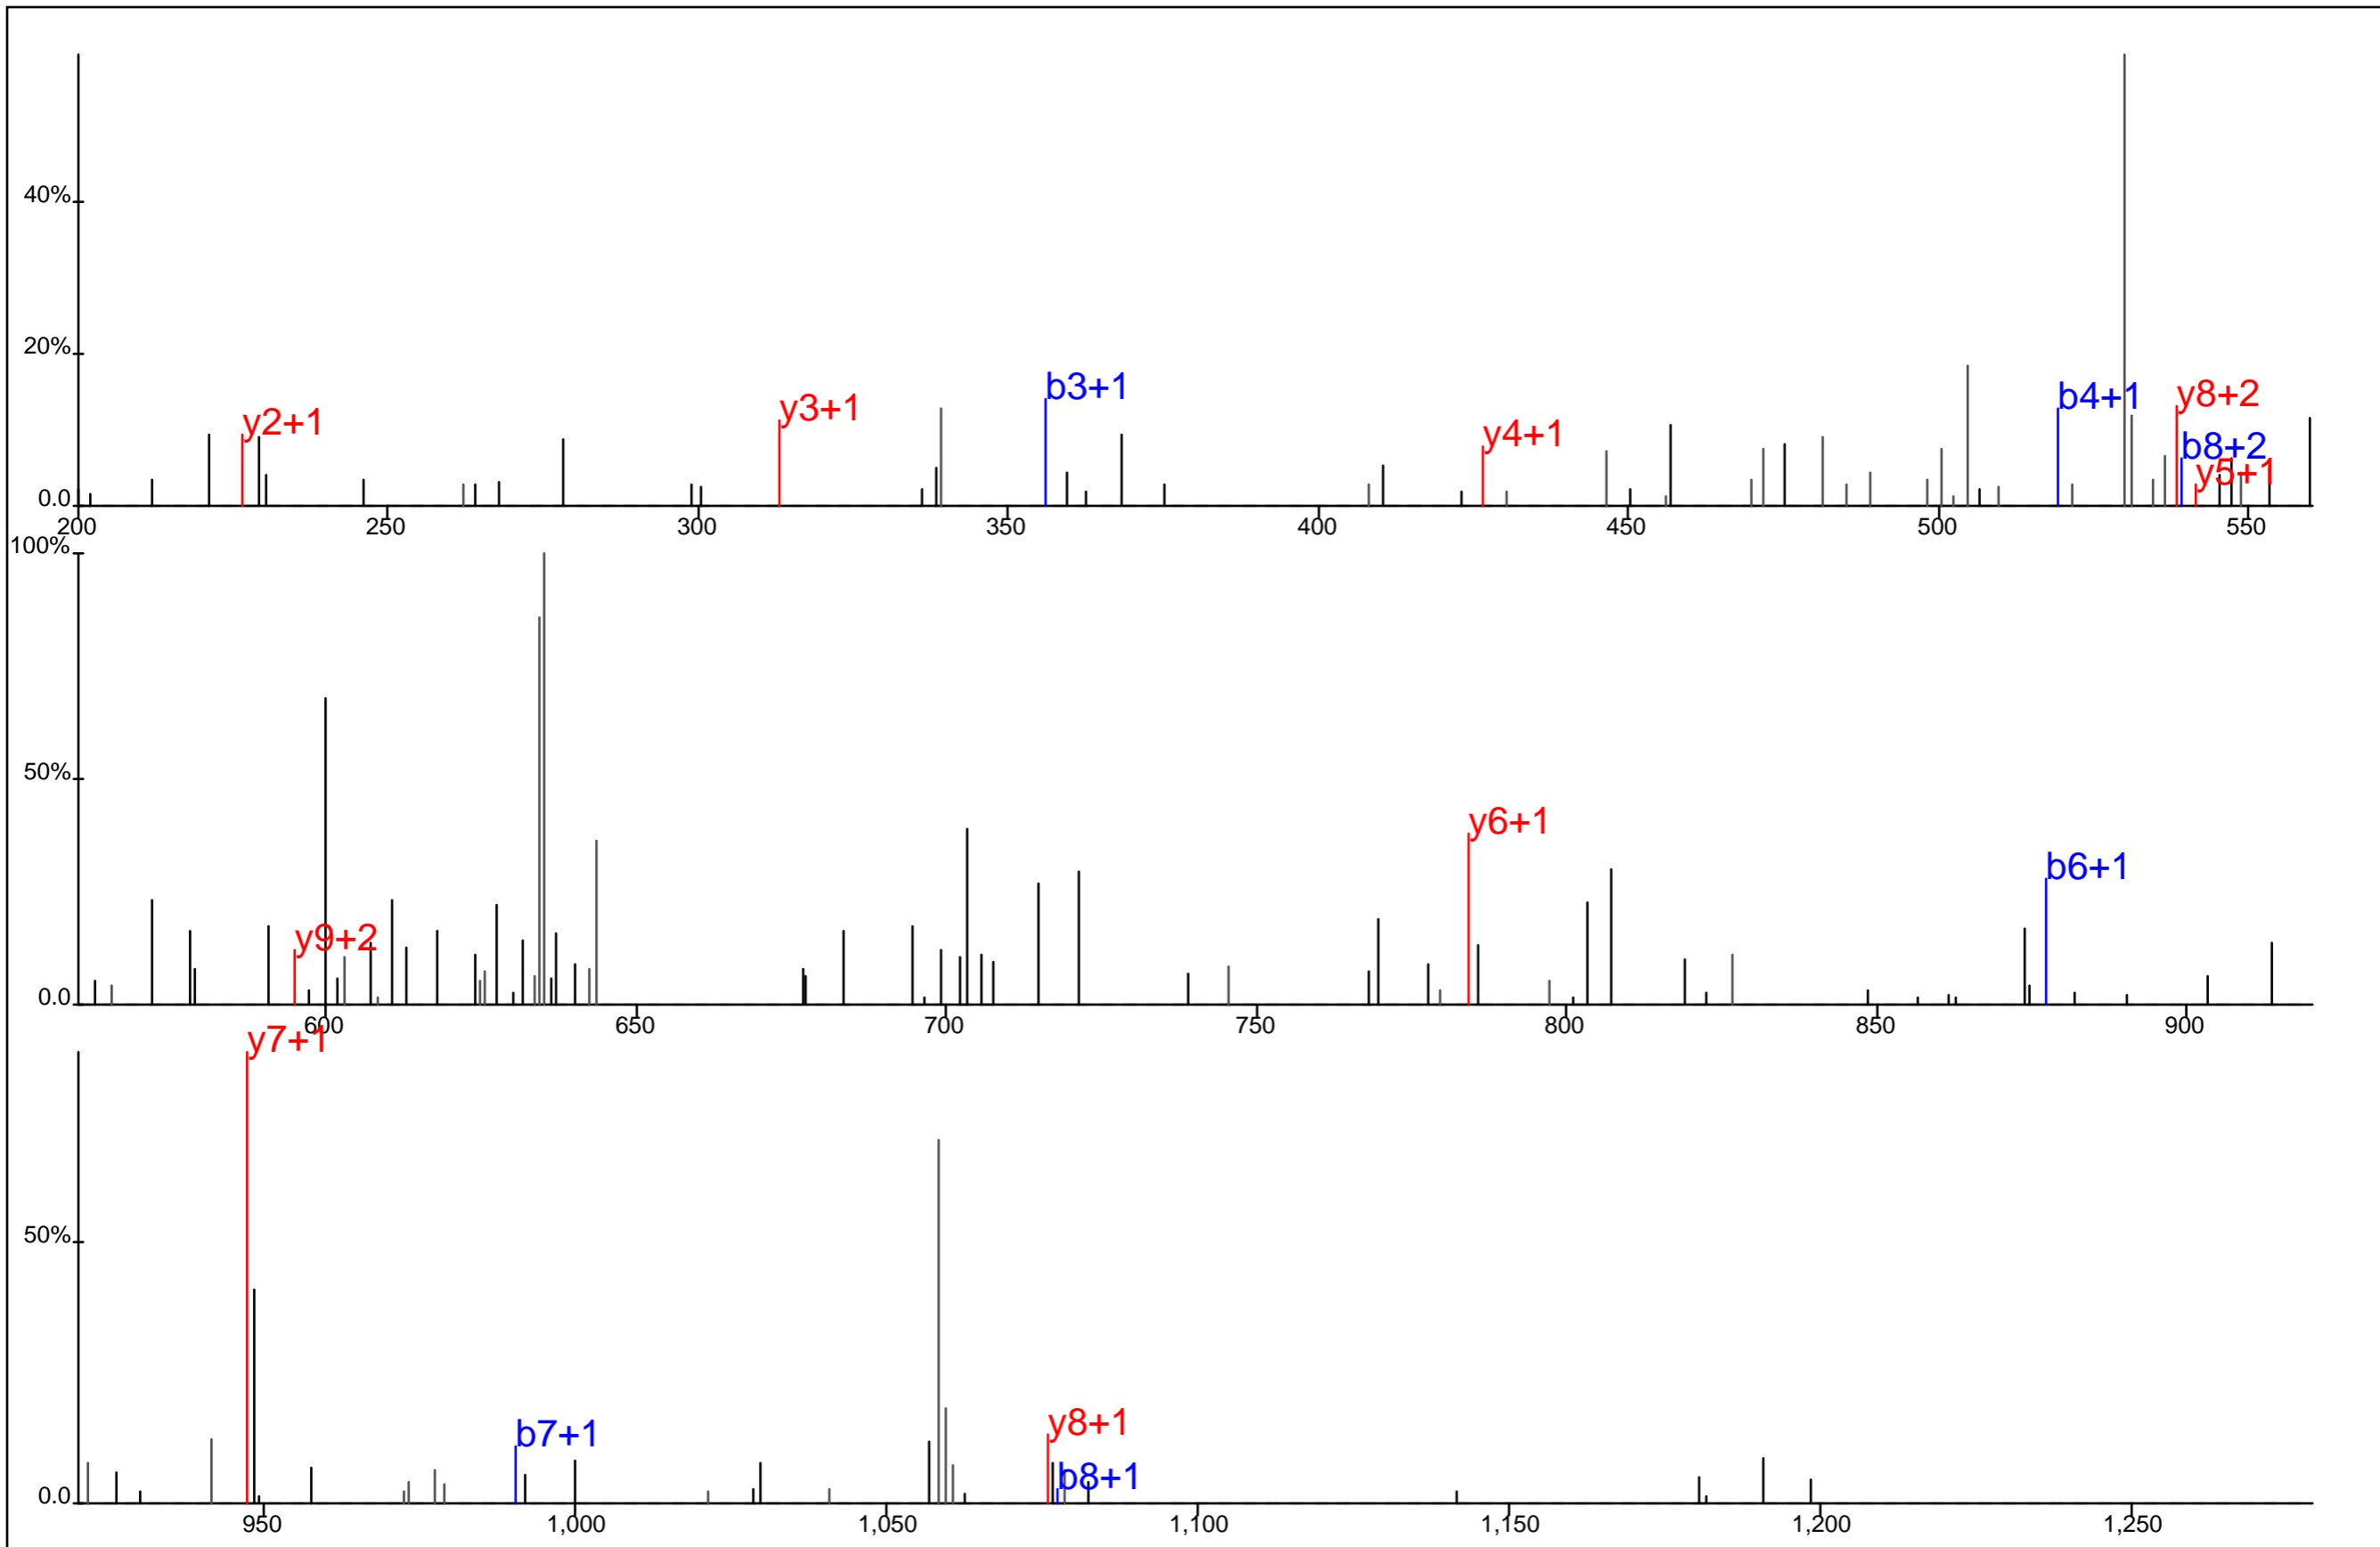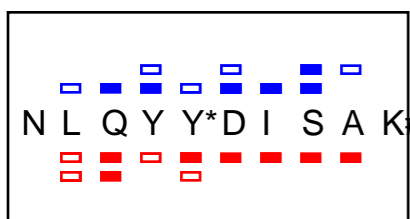

Protein Name: Ran GTPase  
 gi Accession: 21104432  
 Precursor Mass: 651.7984+2  
 Delta Mass: 2.962 ppm  
 XCorr: 18.93

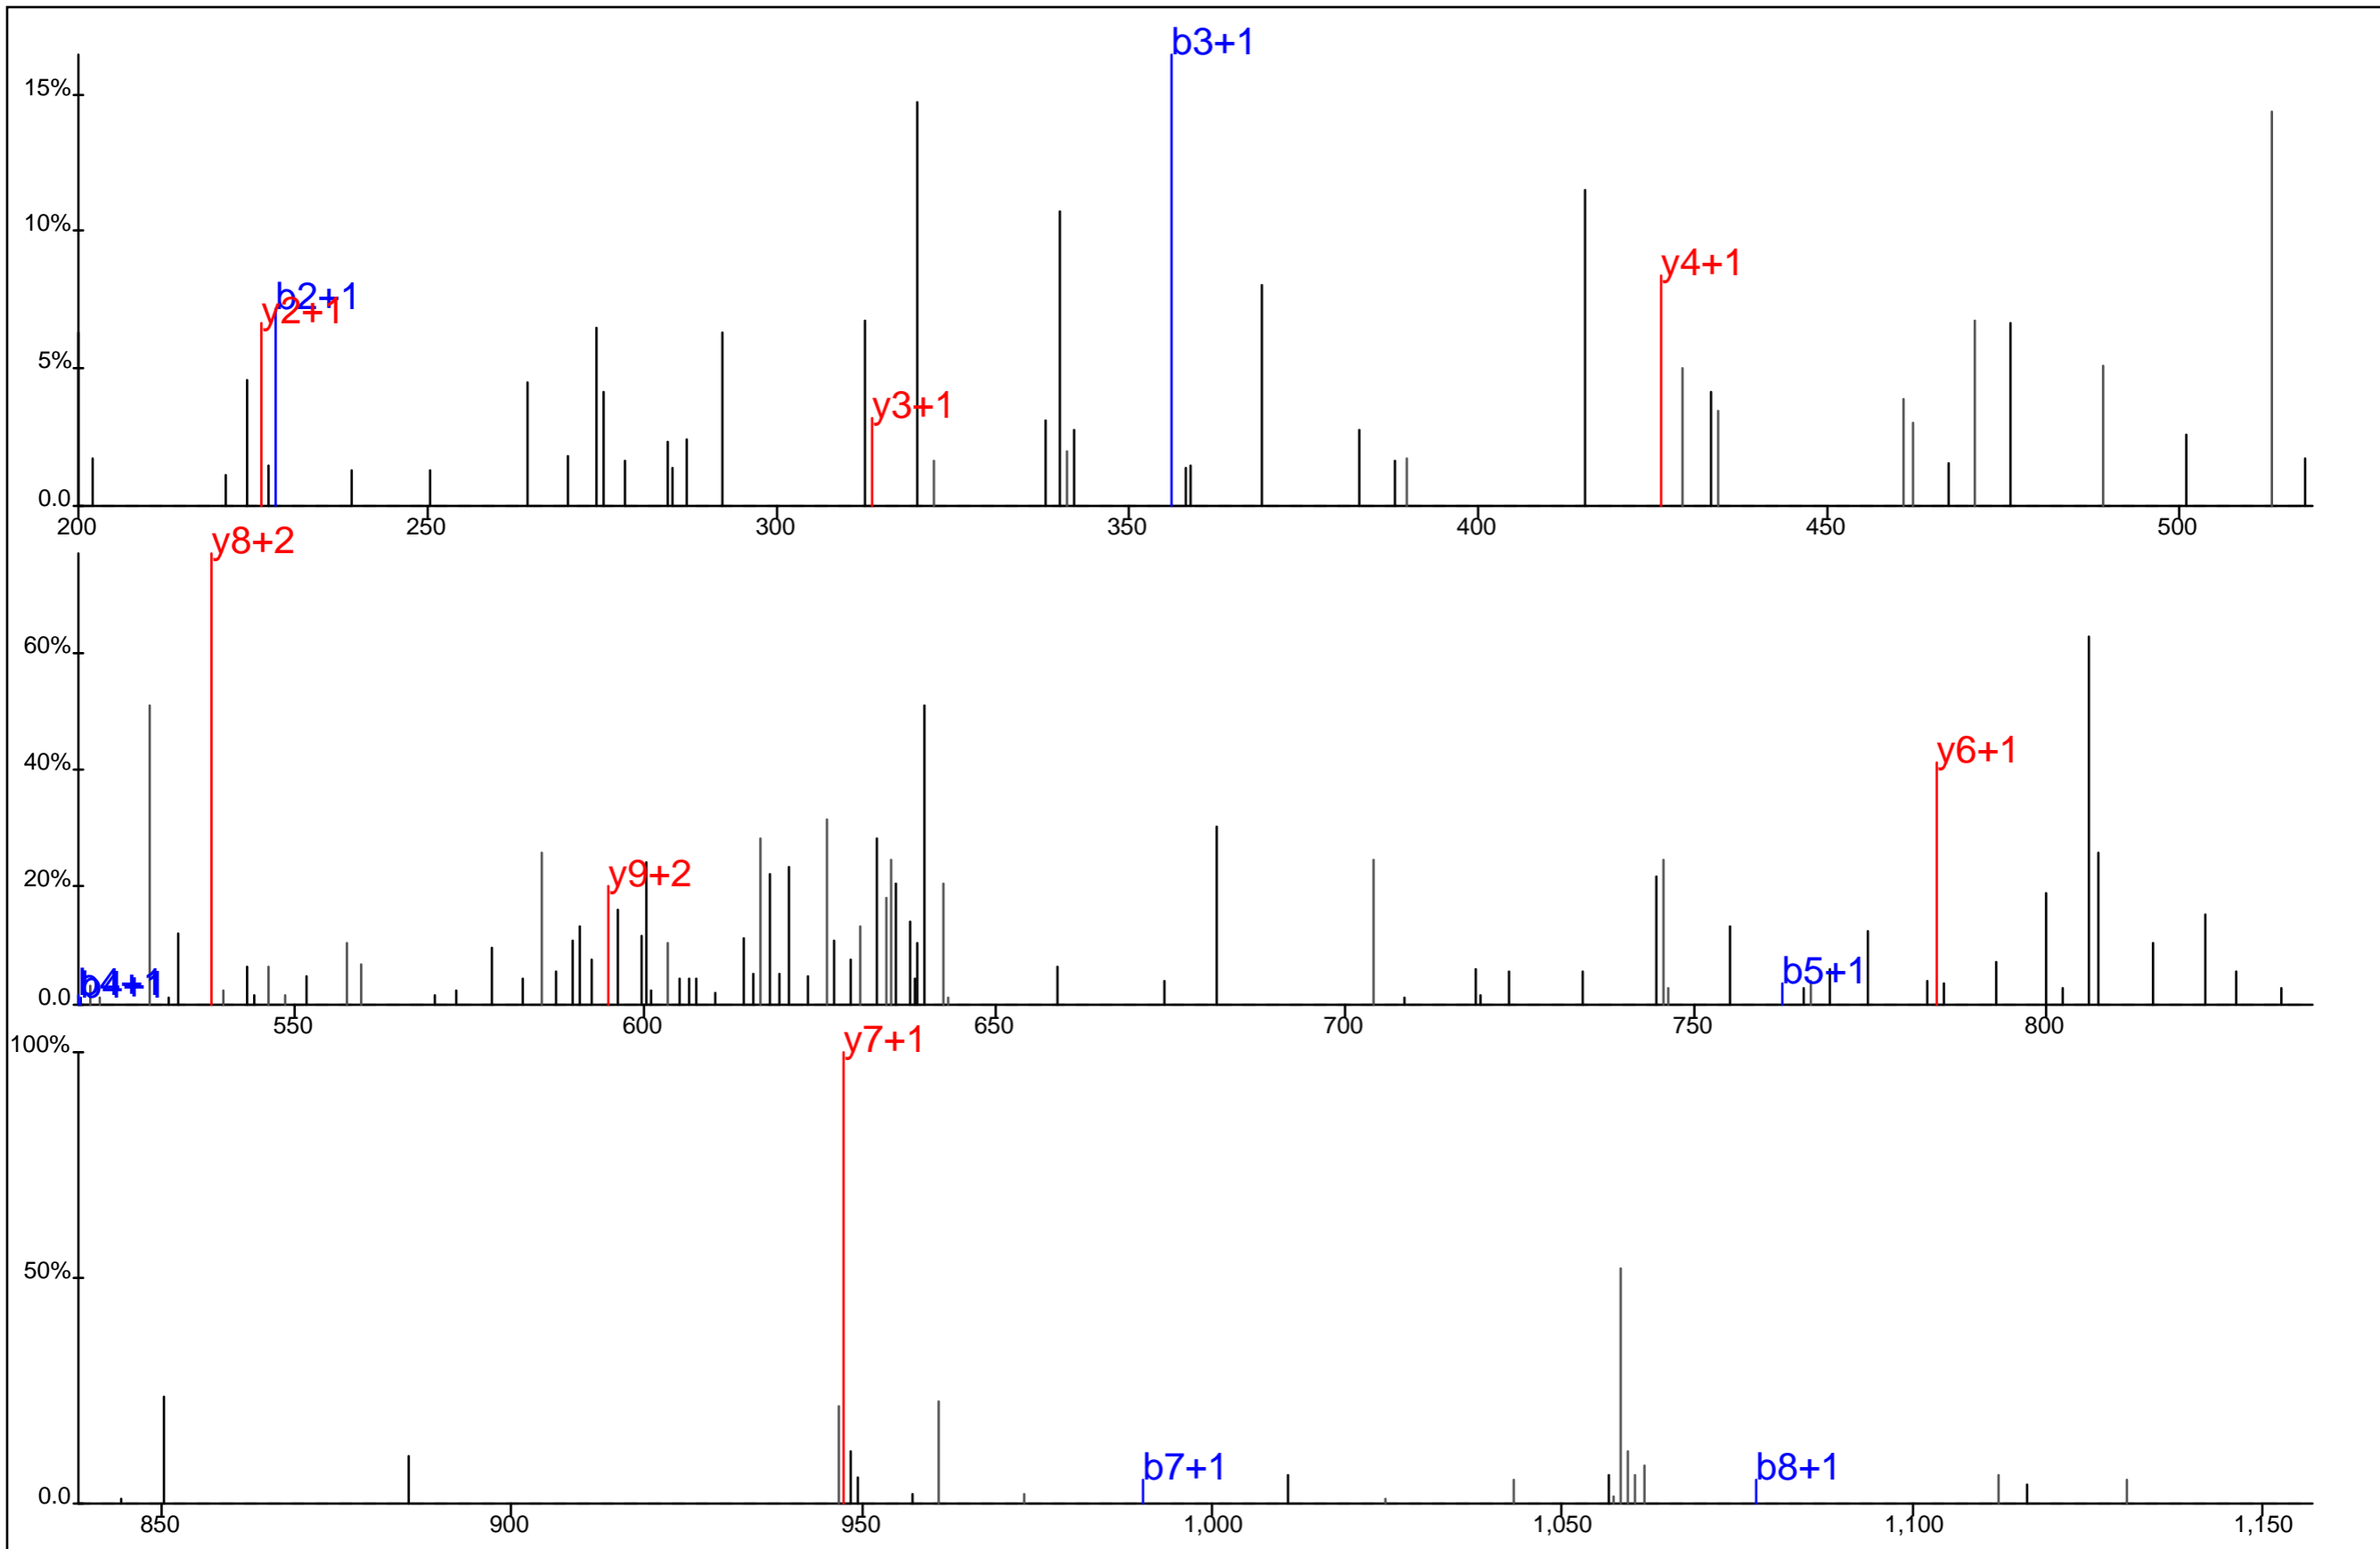

N L Q Y Y\* D I S A K#

Protein Name: Ran GTPase  
 gi Accession: 21104432  
 Precursor Mass: 651.7973+2  
 Delta Mass: 1.273 ppm  
 XCorr: 16.28

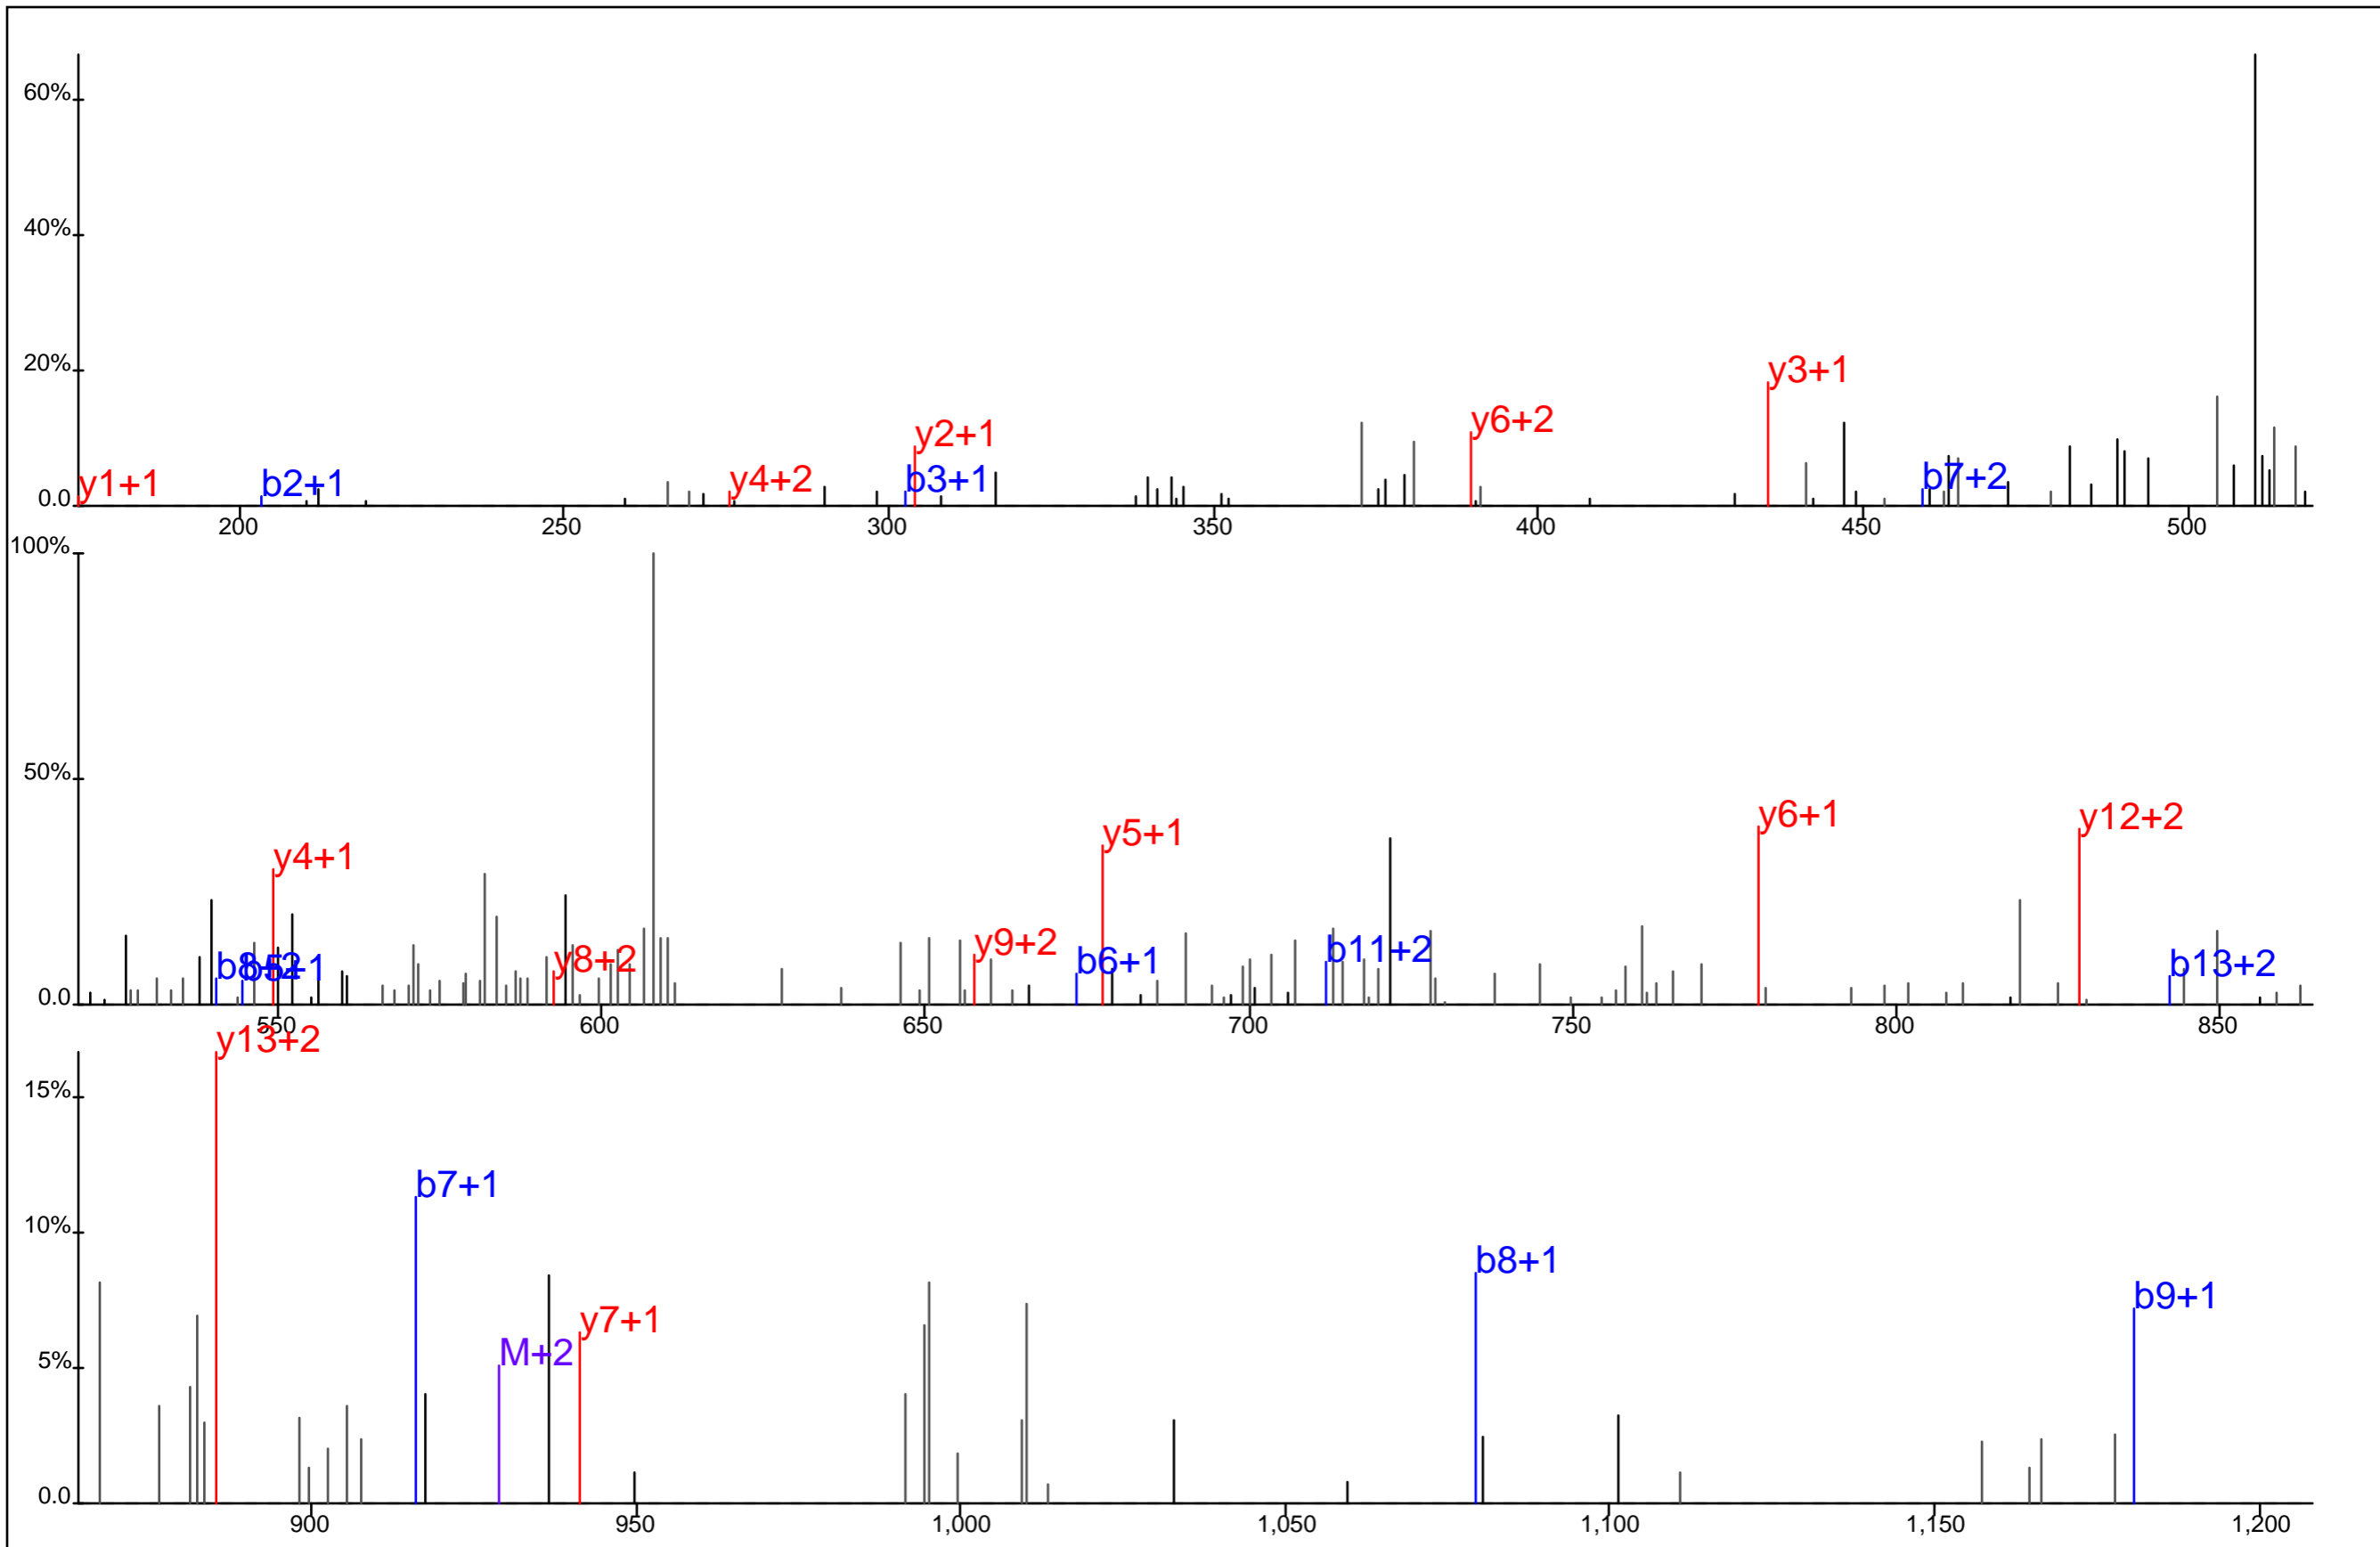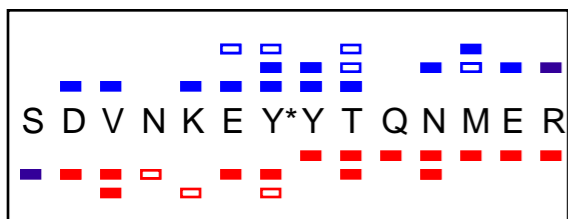

Protein Name: RBM22  
 gi Accession: 8922328  
 Precursor Mass: 619.5899+3  
 Delta Mass: 1.690 ppm  
 XCorr: 22.91

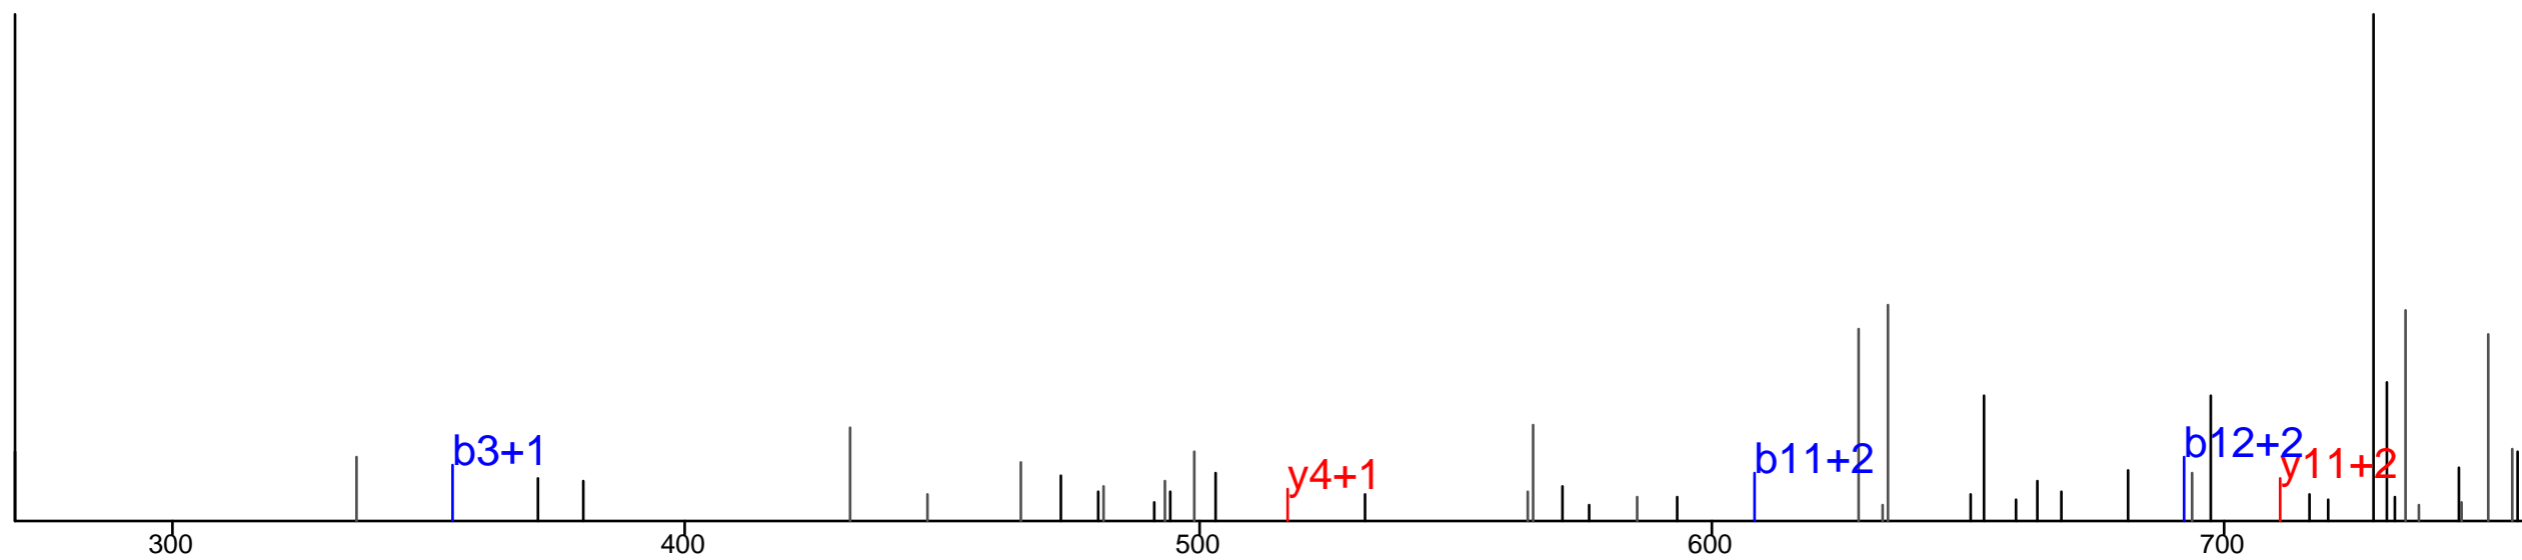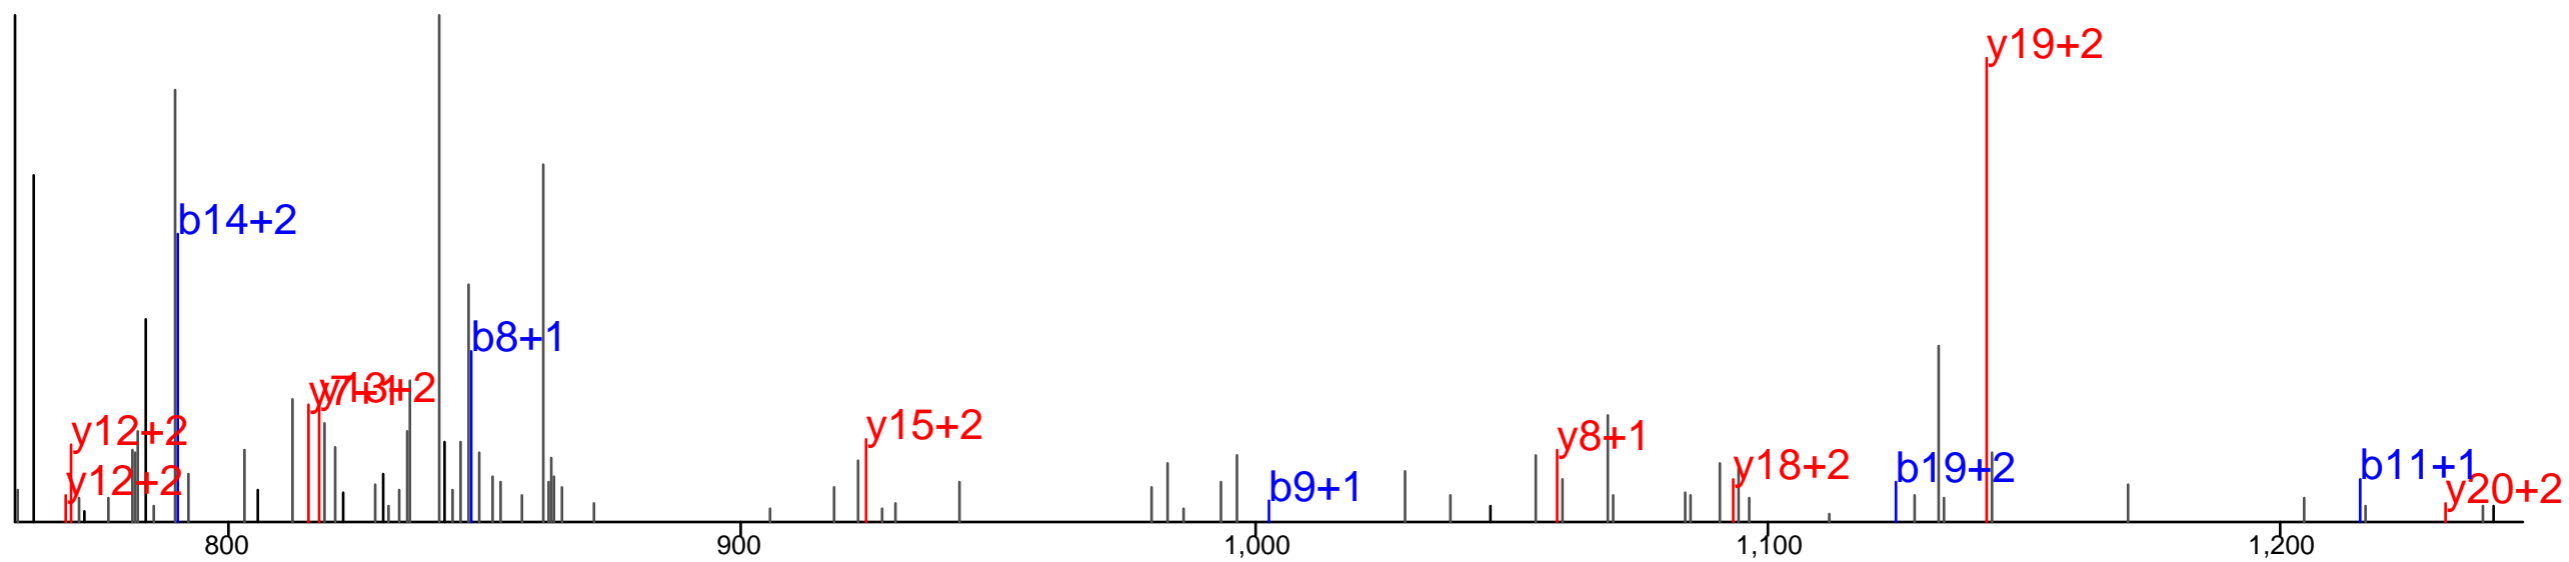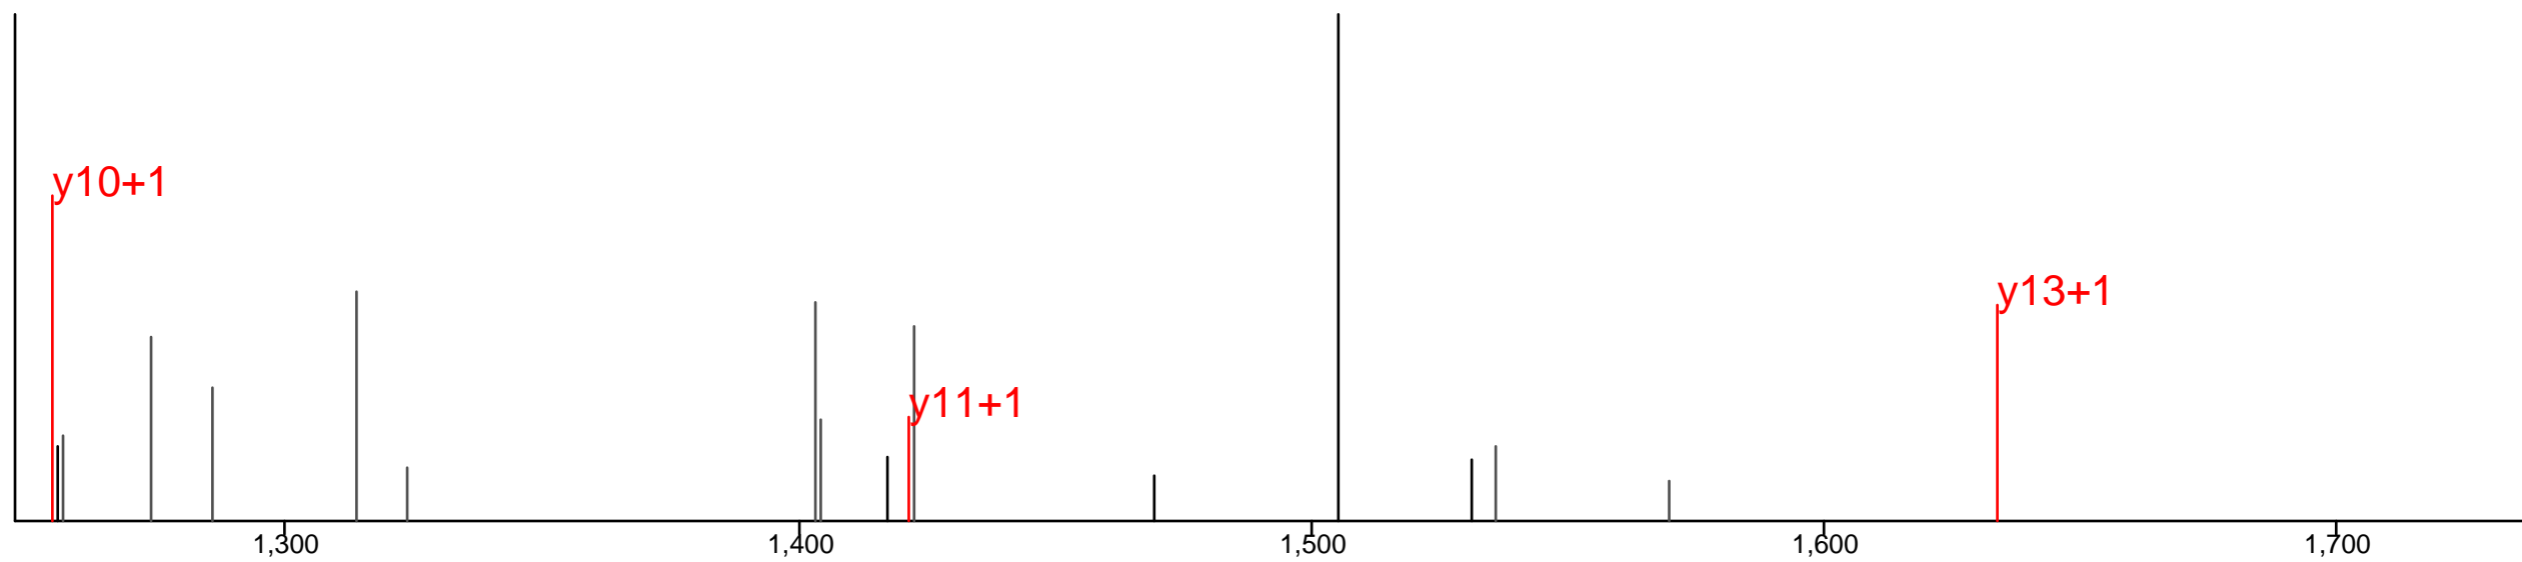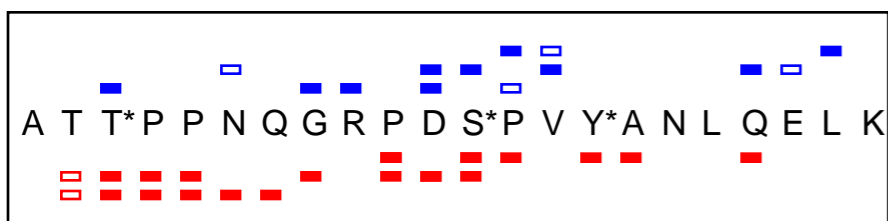

Protein Name: RhoGAP 12  
 gi Accession: 26986534  
 Precursor Mass: 879.3859+3  
 Delta Mass: 8.963 ppm  
 XCorr: 10.41

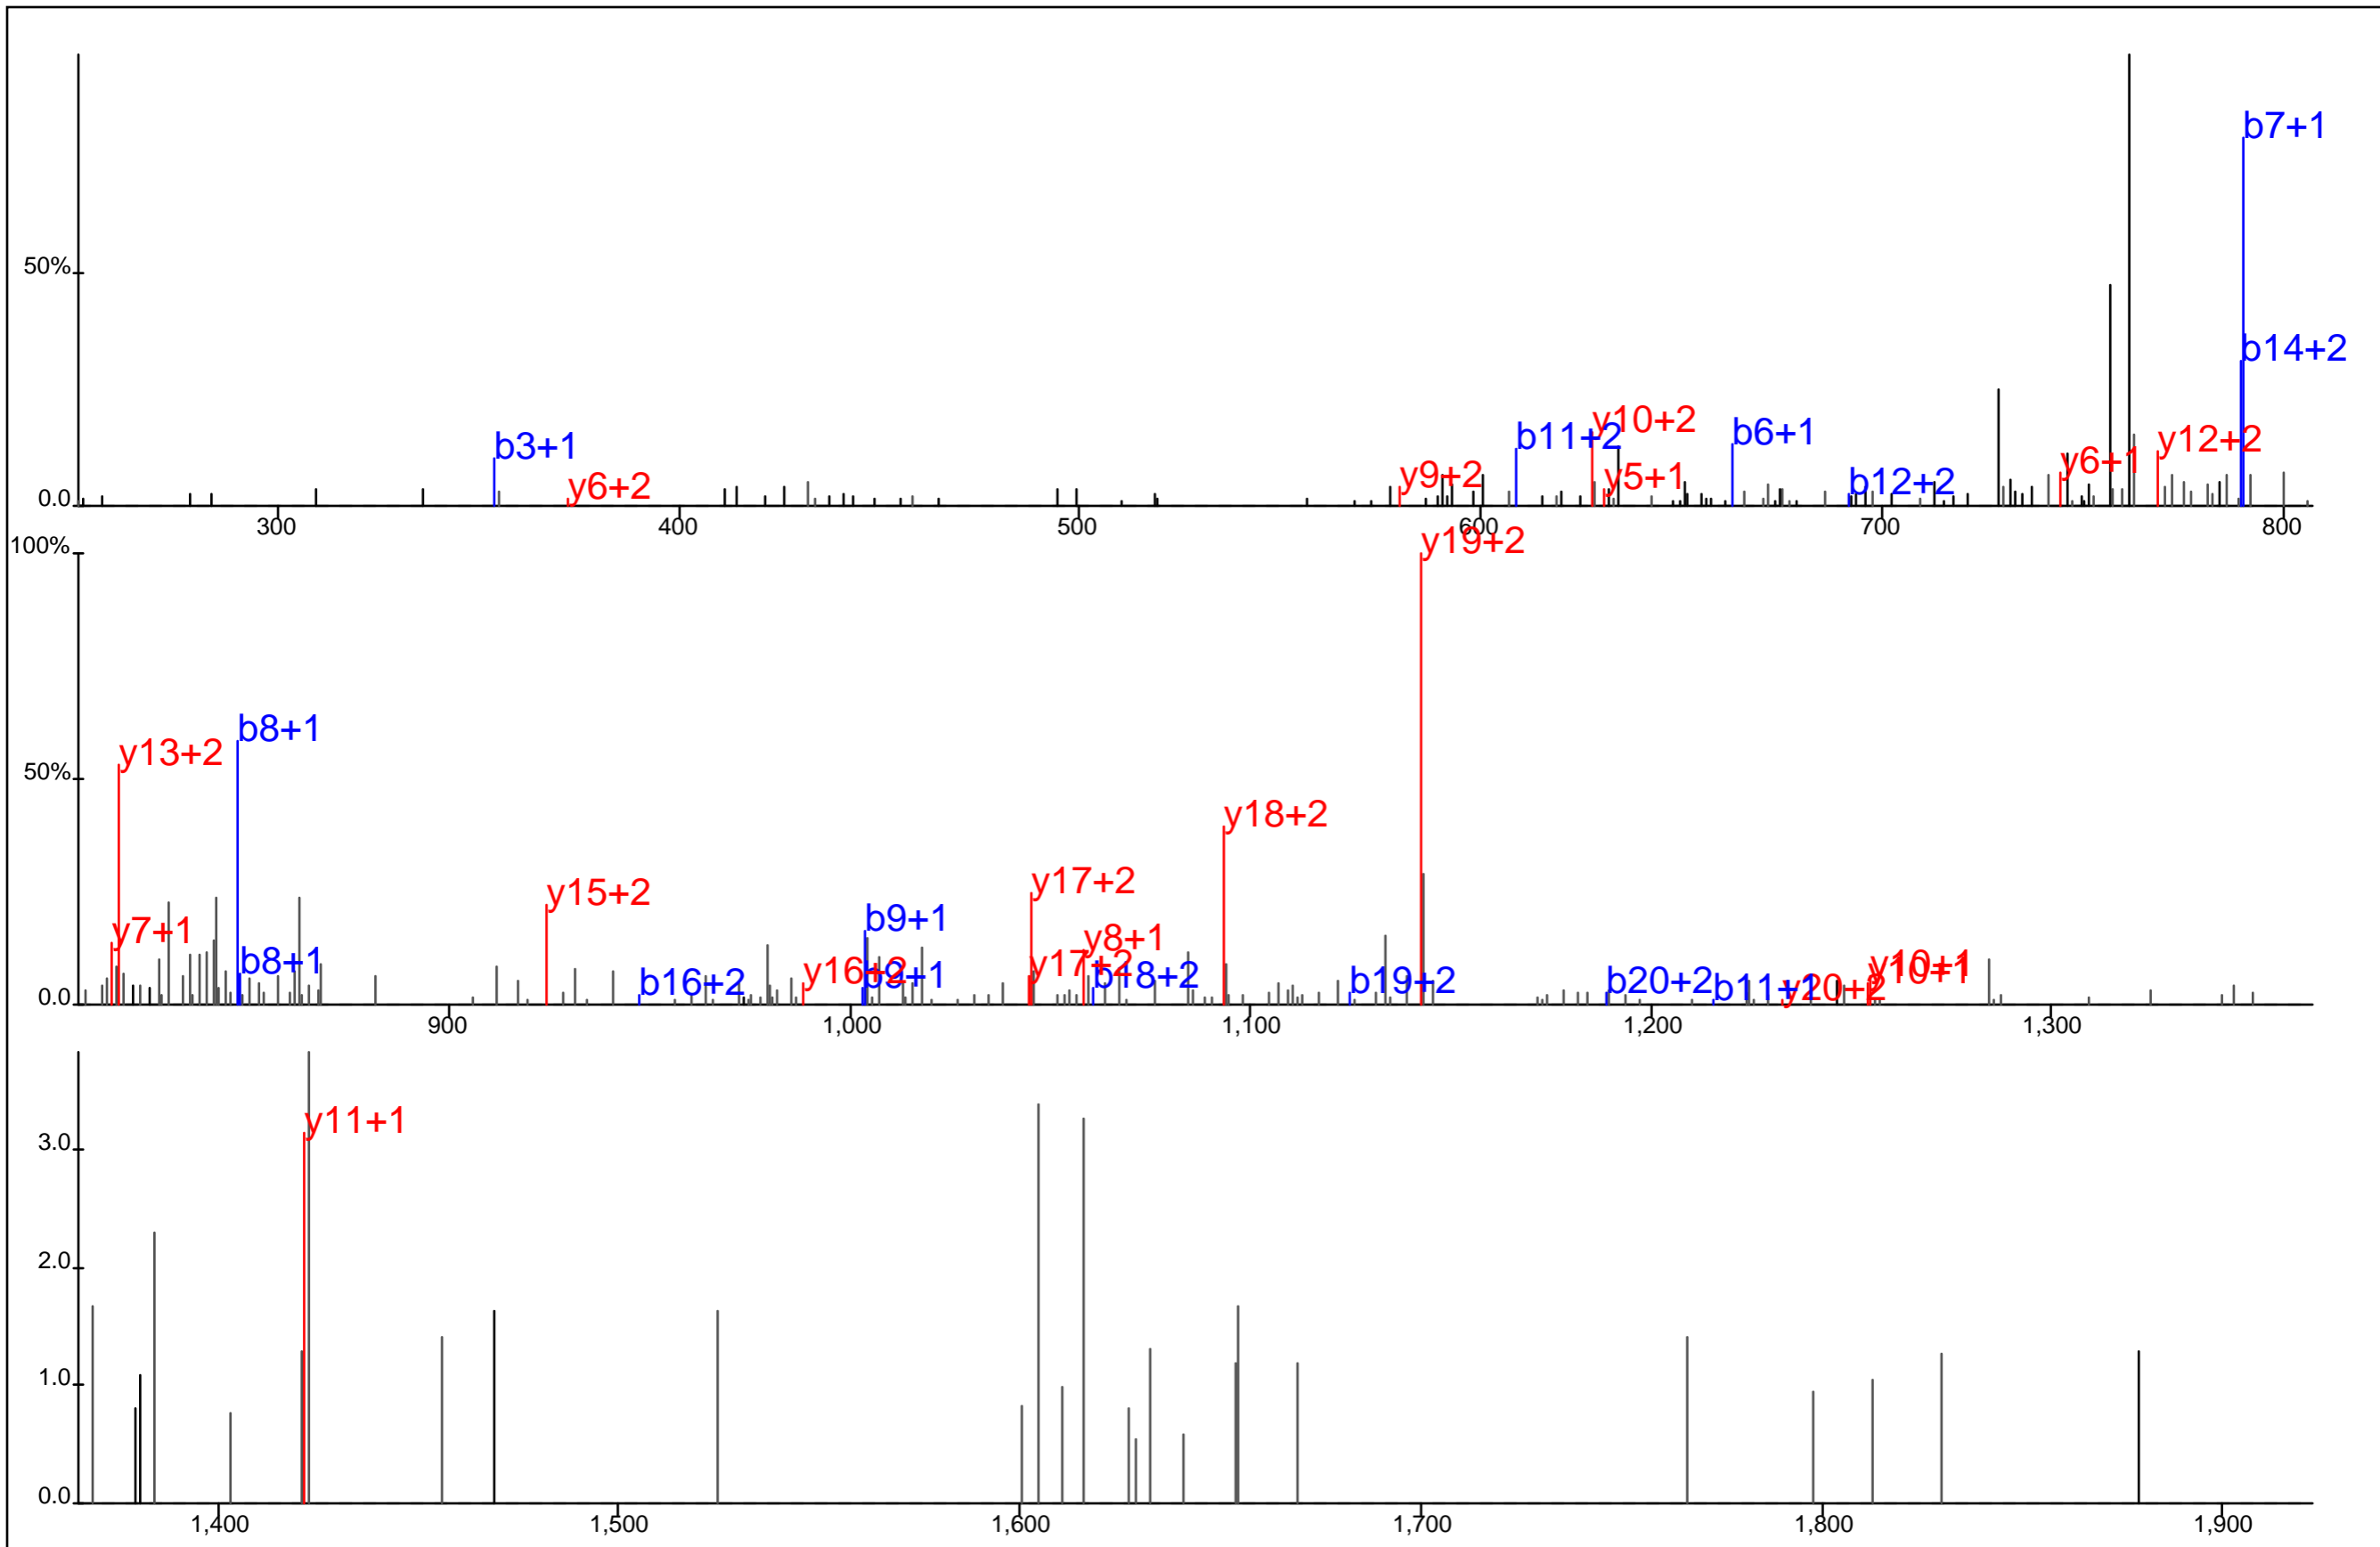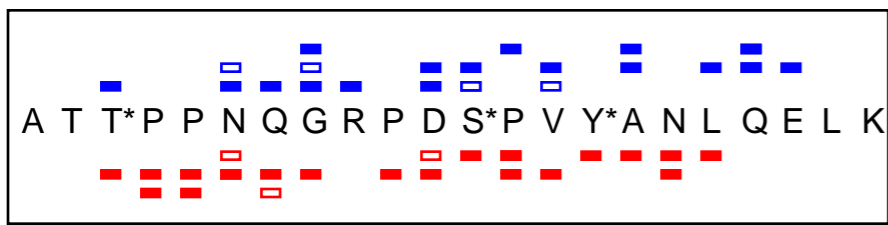

Protein Name: RhoGAP 12  
 gi Accession: 26986534  
 Precursor Mass: 879.3848+3  
 Delta Mass: 7.783 ppm  
 XCorr: 13.99

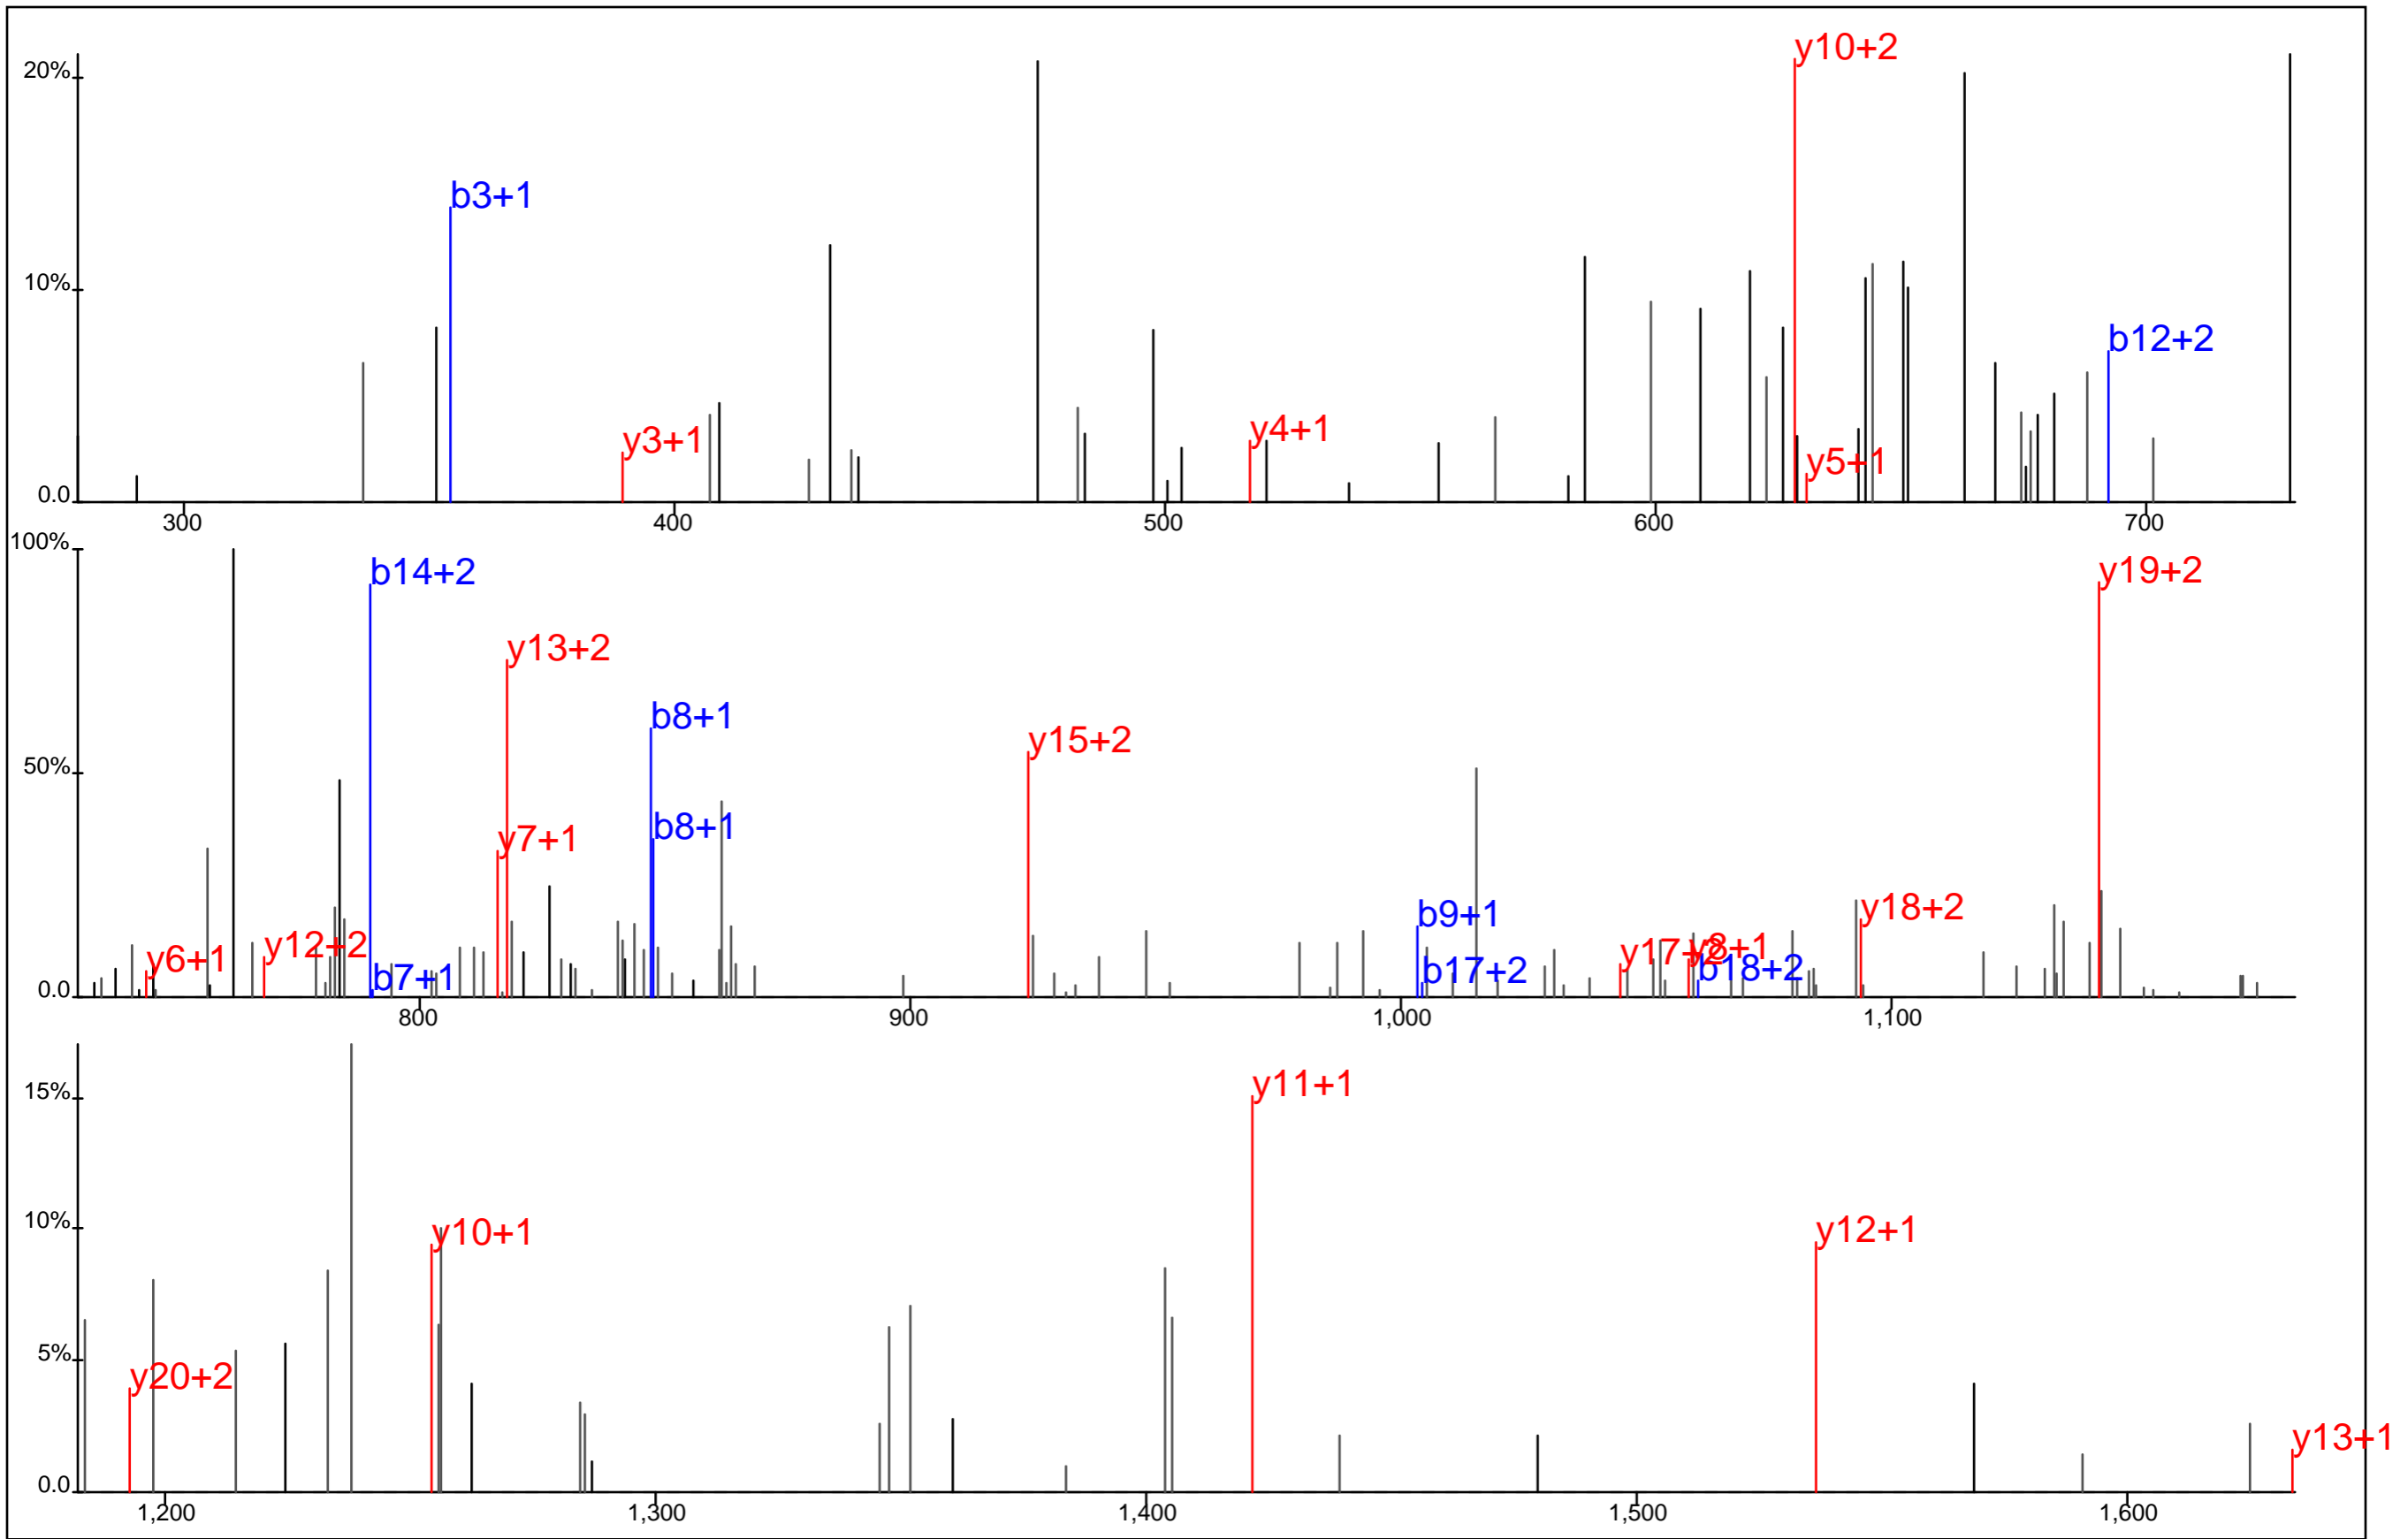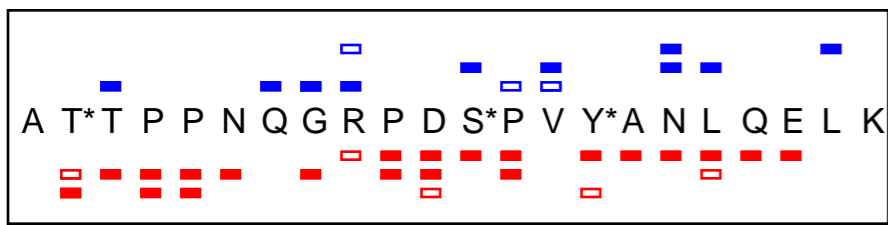

Protein Name: RhoGAP 12  
 gi Accession: 26986534  
 Precursor Mass: 879.3845+3  
 Delta Mass: 7.367 ppm  
 XCorr: 14.99

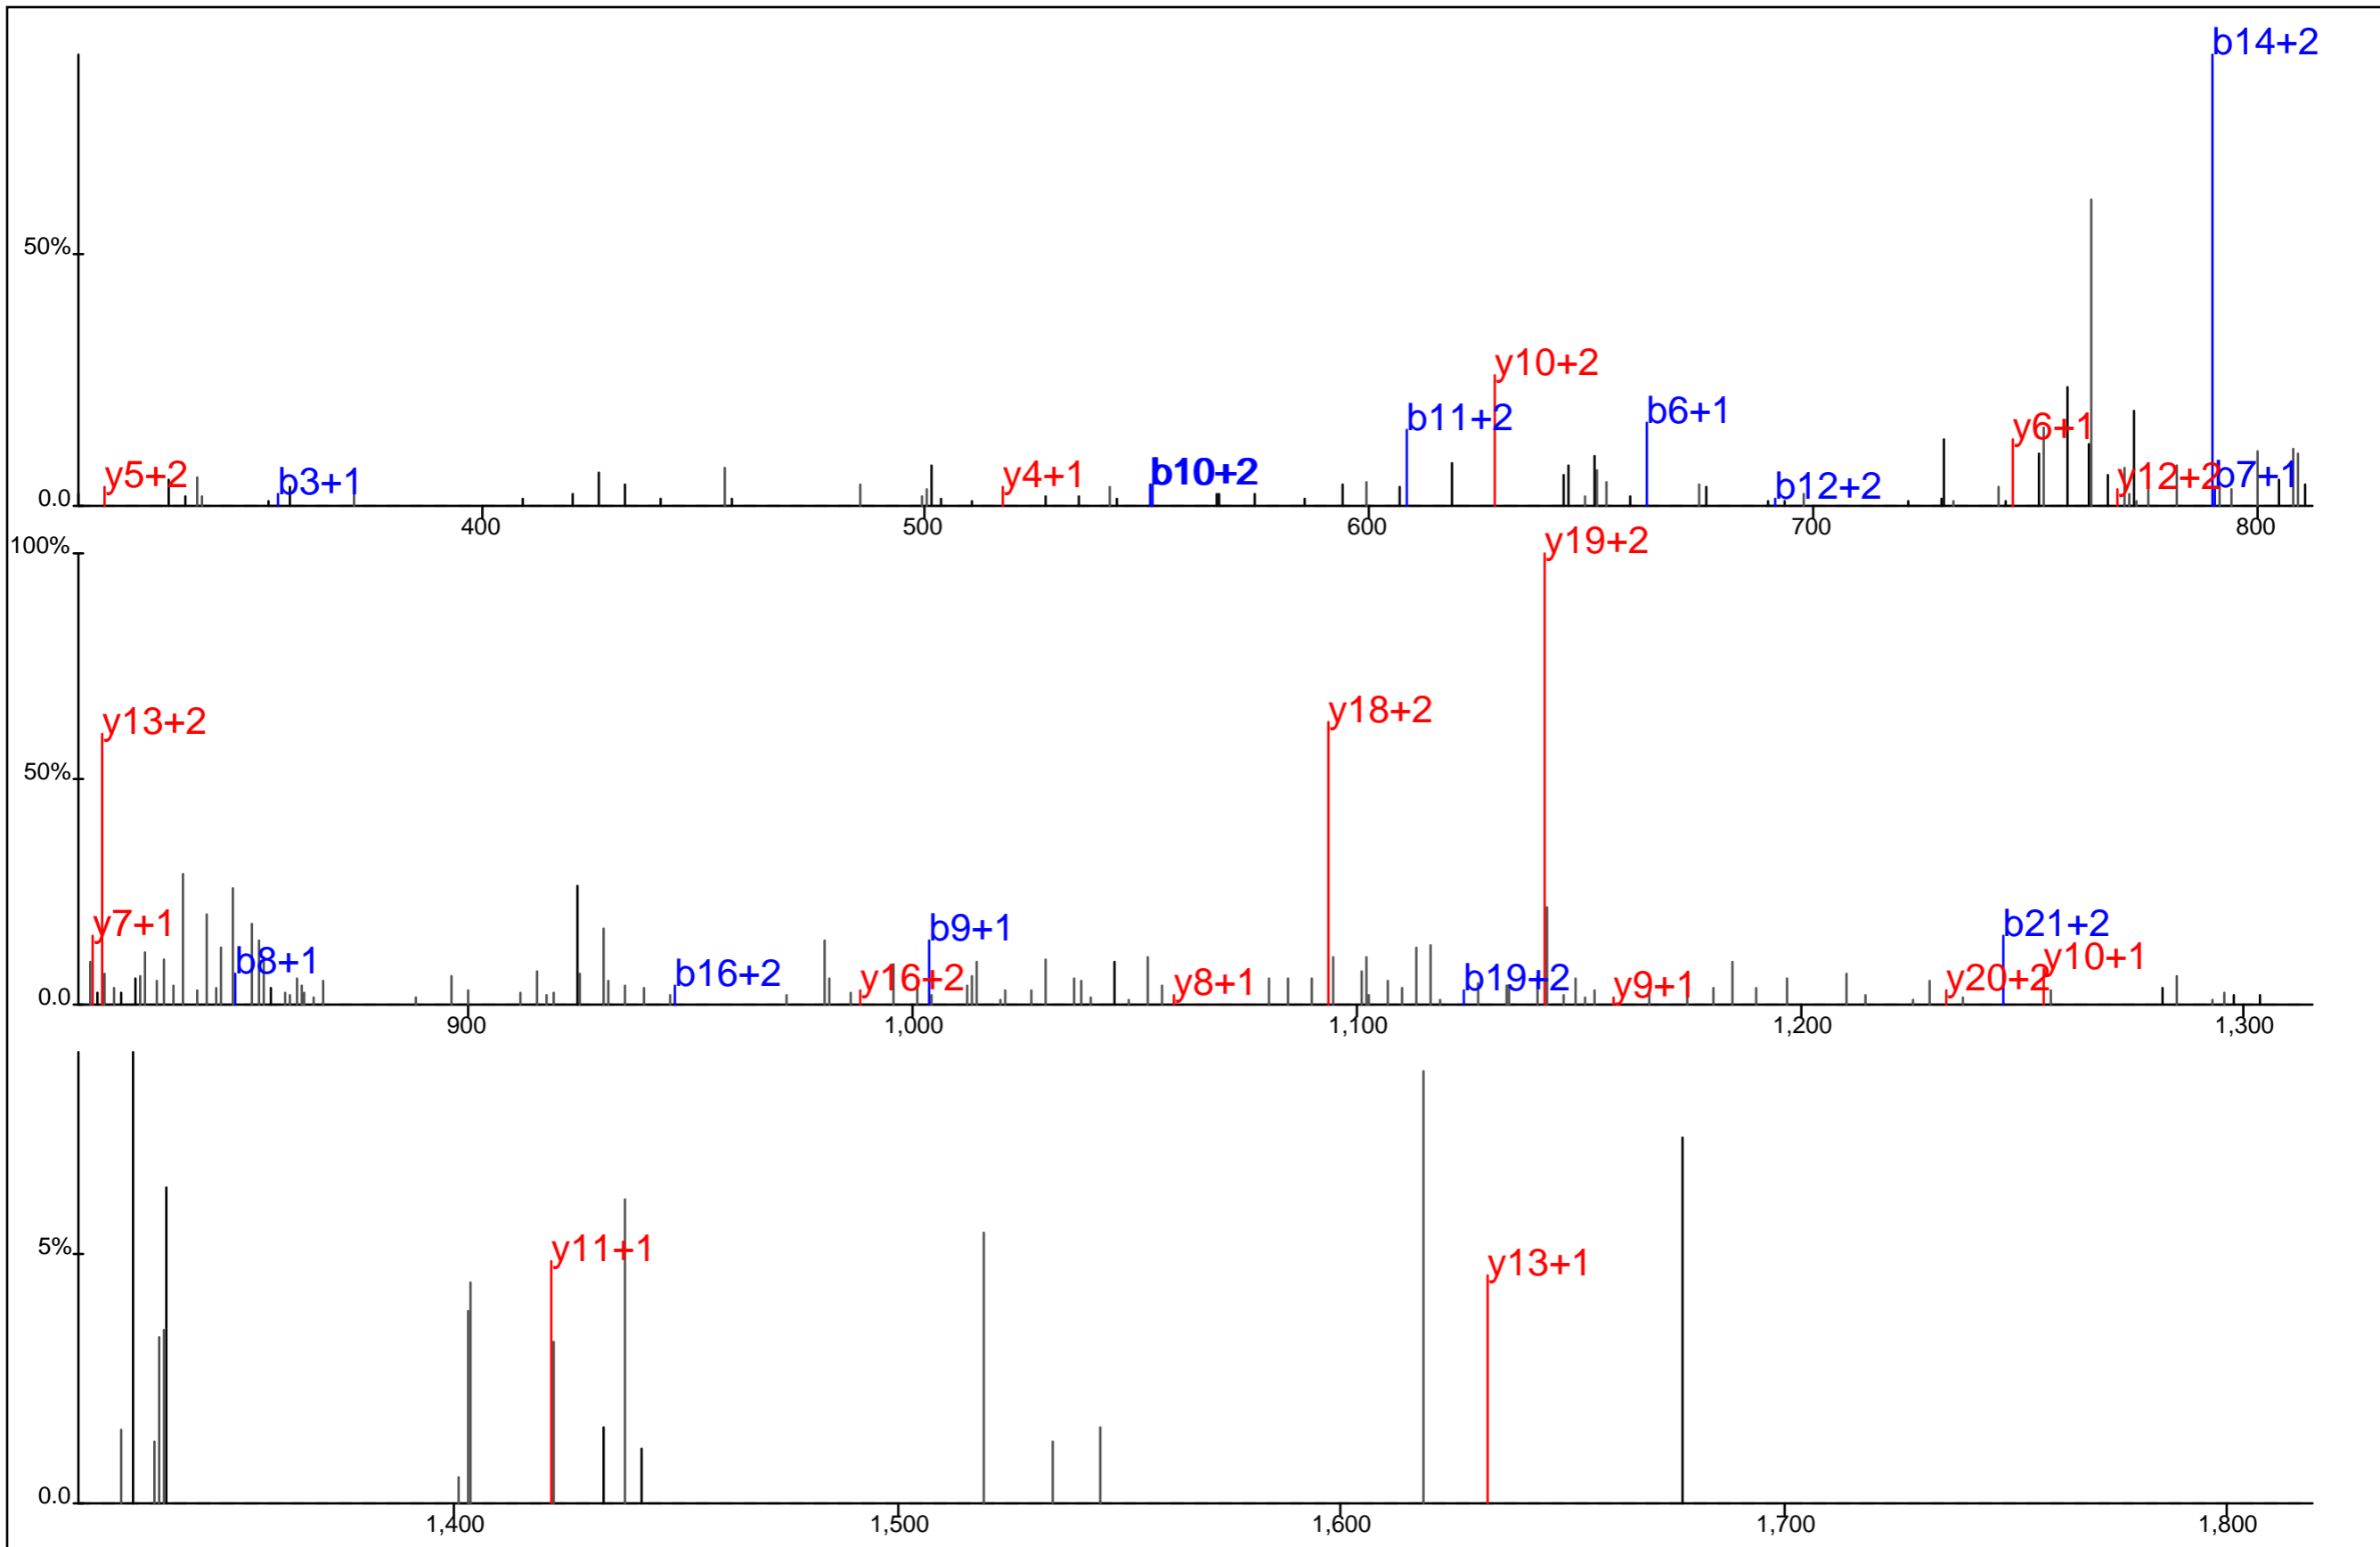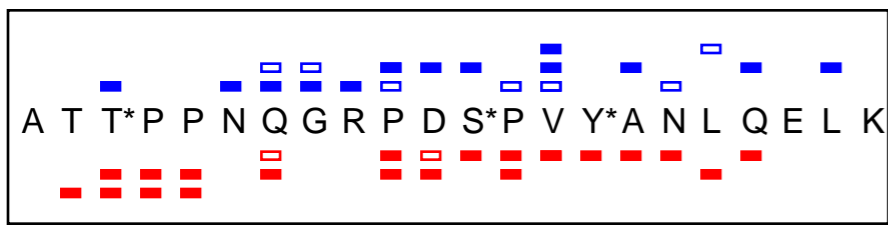

Protein Name: RhoGAP 12  
 gi Accession: 26986534  
 Precursor Mass: 879.3817+3  
 Delta Mass: 4.240 ppm  
 XCorr: 18.82

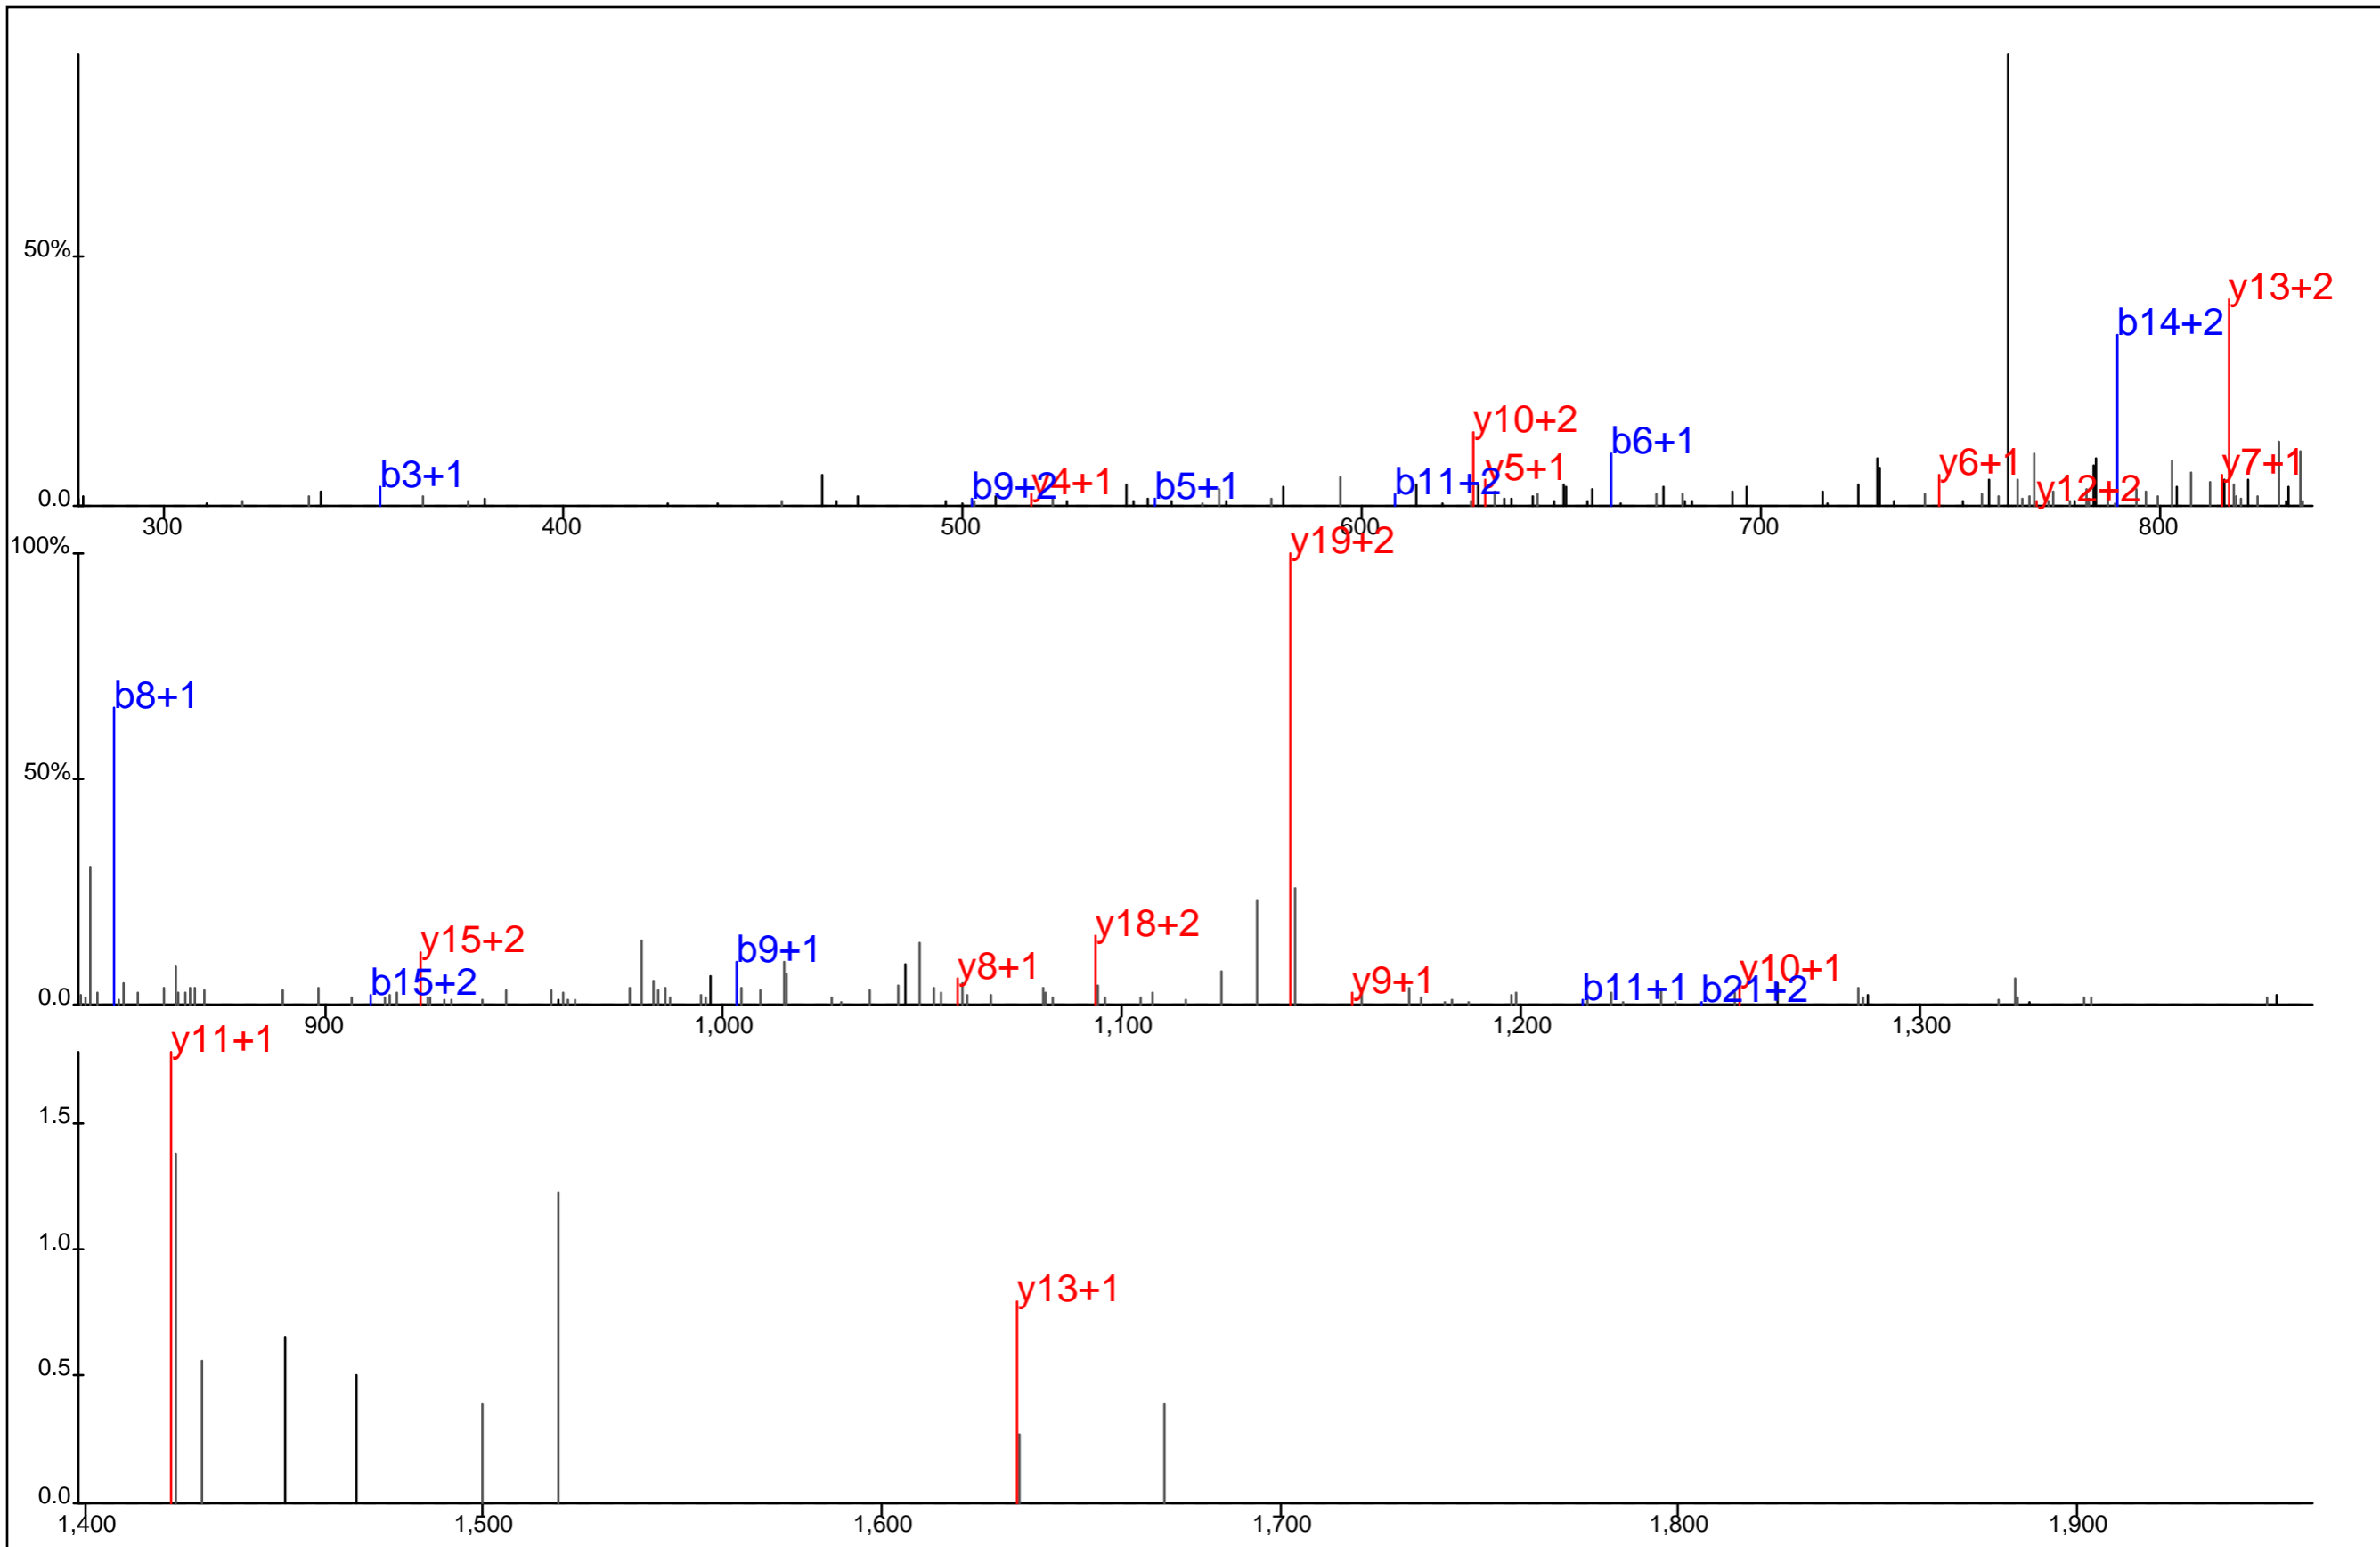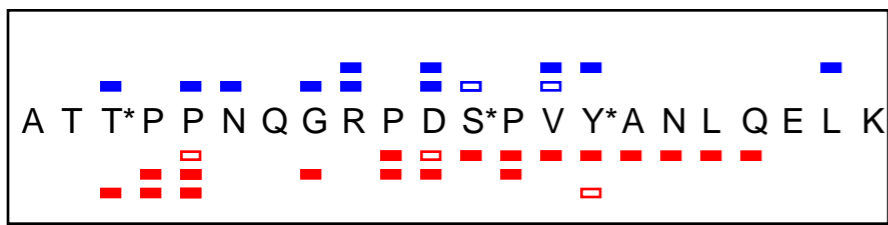

Protein Name: RhoGAP 12  
 gi Accession: 26986534  
 Precursor Mass: 879.3837+3  
 Delta Mass: 6.463 ppm  
 XCorr: 15.09



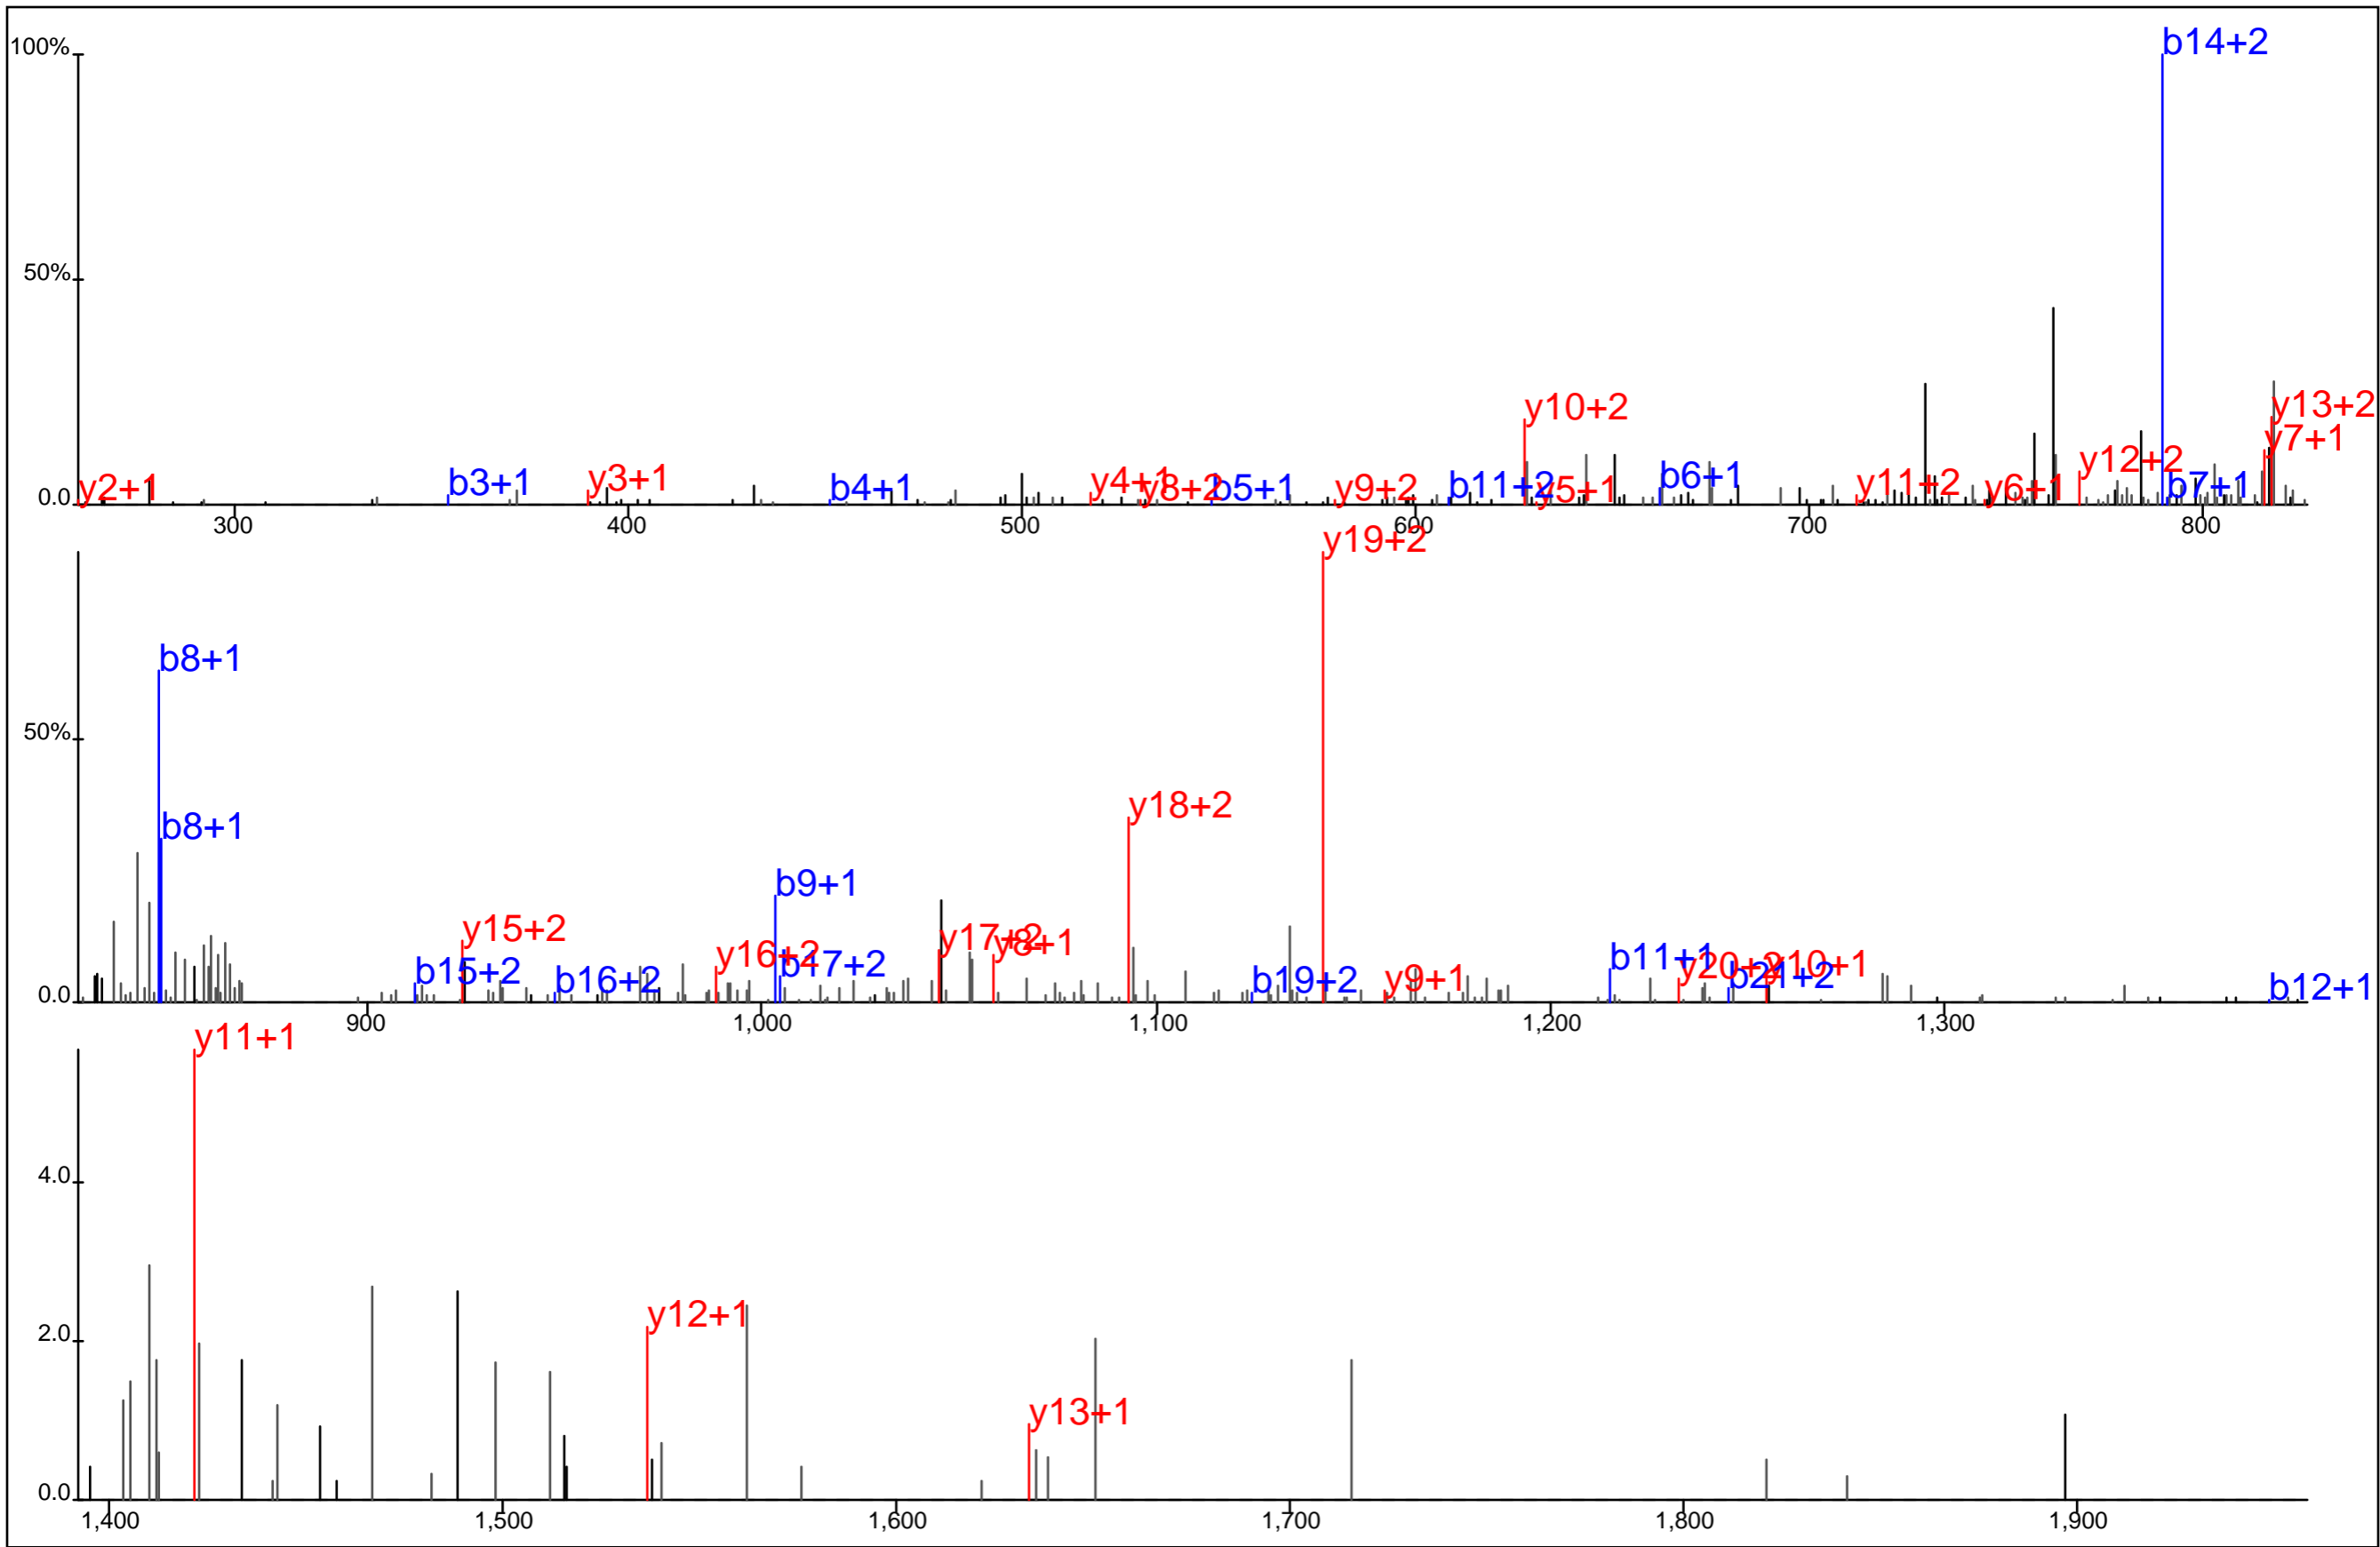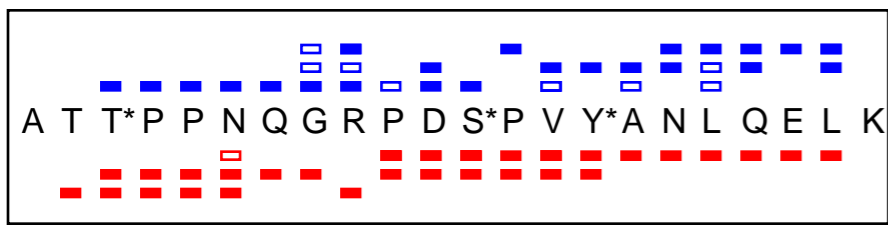

Protein Name: RhoGAP 12  
 gi Accession: 26986534  
 Precursor Mass: 879.3813+3  
 Delta Mass: 3.754 ppm  
 XCorr: 20.43

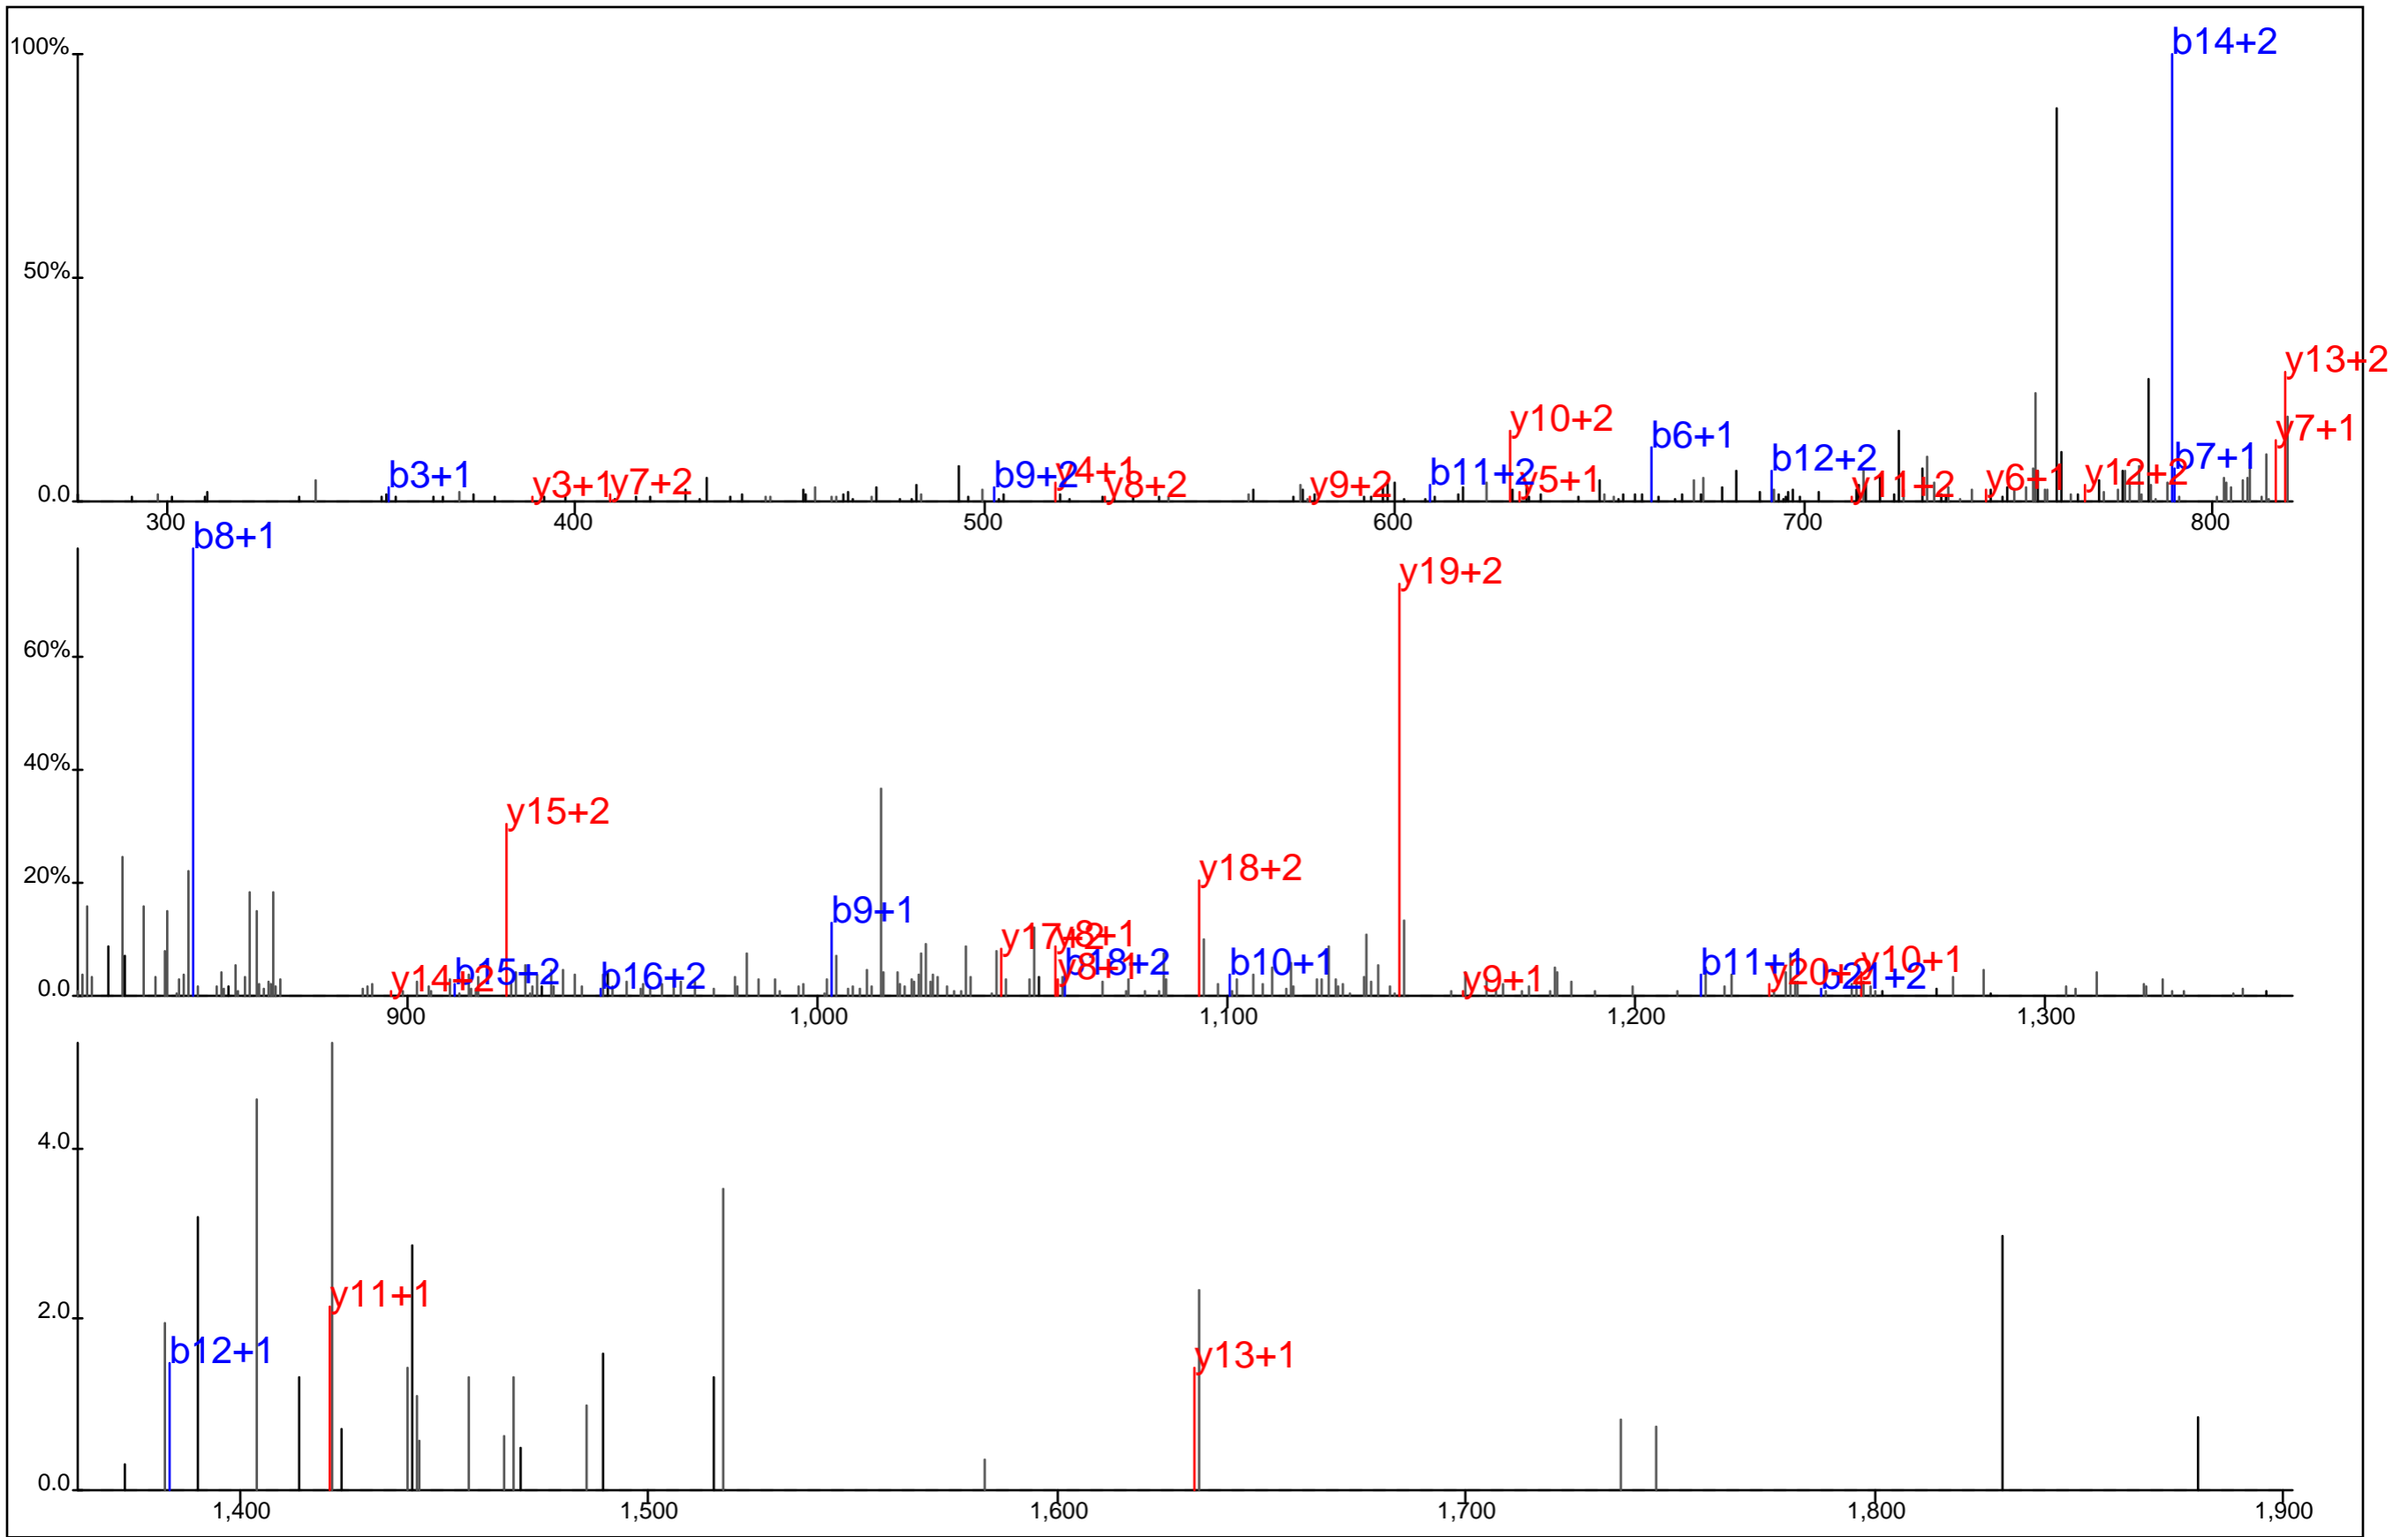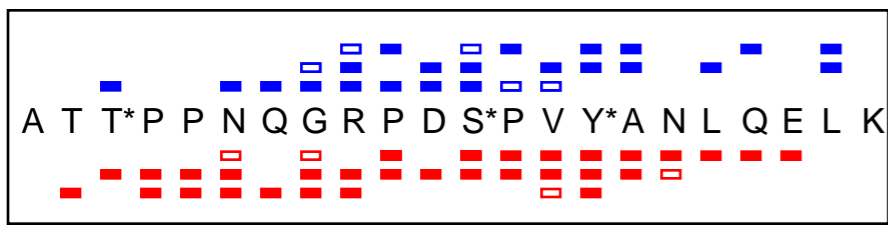

Protein Name: RhoGAP 12  
 gi Accession: 26986534  
 Precursor Mass: 879.3707+3  
 Delta Mass: 8.263 ppm  
 XCorr: 15.55

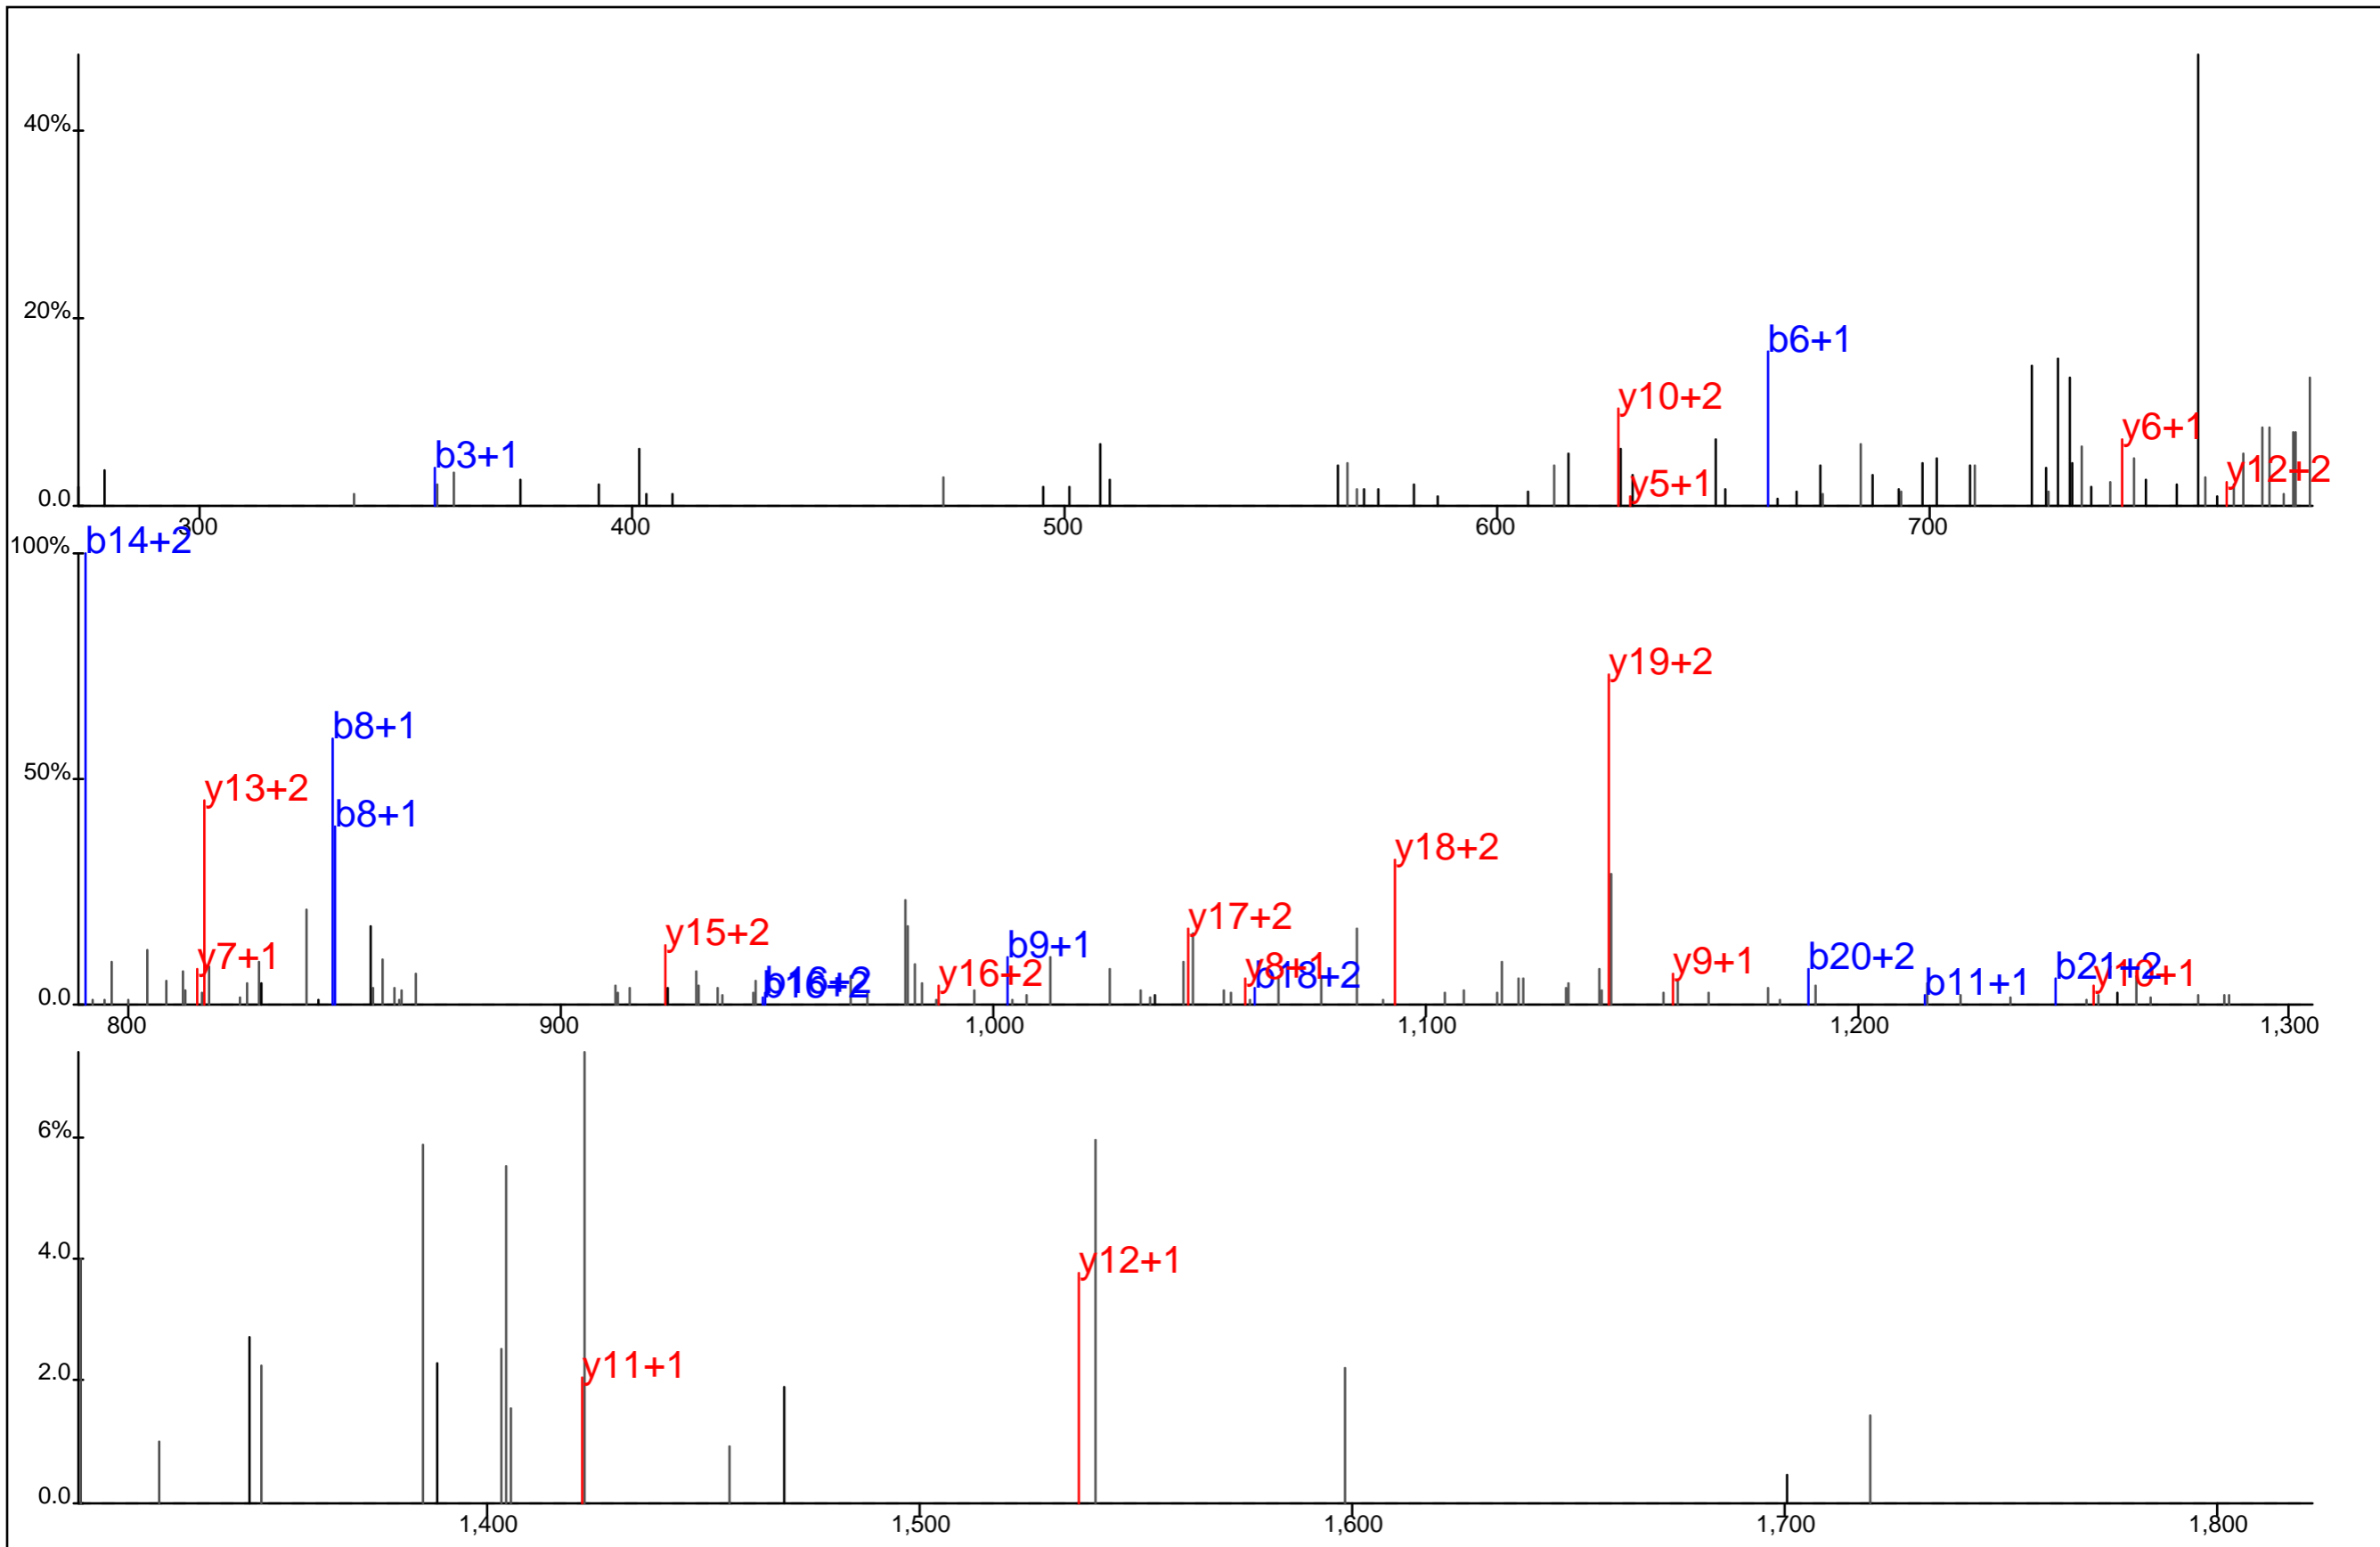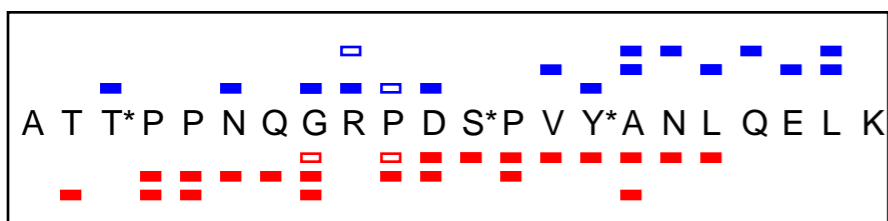

Protein Name: RhoGAP 12  
 gi Accession: 26986534  
 Precursor Mass: 879.3904+3  
 Delta Mass: 14.104 ppm  
 XCorr: 19.05

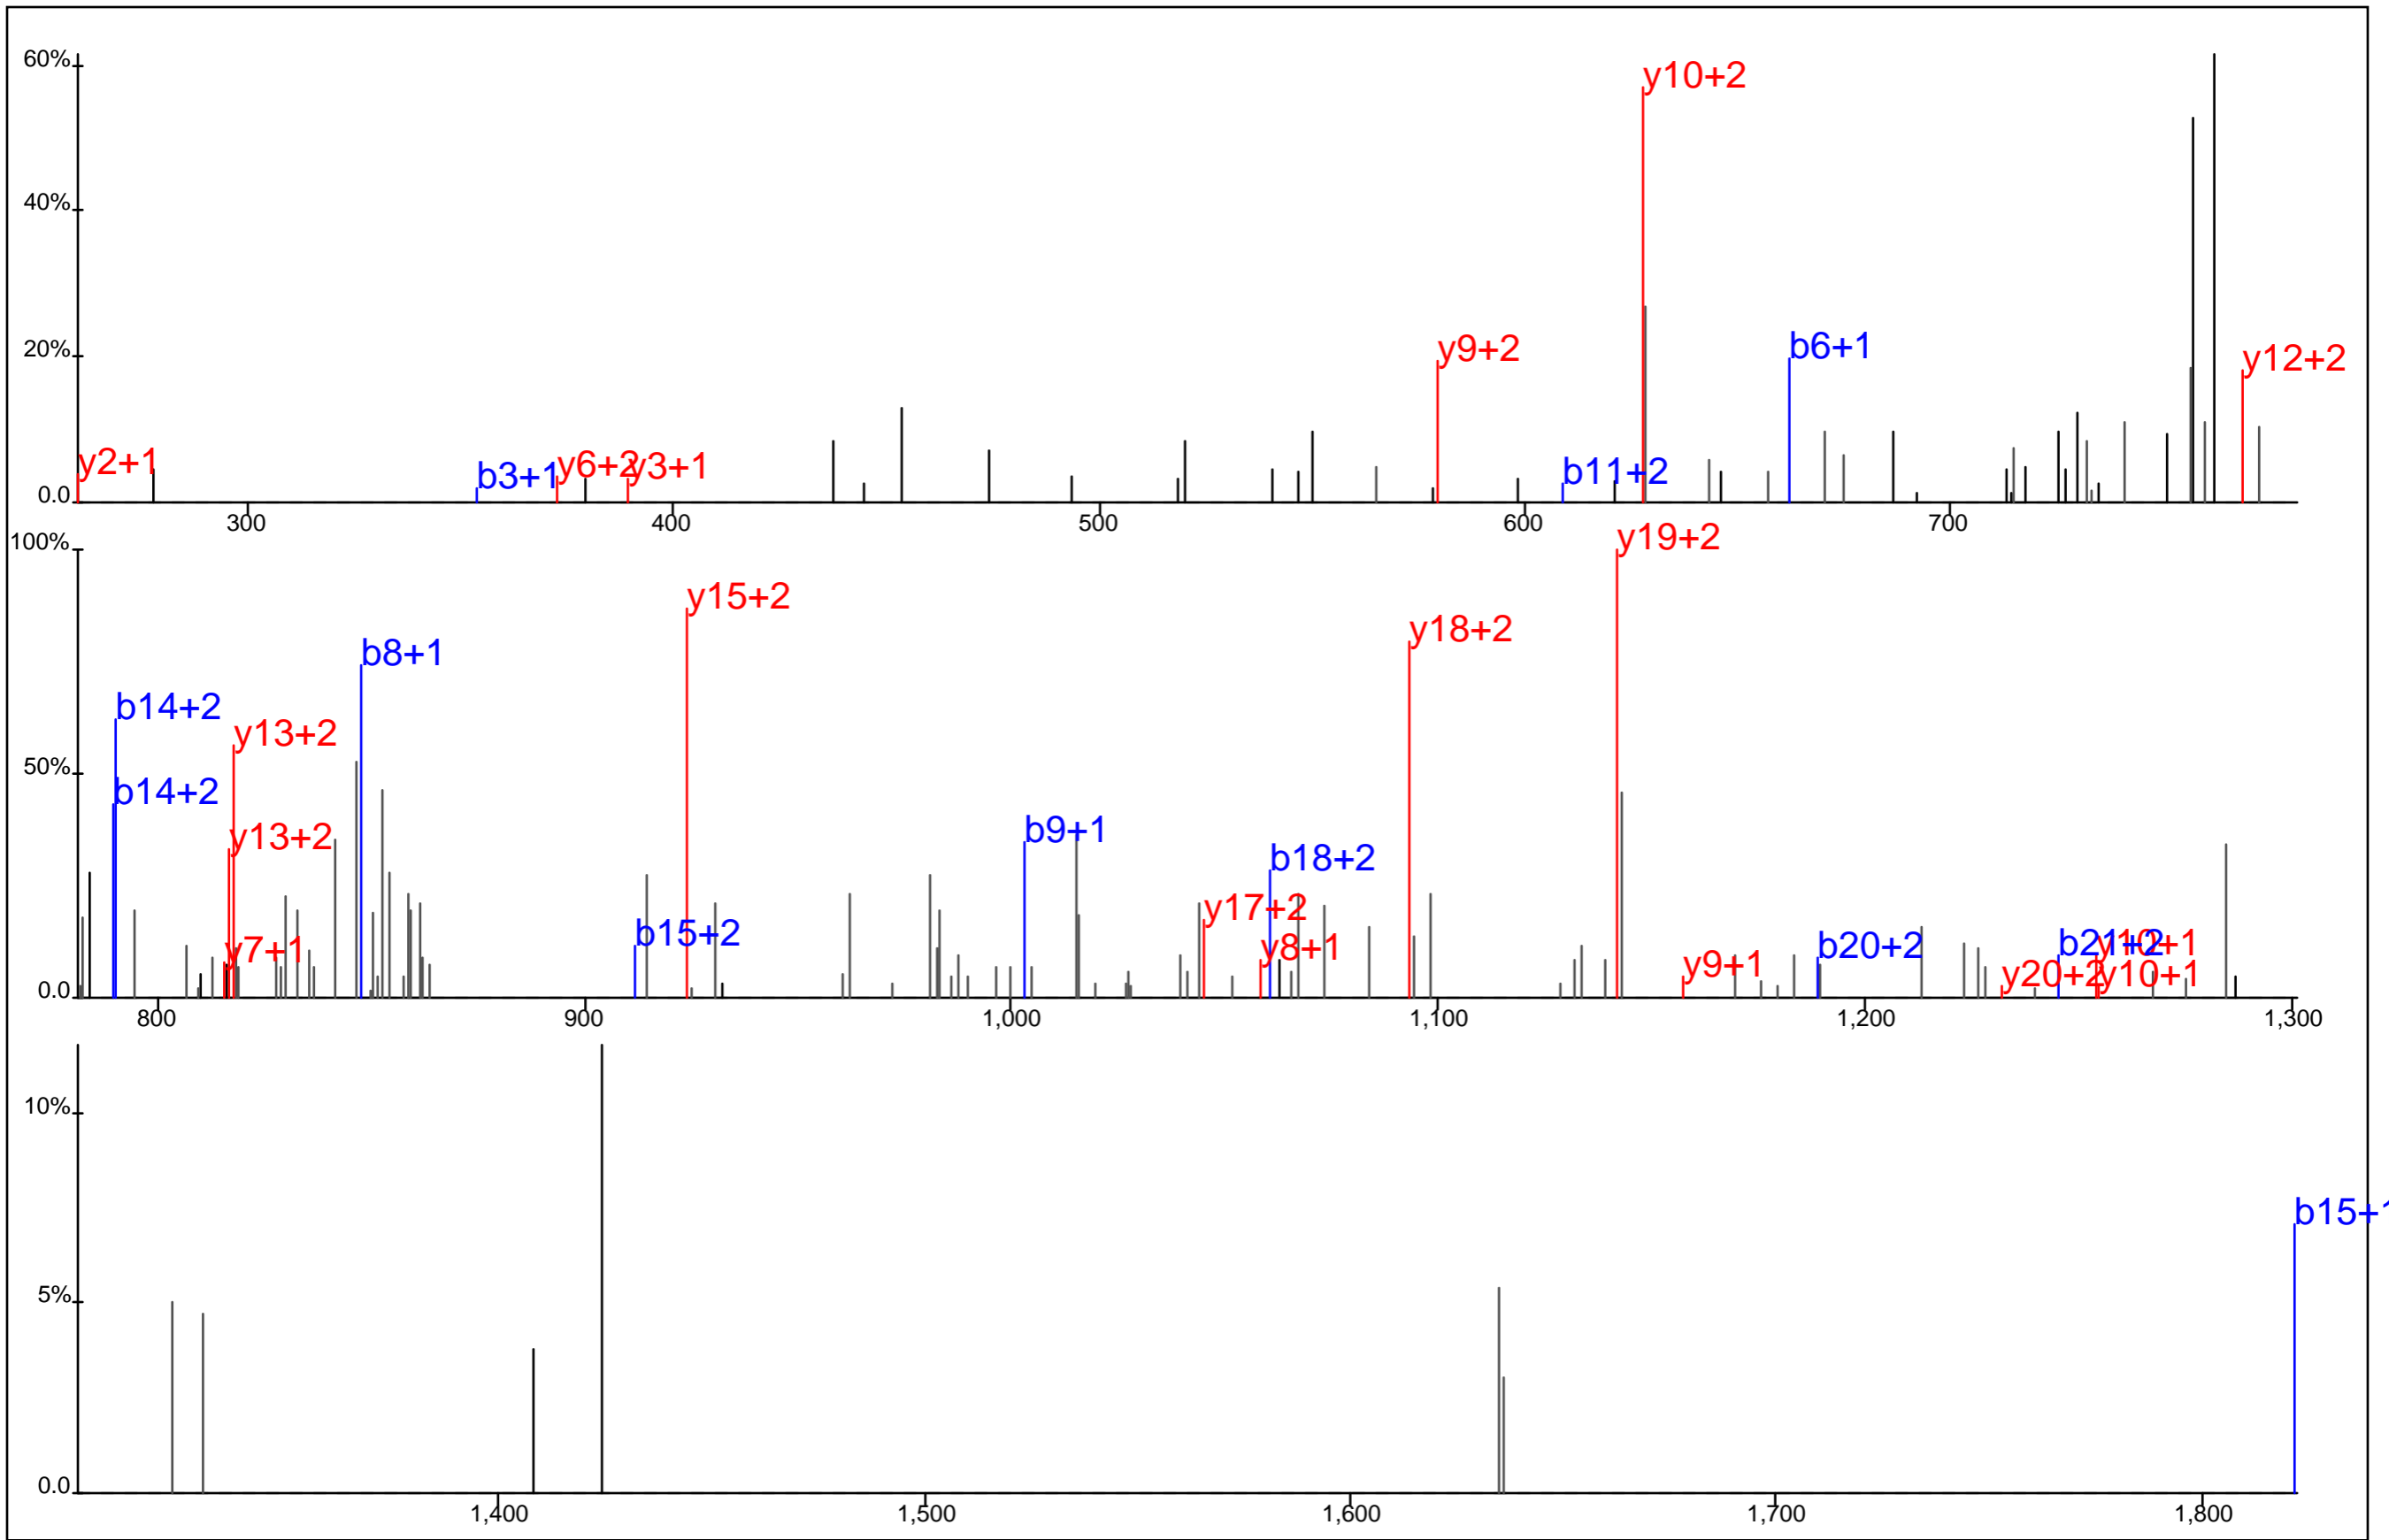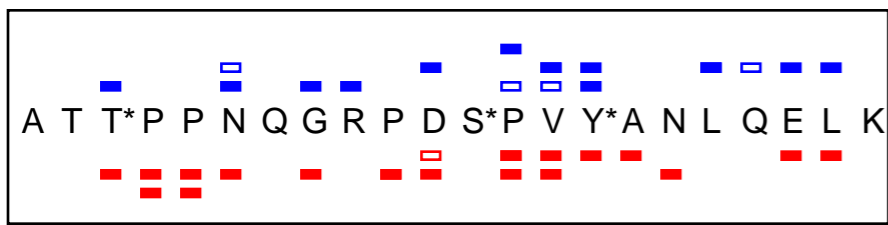

Protein Name: RhoGAP 12  
 gi Accession: 26986534  
 Precursor Mass: 879.3796+3  
 Delta Mass: 1.808 ppm  
 XCorr: 25.03

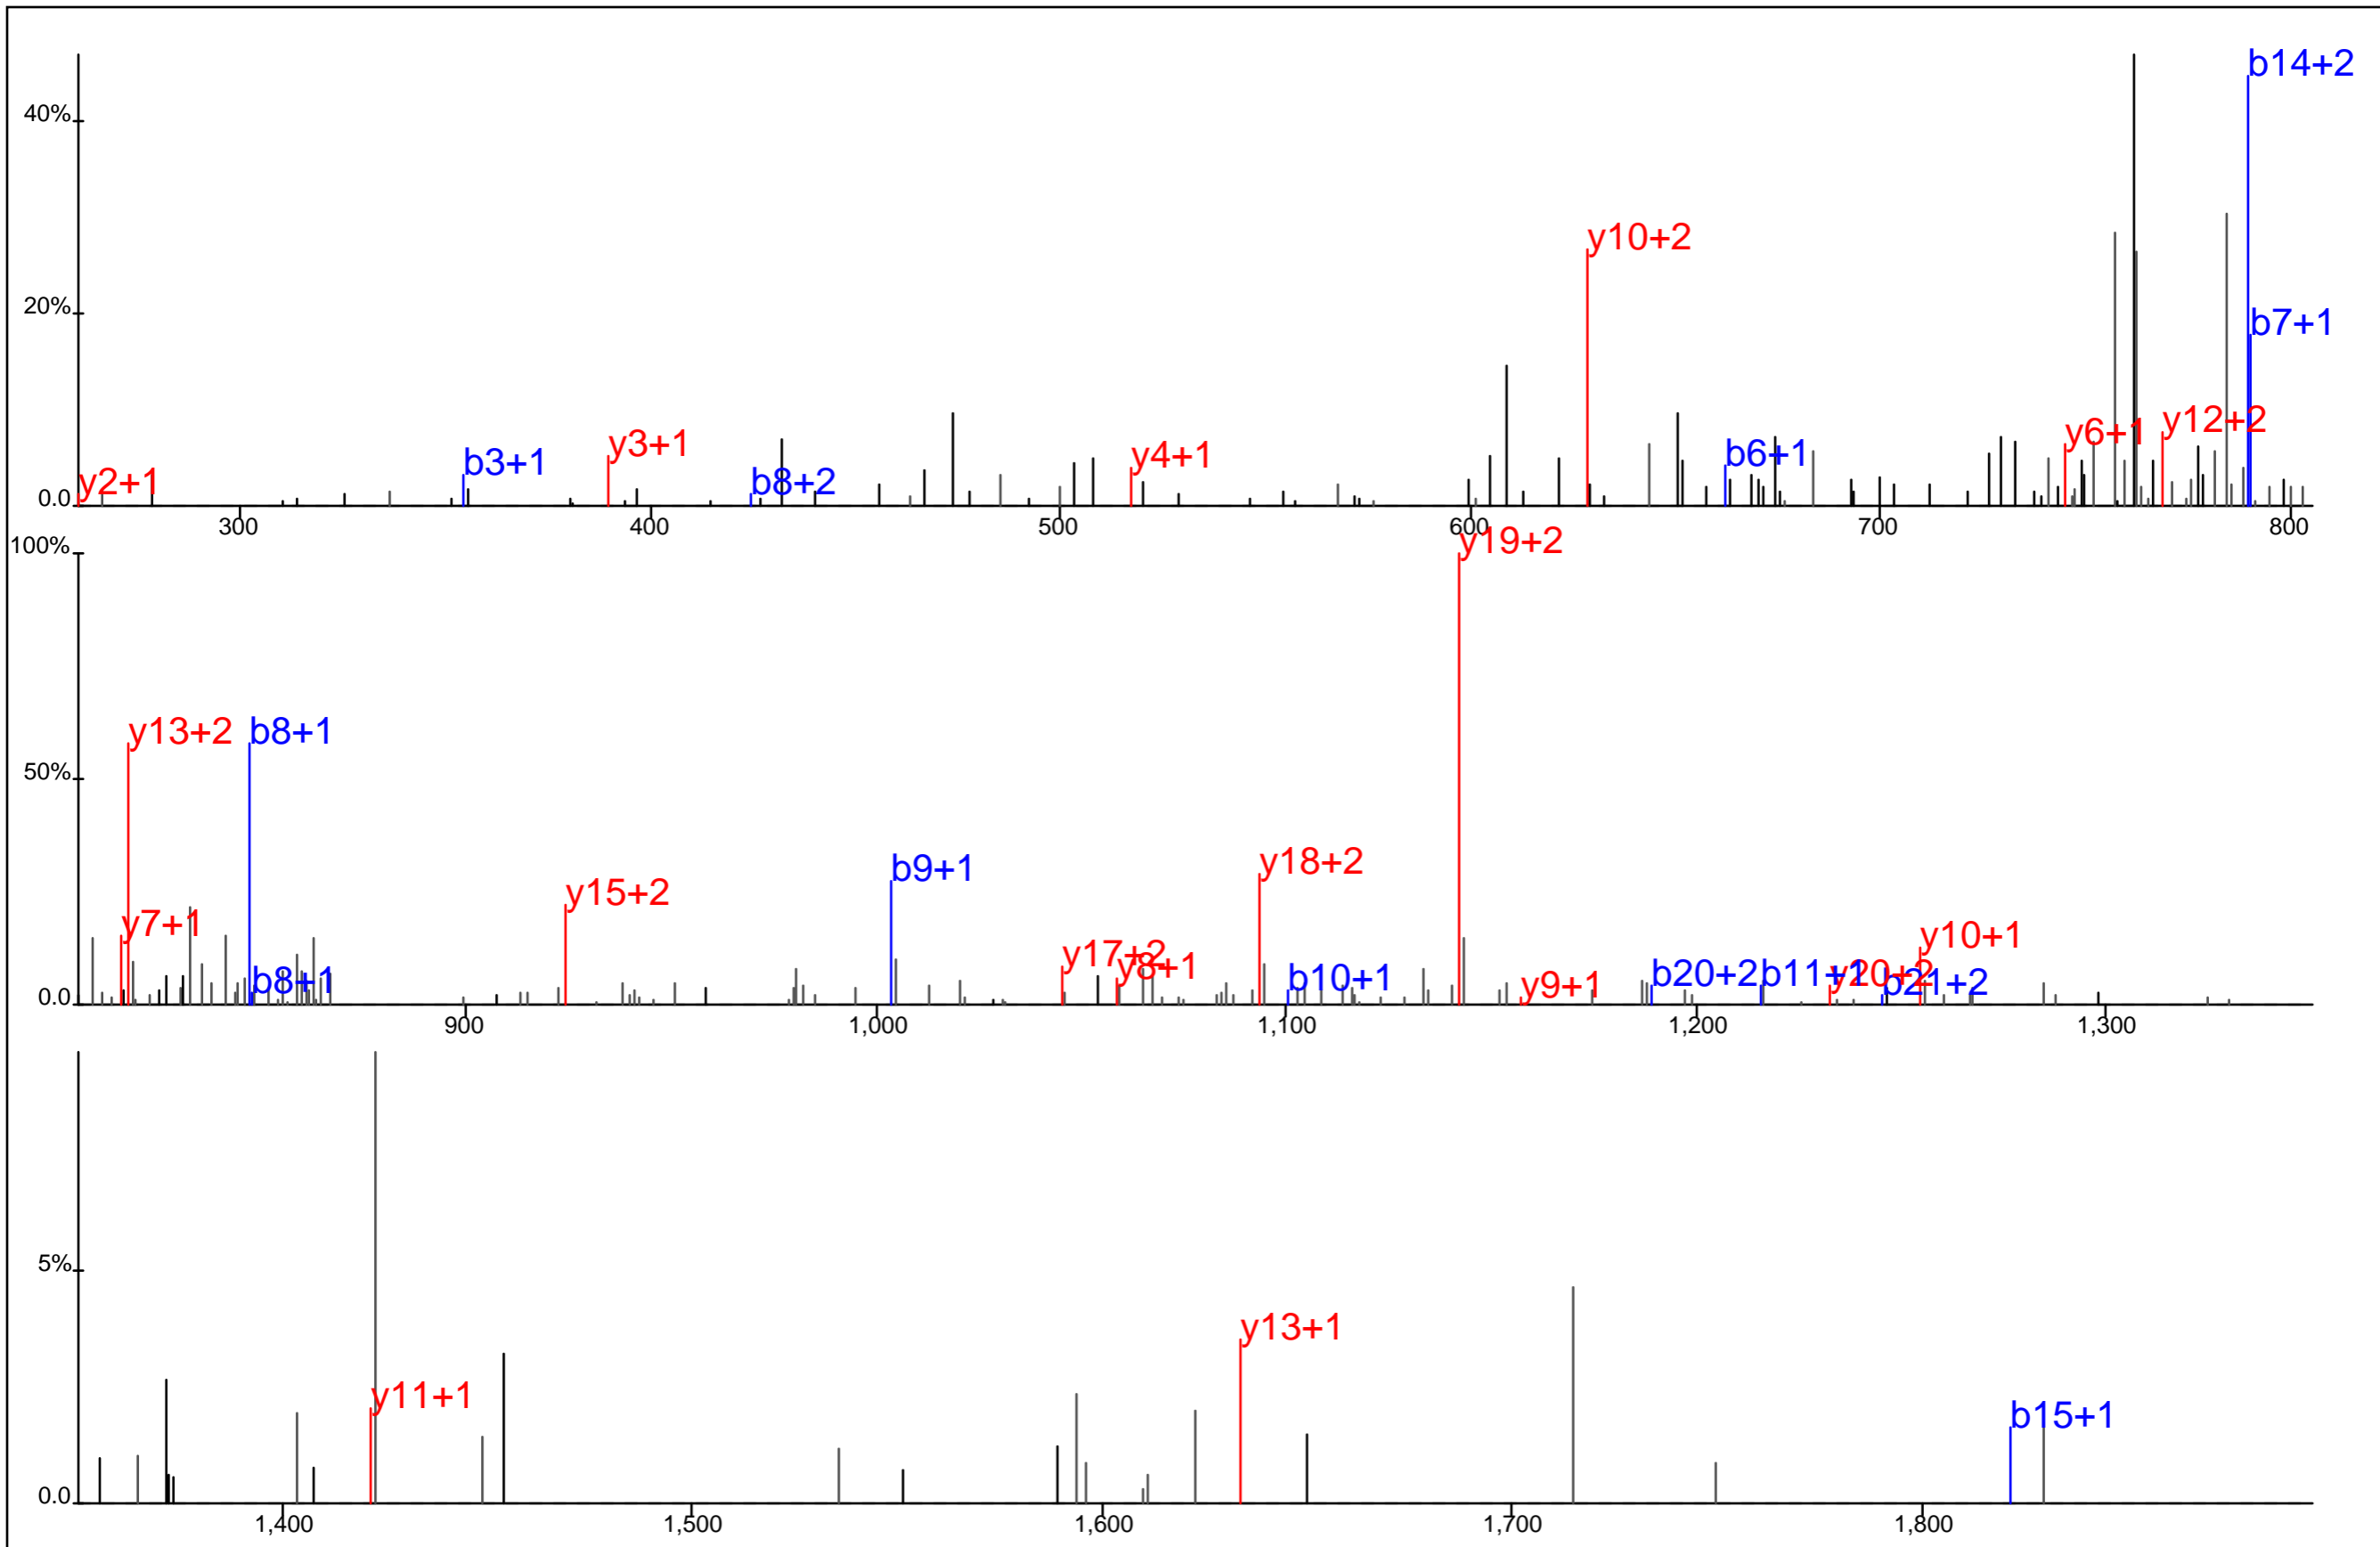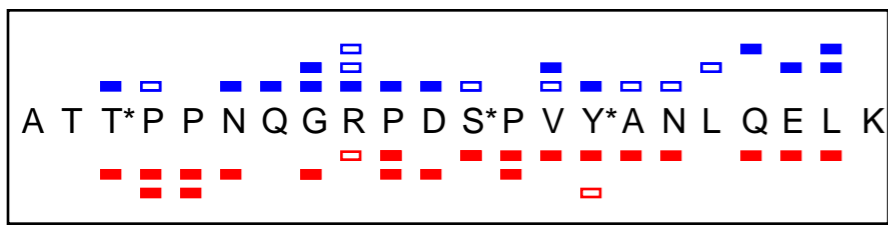

Protein Name: RhoGAP 12  
 gi Accession: 26986534  
 Precursor Mass: 879.3810+3  
 Delta Mass: 3.474 ppm  
 XCorr: 22.31

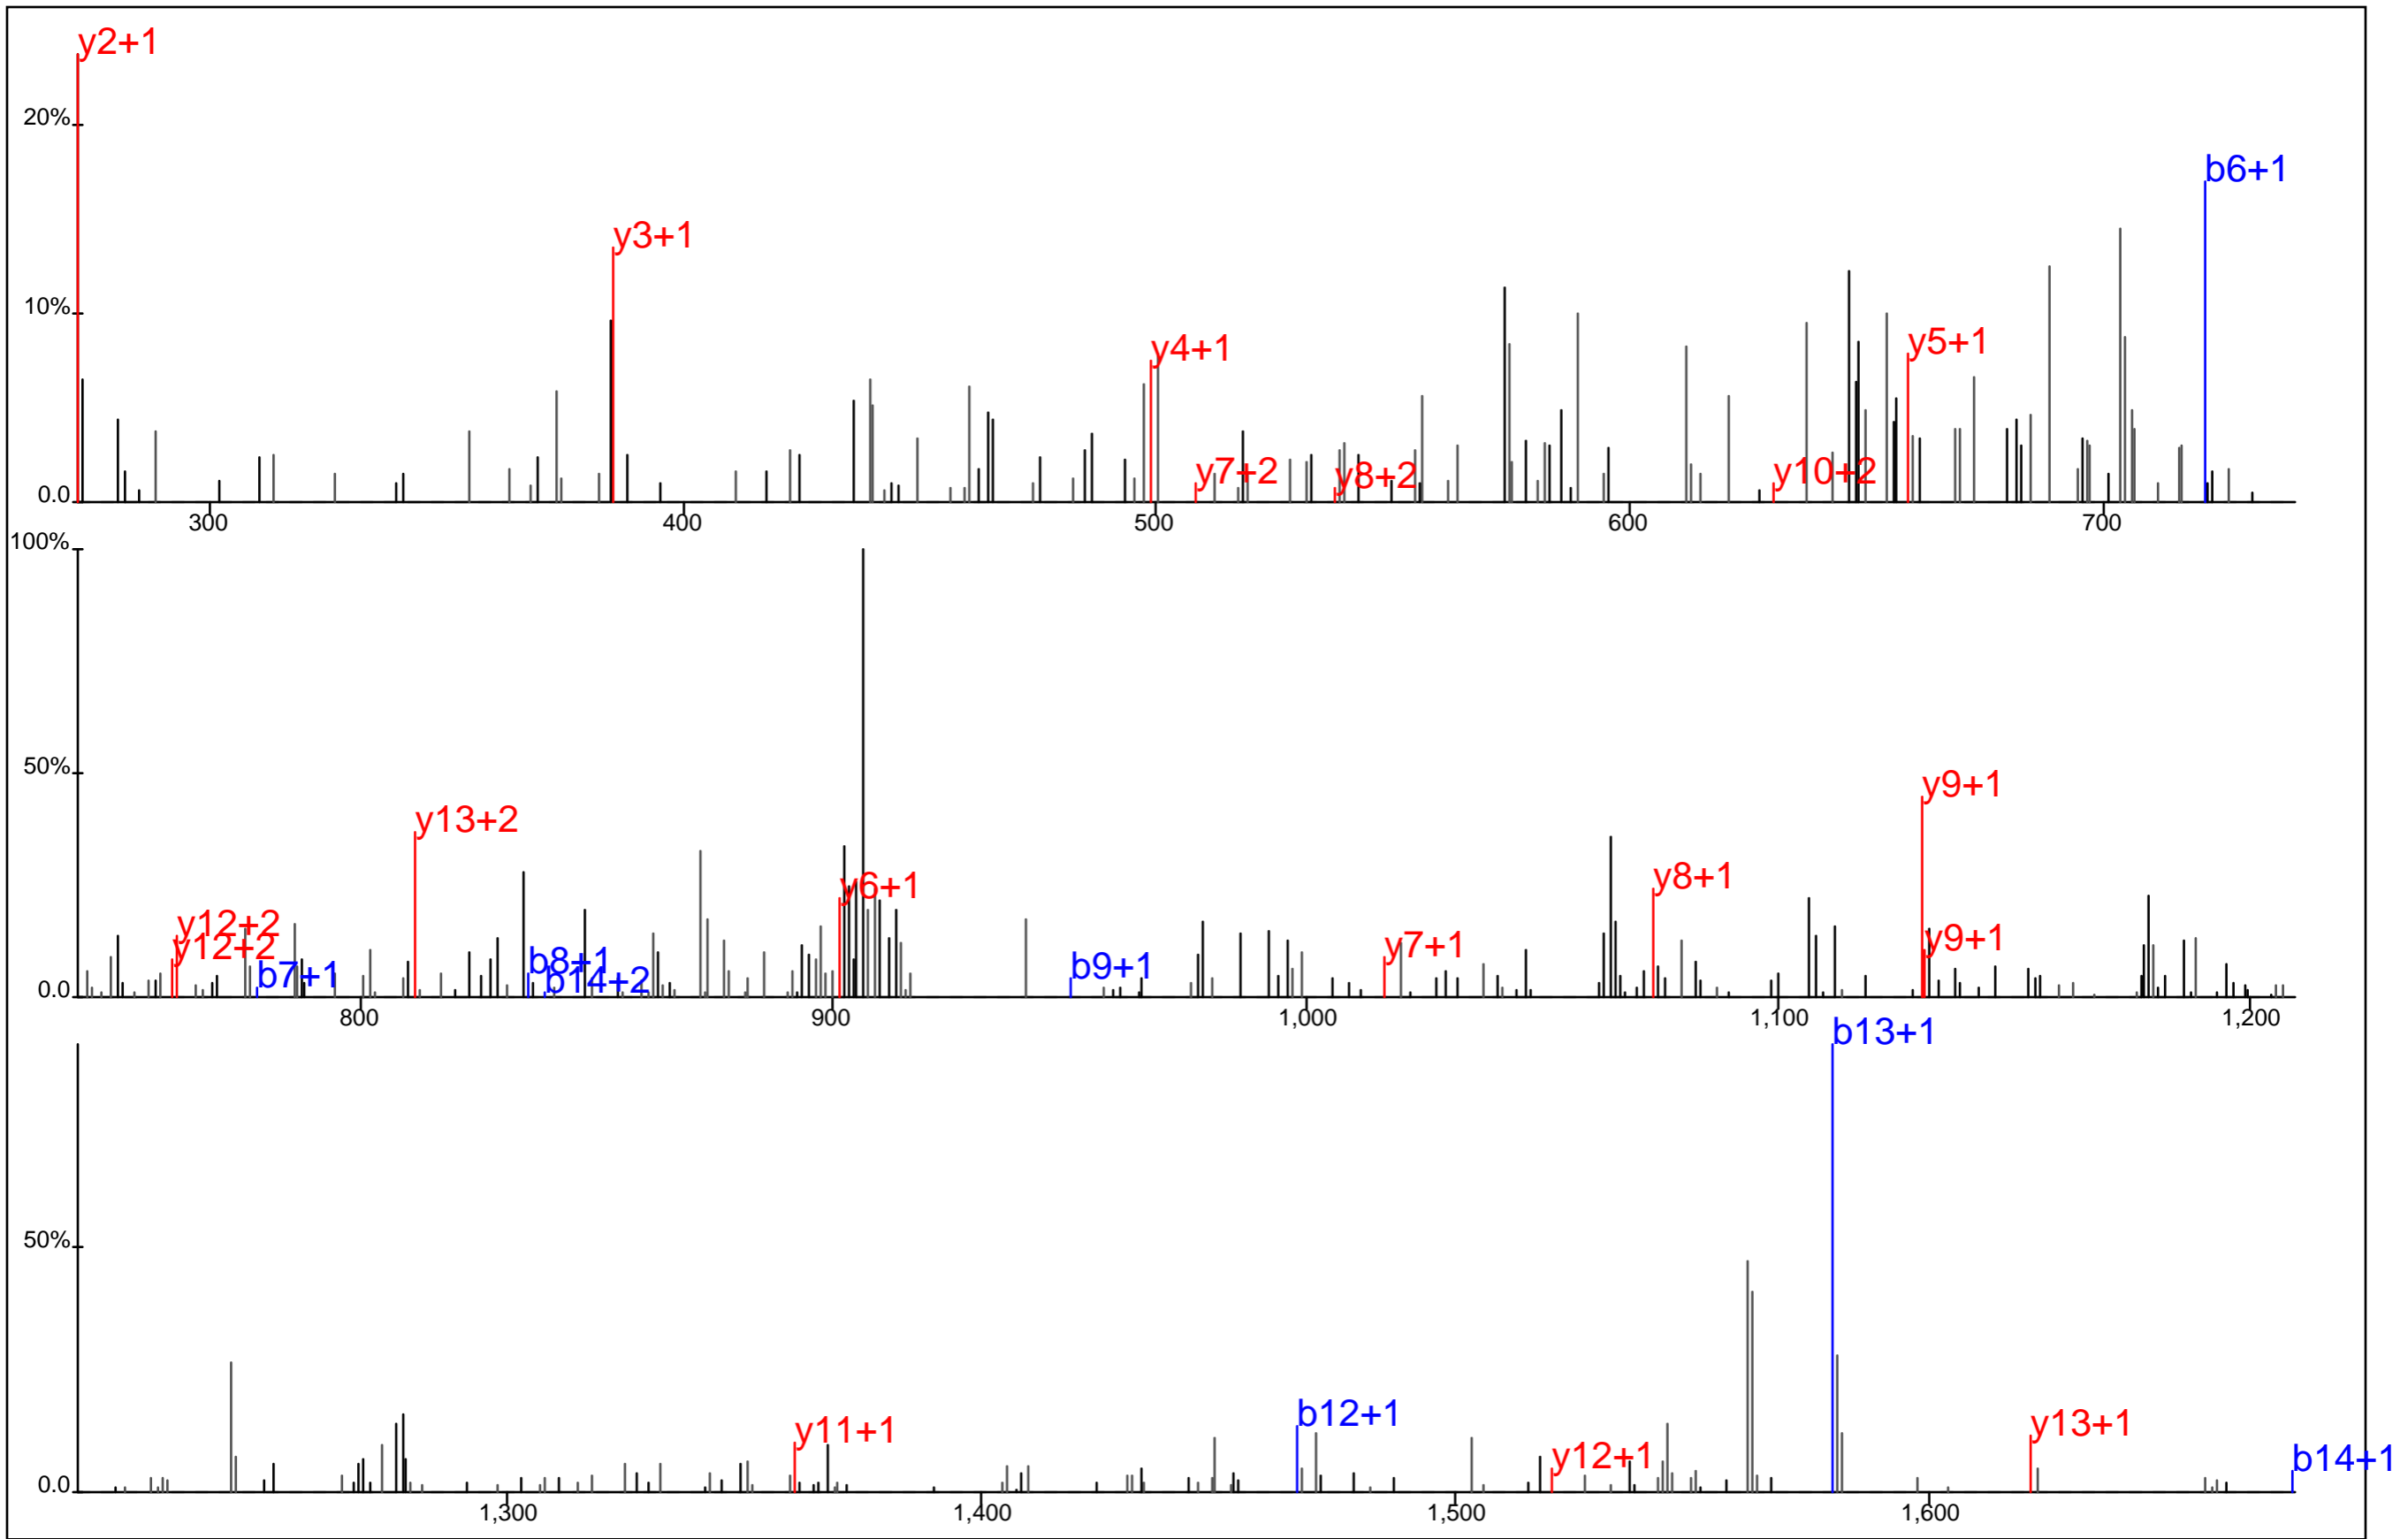

▣ ▣ ▣ ▣ ▣ ▣ ▣ ▣ ▣ ▣ ▣ ▣  
**T Q T C T E G G D Y \* C L I P R**  
▣ ▣ ▣ ▣ ▣ ▣ ▣ ▣ ▣ ▣ ▣ ▣

Protein Name: RhoGAP 30  
 gi Accession: 47077657  
 Precursor Mass: 925.8760+2  
 Delta Mass: 0.044 ppm  
 XCorr: 22.73

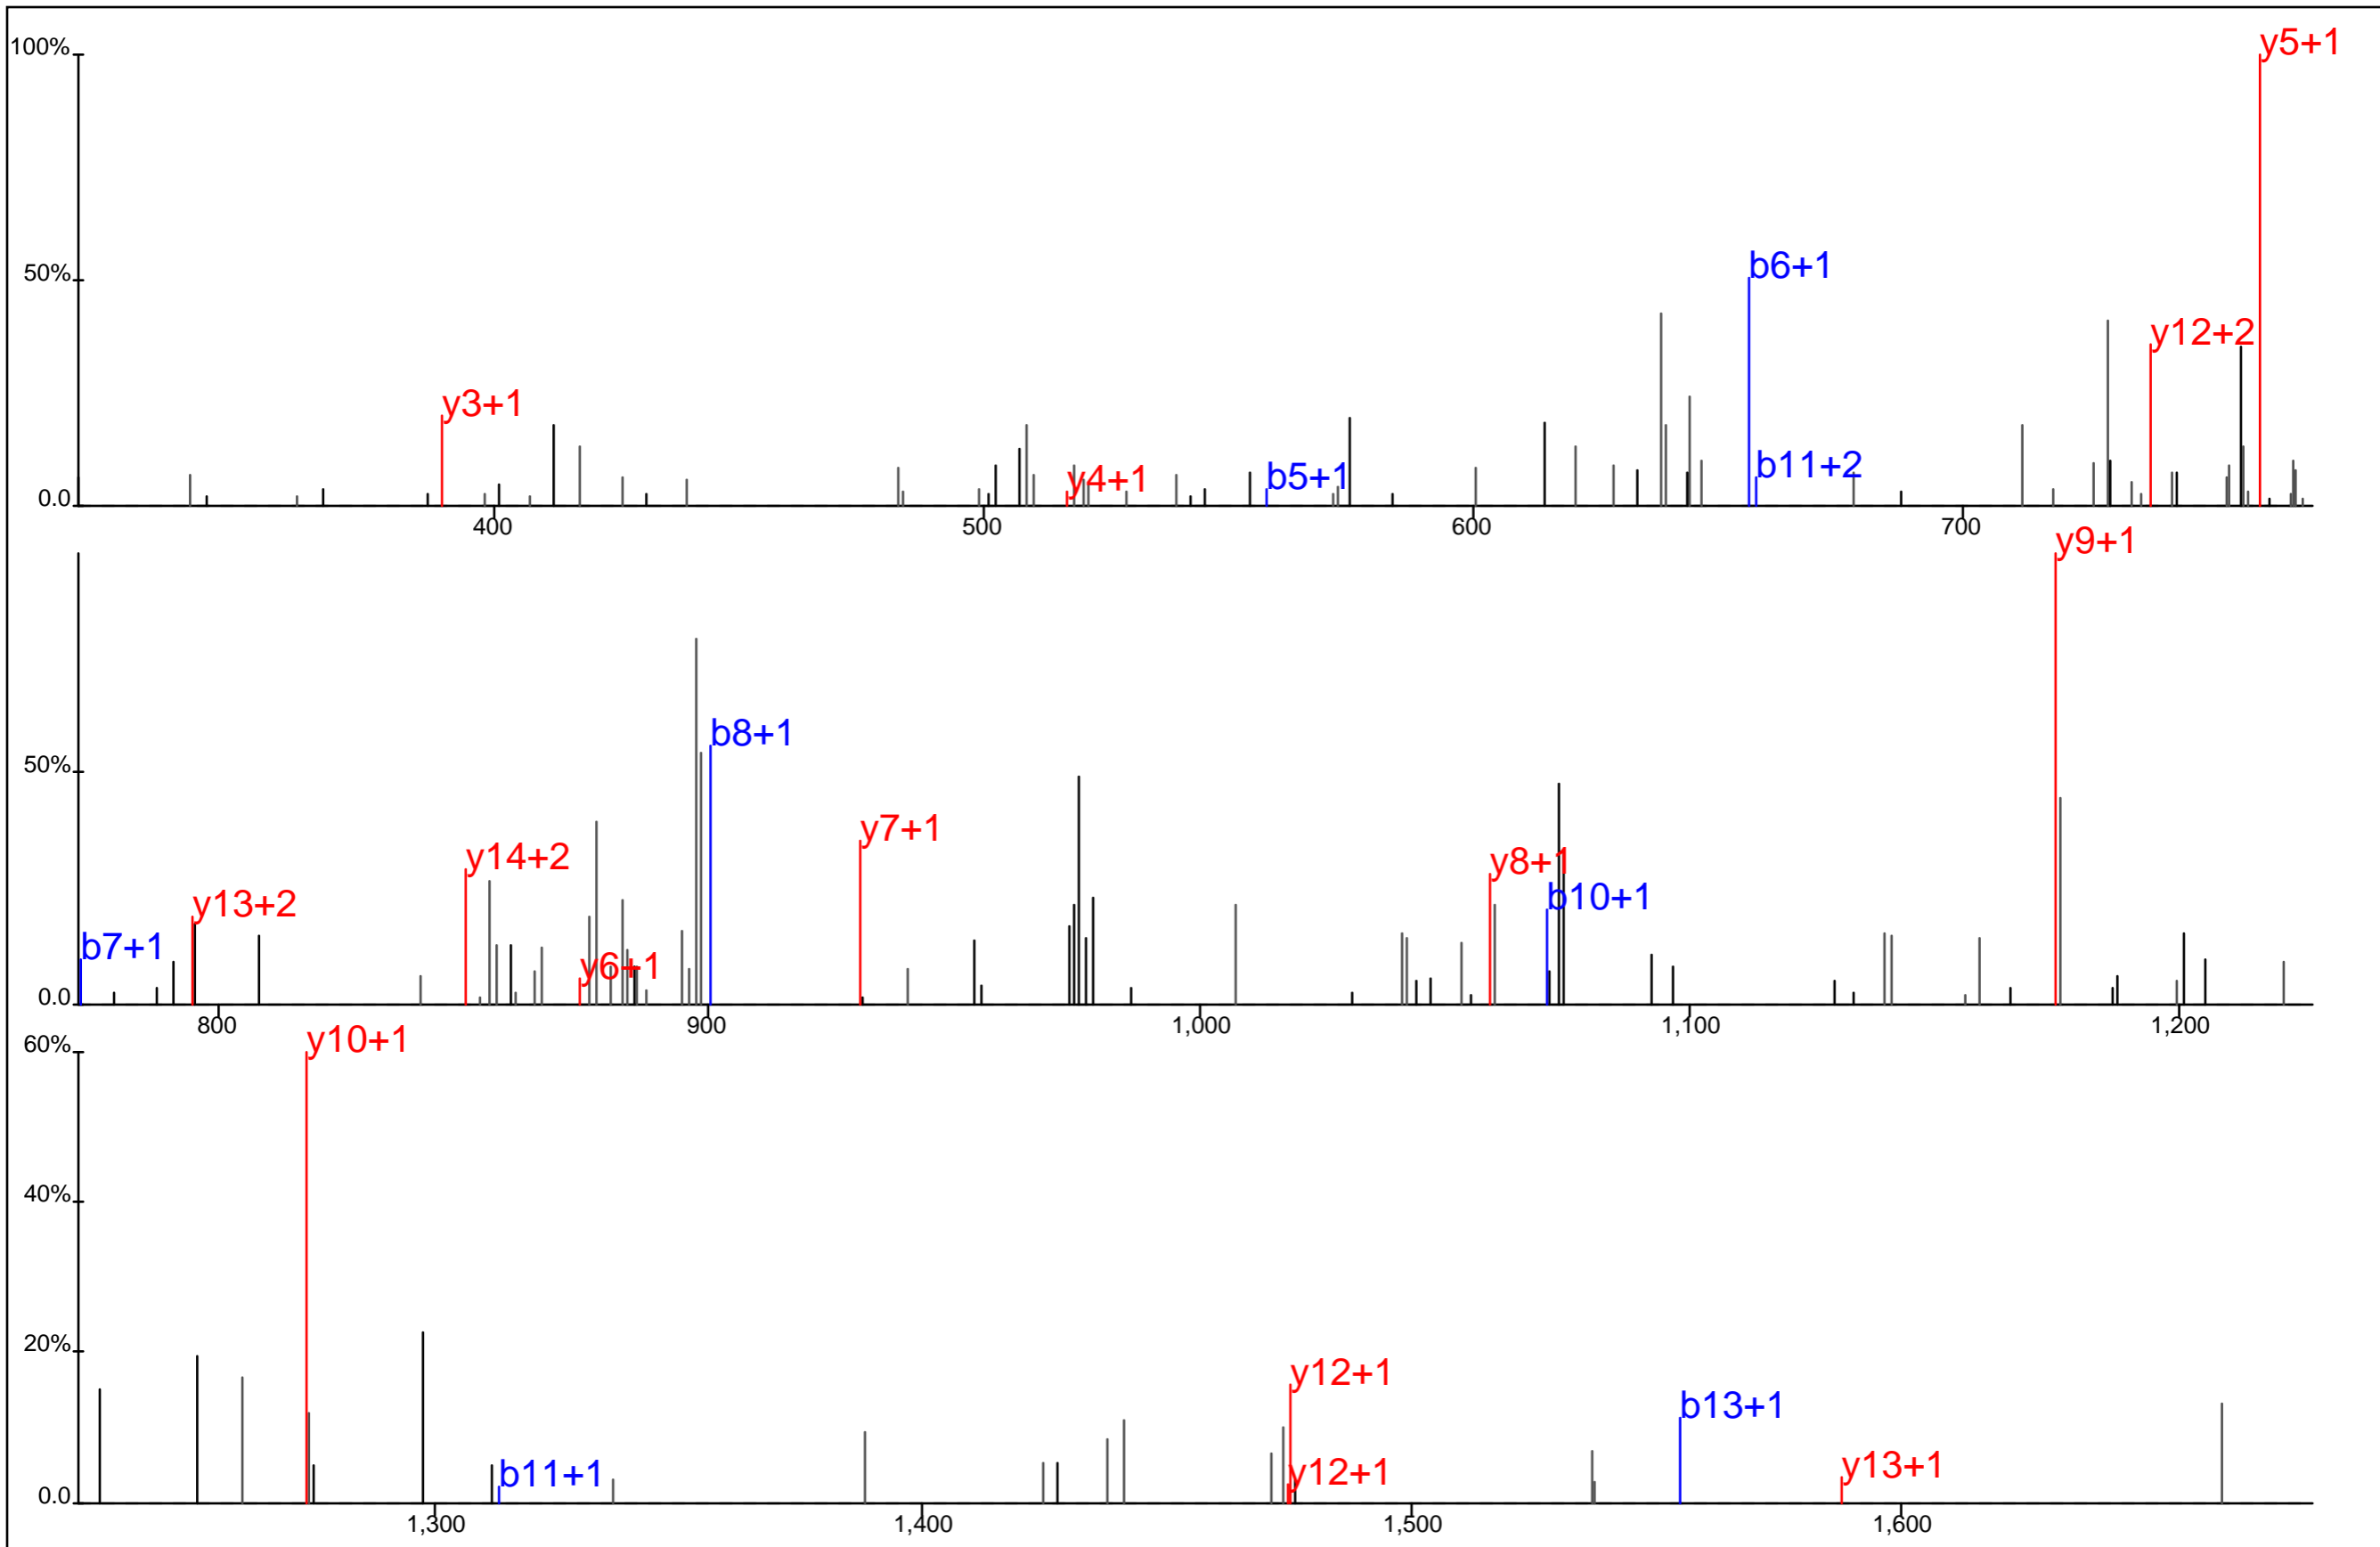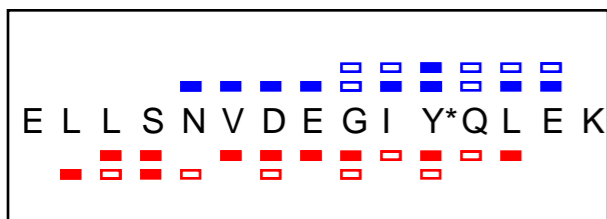

Protein Name: RhoGEF2  
 gi Accession: 15011974  
 Precursor Mass: 915.4340+2  
 Delta Mass: 2.163 ppm  
 XCorr: 35.88

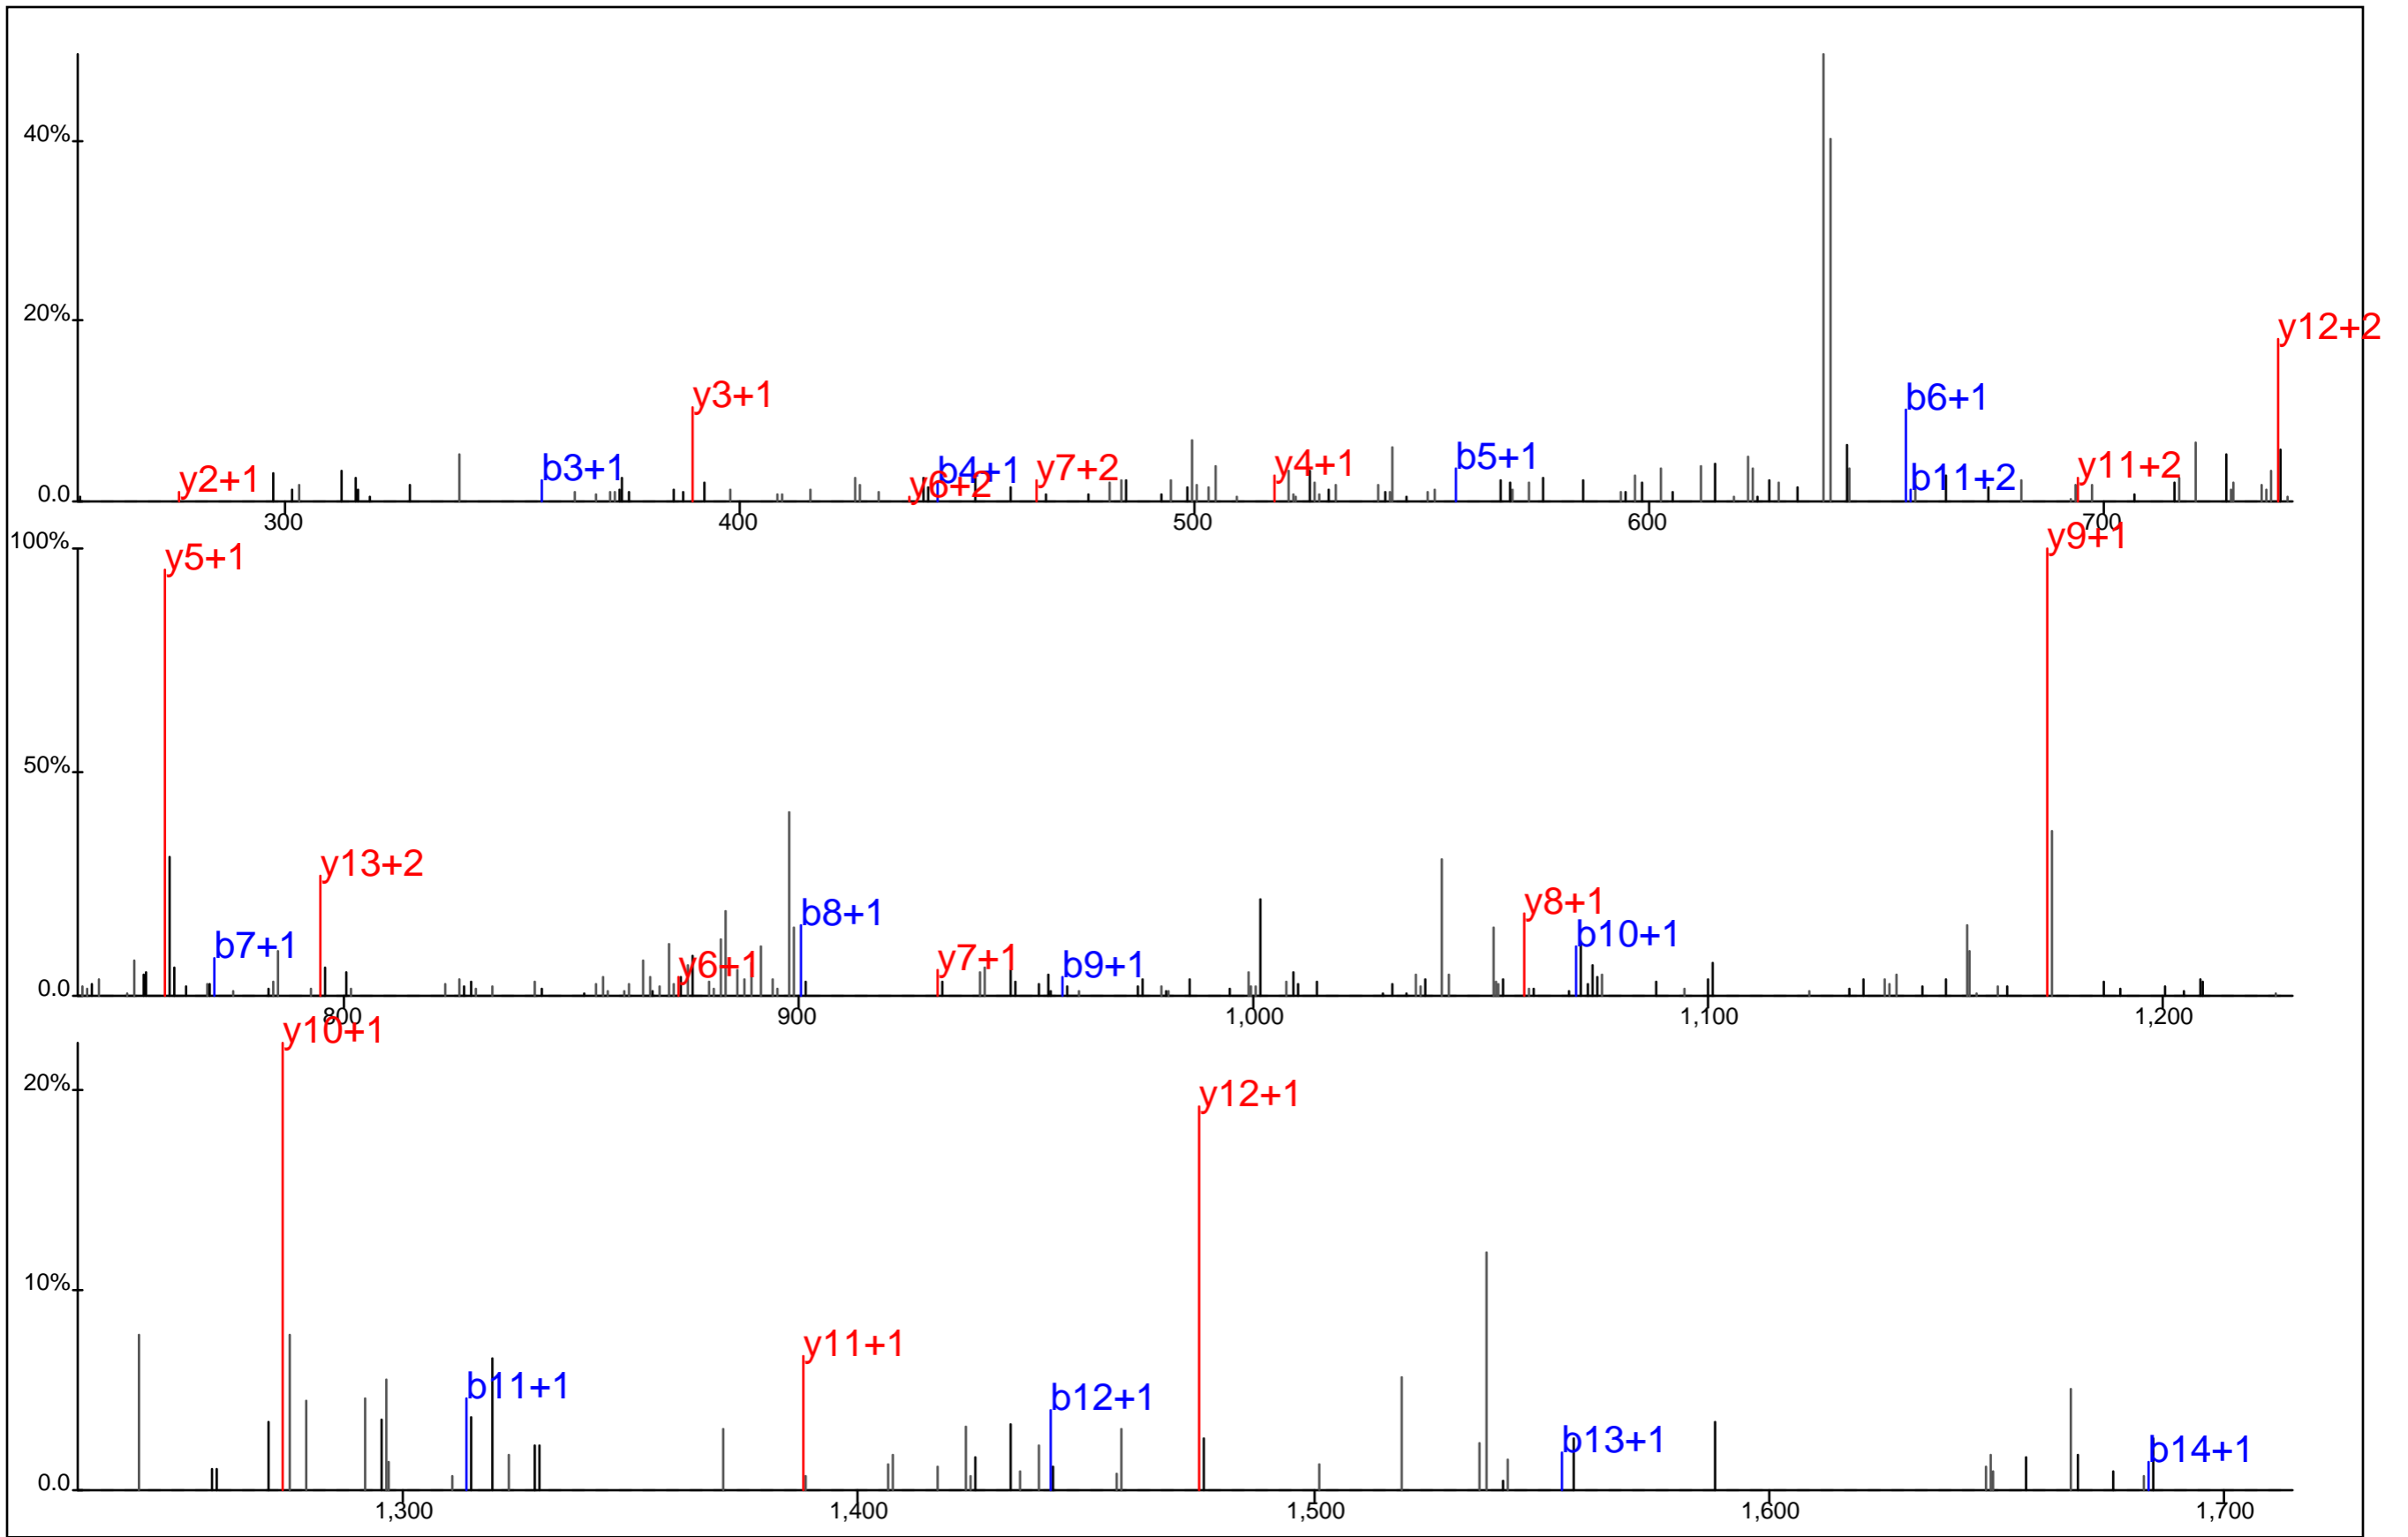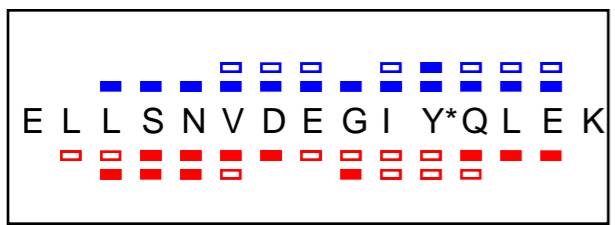

Protein Name: RhoGEF2  
 gi Accession: 15011974  
 Precursor Mass: 915.4363+2  
 Delta Mass: 4.693 ppm  
 XCorr: 43.55



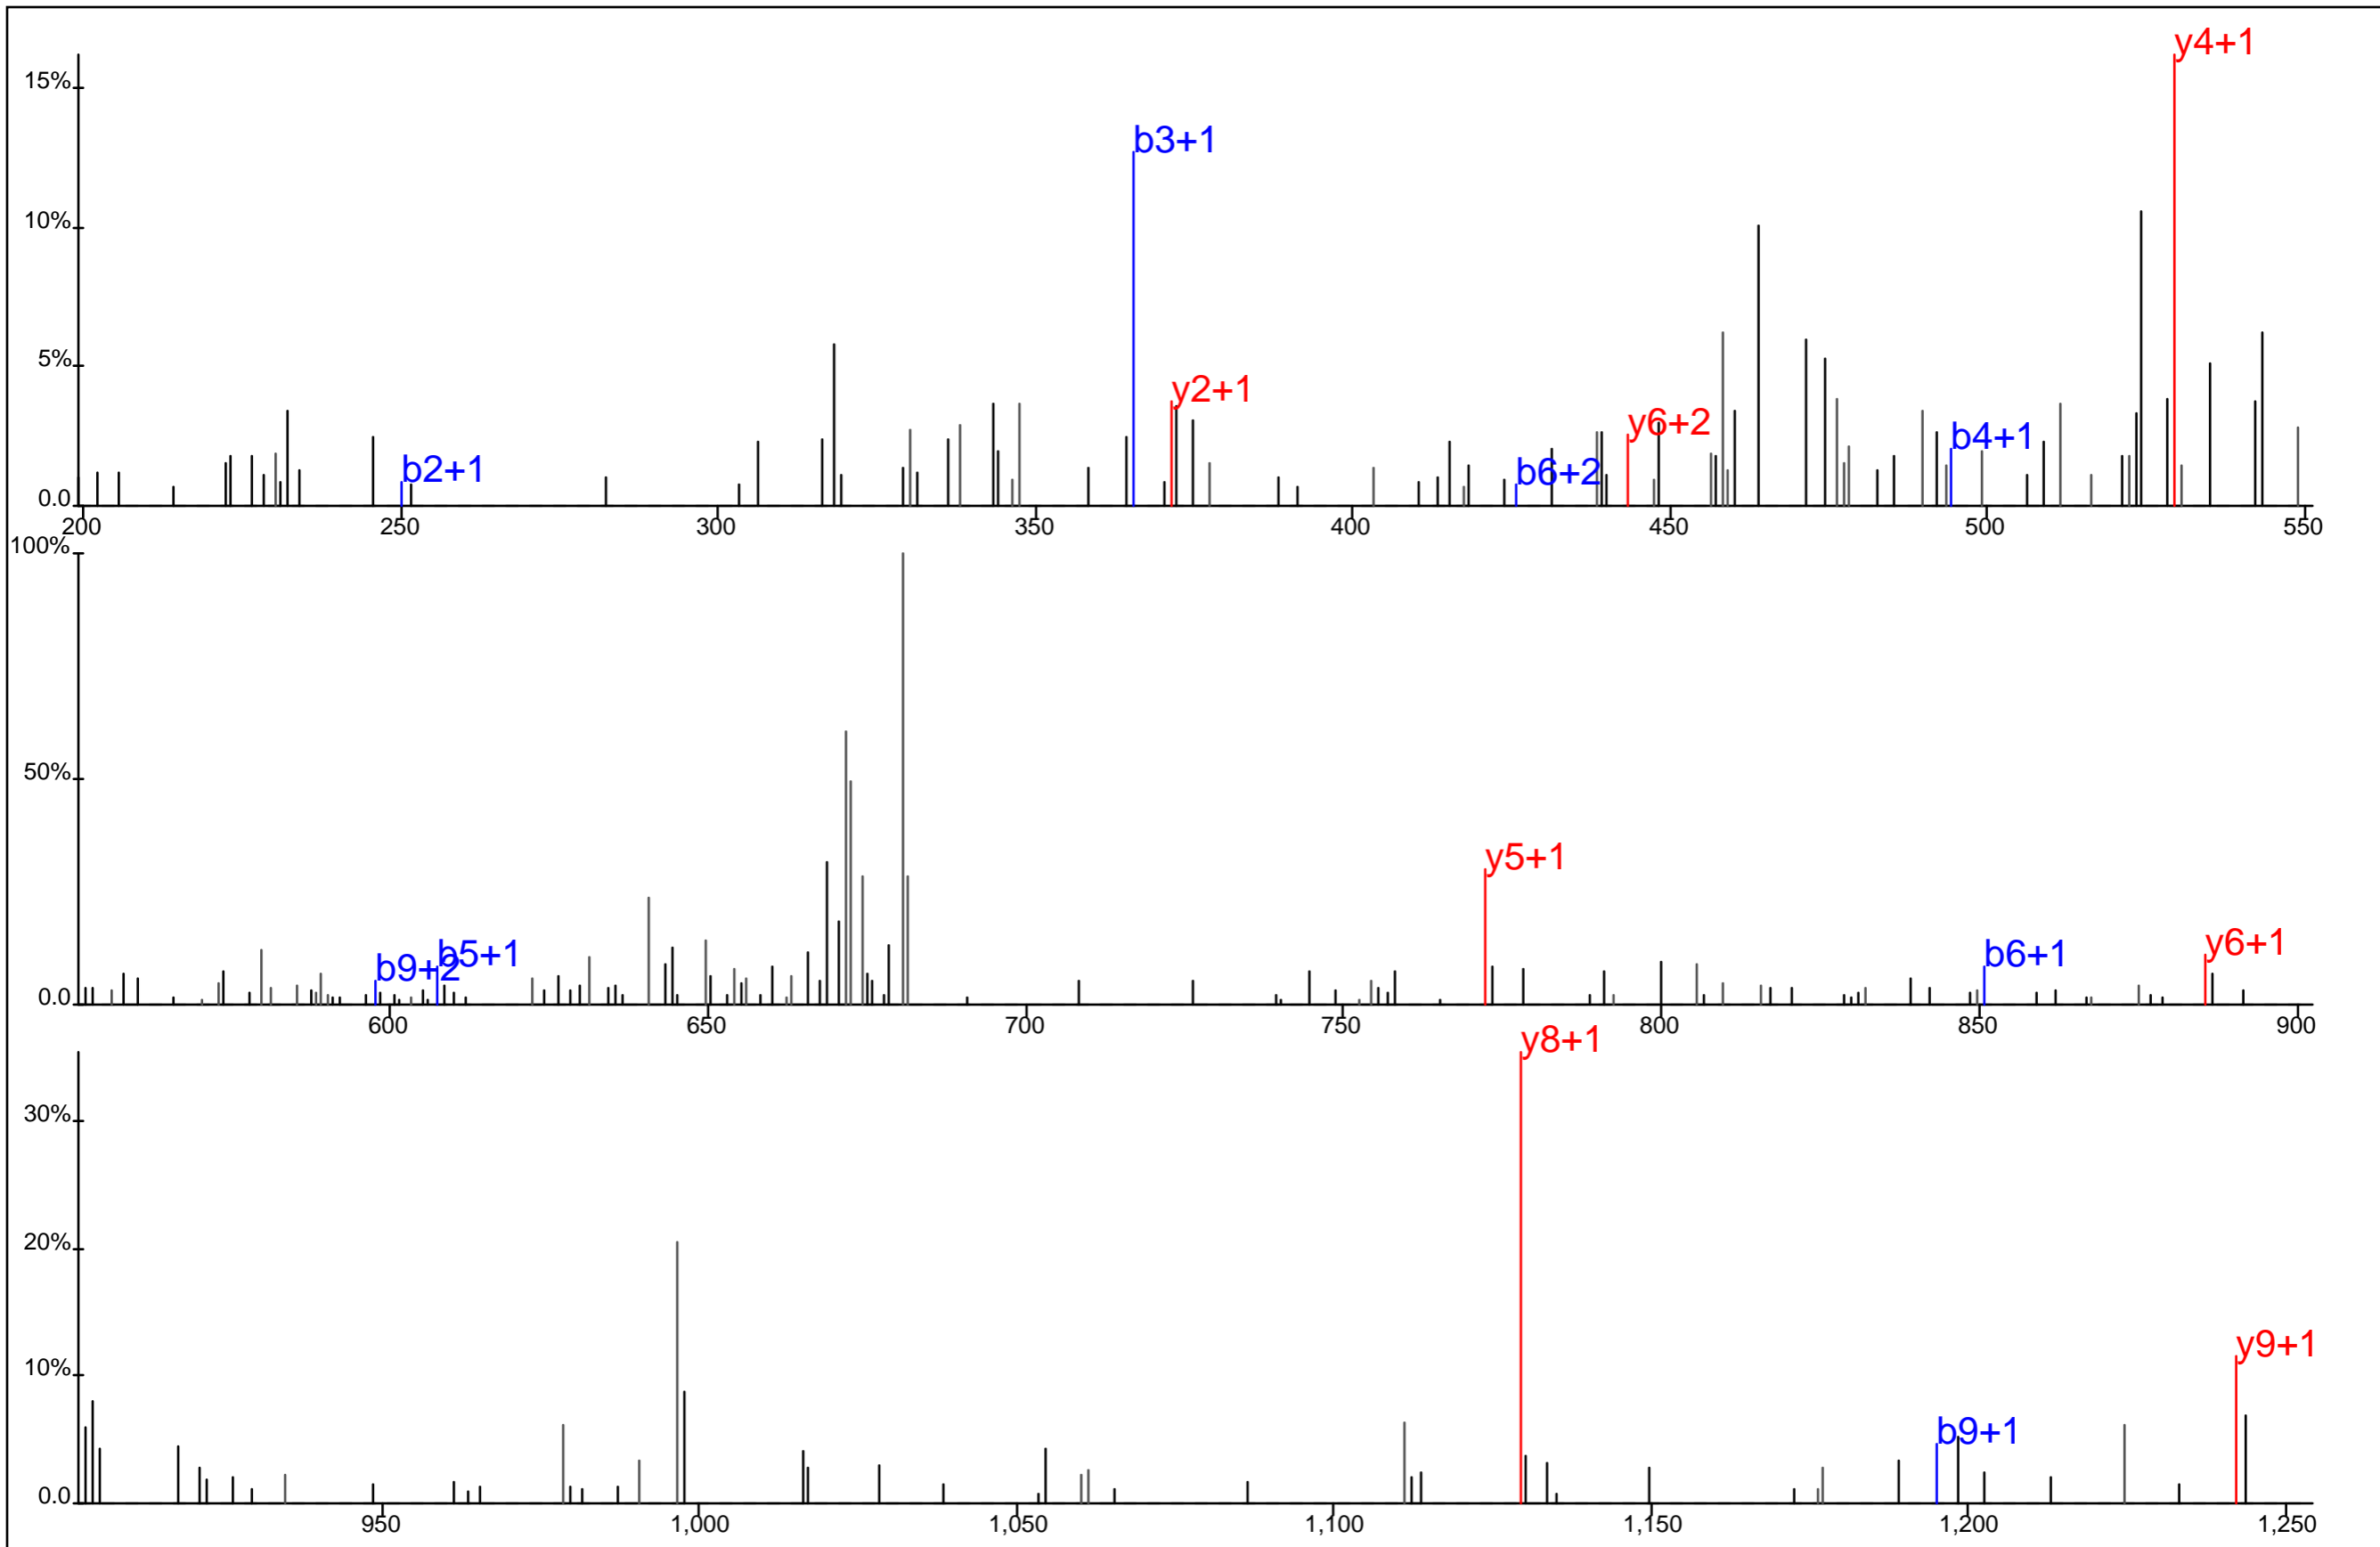

■ ■ ■ ■ ■ ■ ■ ■  
 K#L D E L Y\*G T W R%  
 ■ ■ ■ ■ ■ ■ ■ ■  
 ■ ■ ■ ■ ■ ■ ■ ■

Protein Name: Ribosomal protein L4  
 gi Accession: 16579885  
 Precursor Mass: 689.8322+2  
 Delta Mass: 3.633 ppm  
 XCorr: 29.87

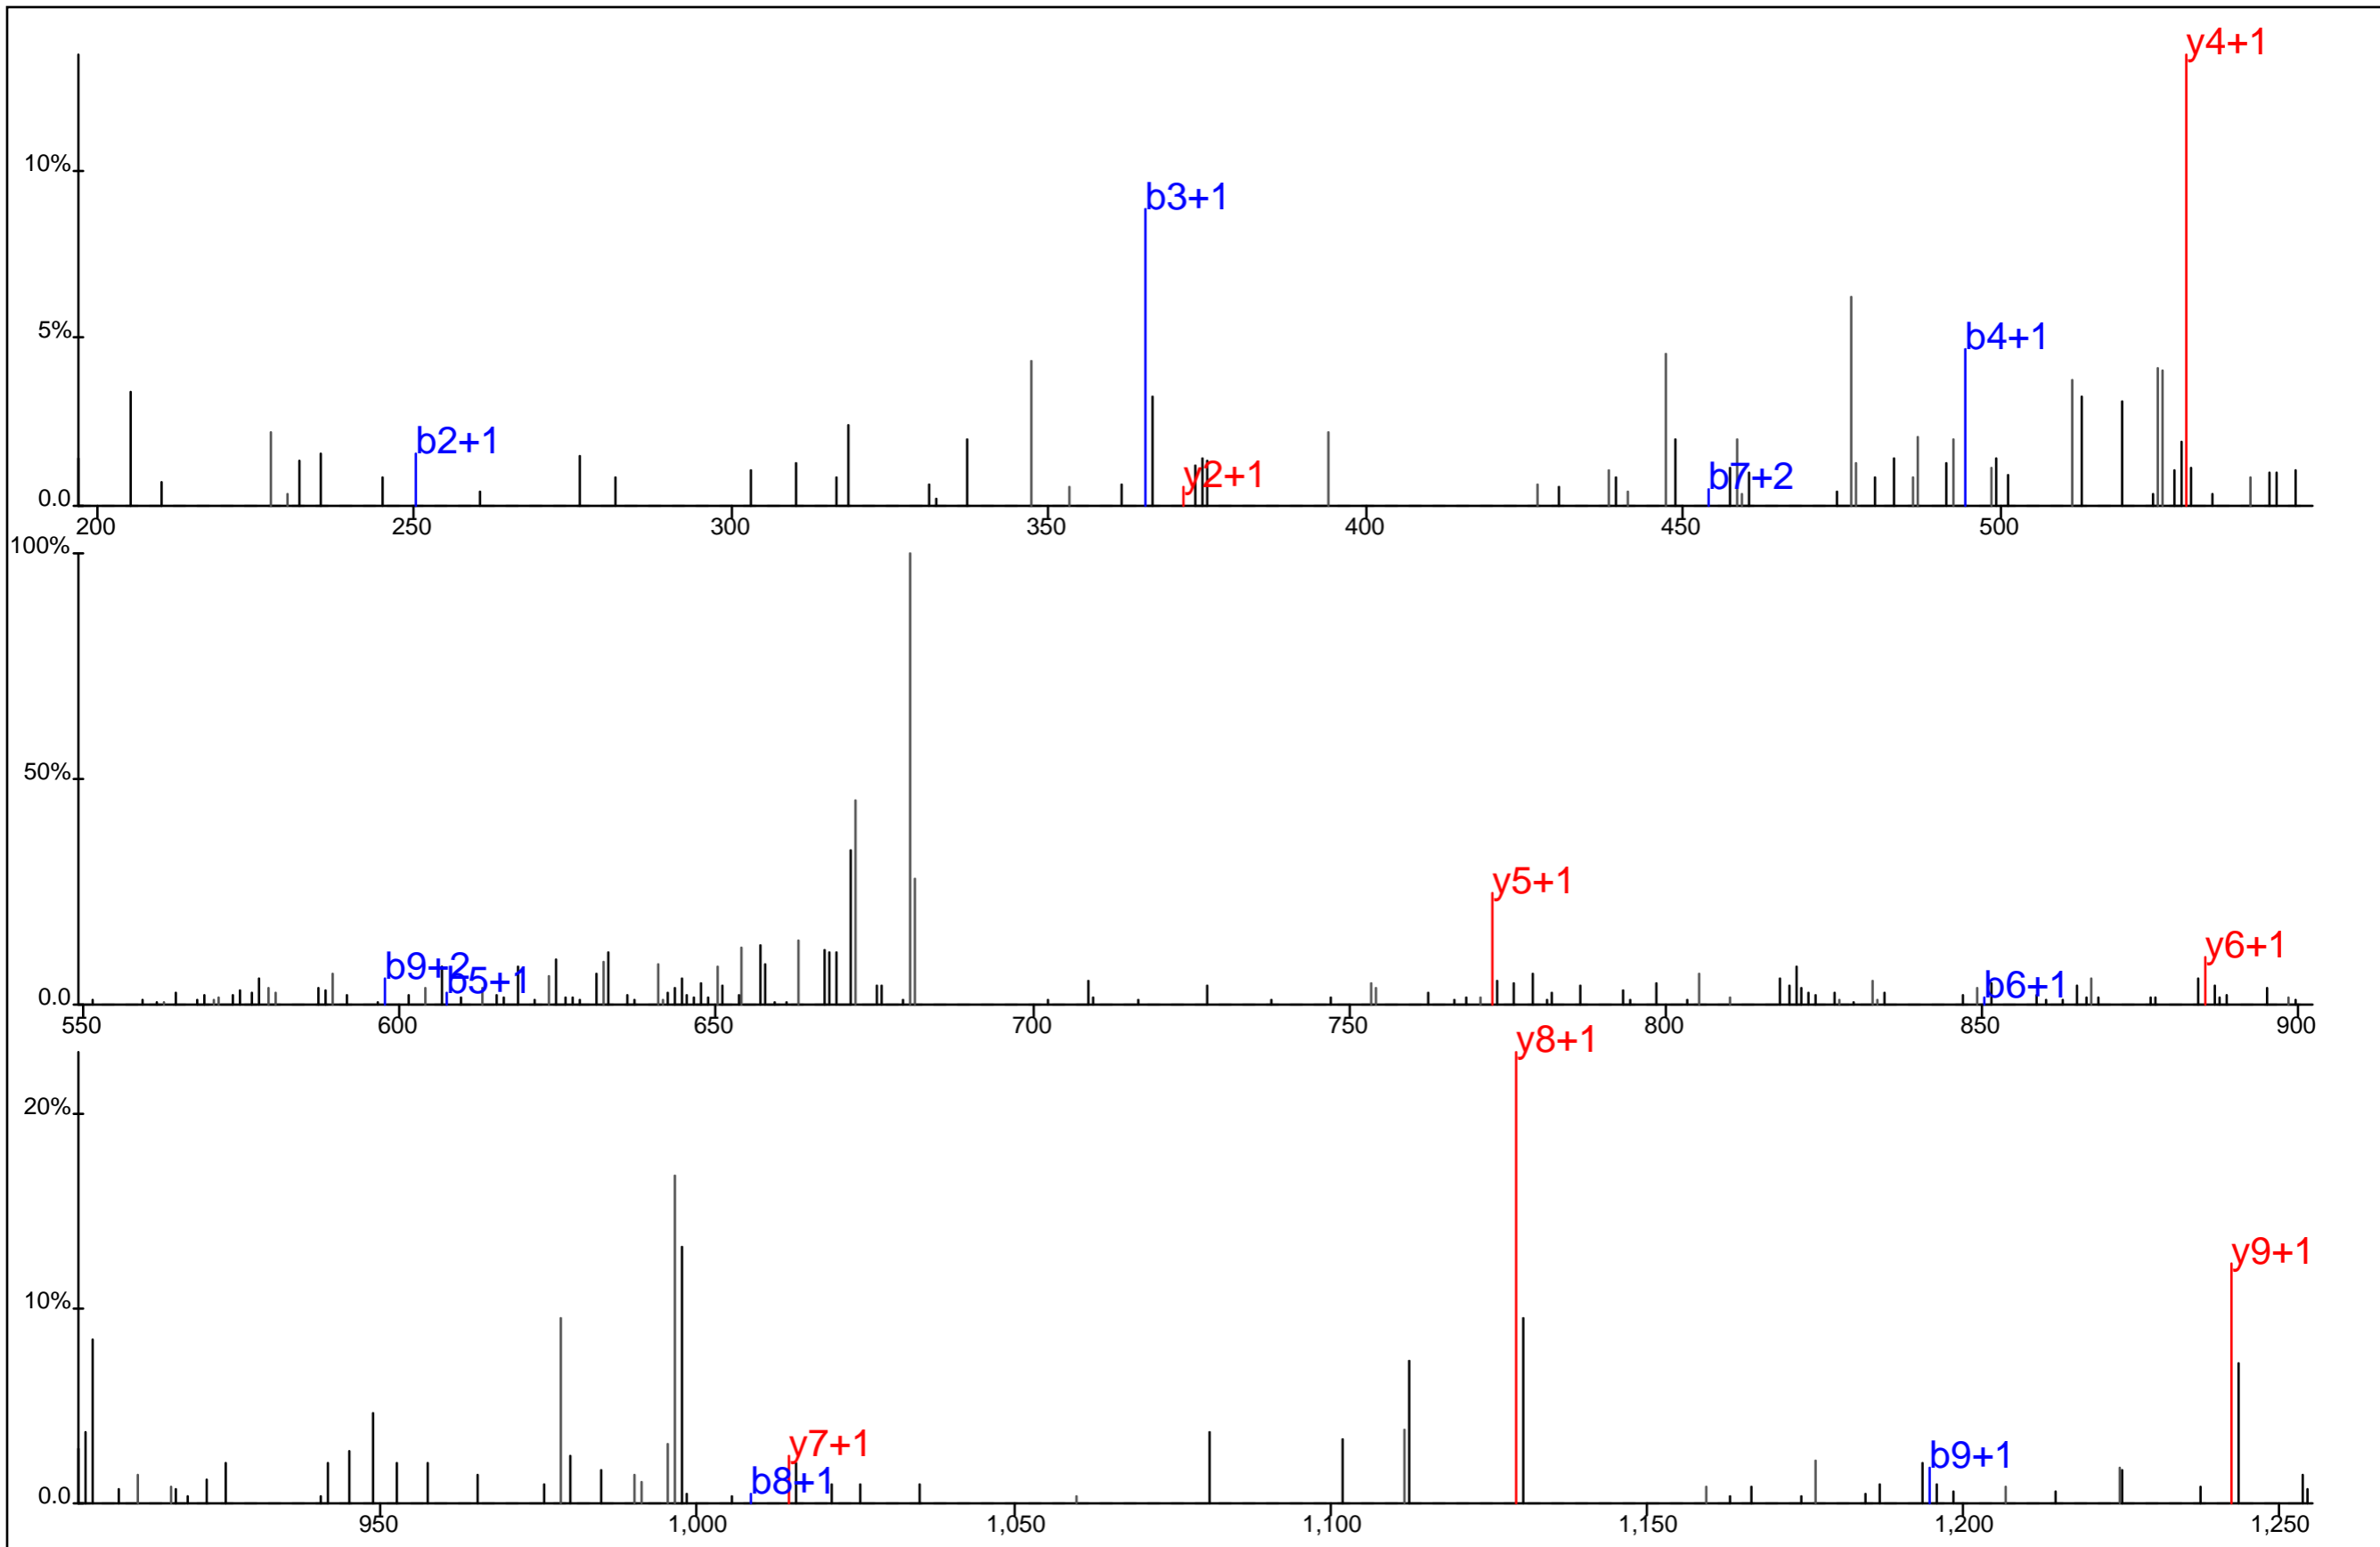

| K# | L | D | E | L | Y* | G | T | W | R% |
|----|---|---|---|---|----|---|---|---|----|
| ■  | ■ | ■ | ■ | ■ | ■  | ■ | ■ | ■ | ■  |
| □  | □ | □ | □ | □ | □  | □ | □ | □ | □  |

Protein Name: Ribosomal protein L4  
 gi Accession: 16579885  
 Precursor Mass: 689.8326+2  
 Delta Mass: 4.256 ppm  
 XCorr: 33.78

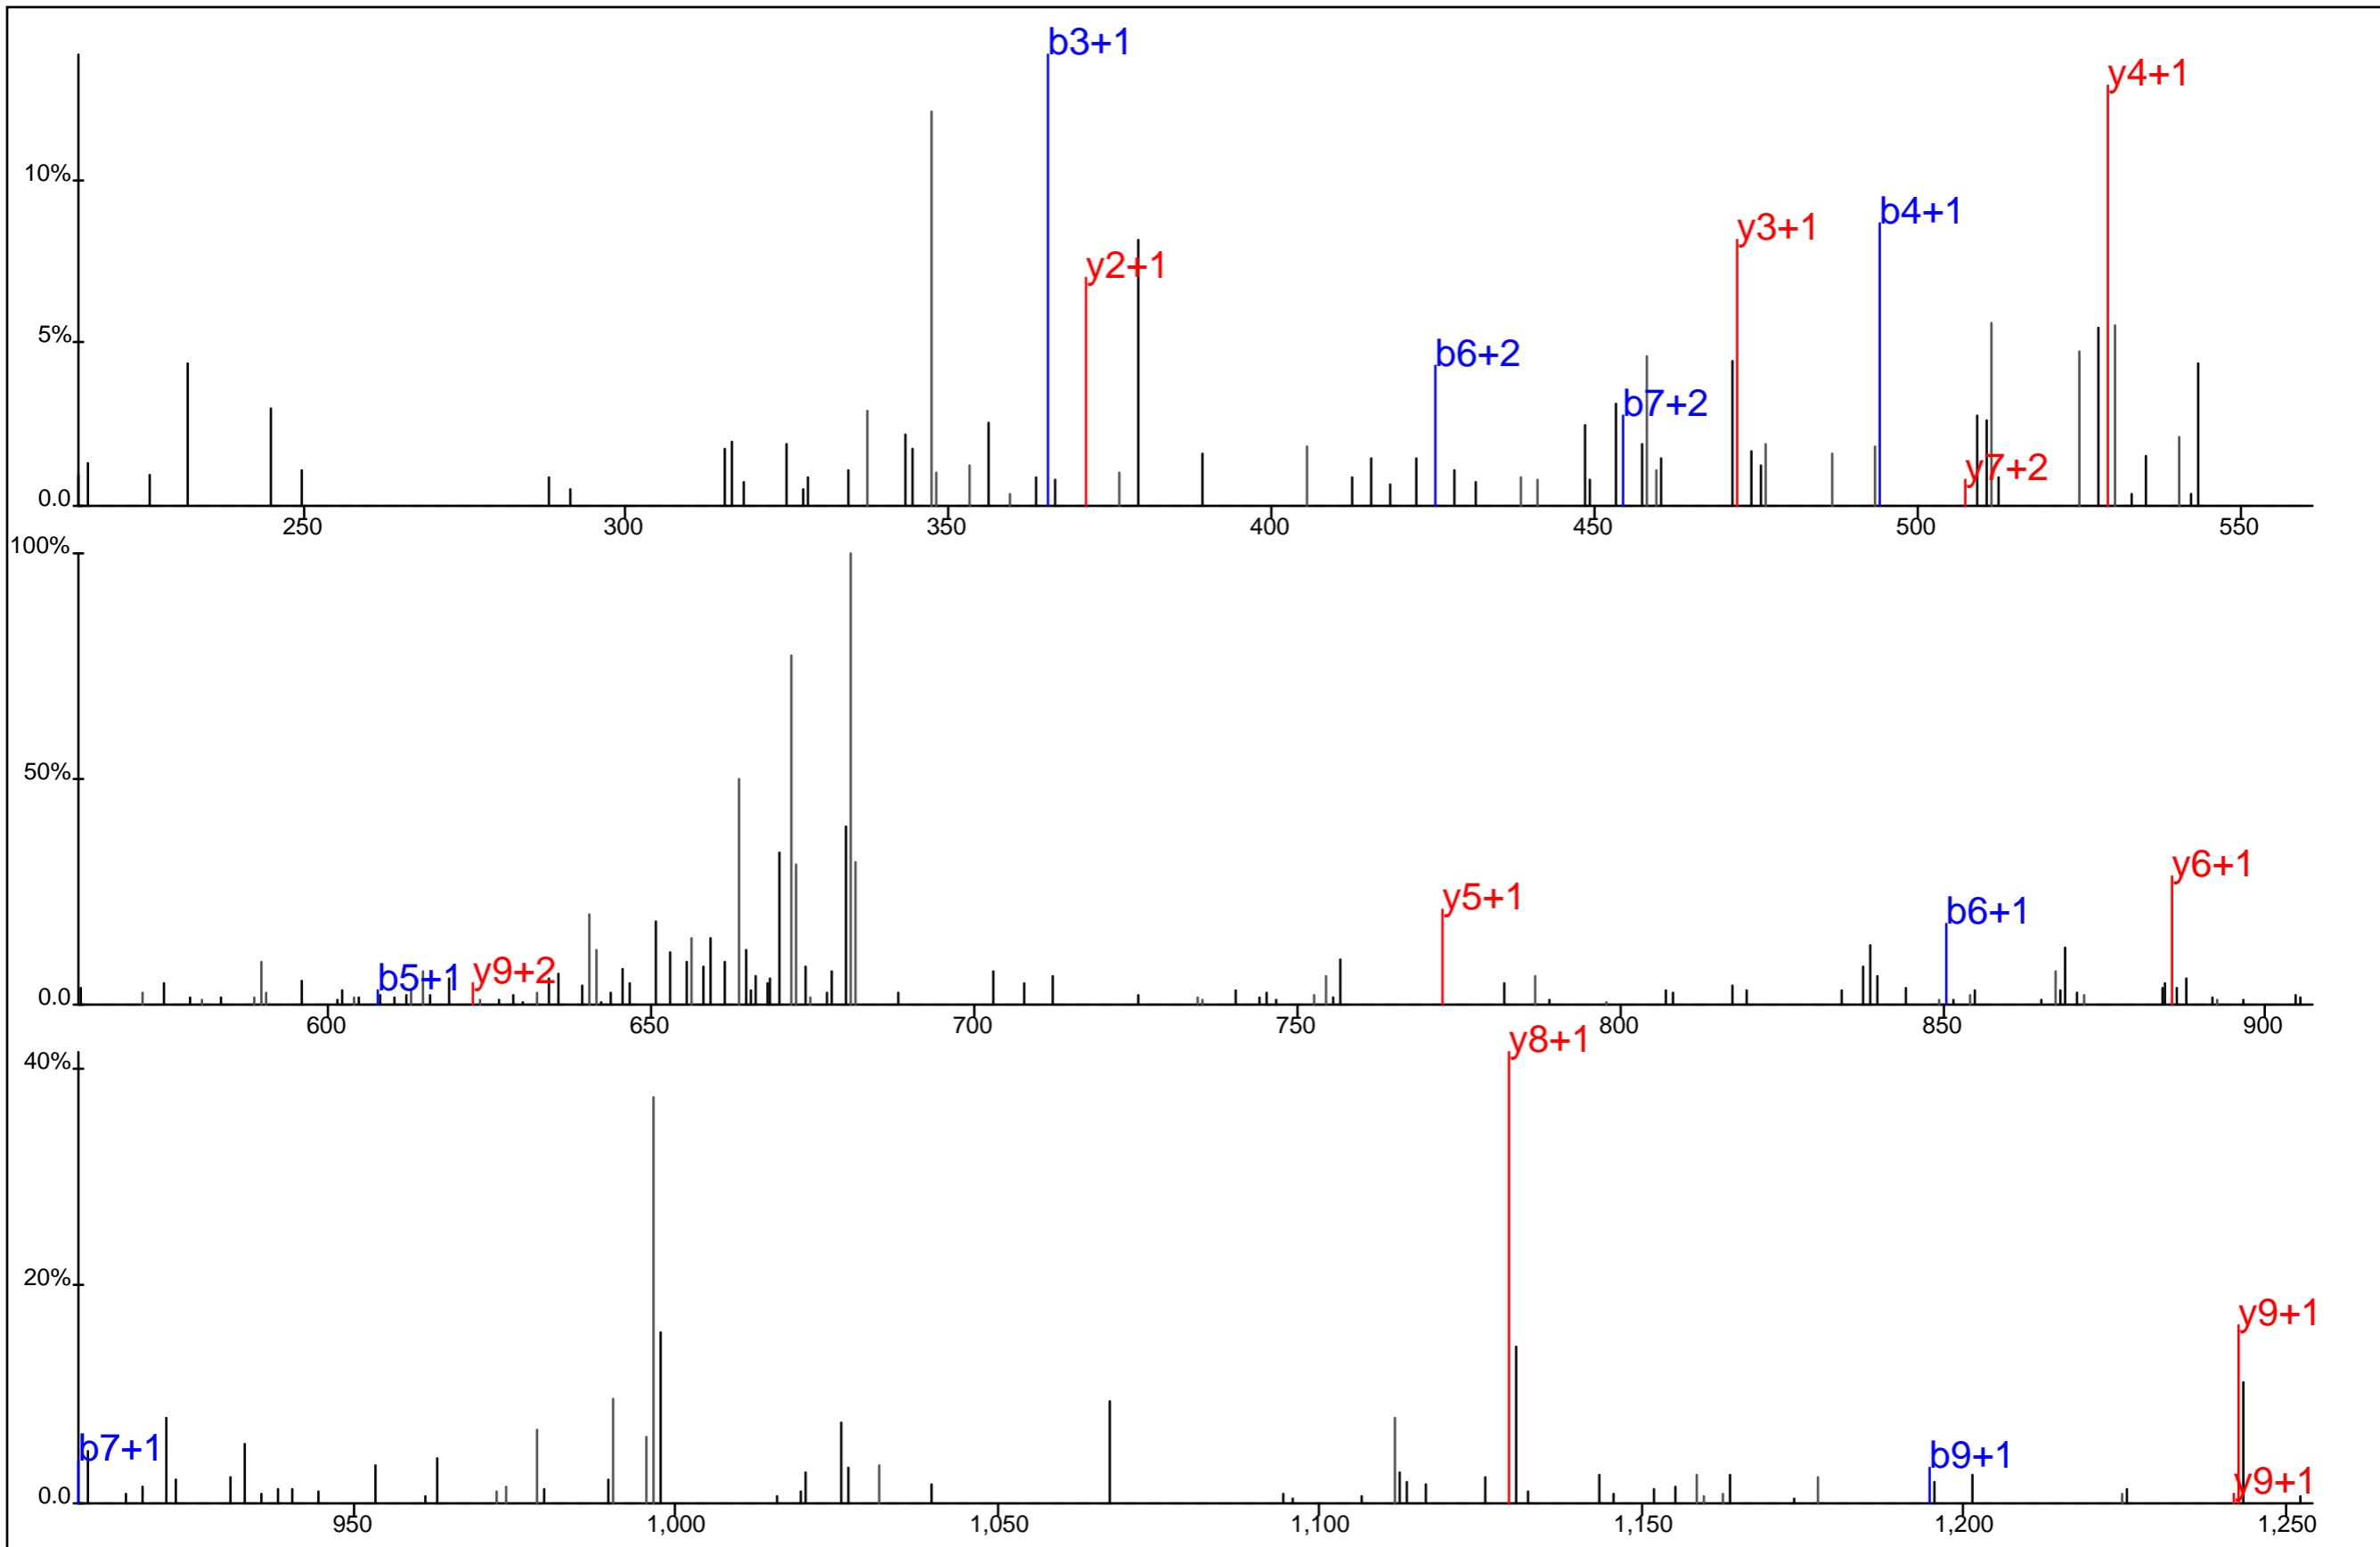

|                                   |                                   |                                   |                                   |                                   |                                   |                                   |                                   |    |
|-----------------------------------|-----------------------------------|-----------------------------------|-----------------------------------|-----------------------------------|-----------------------------------|-----------------------------------|-----------------------------------|----|
| K#L                               | D                                 | E                                 | L                                 | Y*                                | G                                 | T                                 | W                                 | R% |
| <span style="color:blue">■</span> | <span style="color:blue">■</span> | <span style="color:blue">■</span> | <span style="color:blue">■</span> | <span style="color:blue">■</span> | <span style="color:blue">■</span> | <span style="color:blue">■</span> | <span style="color:blue">■</span> |    |
| <span style="color:red">■</span>  | <span style="color:red">■</span>  | <span style="color:red">■</span>  | <span style="color:red">■</span>  | <span style="color:red">■</span>  | <span style="color:red">■</span>  | <span style="color:red">■</span>  | <span style="color:red">■</span>  |    |

Protein Name: Ribosomal protein L4  
 gi Accession: 16579885  
 Precursor Mass: 689.8329+2  
 Delta Mass: 4.604 ppm  
 XCorr: 40.58

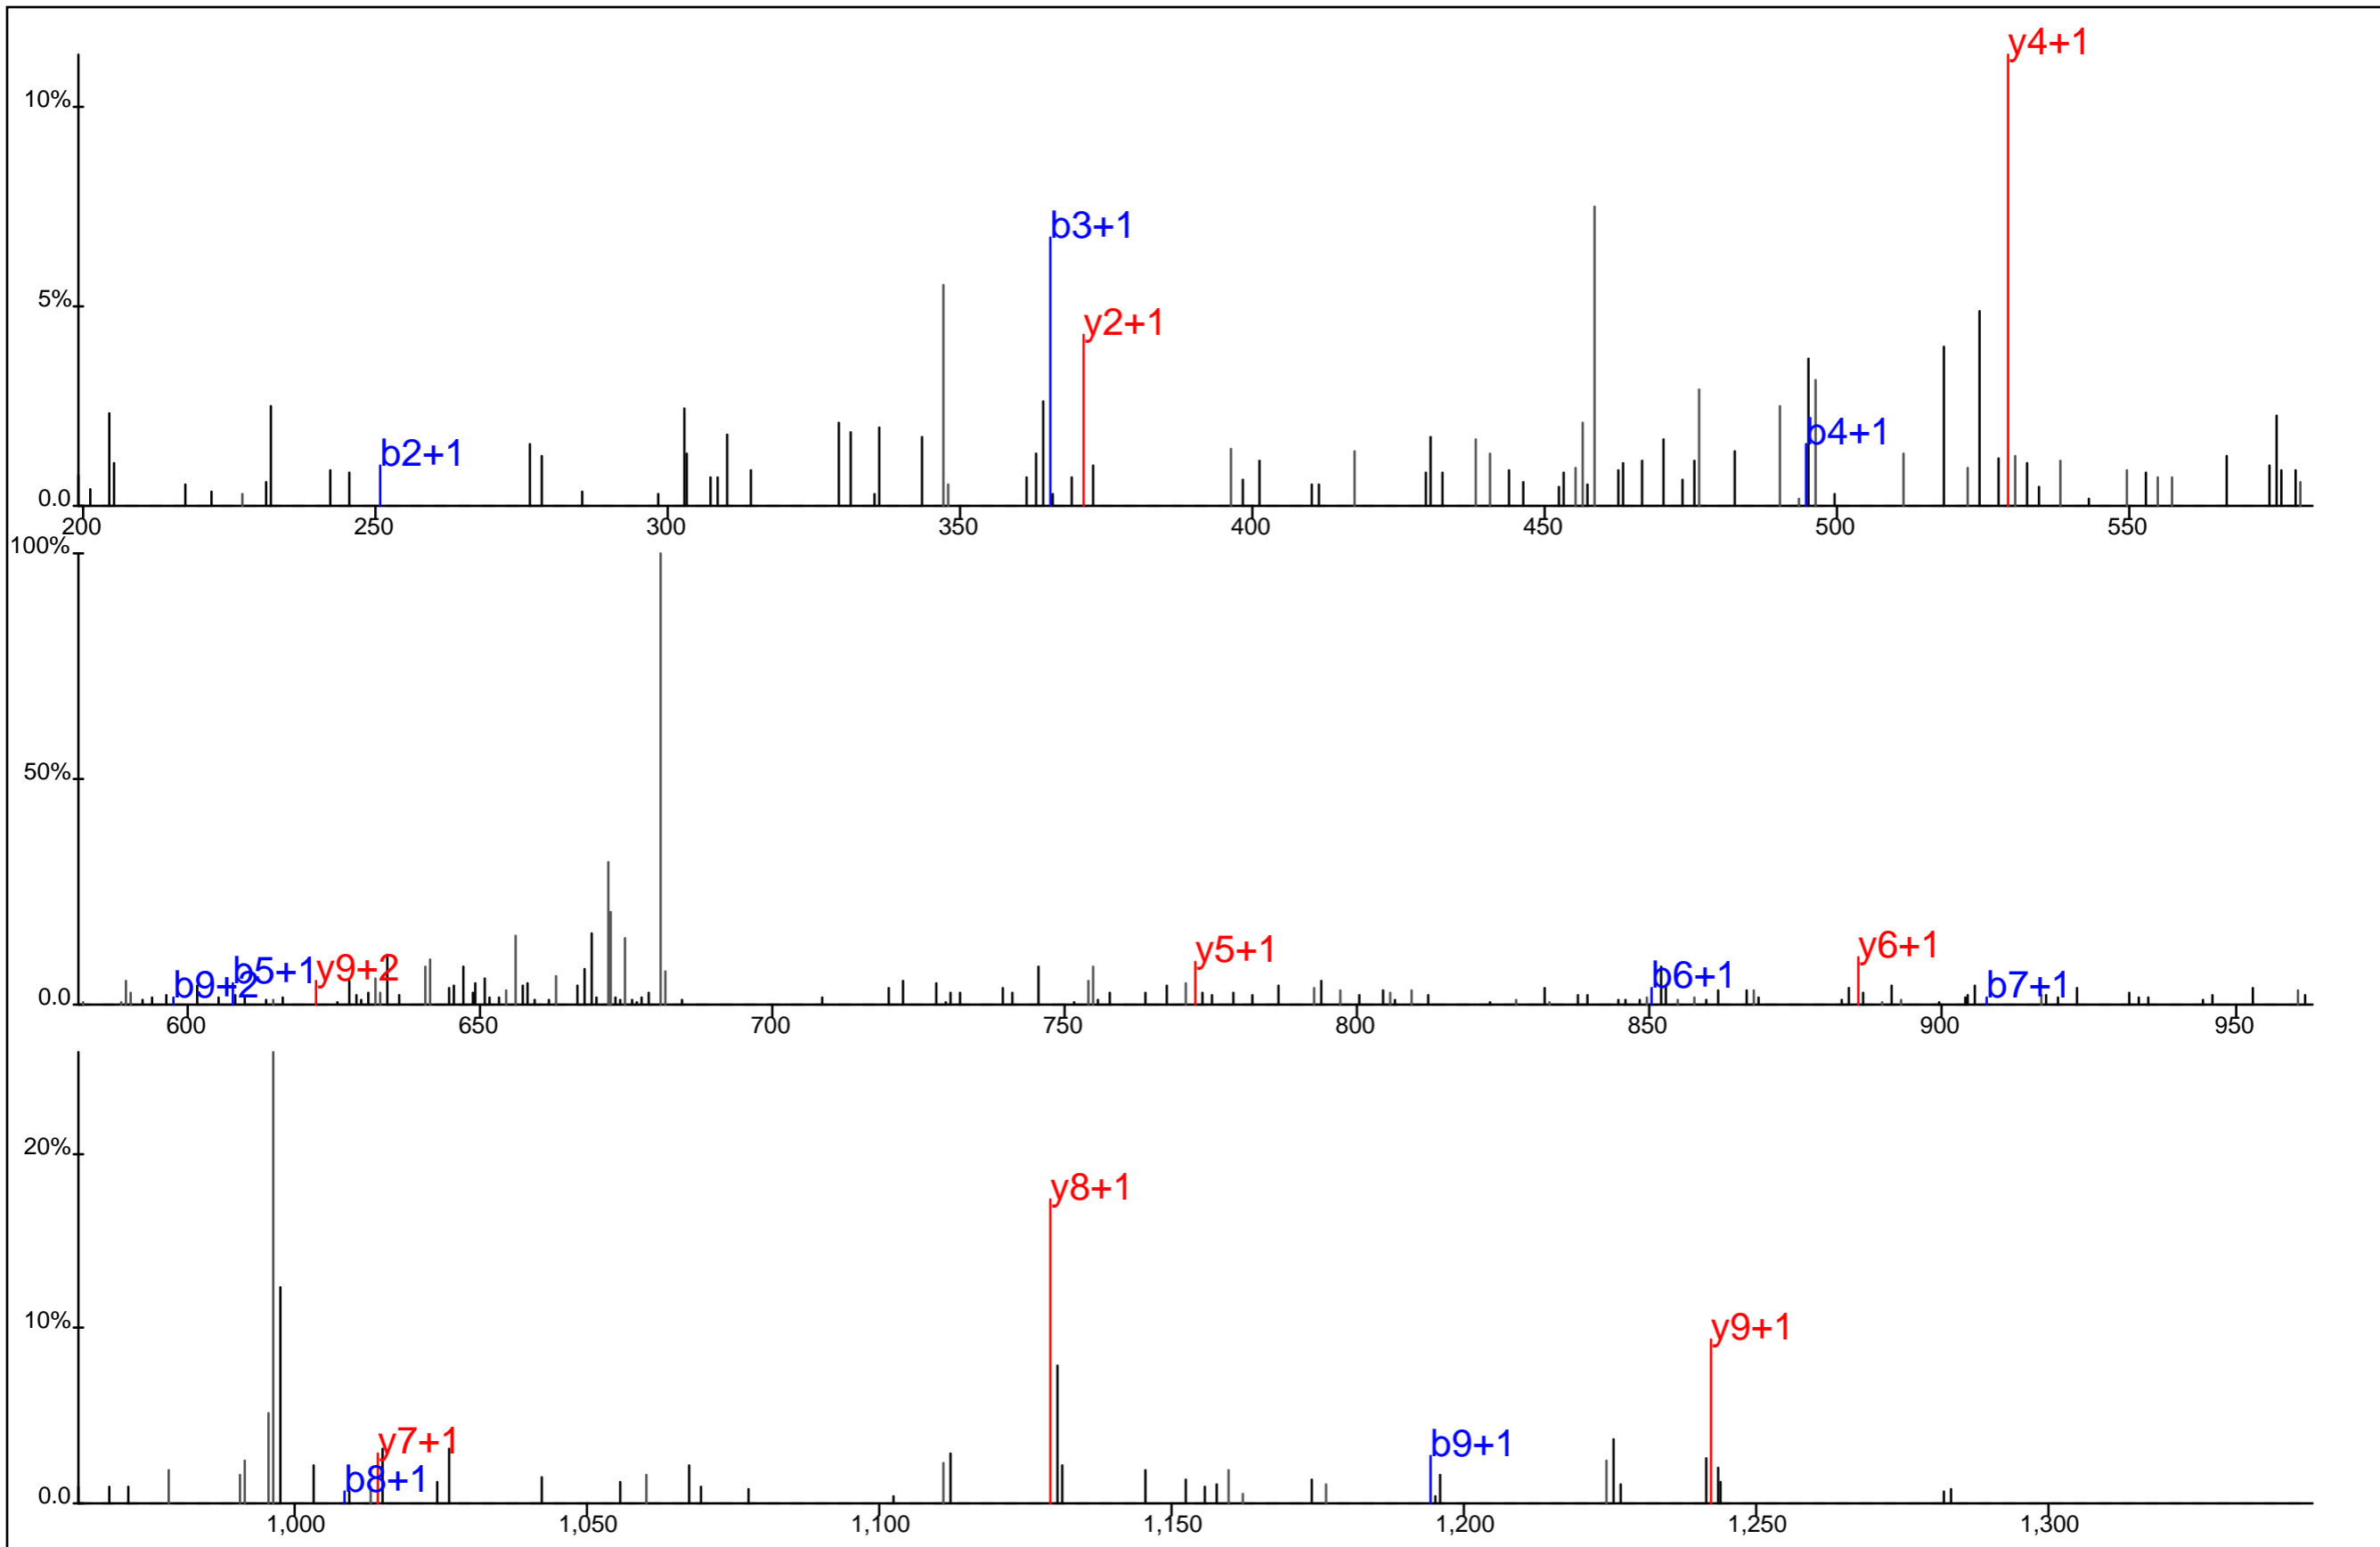

|    |   |   |   |    |   |   |   |    |
|----|---|---|---|----|---|---|---|----|
| K# | D | E | L | Y* | G | T | W | R% |
| ■  | ■ | ■ | ■ | ■  | ■ | ■ | ■ | ■  |
| ■  | ■ | ■ | ■ | ■  | ■ | ■ | ■ | ■  |

Protein Name: Ribosomal protein L4  
 gi Accession: 16579885  
 Precursor Mass: 689.8311+2  
 Delta Mass: 2.037 ppm  
 XCorr: 30.56

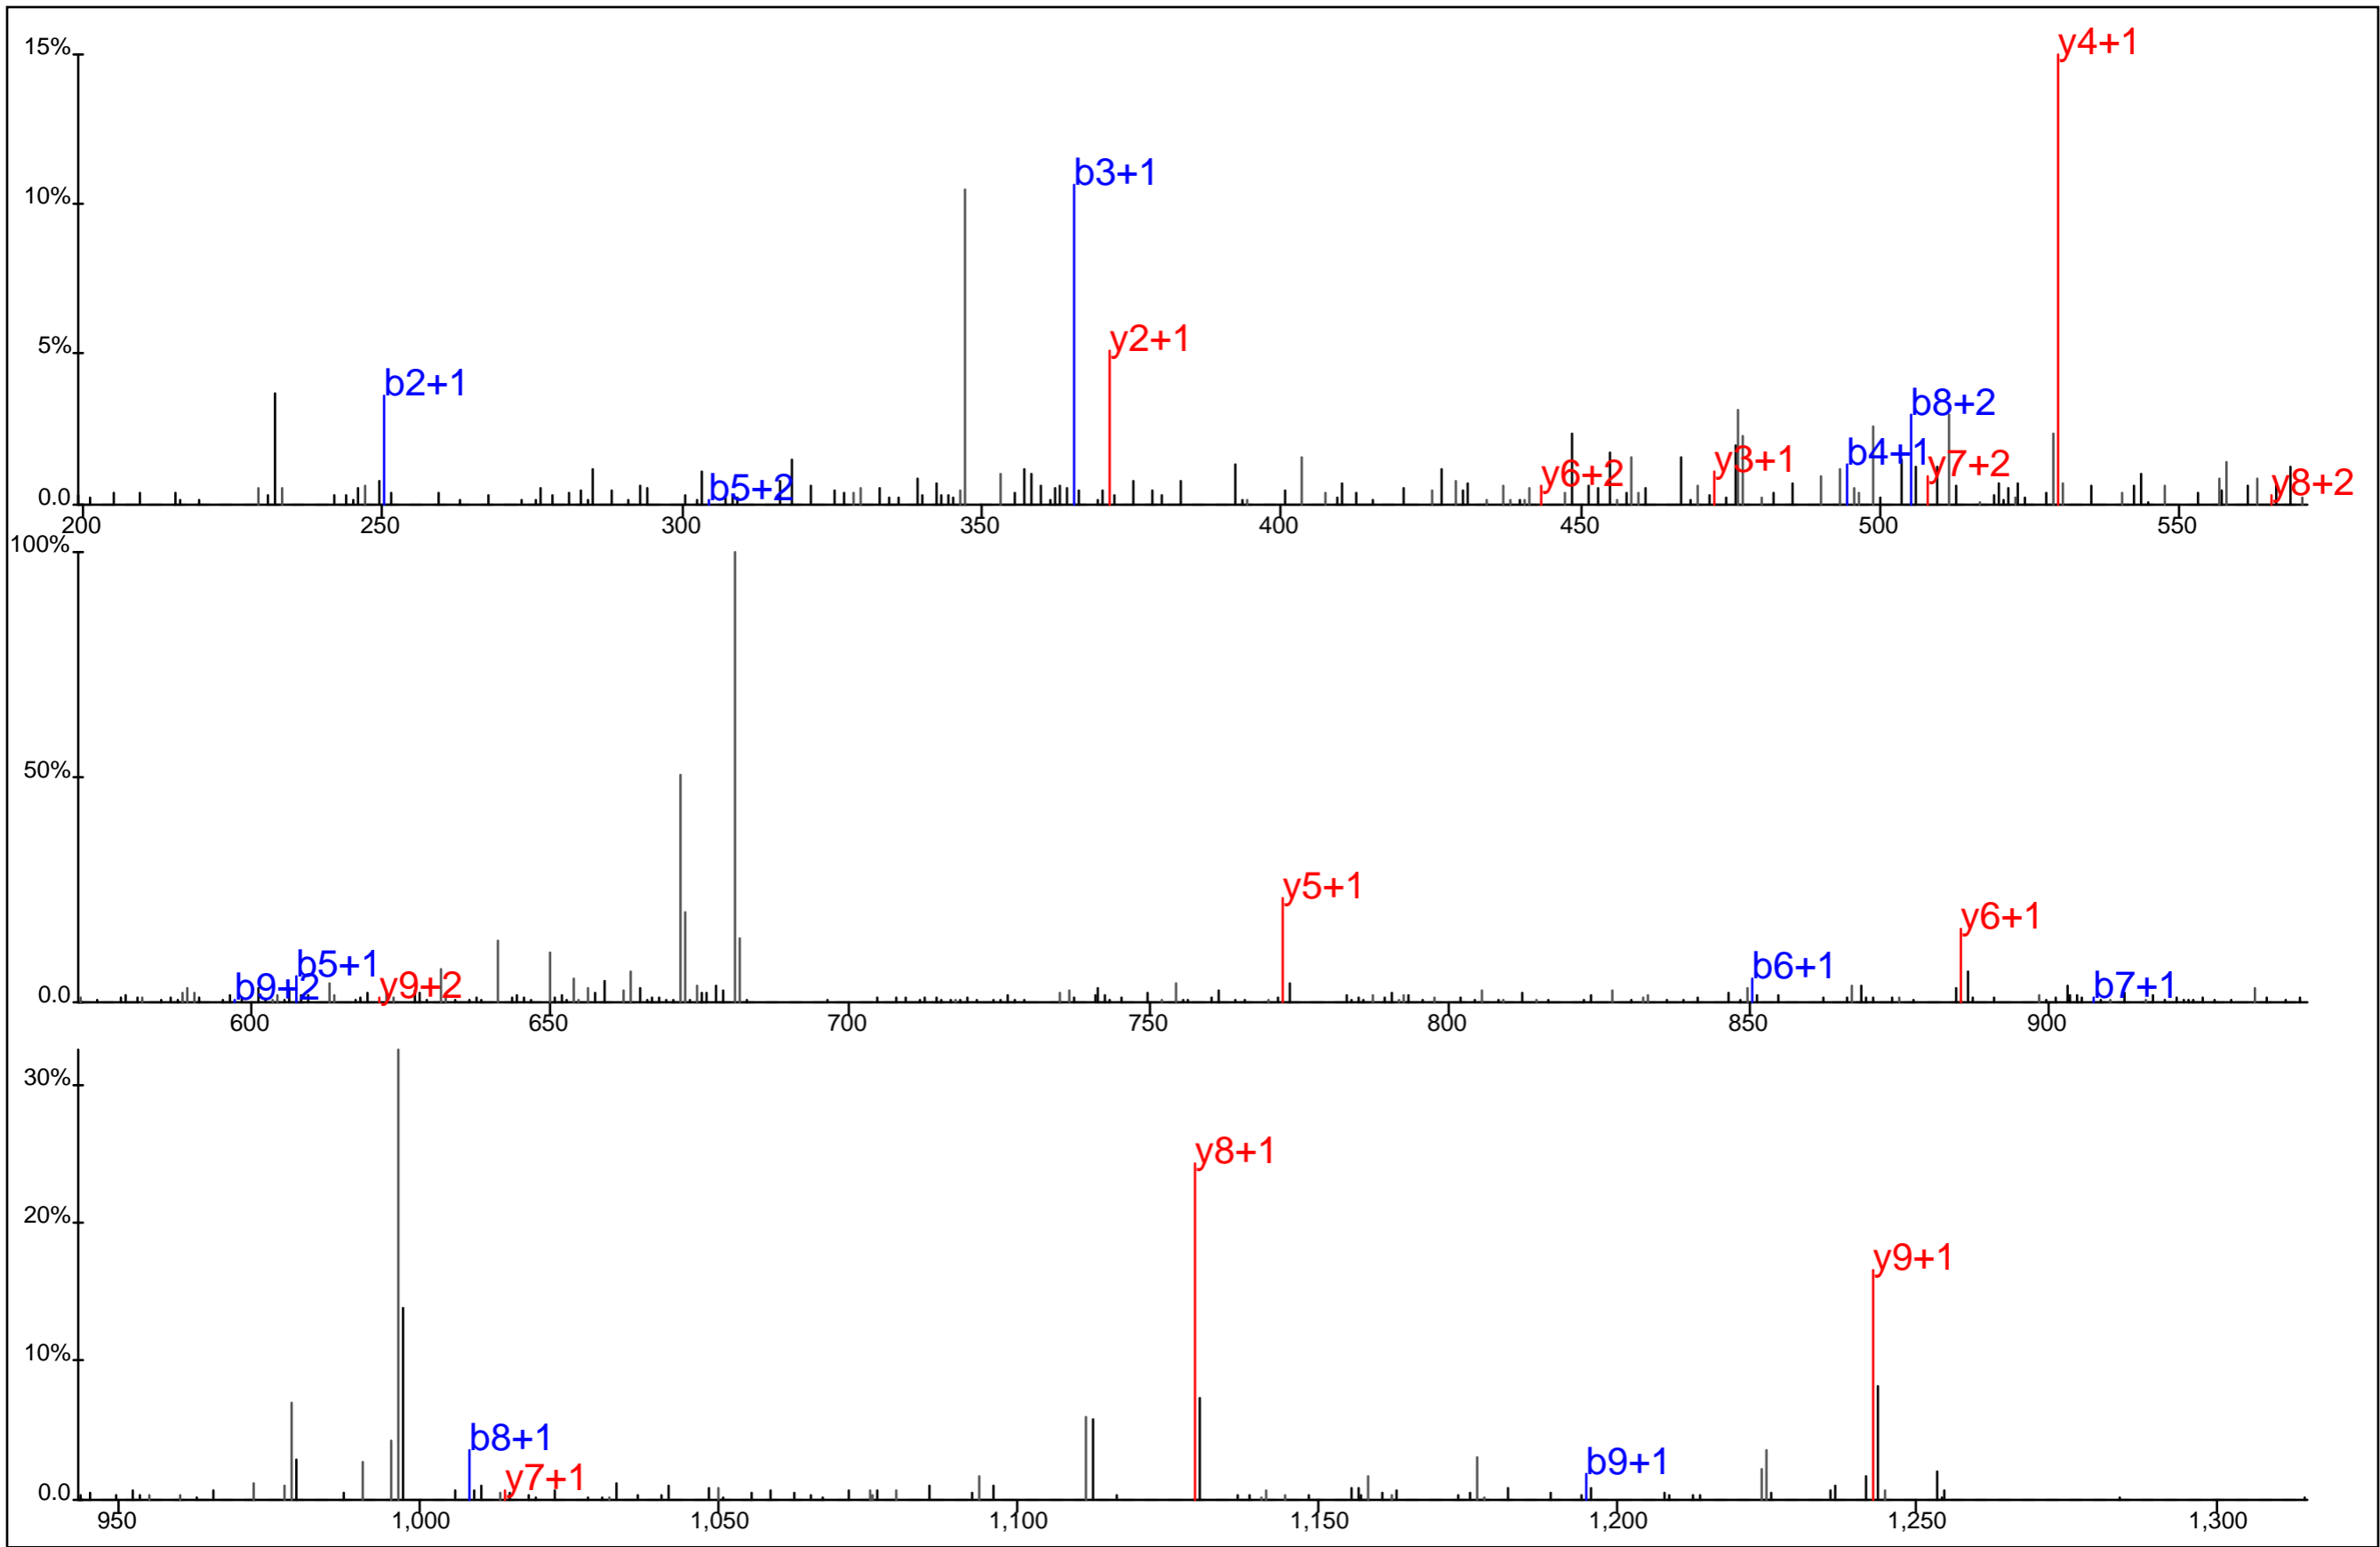

|     |   |   |   |    |   |   |   |
|-----|---|---|---|----|---|---|---|
|     |   |   |   |    |   |   |   |
| K#L | D | E | L | Y* | G | T | W |
|     |   |   |   |    |   |   |   |

Protein Name: Ribosomal protein L4  
 gi Accession: 16579885  
 Precursor Mass: 689.8312+2  
 Delta Mass: 2.131 ppm  
 XCorr: 38.0

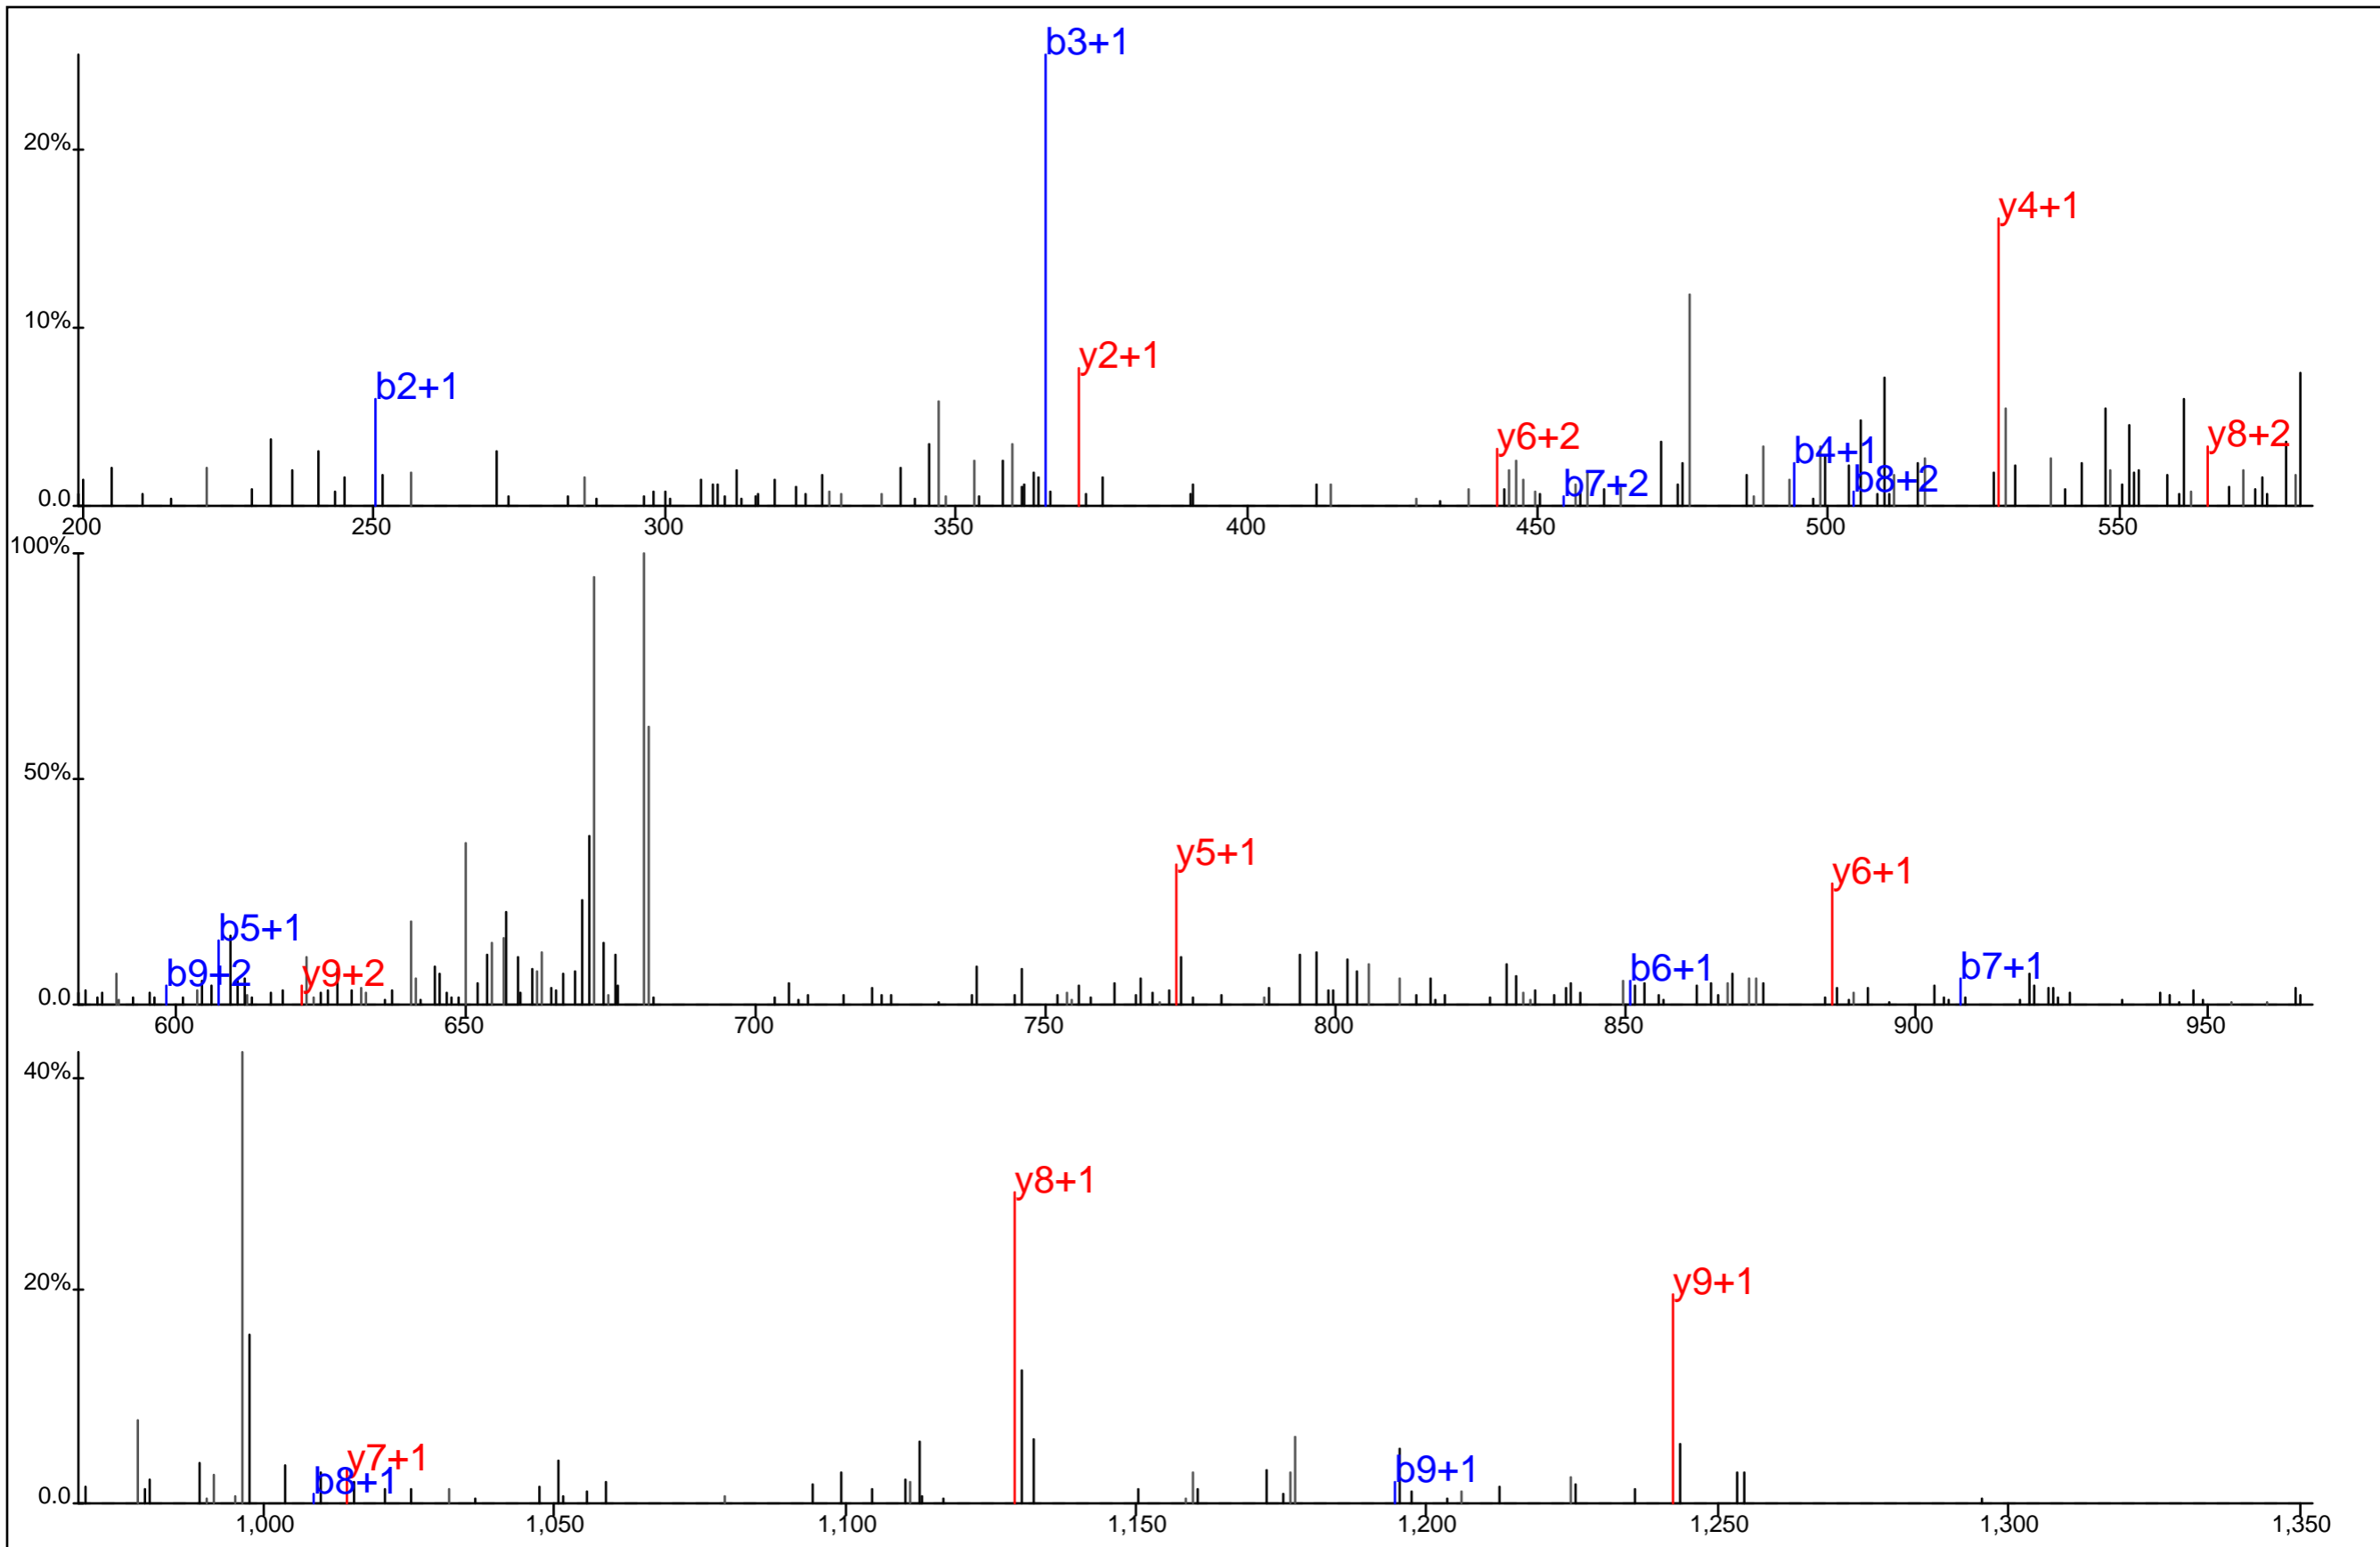

|    |   |   |   |    |   |   |   |    |
|----|---|---|---|----|---|---|---|----|
| K# | D | E | L | Y* | G | T | W | R% |
| ■  | ■ | ■ | ■ | ■  | ■ | ■ | ■ | ■  |
| □  | □ | □ | □ | □  | □ | □ | □ | □  |

Protein Name: Ribosomal protein L4  
 gi Accession: 16579885  
 Precursor Mass: 689.8318+2  
 Delta Mass: 3.016 ppm  
 XCorr: 36.65

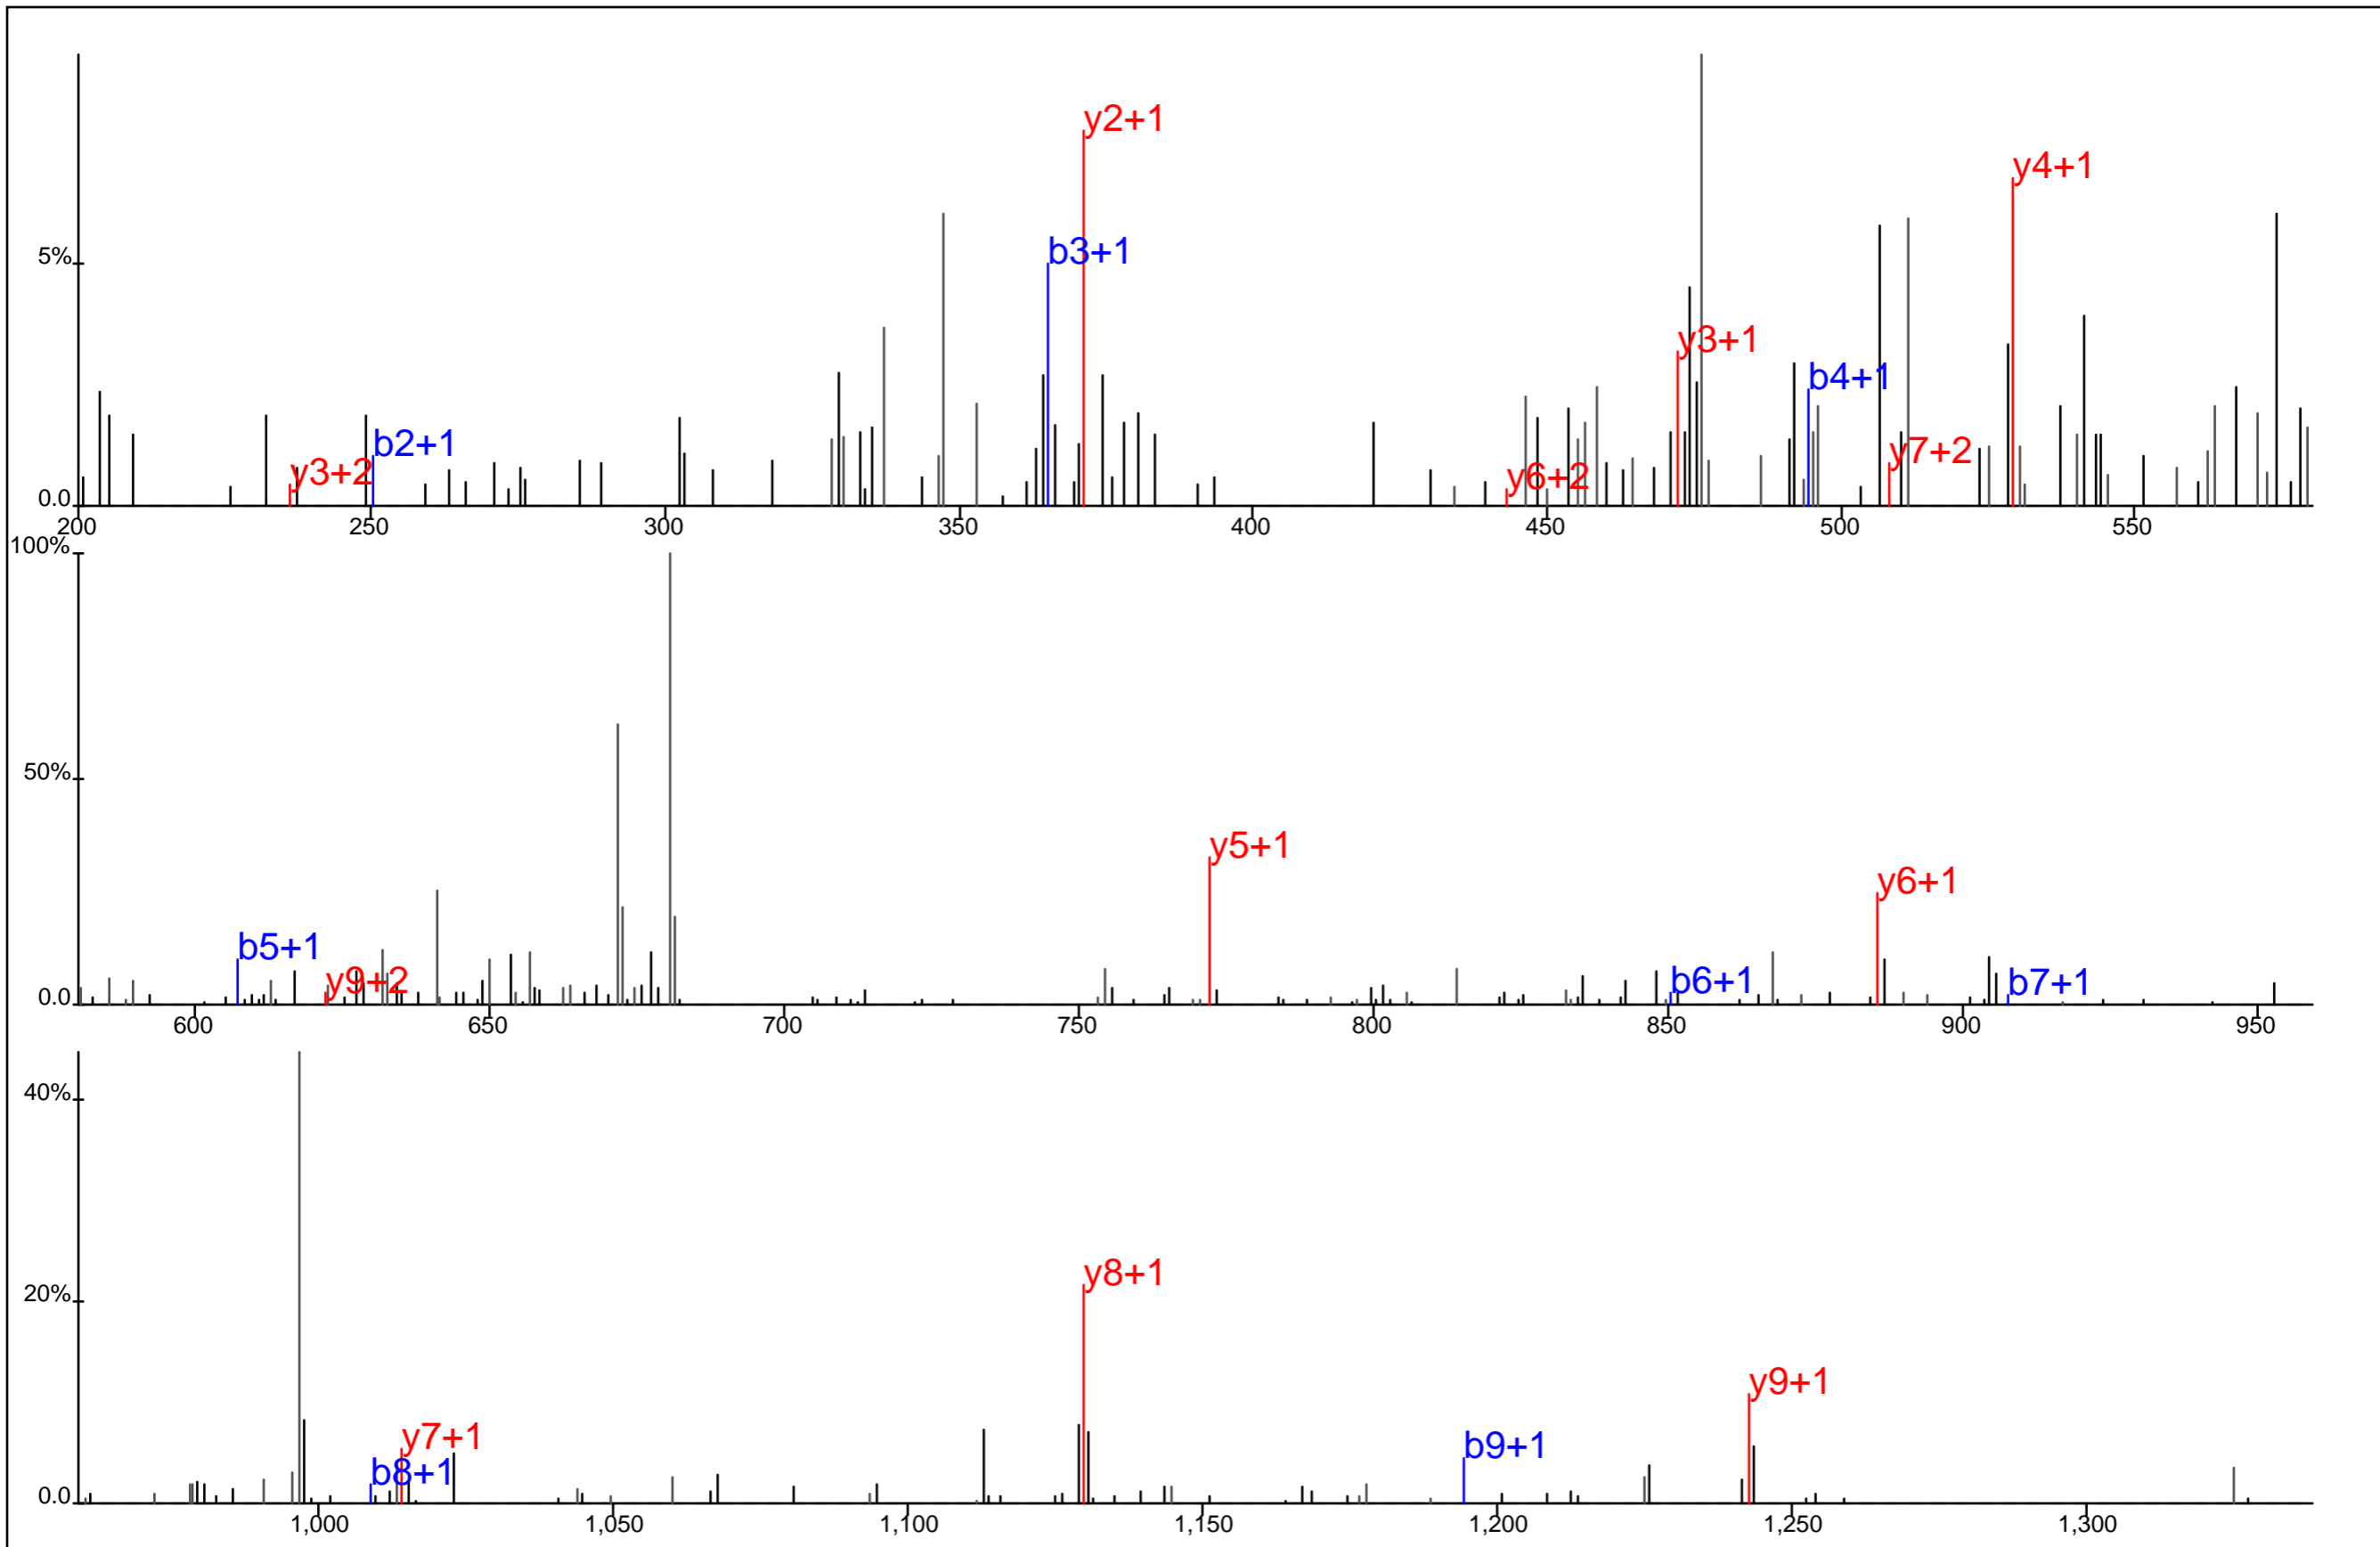

|     |   |   |   |    |   |   |   |
|-----|---|---|---|----|---|---|---|
|     |   |   |   |    |   |   |   |
| K#L | D | E | L | Y* | G | T | W |
|     |   |   |   |    |   |   |   |

Protein Name: Ribosomal protein L4  
 gi Accession: 16579885  
 Precursor Mass: 689.8329+2  
 Delta Mass: 4.699 ppm  
 XCorr: 56.31

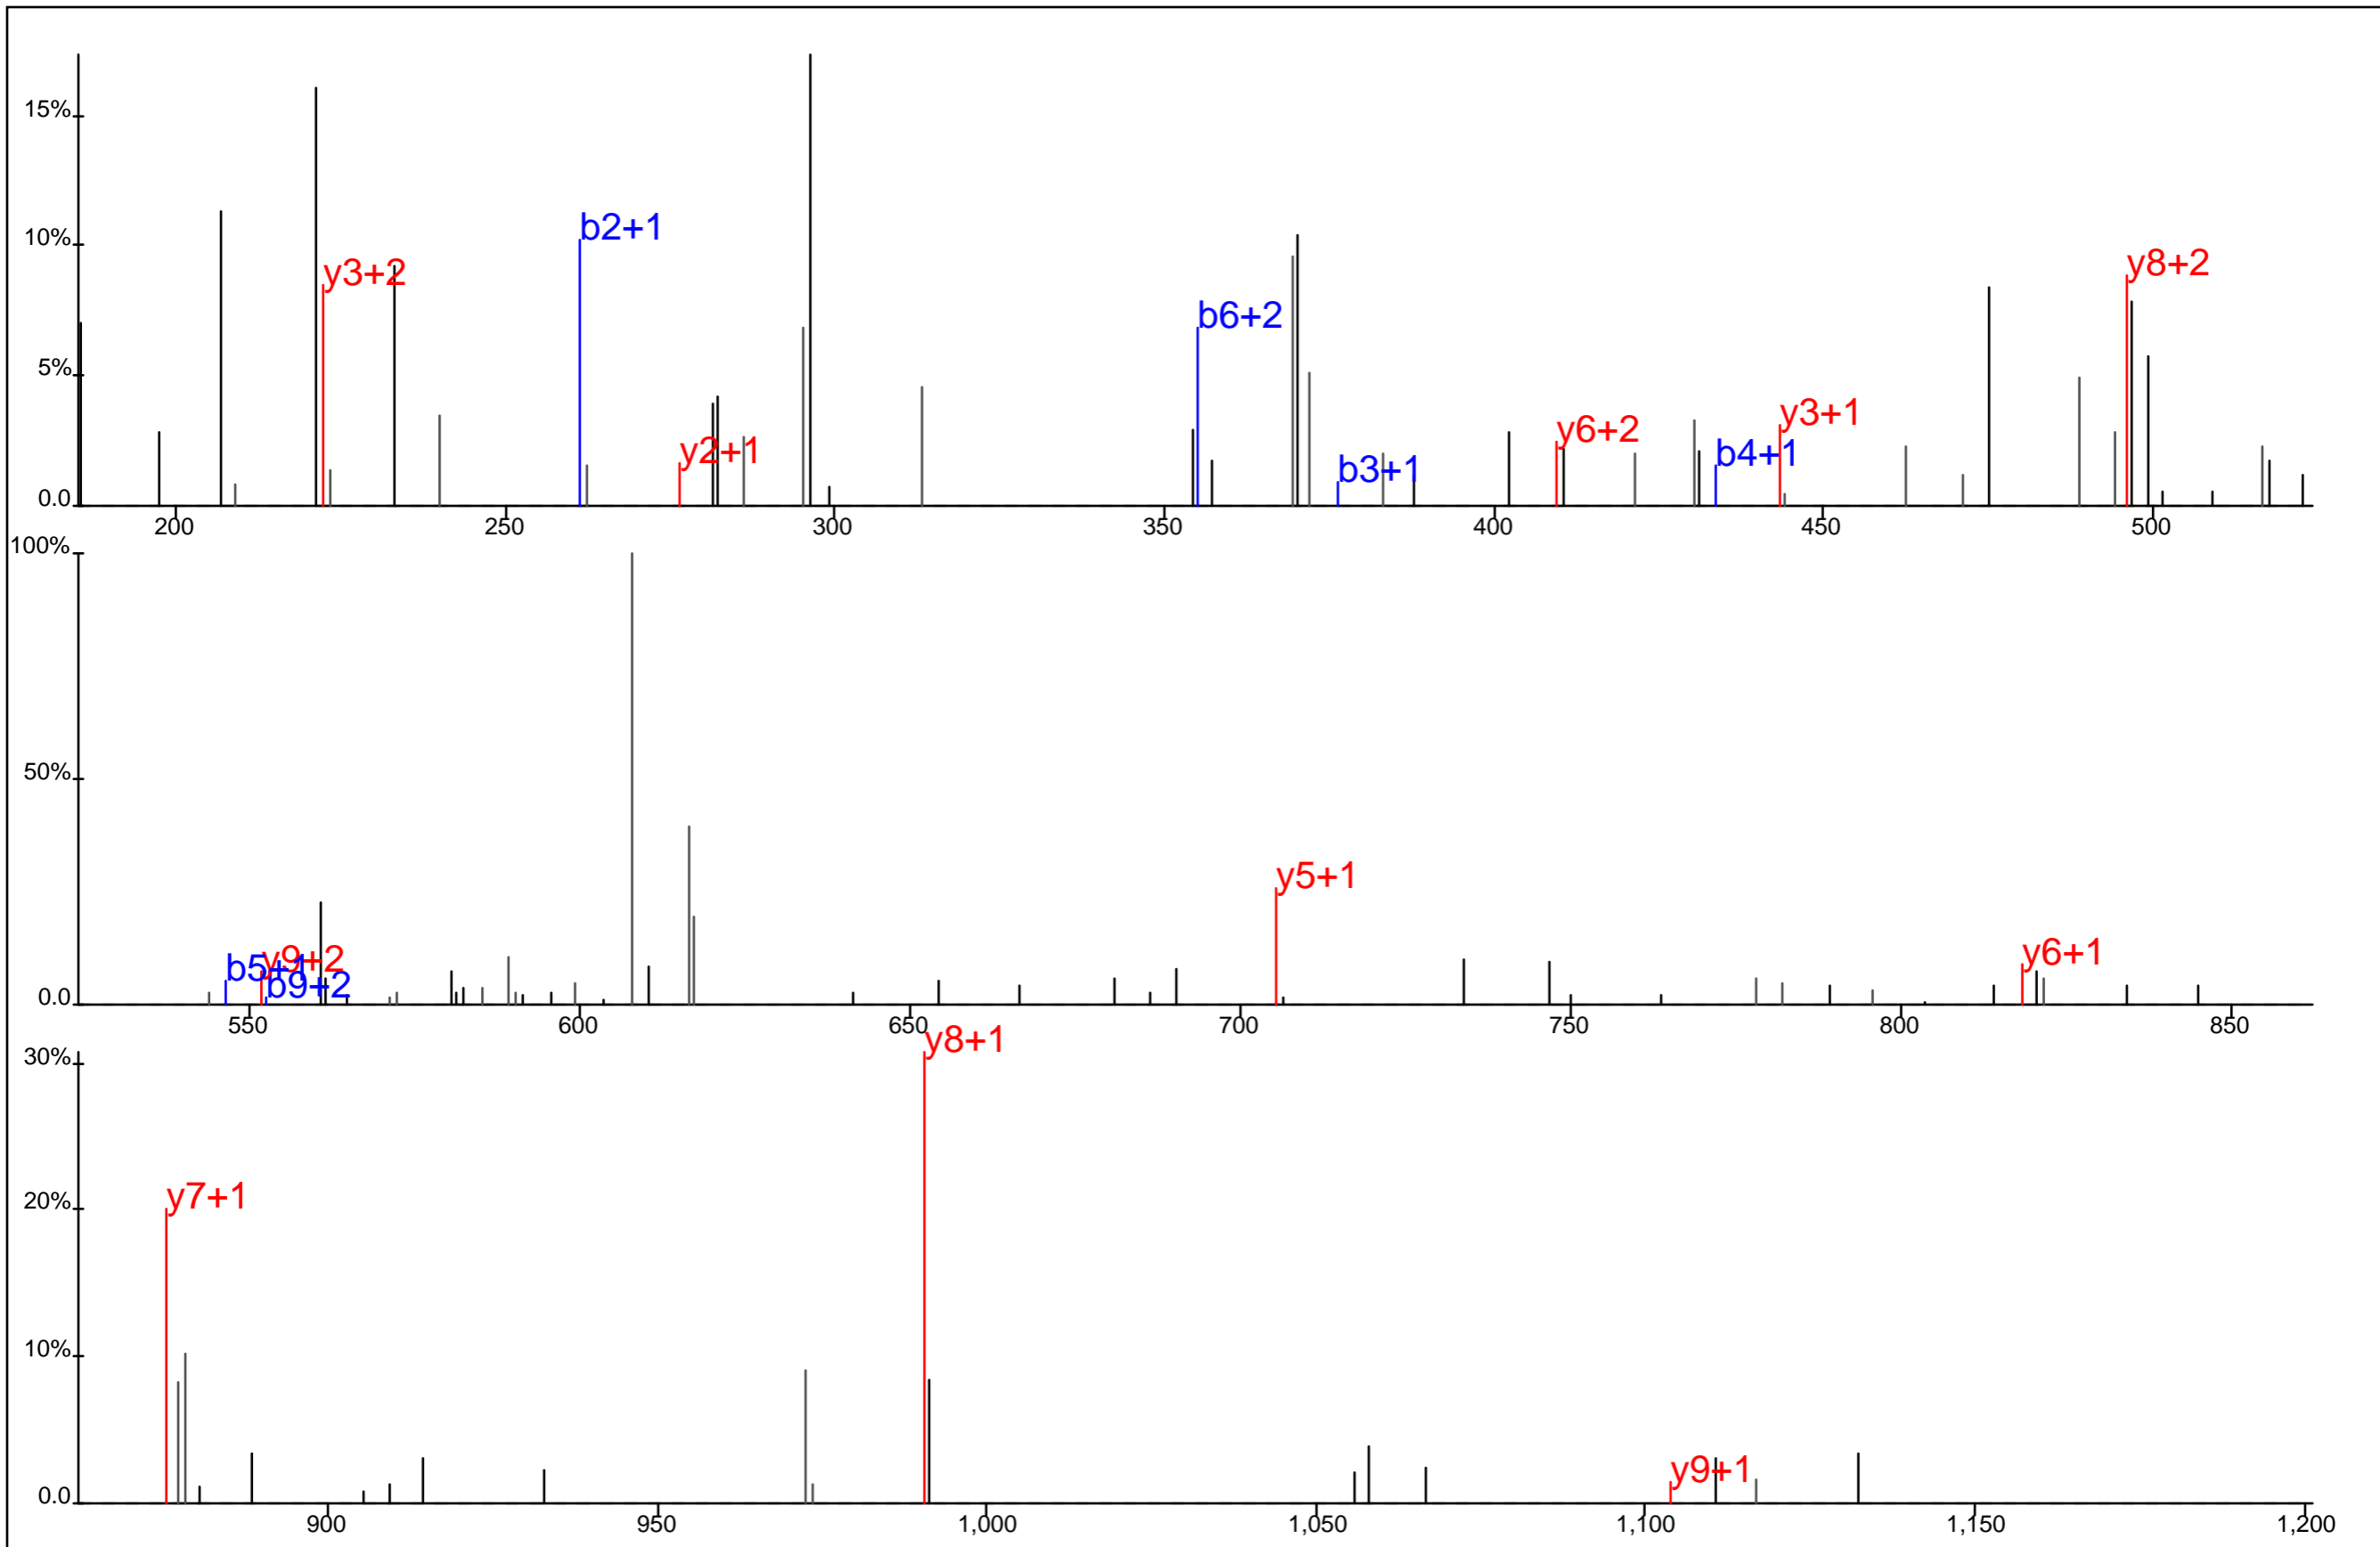

■ ■ ■ ■ ■ ■ ■ ■  
■ ■ ■ ■ ■ ■ ■ ■  
**F L D G I Y V S\* E K**

Protein Name: Ribosomal protein L9  
 gi Accession: 3088347  
 Precursor Mass: 625.7878+2  
 Delta Mass: 1.617 ppm  
 XCorr: 16.7



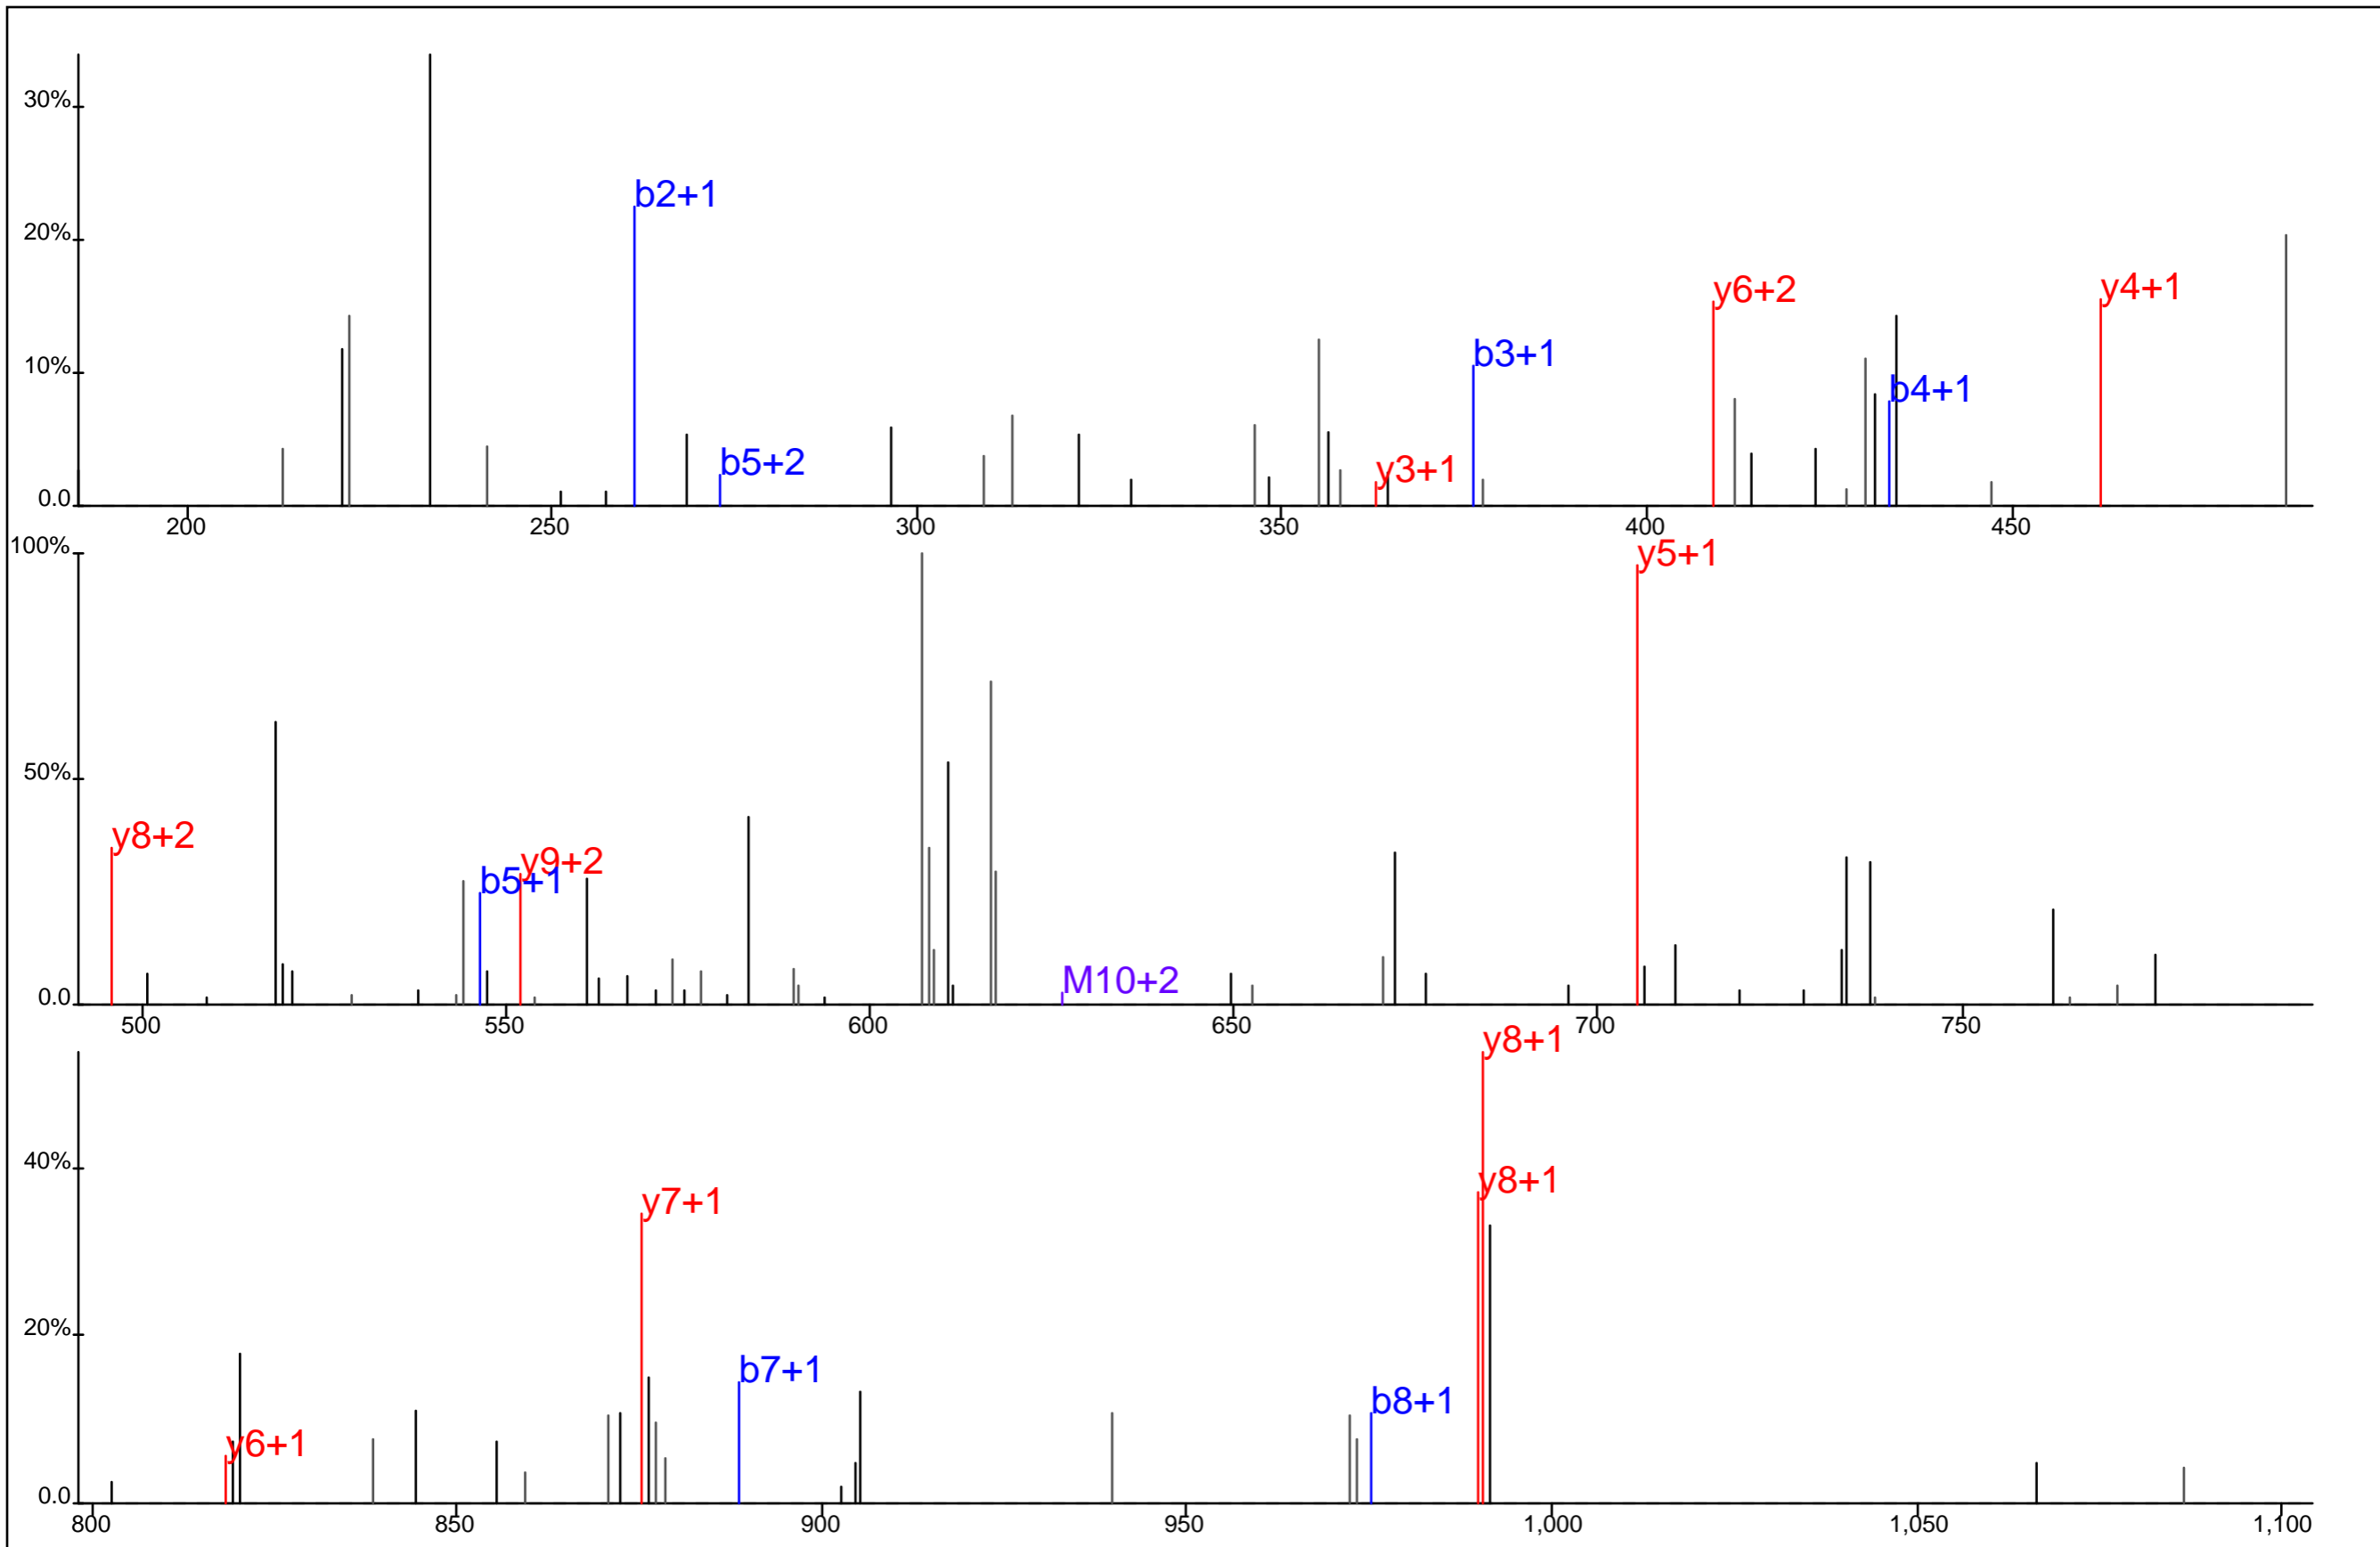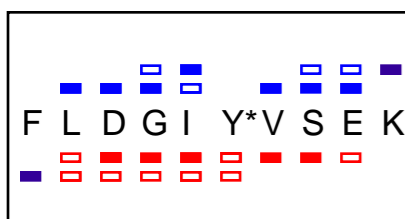

Protein Name: Ribosomal protein L9  
 gi Accession: 3088347  
 Precursor Mass: 625.7848+2  
 Delta Mass: 6.503 ppm  
 XCorr: 27.21

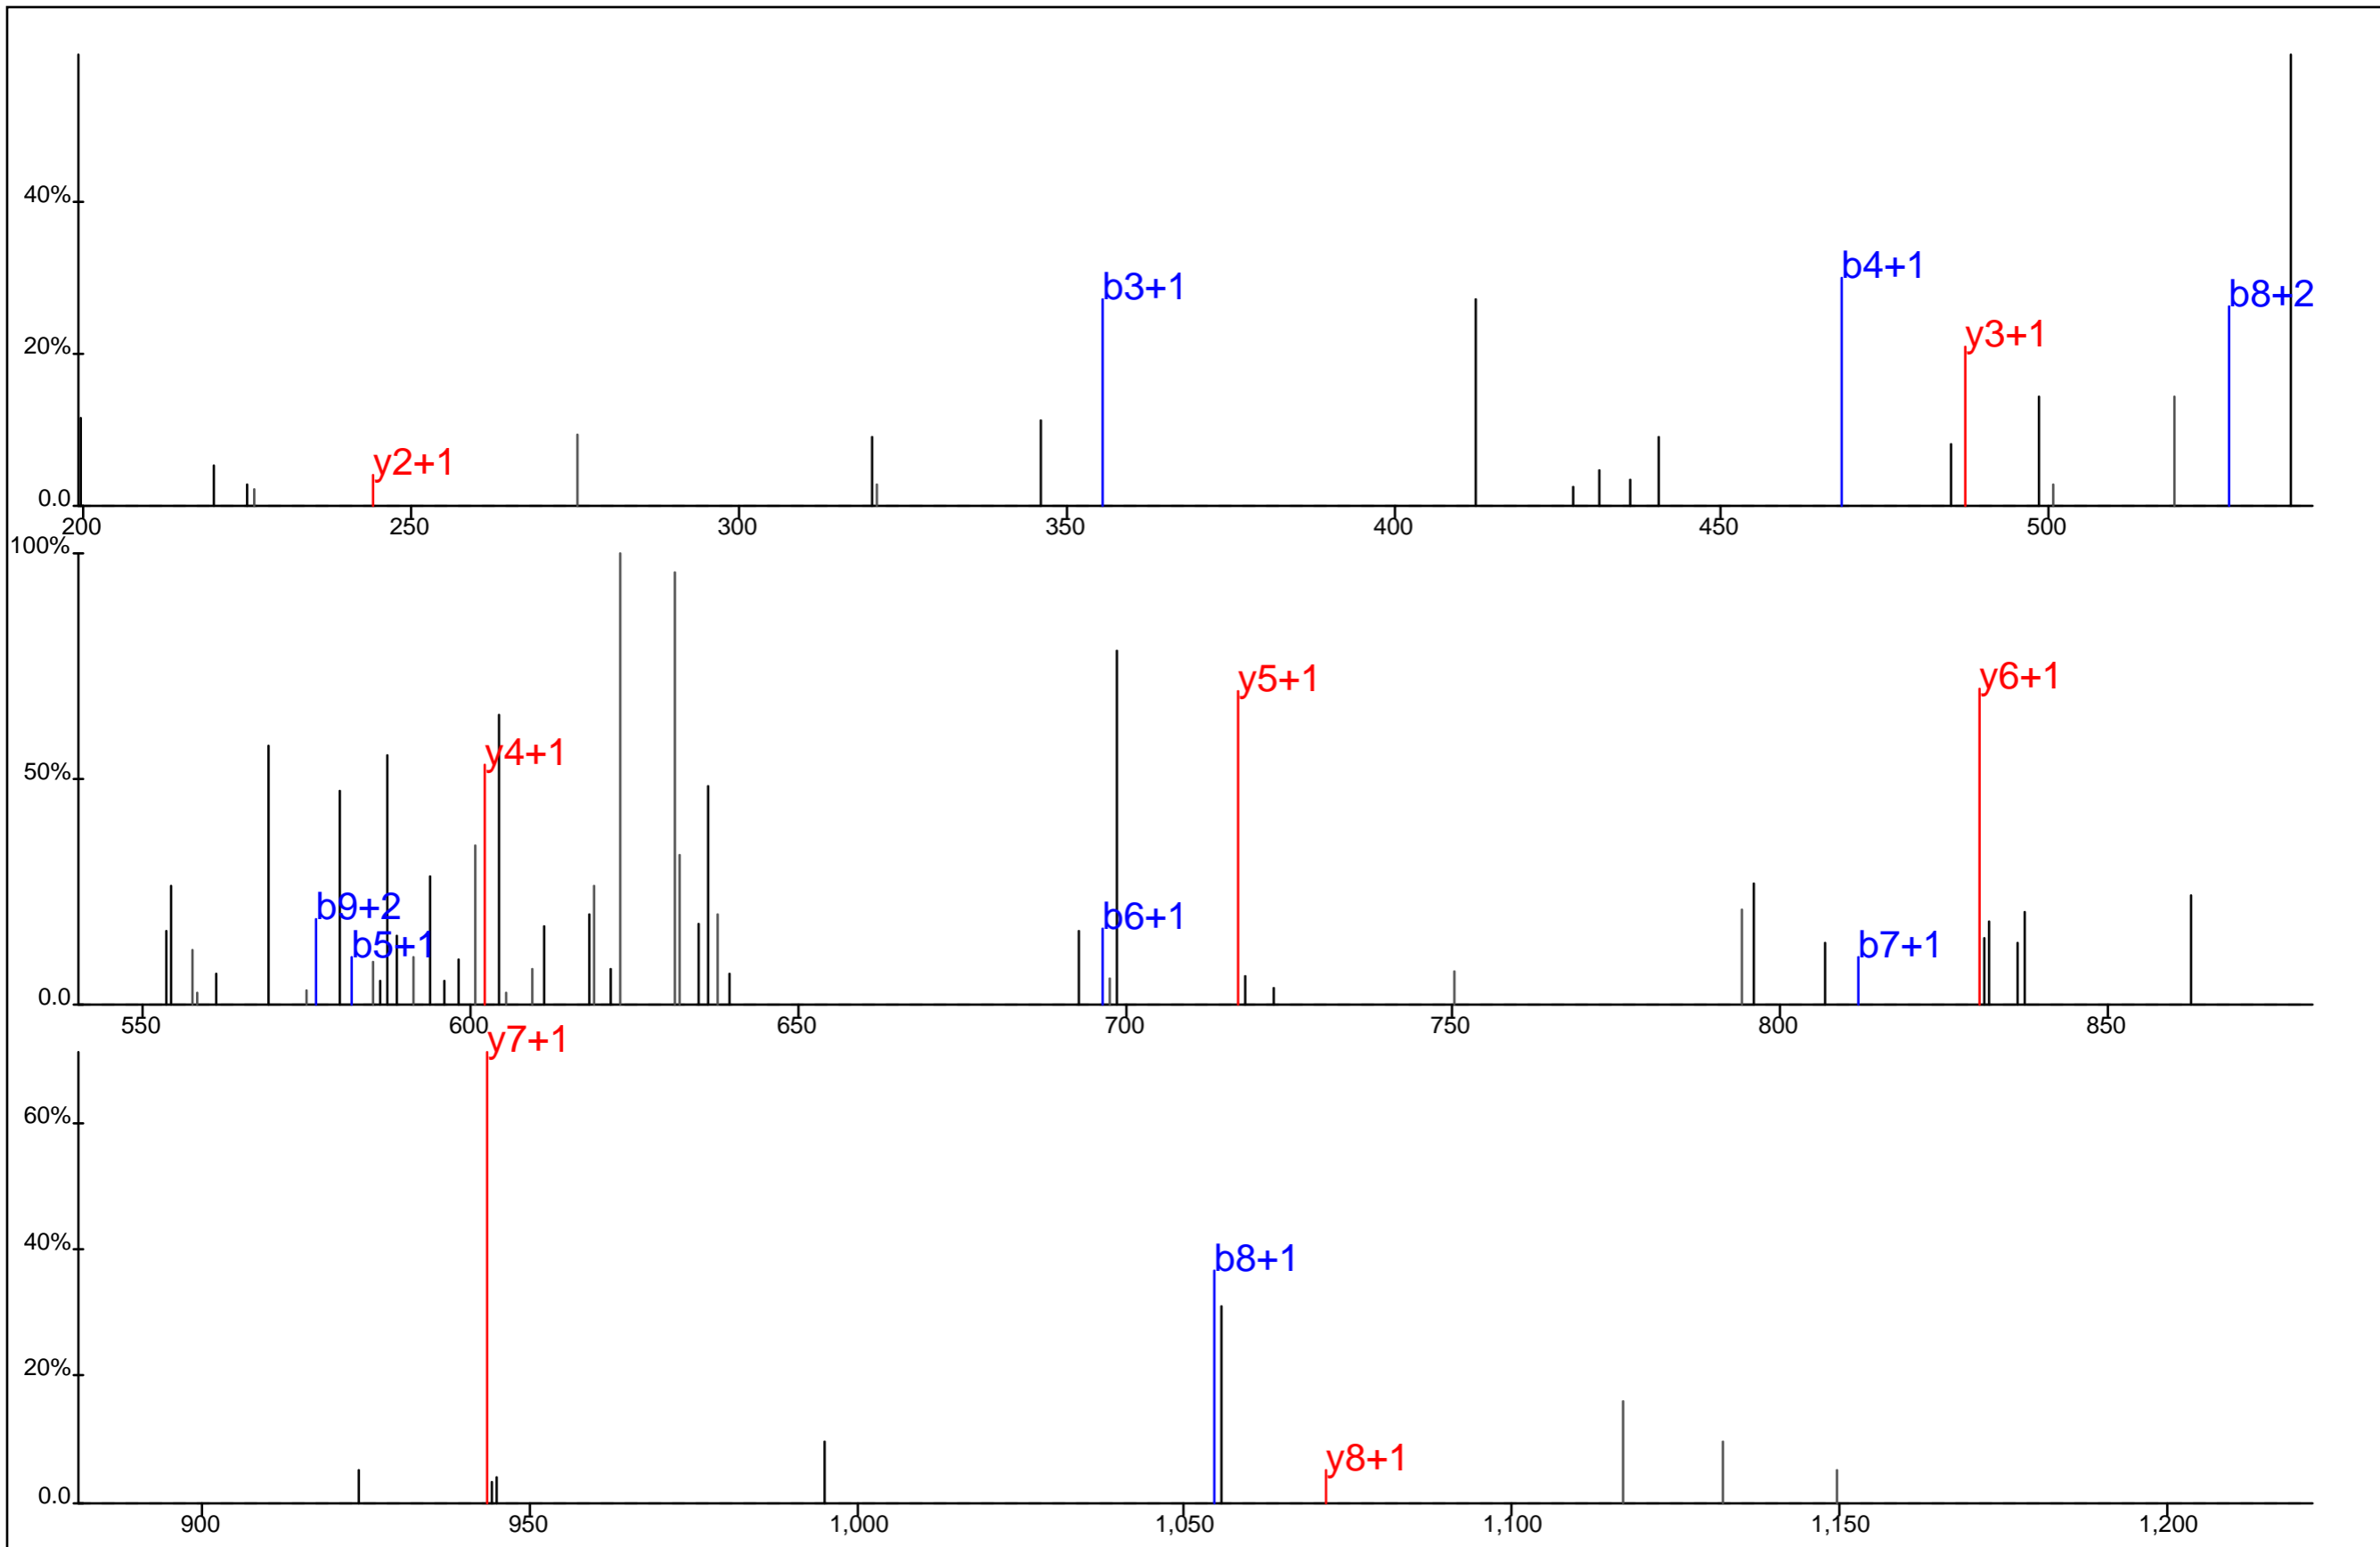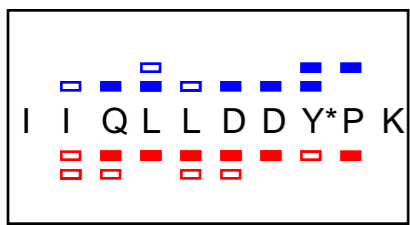

Protein Name: Ribosomal protein P0  
 gi Accession: 4506667  
 Precursor Mass: 649.3287+2  
 Delta Mass: 4.716 ppm  
 XCorr: 2.2849

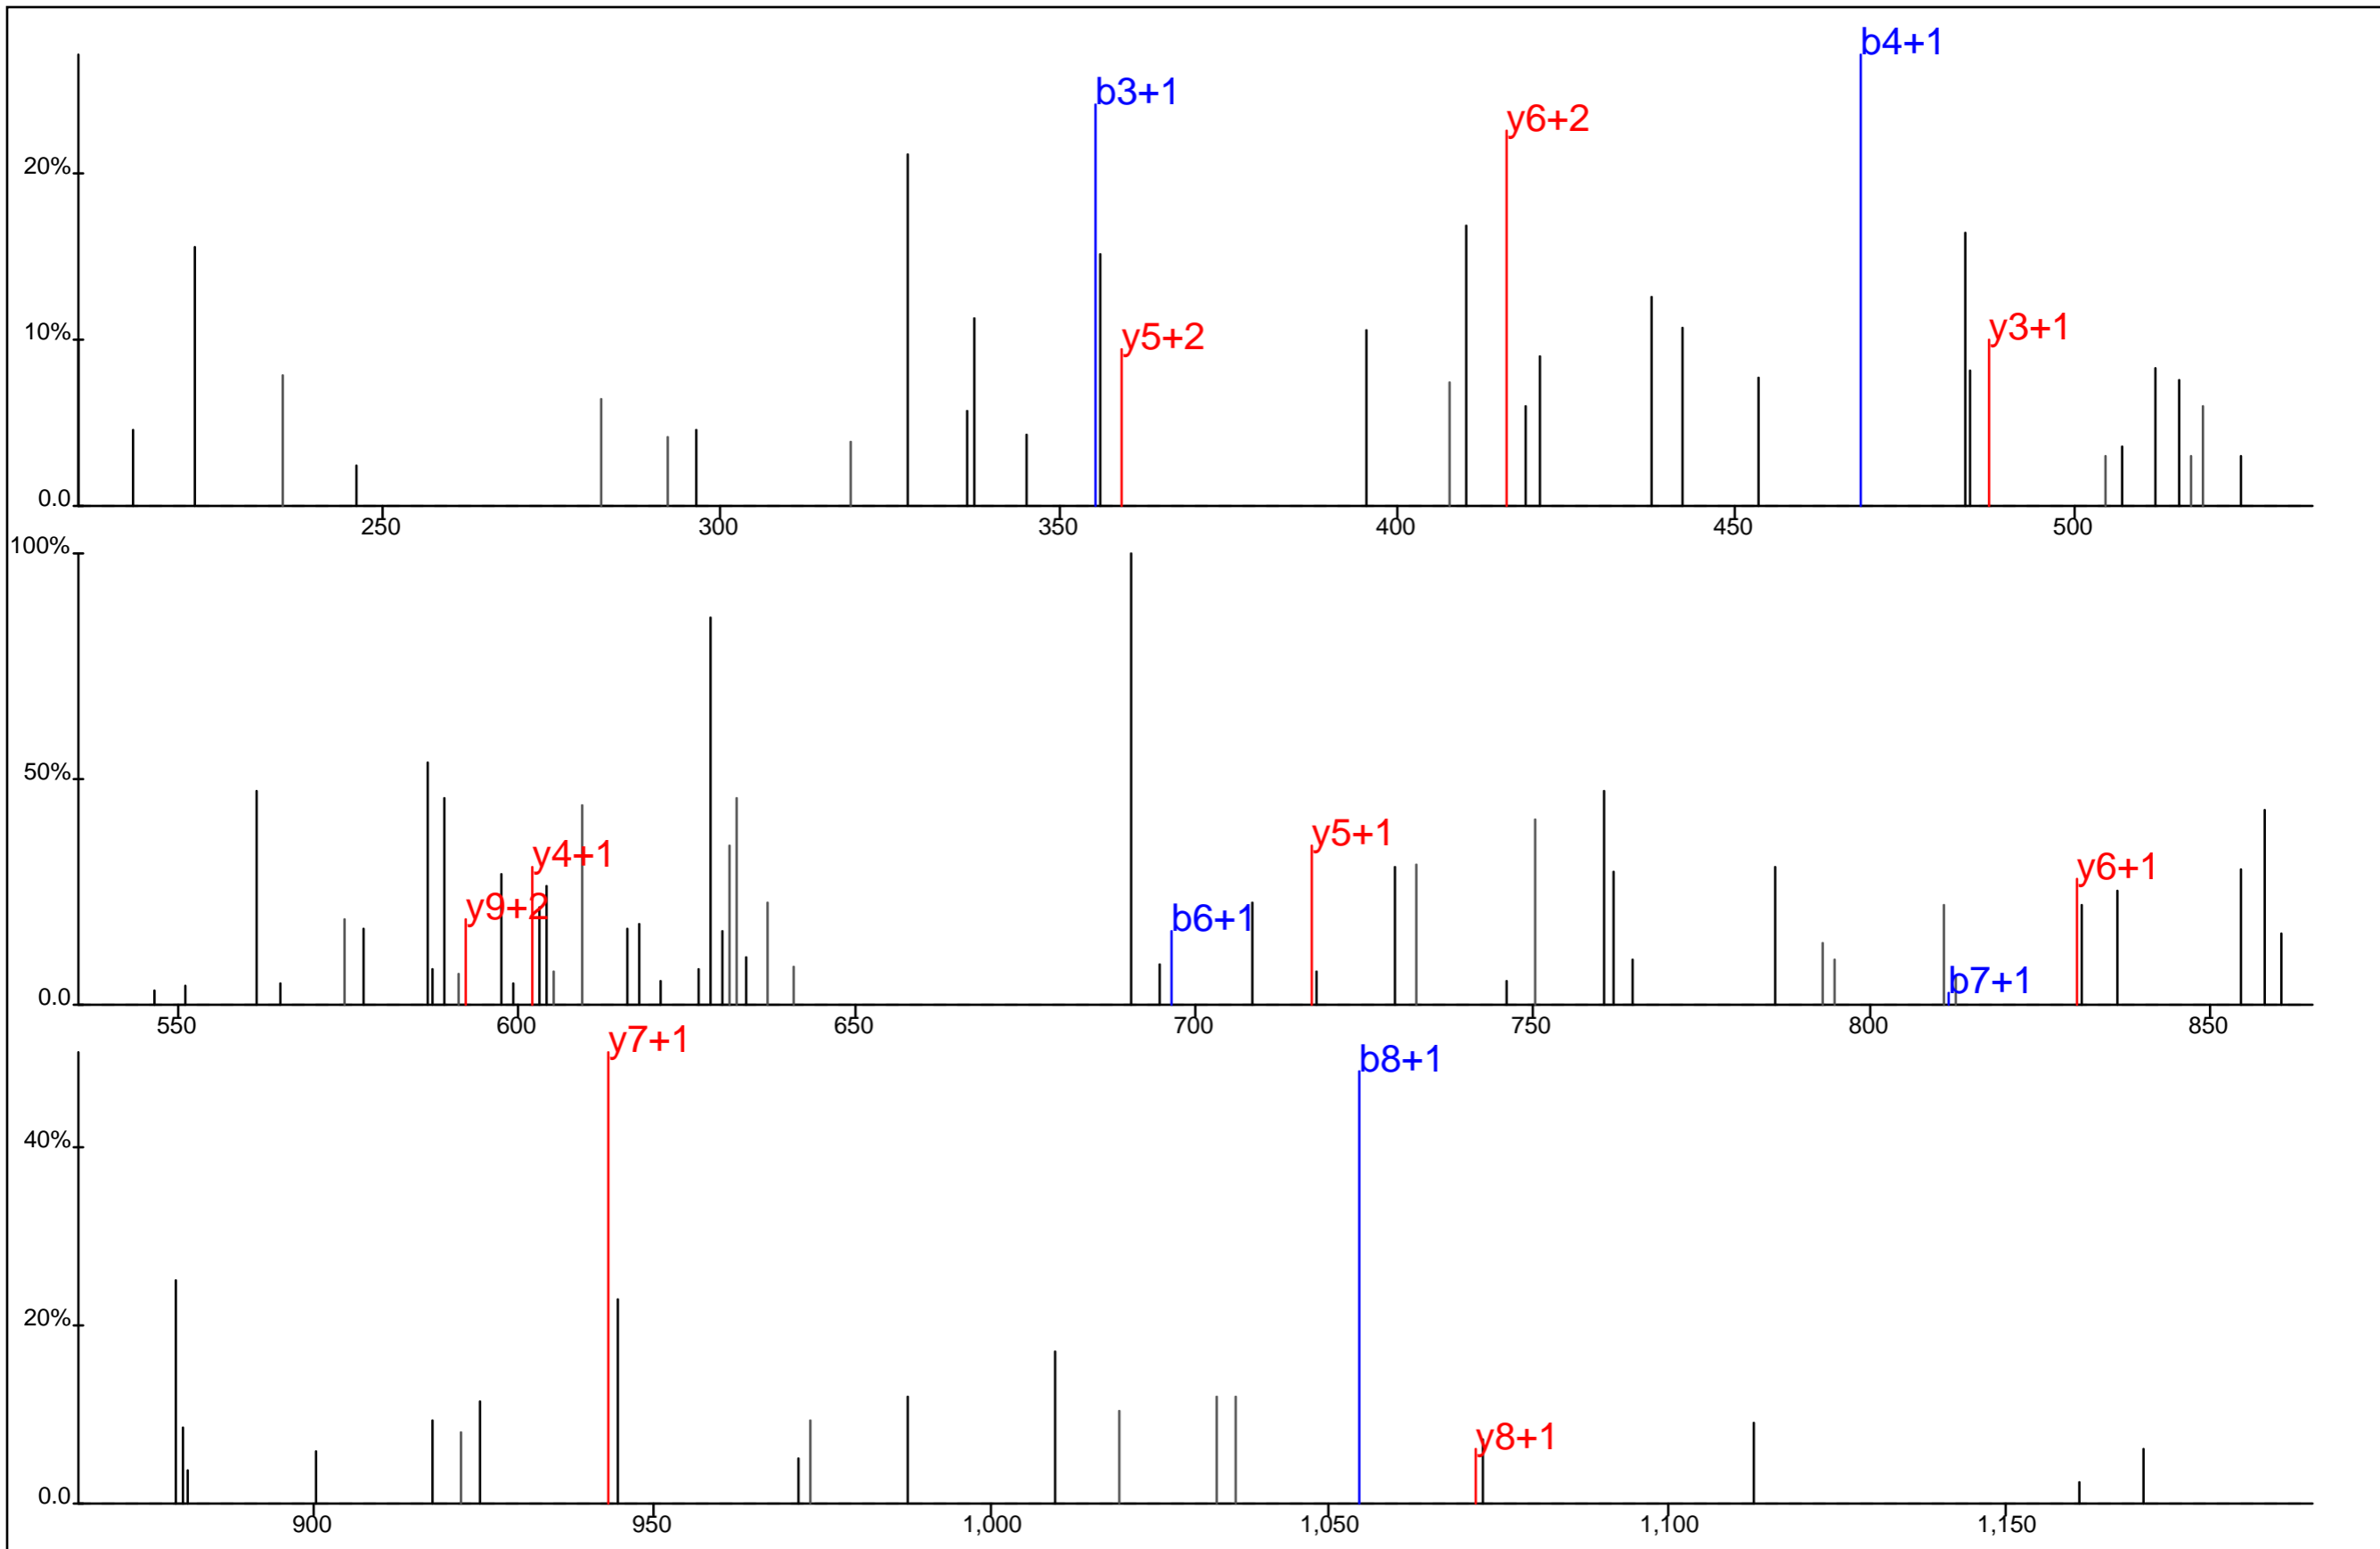

■ ■ ■ ■ ■ ■  
□ □ □ □ □ □

I I Q L L D D Y\*P K

Protein Name: Ribosomal protein P0  
 gi Accession: 4506667  
 Precursor Mass: 649.3258+2  
 Delta Mass: 0.293 ppm  
 XCorr: 2.0974

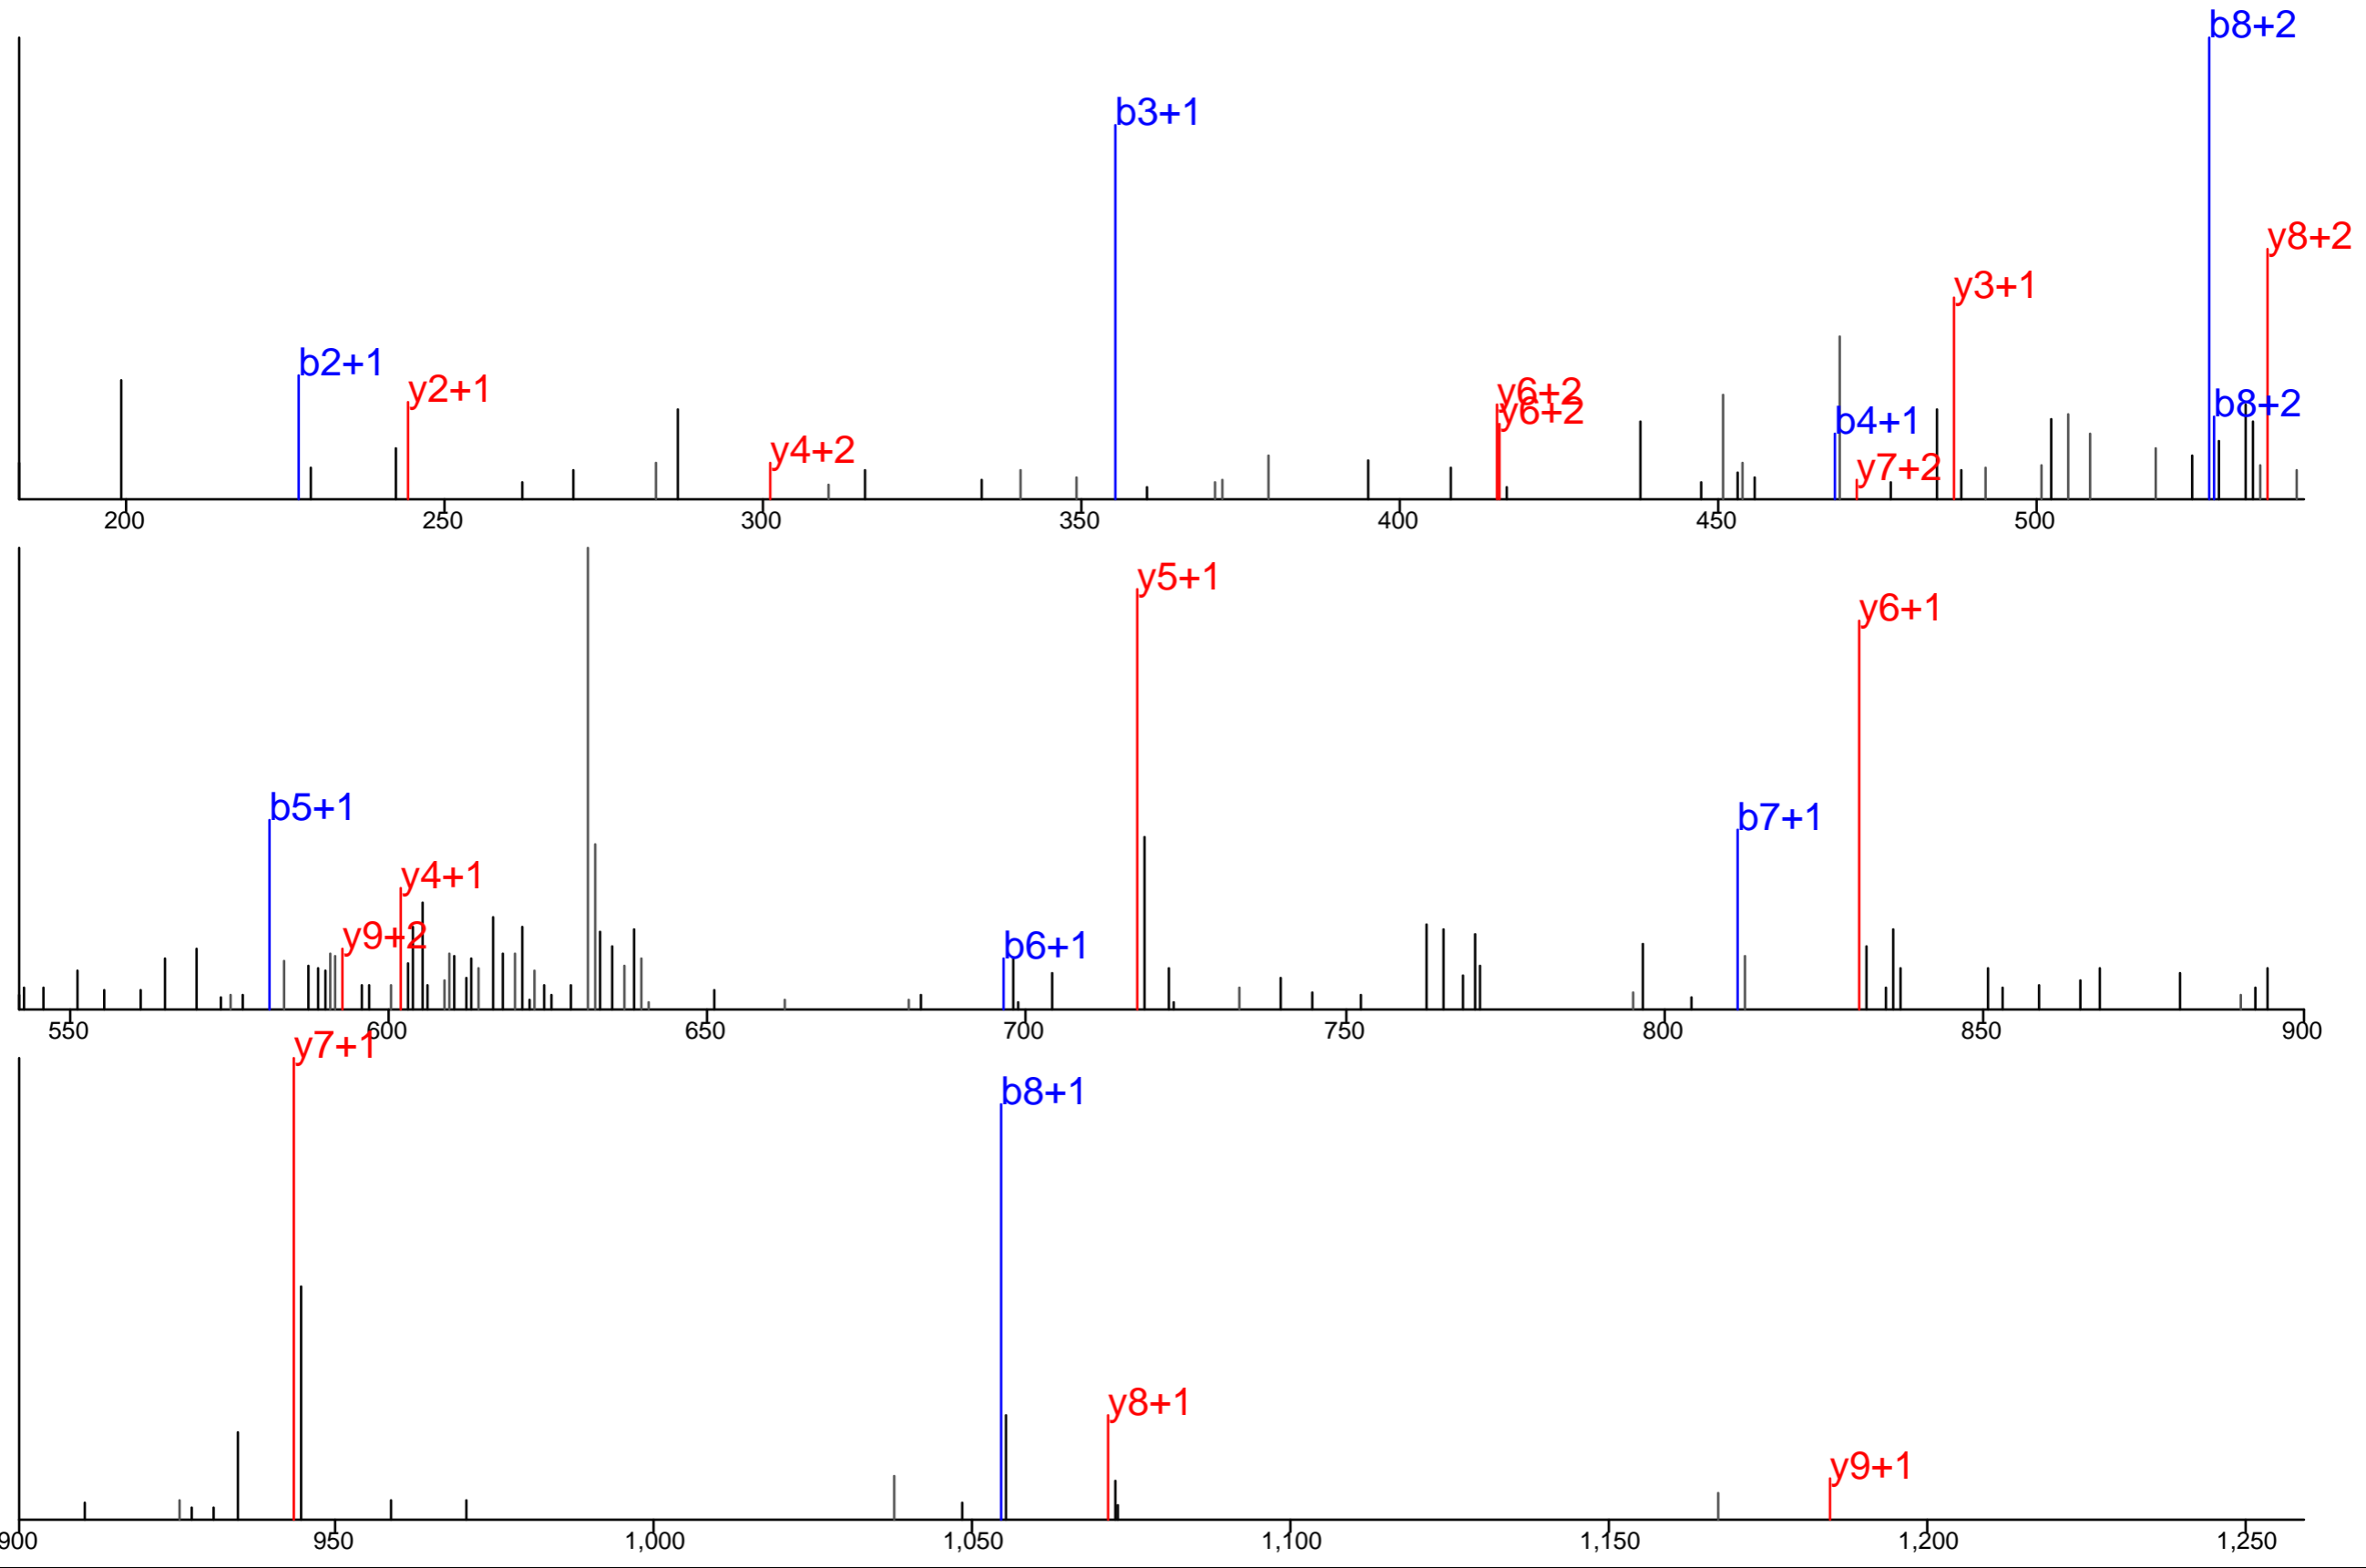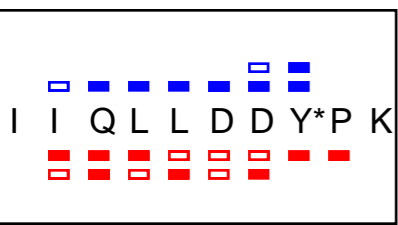

Protein Name: Ribosomal protein P0  
 gi Accession: 4506667  
 Precursor Mass: 649.3278+2  
 Delta Mass: 3.420 ppm  
 XCorr: 48.44

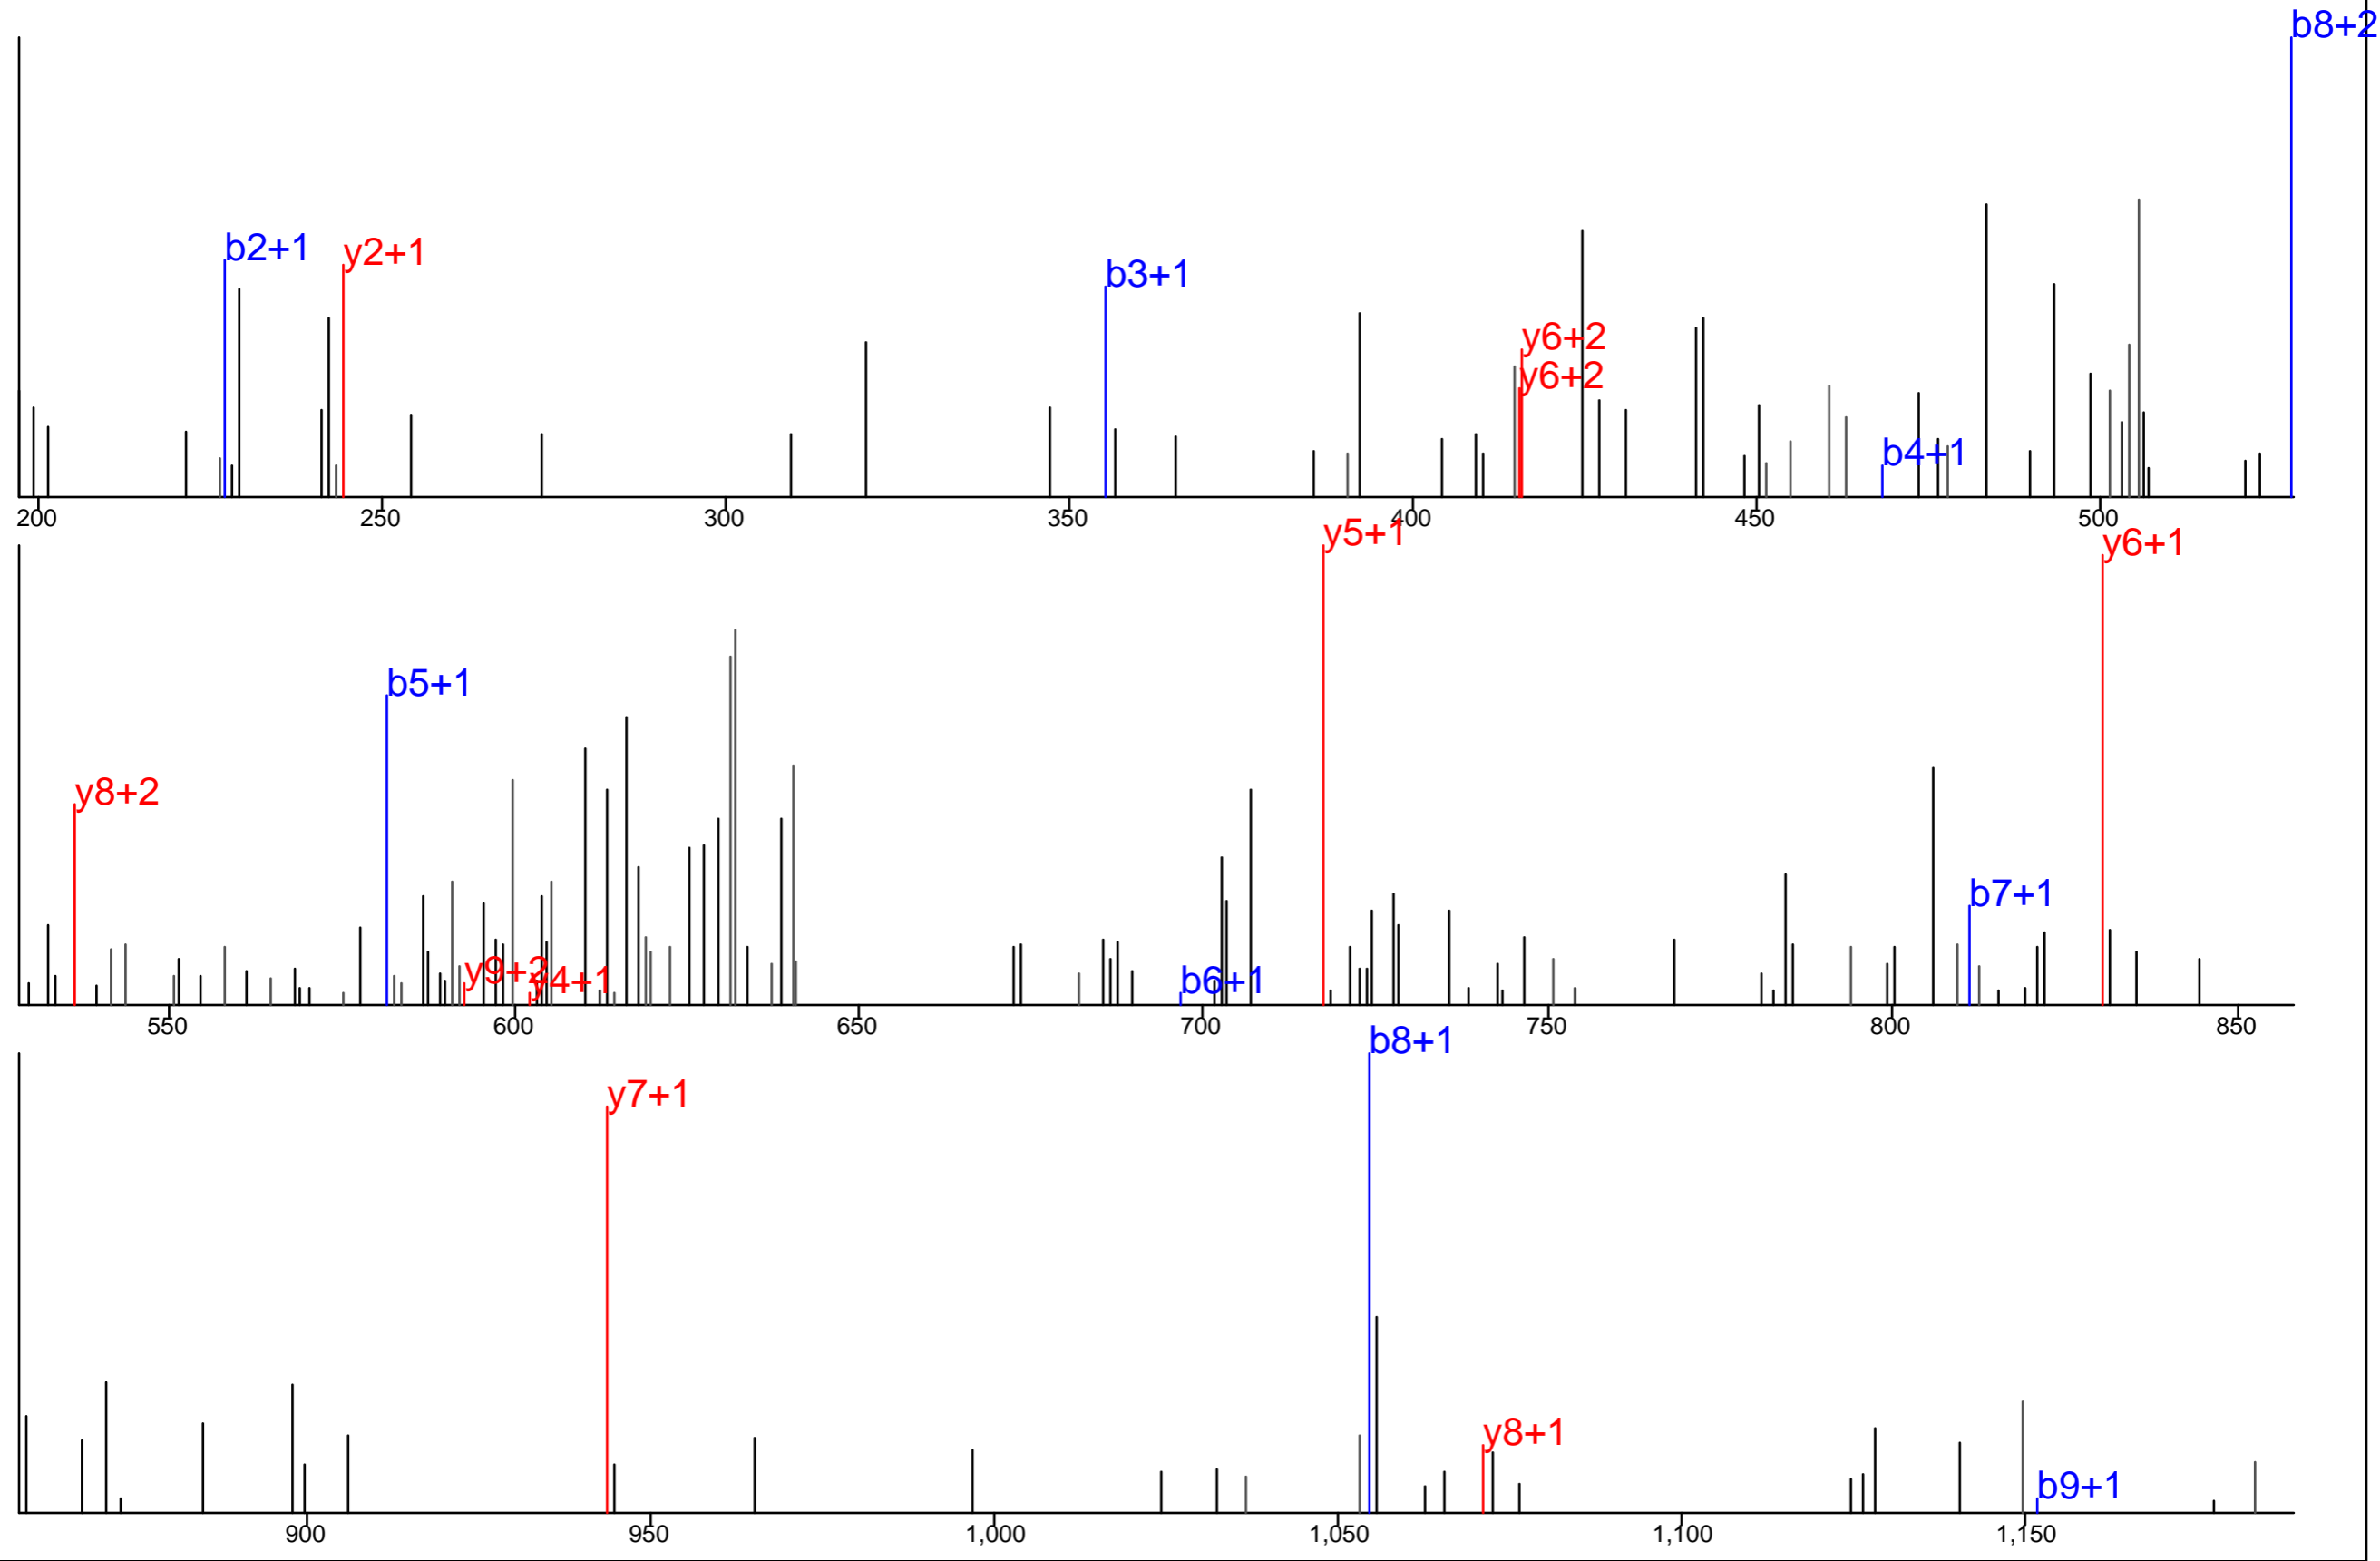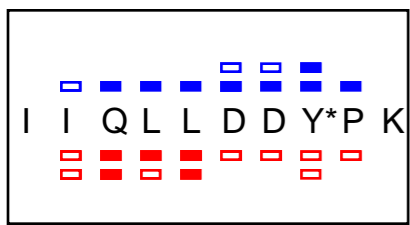

Protein Name: Ribosomal protein P0  
 gi Accession: 4506667  
 Precursor Mass: 649.3303+2  
 Delta Mass: 7.188 ppm  
 XCorr: 28.18

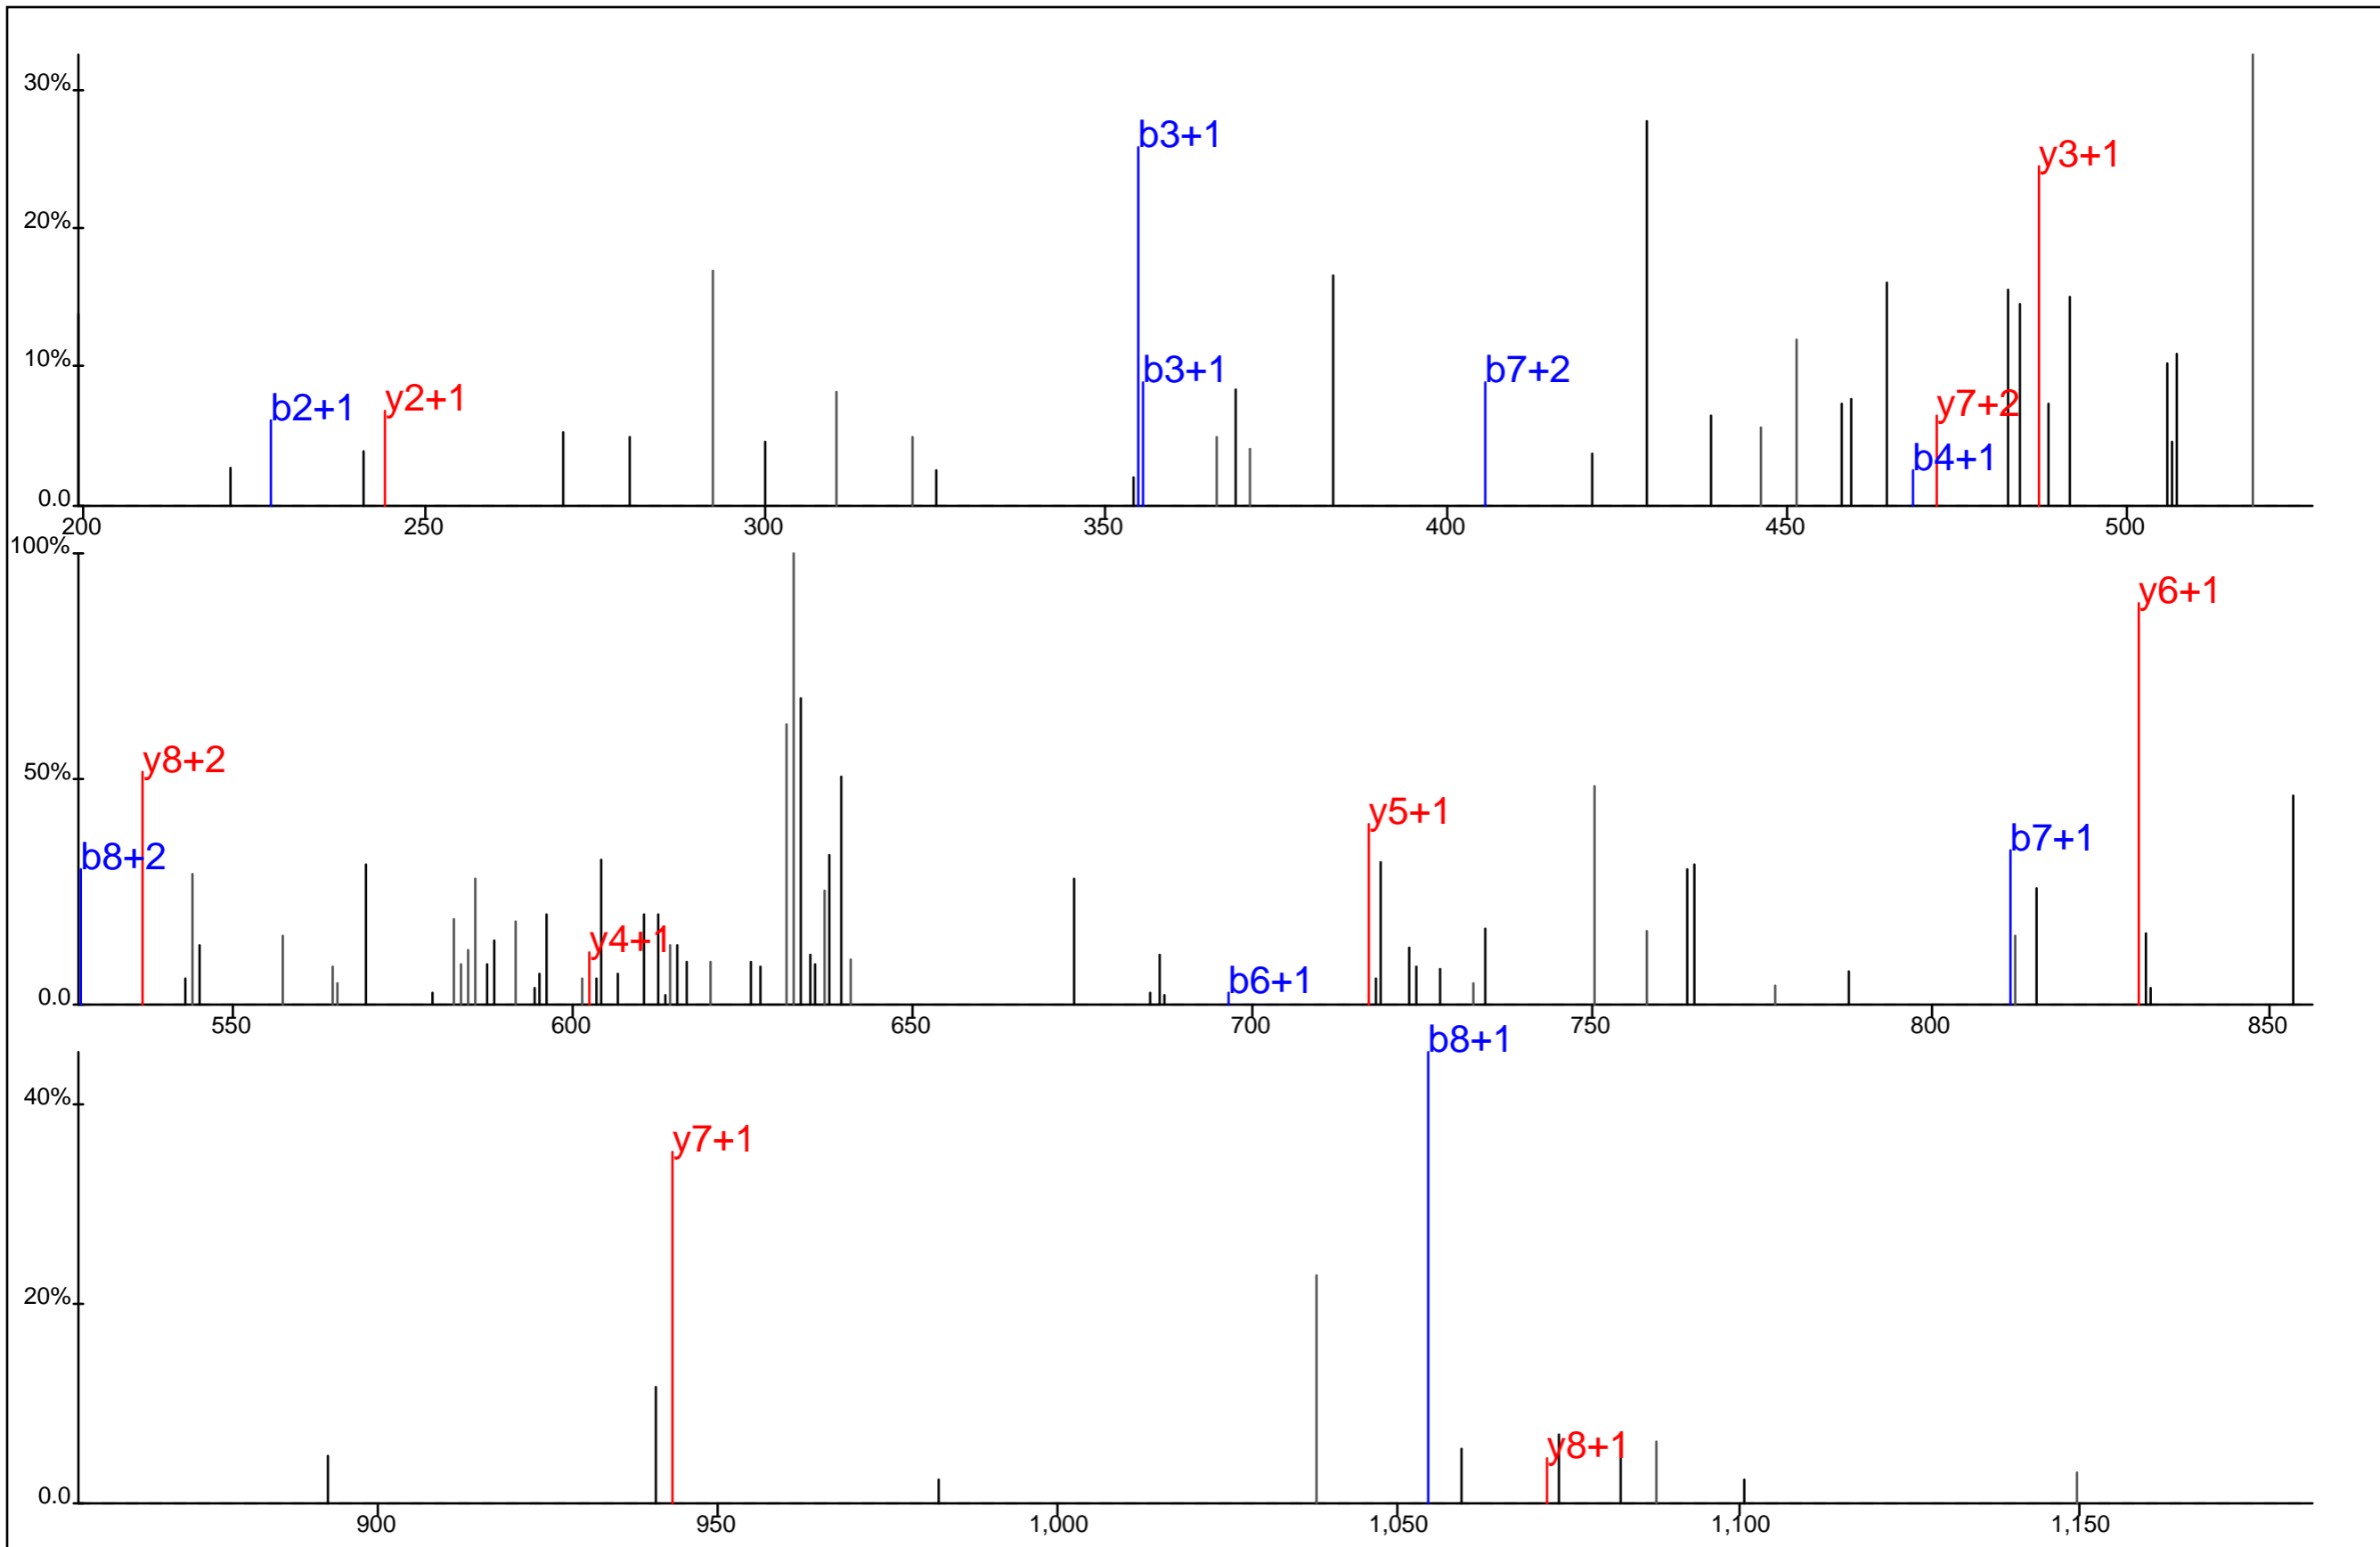

I I Q L L D D Y\* P K

Protein Name: Ribosomal protein P0  
 gi Accession: 4506667  
 Precursor Mass: 649.3313+2  
 Delta Mass: 8.784 ppm  
 XCorr: 28.06

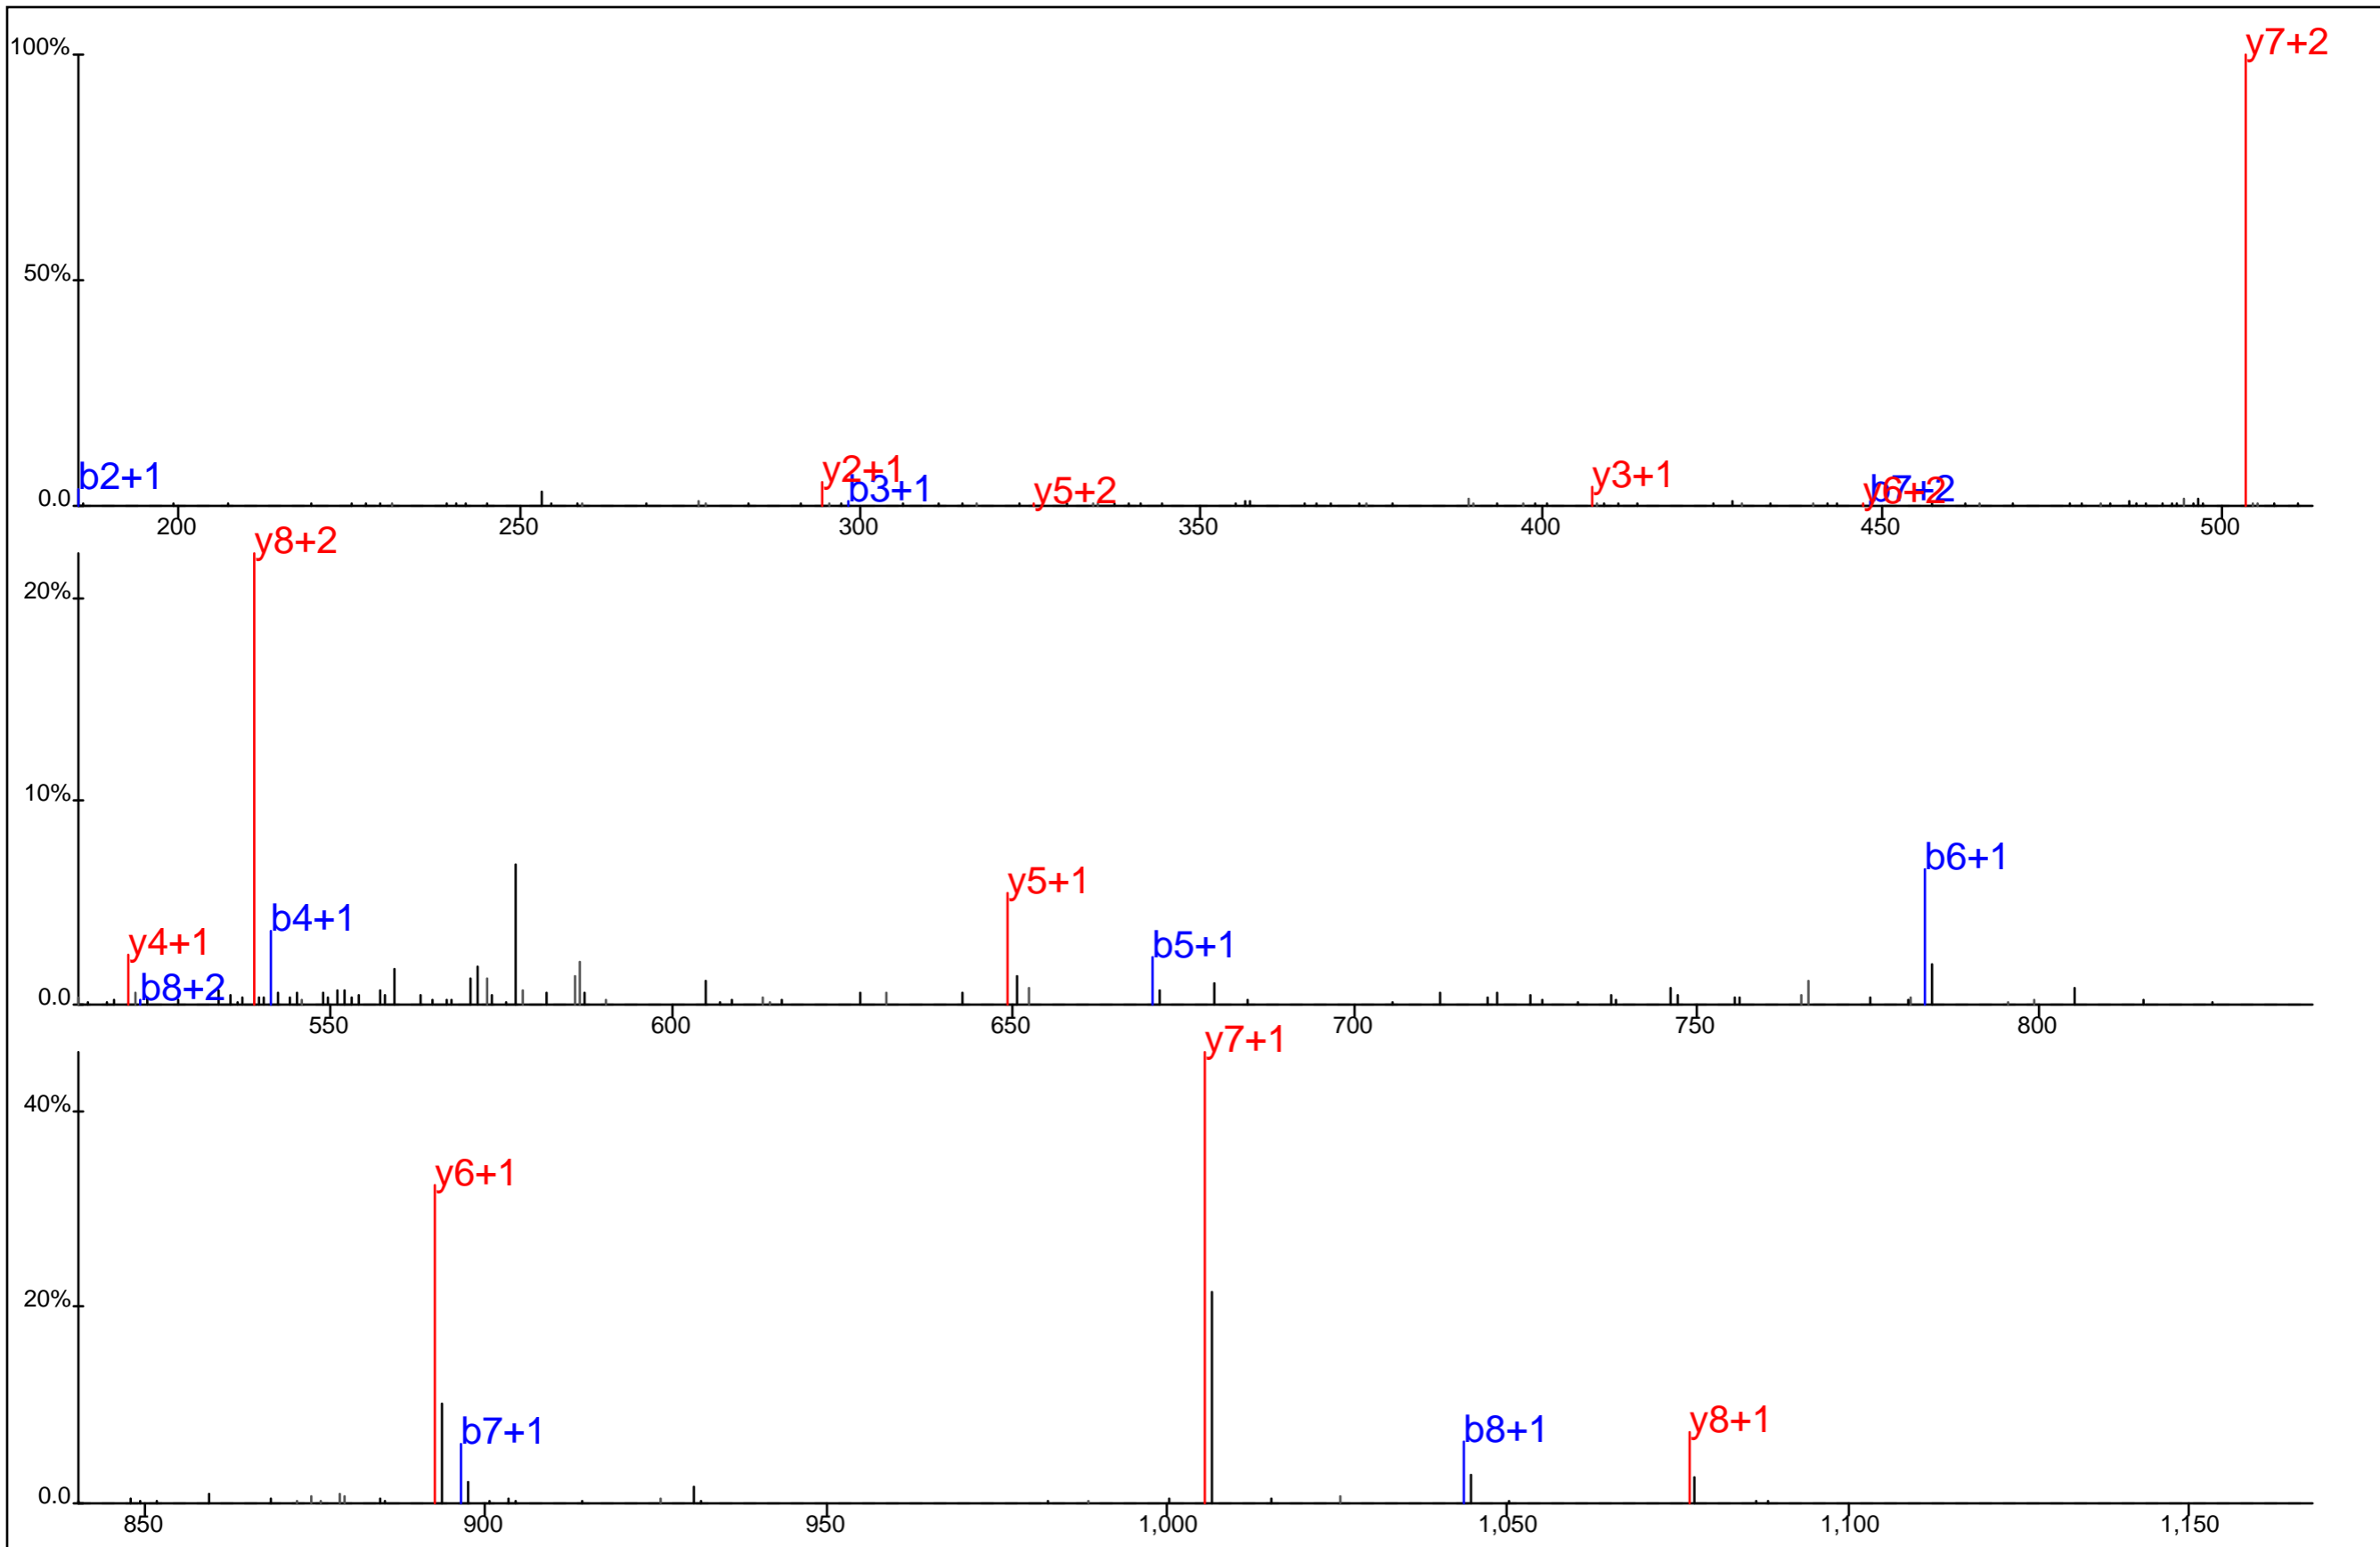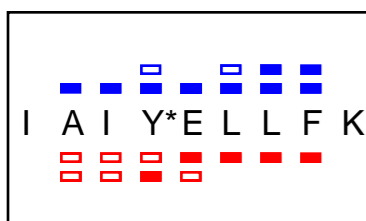

Protein Name: Ribosomal protein S10  
 gi Accession: 3088338  
 Precursor Mass: 595.3193+2  
 Delta Mass: 3.865 ppm  
 XCorr: 41.11

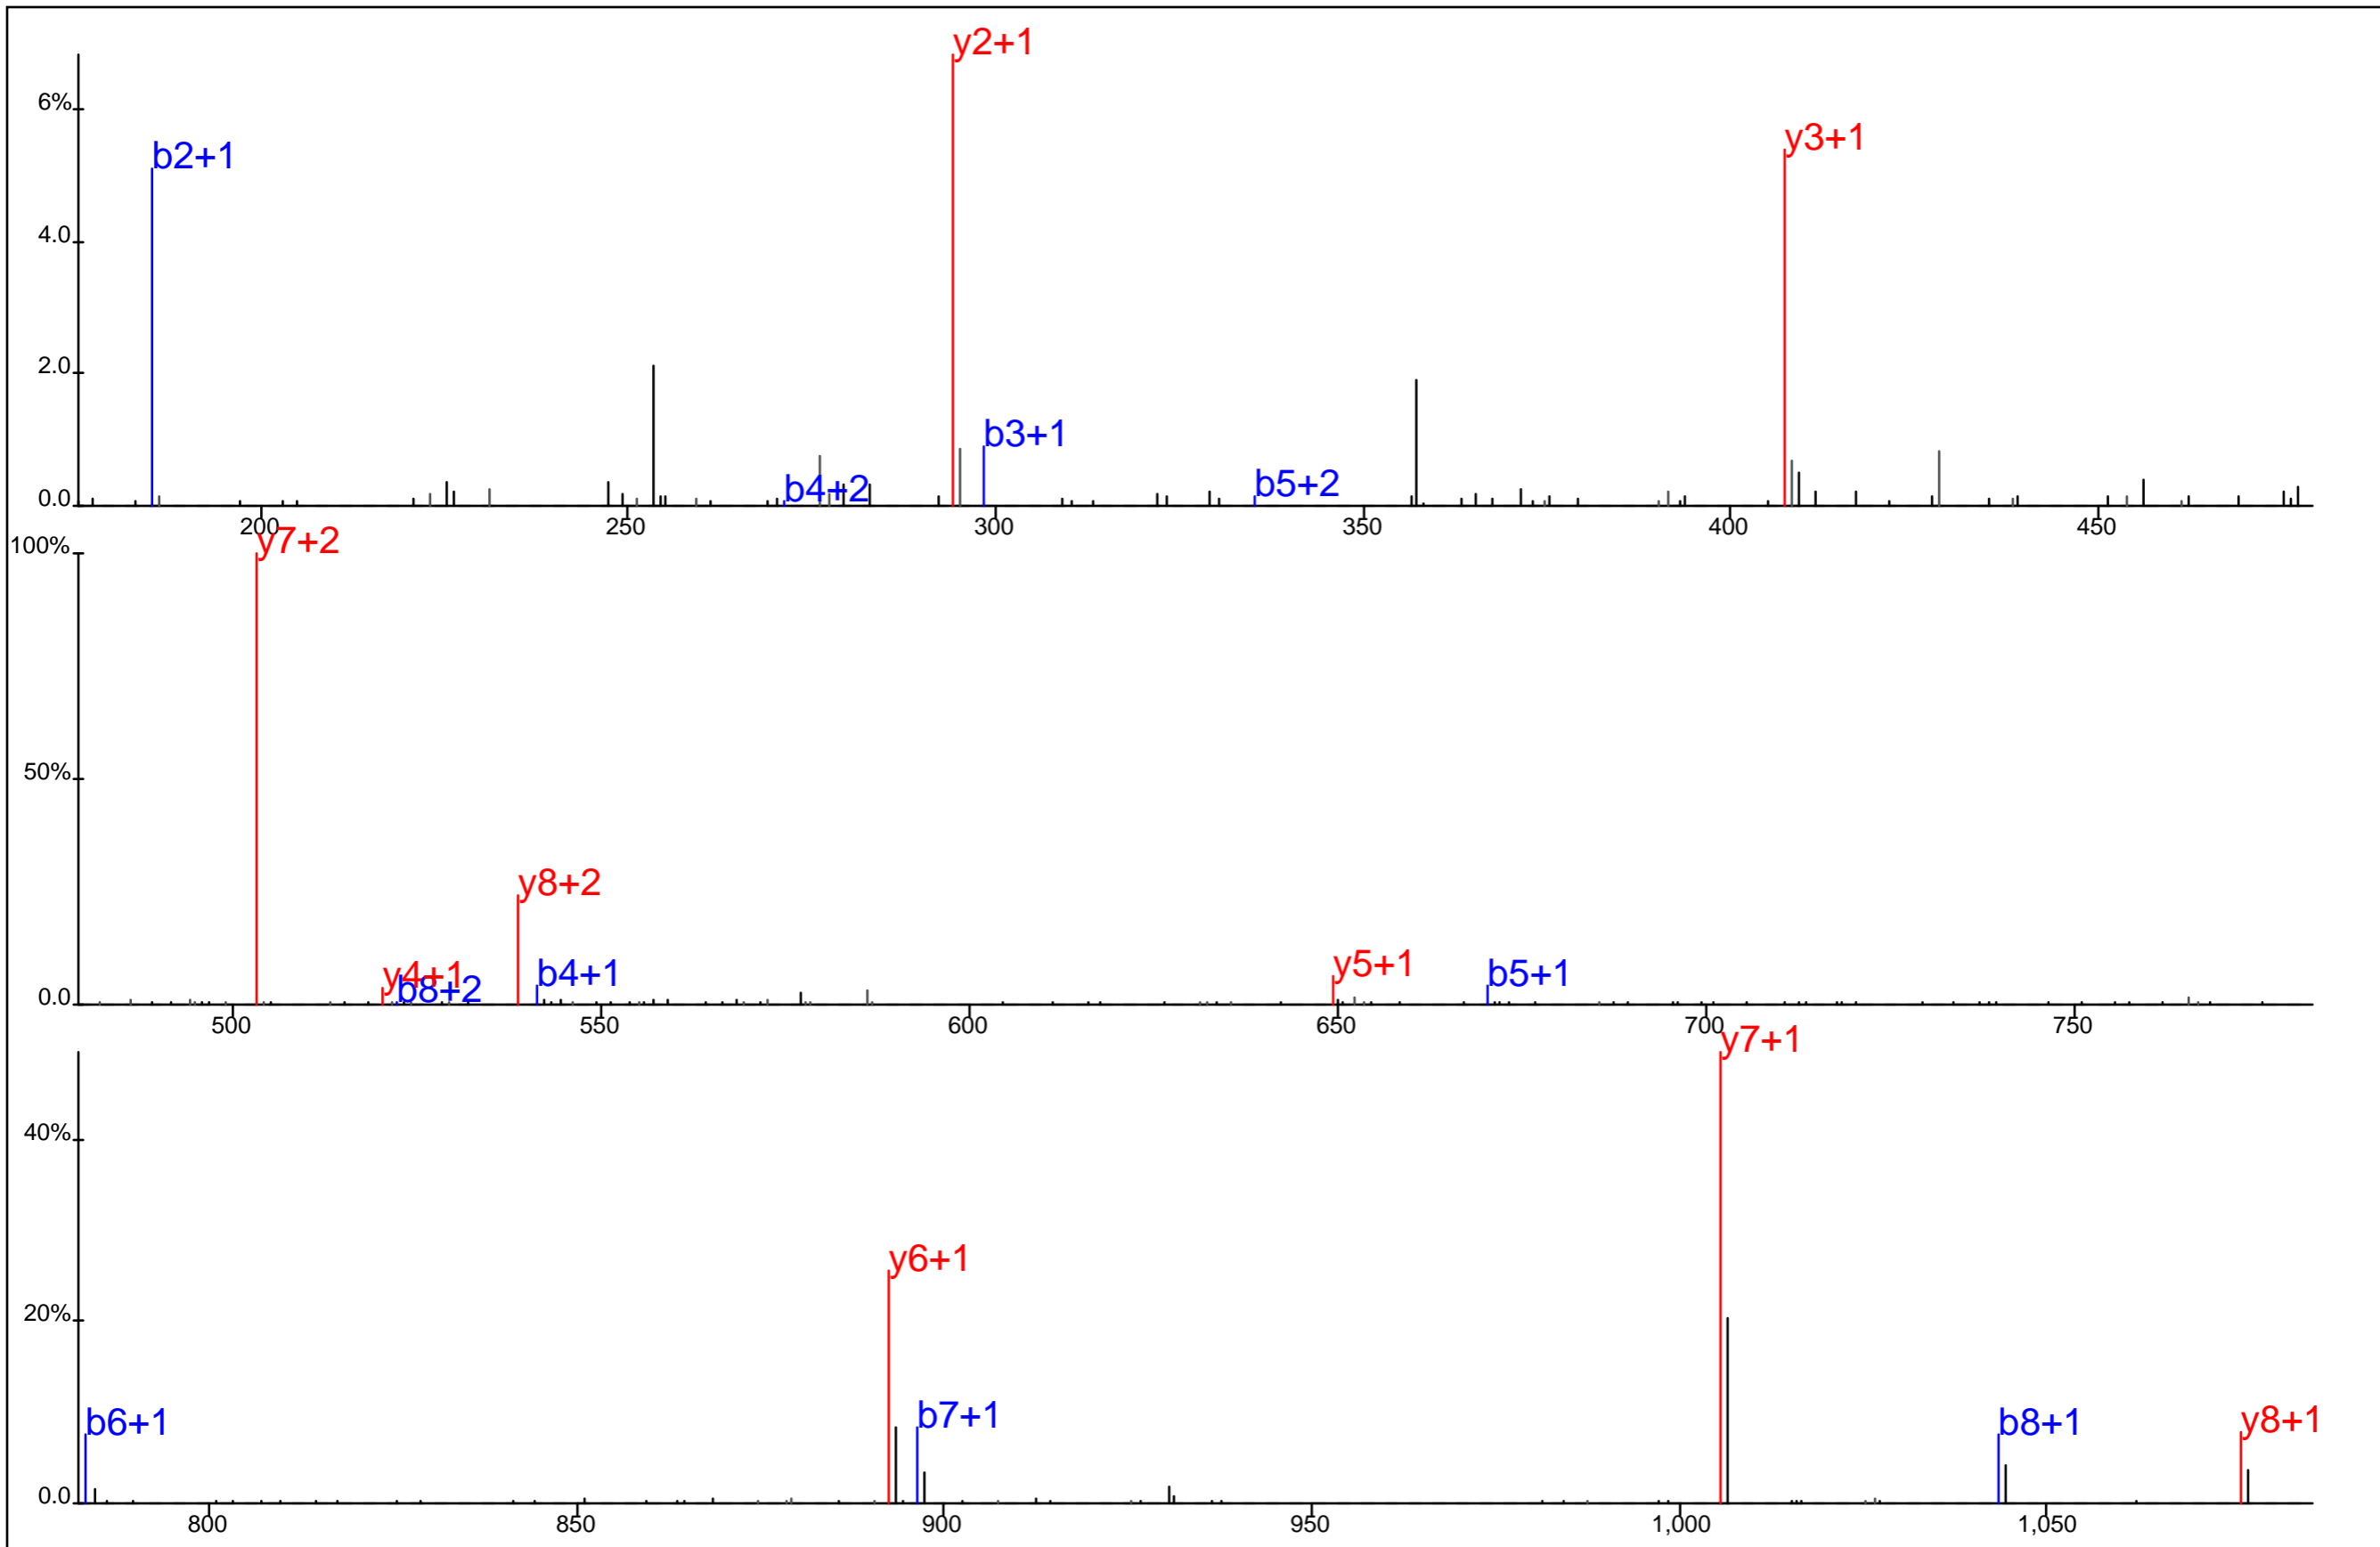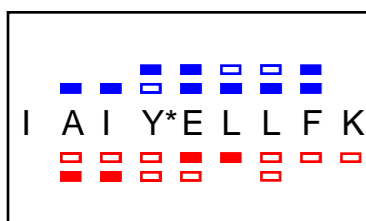

Protein Name: Ribosomal protein S10  
 gi Accession: 3088338  
 Precursor Mass: 595.3190+2  
 Delta Mass: 3.344 ppm  
 XCorr: 62.87



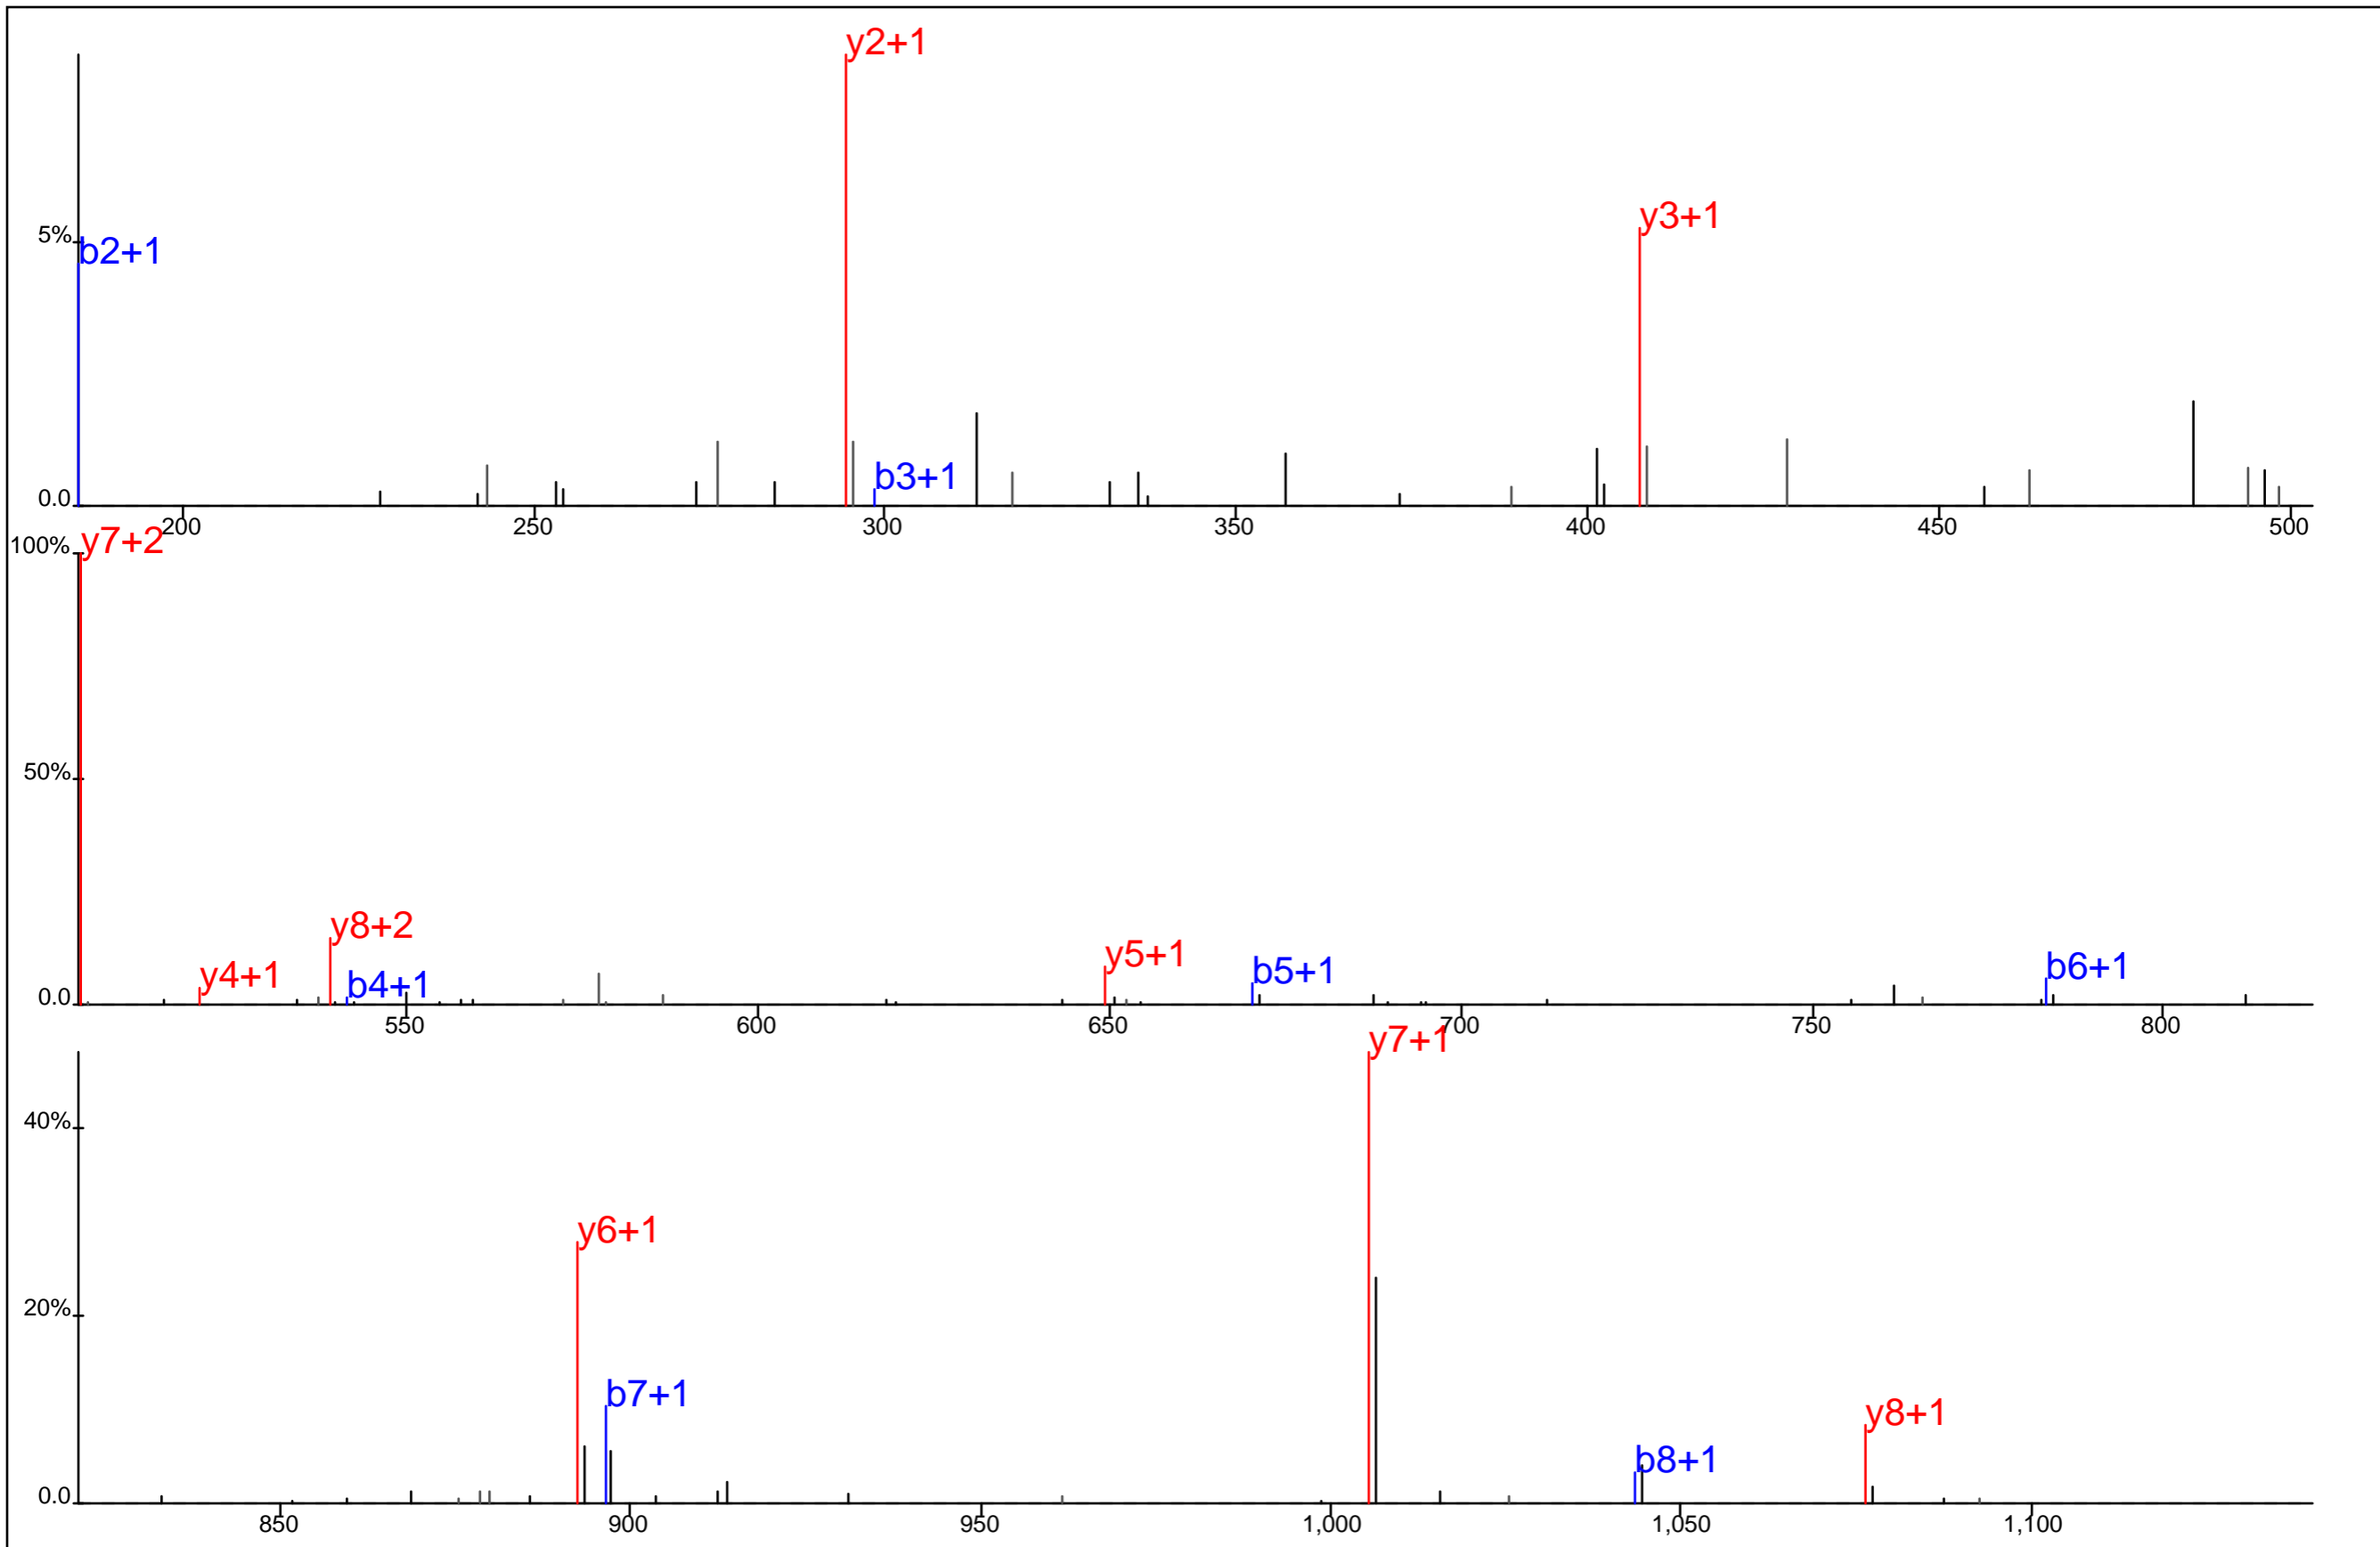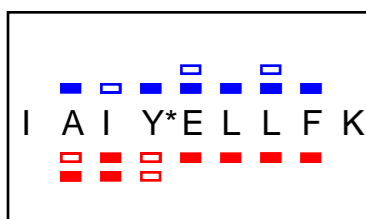

Protein Name: Ribosomal protein S10  
 gi Accession: 3088338  
 Precursor Mass: 595.3190+2  
 Delta Mass: 3.243 ppm  
 XCorr: 41.06

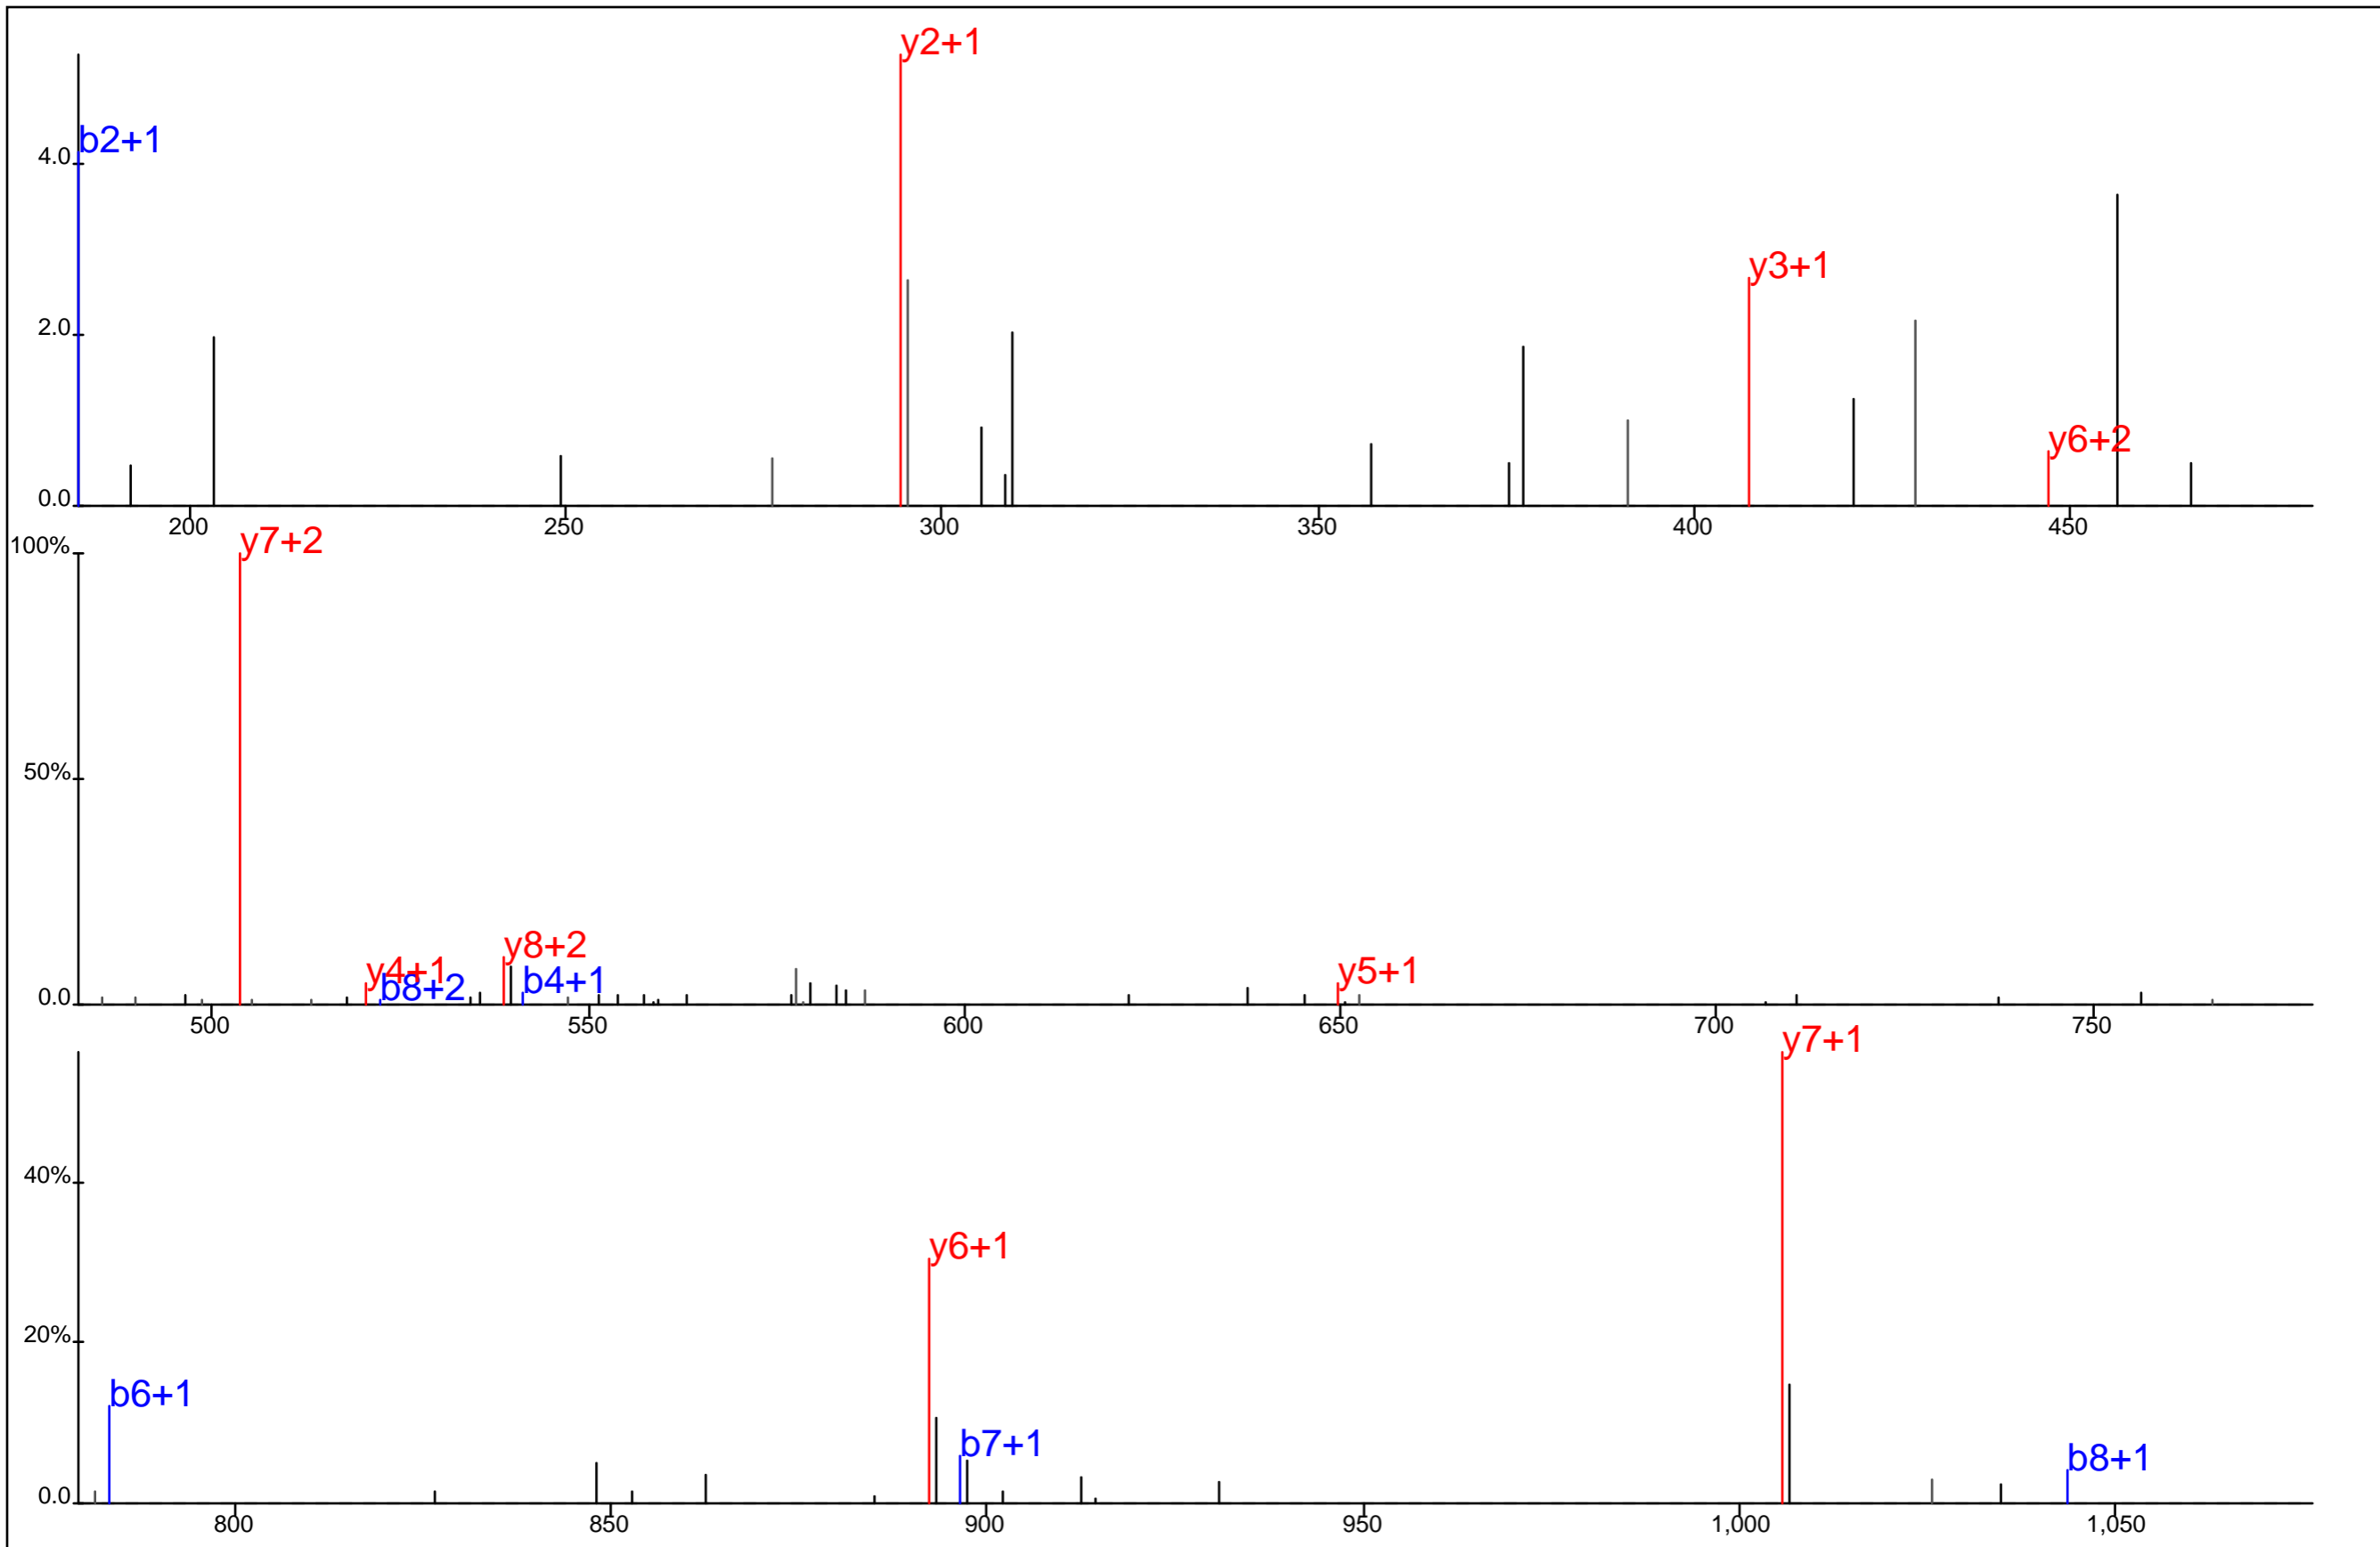

■ ■  
■ ■ □ □  
■ ■ □ □  
■ ■ □ □  
■ ■ □ □  
■ ■ □ □  
■ ■ □ □  
■ ■ □ □  
■ ■ □ □  
■ ■ □ □

Protein Name: Ribosomal protein S10  
 gi Accession: 3088338  
 Precursor Mass: 595.3189+2  
 Delta Mass: 3.142 ppm  
 XCorr: 31.92

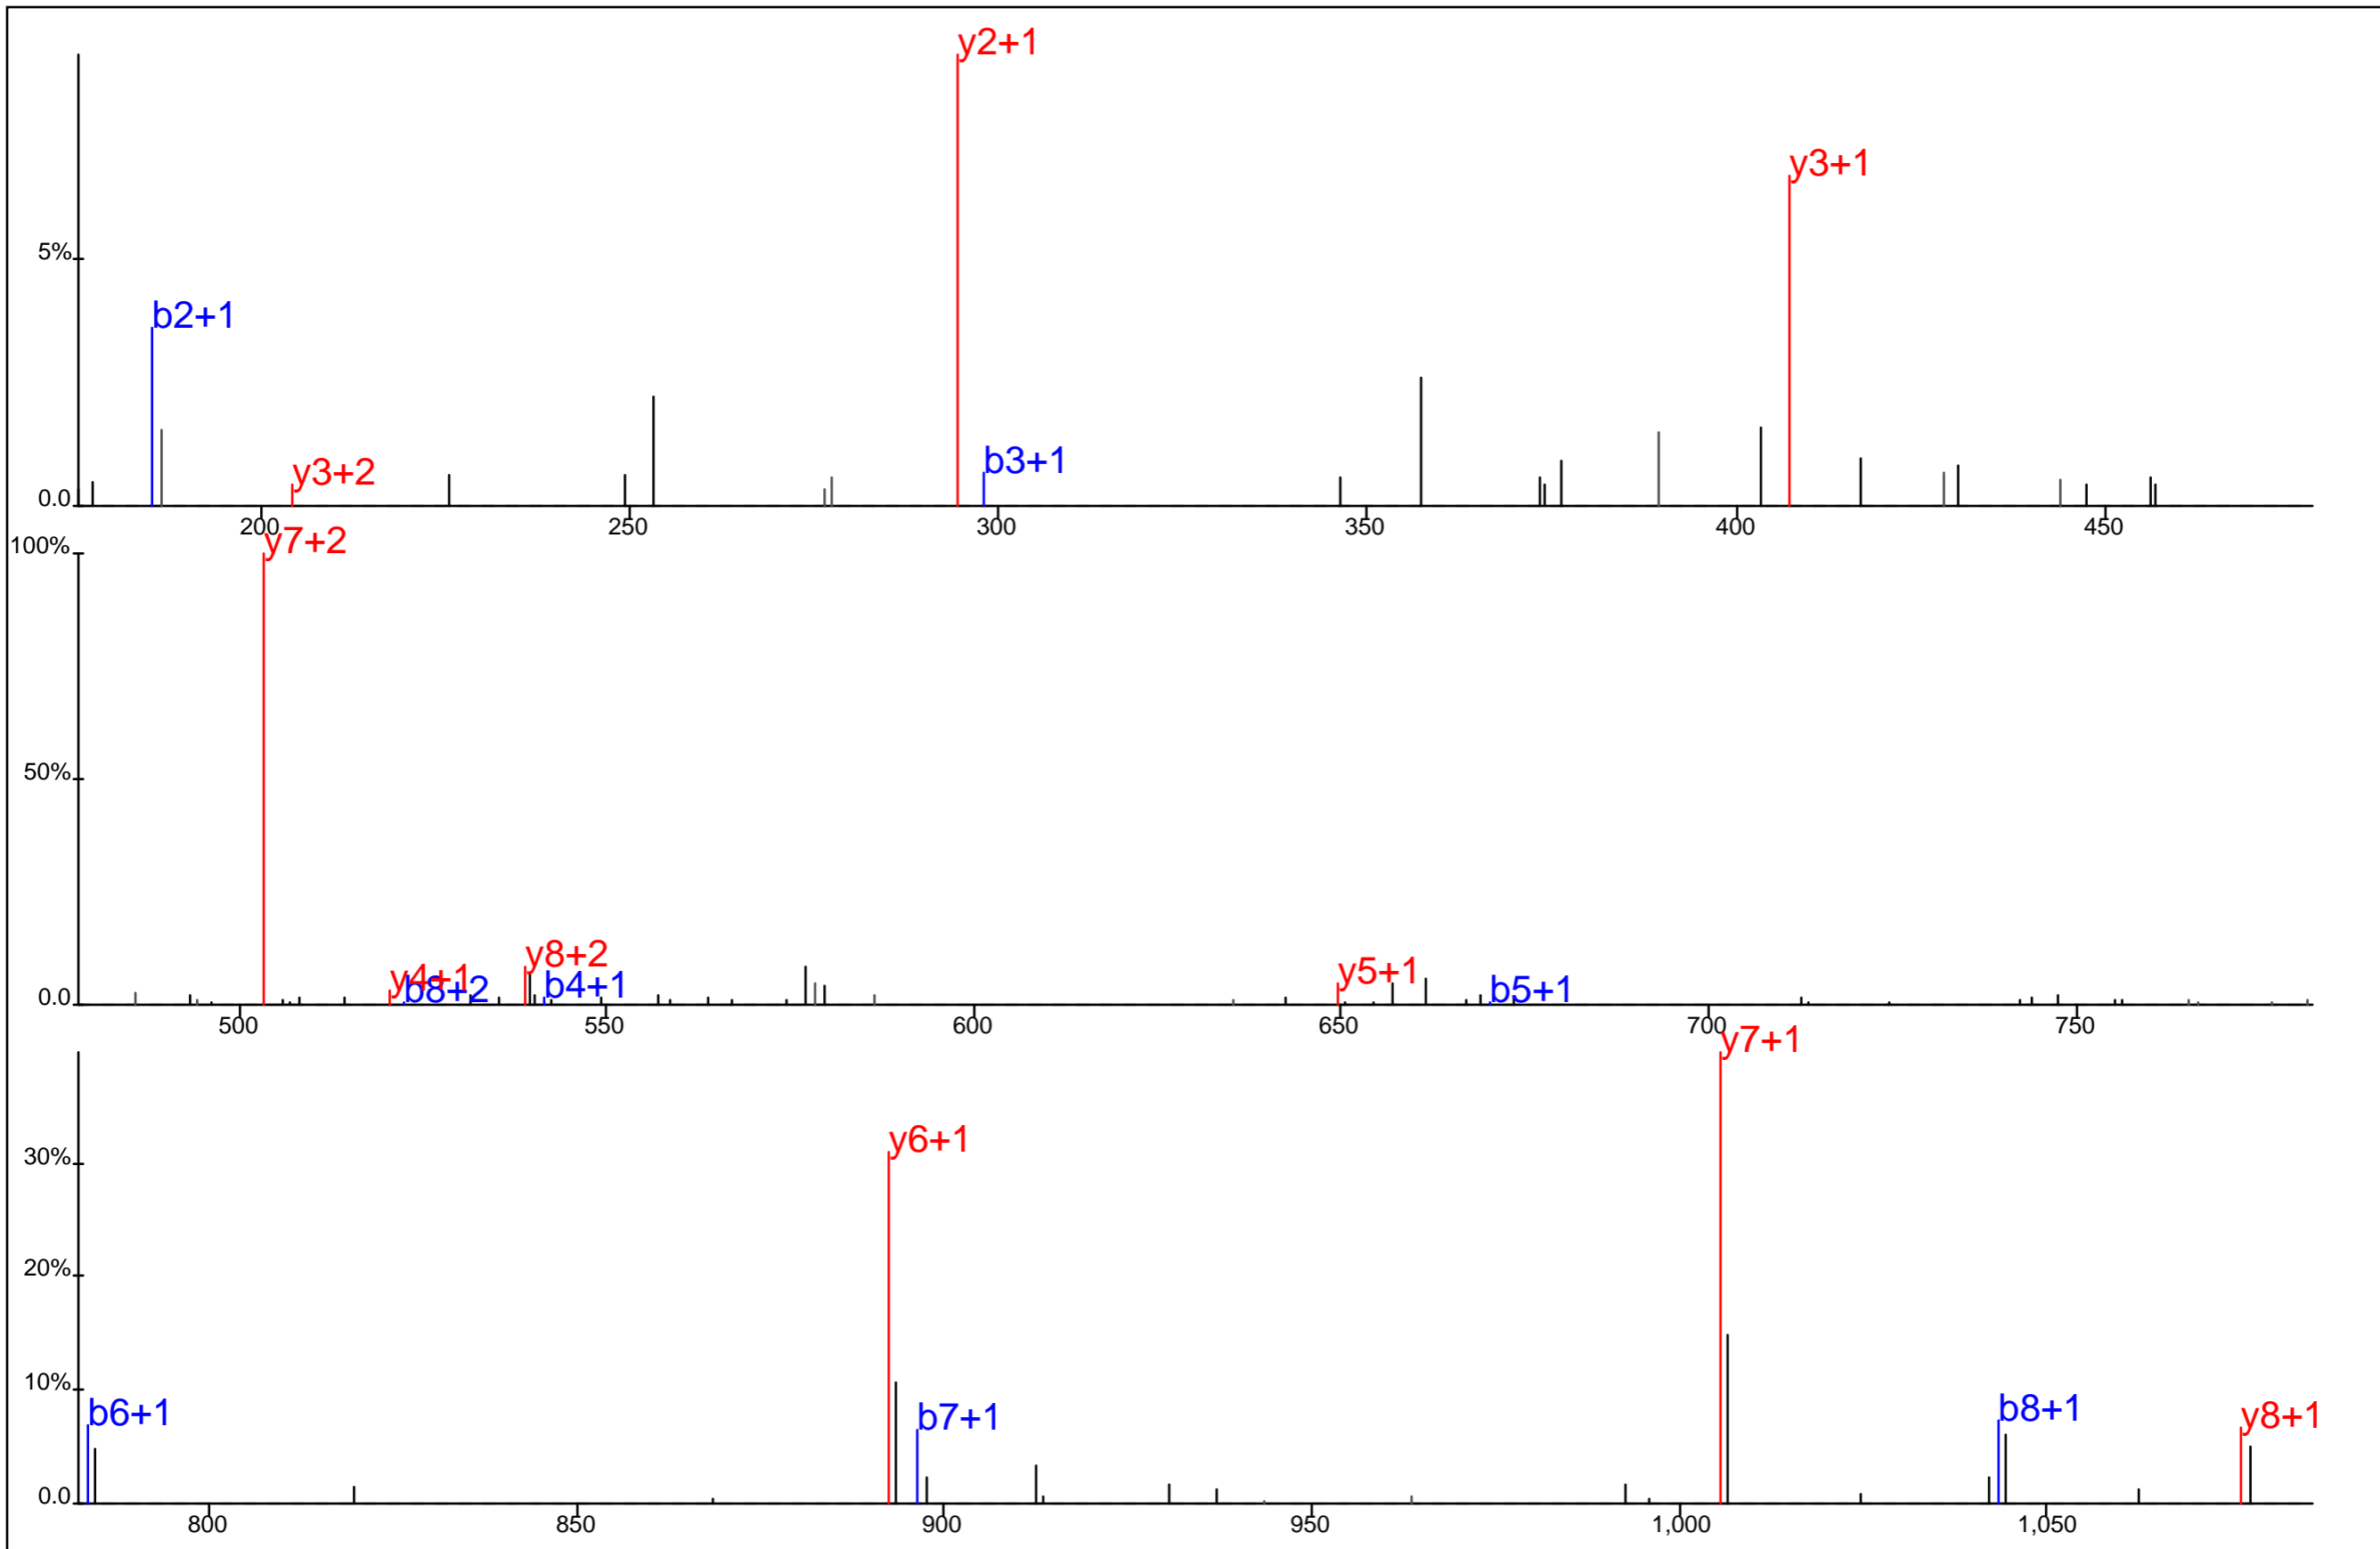

I A I Y\* E L L F K

Protein Name: Ribosomal protein S10  
 gi Accession: 3088338  
 Precursor Mass: 595.3197+2  
 Delta Mass: 4.479 ppm  
 XCorr: 44.79

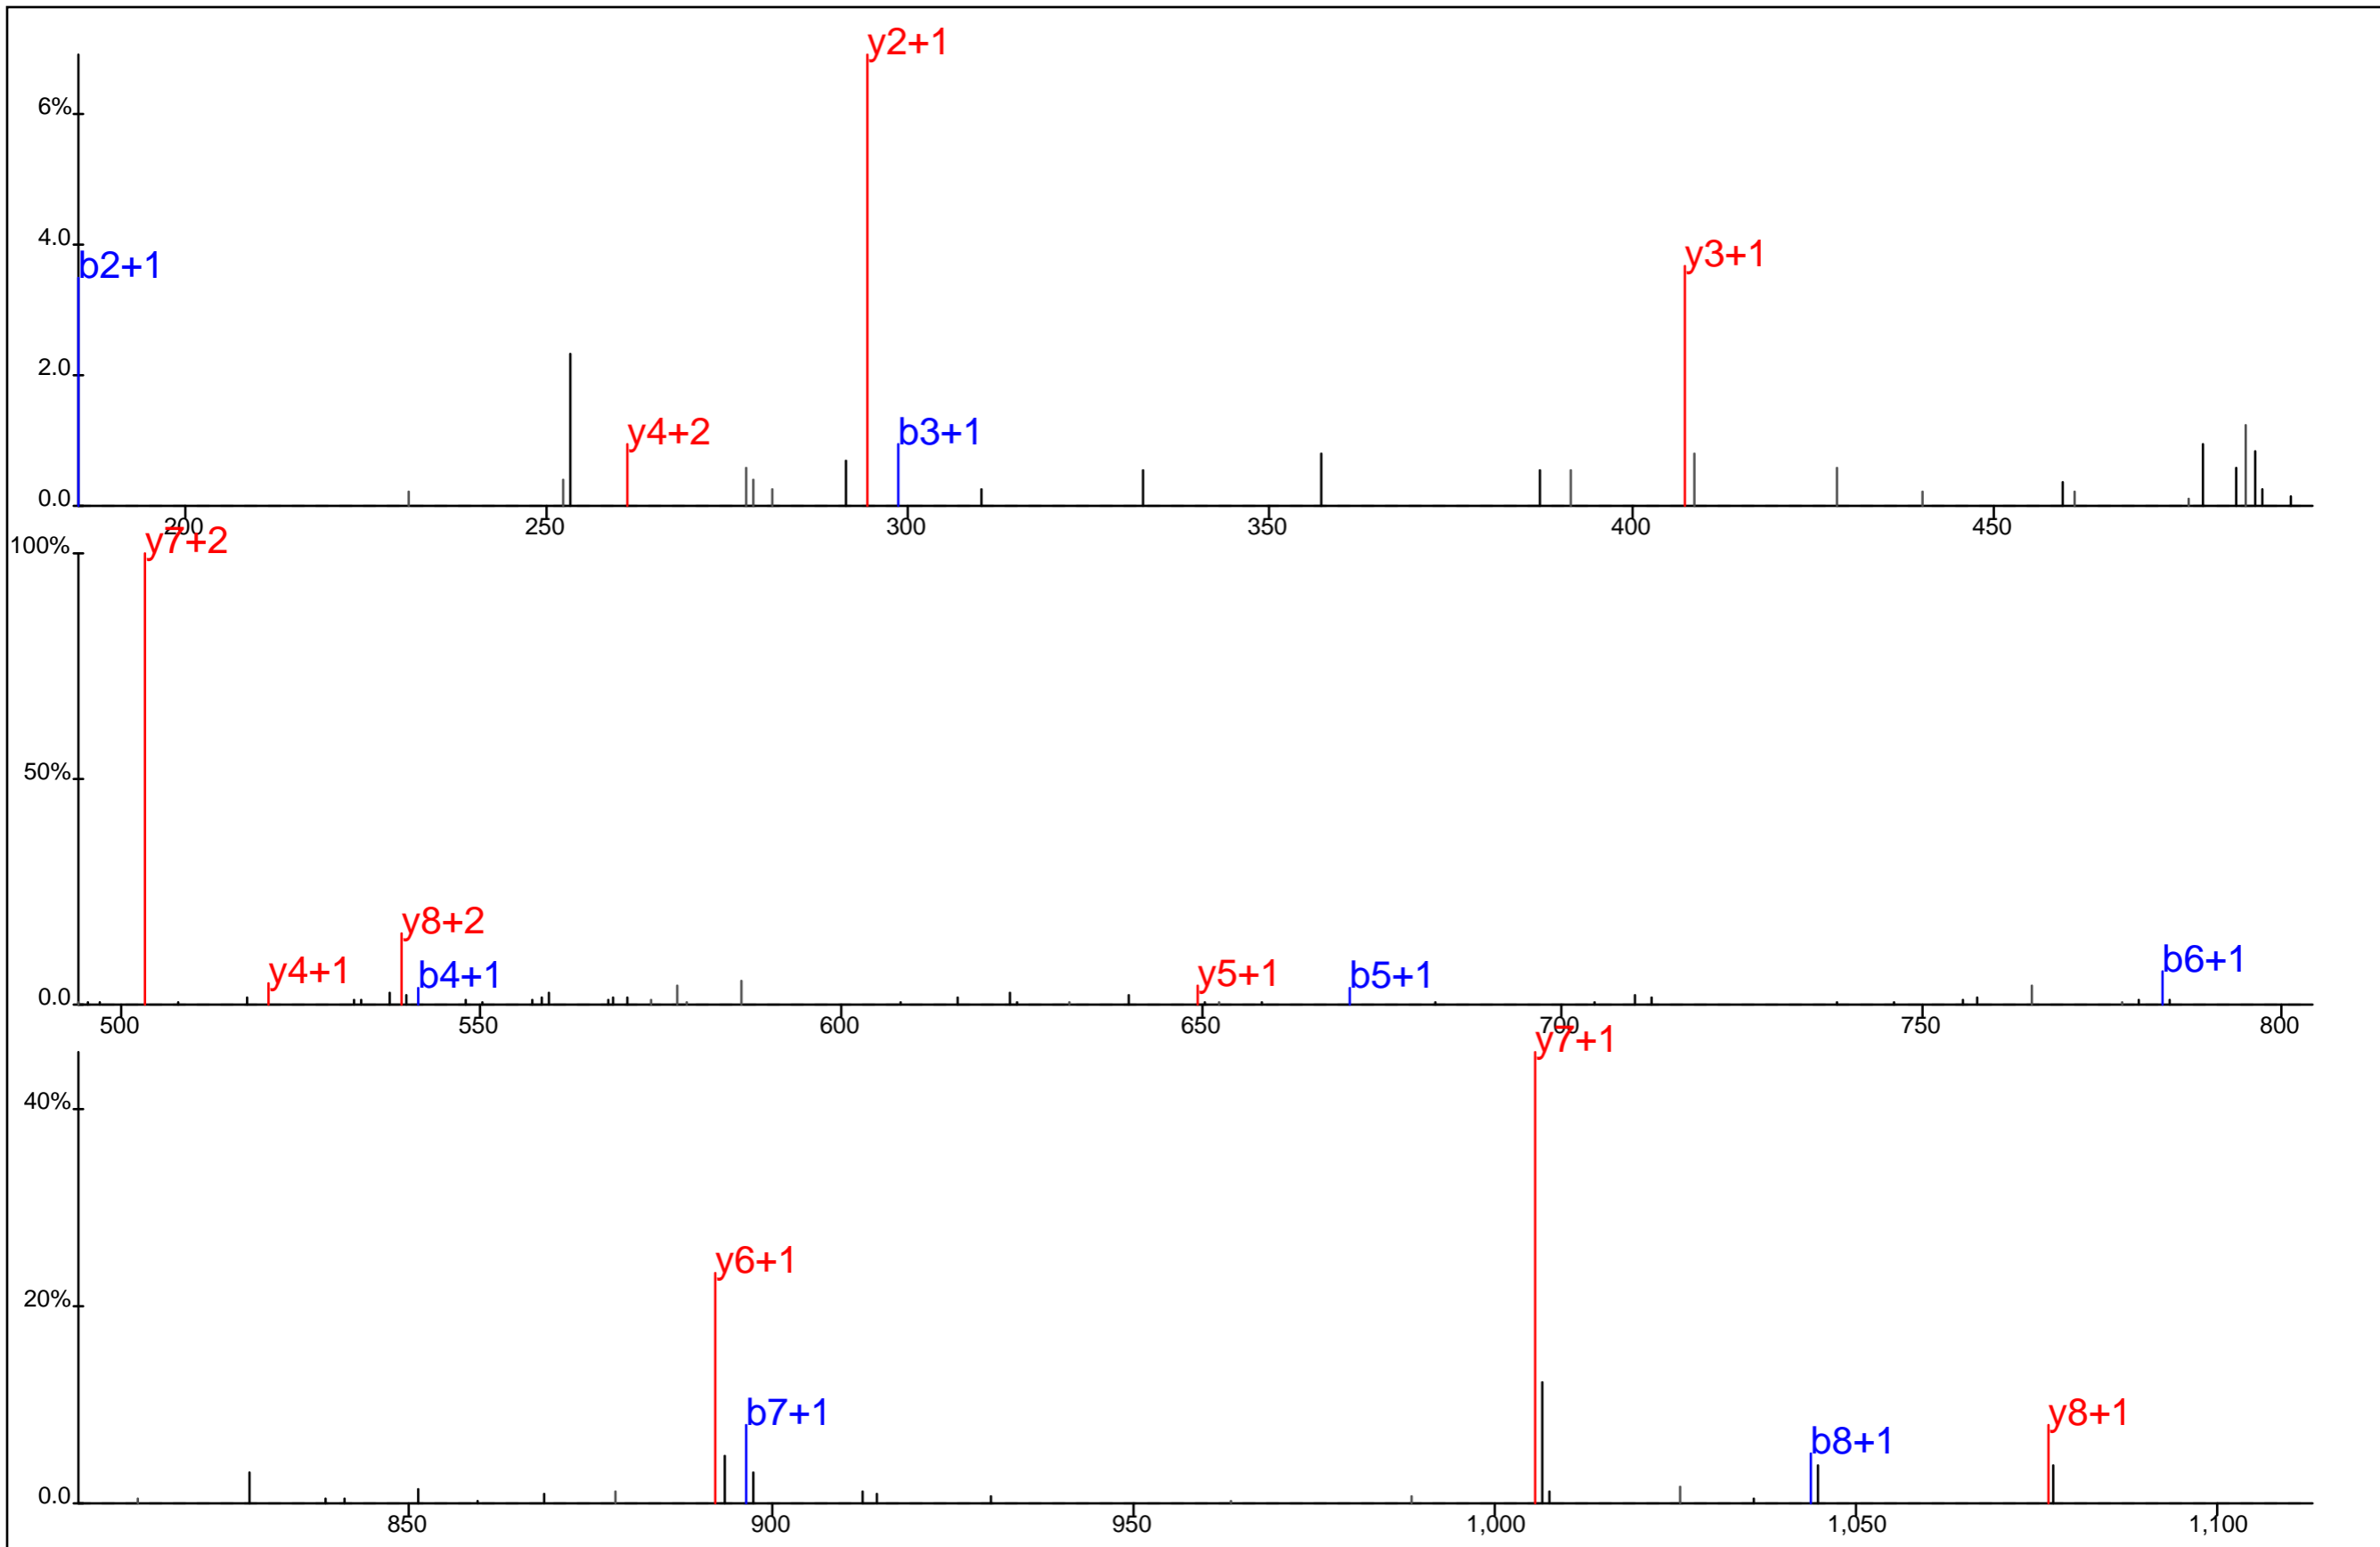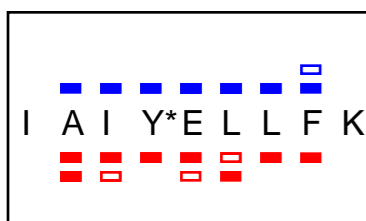

Protein Name: Ribosomal protein S10  
 gi Accession: 3088338  
 Precursor Mass: 595.3200+2  
 Delta Mass: 4.991 ppm  
 XCorr: 50.34

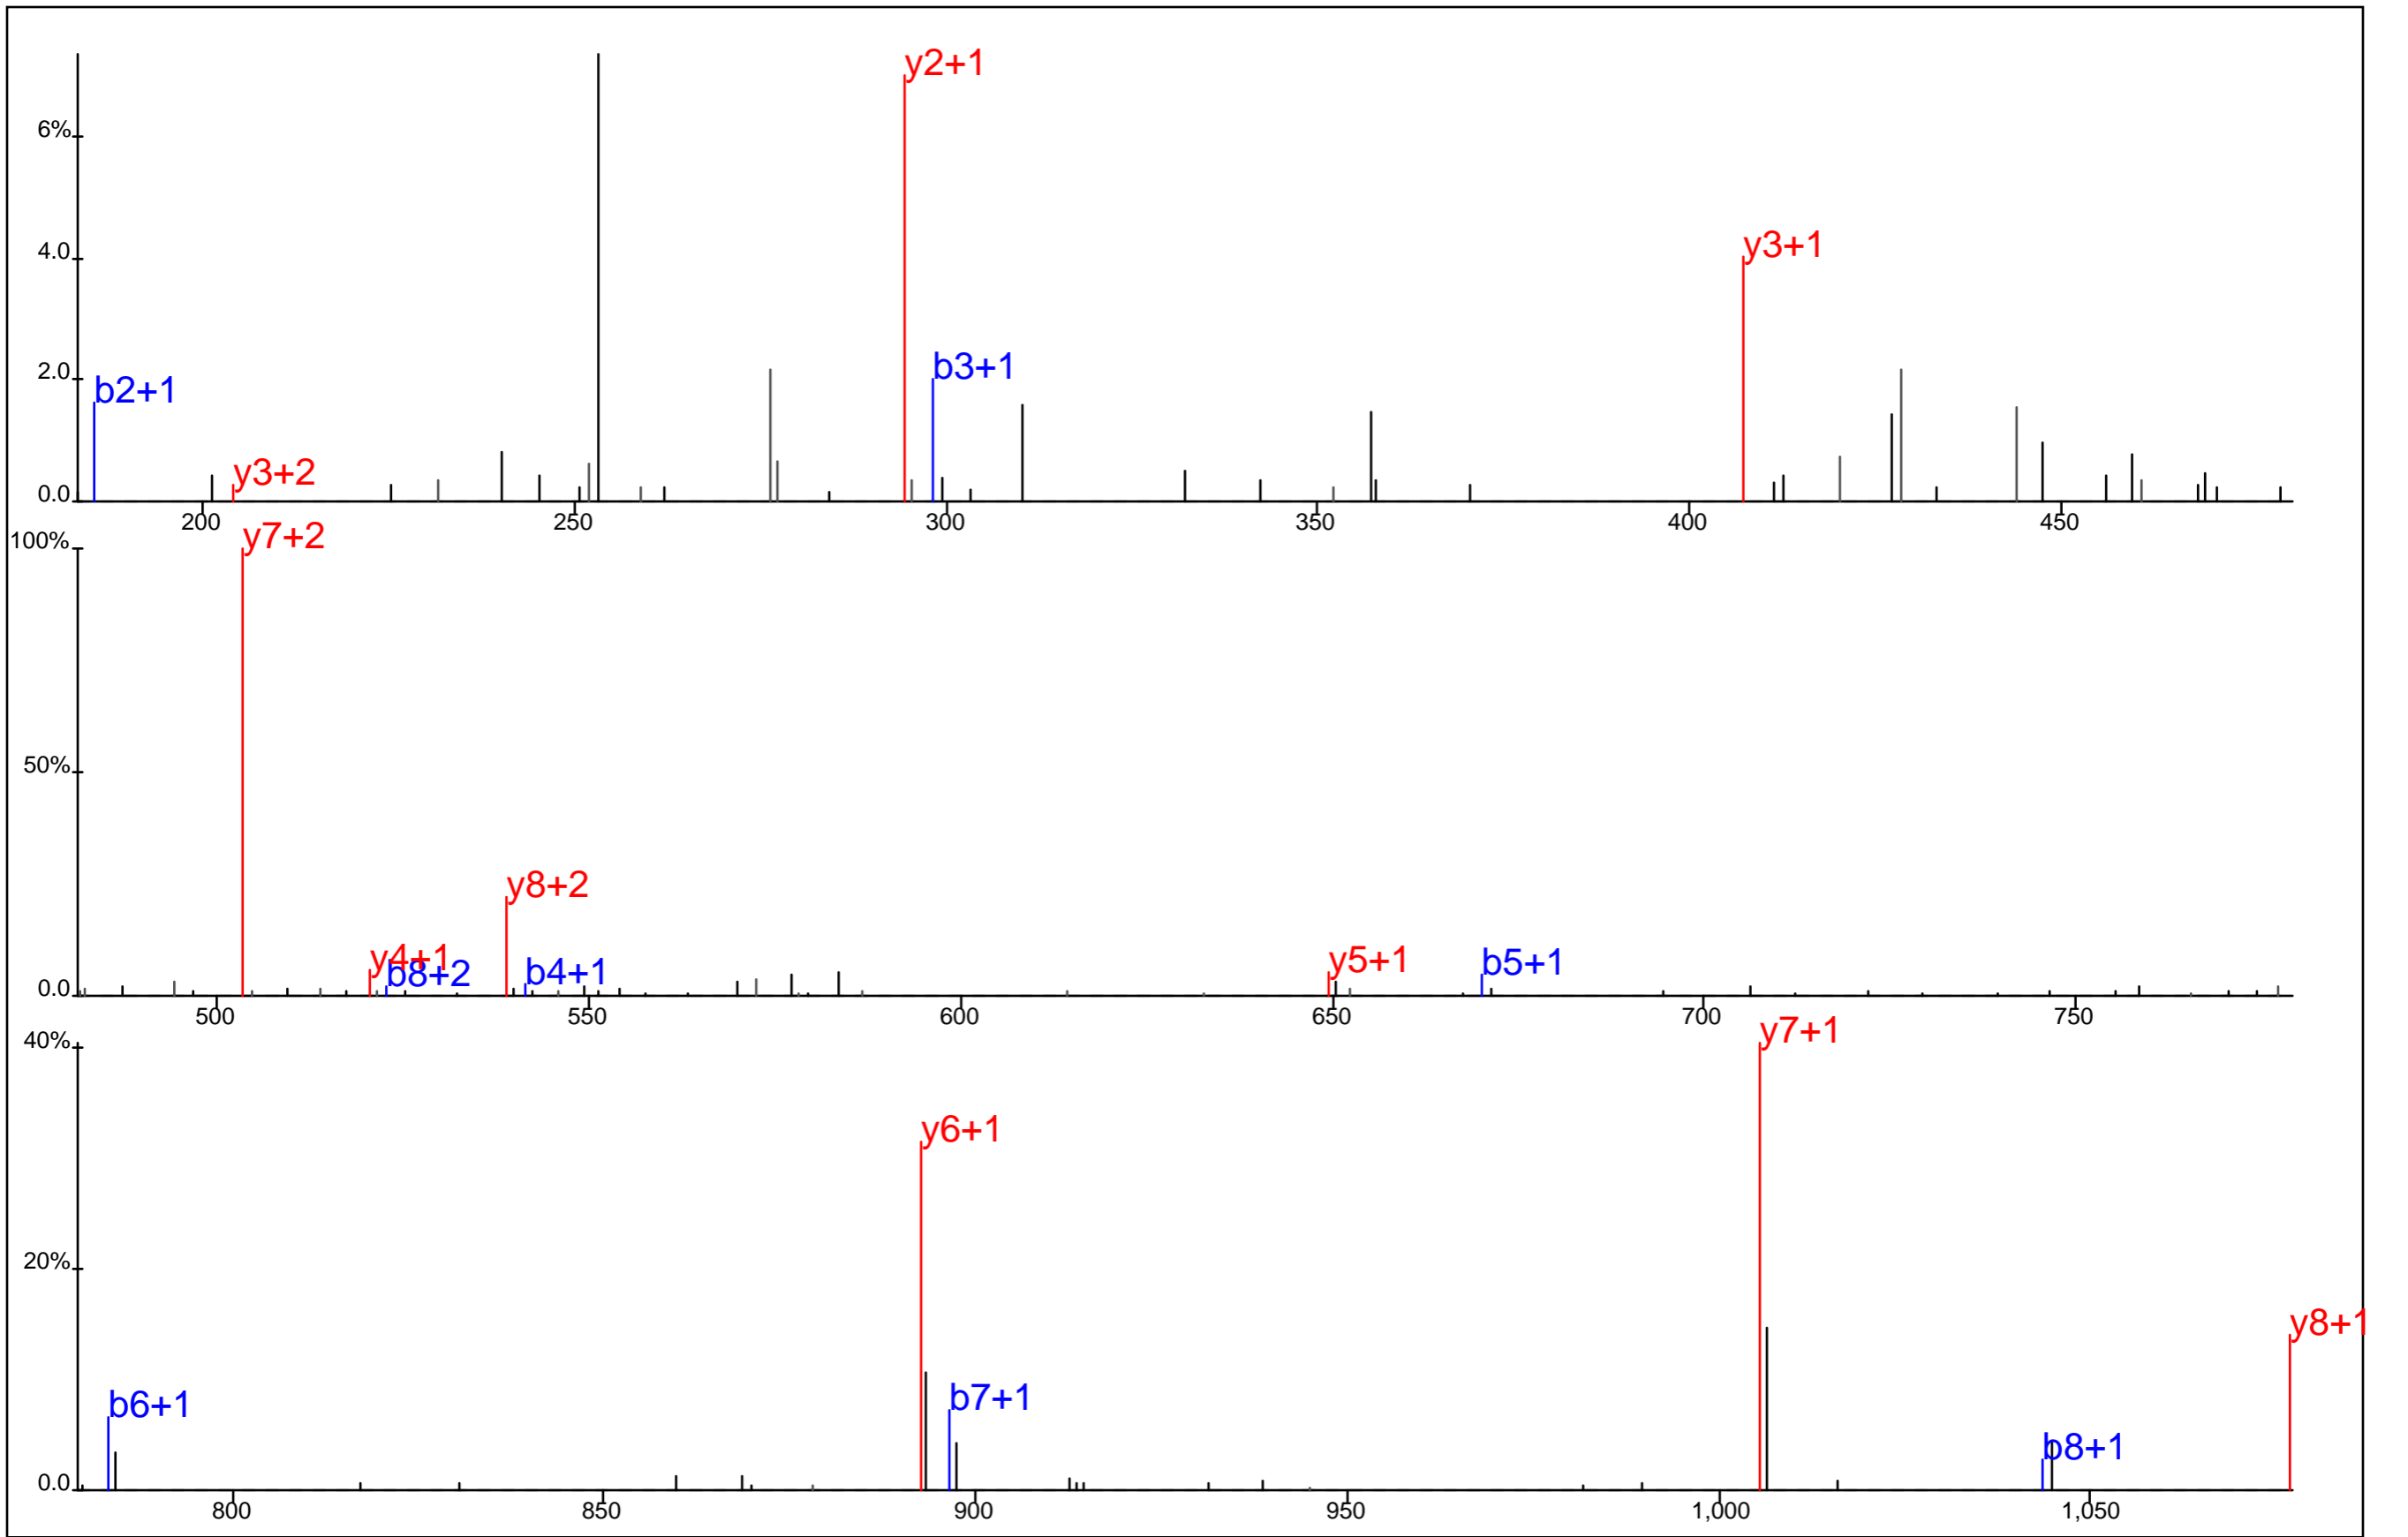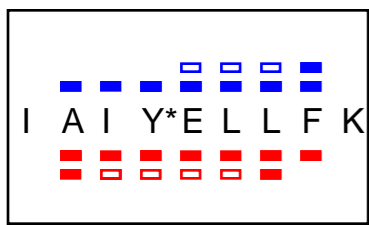

Protein Name: Ribosomal protein S10  
 gi Accession: 3088338  
 Precursor Mass: 595.3203+2  
 Delta Mass: 5.403 ppm  
 XCorr: 44.21

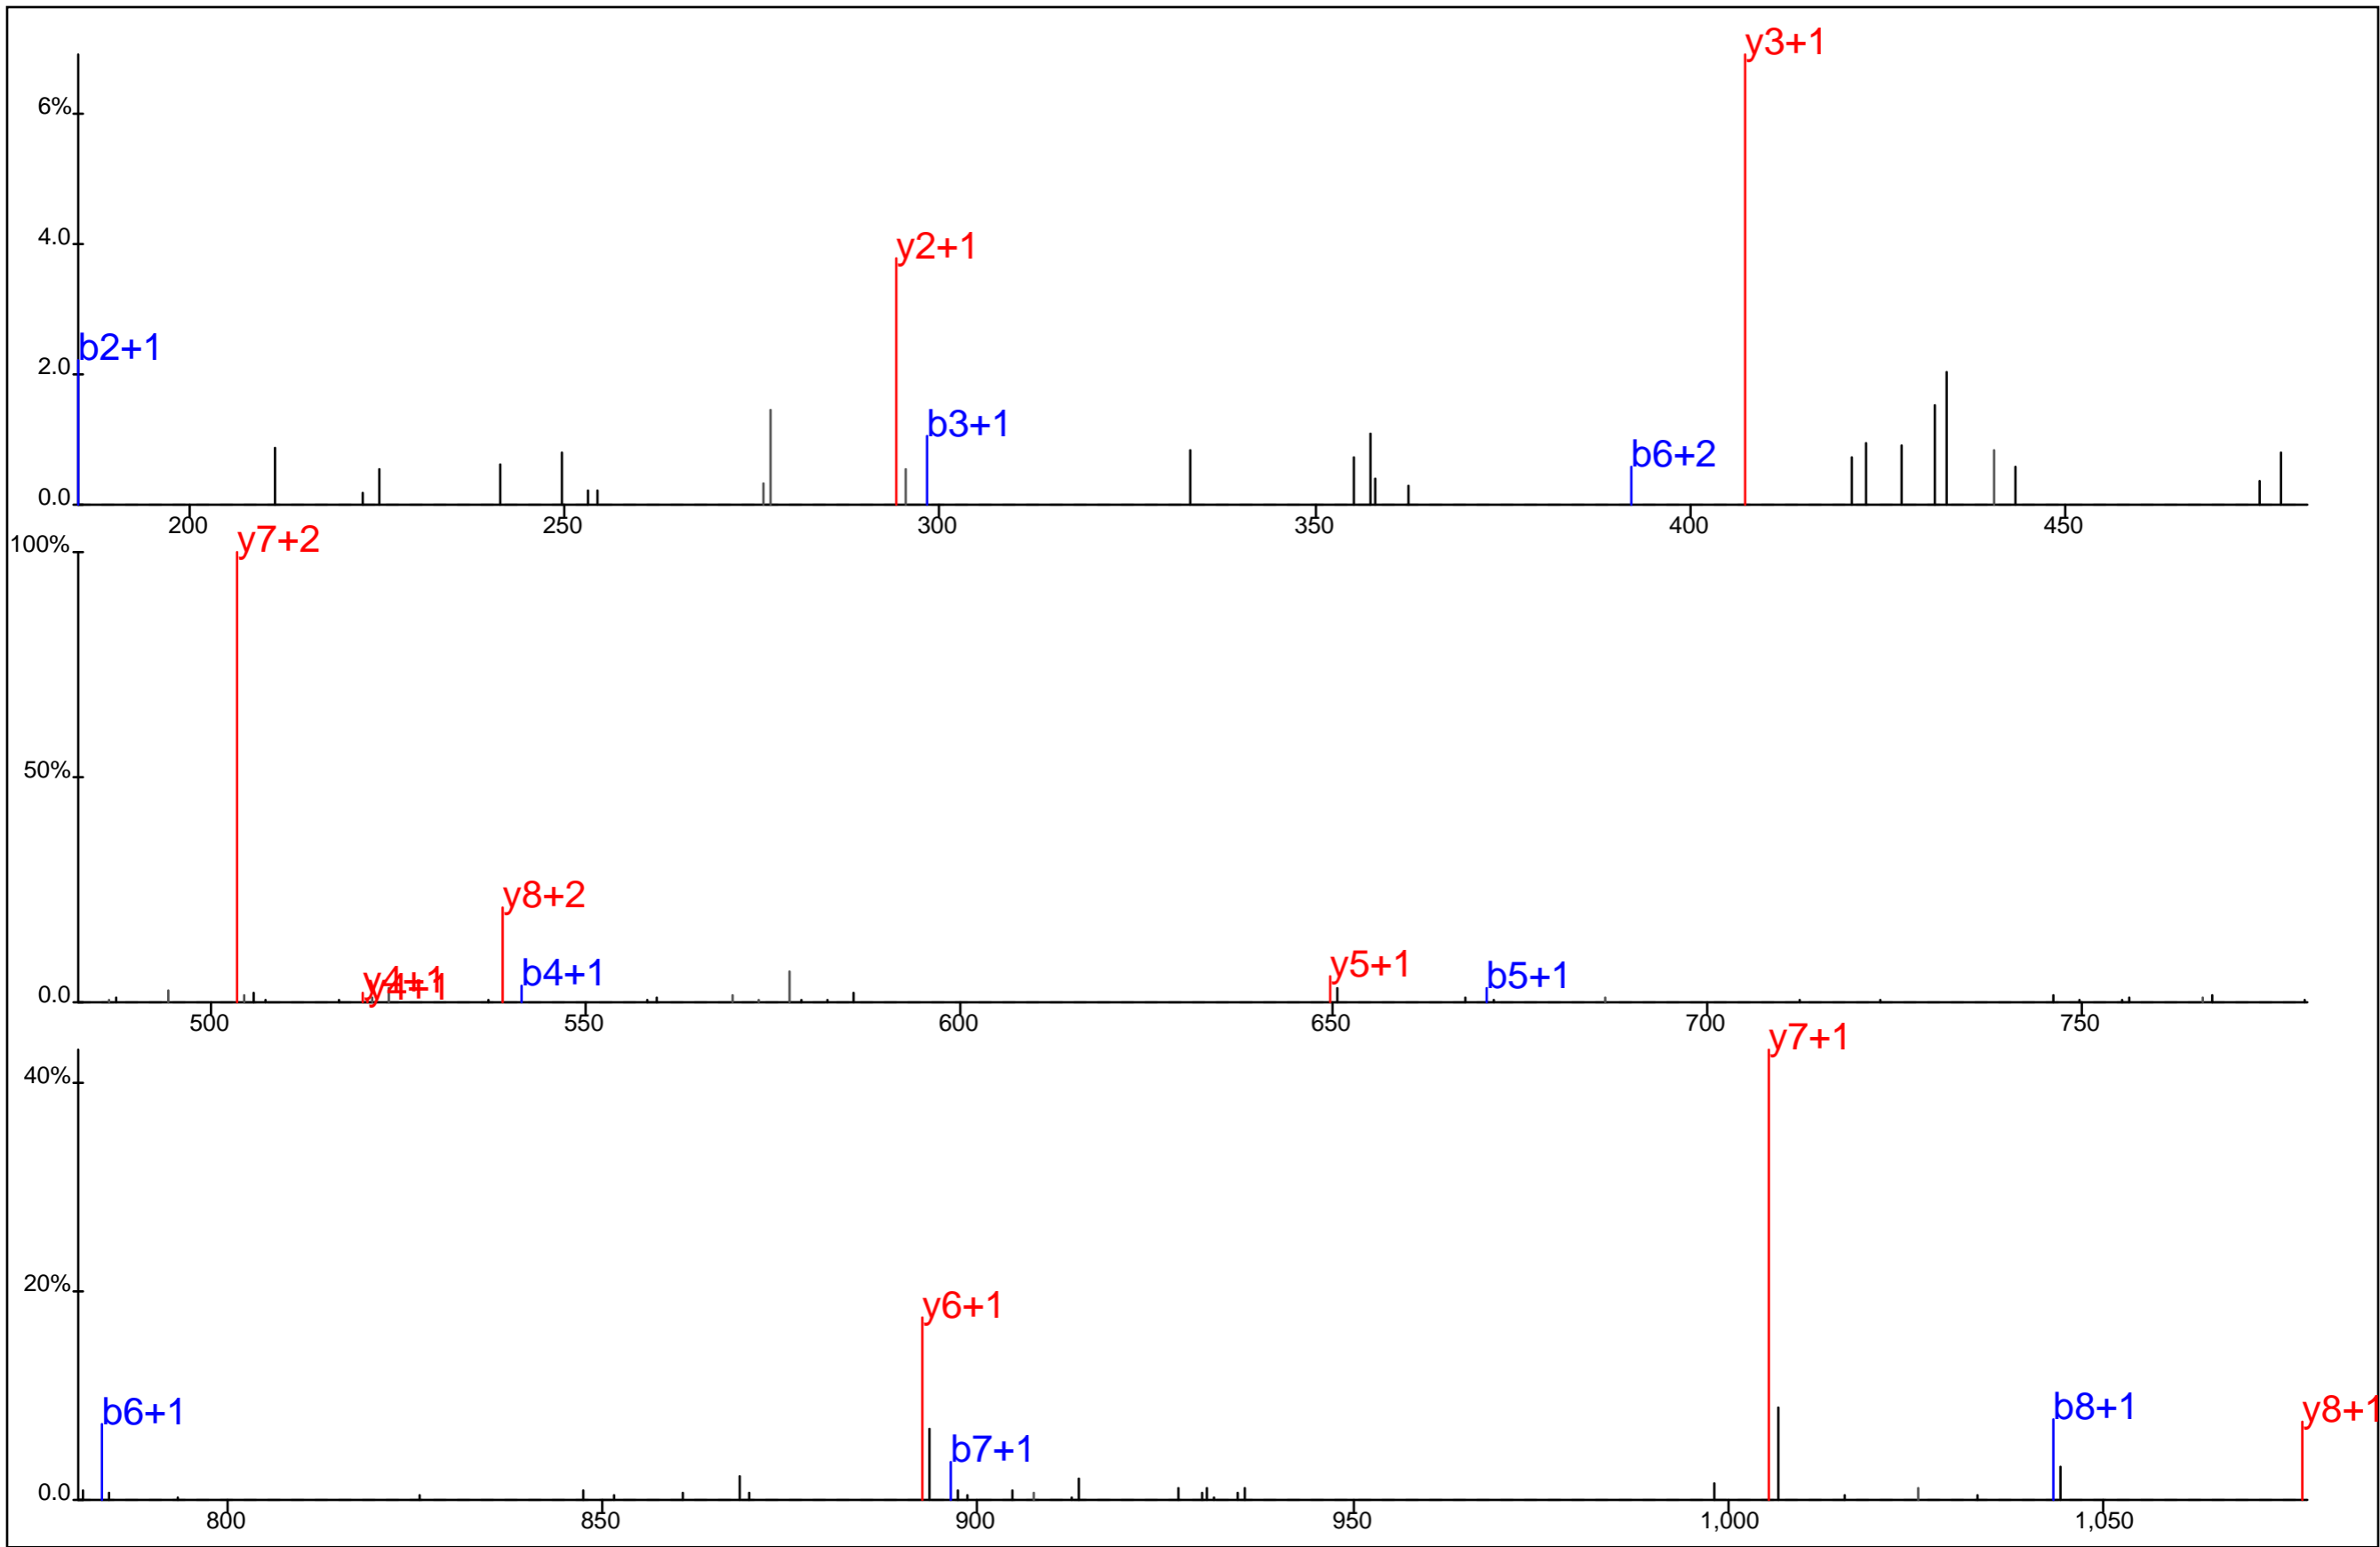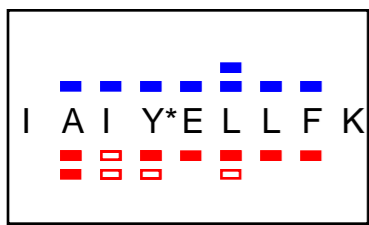

Protein Name: Ribosomal protein S10  
 gi Accession: 3088338  
 Precursor Mass: 595.3206+2  
 Delta Mass: 5.916 ppm  
 XCorr: 44.8

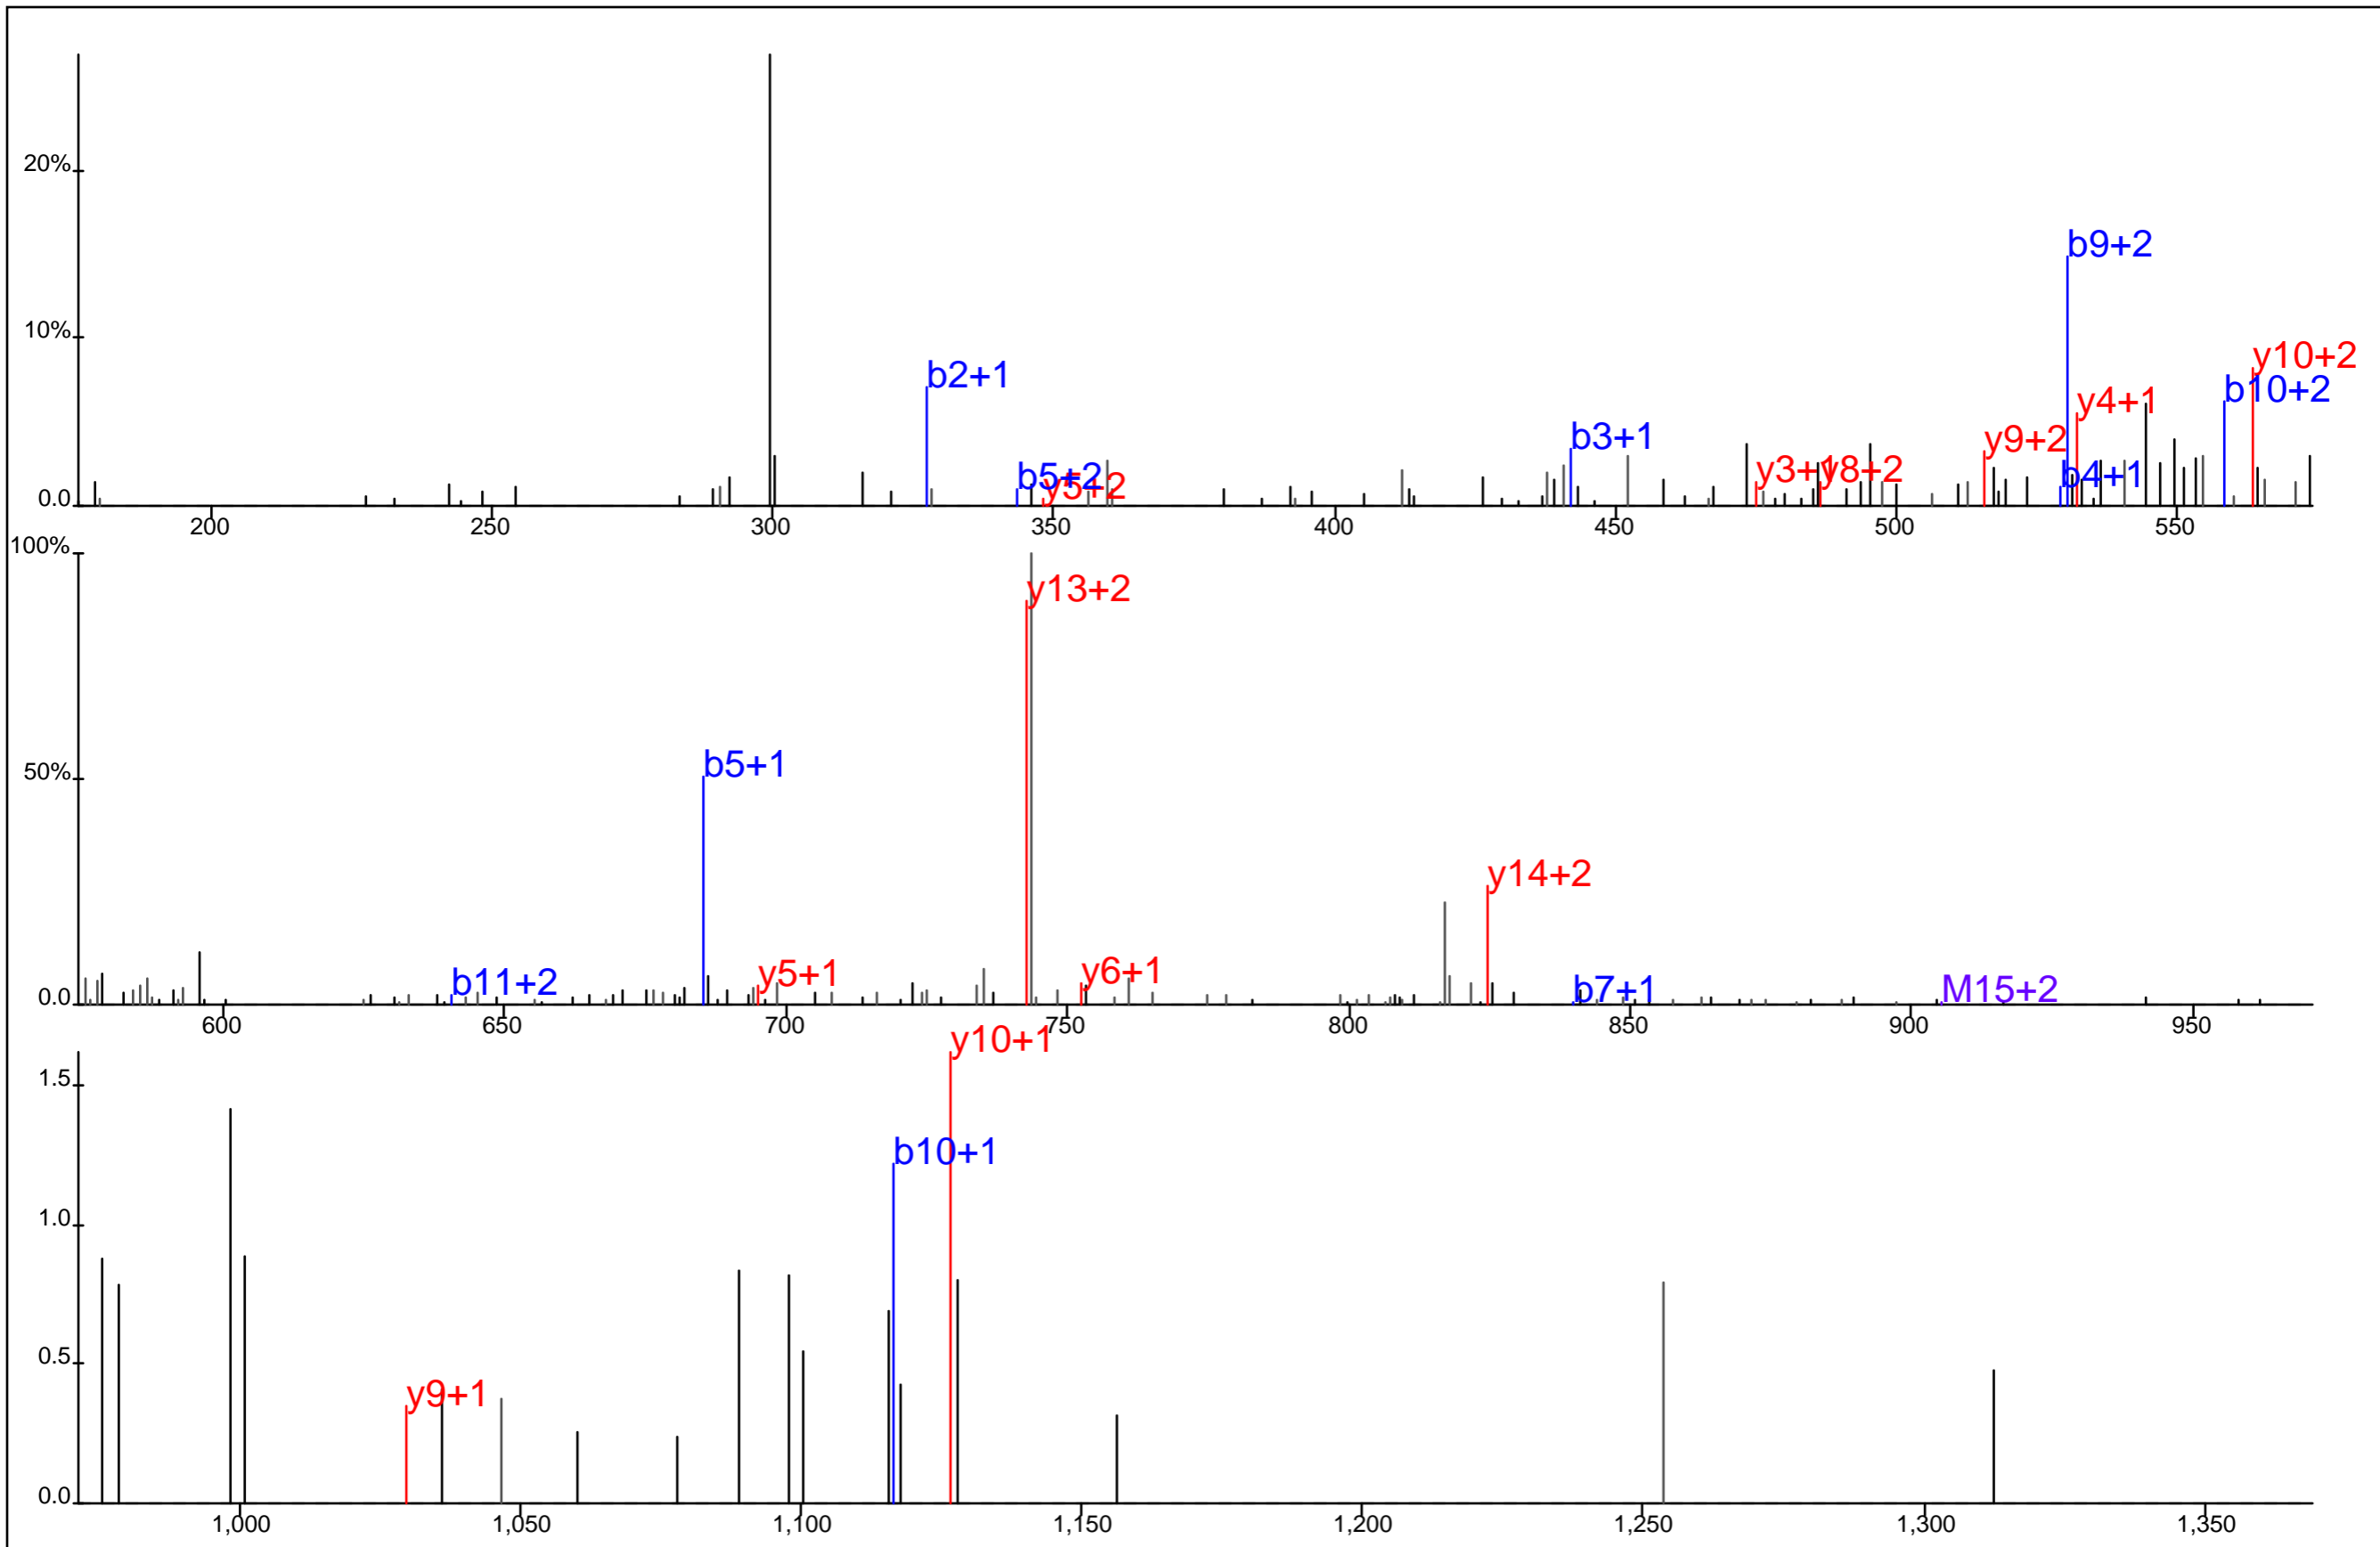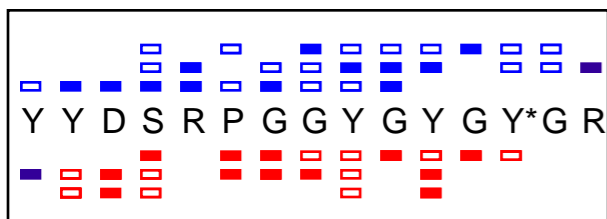

Protein Name: RNA binding motif protein 3  
 gi Accession: 5803137  
 Precursor Mass: 604.2449+3  
 Delta Mass: 1.116 ppm  
 XCorr: 2.816

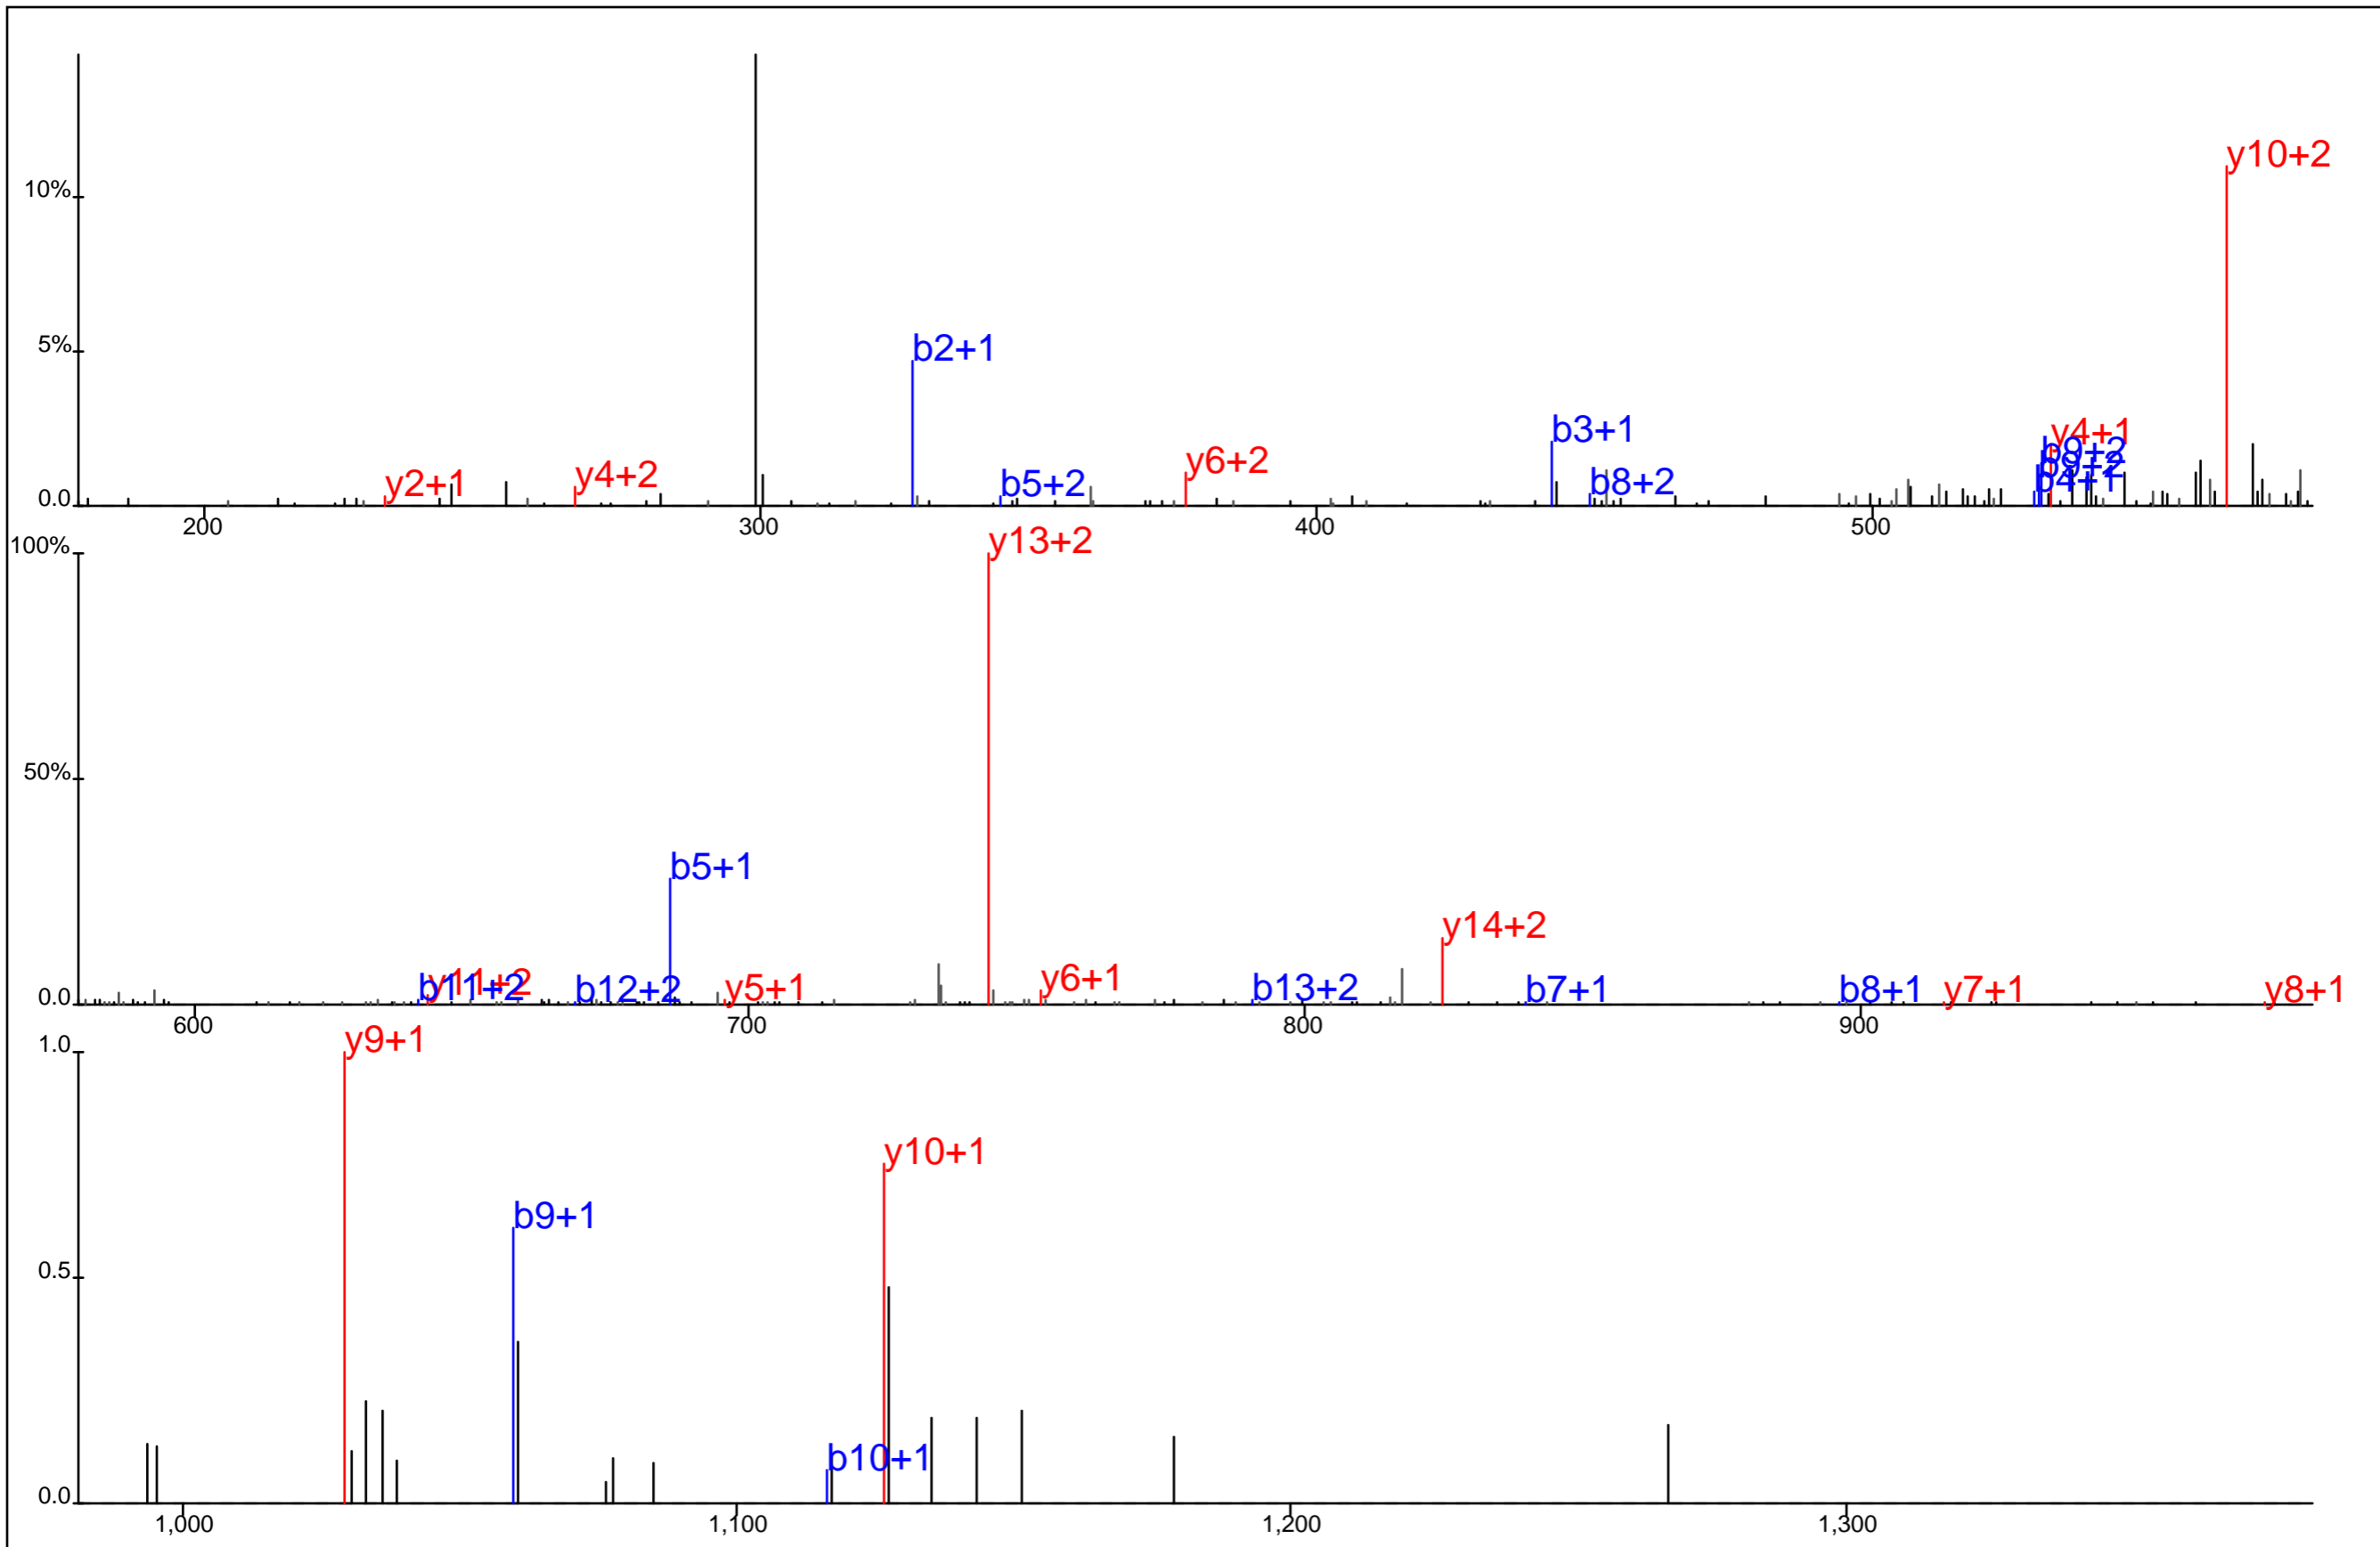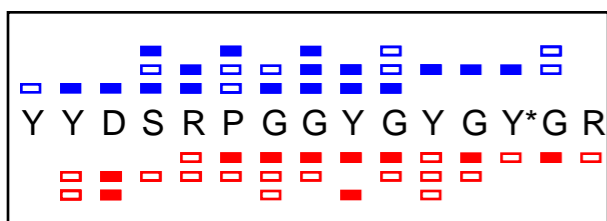

Protein Name: RNA binding motif protein 3  
 gi Accession: 5803137  
 Precursor Mass: 604.2471+3  
 Delta Mass: 2.534 ppm  
 XCorr: 33.2



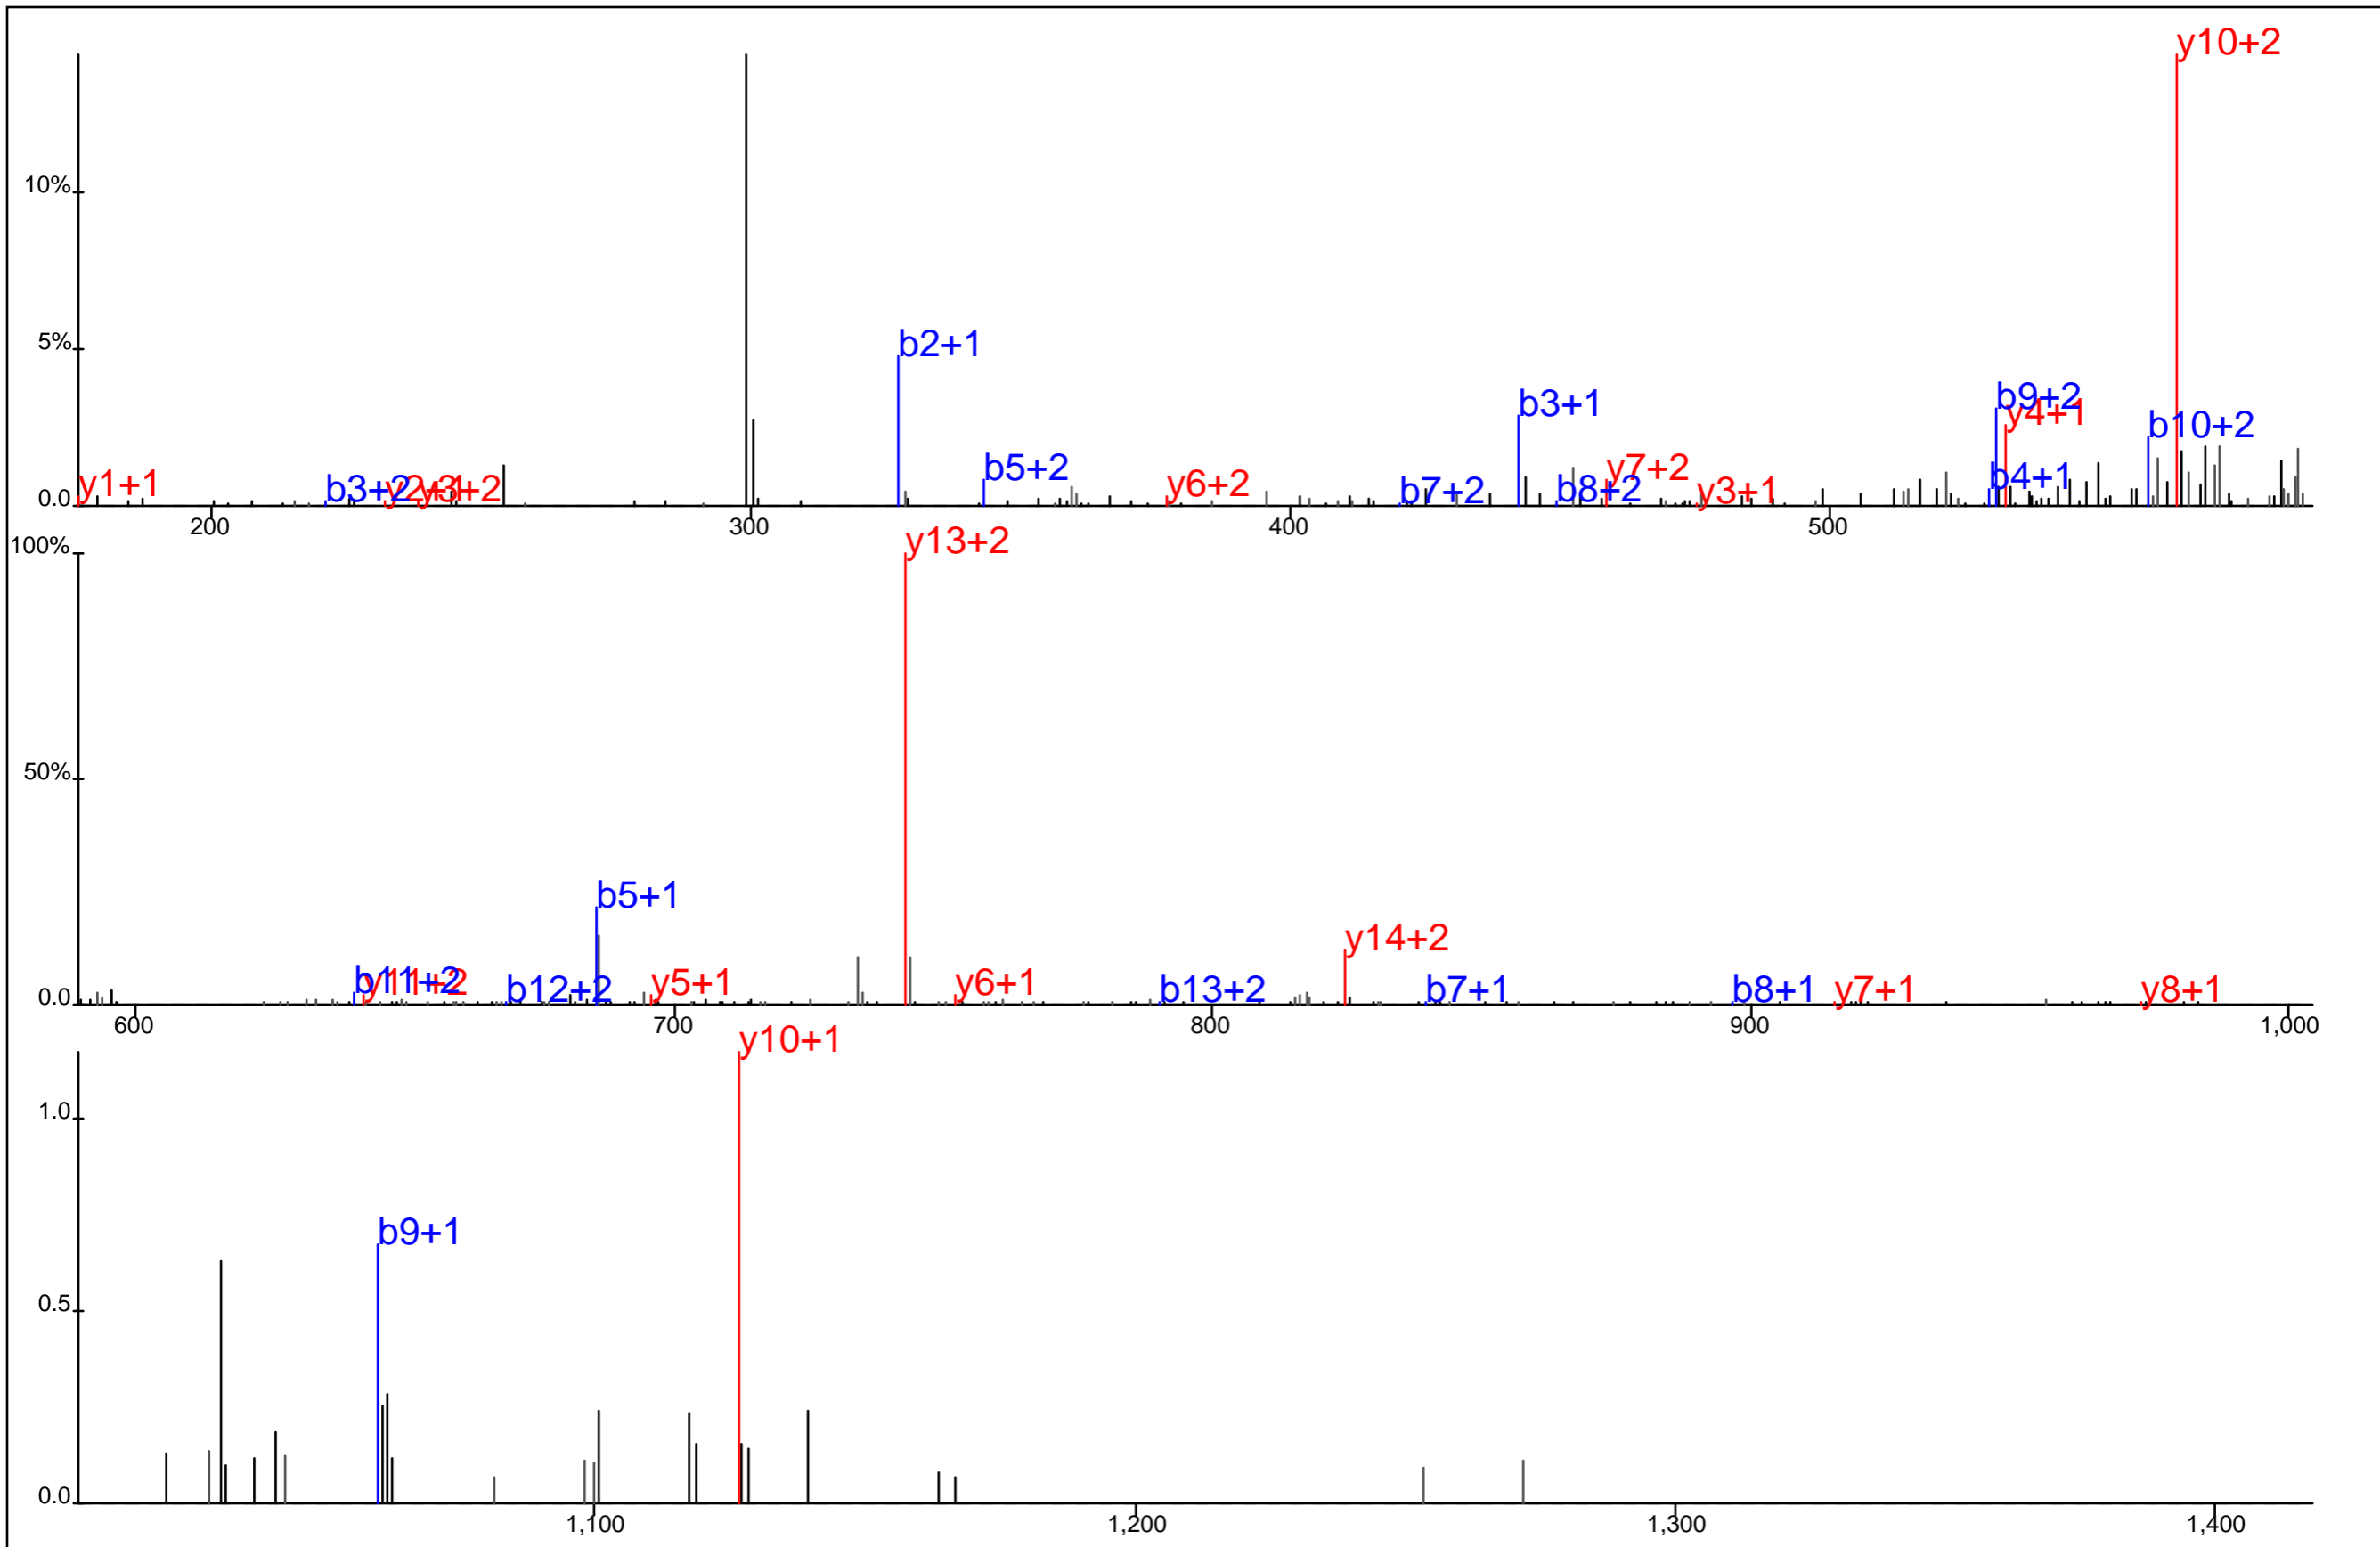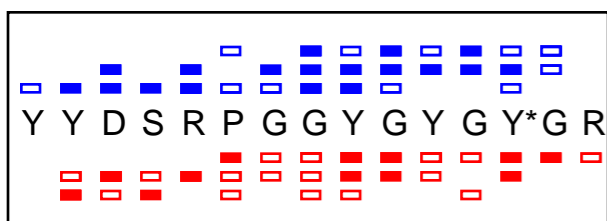

Protein Name: RNA binding motif protein 3  
 gi Accession: 5803137  
 Precursor Mass: 604.2468+3  
 Delta Mass: 2.130 ppm  
 XCorr: 27.02

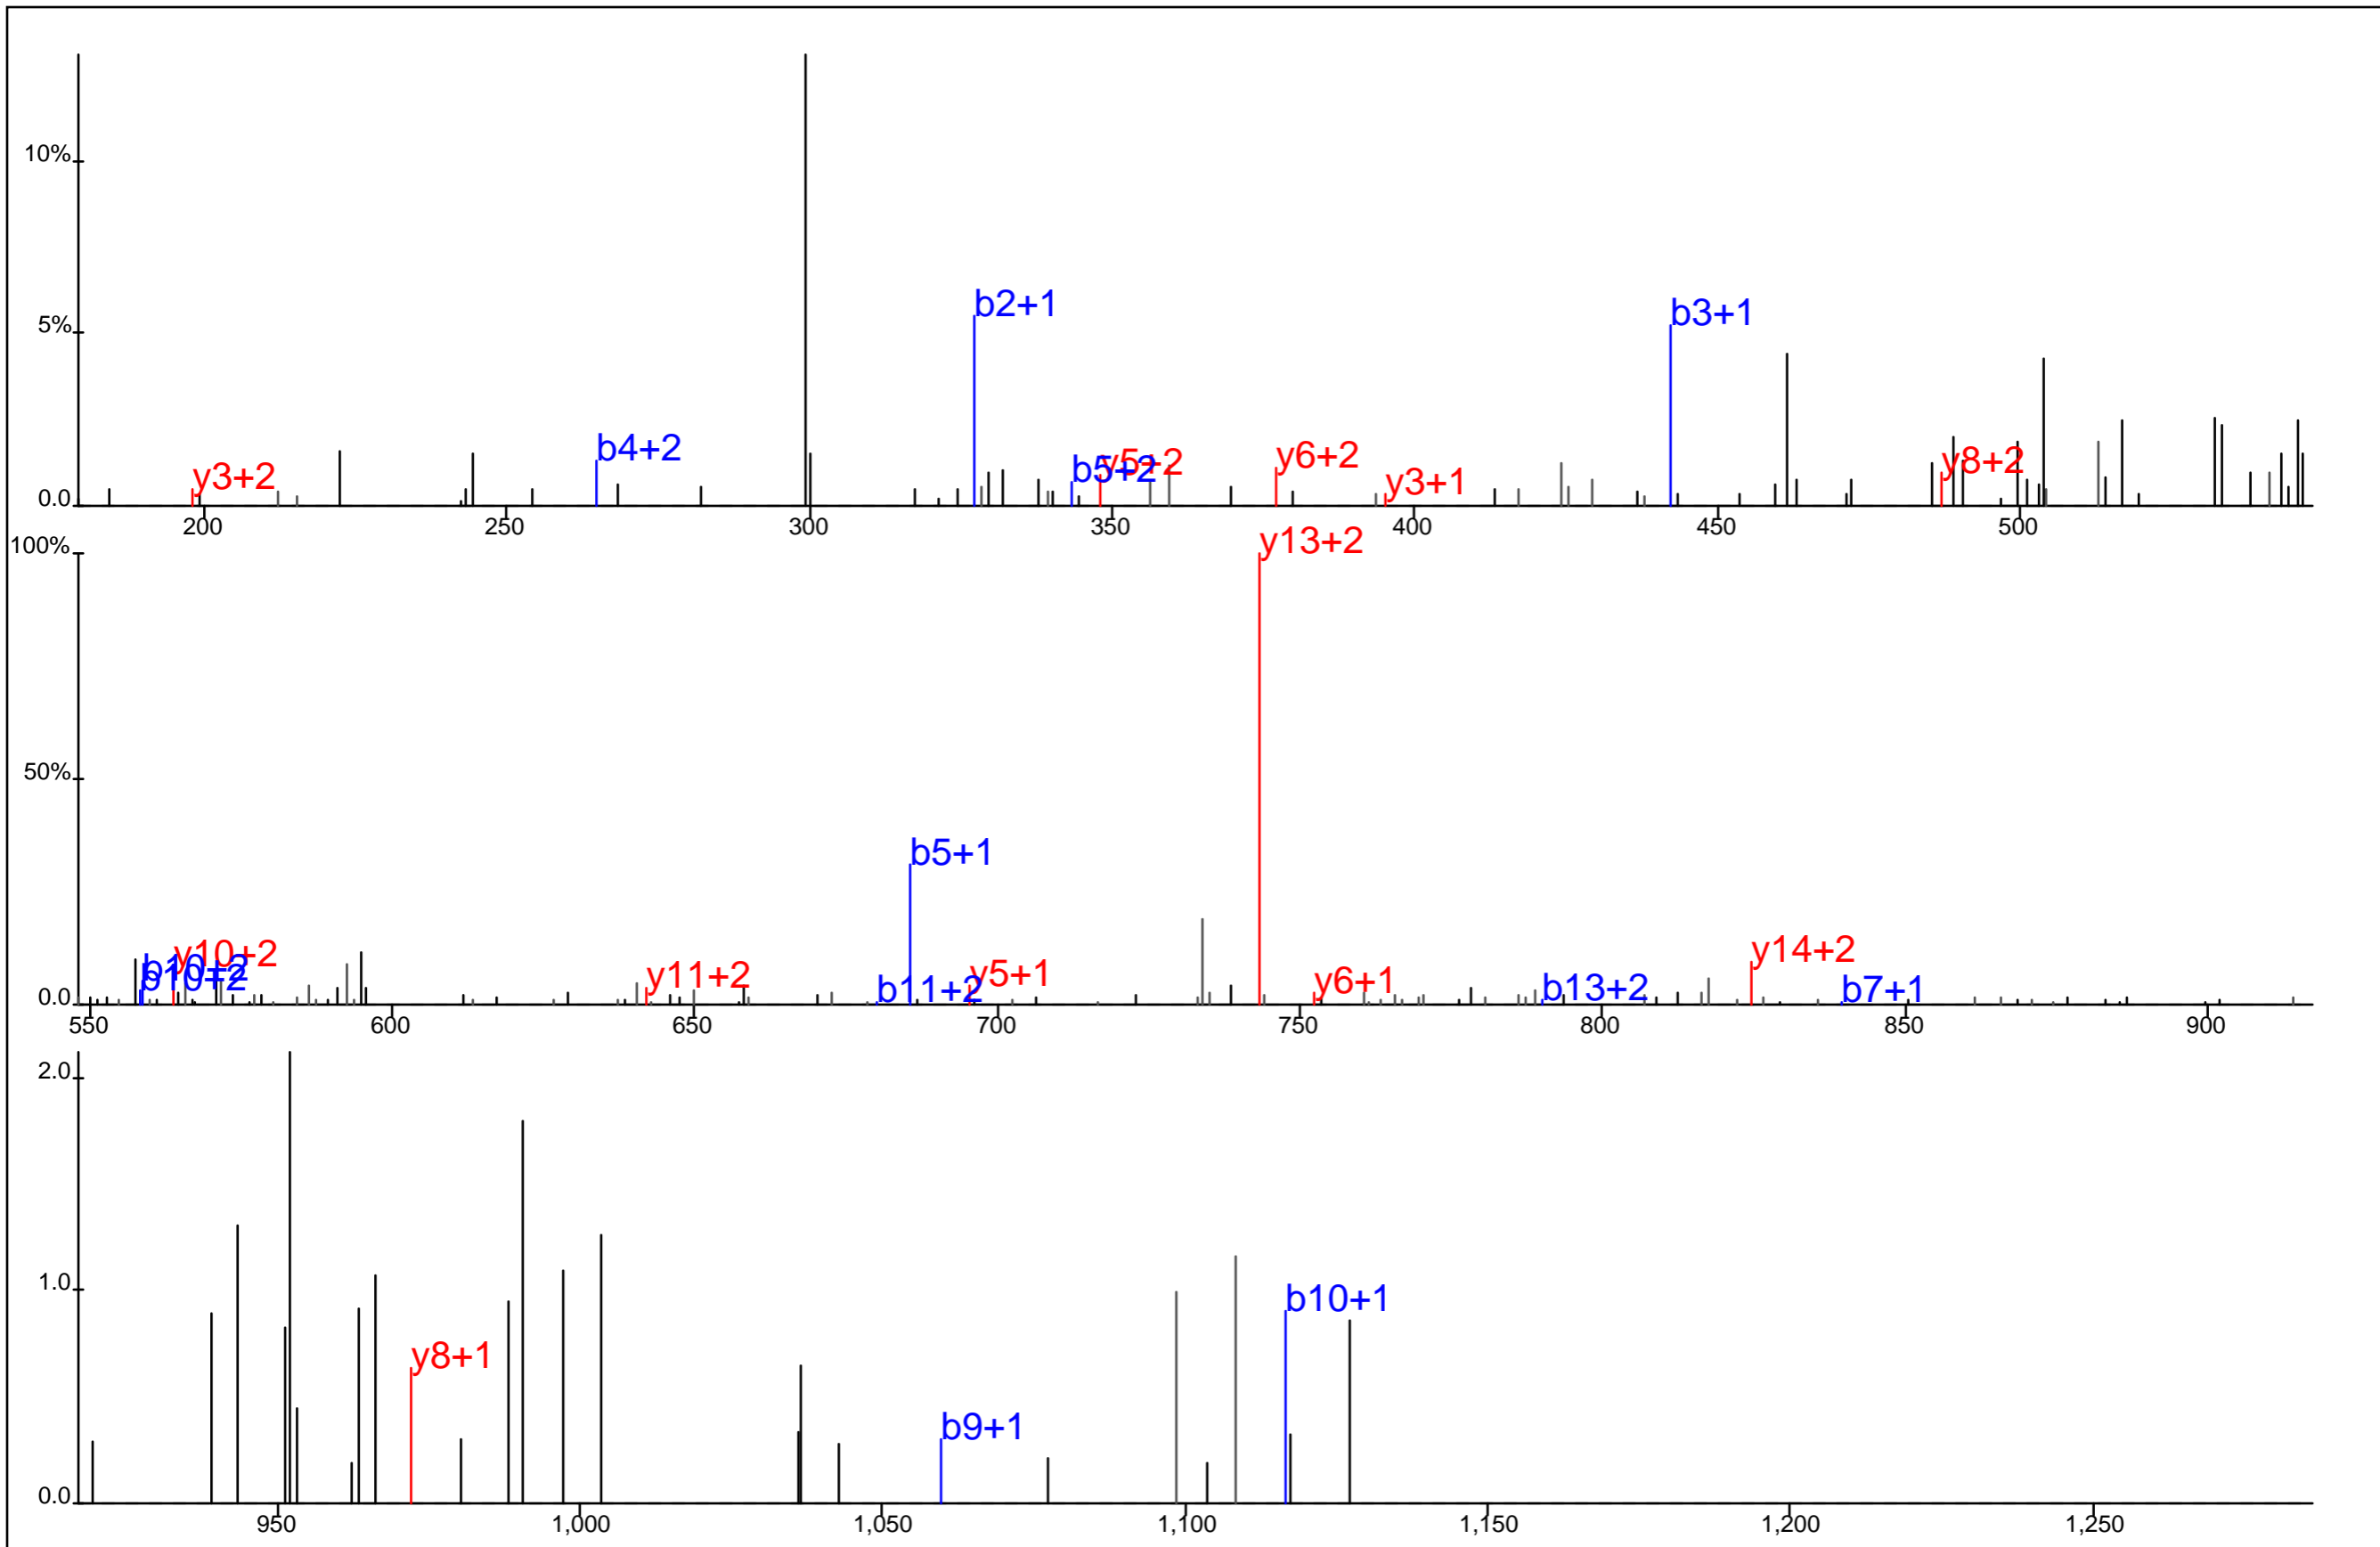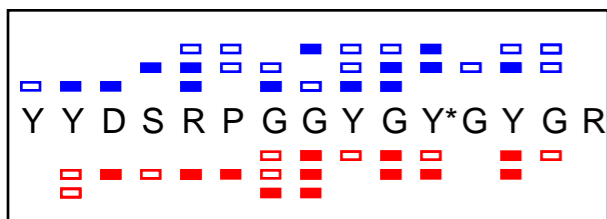

Protein Name: RNA binding motif protein 3  
 gi Accession: 5803137  
 Precursor Mass: 604.2498+3  
 Delta Mass: 6.980 ppm  
 XCorr: 15.69

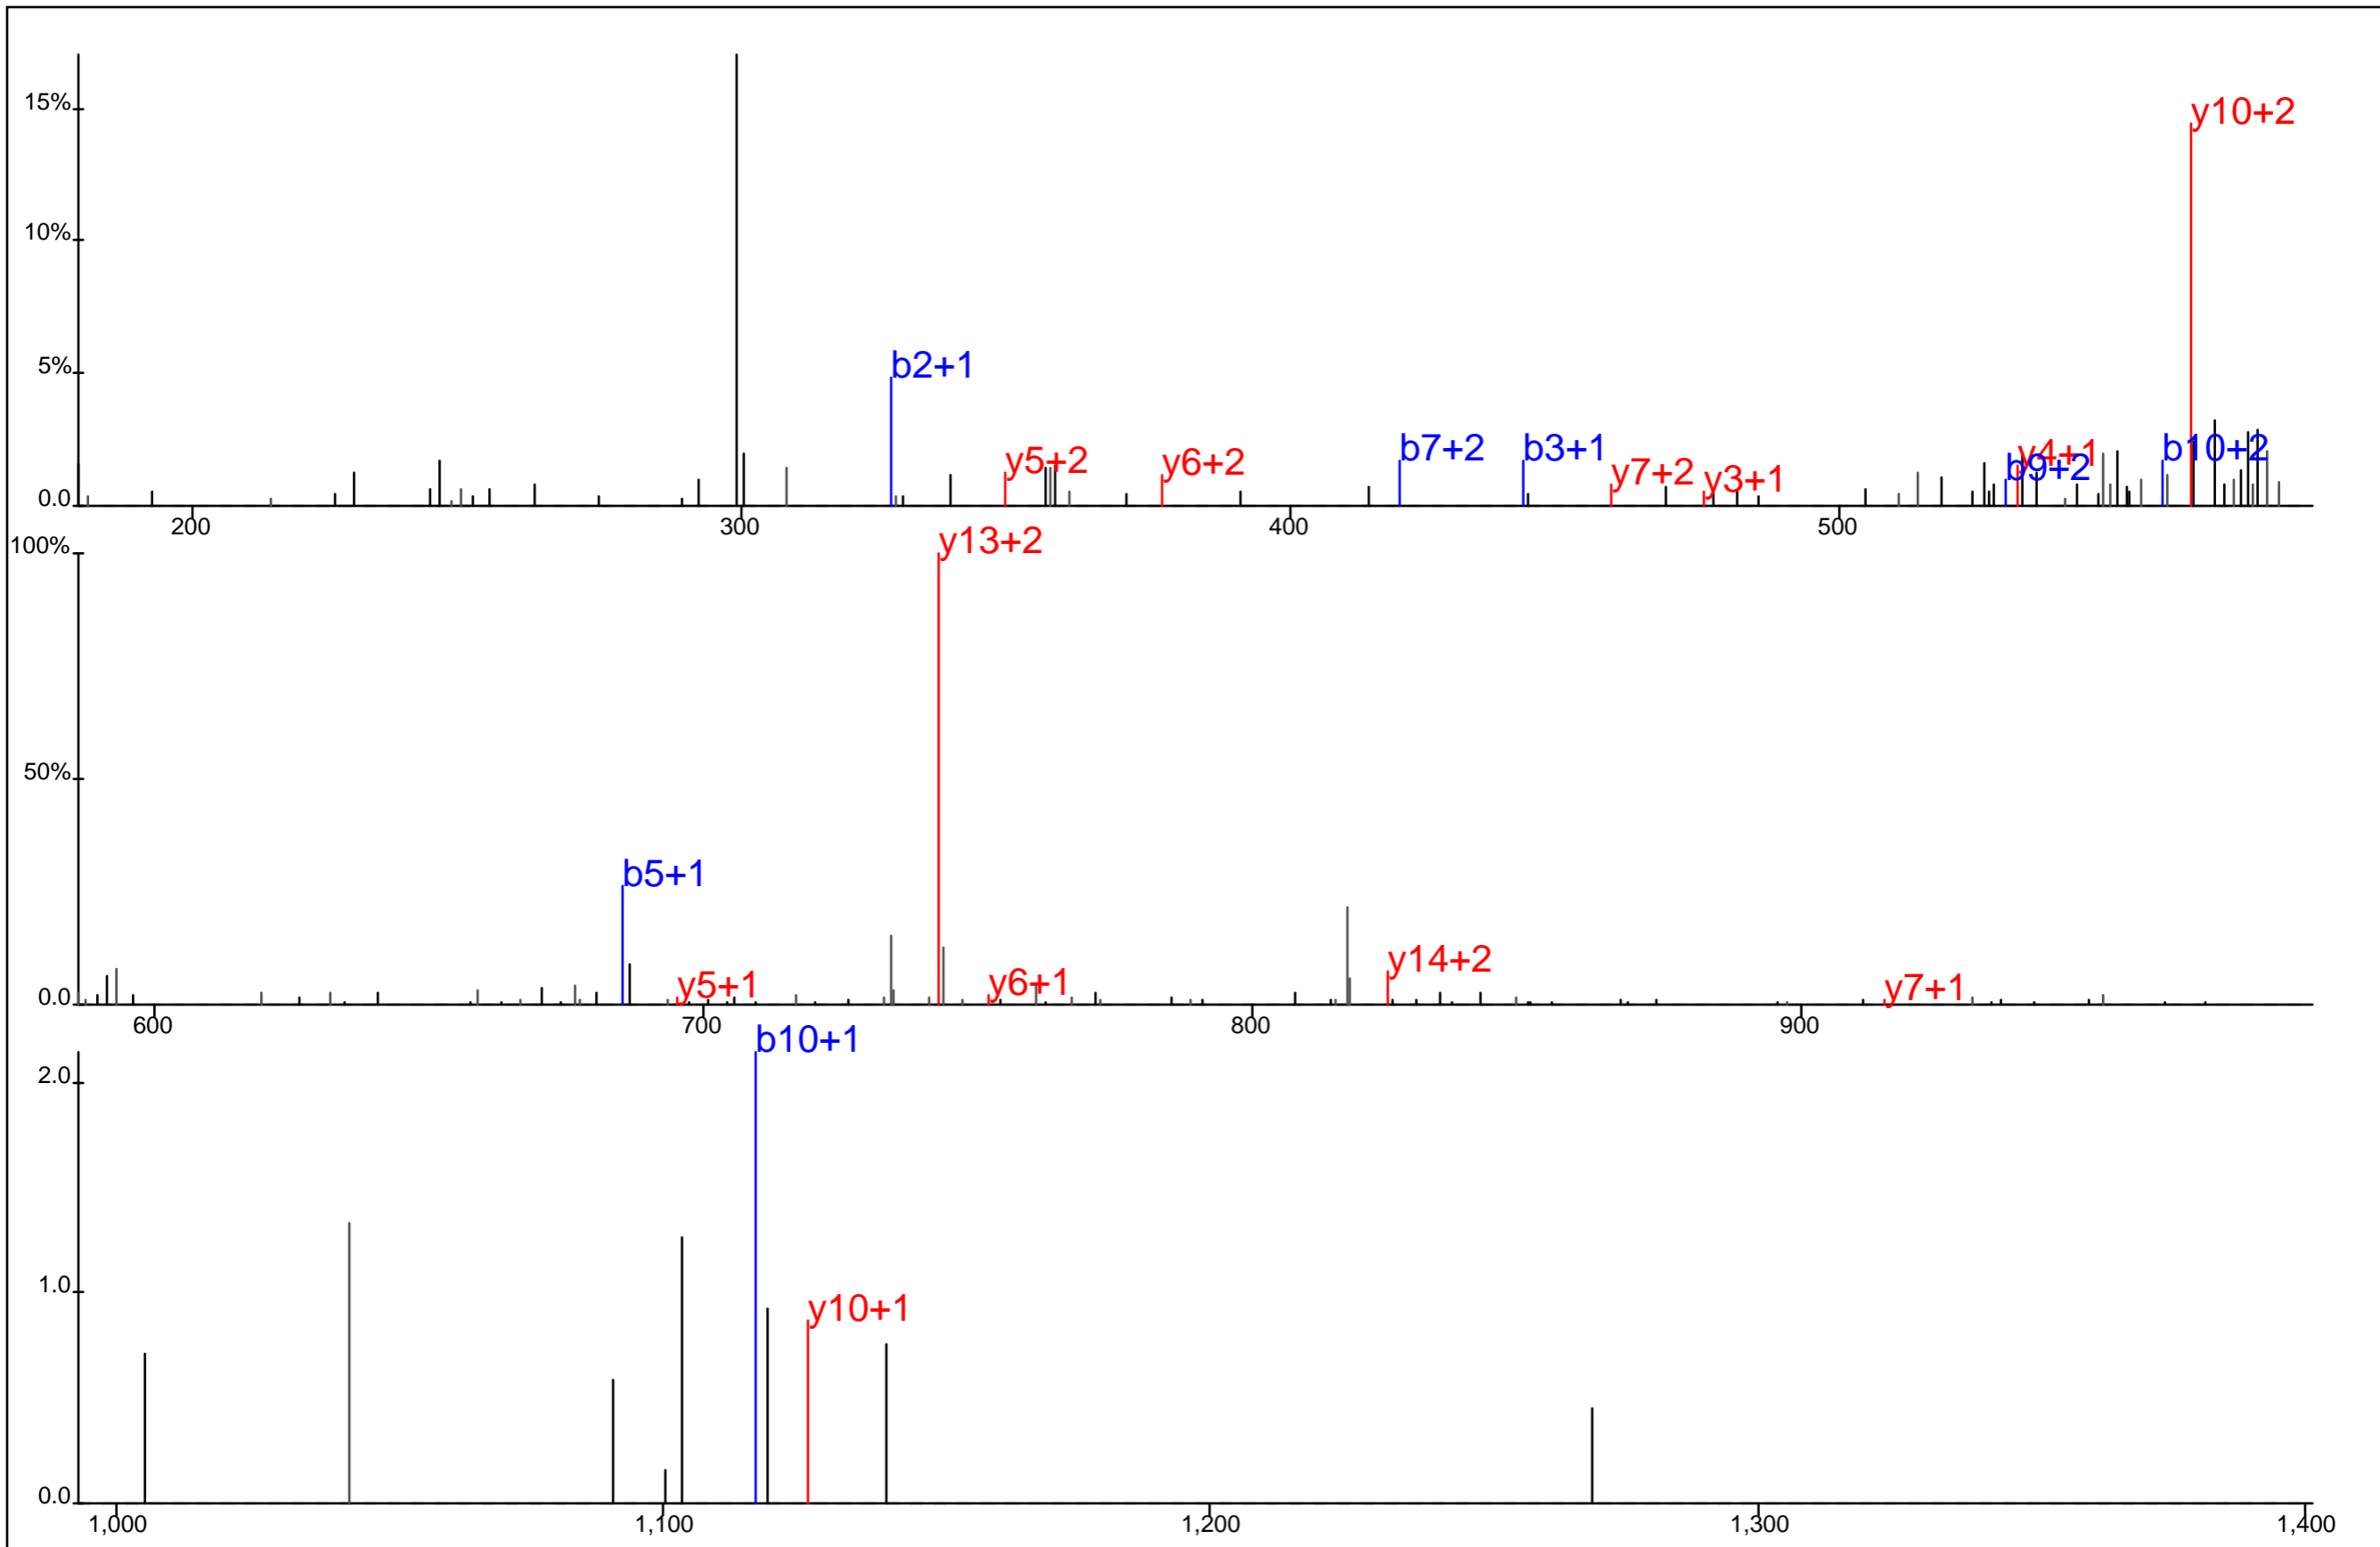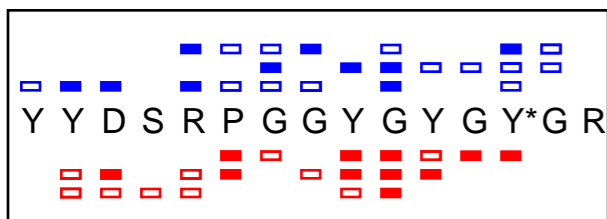

Protein Name: RNA binding motif protein 3  
 gi Accession: 5803137  
 Precursor Mass: 604.2460+3  
 Delta Mass: 0.811 ppm  
 XCorr: 14.16

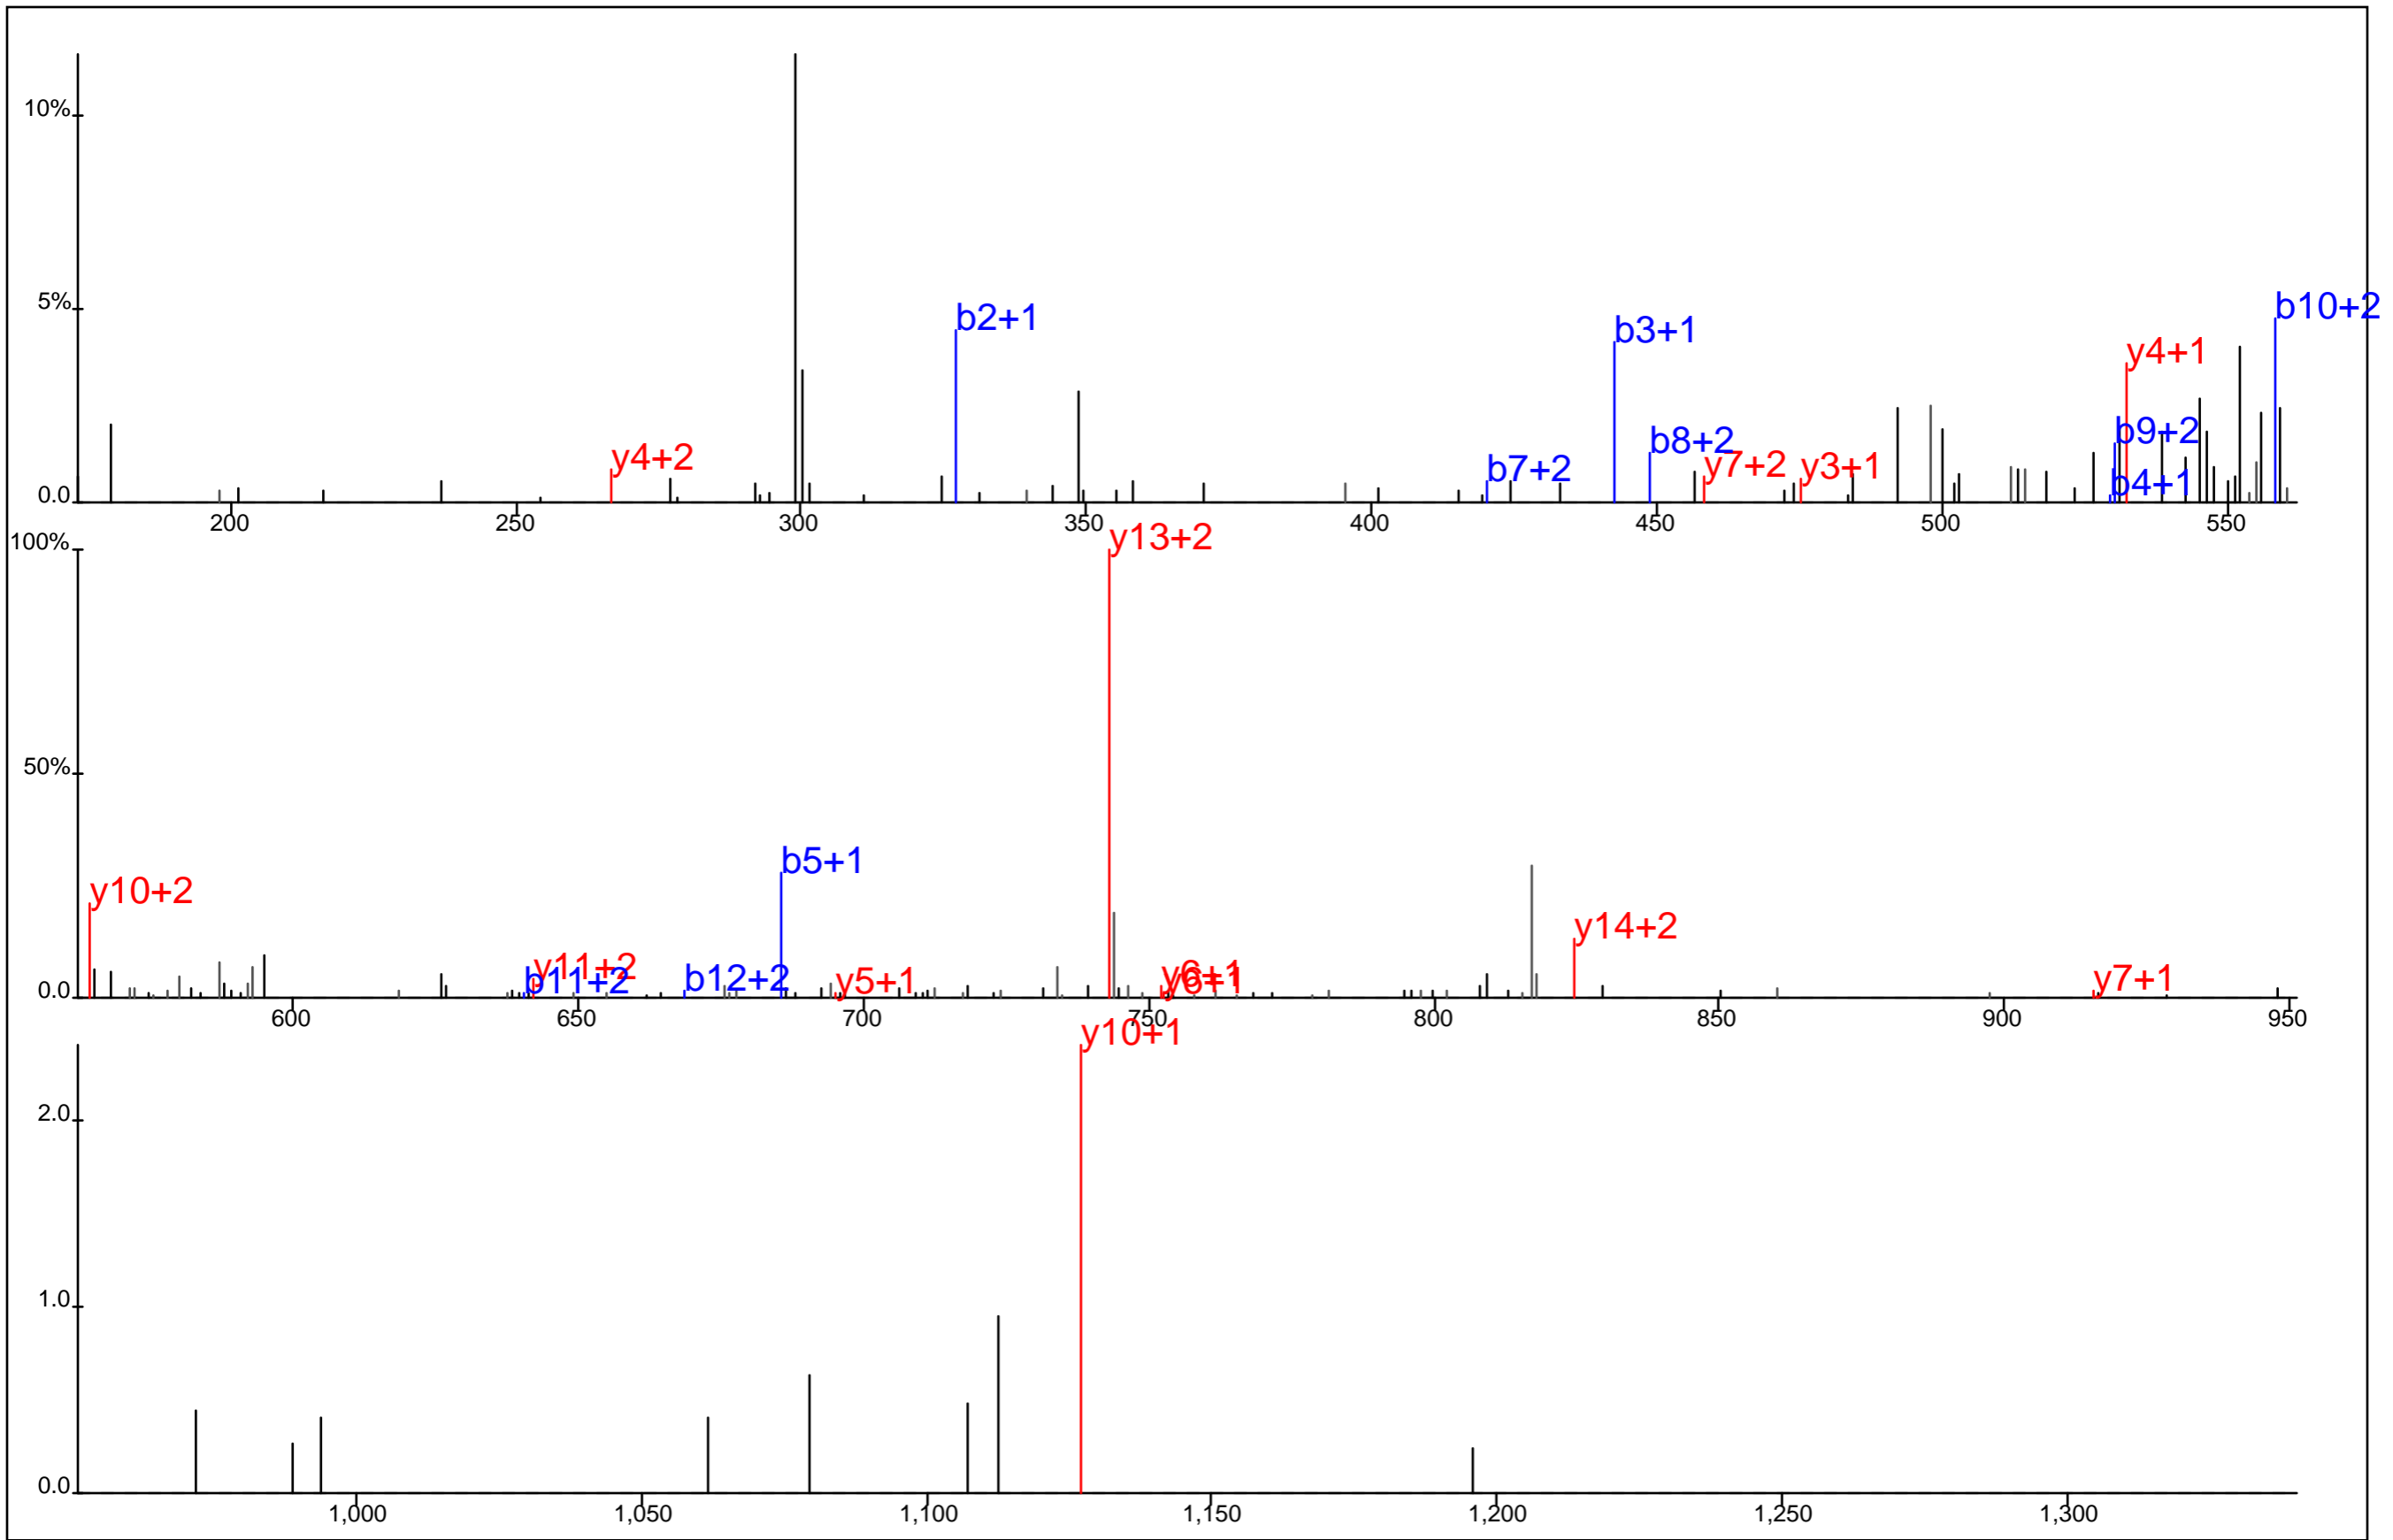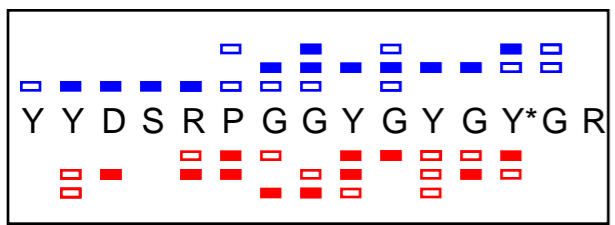

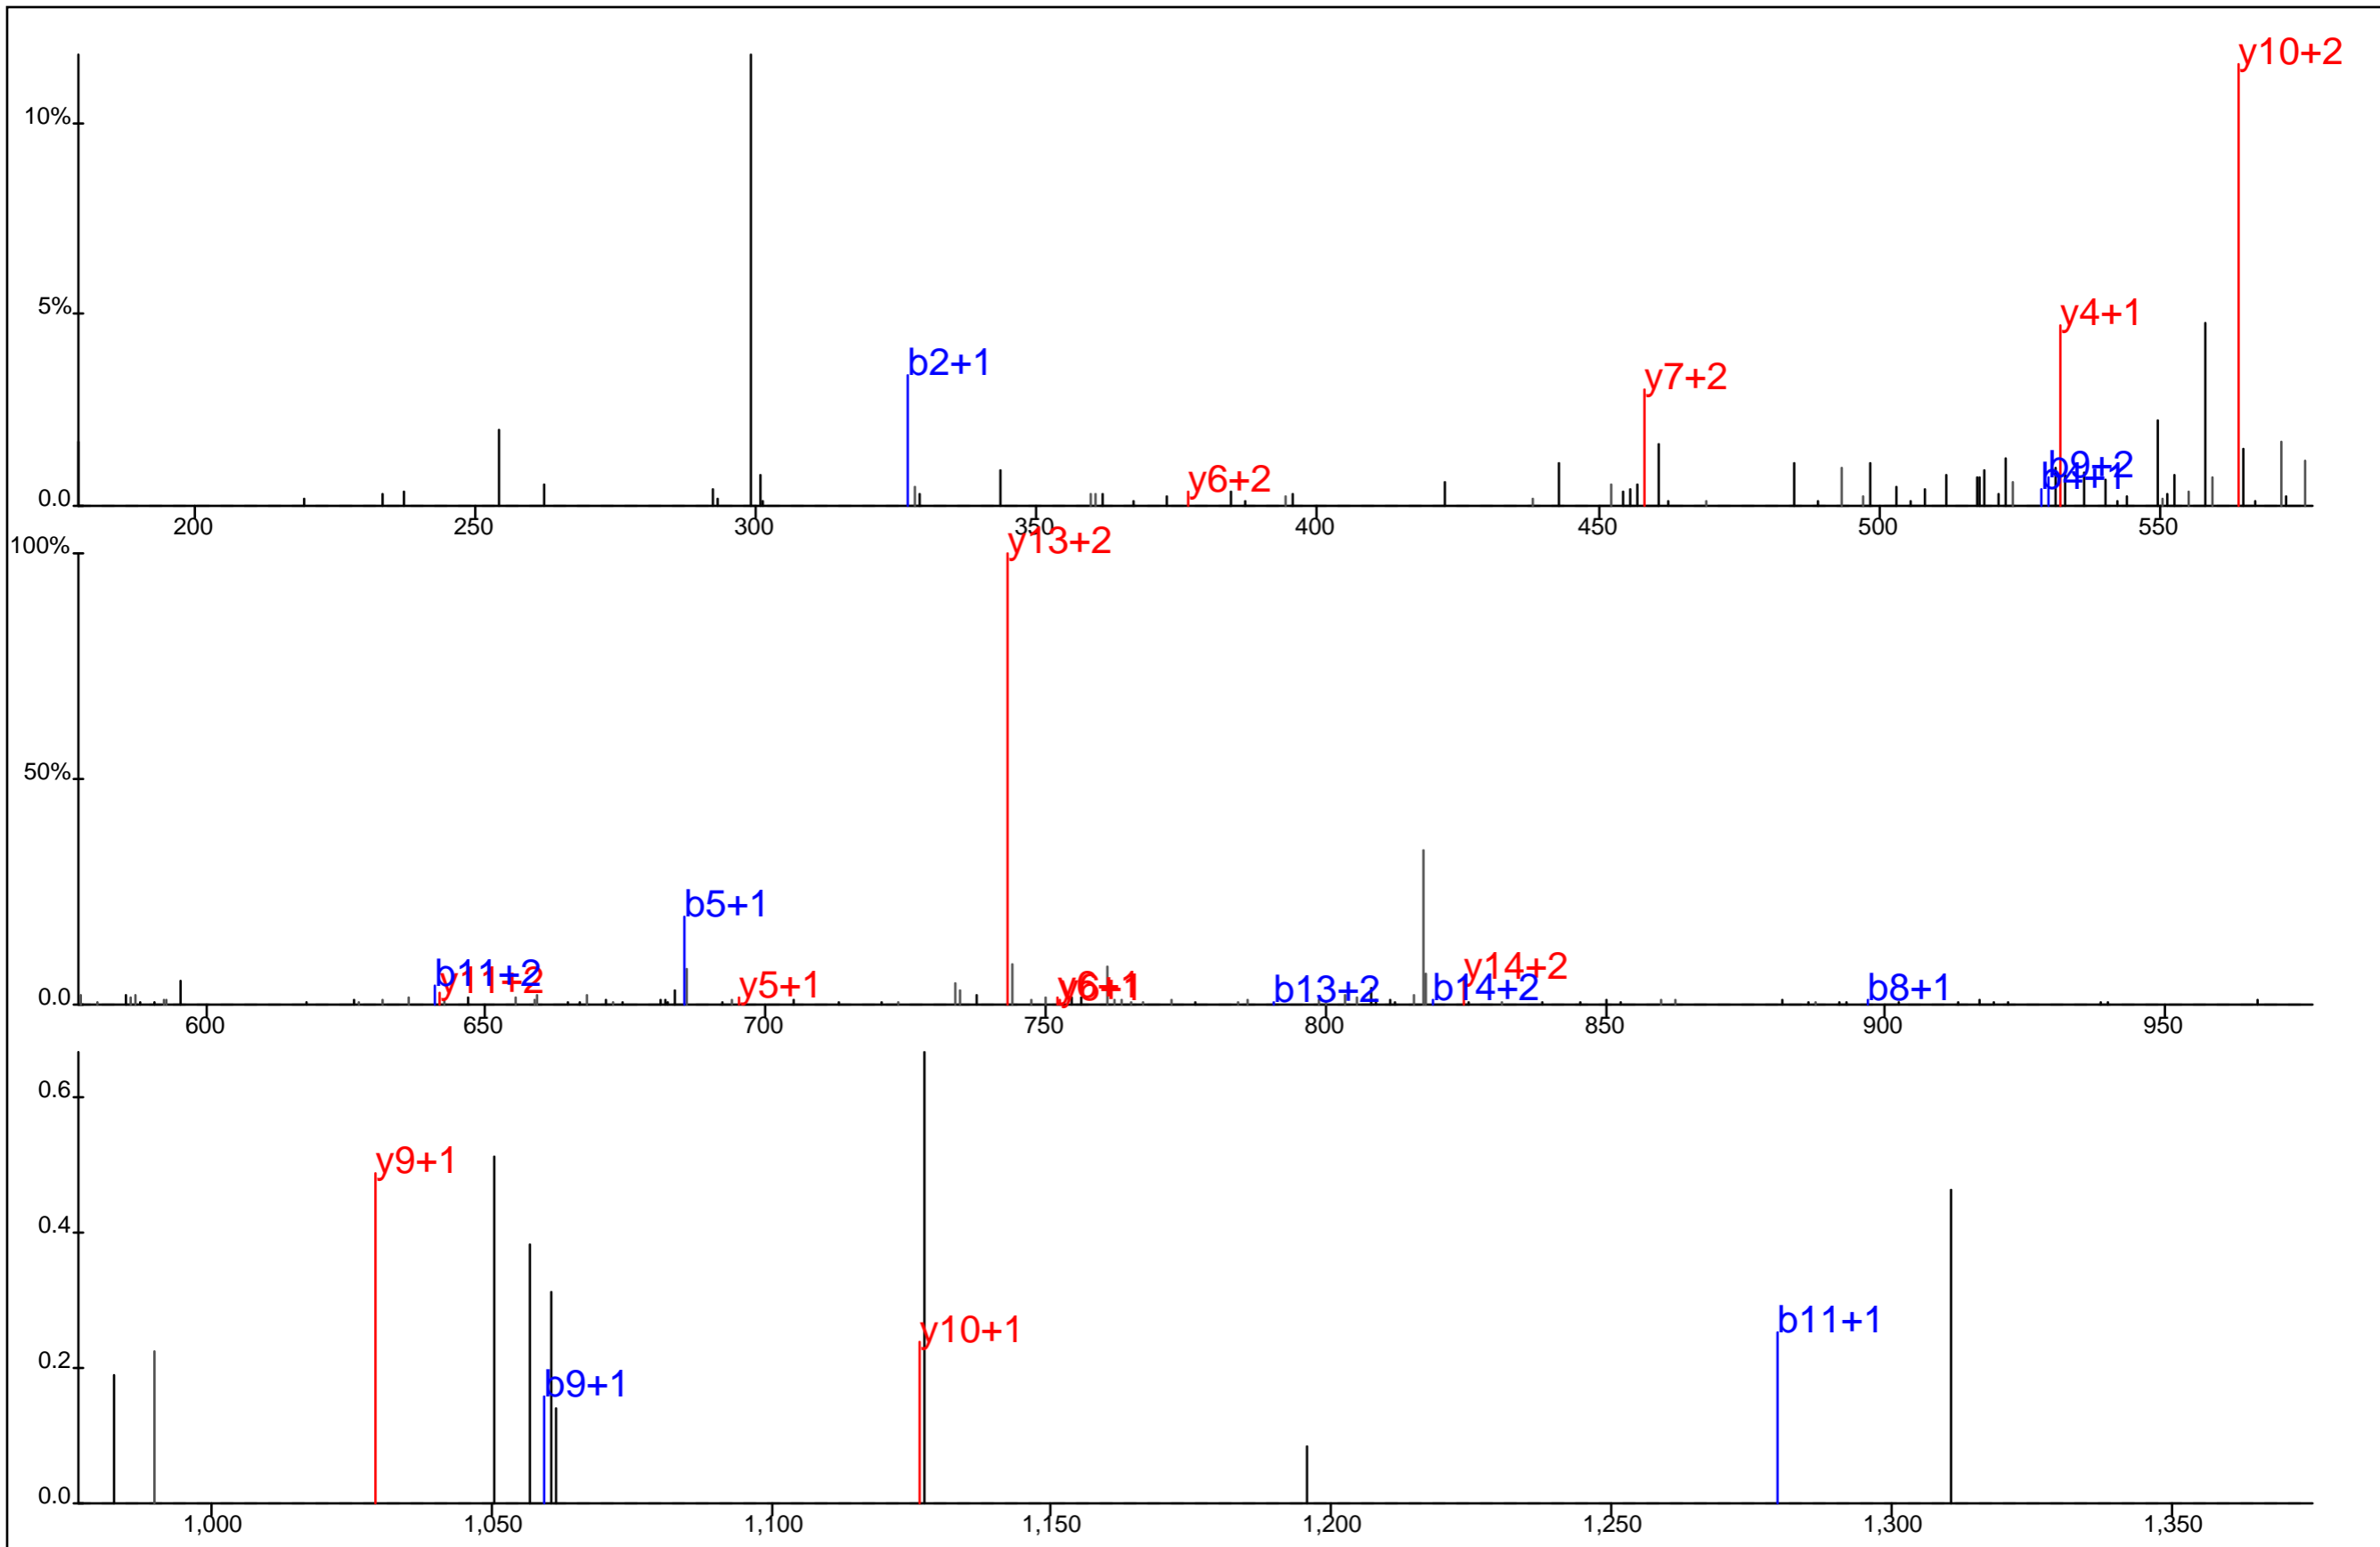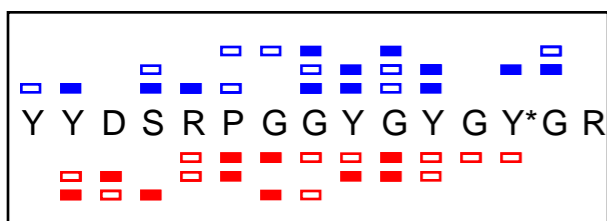

Protein Name: RNA binding motif protein 3  
 gi Accession: 5803137  
 Precursor Mass: 604.2462+3  
 Delta Mass: 1.114 ppm  
 XCorr: 22.19

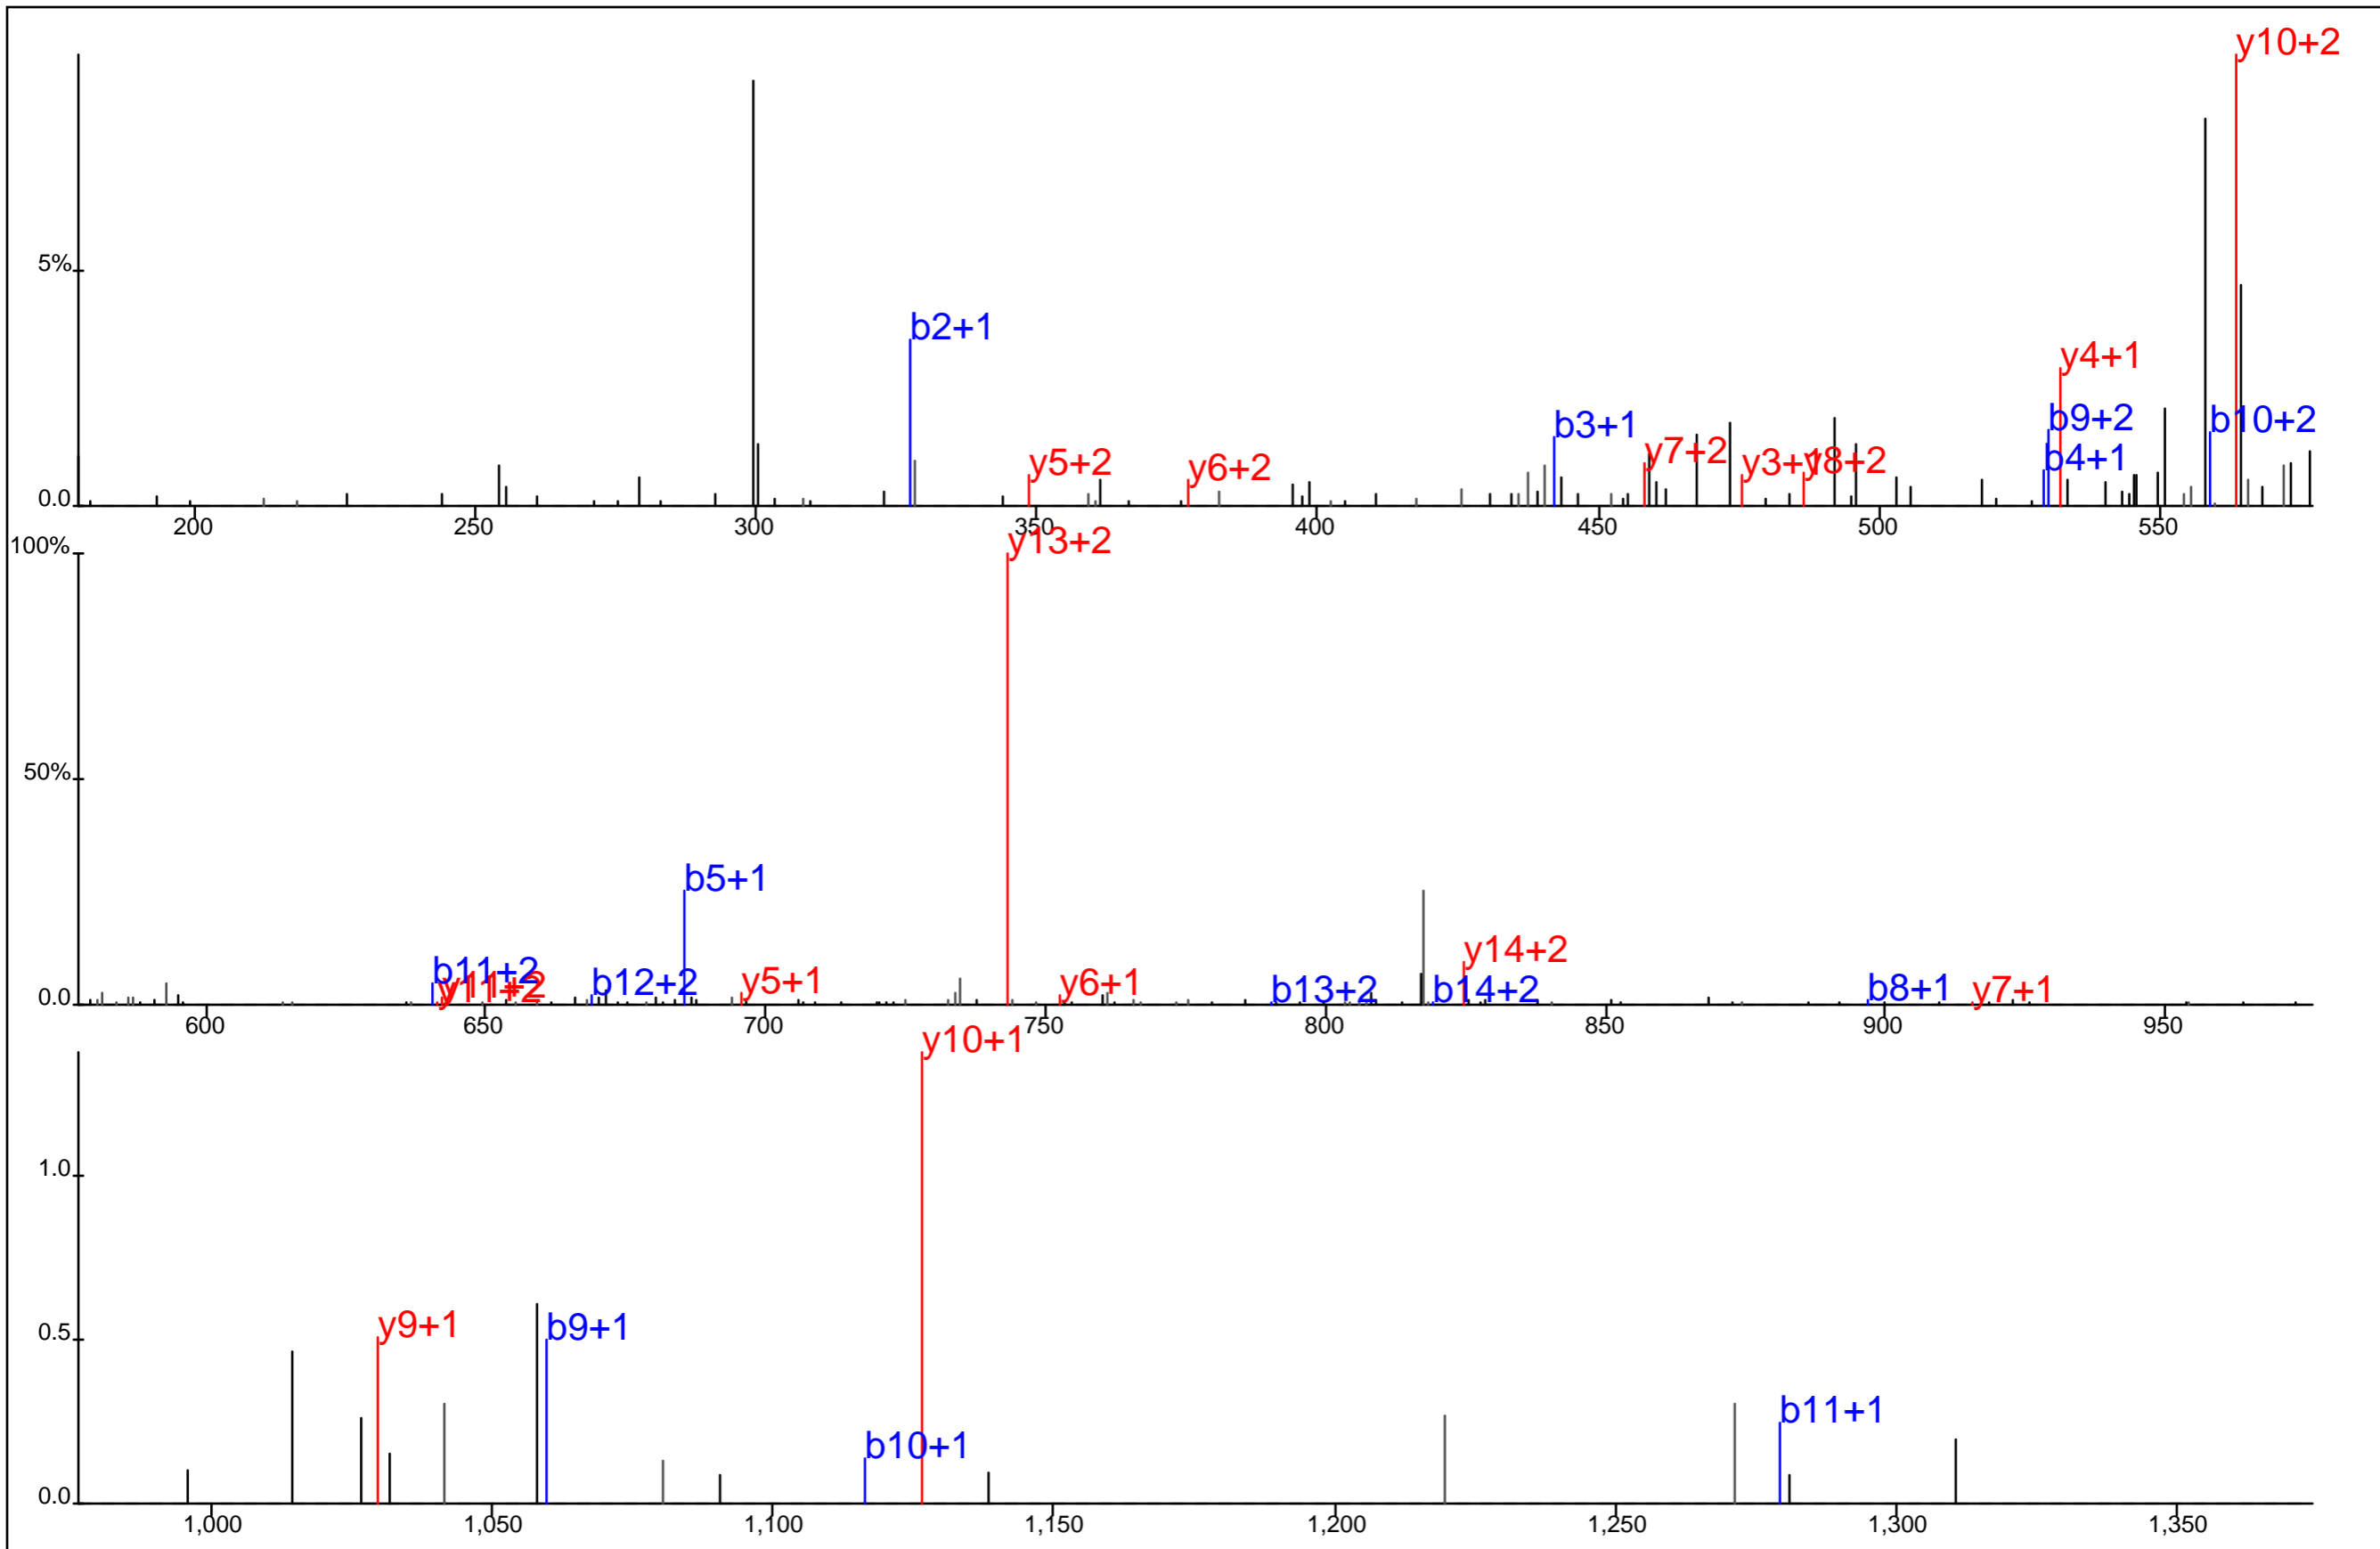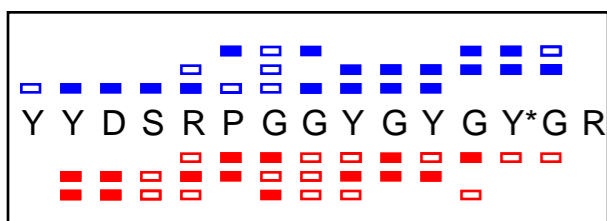

Protein Name: RNA binding motif protein 3  
 gi Accession: 5803137  
 Precursor Mass: 604.2468+3  
 Delta Mass: 2.130 ppm  
 XCorr: 26.3

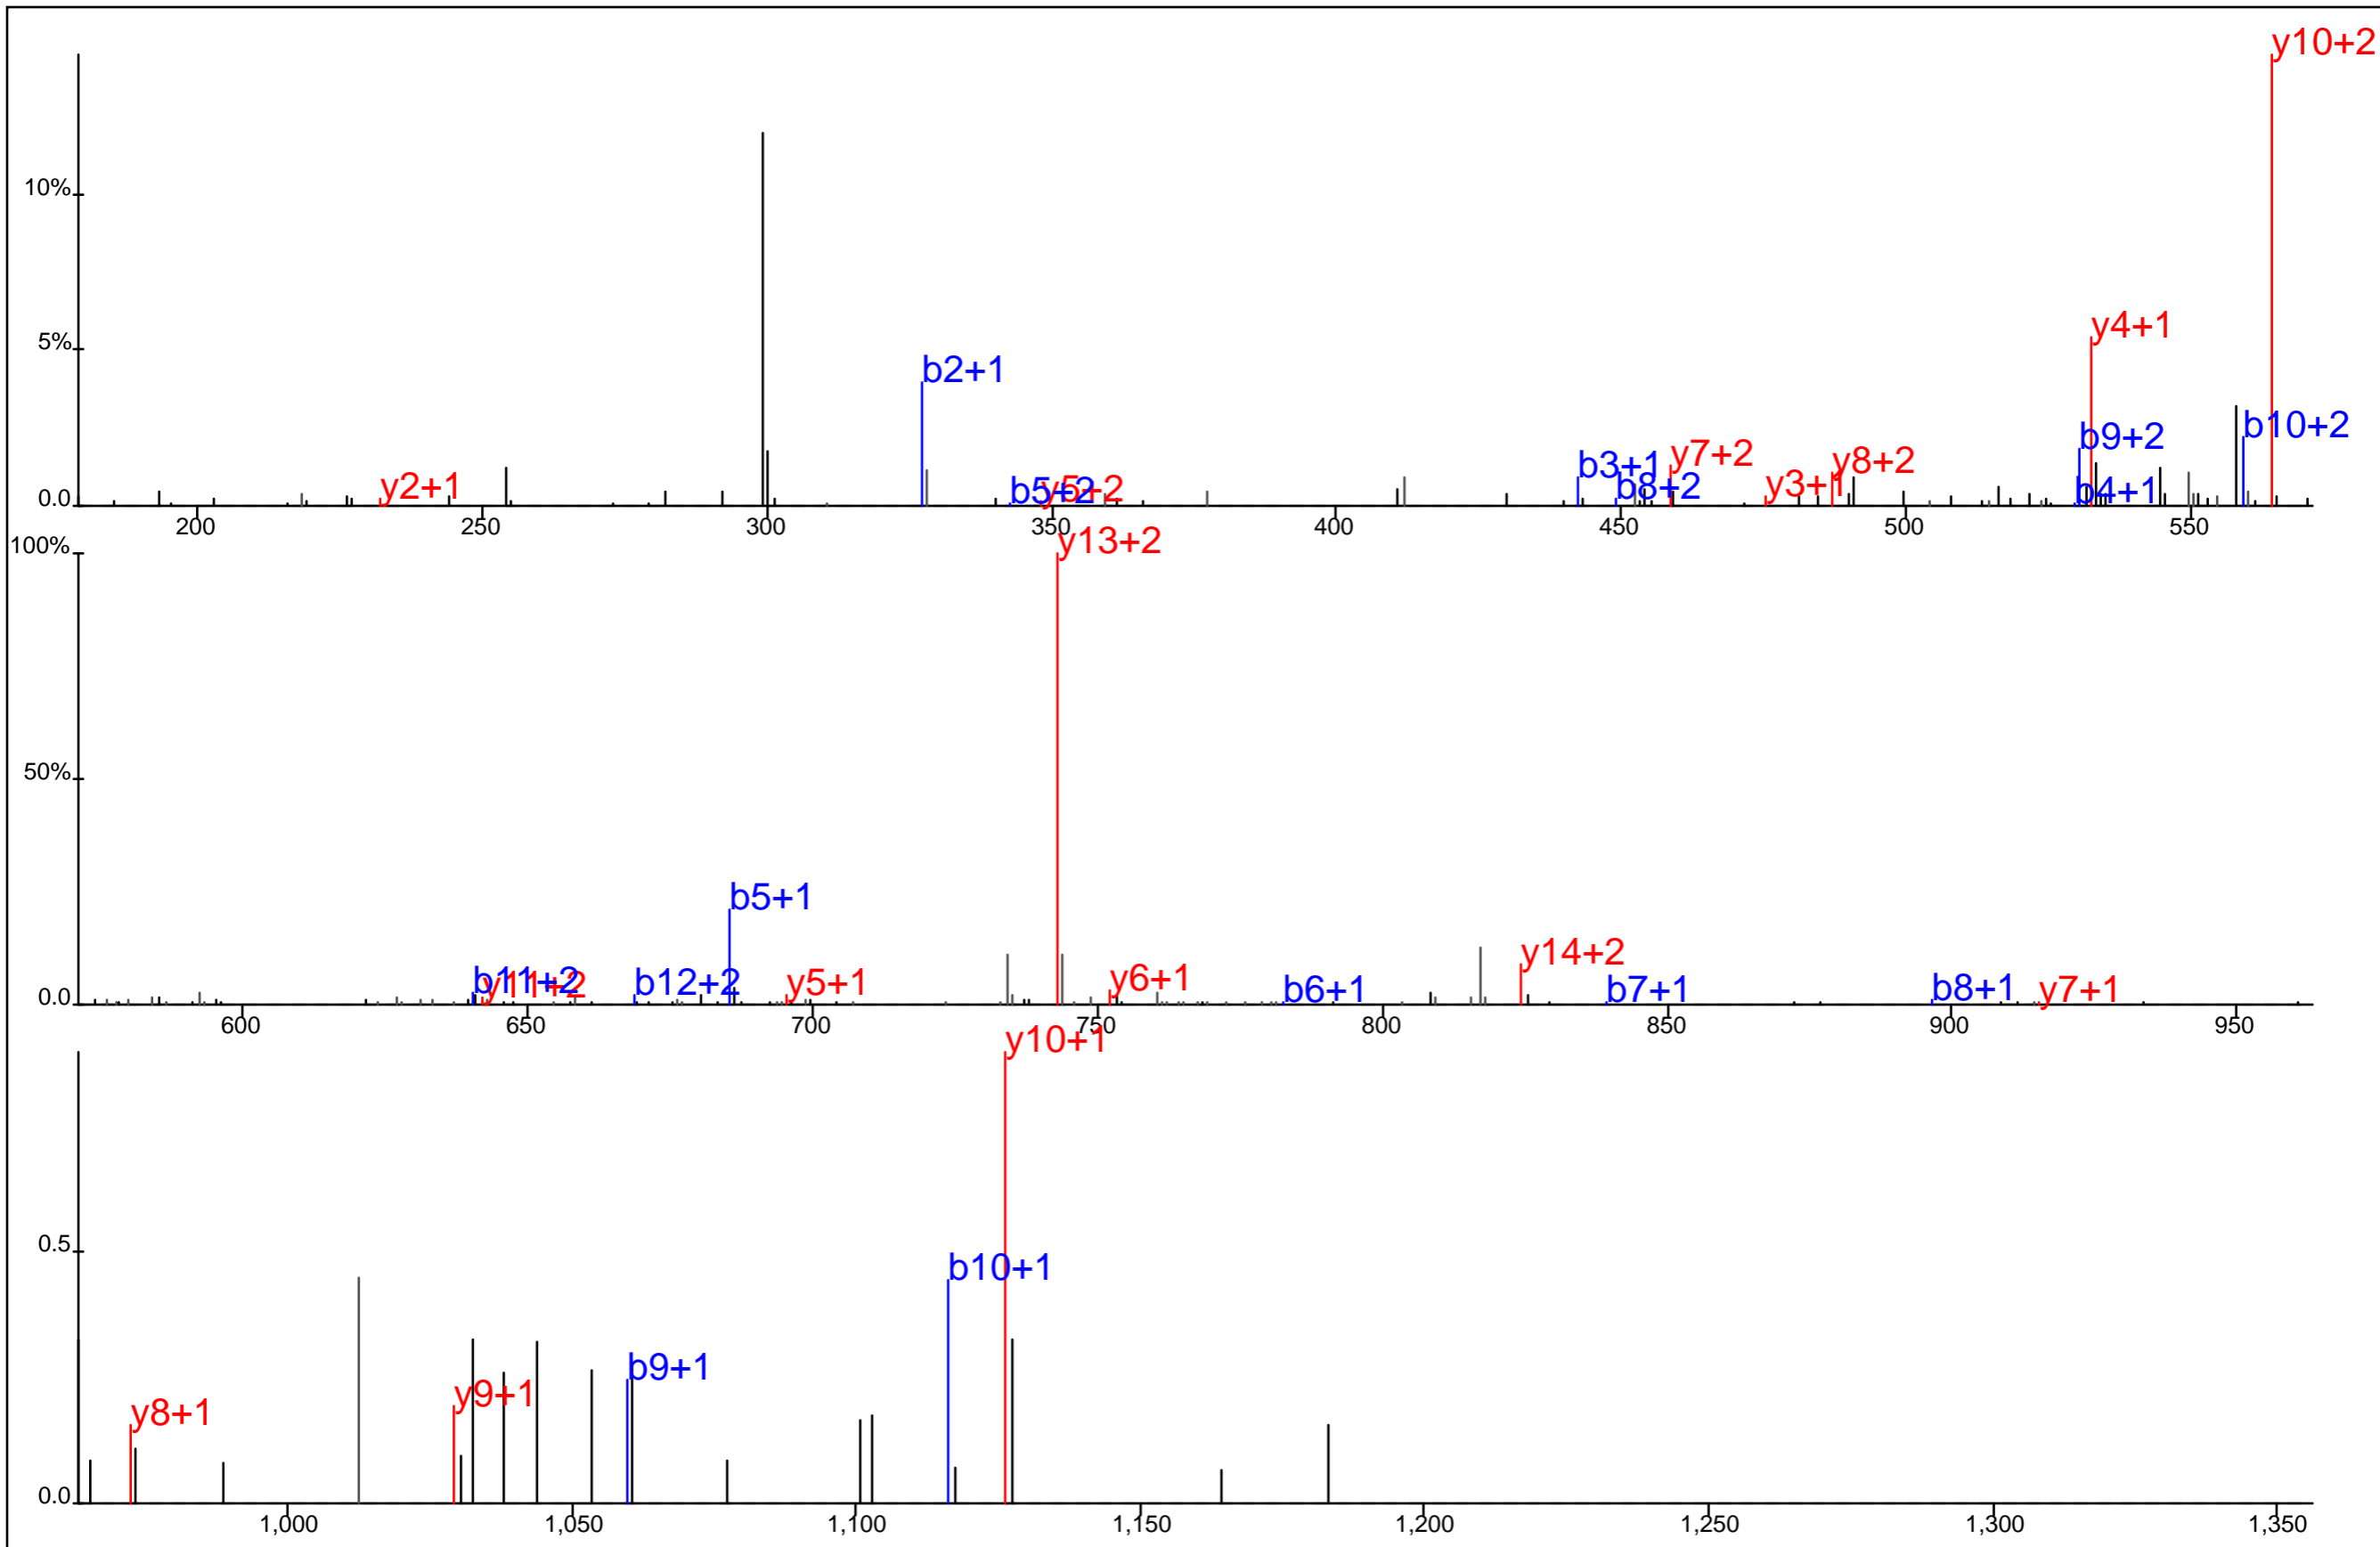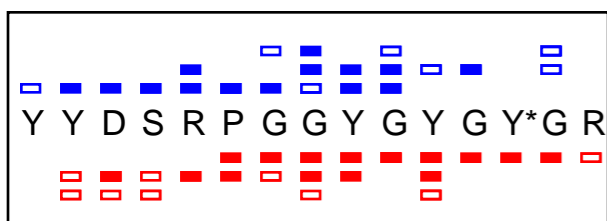

Protein Name: RNA binding motif protein 3  
 gi Accession: 5803137  
 Precursor Mass: 604.2476+3  
 Delta Mass: 3.446 ppm  
 XCorr: 36.76

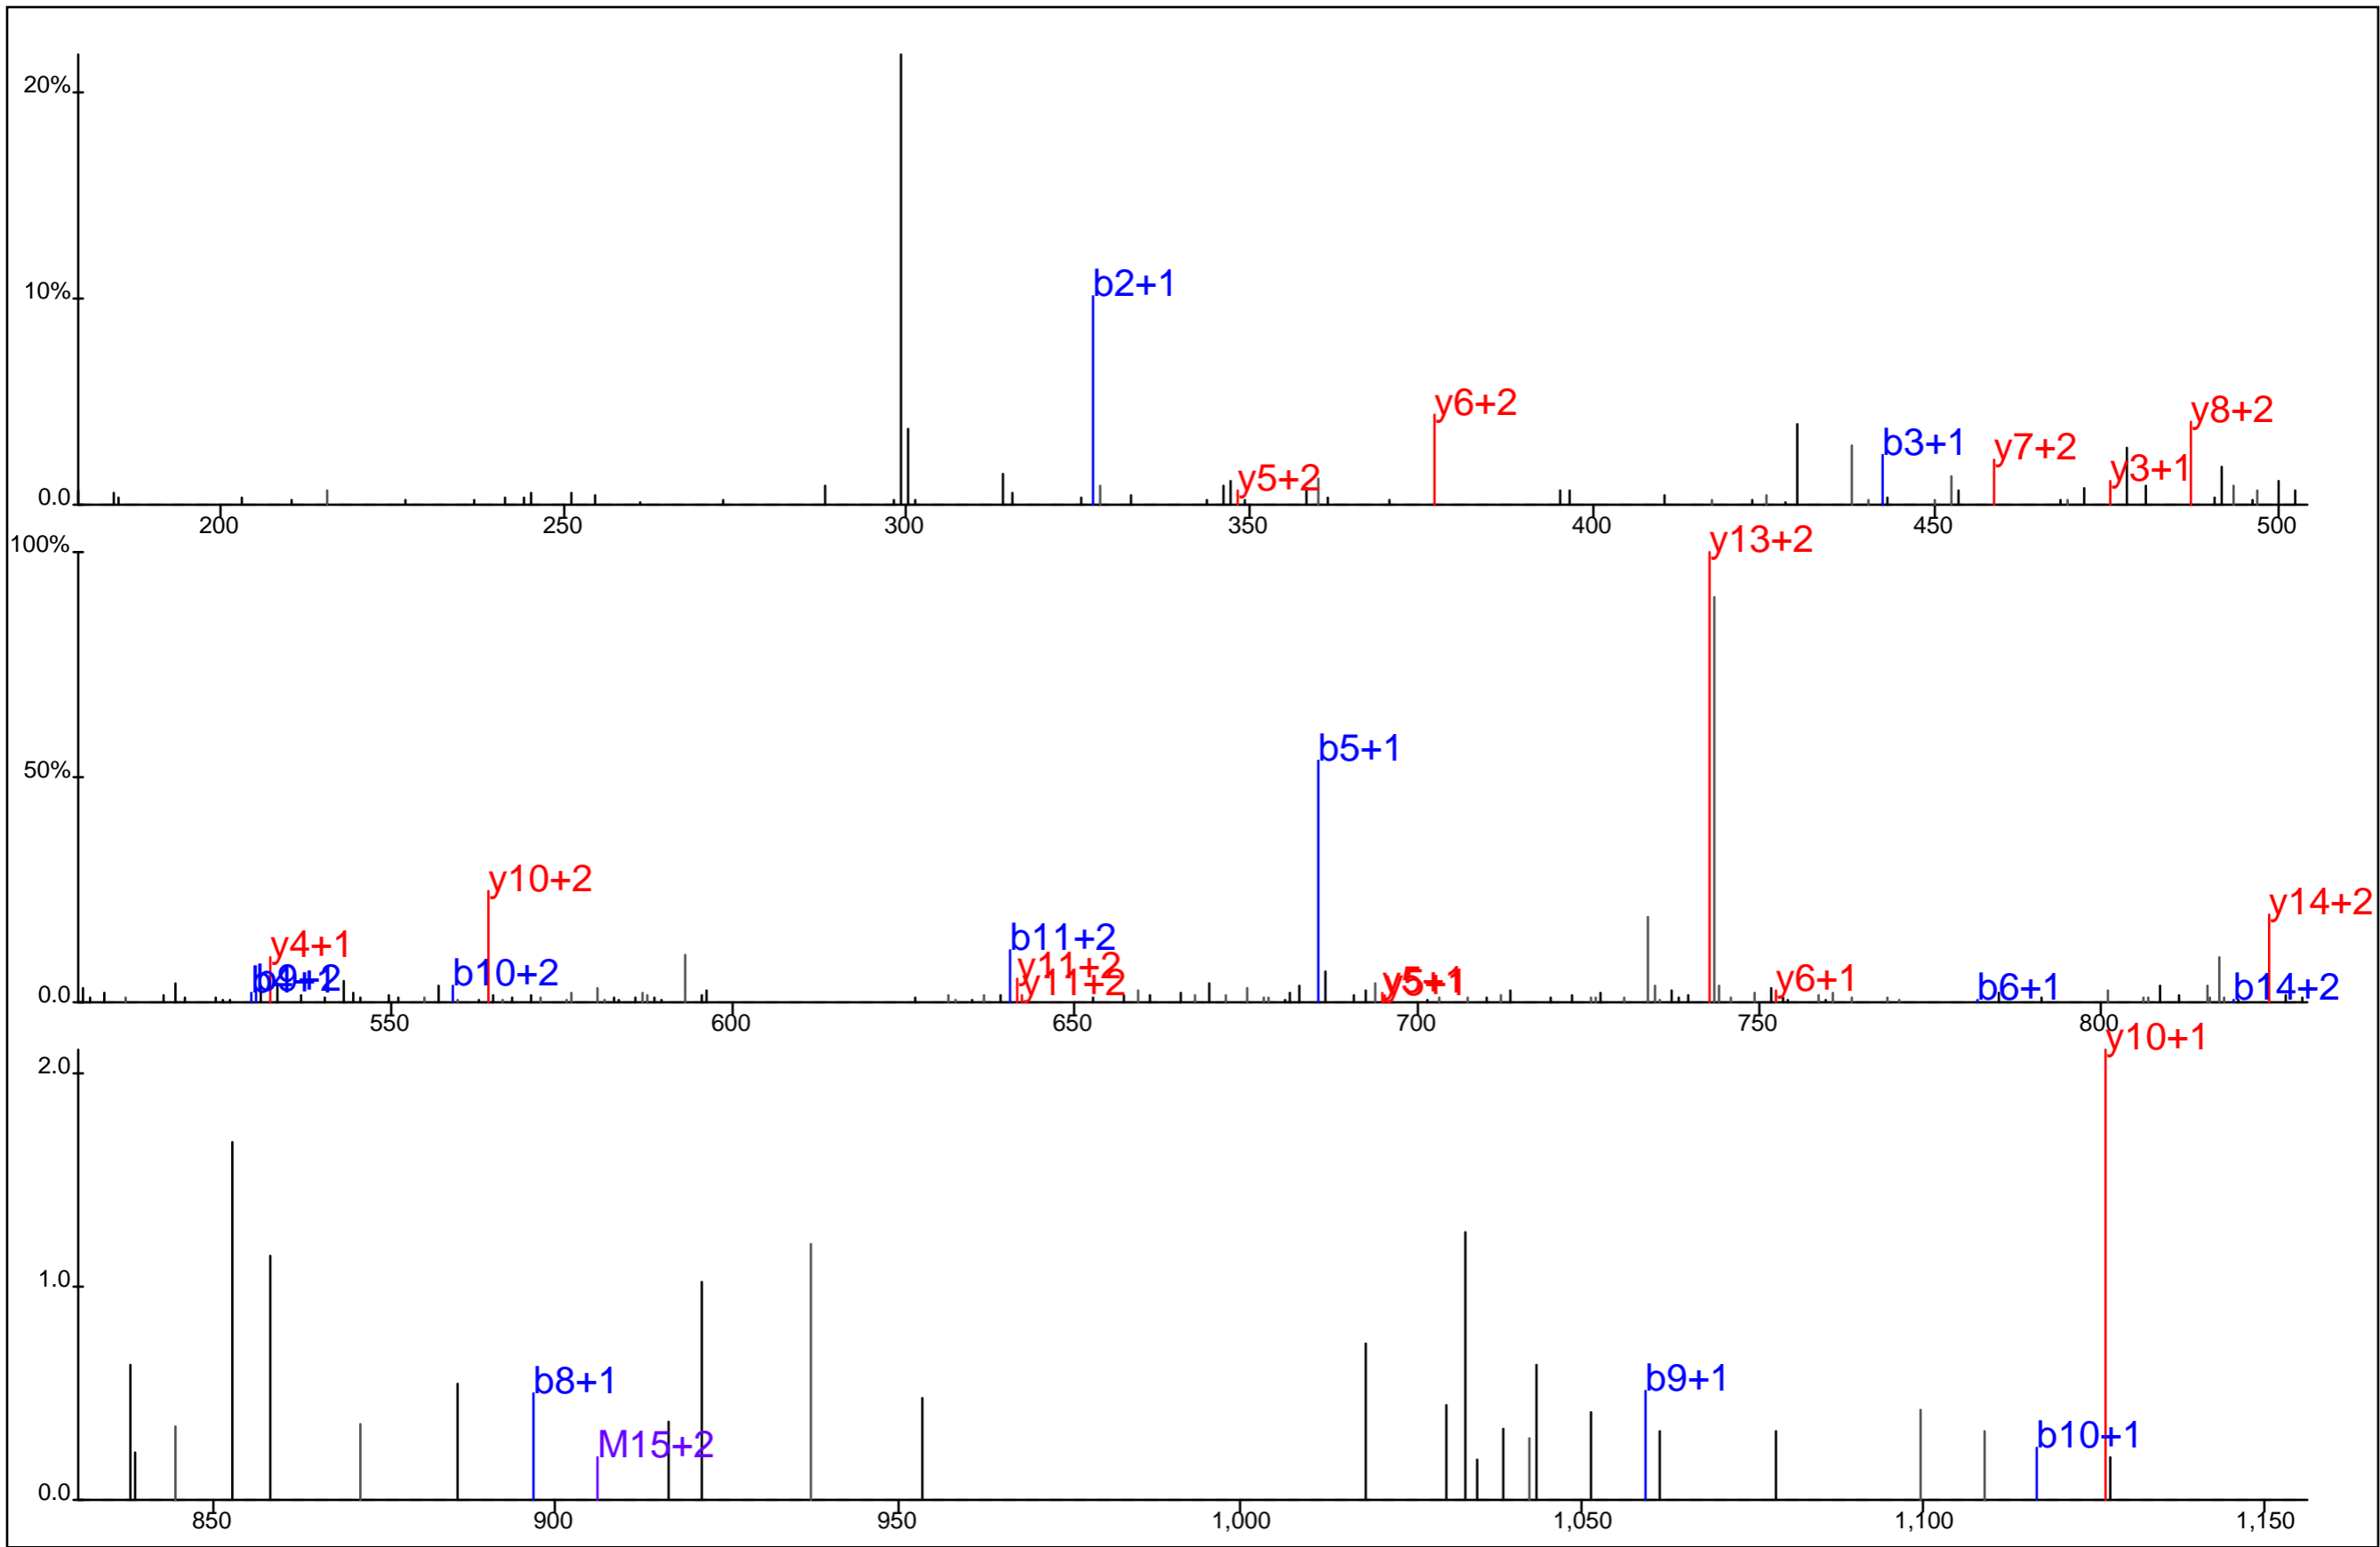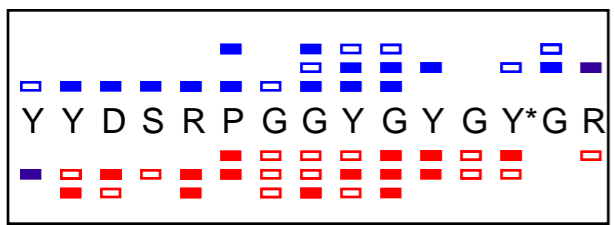

Protein Name: RNA binding motif protein 3  
 gi Accession: 5803137  
 Precursor Mass: 604.2469+3  
 Delta Mass: 2.229 ppm  
 XCorr: 29.49



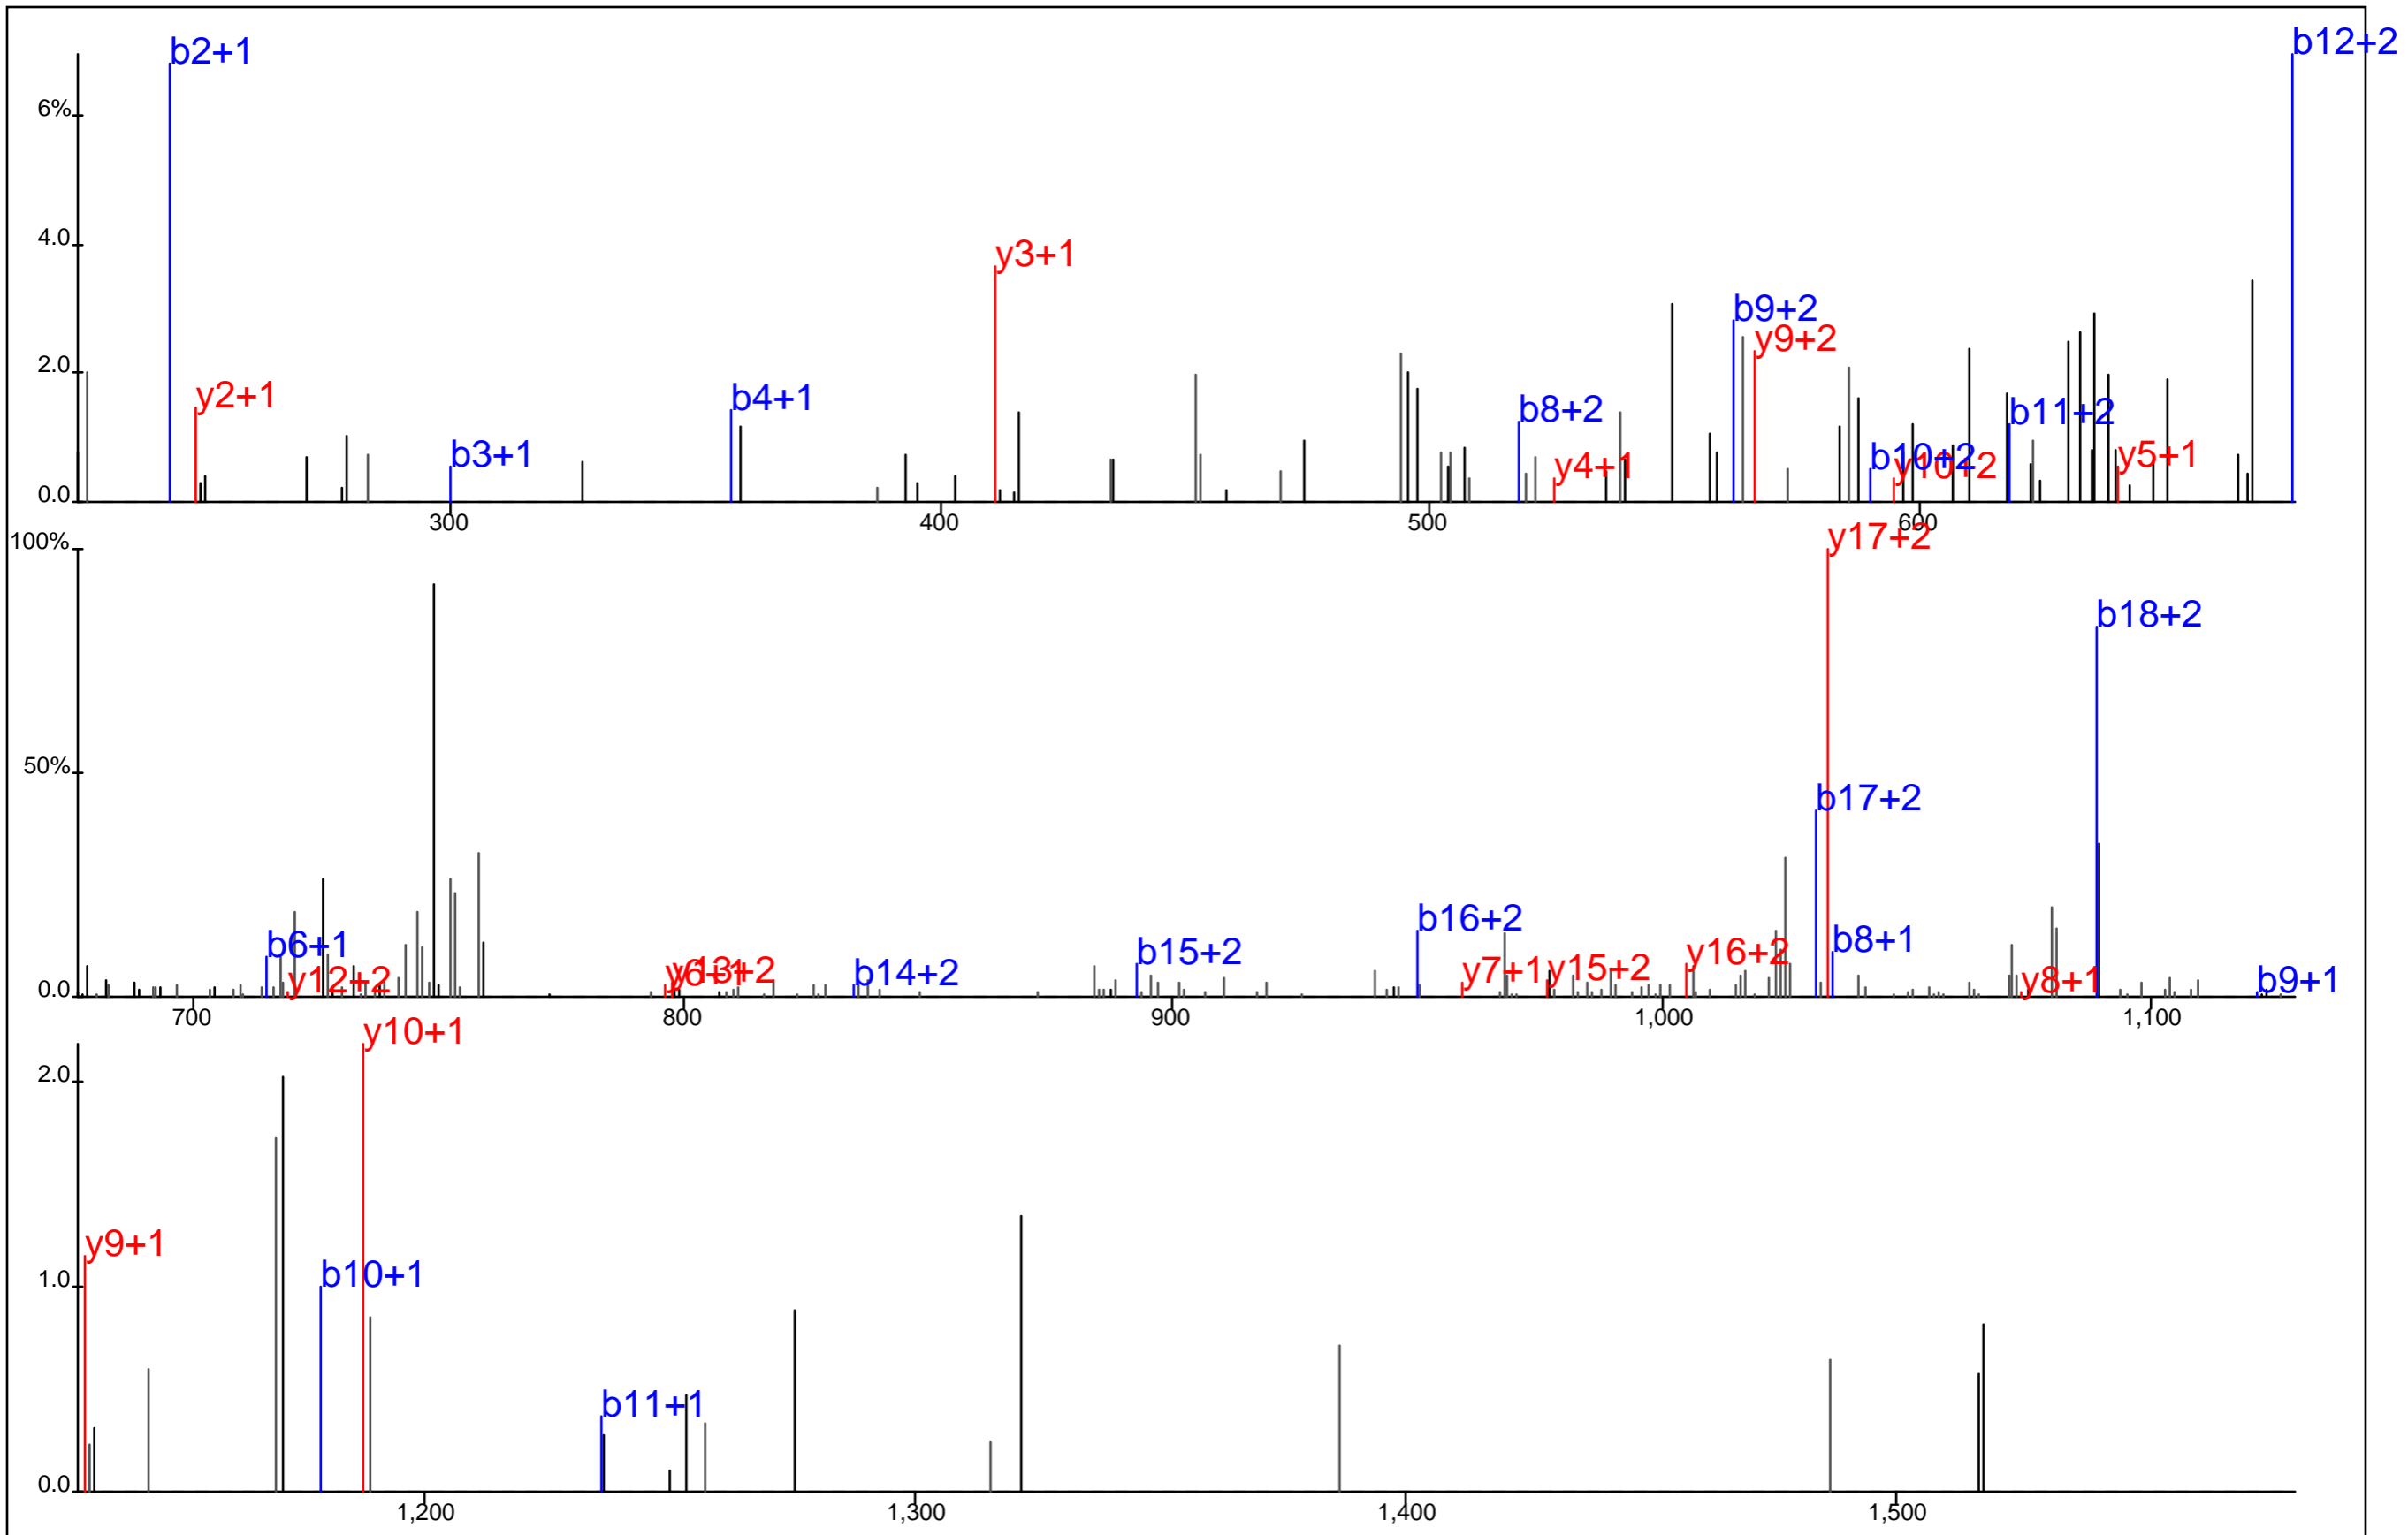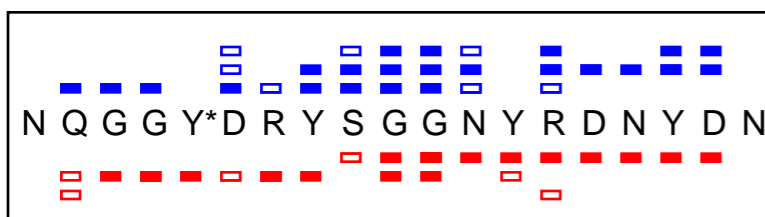

Protein Name: RNA binding motif protein 3  
 gi Accession: 5803137  
 Precursor Mass: 769.9658+3  
 Delta Mass: 6.165 ppm  
 XCorr: 30.75

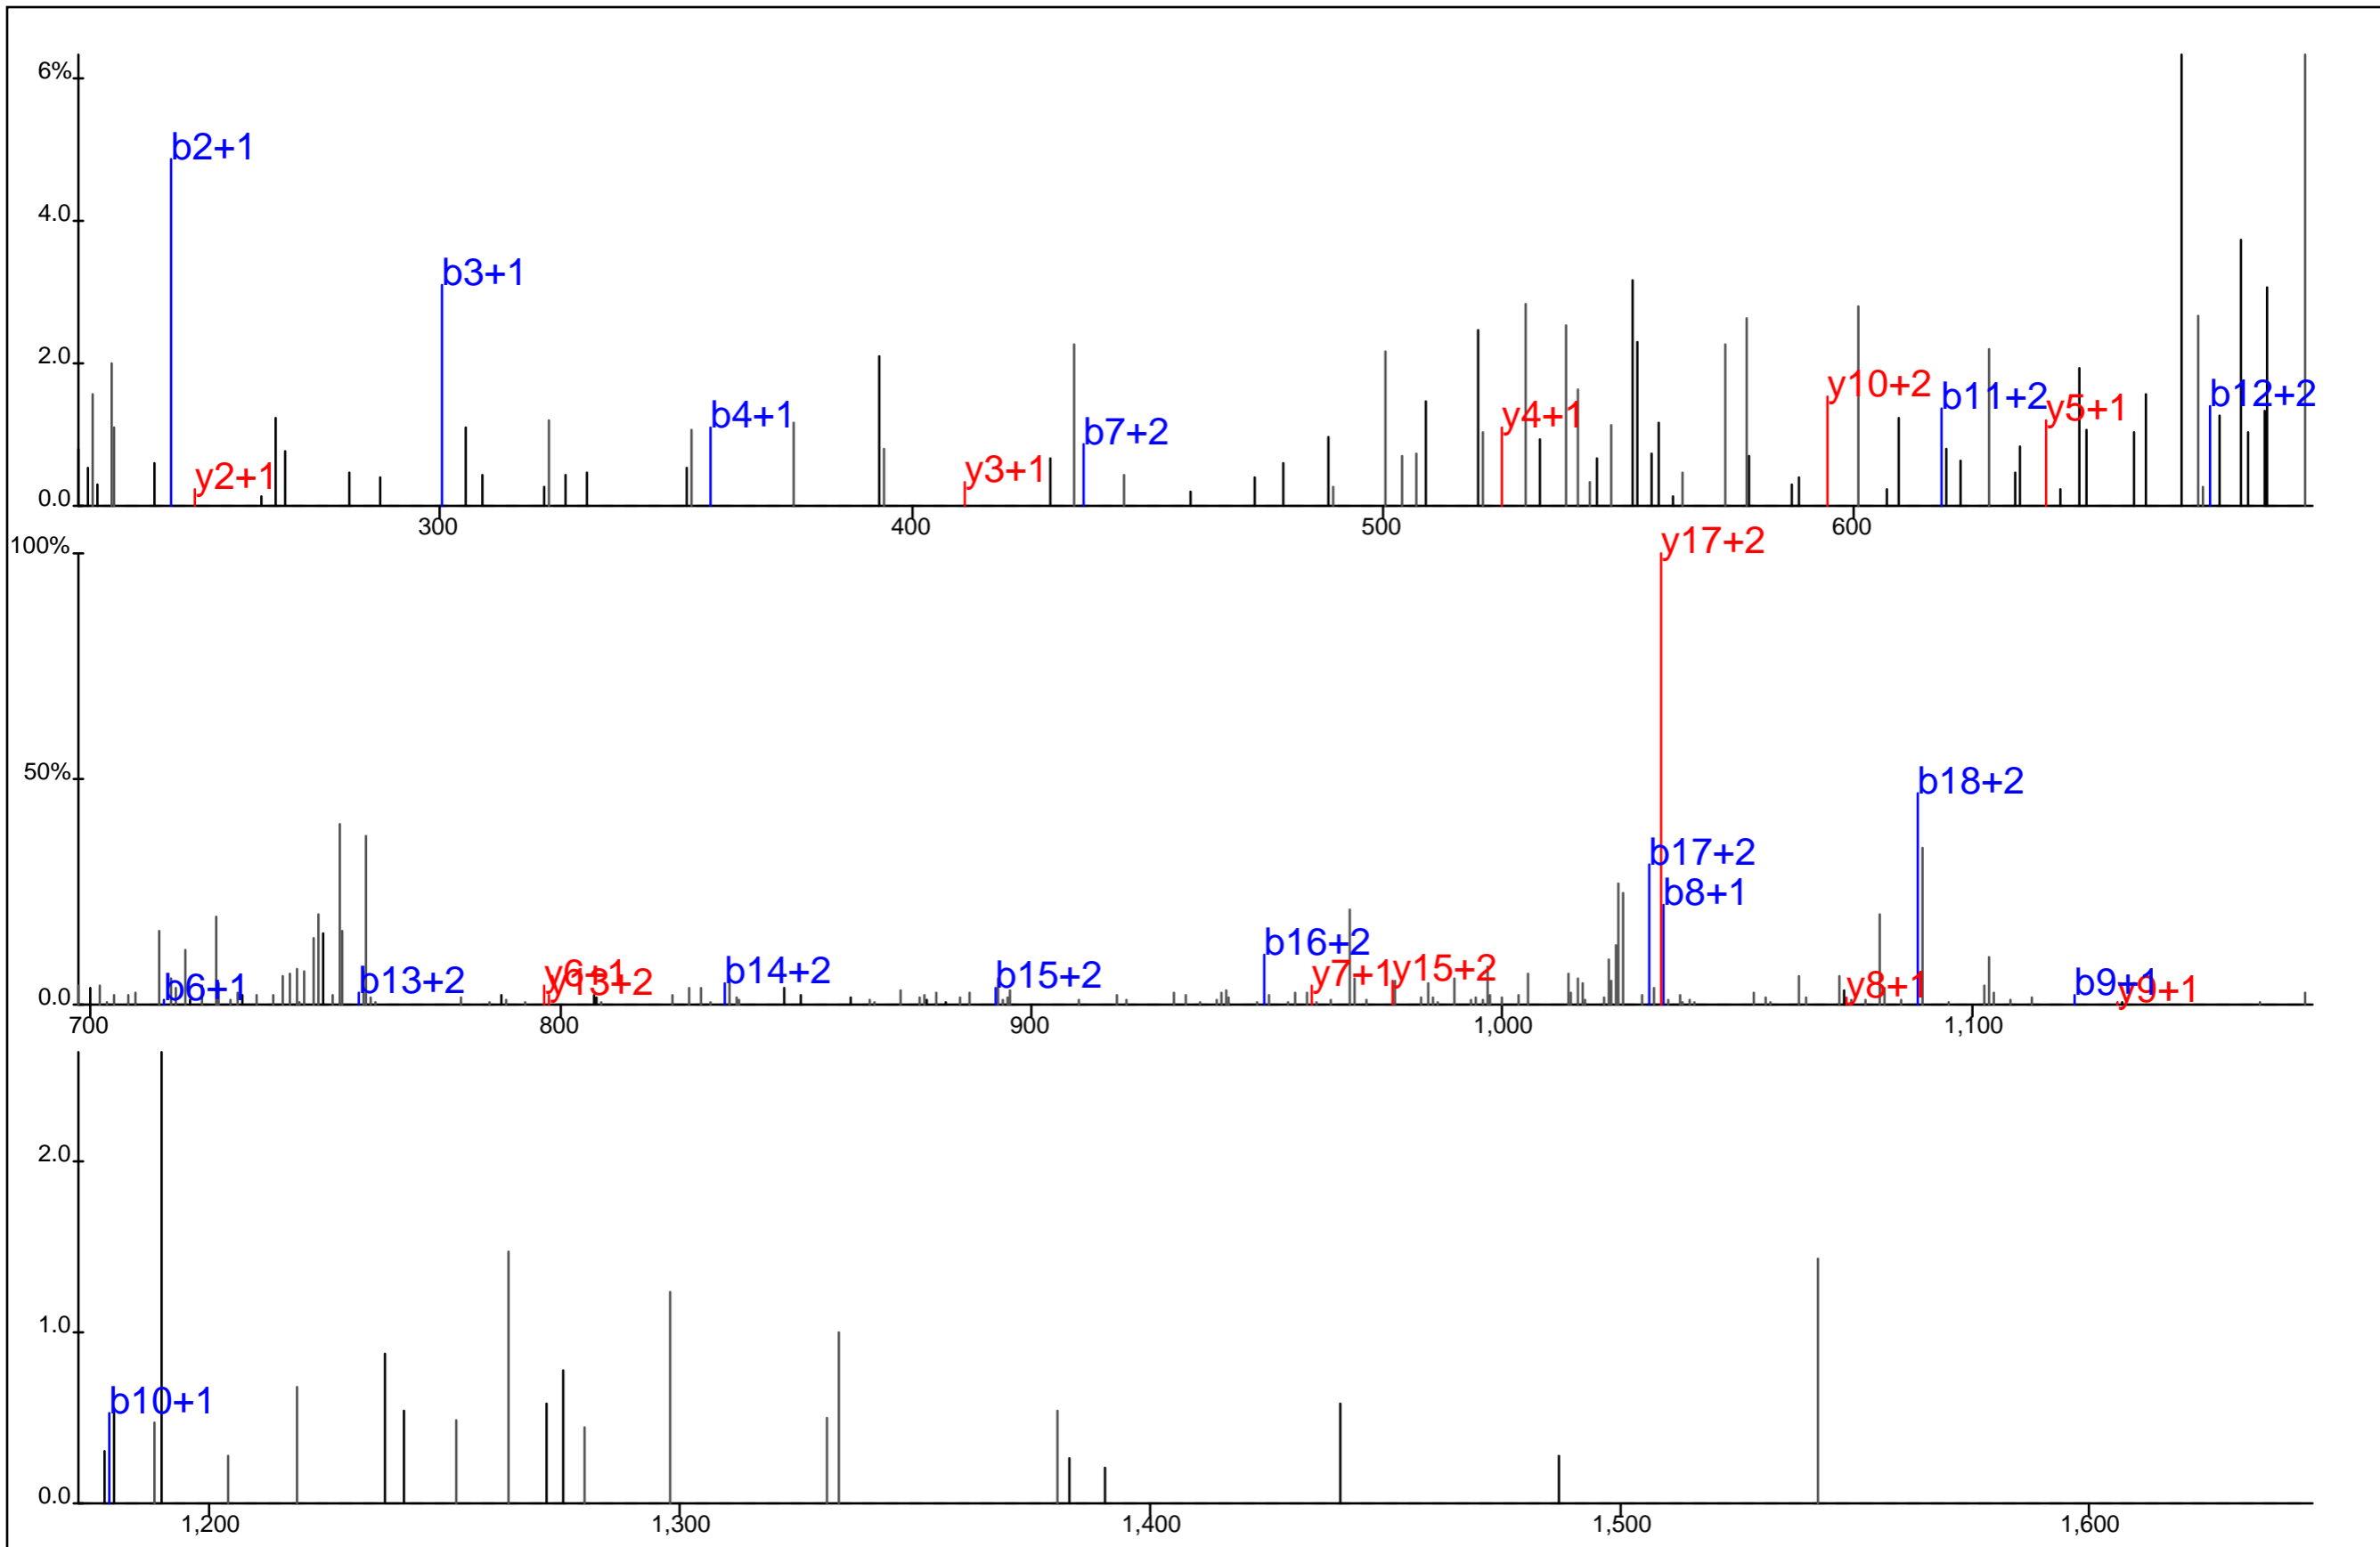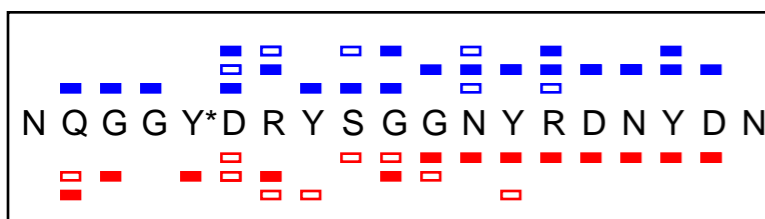

Protein Name: RNA binding motif protein 3  
 gi Accession: 5803137  
 Precursor Mass: 769.9645+3  
 Delta Mass: 4.496 ppm  
 XCorr: 12.22

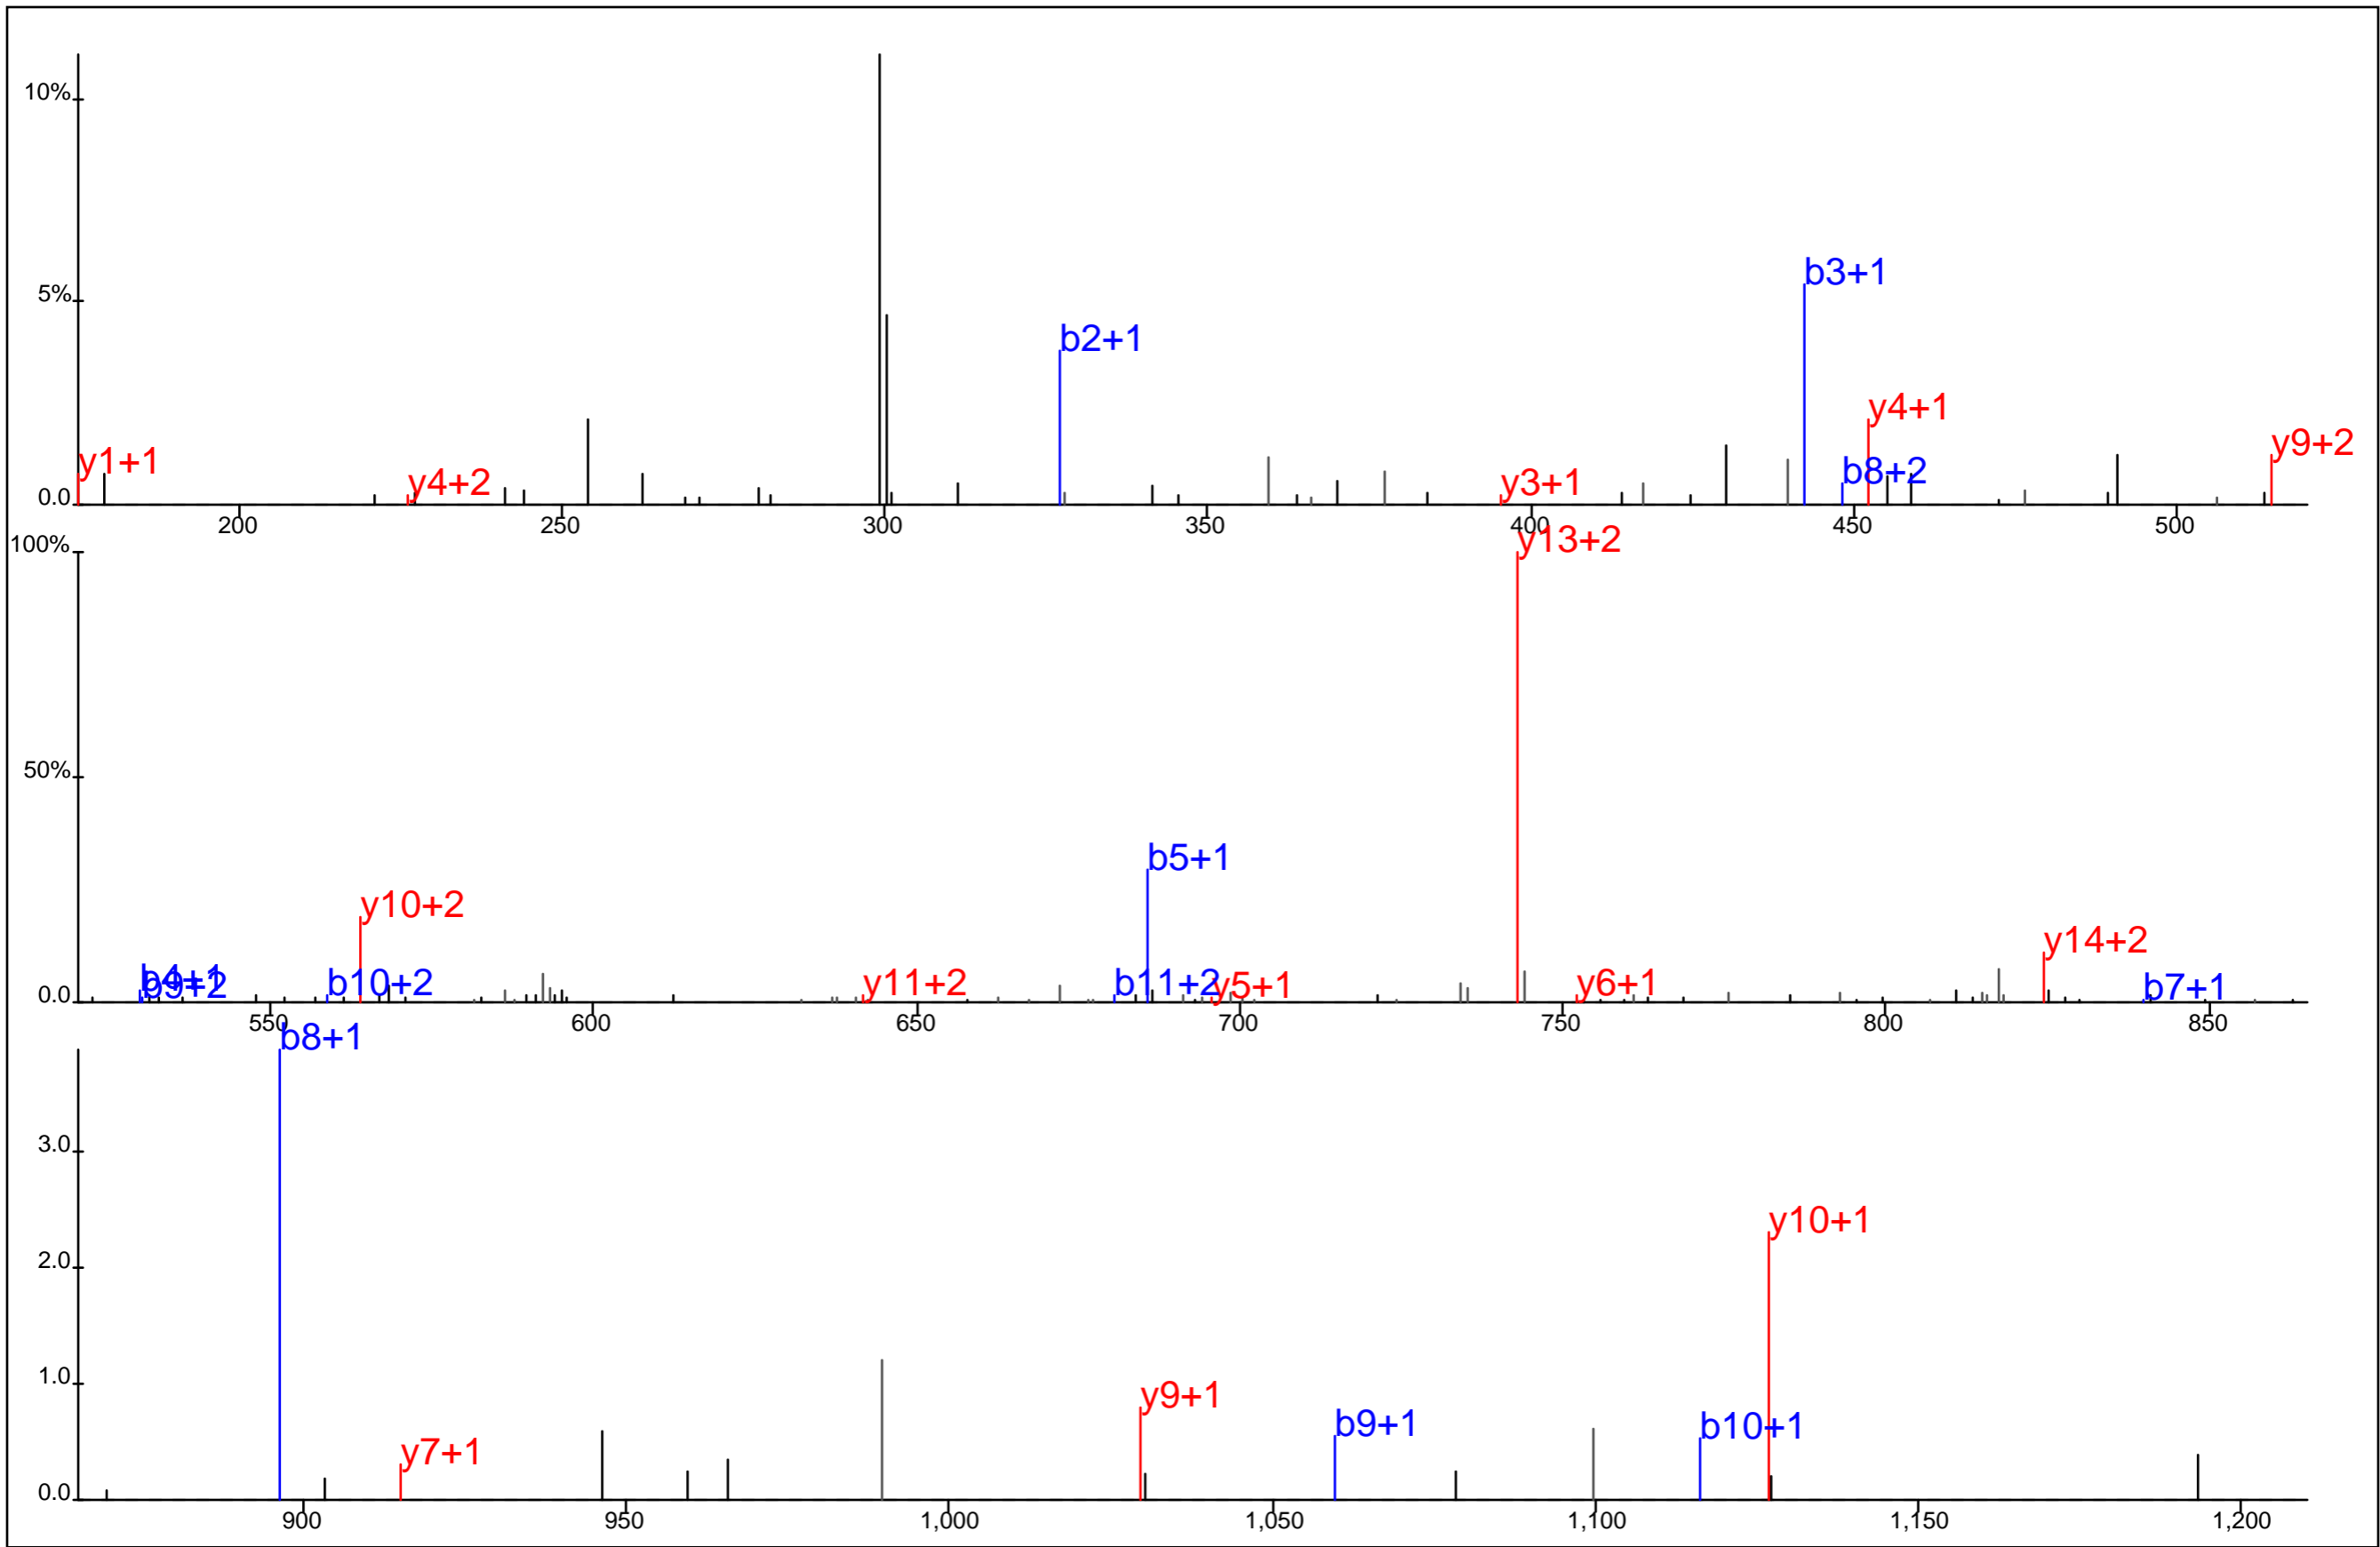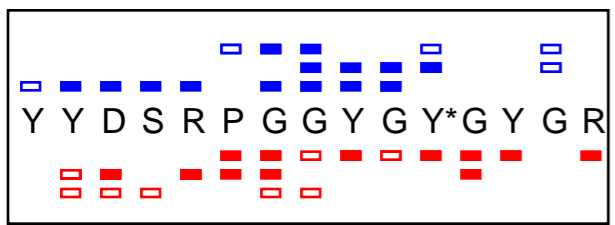

Protein Name: RNA binding motif protein 3  
 gi Accession: 5803137  
 Precursor Mass: 604.2488+3  
 Delta Mass: 5.467 ppm  
 XCorr: 32.96

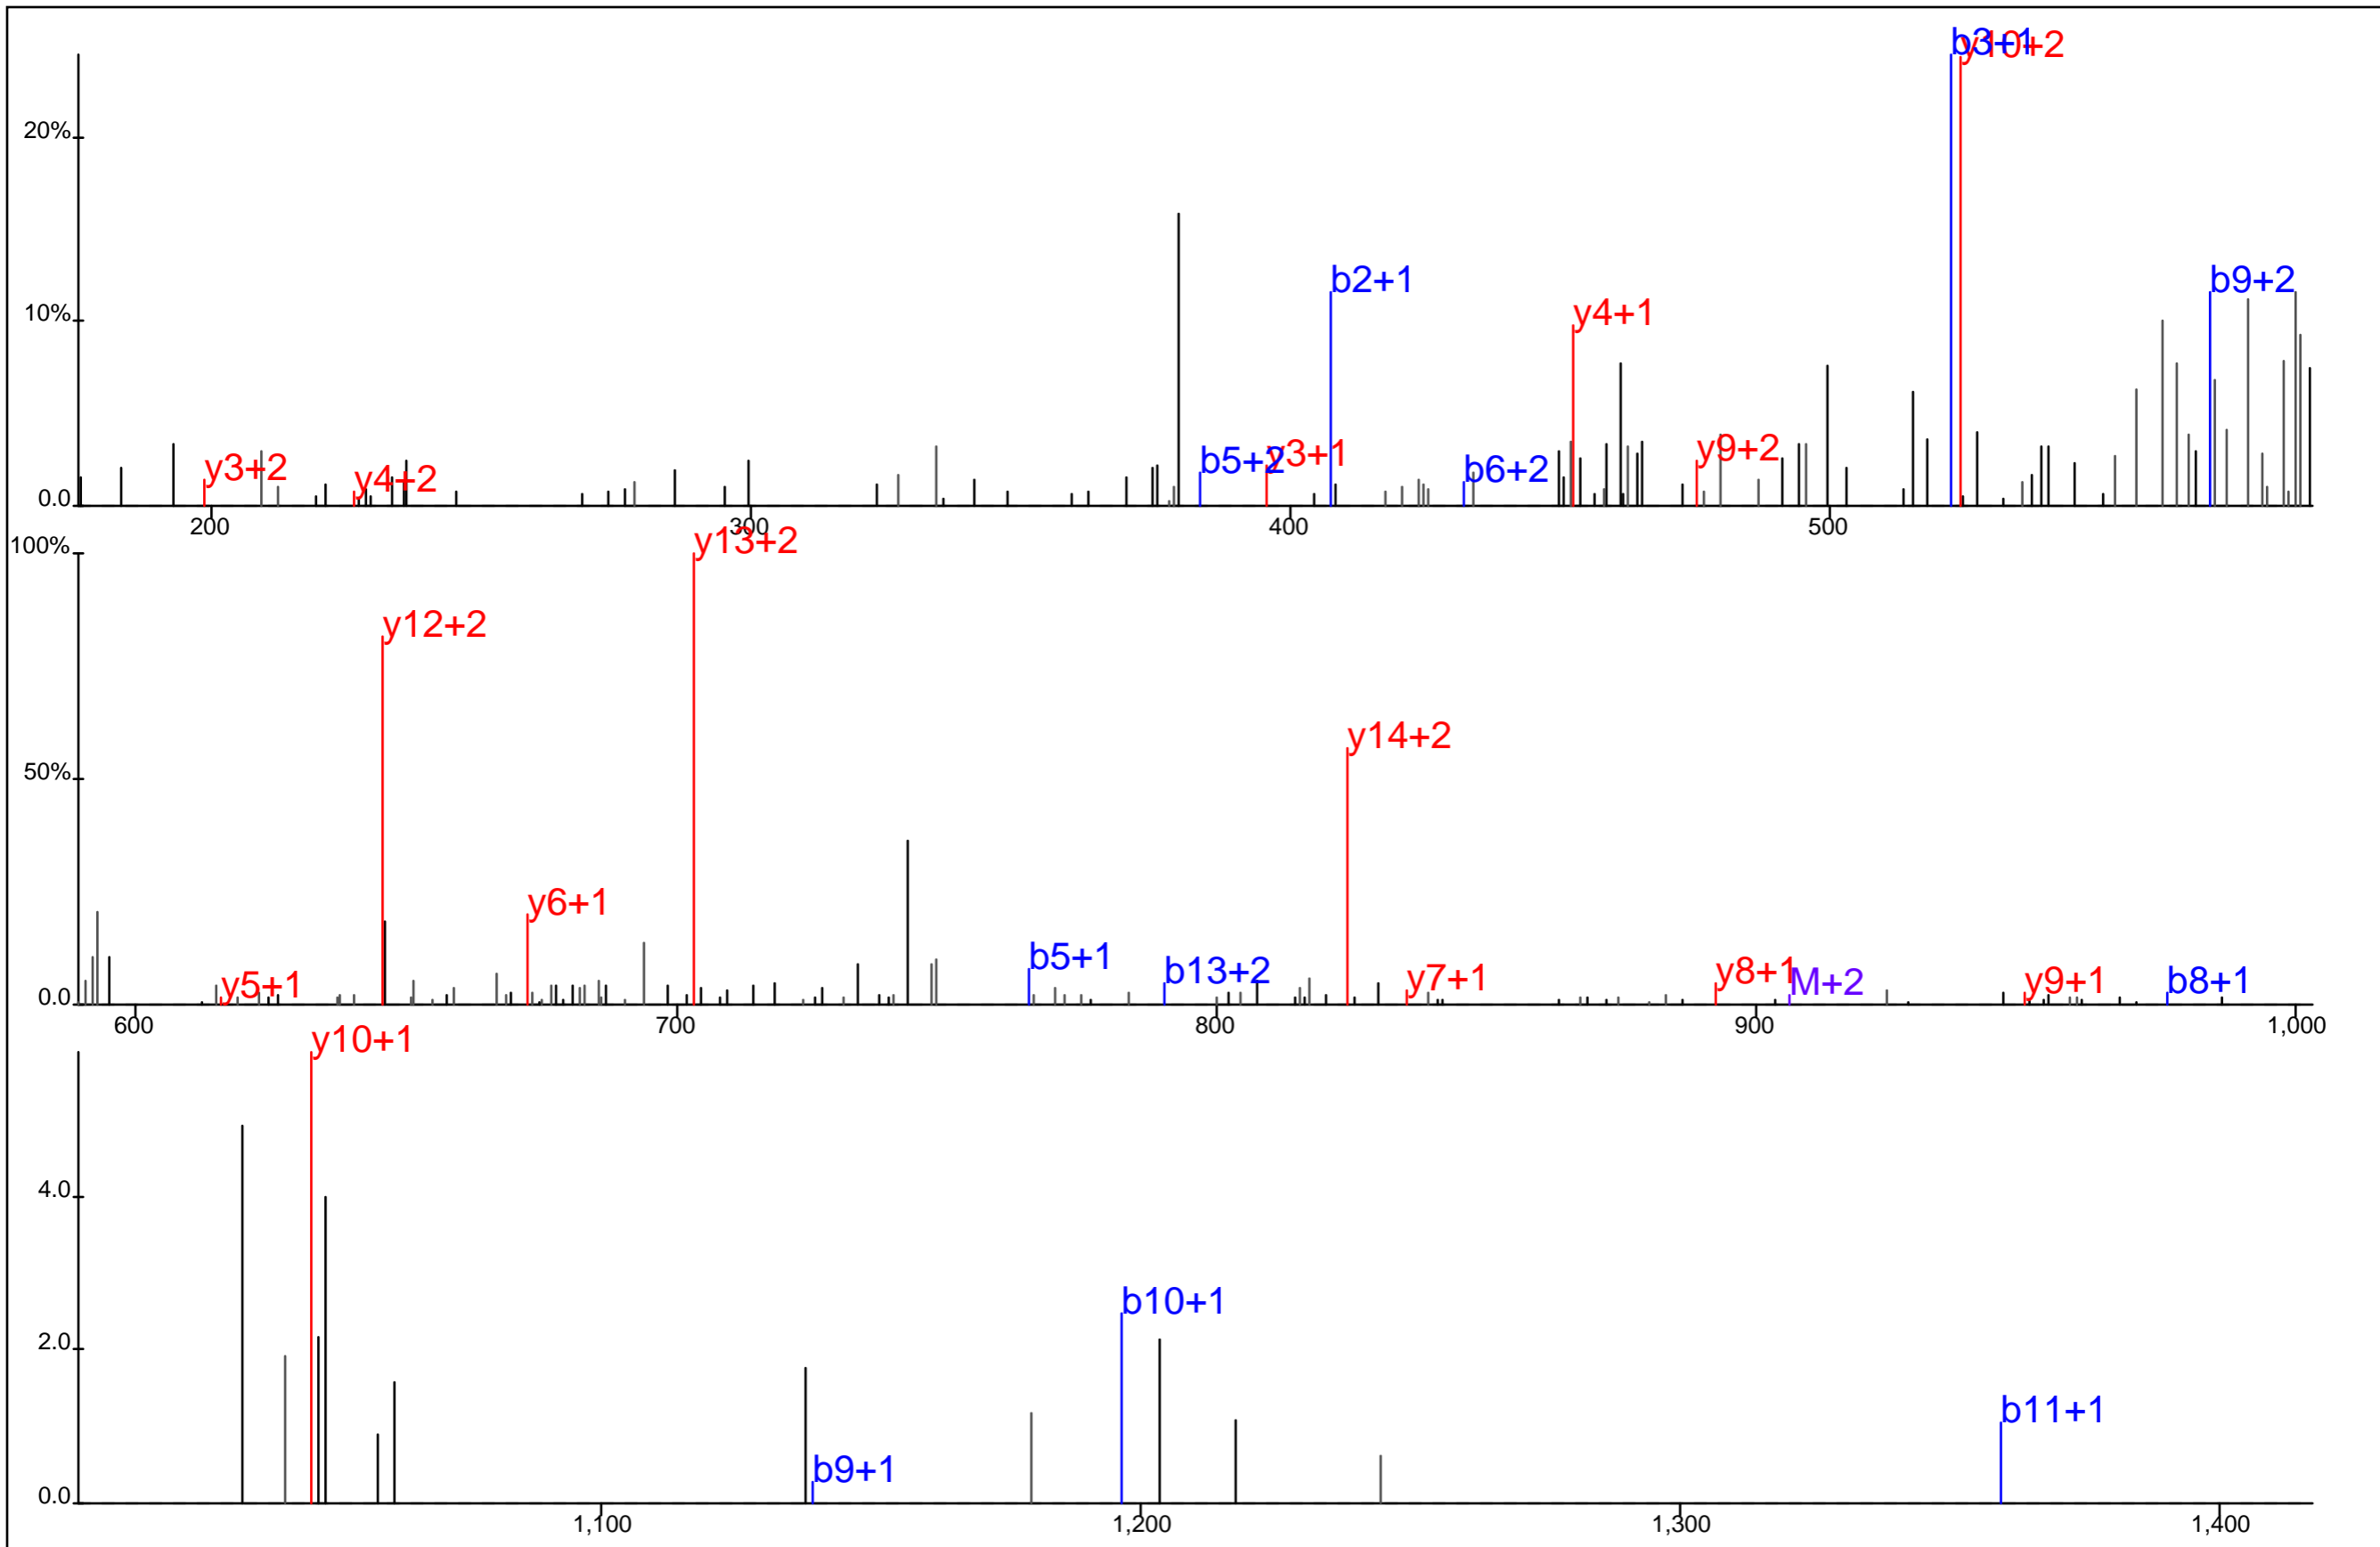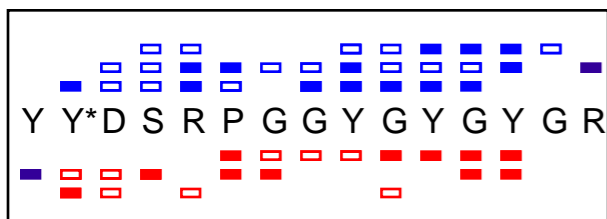

Protein Name: RNA binding motif protein 3  
 gi Accession: 5803137  
 Precursor Mass: 604.2498+3  
 Delta Mass: 7.084 ppm  
 XCorr: 37.77



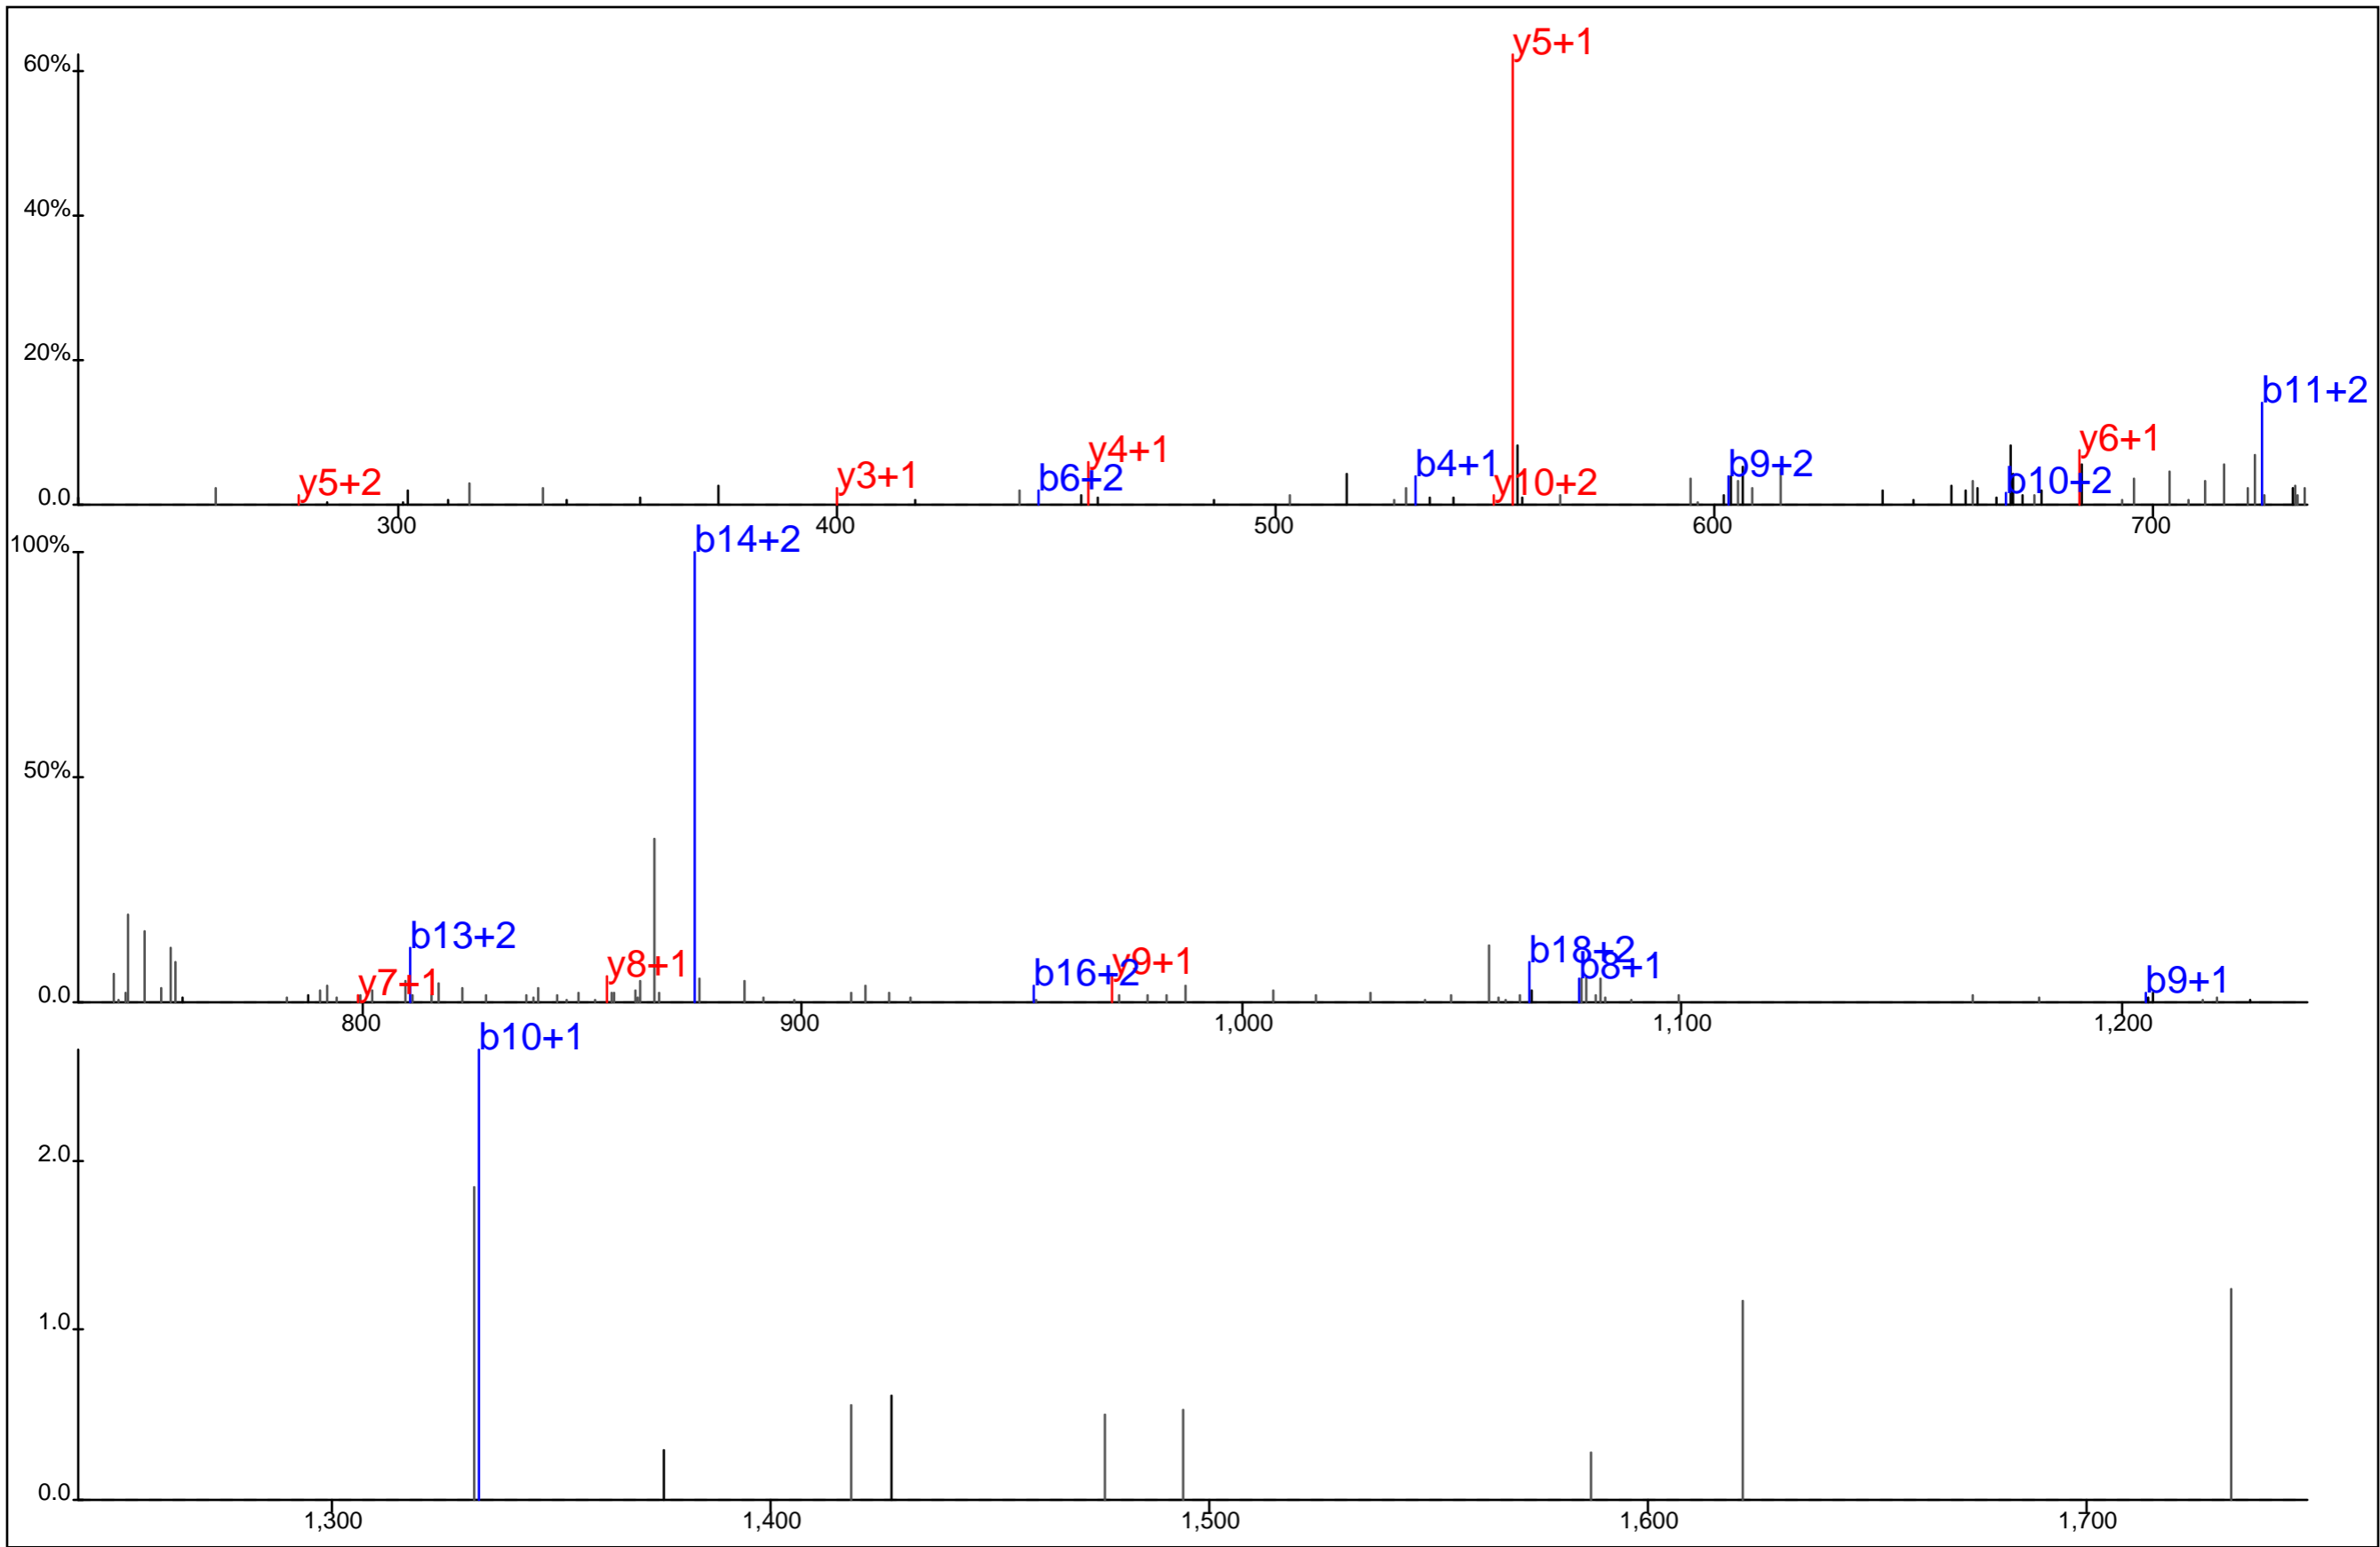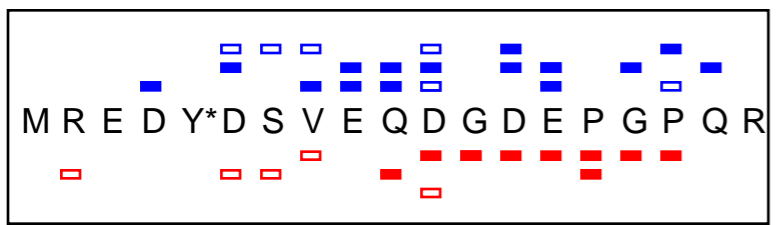

Protein Name: RNA binding motif protein 8  
 gi Accession: 83320121  
 Precursor Mass: 768.3036+3  
 Delta Mass: 1.914 ppm  
 XCorr: 25.79



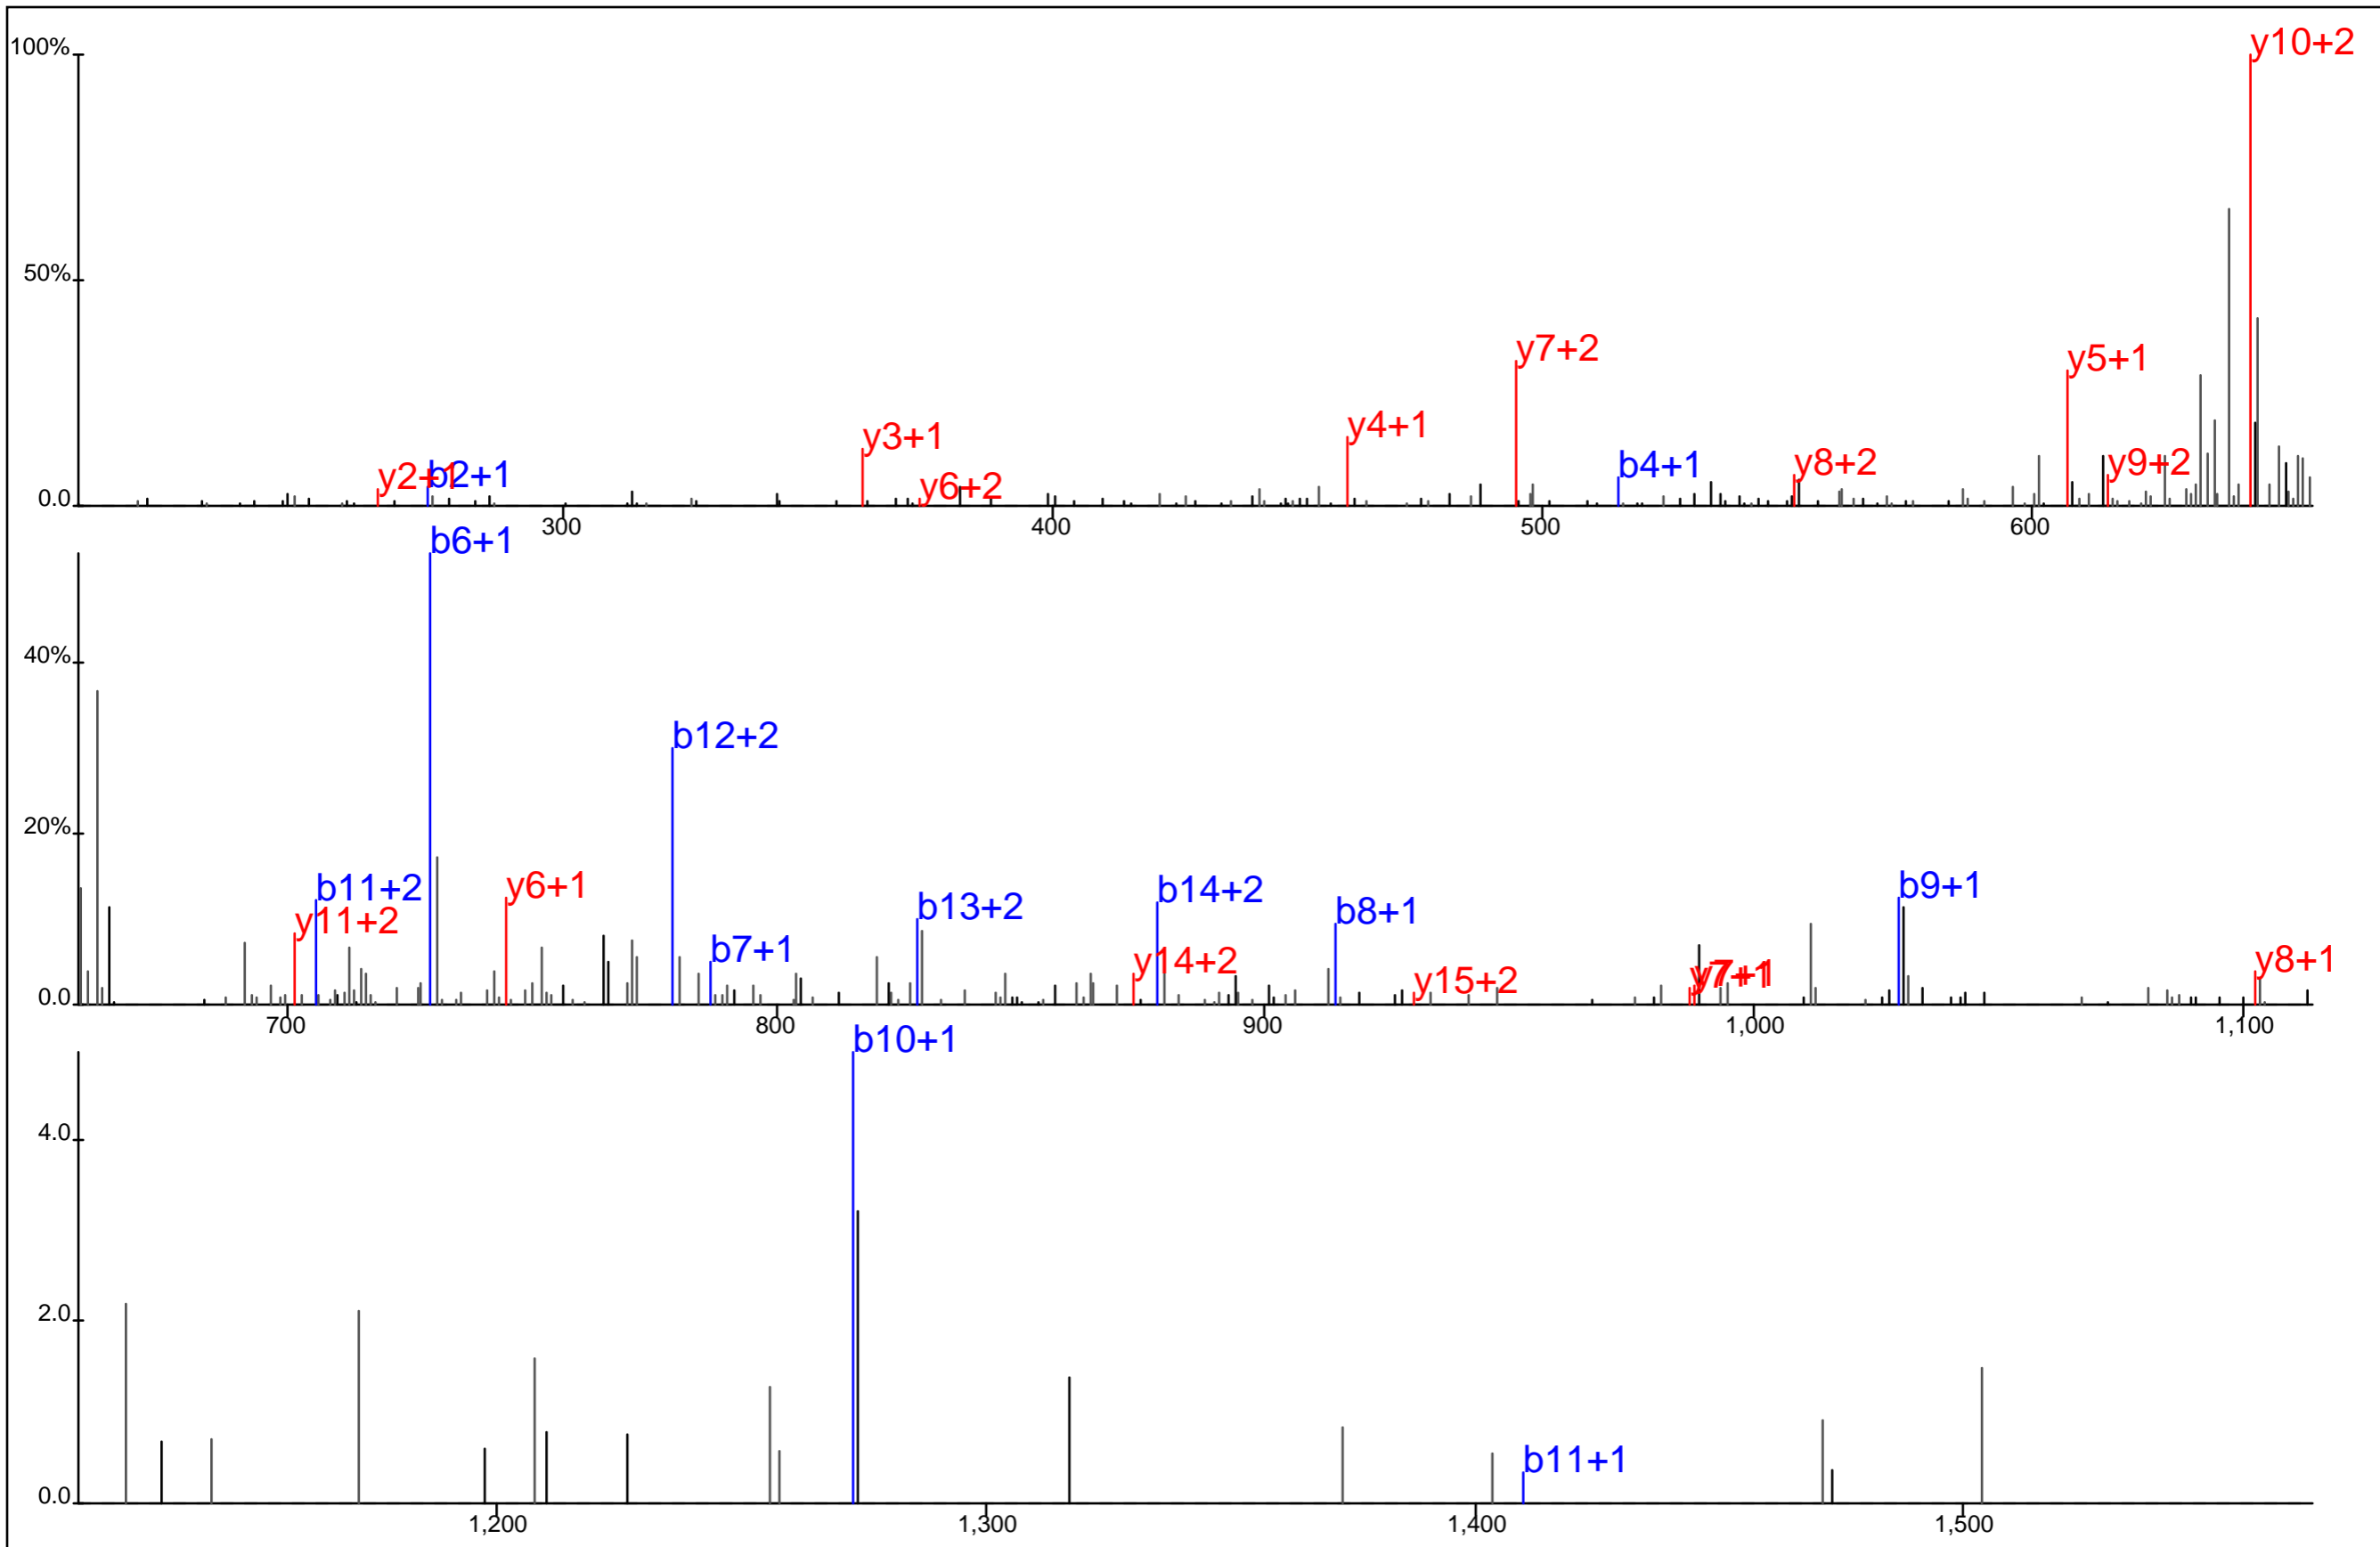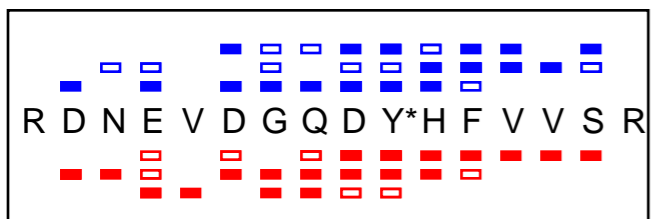

Protein Name: SAP102  
 gi Accession: 119943106  
 Precursor Mass: 672.6221+3  
 Delta Mass: 4.490 ppm  
 XCorr: 28.73



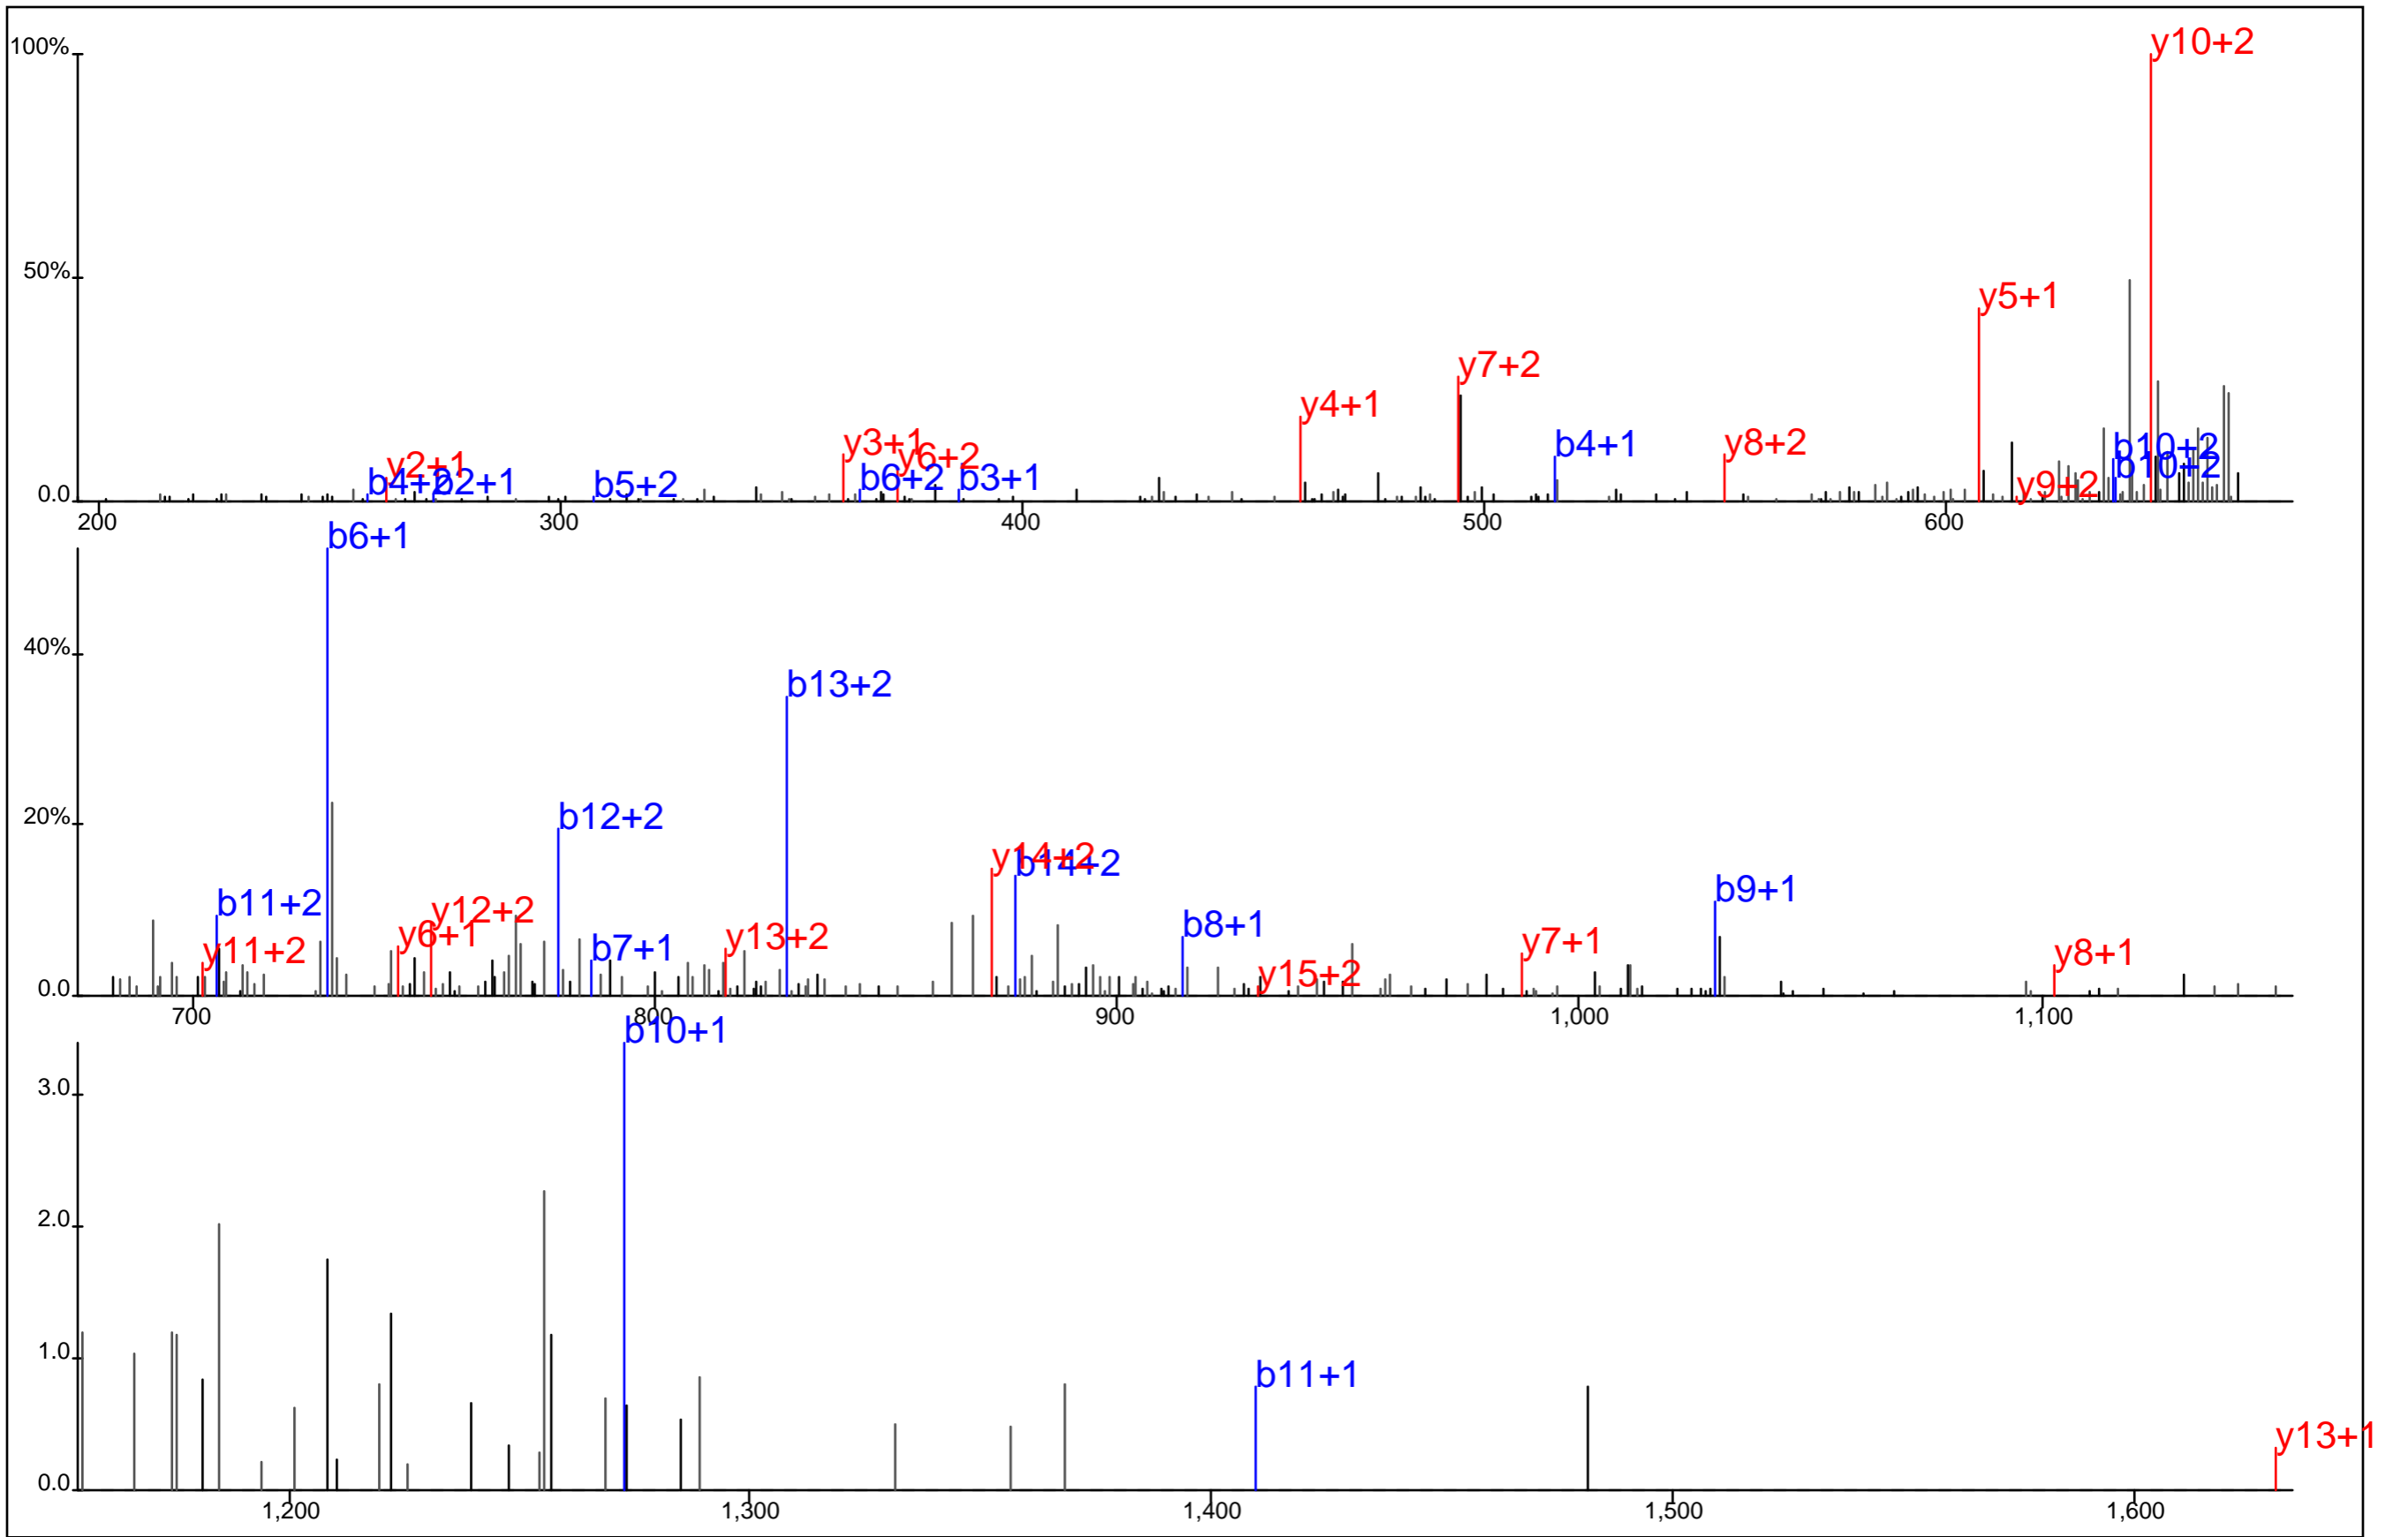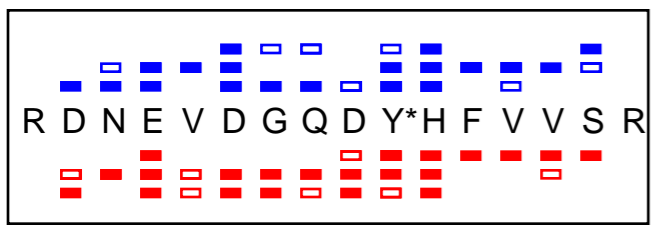

Protein Name: SAP102  
 gi Accession: 119943106  
 Precursor Mass: 672.6282+3  
 Delta Mass: 4.682 ppm  
 XCorr: 38.85

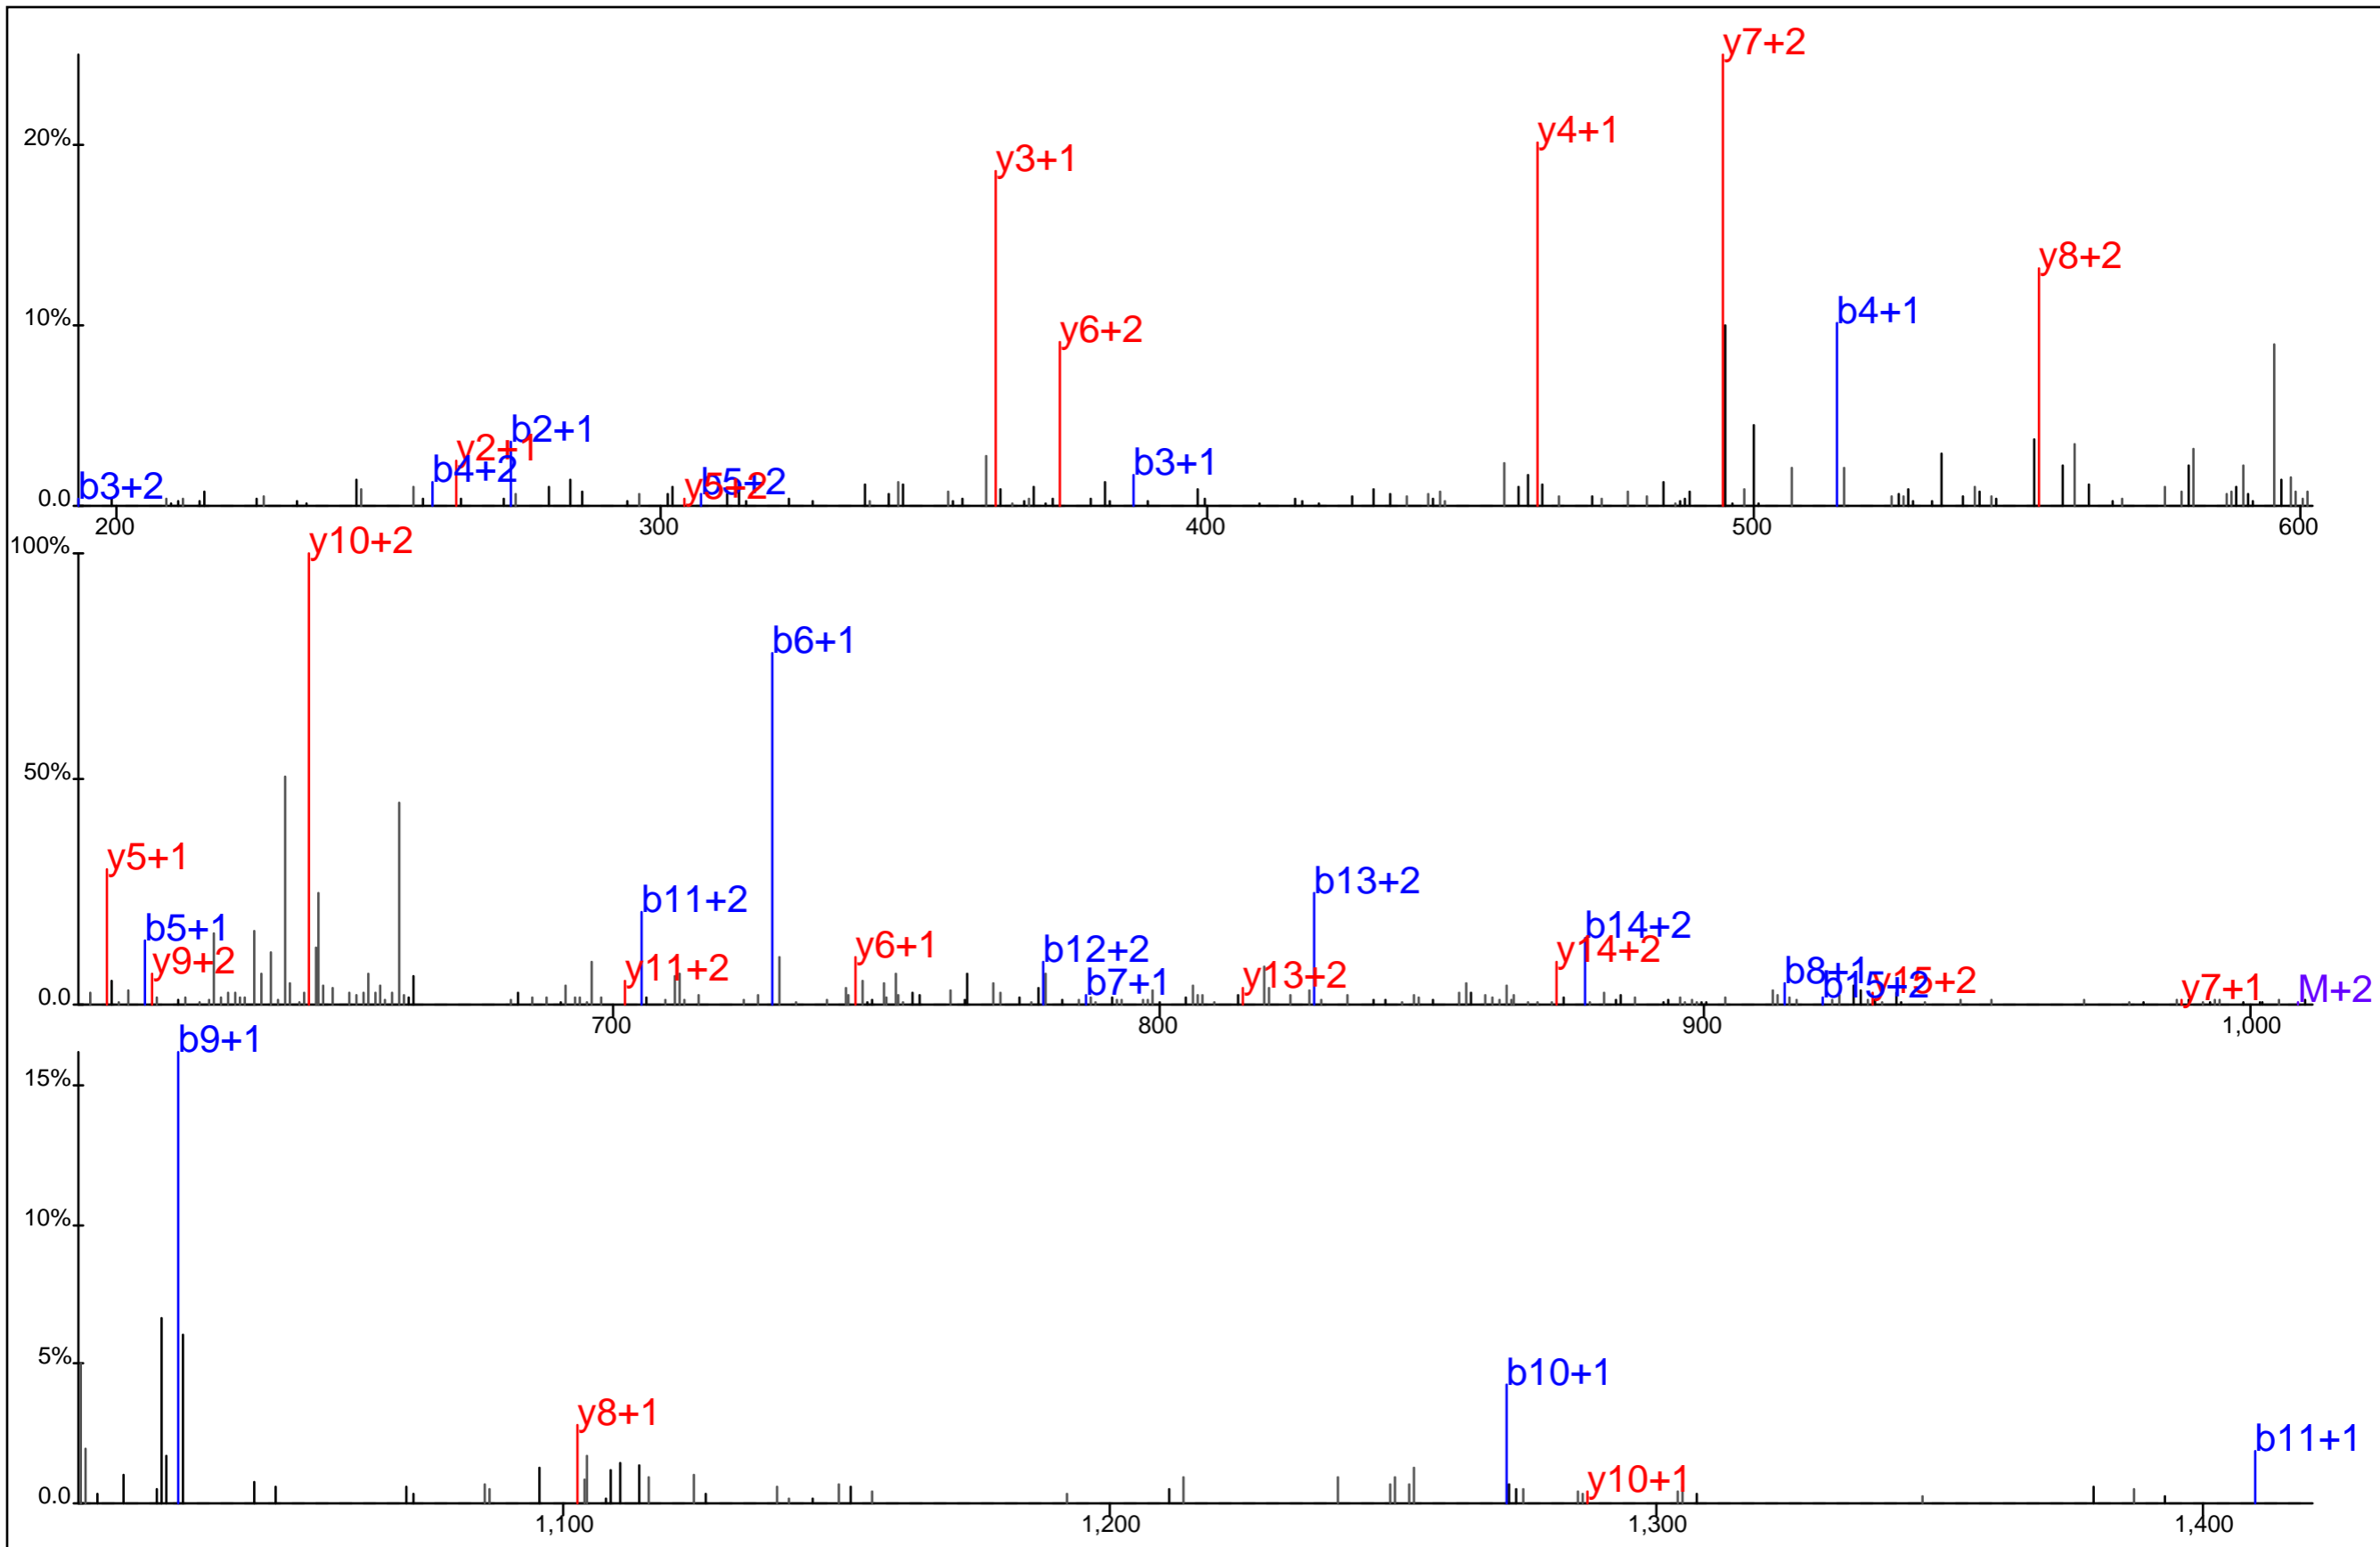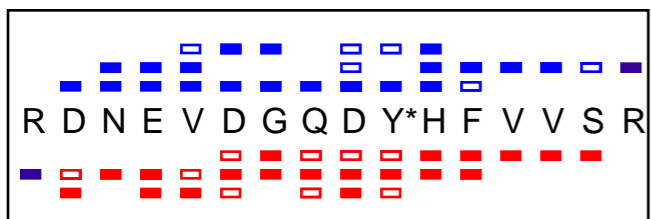

Protein Name: SAP102  
 gi Accession: 119943106  
 Precursor Mass: 672.6309+3  
 Delta Mass: 8.585 ppm  
 XCorr: 43.9

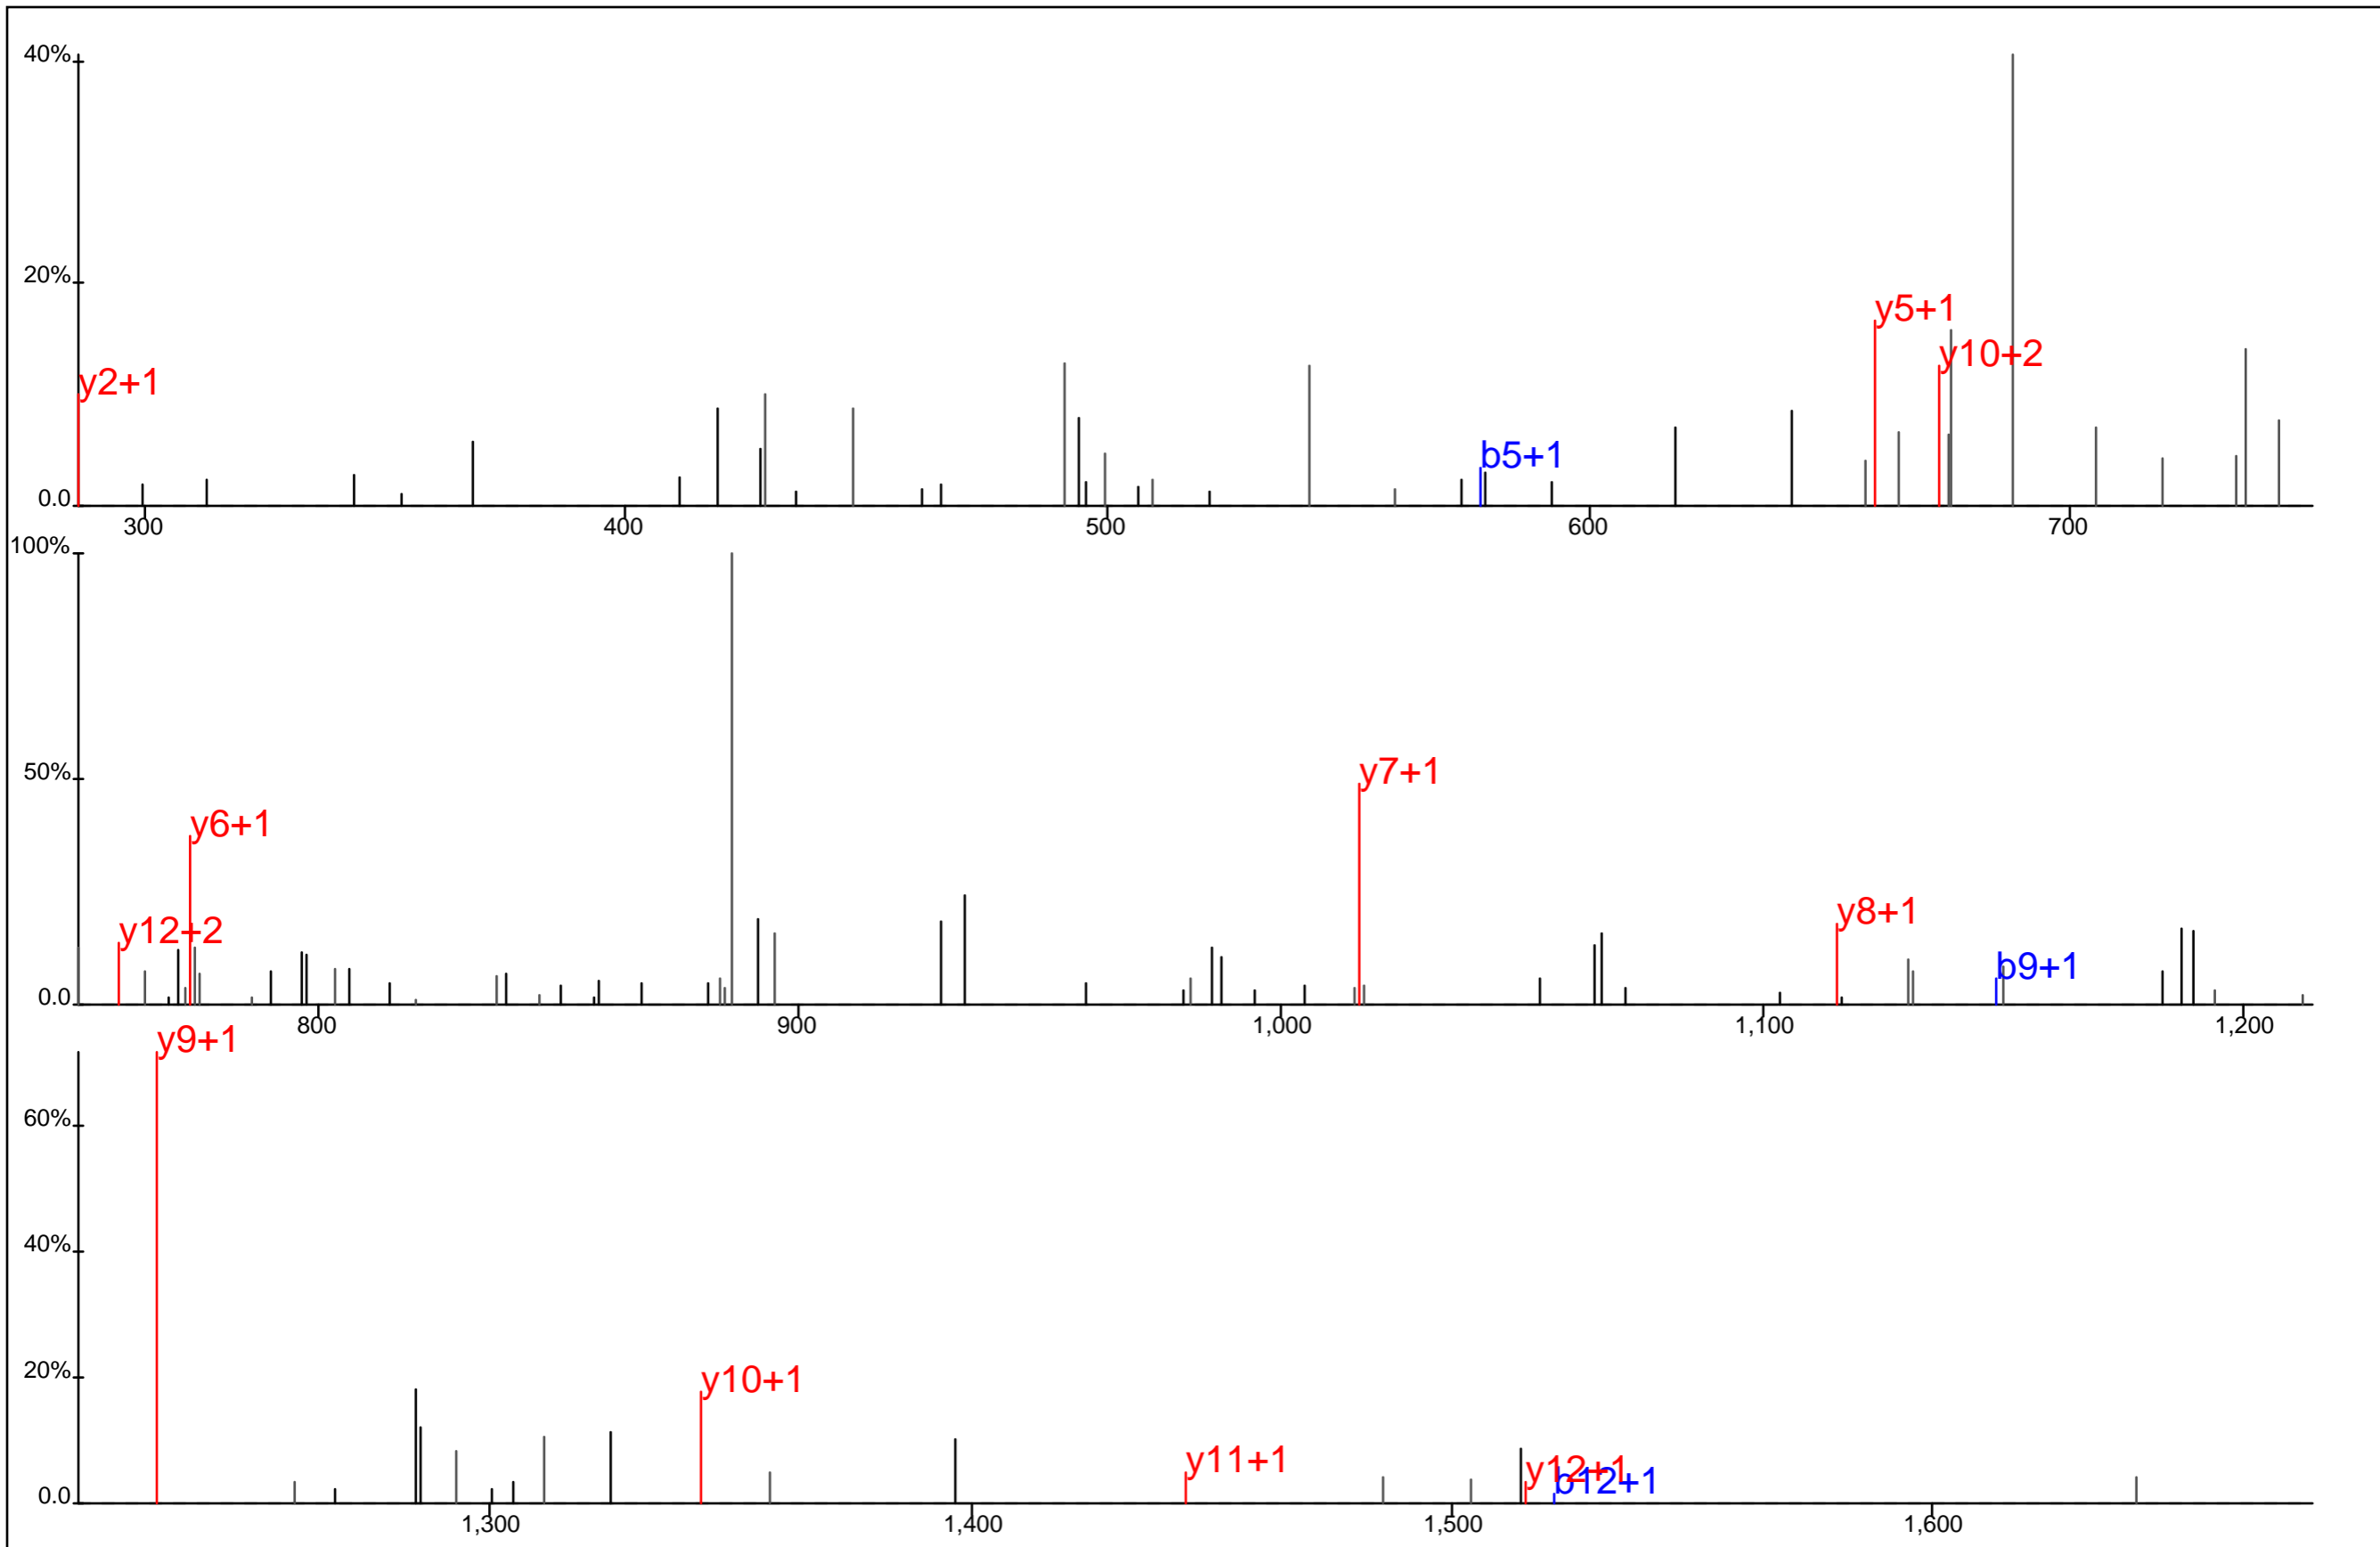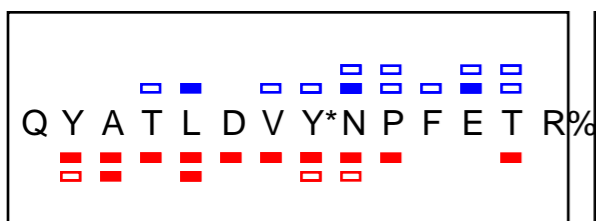

Protein Name: SCAMP3  
 gi Accession: 16445419  
 Precursor Mass: 903.9063+2  
 Delta Mass: 4.421 ppm  
 XCorr: 39.13

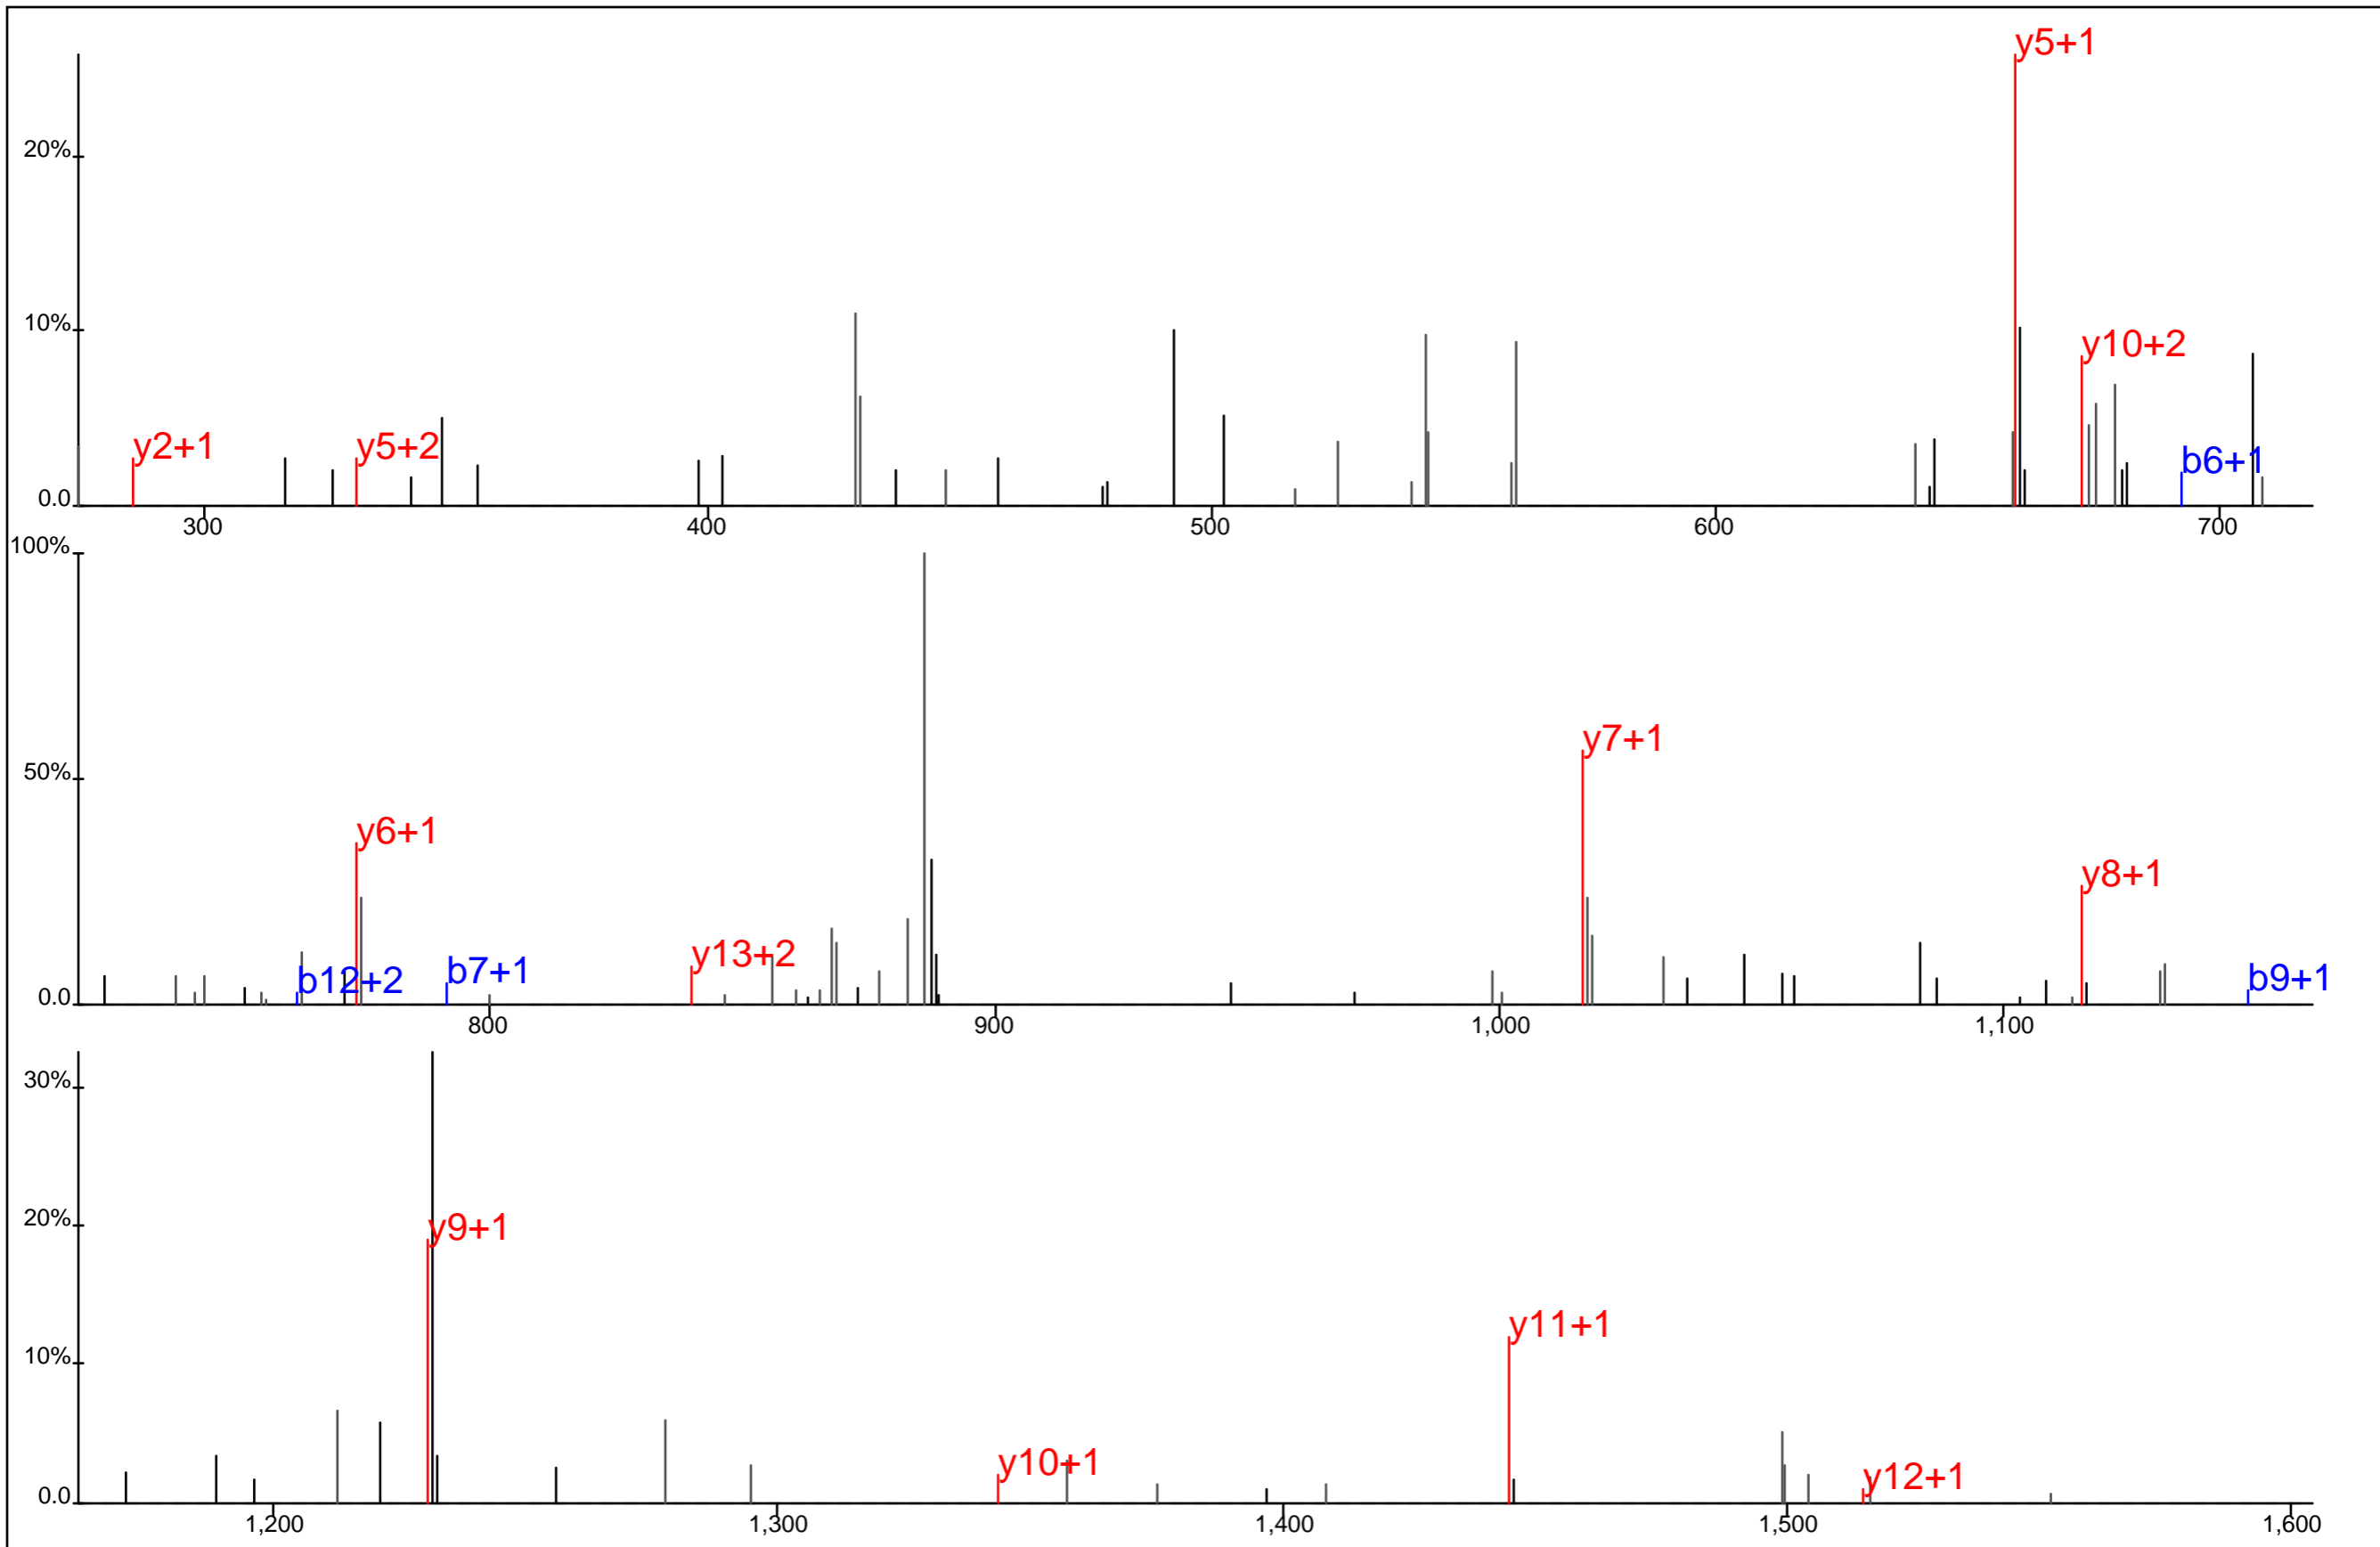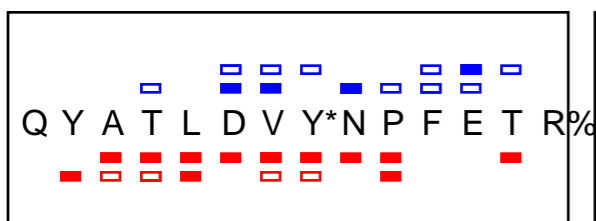

Protein Name: SCAMP3  
 gi Accession: 16445419  
 Precursor Mass: 903.9059+2  
 Delta Mass: 3.945 ppm  
 XCorr: 19.35



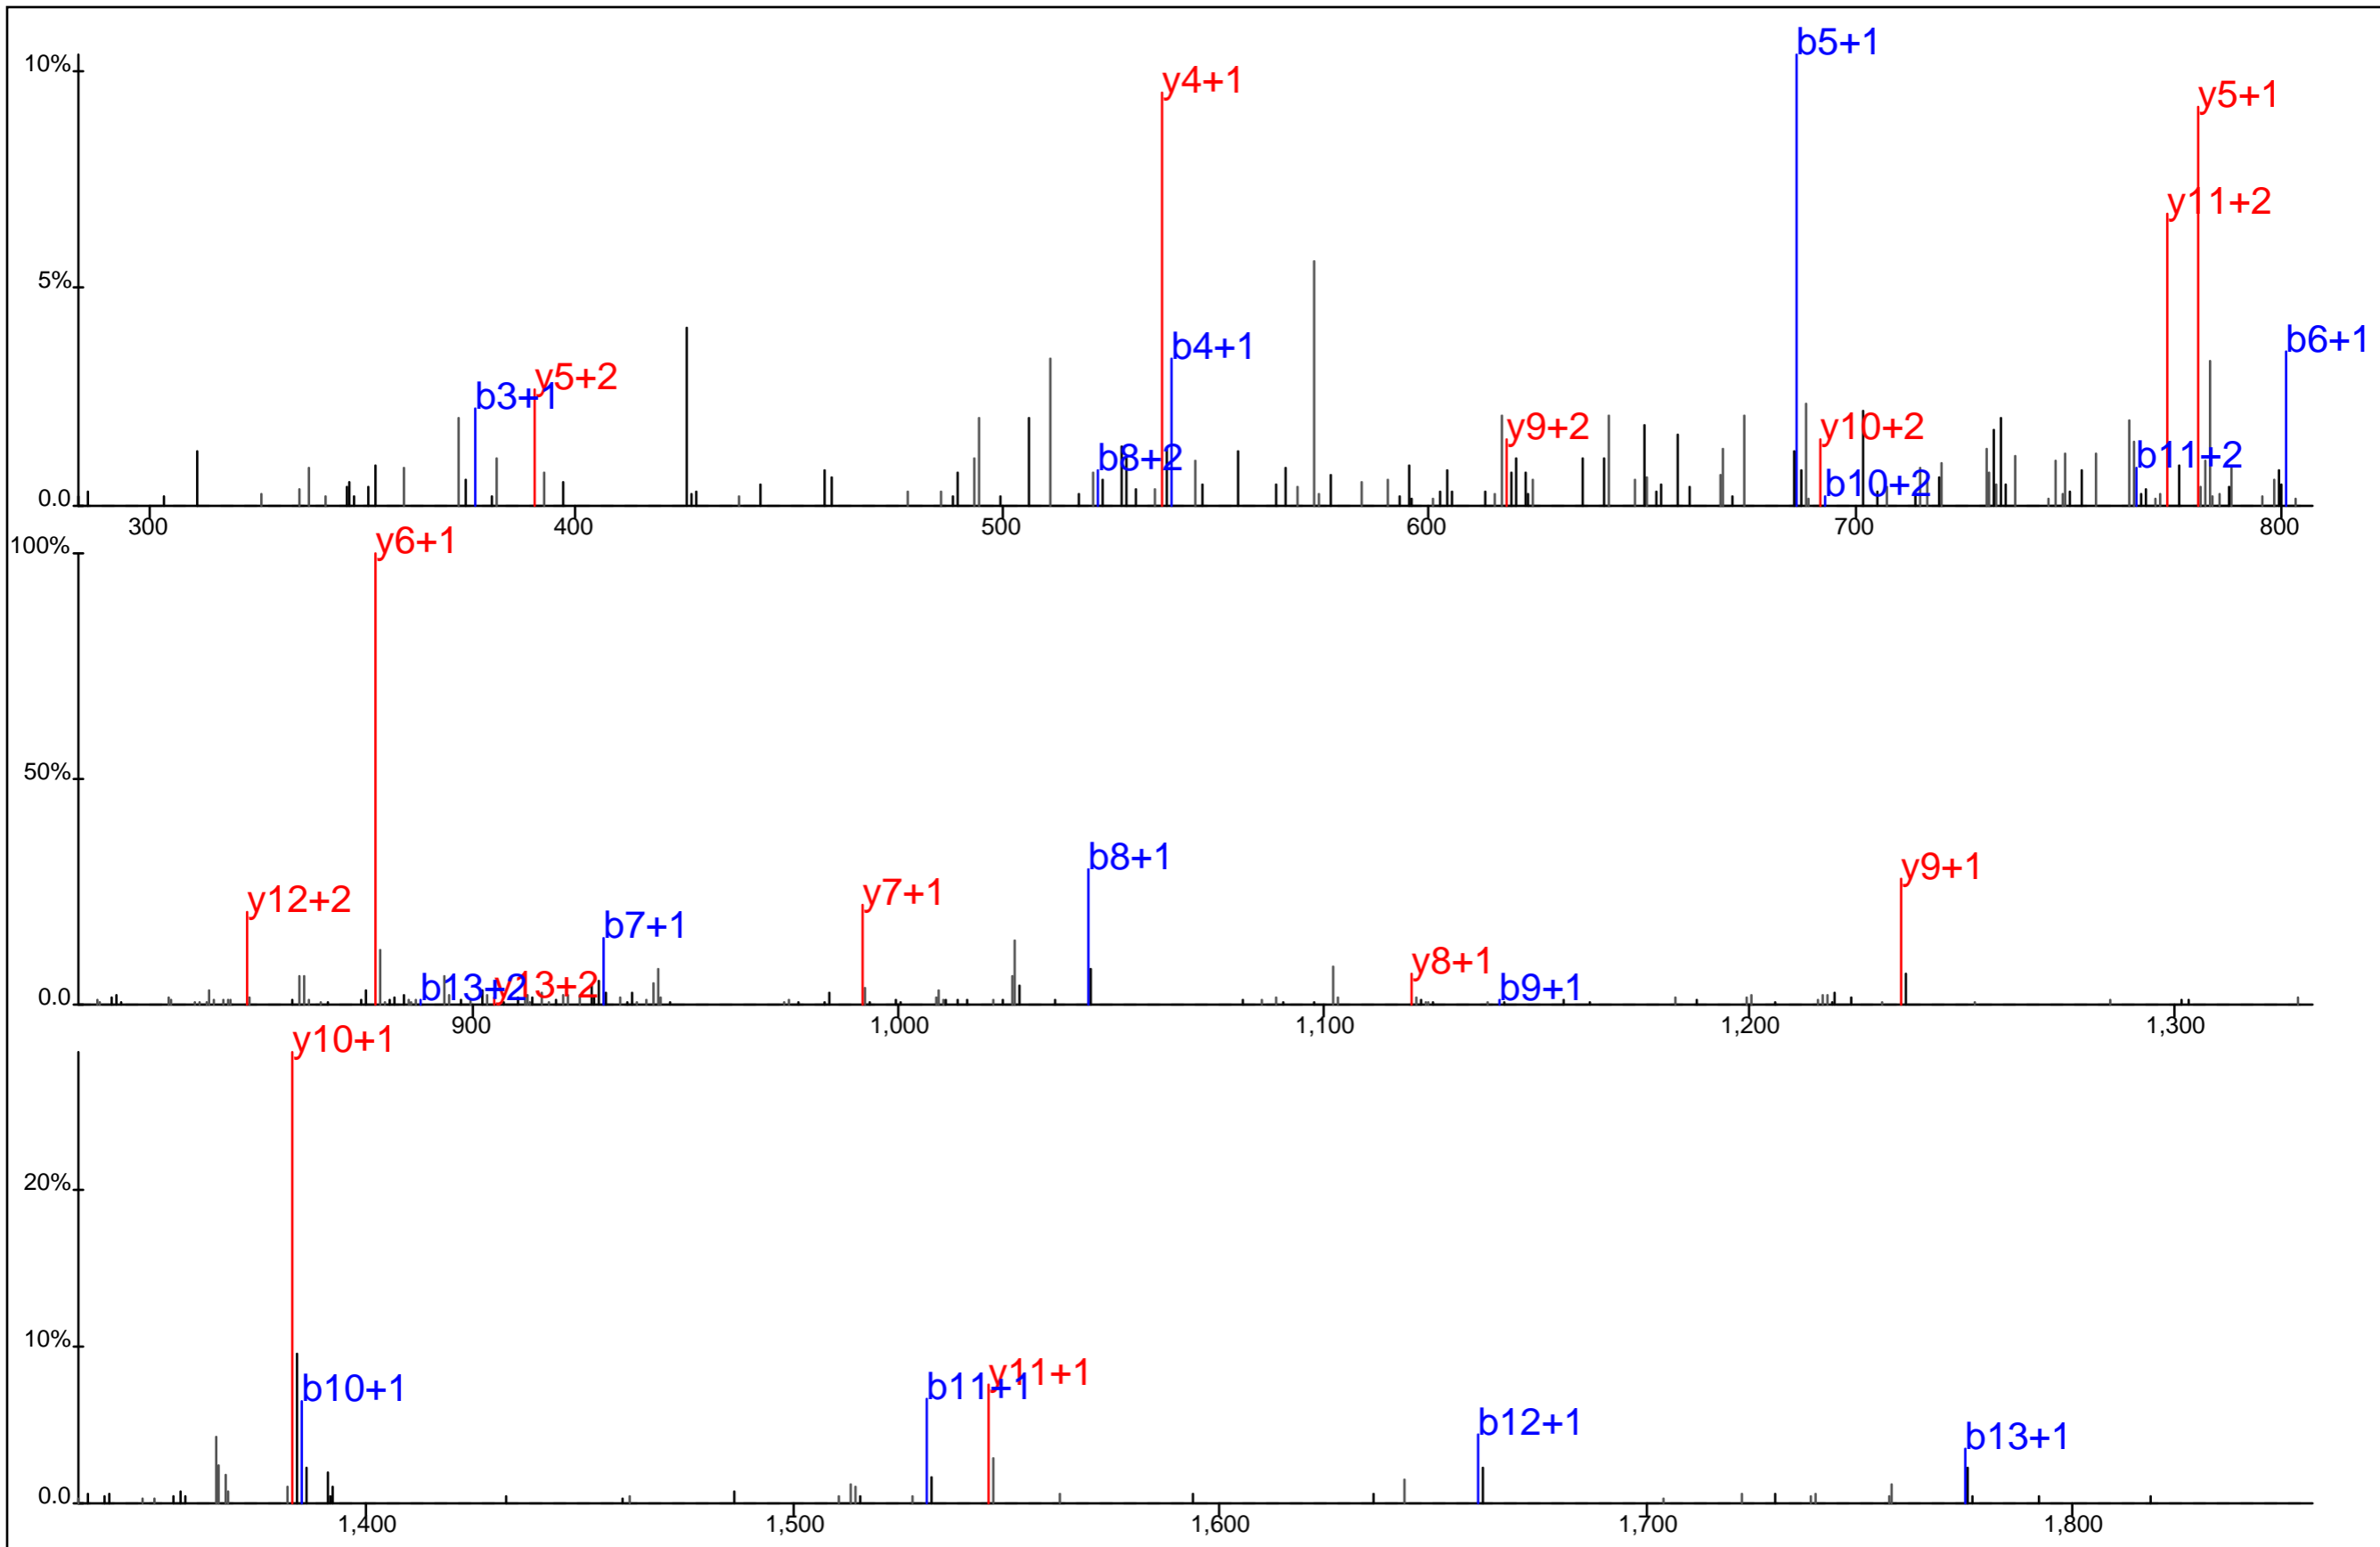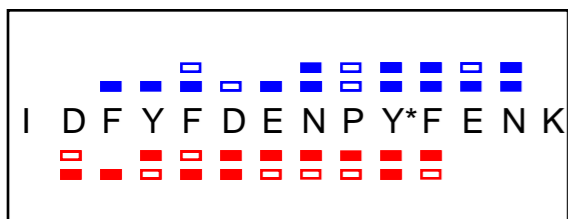

Protein Name: SET protein  
 gi Accession: 170763498  
 Precursor Mass: 960.8934+2  
 Delta Mass: 3.555 ppm  
 XCorr: 67.61

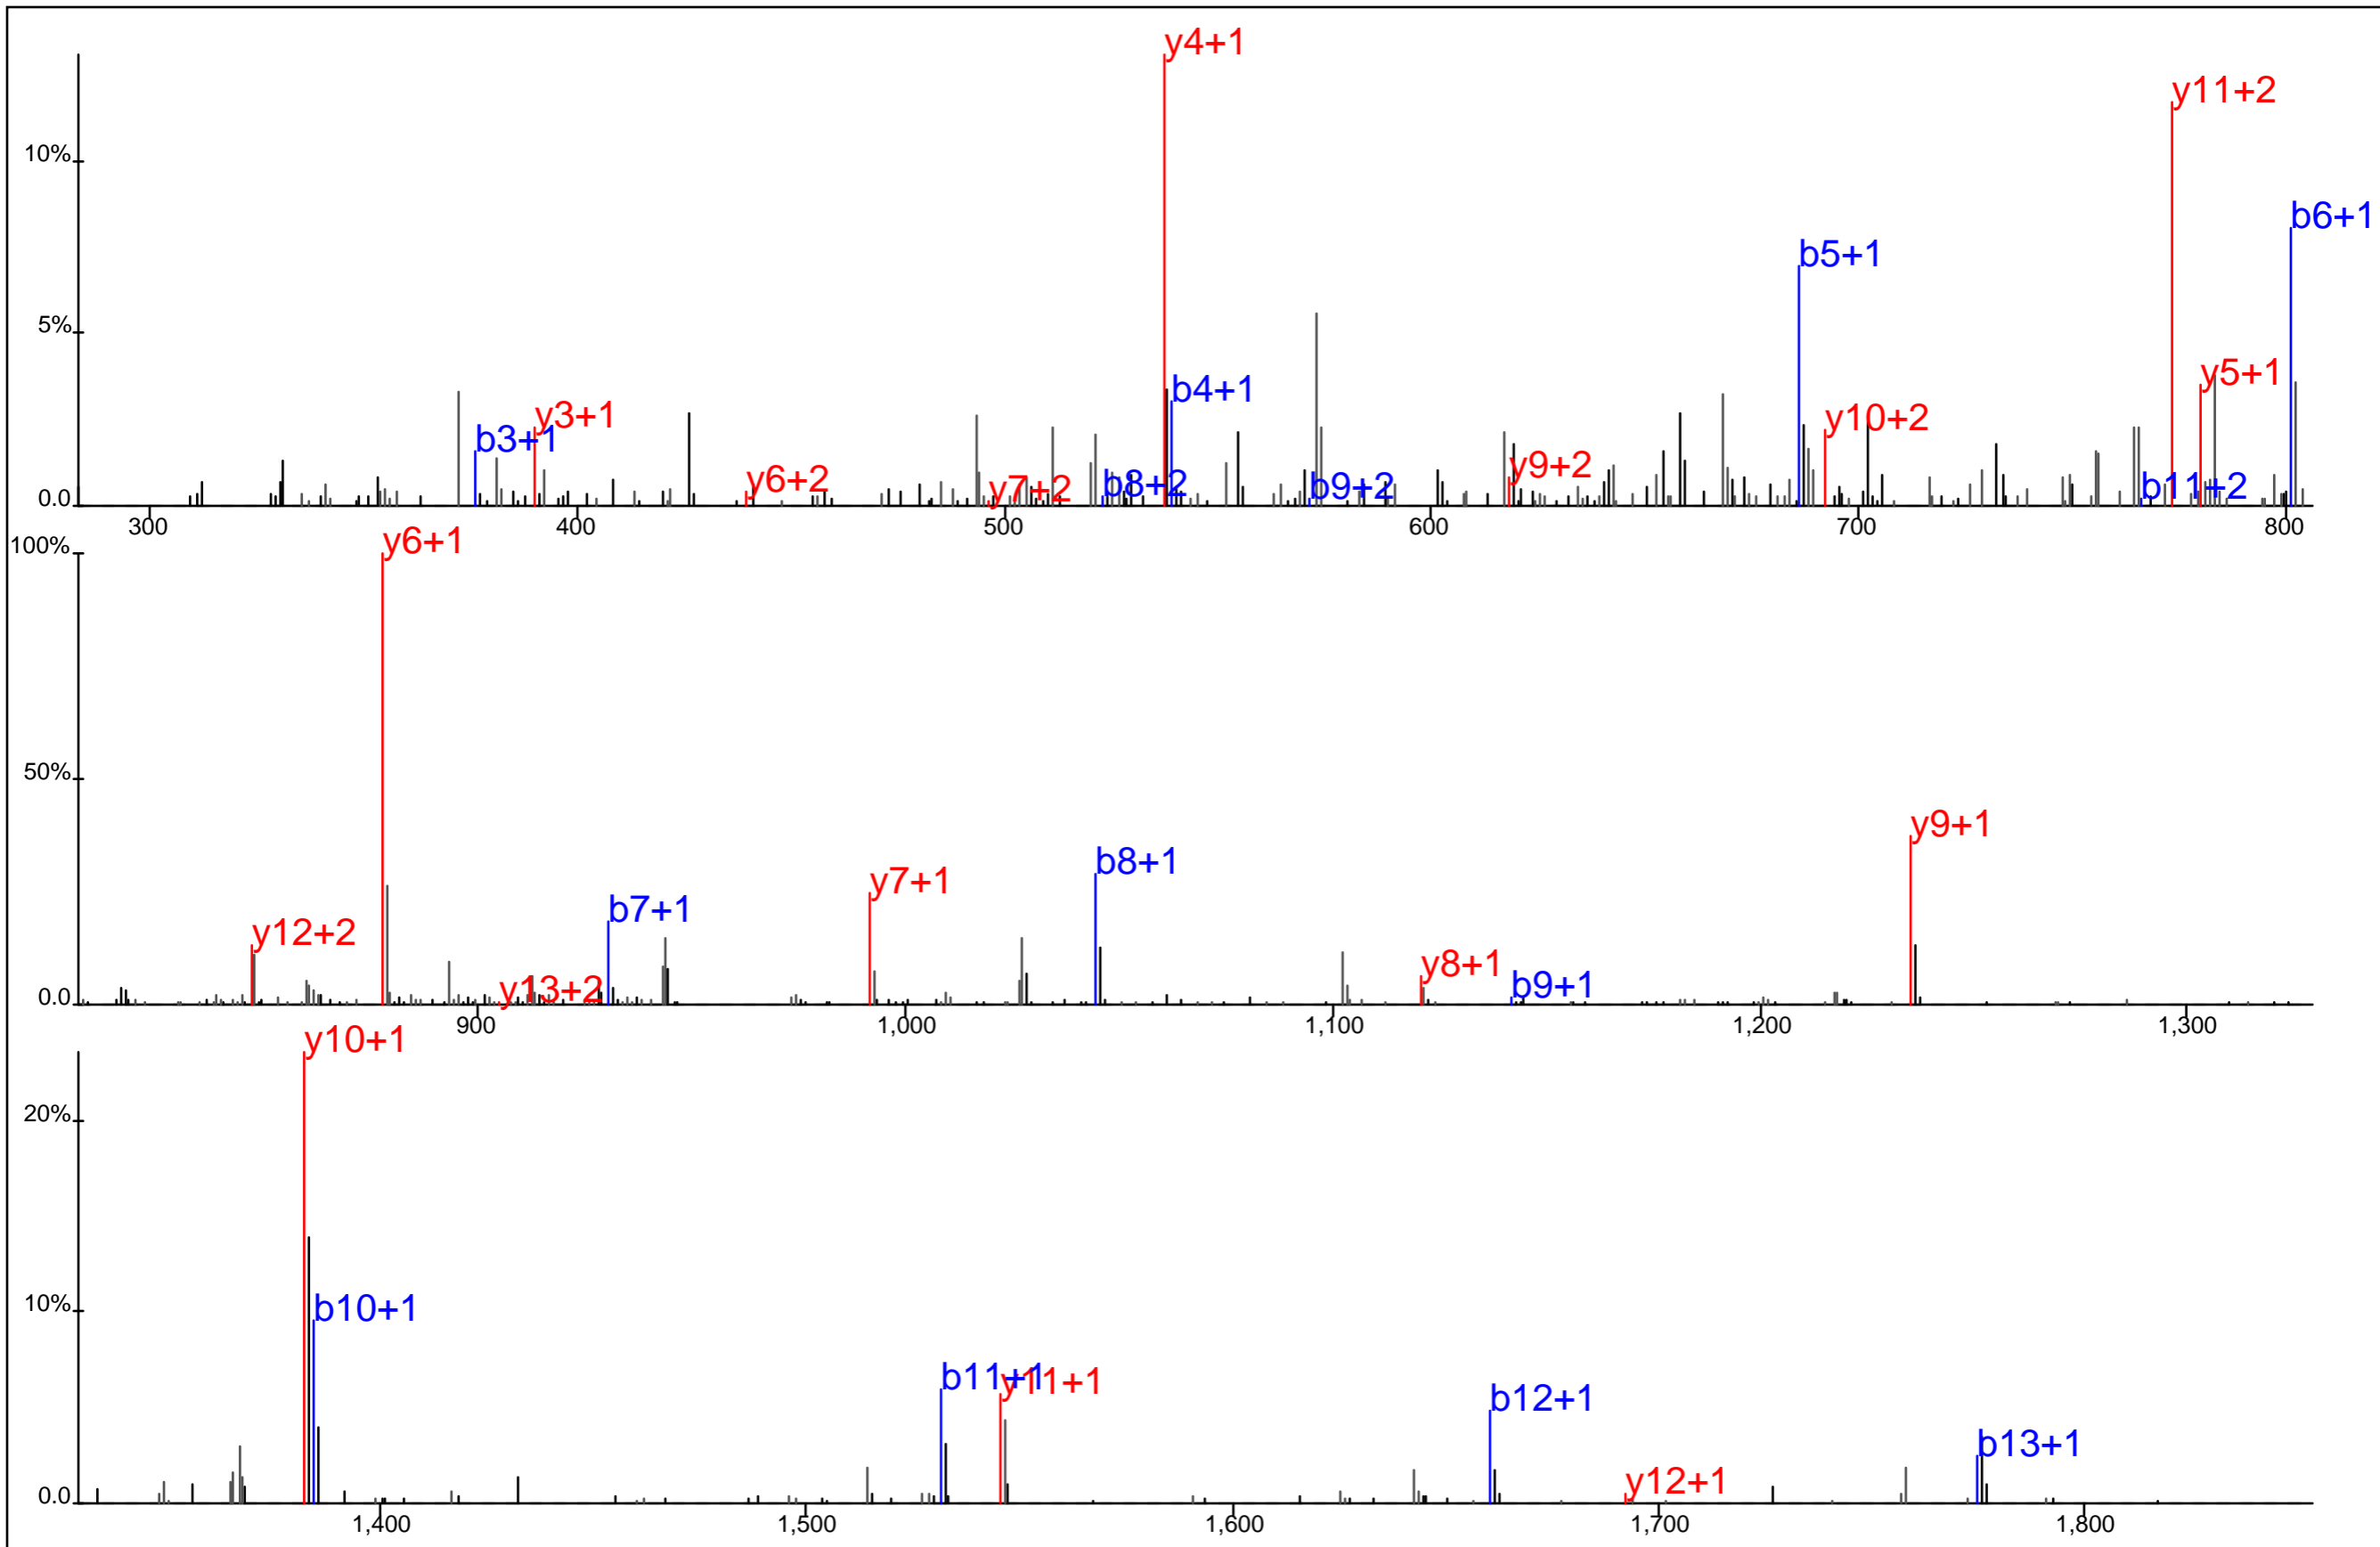

|   |   |   |   |   |   |   |   |   |    |   |   |   |   |
|---|---|---|---|---|---|---|---|---|----|---|---|---|---|
|   |   |   |   |   |   |   |   |   |    |   |   |   |   |
| I | D | F | Y | F | D | E | N | P | Y* | F | E | N | K |
|   |   |   |   |   |   |   |   |   |    |   |   |   |   |

Protein Name: SET protein  
 gi Accession: 170763498  
 Precursor Mass: 960.8912+2  
 Delta Mass: 1.264 ppm  
 XCorr: 66.92

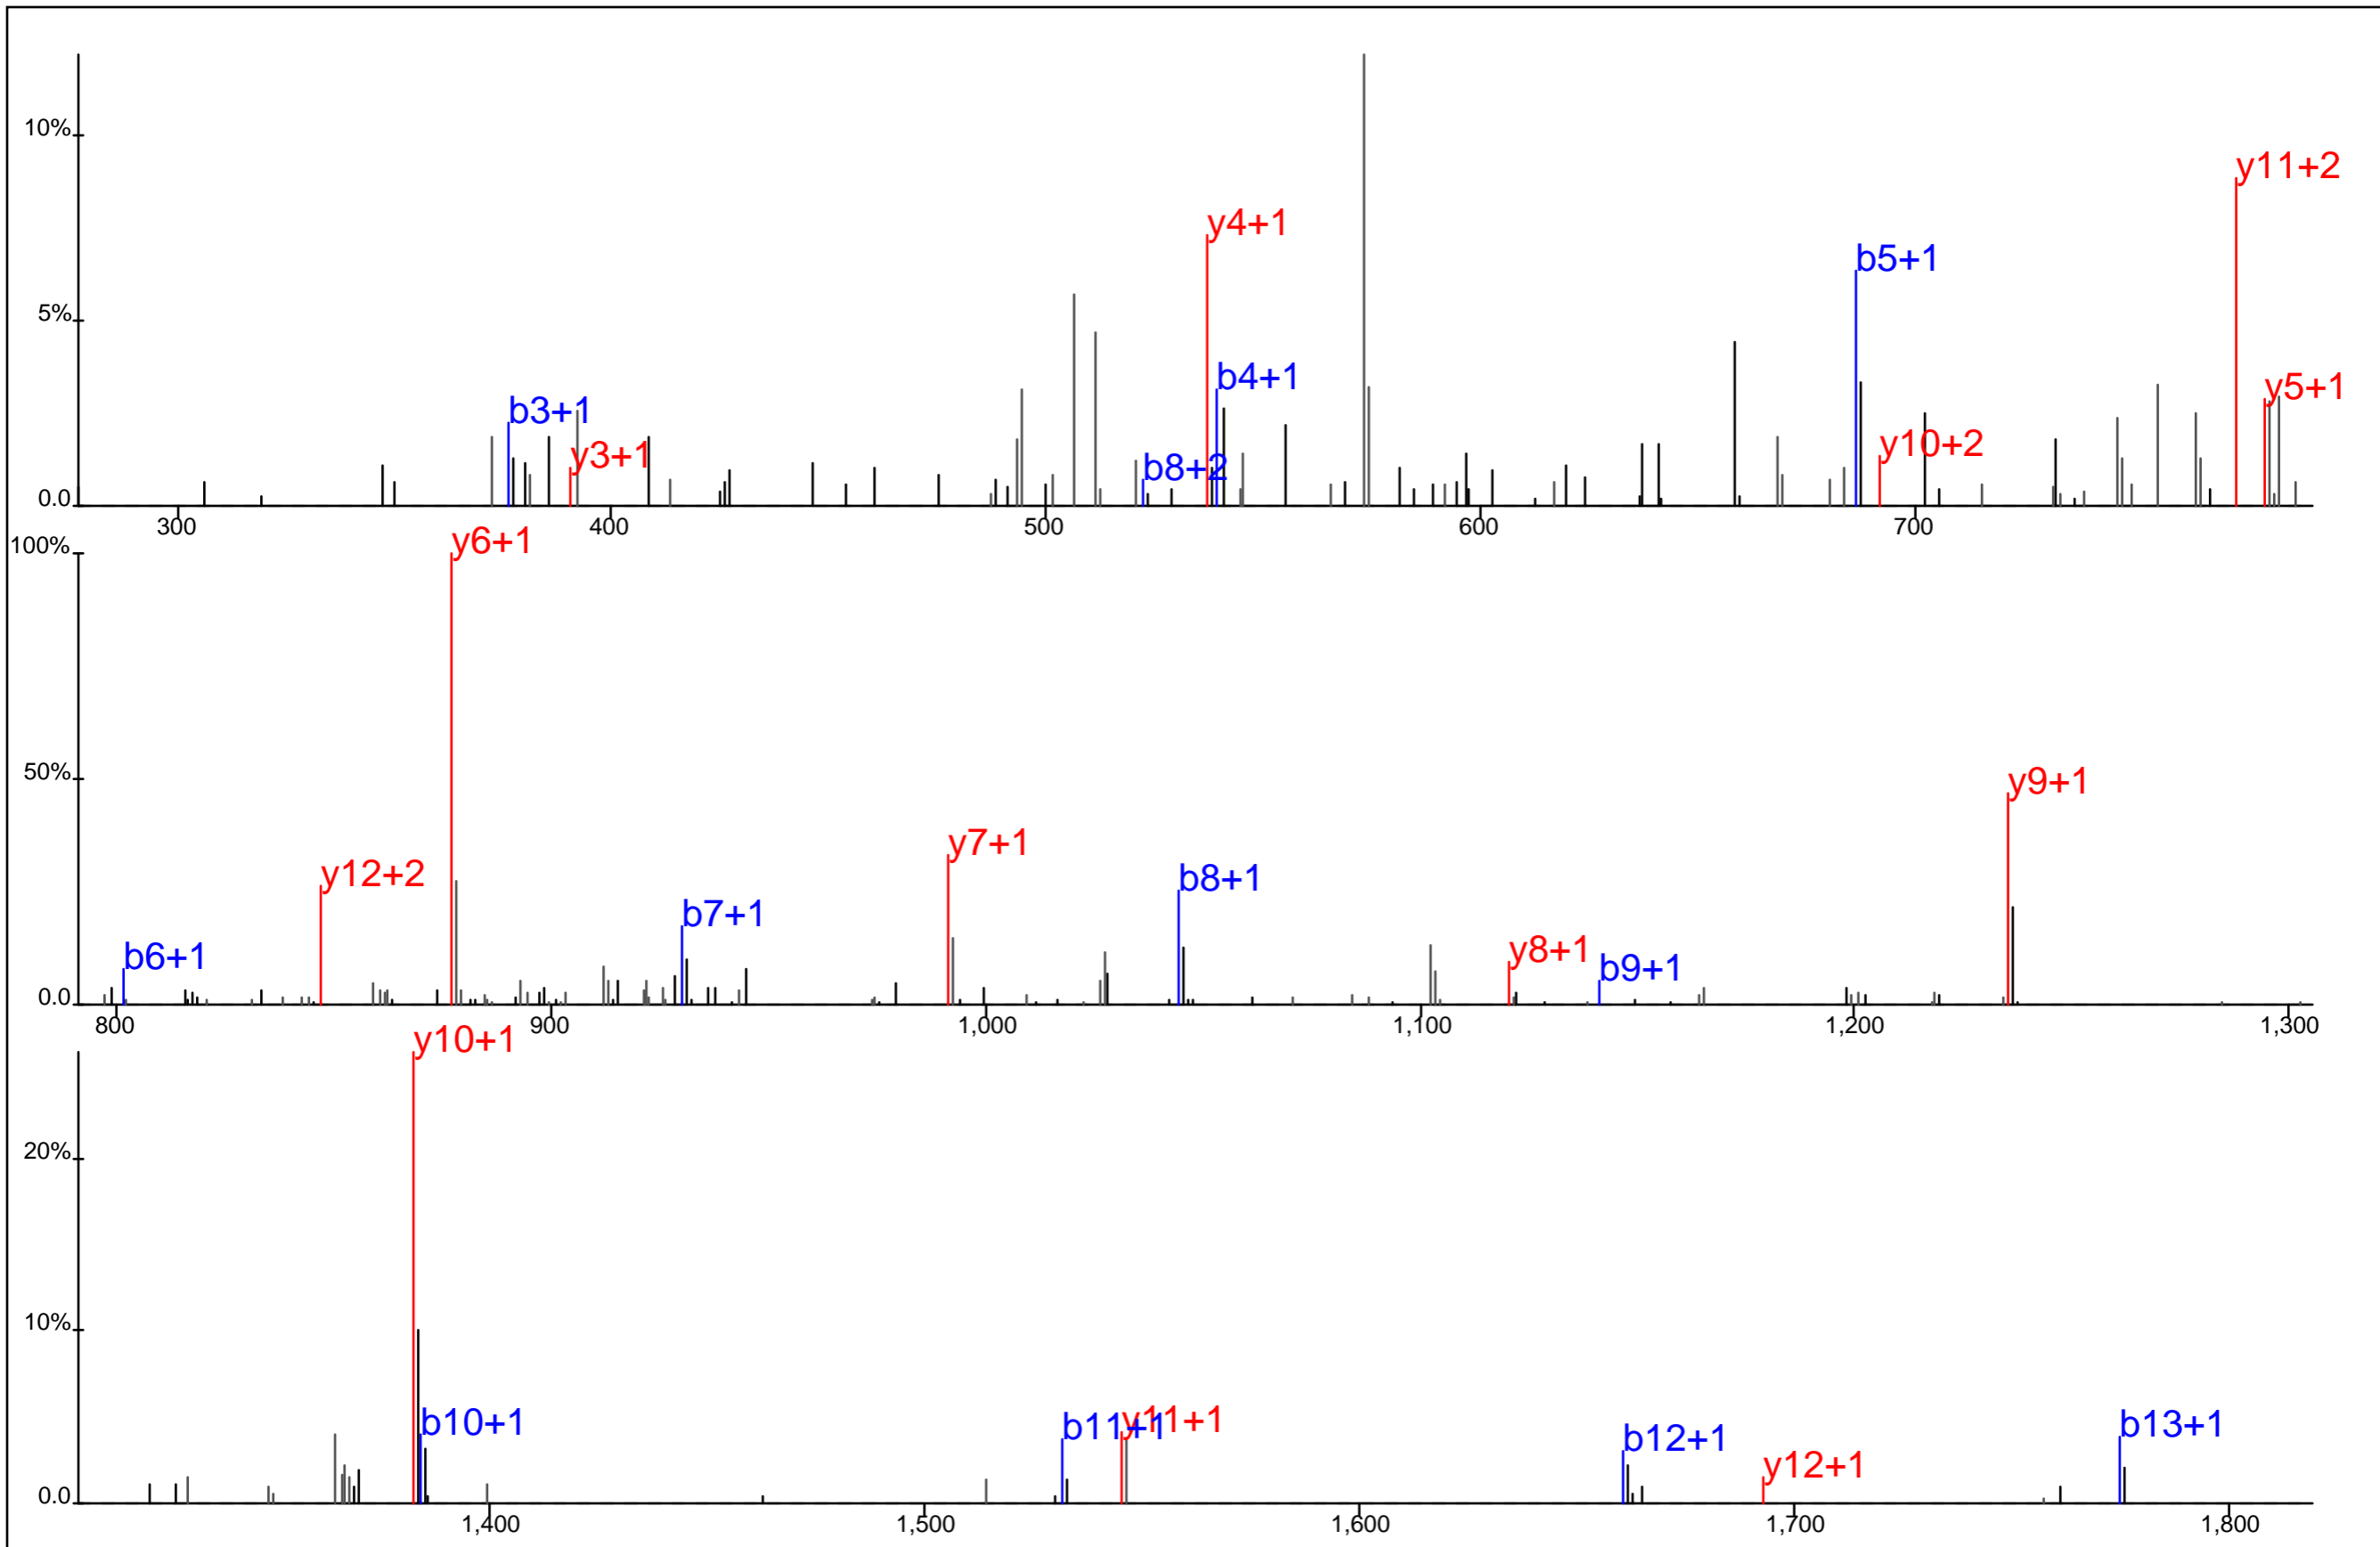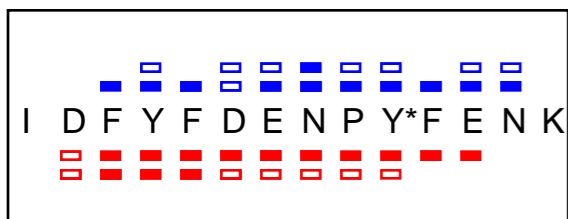

Protein Name: SET protein  
 gi Accession: 170763498  
 Precursor Mass: 960.8909+2  
 Delta Mass: 0.884 ppm  
 XCorr: 53.23





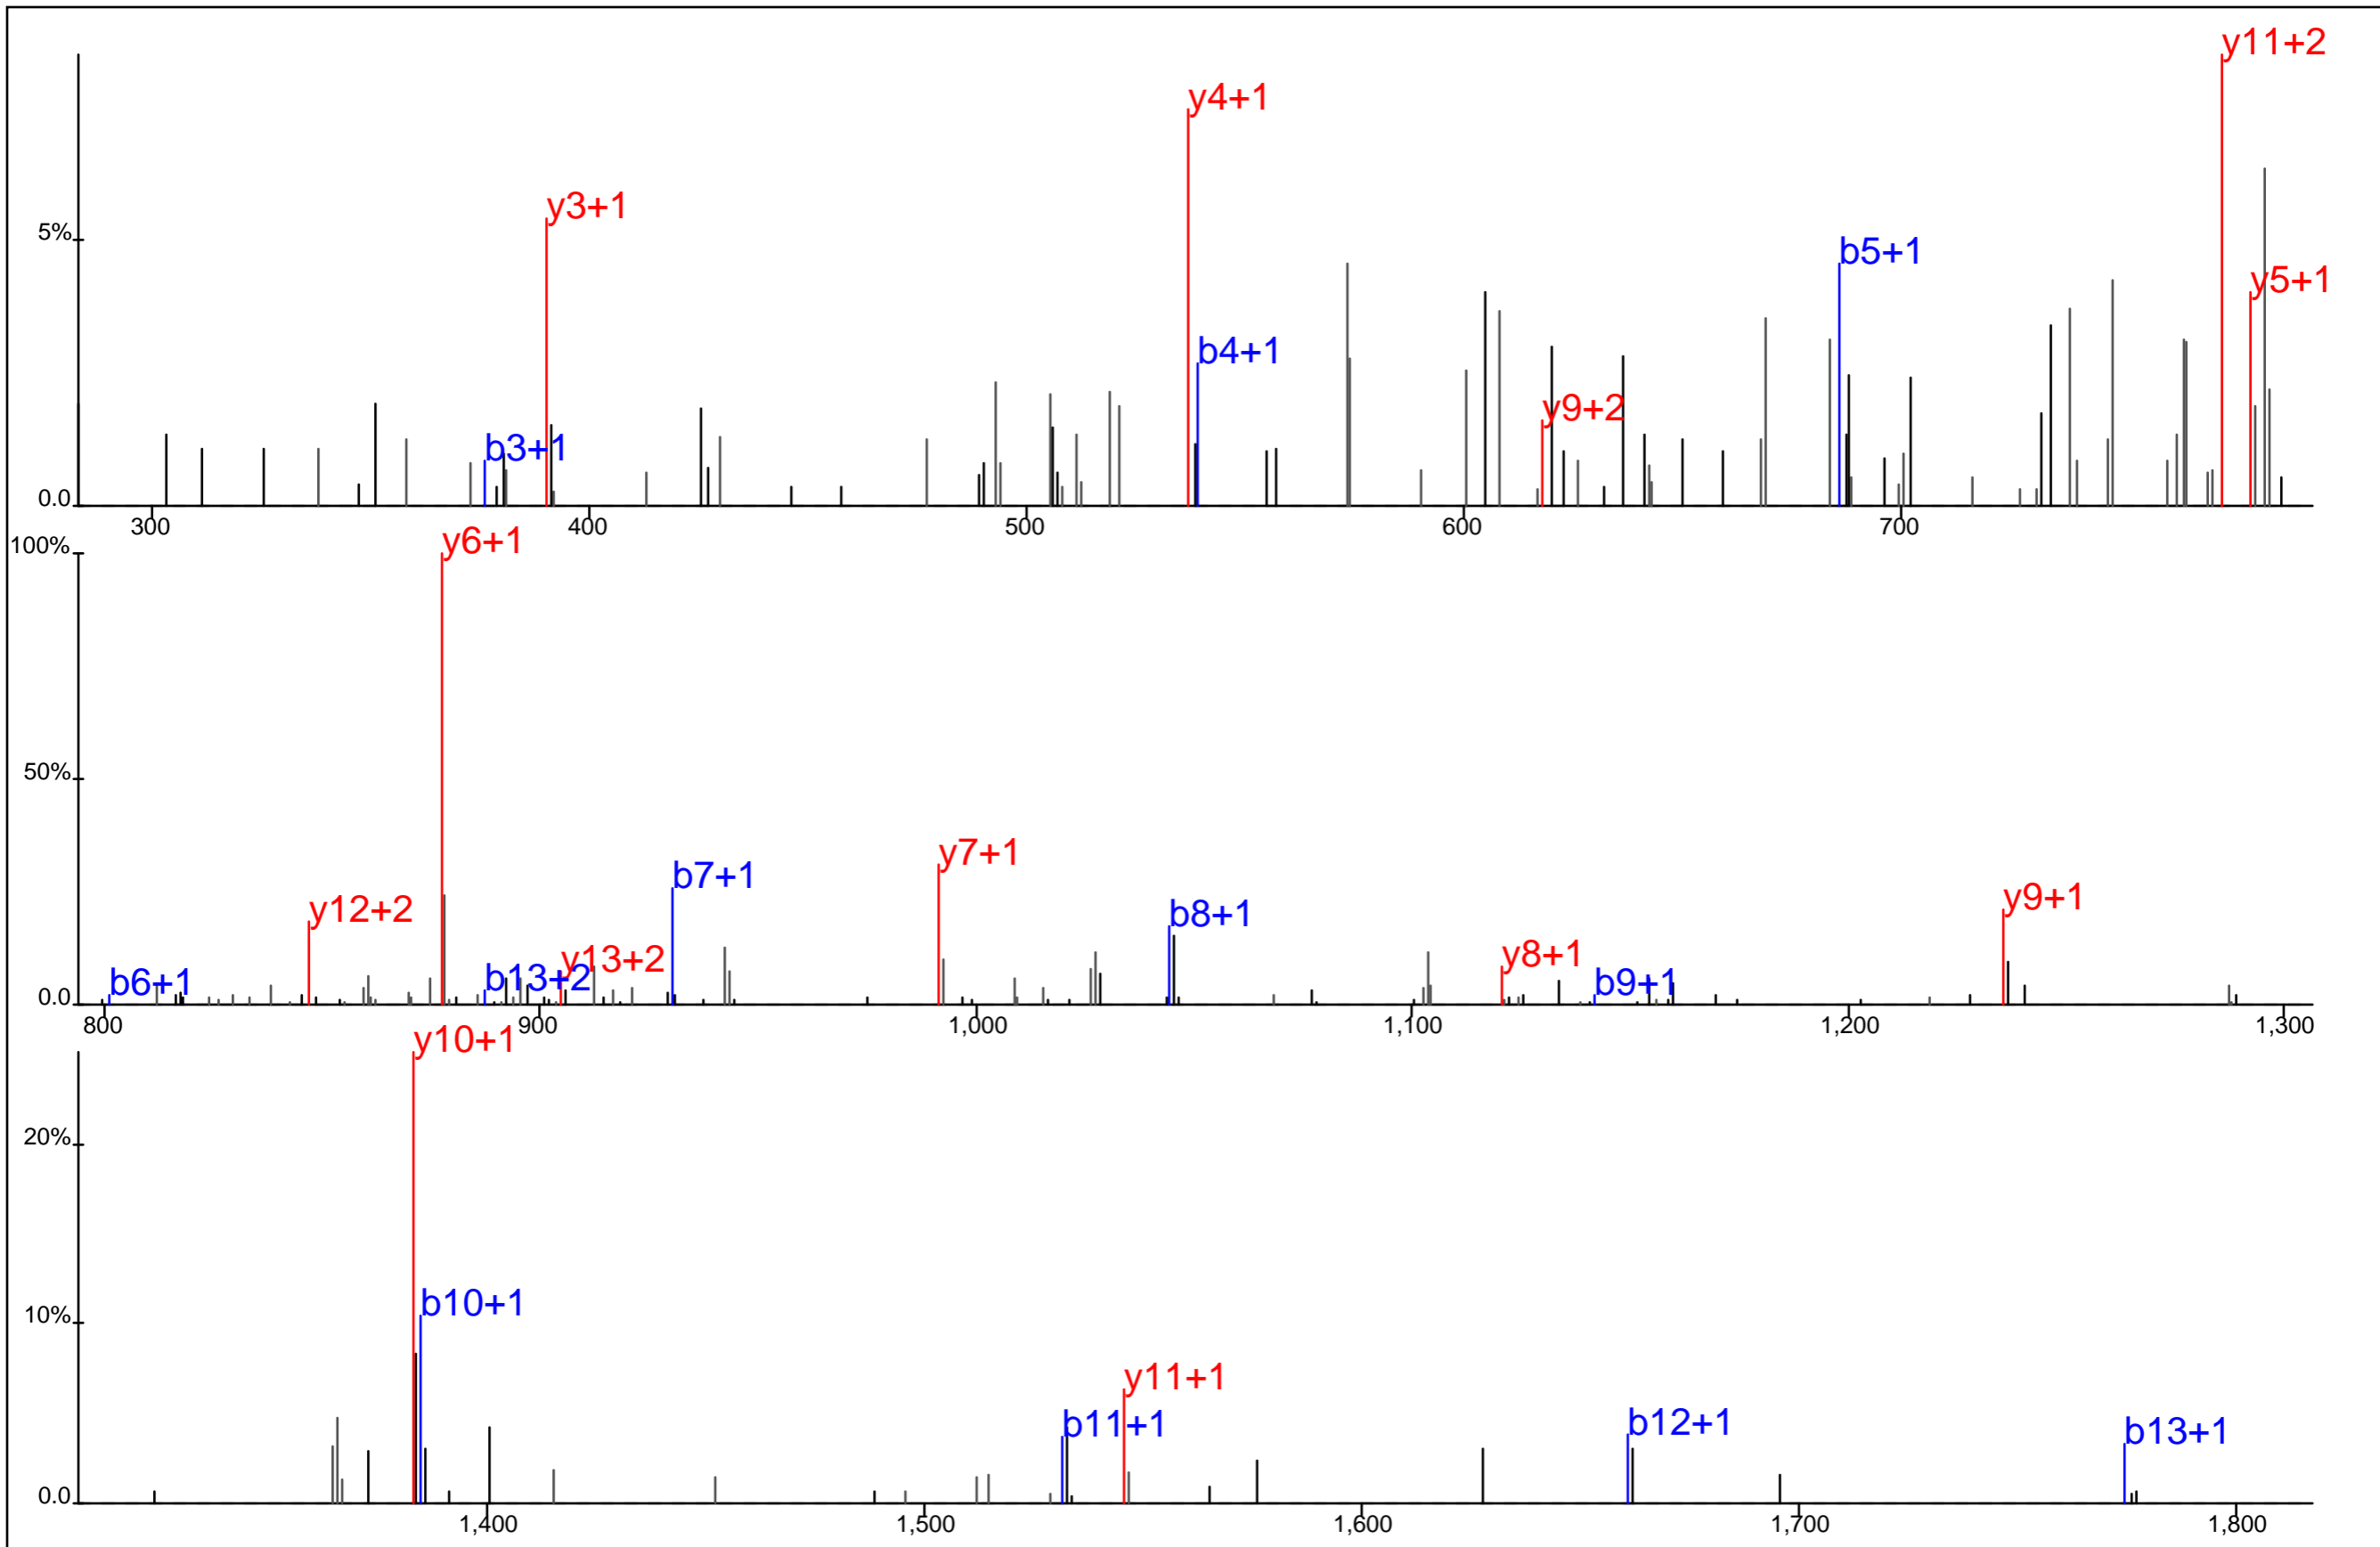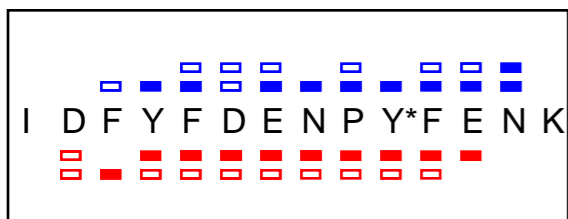

Protein Name: SET protein  
 gi Accession: 170763498  
 Precursor Mass: 960.8906+2  
 Delta Mass: 0.629 ppm  
 XCorr: 52.95

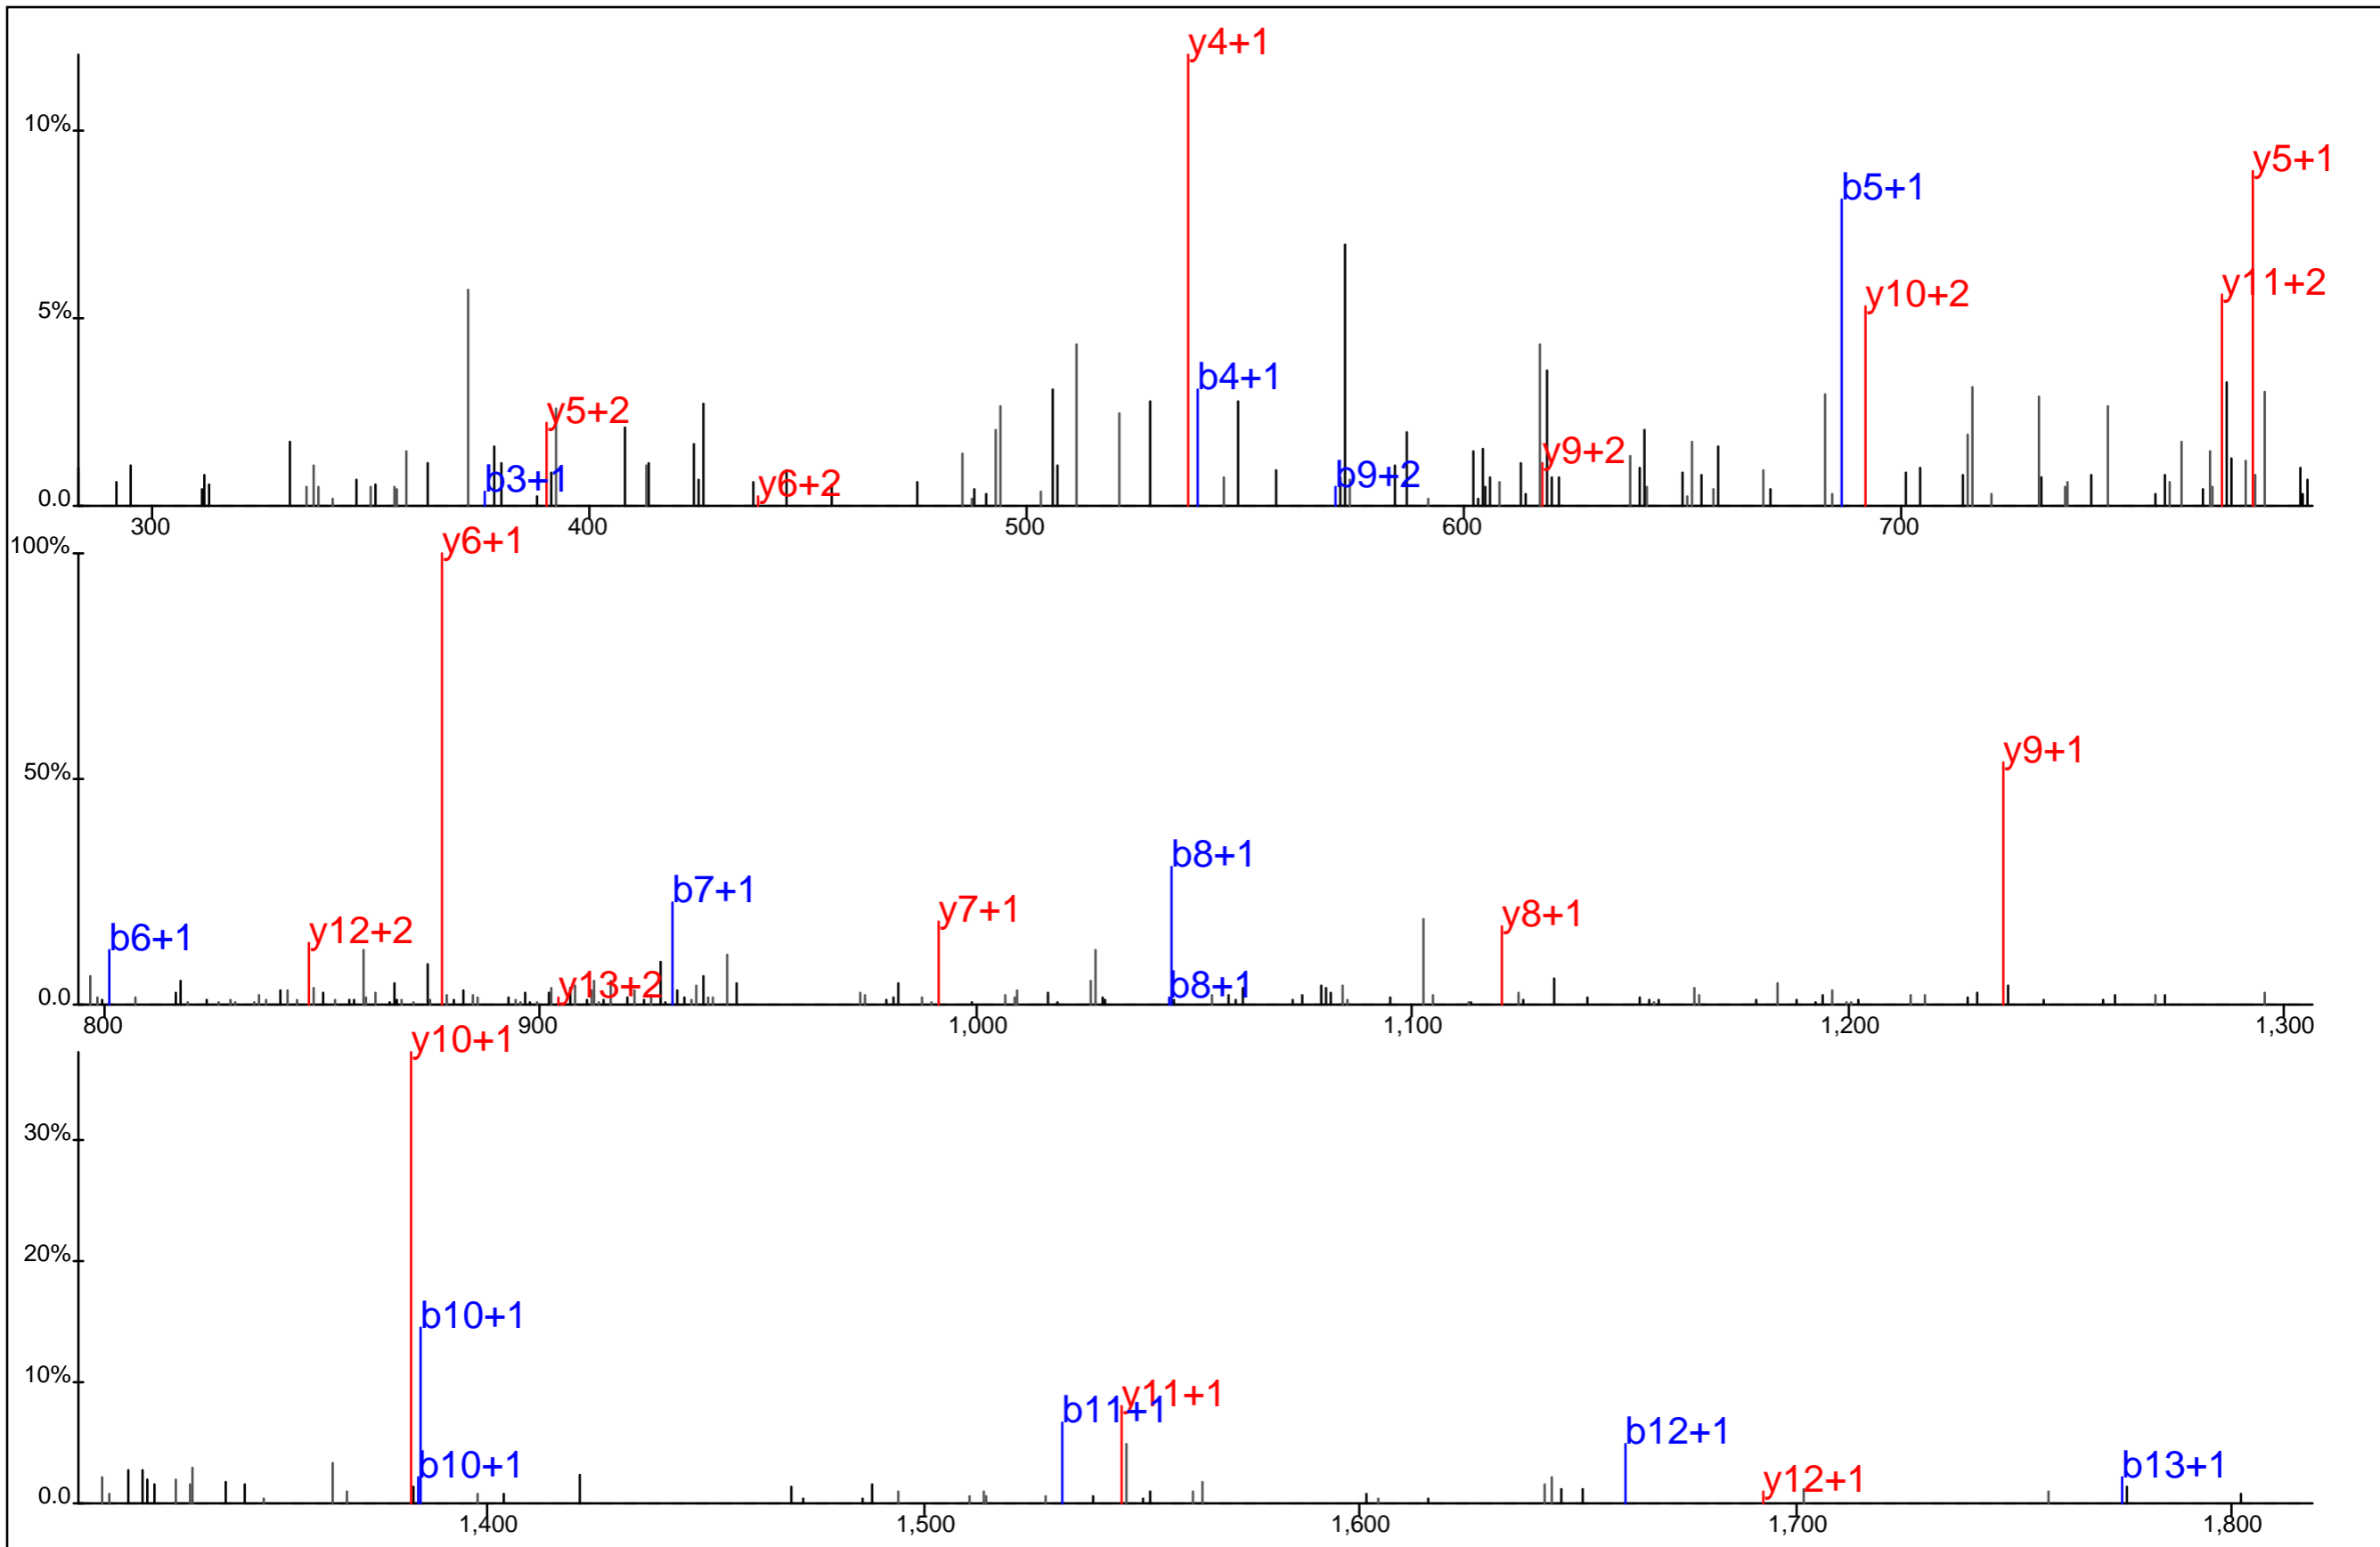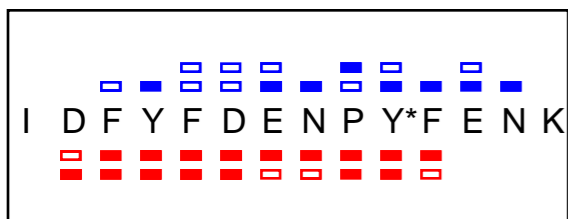

Protein Name: SET protein  
 gi Accession: 170763498  
 Precursor Mass: 960.8905+2  
 Delta Mass: 0.504 ppm  
 XCorr: 59.04

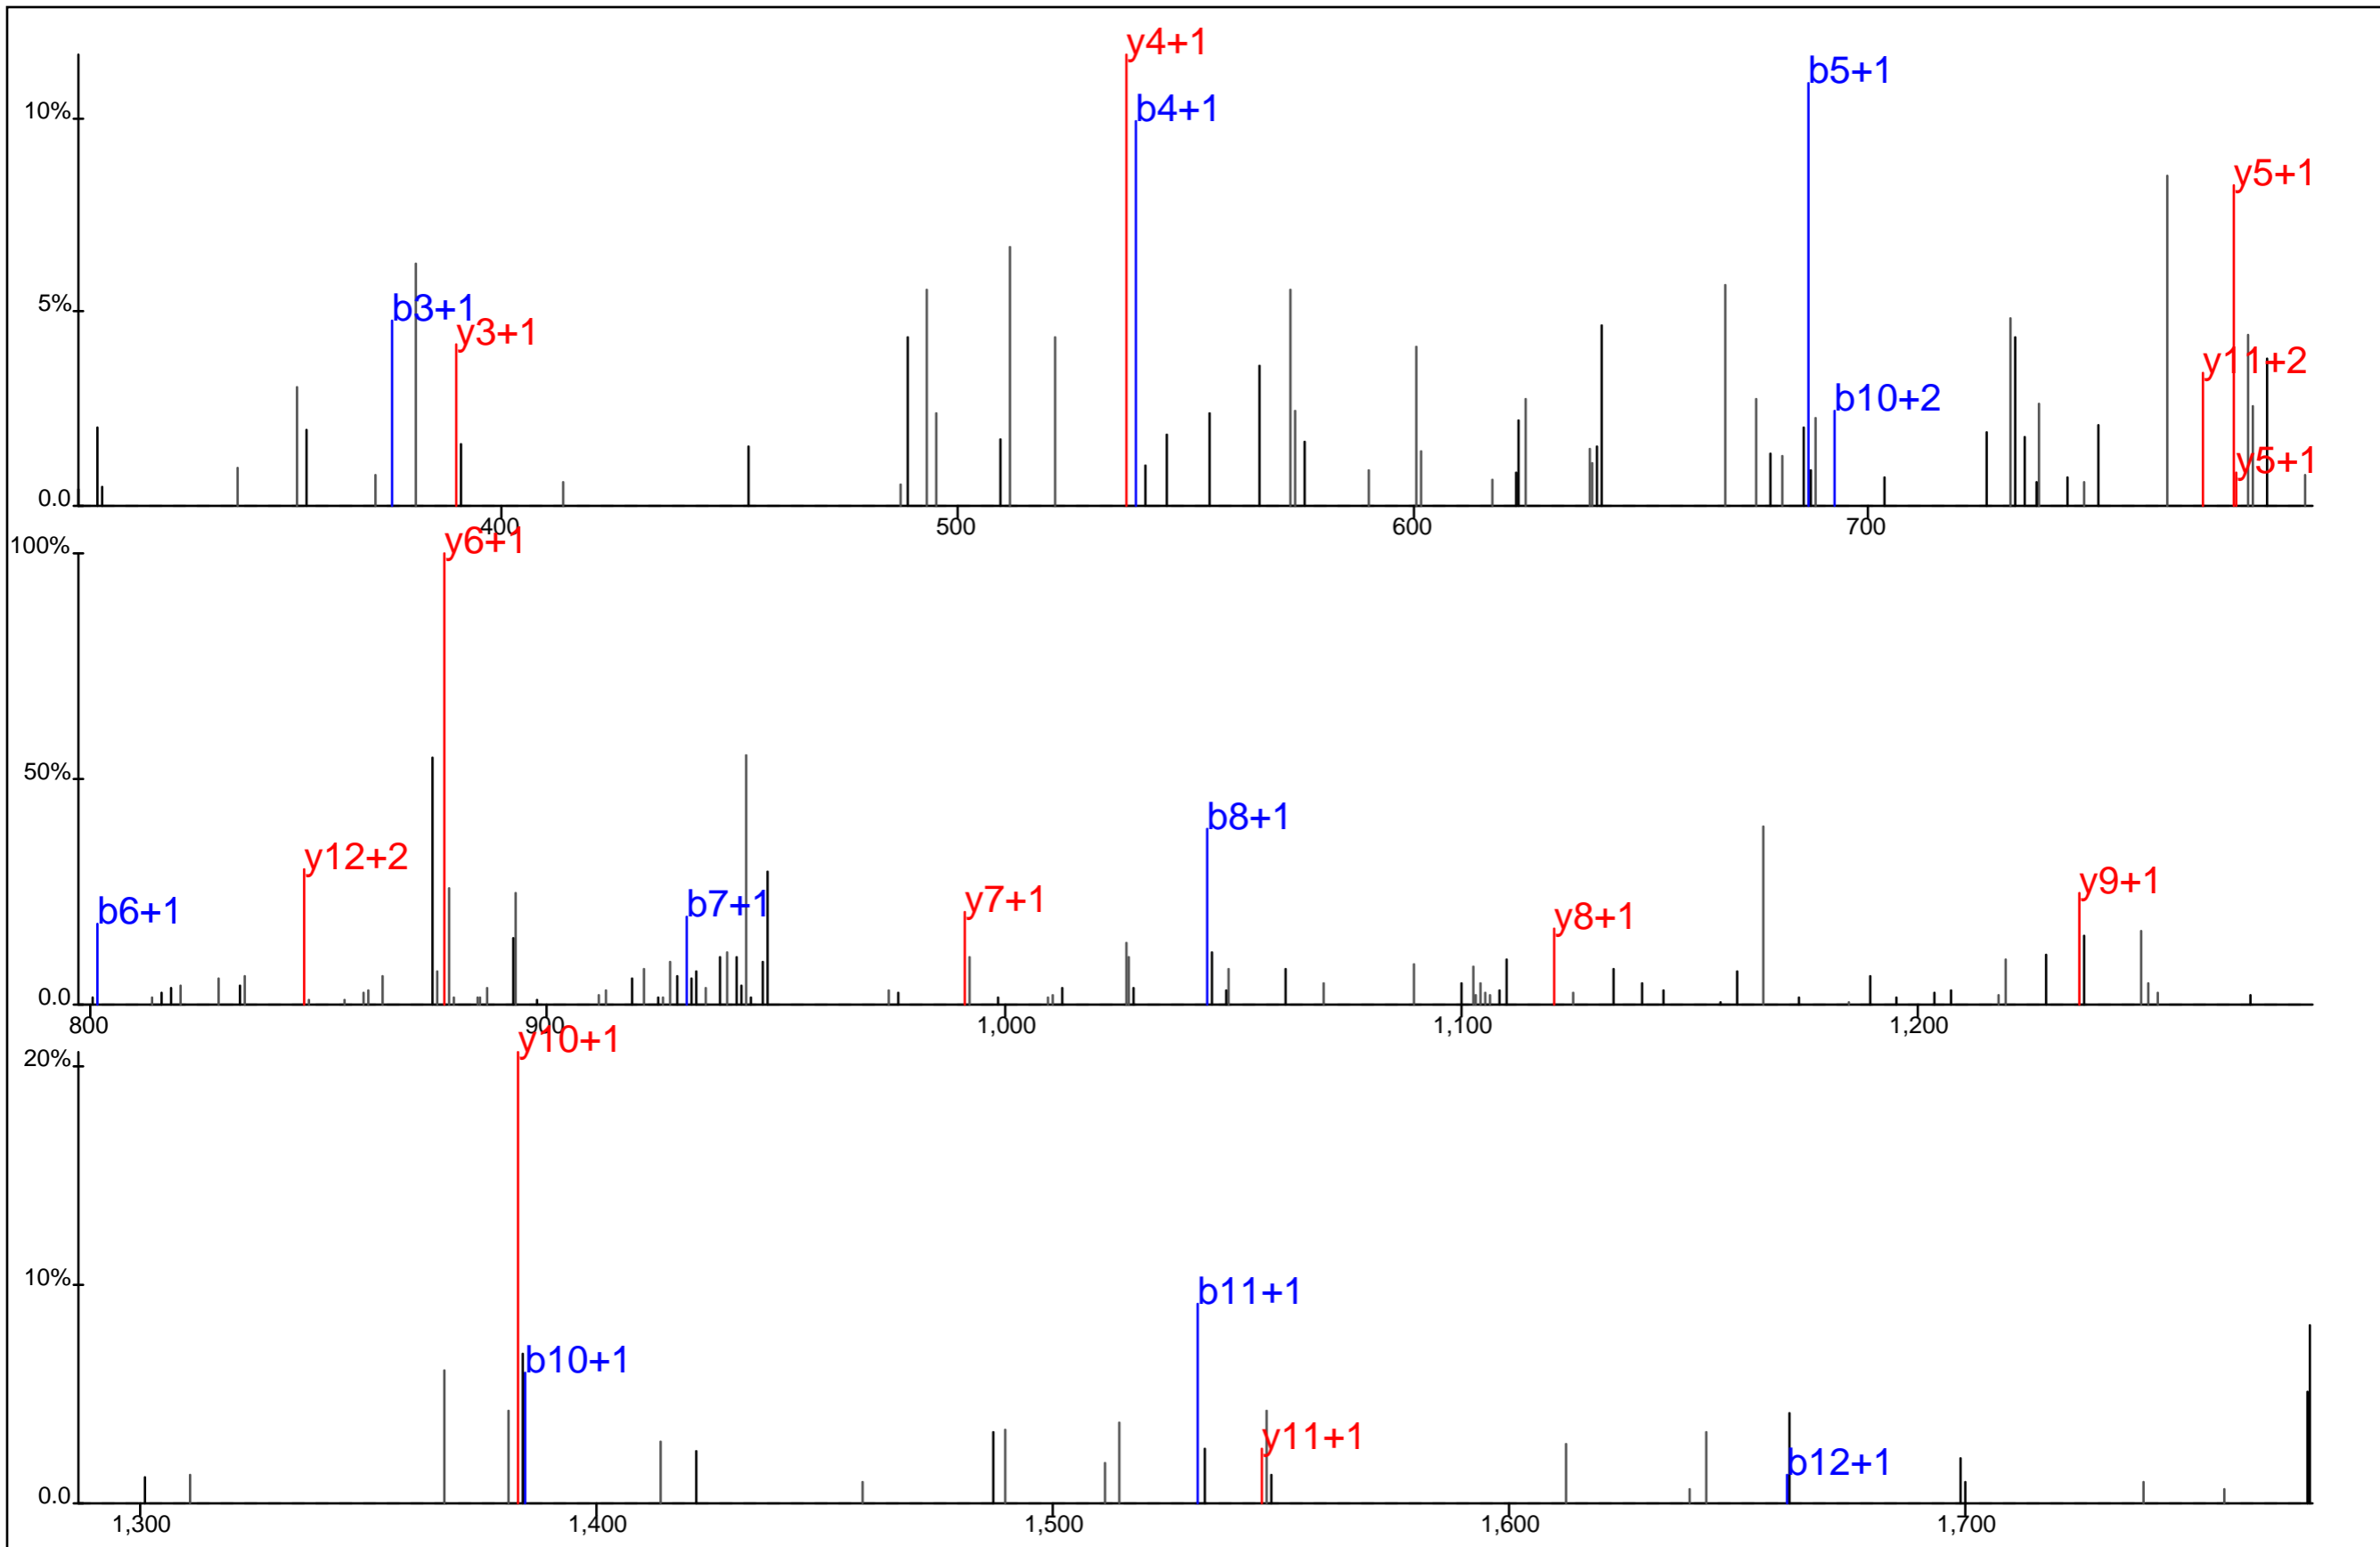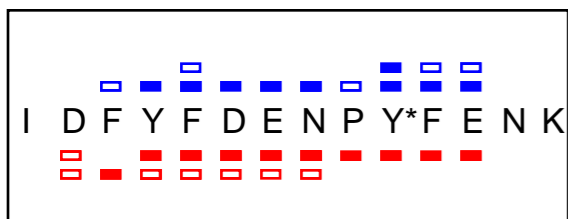

Protein Name: SET protein  
 gi Accession: 170763498  
 Precursor Mass: 960.8960+2  
 Delta Mass: 6.226 ppm  
 XCorr: 33.16

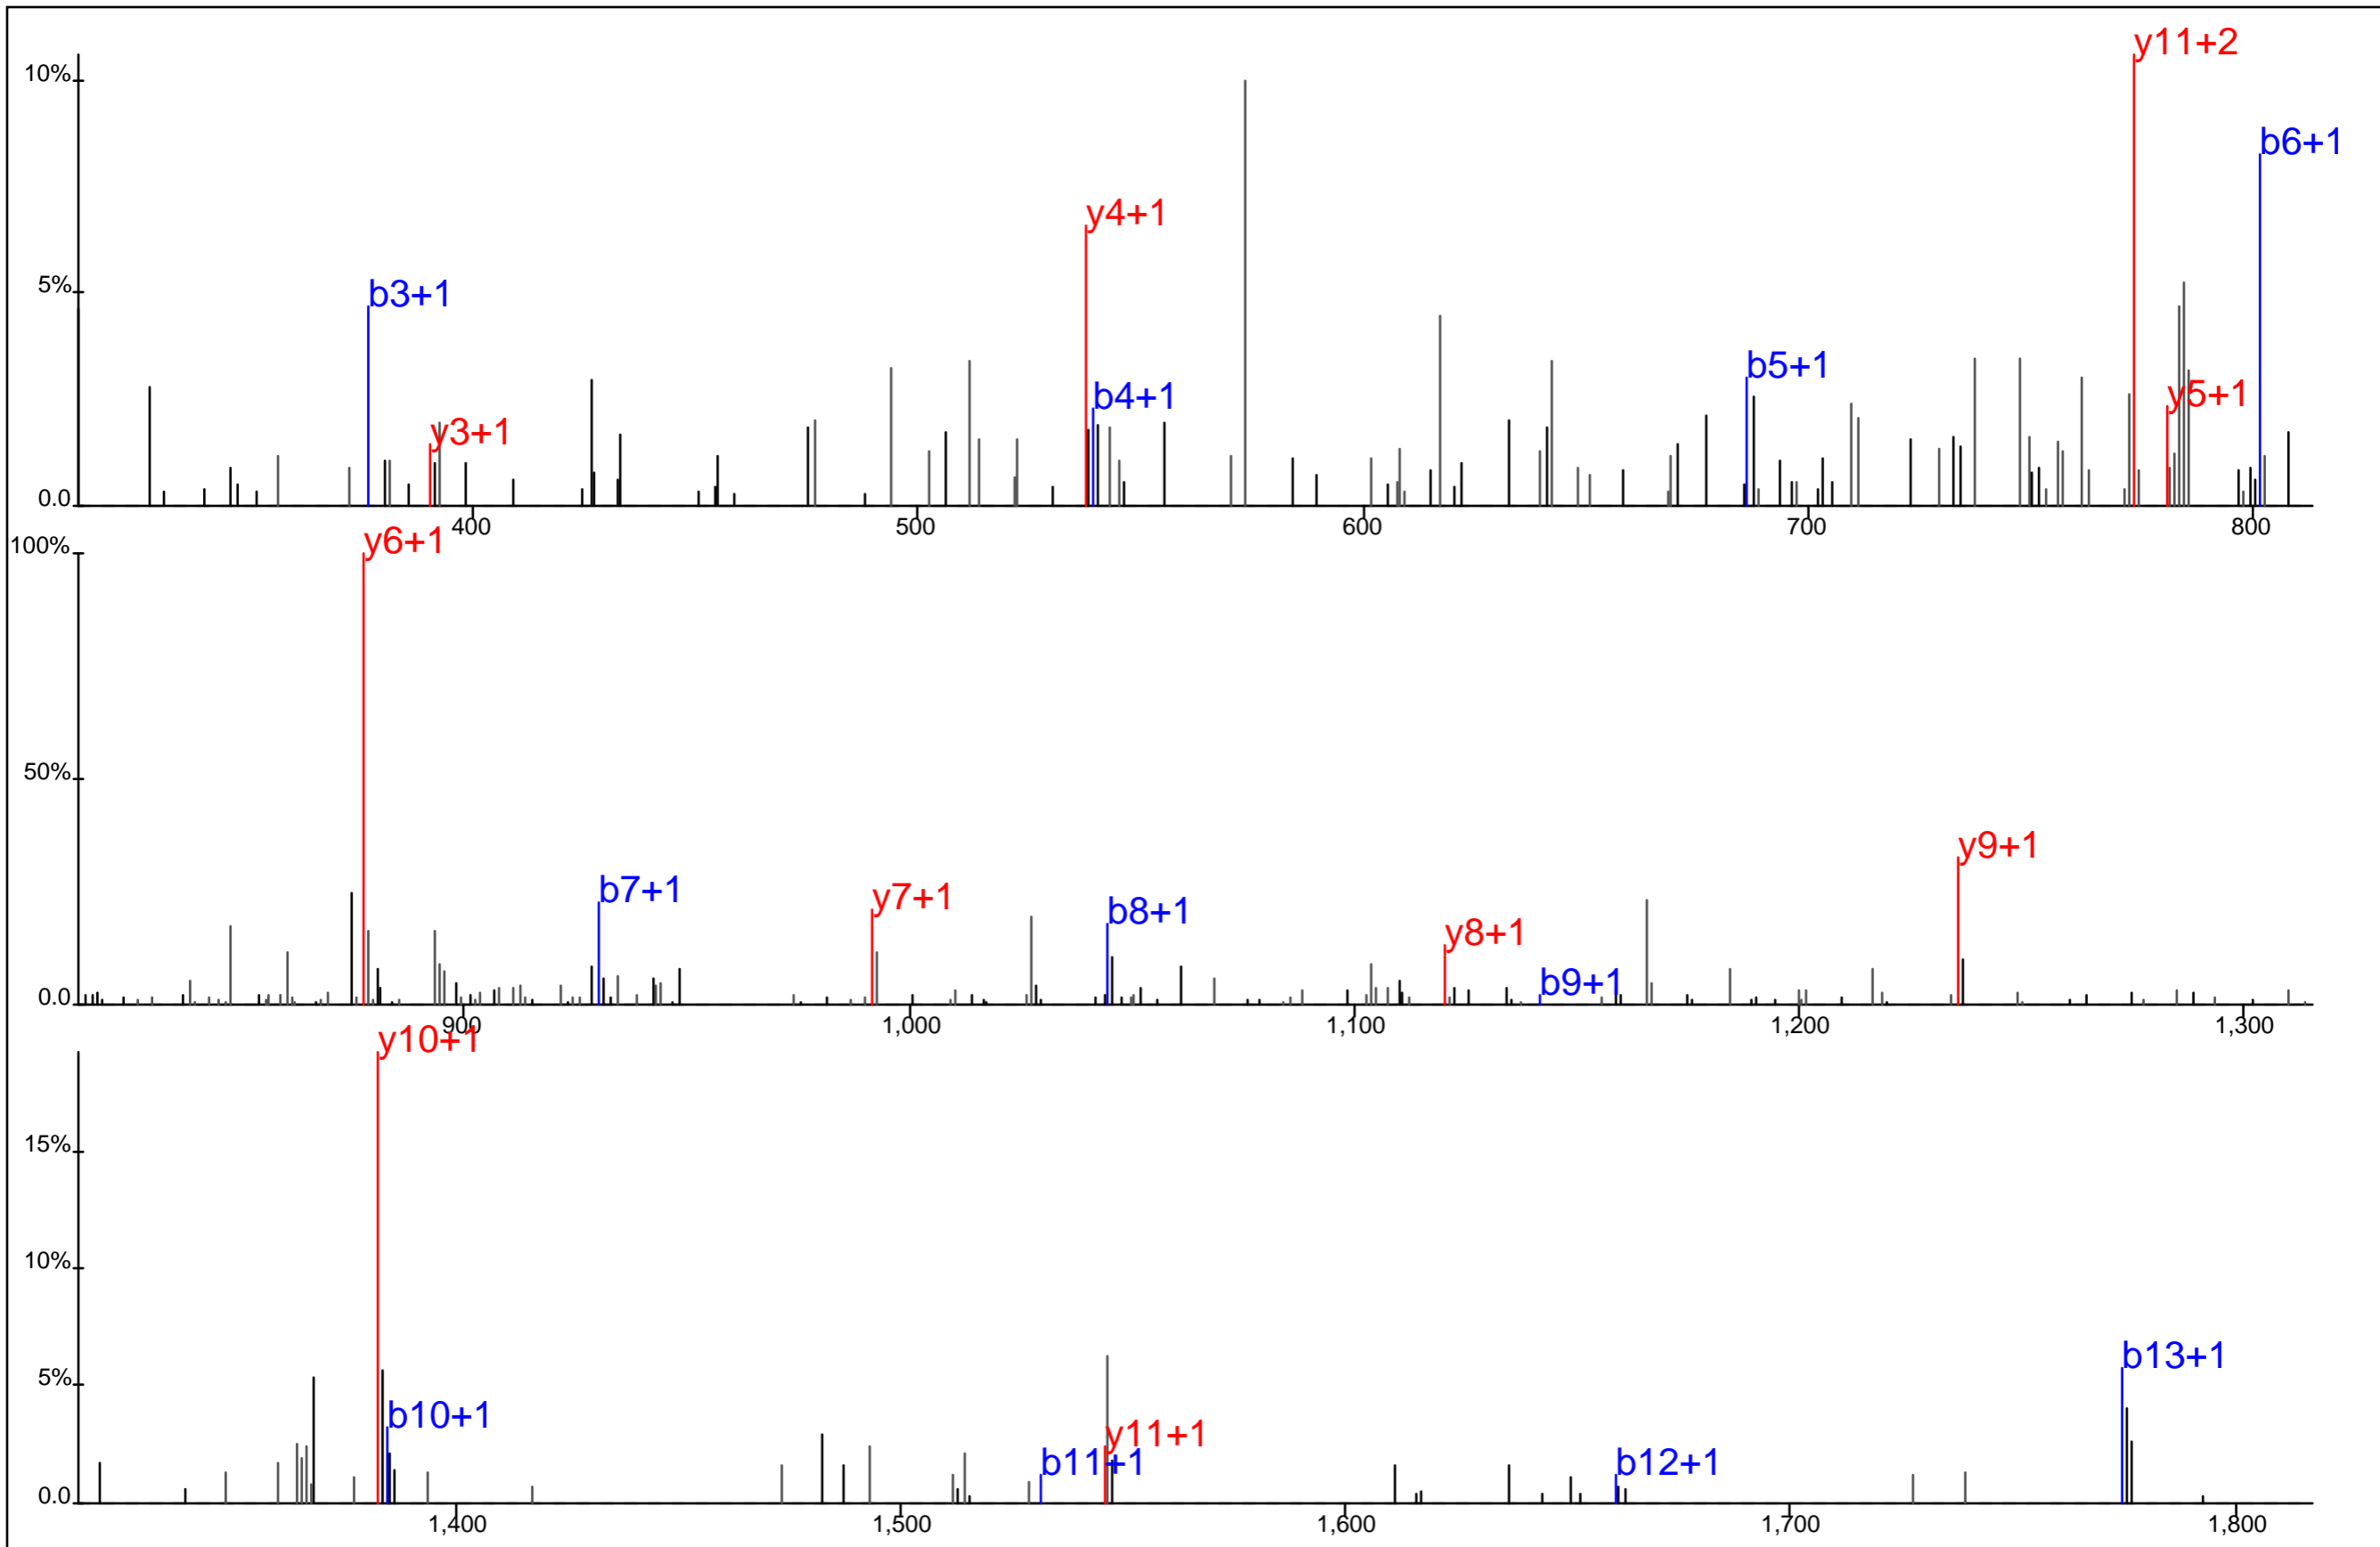

|   |   |   |   |   |   |   |   |   |    |   |   |   |   |
|---|---|---|---|---|---|---|---|---|----|---|---|---|---|
| I | D | F | Y | F | D | E | N | P | Y* | F | E | N | K |
|   |   |   |   |   |   |   |   |   |    |   |   |   |   |
|   |   |   |   |   |   |   |   |   |    |   |   |   |   |

Protein Name: SET protein  
 gi Accession: 170763498  
 Precursor Mass: 960.8929+2  
 Delta Mass: 2.982 ppm  
 XCorr: 33.59

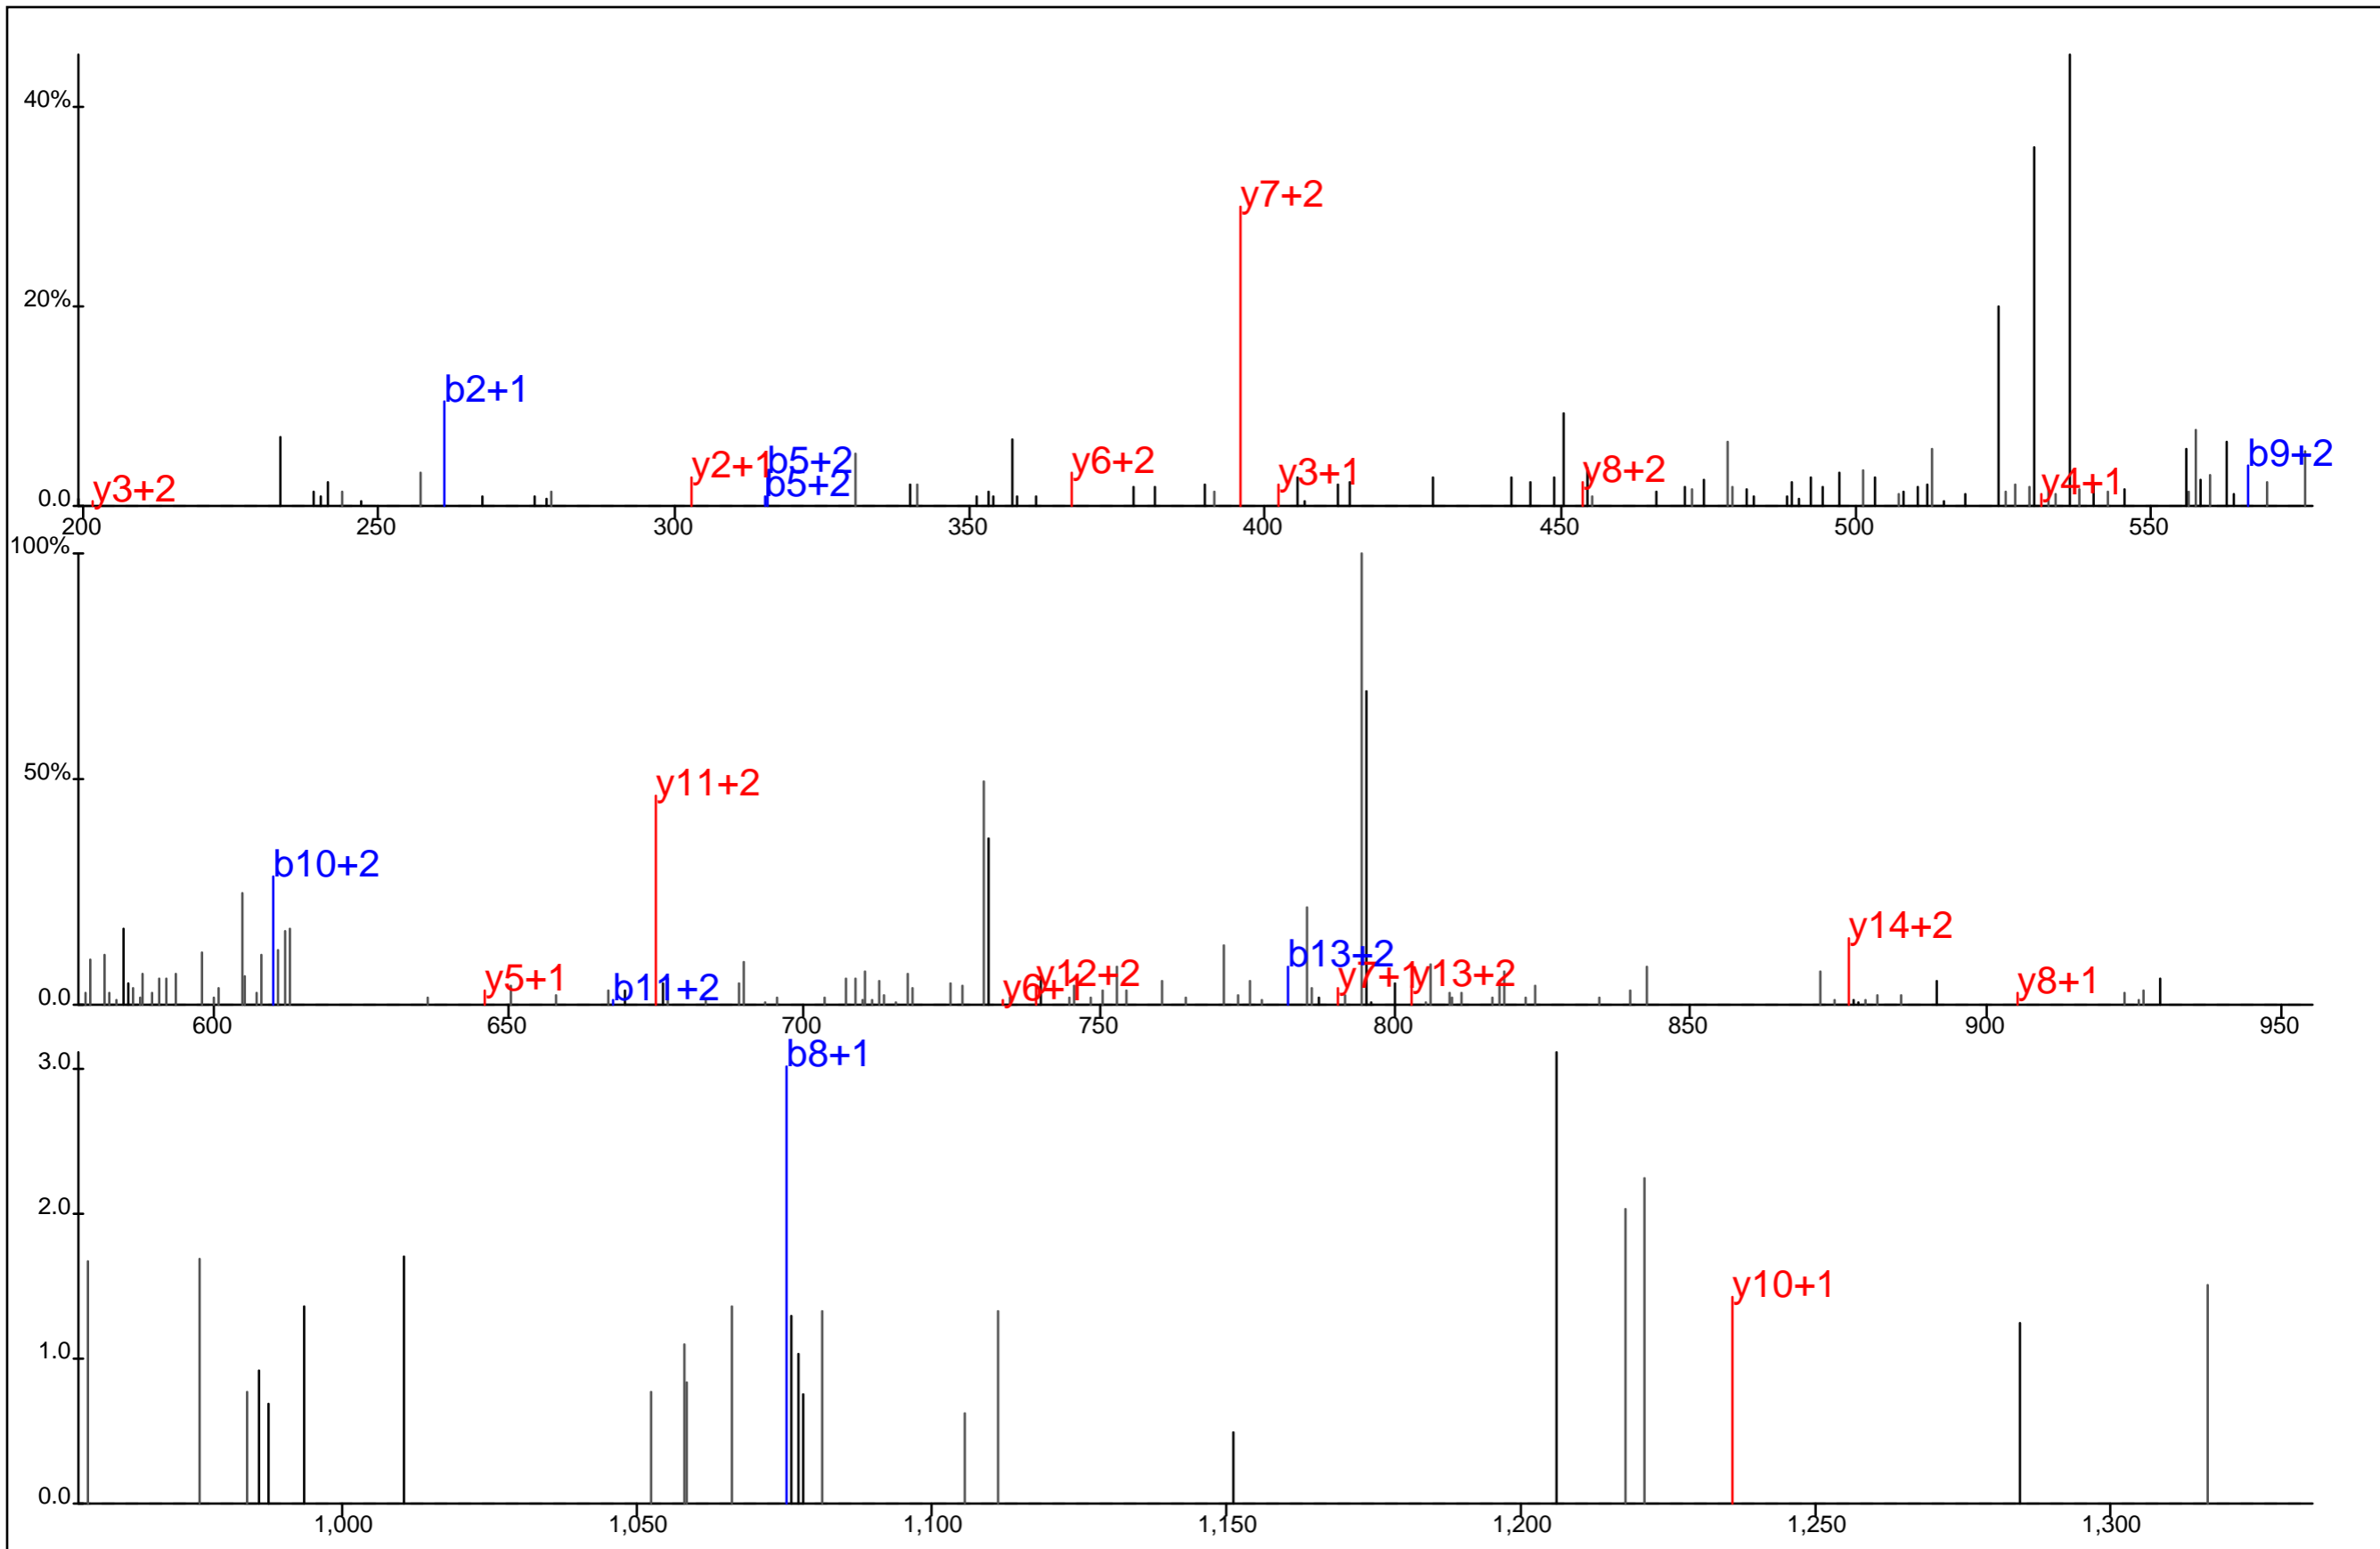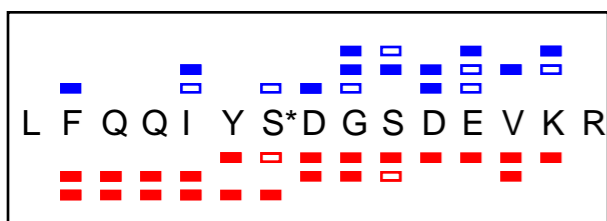

Protein Name: SGT1  
 gi Accession: 5730041  
 Precursor Mass: 622.2893+3  
 Delta Mass: 3.055 ppm  
 XCorr: 13.3

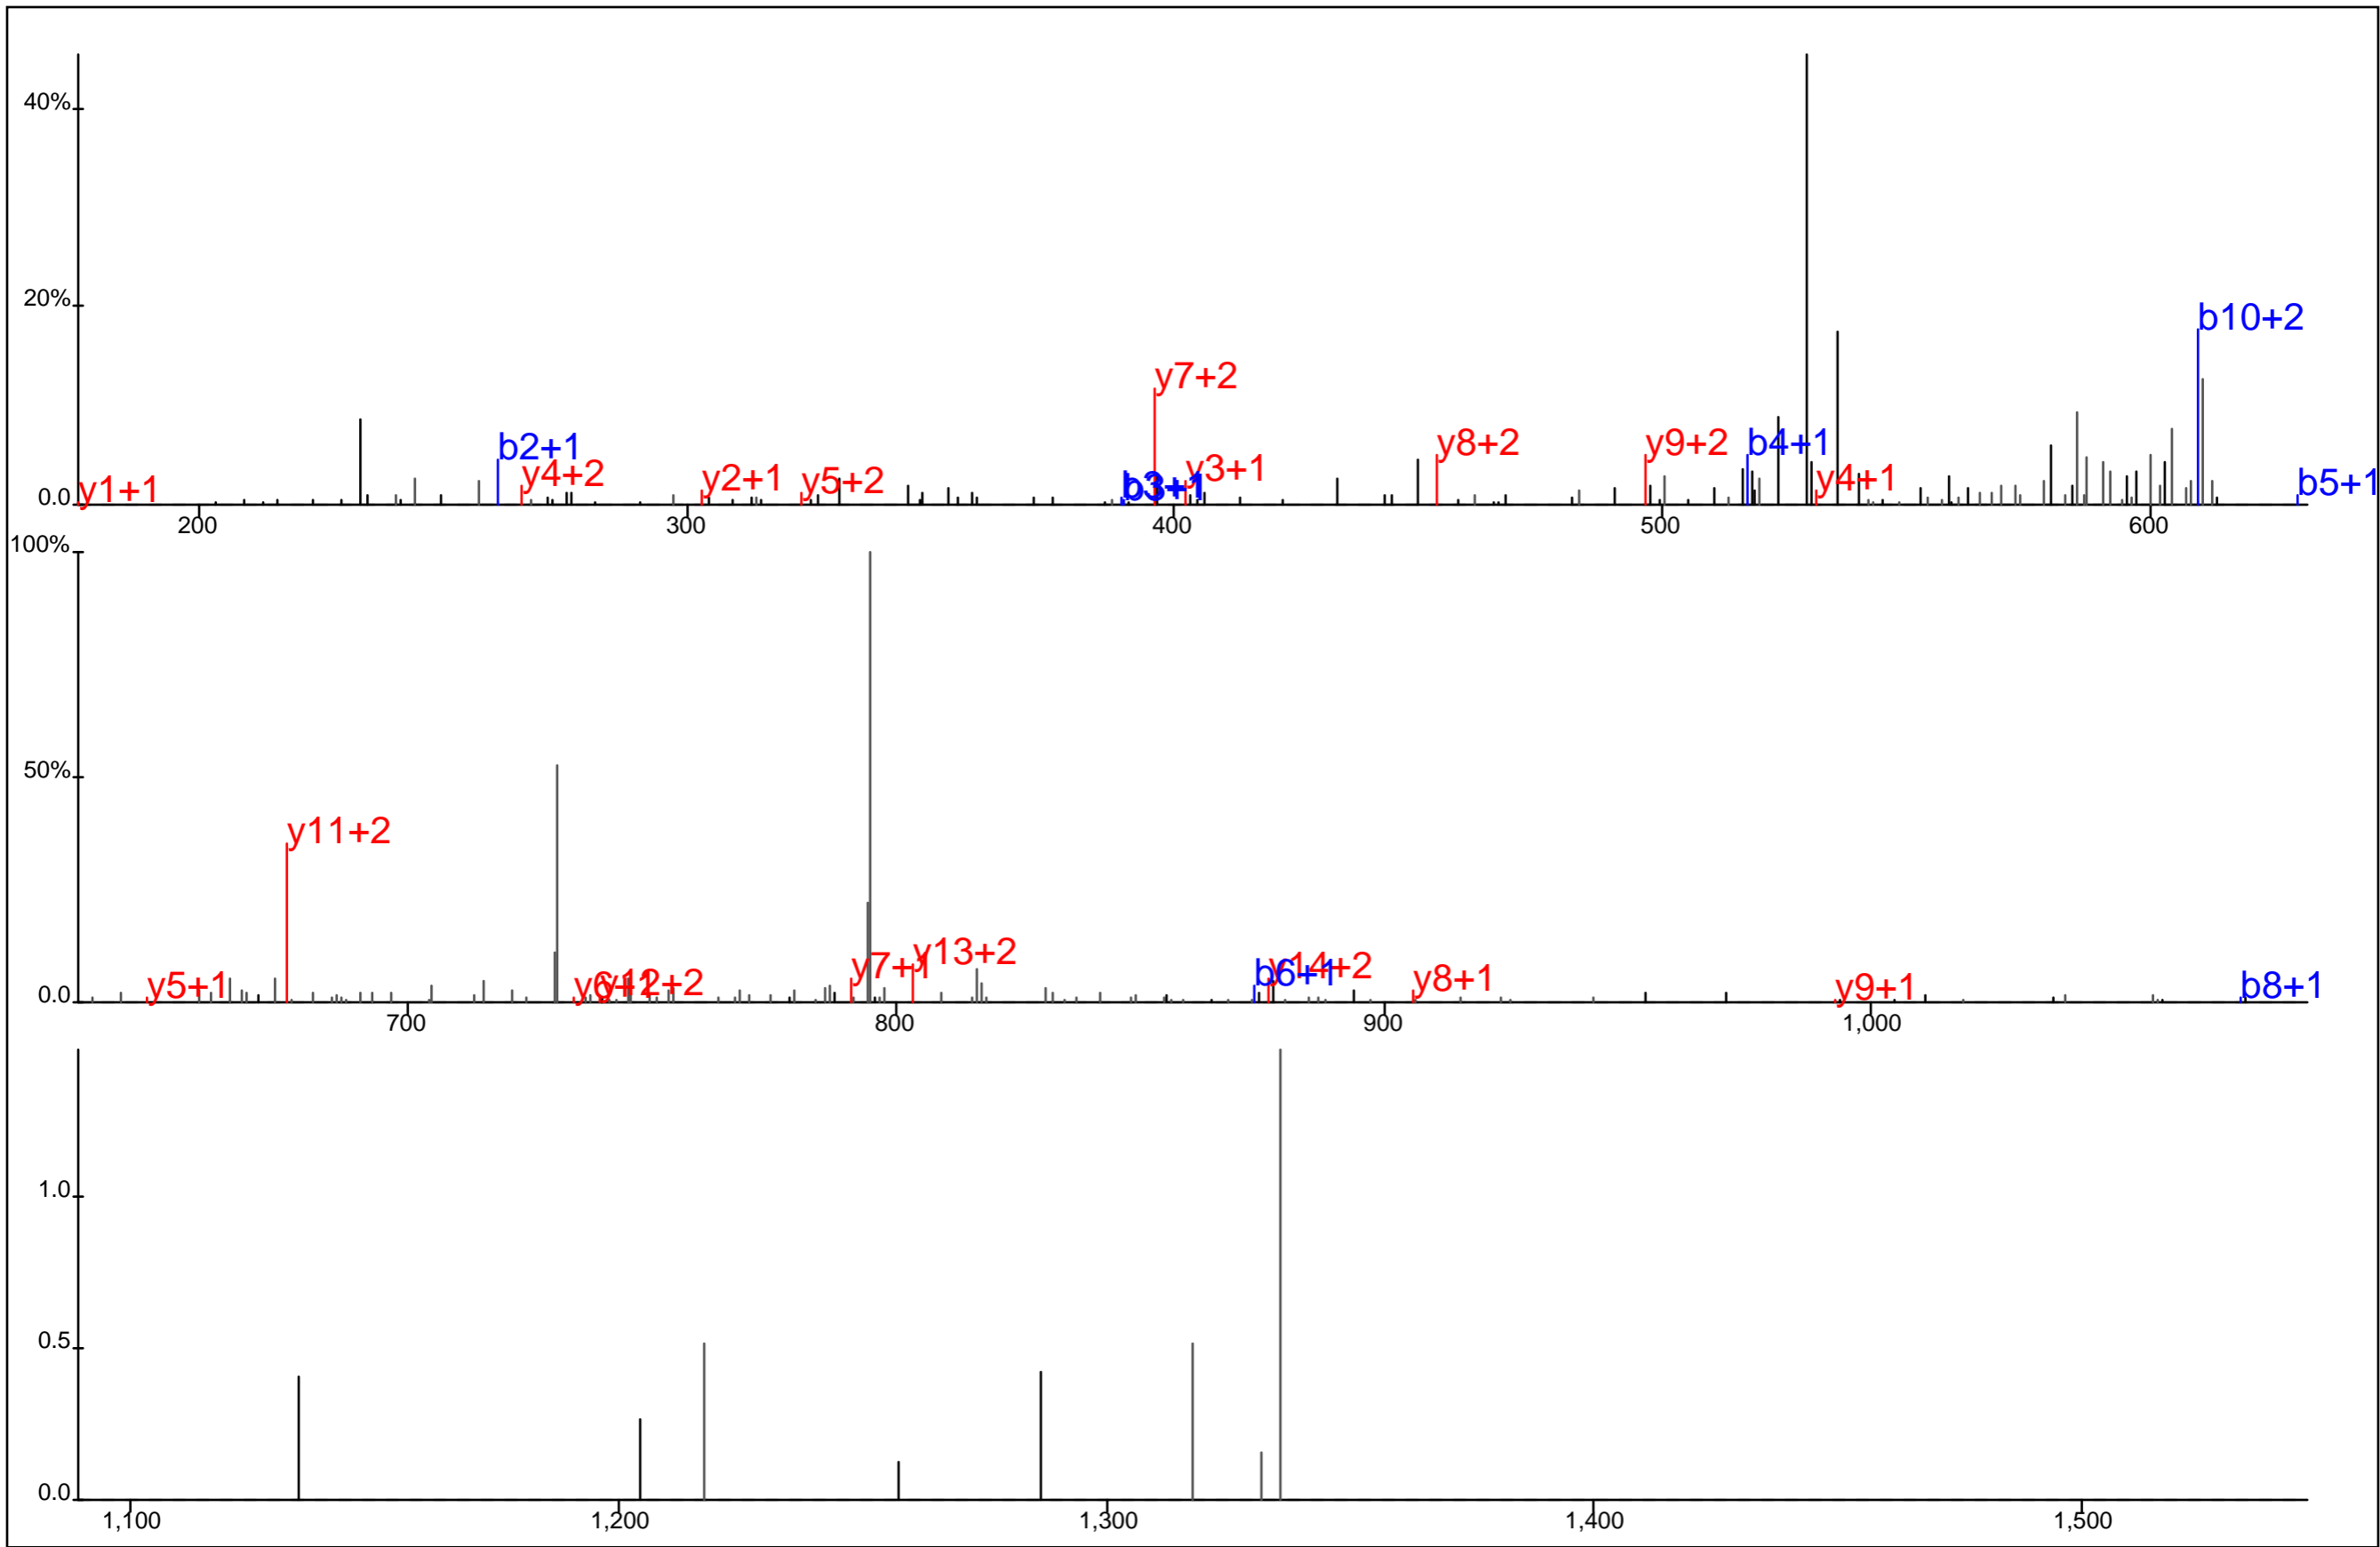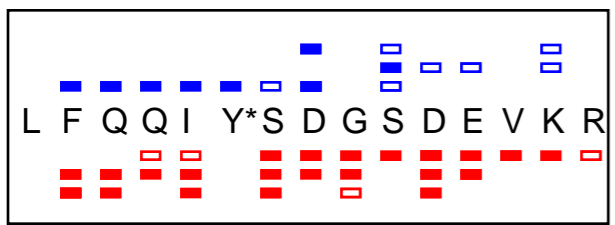

Protein Name: SGT1  
 gi Accession: 5730041  
 Precursor Mass: 622.2897+3  
 Delta Mass: 3.645 ppm  
 XCorr: 27.18

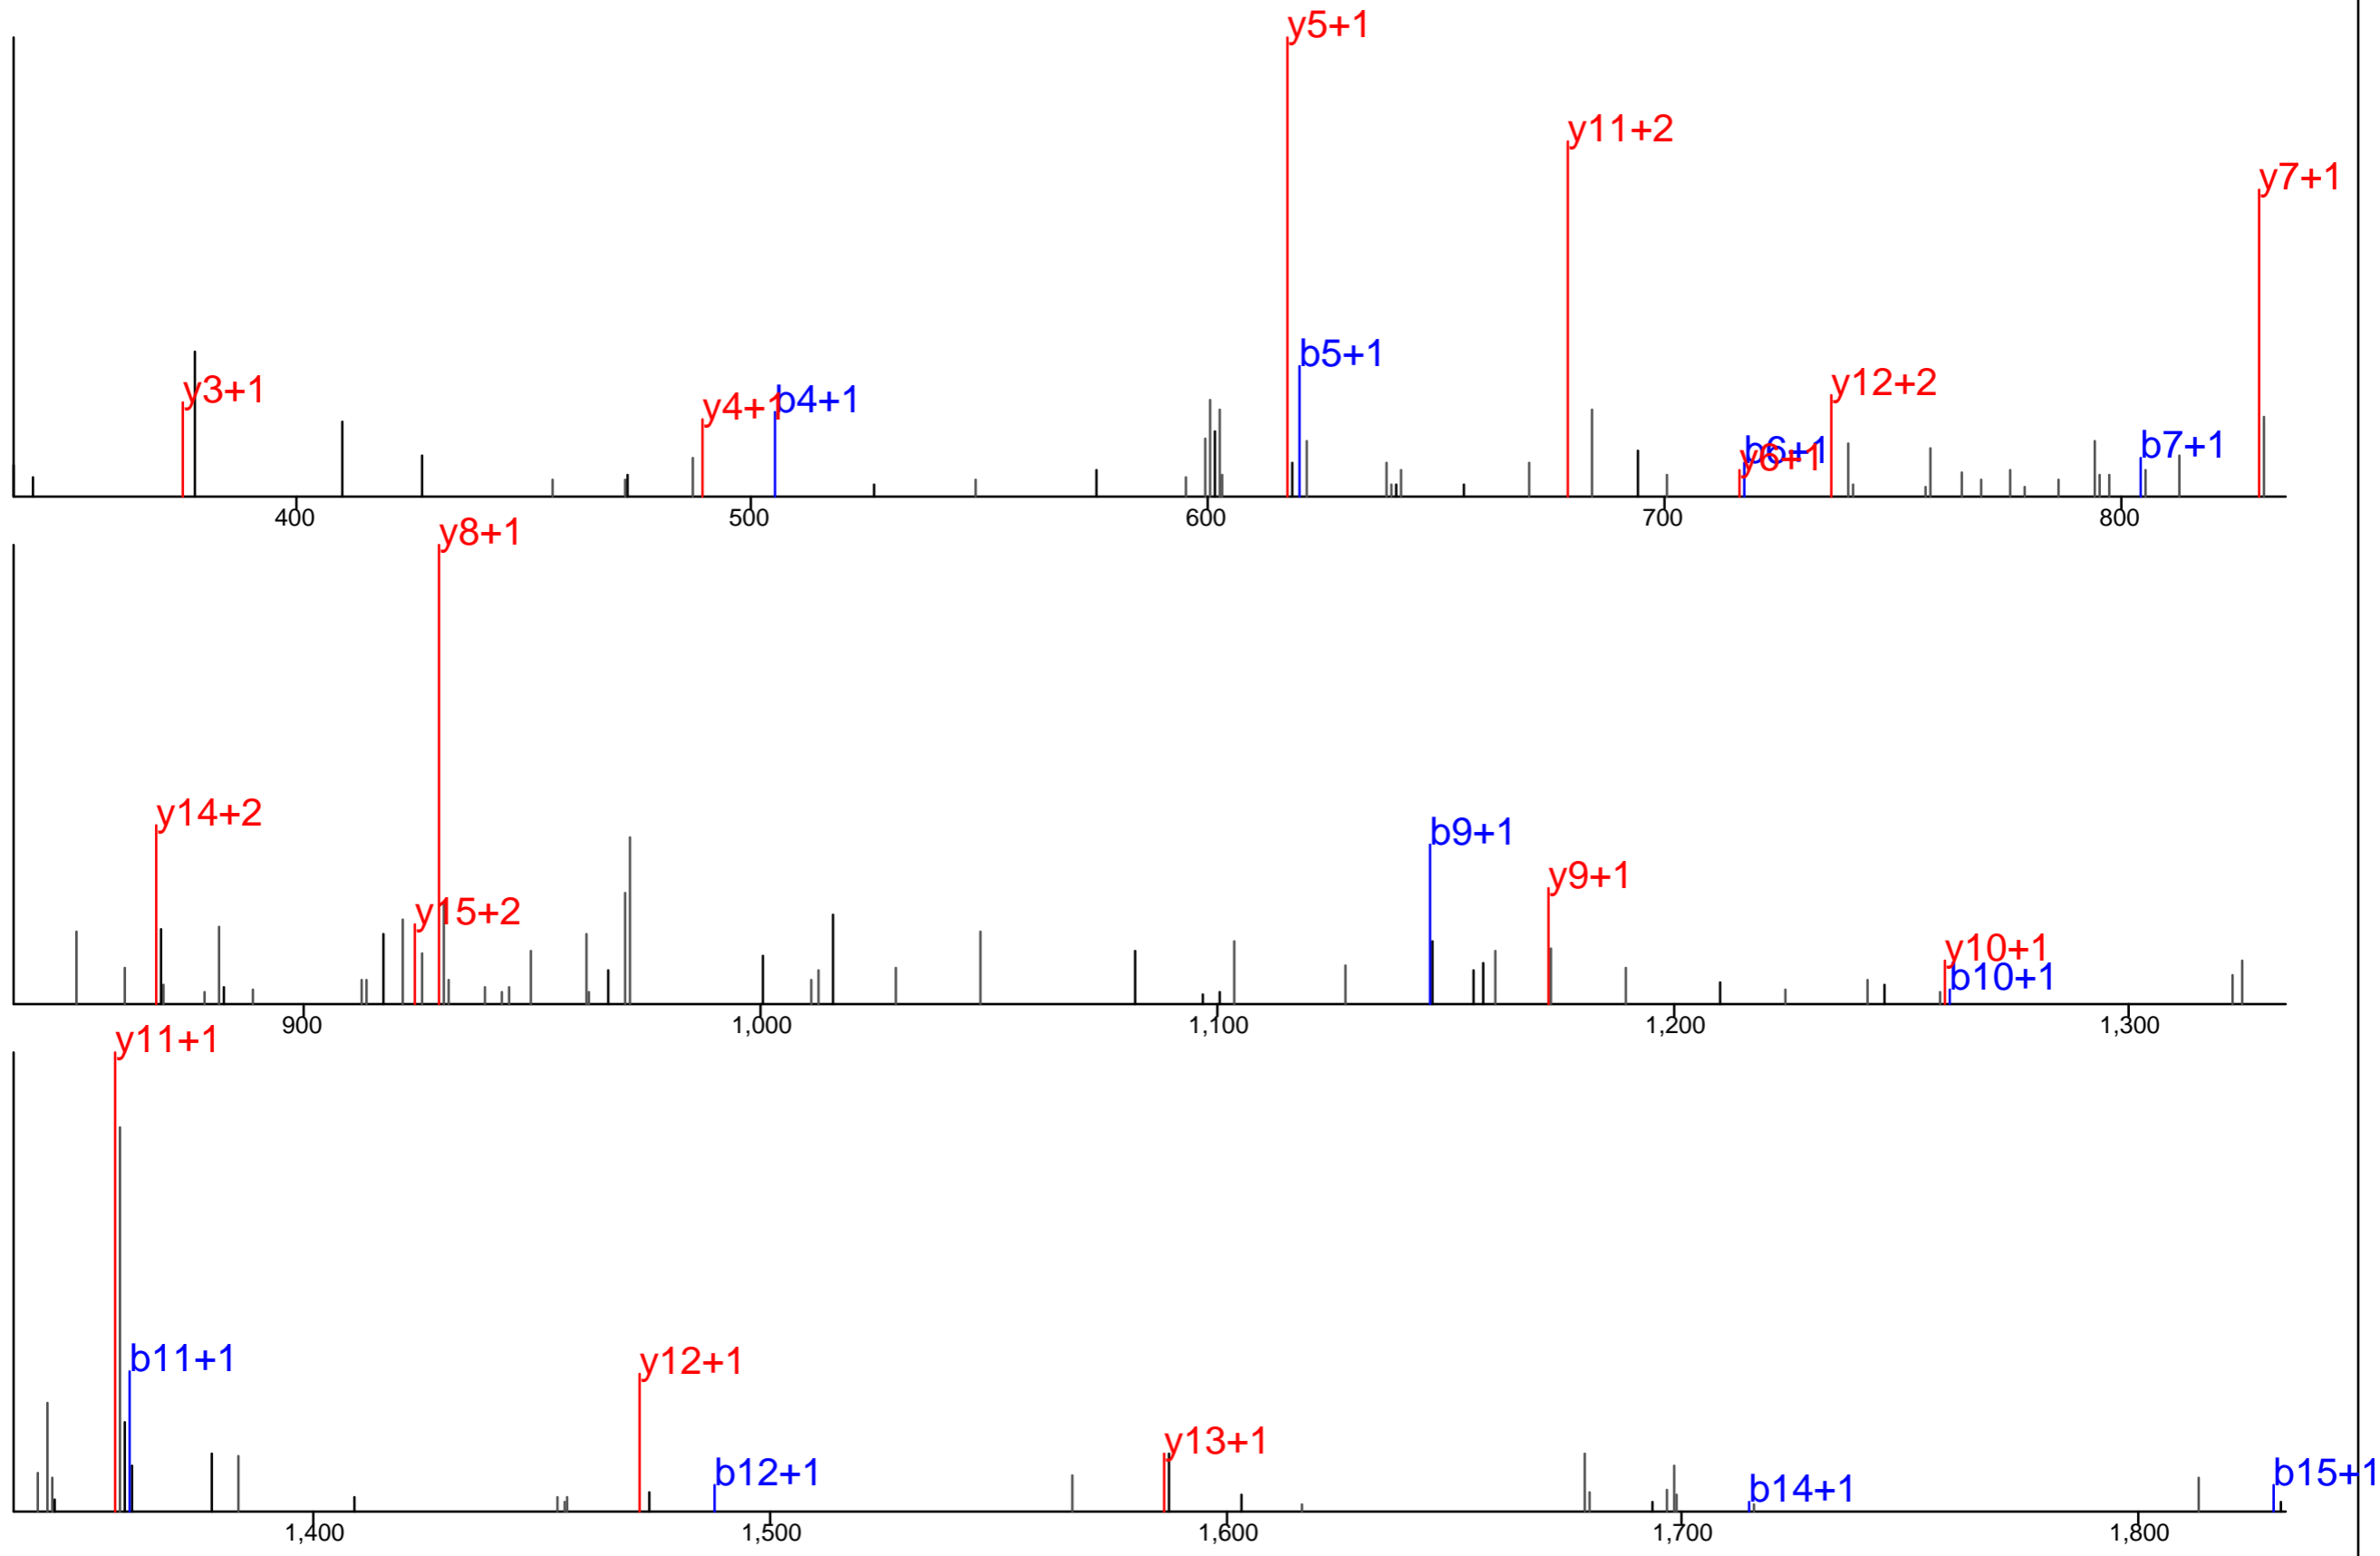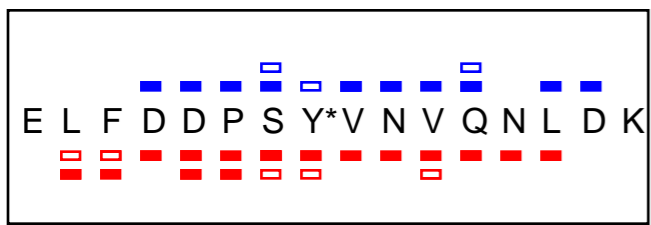

Protein Name: SHC  
 gi Accession: 32261324  
 Precursor Mass: 988.4419+2  
 Delta Mass: 4.073 ppm  
 XCorr: 72.35



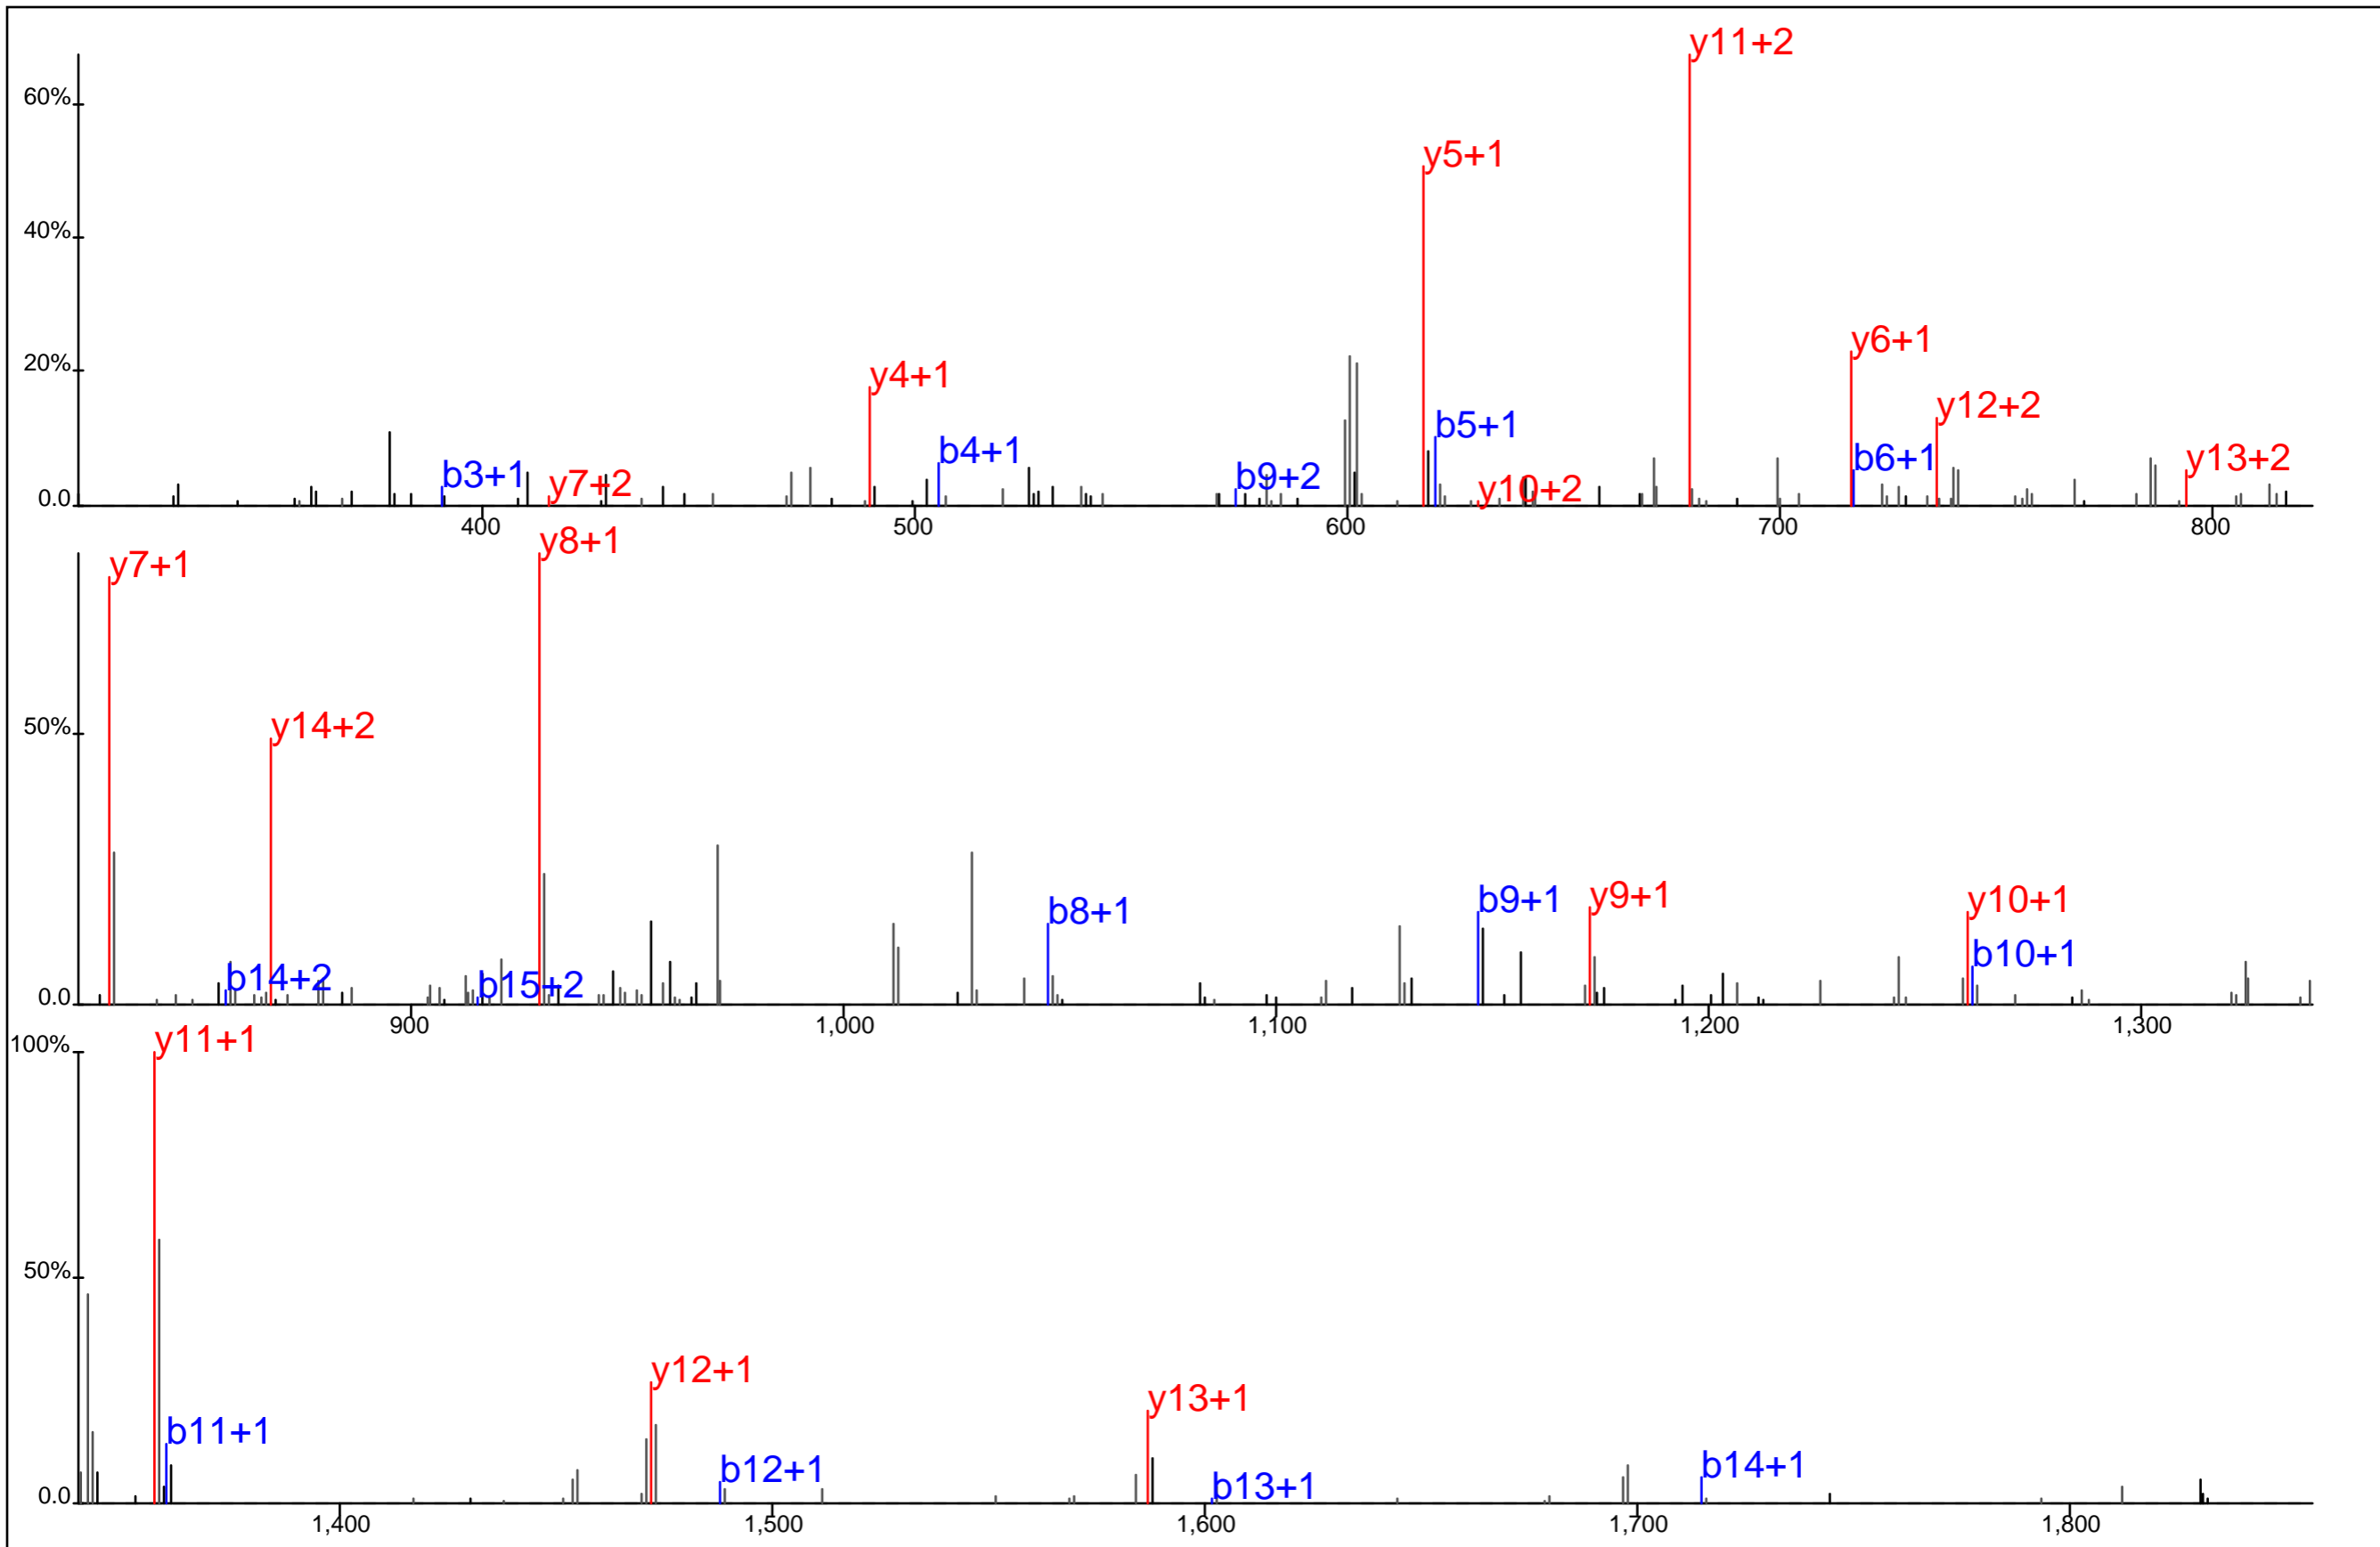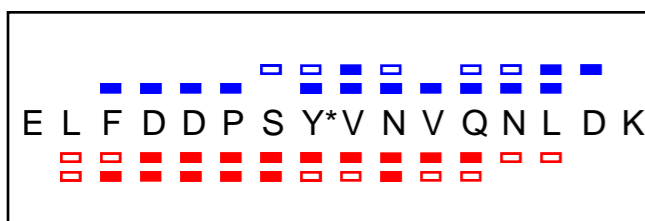

Protein Name: SHC  
 gi Accession: 32261324  
 Precursor Mass: 988.4407+2  
 Delta Mass: 2.838 ppm  
 XCorr: 75.84

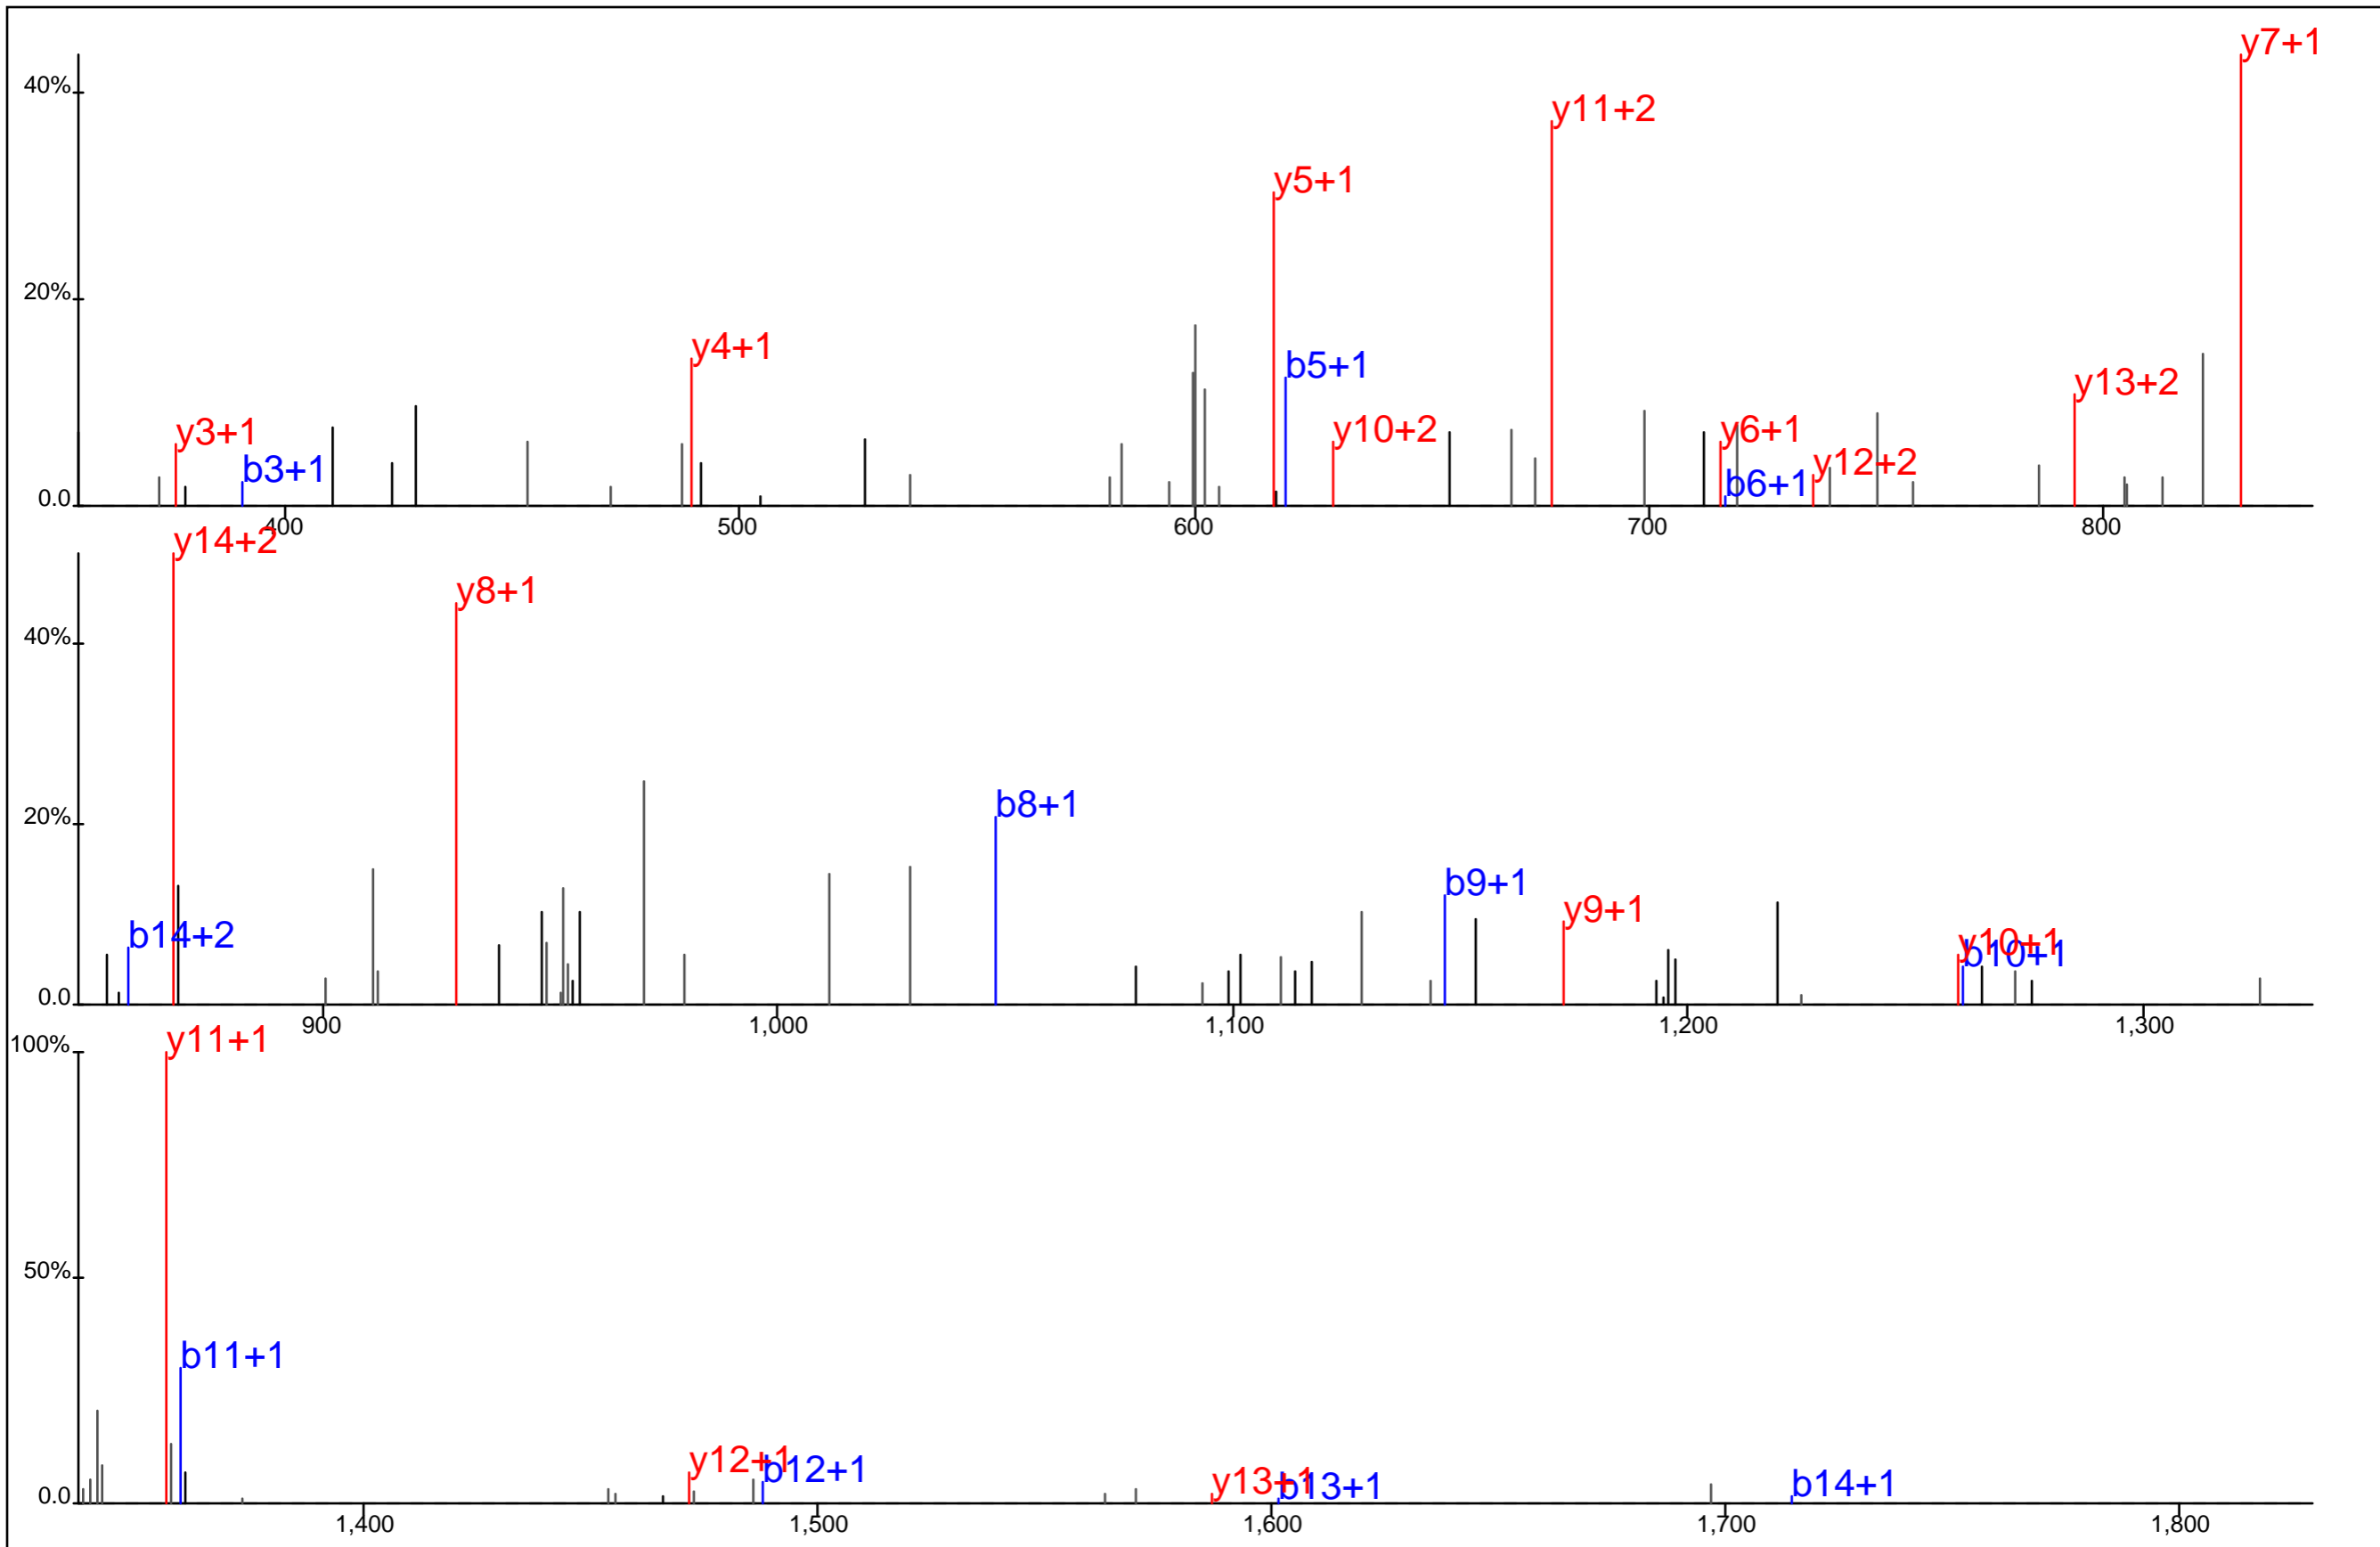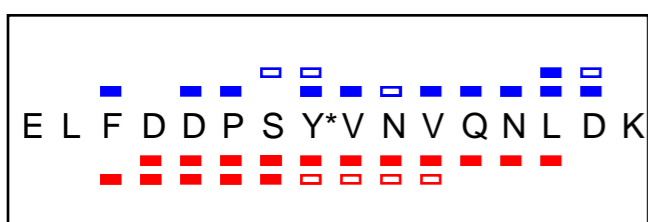

Protein Name: SHC  
 gi Accession: 32261324  
 Precursor Mass: 988.4428+2  
 Delta Mass: 4.999 ppm  
 XCorr: 61.77

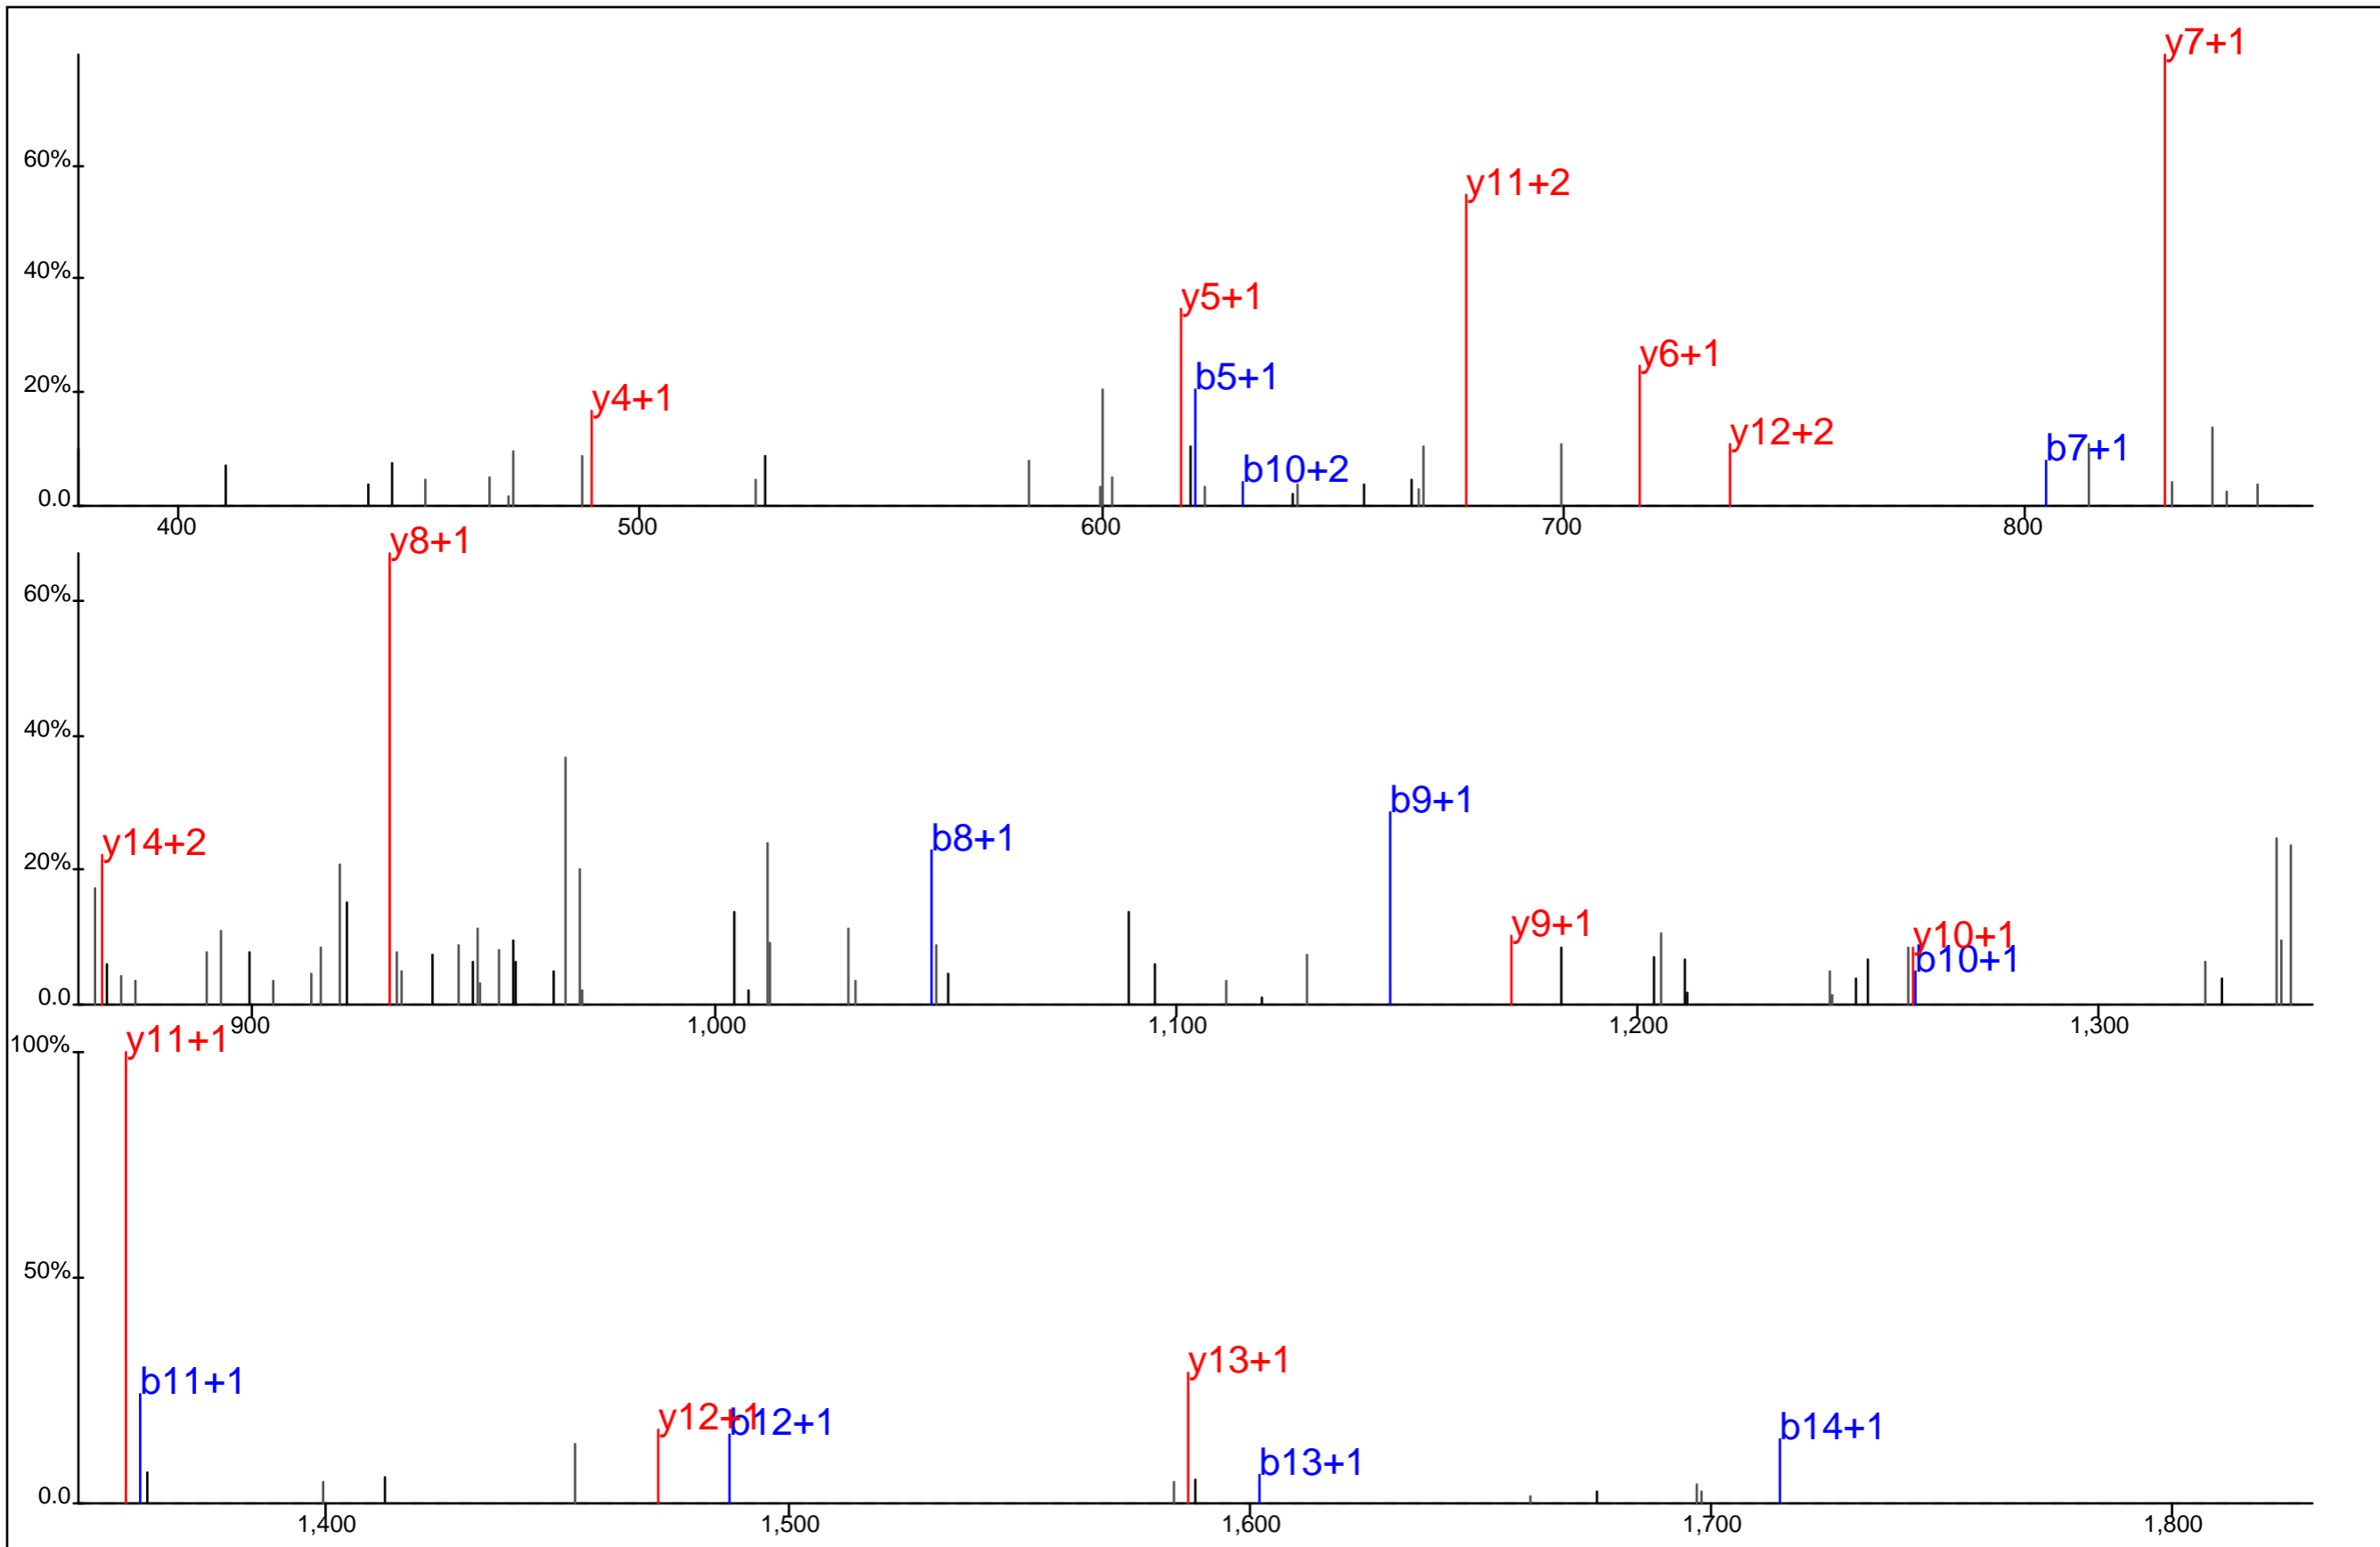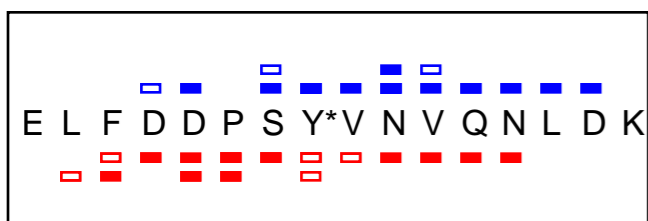

Protein Name: SHC  
 gi Accession: 32261324  
 Precursor Mass: 988.4425+2  
 Delta Mass: 4.691 ppm  
 XCorr: 77.67

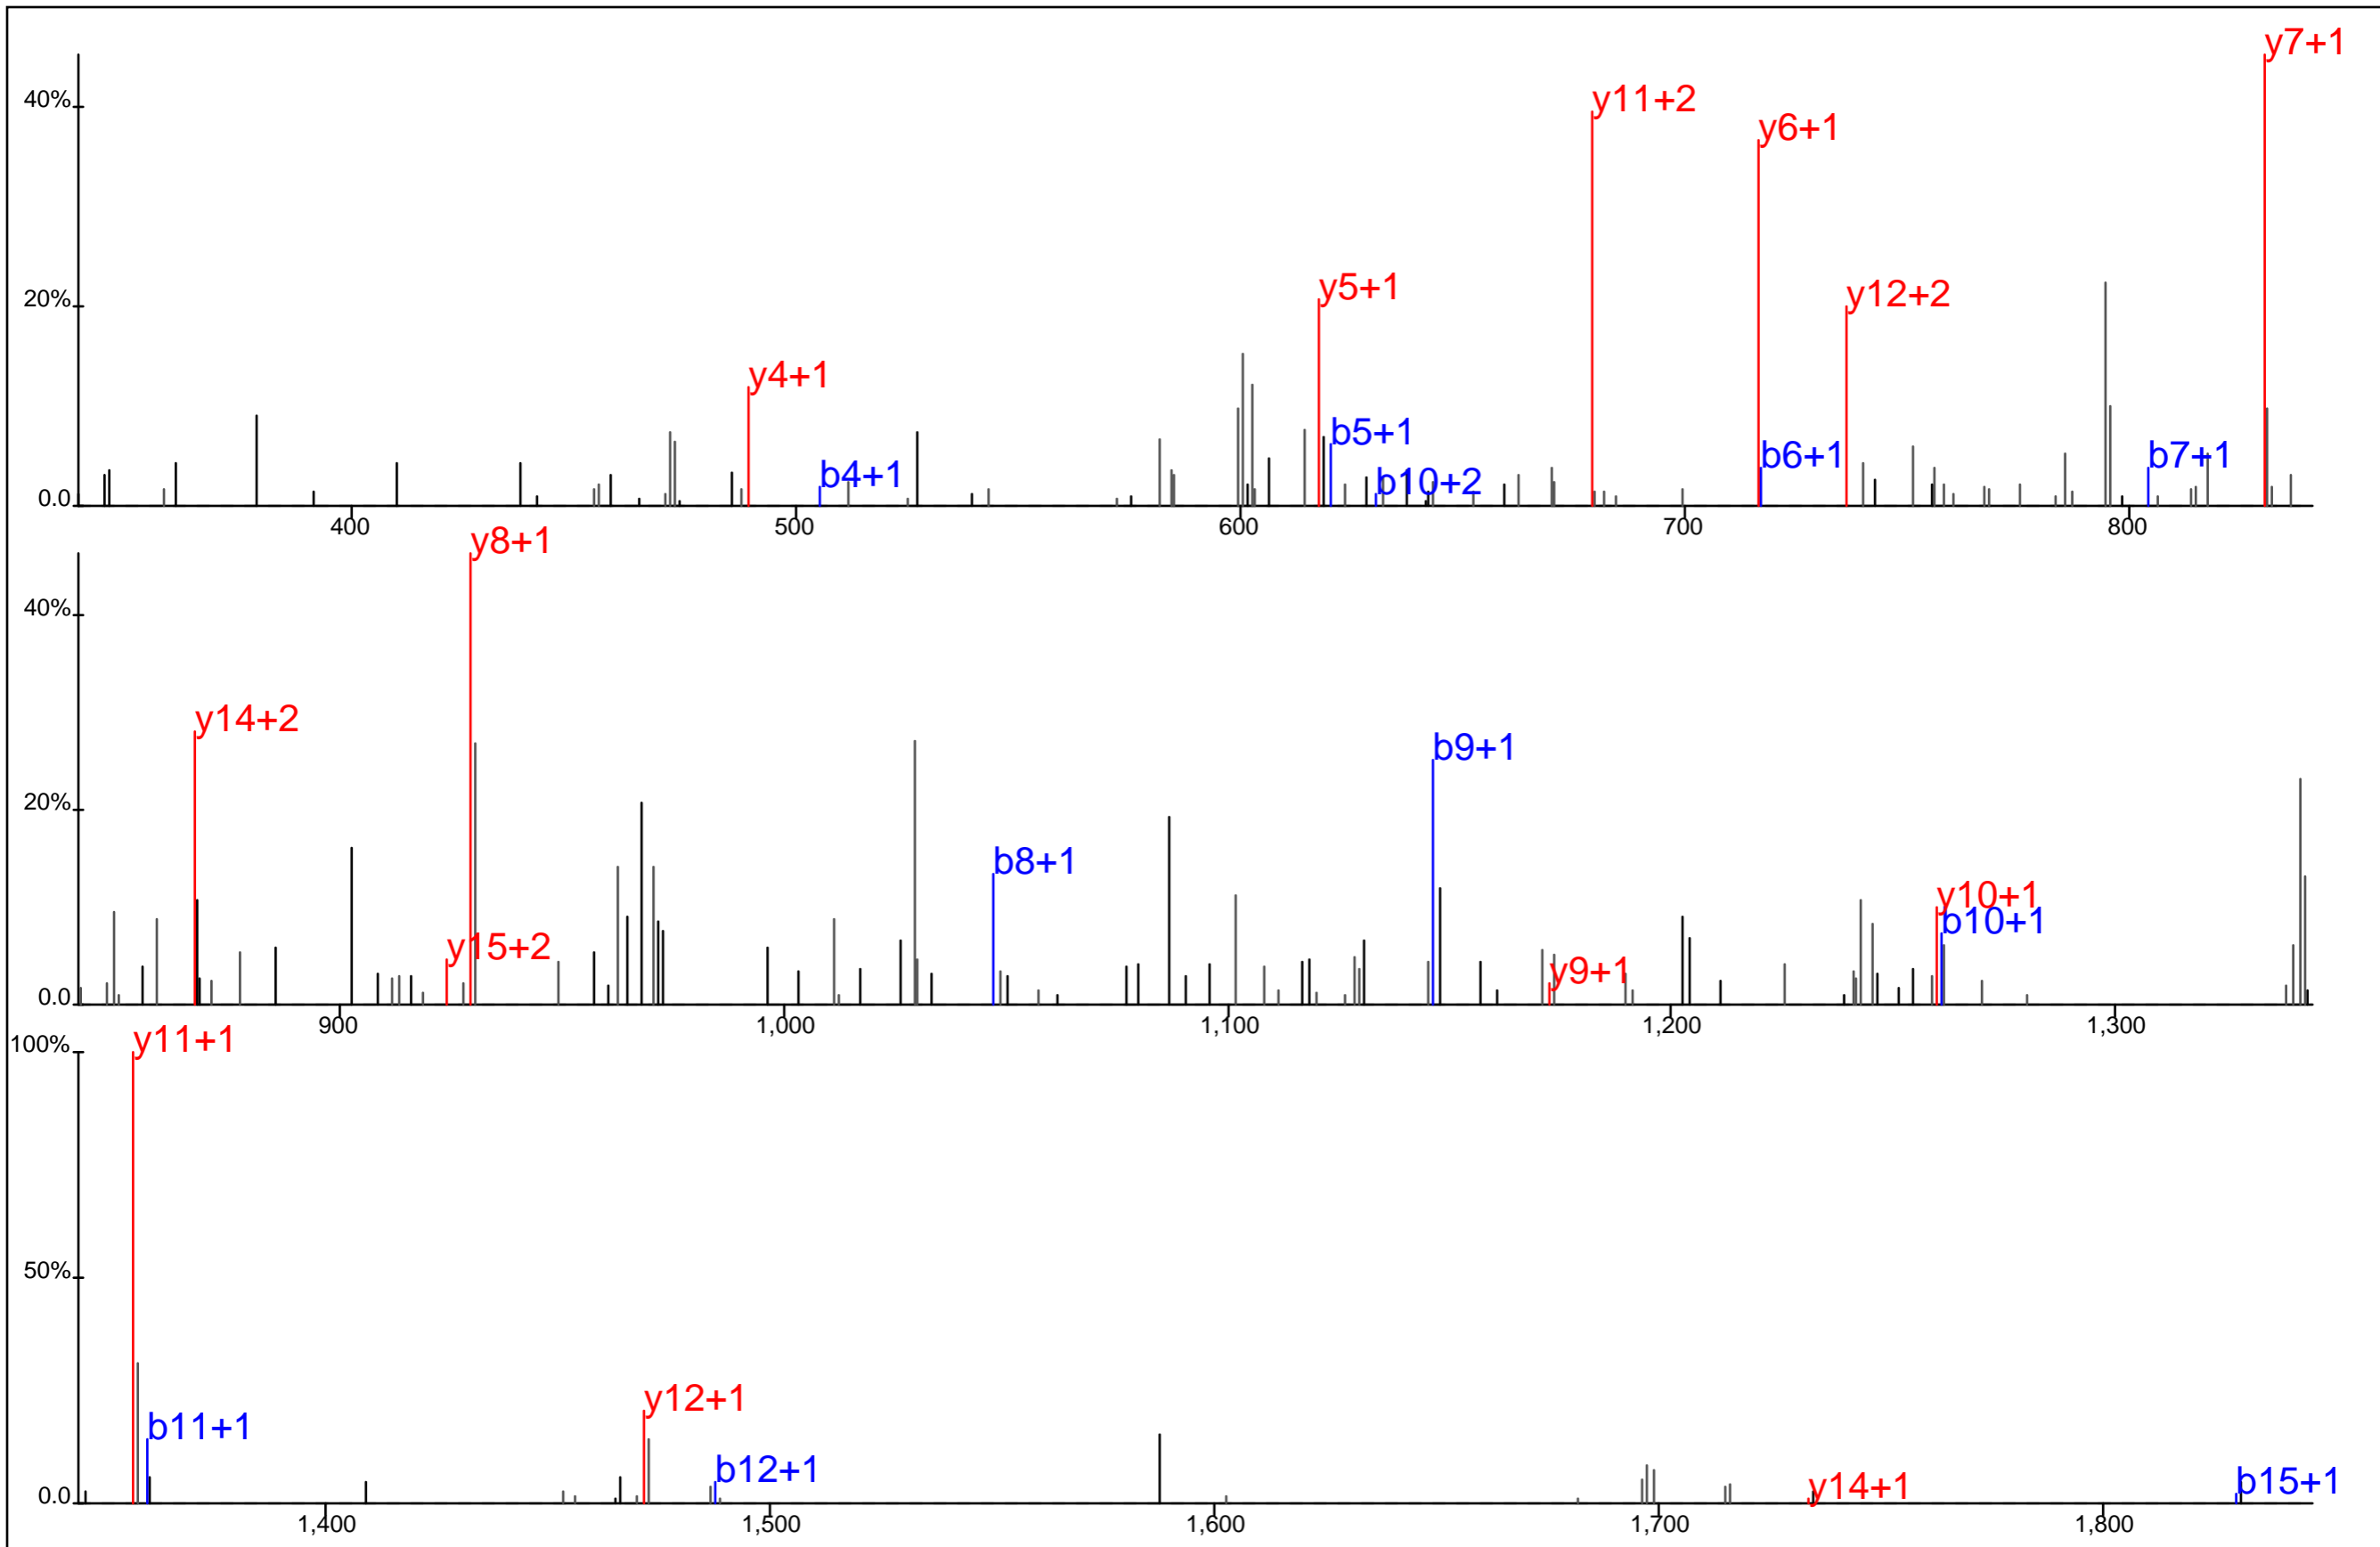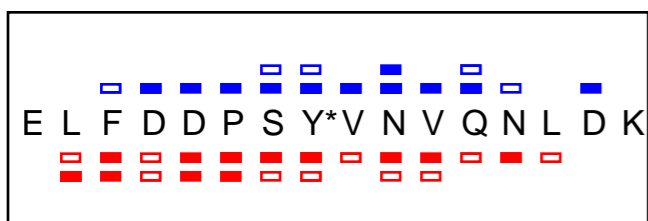

Protein Name: SHC  
 gi Accession: 32261324  
 Precursor Mass: 988.4390+2  
 Delta Mass: 1.173 ppm  
 XCorr: 43.67

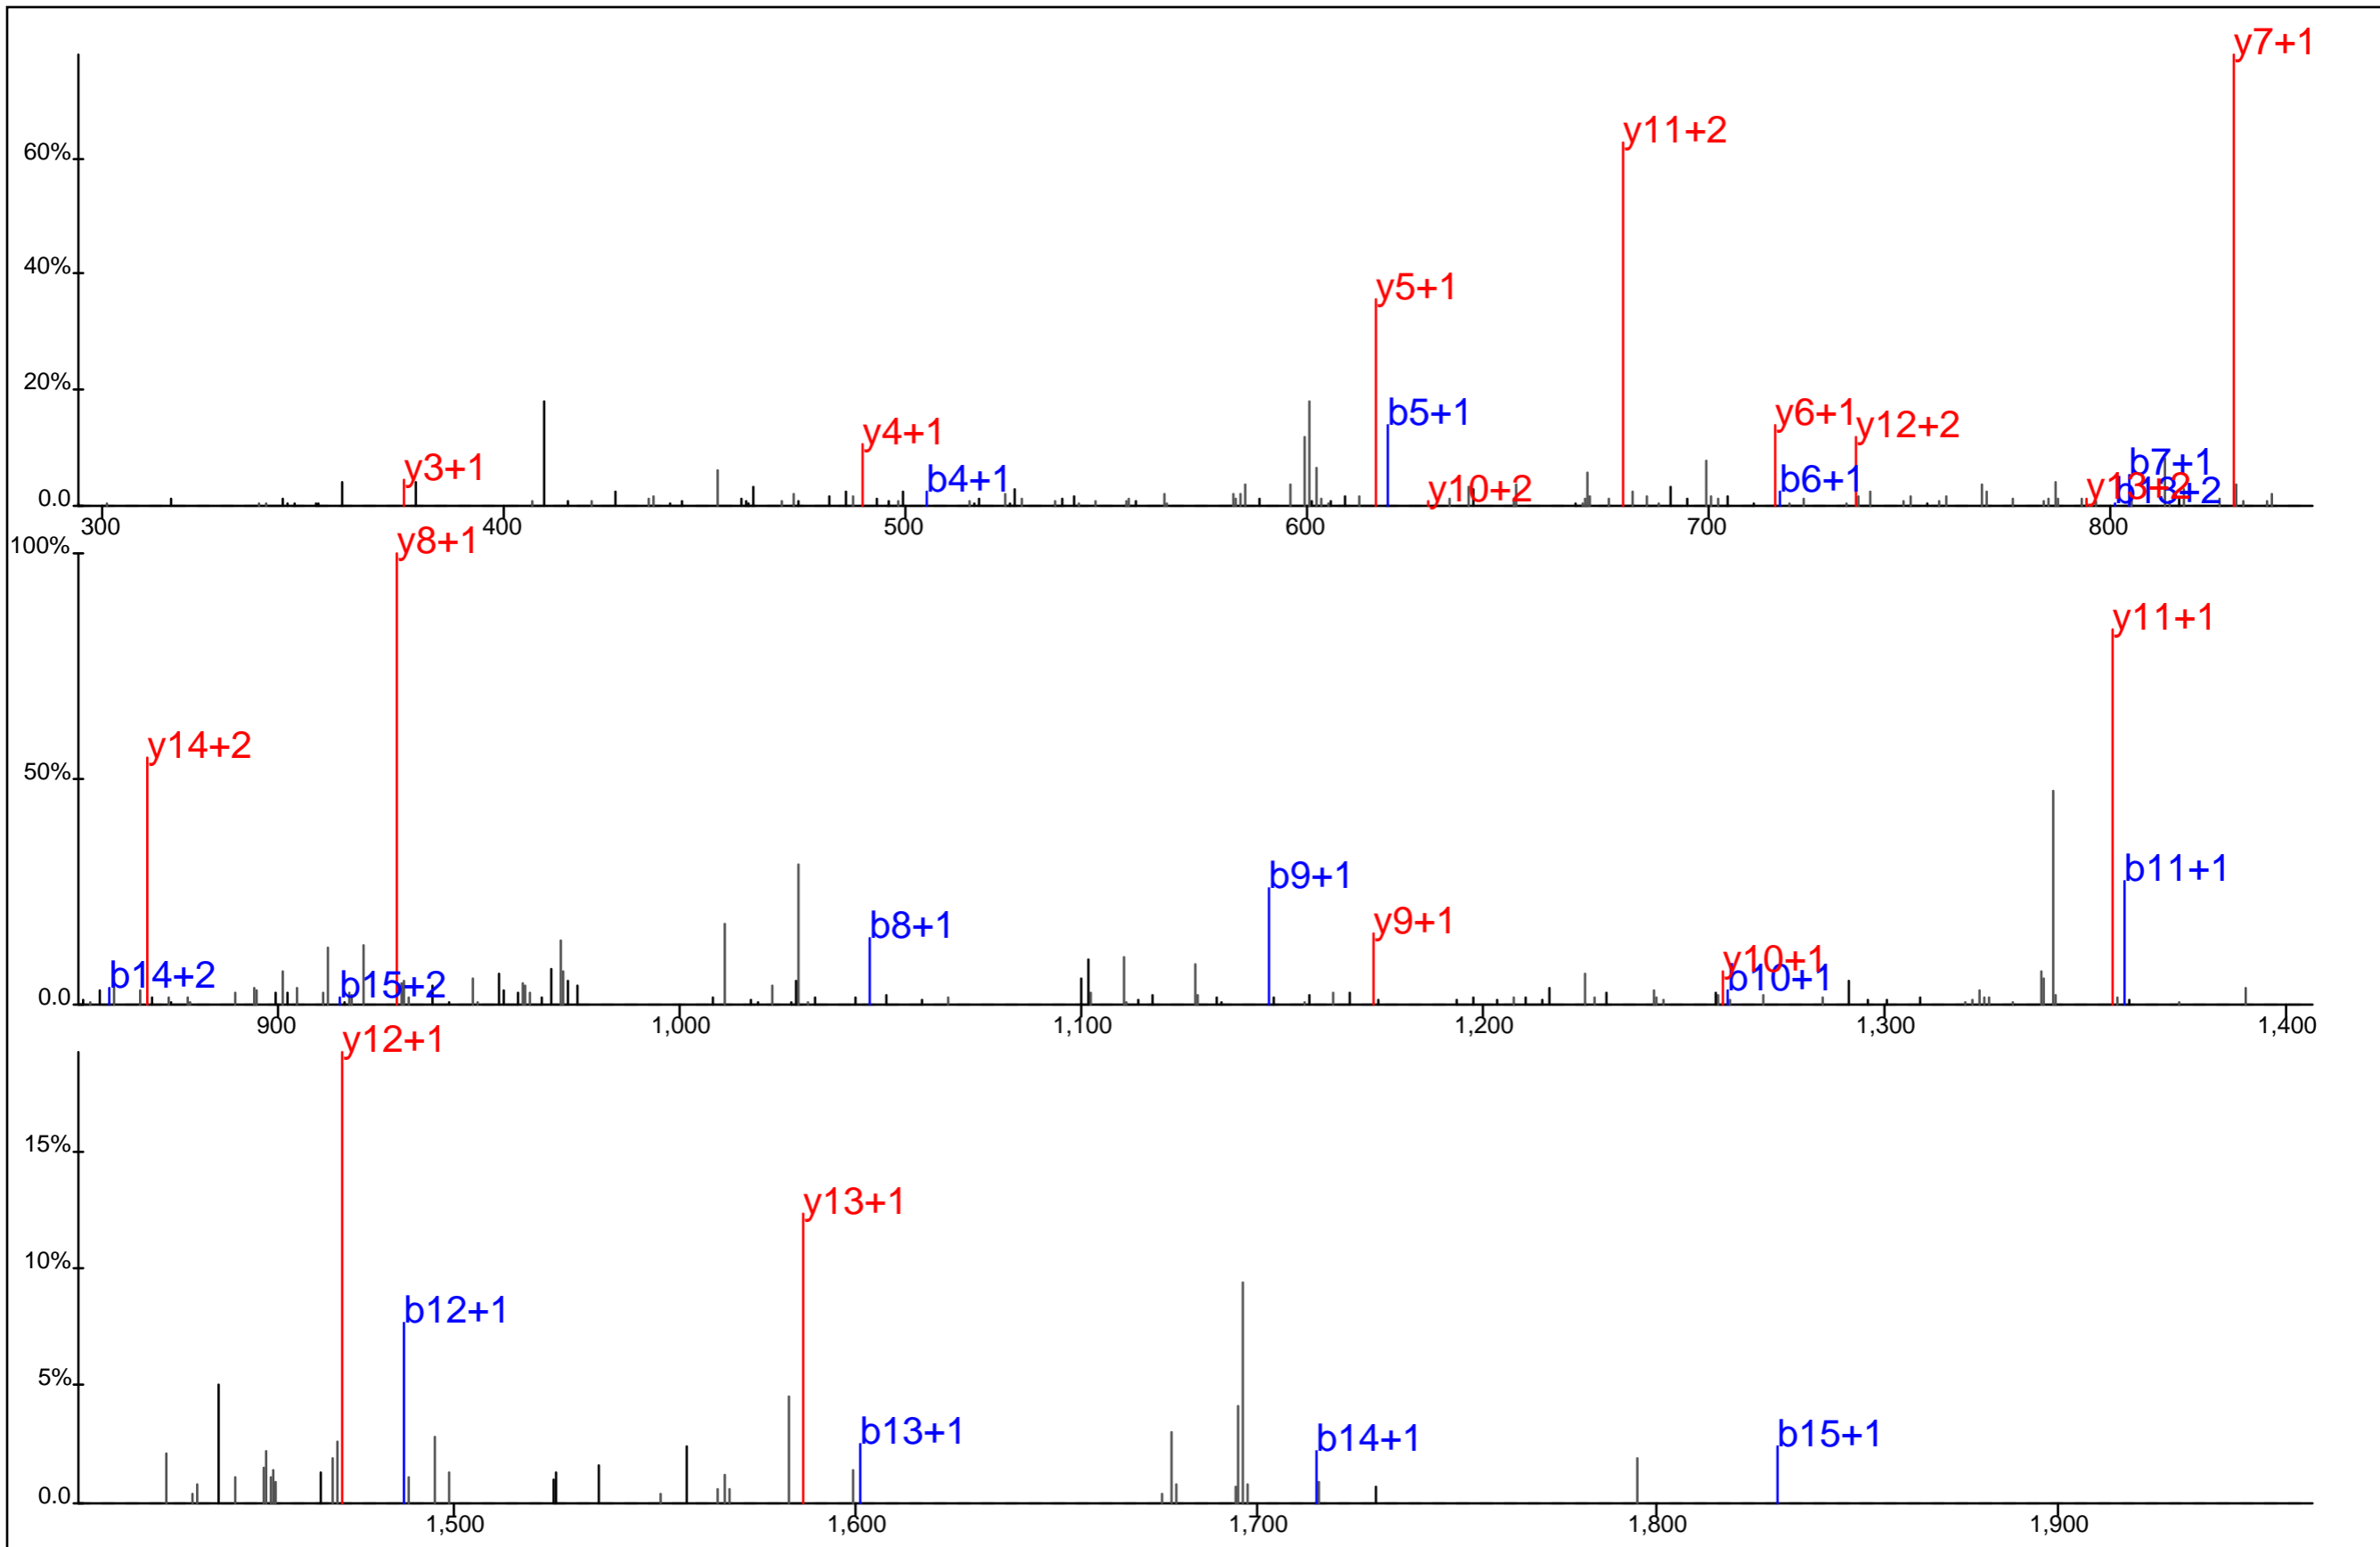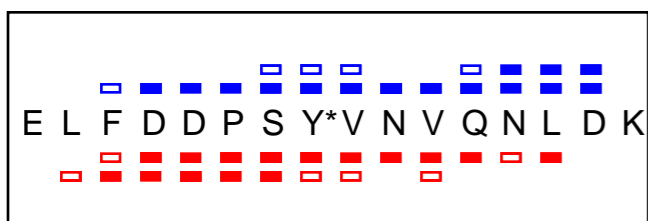

Protein Name: SHC  
 gi Accession: 32261324  
 Precursor Mass: 988.4393+2  
 Delta Mass: 1.416 ppm  
 XCorr: 83.38



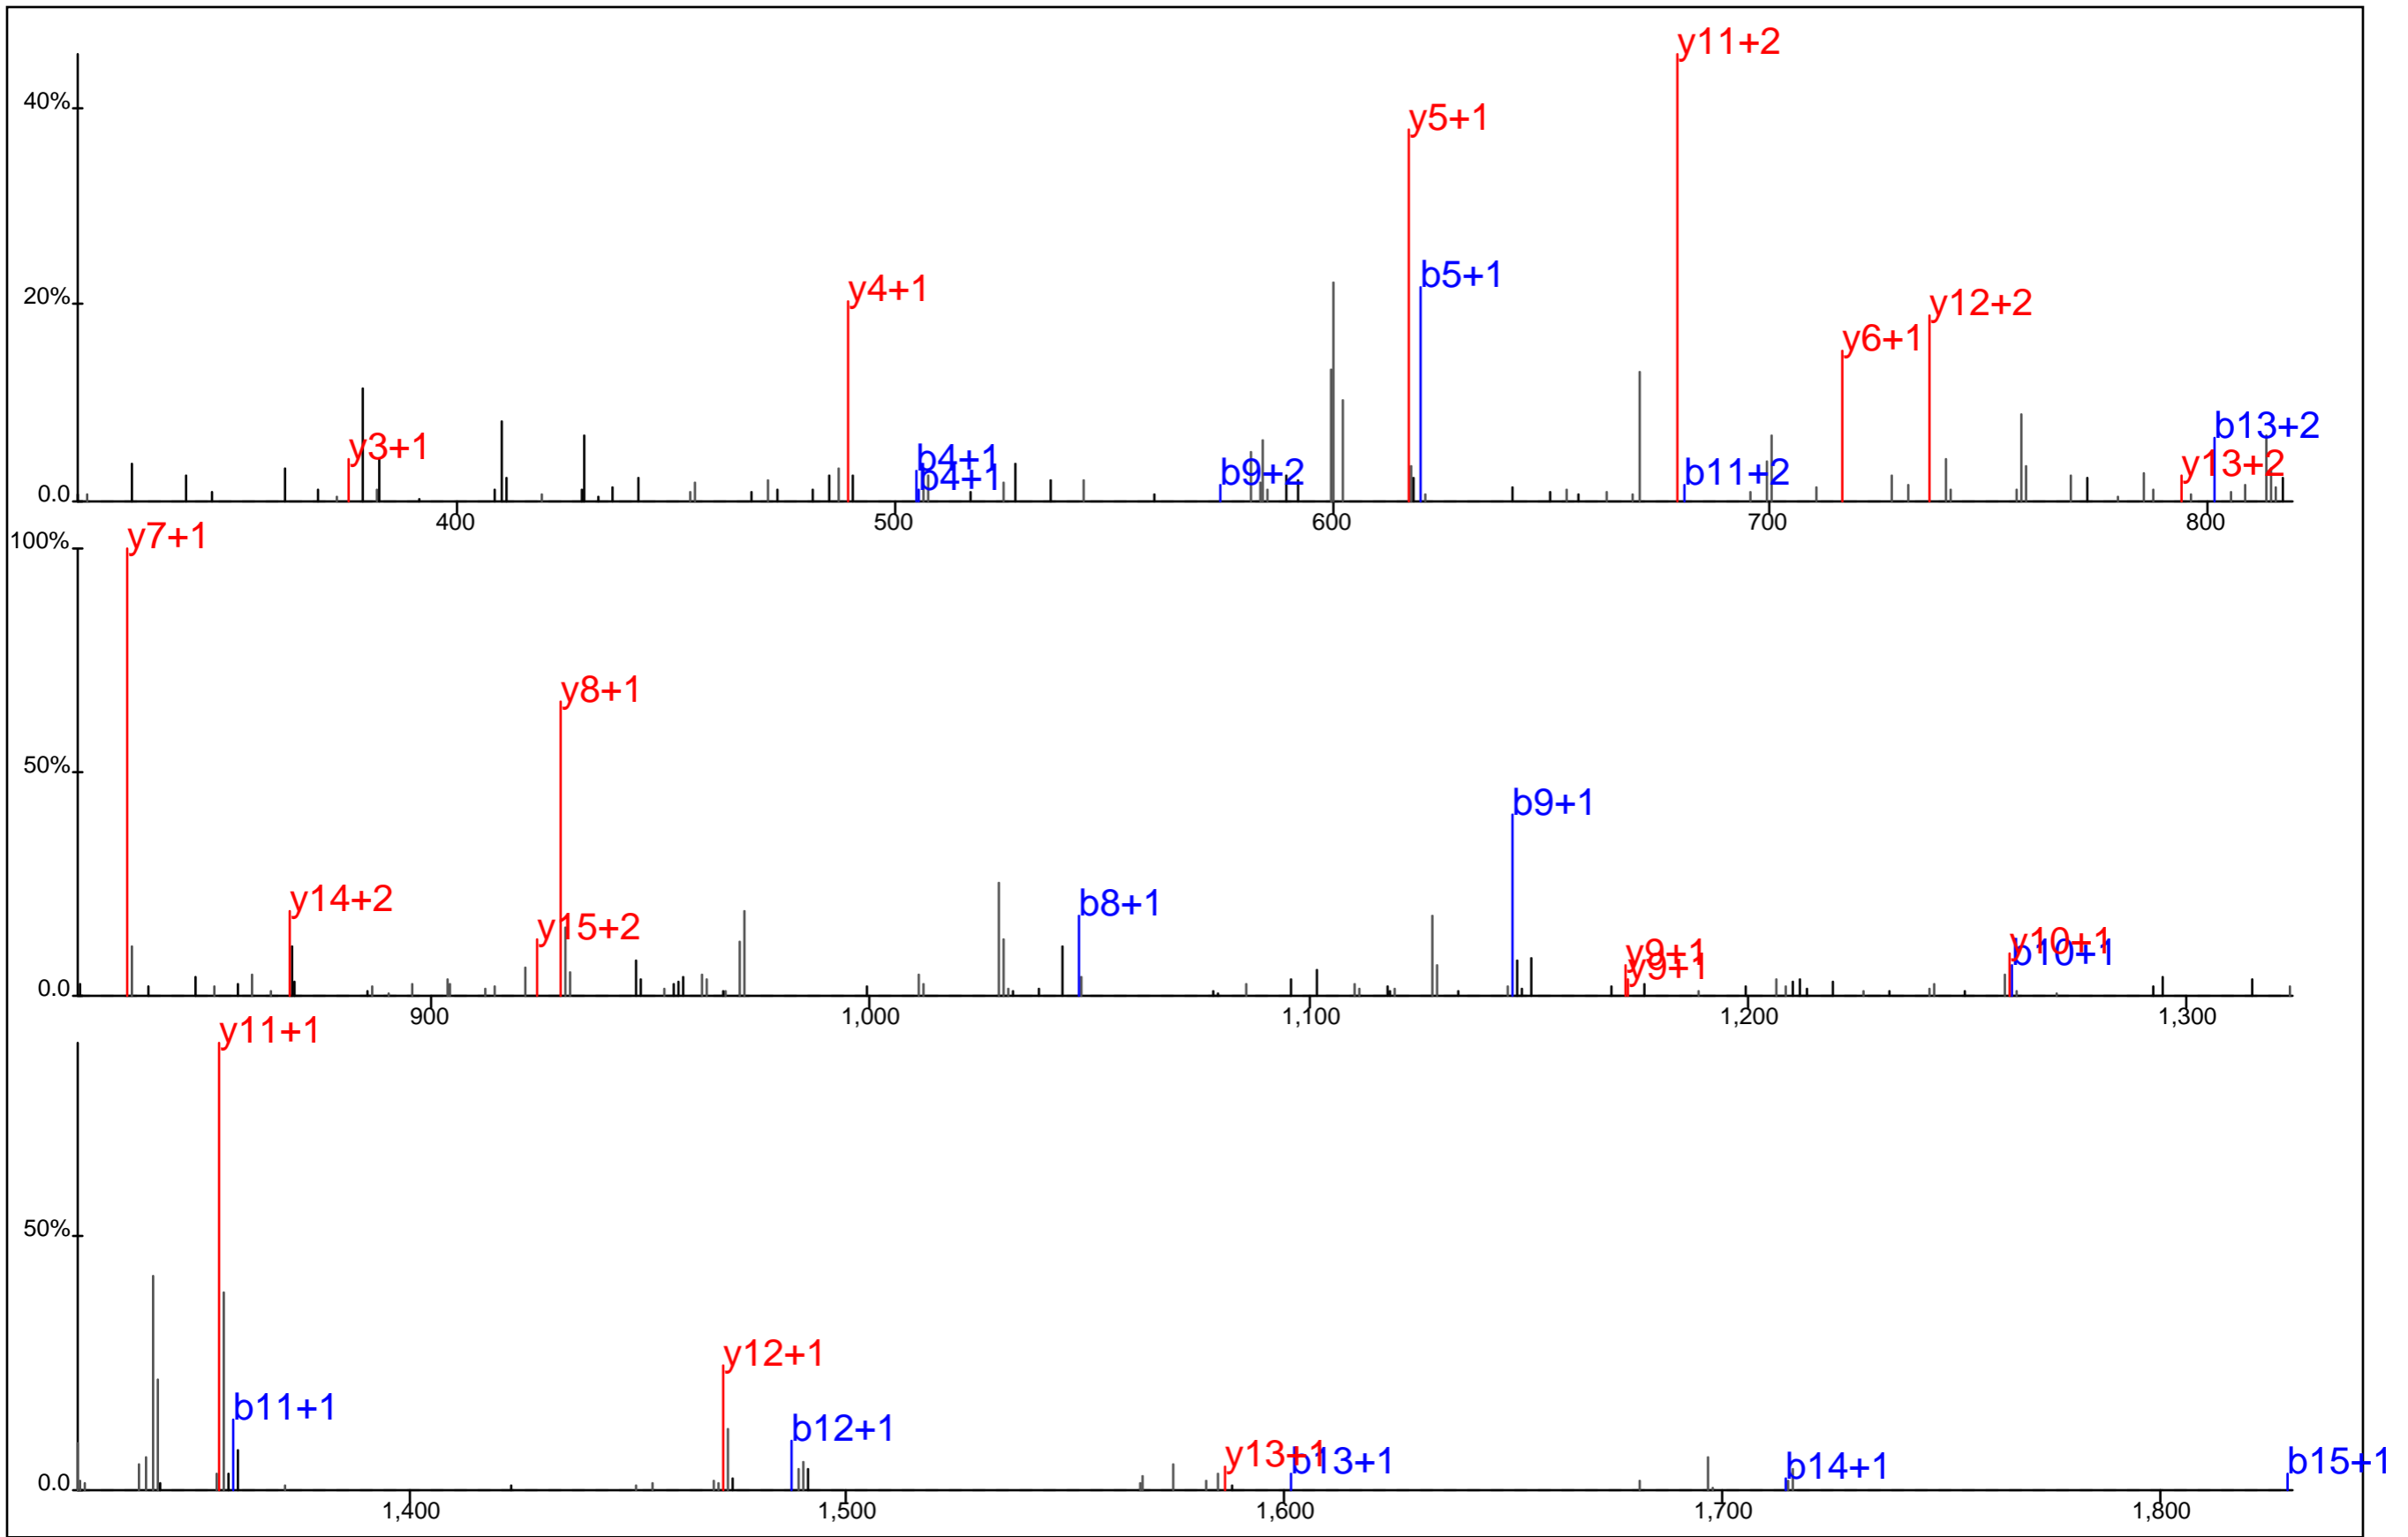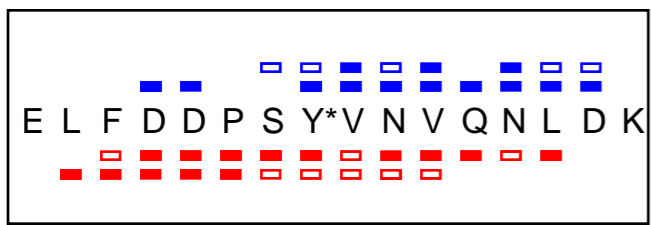

Protein Name: SHC  
 gi Accession: 32261324  
 Precursor Mass: 988.4409+2  
 Delta Mass: 3.086 ppm  
 XCorr: 67.32

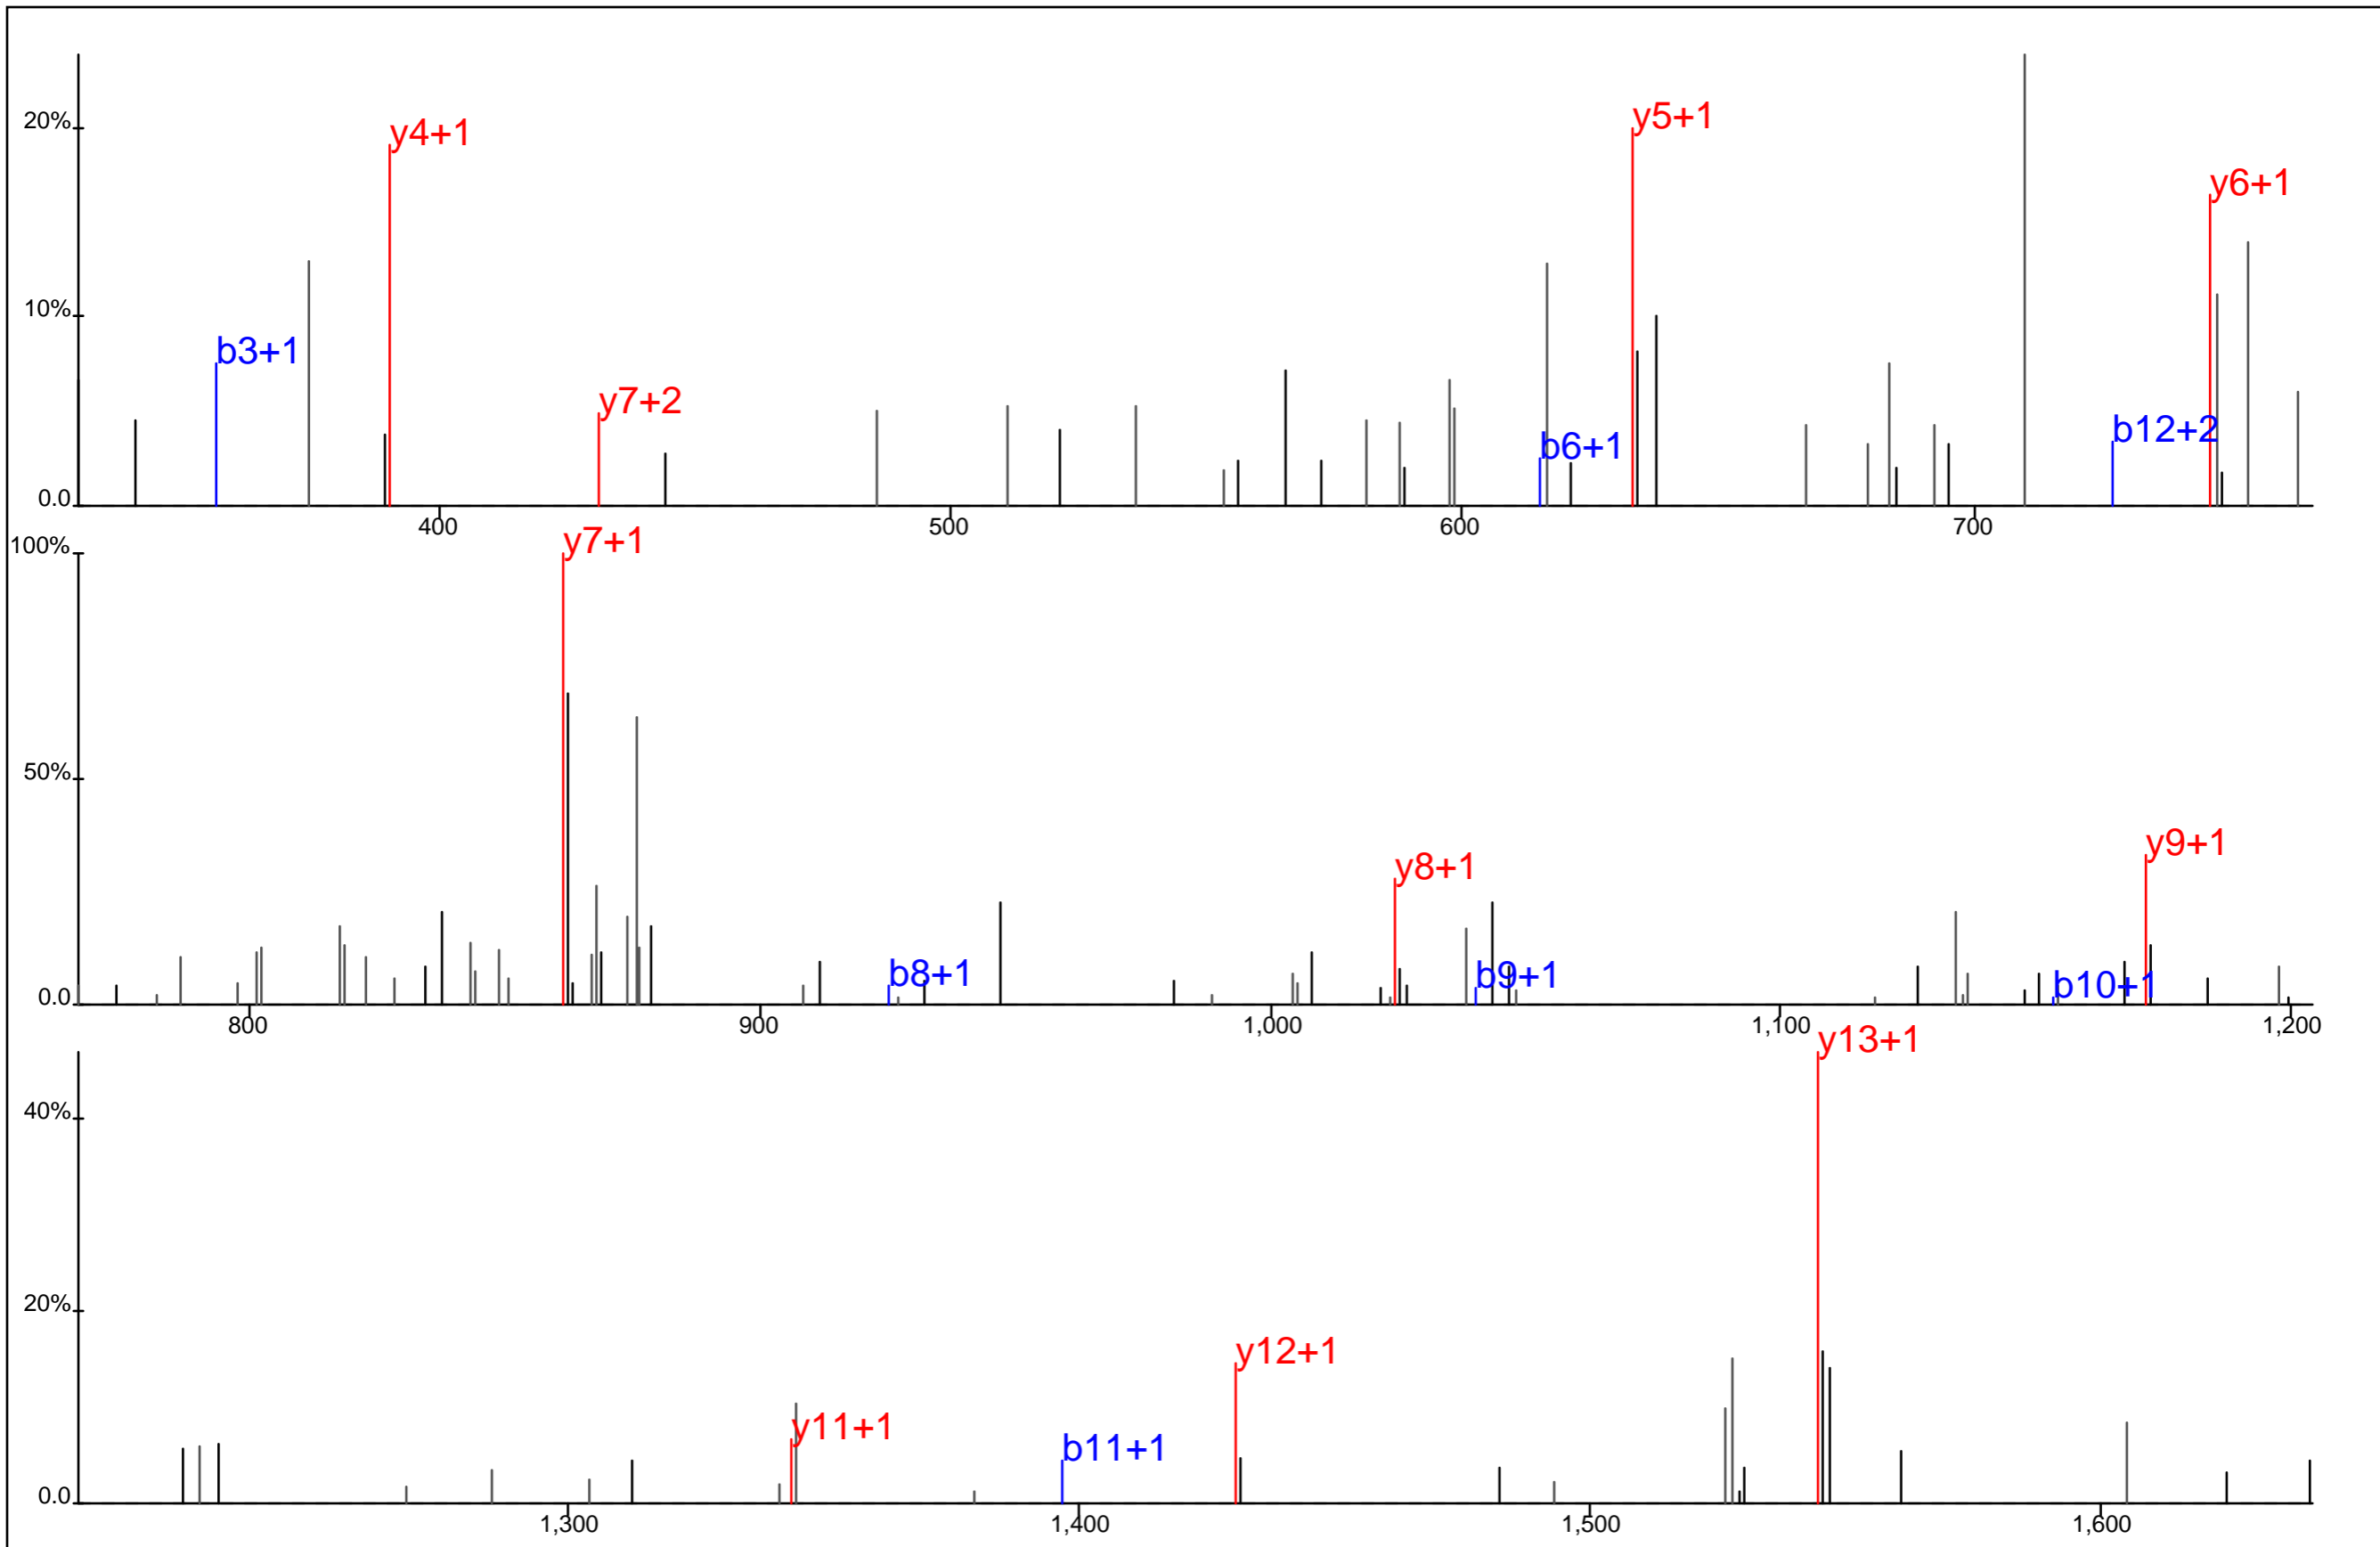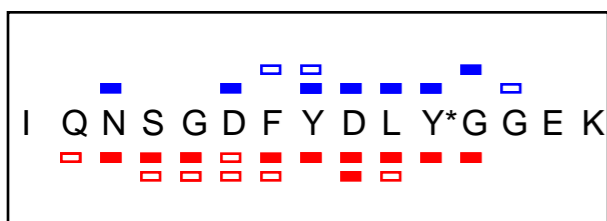

Protein Name: SHP1  
 gi Accession: 18104991  
 Precursor Mass: 893.3760+2  
 Delta Mass: 4.456 ppm  
 XCorr: 42.42



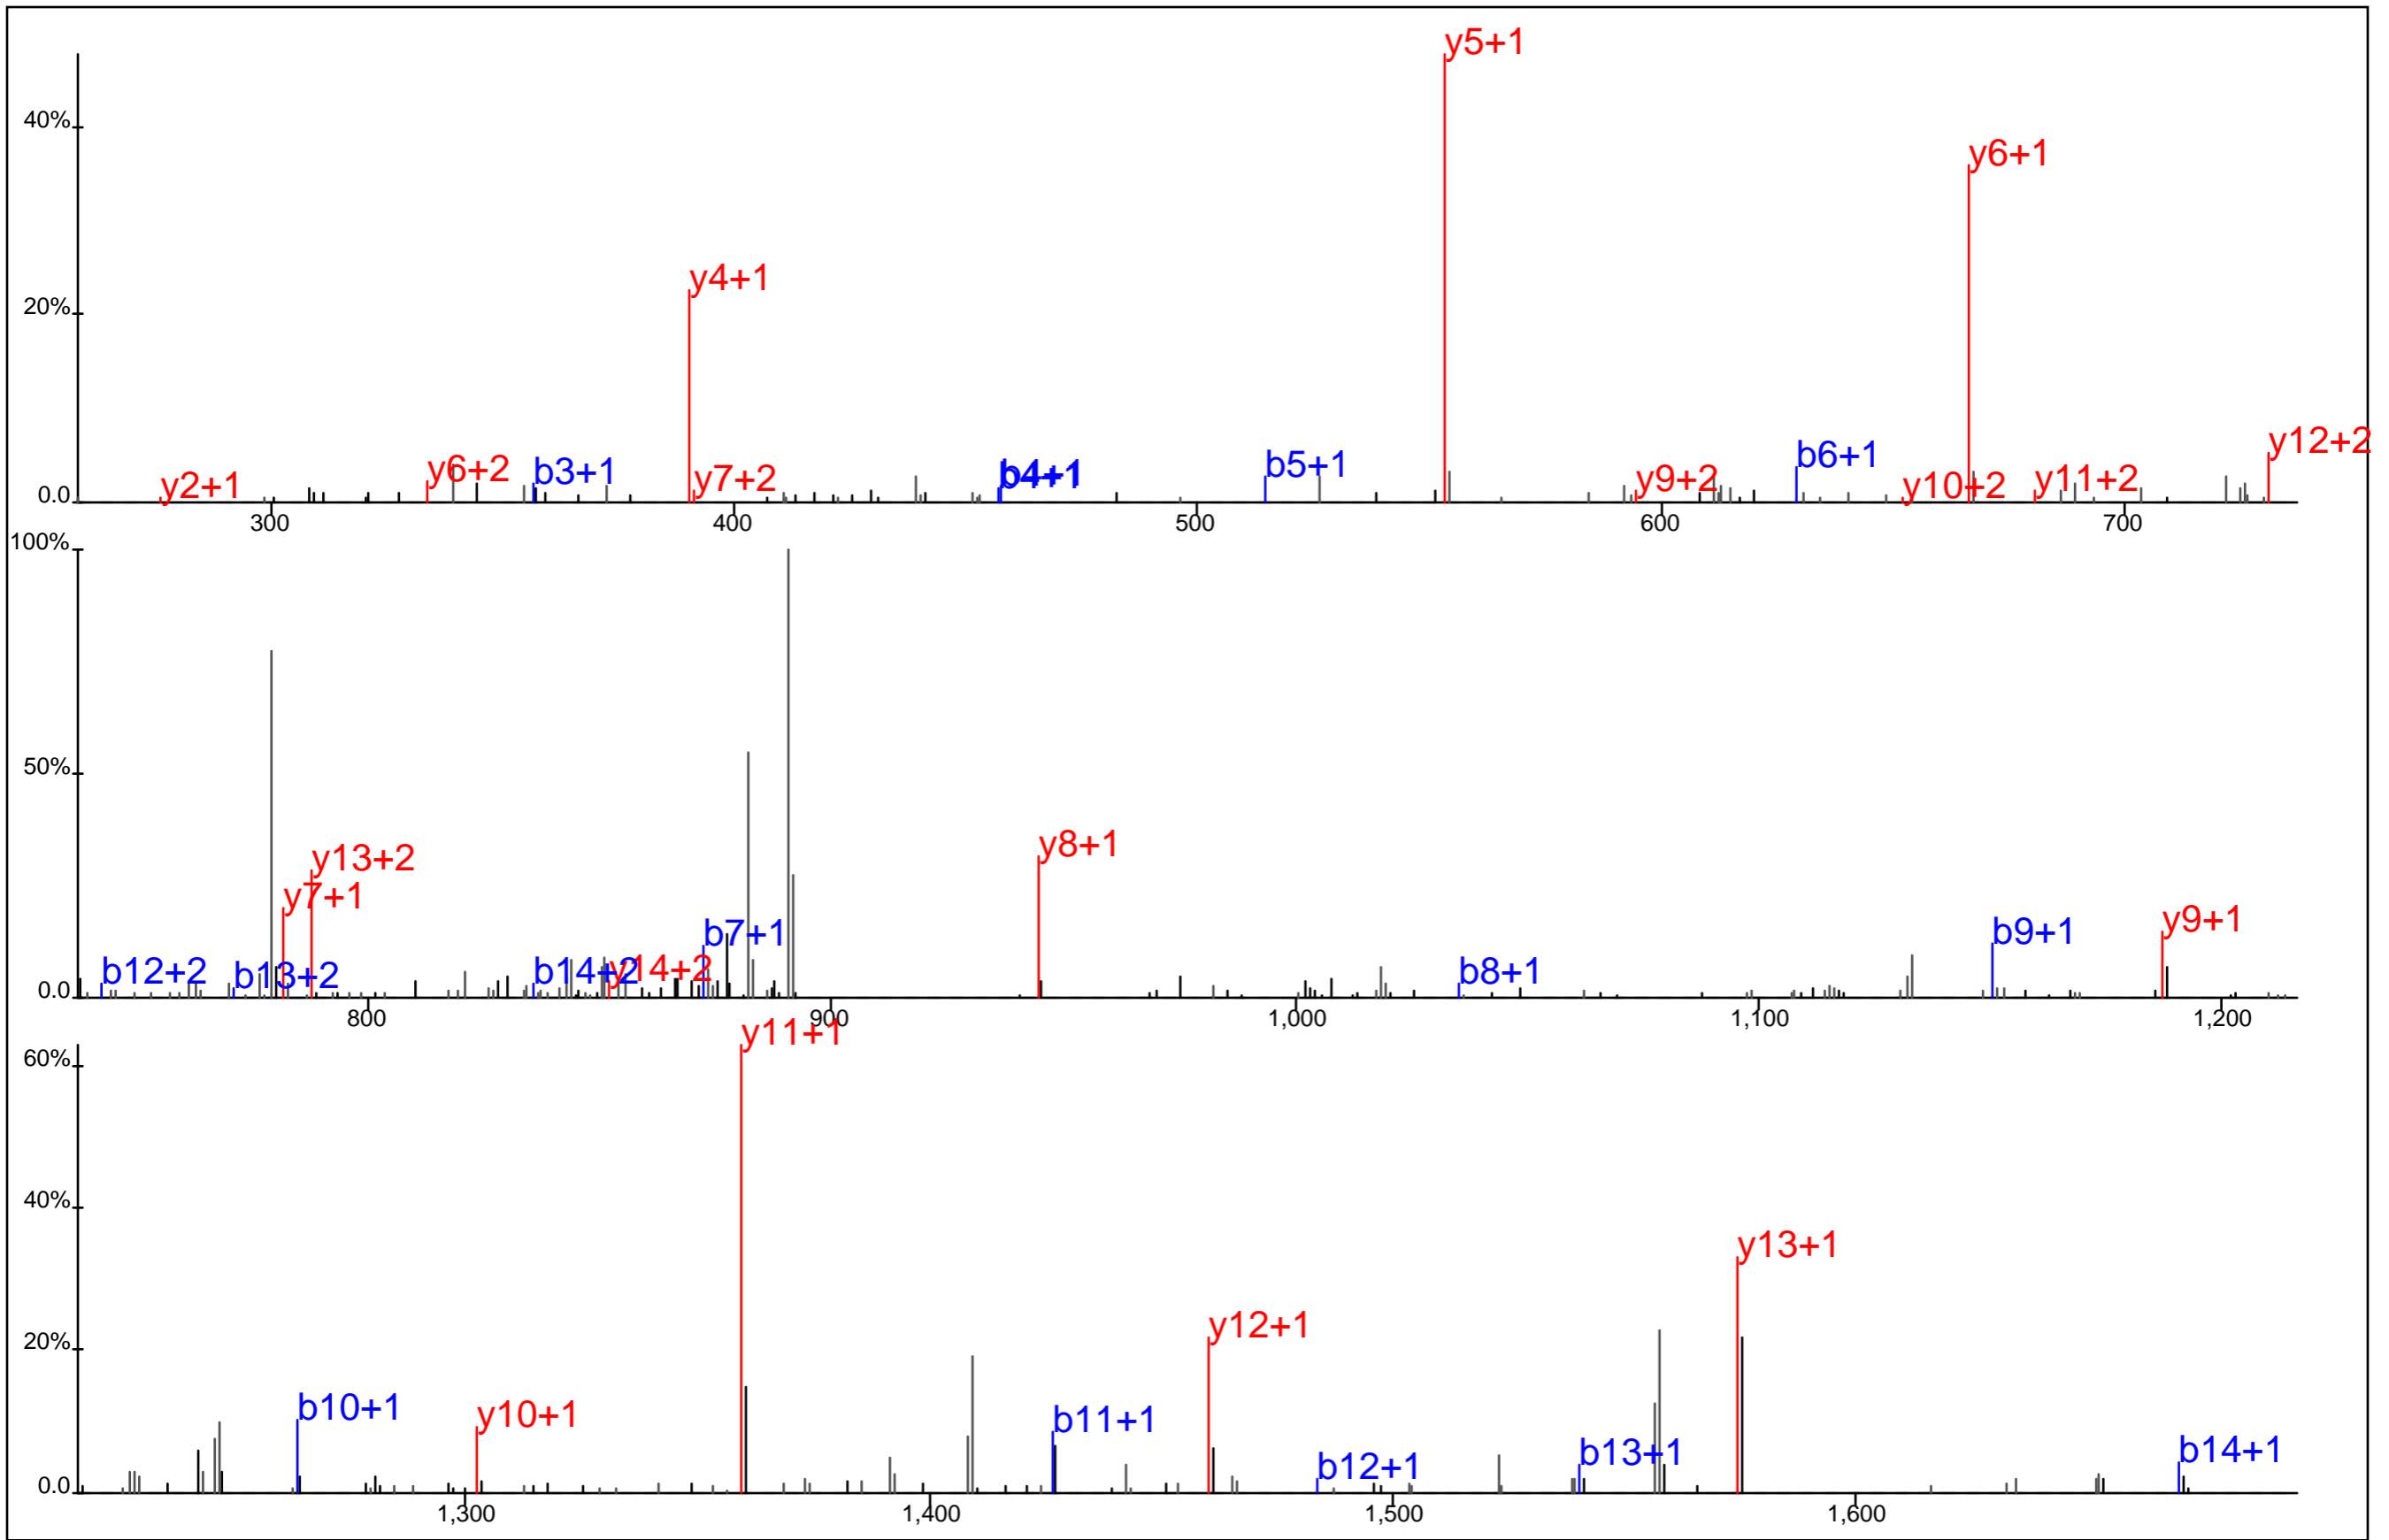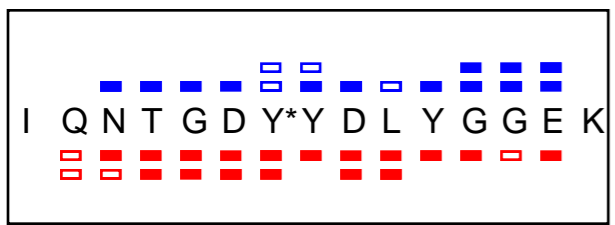

Protein Name: SHP2  
 gi Accession: 33356177  
 Precursor Mass: 908.3773+2  
 Delta Mass: 0.043 ppm  
 XCorr: 83.97

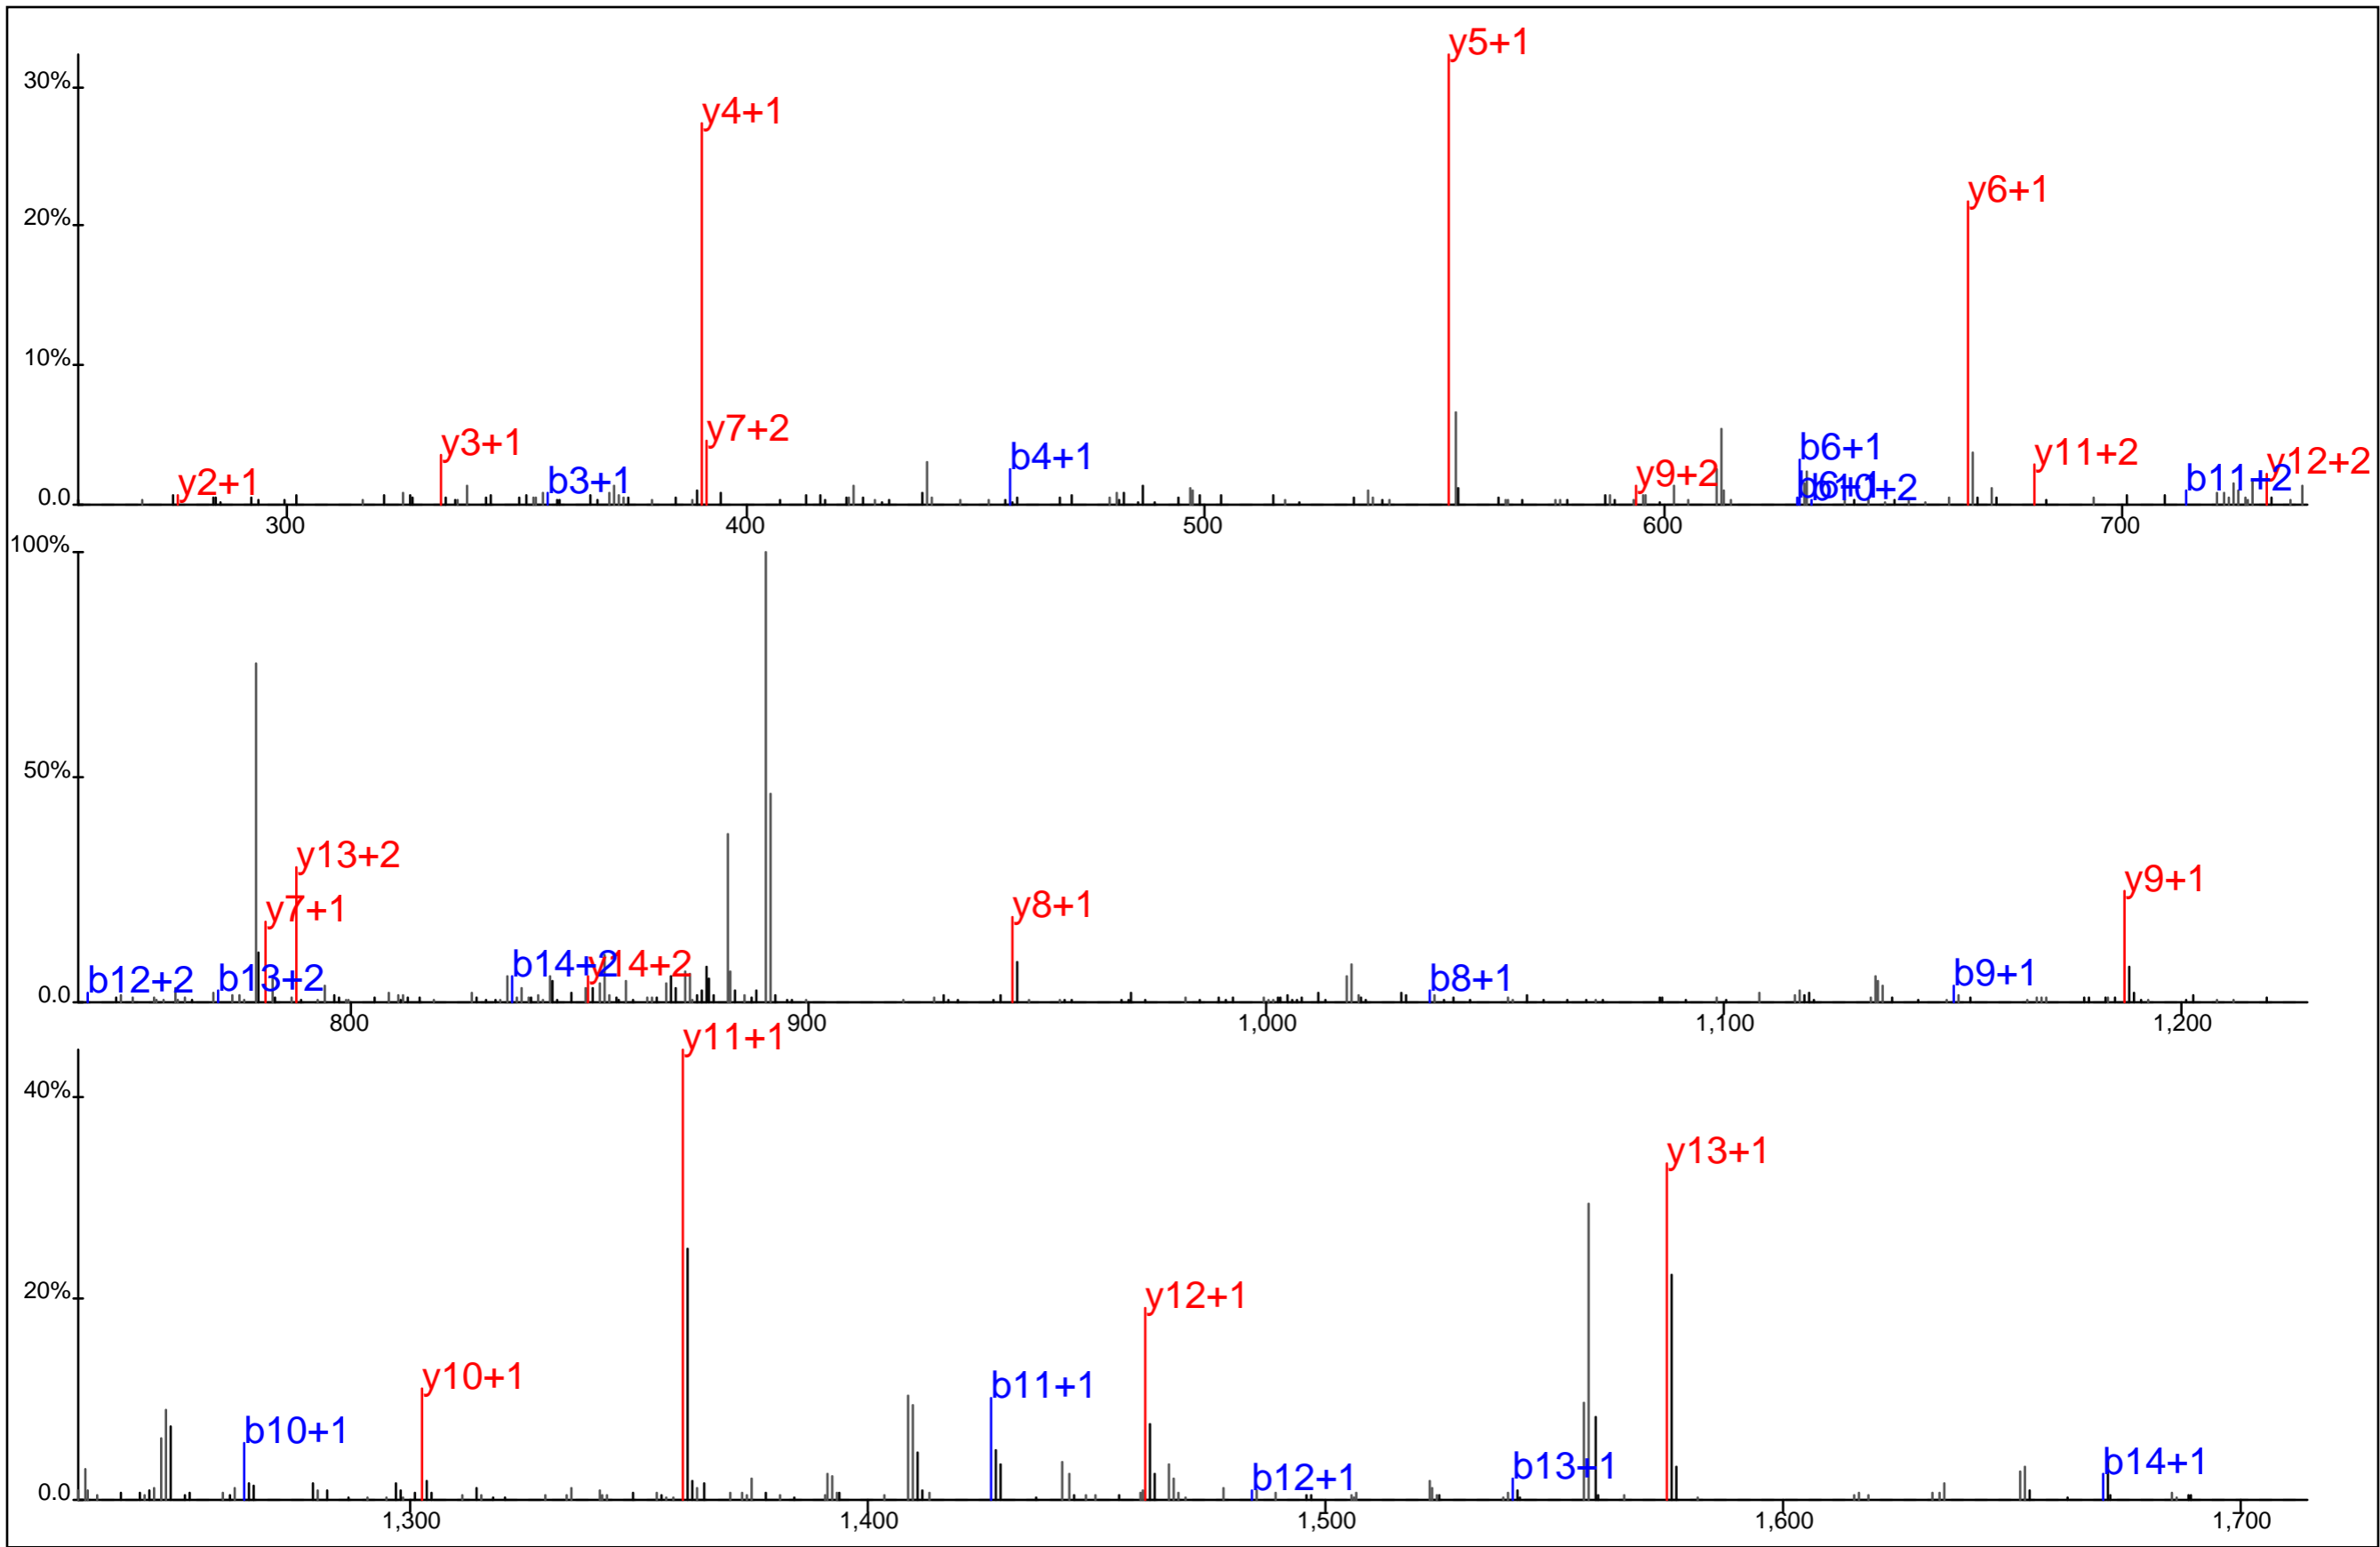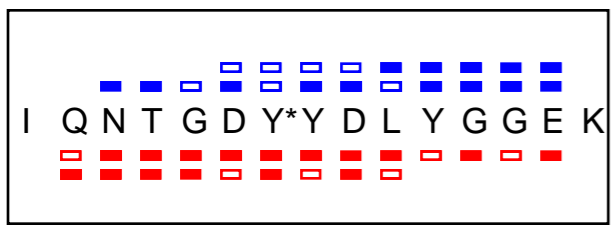

Protein Name: SHP2  
 gi Accession: 33356177  
 Precursor Mass: 908.3777+2  
 Delta Mass: 0.445 ppm  
 XCorr: 86.44

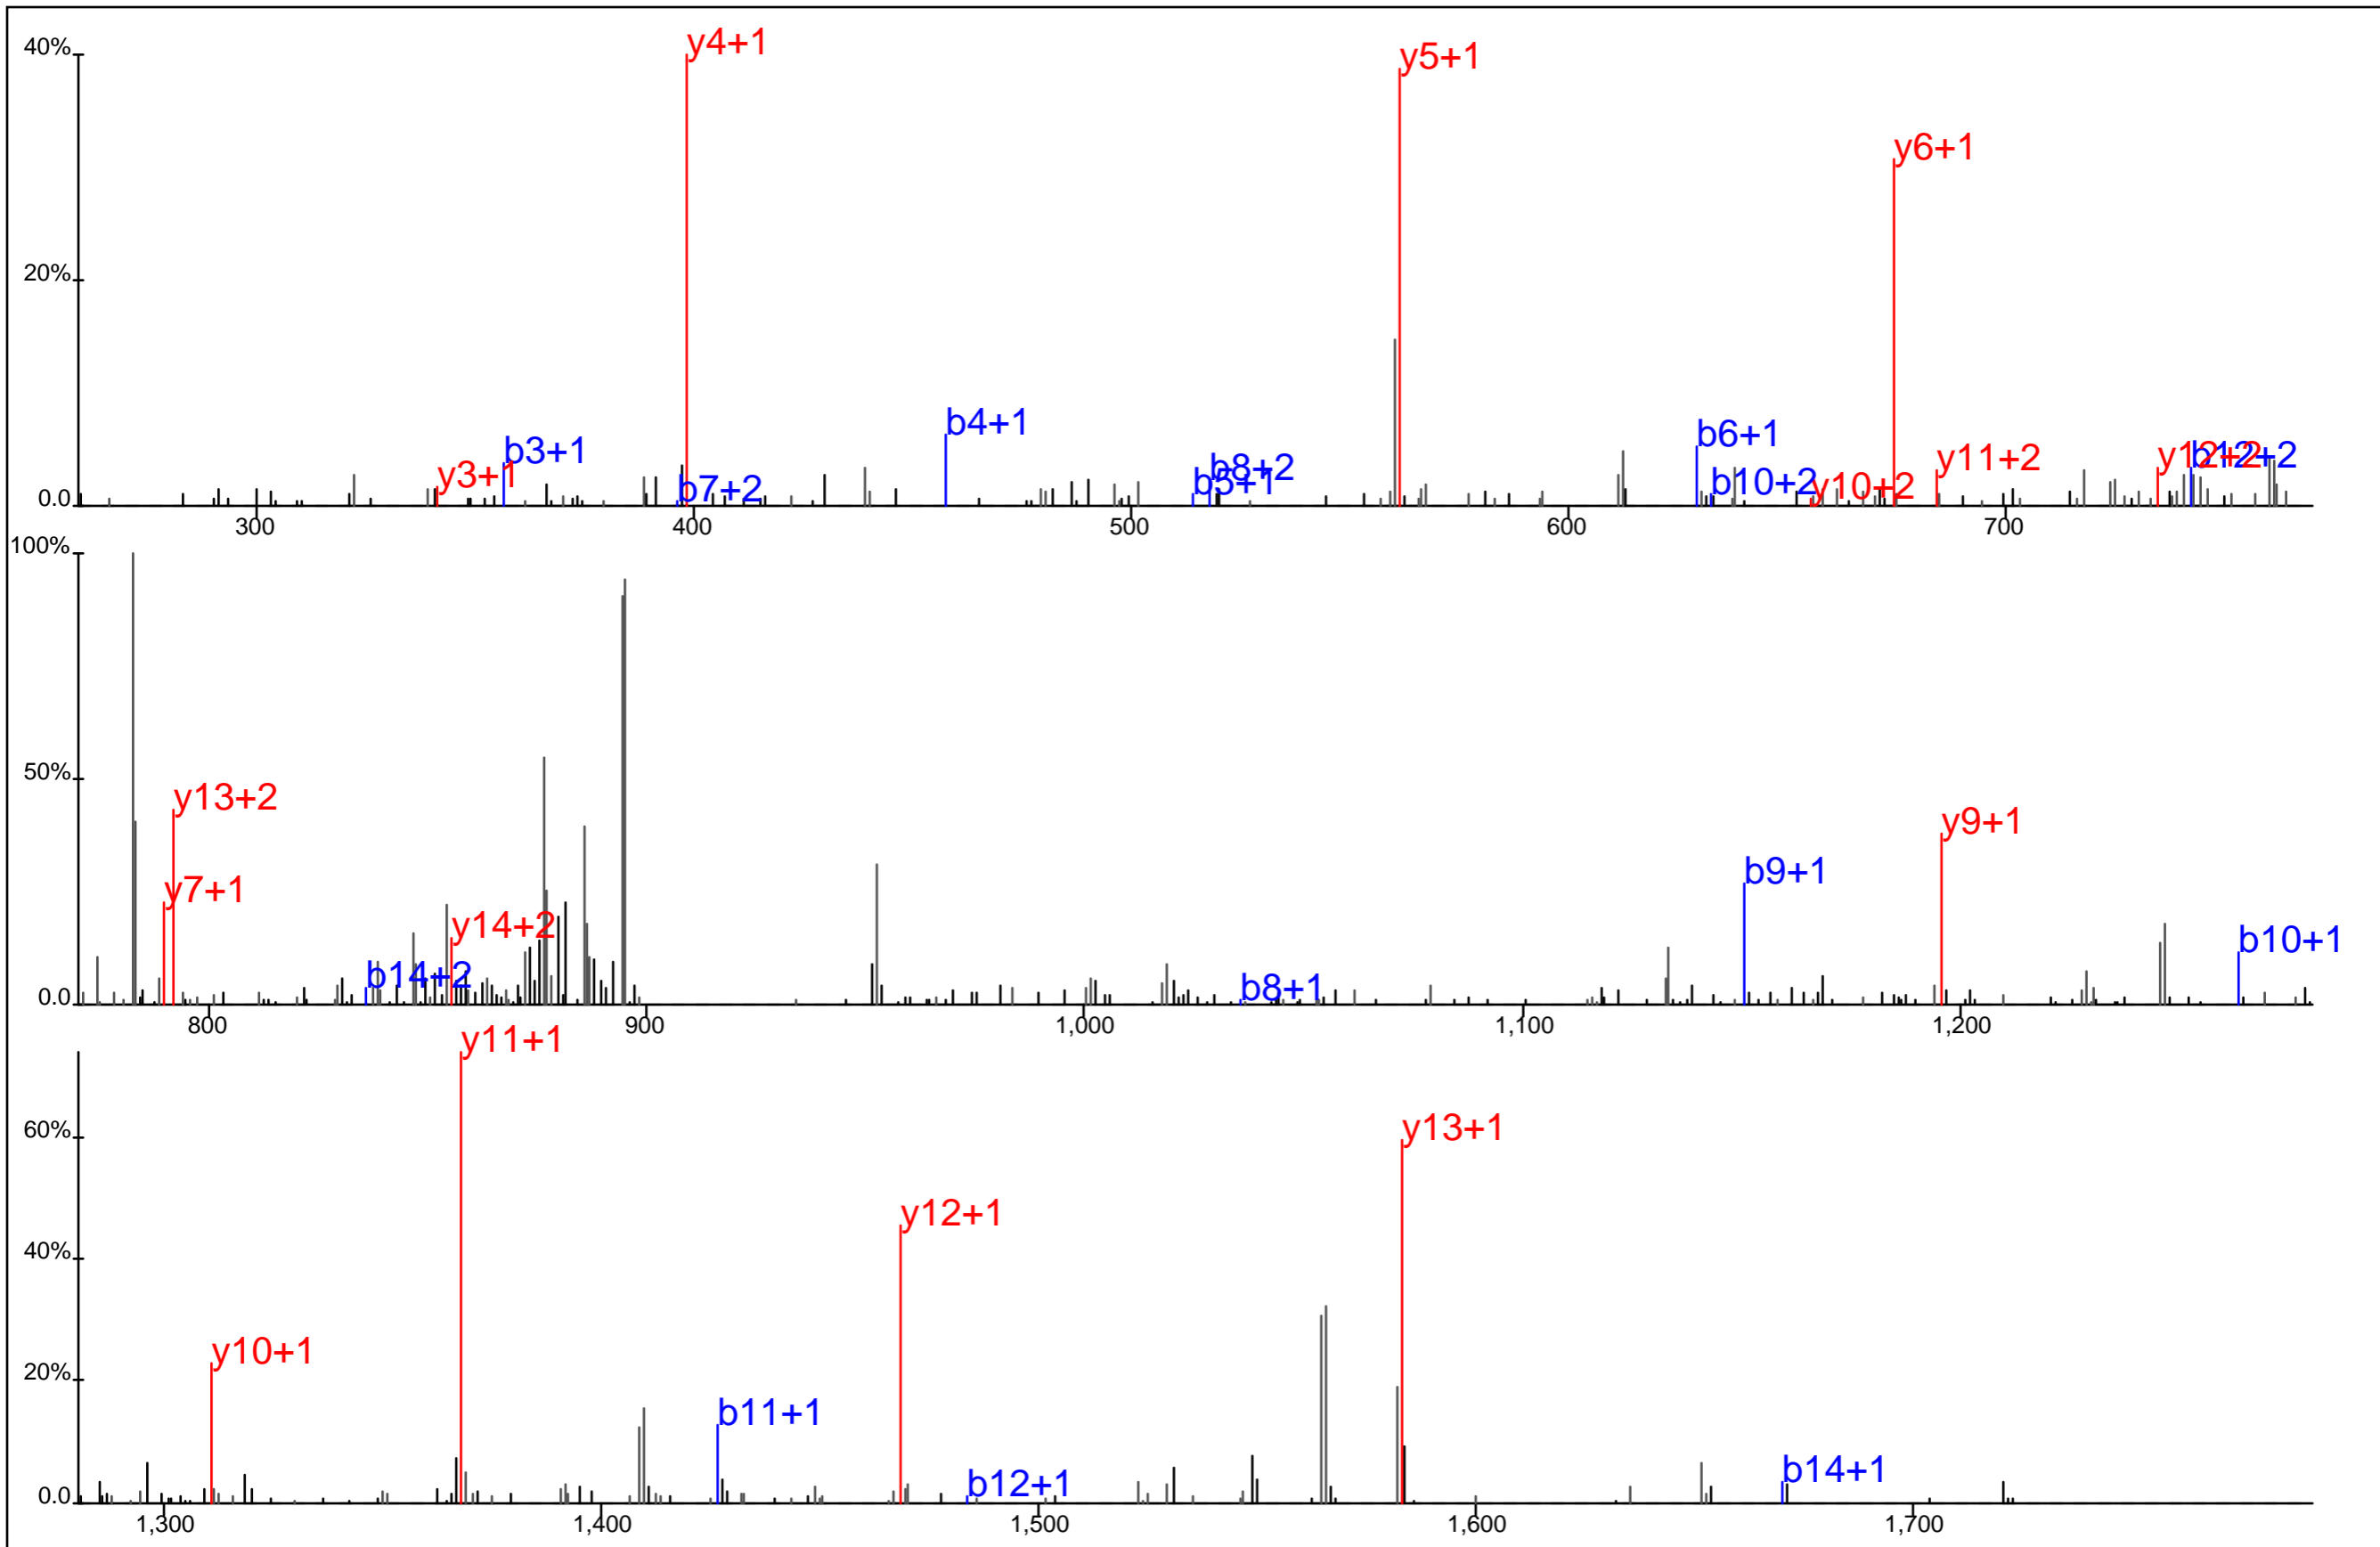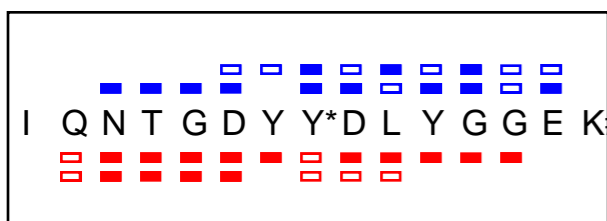

Protein Name: SHP2  
 gi Accession: 33356177  
 Precursor Mass: 912.3885+2  
 Delta Mass: 4.572 ppm  
 XCorr: 68.1

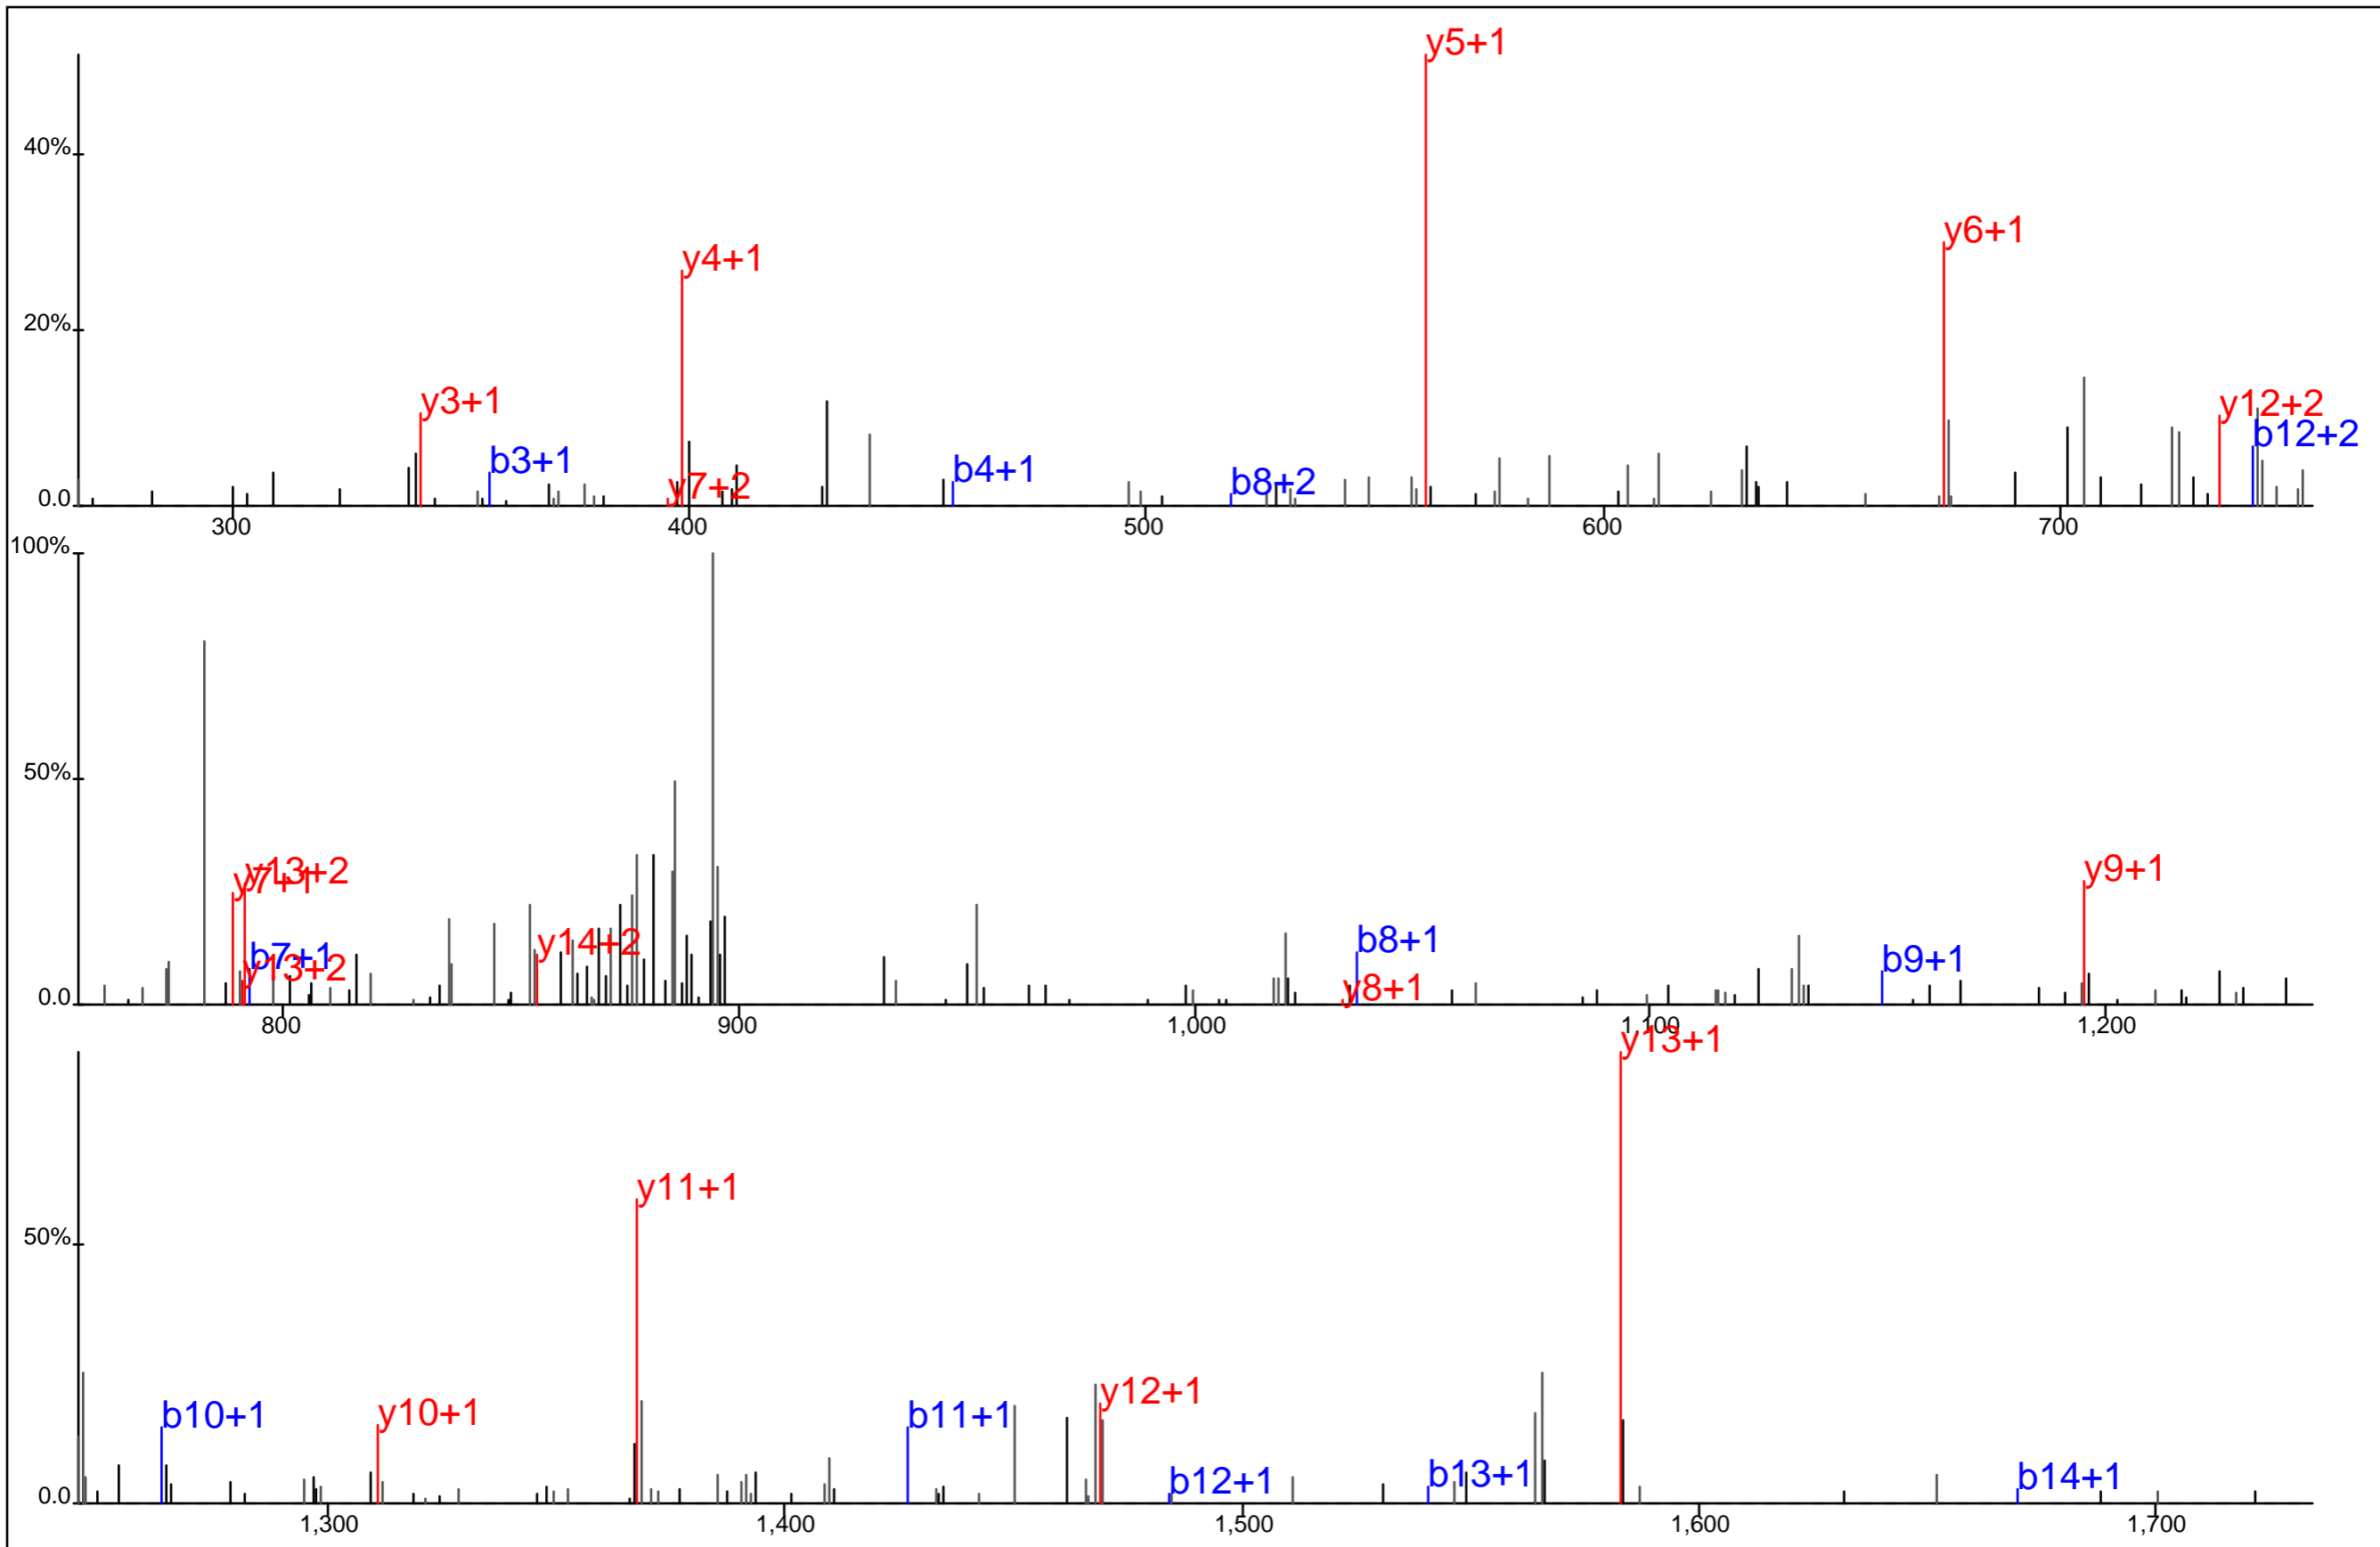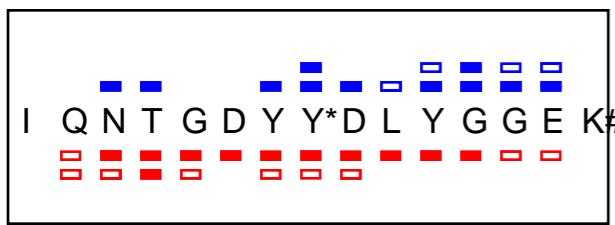

Protein Name: SHP2  
 gi Accession: 33356177  
 Precursor Mass: 912.3857+2  
 Delta Mass: 1.496 ppm  
 XCorr: 56.31

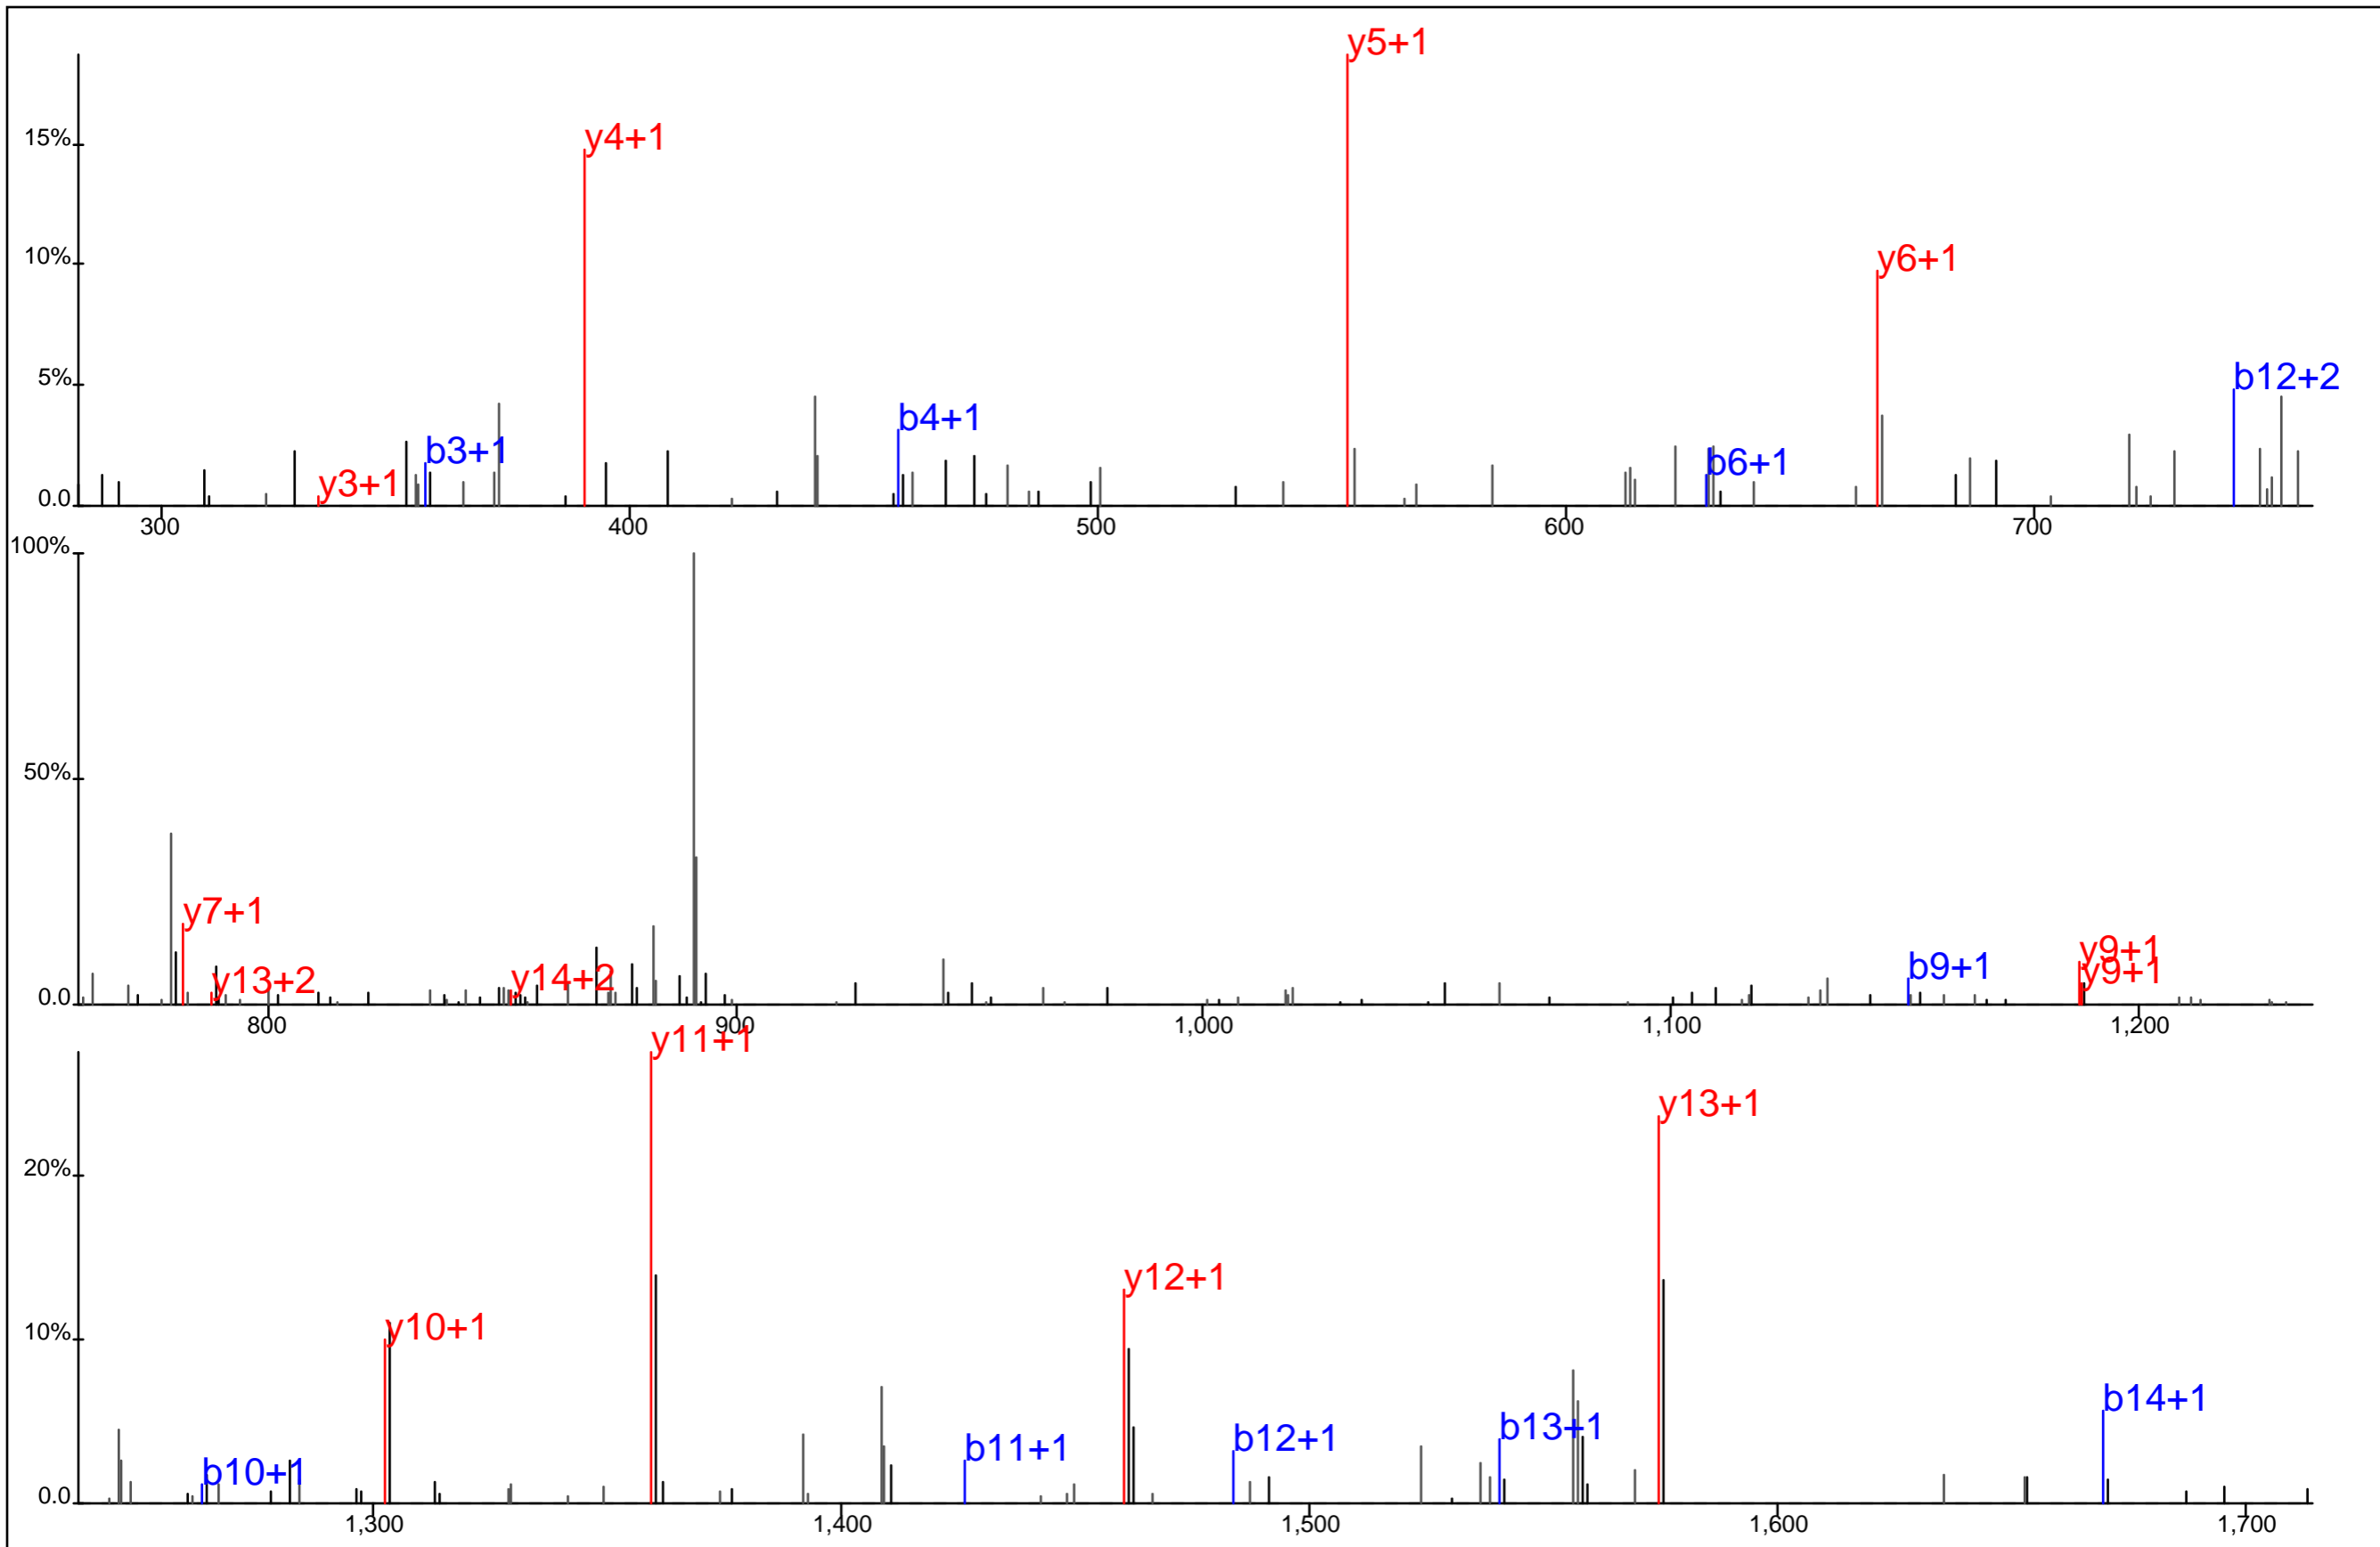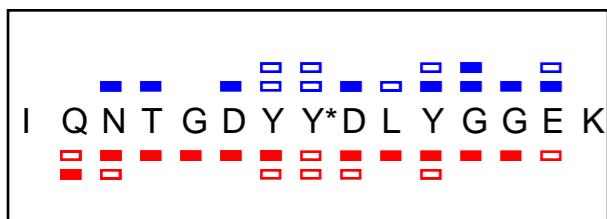

Protein Name: SHP2  
 gi Accession: 33356177  
 Precursor Mass: 908.3806+2  
 Delta Mass: 3.672 ppm  
 XCorr: 52.72

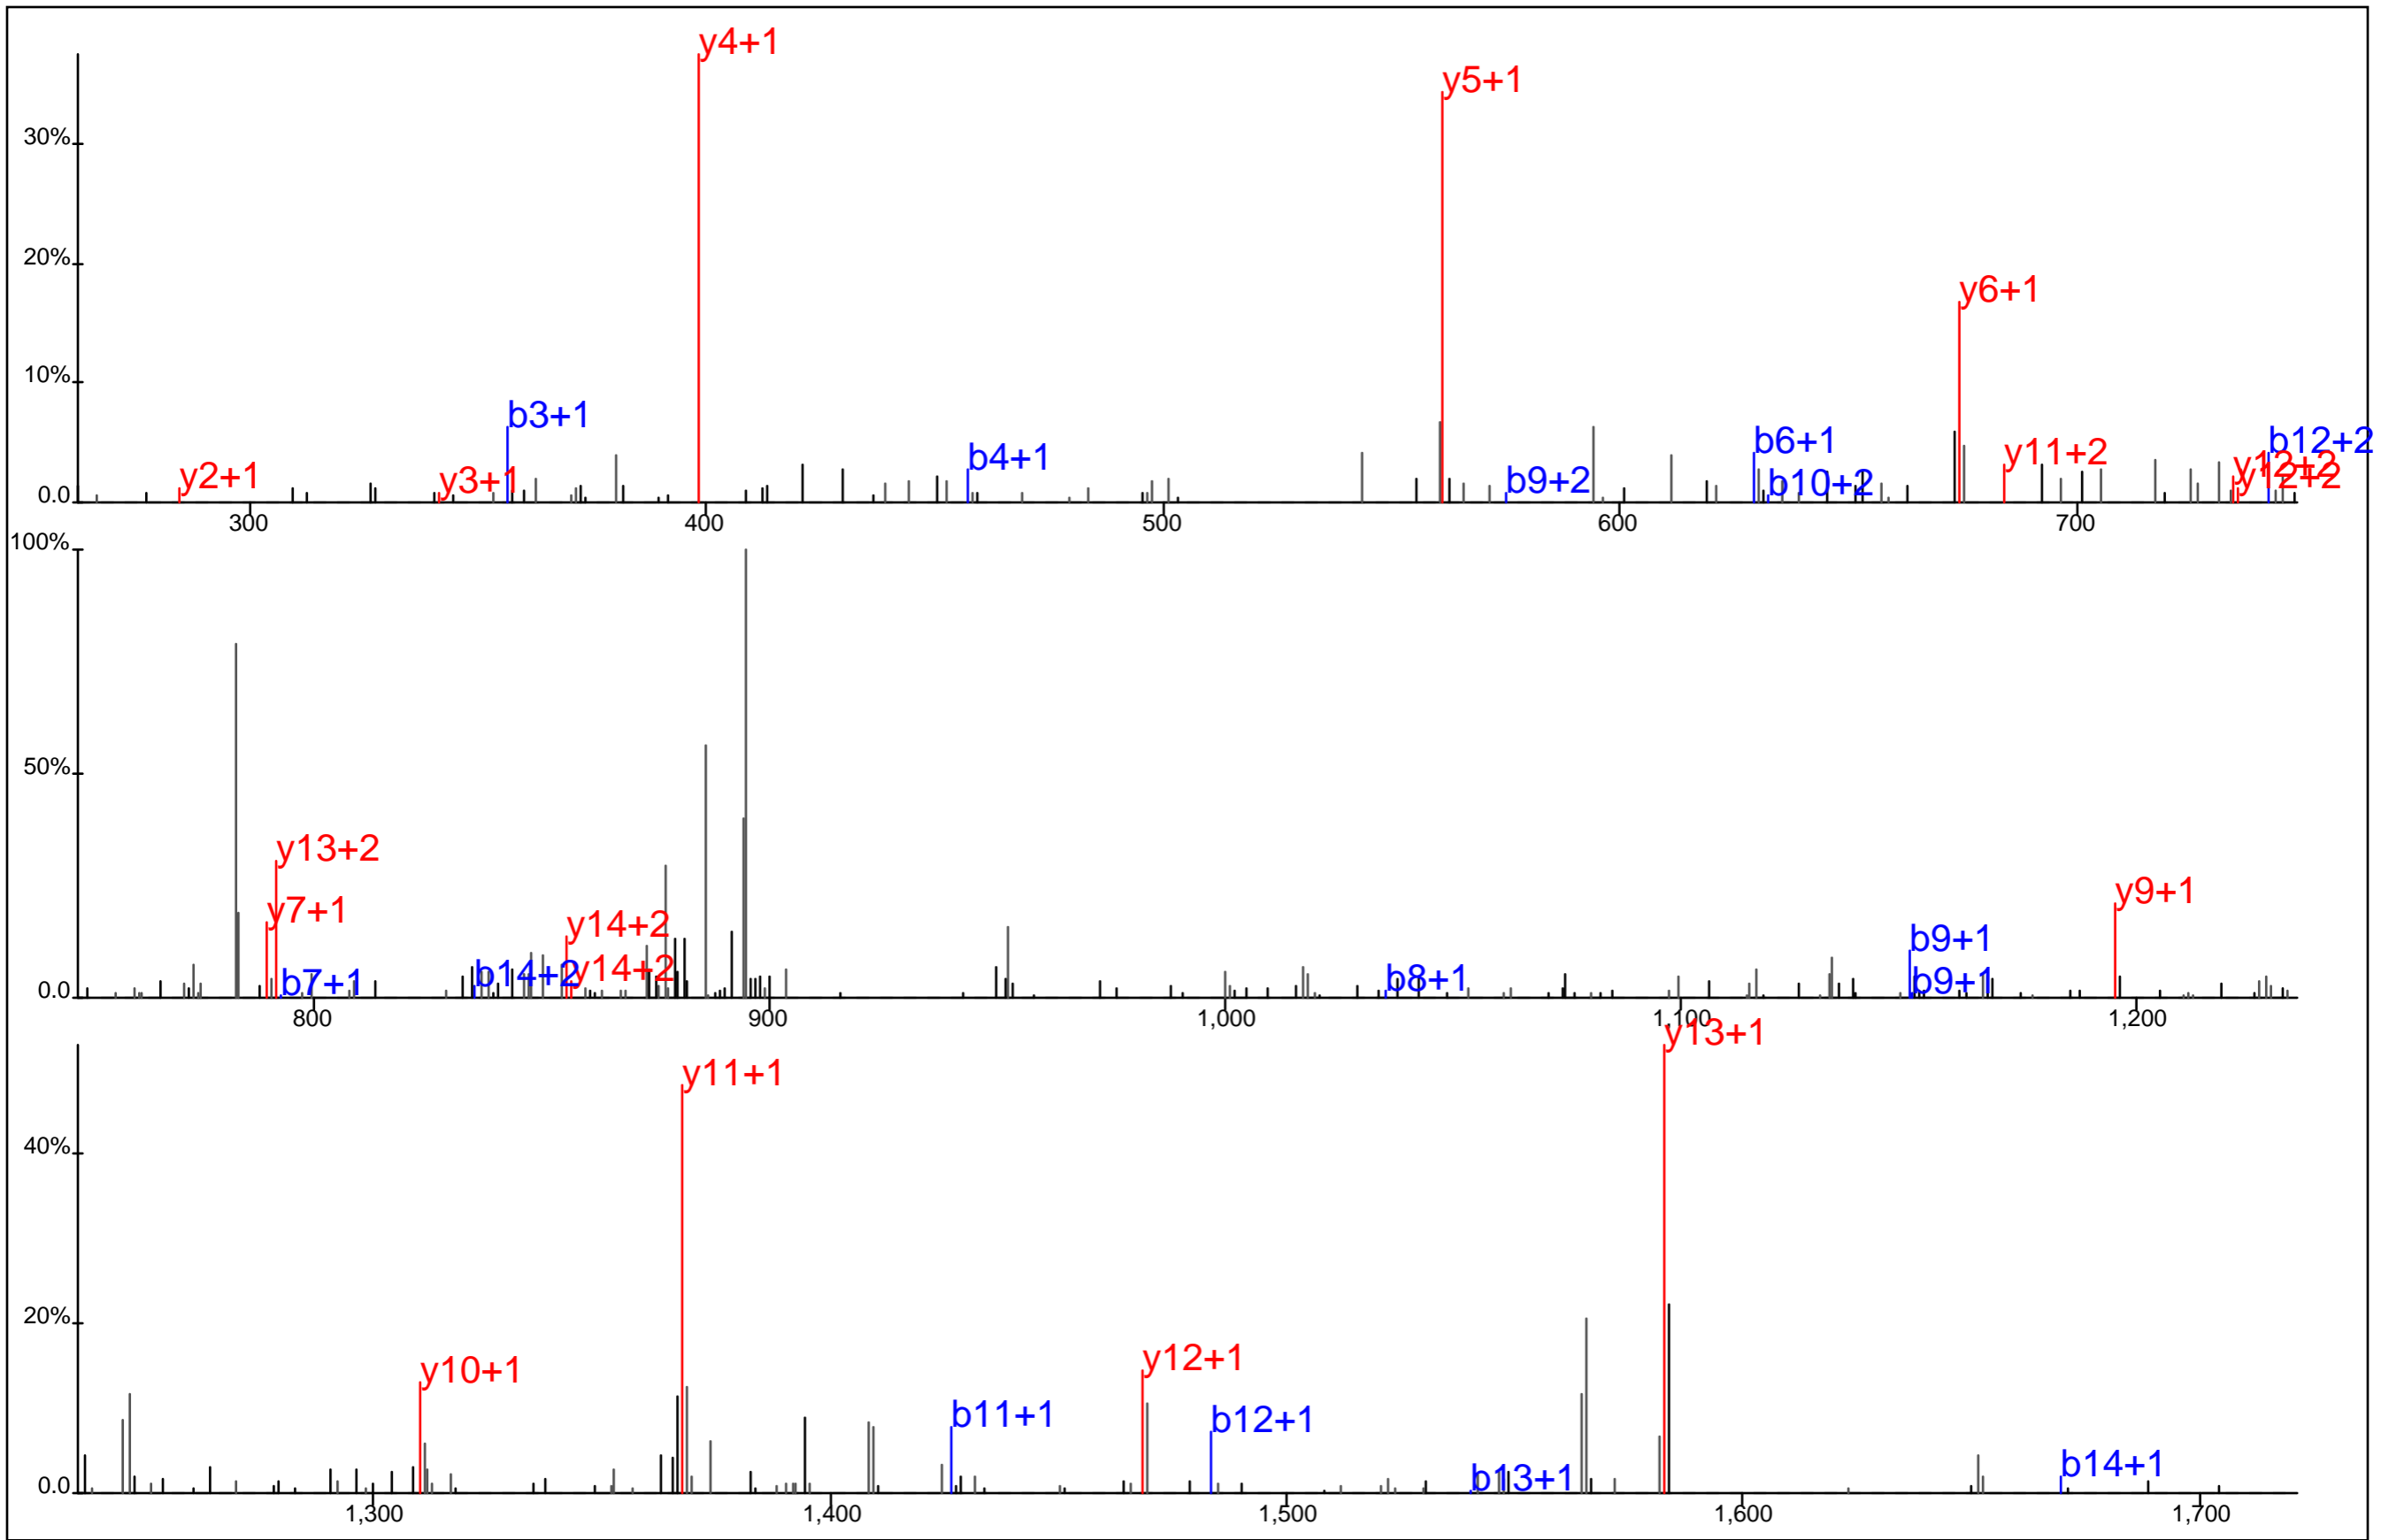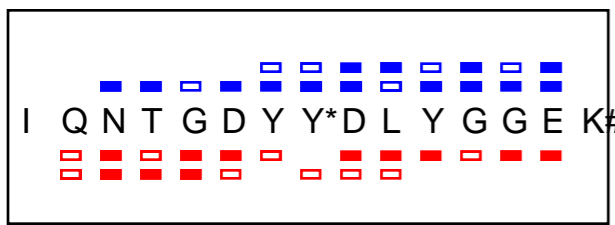

Protein Name: SHP2  
 gi Accession: 33356177  
 Precursor Mass: 912.3899+2  
 Delta Mass: 6.047 ppm  
 XCorr: 72.5

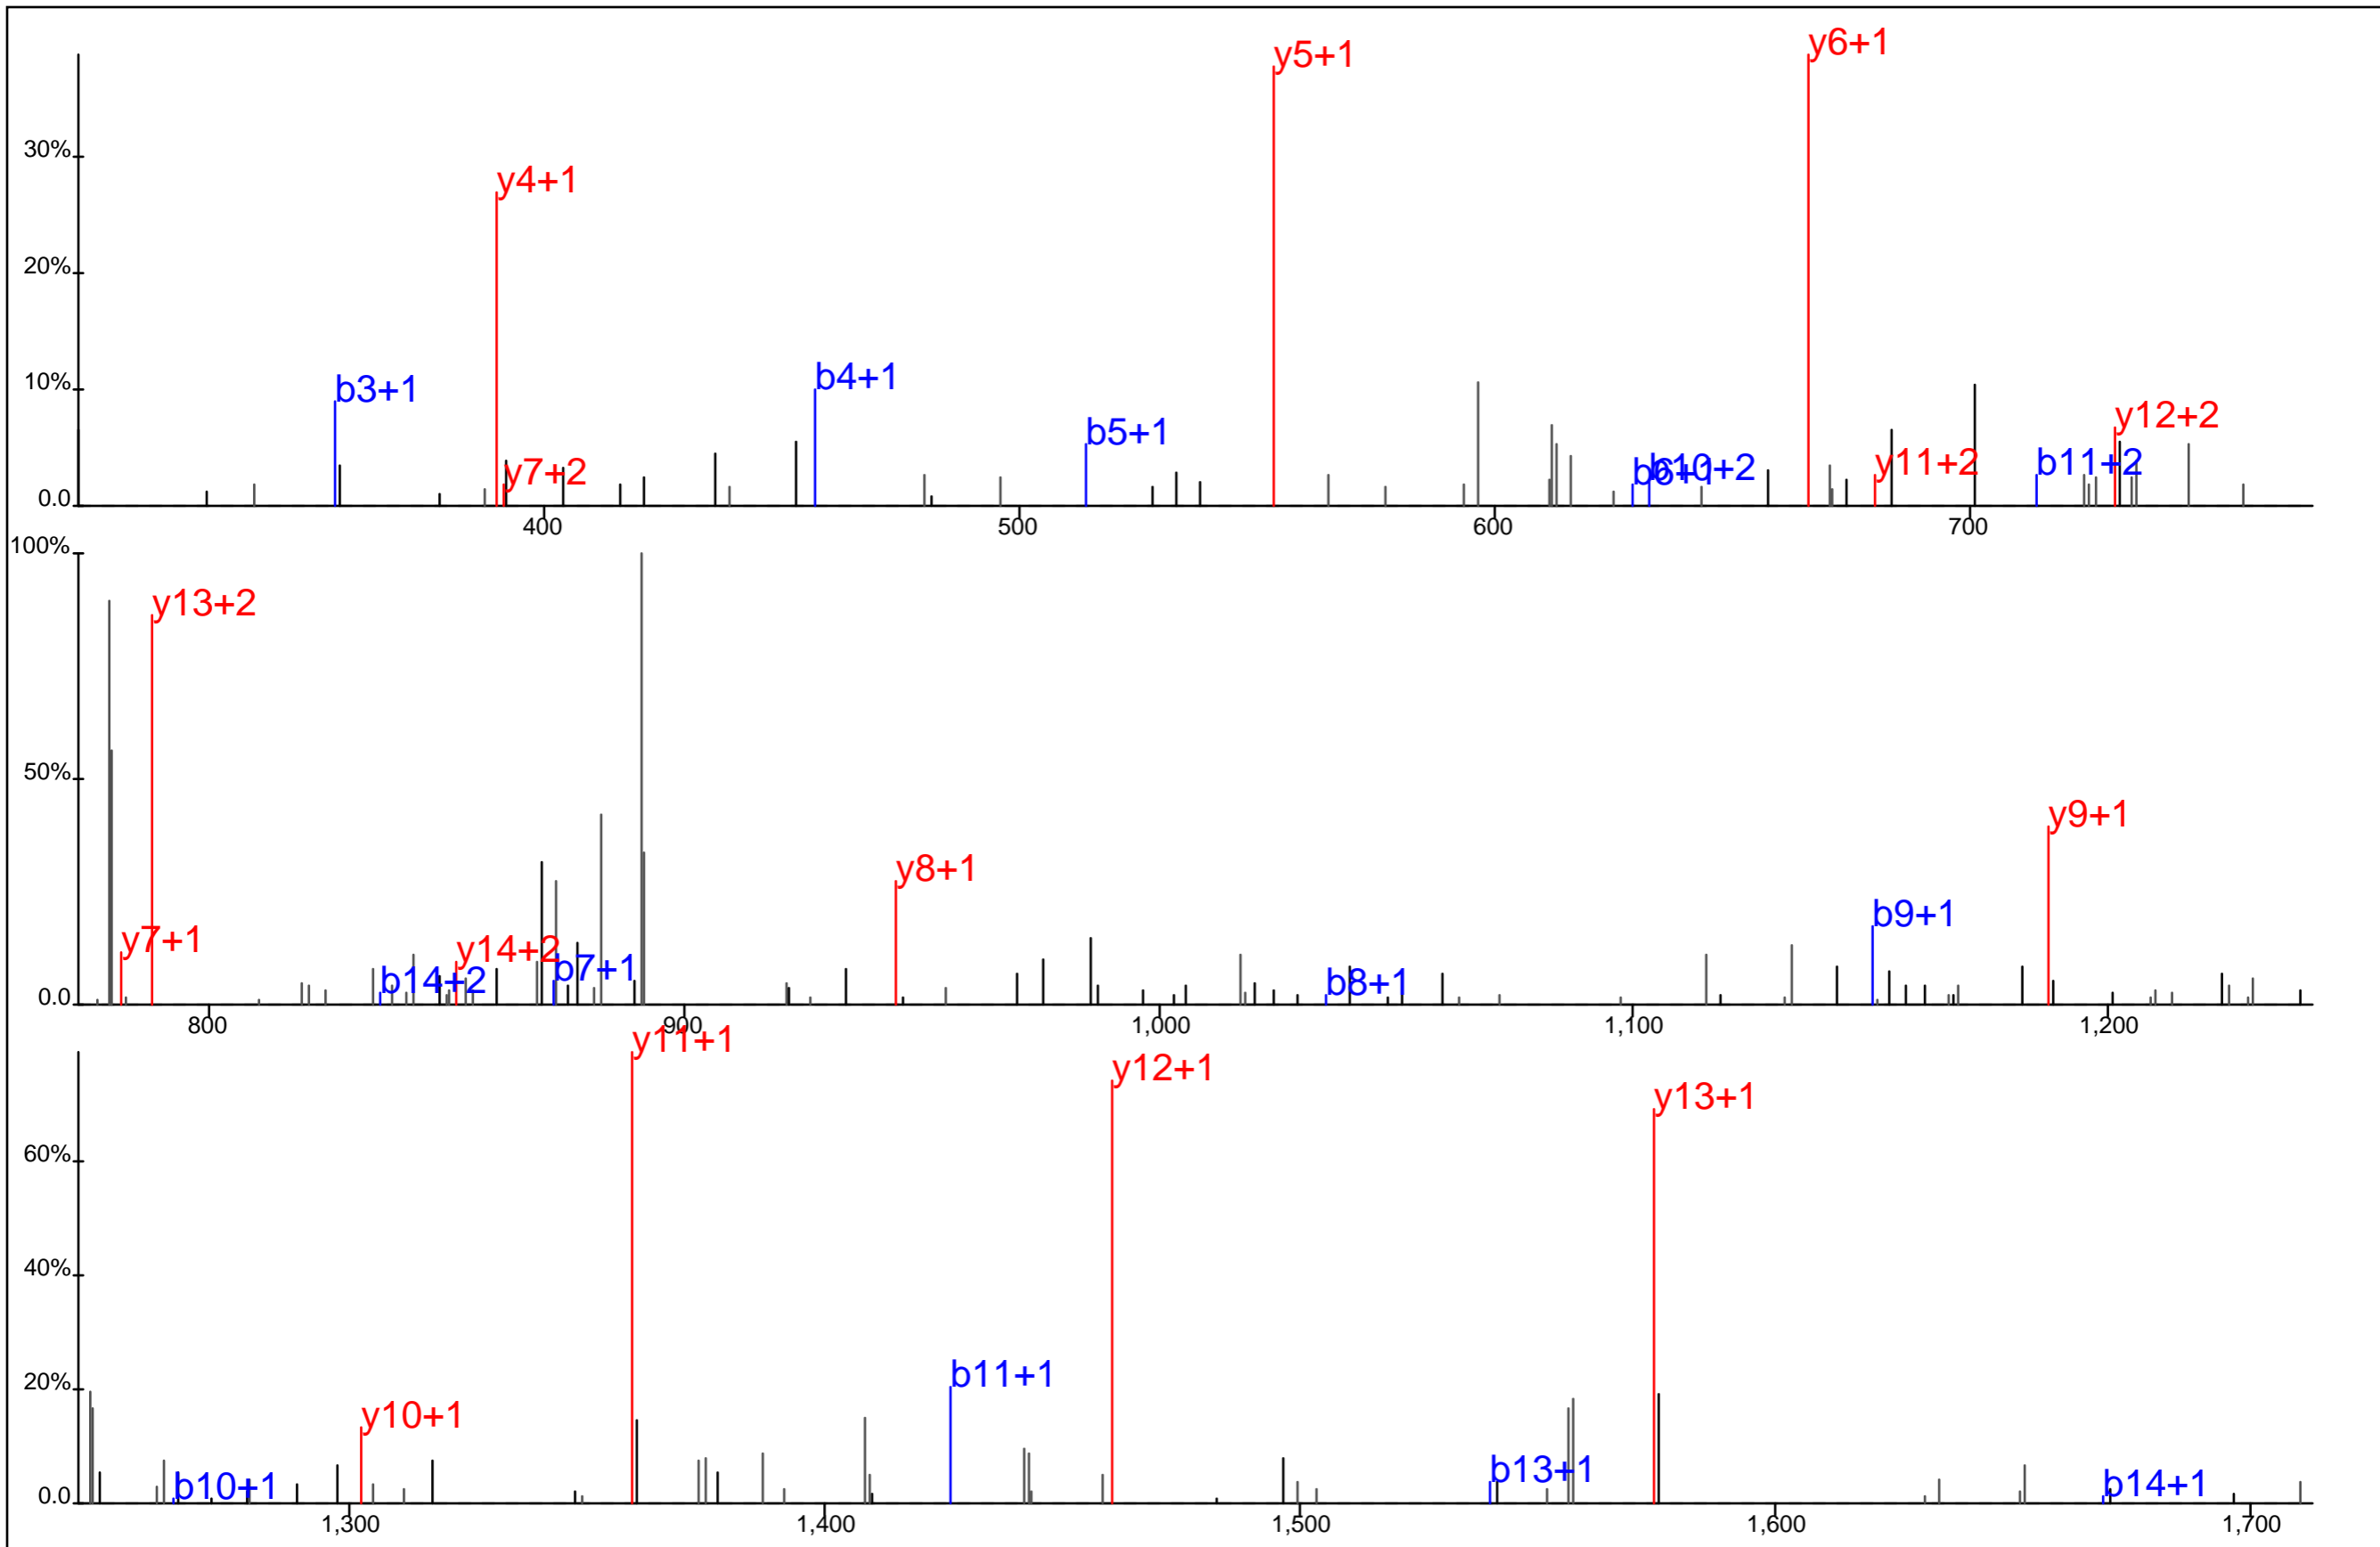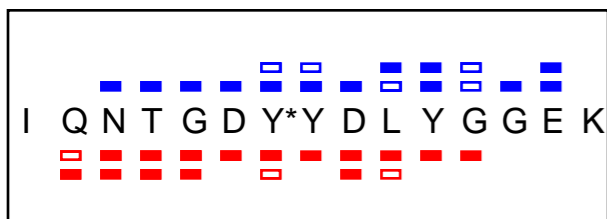

Protein Name: SHP2  
 gi Accession: 33356177  
 Precursor Mass: 908.3759+2  
 Delta Mass: 1.505 ppm  
 XCorr: 53.73

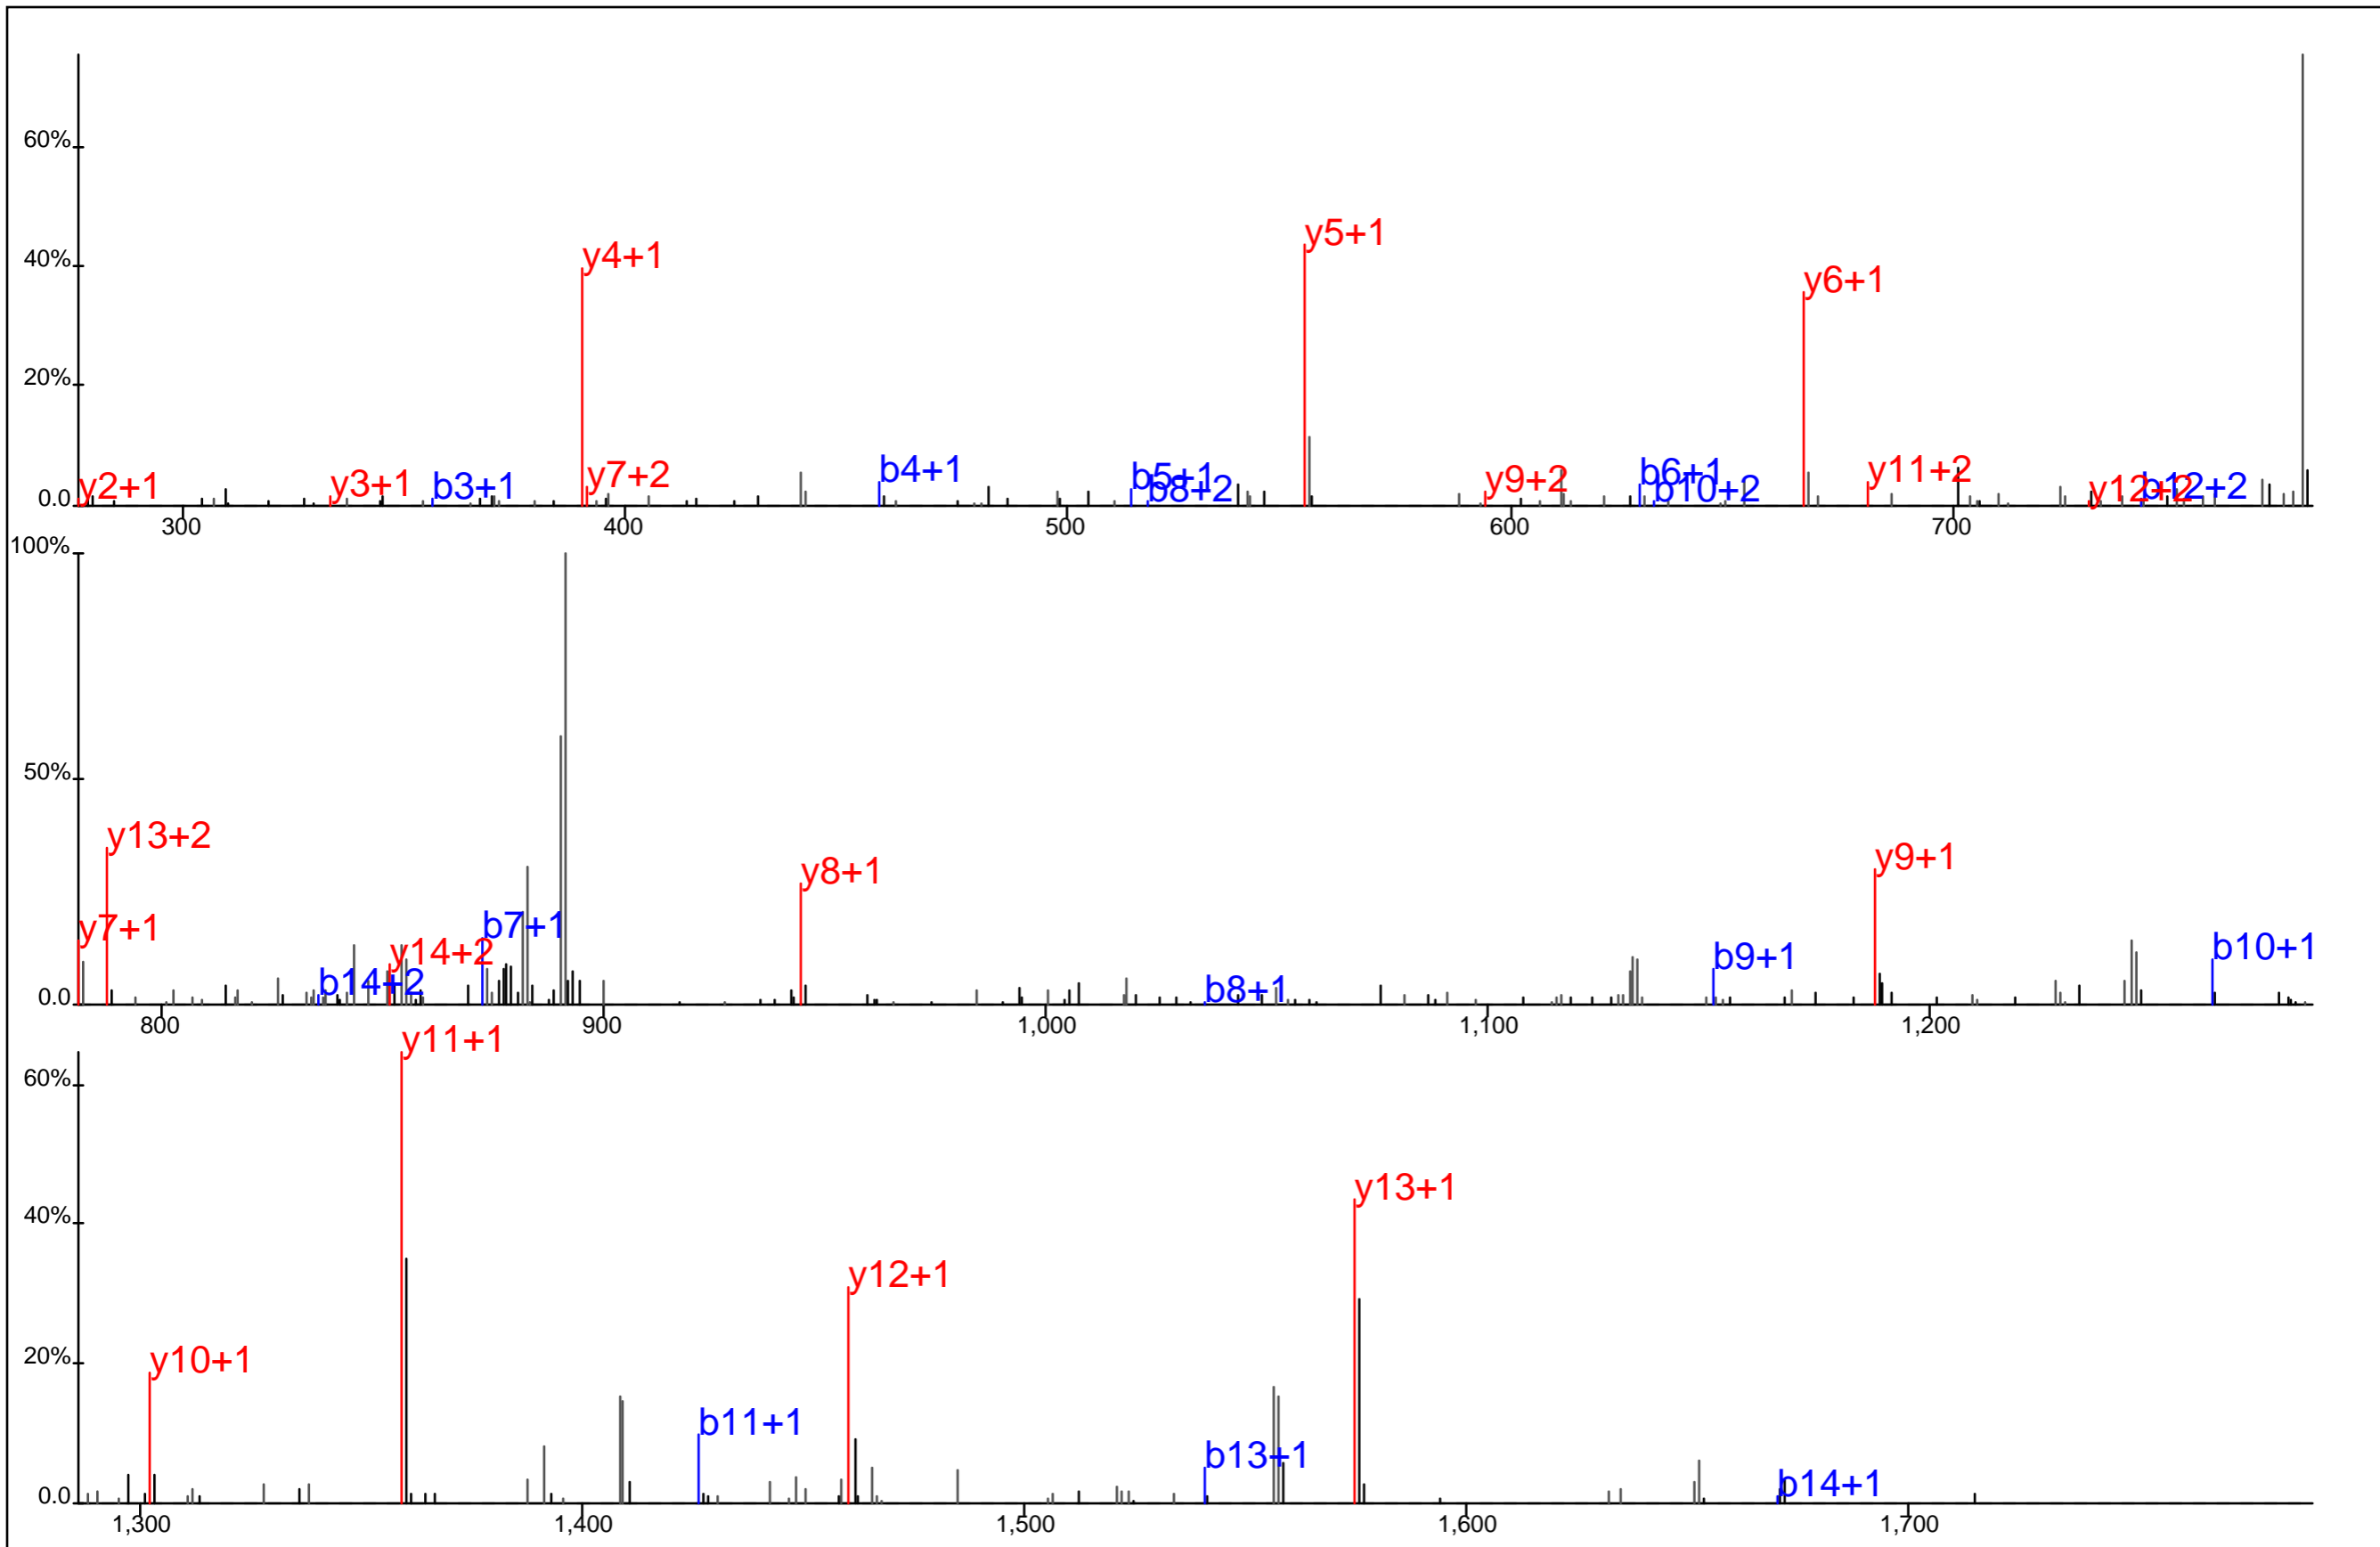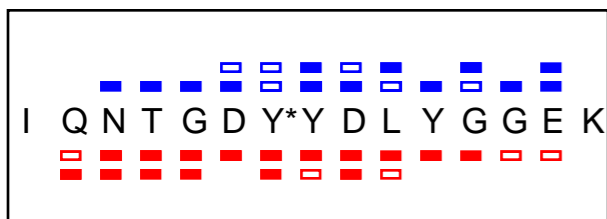

Protein Name: SHP2  
 gi Accession: 33356177  
 Precursor Mass: 908.3782+2  
 Delta Mass: 0.985 ppm  
 XCorr: 70.69



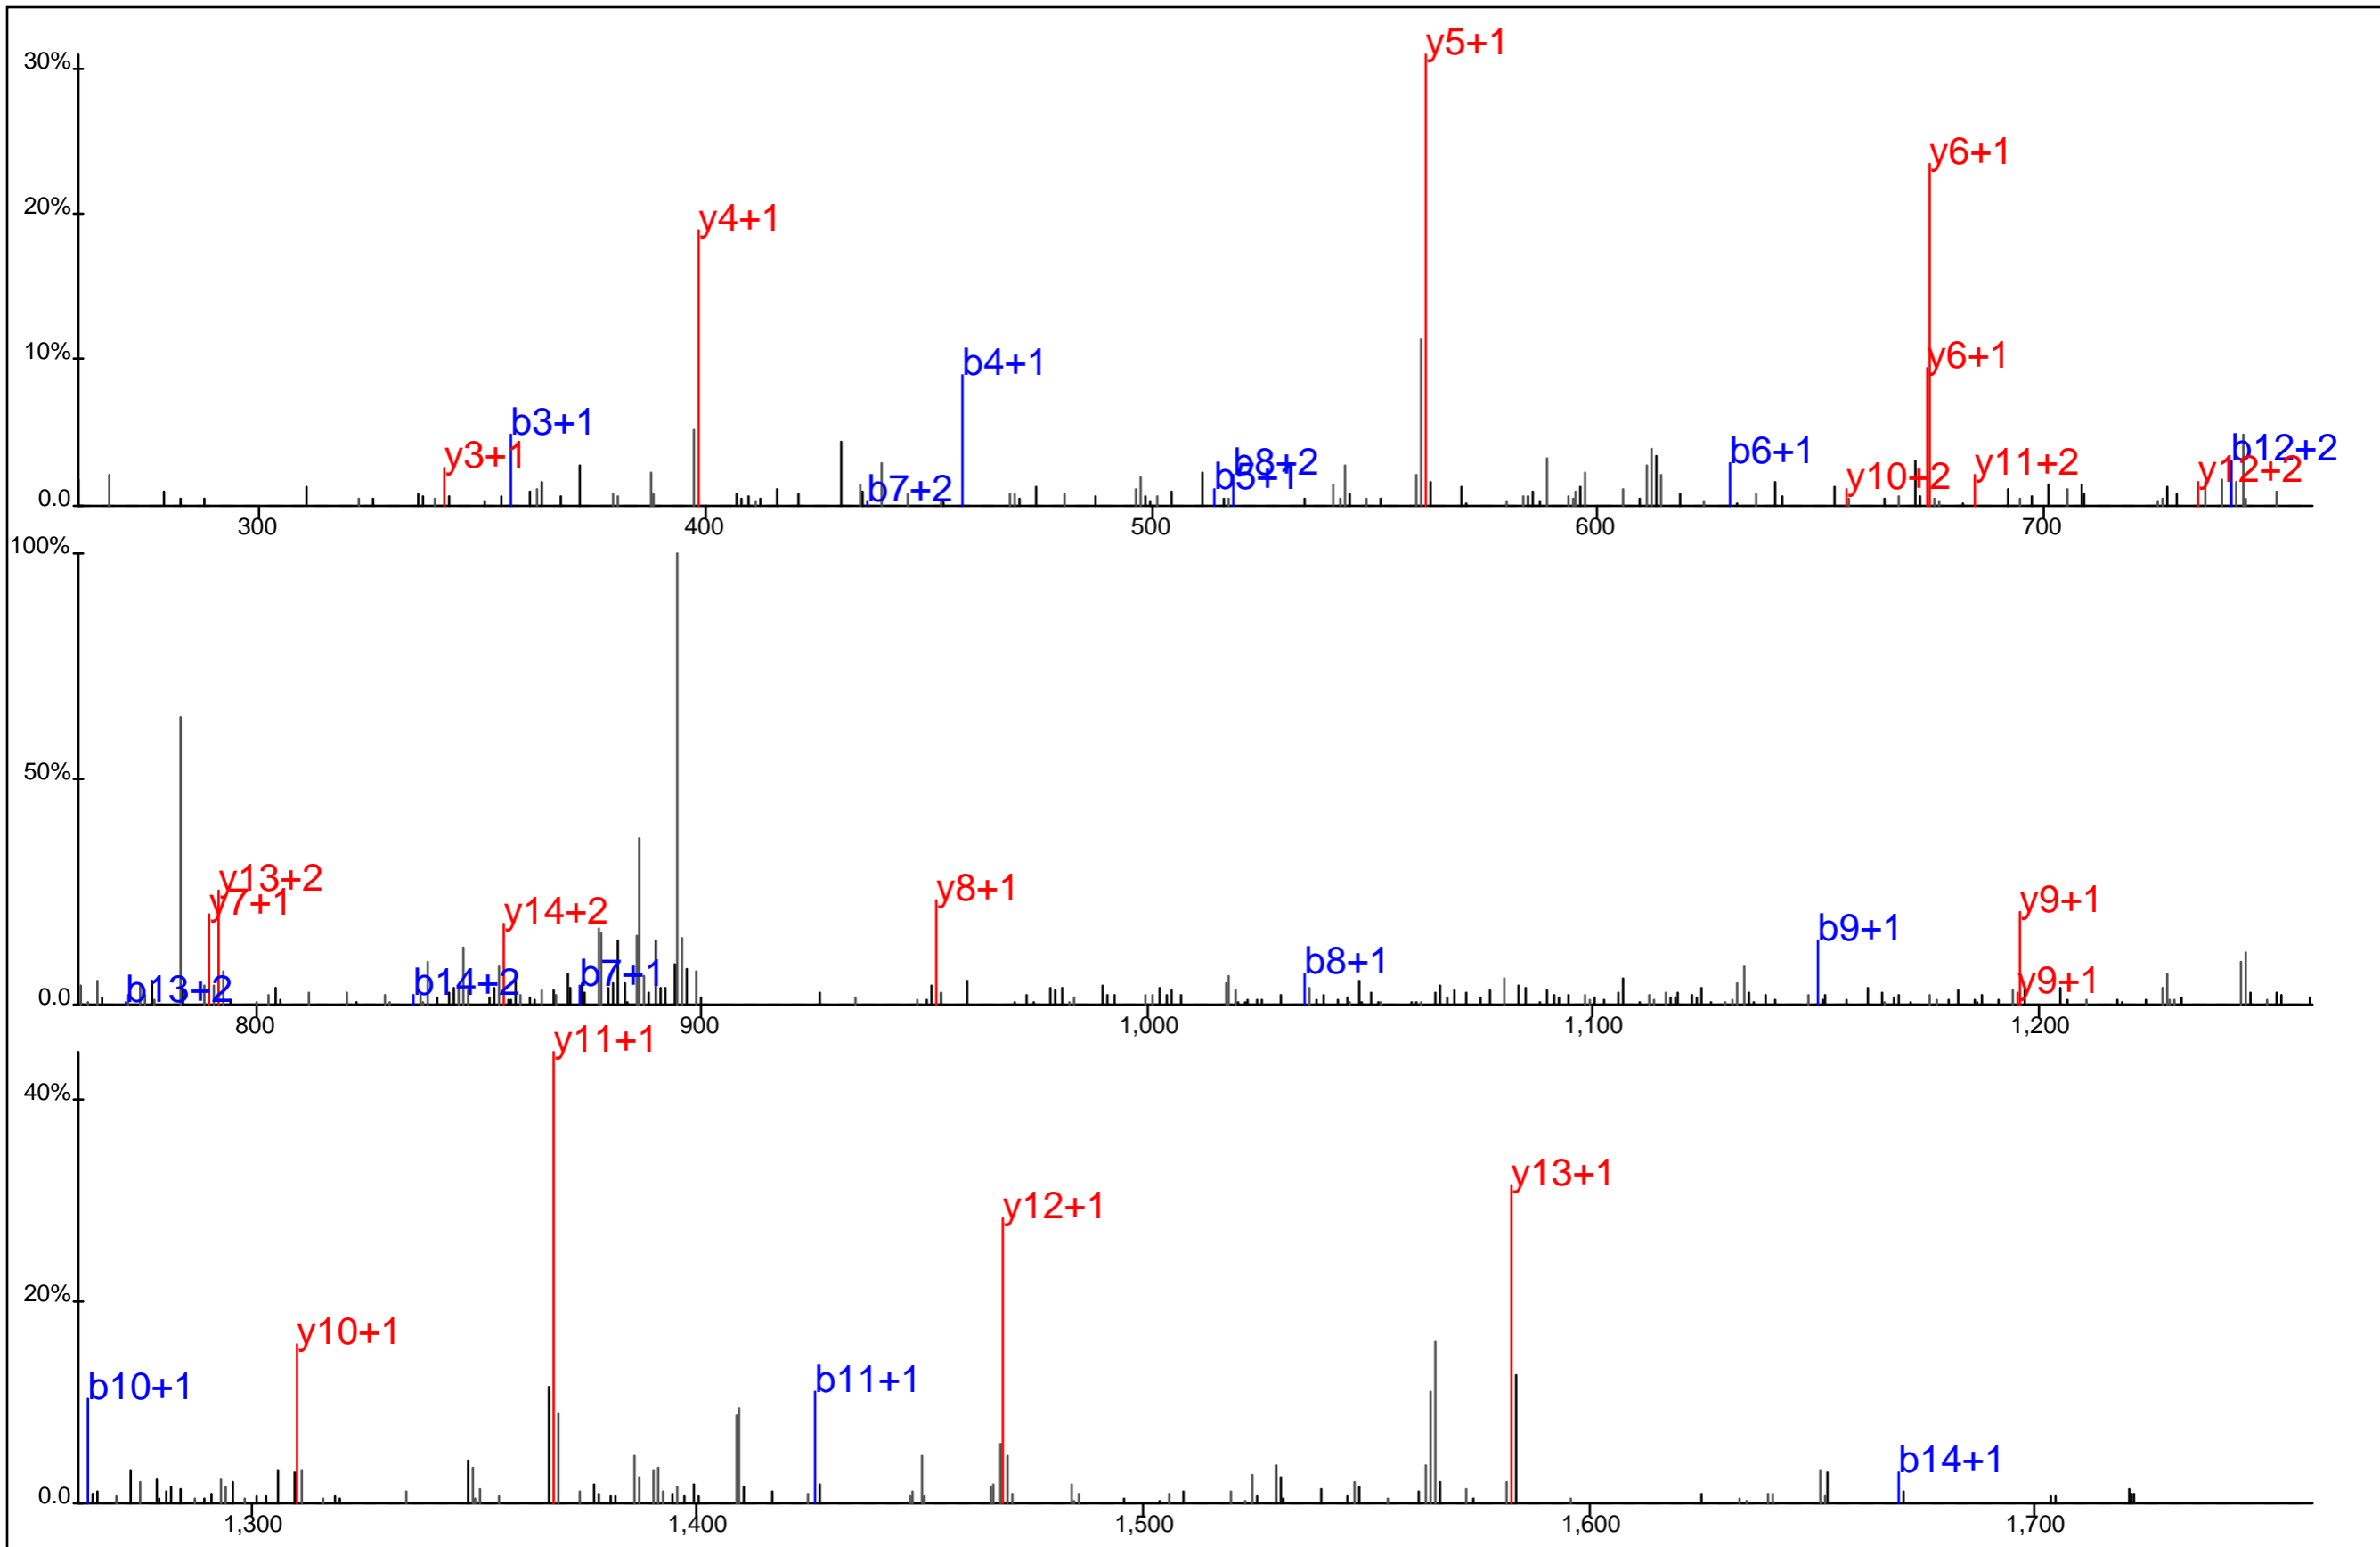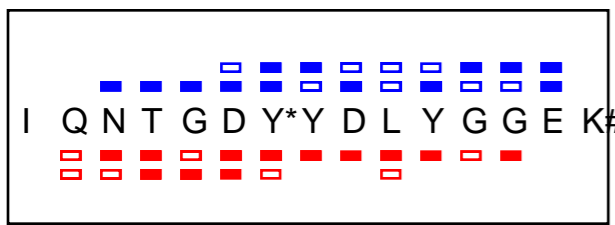

Protein Name: SHP2  
 gi Accession: 33356177  
 Precursor Mass: 912.3856+2  
 Delta Mass: 1.293 ppm  
 XCorr: 74.39

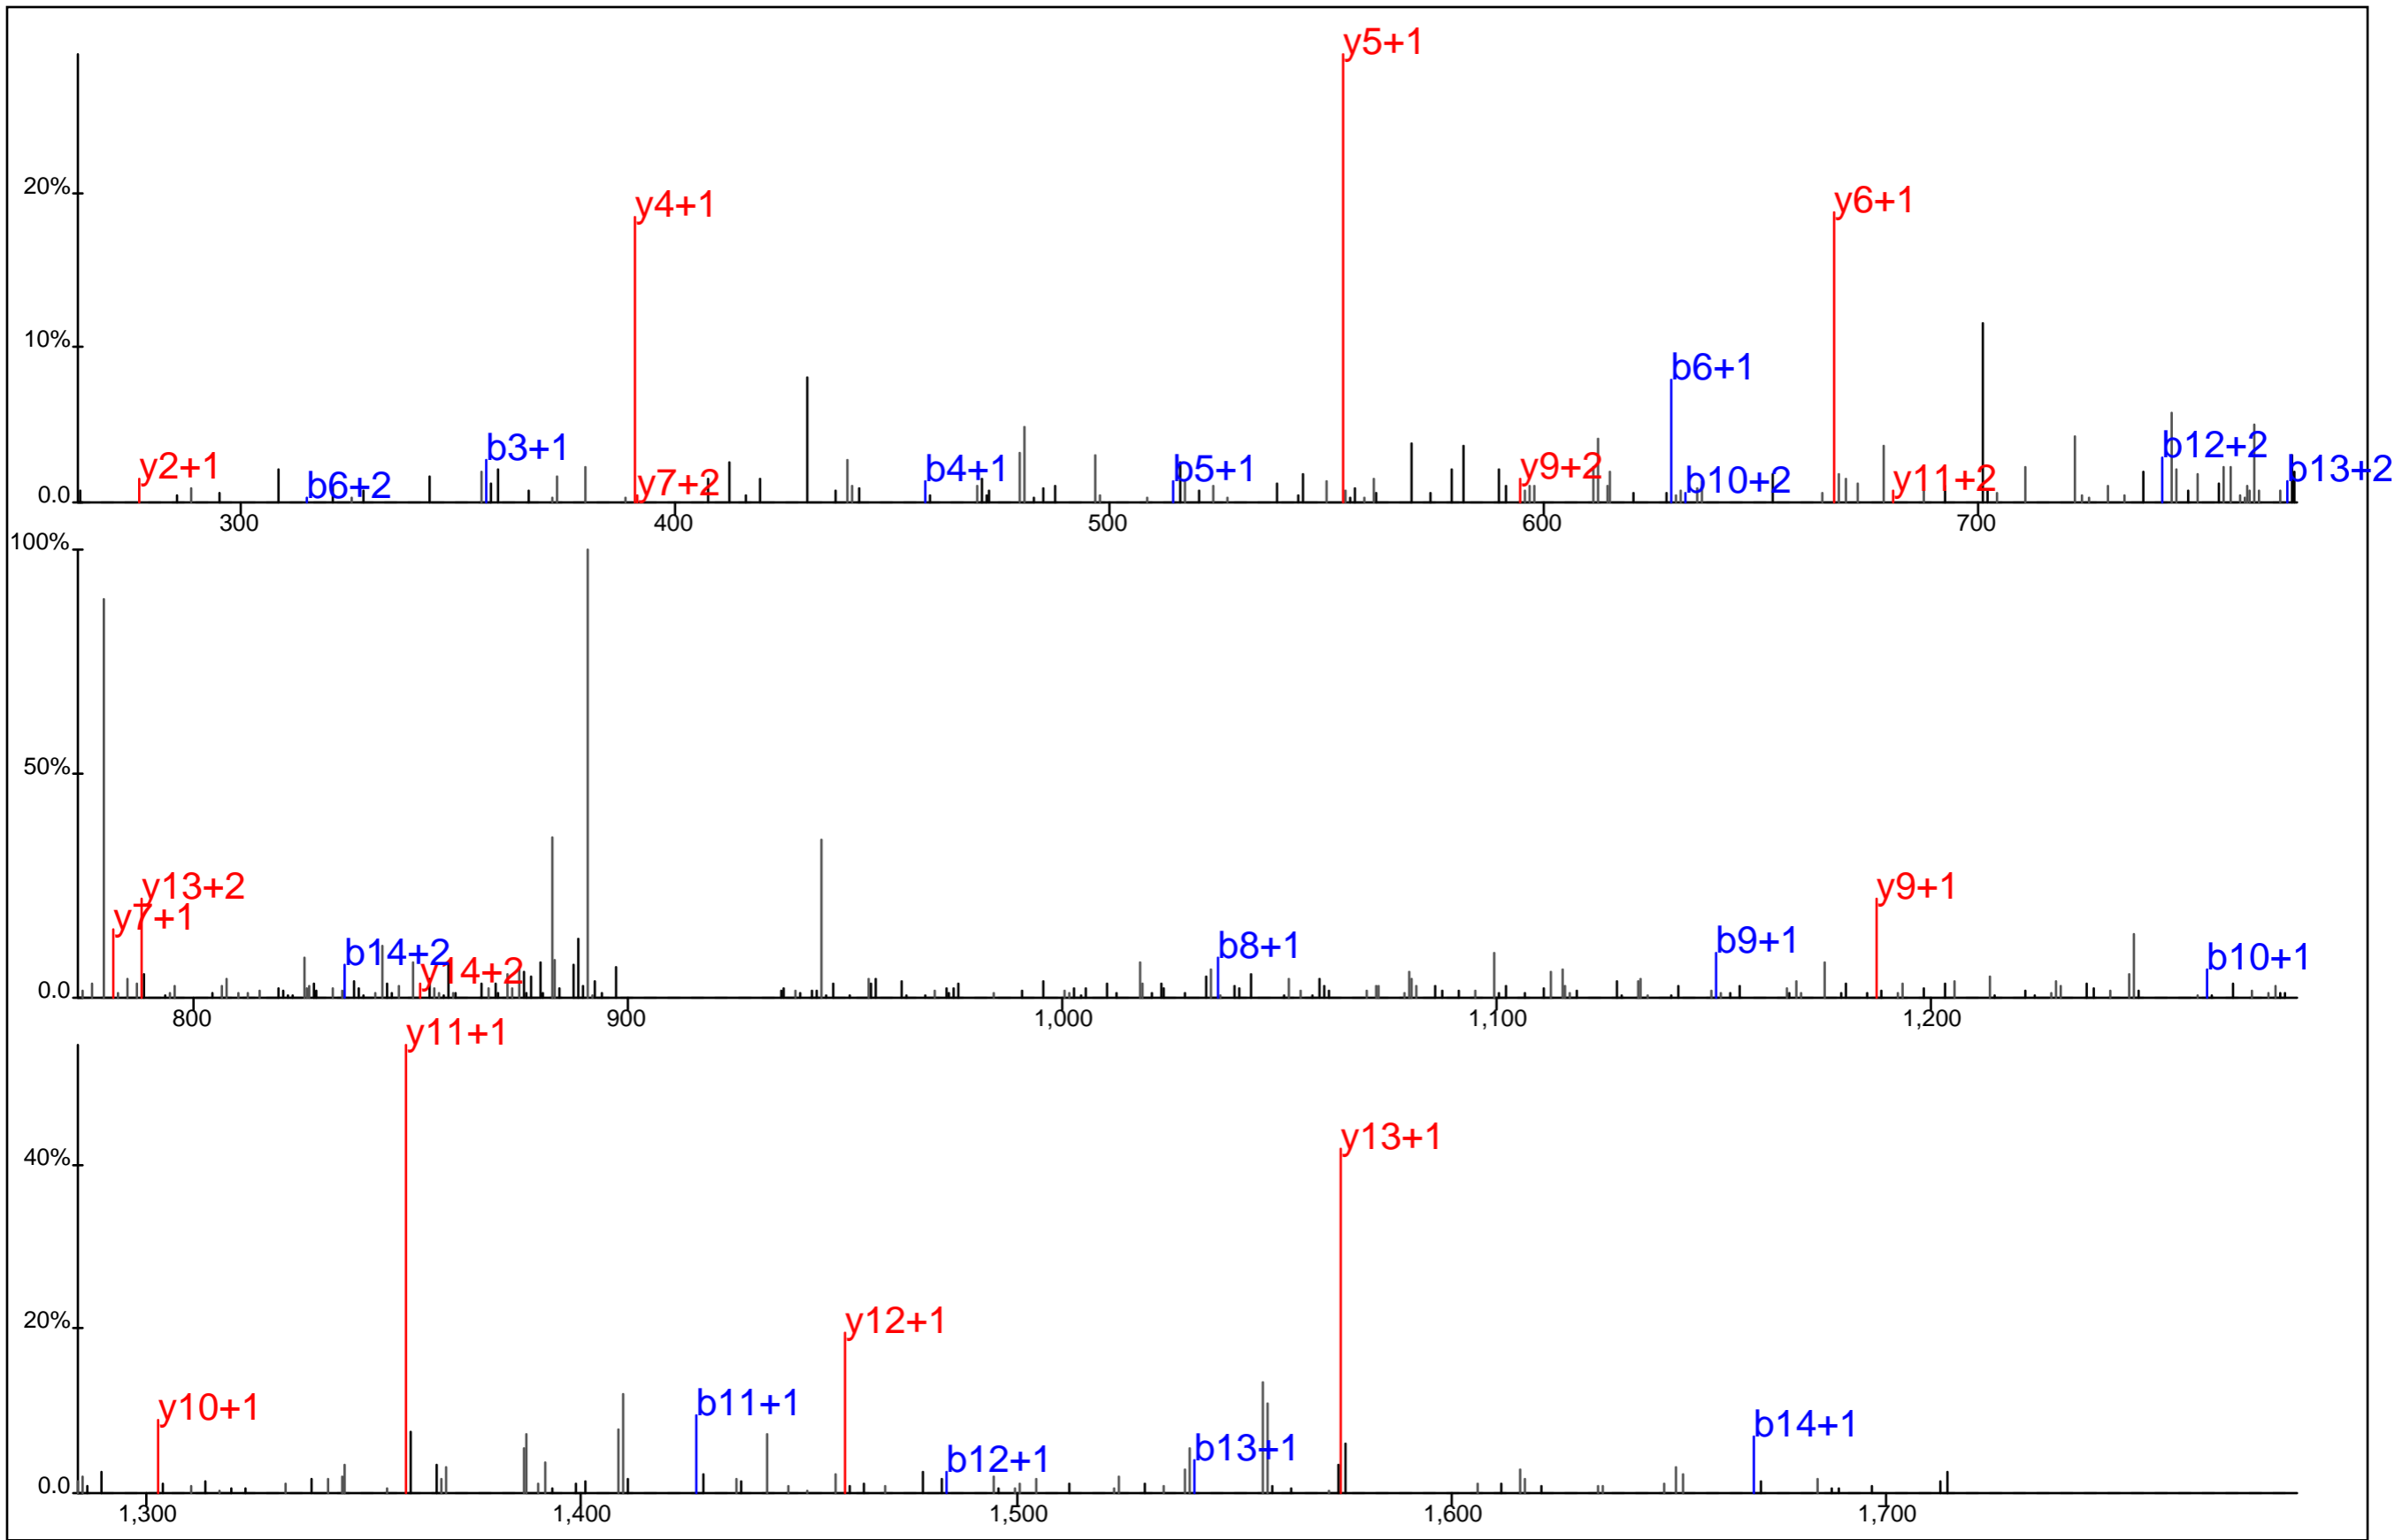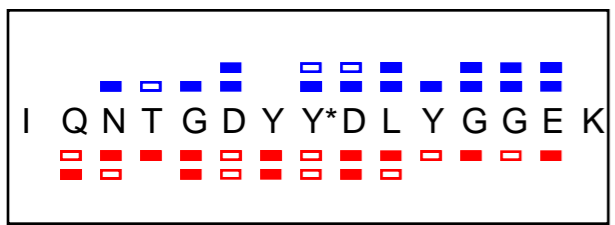

Protein Name: SHP2  
 gi Accession: 33356177  
 Precursor Mass: 908.3772+2  
 Delta Mass: 0.089 ppm  
 XCorr: 57.89

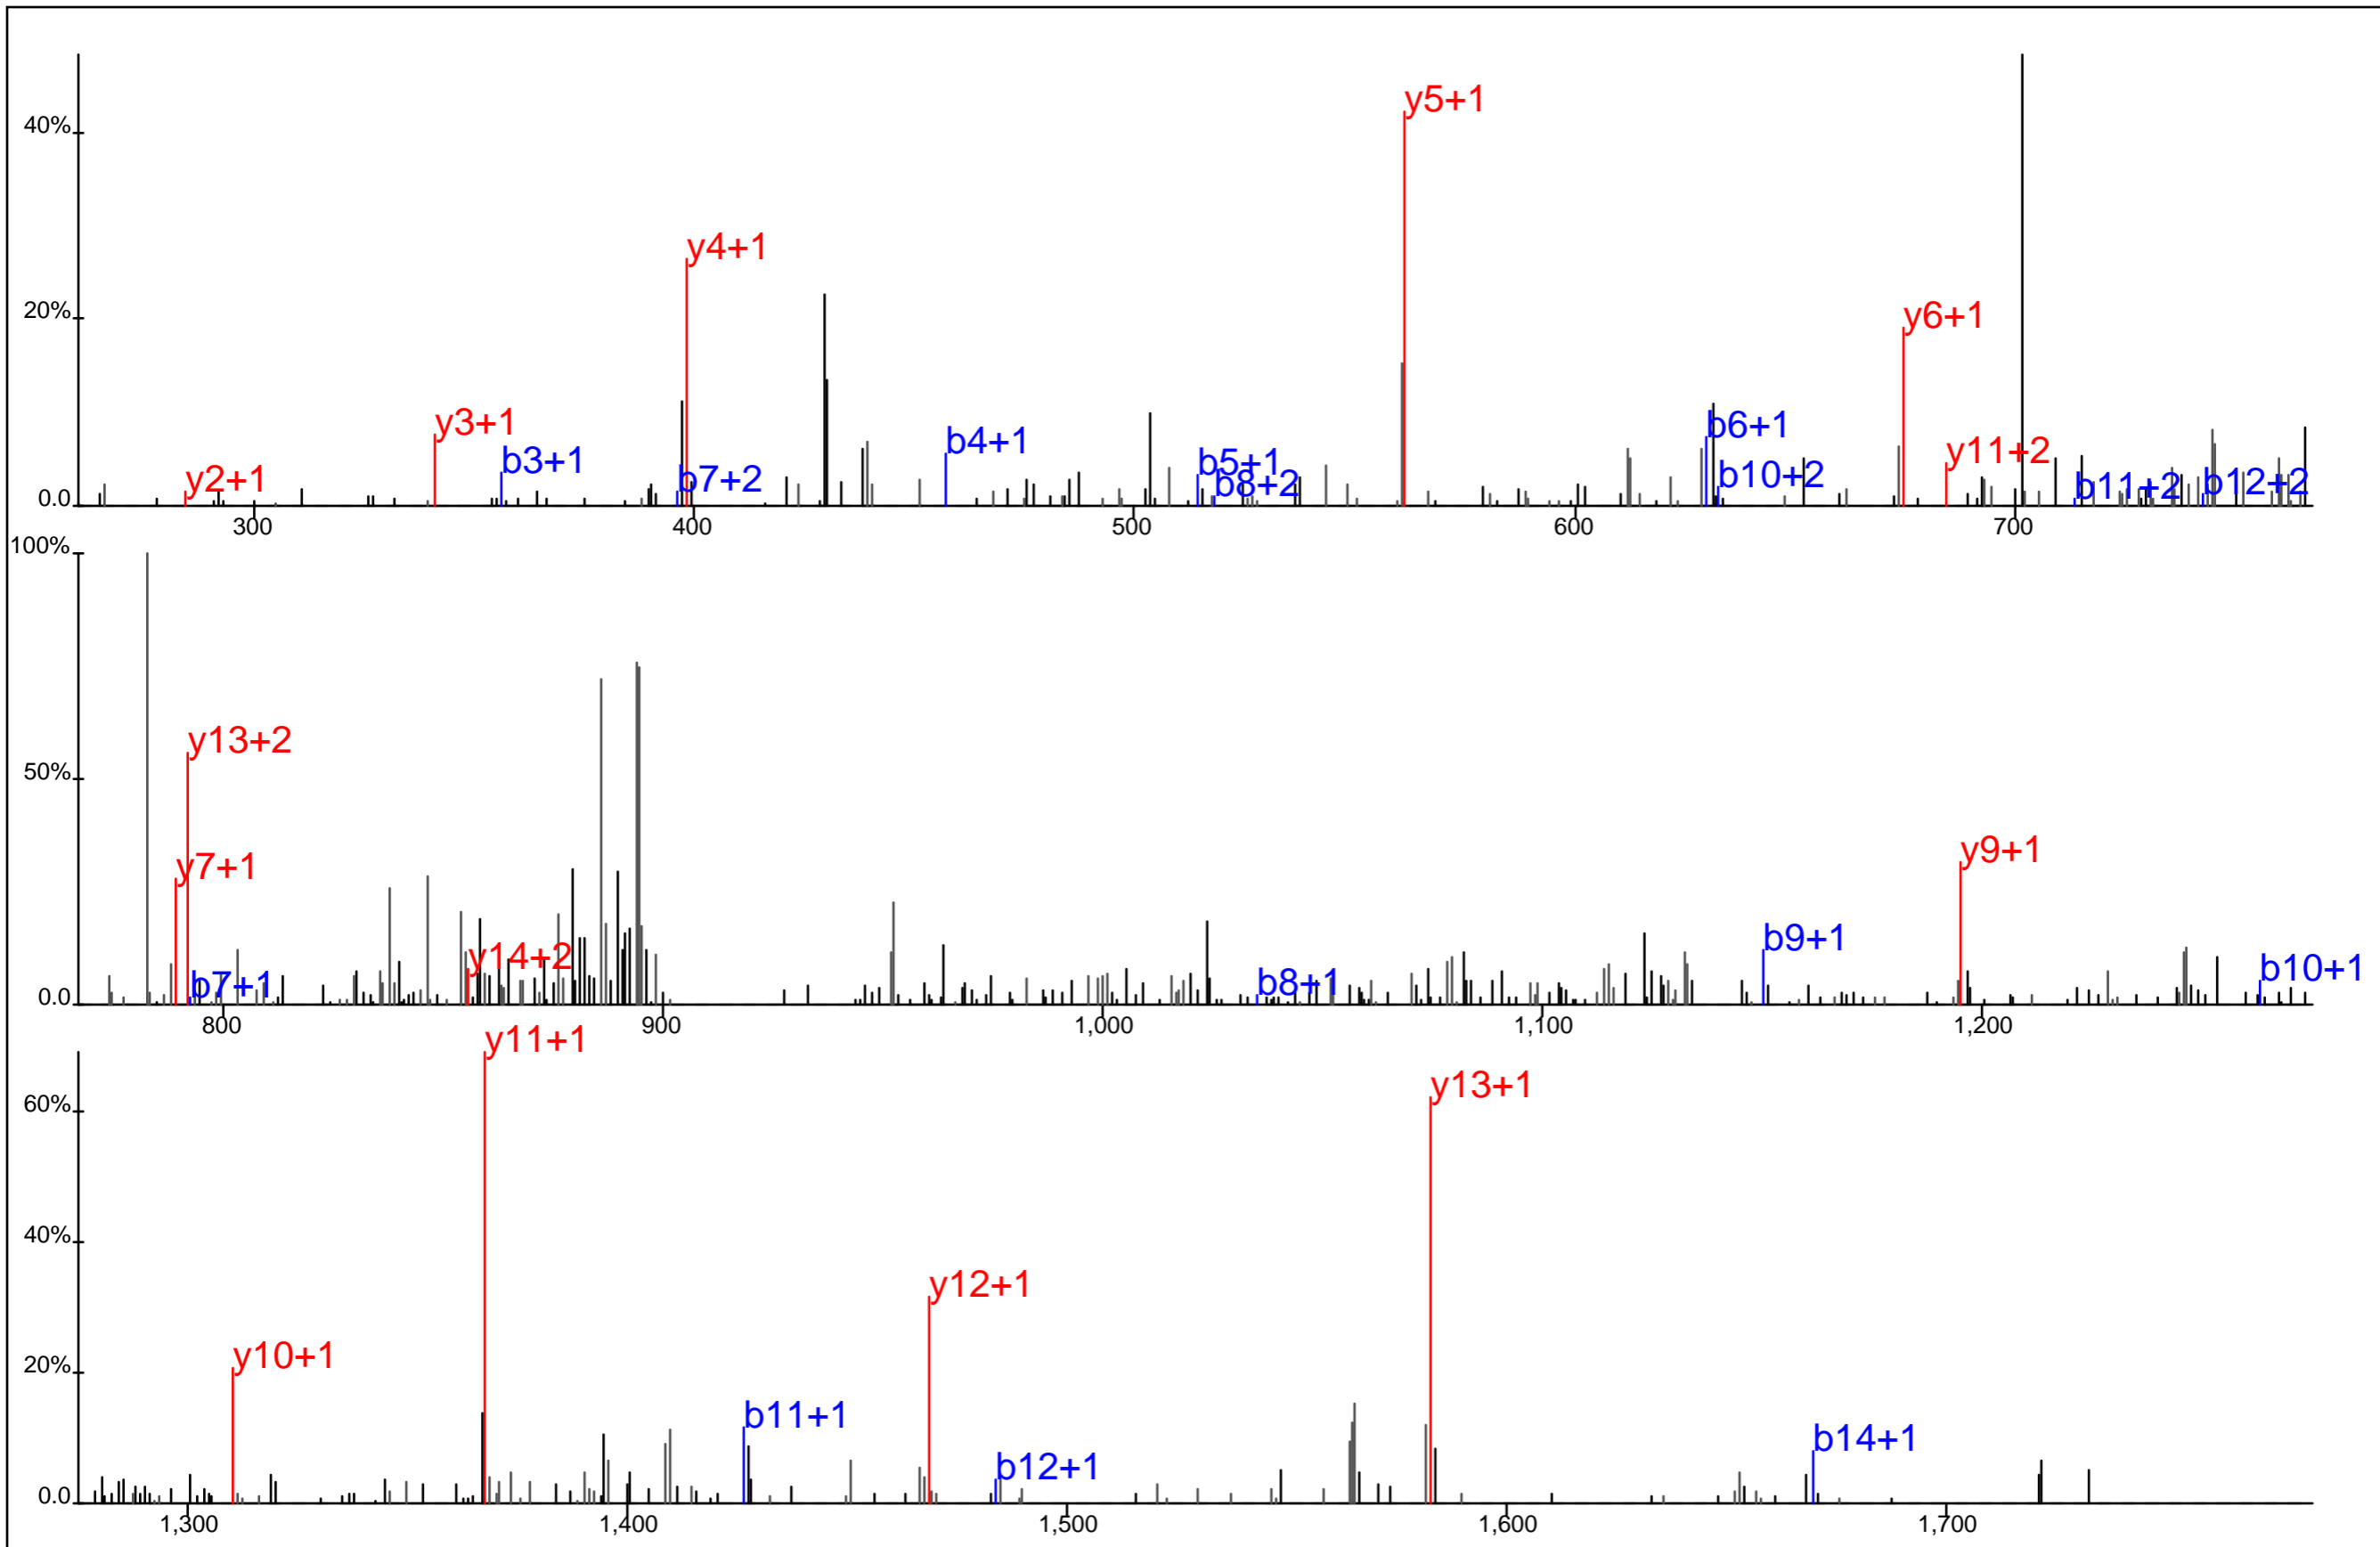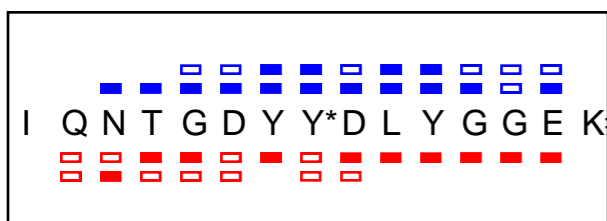

Protein Name: SHP2  
 gi Accession: 33356177  
 Precursor Mass: 912.3876+2  
 Delta Mass: 3.503 ppm  
 XCorr: 60.45

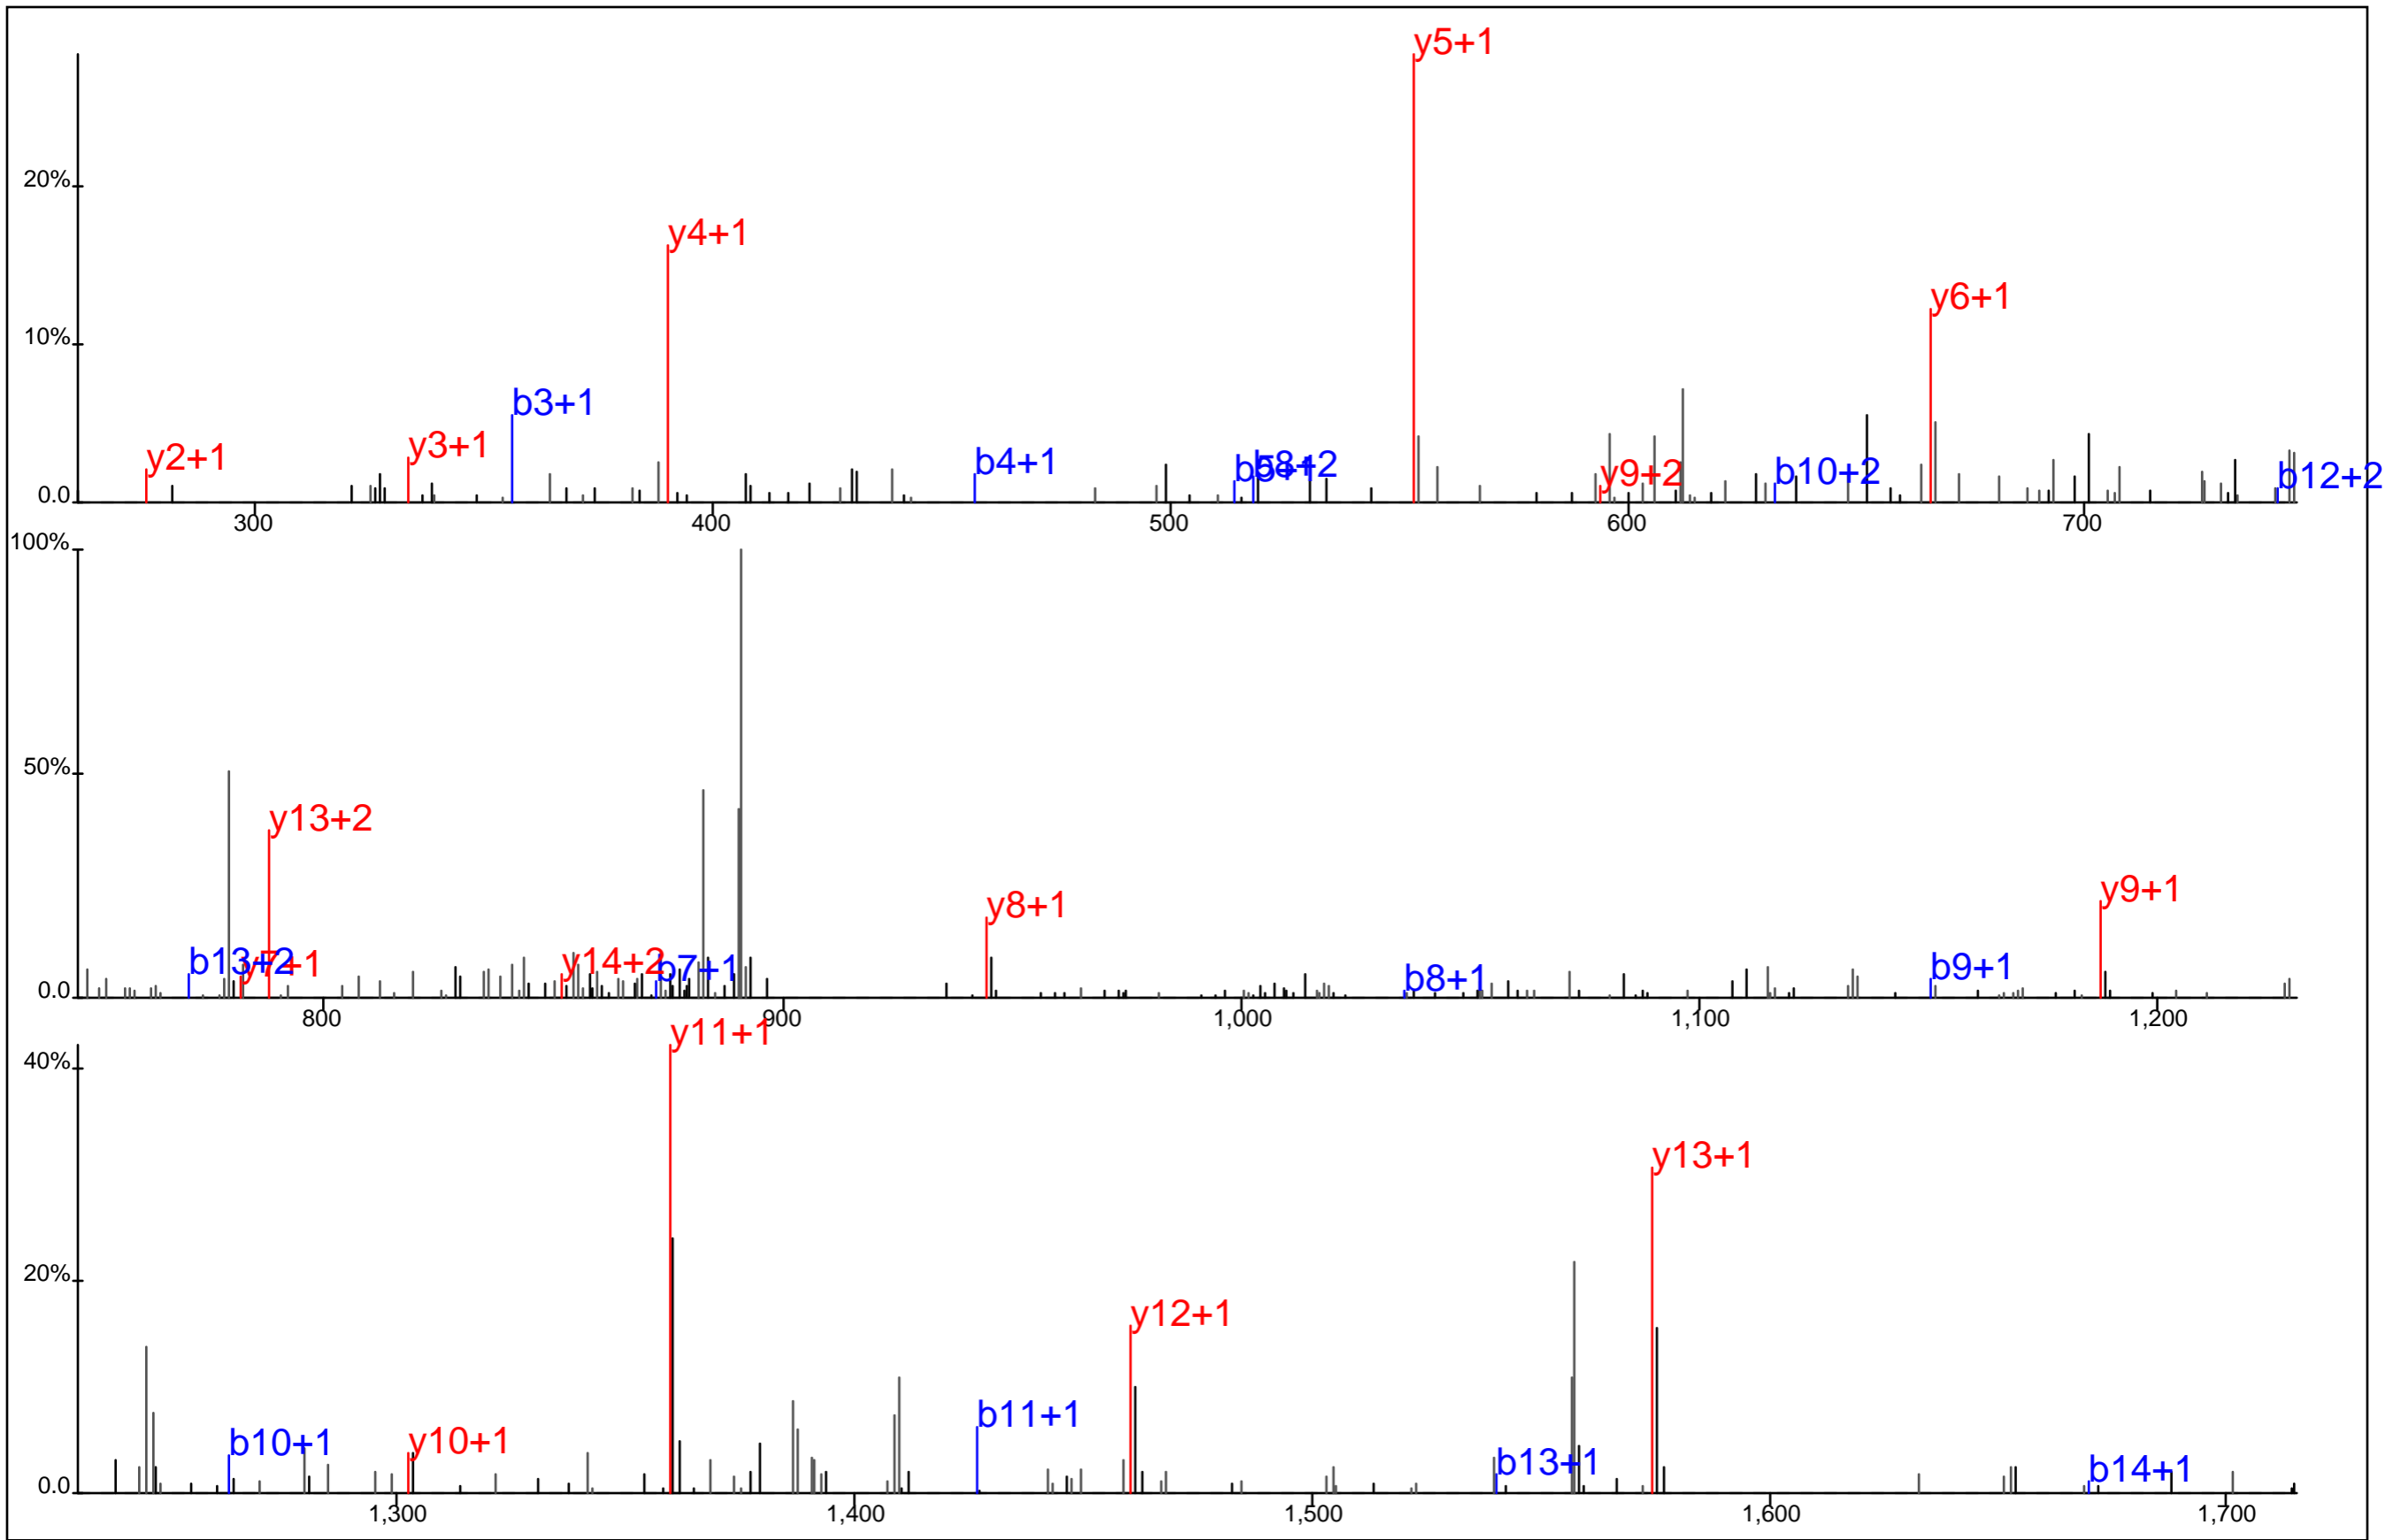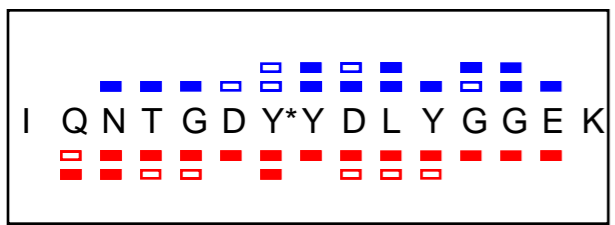

Protein Name: SHP2  
 gi Accession: 33356177  
 Precursor Mass: 908.3826+2  
 Delta Mass: 5.892 ppm  
 XCorr: 48.38

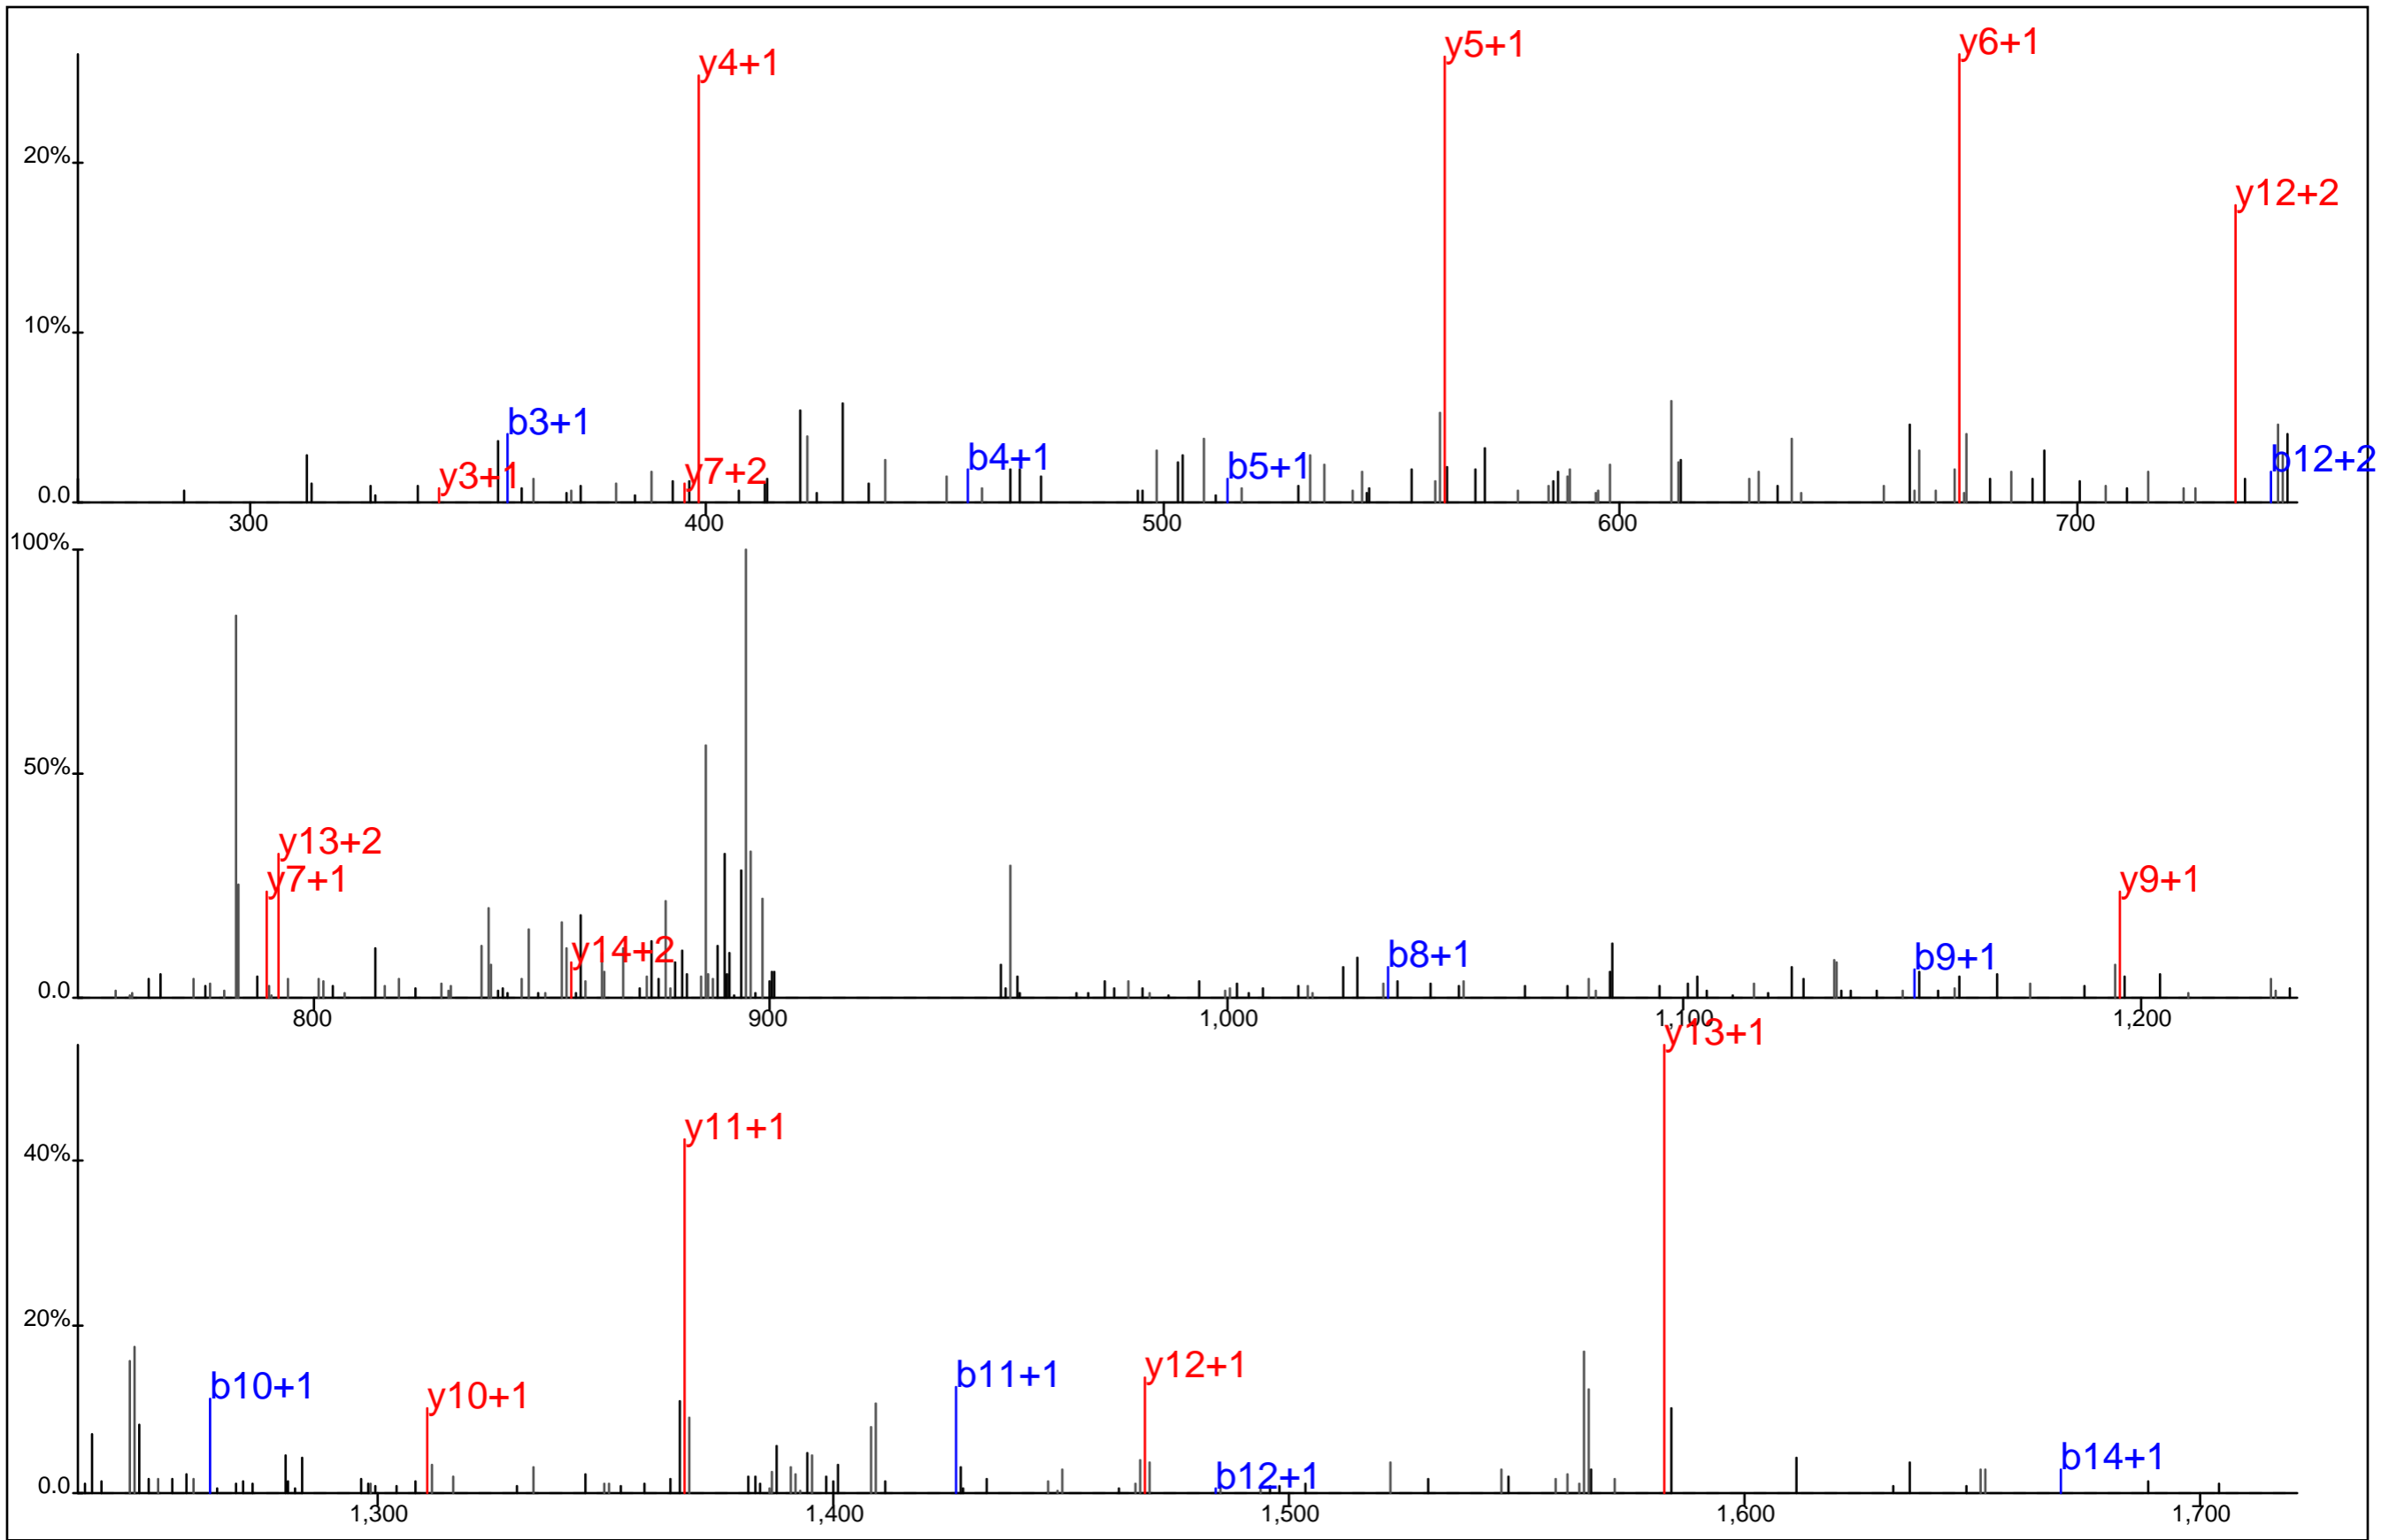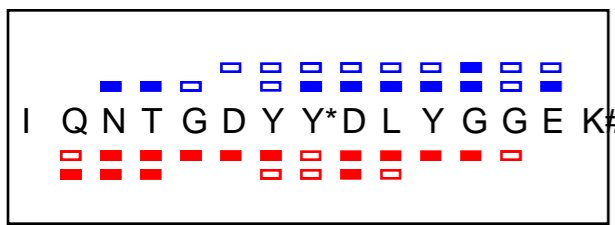

Protein Name: SHP2  
 gi Accession: 33356177  
 Precursor Mass: 912.3886+2  
 Delta Mass: 4.643 ppm  
 XCorr: 55.72

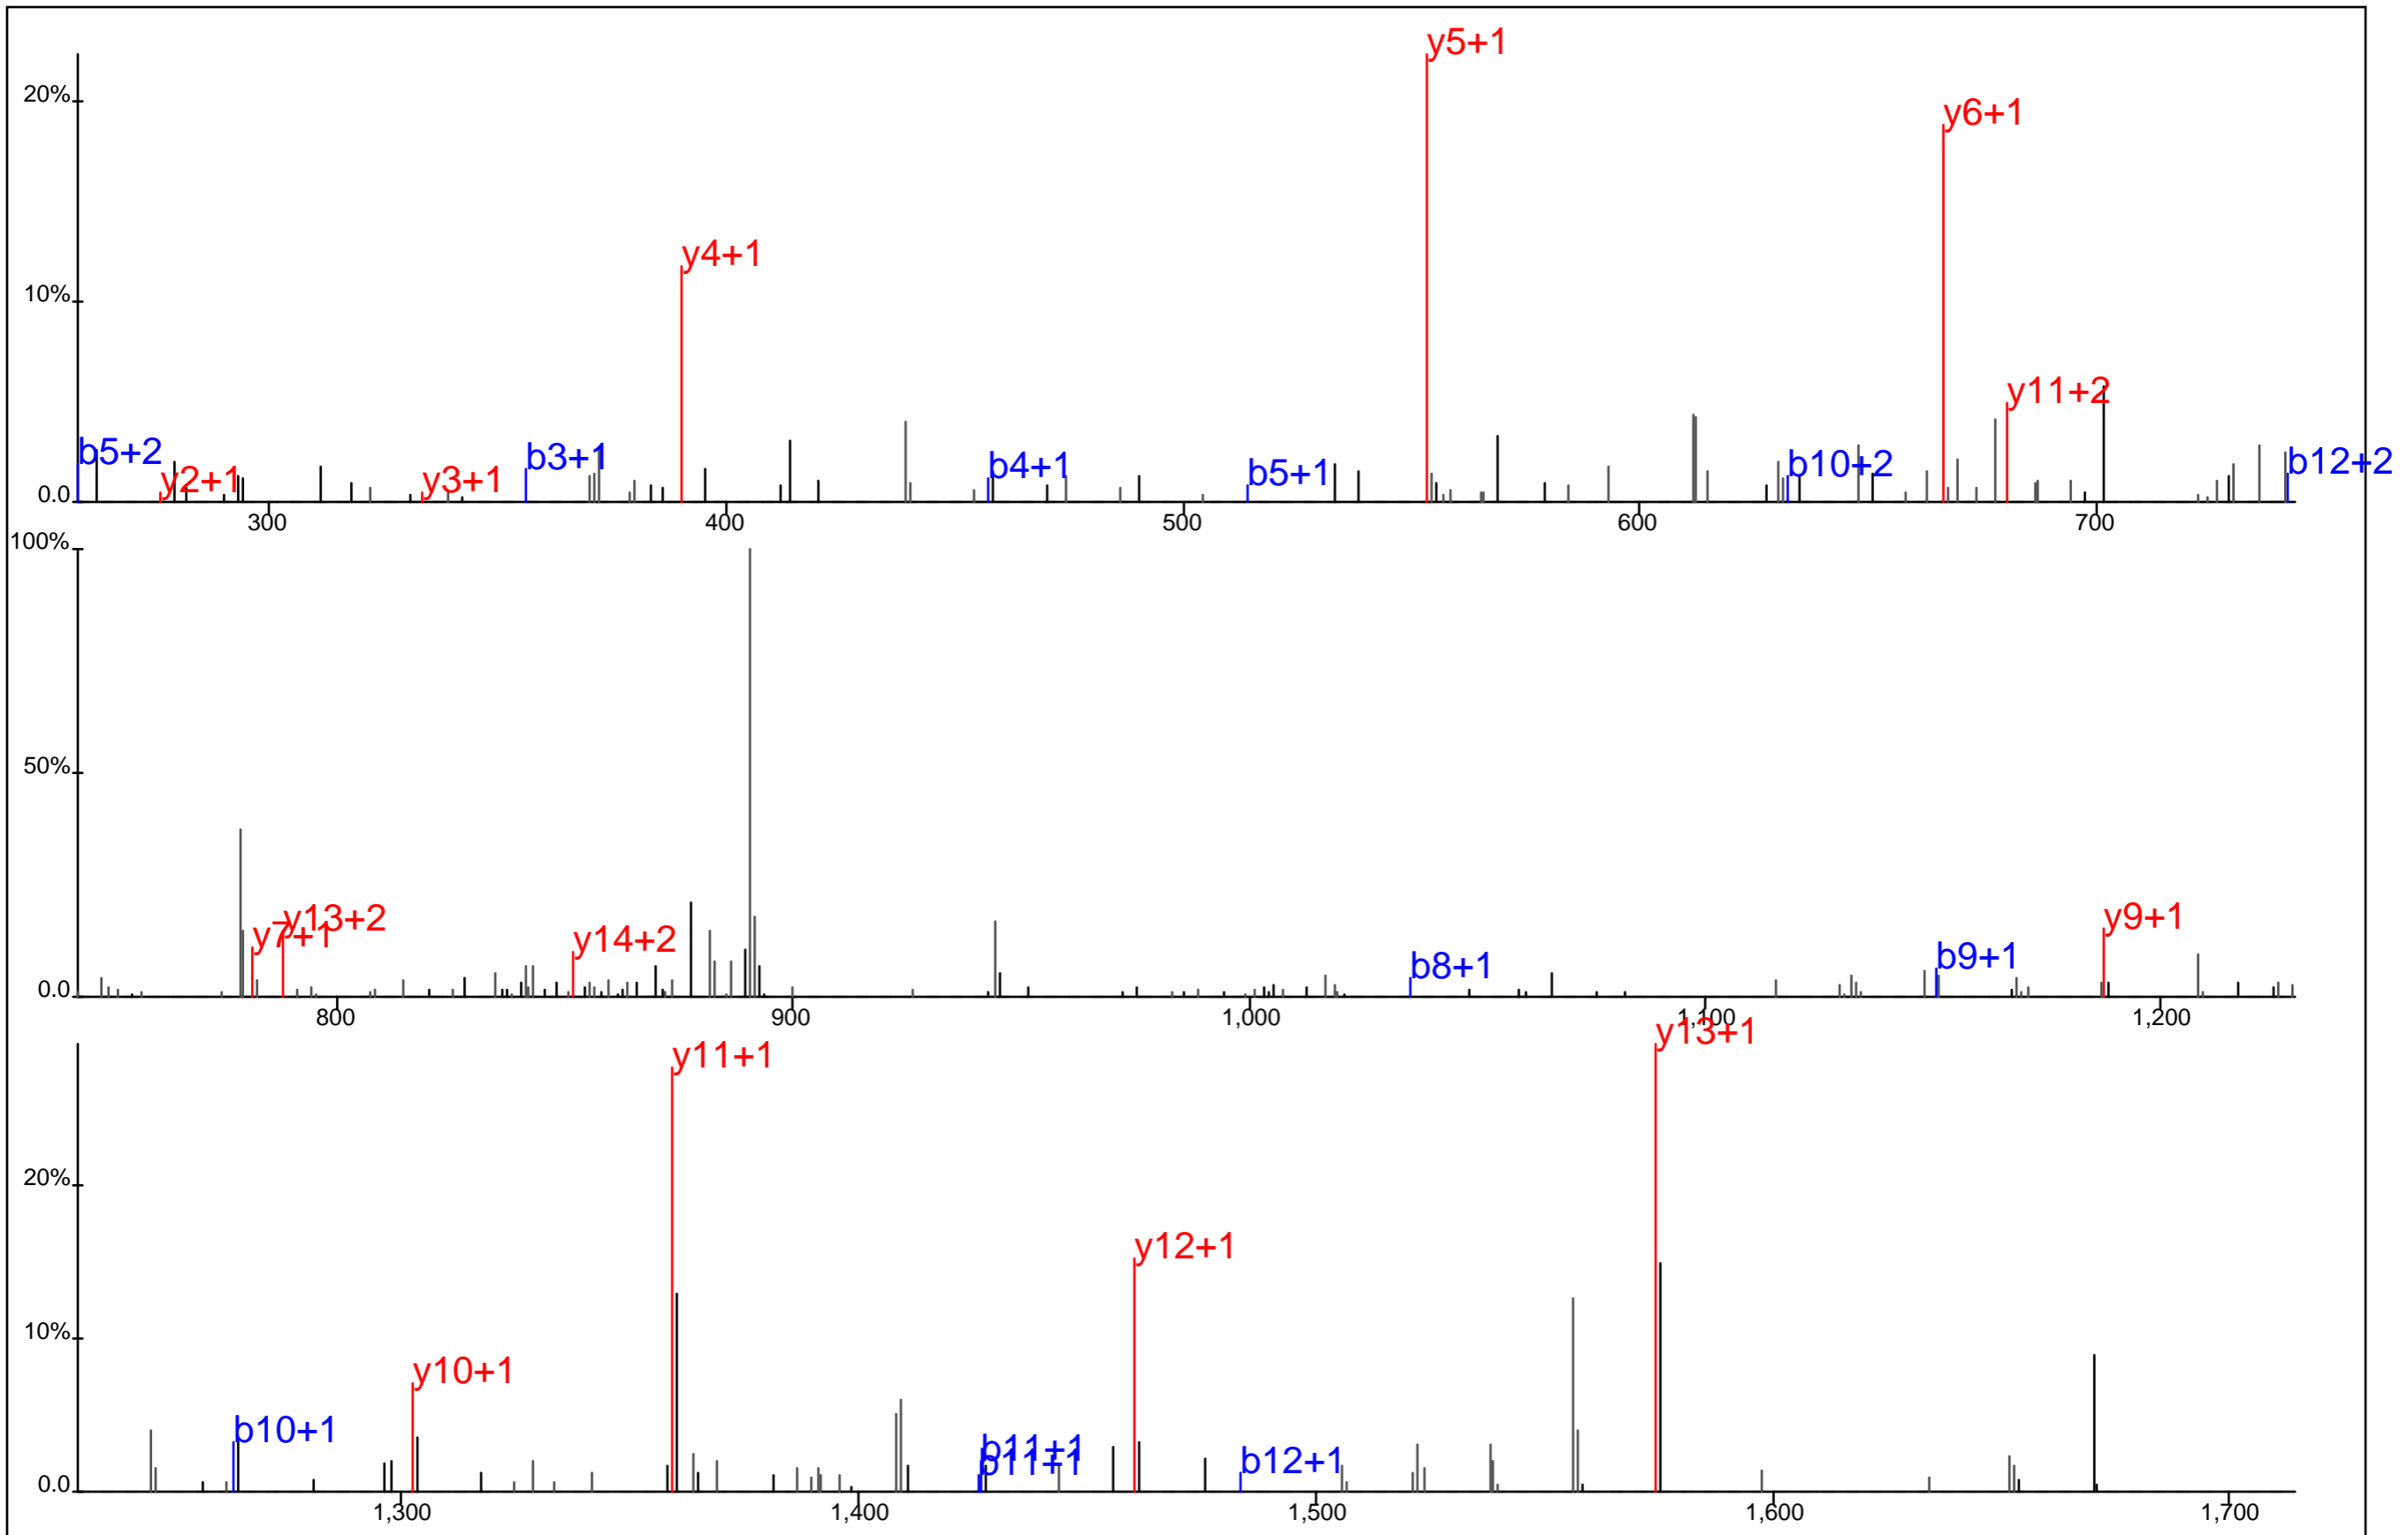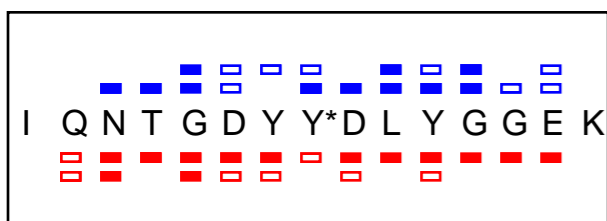

Protein Name: SHP2  
 gi Accession: 33356177  
 Precursor Mass: 908.3778+2  
 Delta Mass: 0.583 ppm  
 XCorr: 53.54

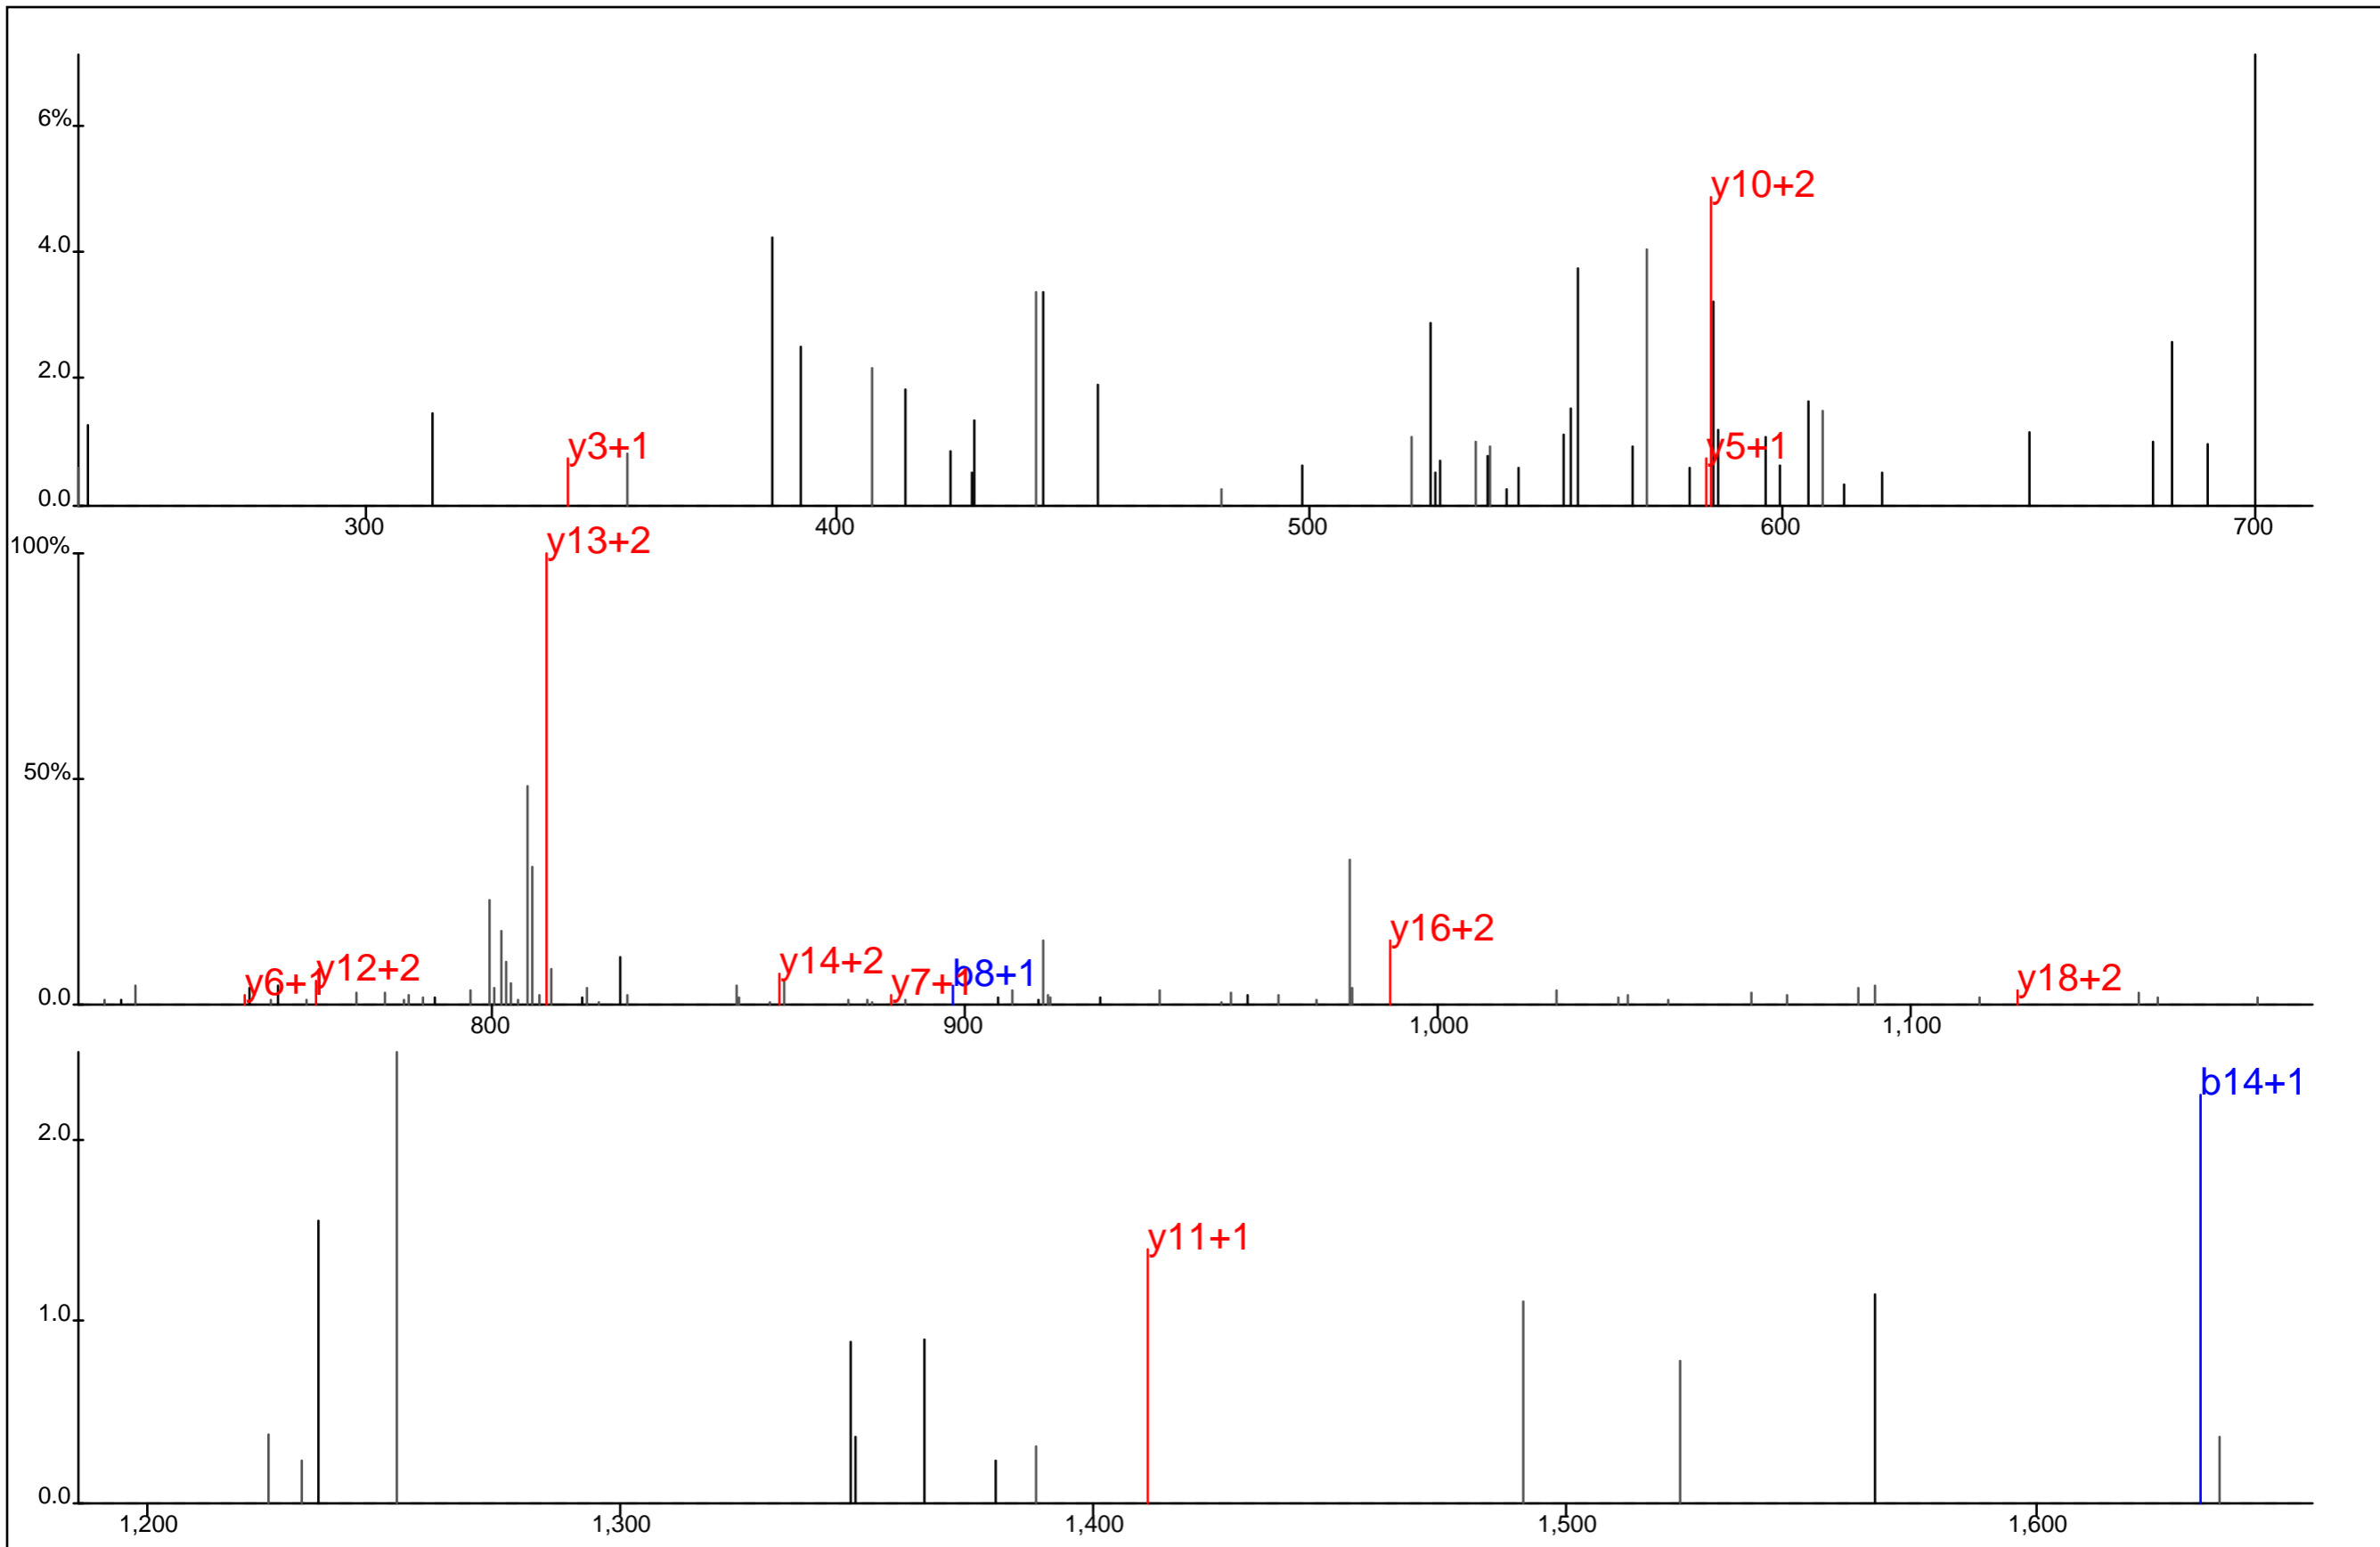

S G E S\*V E E V P L Y\*G N L H Y L Q T G R#  
 - - - - -  
 - - - - -  
 - - - - -

Protein Name: SIT  
 gi Accession: 7657577  
 Precursor Mass: 840.0376+3  
 Delta Mass: 2.224 ppm  
 XCorr: 3.3797

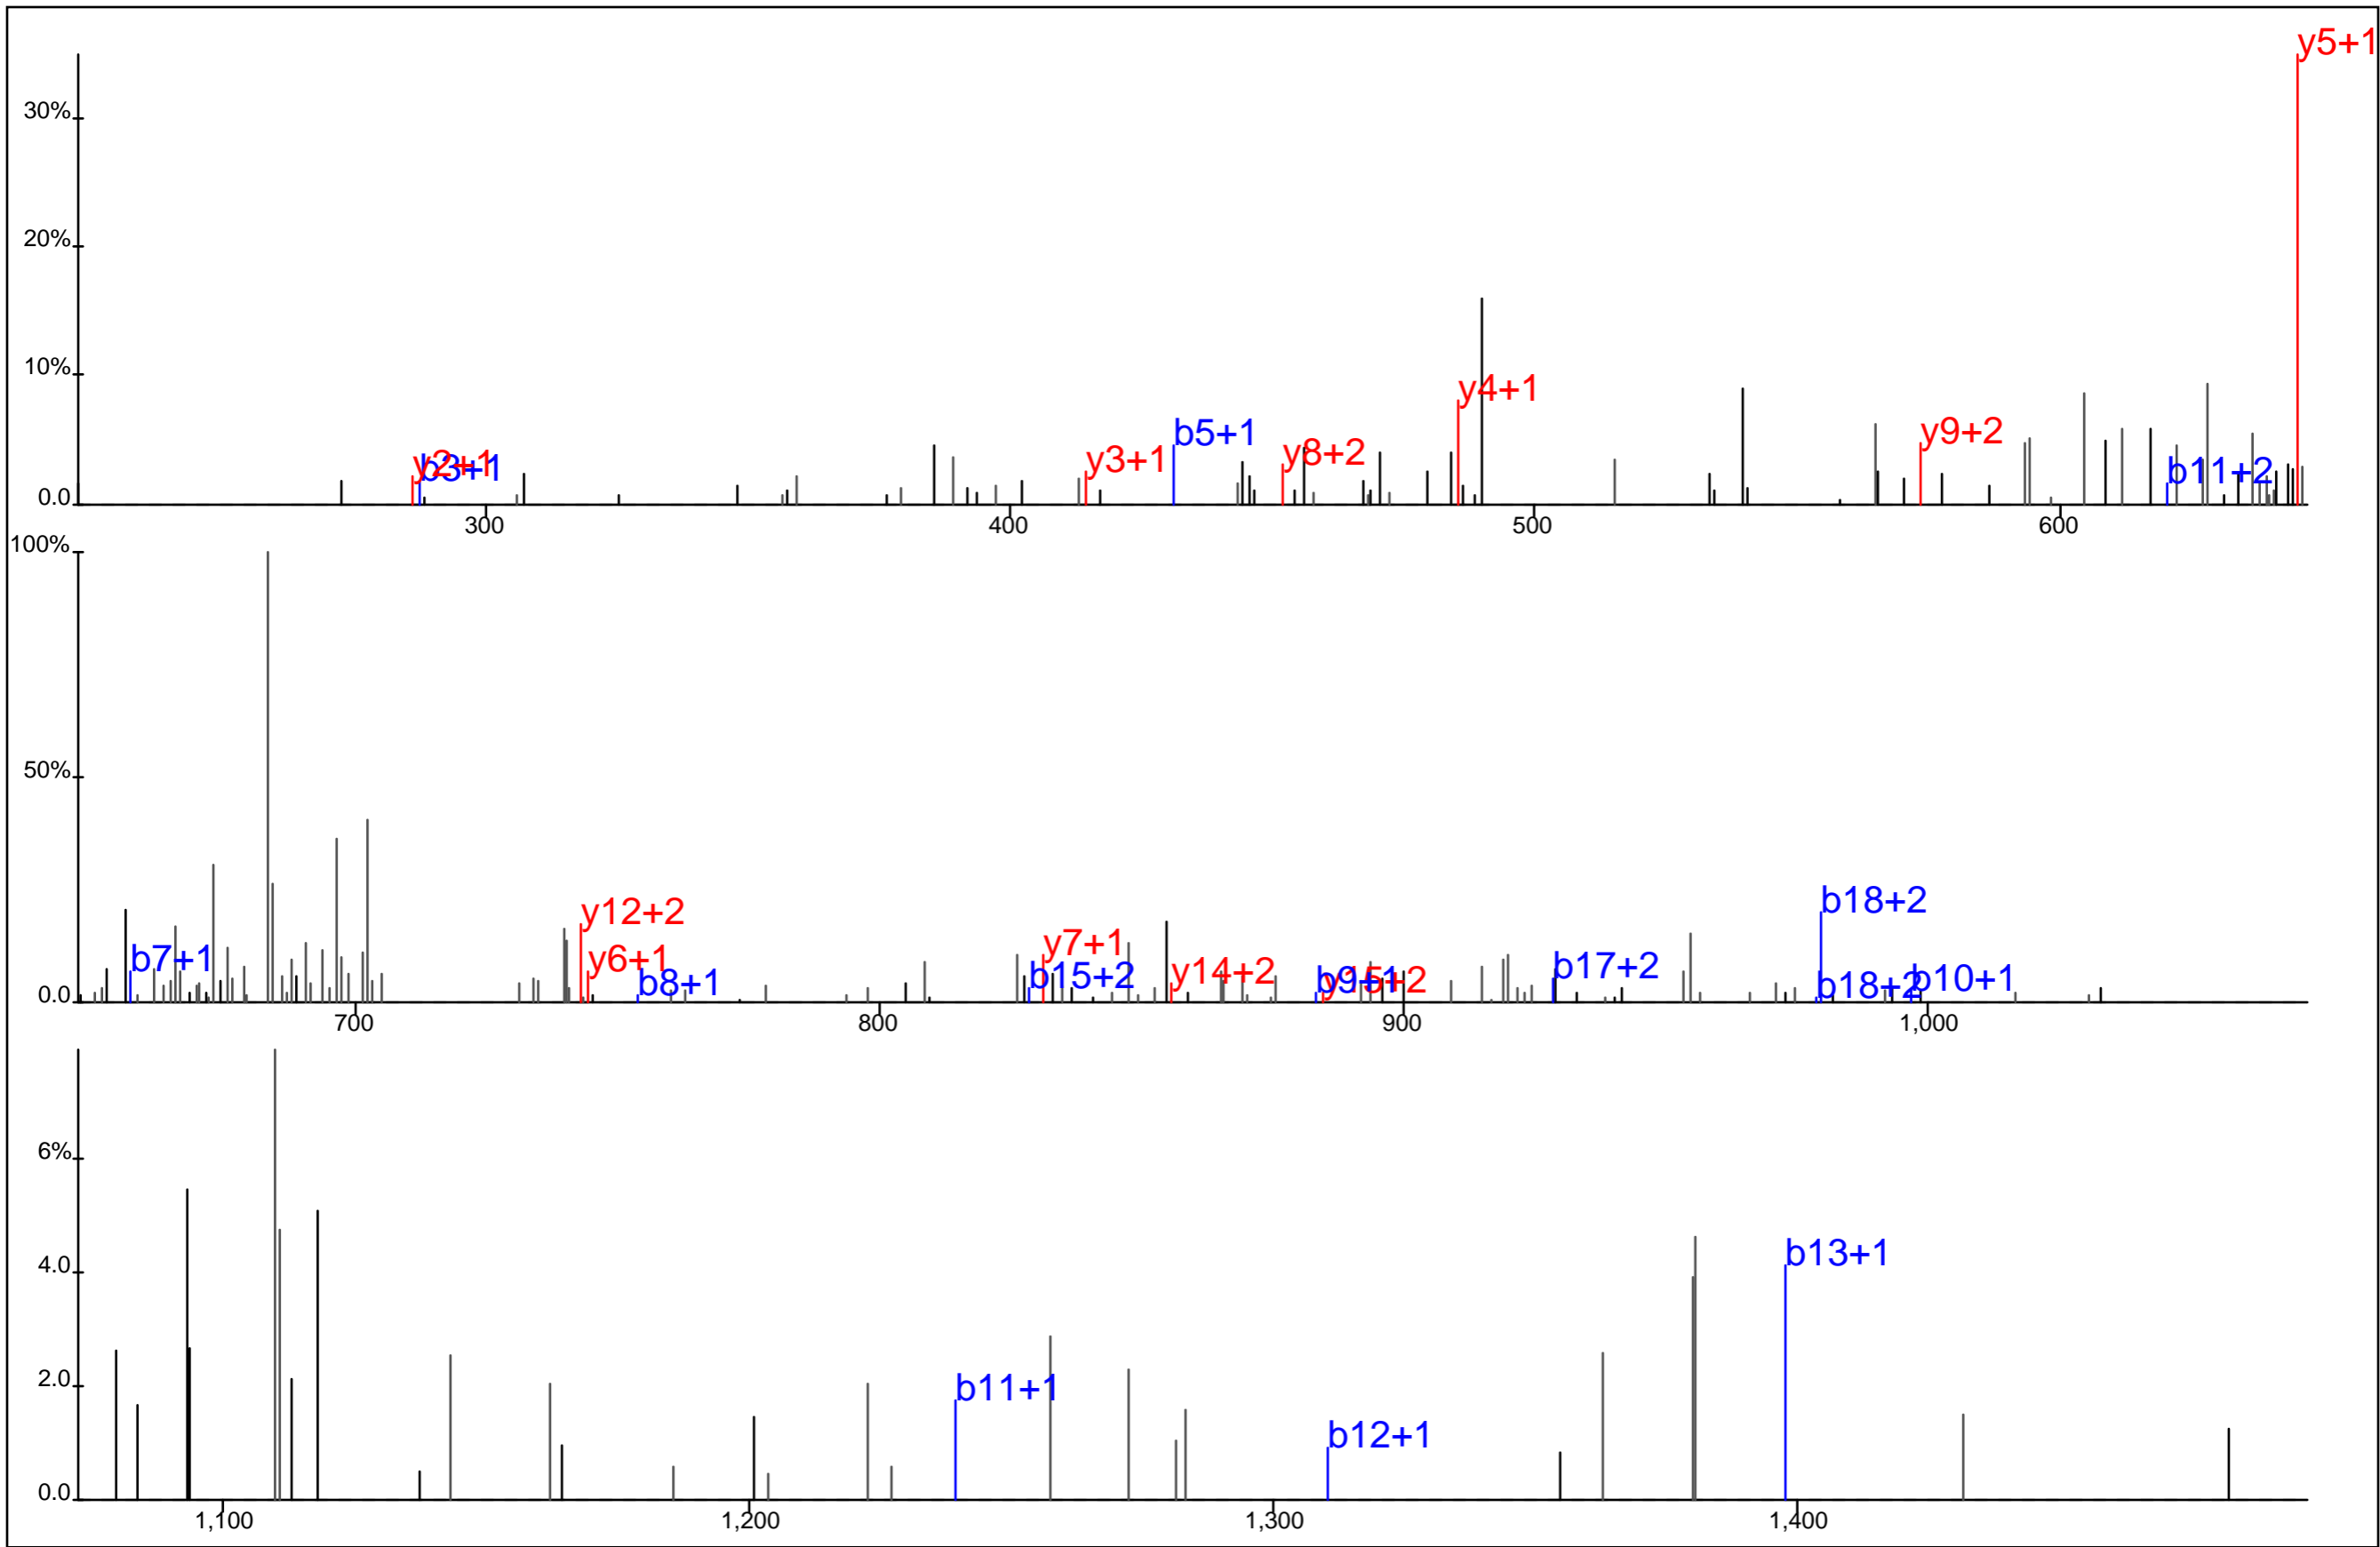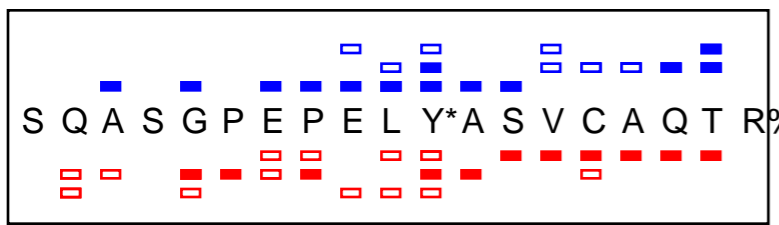

Protein Name: SIT  
 gi Accession: 7657577  
 Precursor Mass: 714.3173+3  
 Delta Mass: 6.067 ppm  
 XCorr: 14.02



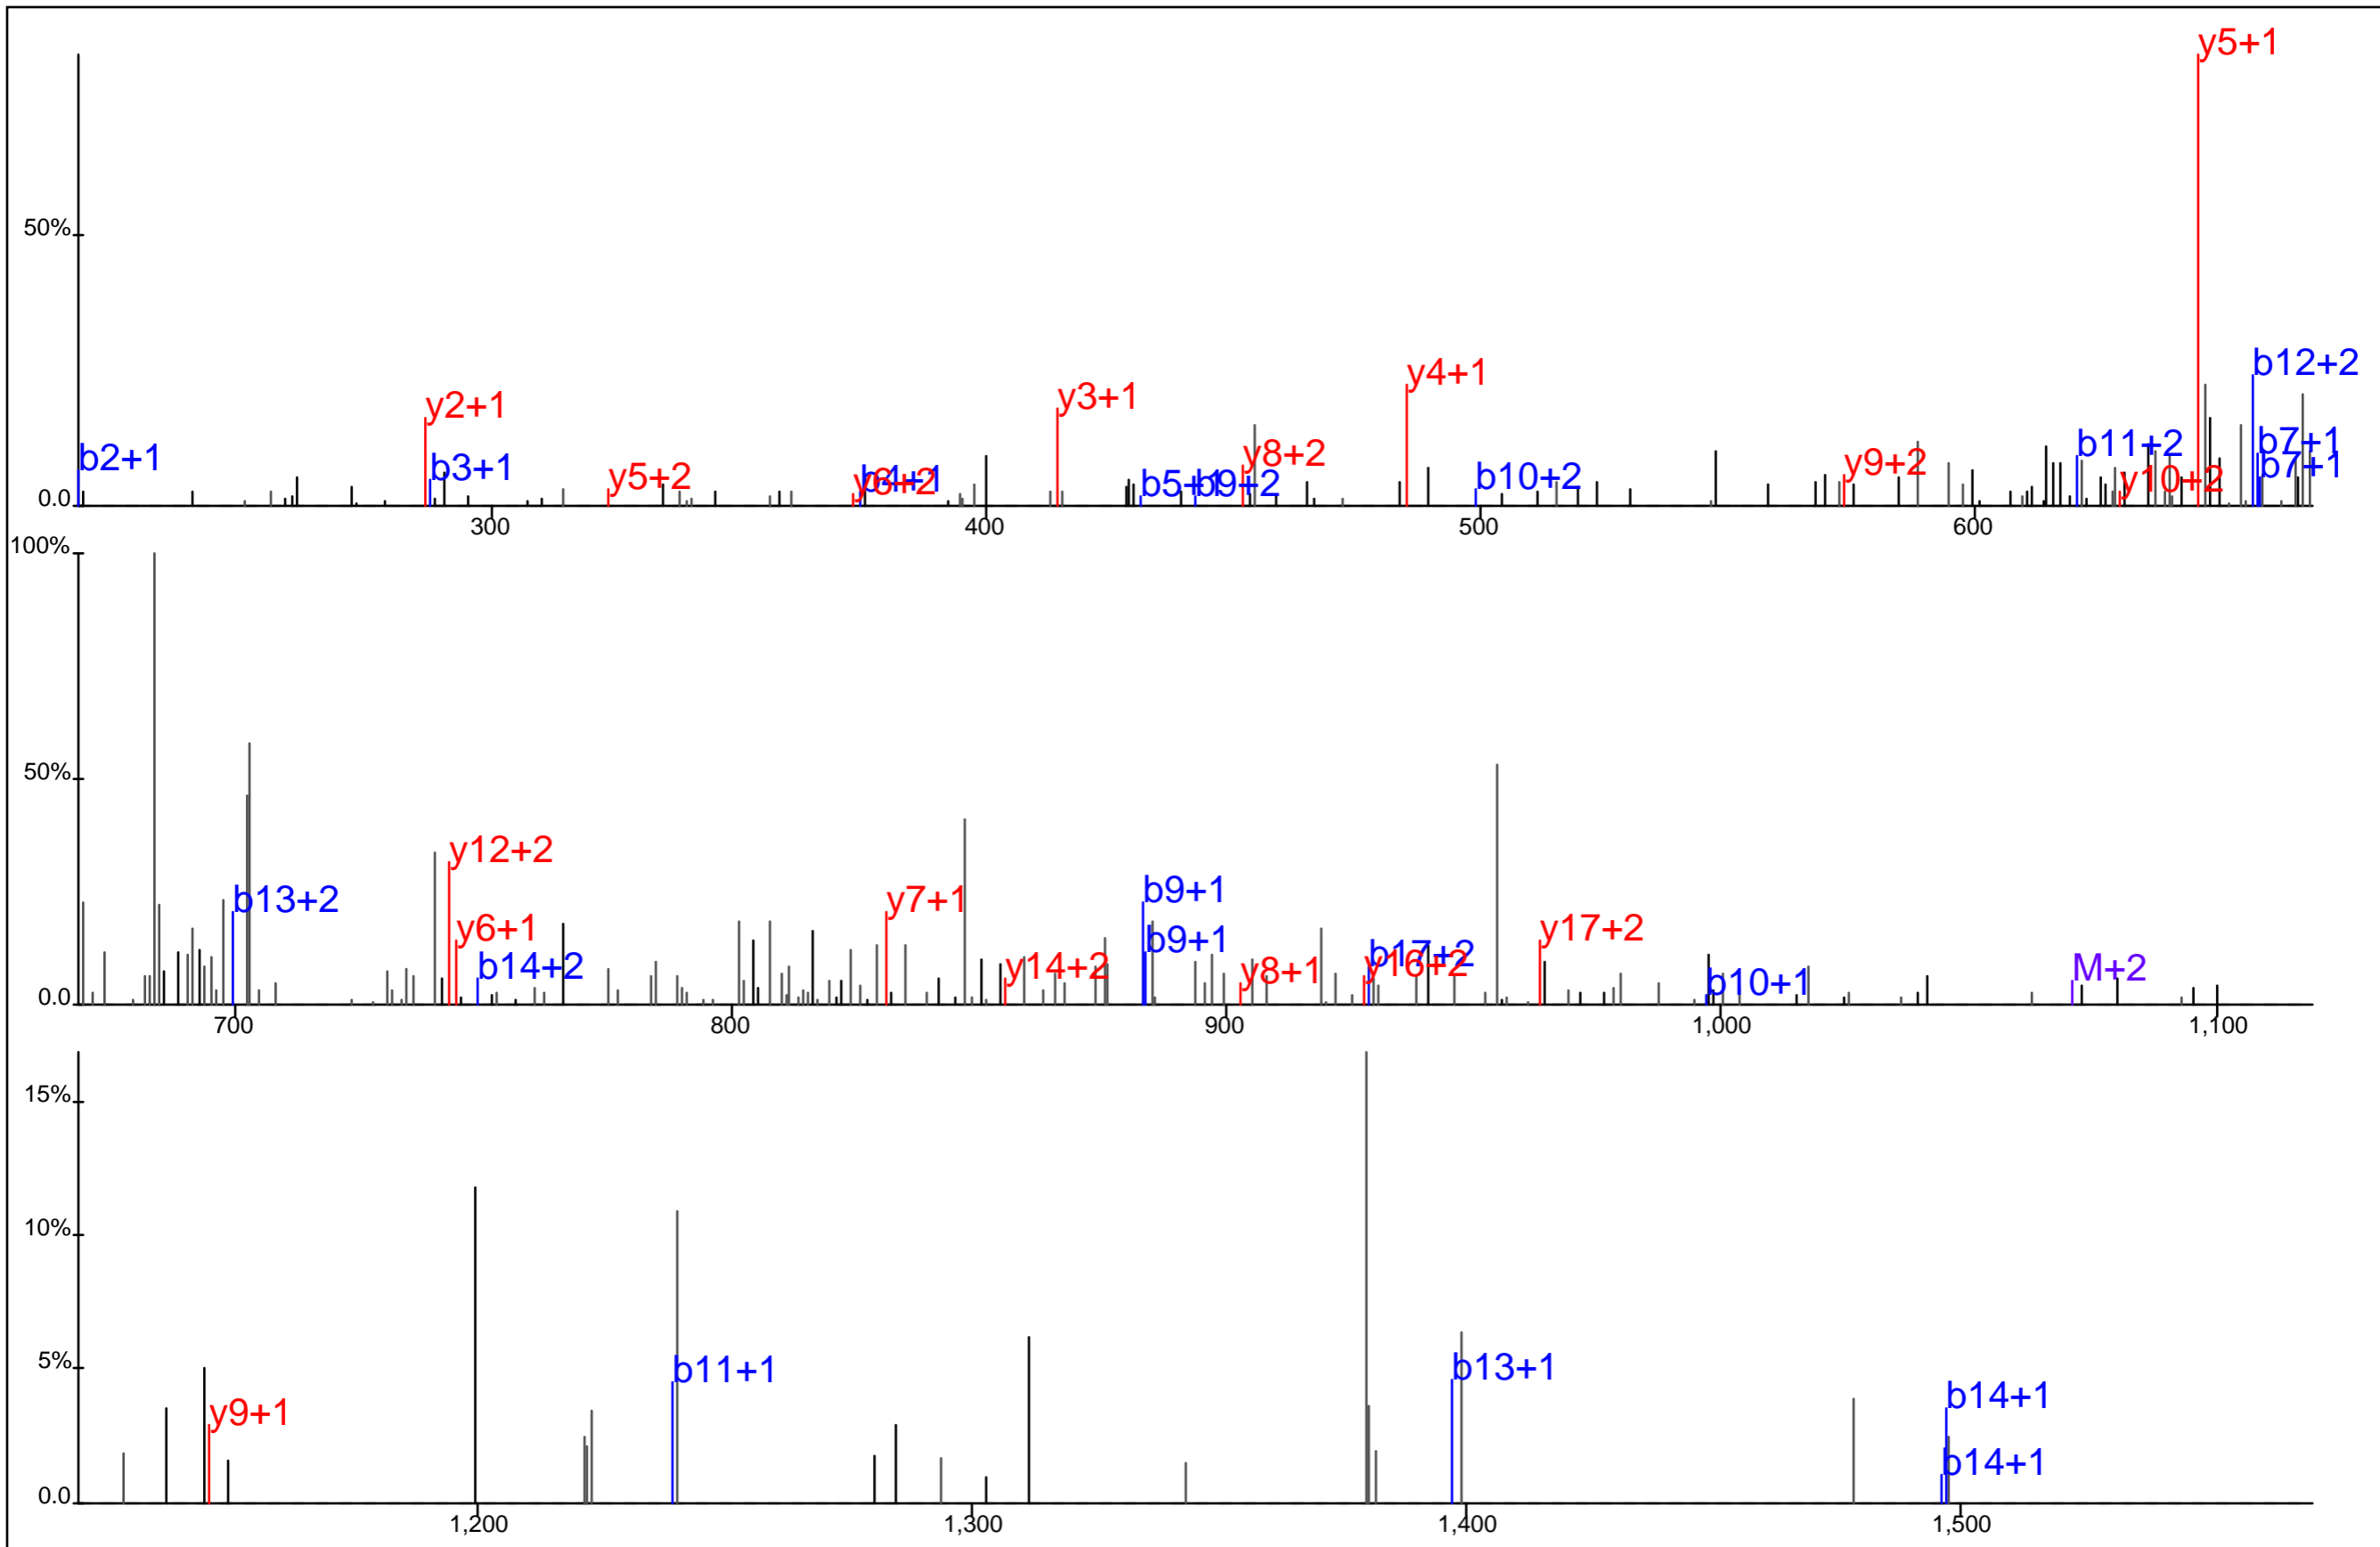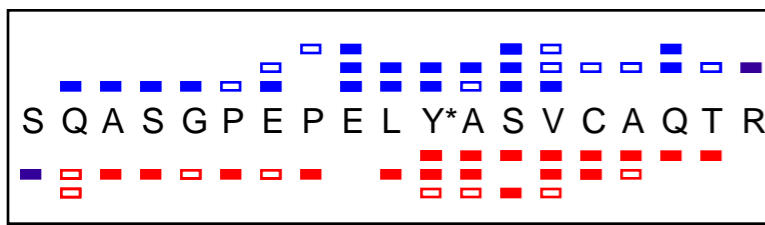

Protein Name: SIT  
 gi Accession: 7657577  
 Precursor Mass: 714.3158+3  
 Delta Mass: 3.927 ppm  
 XCorr: 26.92

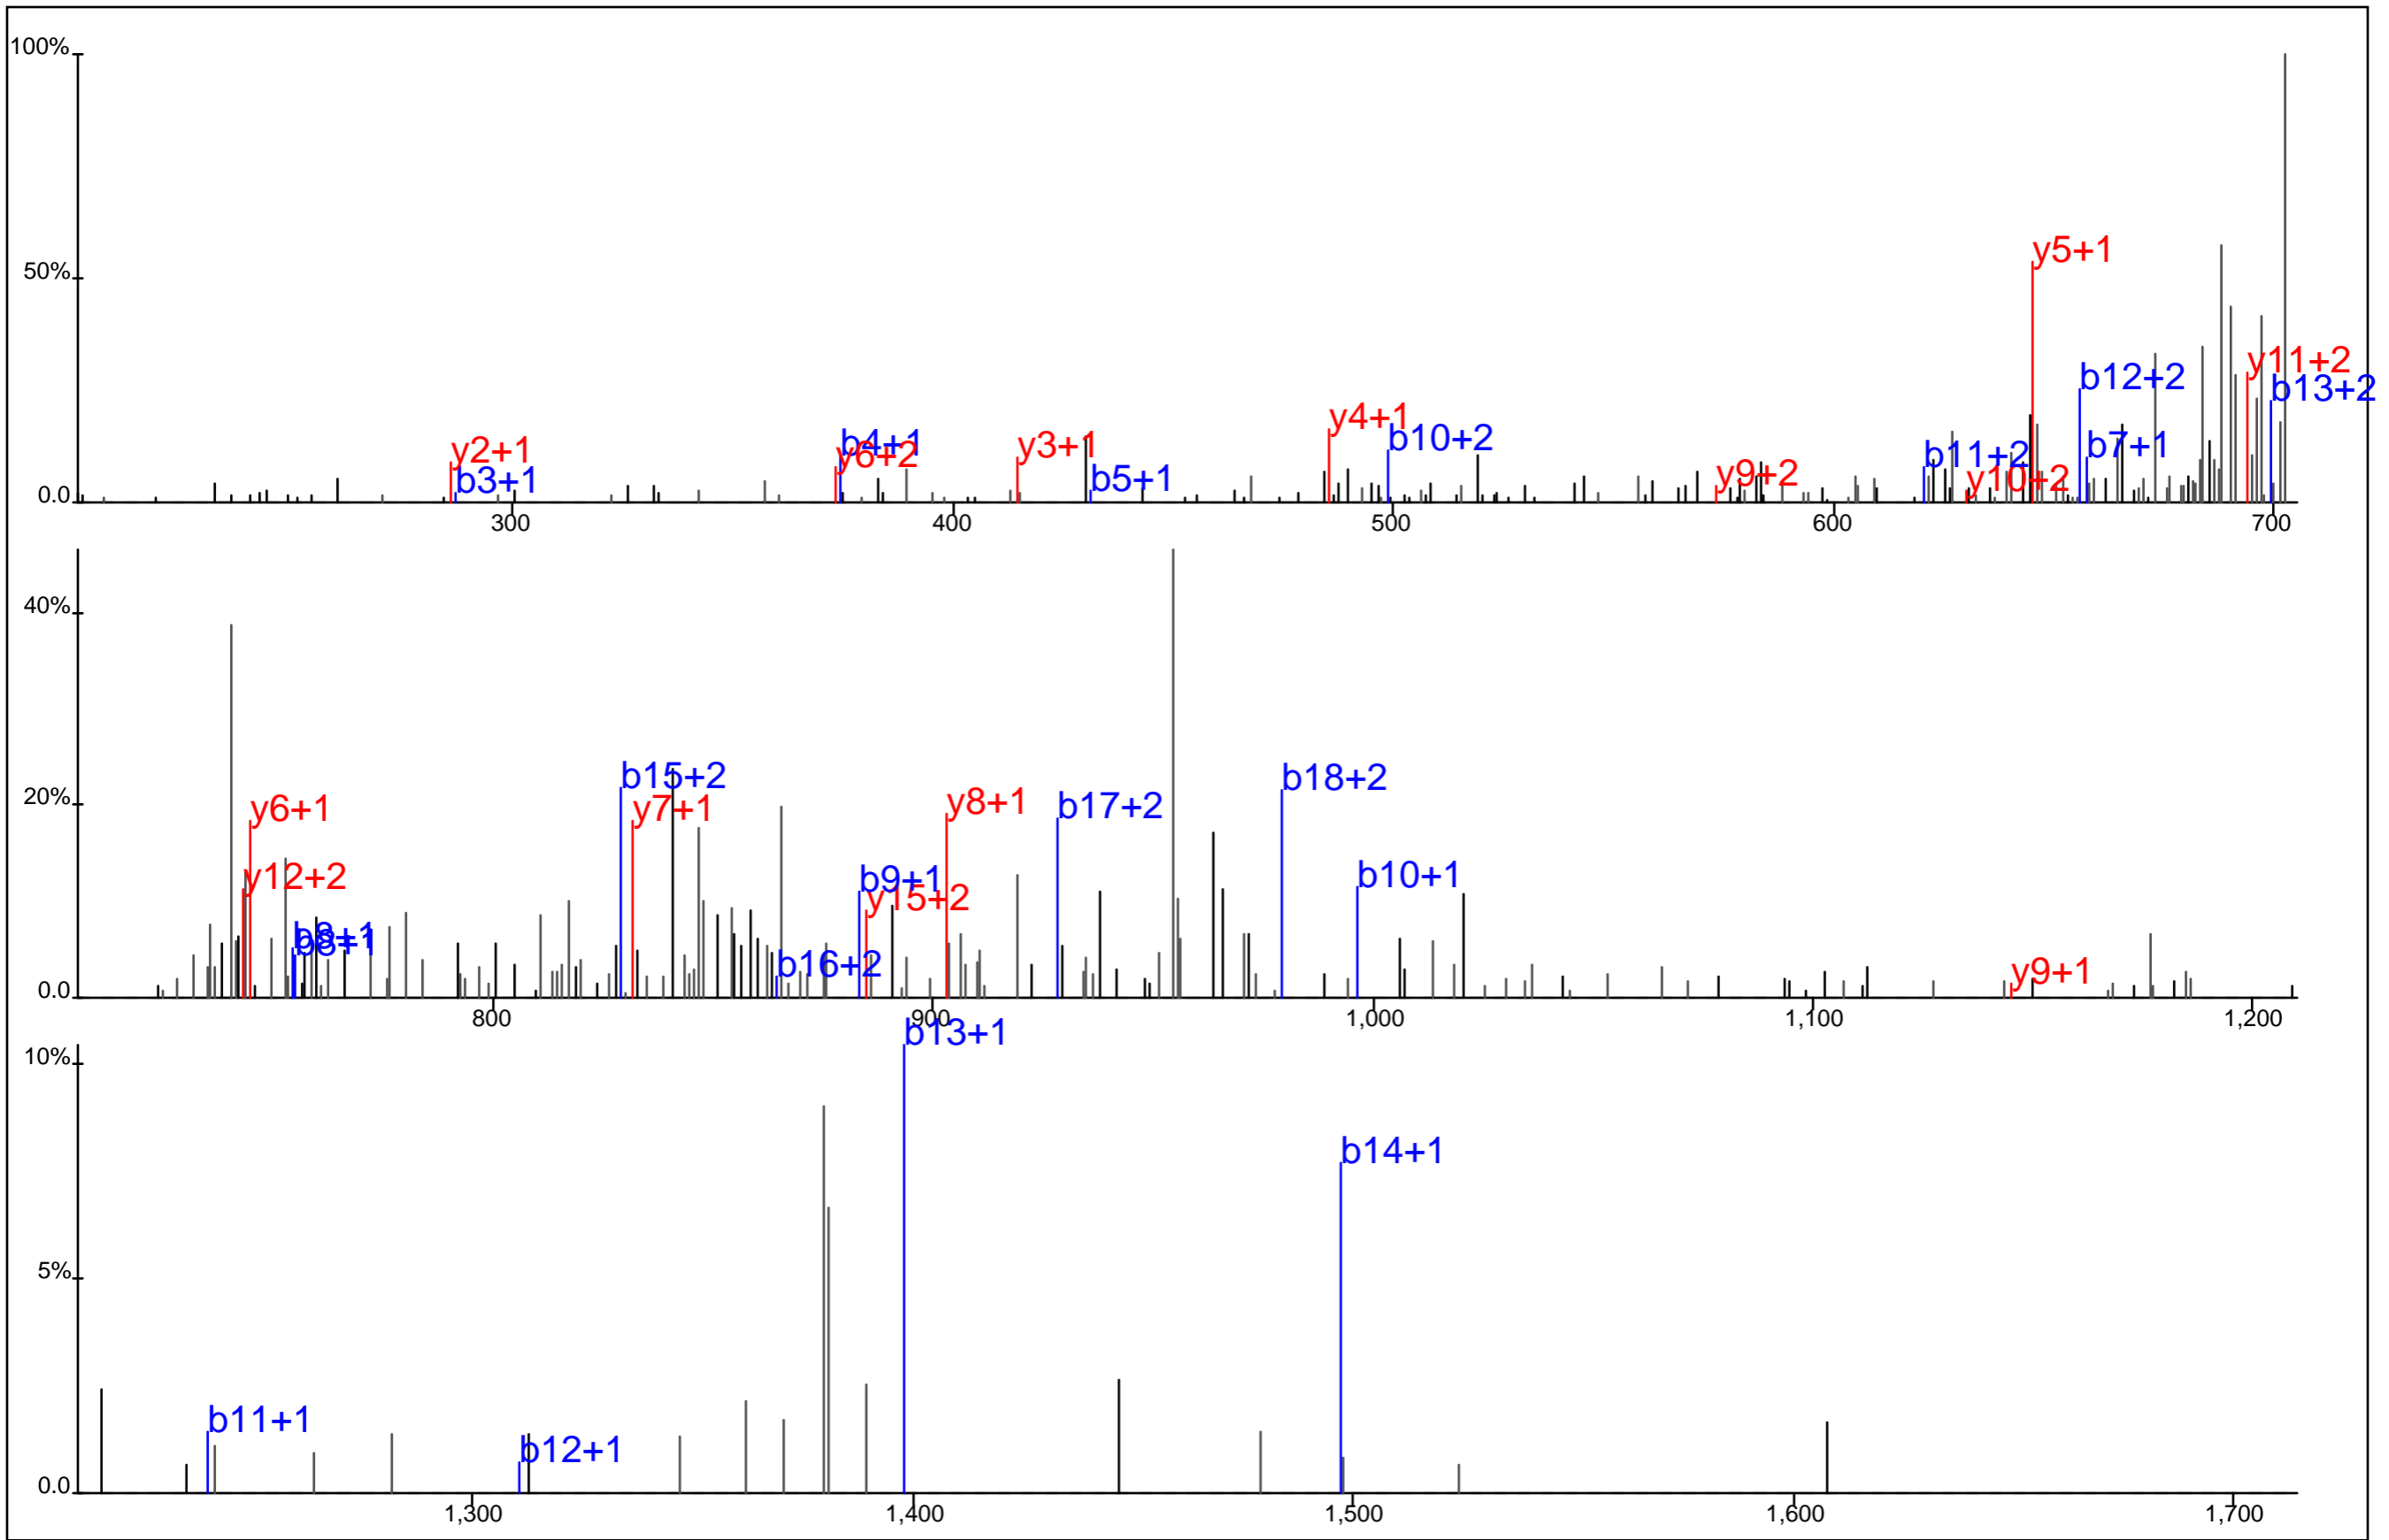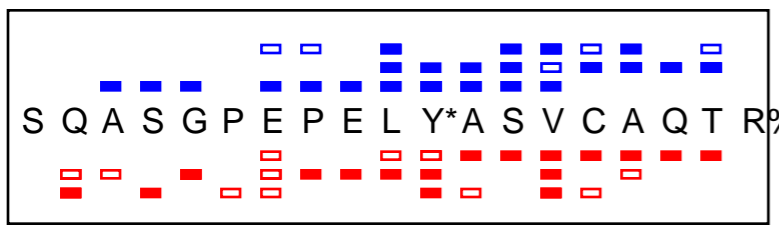

Protein Name: SIT  
 gi Accession: 7657577  
 Precursor Mass: 714.3151+3  
 Delta Mass: 2.904 ppm  
 XCorr: 24.02

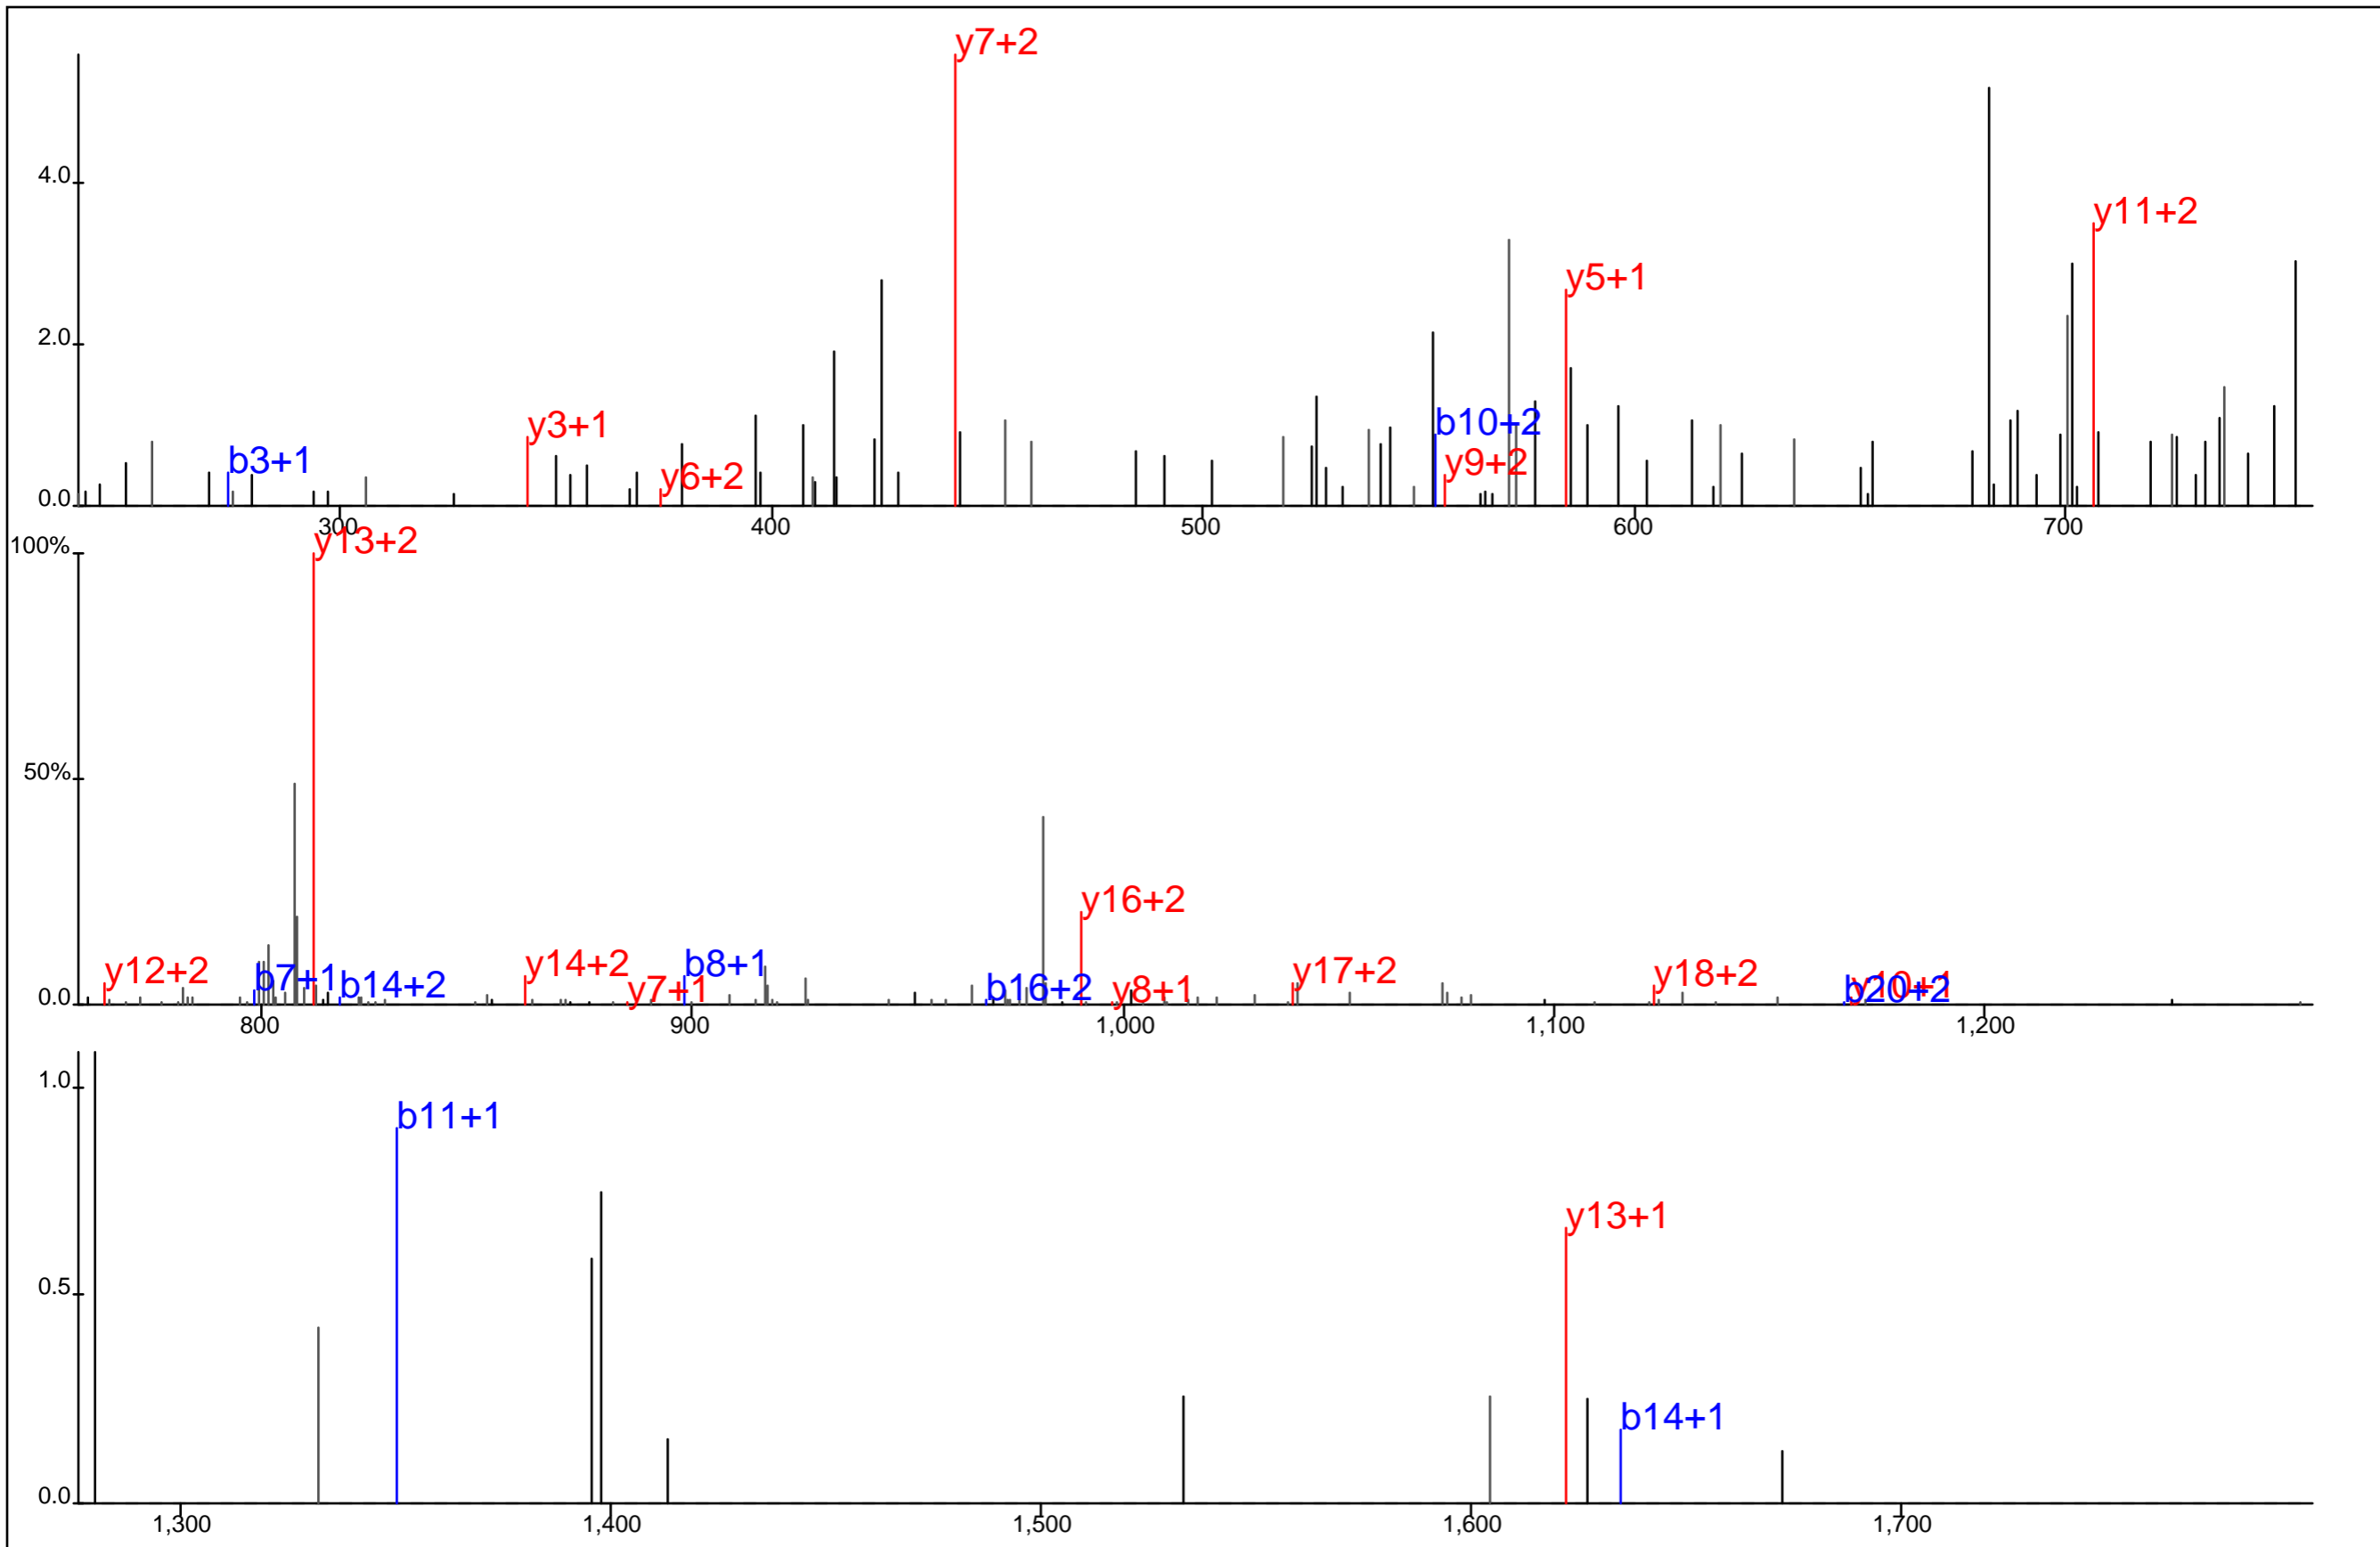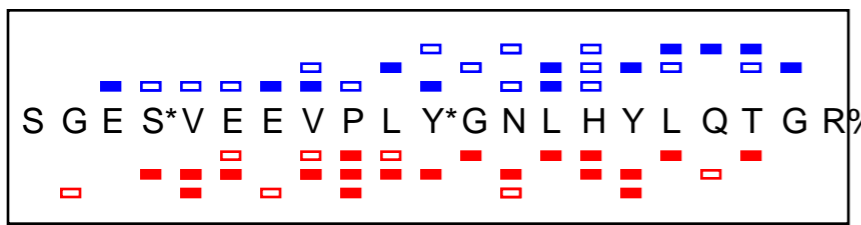

Protein Name: SIT  
 gi Accession: 7657577  
 Precursor Mass: 840.0367+3  
 Delta Mass: 1.139 ppm  
 XCorr: 35.06

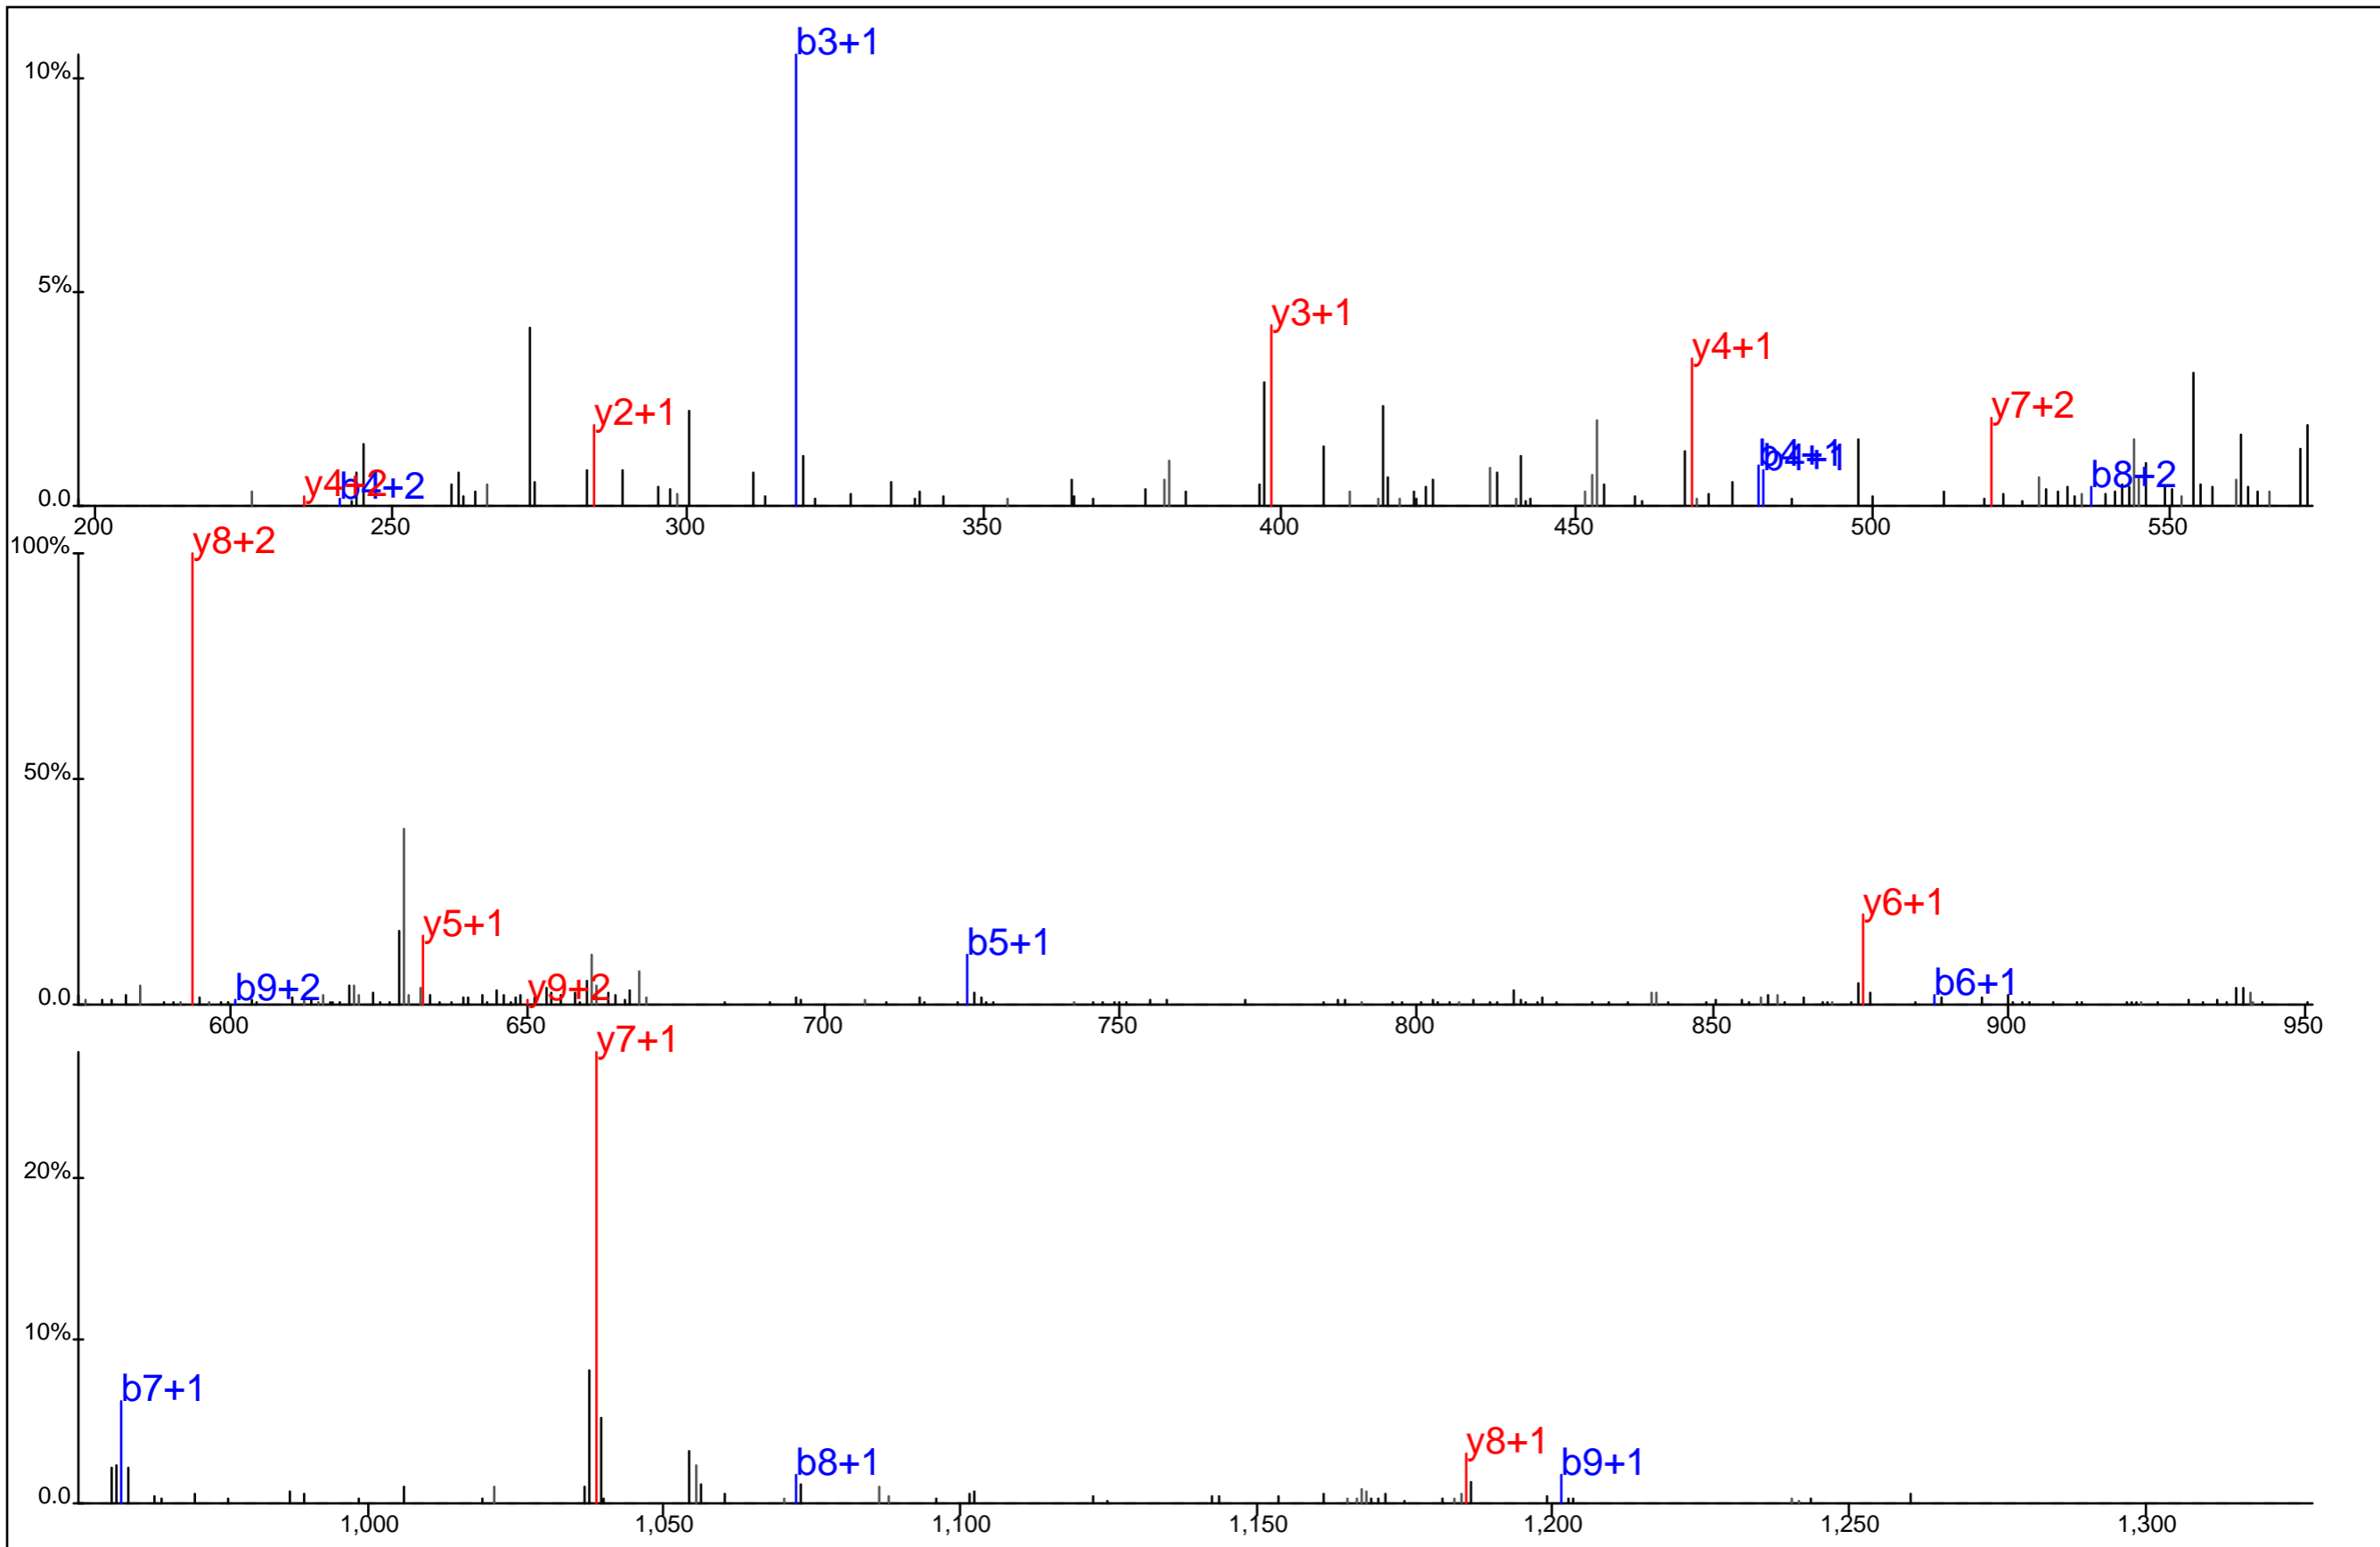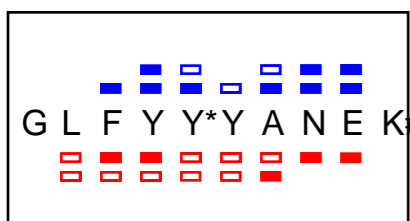

Protein Name: SKAP55  
 gi Accession: 114666366  
 Precursor Mass: 678.2972+2  
 Delta Mass: 5.325 ppm  
 XCorr: 32.8

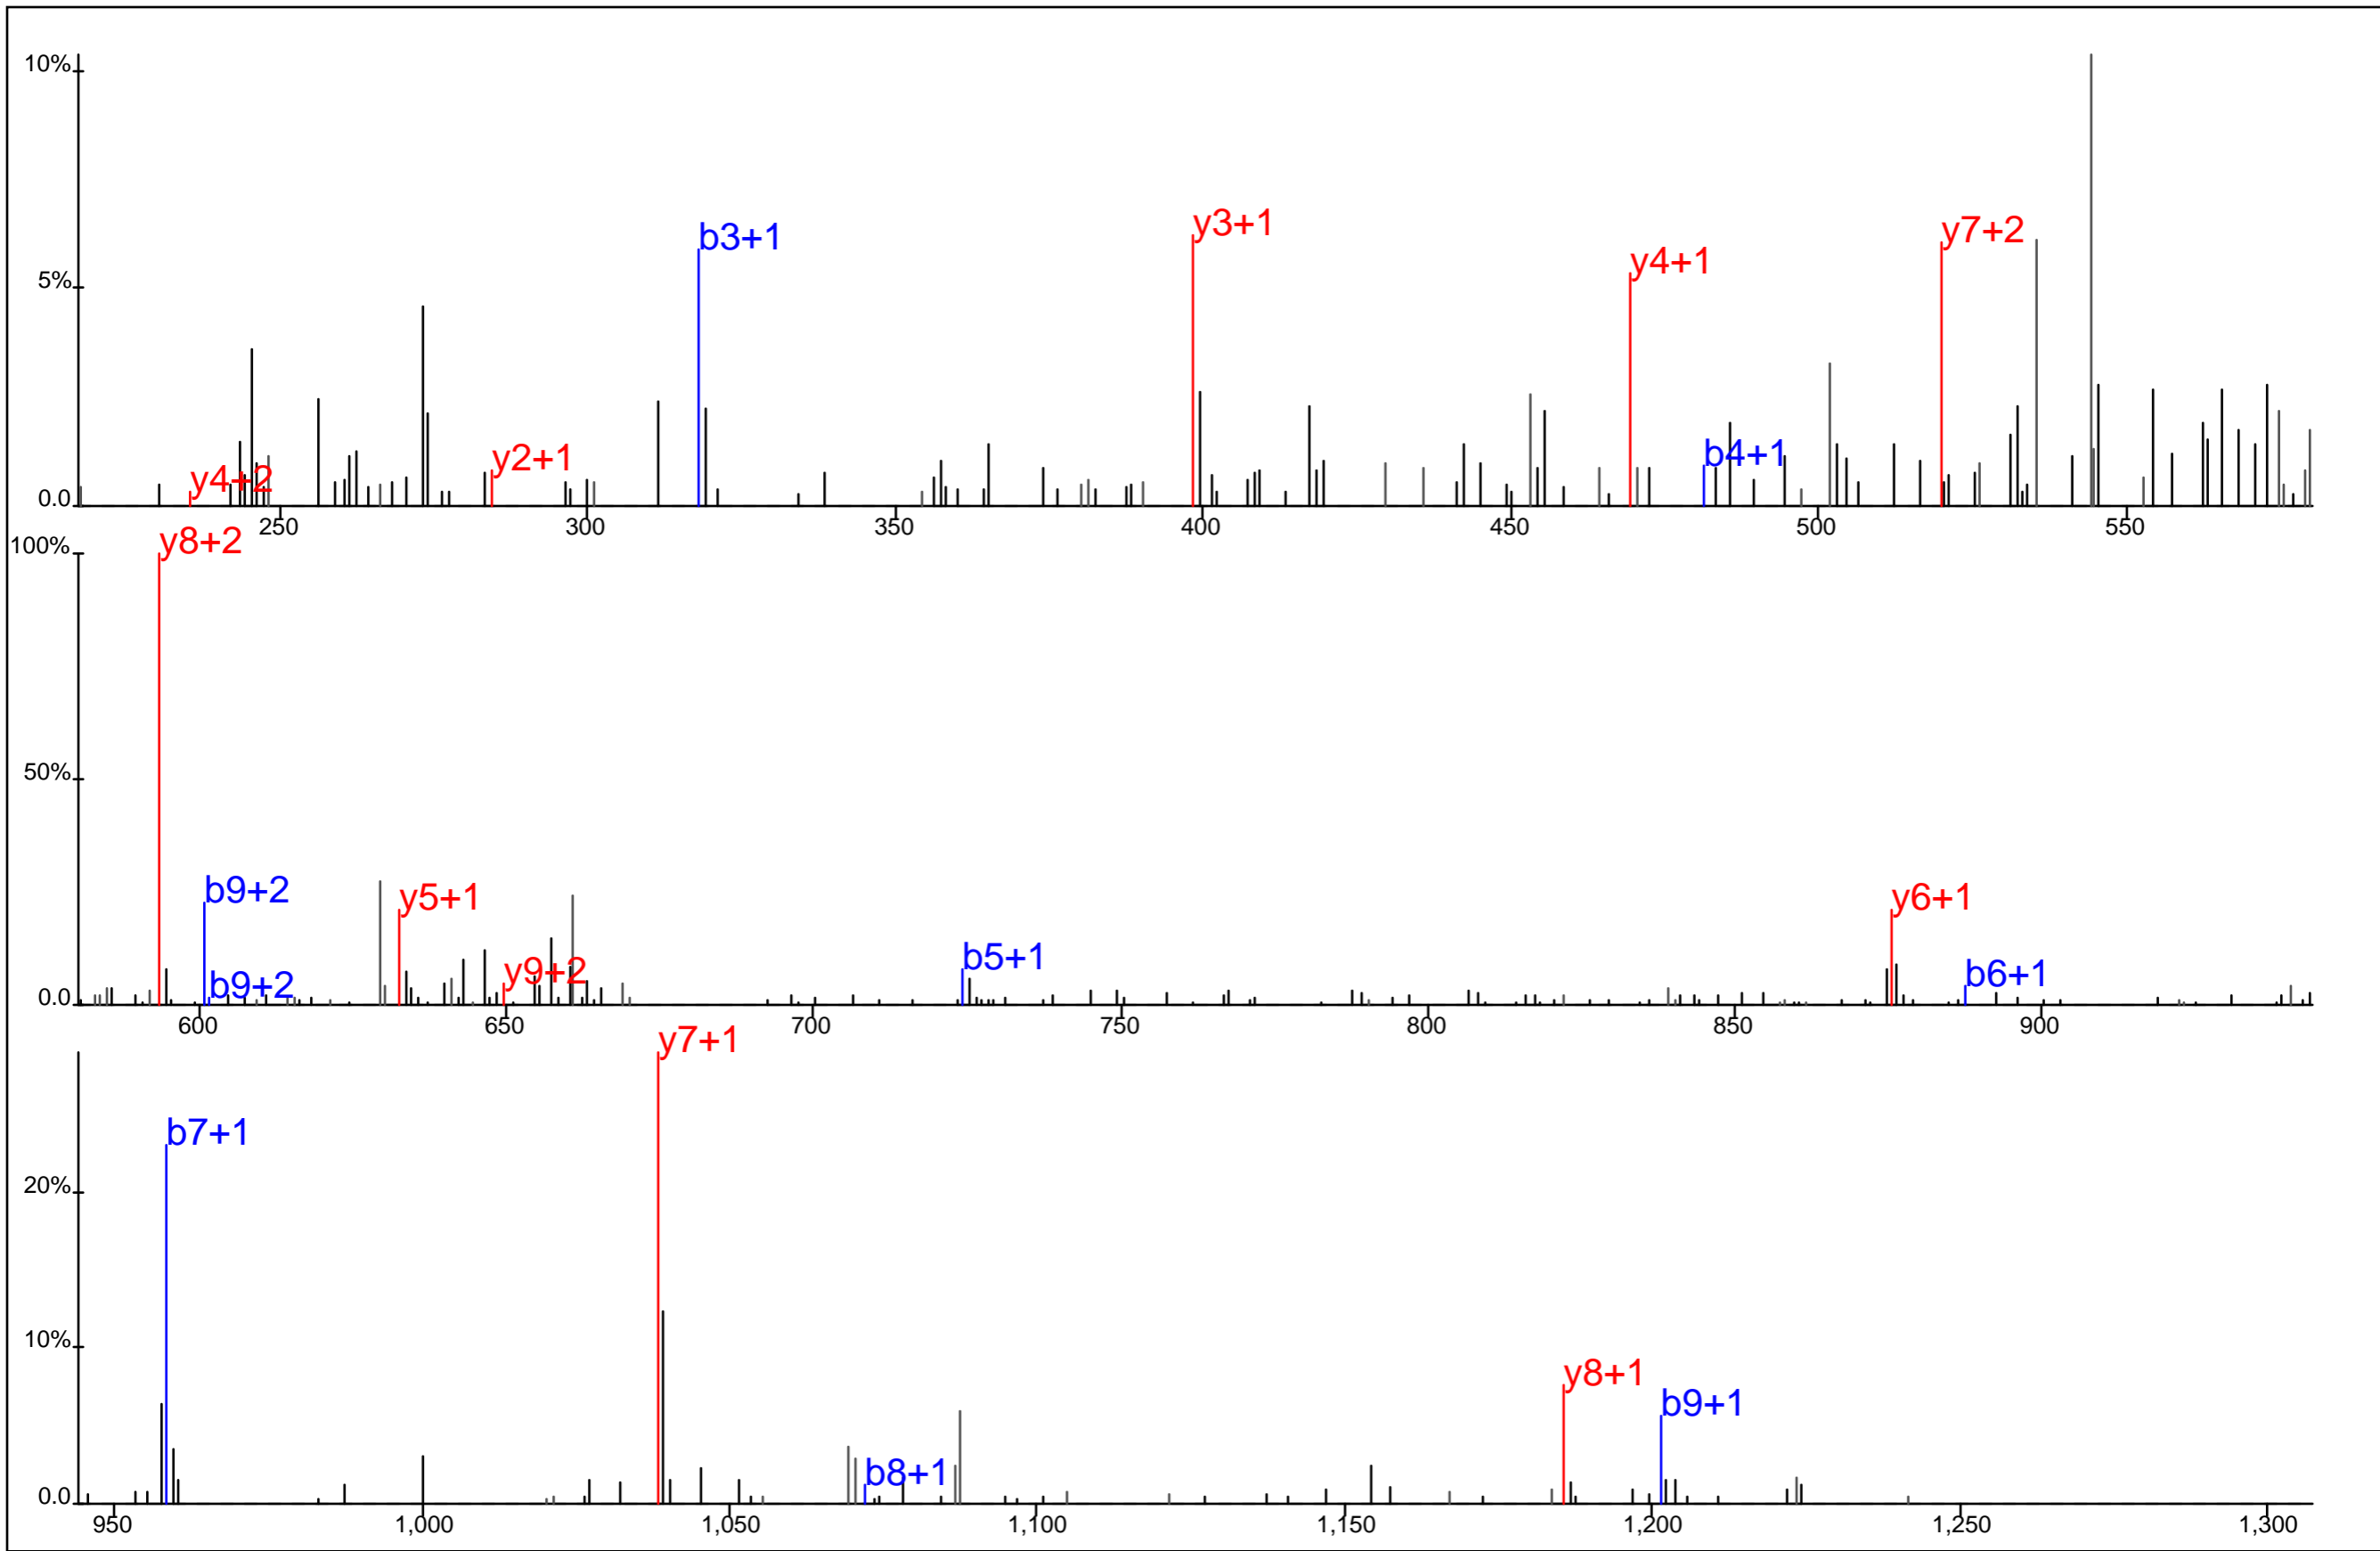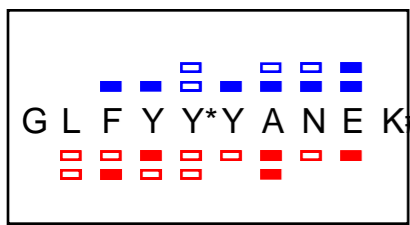

Protein Name: SKAP55  
 gi Accession: 114666366  
 Precursor Mass: 678.2963+2  
 Delta Mass: 4.063 ppm  
 XCorr: 30.89

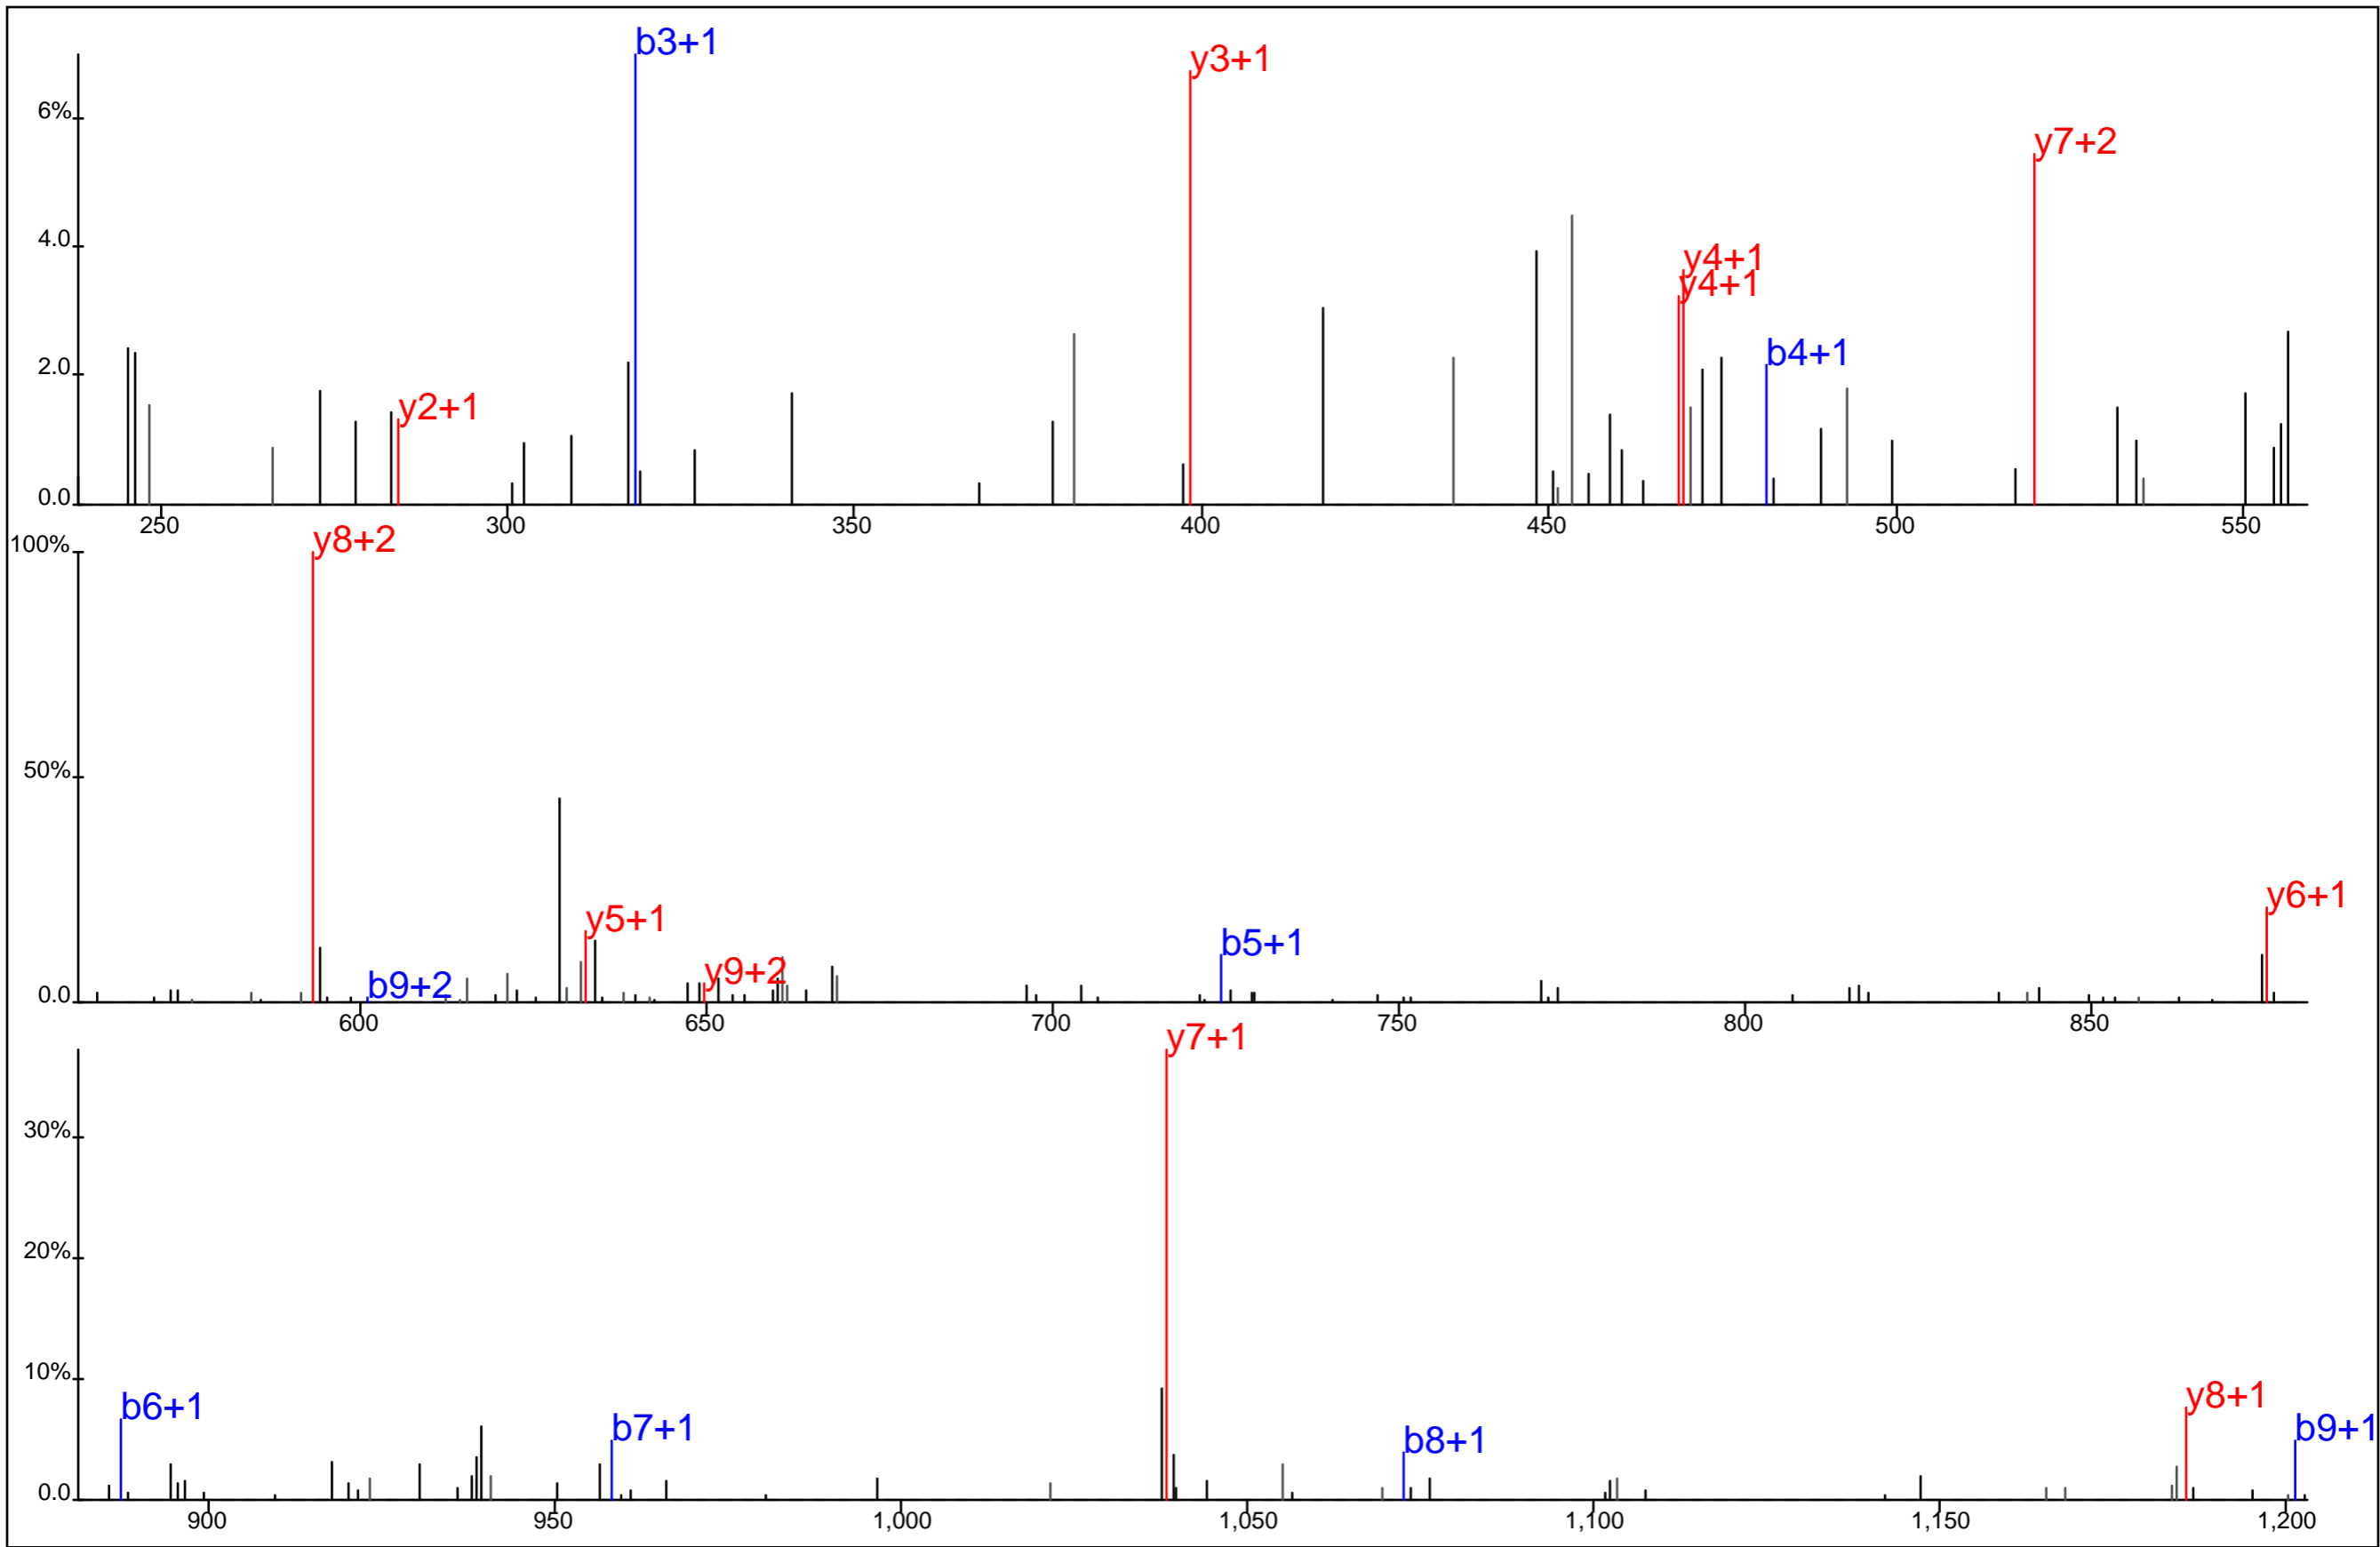

|  |                                                                                                                                                                       |
|--|-----------------------------------------------------------------------------------------------------------------------------------------------------------------------|
|  | <p>Protein Name: SKAP55<br/>         gi Accession: 114666366<br/>         Precursor Mass: 678.2963+2<br/>         Delta Mass: 3.975 ppm<br/>         XCorr: 34.99</p> |
|--|-----------------------------------------------------------------------------------------------------------------------------------------------------------------------|

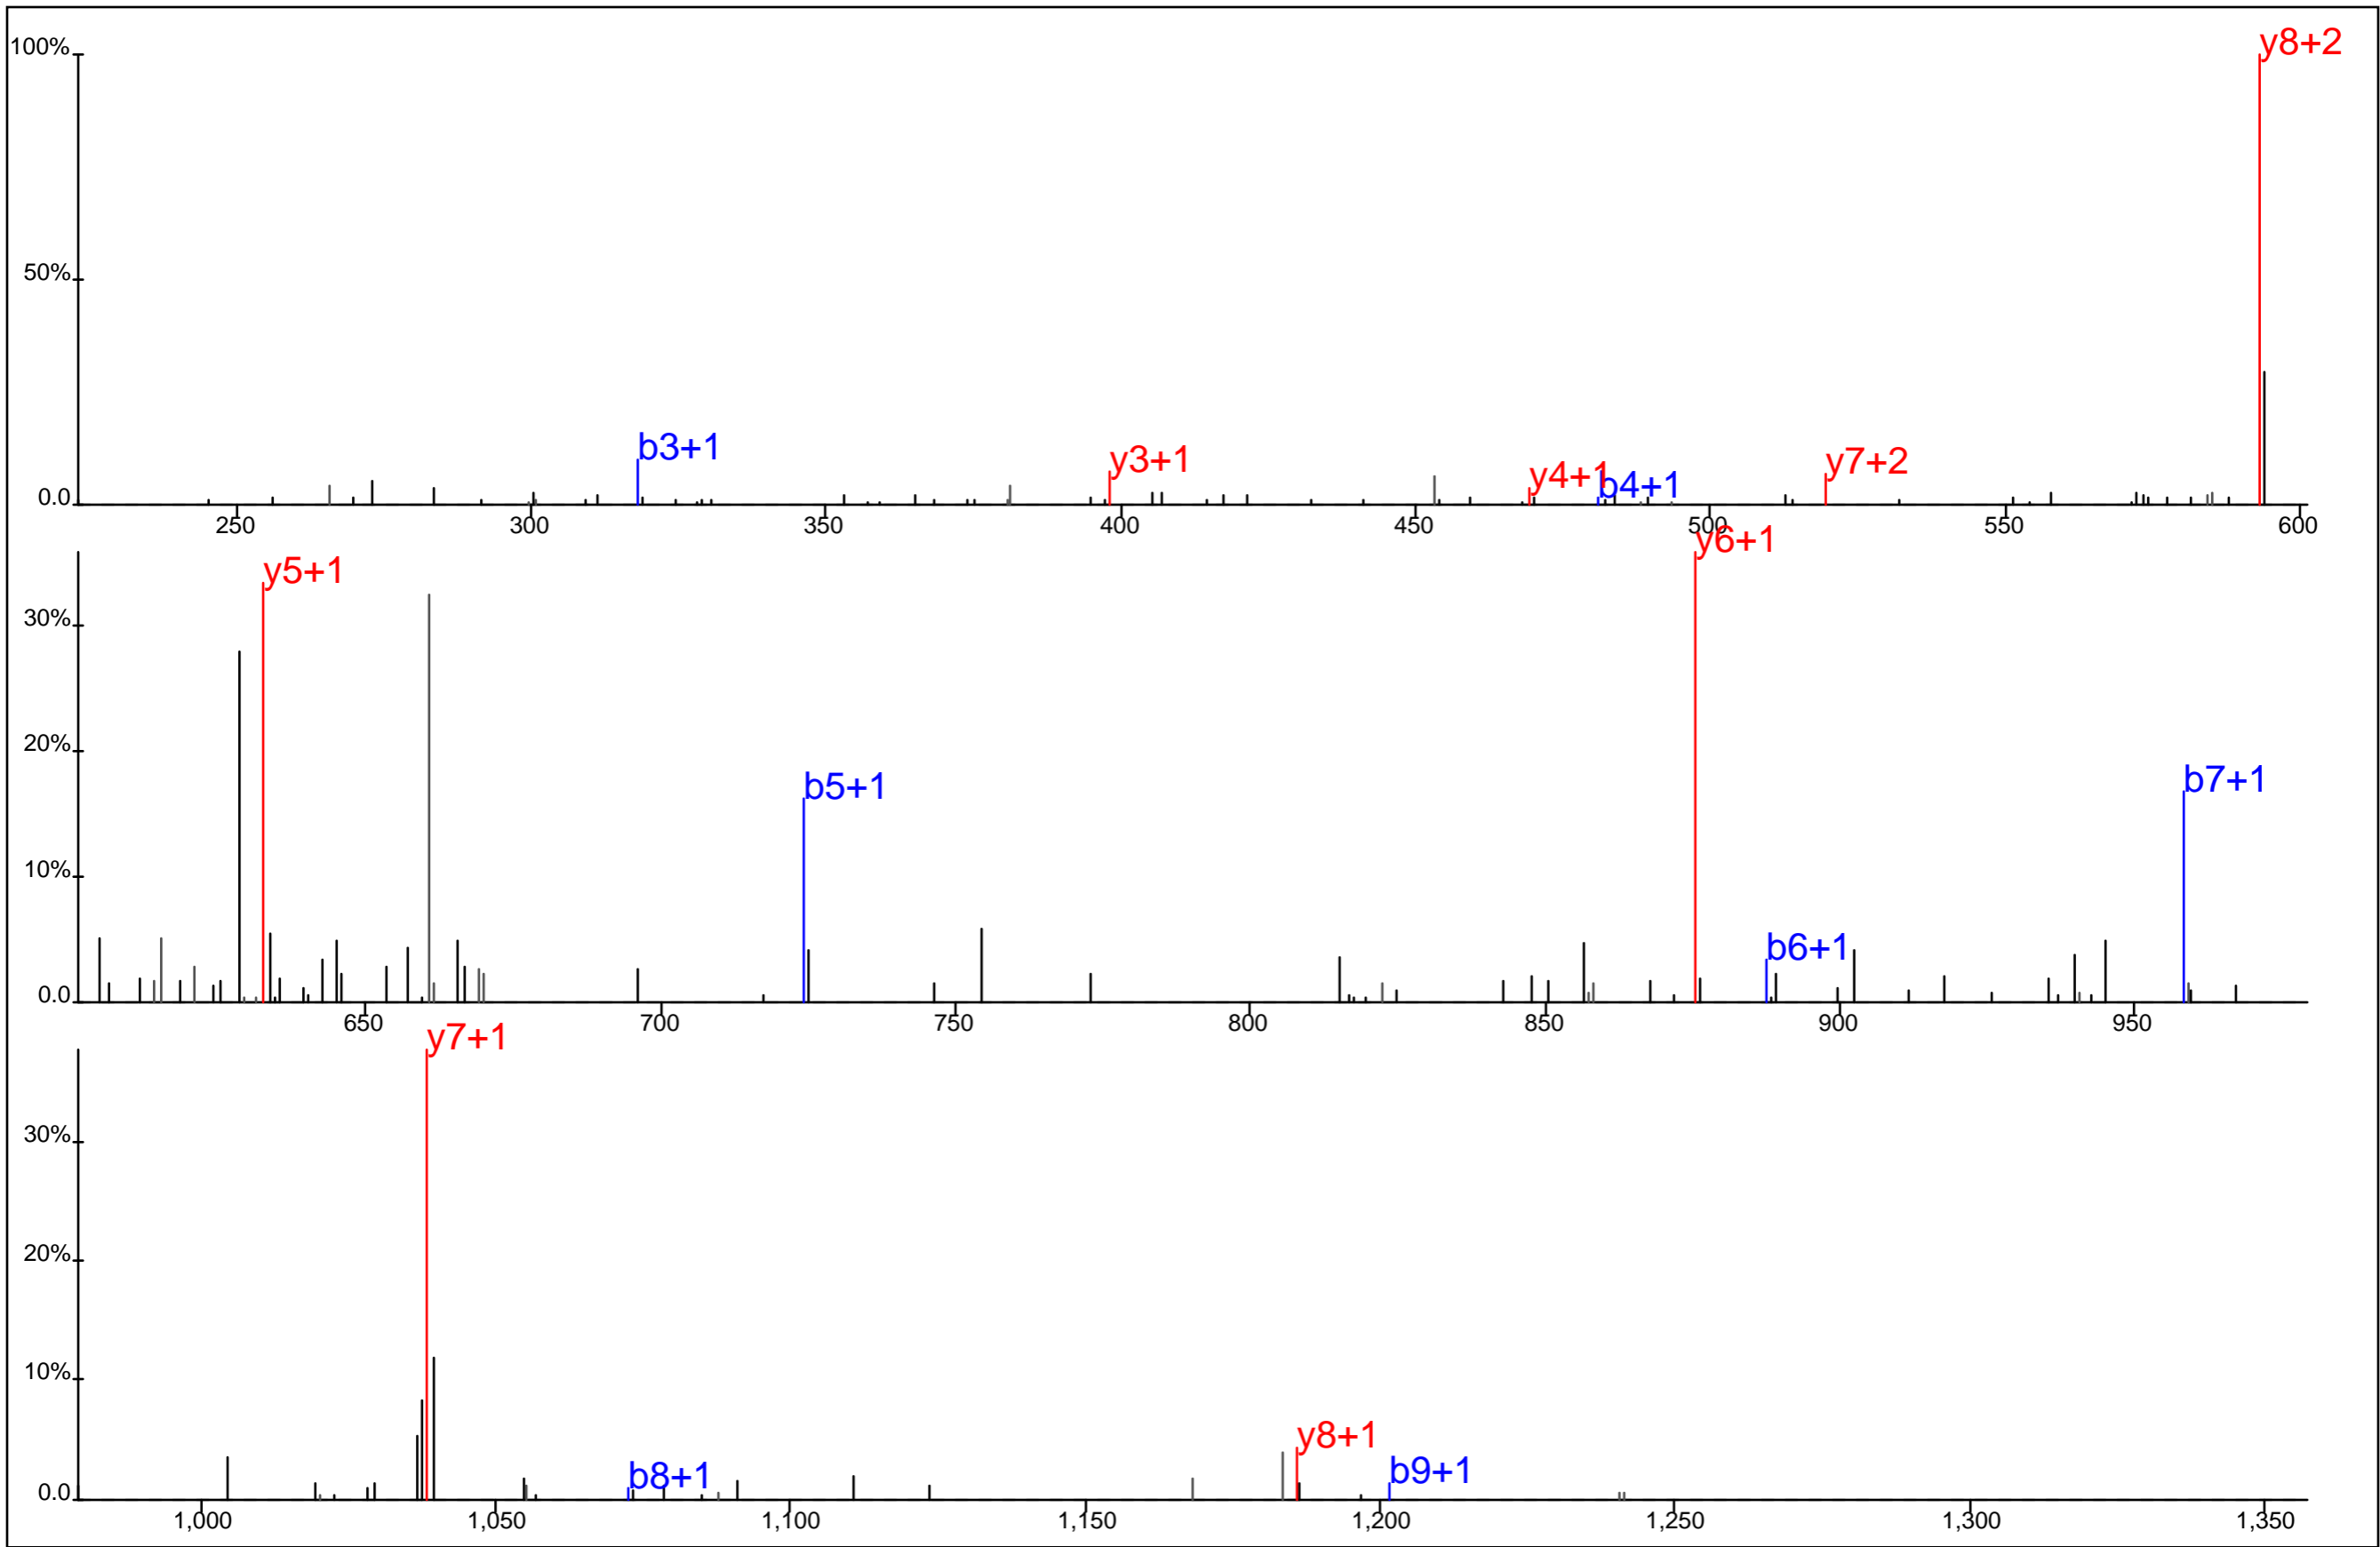

|  |                                                                                                                        |
|--|------------------------------------------------------------------------------------------------------------------------|
|  | Protein Name: SKAP55<br>gi Accession: 114666366<br>Precursor Mass: 678.2964+2<br>Delta Mass: 4.248 ppm<br>XCorr: 42.03 |
|--|------------------------------------------------------------------------------------------------------------------------|

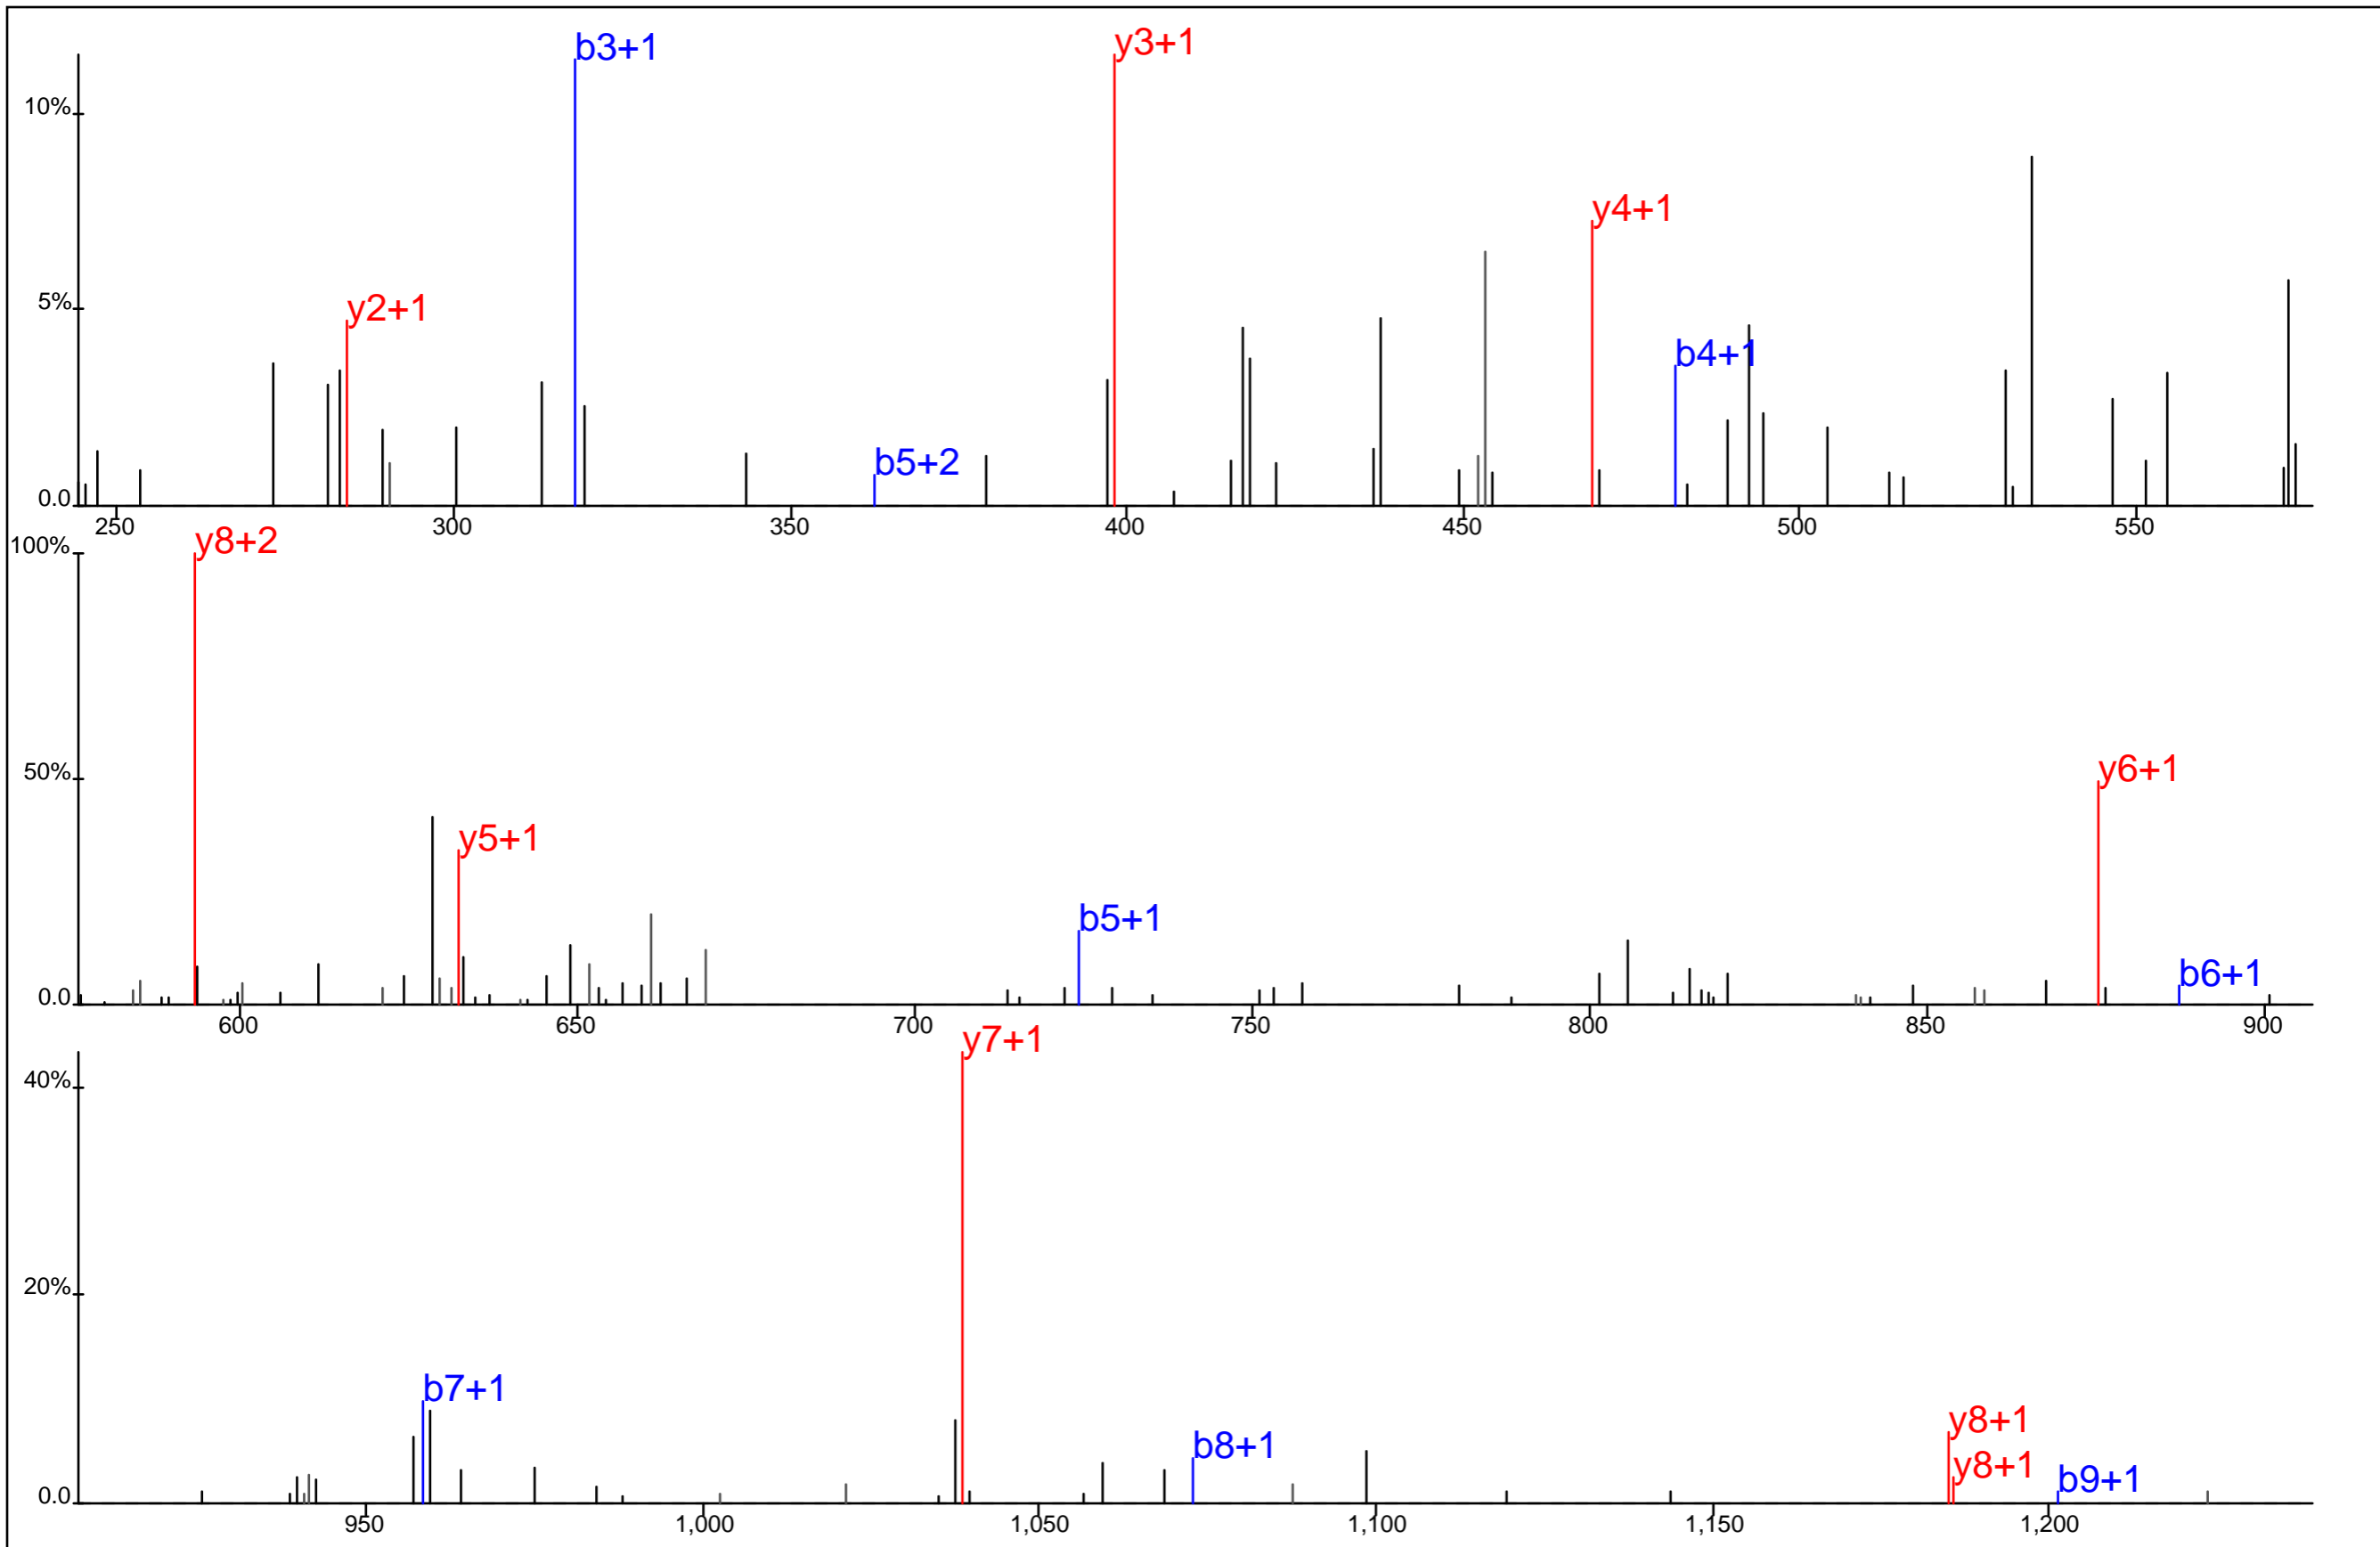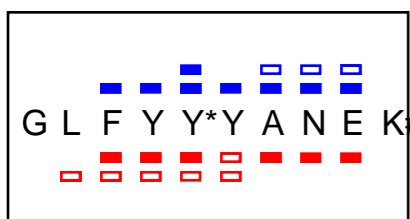

Protein Name: SKAP55  
 gi Accession: 114666366  
 Precursor Mass: 678.2967+2  
 Delta Mass: 4.609 ppm  
 XCorr: 35.96



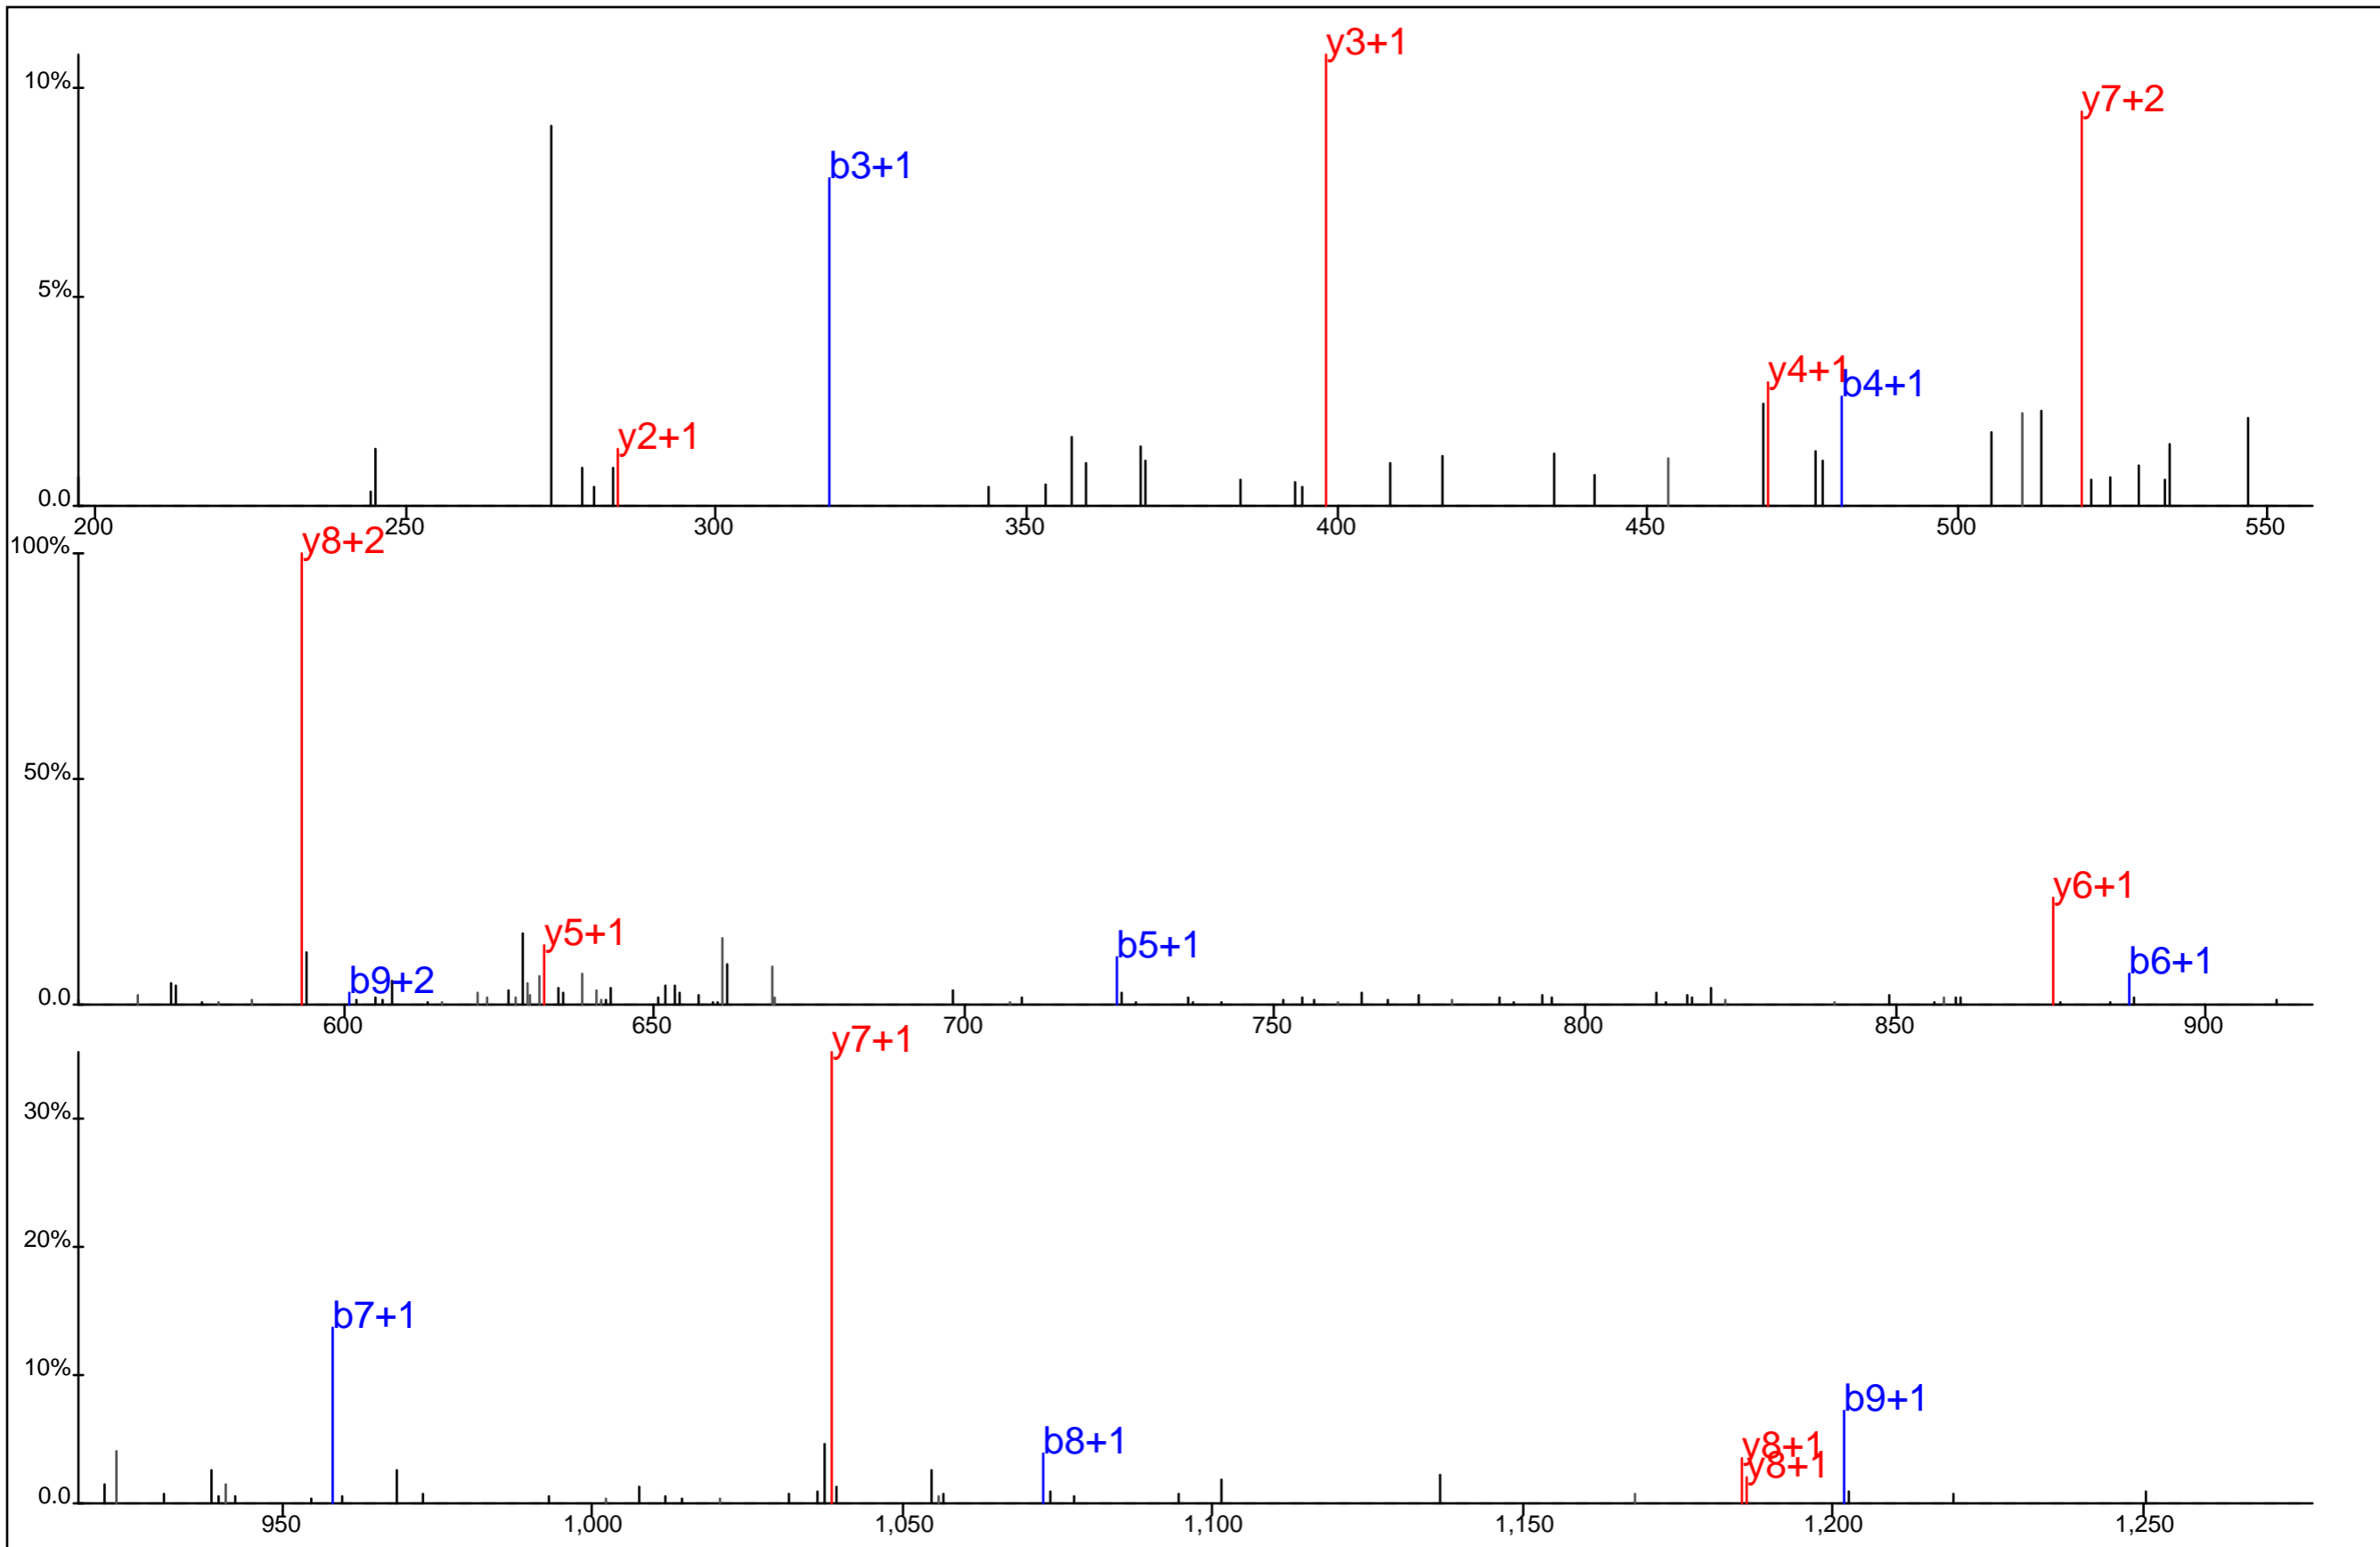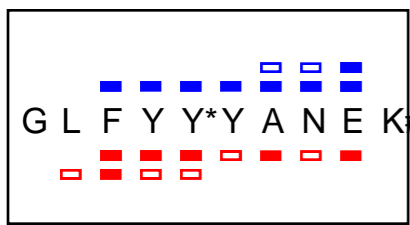

Protein Name: SKAP55  
 gi Accession: 114666366  
 Precursor Mass: 678.2970+2  
 Delta Mass: 5.059 ppm  
 XCorr: 43.32

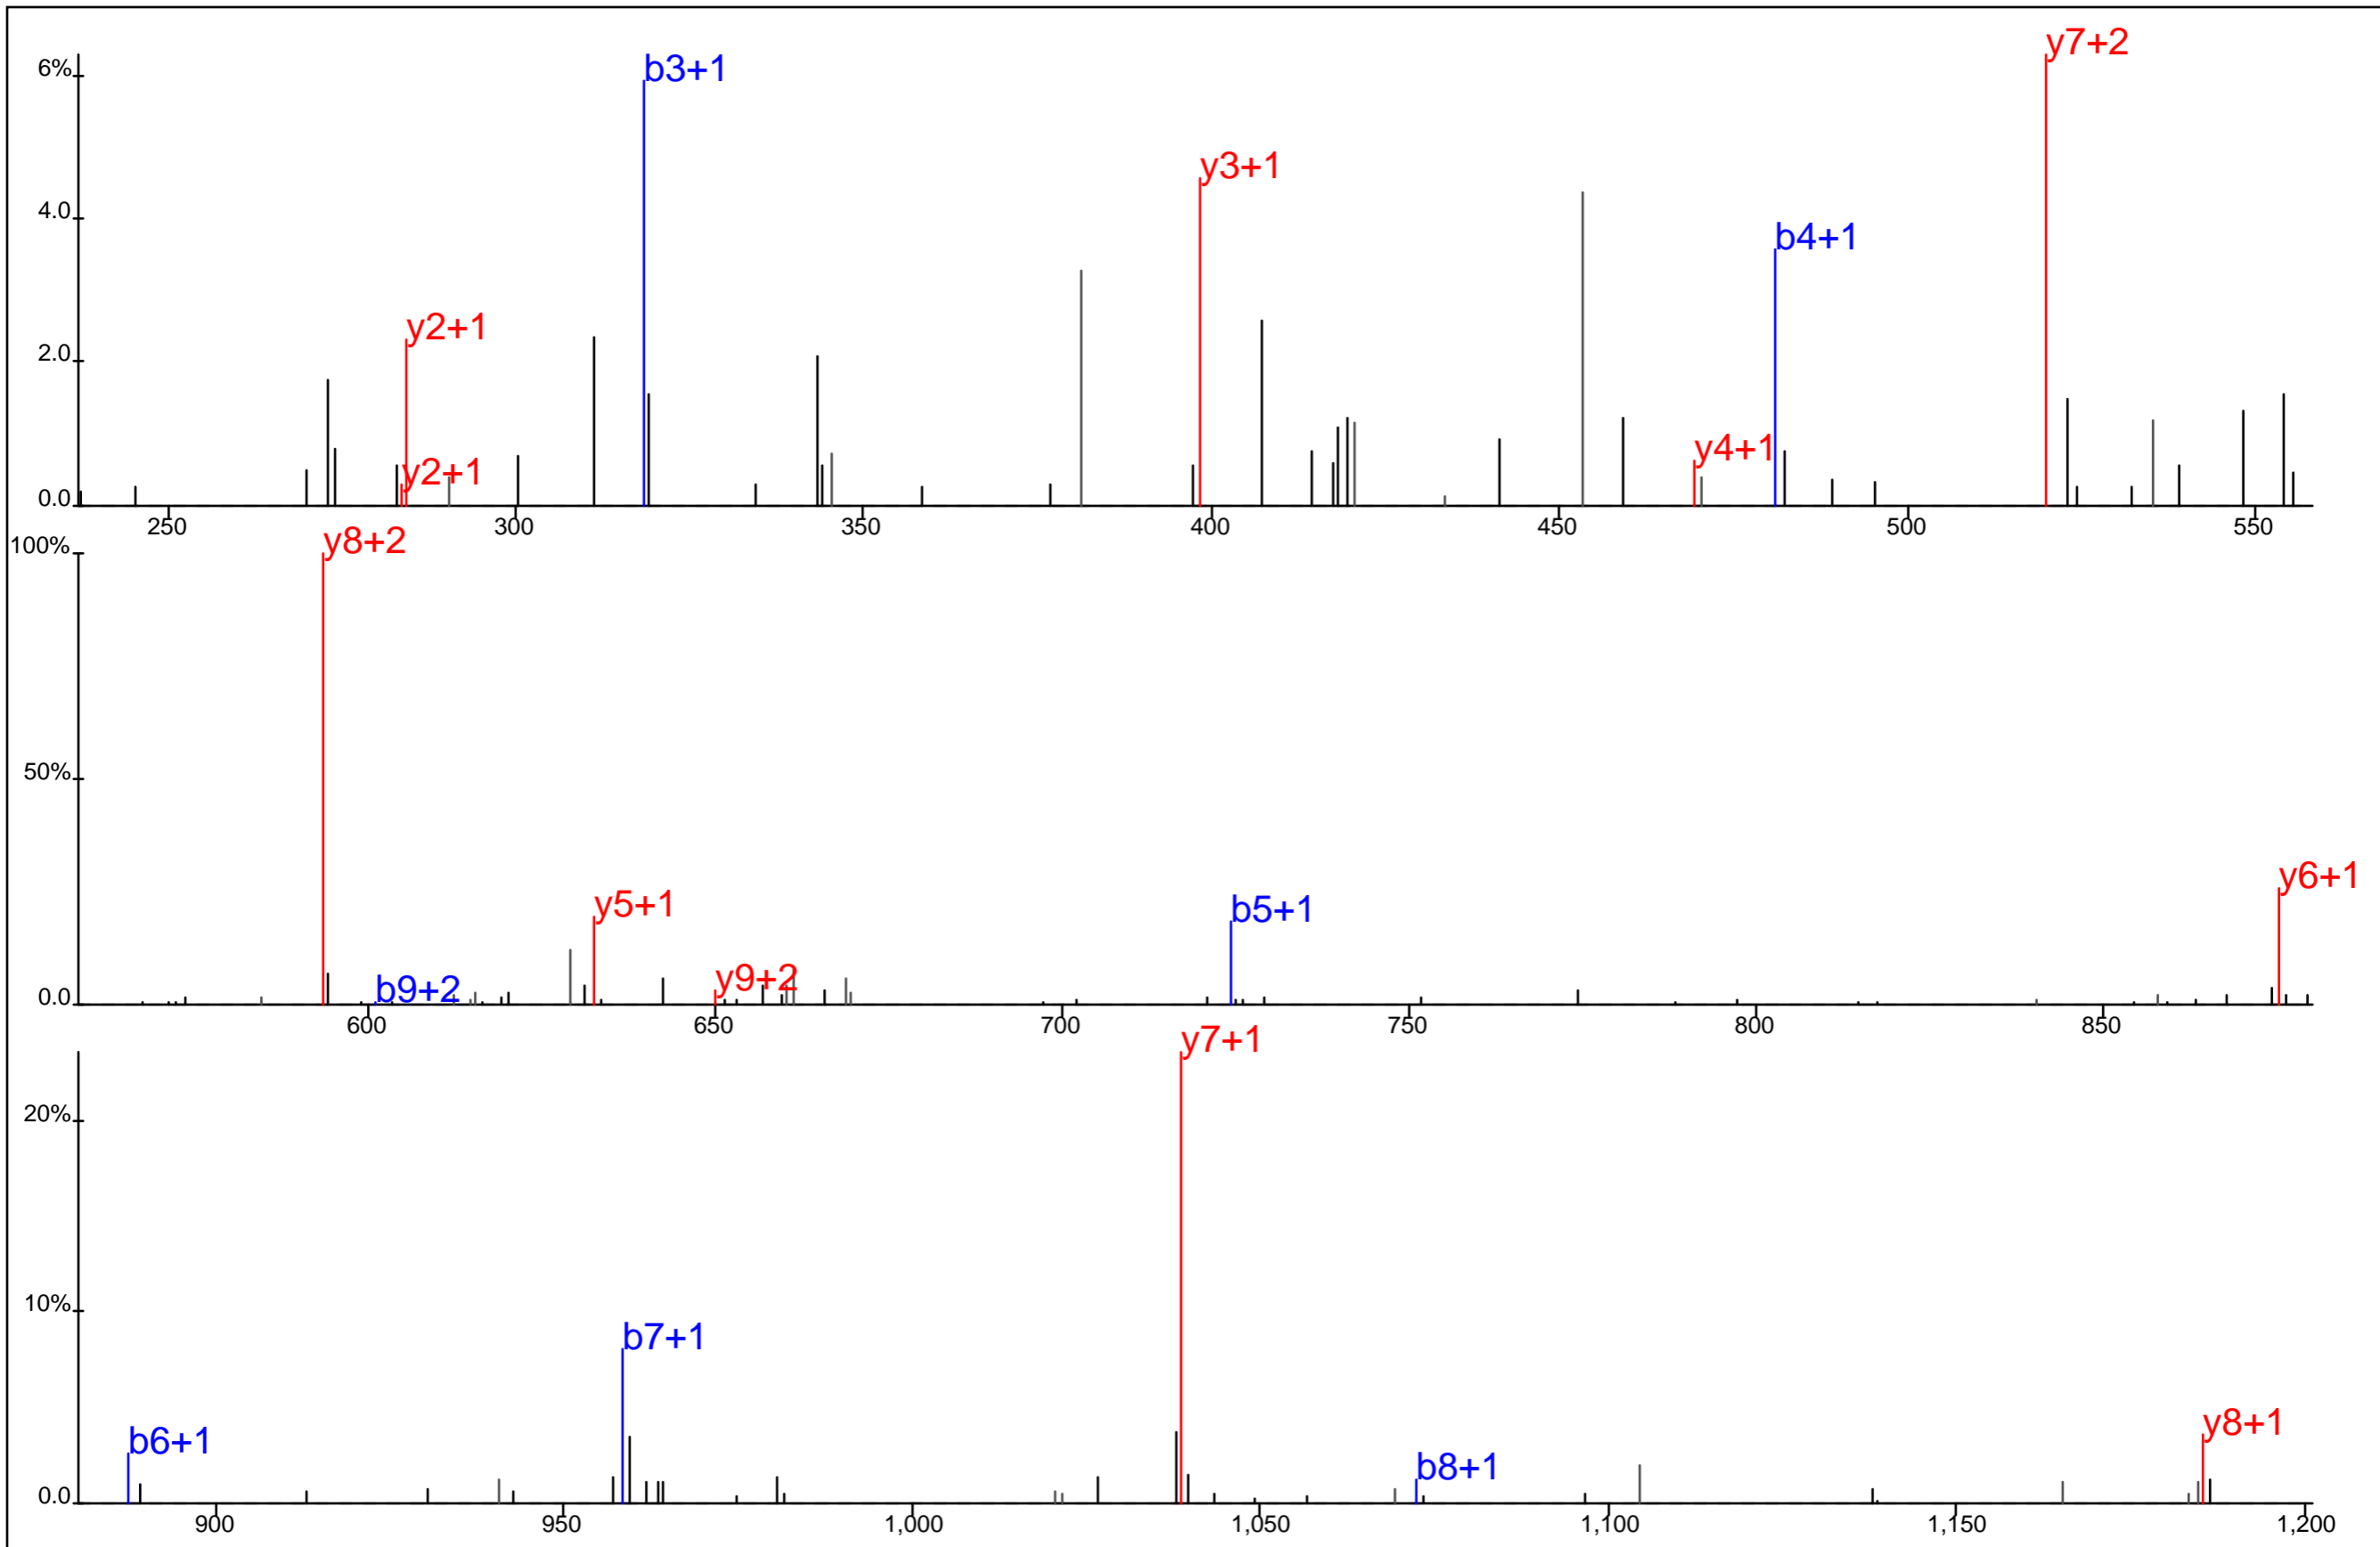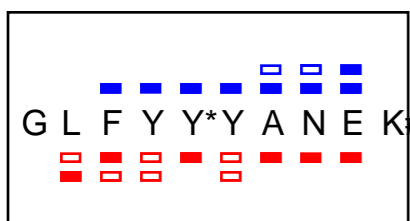

Protein Name: SKAP55  
 gi Accession: 114666366  
 Precursor Mass: 678.2980+2  
 Delta Mass: 6.498 ppm  
 XCorr: 37.25

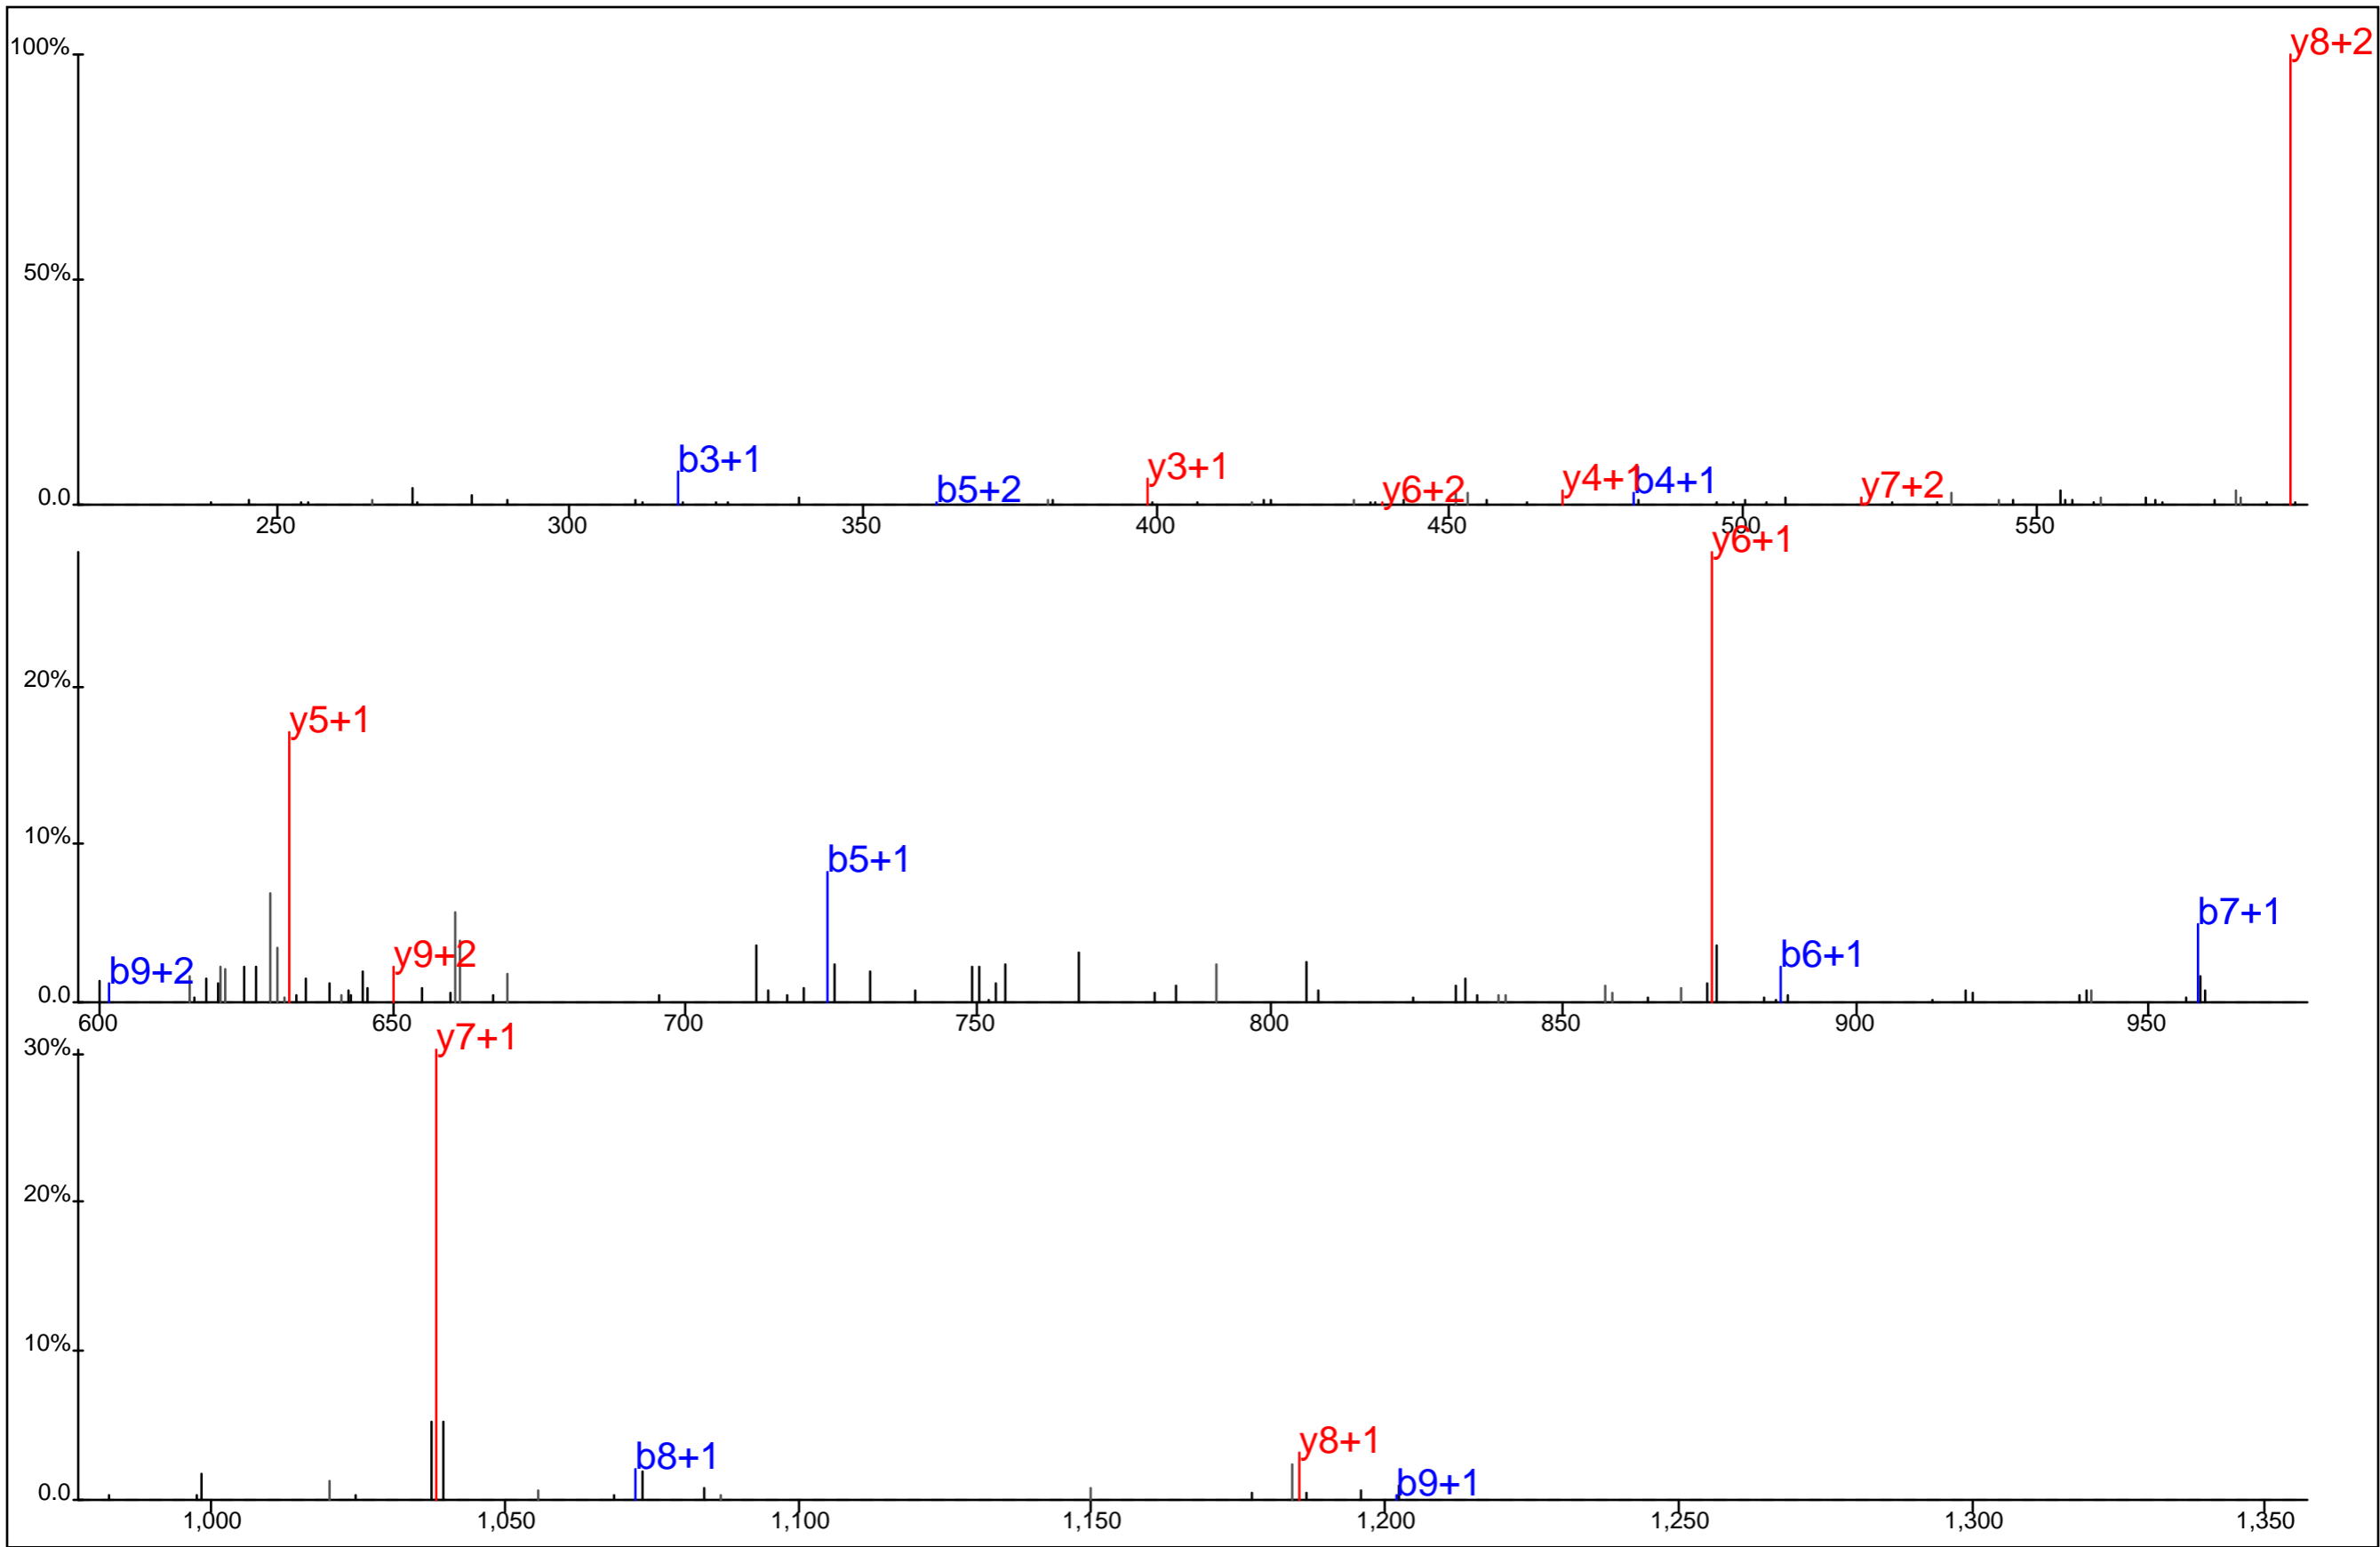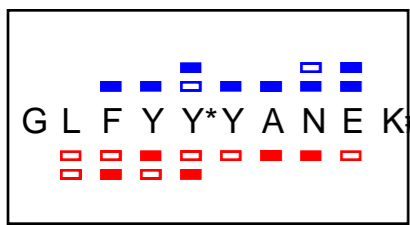

Protein Name: SKAP55  
 gi Accession: 114666366  
 Precursor Mass: 678.2950+2  
 Delta Mass: 2.175 ppm  
 XCorr: 39.16

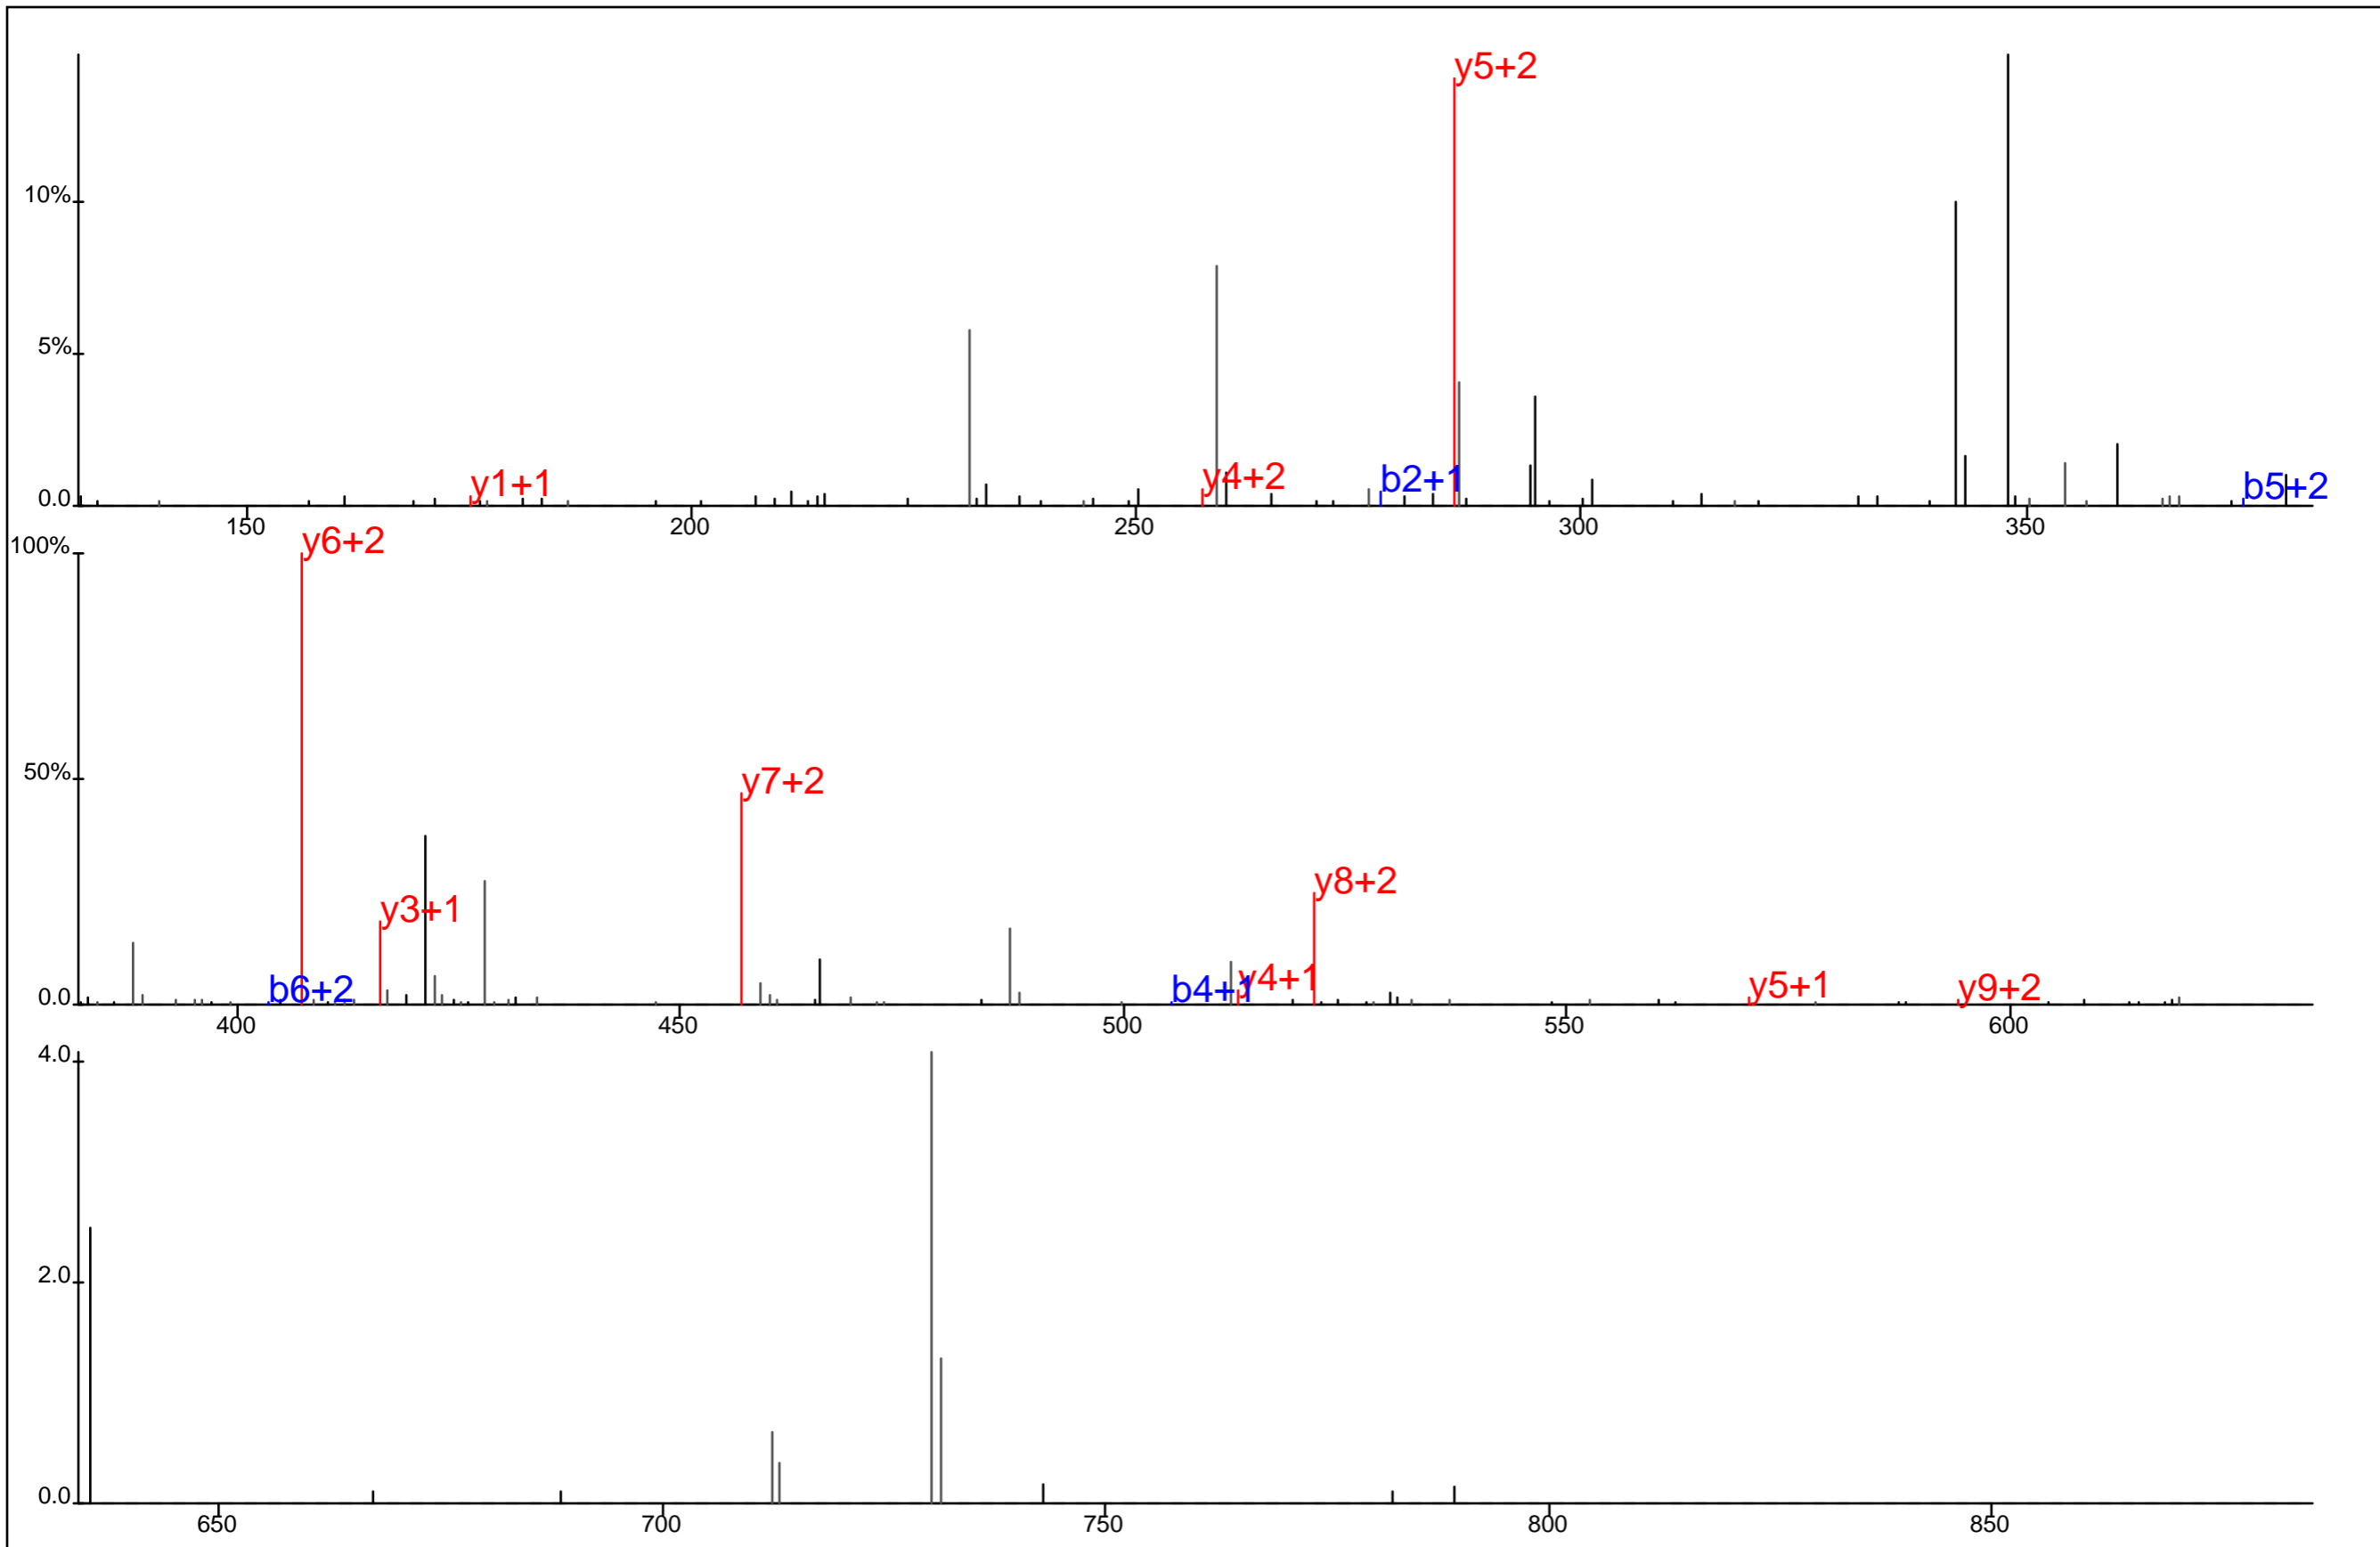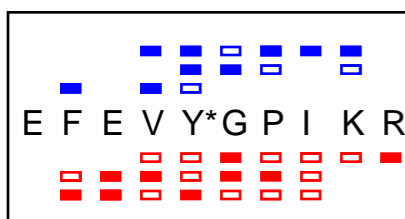

Protein Name: snRNP70  
 gi Accession: 602021  
 Precursor Mass: 439.8807+3  
 Delta Mass: 2.889 ppm  
 XCorr: 15.96

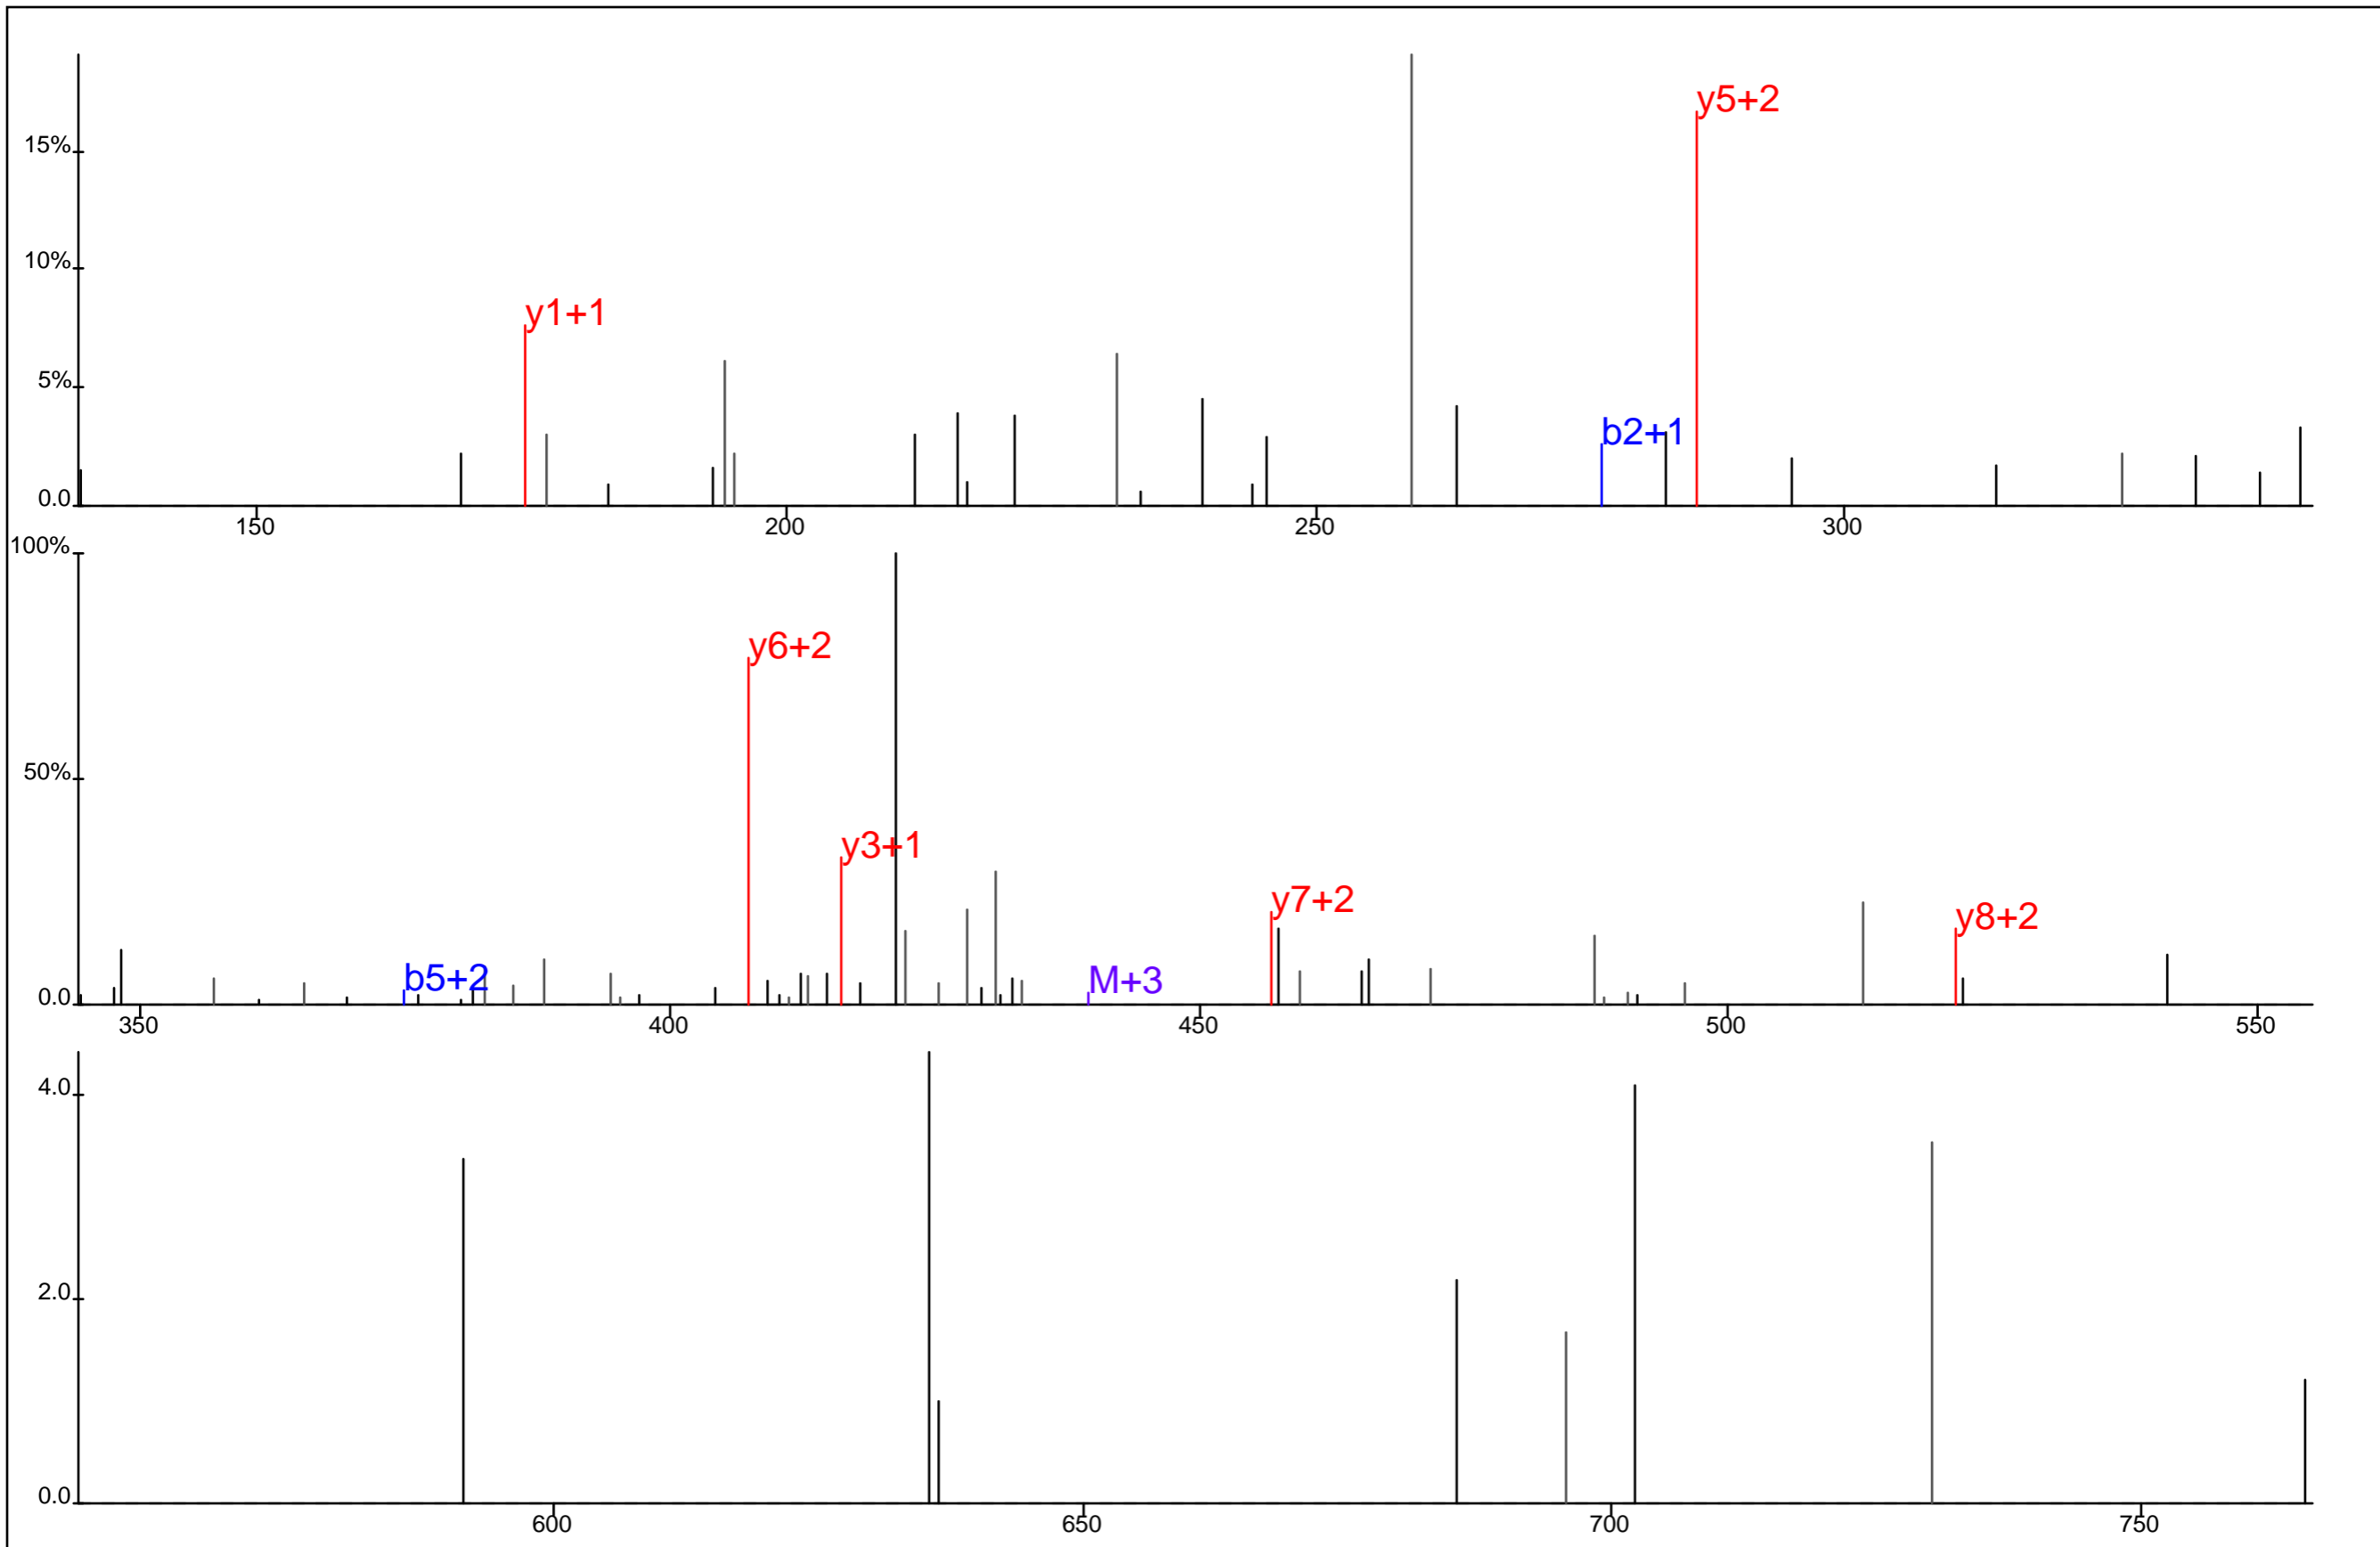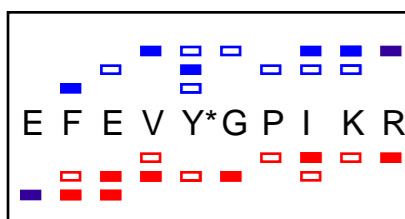

Protein Name: snRNP70  
 gi Accession: 602021  
 Precursor Mass: 439.8806+3  
 Delta Mass: 2.473 ppm  
 XCorr: 14.17

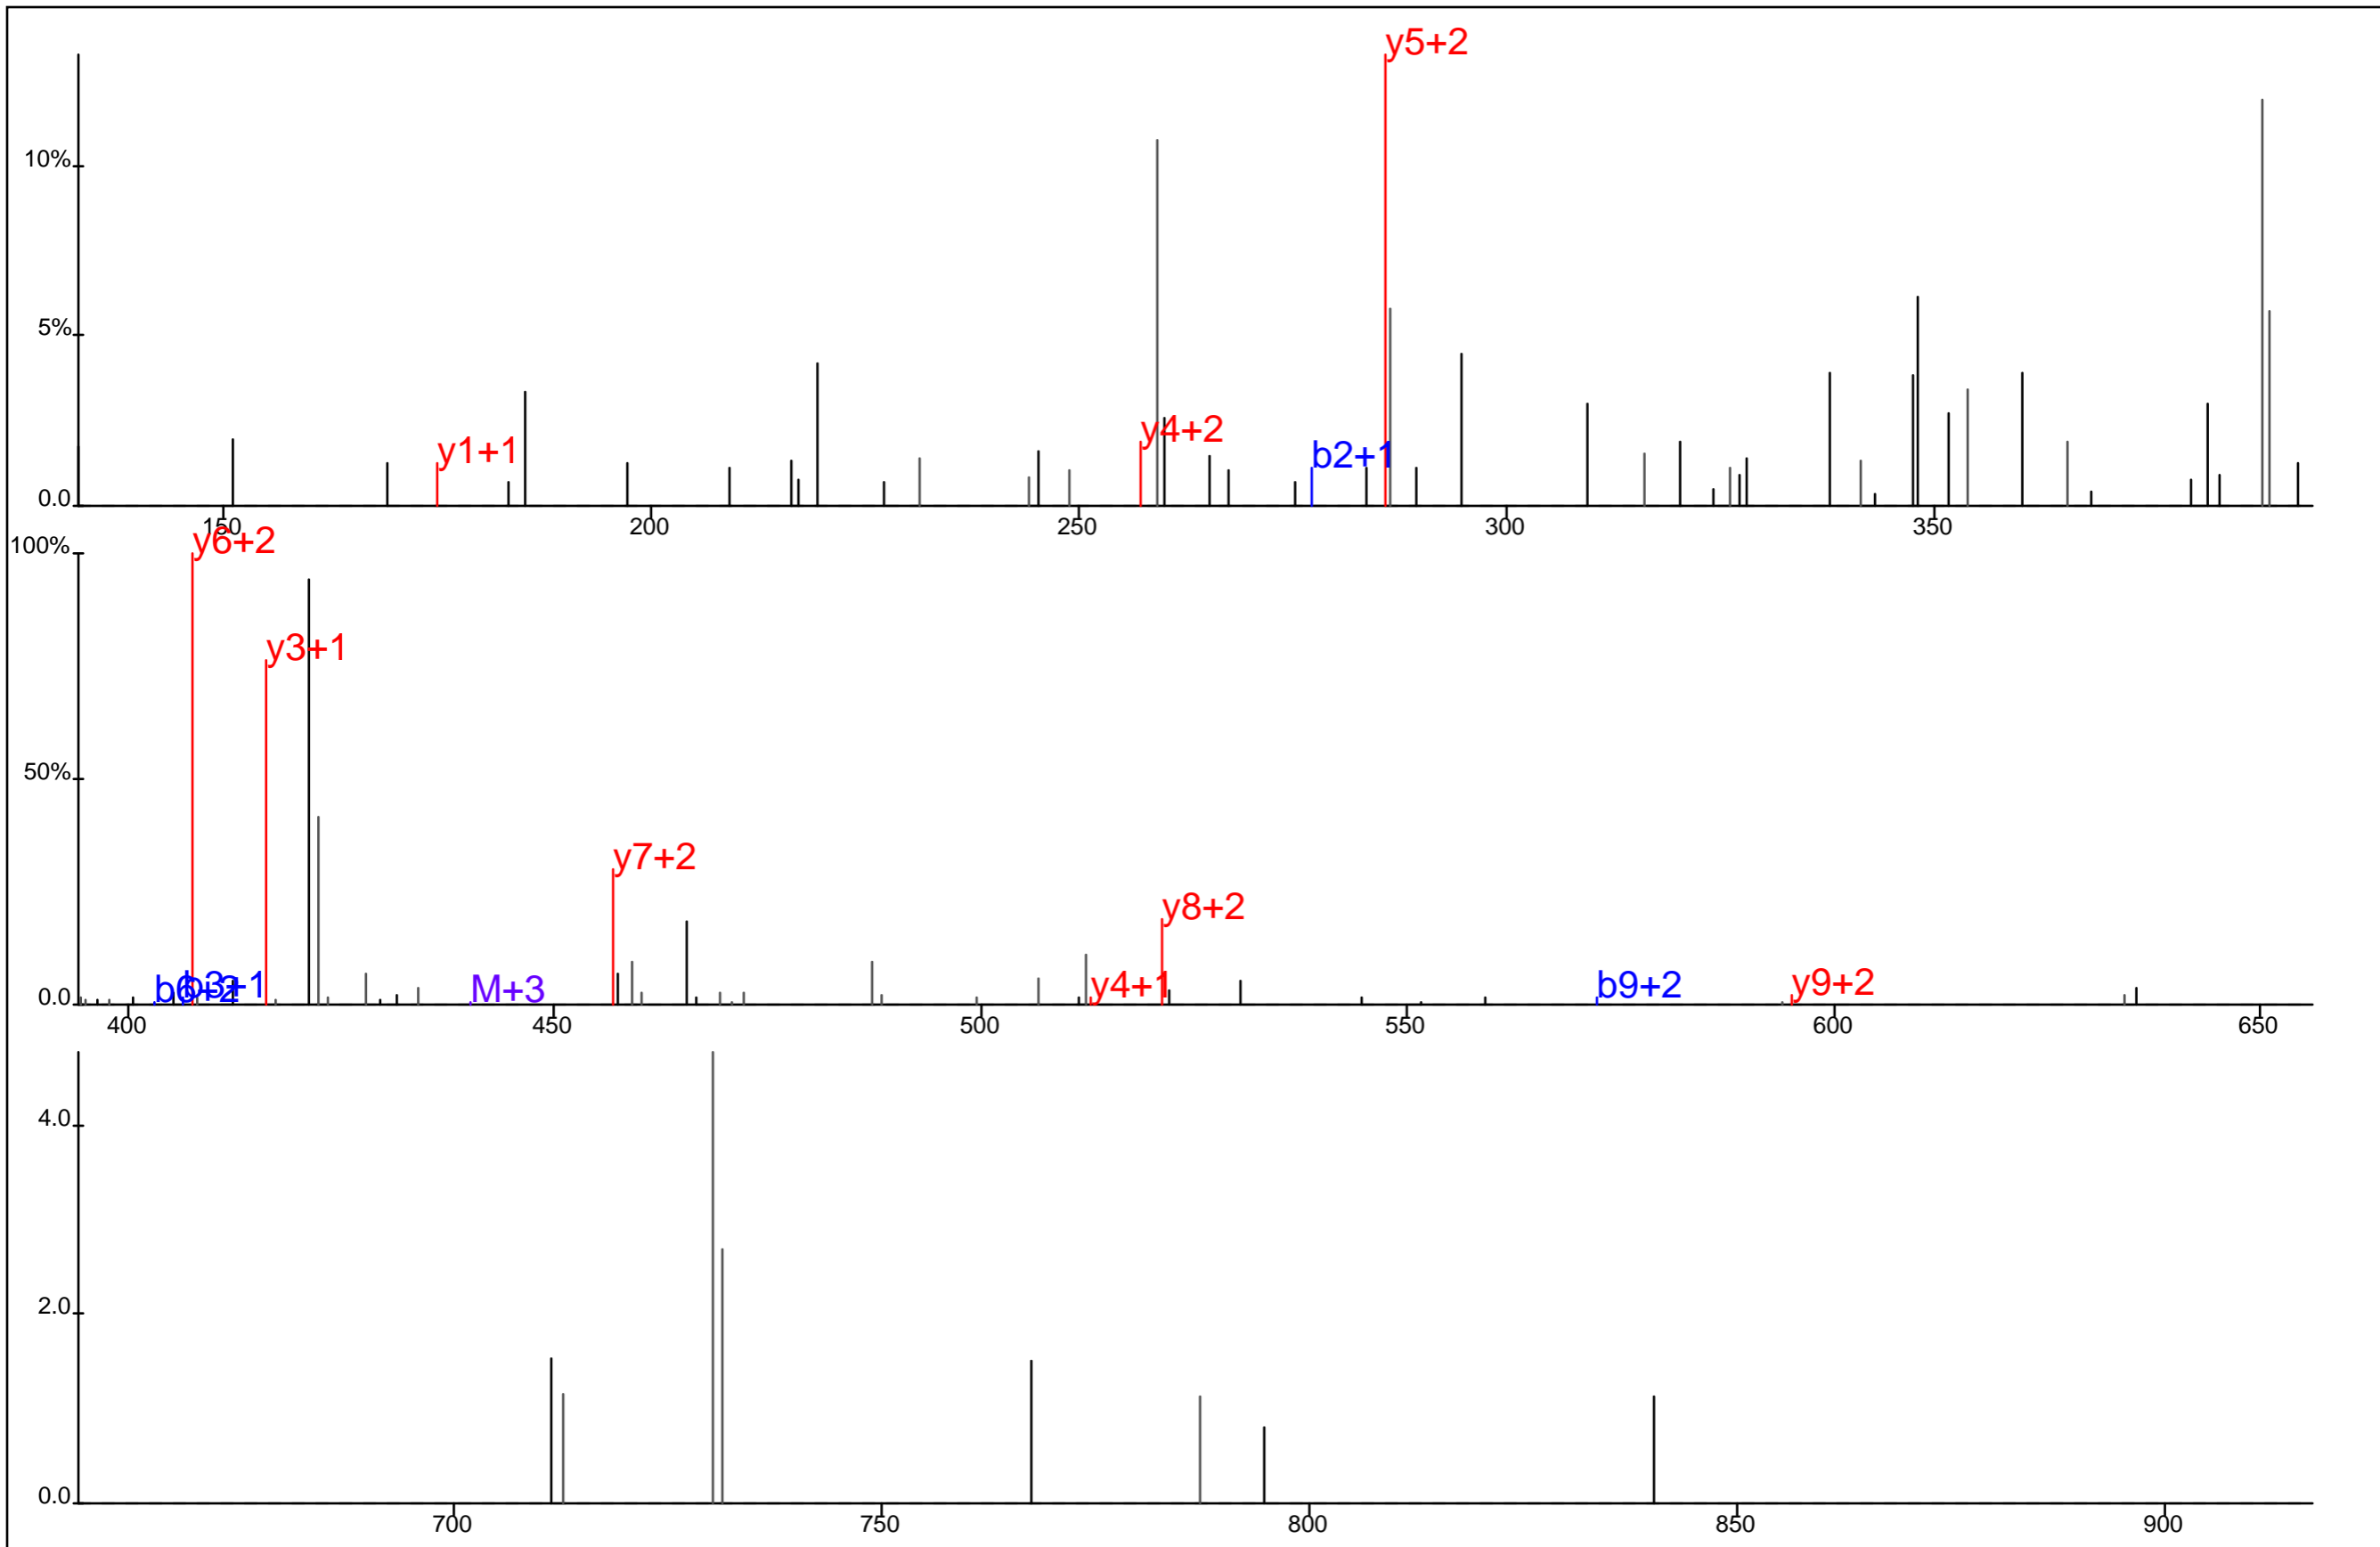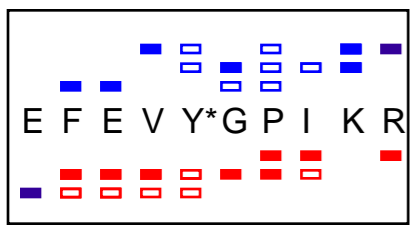

Protein Name: snRNP70  
 gi Accession: 602021  
 Precursor Mass: 439.8802+3  
 Delta Mass: 1.637 ppm  
 XCorr: 19.48

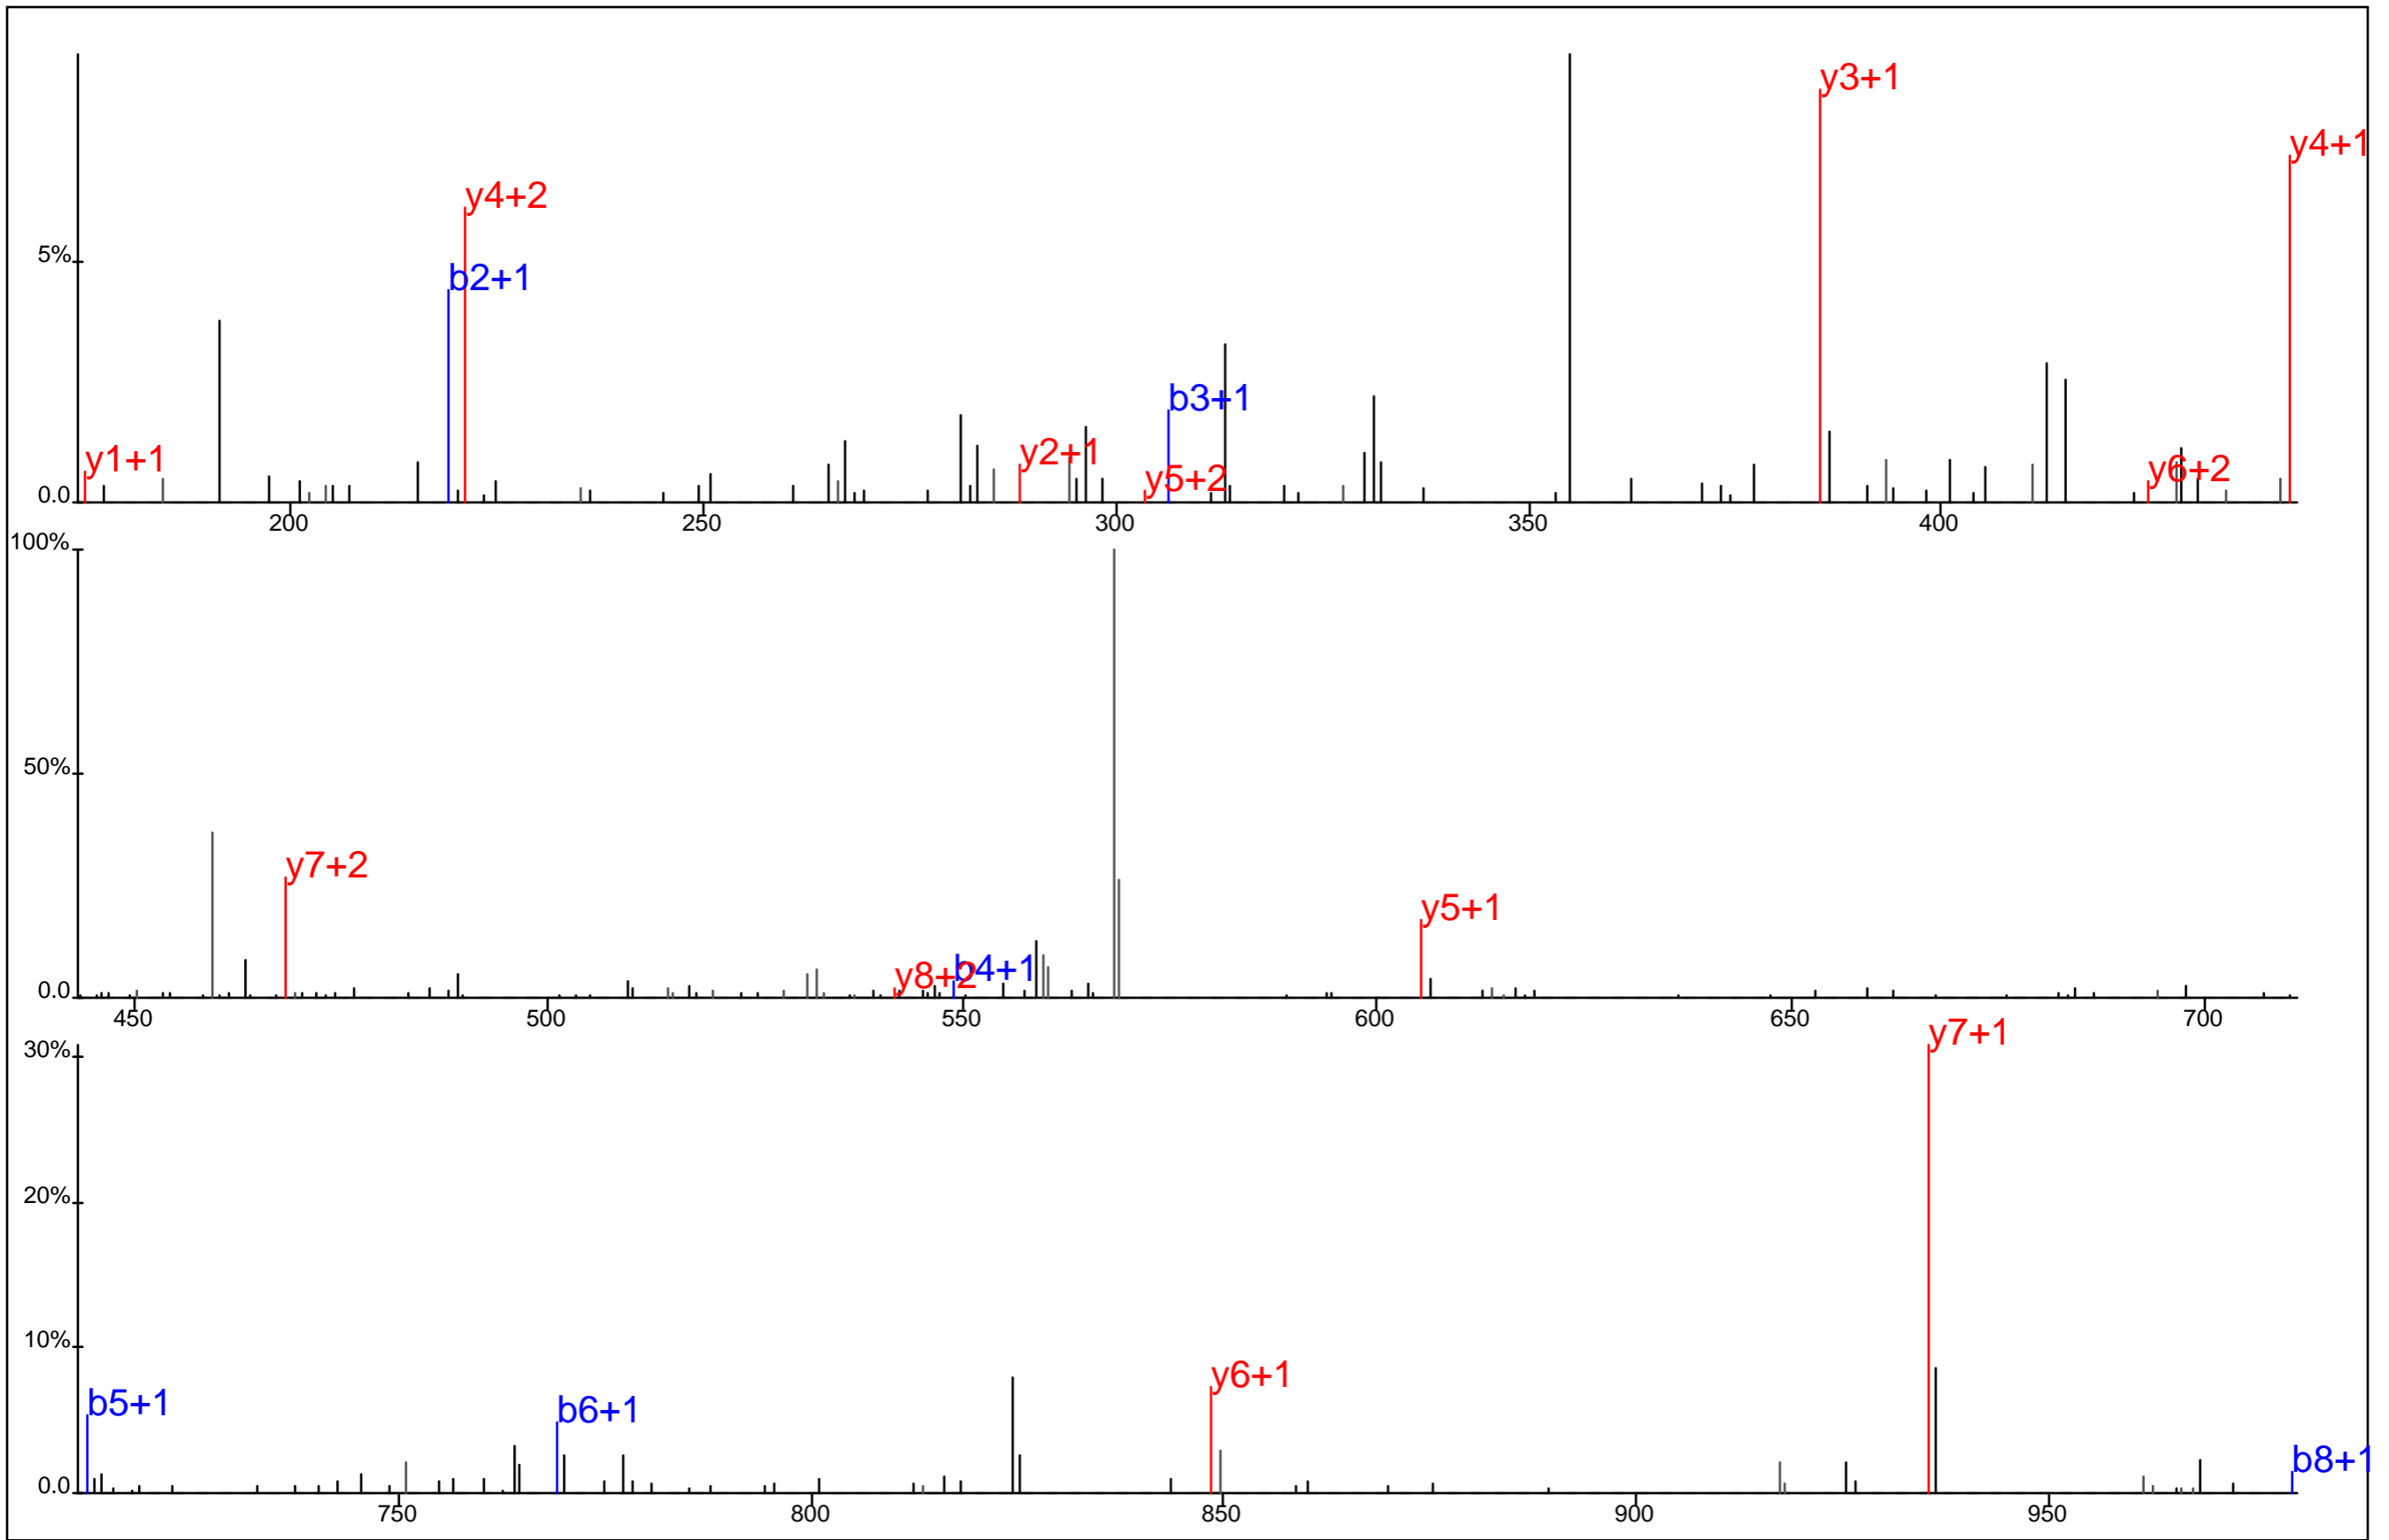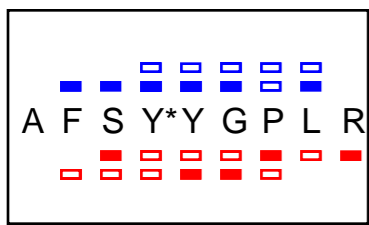

Protein Name: Splicing factor 9G8  
 gi Accession: 72534660  
 Precursor Mass: 577.2592+2  
 Delta Mass: 2.833 ppm  
 XCorr: 28.7

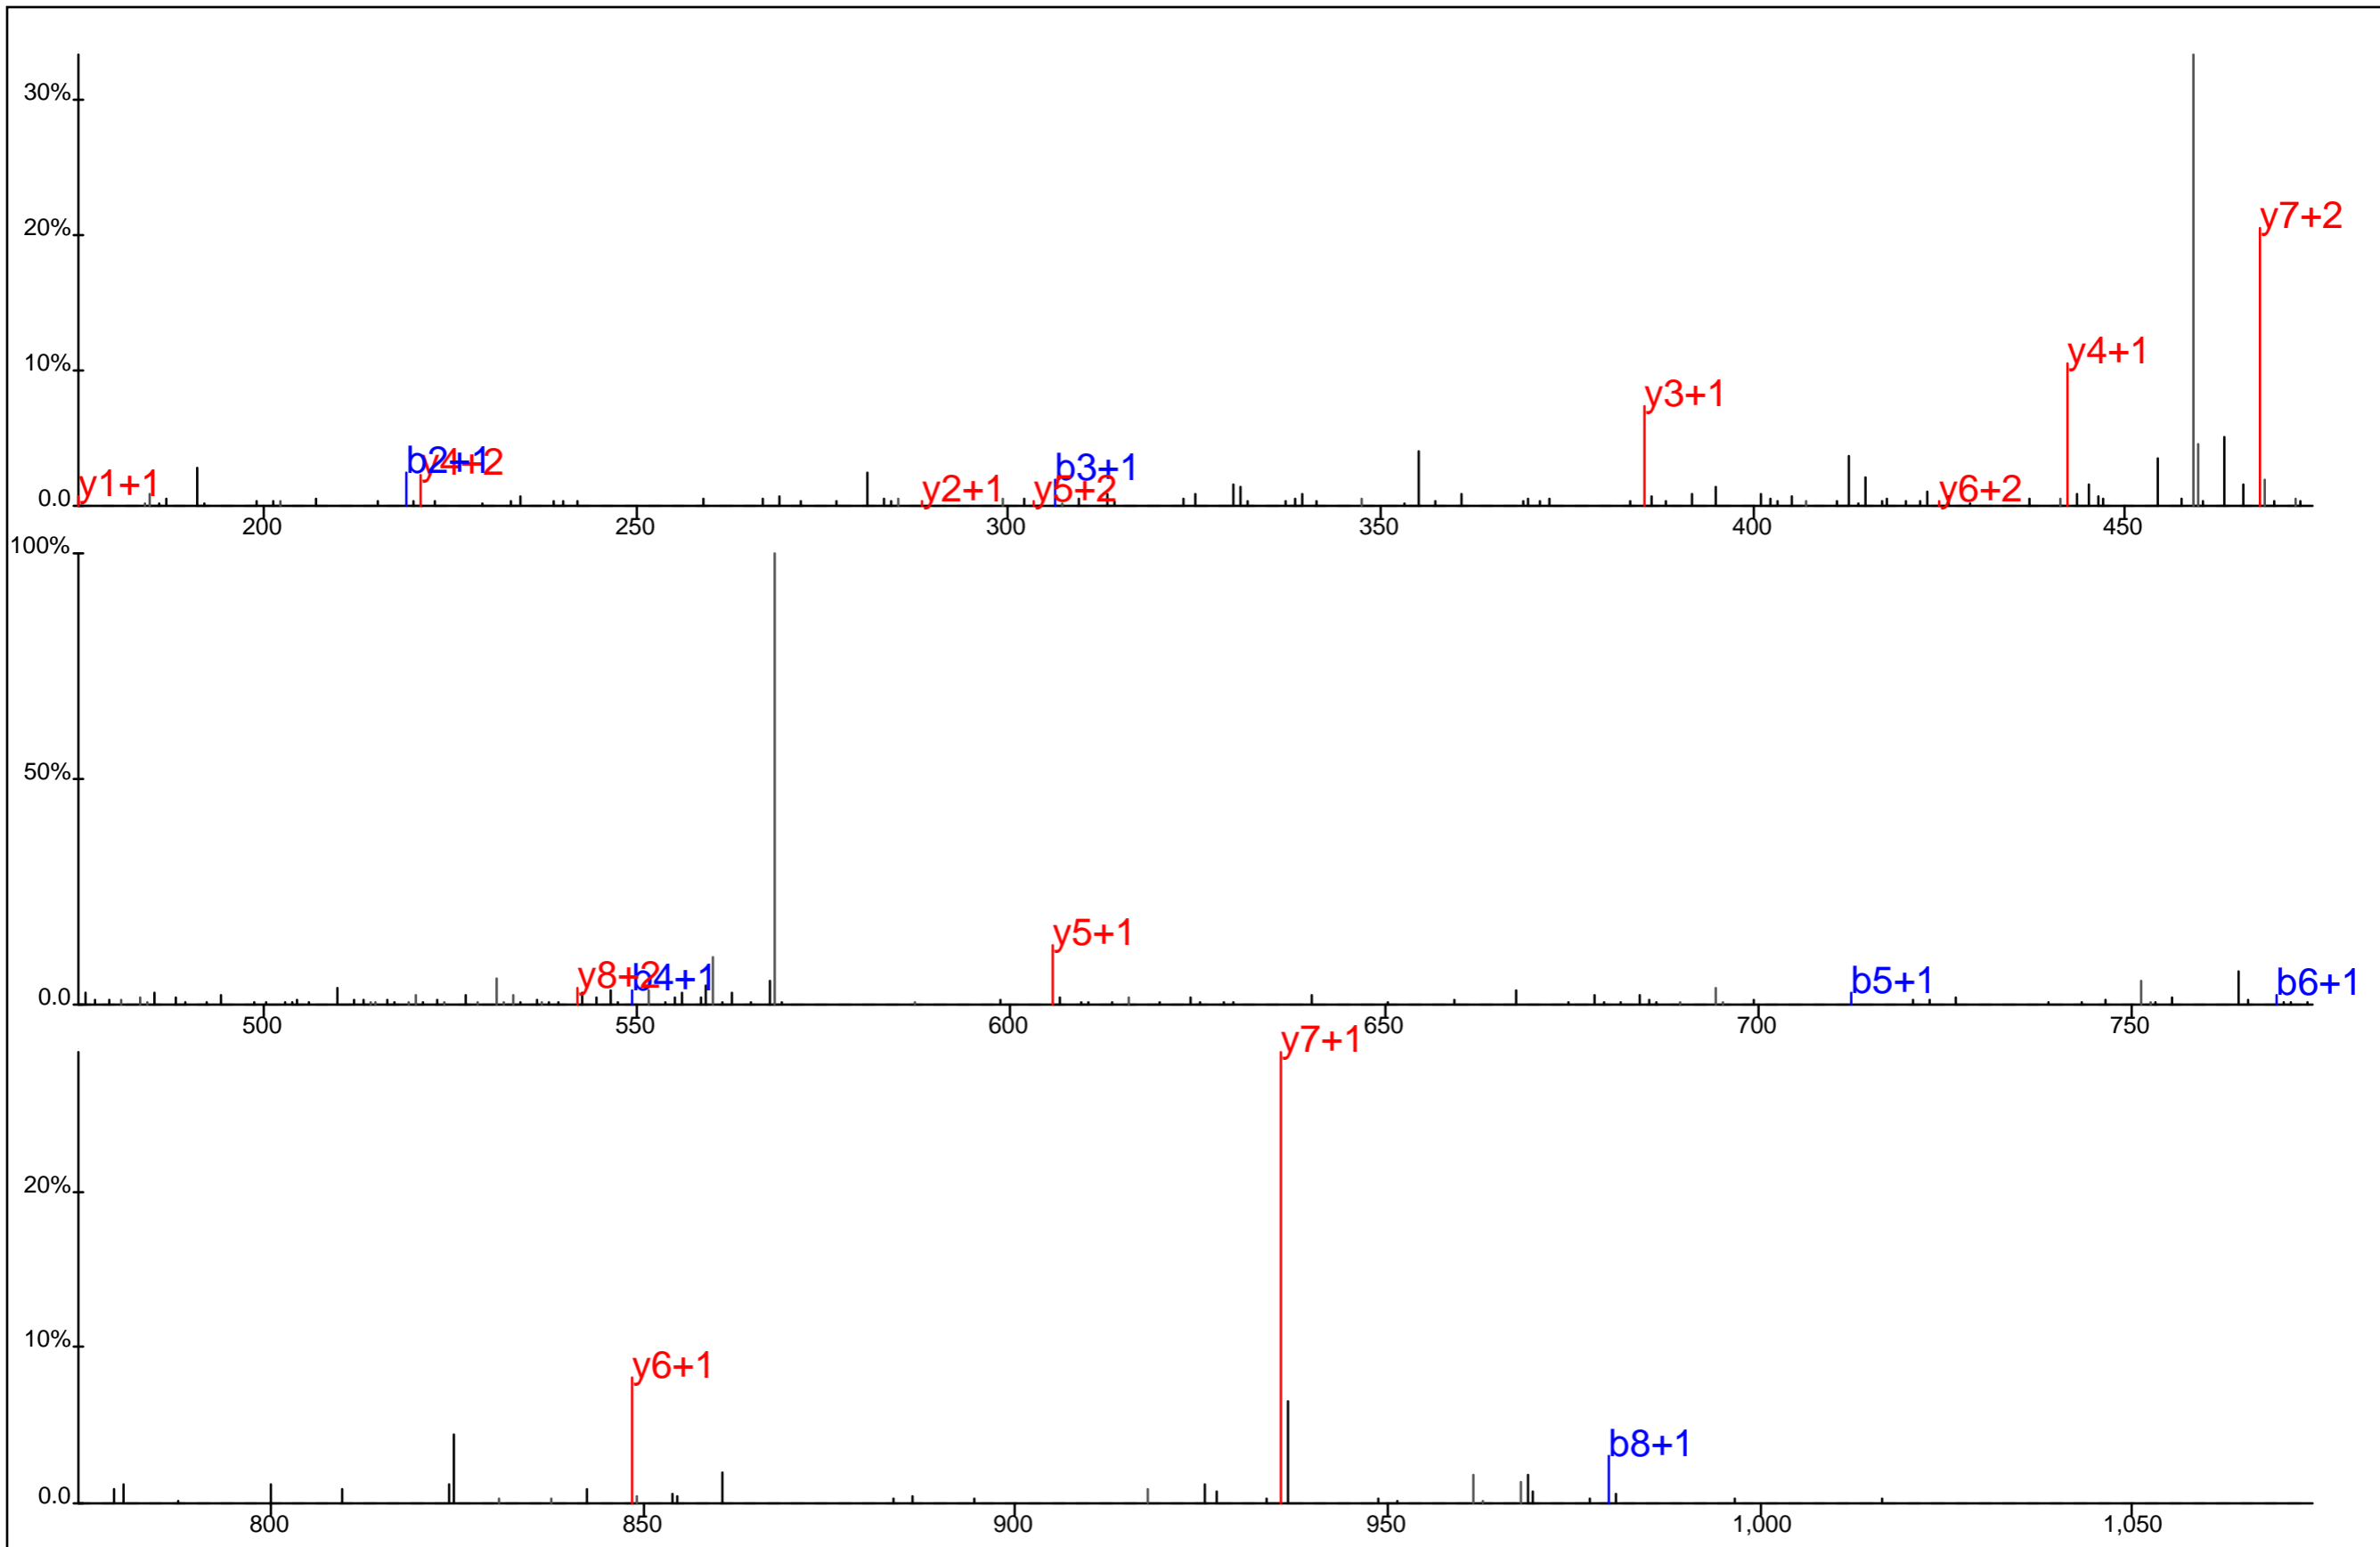

|                                     |                                     |                                     |                                     |                                     |                                     |                                     |                                     |
|-------------------------------------|-------------------------------------|-------------------------------------|-------------------------------------|-------------------------------------|-------------------------------------|-------------------------------------|-------------------------------------|
| <span style="color: blue;">▢</span> | <span style="color: blue;">▢</span> | <span style="color: blue;">▢</span> | <span style="color: blue;">▢</span> | <span style="color: blue;">▢</span> | <span style="color: blue;">▢</span> | <span style="color: blue;">▢</span> | <span style="color: blue;">▢</span> |
| A                                   | F                                   | S                                   | Y*                                  | Y                                   | G                                   | P                                   | L R                                 |
| <span style="color: red;">▢</span>  | <span style="color: red;">▢</span>  | <span style="color: red;">▢</span>  | <span style="color: red;">▢</span>  | <span style="color: red;">▢</span>  | <span style="color: red;">▢</span>  | <span style="color: red;">▢</span>  | <span style="color: red;">▢</span>  |
|                                     |                                     |                                     |                                     |                                     |                                     |                                     |                                     |

Protein Name: Splicing factor 9G8  
 gi Accession: 72534660  
 Precursor Mass: 577.2595+2  
 Delta Mass: 3.475 ppm  
 XCorr: 26.1



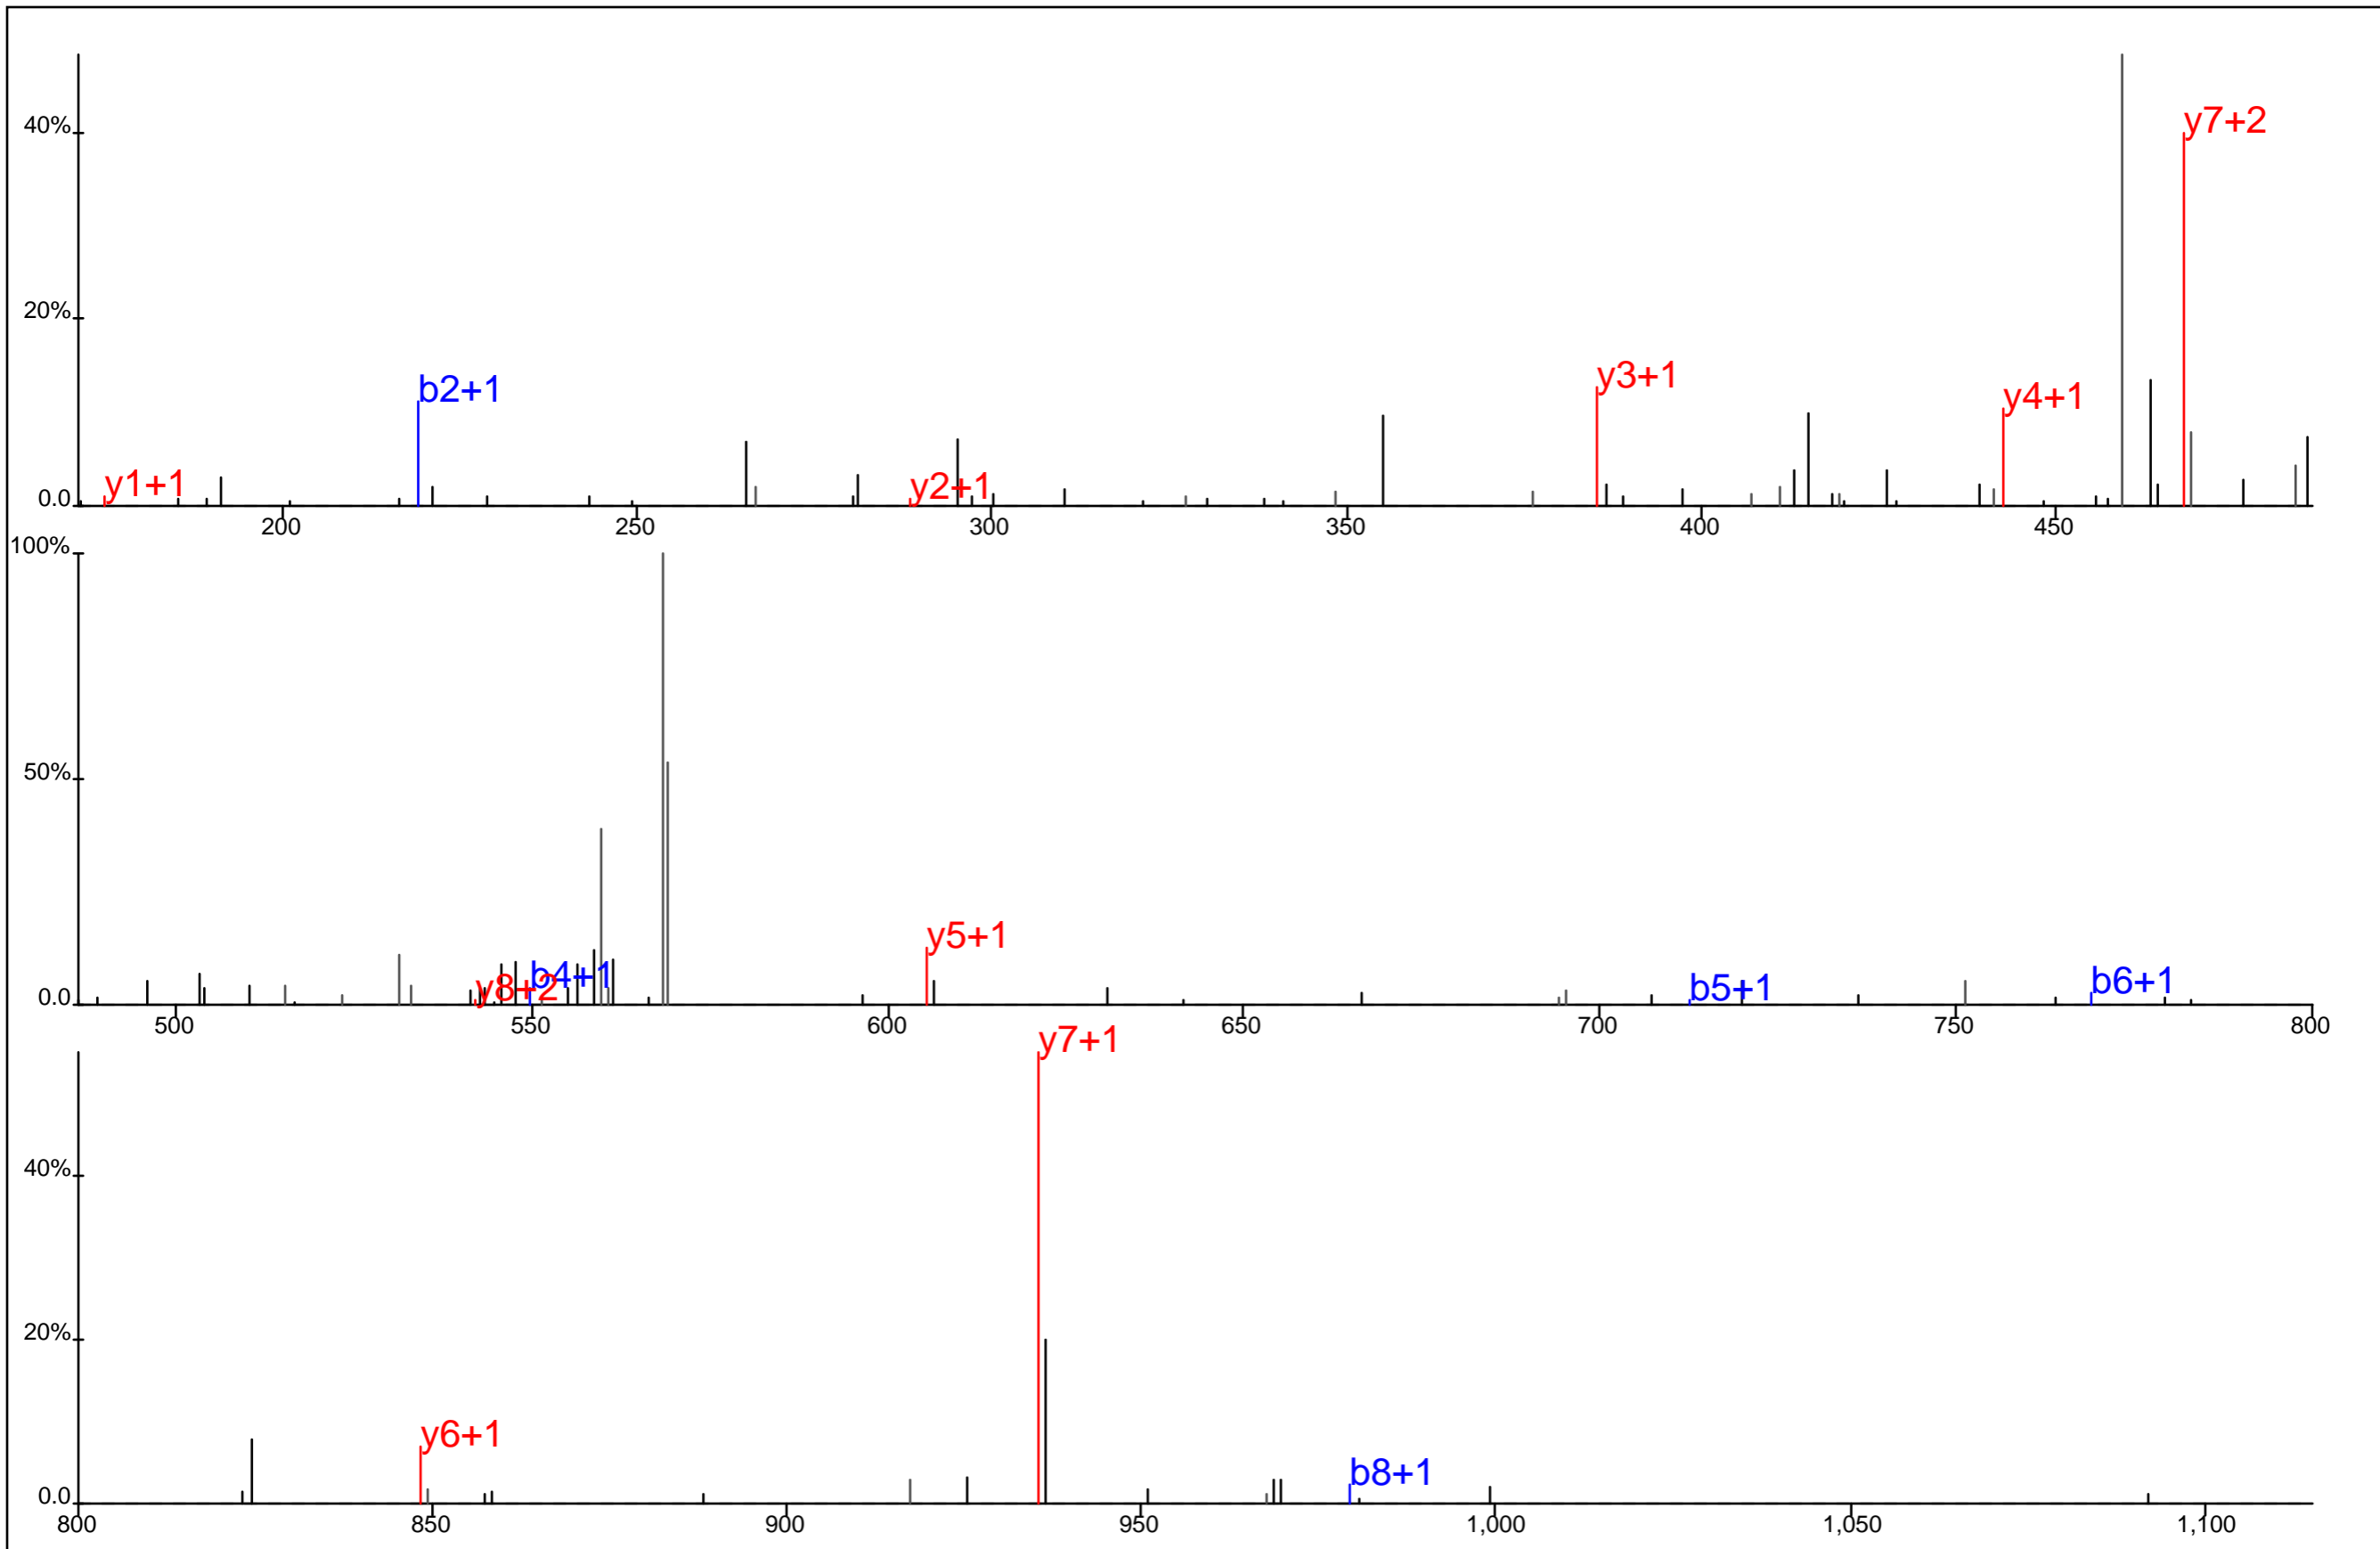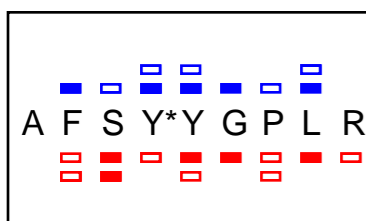

Protein Name: Splicing factor 9G8  
 gi Accession: 72534660  
 Precursor Mass: 577.2598+2  
 Delta Mass: 4.003 ppm  
 XCorr: 19.25

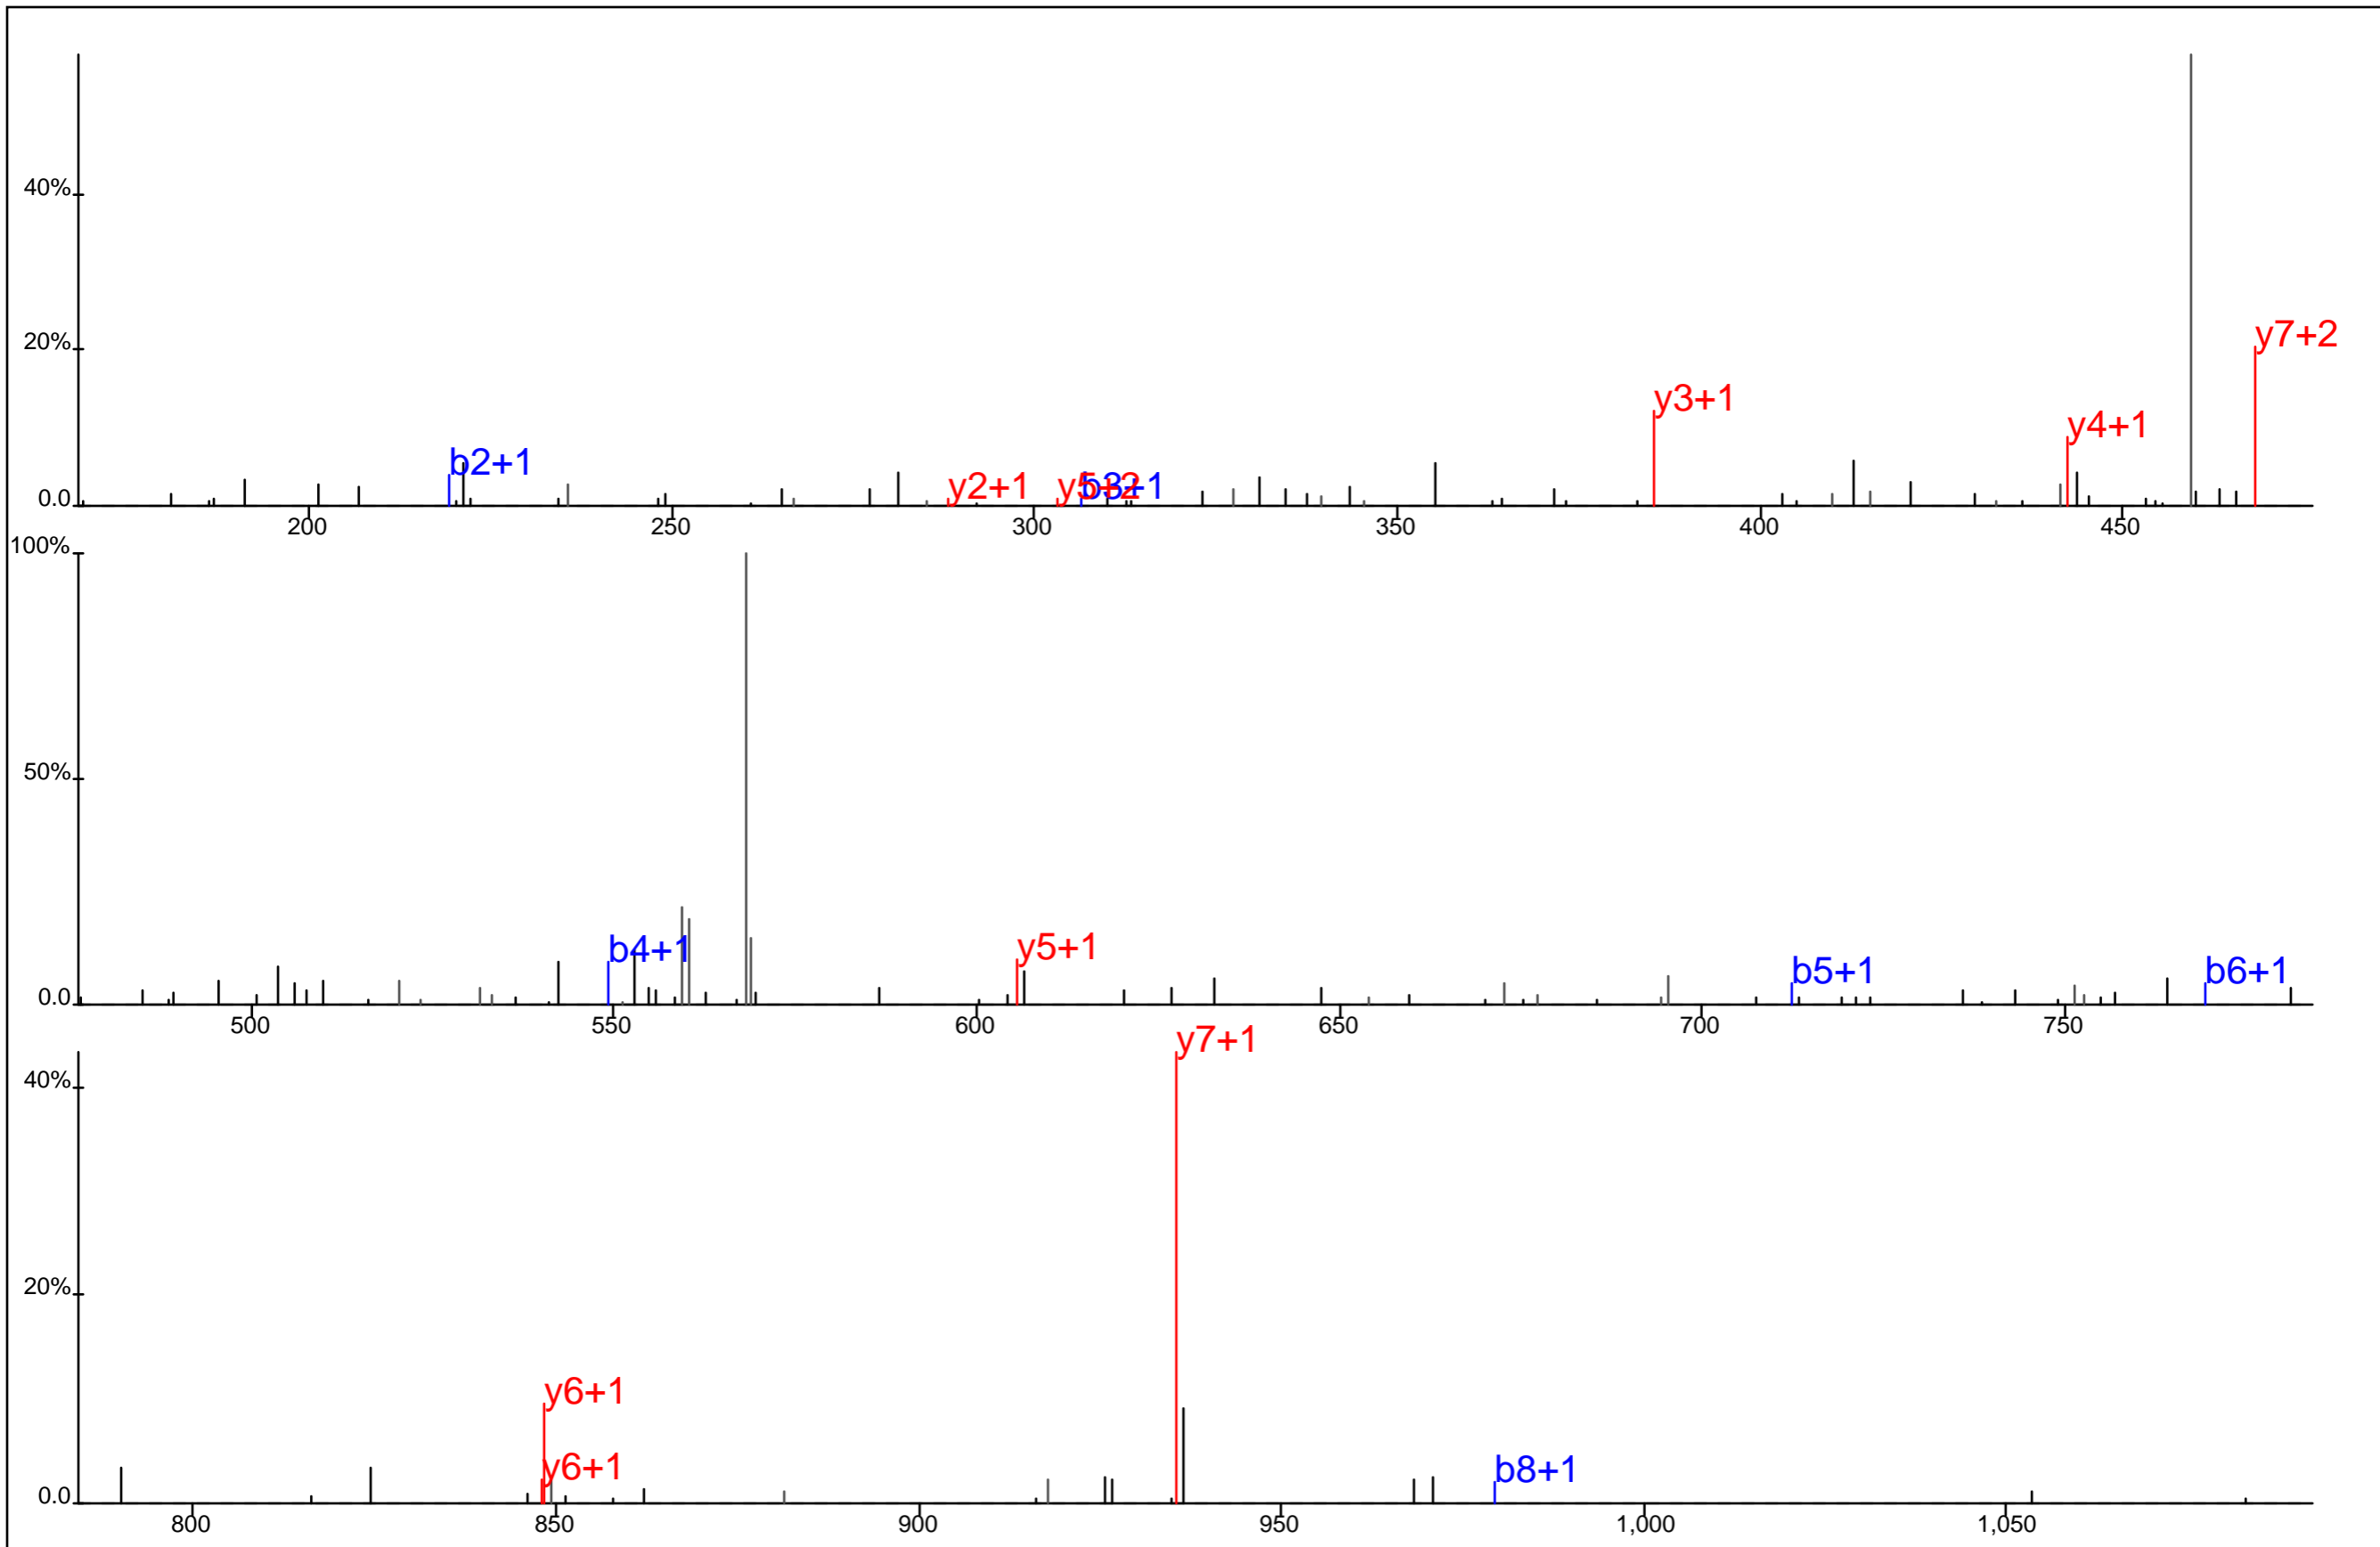

A F S Y\*Y G P L R

Protein Name: Splicing factor 9G8  
 gi Accession: 72534660  
 Precursor Mass: 577.2594+2  
 Delta Mass: 3.258 ppm  
 XCorr: 19.56

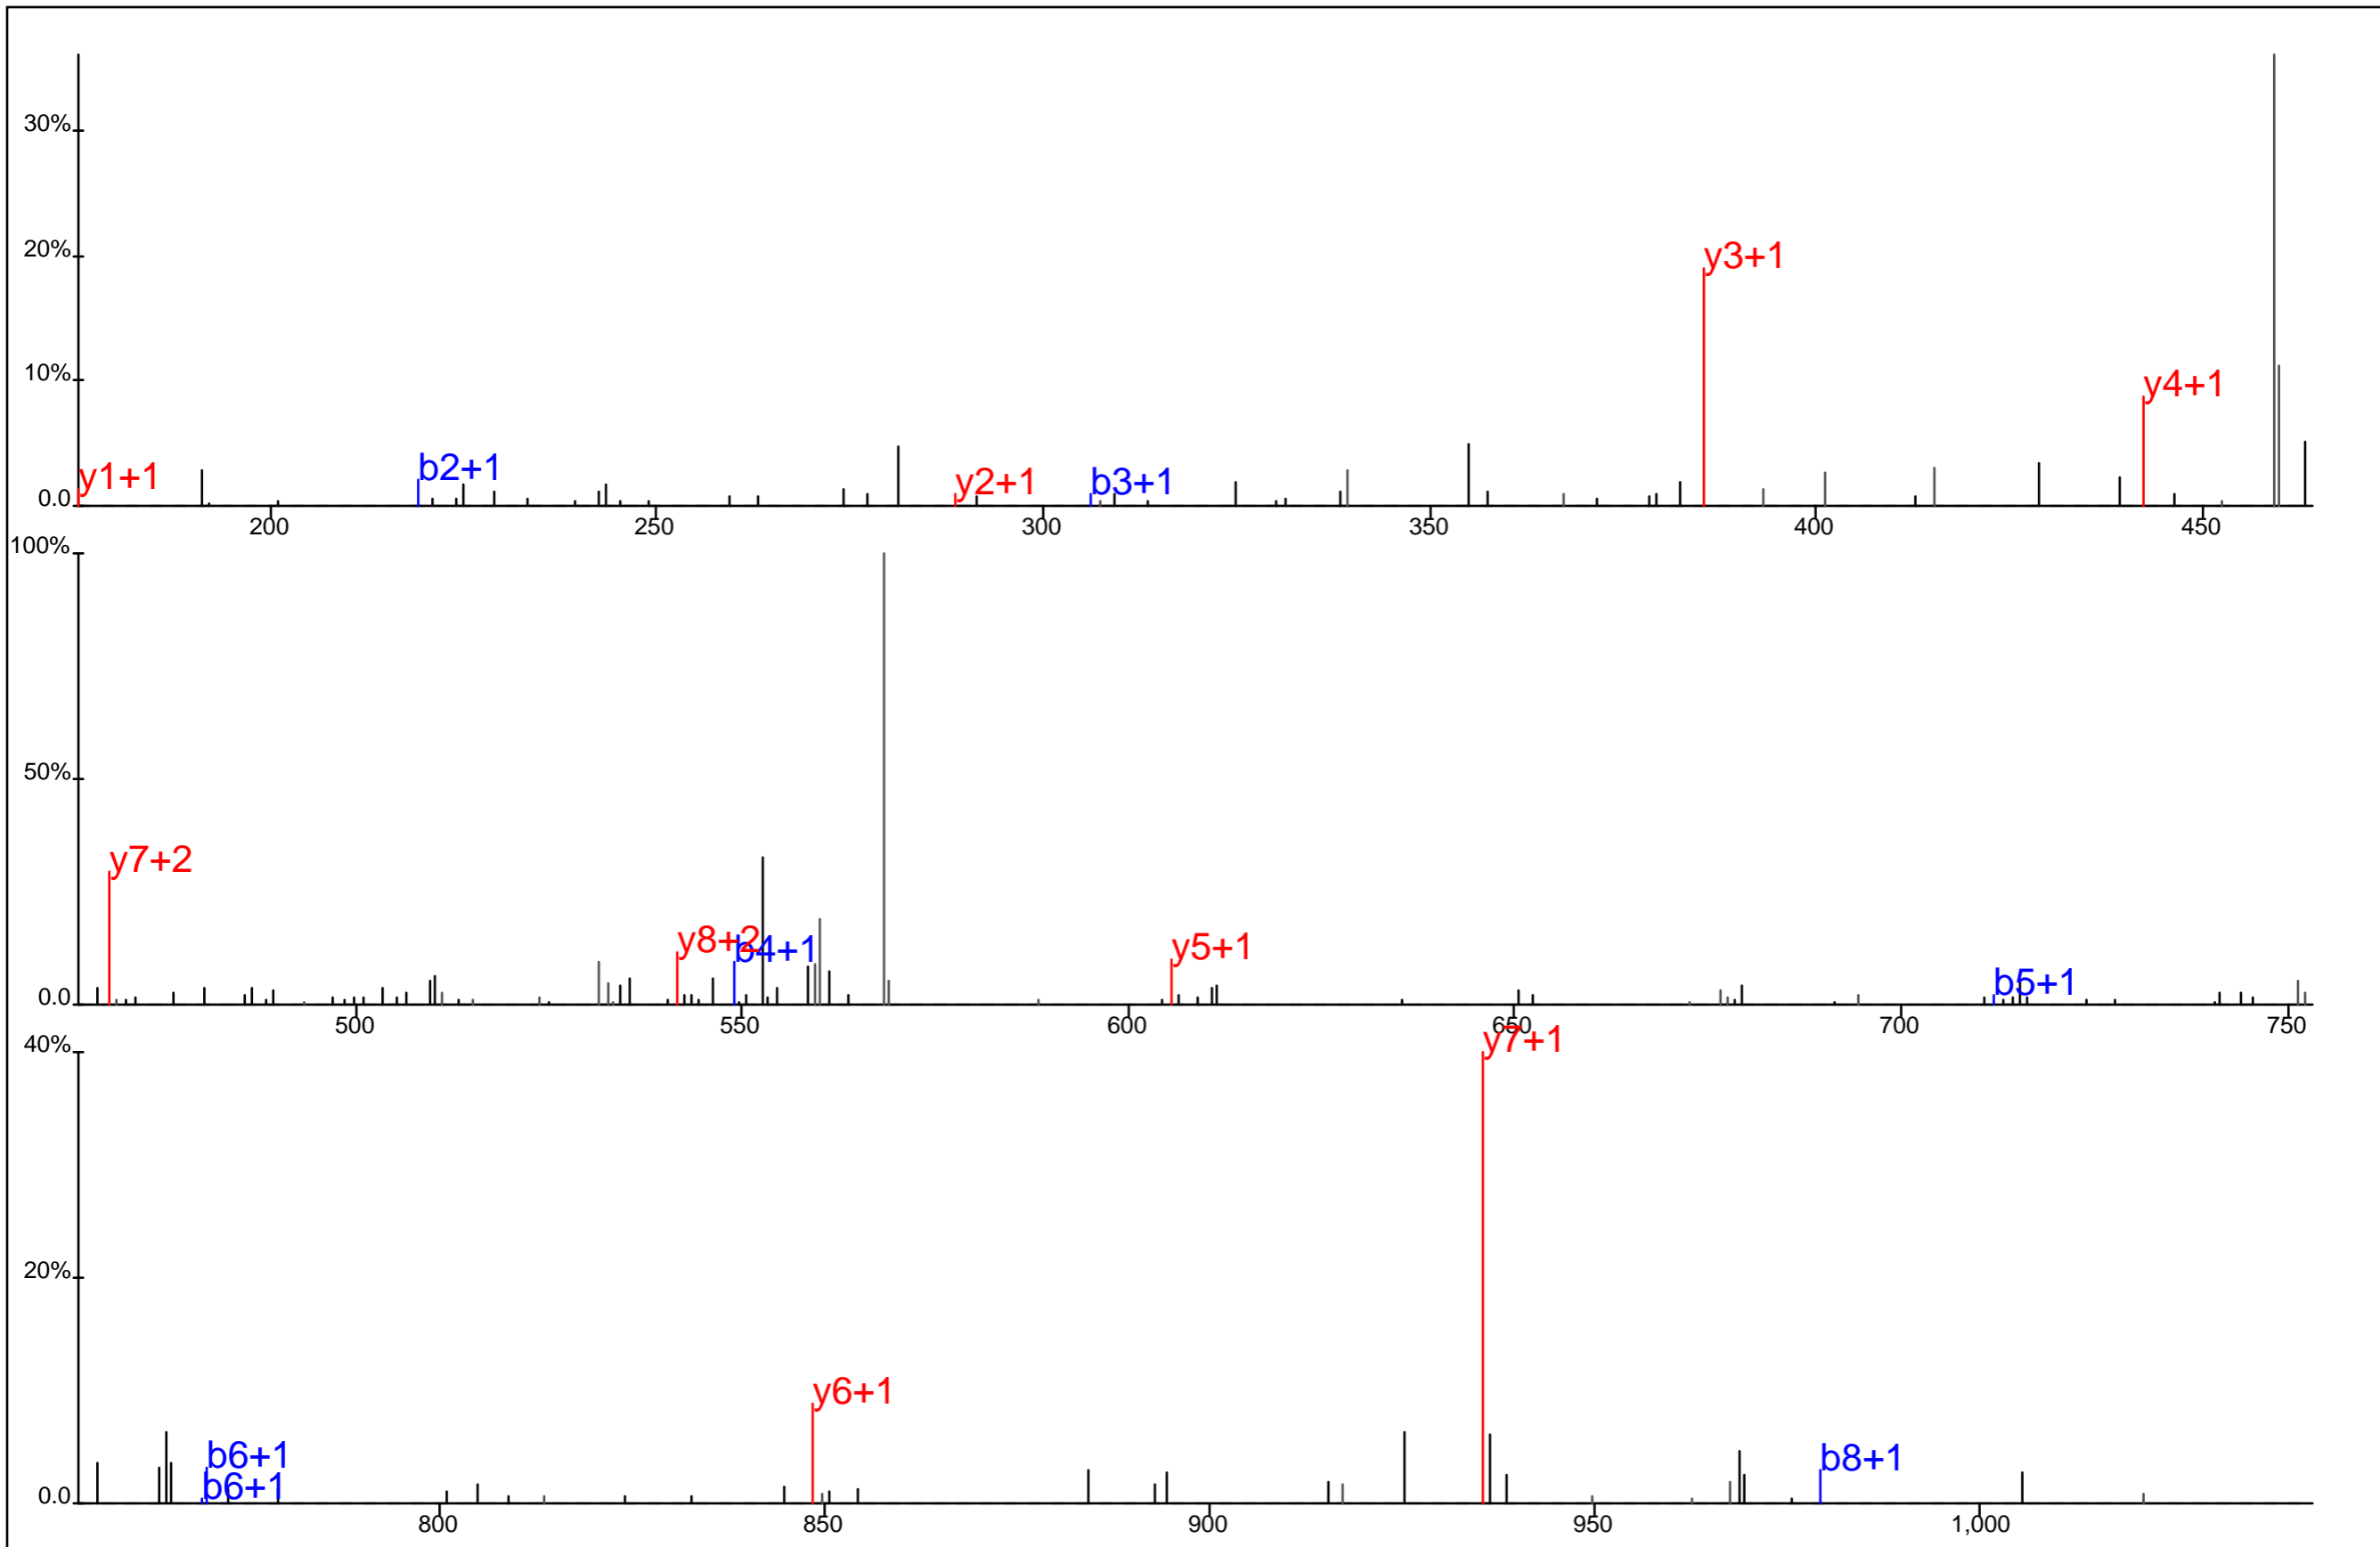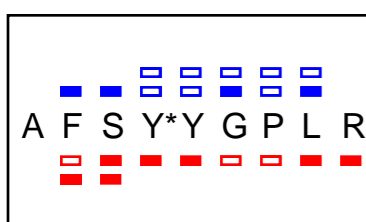

Protein Name: Splicing factor 9G8  
 gi Accession: 72534660  
 Precursor Mass: 577.2589+2  
 Delta Mass: 2.417 ppm  
 XCorr: 20.46

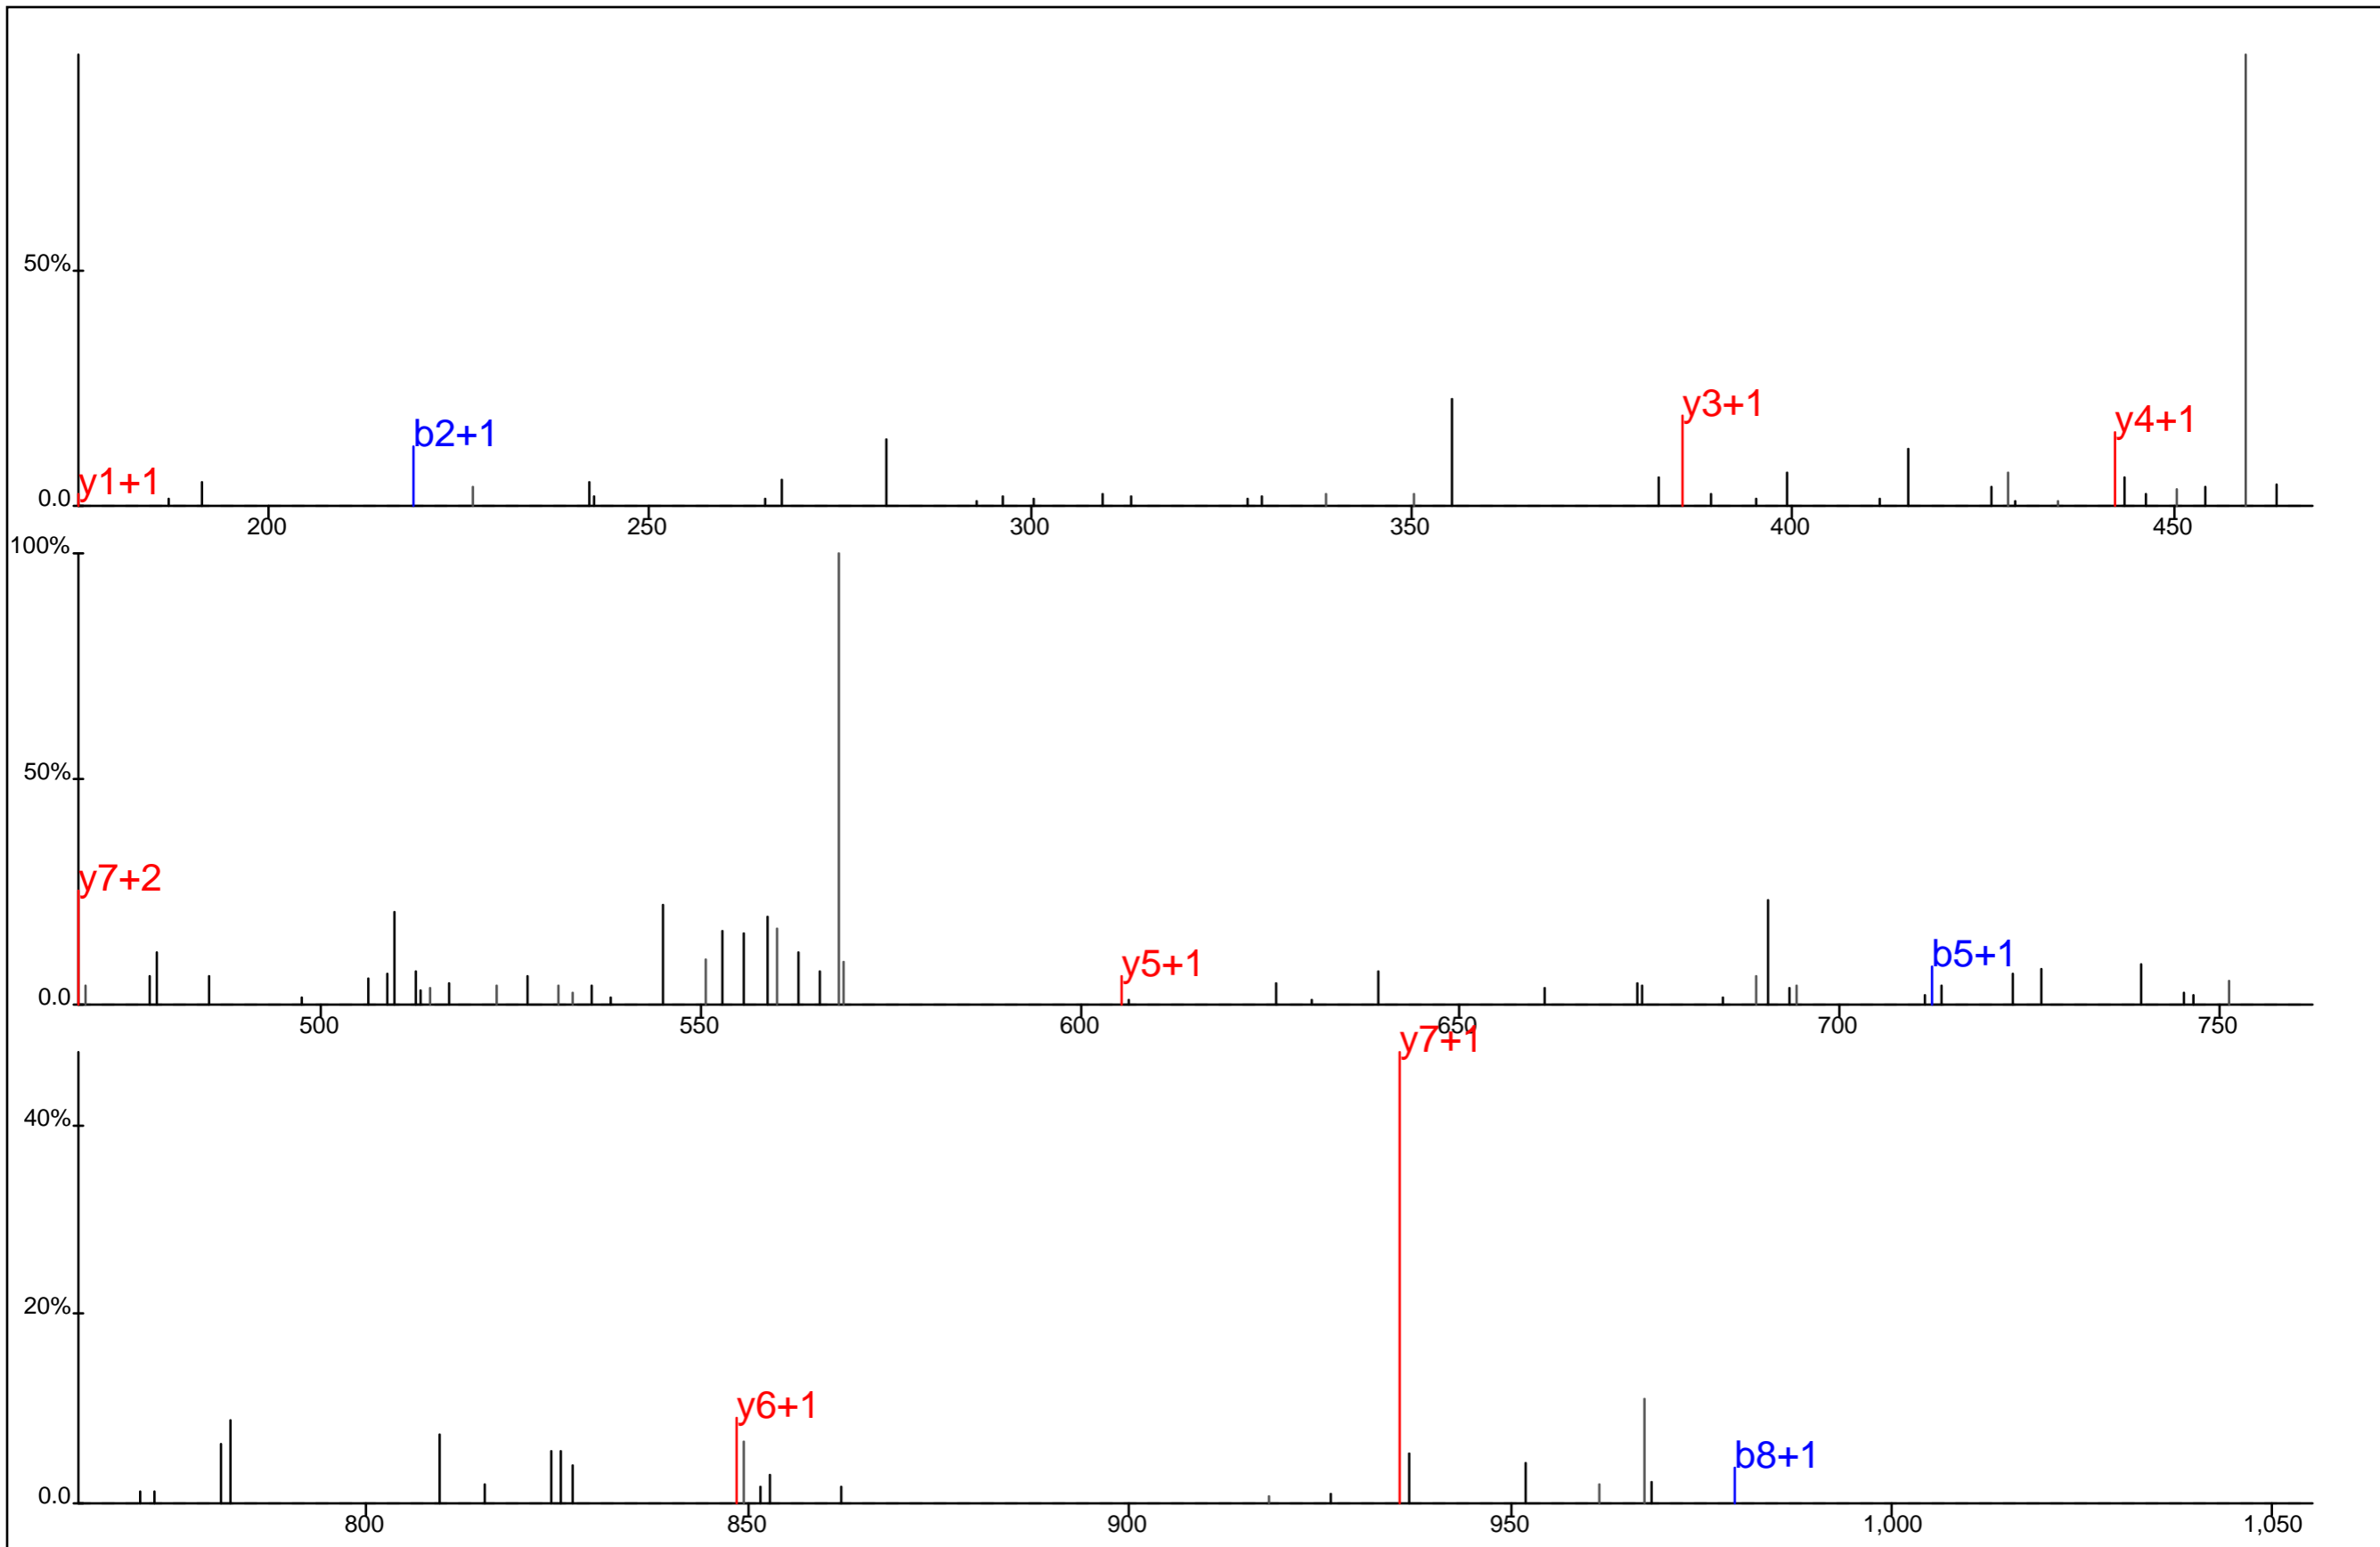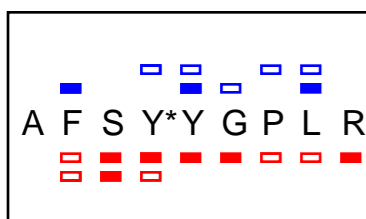

Protein Name: Splicing factor 9G8  
 gi Accession: 72534660  
 Precursor Mass: 577.2601+2  
 Delta Mass: 4.420 ppm  
 XCorr: 17.32

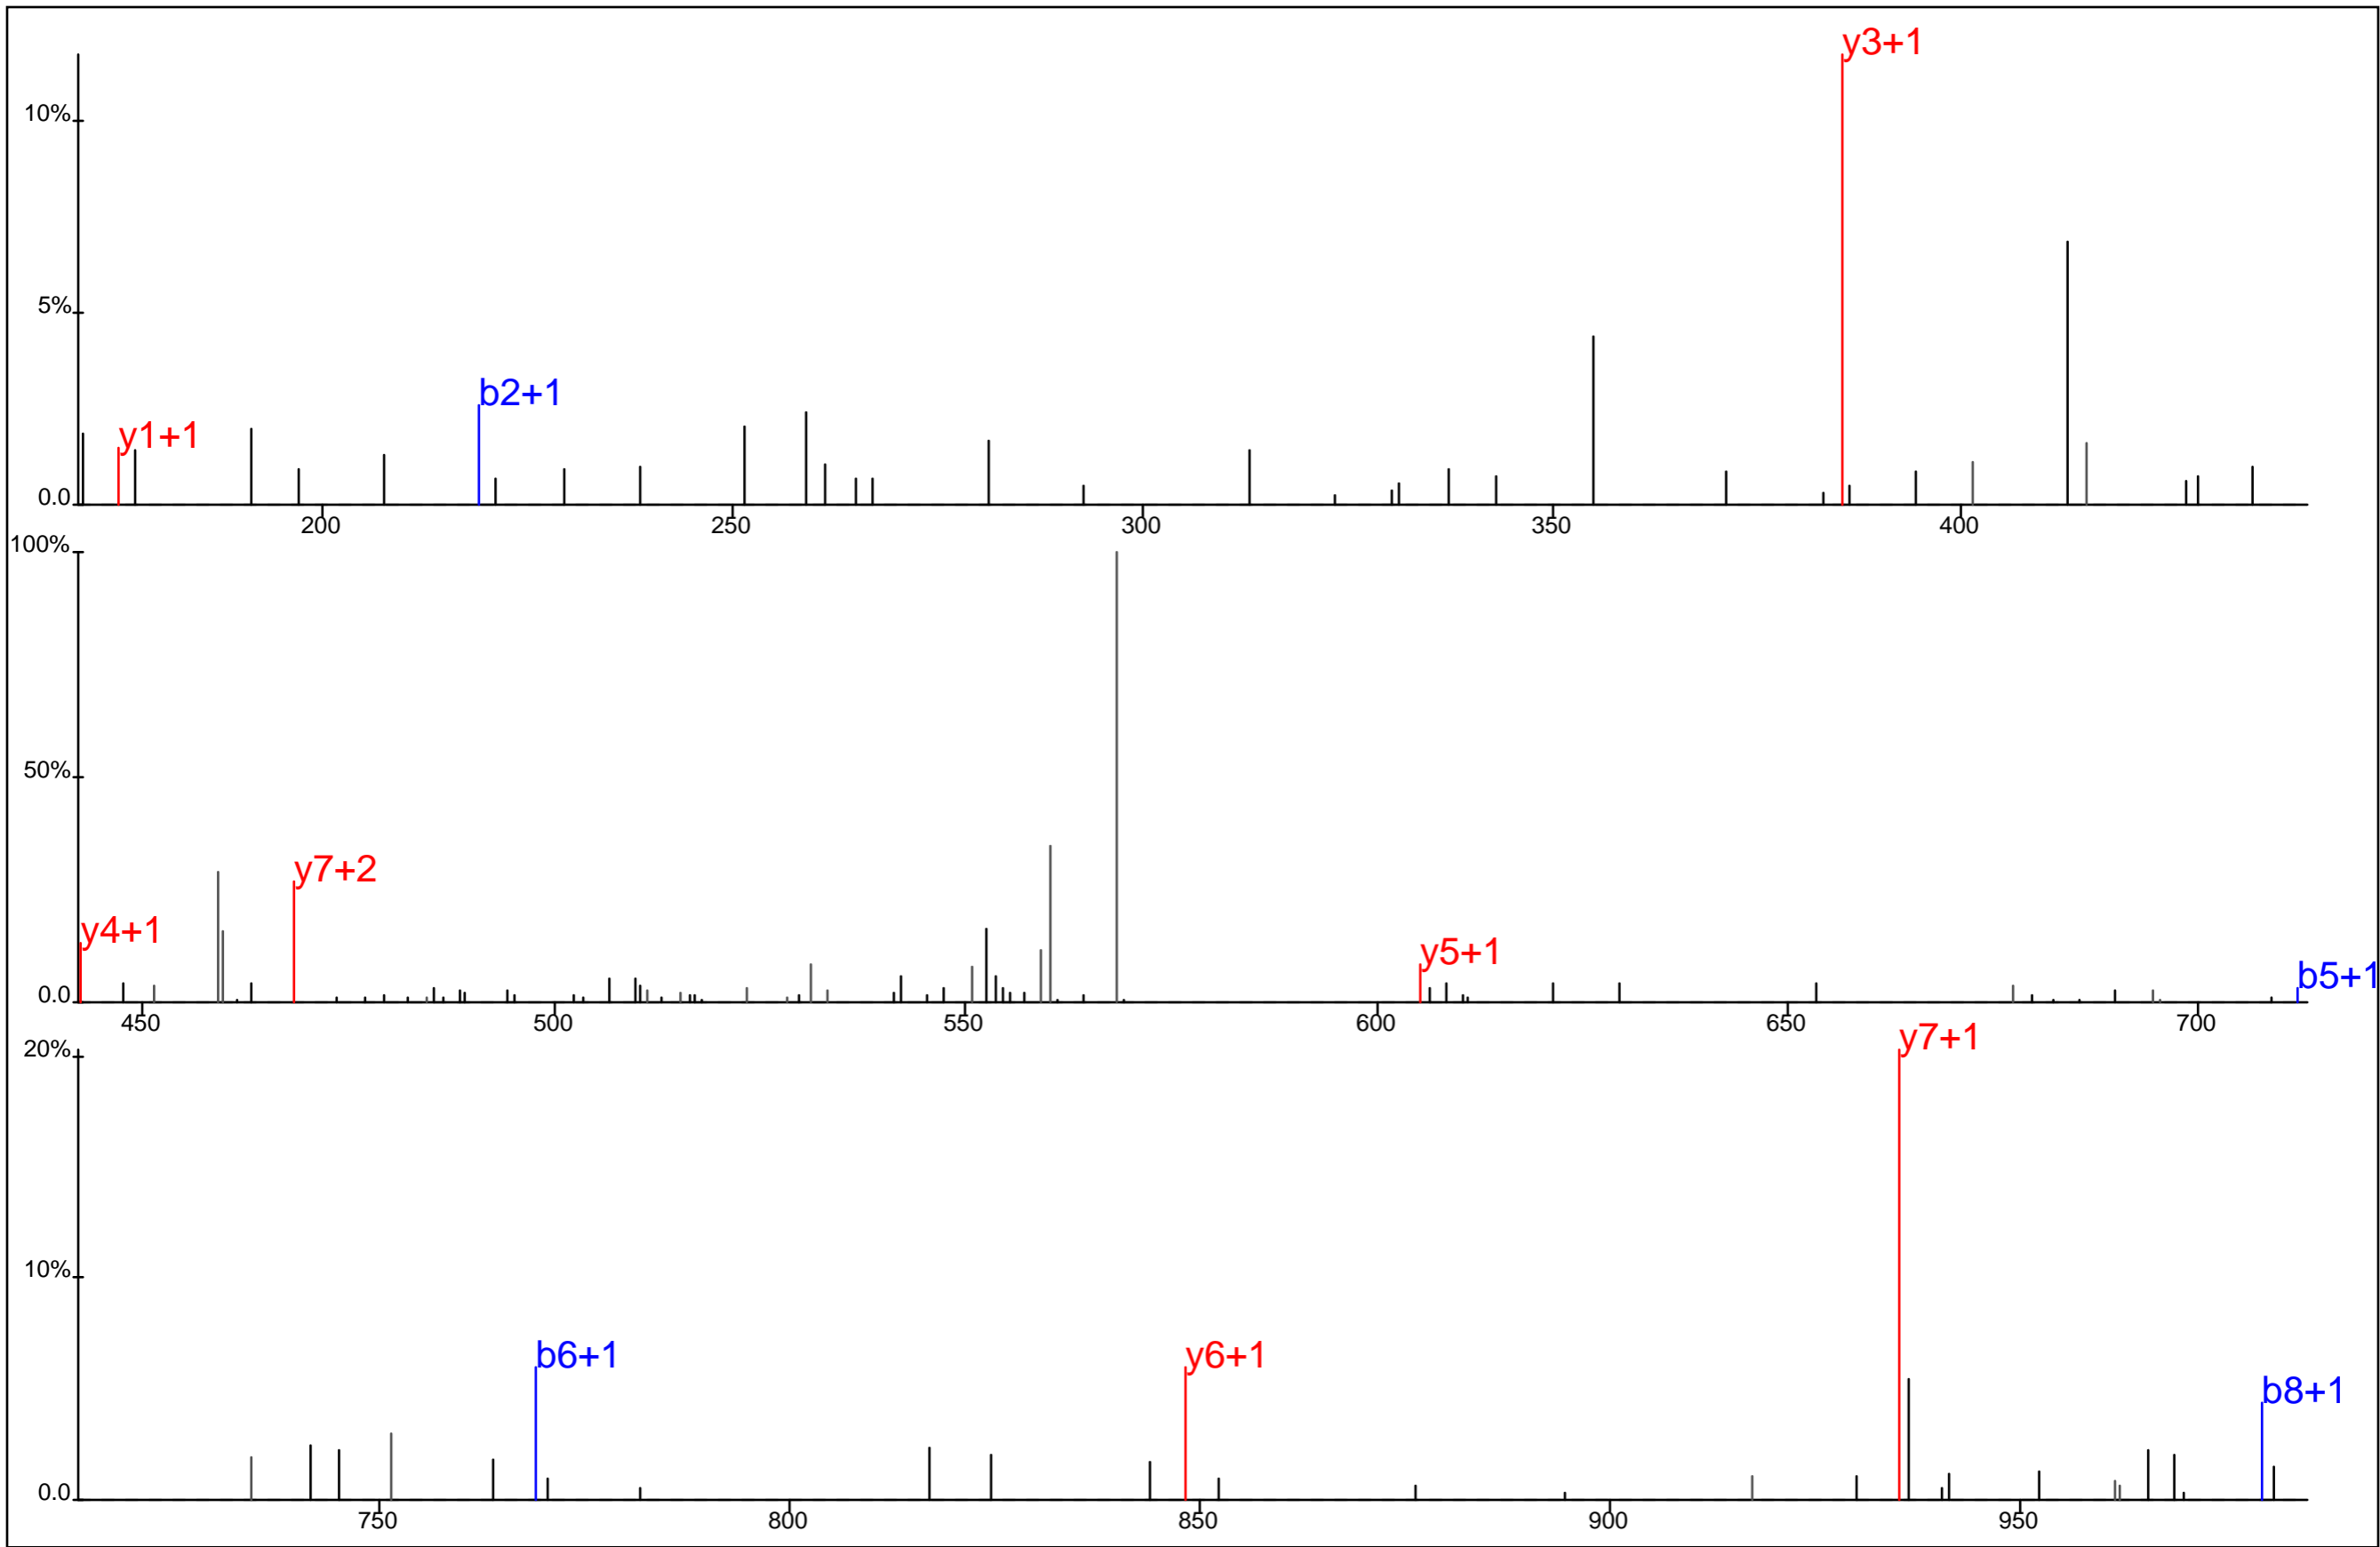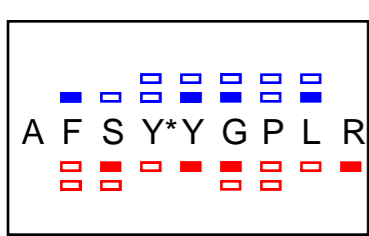

Protein Name: Splicing factor 9G8  
 gi Accession: 72534660  
 Precursor Mass: 577.2643+2  
 Delta Mass: 11.728 ppm  
 XCorr: 30.24

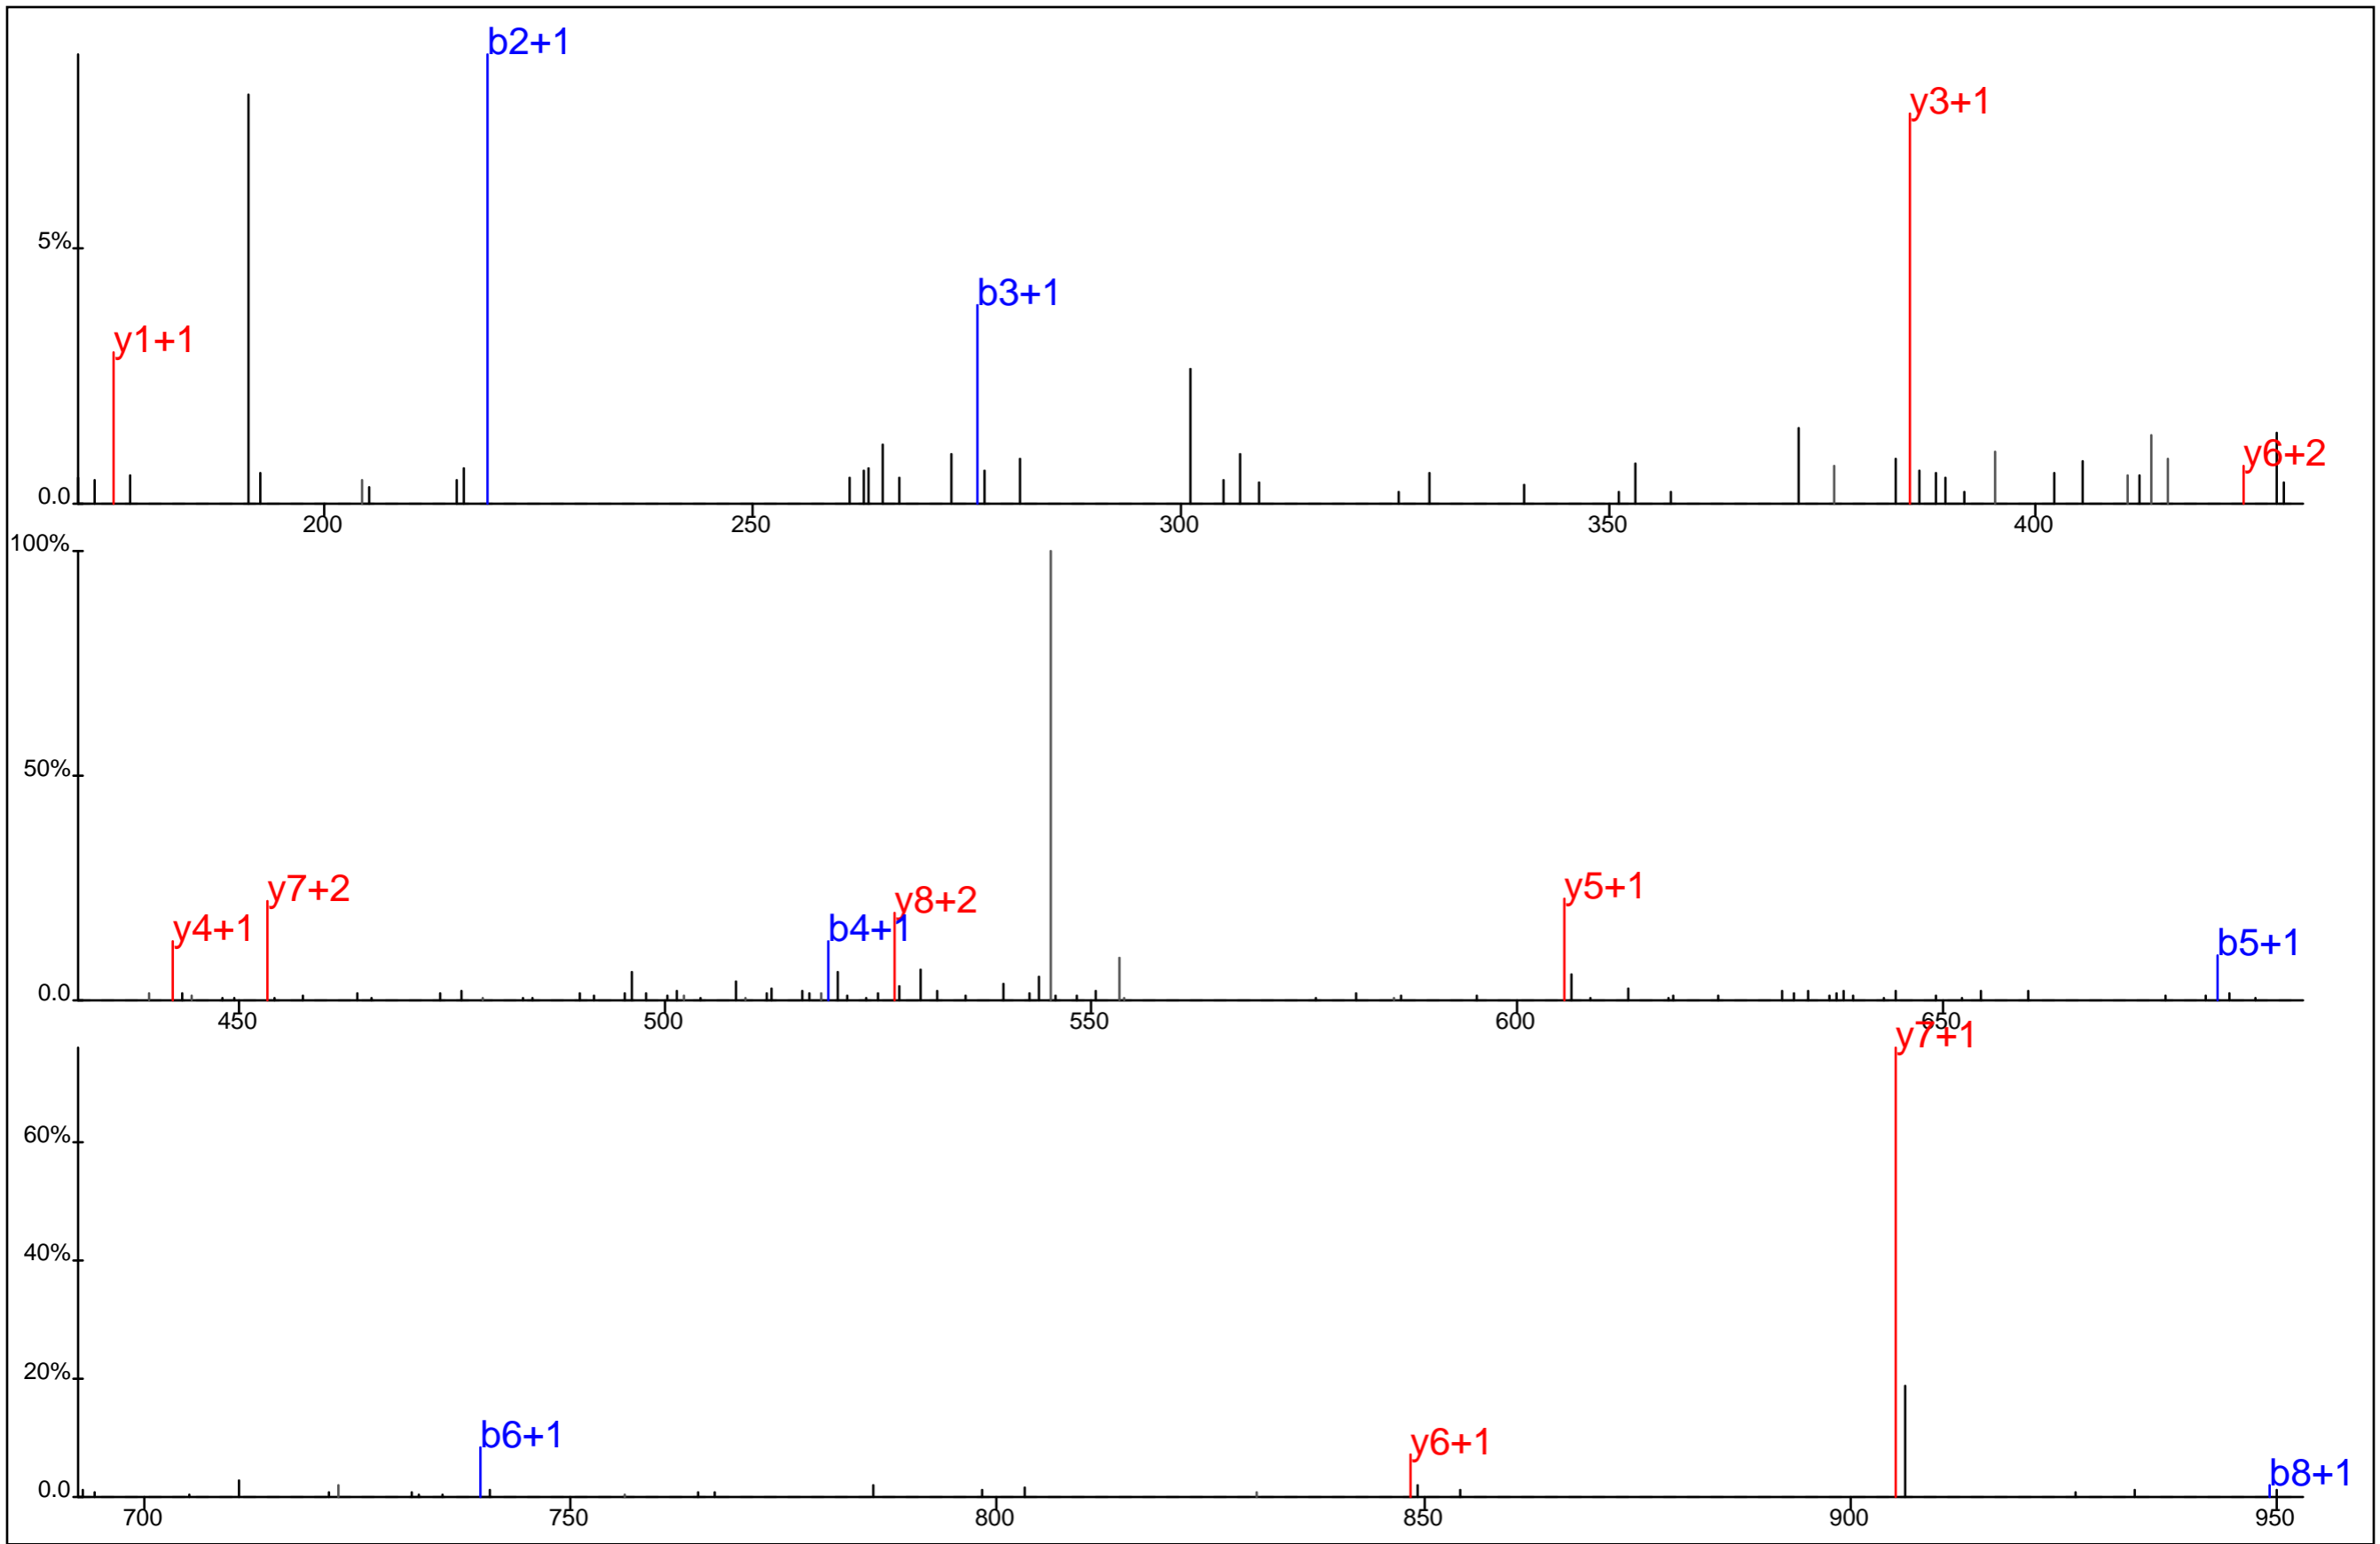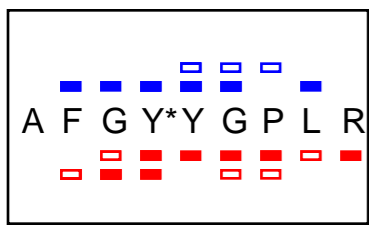

Protein Name: SRP20  
 gi Accession: 4506901  
 Precursor Mass: 562.2537+2  
 Delta Mass: 2.642 ppm  
 XCorr: 37.07

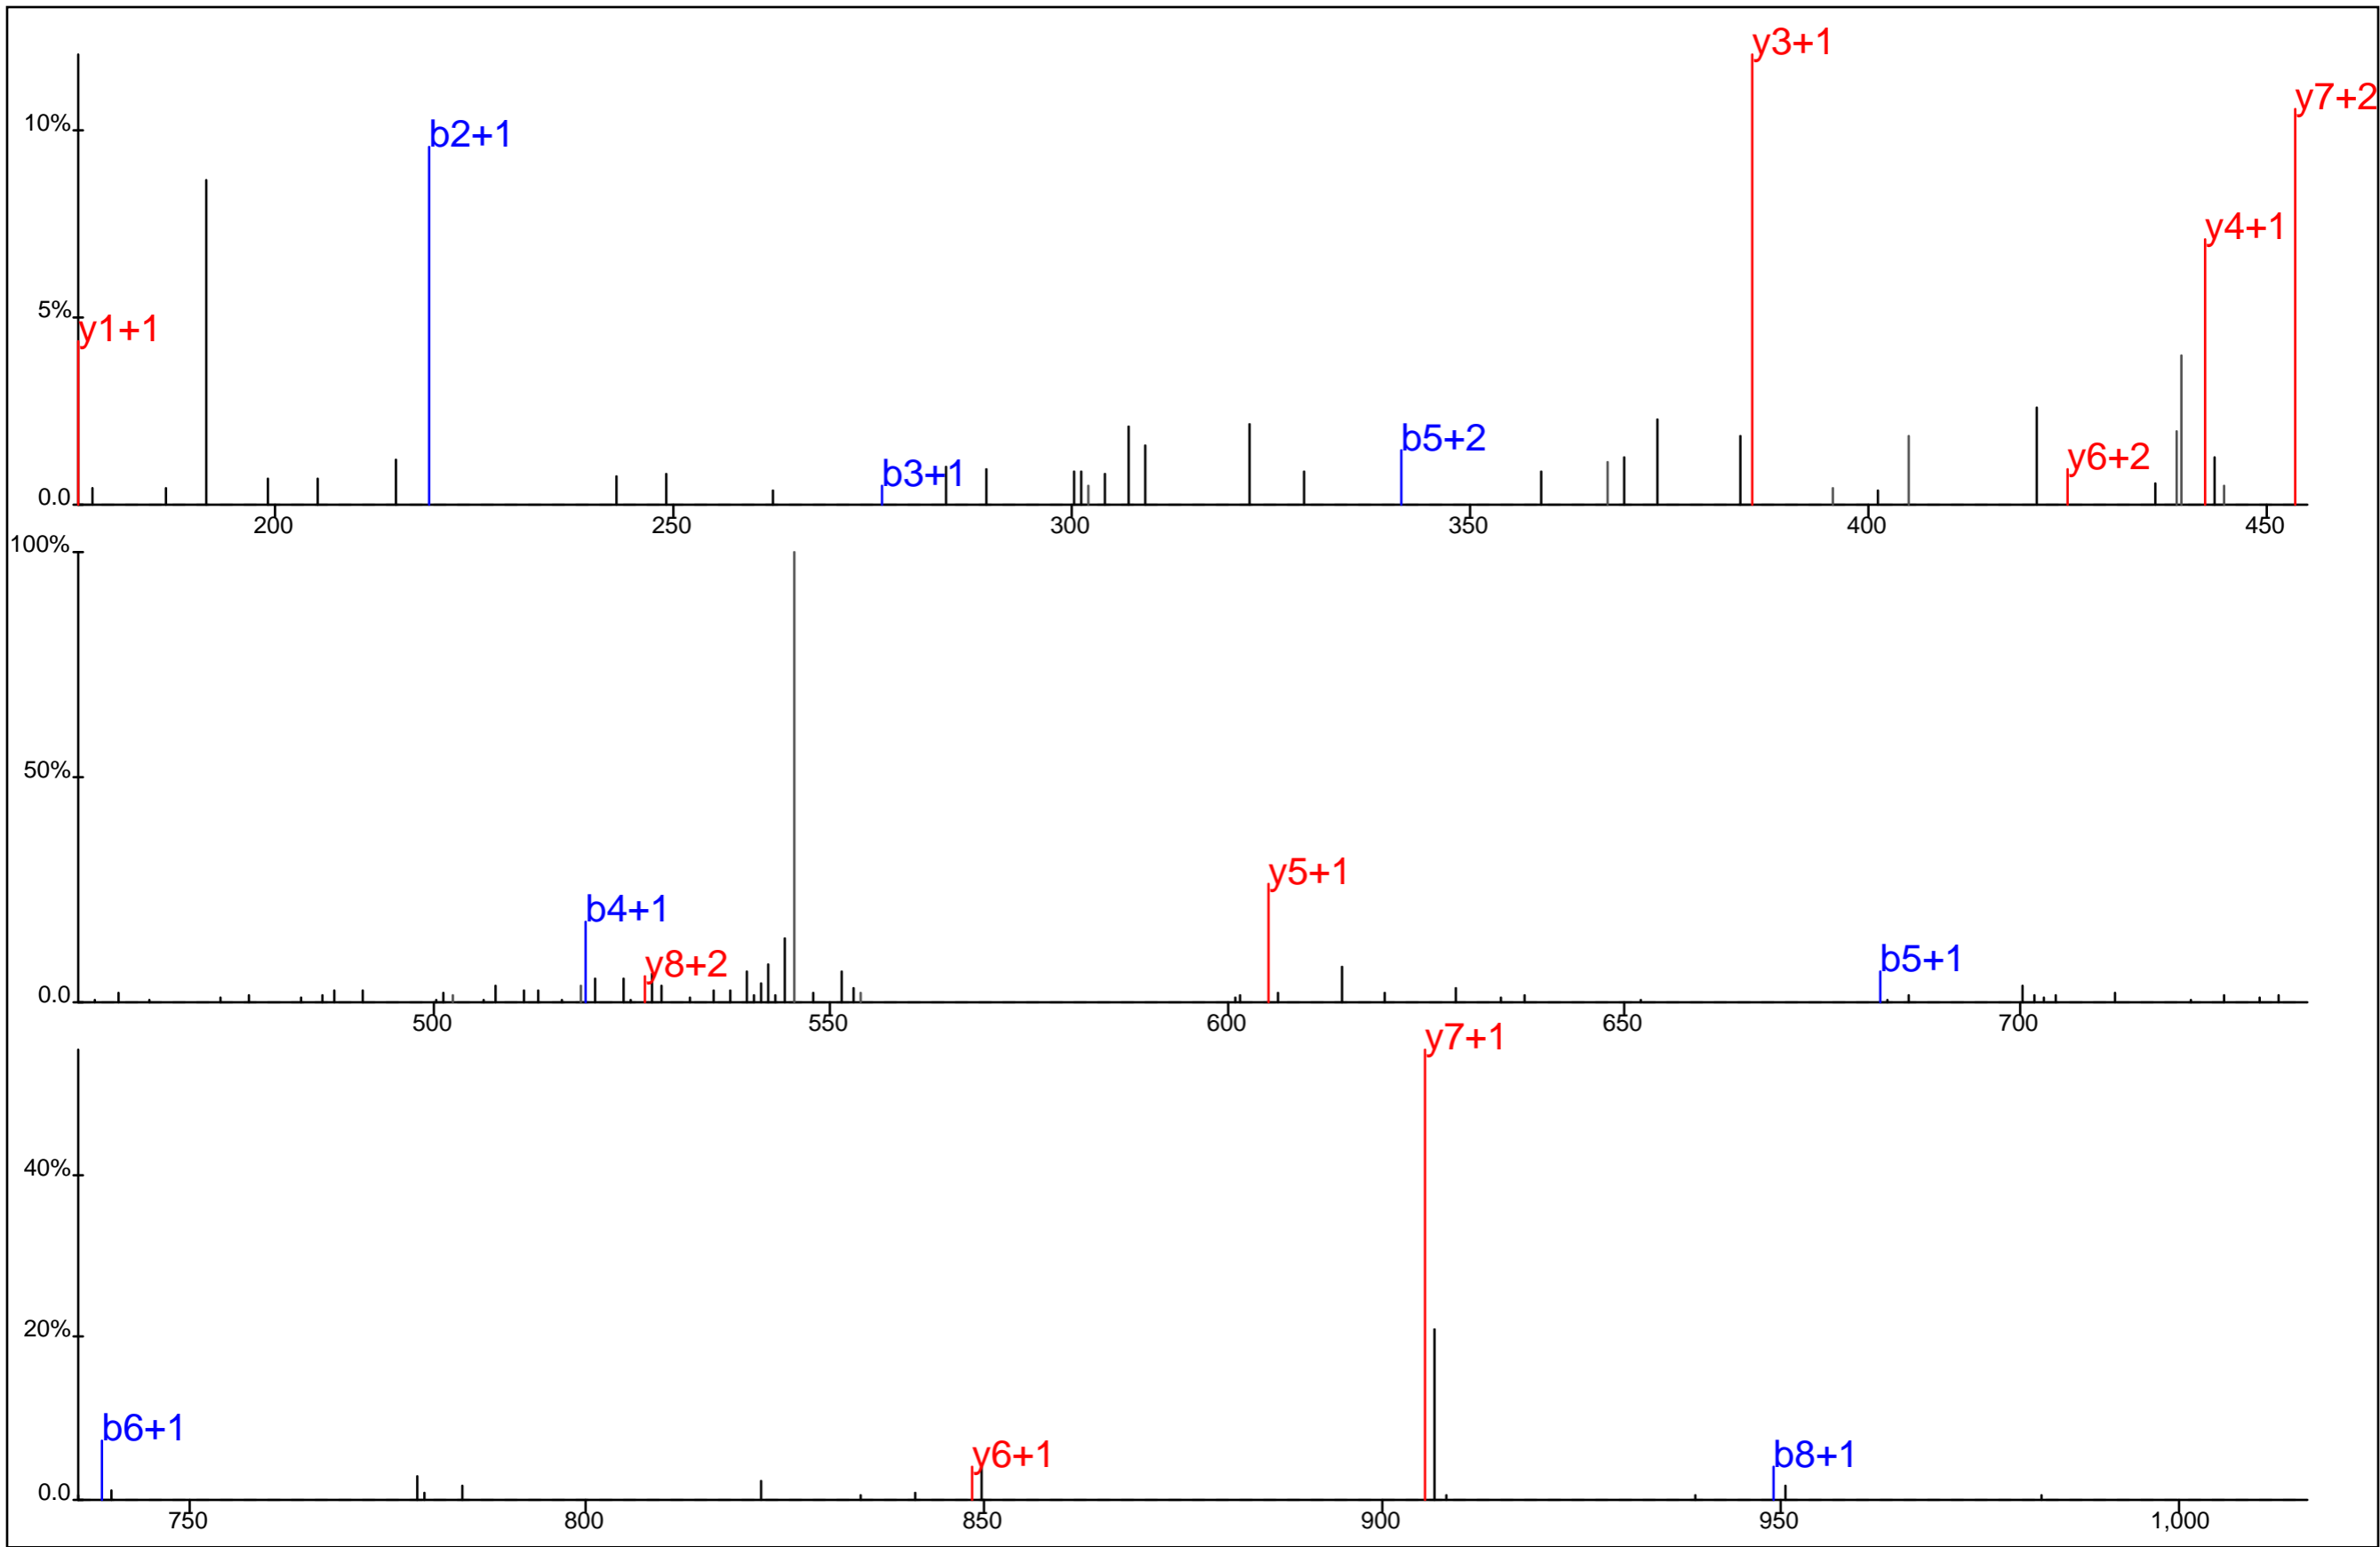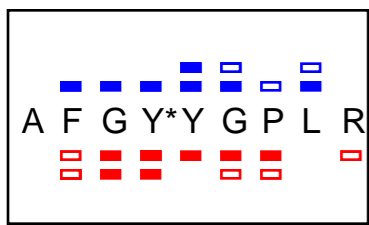

Protein Name: SRP20  
 gi Accession: 4506901  
 Precursor Mass: 562.2524+2  
 Delta Mass: 0.363 ppm  
 XCorr: 28.32

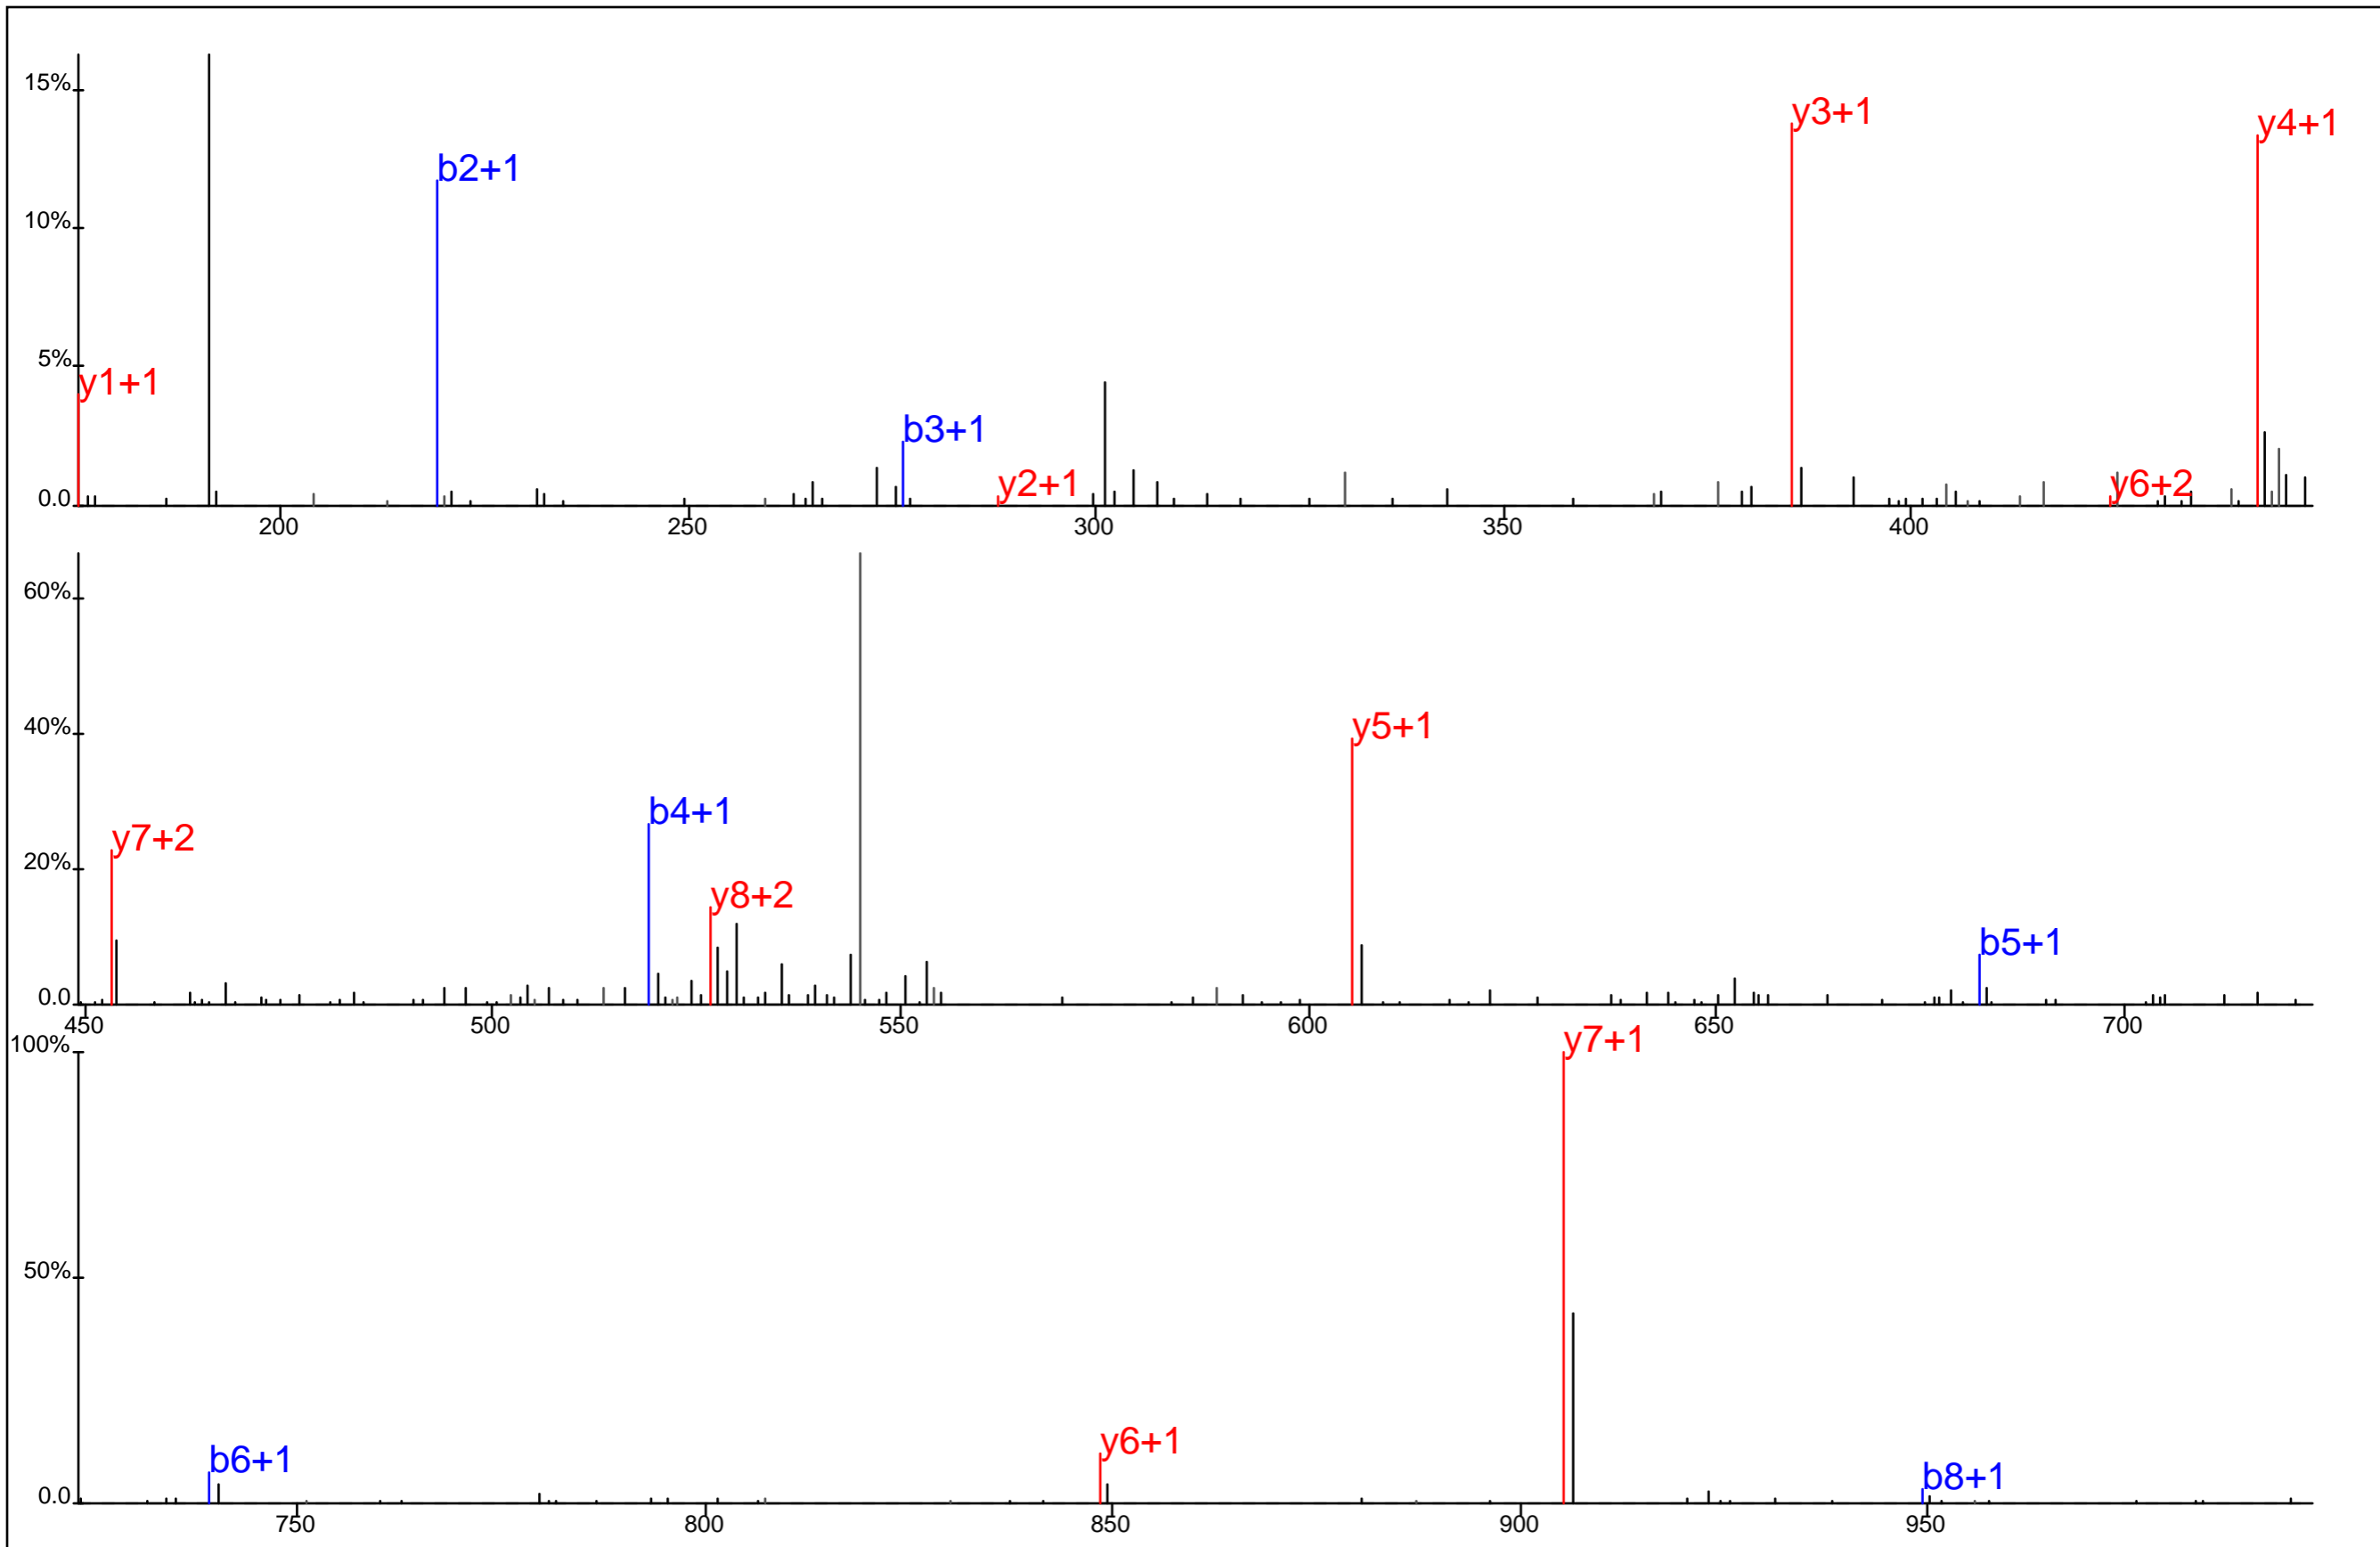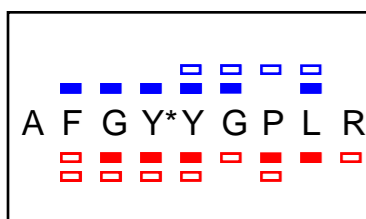

Protein Name: SRP20  
 gi Accession: 4506901  
 Precursor Mass: 562.2538+2  
 Delta Mass: 2.855 ppm  
 XCorr: 35.73



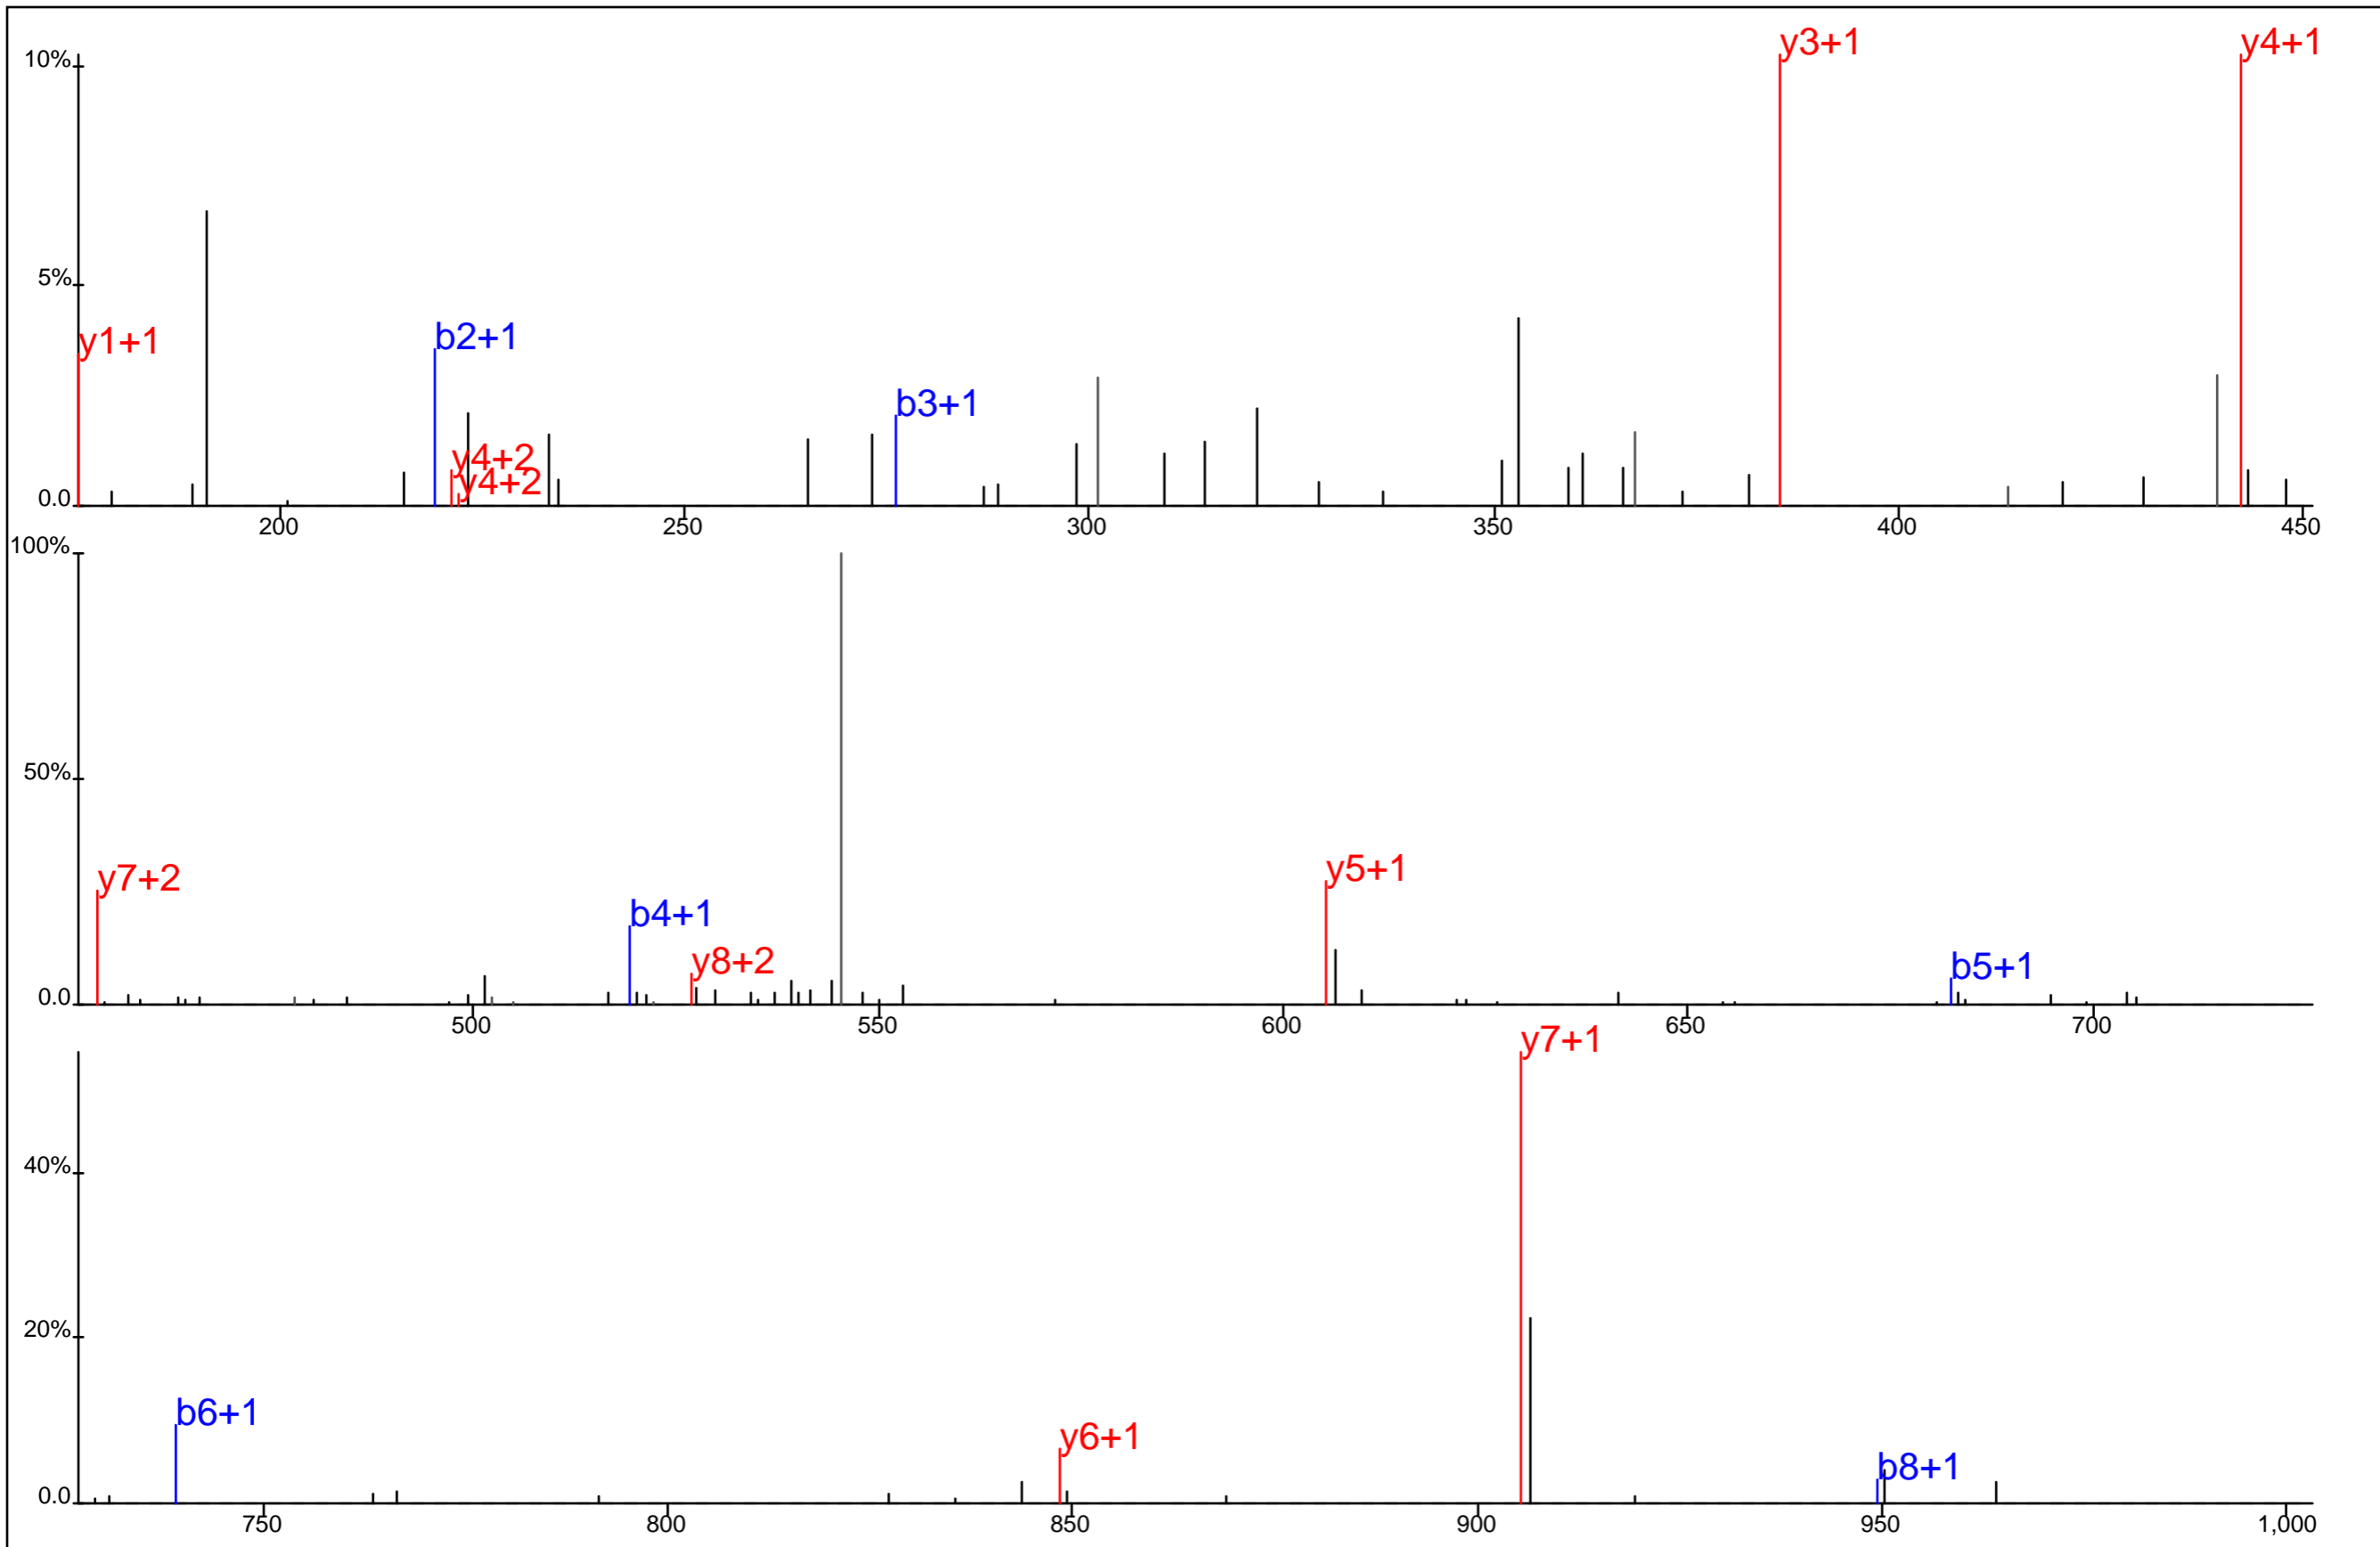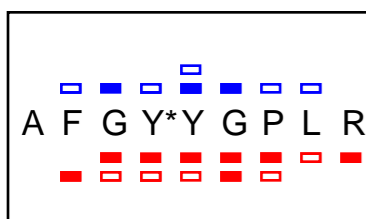

Protein Name: SRP20  
 gi Accession: 4506901  
 Precursor Mass: 562.2535+2  
 Delta Mass: 2.206 ppm  
 XCorr: 31.54

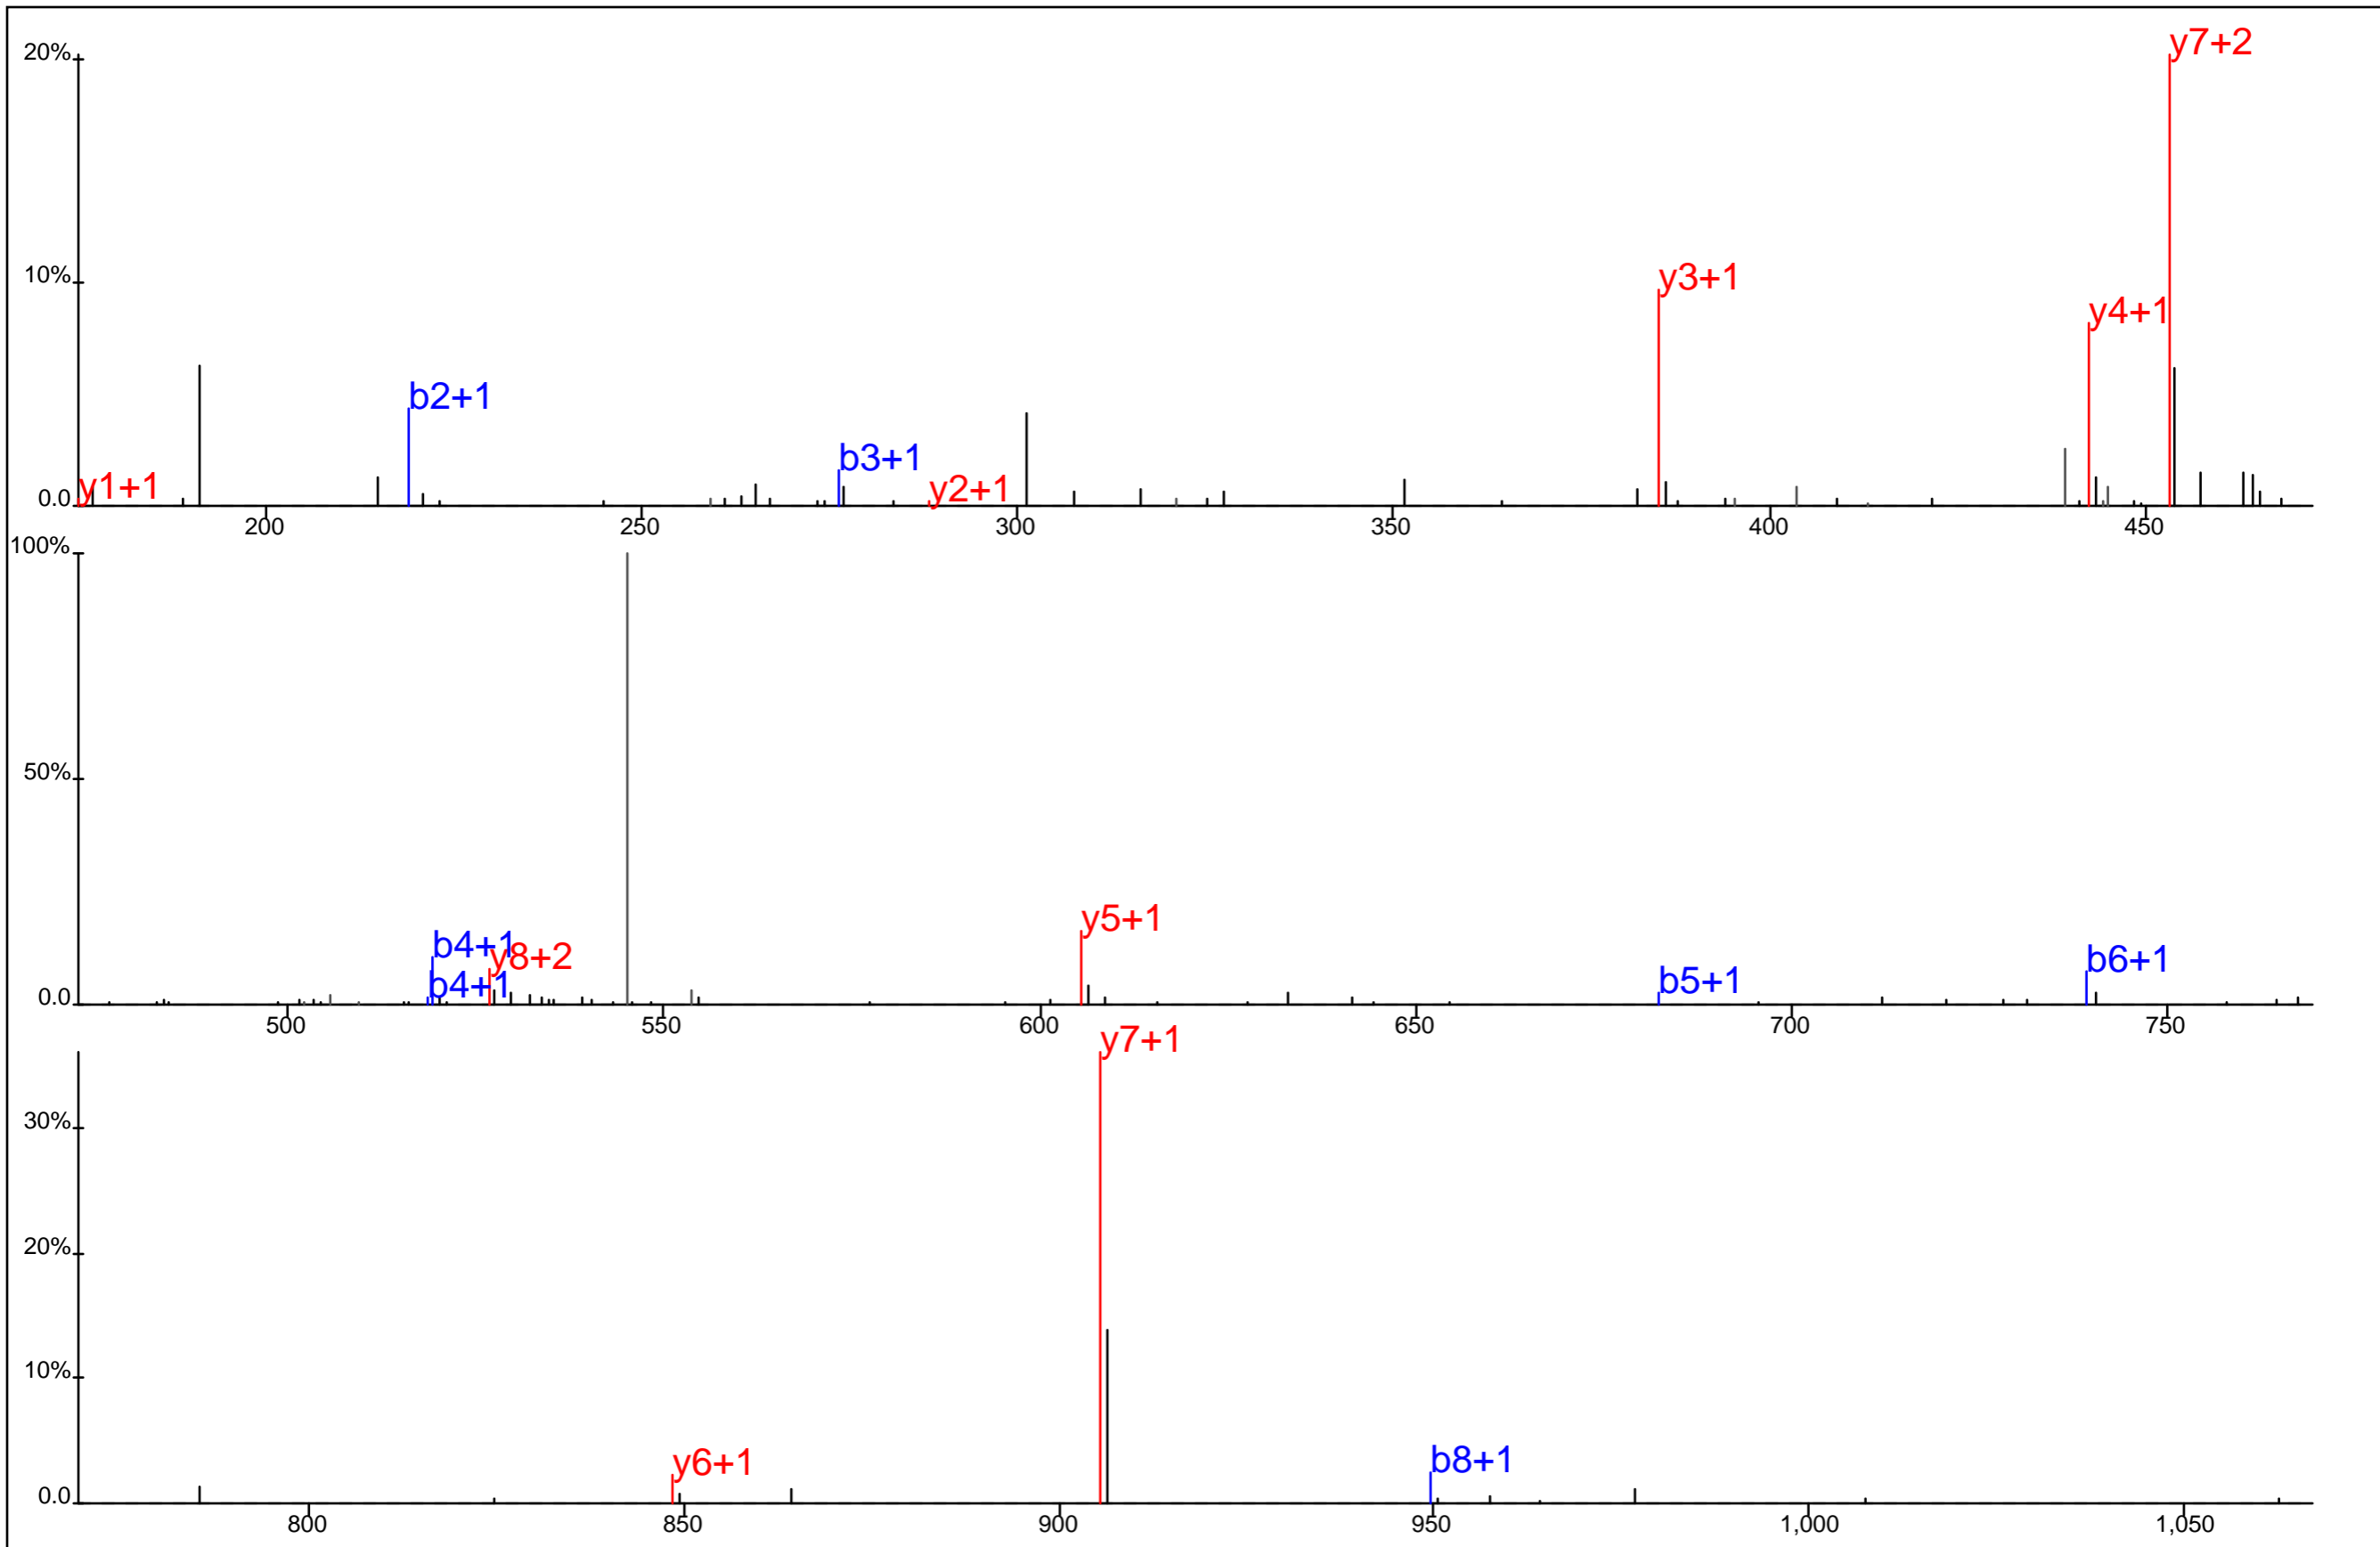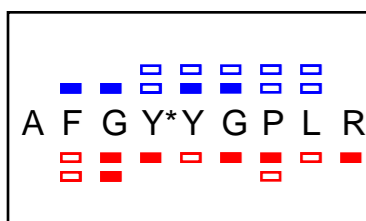

Protein Name: SRP20  
 gi Accession: 4506901  
 Precursor Mass: 562.2529+2  
 Delta Mass: 1.120 ppm  
 XCorr: 34.76

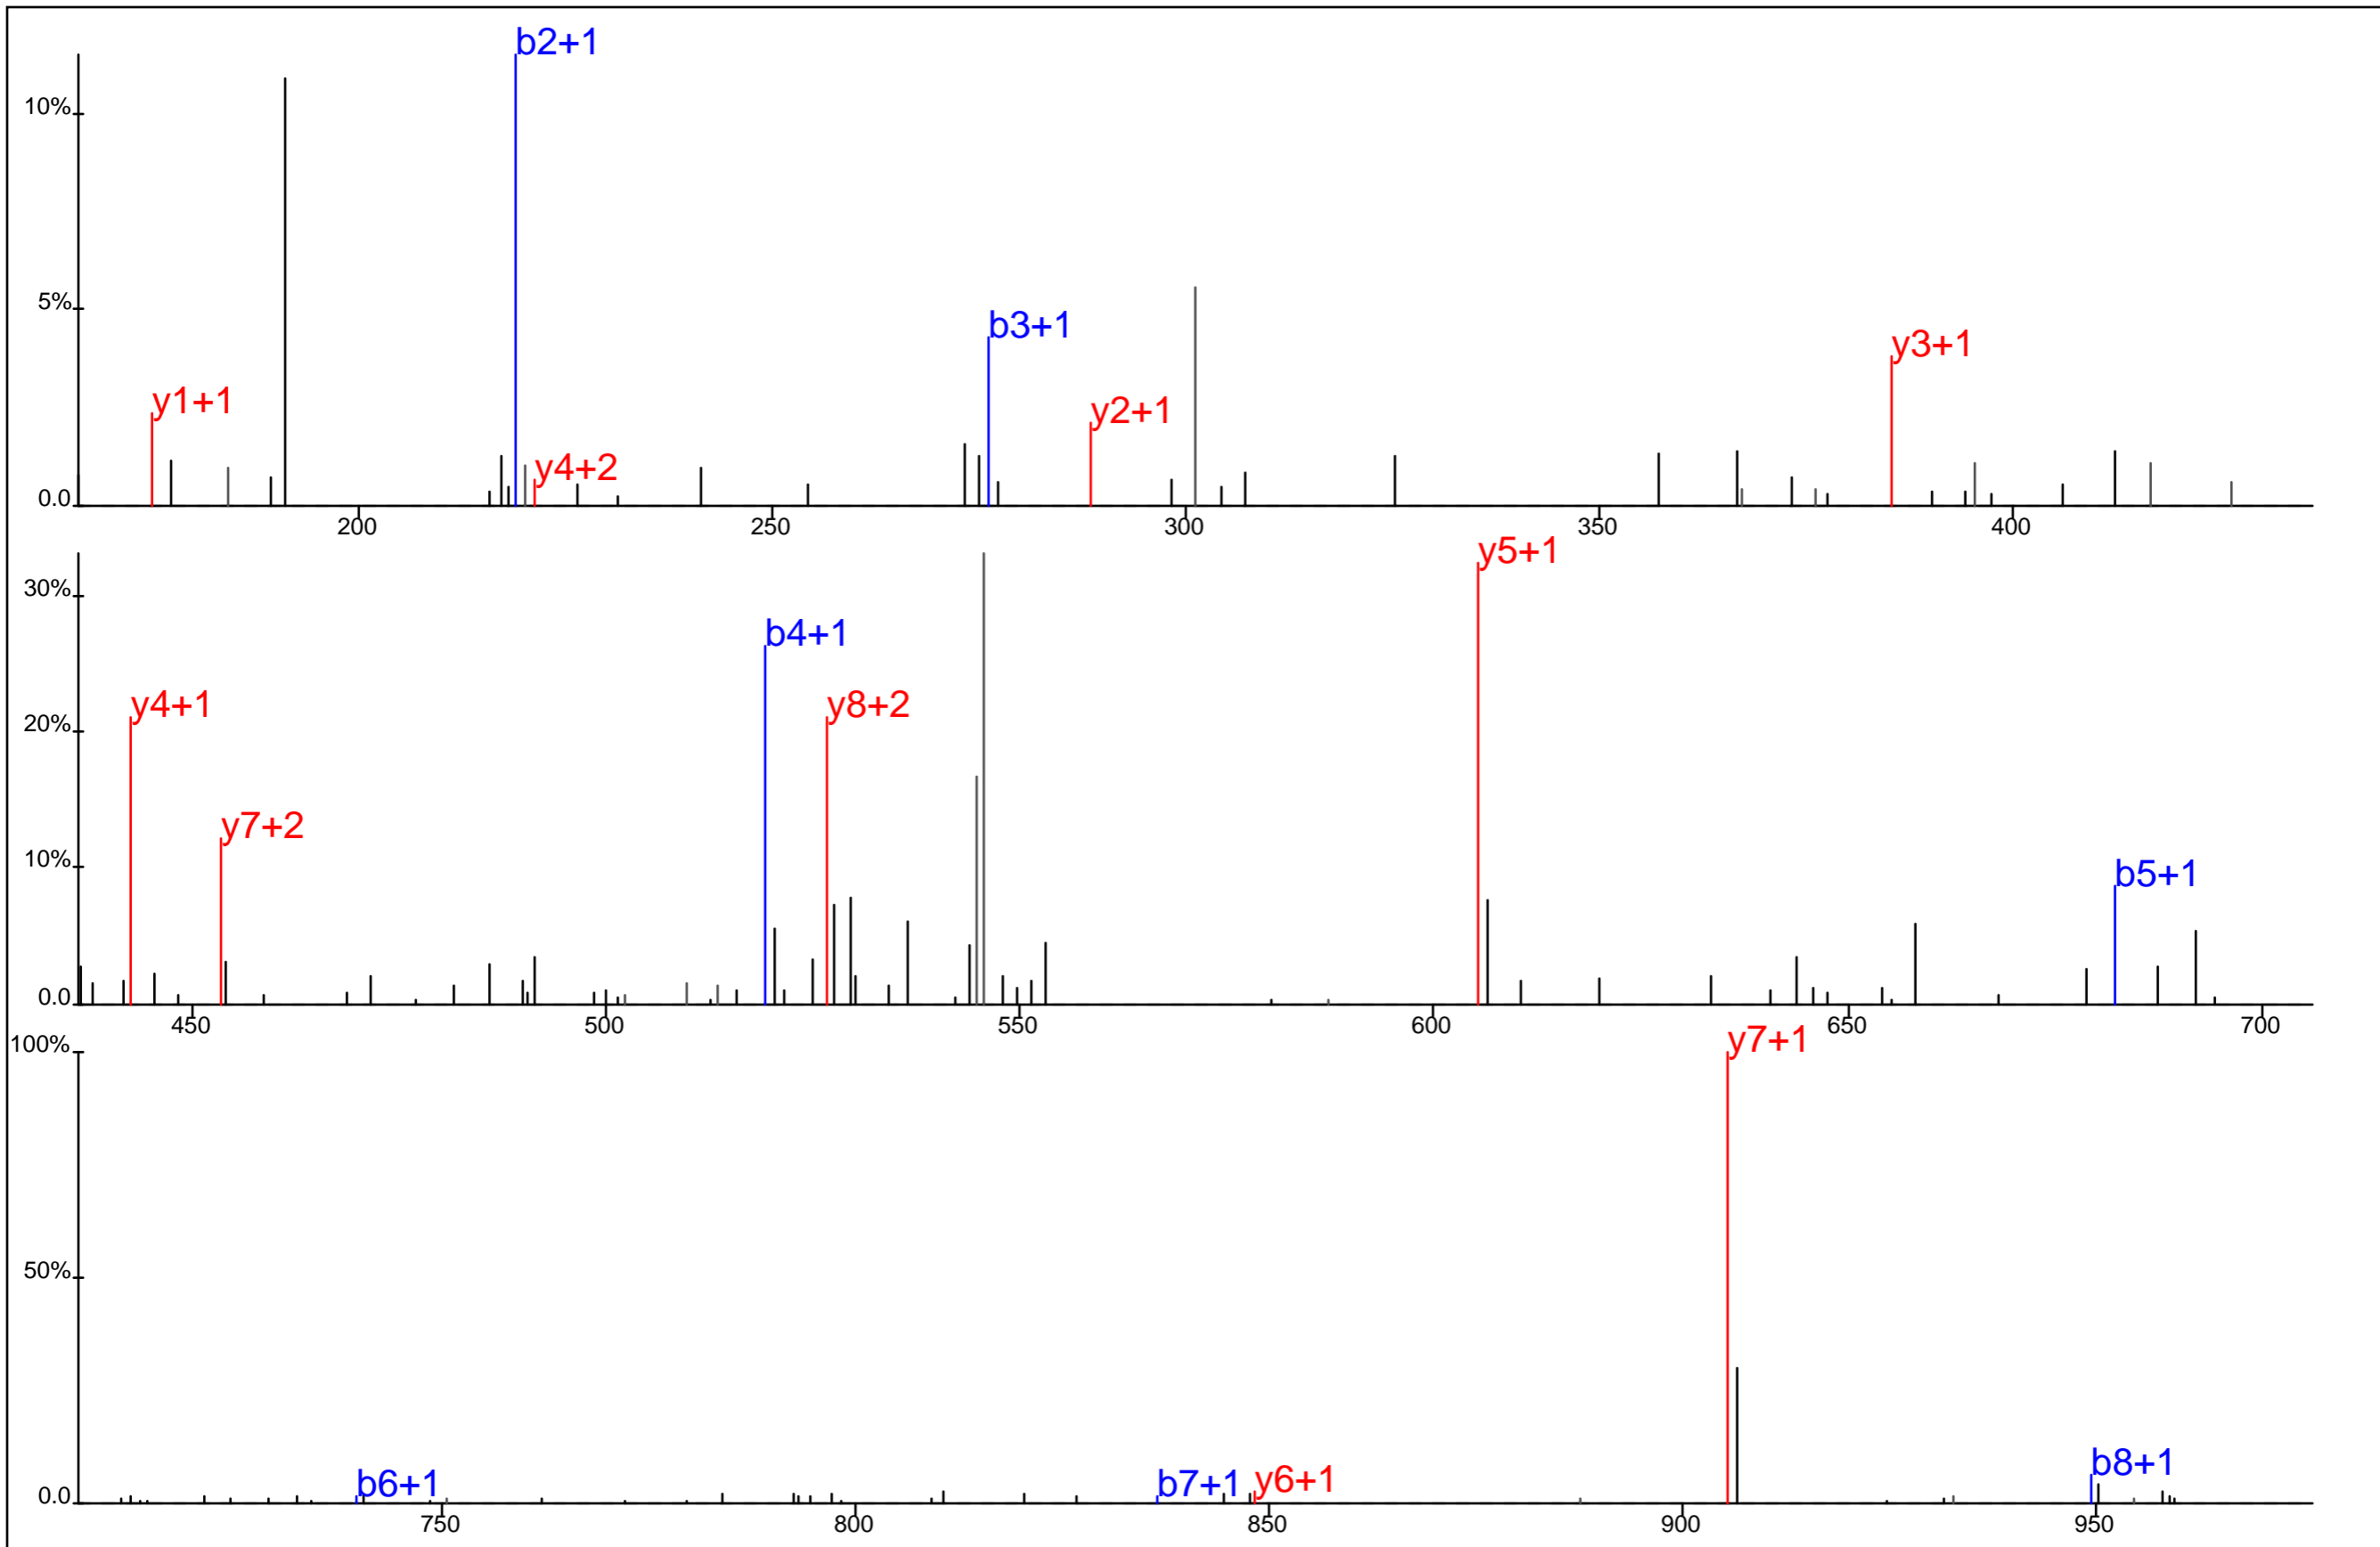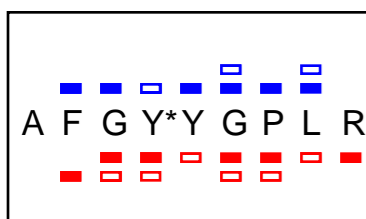

Protein Name: SRP20  
 gi Accession: 4506901  
 Precursor Mass: 562.2521+2  
 Delta Mass: 0.296 ppm  
 XCorr: 45.85

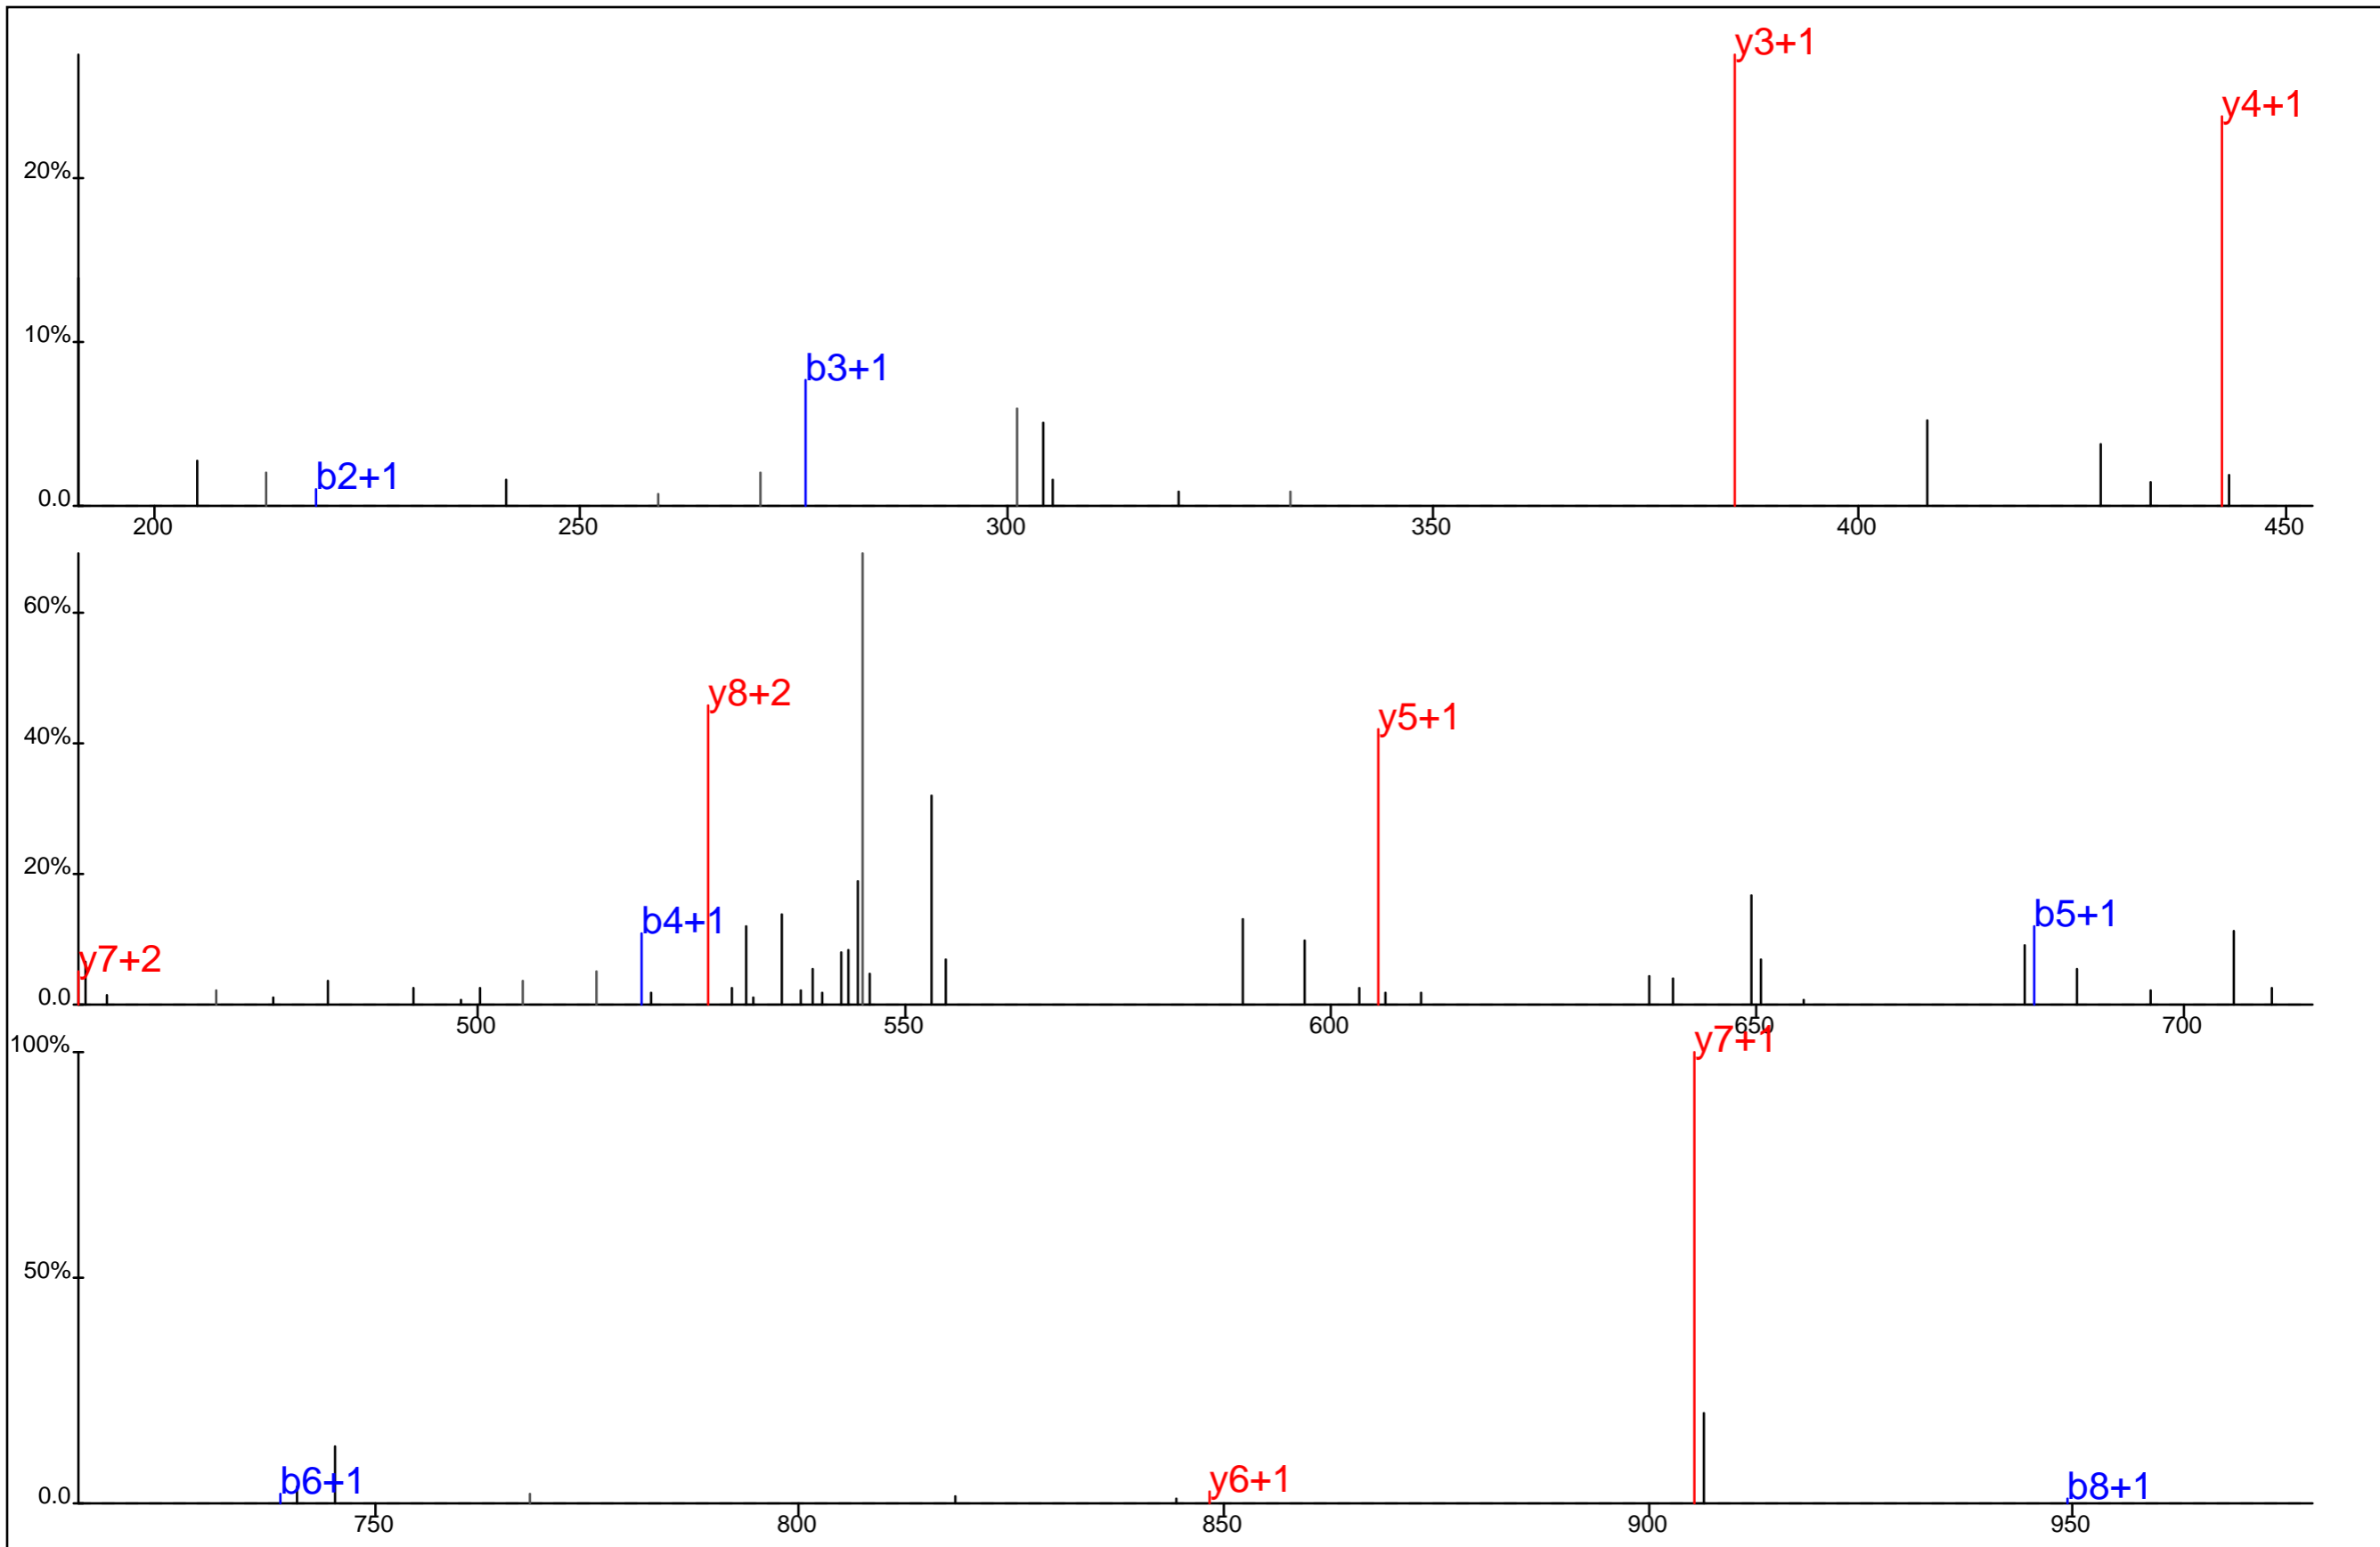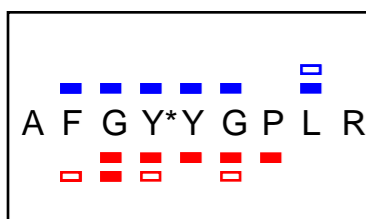

Protein Name: SRP20  
 gi Accession: 4506901  
 Precursor Mass: 562.2545+2  
 Delta Mass: 3.941 ppm  
 XCorr: 35.22

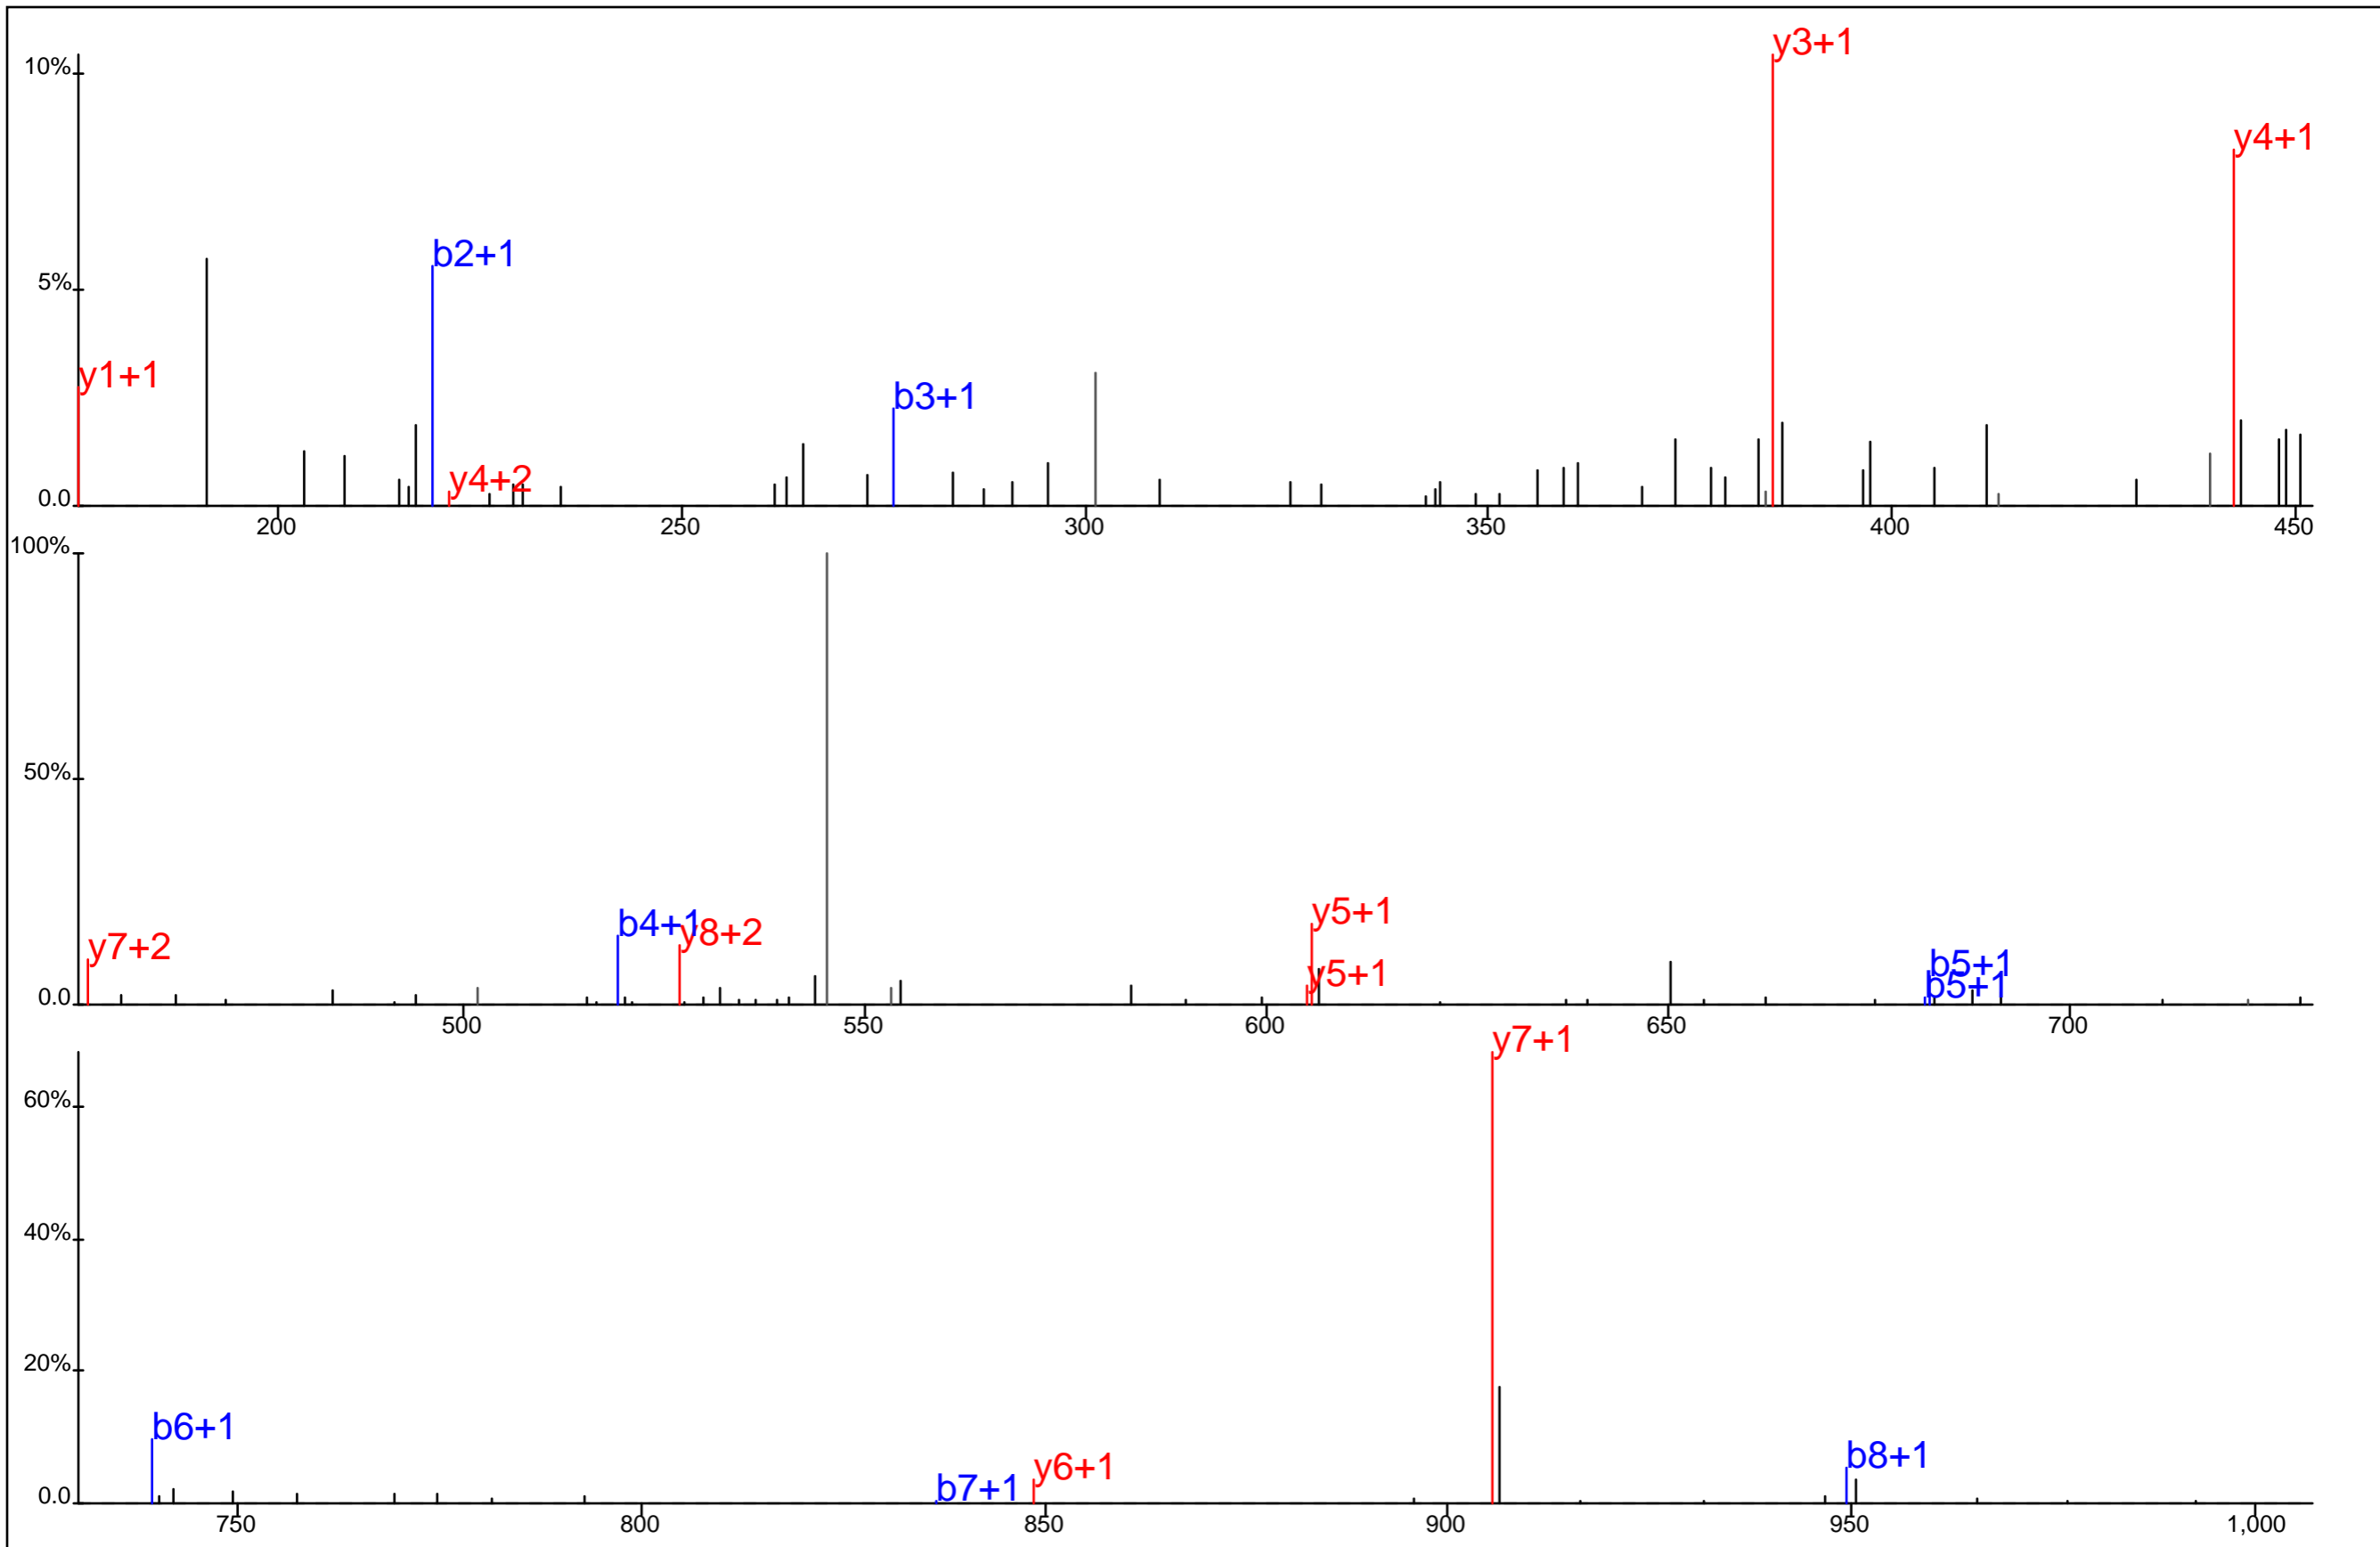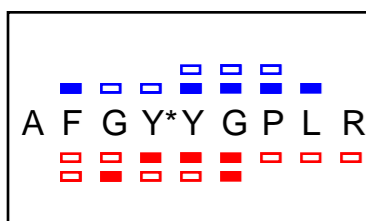

Protein Name: SRP20  
 gi Accession: 4506901  
 Precursor Mass: 562.2531+2  
 Delta Mass: 1.449 ppm  
 XCorr: 39.99

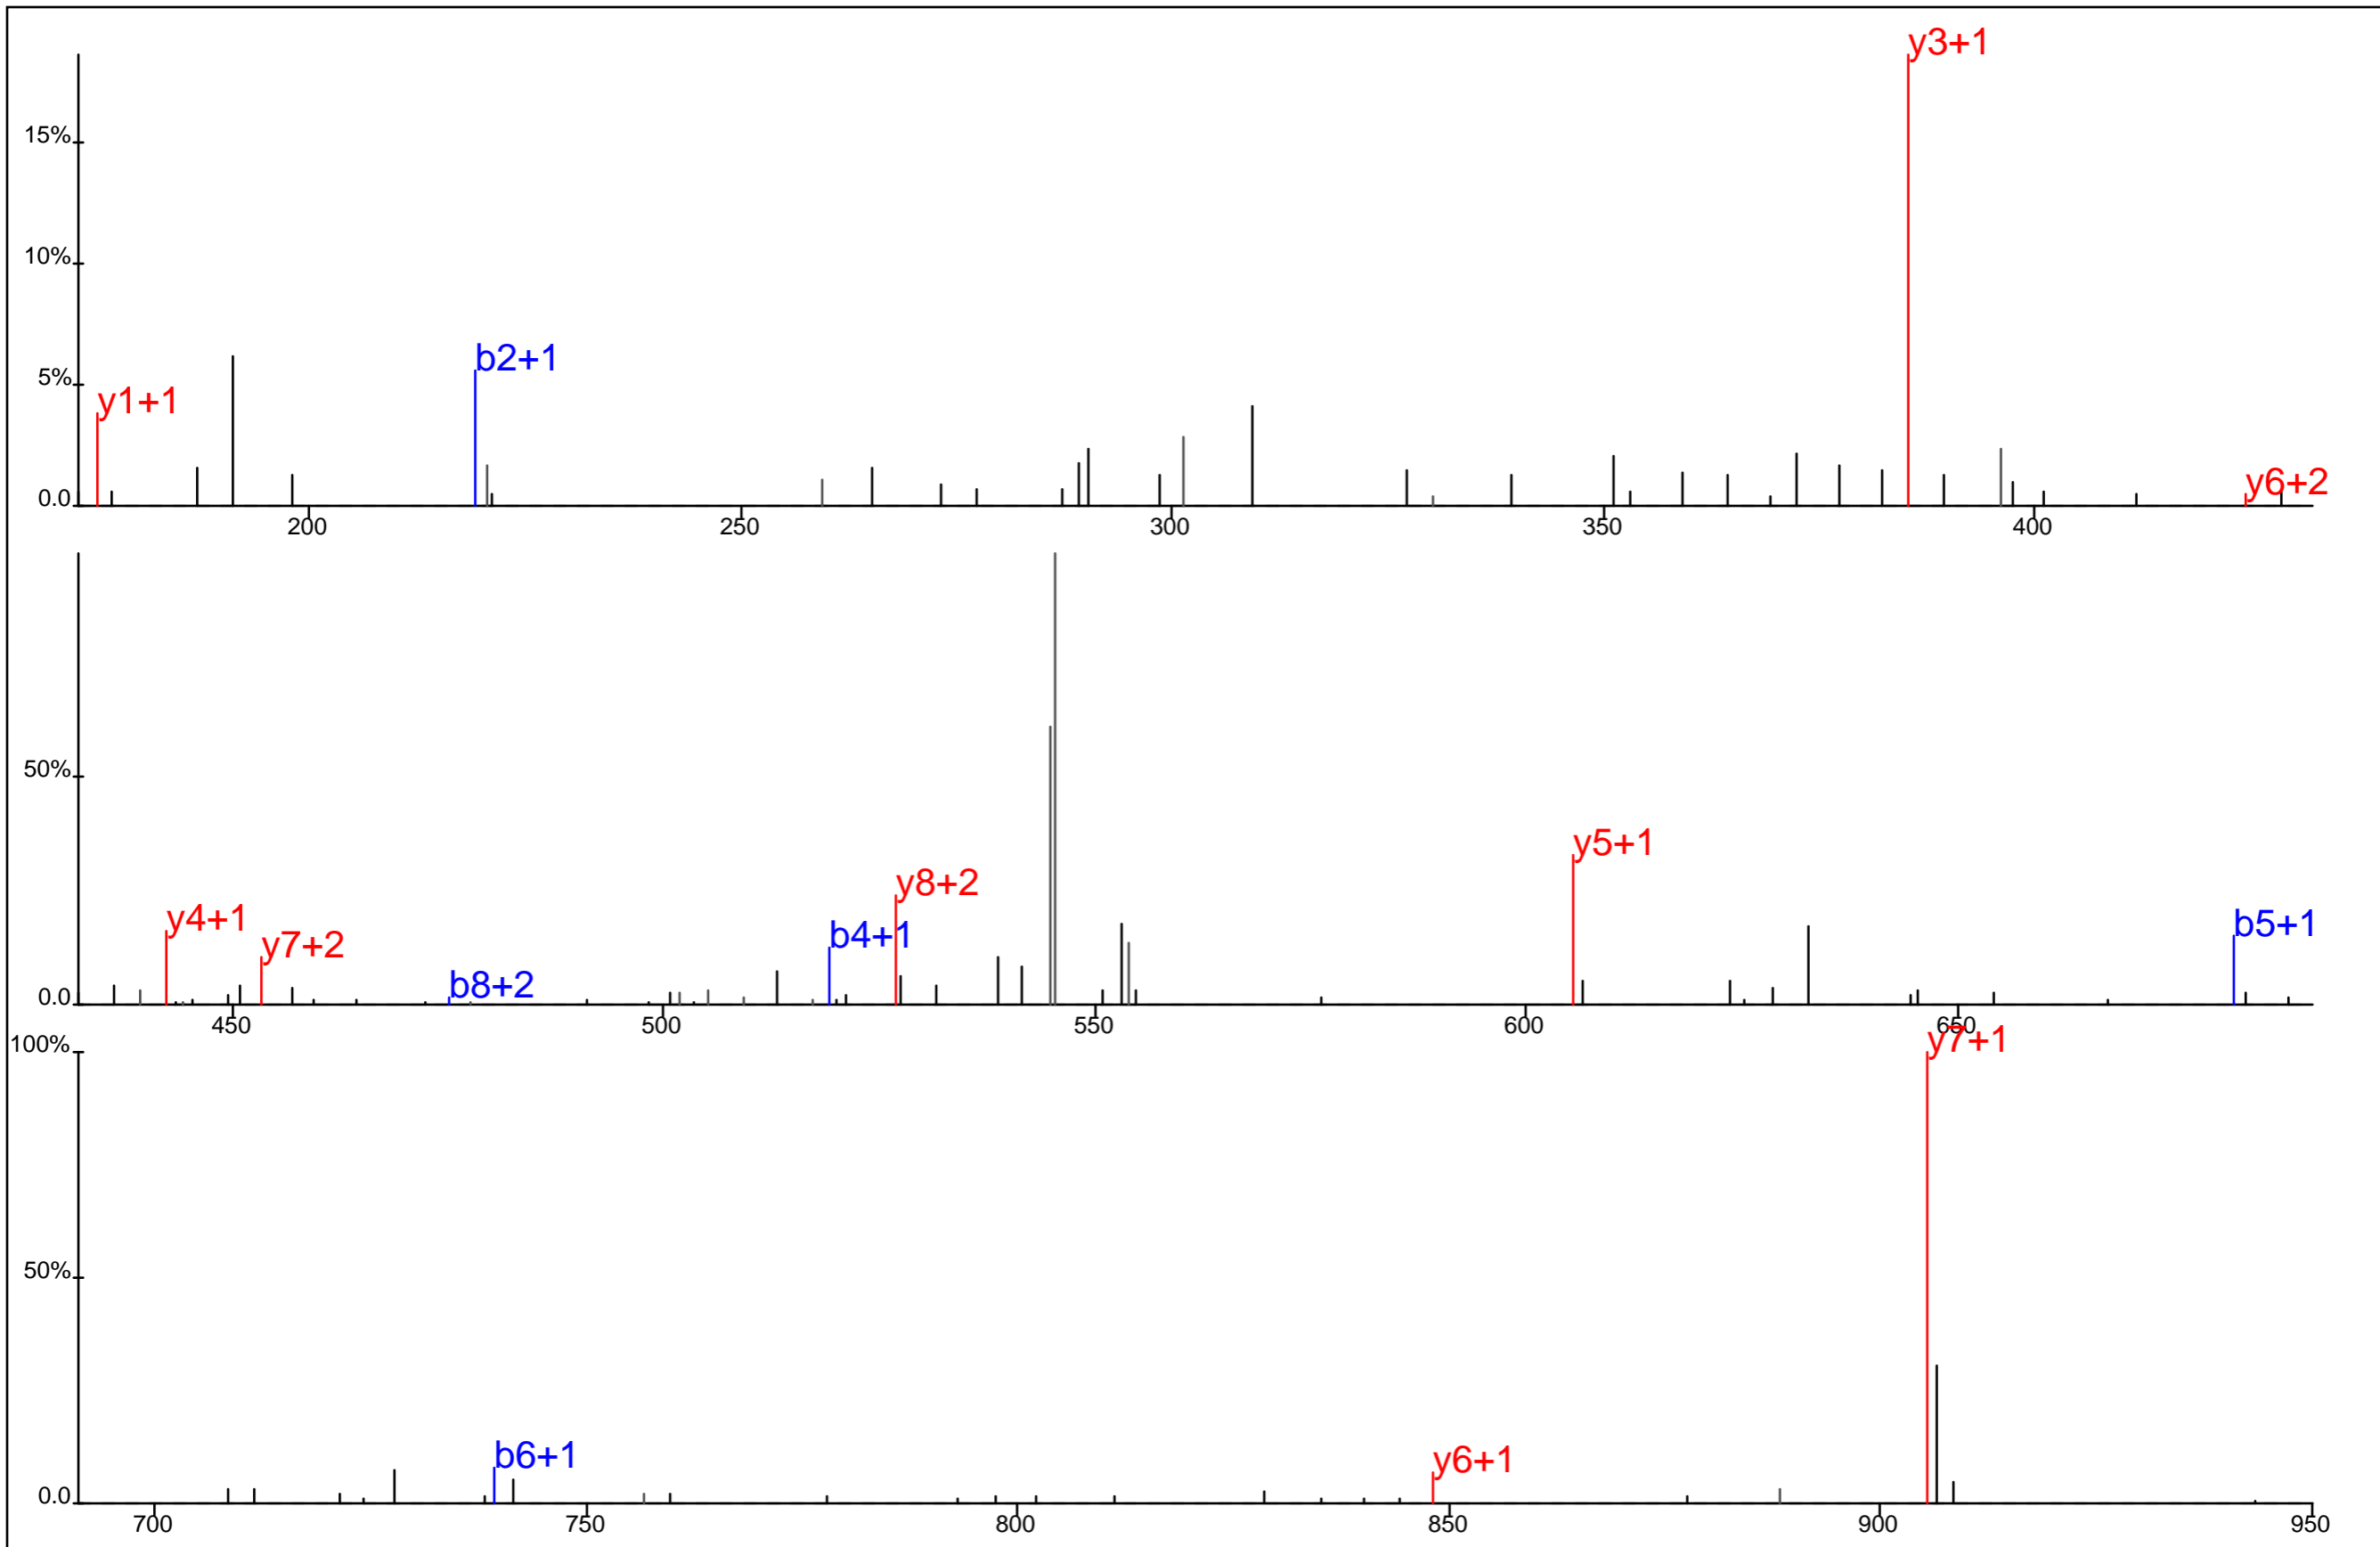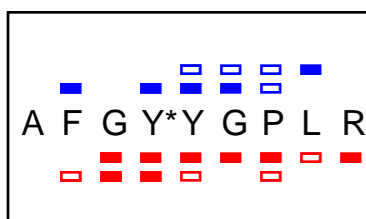

Protein Name: SRP20  
 gi Accession: 4506901  
 Precursor Mass: 562.2535+2  
 Delta Mass: 2.206 ppm  
 XCorr: 33.13

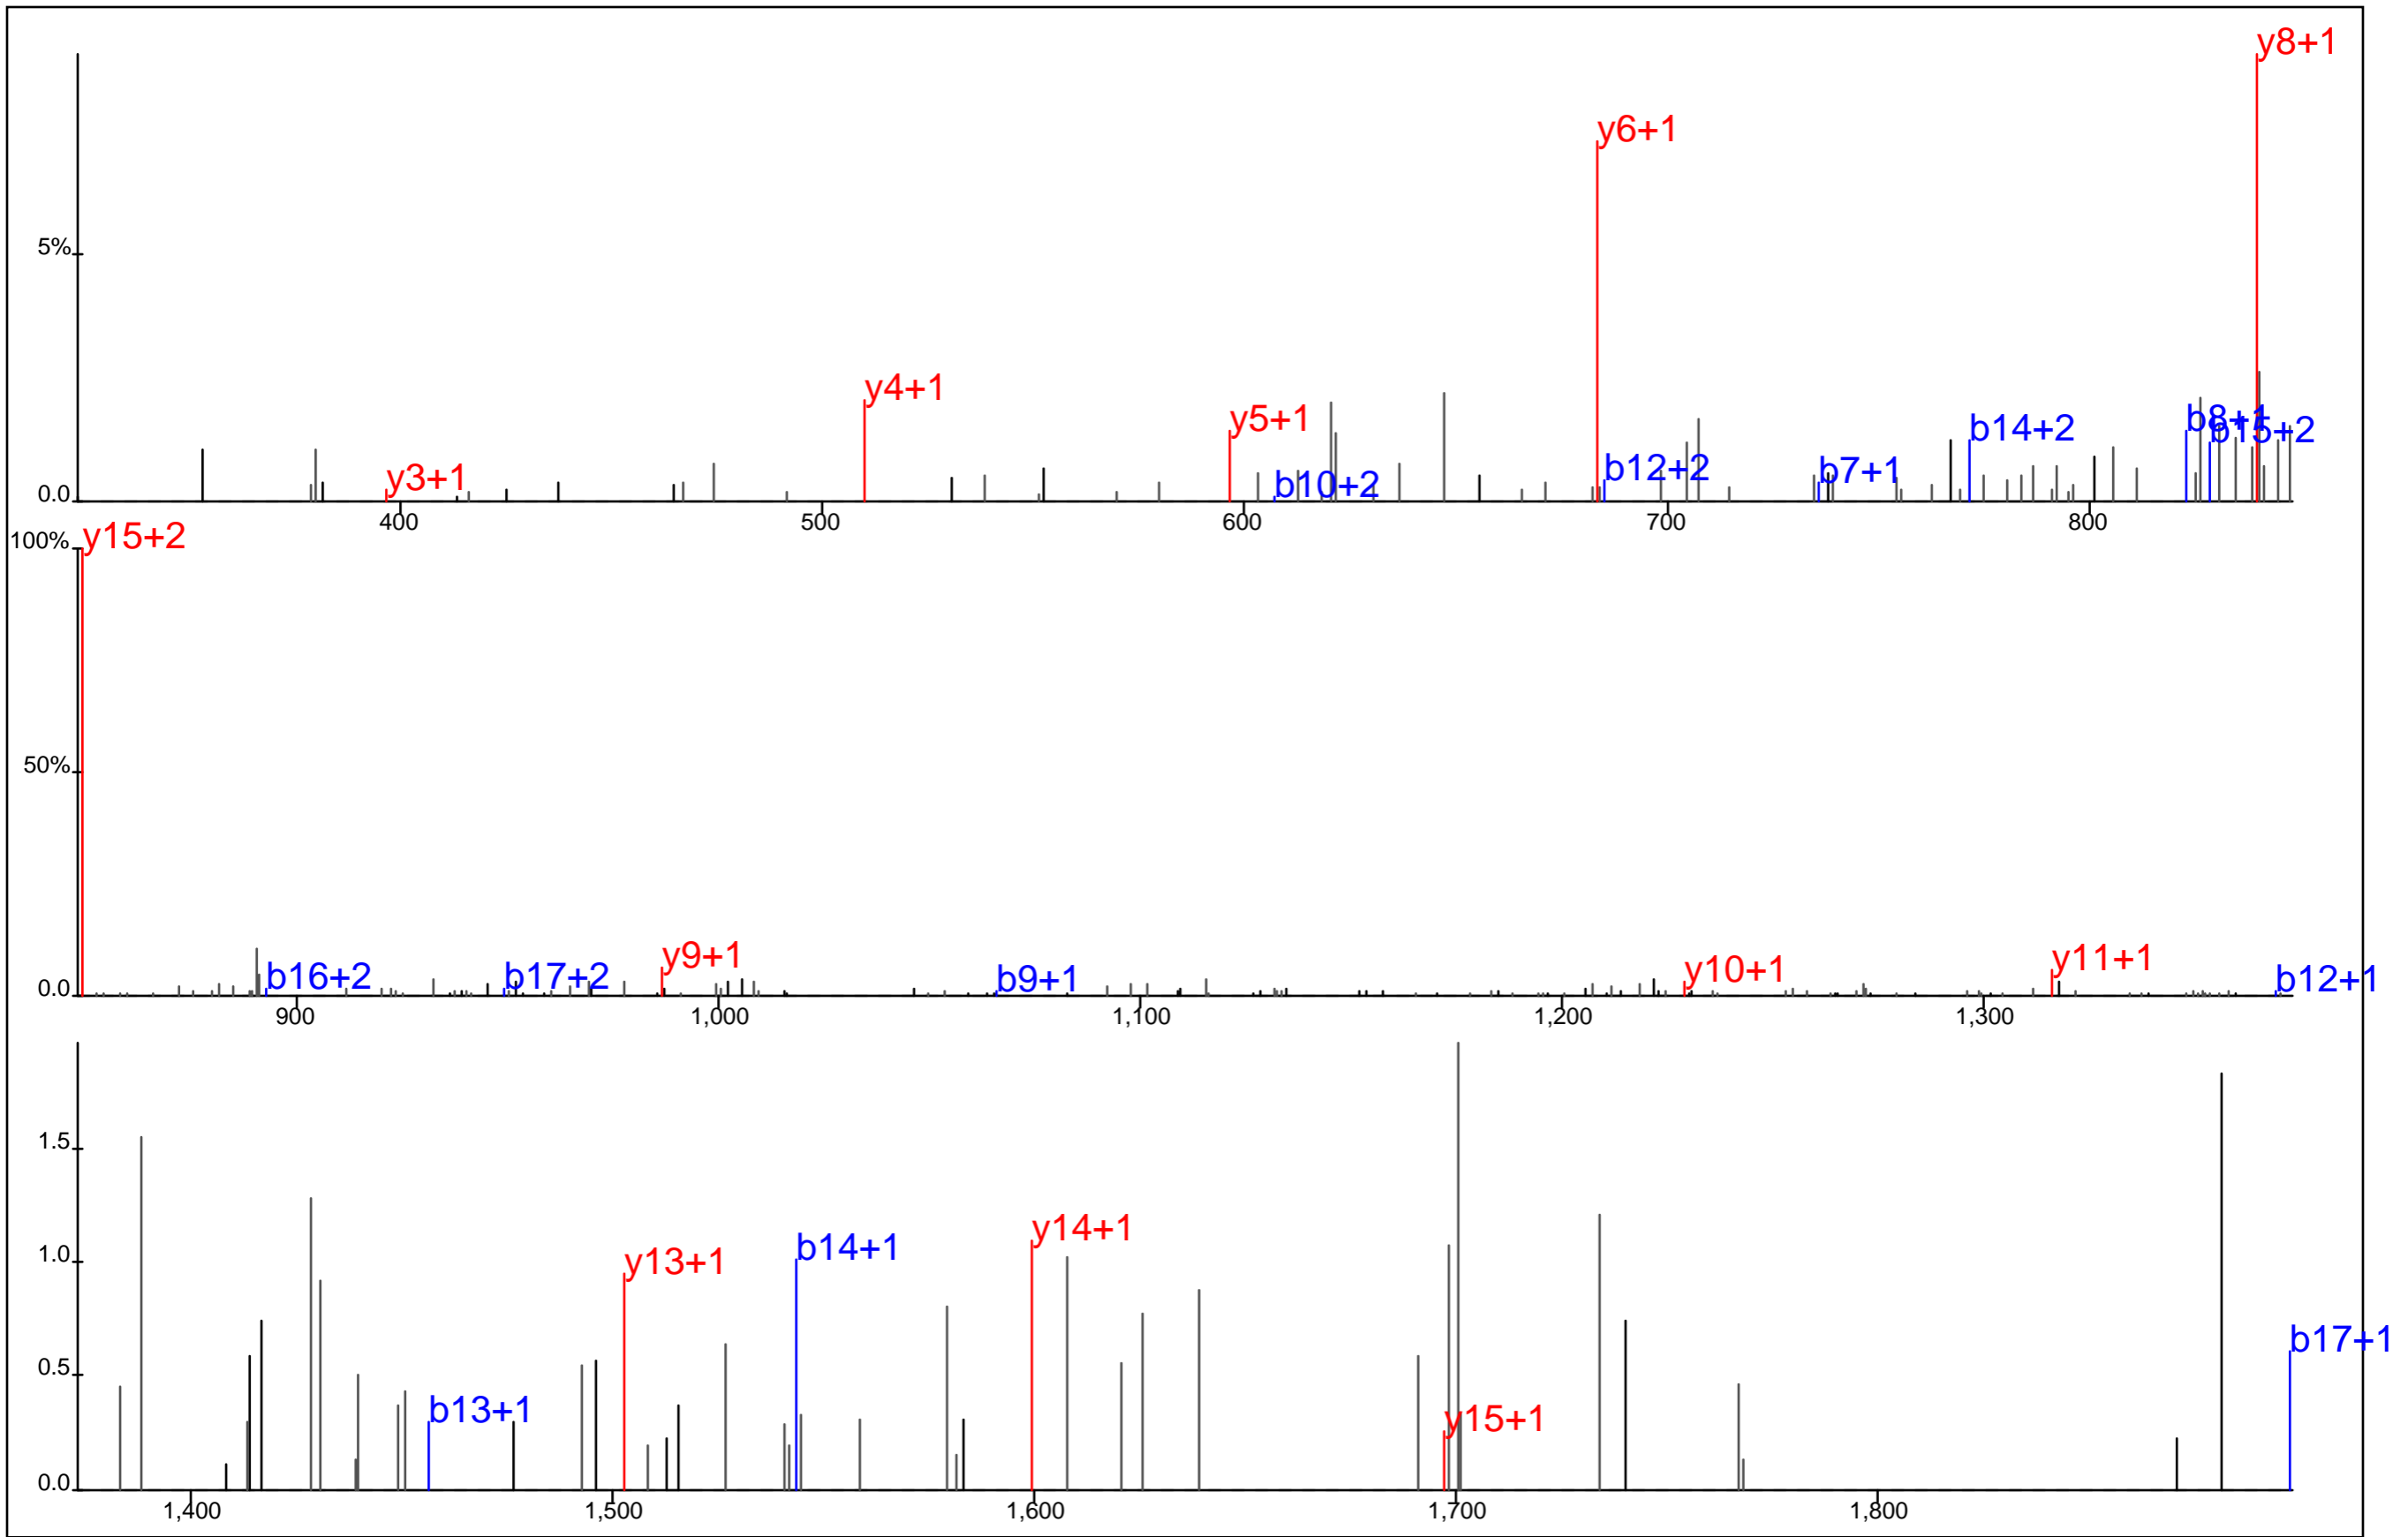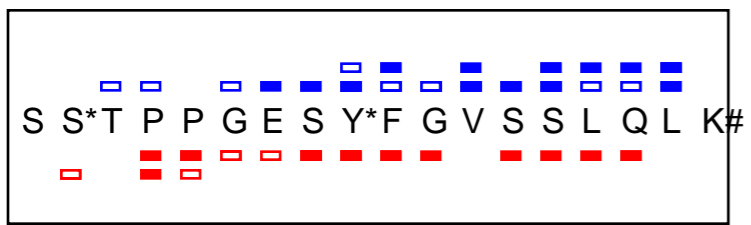

Protein Name: SRRM2  
 gi Accession: 5821153  
 Precursor Mass: 1,026.4562+2  
 Delta Mass: 9.595 ppm  
 XCorr: 40.17

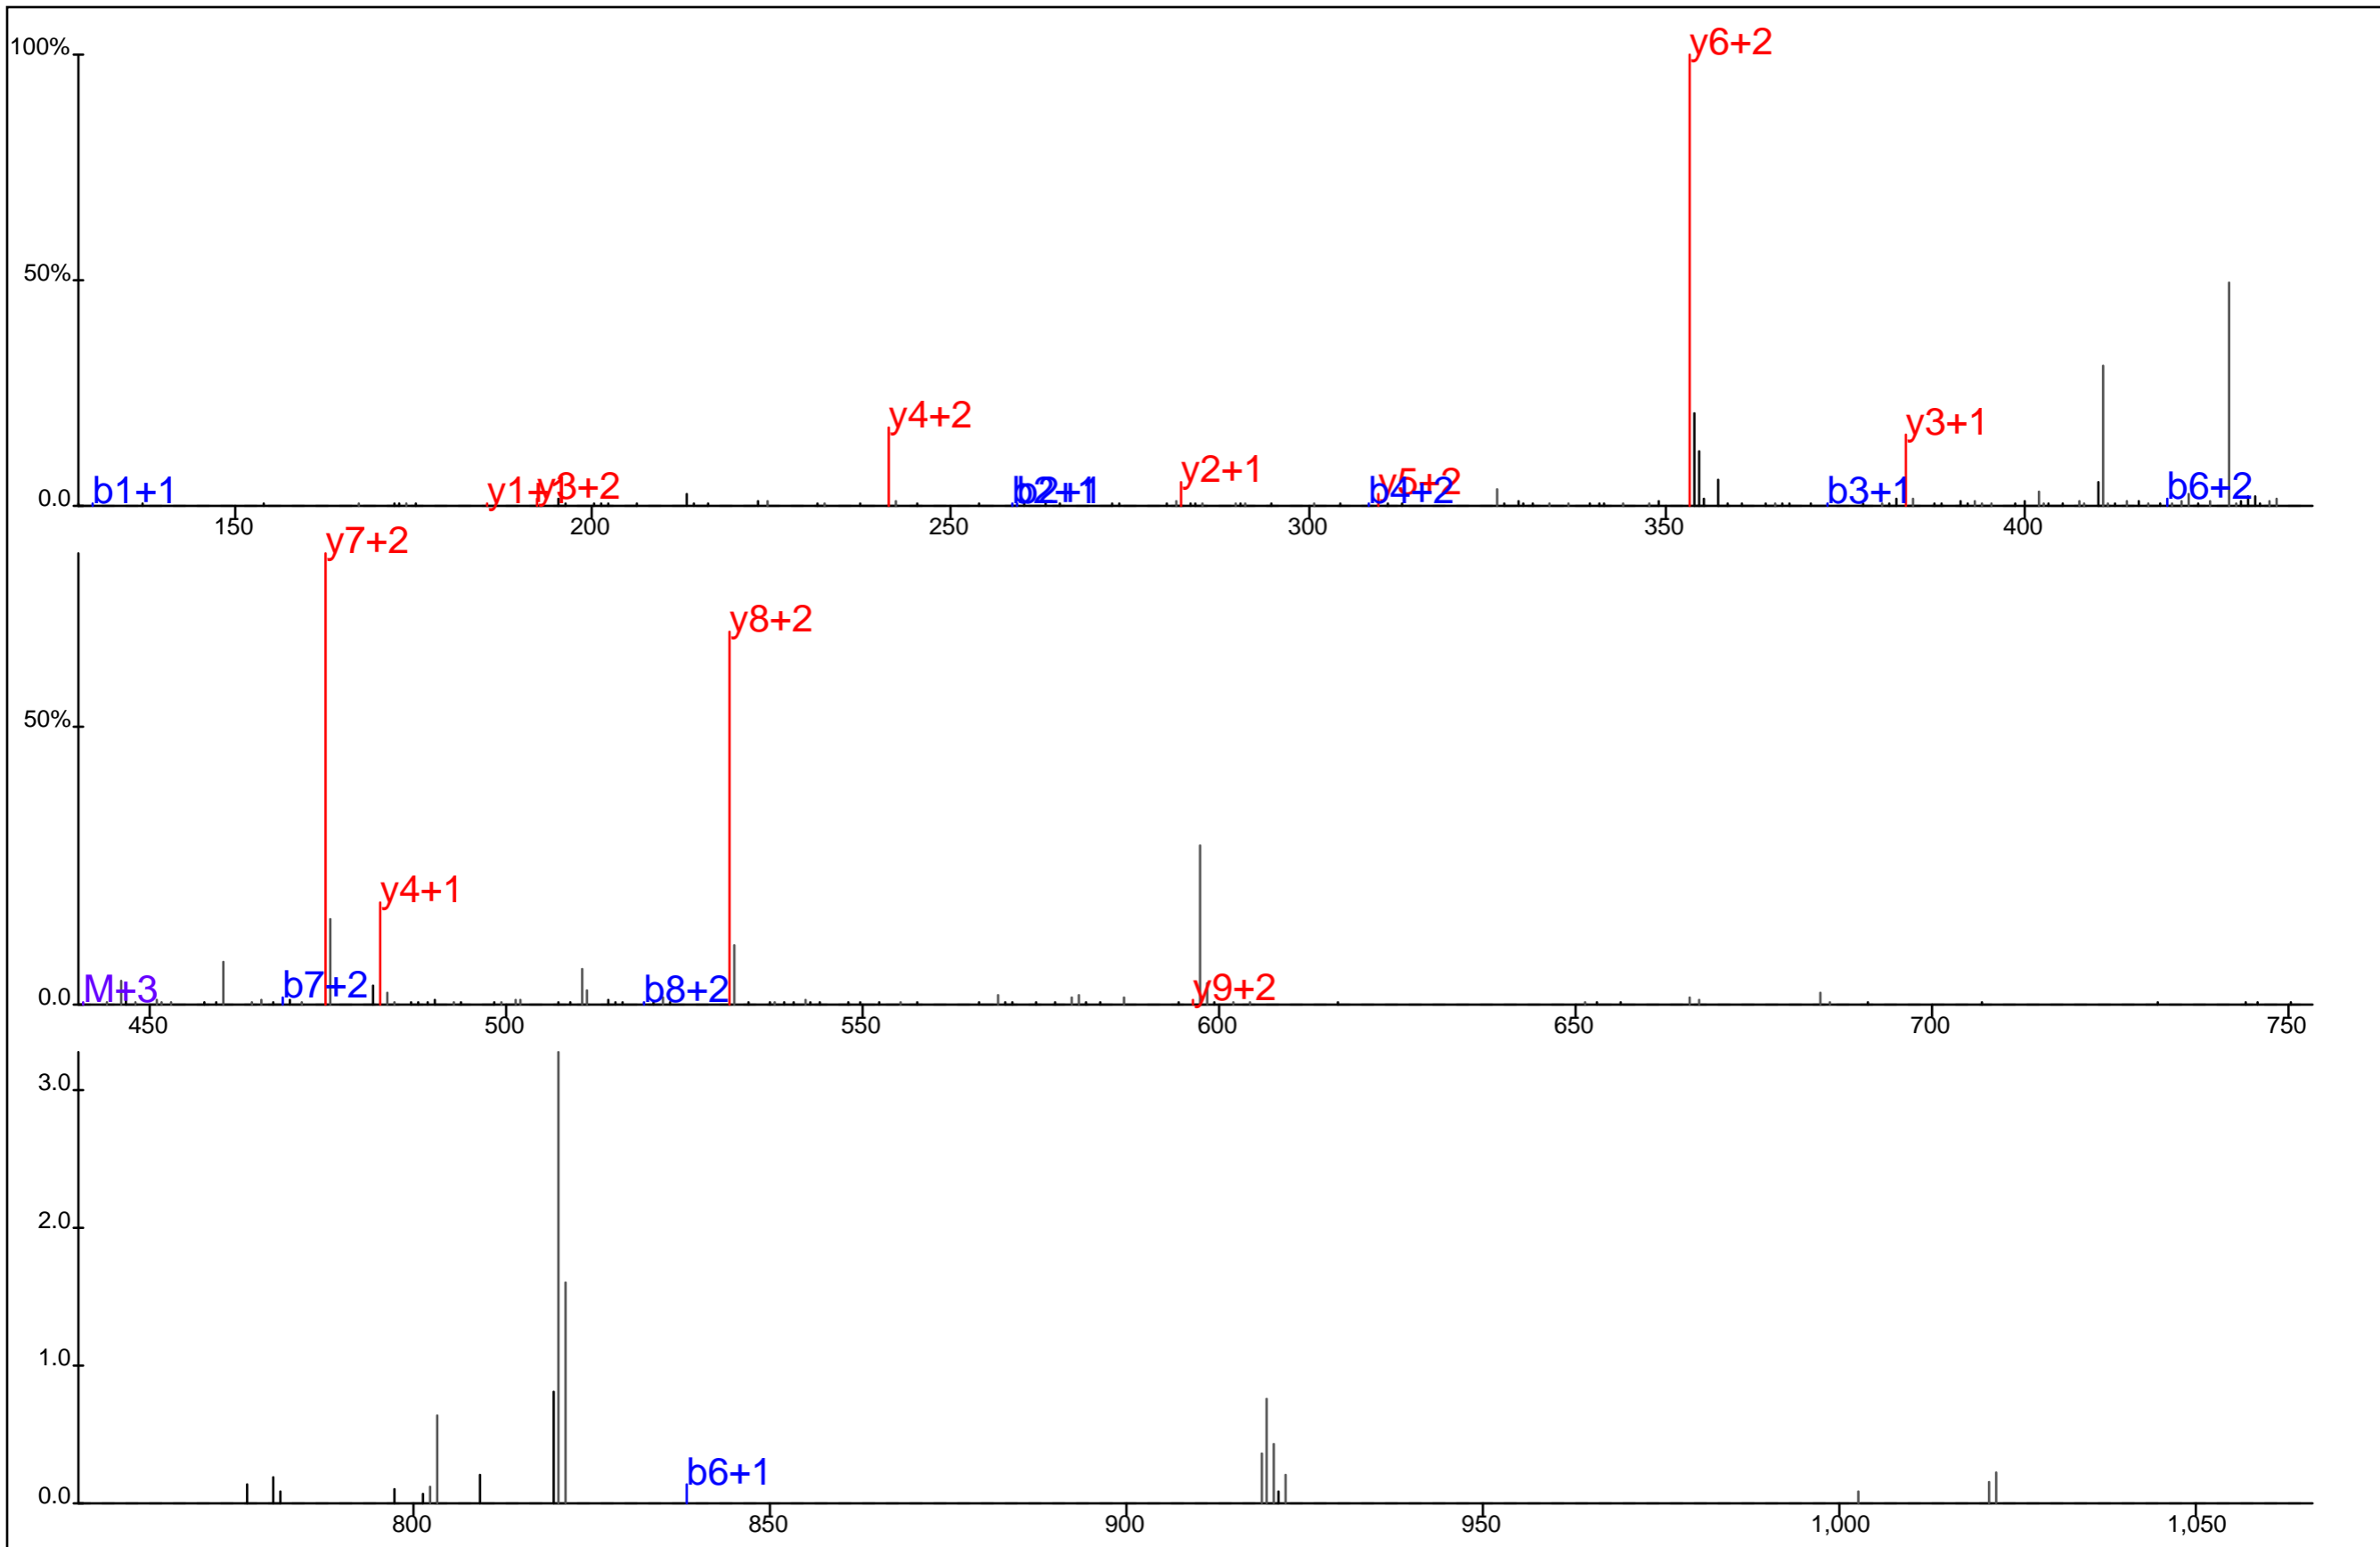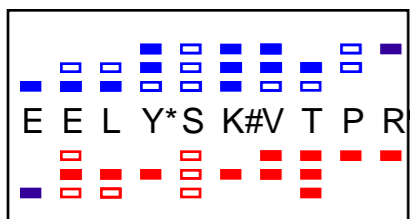

Protein Name: STS1  
 gi Accession: 18916794  
 Precursor Mass: 440.5511+3  
 Delta Mass: 1.863 ppm  
 XCorr: 26.95



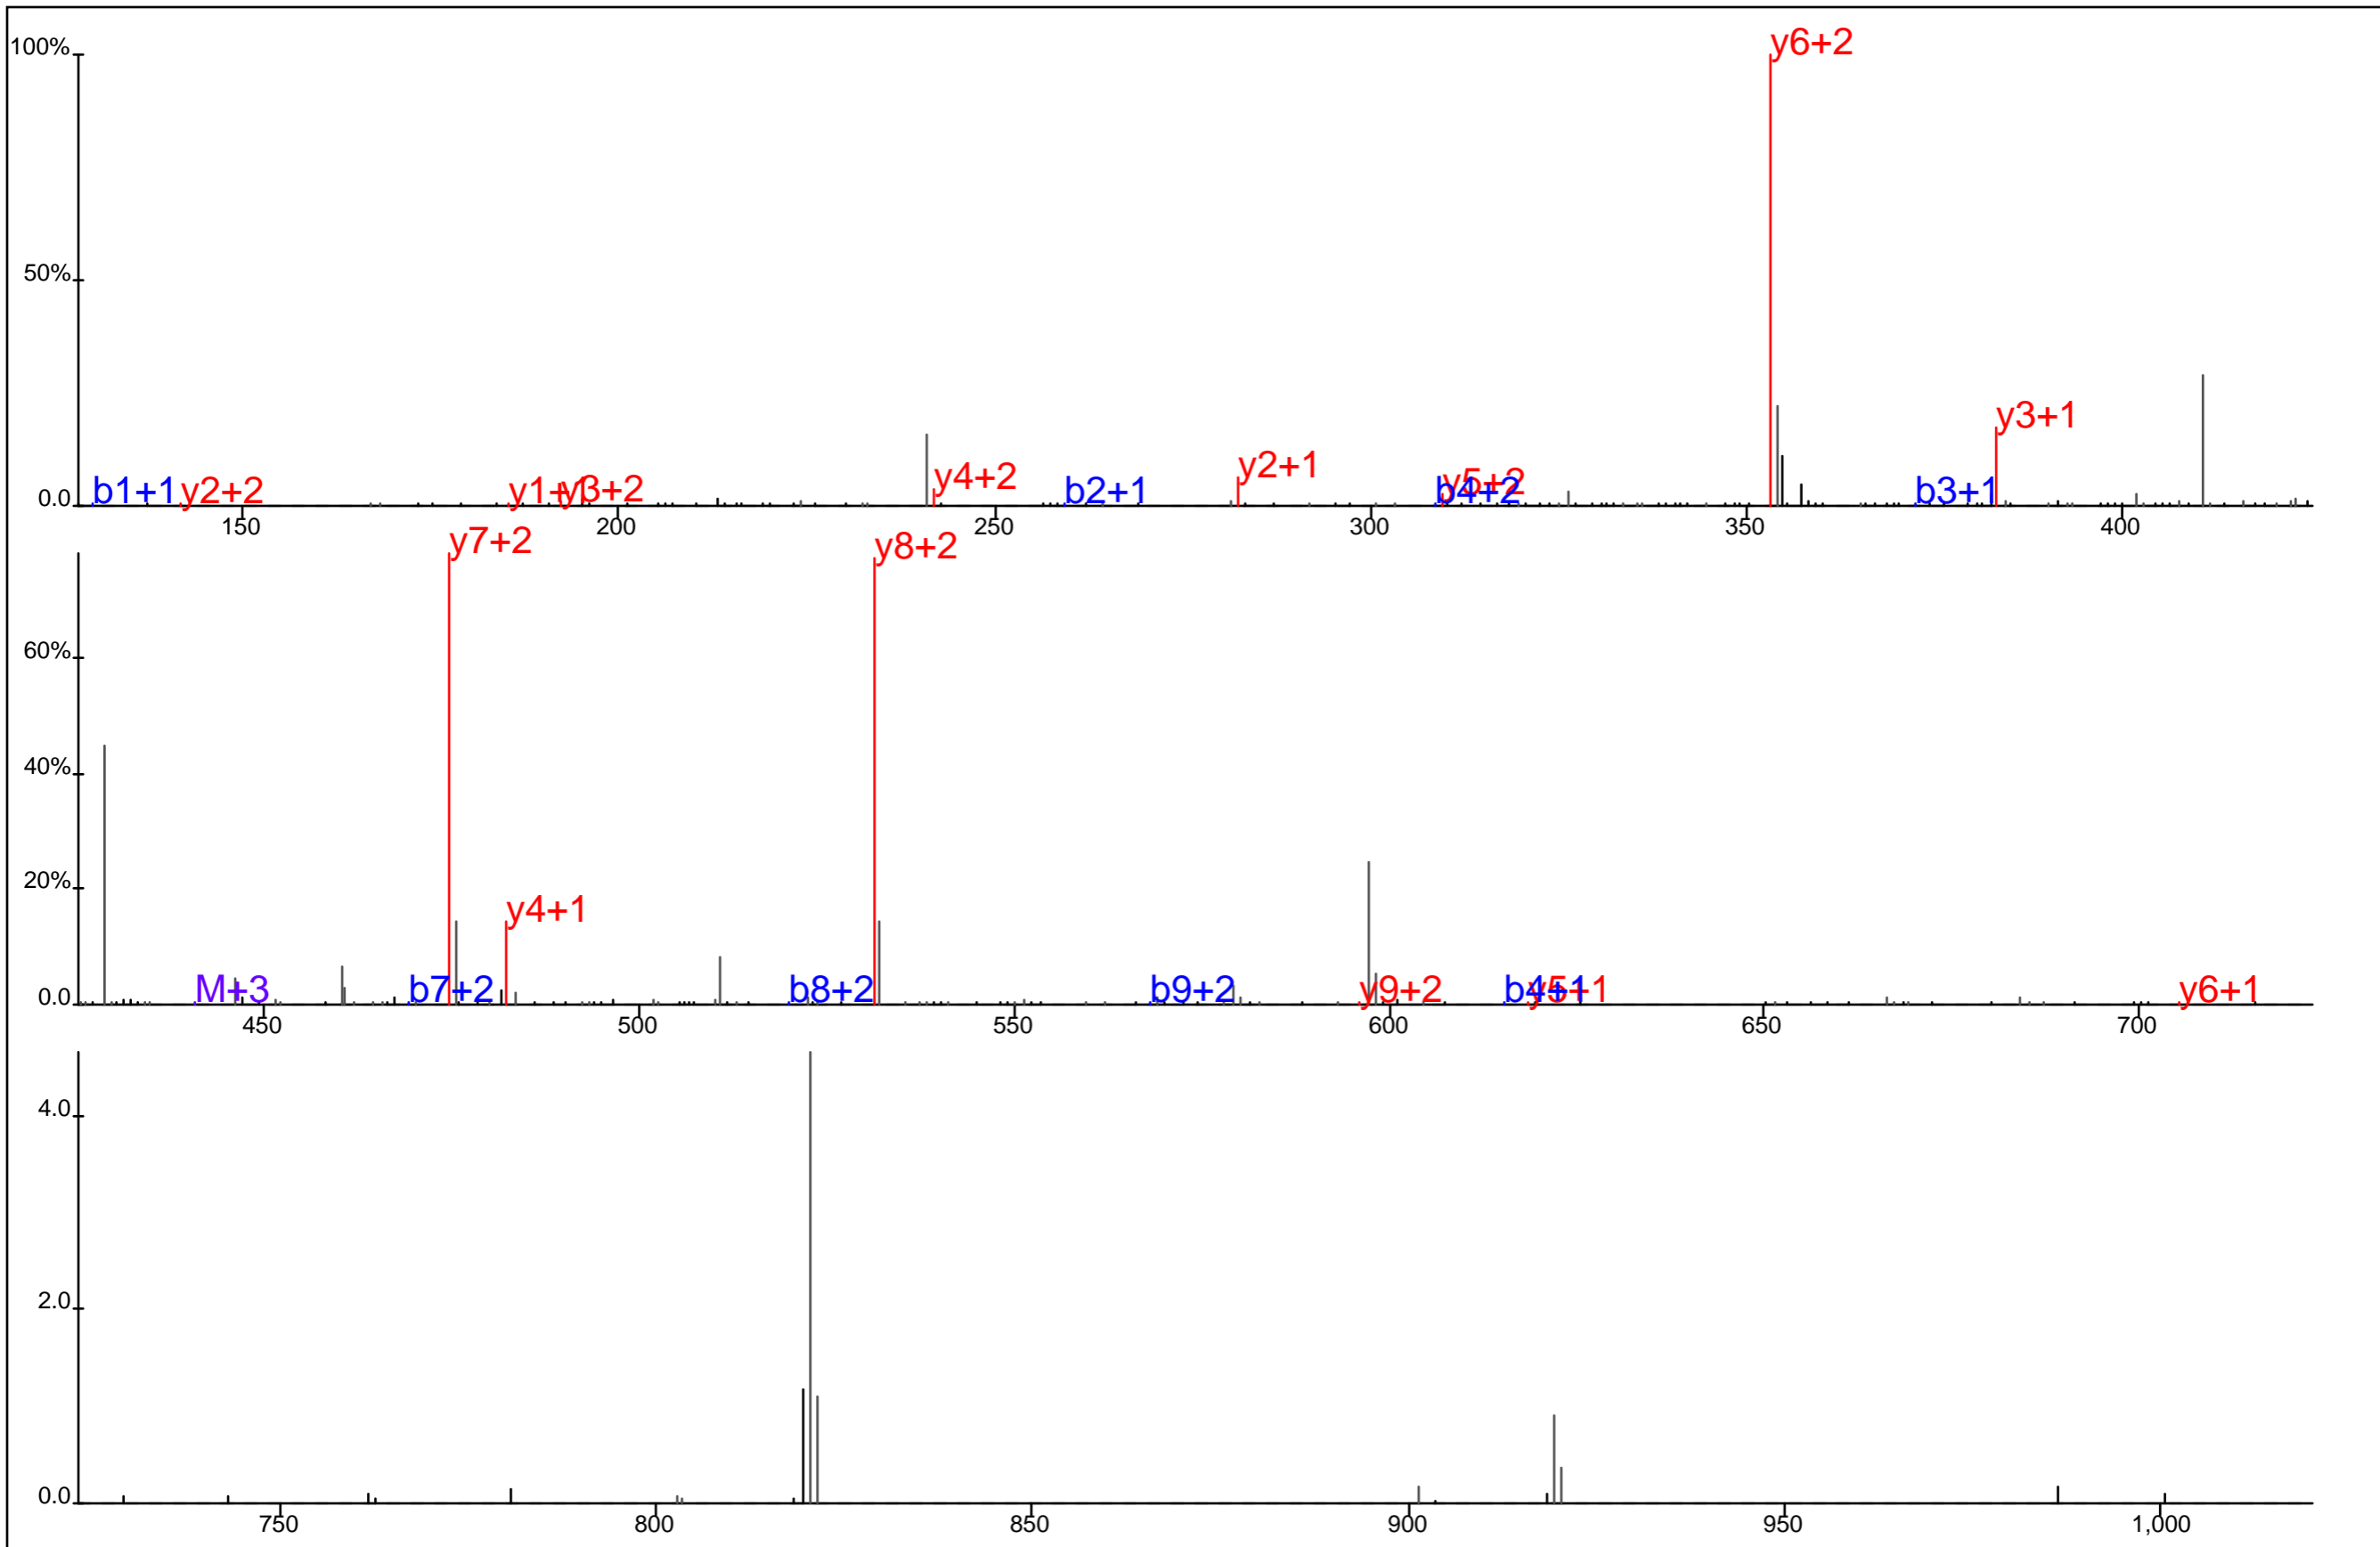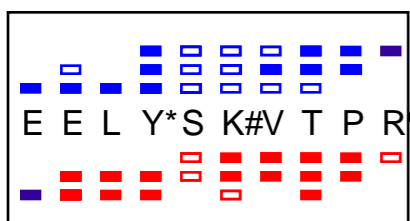

Protein Name: STS1  
 gi Accession: 18916794  
 Precursor Mass: 440.5513+3  
 Delta Mass: 2.424 ppm  
 XCorr: 15.57

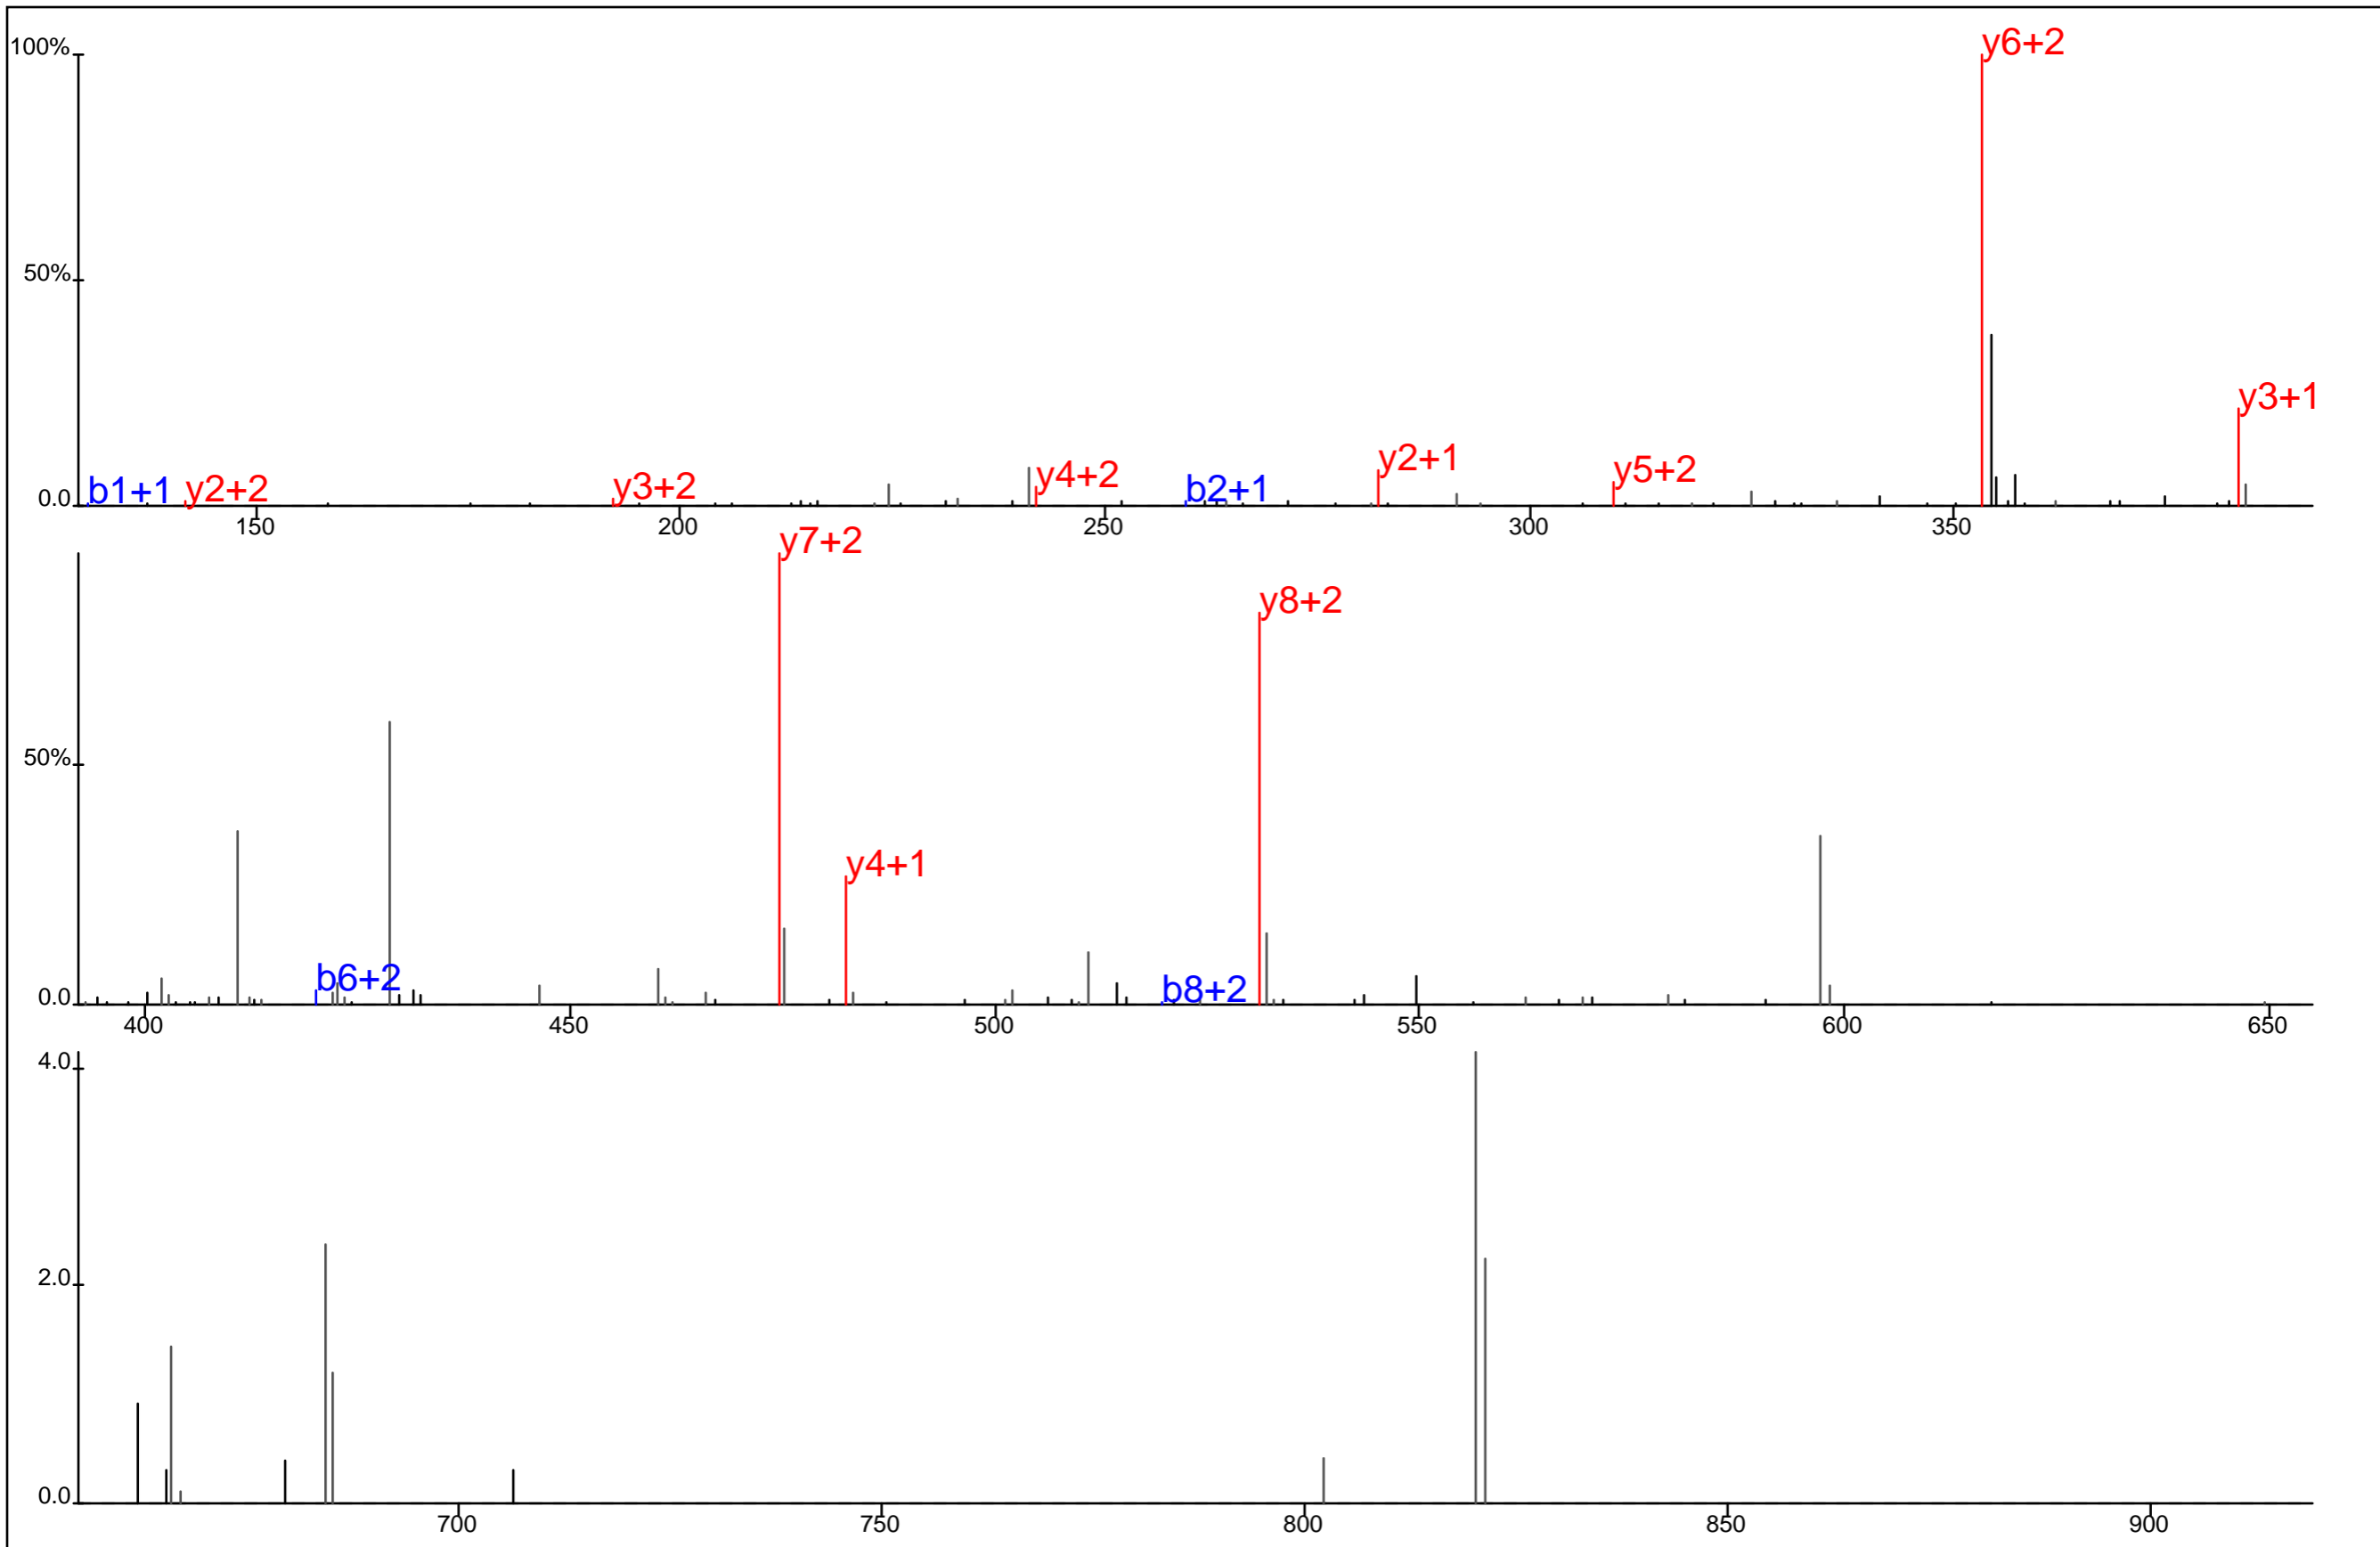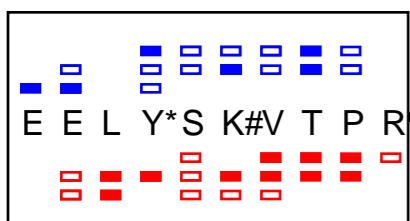

Protein Name: STS1  
 gi Accession: 18916794  
 Precursor Mass: 440.5510+3  
 Delta Mass: 1.794 ppm  
 XCorr: 27.32

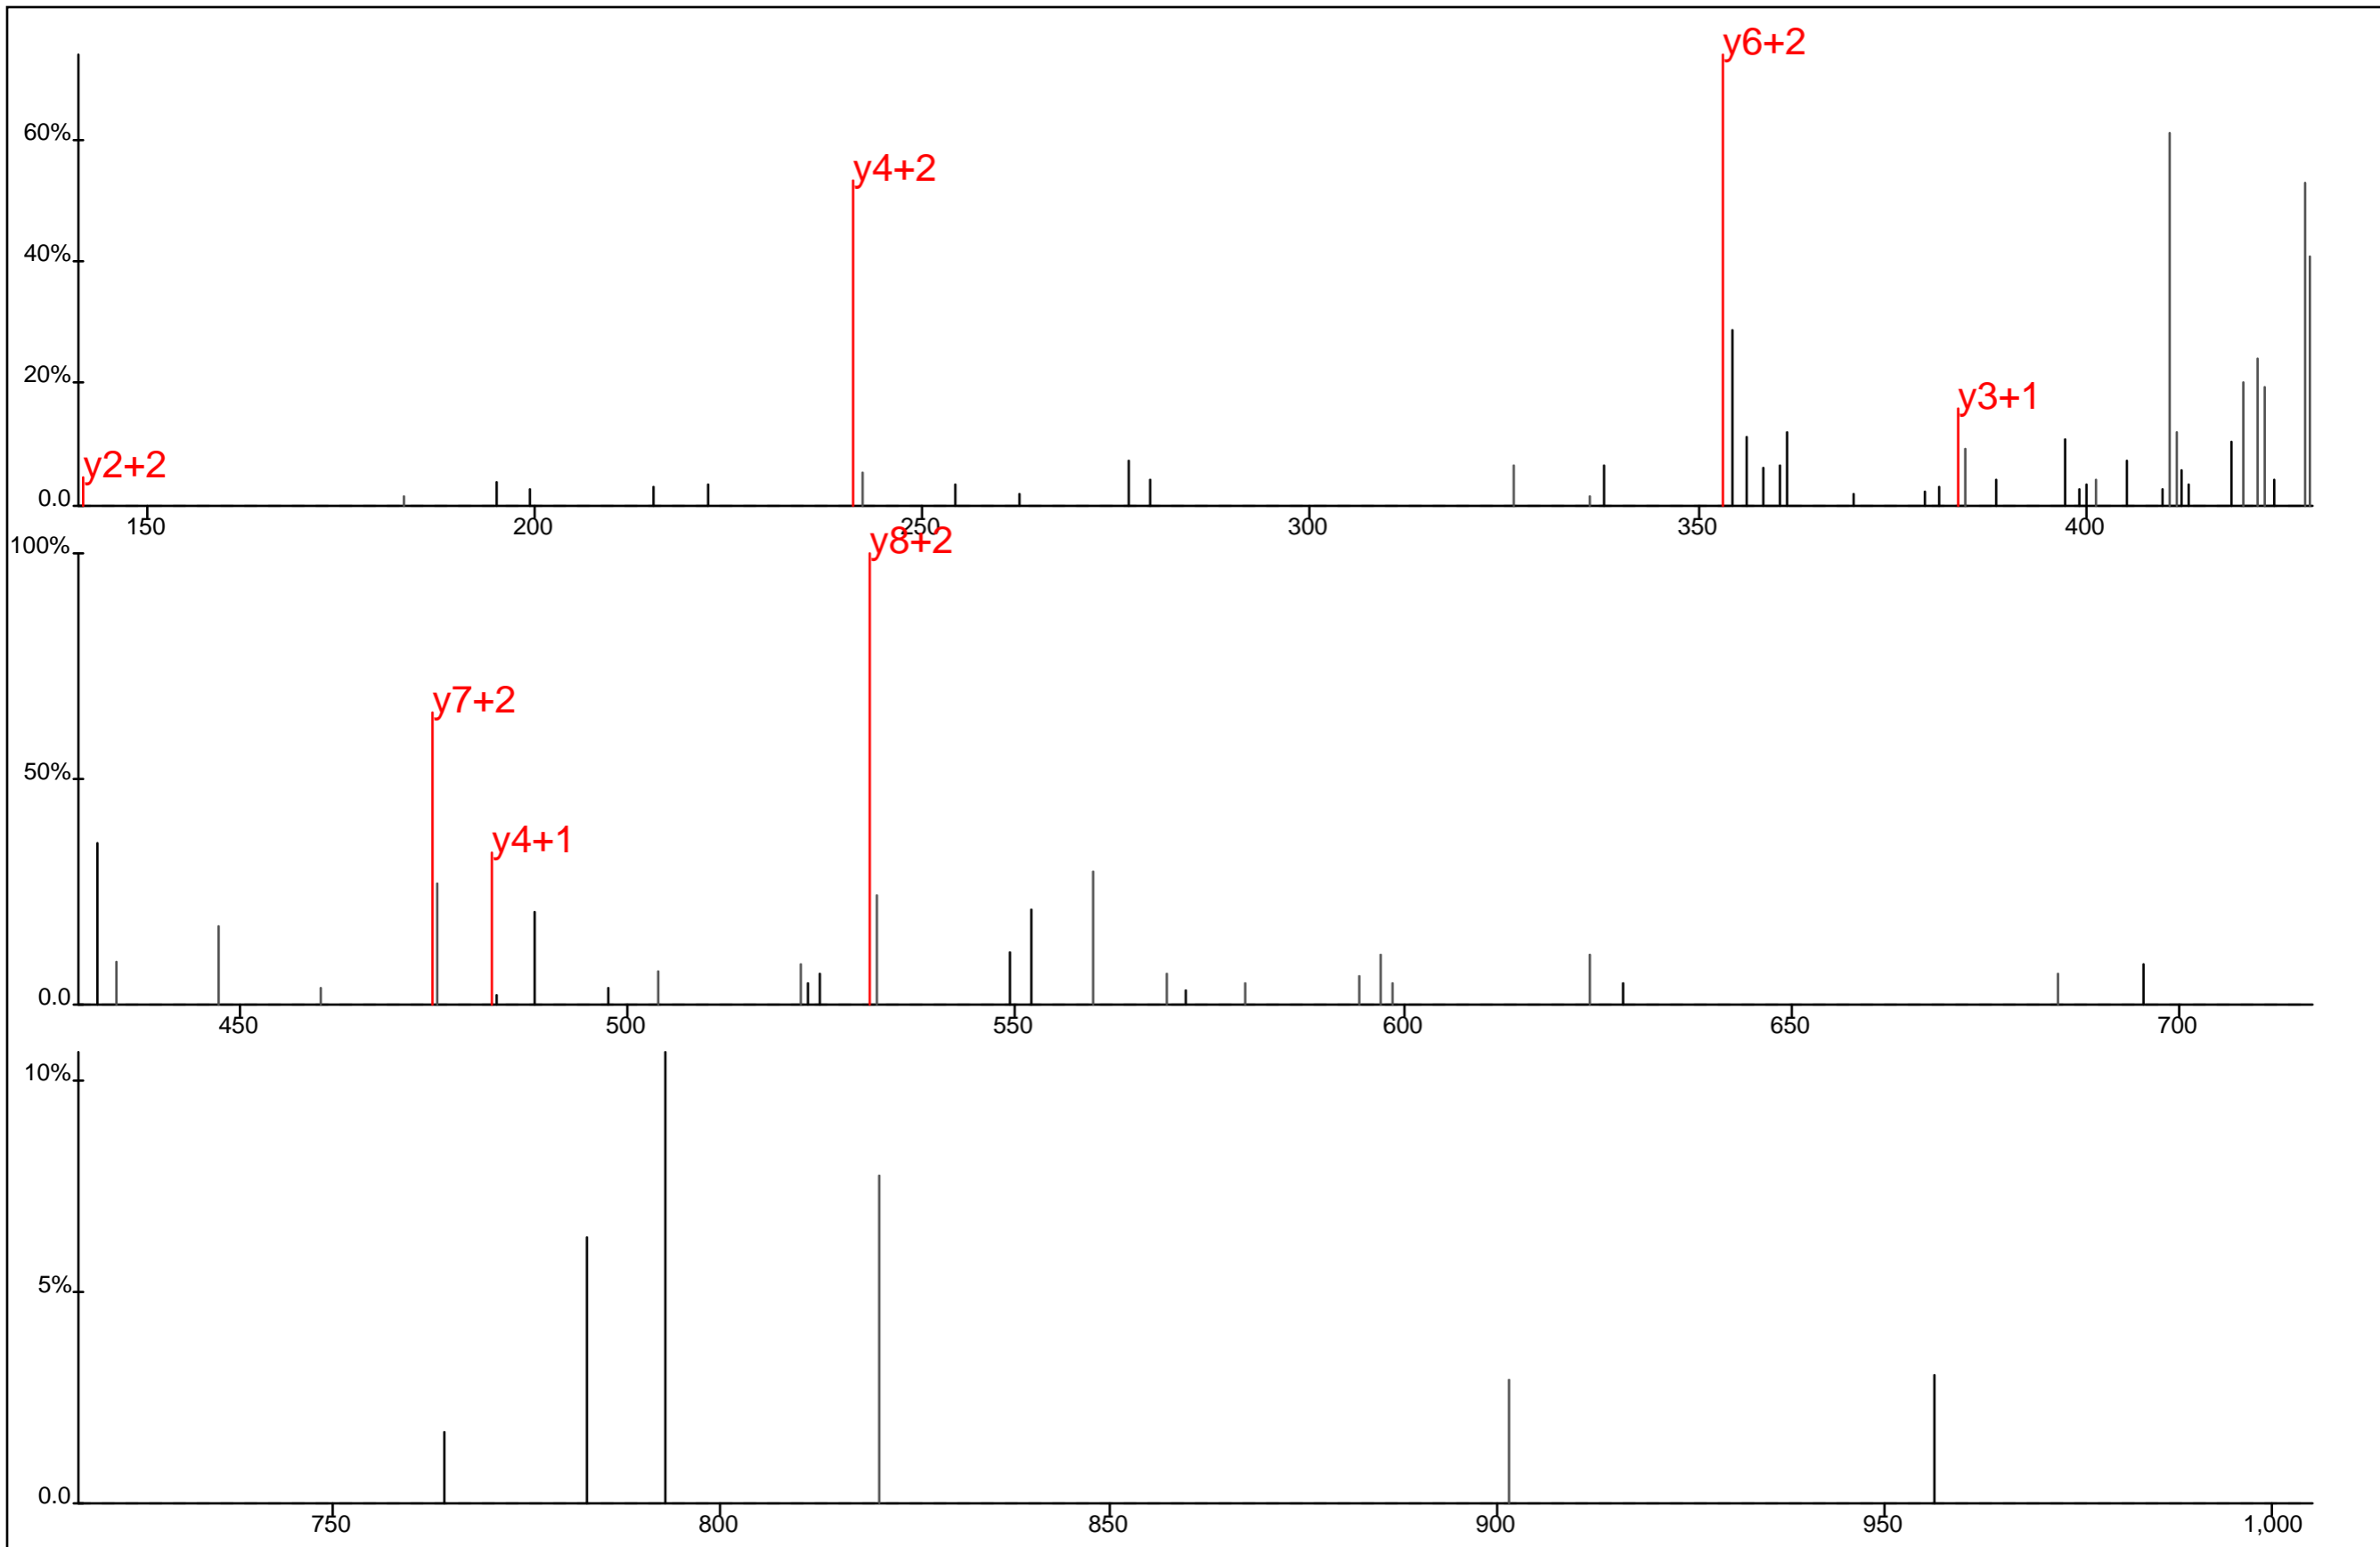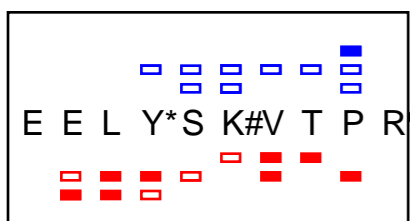

Protein Name: STS1  
 gi Accession: 18916794  
 Precursor Mass: 440.5514+3  
 Delta Mass: 2.697 ppm  
 XCorr: 17.15

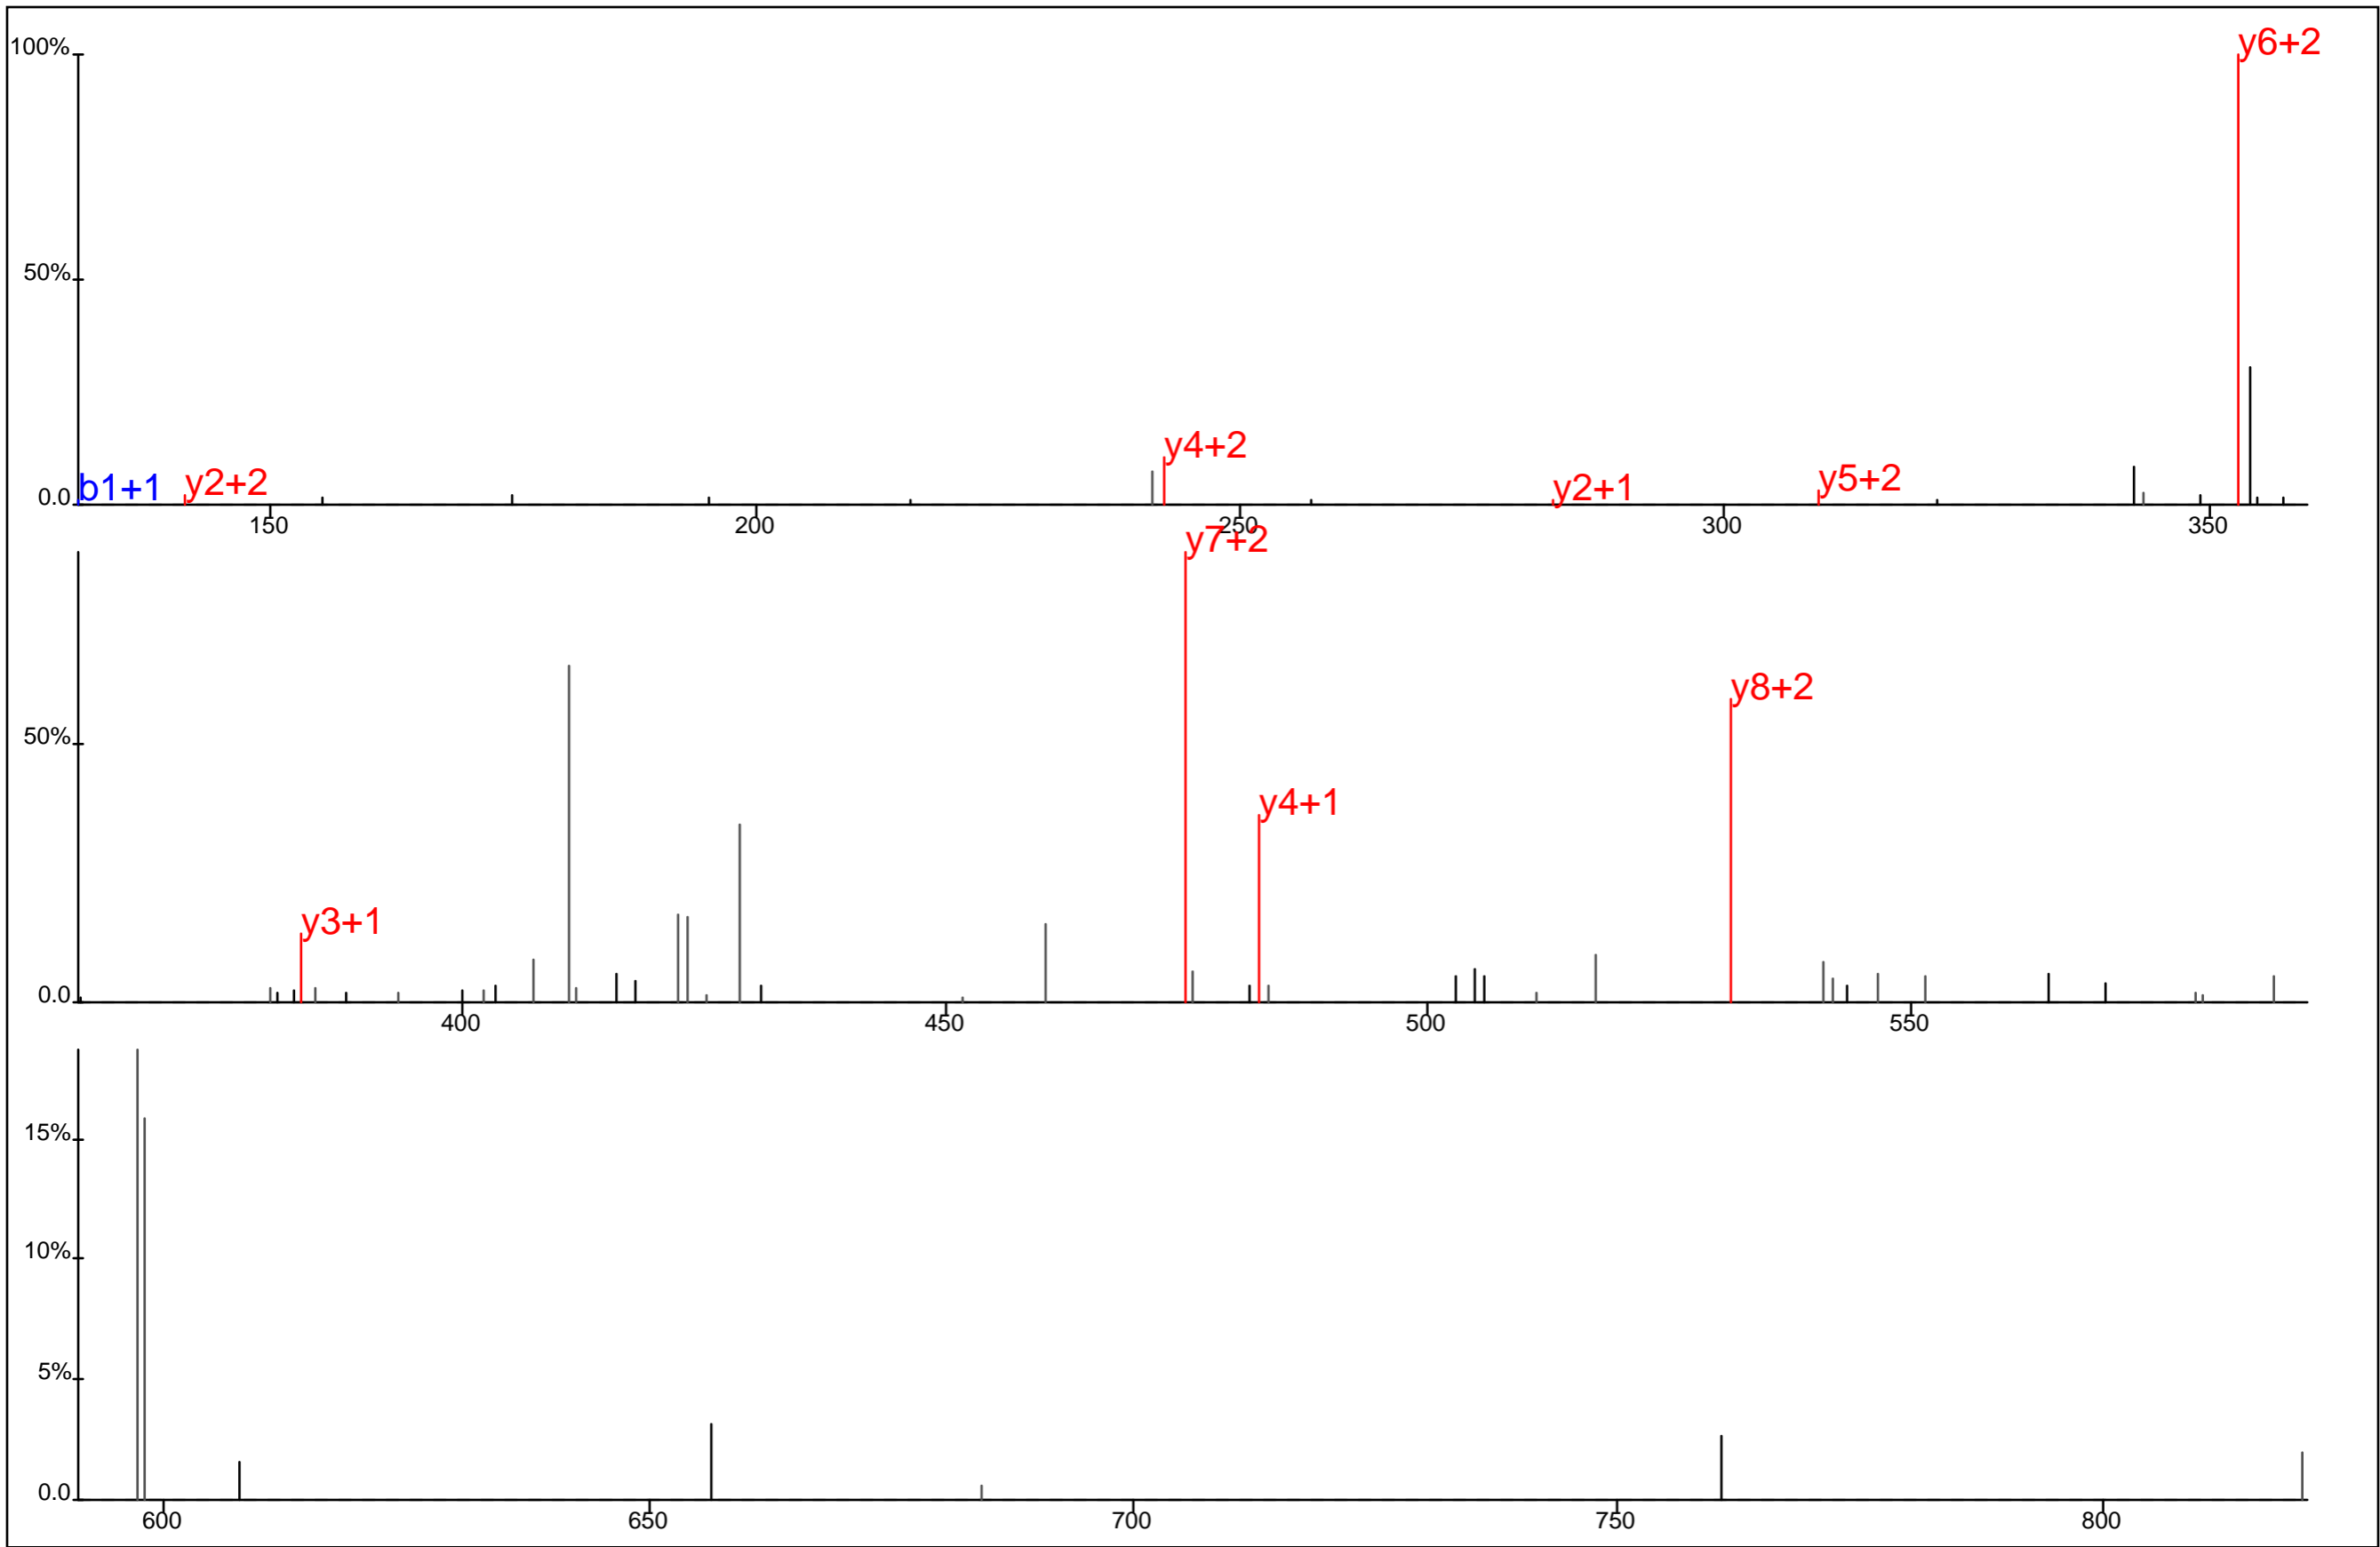

|  |                                                                                                                                    |
|--|------------------------------------------------------------------------------------------------------------------------------------|
|  | <p>Protein Name: STS1<br/> gi Accession: 18916794<br/> Precursor Mass: 440.5511+3<br/> Delta Mass: 2.006 ppm<br/> XCorr: 37.34</p> |
|--|------------------------------------------------------------------------------------------------------------------------------------|

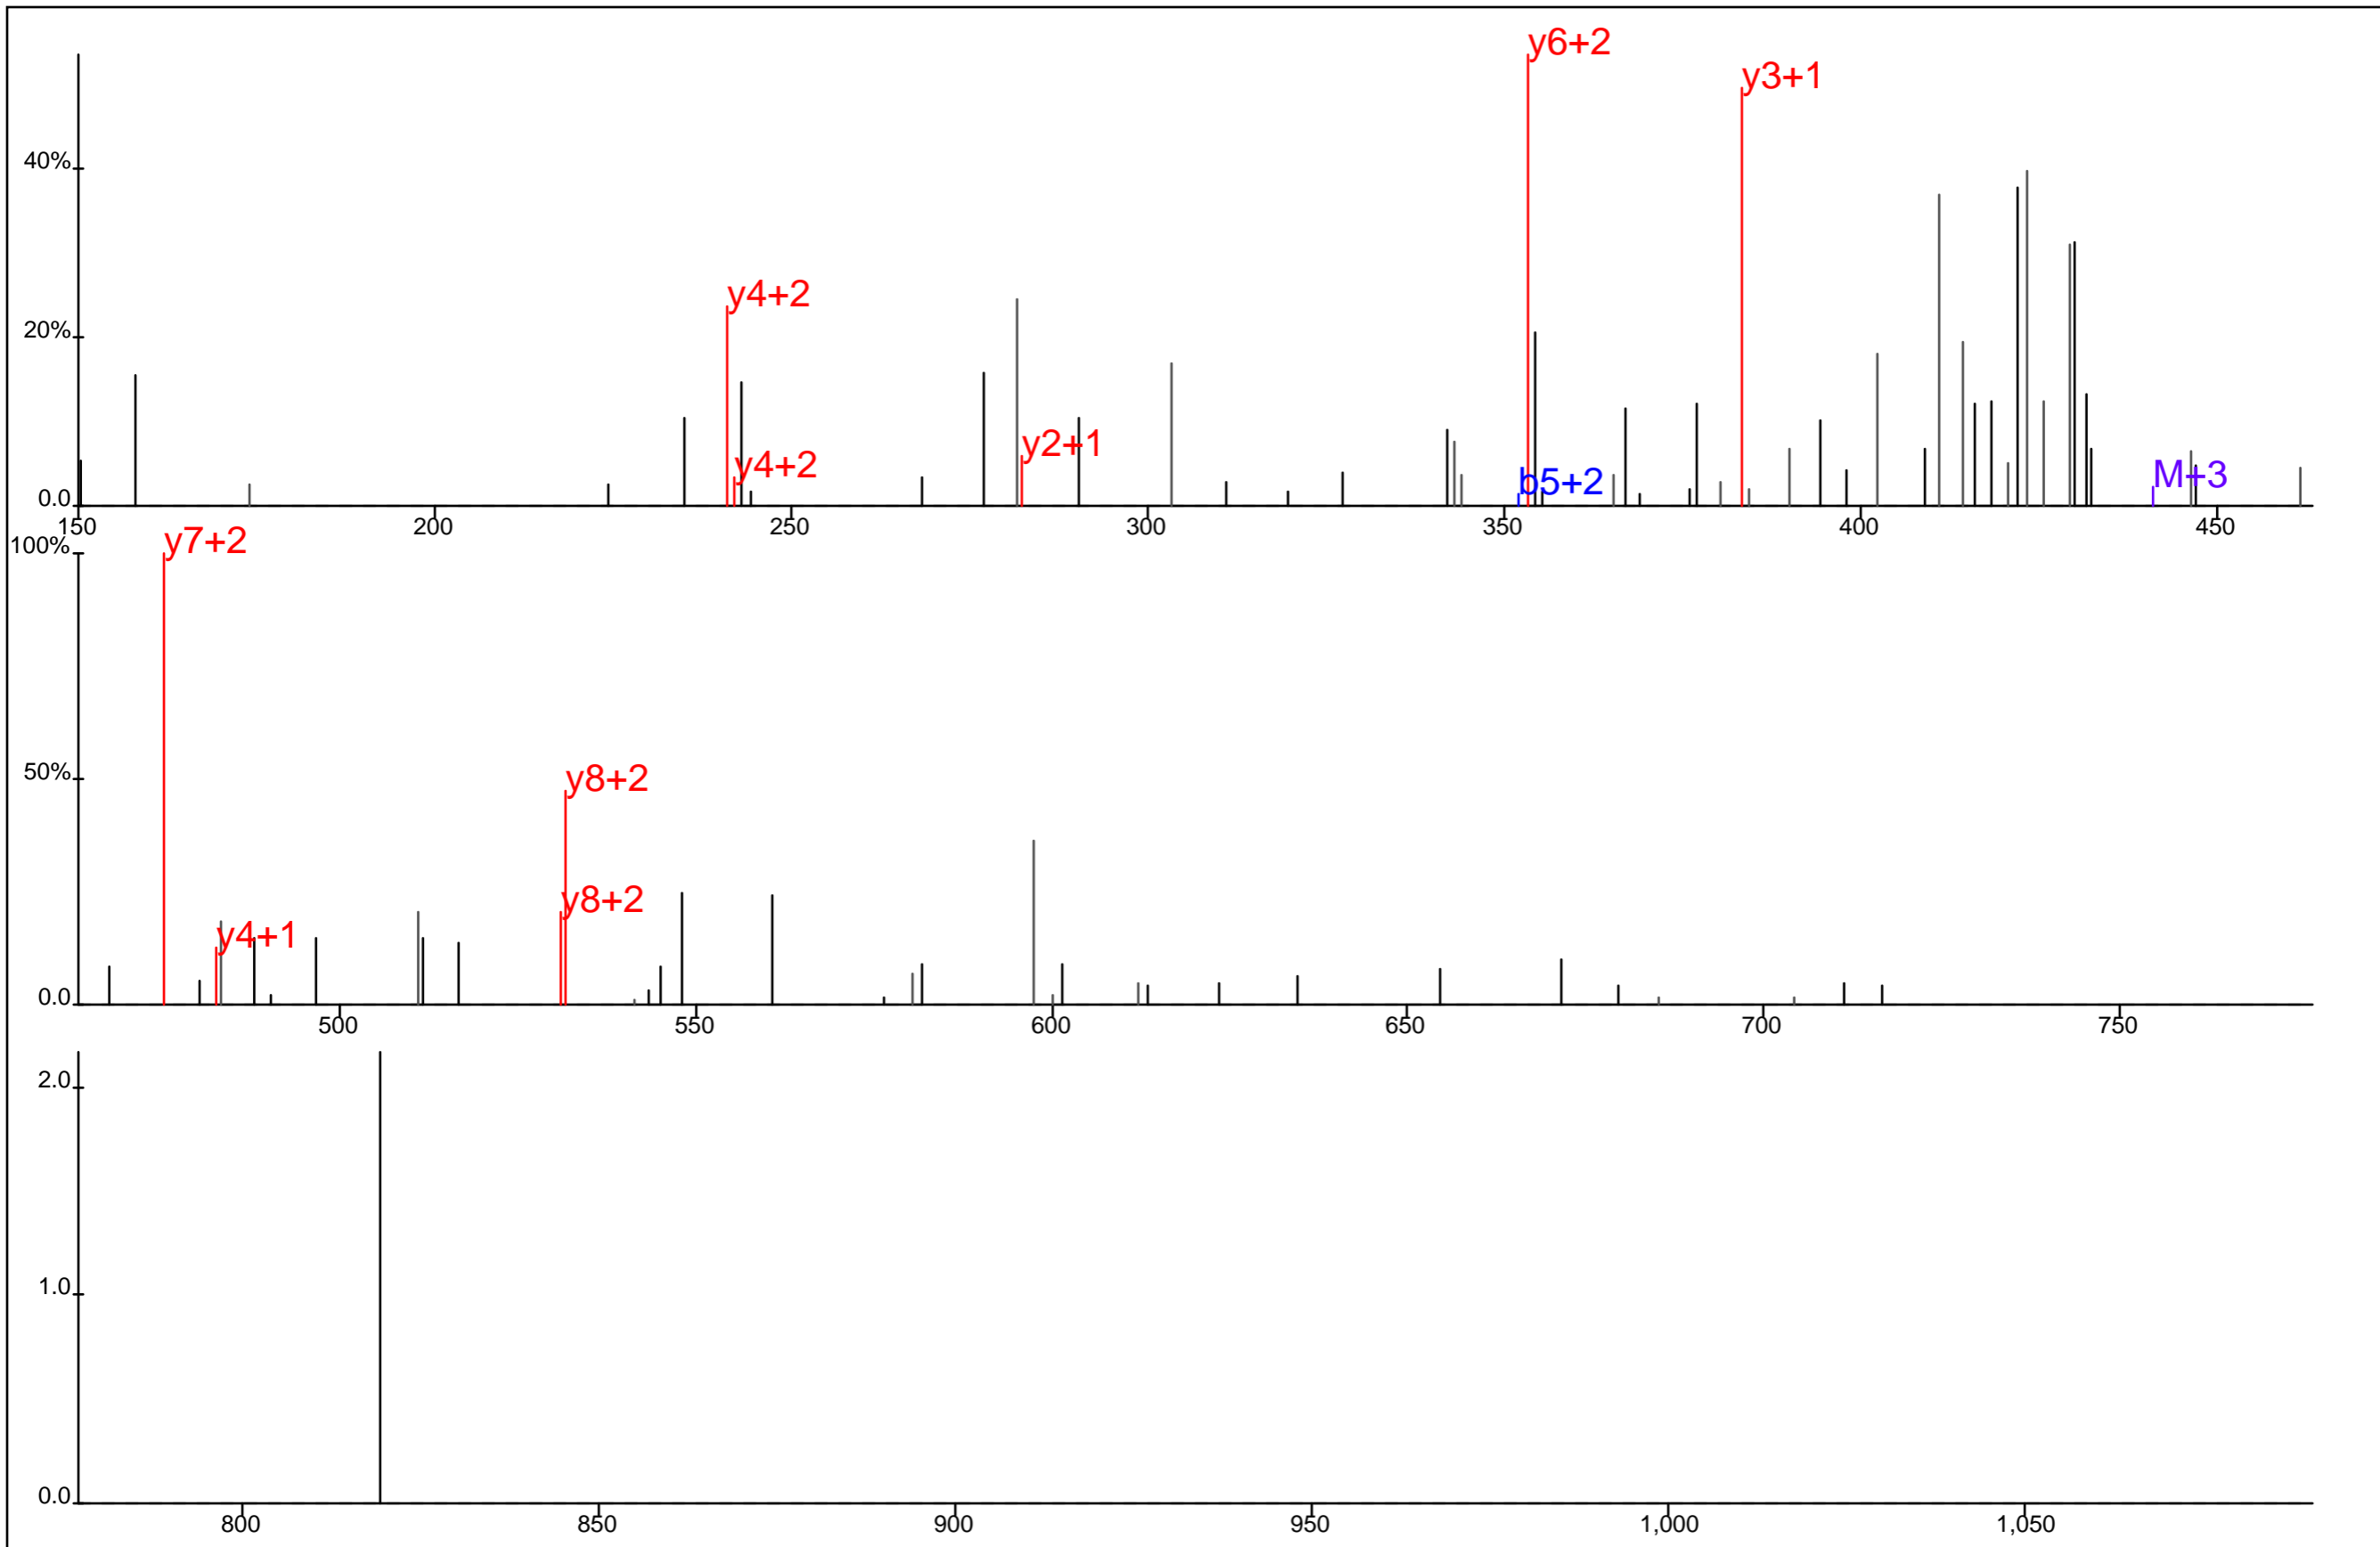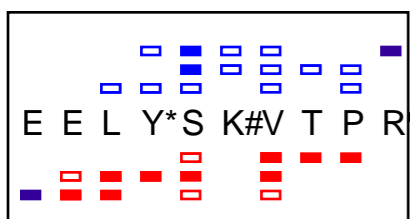

Protein Name: STS1  
 gi Accession: 18916794  
 Precursor Mass: 440.5533+3  
 Delta Mass: 7.000 ppm  
 XCorr: 11.56

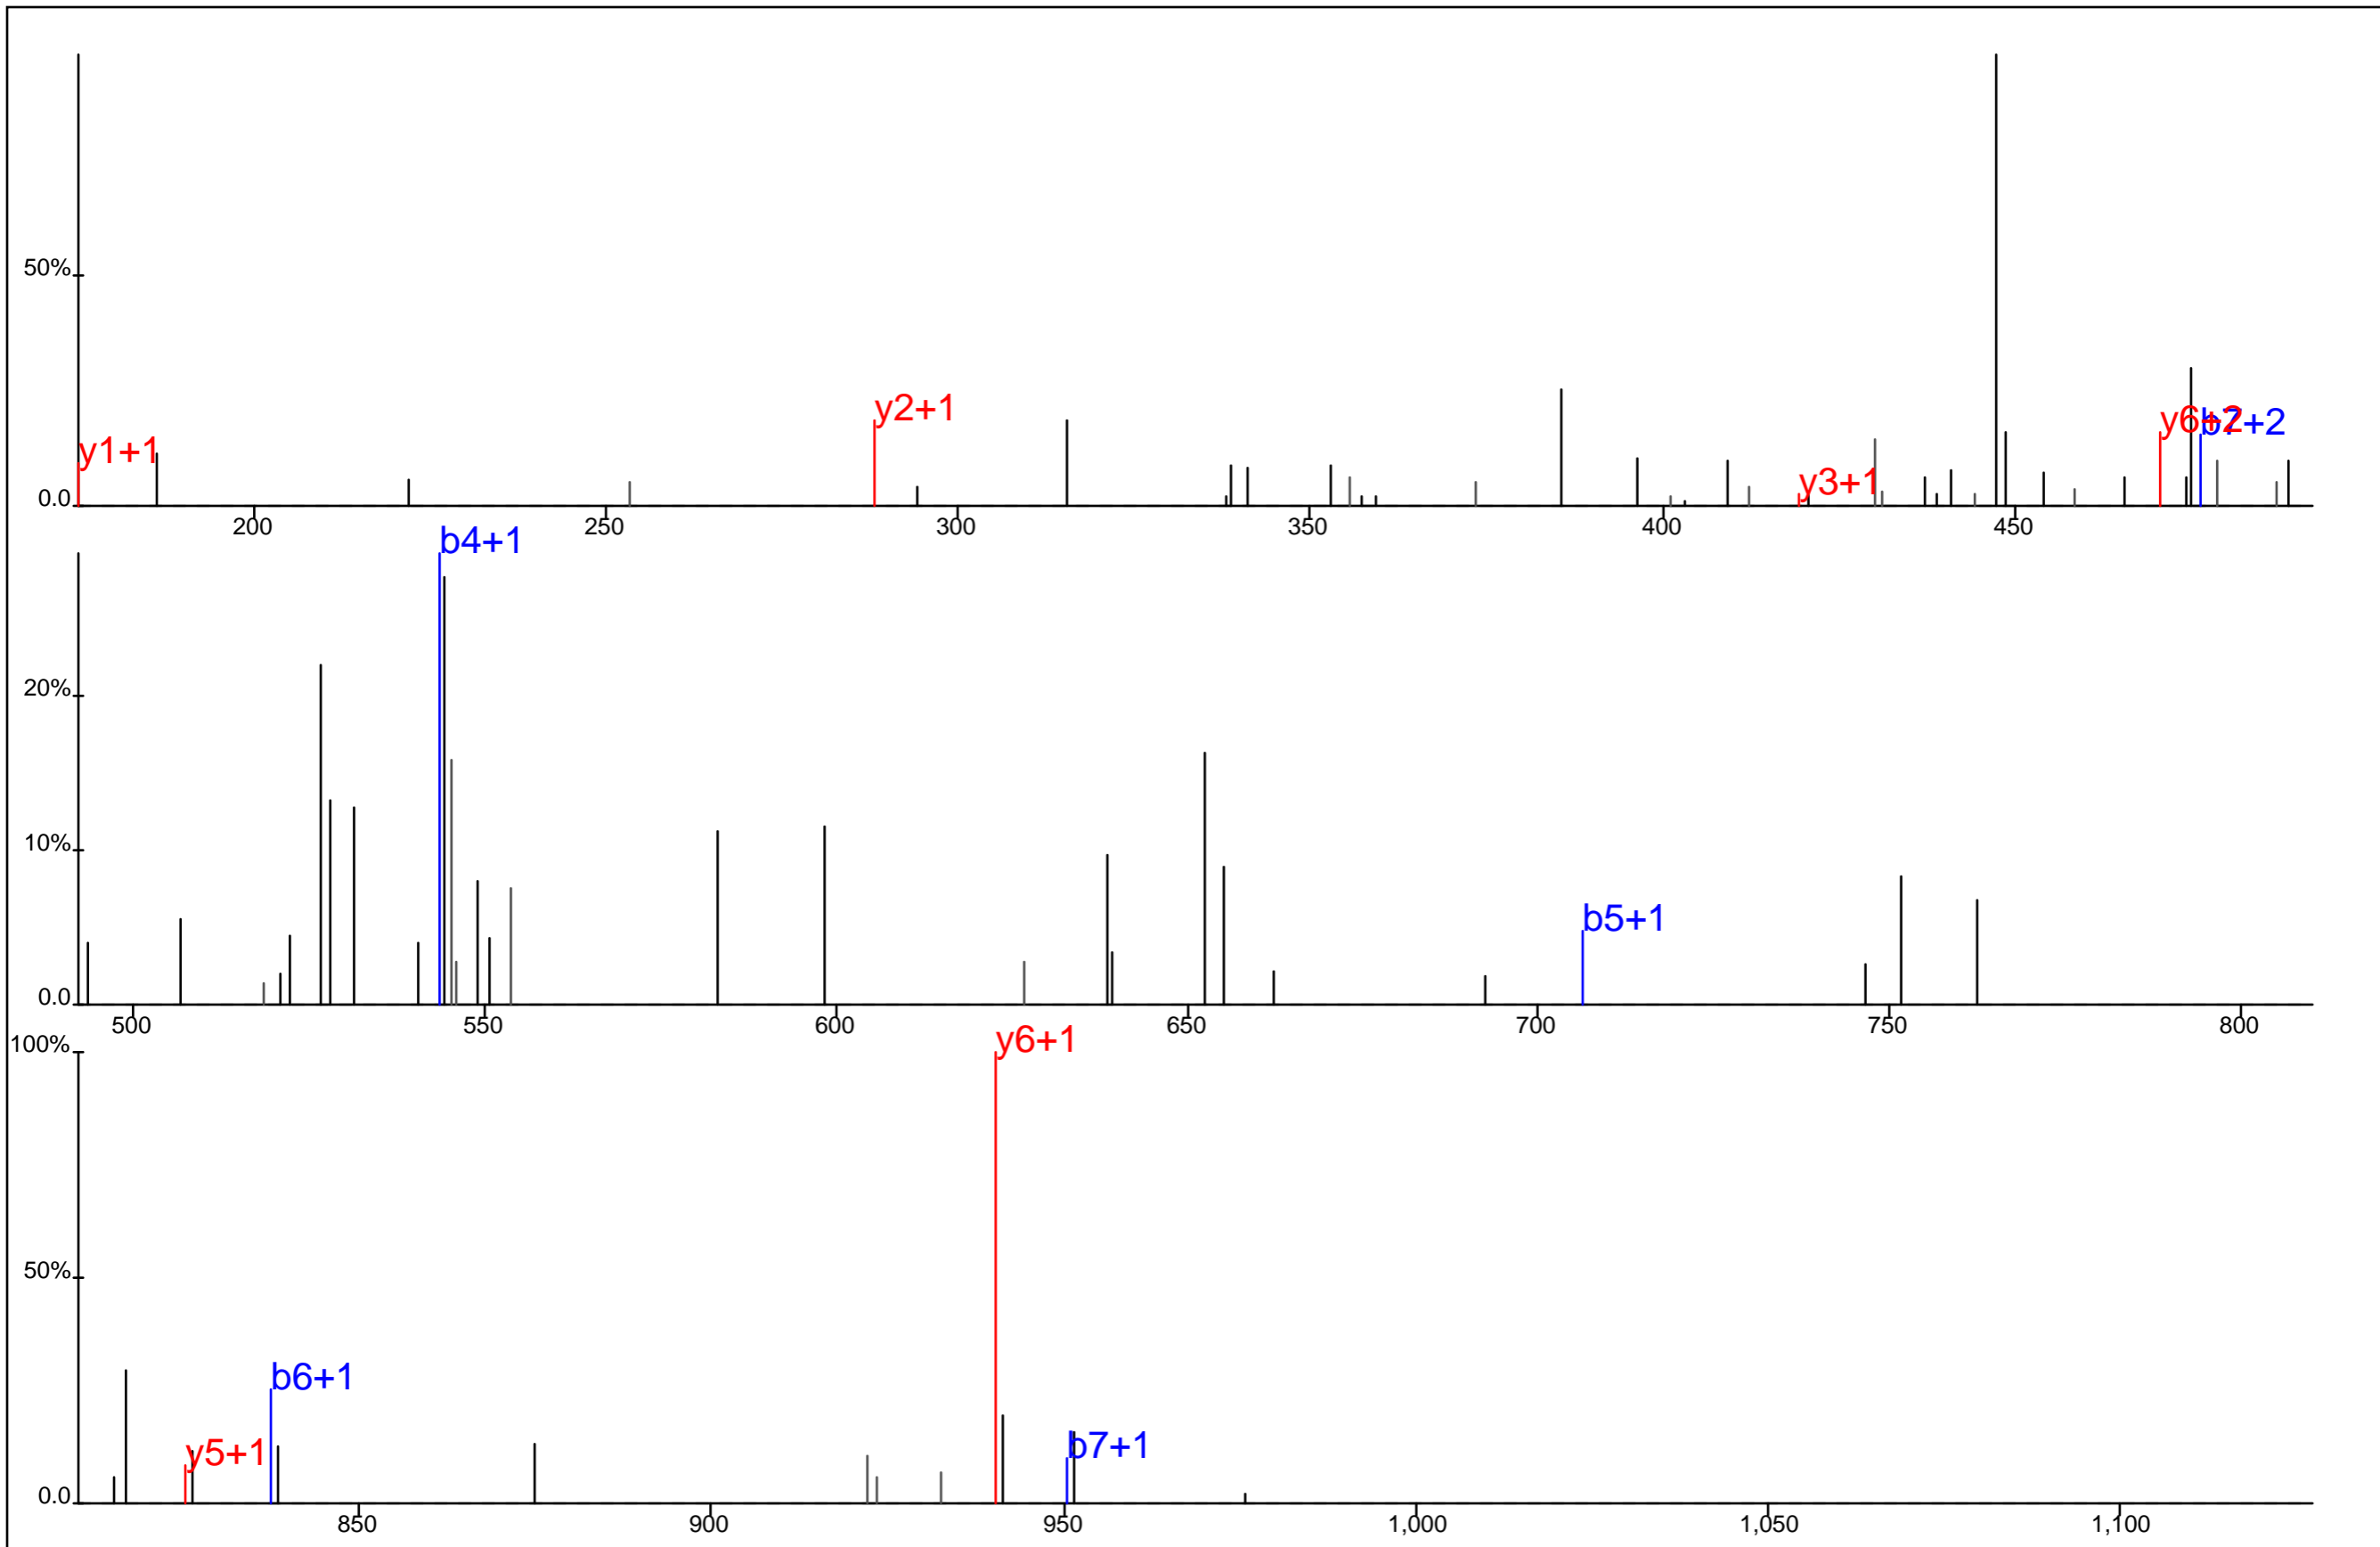

▢ ▢ ▢ ▢ ▢  
 A L D Y\*Y M L R  
▢ ▢ ▢ ▢ ▢ ▢

Protein Name: Talin  
 gi Accession: 81175200  
 Precursor Mass: 562.7482+2  
 Delta Mass: 4.064 ppm  
 XCorr: 2.0664

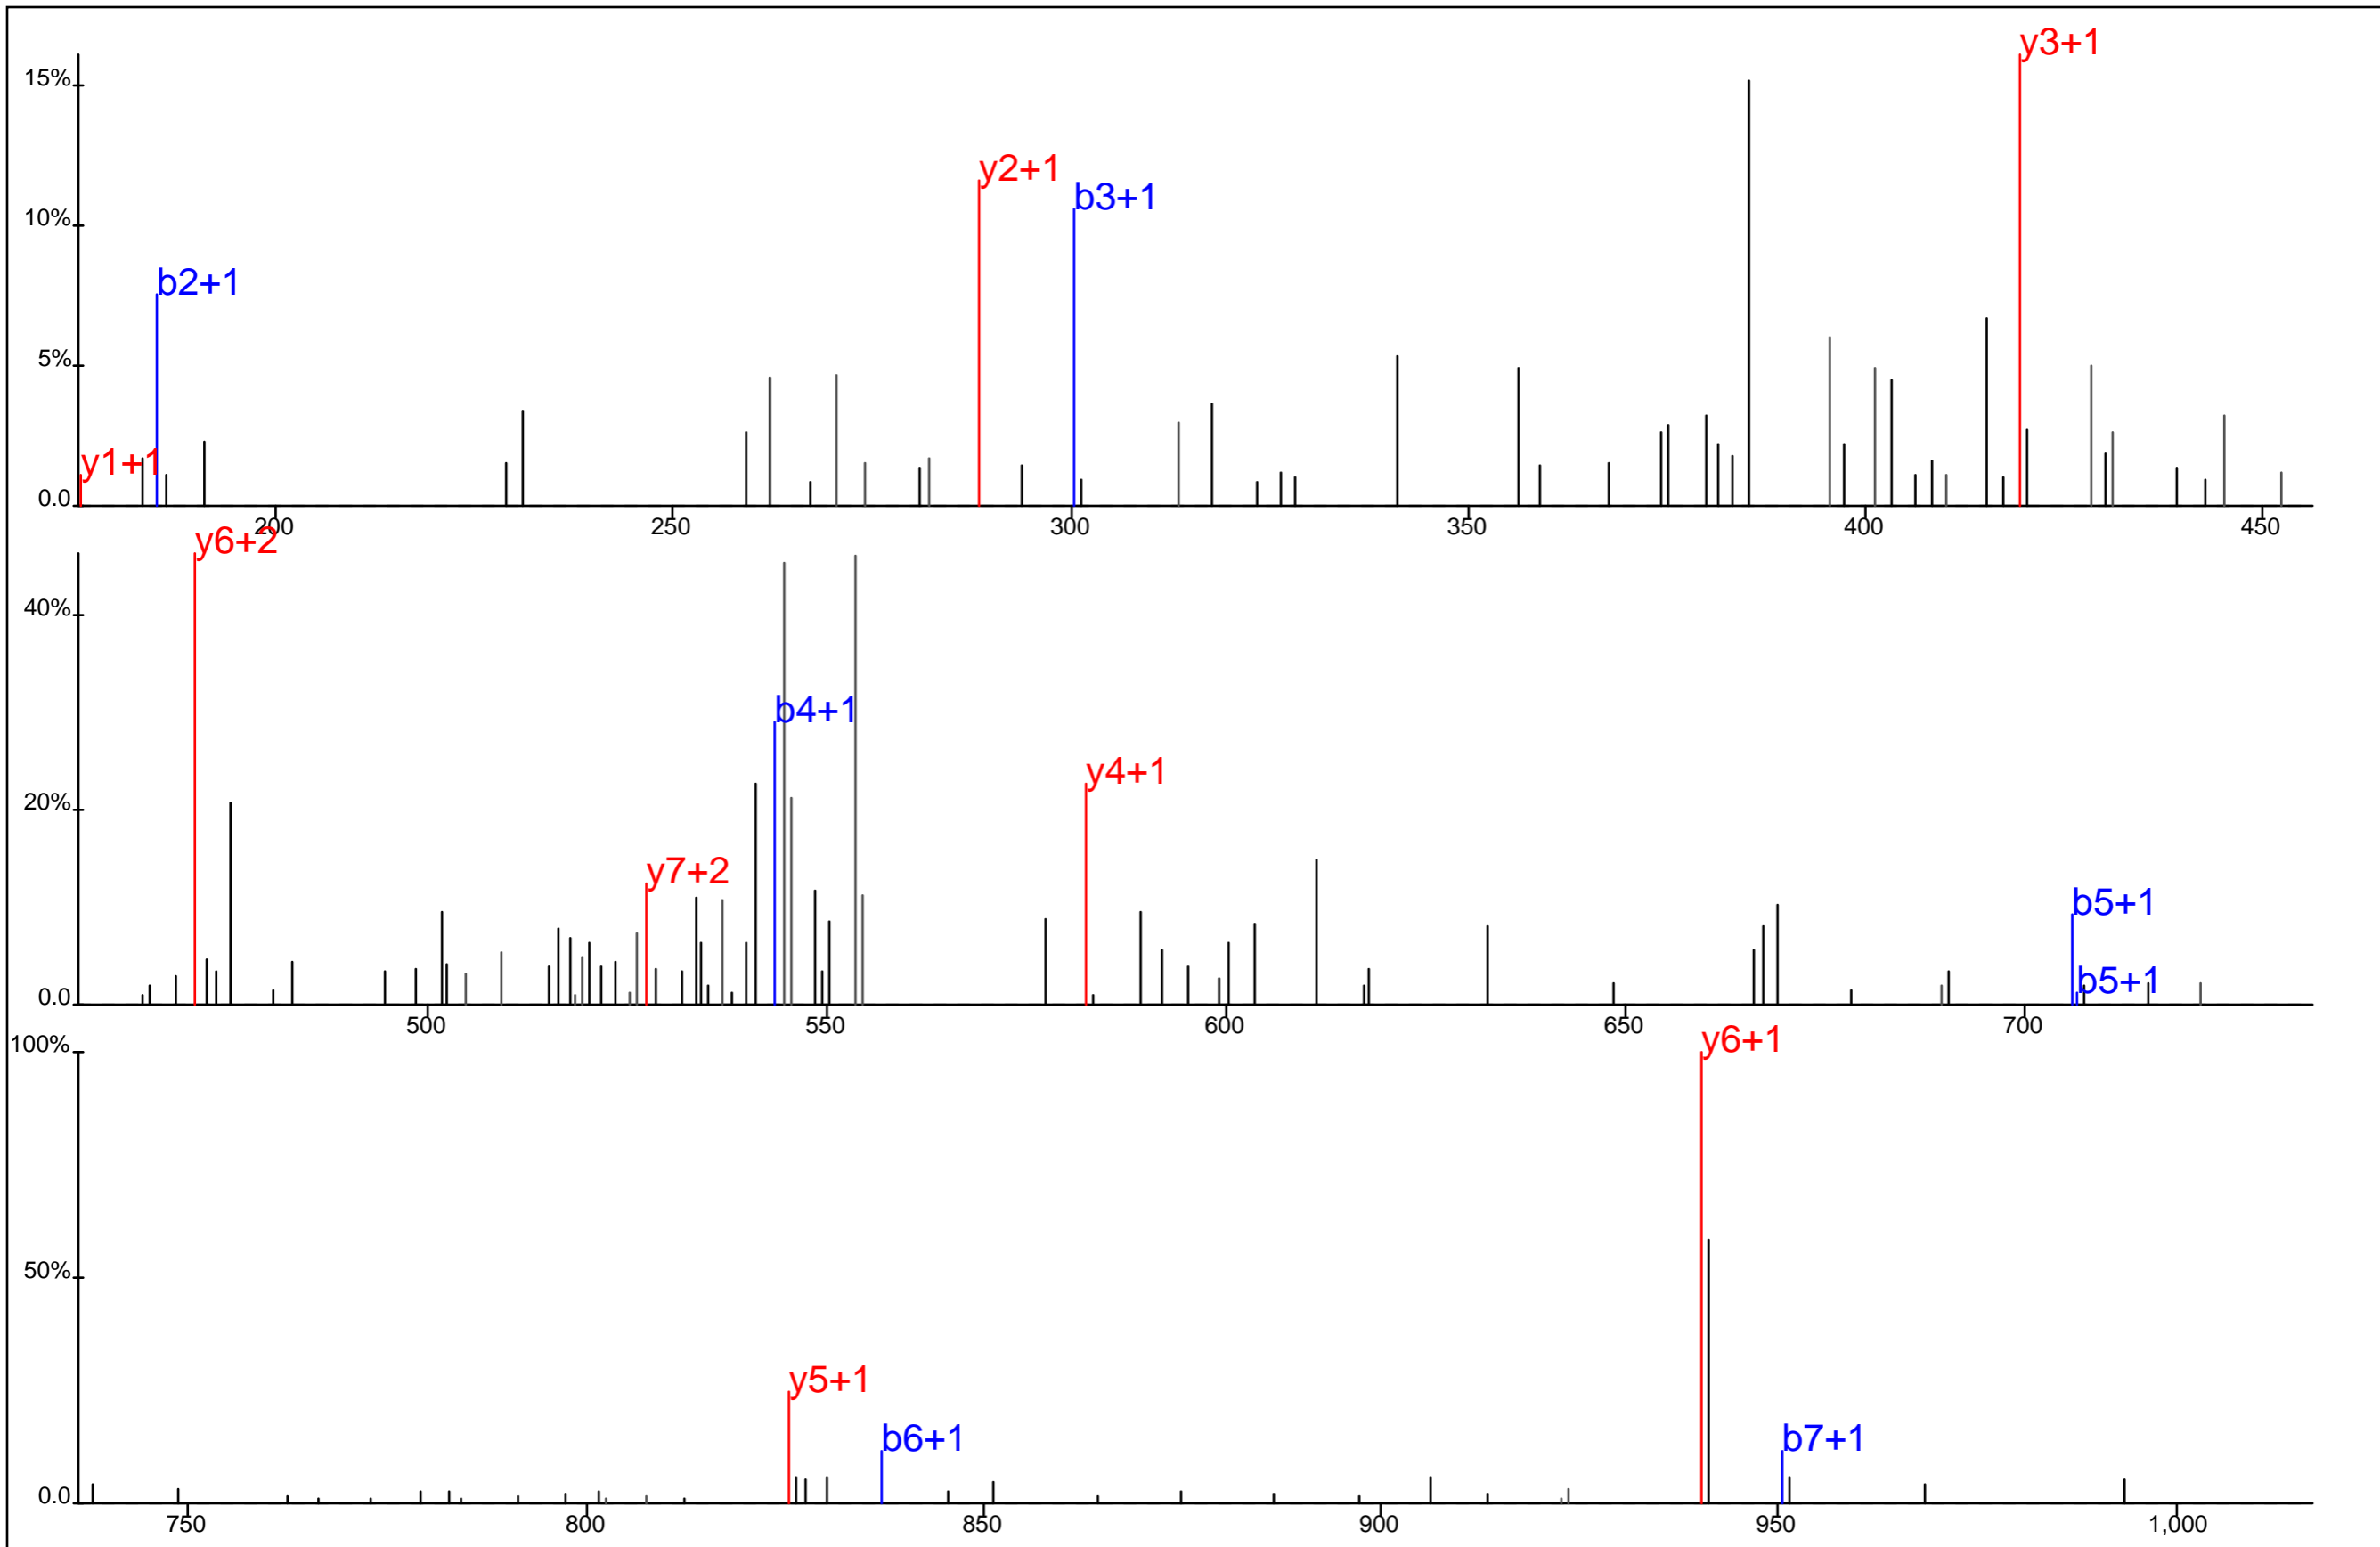

**A L D Y\*Y M L R**

Protein Name: Talin  
 gi Accession: 81175200  
 Precursor Mass: 562.7477+2  
 Delta Mass: 3.235 ppm  
 XCorr: 32.52

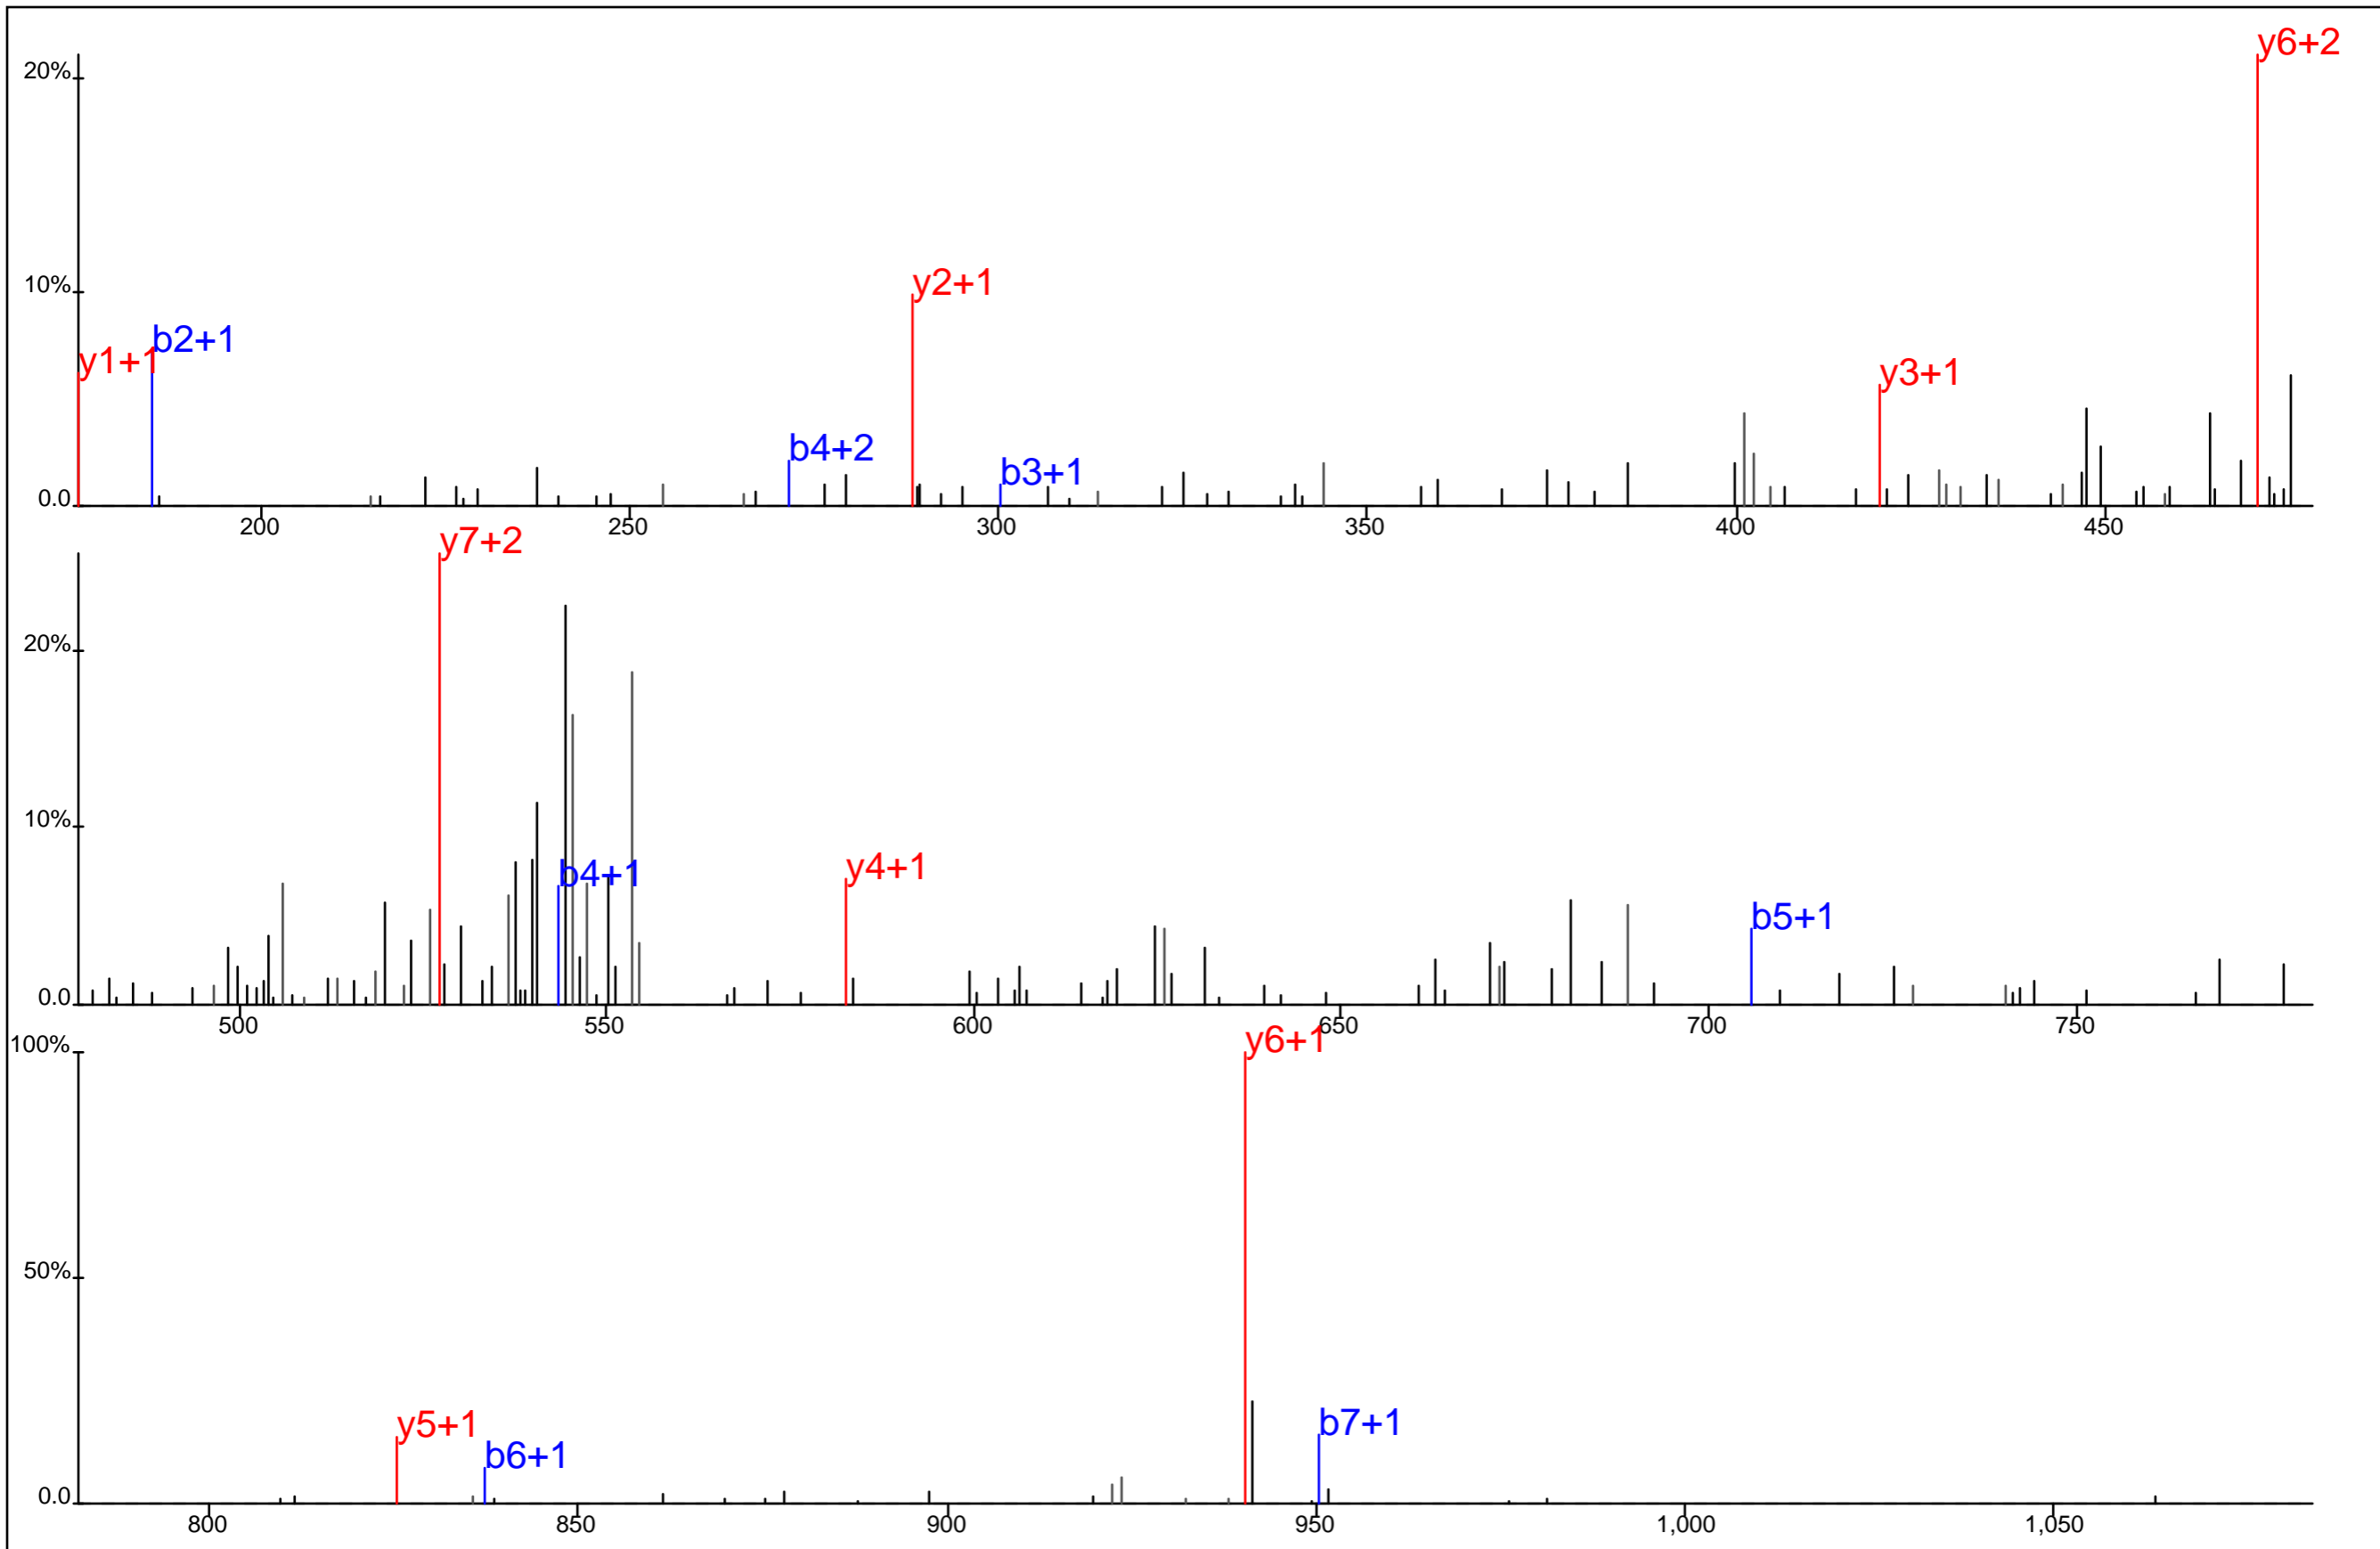

■ ■ ■ ■ ■ ■  
 A L D Y\*Y M L R  
□ □ □ □ □ □

Protein Name: Talin  
 gi Accession: 81175200  
 Precursor Mass: 562.7460+2  
 Delta Mass: 0.194 ppm  
 XCorr: 35.53



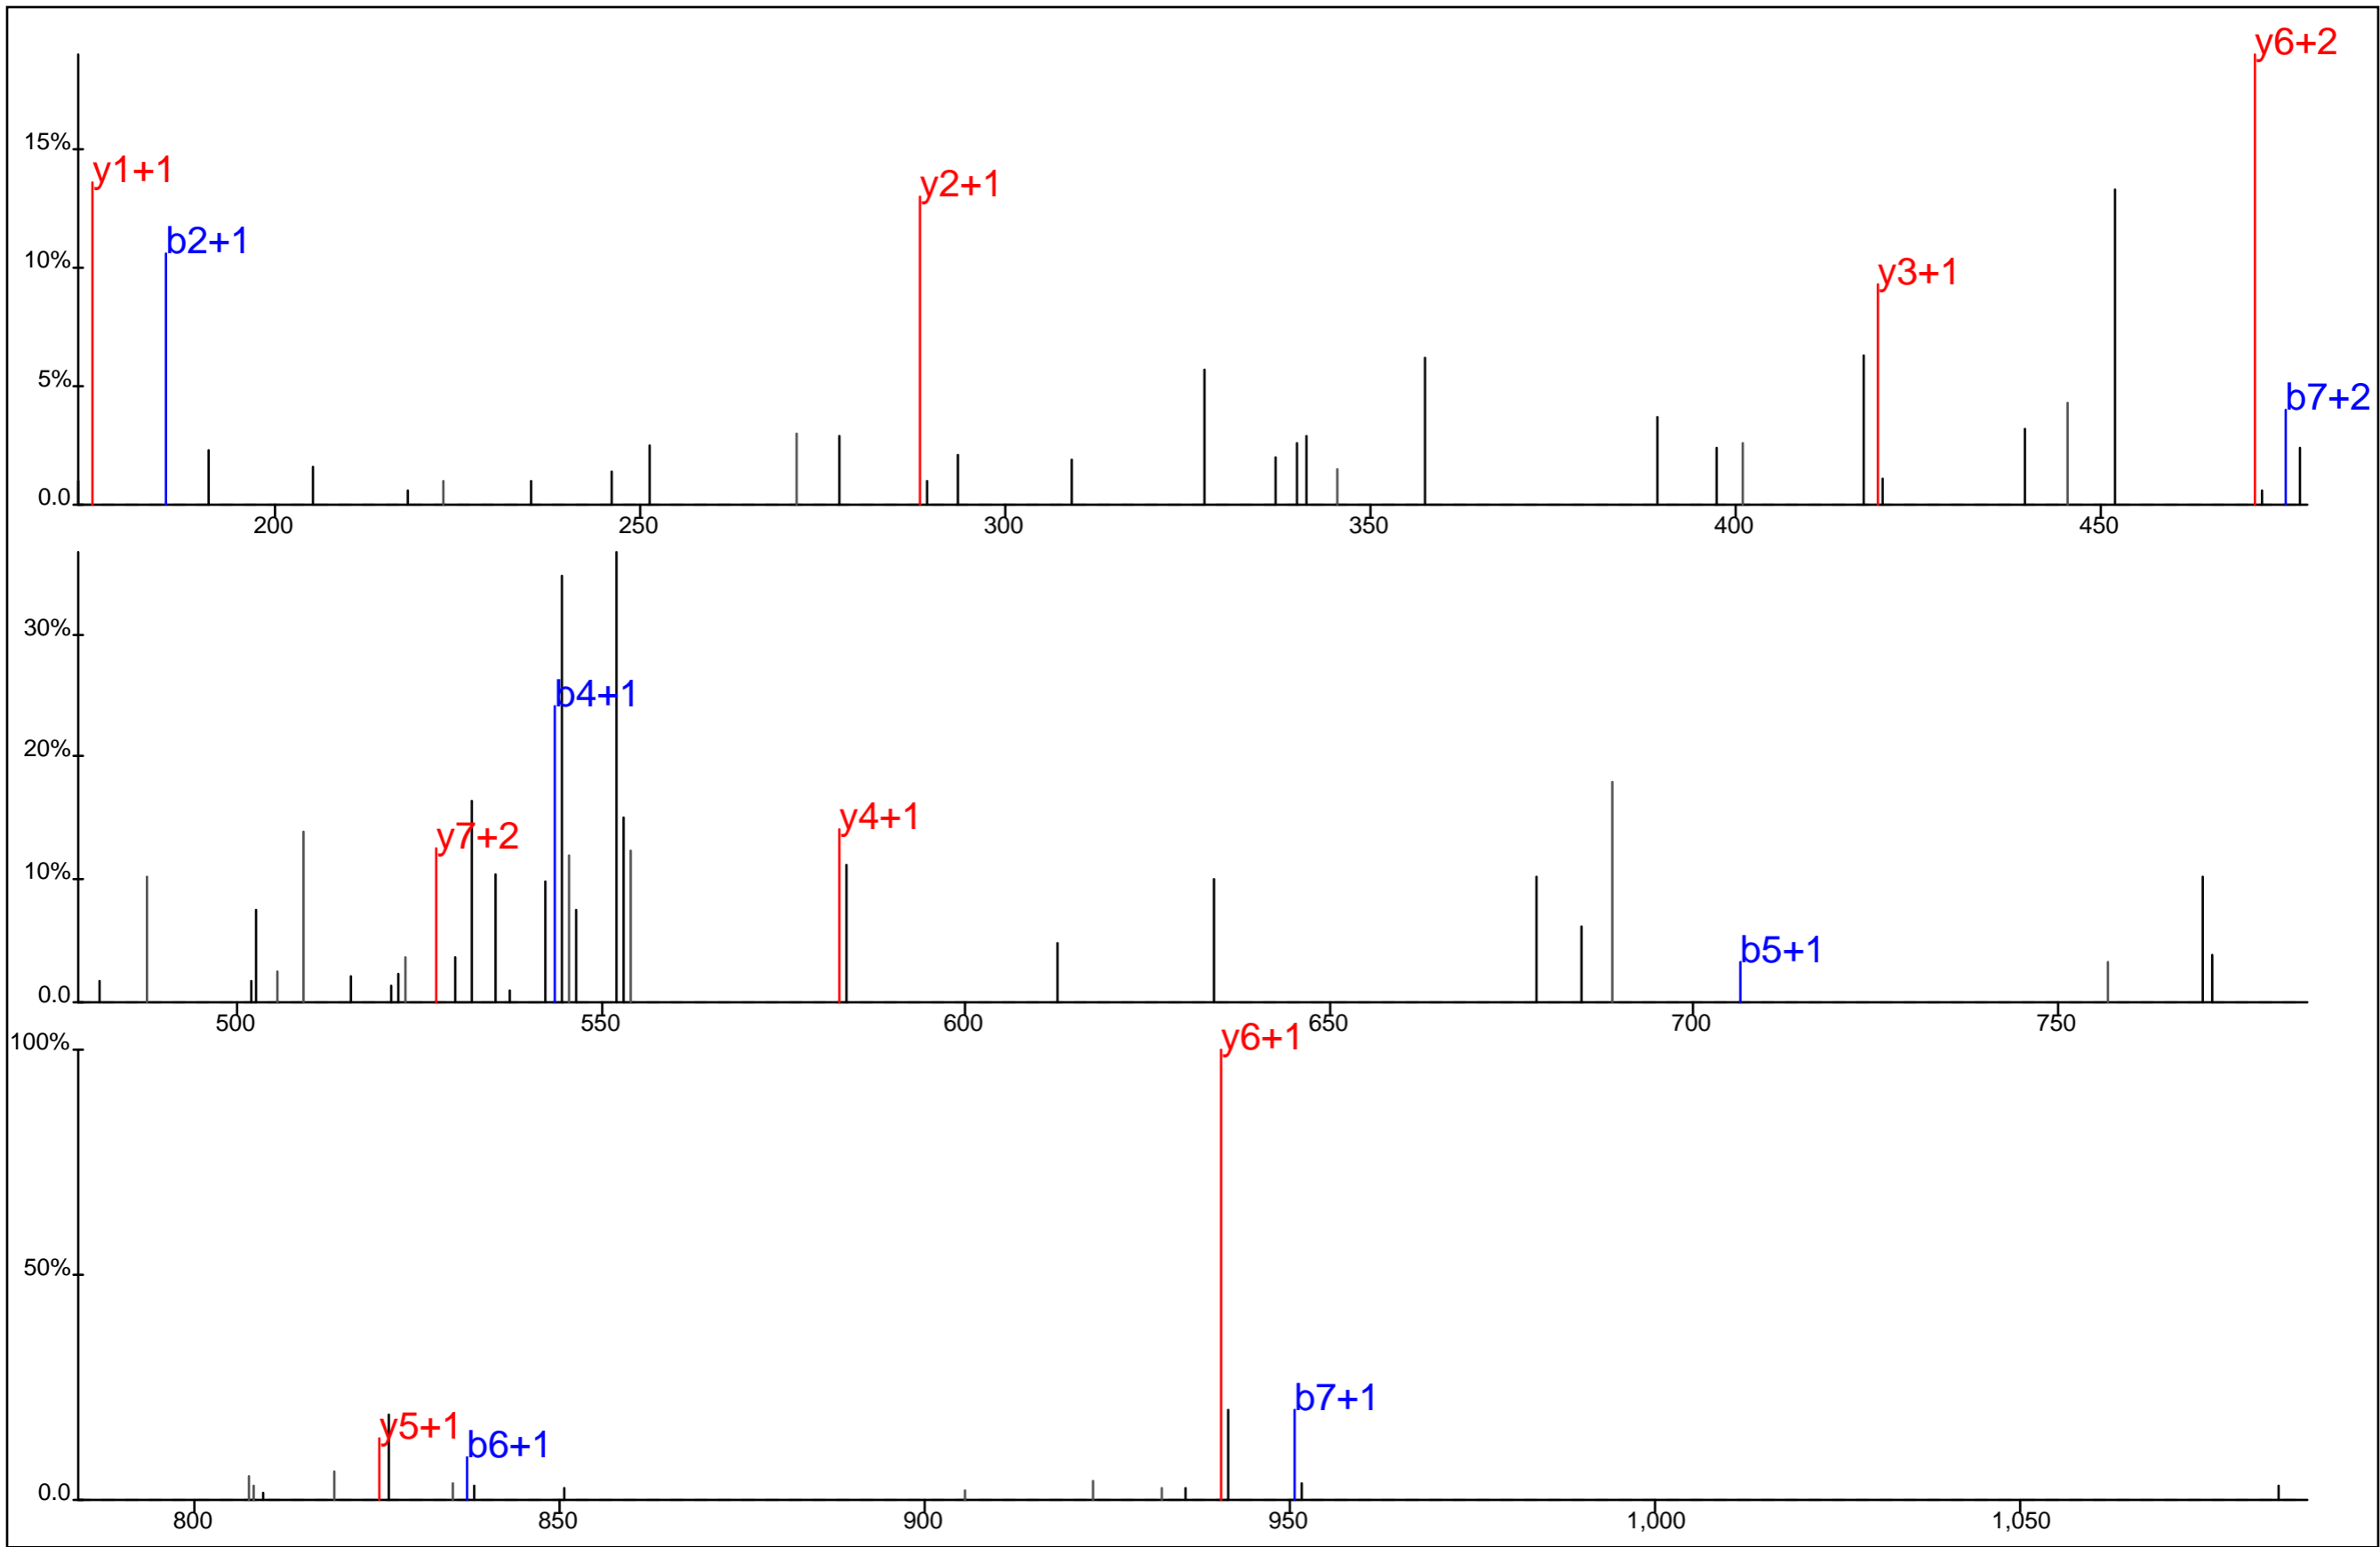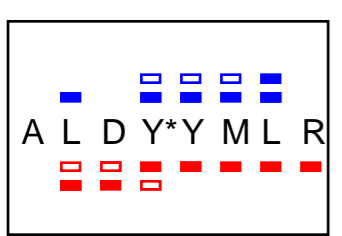

Protein Name: Talin  
 gi Accession: 81175200  
 Precursor Mass: 562.7473+2  
 Delta Mass: 2.364 ppm  
 XCorr: 34.04

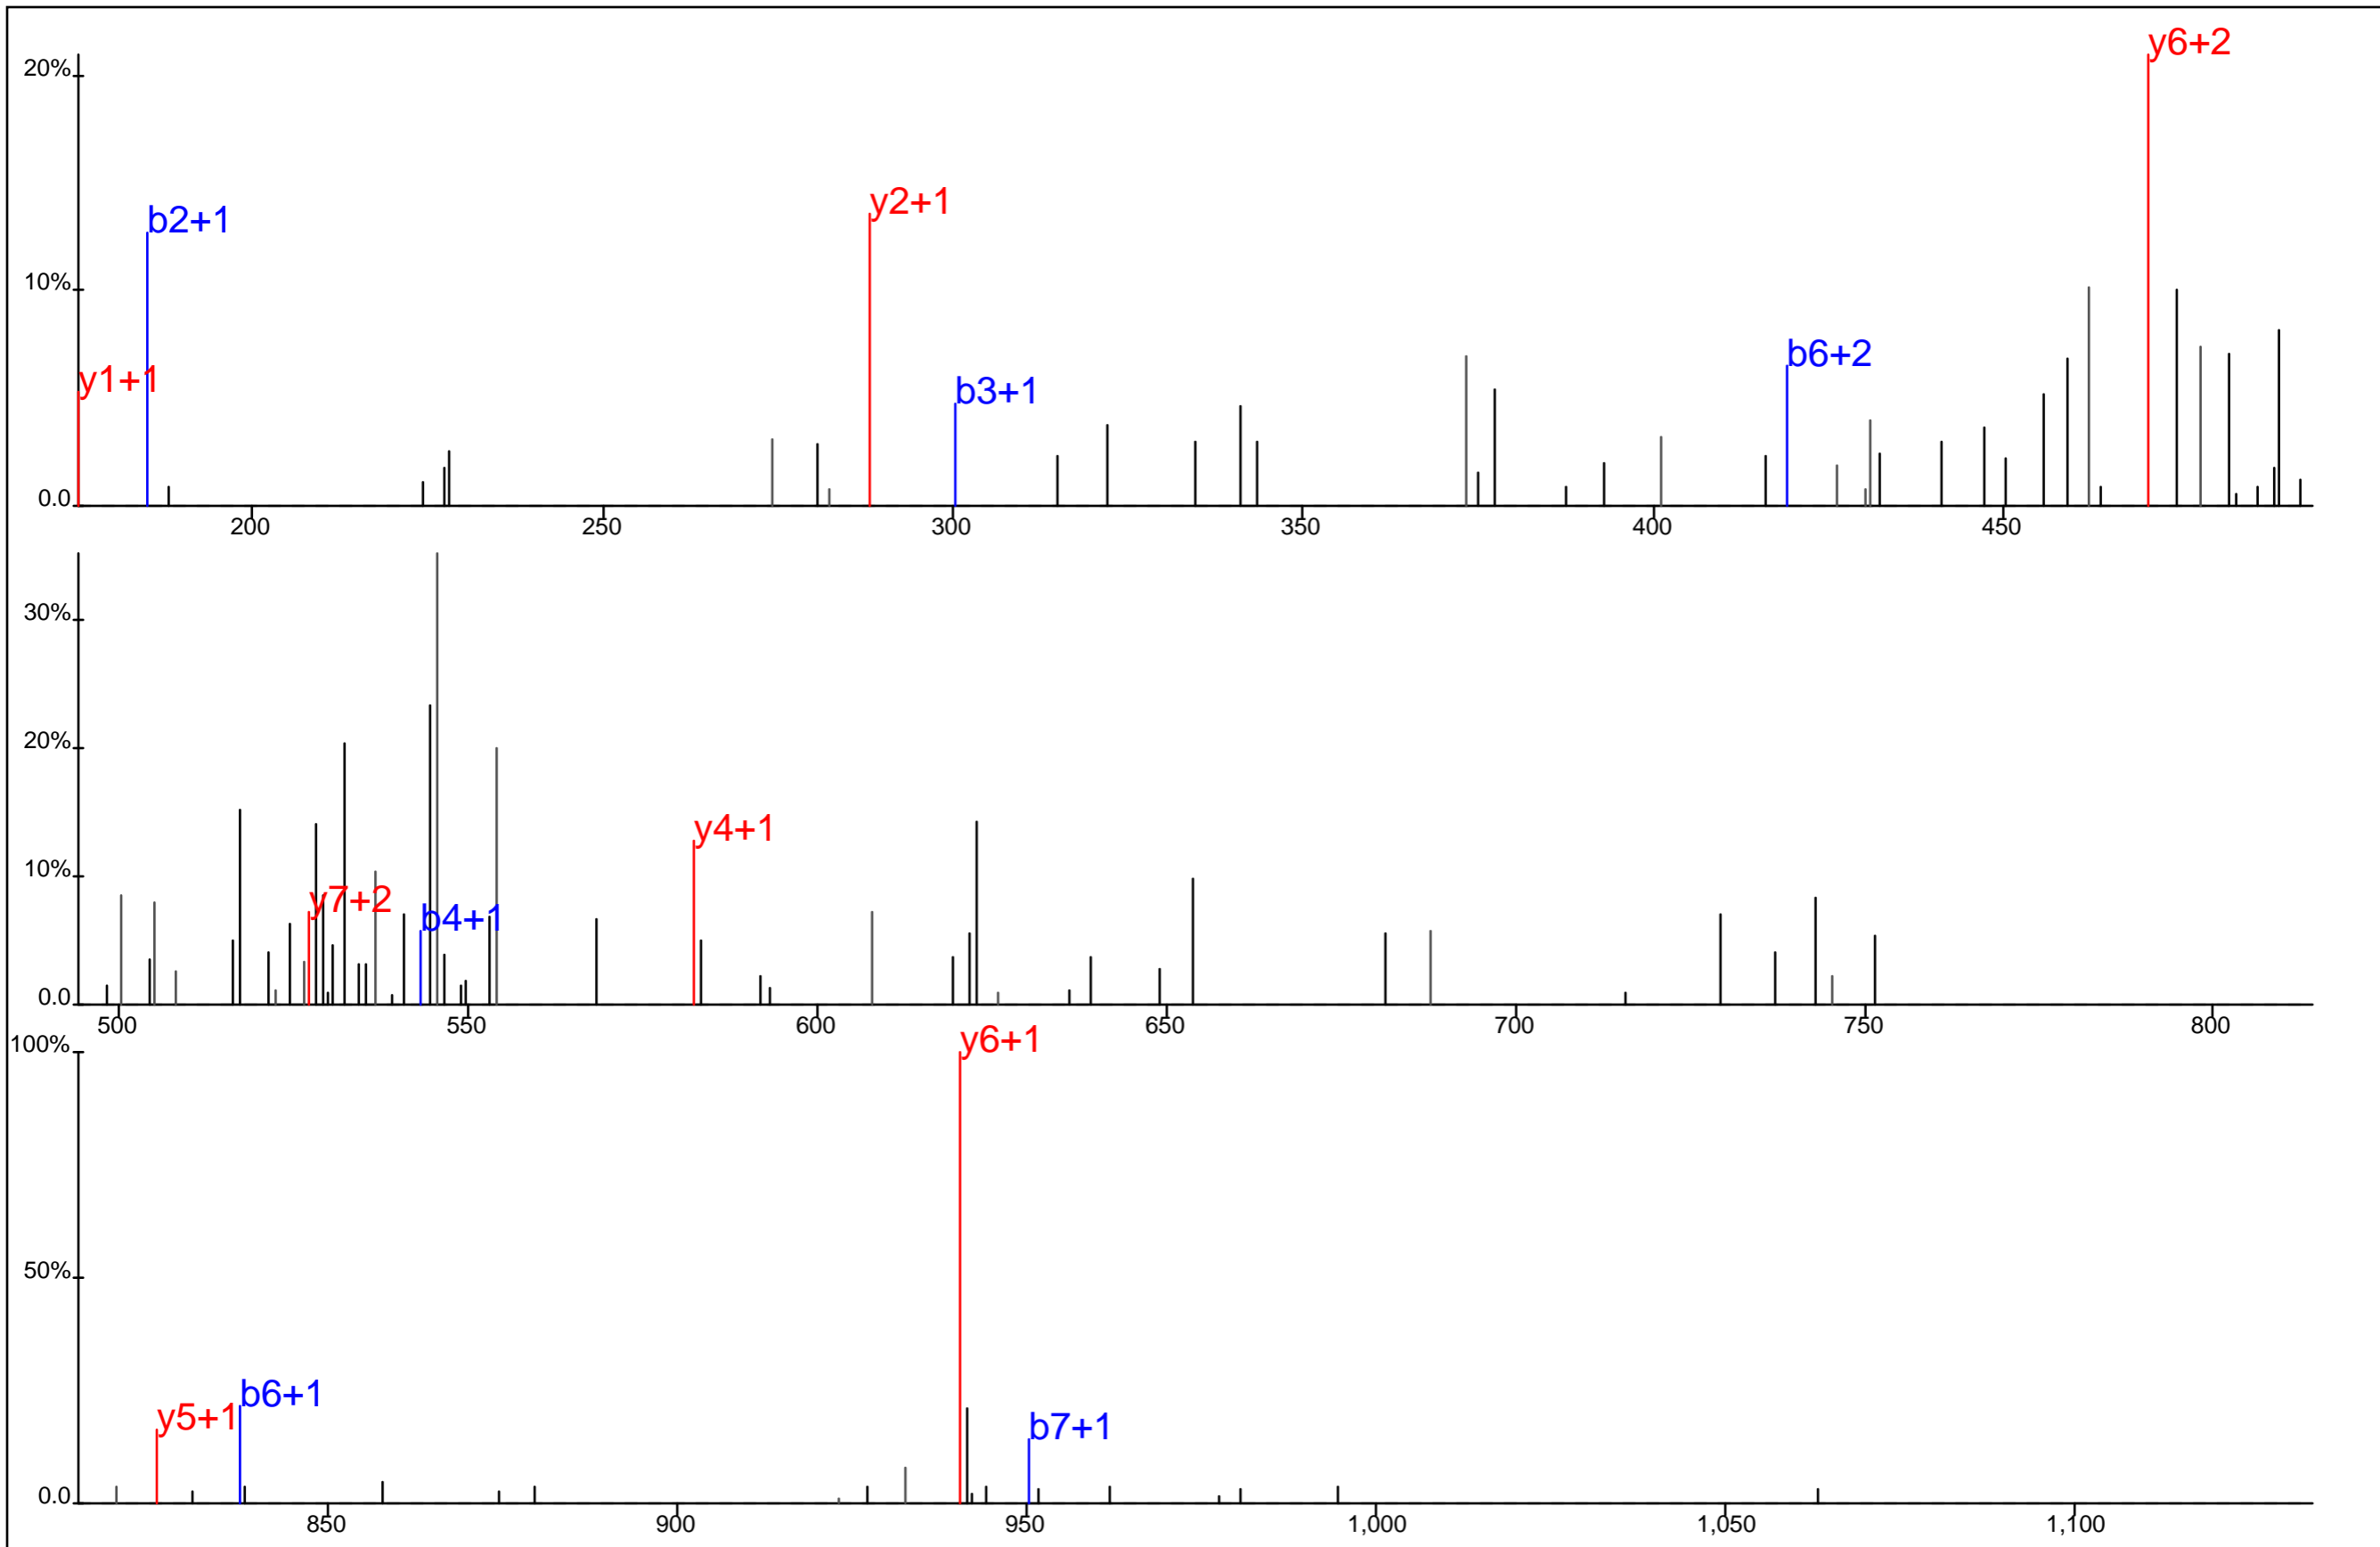

■ □ ■ □ ■ □ ■ □  
 A L D Y\*Y M L R  
□ ■ □ ■ □ ■ □ ■

Protein Name: Talin  
 gi Accession: 81175200  
 Precursor Mass: 562.7481+2  
 Delta Mass: 3.884 ppm  
 XCorr: 27.86

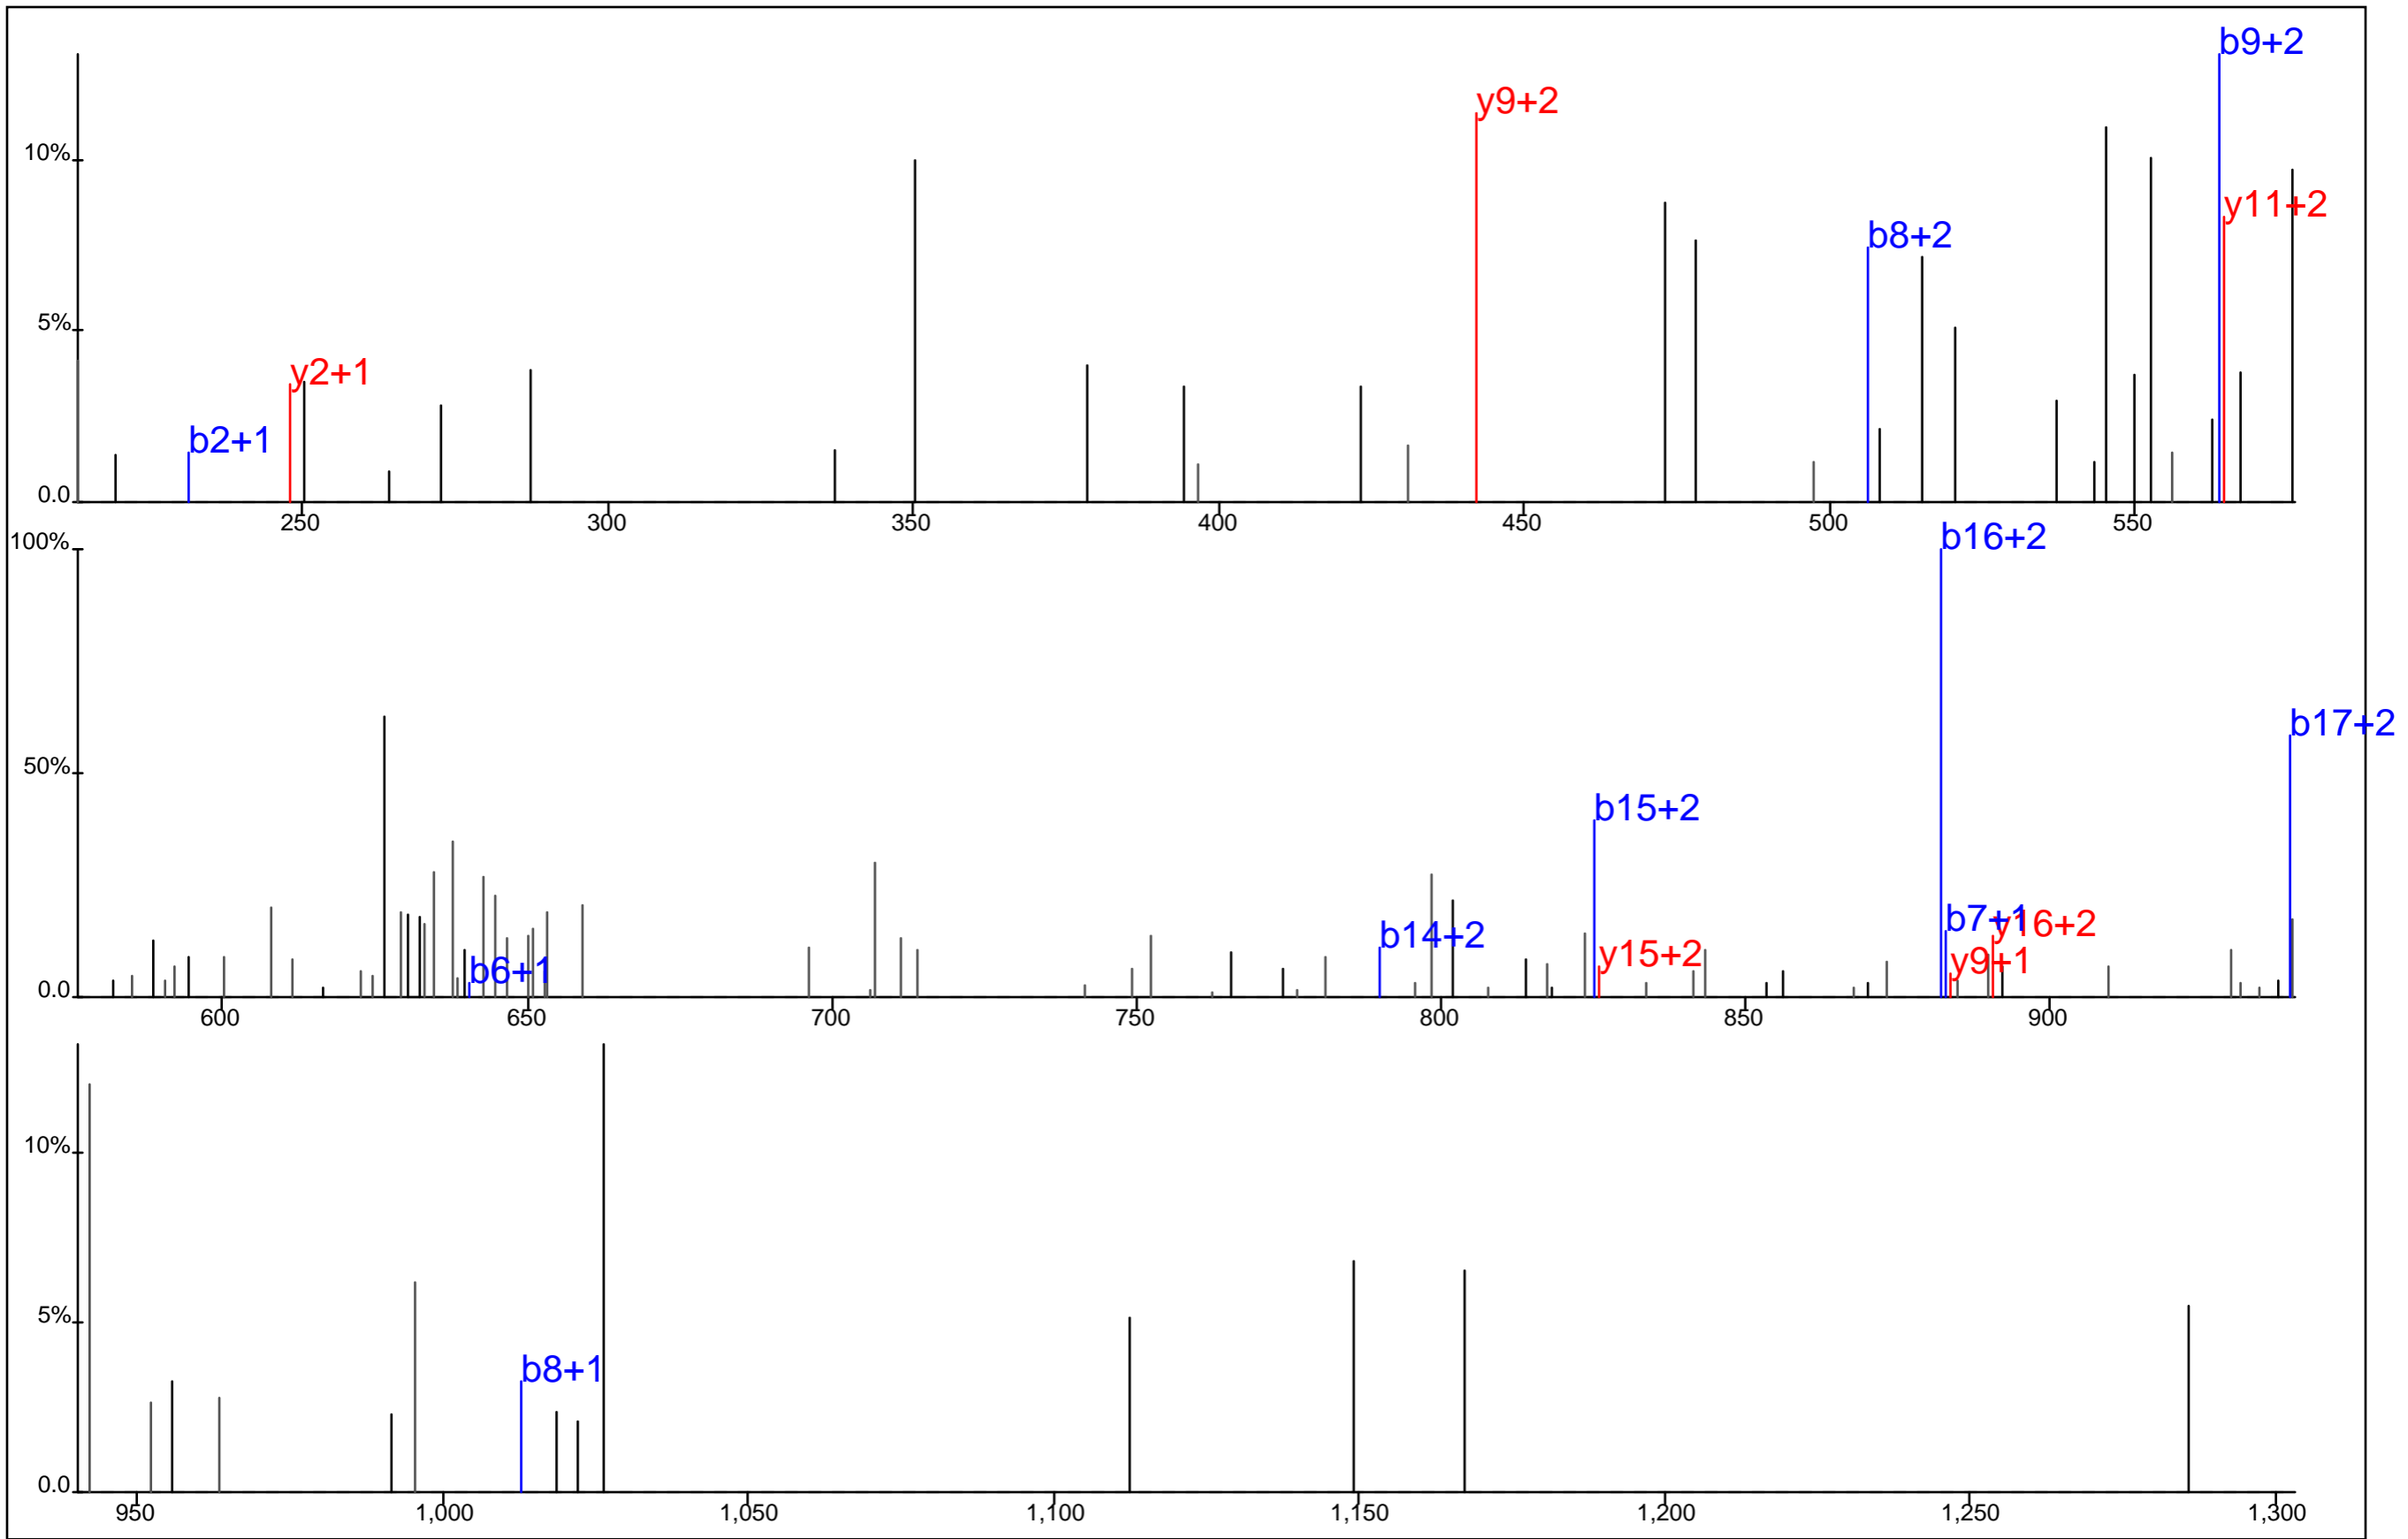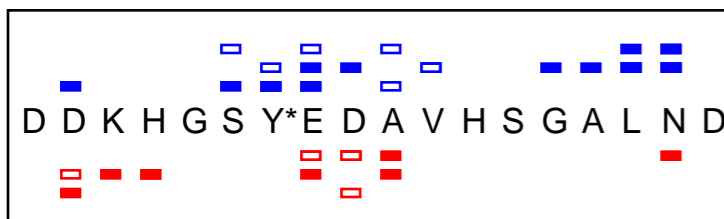

Protein Name: T Complex 1  
 gi Accession: 57863257  
 Precursor Mass: 670.6034+3  
 Delta Mass: 4.164 ppm  
 XCorr: 11.56

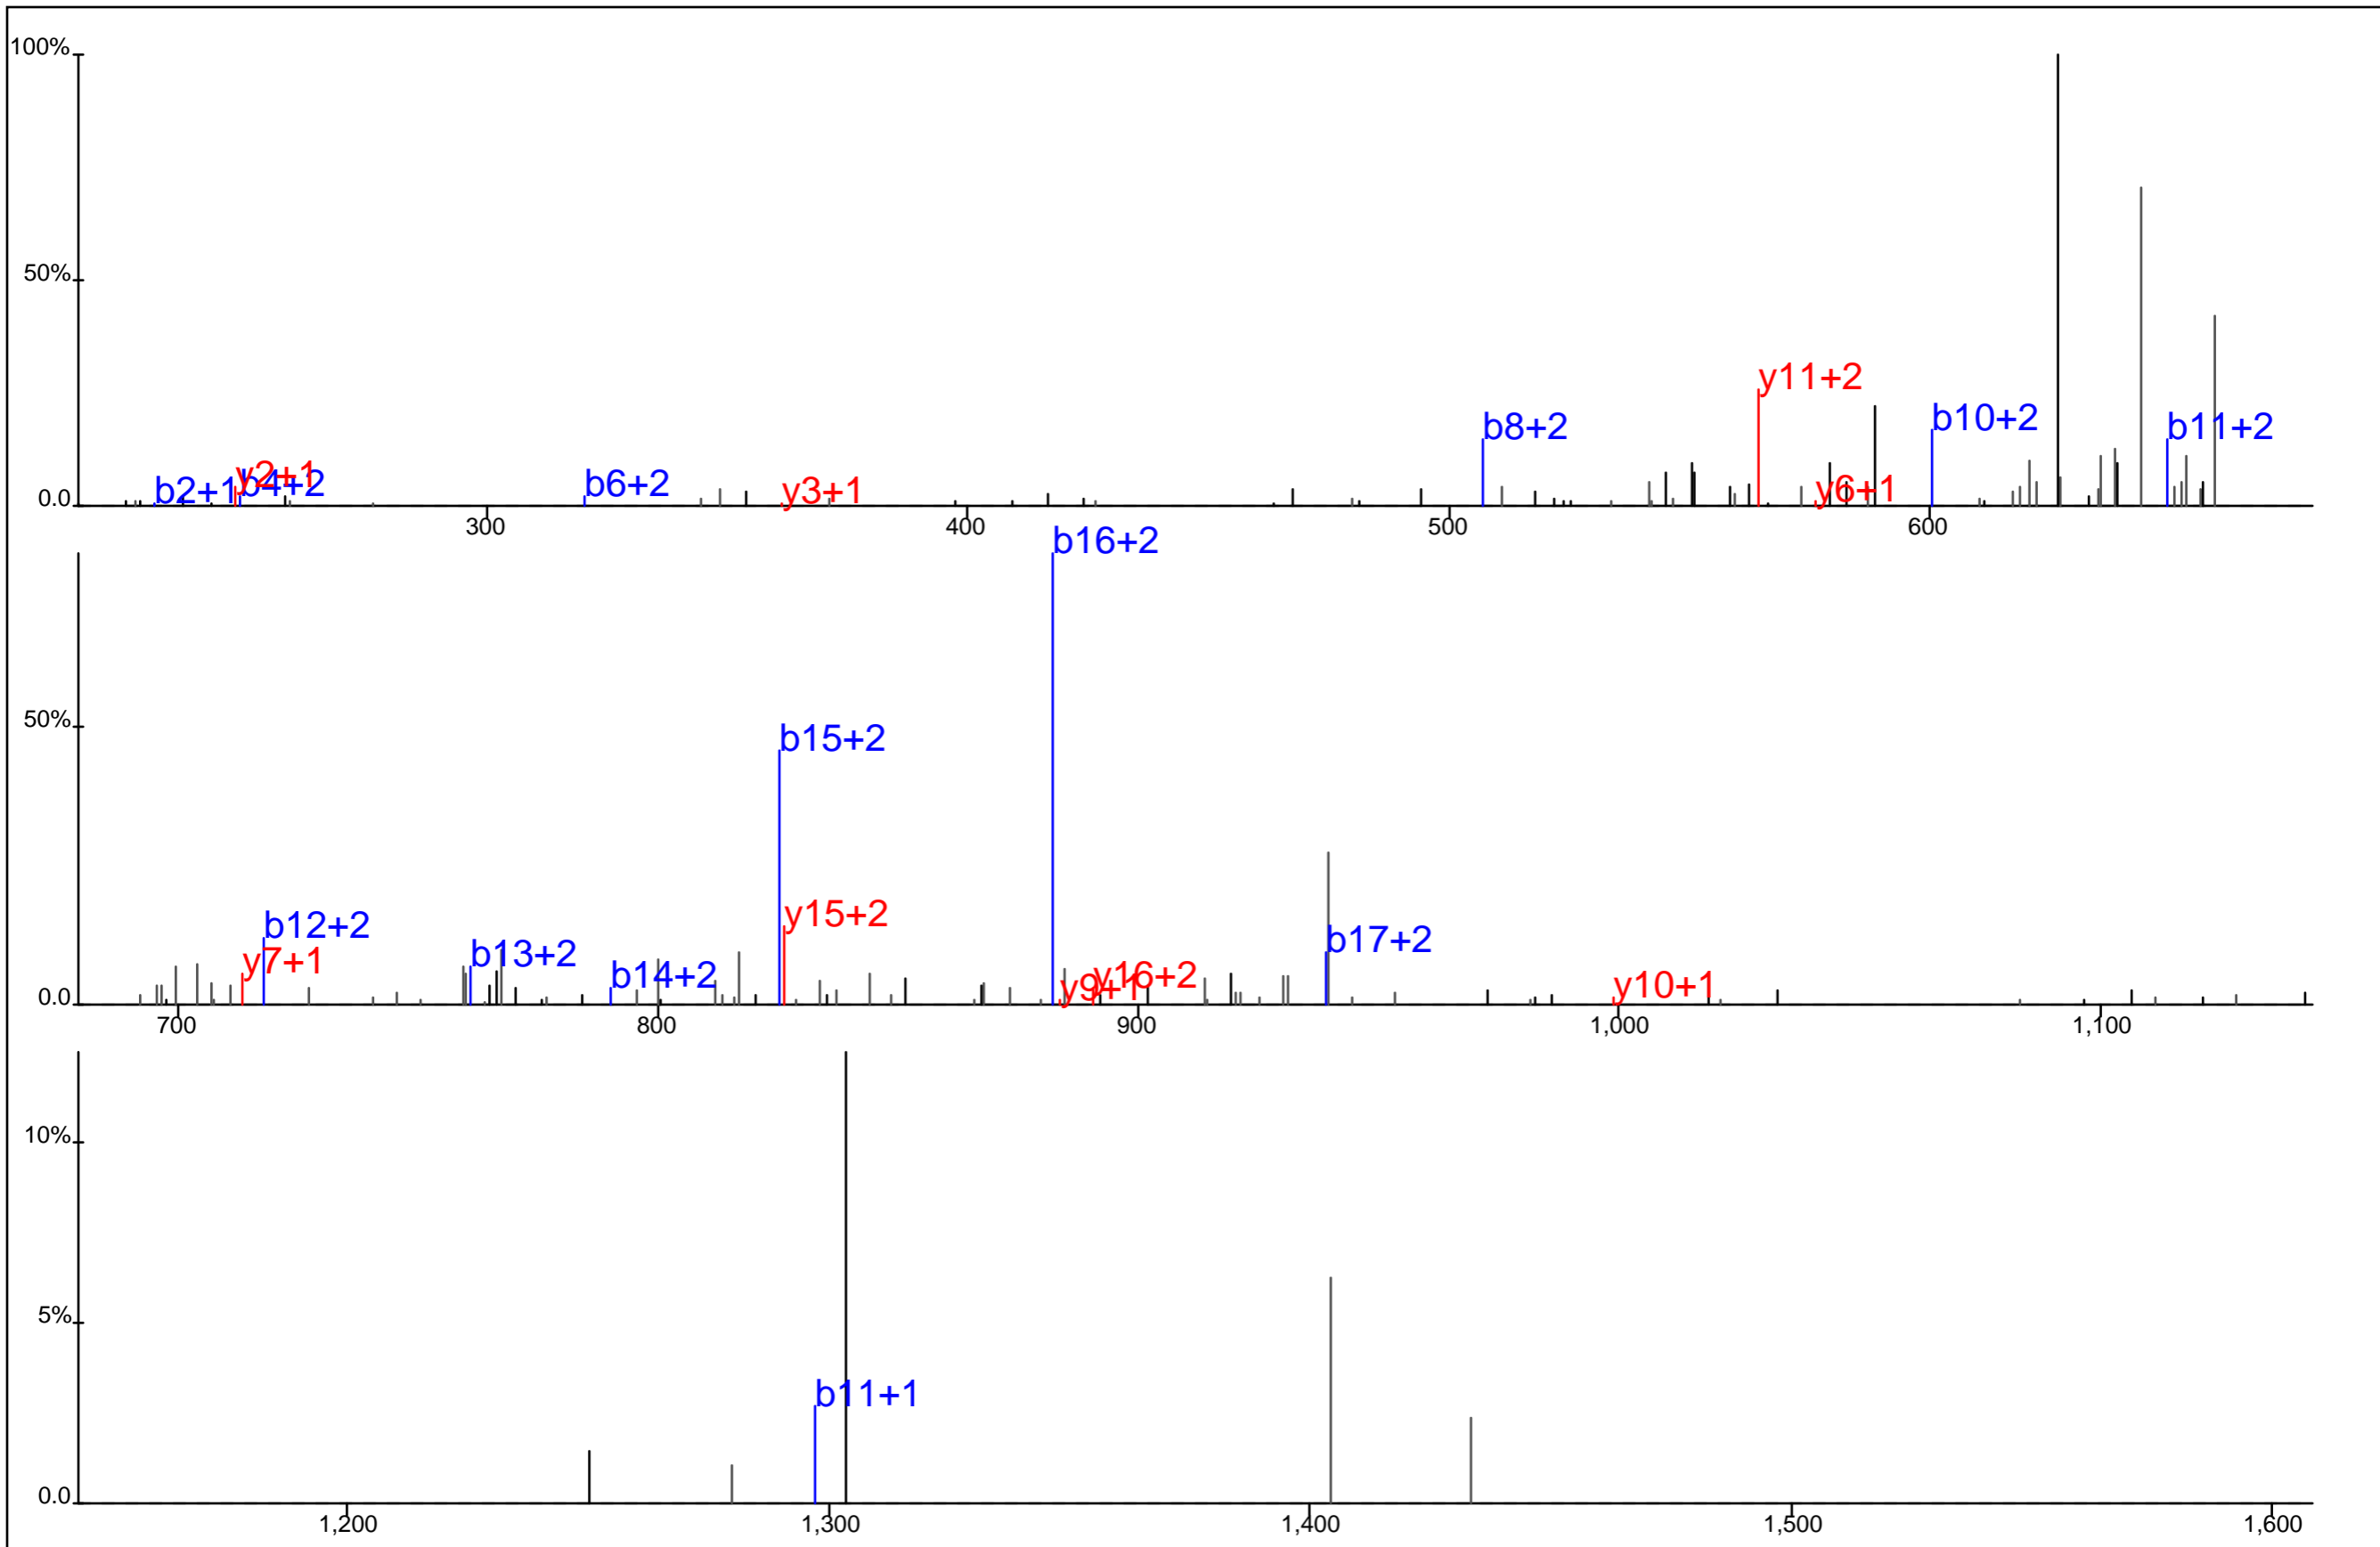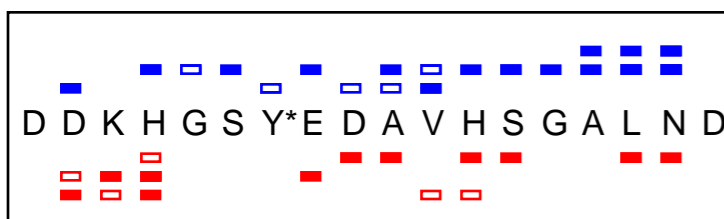

Protein Name: T Complex 1  
 gi Accession: 57863257  
 Precursor Mass: 670.6026+3  
 Delta Mass: 2.980 ppm  
 XCorr: 29.23

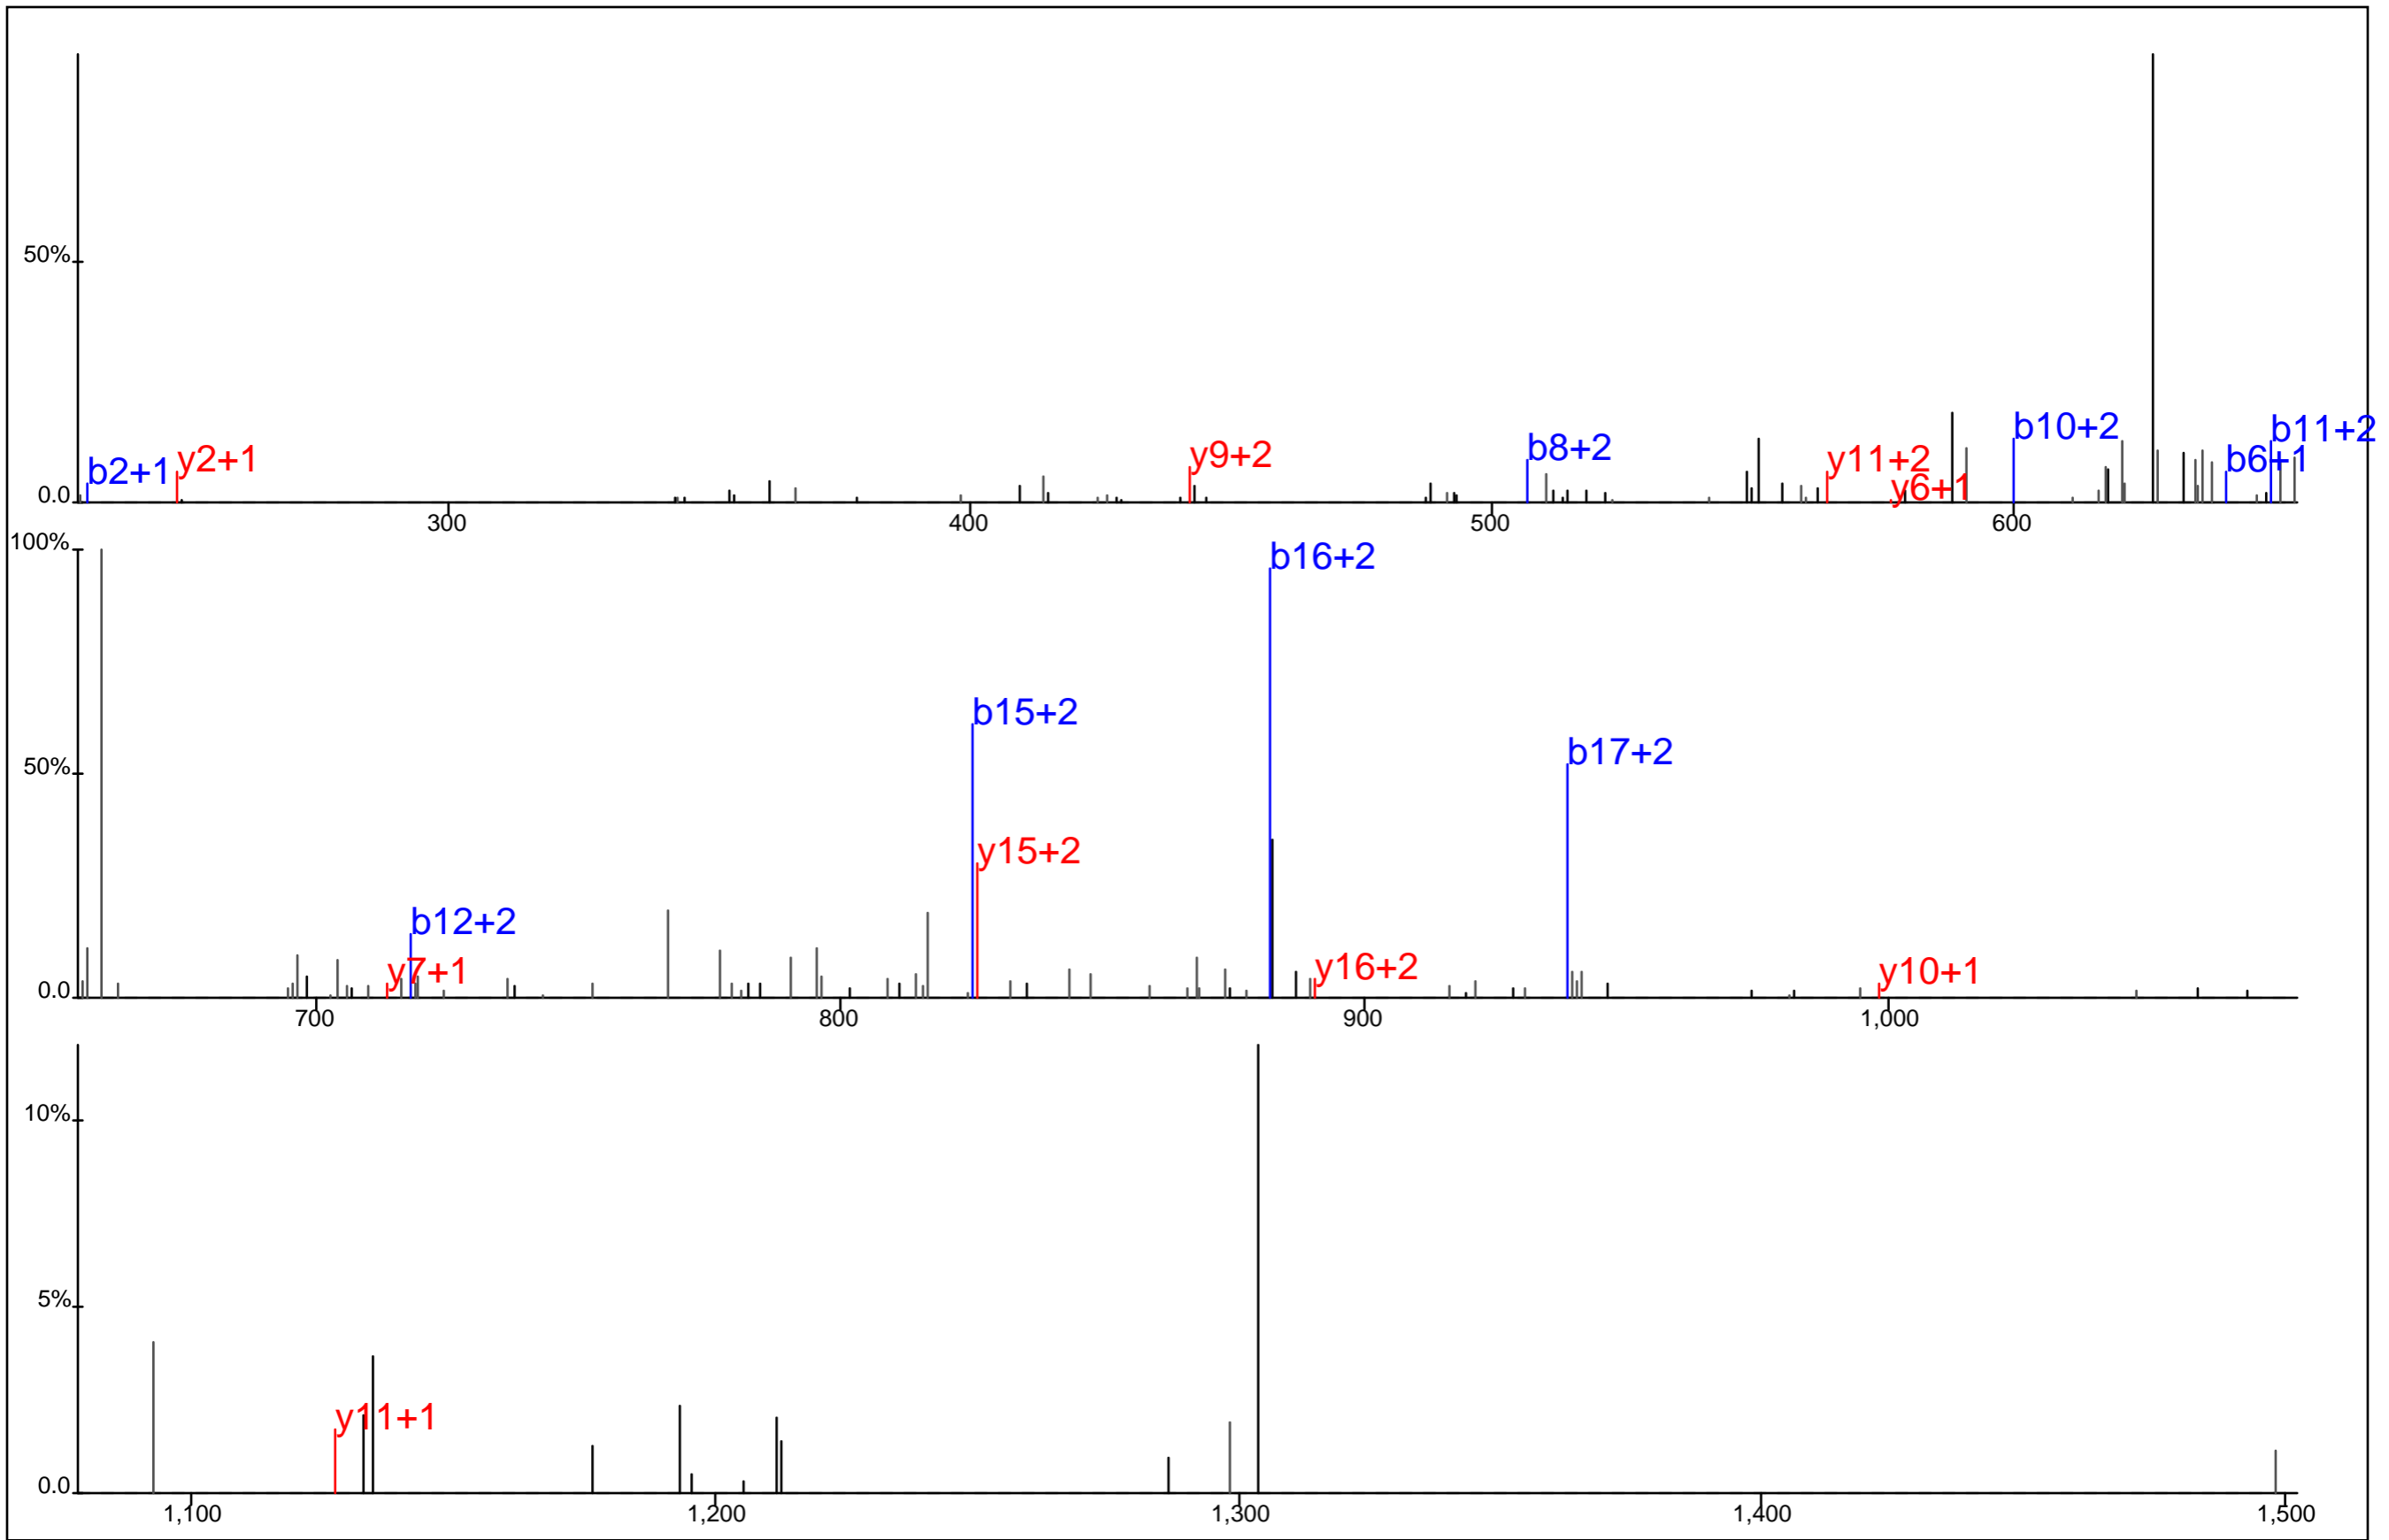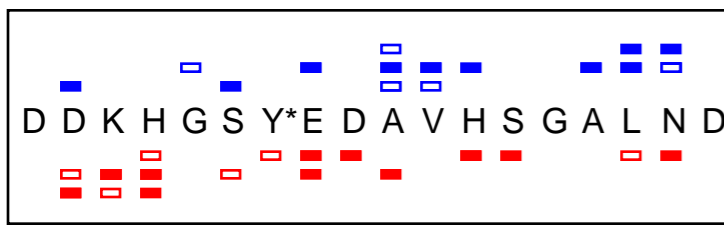

Protein Name: T Complex 1  
 gi Accession: 57863257  
 Precursor Mass: 670.6042+3  
 Delta Mass: 5.437 ppm  
 XCorr: 40.37

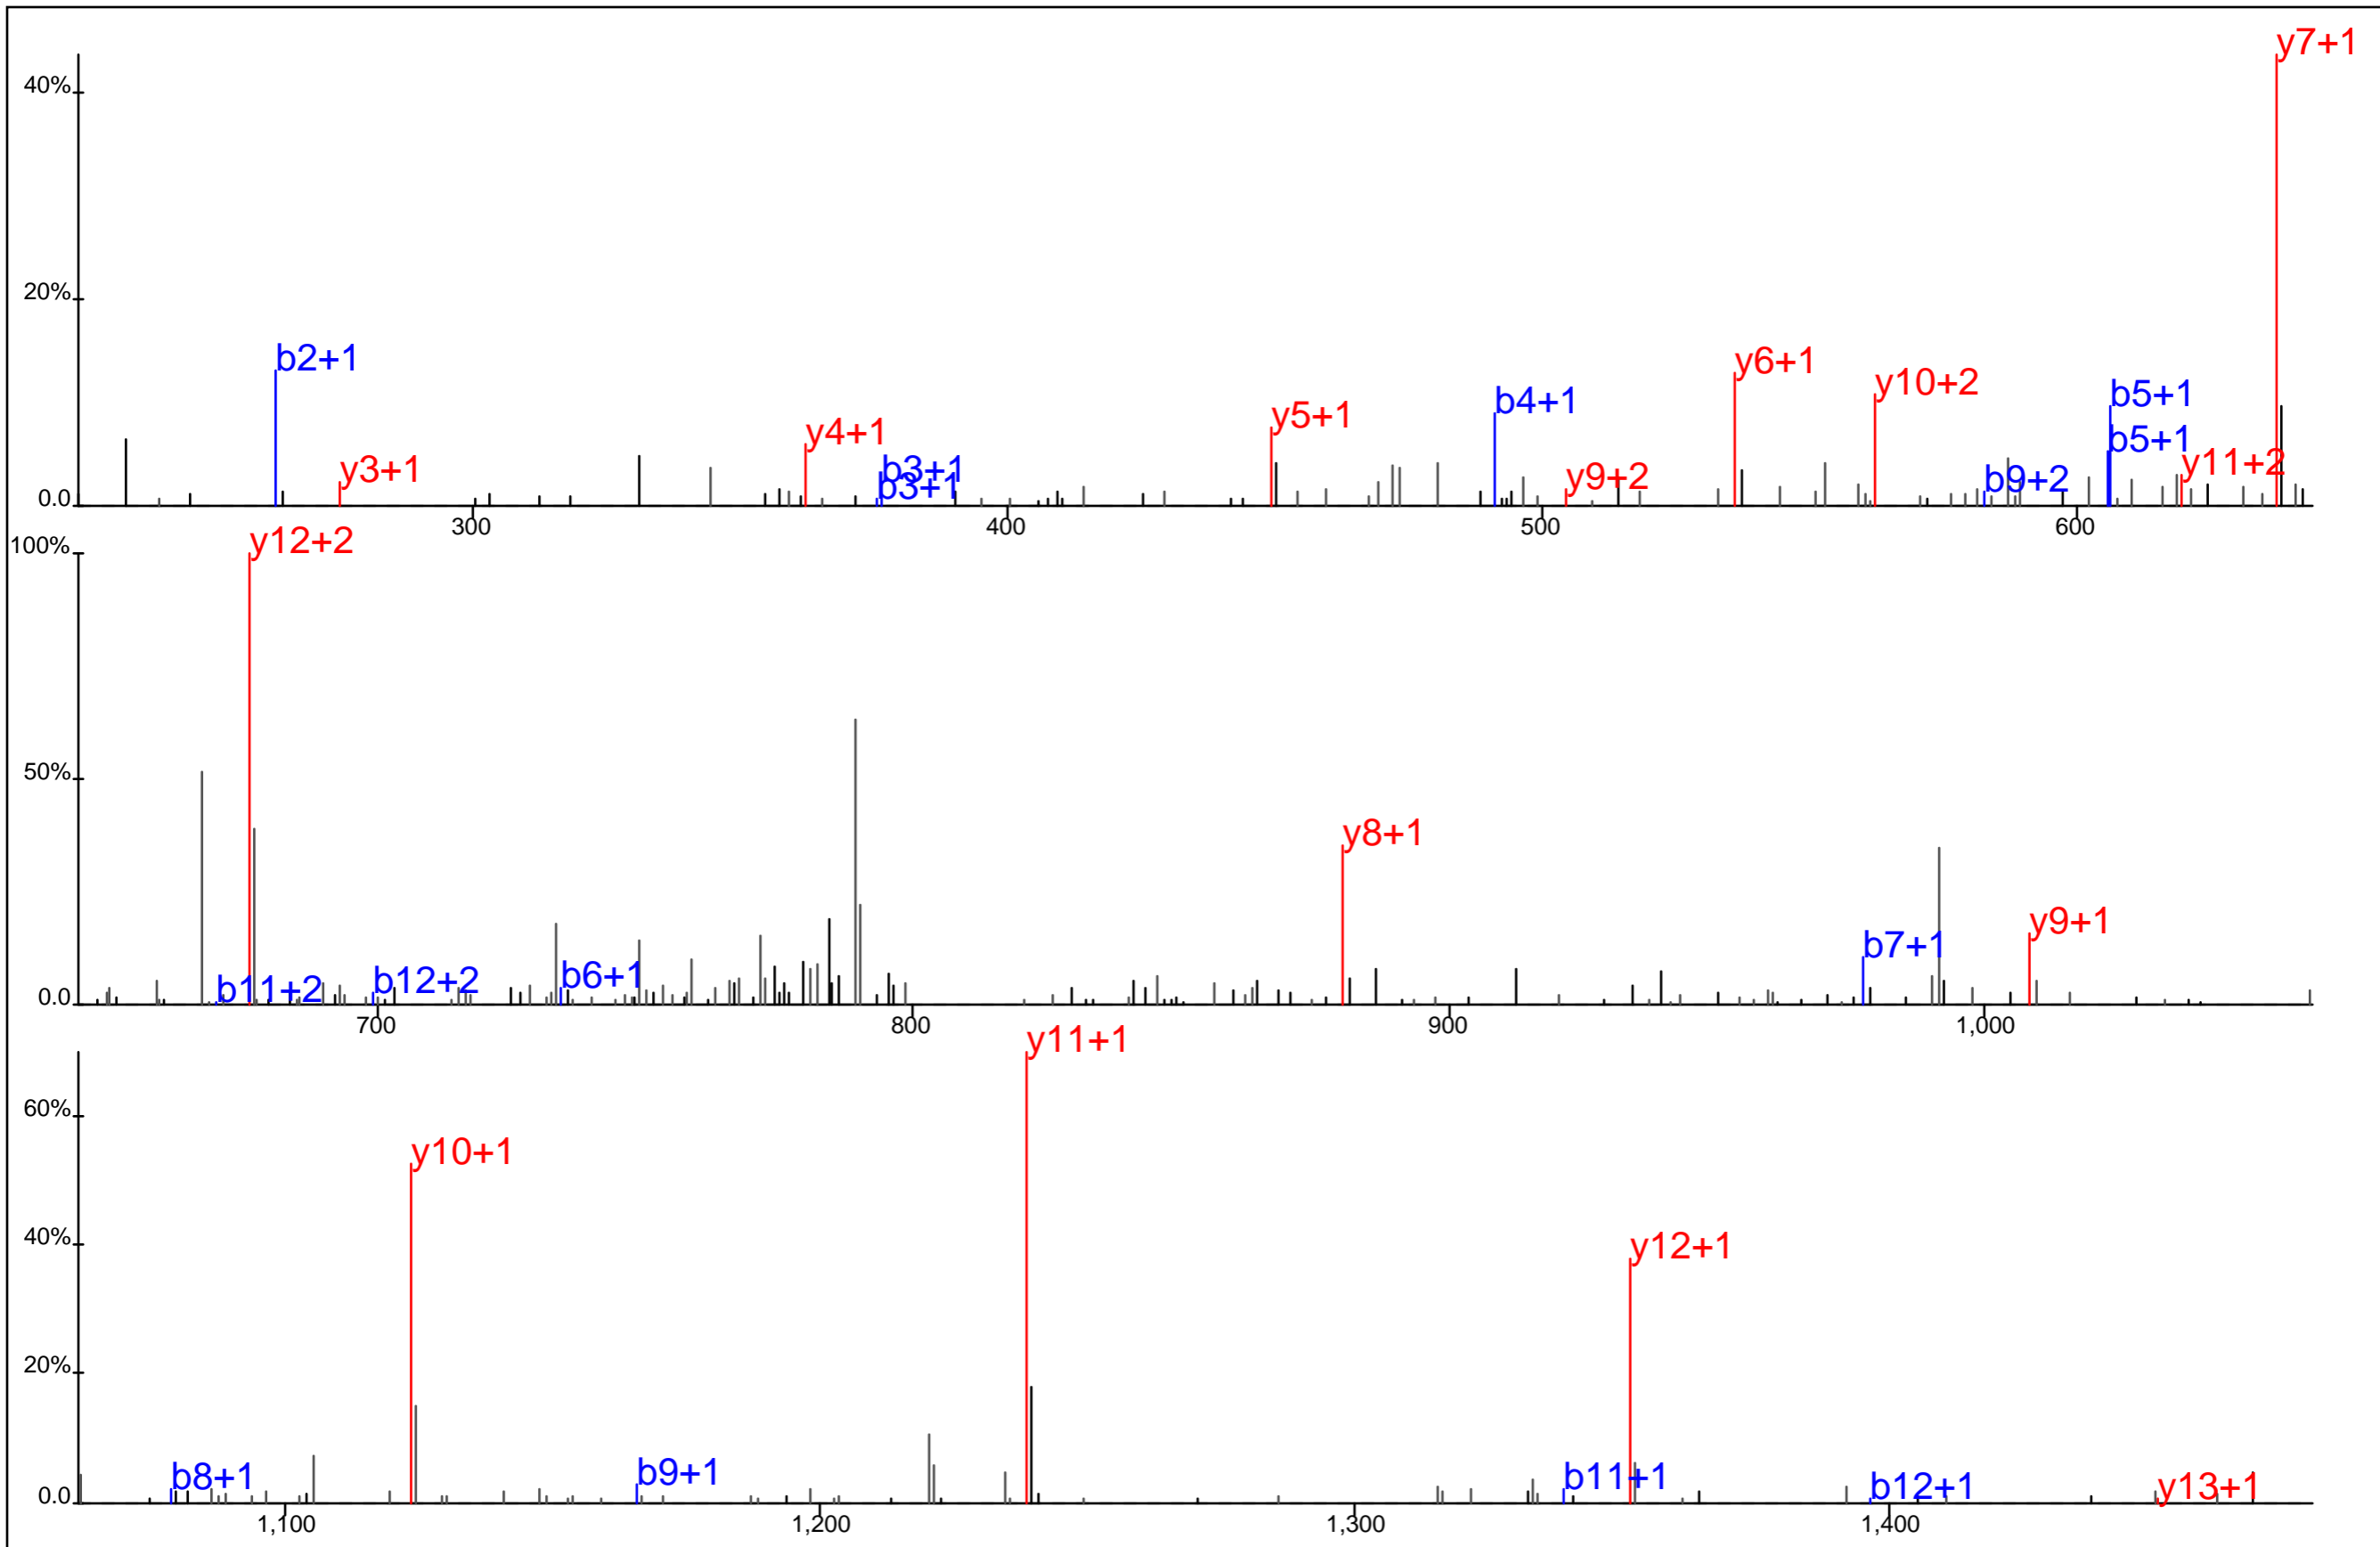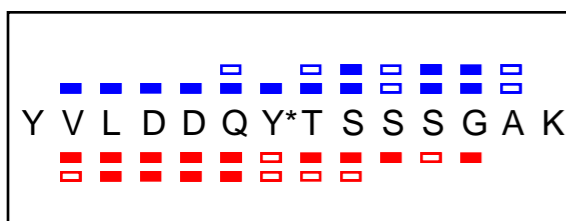

Protein Name: Tec  
 gi Accession: 130977759  
 Precursor Mass: 807.3484+2  
 Delta Mass: 10.187 ppm  
 XCorr: 76.82

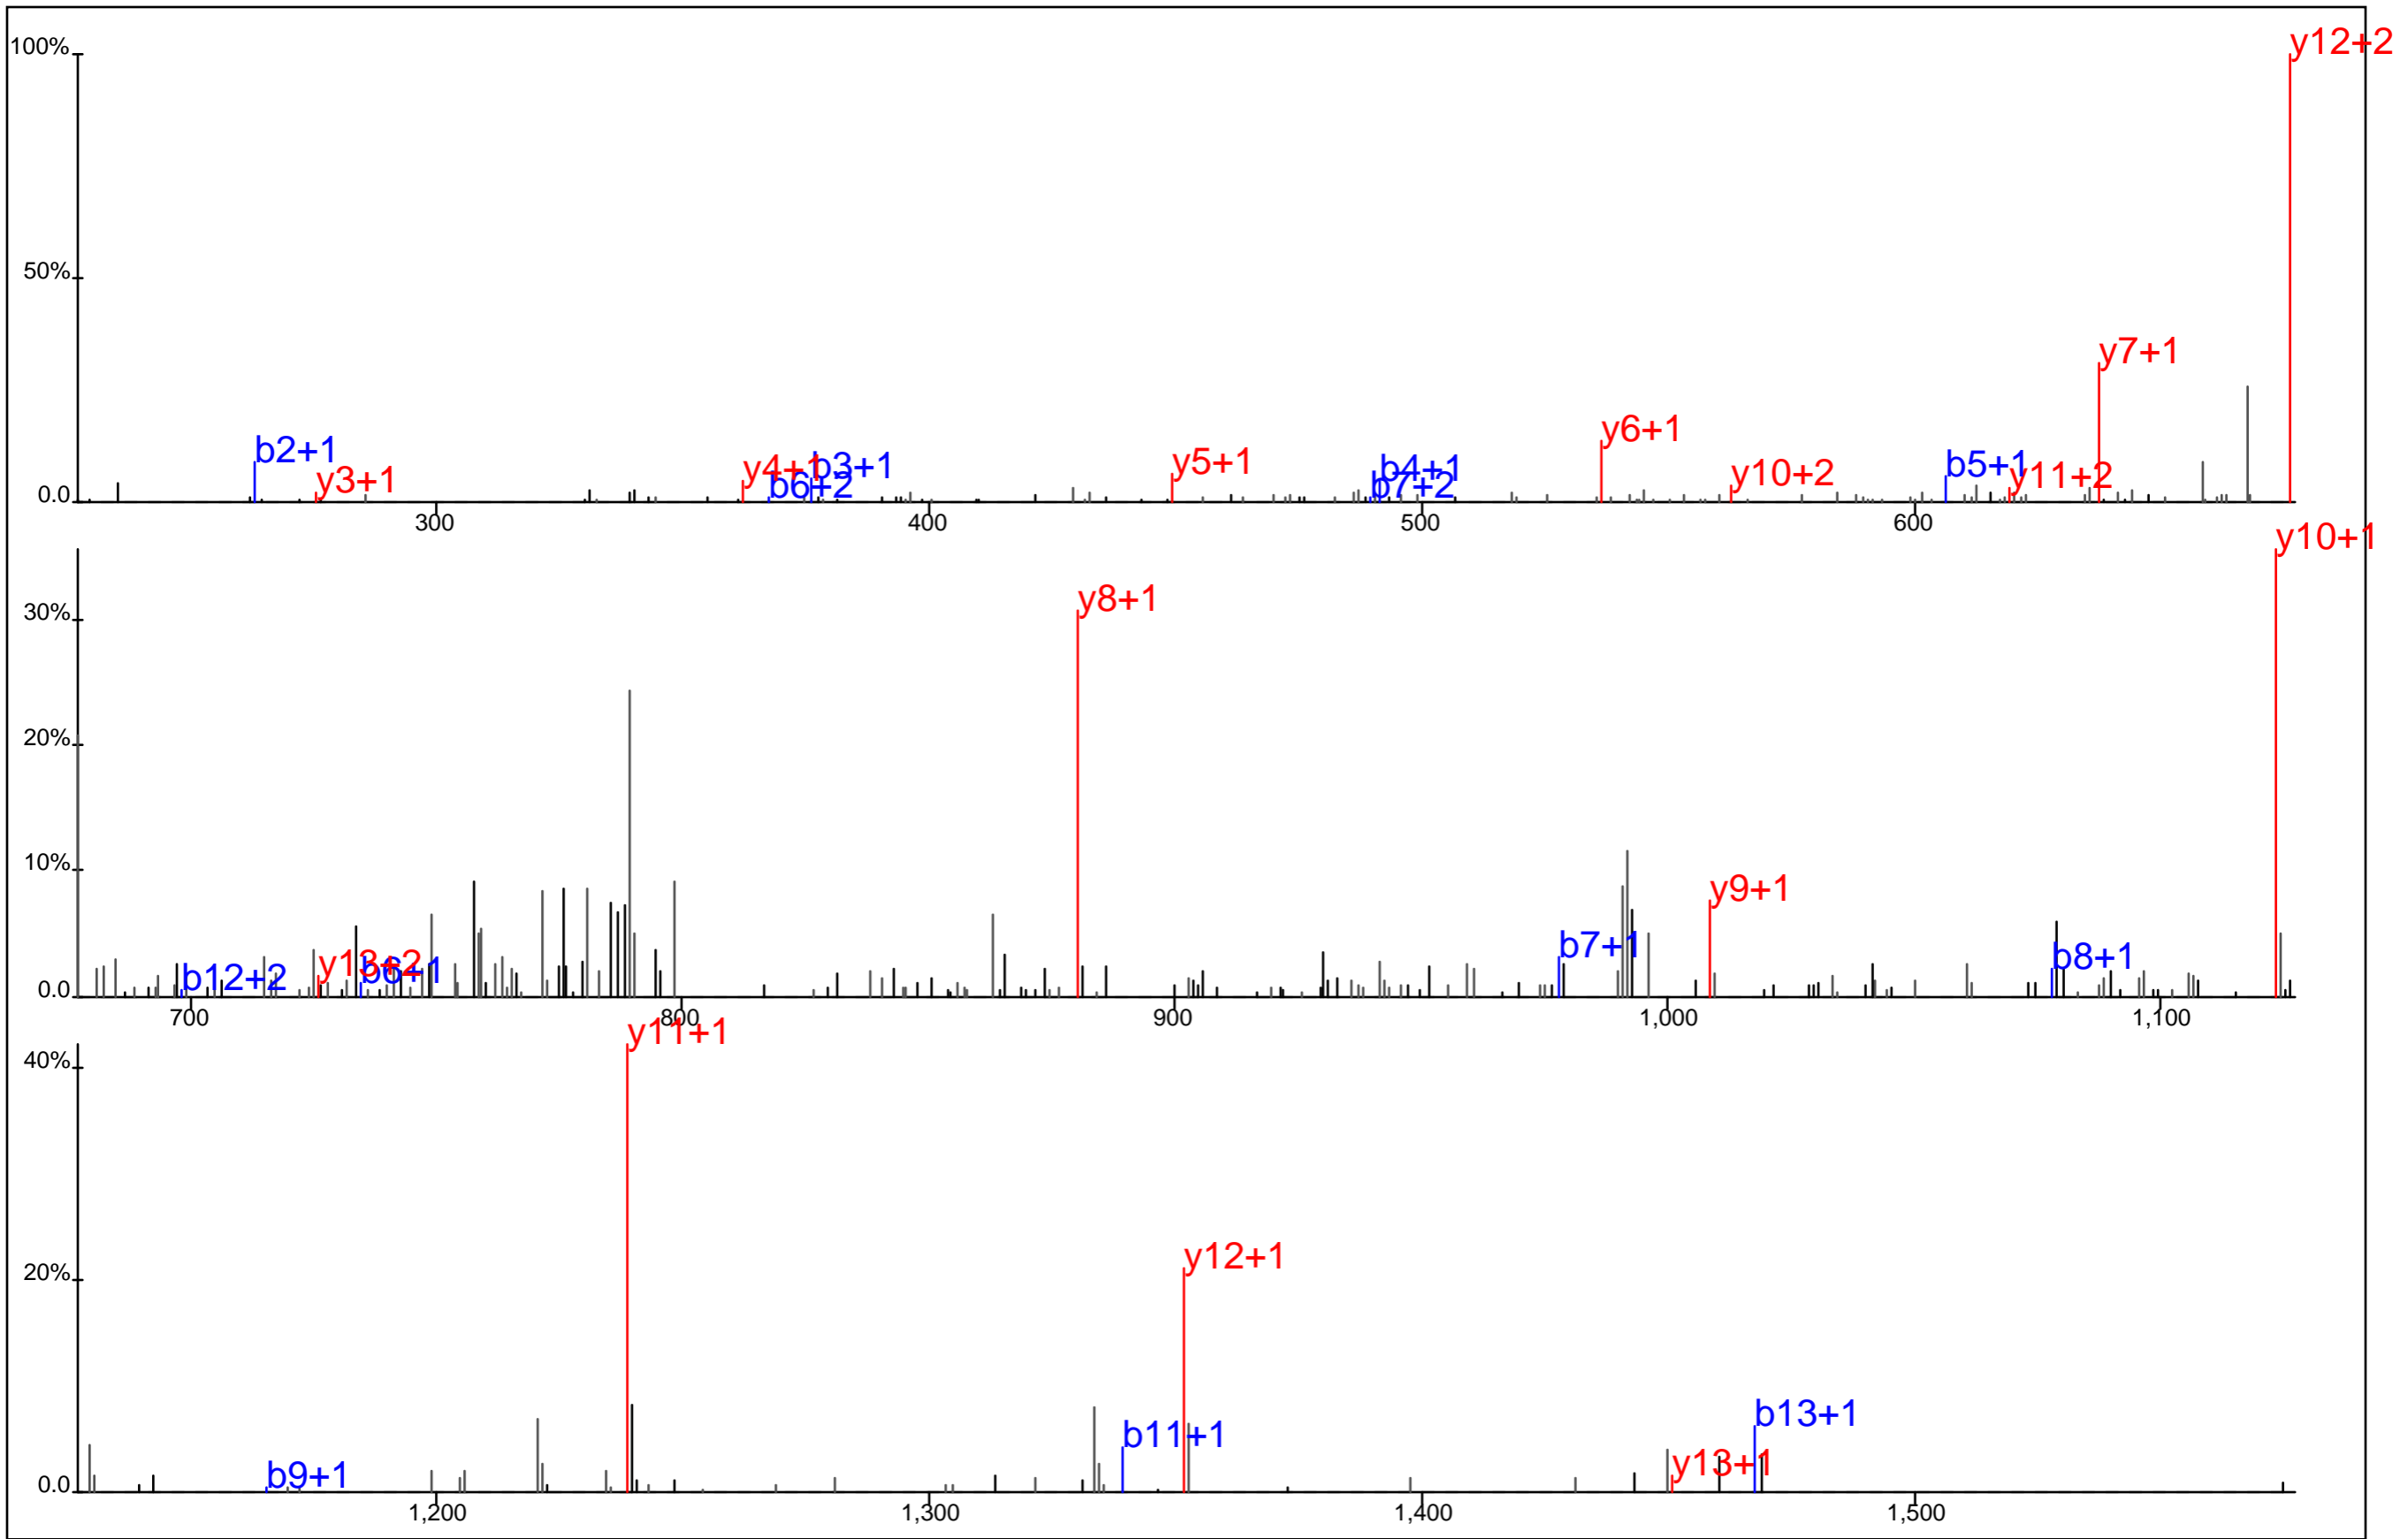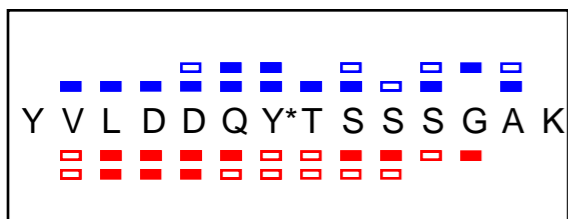

Protein Name: Tec  
 gi Accession: 130977759  
 Precursor Mass: 807.3434+2  
 Delta Mass: 4.058 ppm  
 XCorr: 73.57

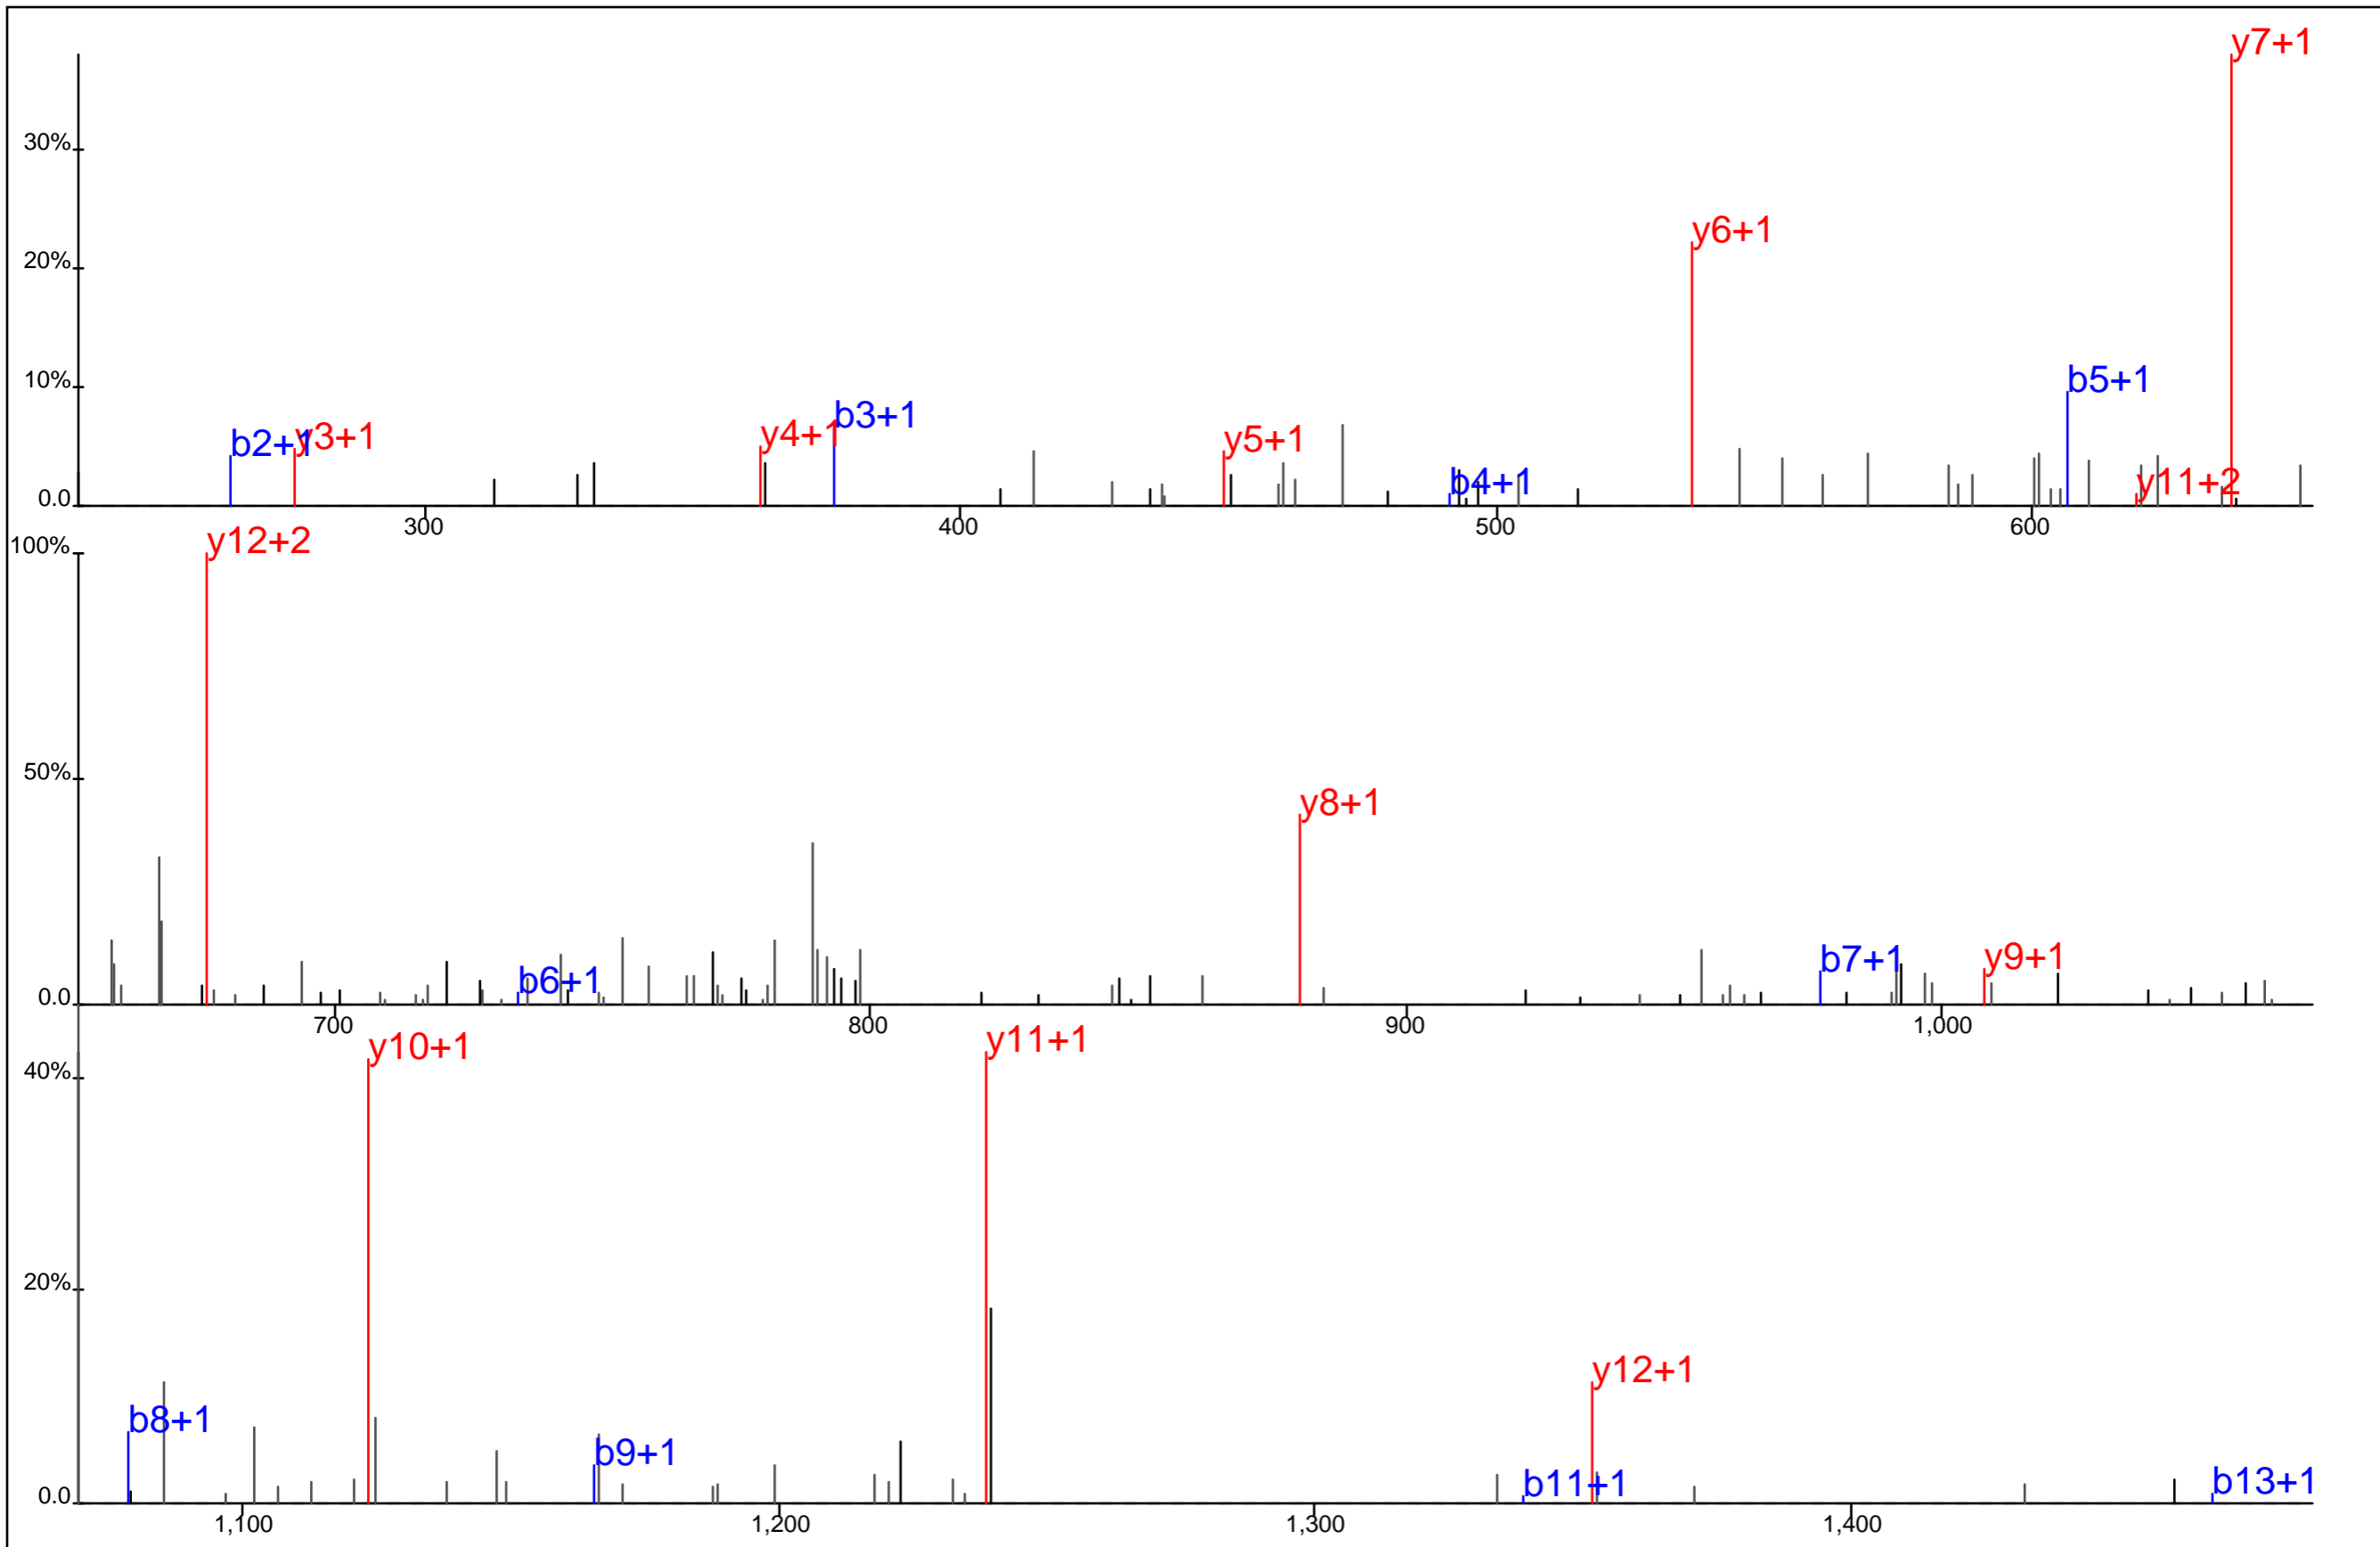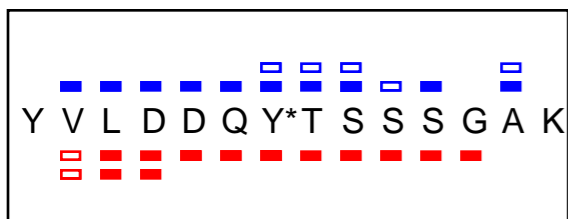

Protein Name: Tec  
 gi Accession: 130977759  
 Precursor Mass: 807.3425+2  
 Delta Mass: 2.849 ppm  
 XCorr: 57.57



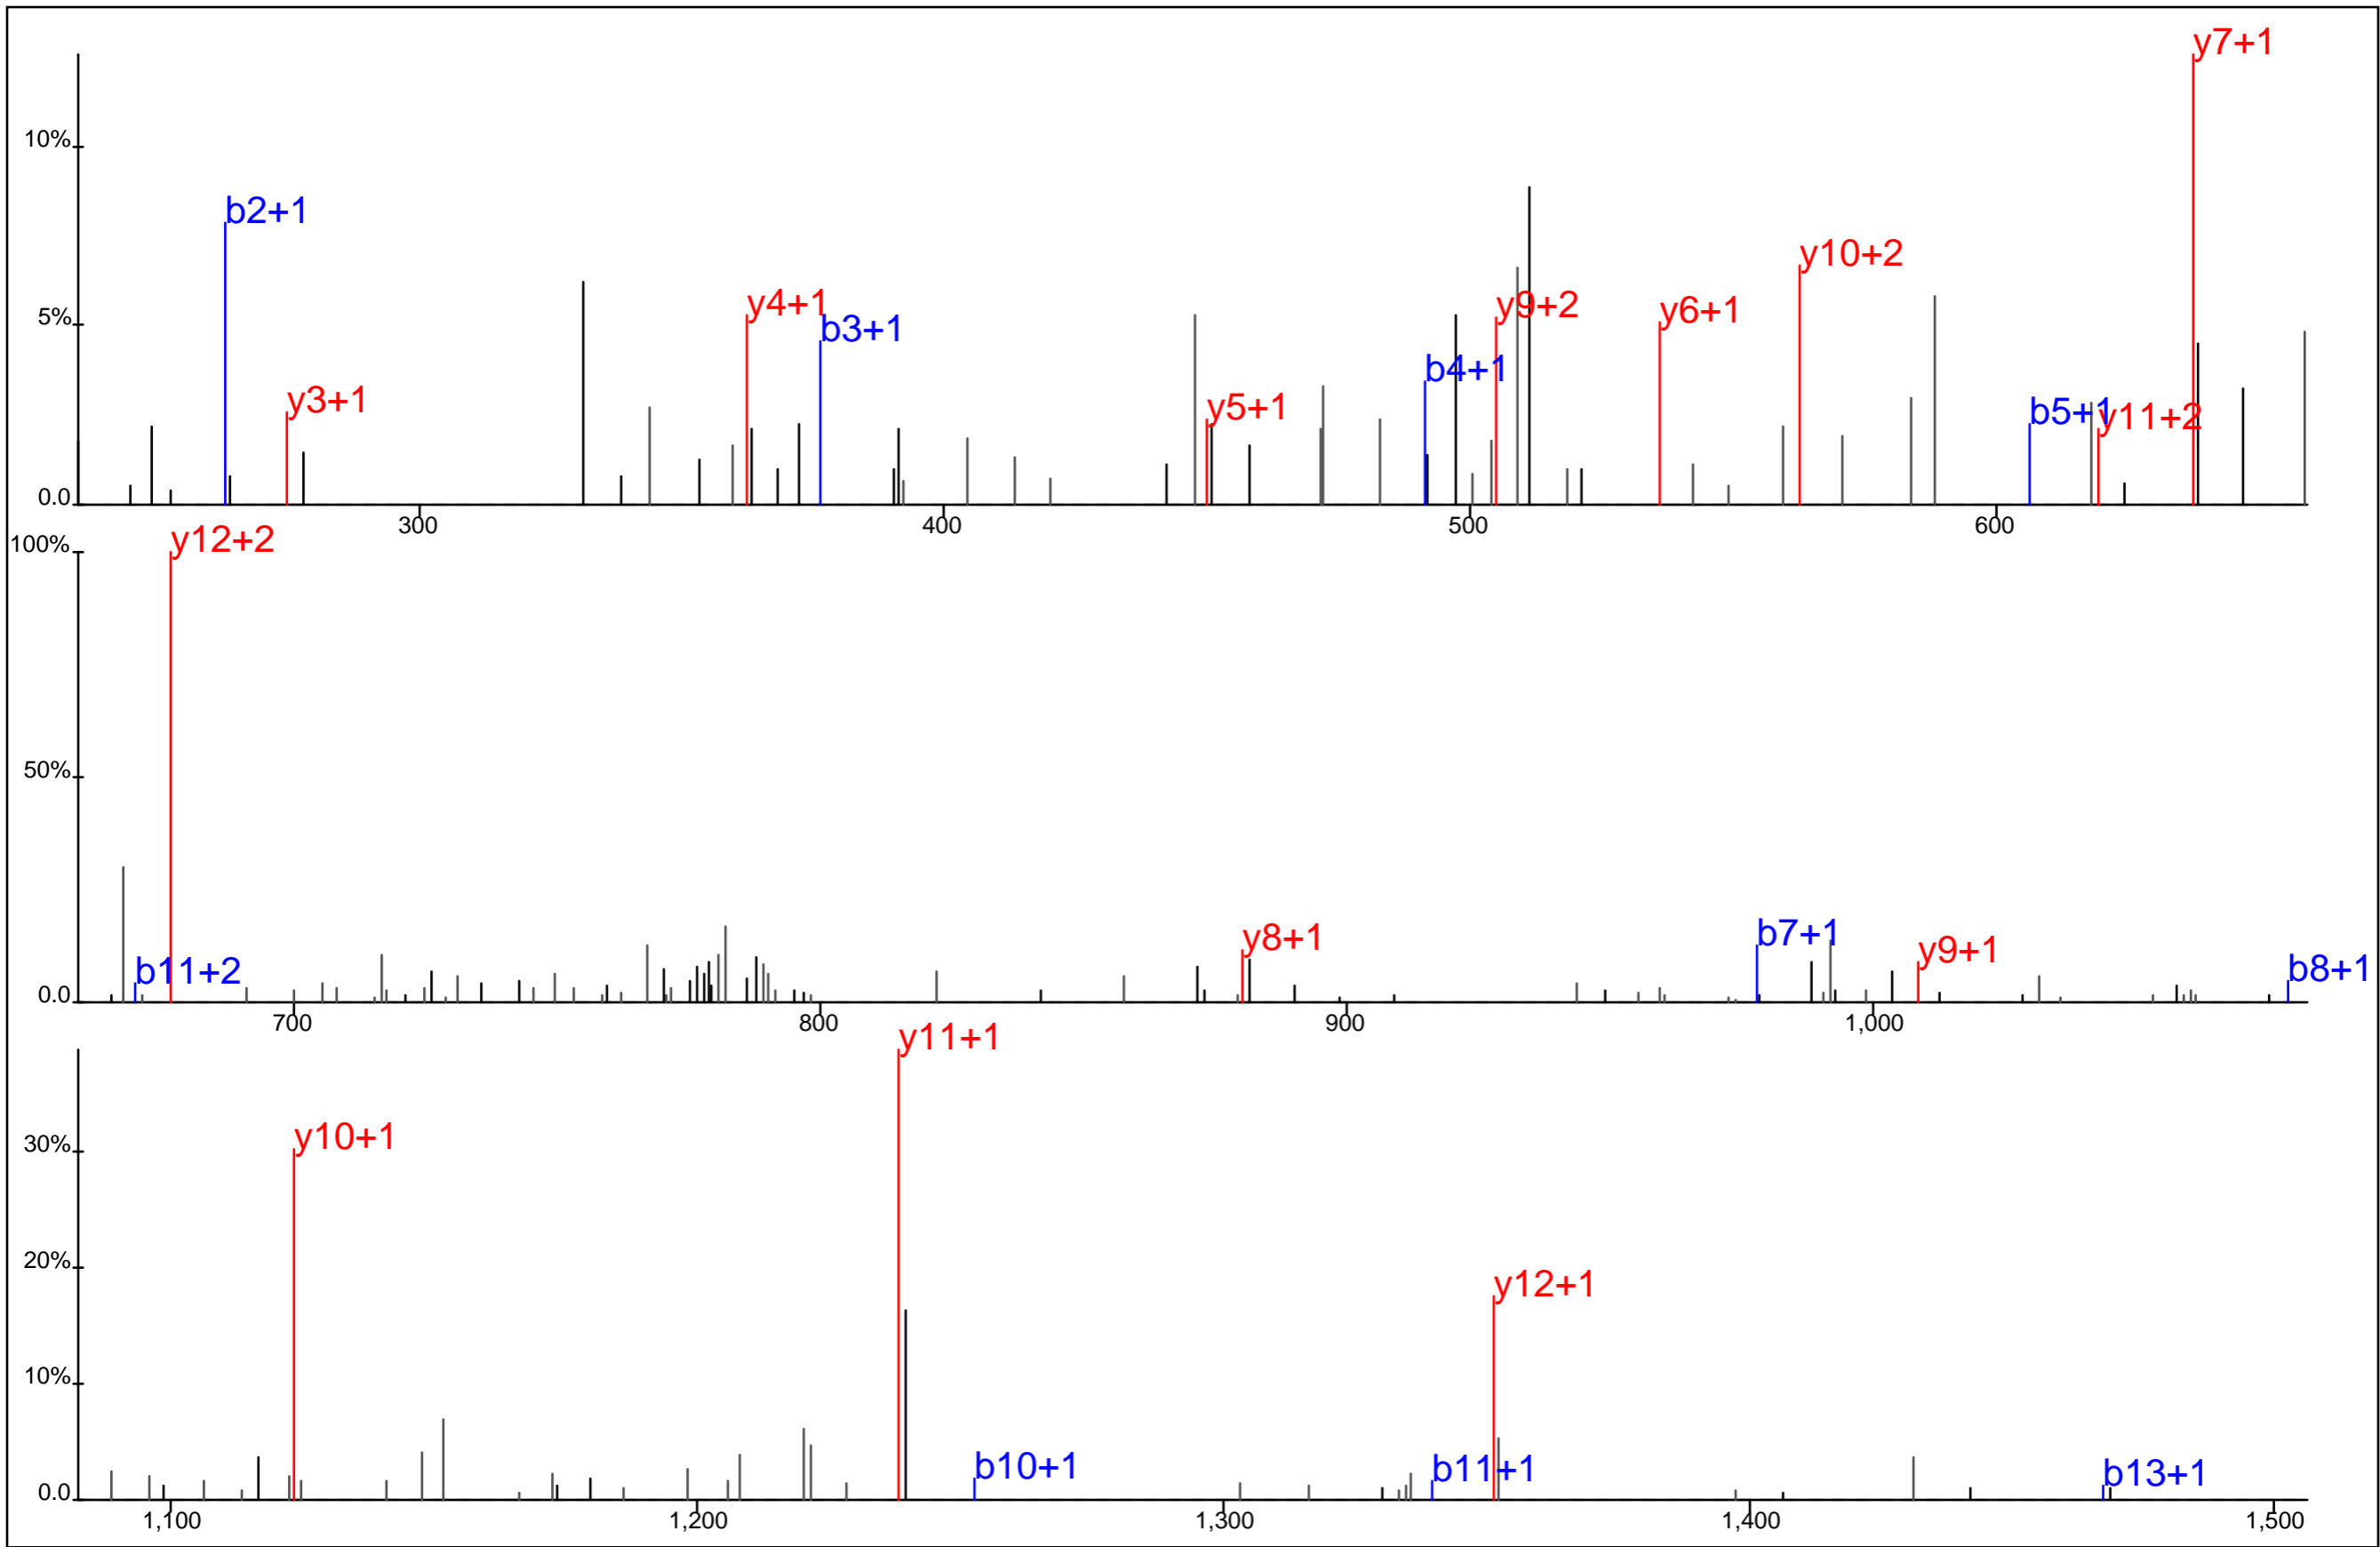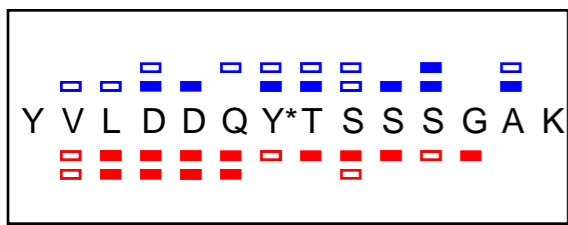

Protein Name: Tec  
 gi Accession: 130977759  
 Precursor Mass: 807.3444+2  
 Delta Mass: 5.272 ppm  
 XCorr: 55.86

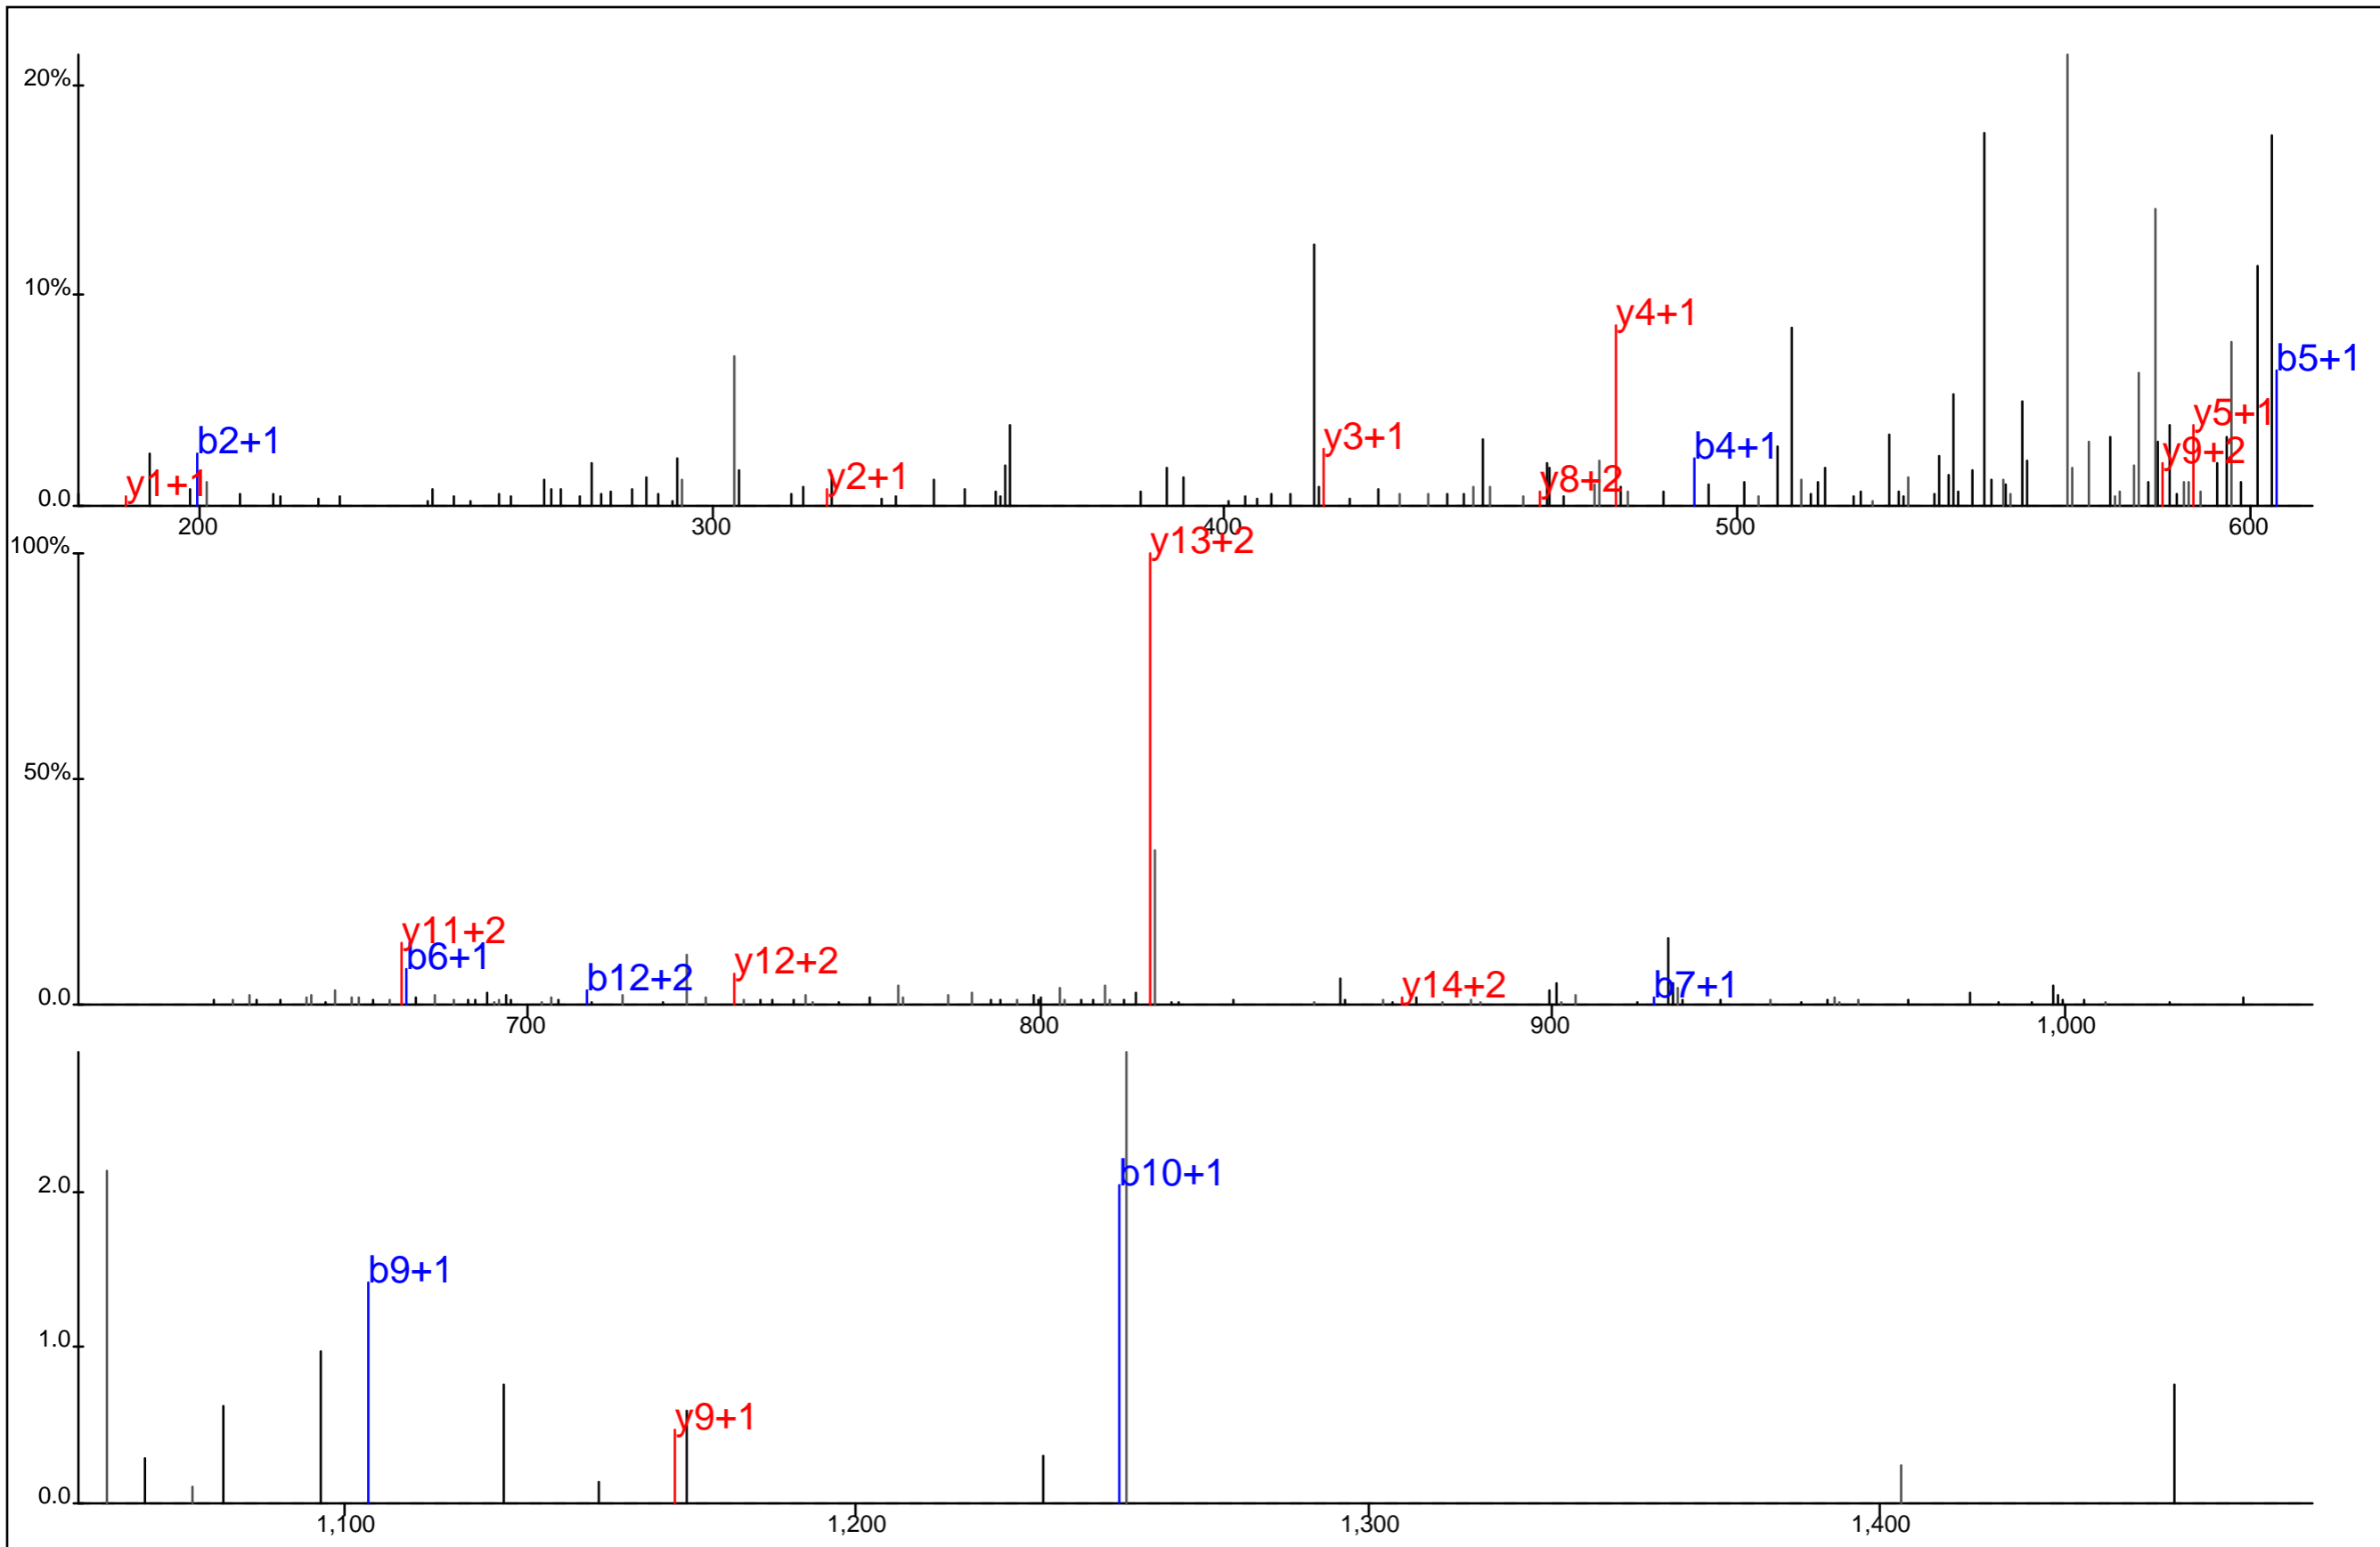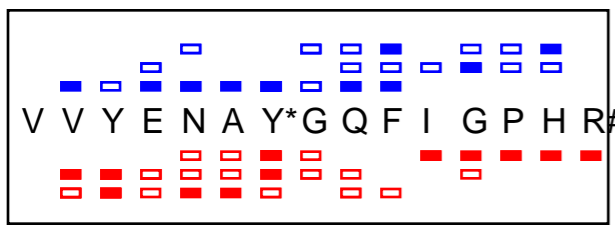

Protein Name: Thioredoxin reductase 1  
 gi Accession: 1843434  
 Precursor Mass: 613.9551+3  
 Delta Mass: 3.006 ppm  
 XCorr: 2.6309

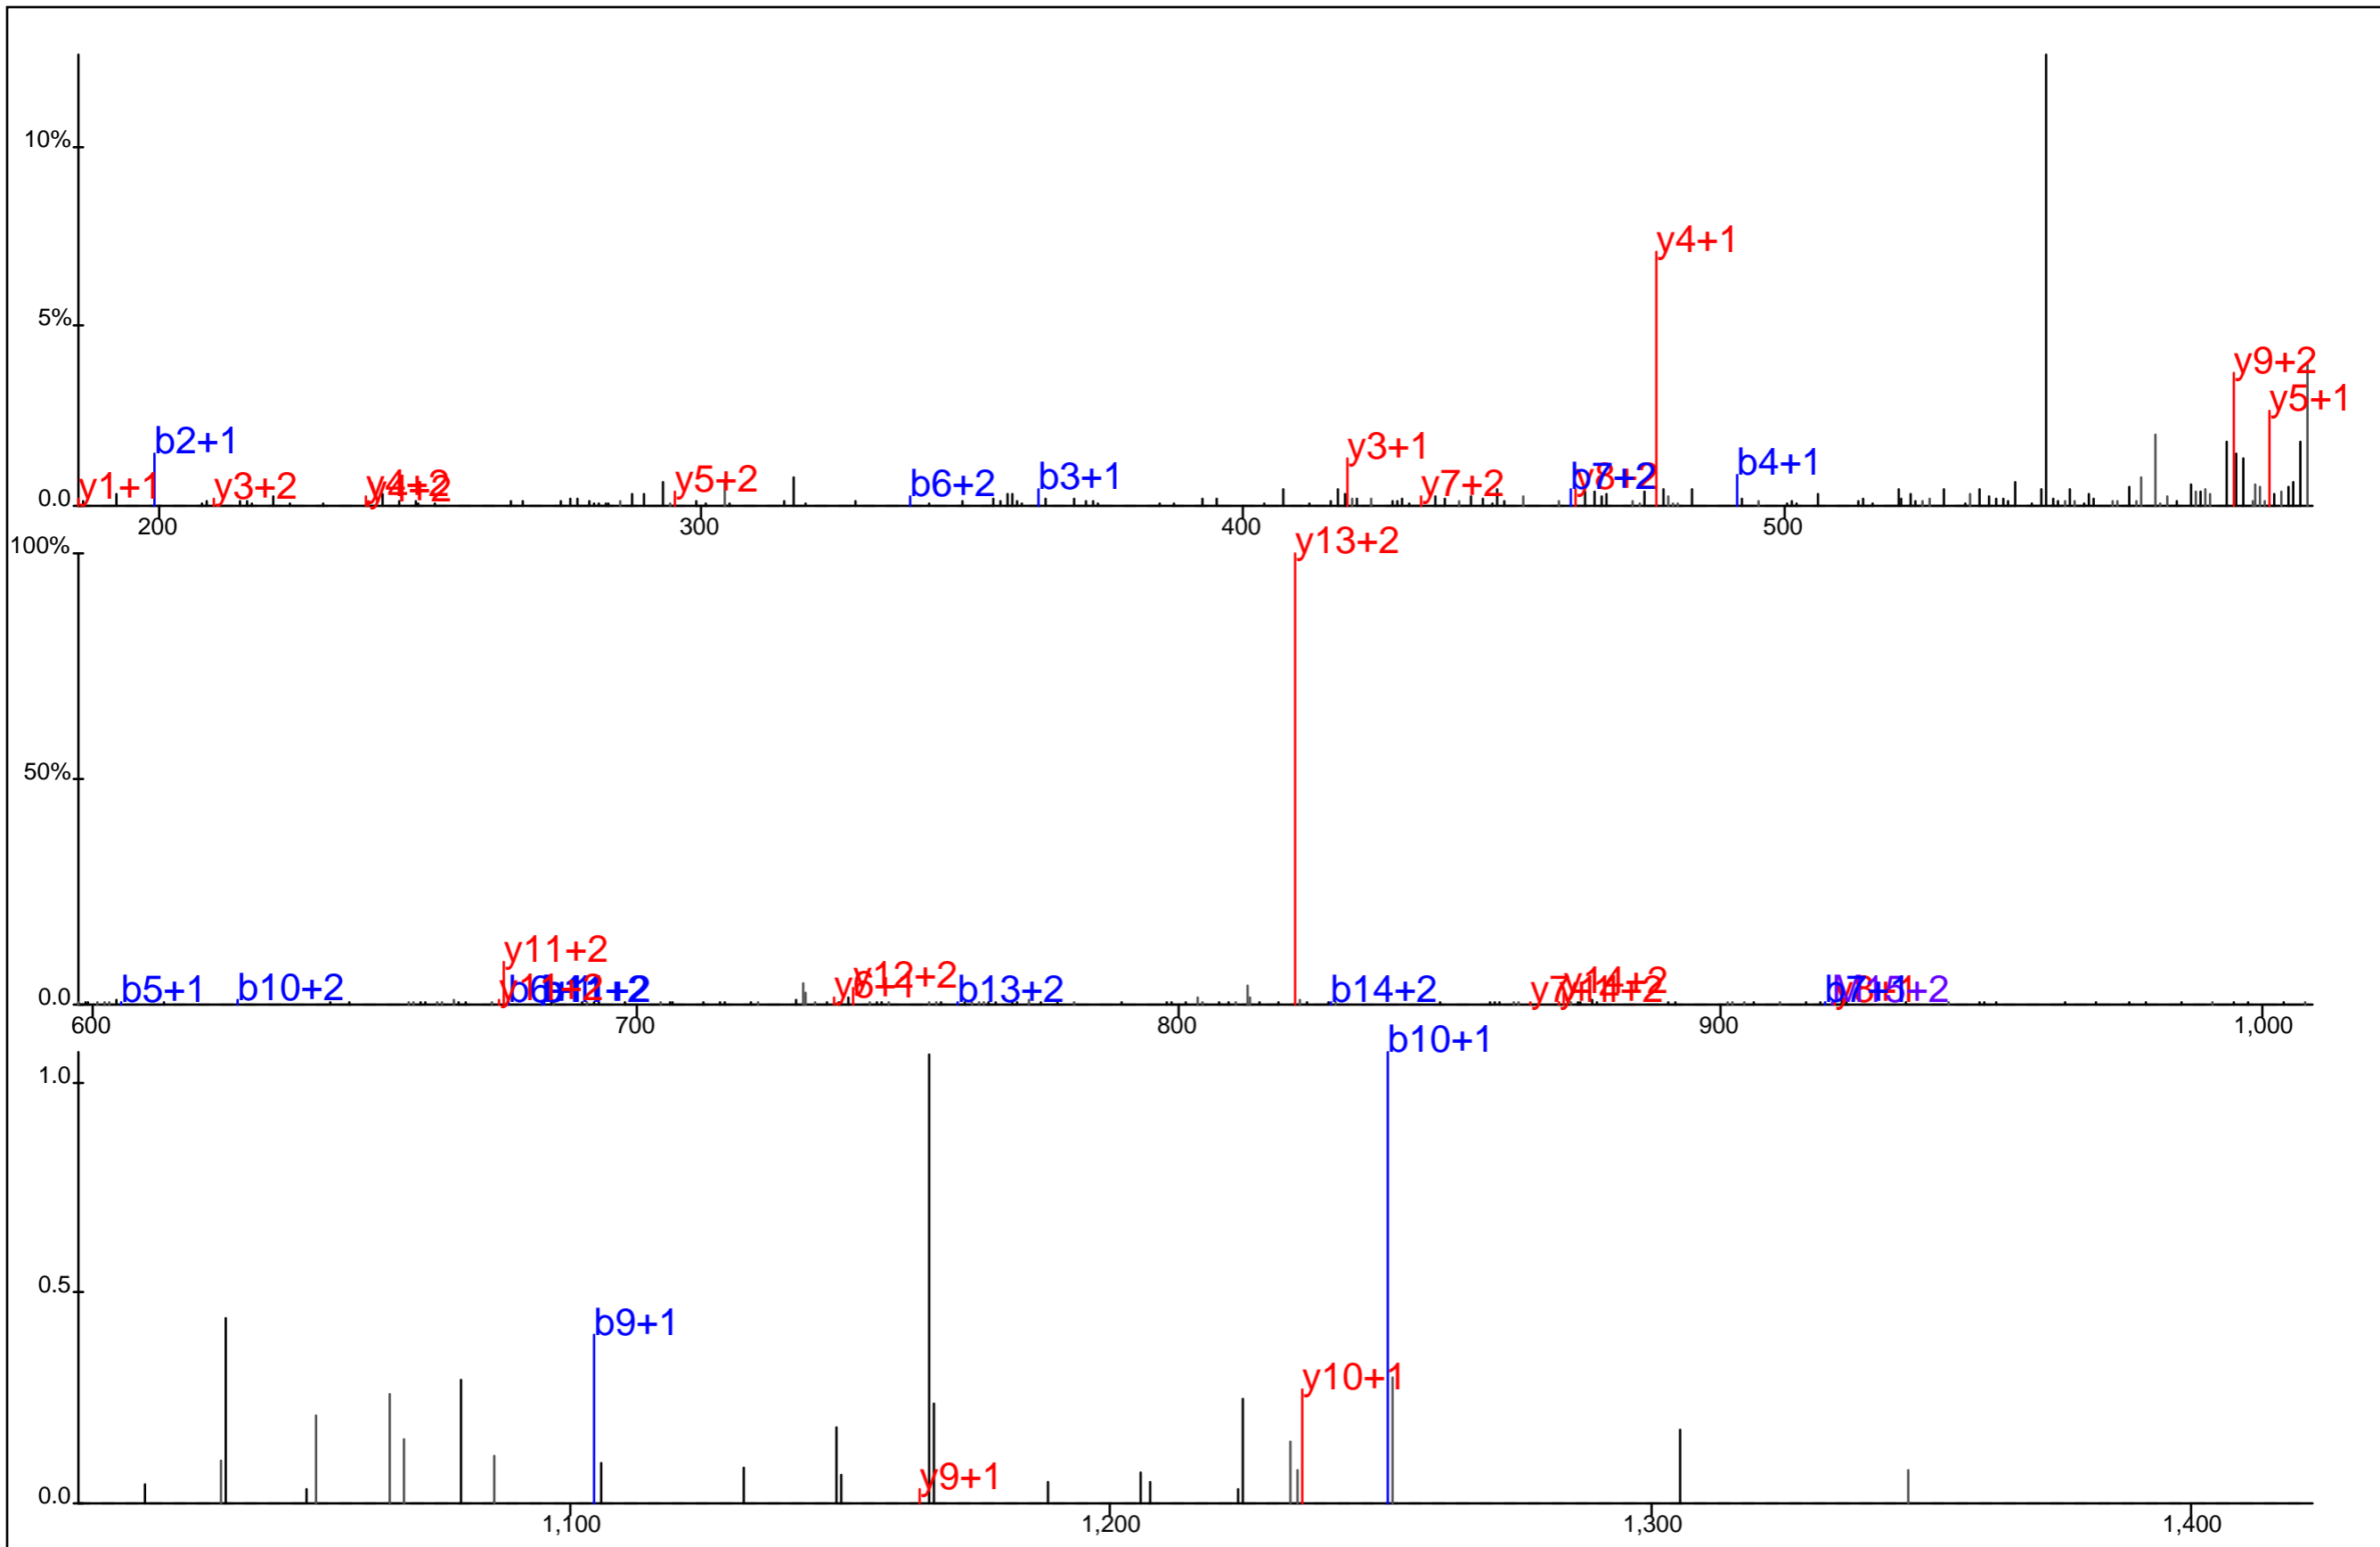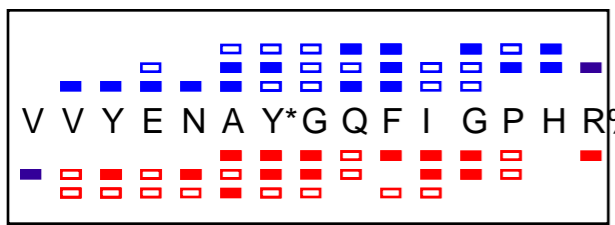

Protein Name: Thioredoxin reductase 1  
 gi Accession: 1843434  
 Precursor Mass: 613.9568+3  
 Delta Mass: 5.798 ppm  
 XCorr: 36.74

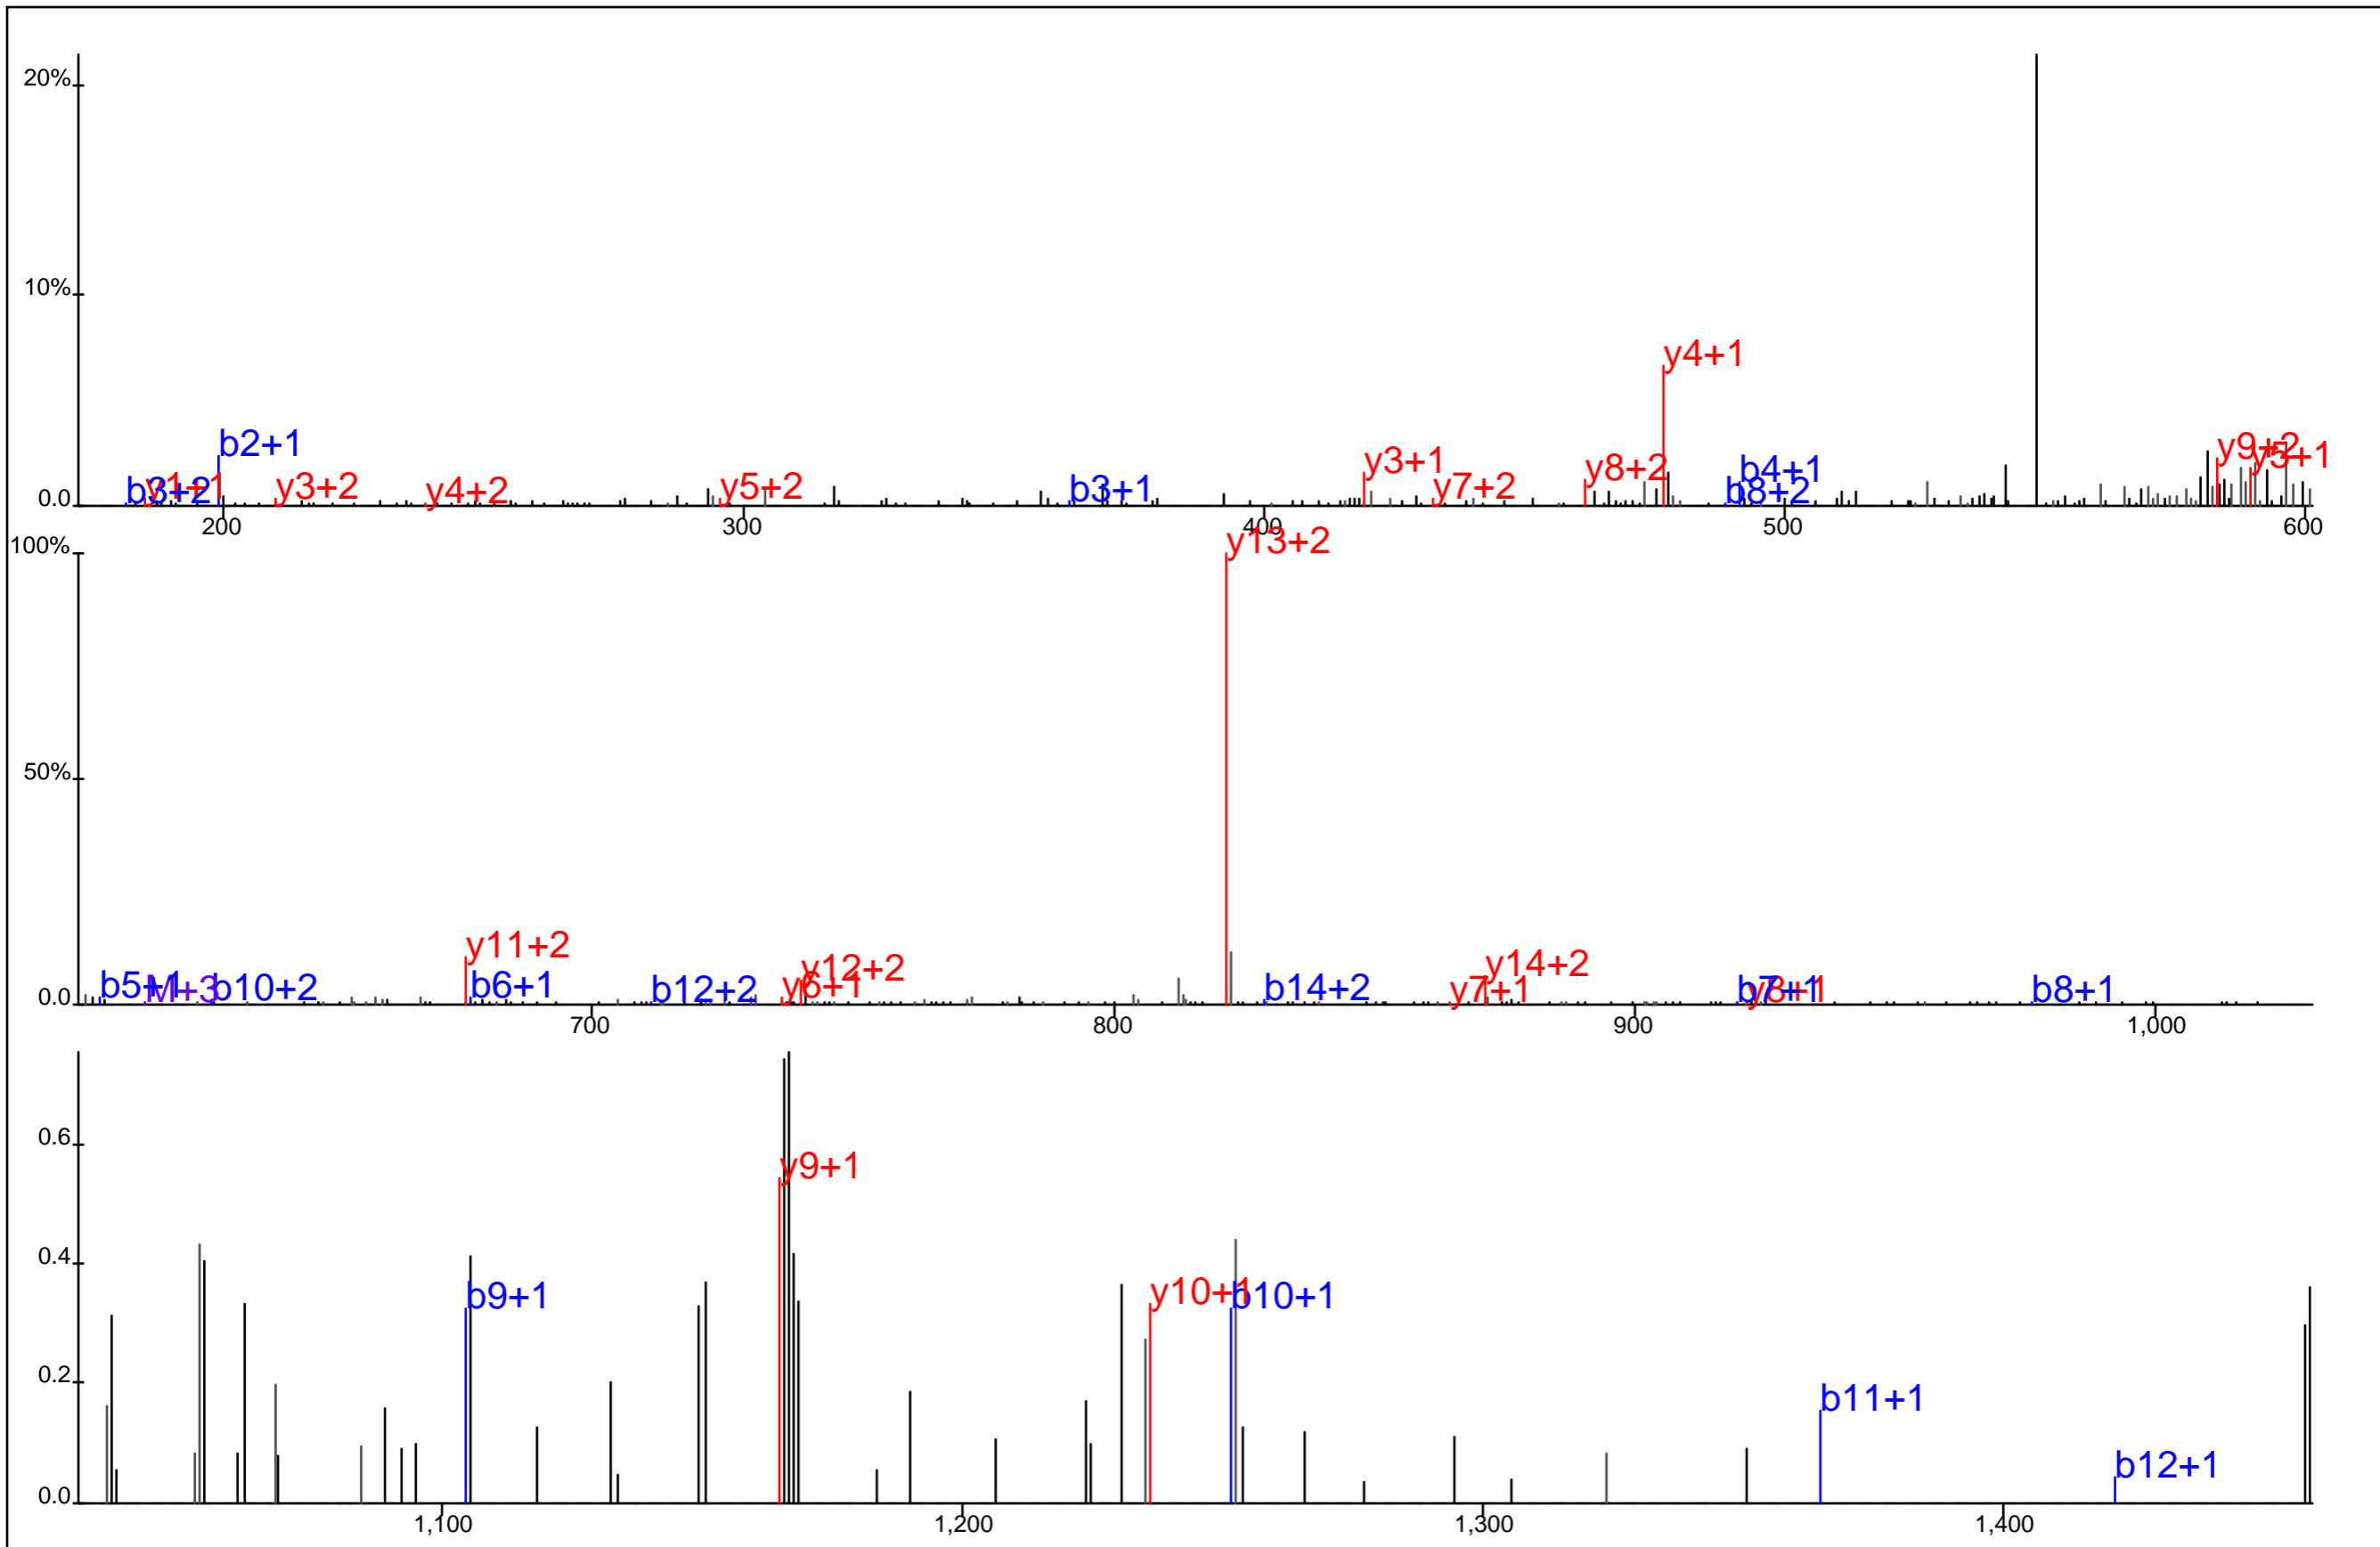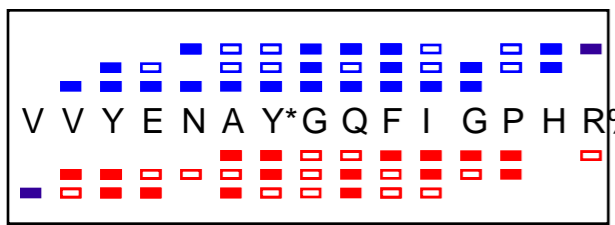

Protein Name: Thioredoxin reductase 1  
 gi Accession: 1843434  
 Precursor Mass: 613.9539+3  
 Delta Mass: 1.020 ppm  
 XCorr: 38.86

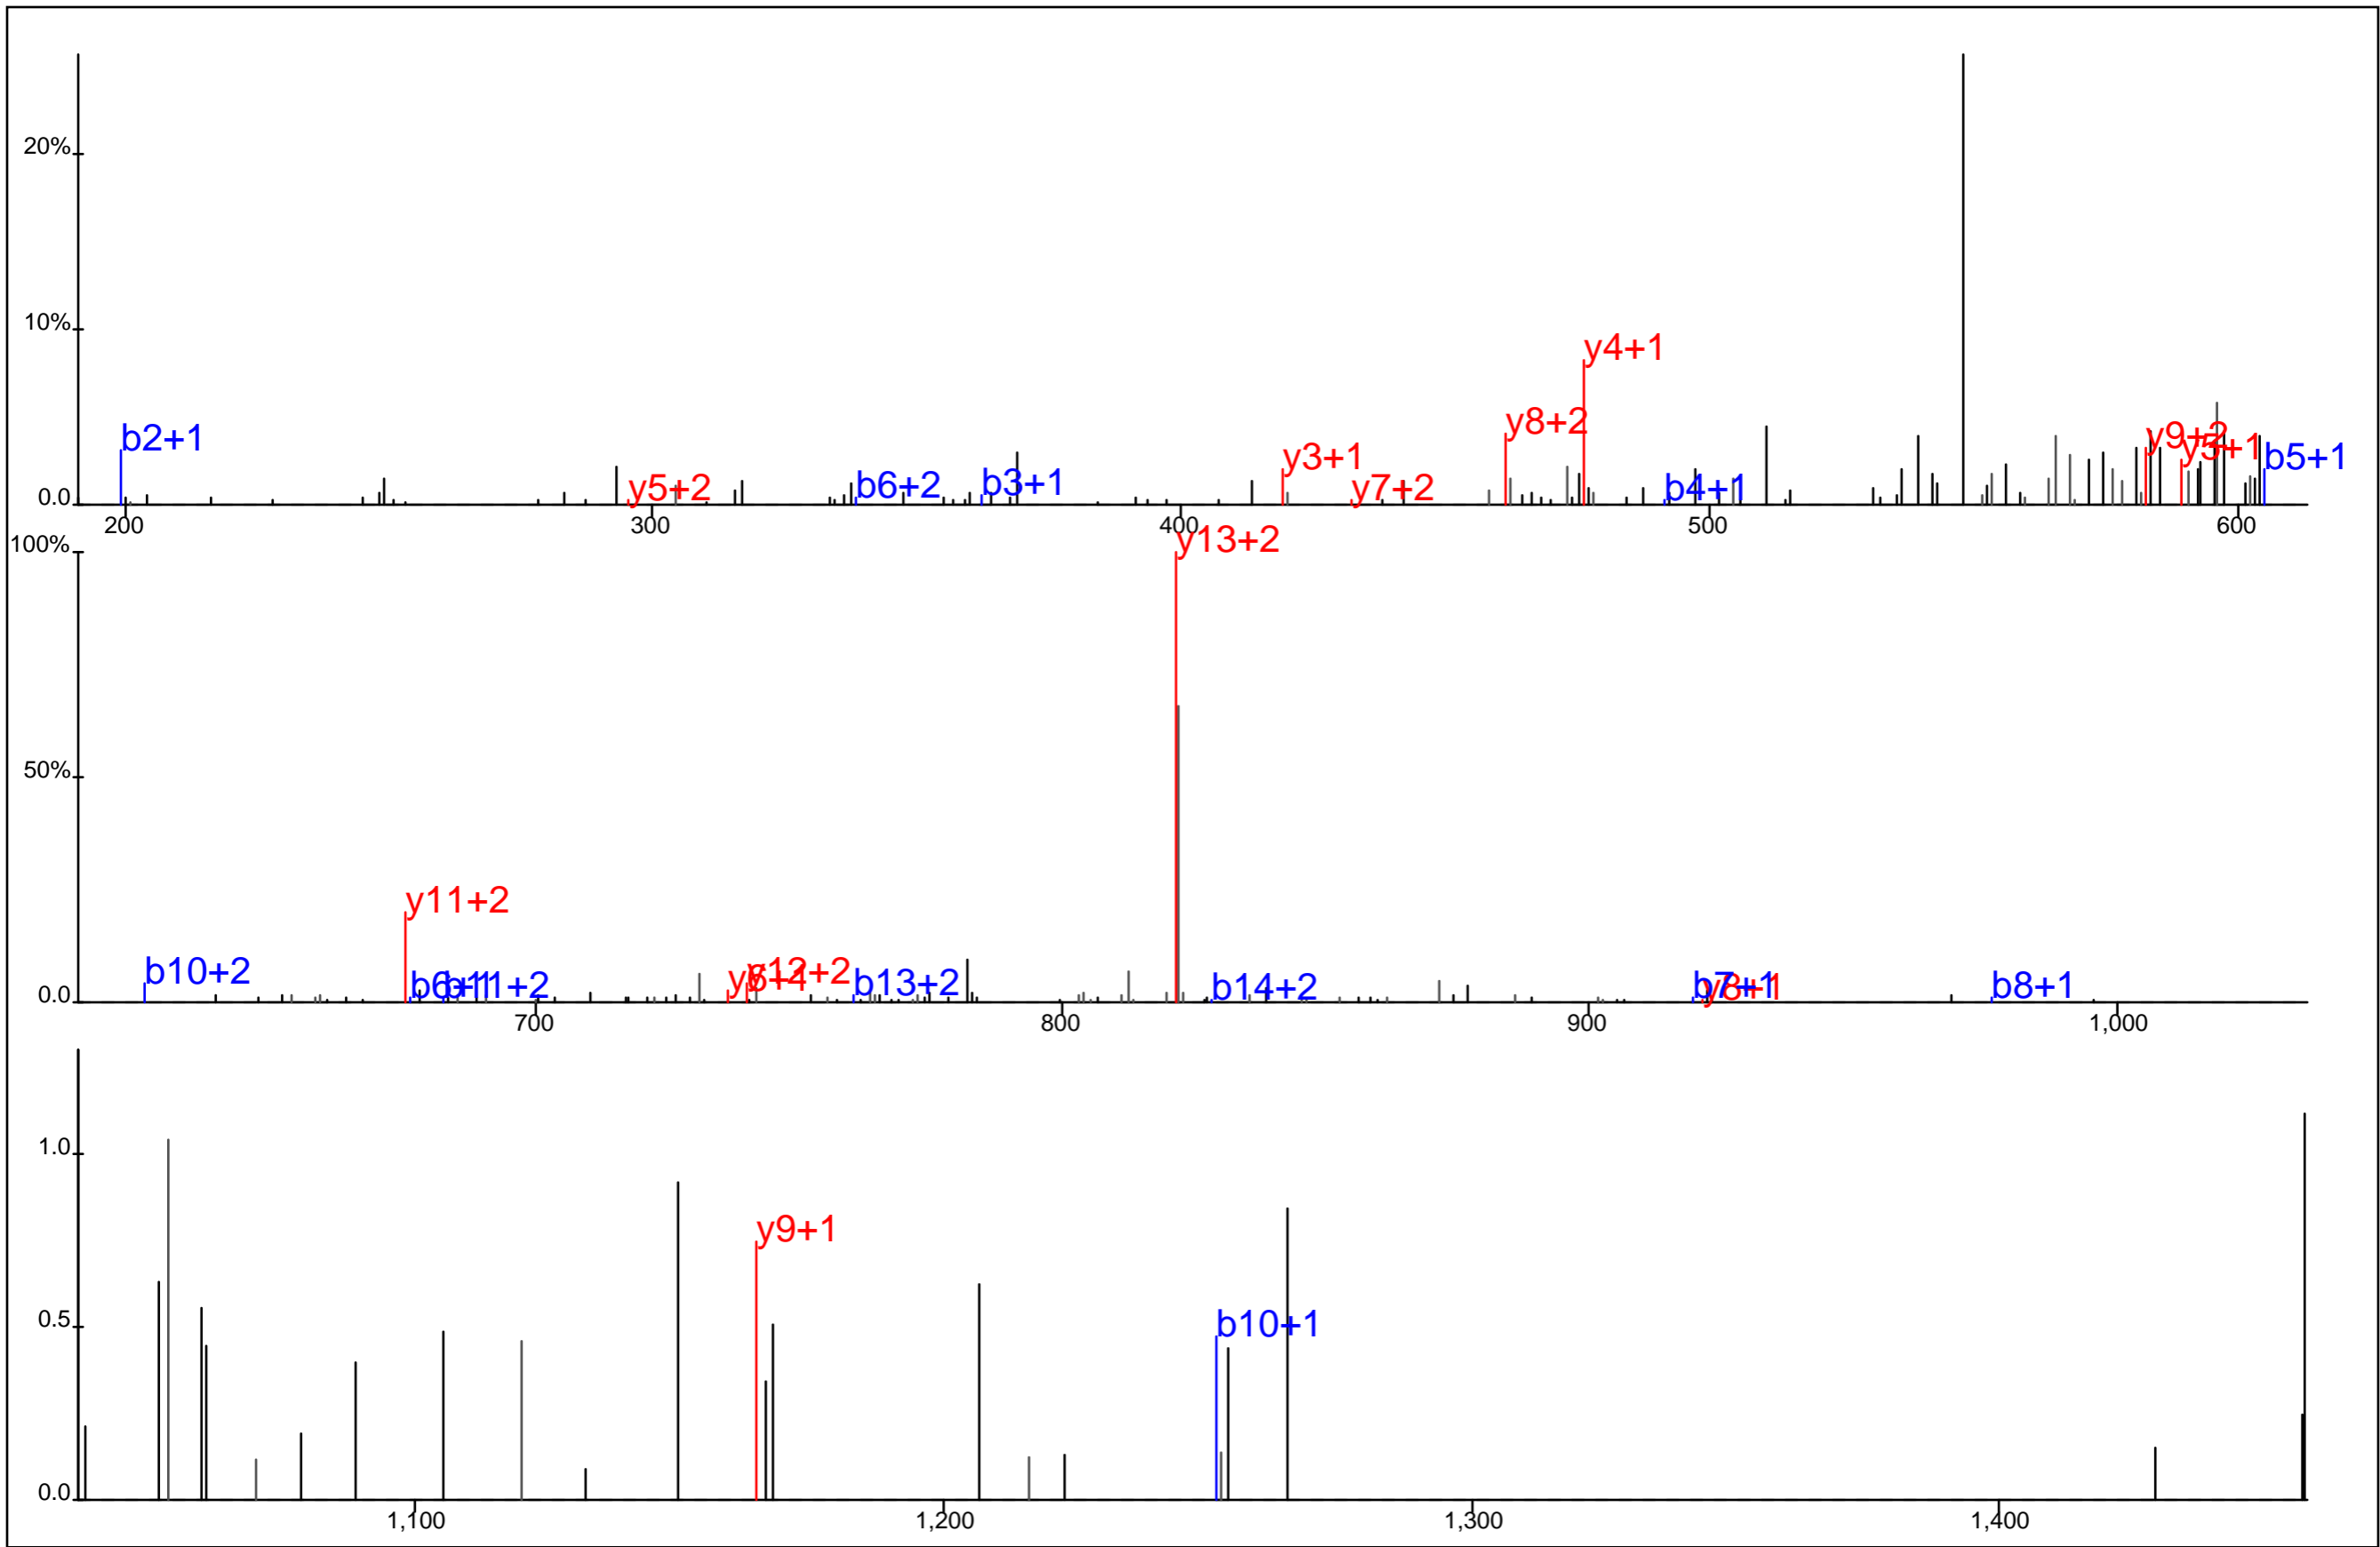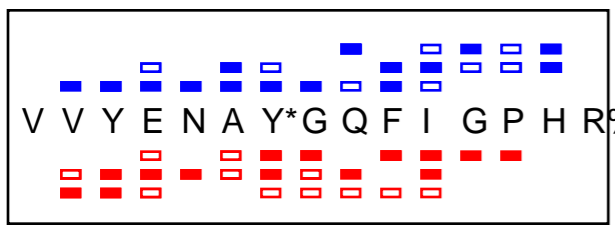

Protein Name: Thioredoxin reductase 1  
 gi Accession: 1843434  
 Precursor Mass: 613.9543+3  
 Delta Mass: 1.716 ppm  
 XCorr: 14.14

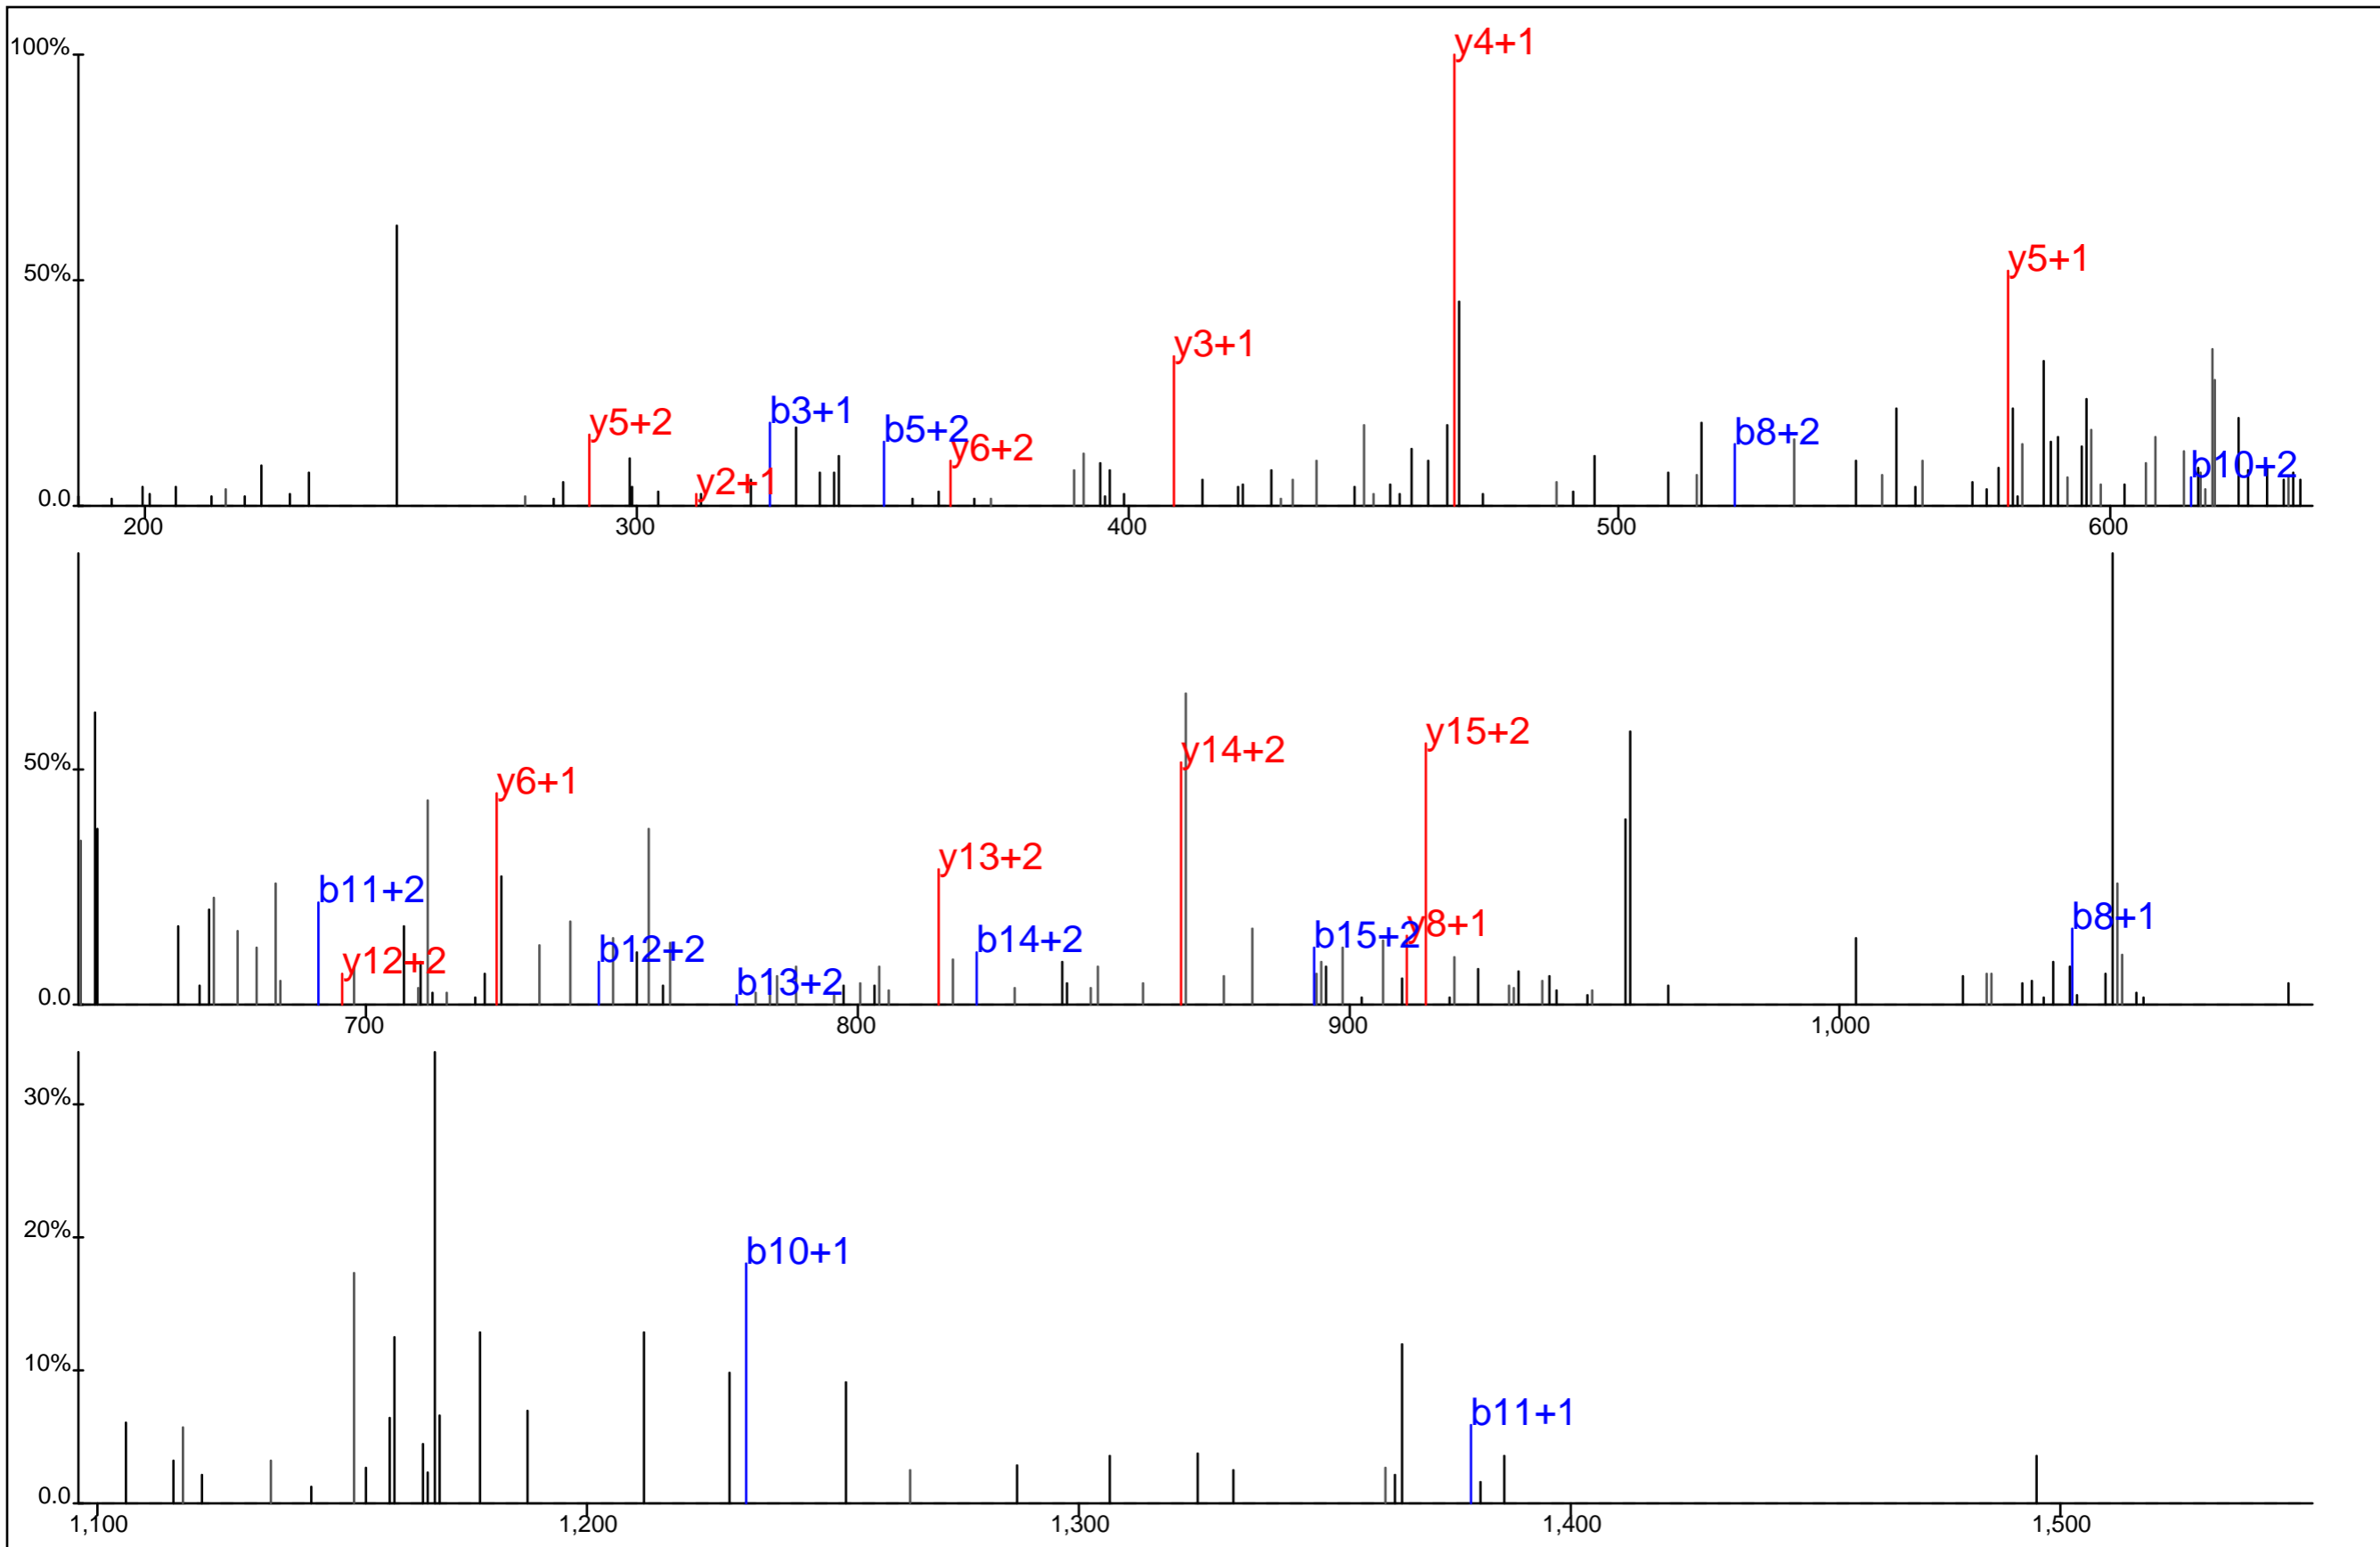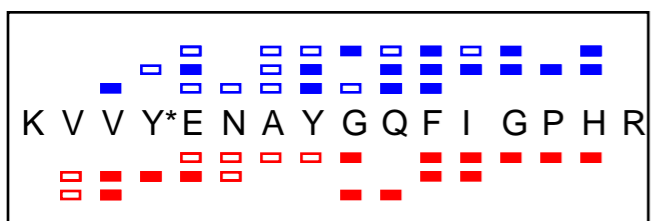

Protein Name: Thioredoxin reductase 1  
 gi Accession: 1843434  
 Precursor Mass: 653.3148+3  
 Delta Mass: 1.074 ppm  
 XCorr: 17.66

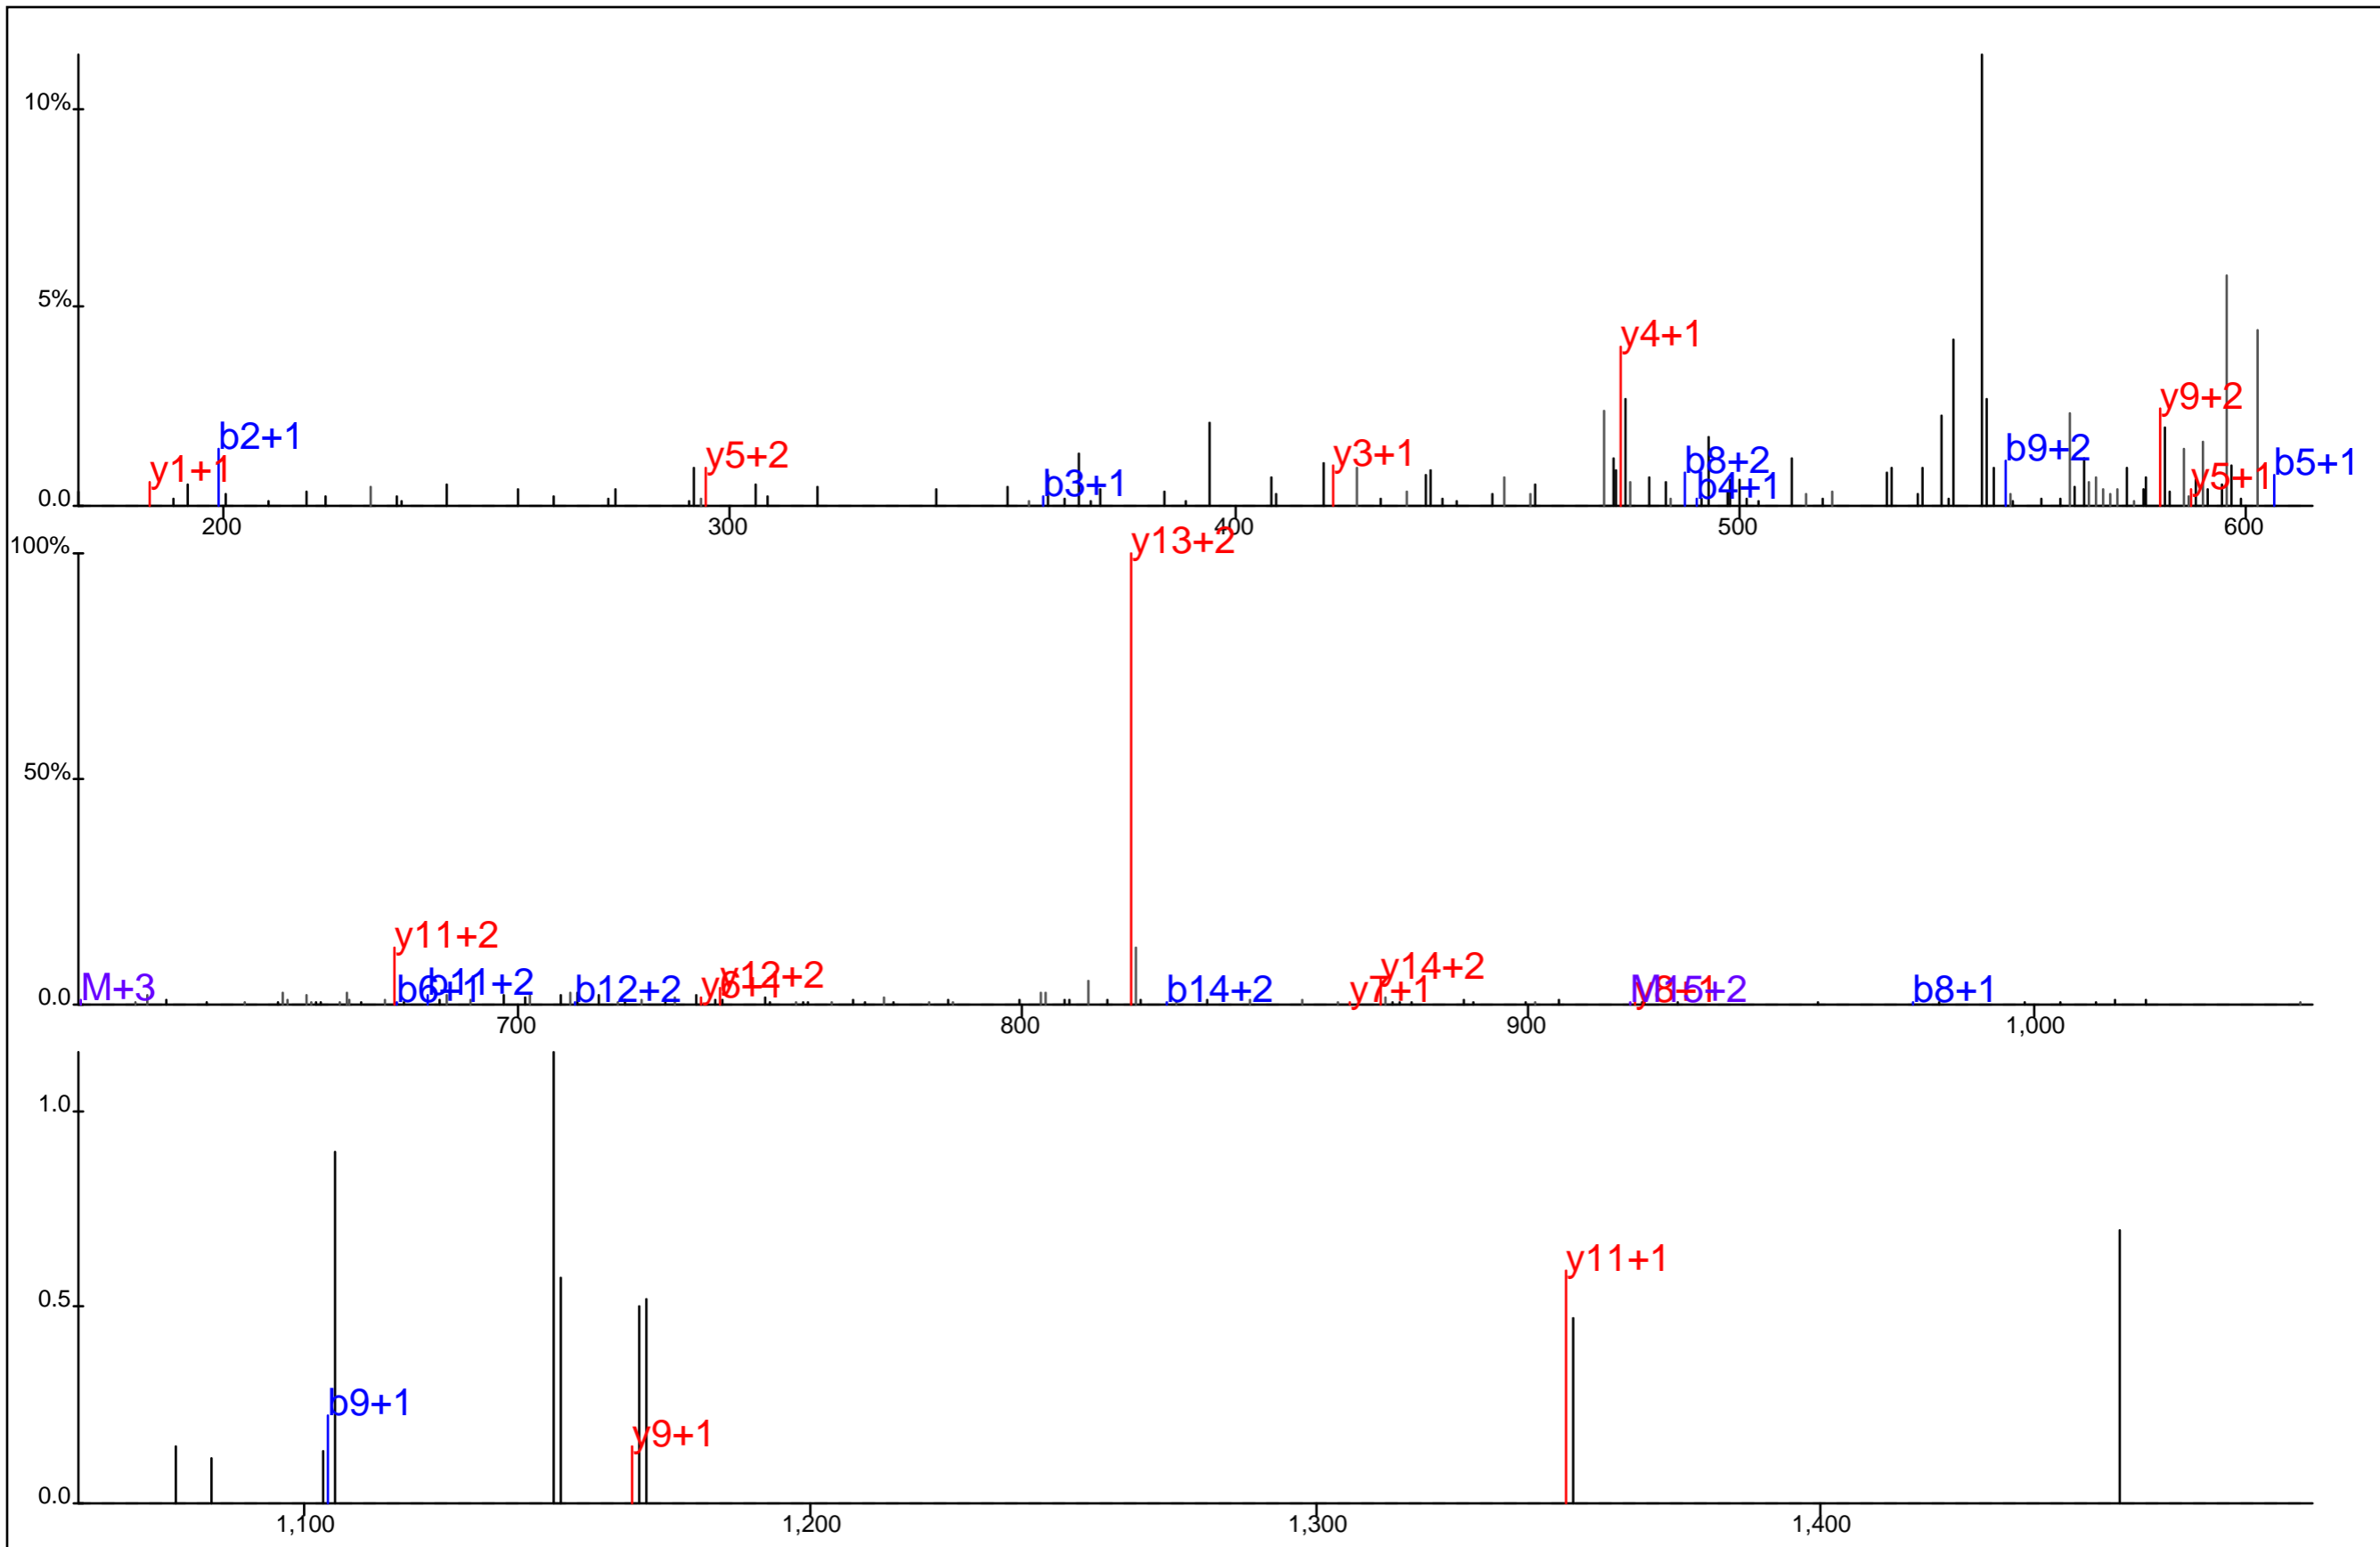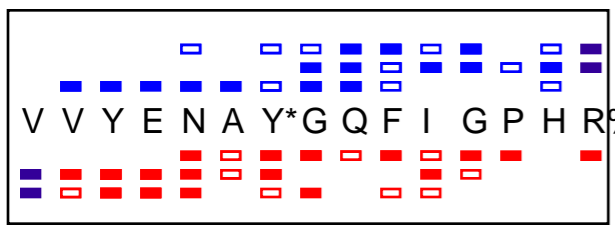

Protein Name: Thioredoxin reductase 1  
 gi Accession: 1843434  
 Precursor Mass: 613.9547+3  
 Delta Mass: 2.315 ppm  
 XCorr: 27.12

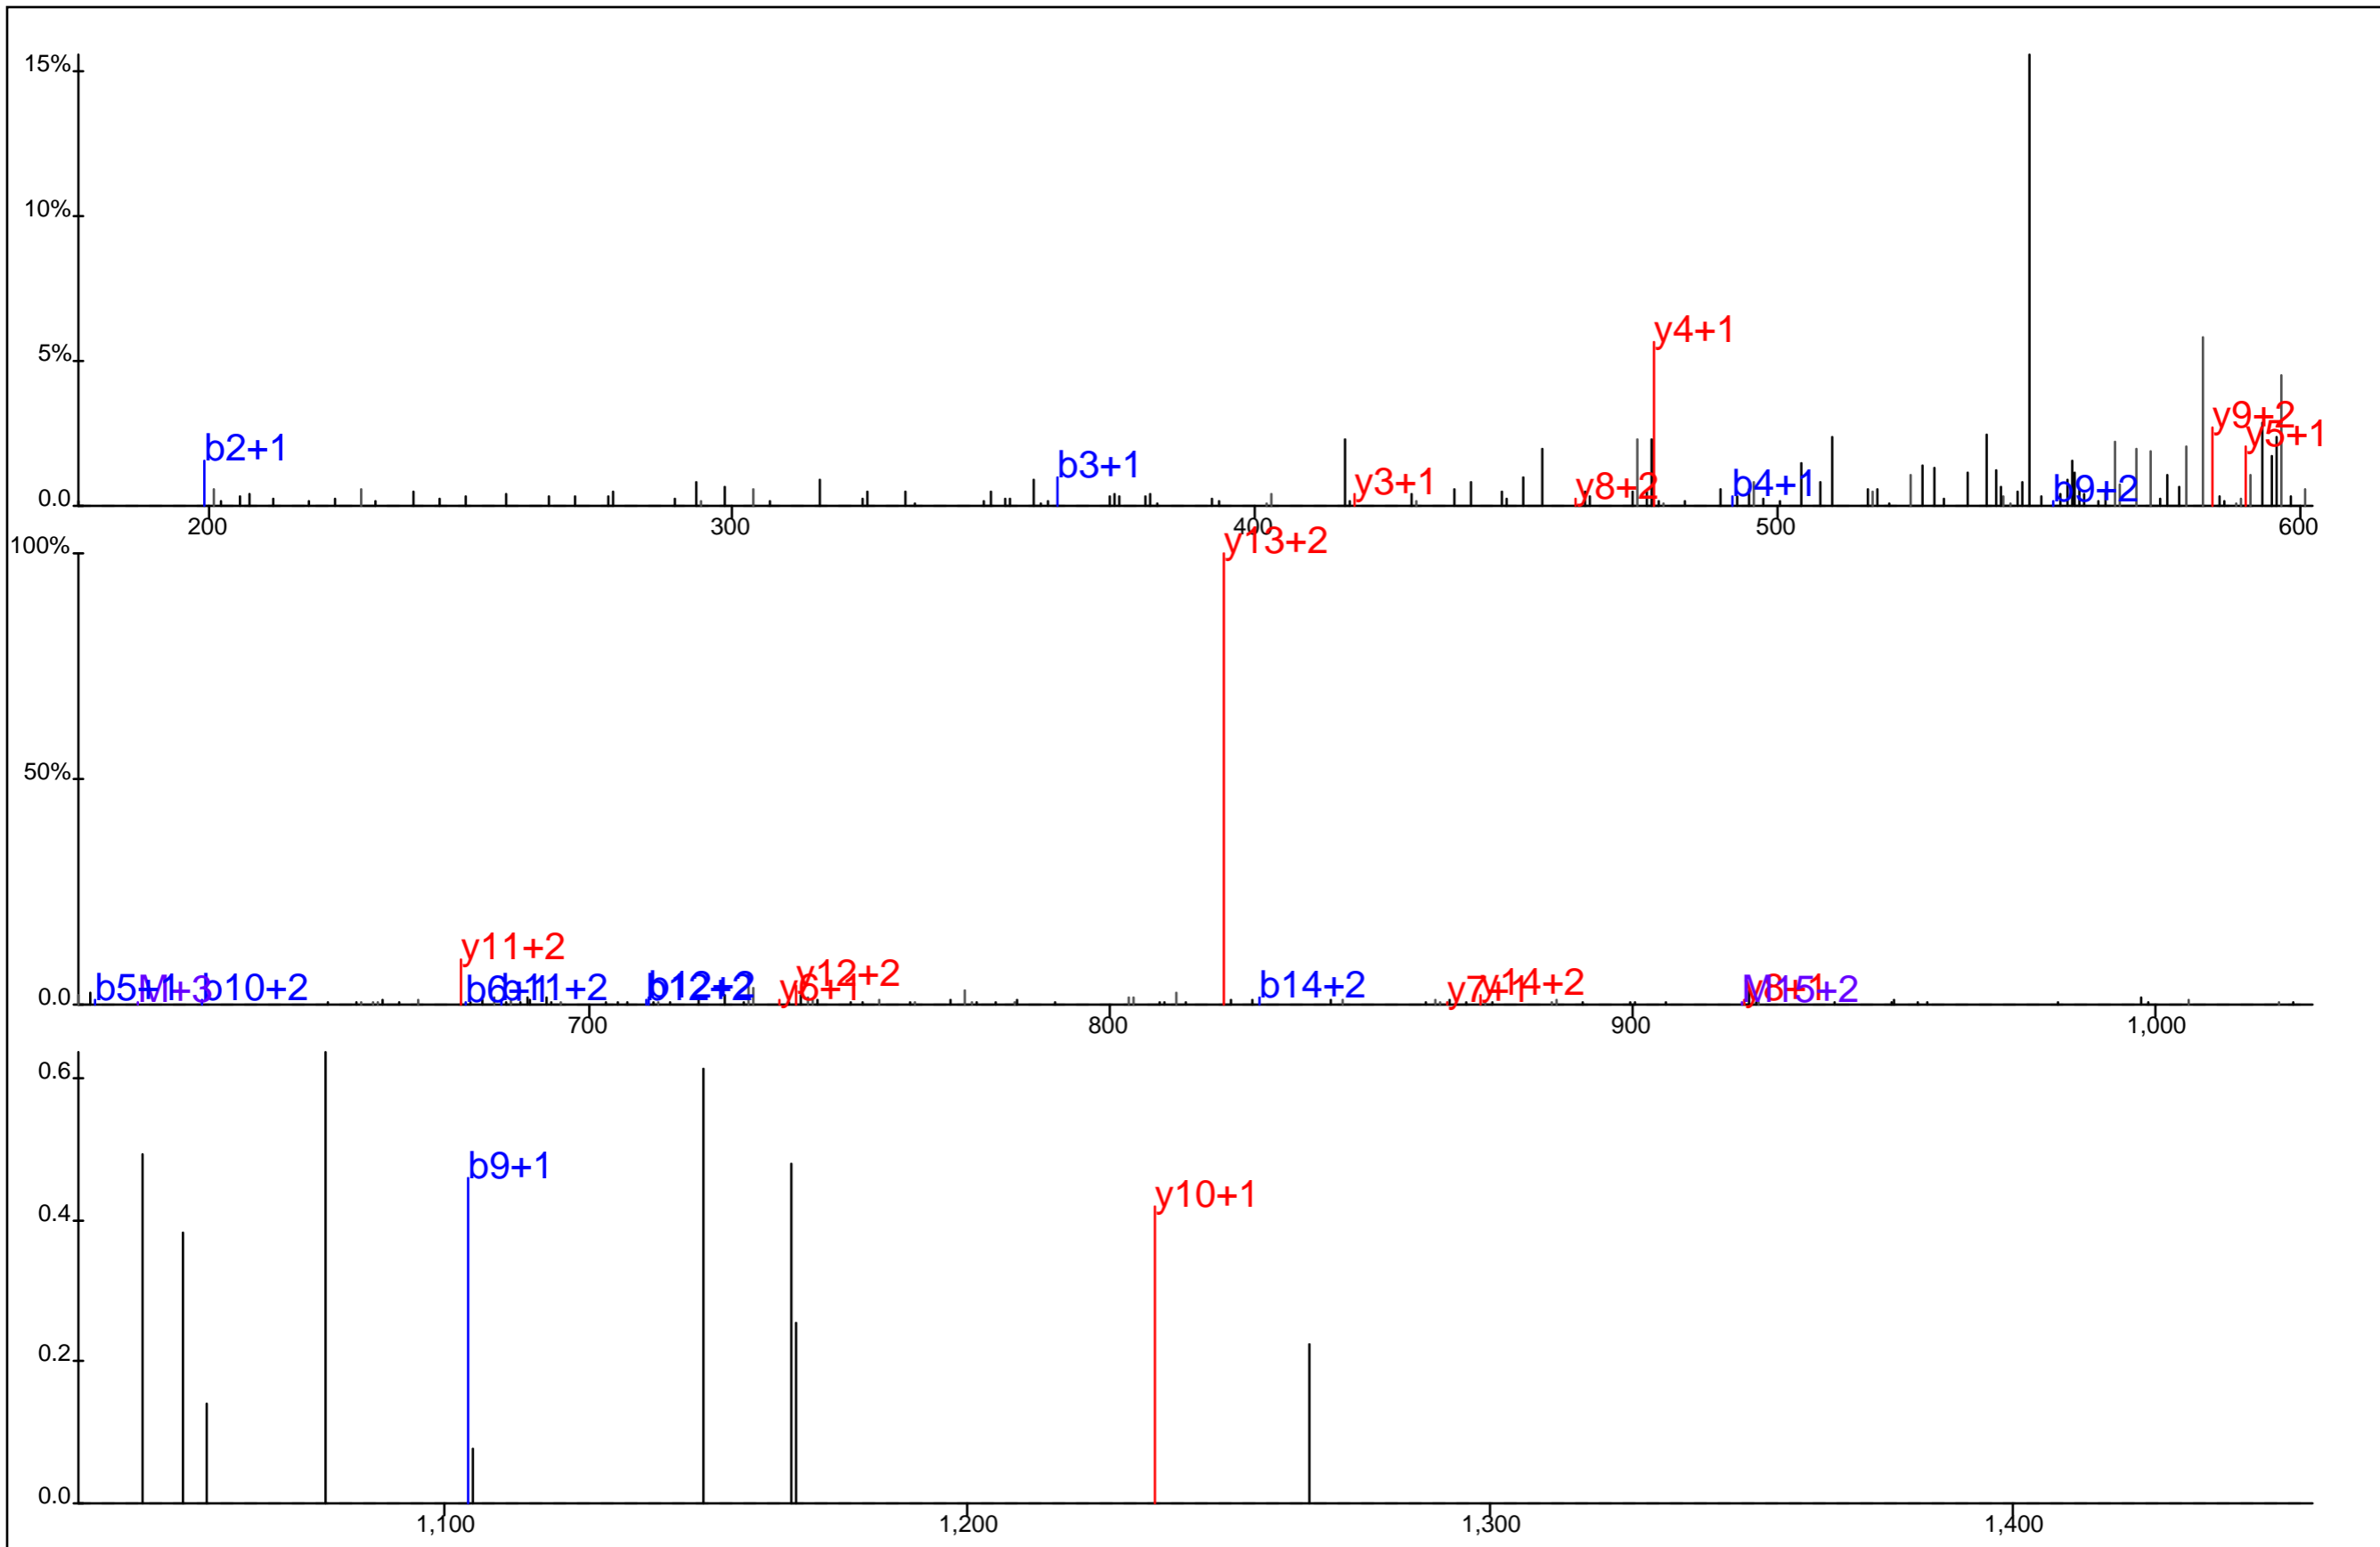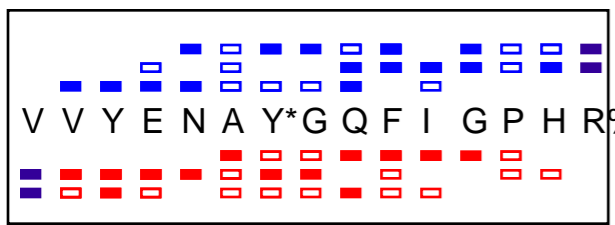

Protein Name: Thioredoxin reductase 1  
 gi Accession: 1843434  
 Precursor Mass: 613.9555+3  
 Delta Mass: 3.608 ppm  
 XCorr: 17.75



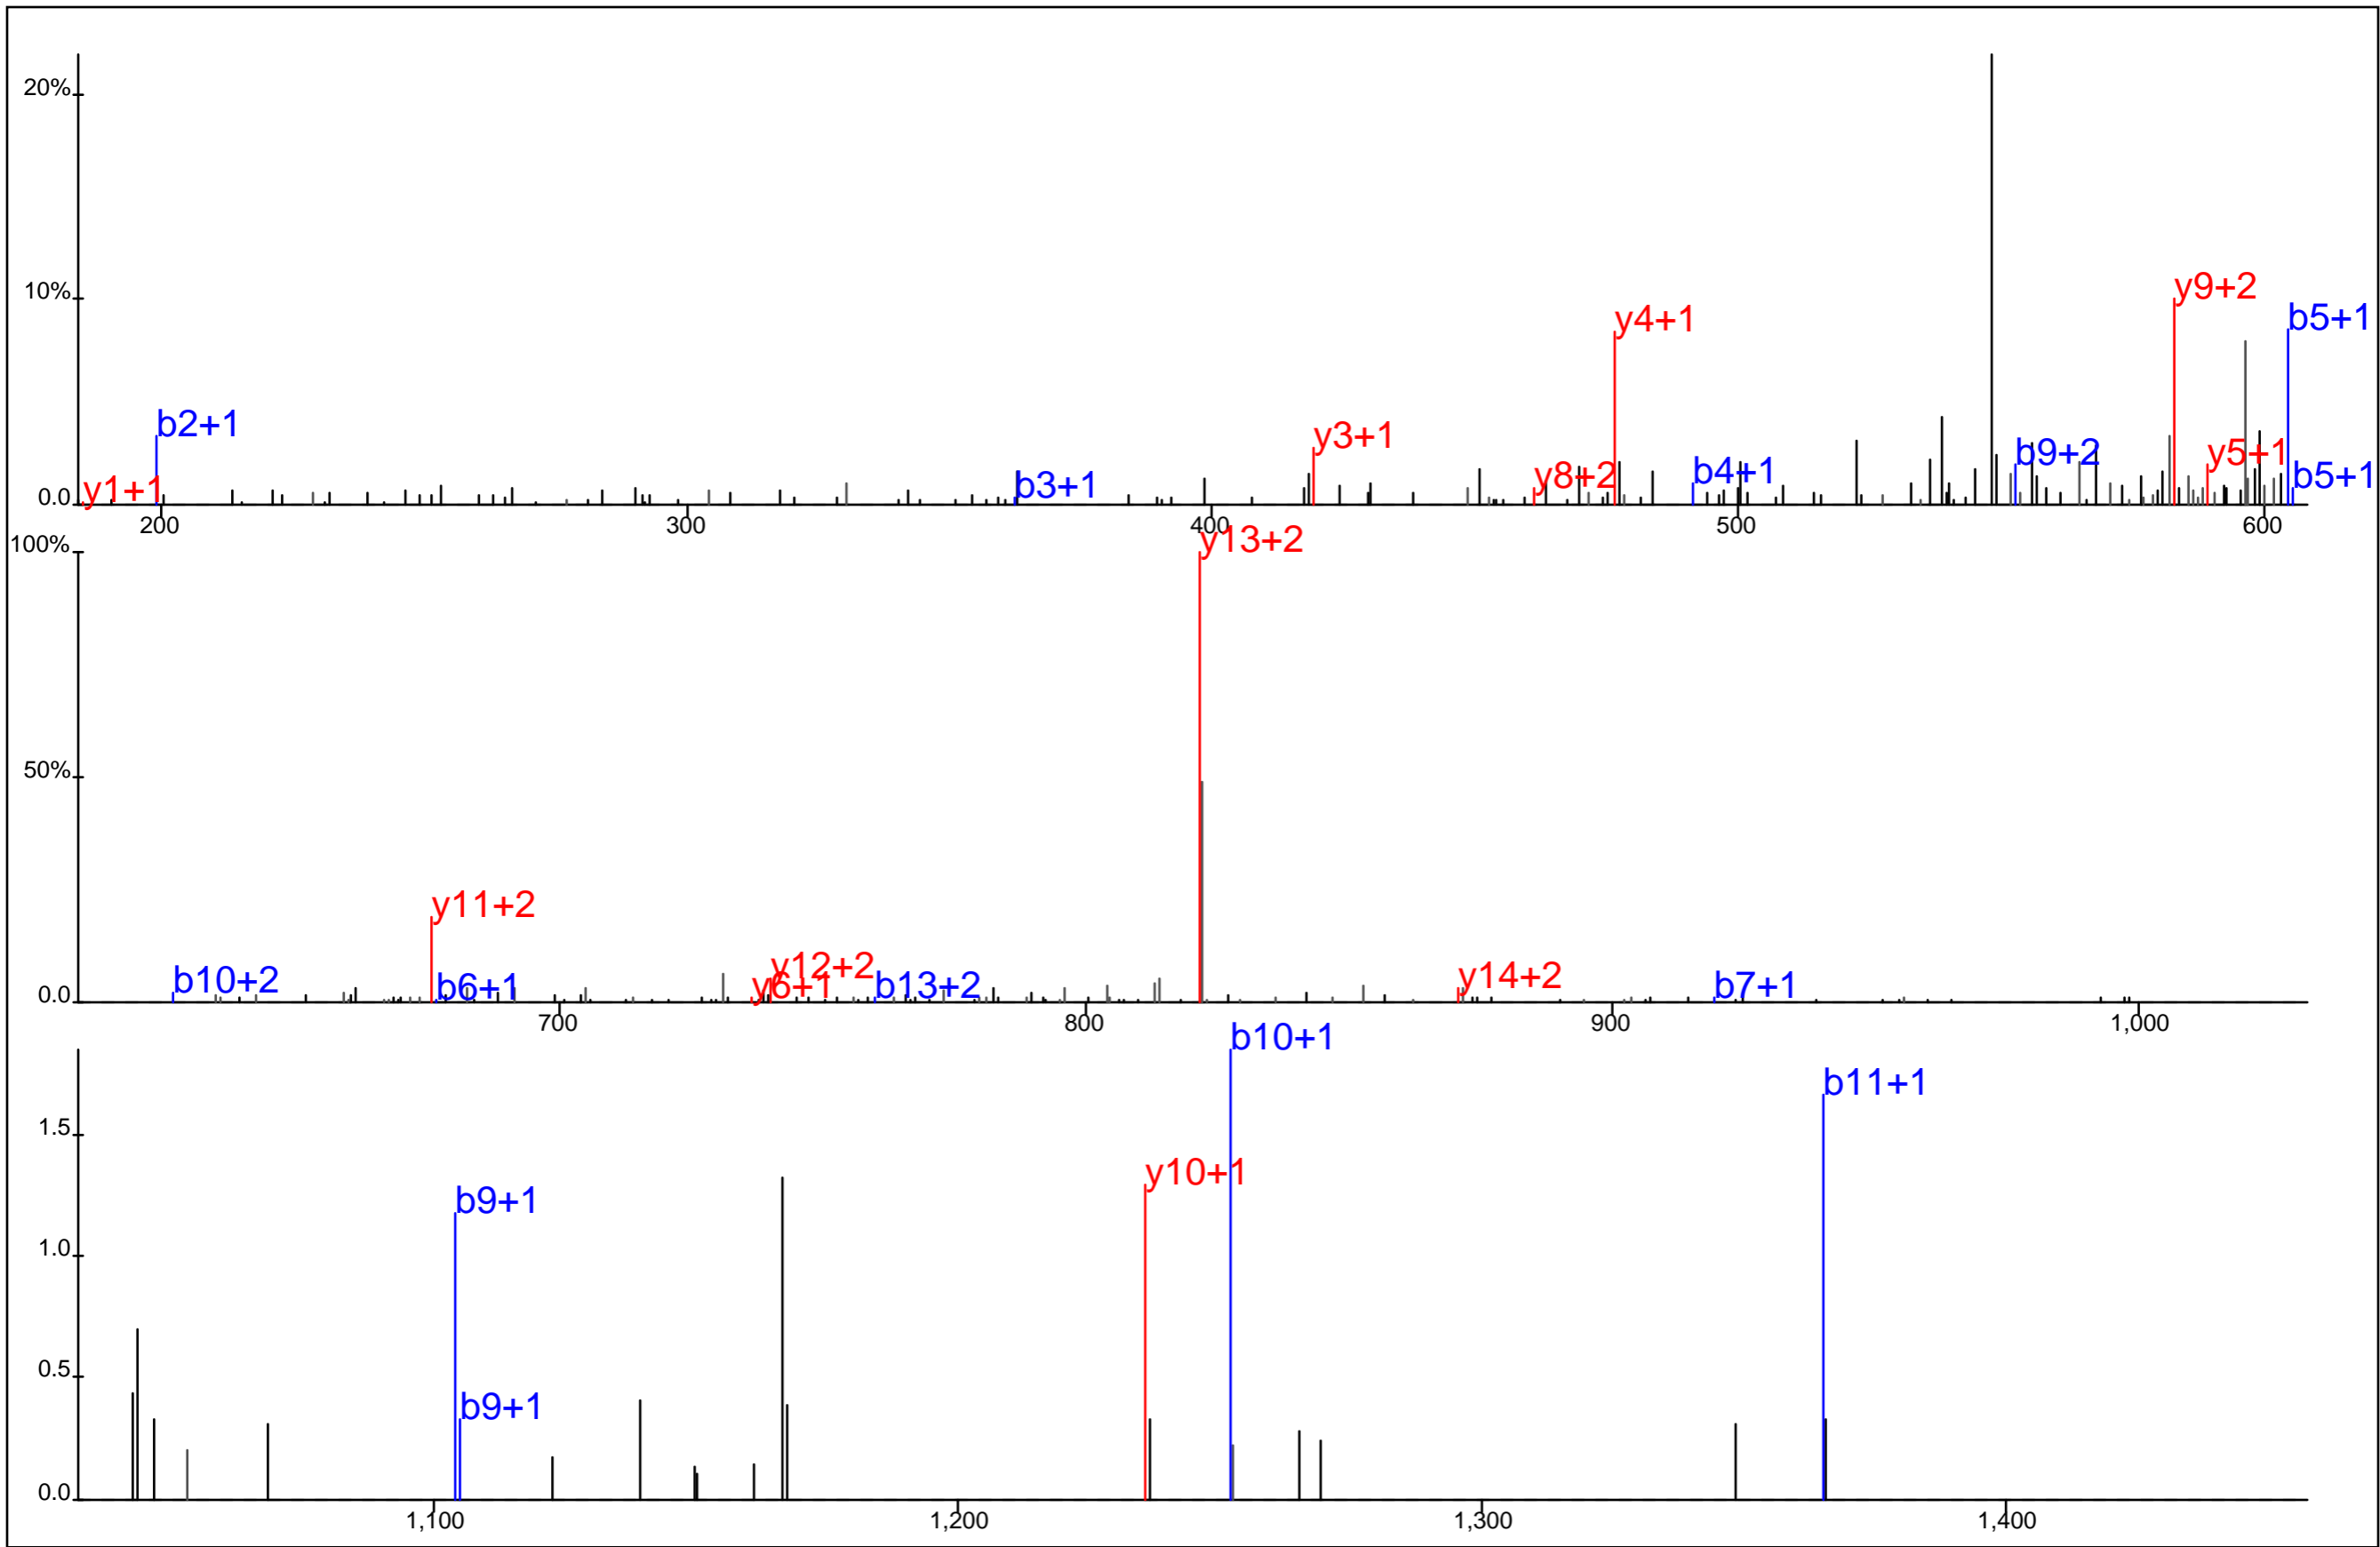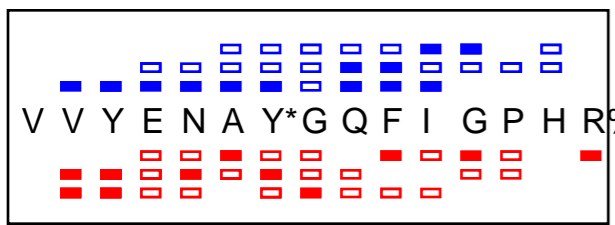

Protein Name: Thioredoxin reductase 1  
 gi Accession: 1843434  
 Precursor Mass: 613.9561+3  
 Delta Mass: 4.505 ppm  
 XCorr: 28.89

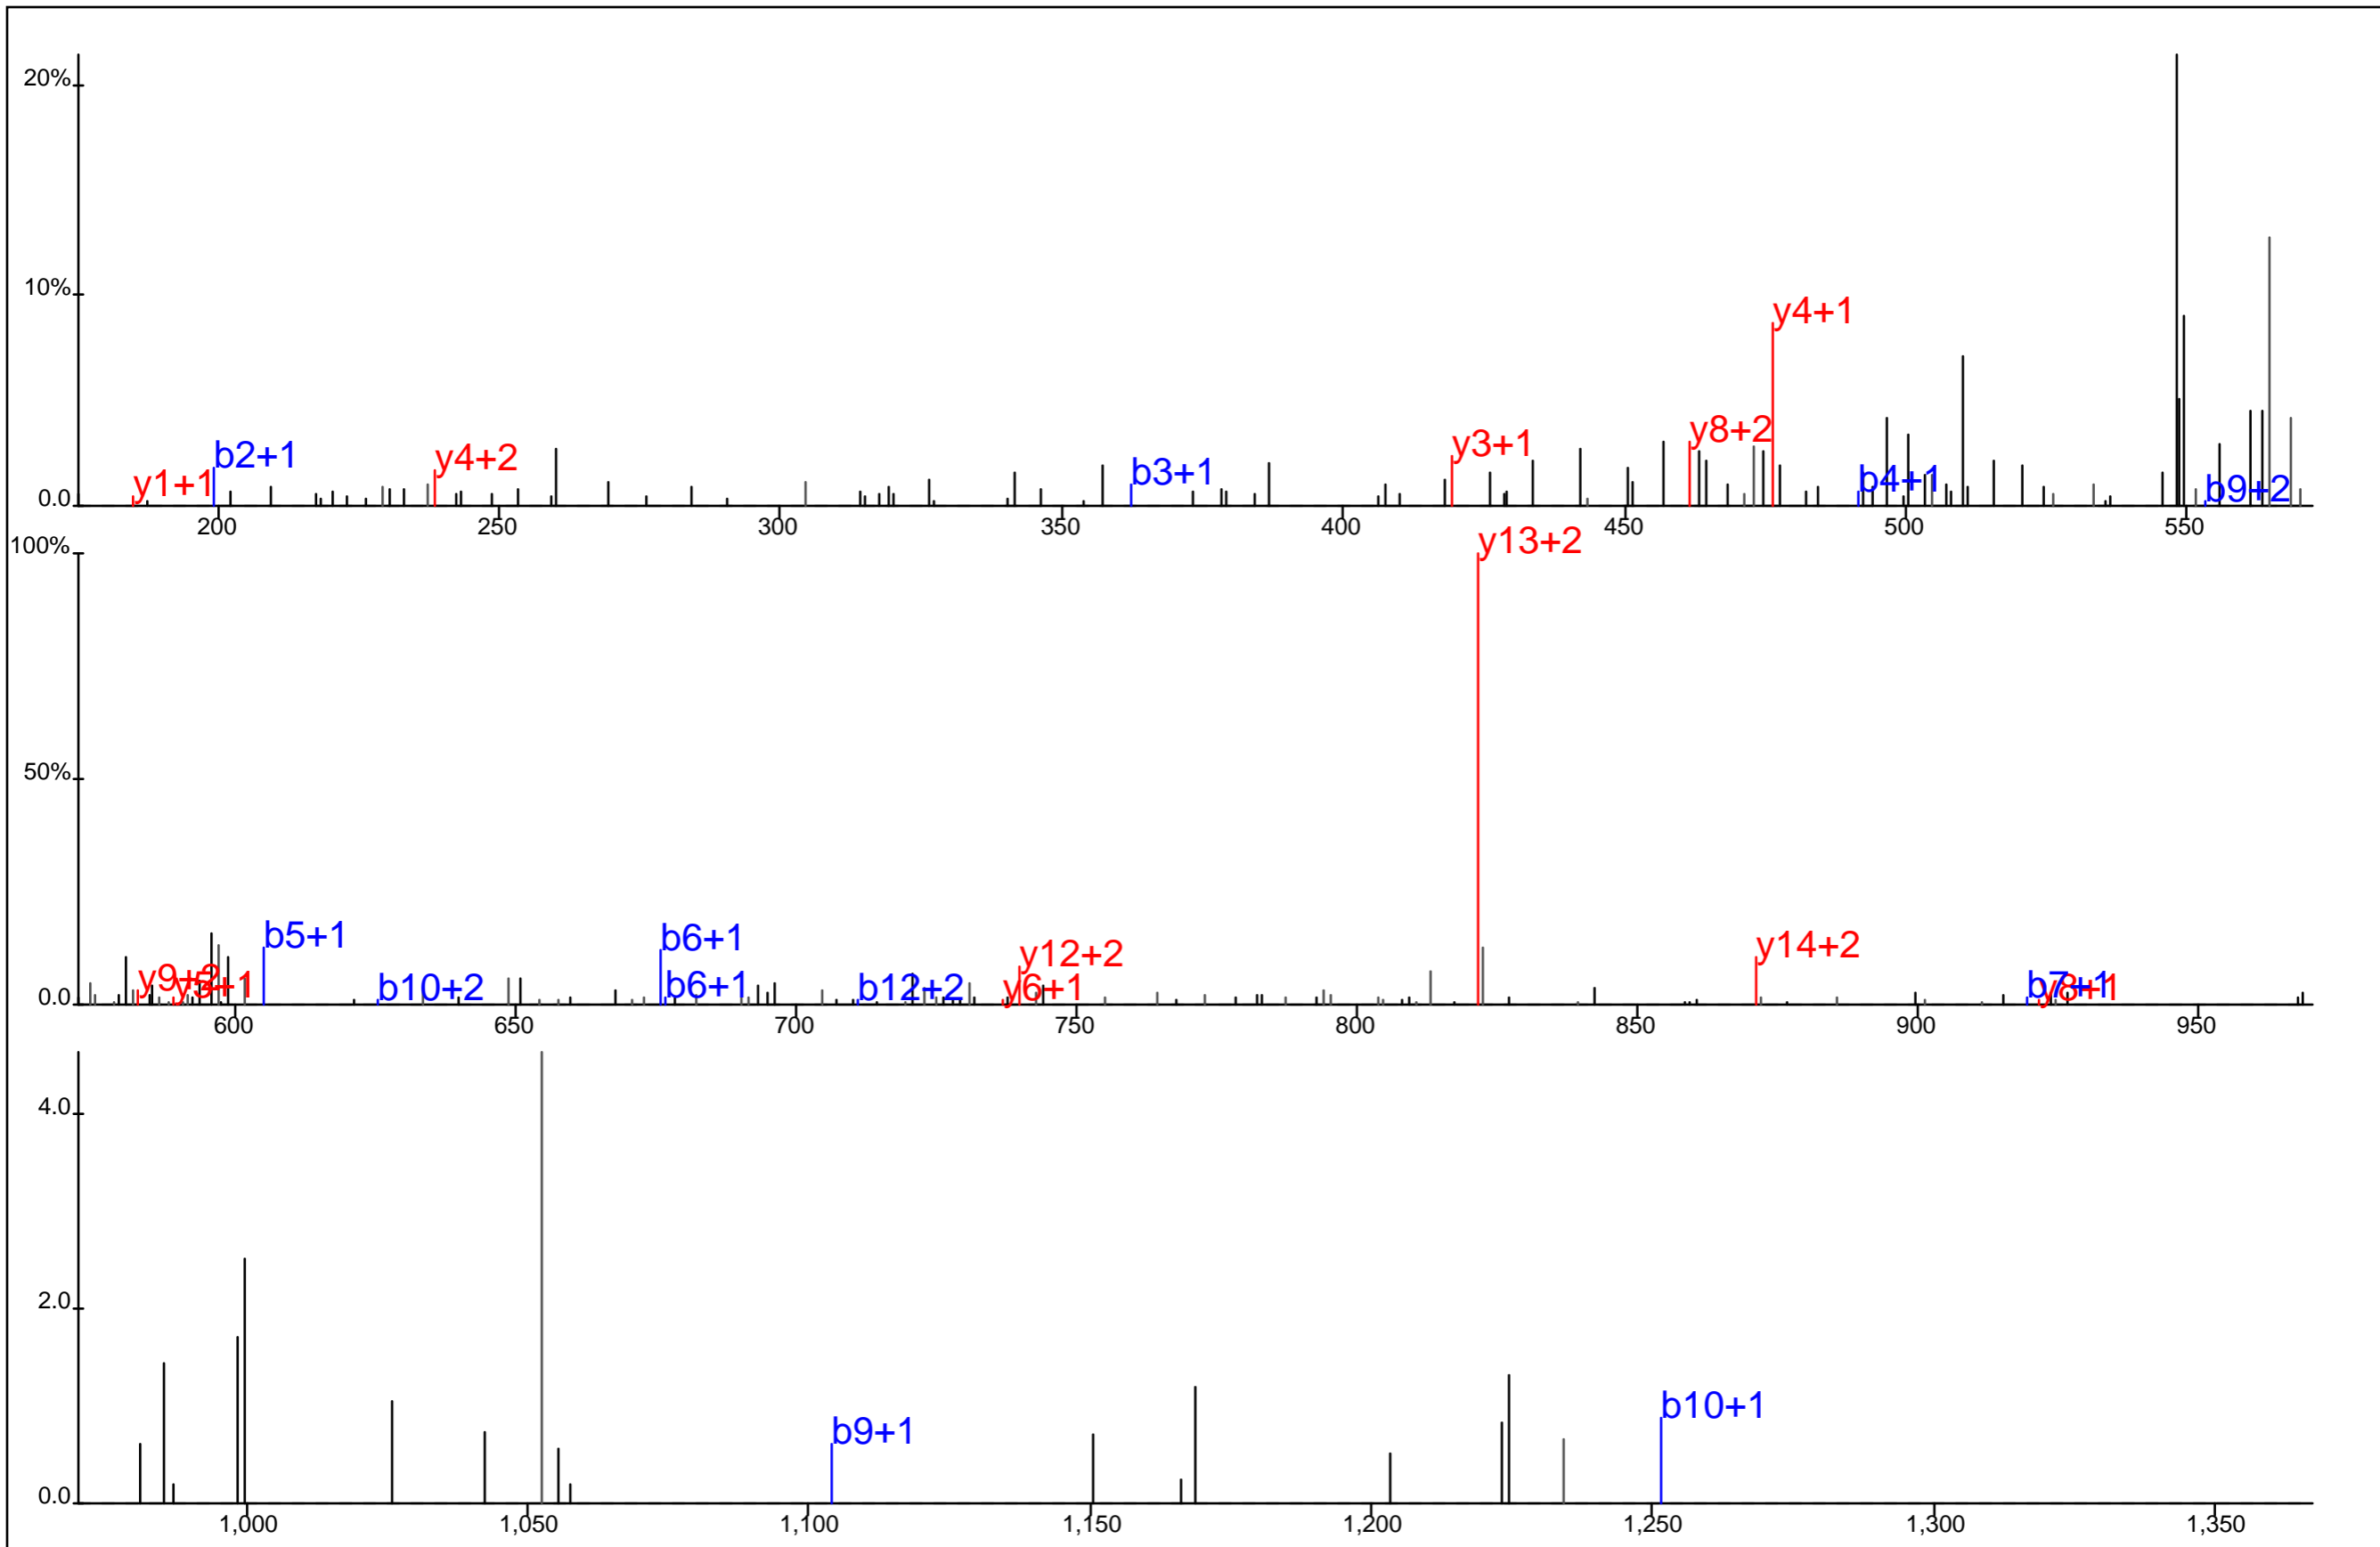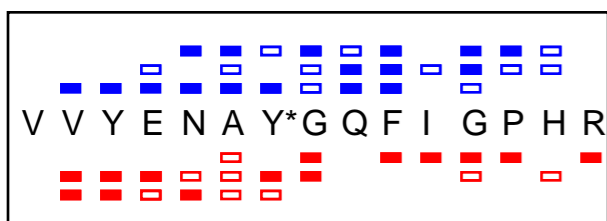

Protein Name: Thioredoxin reductase 1  
 gi Accession: 1843434  
 Precursor Mass: 613.9531+3  
 Delta Mass: 0.371 ppm  
 XCorr: 20.14

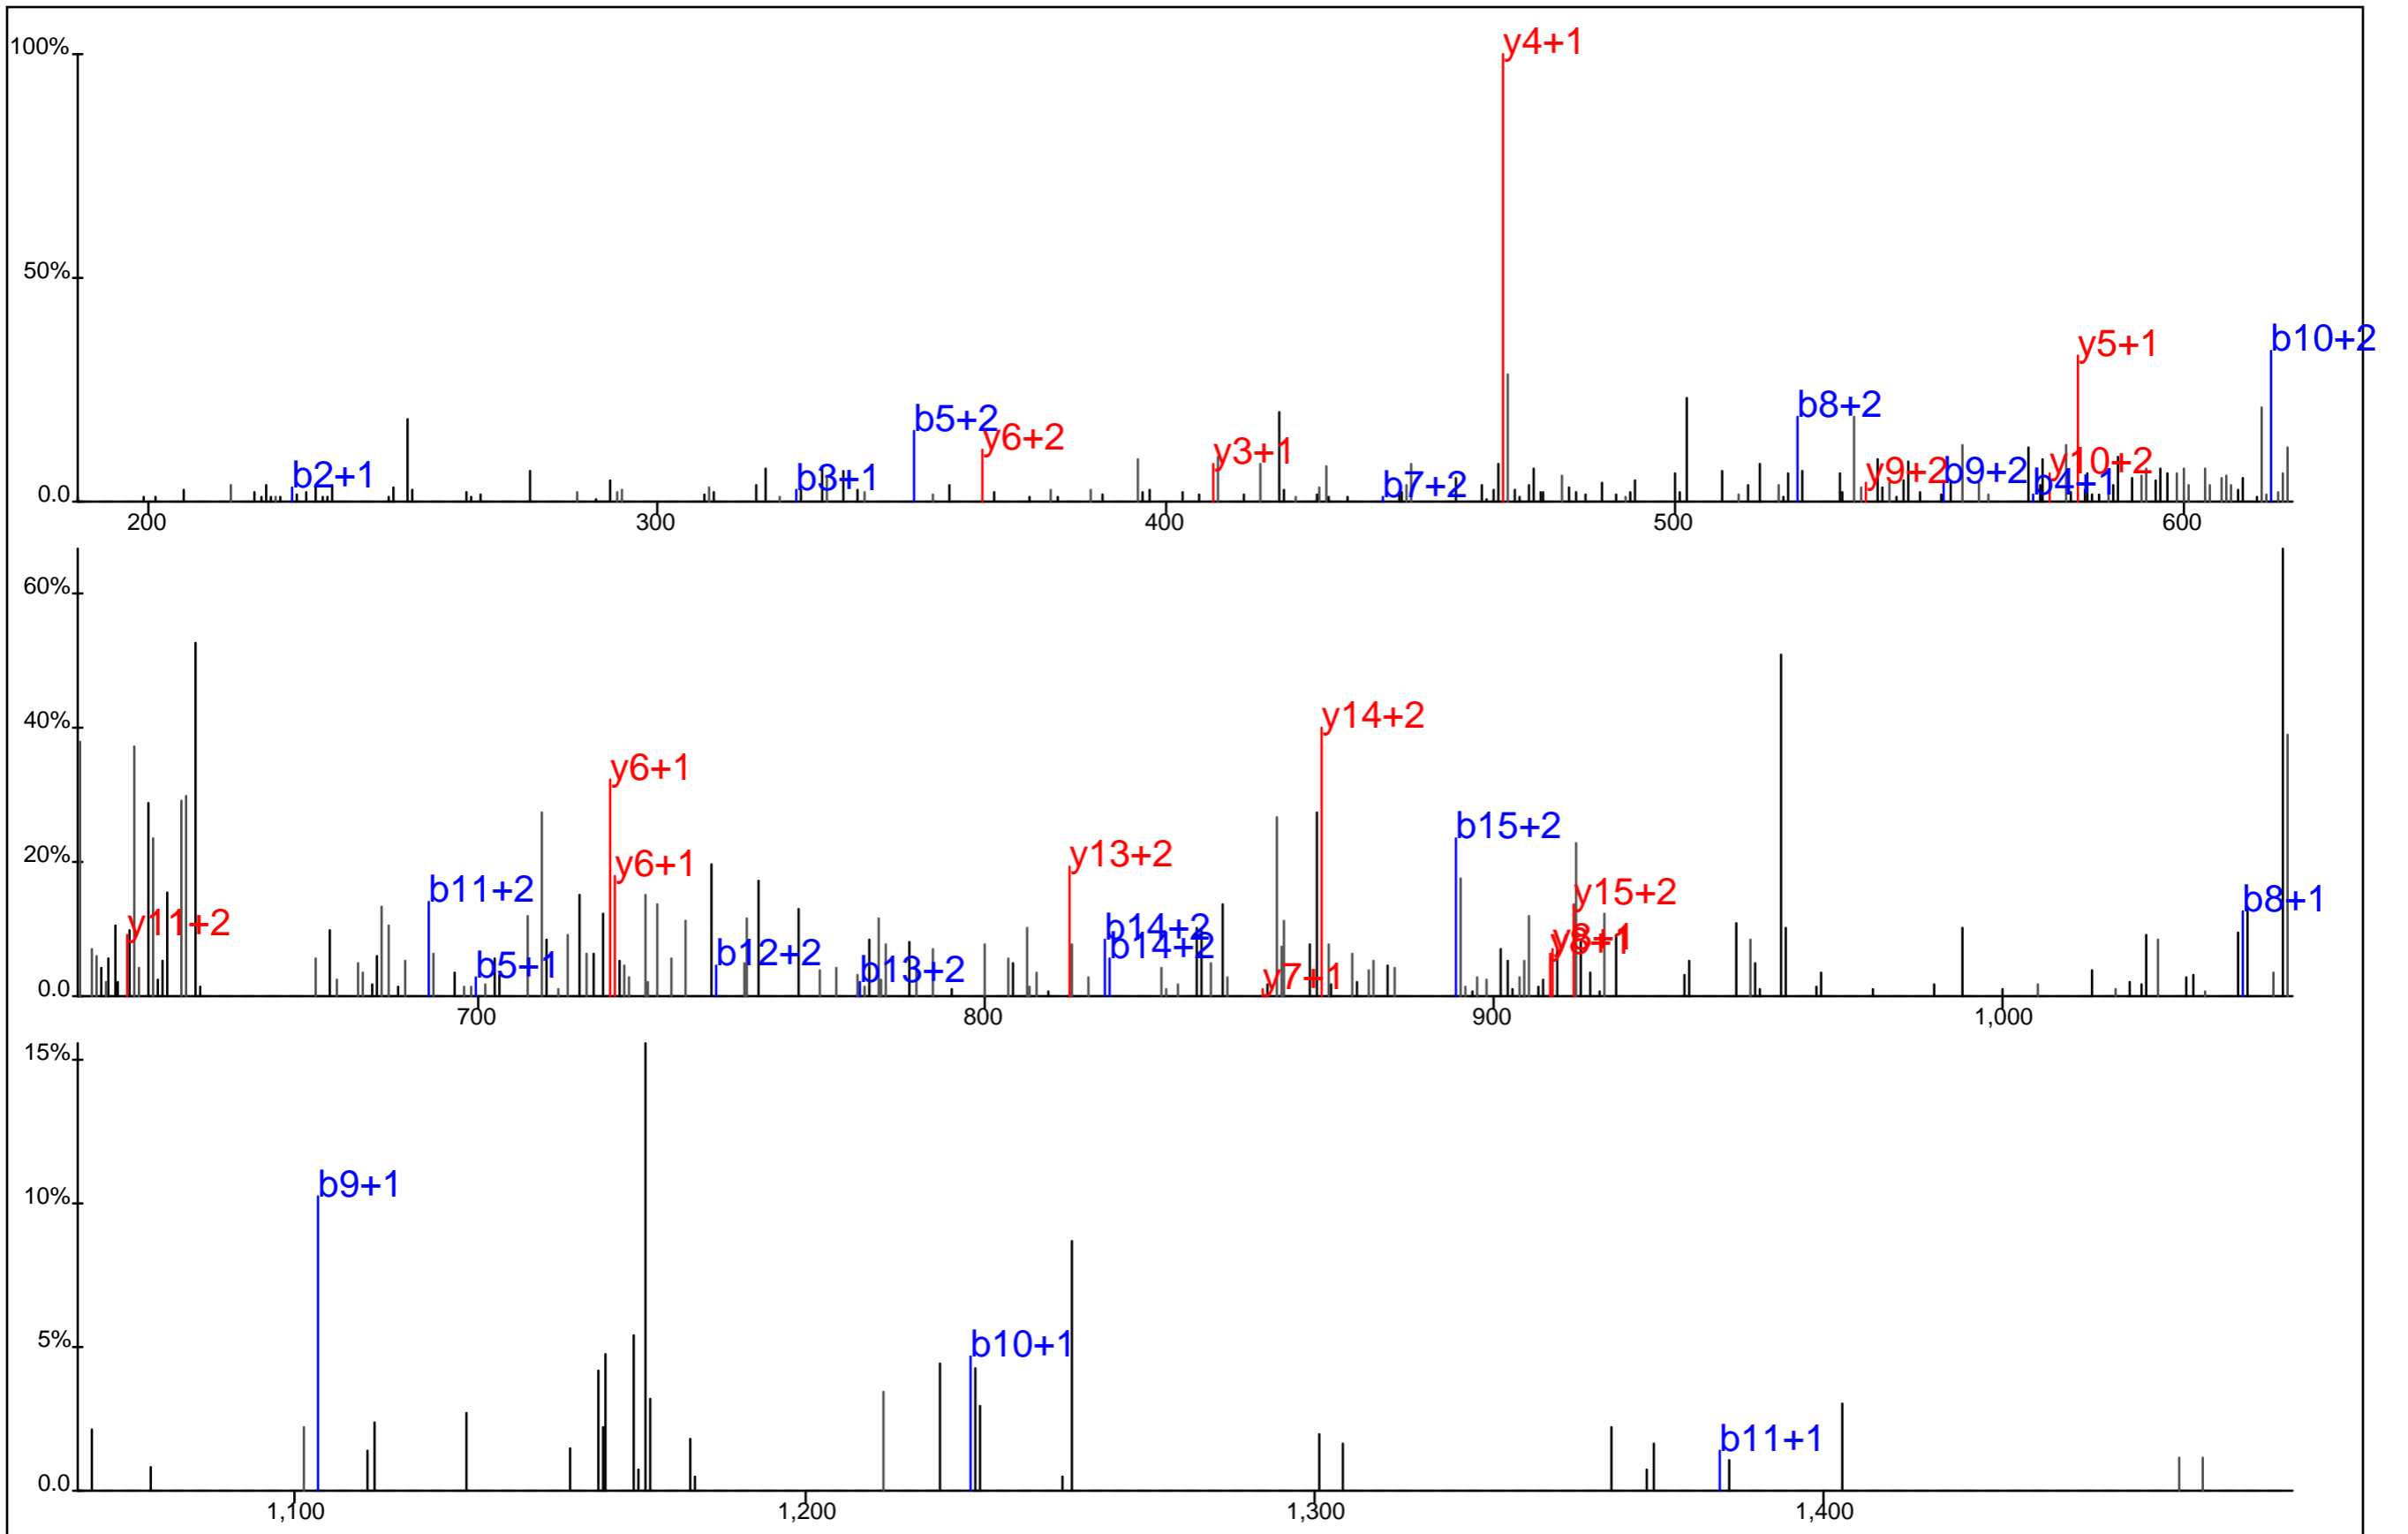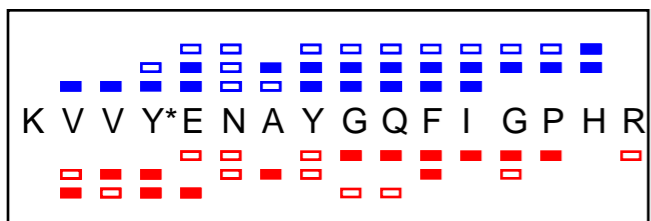

Protein Name: Thioredoxin reductase 1  
 gi Accession: 1843434  
 Precursor Mass: 653.3107+3  
 Delta Mass: 7.335 ppm  
 XCorr: 12.2

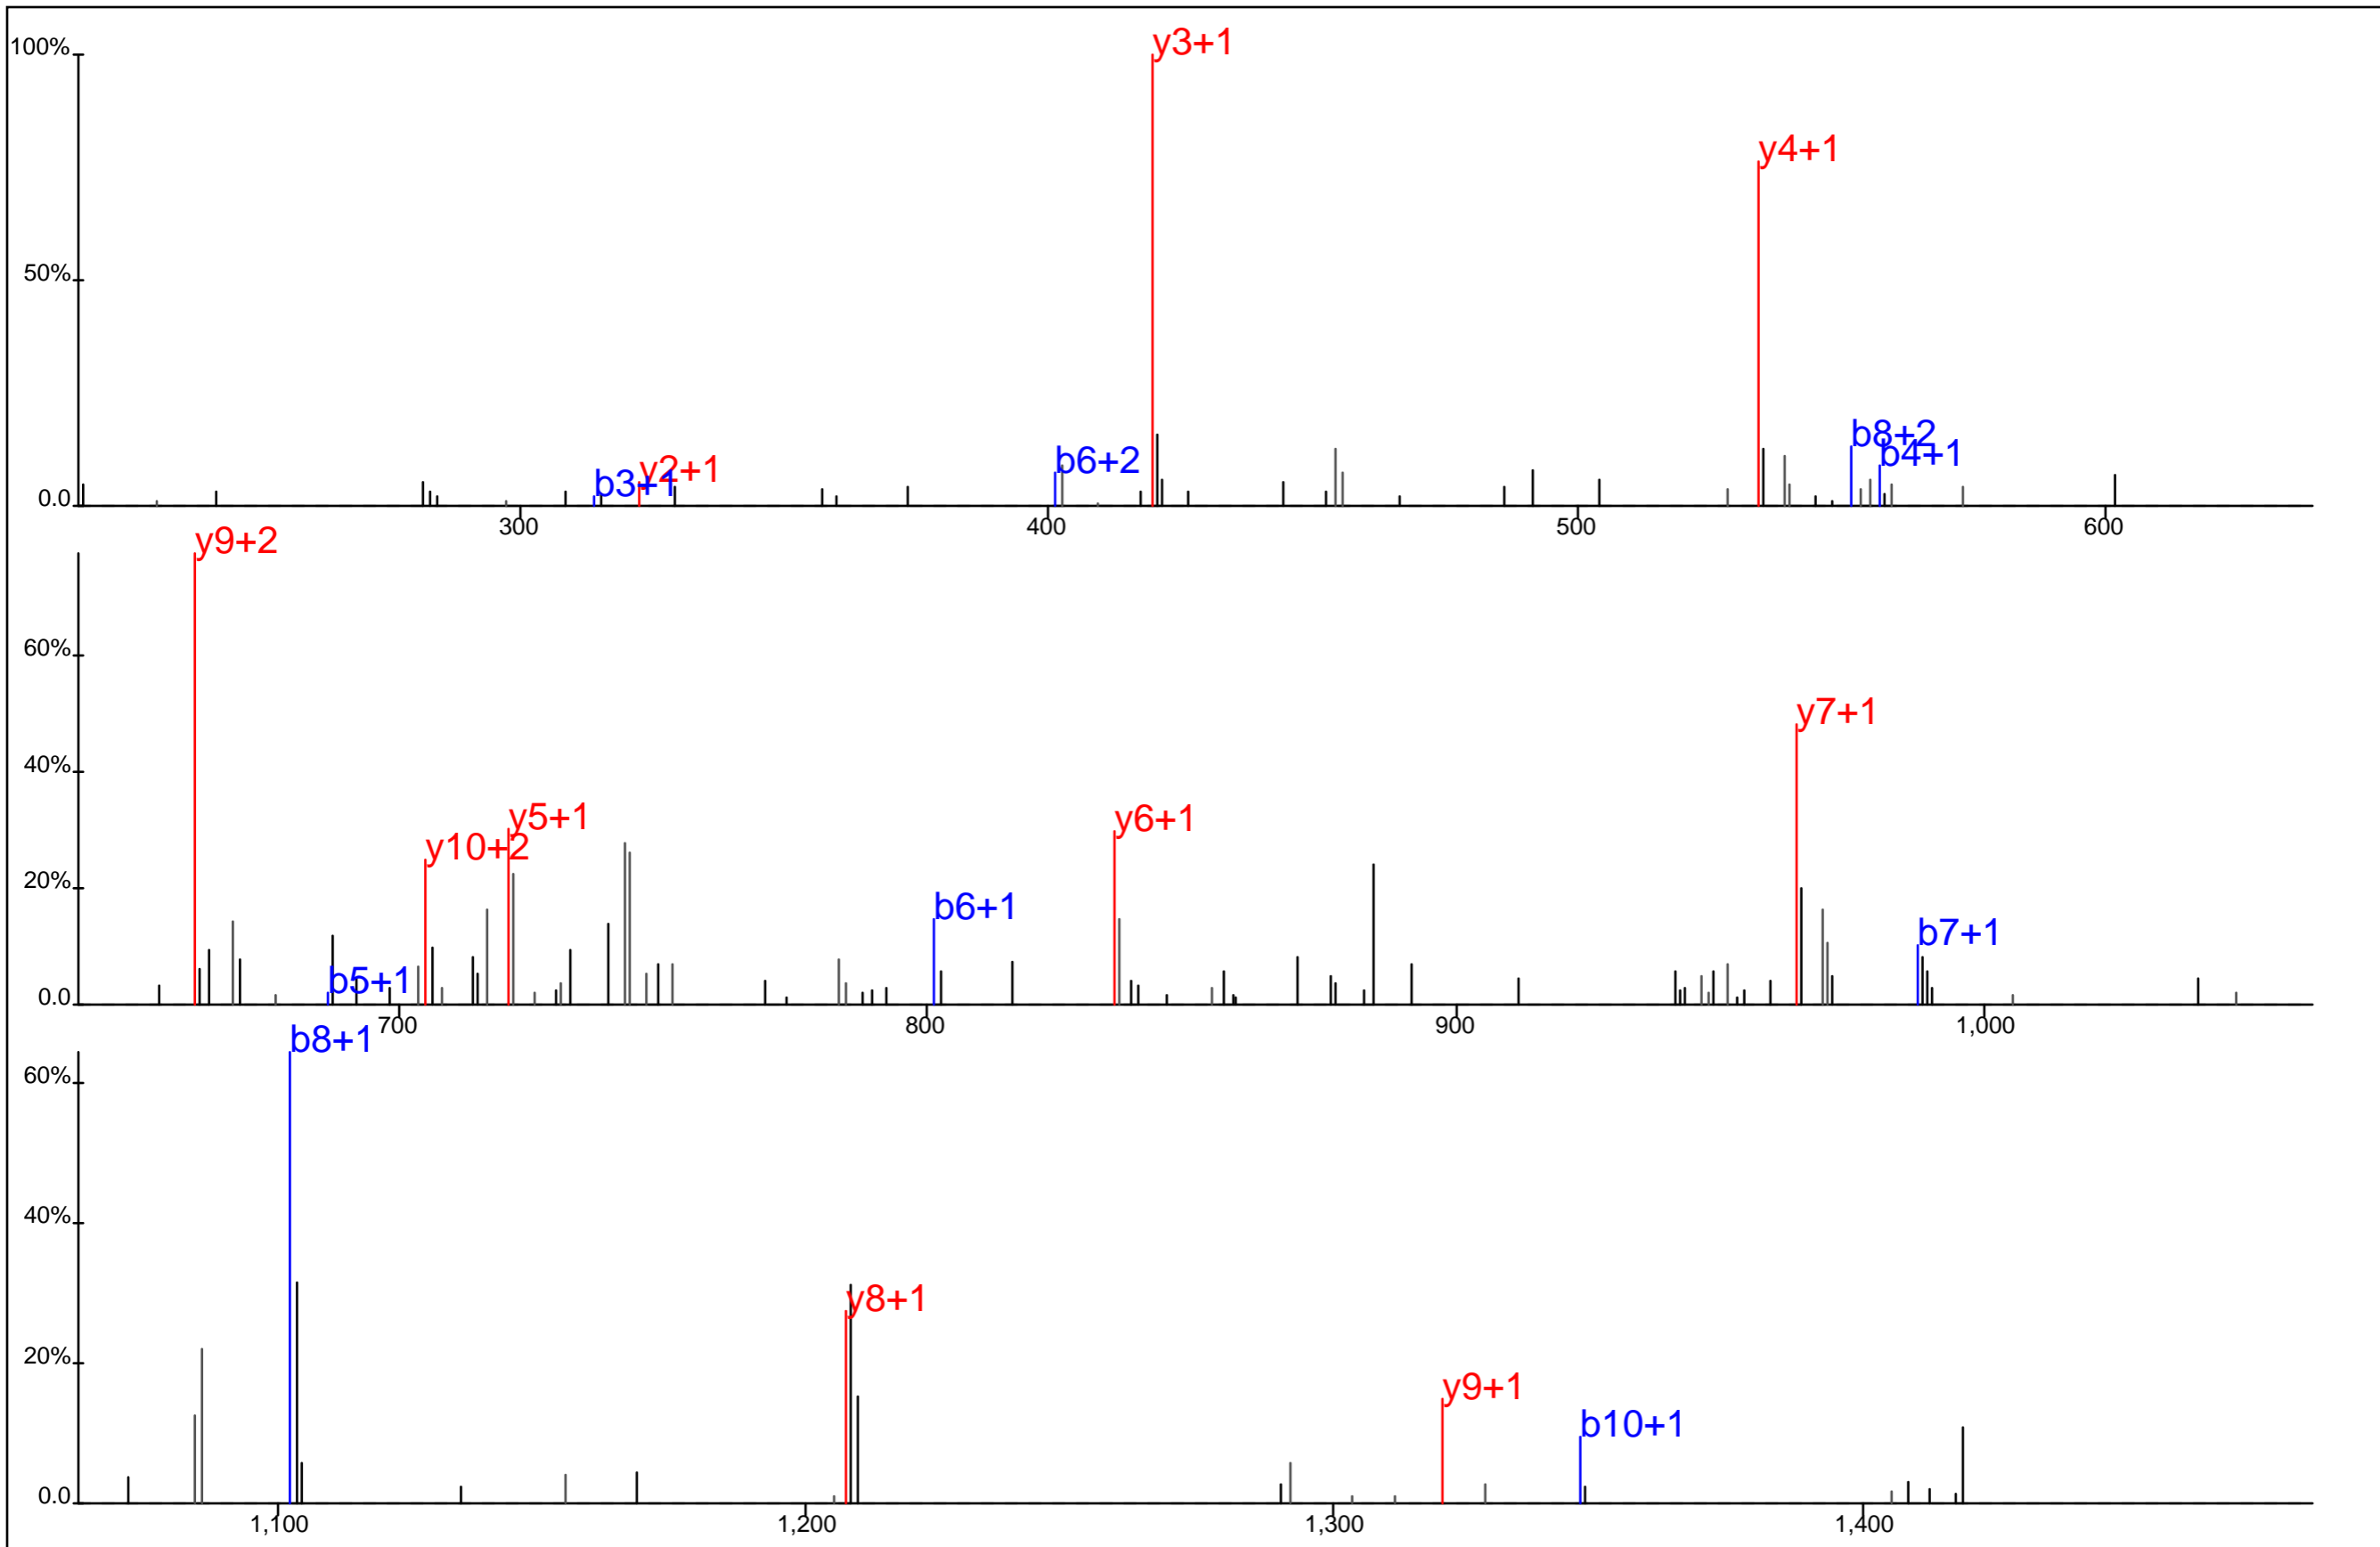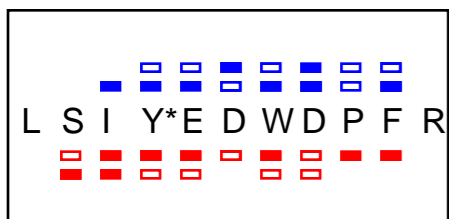

Protein Name: TIAM1  
 gi Accession: 115583670  
 Precursor Mass: 760.8259+2  
 Delta Mass: 0.830 ppm  
 XCorr: 43.19

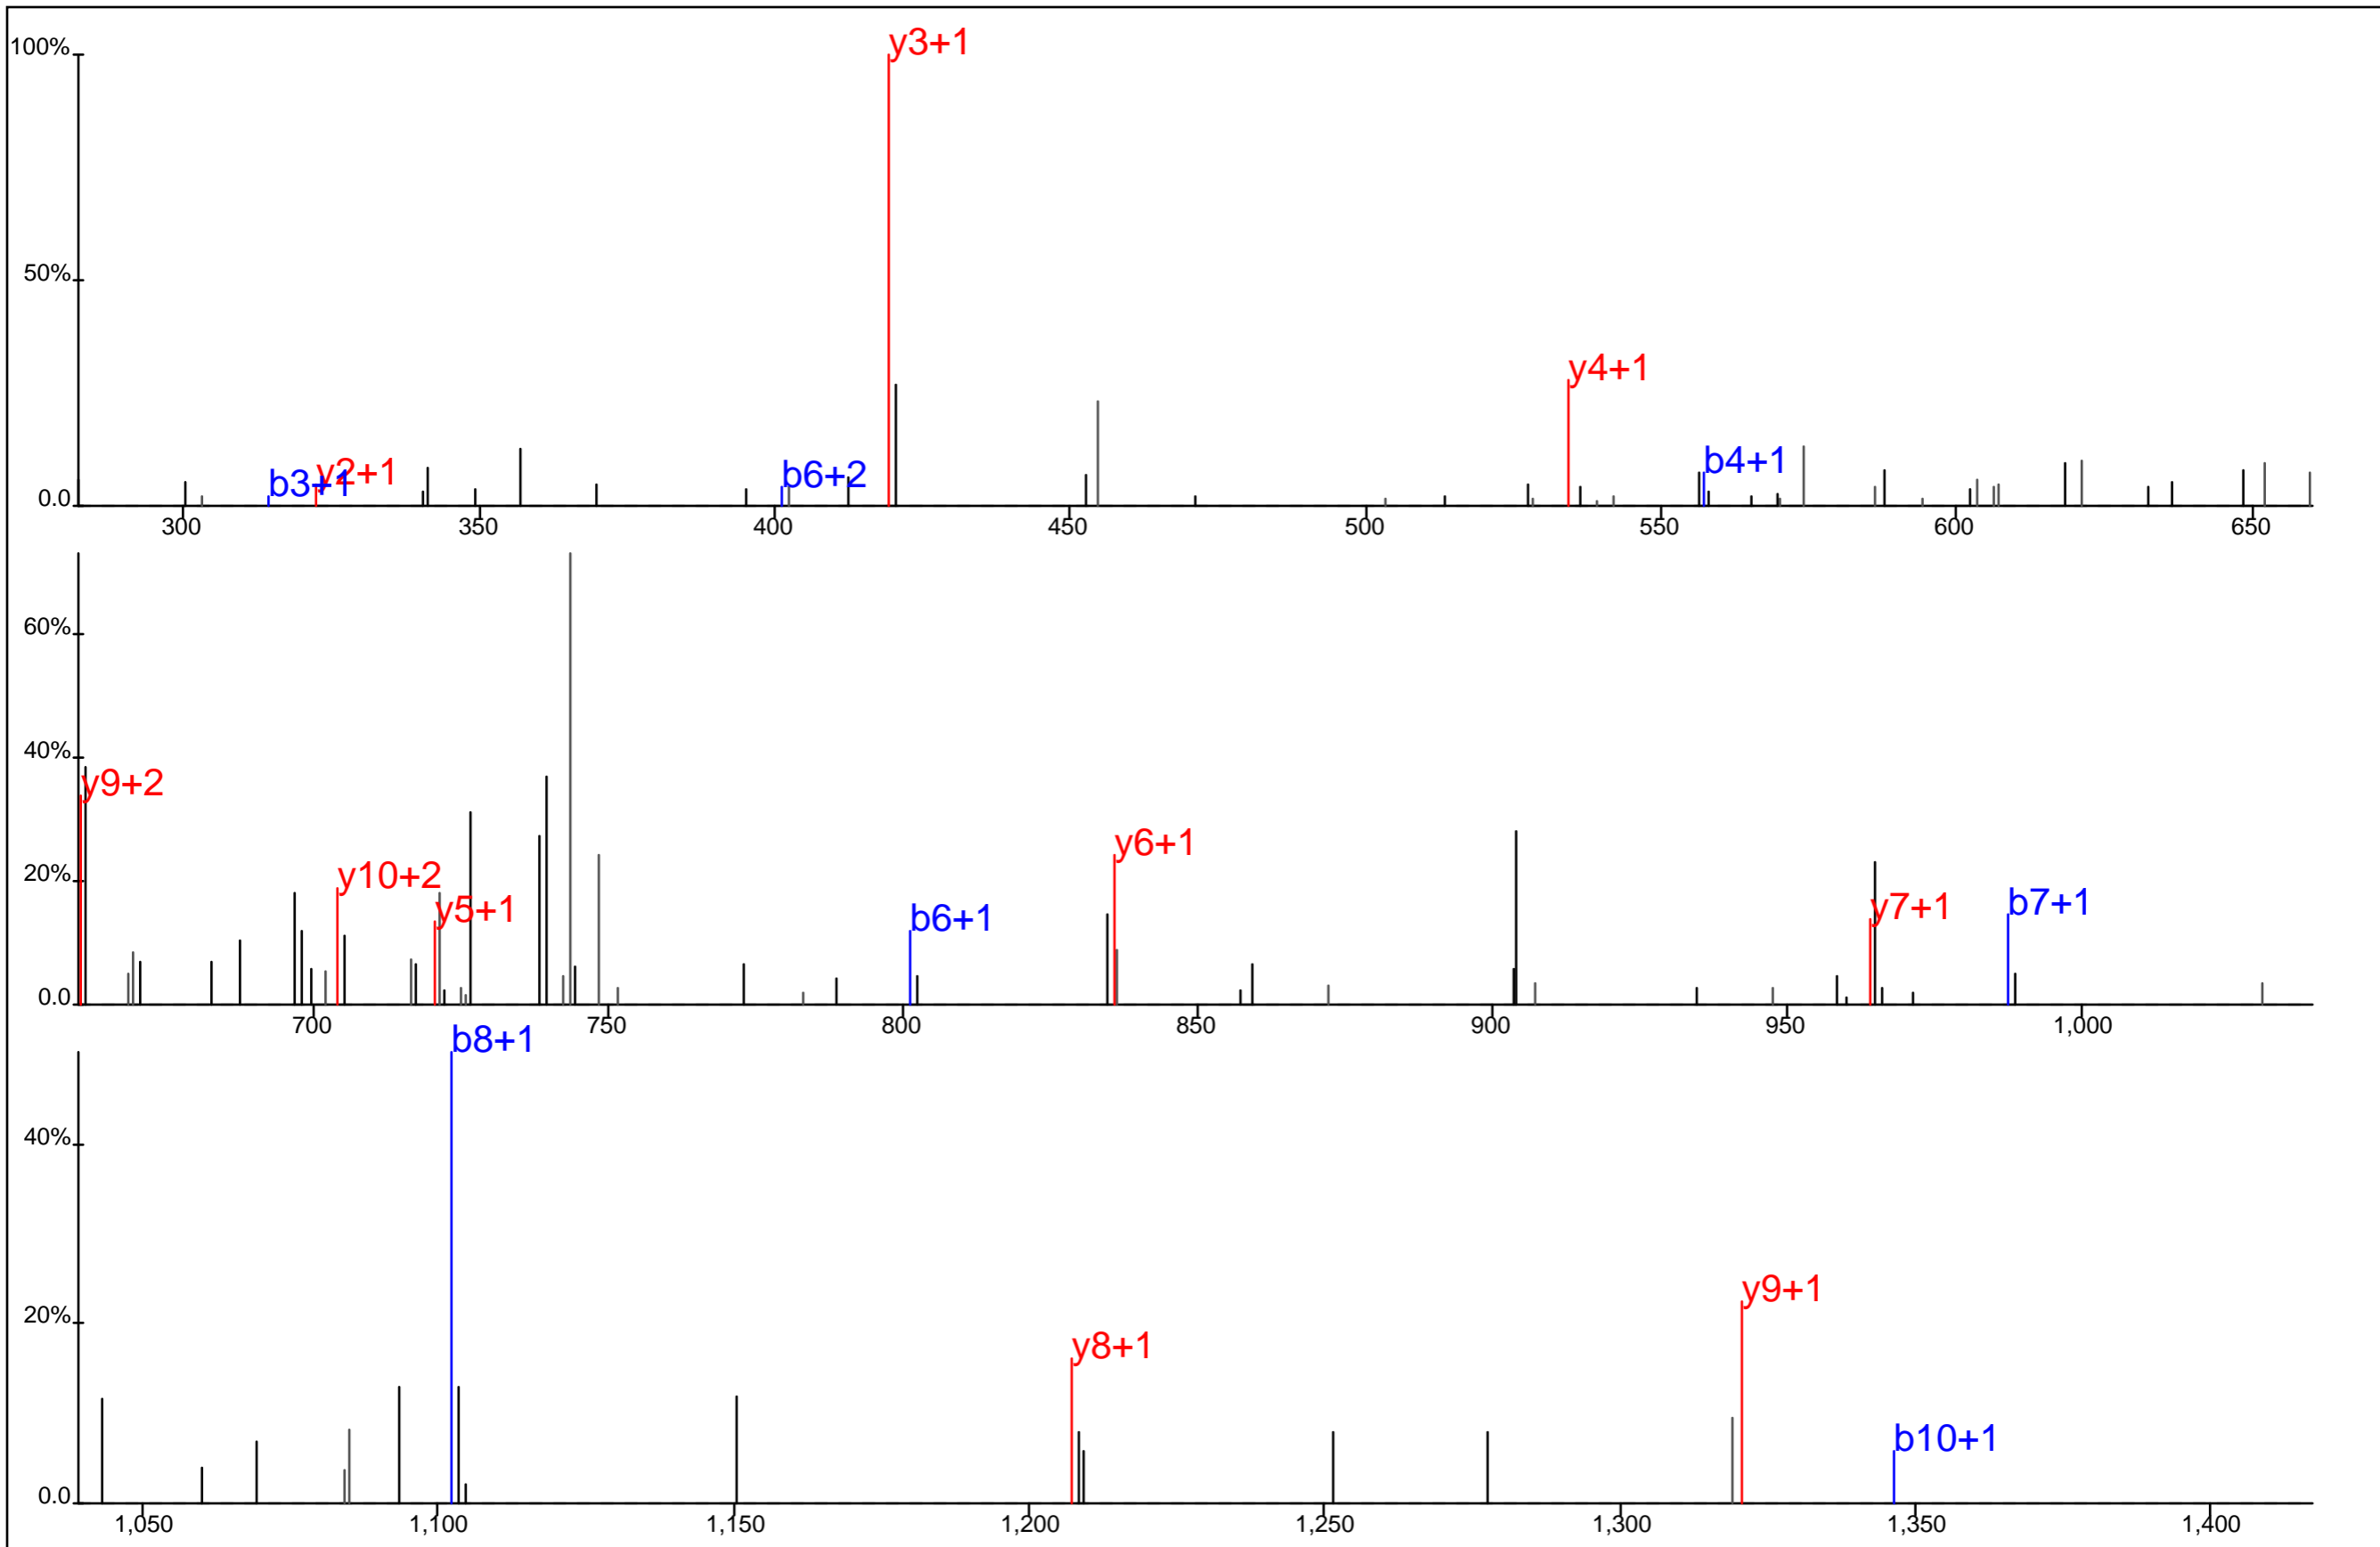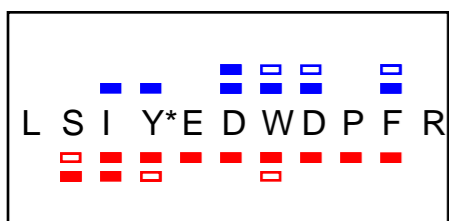

Protein Name: TIAM1  
 gi Accession: 115583670  
 Precursor Mass: 760.8293+2  
 Delta Mass: 3.741 ppm  
 XCorr: 30.02

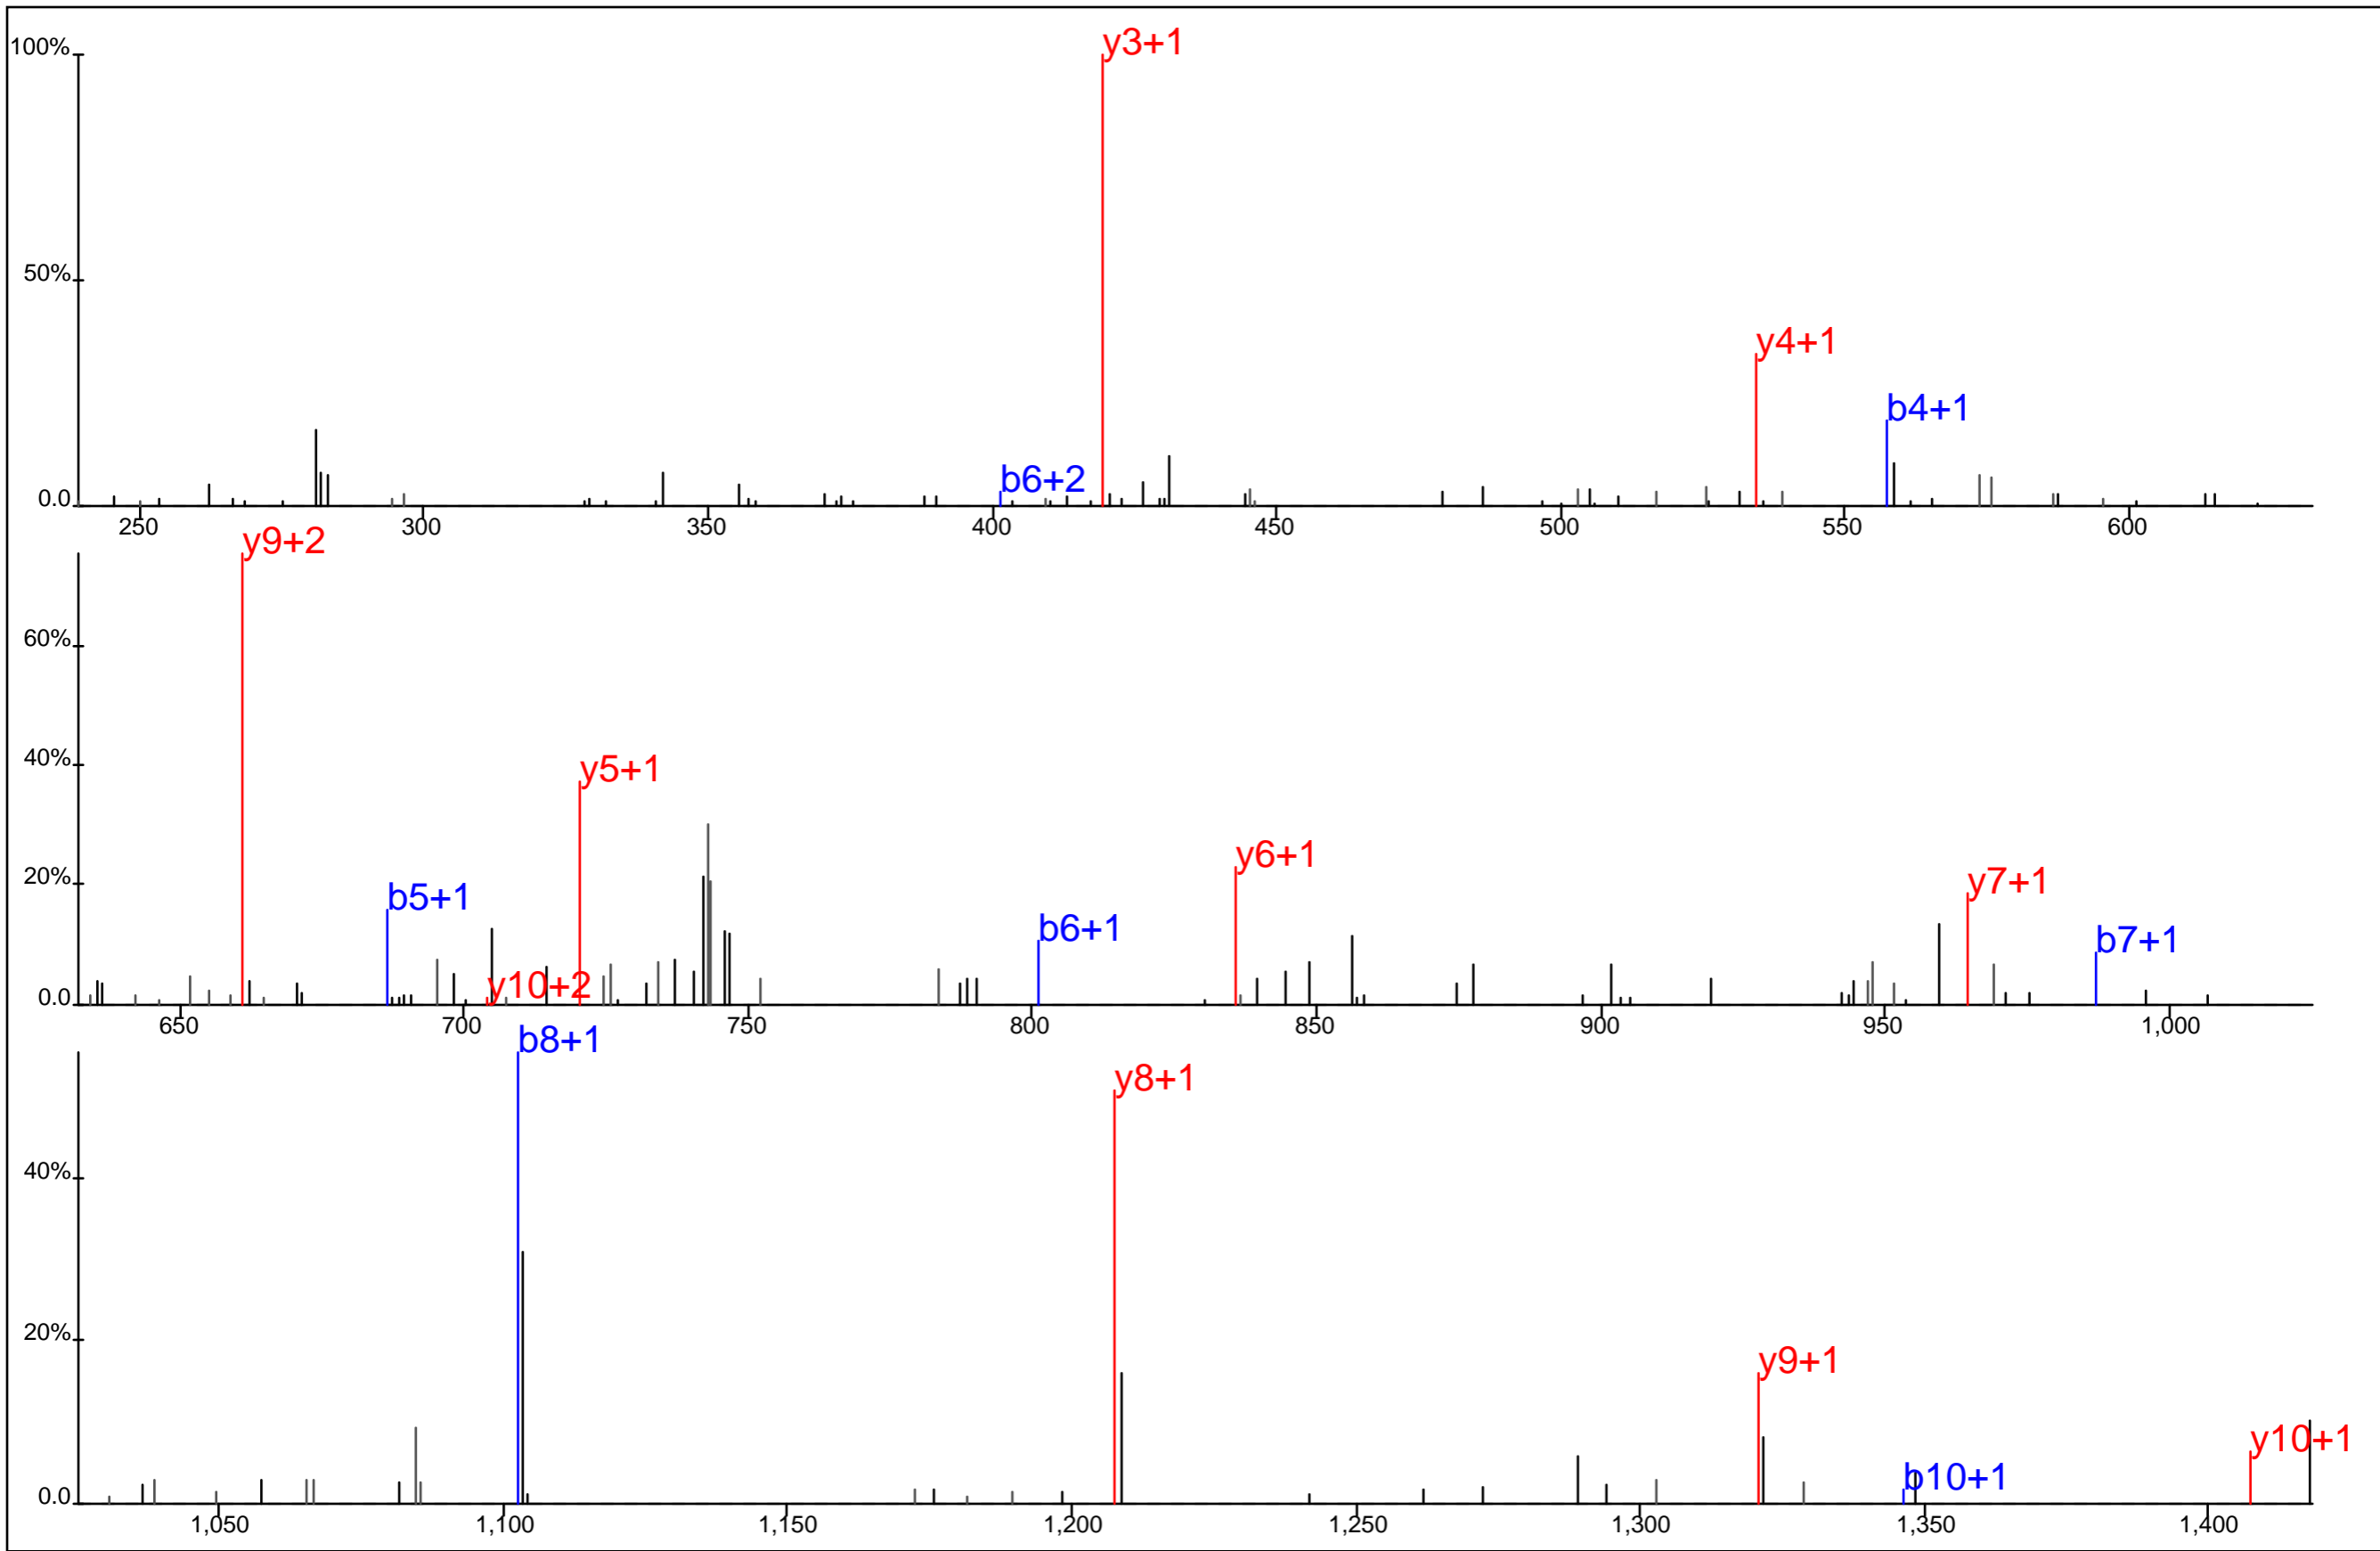

▢ ▢ ▢ ▢ ▢ ▢ ▢  
**L S I Y\* E D W D P F R**  
▢ ▢ ▢ ▢ ▢ ▢ ▢ ▢

Protein Name: TIAM1  
 gi Accession: 115583670  
 Precursor Mass: 760.8295+2  
 Delta Mass: 3.984 ppm  
 XCorr: 45.72

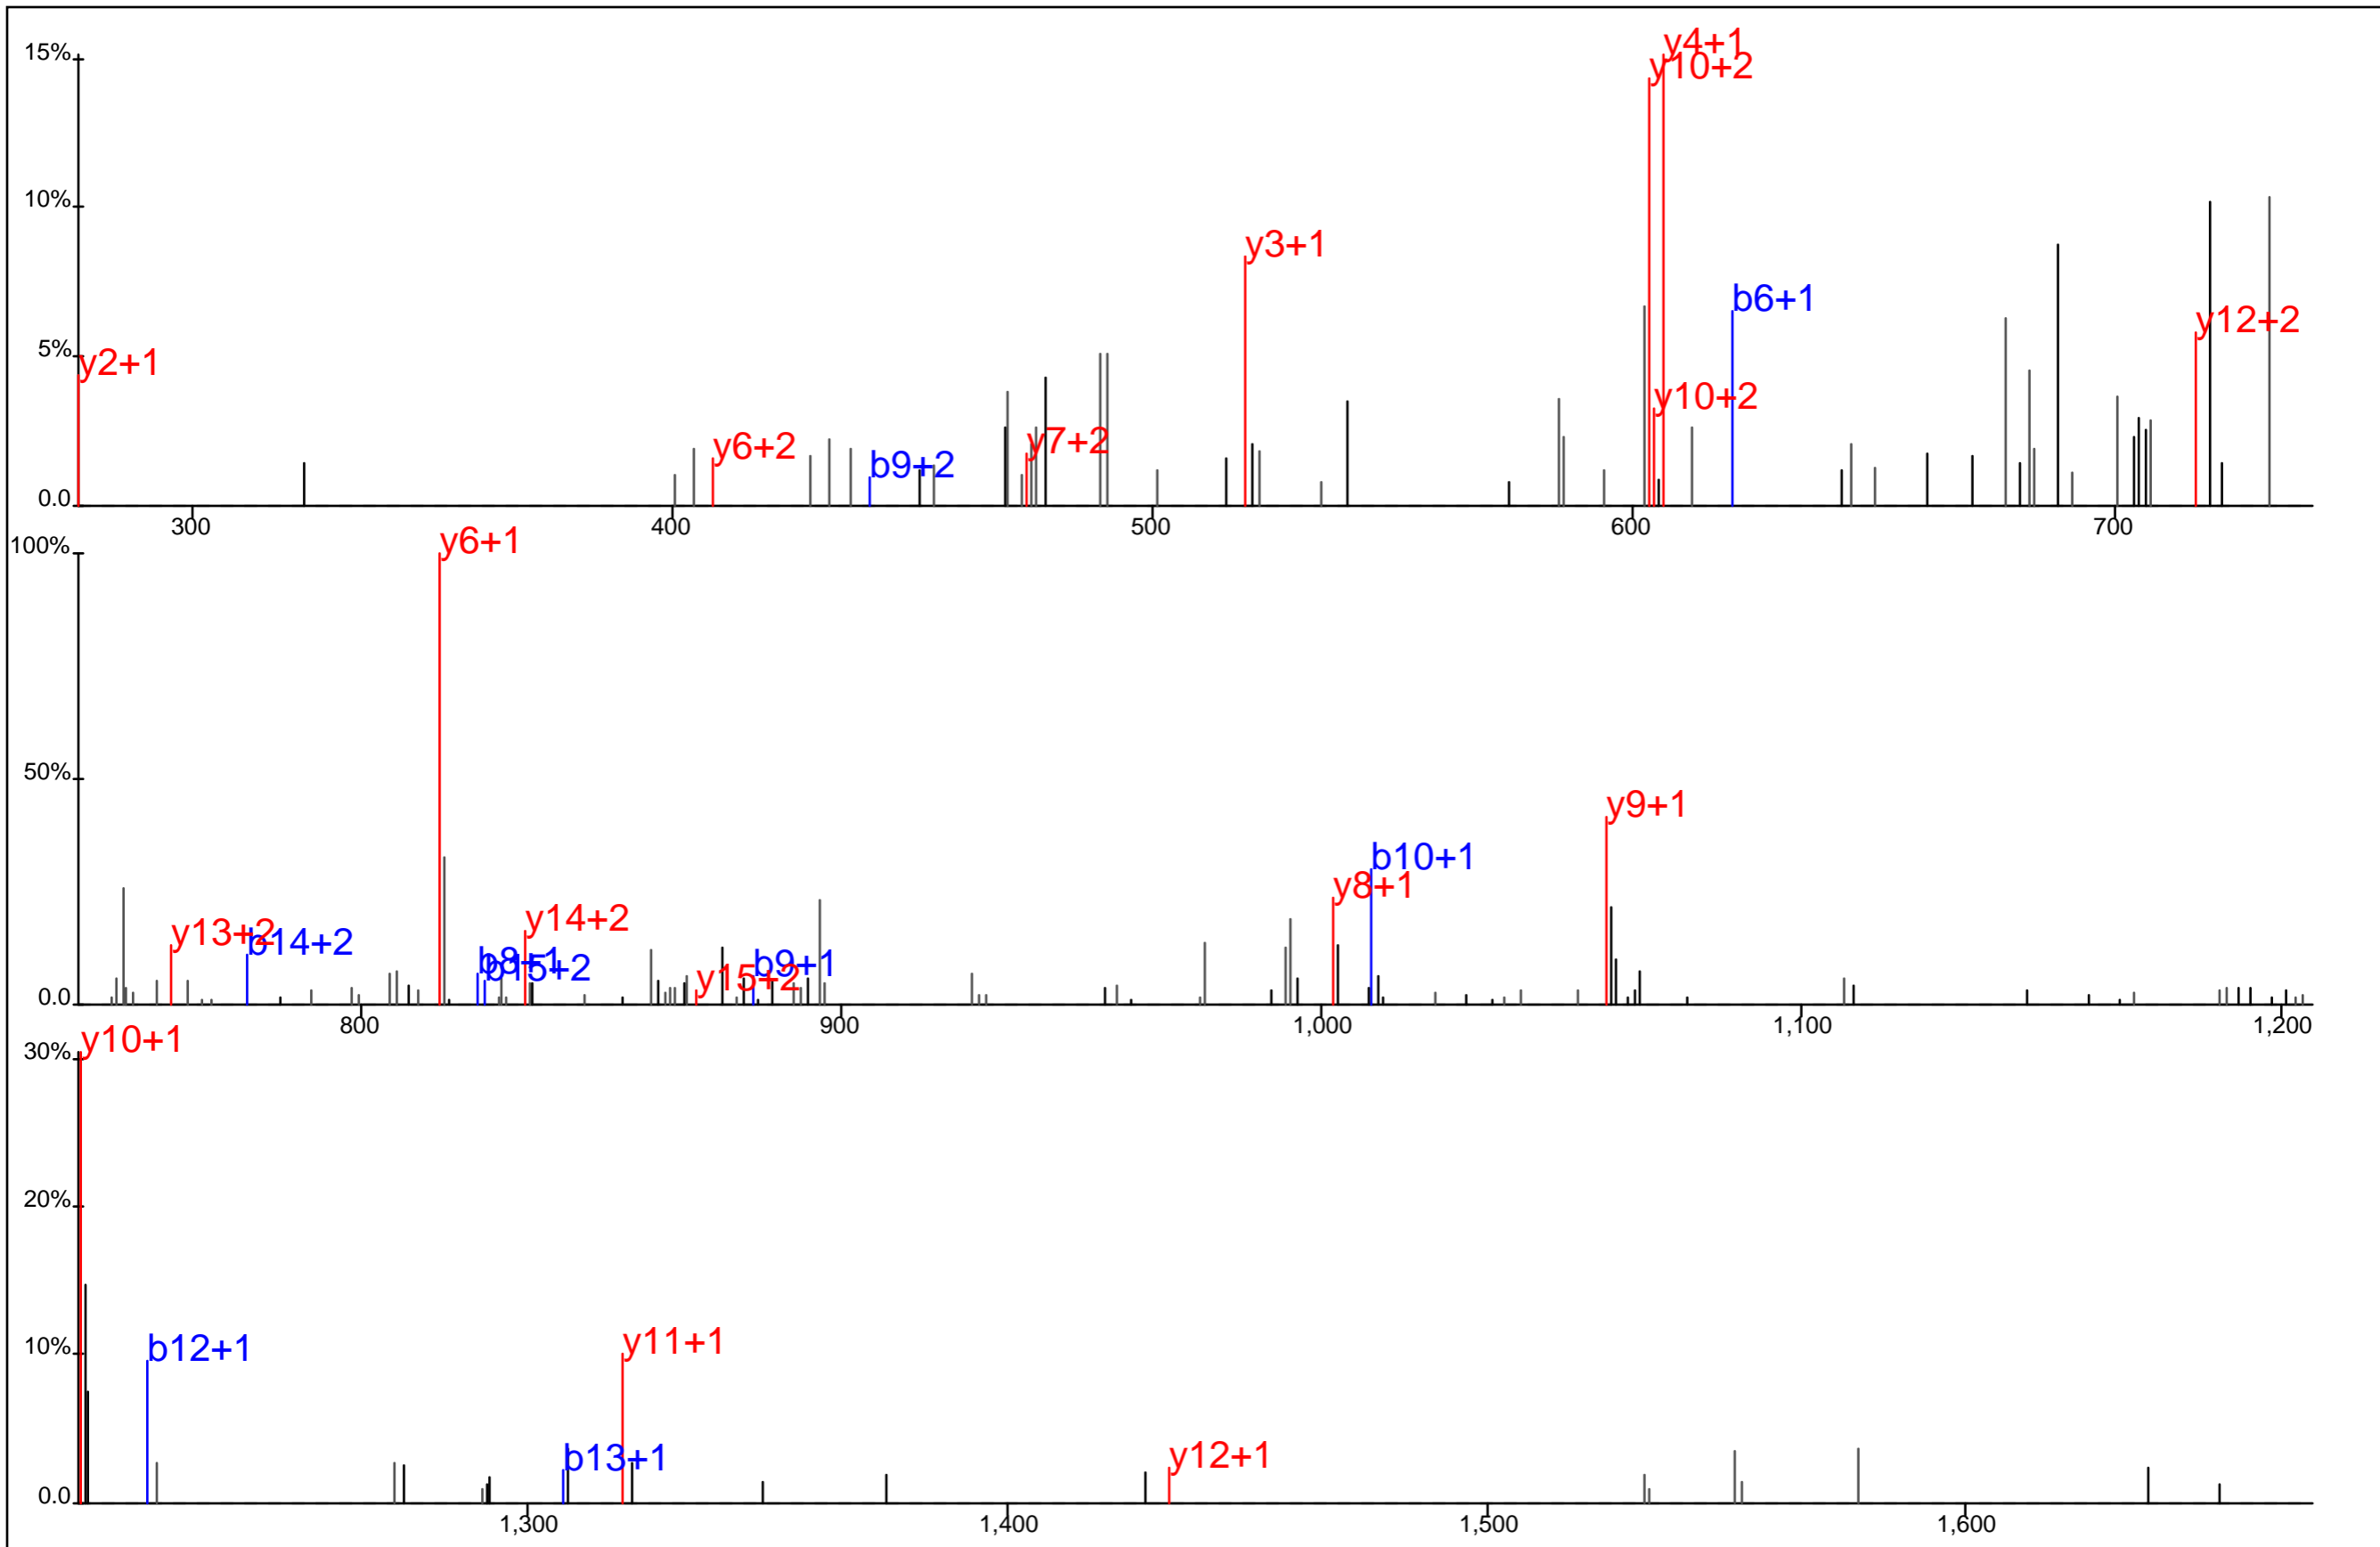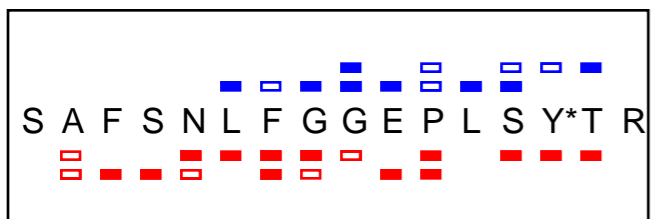

Protein Name: Transferrin receptor  
 gi Accession: 37433  
 Precursor Mass: 913.4155+2  
 Delta Mass: 4.457 ppm  
 XCorr: 51.96

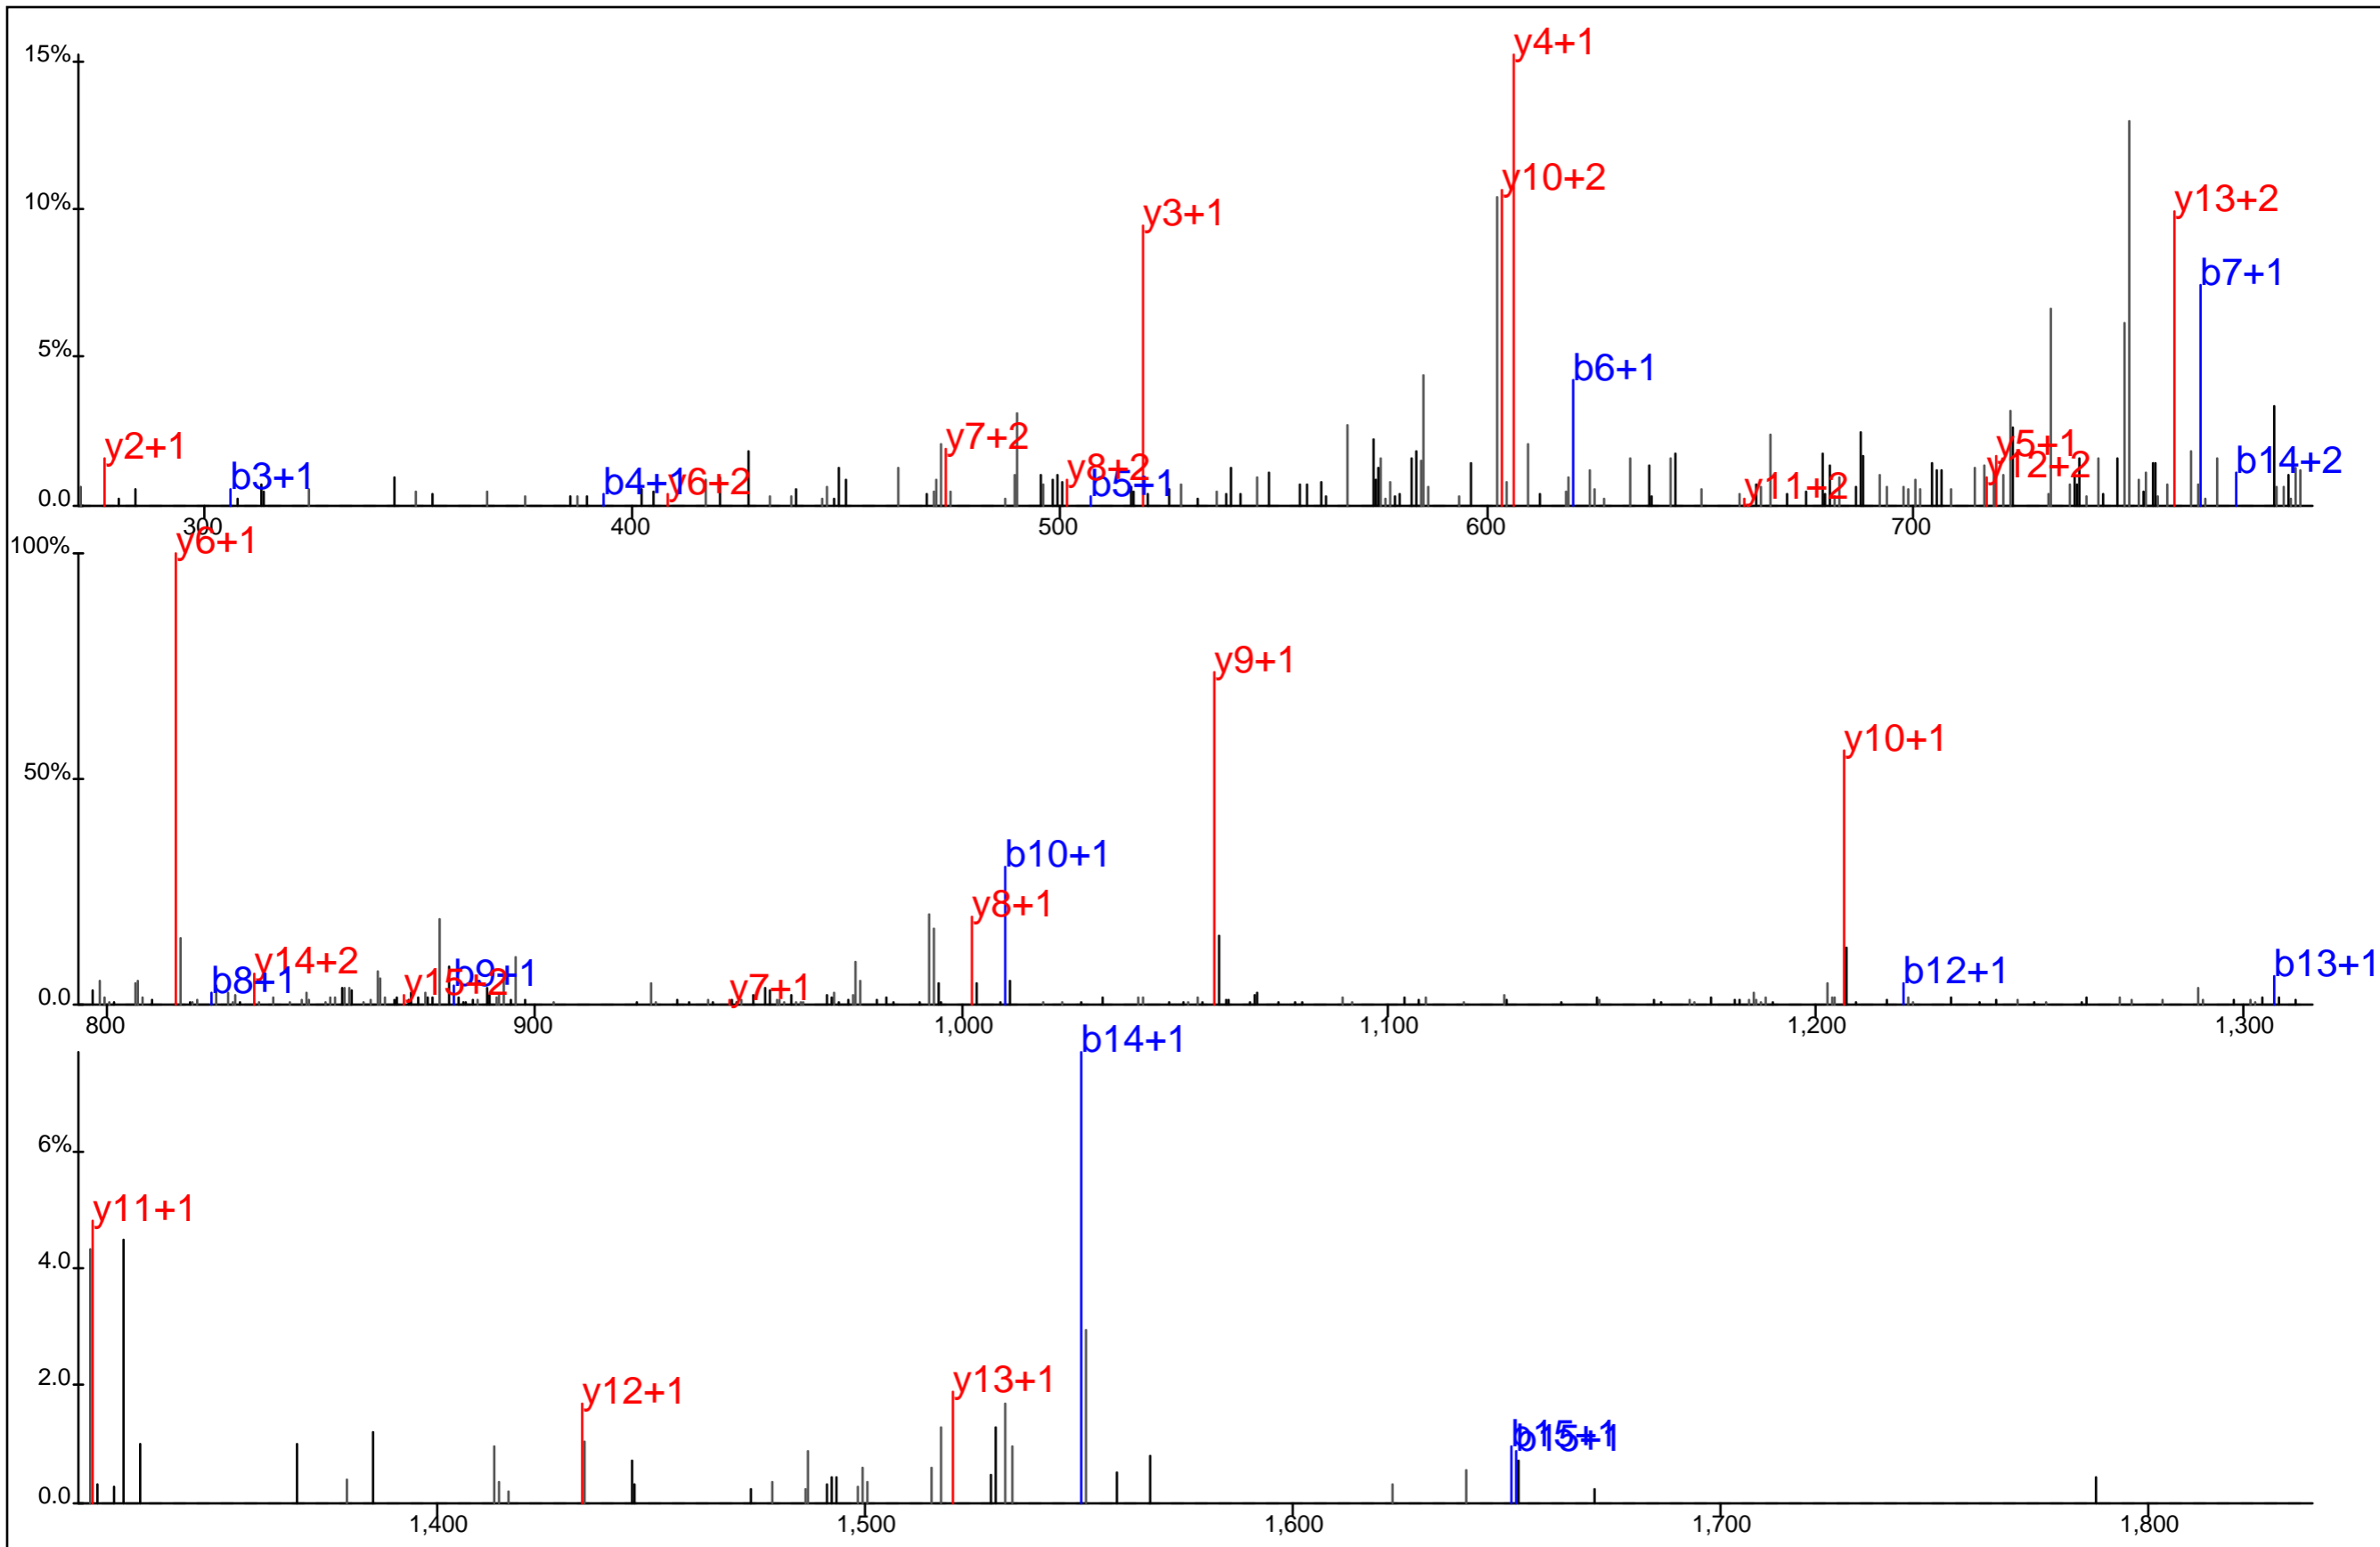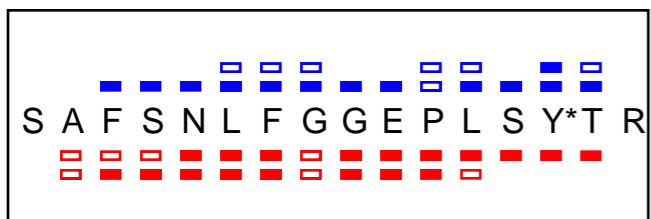

Protein Name: Transferrin receptor  
 gi Accession: 37433  
 Precursor Mass: 913.4132+2  
 Delta Mass: 1.916 ppm  
 XCorr: 53.89



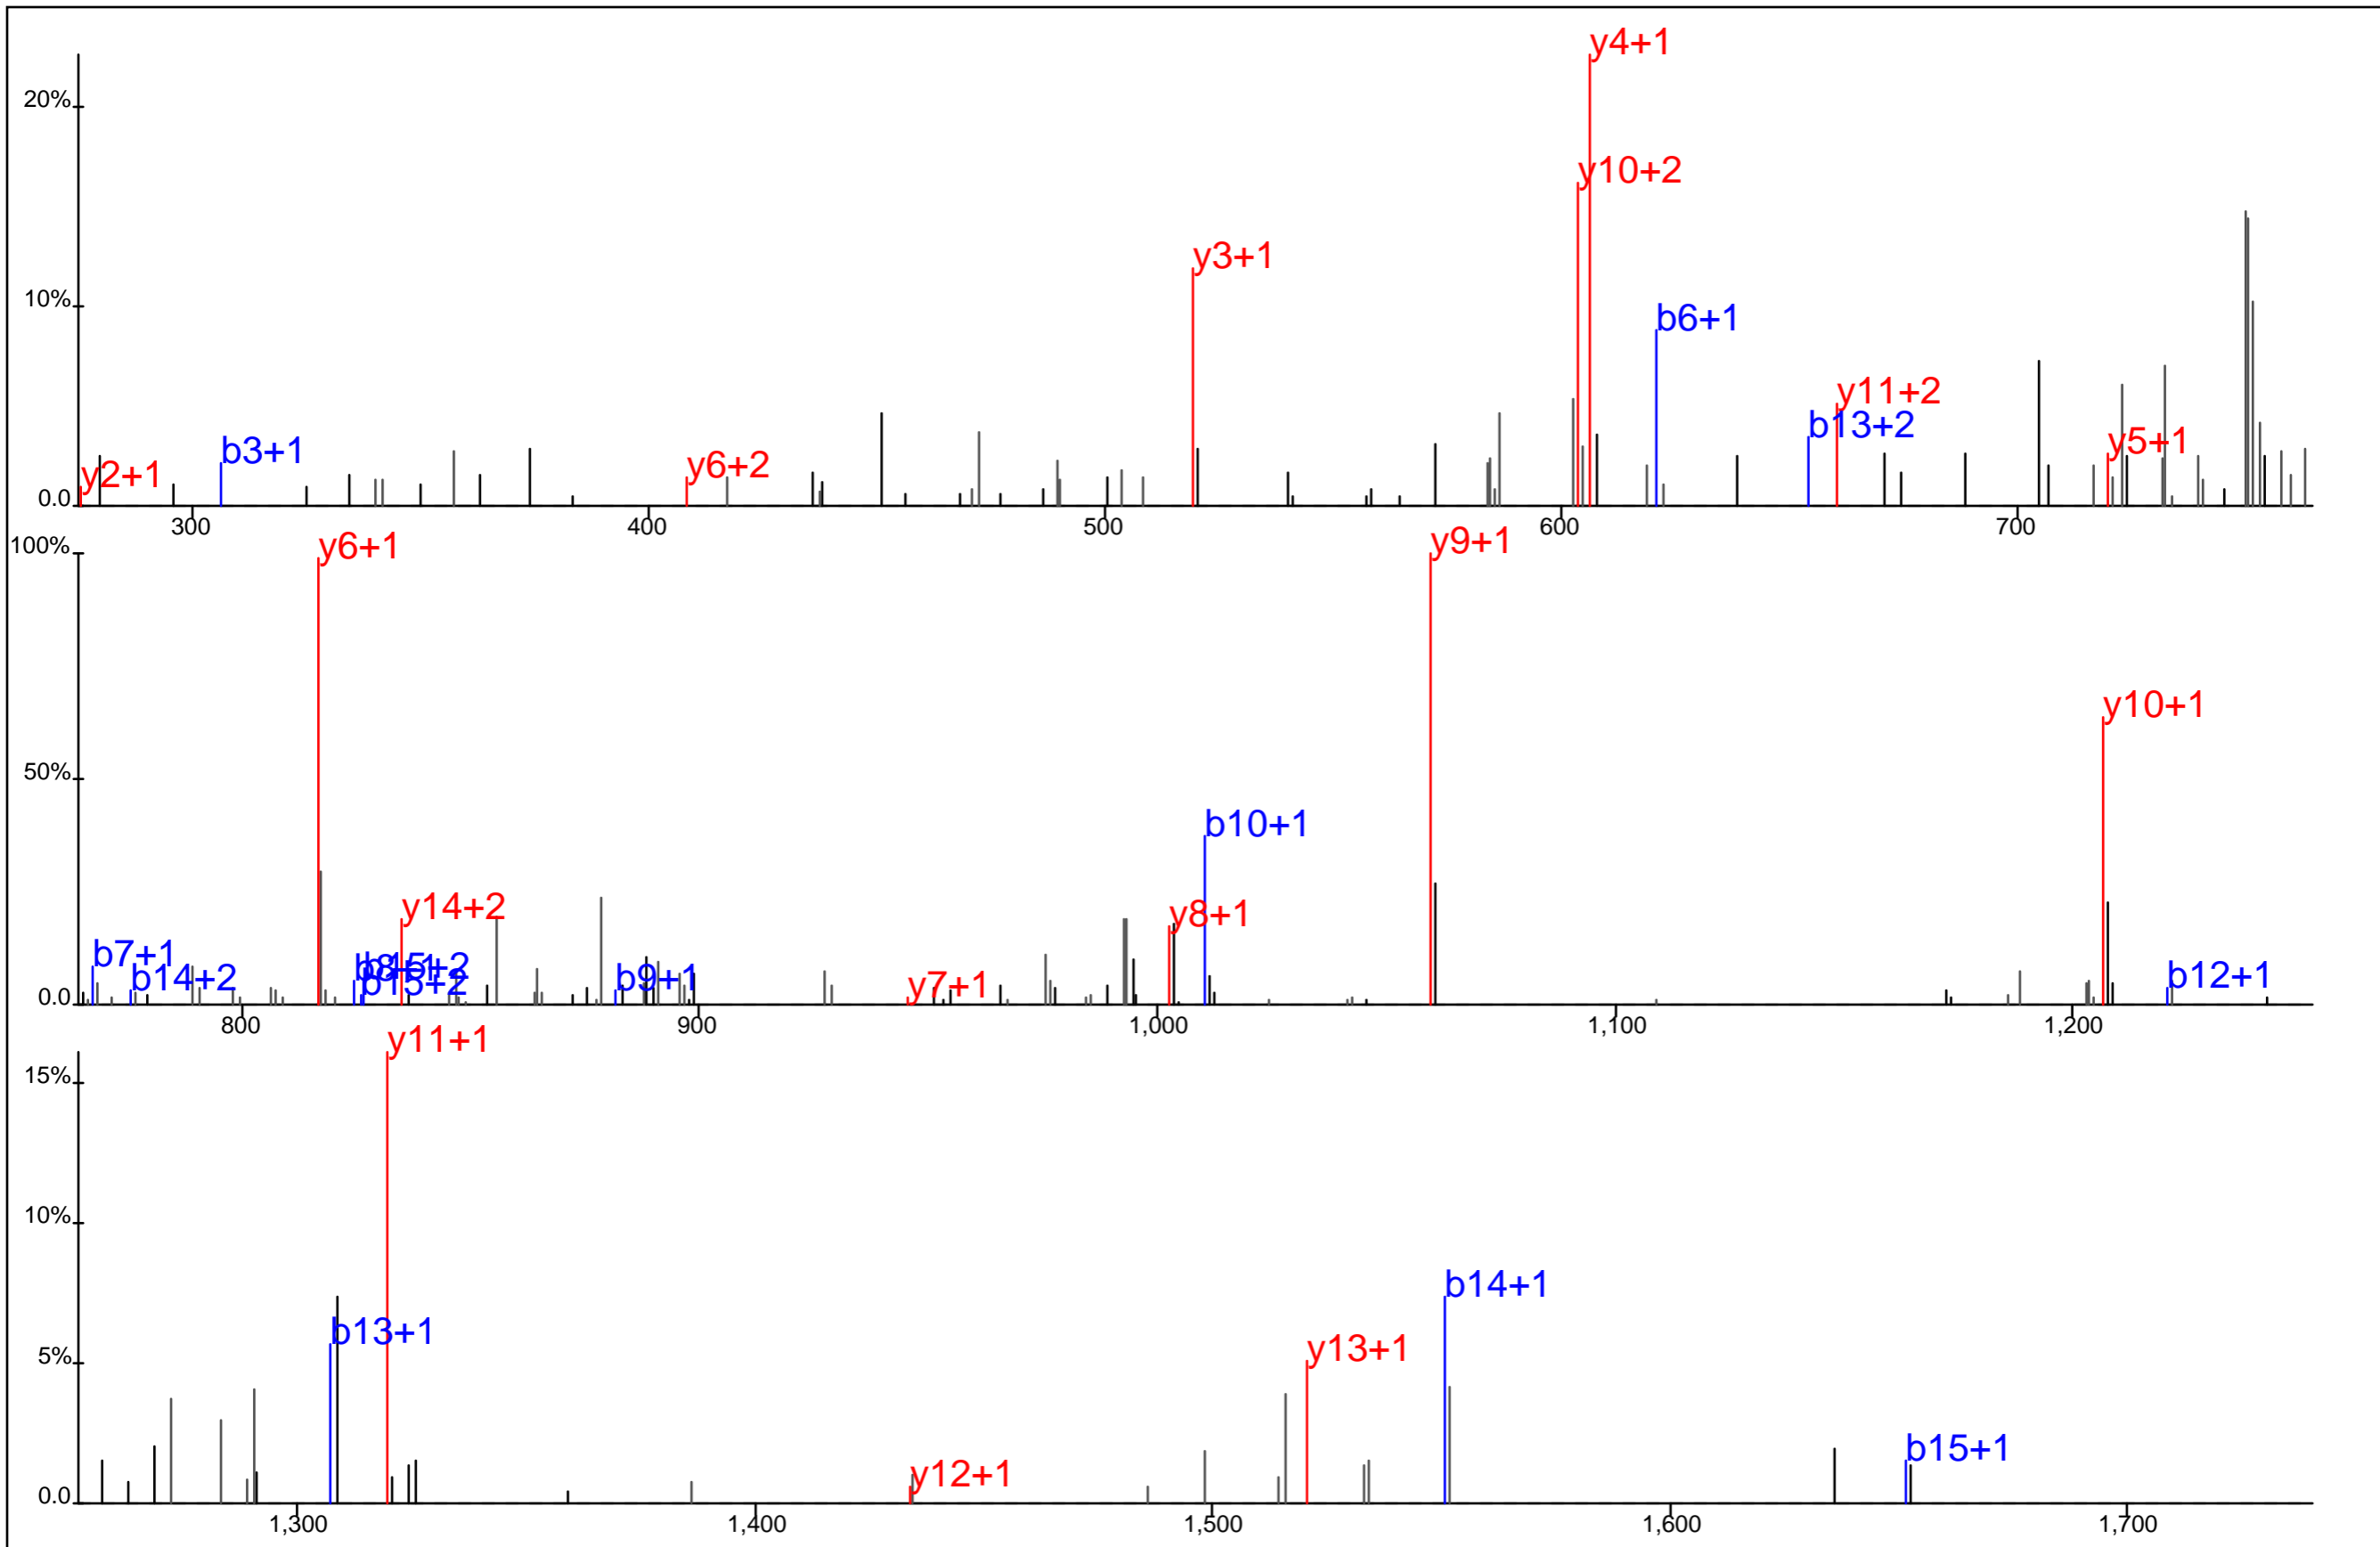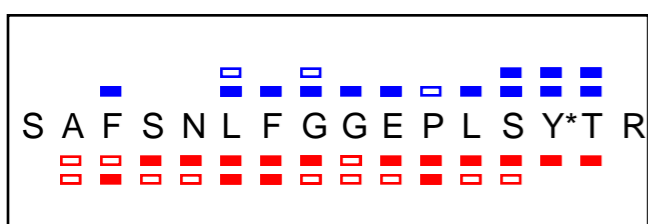

Protein Name: Transferrin receptor  
 gi Accession: 37433  
 Precursor Mass: 913.4124+2  
 Delta Mass: 1.045 ppm  
 XCorr: 37.0

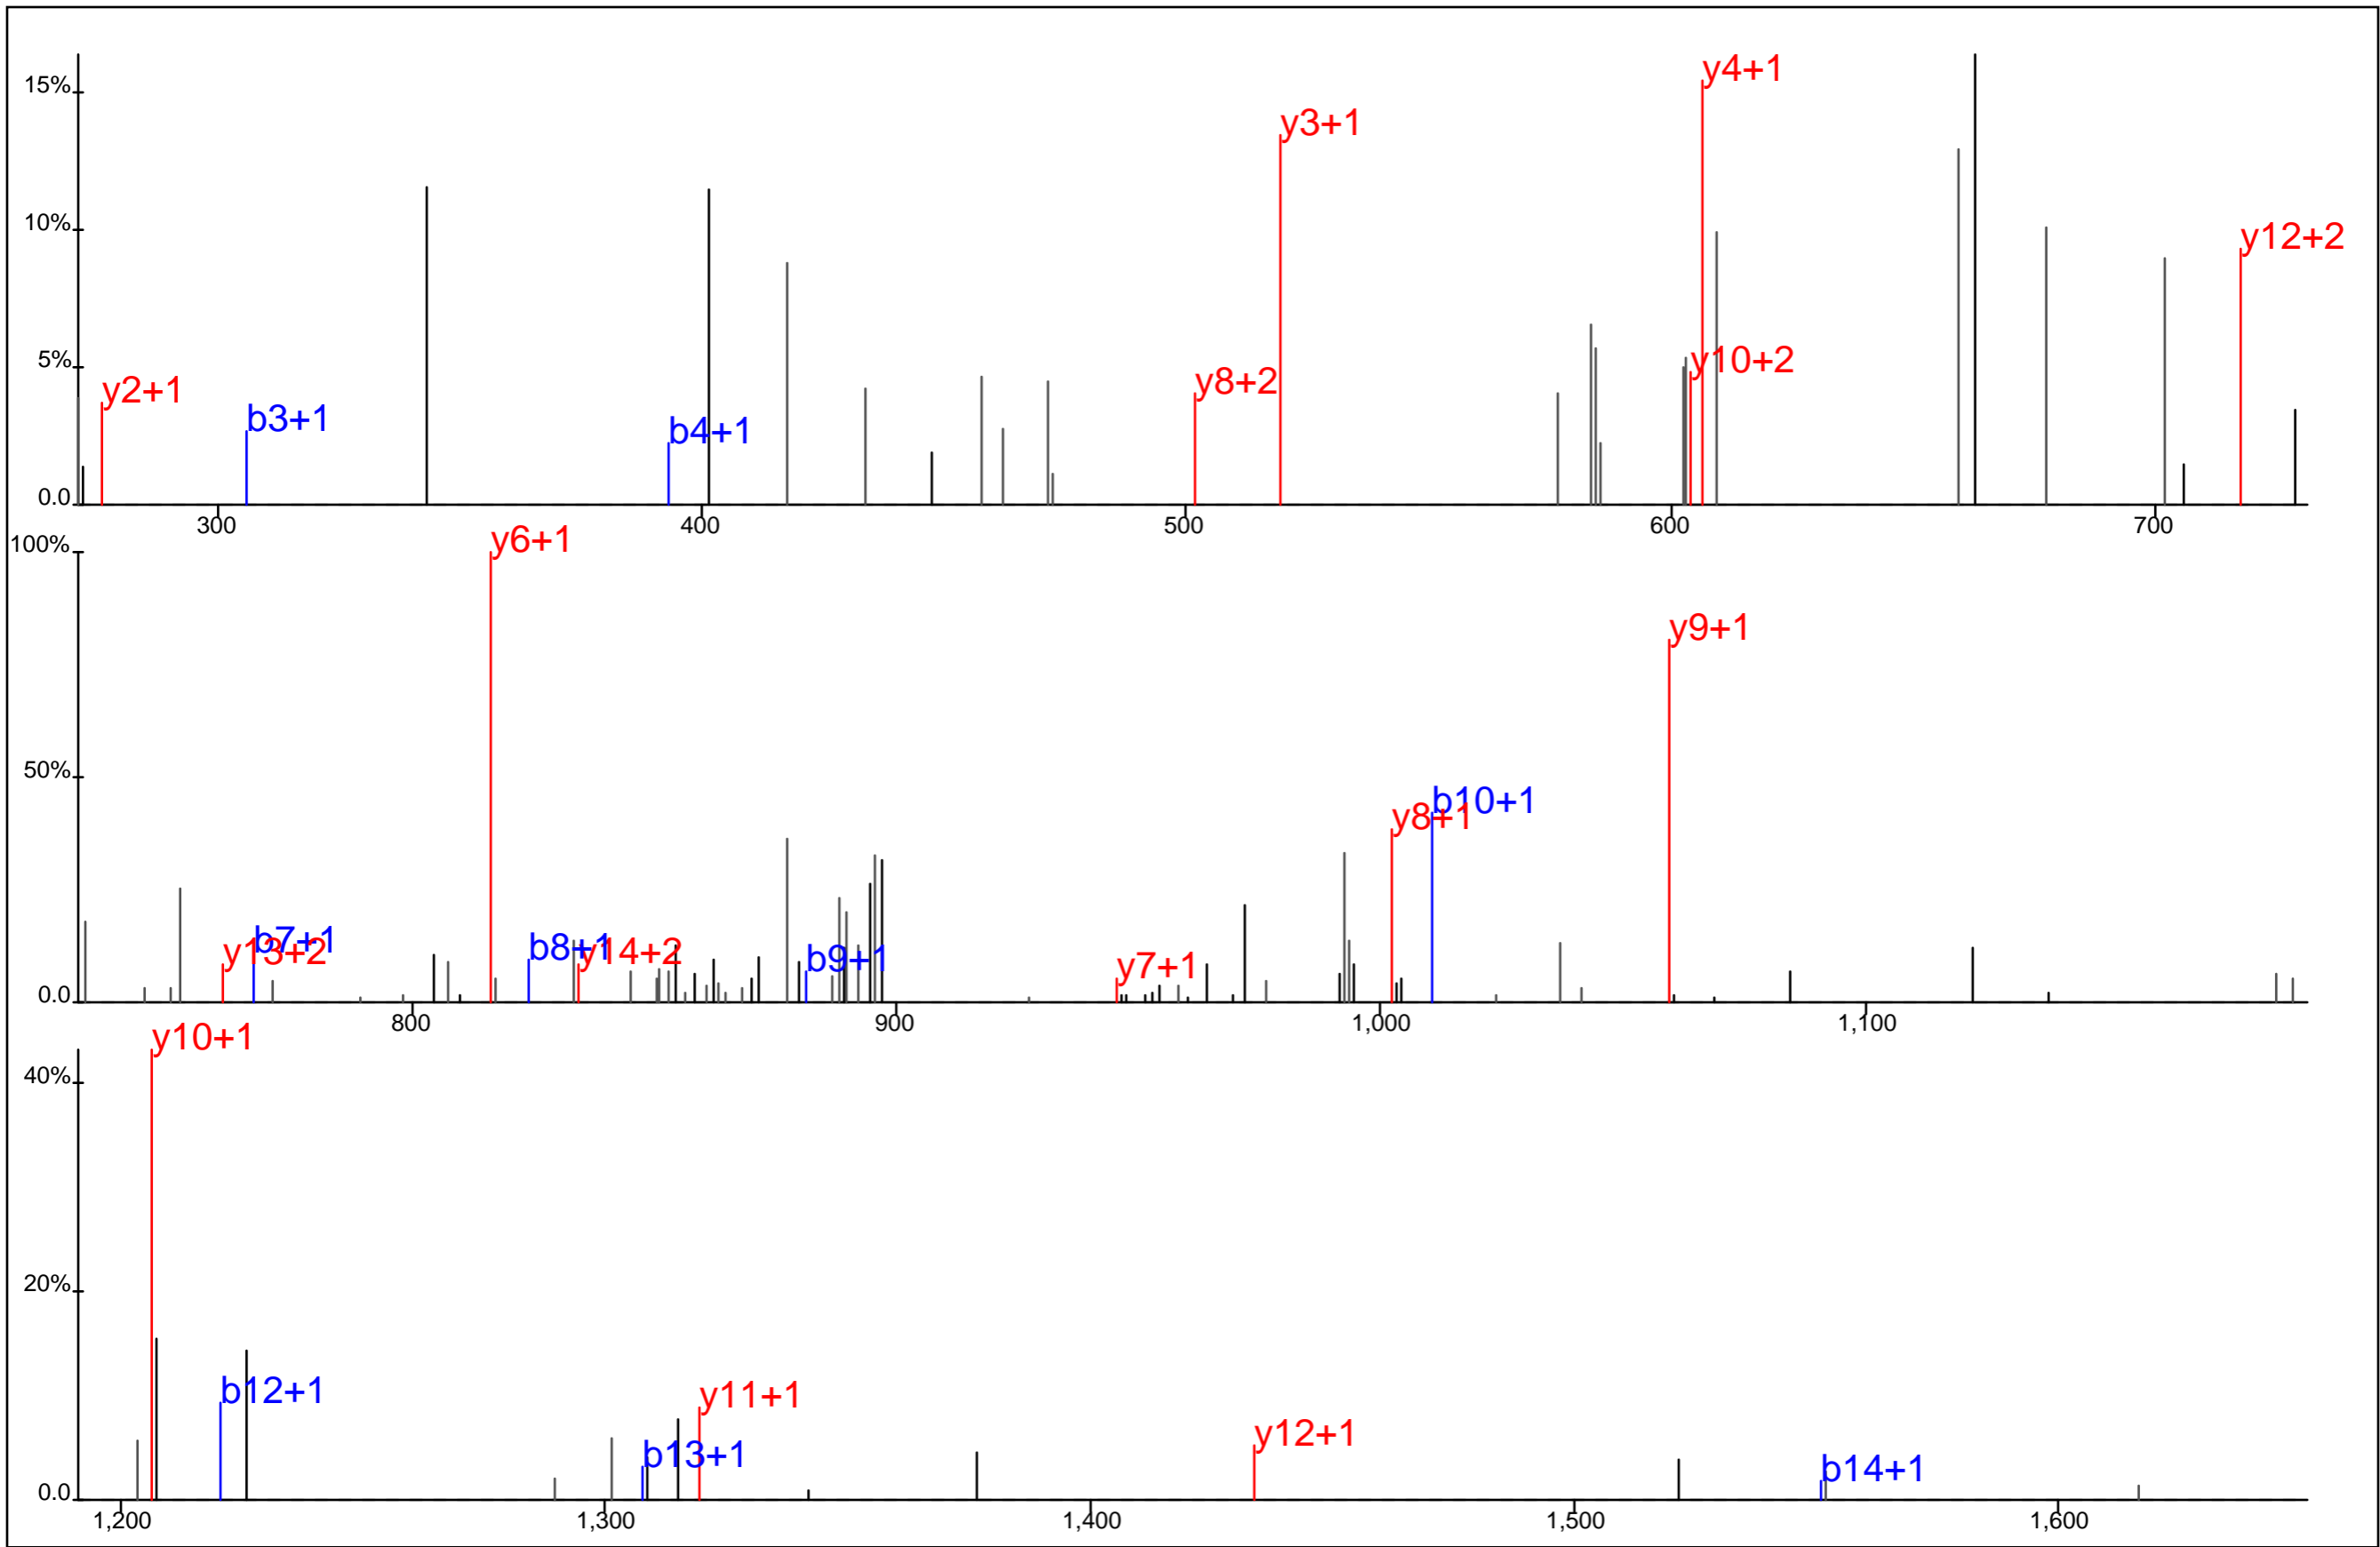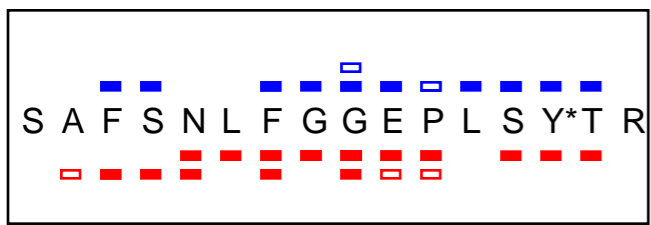

Protein Name: Transferrin receptor  
 gi Accession: 37433  
 Precursor Mass: 913.4155+2  
 Delta Mass: 4.457 ppm  
 XCorr: 41.36

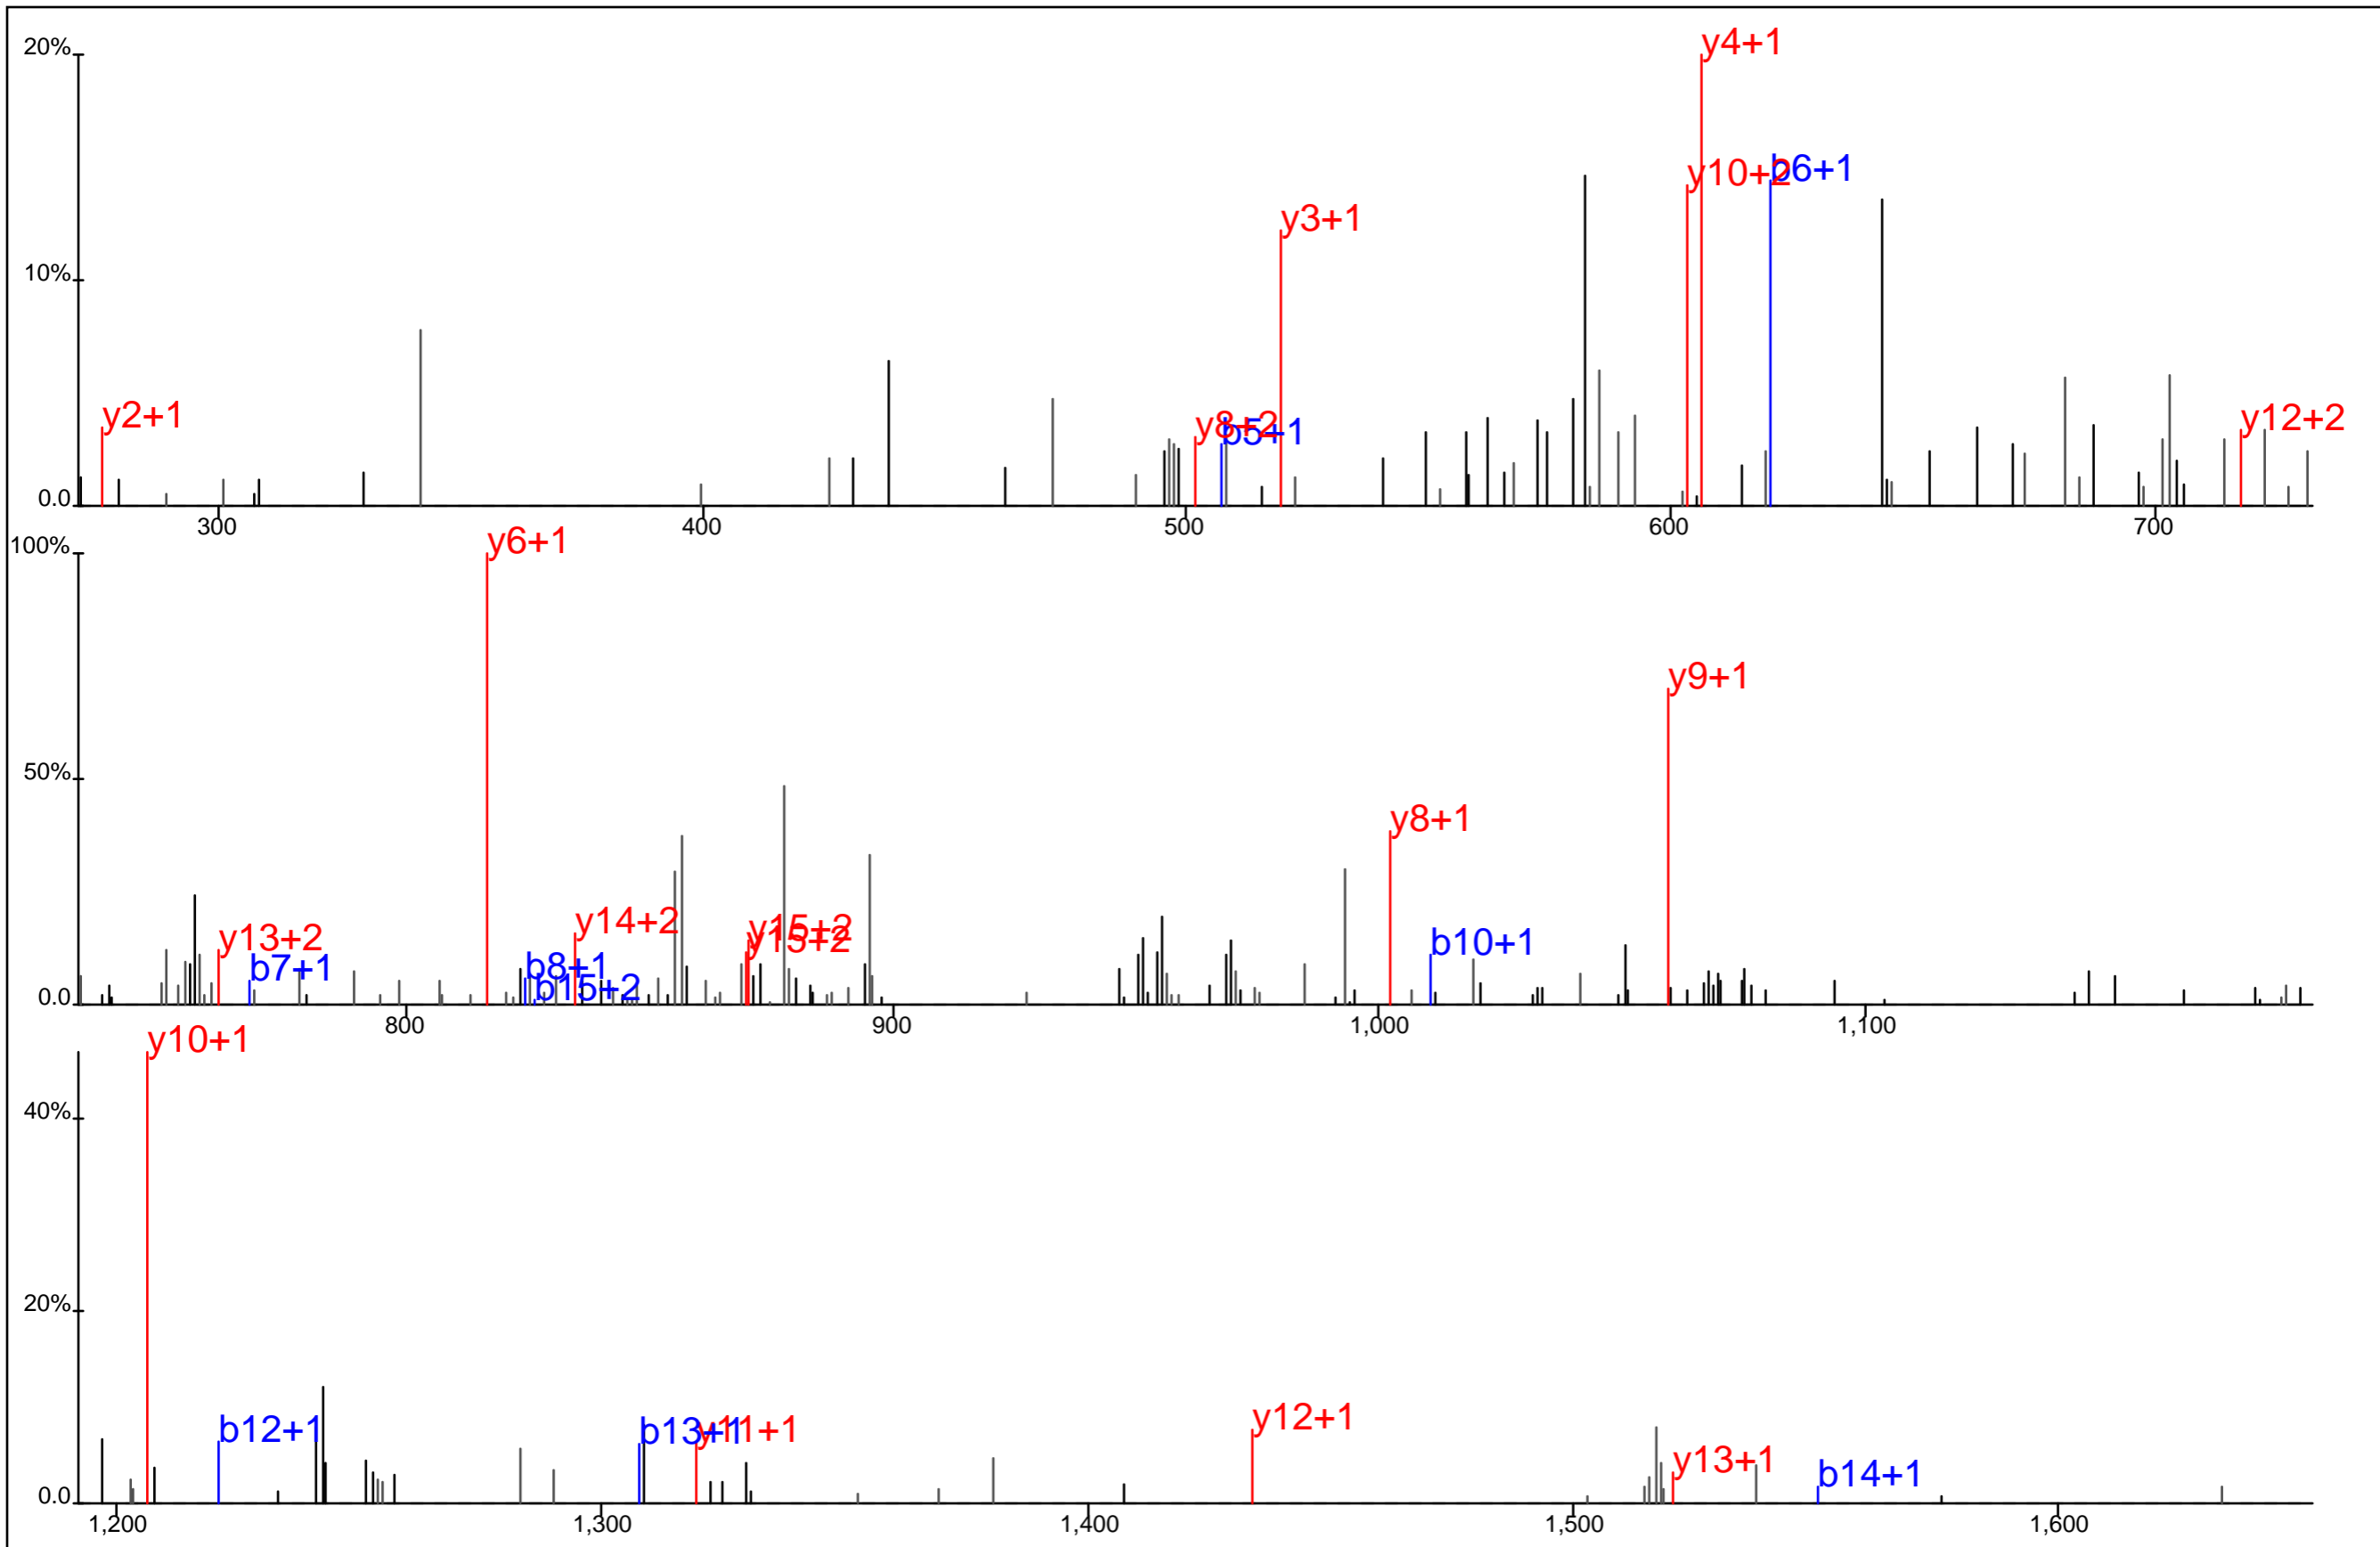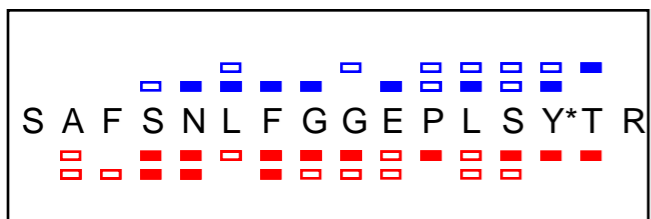

Protein Name: Transferrin receptor  
 gi Accession: 37433  
 Precursor Mass: 913.4113+2  
 Delta Mass: 0.226 ppm  
 XCorr: 38.28

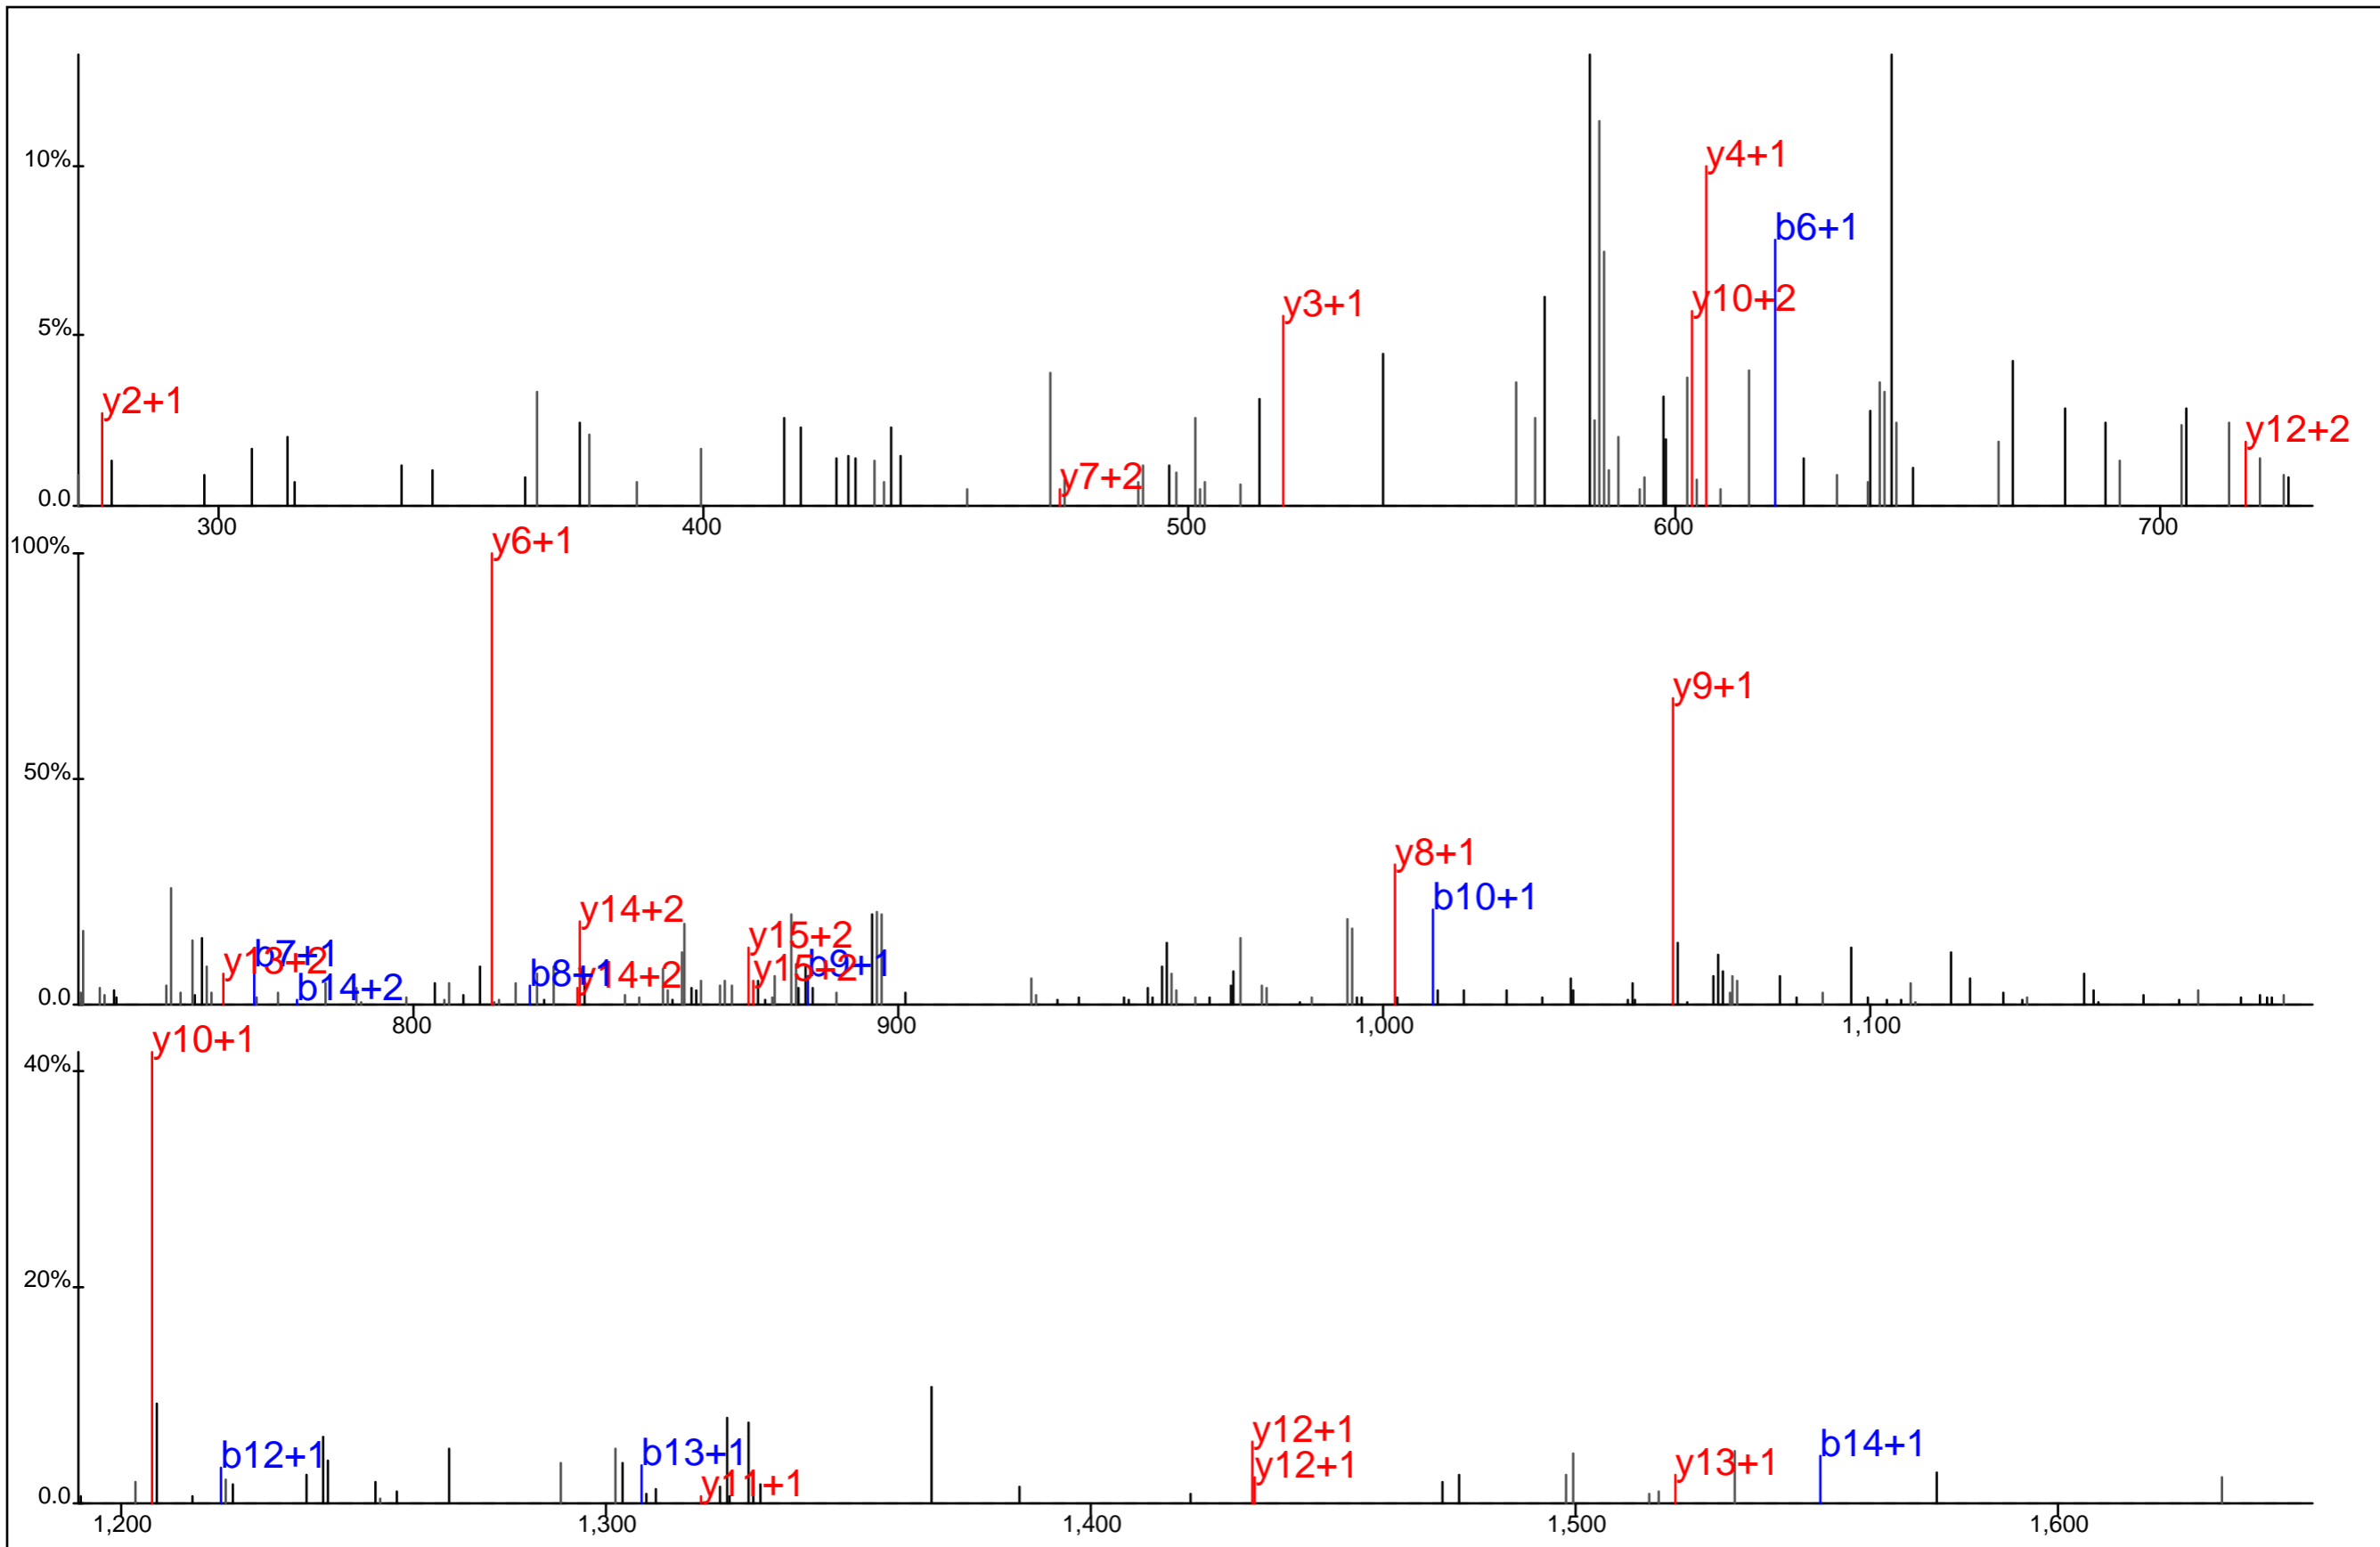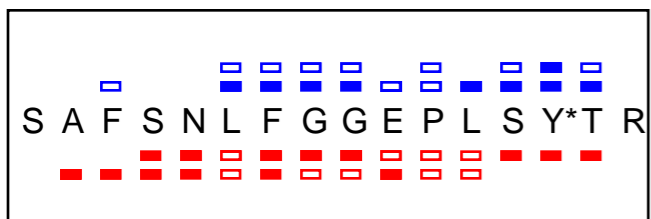

Protein Name: Transferrin receptor  
 gi Accession: 37433  
 Precursor Mass: 913.4152+2  
 Delta Mass: 4.123 ppm  
 XCorr: 26.64

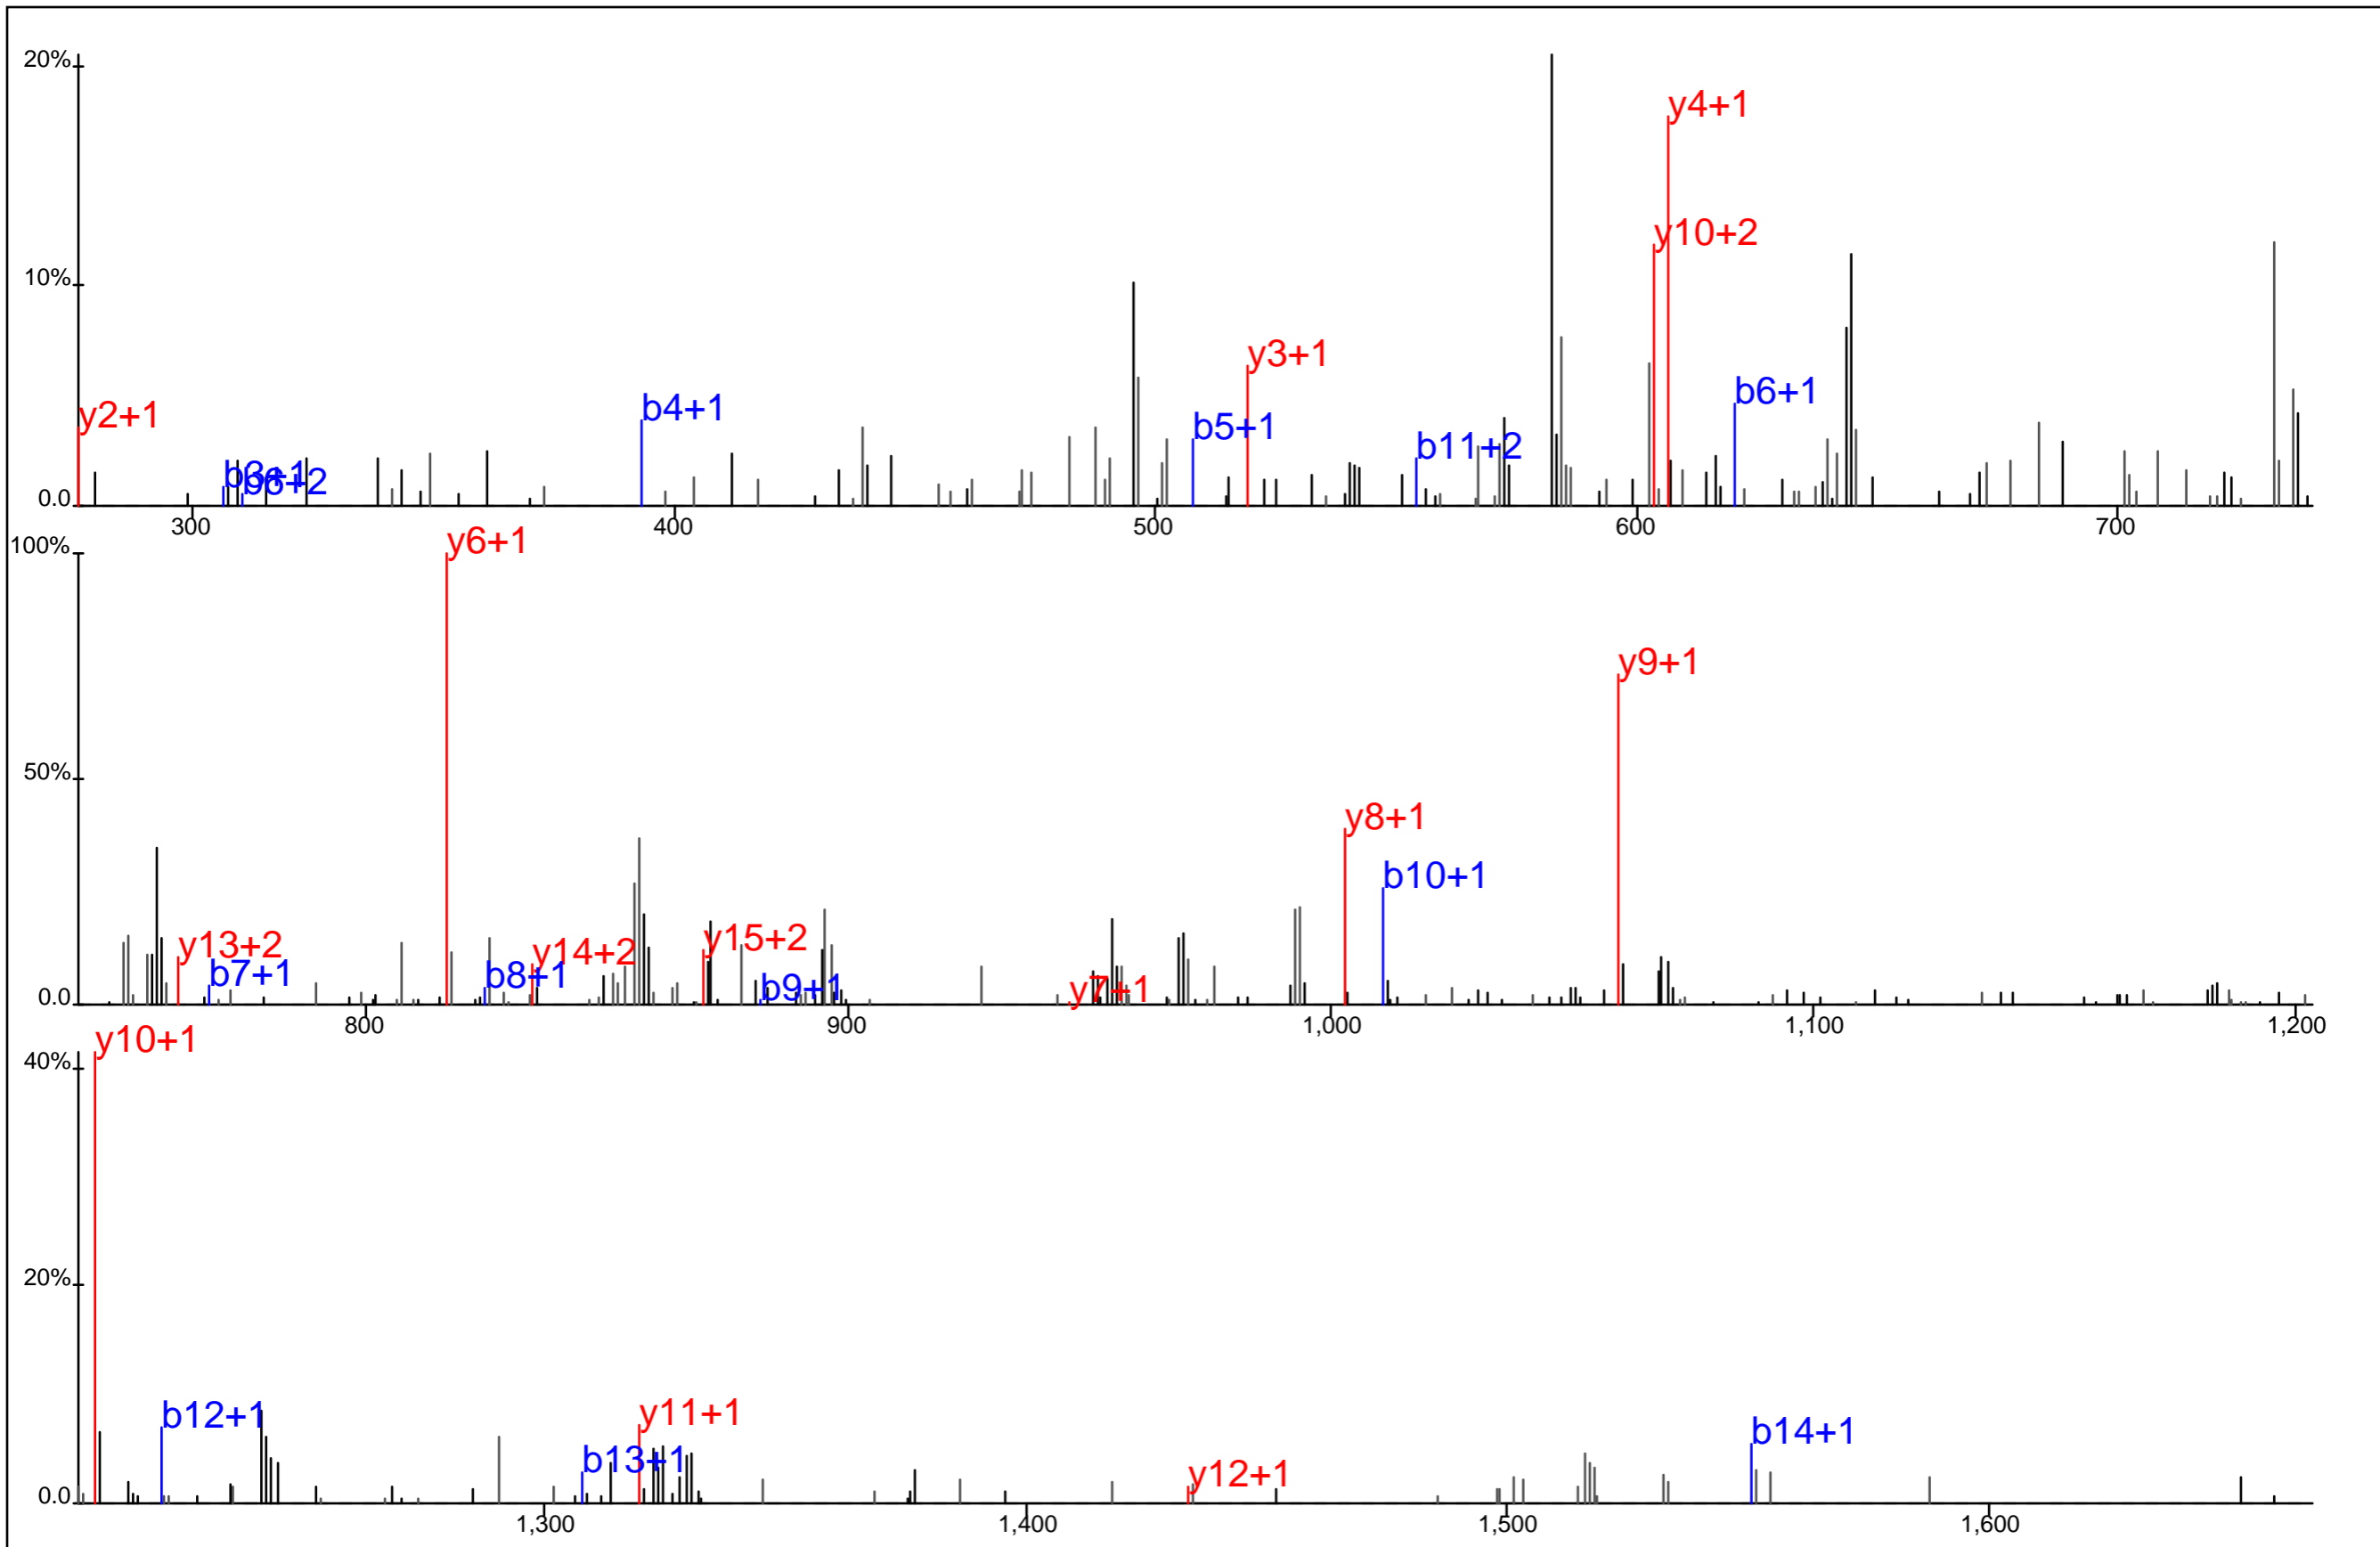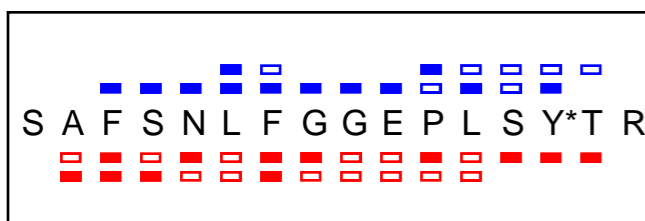

Protein Name: Transferrin receptor  
 gi Accession: 37433  
 Precursor Mass: 913.4159+2  
 Delta Mass: 4.857 ppm  
 XCorr: 40.34

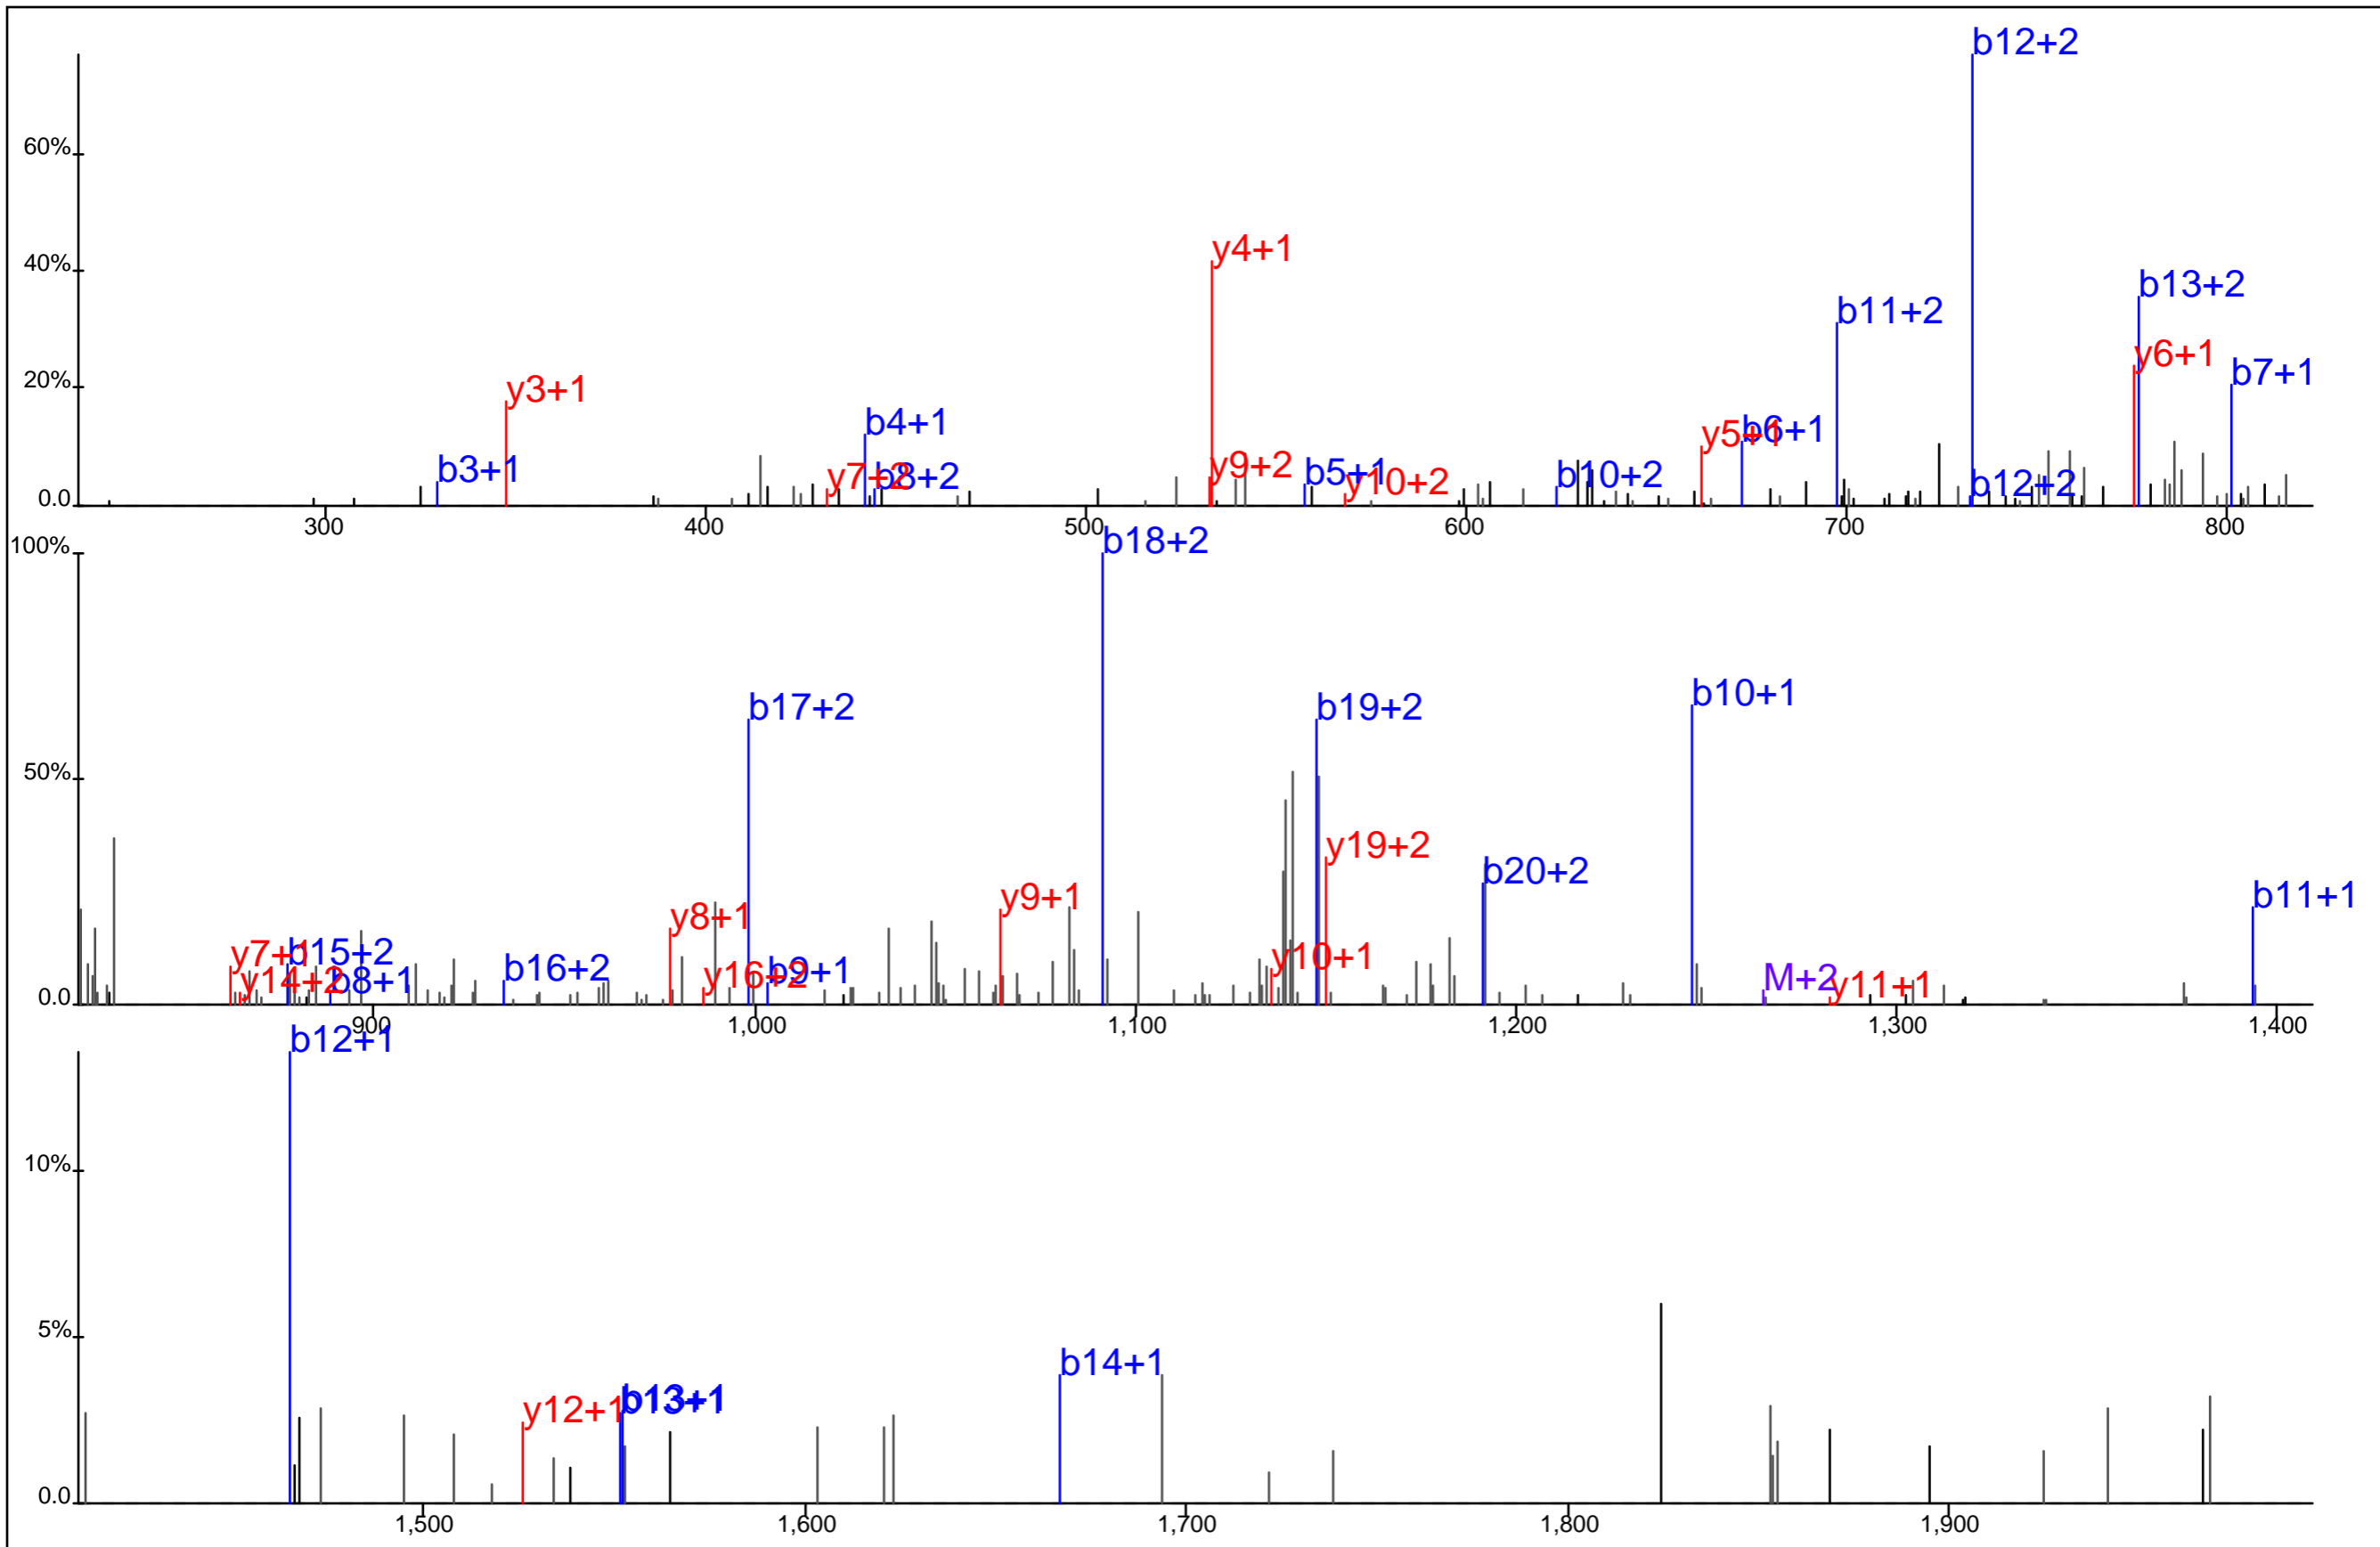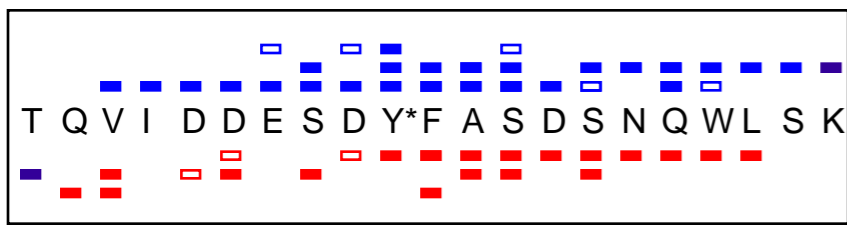

Protein Name: TRIP4  
 gi Accession: 6013191  
 Precursor Mass: 843.3614+3  
 Delta Mass: 7.724 ppm  
 XCorr: 58.13

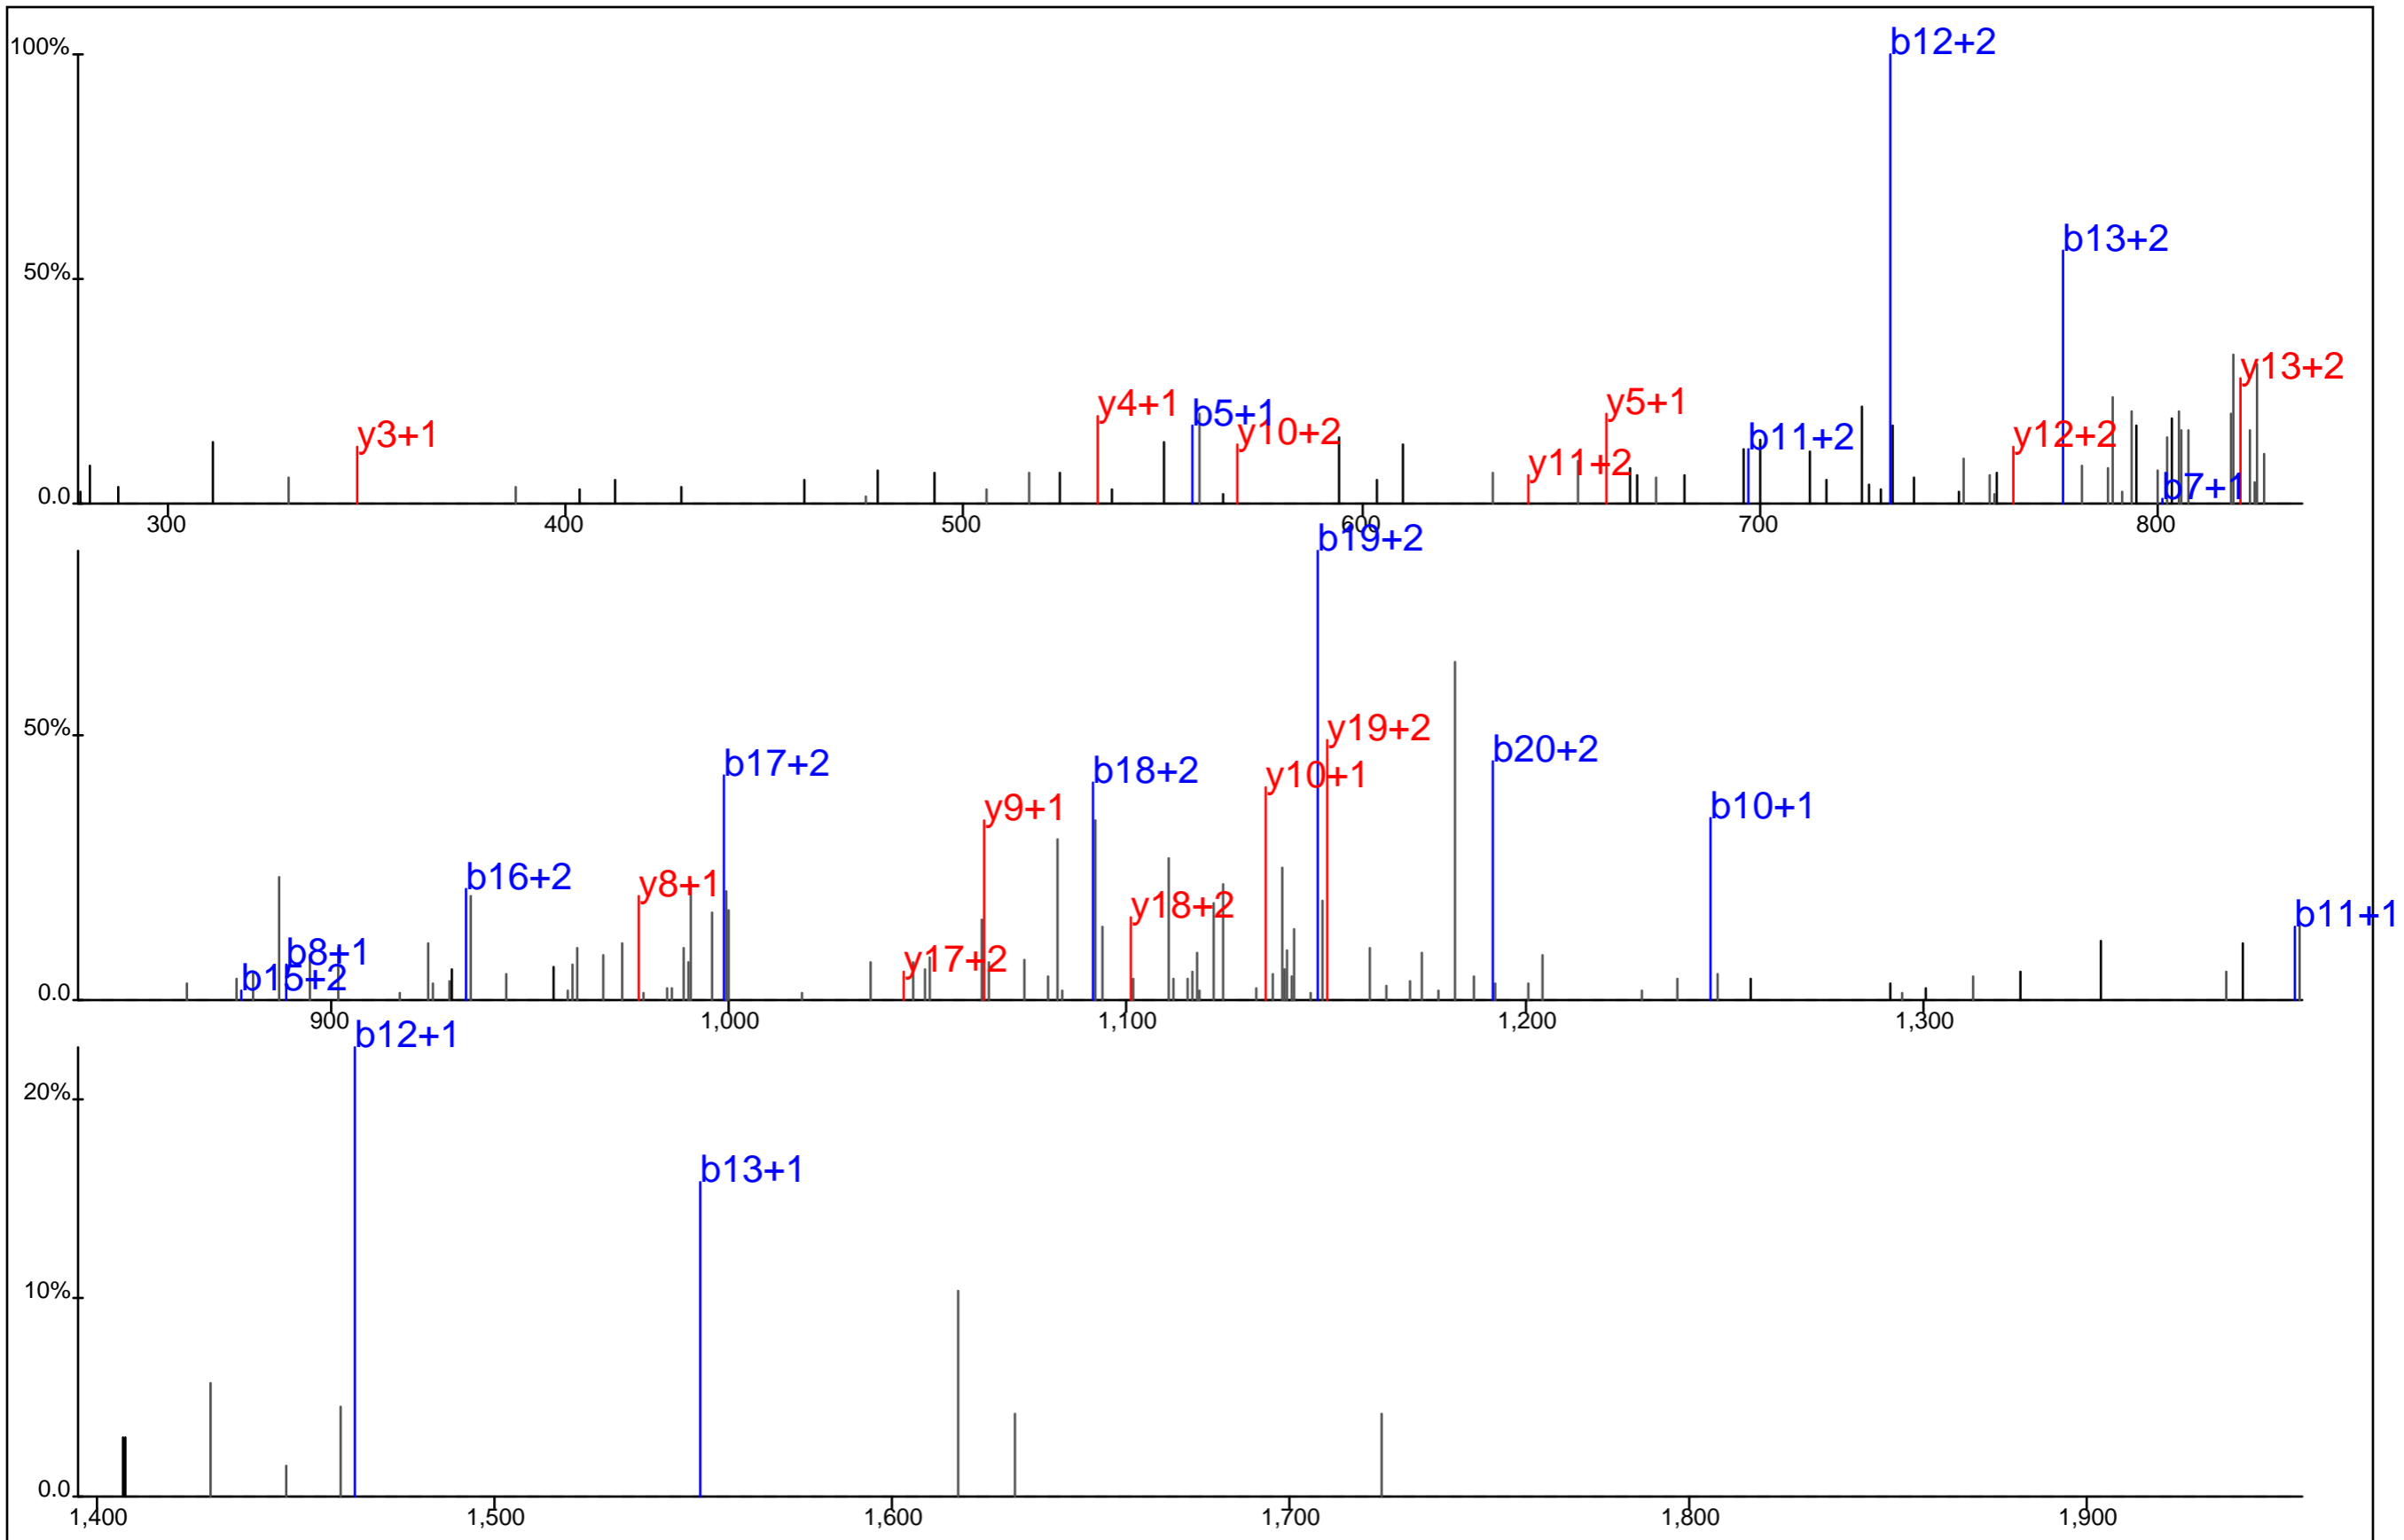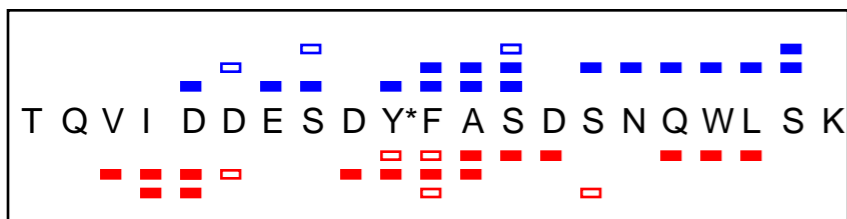

Protein Name: TRIP4  
 gi Accession: 6013191  
 Precursor Mass: 843.3543+3  
 Delta Mass: 0.678 ppm  
 XCorr: 37.22

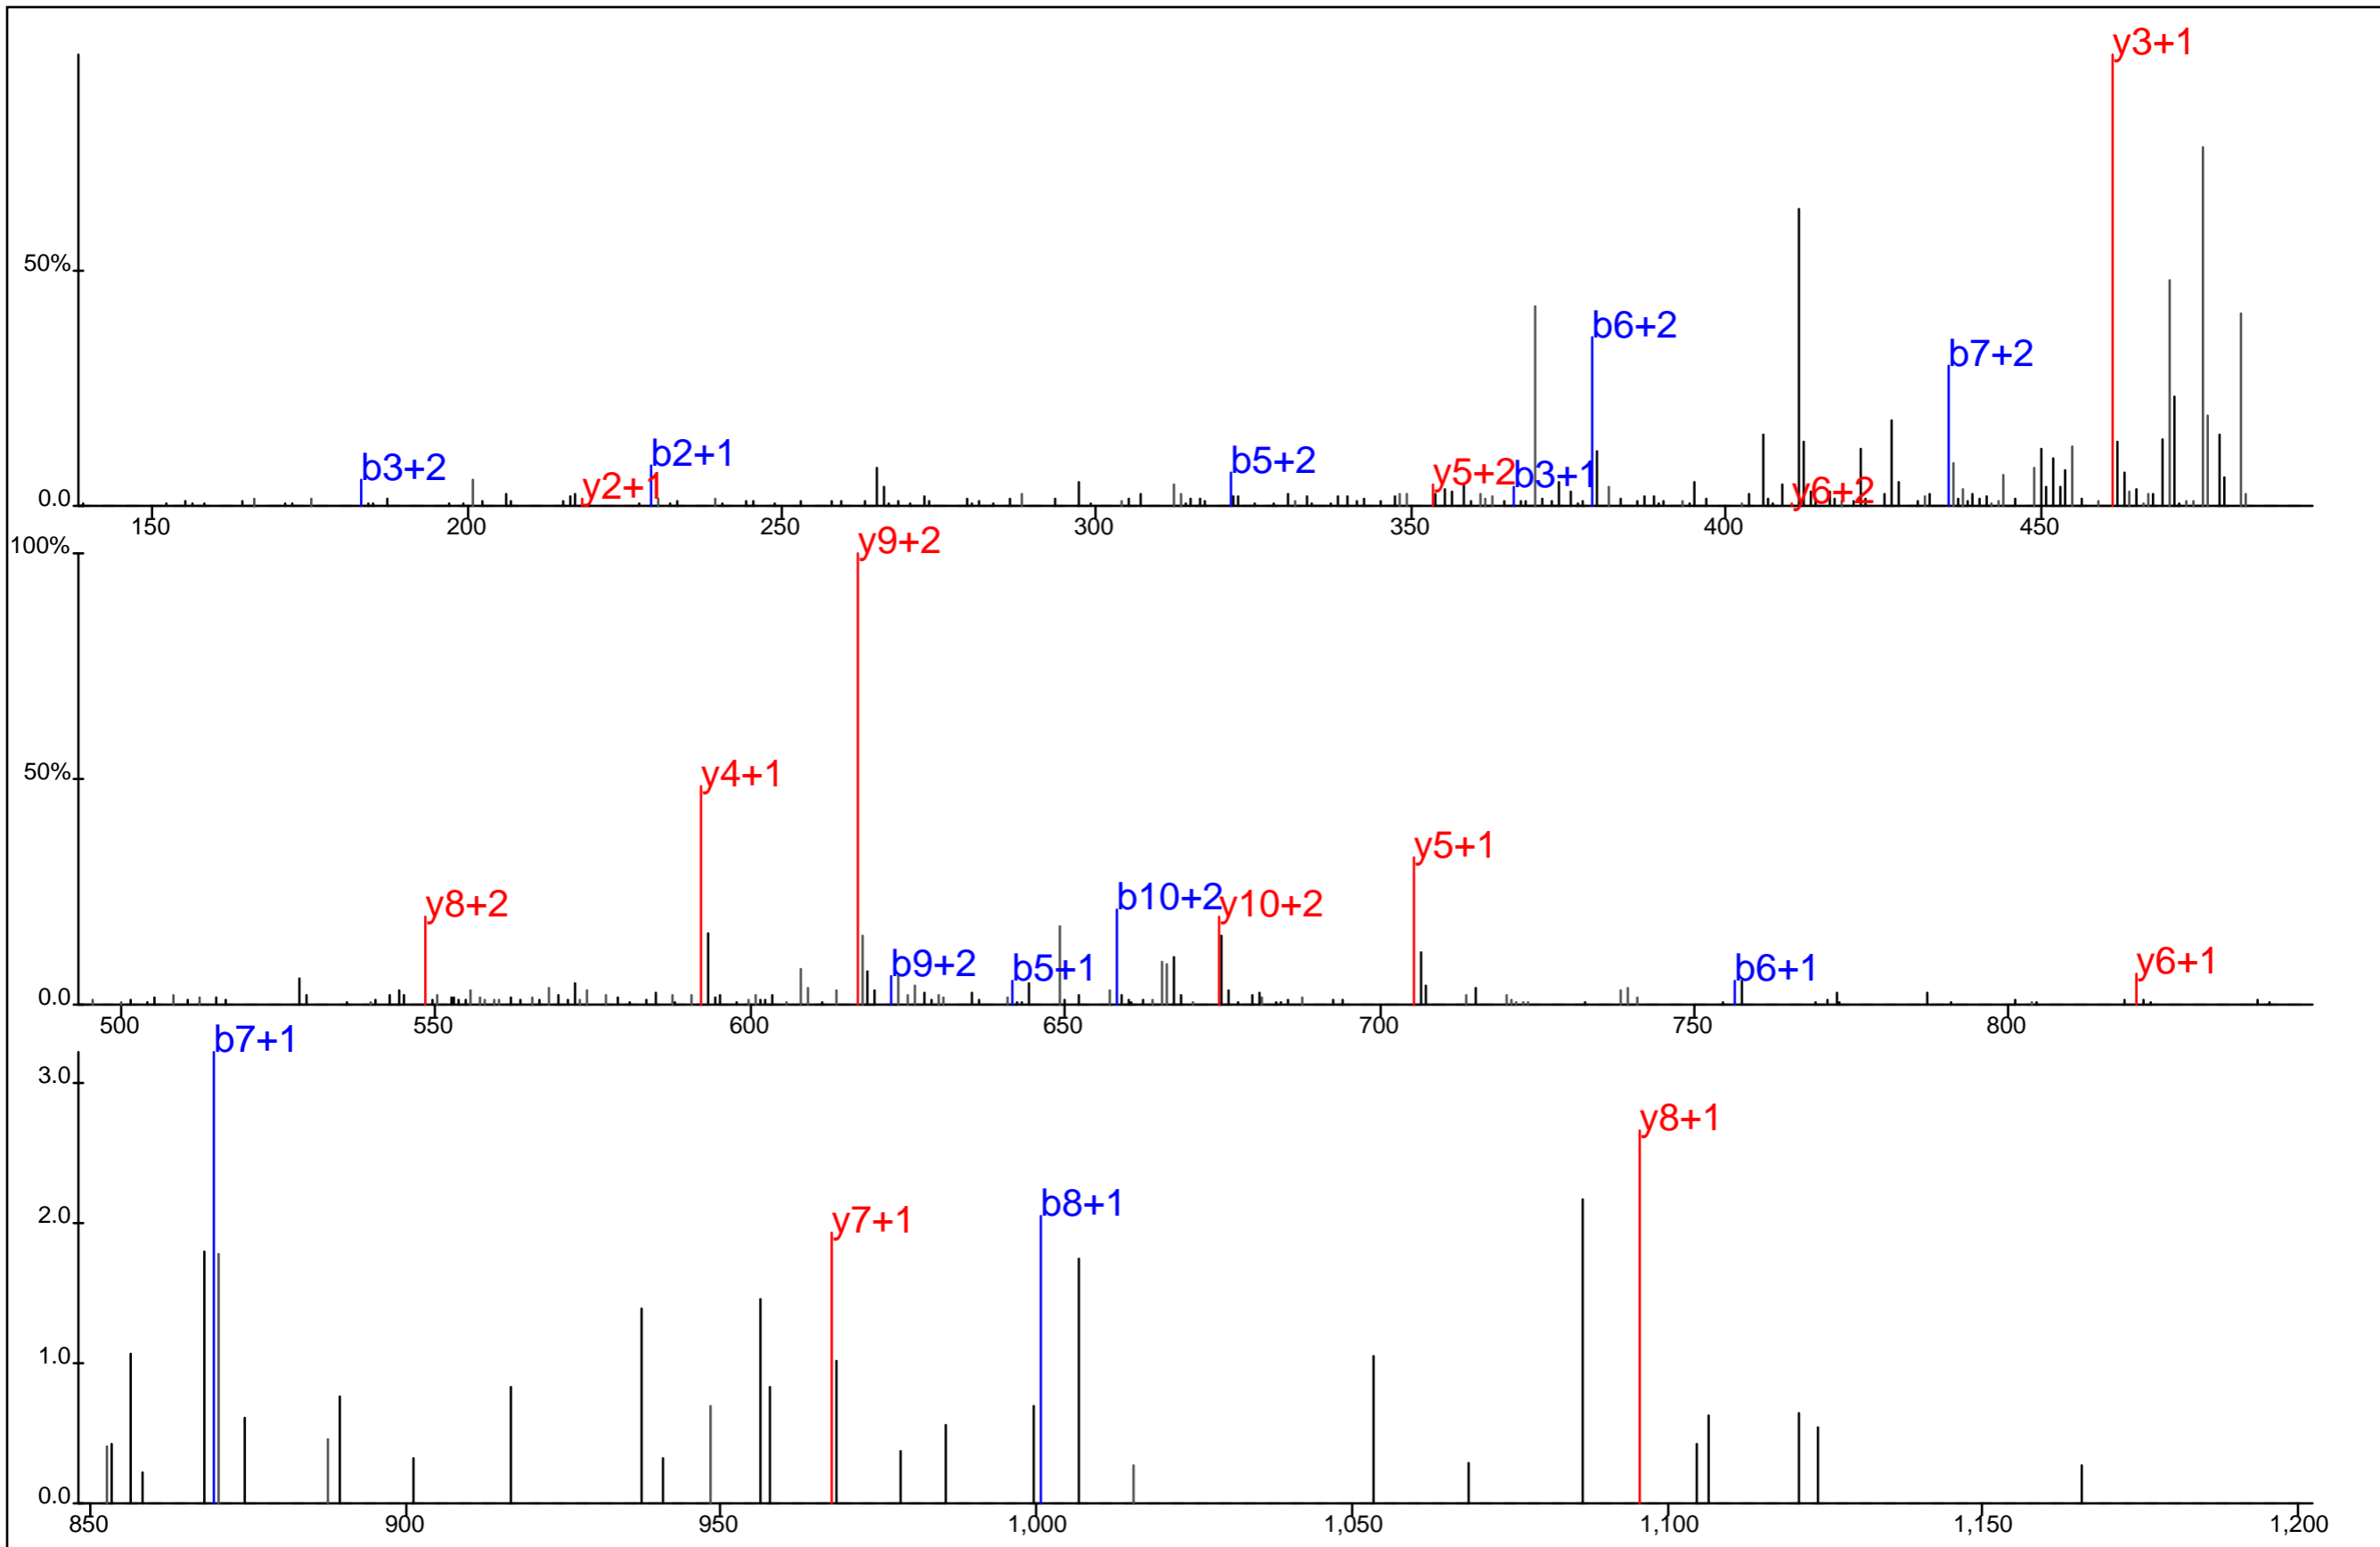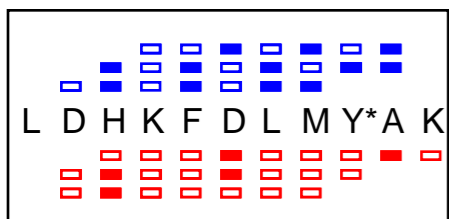

Protein Name: Tubulin alpha  
 gi Accession: 13376181  
 Precursor Mass: 487.5612+3  
 Delta Mass: 3.202 ppm  
 XCorr: 37.36



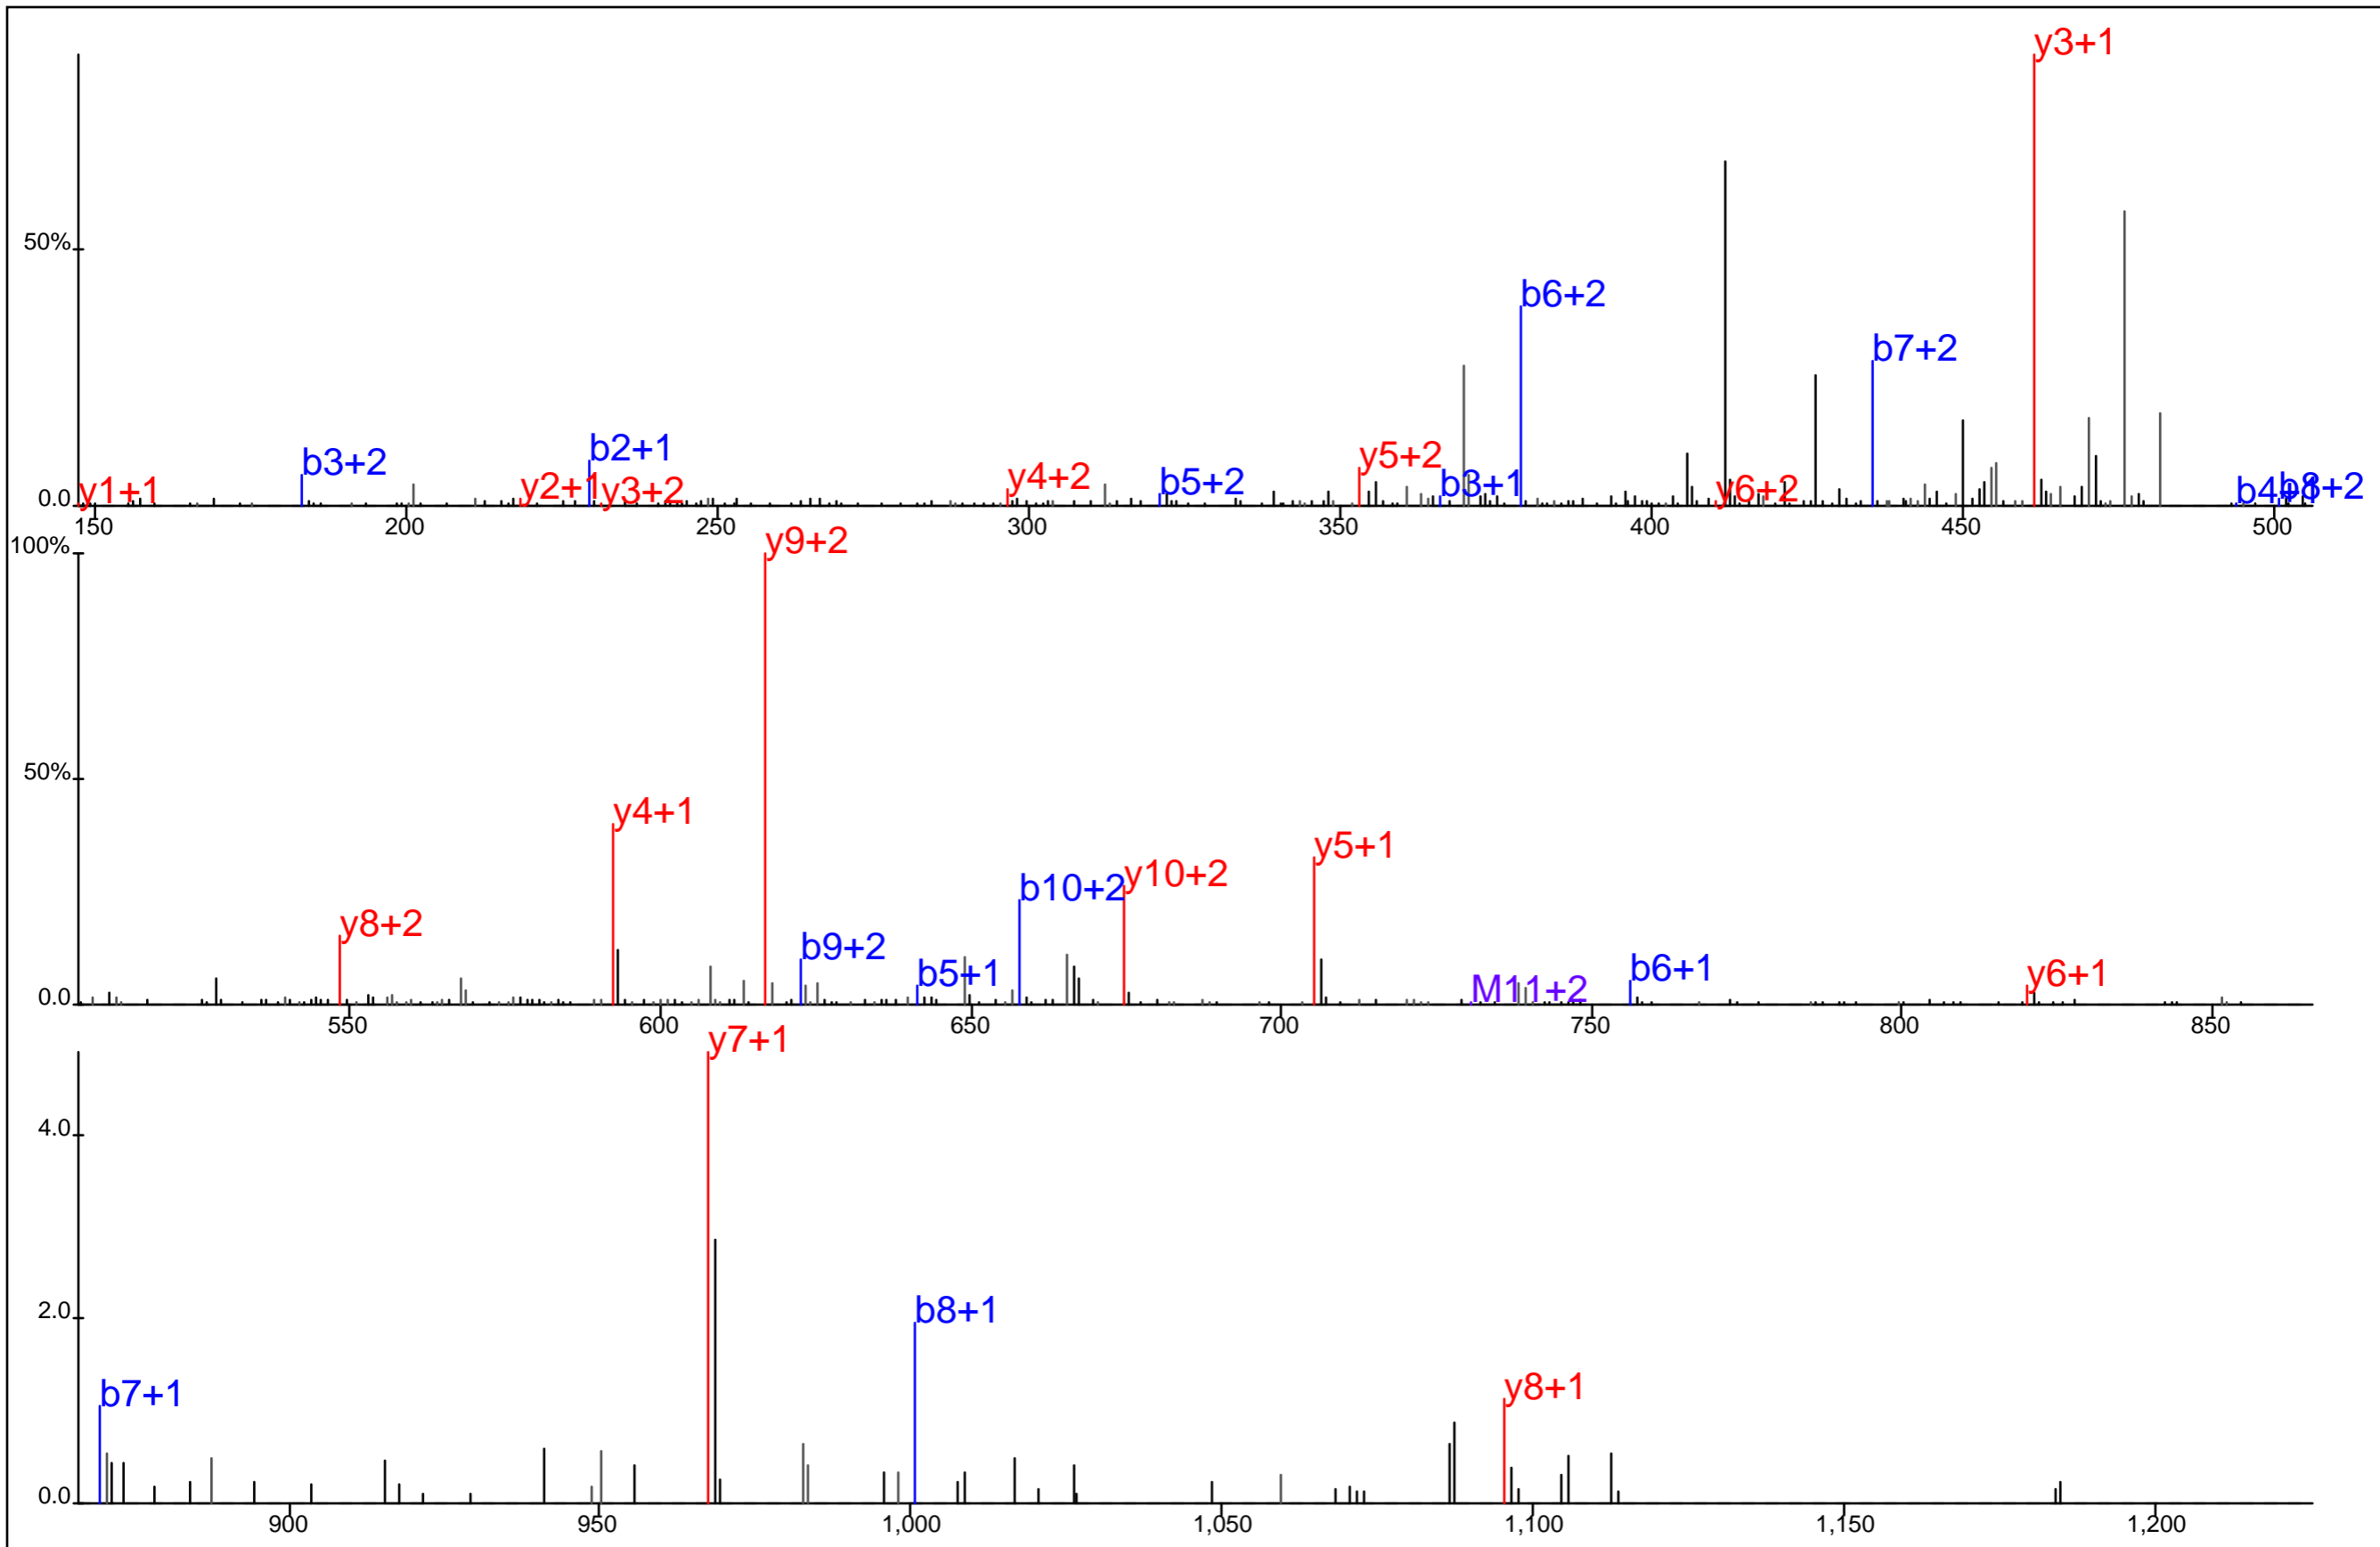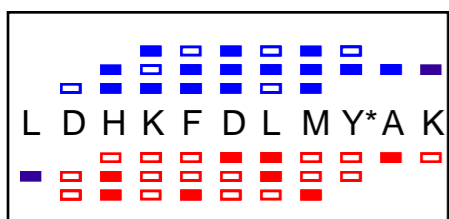

Protein Name: Tubulin alpha  
 gi Accession: 13376181  
 Precursor Mass: 487.5601+3  
 Delta Mass: 1.013 ppm  
 XCorr: 42.21

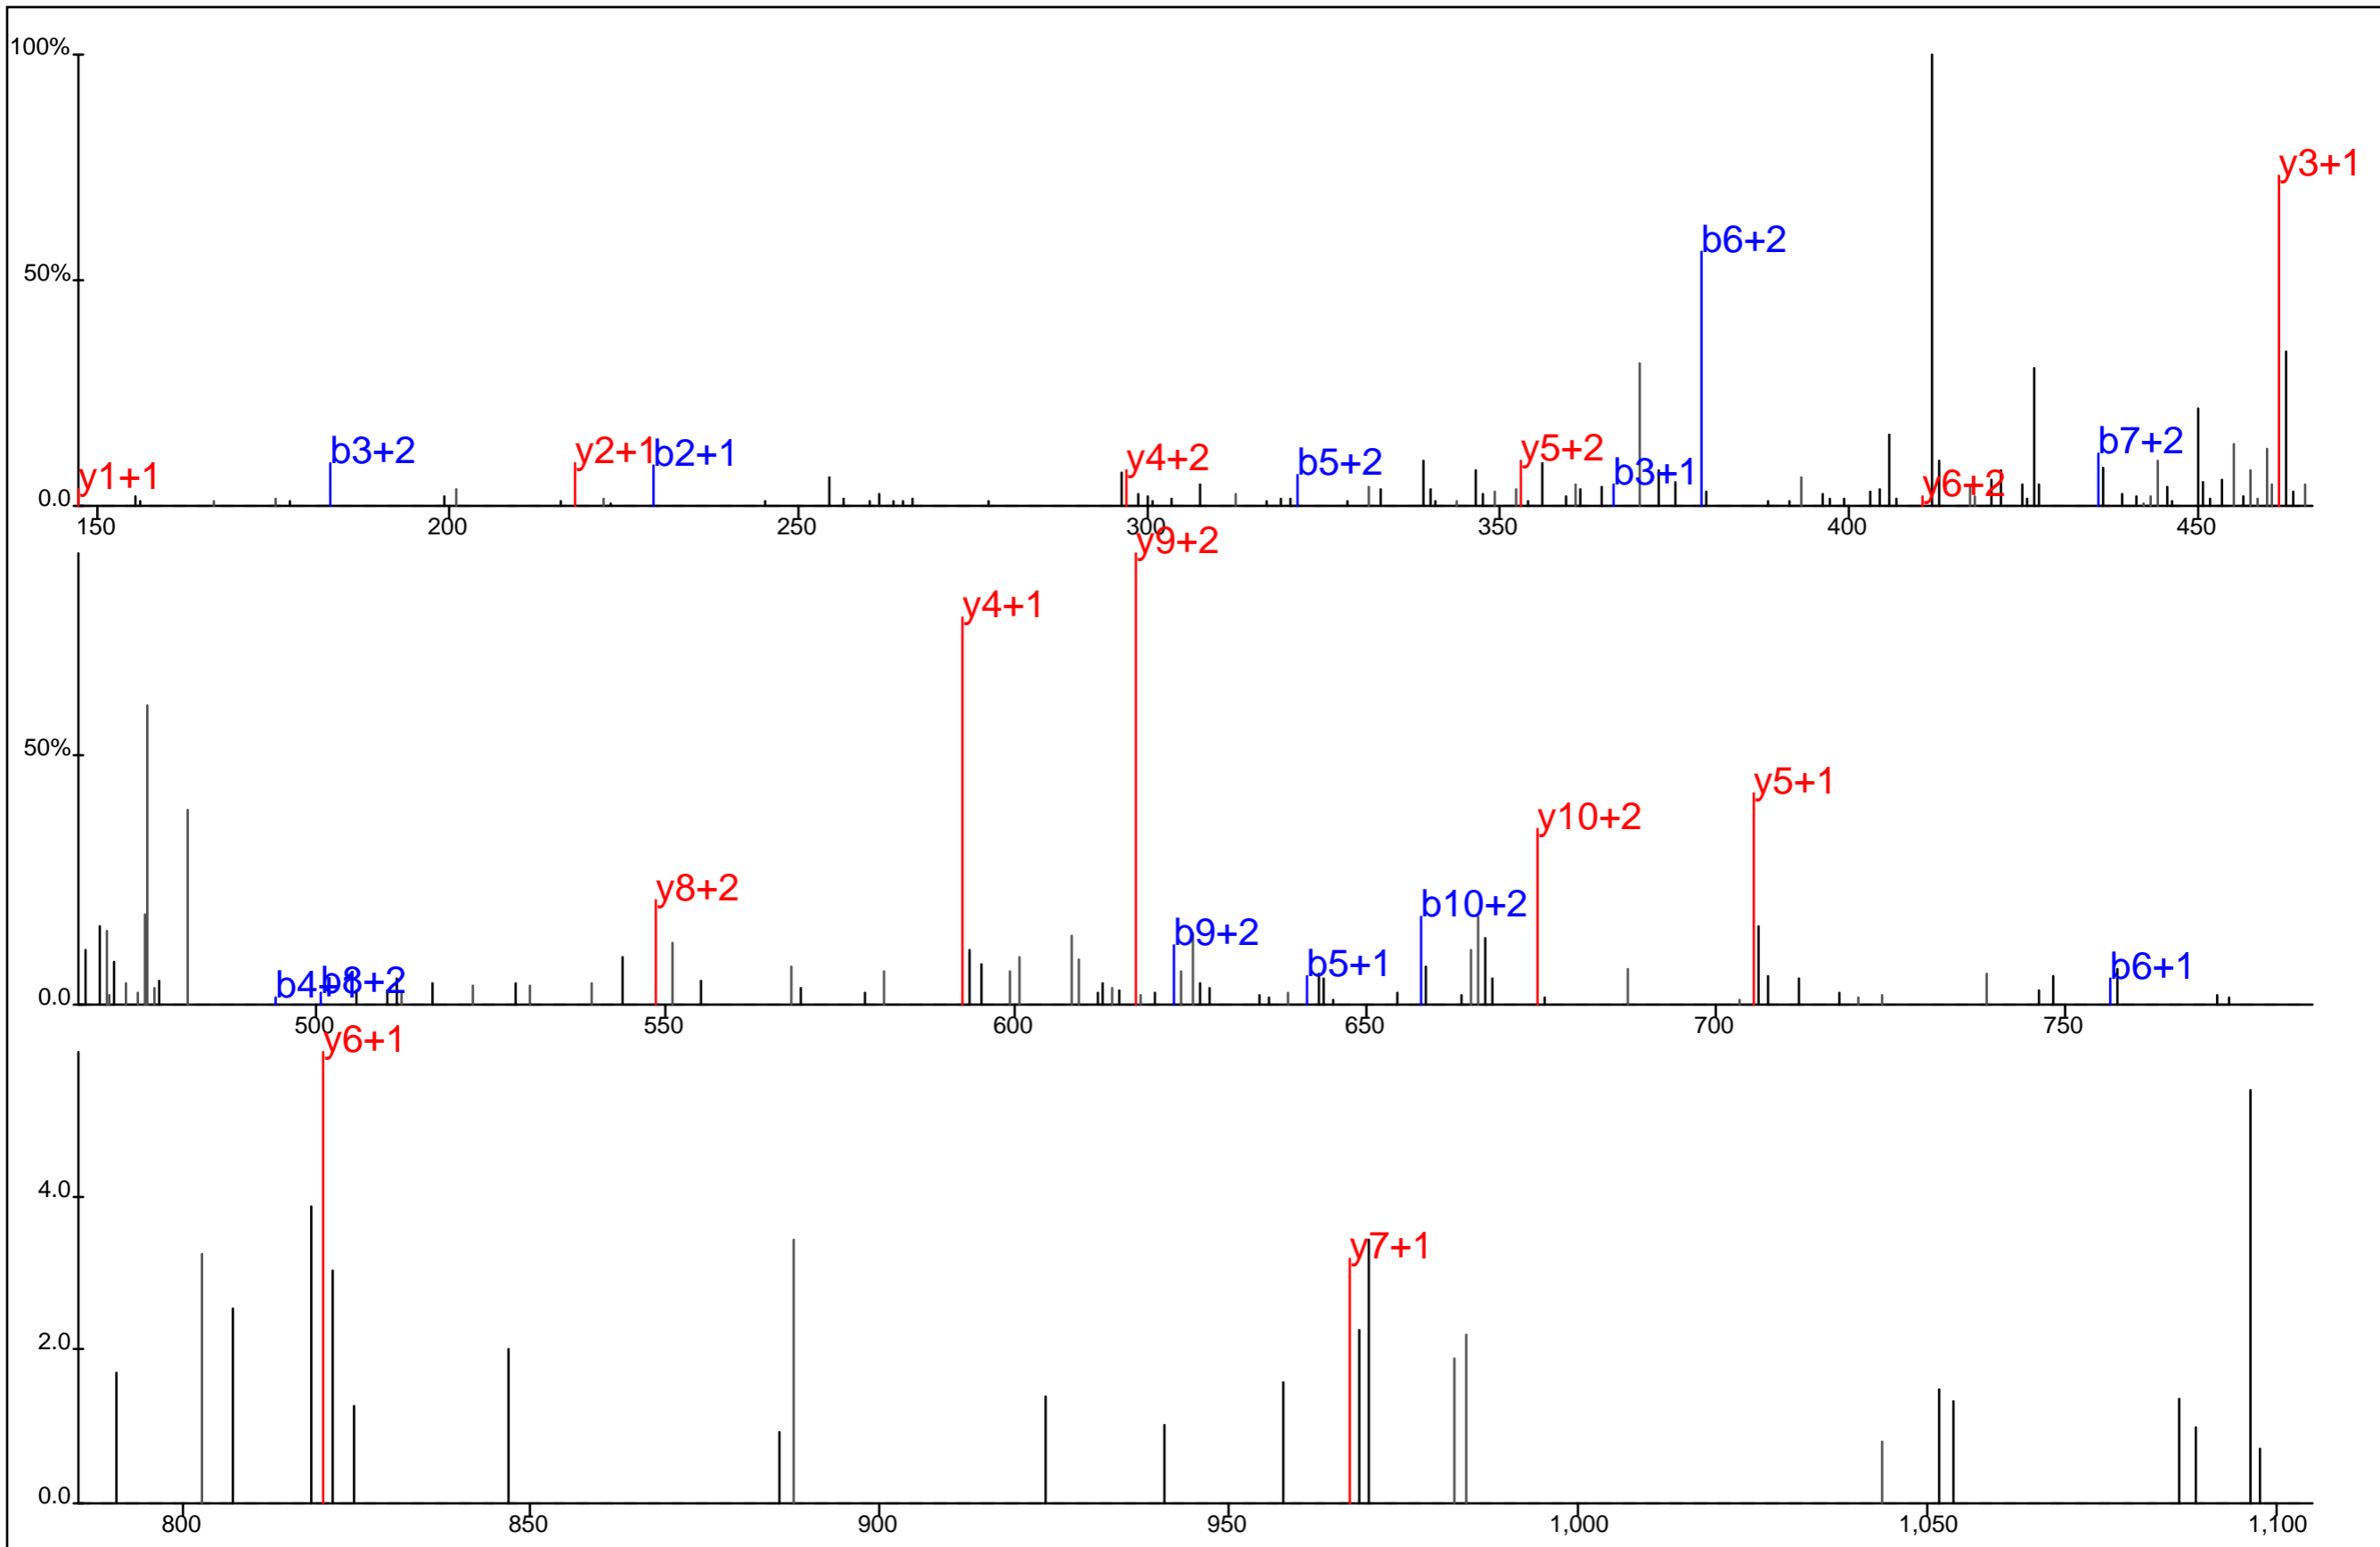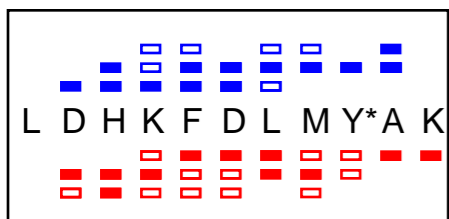

Protein Name: Tubulin alpha  
 gi Accession: 13376181  
 Precursor Mass: 487.5606+3  
 Delta Mass: 2.011 ppm  
 XCorr: 39.2

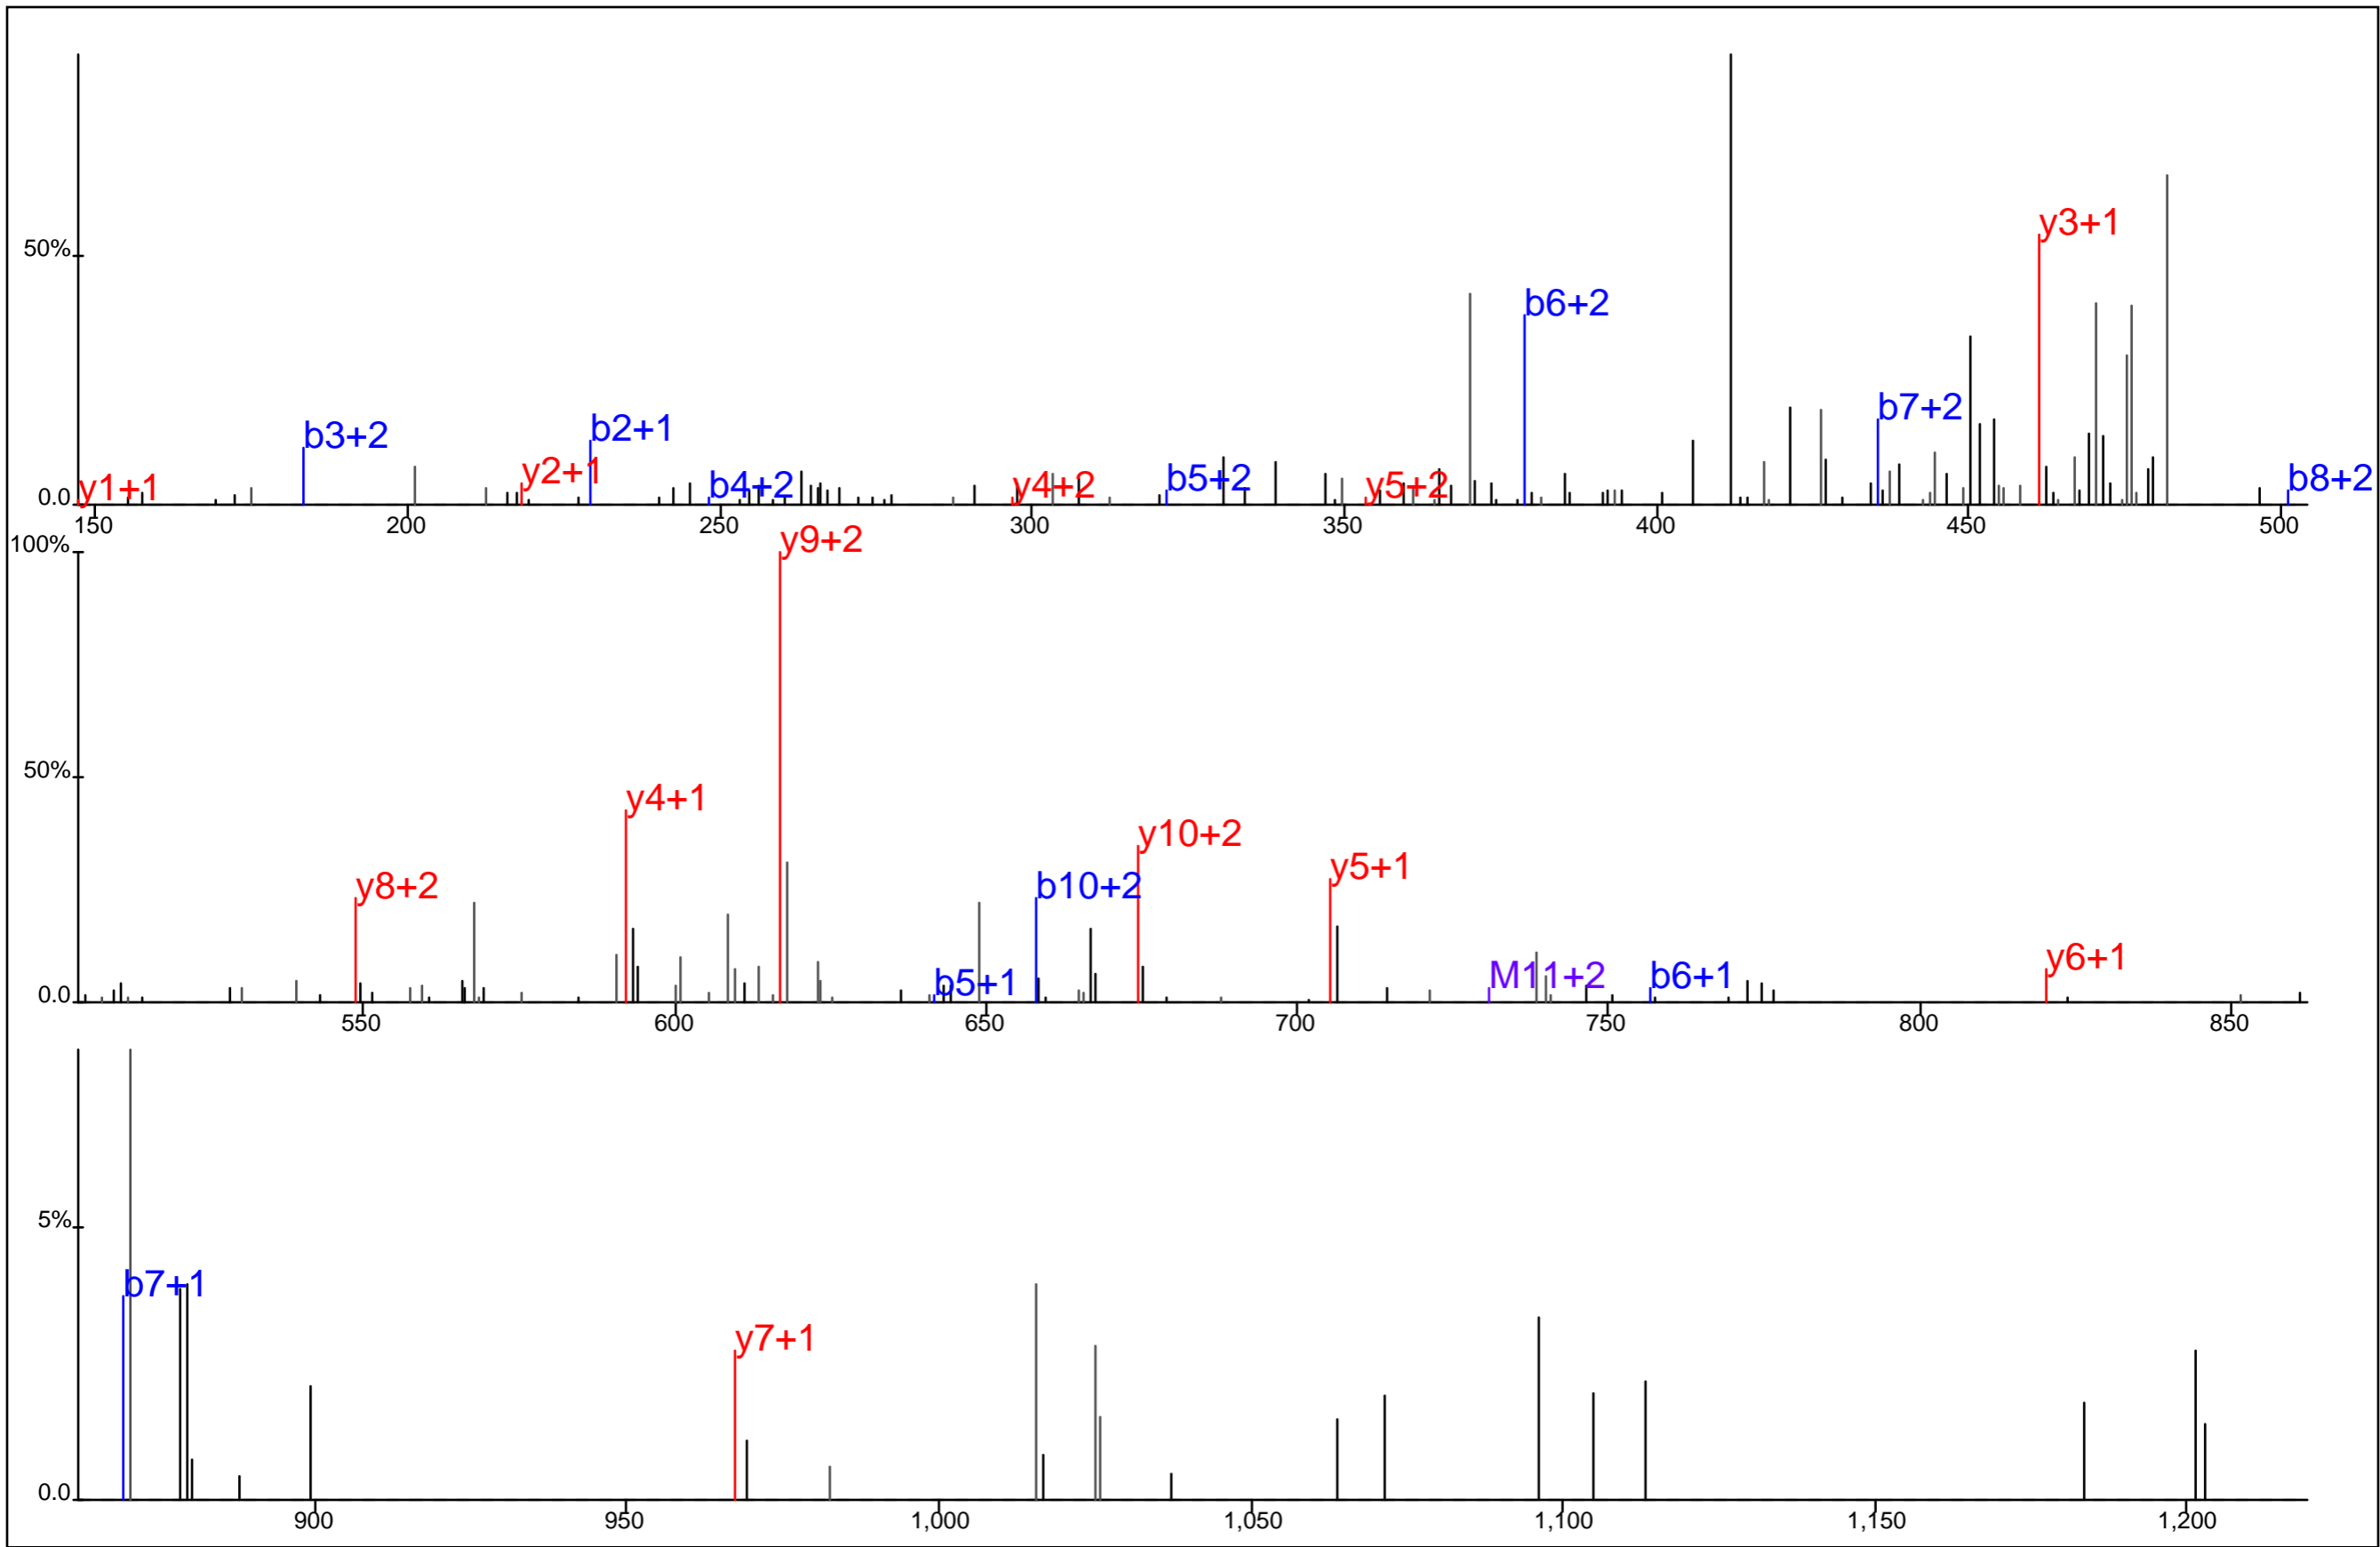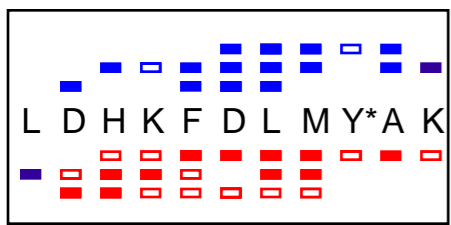

Protein Name: Tubulin alpha  
 gi Accession: 13376181  
 Precursor Mass: 487.5605+3  
 Delta Mass: 1.887 ppm  
 XCorr: 21.2

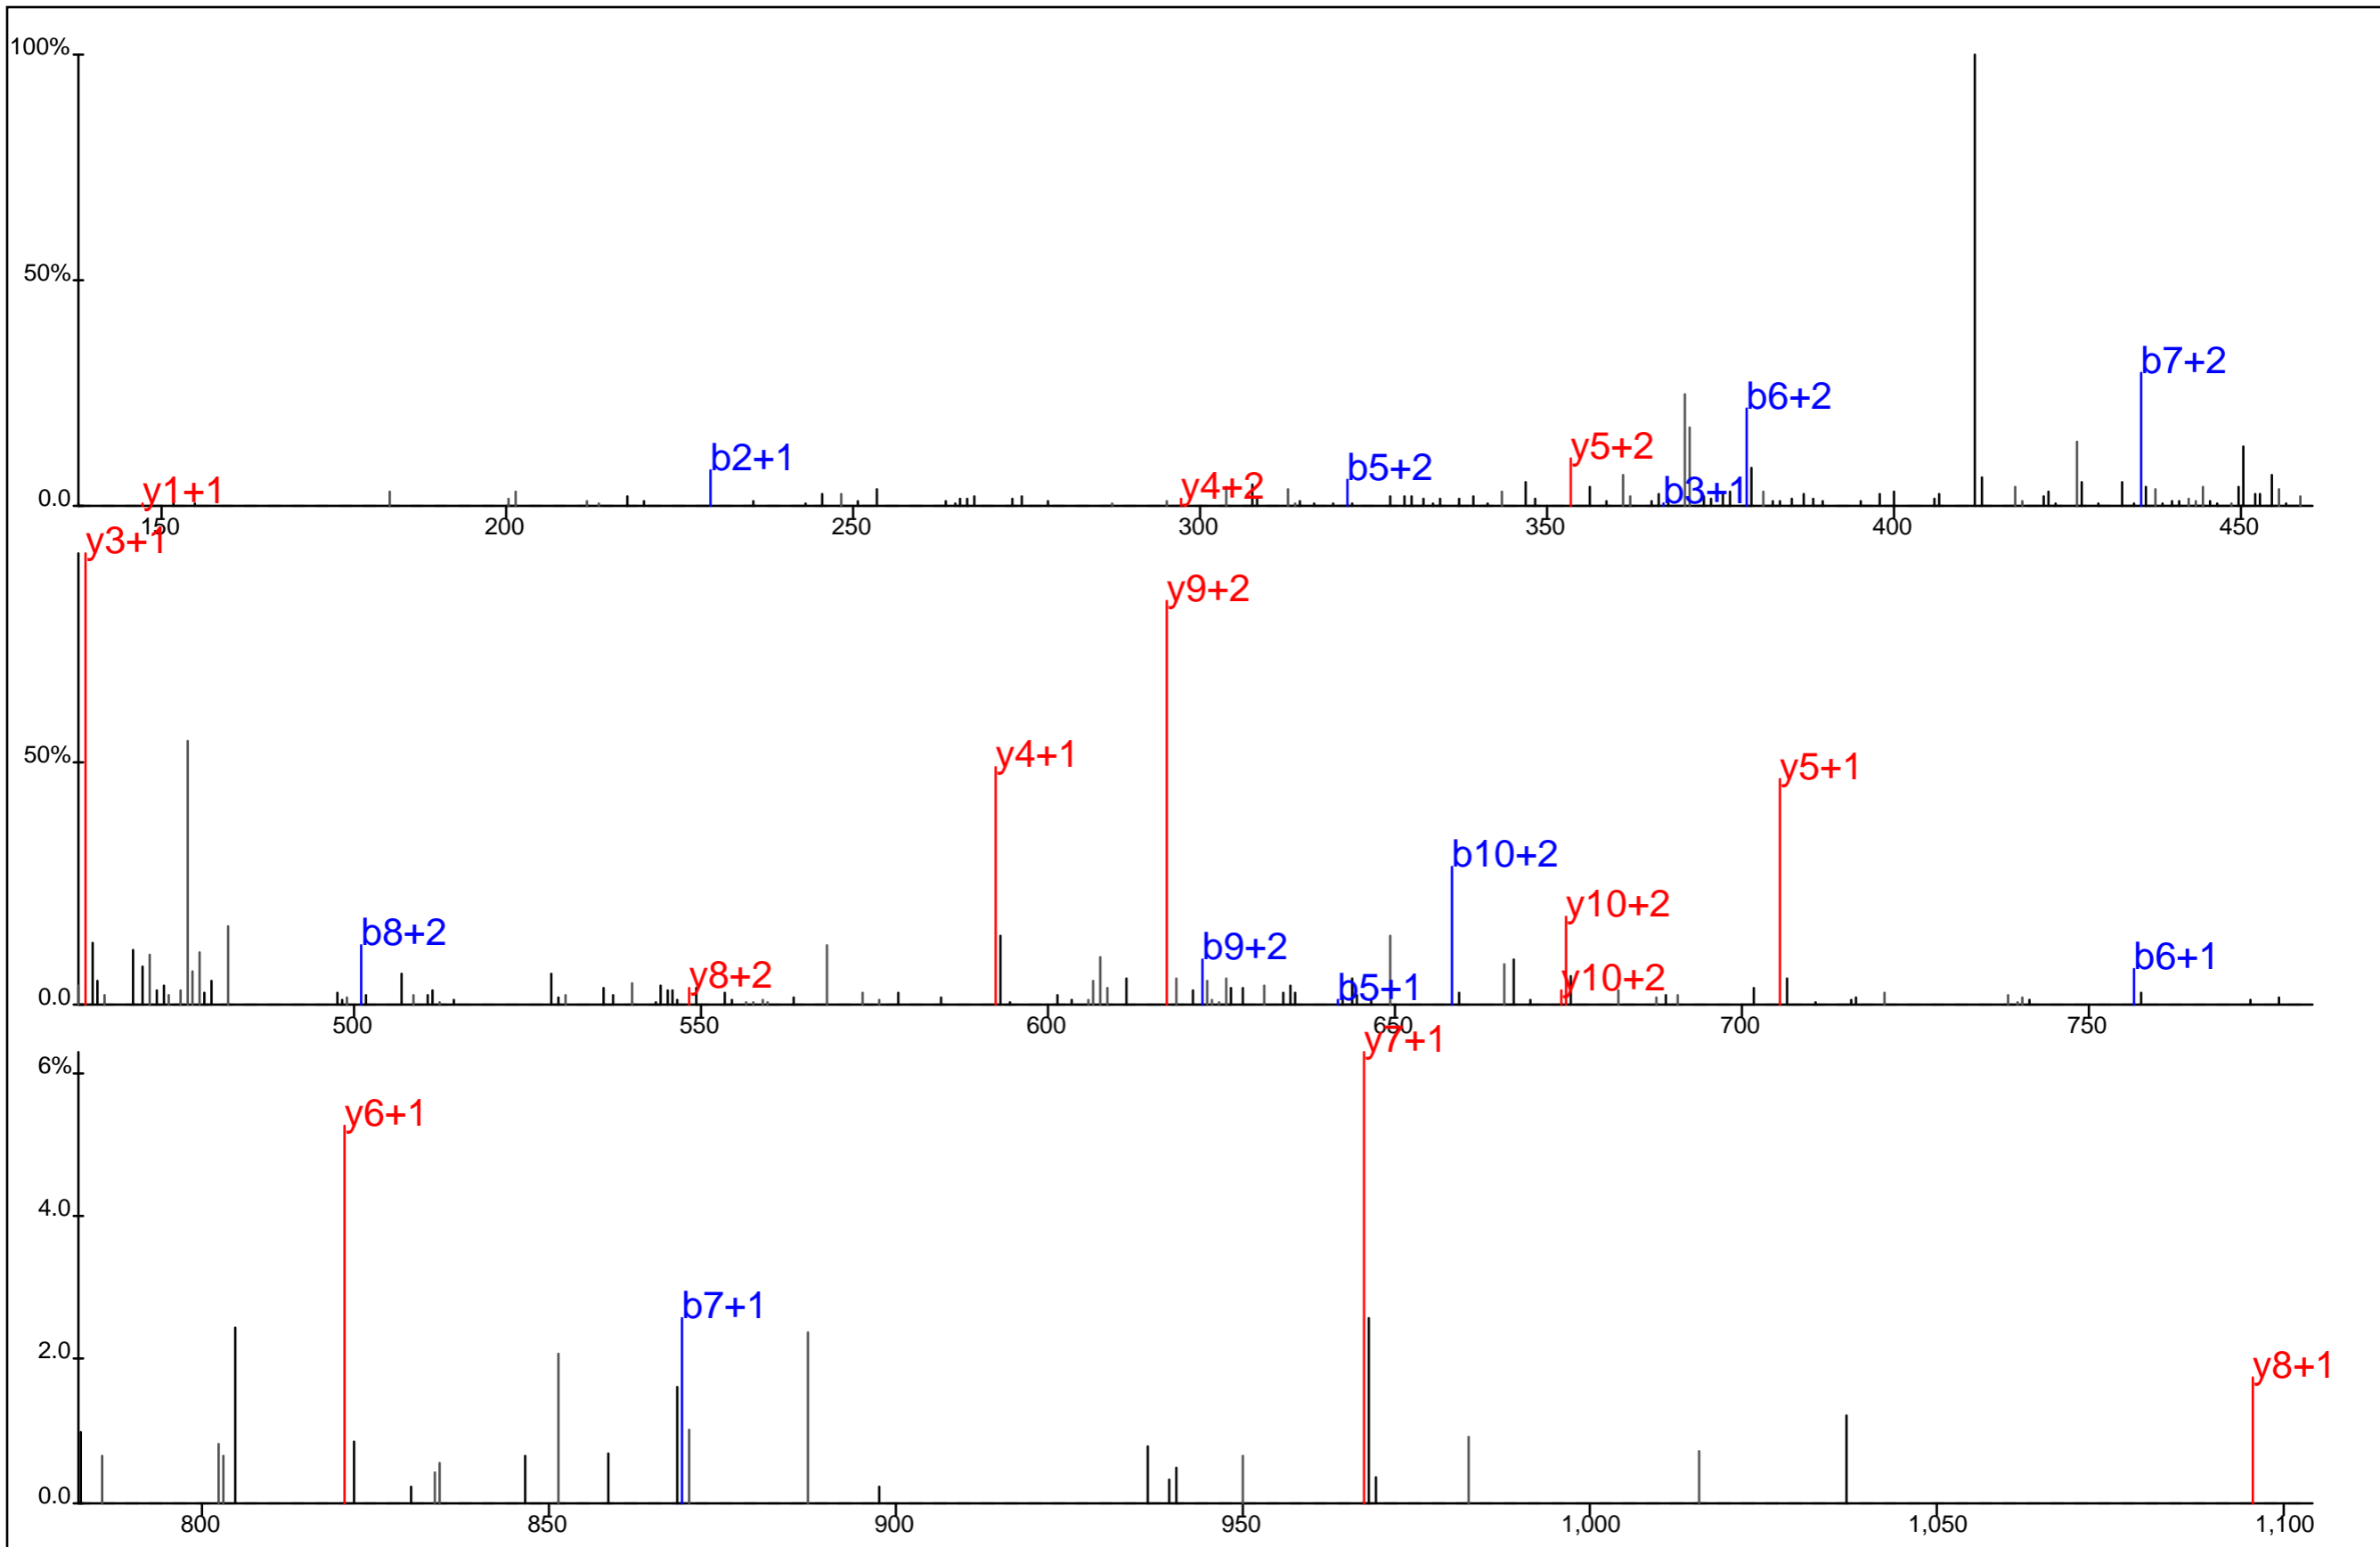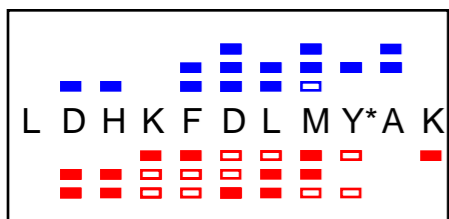

Protein Name: Tubulin alpha  
 gi Accession: 13376181  
 Precursor Mass: 487.5605+3  
 Delta Mass: 1.887 ppm  
 XCorr: 39.41

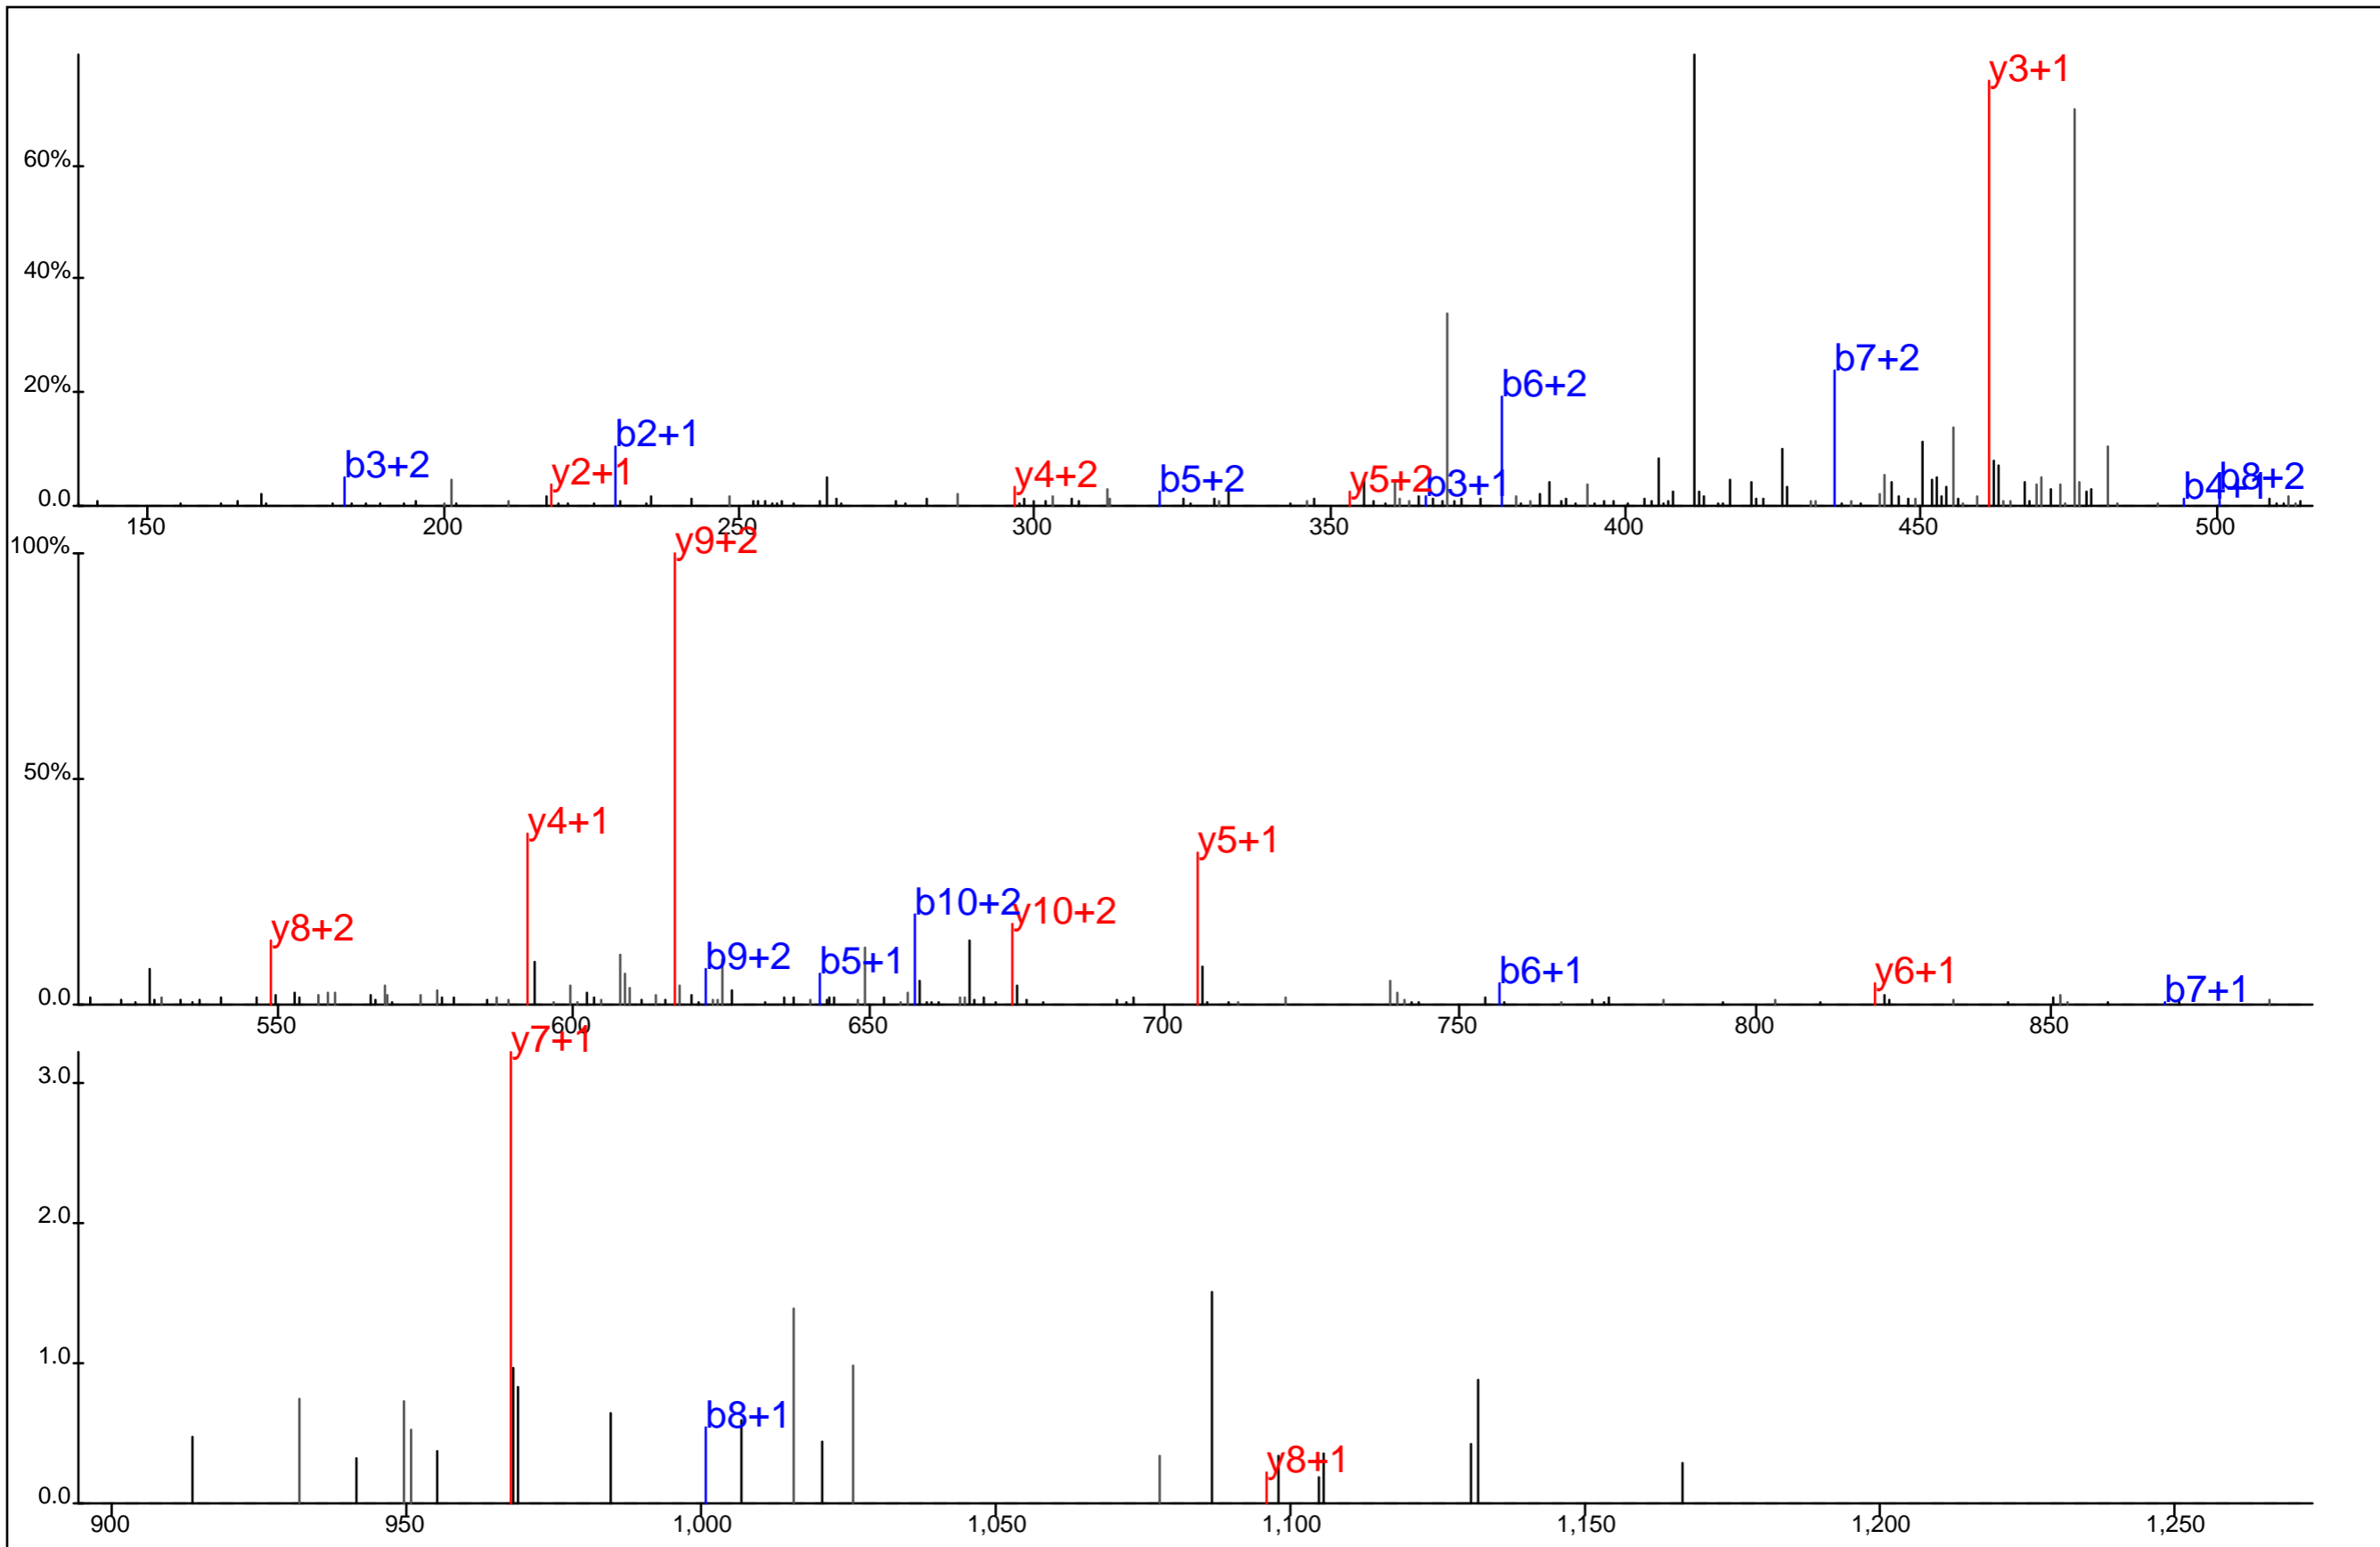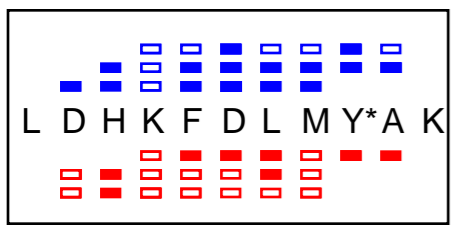

Protein Name: Tubulin alpha  
 gi Accession: 13376181  
 Precursor Mass: 487.5602+3  
 Delta Mass: 1.074 ppm  
 XCorr: 34.93

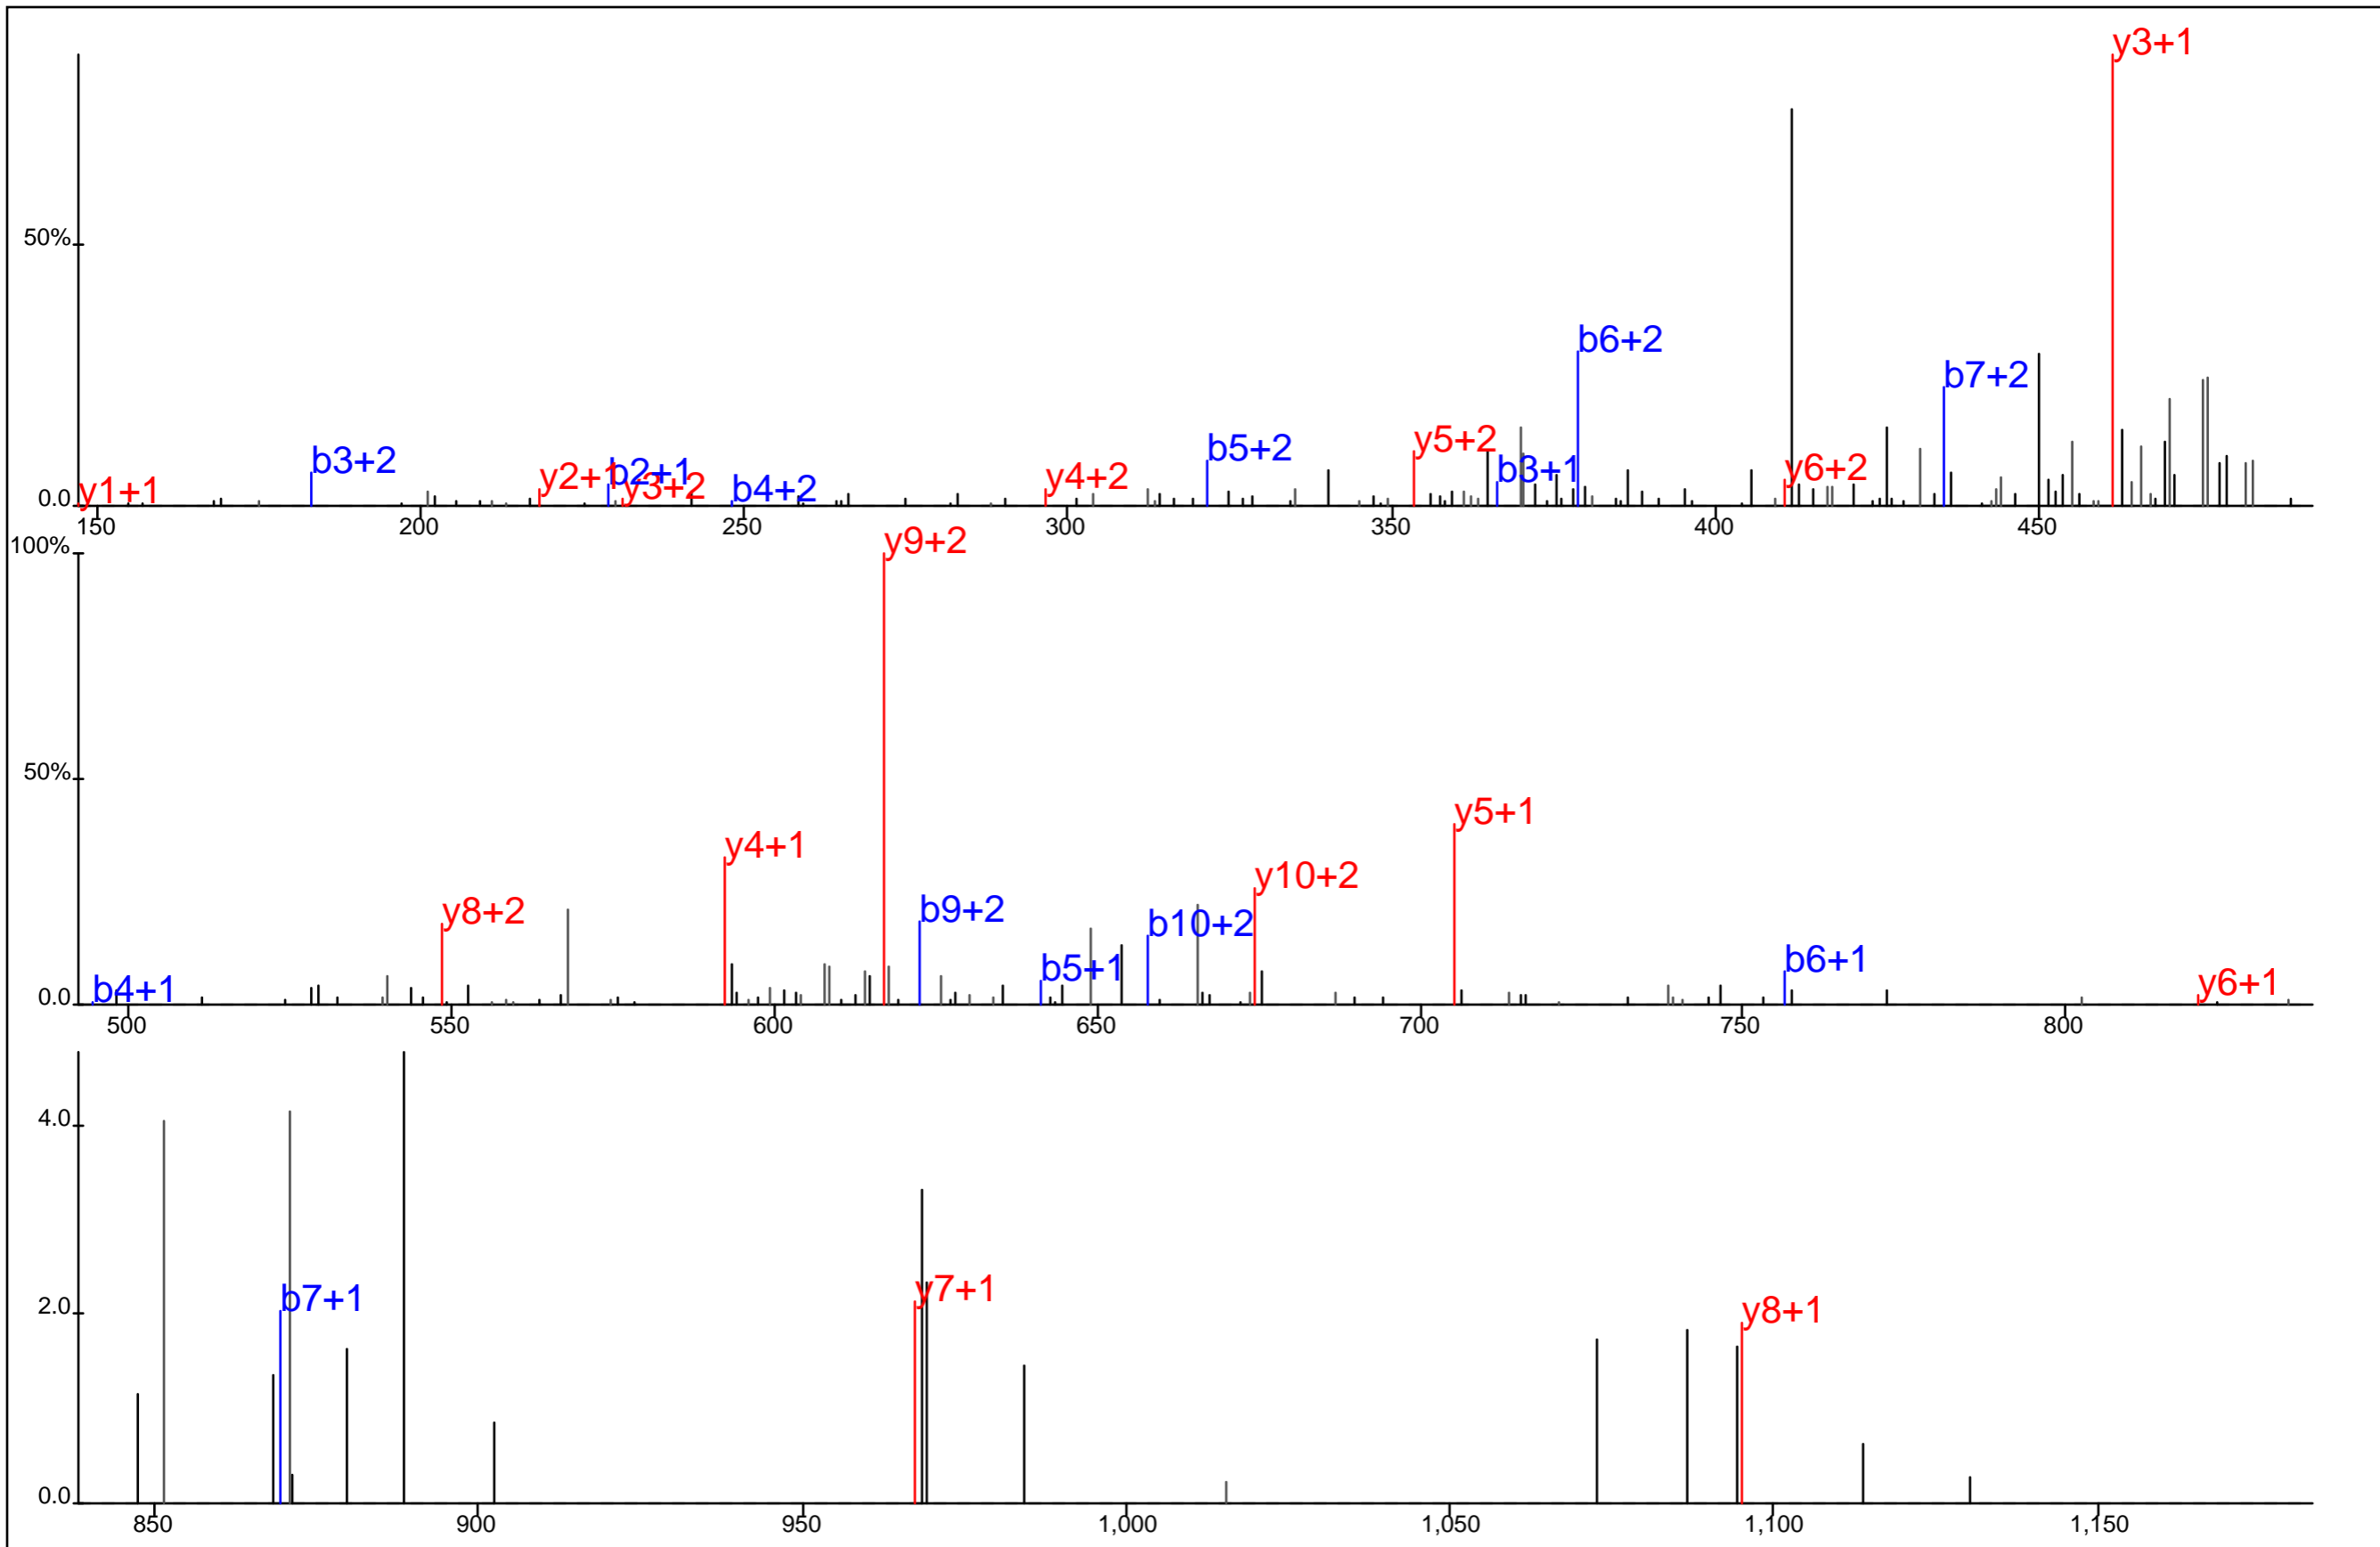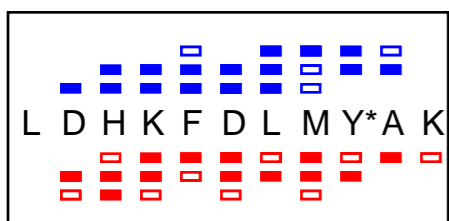

Protein Name: Tubulin alpha  
 gi Accession: 13376181  
 Precursor Mass: 487.5611+3  
 Delta Mass: 2.949 ppm  
 XCorr: 38.85

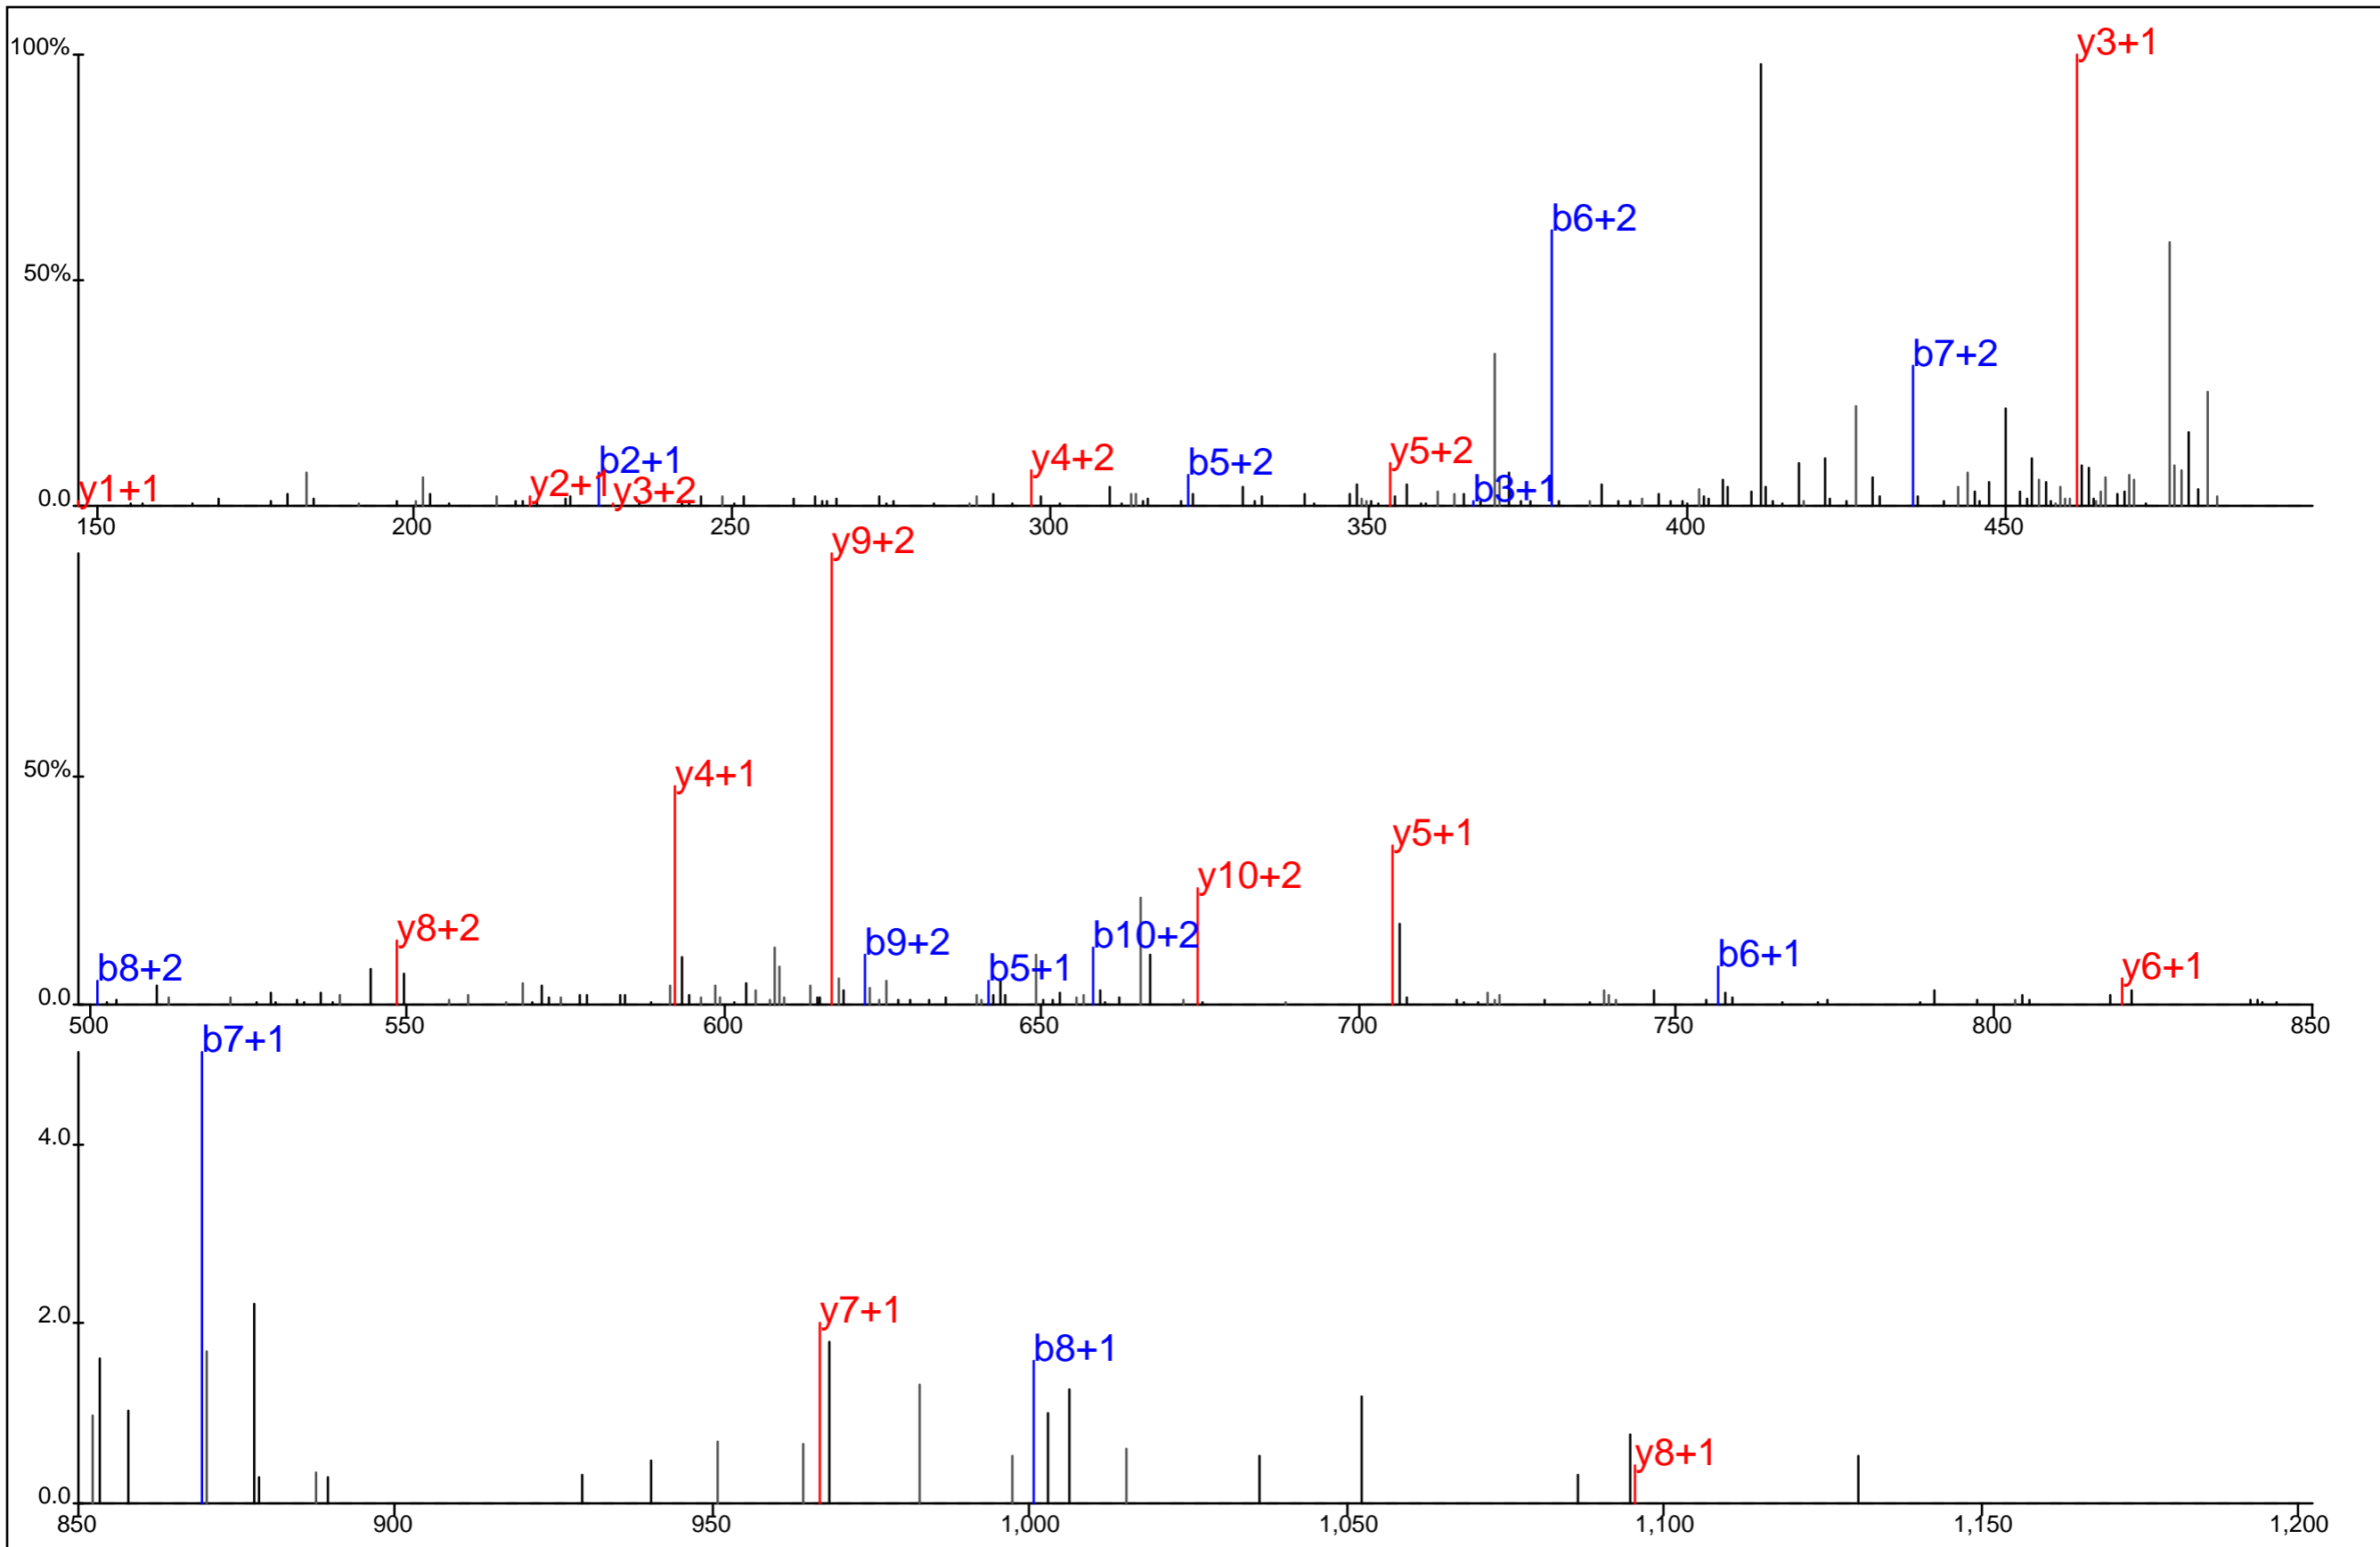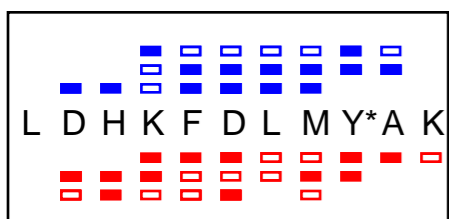

Protein Name: Tubulin alpha  
 gi Accession: 13376181  
 Precursor Mass: 487.5633+3  
 Delta Mass: 7.529 ppm  
 XCorr: 32.33

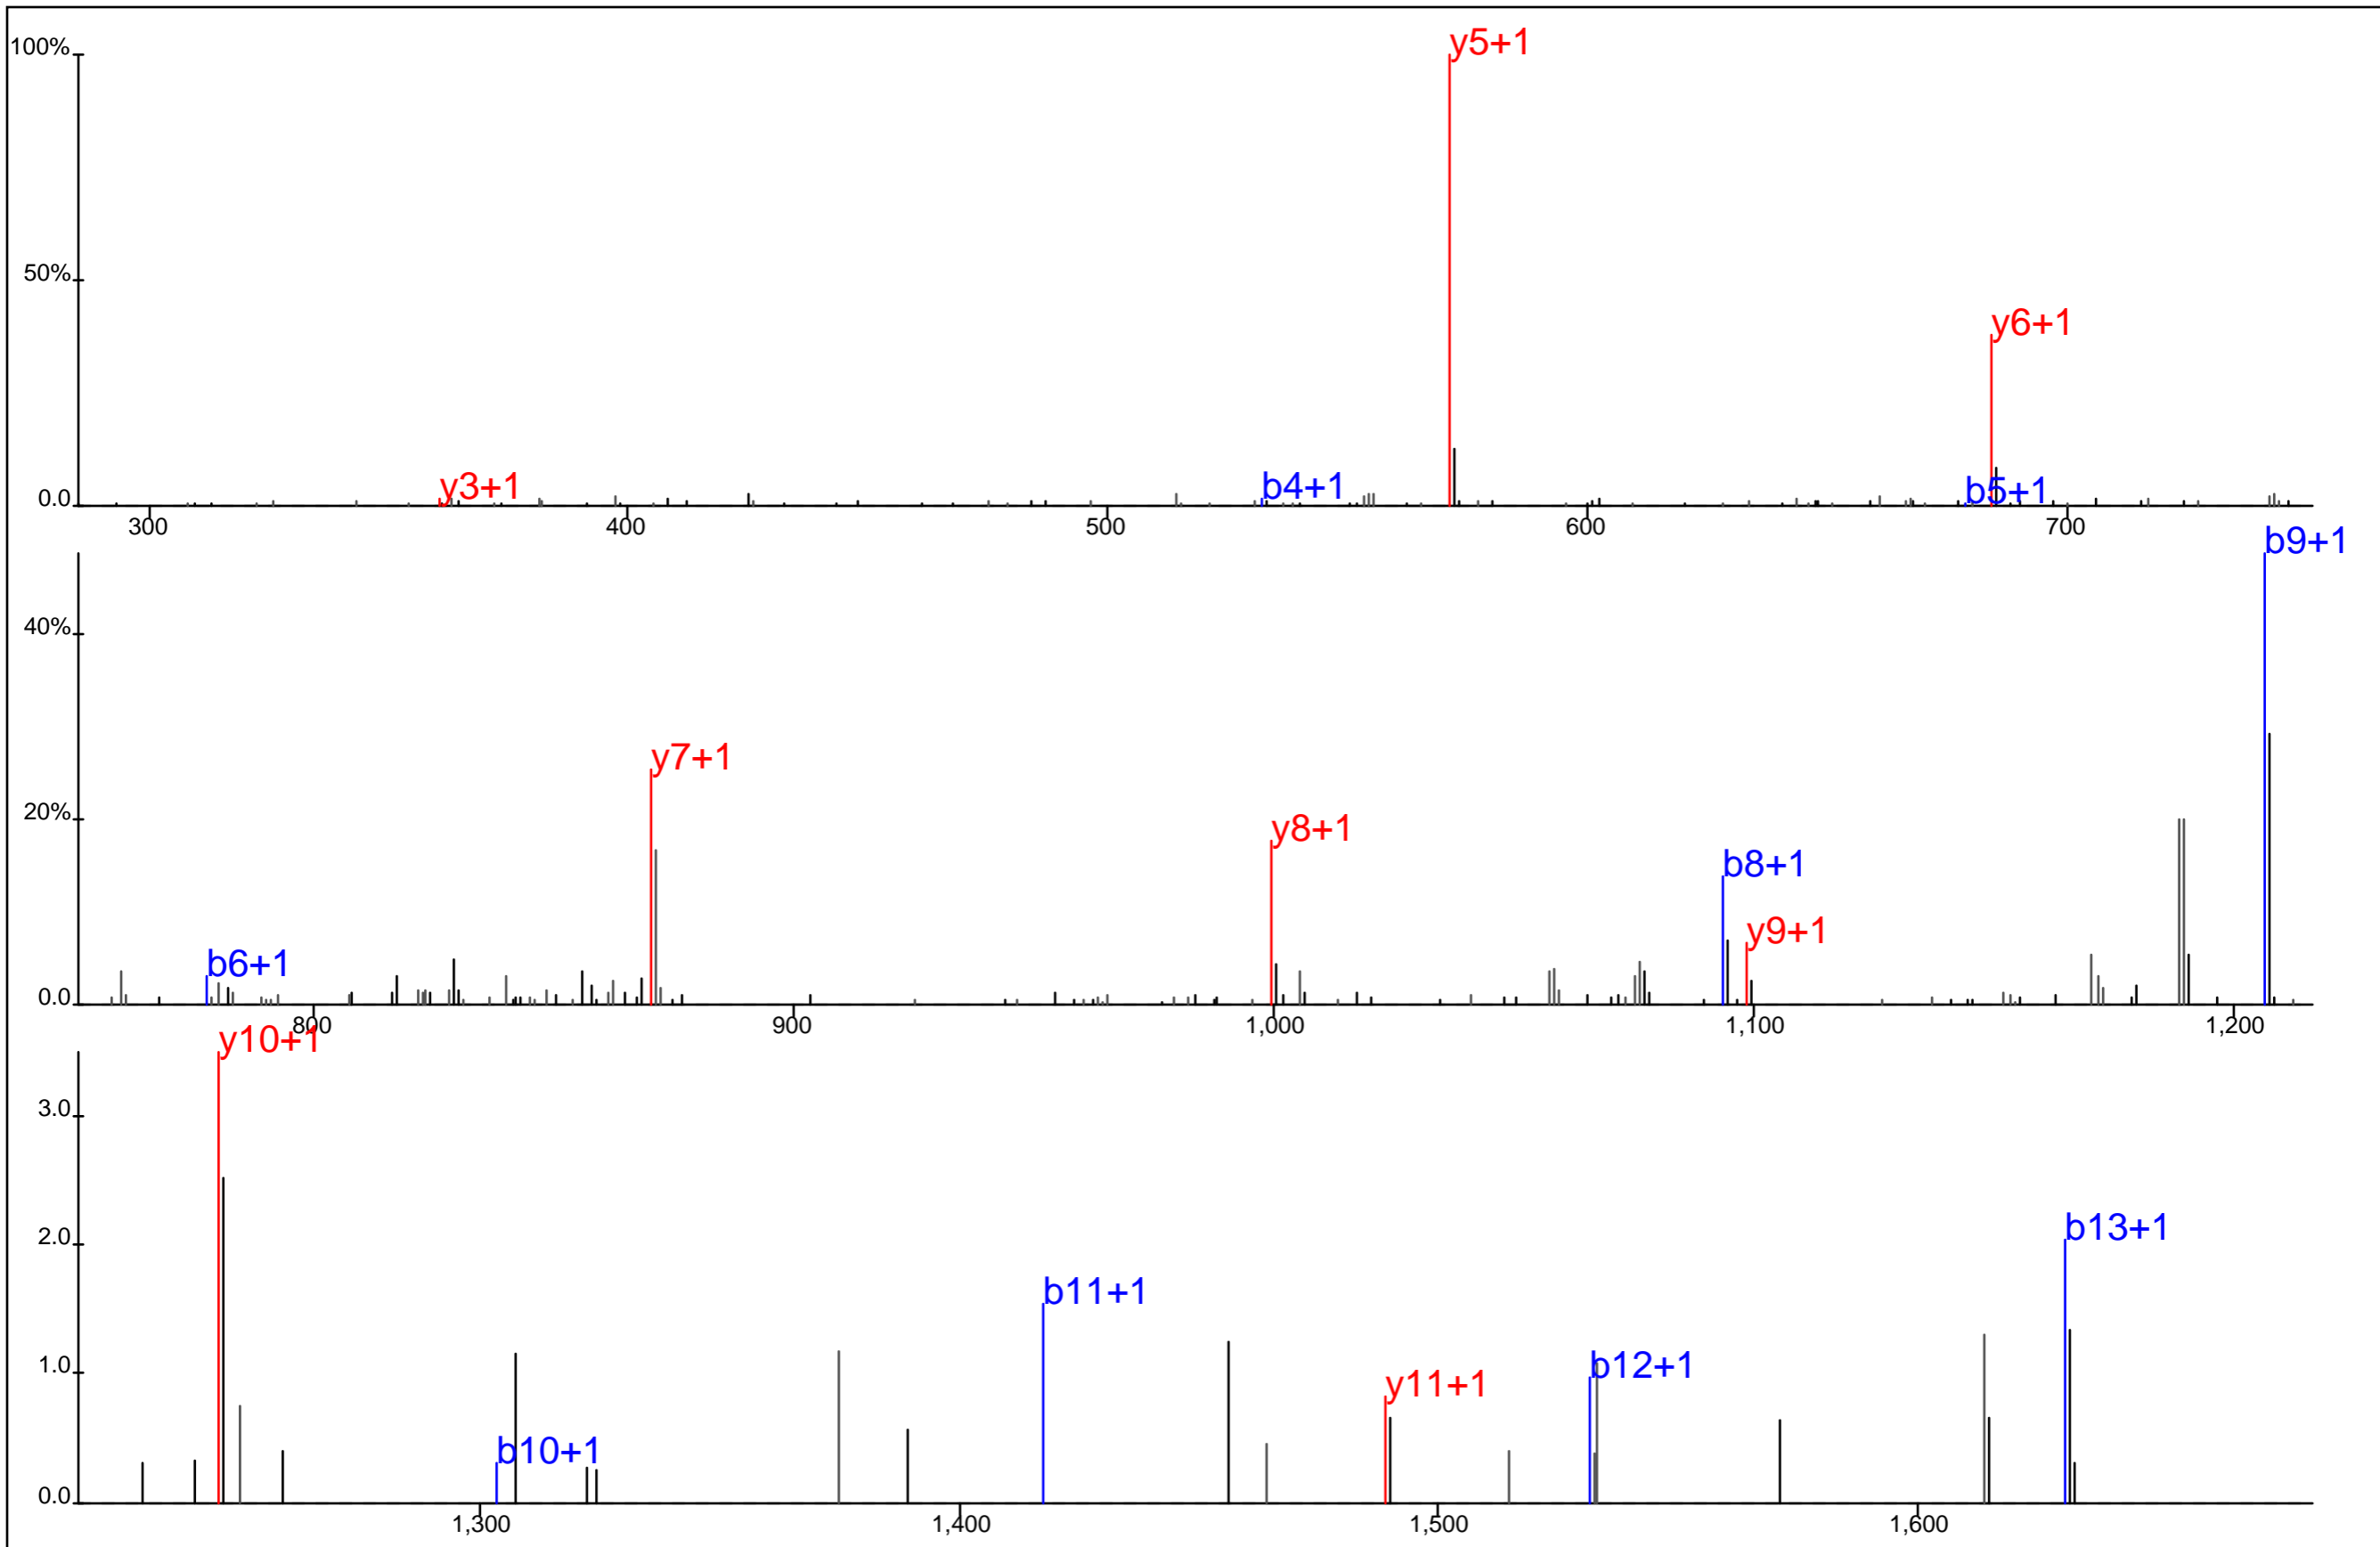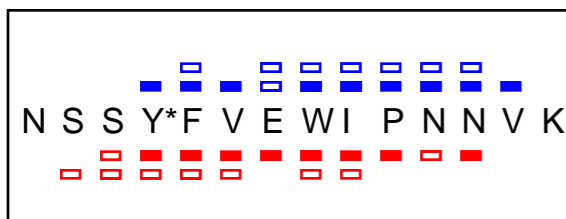

Protein Name: Tubulin beta  
 gi Accession: 2119276  
 Precursor Mass: 888.9061+2  
 Delta Mass: 3.224 ppm  
 XCorr: 44.44



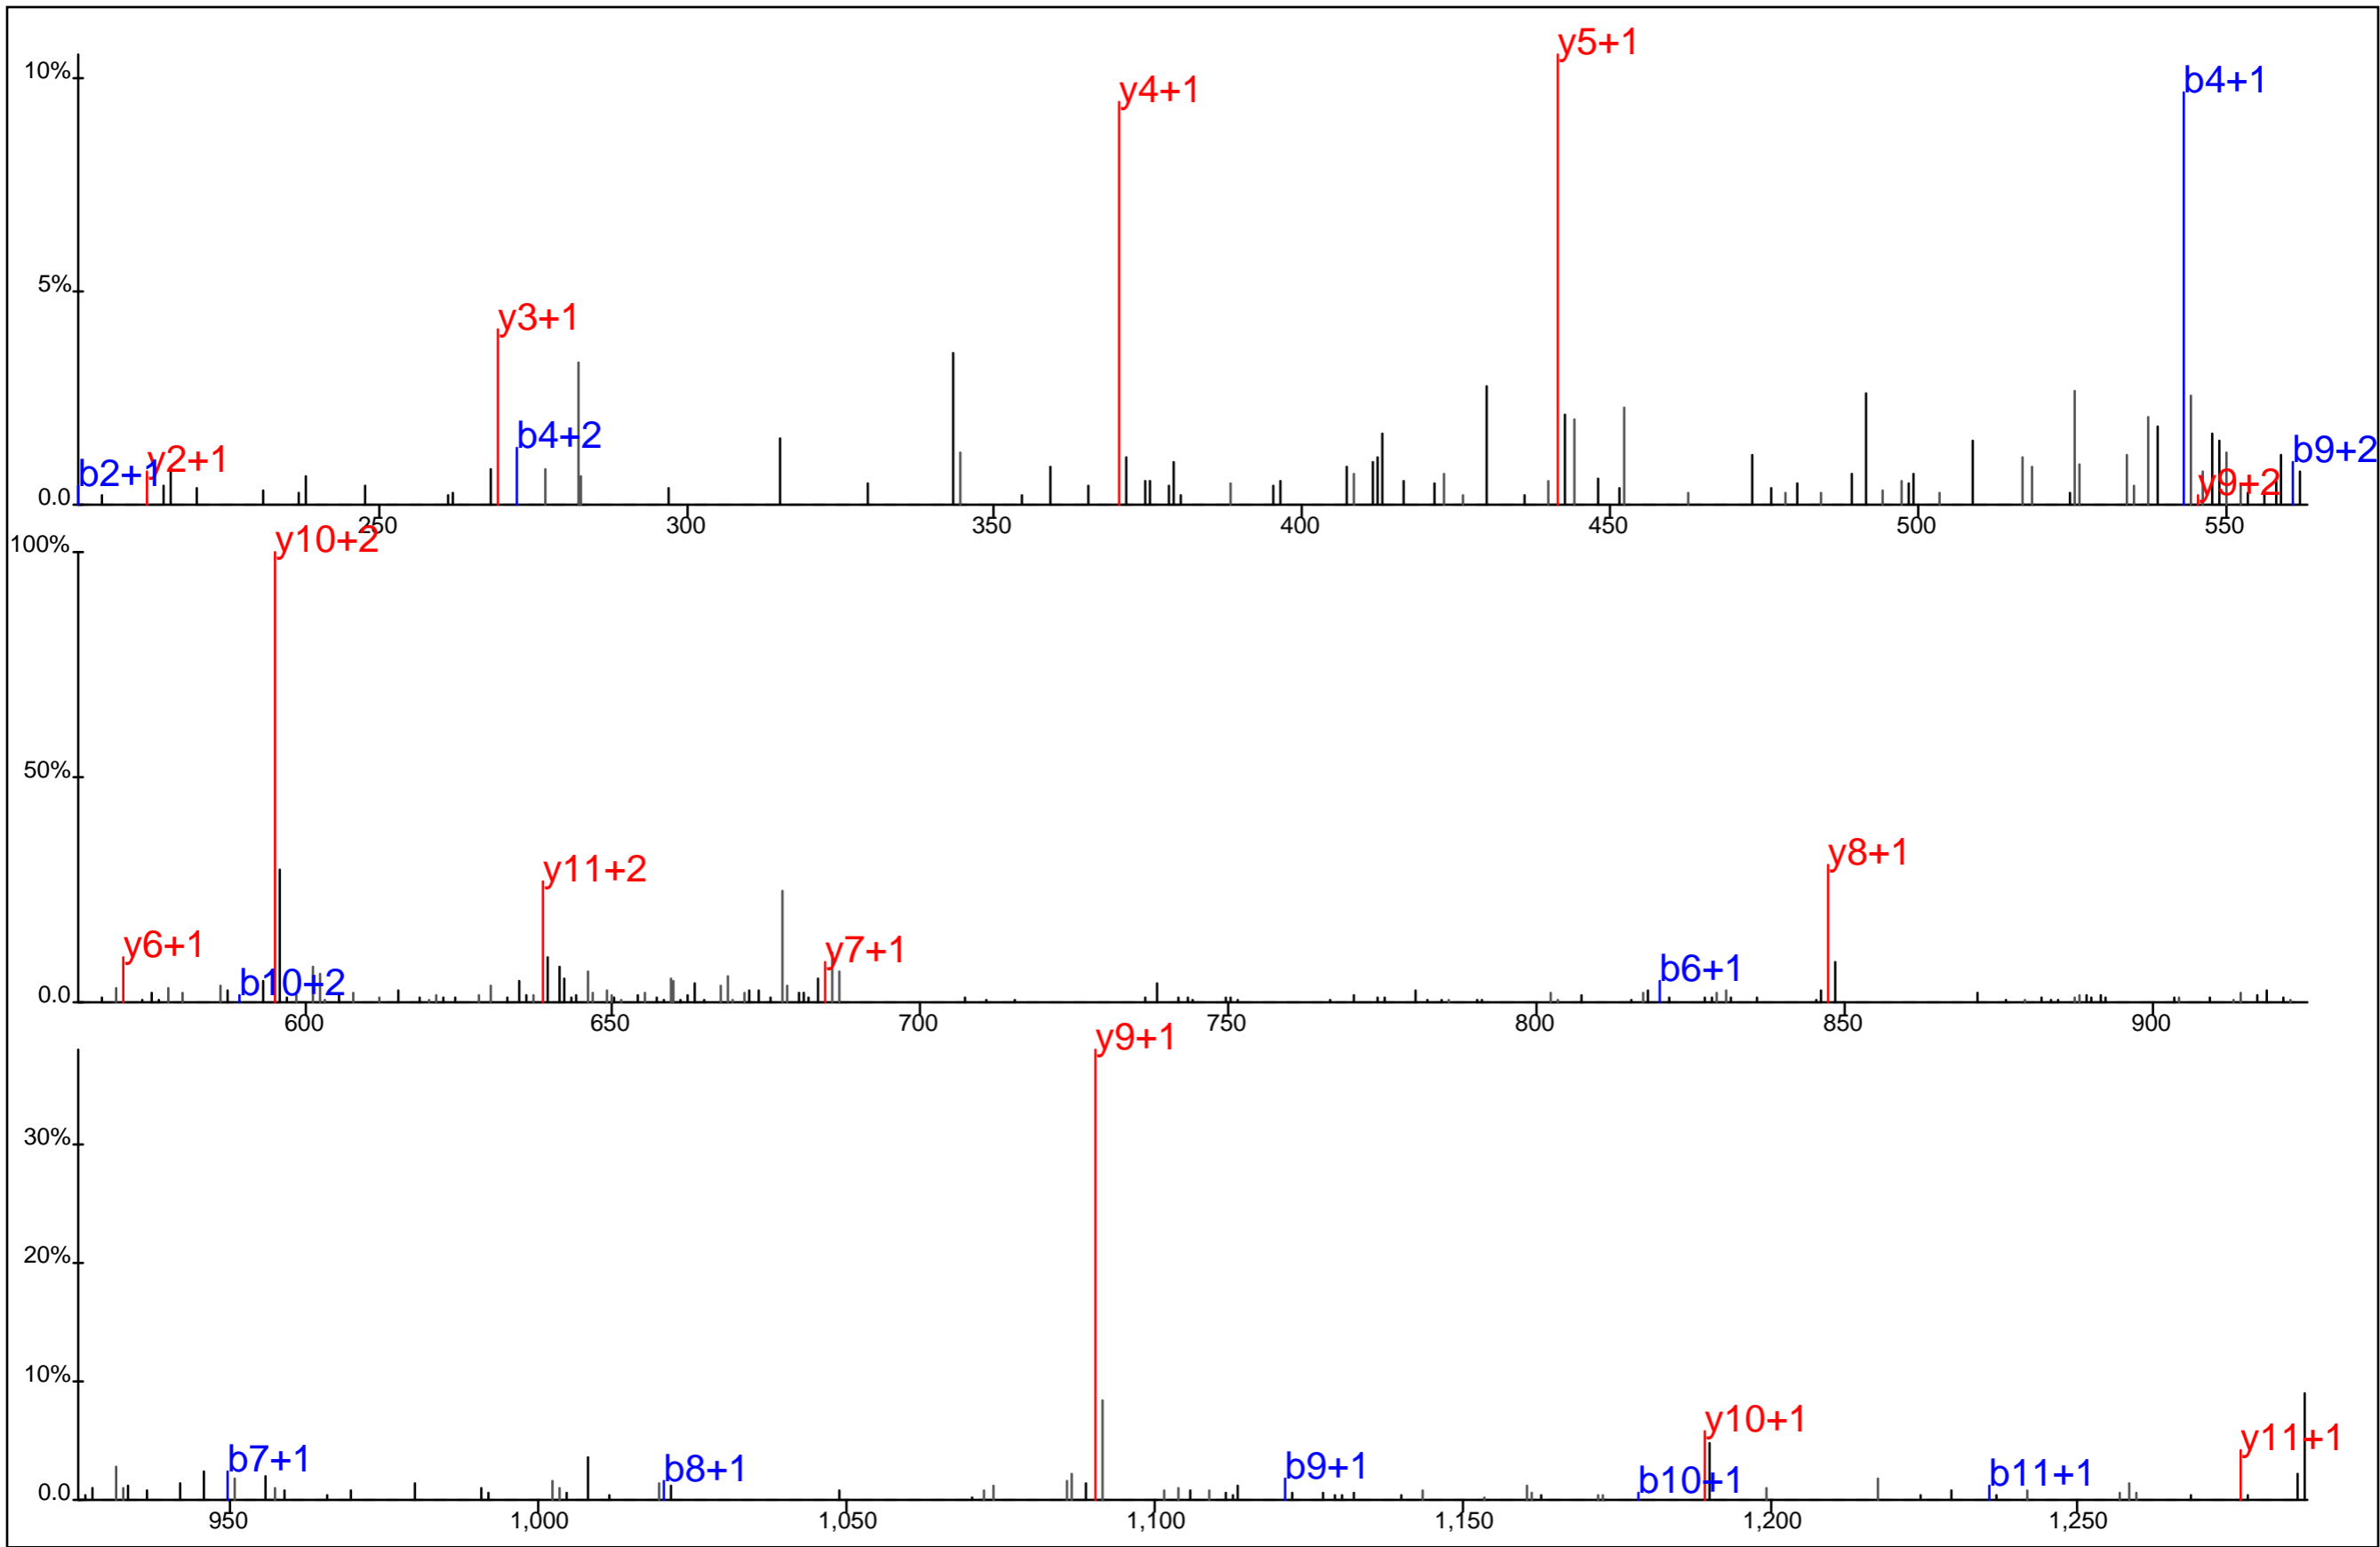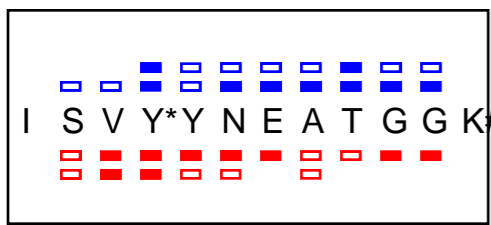

Protein Name: Tubulin beta  
 gi Accession: 2119276  
 Precursor Mass: 695.3134+2  
 Delta Mass: 1.229 ppm  
 XCorr: 47.58

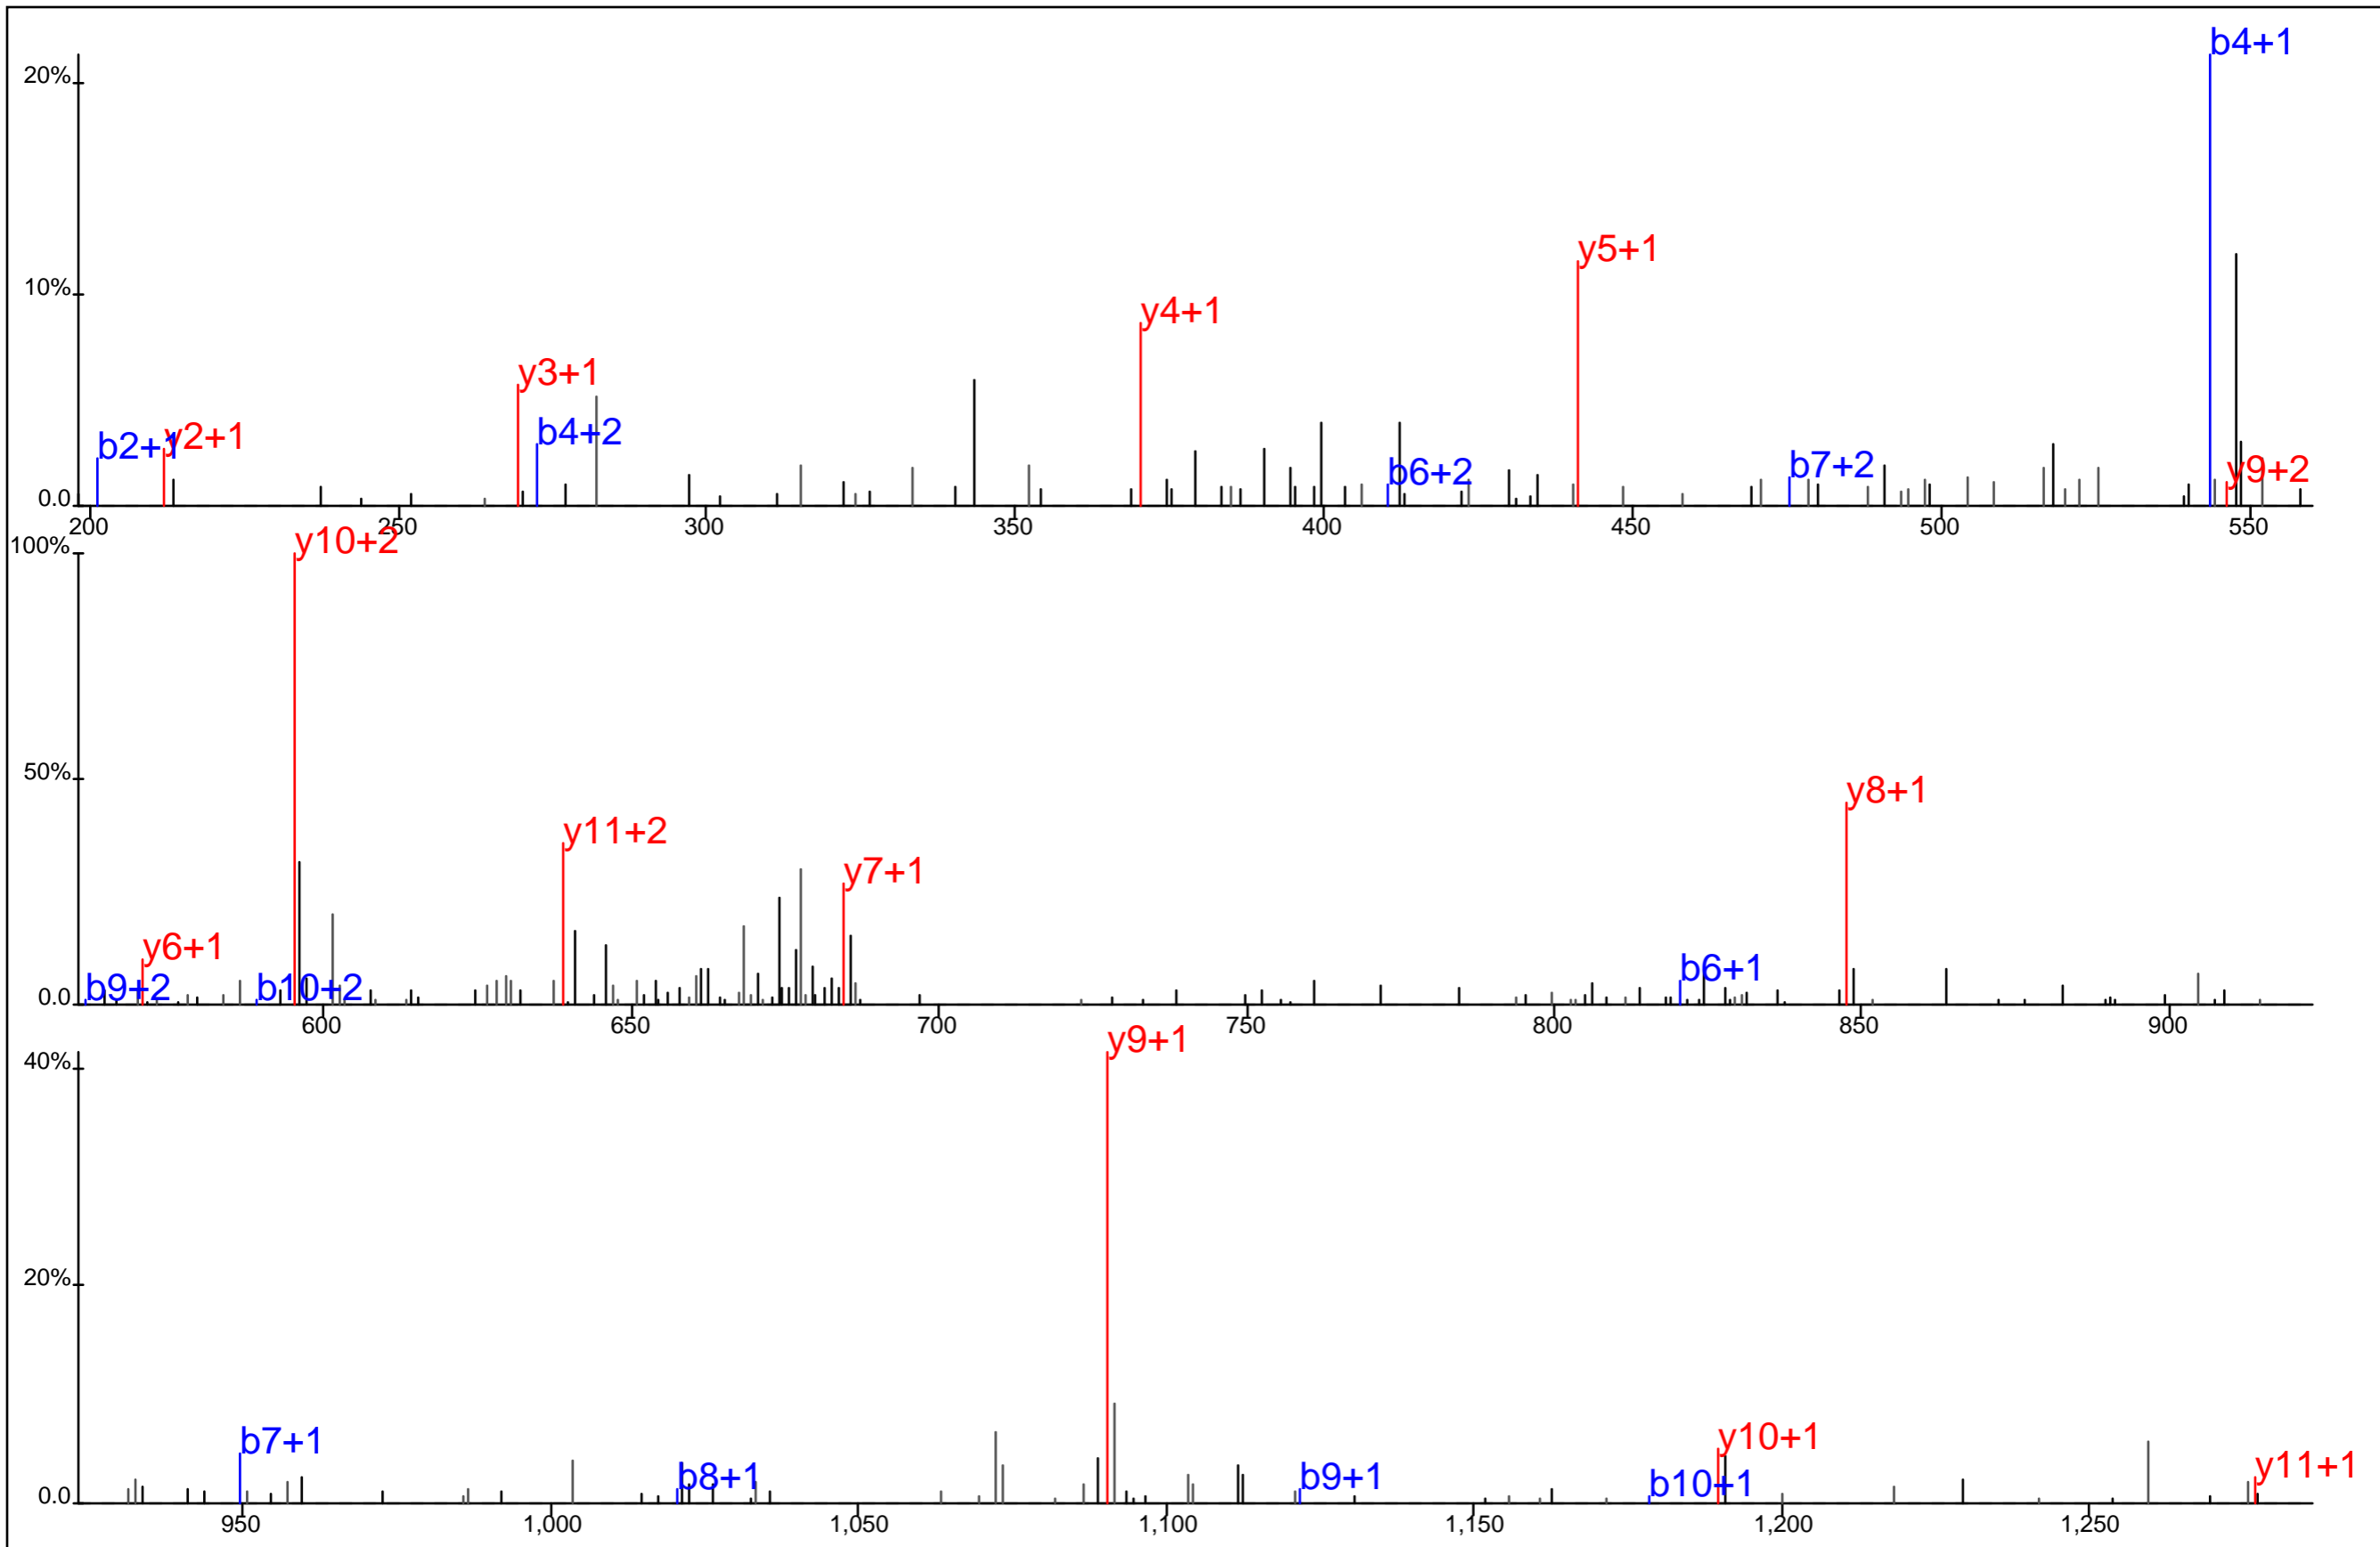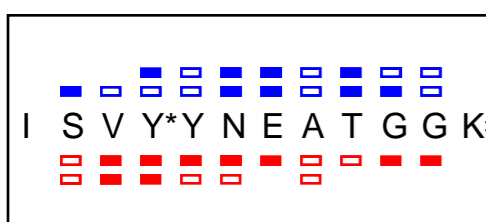

Protein Name: Tubulin beta  
 gi Accession: 2119276  
 Precursor Mass: 695.3169+2  
 Delta Mass: 6.324 ppm  
 XCorr: 51.11

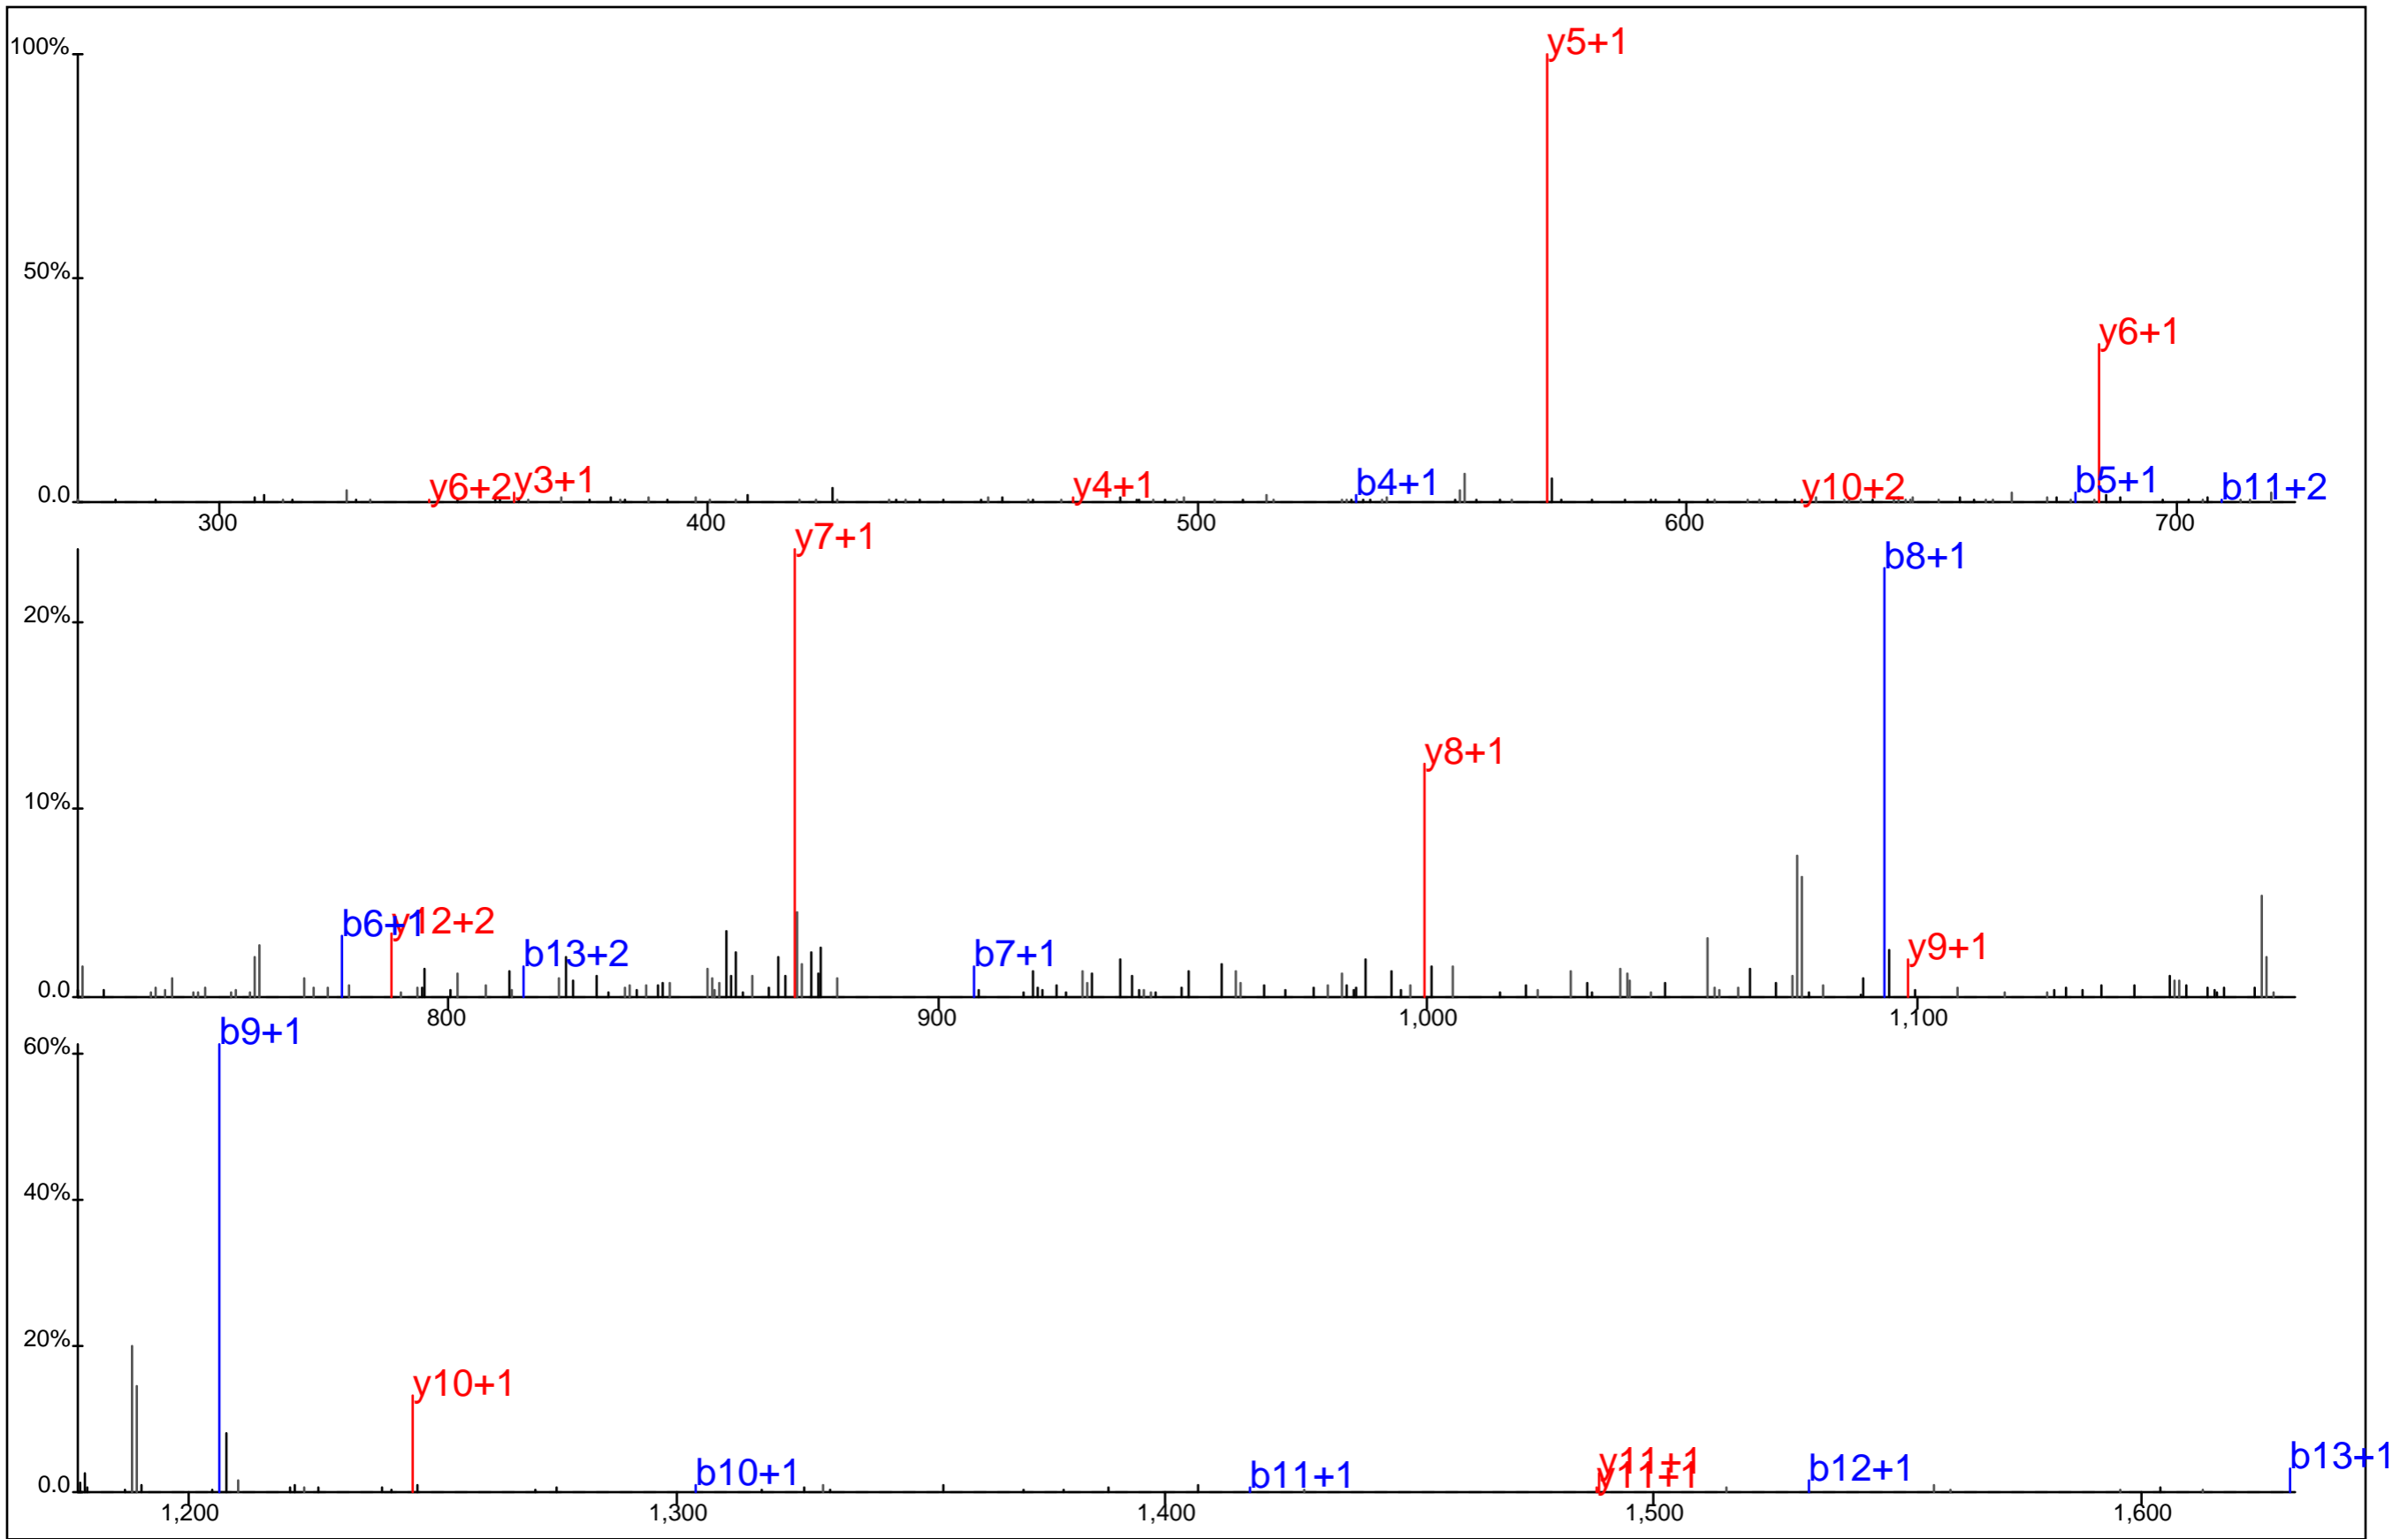

|   |   |   |    |   |   |   |   |   |   |   |   |   |   |
|---|---|---|----|---|---|---|---|---|---|---|---|---|---|
|   |   |   |    |   |   |   |   |   |   |   |   |   |   |
| N | S | S | Y* | F | V | E | W | I | P | N | N | V | K |
|   |   |   |    |   |   |   |   |   |   |   |   |   |   |
|   |   |   |    |   |   |   |   |   |   |   |   |   |   |

Protein Name: Tubulin beta  
 gi Accession: 2119276  
 Precursor Mass: 888.9070+2  
 Delta Mass: 4.254 ppm  
 XCorr: 45.71

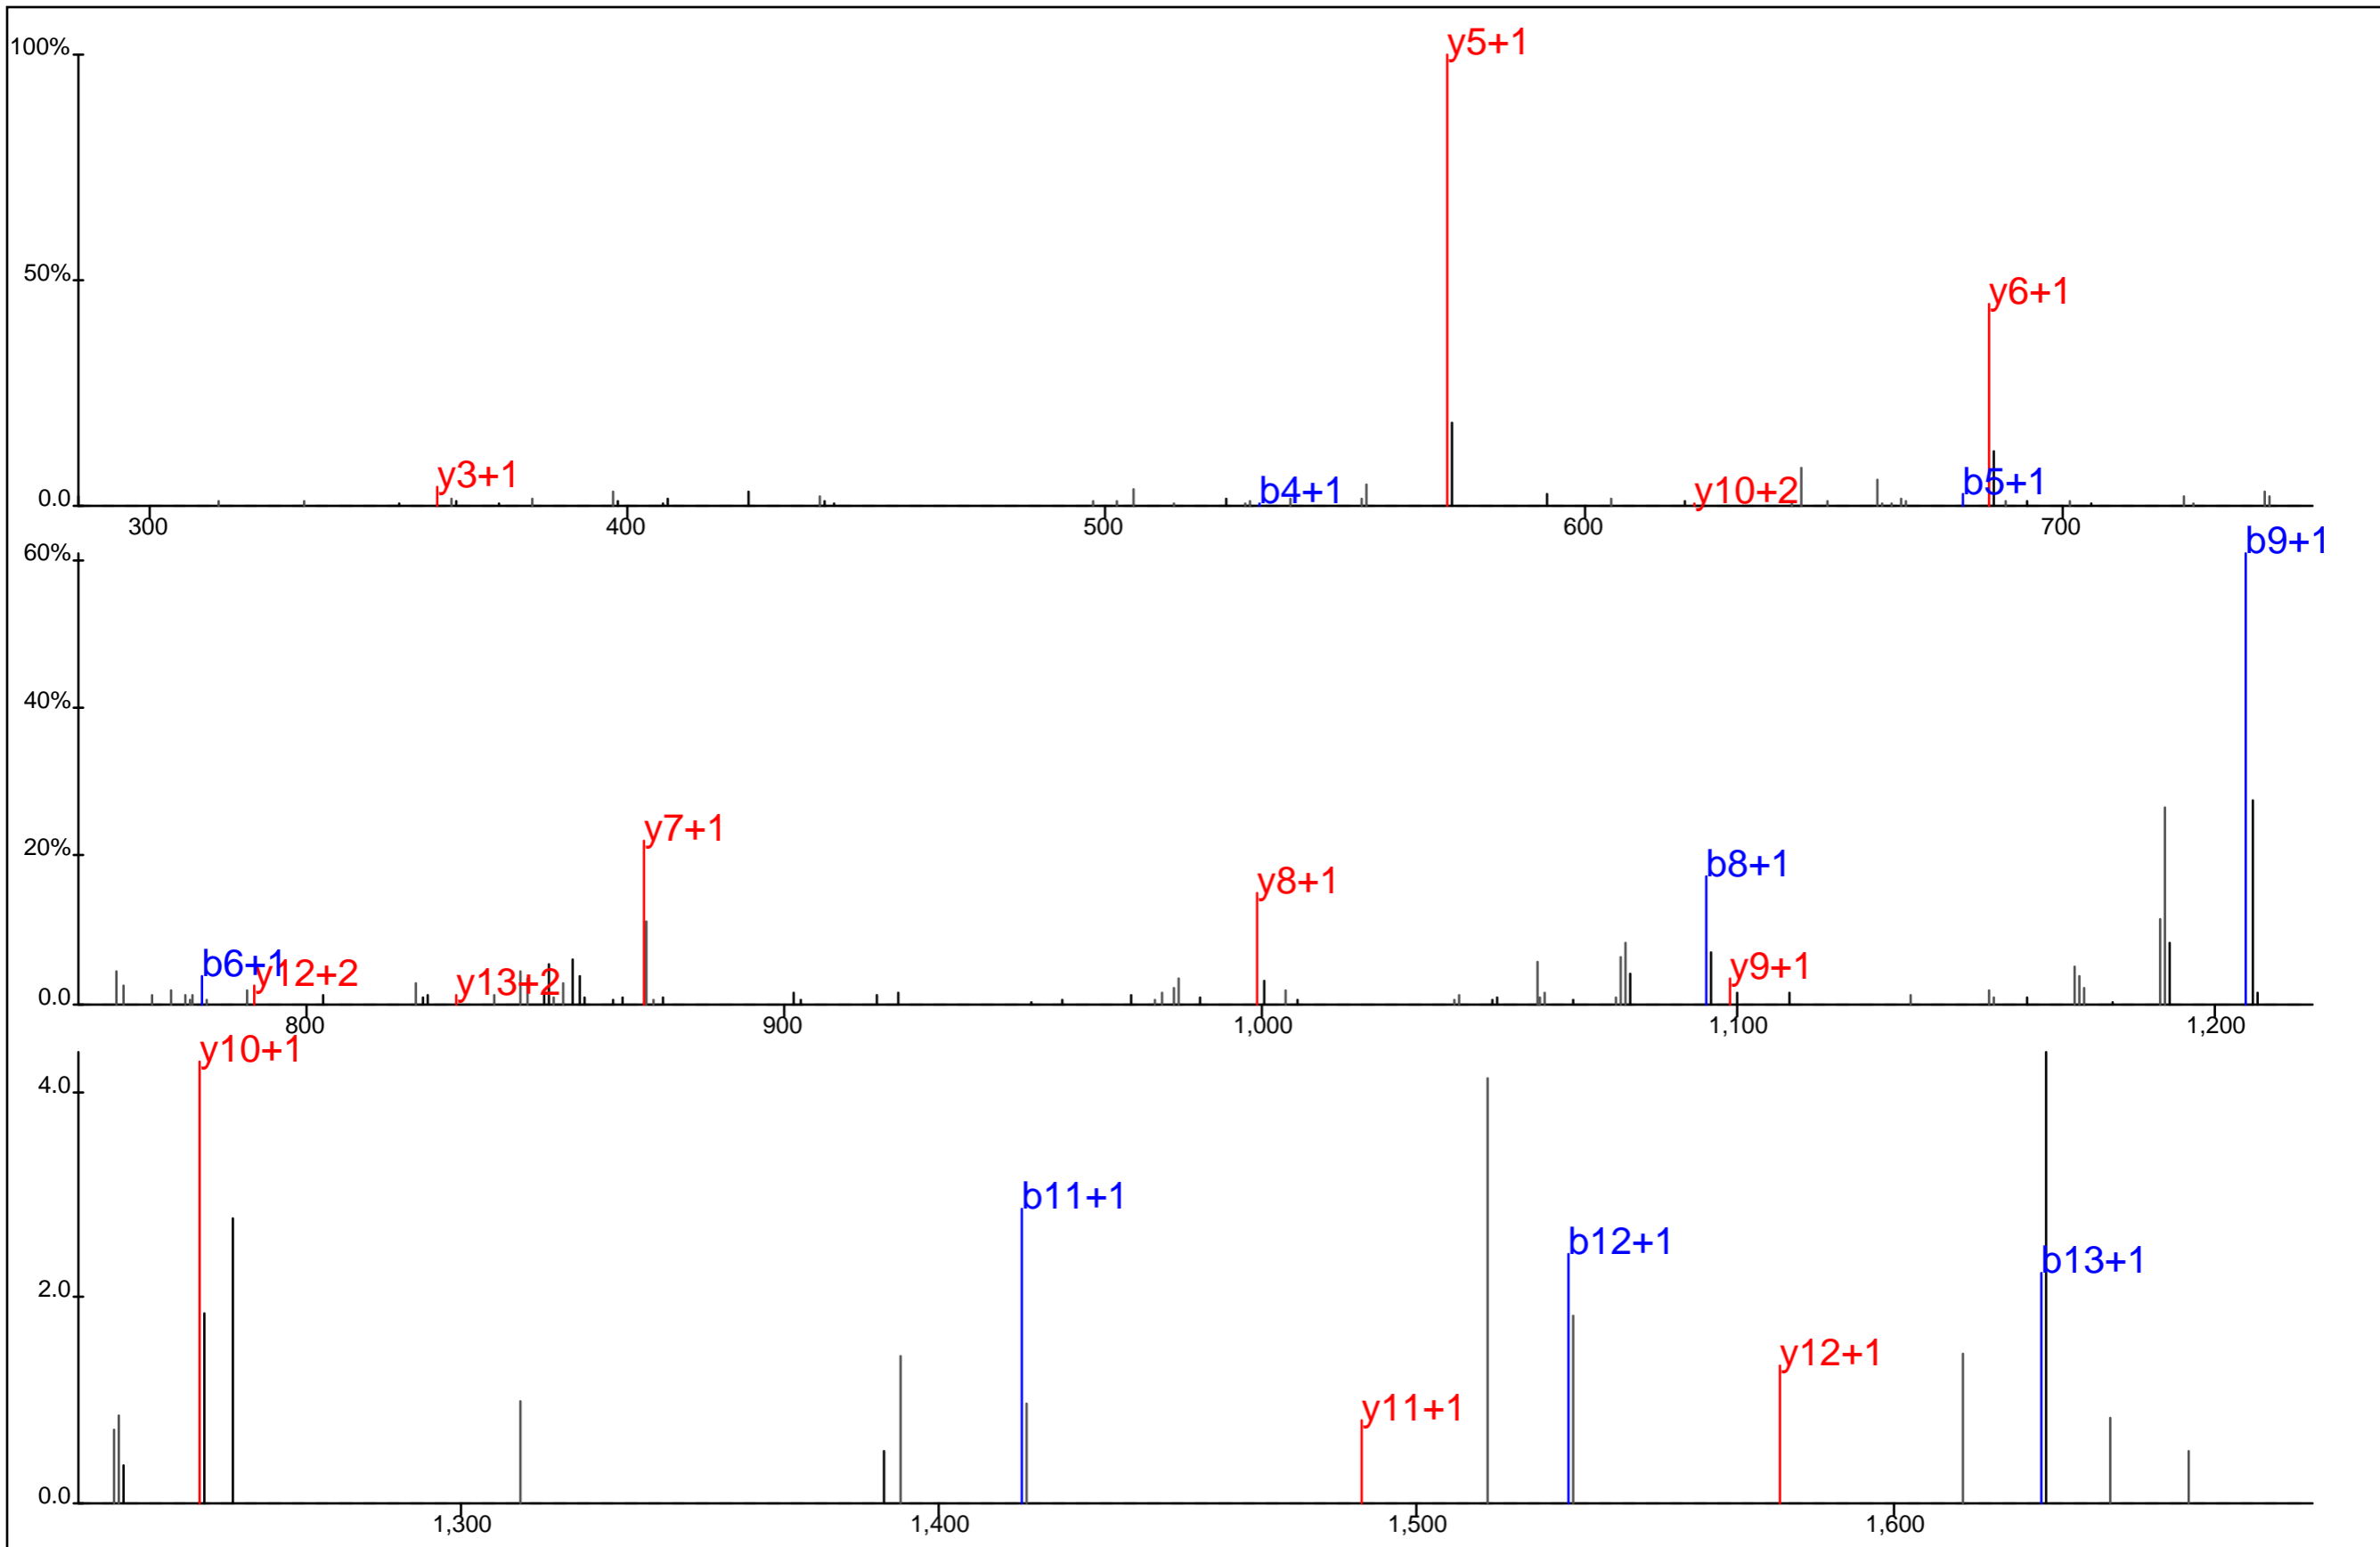

N S S Y\*F V E W I P N N V K  
 - - - - -  
 - - - - -

Protein Name: Tubulin beta  
 gi Accession: 2119276  
 Precursor Mass: 888.9053+2  
 Delta Mass: 2.261 ppm  
 XCorr: 37.16

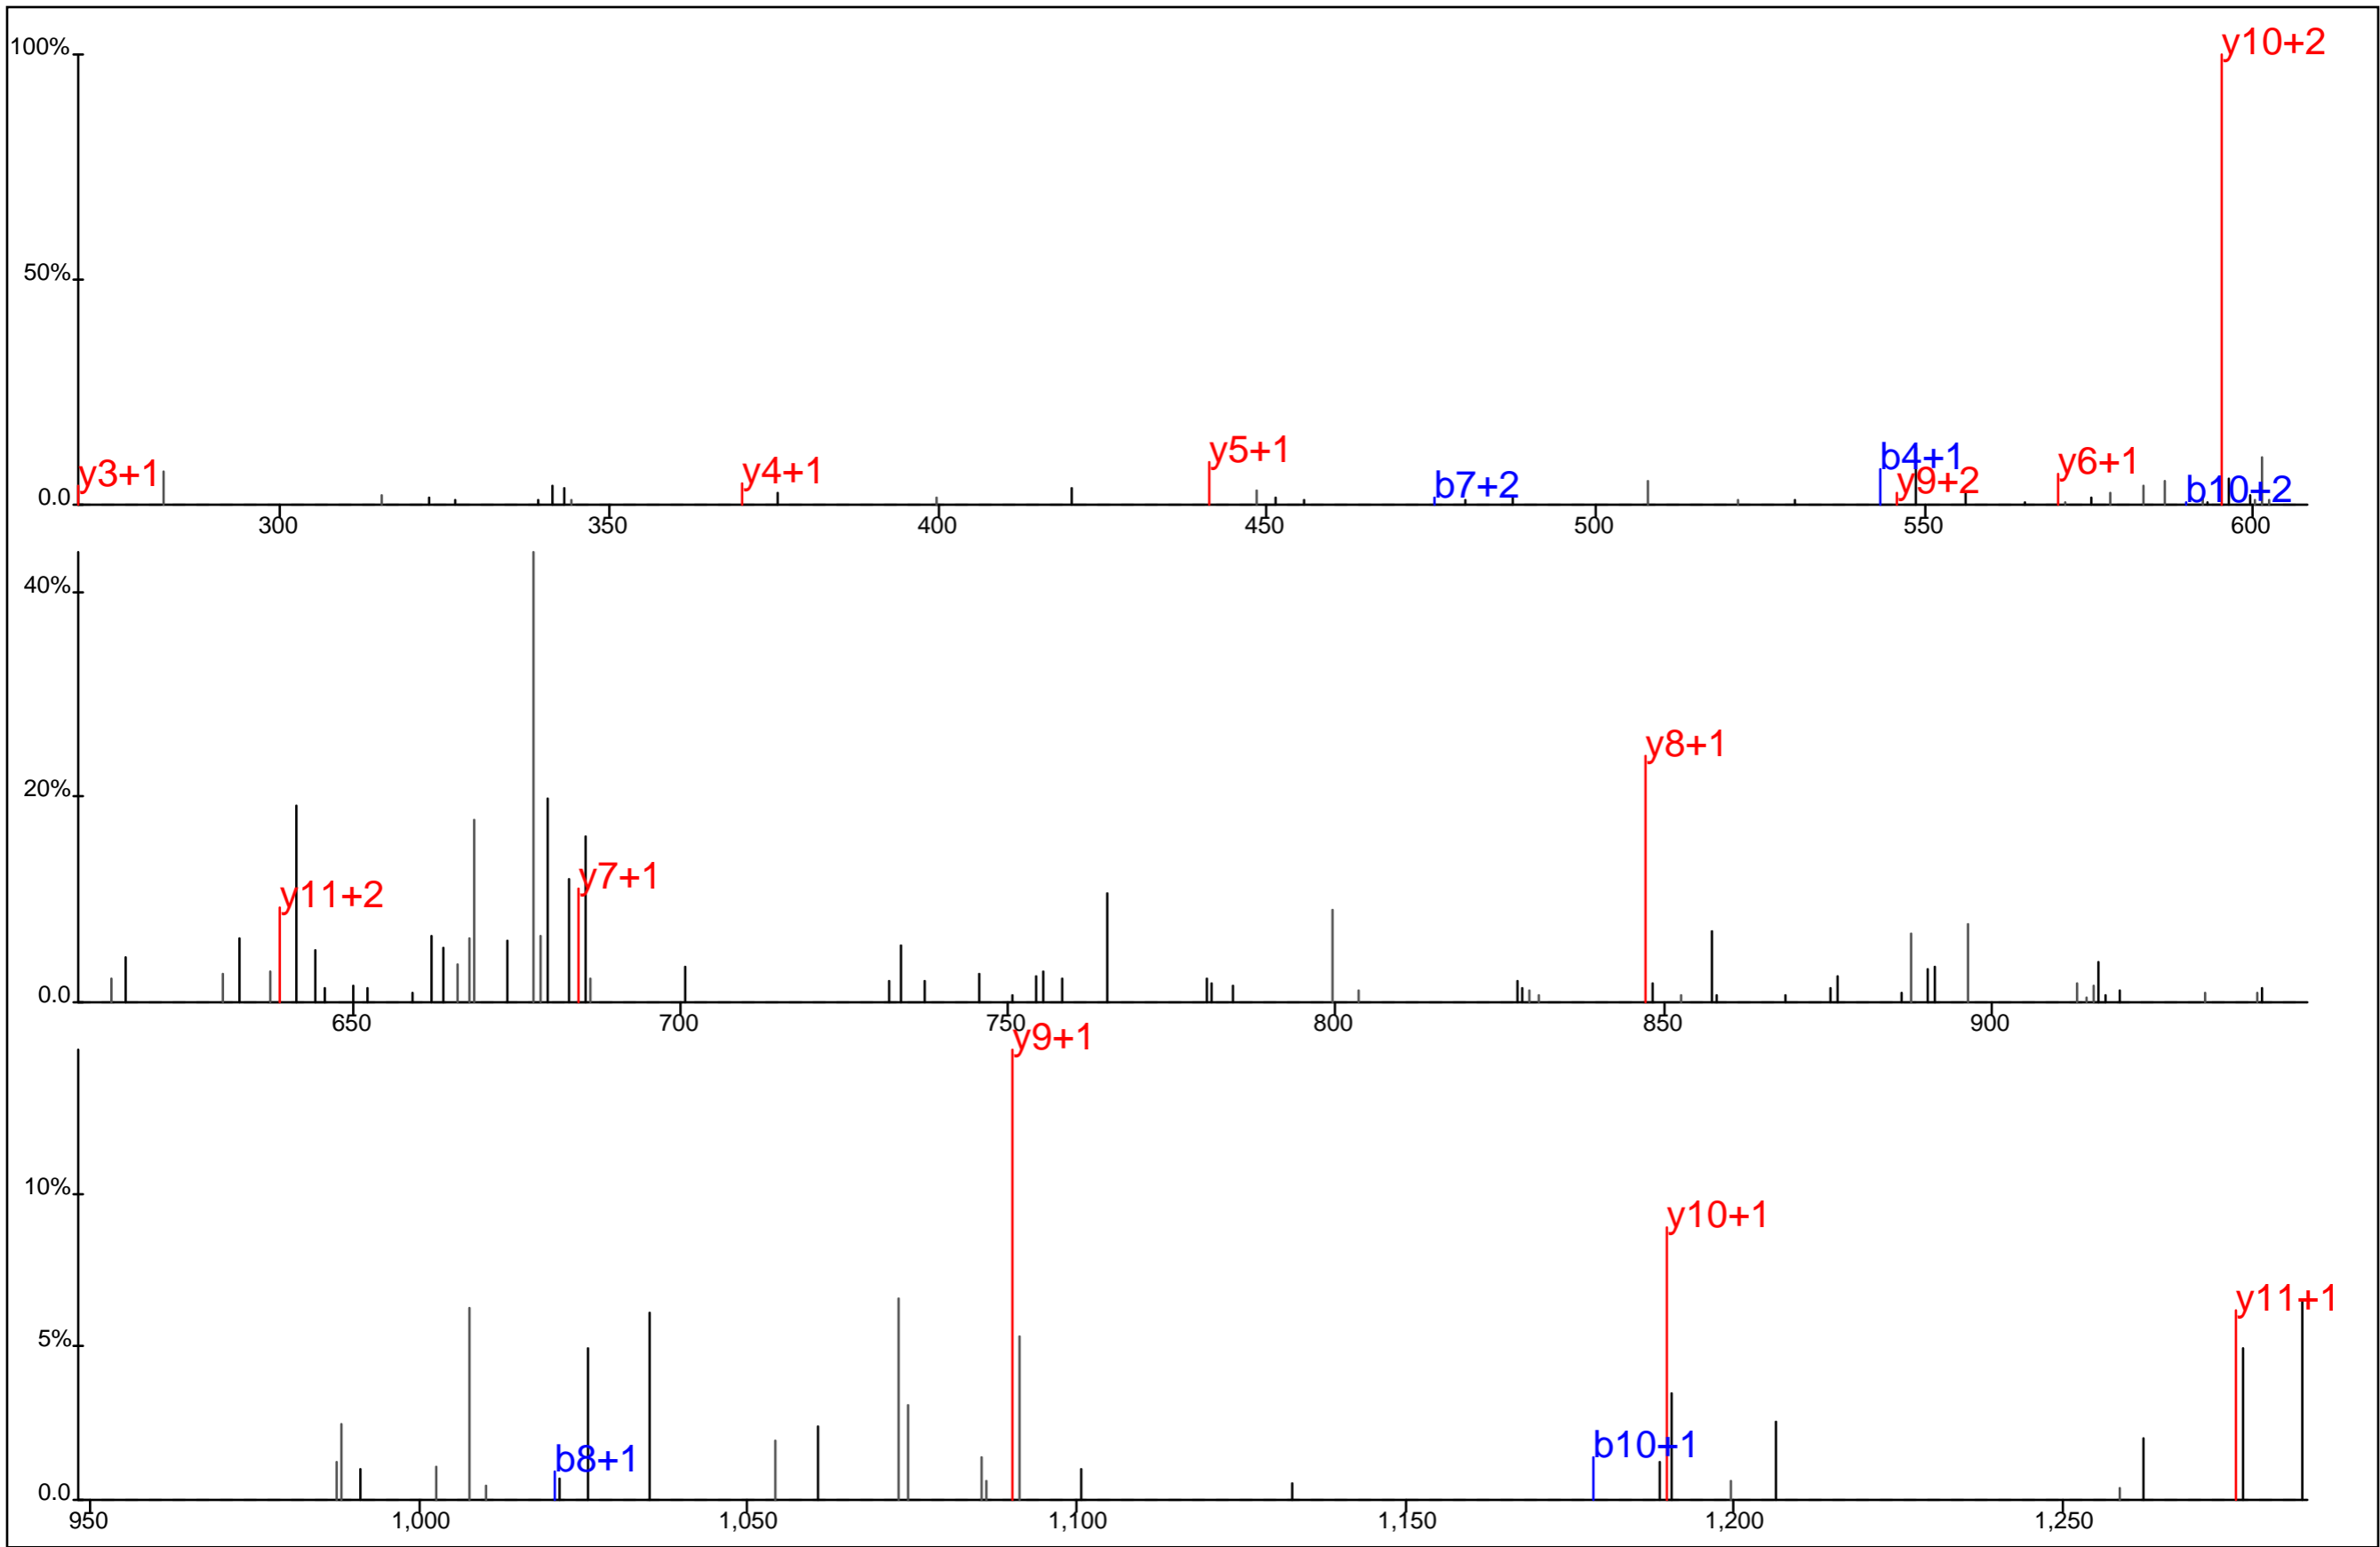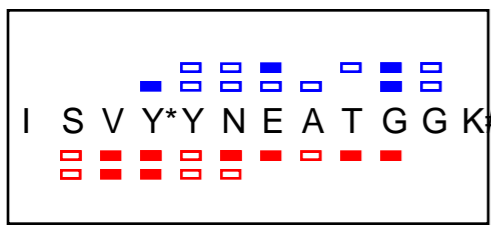

Protein Name: Tubulin beta  
 gi Accession: 2119276  
 Precursor Mass: 695.3144+2  
 Delta Mass: 2.726 ppm  
 XCorr: 33.26



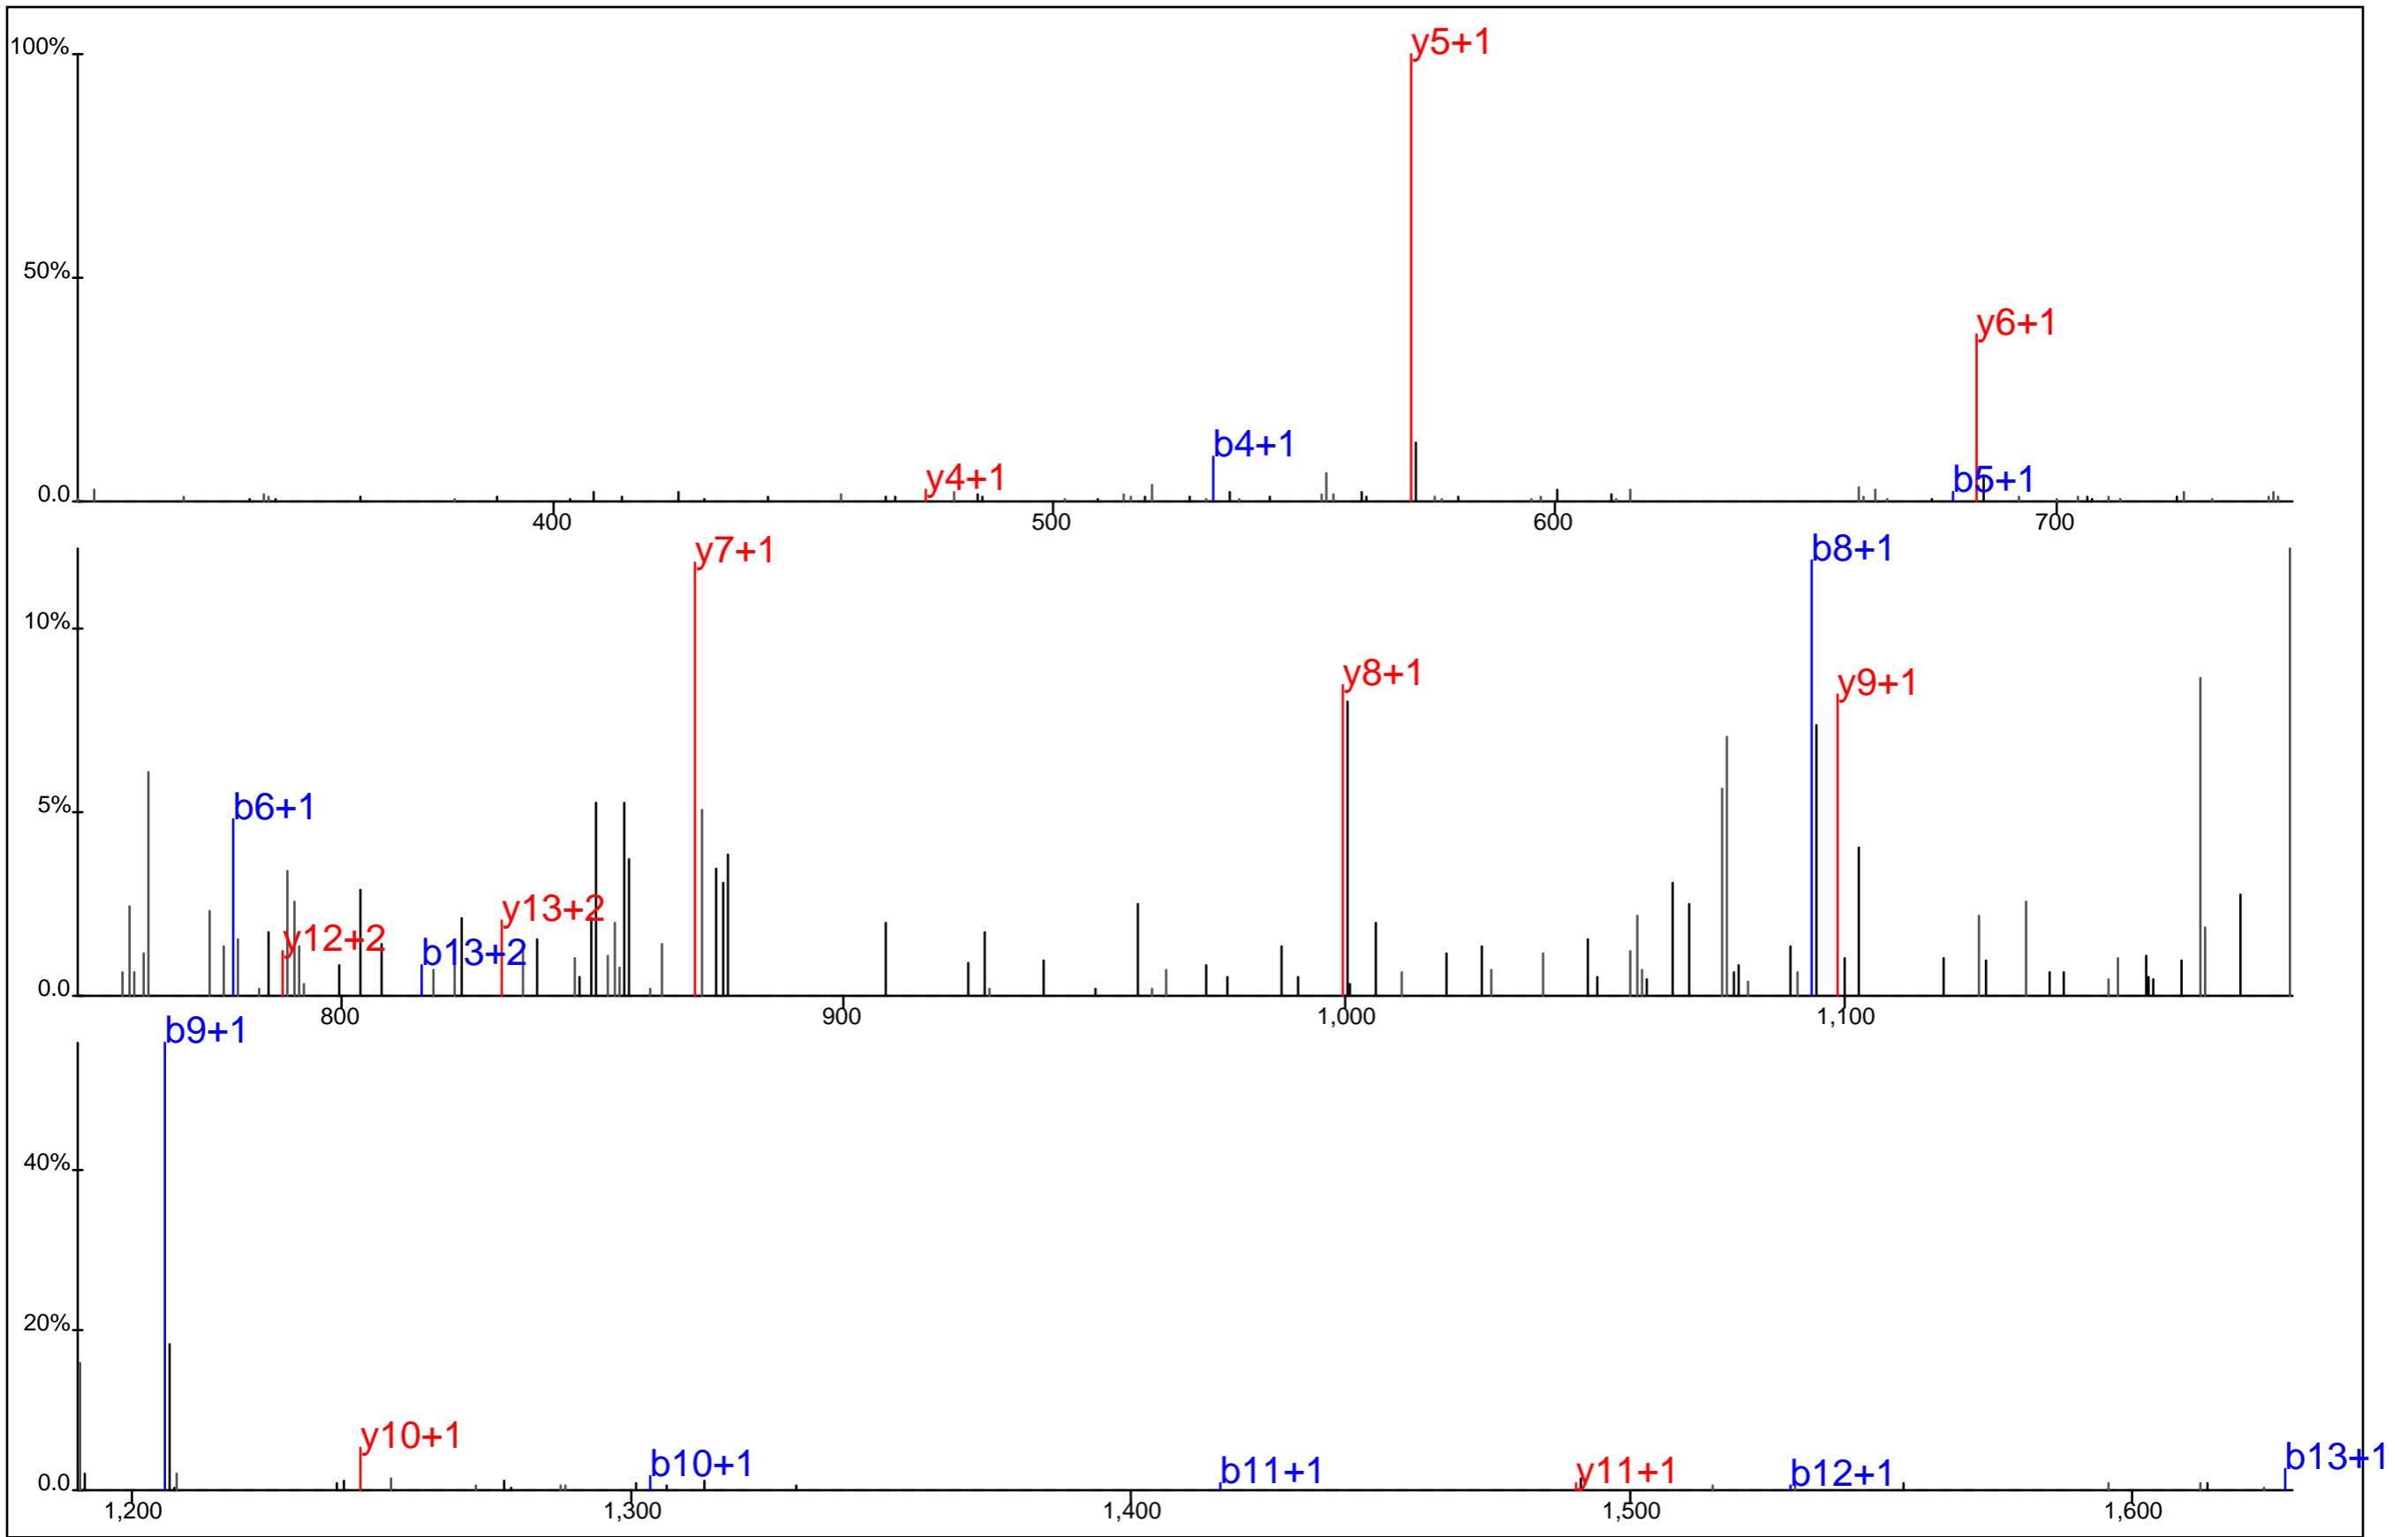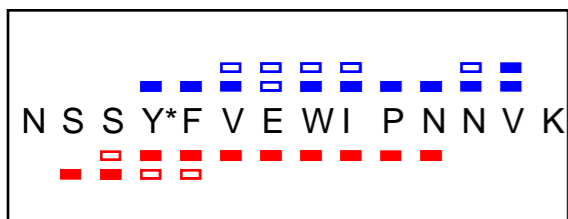

Protein Name: Tubulin beta  
 gi Accession: 2119276  
 Precursor Mass: 888.9024+2  
 Delta Mass: 0.969 ppm  
 XCorr: 41.27

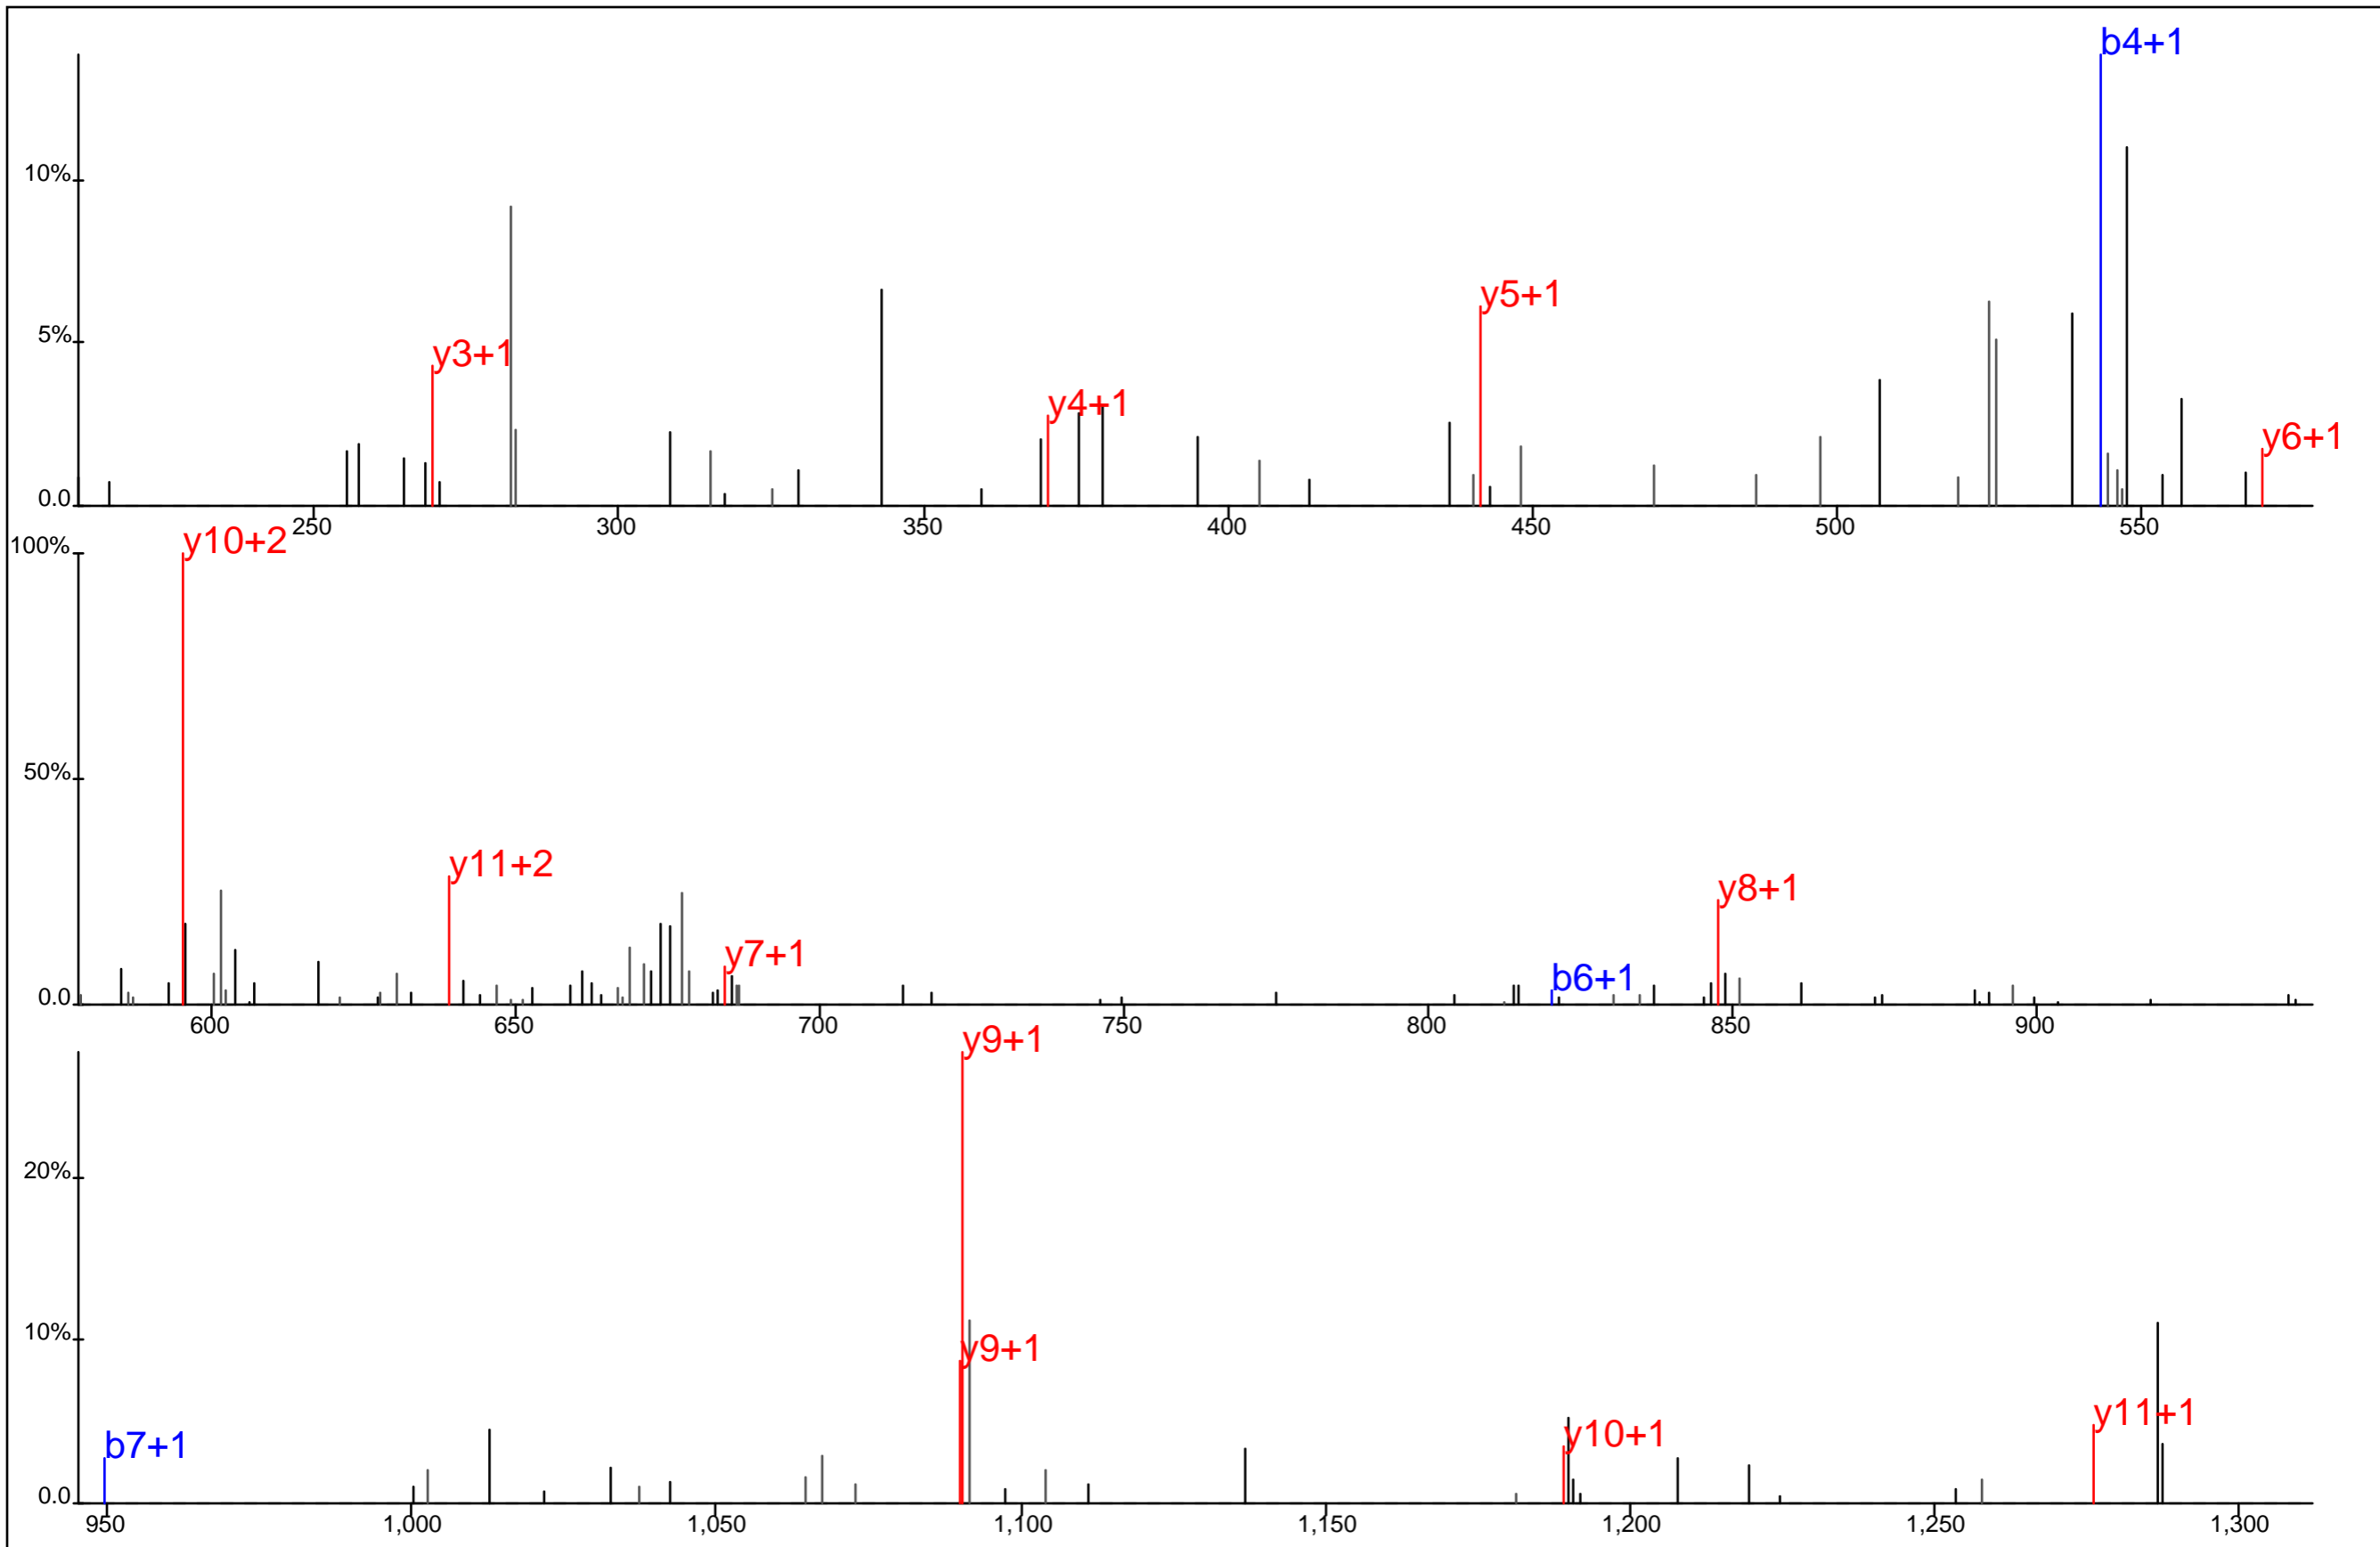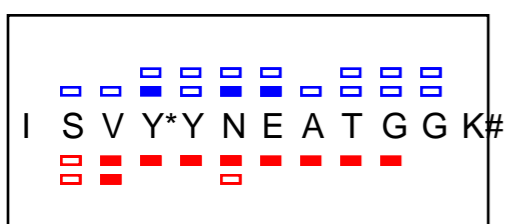

Protein Name: Tubulin beta  
 gi Accession: 2119276  
 Precursor Mass: 695.3140+2  
 Delta Mass: 2.107 ppm  
 XCorr: 24.05



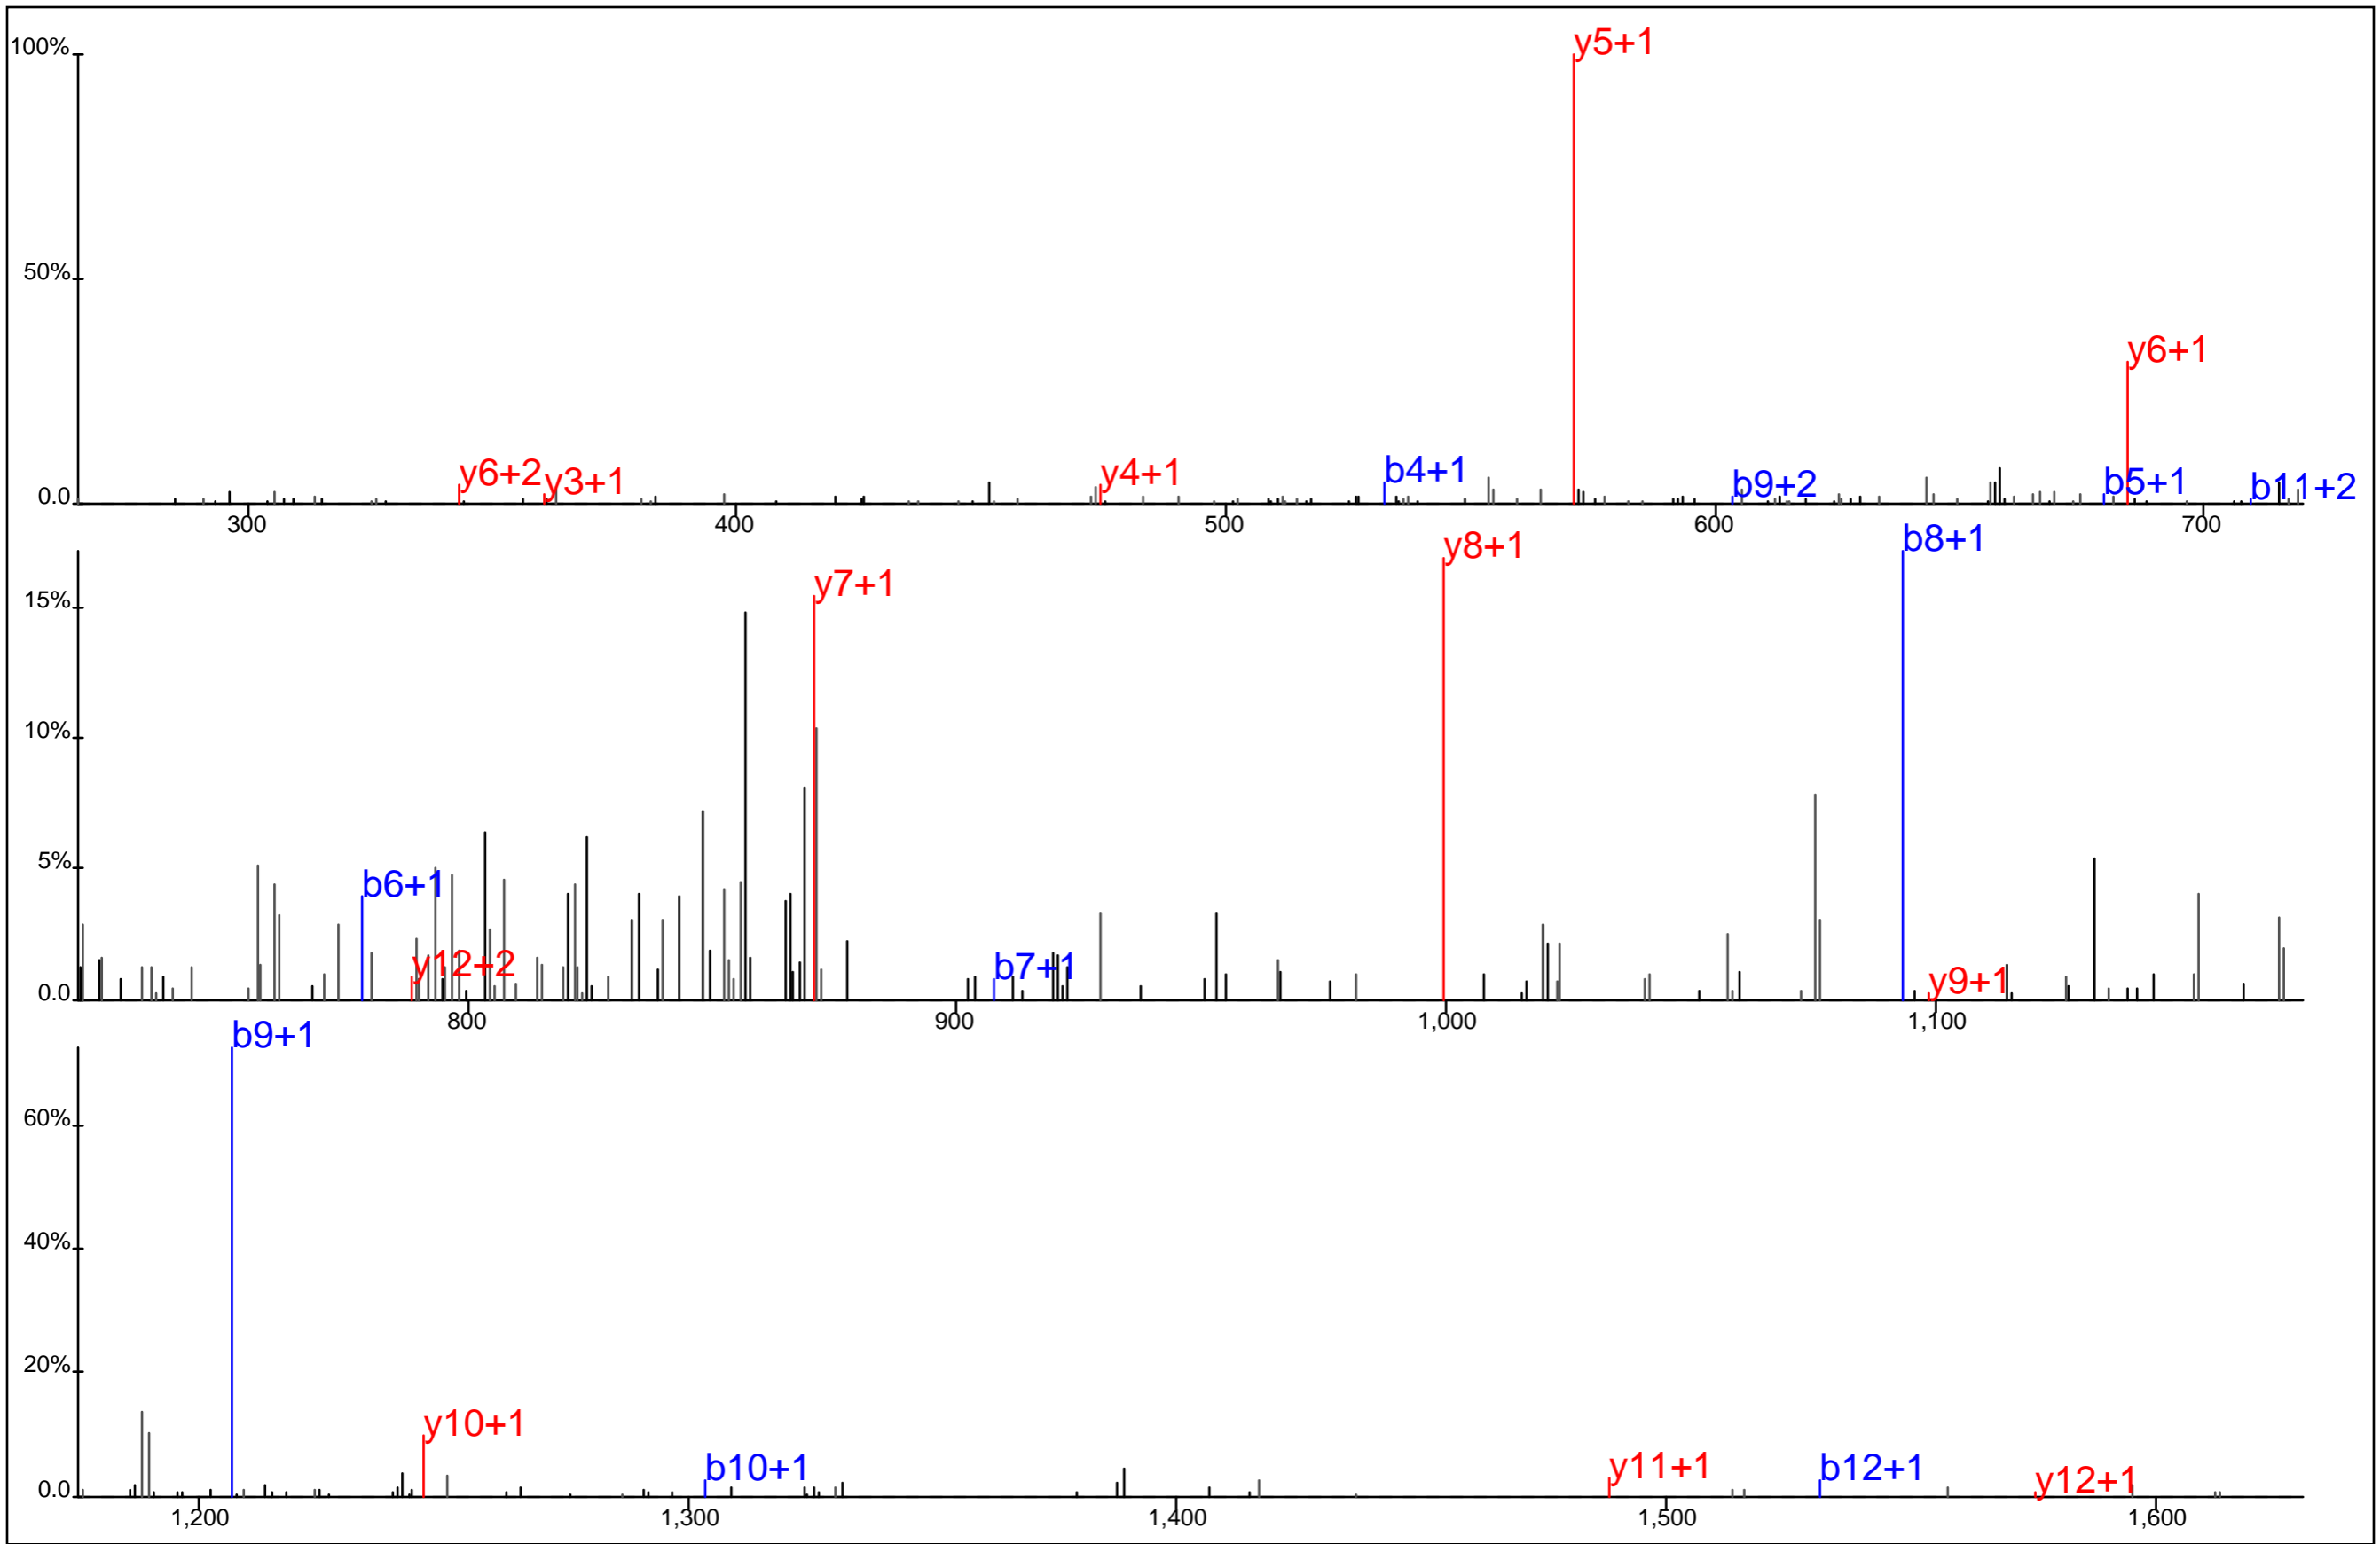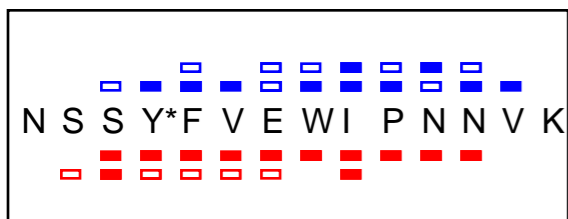

Protein Name: Tubulin beta  
gi Accession: 2119276  
Precursor Mass: 888.9148+2  
Delta Mass: 12.977 ppm  
XCorr: 39.17

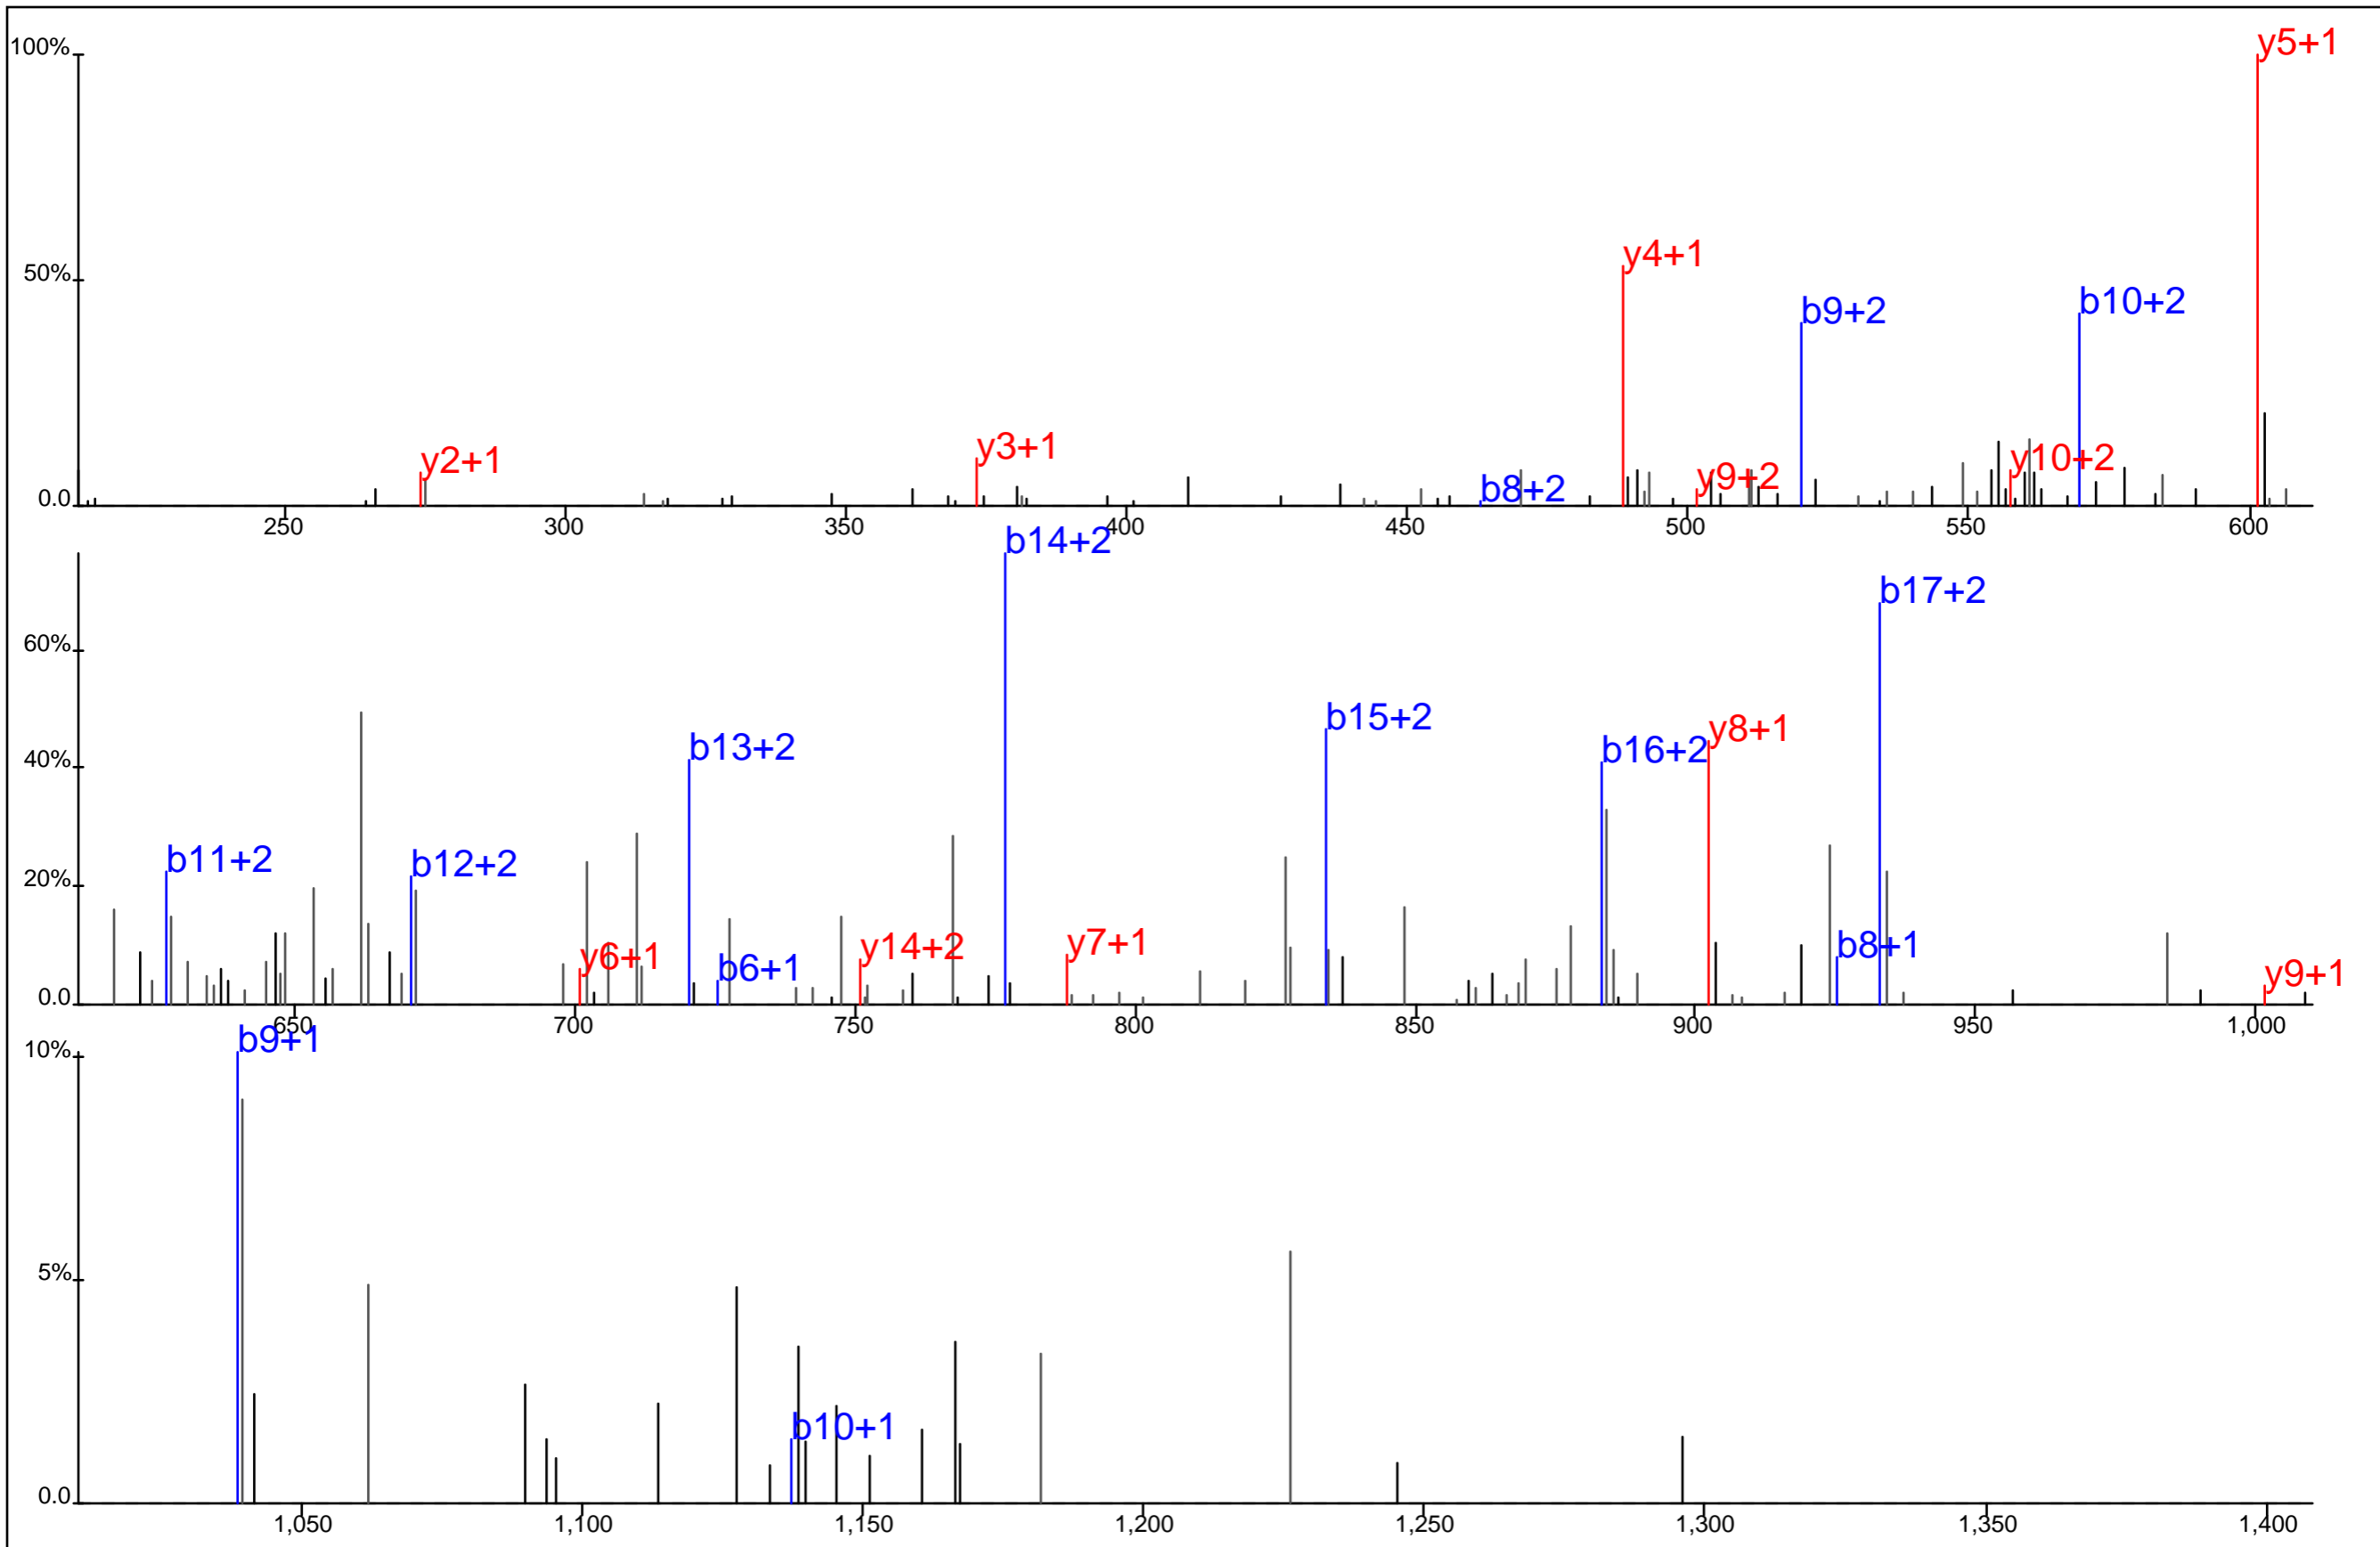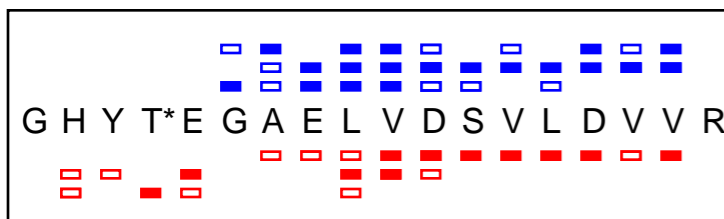

Protein Name: Tubulin beta  
 gi Accession: 2119276  
 Precursor Mass: 680.3248+3  
 Delta Mass: 5.698 ppm  
 XCorr: 30.65

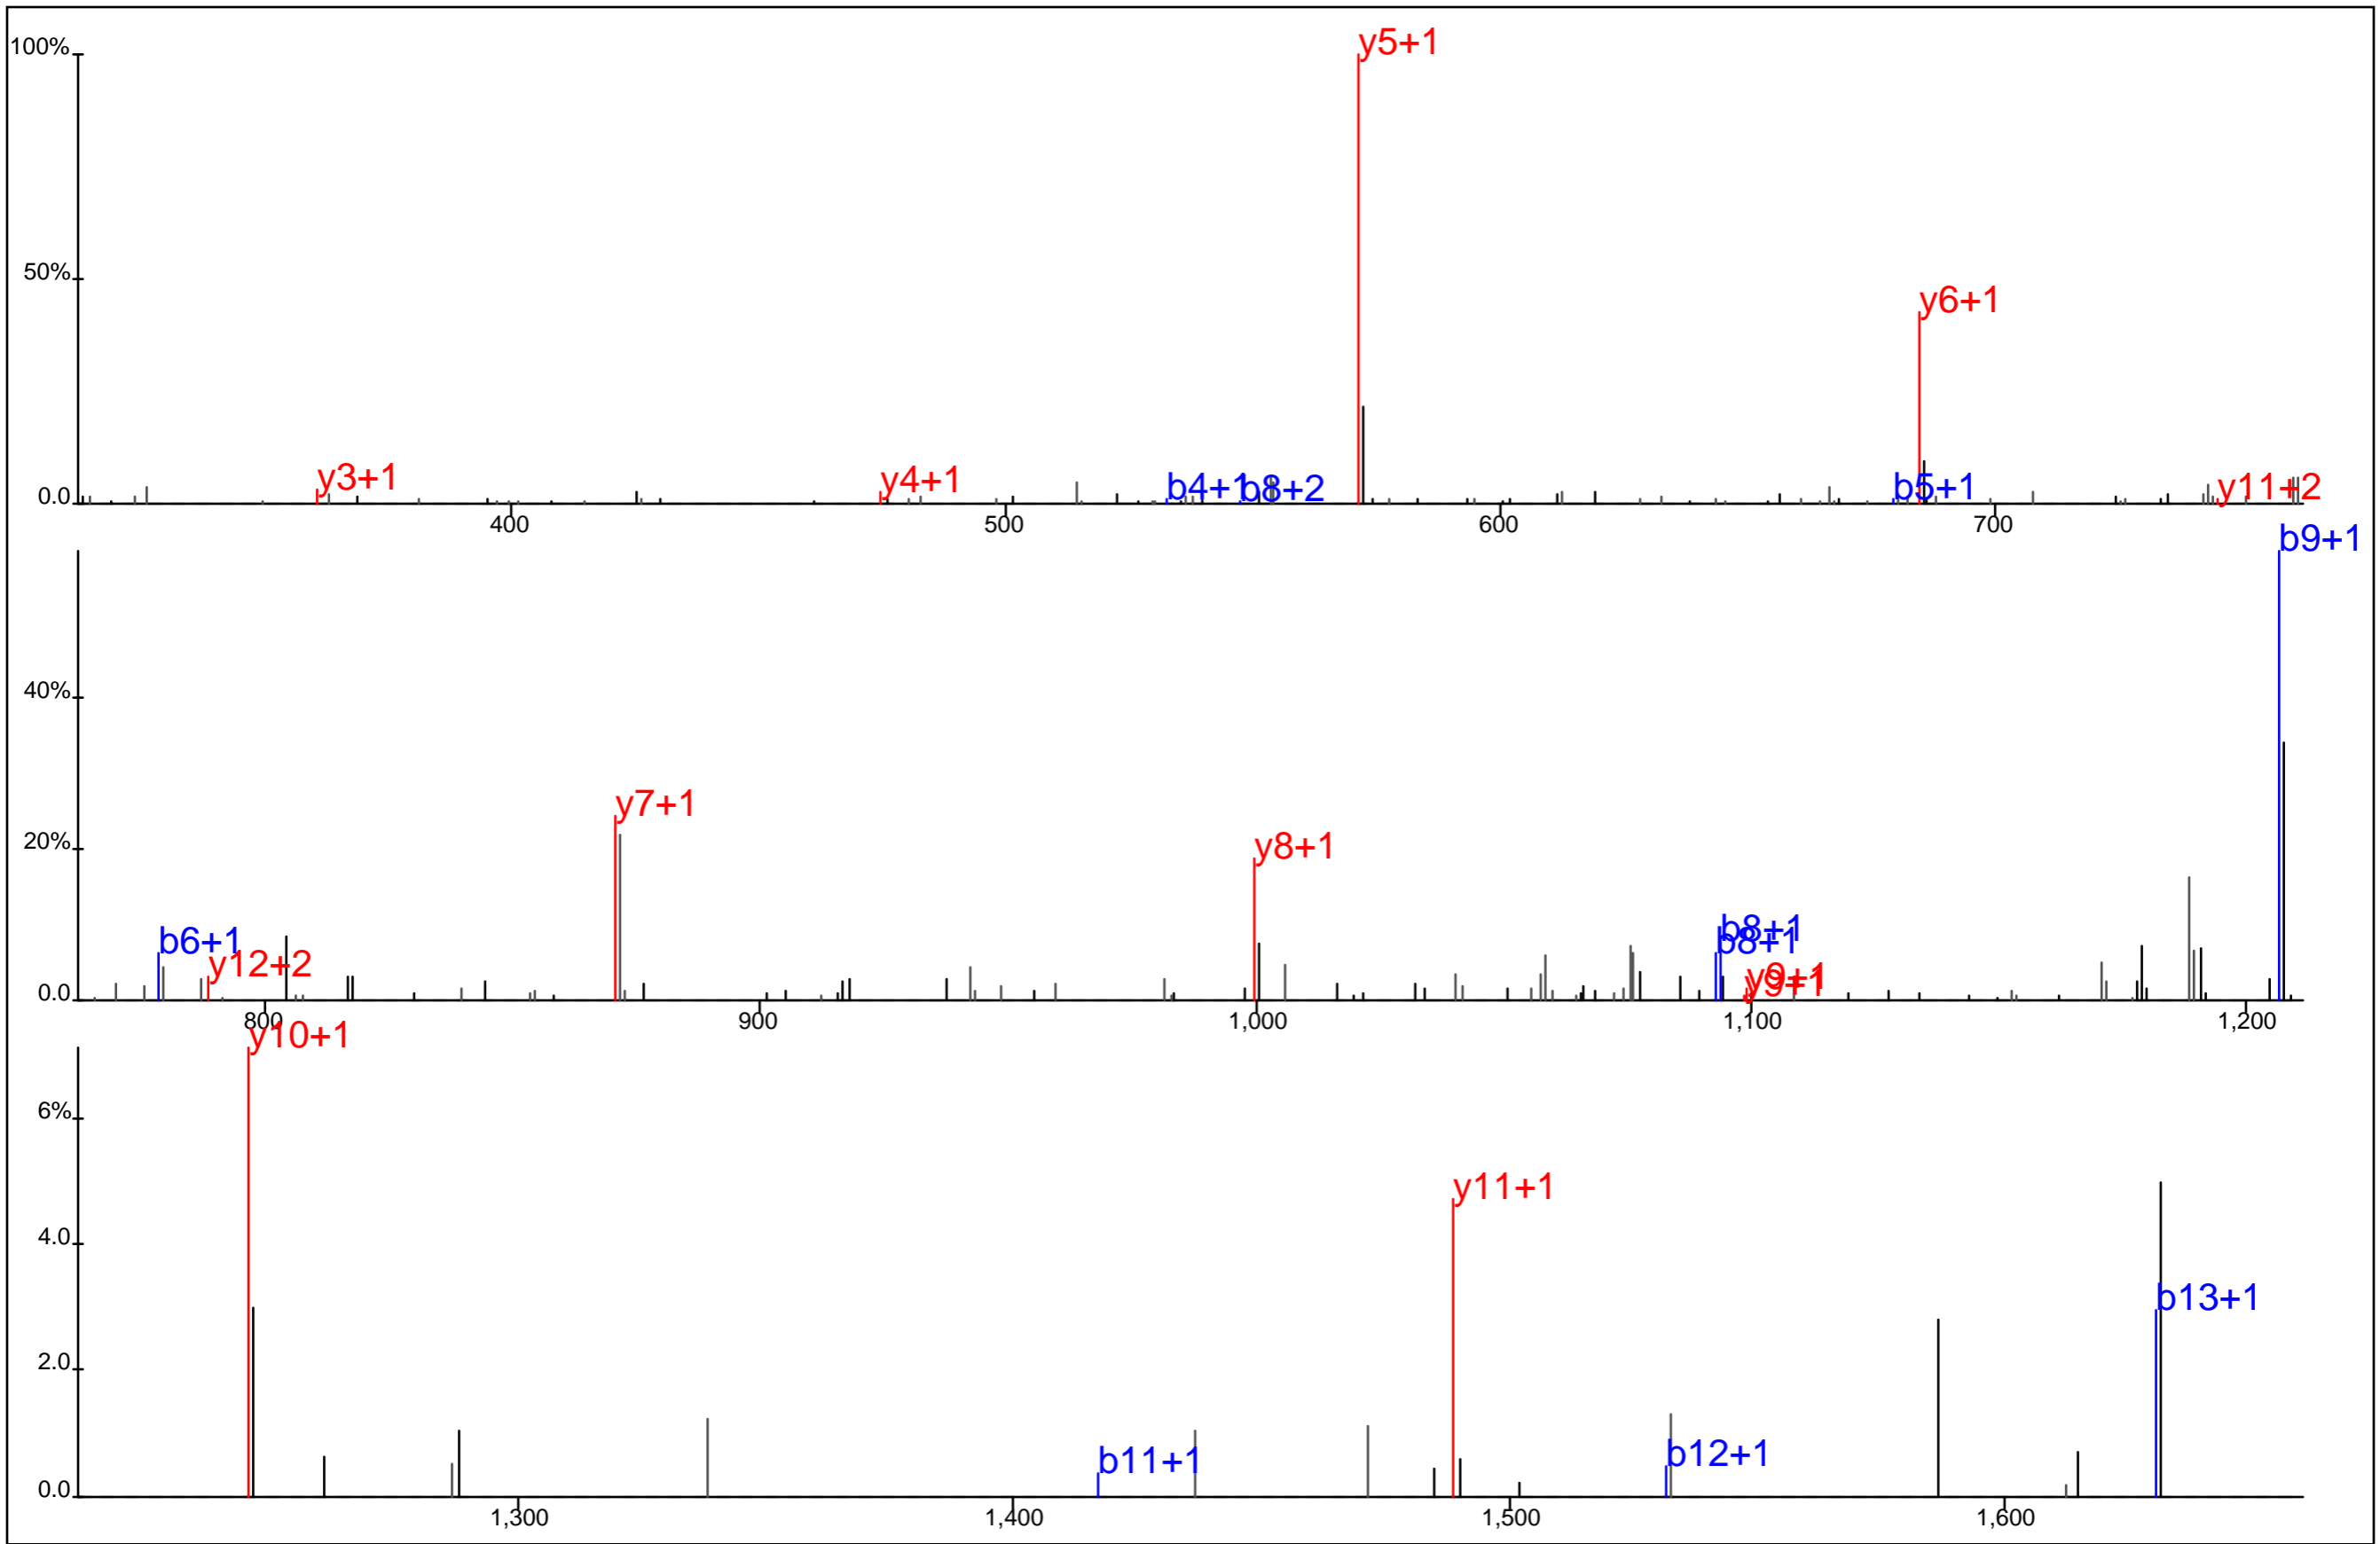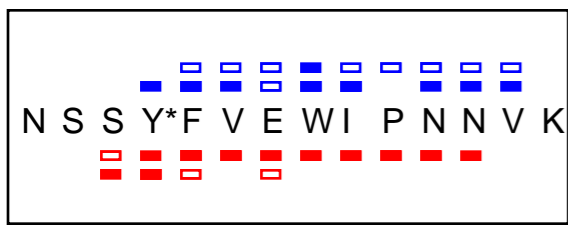

Protein Name: Tubulin beta  
 gi Accession: 2119276  
 Precursor Mass: 888.9005+2  
 Delta Mass: 3.097 ppm  
 XCorr: 47.6

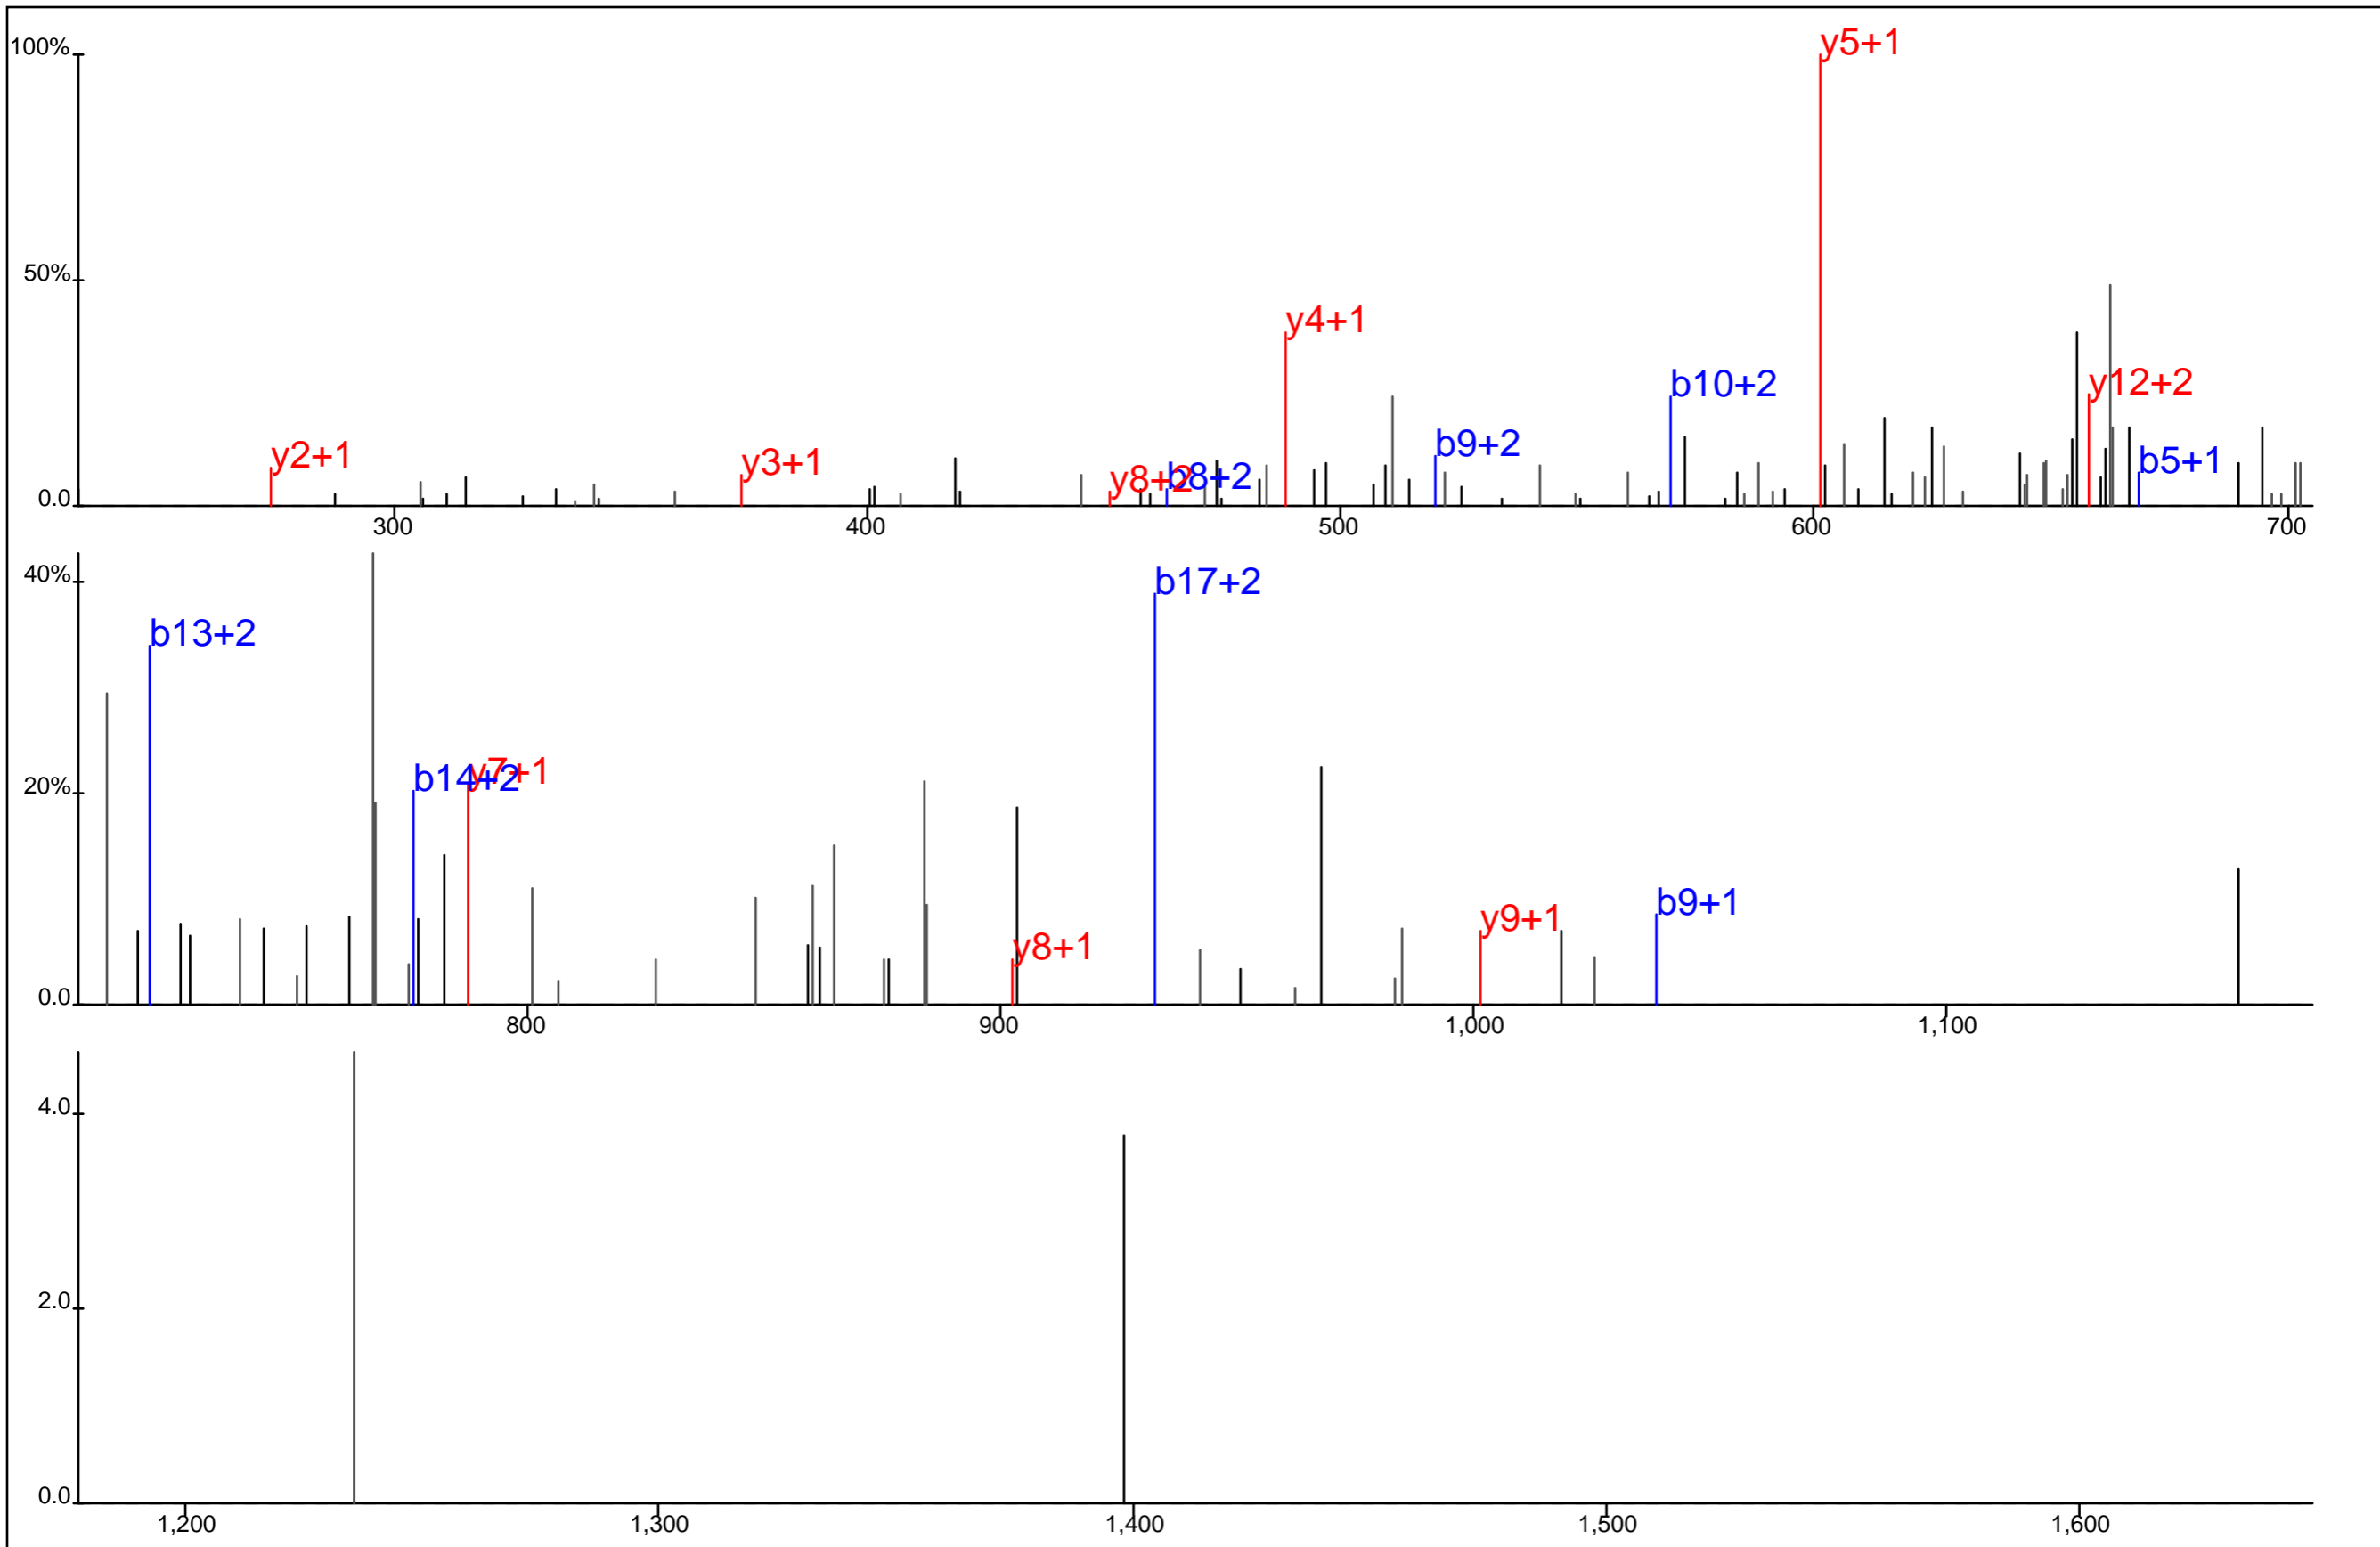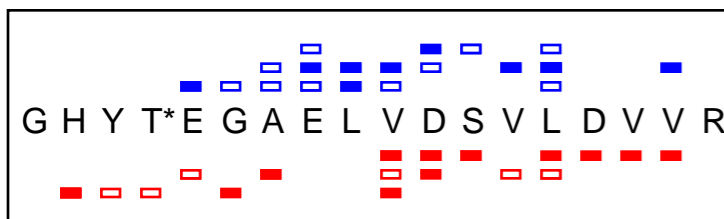

Protein Name: Tubulin beta  
 gi Accession: 2119276  
 Precursor Mass: 680.3228+3  
 Delta Mass: 2.824 ppm  
 XCorr: 26.68

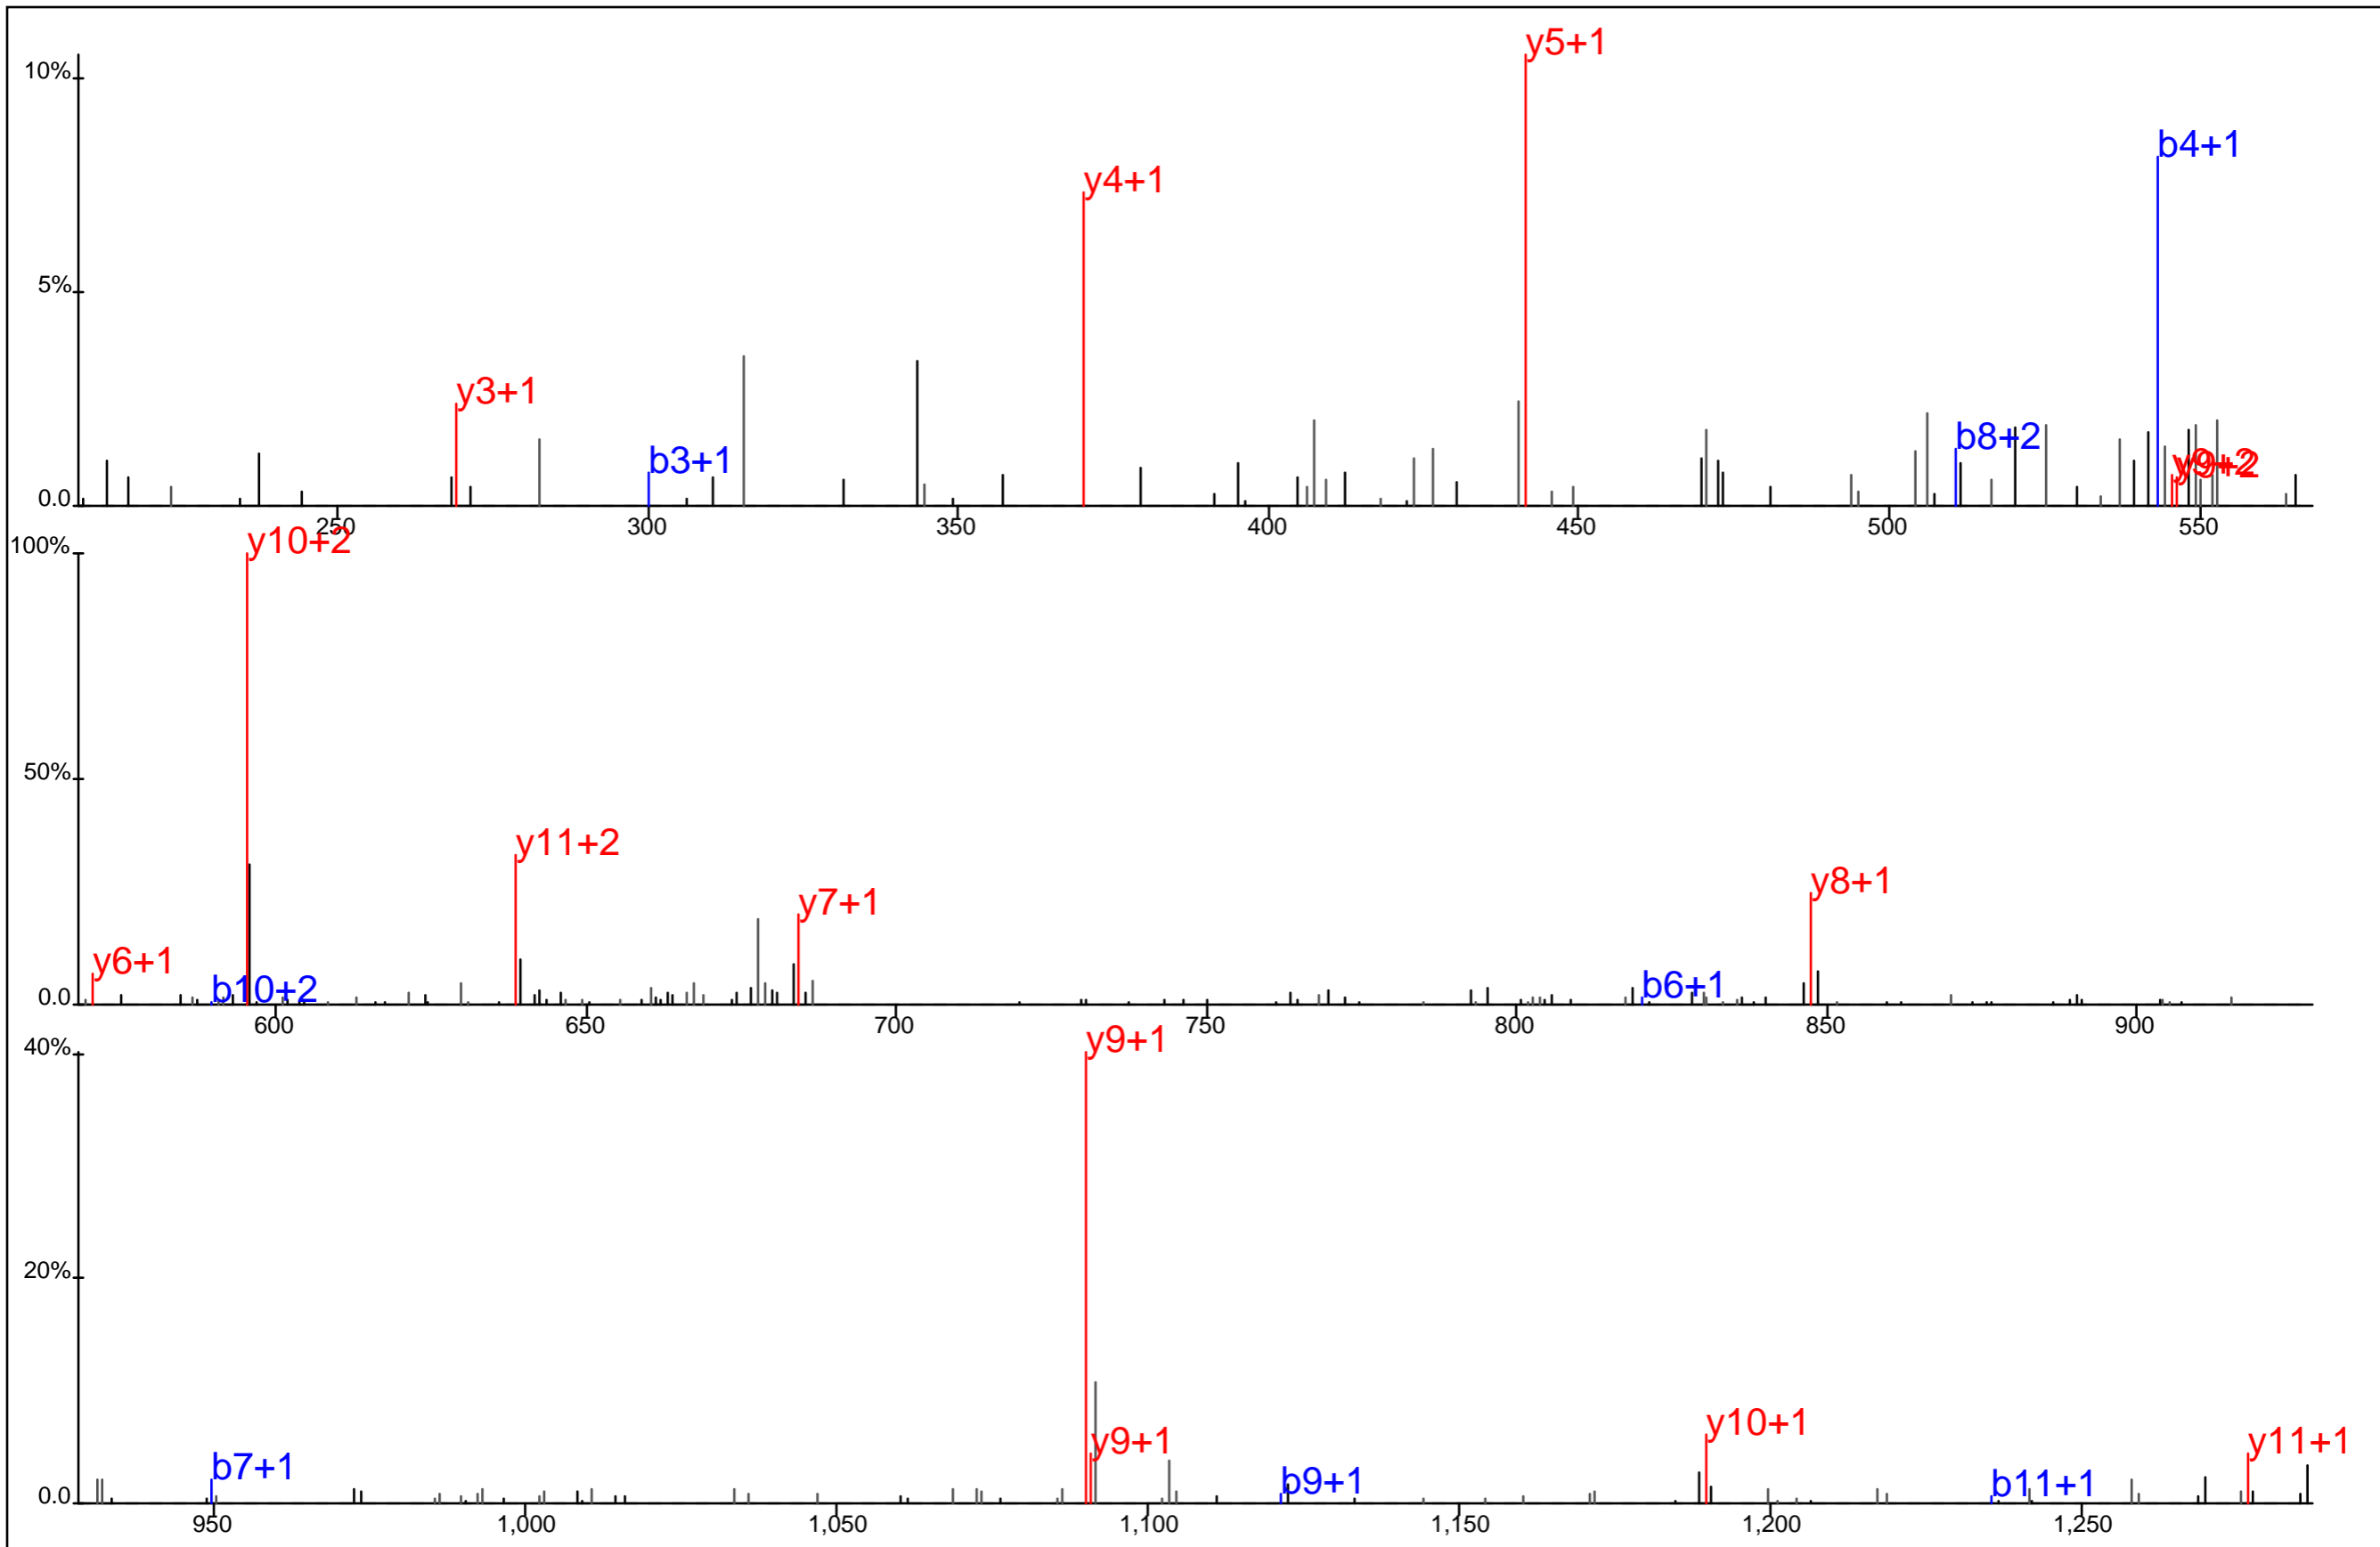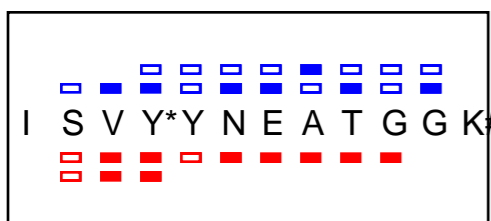

Protein Name: Tubulin beta  
 gi Accession: 2119276  
 Precursor Mass: 695.3155+2  
 Delta Mass: 4.302 ppm  
 XCorr: 61.24

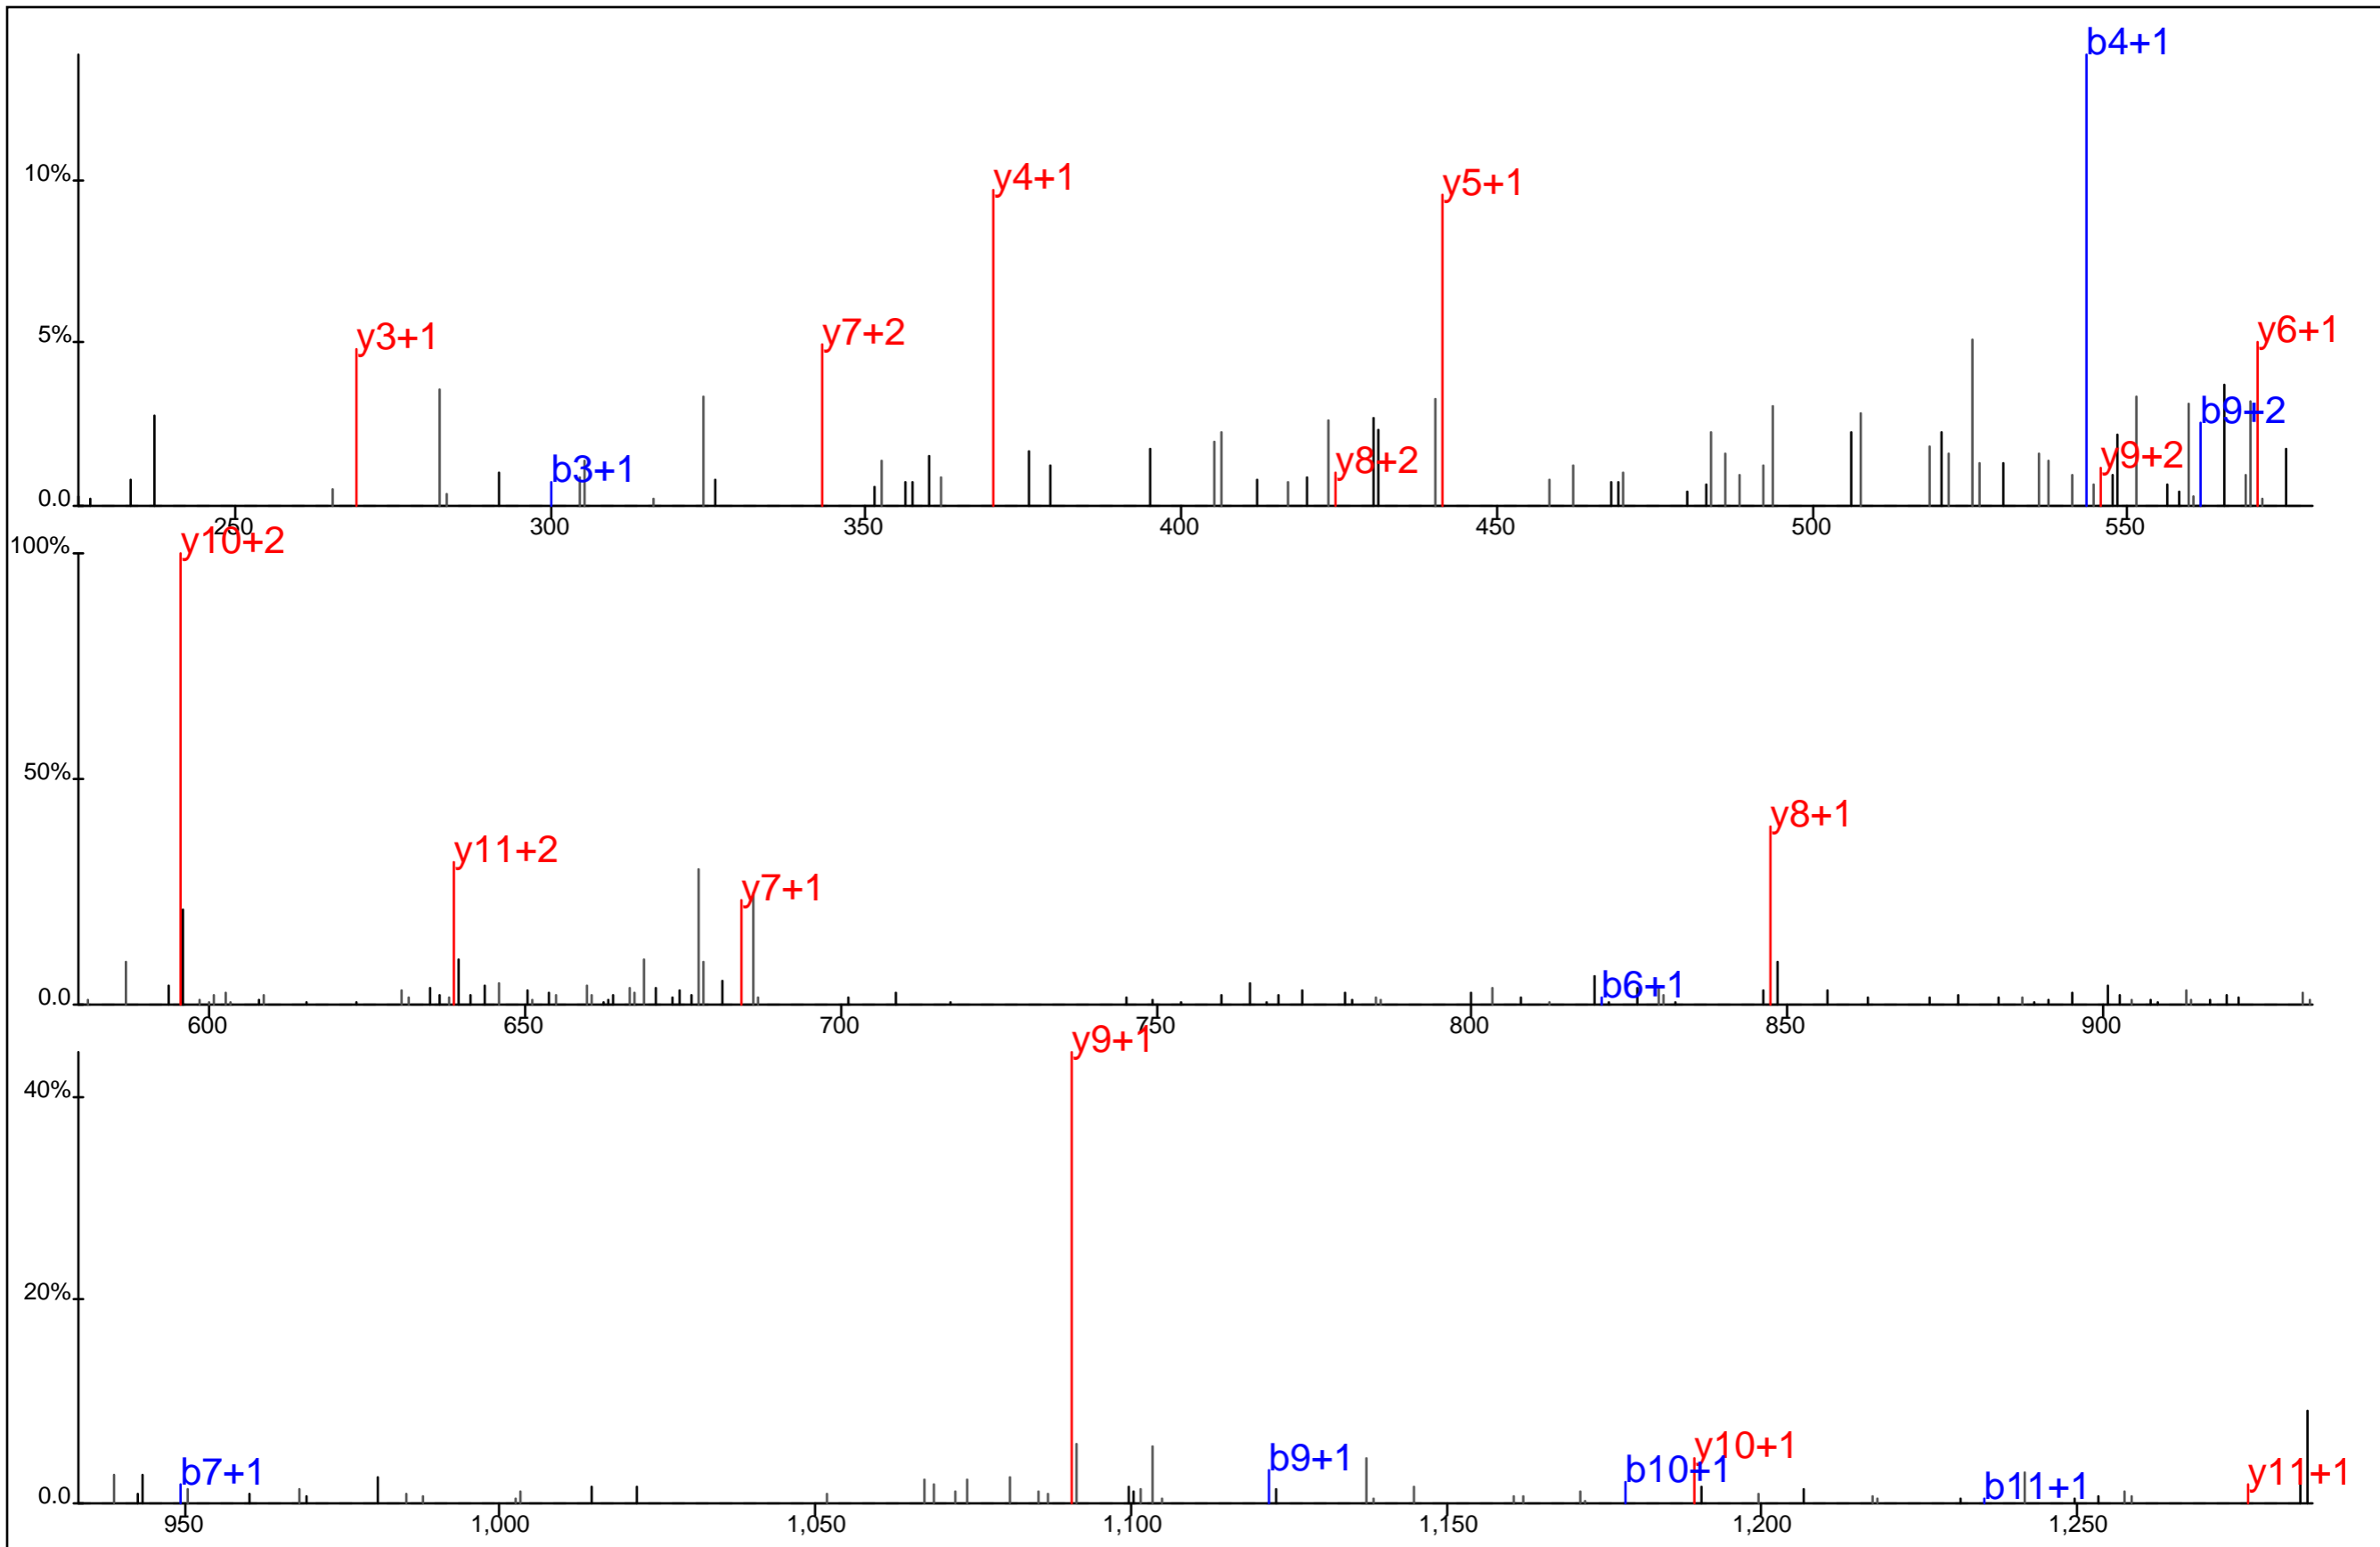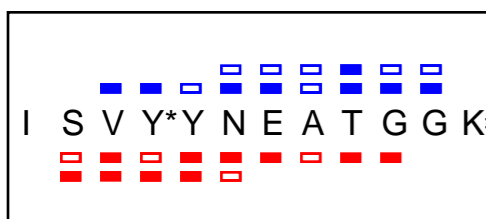

Protein Name: Tubulin beta  
 gi Accession: 2119276  
 Precursor Mass: 695.3134+2  
 Delta Mass: 1.315 ppm  
 XCorr: 45.02

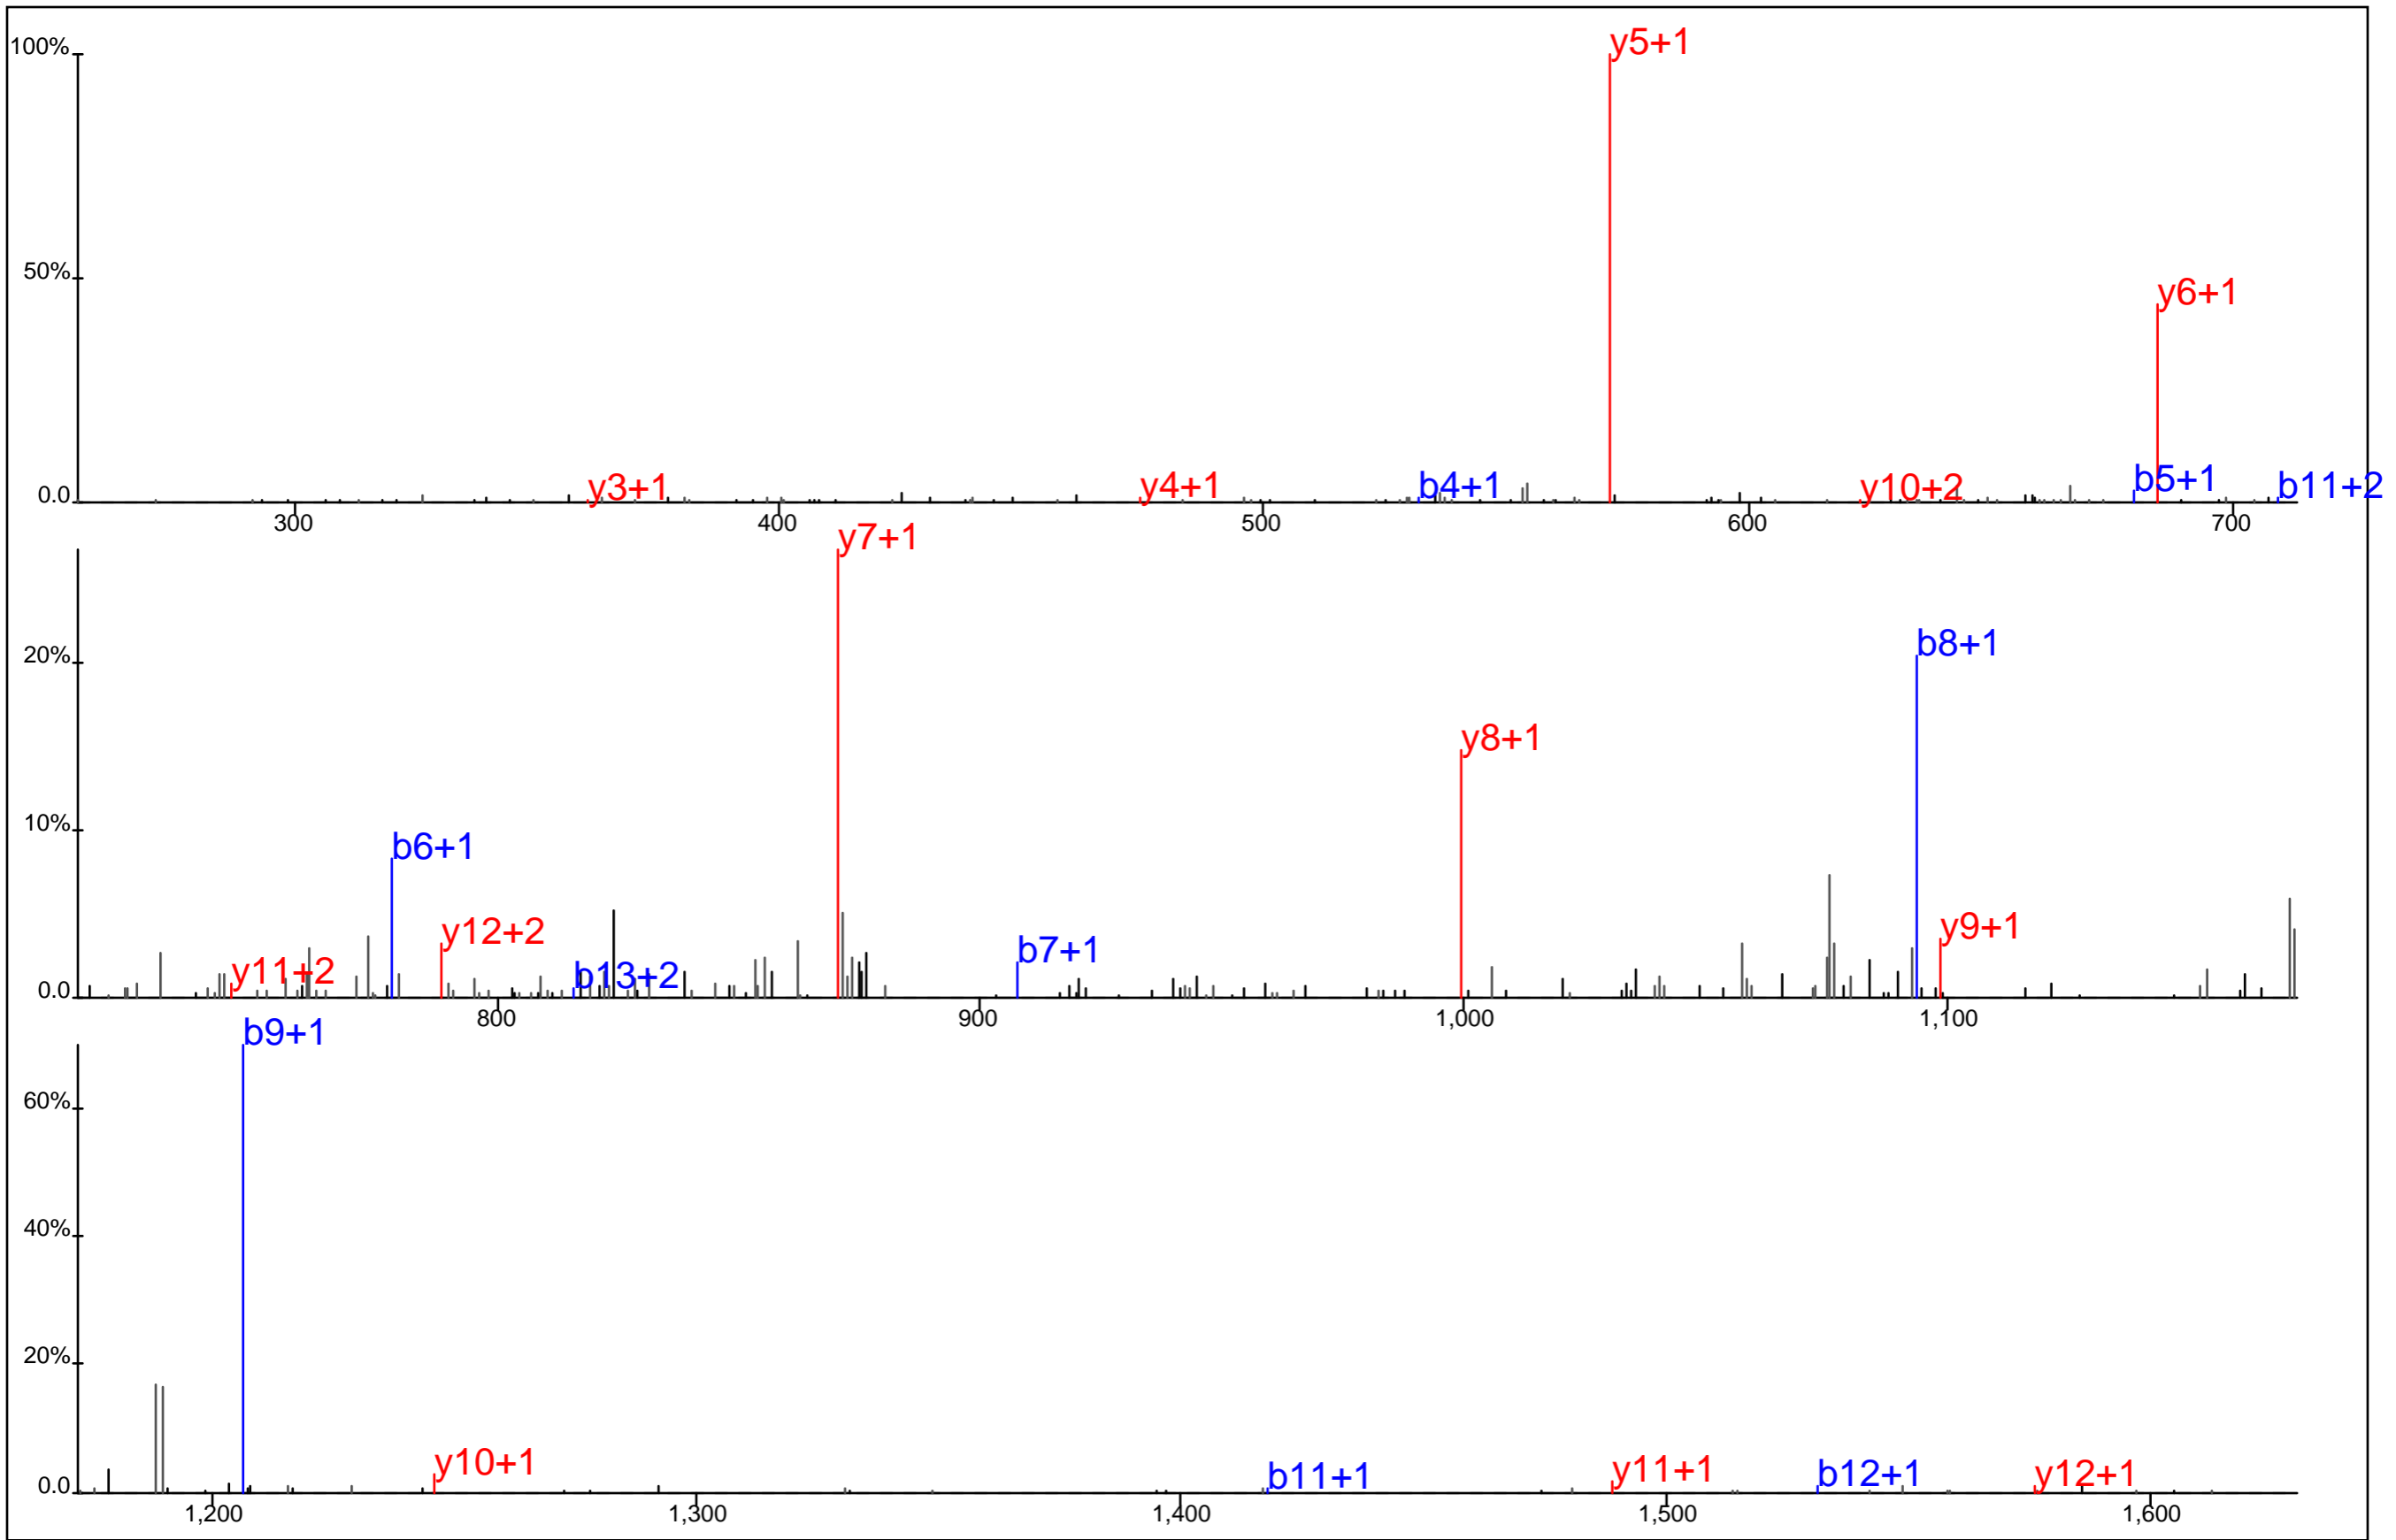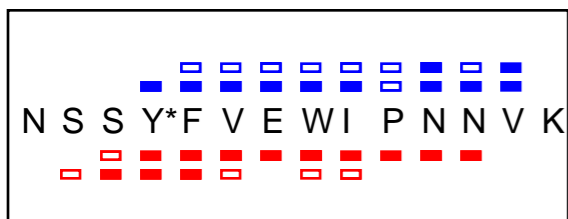

Protein Name: Tubulin beta  
 gi Accession: 2119276  
 Precursor Mass: 888.9056+2  
 Delta Mass: 2.605 ppm  
 XCorr: 44.83

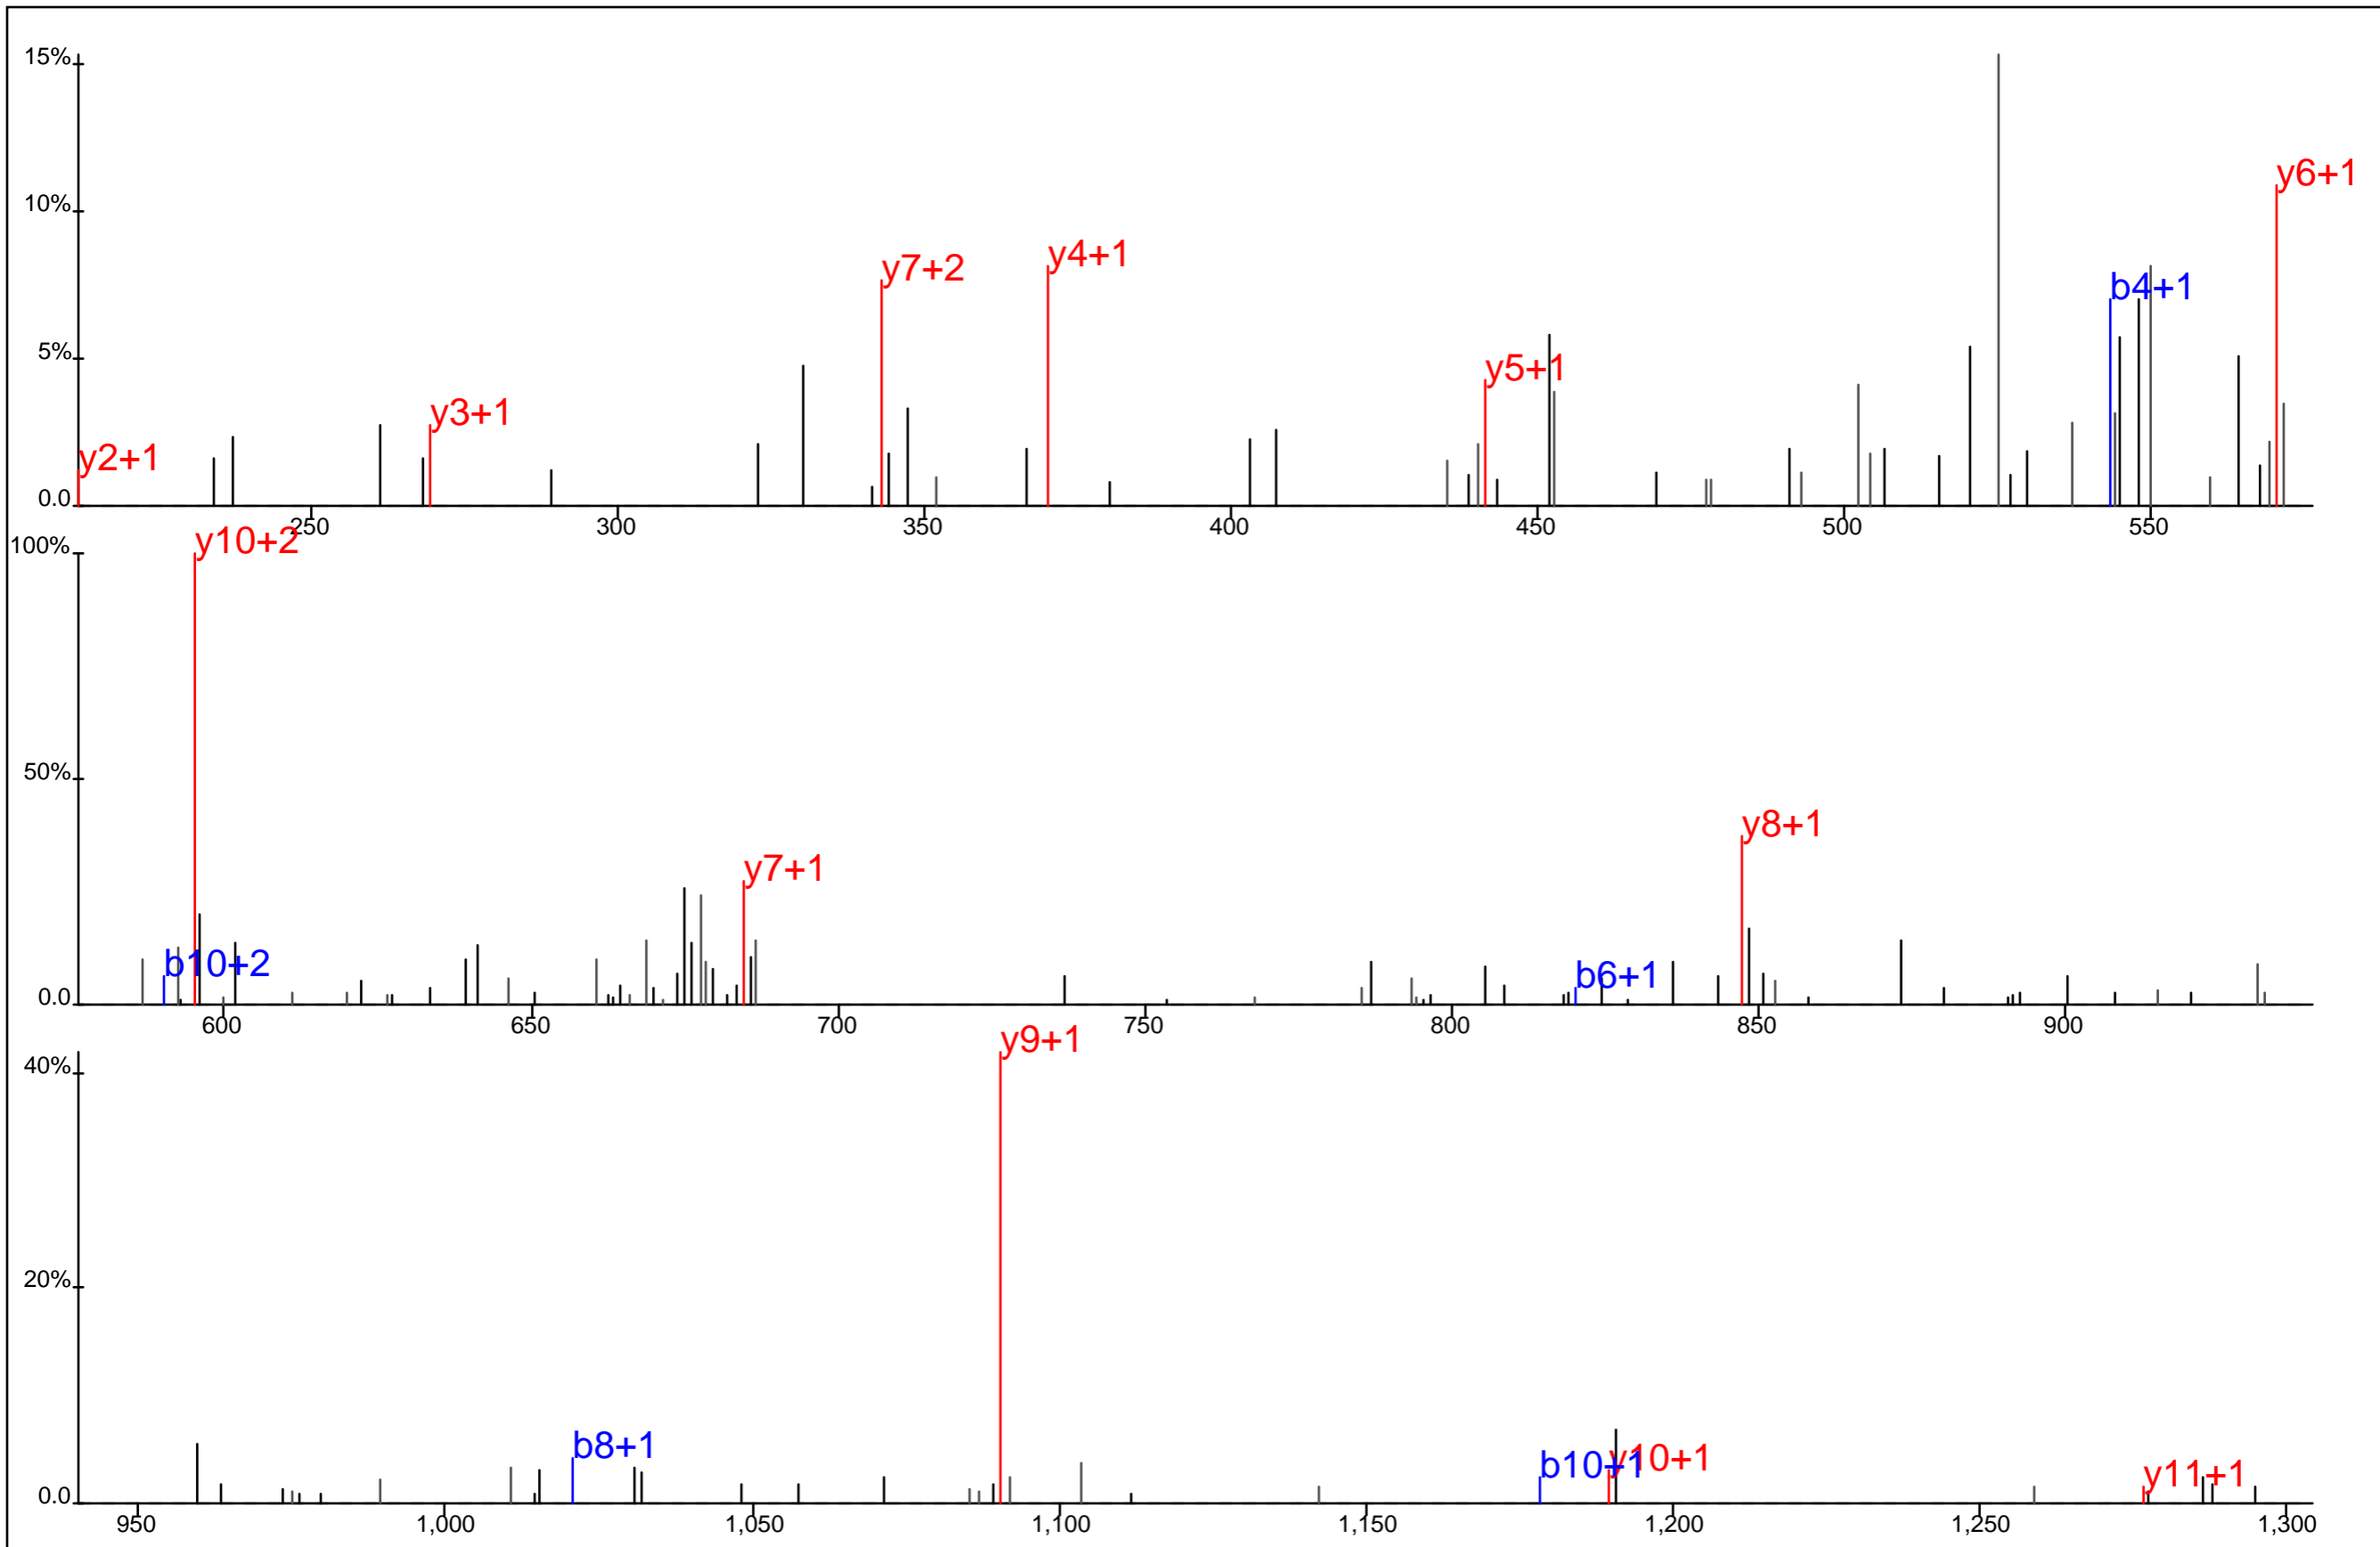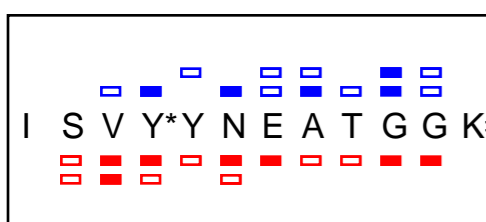

Protein Name: Tubulin beta  
 gi Accession: 2119276  
 Precursor Mass: 695.3160+2  
 Delta Mass: 5.007 ppm  
 XCorr: 35.17



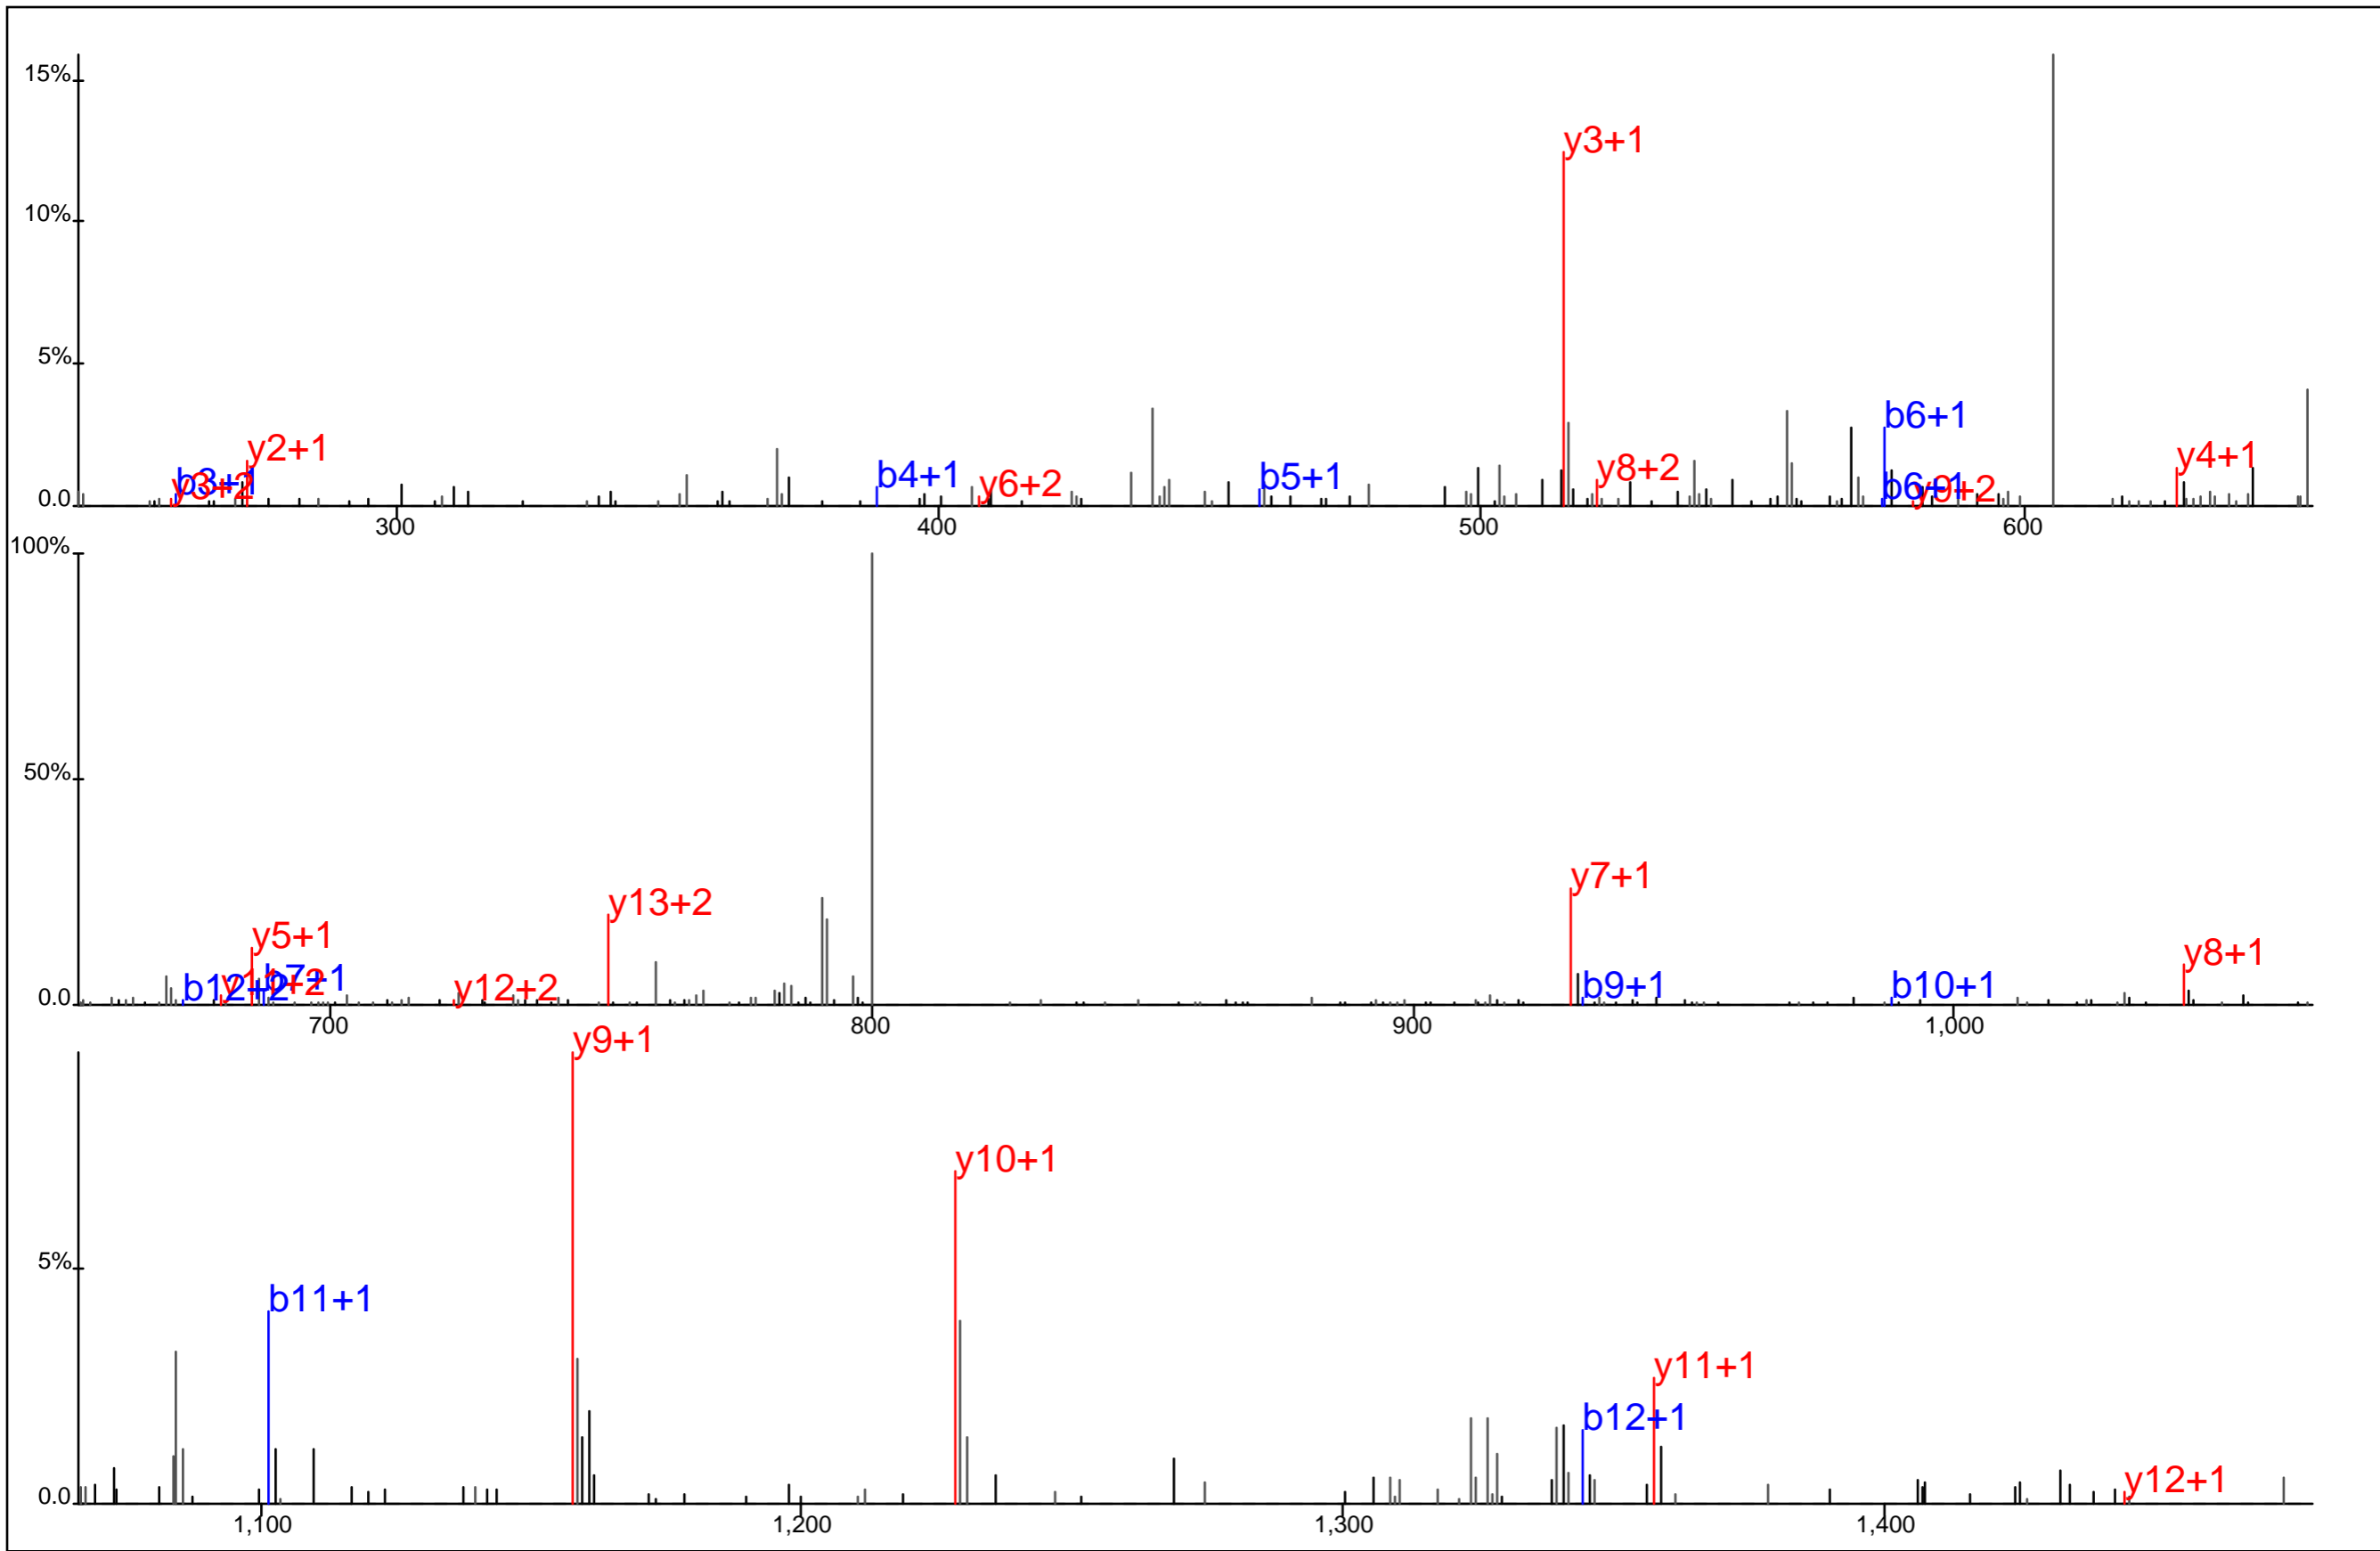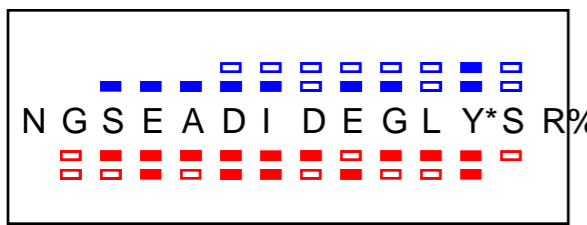

Protein Name: Ubiquitin activating enzyme 1  
 gi Accession: 23510338  
 Precursor Mass: 808.3322+2  
 Delta Mass: 3.762 ppm  
 XCorr: 55.32

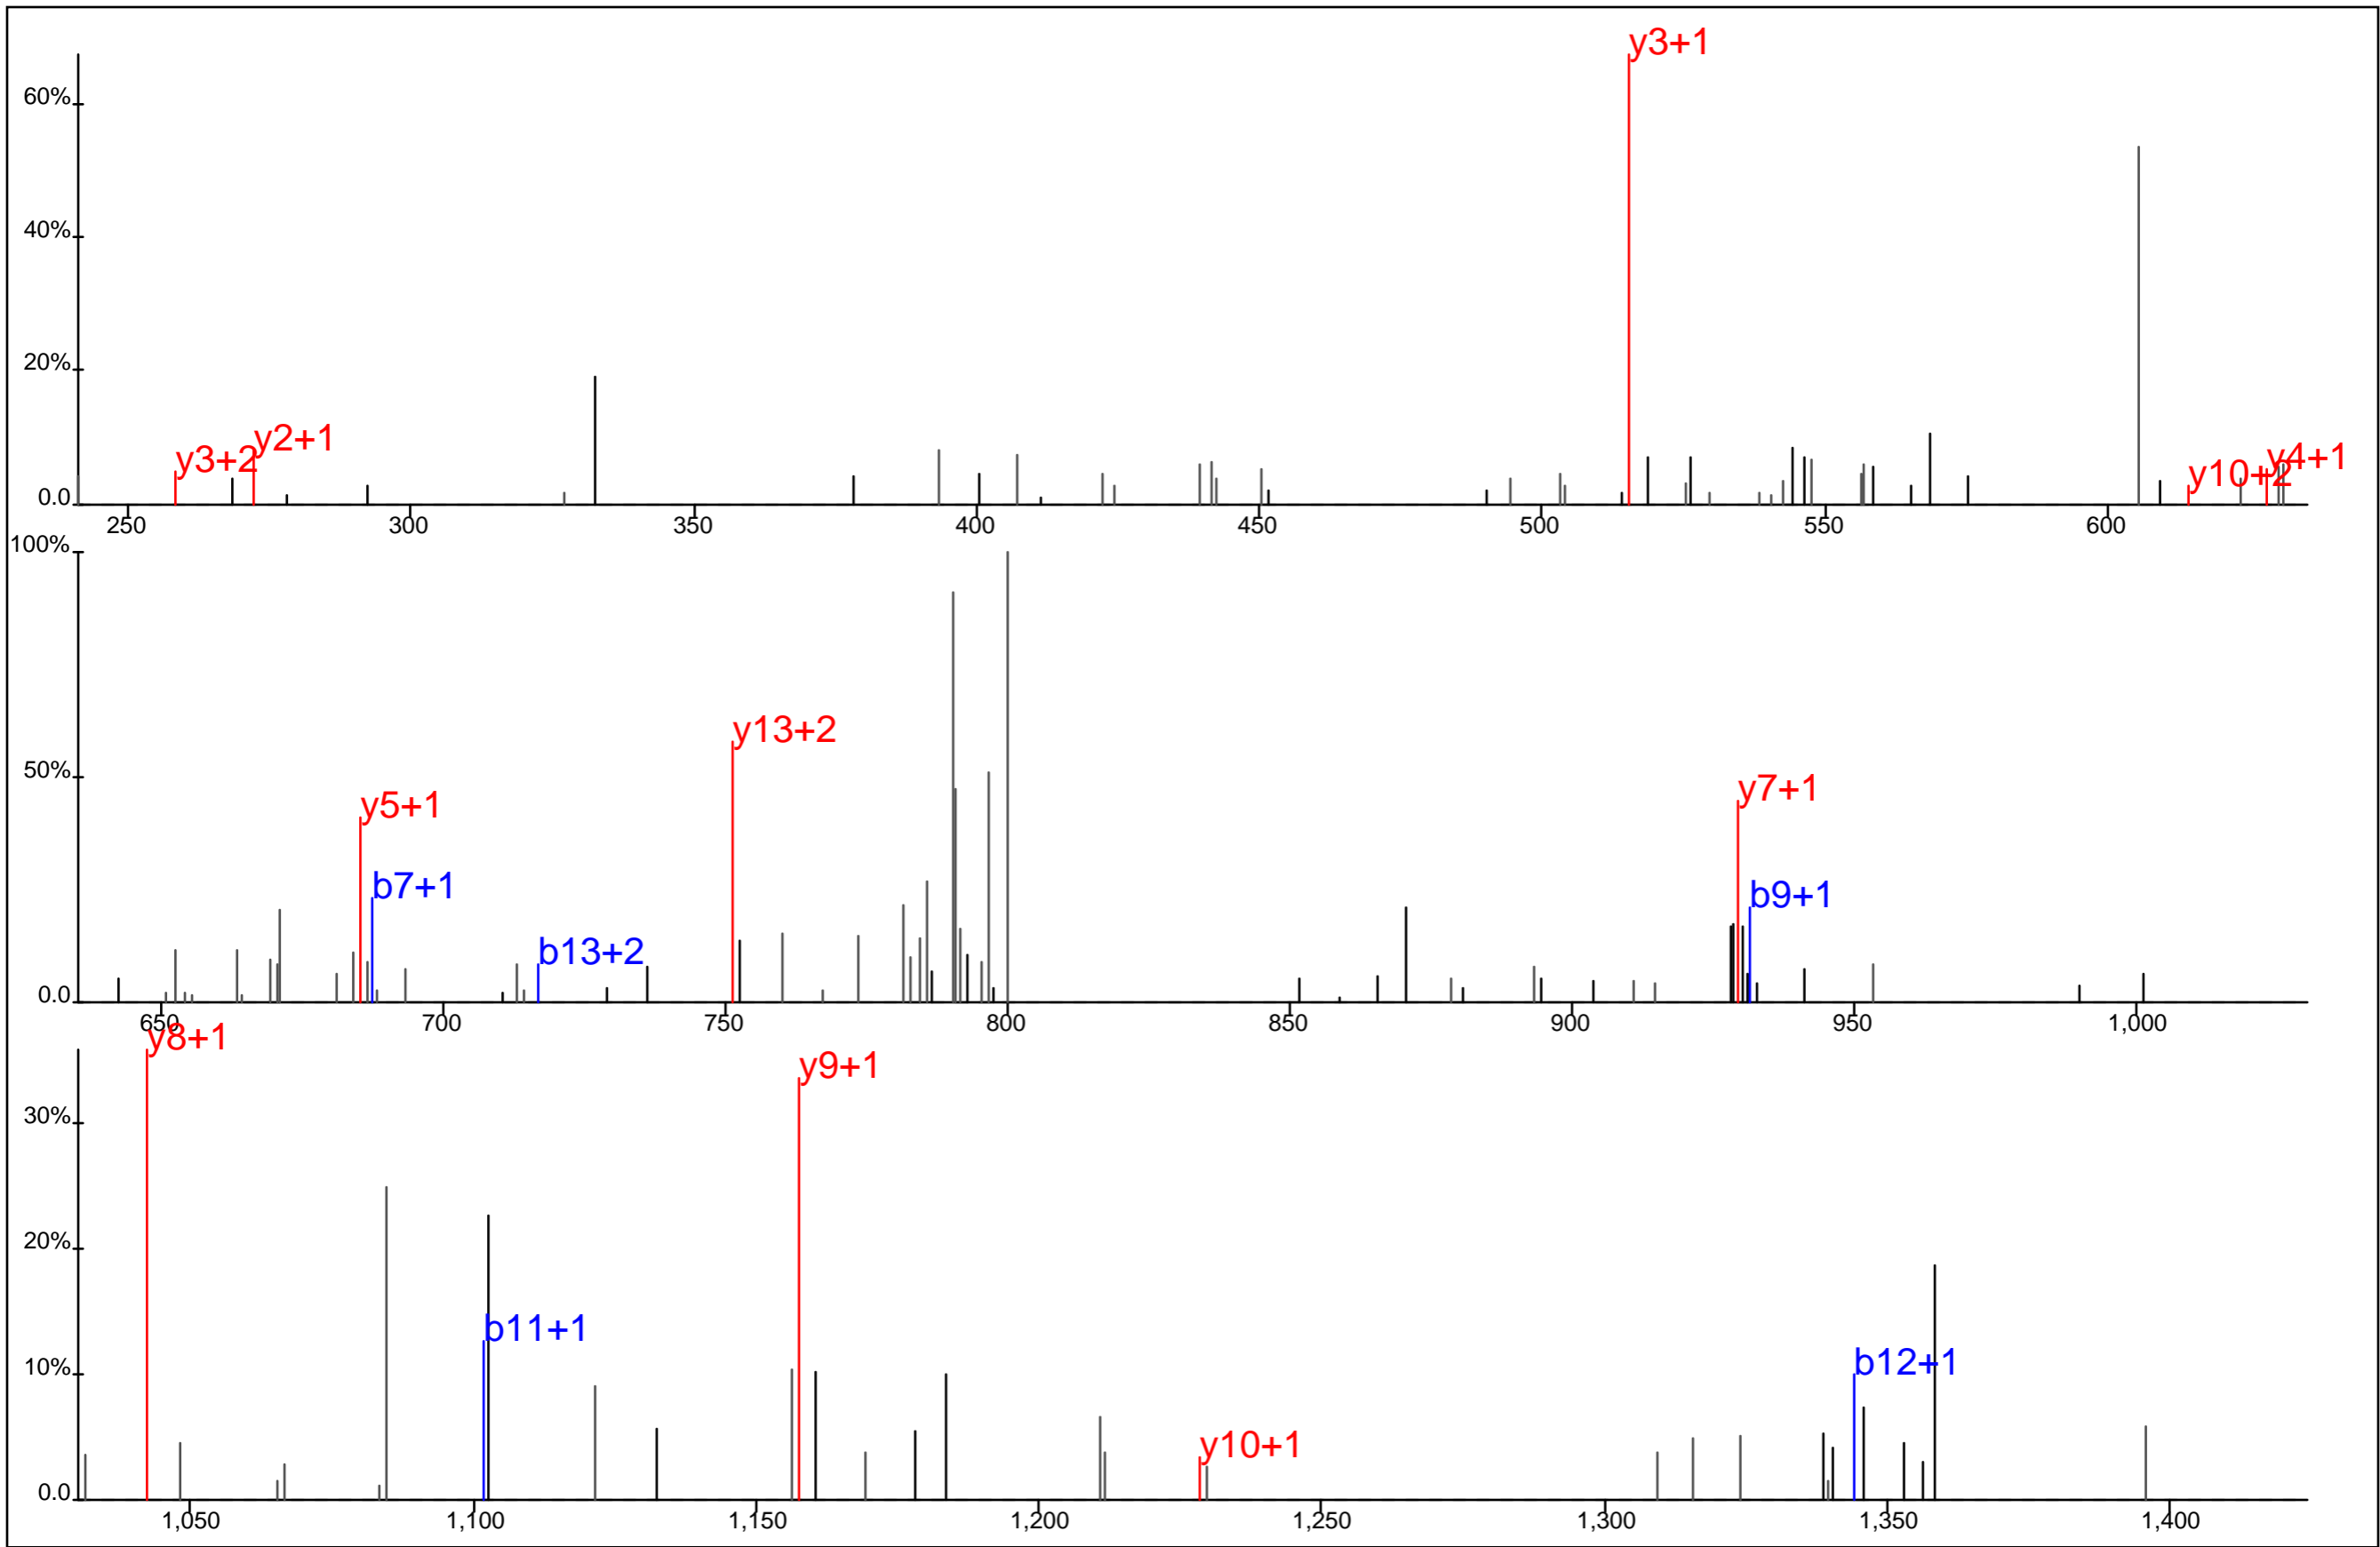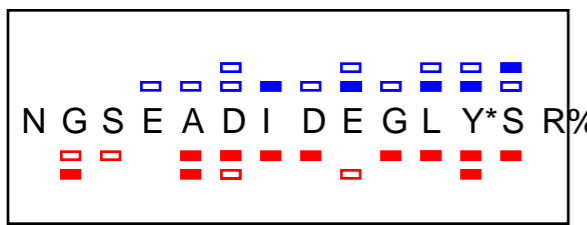

Protein Name: Ubiquitin activating enzyme 1  
 gi Accession: 23510338  
 Precursor Mass: 808.3314+2  
 Delta Mass: 2.784 ppm  
 XCorr: 31.63

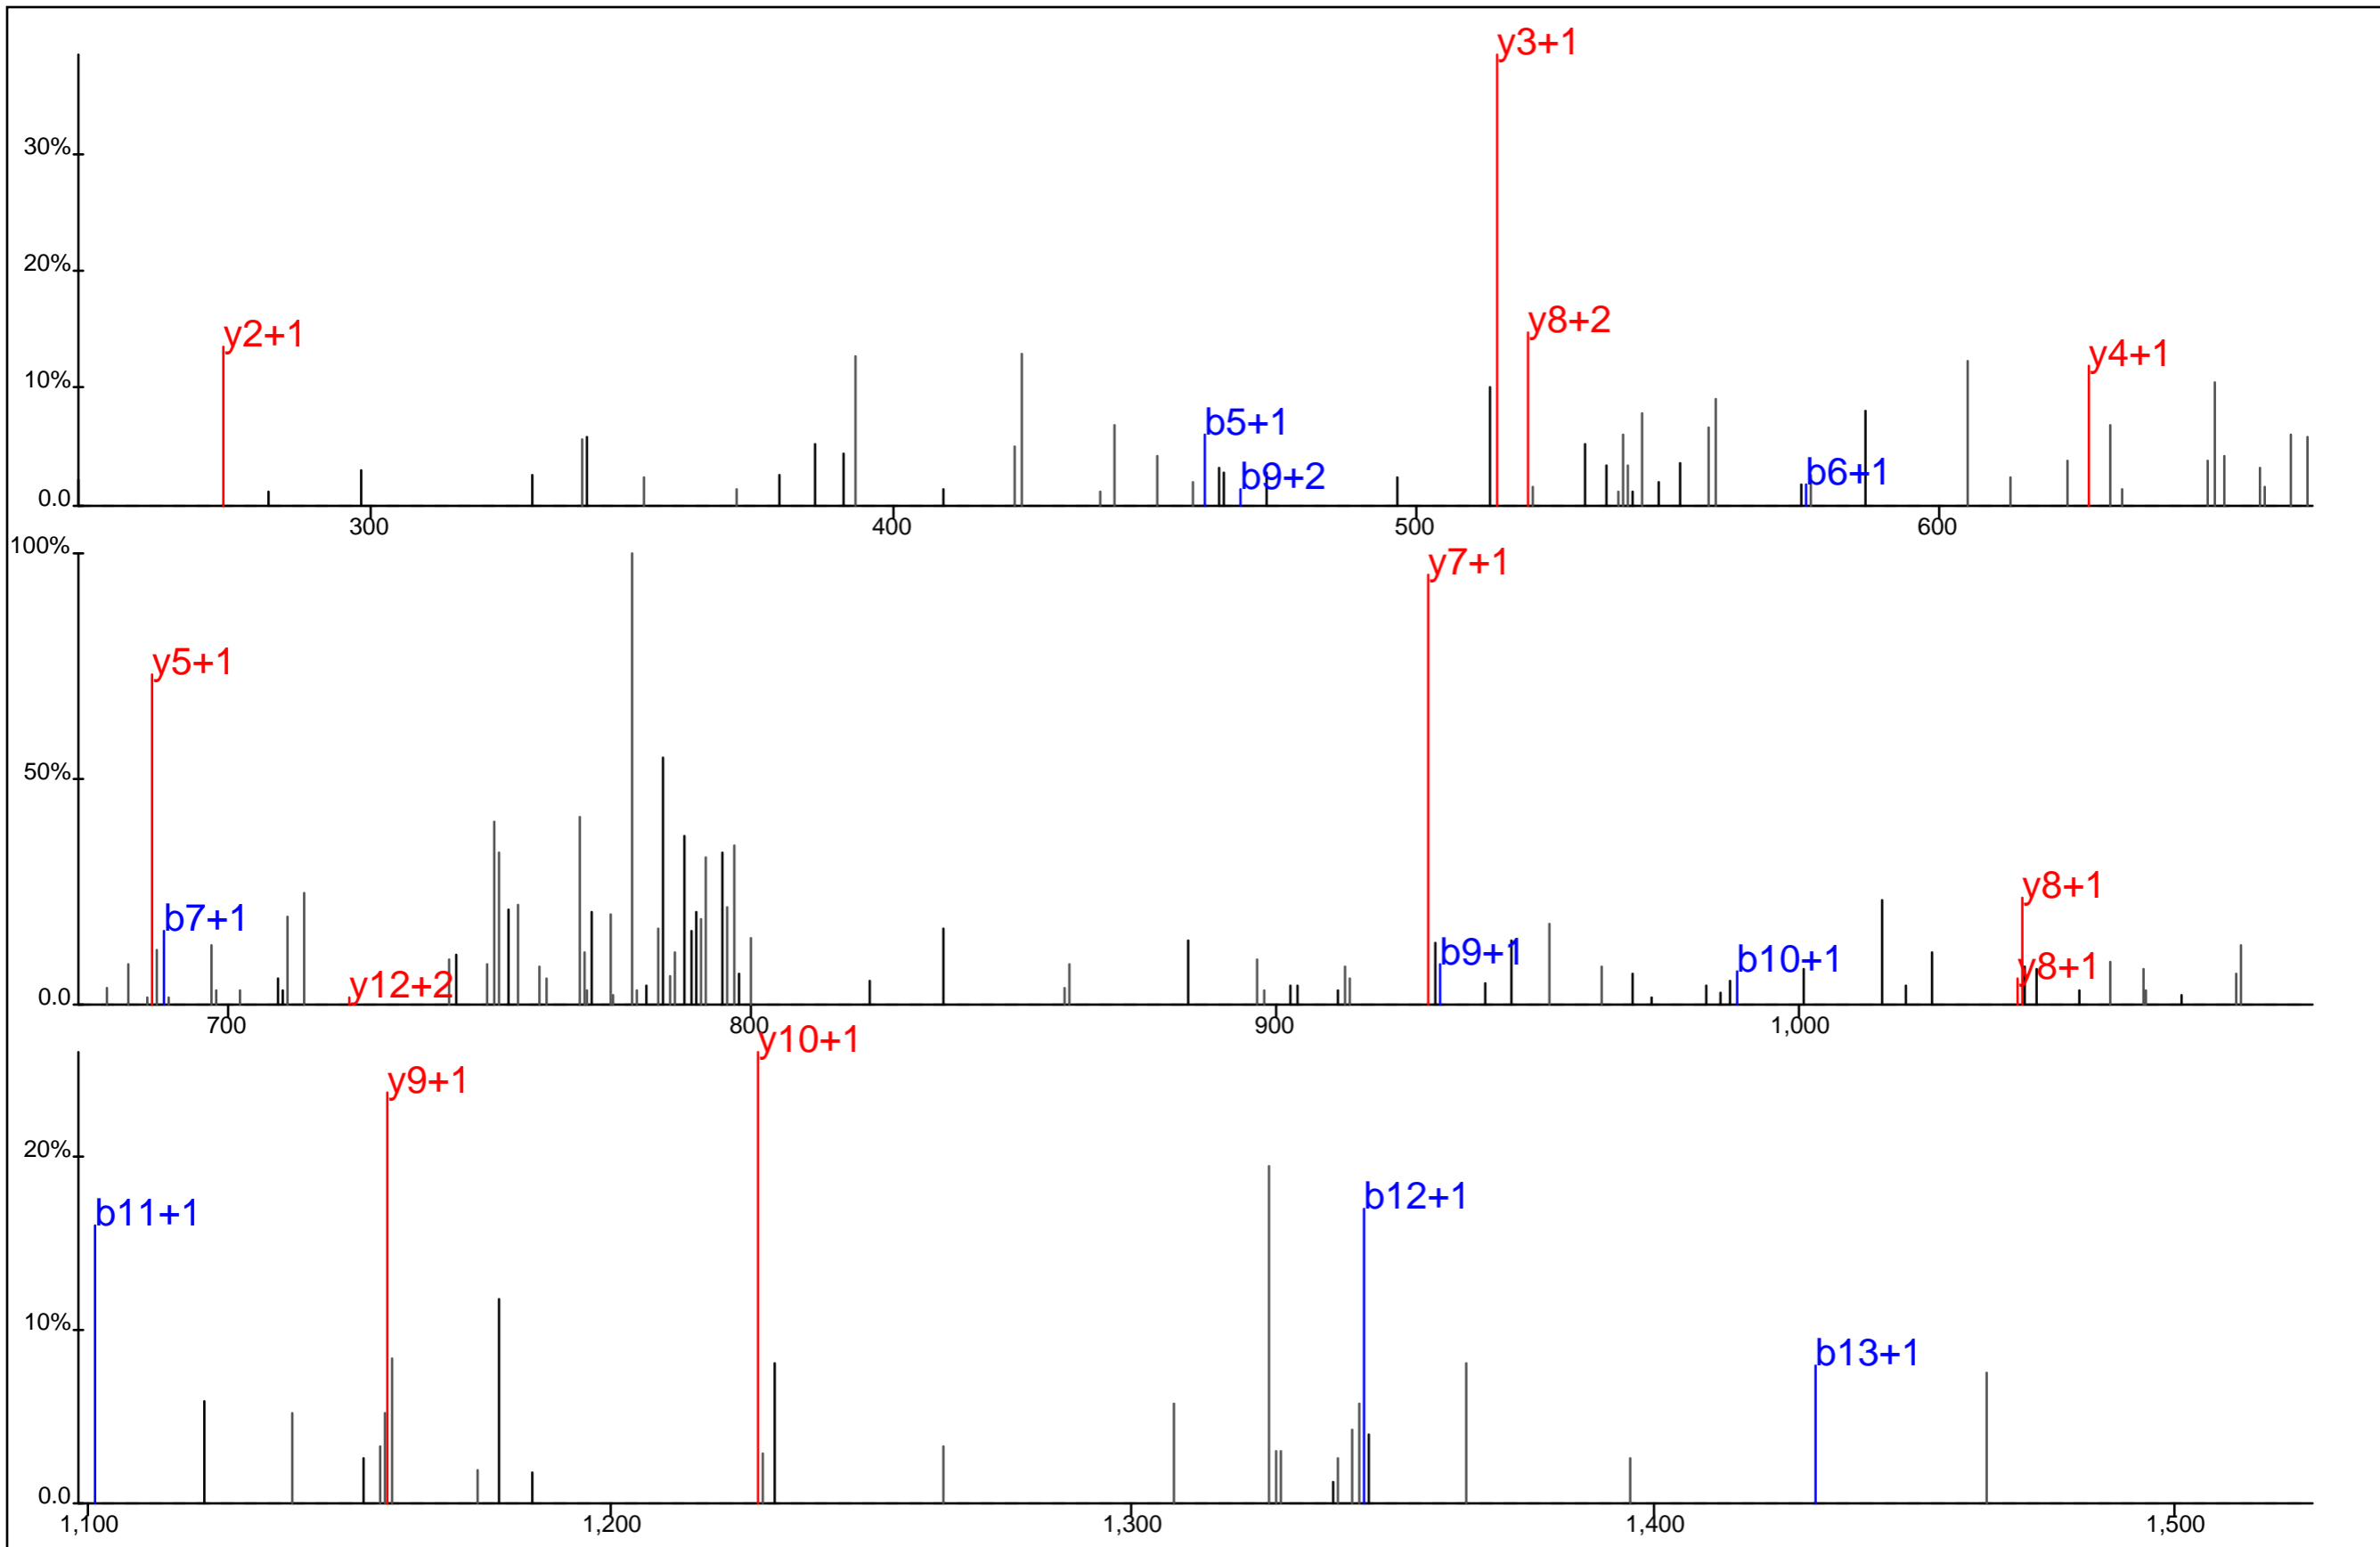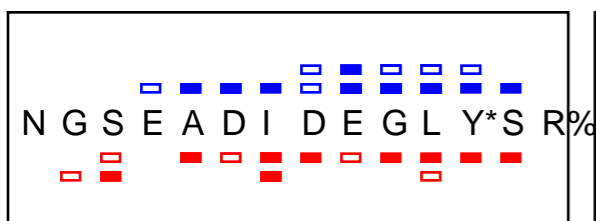

Protein Name: Ubiquitin activating enzyme 1  
 gi Accession: 23510338  
 Precursor Mass: 808.3311+2  
 Delta Mass: 2.326 ppm  
 XCorr: 47.96

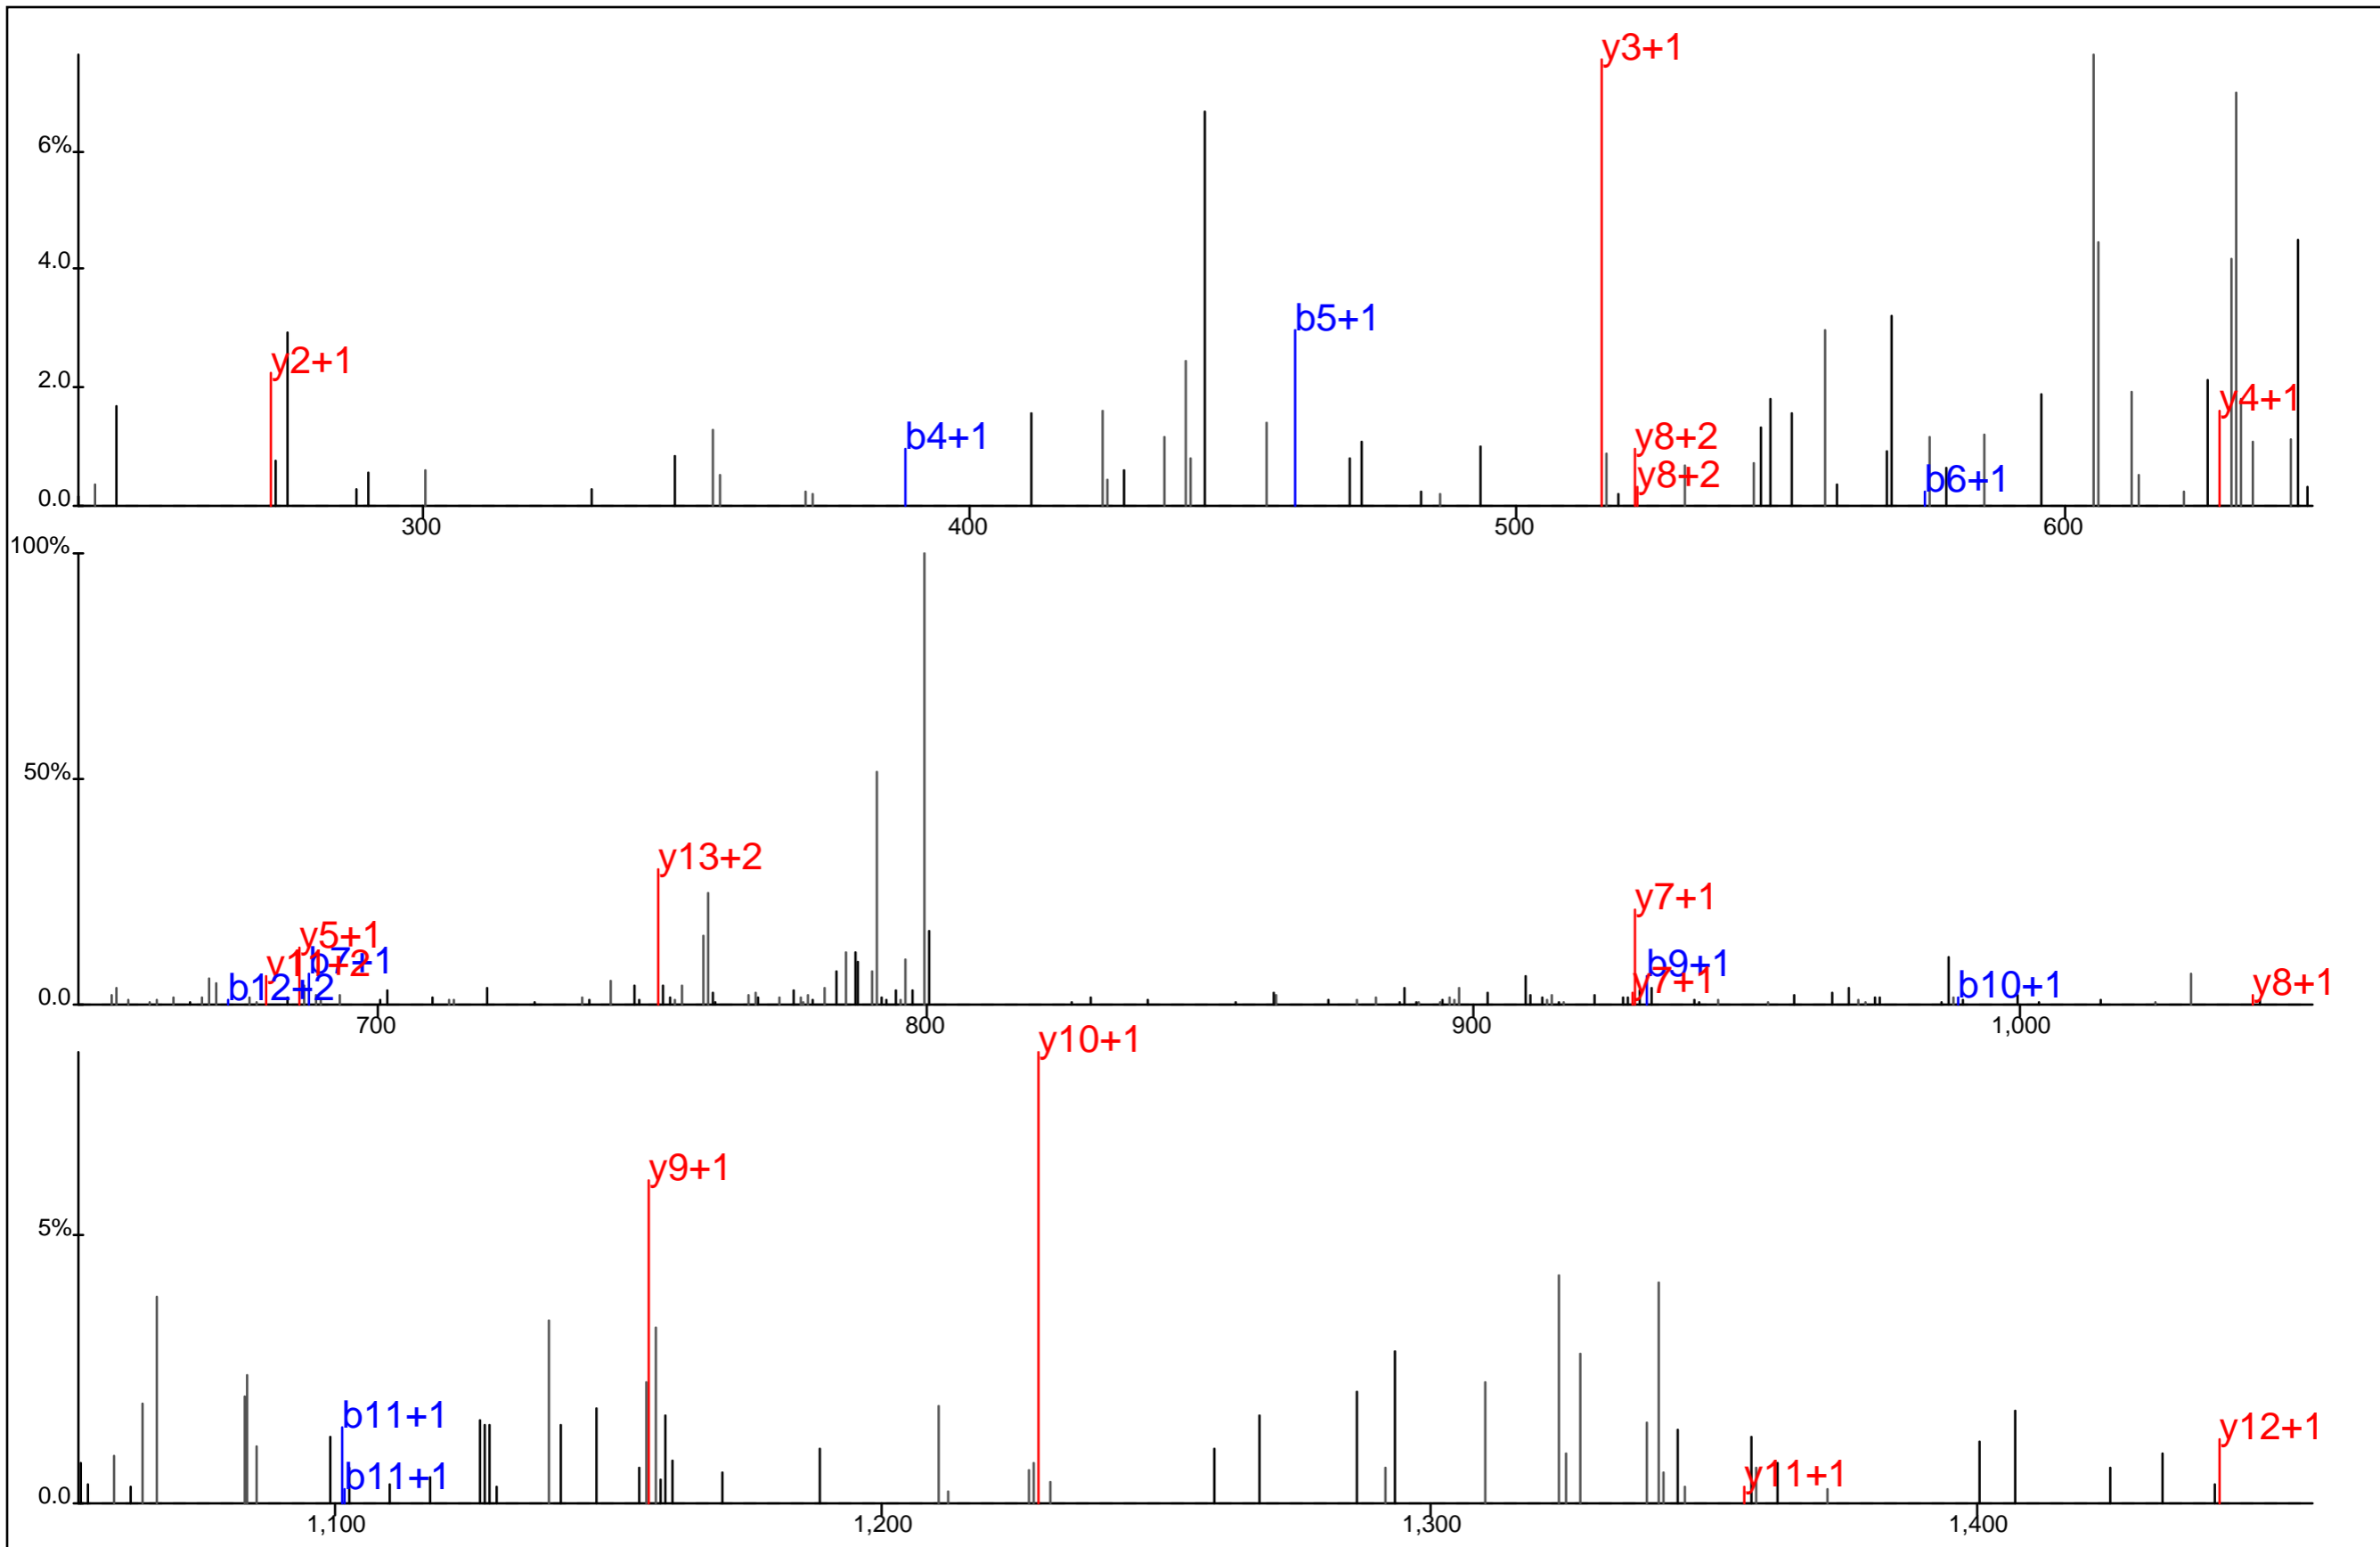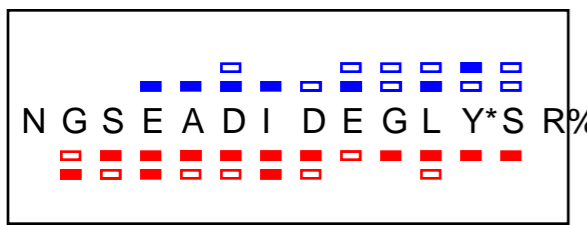

Protein Name: Ubiquitin activating enzyme 1  
 gi Accession: 23510338  
 Precursor Mass: 808.3308+2  
 Delta Mass: 2.023 ppm  
 XCorr: 35.9

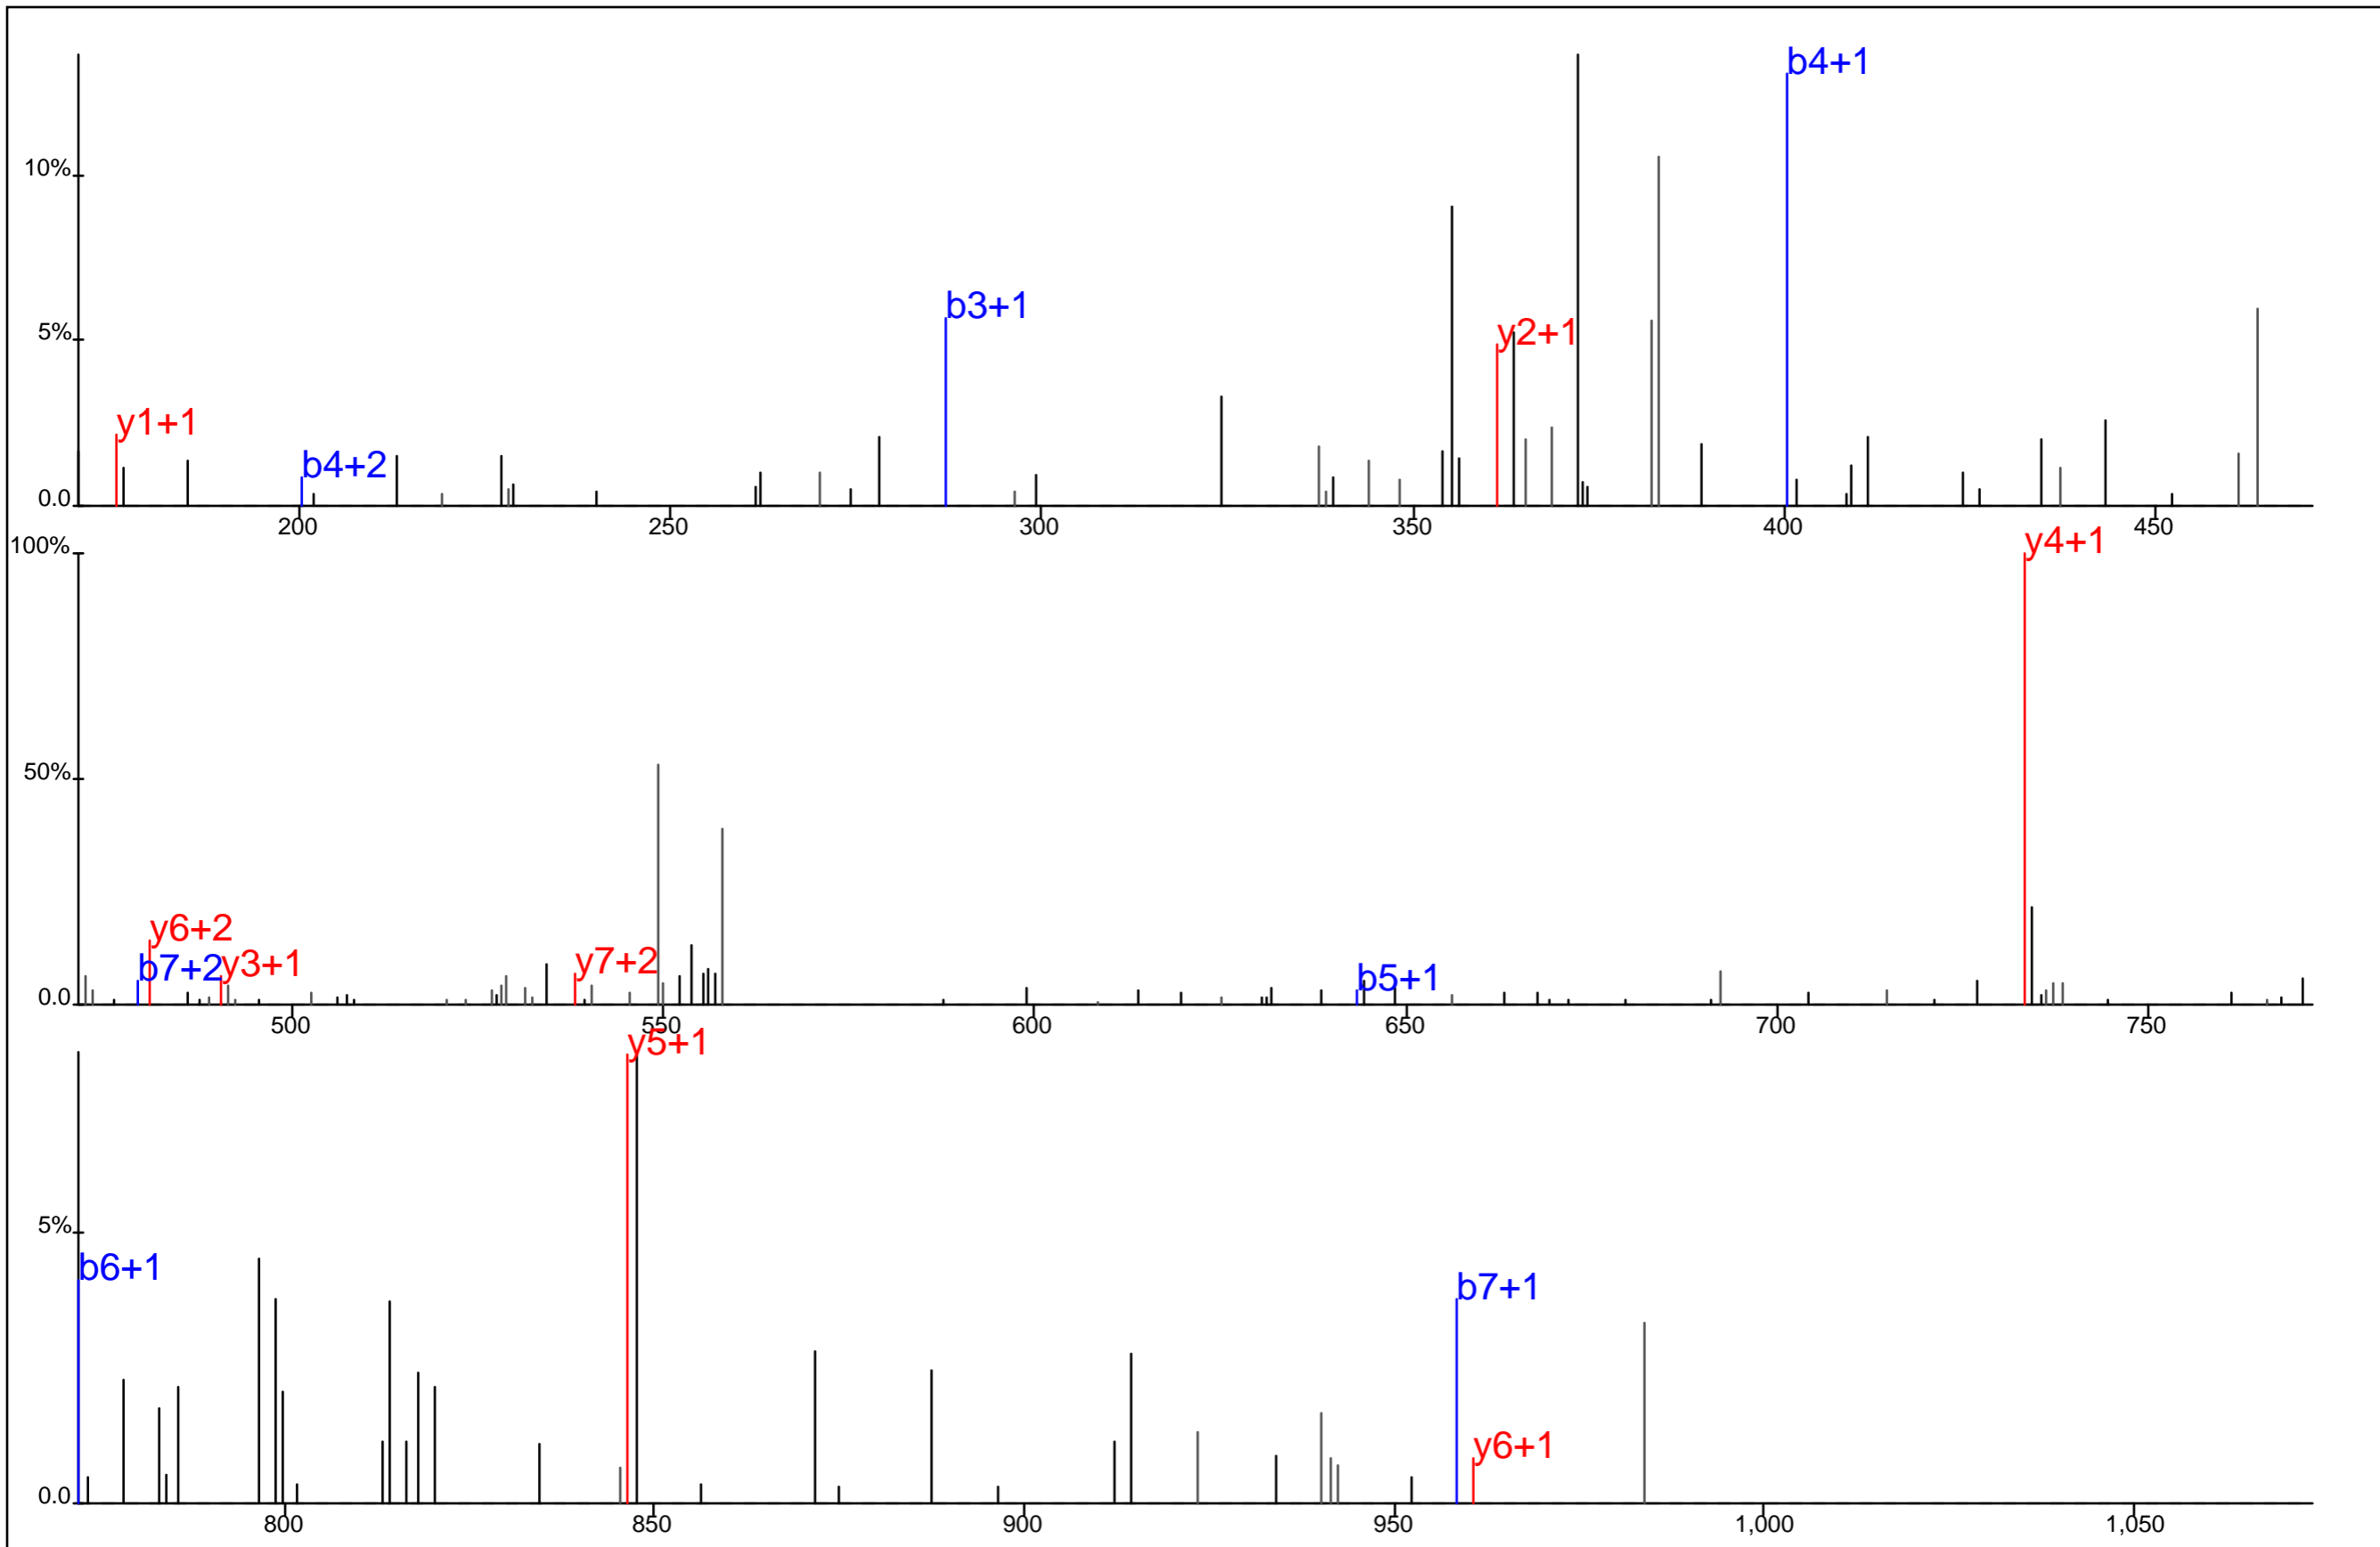

□ □ □ □ □ □  
 G D N I Y\* E W R  
□ □ □ □ □ □

Protein Name: Ubiquitin conjugating enzyme  
 gi Accession: 22749327  
 Precursor Mass: 566.7271+2  
 Delta Mass: 0.804 ppm  
 XCorr: 2.3723

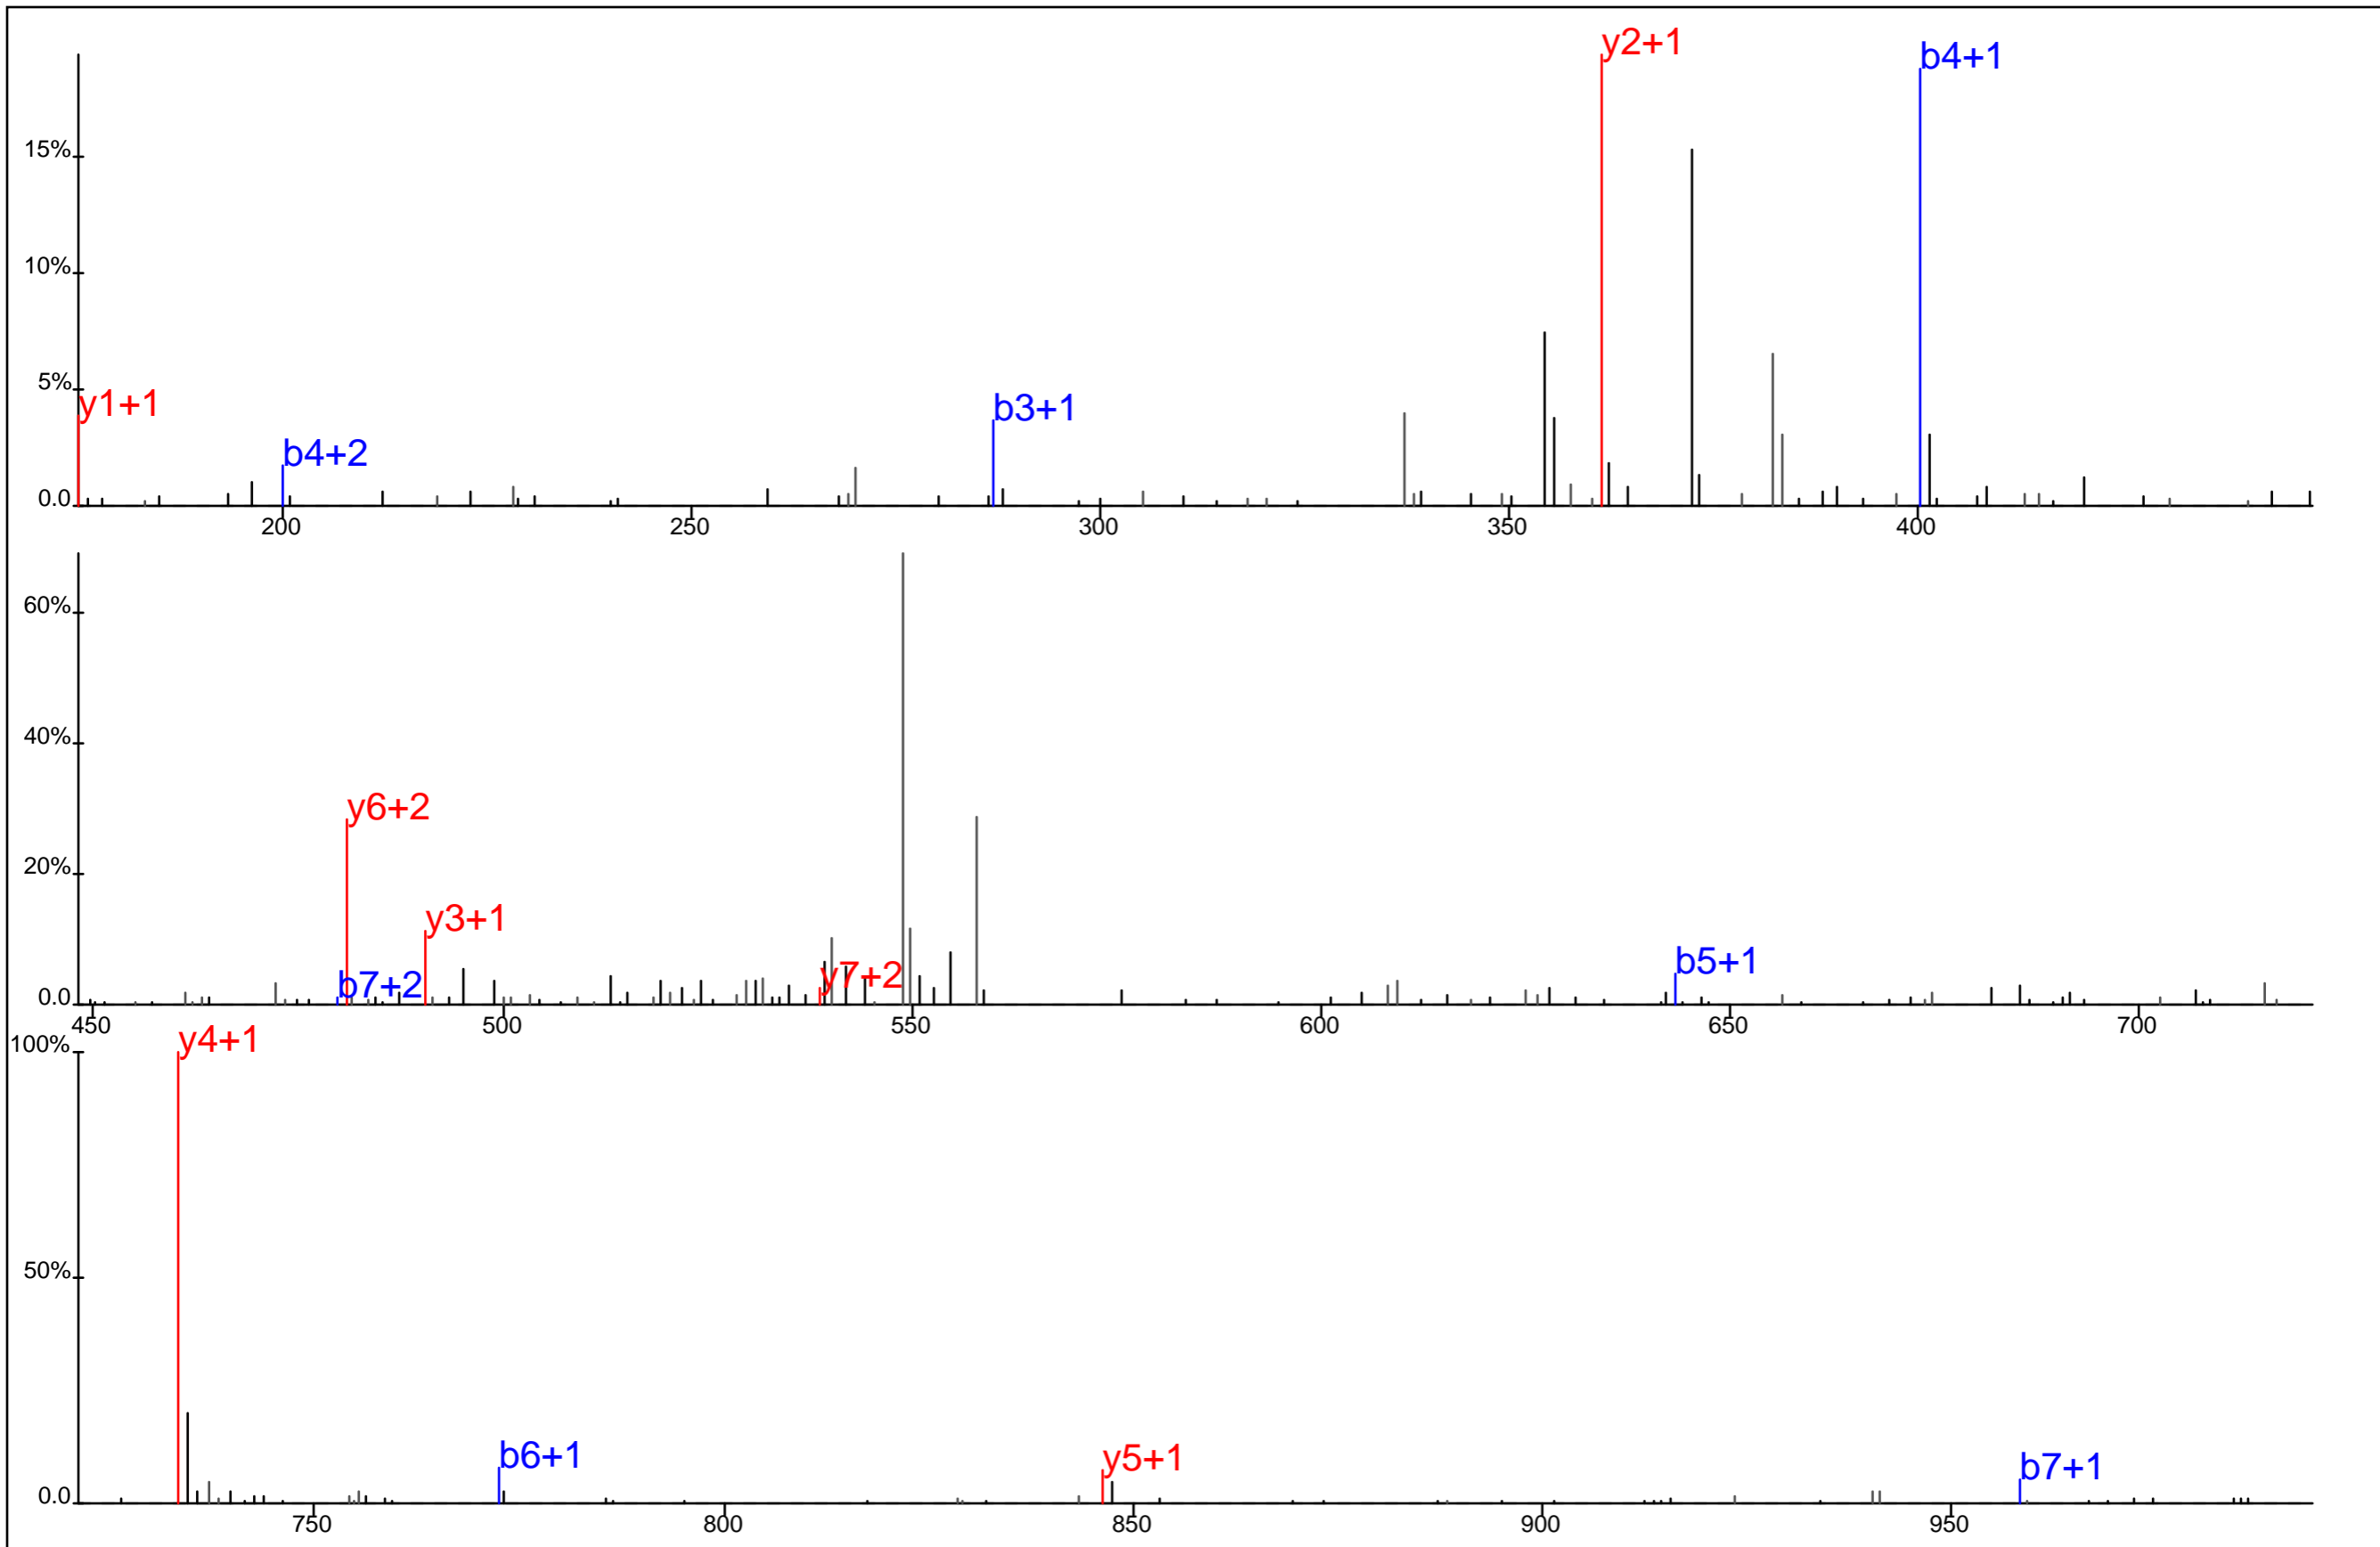

G D N I Y\* E W R

Protein Name: Ubiquitin conjugating enzyme  
 gi Accession: 22749327  
 Precursor Mass: 566.7282+2  
 Delta Mass: 2.868 ppm  
 XCorr: 34.97

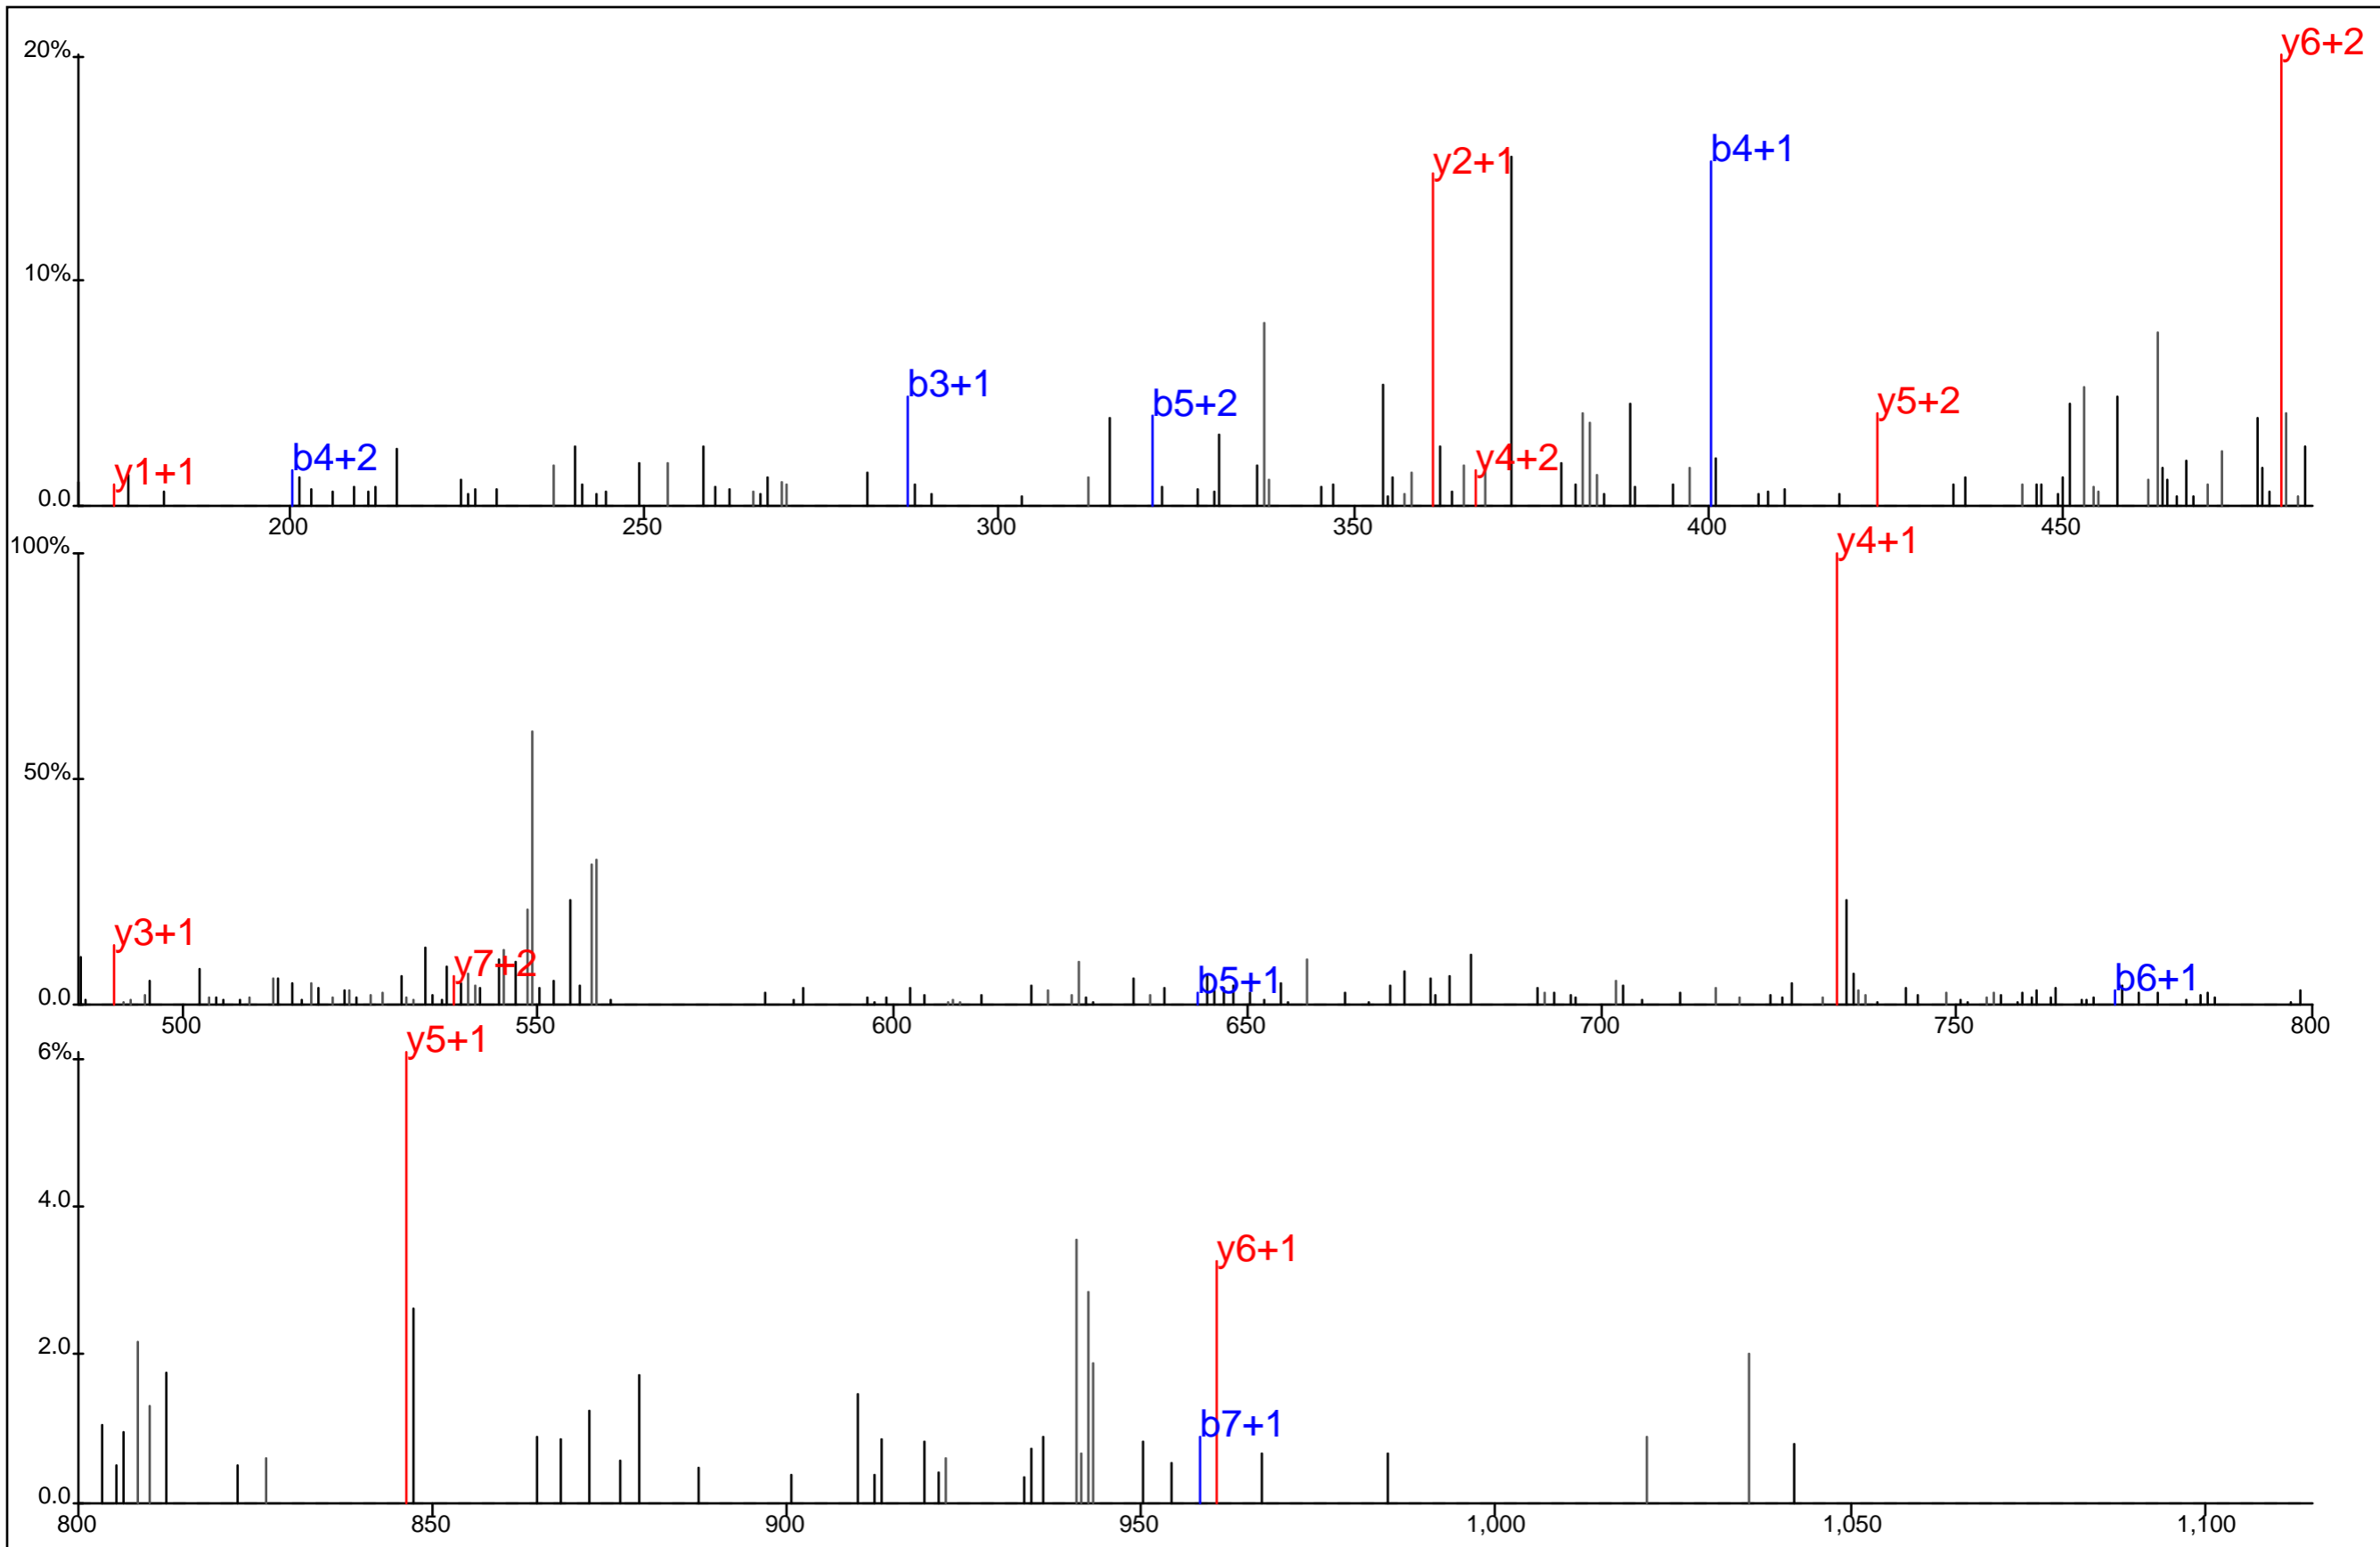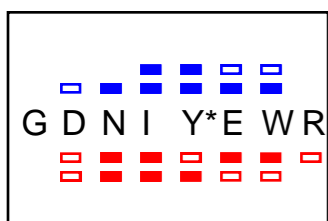

Protein Name: Ubiquitin conjugating enzyme  
 gi Accession: 22749327  
 Precursor Mass: 566.7266+2  
 Delta Mass: 0.037 ppm  
 XCorr: 14.4

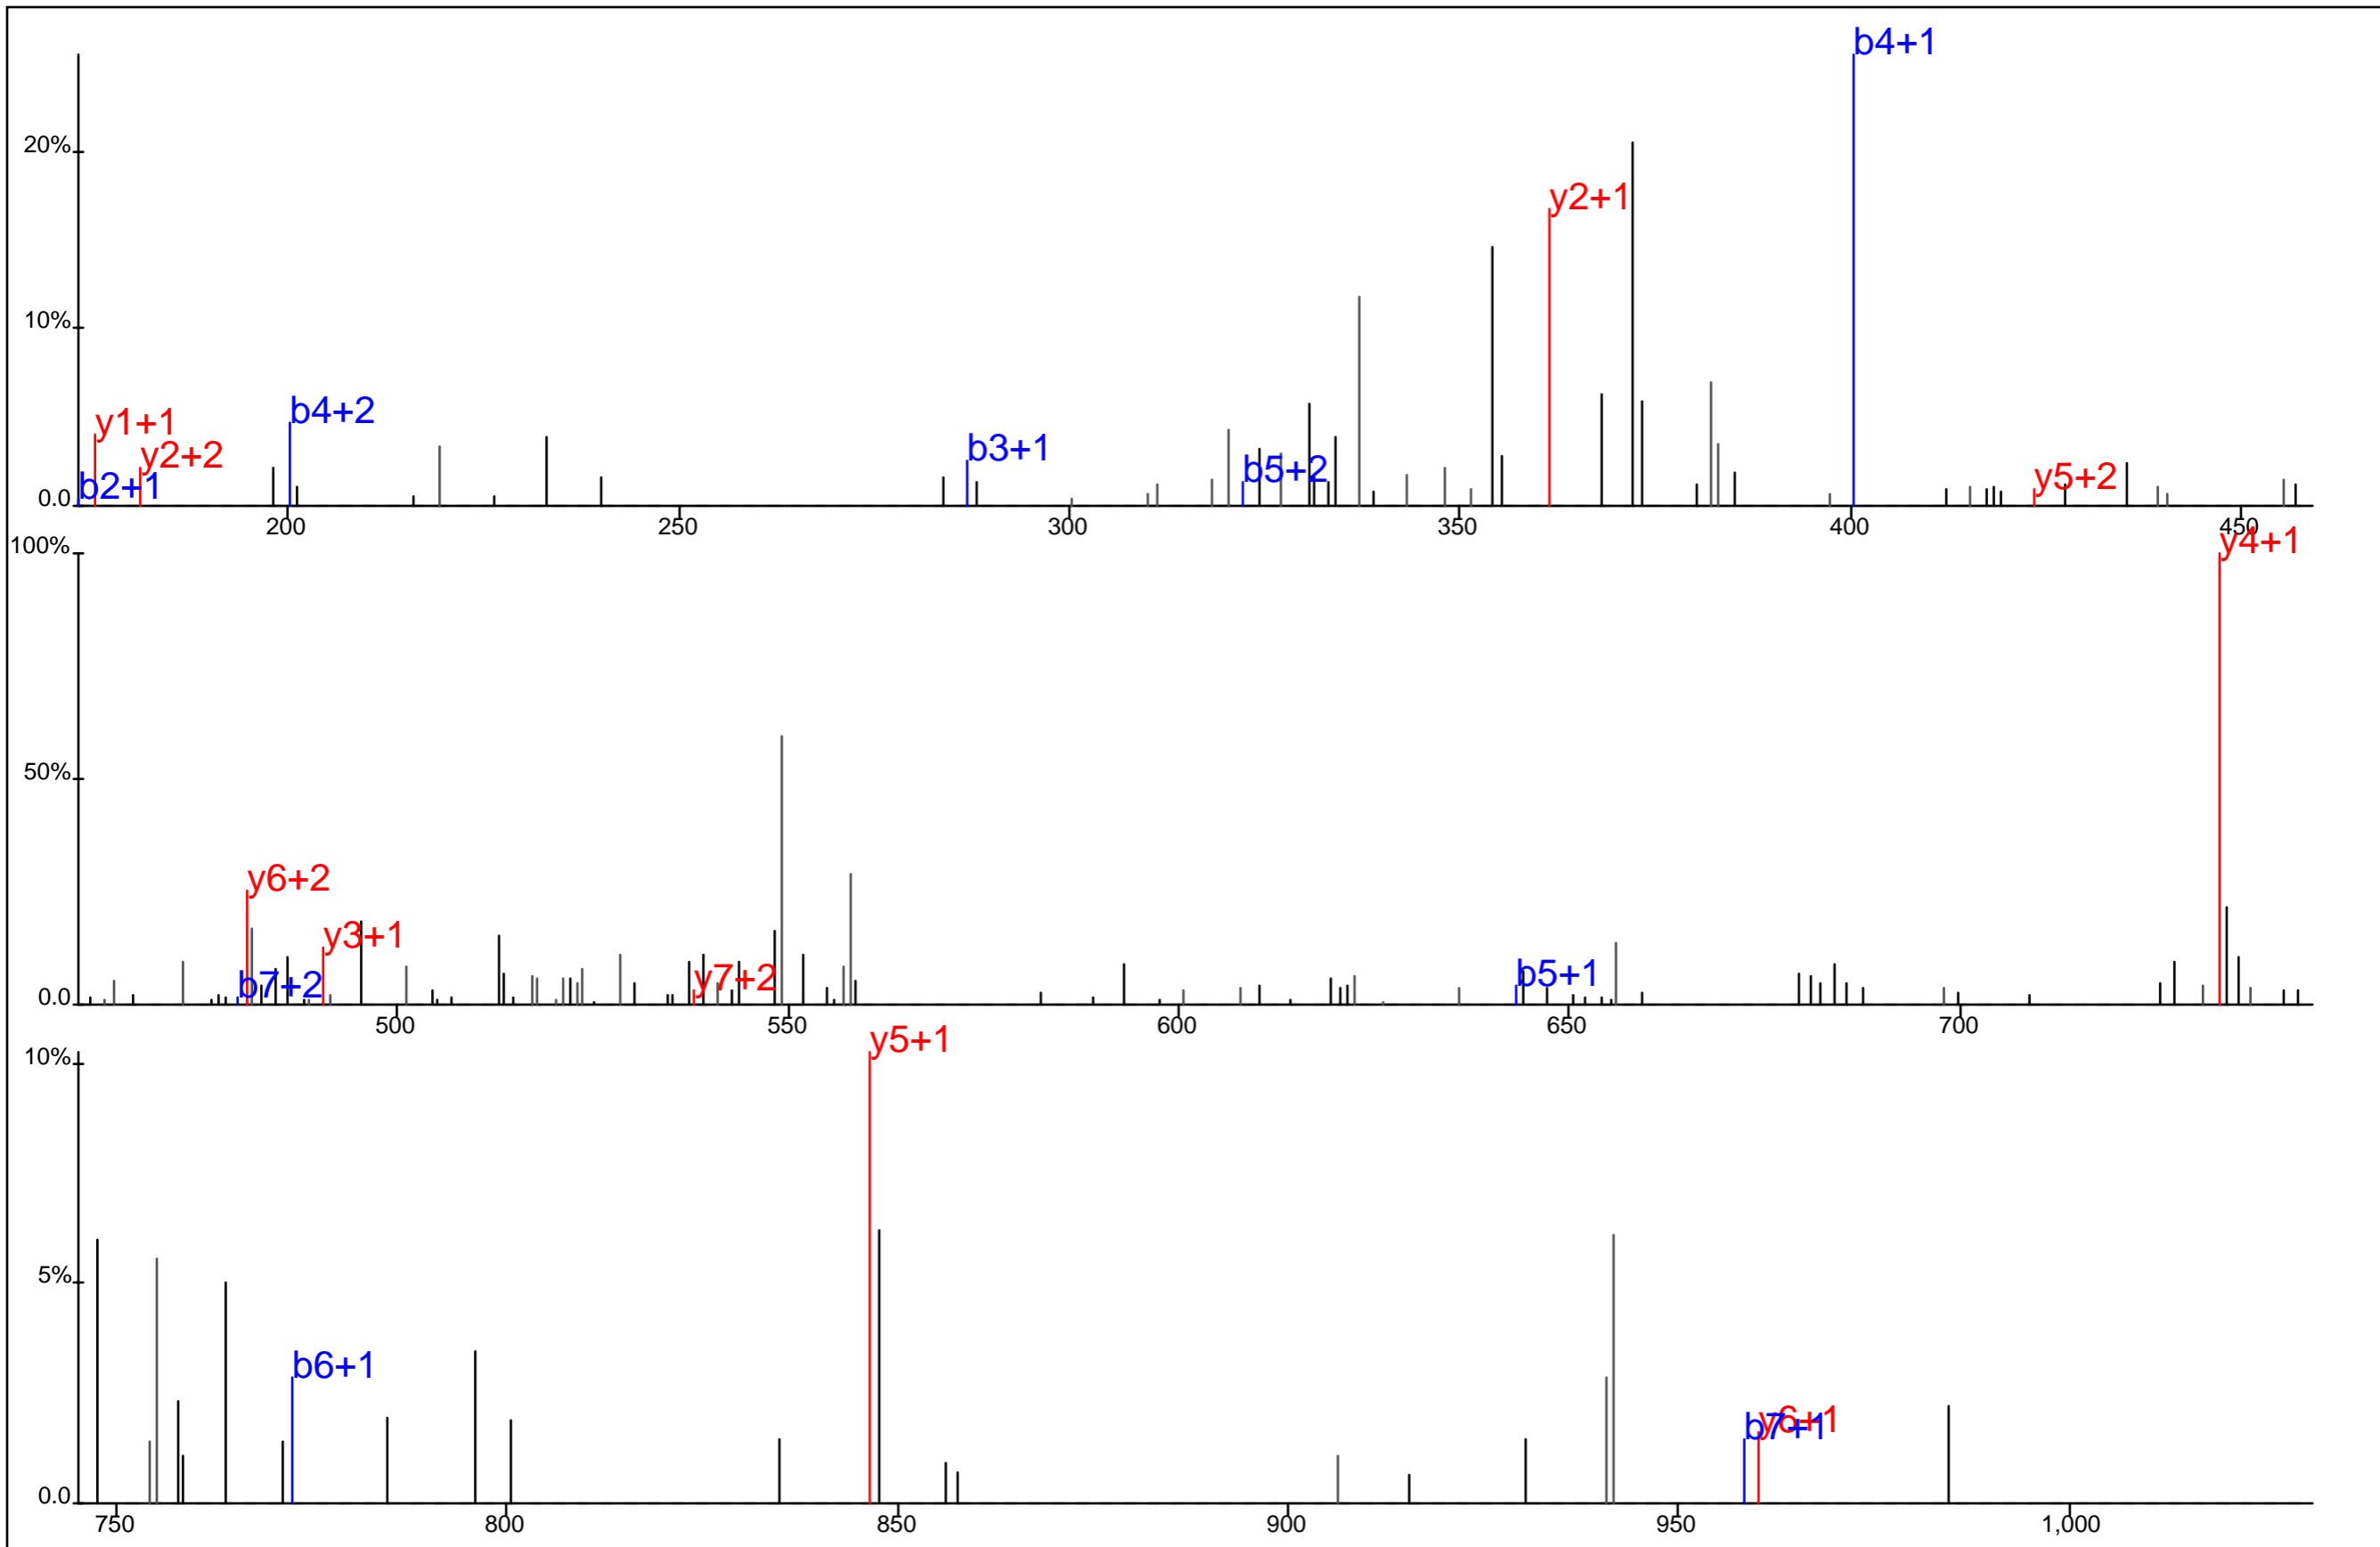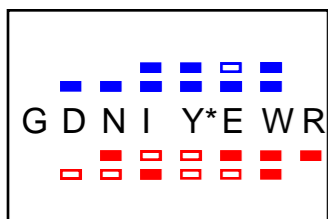

Protein Name: Ubiquitin conjugating enzyme  
 gi Accession: 22749327  
 Precursor Mass: 566.7285+2  
 Delta Mass: 3.407 ppm  
 XCorr: 17.62



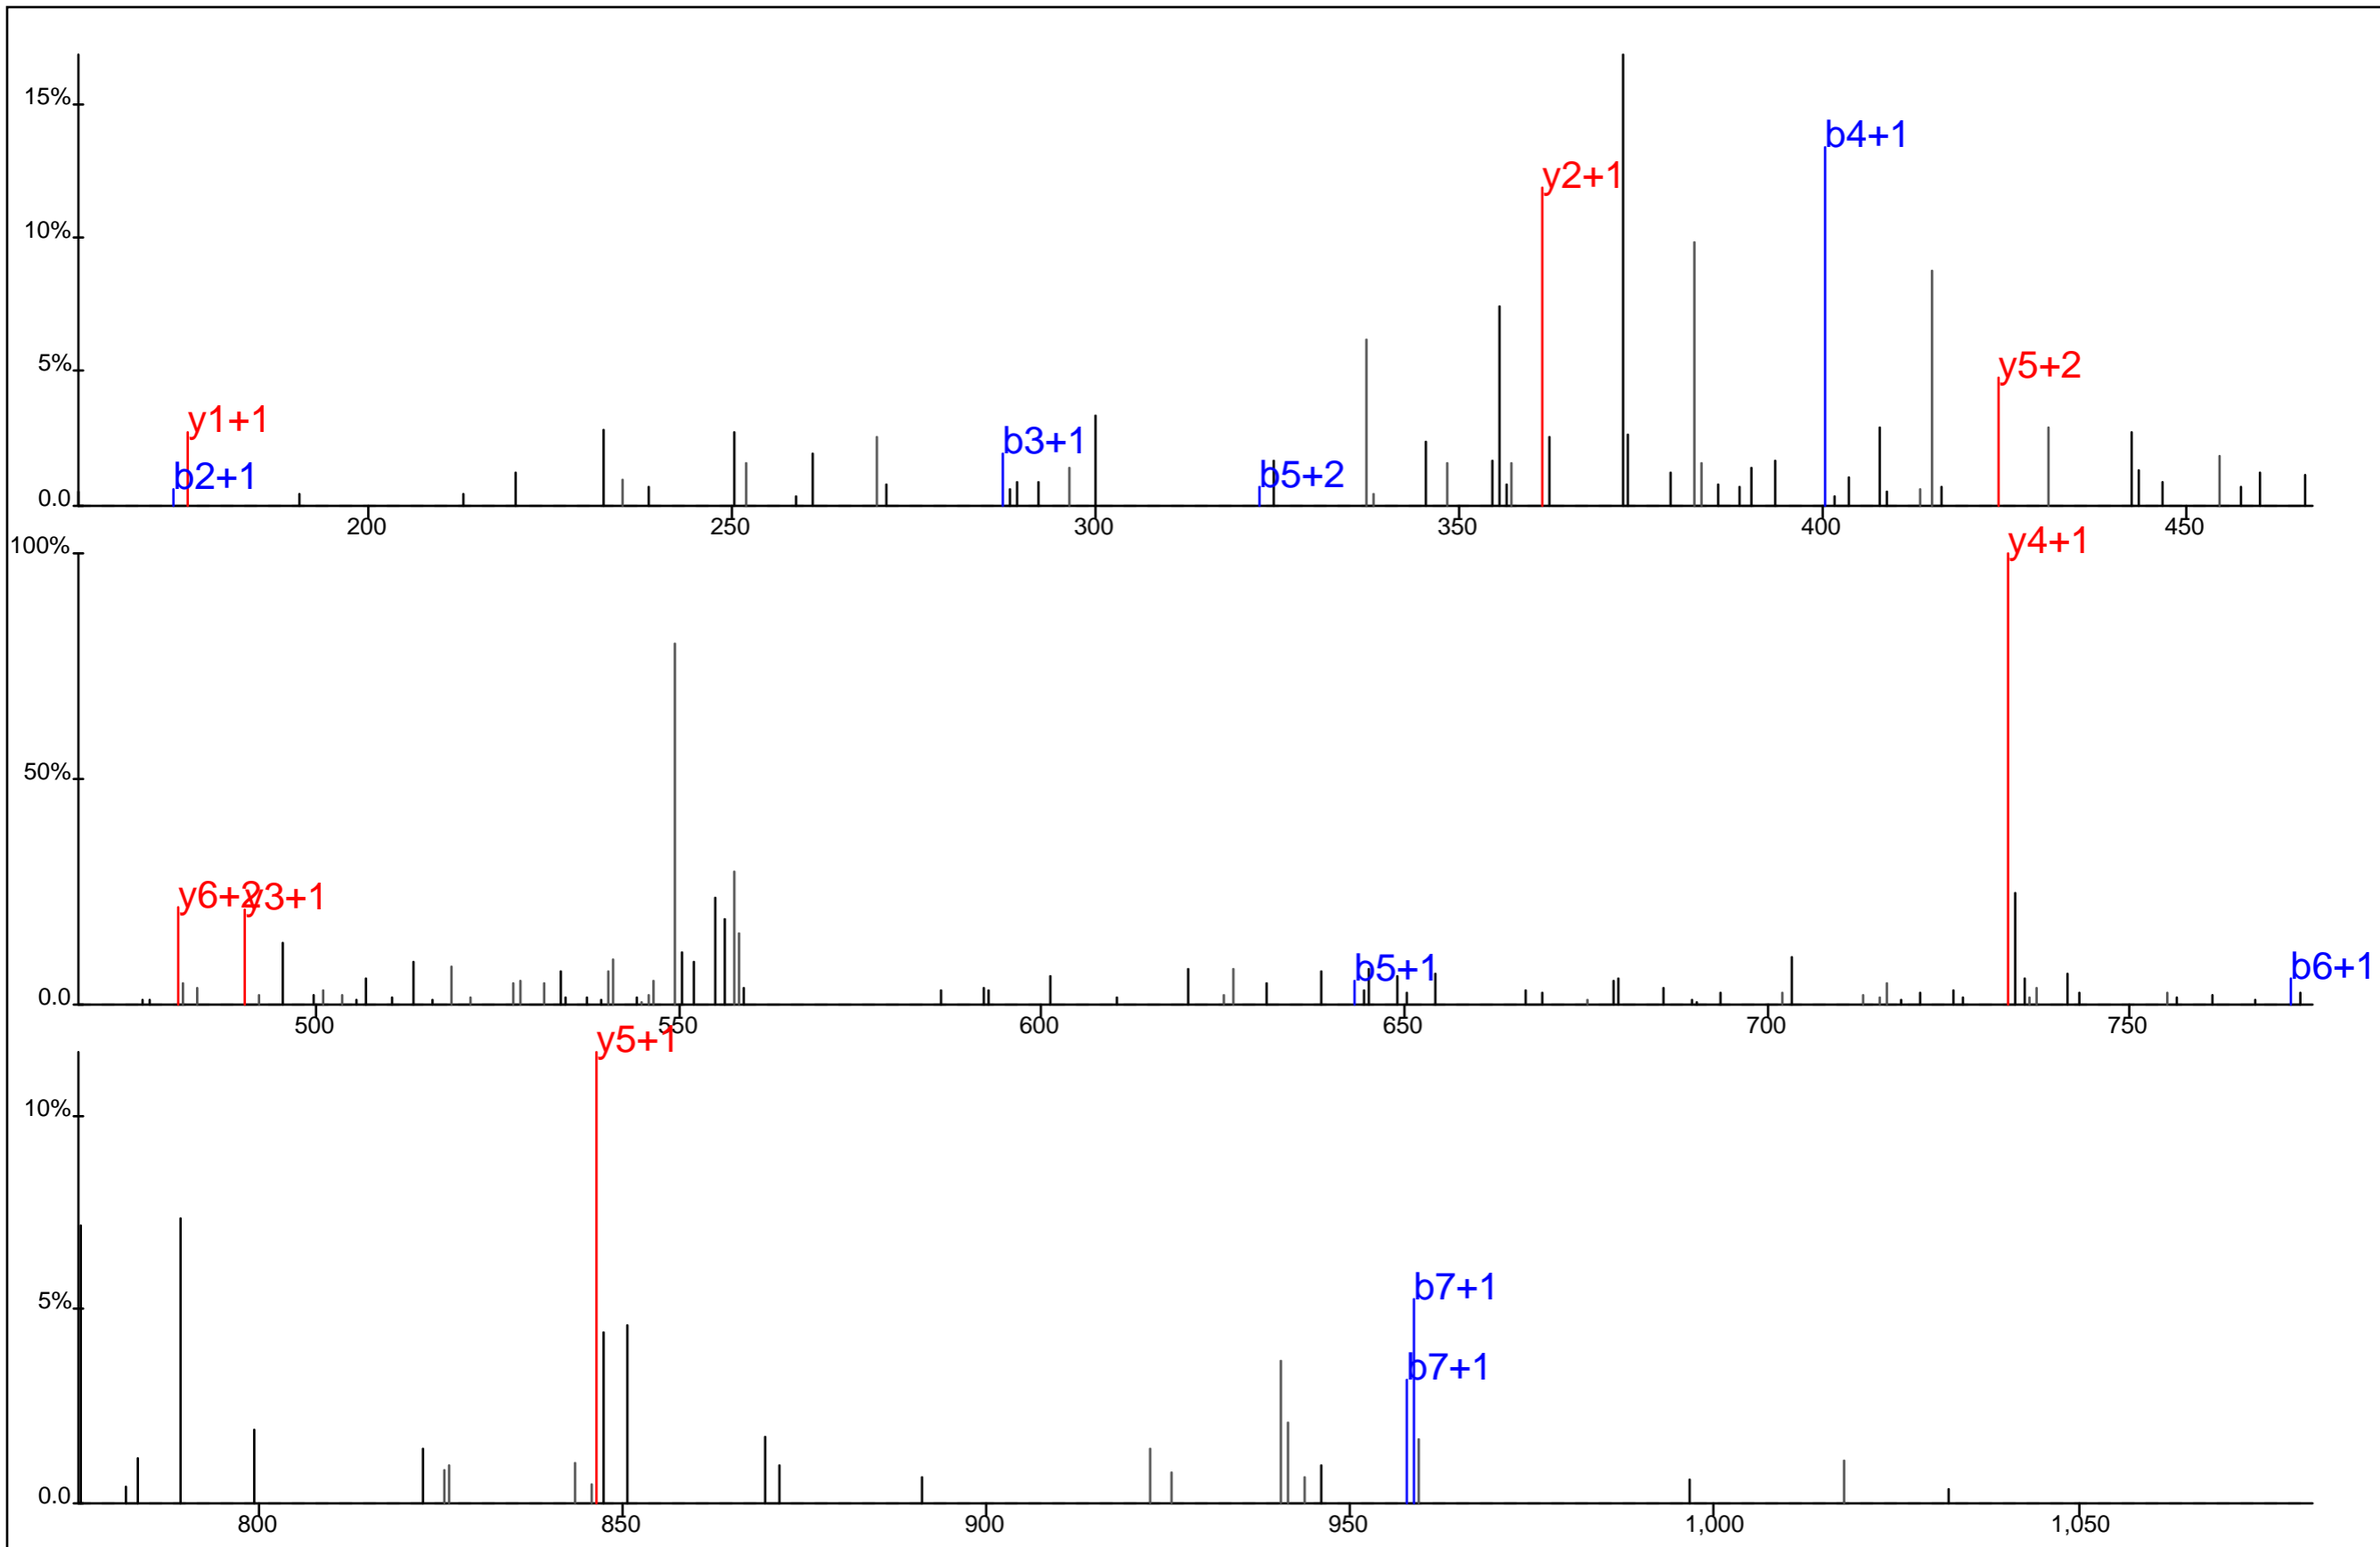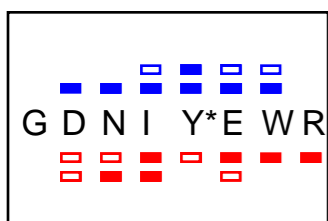

Protein Name: Ubiquitin conjugating enzyme  
 gi Accession: 22749327  
 Precursor Mass: 566.7286+2  
 Delta Mass: 3.628 ppm  
 XCorr: 17.6

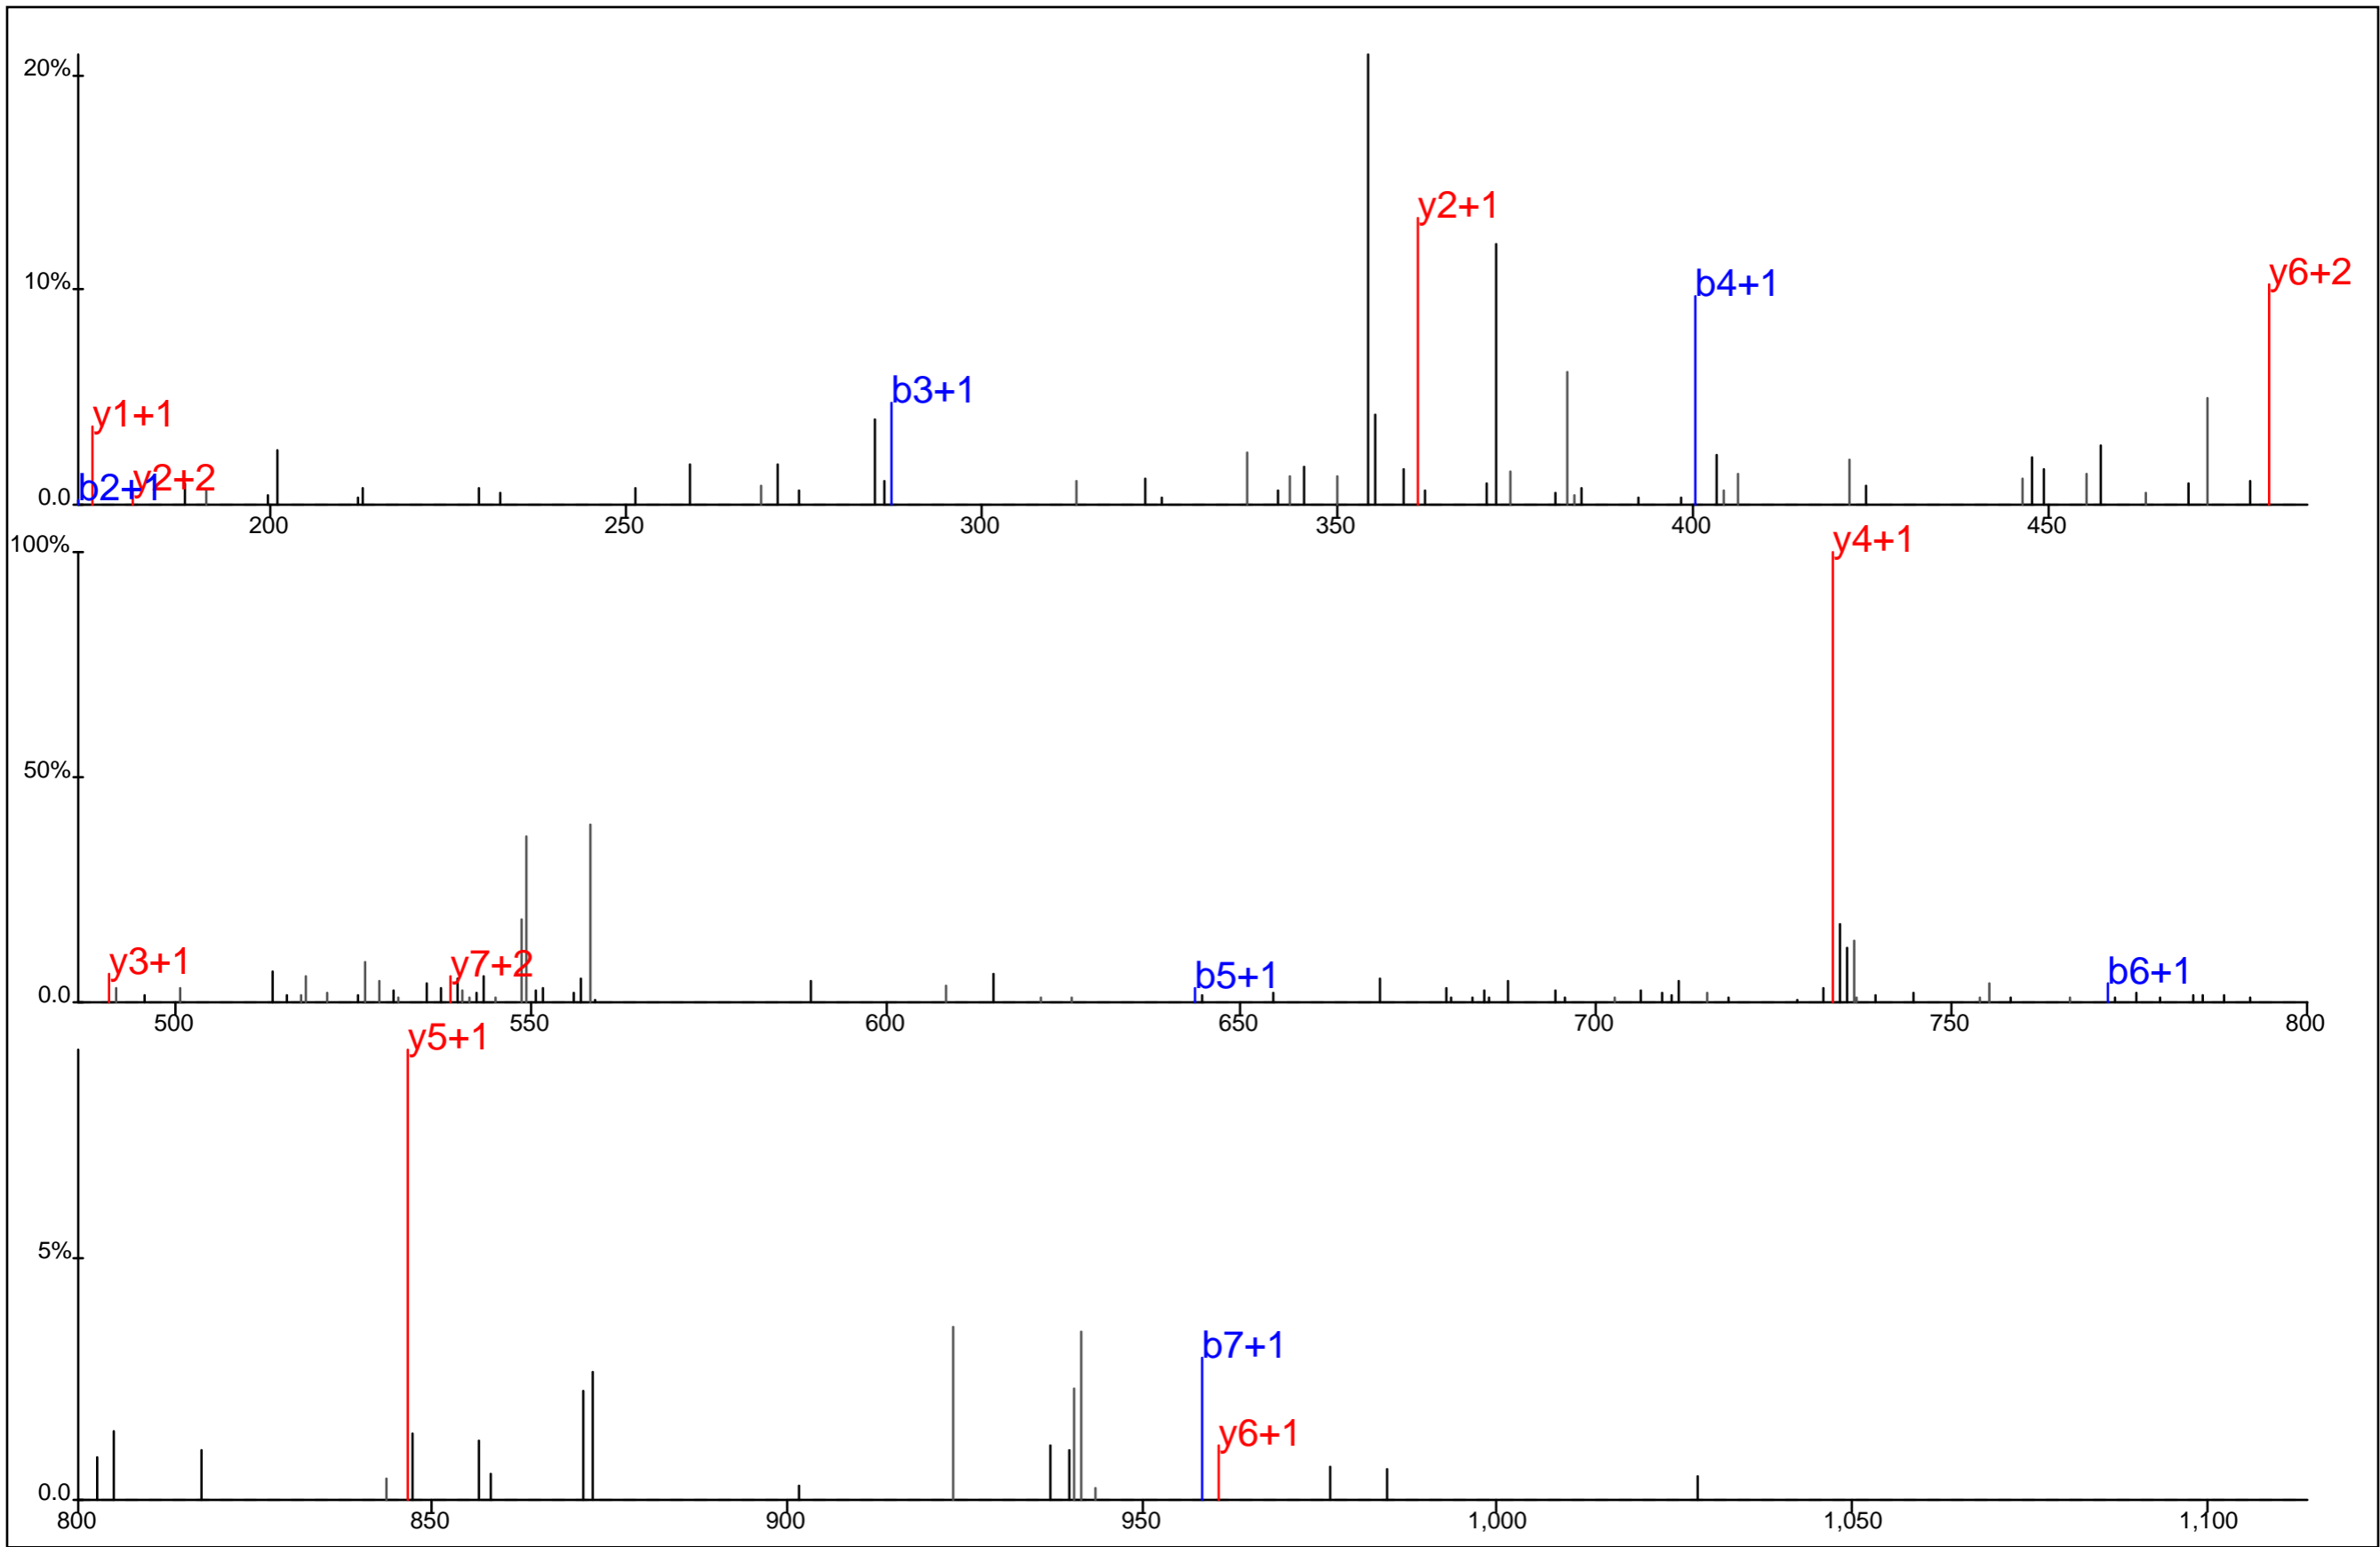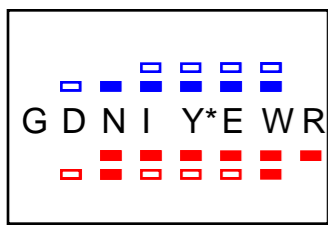

Protein Name: Ubiquitin conjugating enzyme  
 gi Accession: 22749327  
 Precursor Mass: 566.7286+2  
 Delta Mass: 3.522 ppm  
 XCorr: 19.05

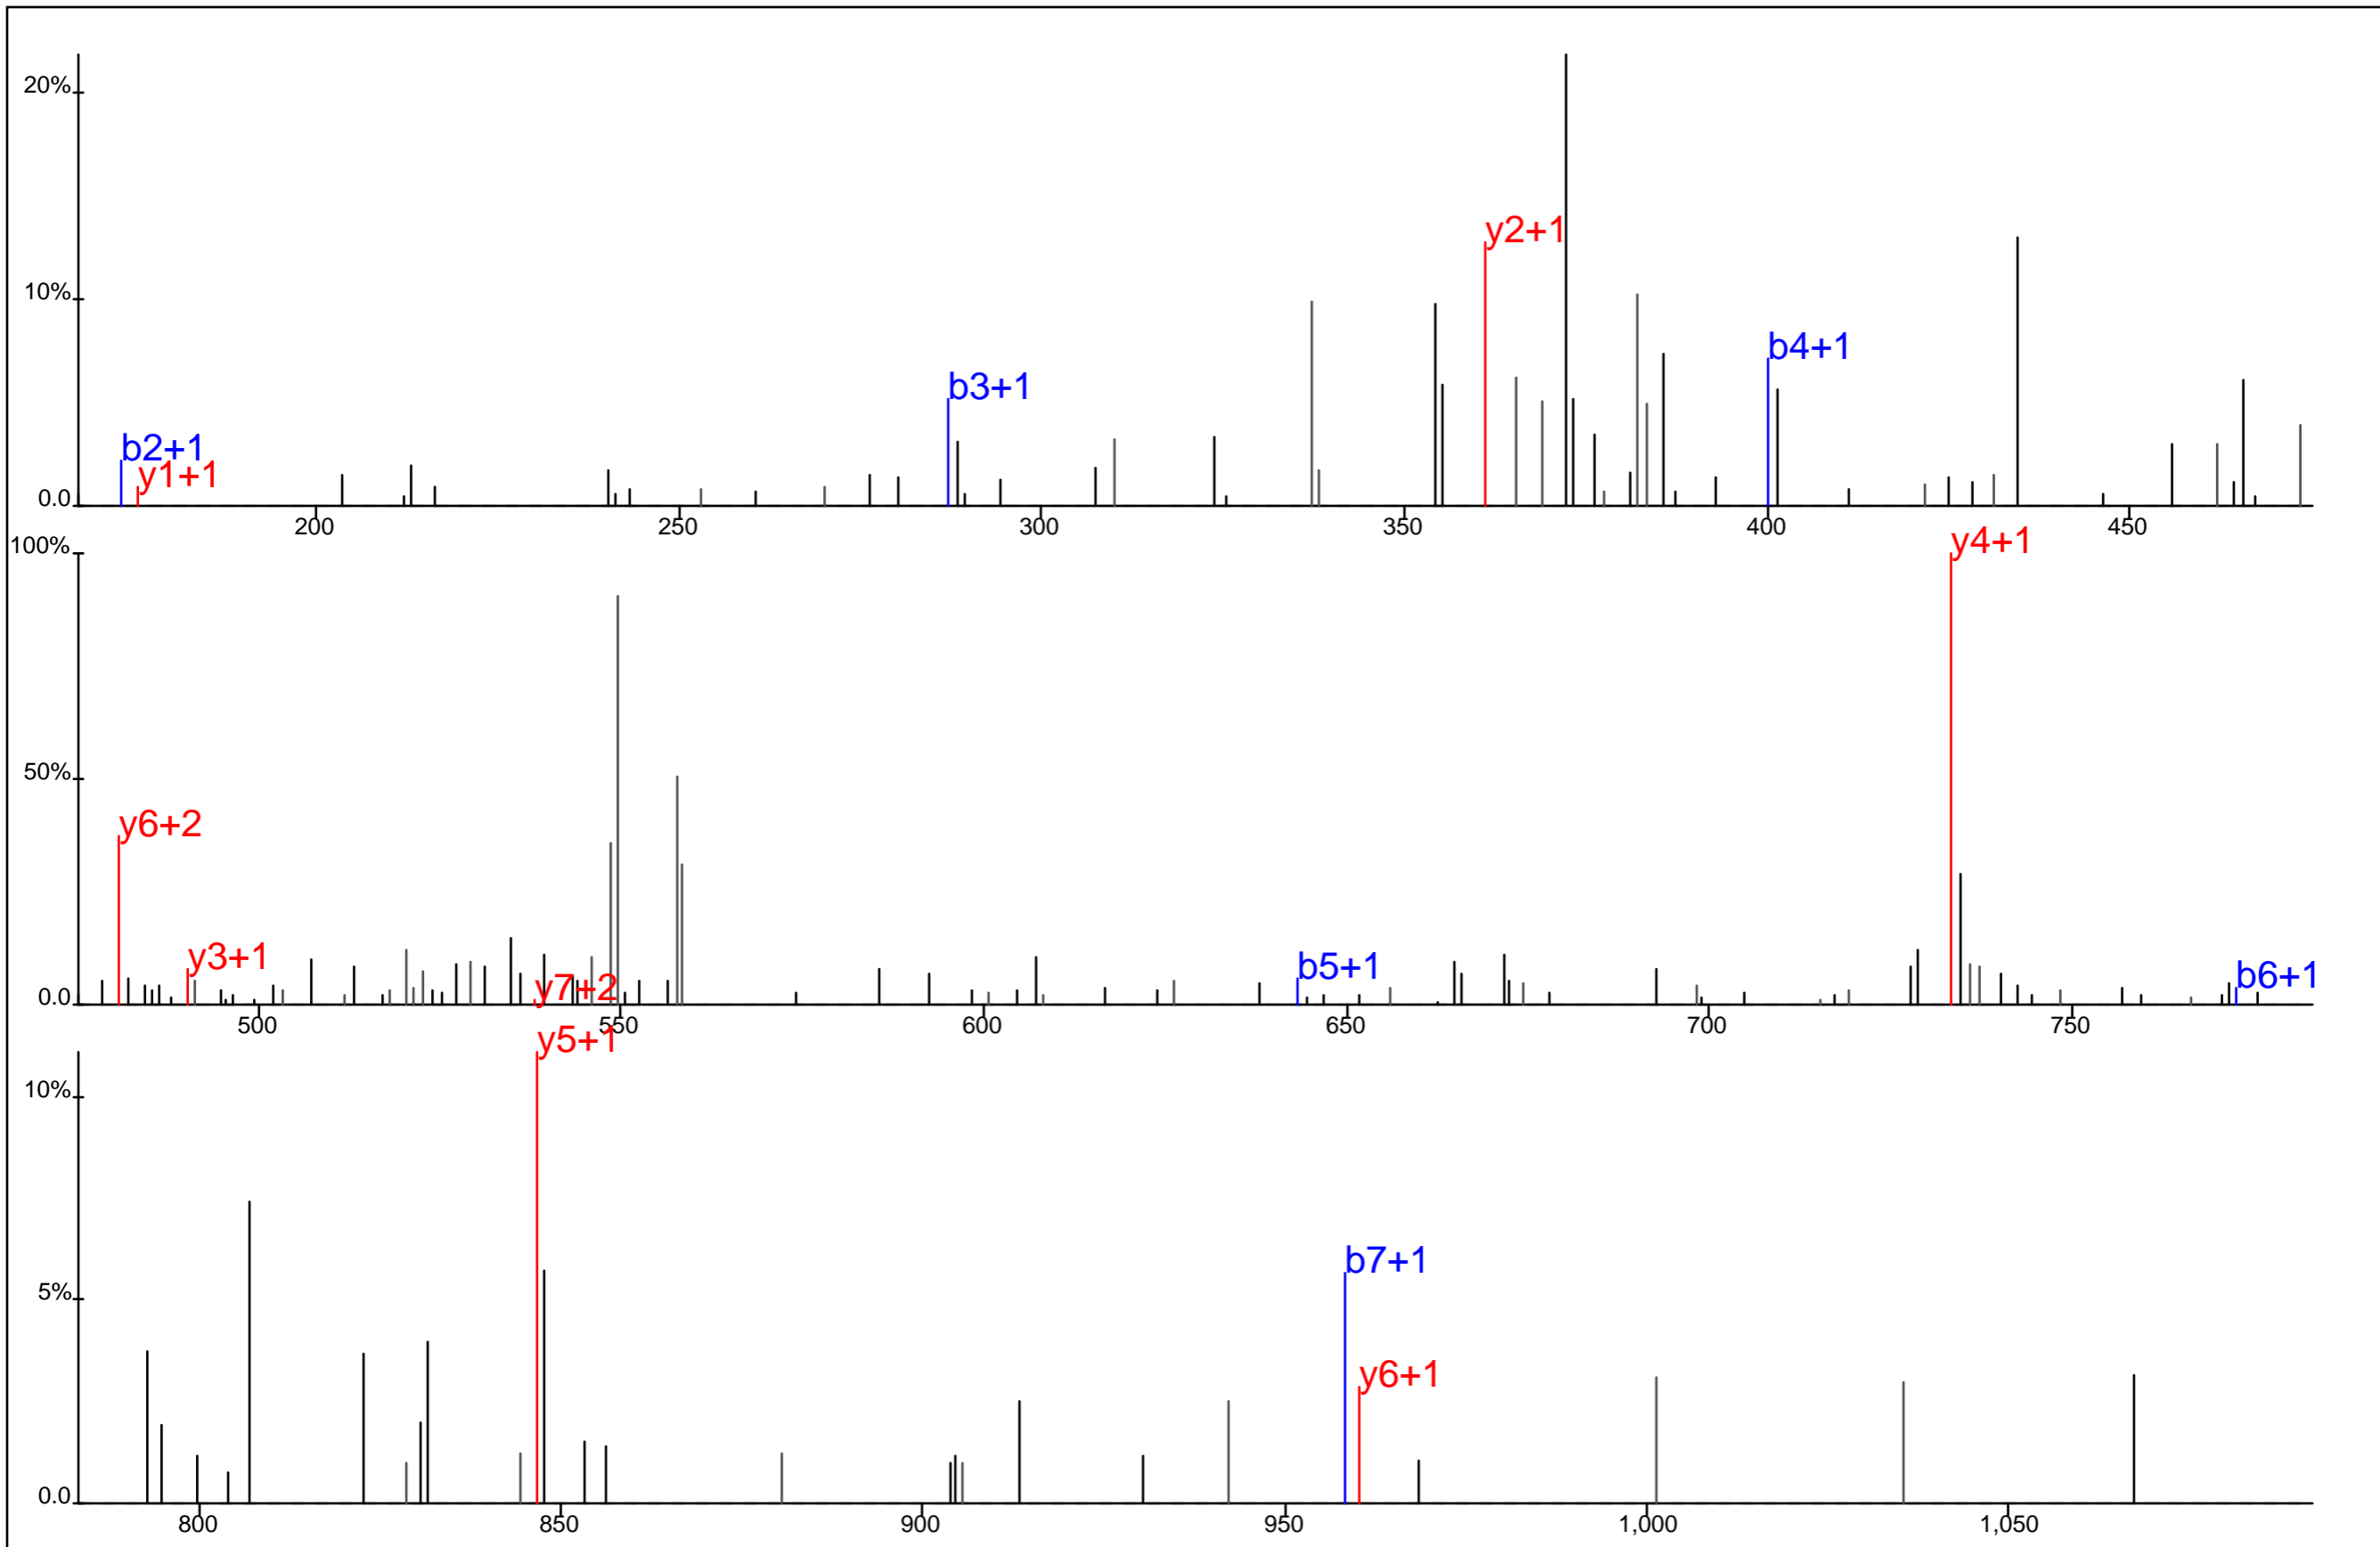

■ ■ ■ ■ ■ ■  
 G D N I Y\* E W R  
■ ■ ■ ■ ■ ■

Protein Name: Ubiquitin conjugating enzyme  
 gi Accession: 22749327  
 Precursor Mass: 566.7278+2  
 Delta Mass: 2.118 ppm  
 XCorr: 17.33

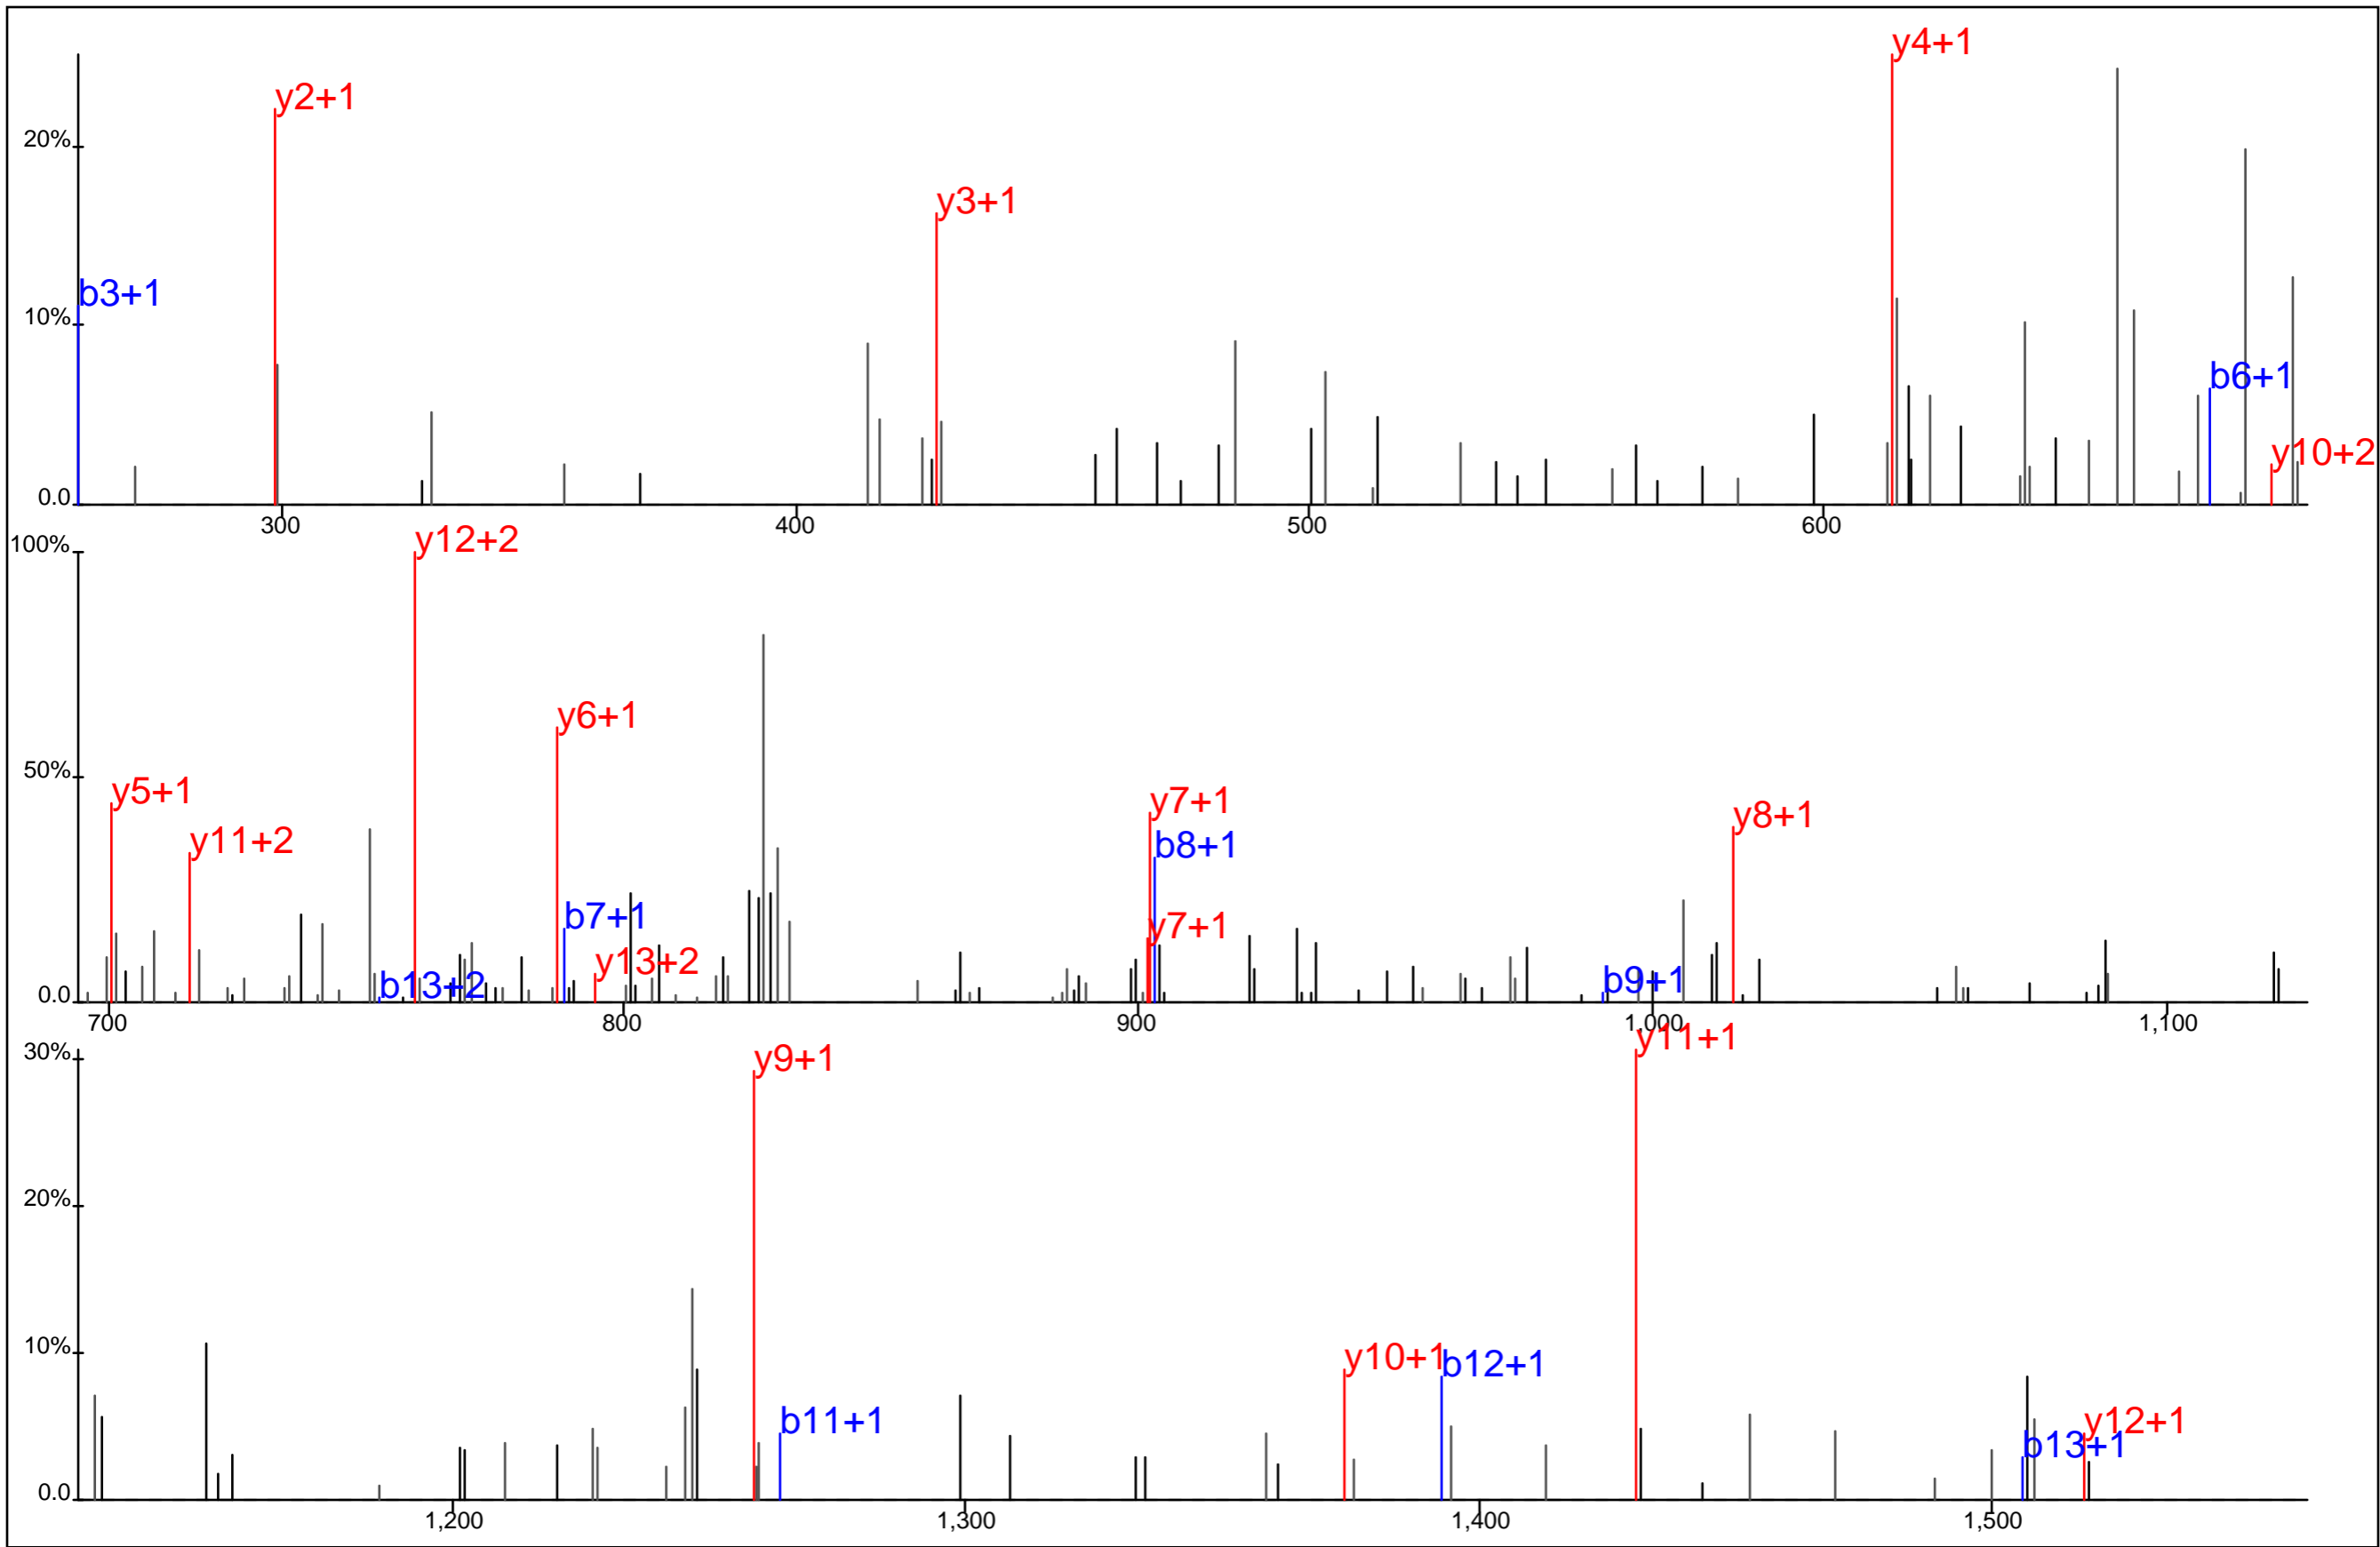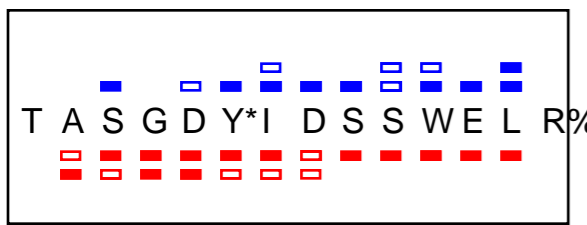

Protein Name: URP2  
 gi Accession: 41281905  
 Precursor Mass: 845.3568+2  
 Delta Mass: 1.833 ppm  
 XCorr: 66.62

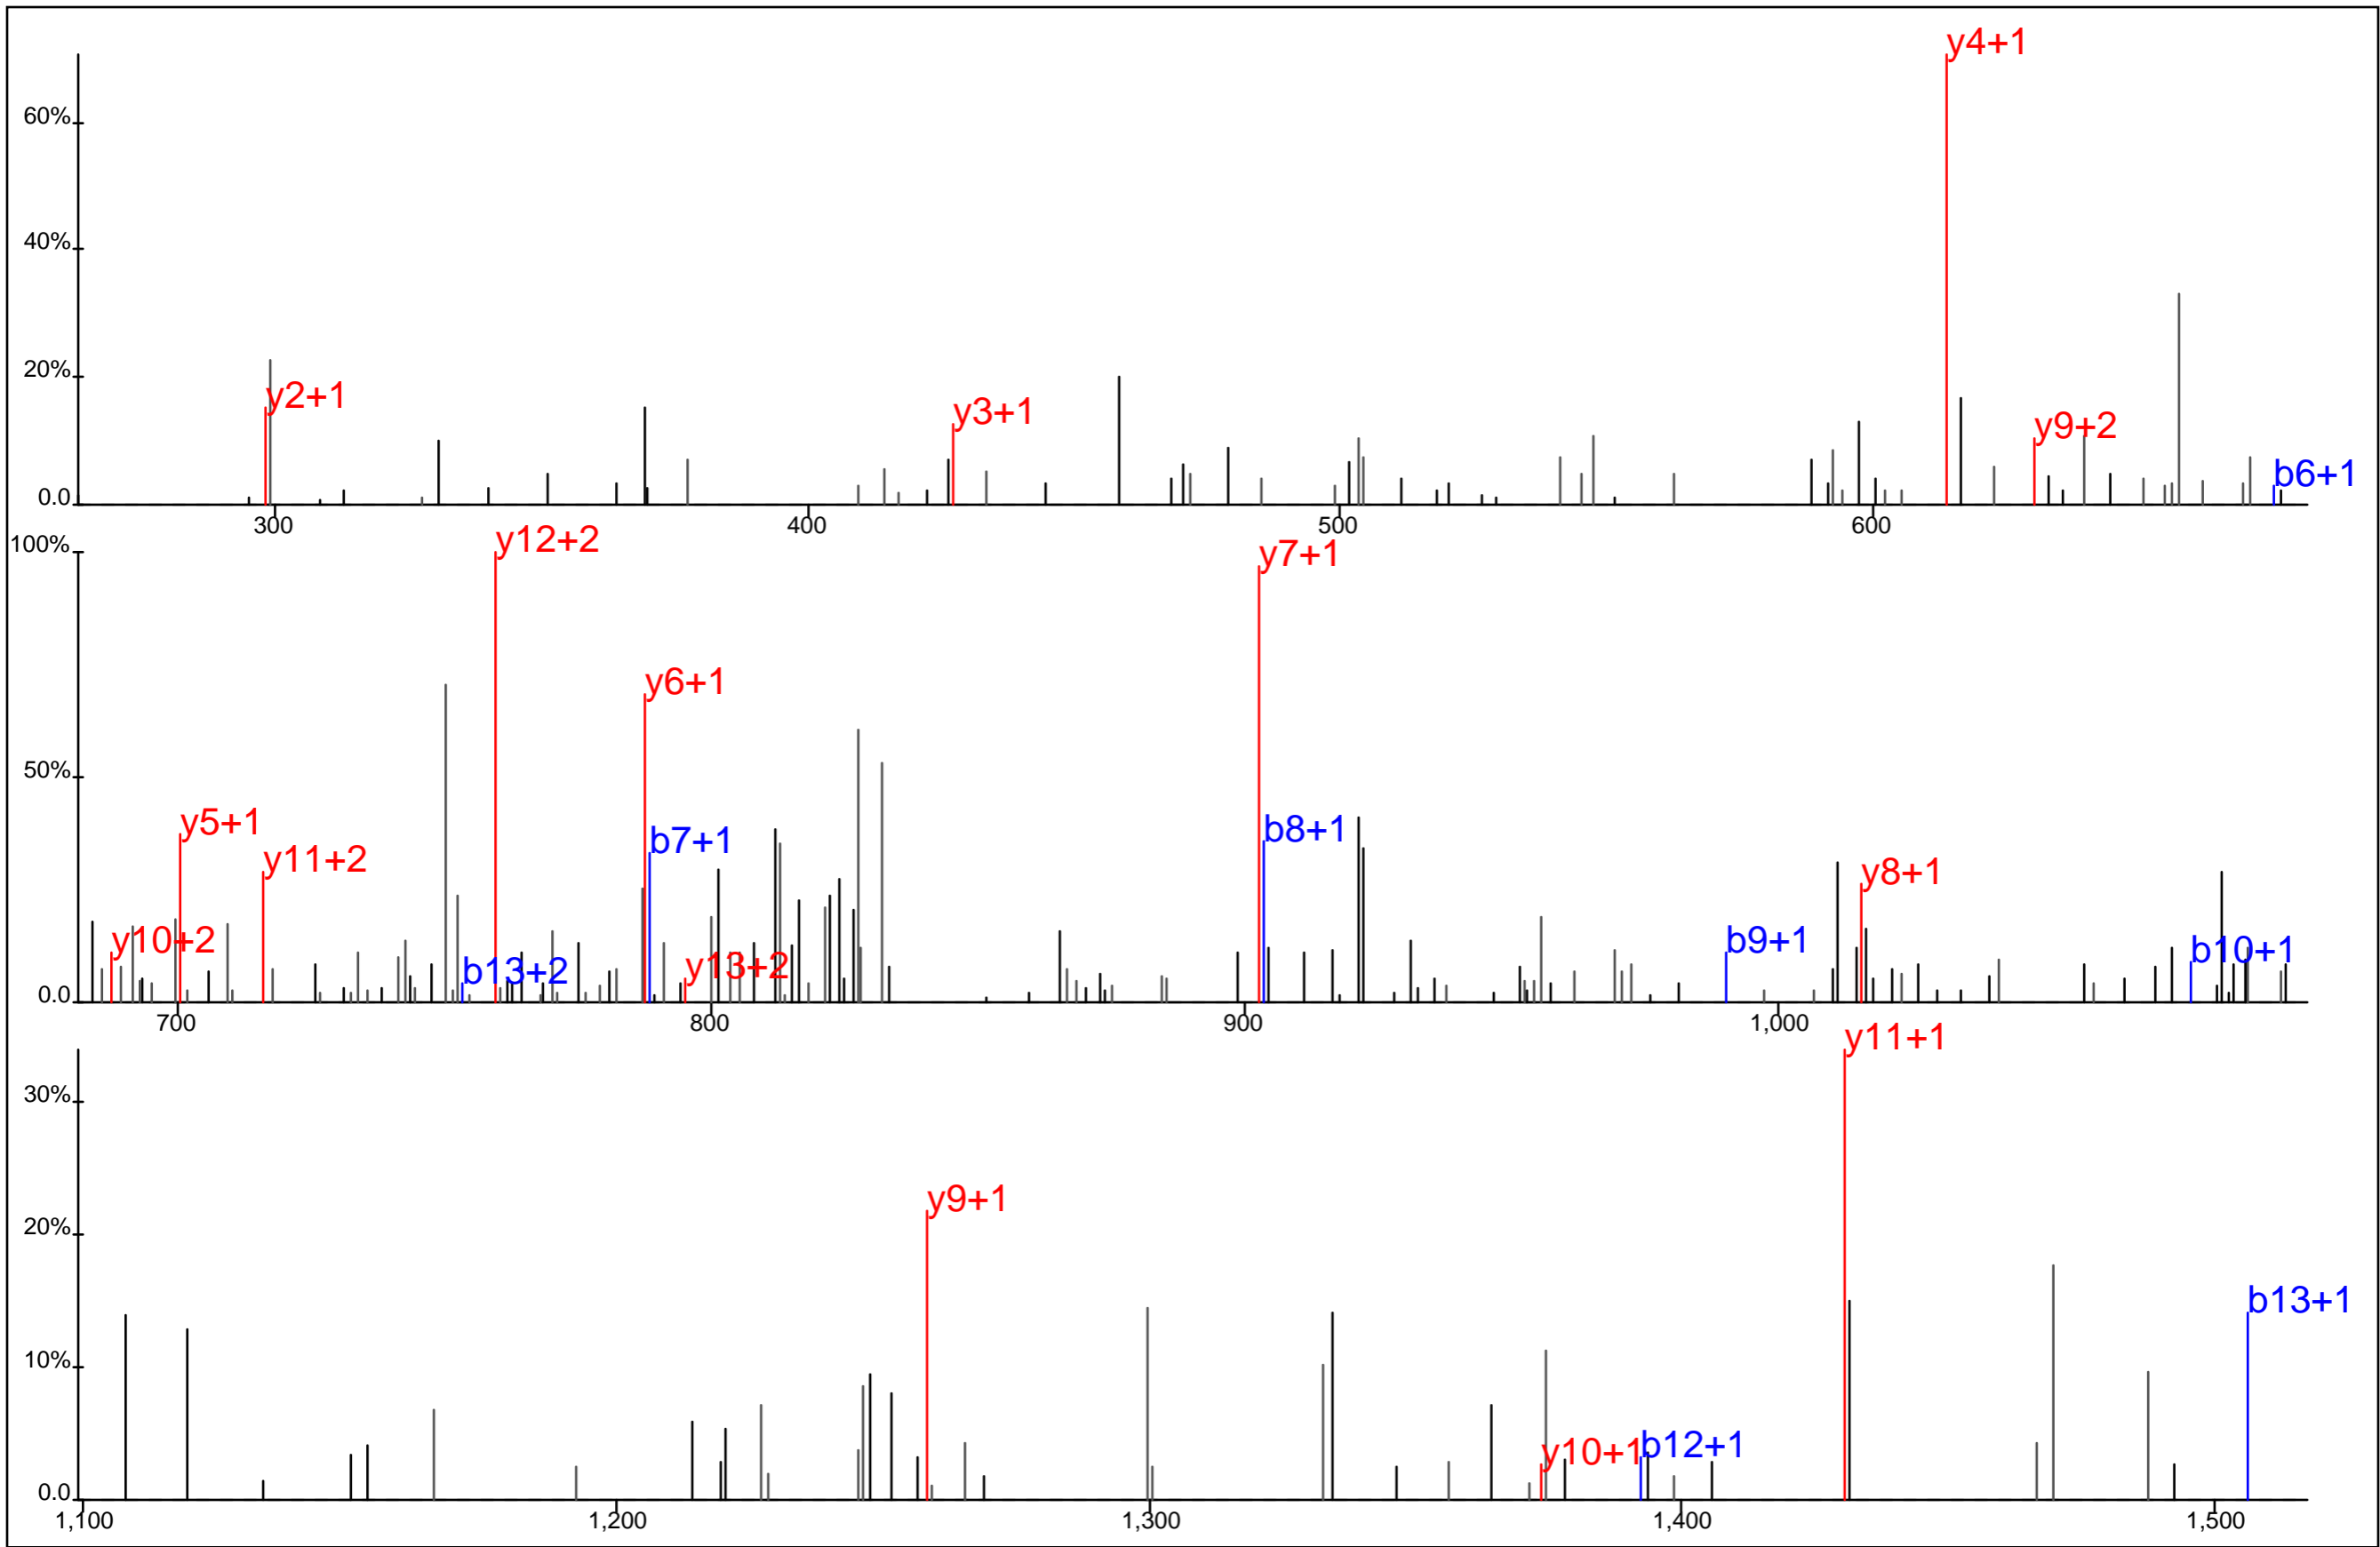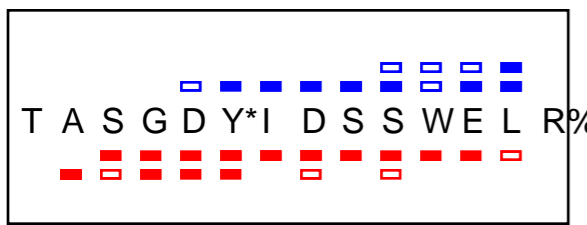

Protein Name: URP2  
 gi Accession: 41281905  
 Precursor Mass: 845.3600+2  
 Delta Mass: 5.663 ppm  
 XCorr: 52.72

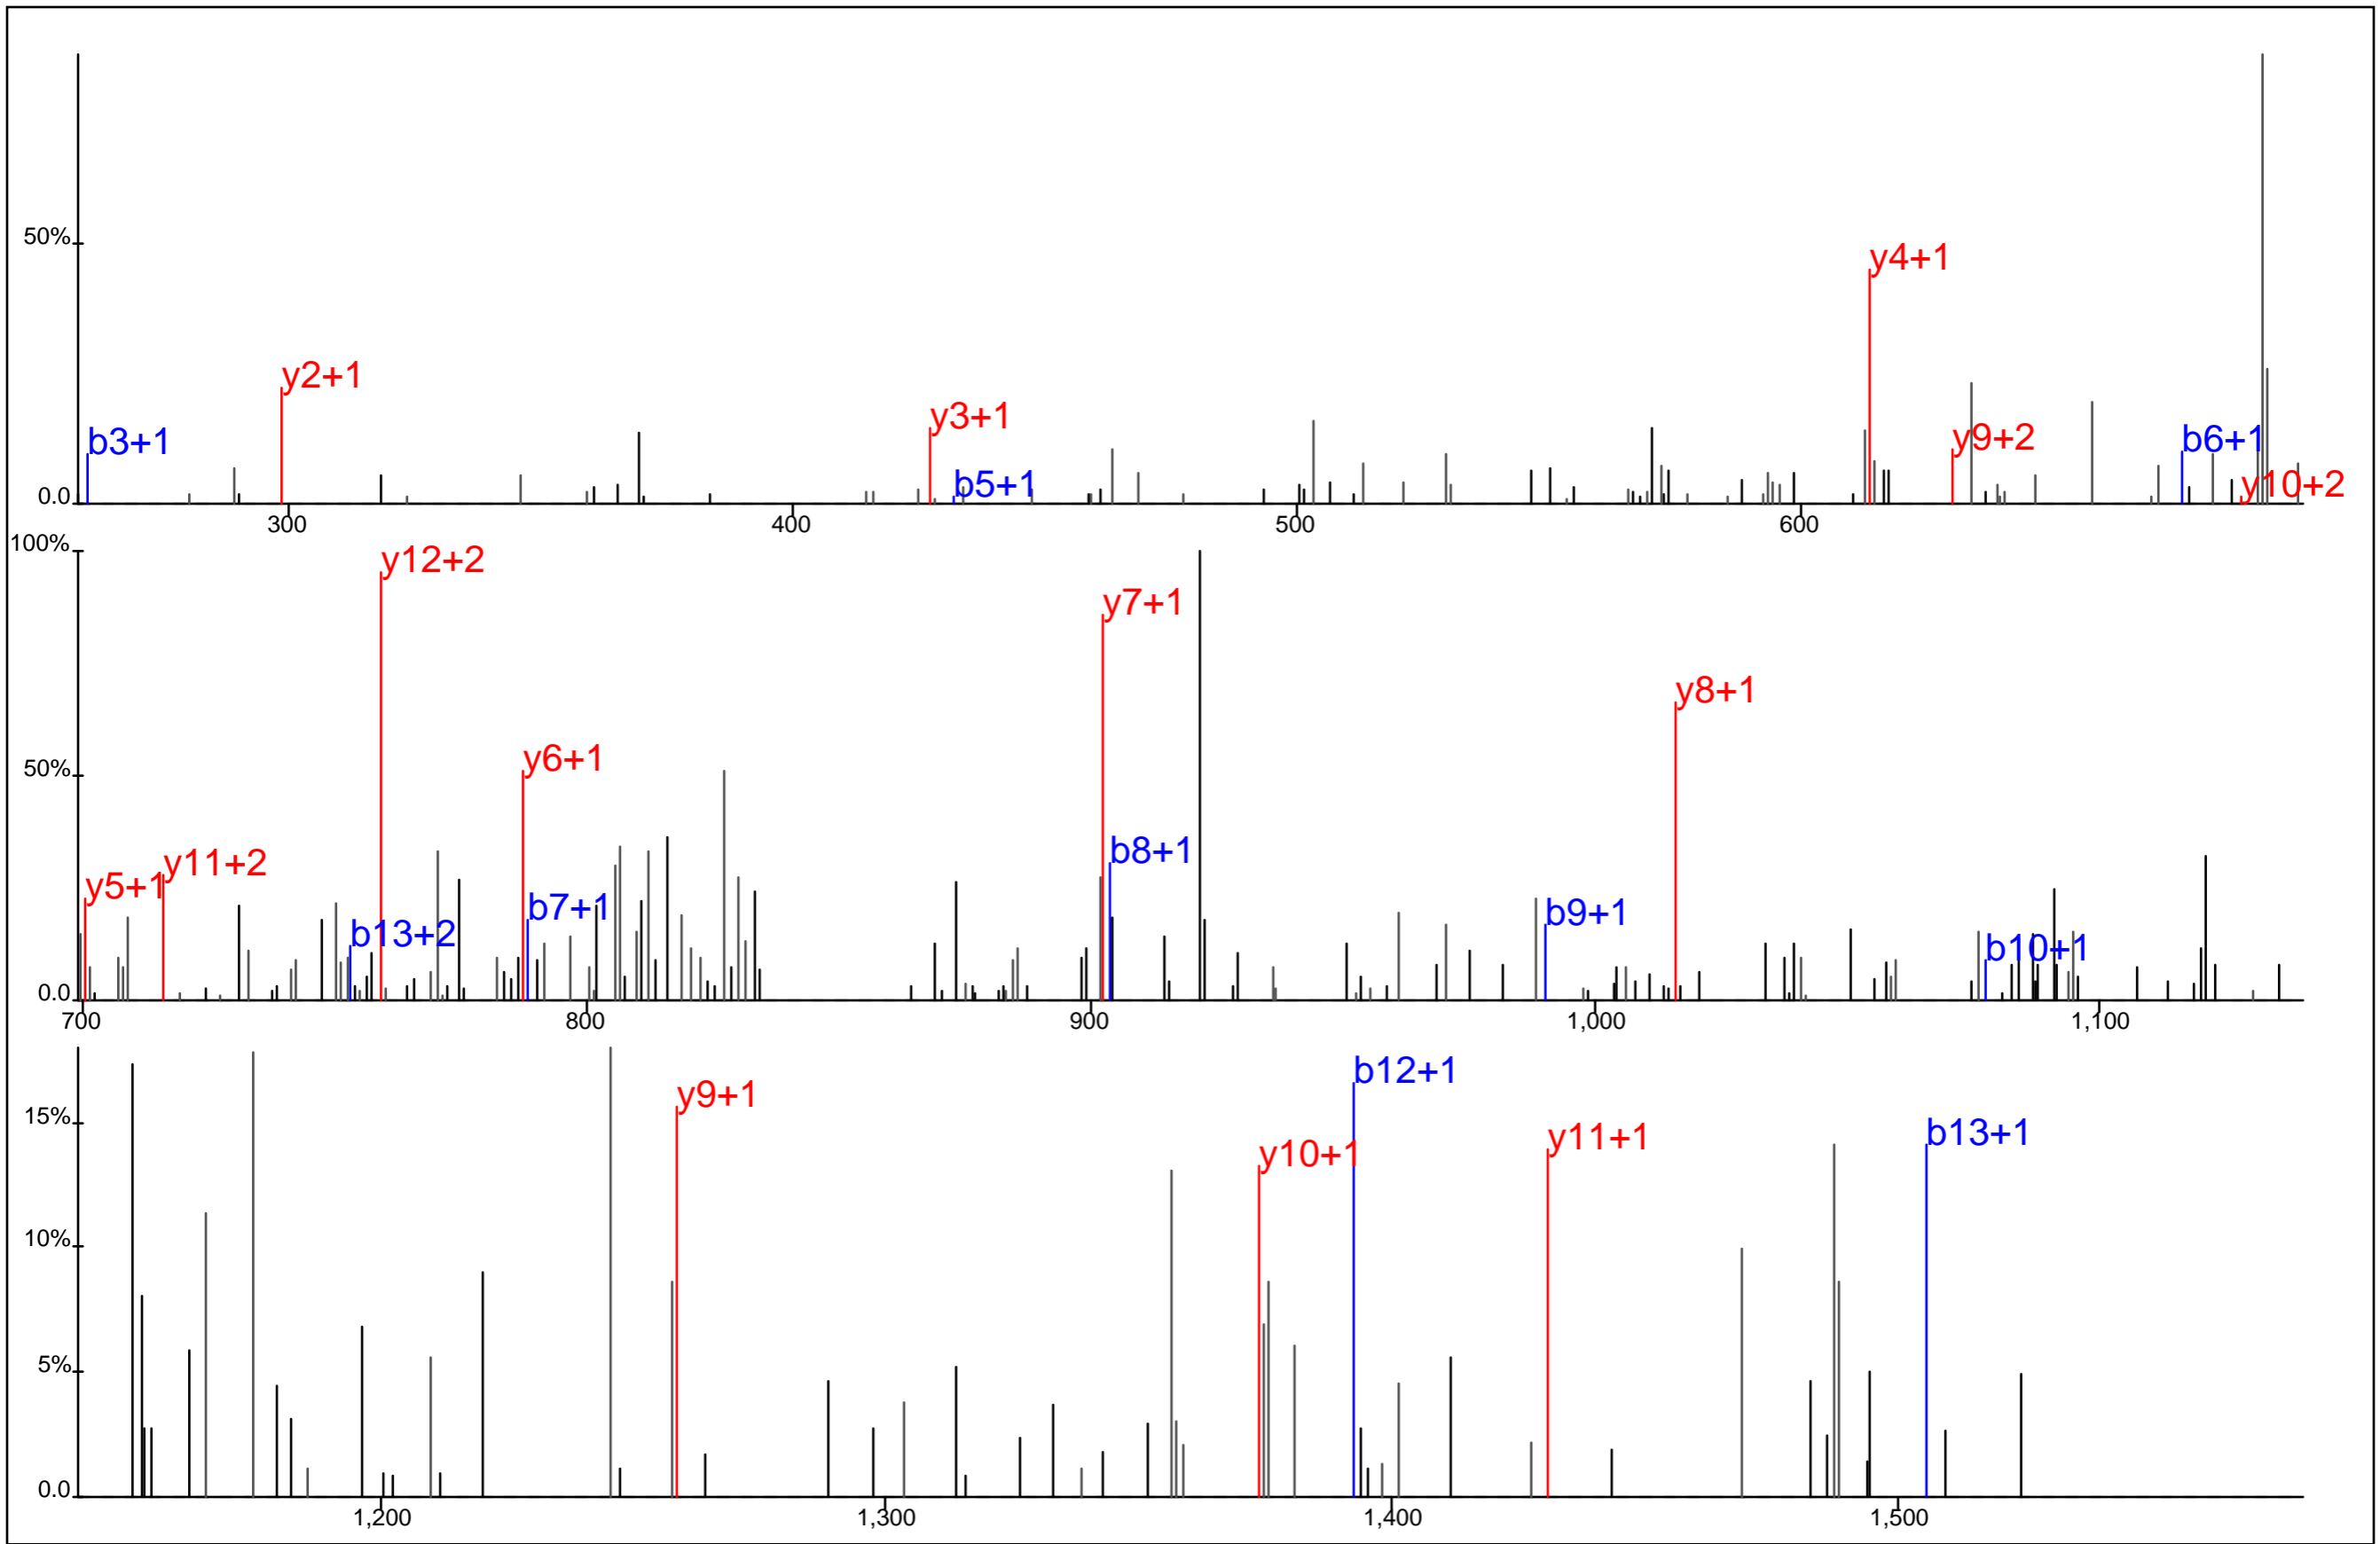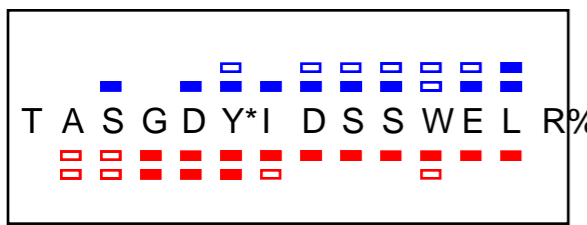

Protein Name: URP2  
 gi Accession: 41281905  
 Precursor Mass: 845.3600+2  
 Delta Mass: 5.663 ppm  
 XCorr: 46.51

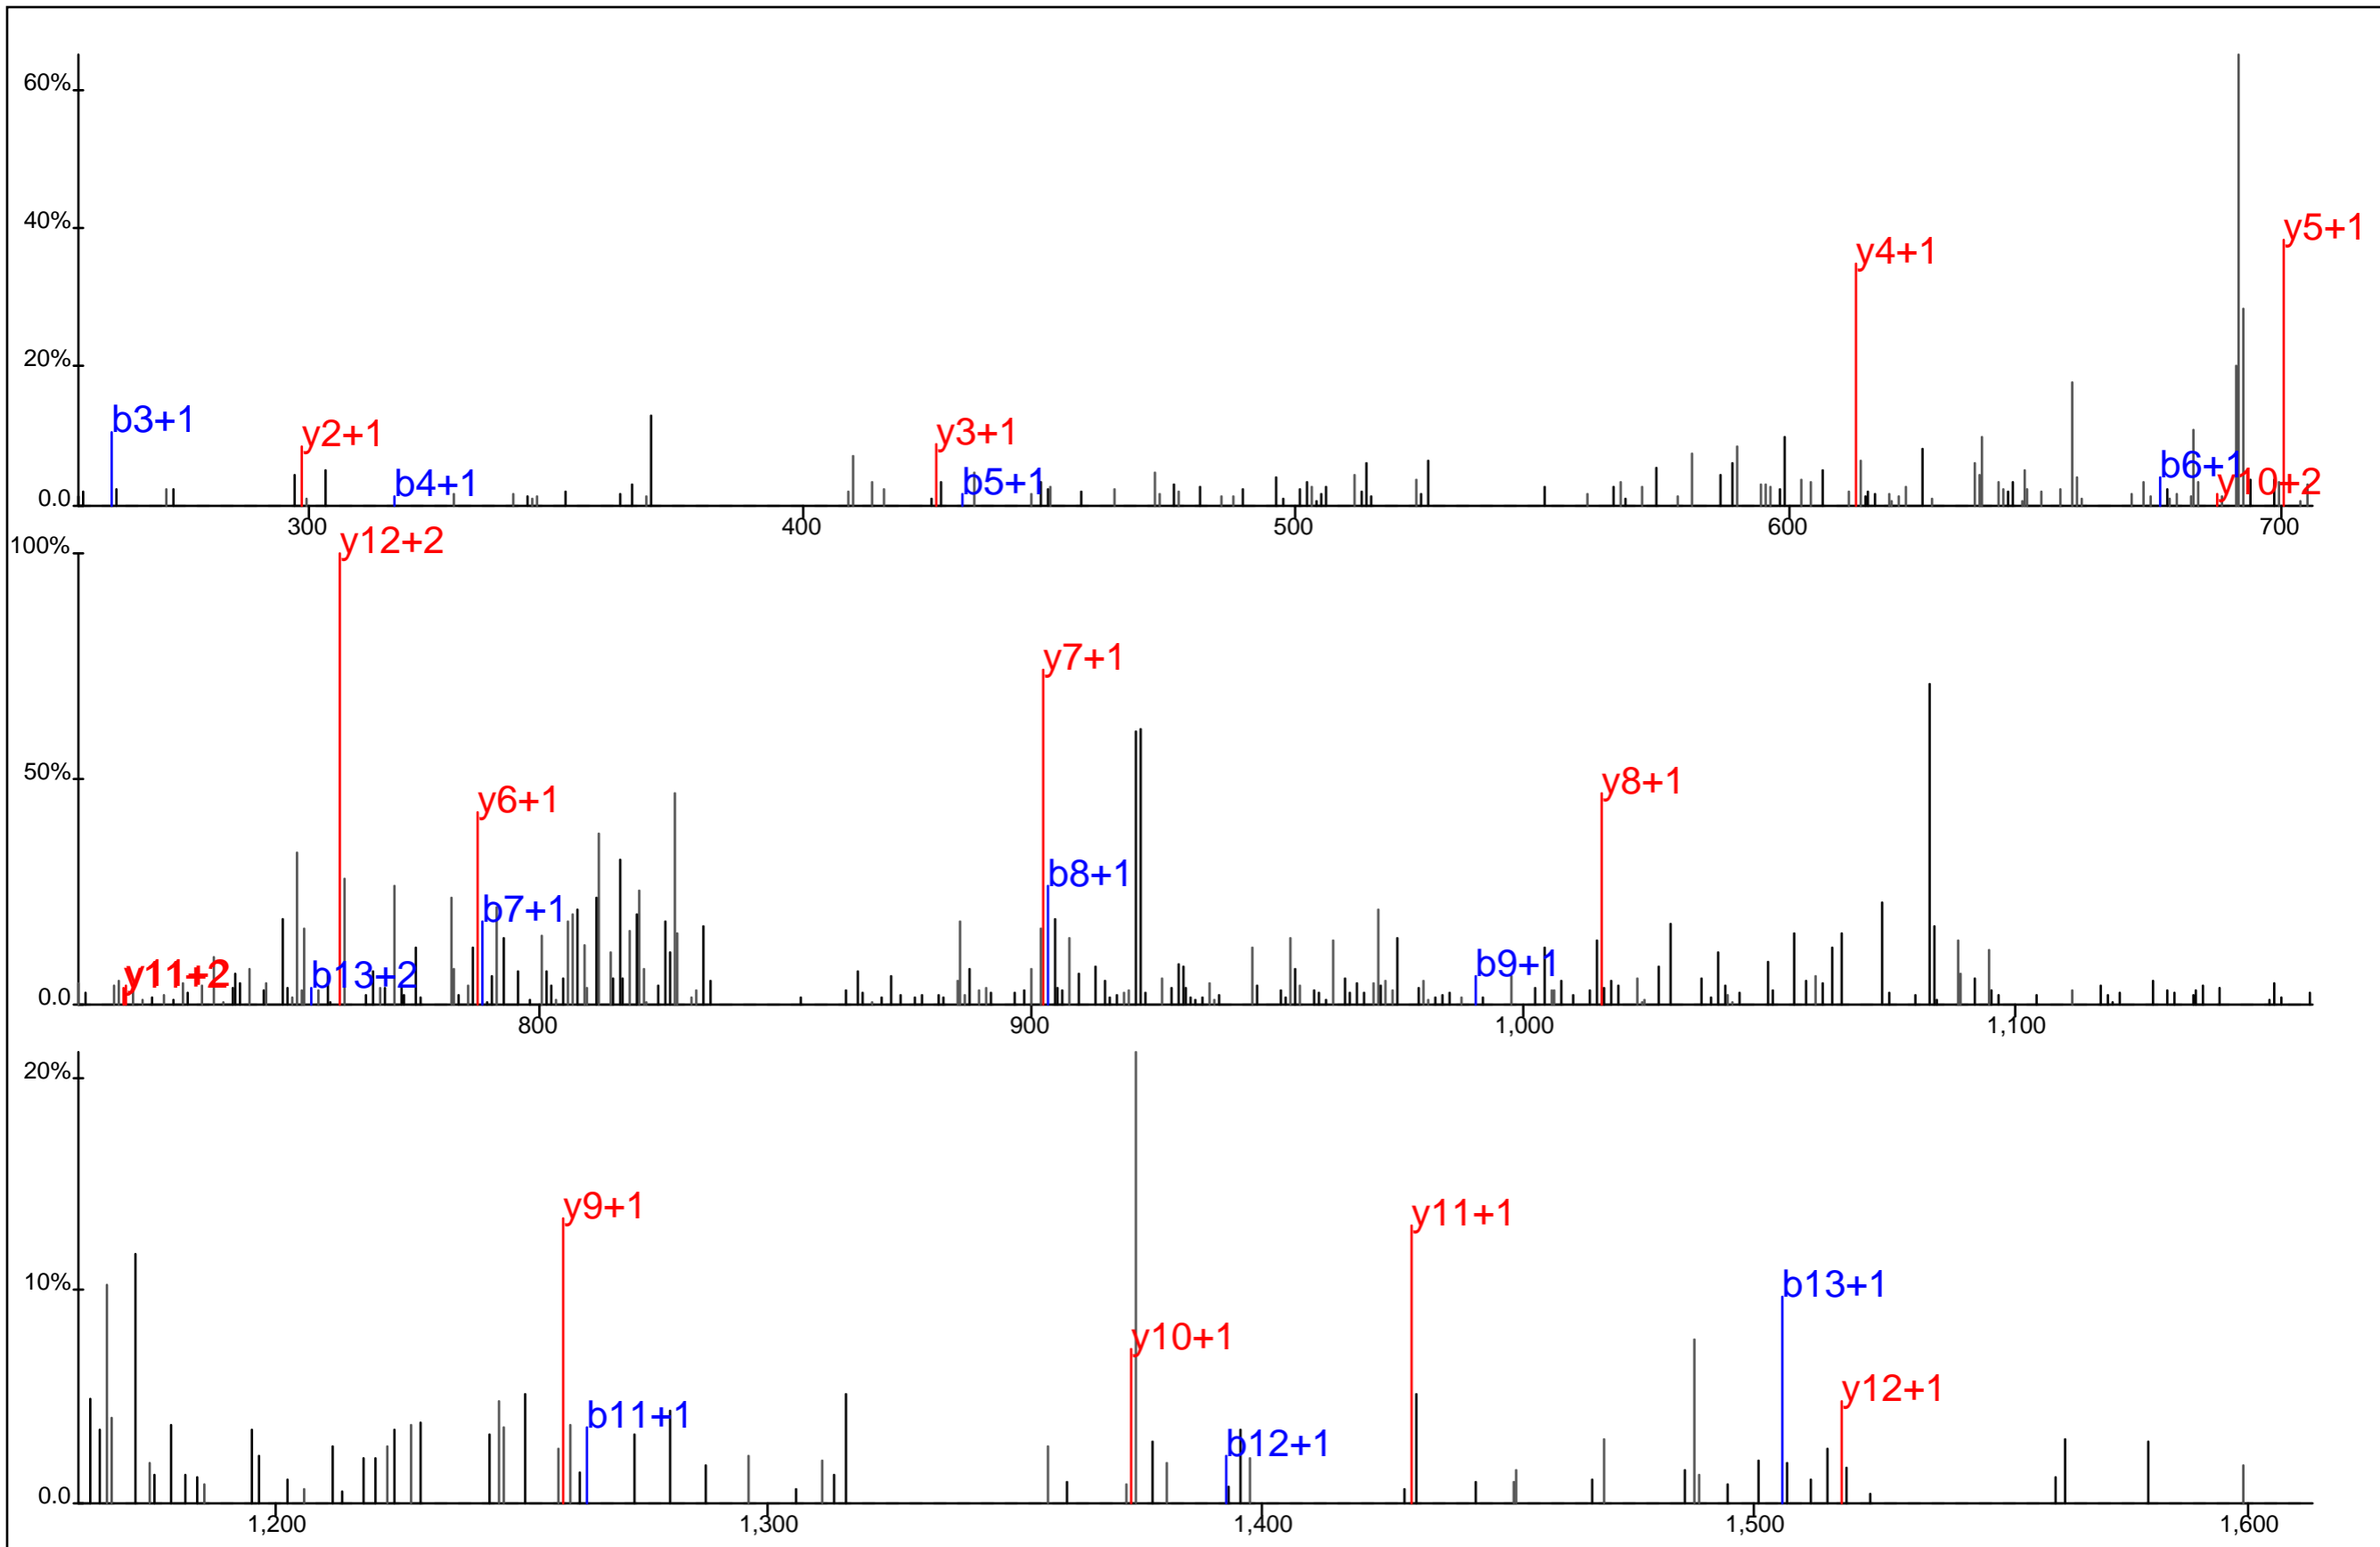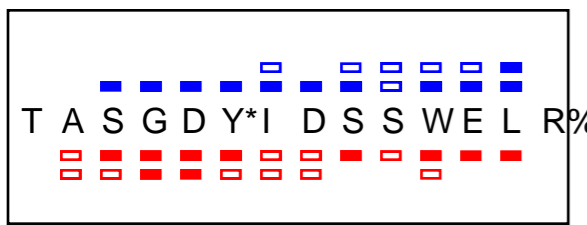

Protein Name: URP2  
 gi Accession: 41281905  
 Precursor Mass: 845.3576+2  
 Delta Mass: 2.845 ppm  
 XCorr: 59.67

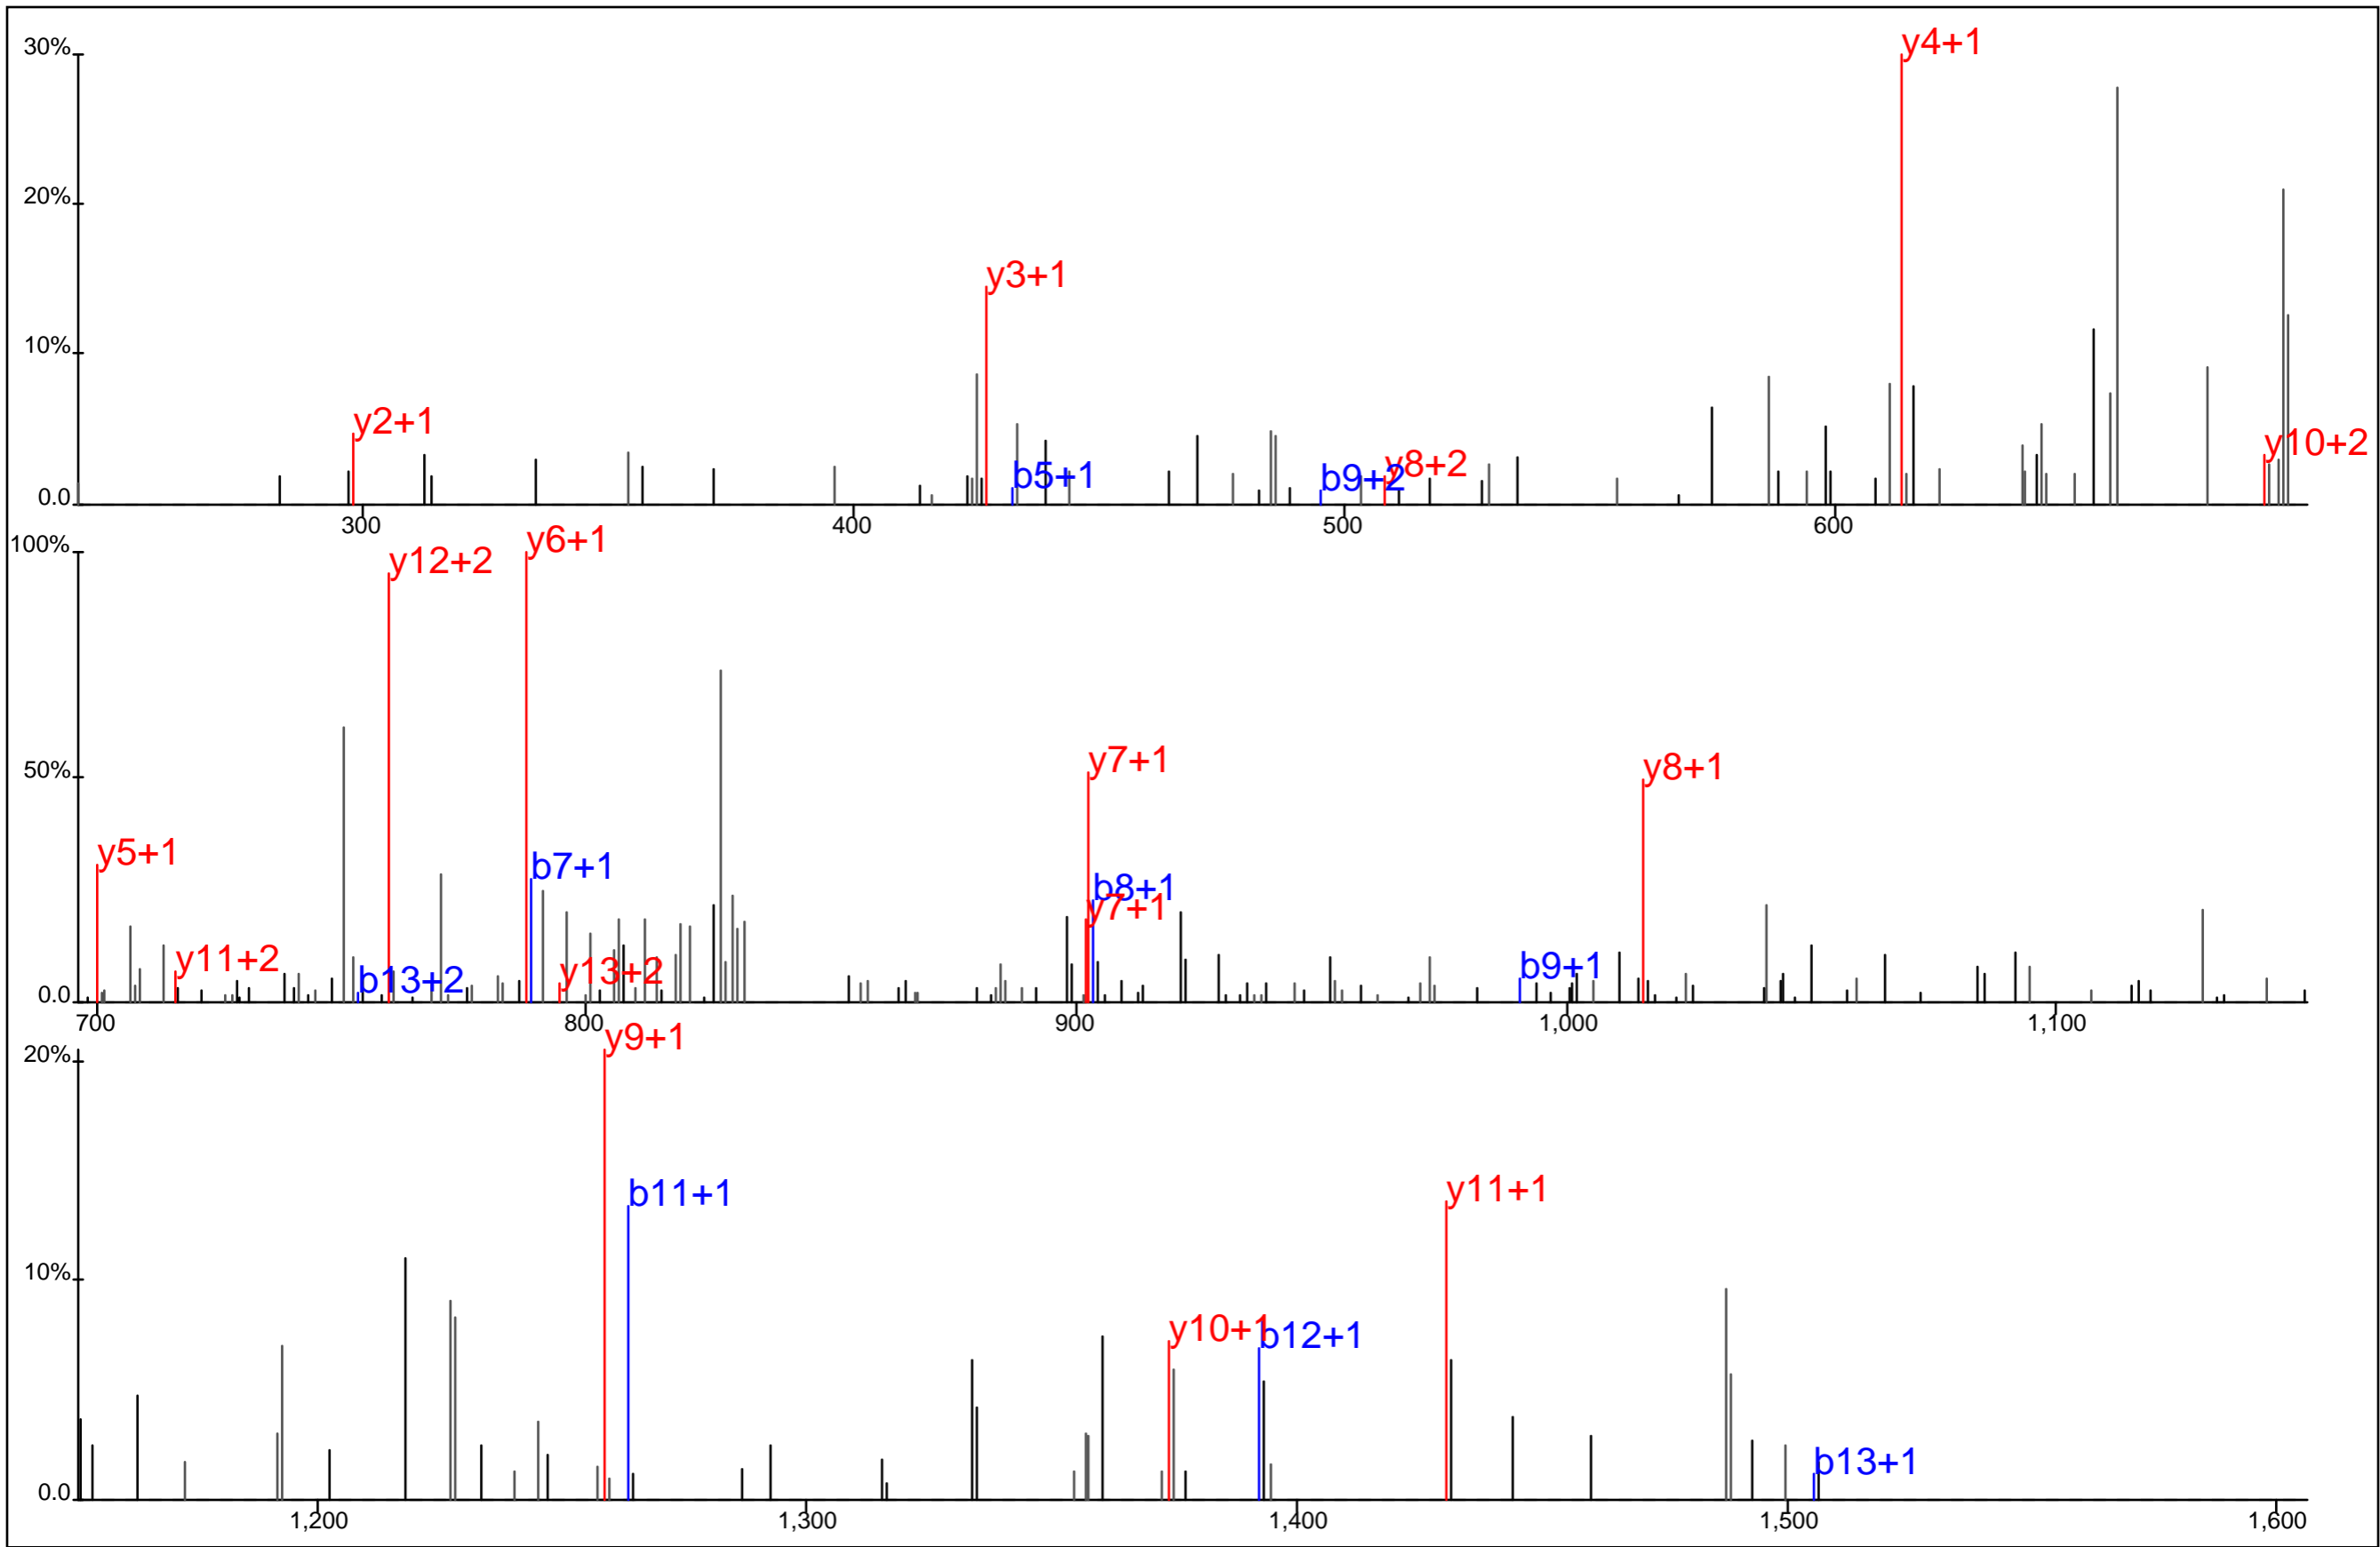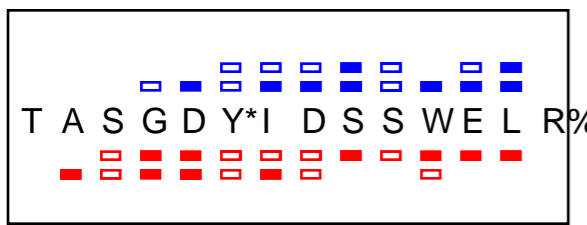

Protein Name: URP2  
 gi Accession: 41281905  
 Precursor Mass: 845.3577+2  
 Delta Mass: 2.993 ppm  
 XCorr: 66.48



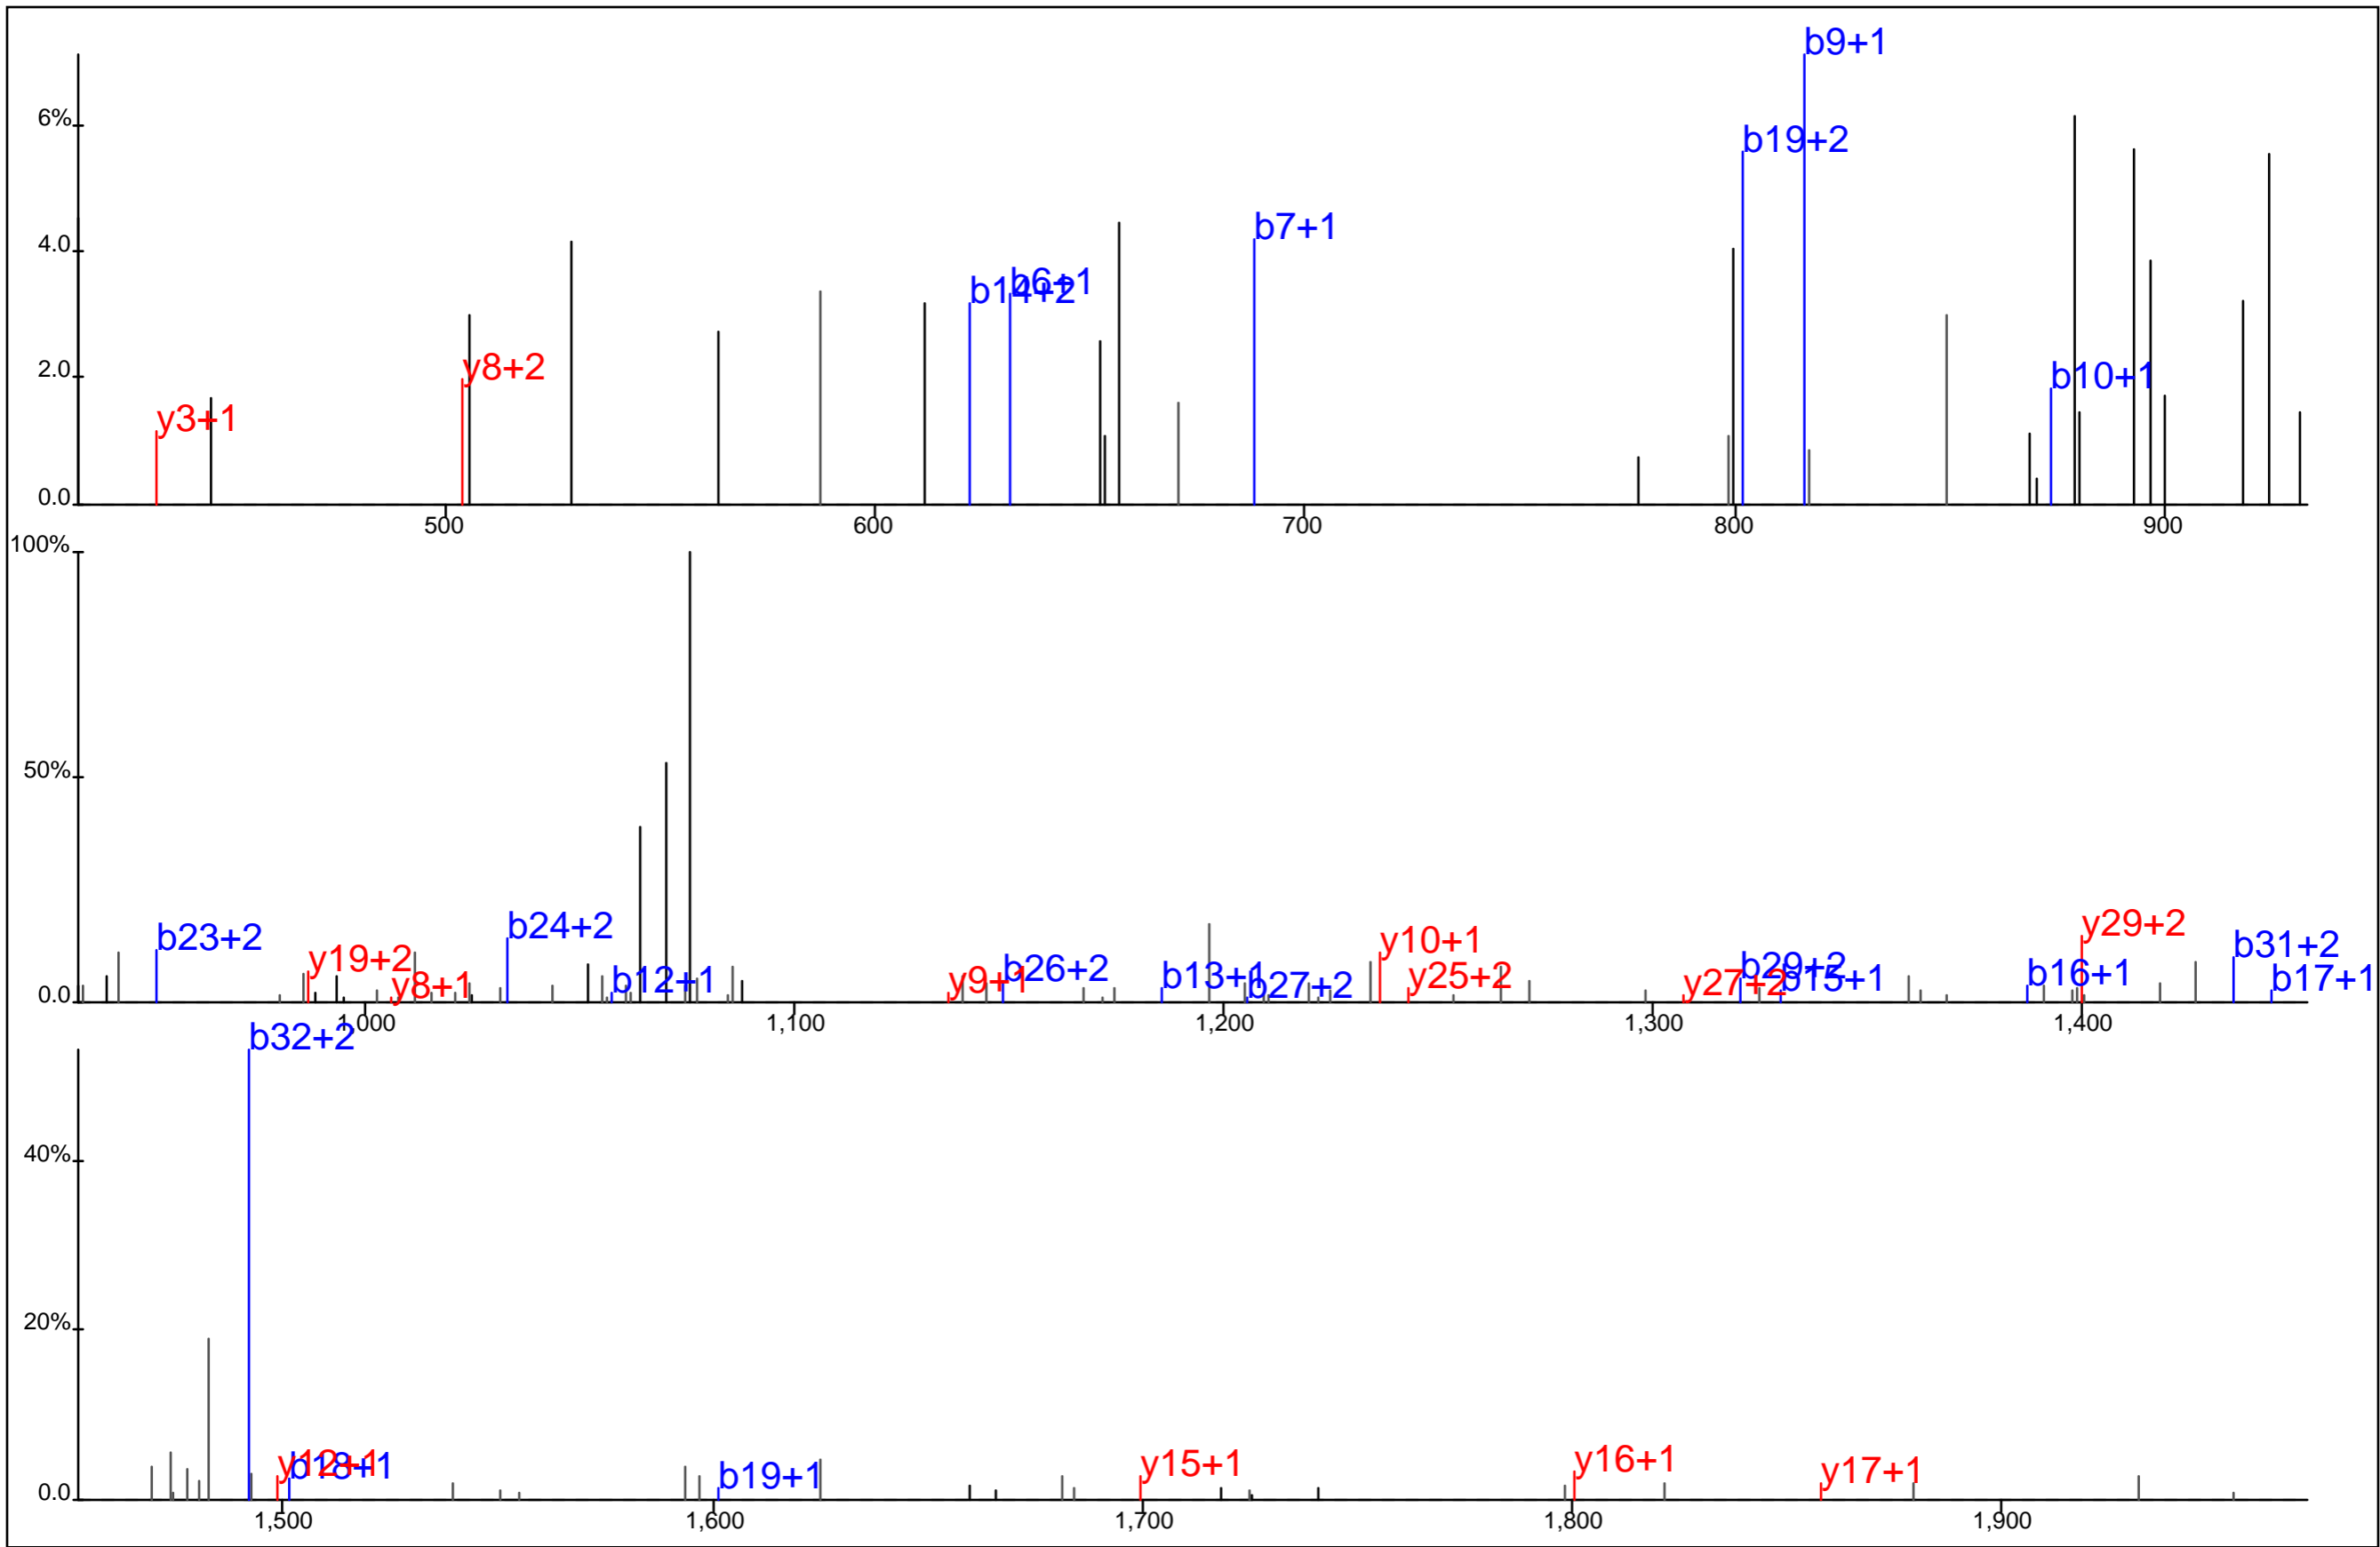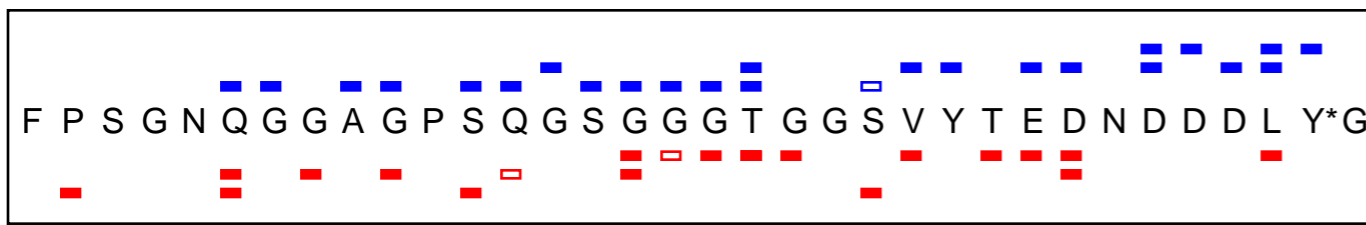

Protein Name: Valosin containing protein  
 gi Accession: 6005942  
 Precursor Mass: 1,100.7711+3  
 Delta Mass: 3.465 ppm  
 XCorr: 47.07

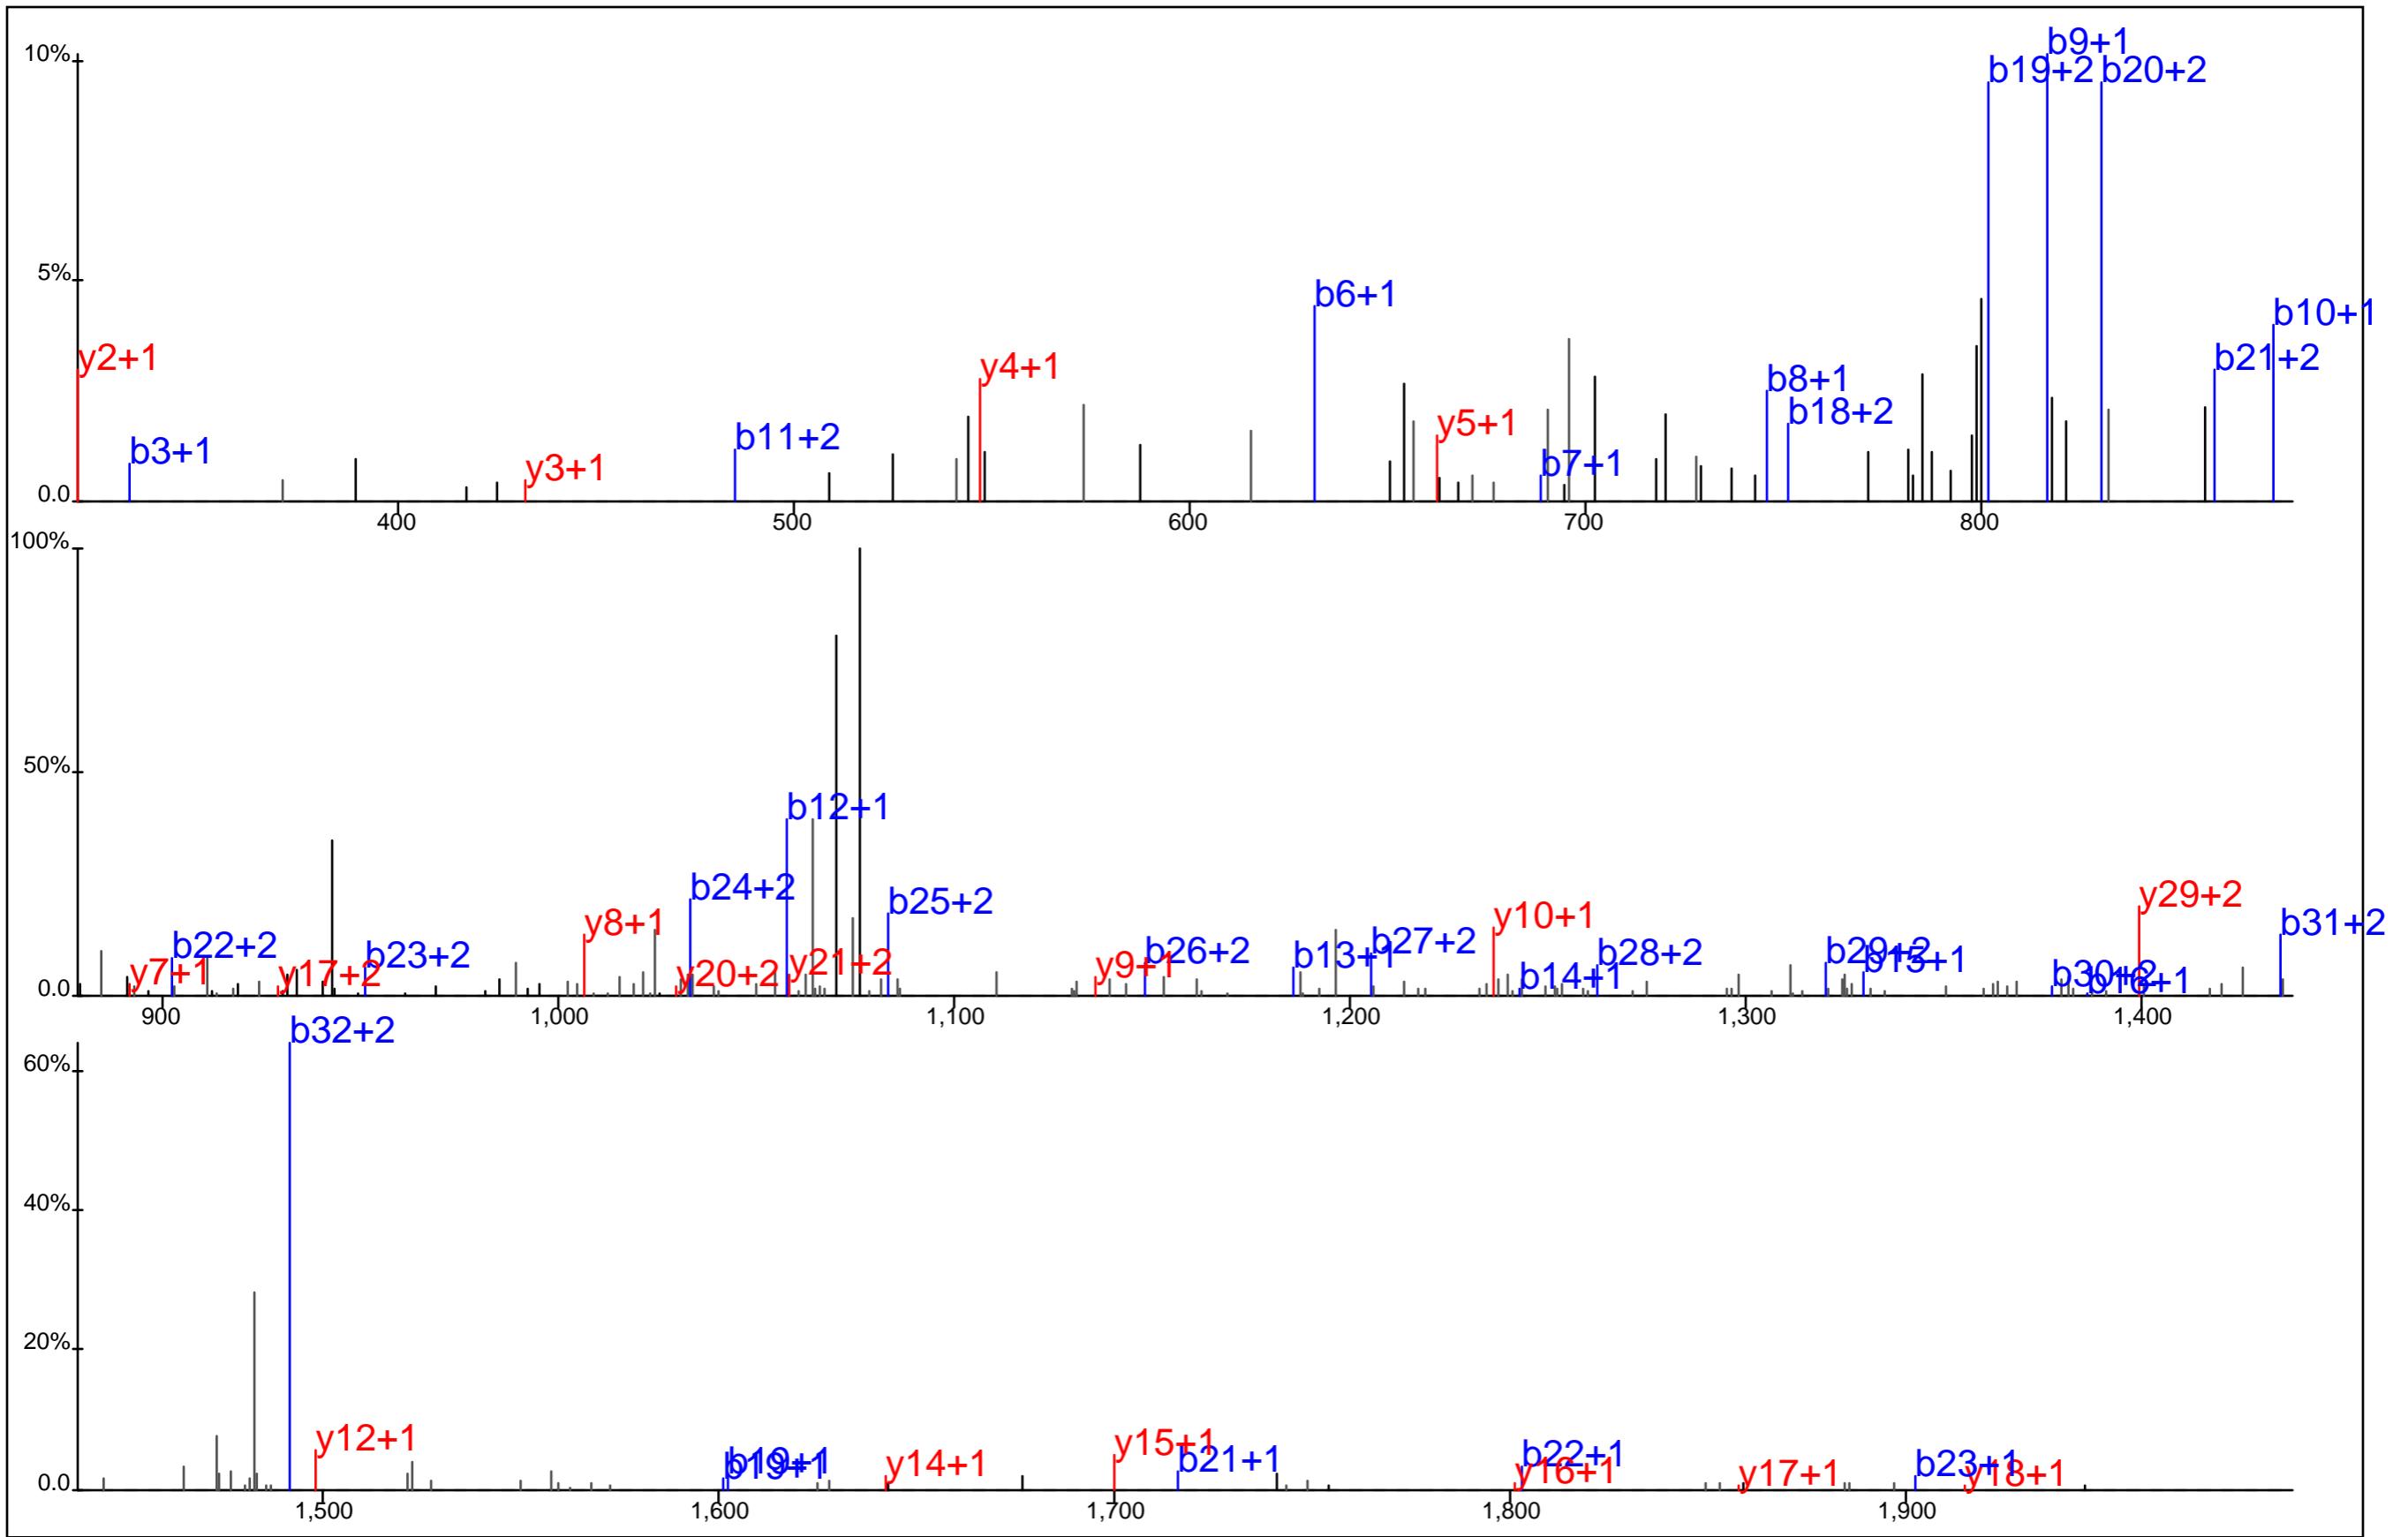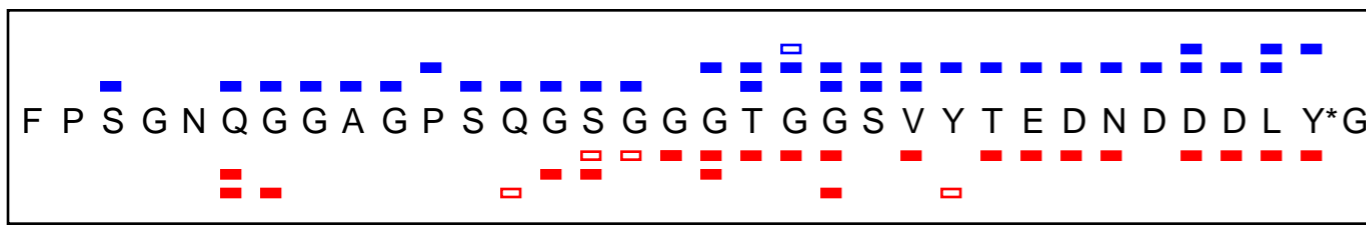

Protein Name: Valosin containing protein  
 gi Accession: 6005942  
 Precursor Mass: 1,100.7733+3  
 Delta Mass: 5.463 ppm  
 XCorr: 80.89

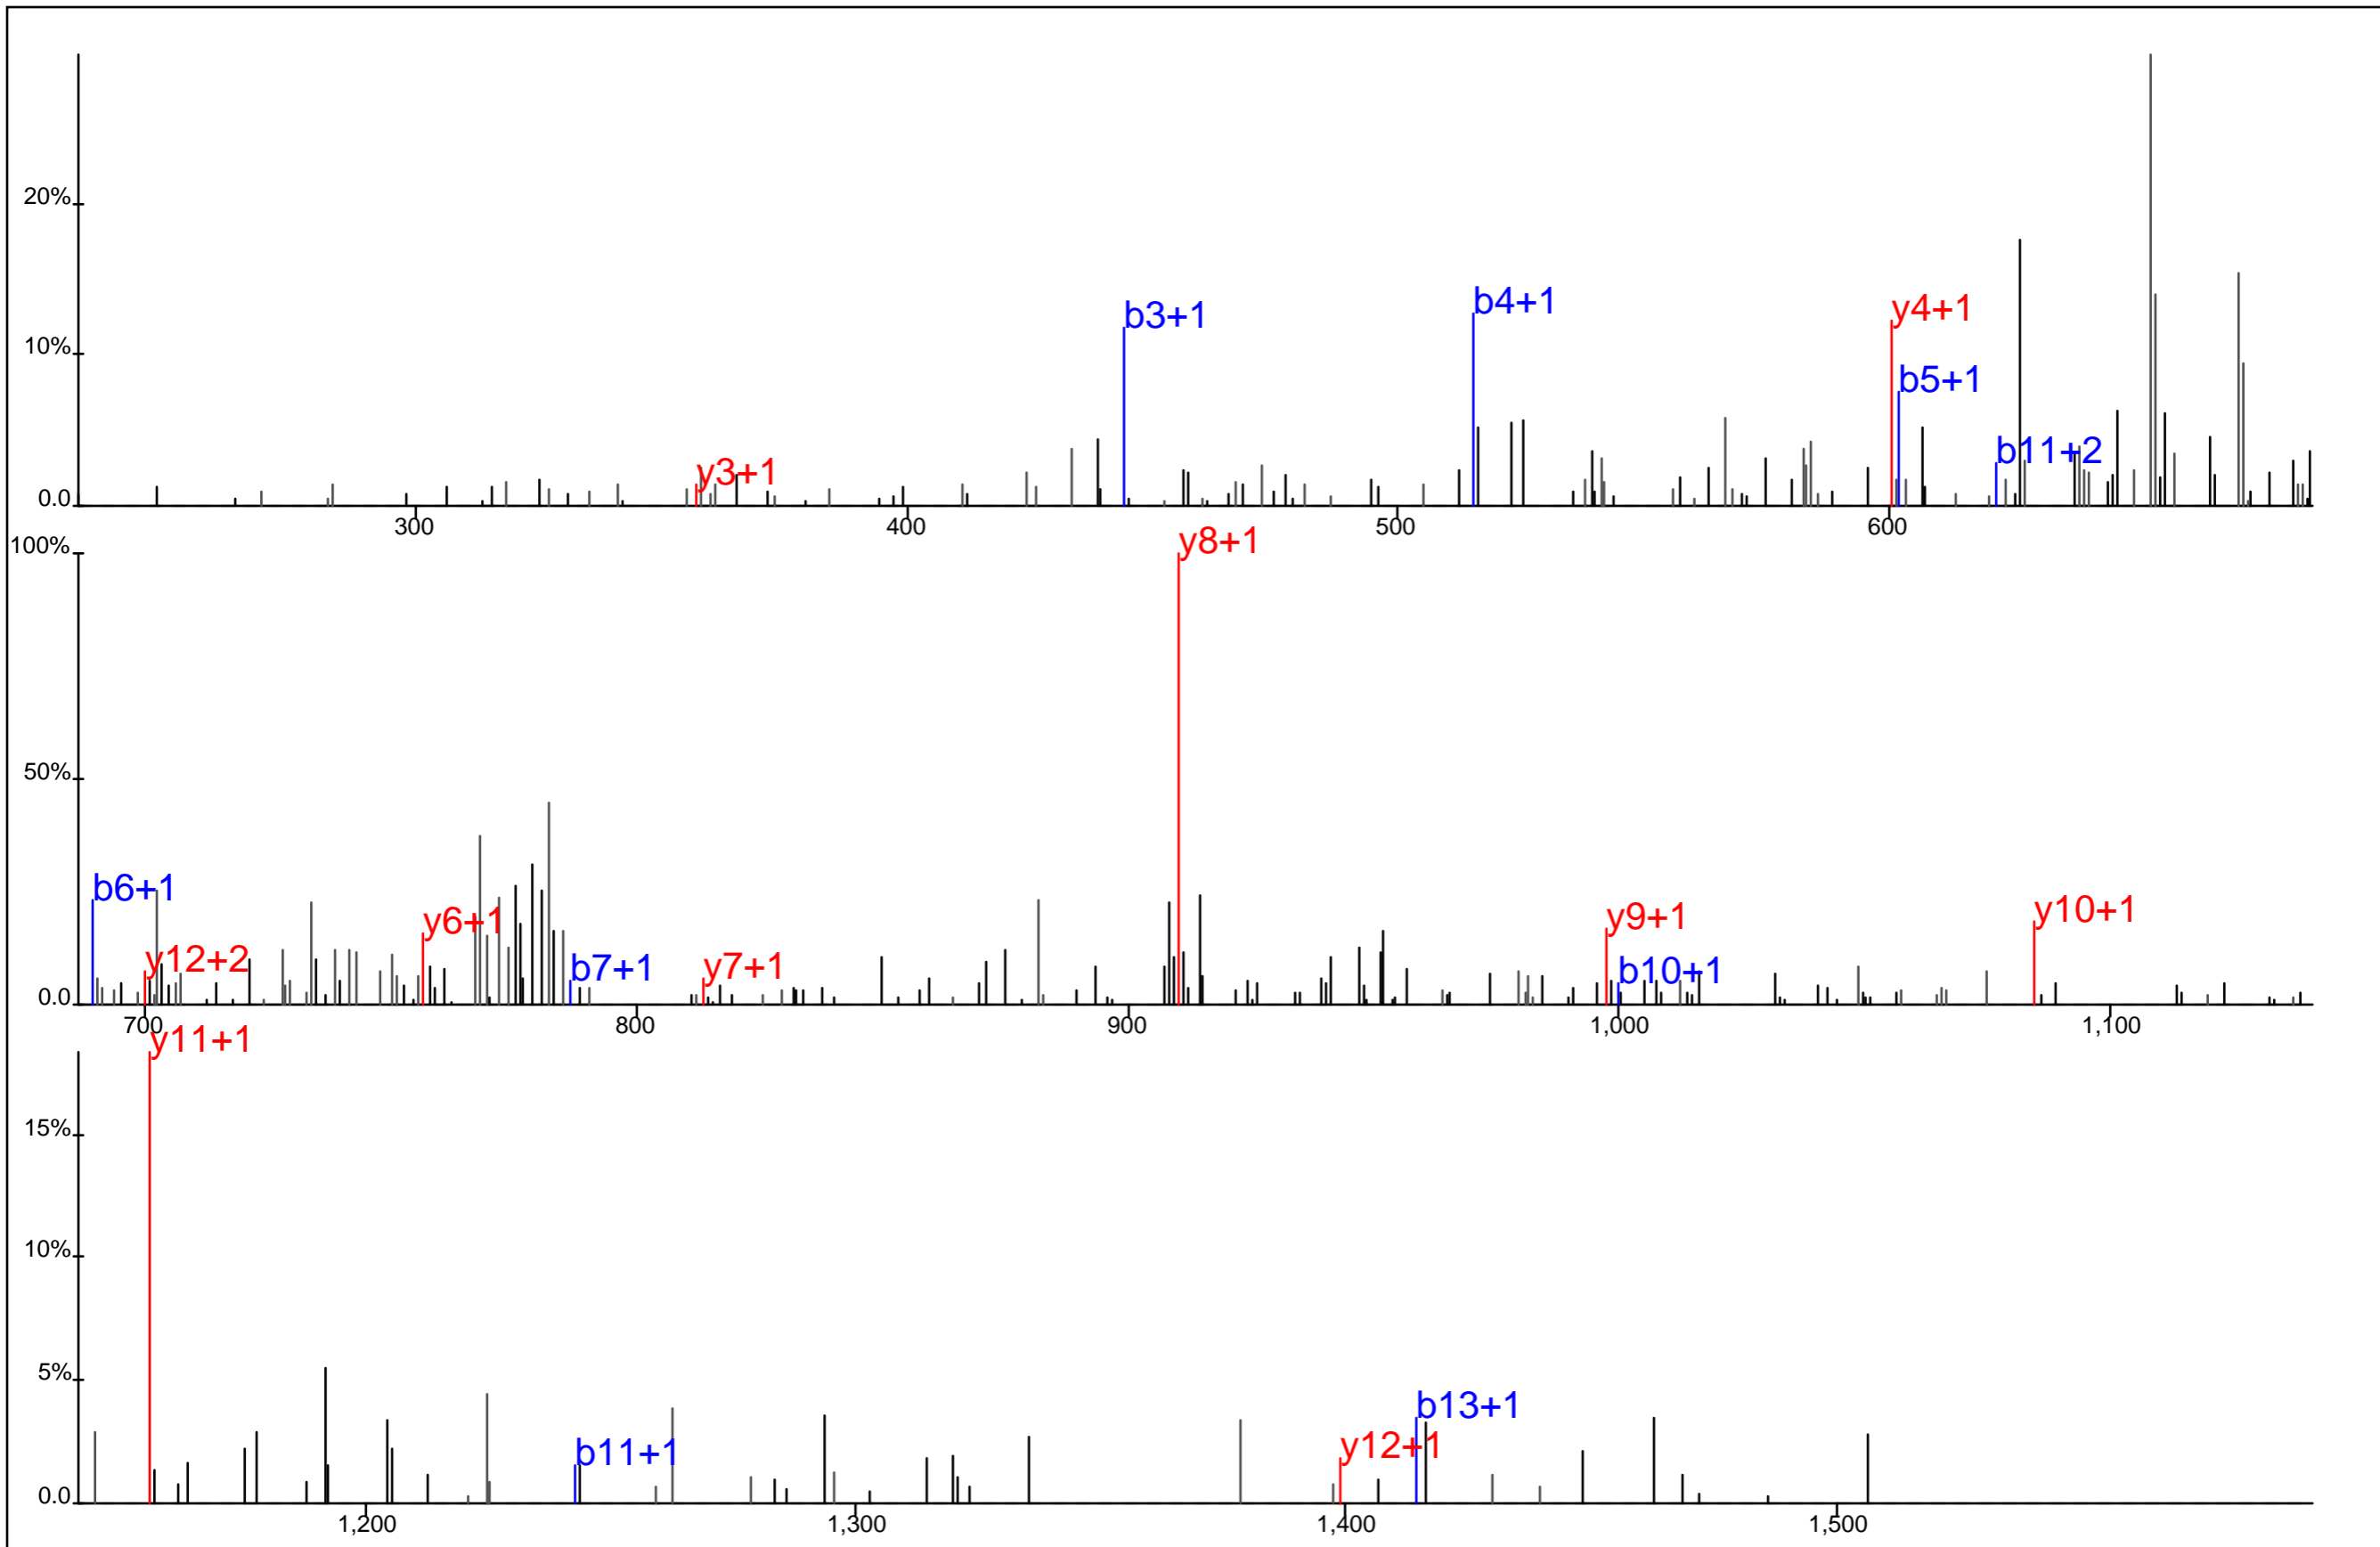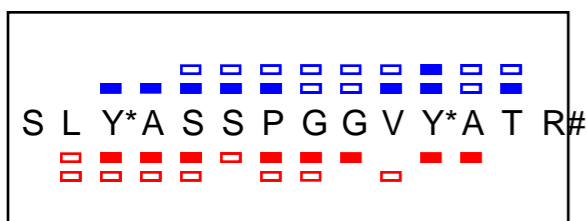

Protein Name: Vimentin  
 gi Accession: 37848  
 Precursor Mass: 799.8342+2  
 Delta Mass: 5.304 ppm  
 XCorr: 3.3085

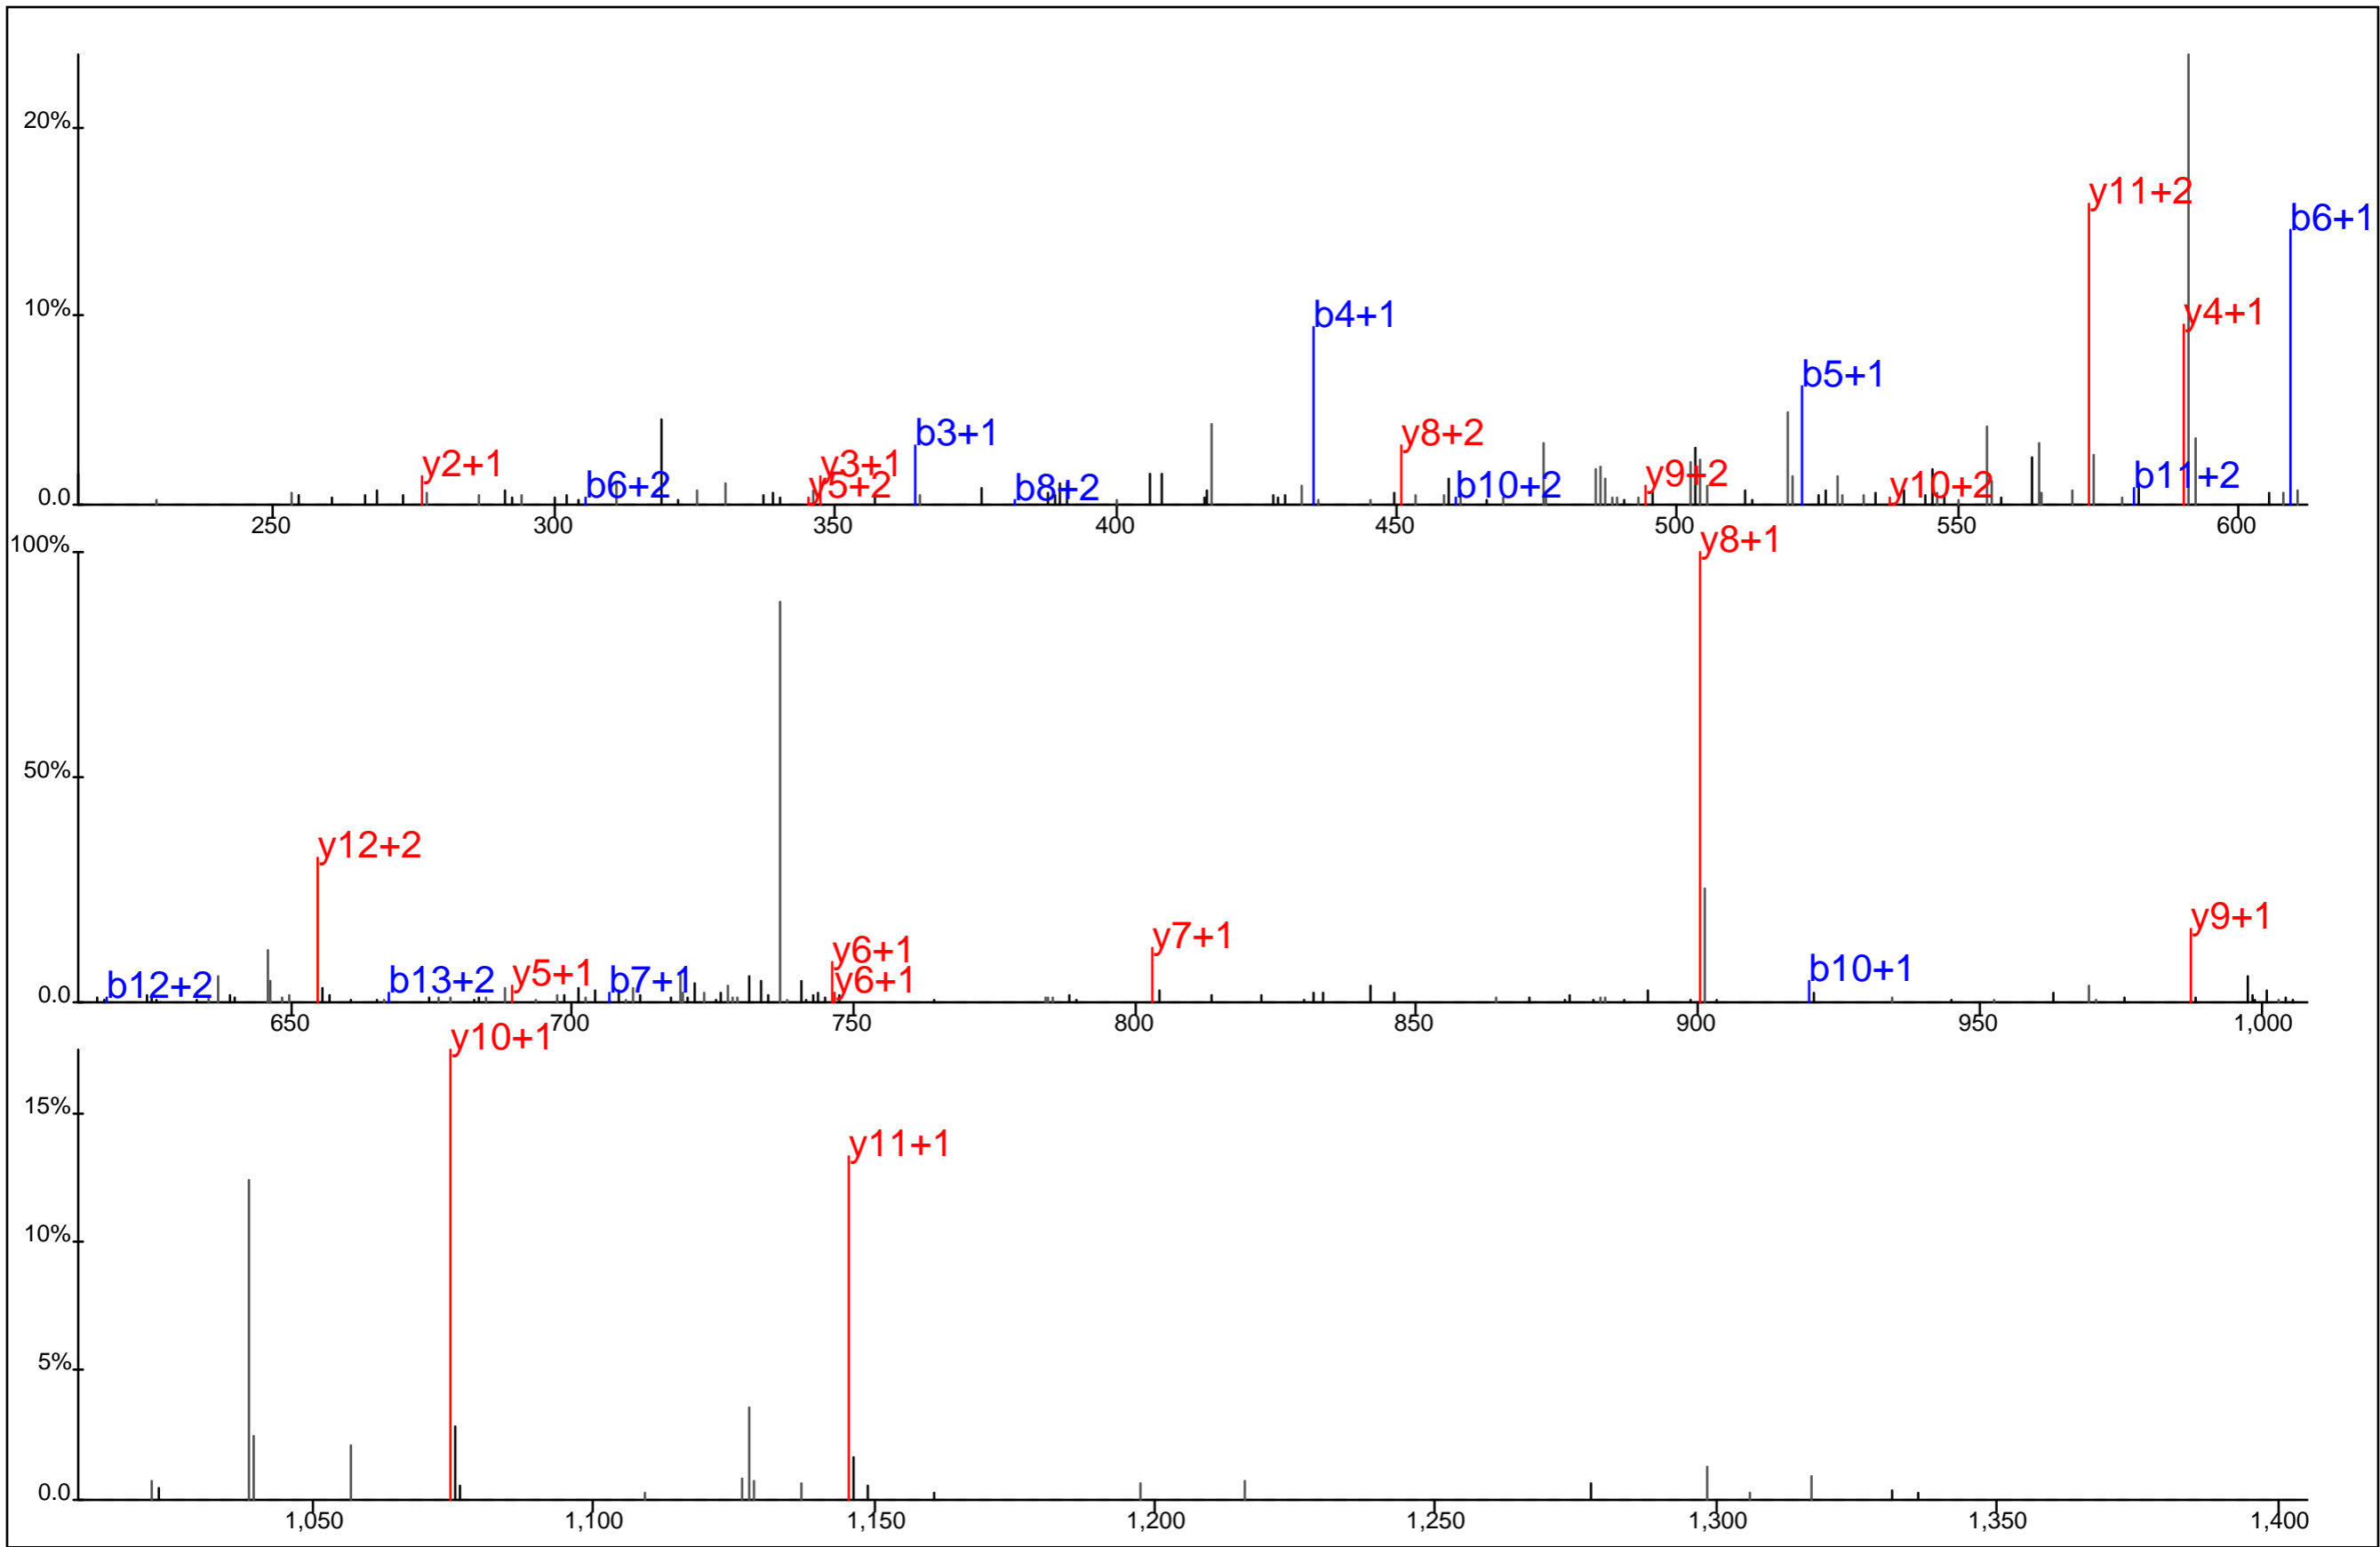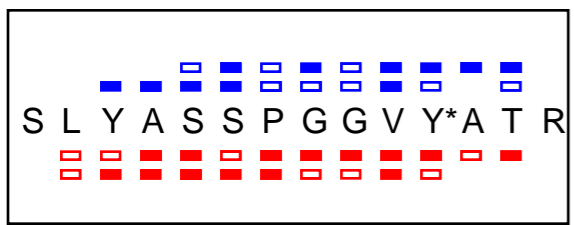

Protein Name: Vimentin  
 gi Accession: 37848  
 Precursor Mass: 754.8438+2  
 Delta Mass: 1.417 ppm  
 XCorr: 59.45

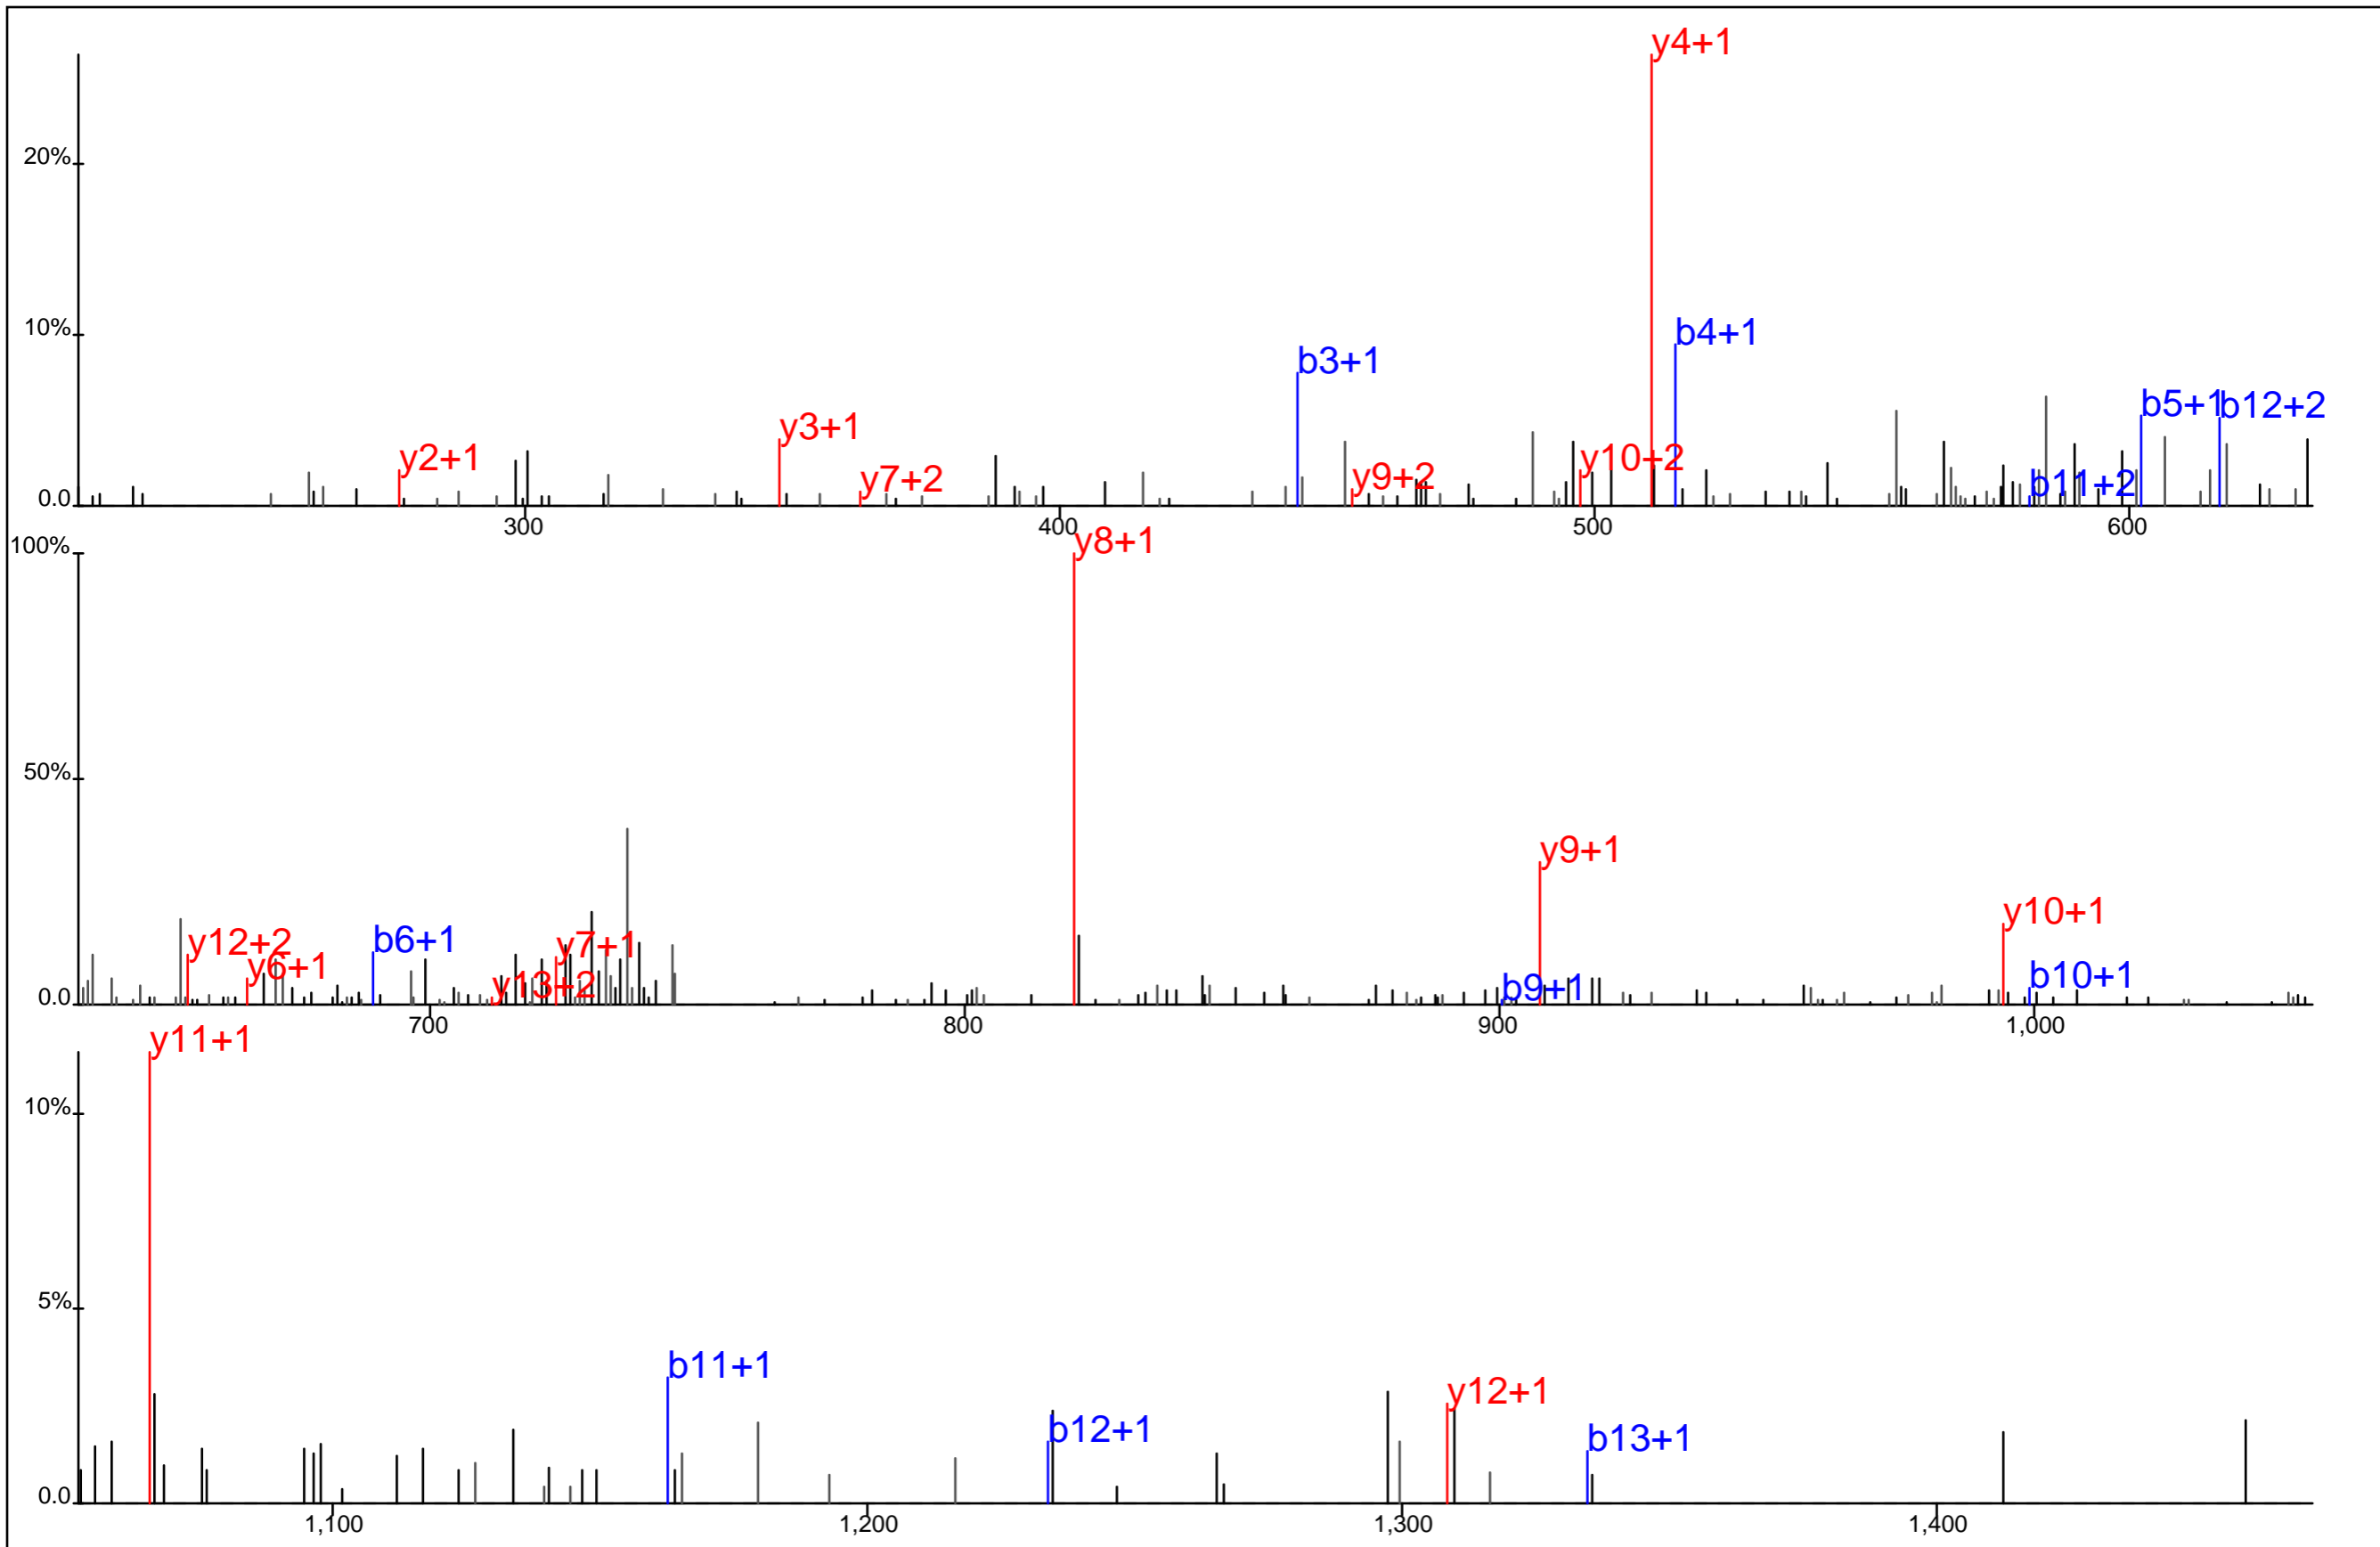

▢ ▢ ▢ ▢ ▢ ▢ ▢ ▢ ▢ ▢ ▢  
 S L Y\* A S S P G G V Y A T R  
▢ ▢ ▢ ▢ ▢ ▢ ▢ ▢ ▢ ▢ ▢

Protein Name: Vimentin  
 gi Accession: 37848  
 Precursor Mass: 754.8475+2  
 Delta Mass: 6.435 ppm  
 XCorr: 40.61

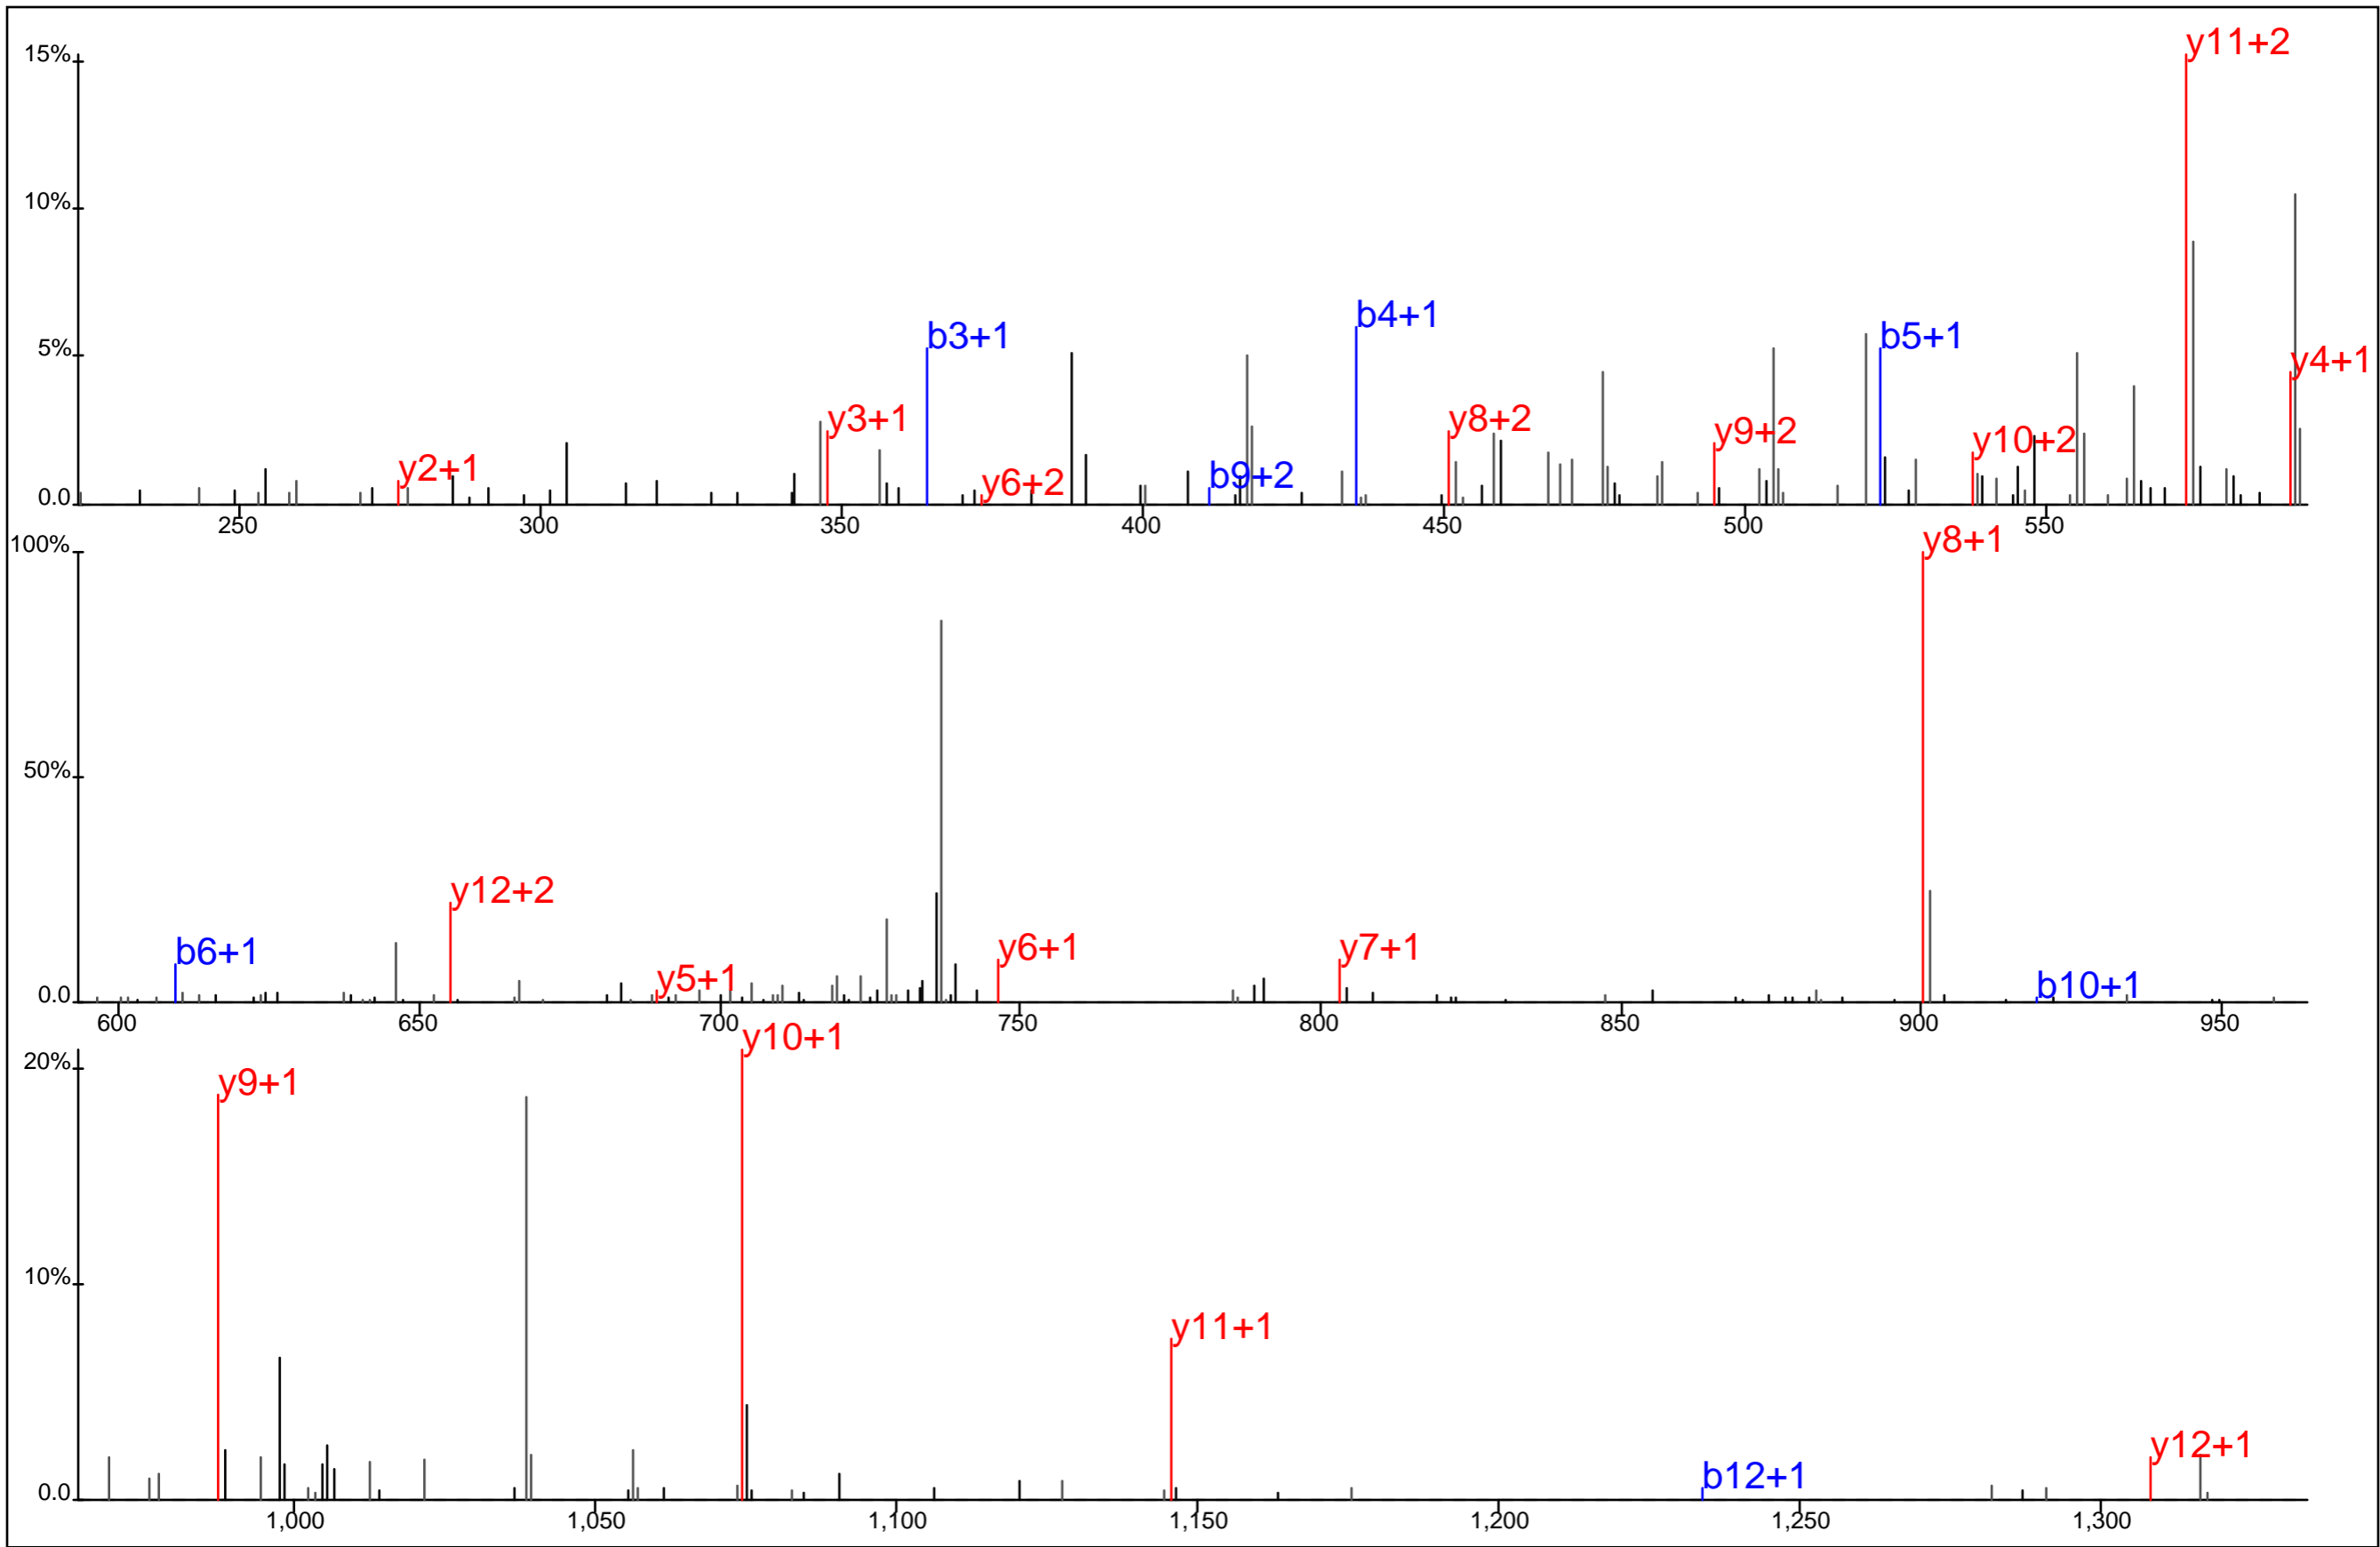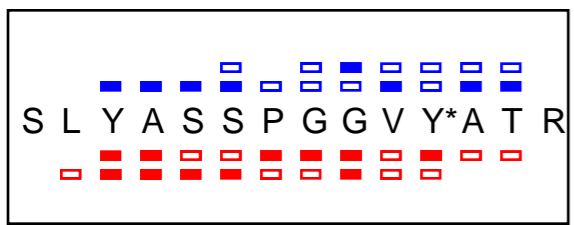

Protein Name: Vimentin  
 gi Accession: 37848  
 Precursor Mass: 754.8450+2  
 Delta Mass: 3.034 ppm  
 XCorr: 55.98



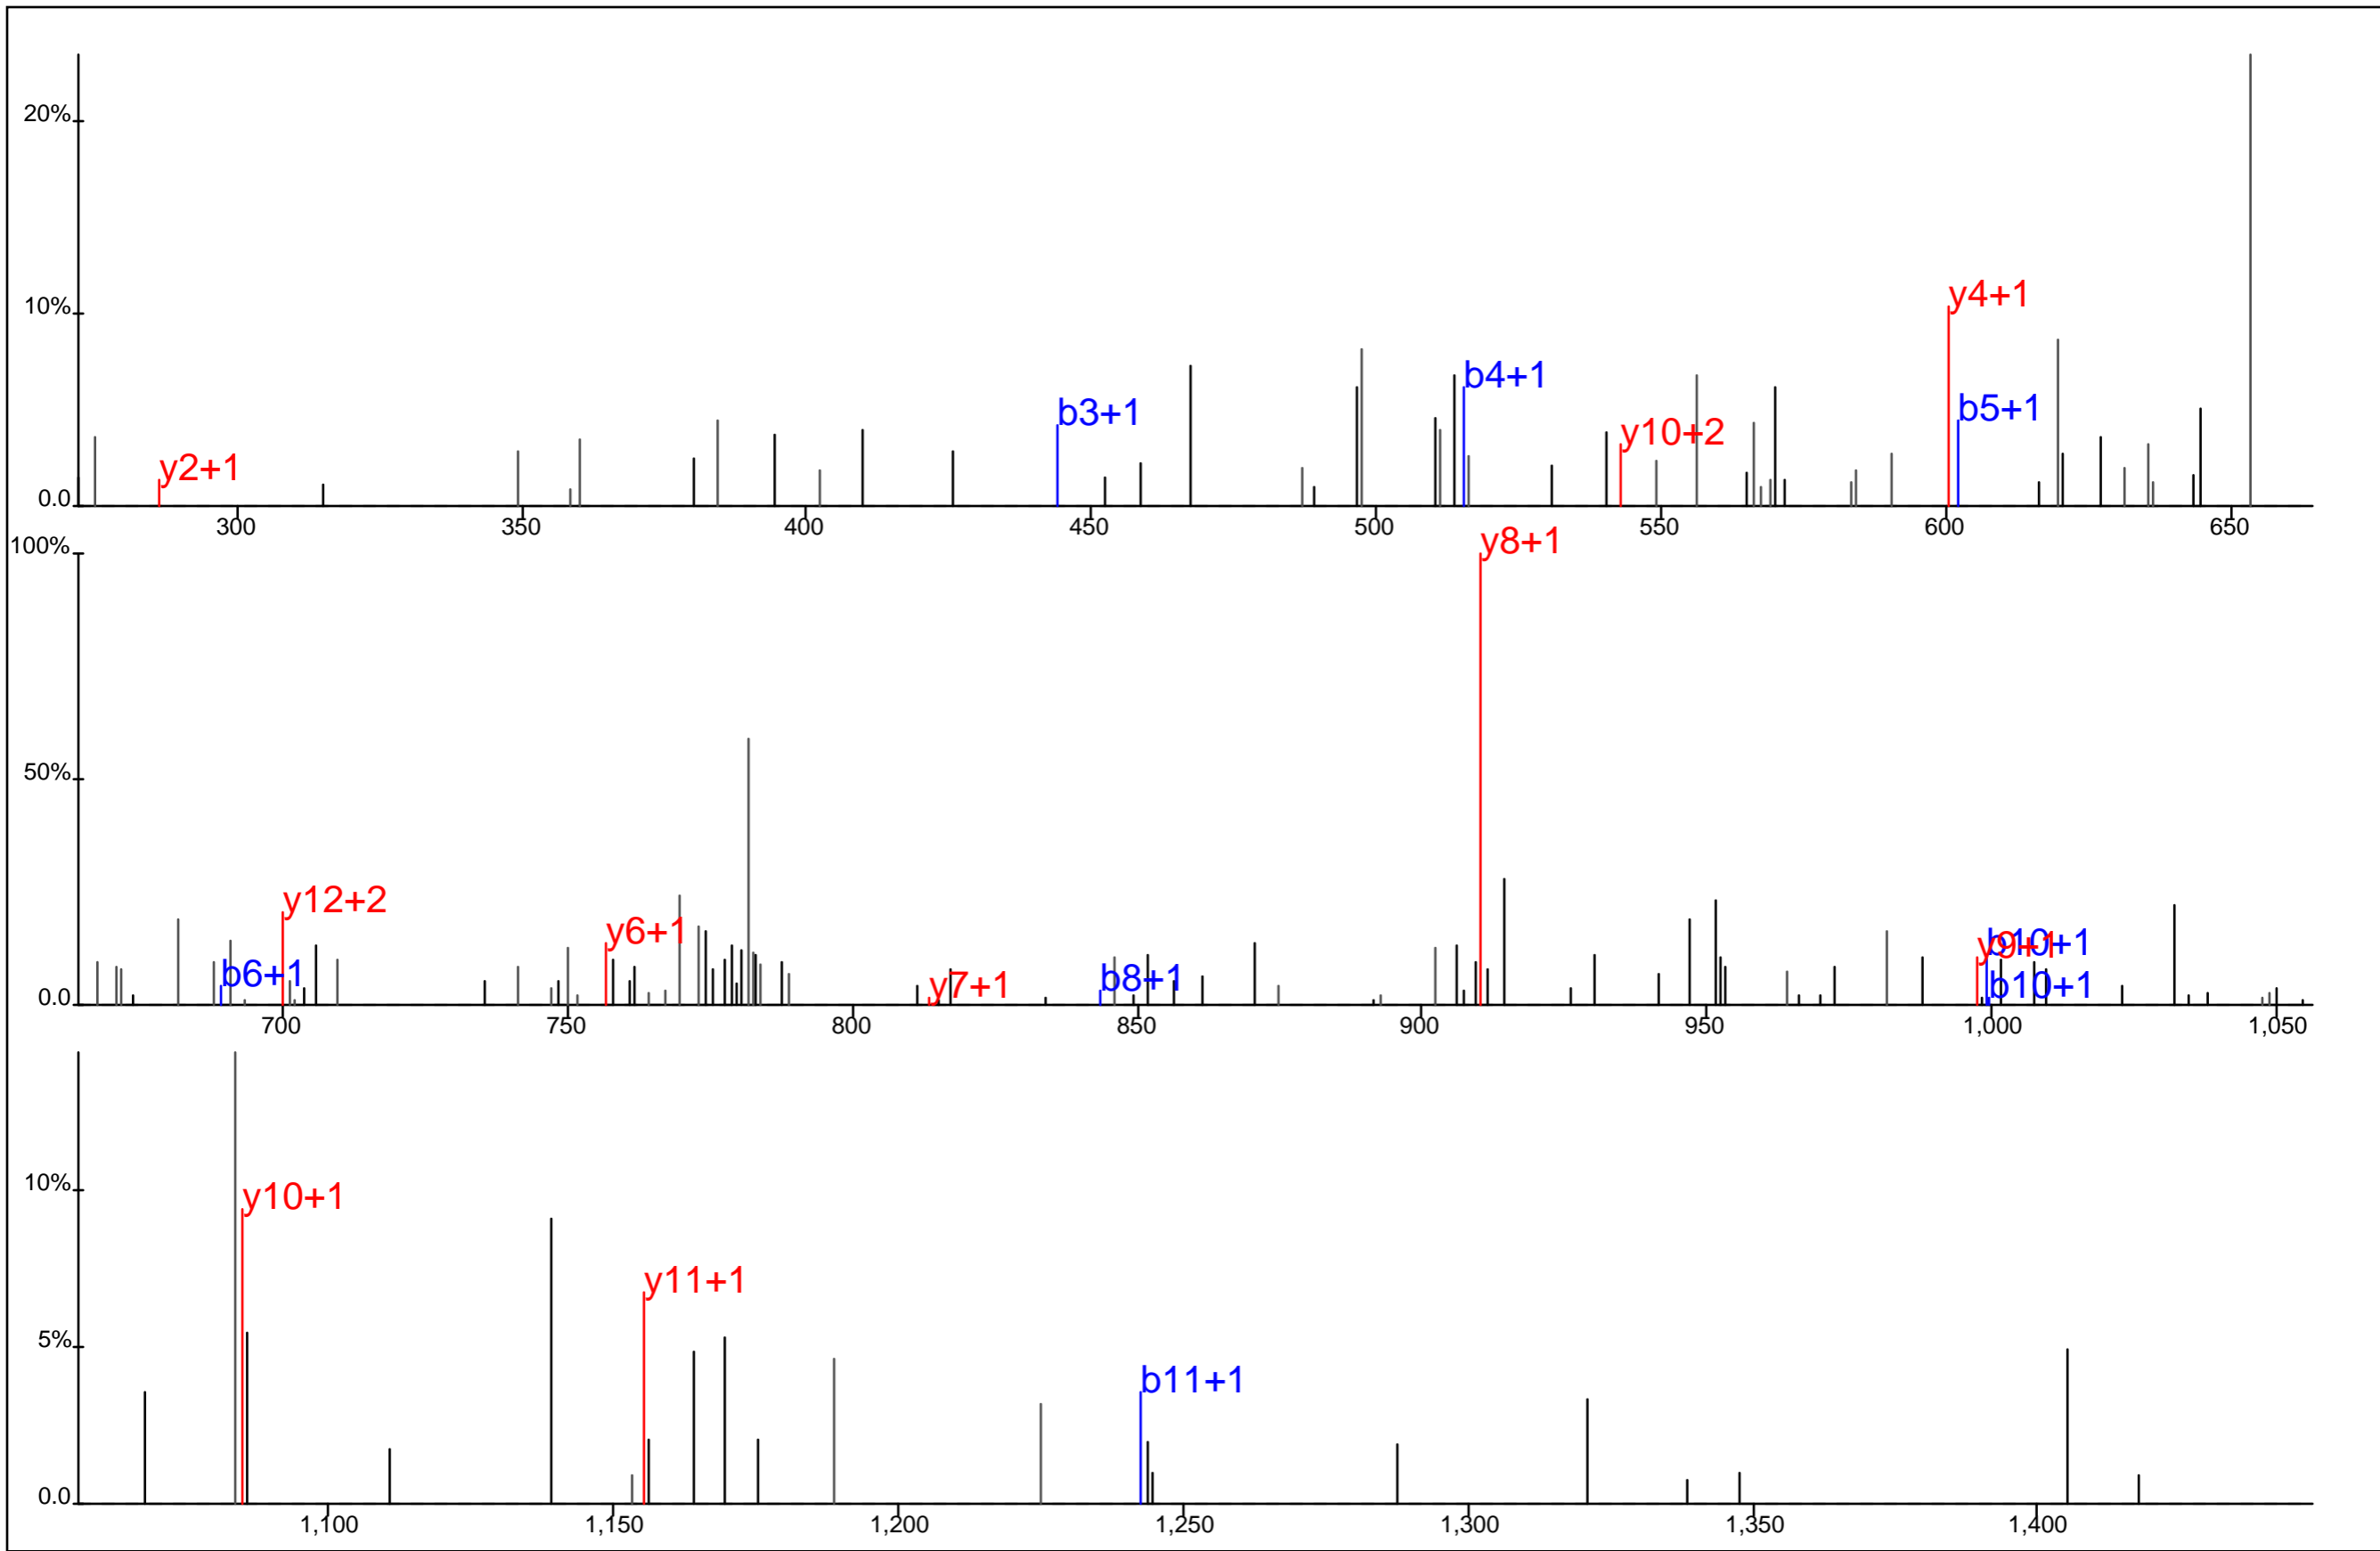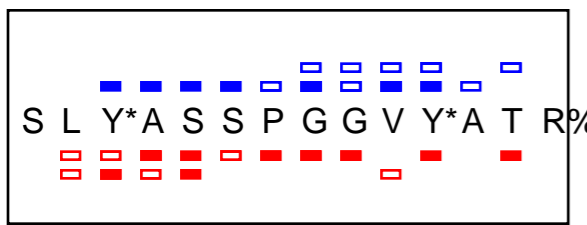

Protein Name: Vimentin  
 gi Accession: 37848  
 Precursor Mass: 799.8319+2  
 Delta Mass: 2.413 ppm  
 XCorr: 19.2





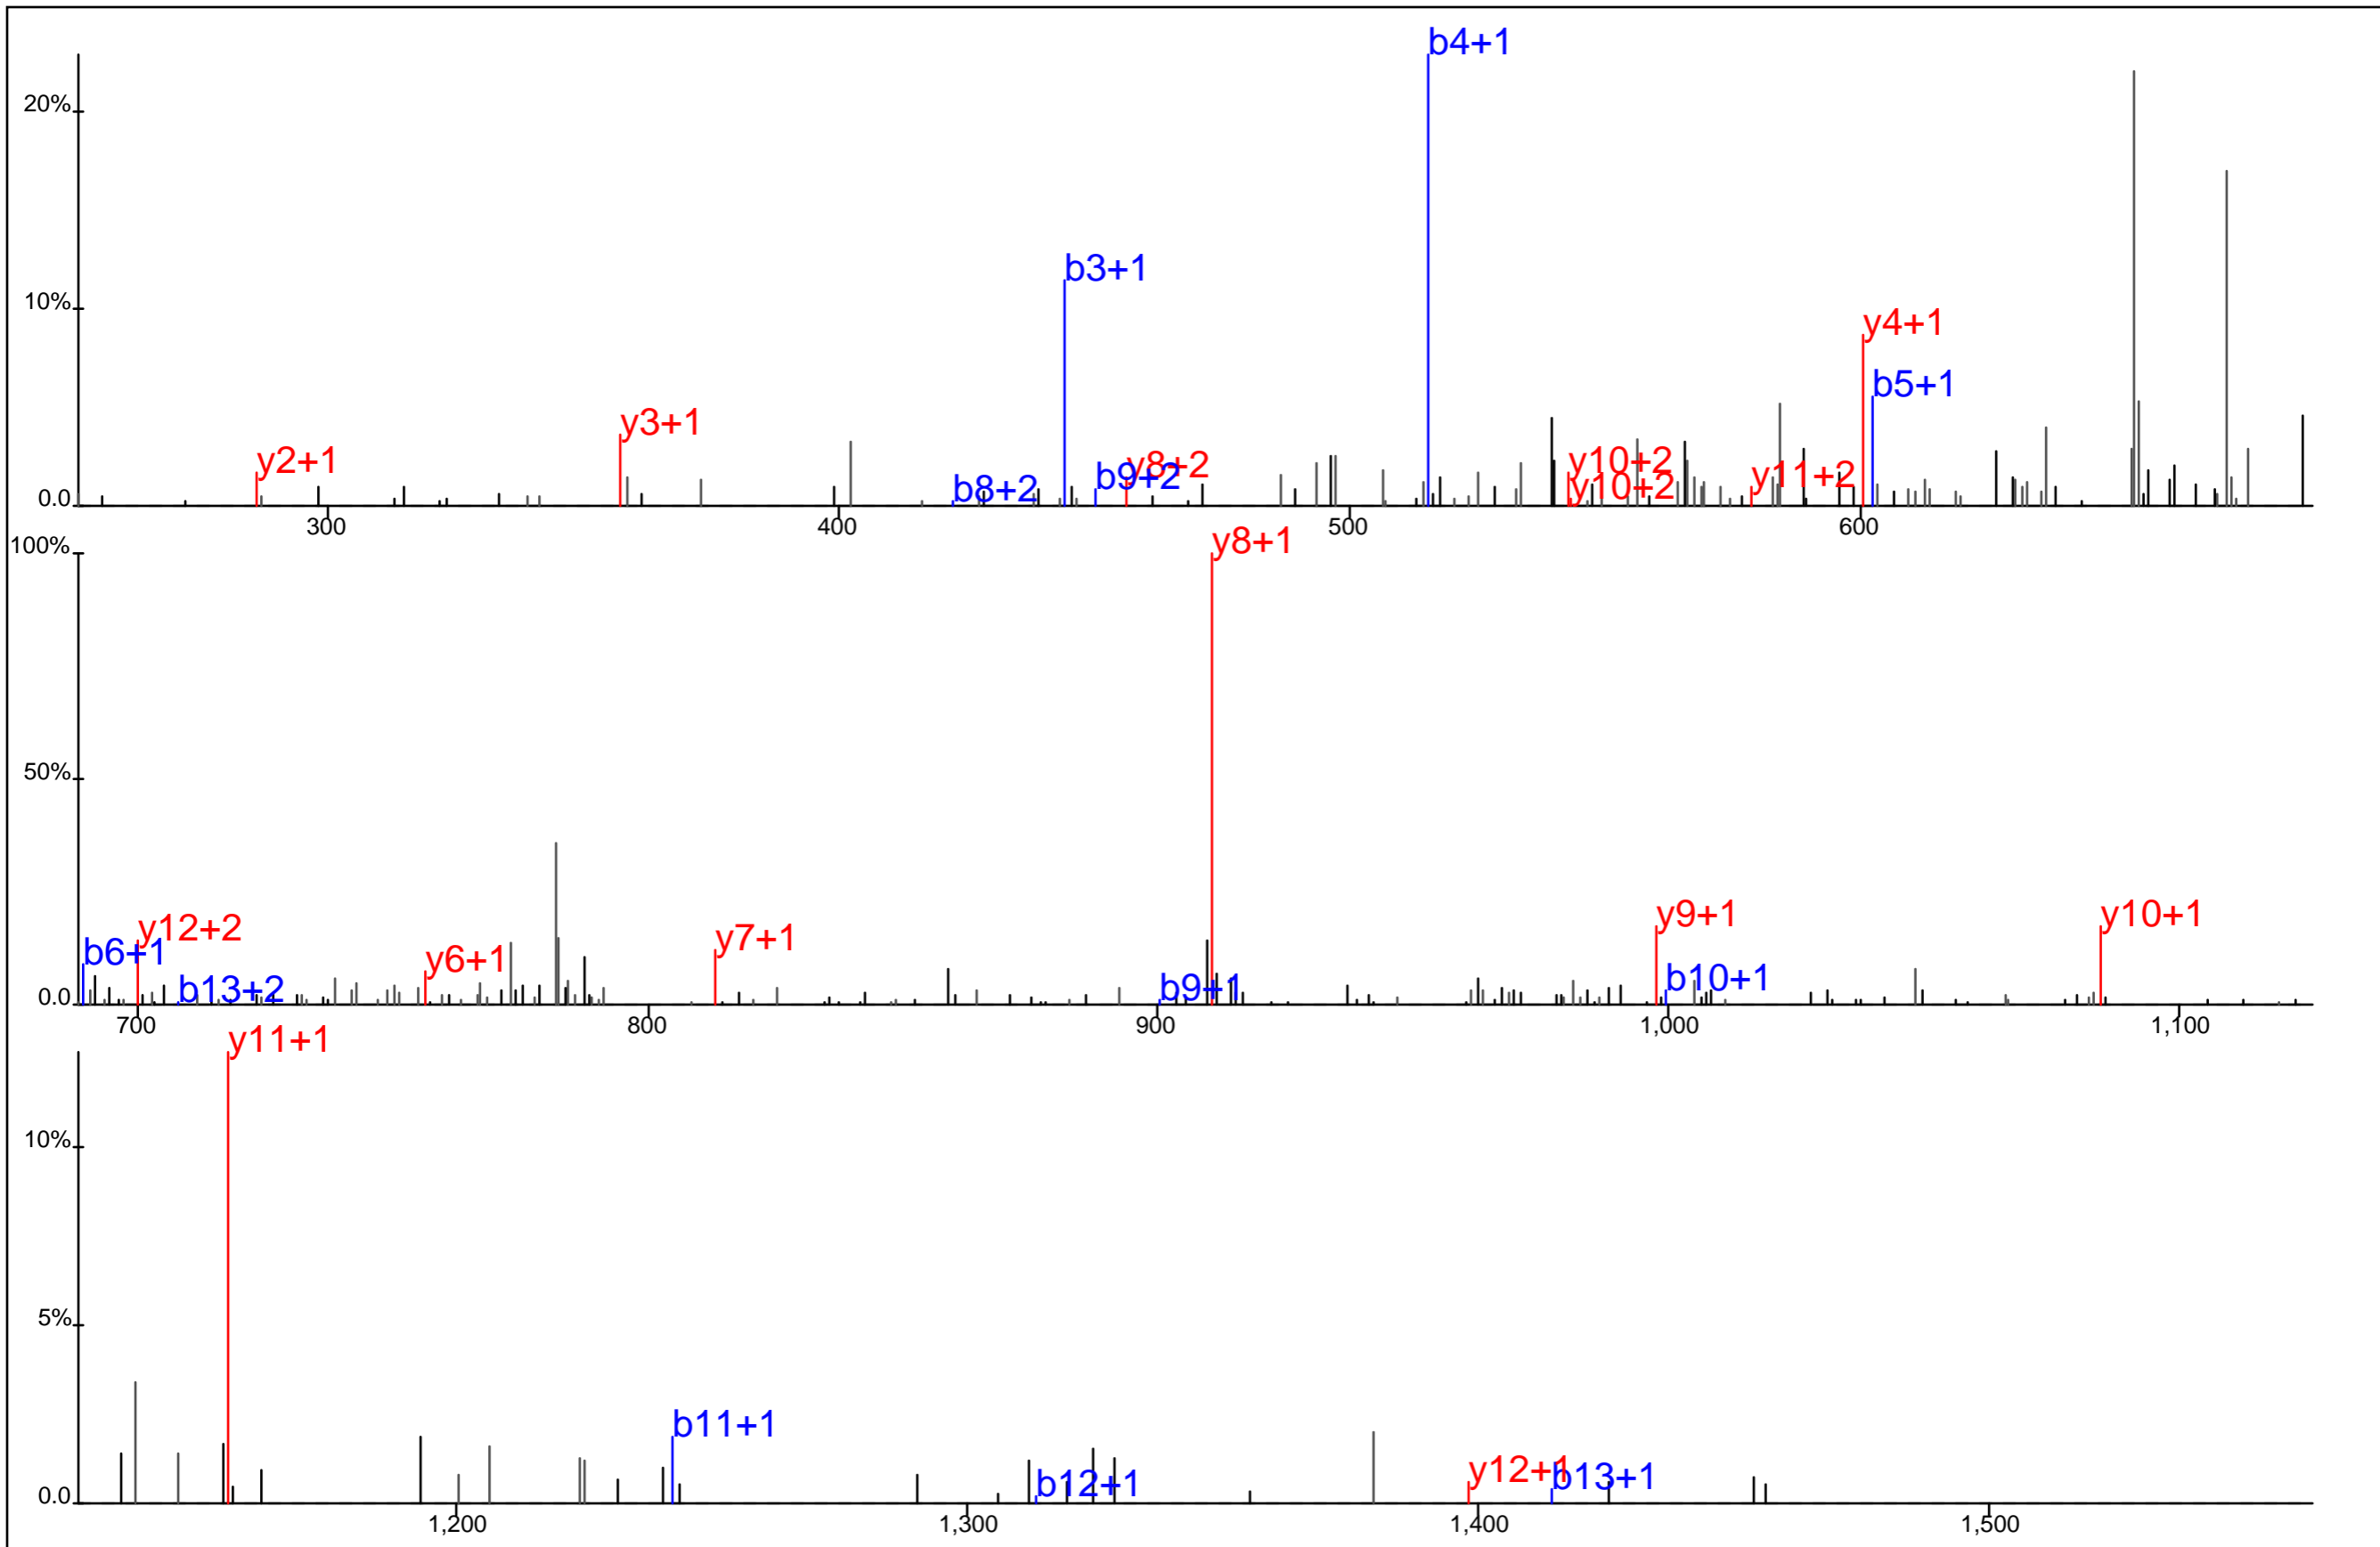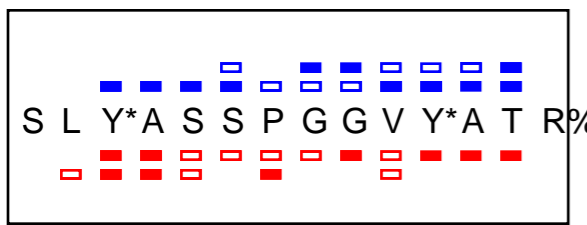

Protein Name: Vimentin  
 gi Accession: 37848  
 Precursor Mass: 799.8385+2  
 Delta Mass: 10.664 ppm  
 XCorr: 50.24

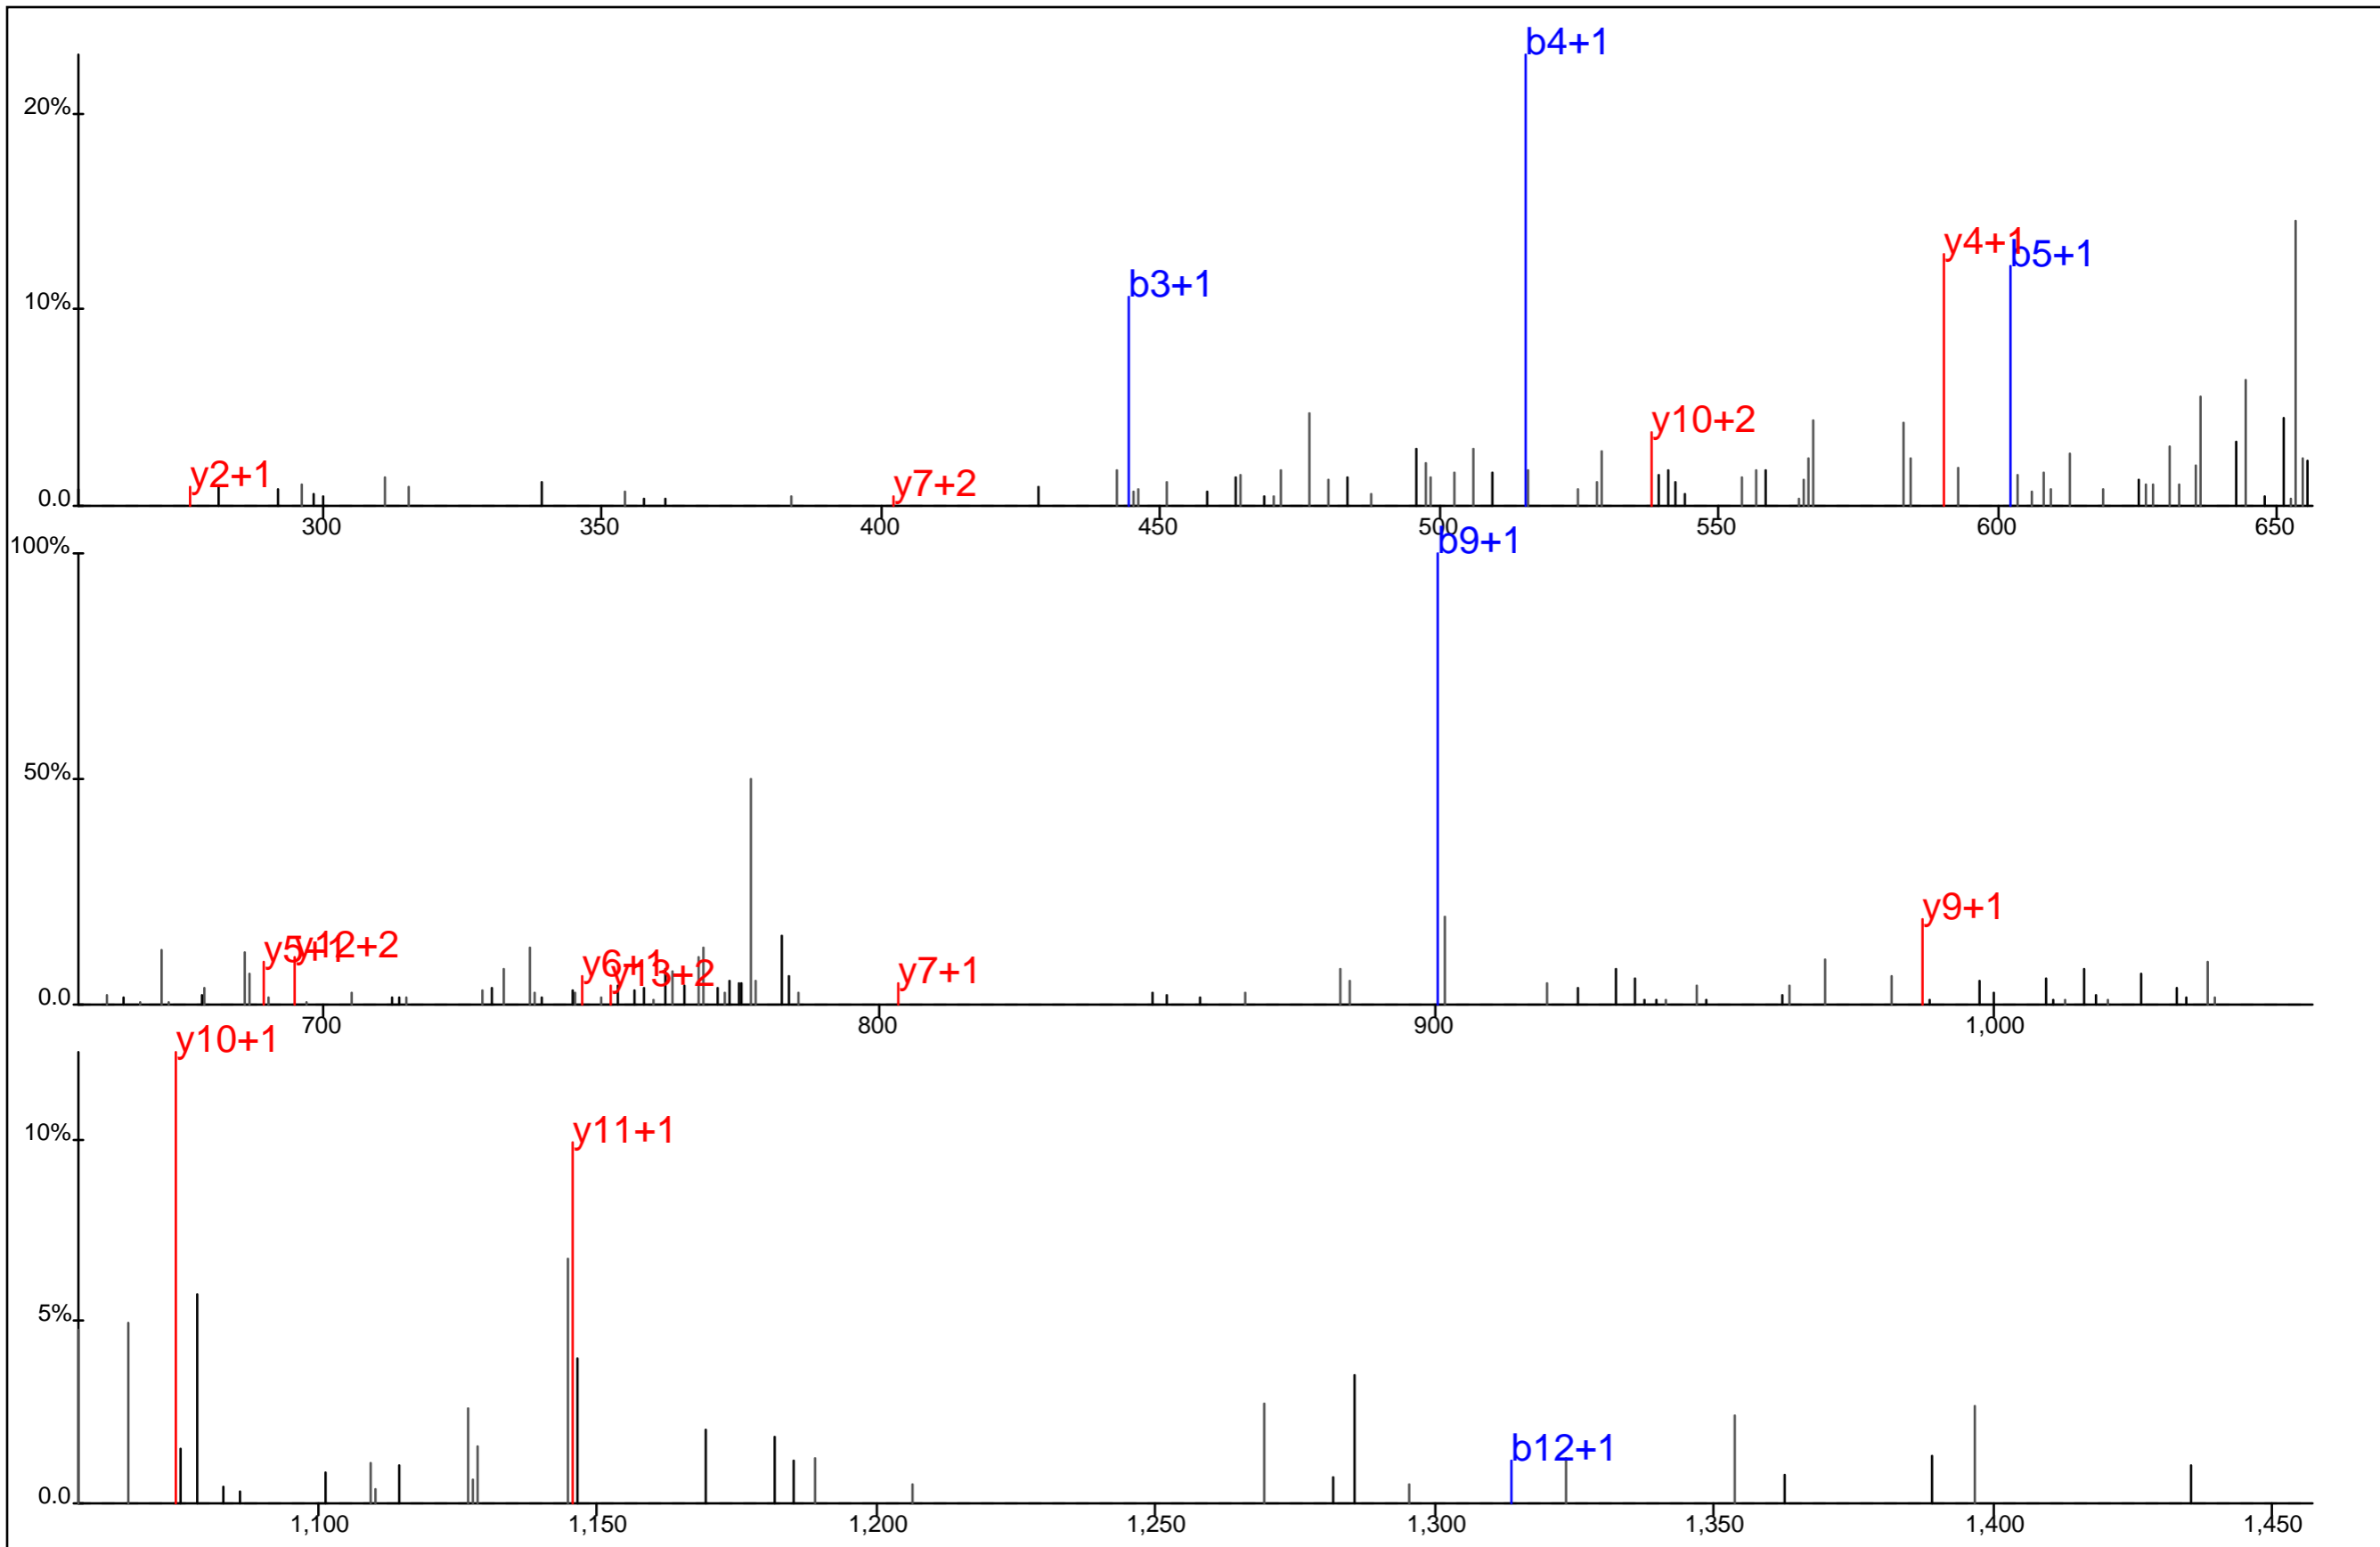

■ □ □ □ □ □ □ □ □ □  
 S L Y\* A S S P G G V Y\* A T R  
□ □ □ □ □ □ □ □ □ □ □

Protein Name: Vimentin  
 gi Accession: 37848  
 Precursor Mass: 794.8290+2  
 Delta Mass: 4.027 ppm  
 XCorr: 23.06

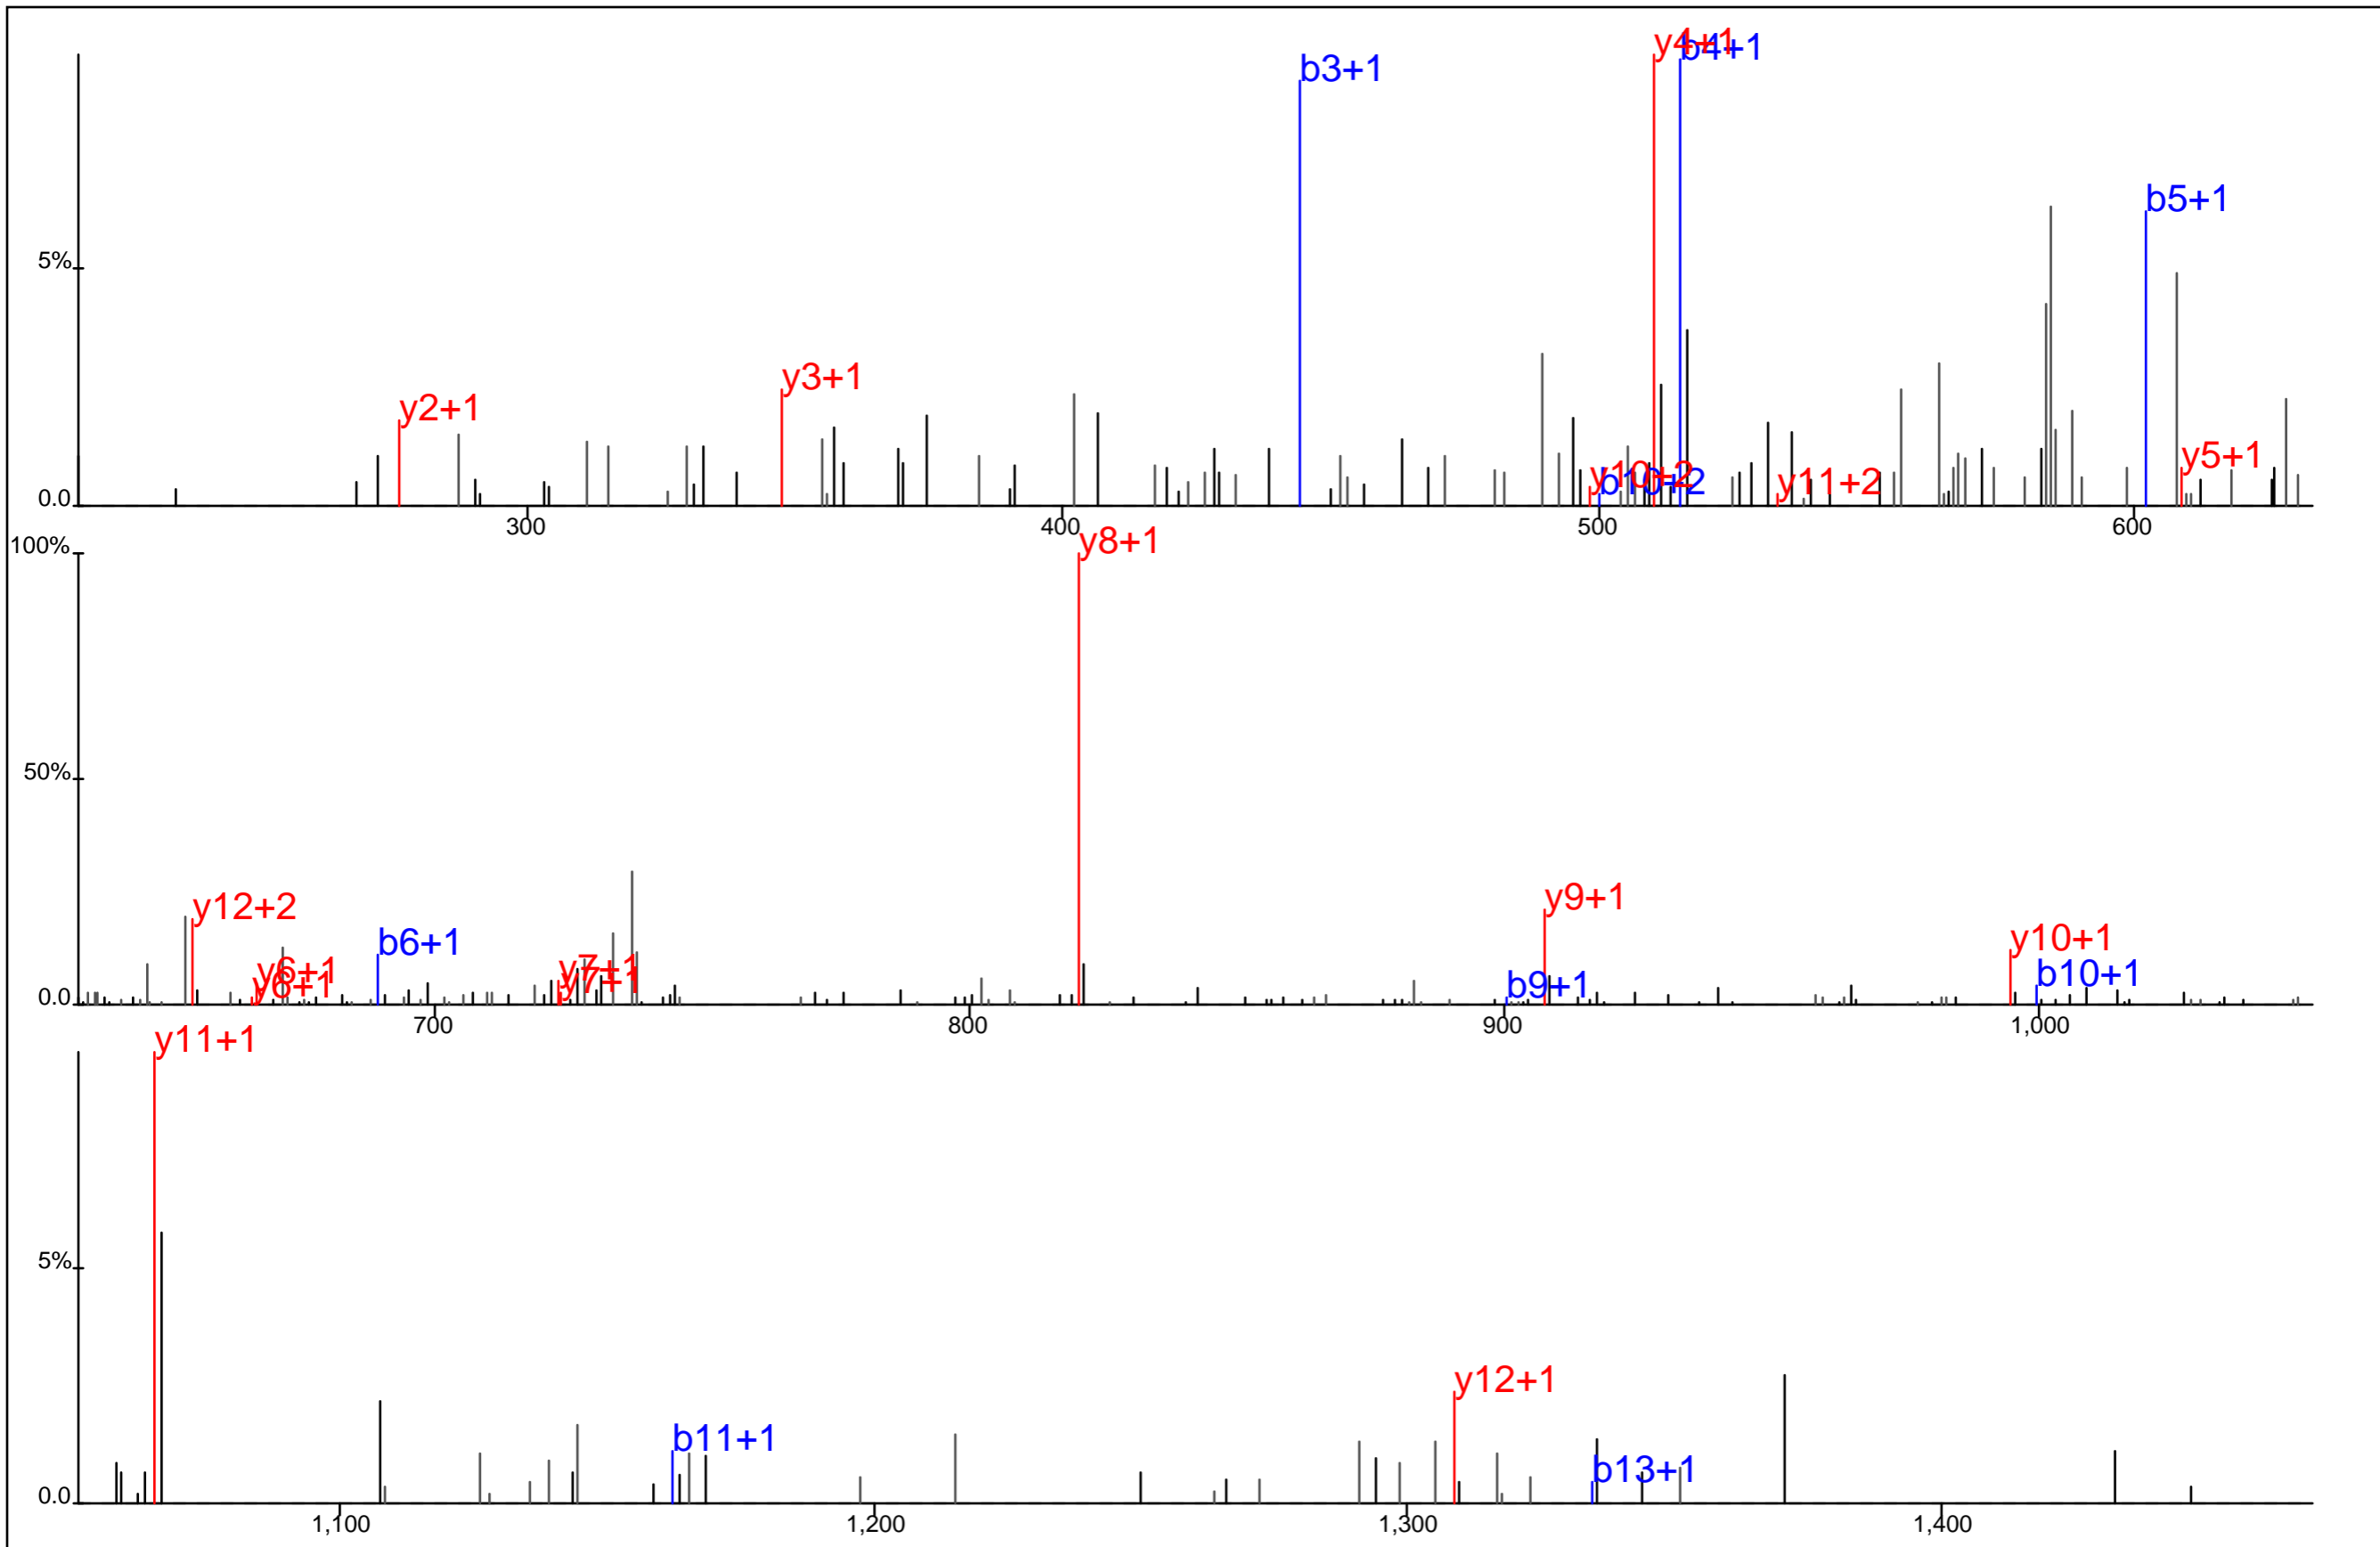

▢ ▢ ▢ ▢ ▢ ▢ ▢ ▢ ▢ ▢ ▢ ▢  
 S L Y\* A S S P G G V Y A T R  
▢ ▢ ▢ ▢ ▢ ▢ ▢ ▢ ▢ ▢ ▢ ▢

Protein Name: Vimentin  
 gi Accession: 37848  
 Precursor Mass: 754.8446+2  
 Delta Mass: 2.551 ppm  
 XCorr: 53.24

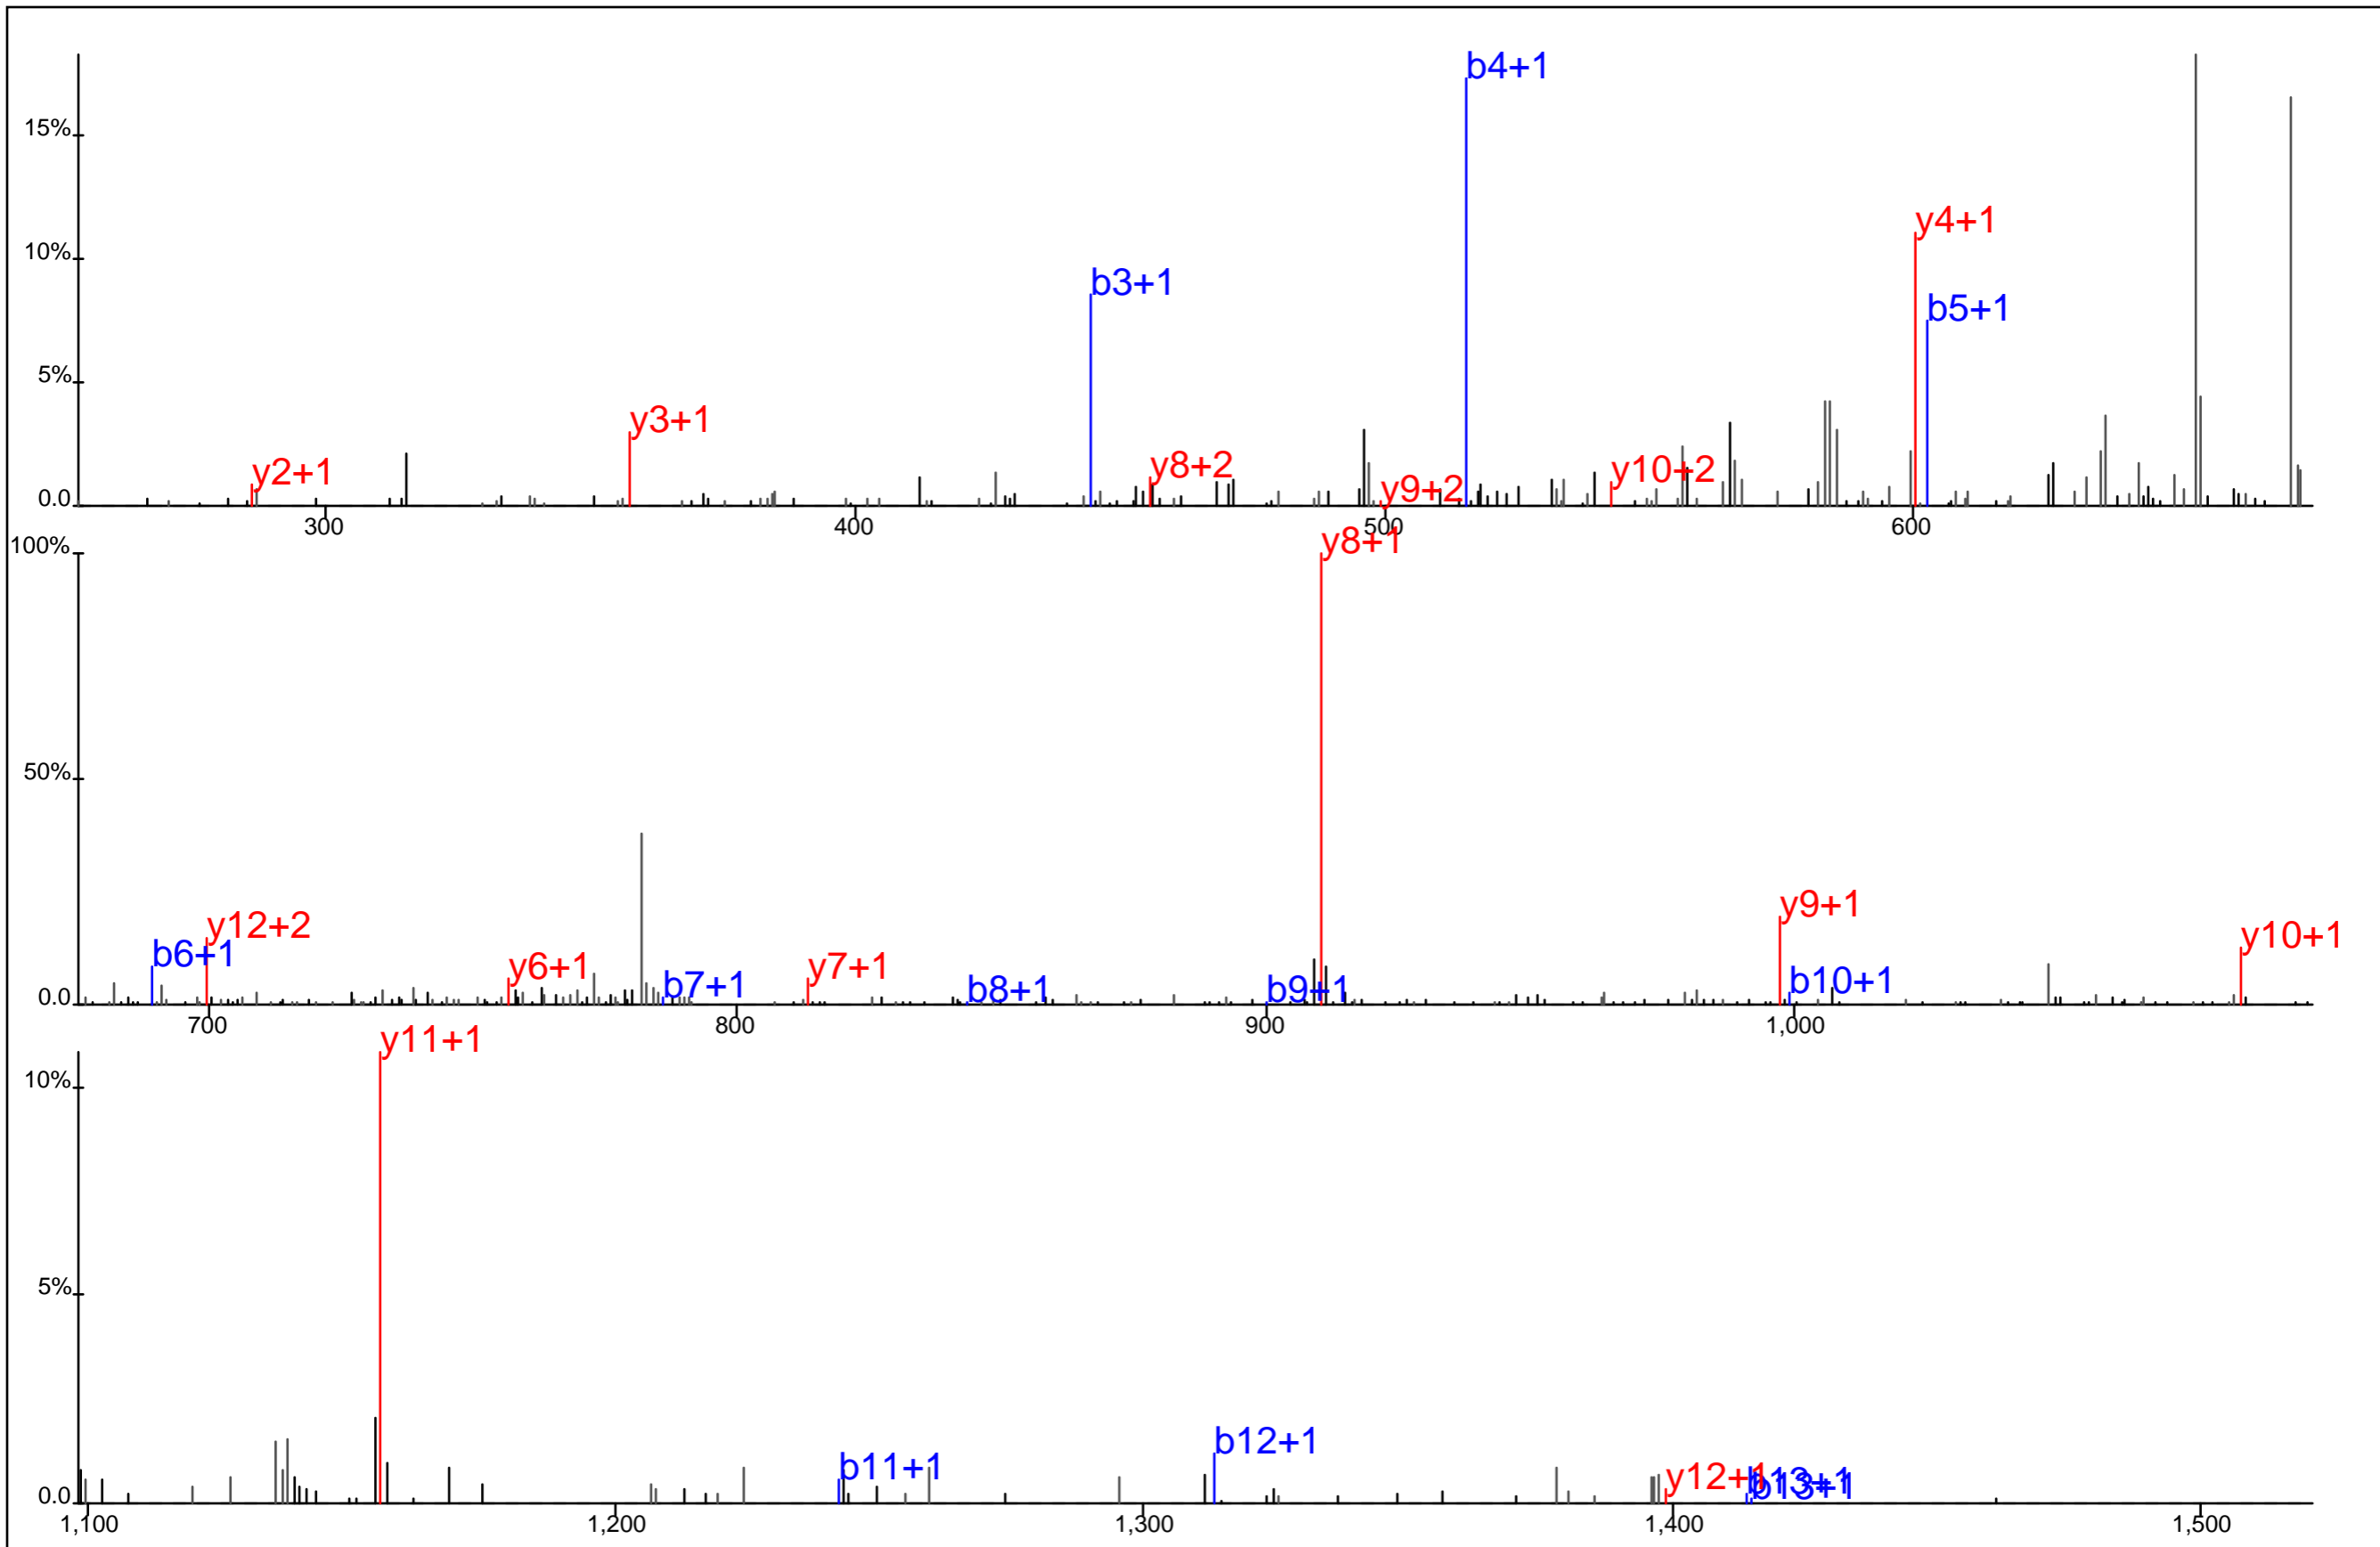

|   |   |    |   |   |   |   |   |   |   |    |   |   |    |
|---|---|----|---|---|---|---|---|---|---|----|---|---|----|
| S | L | Y* | A | S | S | P | G | G | V | Y* | A | T | R% |
| □ | □ | □  | □ | □ | □ | □ | □ | □ | □ | □  | □ | □ | □  |
| □ | □ | □  | □ | □ | □ | □ | □ | □ | □ | □  | □ | □ | □  |

Protein Name: Vimentin  
 gi Accession: 37848  
 Precursor Mass: 799.8329+2  
 Delta Mass: 3.633 ppm  
 XCorr: 65.82

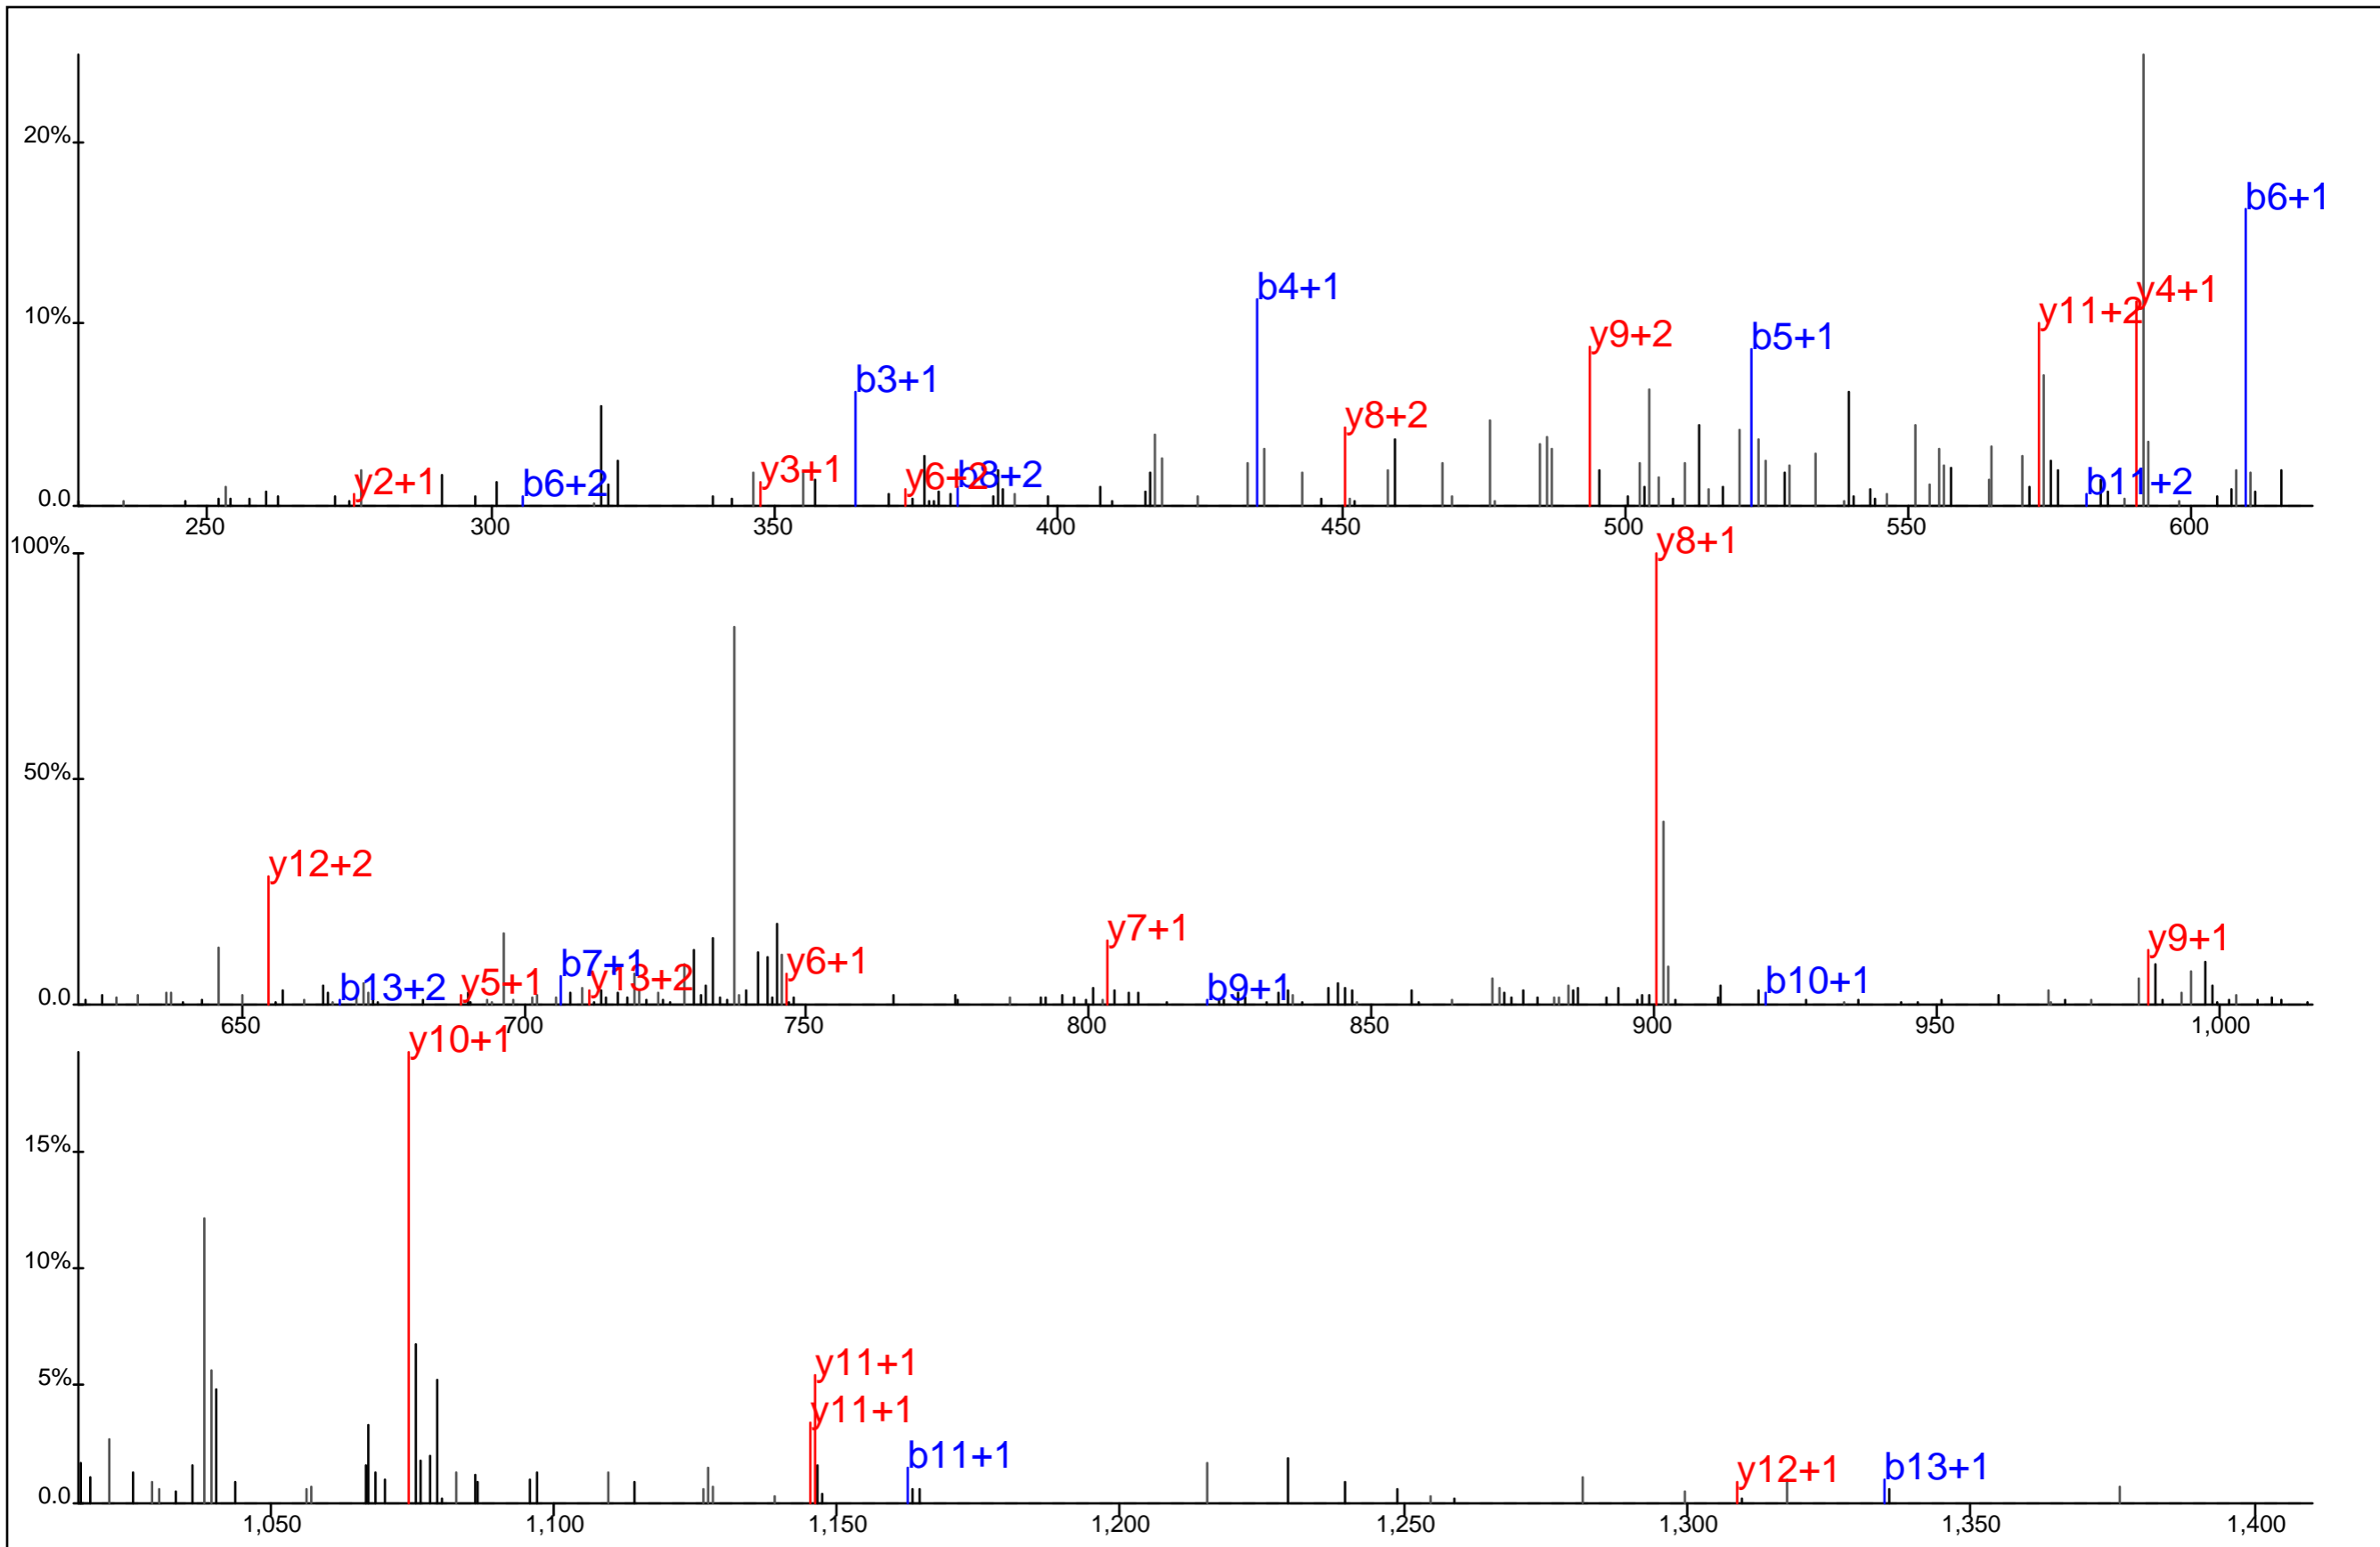

S L Y A S S P G G V Y\* A T R  
 [Red boxes under Y, A, S, S, P, G, G, V, Y, A, T]

Protein Name: Vimentin  
 gi Accession: 37848  
 Precursor Mass: 754.8461+2  
 Delta Mass: 4.572 ppm  
 XCorr: 35.03

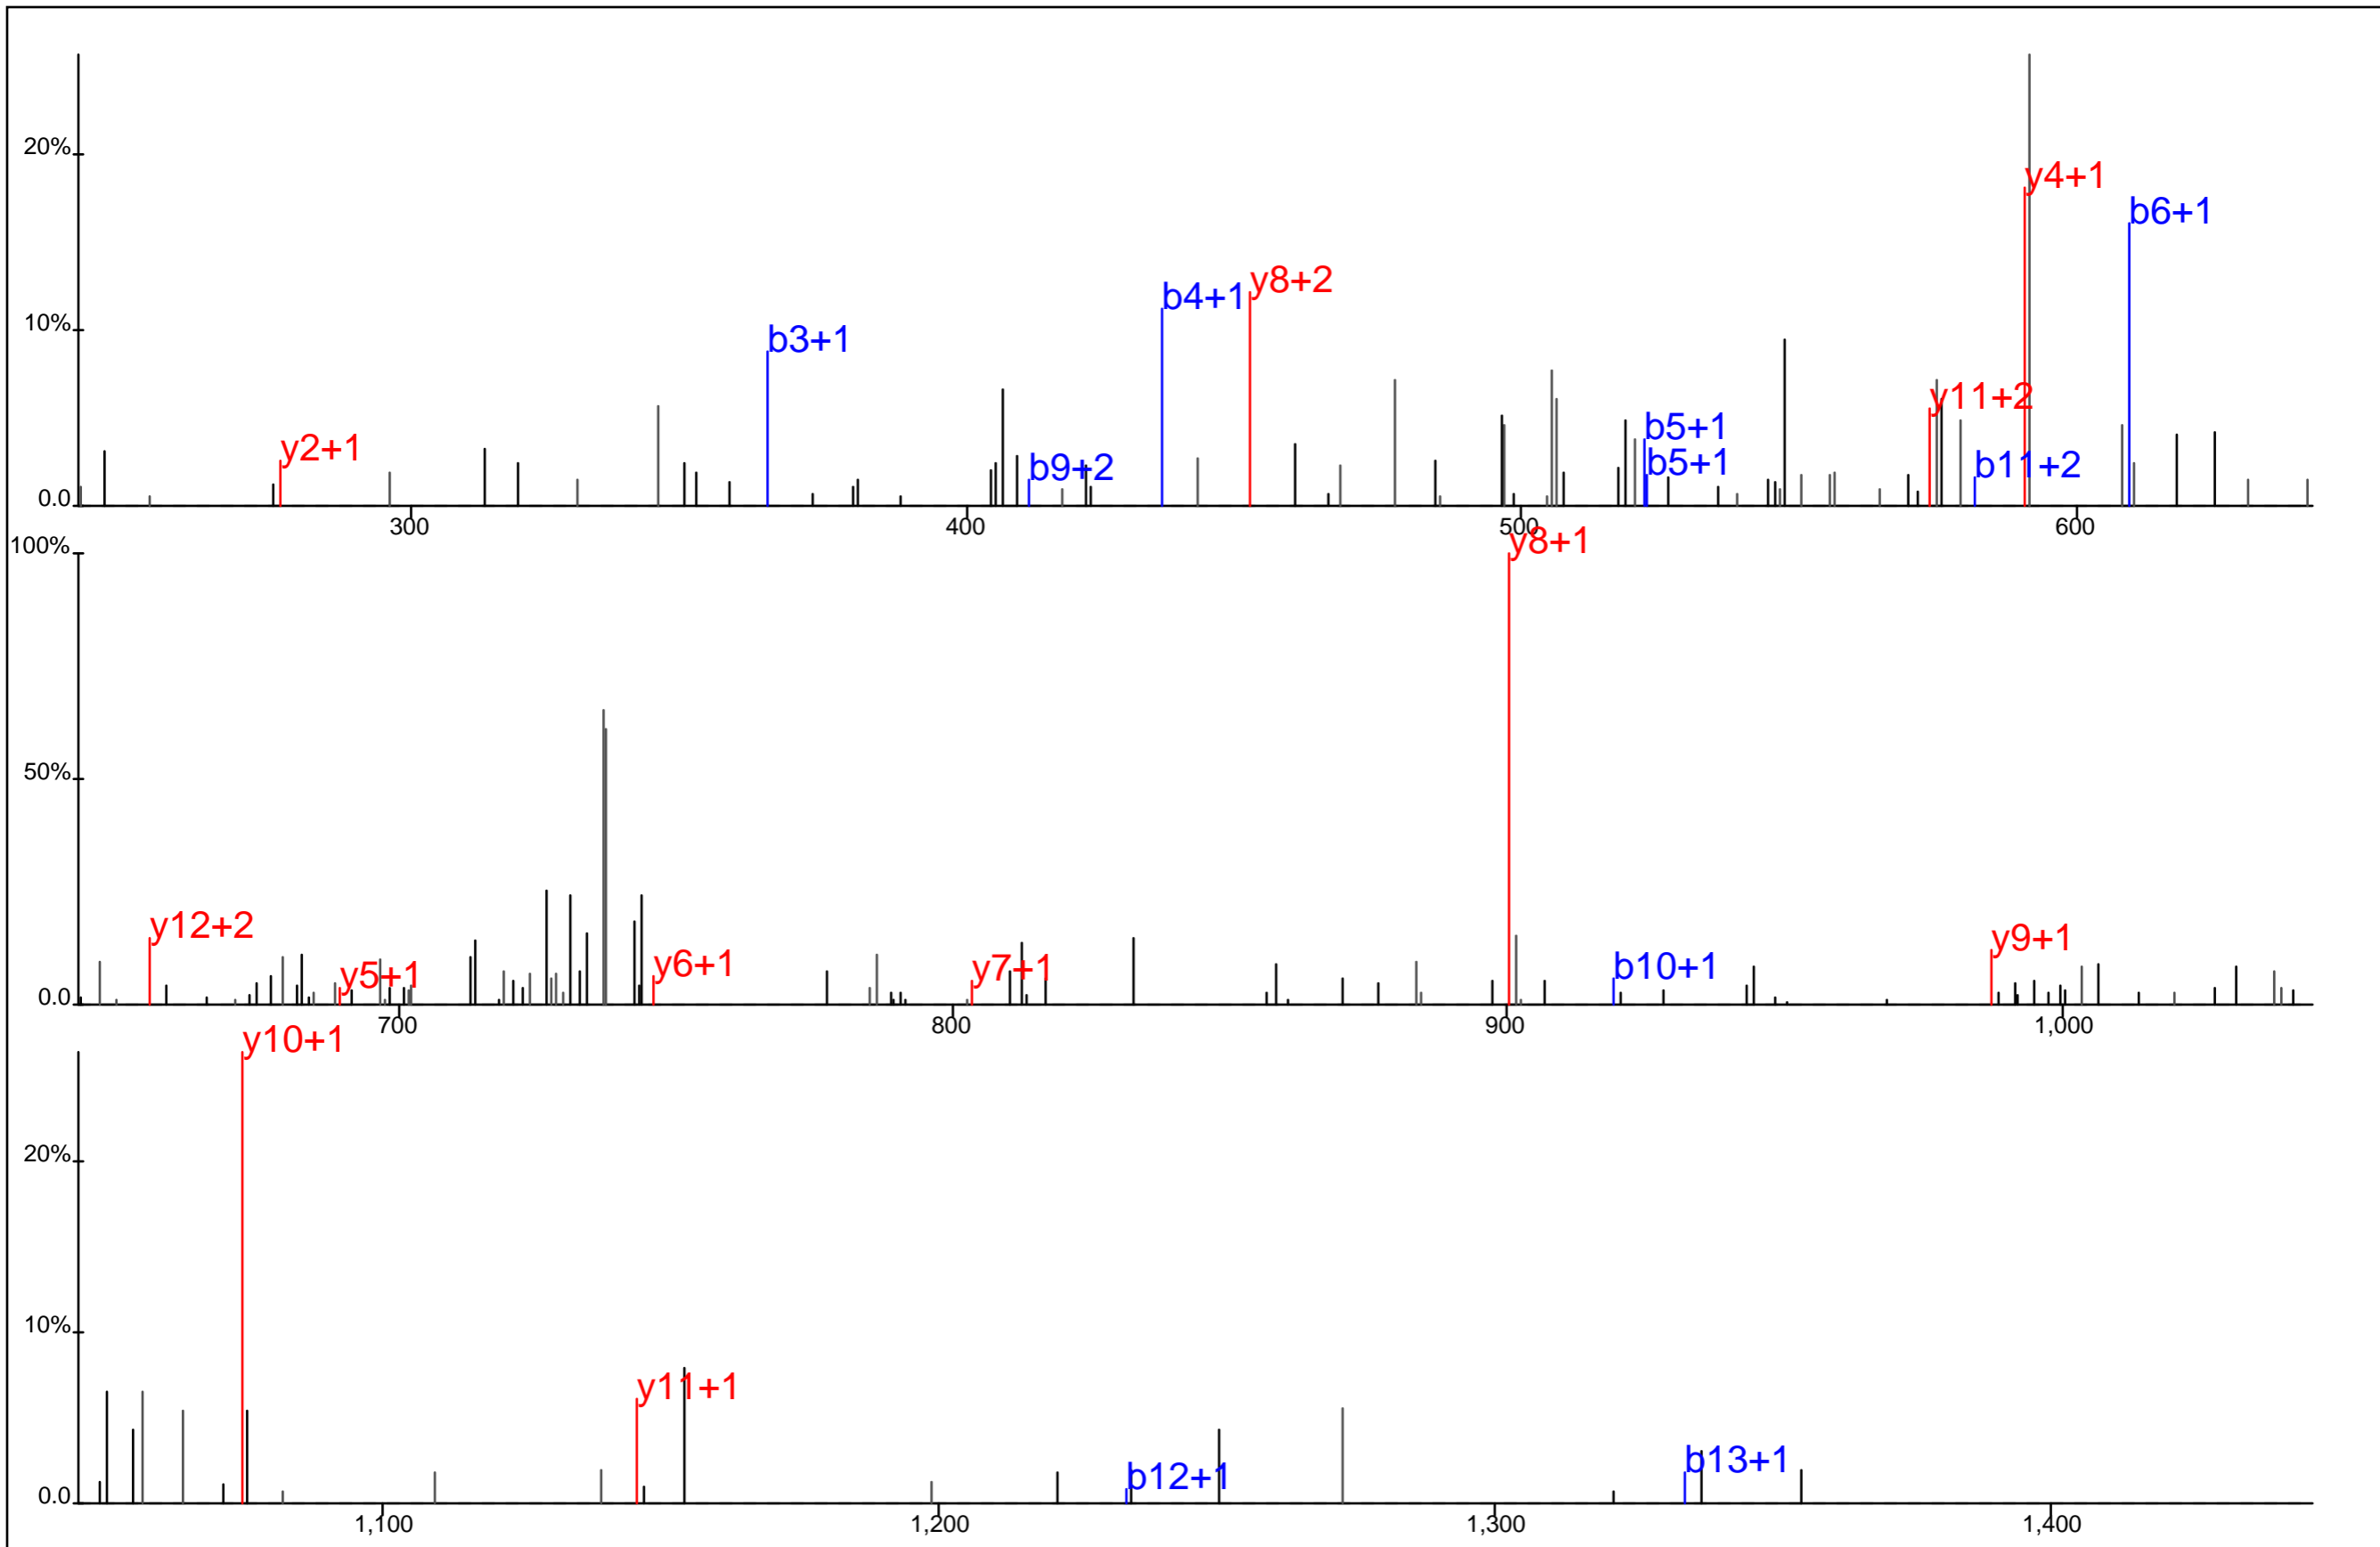

▢ ▢ ▢ ▢ ▢ ▢ ▢ ▢ ▢ ▢ ▢ ▢  
 S L Y A S S P G G V Y\* A T R  
▢ ▢ ▢ ▢ ▢ ▢ ▢ ▢ ▢ ▢ ▢ ▢

Protein Name: Vimentin  
 gi Accession: 37848  
 Precursor Mass: 754.8453+2  
 Delta Mass: 3.525 ppm  
 XCorr: 24.37

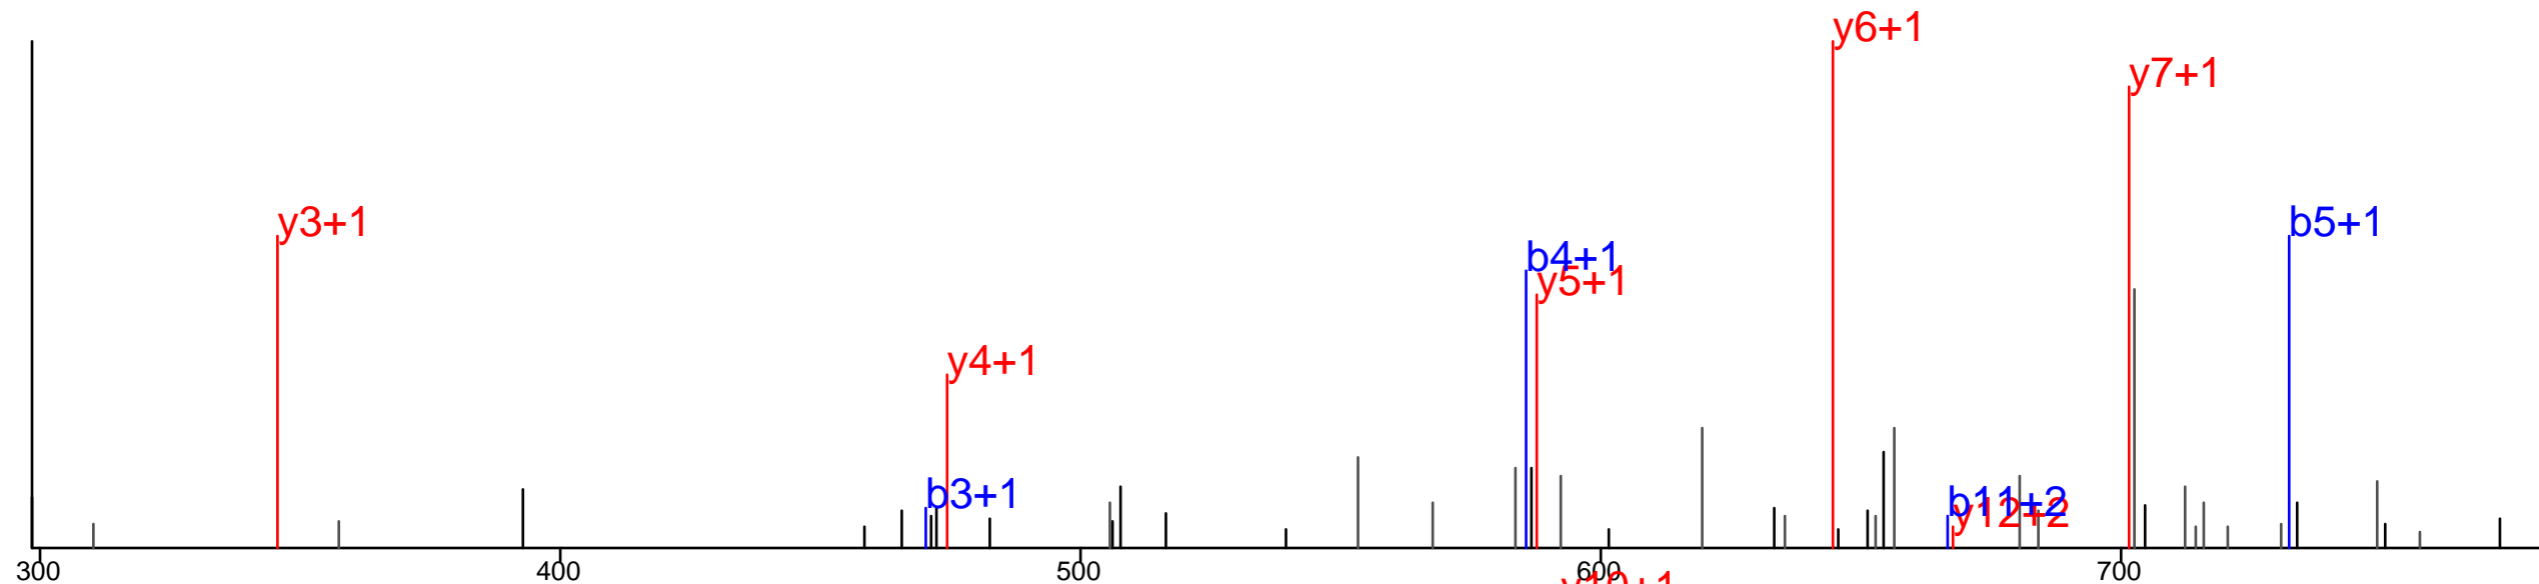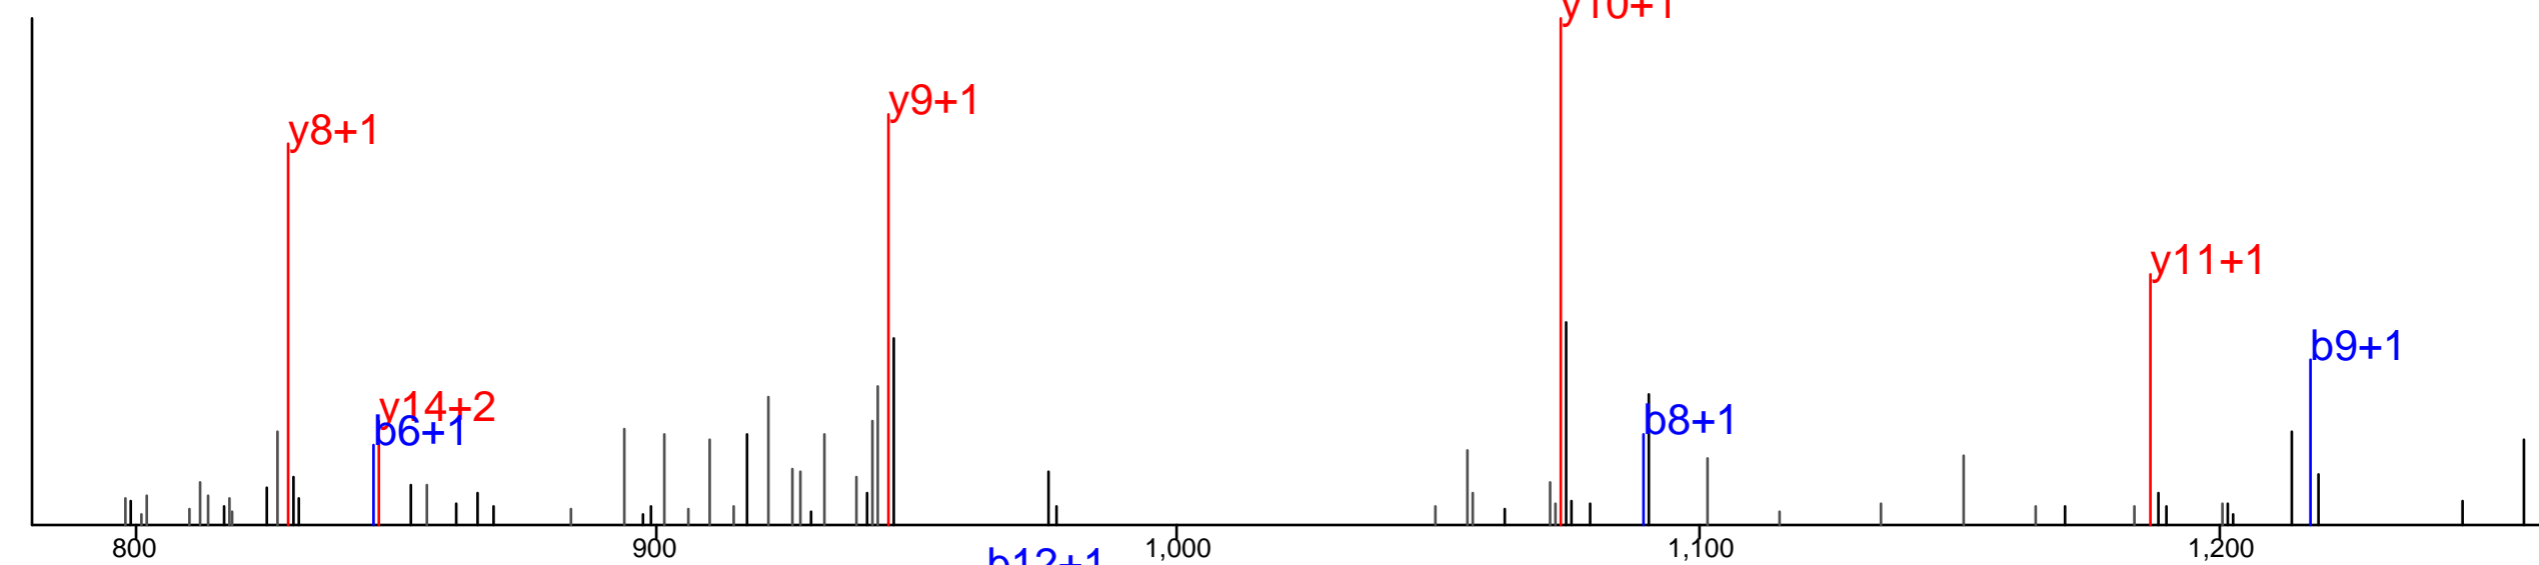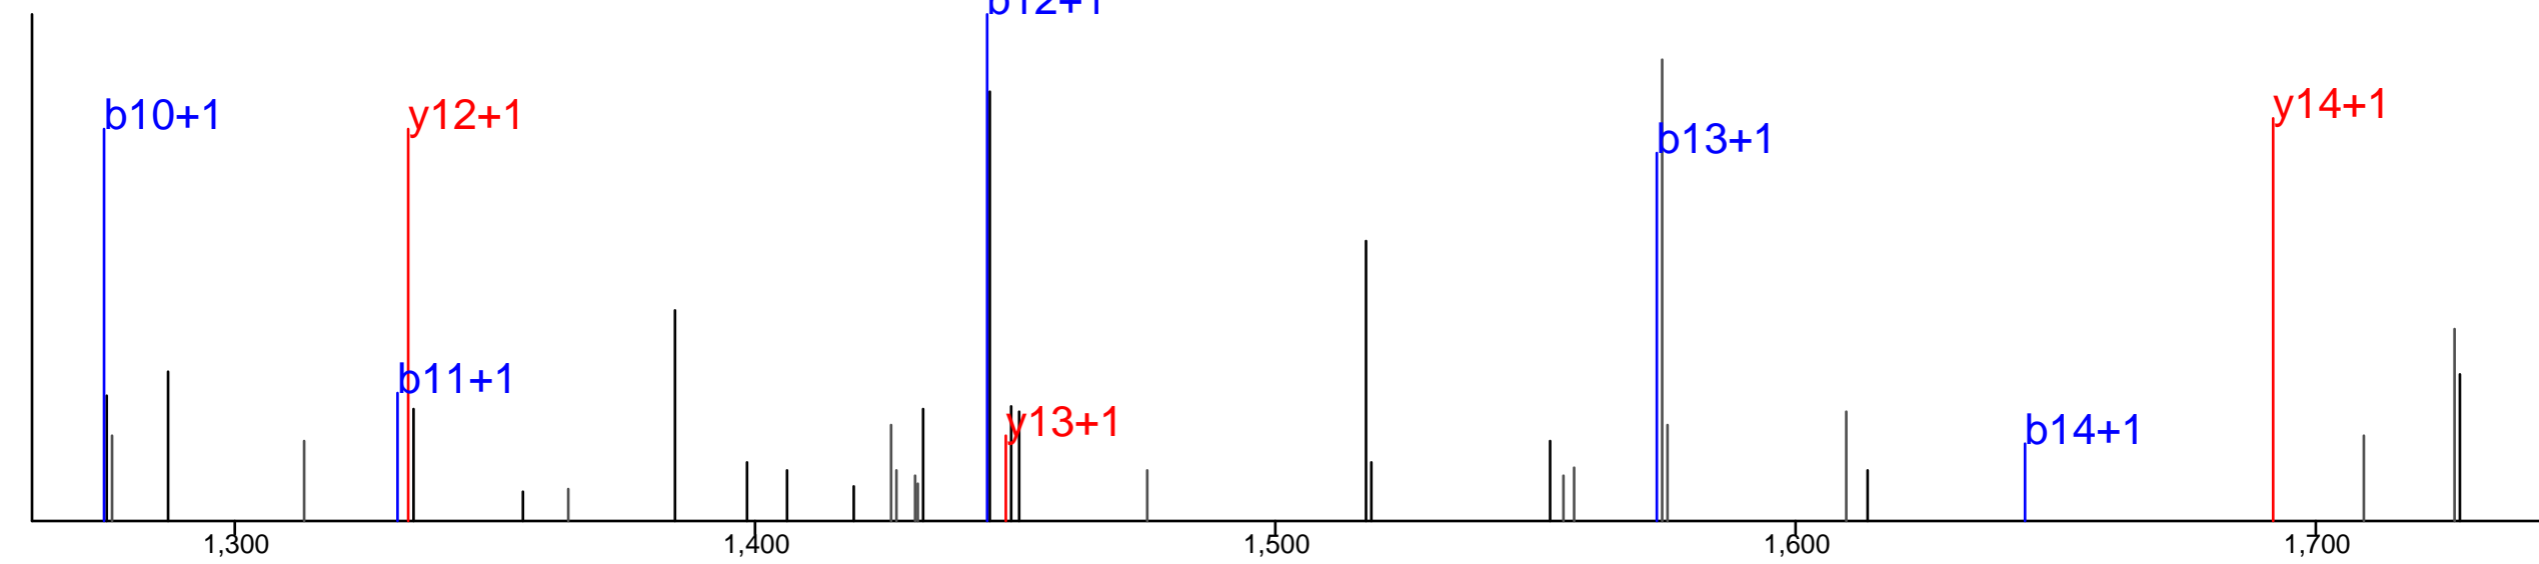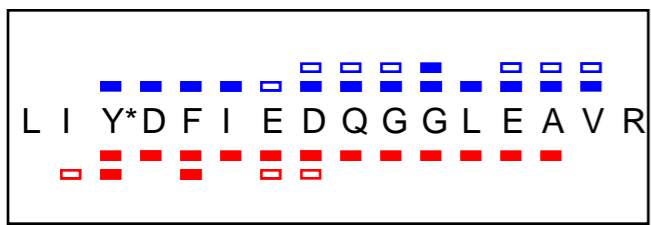

Protein Name: WASP  
 gi Accession: 4507909  
 Precursor Mass: 959.4542+2  
 Delta Mass: 0.943 ppm  
 XCorr: 96.33





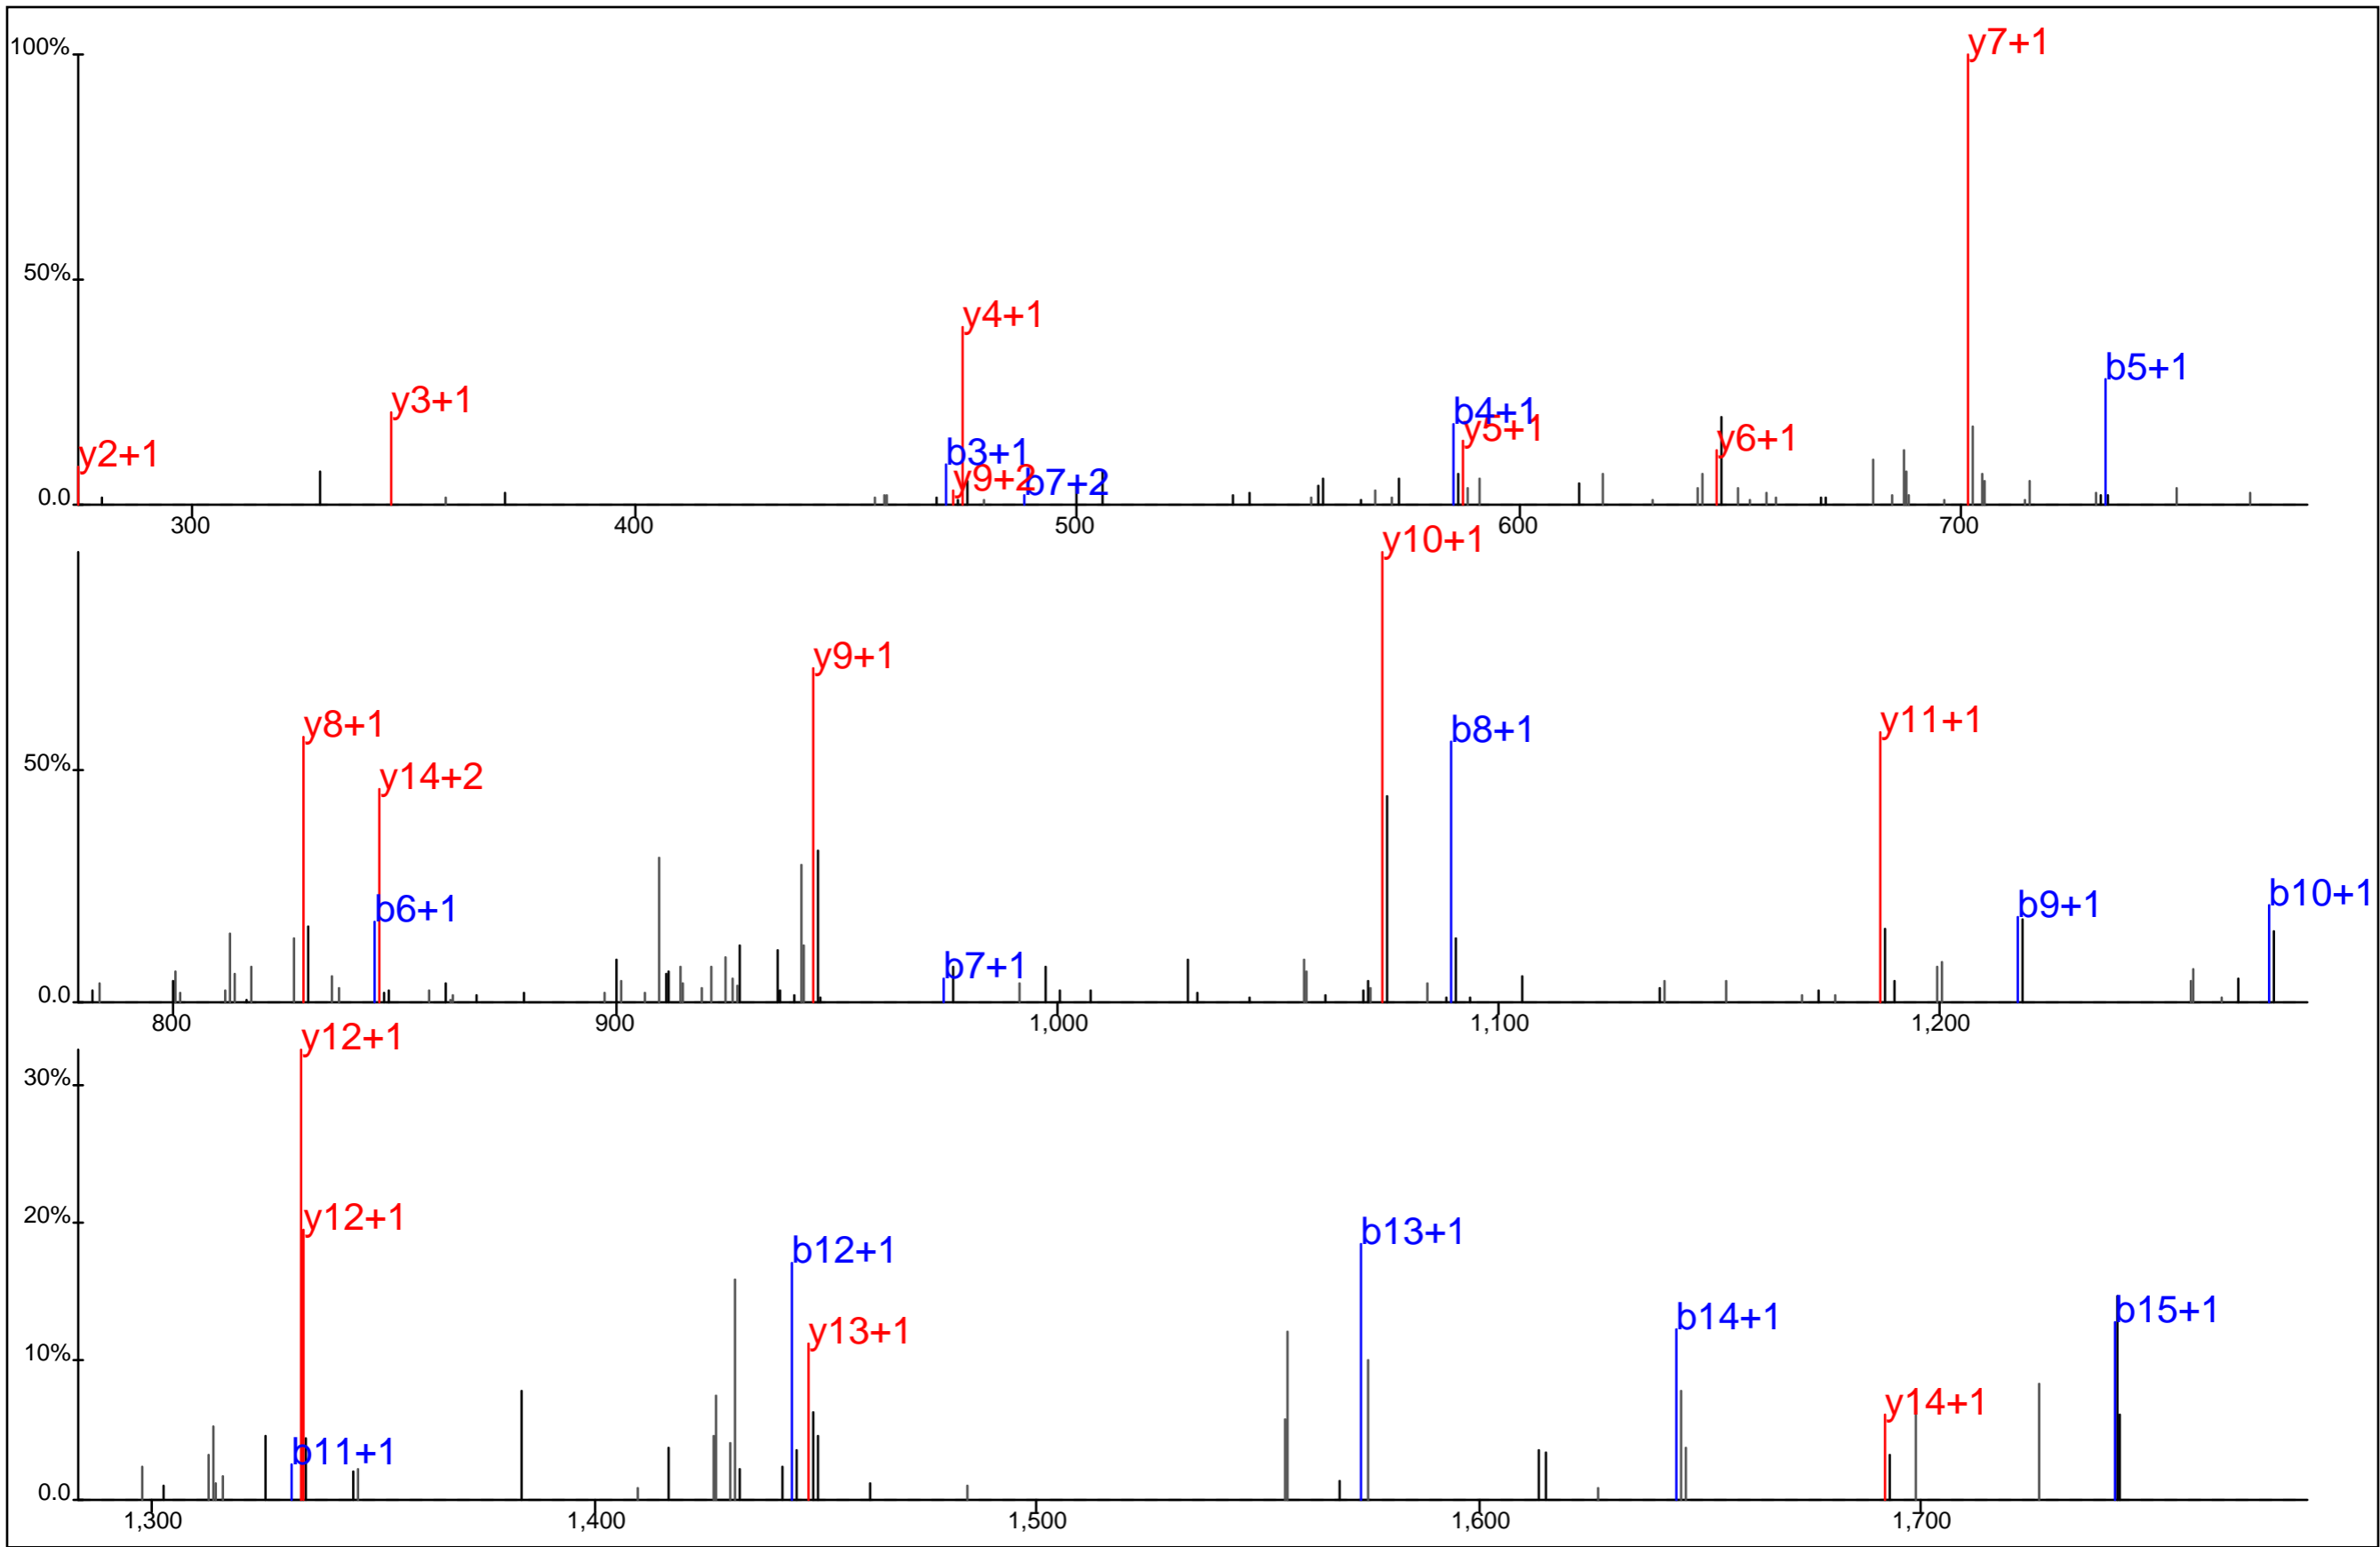

■ □  
■ □ ■ □ ■ □ ■ □ ■ □ ■ □ ■ □  
**L I Y\* D F I E D Q G G L E A V R**  
■ ■ ■ ■ ■ ■ ■ ■ ■ ■ ■ ■ ■ ■

Protein Name: WASP  
 gi Accession: 4507909  
 Precursor Mass: 959.4539+2  
 Delta Mass: 0.625 ppm  
 XCorr: 82.89

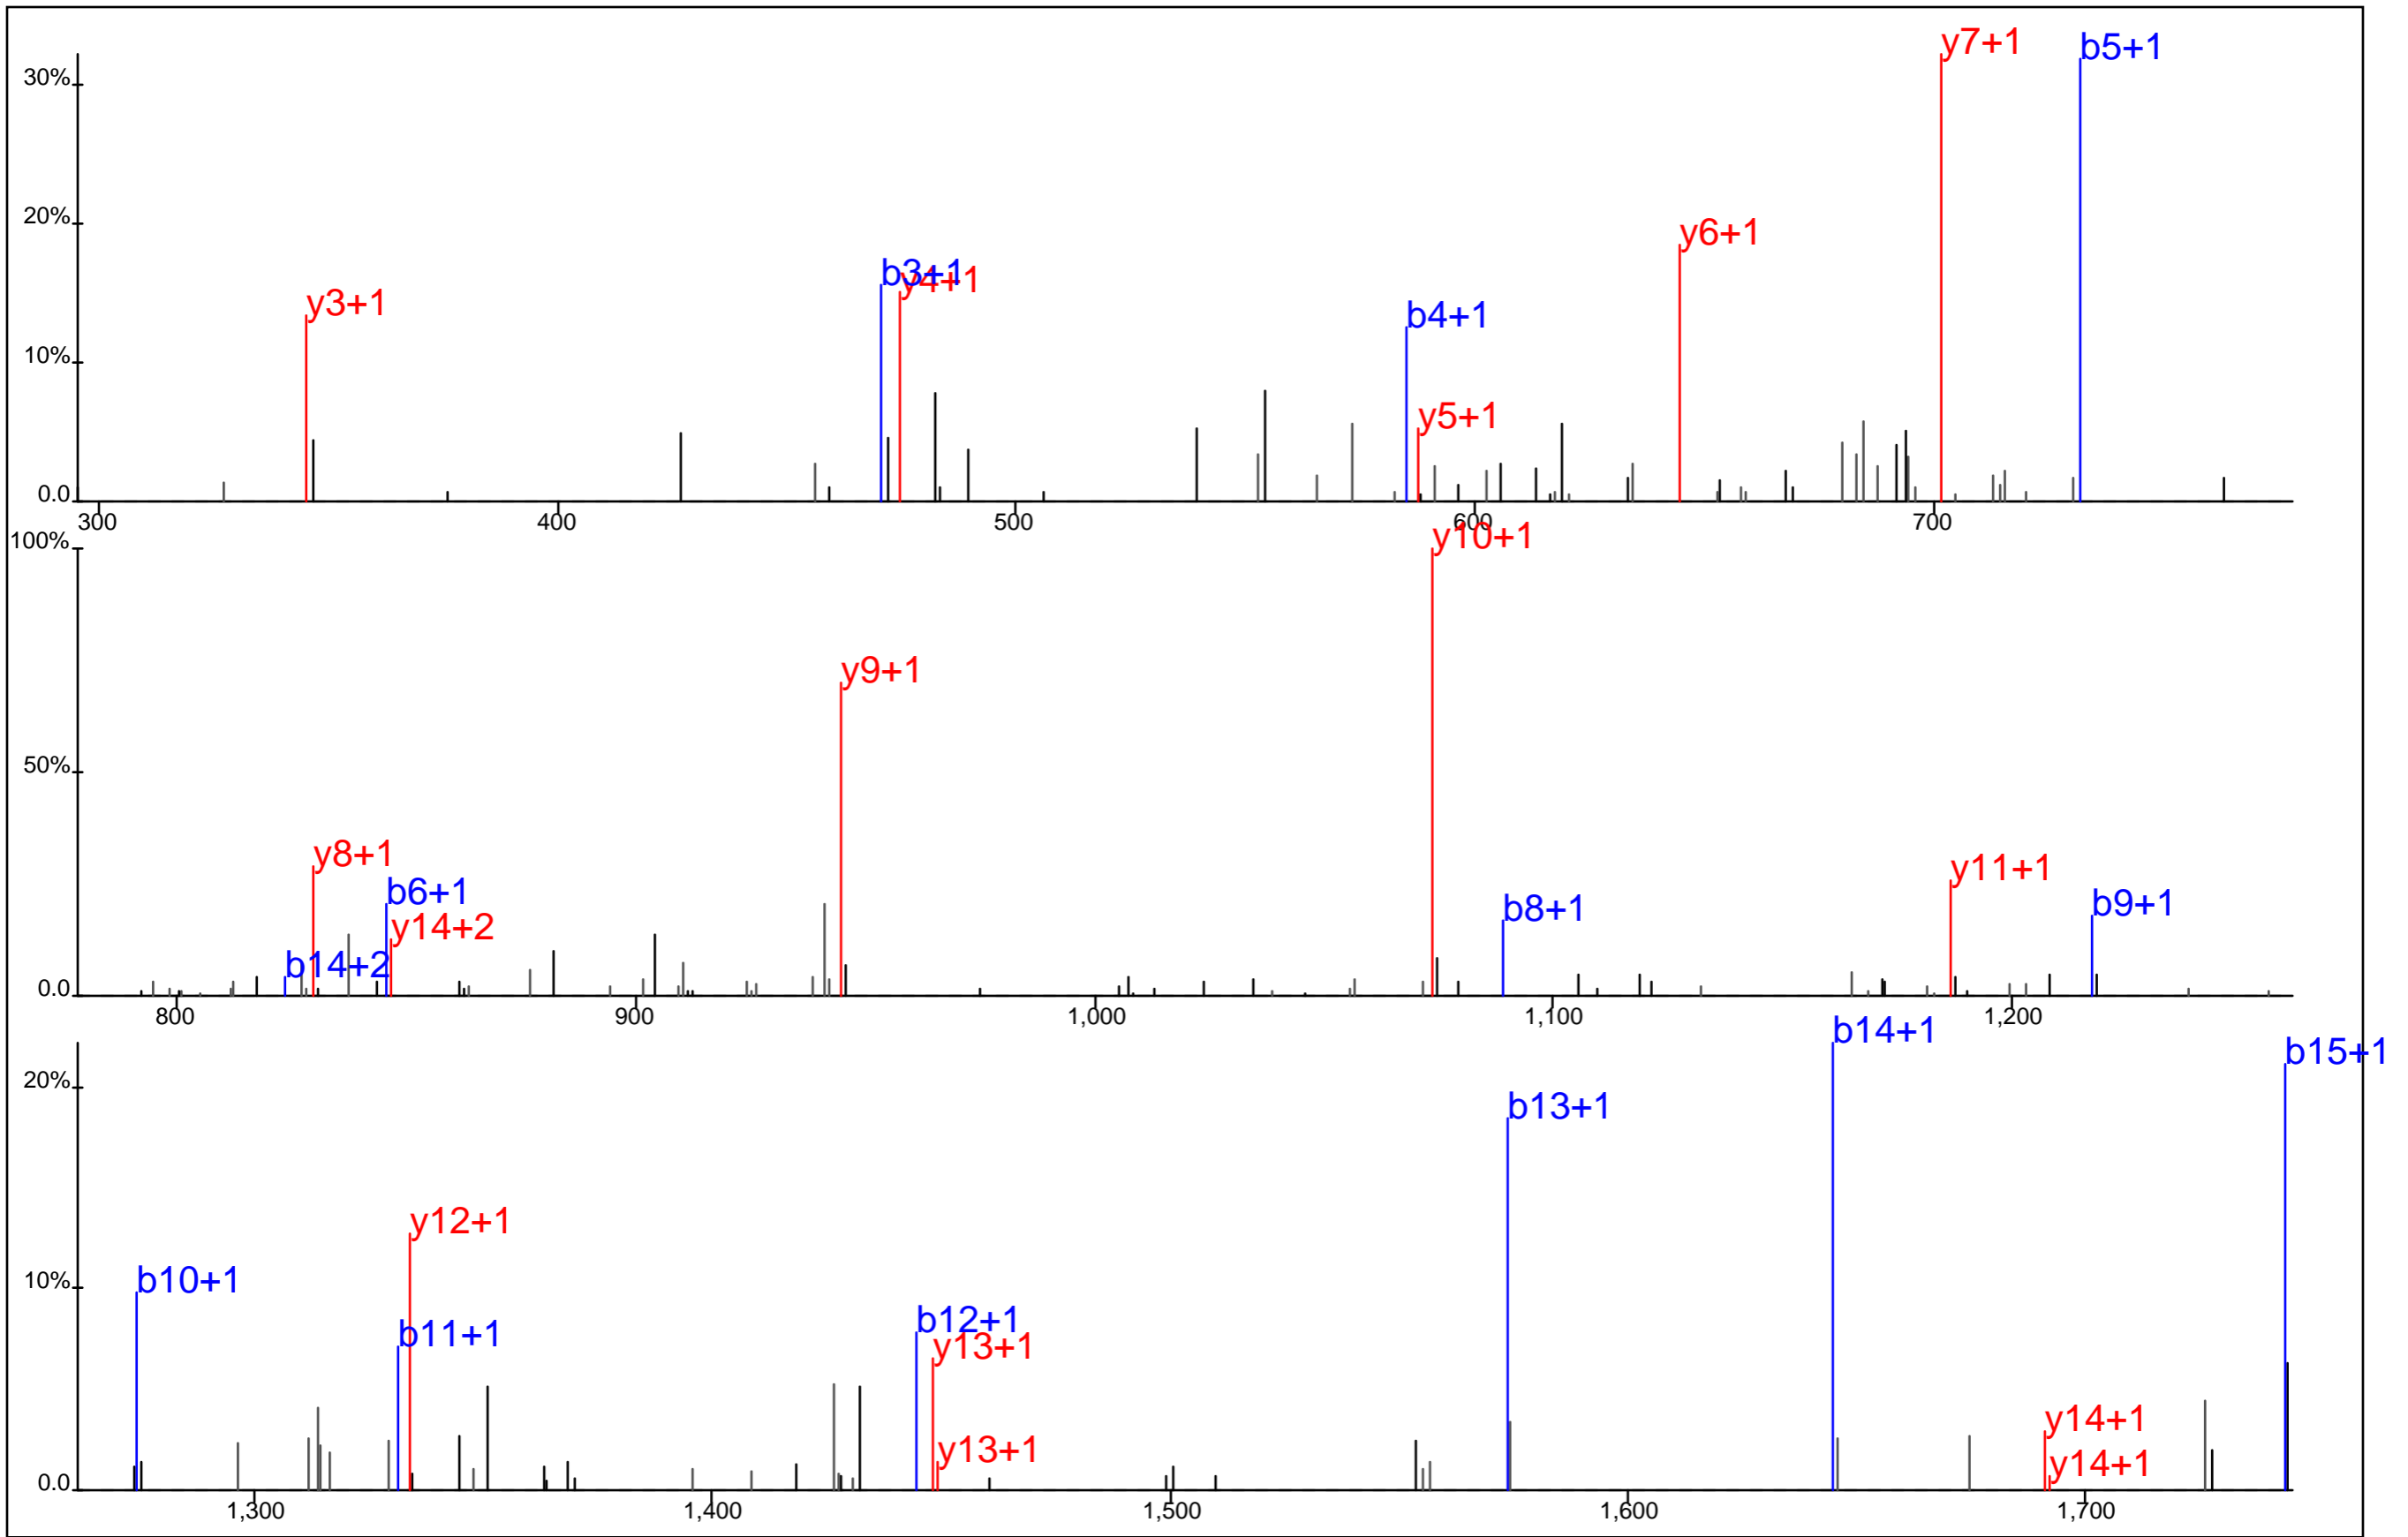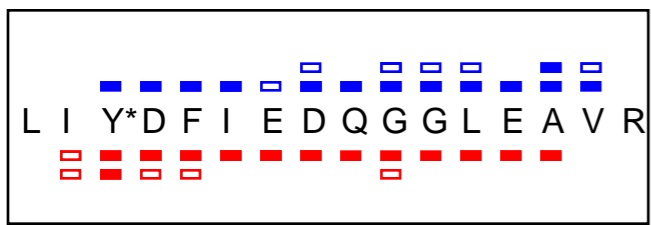

Protein Name: WASP  
 gi Accession: 4507909  
 Precursor Mass: 959.4562+2  
 Delta Mass: 2.981 ppm  
 XCorr: 118.46

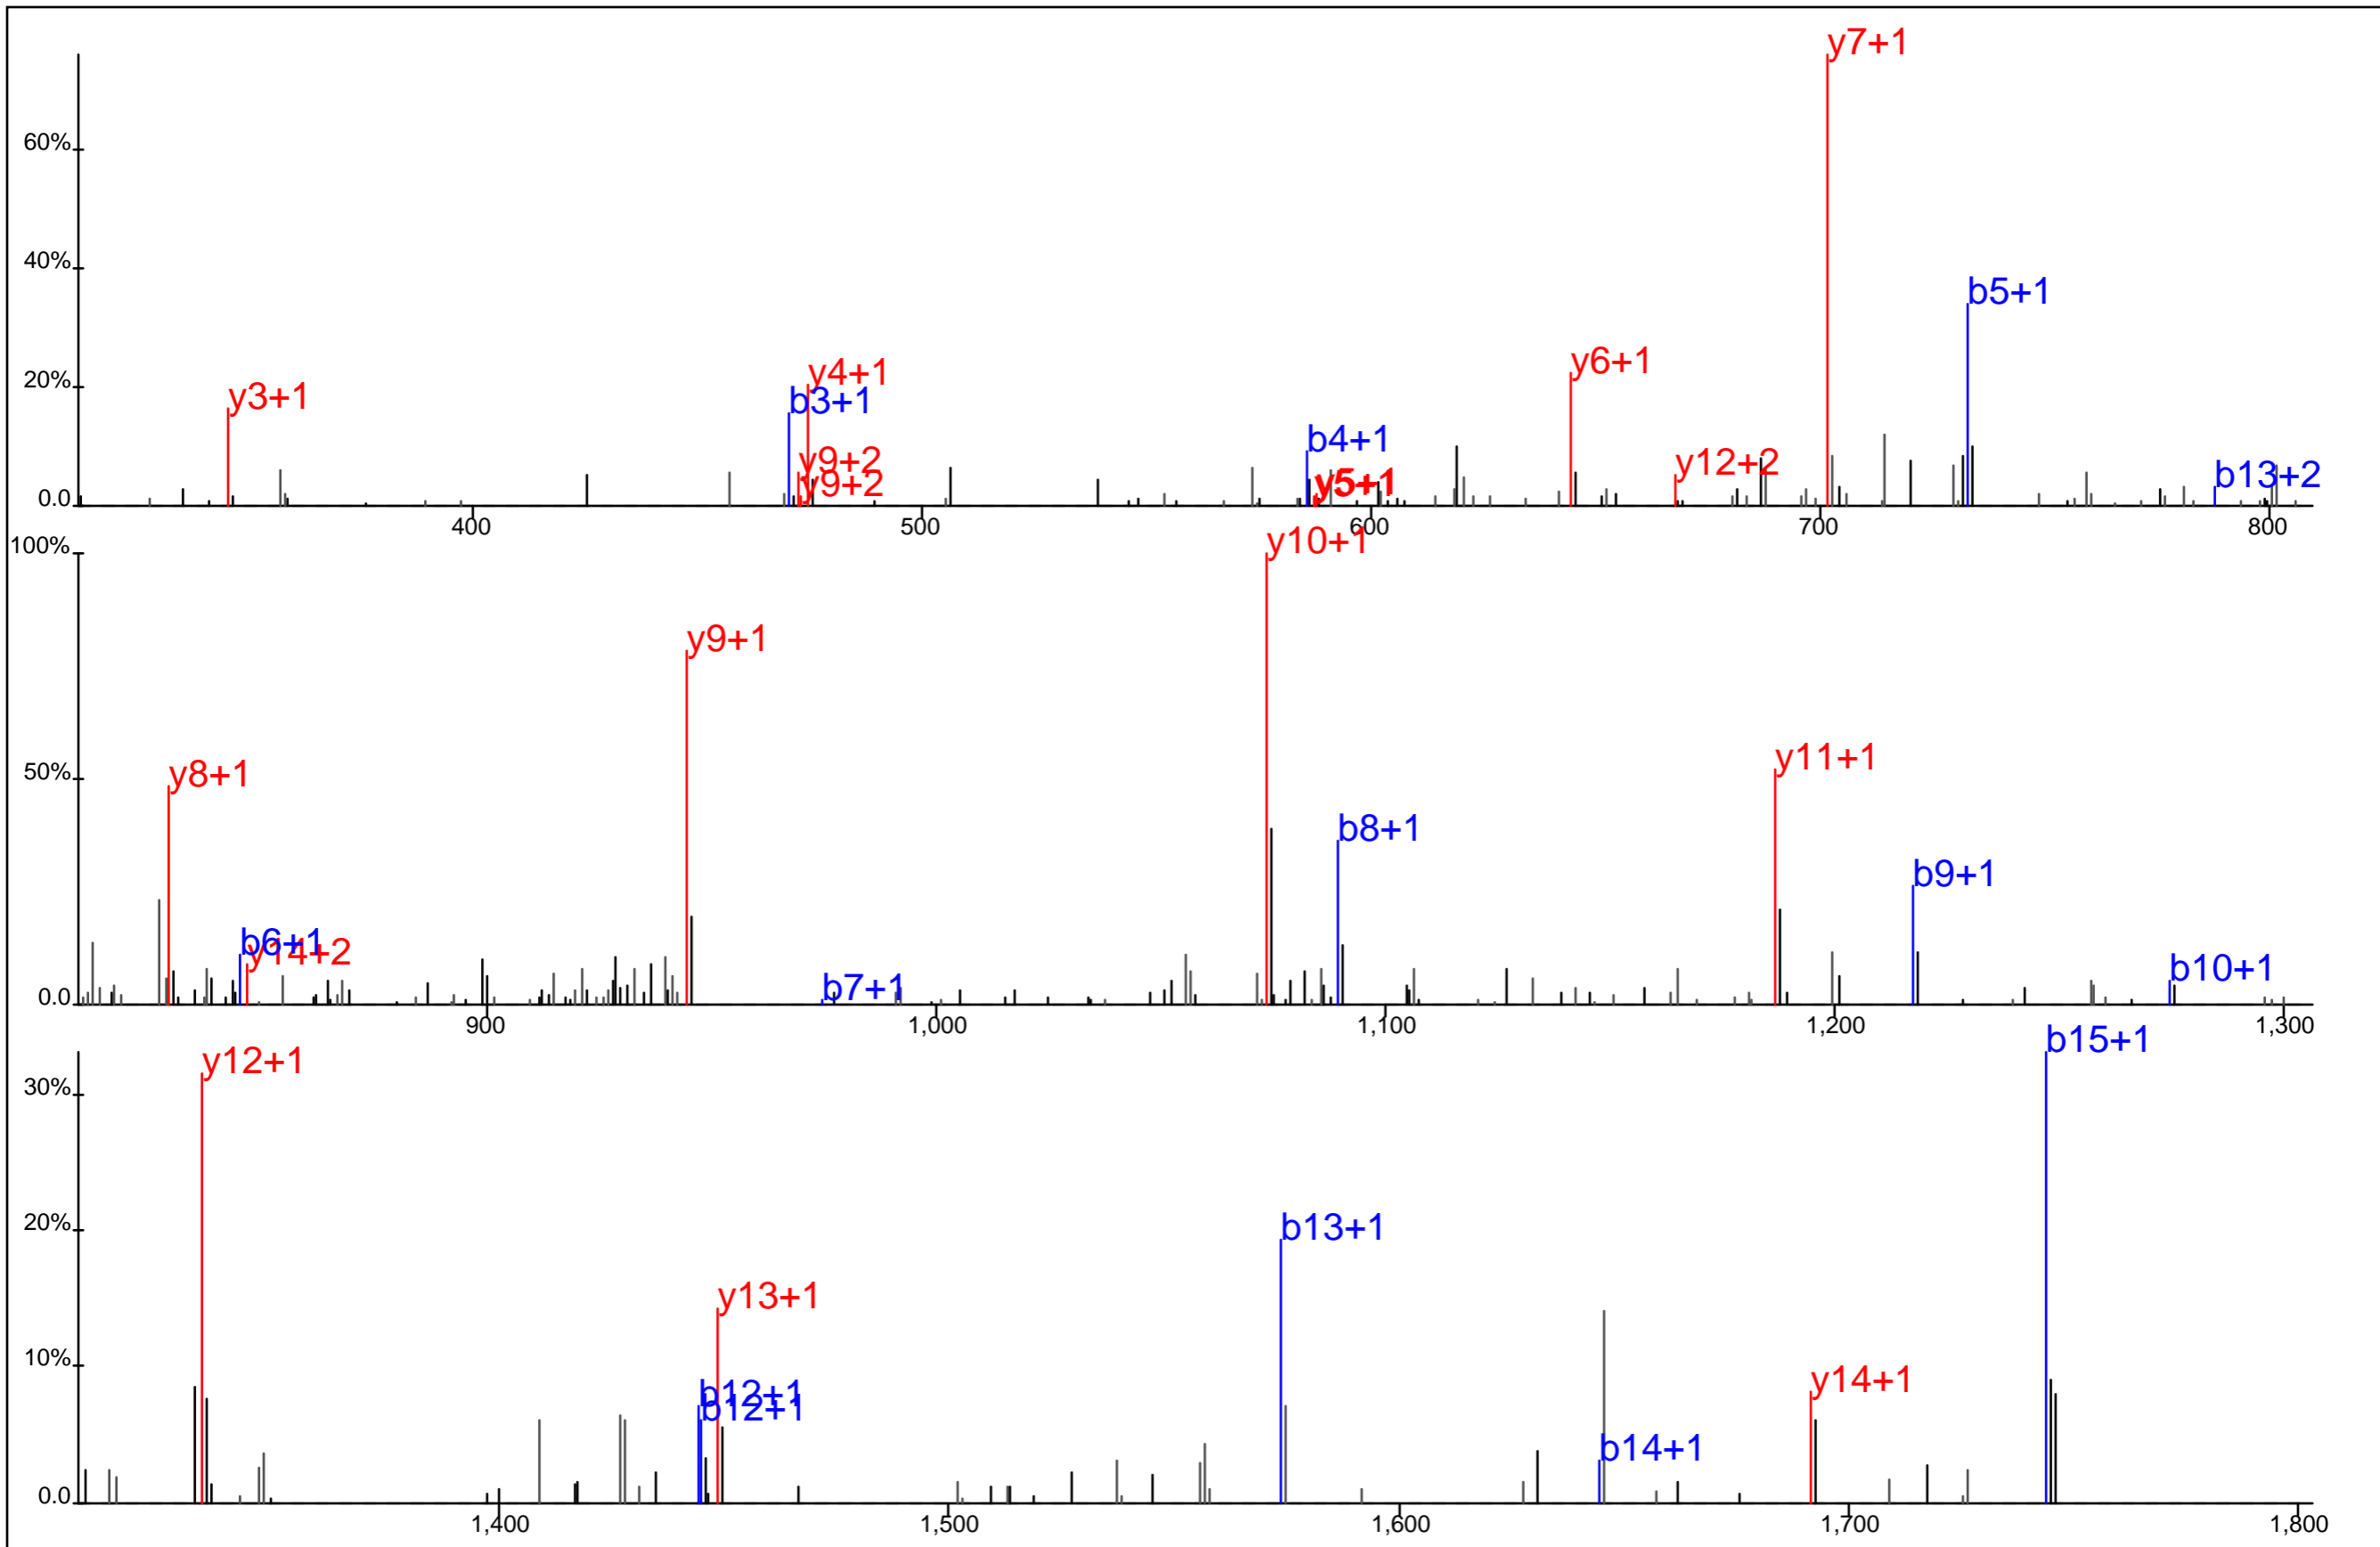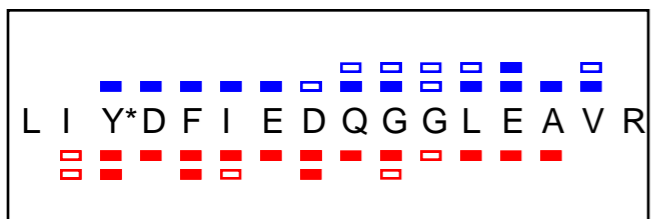

Protein Name: WASP  
 gi Accession: 4507909  
 Precursor Mass: 959.4556+2  
 Delta Mass: 2.345 ppm  
 XCorr: 84.15

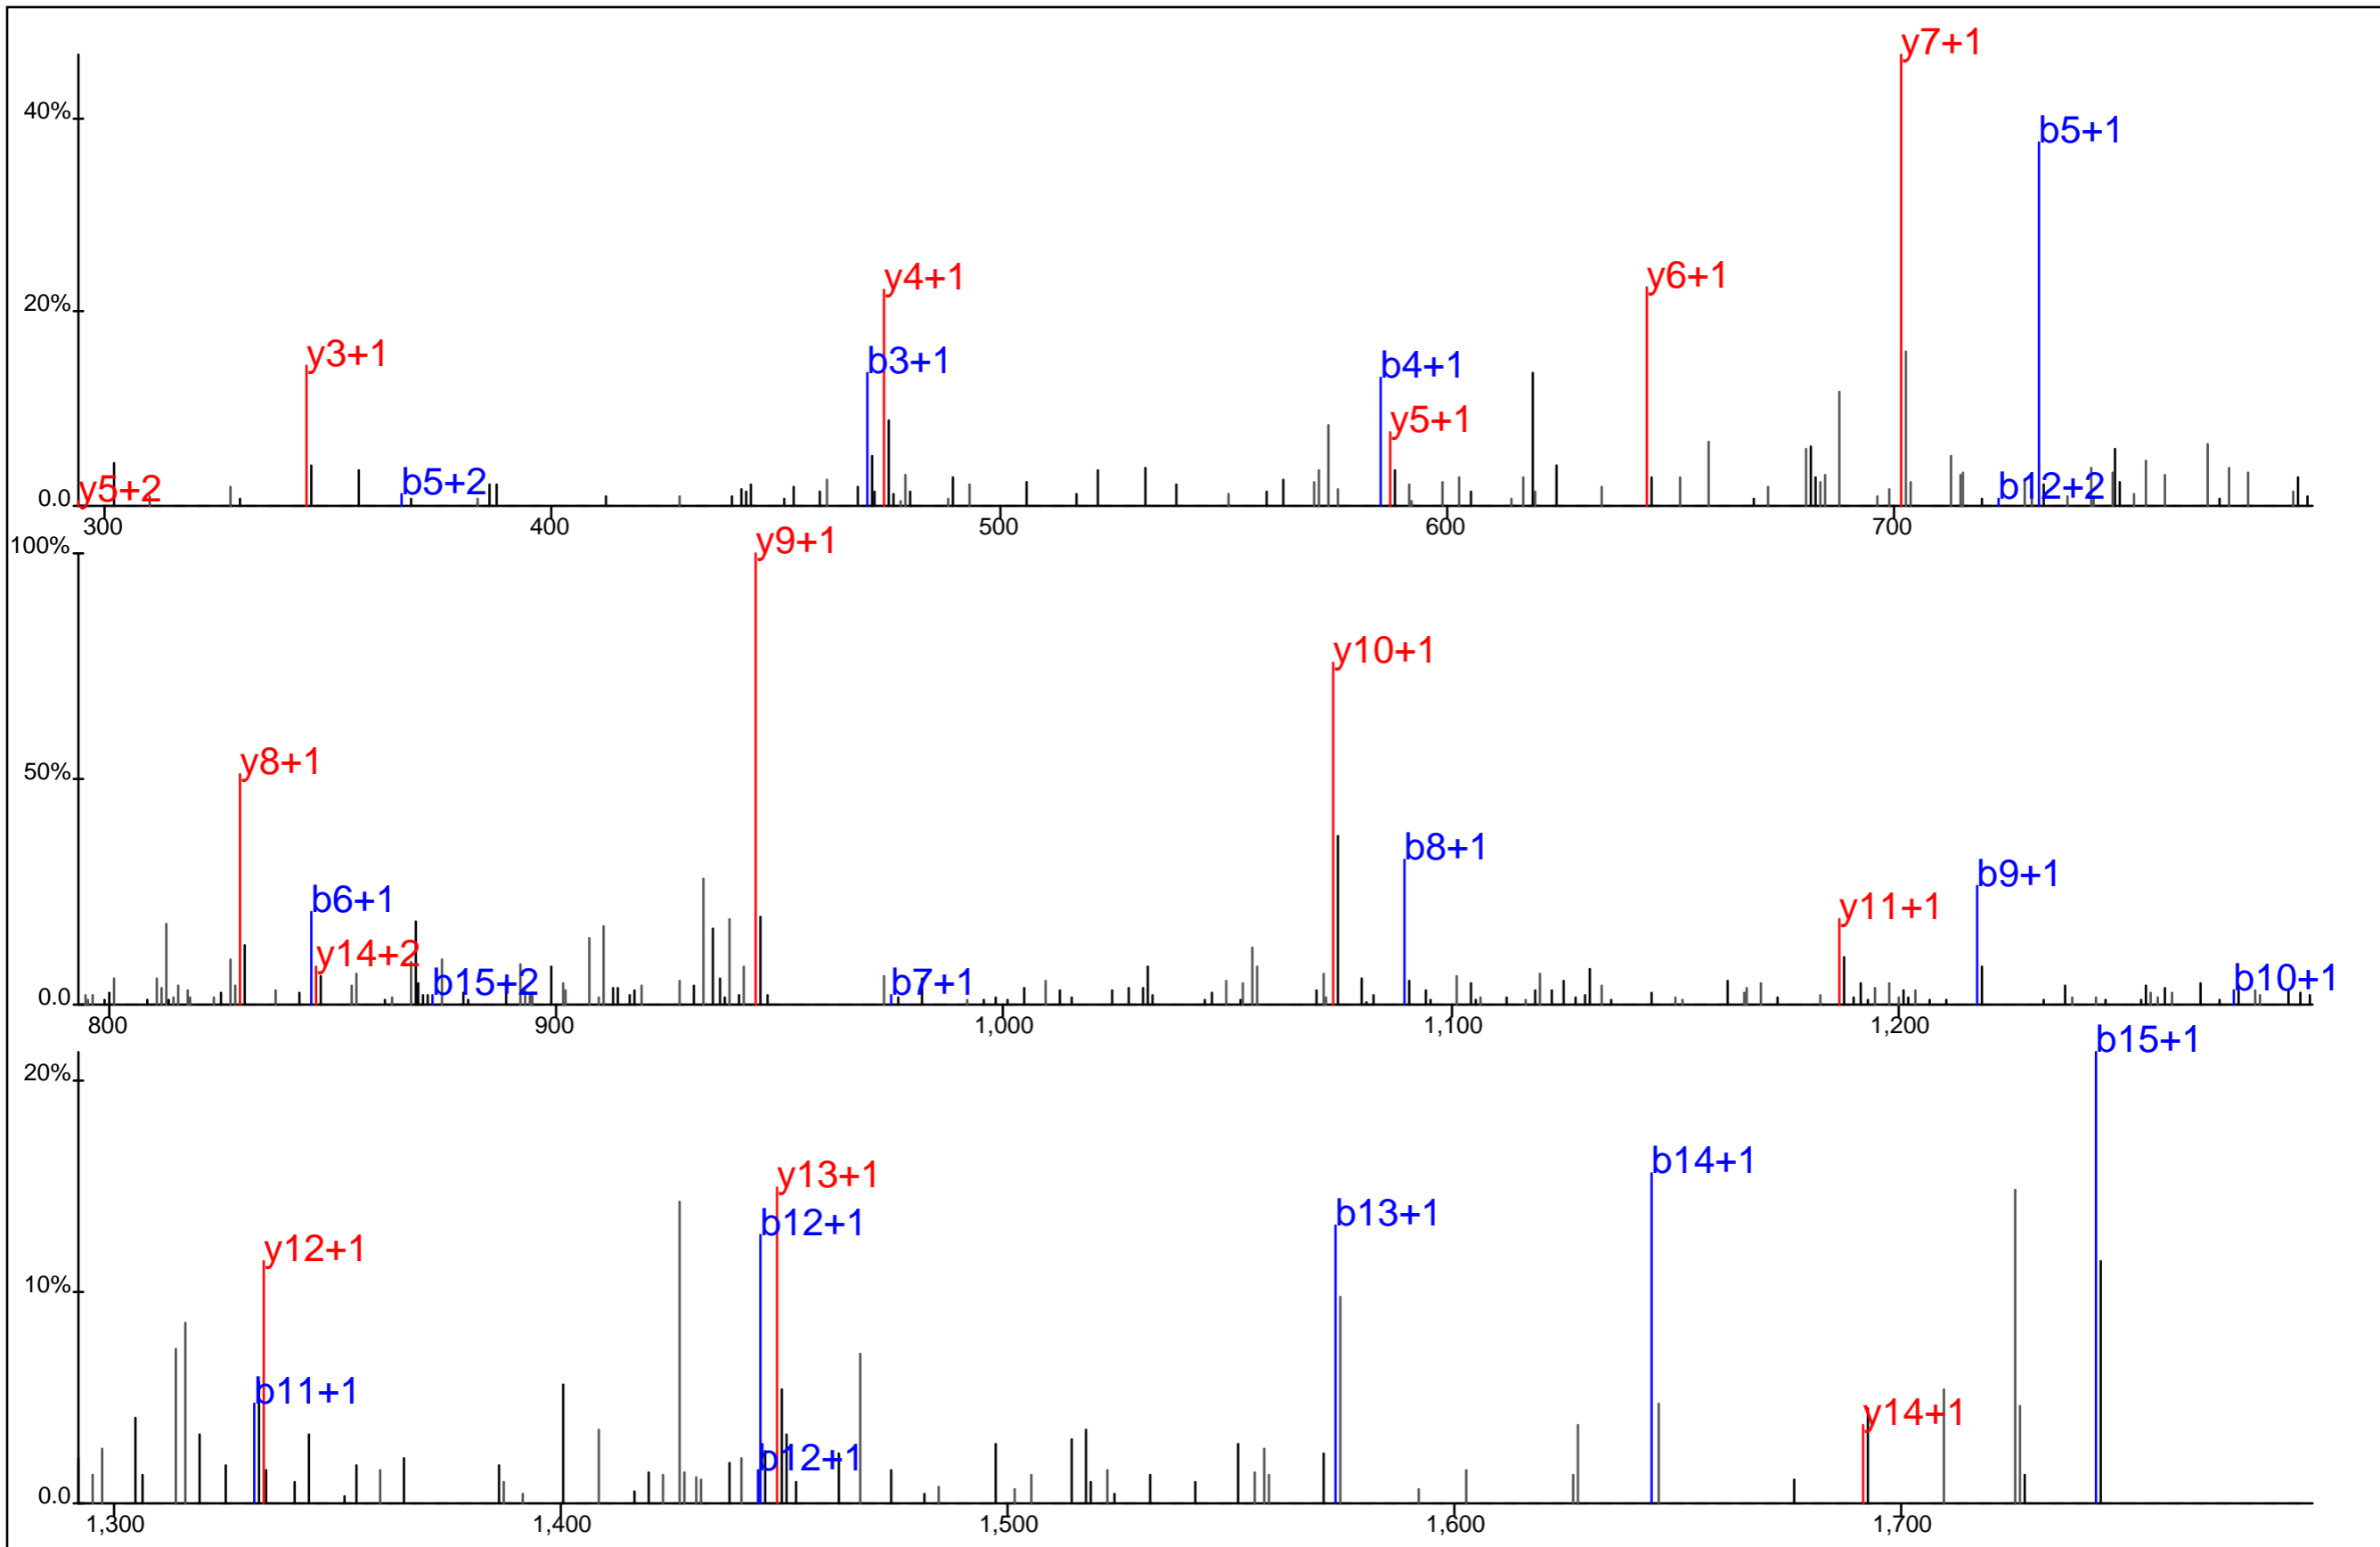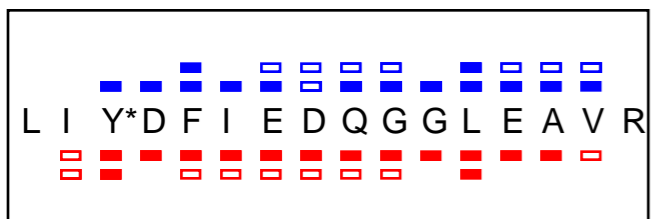

Protein Name: WASP  
 gi Accession: 4507909  
 Precursor Mass: 959.4549+2  
 Delta Mass: 1.641 ppm  
 XCorr: 102.47









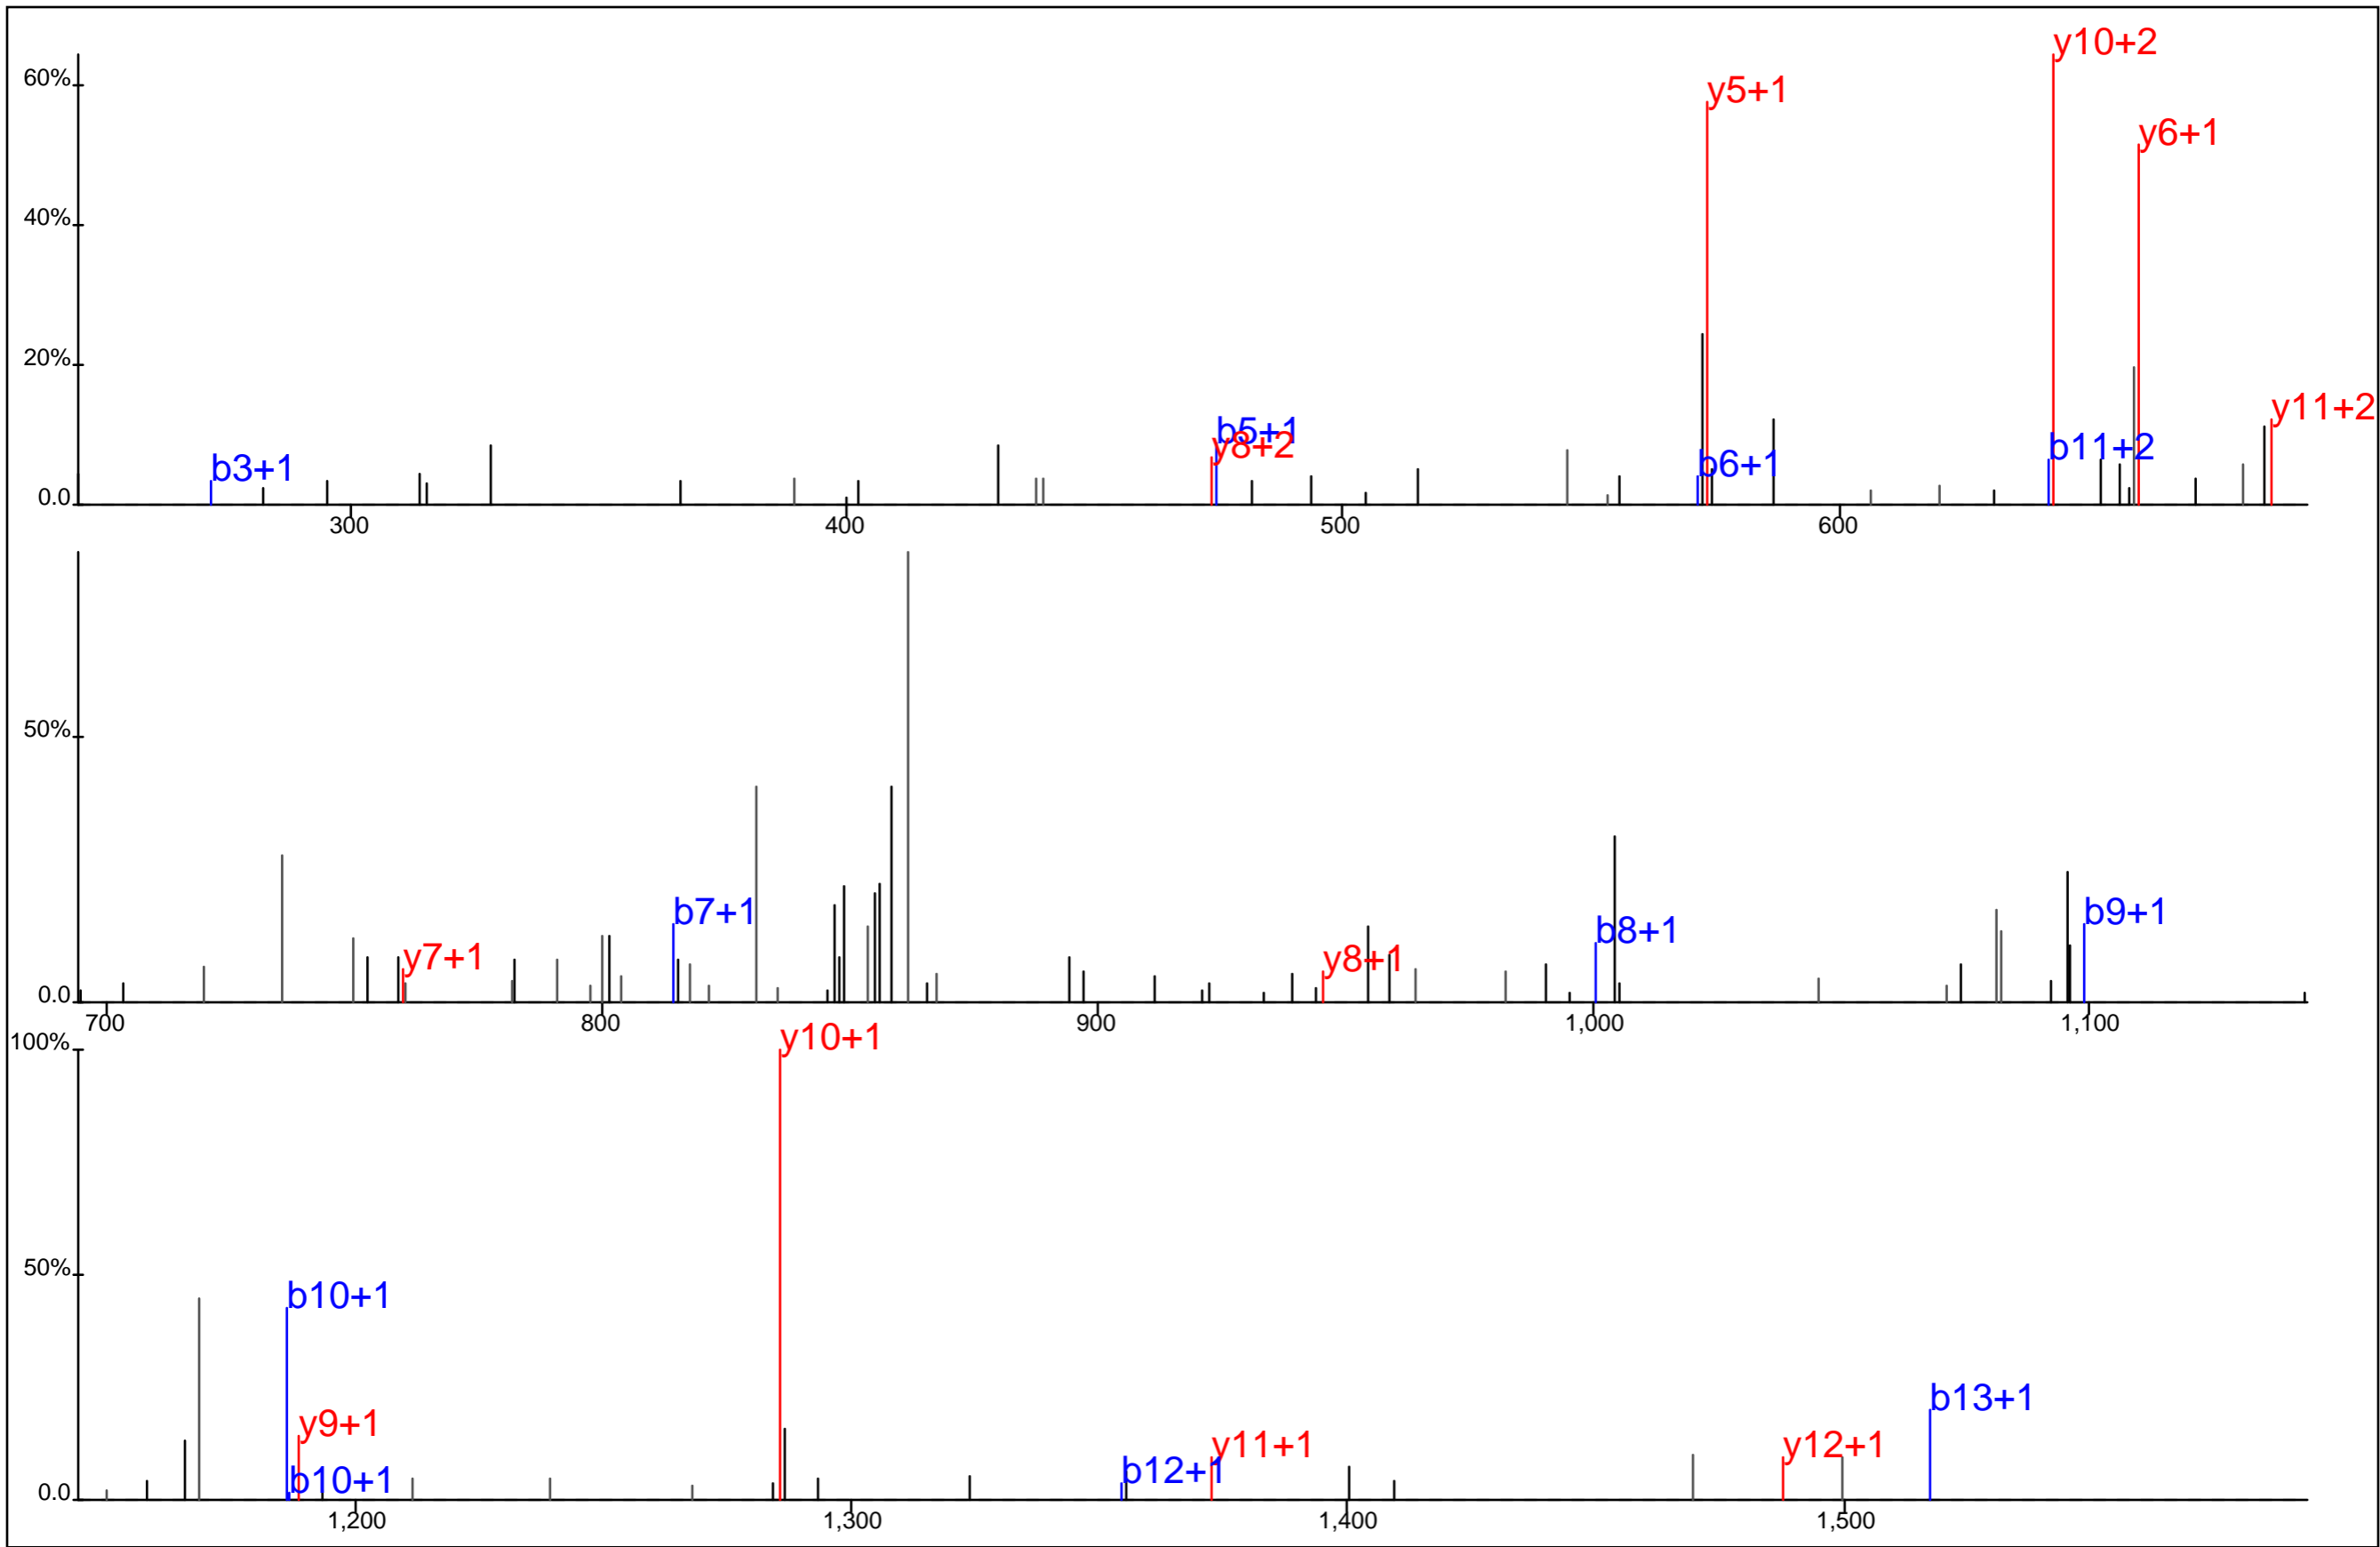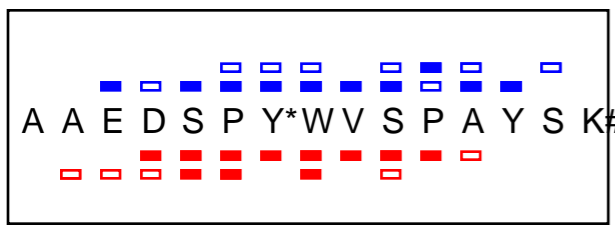

Protein Name: WD repeat domain 70  
 gi Accession: 12224837  
 Precursor Mass: 879.8851+2  
 Delta Mass: 7.282 ppm  
 XCorr: 33.0

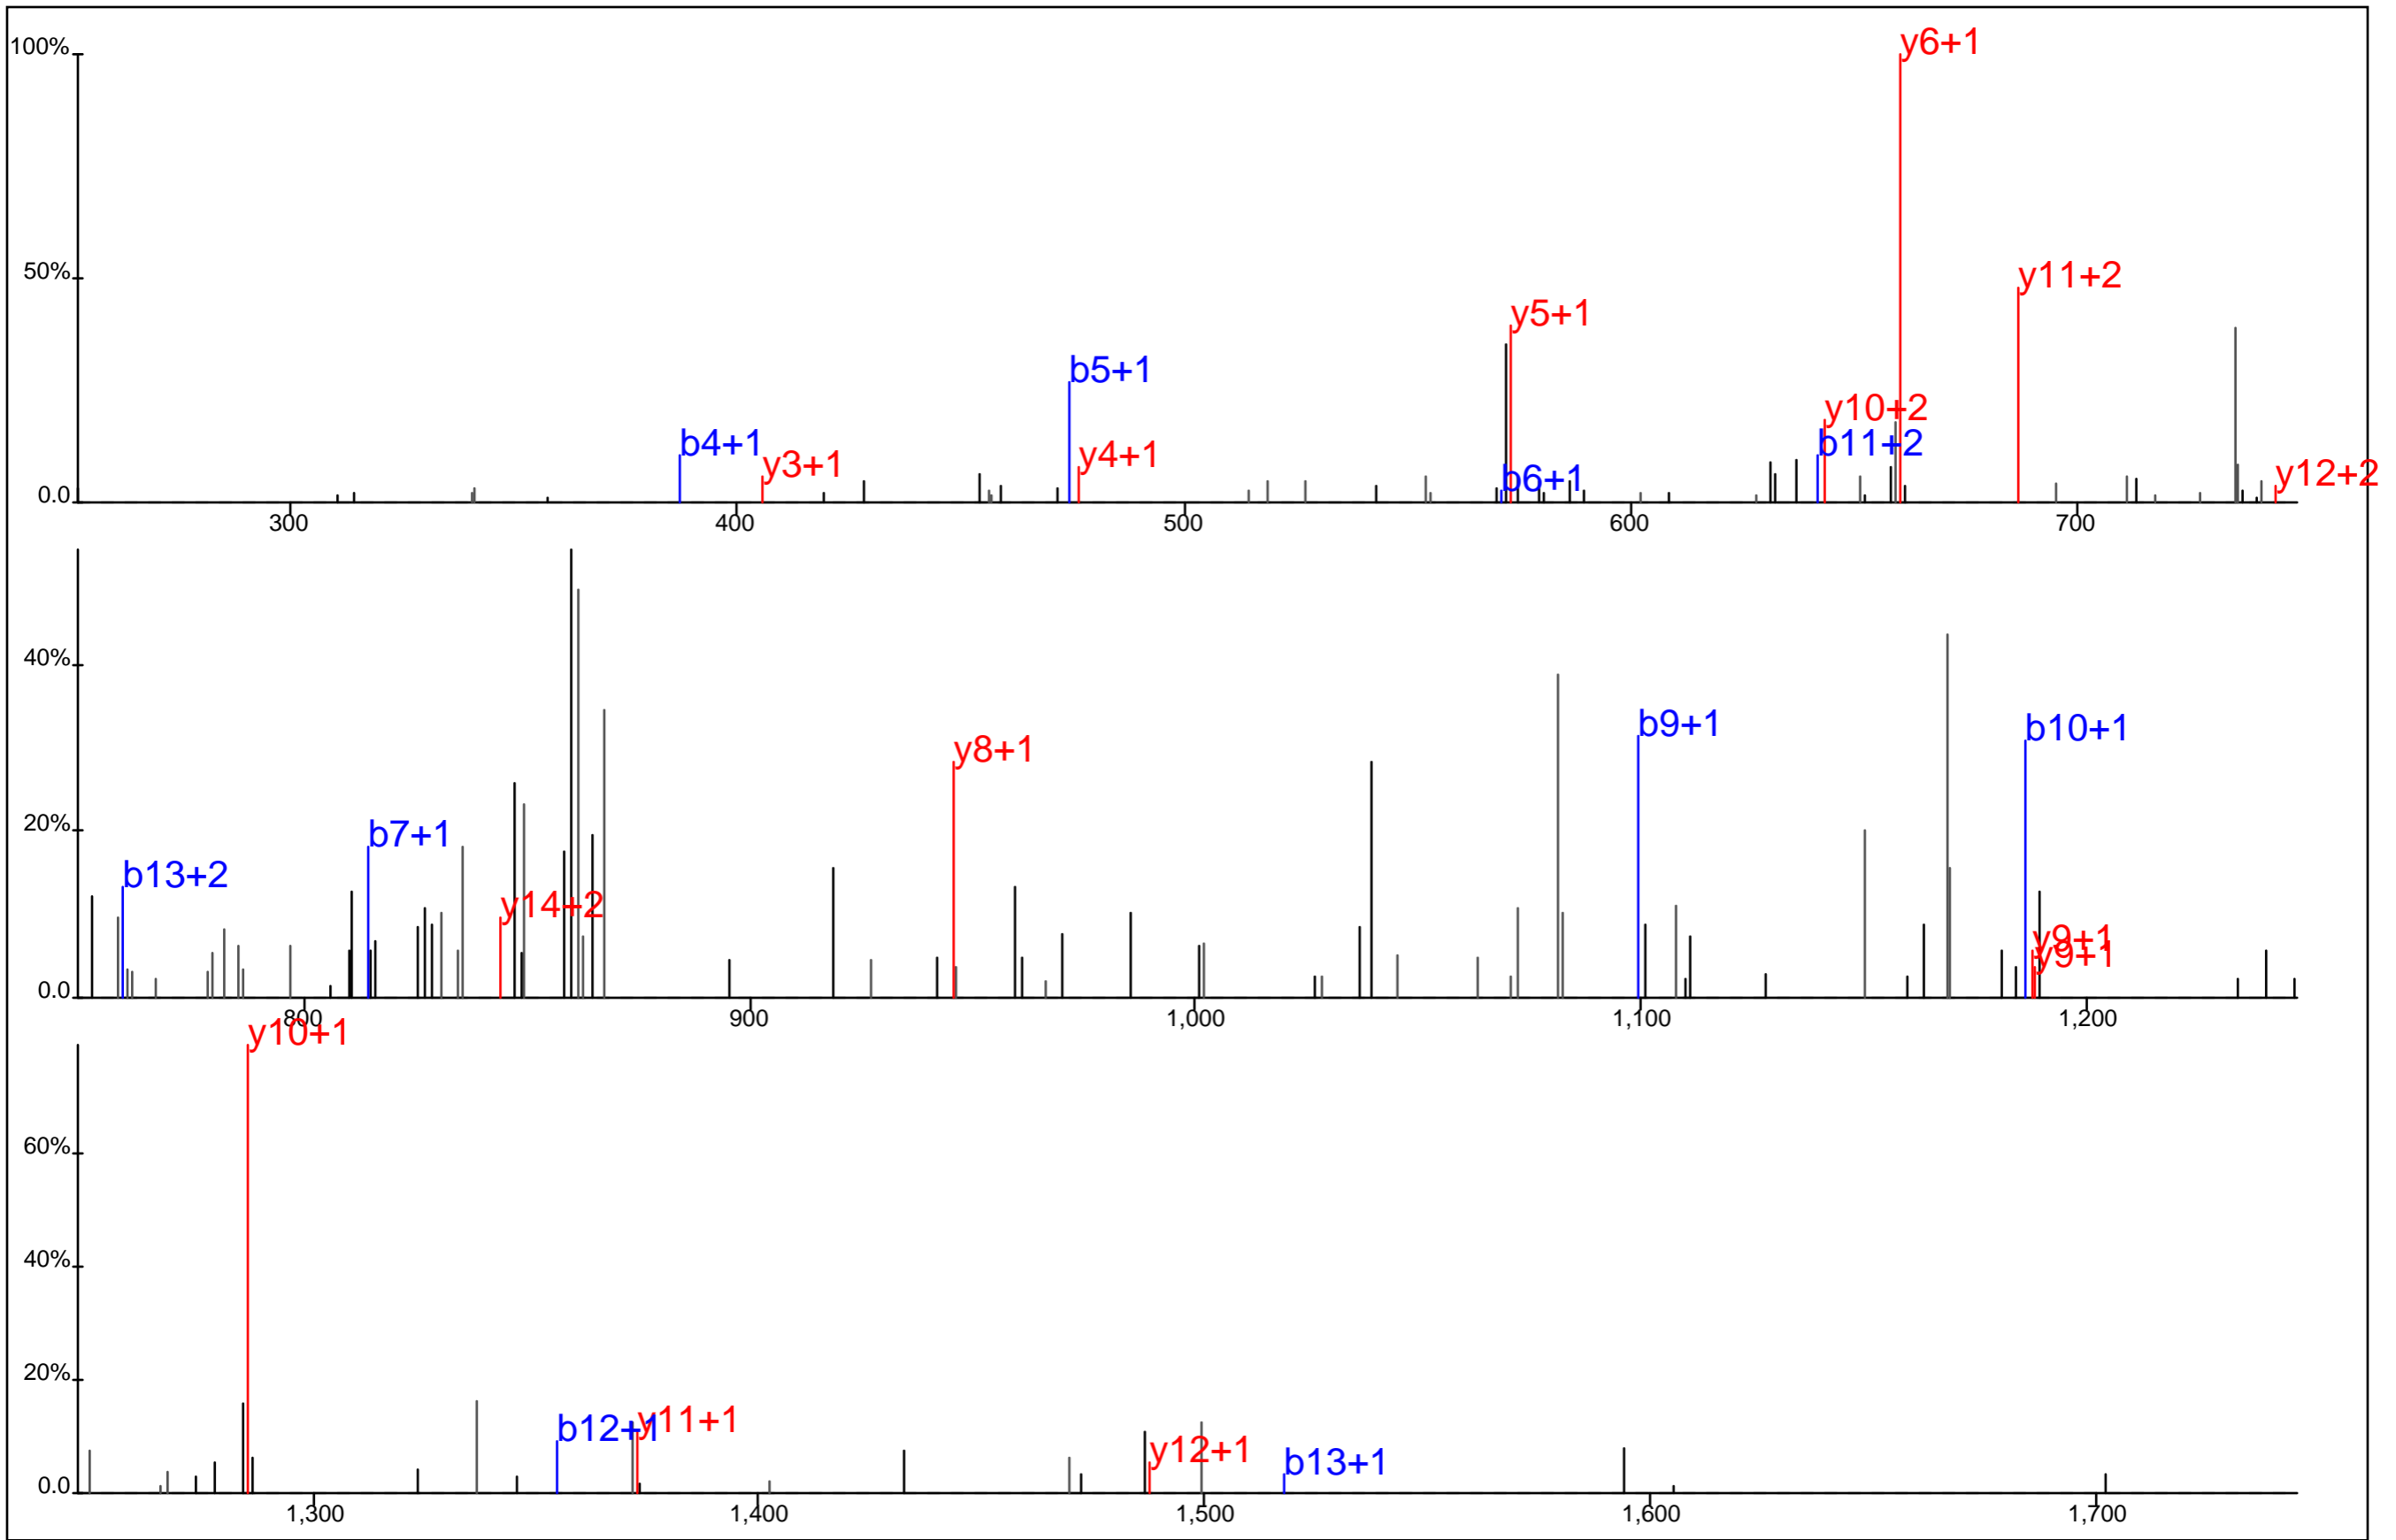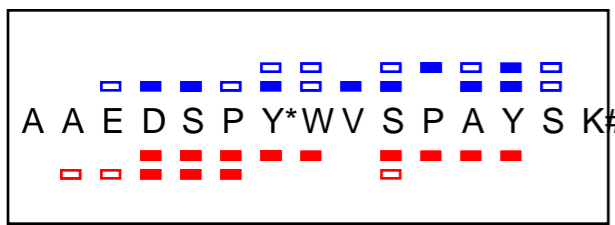

Protein Name: WD repeat domain 70  
 gi Accession: 12224837  
 Precursor Mass: 879.8849+2  
 Delta Mass: 7.004 ppm  
 XCorr: 34.41

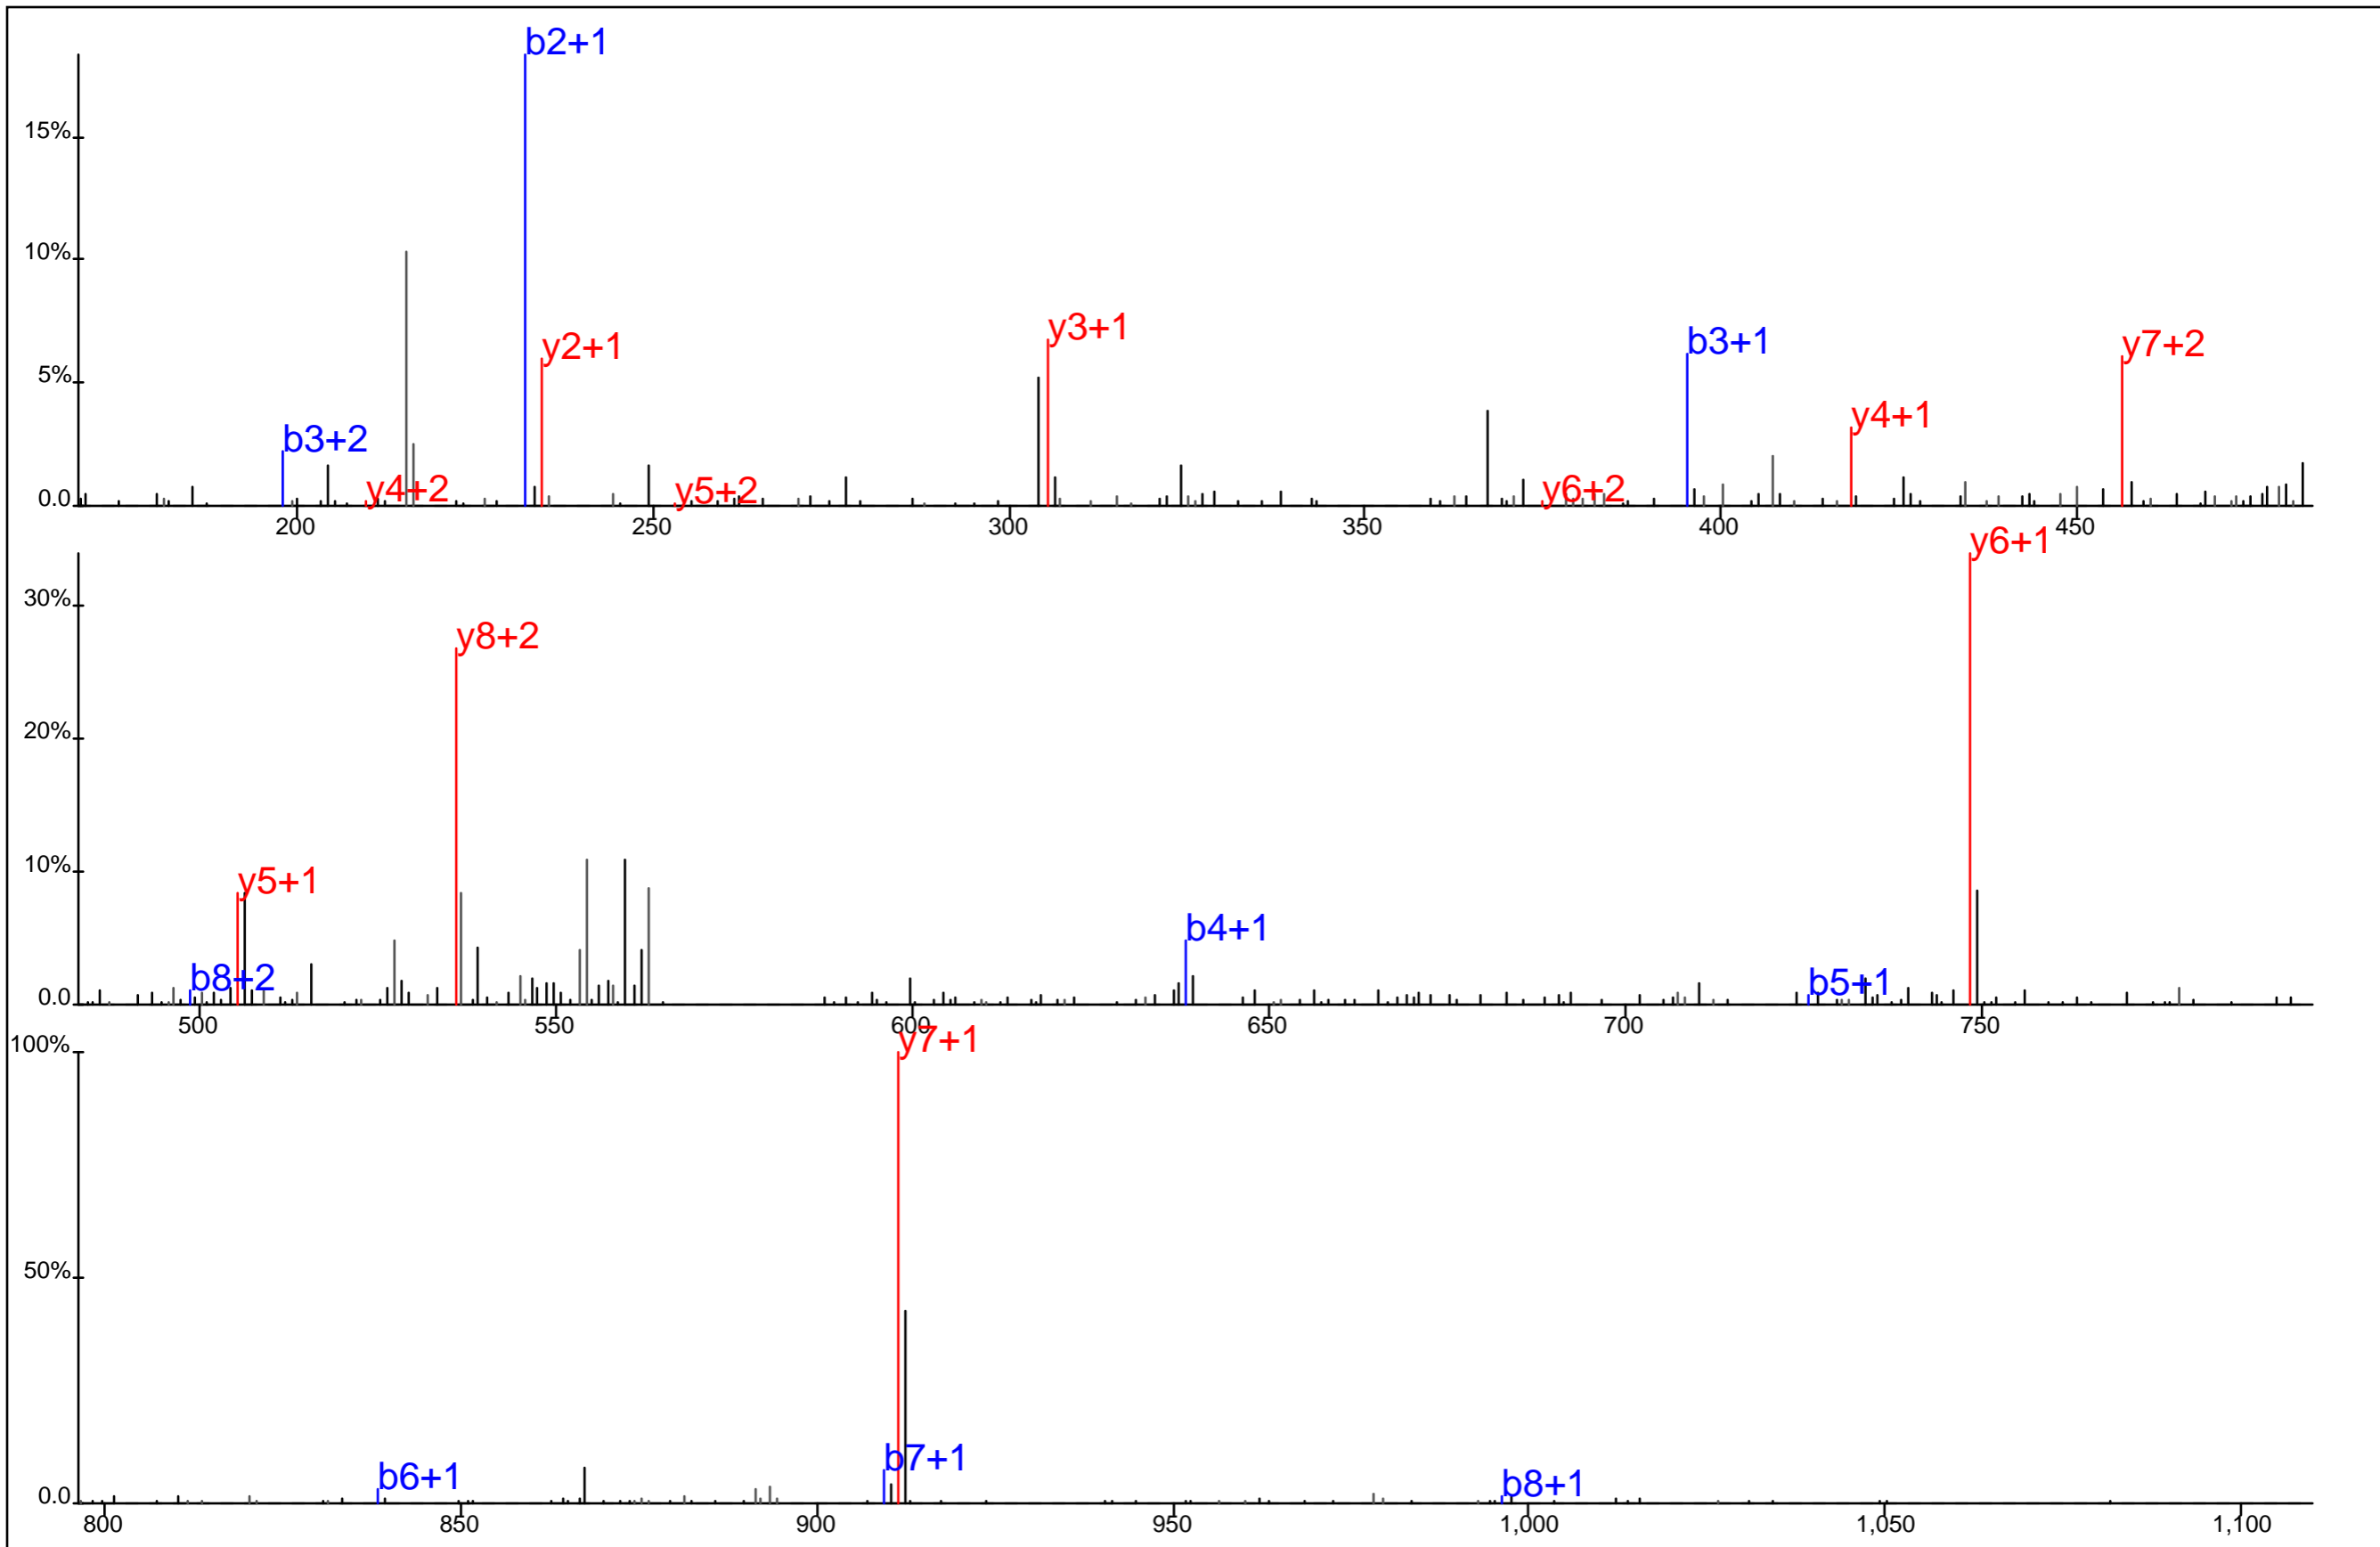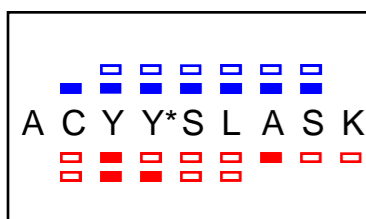

Protein Name: ZAP70  
 gi Accession: 31455611  
 Precursor Mass: 571.7337+2  
 Delta Mass: 1.206 ppm  
 XCorr: 35.16

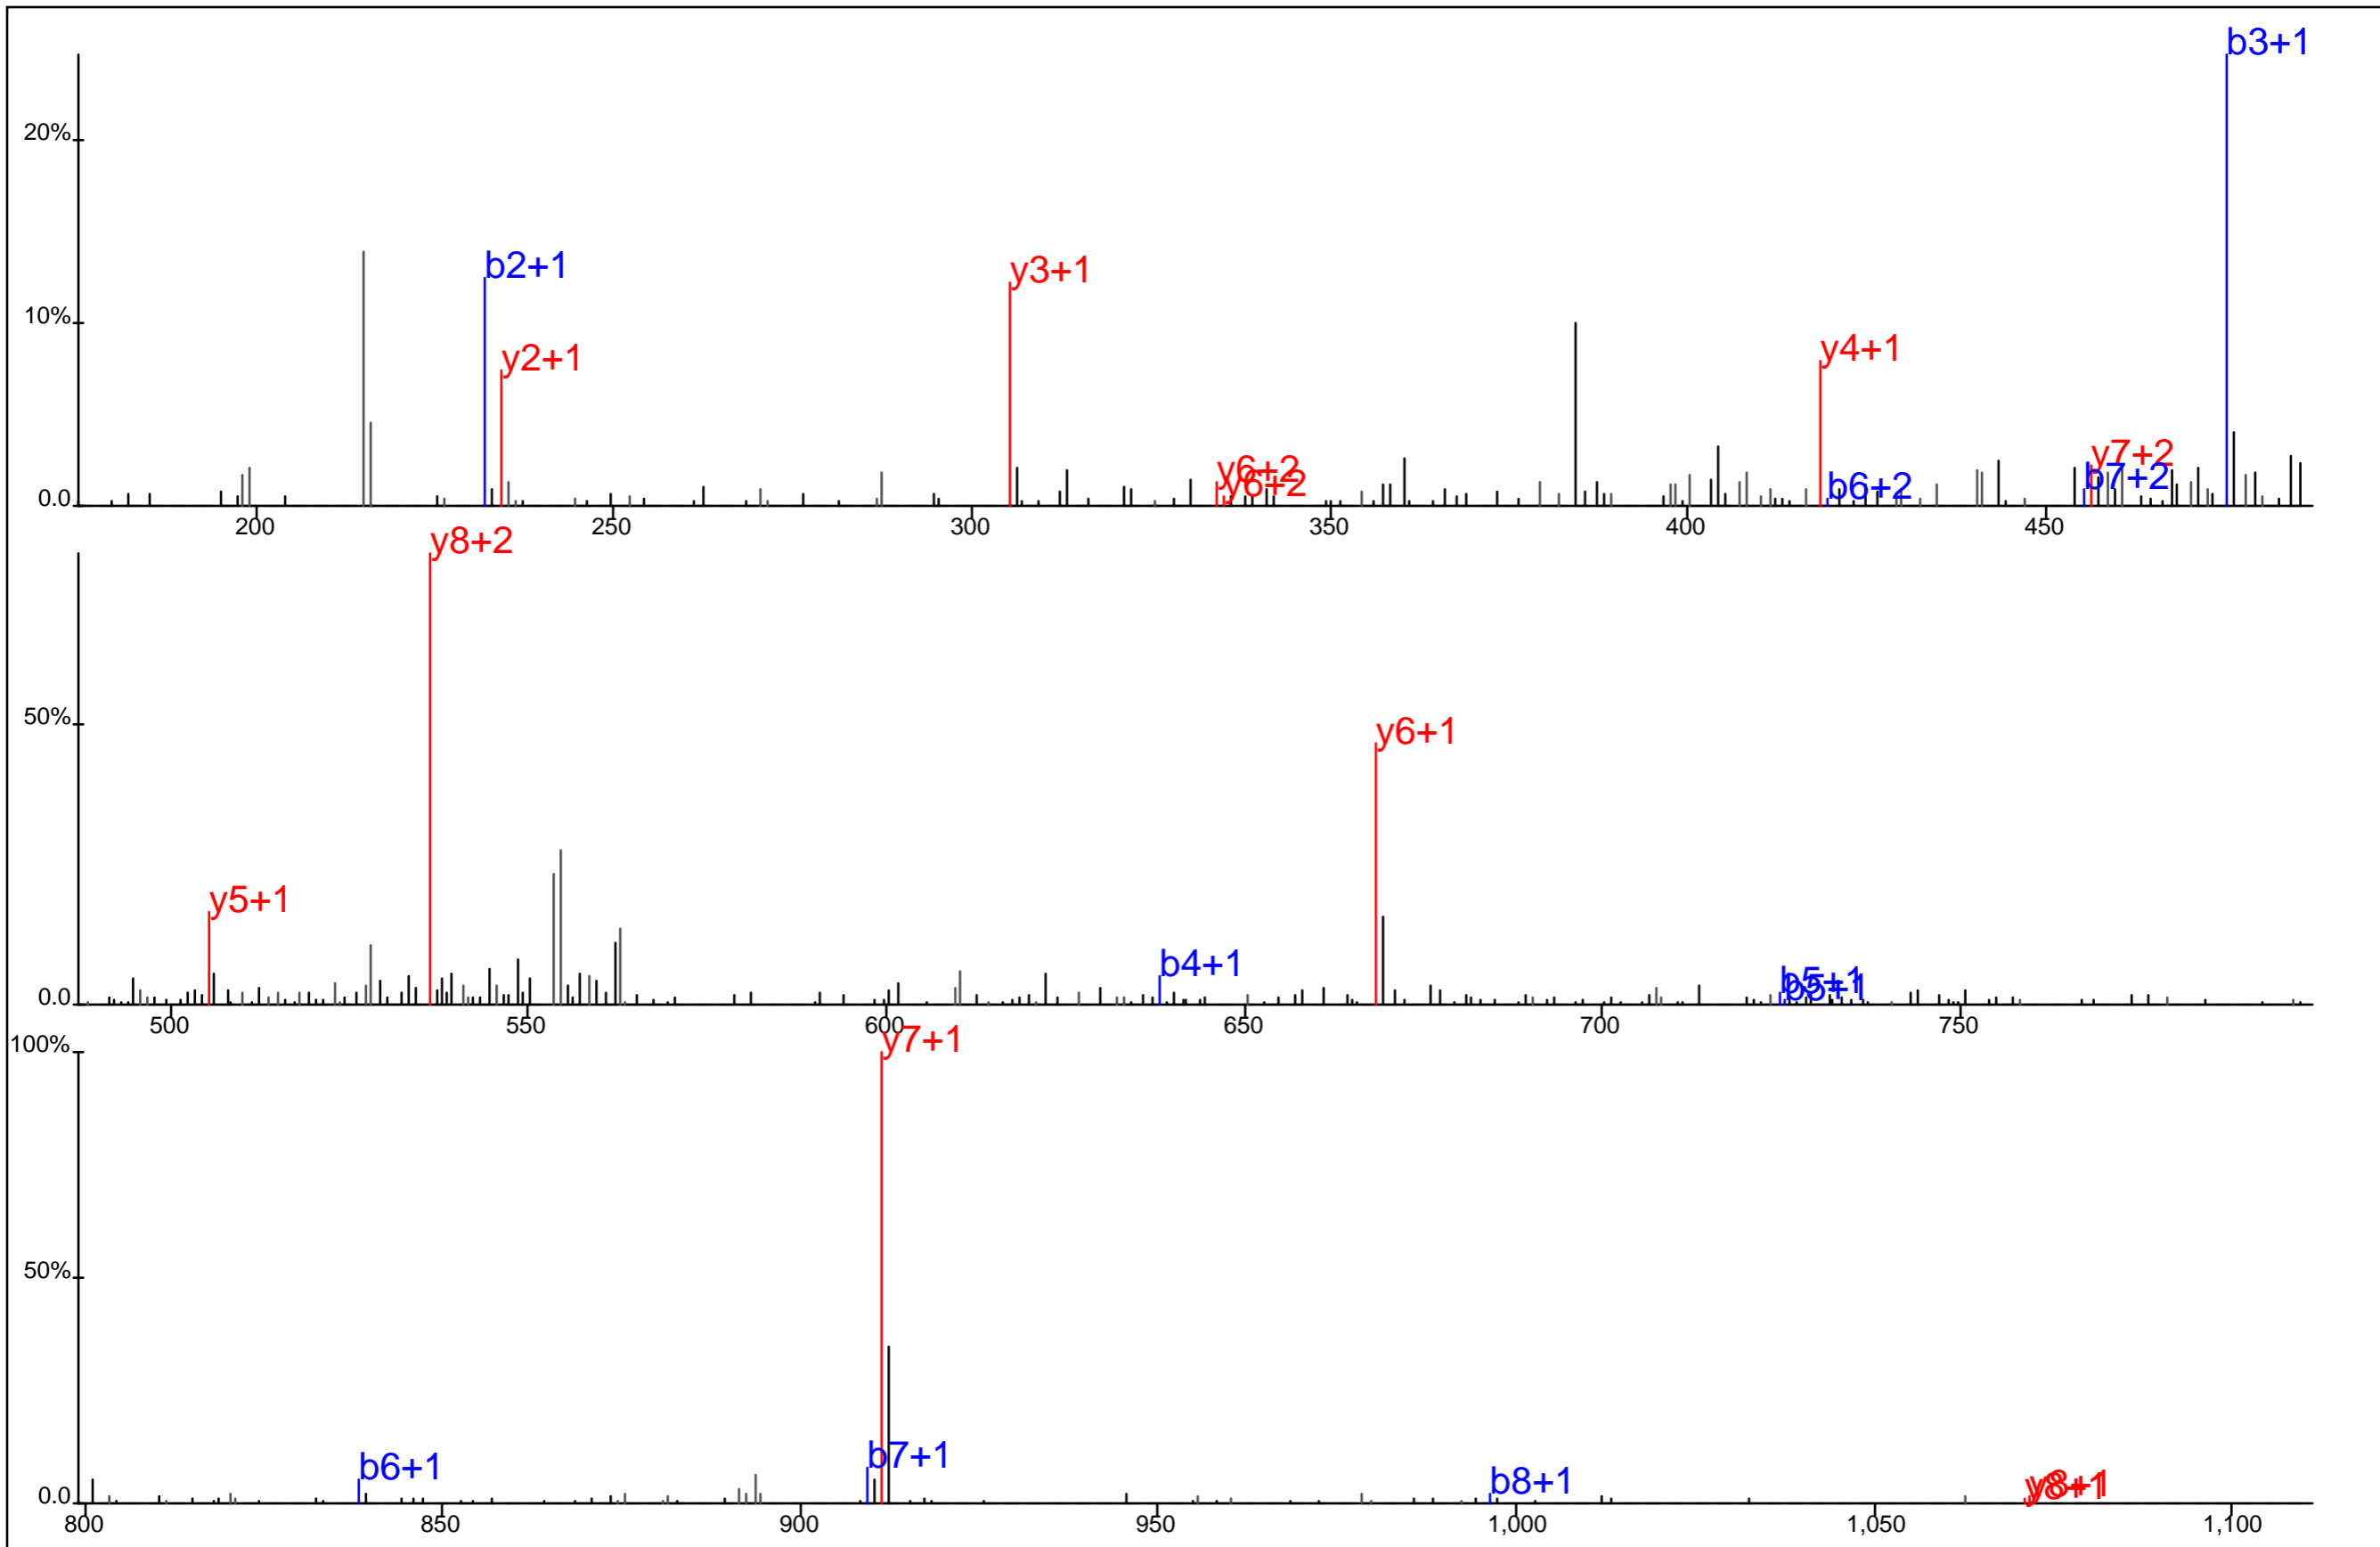

|   |   |    |   |   |   |   |   |   |
|---|---|----|---|---|---|---|---|---|
| ■ | ■ | ■  | ■ | ■ | ■ | ■ |   |   |
| A | C | Y* | Y | S | L | A | S | K |
| ■ | ■ | ■  | ■ | ■ | ■ | ■ | ■ | ■ |

Protein Name: ZAP70  
 gi Accession: 31455611  
 Precursor Mass: 571.7338+2  
 Delta Mass: 1.311 ppm  
 XCorr: 35.23

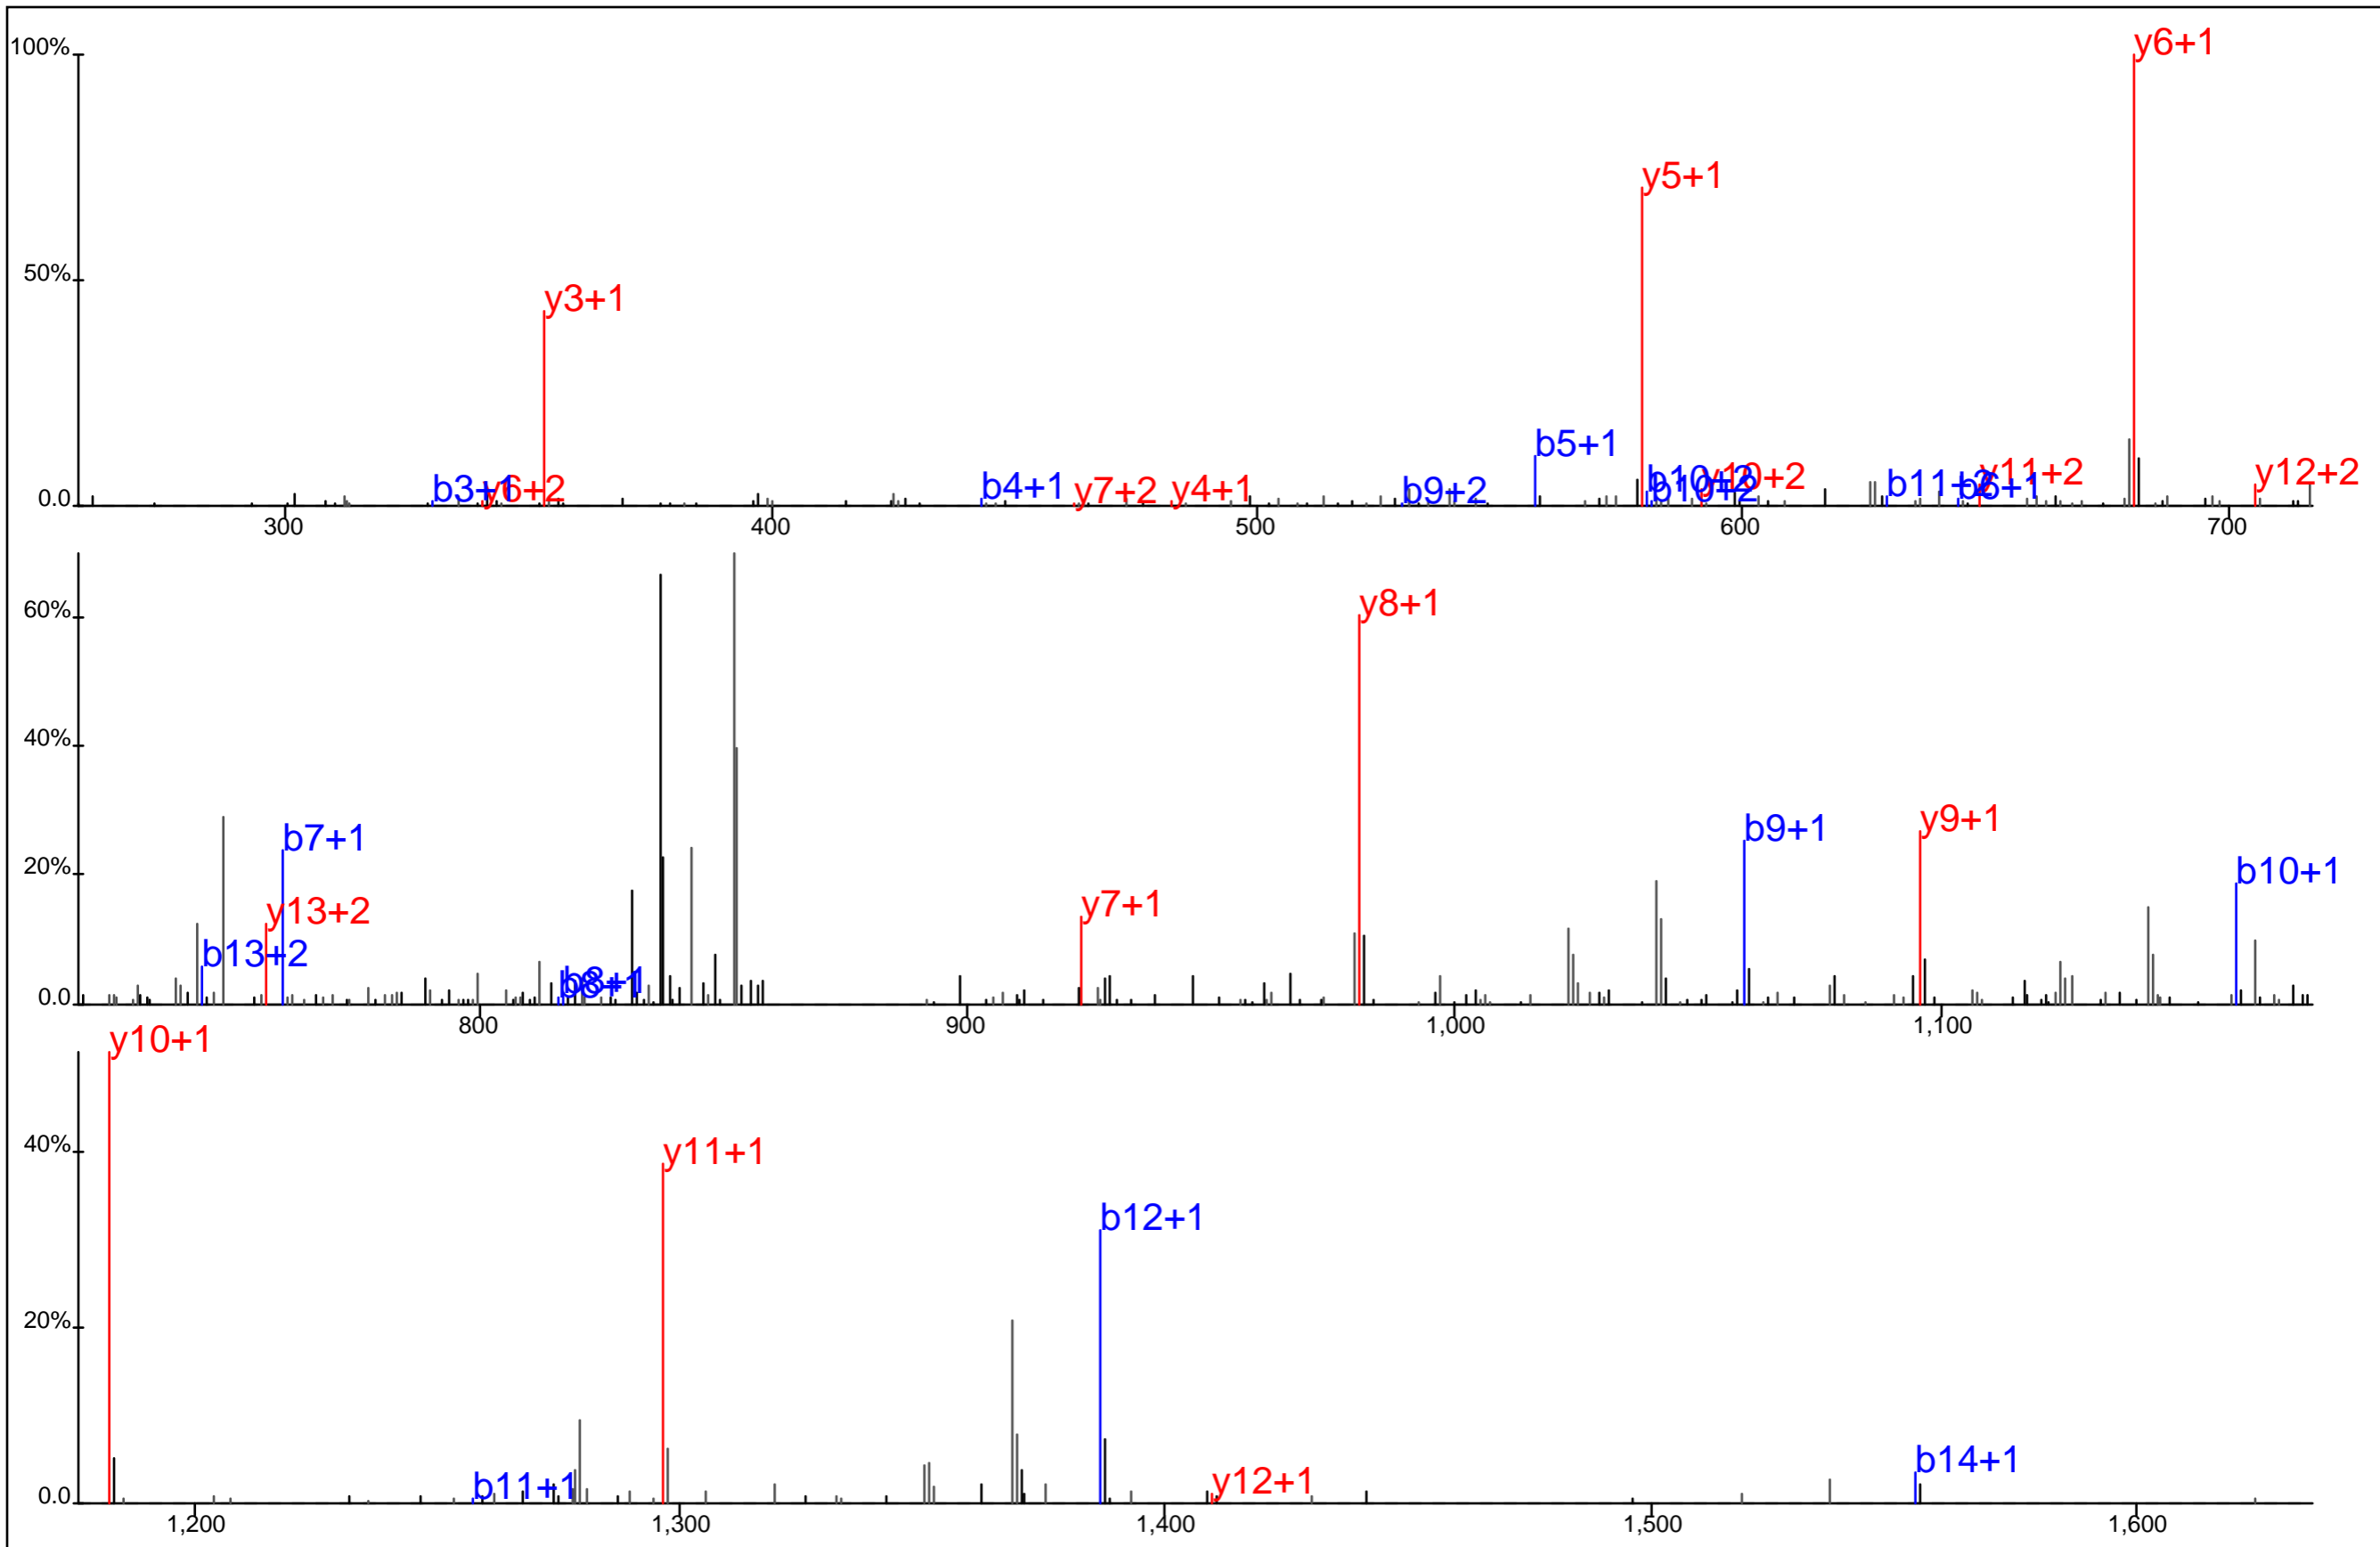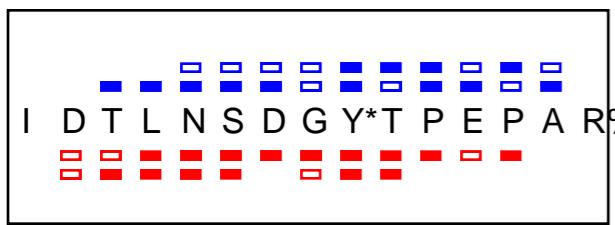

Protein Name: ZAP70  
 gi Accession: 31455611  
 Precursor Mass: 869.8841+2  
 Delta Mass: 2.892 ppm  
 XCorr: 74.21

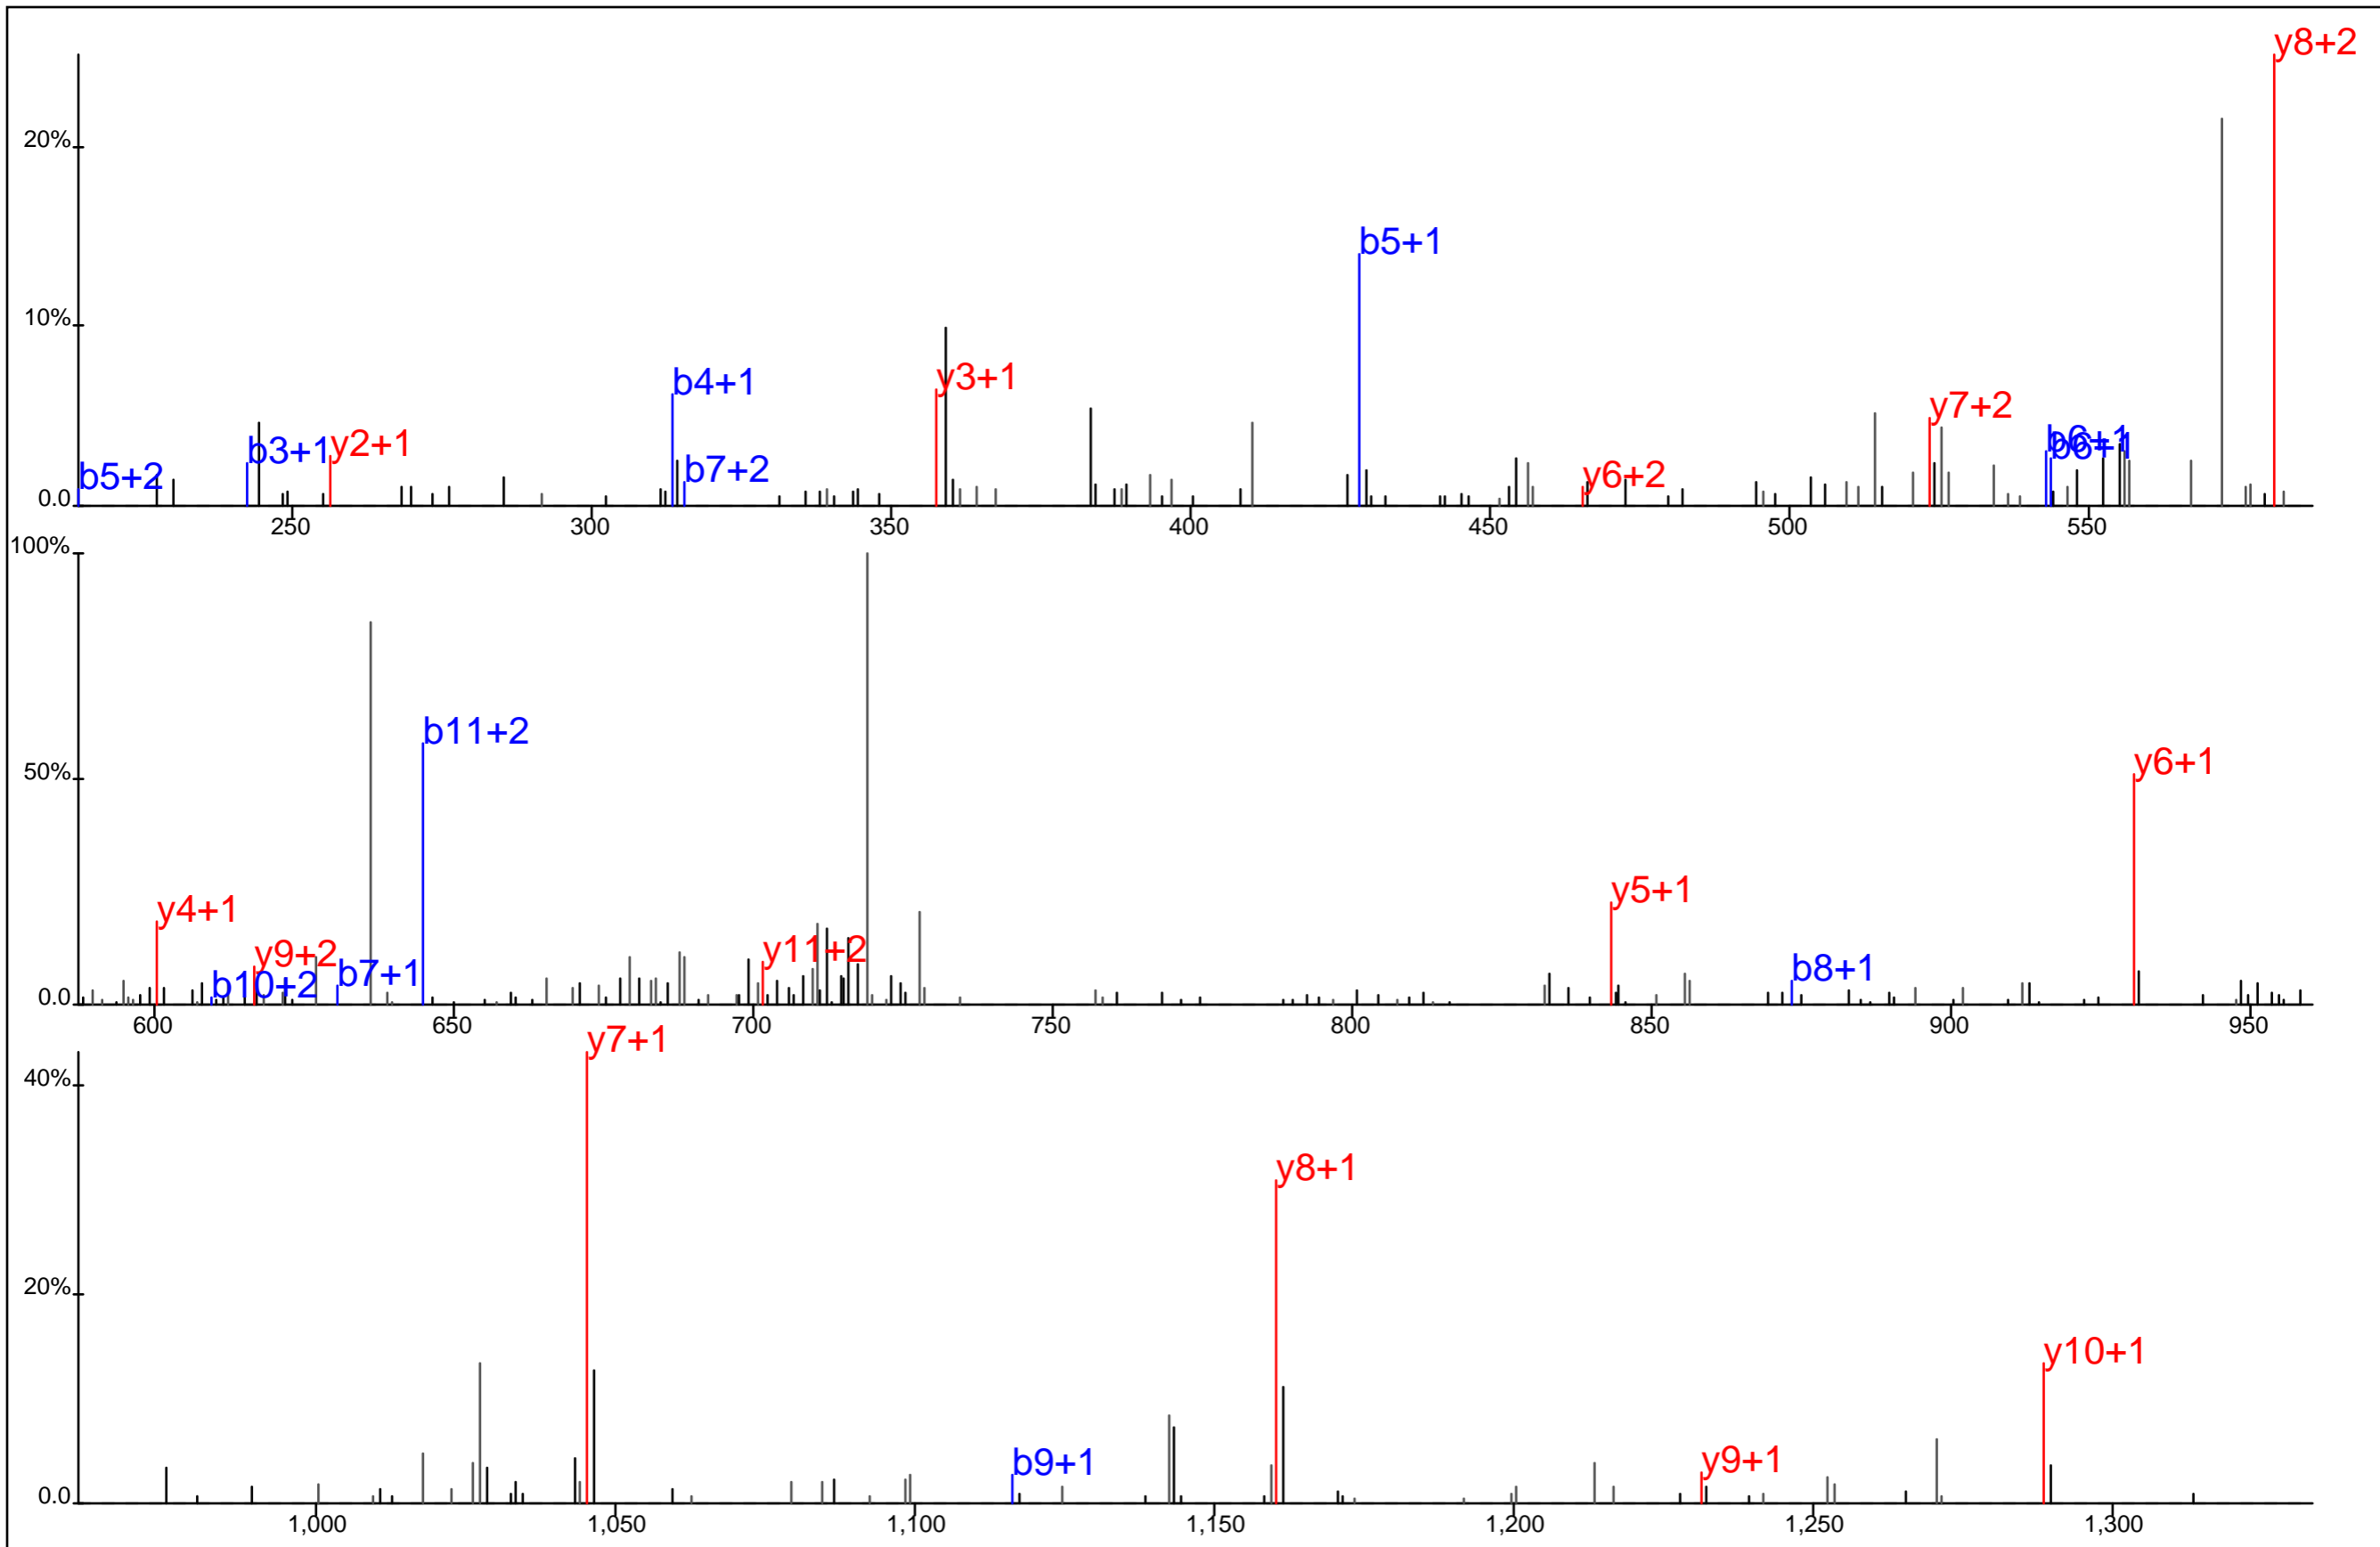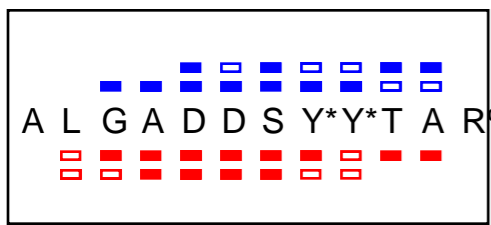

Protein Name: ZAP70  
 gi Accession: 31455611  
 Precursor Mass: 736.7722+2  
 Delta Mass: 0.128 ppm  
 XCorr: 53.24

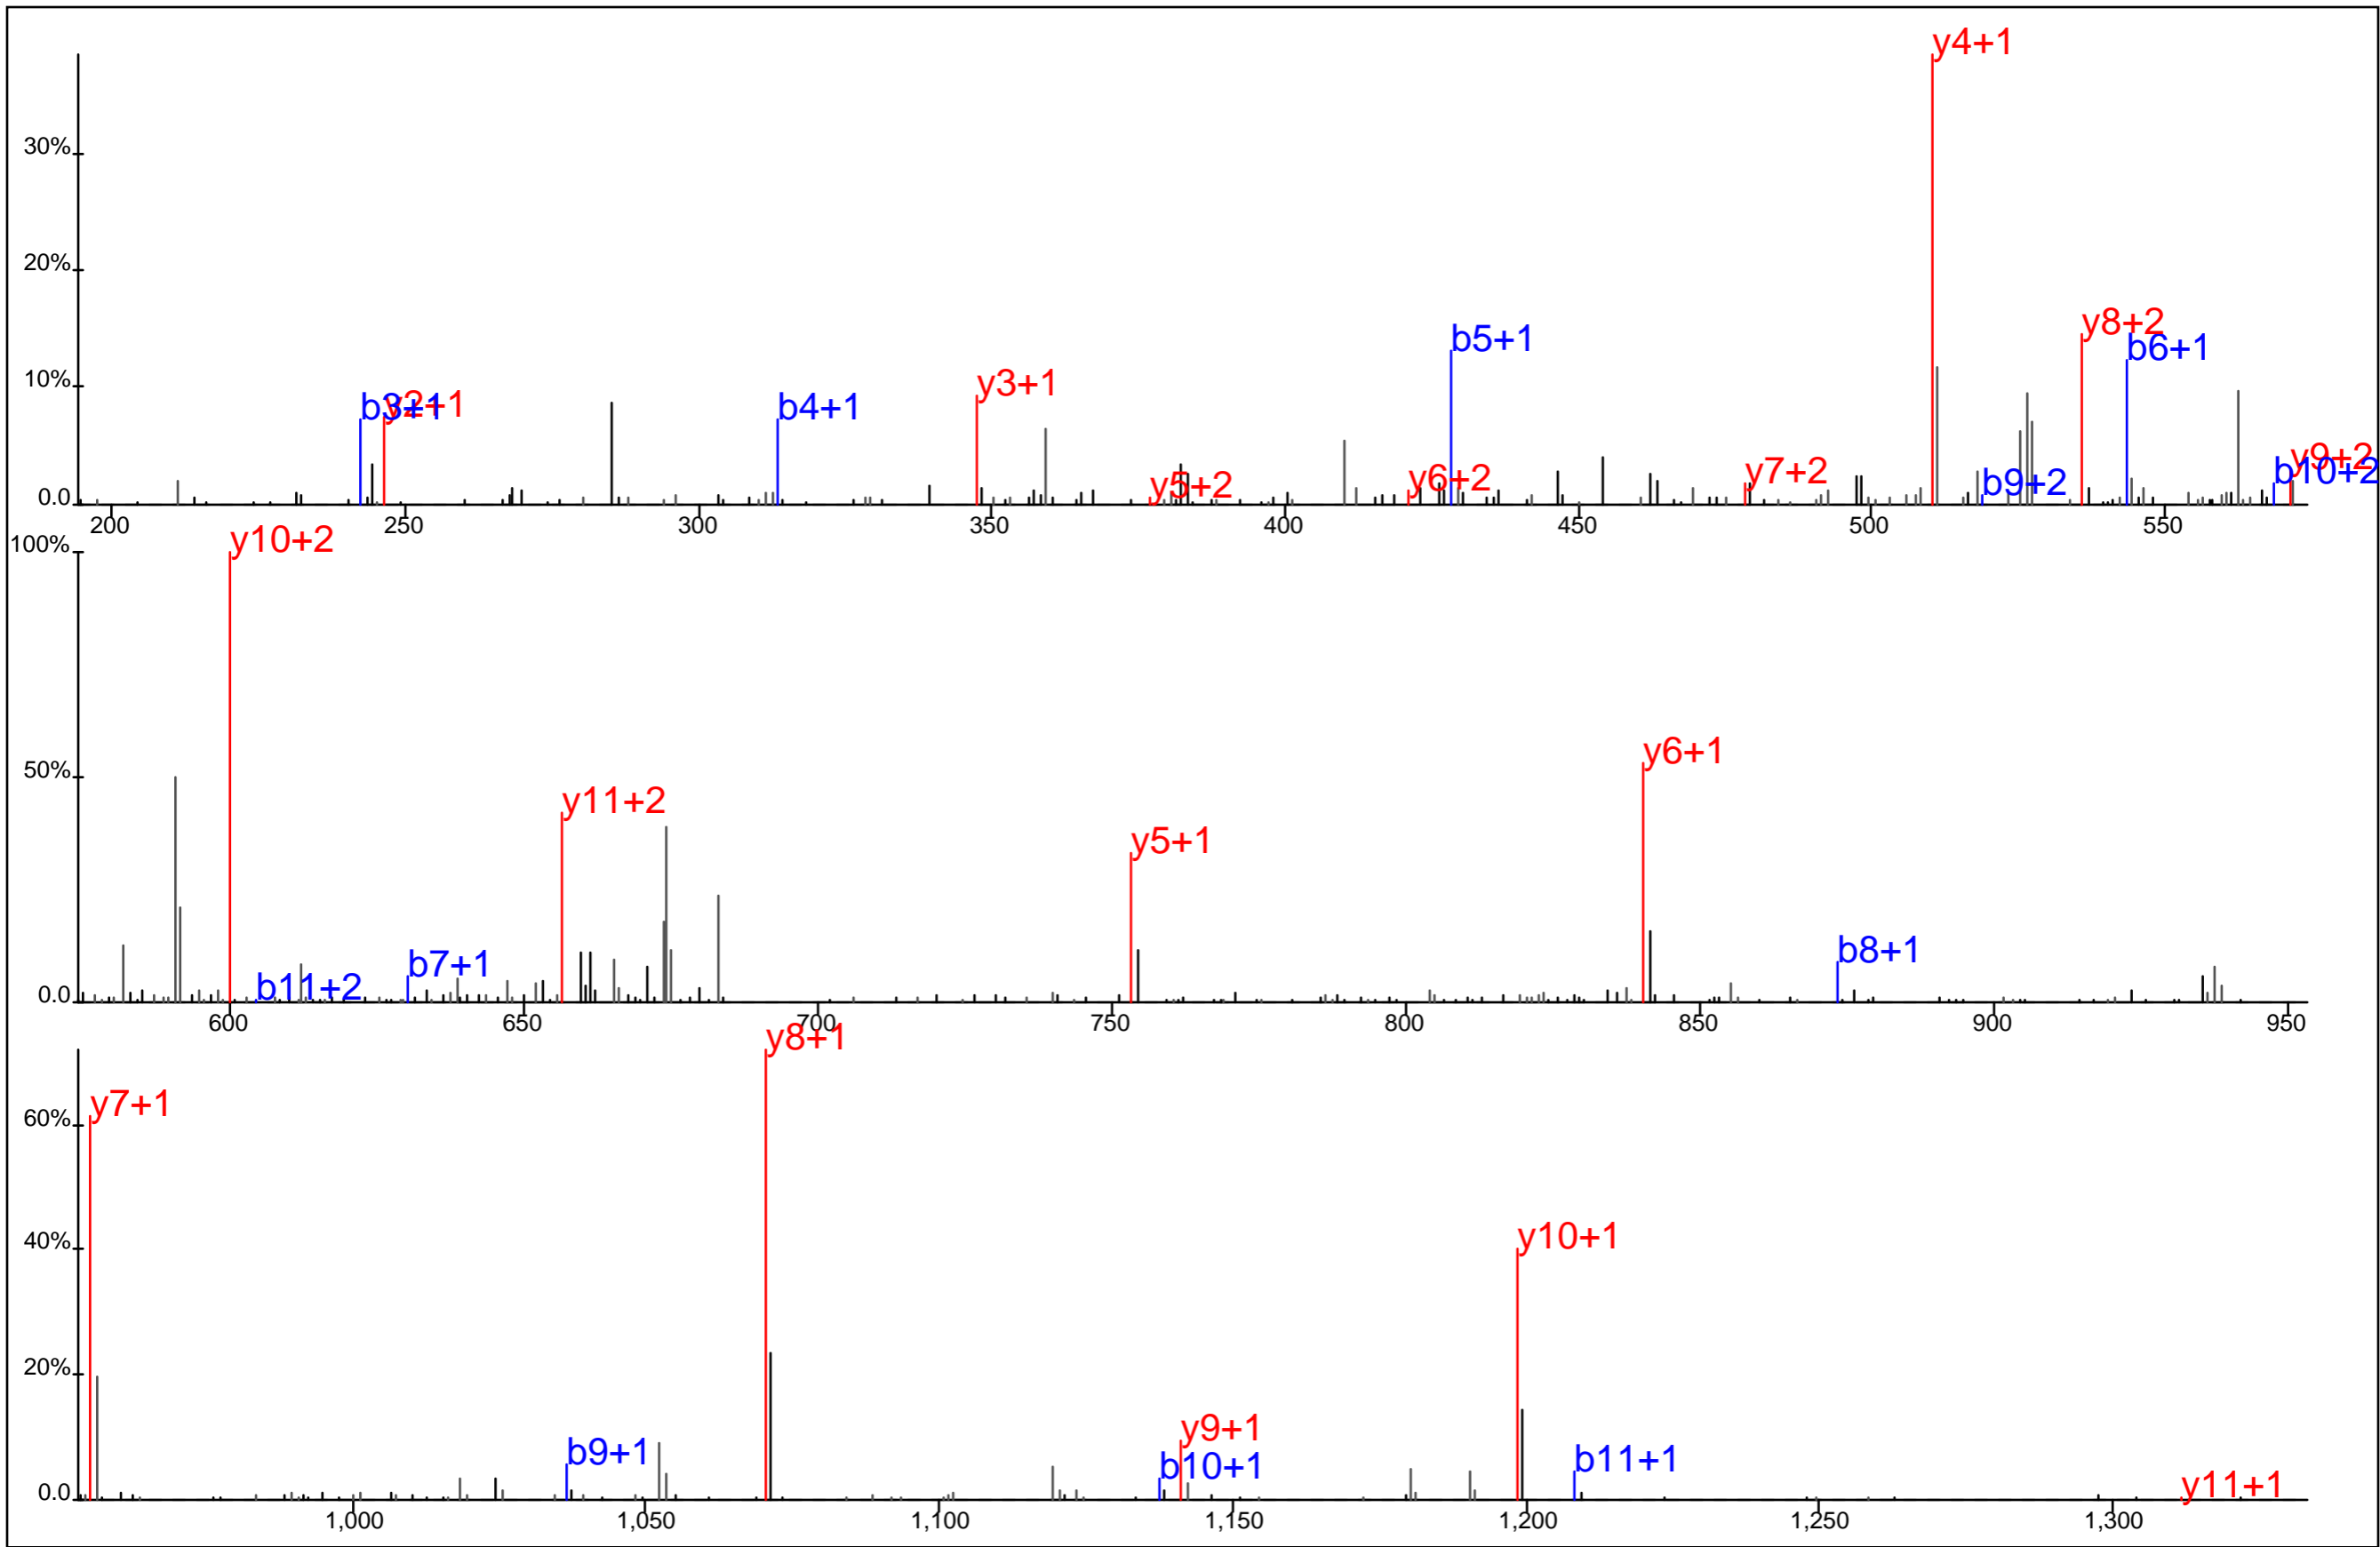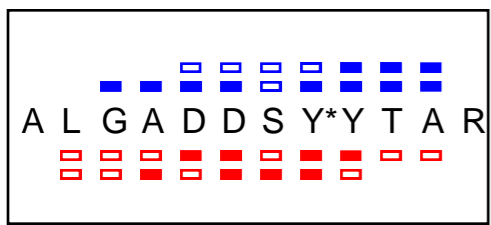

Protein Name: ZAP70  
 gi Accession: 31455611  
 Precursor Mass: 691.7853+2  
 Delta Mass: 0.744 ppm  
 XCorr: 81.16

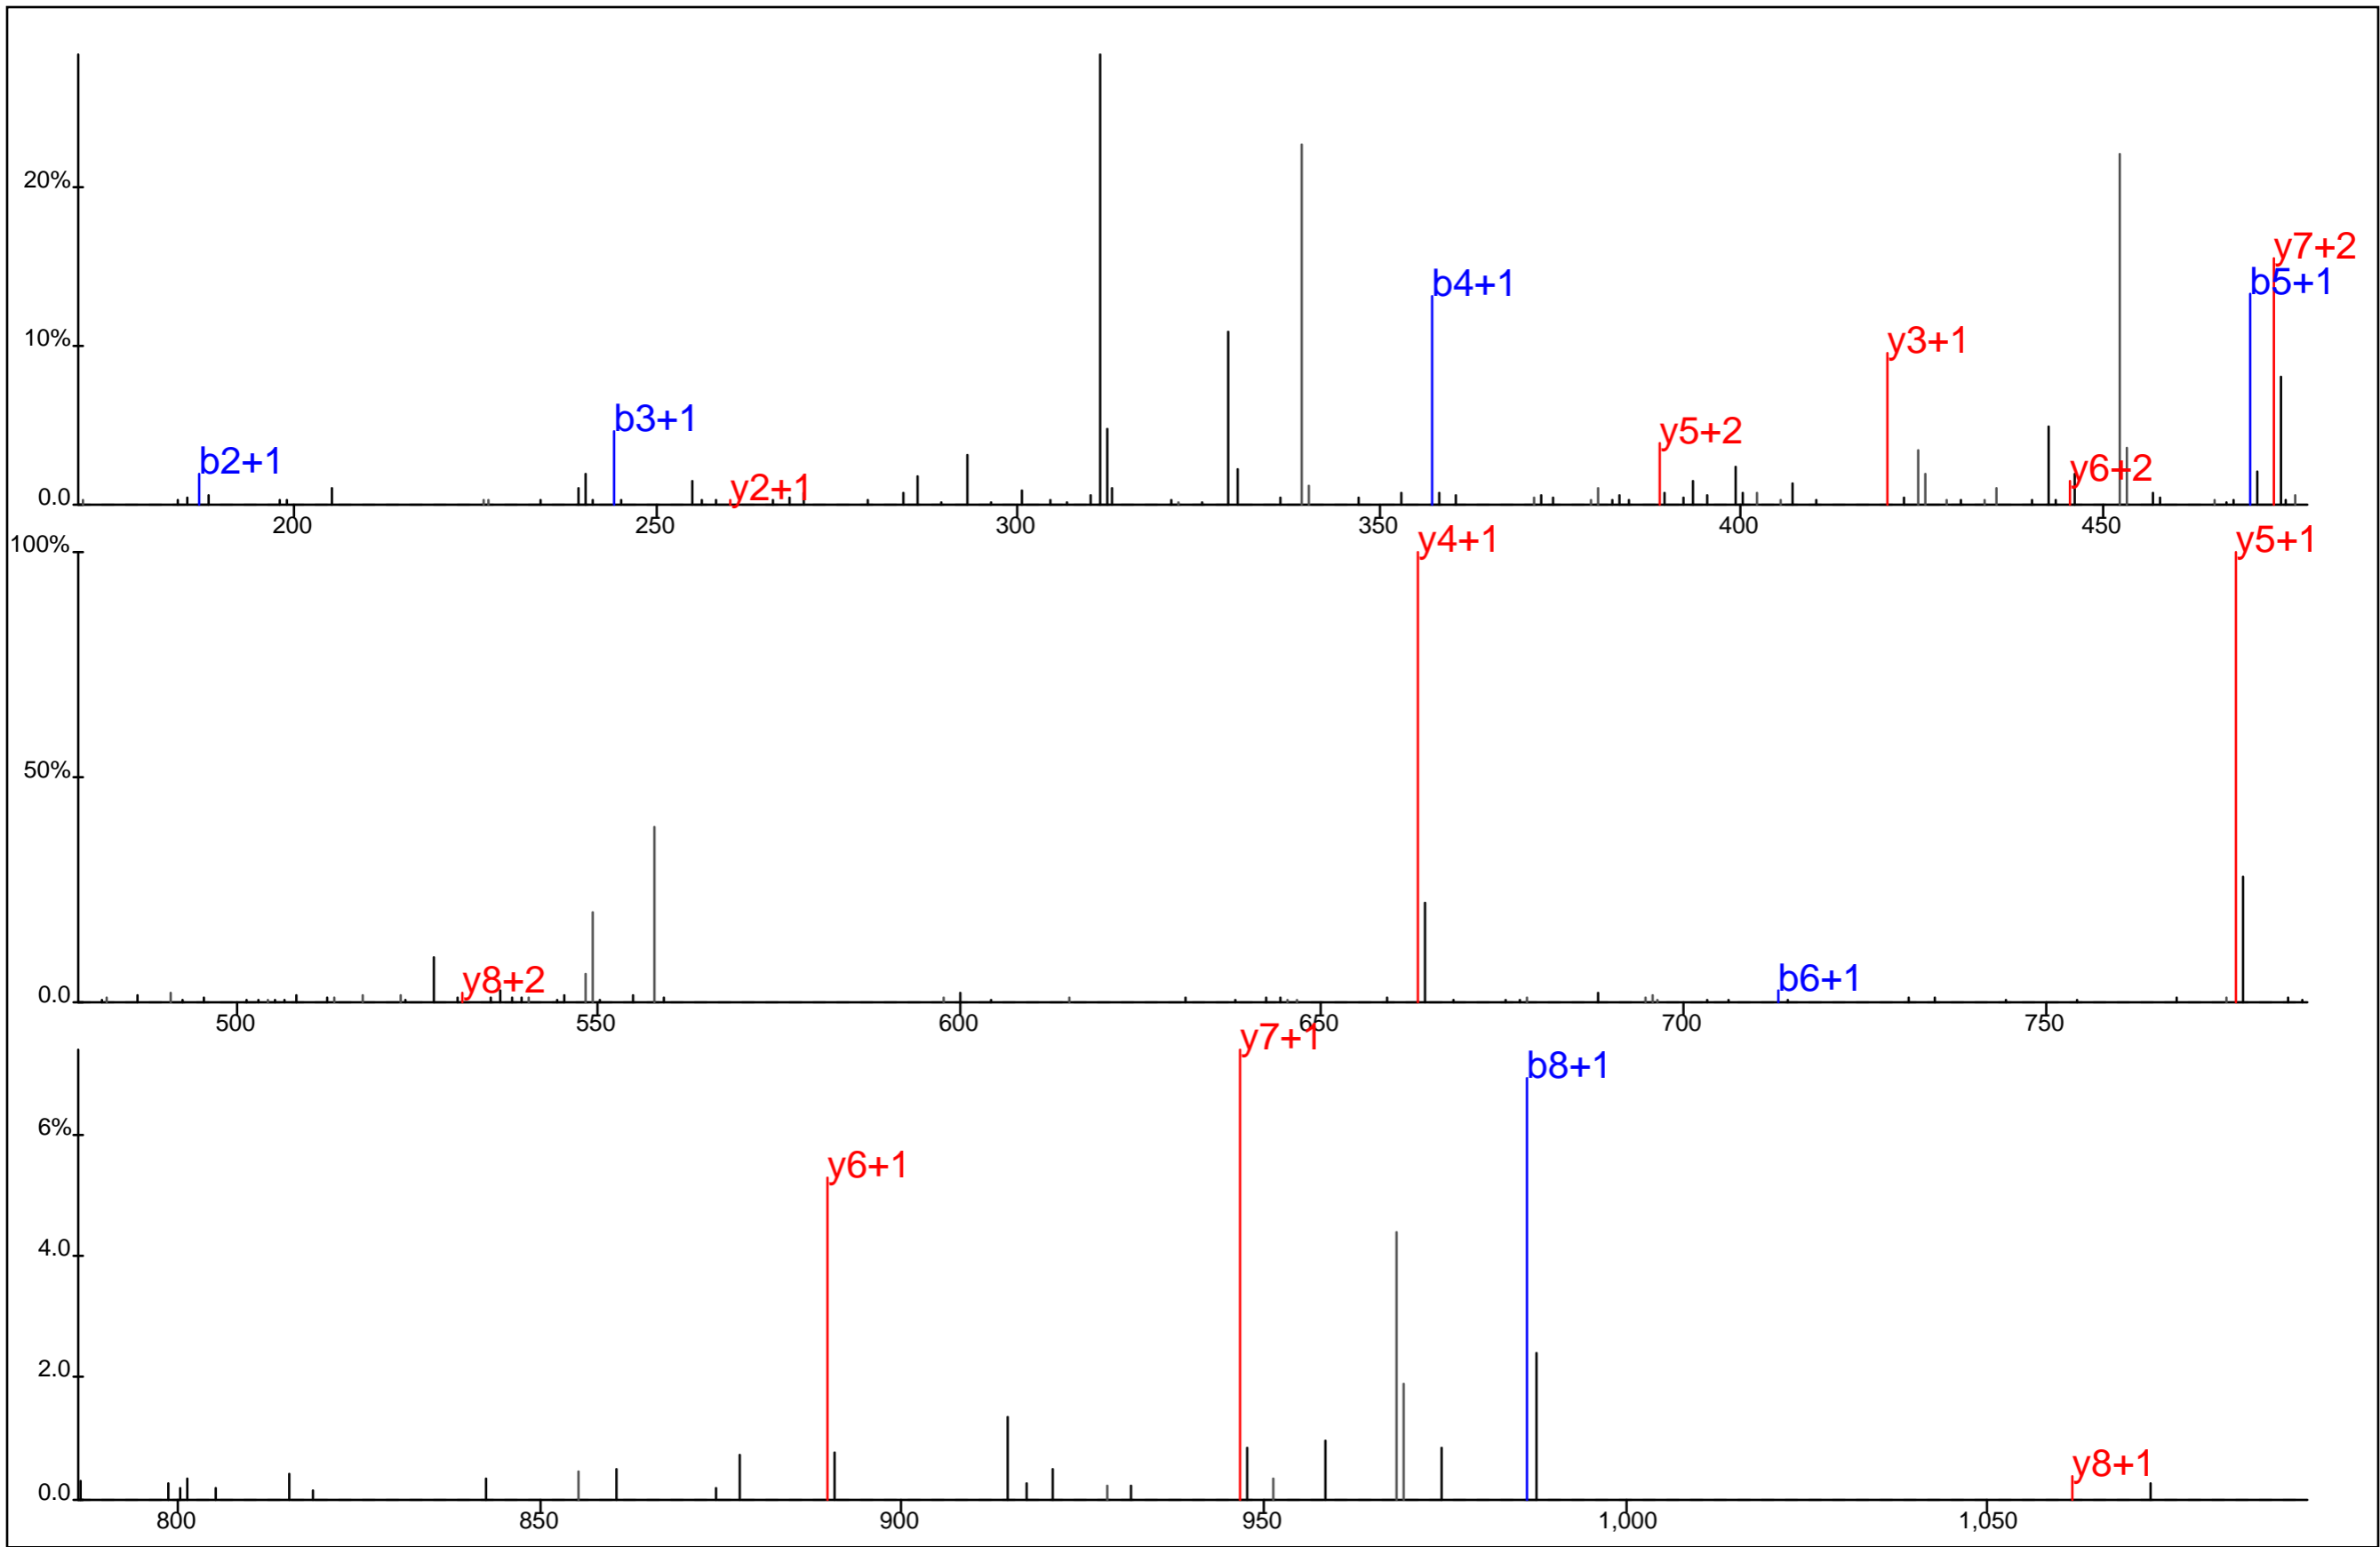

■ ■ ■ ■ ■ ■ ■ ■  
□ □ □ □ □ □ □ □  
**A D G L I Y\* C L K**

Protein Name: ZAP70  
 gi Accession: 31455611  
 Precursor Mass: 566.7620+2  
 Delta Mass: 5.164 ppm  
 XCorr: 36.63



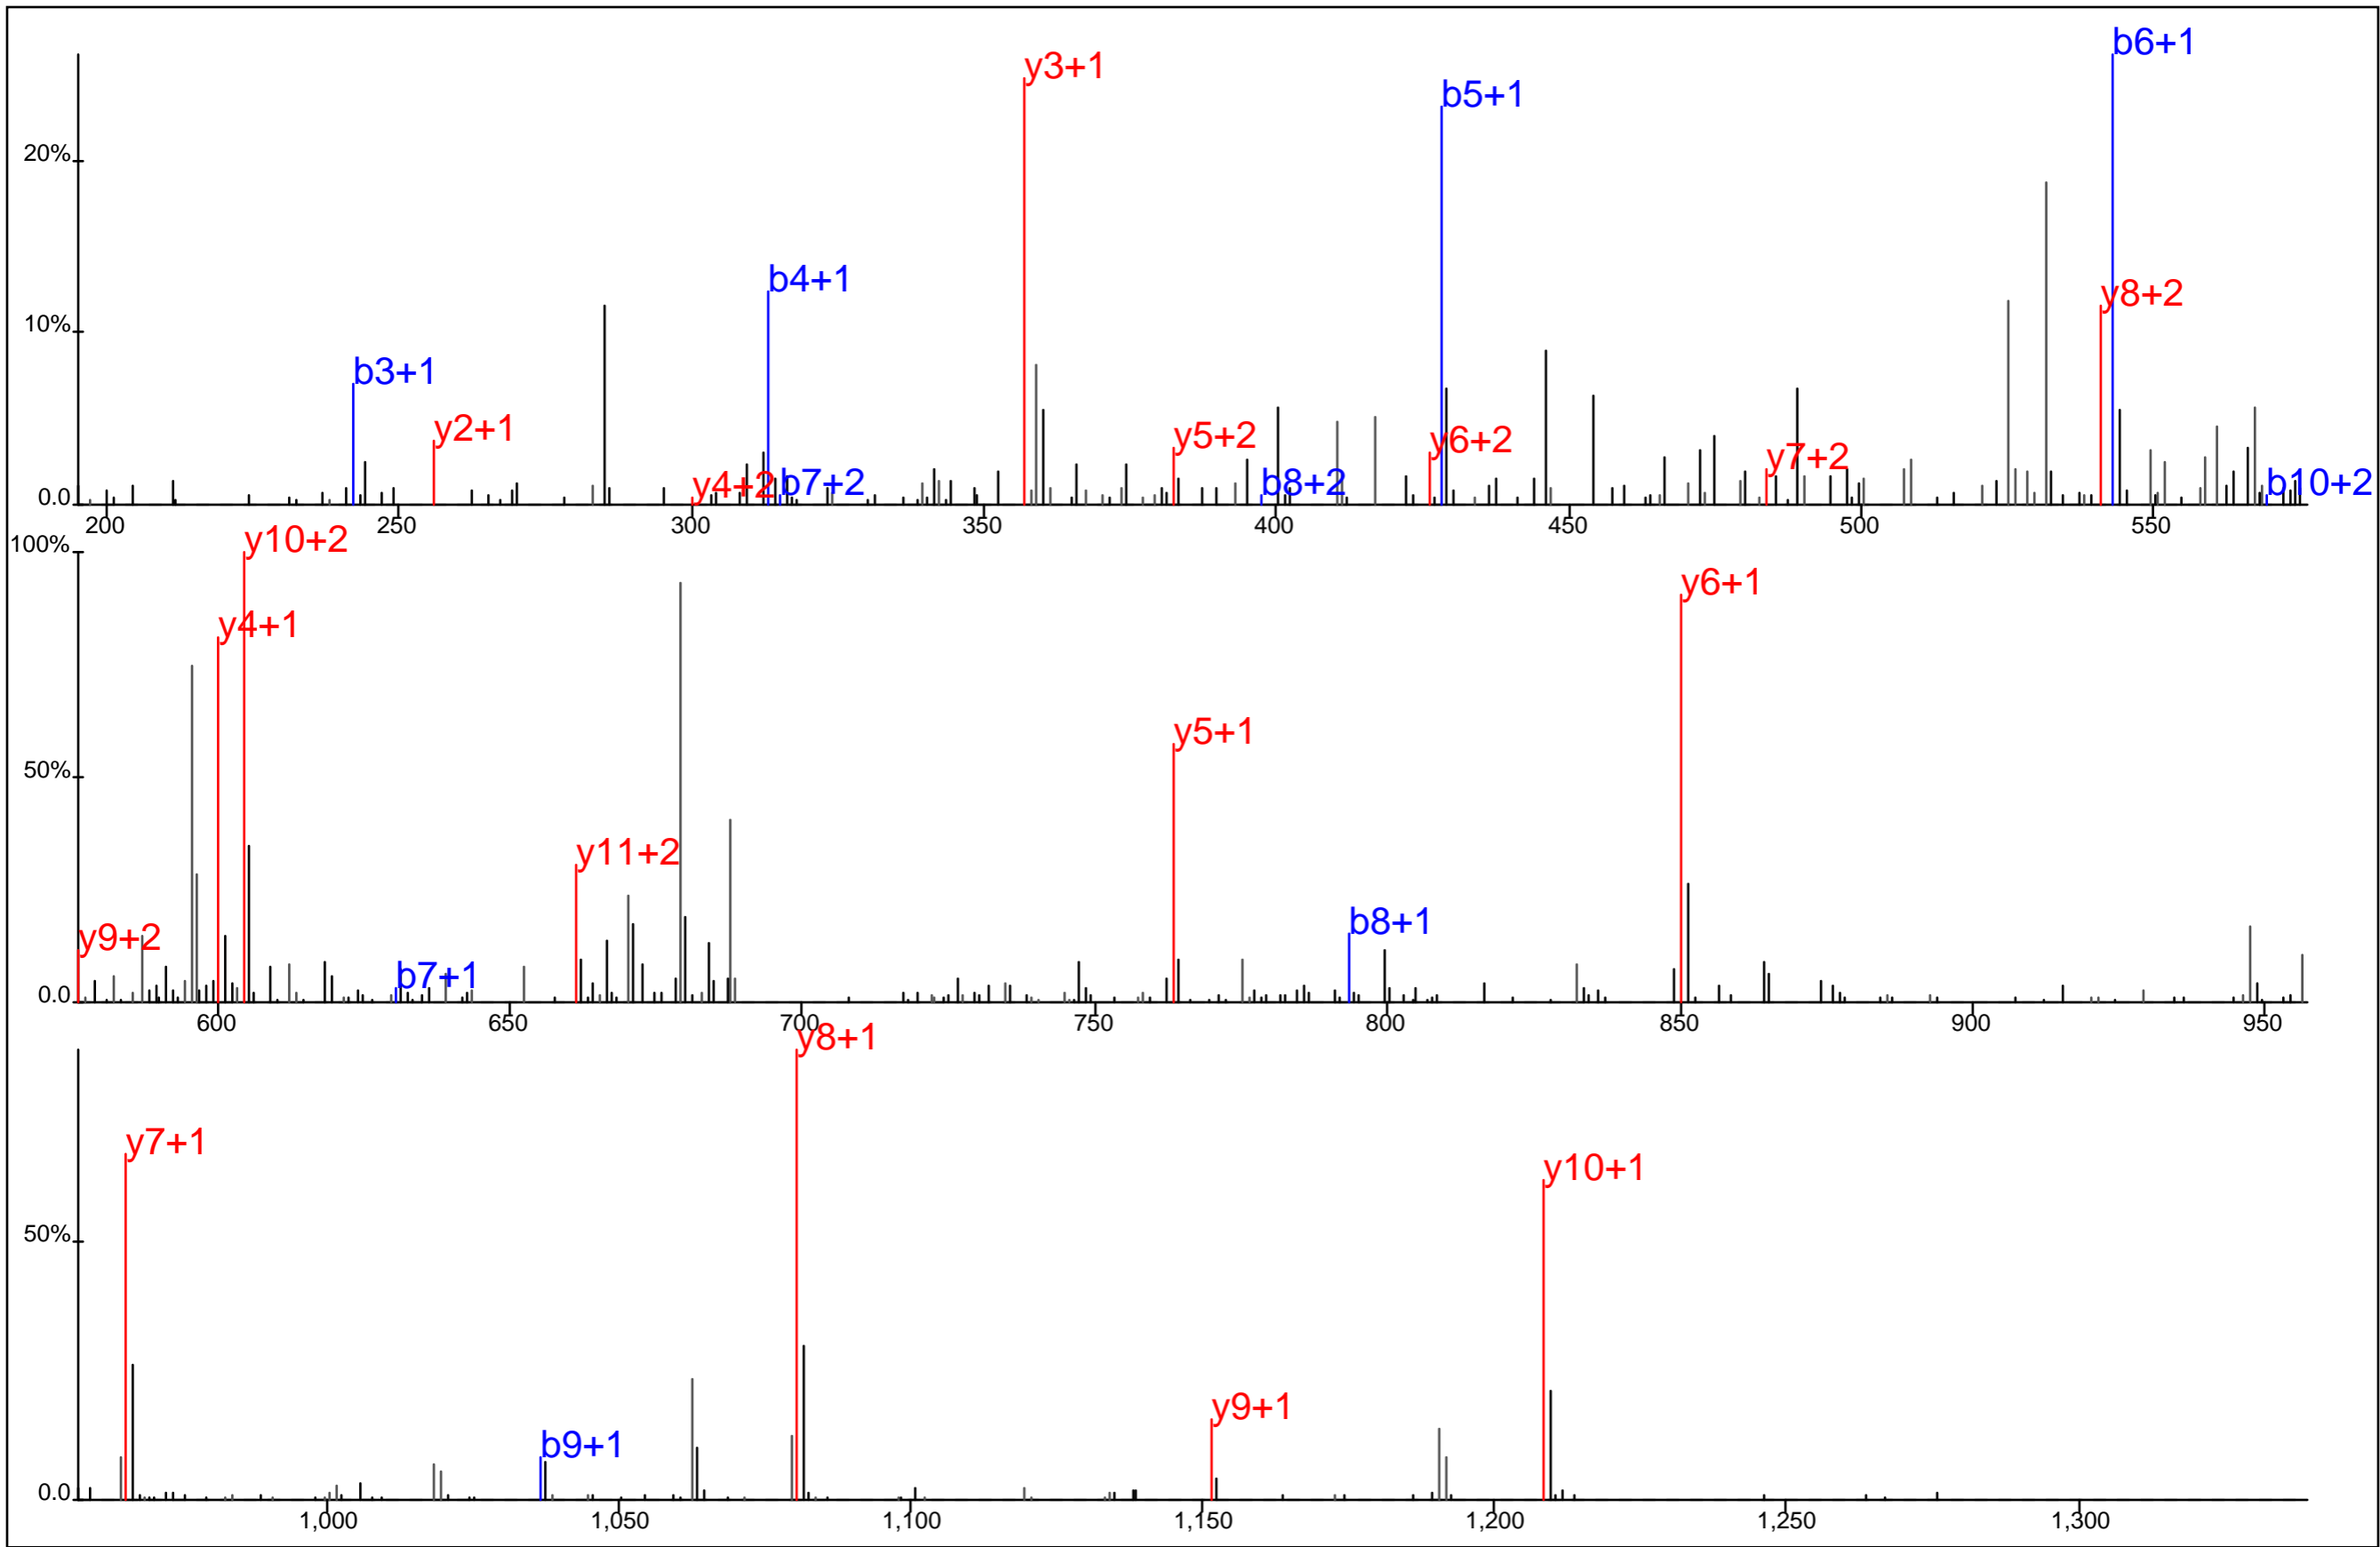

|                                     |                                                                                                                      |
|-------------------------------------|----------------------------------------------------------------------------------------------------------------------|
| <br><b>A L G A D D S Y Y* T A R</b> | Protein Name: ZAP70<br>gi Accession: 31455611<br>Precursor Mass: 696.7888+2<br>Delta Mass: 0.203 ppm<br>XCorr: 61.93 |
| <br><b>A L G A D D S Y Y* T A R</b> |                                                                                                                      |

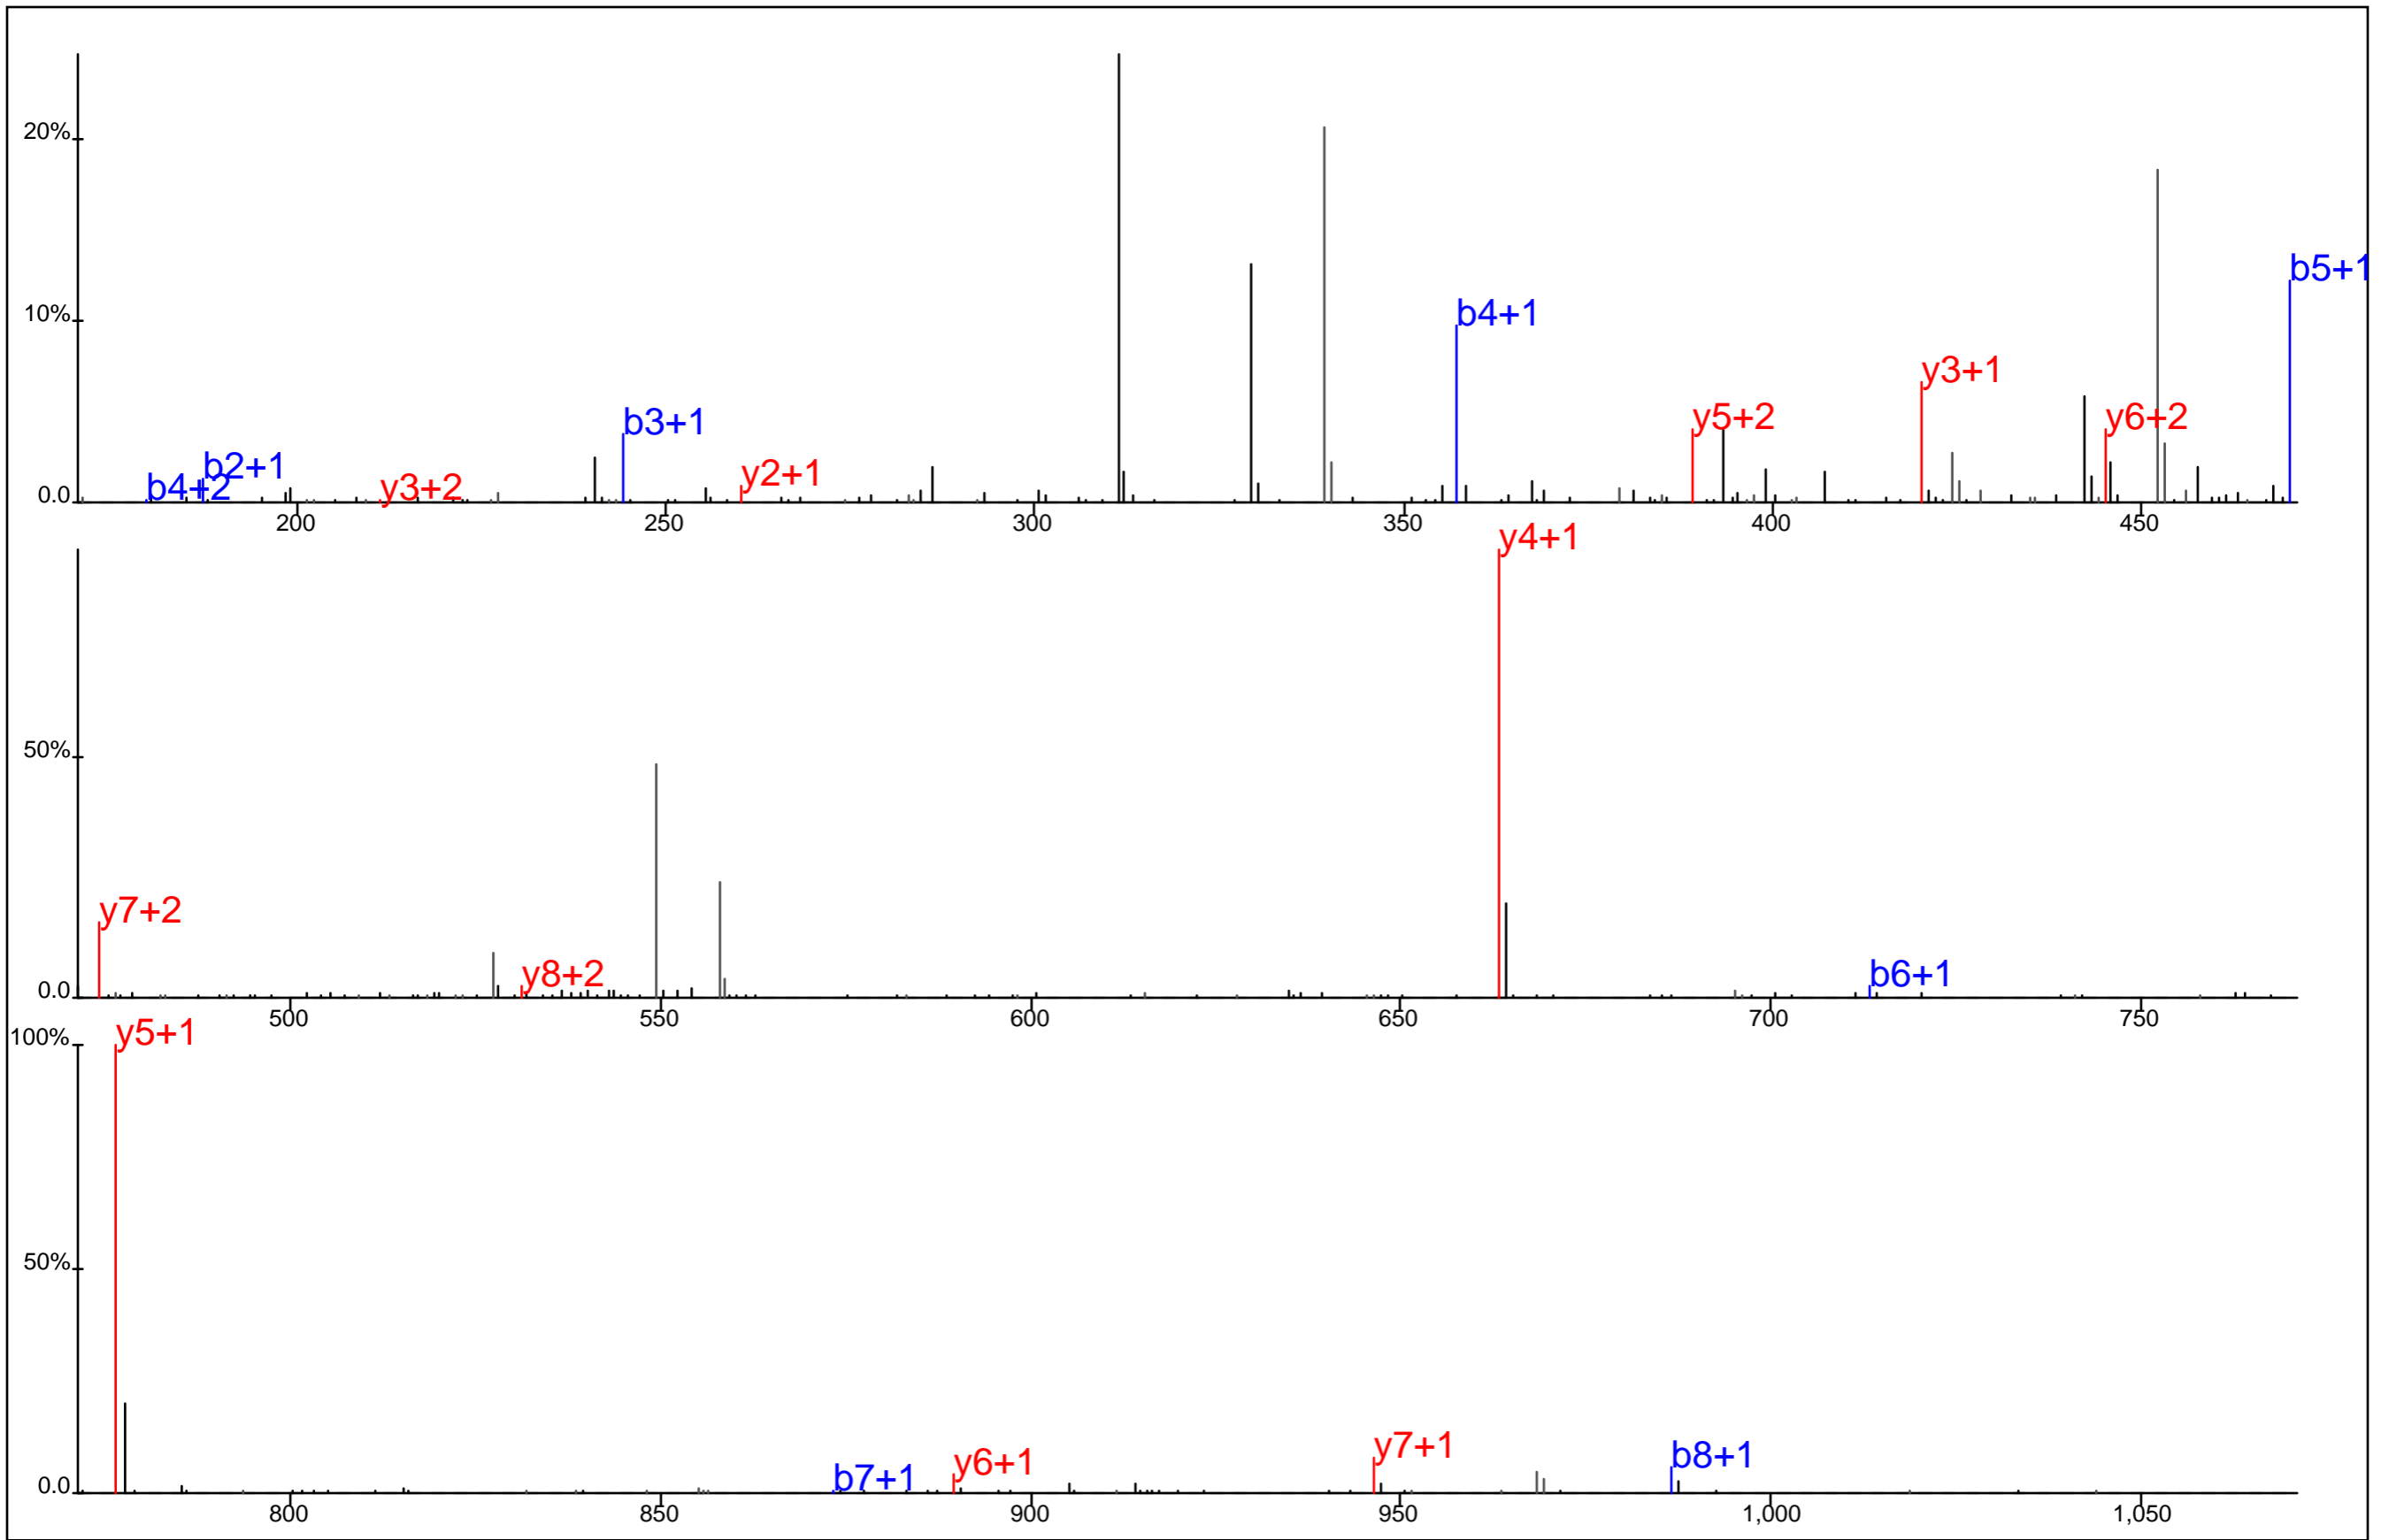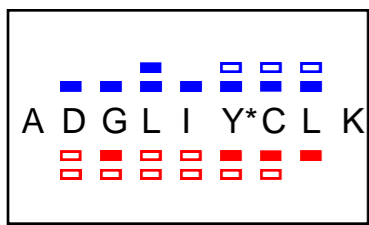

Protein Name: ZAP70  
 gi Accession: 31455611  
 Precursor Mass: 566.7606+2  
 Delta Mass: 2.683 ppm  
 XCorr: 34.37

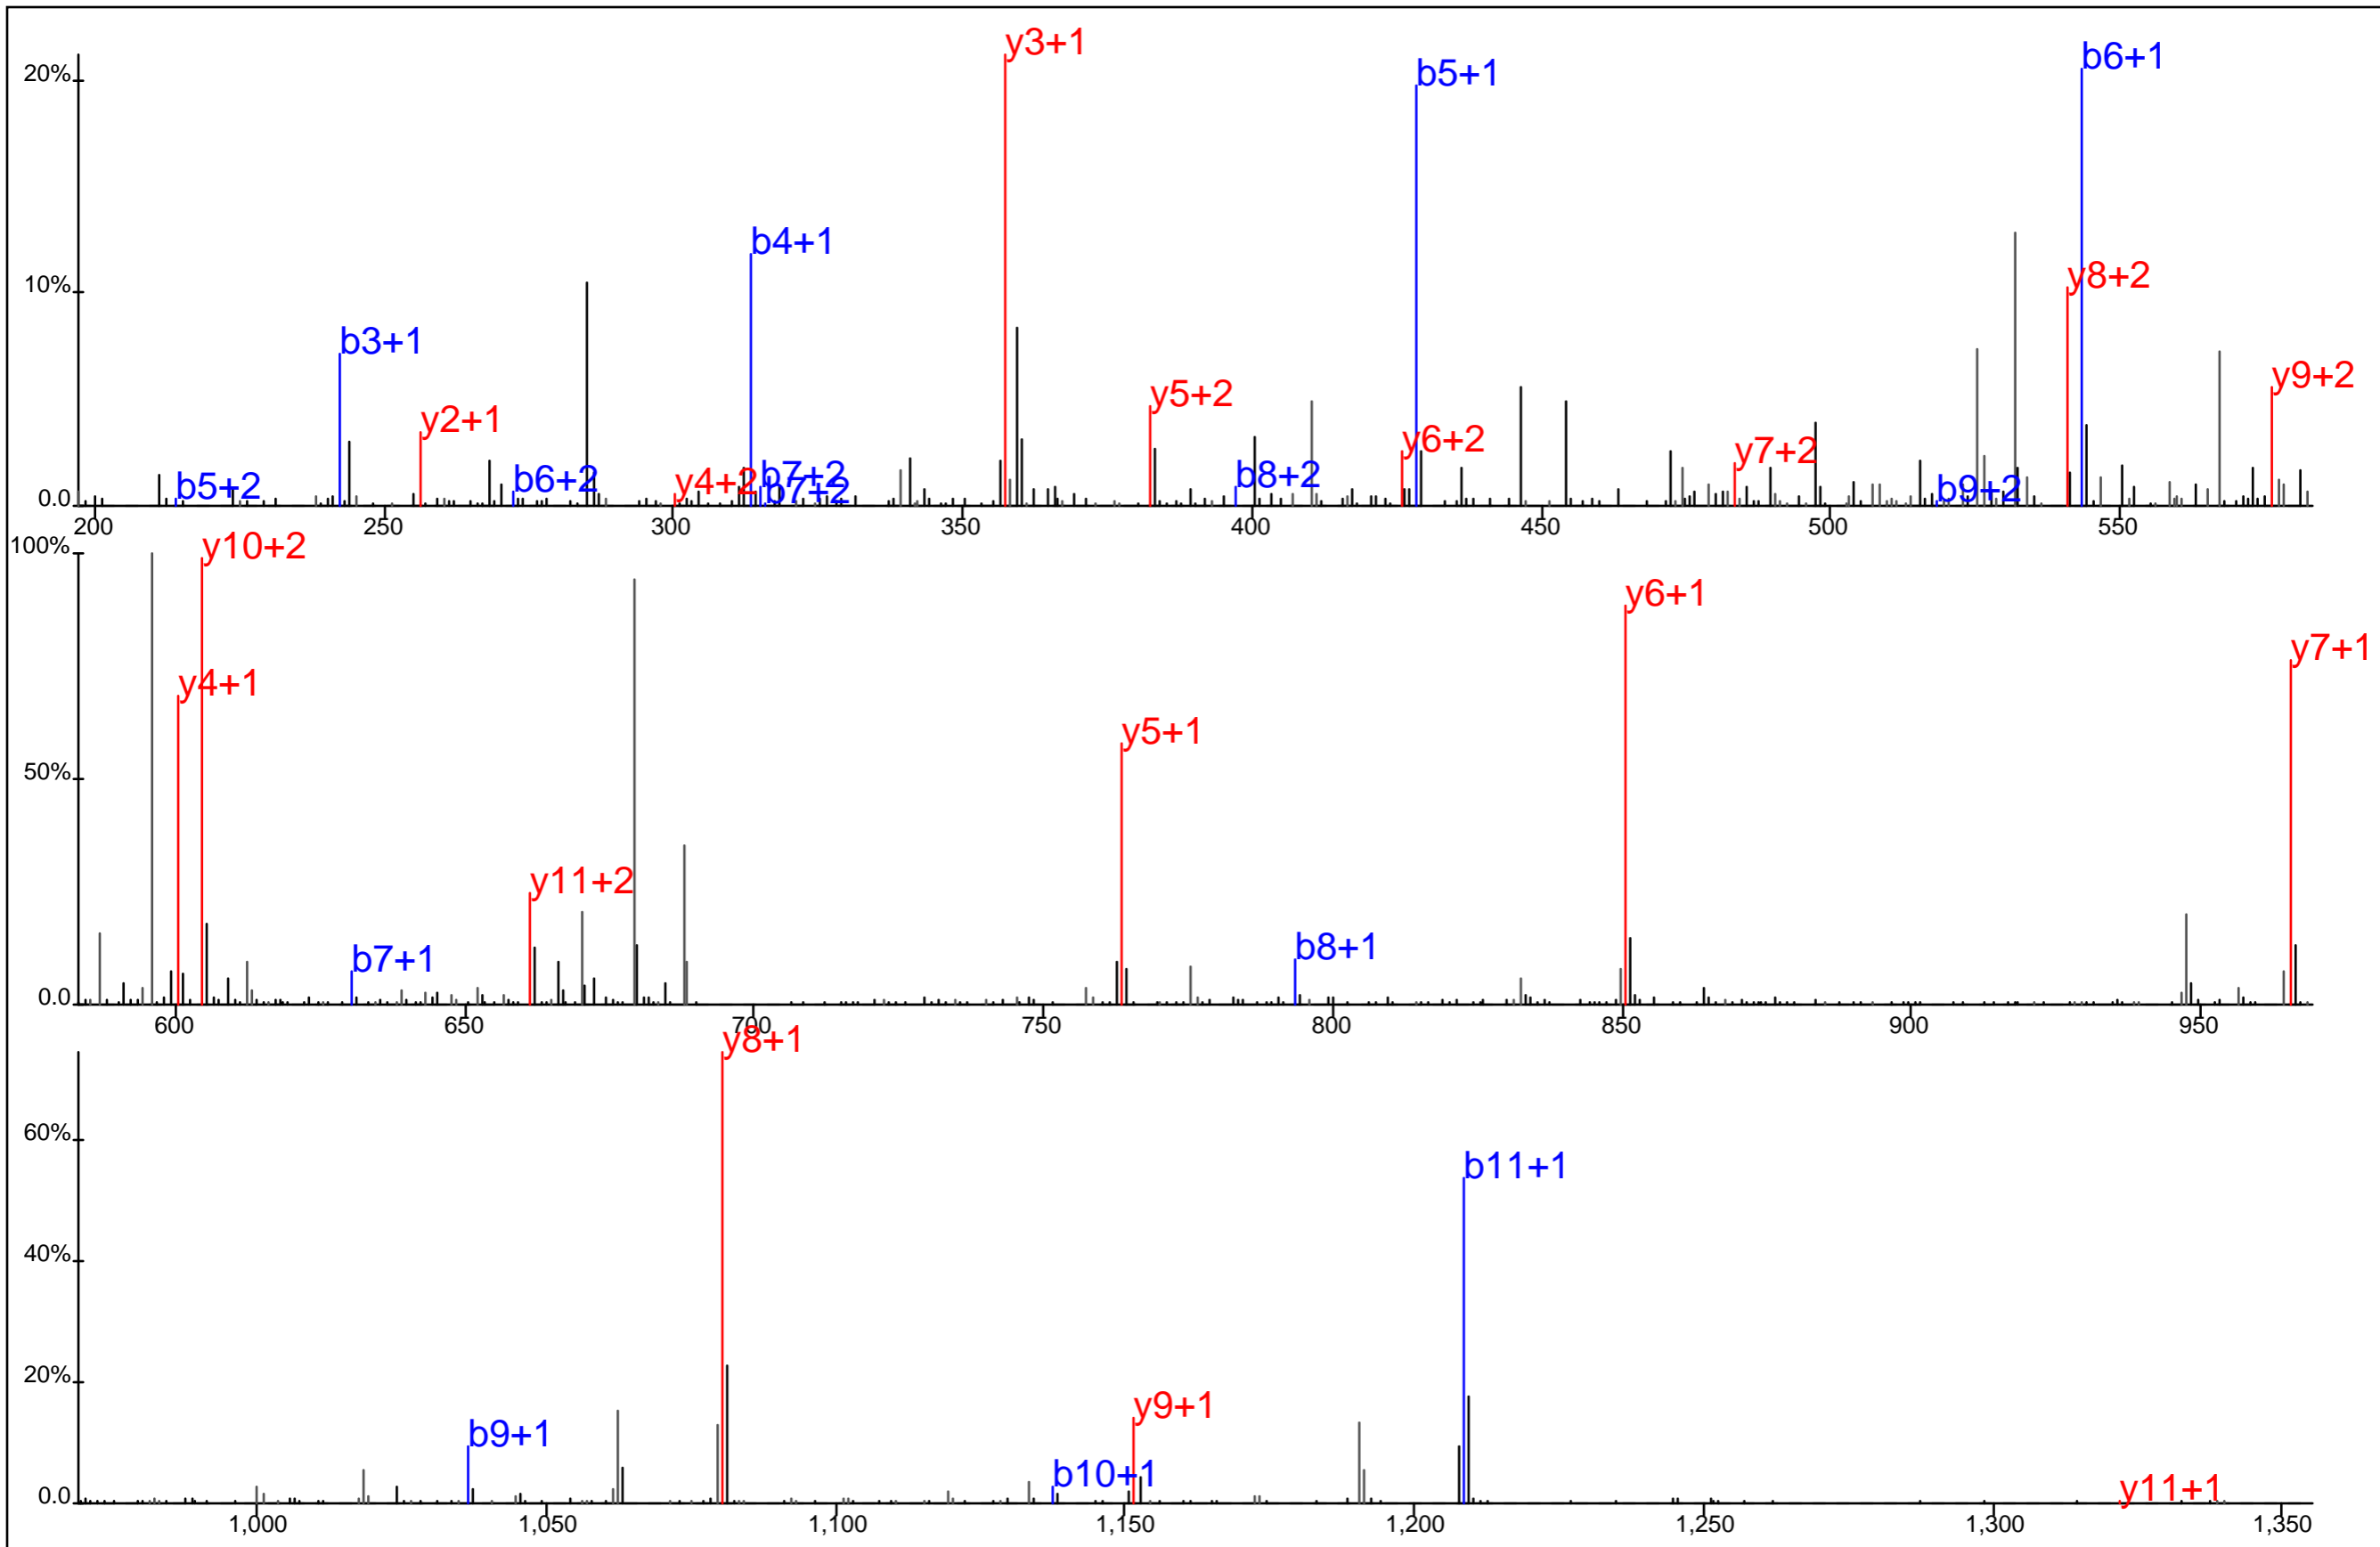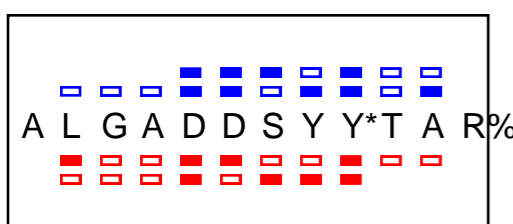

Protein Name: ZAP70  
 gi Accession: 31455611  
 Precursor Mass: 696.7895+2  
 Delta Mass: 0.760 ppm  
 XCorr: 75.2

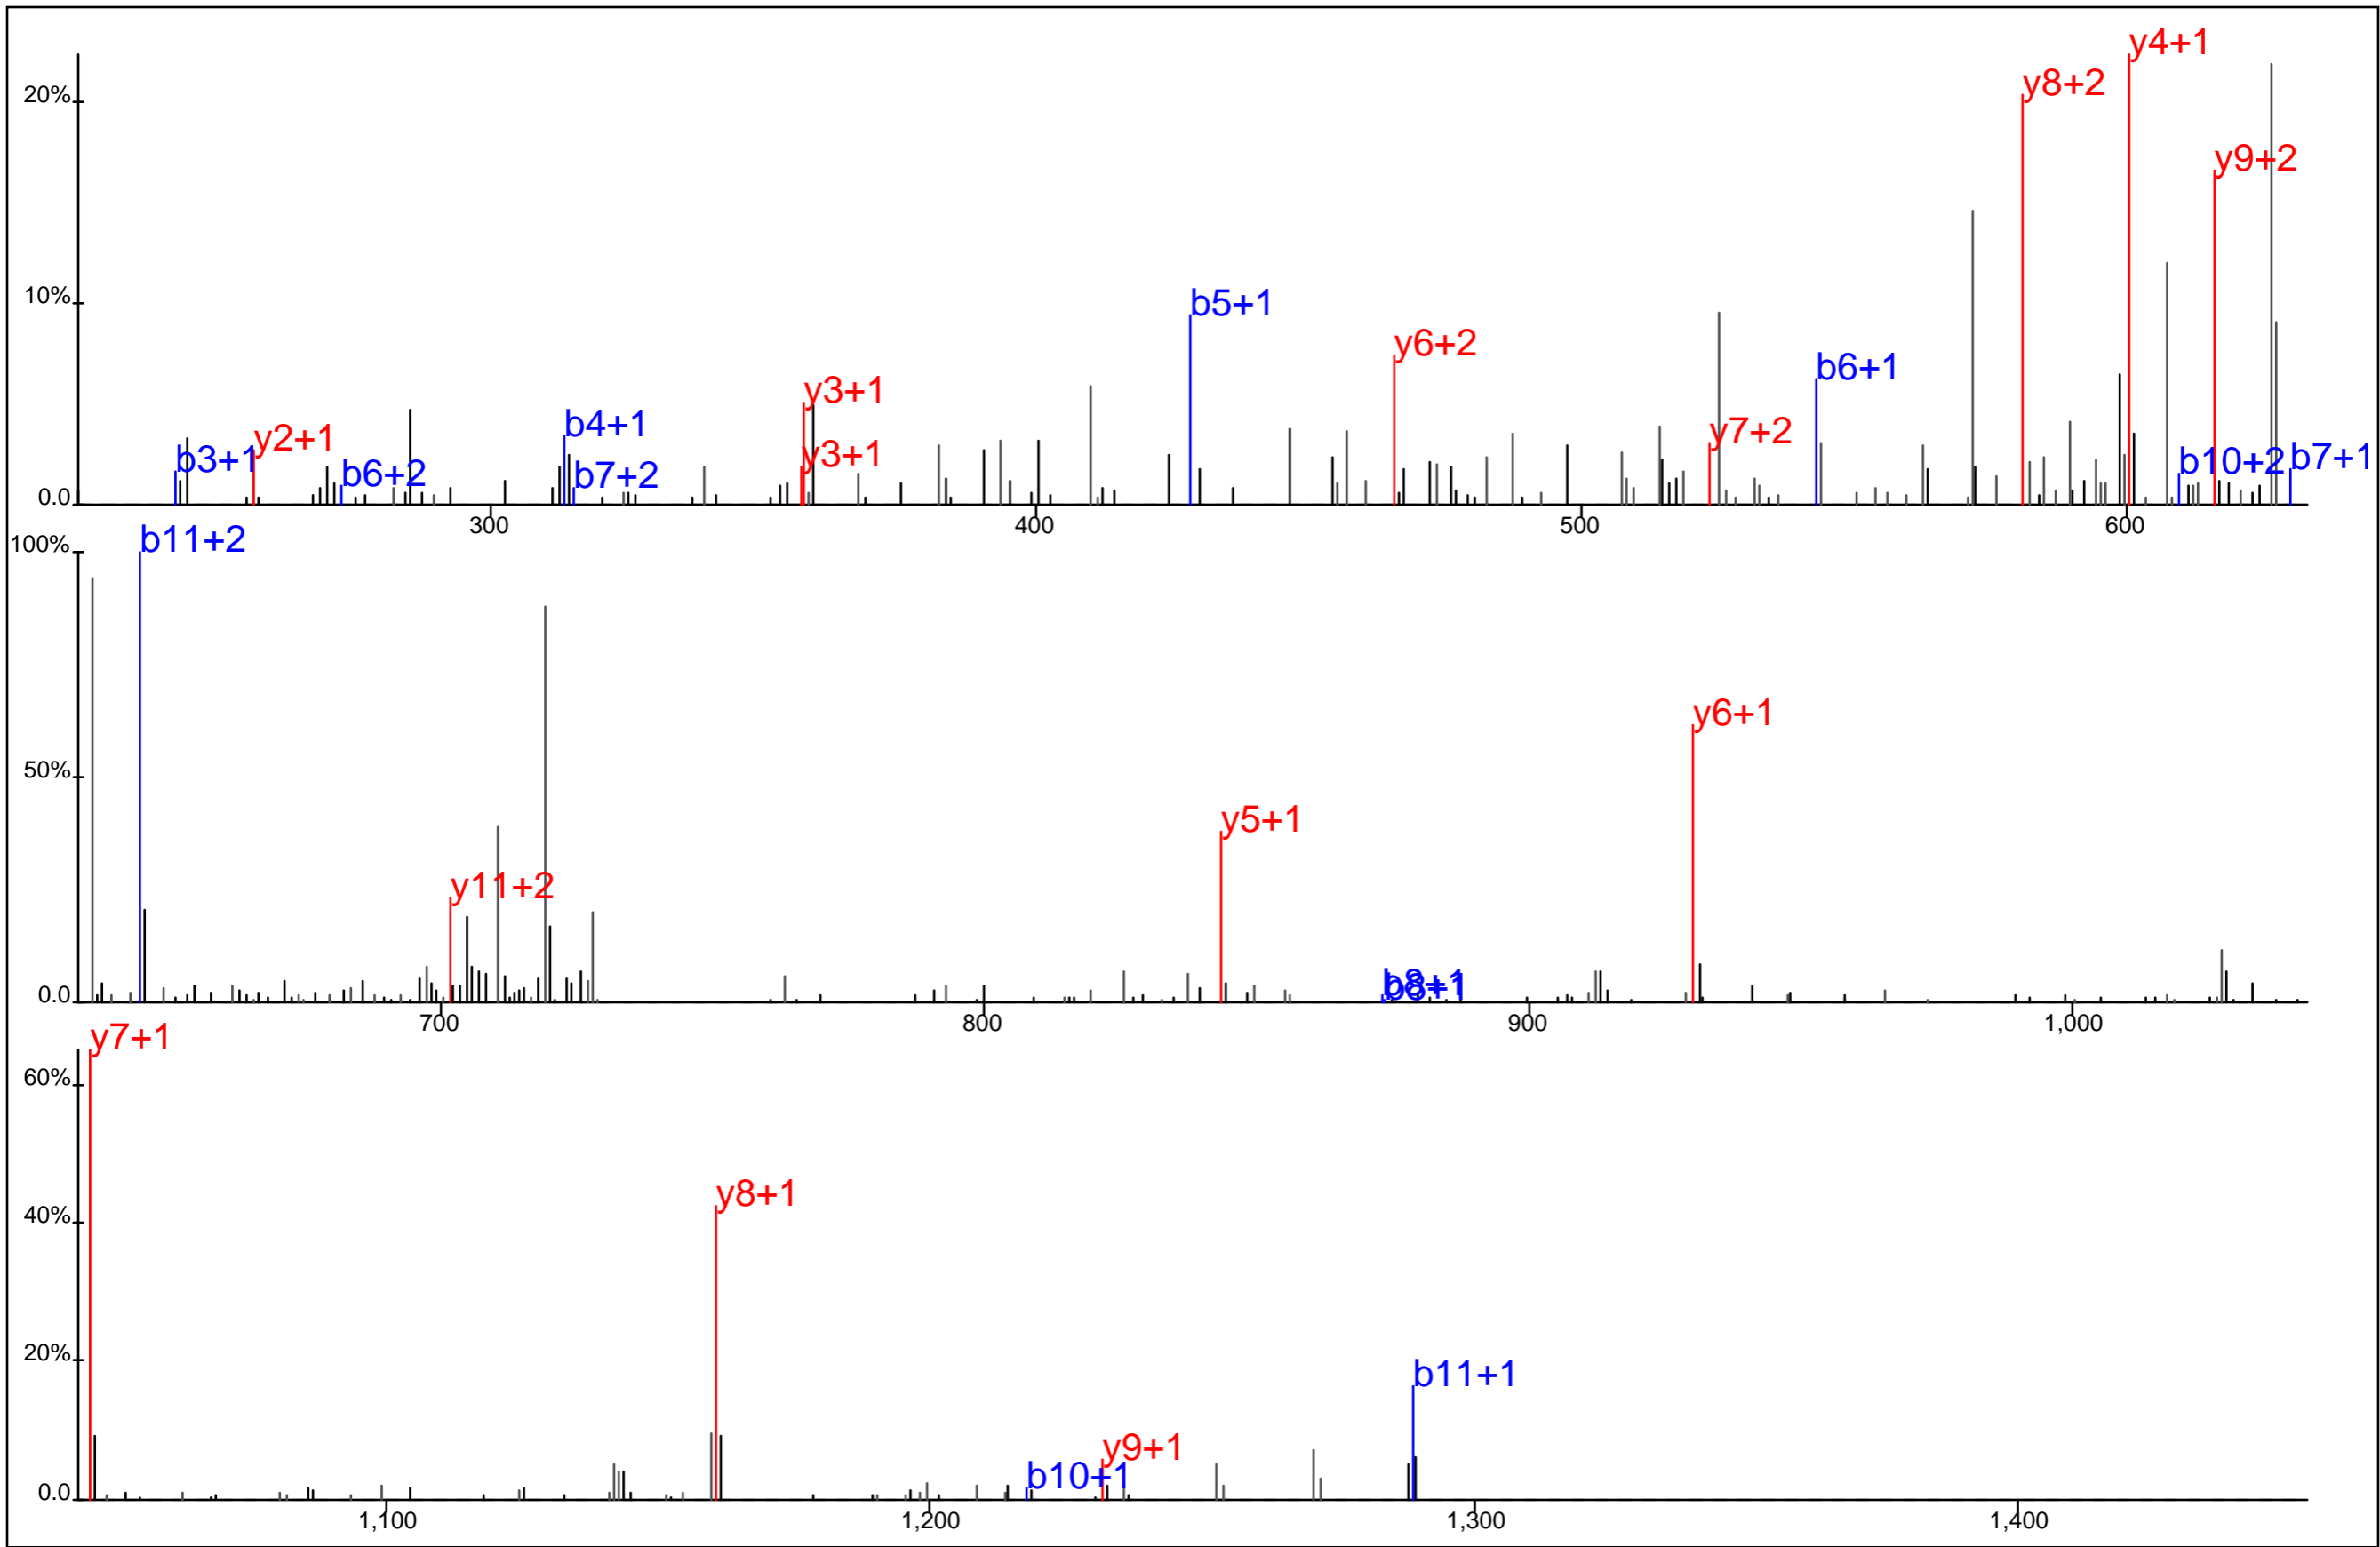

|  |                                                                                                                                                                     |
|--|---------------------------------------------------------------------------------------------------------------------------------------------------------------------|
|  | <p>Protein Name: ZAP70<br/>         gi Accession: 31455611<br/>         Precursor Mass: 736.7754+2<br/>         Delta Mass: 4.433 ppm<br/>         XCorr: 59.05</p> |
|--|---------------------------------------------------------------------------------------------------------------------------------------------------------------------|

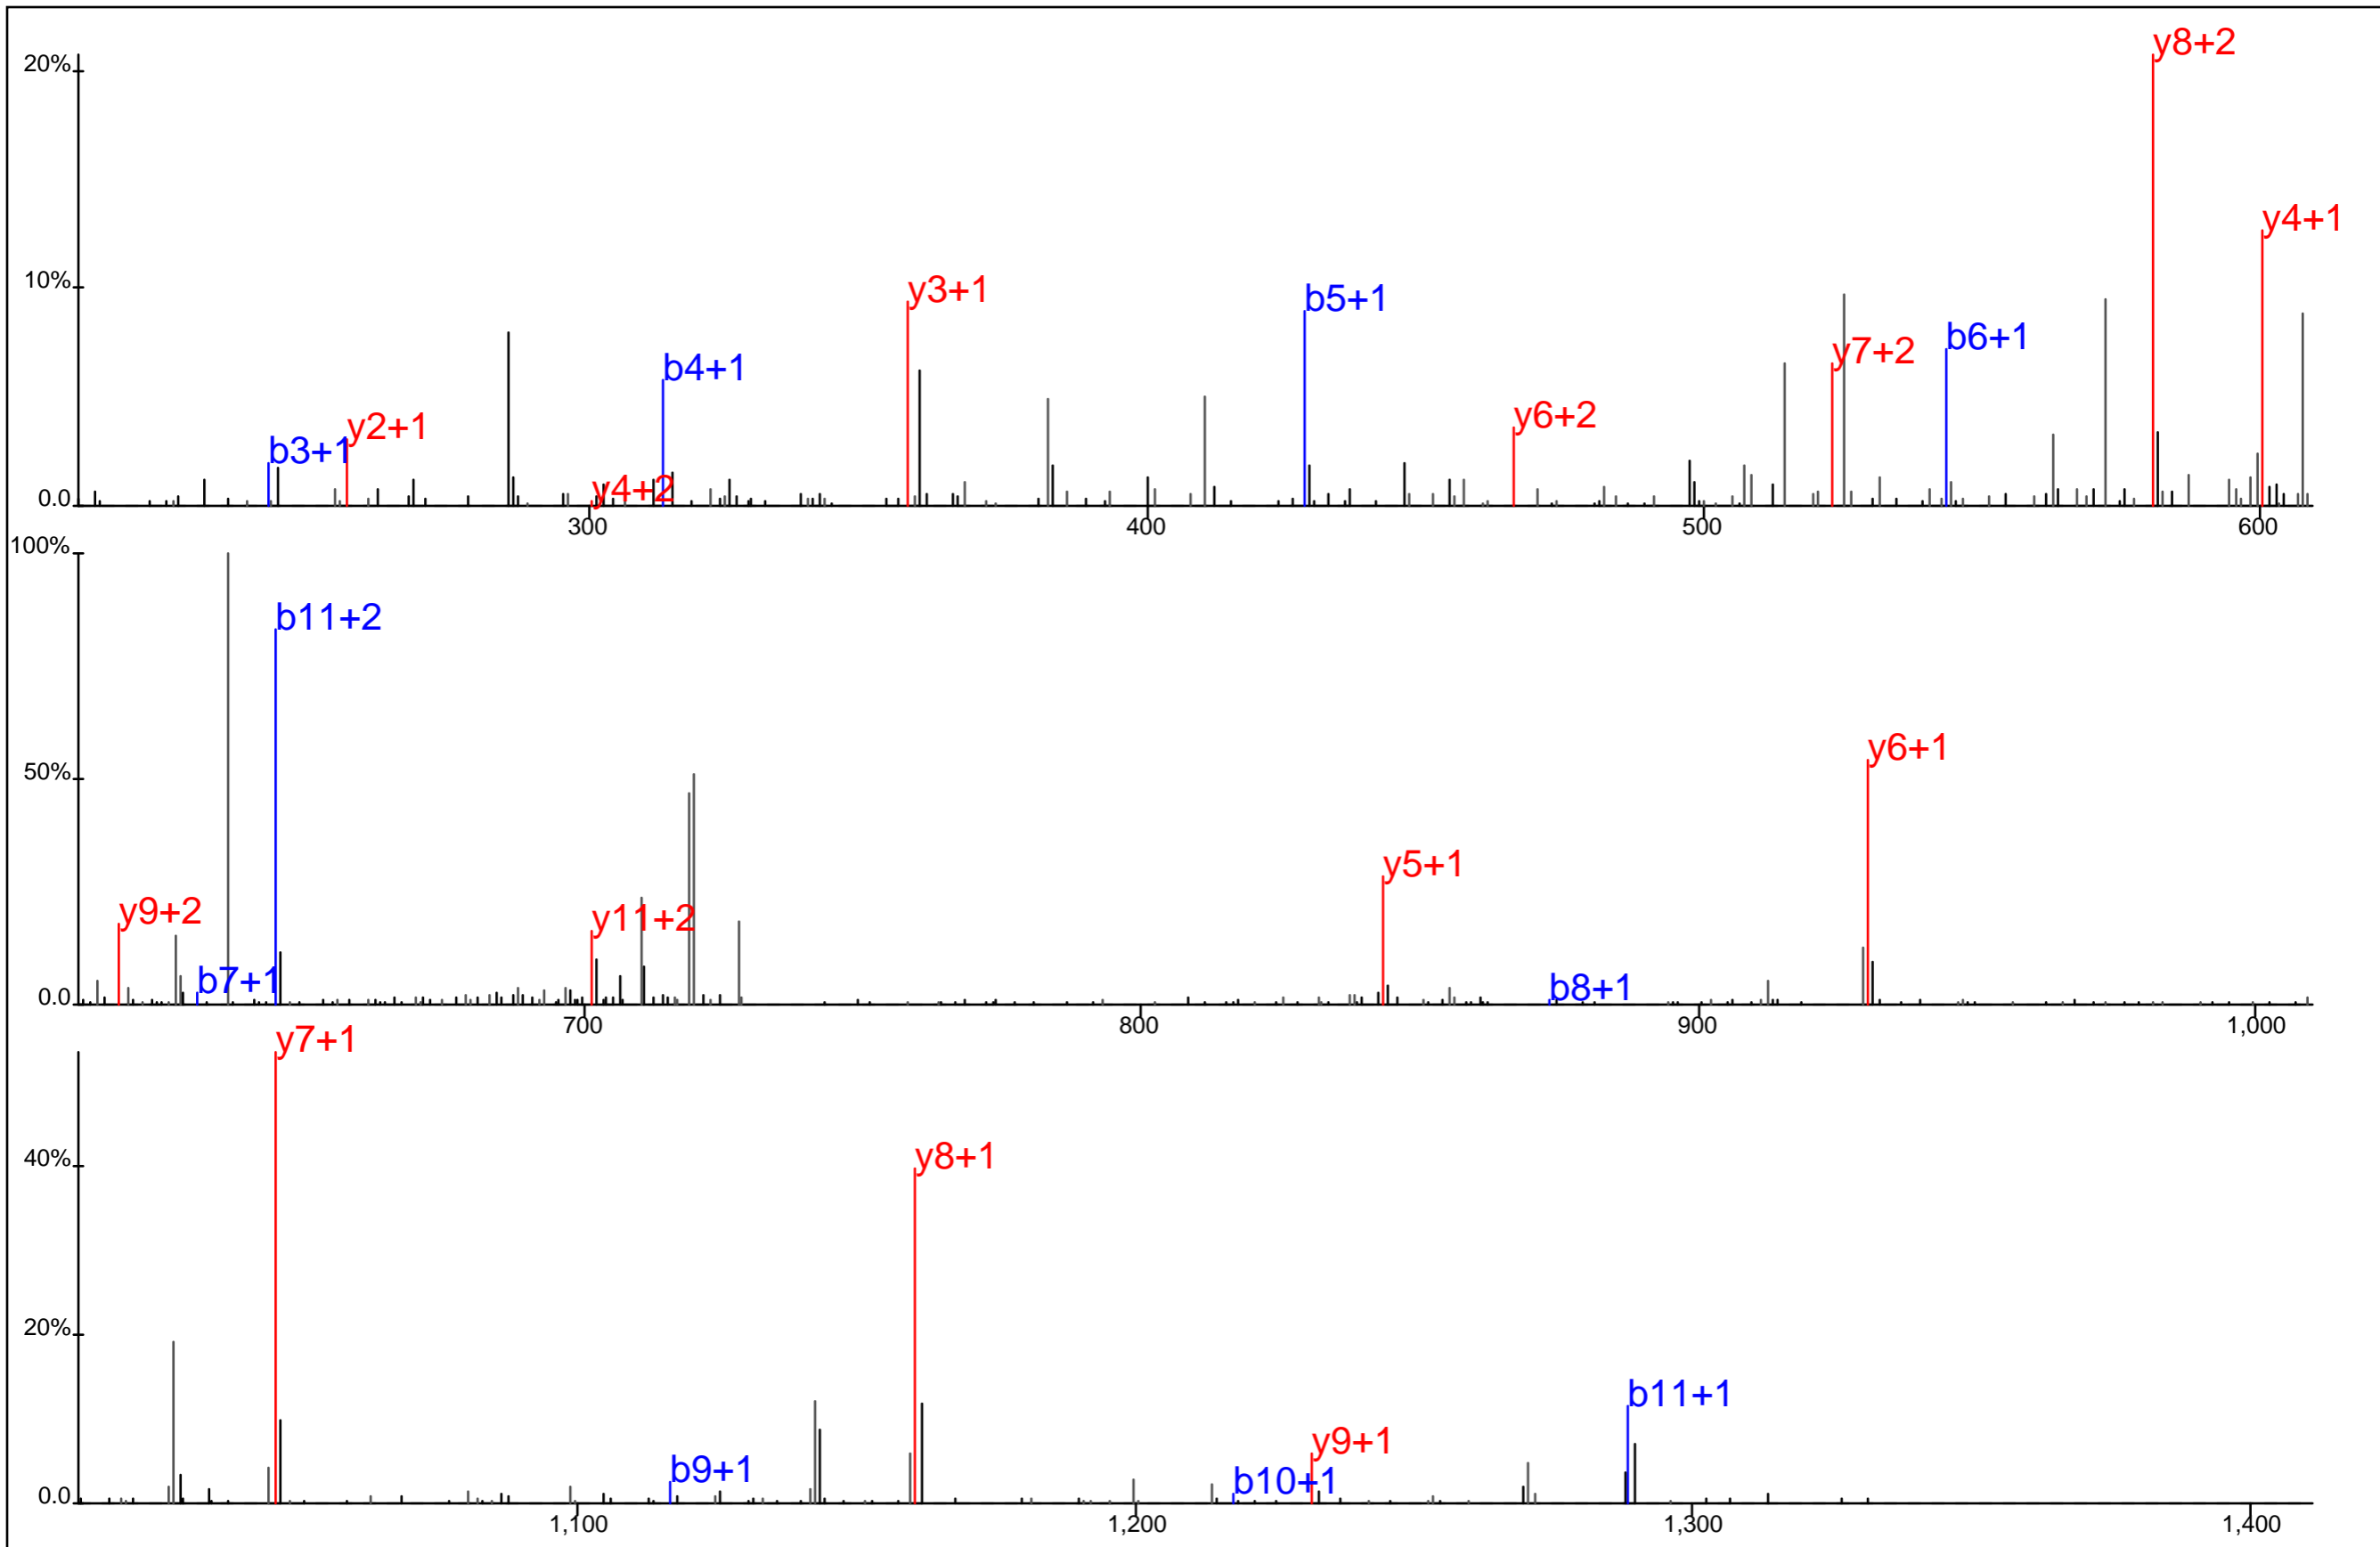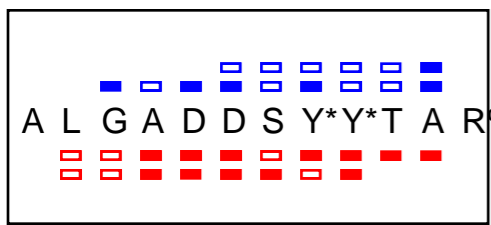

Protein Name: ZAP70  
 gi Accession: 31455611  
 Precursor Mass: 736.7737+2  
 Delta Mass: 2.199 ppm  
 XCorr: 63.41

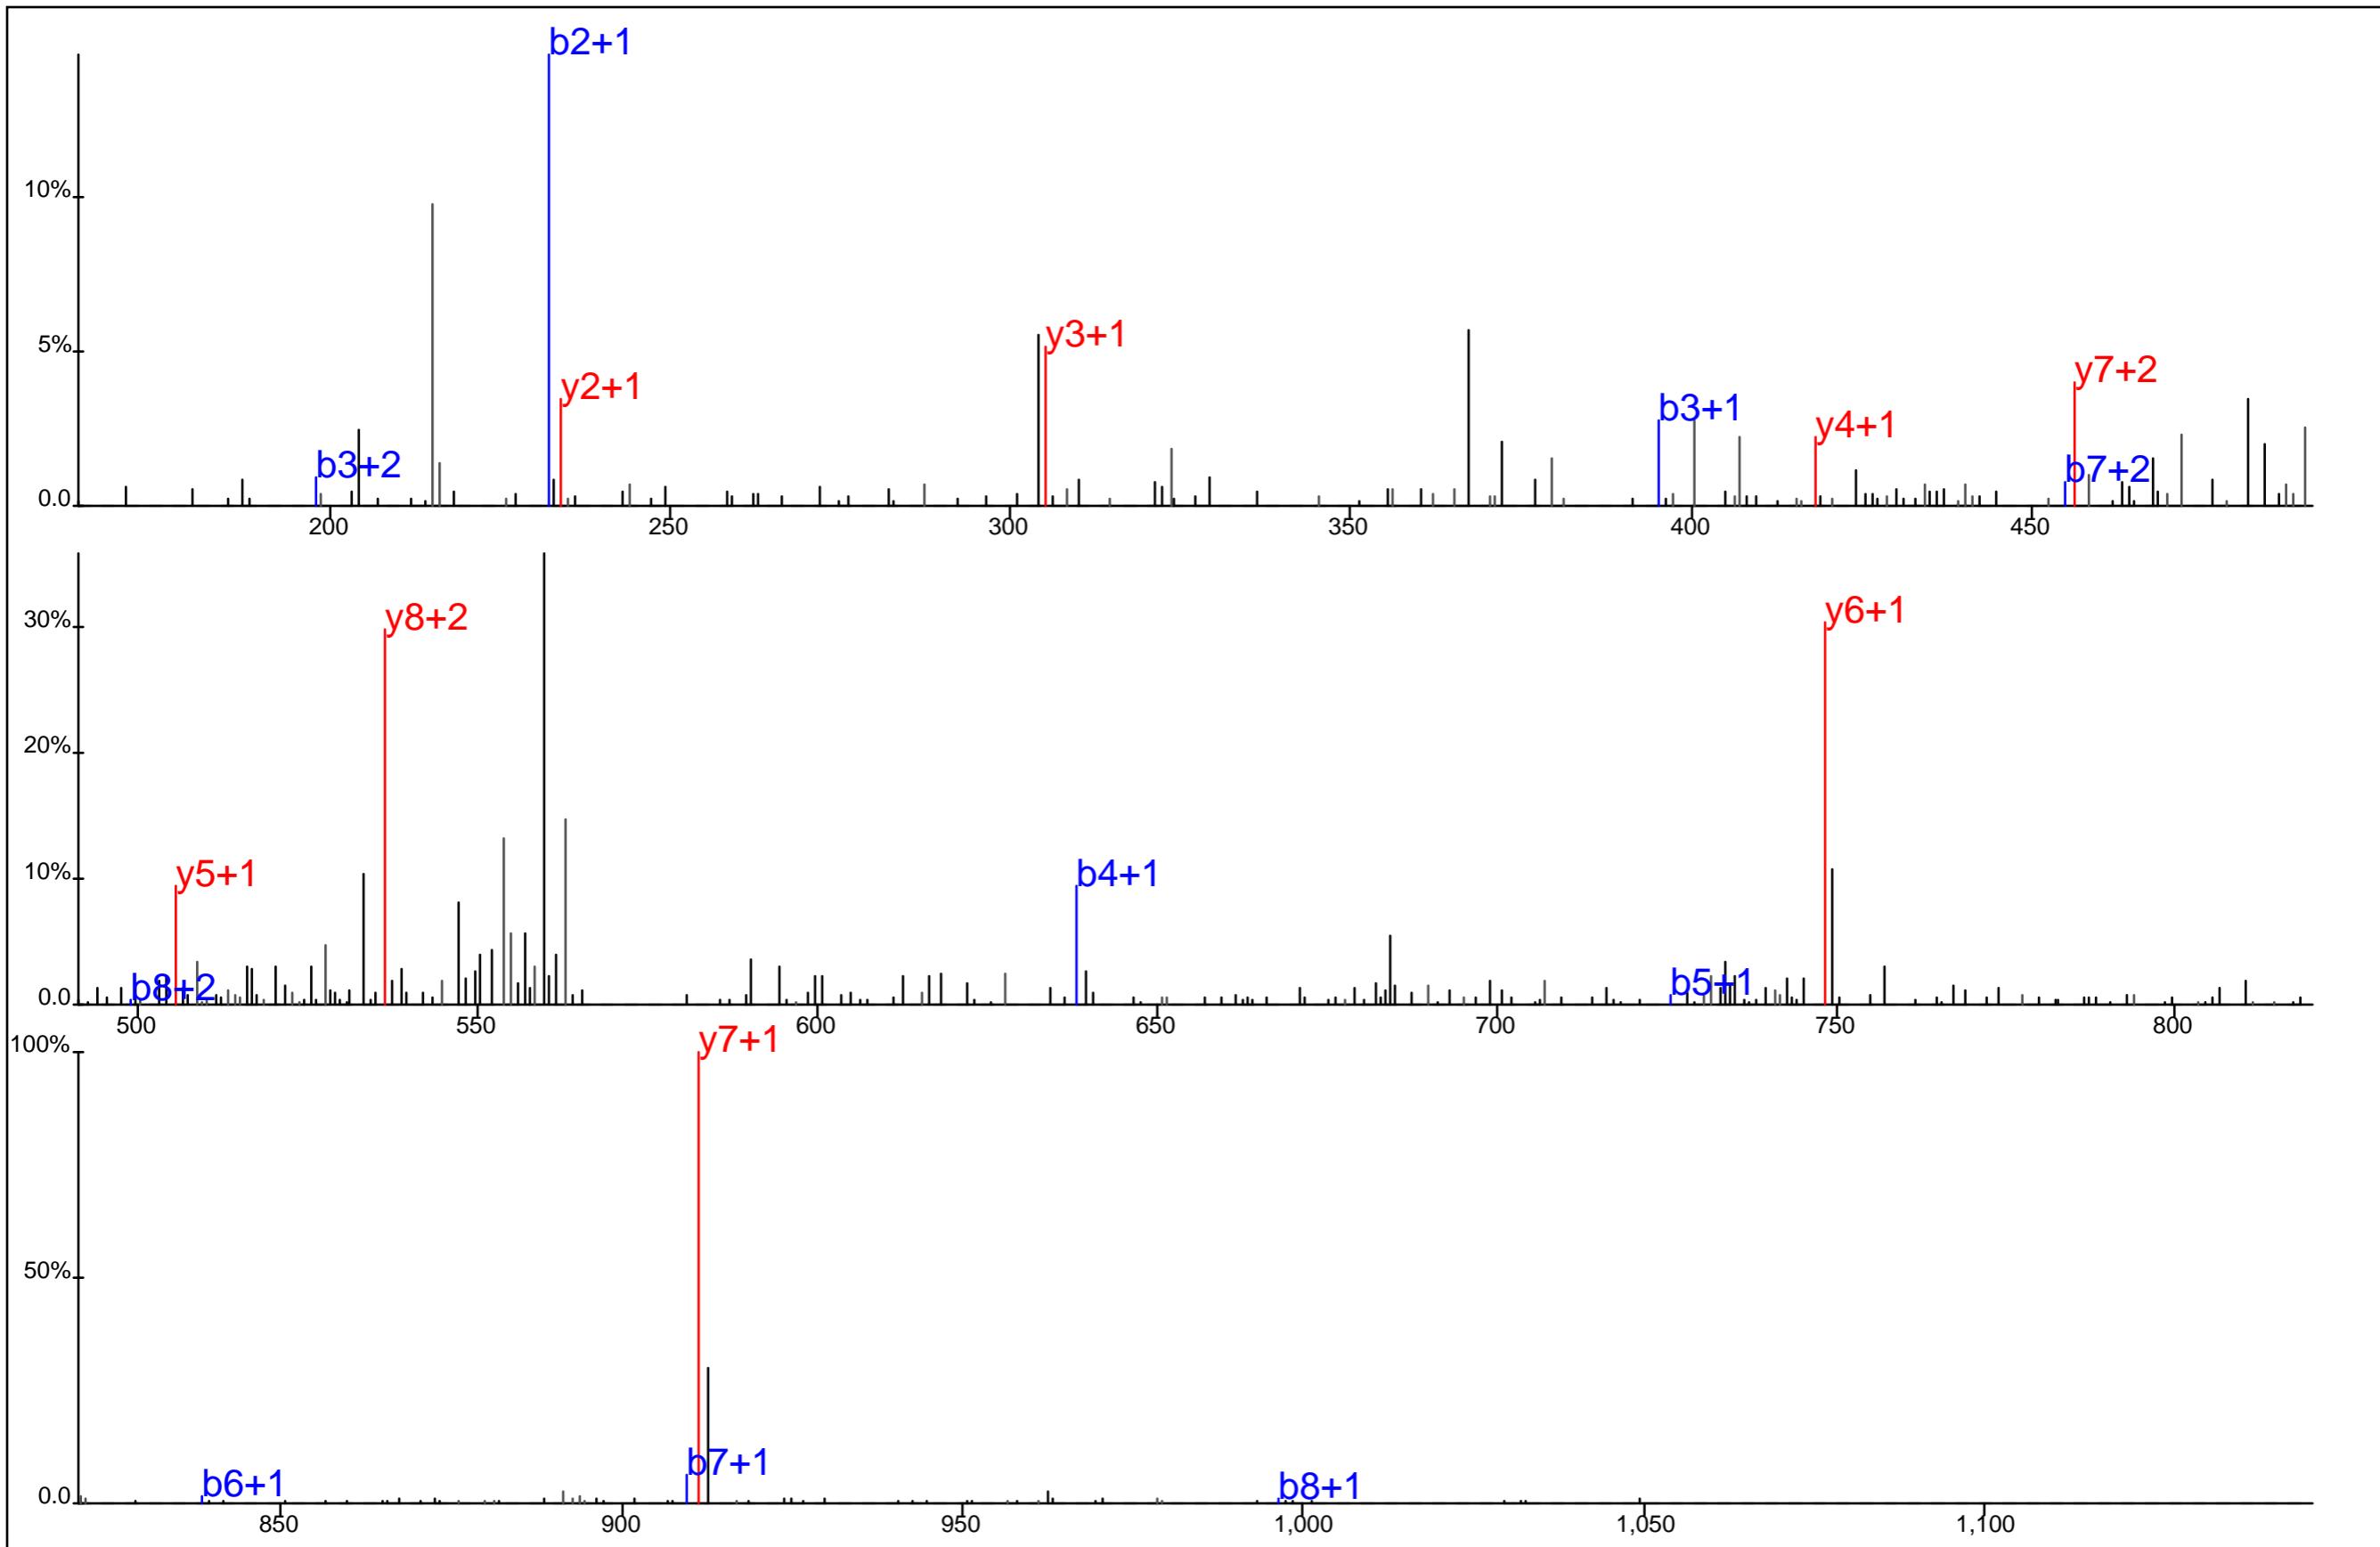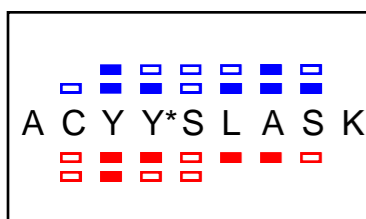

Protein Name: ZAP70  
 gi Accession: 31455611  
 Precursor Mass: 571.7356+2  
 Delta Mass: 4.515 ppm  
 XCorr: 32.95

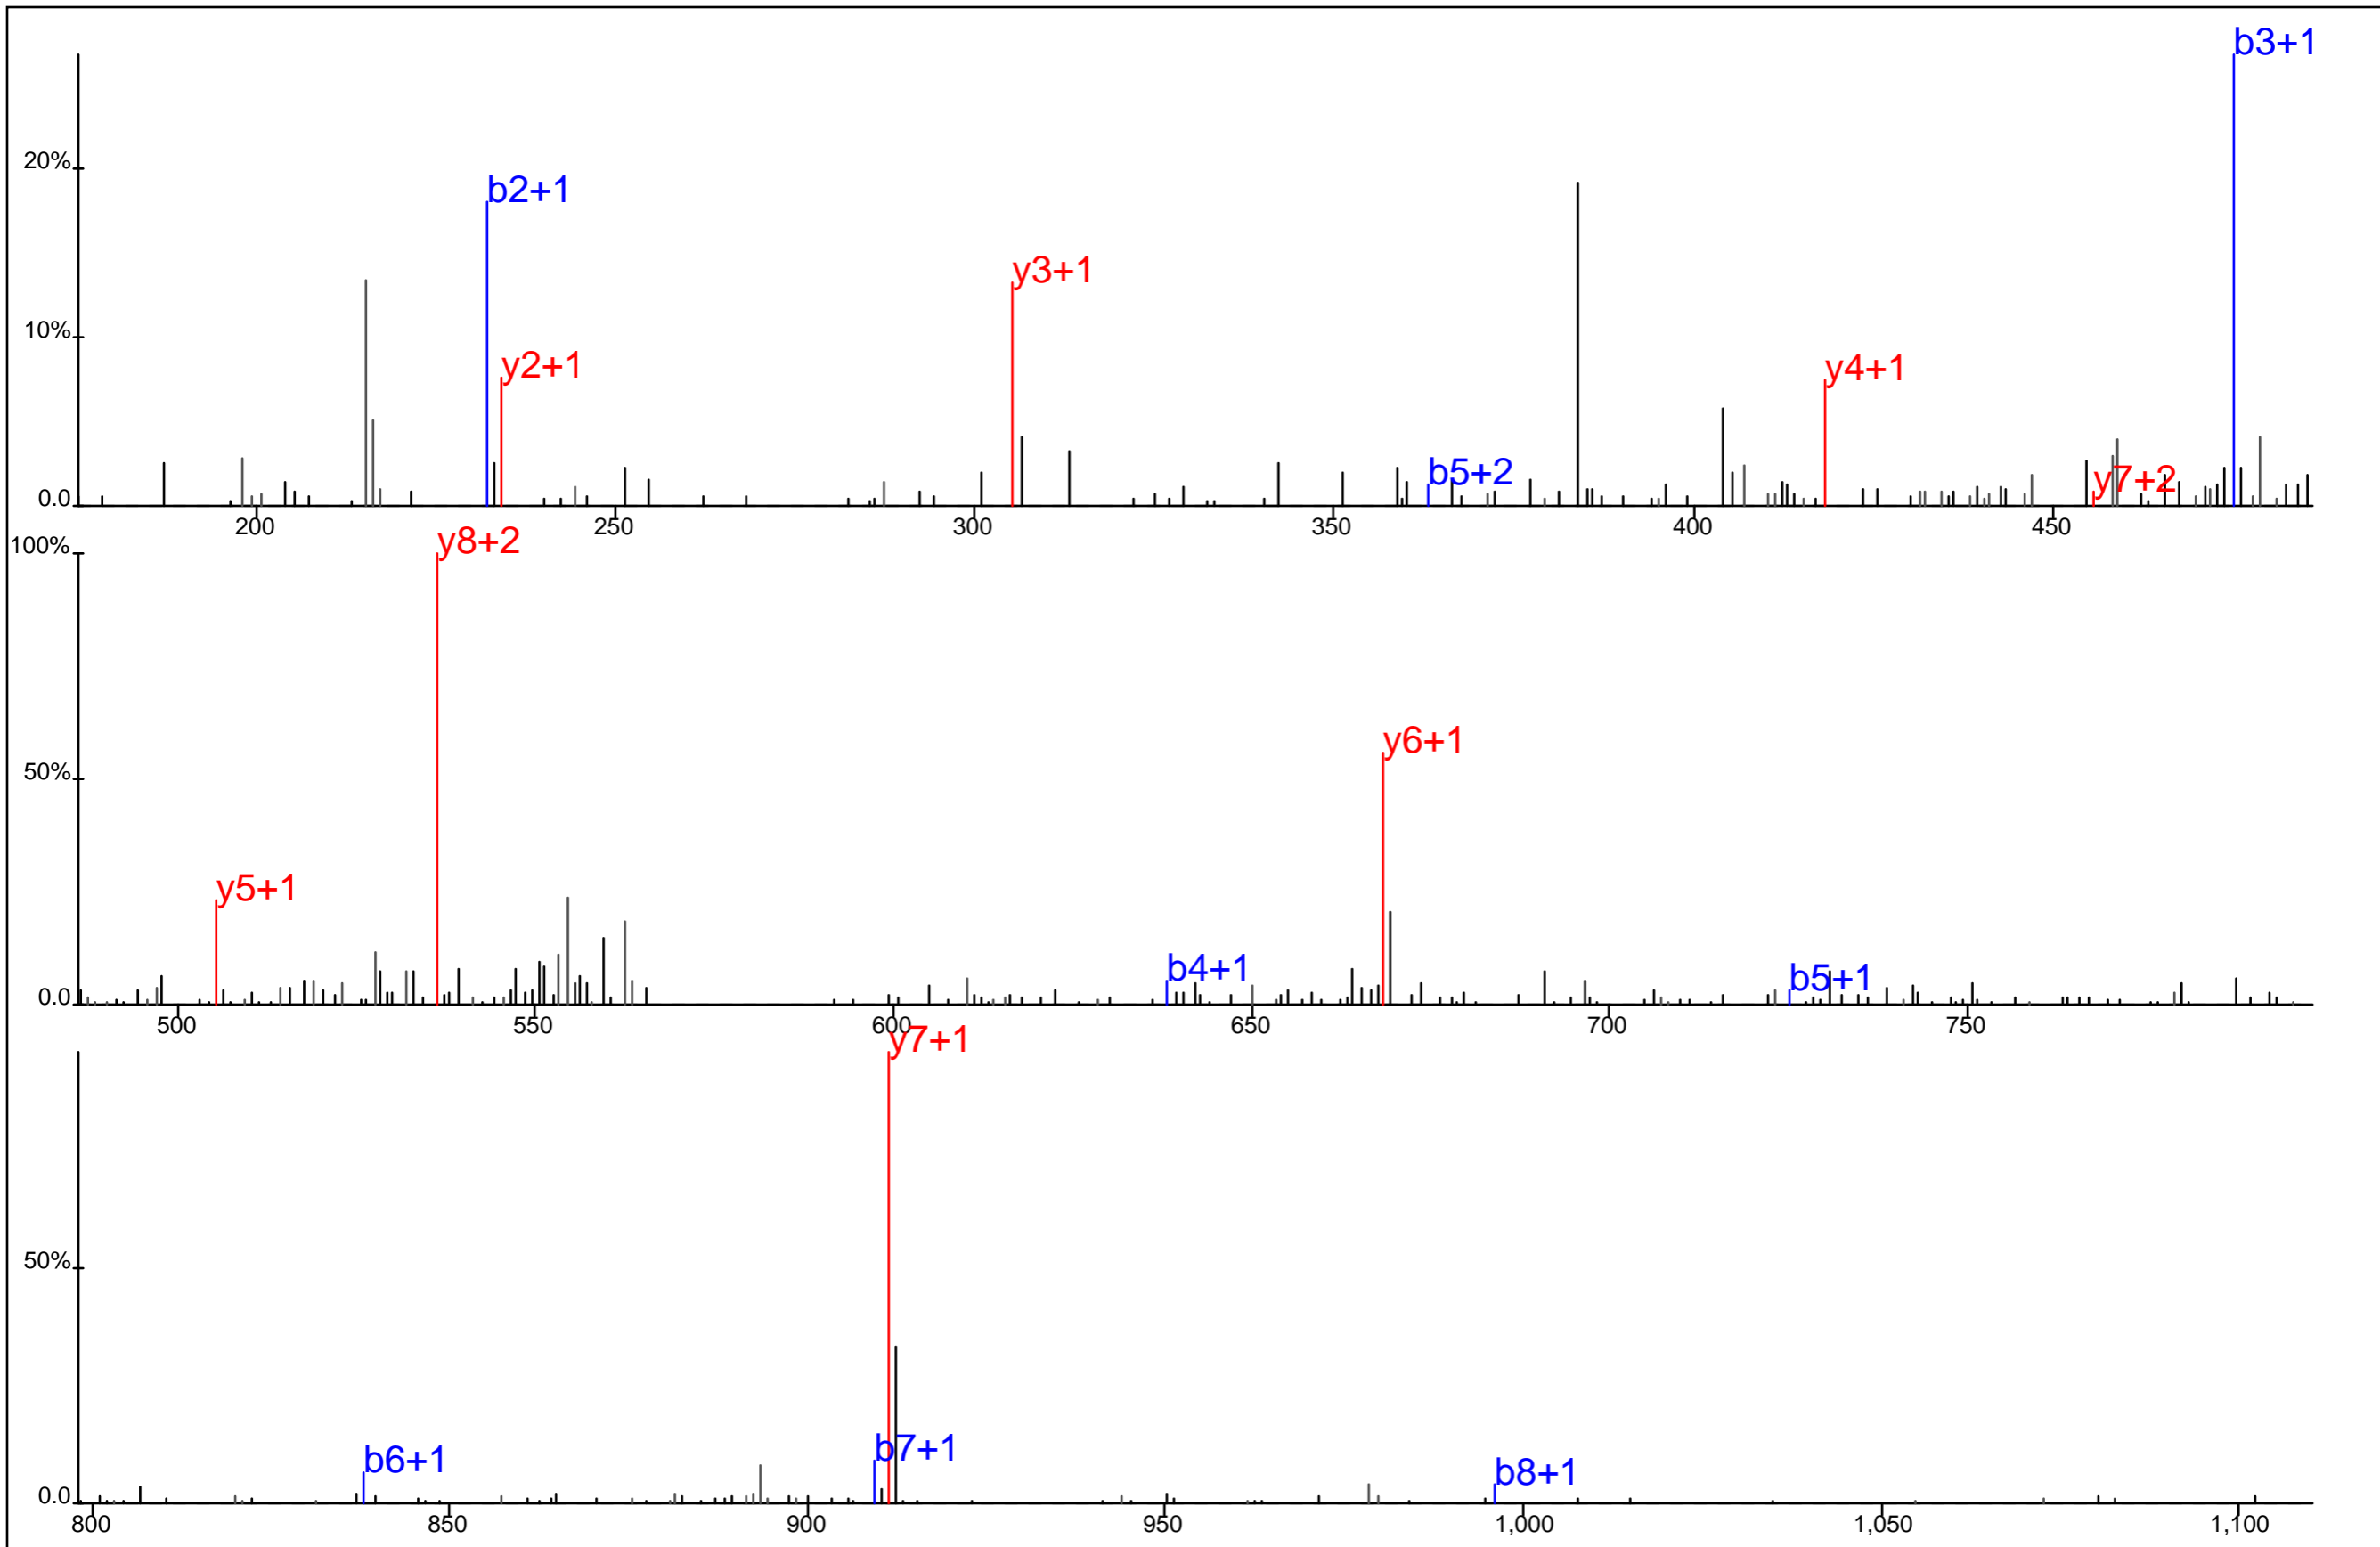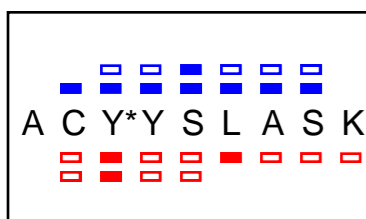

Protein Name: ZAP70  
 gi Accession: 31455611  
 Precursor Mass: 571.7346+2  
 Delta Mass: 2.808 ppm  
 XCorr: 24.57

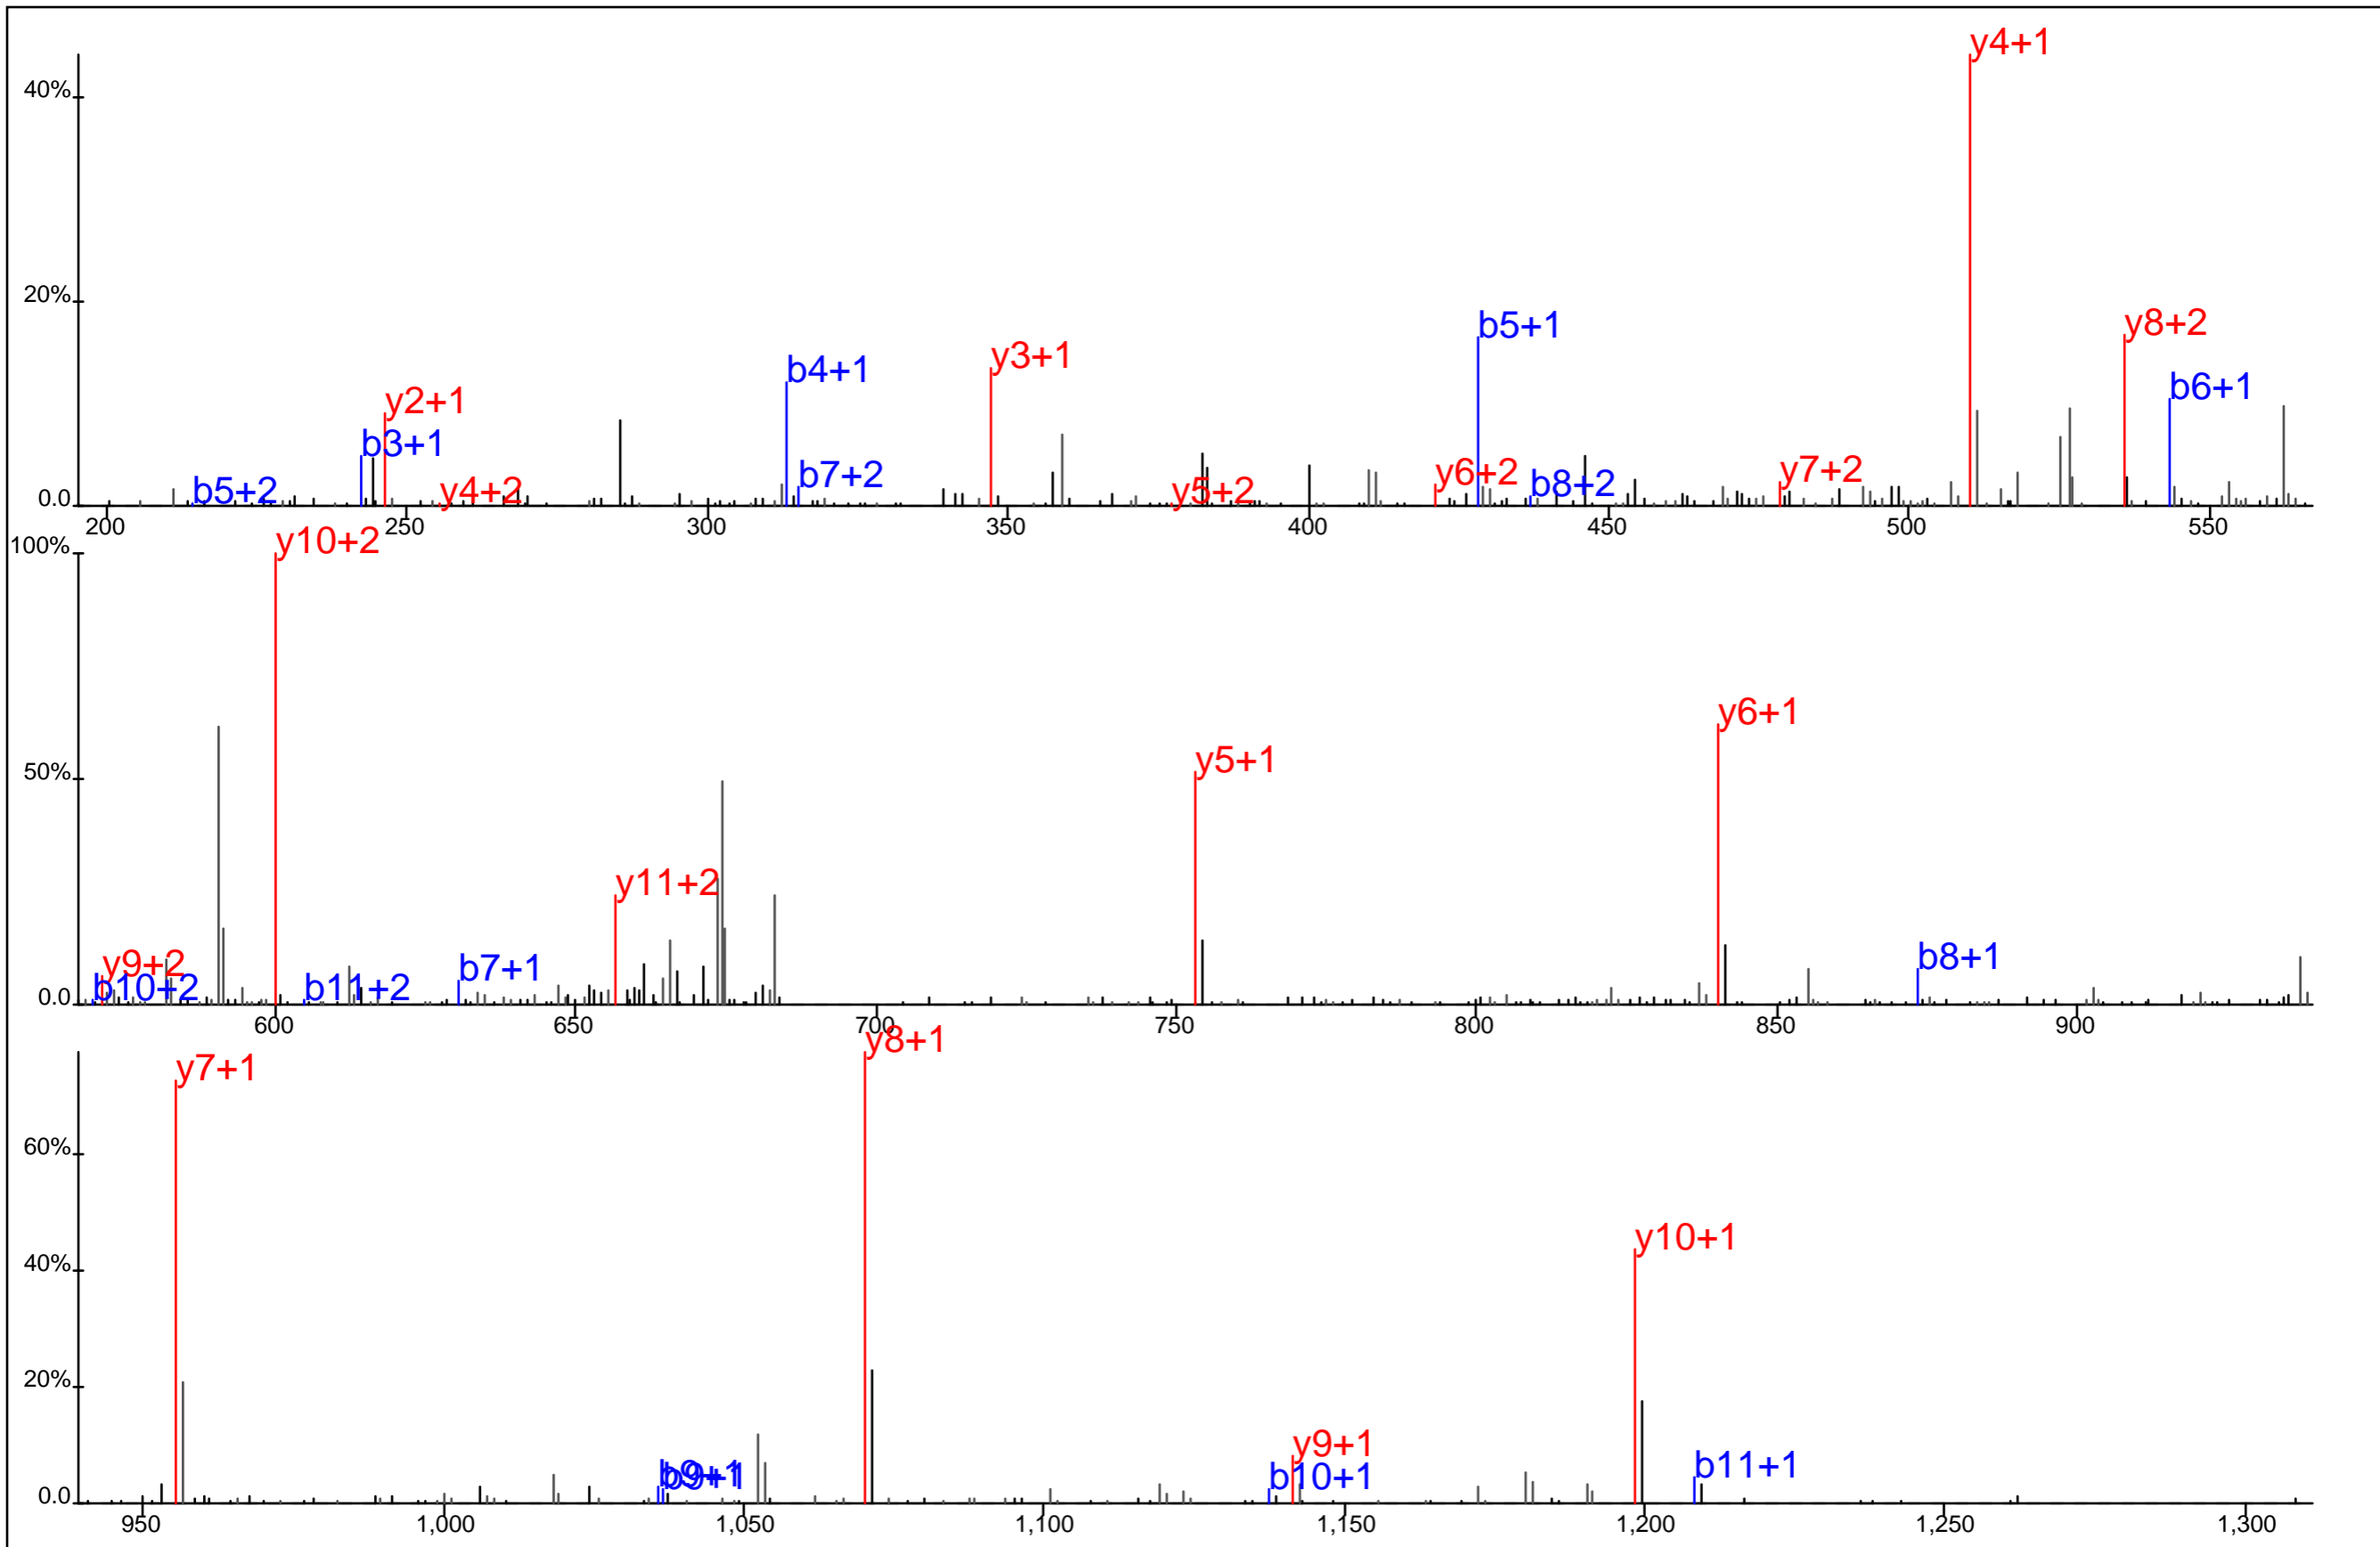

□ □ □ ■ □ □ ■ □ ■ ■  
 A L G A D D S Y\*Y T A R  
□ □ □ ■ □ □ □ □ □ □

Protein Name: ZAP70  
 gi Accession: 31455611  
 Precursor Mass: 691.7875+2  
 Delta Mass: 3.832 ppm  
 XCorr: 81.06



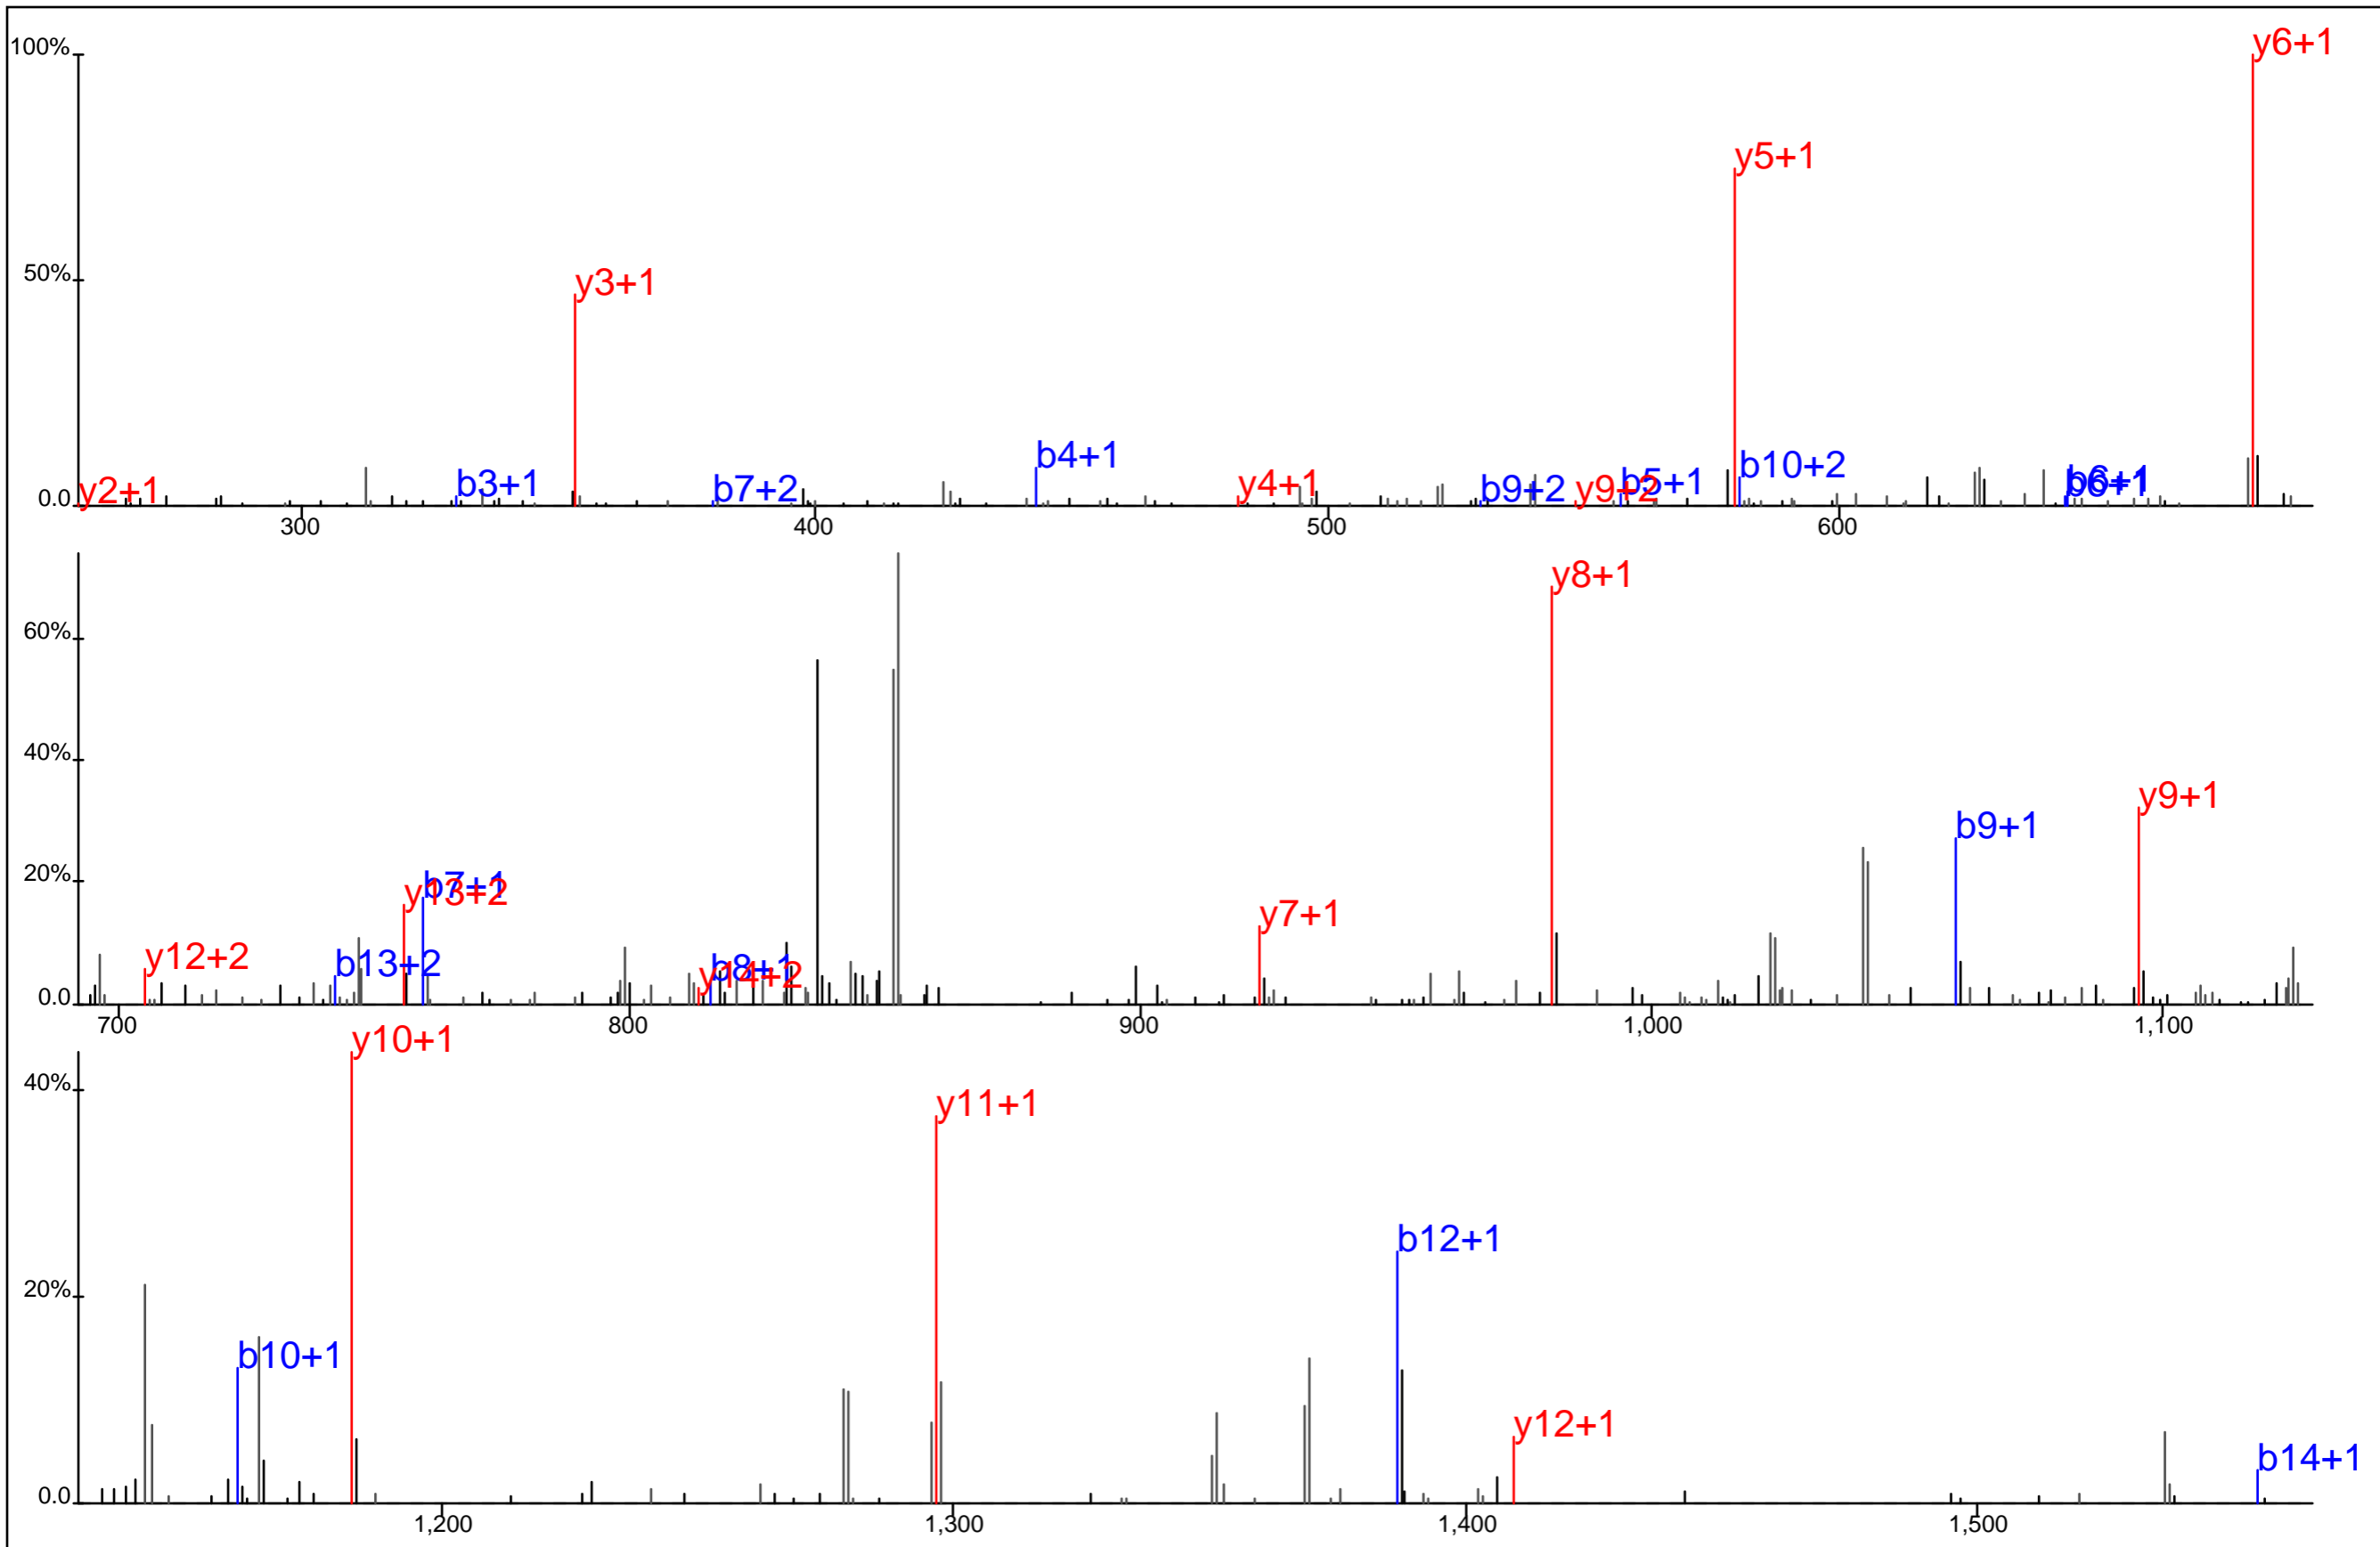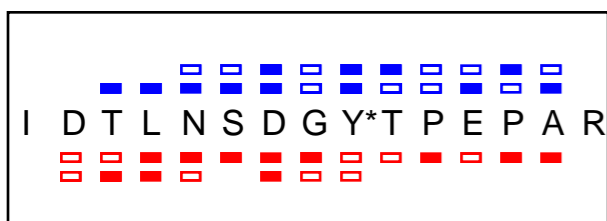

Protein Name: ZAP70  
 gi Accession: 31455611  
 Precursor Mass: 869.8817+2  
 Delta Mass: 0.154 ppm  
 XCorr: 74.21

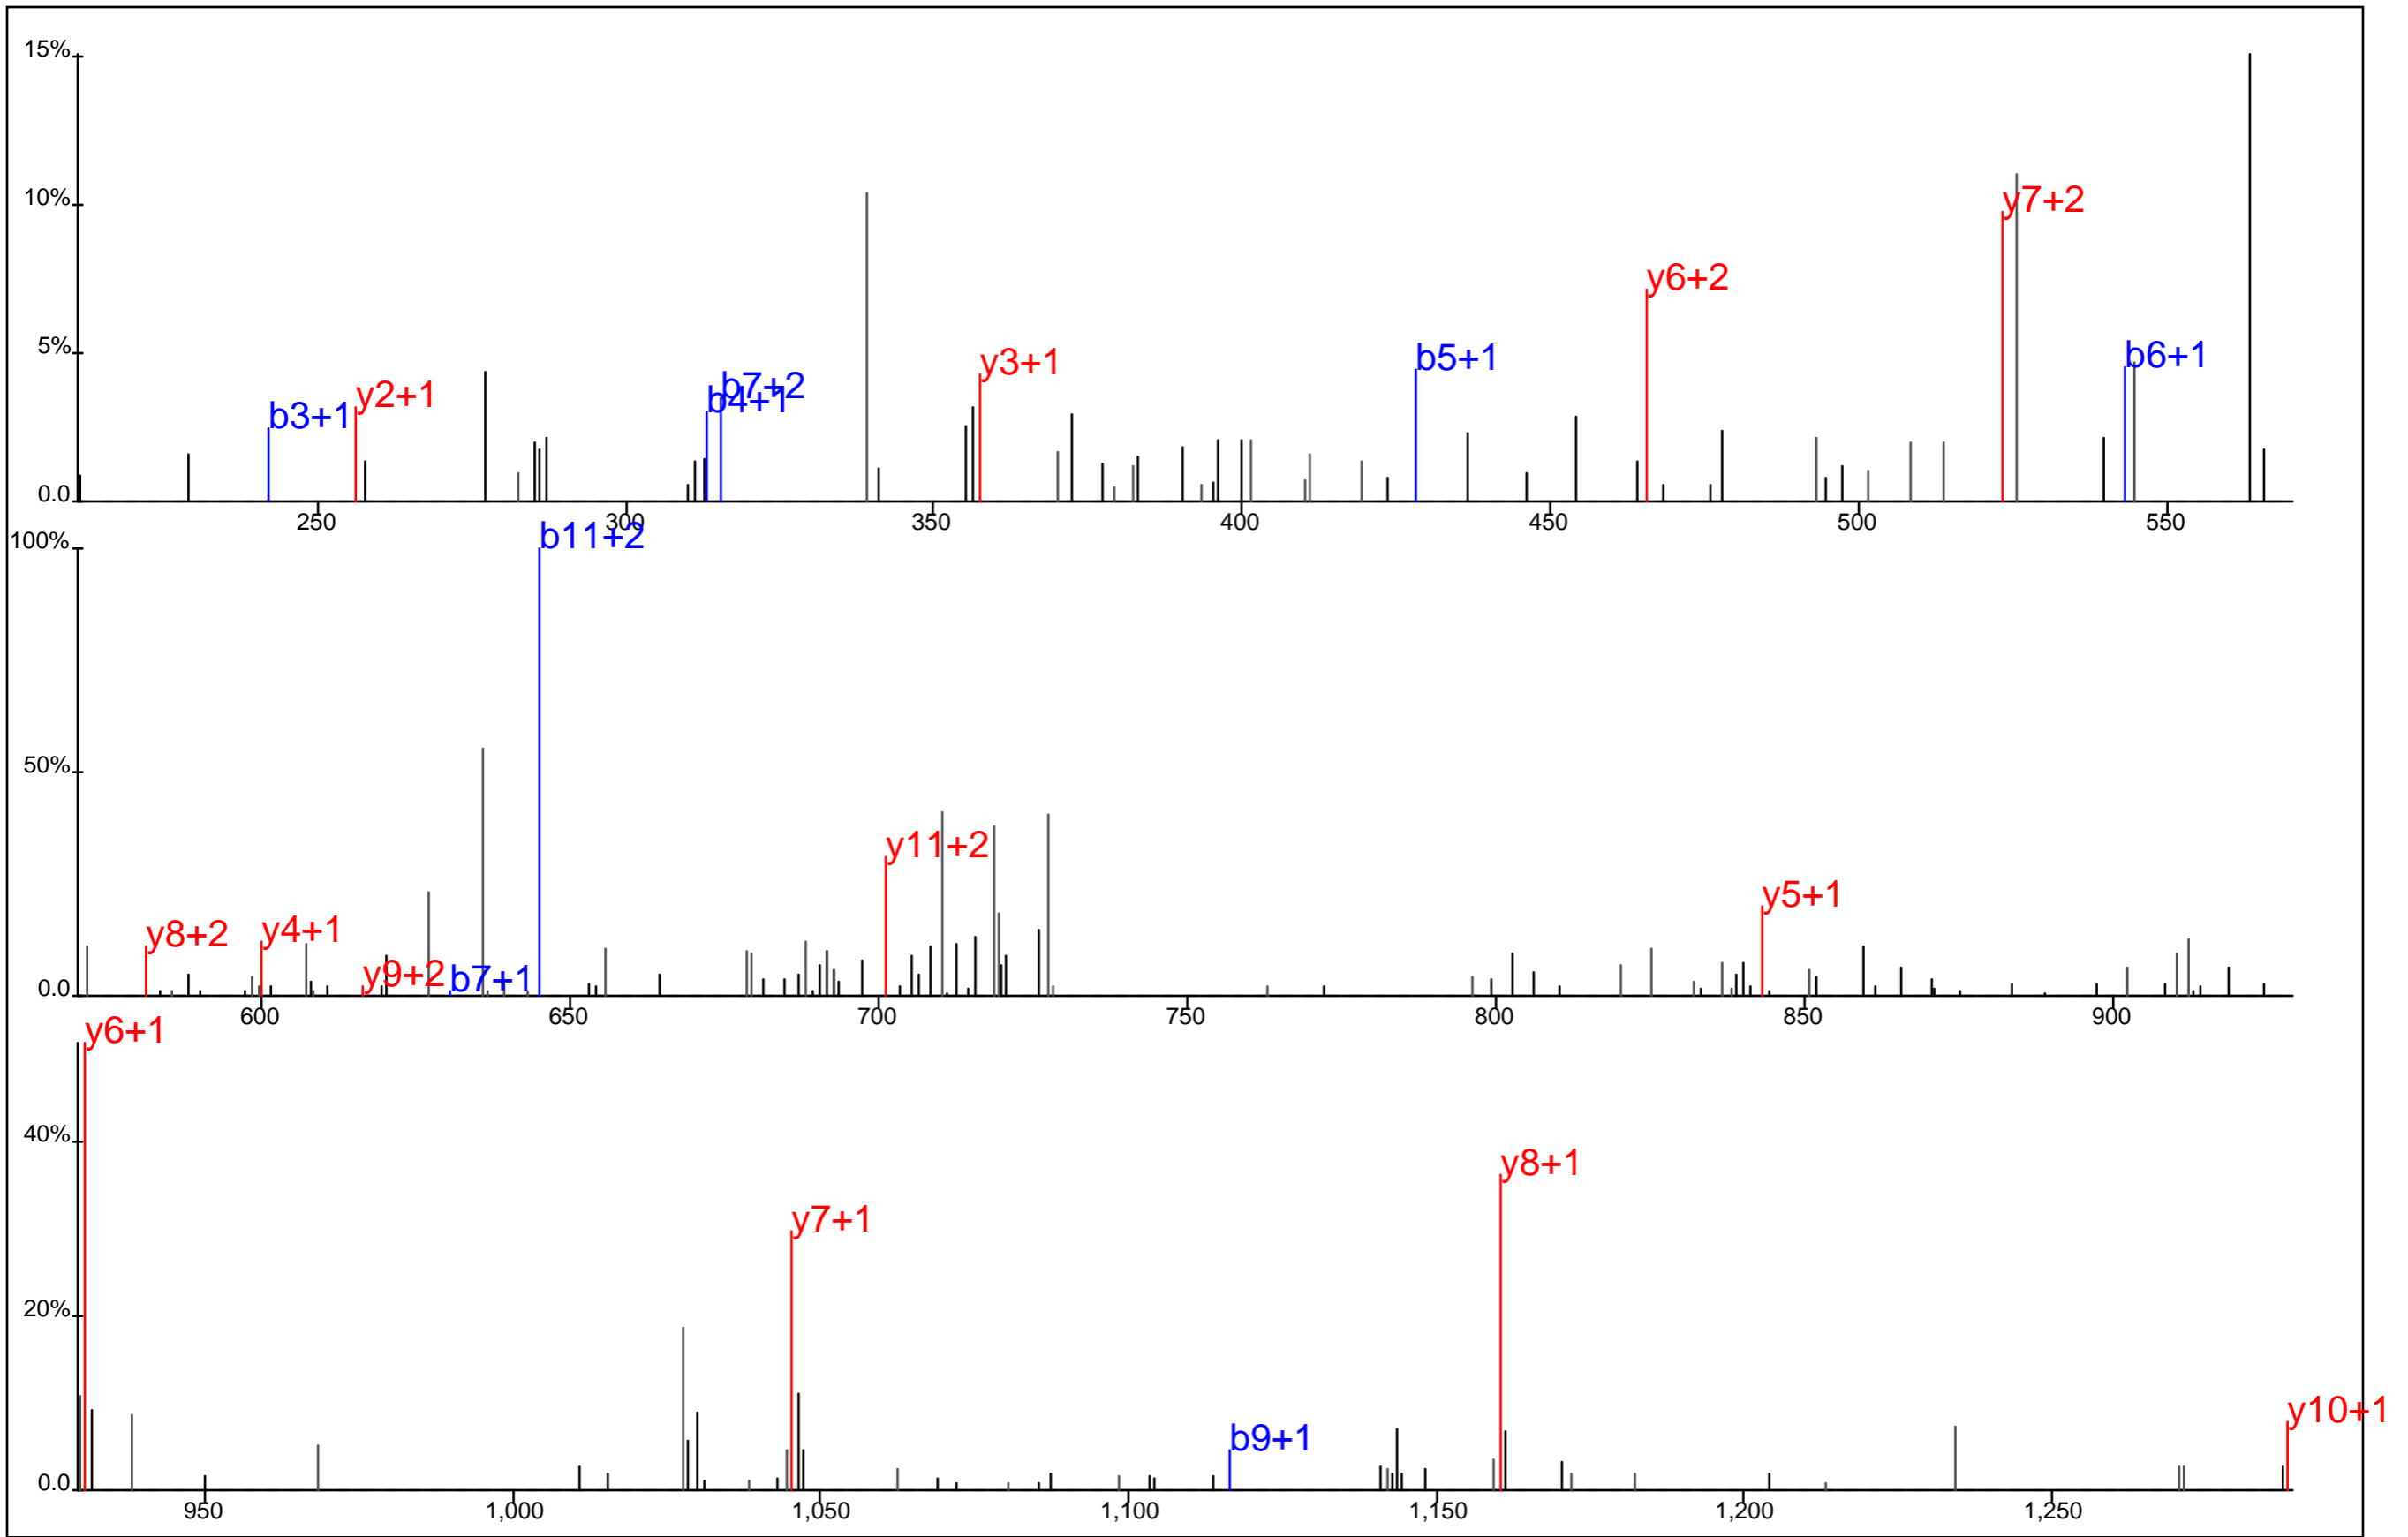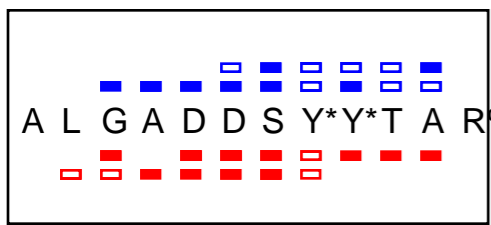

Protein Name: ZAP70  
 gi Accession: 31455611  
 Precursor Mass: 736.7736+2  
 Delta Mass: 1.948 ppm  
 XCorr: 66.97

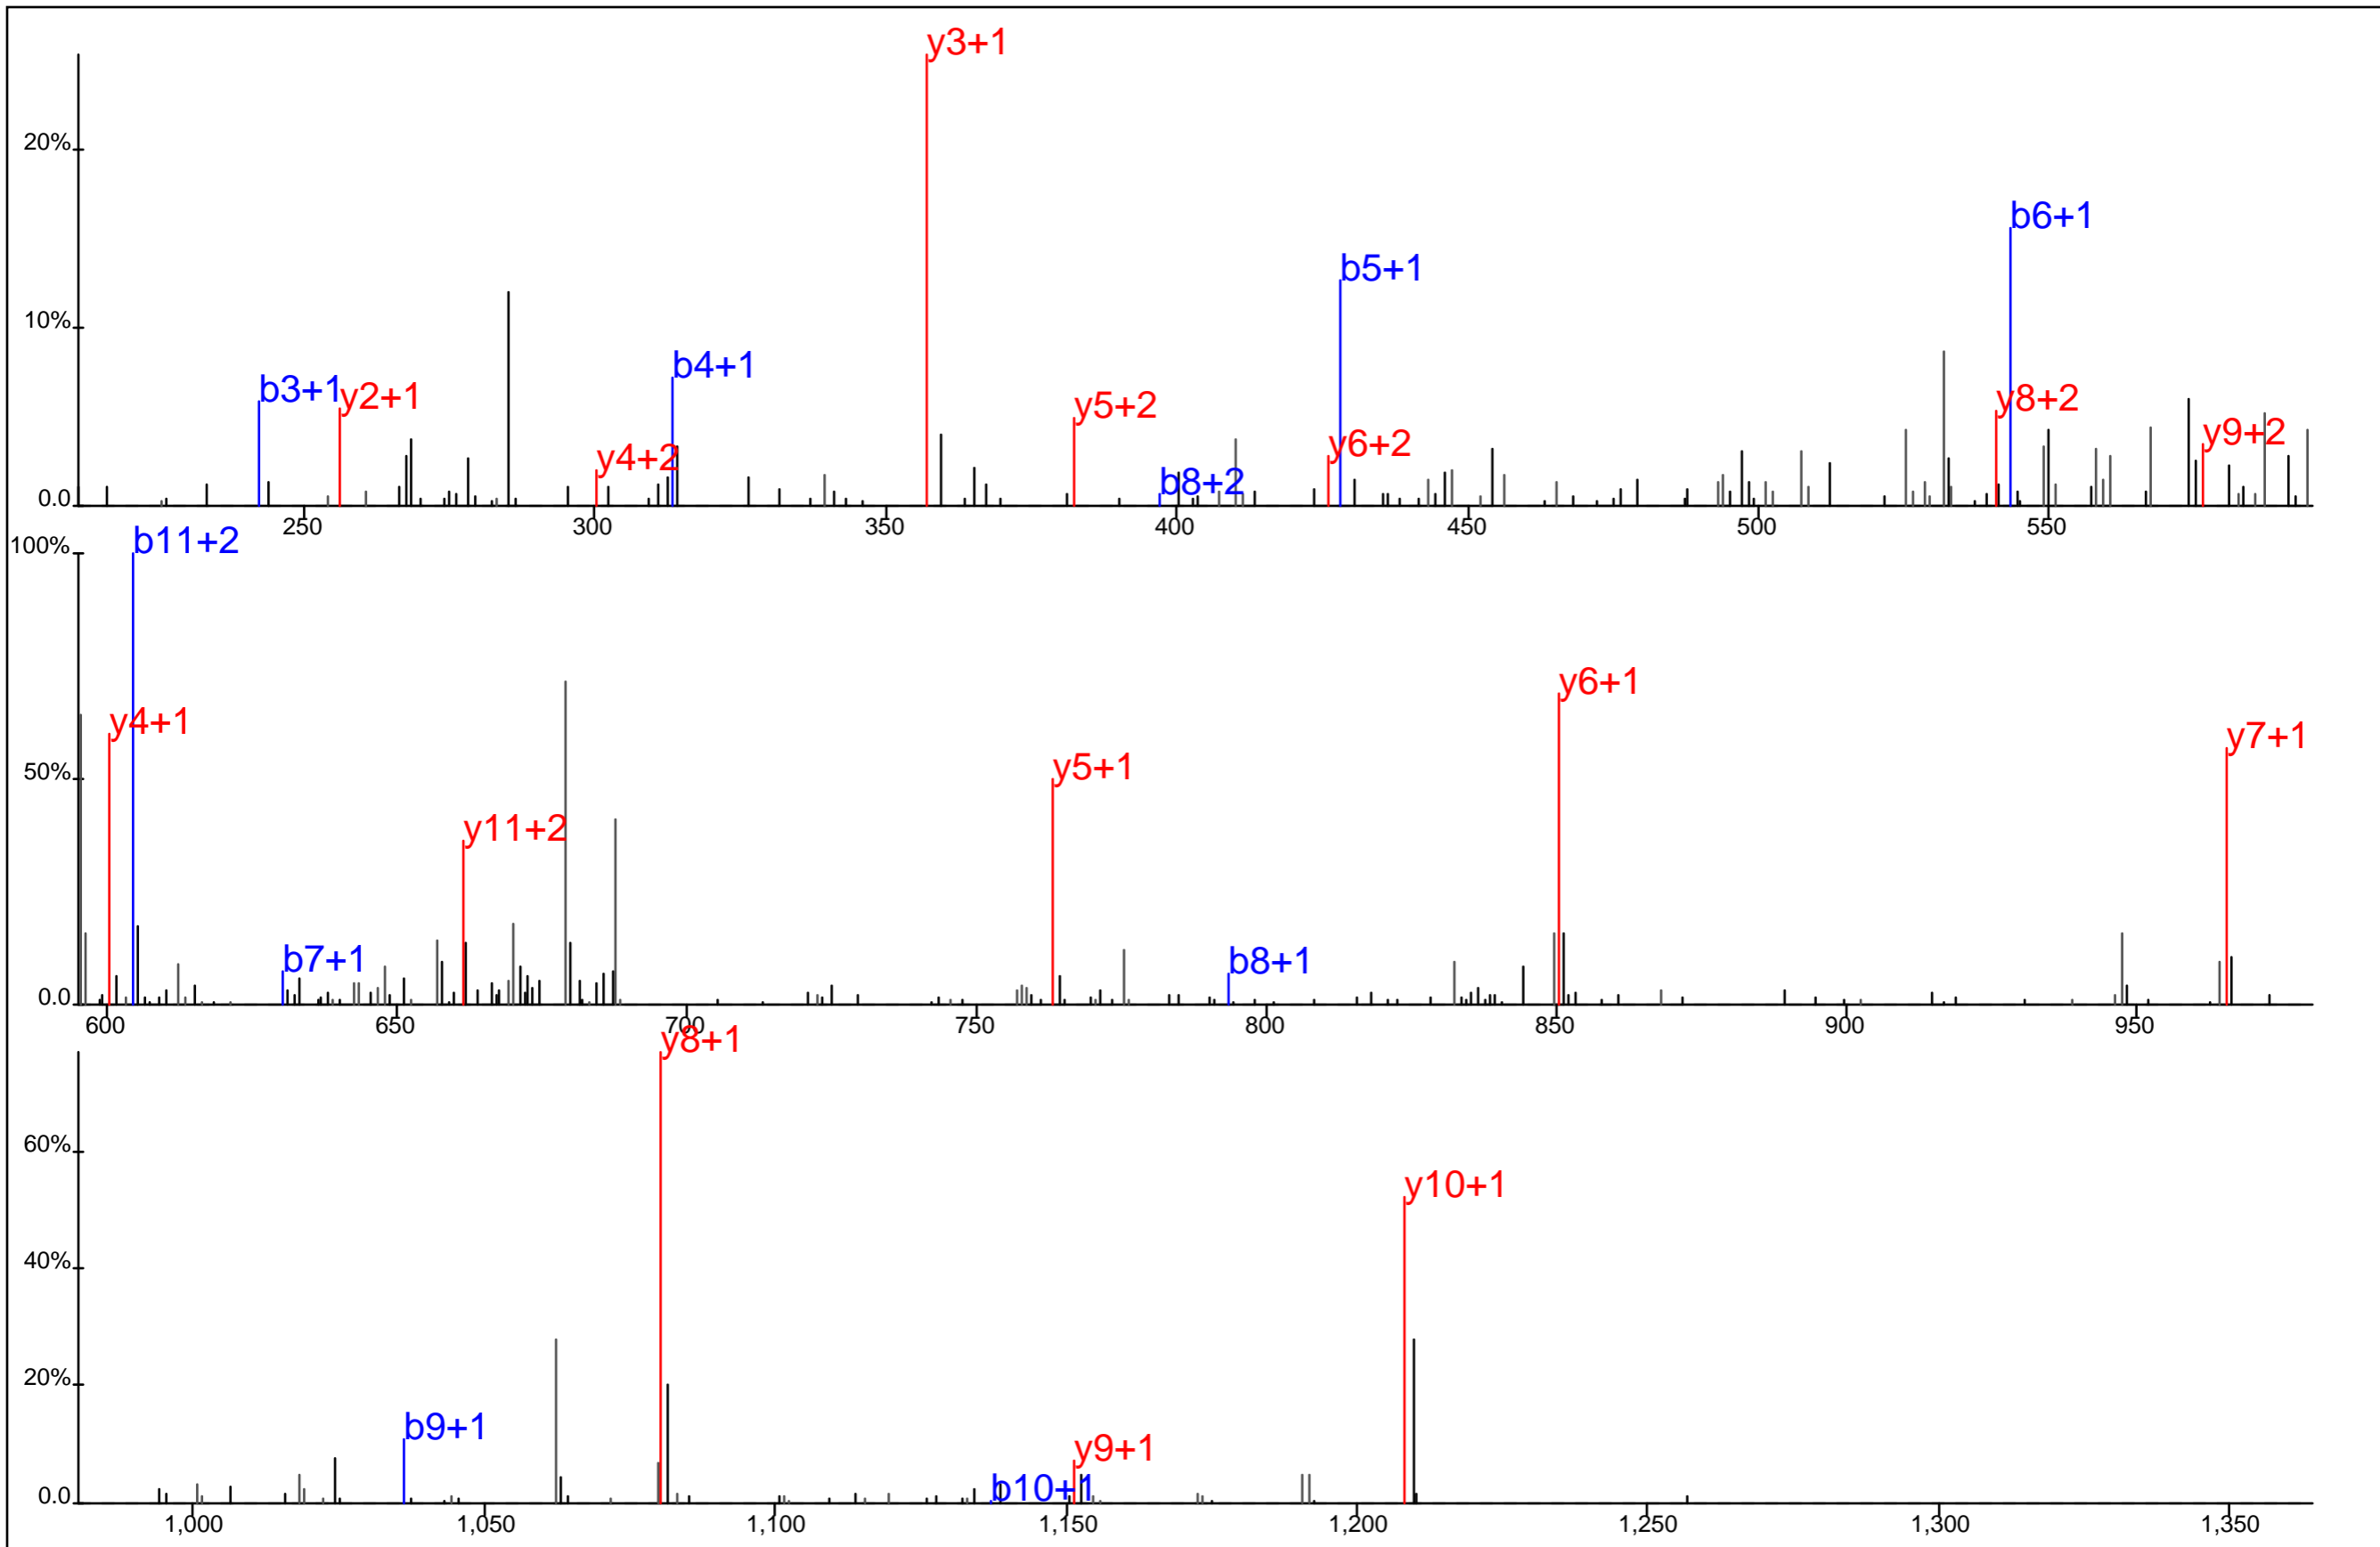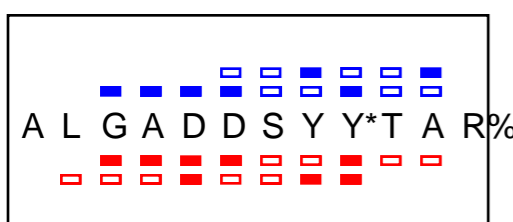

Protein Name: ZAP70  
 gi Accession: 31455611  
 Precursor Mass: 696.7914+2  
 Delta Mass: 3.568 ppm  
 XCorr: 69.9

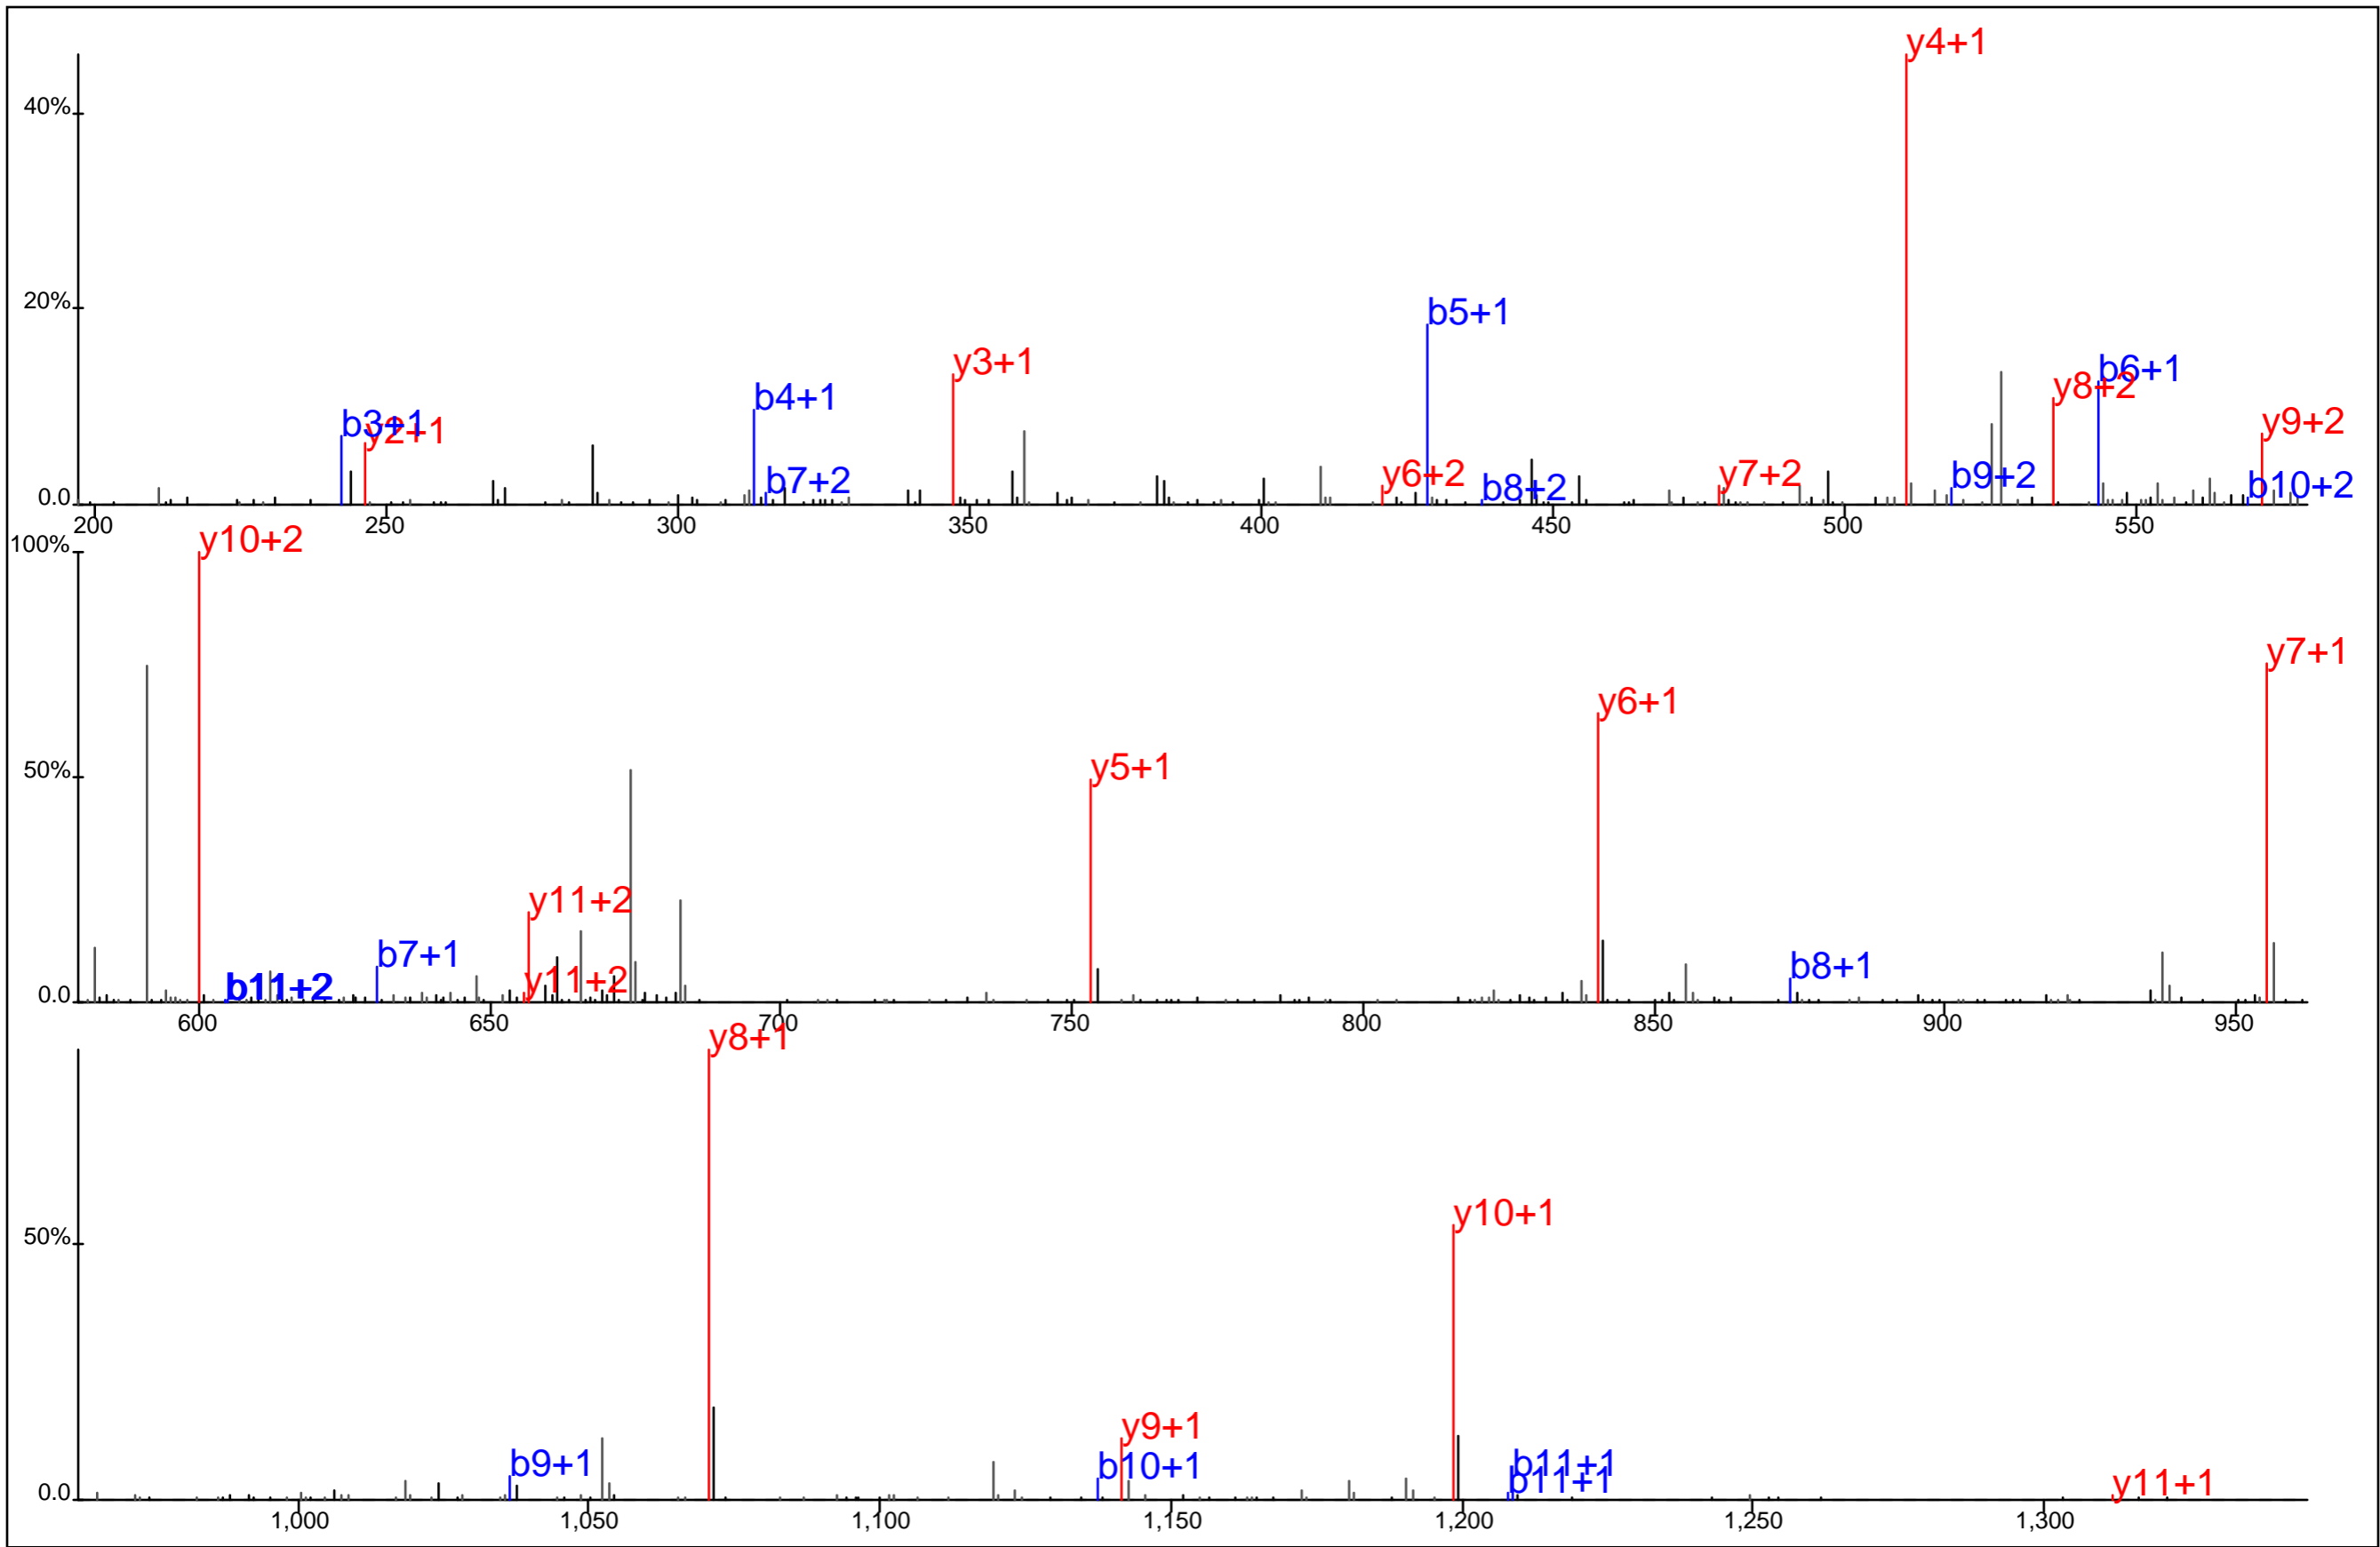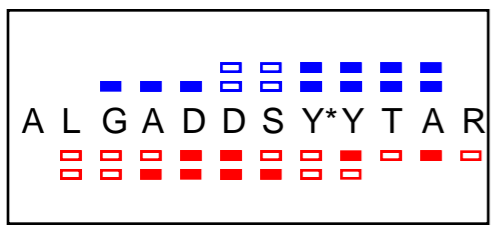

Protein Name: ZAP70  
 gi Accession: 31455611  
 Precursor Mass: 691.7851+2  
 Delta Mass: 0.389 ppm  
 XCorr: 84.5

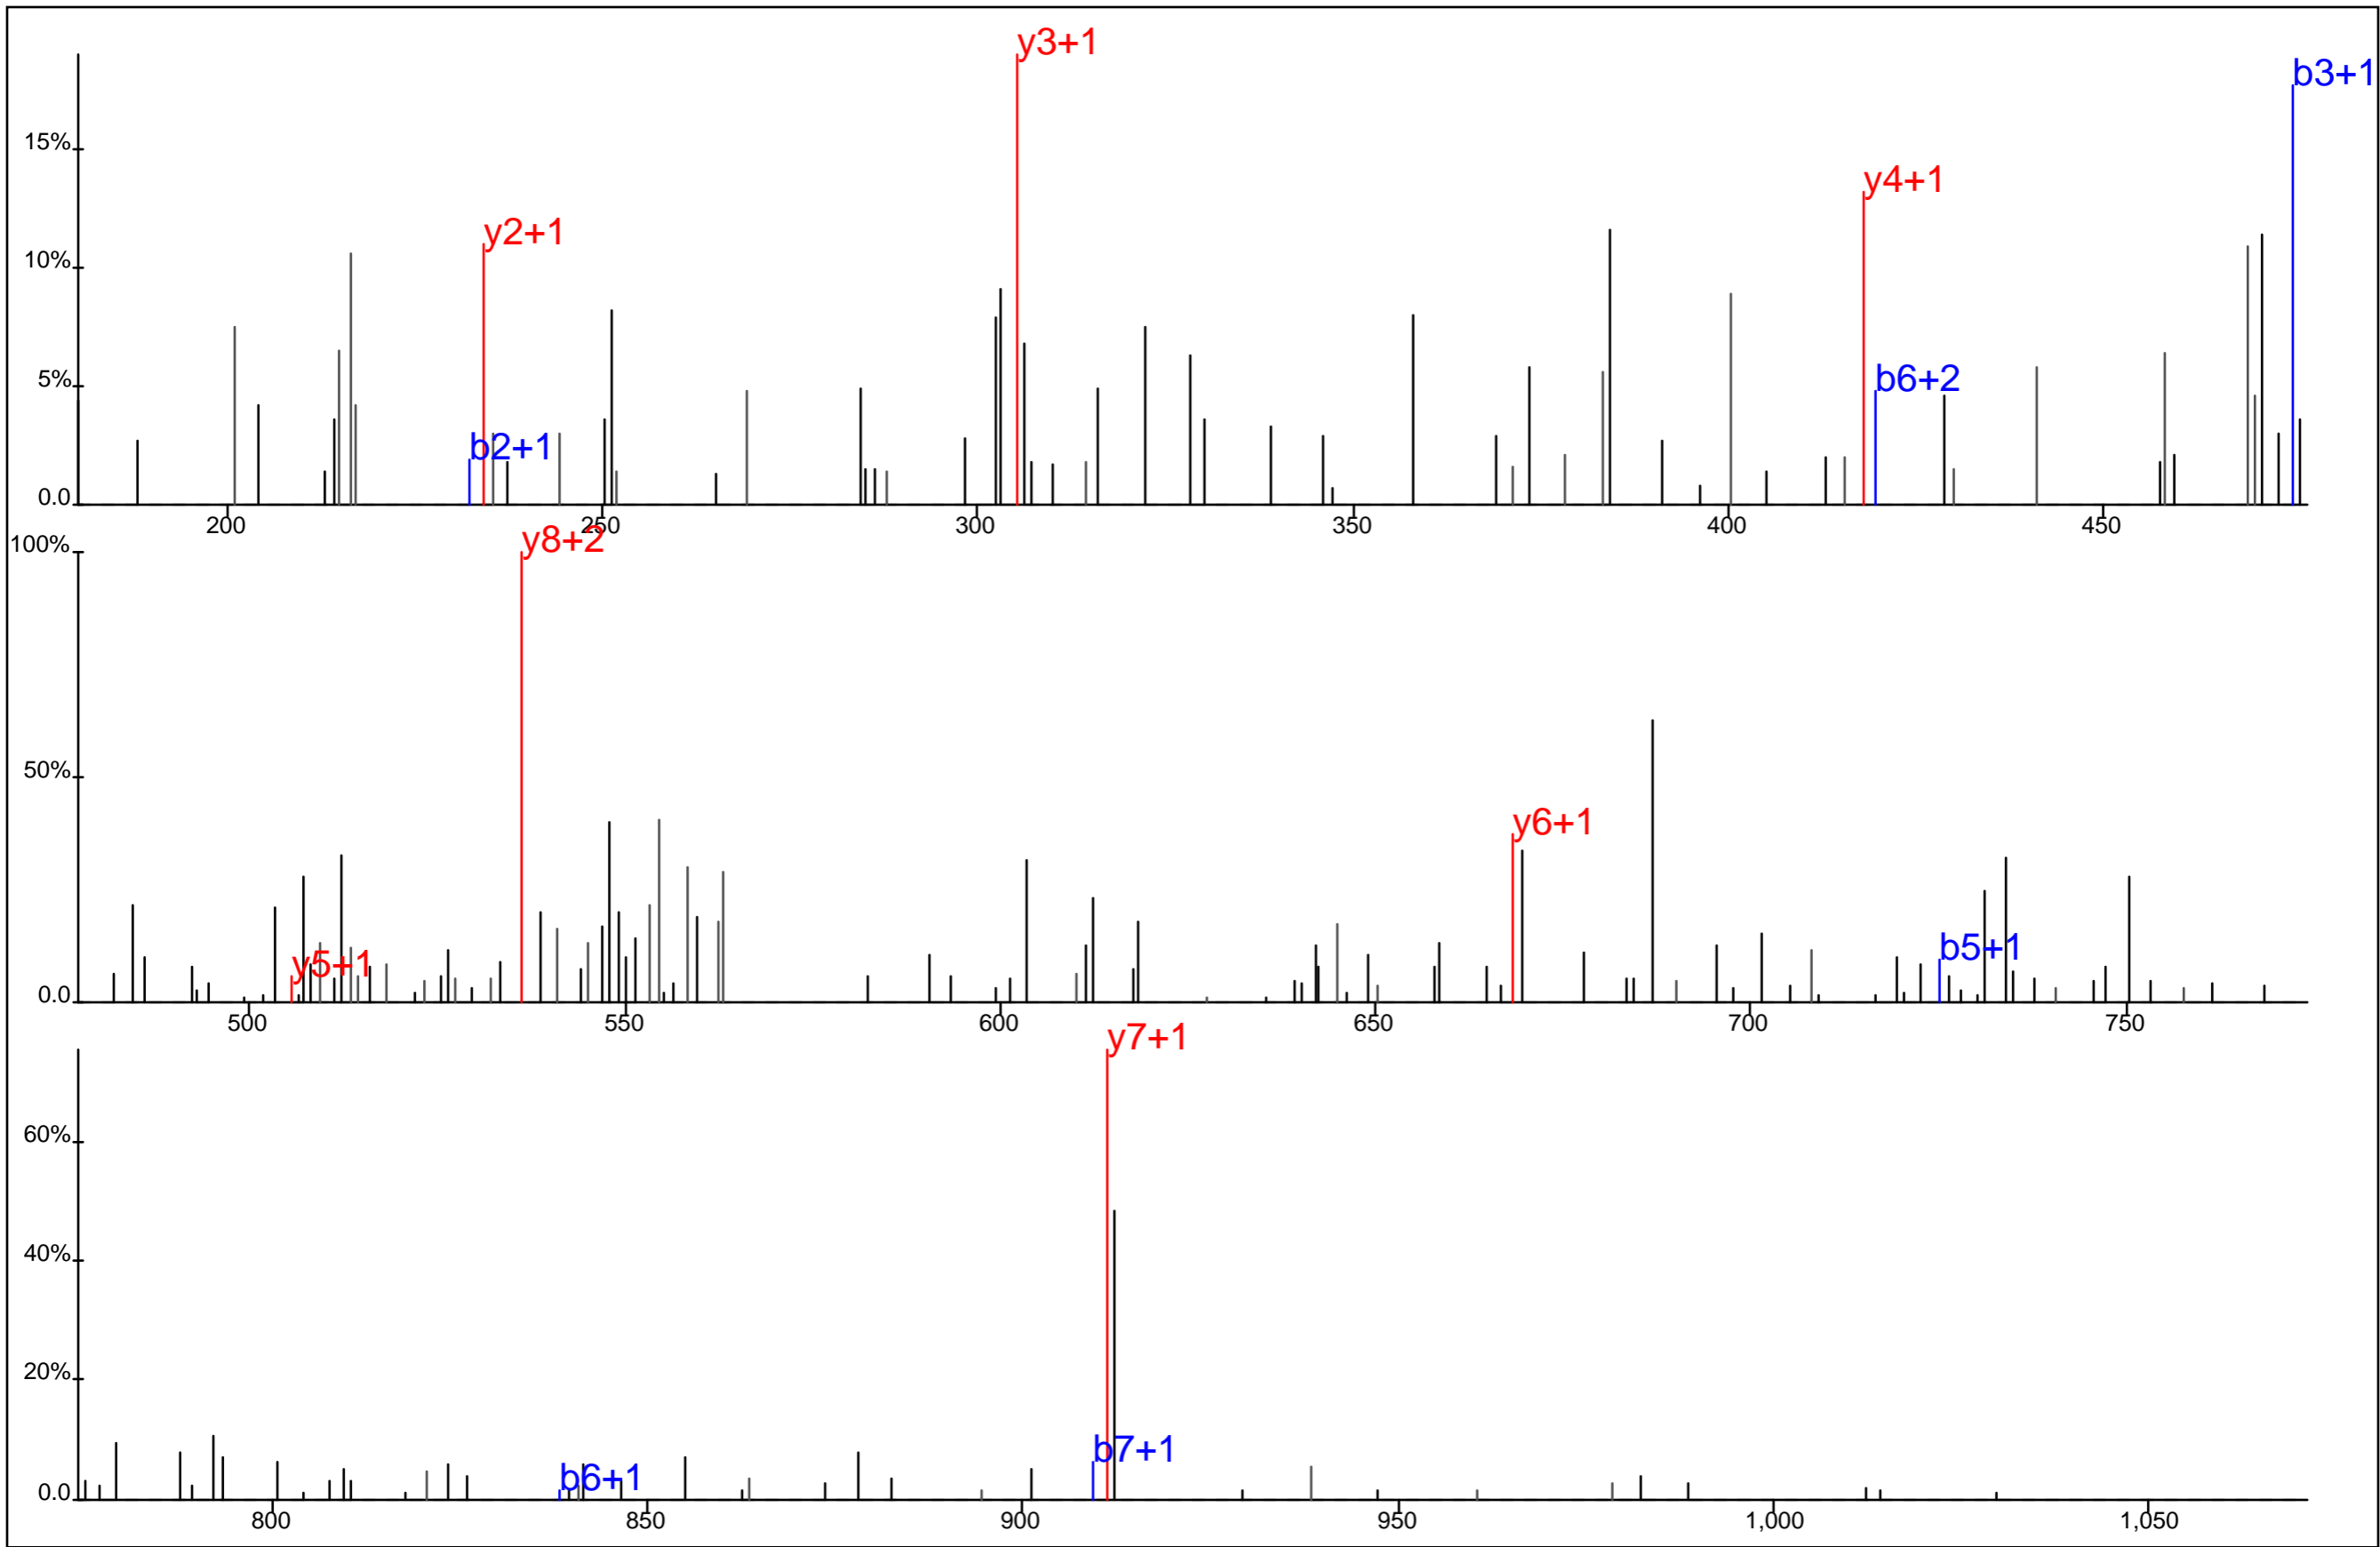

■ ■ ■ ■ ■ ■ ■  
■ ■ ■ ■ ■ ■ ■  
**A C Y\* Y S L A S K**

Protein Name: ZAP70  
 gi Accession: 31455611  
 Precursor Mass: 571.7343+2  
 Delta Mass: 2.169 ppm  
 XCorr: 29.43

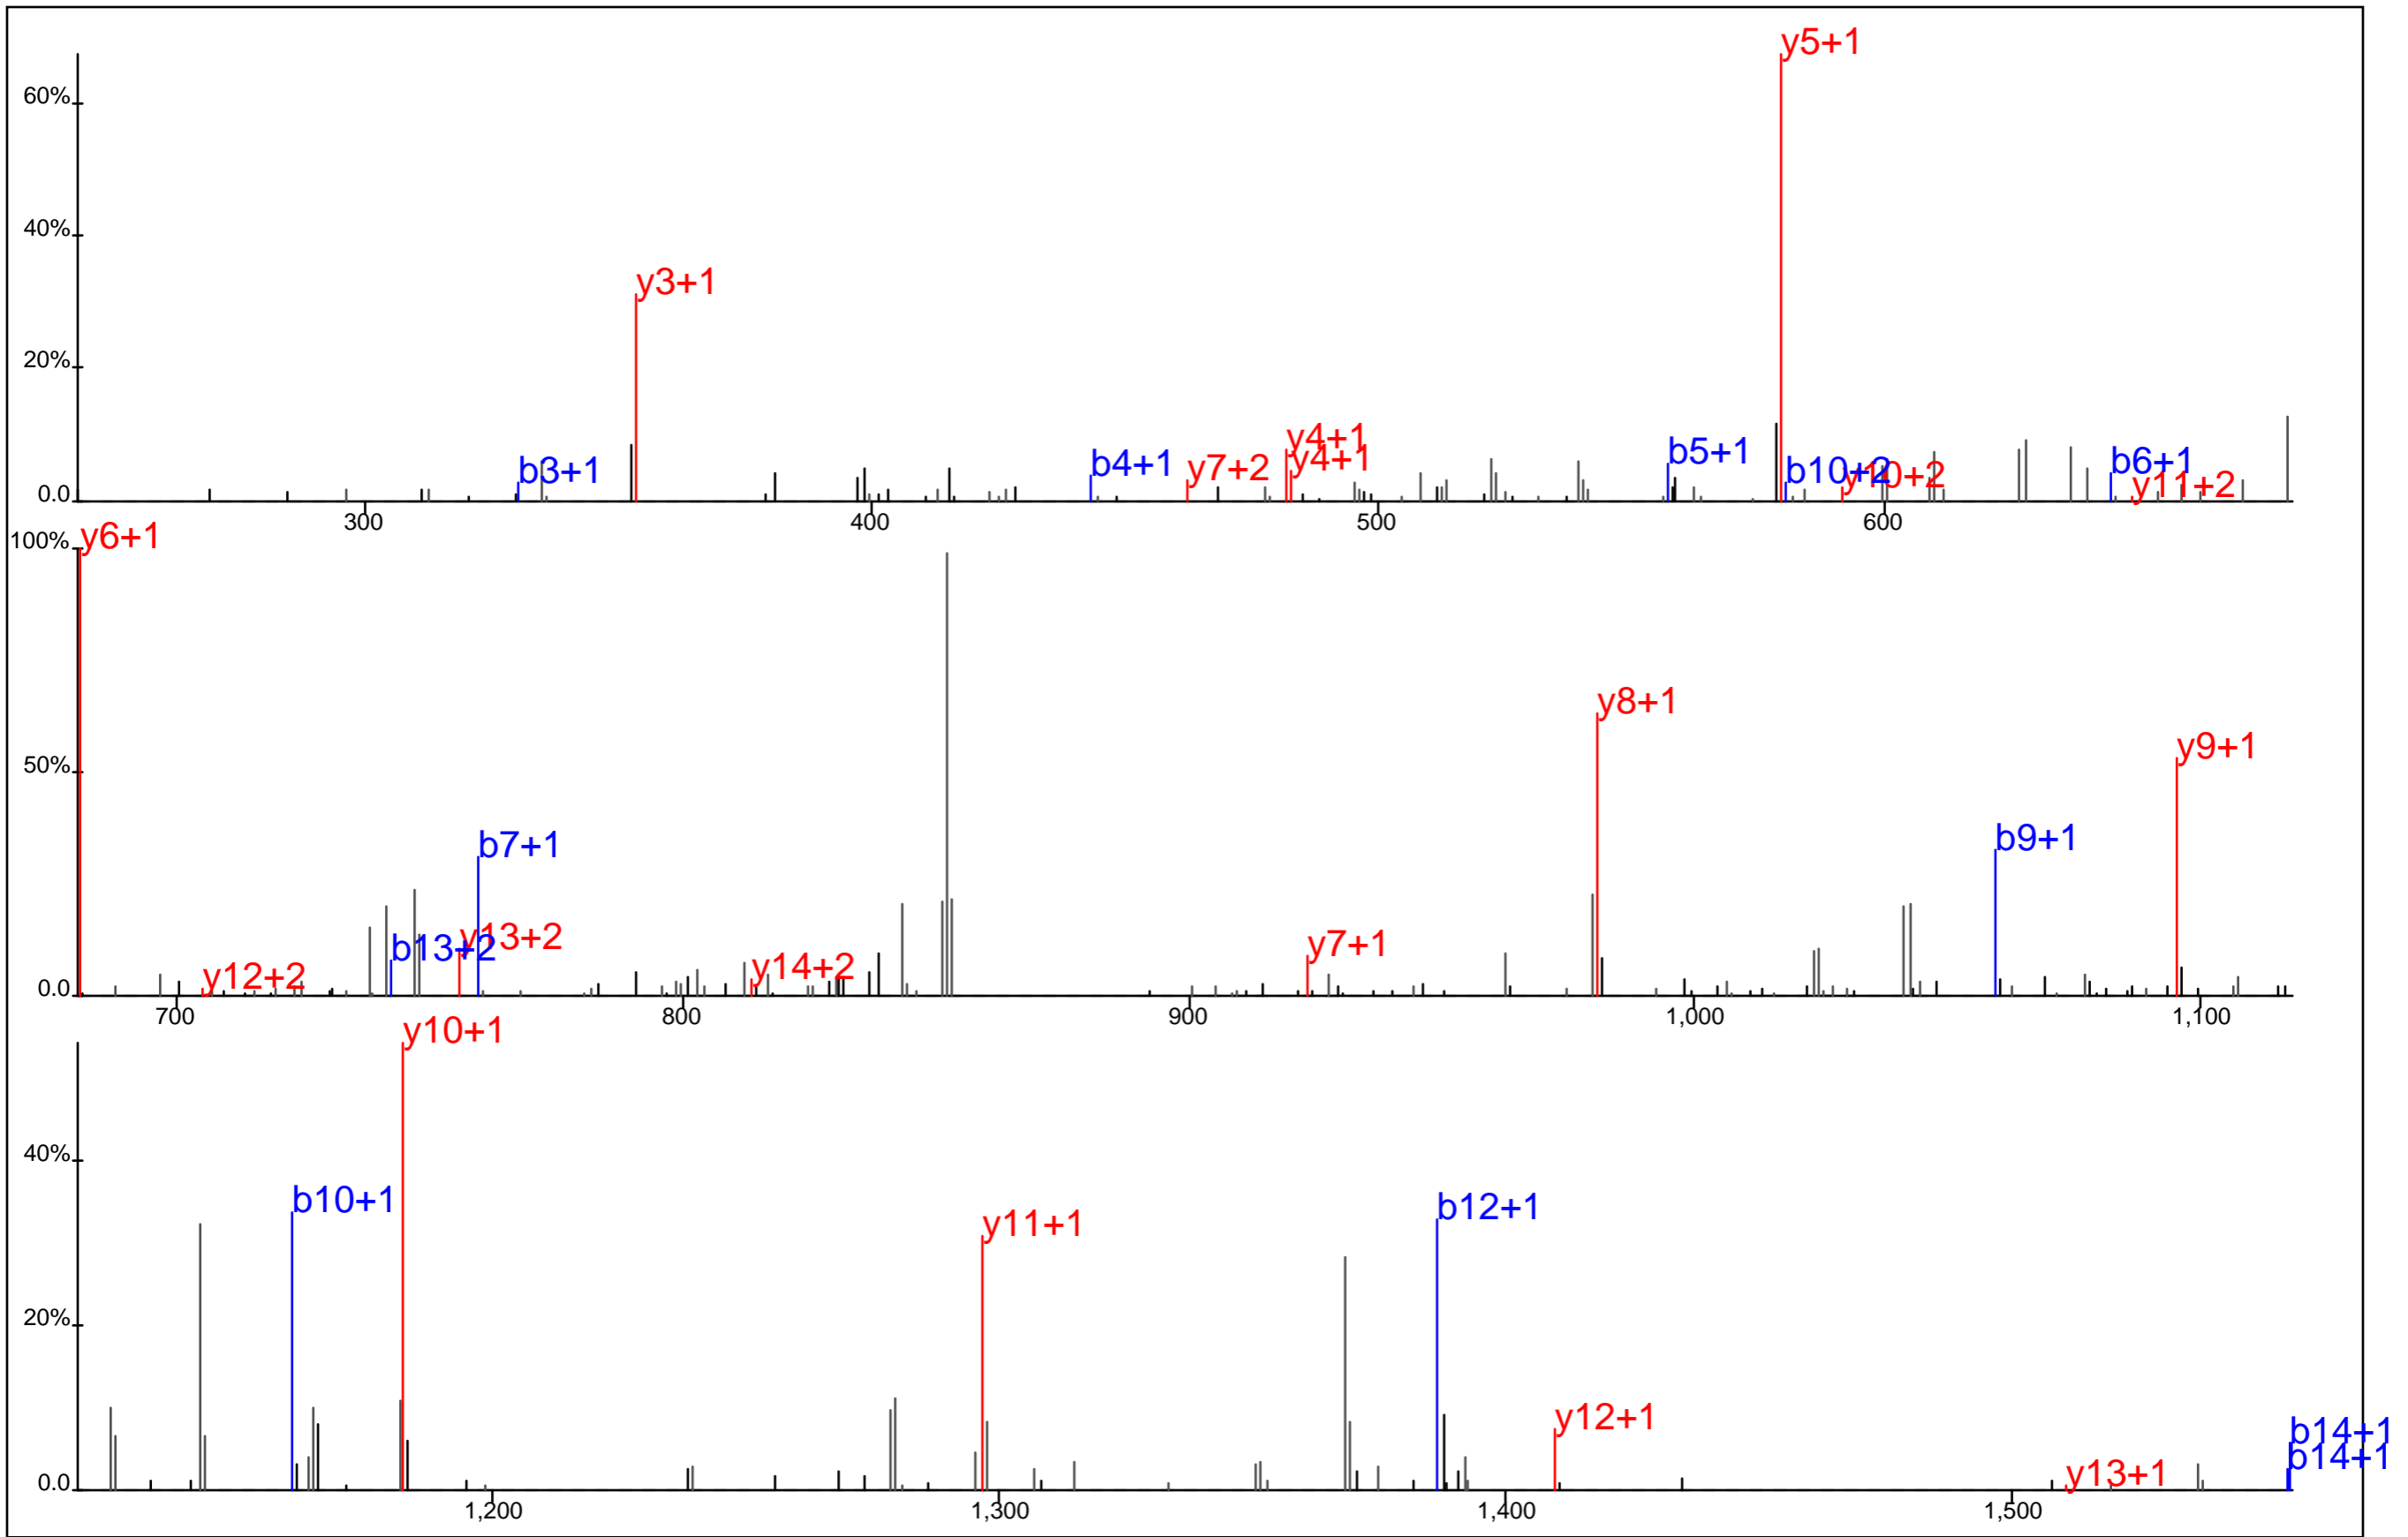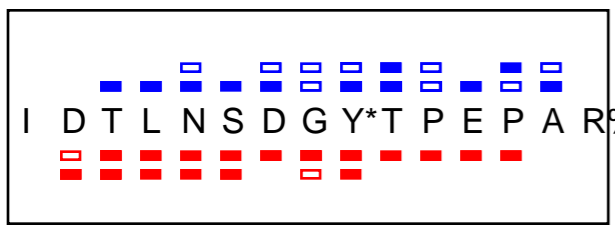

Protein Name: ZAP70  
 gi Accession: 31455611  
 Precursor Mass: 869.8839+2  
 Delta Mass: 2.685 ppm  
 XCorr: 74.23

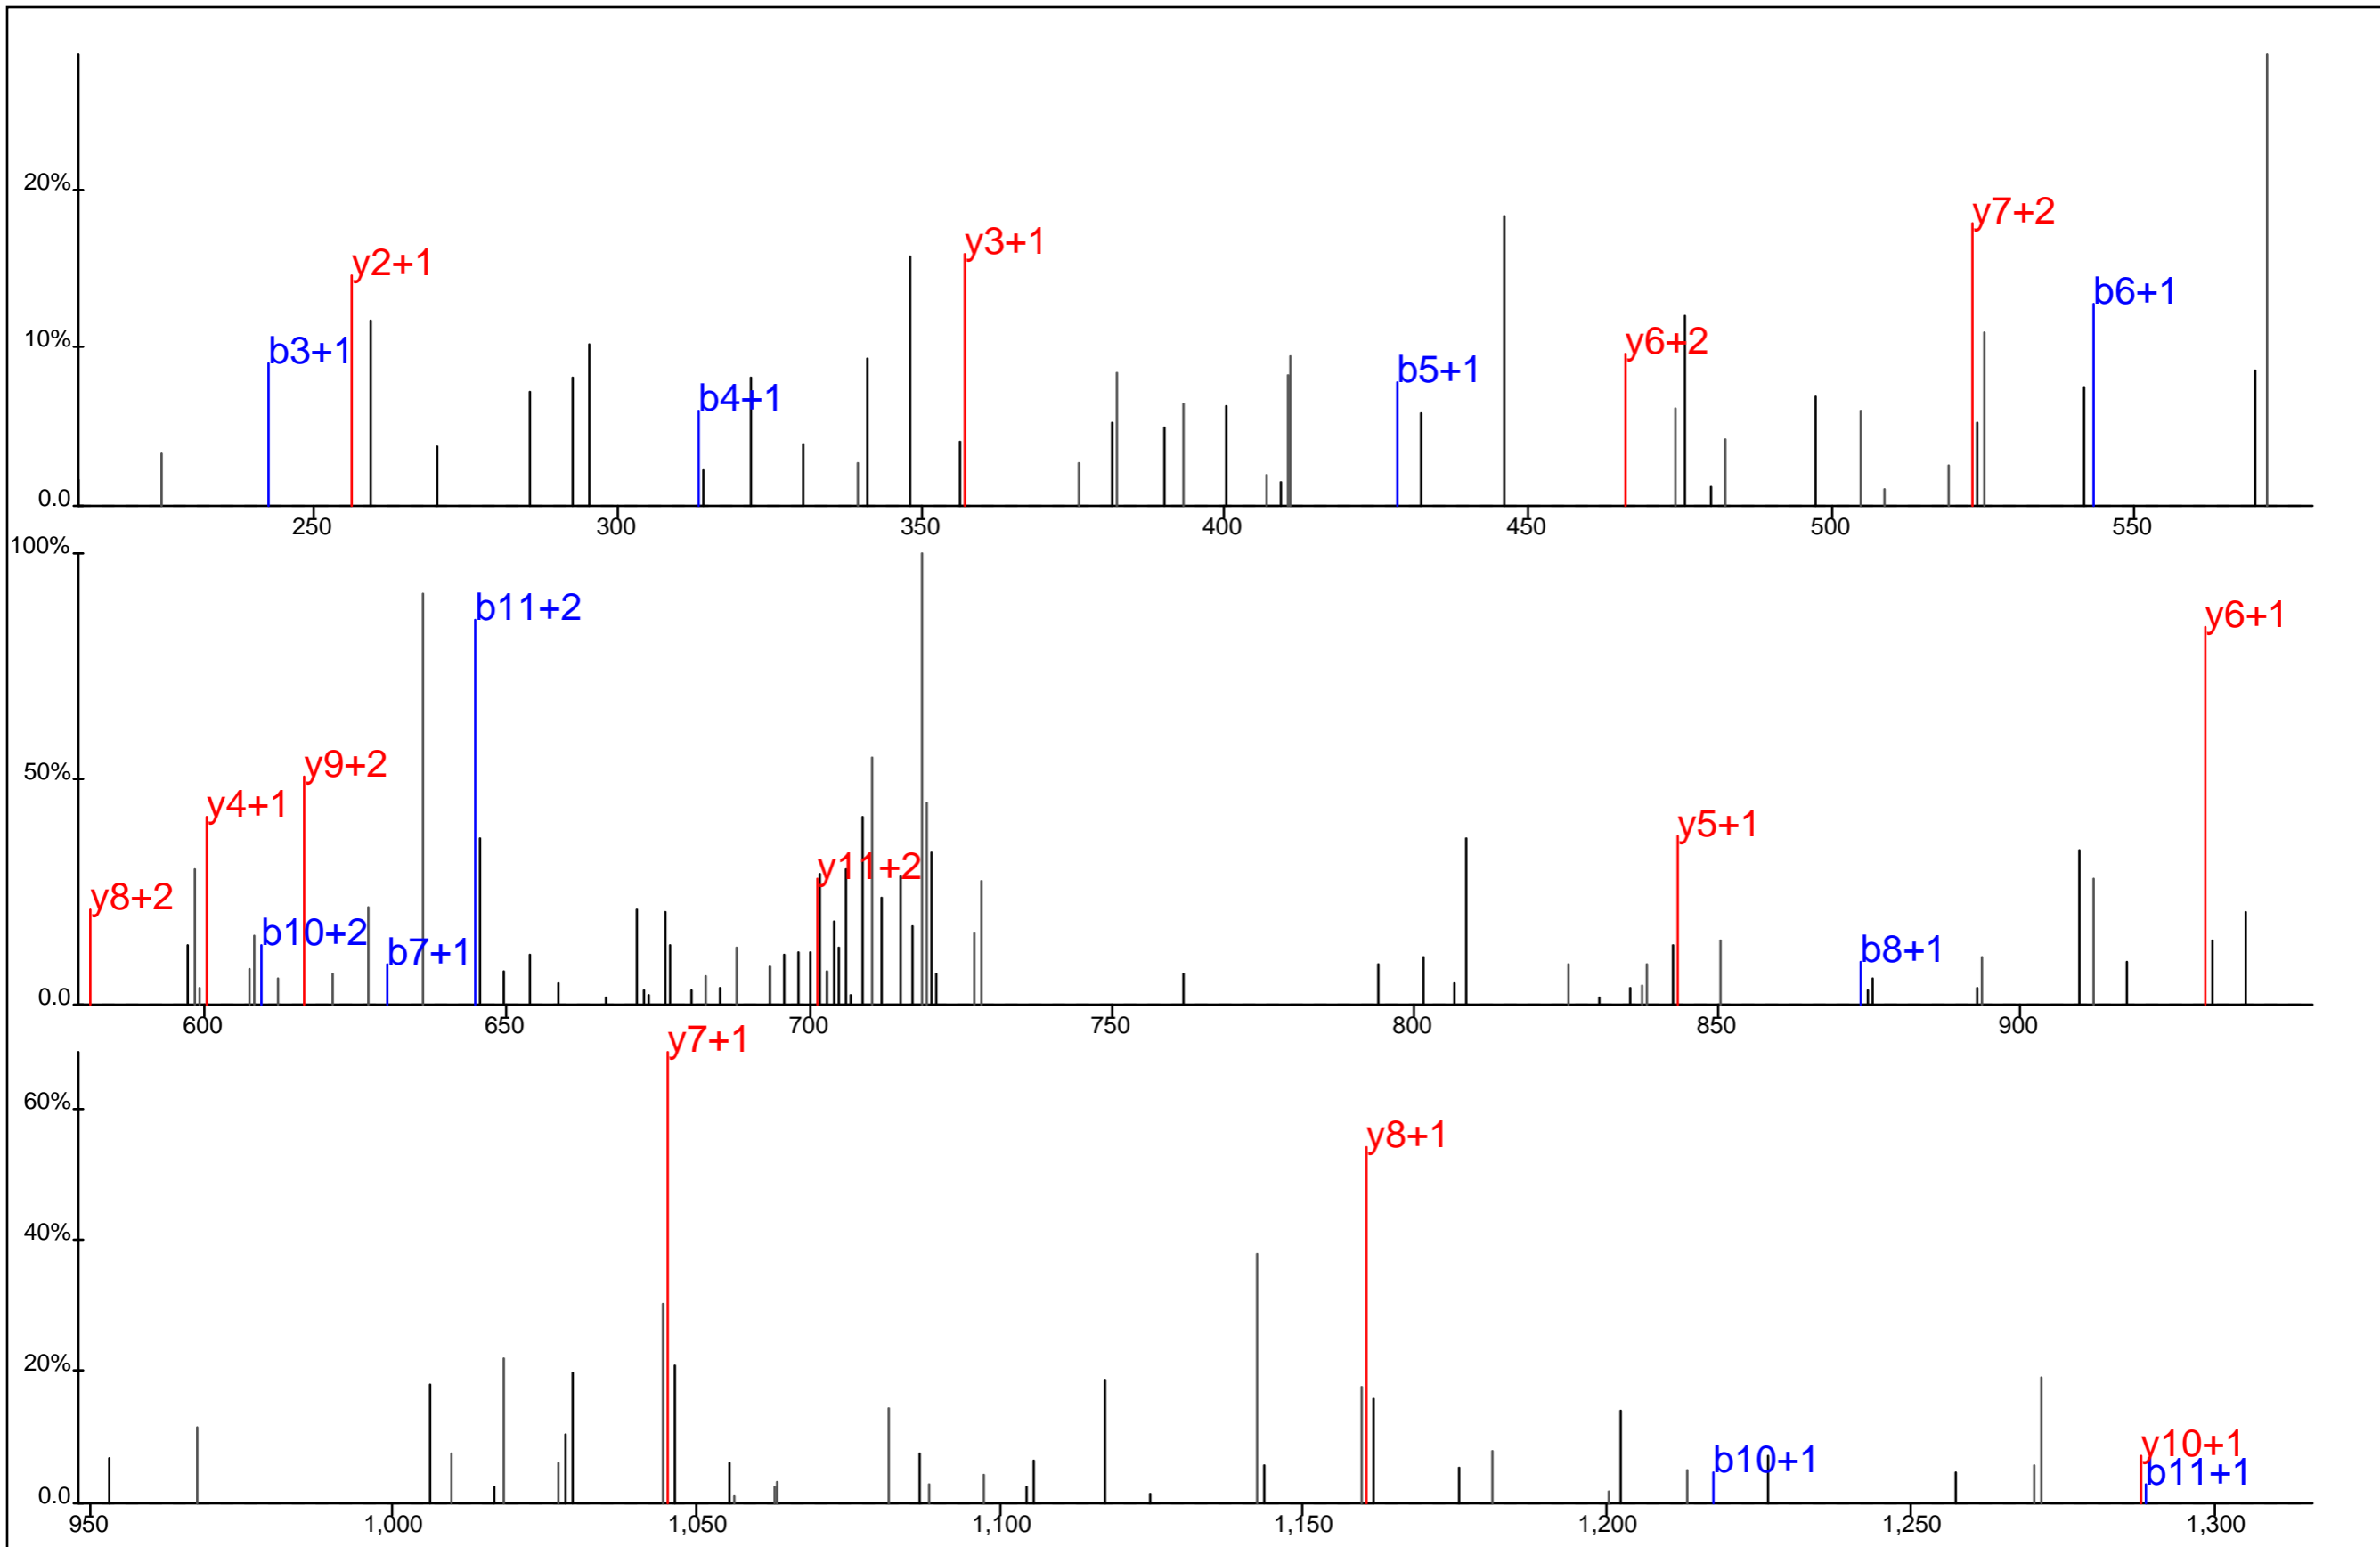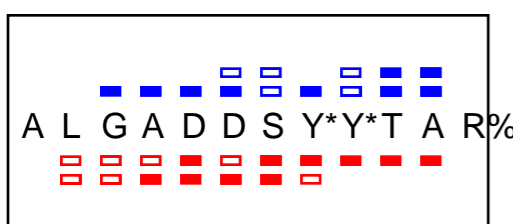

Protein Name: ZAP70  
 gi Accession: 31455611  
 Precursor Mass: 736.7745+2  
 Delta Mass: 3.279 ppm  
 XCorr: 53.67

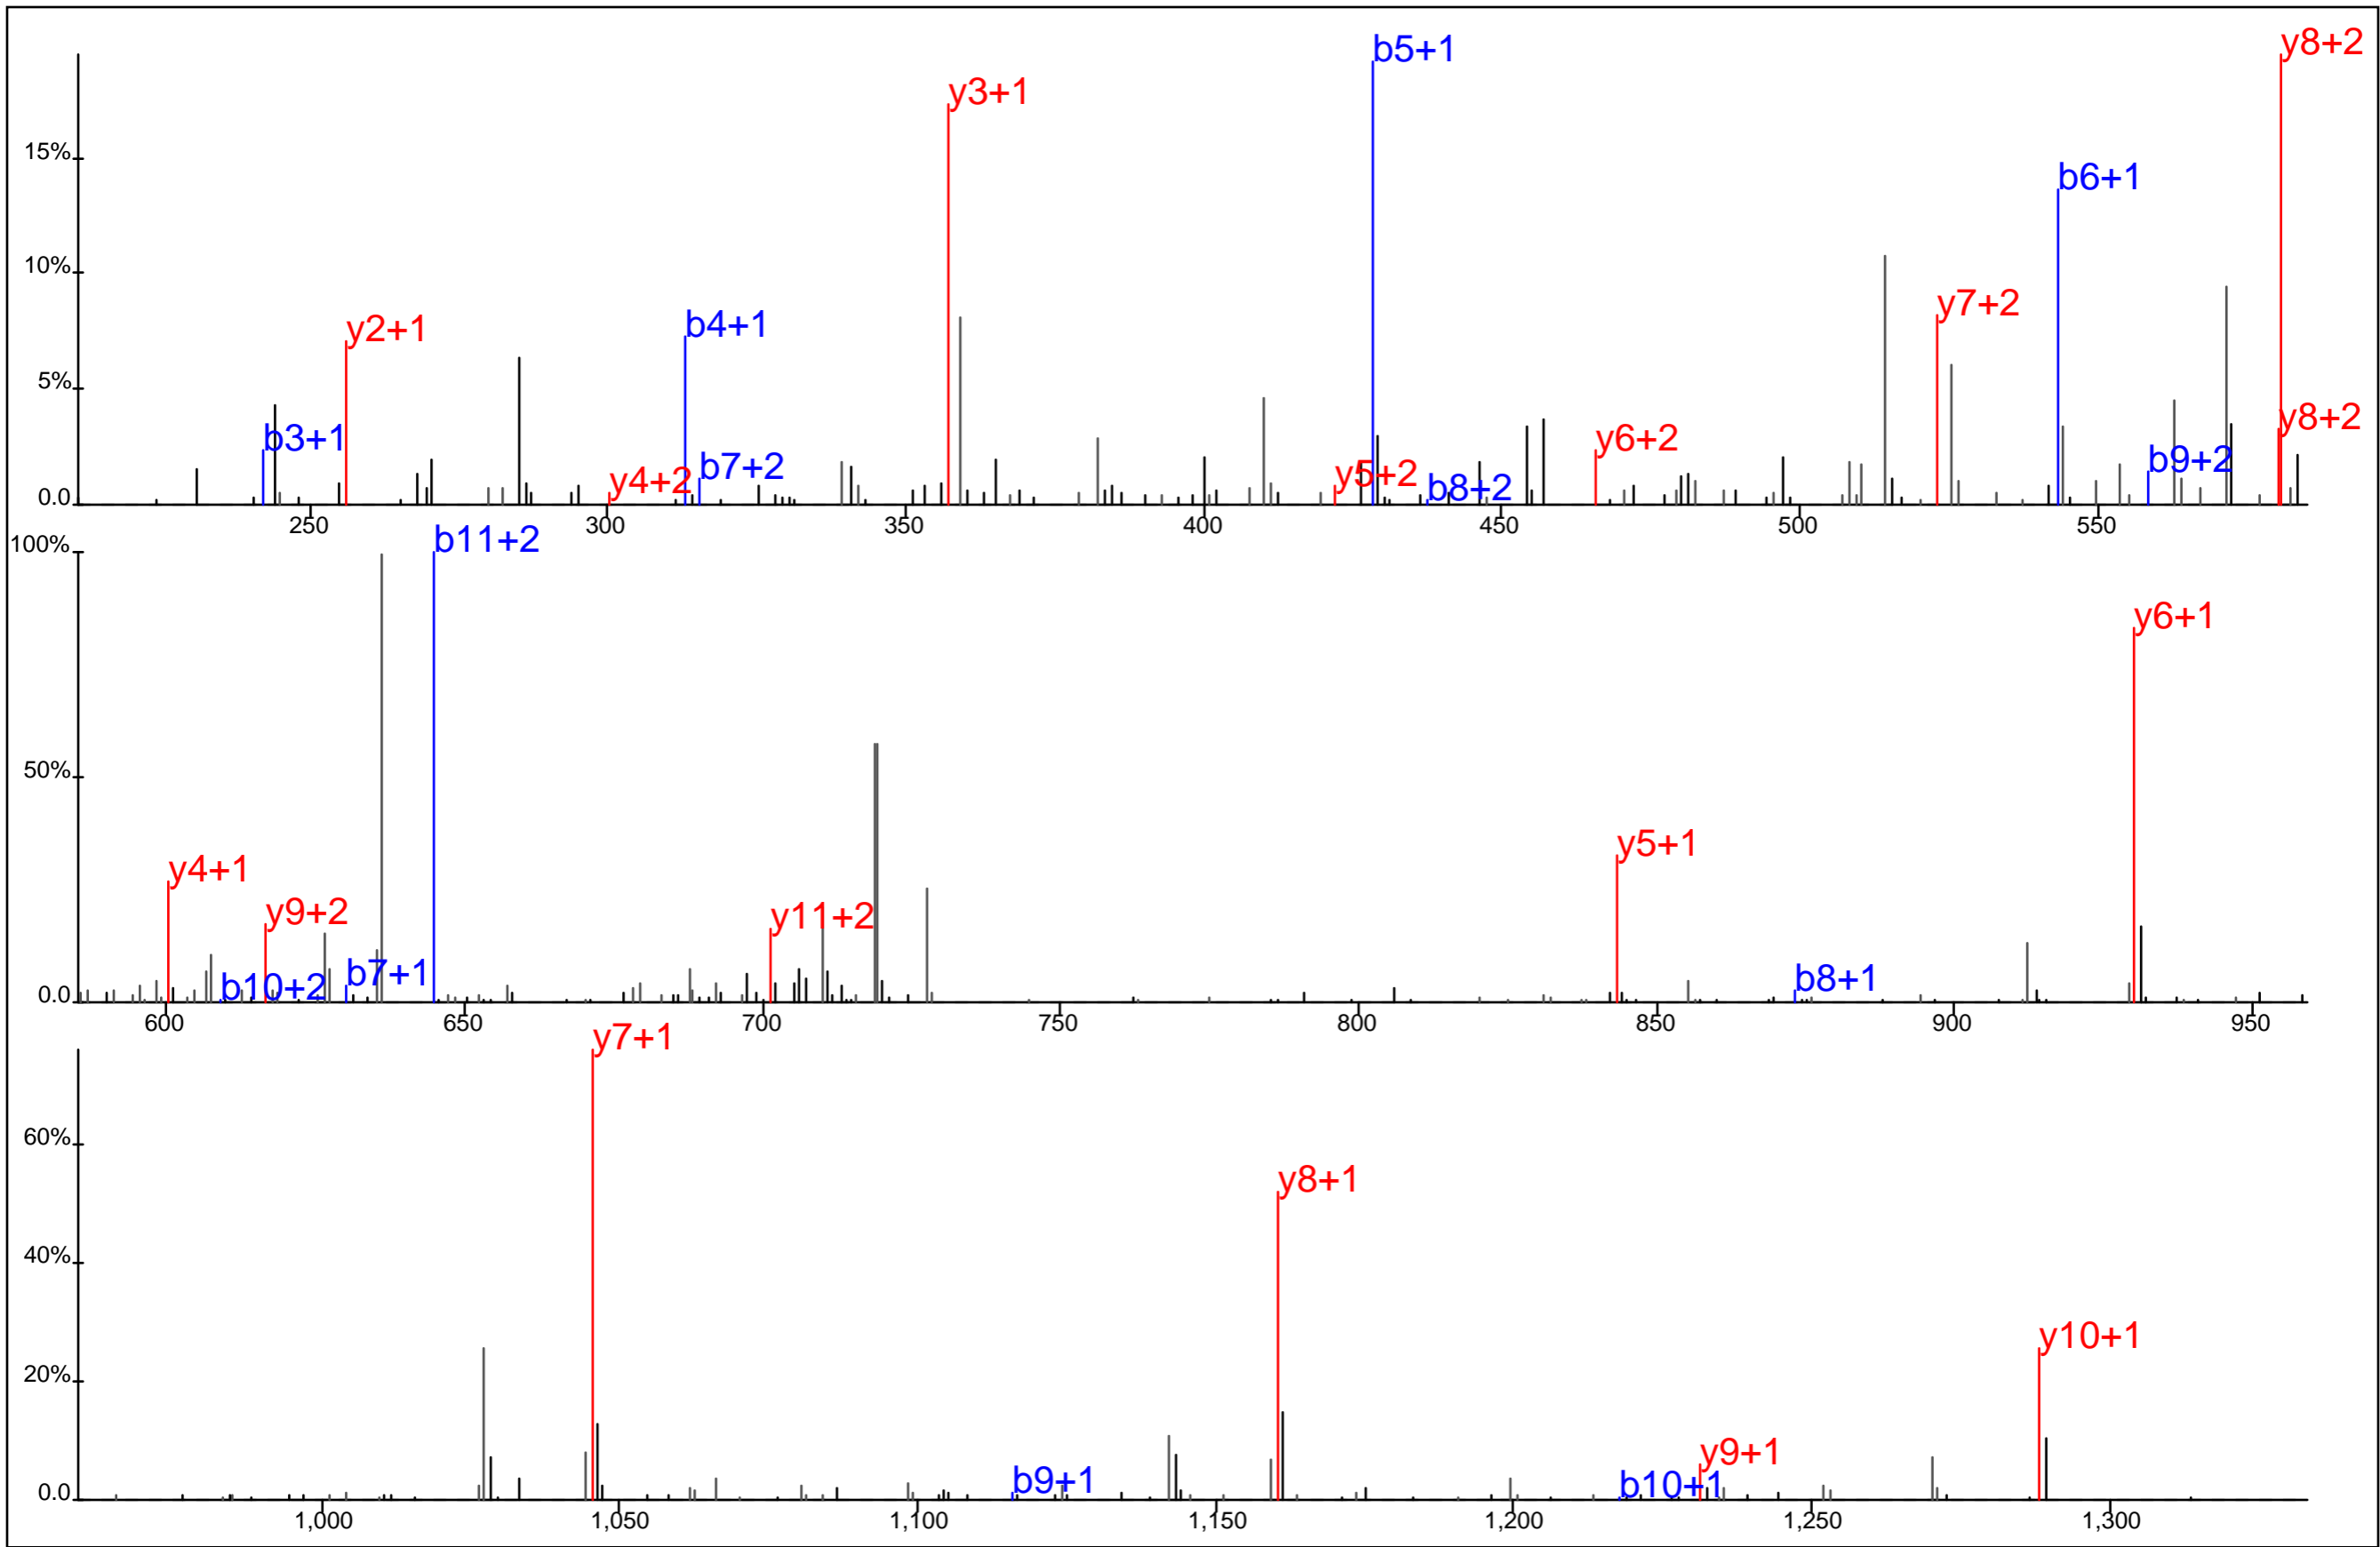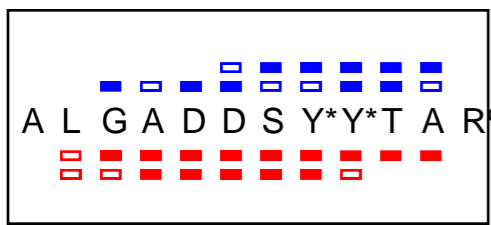

Protein Name: ZAP70  
 gi Accession: 31455611  
 Precursor Mass: 736.7734+2  
 Delta Mass: 1.703 ppm  
 XCorr: 72.05





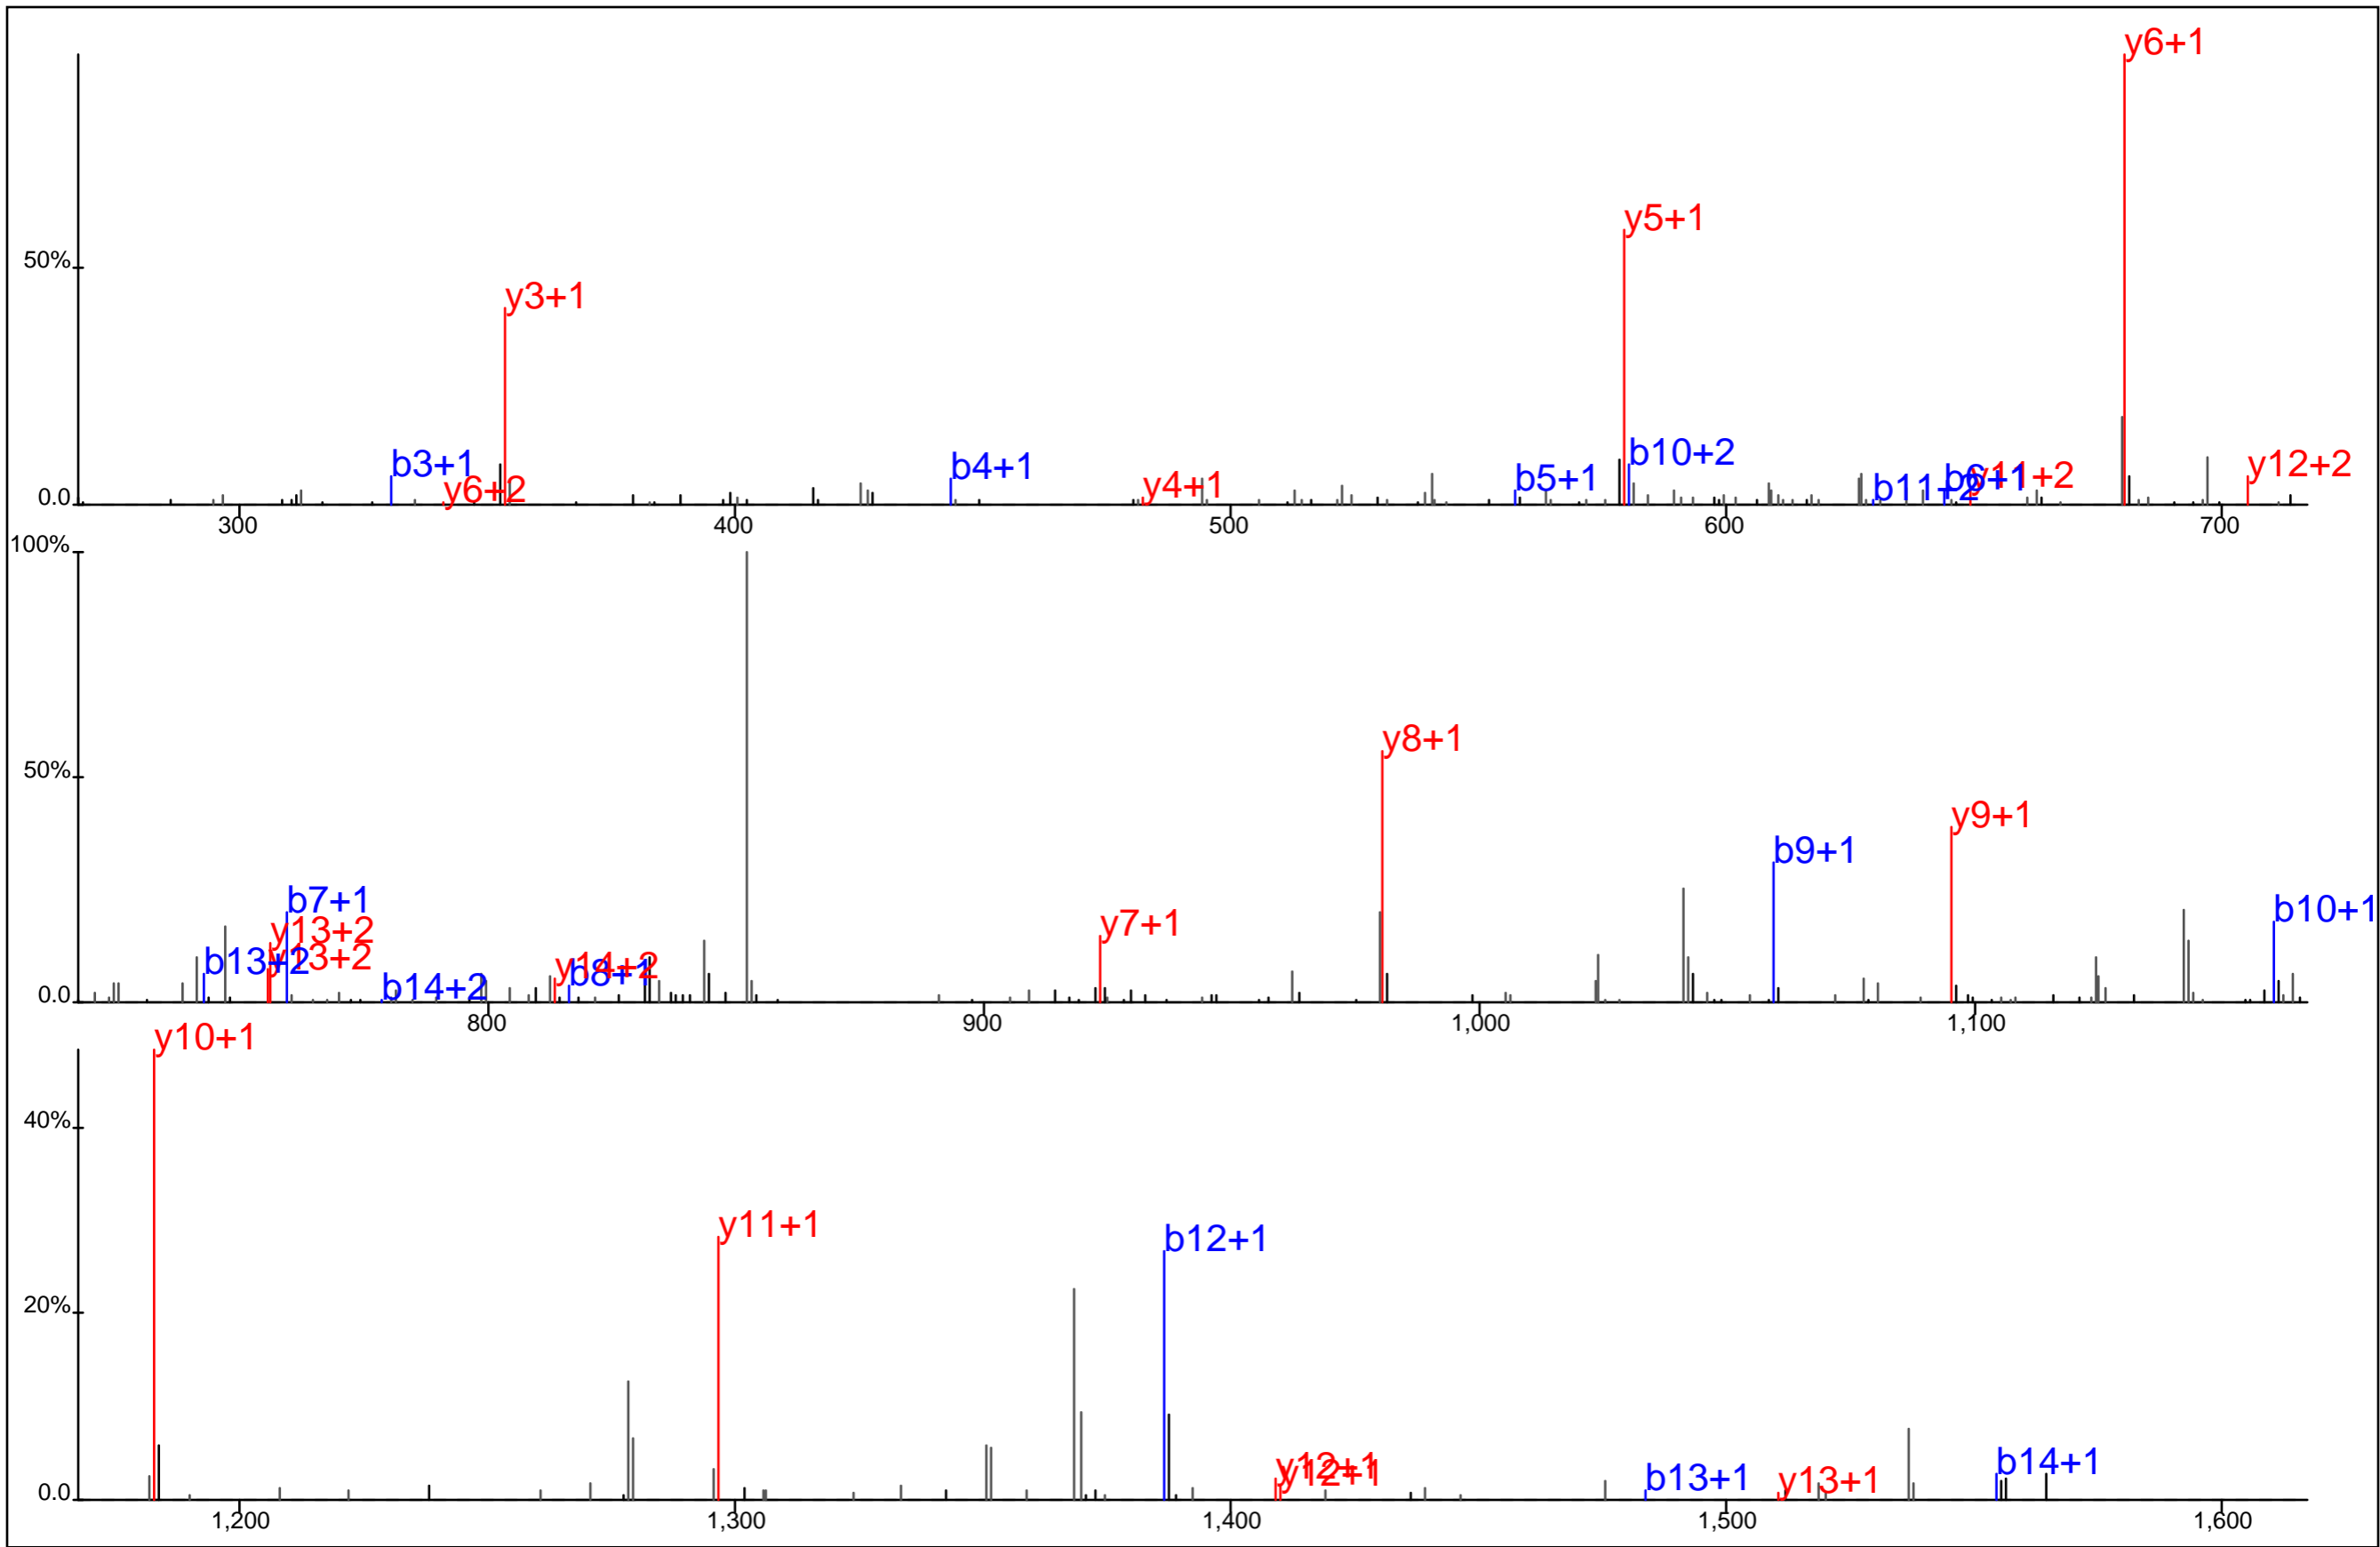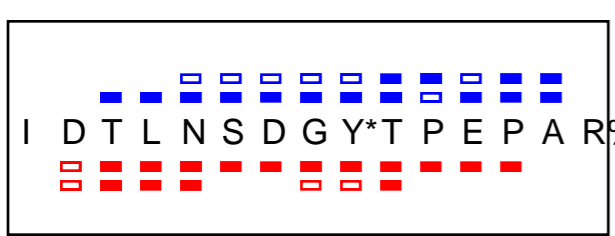

Protein Name: ZAP70  
 gi Accession: 31455611  
 Precursor Mass: 869.8829+2  
 Delta Mass: 1.488 ppm  
 XCorr: 74.6

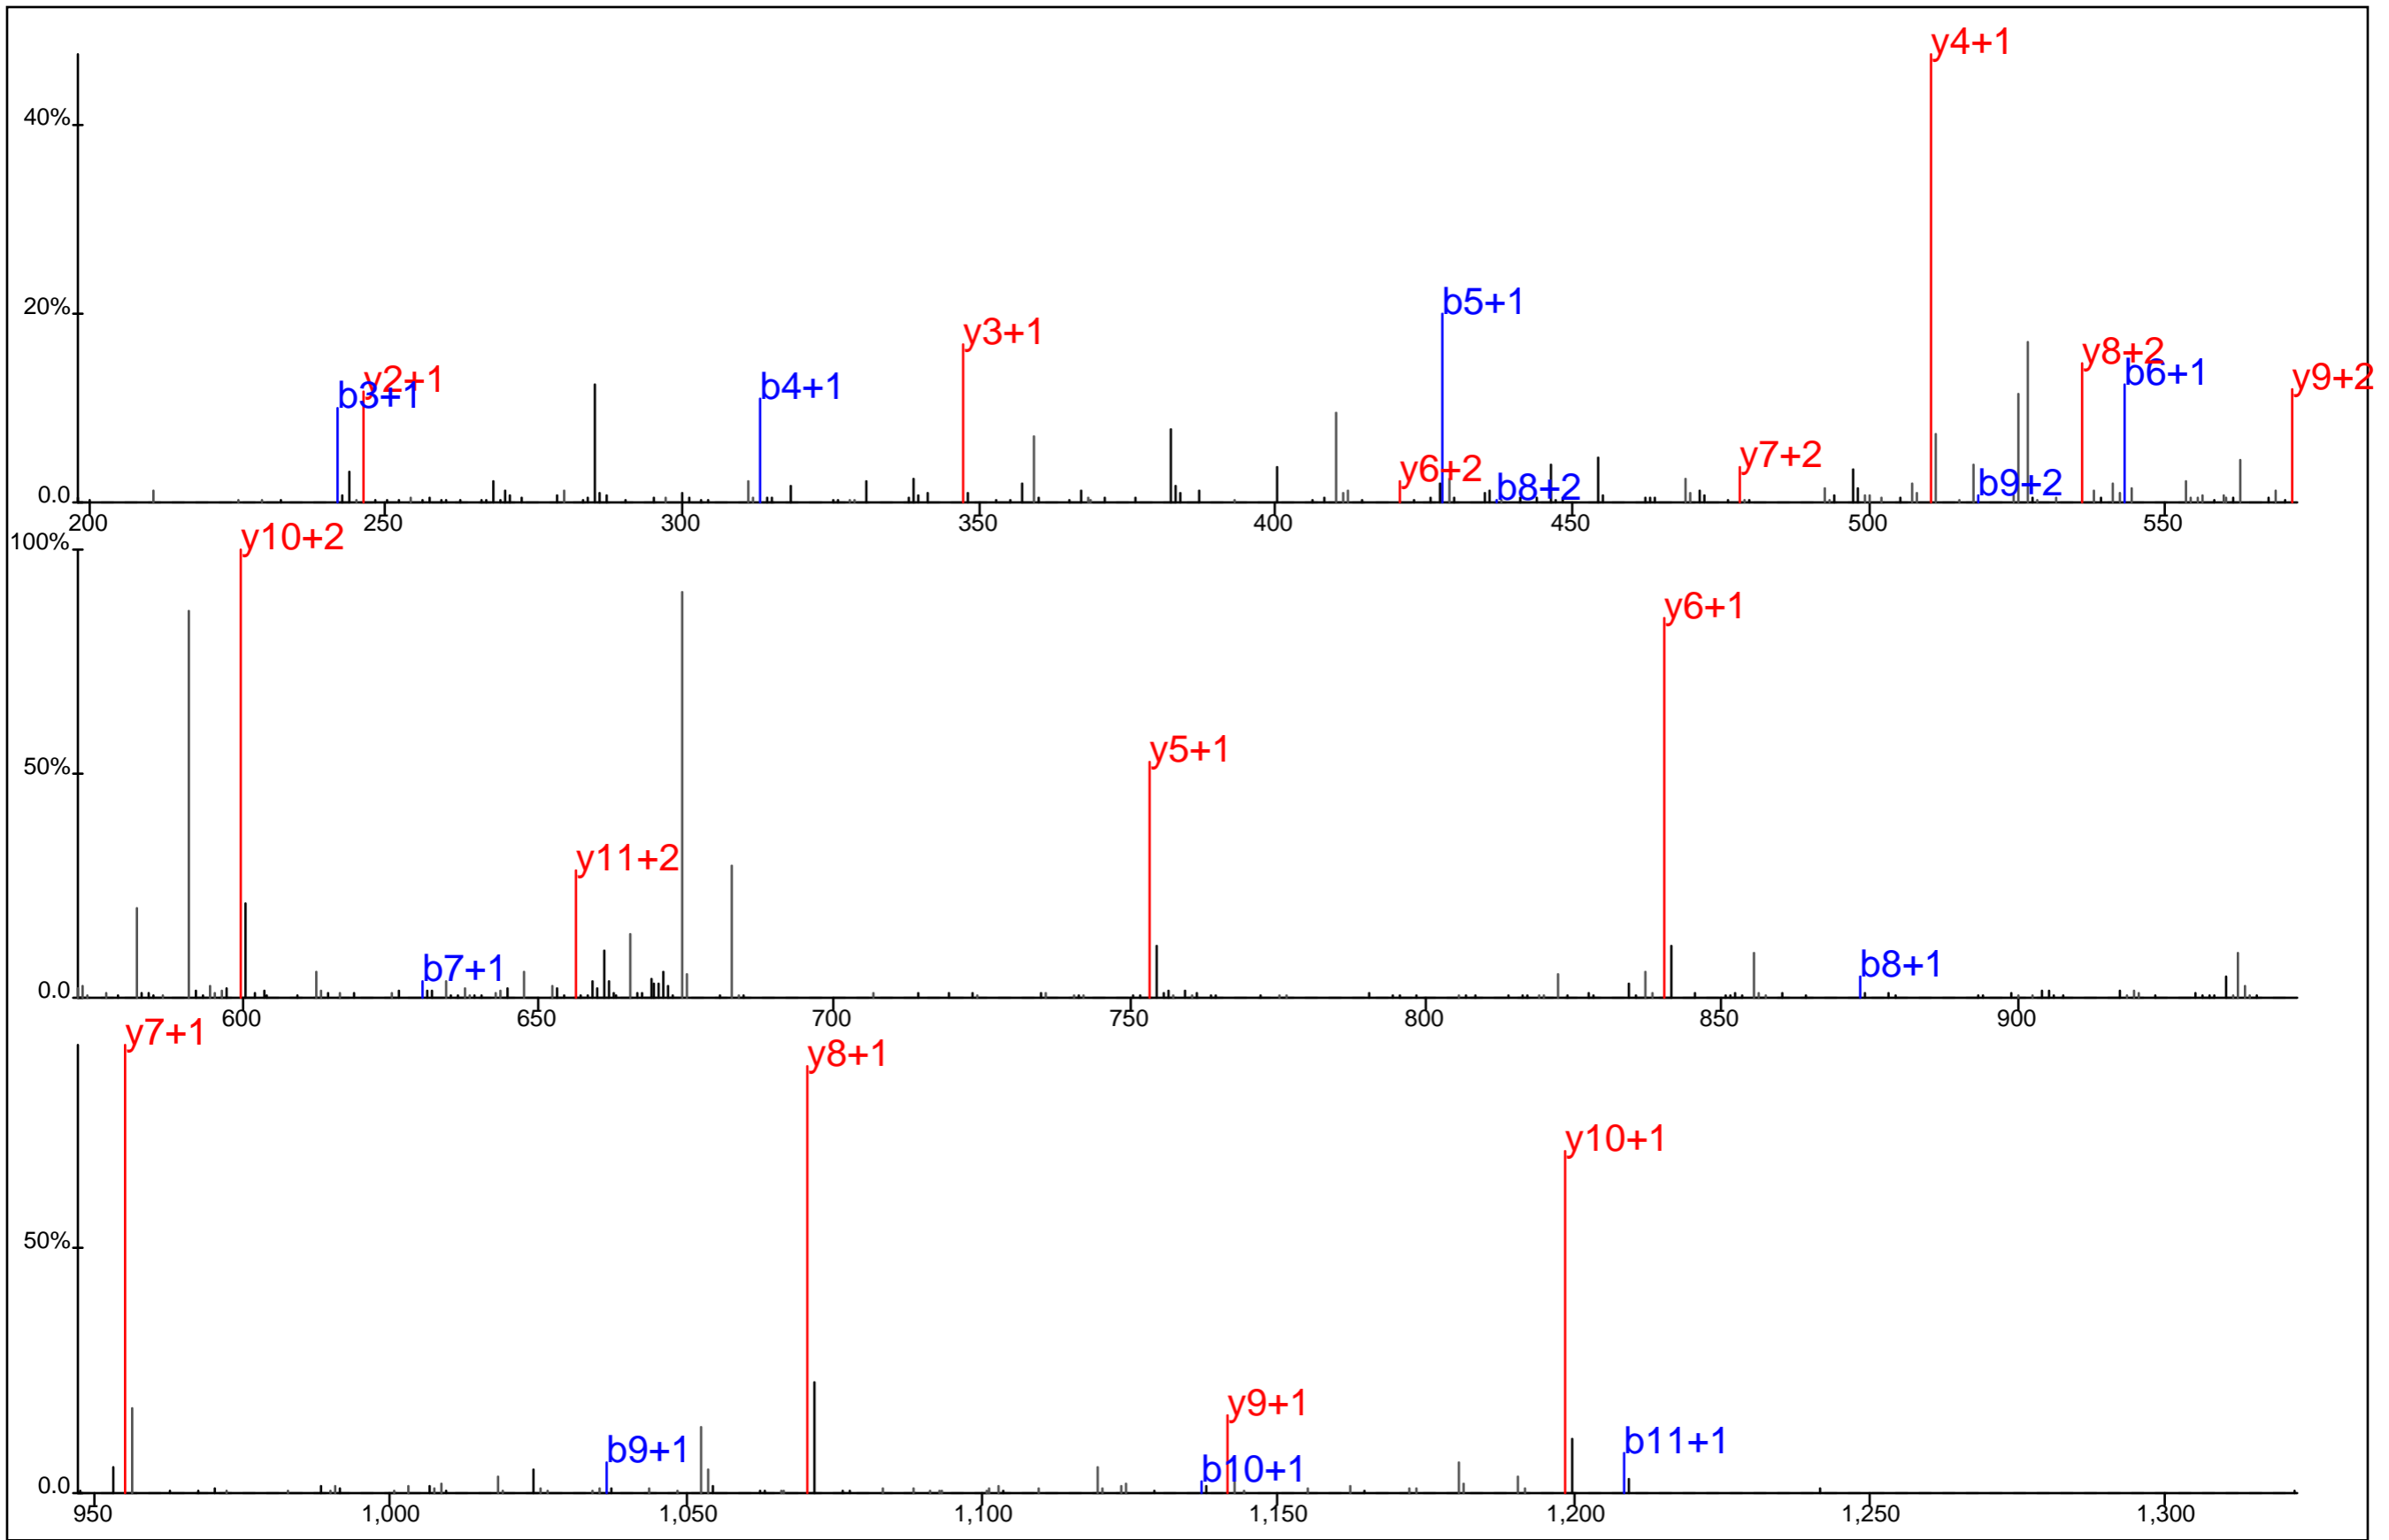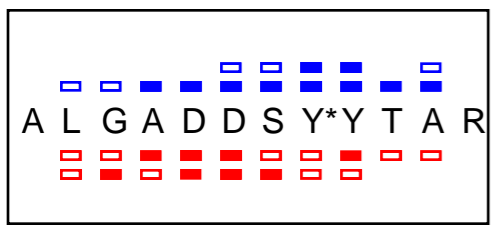

Protein Name: ZAP70  
 gi Accession: 31455611  
 Precursor Mass: 691.7846+2  
 Delta Mass: 0.312 ppm  
 XCorr: 69.19

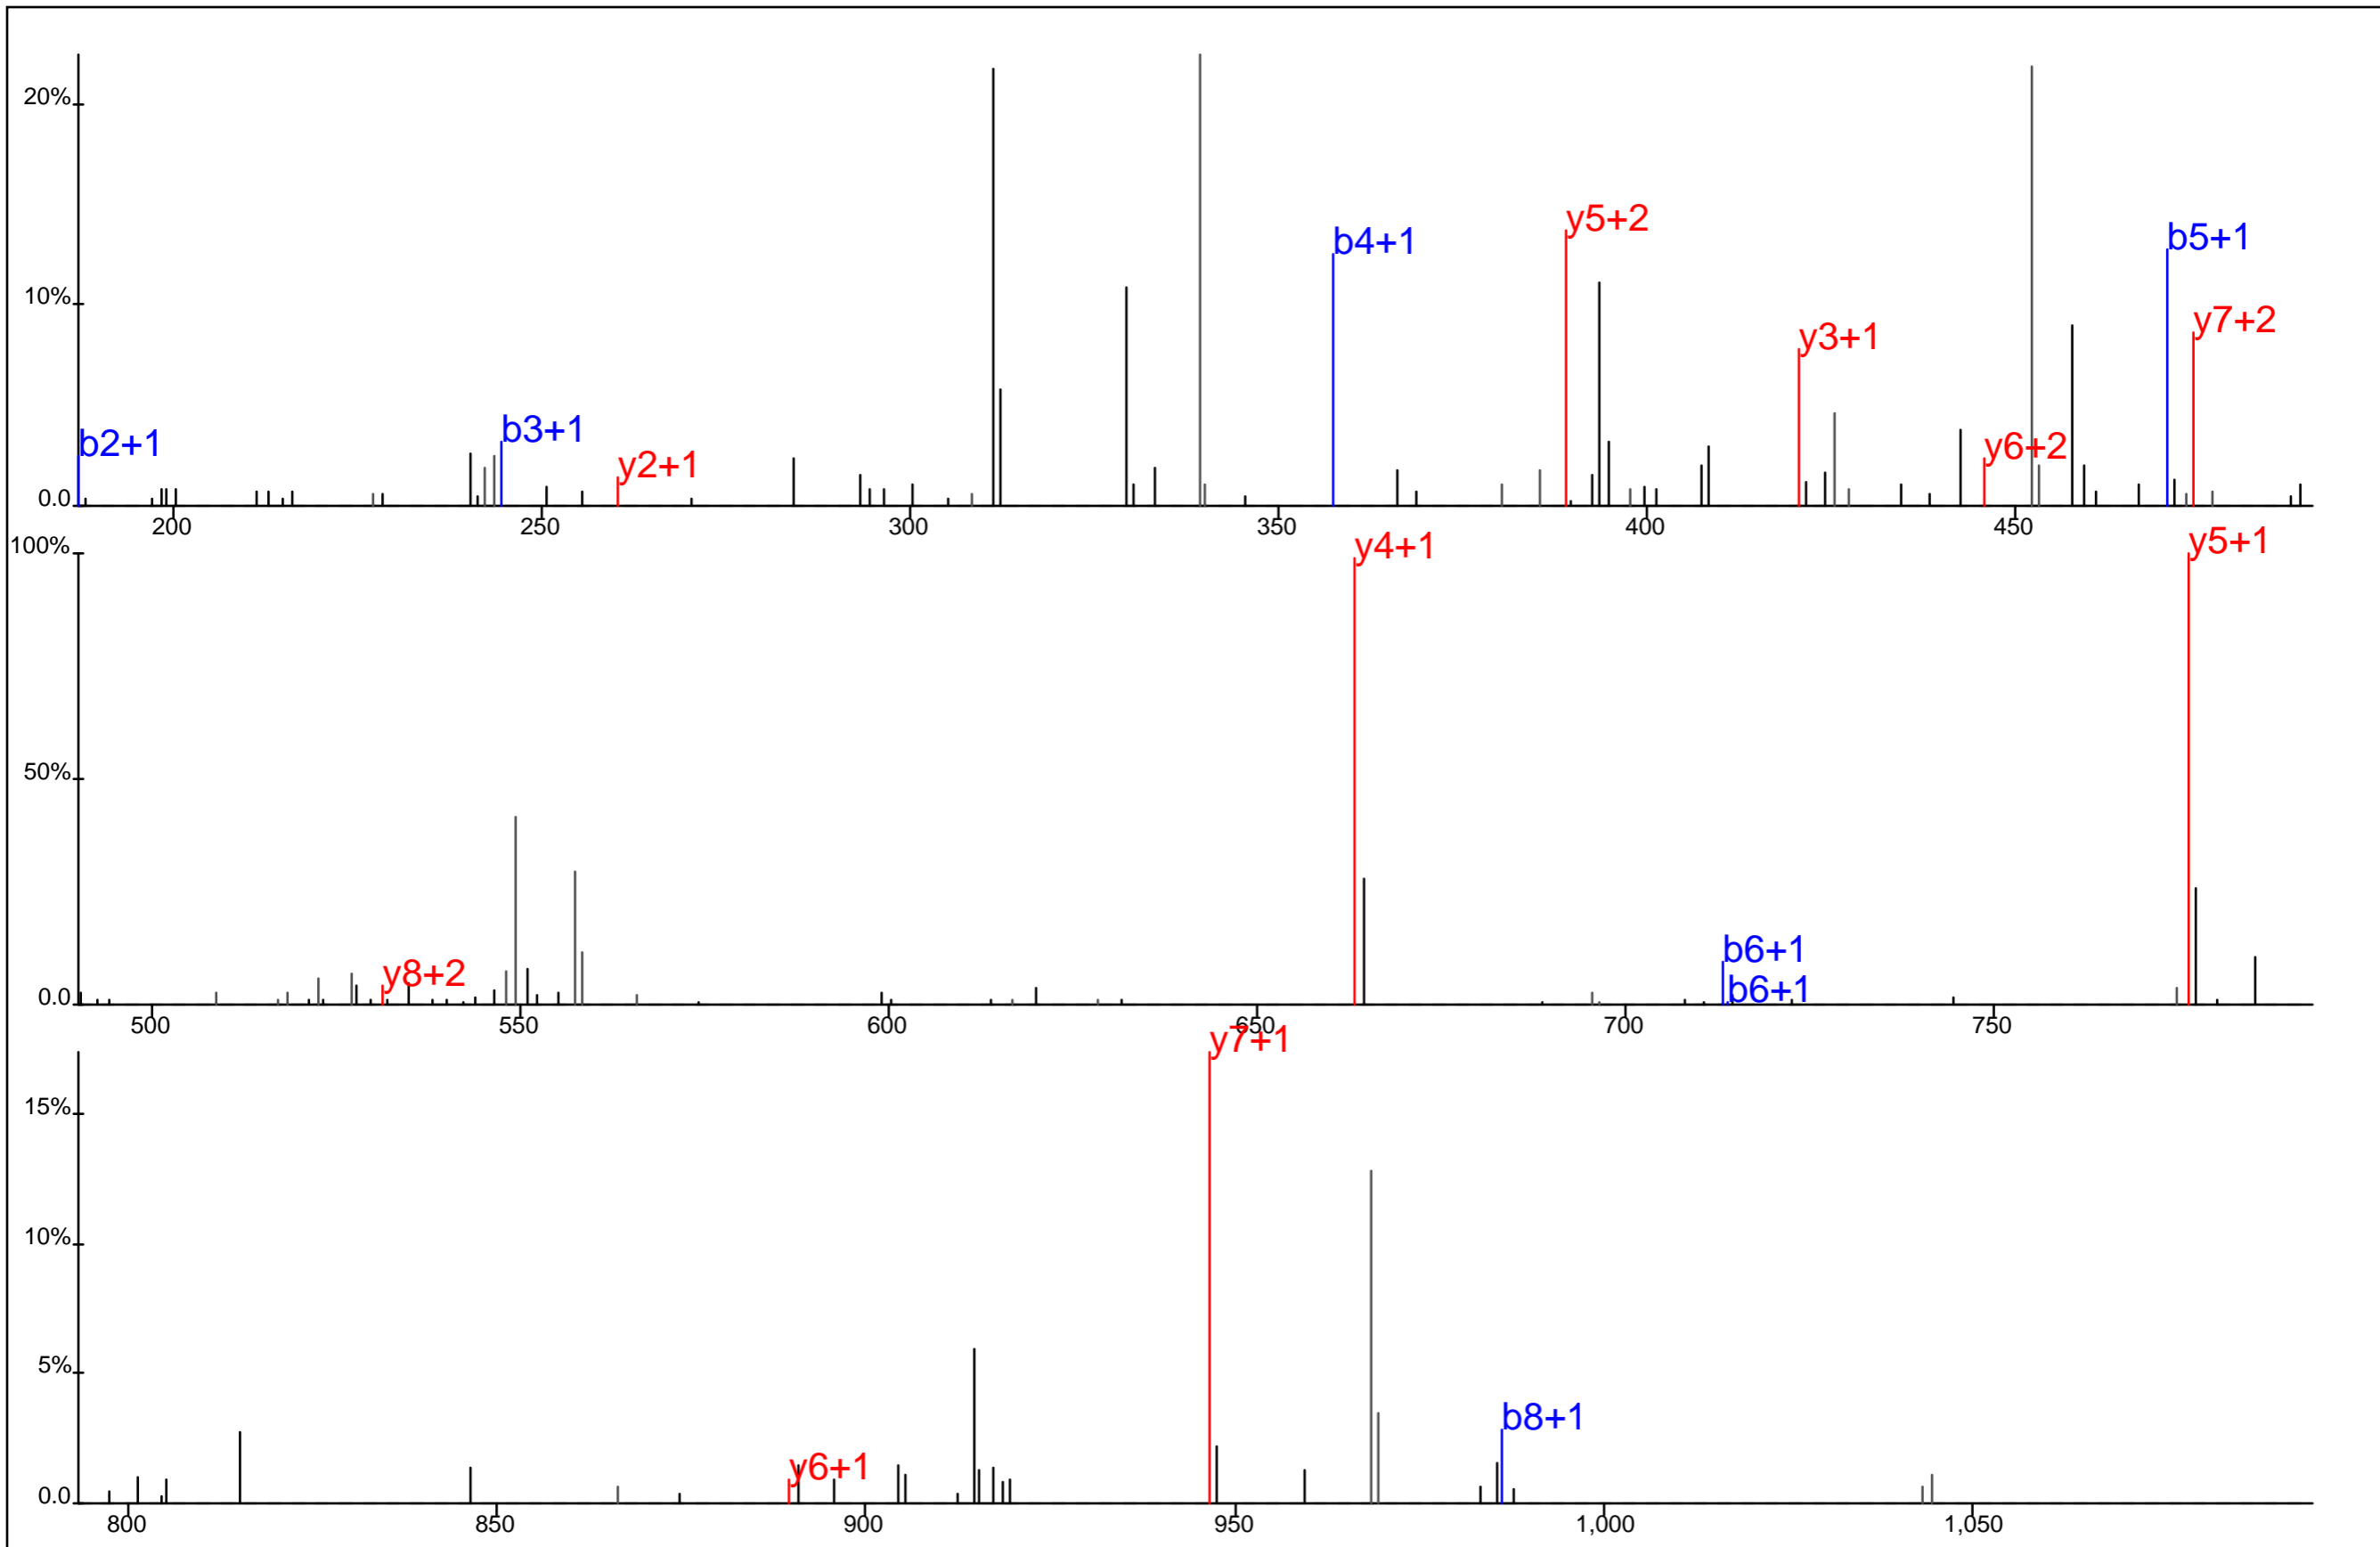

■ ■ ■ ■ ■ ■ ■ ■  
■ ■ ■ ■ ■ ■ ■ ■  
**A D G L I Y\* C L K**

Protein Name: ZAP70  
 gi Accession: 31455611  
 Precursor Mass: 566.7625+2  
 Delta Mass: 6.135 ppm  
 XCorr: 26.17

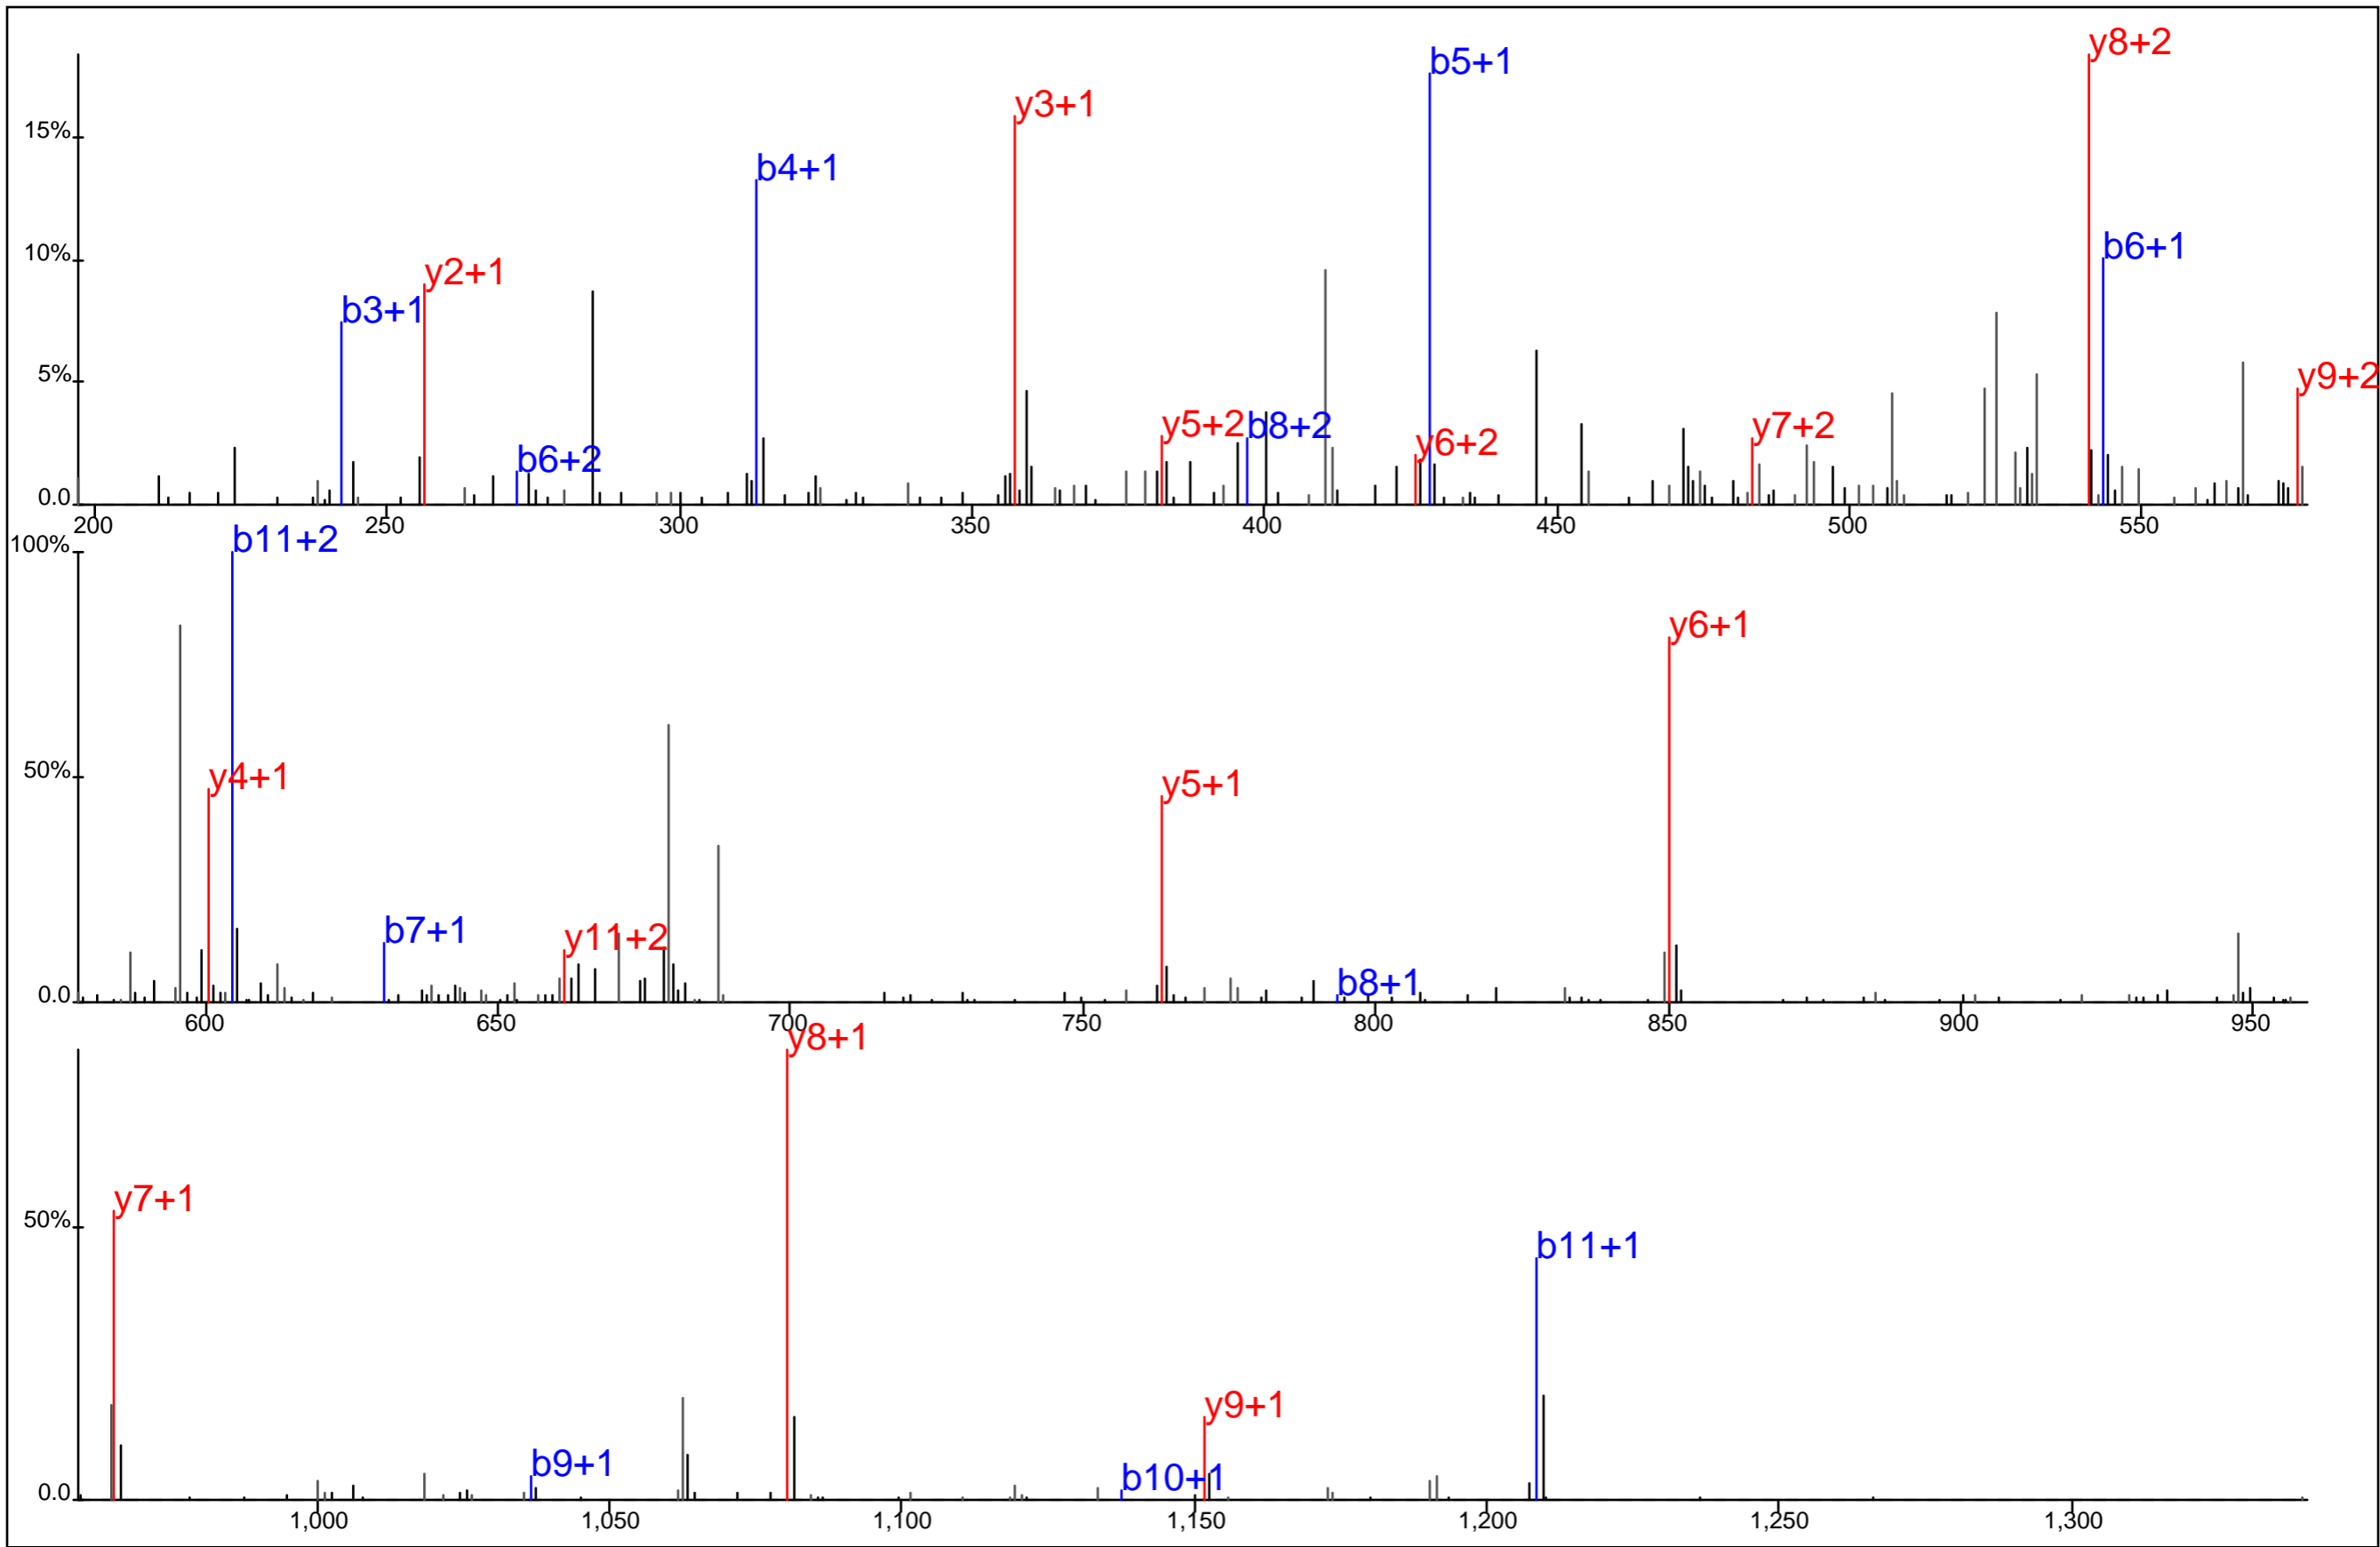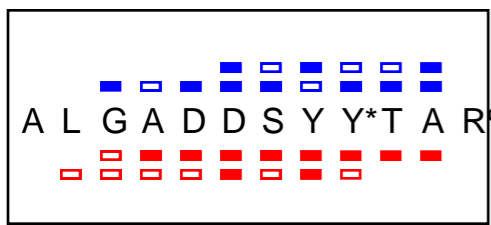

Protein Name: ZAP70  
 gi Accession: 31455611  
 Precursor Mass: 696.7901+2  
 Delta Mass: 1.636 ppm  
 XCorr: 74.18

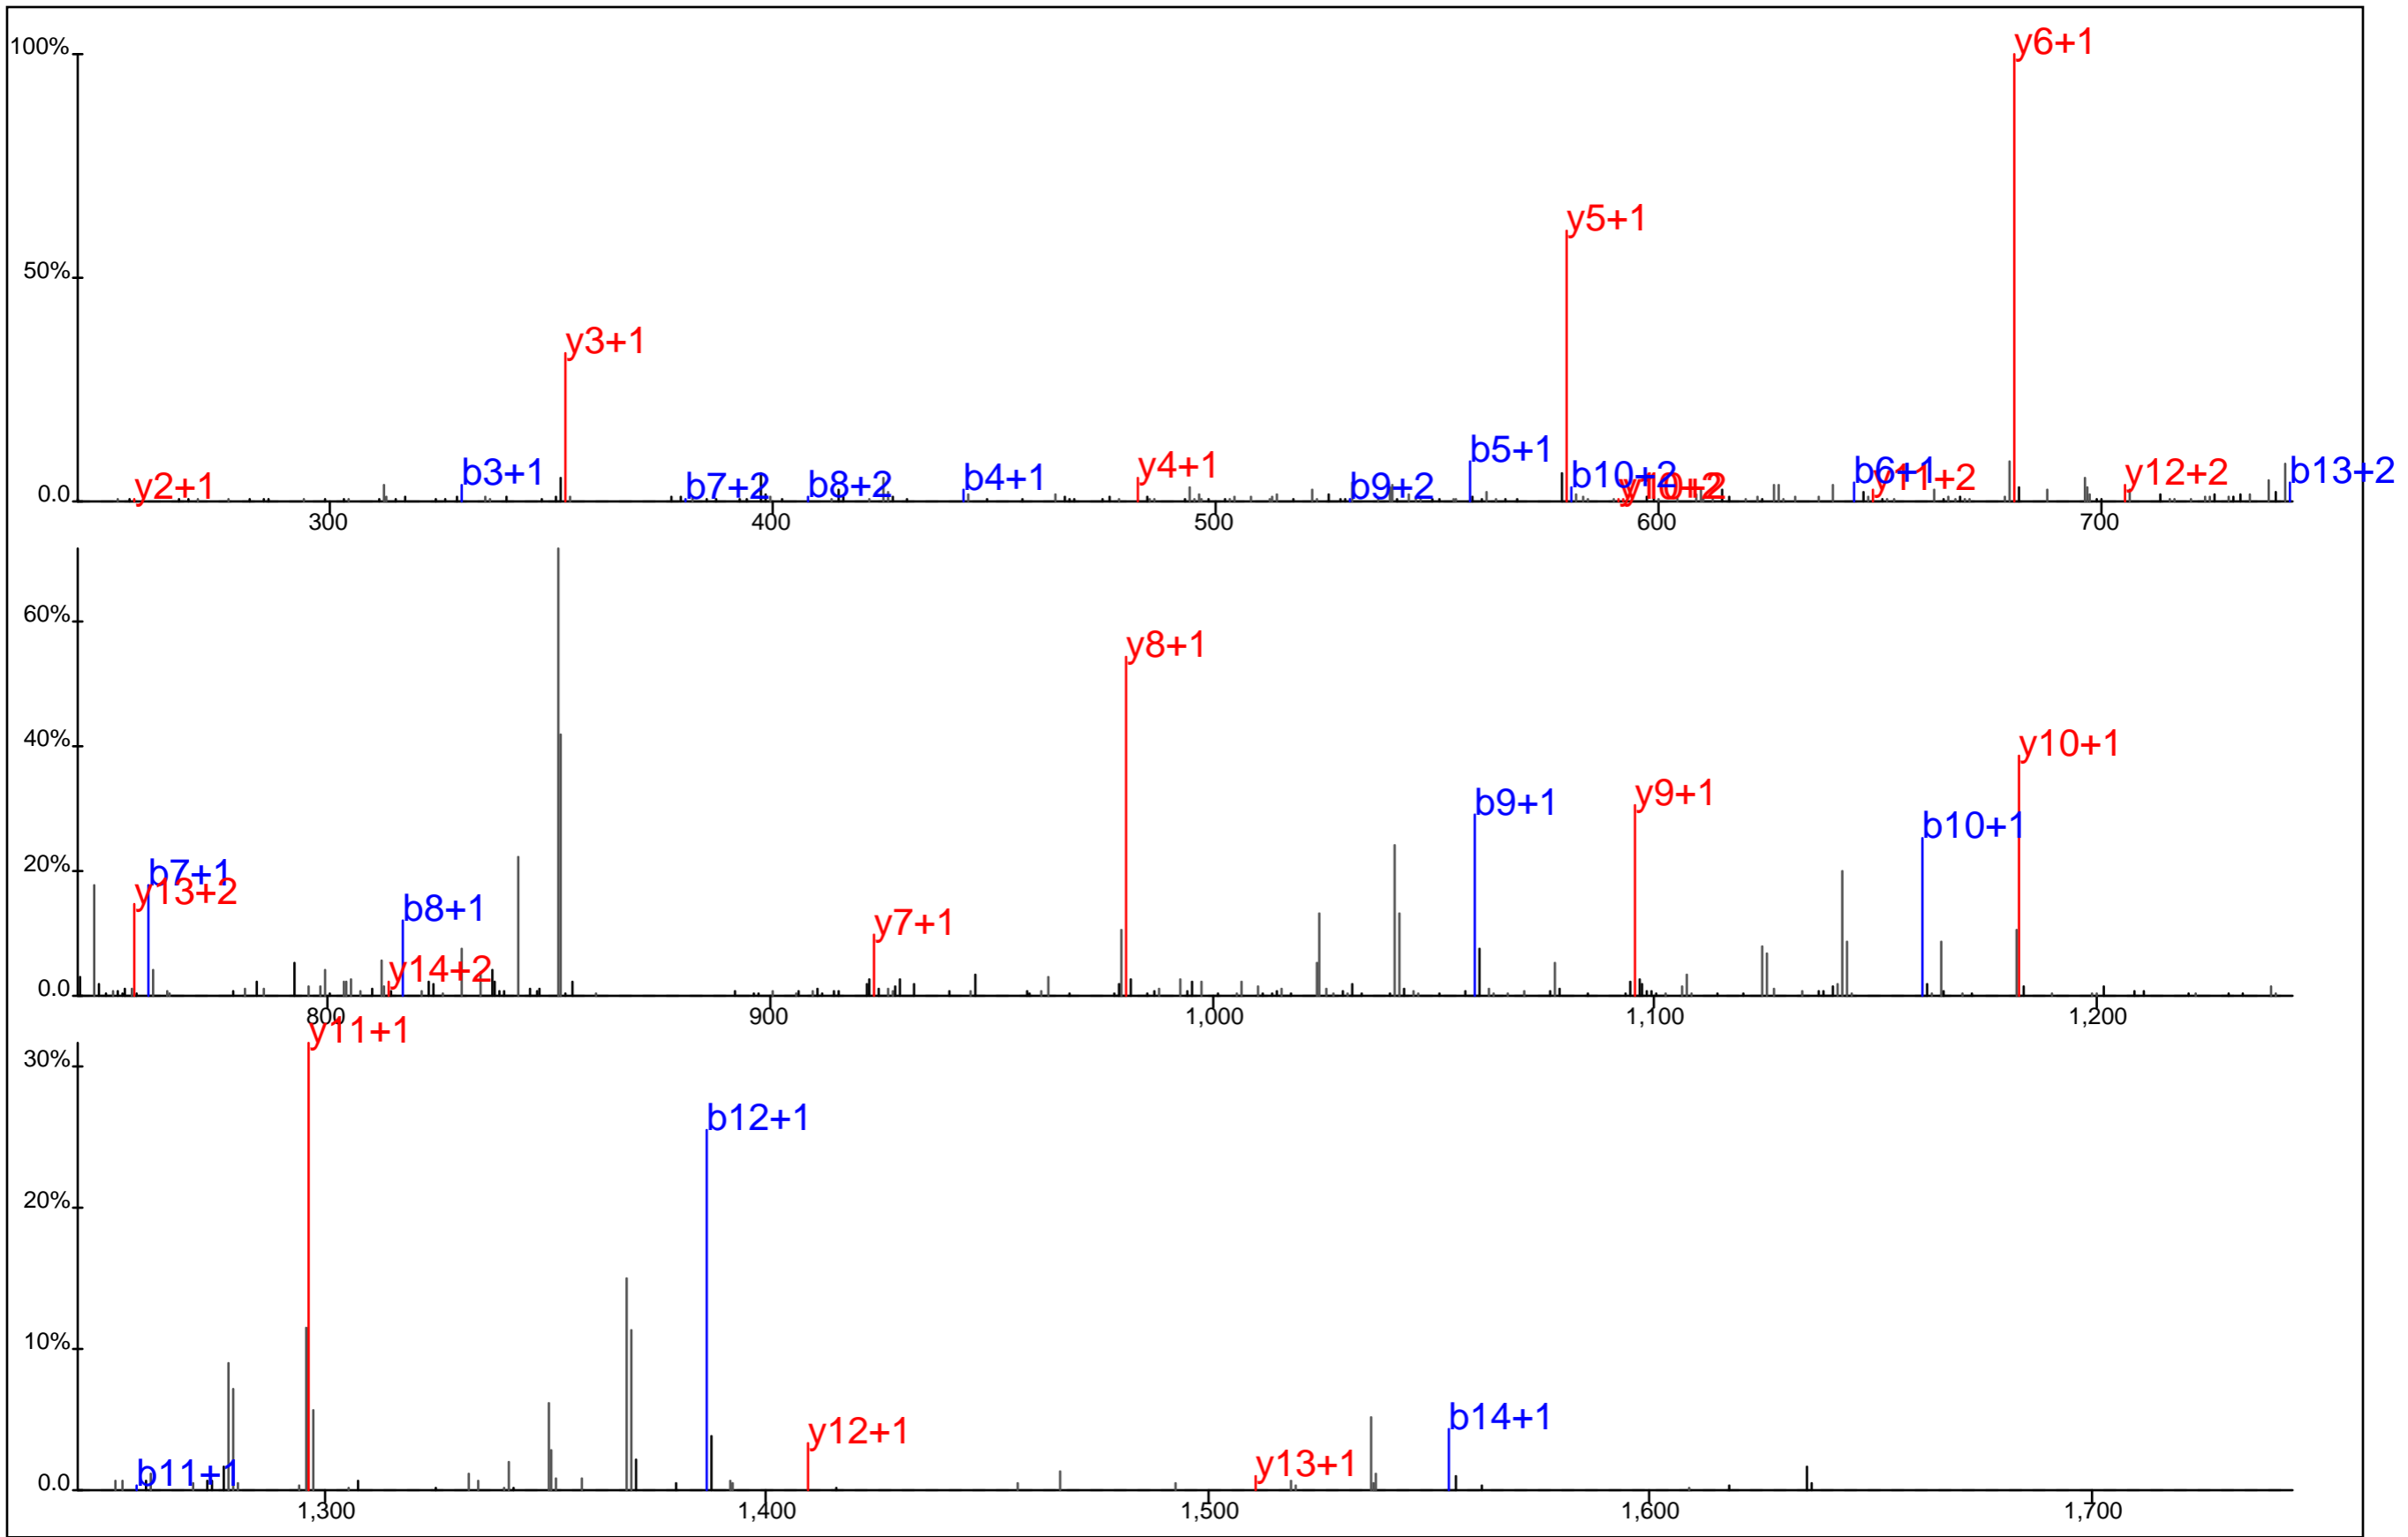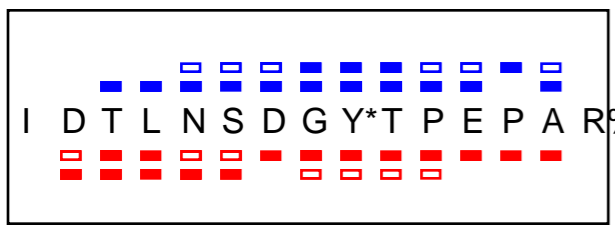

Protein Name: ZAP70  
 gi Accession: 31455611  
 Precursor Mass: 869.8814+2  
 Delta Mass: 0.197 ppm  
 XCorr: 80.35

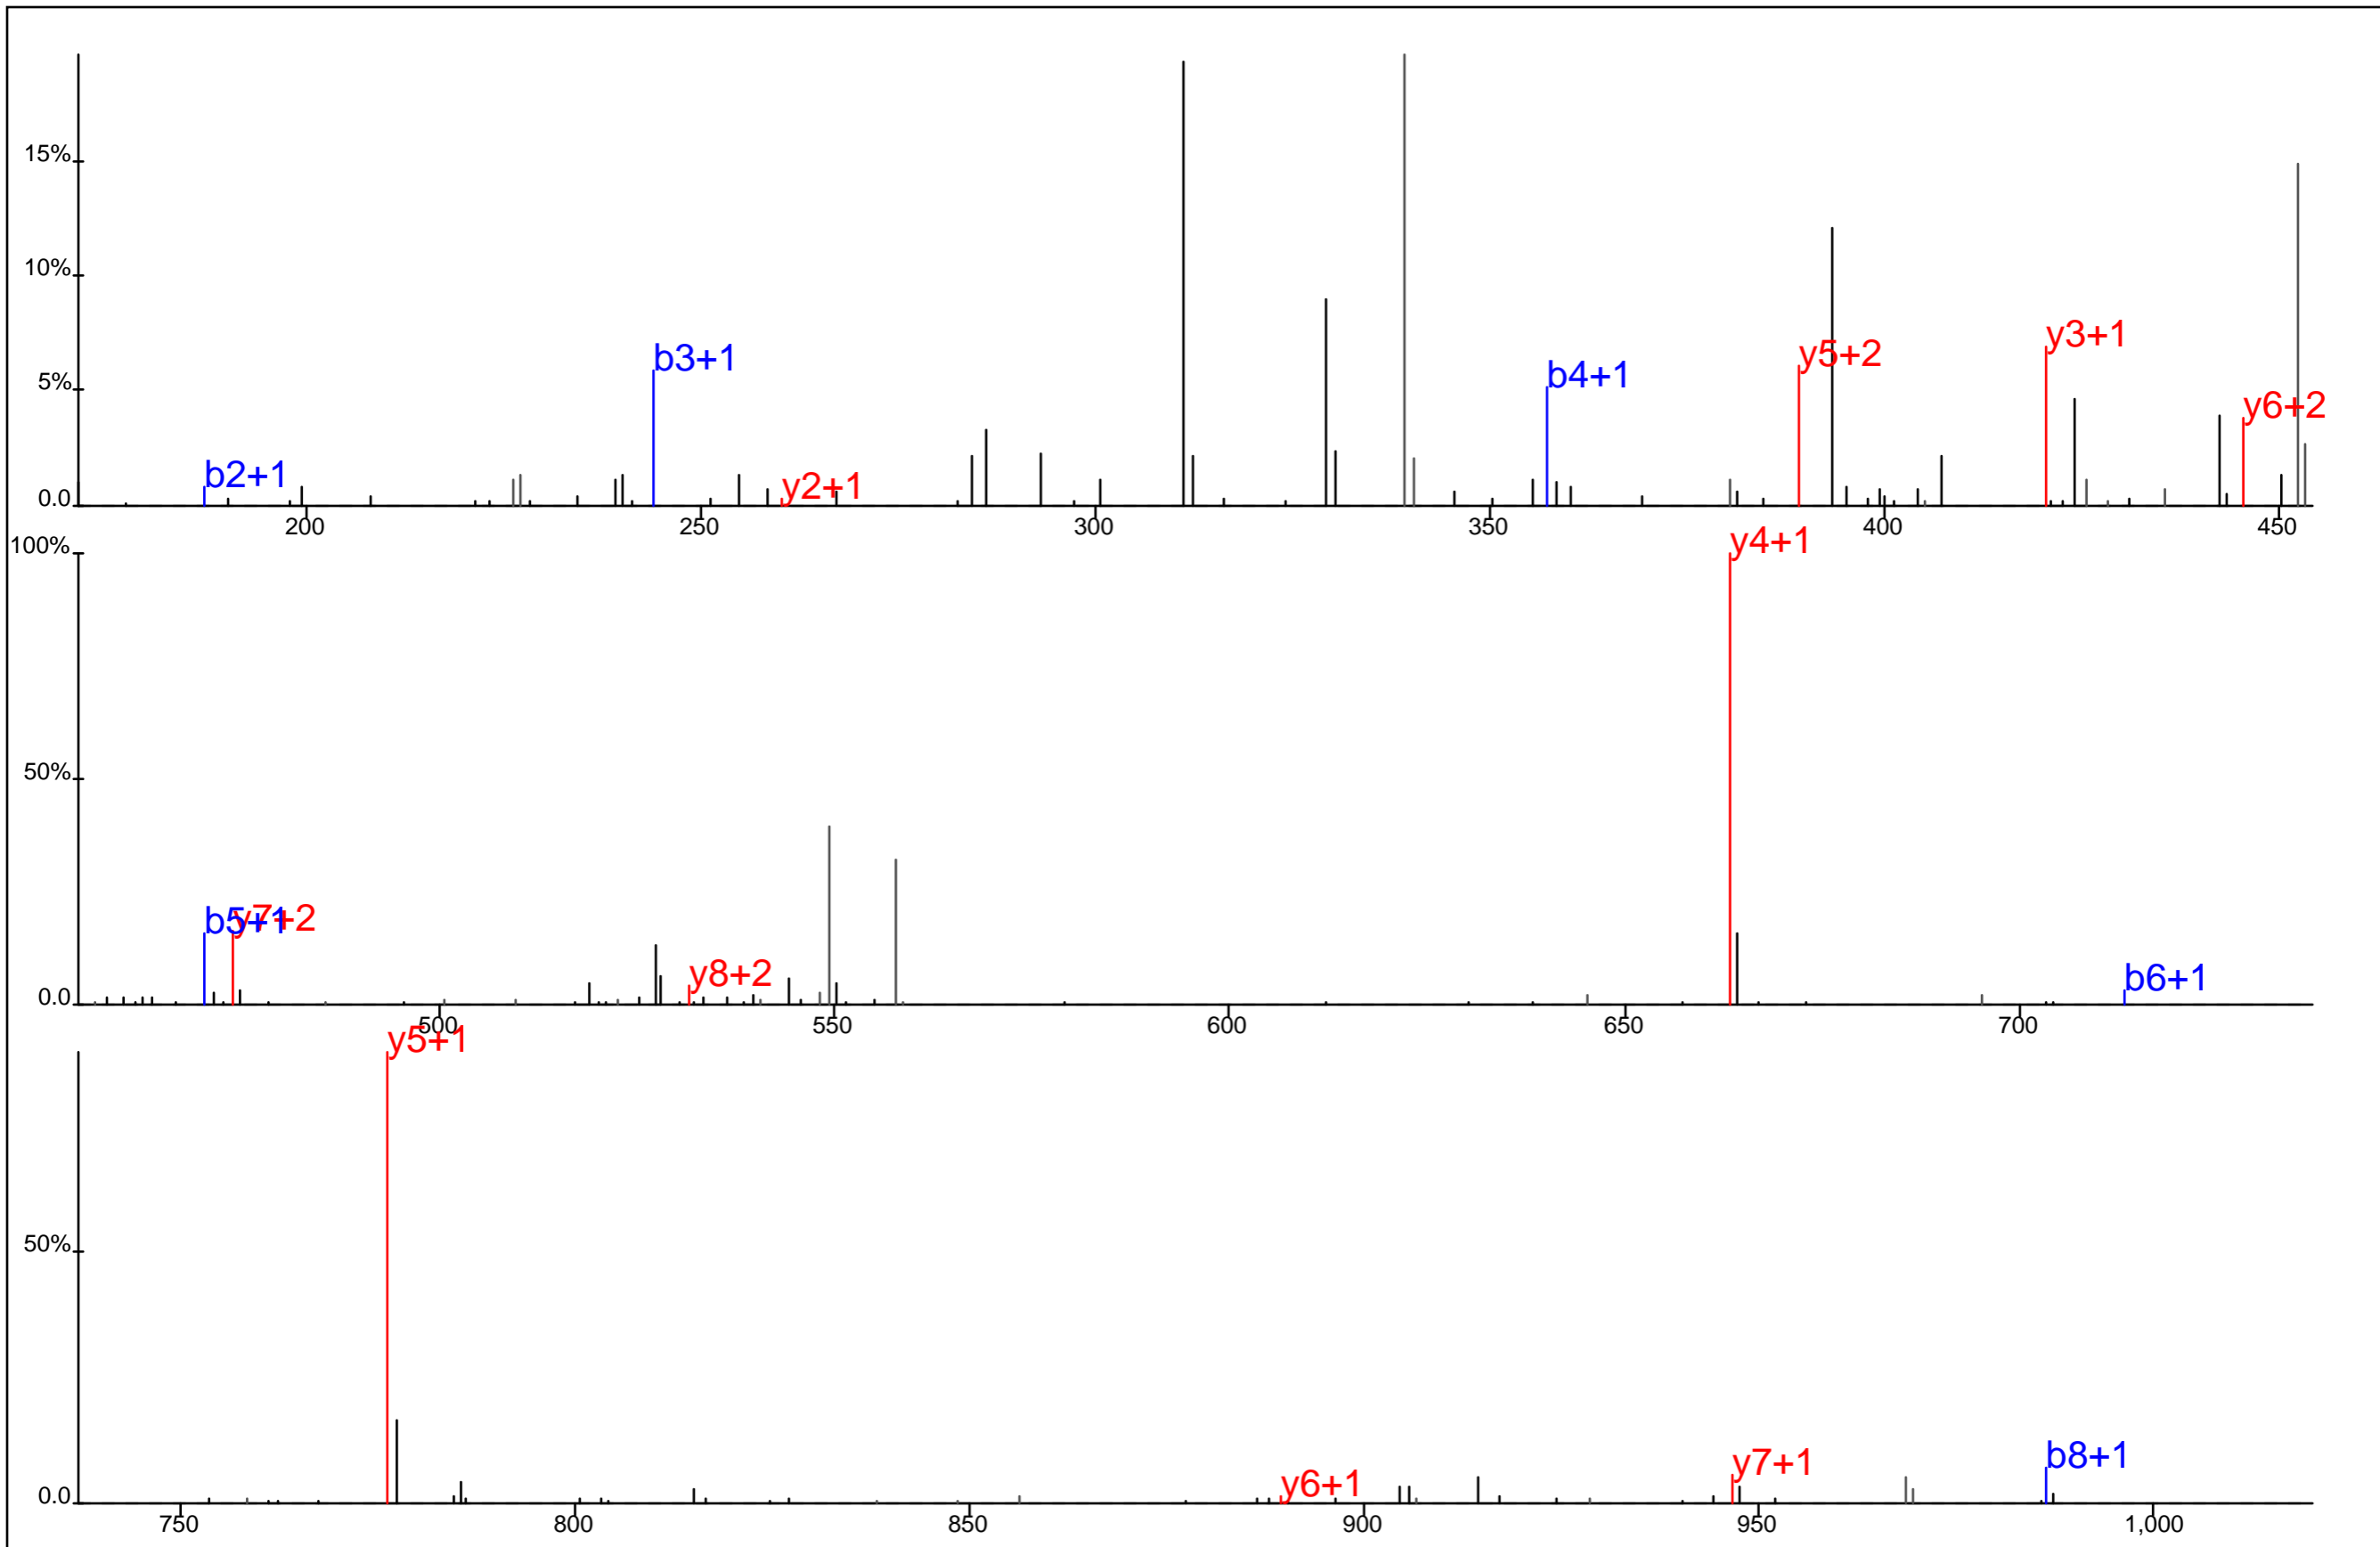

■ ■ □ □ □ □  
□ □ □ □ □ □

A D G L I Y\* C L K

Protein Name: ZAP70  
 gi Accession: 31455611  
 Precursor Mass: 566.7604+2  
 Delta Mass: 2.365 ppm  
 XCorr: 44.6

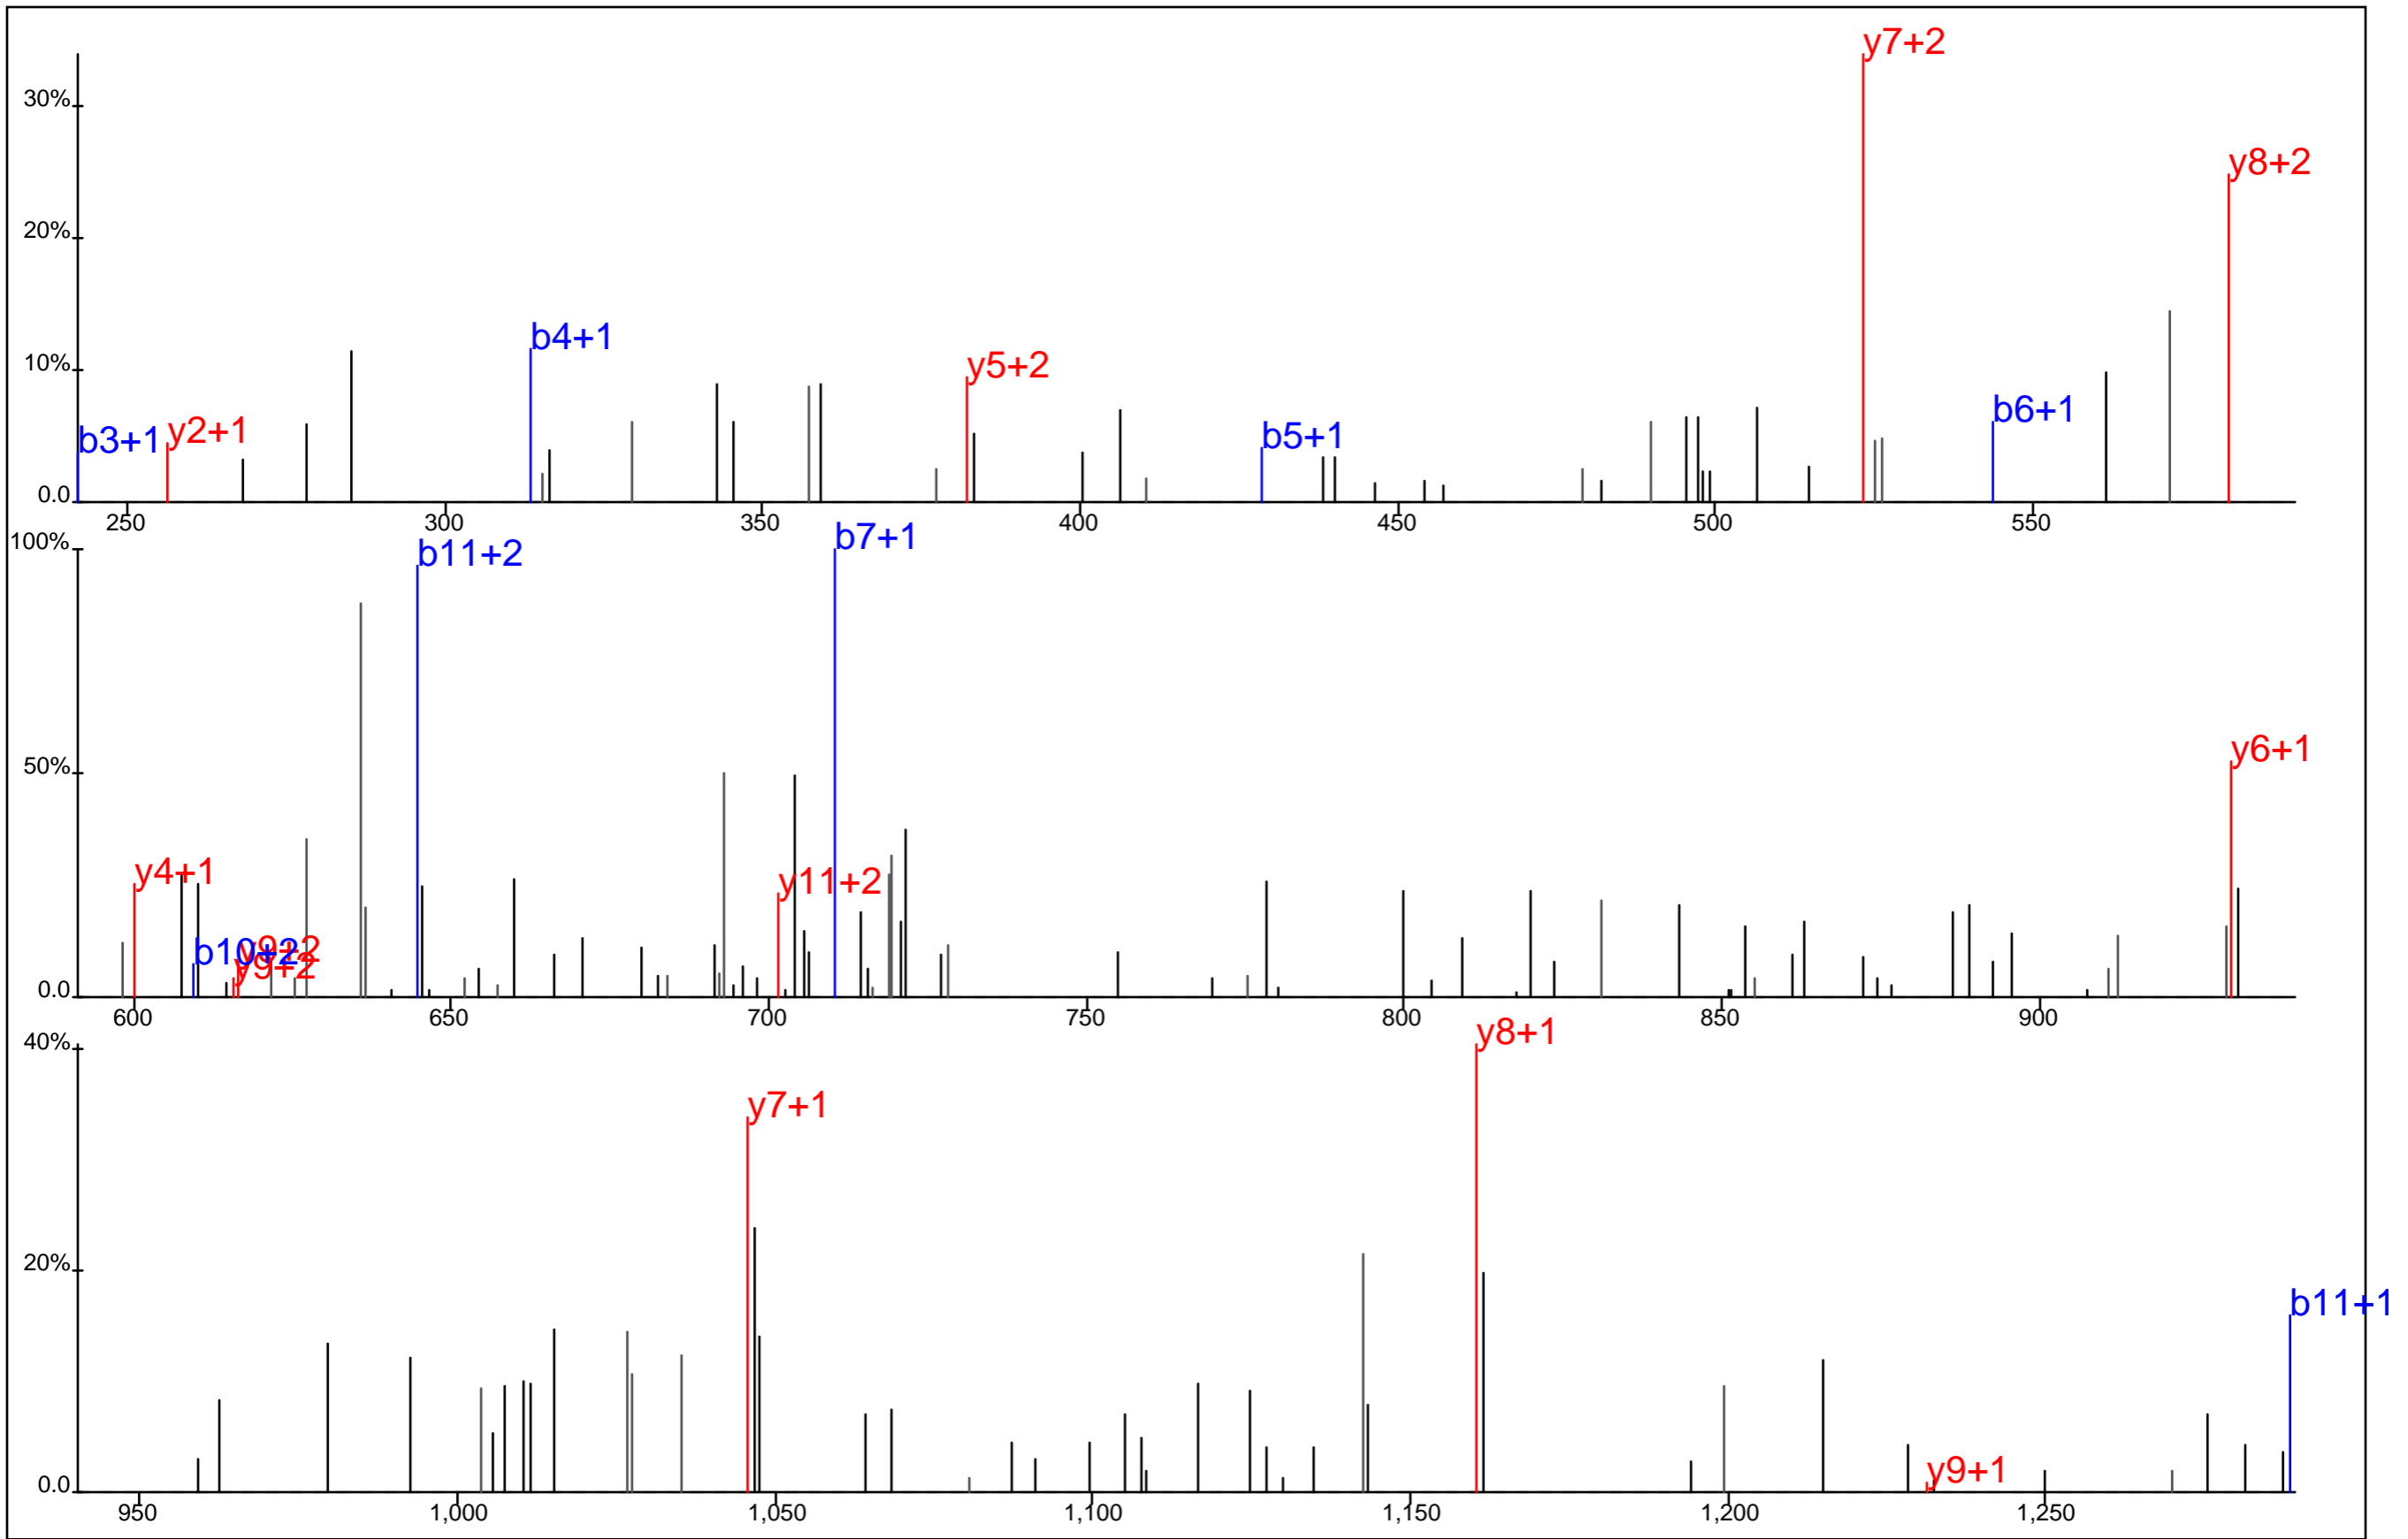

A L G A D D S\*Y Y T\* A R%  
 □ □ ■ ■ ■ ■ ■ ■ ■ ■

Protein Name: ZAP70  
 gi Accession: 31455611  
 Precursor Mass: 736.7721+2  
 Delta Mass: 0.042 ppm  
 XCorr: 26.8



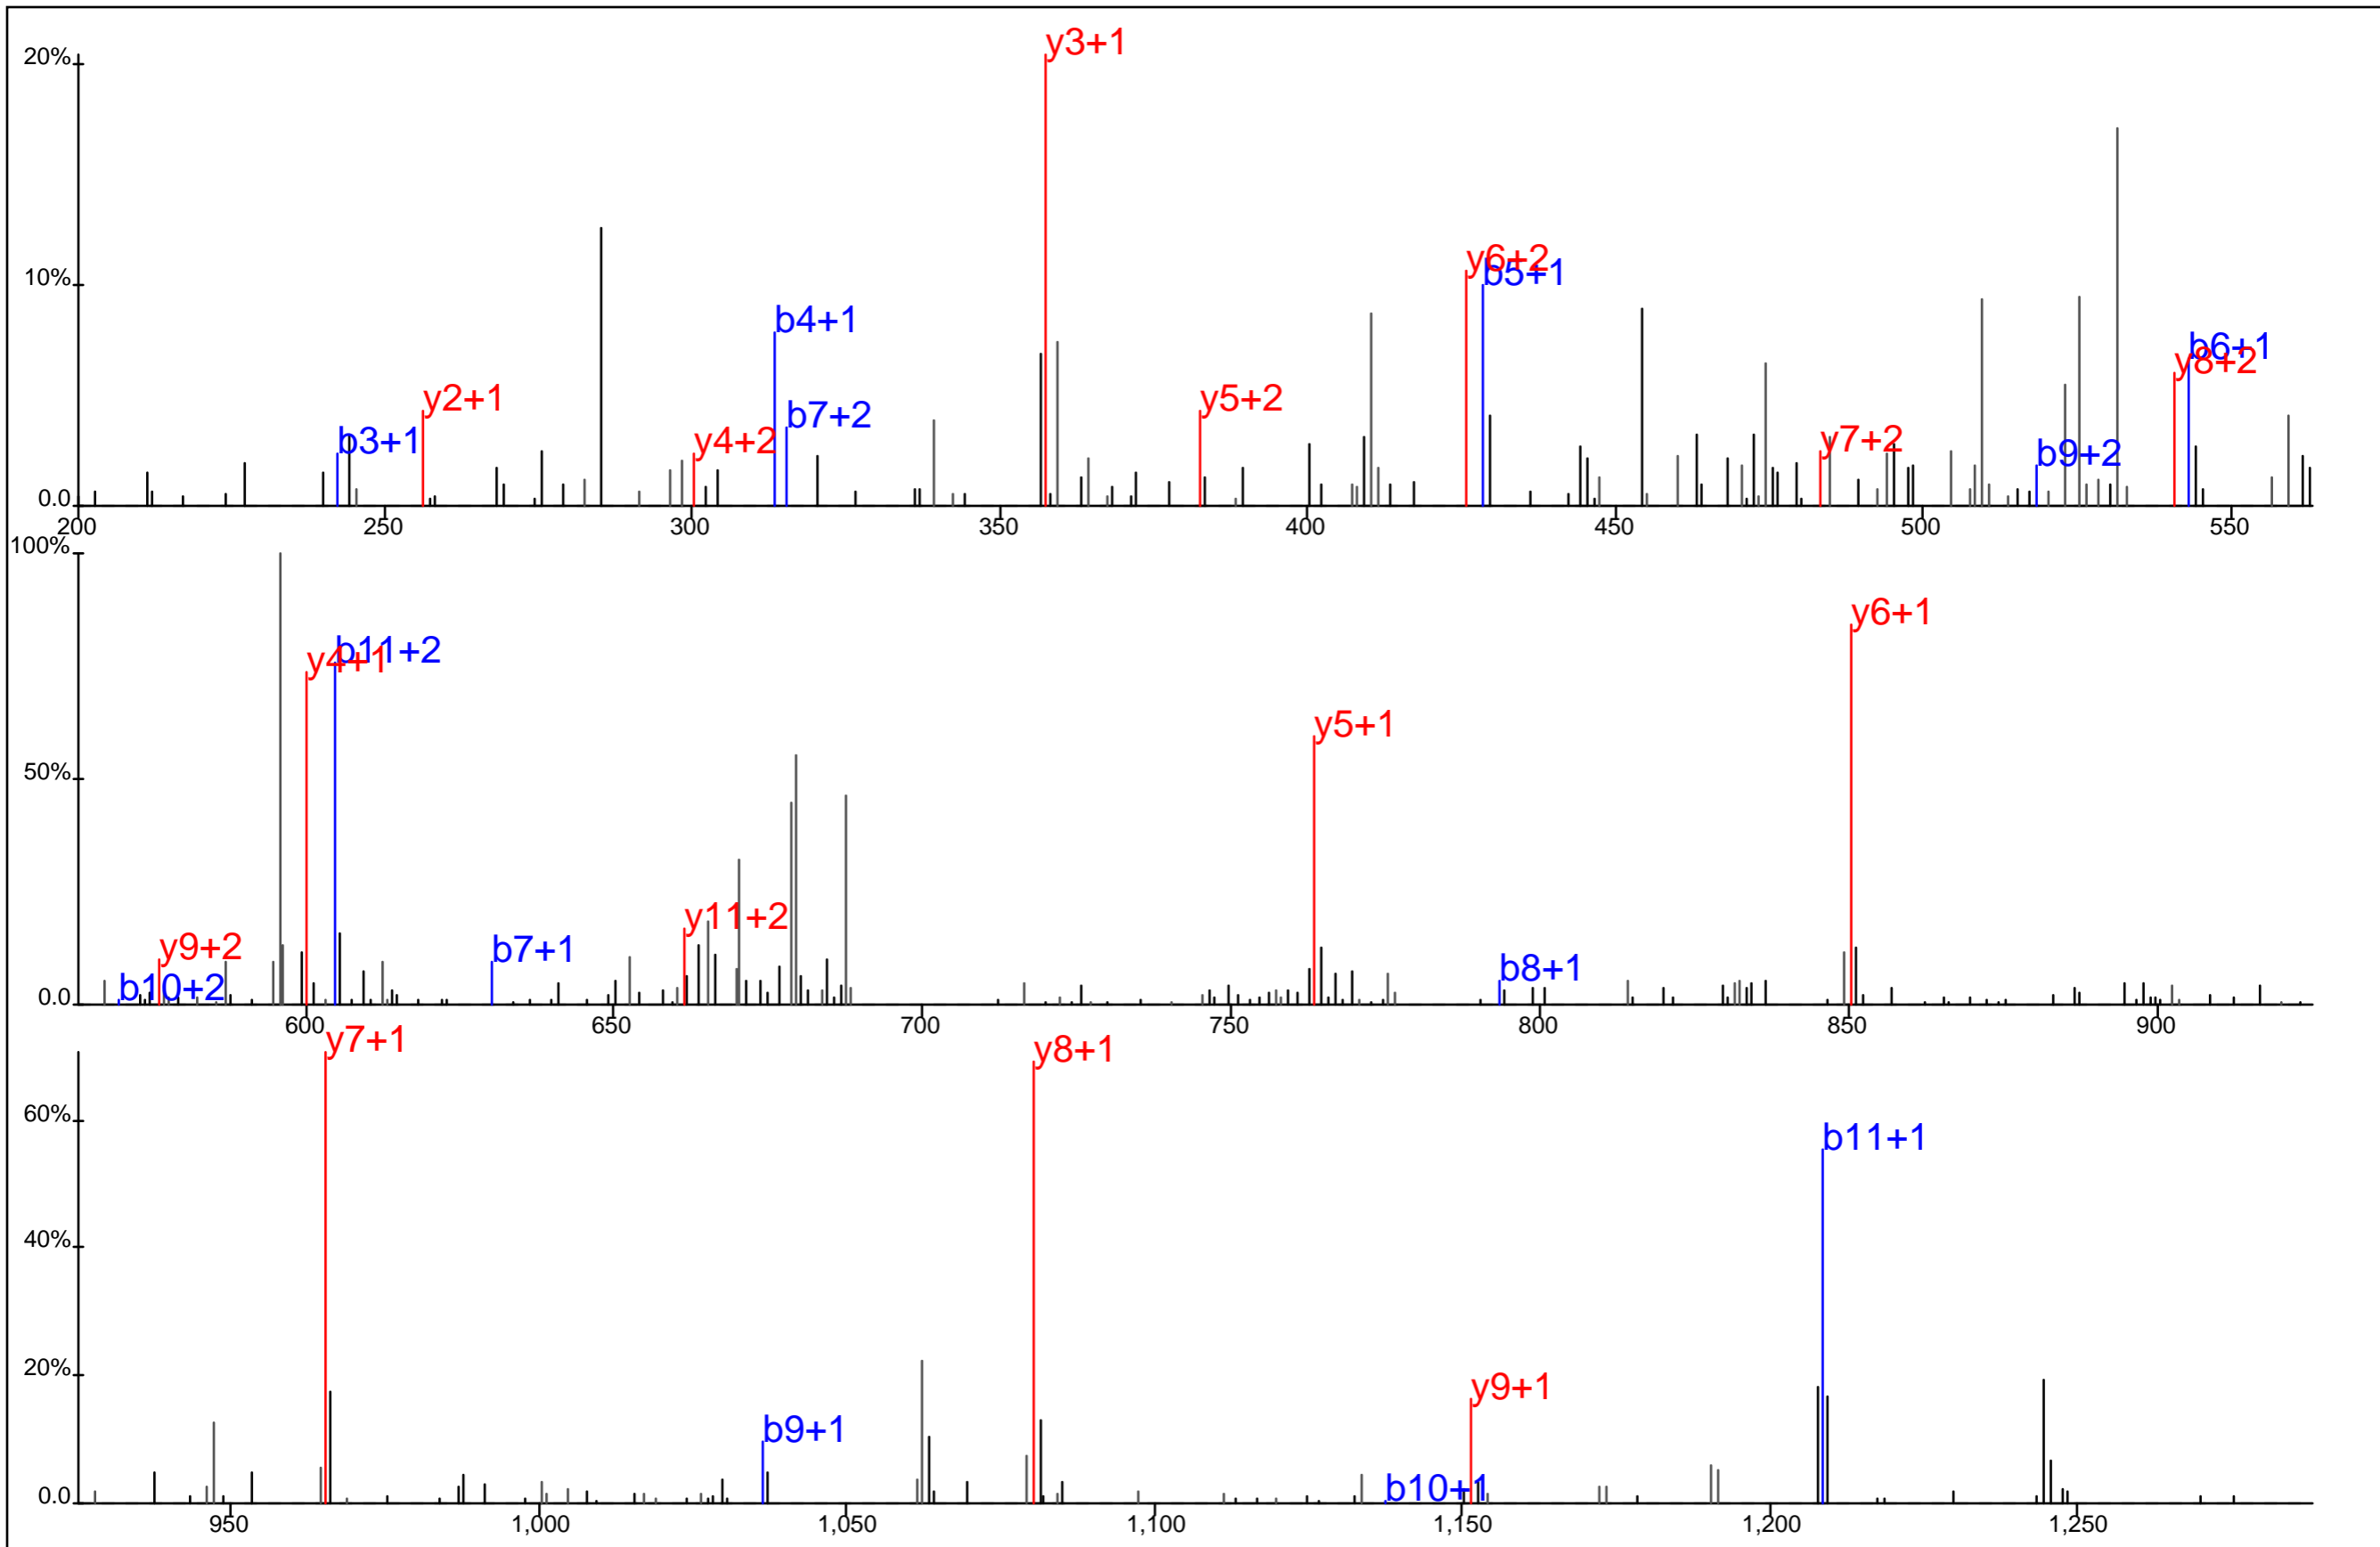

▢ ▢ ▢ ▢ ▢ ▢ ▢ ▢ ▢  
 A L G A D D S Y Y\* T A R%  
▢ ▢ ▢ ▢ ▢ ▢ ▢ ▢ ▢ ▢

Protein Name: ZAP70  
 gi Accession: 31455611  
 Precursor Mass: 696.7898+2  
 Delta Mass: 1.198 ppm  
 XCorr: 78.9

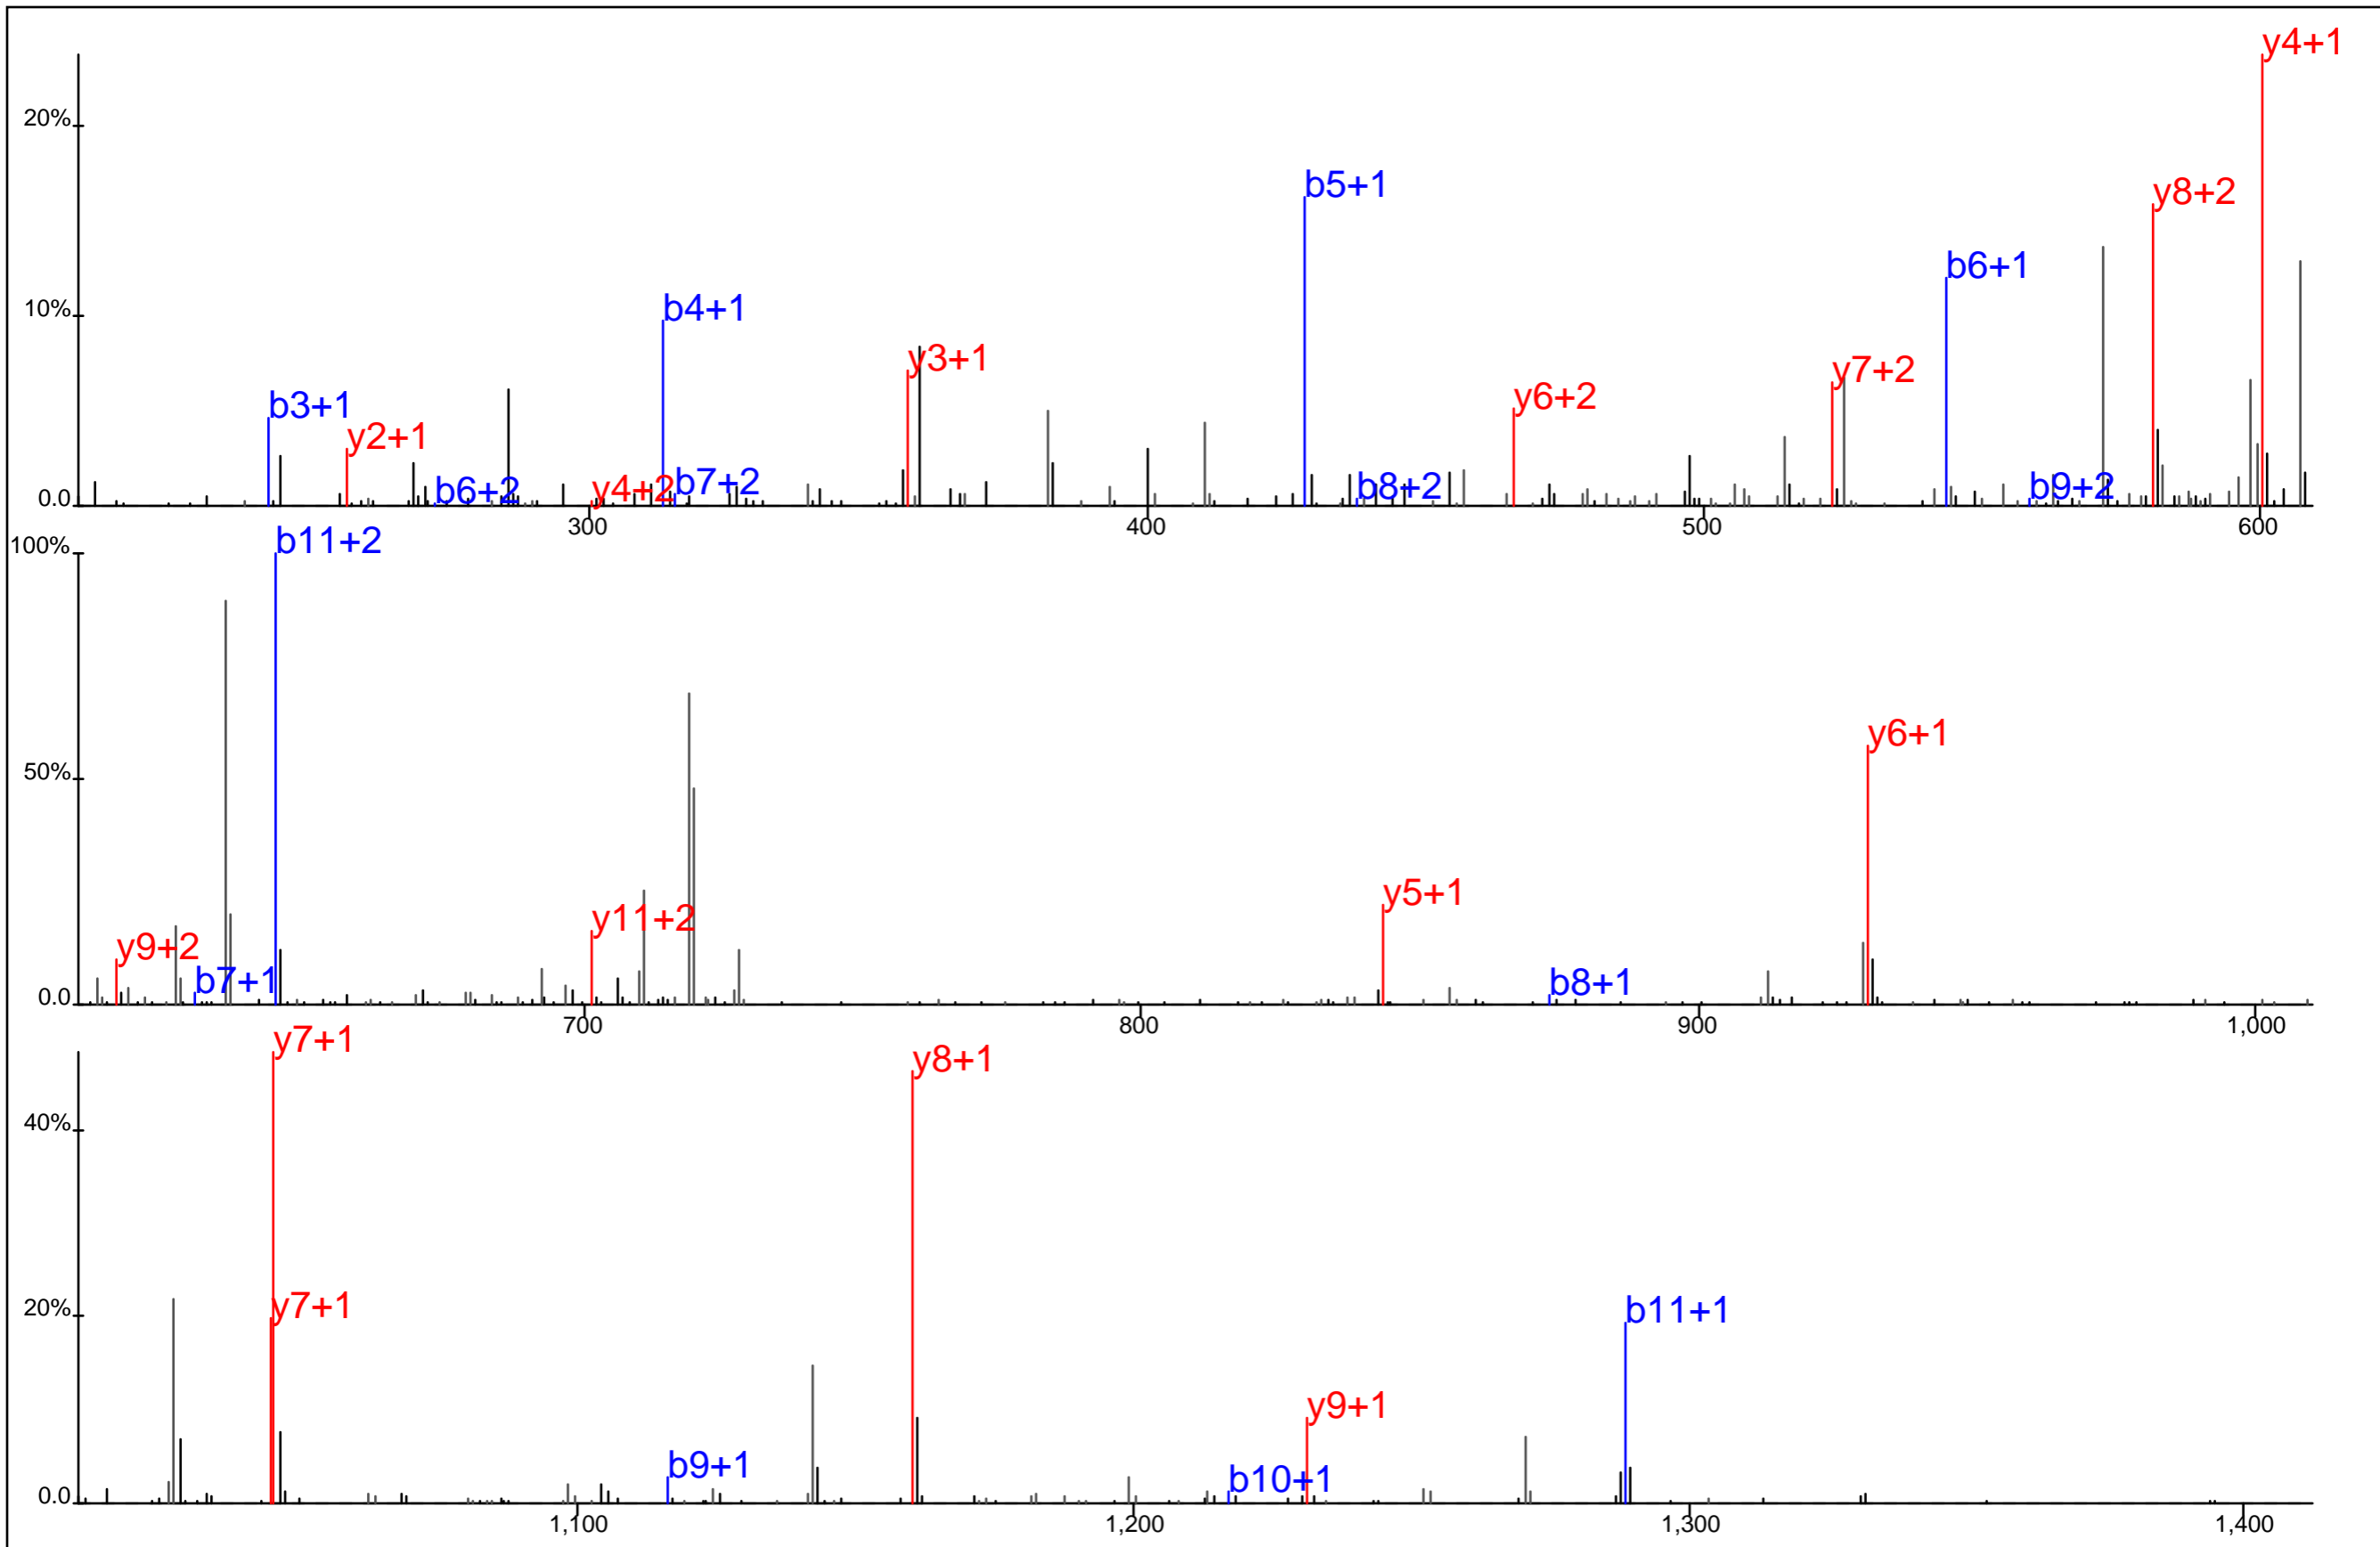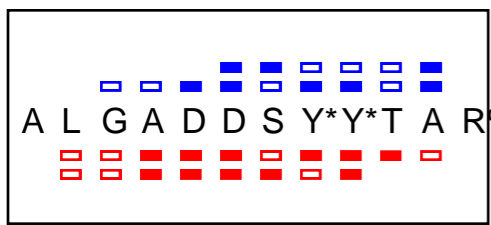

Protein Name: ZAP70  
 gi Accession: 31455611  
 Precursor Mass: 736.7717+2  
 Delta Mass: 0.619 ppm  
 XCorr: 67.29

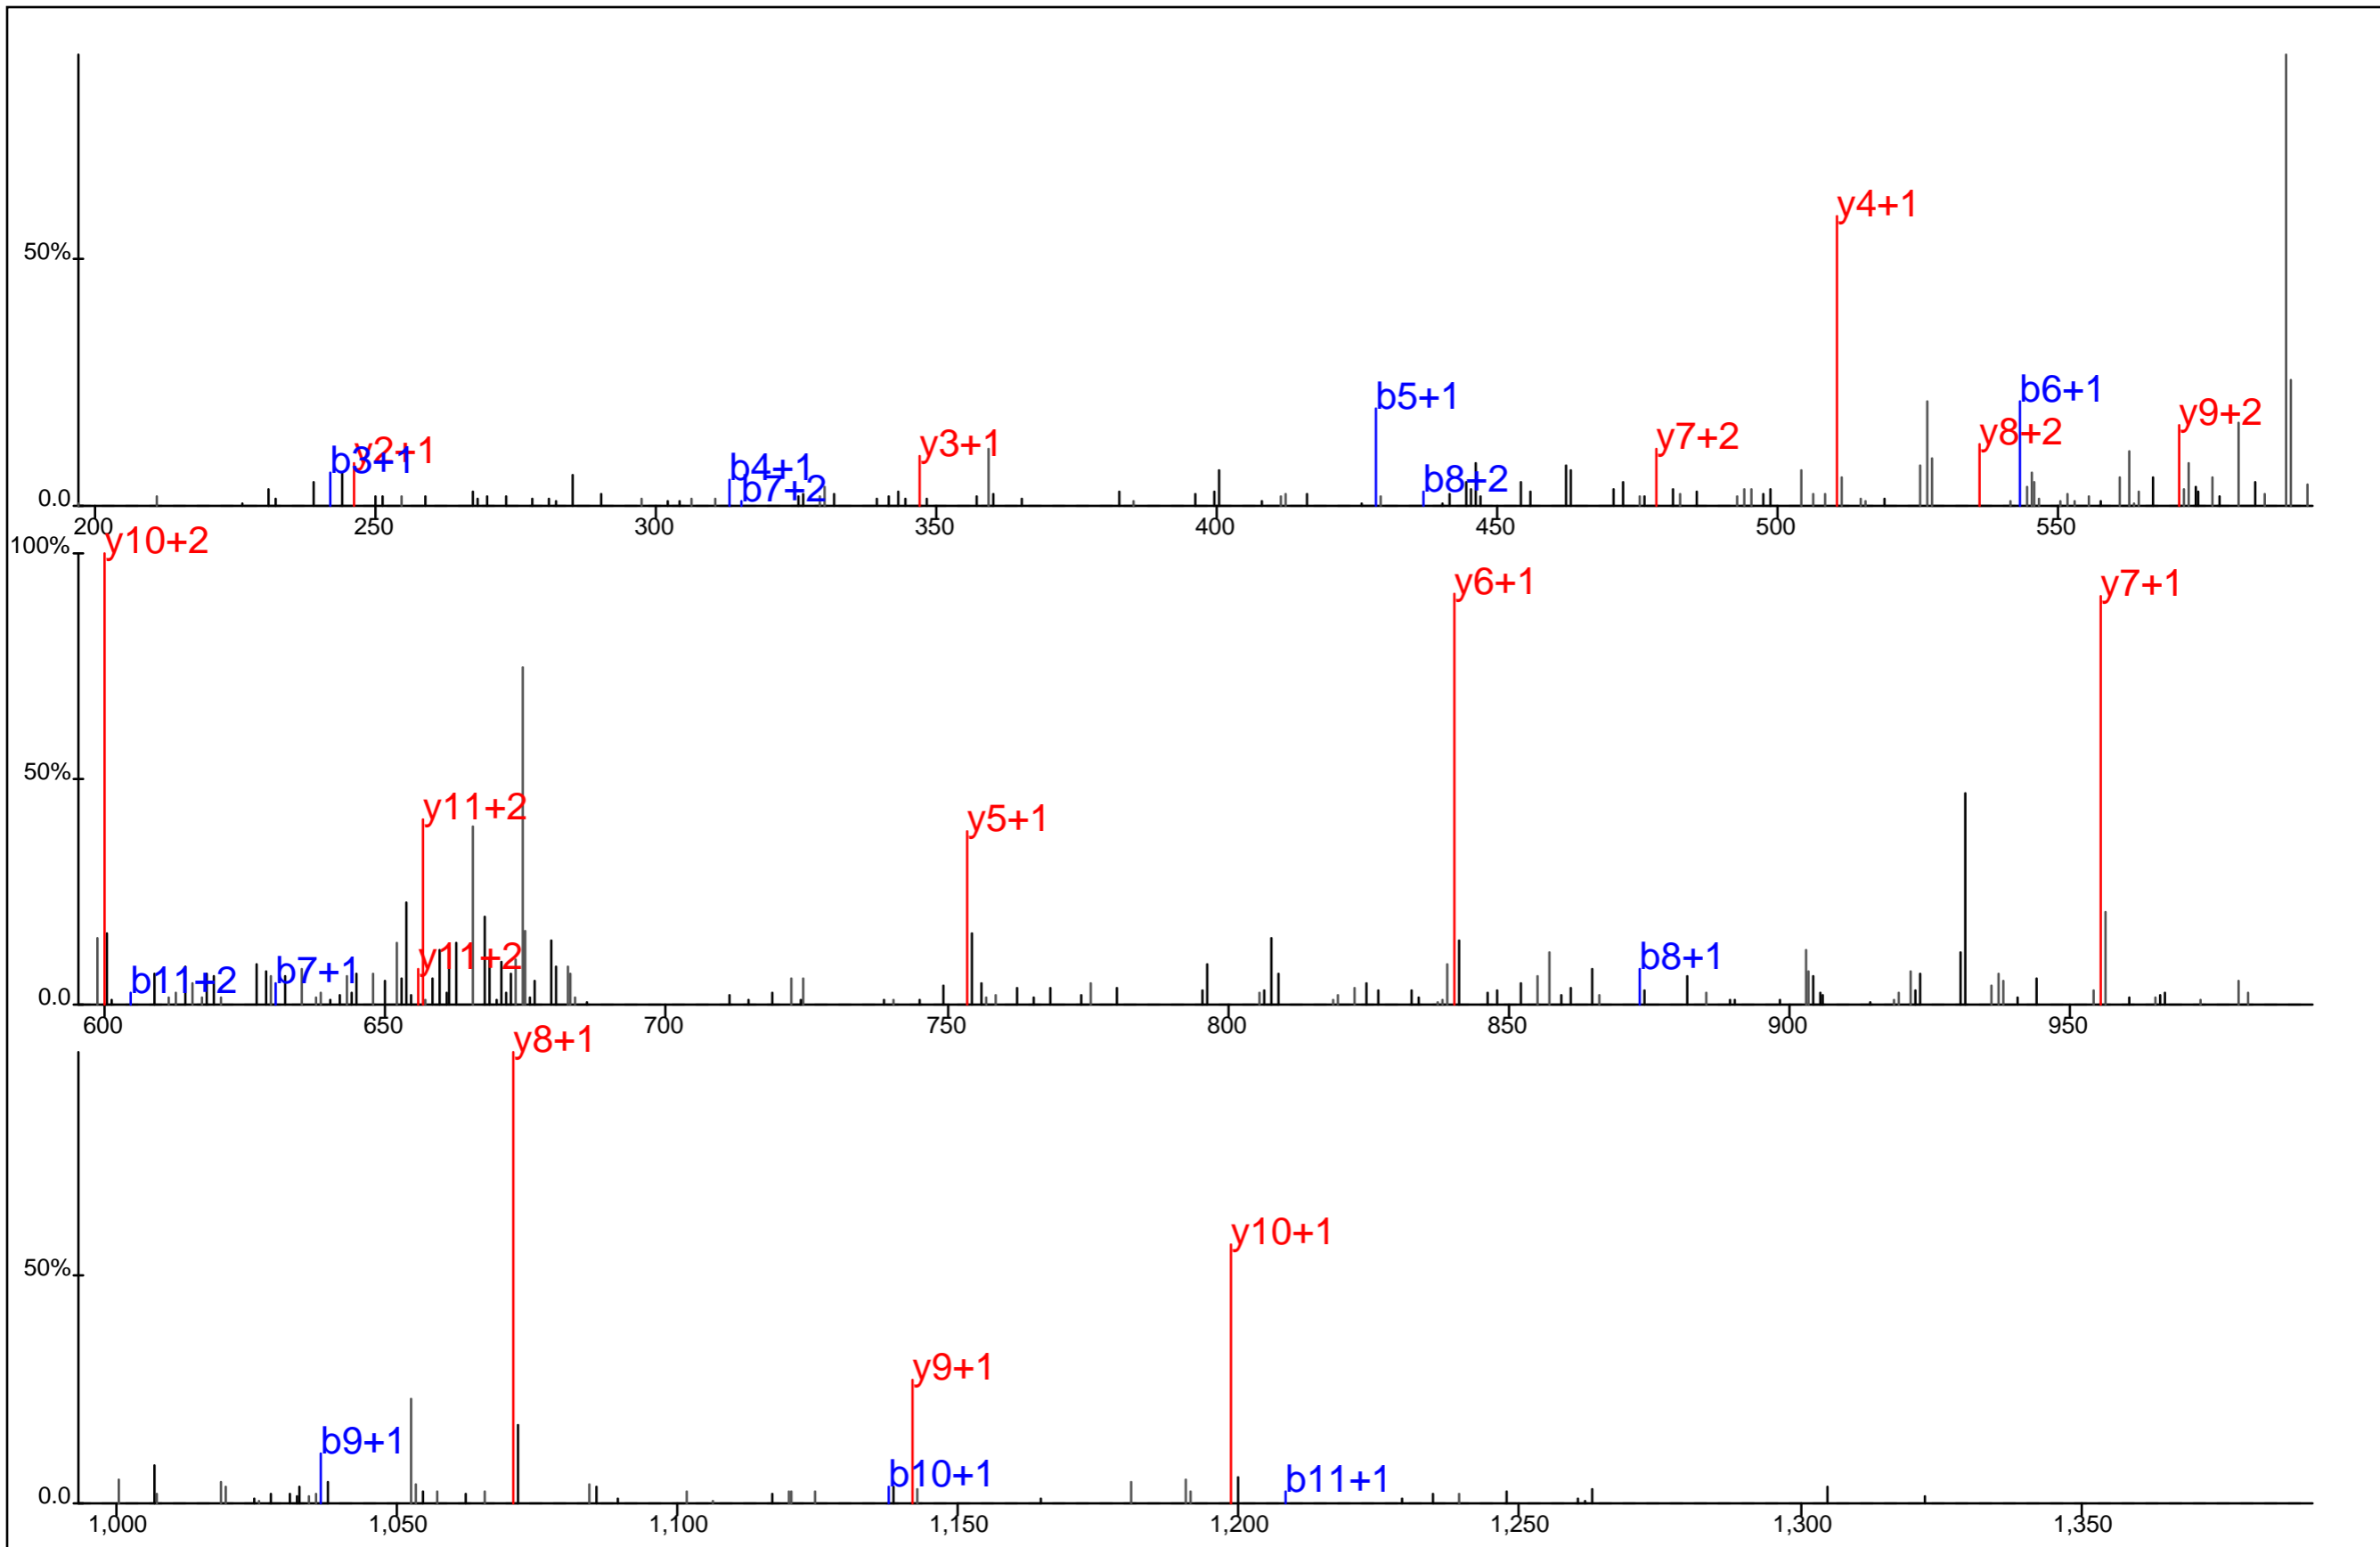

■ ■ ■ ■ ■ ■ ■ ■  
 A L G A D D S Y\*Y T A R  
□ □ □ □ □ □ □ □

Protein Name: ZAP70  
 gi Accession: 31455611  
 Precursor Mass: 691.7858+2  
 Delta Mass: 1.366 ppm  
 XCorr: 73.65

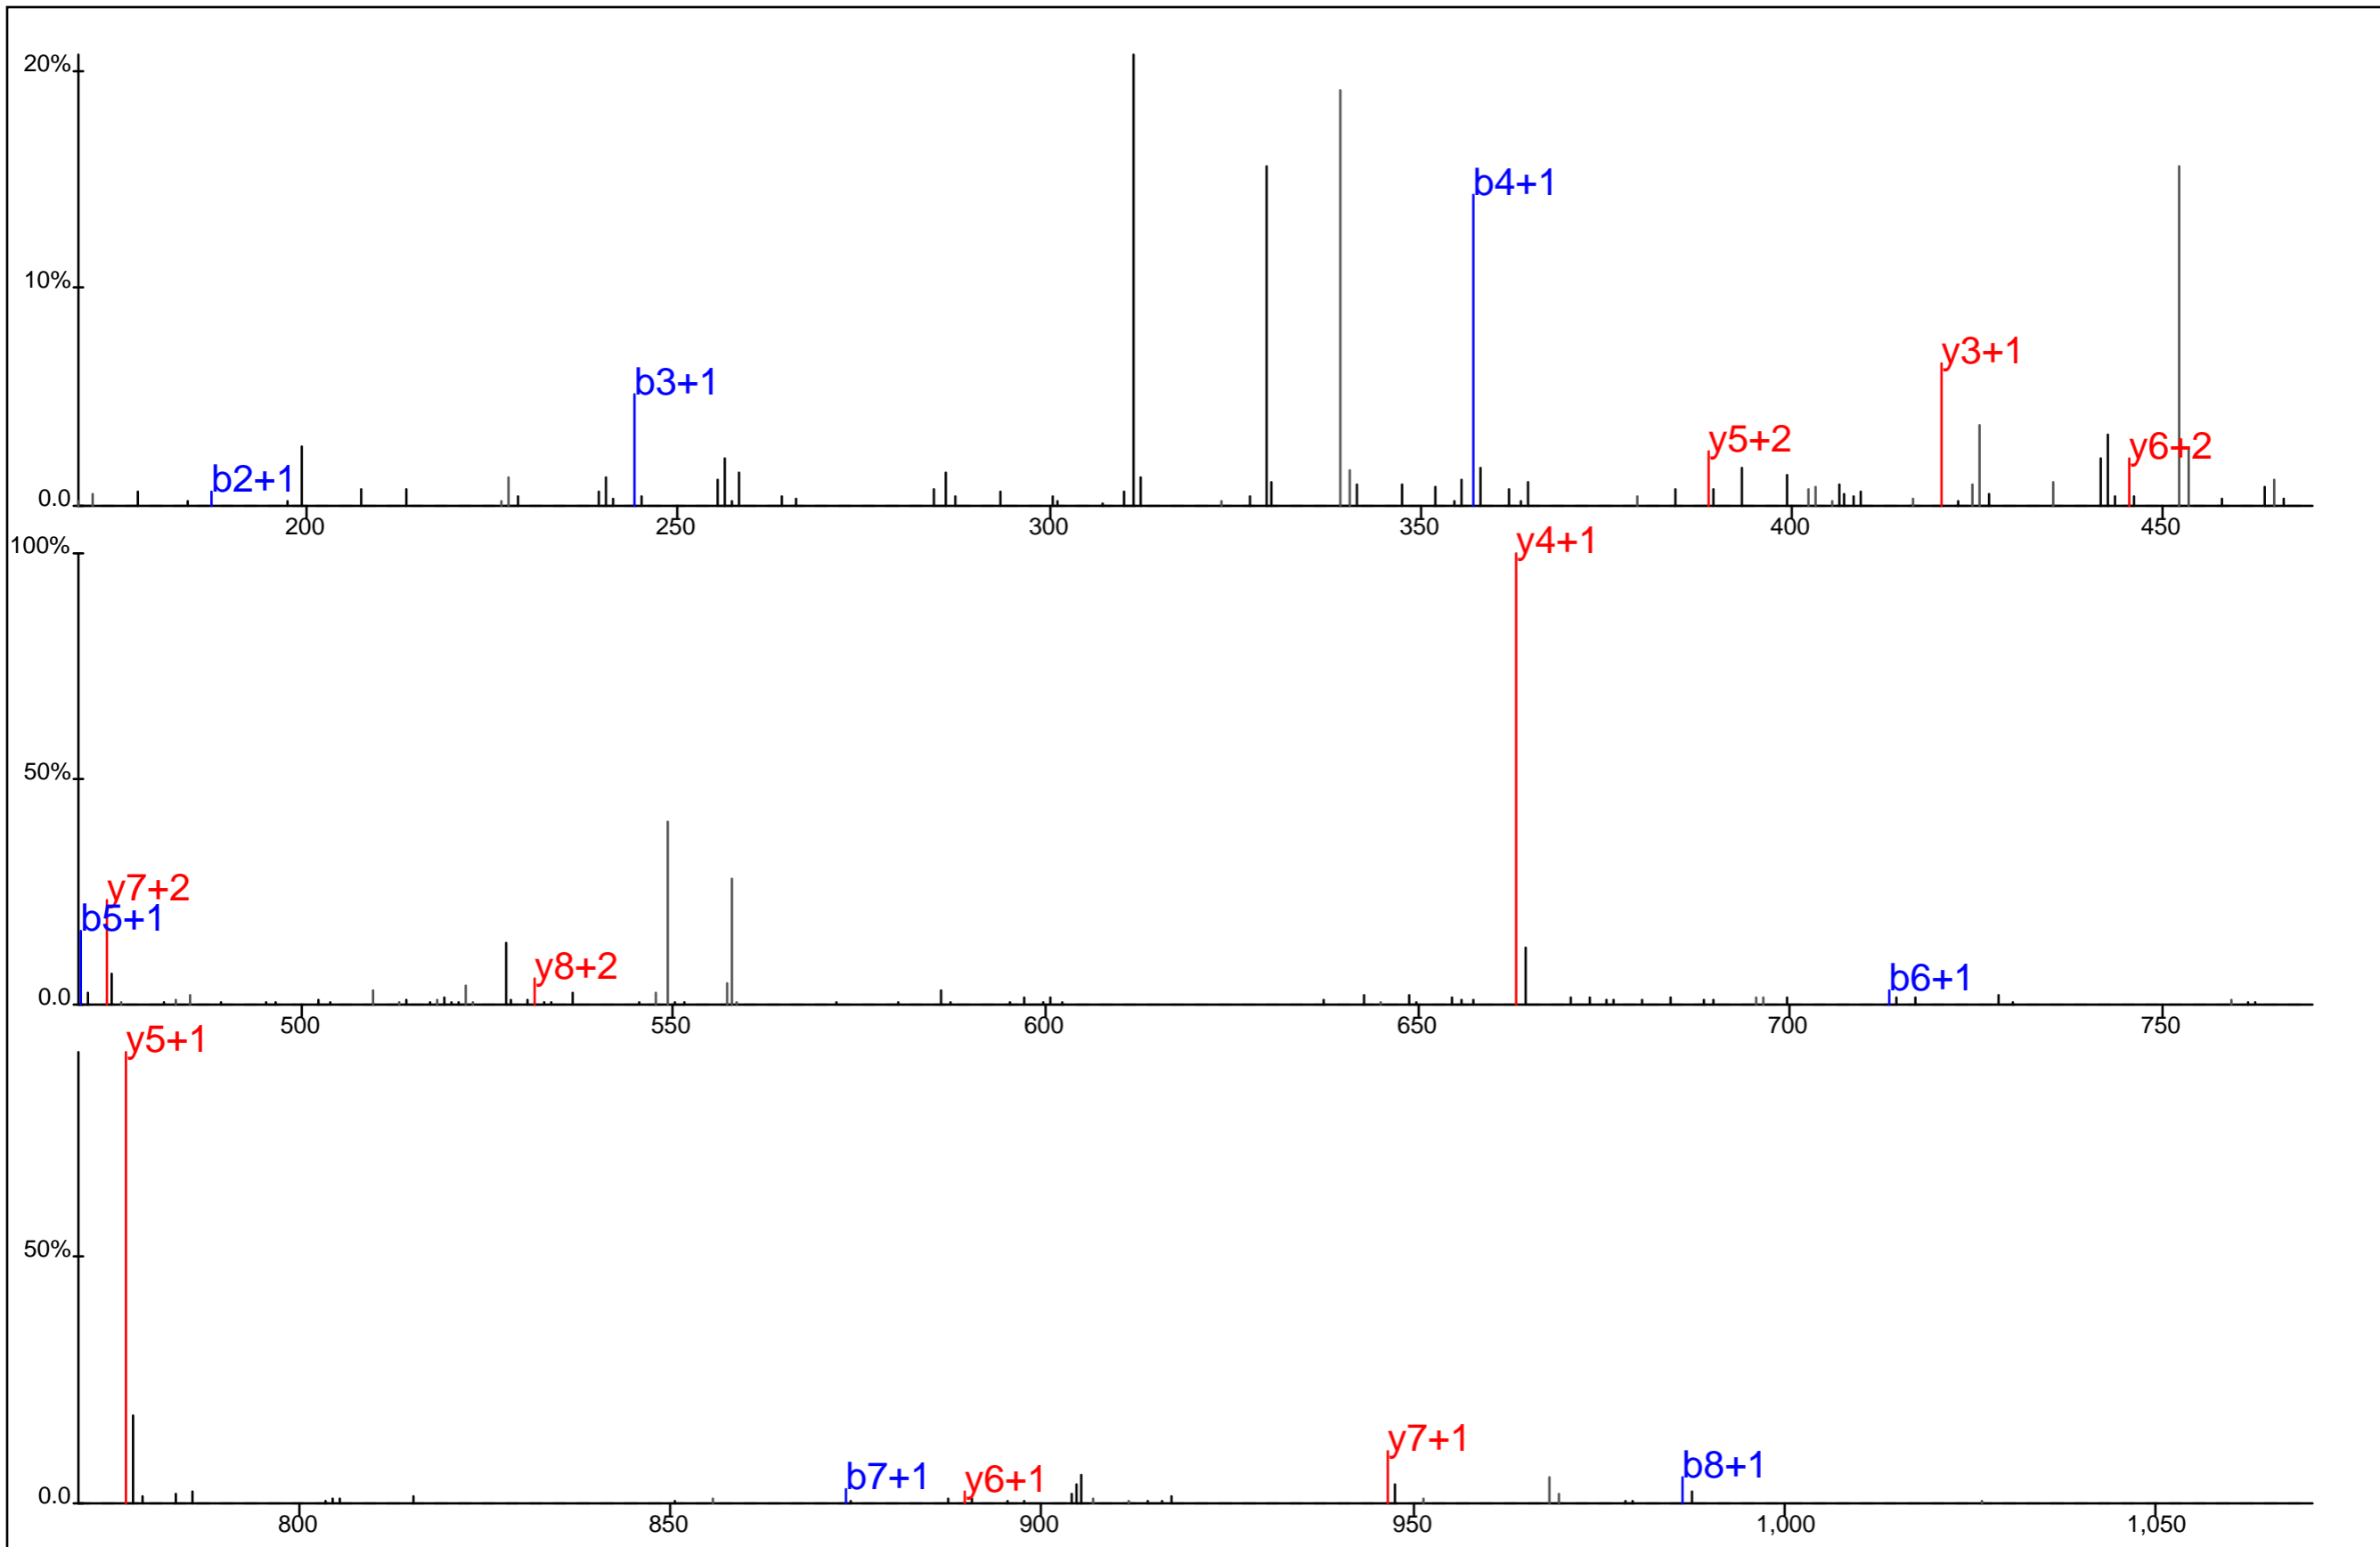

■ ■ □ □ □ ■ □  
 A D G L I Y\* C L K  
□ ■ ■ □ □ ■ □

Protein Name: ZAP70  
 gi Accession: 31455611  
 Precursor Mass: 566.7604+2  
 Delta Mass: 2.471 ppm  
 XCorr: 31.71

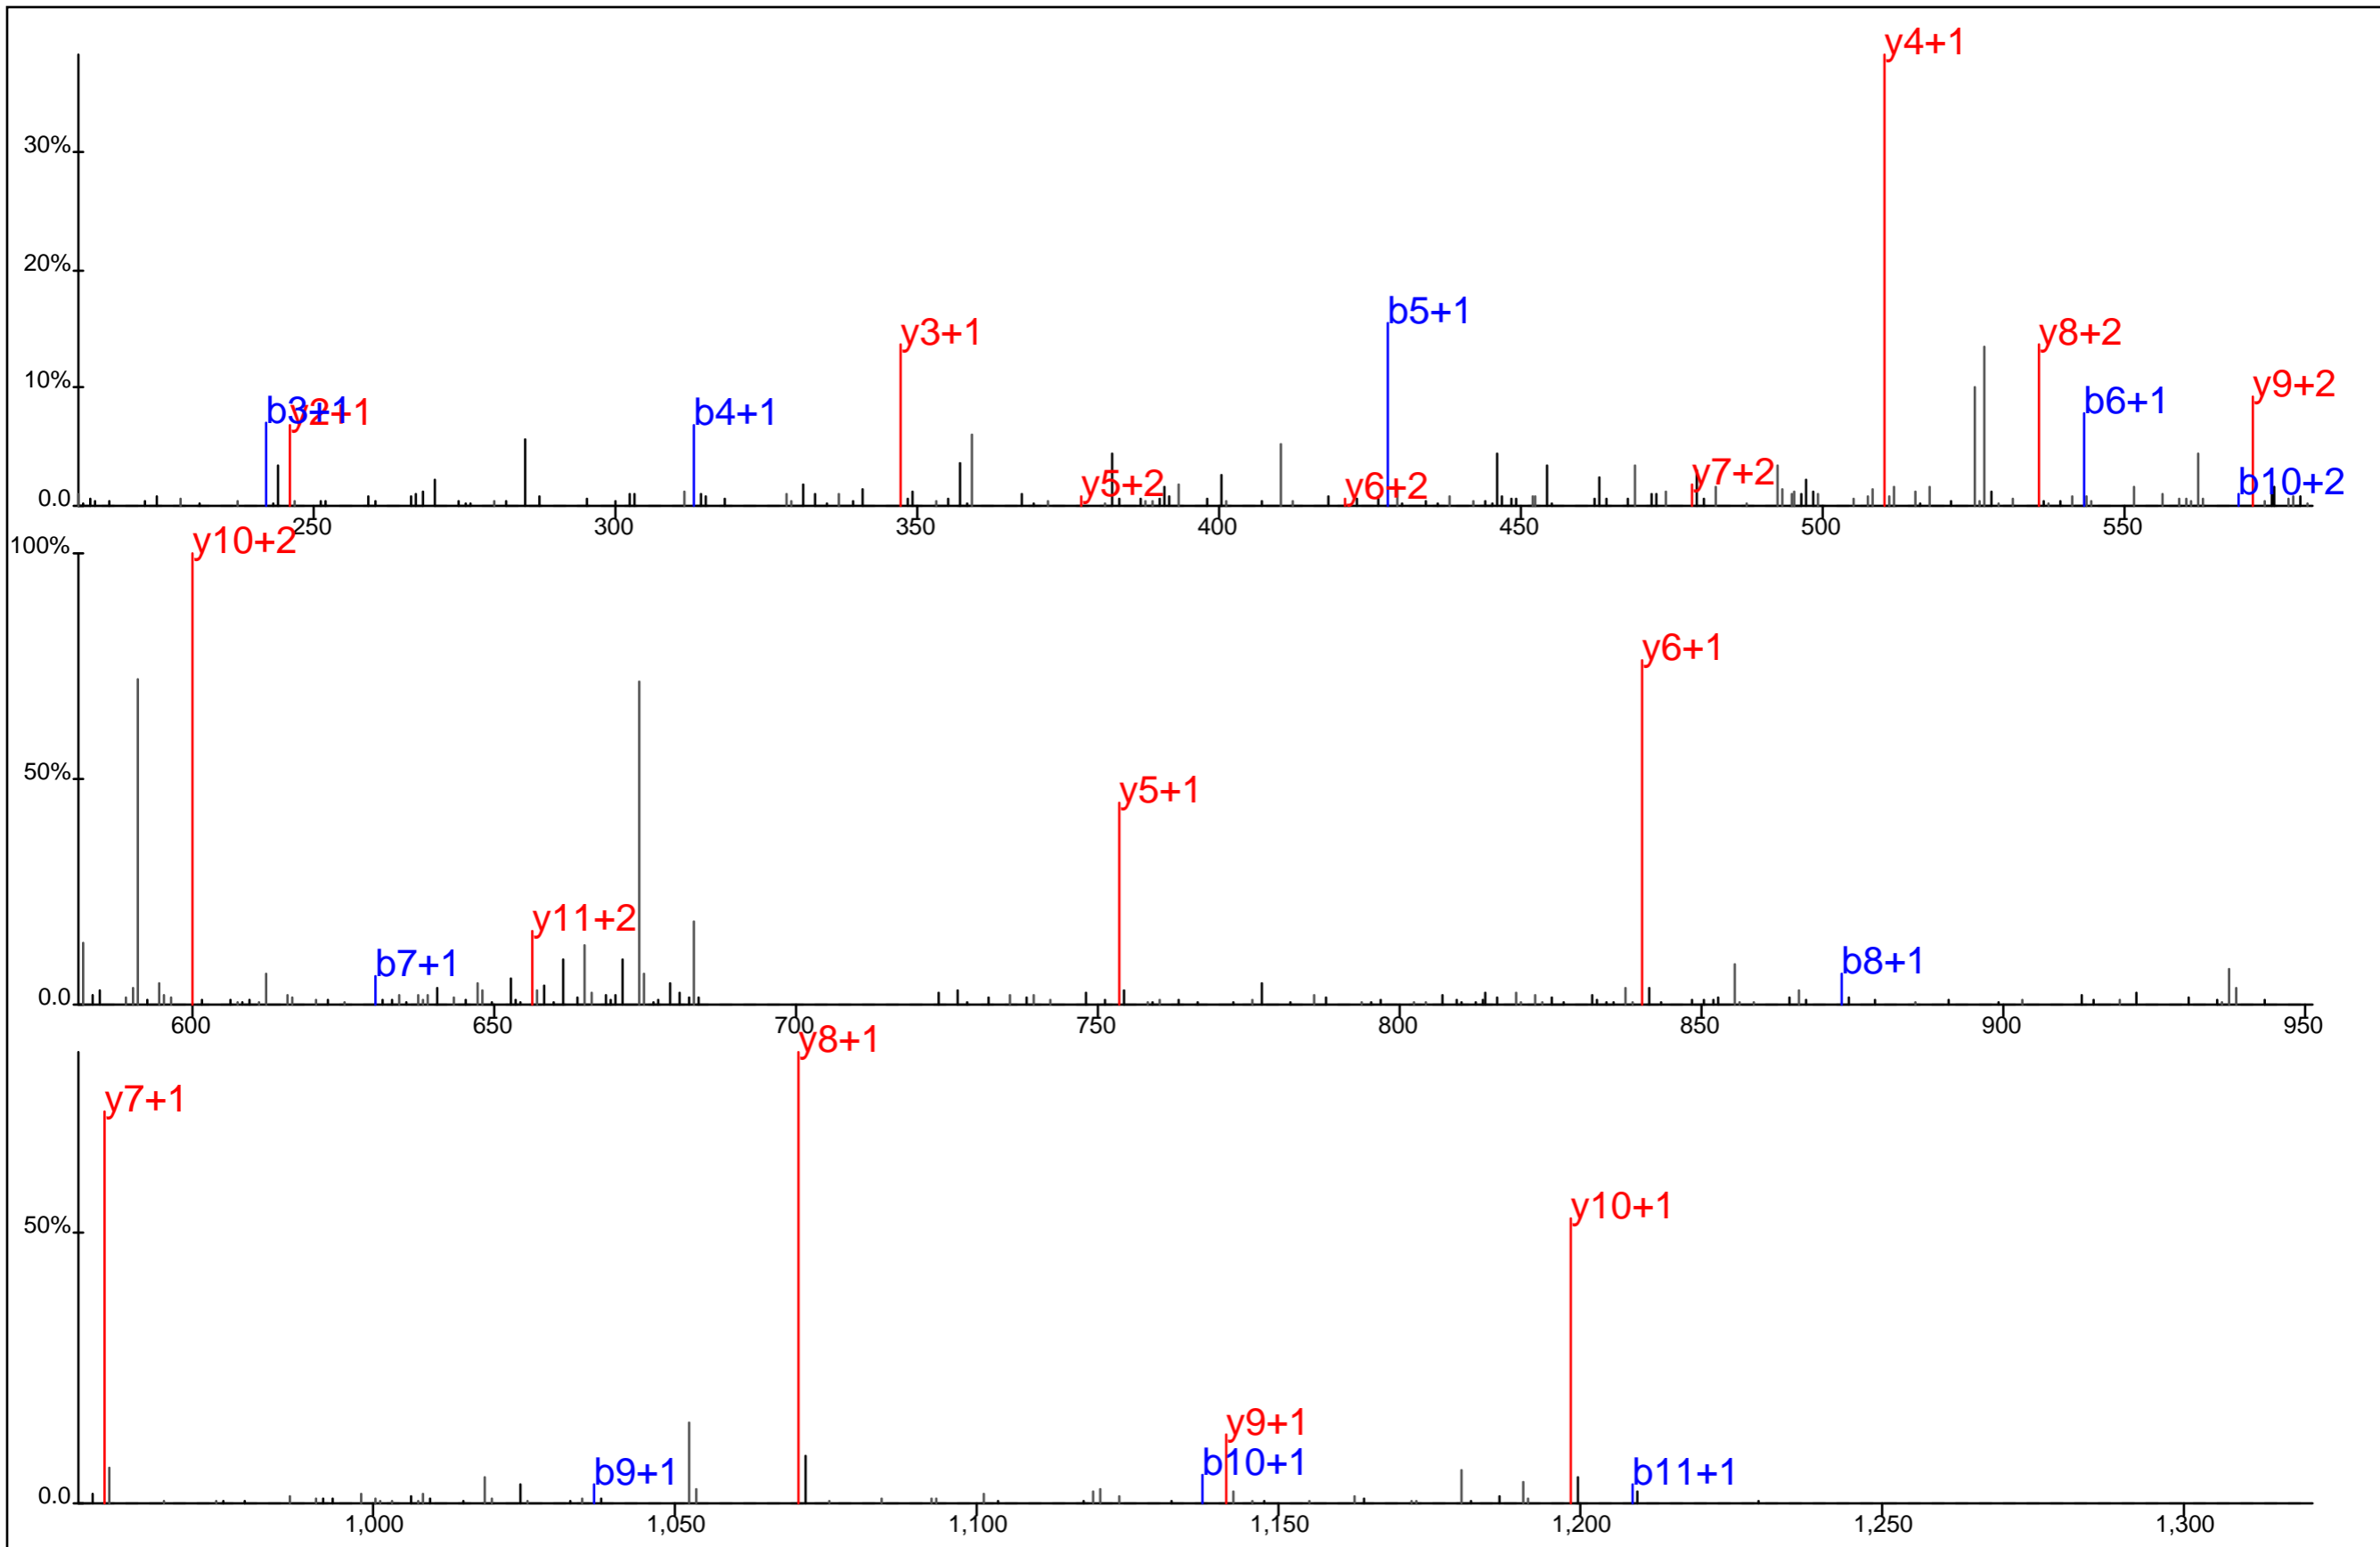

■ ■ ■ ■ ■ ■ ■ ■ ■ ■  
 A L G A D D S Y\*Y T A R  
□ □ □ □ □ □ □ □ □ □

Protein Name: ZAP70  
 gi Accession: 31455611  
 Precursor Mass: 691.7852+2  
 Delta Mass: 0.570 ppm  
 XCorr: 83.35

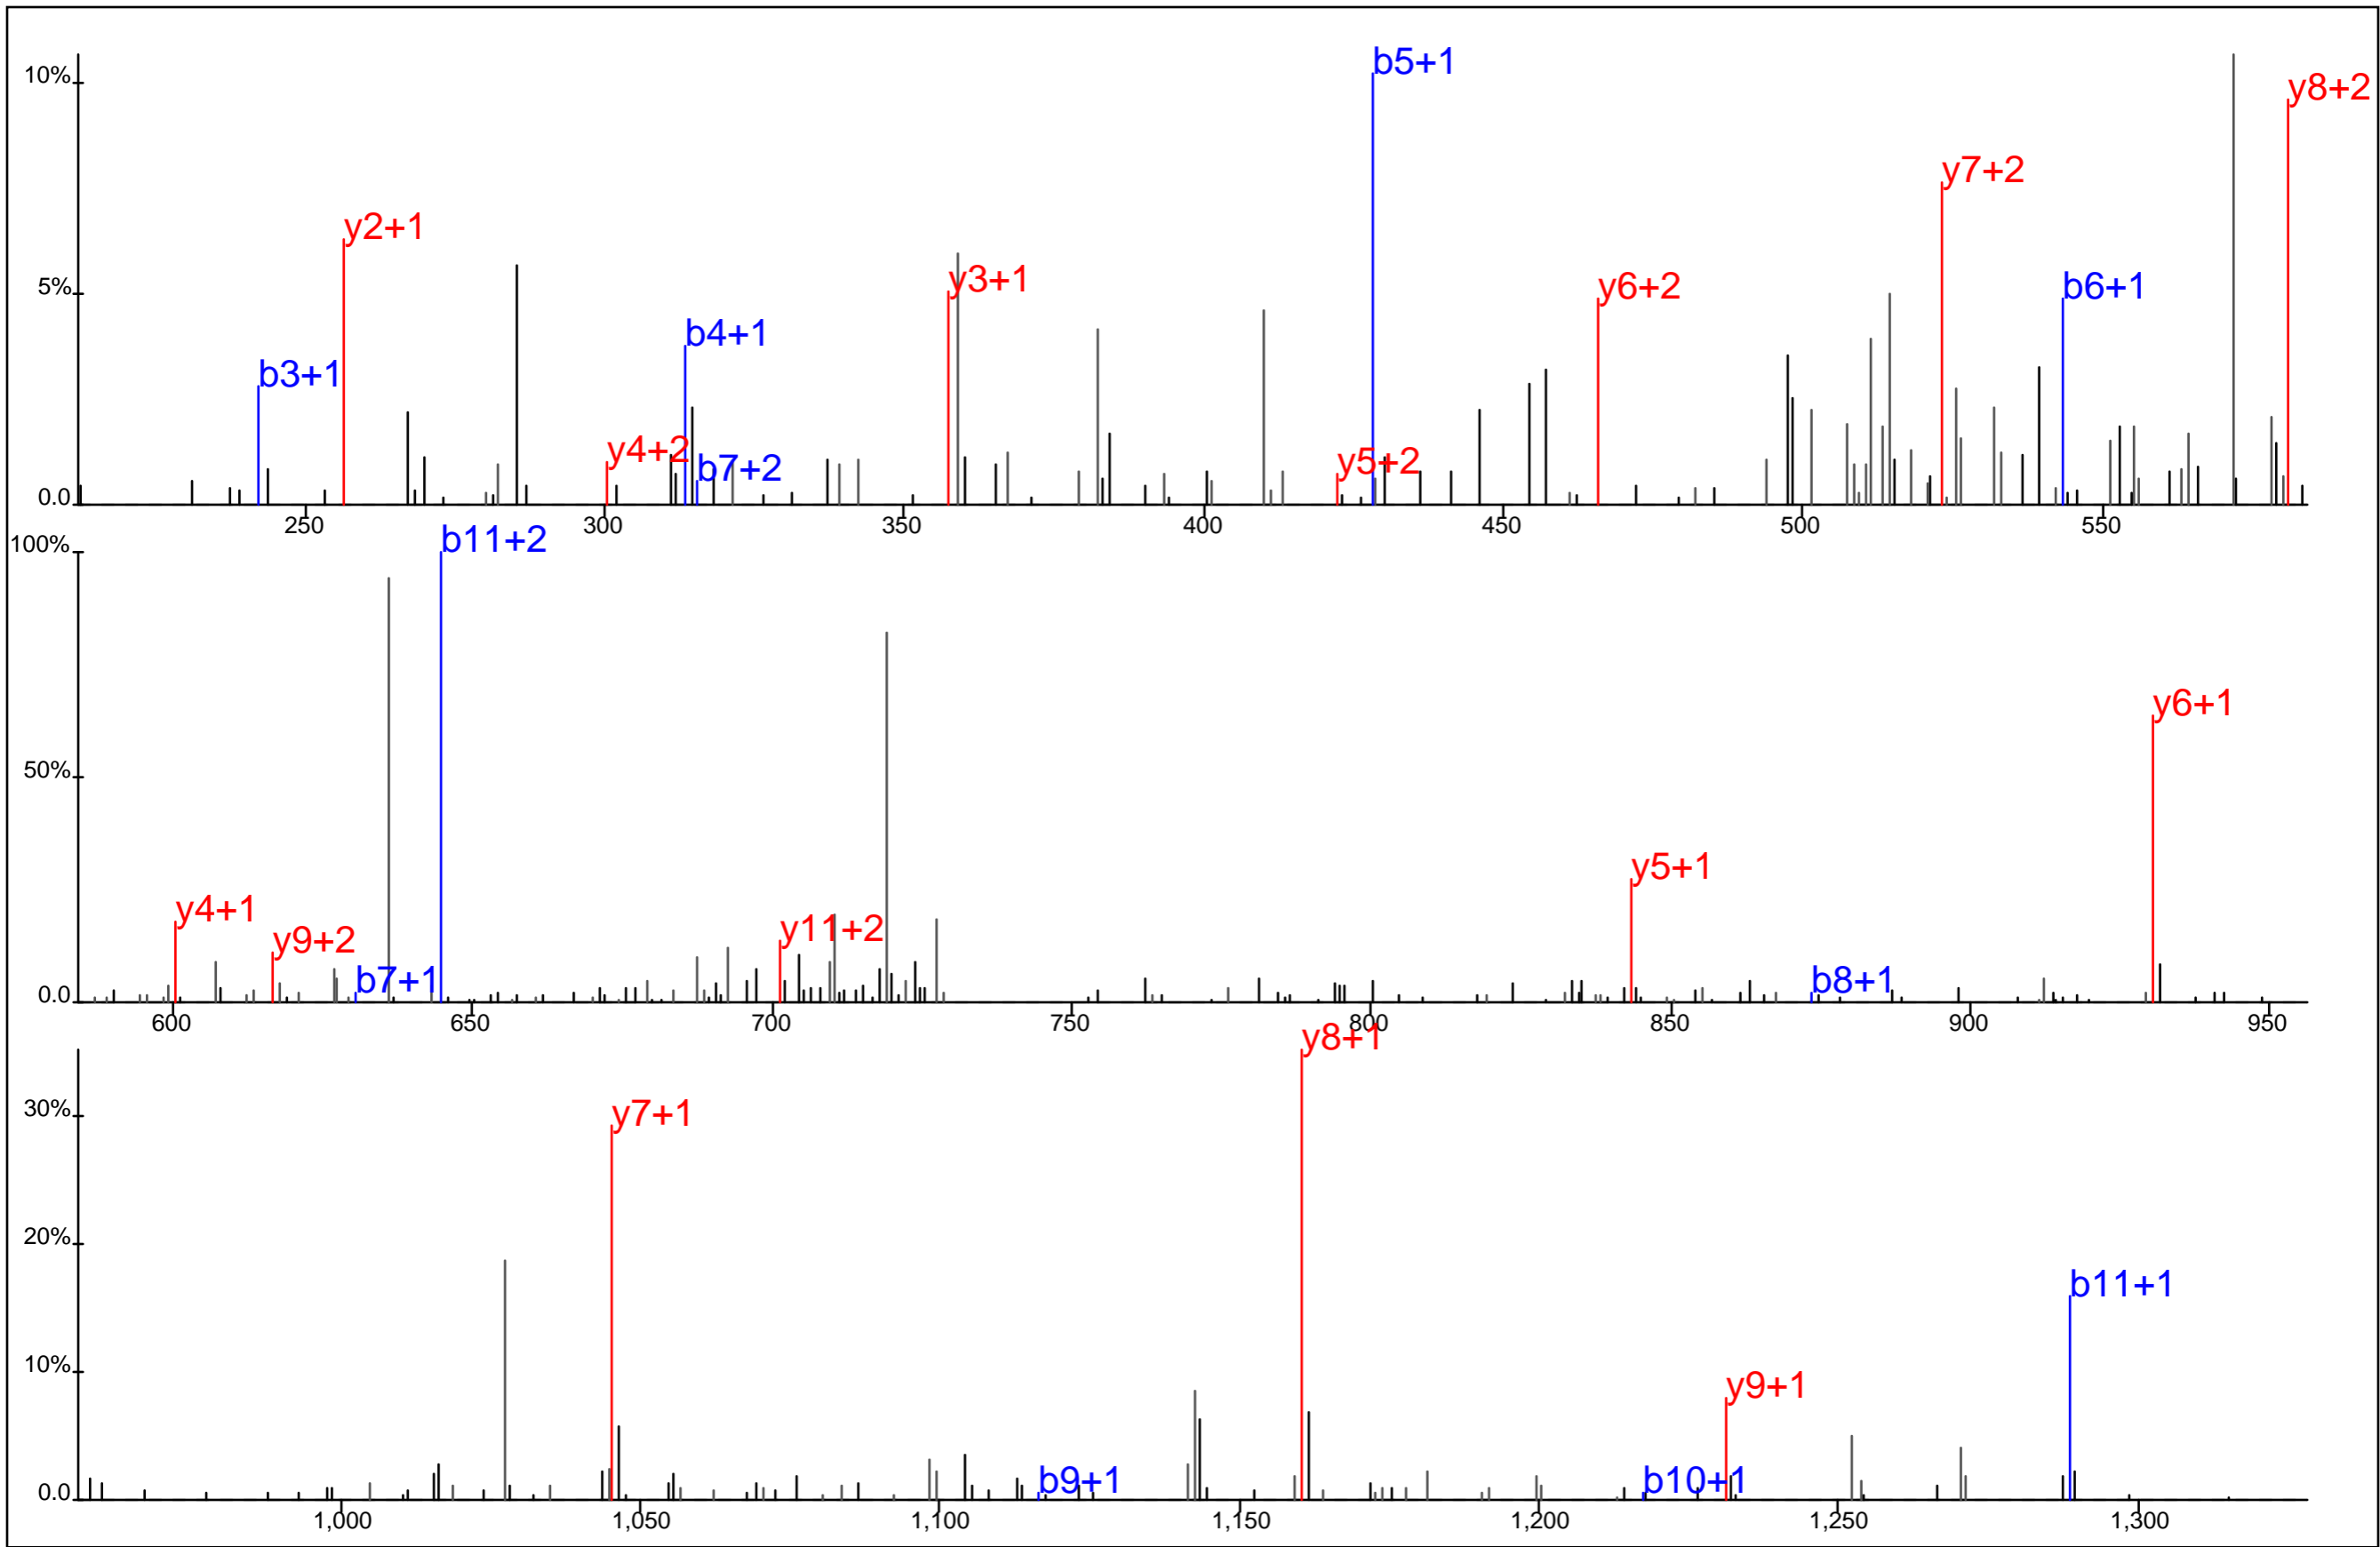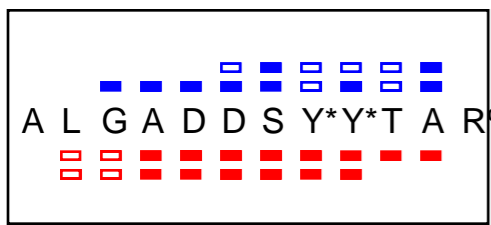

Protein Name: ZAP70  
 gi Accession: 31455611  
 Precursor Mass: 736.7730+2  
 Delta Mass: 1.201 ppm  
 XCorr: 78.01

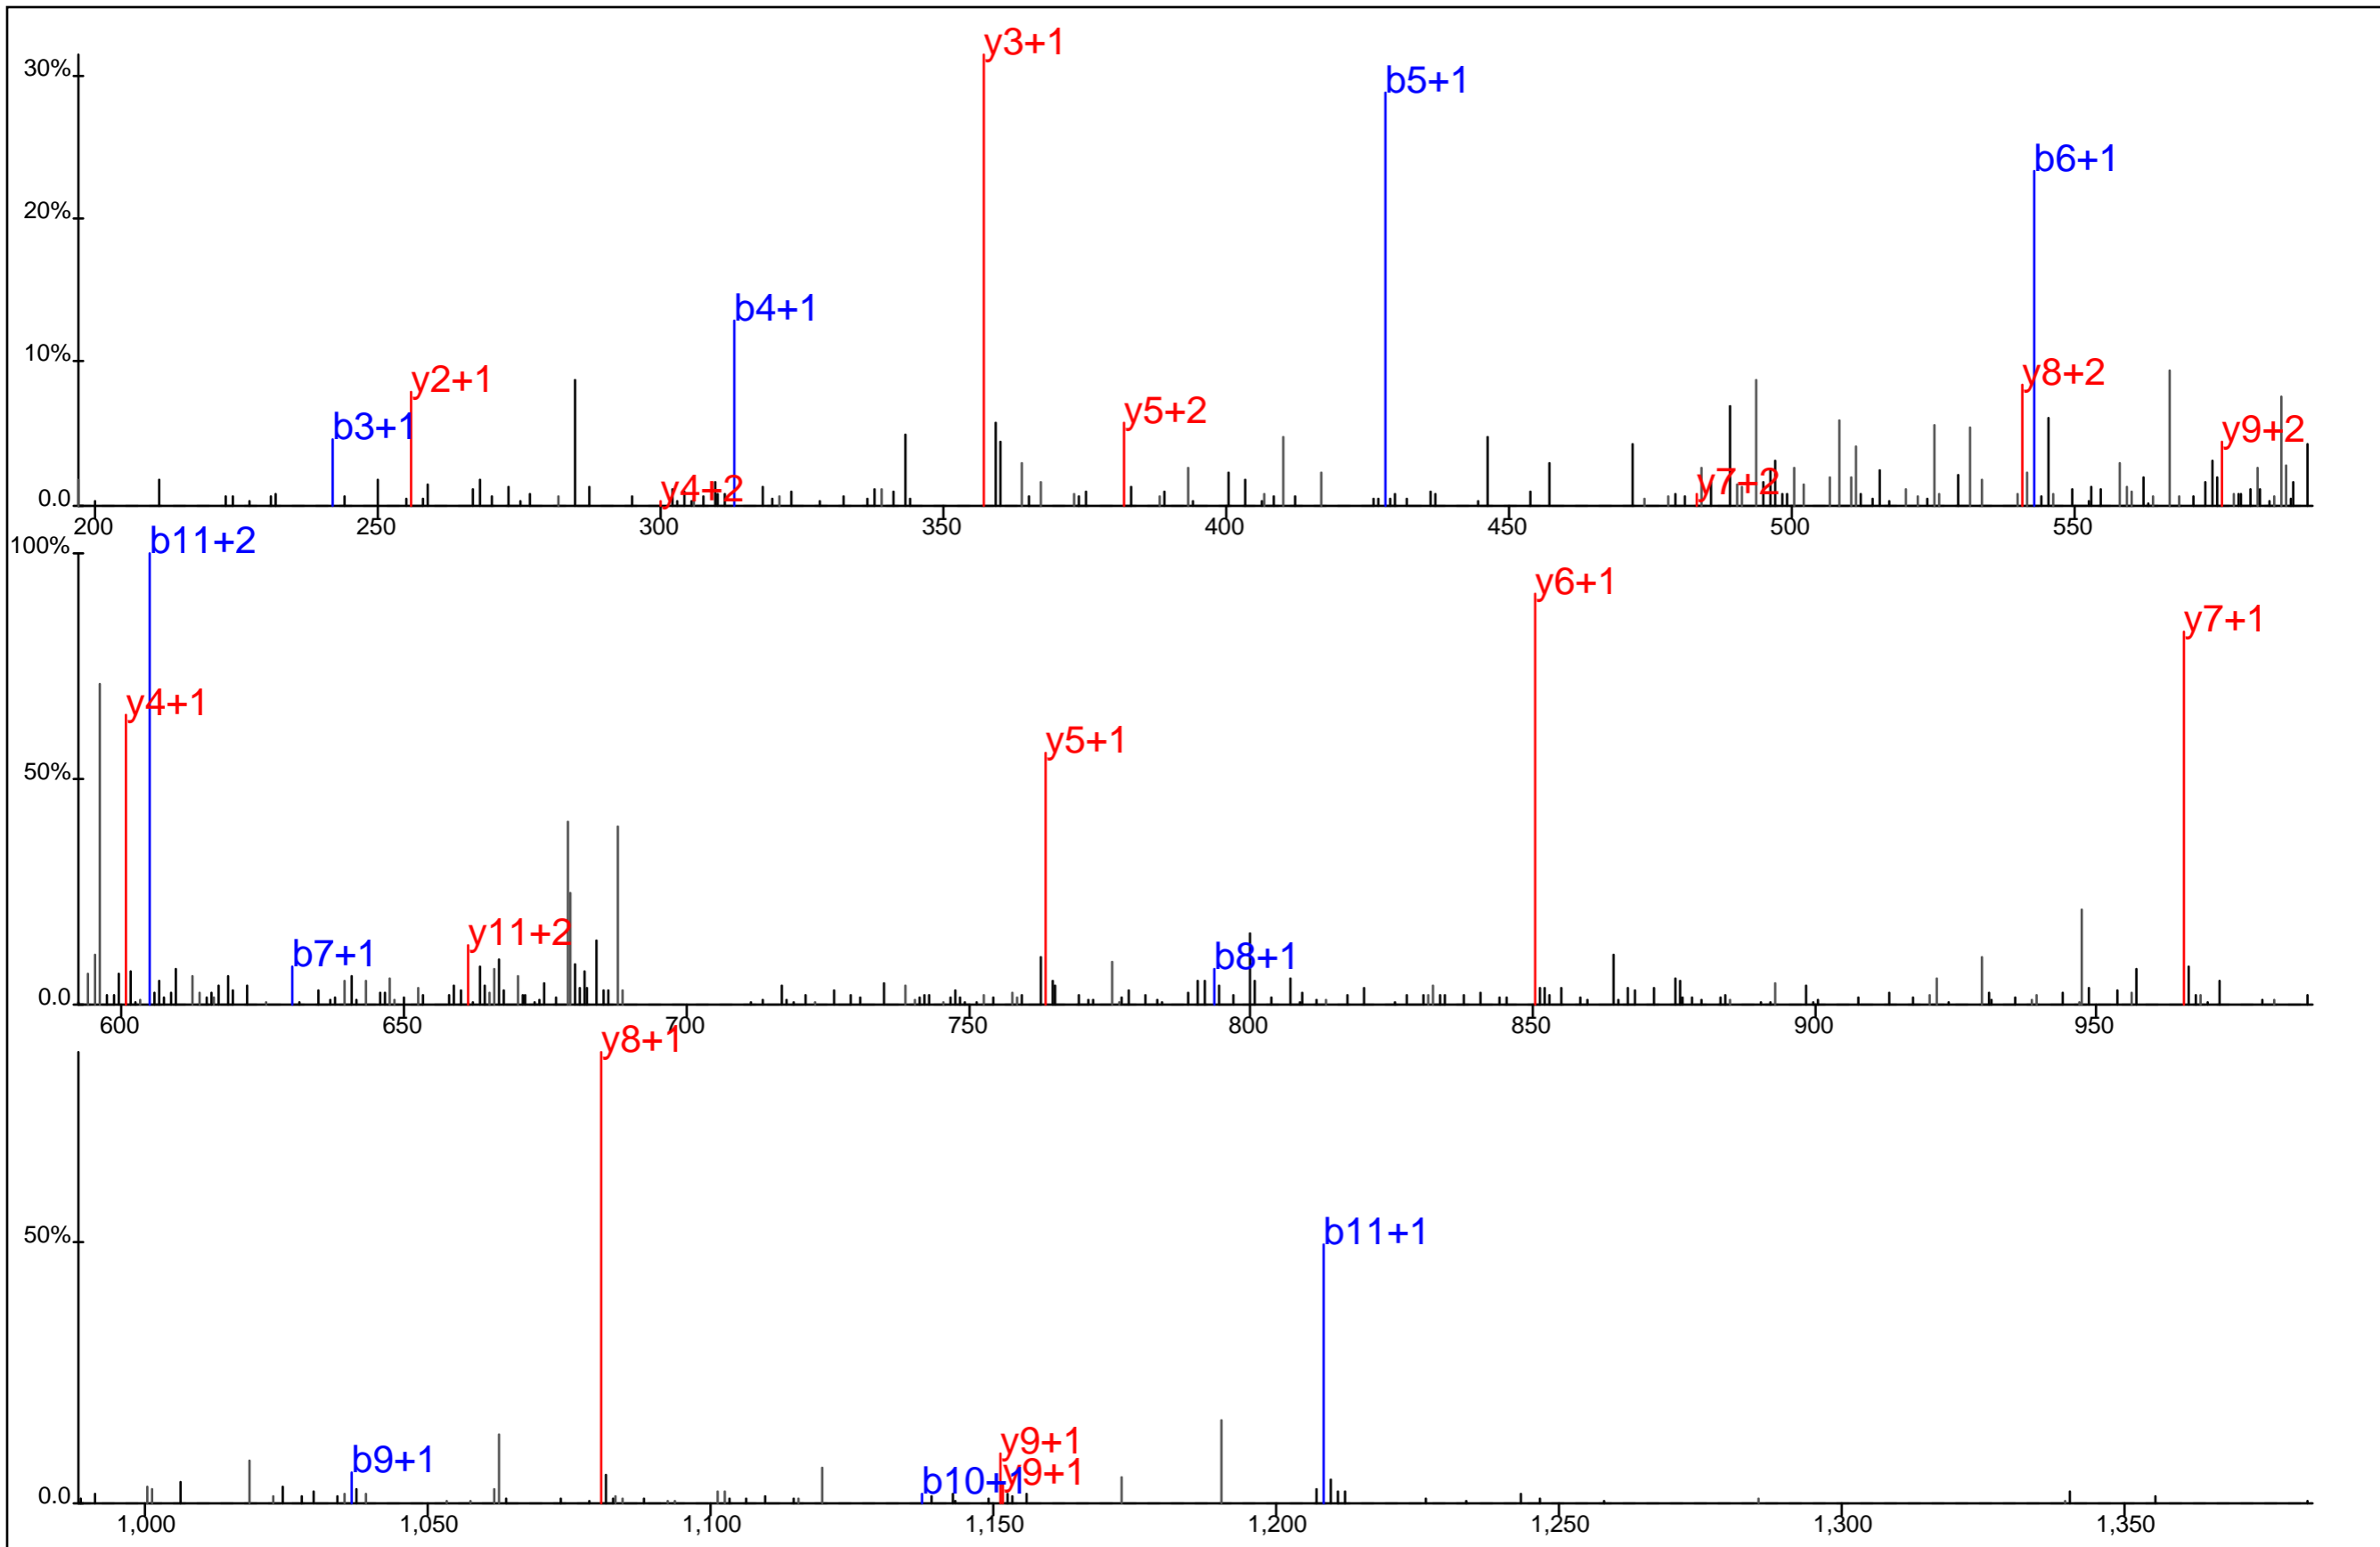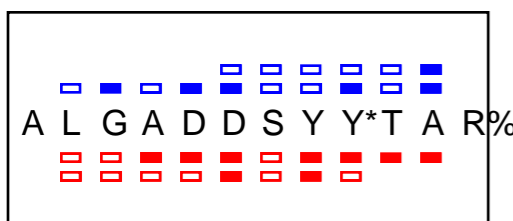

Protein Name: ZAP70  
 gi Accession: 31455611  
 Precursor Mass: 696.7906+2  
 Delta Mass: 2.340 ppm  
 XCorr: 71.59

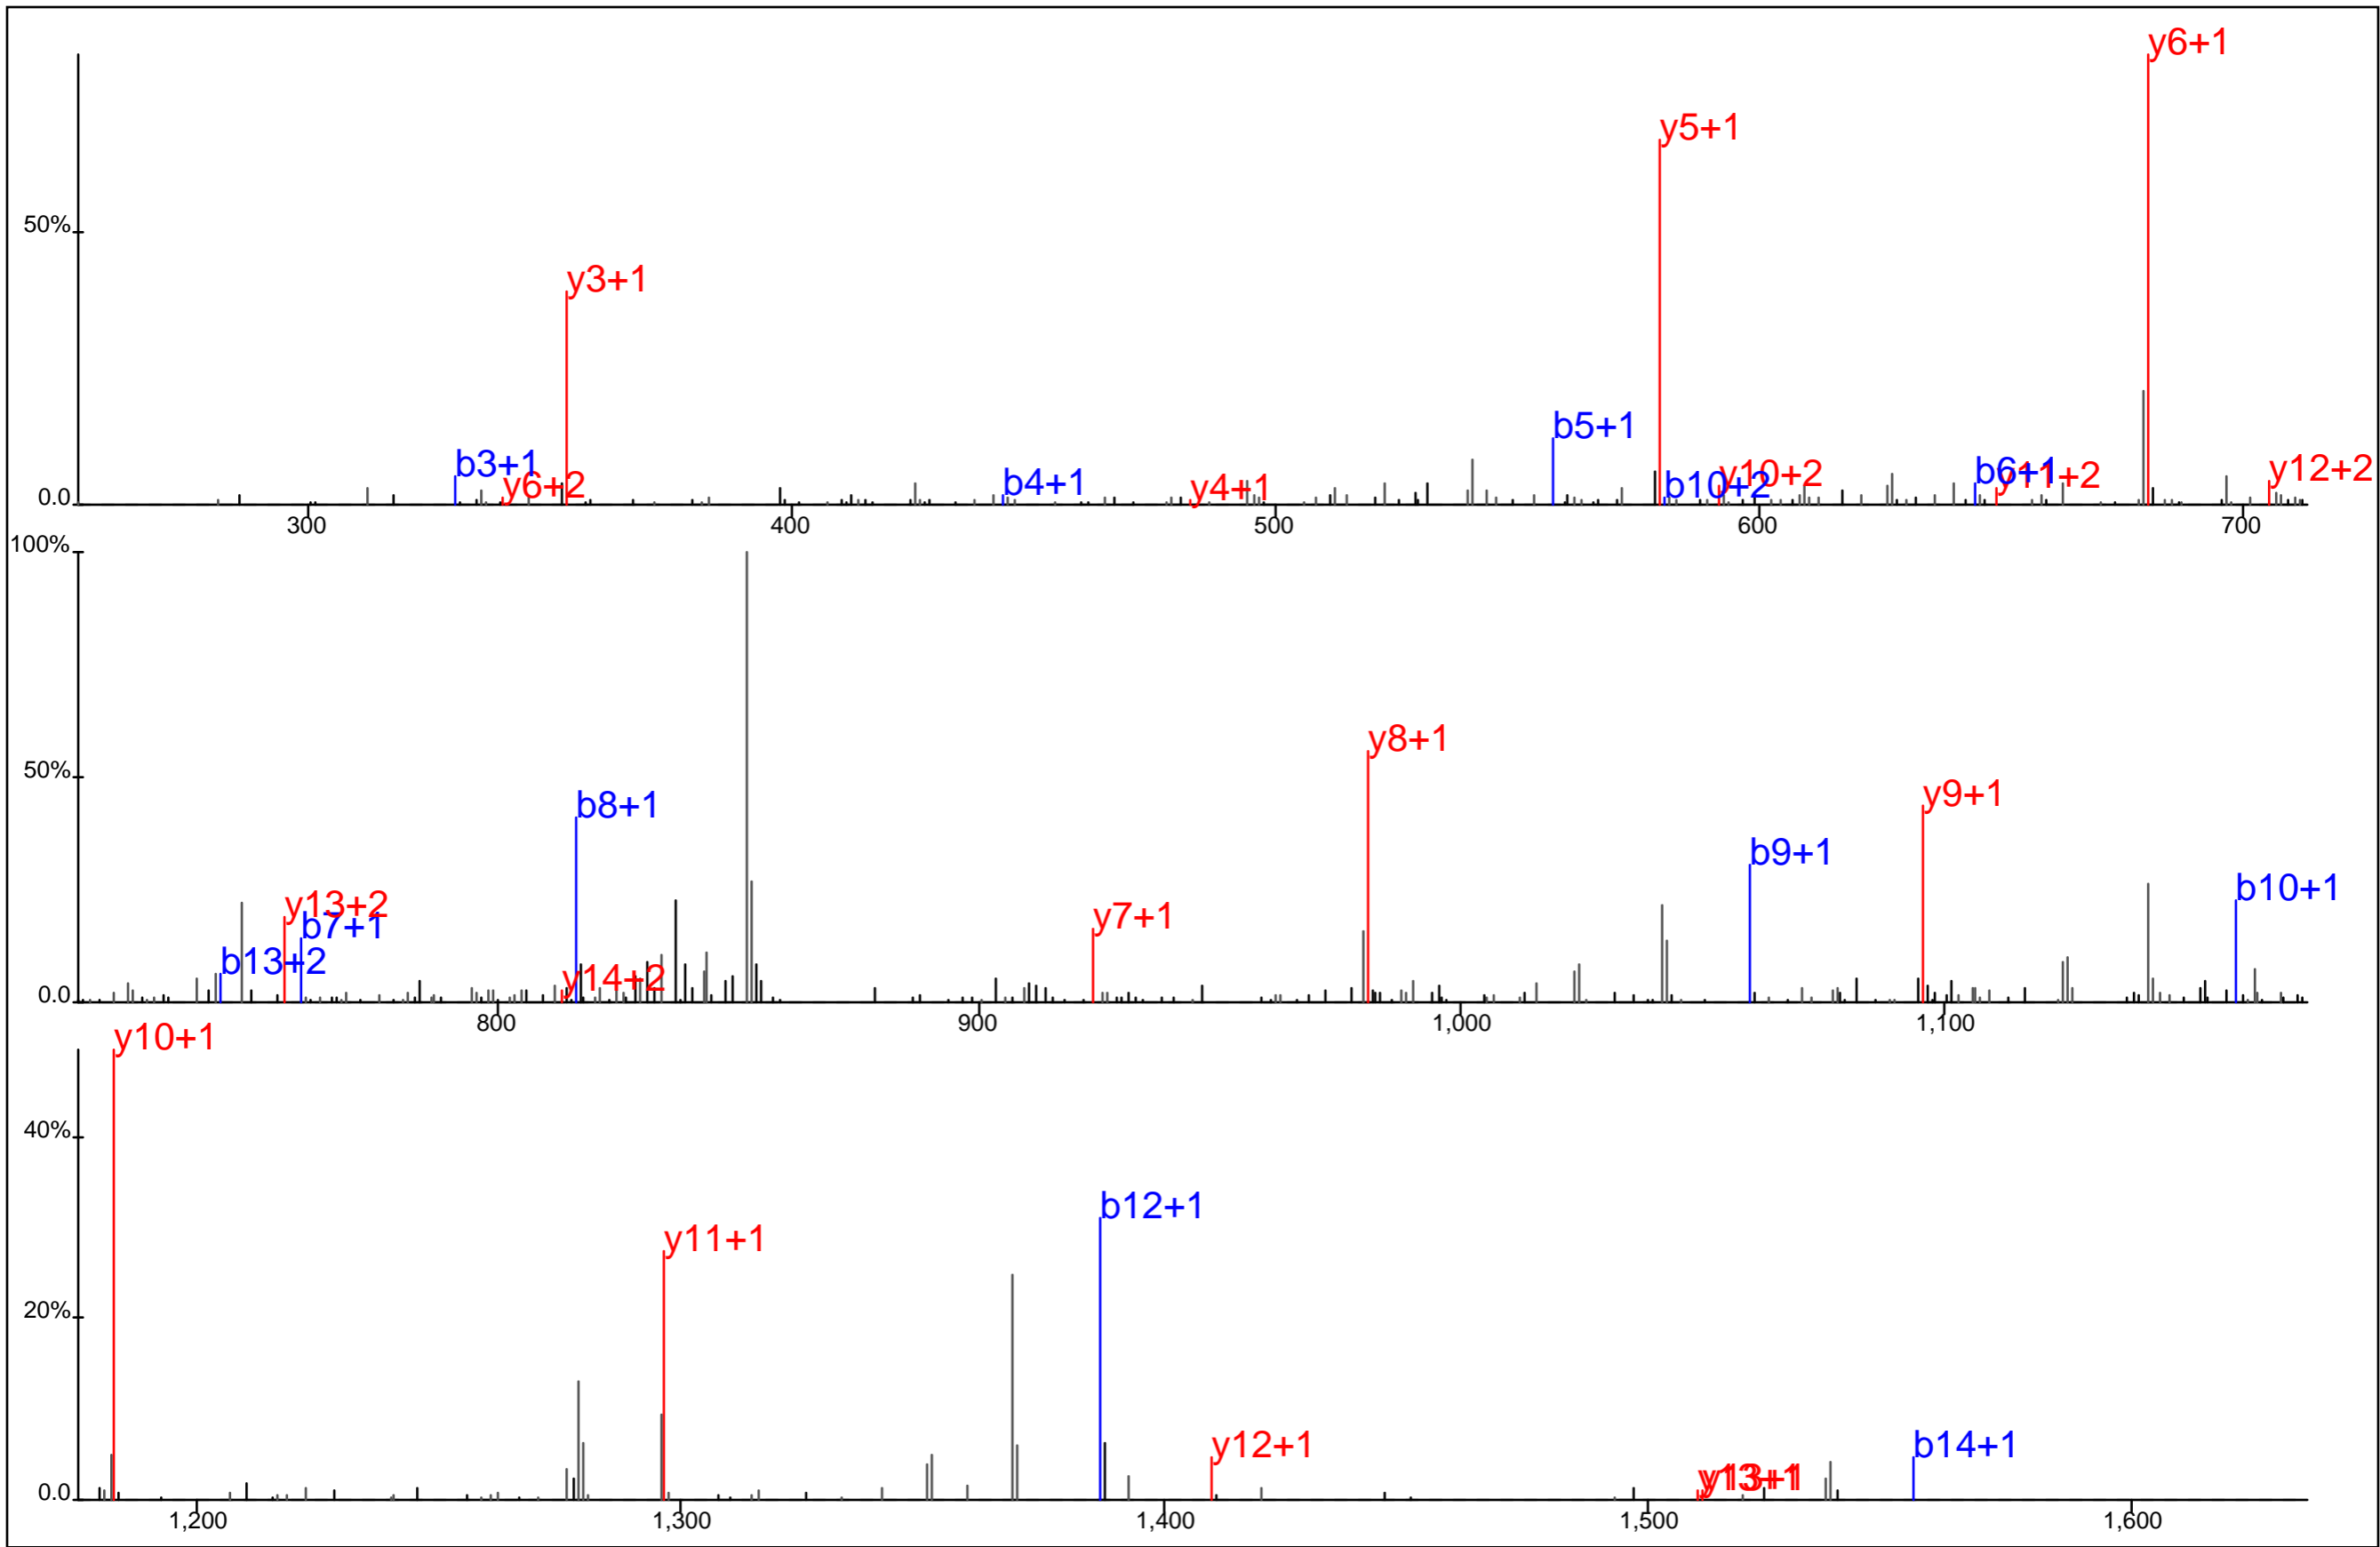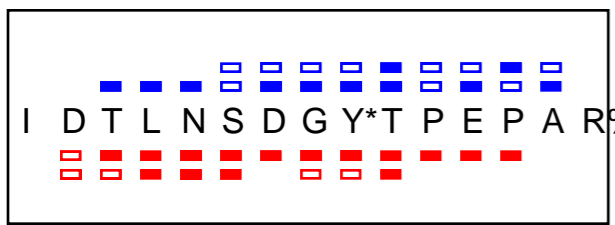

Protein Name: ZAP70  
 gi Accession: 31455611  
 Precursor Mass: 869.8851+2  
 Delta Mass: 4.013 ppm  
 XCorr: 77.66



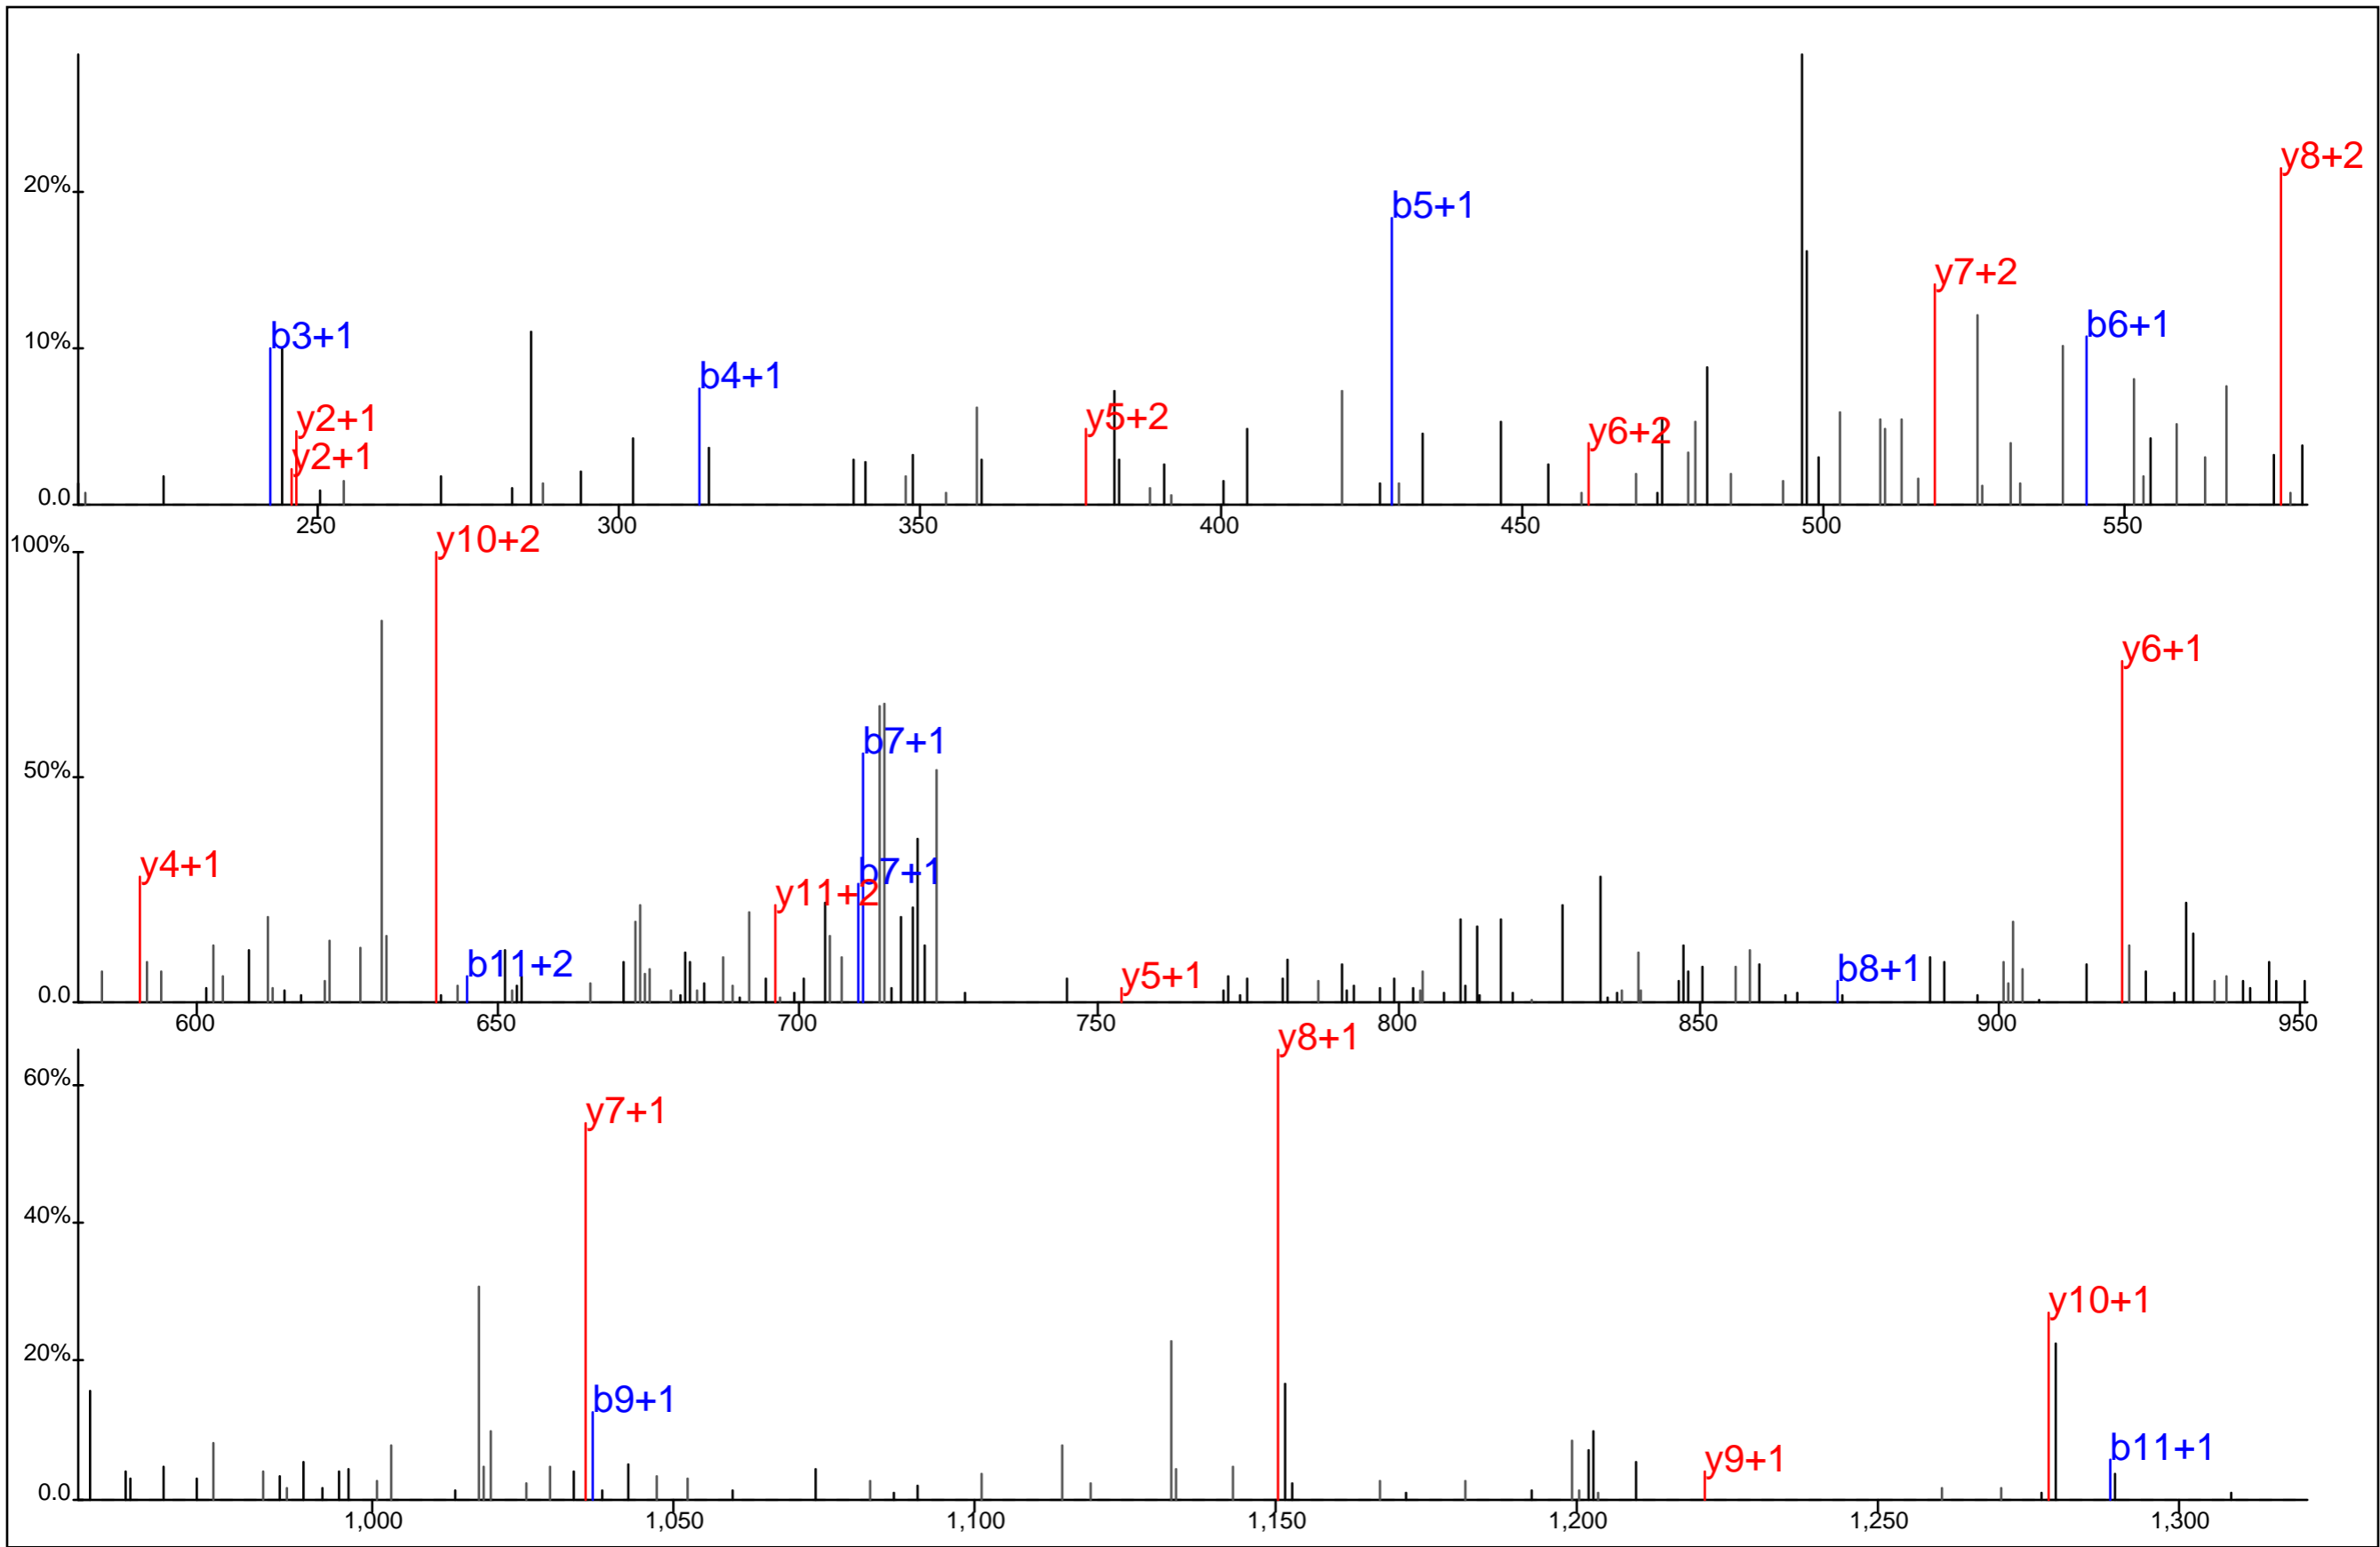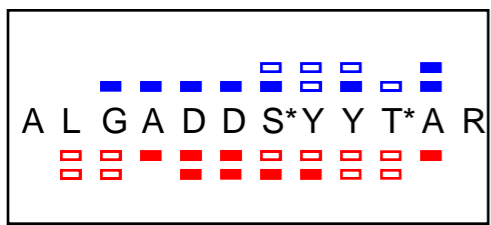

Protein Name: ZAP70  
 gi Accession: 31455611  
 Precursor Mass: 731.7704+2  
 Delta Mass: 3.274 ppm  
 XCorr: 44.88

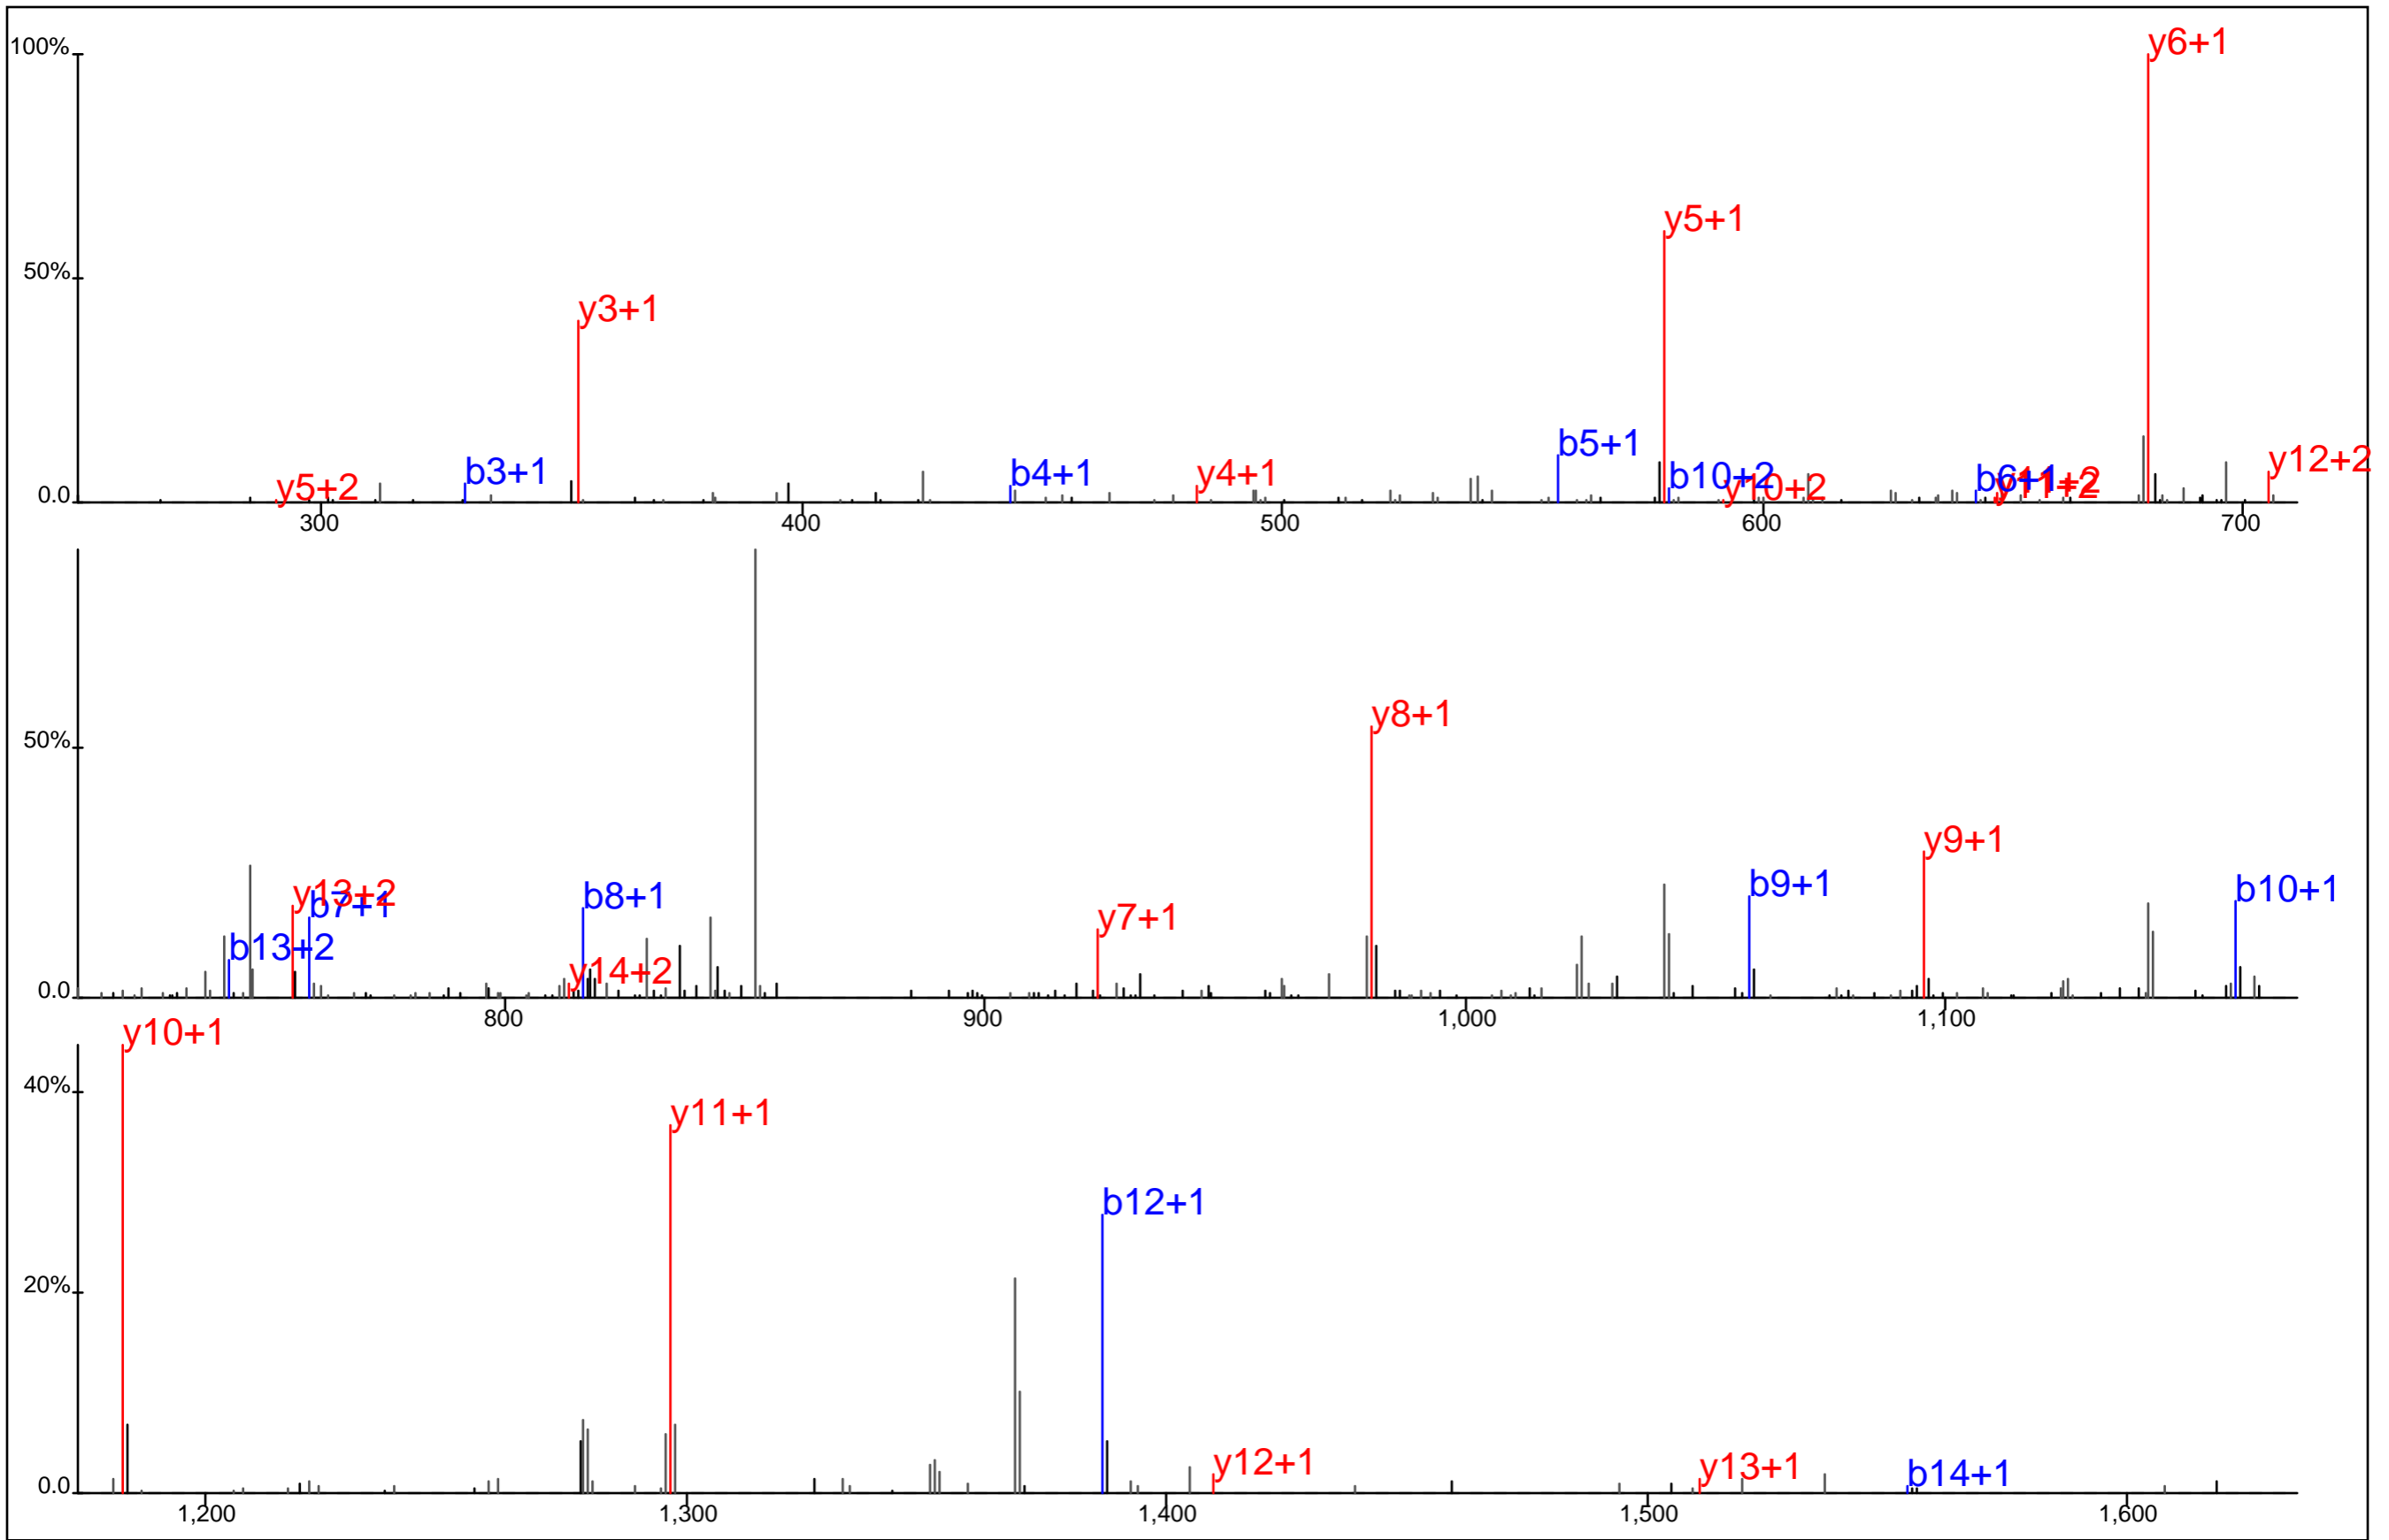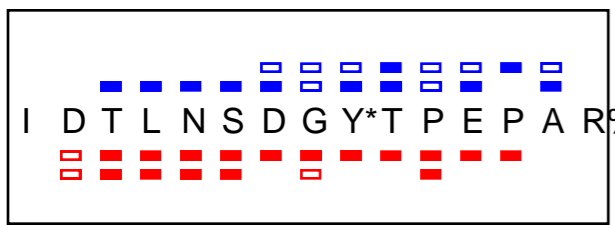

Protein Name: ZAP70  
 gi Accession: 31455611  
 Precursor Mass: 869.8840+2  
 Delta Mass: 2.823 ppm  
 XCorr: 75.97

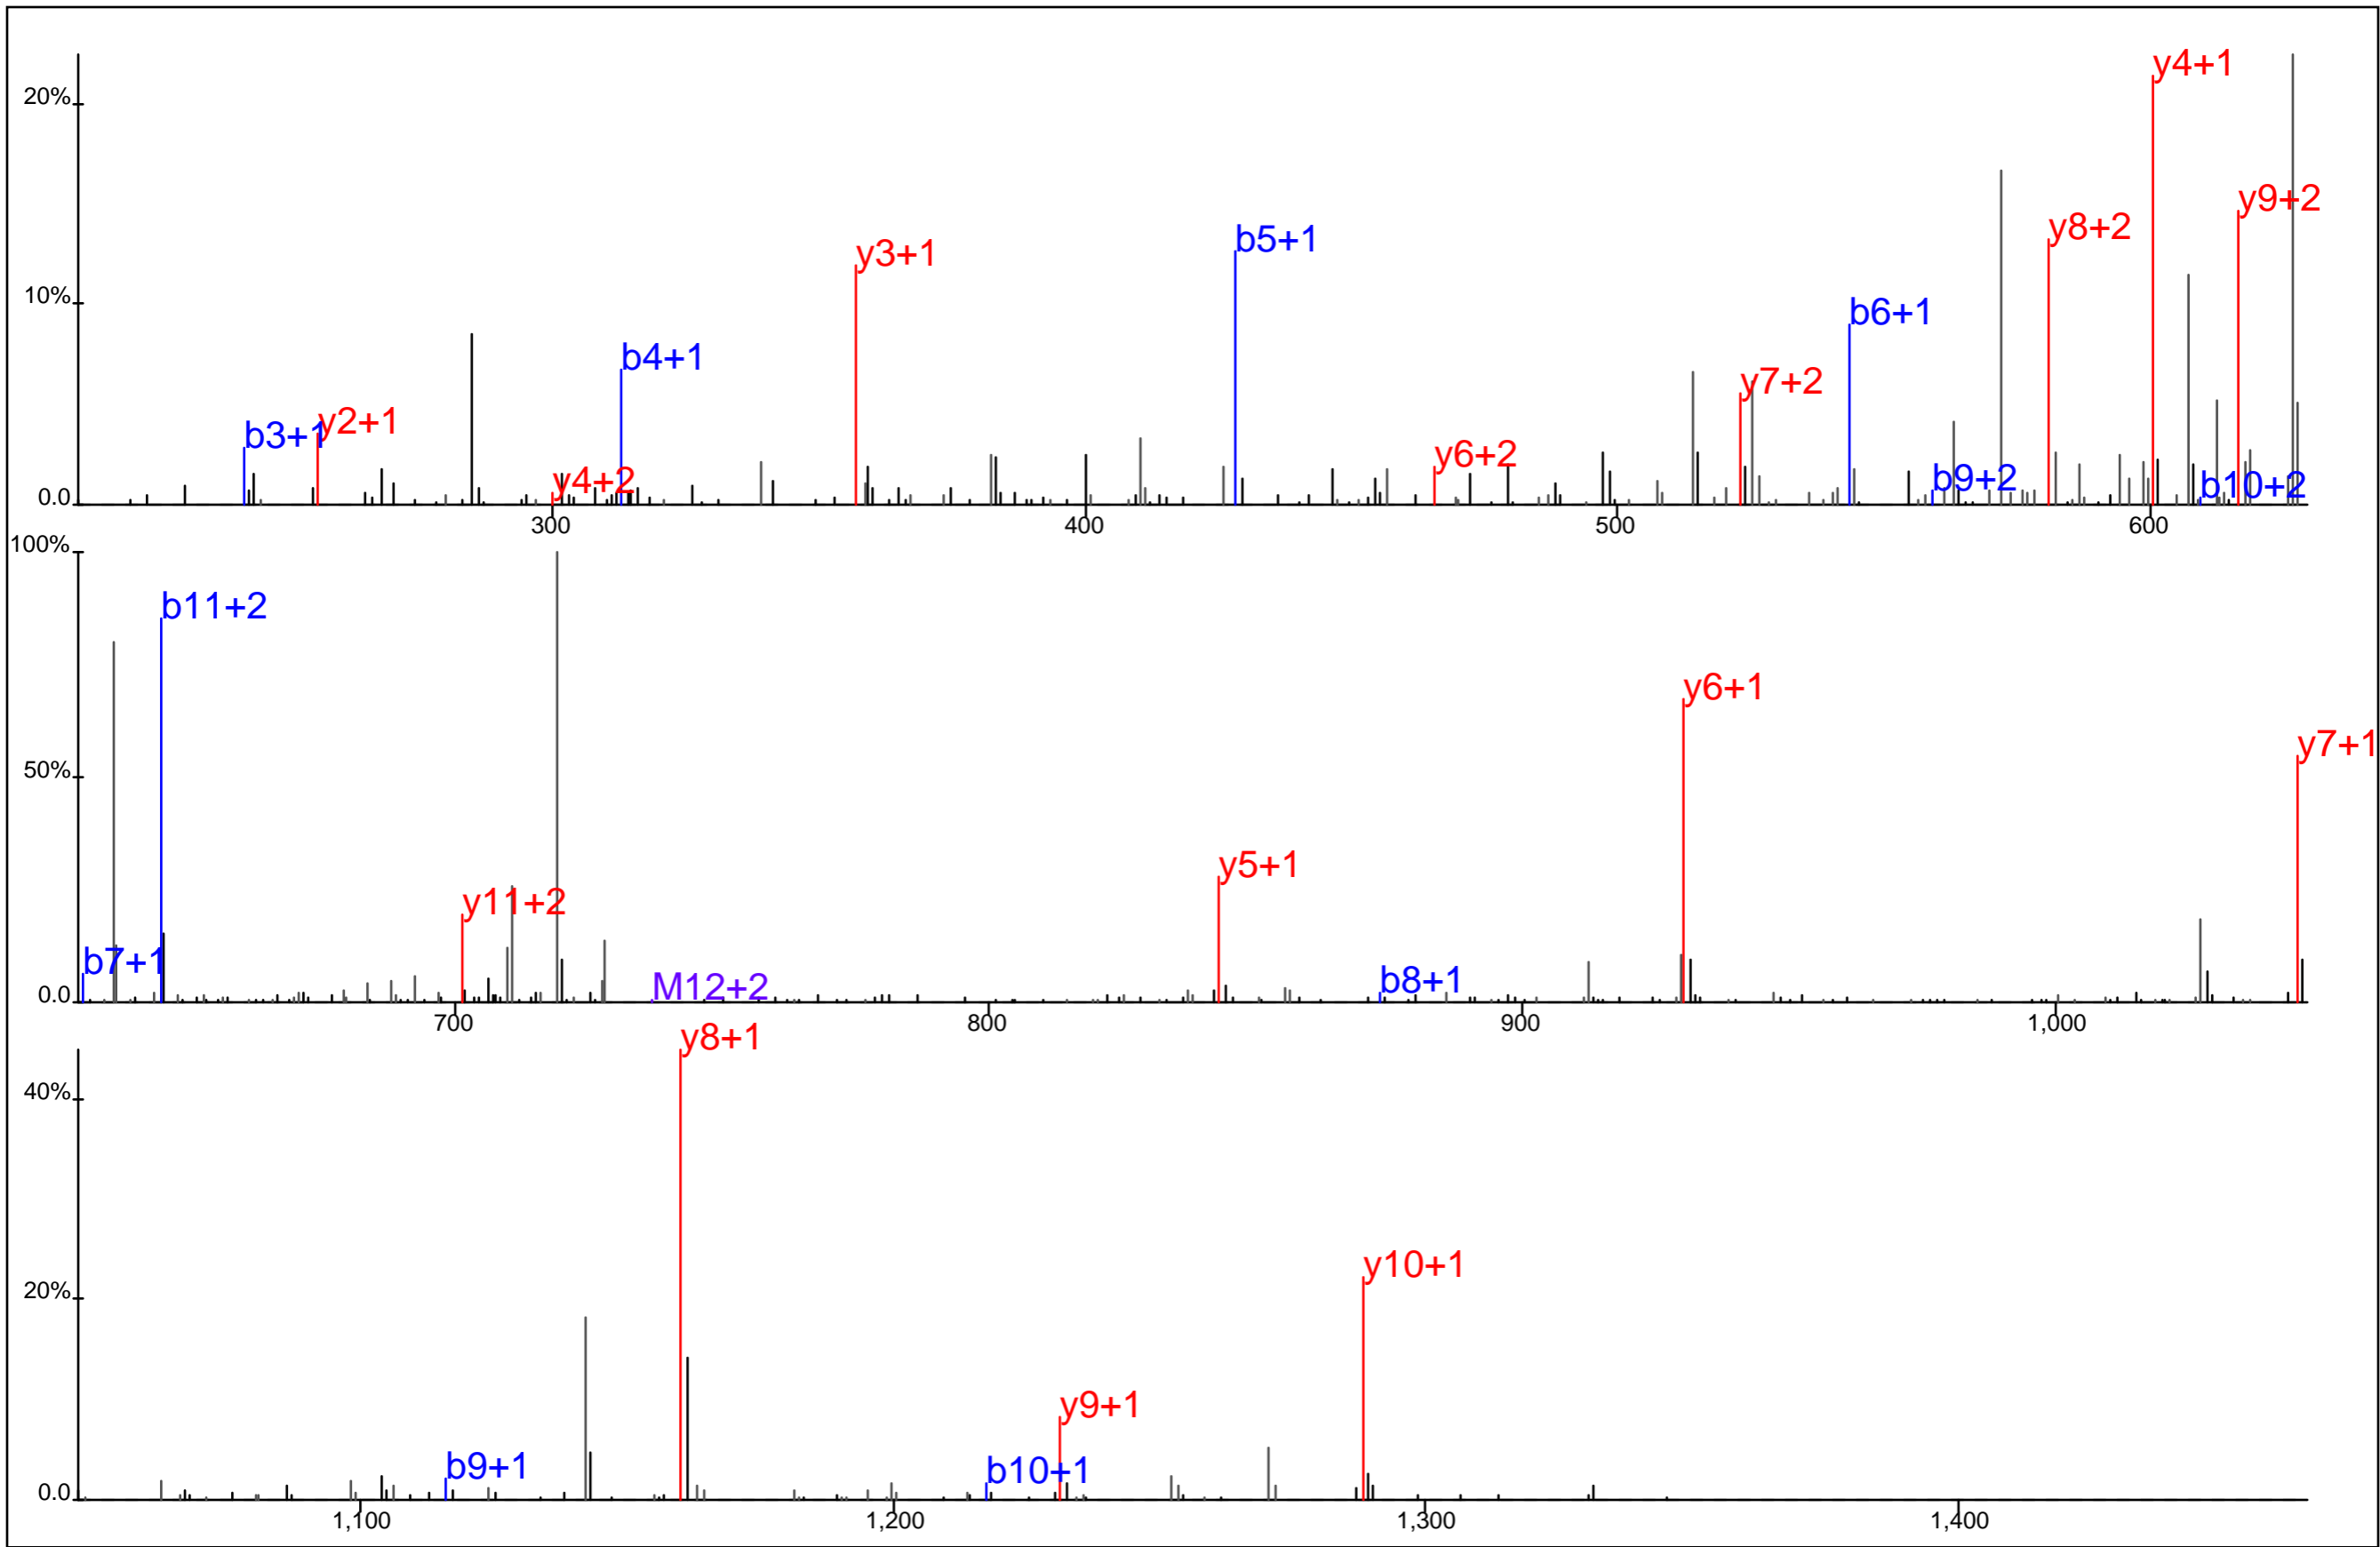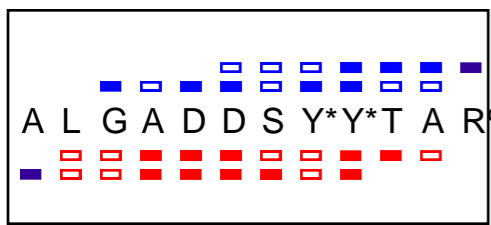

Protein Name: ZAP70  
 gi Accession: 31455611  
 Precursor Mass: 736.7739+2  
 Delta Mass: 2.443 ppm  
 XCorr: 70.11

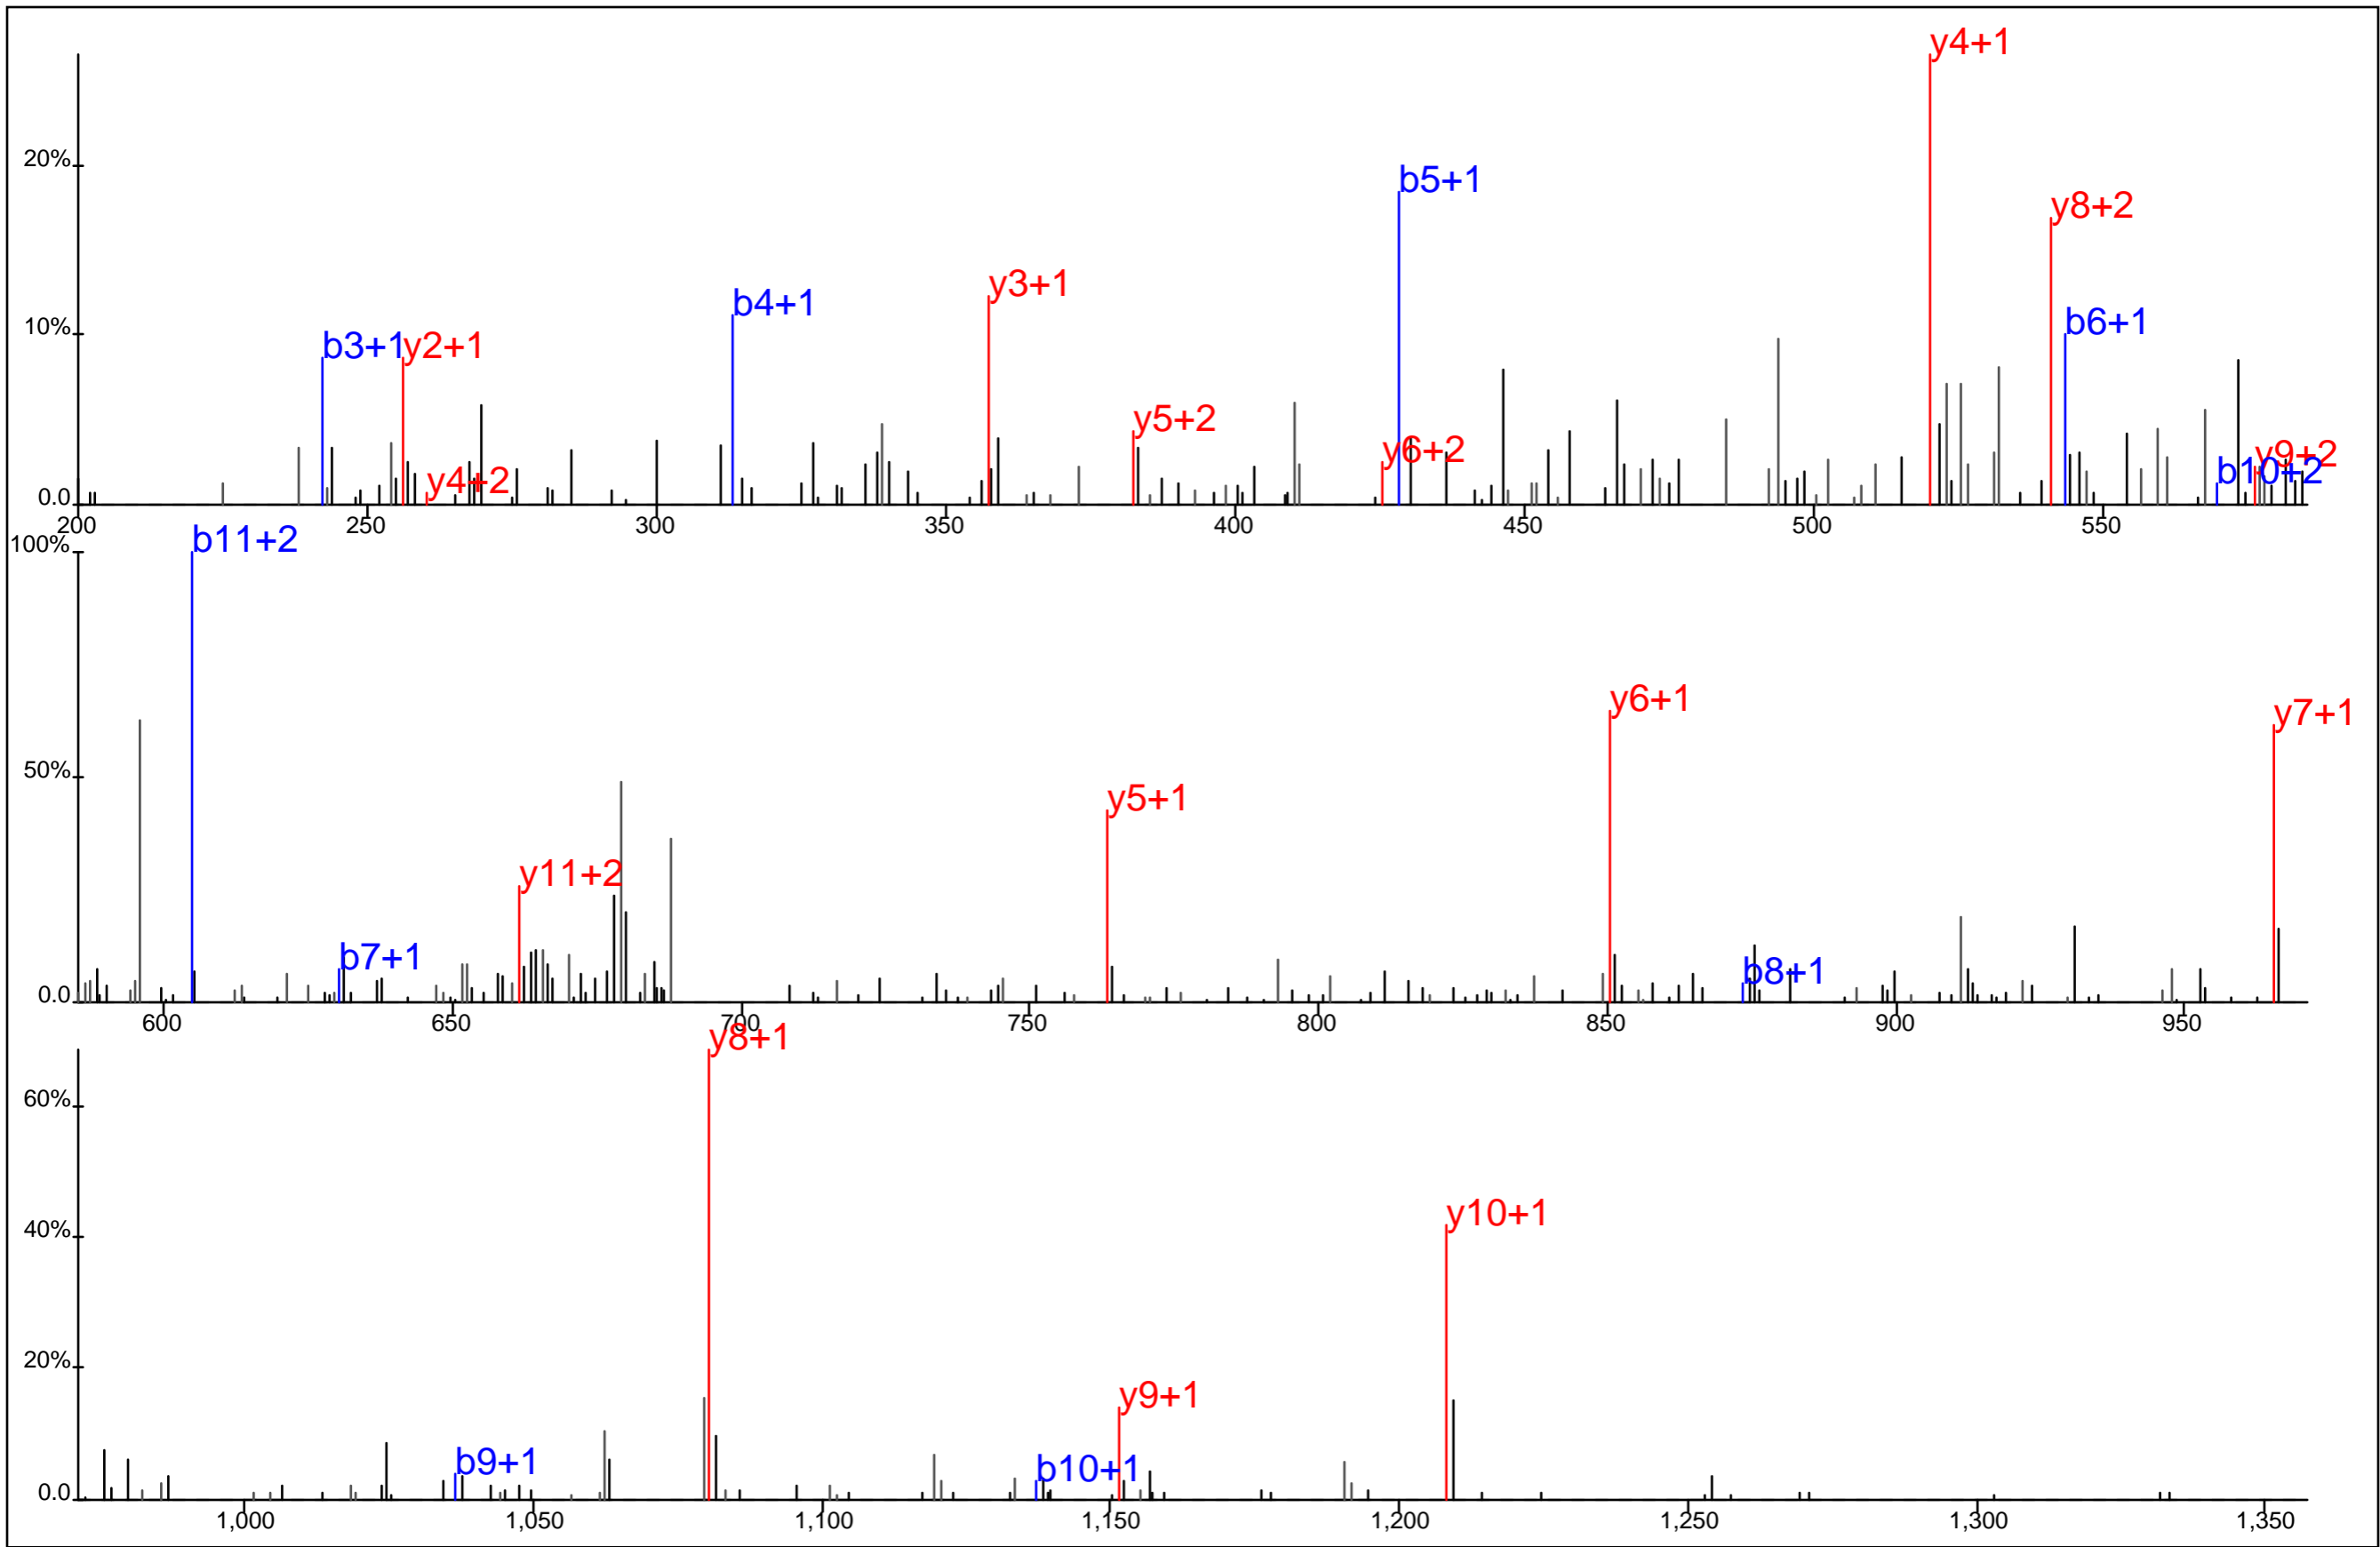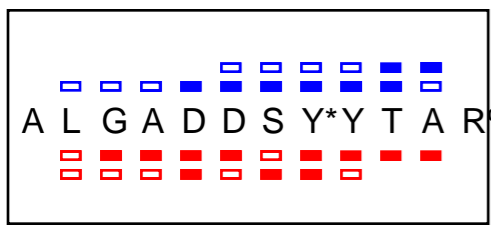

Protein Name: ZAP70  
 gi Accession: 31455611  
 Precursor Mass: 696.7920+2  
 Delta Mass: 4.357 ppm  
 XCorr: 68.16

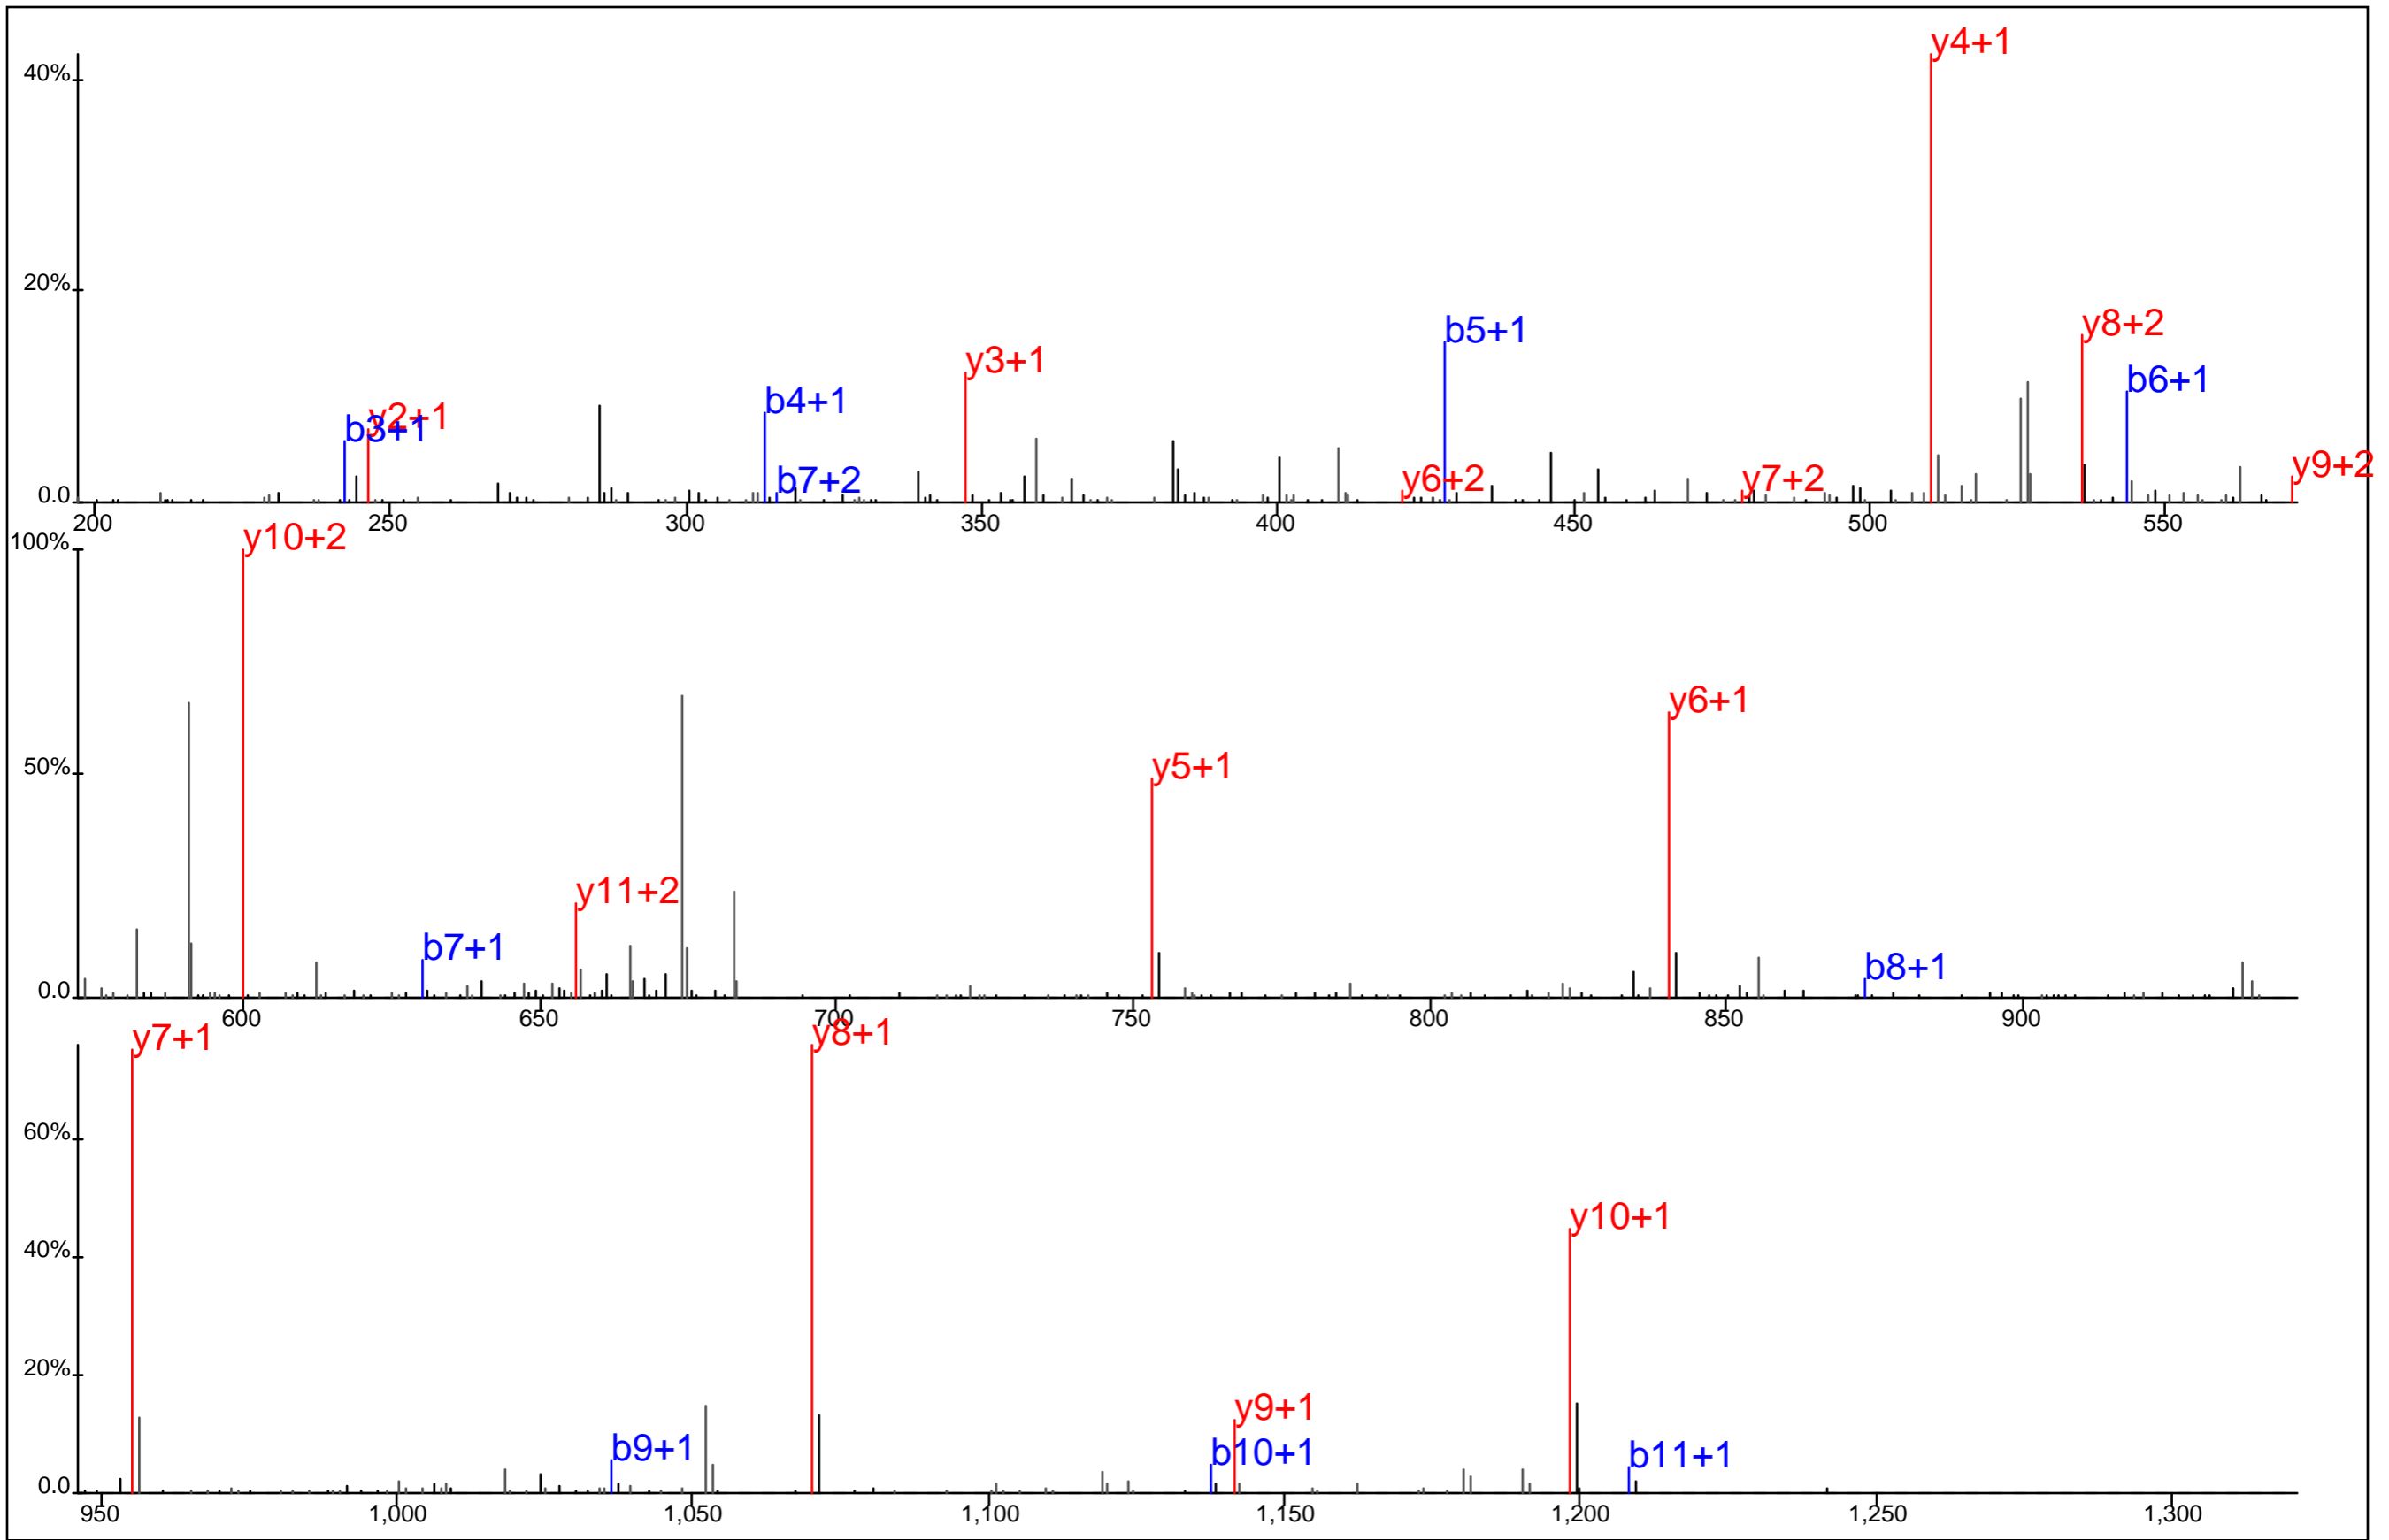

▢ ▢ ▢ ▢ ▢ ▢ ▢ ▢ ▢  
 A L G A D D S Y\*Y T A R  
▢ ▢ ▢ ▢ ▢ ▢ ▢ ▢ ▢ ▢

Protein Name: ZAP70  
 gi Accession: 31455611  
 Precursor Mass: 691.7852+2  
 Delta Mass: 0.483 ppm  
 XCorr: 74.18

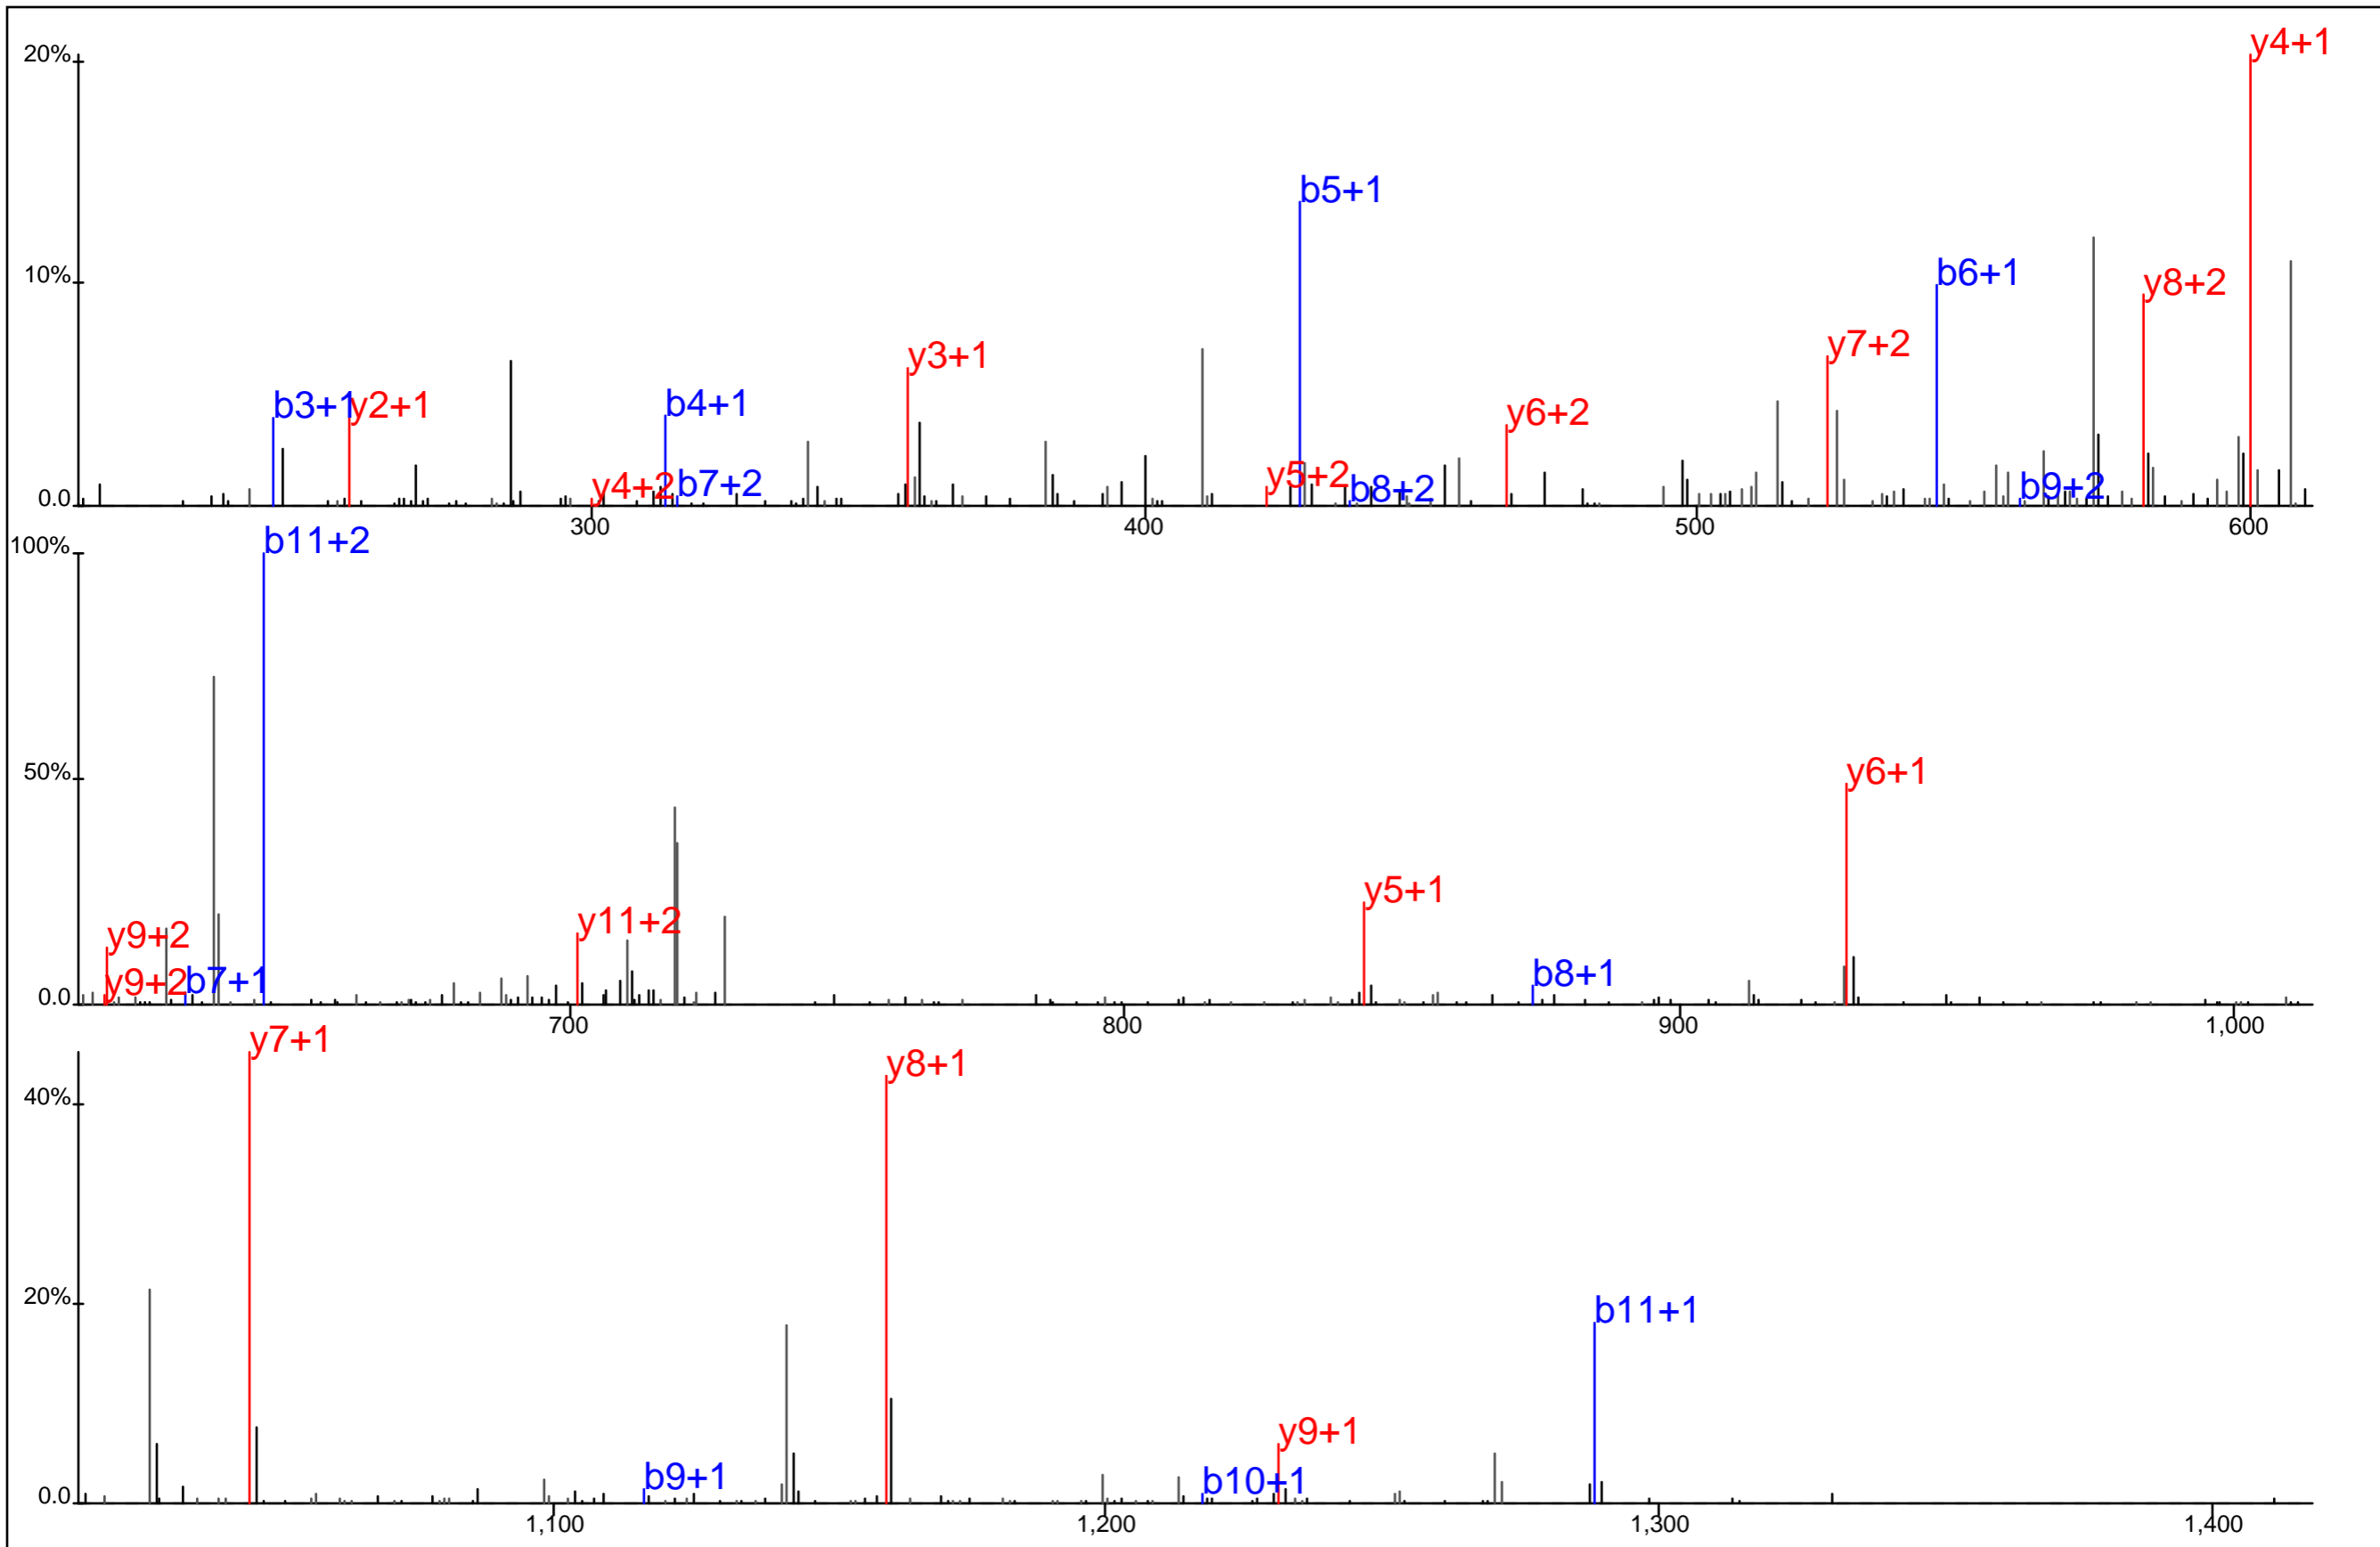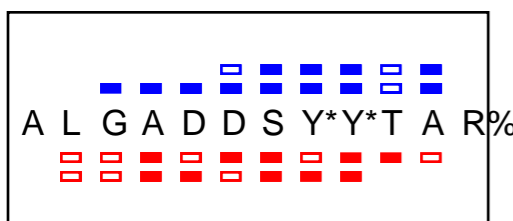

Protein Name: ZAP70  
 gi Accession: 31455611  
 Precursor Mass: 736.7750+2  
 Delta Mass: 3.856 ppm  
 XCorr: 65.7

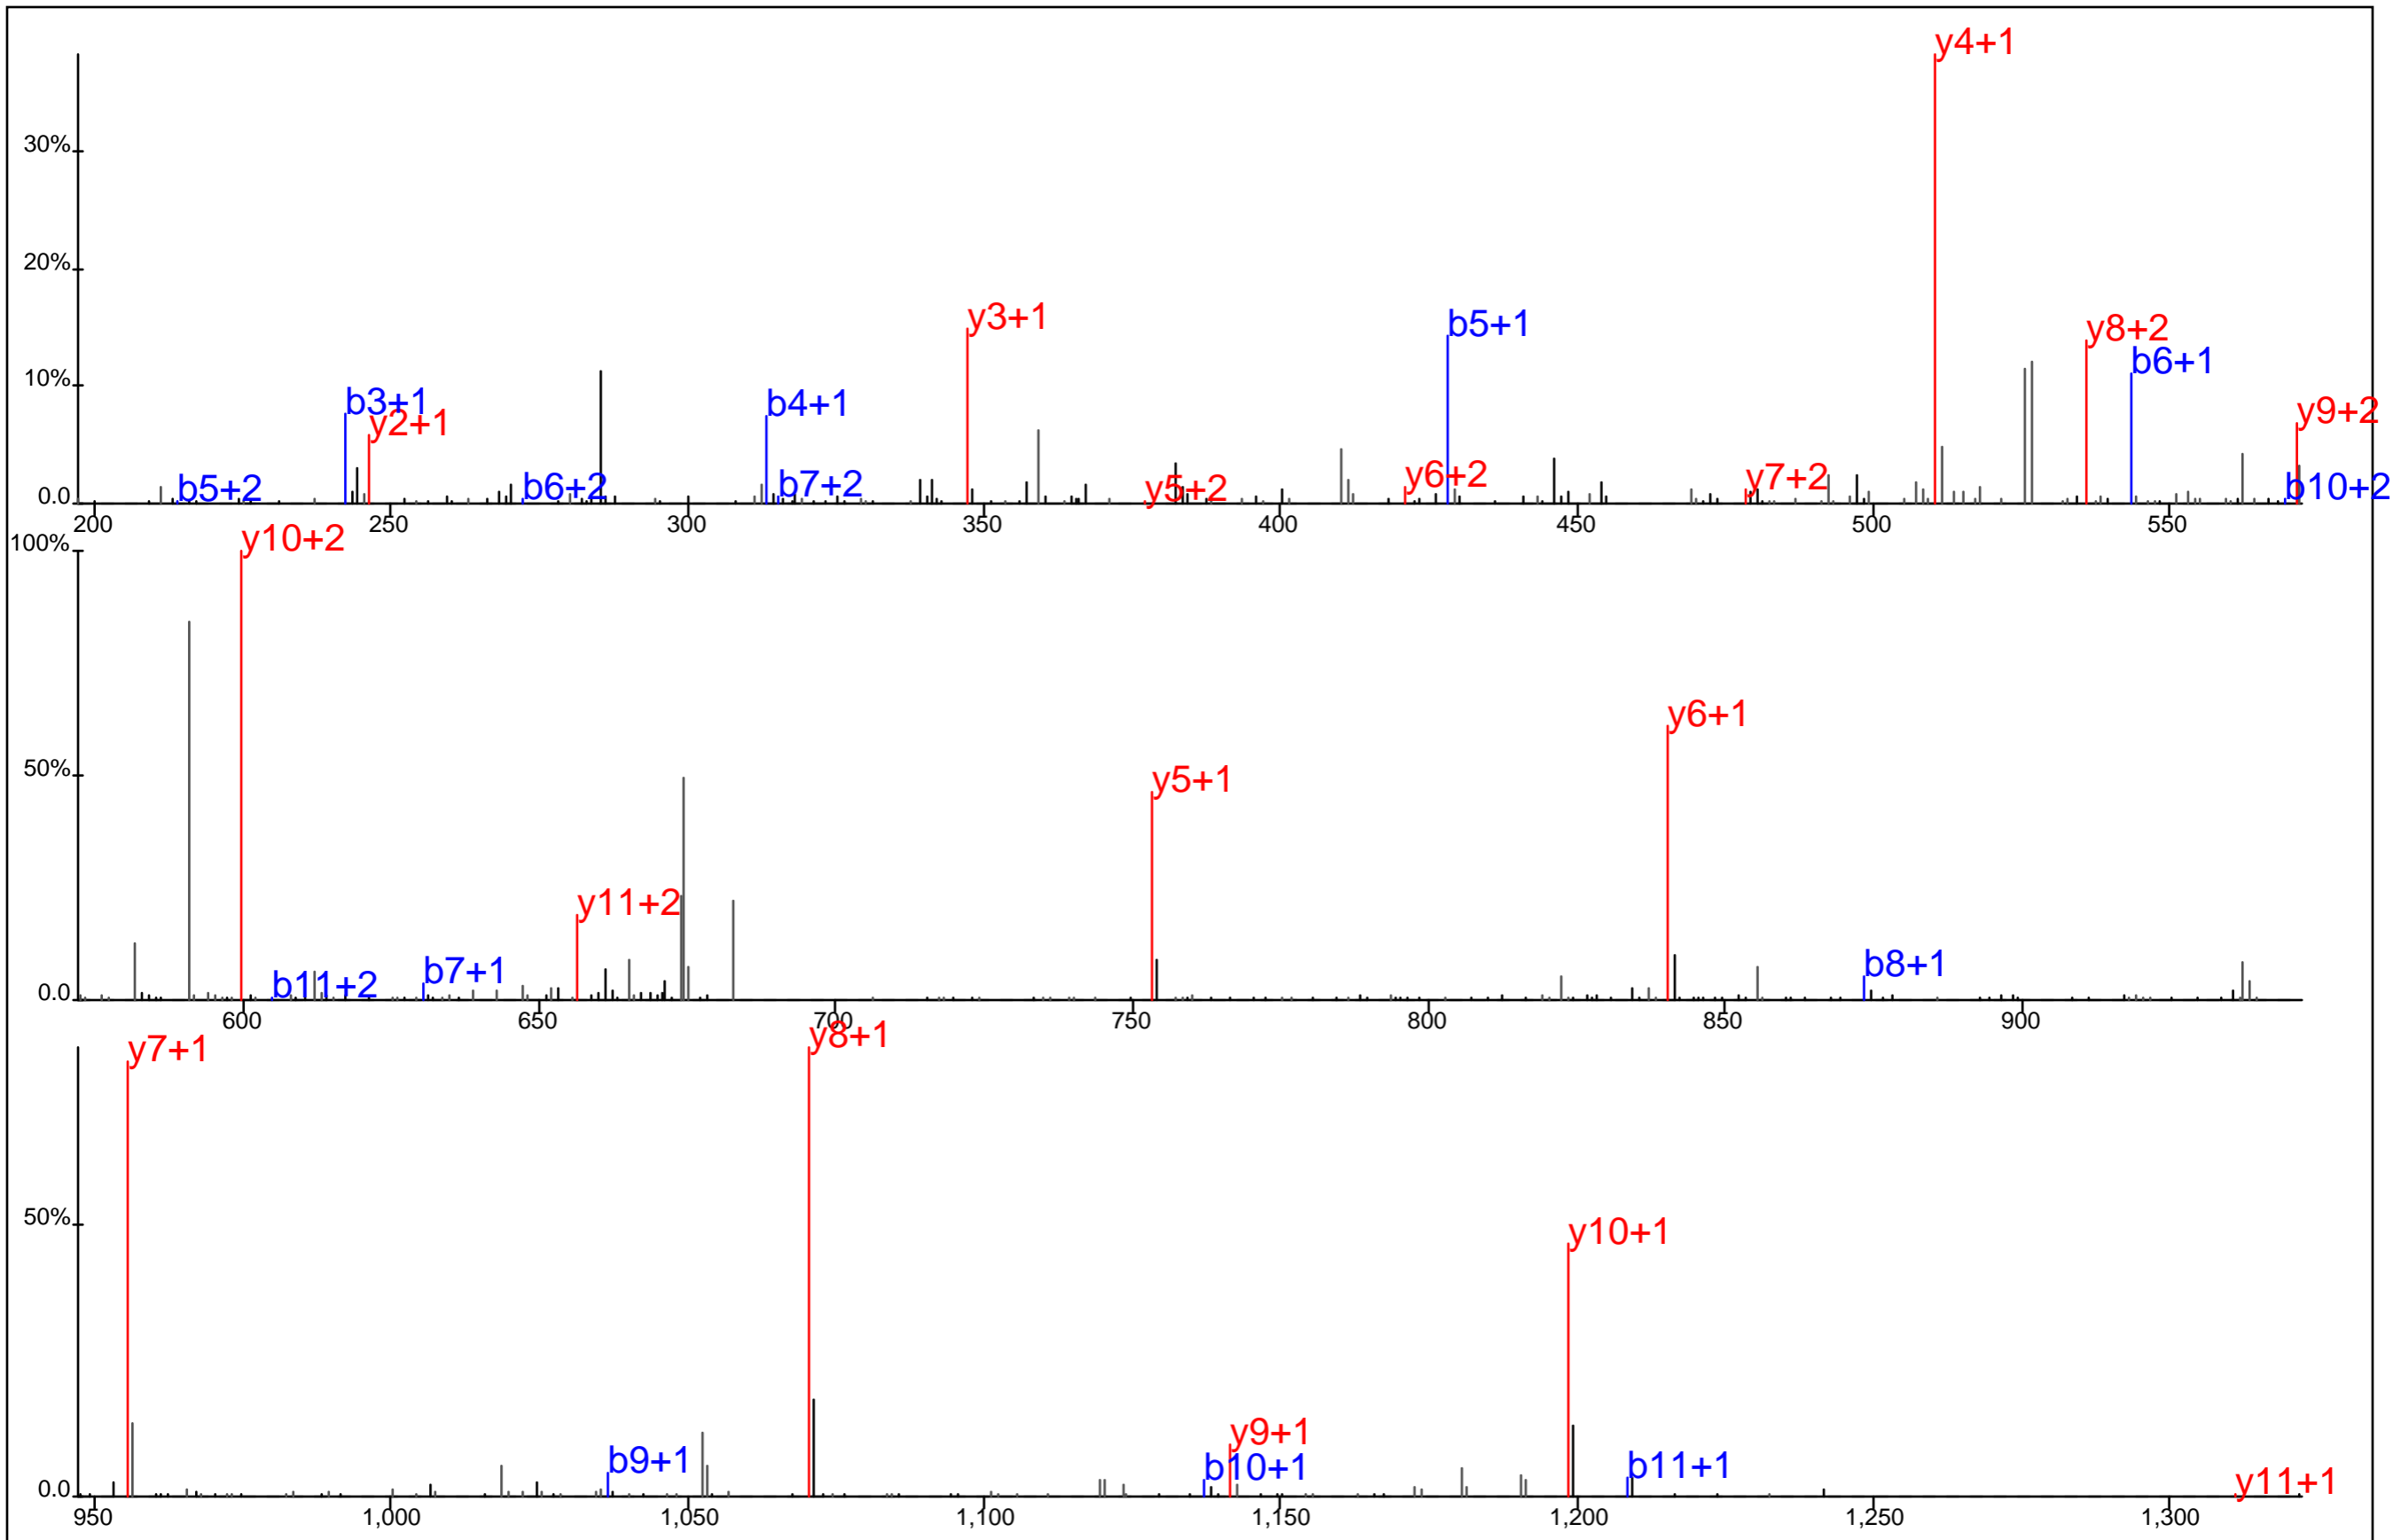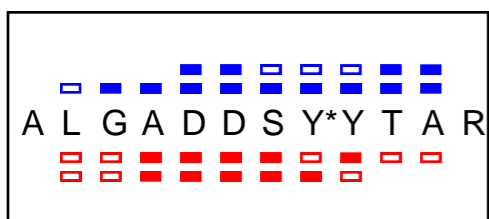

Protein Name: ZAP70  
 gi Accession: 31455611  
 Precursor Mass: 691.7852+2  
 Delta Mass: 0.483 ppm  
 XCorr: 79.5

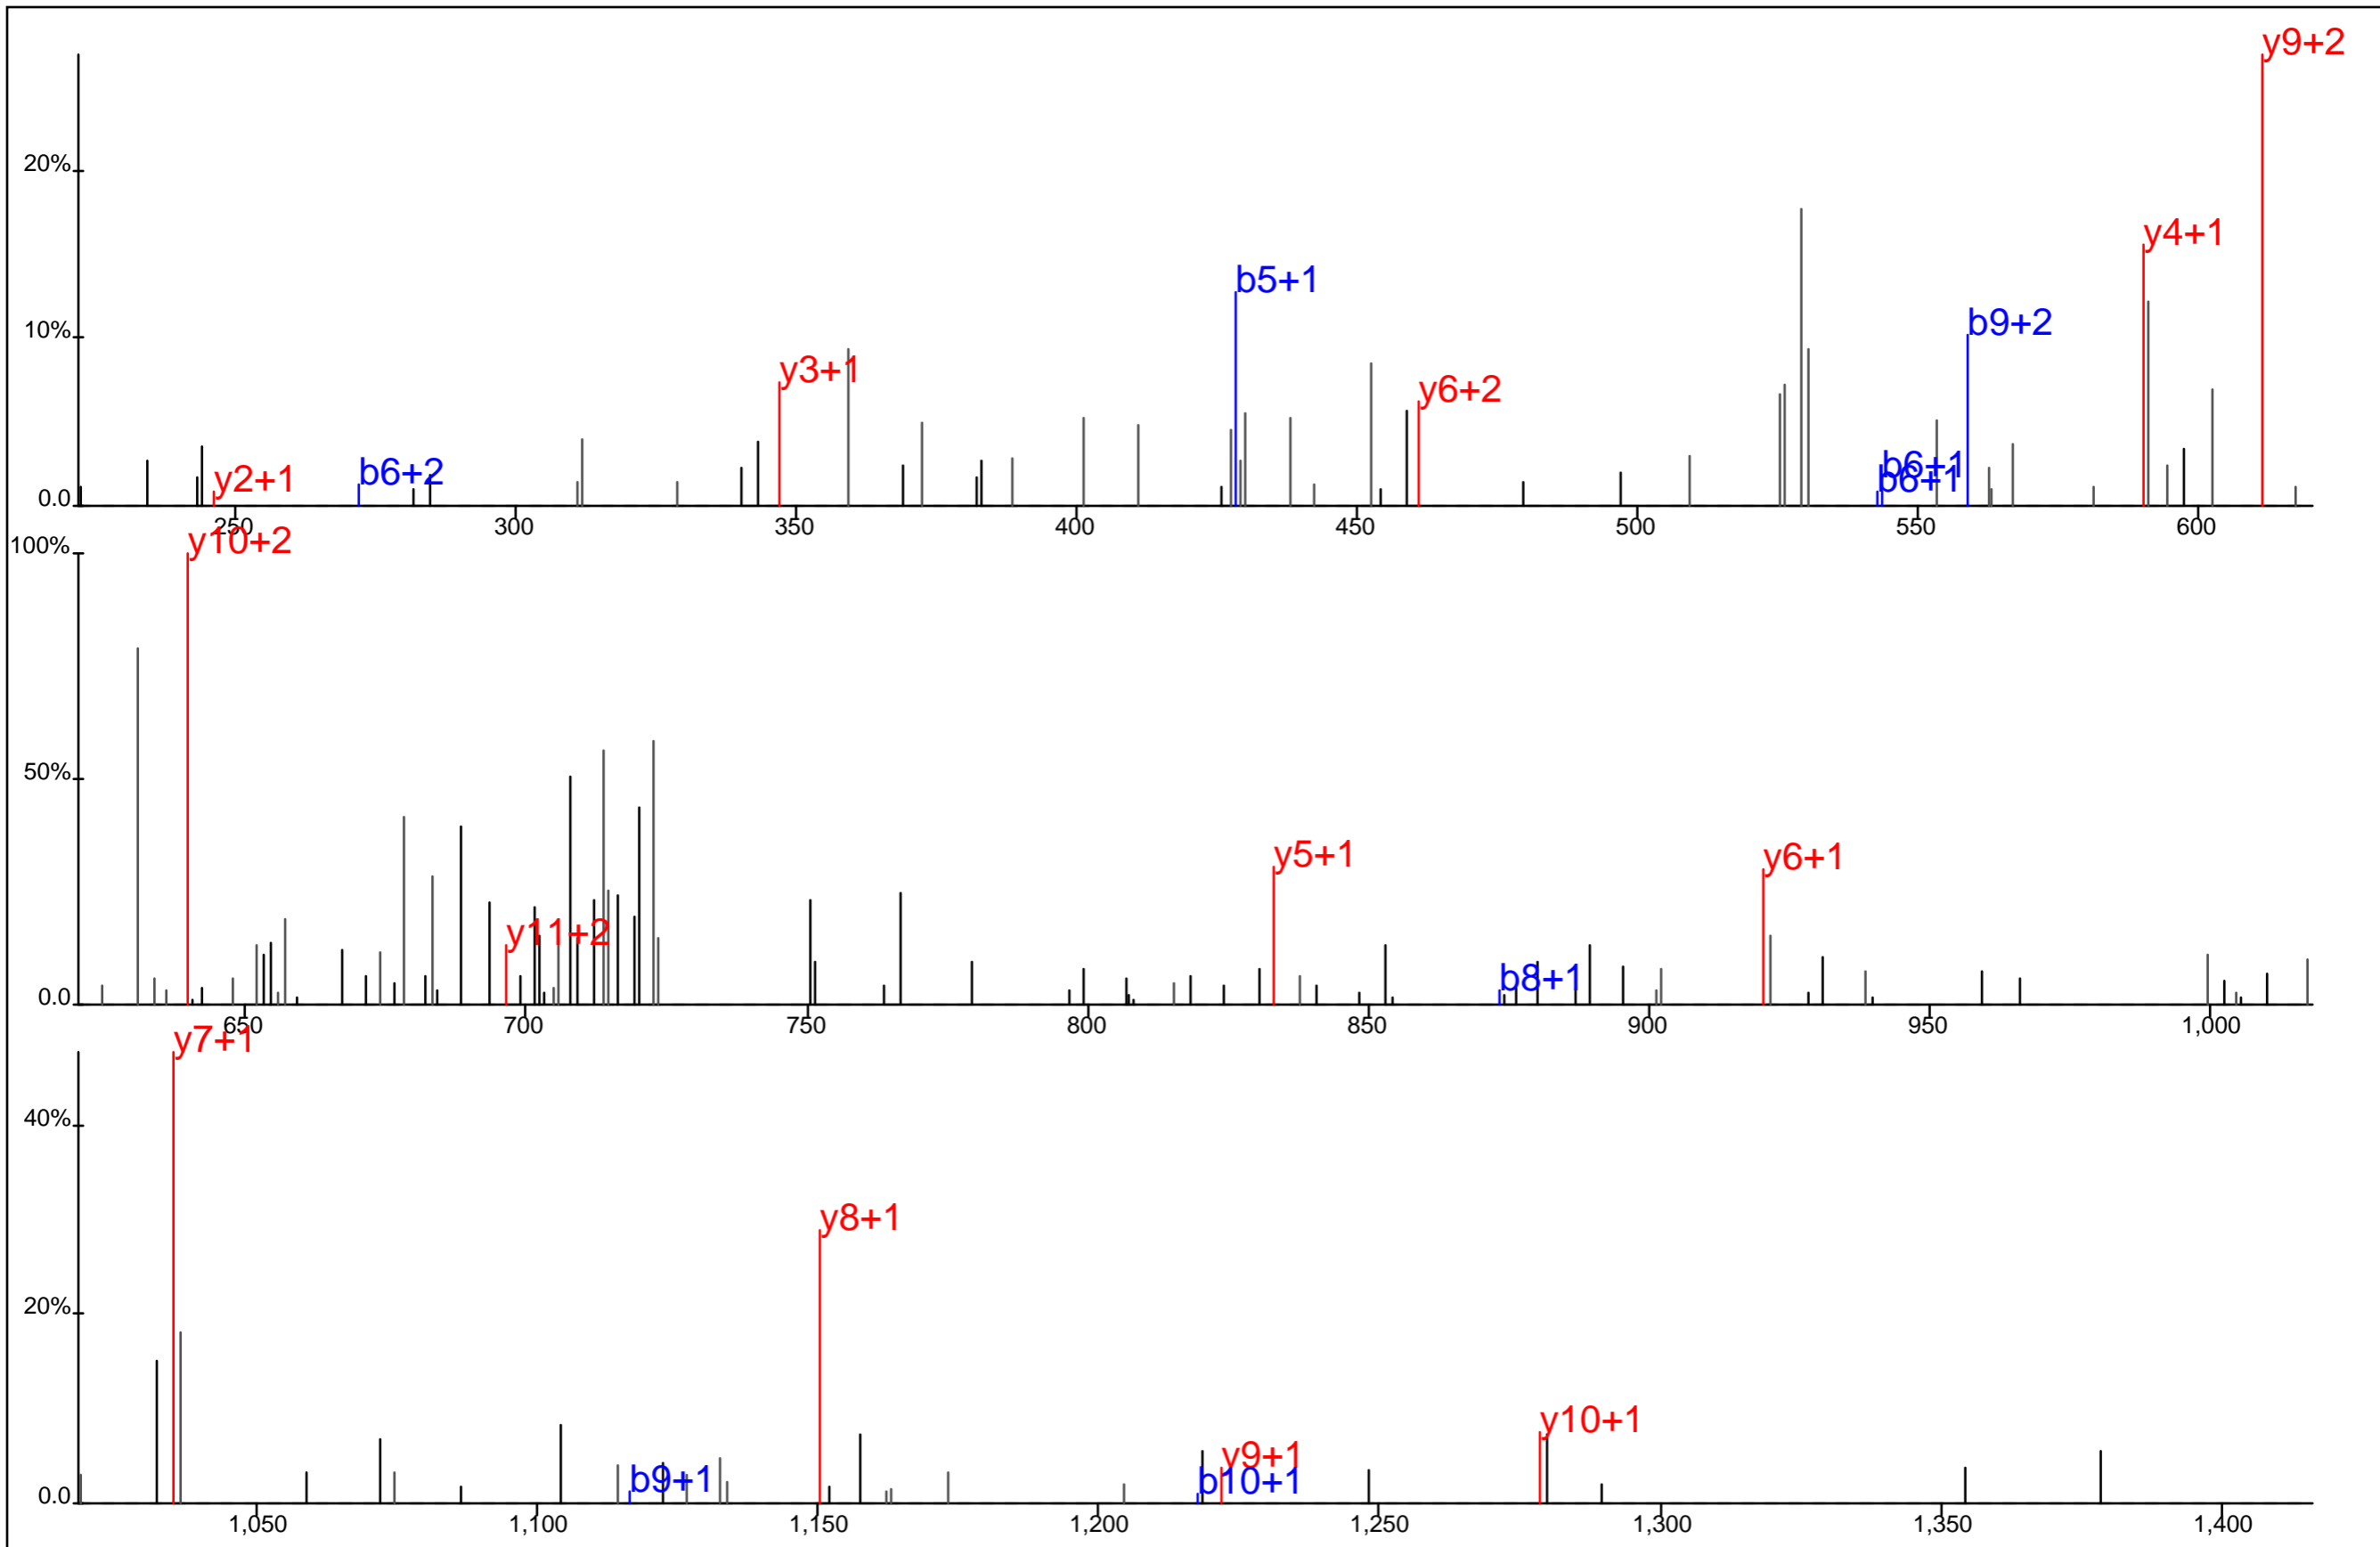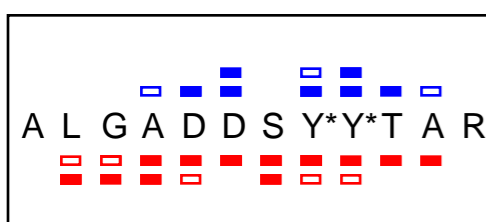

Protein Name: ZAP70  
 gi Accession: 31455611  
 Precursor Mass: 731.7725+2  
 Delta Mass: 6.118 ppm  
 XCorr: 29.37



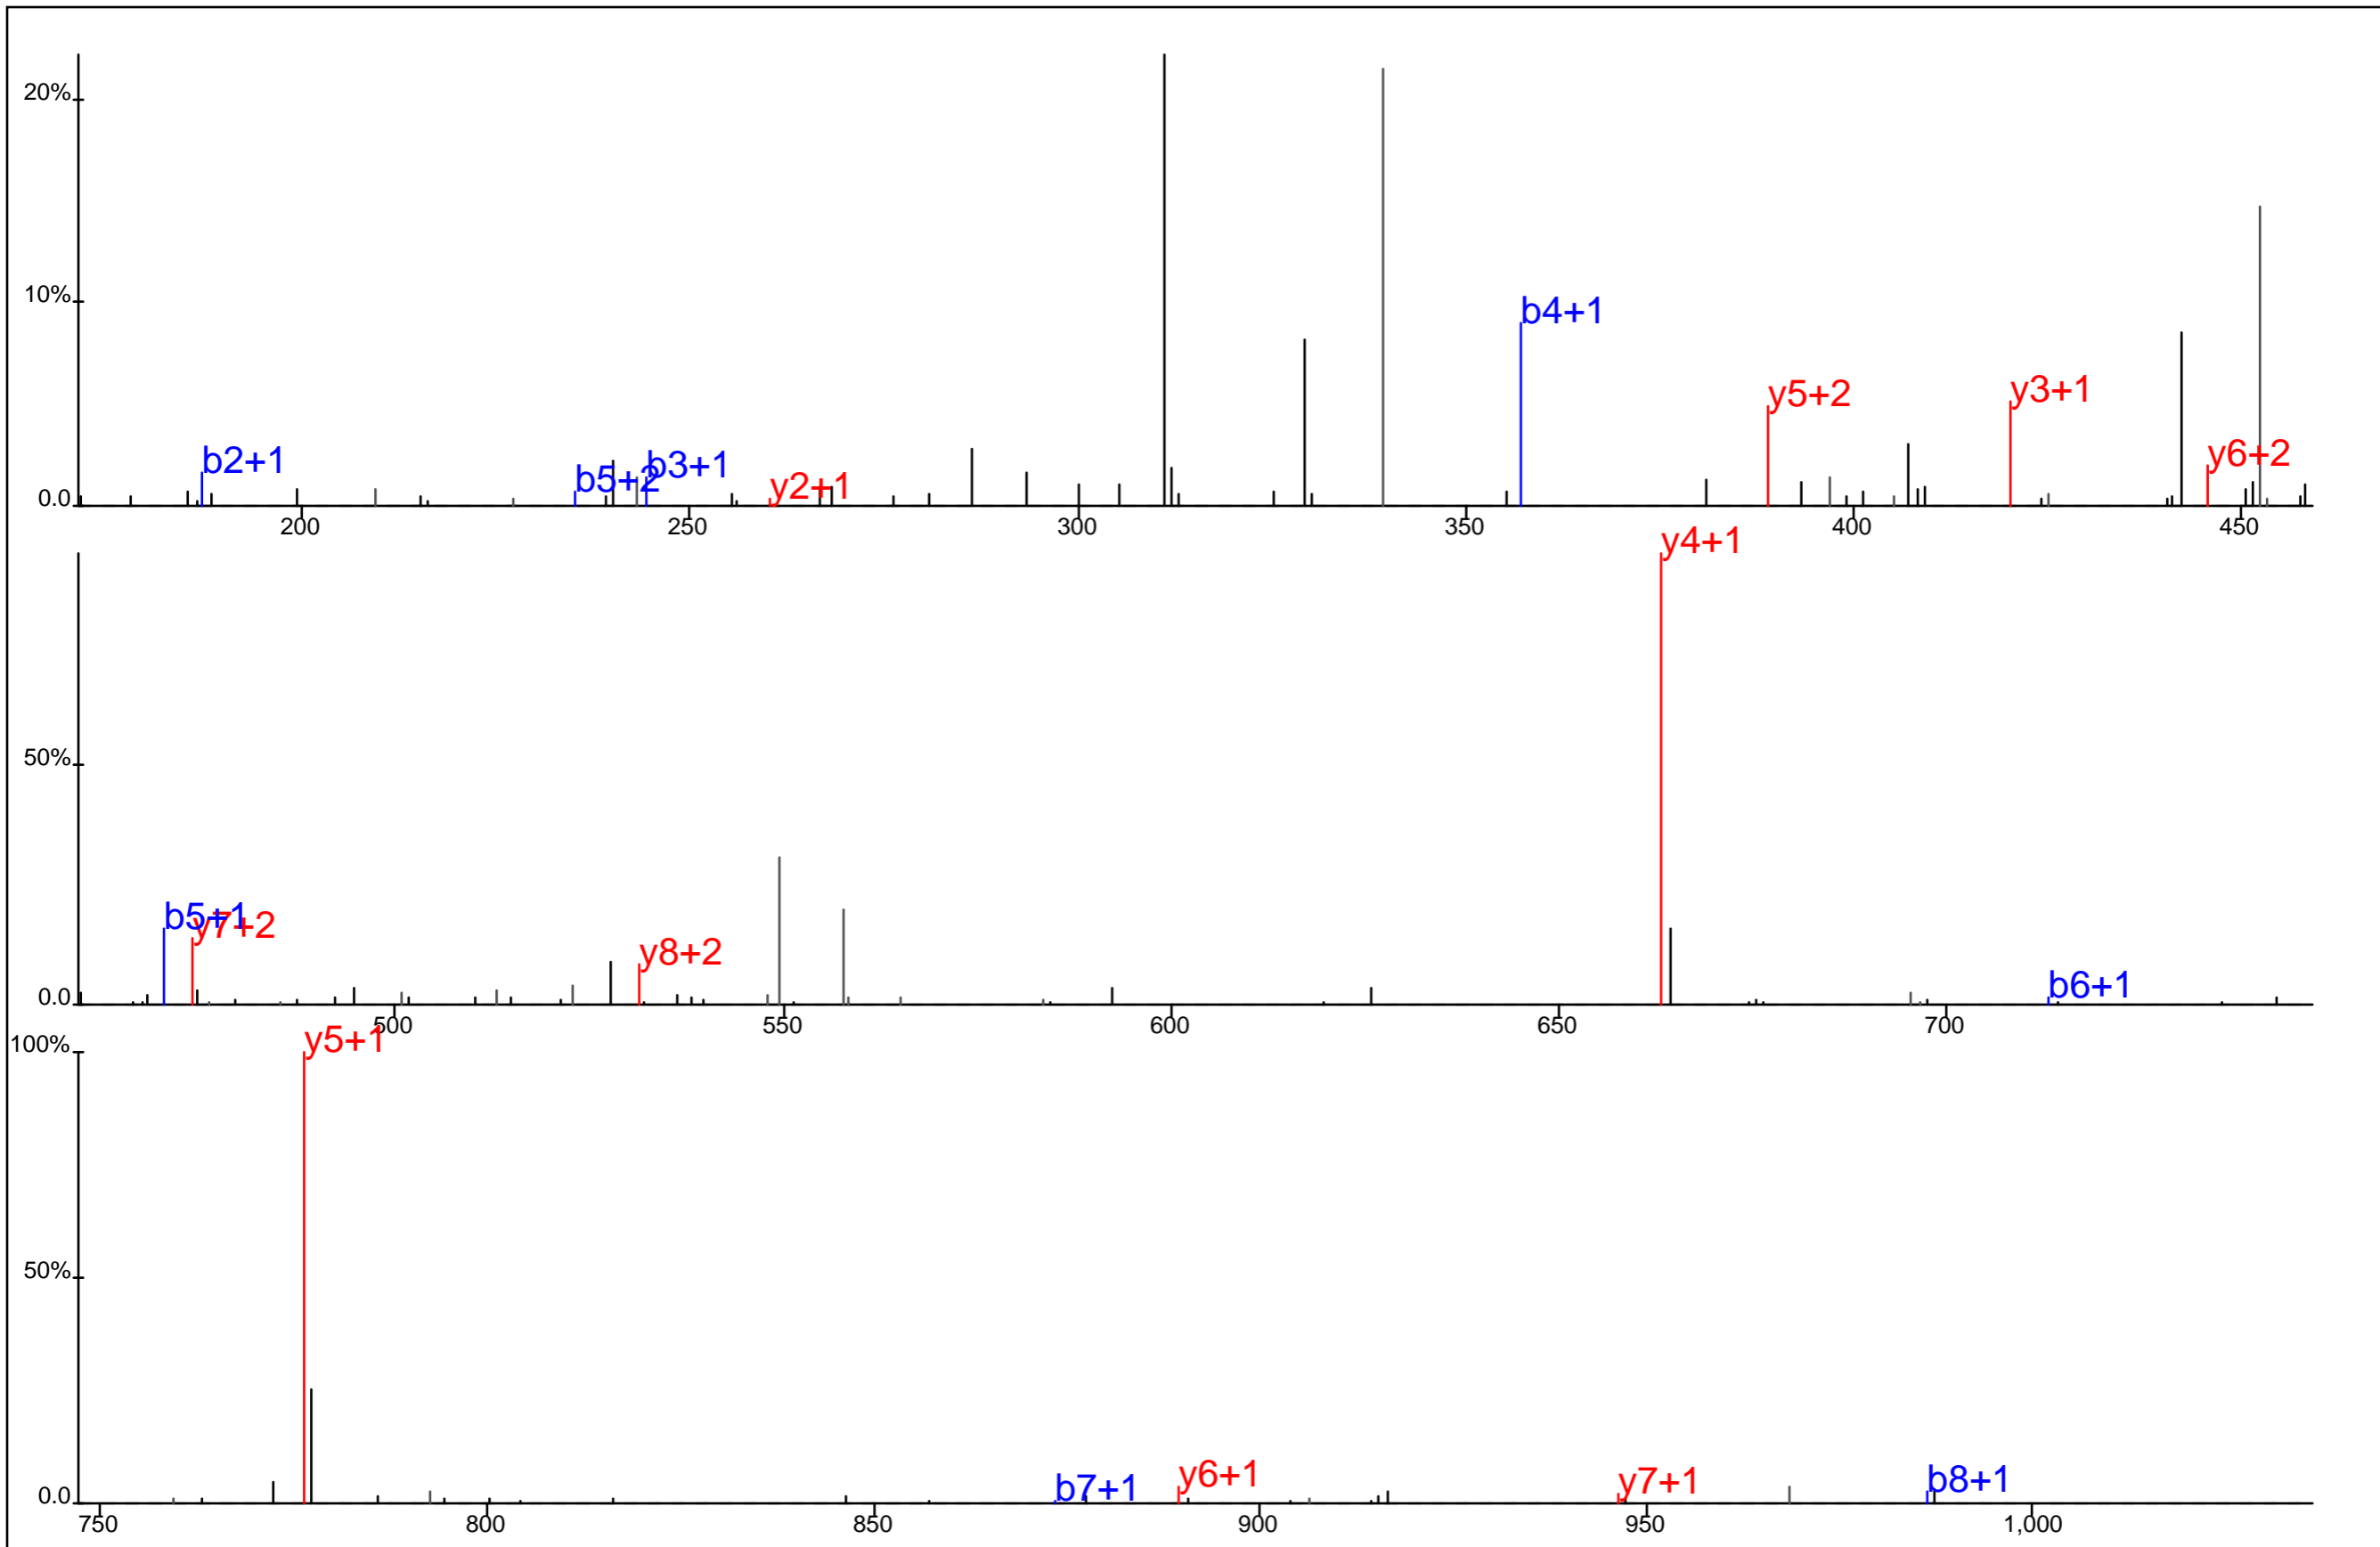

■ ■ ■ ■ ■ ■ ■ ■  
□ □ □ □ □ □ □ ■  
**A D G L I Y\* C L K**

Protein Name: ZAP70  
 gi Accession: 31455611  
 Precursor Mass: 566.7603+2  
 Delta Mass: 2.250 ppm  
 XCorr: 31.86

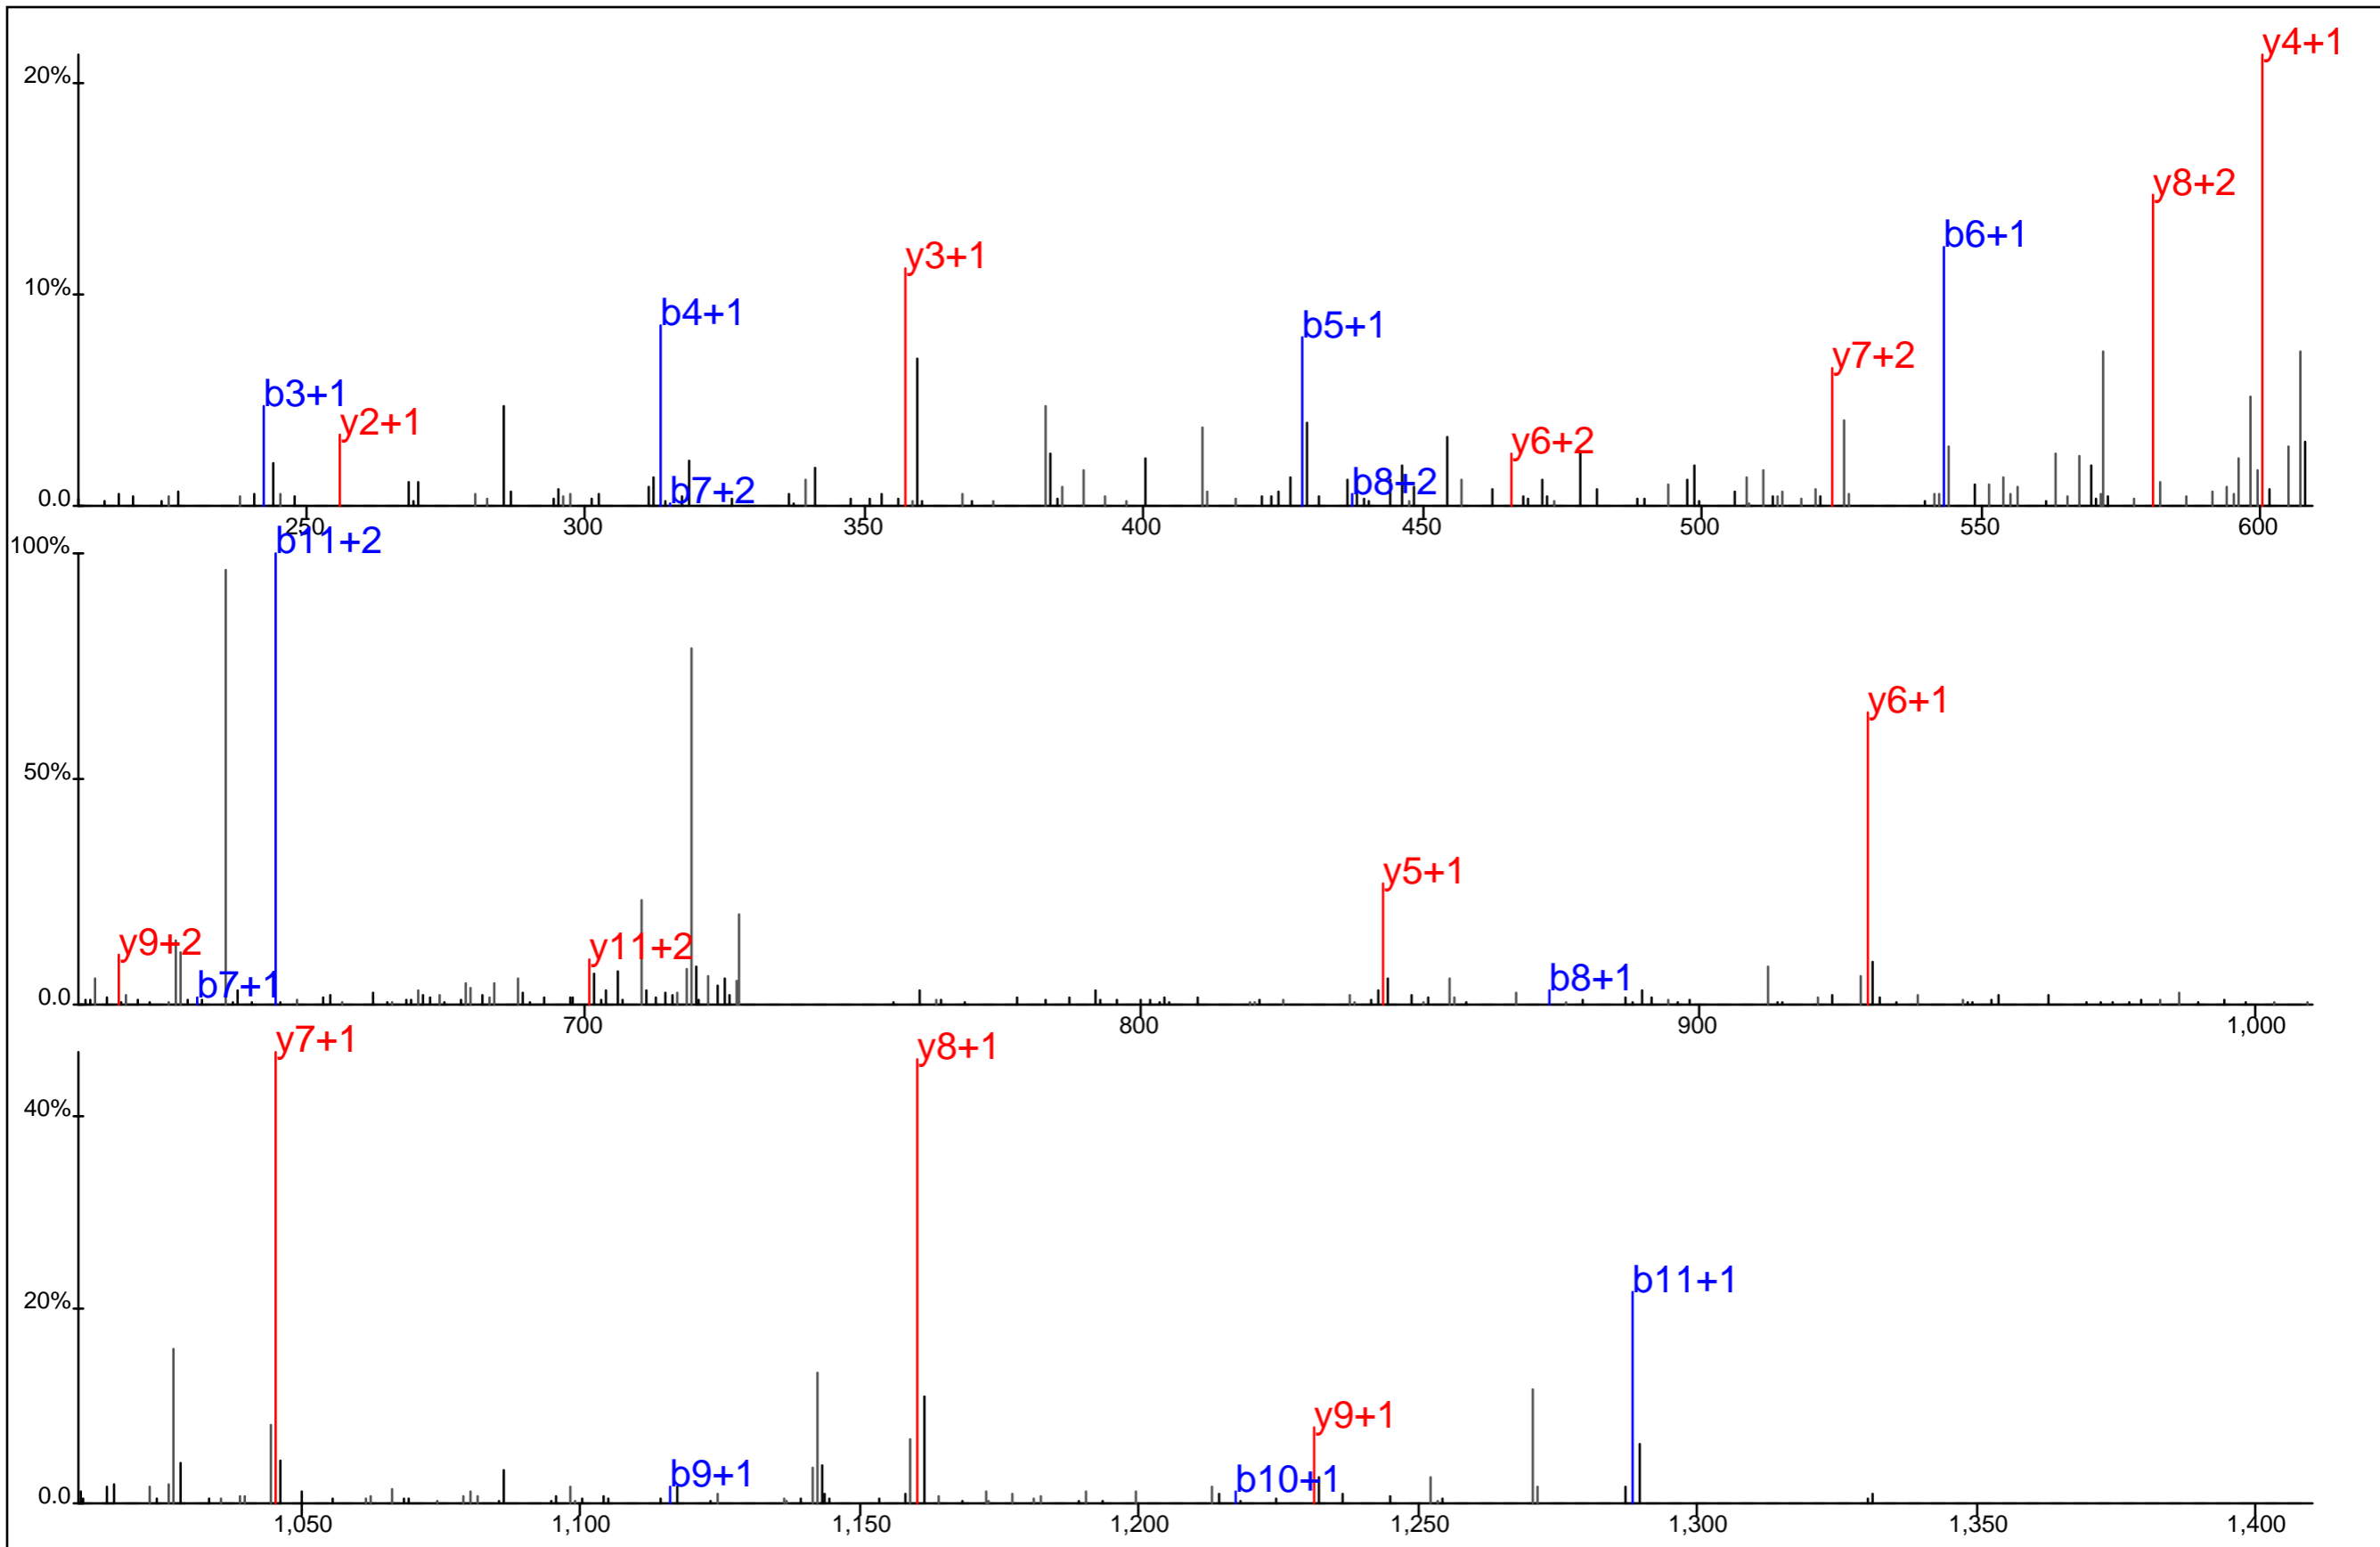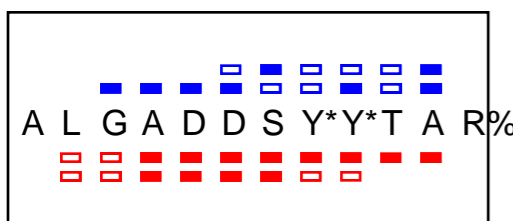

Protein Name: ZAP70  
 gi Accession: 31455611  
 Precursor Mass: 736.7729+2  
 Delta Mass: 1.038 ppm  
 XCorr: 65.06

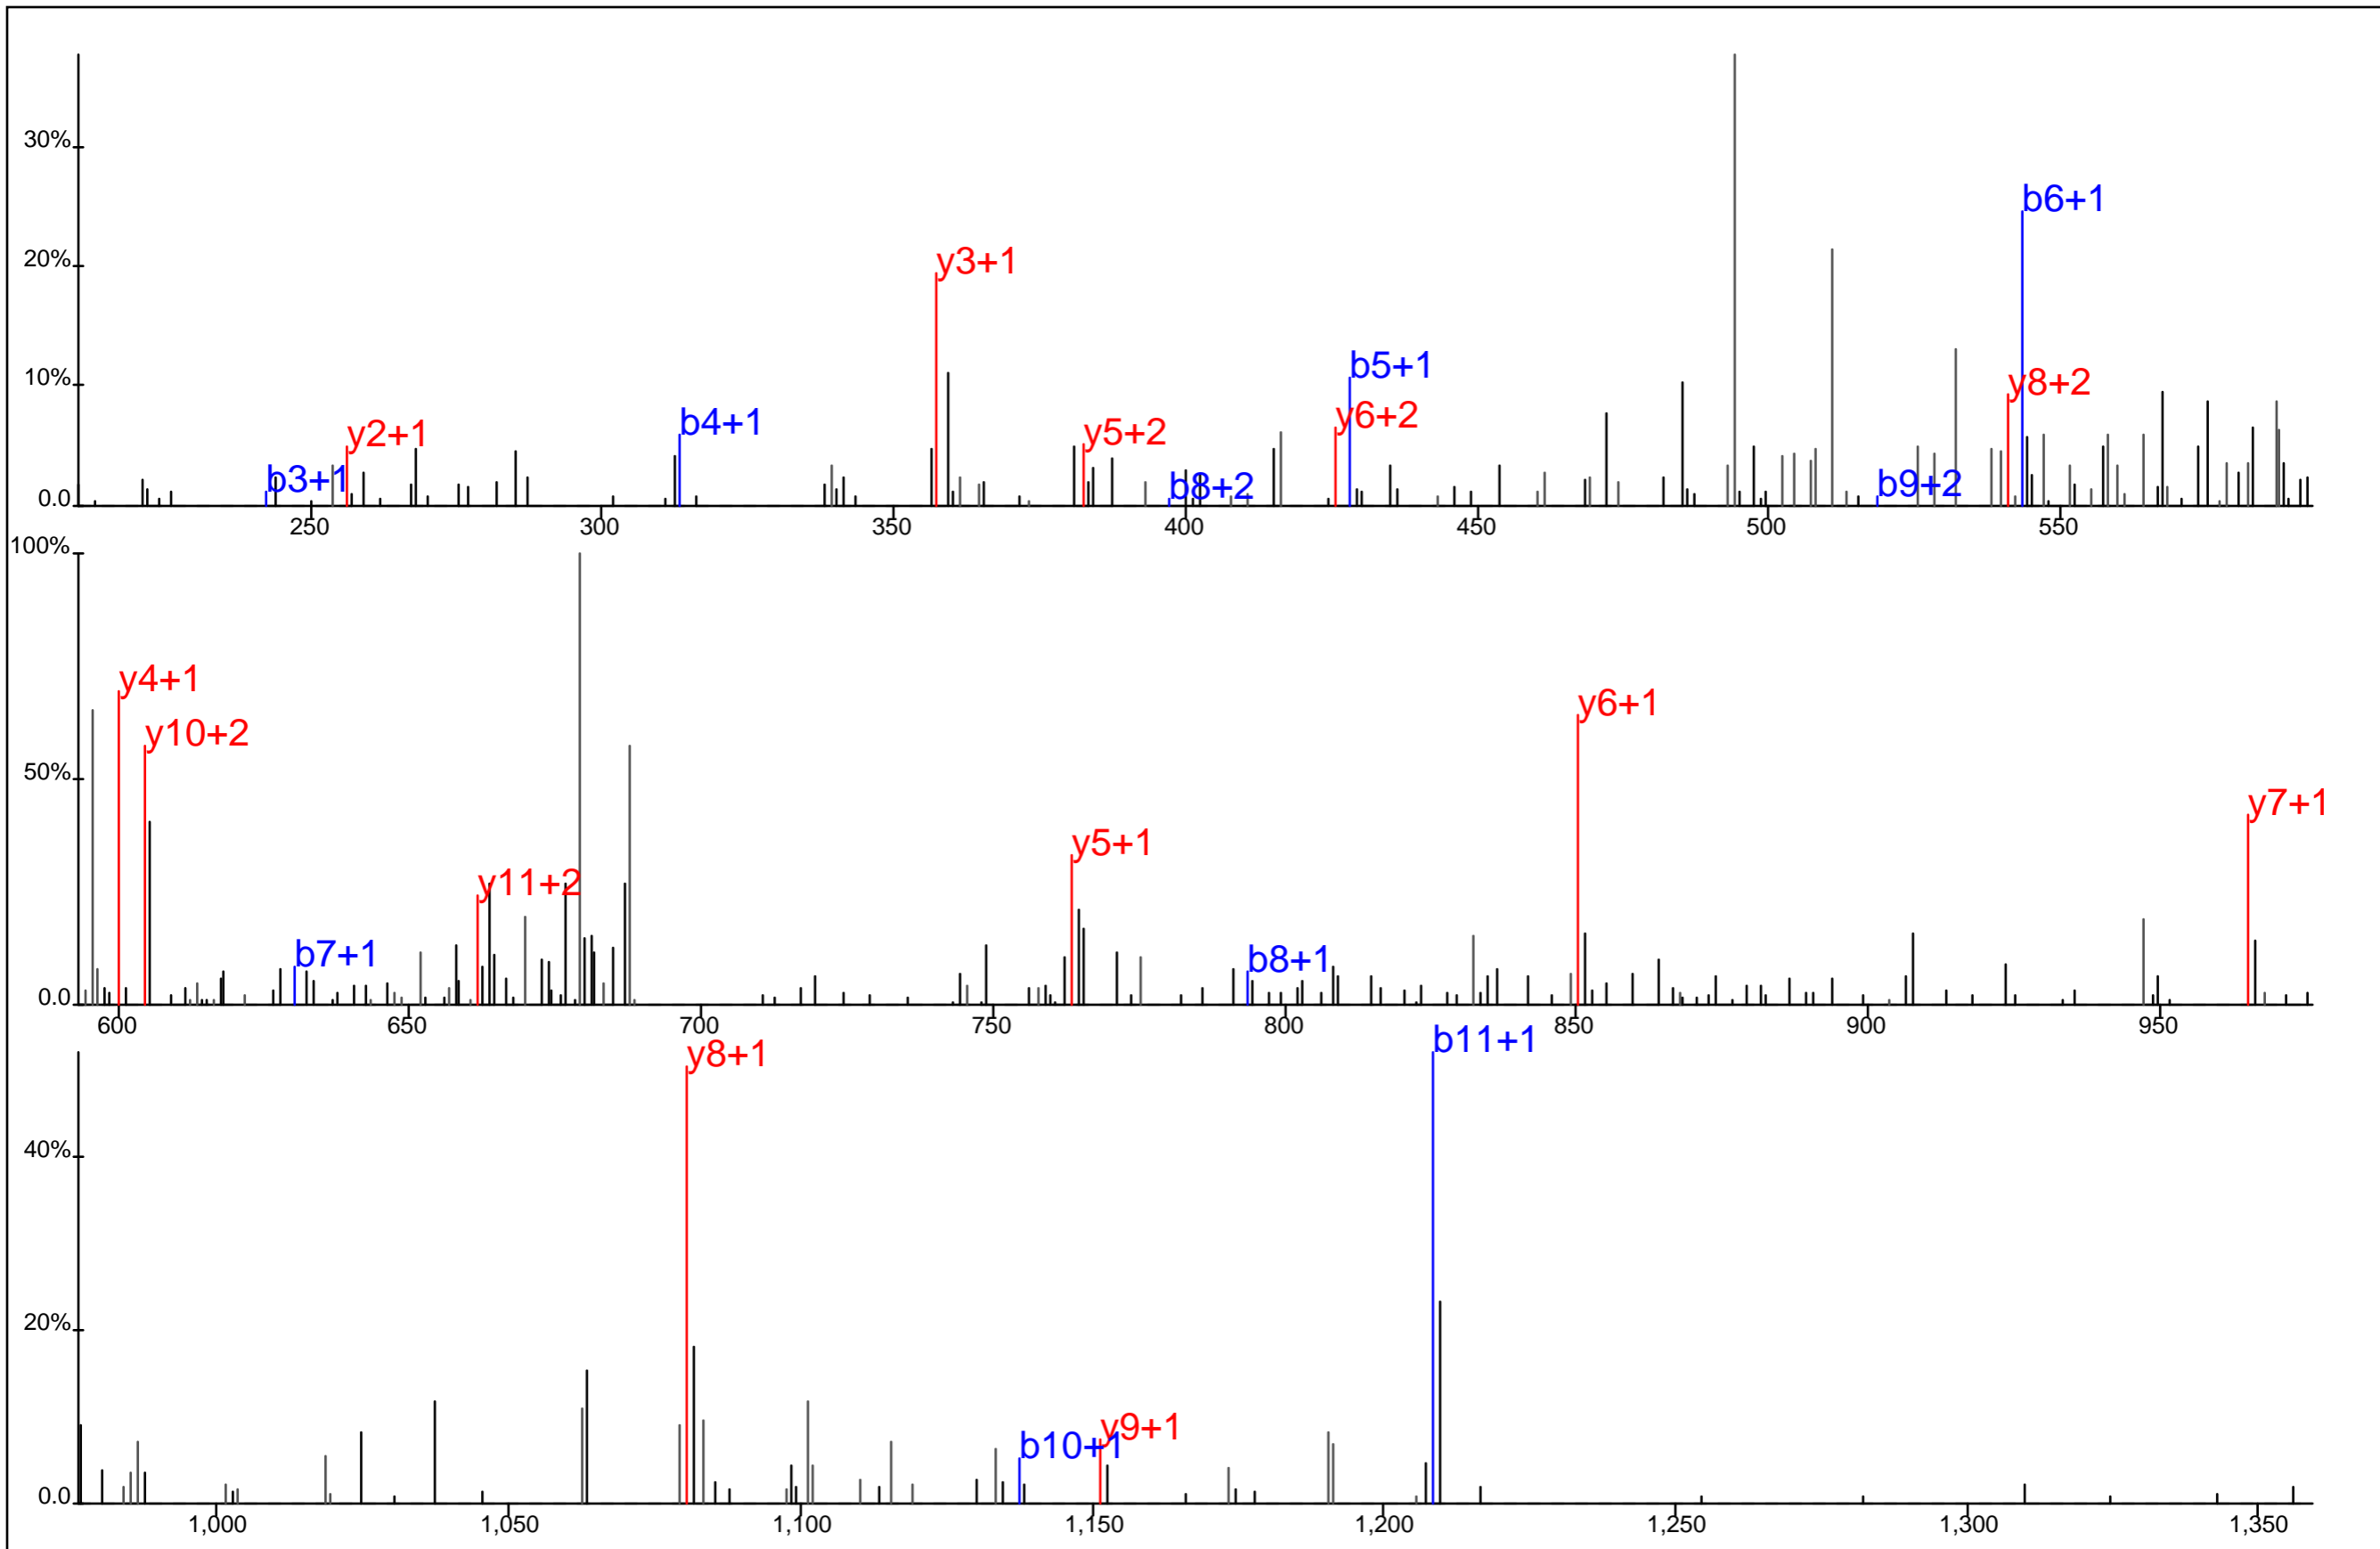

■ ■ ■ ■ ■ ■ ■ ■  
 A L G A D D S Y Y\* T A R%  
■ ■ ■ ■ ■ ■ ■ ■

Protein Name: ZAP70  
 gi Accession: 31455611  
 Precursor Mass: 696.7902+2  
 Delta Mass: 1.815 ppm  
 XCorr: 63.33

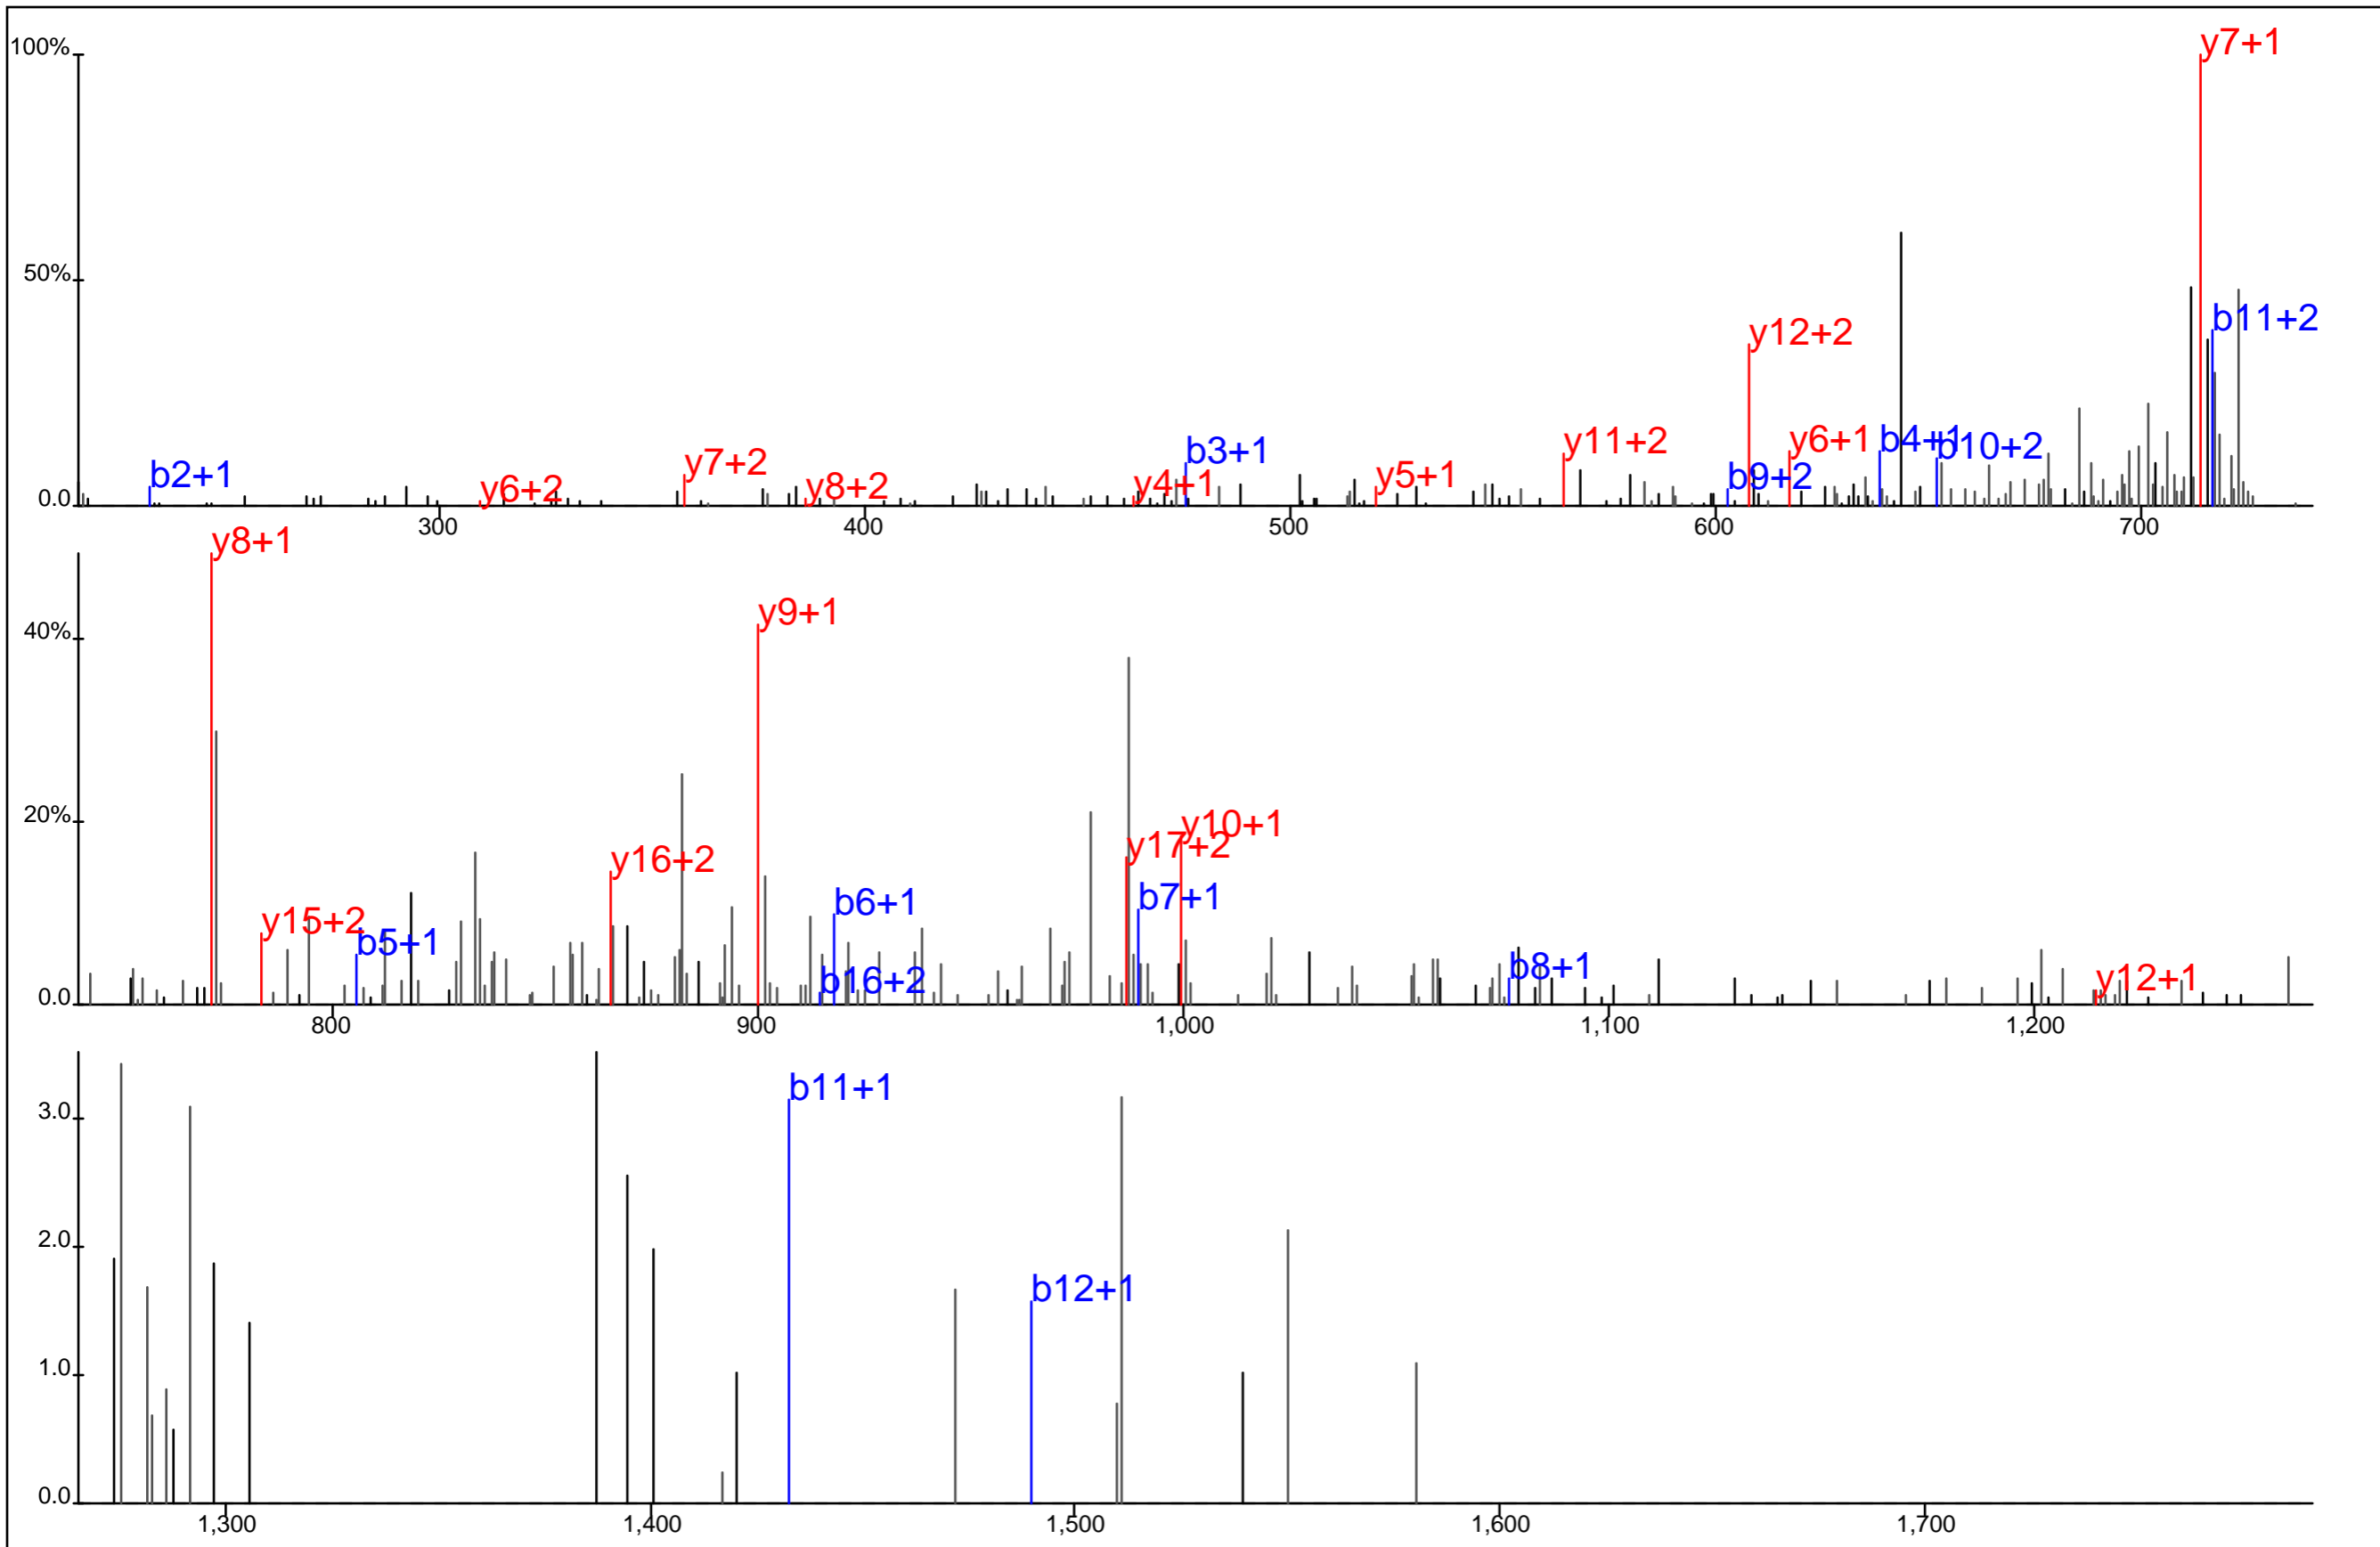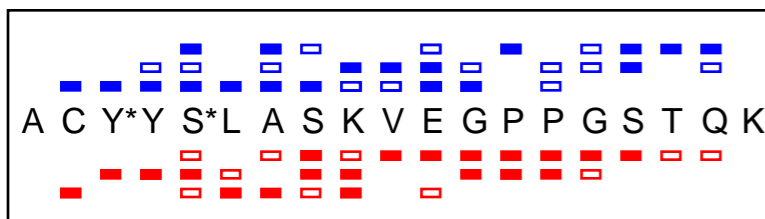

Protein Name: ZAP70  
 gi Accession: 31455611  
 Precursor Mass: 734.9806+3  
 Delta Mass: 4.276 ppm  
 XCorr: 23.82

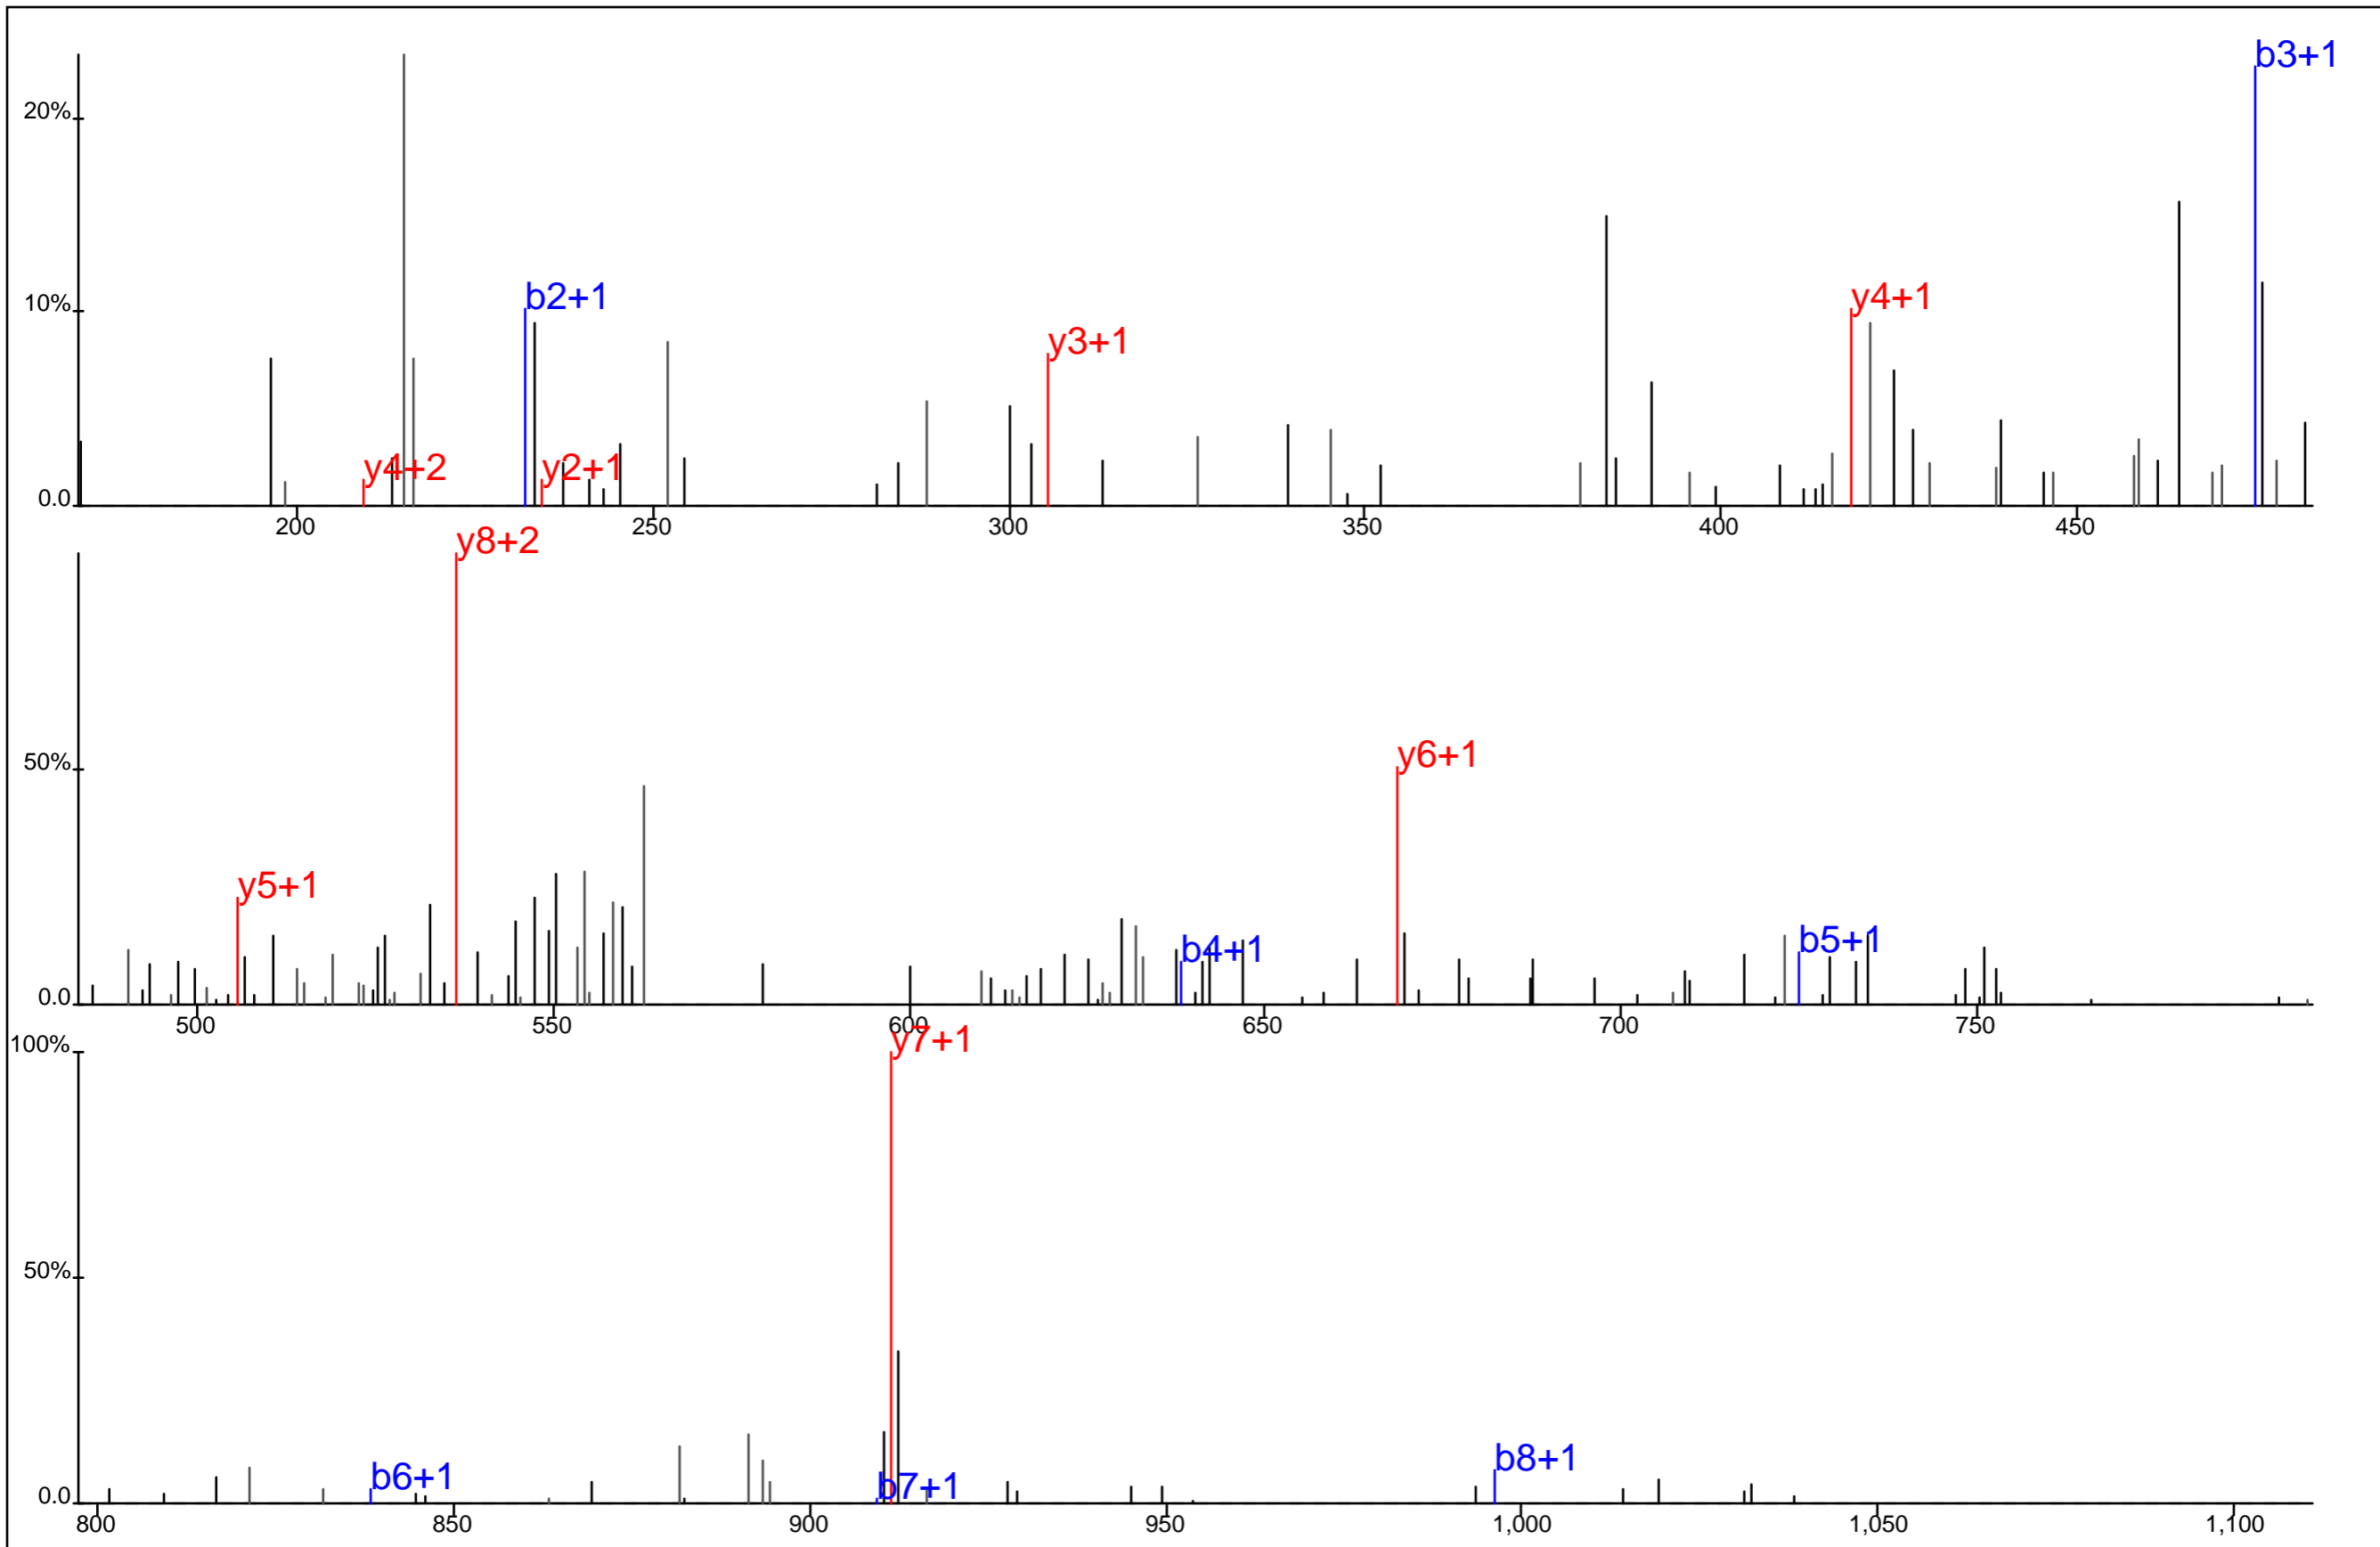

■ ■ ■ ■ ■ ■  
 A C Y\*Y S L A S K  
□ □ □ □ □ □  
□ □ □ □ □ □

Protein Name: ZAP70  
 gi Accession: 31455611  
 Precursor Mass: 571.7351+2  
 Delta Mass: 3.666 ppm  
 XCorr: 13.43

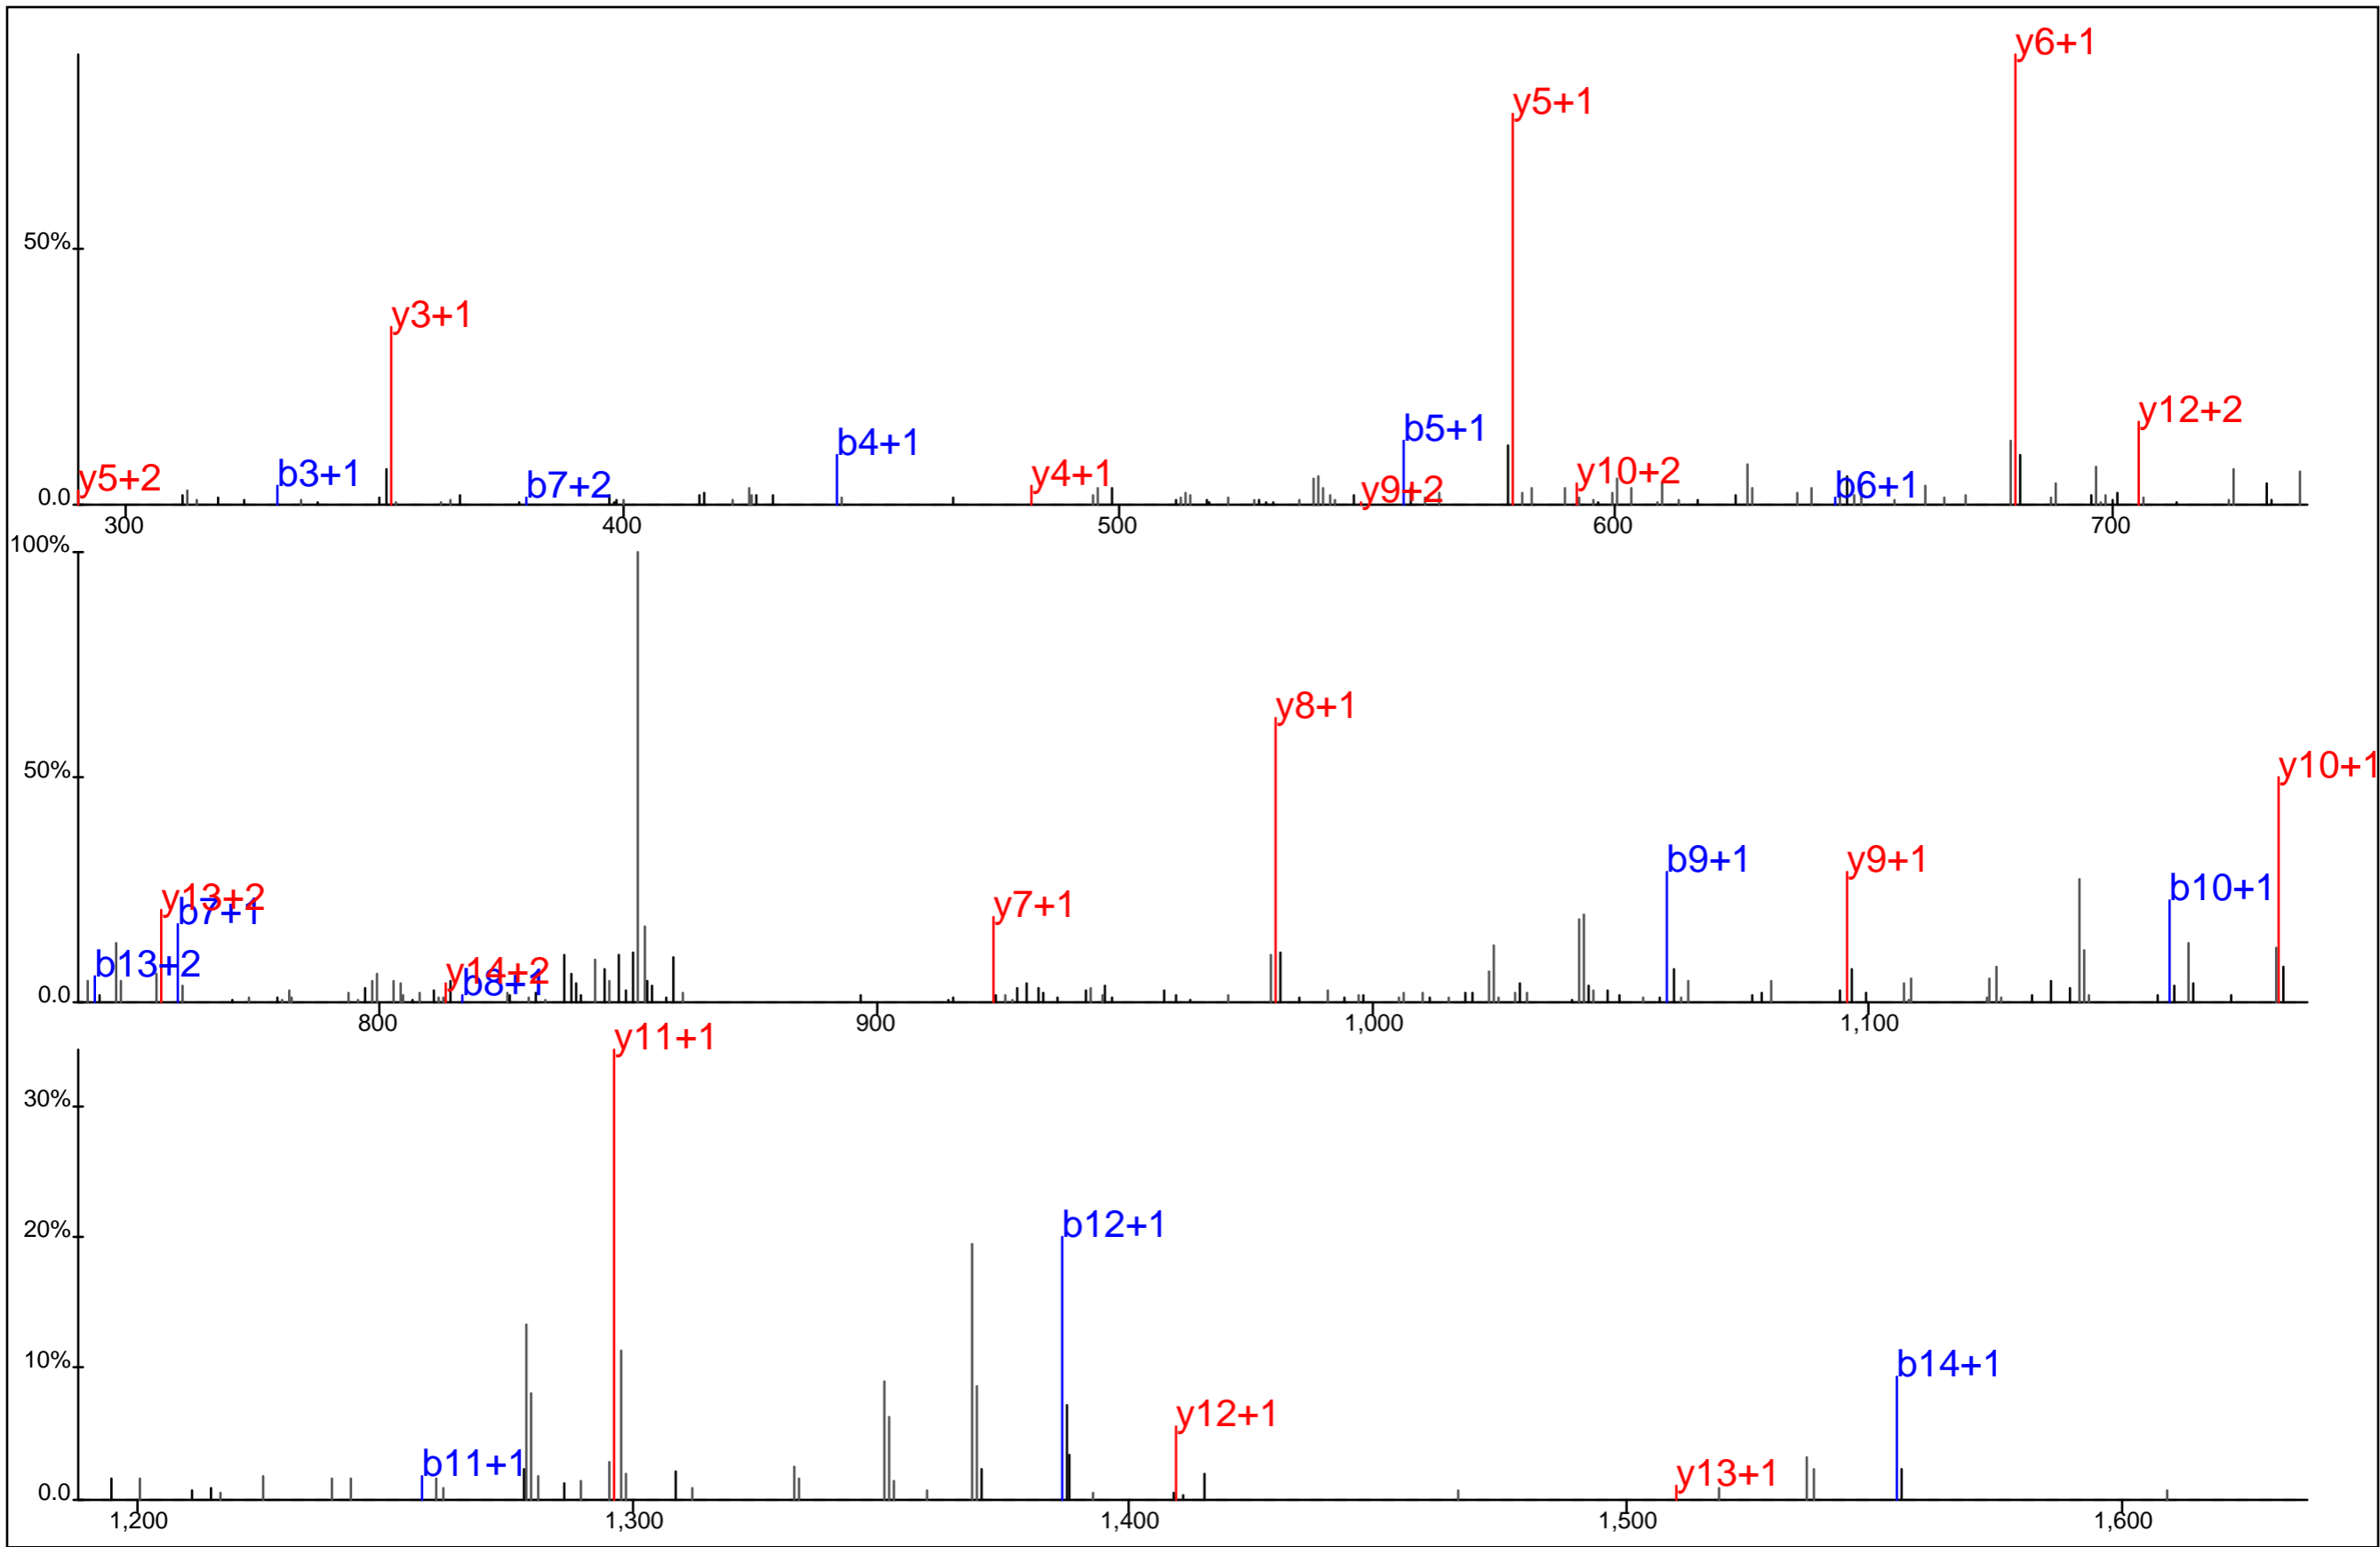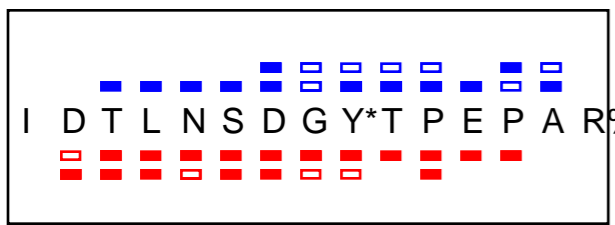

Protein Name: ZAP70  
 gi Accession: 31455611  
 Precursor Mass: 869.8835+2  
 Delta Mass: 2.259 ppm  
 XCorr: 83.97



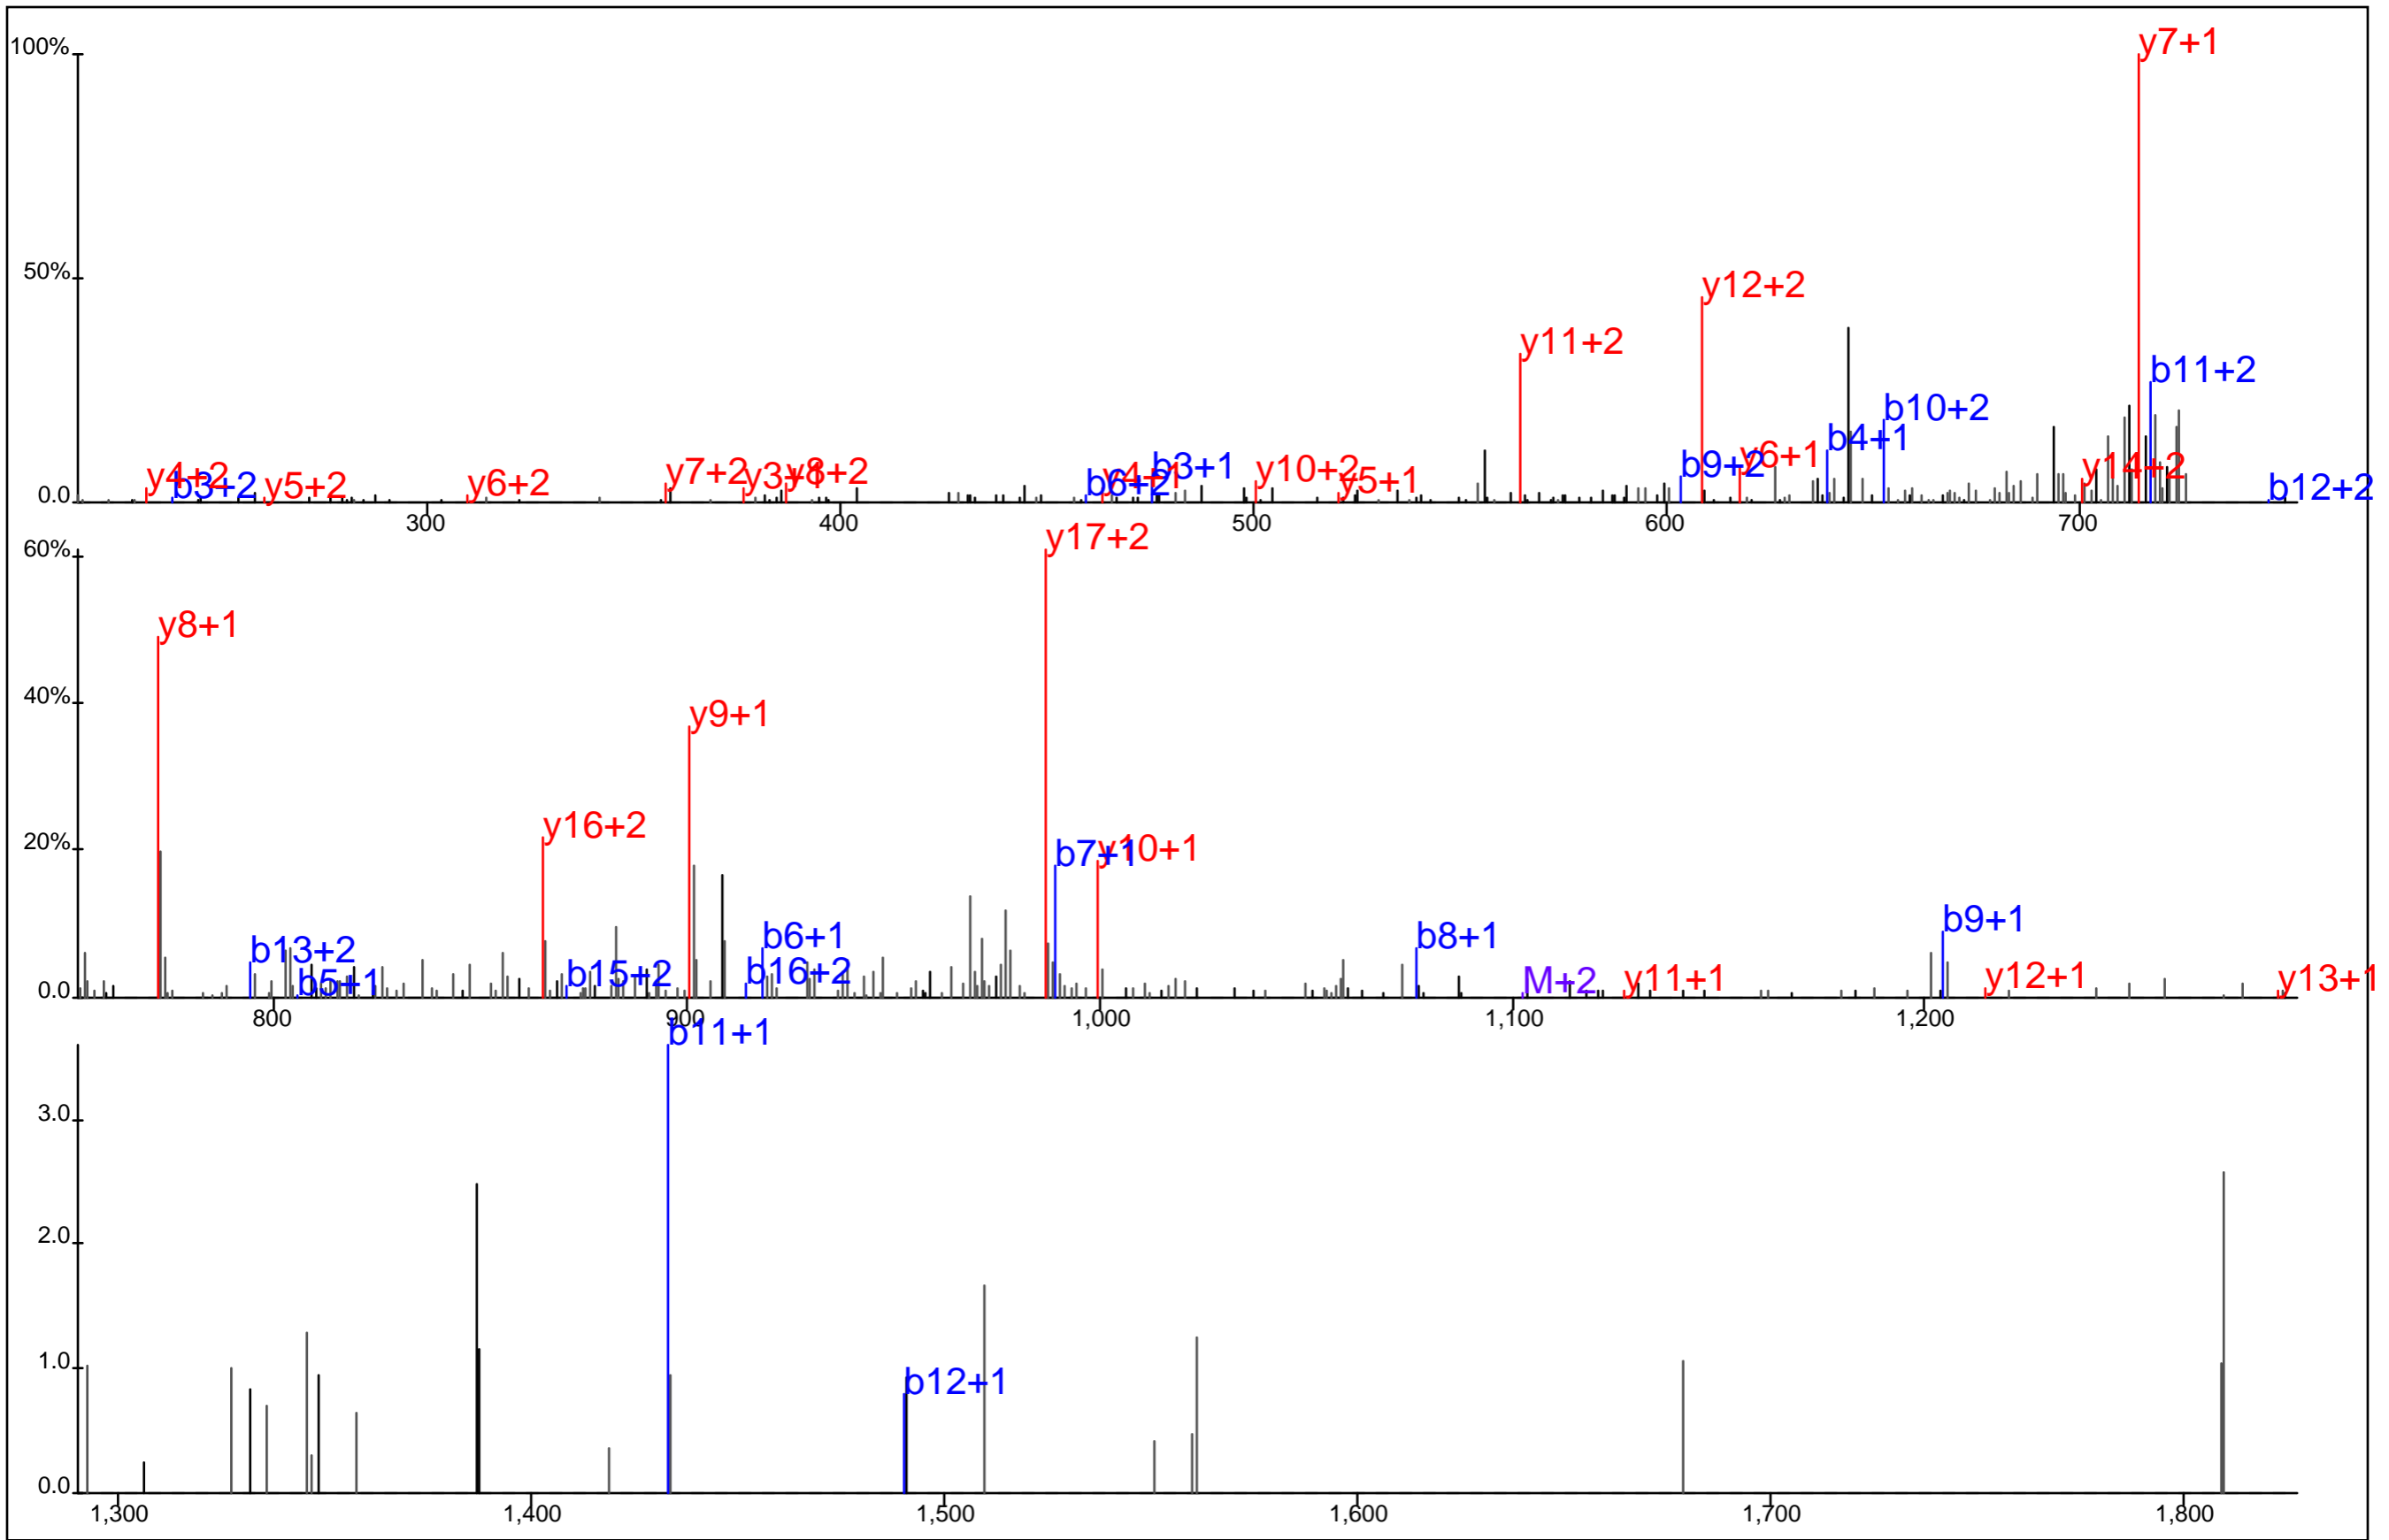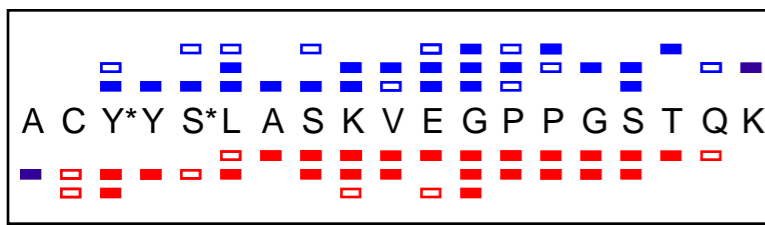

Protein Name: ZAP70  
 gi Accession: 31455611  
 Precursor Mass: 734.9777+3  
 Delta Mass: 0.286 ppm  
 XCorr: 55.84



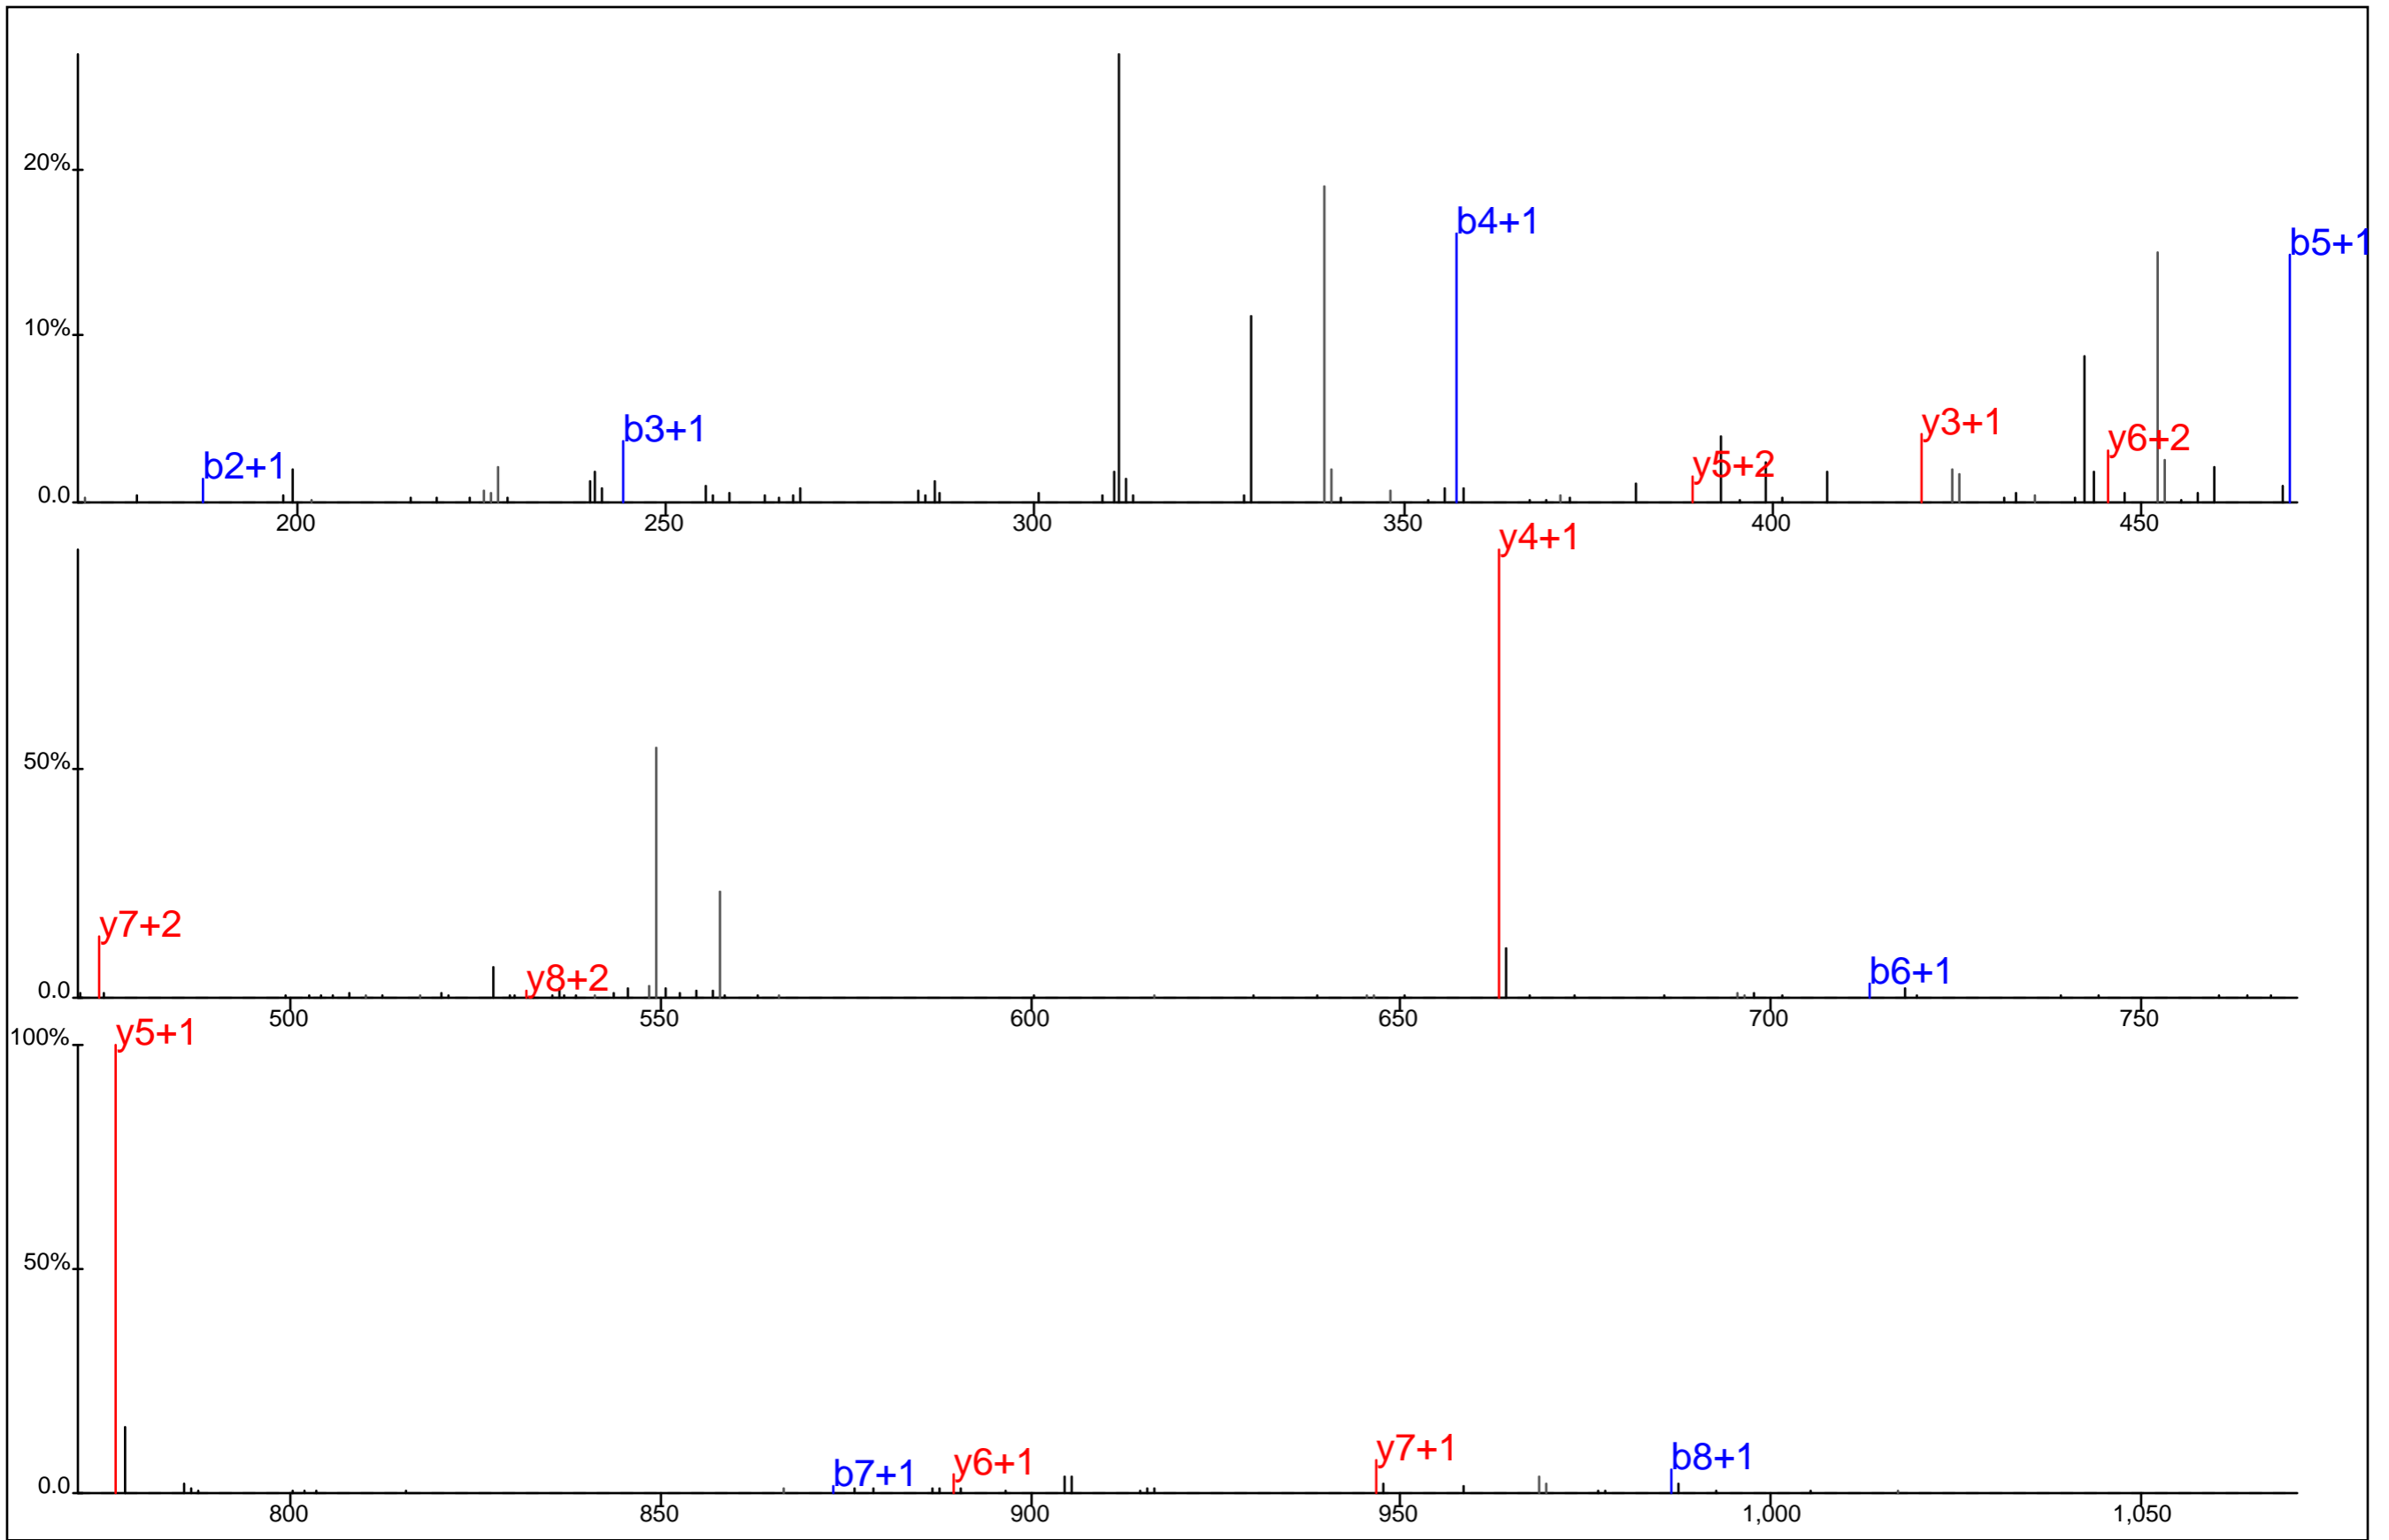

■ ■ ■ ■ ■ ■ ■  
□ □ □ □ □ □ □  
**A D G L I Y\* C L K**

Protein Name: ZAP70  
 gi Accession: 31455611  
 Precursor Mass: 566.7616+2  
 Delta Mass: 4.519 ppm  
 XCorr: 32.33

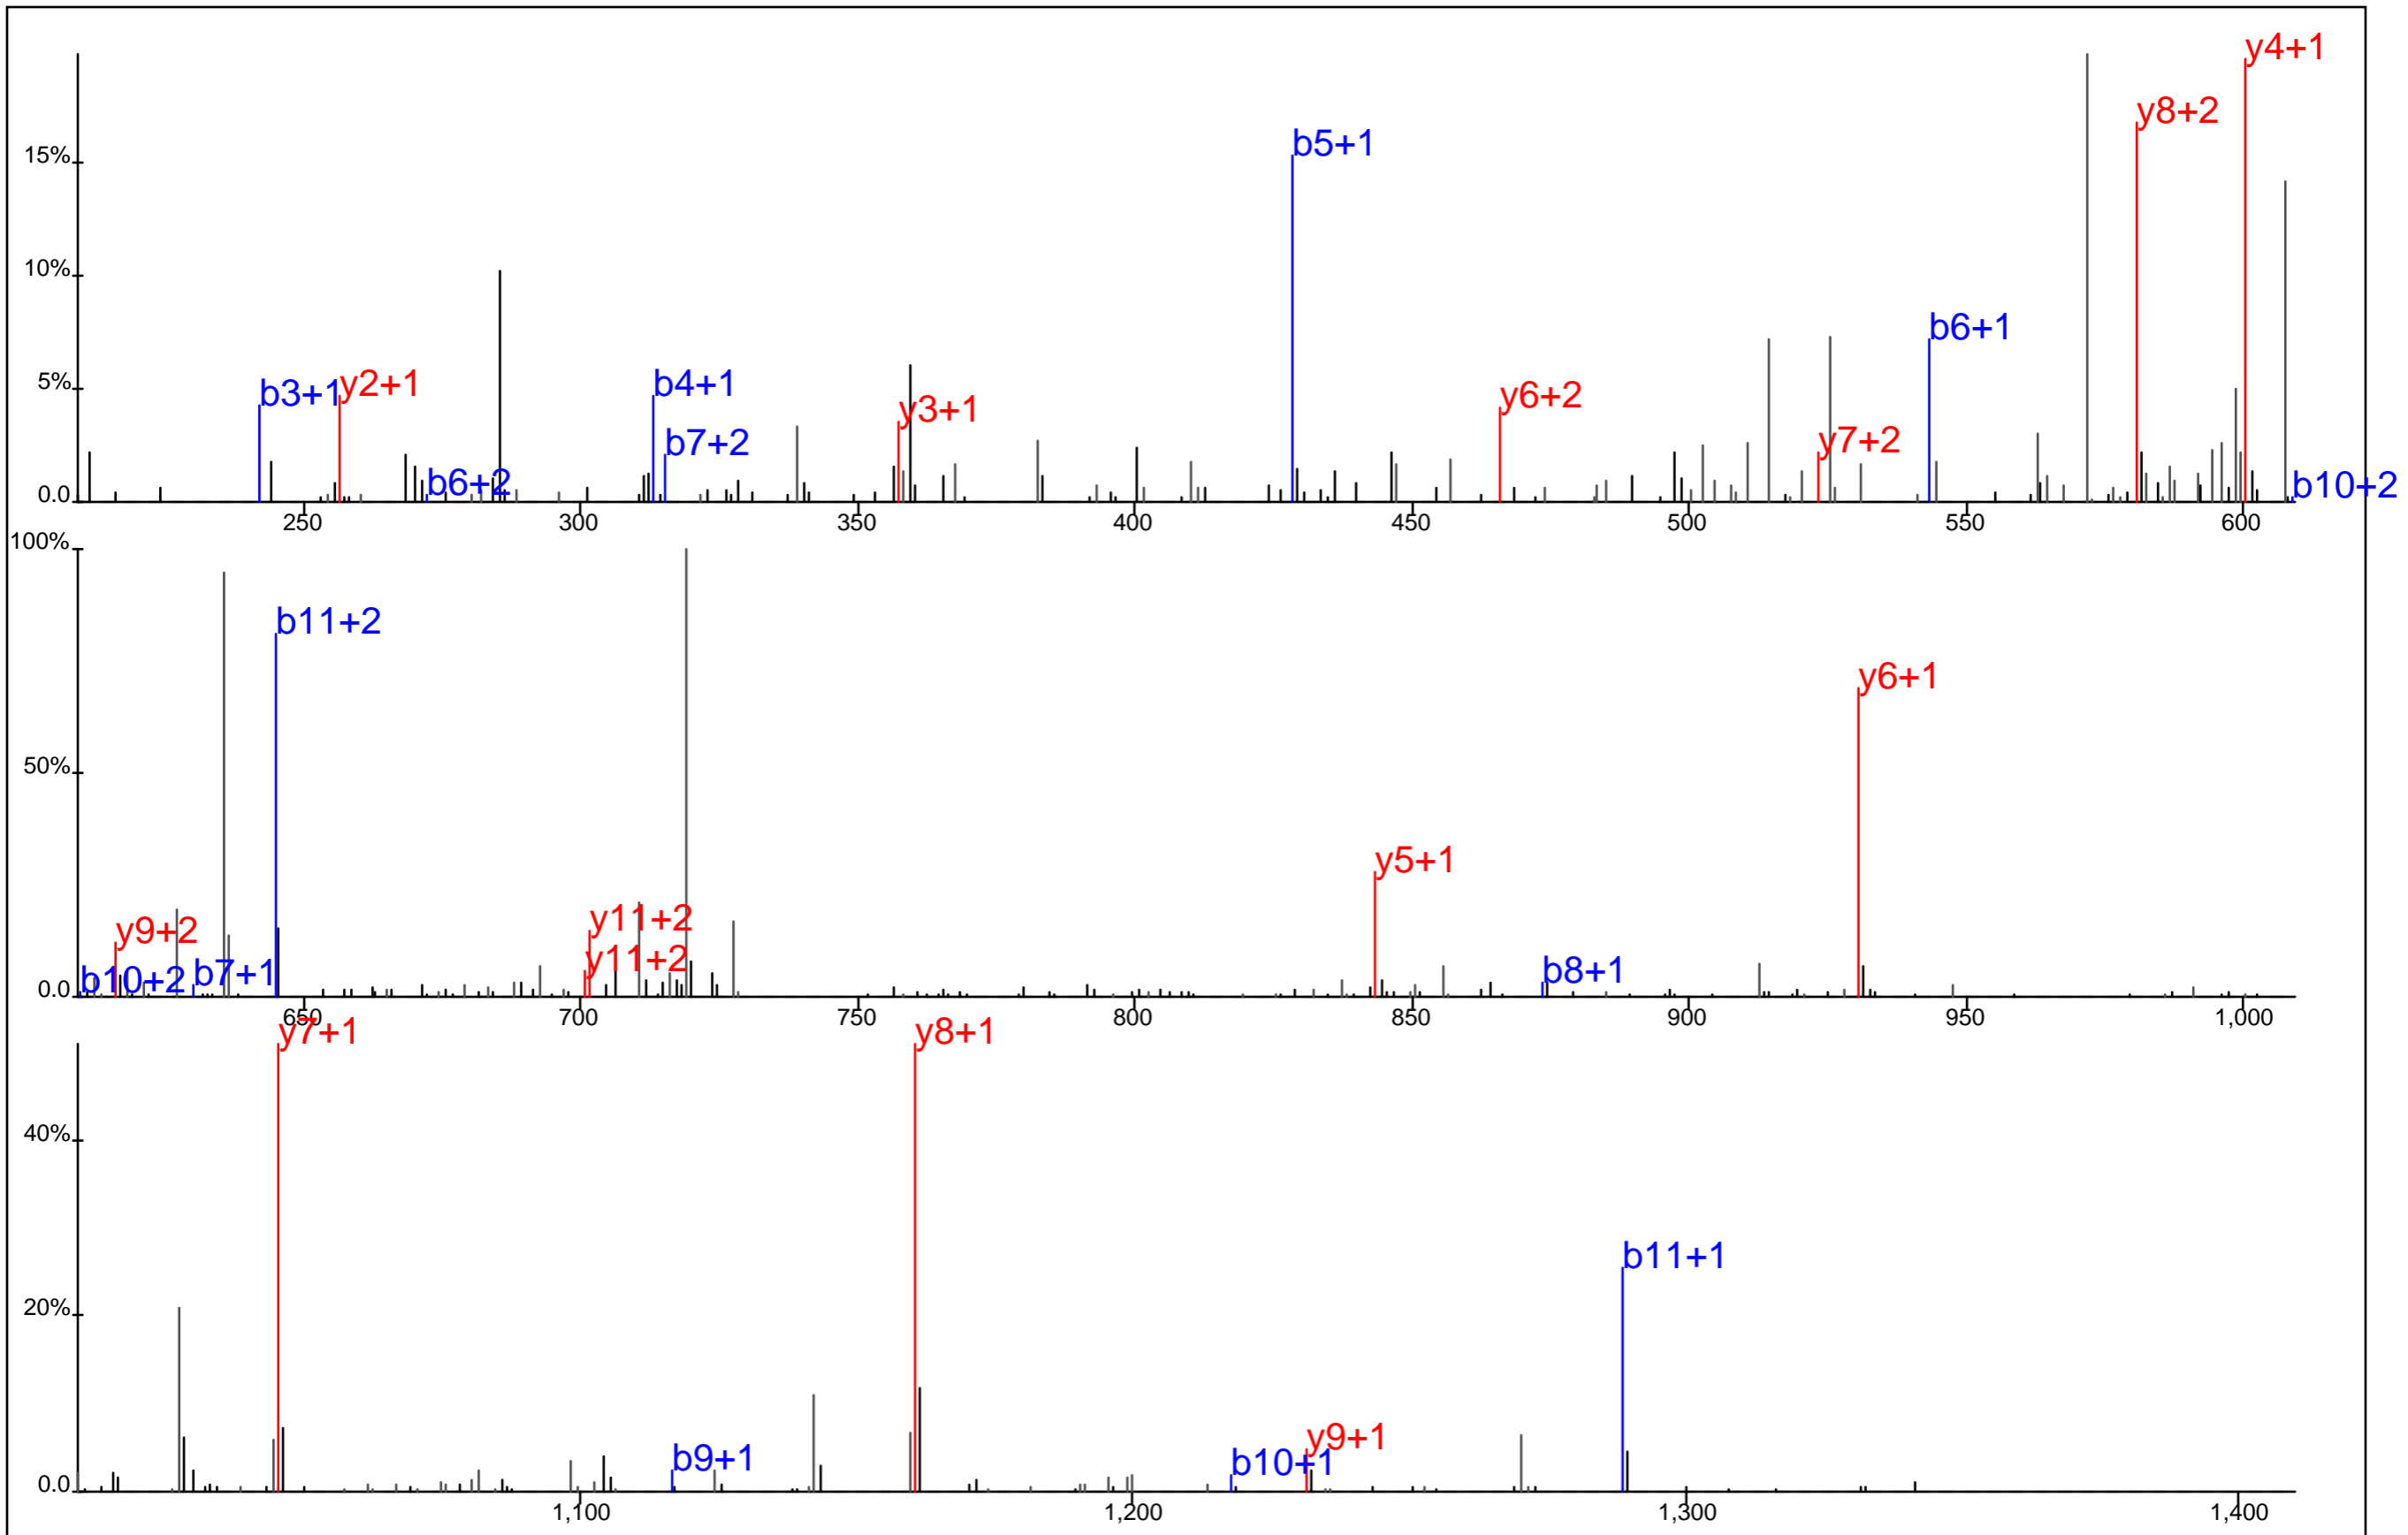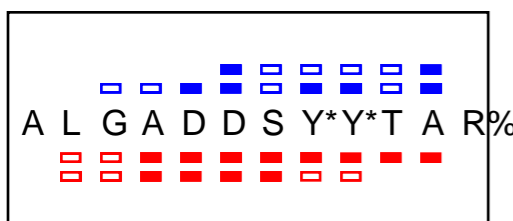

Protein Name: ZAP70  
 gi Accession: 31455611  
 Precursor Mass: 736.7742+2  
 Delta Mass: 2.864 ppm  
 XCorr: 63.51

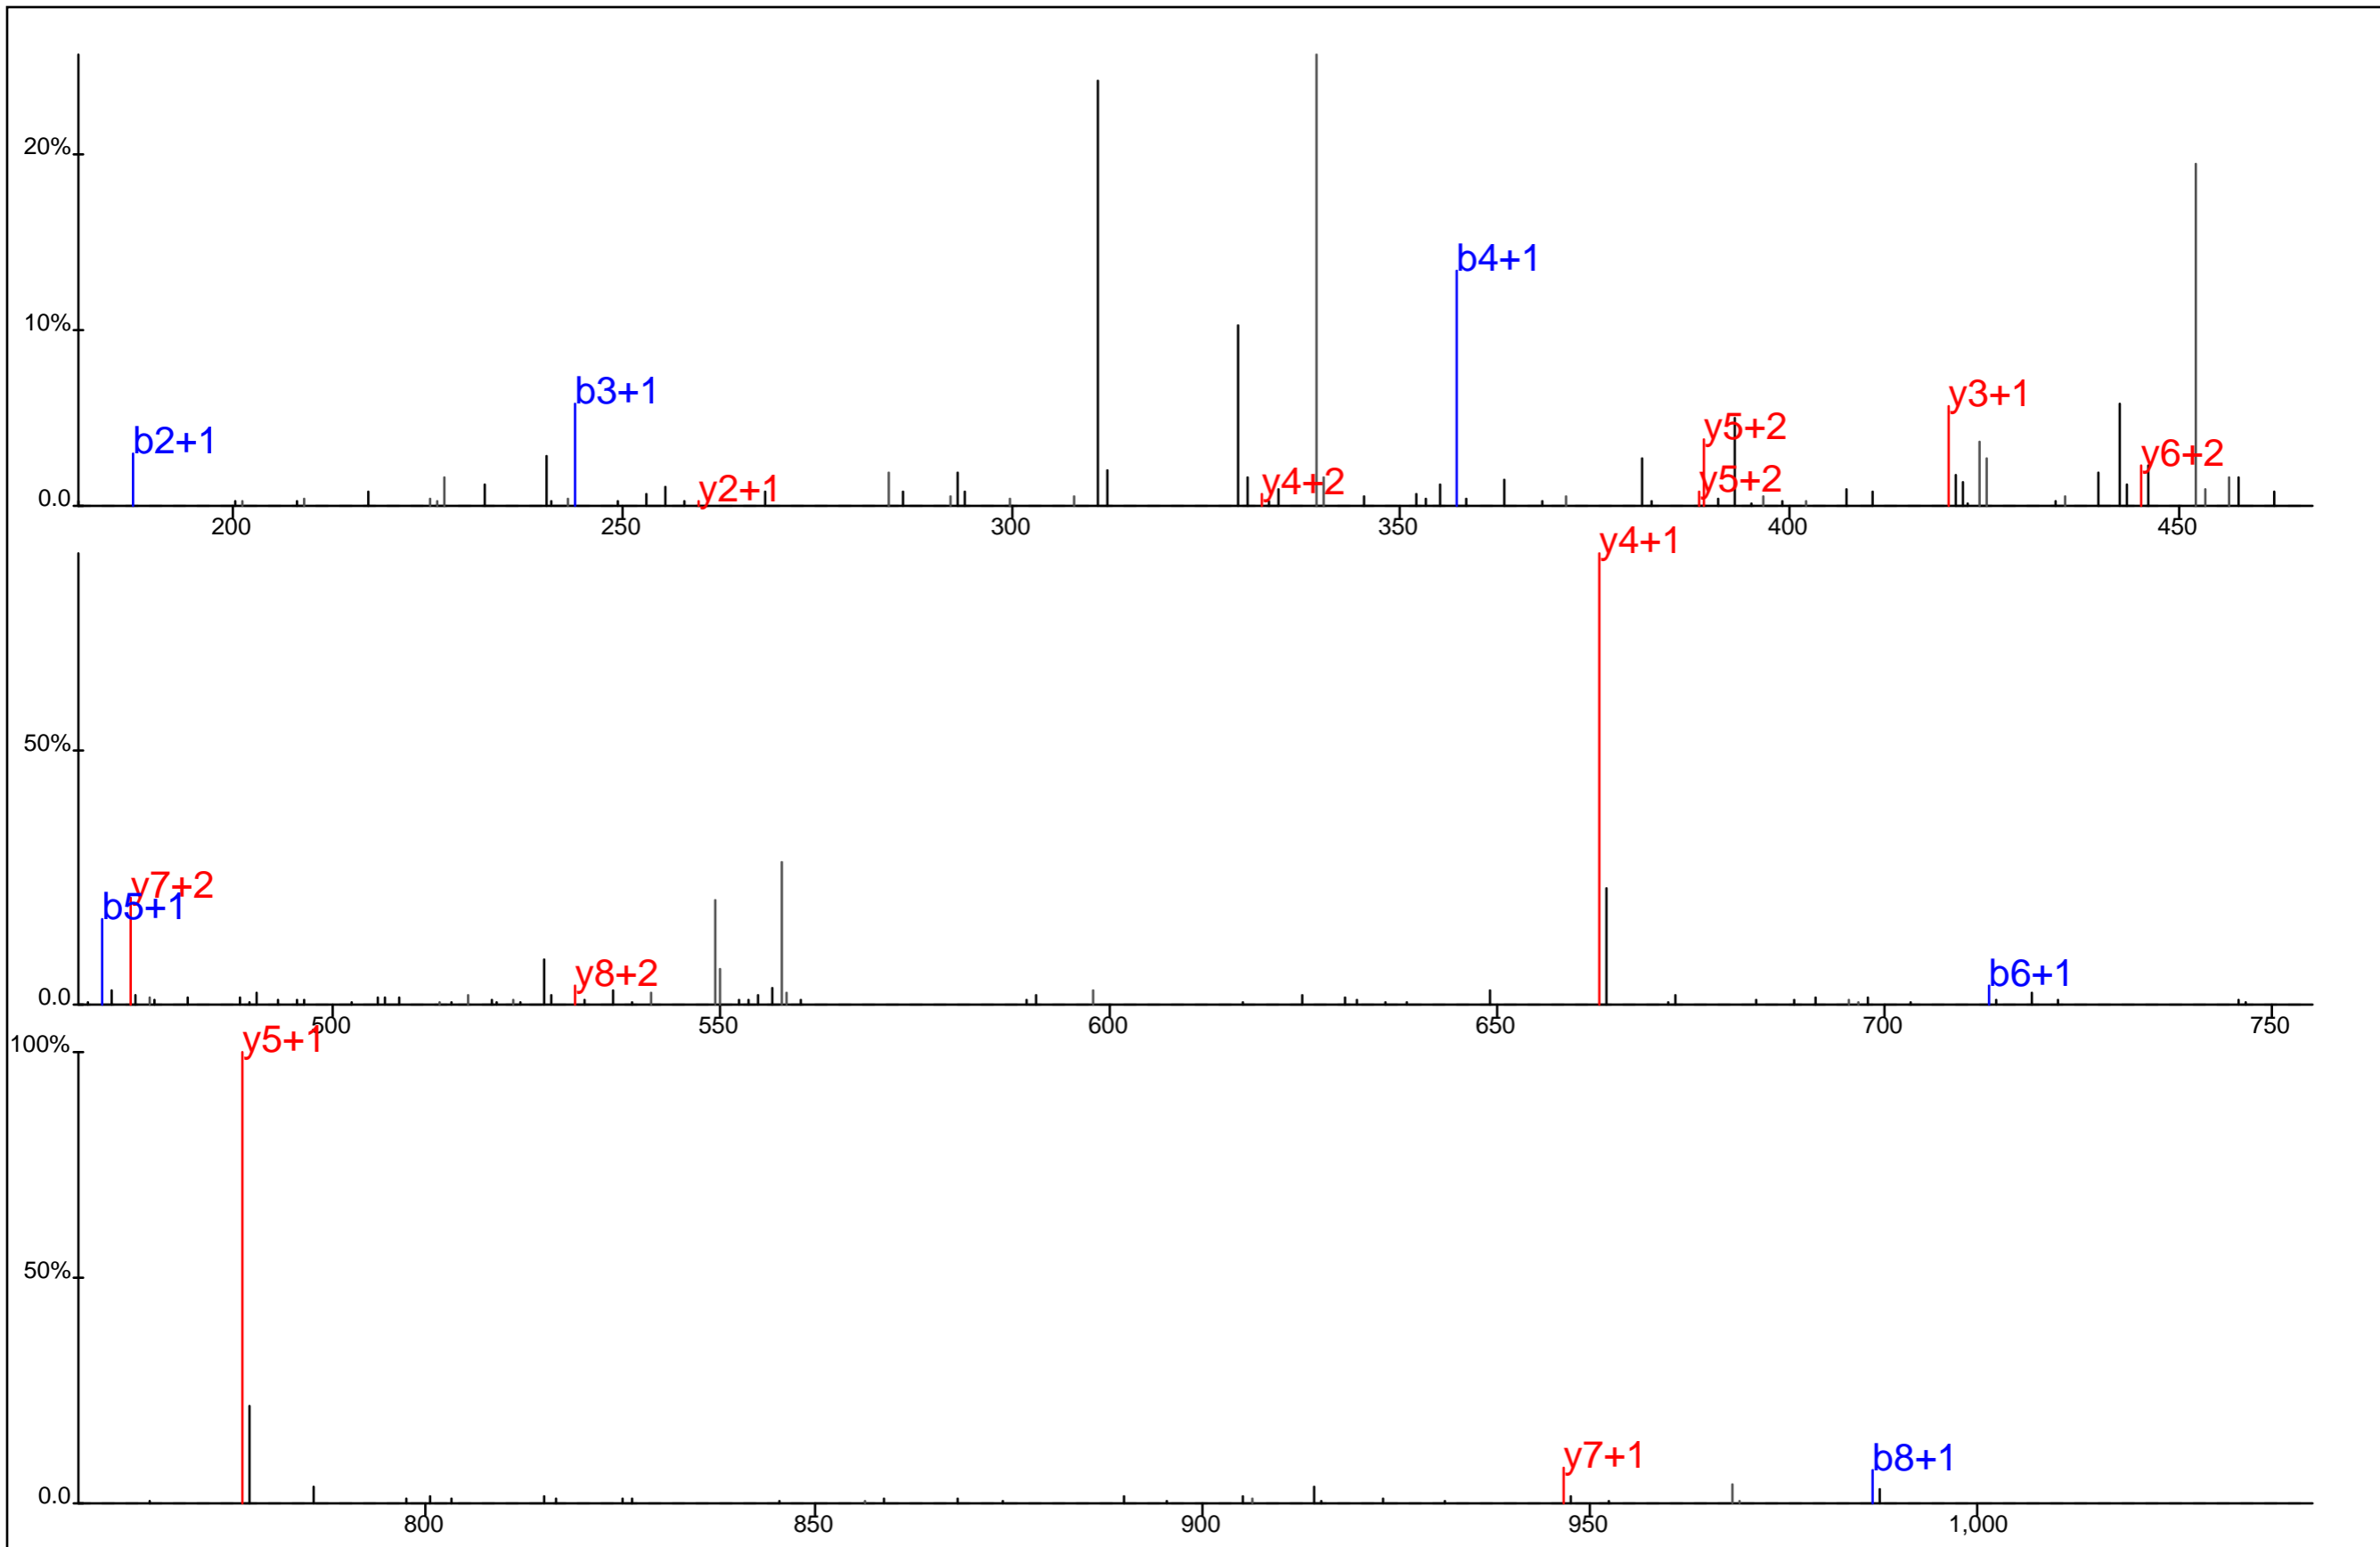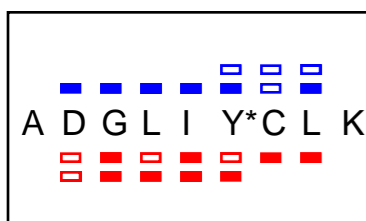

Protein Name: ZAP70  
 gi Accession: 31455611  
 Precursor Mass: 566.7612+2  
 Delta Mass: 3.760 ppm  
 XCorr: 35.81

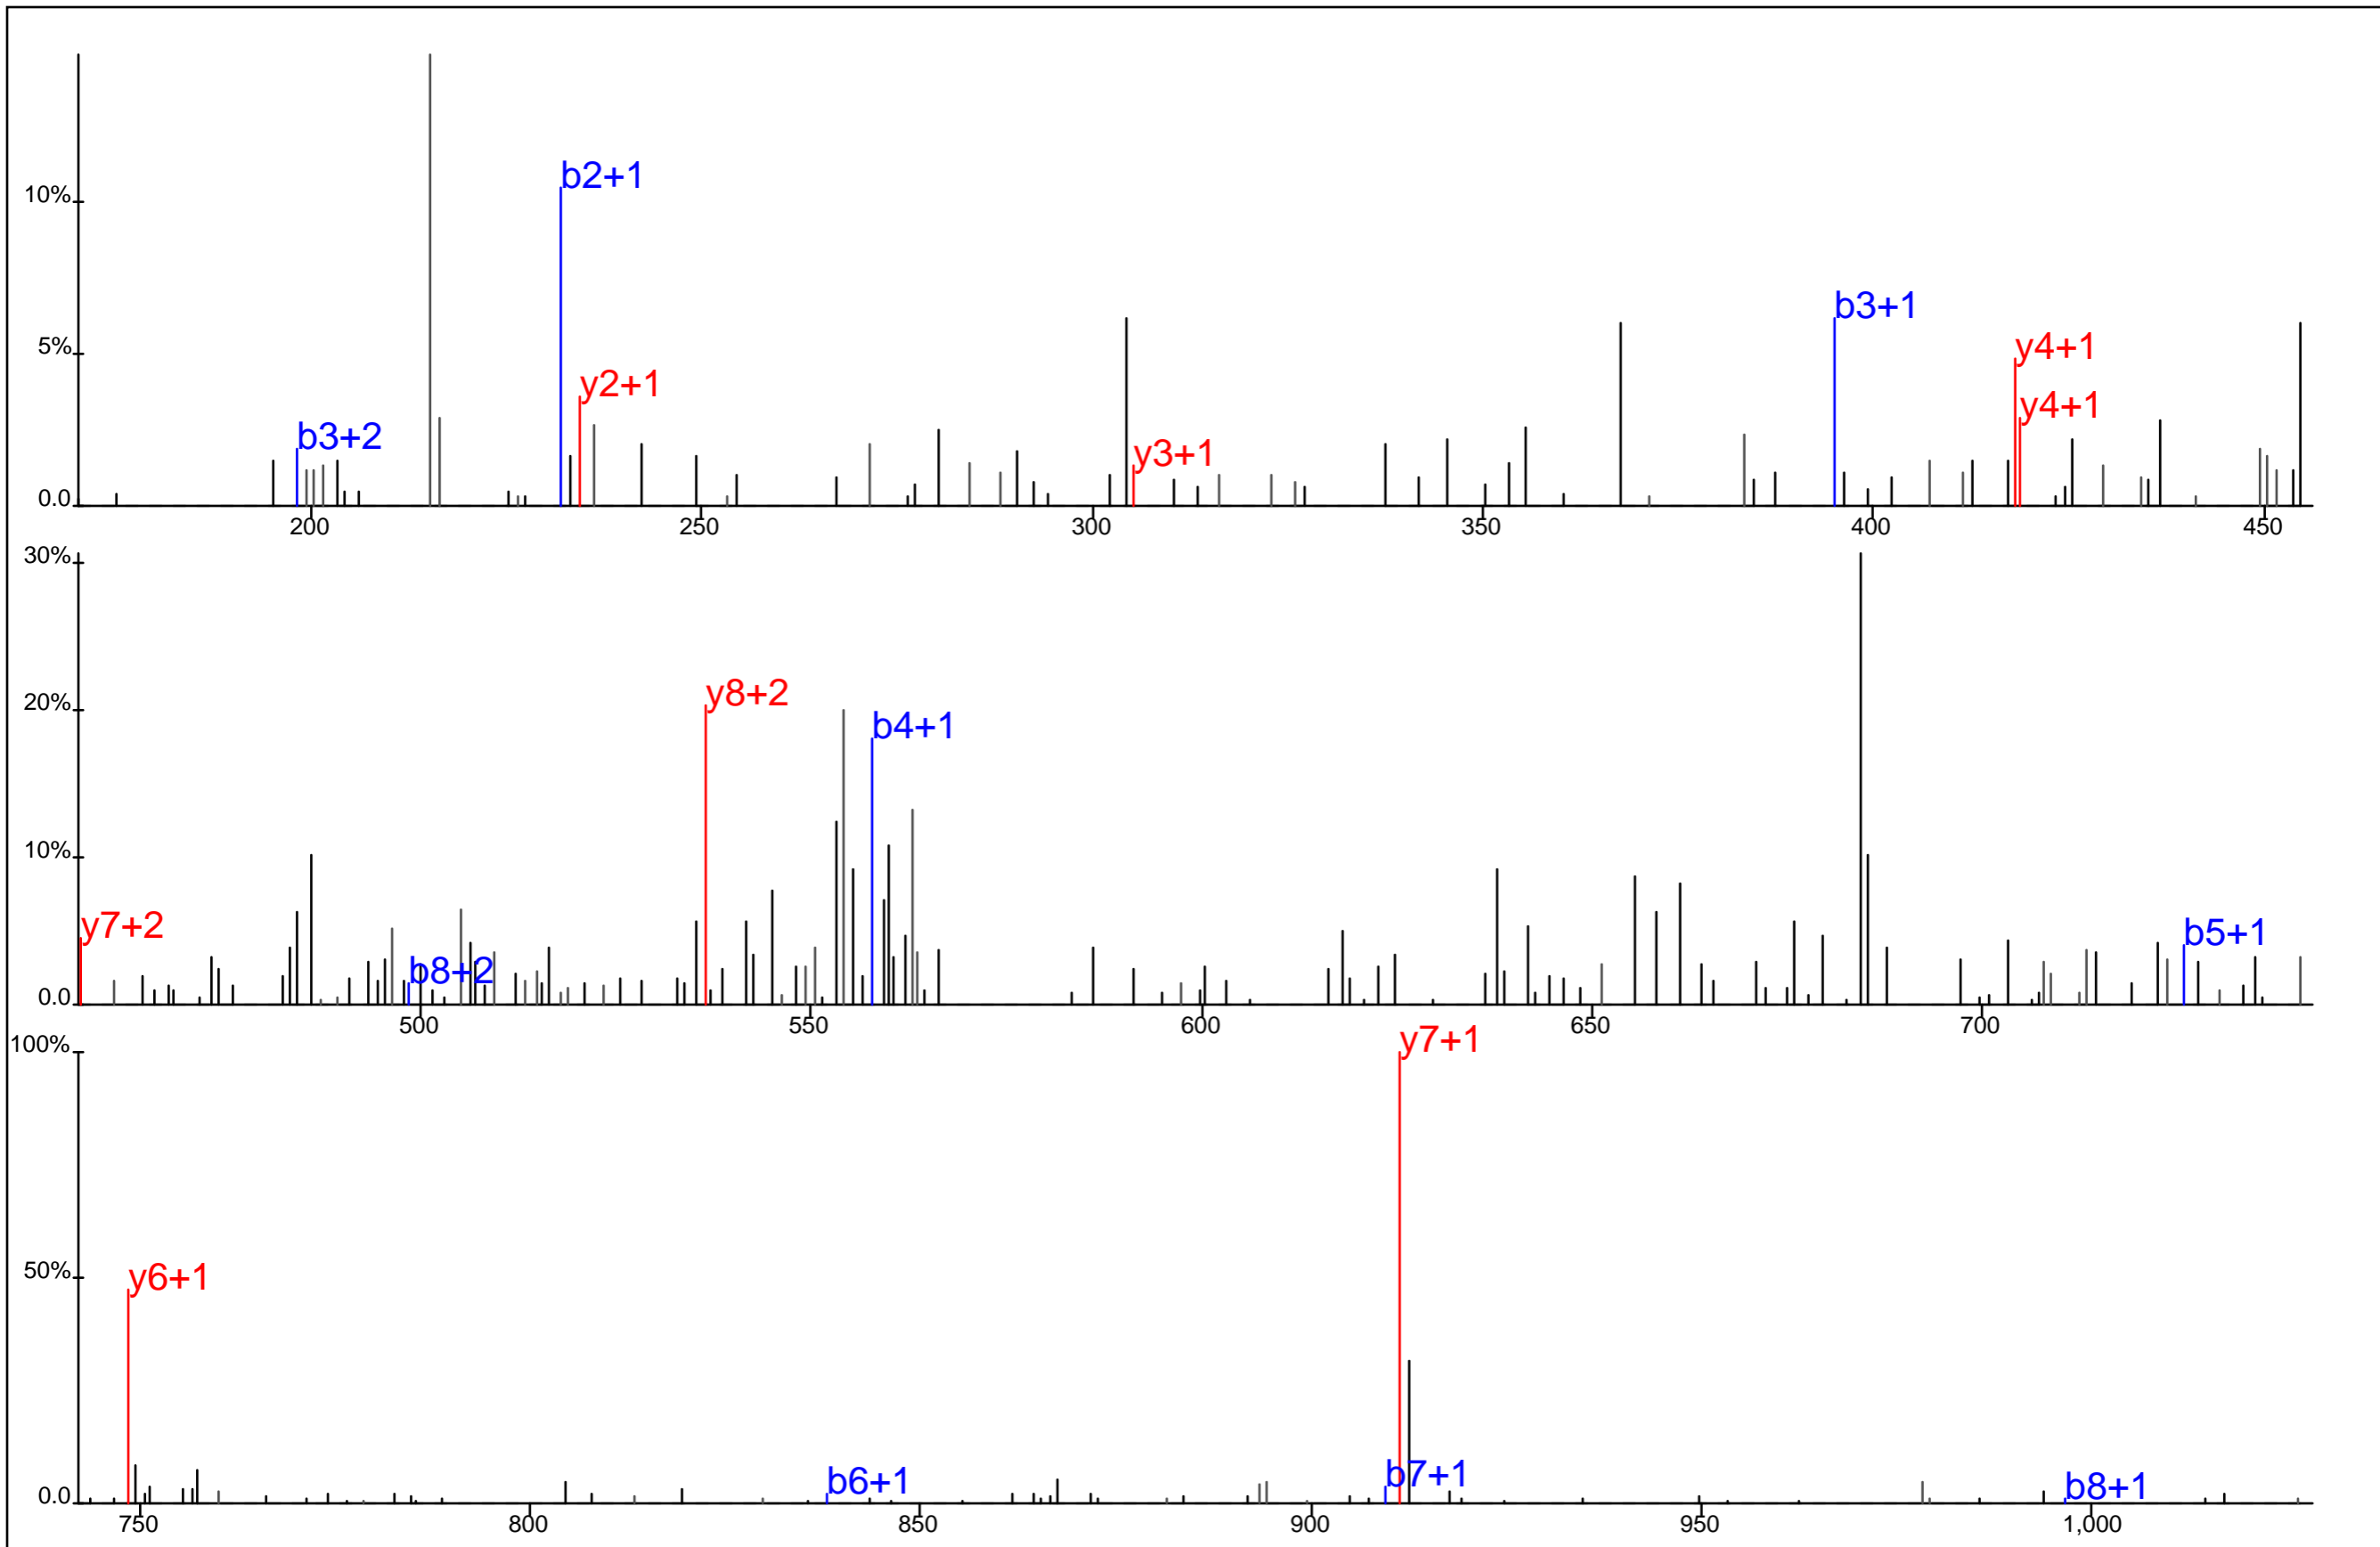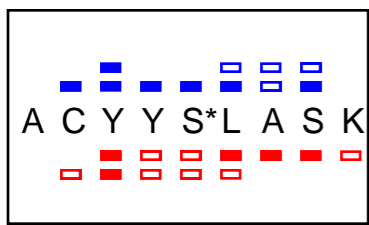

Protein Name: ZAP70  
 gi Accession: 31455611  
 Precursor Mass: 571.7328+2  
 Delta Mass: 0.396 ppm  
 XCorr: 16.73

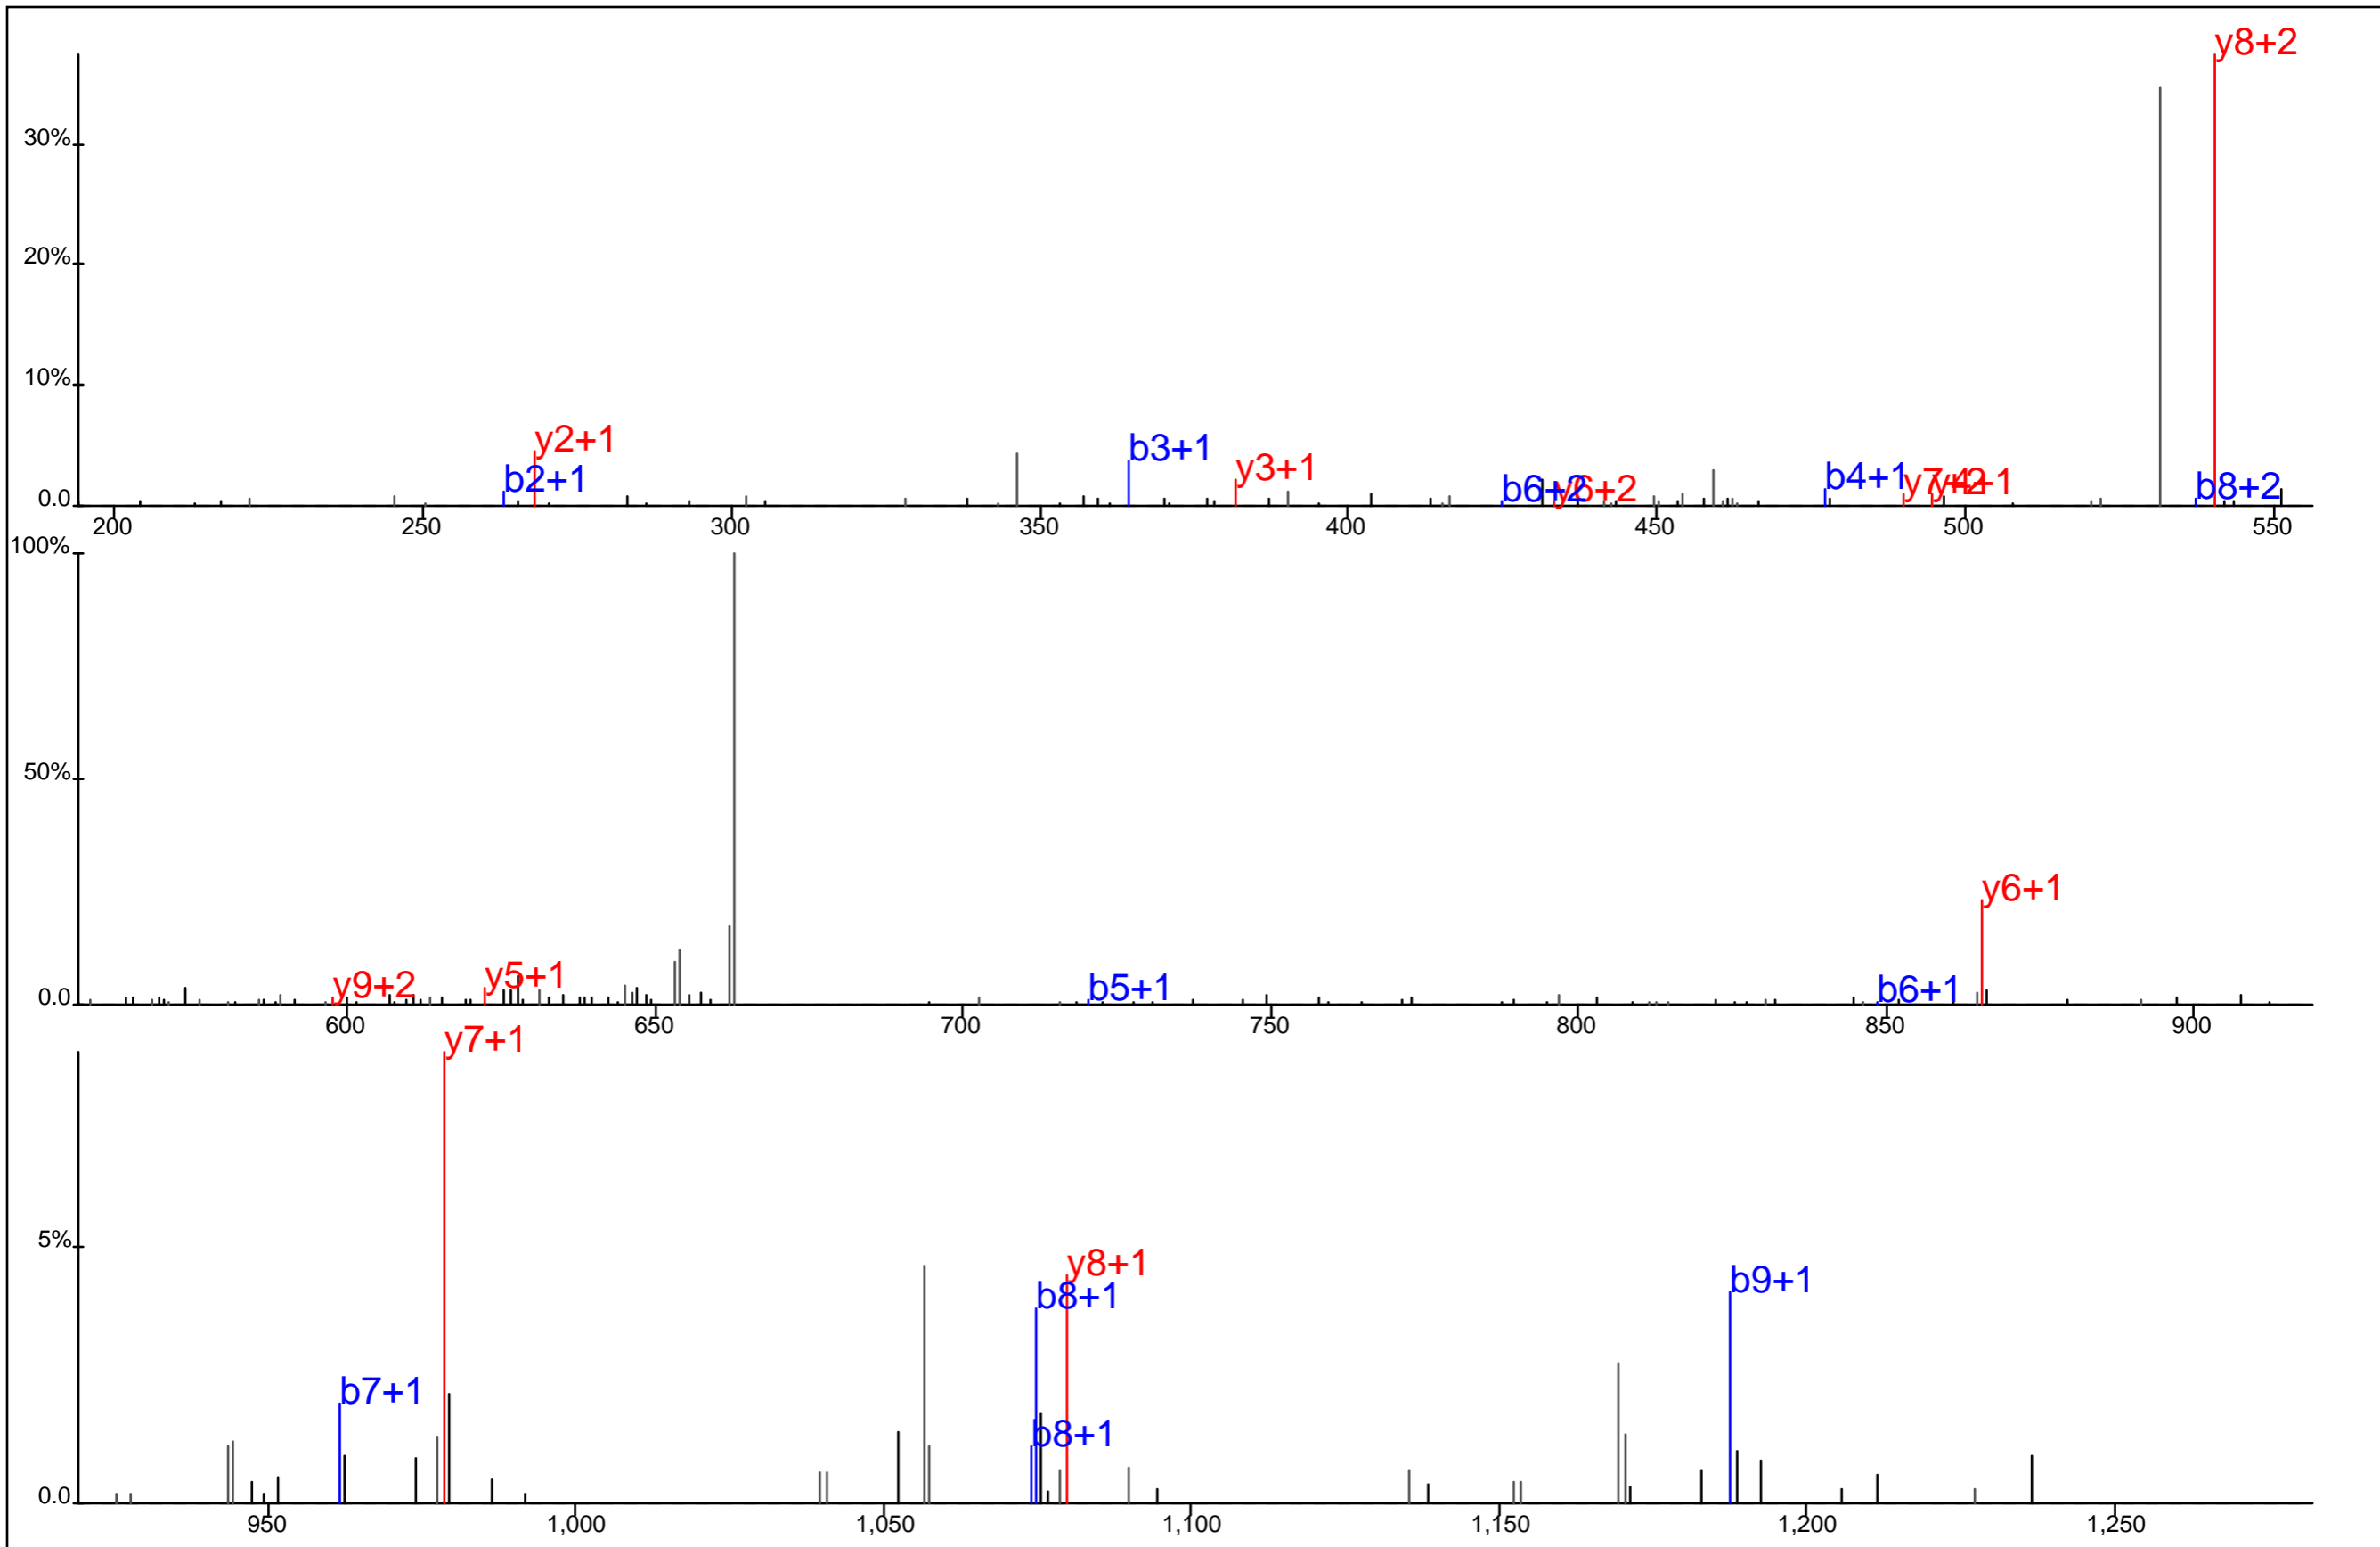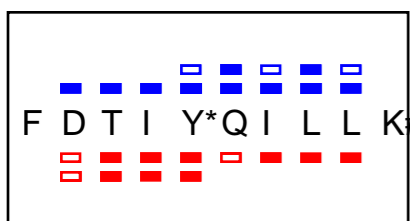

Protein Name: Zinc finger protein 147  
 gi Accession: 12585547  
 Precursor Mass: 671.3539+2  
 Delta Mass: 4.448 ppm  
 XCorr: 35.44

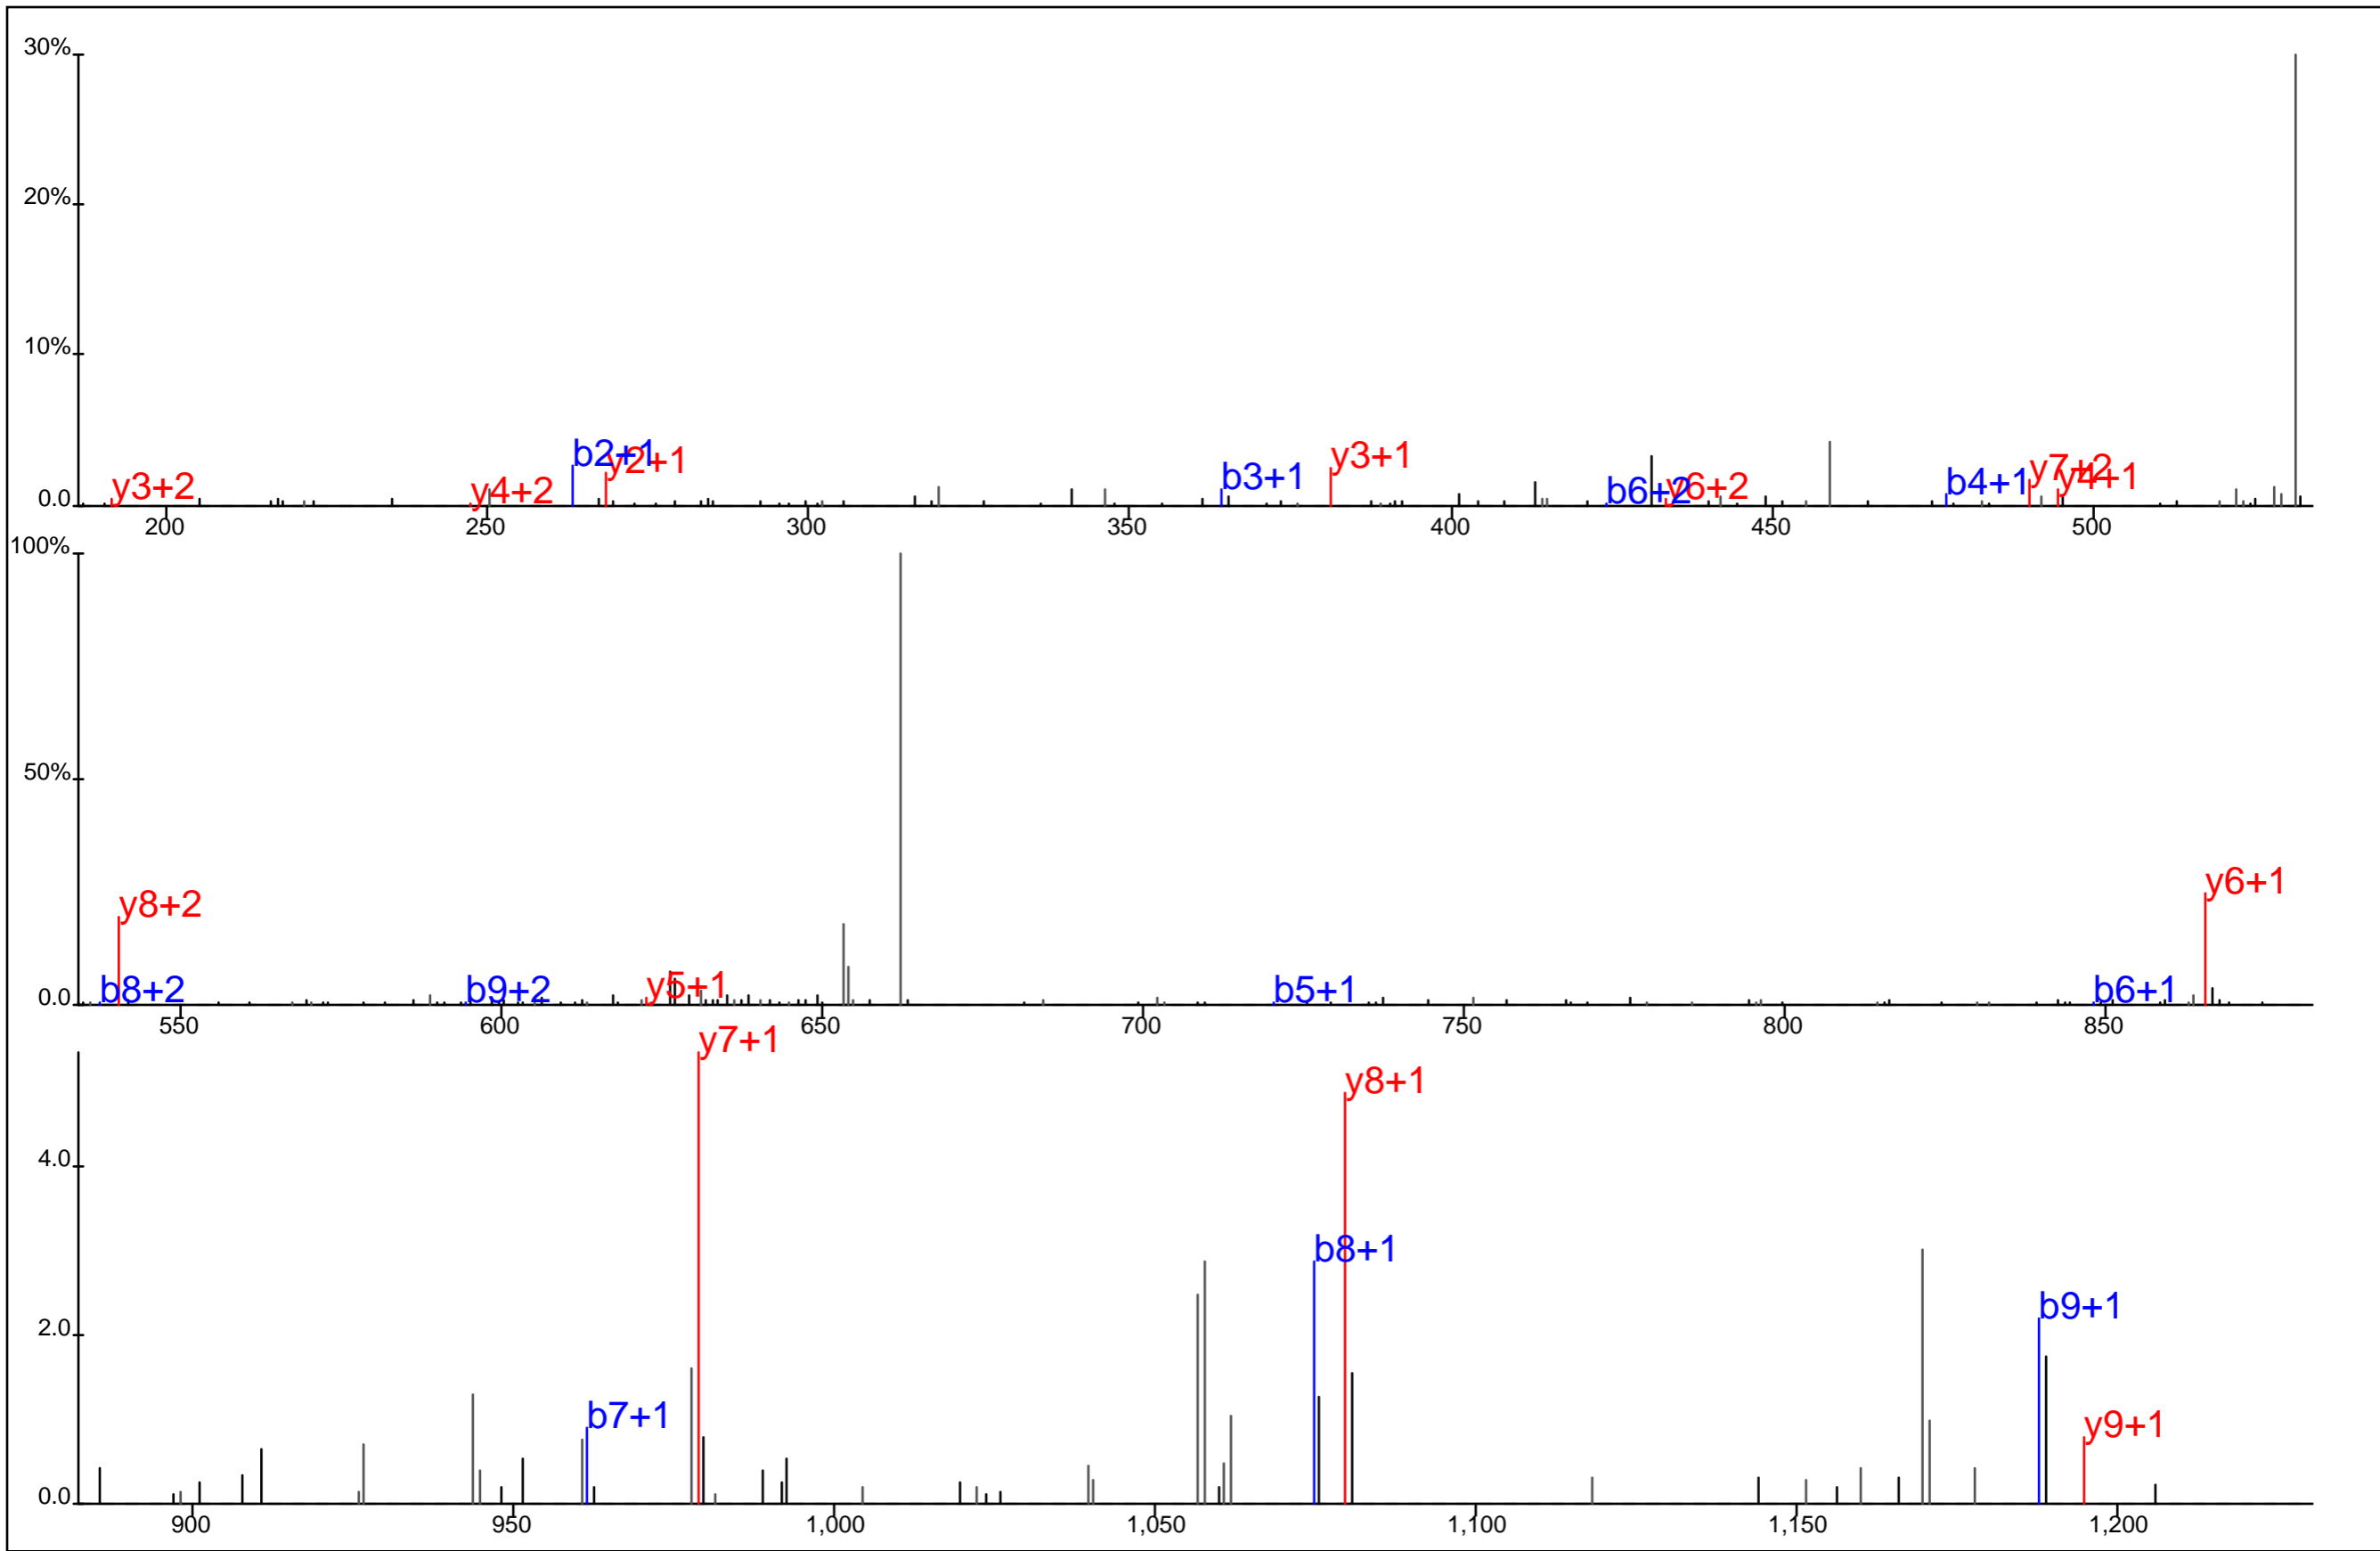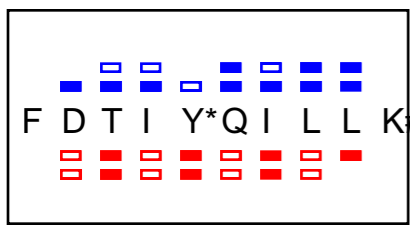

Protein Name: Zinc finger protein 147  
 gi Accession: 12585547  
 Precursor Mass: 671.3544+2  
 Delta Mass: 5.268 ppm  
 XCorr: 38.24

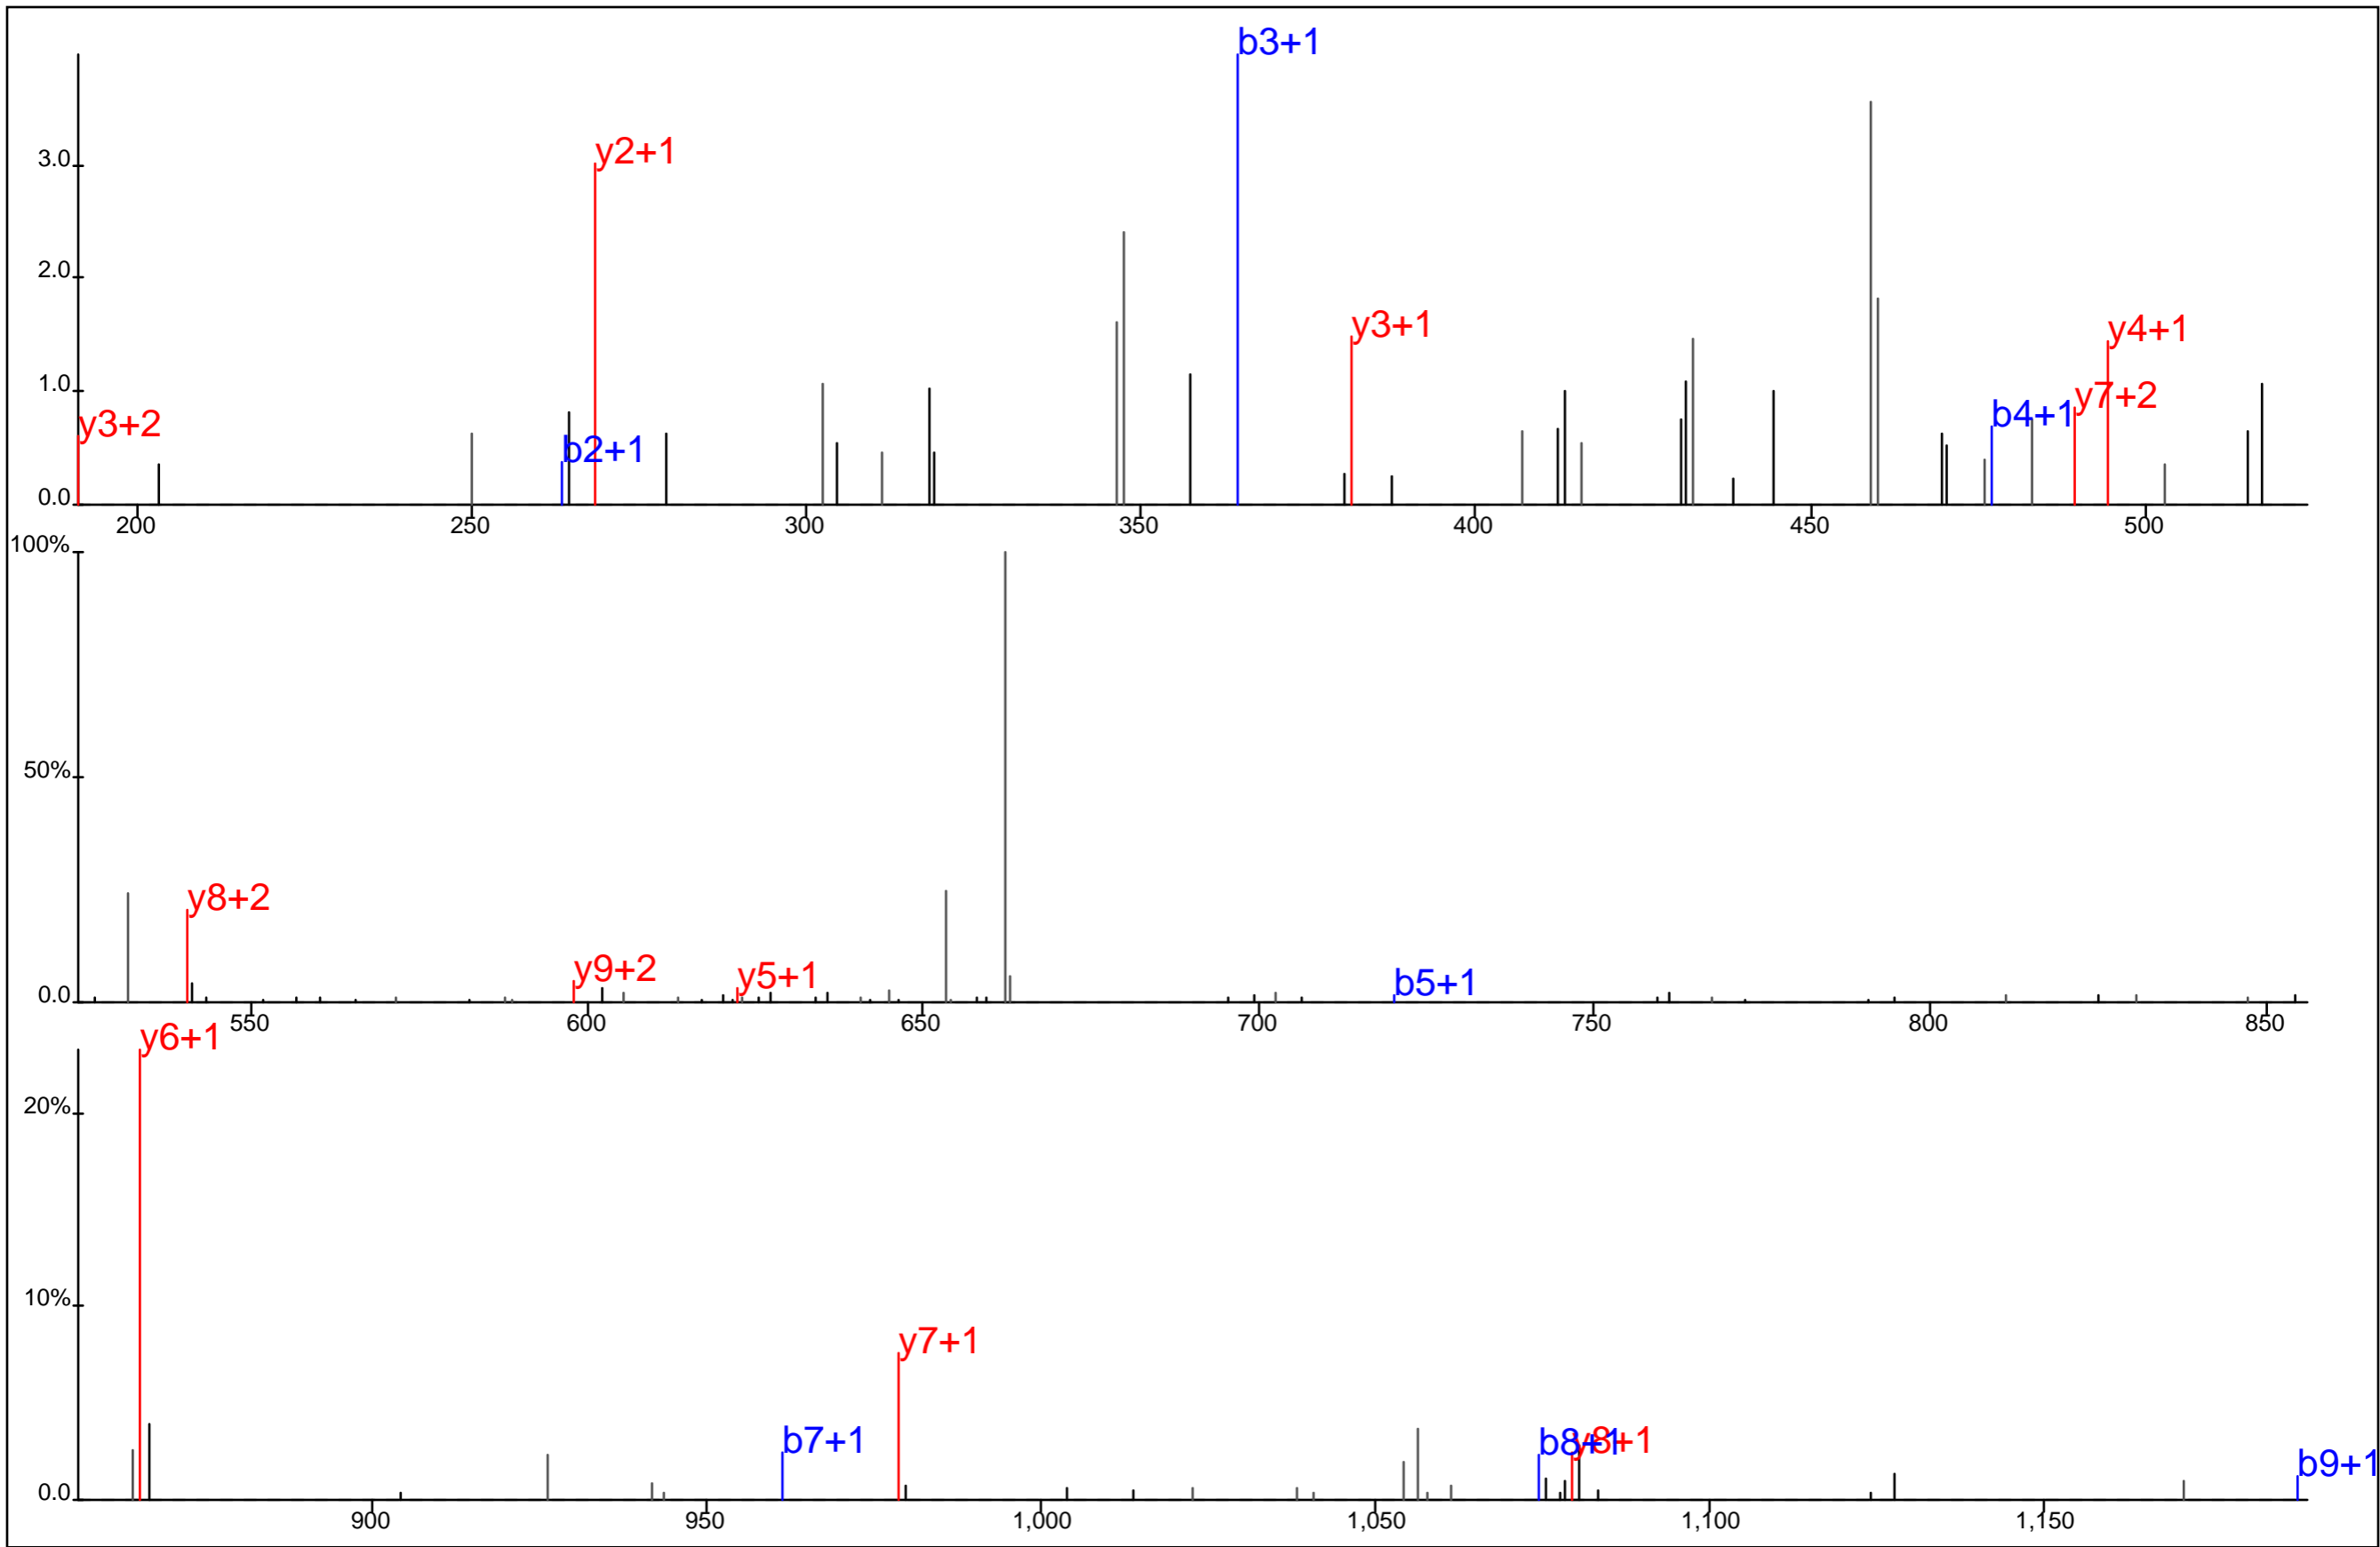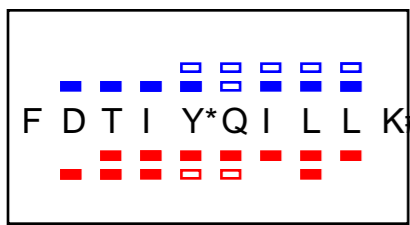

Protein Name: Zinc finger protein 147  
 gi Accession: 12585547  
 Precursor Mass: 671.3525+2  
 Delta Mass: 2.443 ppm  
 XCorr: 35.82

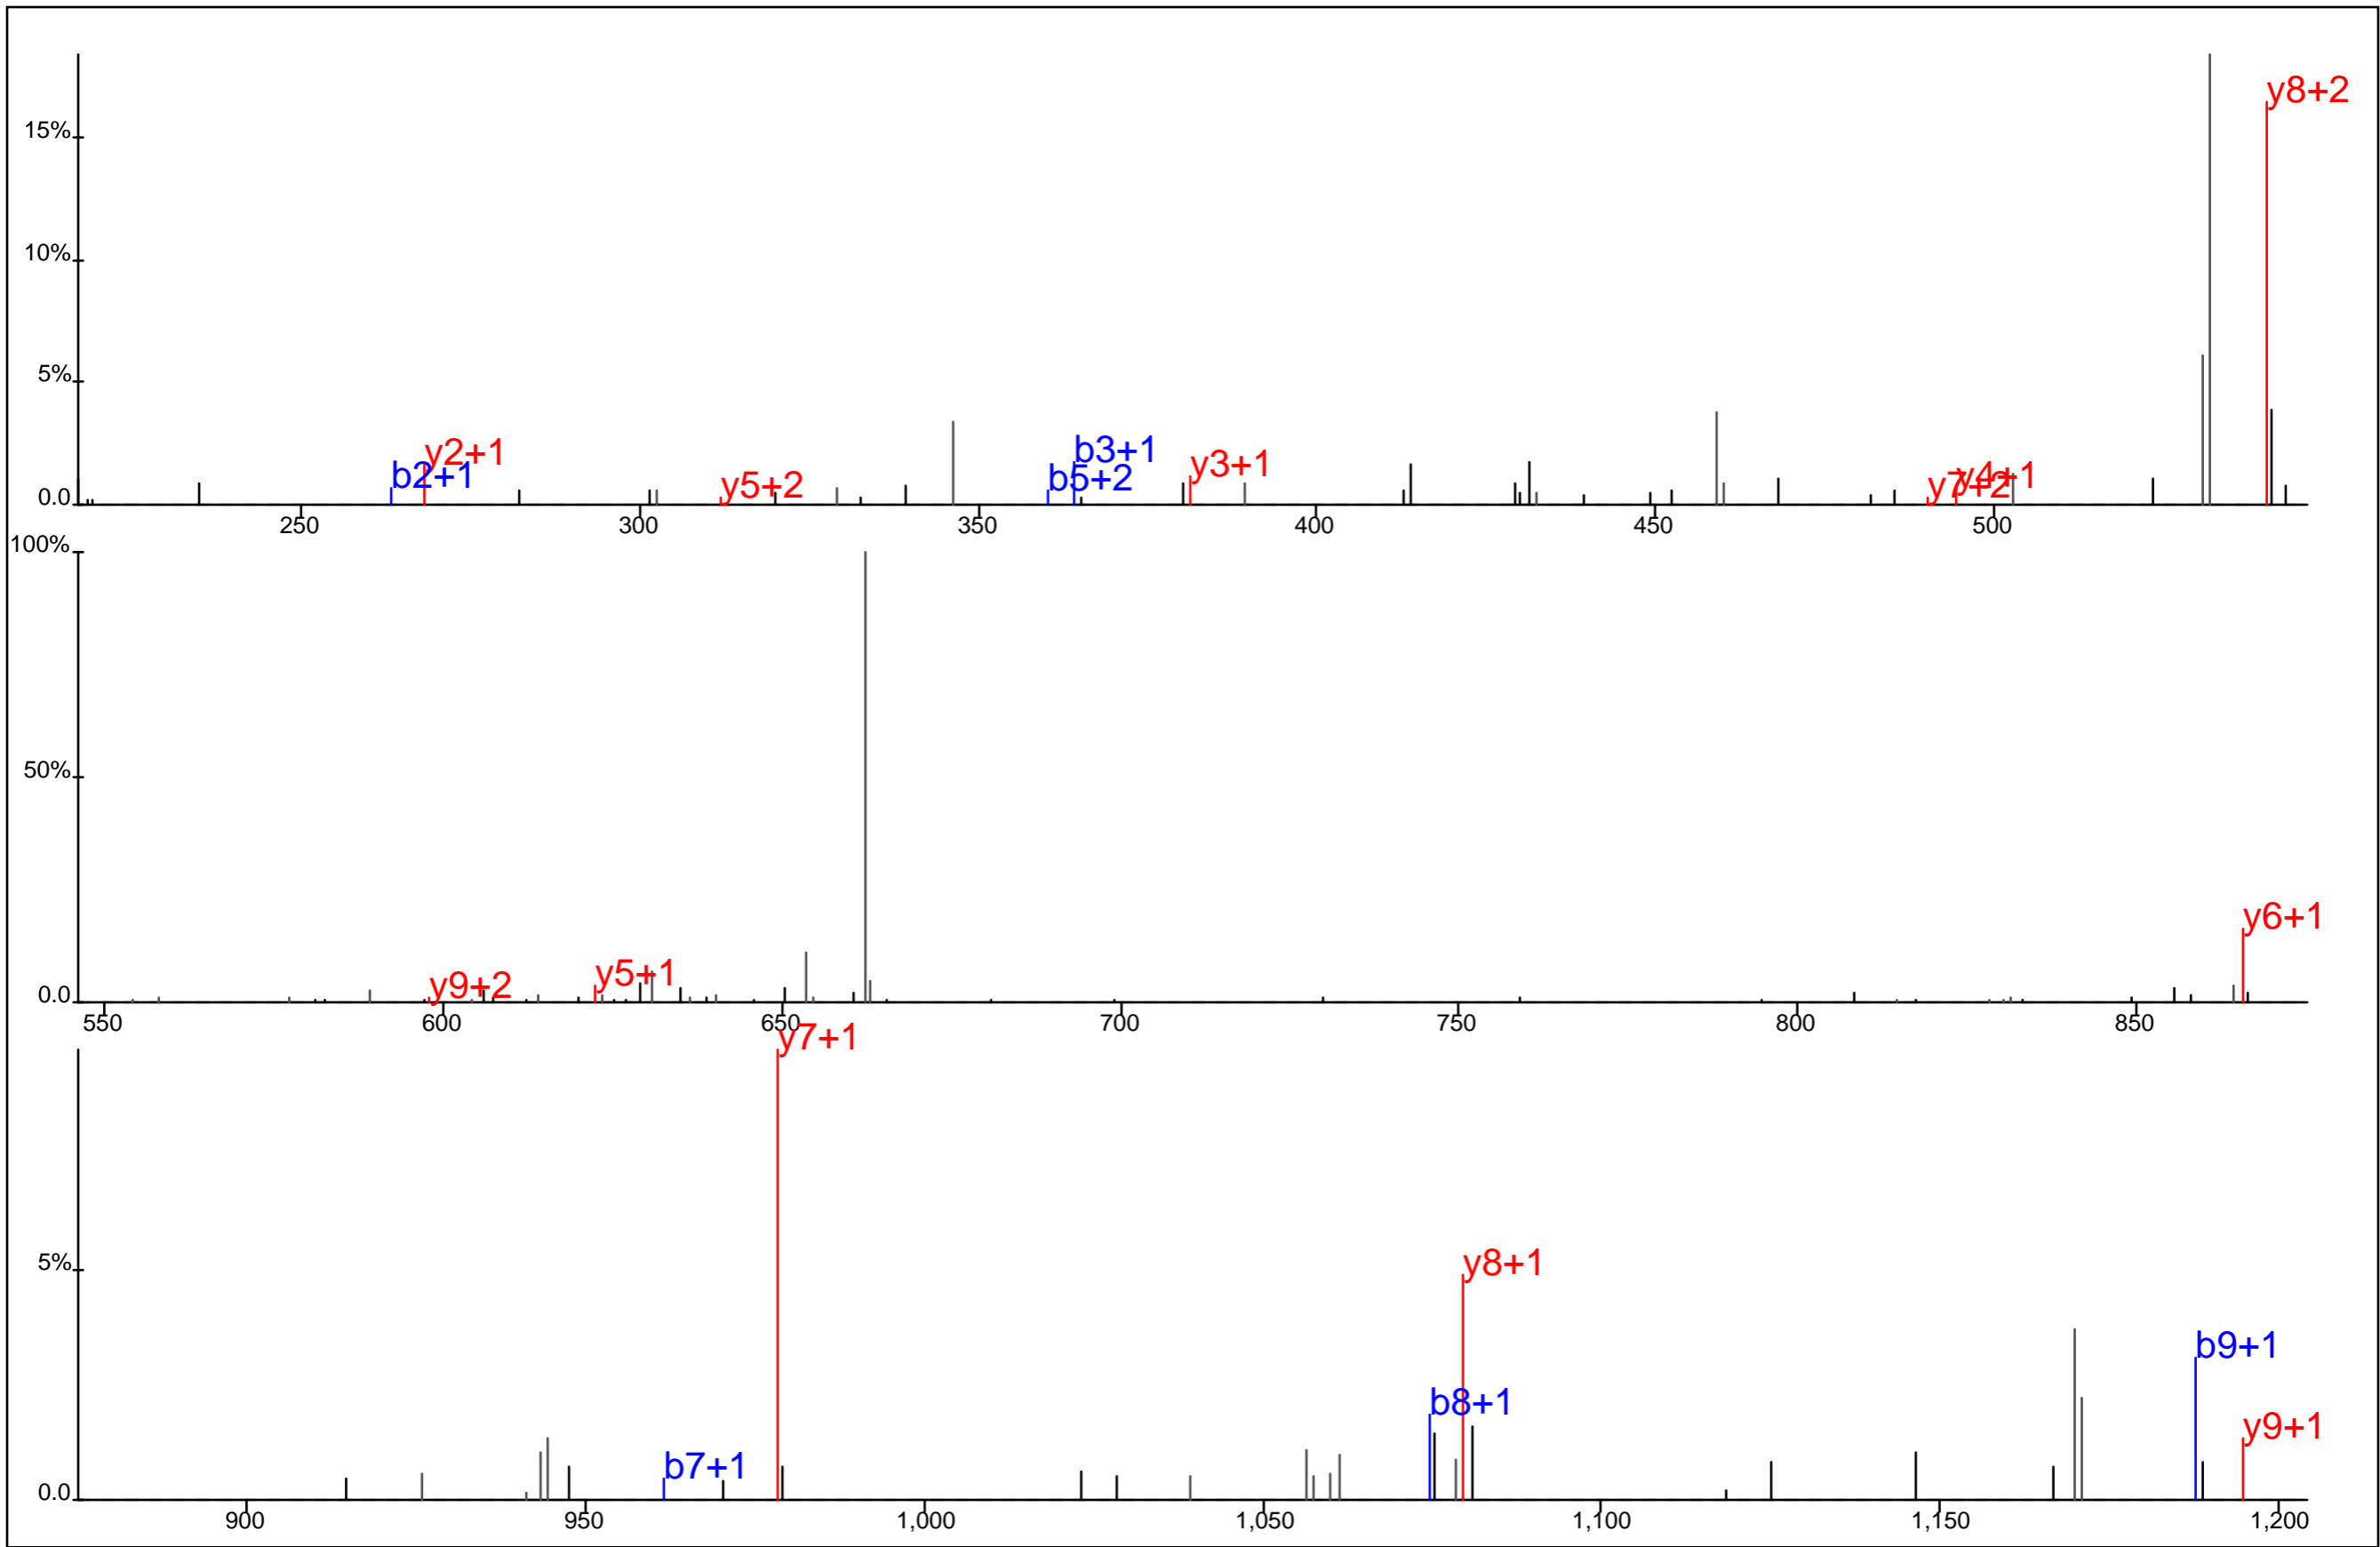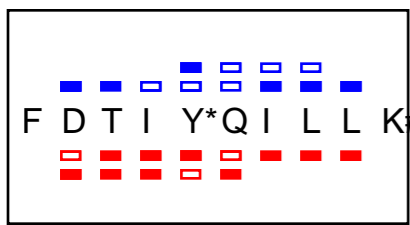

Protein Name: Zinc finger protein 147  
 gi Accession: 12585547  
 Precursor Mass: 671.3534+2  
 Delta Mass: 3.718 ppm  
 XCorr: 34.4



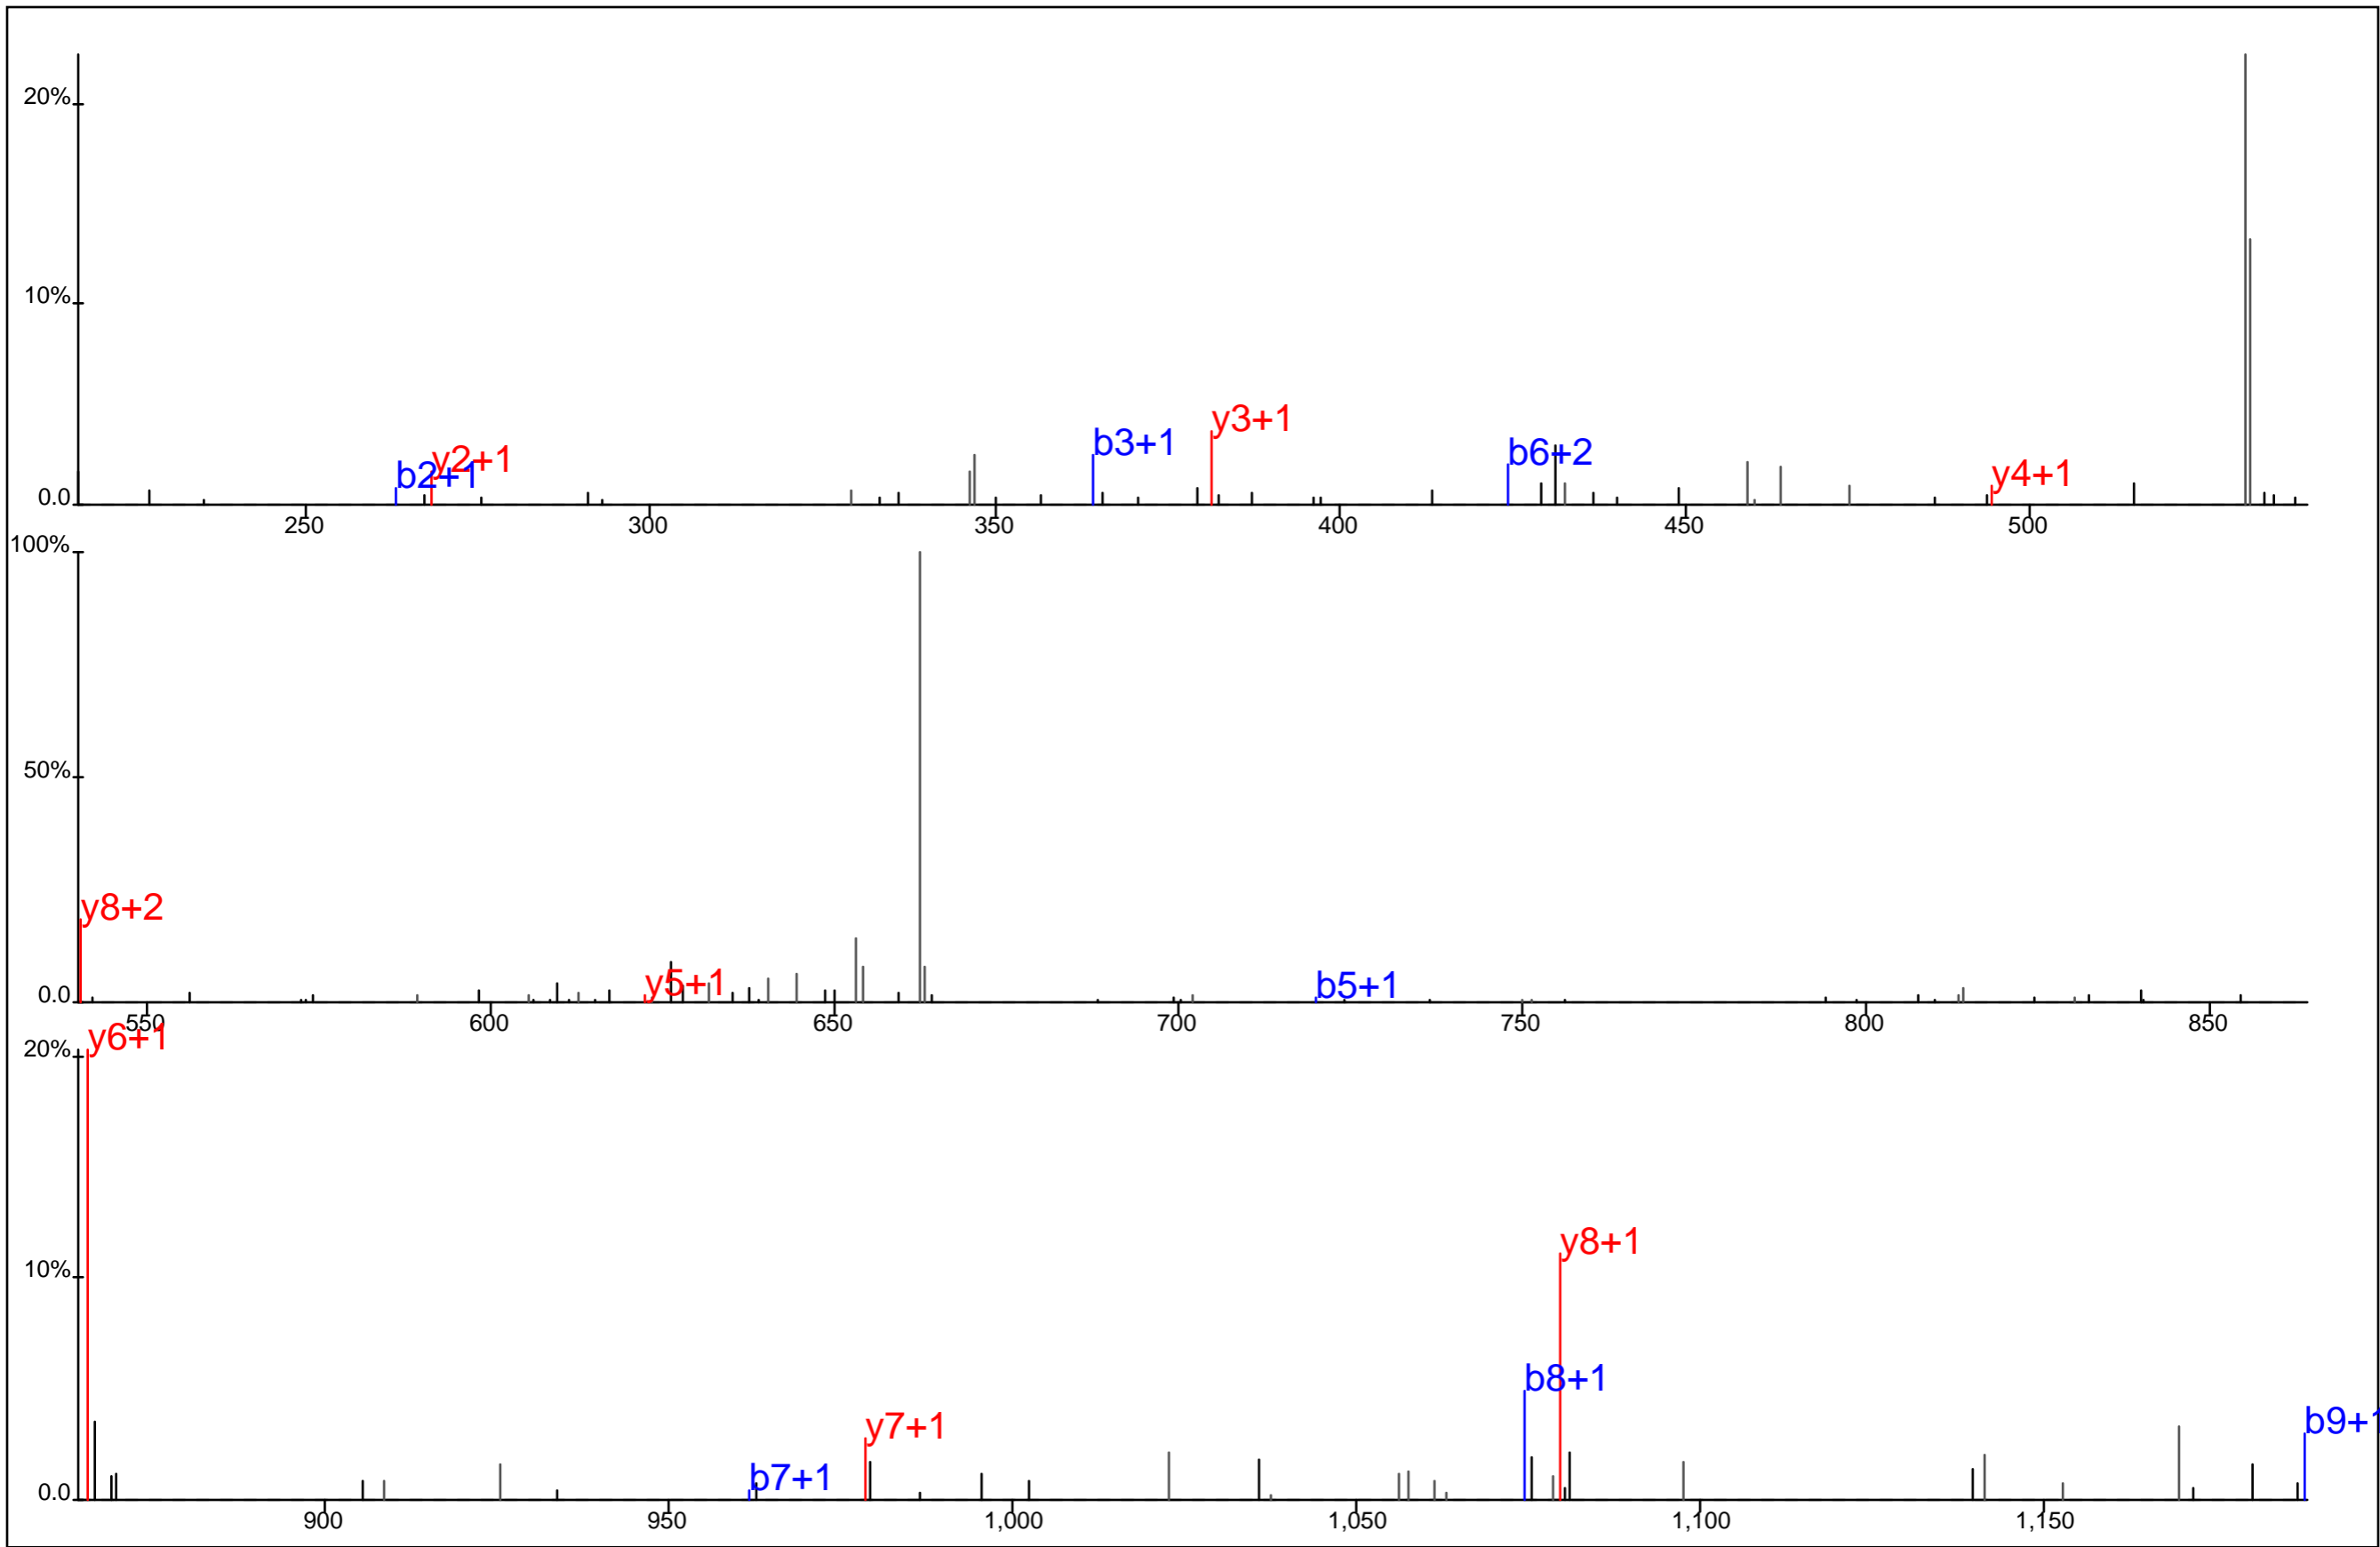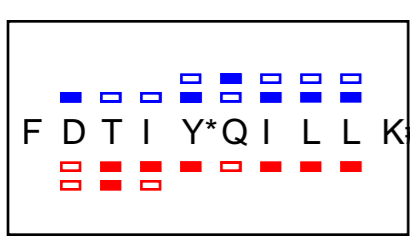

Protein Name: Zinc finger protein 147  
 gi Accession: 12585547  
 Precursor Mass: 671.3539+2  
 Delta Mass: 4.448 ppm  
 XCorr: 34.87

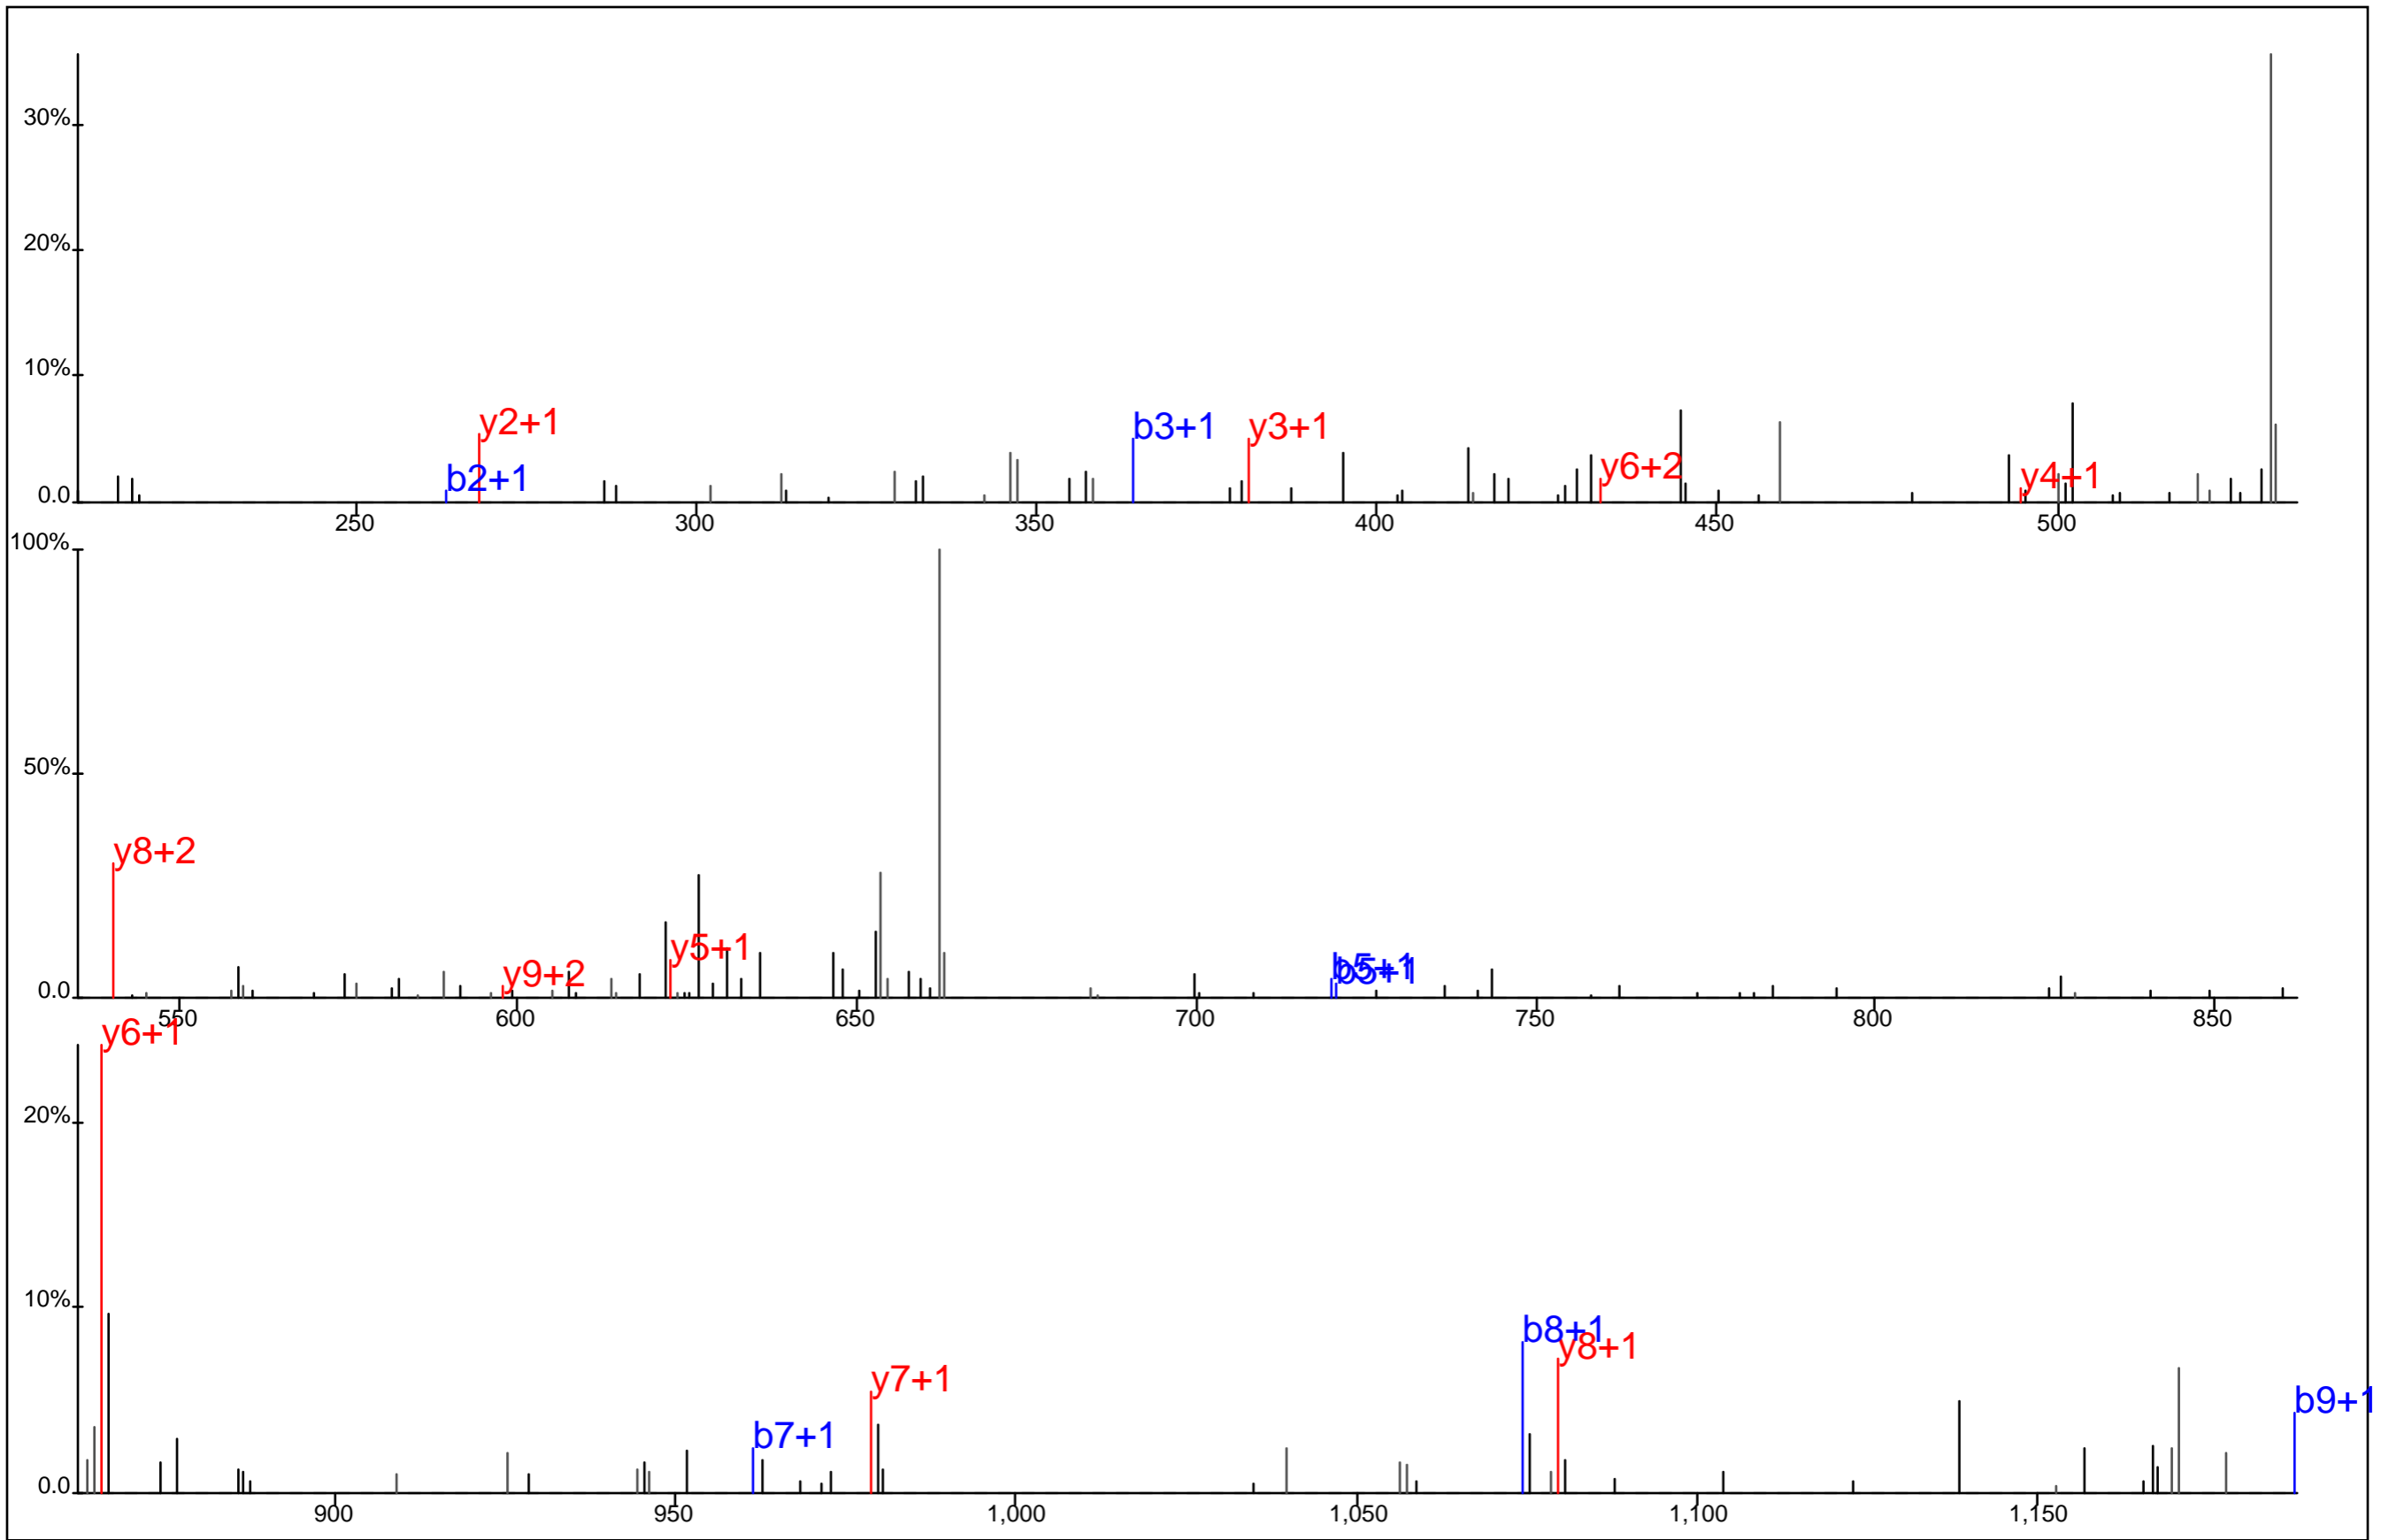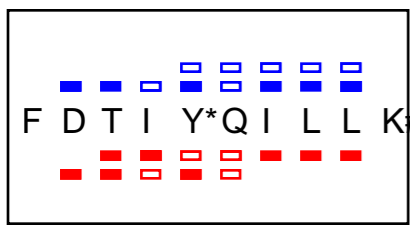

Protein Name: Zinc finger protein 147  
 gi Accession: 12585547  
 Precursor Mass: 671.3542+2  
 Delta Mass: 4.992 ppm  
 XCorr: 28.86

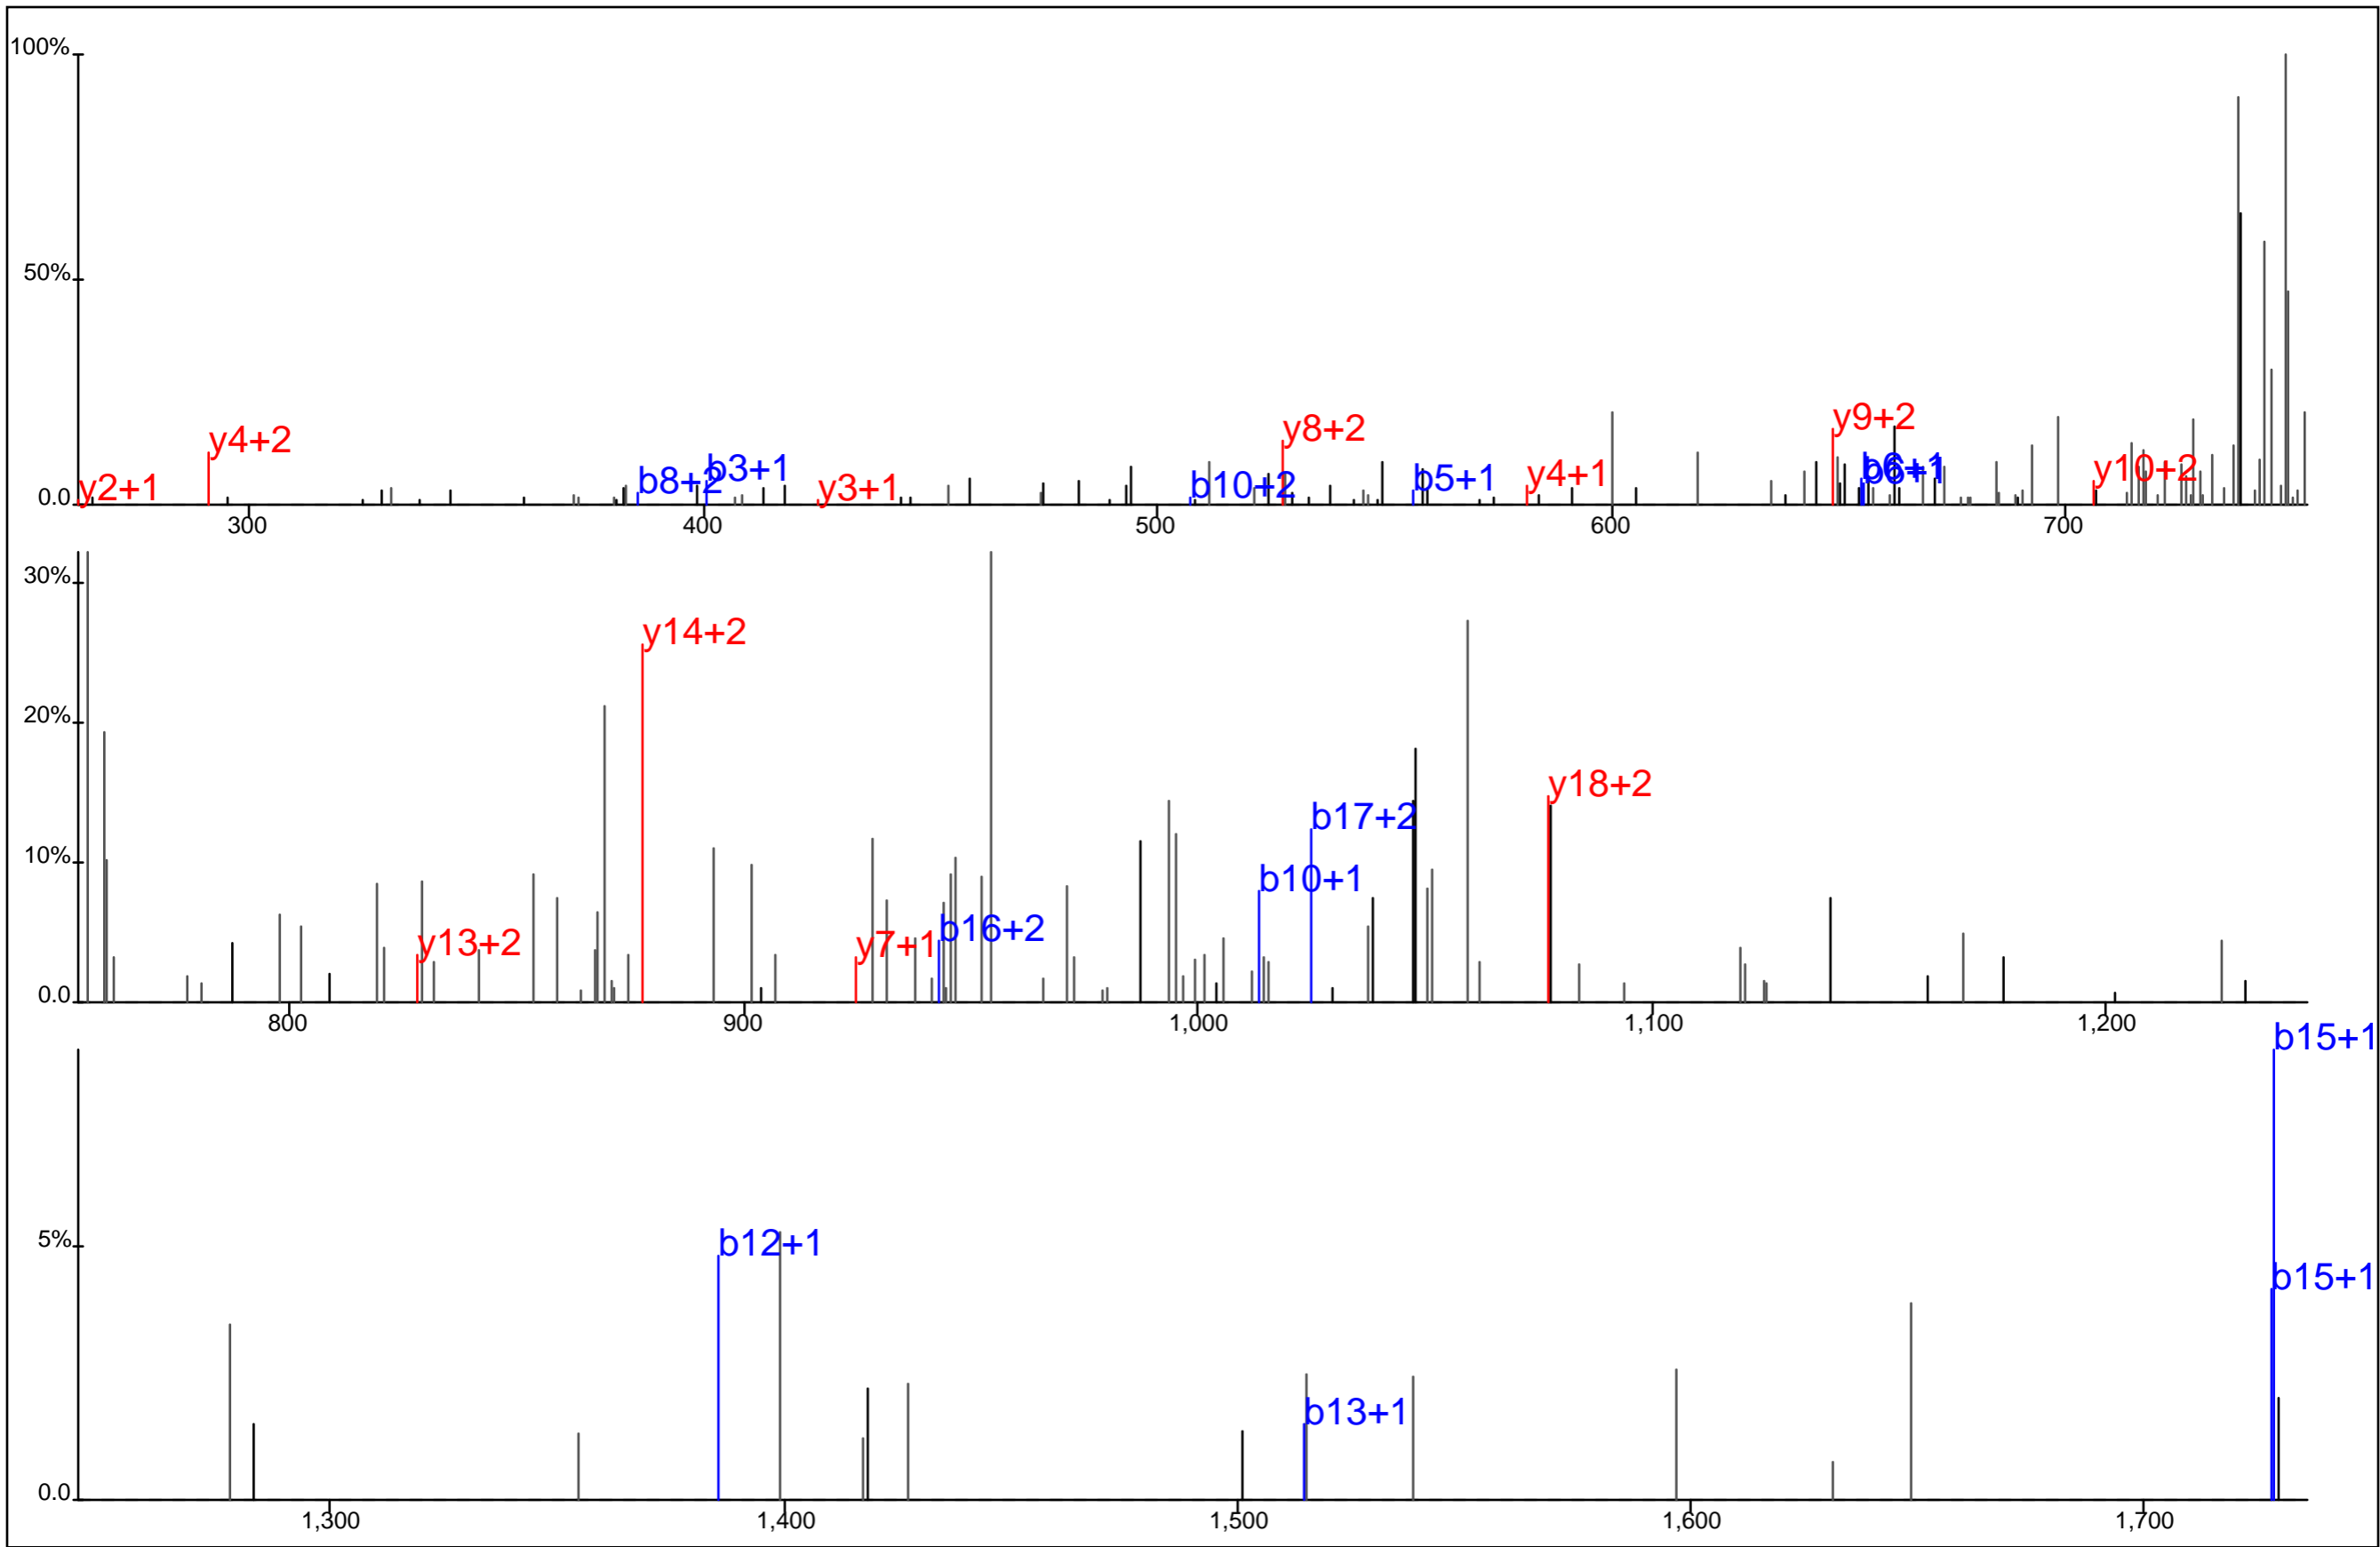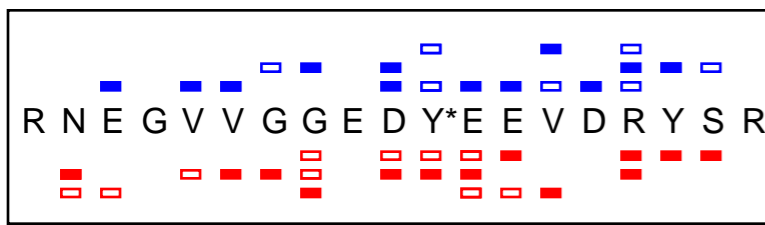

Protein Name: Zinc finger protein 598  
 gi Accession: 30039694  
 Precursor Mass: 770.3351+3  
 Delta Mass: 3.343 ppm  
 XCorr: 11.47

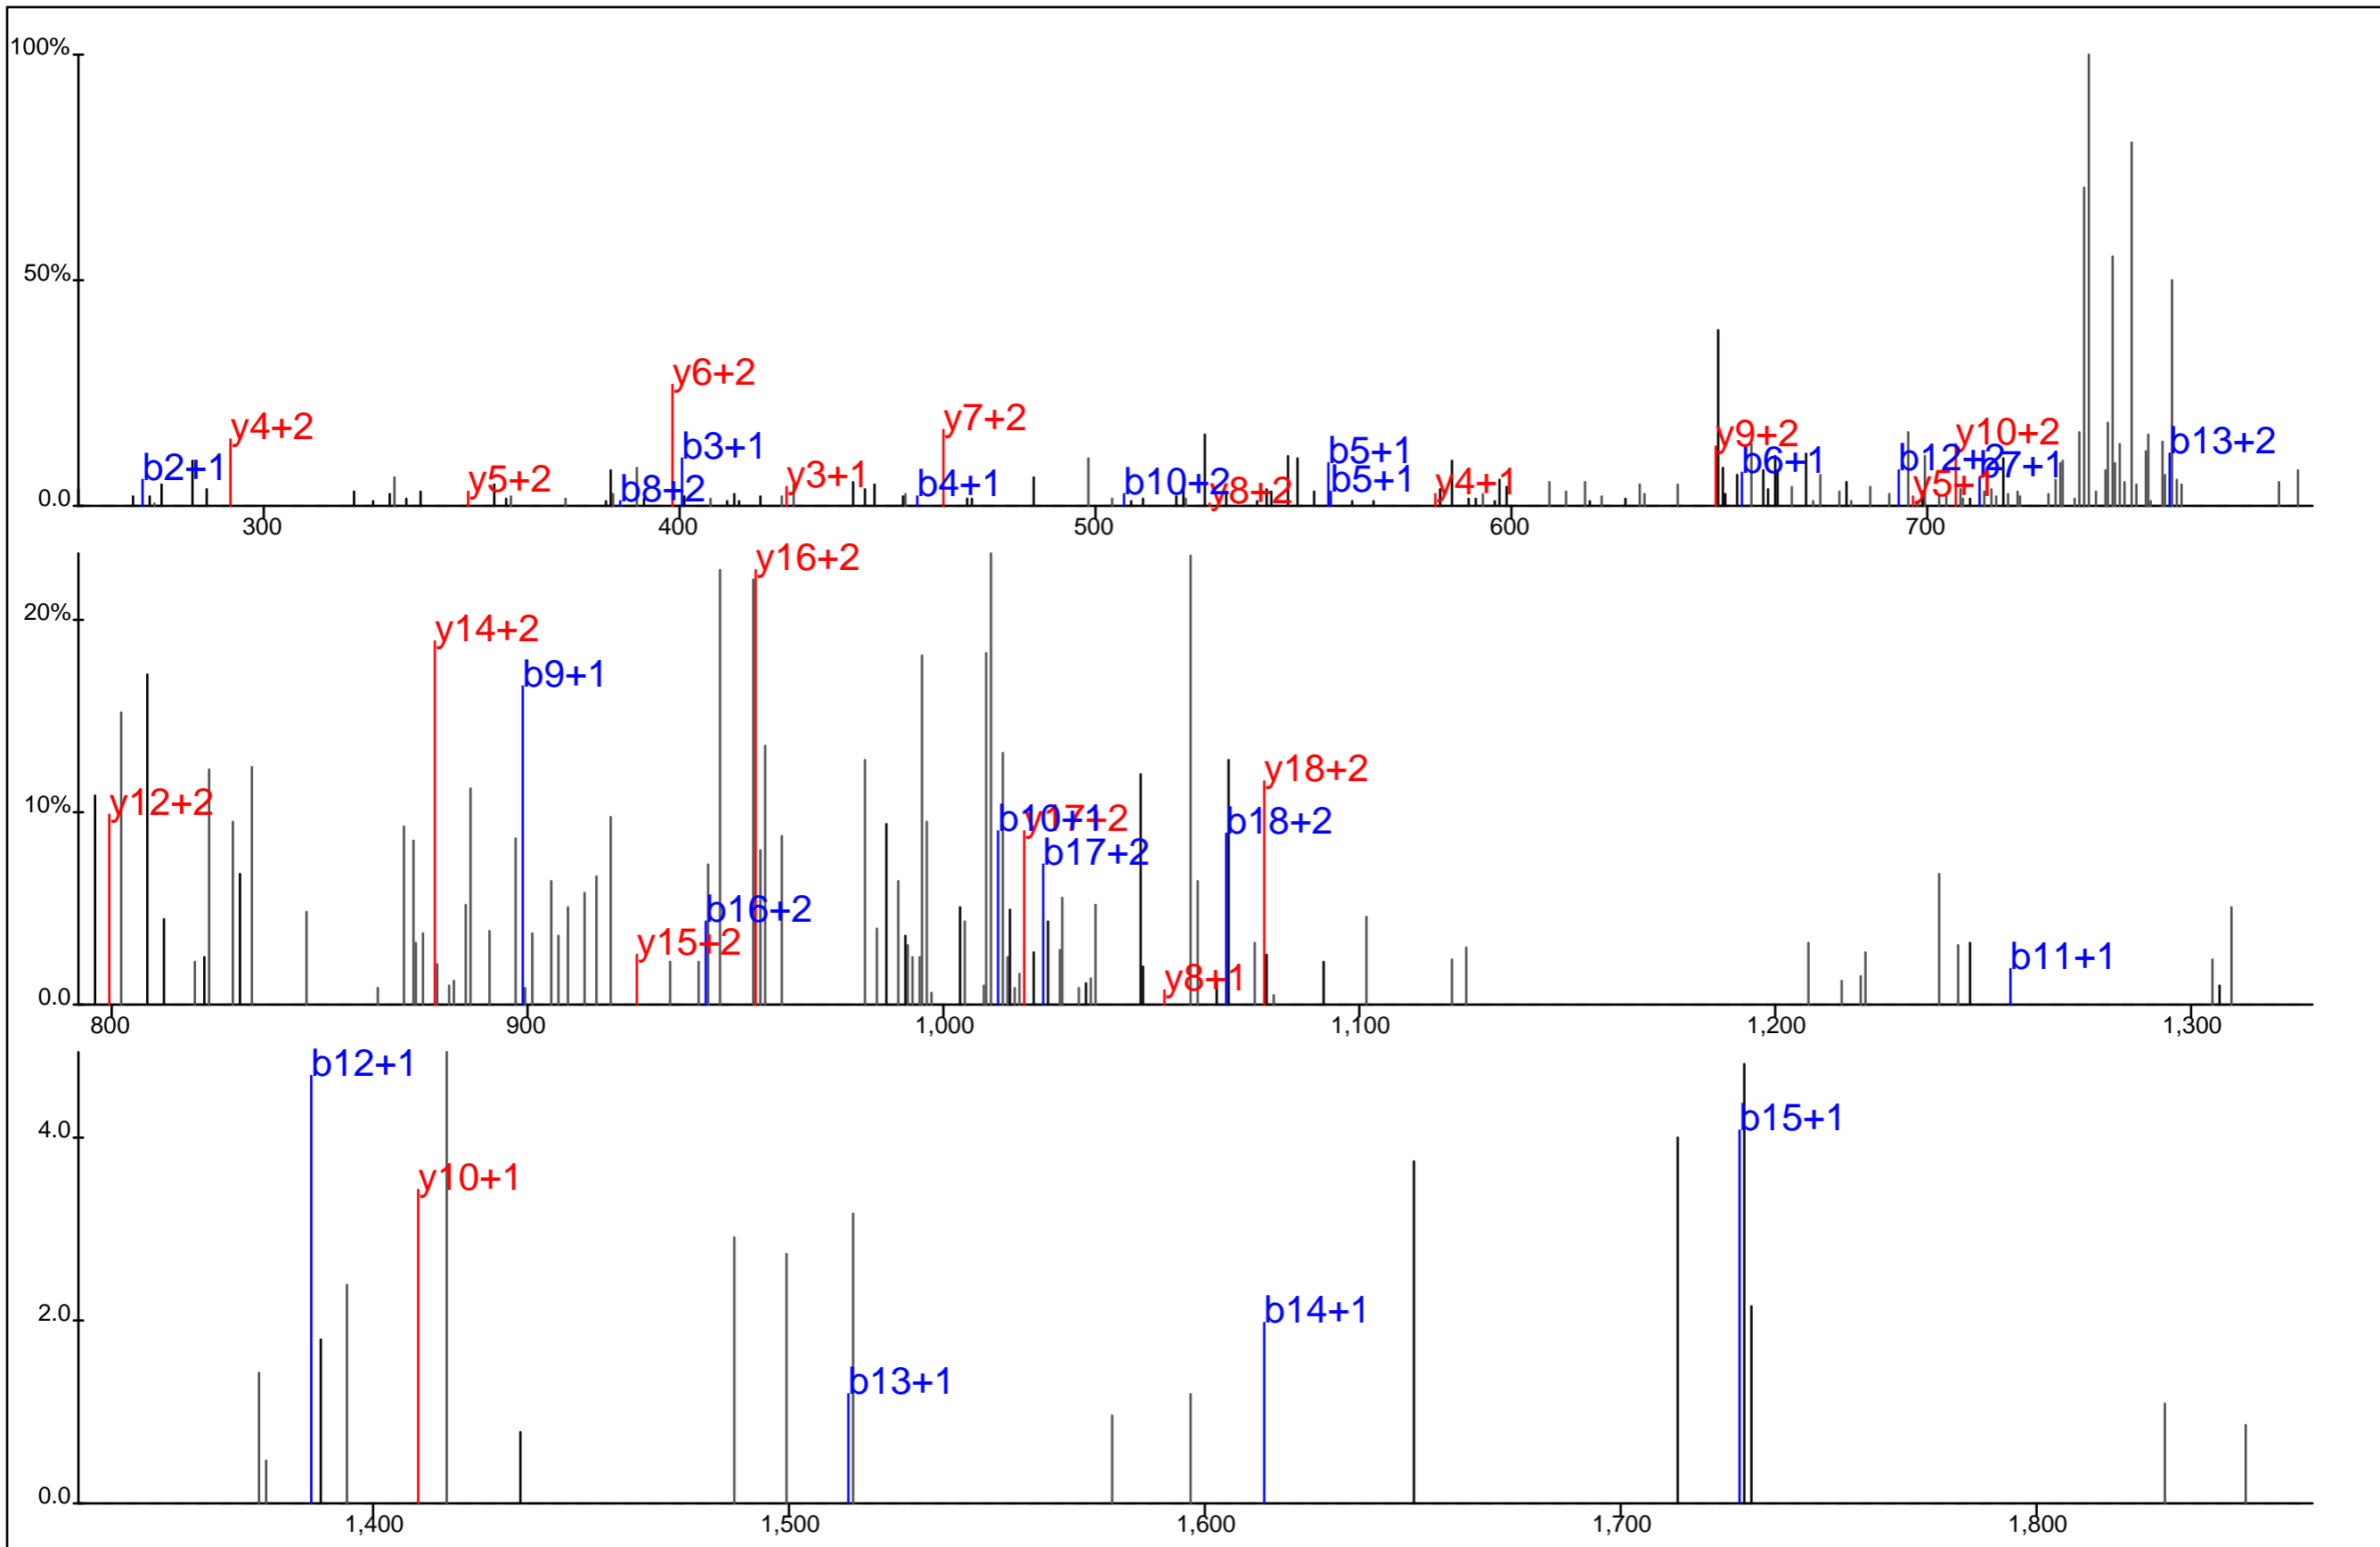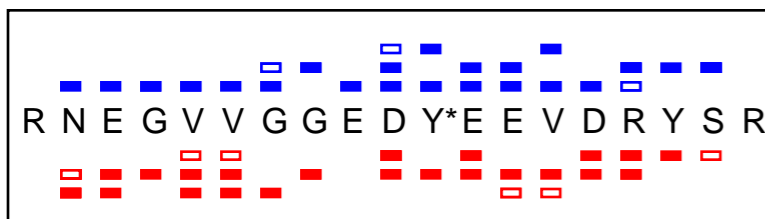

Protein Name: Zinc finger protein 598  
 gi Accession: 30039694  
 Precursor Mass: 770.3360+3  
 Delta Mass: 4.529 ppm  
 XCorr: 27.02

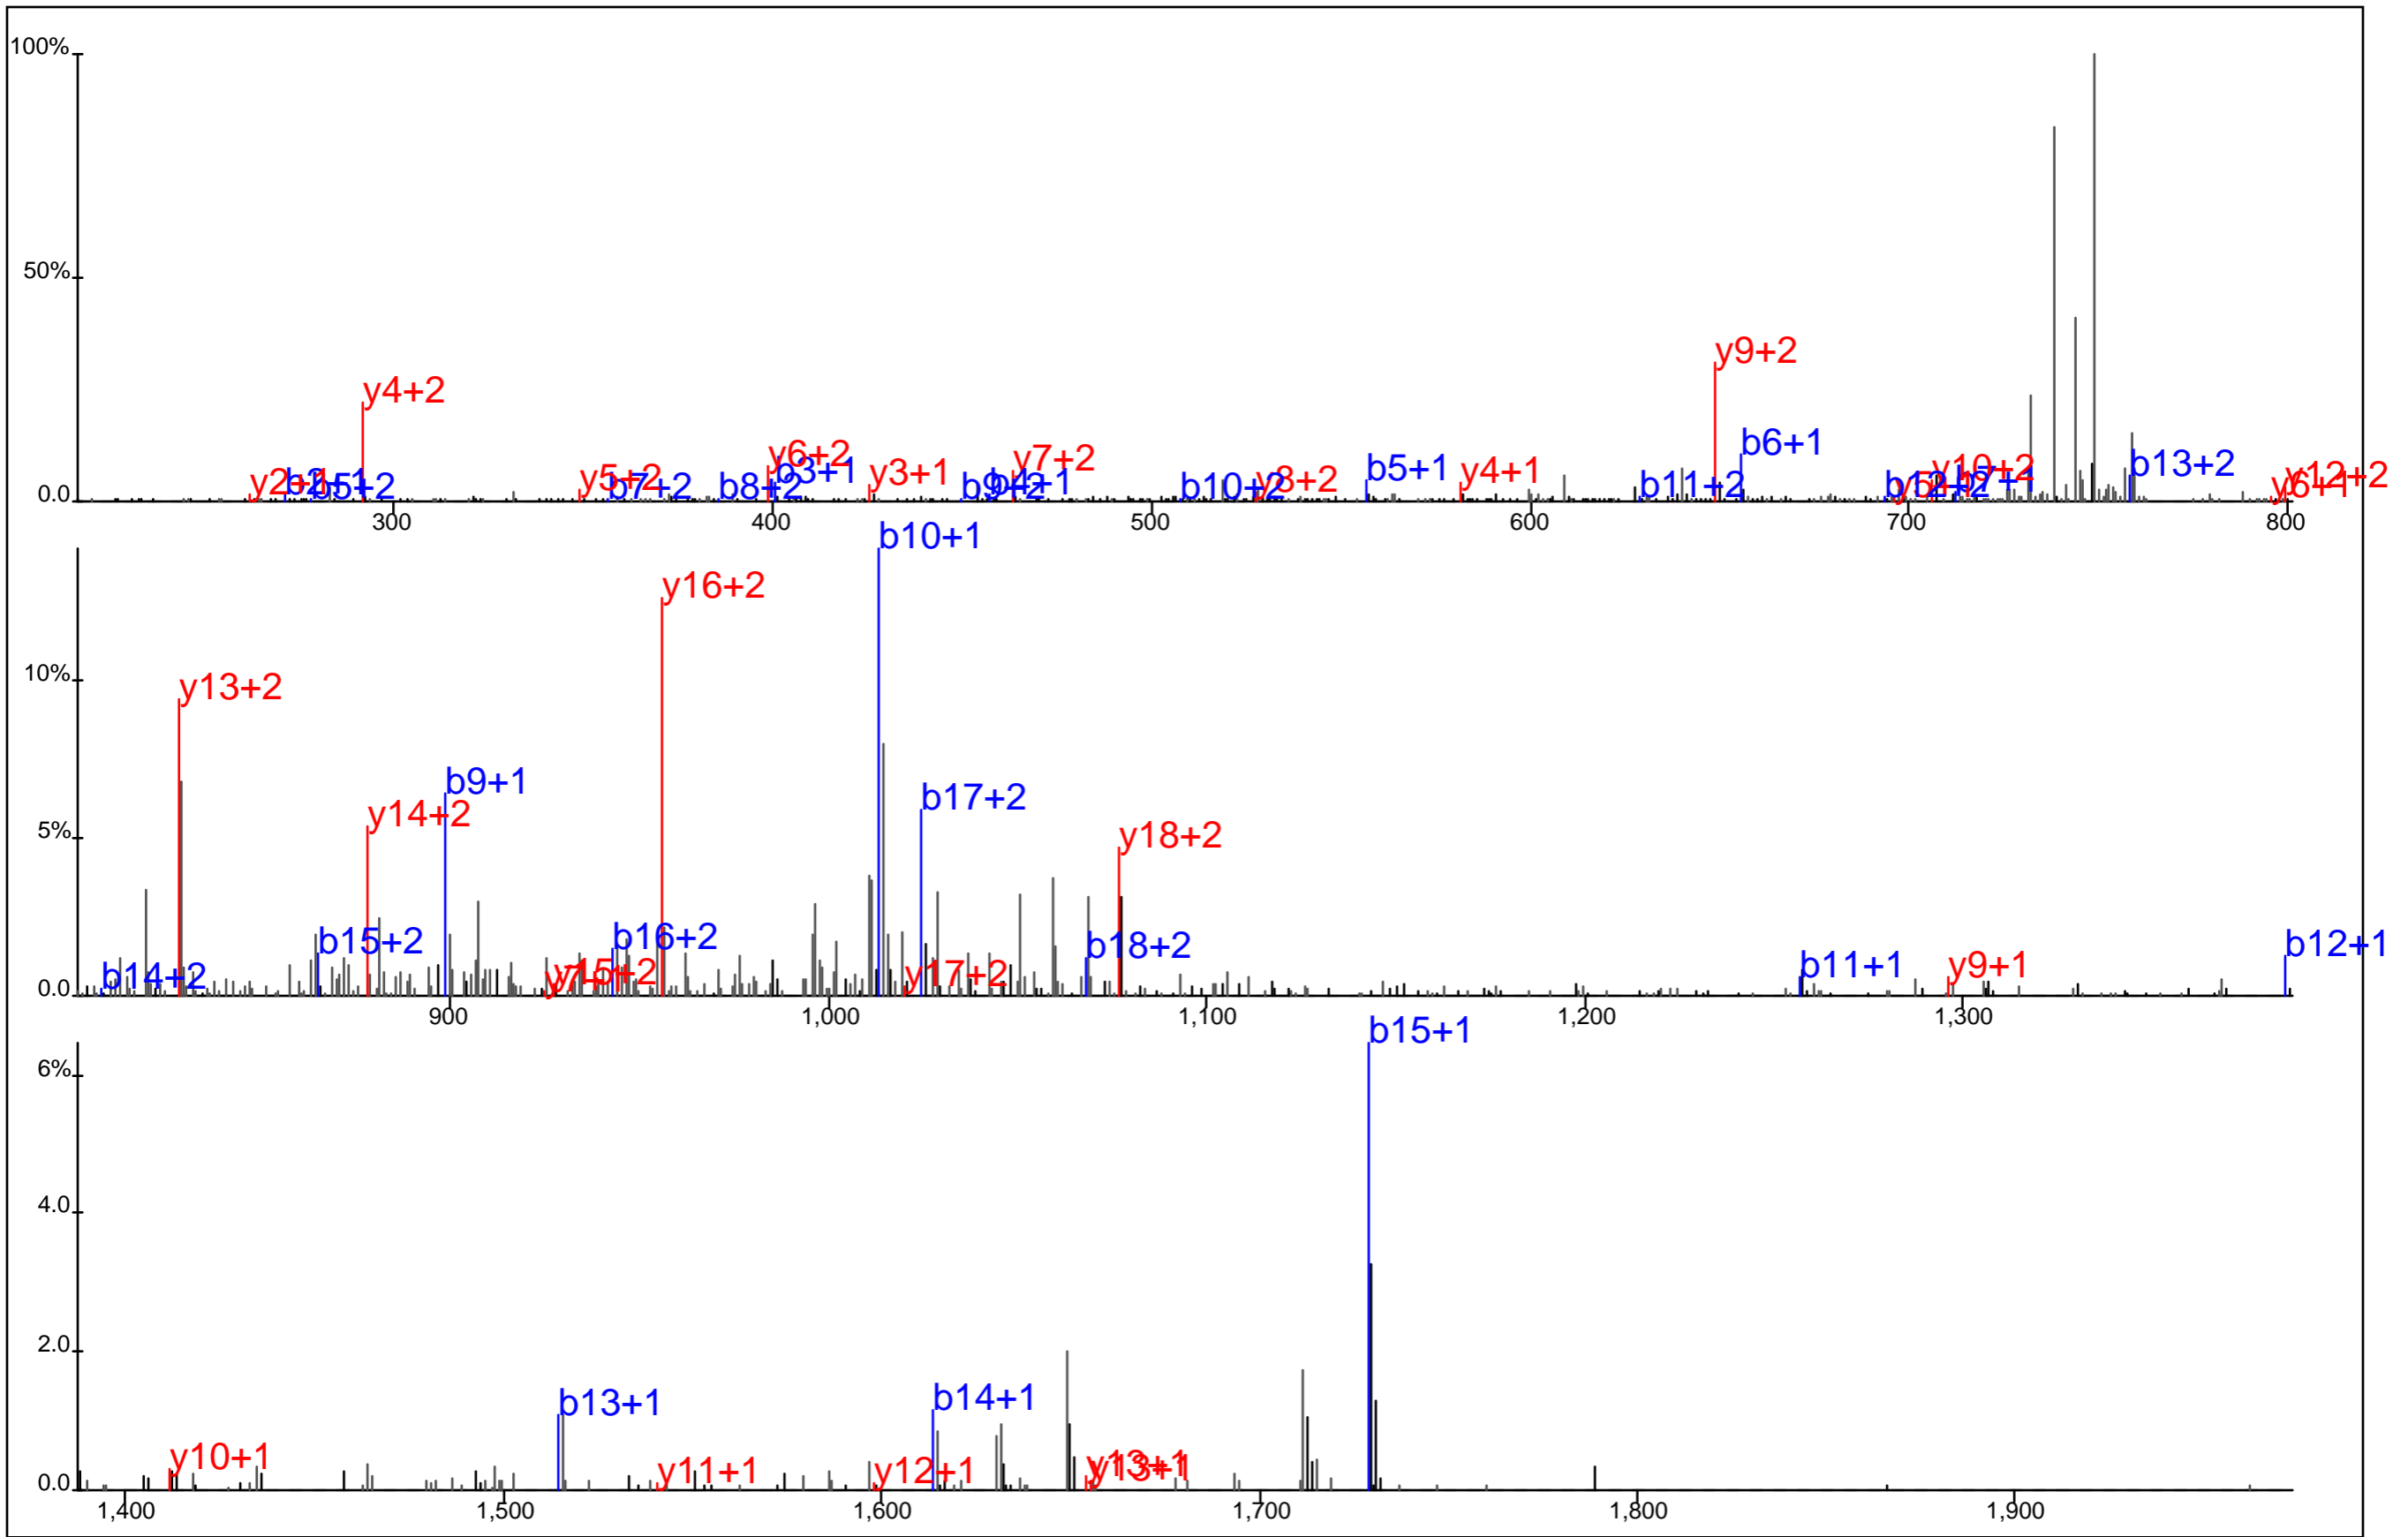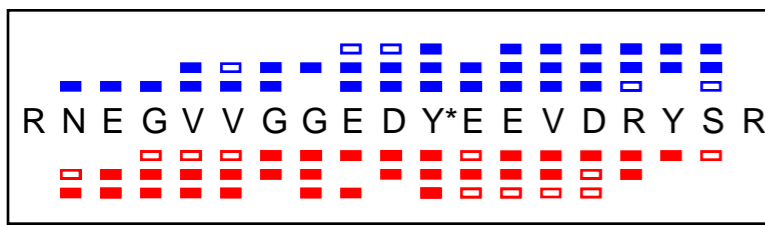

Protein Name: Zinc finger protein 598  
 gi Accession: 30039694  
 Precursor Mass: 770.3334+3  
 Delta Mass: 1.199 ppm  
 XCorr: 64.22

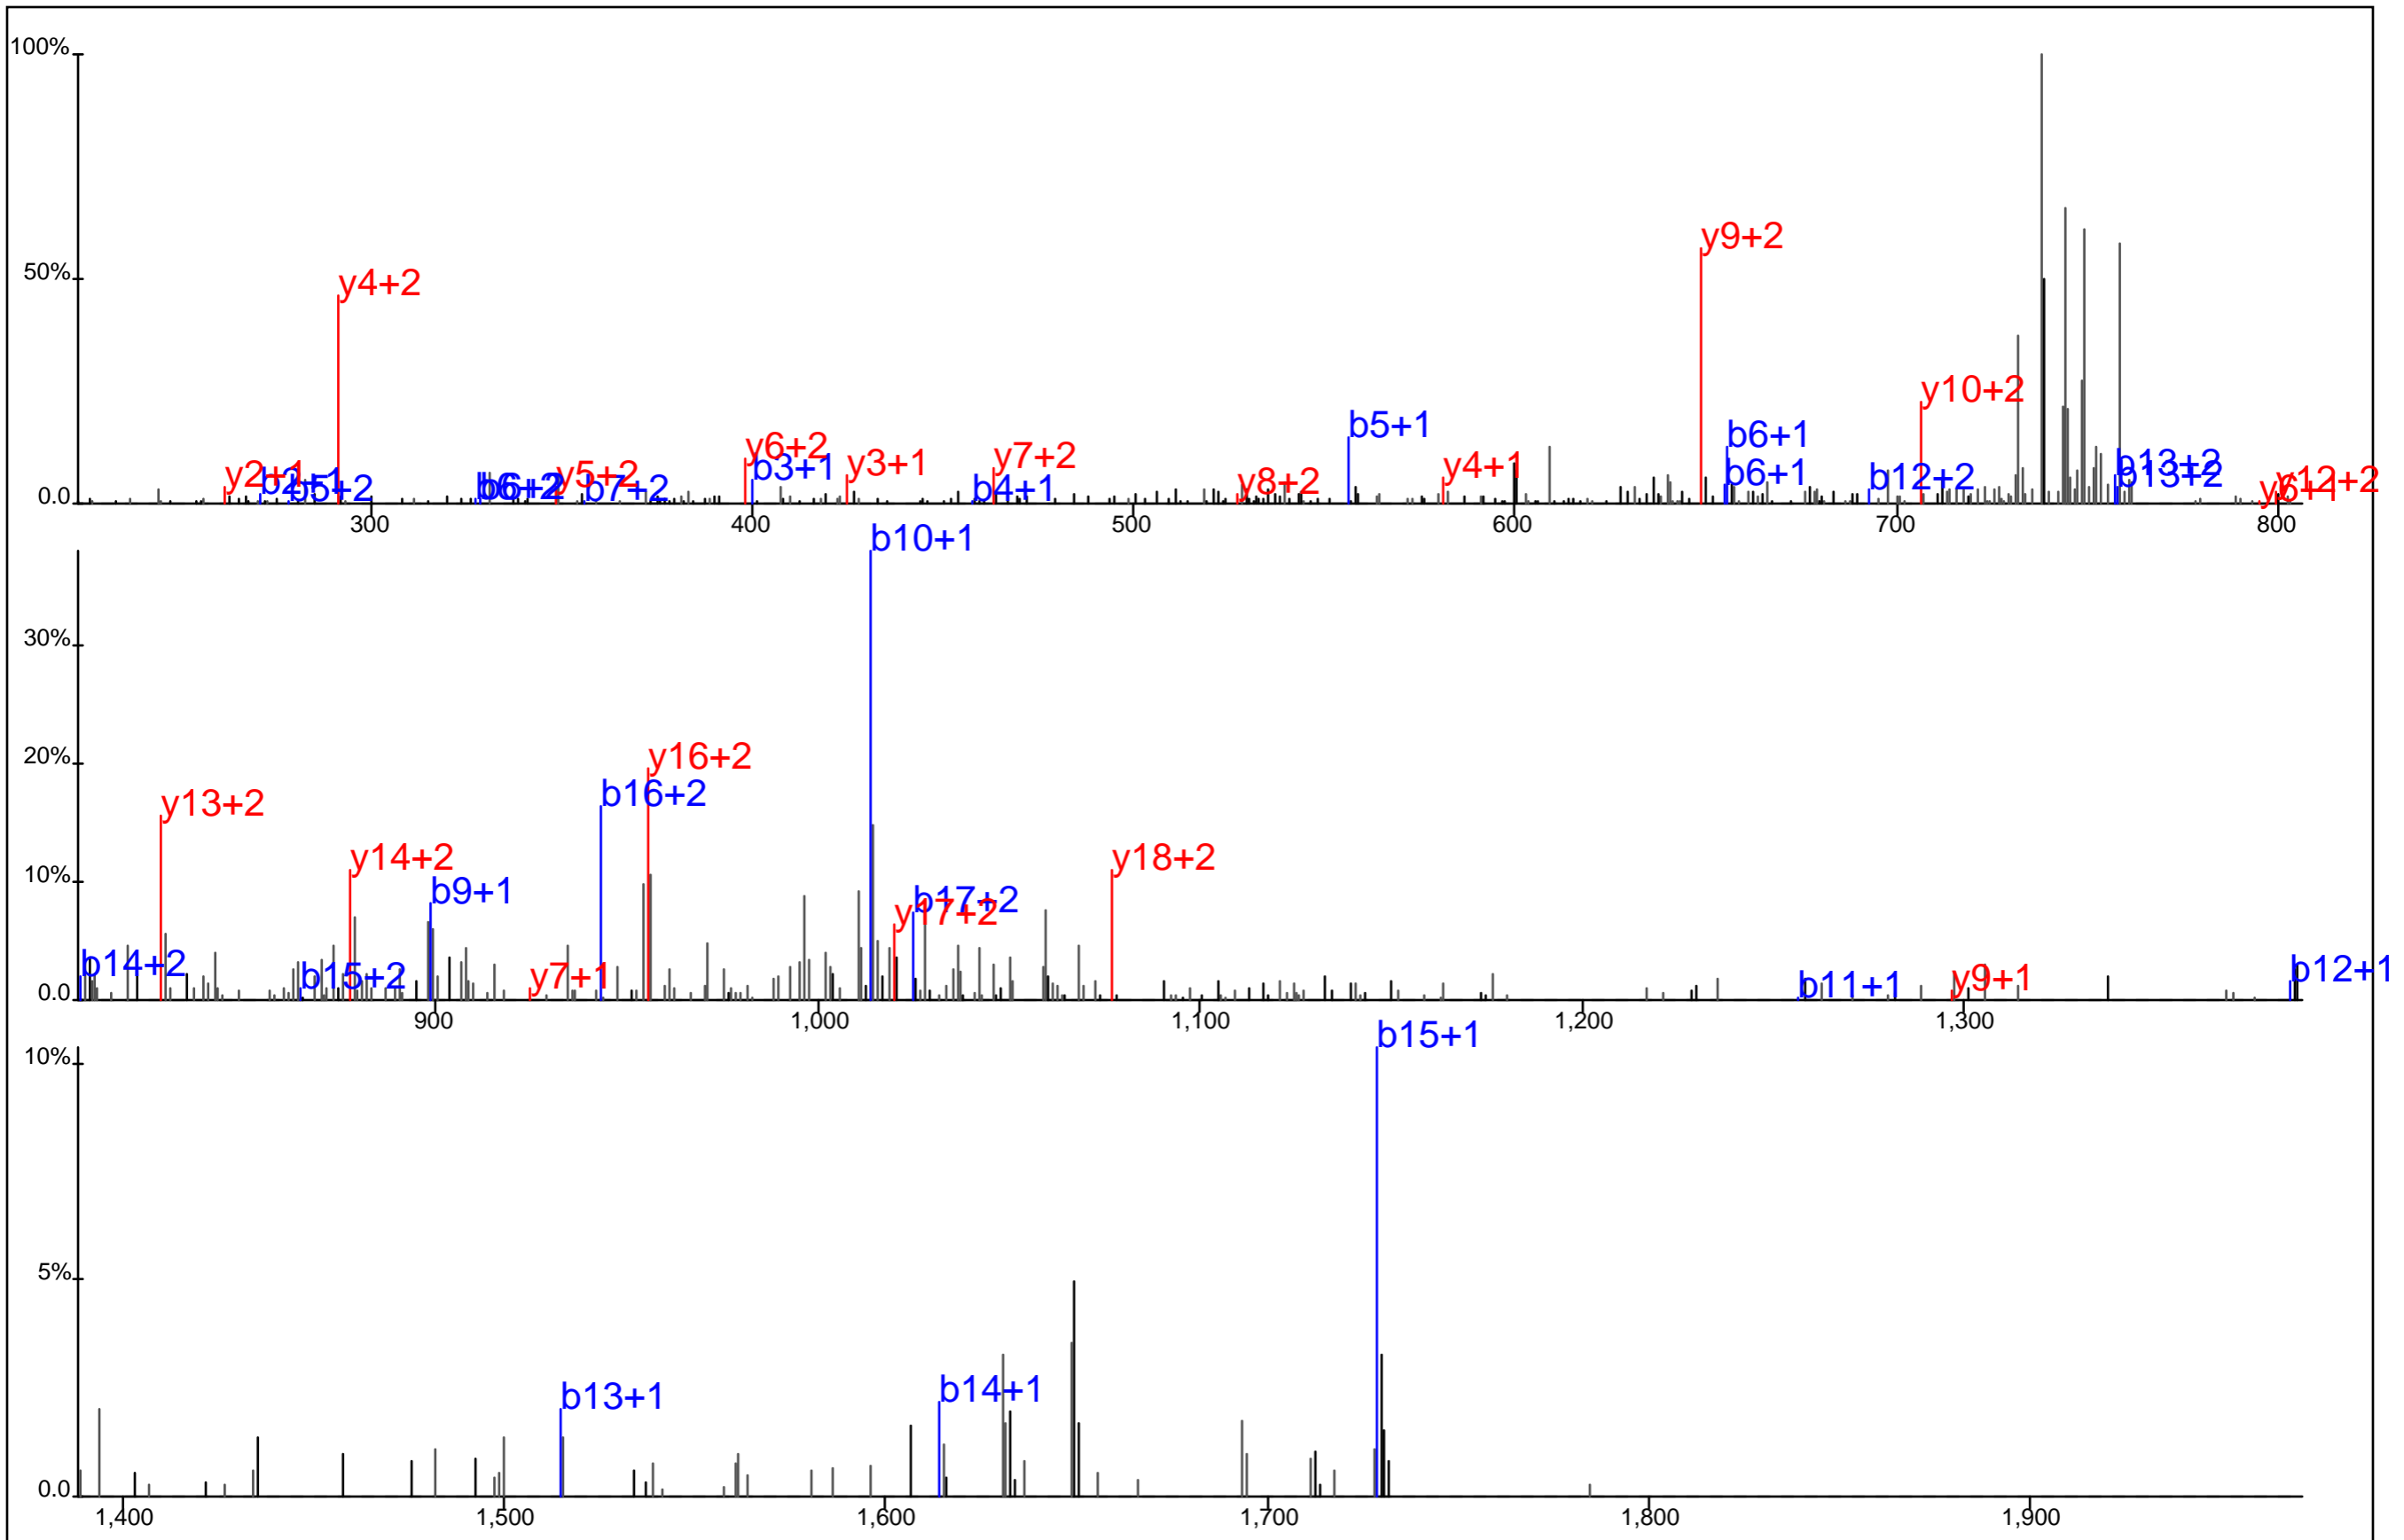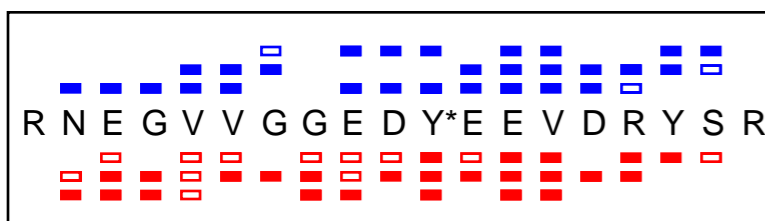

Protein Name: Zinc finger protein 598  
 gi Accession: 30039694  
 Precursor Mass: 770.3329+3  
 Delta Mass: 0.566 ppm  
 XCorr: 37.44

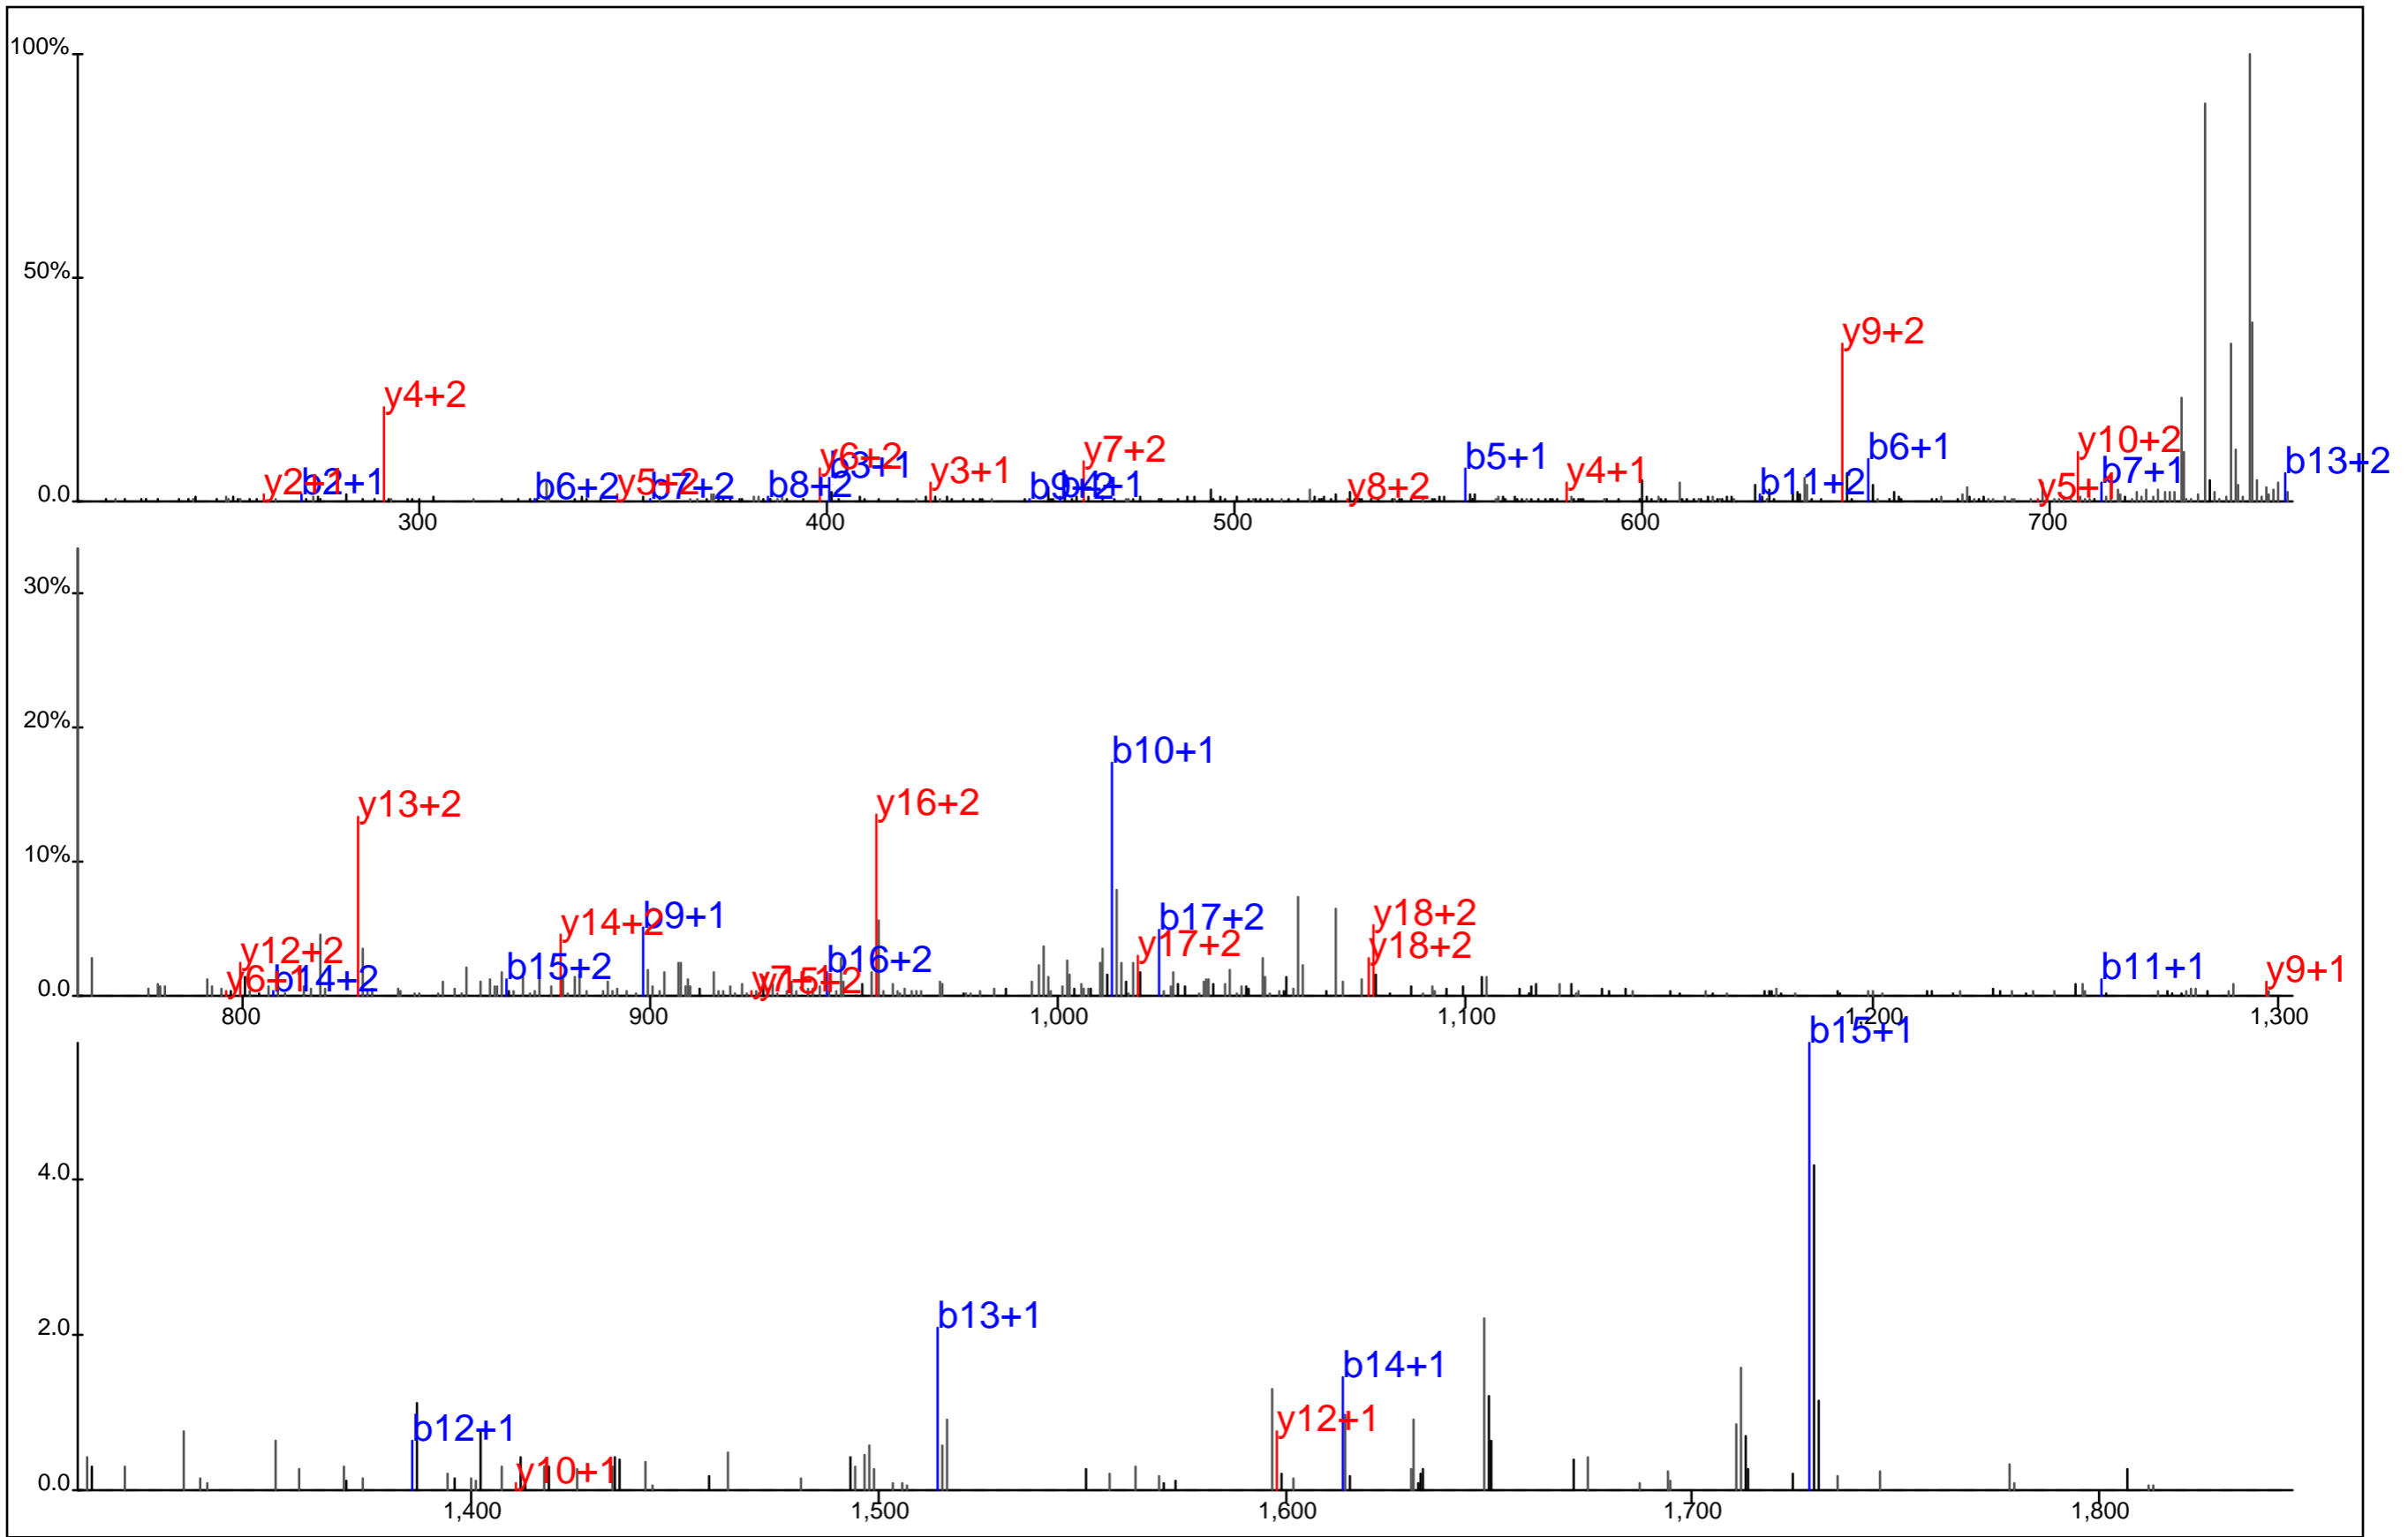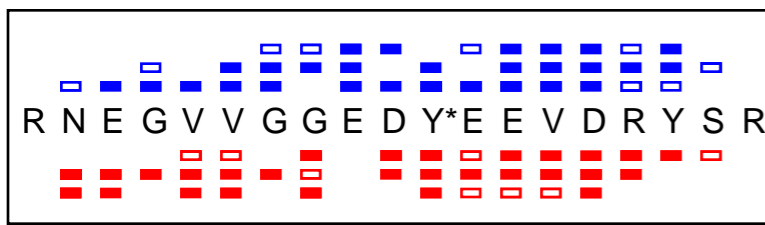

Protein Name: Zinc finger protein 598  
 gi Accession: 30039694  
 Precursor Mass: 770.3340+3  
 Delta Mass: 1.991 ppm  
 XCorr: 62.09
