# Supplementary material for: Quantitative Phosphoproteomics Reveals SLP-76 Dependent Regulation of PAG and Src Family Kinases in T Cells
Source: PubMed Central journal article supplement (PMC3469622; doi:10.1371/journal.pone.0046725), 2012-10-11
Supplement: pone.0046725.s006.pdf [file pone.0046725.s006.pdf]

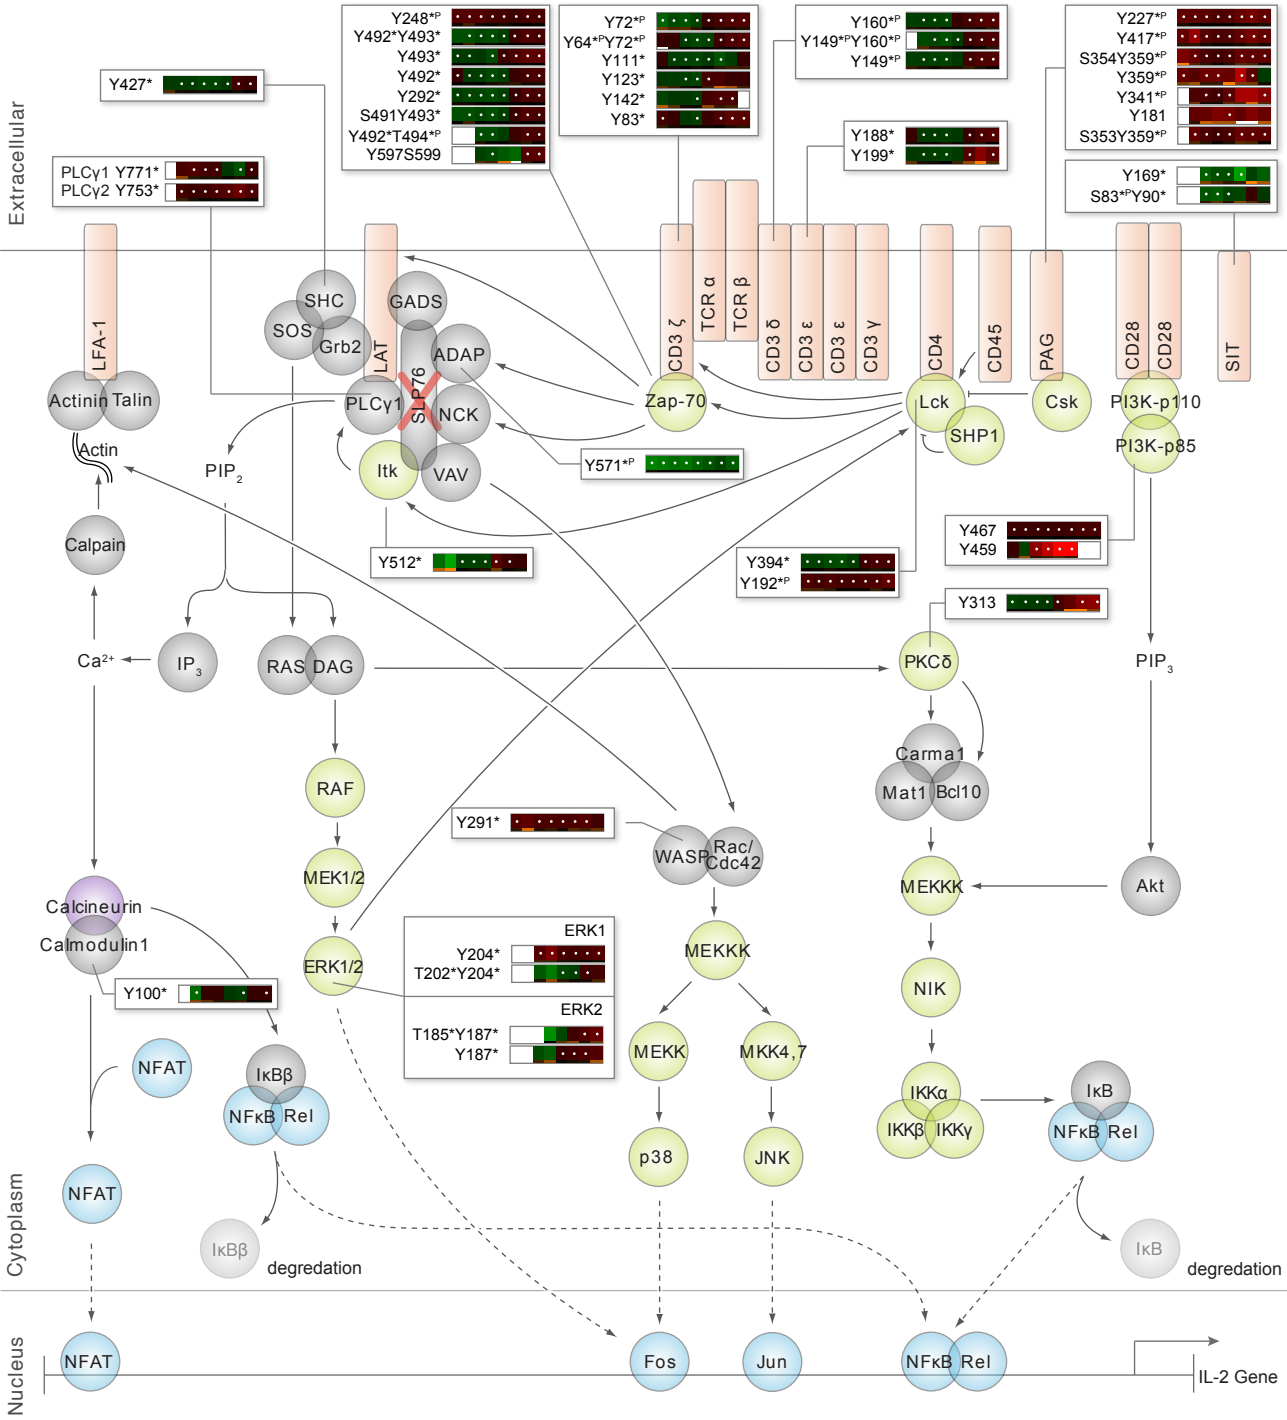

**LEGEND**

- Transcription factor
- Kinase
- Phosphatases
- Stimulatory Modification
- Inhibitory Modification
- Translocation
- - - Separation of Subunits
- - - Joining of Subunits

**SILAC Fold Change Key**

↓ SLP76- / SLP76+    0.5   1   2   5   10   20   50   100

**%CV Key**

↑ SLP76- / SLP76+    0   20   42   71   86   100
